# Supplementary material for: National, regional, and global levels and trends in maternal mortality between 1990 and 2015 with scenario-based projections to 2030: a systematic analysis by the United Nations Maternal Mortality Estimation Inter-Agency Group
Source: PubMed Central journal article supplement — Lancet. Author manuscript; Available in PMC 2017 Jul 18. (PMC5515236; doi:10.1016/s0140-6736(15)00838-7), 2015-11-13
Supplement: NIHMS863926-supplement.pdf [file NIHMS863926-supplement.pdf]

# National, regional, and global levels and trends in maternal mortality between 1990 and 2015 with scenario-based projections to 2030: a systematic analysis by the United Nations Maternal Mortality Estimation Inter-Agency Group

## Authors:

Leontine Alkema\*, Doris Chou\*, Daniel Hogan, Sanqian Zhang, Ann-Beth Moller, Alison Gemmill, Doris Ma Fat, Ties Boerma, Marleen Temmerman, Colin Mathers and Lale Say;  
Written on behalf of UN MMEIG collaborators and the UN MMEIG technical advisory group (Saifuddin Ahmed, Mohamed Ali, Agbessi Amouzou, David Braunholtz, Peter Byass, Liliana Carvajal-Velez, Victor Gaigbe-Togbe, Patrick Gerland, Edilberto Loaiza, Samuel Mills, Namuunda Mutombo, Holly Newby, Thomas W. Pullum and Emi Suzuki)

## Table of Contents

|                                                            |     |
|------------------------------------------------------------|-----|
| 1. Data base construction and systematic data search ..... | 1   |
| 2. Country consultation process .....                      | 2   |
| 3. Covariates .....                                        | 2   |
| 4. Supplementary tables .....                              | 3   |
| 5. REFERENCES .....                                        | 126 |
| 6. Supplementary figures .....                             | 126 |

### 1. Data base construction and systematic data search

Vital registration data on maternal deaths were extracted from the WHO mortality database on 30 July 2015 for the years 1985 and onwards, and supplemented with vital registration data provided during country consultation. For vital registration data coded in ICD-9, deaths from Chapter X “complications of pregnancy, childbirth, and the puerperium” codes 630-676 were included. For data coded in ICD-10, deaths from Chapter XV, “Pregnancy, childbirth, and the puerperium”, codes O00 to O99, excluding late maternal deaths (codes O96 and O97), plus A34 were extracted.

For data from household surveys, censuses and special inquires, the MMEIG updated its existing data base and included pertinent data available as of 30 July 2015. To ensure recent data were considered, the DHS and MICS websites were queried to identify surveys completed in 2014/2015. Additionally, UNFPA identified recent censuses that contained a module on maternal mortality. Specialized inquiries and or country led surveys, apart from the DHS/MICS series, were found by searching national statistical databases on a continuous basis from 2013, and through a systematic search, as summarized in supplementary Table 1. Additionally, during country consultation (described in the next section), nationally nominated Focal Points were requested to advise the MMEIG on the availability of any other nationally representative surveys, studies, or inquiries on maternal mortality measurement to include for consideration.

## 2. Country consultation process

The Country Consultation process for maternal mortality estimates is initiated by official communication sent from WHO to all Member States. The letter sent informed Member States of the ongoing exercise in maternal mortality estimation and requested the nomination of a Focal Point to participate in the consultation with the objective to build a mutual understanding of the strengths and weaknesses of available data to ensure broad ownership of the results.

Focal points received by email, (1) a copy of official communication, (2) draft estimates, (3) a summary of the methodology. The Focal points were asked to review the draft estimates and data sources identified in order to provide advice on any other primary sources of data not previously reported or used. Prior to initiating consultation, it was agreed that when Focal Points supplied additional data or queried the application of adjustment factors to their data, they would be requested to send a description of methodology which could be referenced. Those data sources which met inclusion criteria for the estimation exercise would be assessed for its quality and then added as data inputs in the re-run of the model to generate the final estimates.

Between 26 June and 24 July 2015 members of the MMEIG were in communication with Focal Points, responding to their queries and reviewing additional data as received. Of 183 Member States included in the estimation exercise, 125 Focal Points were nominated. In the circumstance that more than one Focal point was appointed from the country or territory, all were informed such that each Member State would have one response during the consultation.

In summary, new data points, which met inclusion criteria, were received from twenty six countries and consisted primarily of updates to civil registration data. Following revision of the complete data set, the model was re-run, thus revising the estimates for all countries/territories included in the exercise.

## 3. Covariates

Three covariates were used in the statistical analysis: the gross domestic product per capita (GDP), the general fertility rate (GFR), and the proportion of births delivered by a skilled health personnel (SAB).

GDP was measured in purchasing power parity equivalent dollars using 2011 as the baseline year. GDP inputs were taken from The World Bank, with estimates from other sources (e.g., IMF, OECD, WHO National Health Accounts and the Institute for Health Metrics and Evaluation) used to inform trends in instances with missing country-years in the World Bank data set. (1) A five-year moving average was applied to this GDP series to smooth year-to-year GDP fluctuations.

The GFR was computed from data on live births and population size (of women aged 15-49) from the United Nations Population Division World Population Prospects, the 2015 revision. (2)

SAB coverage estimates consist of time series derived using data from UNICEF global database 2015 (3) (available at <http://data.unicef.org/>), based on MICS, DHS and other nationally representative sources. Although other sources of SAB data were consulted, only the UNICEF data were used because they adhere strictly to the indicator's definition.(4) For countries with any value of SAB less than 95% and with four or more observations, annual

series were estimated by fitting a regression model with time as the sole predictor for the logit (log-odds) of SAB; such a model was estimated separately for each country. For all other countries, including those with no available SAB data, the SAB annual series were estimated using a multi-level model. In the multi-level model, logit (or log-odds) of observed SAB proportions for all countries were regressed against time. The model included region- and country-specific intercepts and slopes.

The regression coefficients for the non-AIDS regression model, with dependent variable  $\log(\text{maternal non-AIDS deaths/all non-AIDS deaths})$  are given by -0.22 (-0.28 to -0.16) for  $\log(\text{GDP})$ , 1.3 (1.2 to 1.4) for  $\log(\text{GFR})$  and -0.5 (-0.8 to -0.2) for SAB.

#### 4. Supplementary tables

**Table 1. Strategy for systematic searches of the published literature**

Searches were conducted 18<sup>th</sup> April 2013 covering the period from 1990 (no age limit, no language restrictions, and HUMAN only)

| <b>EMBASE</b>                                                                                                                                                                                                                                                                                                                                                                                                                                                                                                                                      |
|----------------------------------------------------------------------------------------------------------------------------------------------------------------------------------------------------------------------------------------------------------------------------------------------------------------------------------------------------------------------------------------------------------------------------------------------------------------------------------------------------------------------------------------------------|
| 'maternal mortality'/exp OR 'maternal mortality' OR 'maternal mortalities'                                                                                                                                                                                                                                                                                                                                                                                                                                                                         |
| <b>AND</b>                                                                                                                                                                                                                                                                                                                                                                                                                                                                                                                                         |
| 'underreporting' OR 'under reporting' OR underreported OR 'under reported' OR 'data quality' OR 'official figures' OR 'record linkage' OR 'quality of information' OR 'officially reported' OR 'multiple sources' OR 'linkage' OR 'under registered' OR 'under registration' OR underregistered OR underregistration OR 'under registering' OR 'source of error' OR 'misclassification' OR 'misclassified' OR (errors AND ('registration'/exp OR registration)) OR 'late maternal mortality' OR 'confidential enquiries' OR 'confidential enquiry' |
| <b>AND</b>                                                                                                                                                                                                                                                                                                                                                                                                                                                                                                                                         |
| 'data collection method'/exp OR 'health survey'/exp AND (standard* OR method*)                                                                                                                                                                                                                                                                                                                                                                                                                                                                     |
| <b>AND</b>                                                                                                                                                                                                                                                                                                                                                                                                                                                                                                                                         |
| 'pregnancy'/exp OR 'pregnancy complication'/exp OR 'pregnancy disorder'/exp OR 'abortion'/exp AND ('death'/exp OR deaths OR 'mortality'/exp OR fatal OR fatalities OR deceased)                                                                                                                                                                                                                                                                                                                                                                    |

| <b>PubMed</b>                                                                                                                                                                                                                                                                                                                                                                                                                                                                                                                                                                                                                                                                                                                                                                                                                                                                              |
|--------------------------------------------------------------------------------------------------------------------------------------------------------------------------------------------------------------------------------------------------------------------------------------------------------------------------------------------------------------------------------------------------------------------------------------------------------------------------------------------------------------------------------------------------------------------------------------------------------------------------------------------------------------------------------------------------------------------------------------------------------------------------------------------------------------------------------------------------------------------------------------------|
| "underreporting"[tiab] OR "under reporting "[tiab] OR underreported [tiab]OR " under reported" [tiab]OR "data quality" [tiab] OR "official figures" [tiab] OR "record linkage" [tiab] OR "quality of information" [tiab] OR "officially reported "[tiab] OR "multiple sources" [tiab] OR" linkage" [tiab] OR "under registered" [tiab] OR" under registration" [tiab] OR "under registering" [tiab] OR underregistered[tiab] OR underregistration[tiab] OR "under registering" [tiab] OR "source of error" [tiab] OR "misclassification" [tiab] OR "misclassified "[tiab] OR (errors[tiab] AND registration[tiab]) OR "late maternal mortality" [tiab] OR "confidential enquiries" [tiab] OR "confidential enquiry" [tiab] OR "Data Collection/methods"[Mesh] OR "Data Collection/standards"[Mesh] OR "Population Surveillance/methods"[Mesh] OR "Population Surveillance/standards"[Mesh] |
| <b>AND</b>                                                                                                                                                                                                                                                                                                                                                                                                                                                                                                                                                                                                                                                                                                                                                                                                                                                                                 |
| "Maternal Mortality"[Mesh] OR "maternal mortality" [Tw] OR "maternal mortalities" [Tw] OR ((Pregnancy[mesh] OR "pregnancy complications" [Mesh] or "pregnant women" or parturition[mesh] or mothers[mesh] or "maternal health services"[mesh] or pregnancy or pregnant or parturition or mother* or gestation or gestational or childbirth or childbirths or maternal or maternity ) AND (mortality OR mortalities OR Death OR deceased OR fatality OR fatalities))                                                                                                                                                                                                                                                                                                                                                                                                                        |

**AND**

"mothers"[MeSH Terms] OR "mothers"[All Fields] OR "mother"[All Fields] OR "mothers"[MeSH Terms] OR "mothers"[All Fields] OR "maternal"[All Fields] OR "pregnancy"[MeSH Terms] OR "pregnancy"[All Fields] OR "parturition"[MeSH Terms] OR "parturition"[All Fields] OR "postpartum period"[MeSH Terms] OR "postpartum"[All Fields] AND "period"[All Fields] OR "postpartum period"[All Fields] OR "postpartum"[All Fields] OR antepartum[All Fields] OR intrapartum[All Fields] OR "parturition"[MeSH Terms] OR "parturition"[All Fields] OR "childbirth"[All Fields] OR "delivery, obstetric"[MeSH Terms] OR ("delivery"[All Fields] AND "obstetric"[All Fields]) OR "obstetric delivery"[All Fields] OR "parturition"[MeSH Terms] OR "parturition"[All Fields] OR "birth"[All Fields] OR termination[All Fields] OR "abortion, induced"[MeSH Terms] OR ( "abortion"[All Fields] AND "induced"[All Fields]) OR "induced abortion"[All Fields] OR "abortion"[All Fields] OR "abortion, spontaneous"[MeSH Terms] OR ("abortion"[All Fields] AND "spontaneous"[All Fields]) OR "spontaneous abortion"[All Fields] OR "miscarriage"[All Fields]

**AND**

"death"[MeSH Terms] OR "death"[All Fields] OR fatal[All Fields] OR fatality[All Fields] OR "mortality"[Subheading] OR "mortality"[All Fields] OR "mortality"[MeSH Terms]

**Global Index Medicus**

((underreporting) OR (under reporting ) OR underreported OR ( under reported) OR (data quality) OR (official figures) OR (record linkage) OR (quality of information) OR (officially reported ) OR (multiple sources) OR ( linkage) OR (under registered) OR ( under registration) OR (under registering) OR underregistered OR underregistration OR (under registering) OR (source of error) OR (misclassification) OR (misclassified ) OR (errors AND registration) OR (late maternal mortality) OR (confidential enquiries) OR (confidential enquiry)) AND ((MOTHERS AND Mortality) OR (Maternal Mortality) OR (Maternal Death) OR (maternal mortality) OR (maternal deaths) OR (pregnancy related deaths) OR (pregnancy related deaths))

**EBSCO**

(underreporting OR under reporting OR underreported OR under reported OR data quality OR official figures OR official national figures OR record linkage OR quality of information OR officially reported OR multiple sources OR linkage OR under registered OR under registration OR under registering OR underregistered OR underregistration OR under registering OR sources of error OR misclassification OR misclassified OR (errors AND registration) OR late maternal mortality OR confidential enquiries OR confidential enquiry OR (data collection AND (methods OR standards)) OR audit OR (population surveillance AND (methods OR standards))) AND (maternal mortality OR pregnancy related deaths OR maternal deaths)

**Table 2. Overview of all non-VR data sources**

| Country     | Start year | End year | Type (inq refers to a specialized study) | Included in modelling | Exclude-reason                       | Source                                  | Reference                                                                                                                                                                                                                                                                                                                                                                                                                              |
|-------------|------------|----------|------------------------------------------|-----------------------|--------------------------------------|-----------------------------------------|----------------------------------------------------------------------------------------------------------------------------------------------------------------------------------------------------------------------------------------------------------------------------------------------------------------------------------------------------------------------------------------------------------------------------------------|
| Afghanistan | 2003.65    | 2010.65  | dhs                                      | YES                   | NA                                   | AMS 2010                                | Afghan Public Health Institute, Ministry of Public Health (APHI/MoPH) [Afghanistan], Central Statistics Organization (CSO) [Afghanistan], ICF Macro, Indian Institute of Health Management Research (IIHMR) [India], and World Health Organization Regional Office for the Eastern Mediterranean (WHO/EMRO) [Egypt]. Afghanistan Mortality Survey 2010. Calverton, Maryland, USA: APHI/MoPH, CSO, ICF Macro, IIHMR and WHO/EMRO; 2011. |
| Afghanistan | 1999       | 2002     | misc                                     | NO                    | Sub-national/sub-population coverage | RAMOS 2002                              | Bartlett LA et al. Where giving birth is a forecast of death: maternal mortality in four districts of Afghanistan, 1999-2002. Lancet, 365(9462):864-70; 2005.                                                                                                                                                                                                                                                                          |
| Algeria     | 1999       | 2000     | misc                                     | YES                   | NA                                   | ENMM 1999                               | INSP. Enquete national sur la mortalite maternelle. Algeria; 2001.                                                                                                                                                                                                                                                                                                                                                                     |
| Australia   | 2006       | 2011     | inq                                      | YES                   | NA                                   | Maternal deaths in Australia 2006-2010. | Johnson S, Bonello MR, Li Z, Hilder L, Sullivan EA. Maternal deaths in Australia 2006-2010, Maternal deaths series no. 4. Cat. no. PER 61. Canberra: AIHW; 2014.                                                                                                                                                                                                                                                                       |
| Australia   | 2000       | 2003     | inq                                      | YES                   | NA                                   | Maternal deaths in Australia 2000-C2002 | Sullivan EA, King JF, eds. Maternal deaths in Australia 2000-2002. Maternal Deaths Series no. 2.-at. no. PER 32. Sydney: AIHW National Perinatal Statistics Unit; 2006.                                                                                                                                                                                                                                                                |
| Australia   | 1994       | 1997     | inq                                      | YES                   | NA                                   | Maternal Deaths in Australia, 1994-1996 | NHM-, AIHW. Report on Maternal Deaths in Australia, 1994-1996.Canberra; 2001.                                                                                                                                                                                                                                                                                                                                                          |

| Country    | Start year | End year | Type (inq refers to a specialized study) | Included in modelling | Exclude-reason              | Source                                                                       | Reference                                                                                                                                                                                                                                                                                                 |
|------------|------------|----------|------------------------------------------|-----------------------|-----------------------------|------------------------------------------------------------------------------|-----------------------------------------------------------------------------------------------------------------------------------------------------------------------------------------------------------------------------------------------------------------------------------------------------------|
| Australia  | 2003       | 2006     | inq                                      | NO                    | No envelop found for CI     | Maternal deaths in Australia 2003-2005                                       | Sullivan EA, Hall B, King JF. Maternal deaths in Australia 2003-2005. Maternal Deaths Series no. 3.-at. no. PER 42. Sydney: AIHW National Perinatal Statistics Unit; 2007.                                                                                                                                |
| Australia  | 1997       | 2000     | inq                                      | YES                   | NA                          | Maternal deaths in Australia 1997-1999                                       | Slaytor EK, Sullivan EA, King JF. Maternal deaths in Australia 1997-1999. AIHW-at. No. PER 24. Sydney: AIHW National Perinatal Statistics Unit. (Maternal Deaths Series No.1); 2004.                                                                                                                      |
| Australia  | 2011       | 2012     | inq                                      | YES                   | NA                          | maternal deaths in Australia 2008-2013                                       | AIHW: Humphrey MD, Bonello MR, Chughtai A, Macaldowie A, Harris K & Chambers GM 2015.                                                                                                                                                                                                                     |
| Australia  | 2012       | 2013     | inq                                      | NO                    | No envelop found for CI     | maternal deaths in Australia 2008-2013                                       | AIHW: Humphrey MD, Bonello MR, Chughtai A, Macaldowie A, Harris K & Chambers GM 2015.                                                                                                                                                                                                                     |
| Austria    | 1980       | 1998     | inq                                      | NO                    | Inquiry started before 1985 | Underreporting of direct and indirect obstetrical deaths in Austria, 1980-98 | Karimian-Teherani D et al. Underreporting of dir-t and indir-t obstetr-al deaths in Austria, 1980-98. Acta Obstet Gyn. 2002;81(4):323-7.                                                                                                                                                                  |
| Bangladesh | 1996.238   | 2001.238 | dhs                                      | YES                   | NA                          | BMMS 2001                                                                    | National Institute of Population Research and Training (NIPORT), ORC Macro, Johns Hopkins University and ICDDR,B. Bangladesh Maternal Health Services and Maternal Mortality Survey 2001. Dhaka, Bangladesh and Calverton, Maryland, USA: NIPORT, ORC Macro, Johns Hopkins University, and ICDDR,B; 2003. |

| Country    | Start year | End year | Type (inq refers to a specialized study) | Included in modelling | Exclude-reason | Source    | Reference                                                                                                                                                                                                                                                                                                  |
|------------|------------|----------|------------------------------------------|-----------------------|----------------|-----------|------------------------------------------------------------------------------------------------------------------------------------------------------------------------------------------------------------------------------------------------------------------------------------------------------------|
| Bangladesh | 2007       | 2011     | misc                                     | YES                   | NA             | BMMS 2010 | National Institute of Population Research and Training (NIPORT), MEASURE Evaluation, and icddr,b. Bangladesh Maternal Mortality and Health Care Survey 2010. Dhaka, Bangladesh: NIPORT, MEASURE Evaluation, and icddr,b; 2012.                                                                             |
| Bangladesh | 1998       | 2002     | misc                                     | YES                   | NA             | BMMS 2001 | National Institute of Population Research and Training (NIPORT), ORC Macro, Johns Hopkins University and ICDDR,B. Bangladesh Maternal Health Services and Maternal Mortality Survey 2001. Dhaka, Bangladesh and Calverton, Maryland (USA): NIPORT, ORC Macro, Johns Hopkins University, and ICDDR,B; 2003. |
| Bangladesh | 1986       | 1991     | misc                                     | YES                   | NA             | BMMS 2001 | National Institute of Population Research and Training (NIPORT), ORC Macro, Johns Hopkins University and ICDDR,B. Bangladesh Maternal Health Services and Maternal Mortality Survey 2001. Dhaka, Bangladesh and Calverton, Maryland (USA): NIPORT, ORC Macro, Johns Hopkins University, and ICDDR,B; 2003. |

| Country    | Start year | End year | Type (inq refers to a specialized study) | Included in modelling | Exclude-reason | Source        | Reference                                                                                                                                                                                                                                                                                                                                                                                                       |
|------------|------------|----------|------------------------------------------|-----------------------|----------------|---------------|-----------------------------------------------------------------------------------------------------------------------------------------------------------------------------------------------------------------------------------------------------------------------------------------------------------------------------------------------------------------------------------------------------------------|
| Bangladesh | 1991       | 1997     | misc                                     | YES                   | NA             | BMMS 2001     | National Institute of Population Research and Training (NIPORT), ORC Macro, Johns Hopkins University and ICDDR,B. Bangladesh Maternal Health Services and Maternal Mortality Survey 2001. Dhaka, Bangladesh and Calverton, Maryland (USA): NIPORT, ORC Macro, Johns Hopkins University, and ICDDR,B; 2003.                                                                                                      |
| Benin      | 1989.545   | 1996.545 | dhs                                      | YES                   | NA             | DHS 1996      | Kodjogbé, Nicalse, Gora Mboup, Justin Tossou, IAopoldine de Souza, Timothée Gandaho, Alphonse Guédémé, Thomas Houedokoho, Rafatou Houndékon, Thomas Tohouegnon, Suzanne Zomahoun, Virgile Capo-Chichi, et Andrée Cossi. Enquête Démographique et de Santé, République de Bénin 1996. Calverton, Maryland USA: Institut National de la Statistique et de l'Analyse Économique et Macro International Inc.; 1997. |
| Benin      | 1999.721   | 2006.721 | dhs                                      | YES                   | NA             | DHS 2006      | Institut National de la Statistique et de l'Analyse Économique (INSAE) [Bénin] et Macro International Inc. Enquête Démographique et de Santé (EDSB-III) - Bénin 2006. Calverton, Maryland, USA : Institut National de la Statistique et de l'Analyse Économique et Macro International Inc.; 2007.                                                                                                              |
| Benin      | 1991       | 1992.12  | misc                                     | YES                   | NA             | Census-b 1992 | Benin NSO.                                                                                                                                                                                                                                                                                                                                                                                                      |
| Bhutan     | 1992.33    | 1994.17  | misc                                     | YES                   | NA             | NHS 1994      | Ministry of Health. Report on National Health Survey, June 1994. Thimphu, Bhutan, 1996.                                                                                                                                                                                                                                                                                                                         |



| Country | Start year | End year | Type (inq refers to a specialized study) | Included in modelling | Exclude-reason | Source           | Reference                                                                                                                                                                                                                                                     |
|---------|------------|----------|------------------------------------------|-----------------------|----------------|------------------|---------------------------------------------------------------------------------------------------------------------------------------------------------------------------------------------------------------------------------------------------------------|
| Bhutan  | 1999.2     | 2000.2   | misc                                     | YES                   | NA             | NHS 2000         | Ministry of Health. Report on National Health Survey 2000. Thimphu, Bhutan.                                                                                                                                                                                   |
| Bhutan  | 2006       | 2011     | misc                                     | YES                   | NA             | BMIS 2010-Health | UNFPA, UNICEF, RGOB. BMIS 2010 Thematic Analyses Series Health. Bhutan; 2012.                                                                                                                                                                                 |
| Bhutan  | 2004.41    | 2005.41  | misc                                     | YES                   | NA             | Census 2005      | Bhutan National Statistics Office                                                                                                                                                                                                                             |
| Bolivia | 1996.821   | 2003.821 | dhs                                      | YES                   | NA             | DHS 2003         | Ministerio de Salud y Deportes (MSD), Programa Reforma de Salud (PRS), Instituto Nacional de Estadística (INE), ORC Macro. Encuesta Nacional de Demografía y Salud ENDSA 2003. Calverton, Maryland, USA: ORC Macro; 2004.                                     |
| Bolivia | 2001.302   | 2008.302 | dhs                                      | YES                   | NA             | DHS 2008         | Ministerio de Salud y Deportes (MSD), Programa Reforma de Salud (PRS), Instituto Nacional de Estadística (INE), Macro International. Encuesta Nacional de Demografía y Salud ENDSA 2008. Calverton, Maryland, USA: Macro International; 2009.                 |
| Bolivia | 1985       | 1986     | misc                                     | YES                   | NA             | DHS 1989         | Instituto Nacional de Estadística, Ministerio de Hacienda, Macro International Inc. Encuesta Nacional de Demografía y Salud 1998. Calverton, Maryland, USA: Macro International Inc.; 1998.                                                                   |
| Bolivia | 1986       | 1987     | misc                                     | YES                   | NA             | DHS 1994         | Instituto Nacional de Estadística, Ministerio de Desarrollo Sostenible, Medio Ambiente Secretaría Nacional de Planificación, Macro International Inc. Encuesta Nacional de Demografía y Salud 1994. Calverton, Maryland, USA: Macro International Inc.; 1994. |

| Country  | Start year | End year | Type (inq refers to a specialized study) | Included in modelling | Exclude-reason | Source                              | Reference                                                                                                                                                                                                                                                     |
|----------|------------|----------|------------------------------------------|-----------------------|----------------|-------------------------------------|---------------------------------------------------------------------------------------------------------------------------------------------------------------------------------------------------------------------------------------------------------------|
| Bolivia  | 1989.16    | 1994.16  | misc                                     | YES                   | NA             | DHS 1994                            | Instituto Nacional de Estadística, Ministerio de Desarrollo Sostenible, Medio Ambiente Secretaría Nacional de Planificación, Macro International Inc. Encuesta Nacional de Demografía y Salud 1994. Calverton, Maryland, USA: Macro International Inc.; 1994. |
| Bolivia  | 2000       | 2001     | misc                                     | YES                   | NA             | Census 2001 post enumeration survey | Bolivia National Statistics Office                                                                                                                                                                                                                            |
| Botswana | 2013       | 2014     | misc                                     | YES                   | NA             | SCO Stats Brief 2014/1              | Statistics Botswana. Botswana maternal Mortality Ratio (MMR) 2009-2013. Stats Brief No. 2014/1. Botswana; 2014.                                                                                                                                               |
| Botswana | 2012       | 2013     | misc                                     | YES                   | NA             | SCO Stats Brief 2014/2              | Statistics Botswana. Botswana maternal Mortality Ratio (MMR) 2008-2012. Stats Brief No. 2014/2. Botswana; 2014.                                                                                                                                               |
| Botswana | 2011       | 2012     | misc                                     | YES                   | NA             | SCO Stats Brief 2014/2              | Statistics Botswana. Botswana maternal Mortality Ratio (MMR) 2008-2012. Stats Brief No. 2014/2. Botswana; 2014.                                                                                                                                               |
| Botswana | 2010       | 2011     | misc                                     | YES                   | NA             | SCO Stats Brief 2014/2              | Statistics Botswana. Botswana maternal Mortality Ratio (MMR) 2008-2012. Stats Brief No. 2014/2. Botswana; 2014.                                                                                                                                               |
| Botswana | 2009       | 2010     | misc                                     | YES                   | NA             | SCO Stats Brief 2014/2              | Statistics Botswana. Botswana maternal Mortality Ratio (MMR) 2008-2012. Stats Brief No. 2014/2. Botswana; 2014.                                                                                                                                               |
| Botswana | 2008       | 2009     | misc                                     | YES                   | NA             | SCO Stats Brief 2014/2              | Statistics Botswana. Botswana maternal Mortality Ratio (MMR) 2008-2012. Stats Brief No. 2014/2. Botswana; 2014.                                                                                                                                               |
| Botswana | 2007       | 2008     | misc                                     | YES                   | NA             | SCO Stats Brief 2010                | Statistics Botswana. Botswana maternal Mortality Ratio (MMR) 2008. Stats Brief No. 2009/17. Botswana; 2009.                                                                                                                                                   |

| Country  | Start year | End year | Type (inq refers to a specialized study) | Included in modelling | Exclude-reason | Source               | Reference                                                                                                                                                                                                                                                                                                                                                                 |
|----------|------------|----------|------------------------------------------|-----------------------|----------------|----------------------|---------------------------------------------------------------------------------------------------------------------------------------------------------------------------------------------------------------------------------------------------------------------------------------------------------------------------------------------------------------------------|
| Botswana | 2006       | 2007     | misc                                     | YES                   | NA             | SCO Stats Brief 2010 | Statistics Botswana. Botswana maternal Mortality Ratio (MMR) 2008. Stats Brief No. 2009/17. Botswana; 2009.                                                                                                                                                                                                                                                               |
| Botswana | 2005       | 2006     | misc                                     | YES                   | NA             | SCO Stats Brief 2010 | Statistics Botswana. Botswana maternal Mortality Ratio (MMR) 2008. Stats Brief No. 2009/17. Botswana; 2009.                                                                                                                                                                                                                                                               |
| Brazil   | 2002.08    | 2002.25  | inq                                      | YES                   | NA             | RAMOS 2002           | Brasil Ministério da Saúde, Secretaria de Atenção à Saúde, Departamento de Ações Programáticas Estratégicas. Estudo da mortalidade de mulheres de 10 a 49 anos, com ênfase na mortalidade materna: relatório final. Brasília, Ministério da Saúde, Secretaria de Atenção à Saúde, Departamento de Ações Programáticas Estratégicas, Editora do Ministério da Saúde; 2006. |
| Brazil   | 1996       | 1997     | inq                                      | YES                   | NA             | MoH 2015             | MoH 2015                                                                                                                                                                                                                                                                                                                                                                  |
| Brazil   | 1997       | 1998     | inq                                      | YES                   | NA             | MoH 2015             | MoH 2015                                                                                                                                                                                                                                                                                                                                                                  |
| Brazil   | 1998       | 1999     | inq                                      | YES                   | NA             | MoH 2015             | MoH 2015                                                                                                                                                                                                                                                                                                                                                                  |
| Brazil   | 1999       | 2000     | inq                                      | YES                   | NA             | MoH 2015             | MoH 2015                                                                                                                                                                                                                                                                                                                                                                  |
| Brazil   | 2000       | 2001     | inq                                      | YES                   | NA             | MoH 2015             | MoH 2015                                                                                                                                                                                                                                                                                                                                                                  |
| Brazil   | 2001       | 2002     | inq                                      | YES                   | NA             | MoH 2015             | MoH 2015                                                                                                                                                                                                                                                                                                                                                                  |
| Brazil   | 2002       | 2003     | inq                                      | YES                   | NA             | MoH 2015             | MoH 2015                                                                                                                                                                                                                                                                                                                                                                  |
| Brazil   | 2003       | 2004     | inq                                      | YES                   | NA             | MoH 2015             | MoH 2015                                                                                                                                                                                                                                                                                                                                                                  |
| Brazil   | 2004       | 2005     | inq                                      | YES                   | NA             | MoH 2015             | MoH 2015                                                                                                                                                                                                                                                                                                                                                                  |
| Brazil   | 2005       | 2006     | inq                                      | YES                   | NA             | MoH 2015             | MoH 2015                                                                                                                                                                                                                                                                                                                                                                  |
| Brazil   | 2006       | 2007     | inq                                      | YES                   | NA             | MoH 2015             | MoH 2015                                                                                                                                                                                                                                                                                                                                                                  |
| Brazil   | 2007       | 2008     | inq                                      | YES                   | NA             | MoH 2015             | MoH 2015                                                                                                                                                                                                                                                                                                                                                                  |
| Brazil   | 2008       | 2009     | inq                                      | YES                   | NA             | MoH 2015             | MoH 2015                                                                                                                                                                                                                                                                                                                                                                  |
| Brazil   | 2009       | 2010     | inq                                      | YES                   | NA             | MoH 2015             | MoH 2015                                                                                                                                                                                                                                                                                                                                                                  |
| Brazil   | 2010       | 2011     | inq                                      | YES                   | NA             | MoH 2015             | MoH 2015                                                                                                                                                                                                                                                                                                                                                                  |

| Country      | Start year | End year | Type (inq refers to a specialized study) | Included in modelling | Exclude-reason | Source        | Reference                                                                                                                                                                                                                                                                                     |
|--------------|------------|----------|------------------------------------------|-----------------------|----------------|---------------|-----------------------------------------------------------------------------------------------------------------------------------------------------------------------------------------------------------------------------------------------------------------------------------------------|
| Brazil       | 2011       | 2012     | inq                                      | YES                   | NA             | MoH 2015      | MoH 2015                                                                                                                                                                                                                                                                                      |
| Brazil       | 2012       | 2013     | inq                                      | YES                   | NA             | MoH 2015      | MoH 2015                                                                                                                                                                                                                                                                                      |
| Brazil       | 1989.328   | 1996.328 | dhs                                      | YES                   | NA             | DHS 1996      | Sociedade Civil Bem-Estar Familiar no Brasil, BEMFAM, Programa de Pesquisas de Demografia e Saúde (DHS) Macro International Inc. Brasil Pesquisa Nacional Sobre Demografia e Saúde 1996. Calverton, Maryland, USA: Macro International Inc.; 1997.                                            |
| Burkina Faso | 1992.032   | 1999.032 | dhs                                      | YES                   | NA             | DHS 1998-1999 | Institut National de la Statistique et de la Démographie, et Macro International Inc. Enquête Démographique et de Santé, Burkina Faso 1998-1999. Calverton, Maryland, USA: Macro International Inc.; 2000.                                                                                    |
| Burkina Faso | 2003.703   | 2010.703 | dhs                                      | YES                   | NA             | DHS 2010      | Institut National de la Statistique et de la Démographie (INSD) et ICF International. Enquête Démographique et de Santé et à Indicateurs Multiples du Burkina Faso 2010. Calverton, Maryland, USA : INSD et ICF International; 2012                                                           |
| Burkina Faso | 2005.96    | 2006.96  | misc                                     | YES                   | NA             | Census 2006   | Burkina Faso National Statistics Office                                                                                                                                                                                                                                                       |
| Burundi      | 2003.87    | 2010.87  | dhs                                      | YES                   | NA             | DHS 2010      | Institut de Statistiques et d'Études Économiques du Burundi (ISTEEBU), Ministère de la Santé Publique et de la Lutte contre le Sida [Burundi] (MSPLS), et ICF International. Enquête Démographique et de Santé Burundi 2010. Bujumbura, Burundi : ISTEEBU, MSPLS, et ICF International; 2012. |
| Cambodia     | 1993.33    | 2000.33  | dhs                                      | YES                   | NA             | DHS 2000      | National Institute of Statistics, Directorate General for Health [Cambodia], and ORC Macro. Cambodia Demographic and Health Survey 2000. Phnom Penh, Cambodia, and Calverton, Maryland USA: National Institute of Statistics, Directorate General for Health, and ORC Macro;;2001.            |

| Country  | Start year | End year | Type (inq refers to a specialized study) | Included in modelling | Exclude-reason | Source        | Reference                                                                                                                                                                                                                                                                                                                                                        |
|----------|------------|----------|------------------------------------------|-----------------------|----------------|---------------|------------------------------------------------------------------------------------------------------------------------------------------------------------------------------------------------------------------------------------------------------------------------------------------------------------------------------------------------------------------|
| Cambodia | 1998.934   | 2005.934 | dhs                                      | YES                   | NA             | DHS 2005      | National Institute of Public Health, National Institute of Statistics [Cambodia] and ORC Macro. Cambodia Demographic and Health Survey 2005. Phnom Penh, Cambodia and Calverton, Maryland, USA: National Institute of Public Health, National Institute of Statistics and ORC Macro; 2006.                                                                       |
| Cambodia | 2003.798   | 2010.798 | dhs                                      | YES                   | NA             | DHS 2010      | National Institute of Statistics, Directorate General for Health, and ICF Macro. Cambodia Demographic and Health Survey 2010. Phnom Penh, Cambodia and Calverton, Maryland, USA: National Institute of Statistics, Directorate General for Health, and ICF Macro; 2011.                                                                                          |
| Cambodia | 2008       | 2015     | misc                                     | YES                   | NA             | DHS 2014      | National Institute of Statistics, Directorate General for Health, and ICF International. Cambodia Demographic and Health Survey 2014. Key Indicators Report. ICF International: Rockville, Maryland, USA; 2015.                                                                                                                                                  |
| Cambodia | 2007.17    | 2008.17  | misc                                     | YES                   | NA             | Census 2008   | Cambodia National Statistics Office                                                                                                                                                                                                                                                                                                                              |
| Cameroon | 1991.286   | 1998.286 | dhs                                      | YES                   | NA             | DHS 1998-1999 | Fotso, Médard, René Ndonou, Paul Roger Libité, Martin Tsafack, Roger Wakou, Aboubakar Ghapoutsas, Samuel Kamga, Pierre Kemgo, Michel Kwekem Fankam, Antoine Kamdoum, Bernard Barrère. Enquête Démographique et de Santé, Cameroun 1998. Calverton, Maryland, USA: Bureau Central des Recensements et des Études de Population et Macro International Inc.; 1999. |
| Cameroon | 1997.397   | 2004.397 | dhs                                      | YES                   | NA             | DHS 2004      | Institut National de la Statistique (INS) et ORC Macro. Enquête Démographique et de Santé du Cameroun 2004. Calverton, Maryland, USA: INS et ORC Macro; 2005                                                                                                                                                                                                     |
| Cameroon | 2004.342   | 2011.342 | dhs                                      | YES                   | NA             | DHS 2011      | Institut National de la Statistique (INS) et ICF International. Enquête Démographique et de Santé et à                                                                                                                                                                                                                                                           |

| Country  | Start year | End year | Type (inq refers to a specialized study) | Included in modelling | Exclude-reason                       | Source                                                                                      | Reference                                                                                                                                                                                                                                                                    |
|----------|------------|----------|------------------------------------------|-----------------------|--------------------------------------|---------------------------------------------------------------------------------------------|------------------------------------------------------------------------------------------------------------------------------------------------------------------------------------------------------------------------------------------------------------------------------|
|          |            |          |                                          |                       |                                      |                                                                                             | Indicateurs Multiples du Cameroun 2011. Calverton, Maryland, USA: INS et ICF International; 2012.                                                                                                                                                                            |
| Cameroon | 2010       | 2011     | misc                                     | NO                    | Sub-national/sub-population coverage | Rapport d'expertise sur les données relatives à la mortalité maternelle, 2010.              | Ministère de la Santé Publique. Rapport d'expertise sur les données relatives à la mortalité maternelle et la prématurité des naissances au Cameroun au cours de l'année 2010. Cameroun; 2012.                                                                               |
| Cameroon | 1990.4     | 1997.4   | misc                                     | YES                   | NA                                   | DHS 2004                                                                                    | Institut National de la Statistique (INS) et ORC Macro. Enquête Démographique et de Santé du Cameroun 2004. Calverton, Maryland, USA: INS et ORC Macro; 2005.                                                                                                                |
| Canada   | 1997       | 2001     | inq                                      | NO                    | Sub-national/sub-population coverage | Special report on maternal mortality and severe morbidity in Canada 1997-2000               | Health Canada. Special report on maternal mortality and severe morbidity in Canada - enhanced surveillance: the path to prevention. Ottawa: Minister of Public Works and Government Services Canada; 2004.                                                                   |
| Canada   | 1988       | 1993     | inq                                      | YES                   | NA                                   | Maternal mortality in Canada 1988-1992                                                      | Turner LA, et al. Underreporting of maternal mortality in Canada: a question of definition. Chronic diseases in Canada. 2002; 23(1):22-30.                                                                                                                                   |
| Canada   | 1996.33    | 1999.25  | inq                                      | YES                   | NA                                   | Temporal Trends in Maternal Mortality in Canada II: Estimates Based on Hospitalization Data | Lisonkova S, Liu S, Bartholomew S, Liston RM, Joseph KS; Maternal Health Study Group of the Canadian Perinatal Surveillance System. Temporal Trends in Maternal Mortality in Canada II: Estimates Based on Hospitalization Data. J Obstet Gynaecol Can. 2011,33(10):1020-30. |

| Country                  | Start year | End year | Type (inq refers to a specialized study) | Included in modelling | Exclude-reason | Source                                                                                      | Reference                                                                                                                                                                                                                                                                    |
|--------------------------|------------|----------|------------------------------------------|-----------------------|----------------|---------------------------------------------------------------------------------------------|------------------------------------------------------------------------------------------------------------------------------------------------------------------------------------------------------------------------------------------------------------------------------|
| Canada                   | 1999.33    | 2002.25  | inq                                      | YES                   | NA             | Temporal Trends in Maternal Mortality in Canada II: Estimates Based on Hospitalization Data | Lisonkova S, Liu S, Bartholomew S, Liston RM, Joseph KS; Maternal Health Study Group of the Canadian Perinatal Surveillance System. Temporal Trends in Maternal Mortality in Canada II: Estimates Based on Hospitalization Data. J Obstet Gynaecol Can. 2011,33(10):1020-30. |
| Canada                   | 2002.33    | 2005.25  | inq                                      | YES                   | NA             | Temporal Trends in Maternal Mortality in Canada II: Estimates Based on Hospitalization Data | Lisonkova S, Liu S, Bartholomew S, Liston RM, Joseph KS; Maternal Health Study Group of the Canadian Perinatal Surveillance System. Temporal Trends in Maternal Mortality in Canada II: Estimates Based on Hospitalization Data. J Obstet Gynaecol Can. 2011,33(10):1020-30. |
| Canada                   | 2005.33    | 2008.25  | inq                                      | YES                   | NA             | Temporal Trends in Maternal Mortality in Canada II: Estimates Based on Hospitalization Data | Lisonkova S, Liu S, Bartholomew S, Liston RM, Joseph KS; Maternal Health Study Group of the Canadian Perinatal Surveillance System. Temporal Trends in Maternal Mortality in Canada II: Estimates Based on Hospitalization Data. J Obstet Gynaecol Can. 2011,33(10):1020-30. |
| Central African Republic | 1987.953   | 1994.953 | dhs                                      | YES                   | NA             | DHS 1994-1995                                                                               | Ndamobissi, Robert, Gora Mboup et Edwige Opportune Nguélébé. Enquête Démographique et de Santé, République Centrafricaine 1994-95. Calverton, Maryland, USA: Direction des Statistiques Démographiques et Sociales et Macro International Inc.; 1995.                        |
| Chad                     | 1990.246   | 1997.246 | dhs                                      | YES                   | NA             | DHS 1996-1997                                                                               | Ouagadjo, Bandoumal, Kostelngar Nodjimadji, Joël Nodjimbatem Ngoniri, Ningam Ngakoutou, Keumaye Ignégongba, Joël S. Tokindang, Oumdagoue Kouo, Bernard                                                                                                                       |

| Country | Start year | End year | Type (inq refers to a specialized study) | Included in modelling | Exclude-reason | Source                                 | Reference                                                                                                                                                                                                                                                                                                                     |
|---------|------------|----------|------------------------------------------|-----------------------|----------------|----------------------------------------|-------------------------------------------------------------------------------------------------------------------------------------------------------------------------------------------------------------------------------------------------------------------------------------------------------------------------------|
|         |            |          |                                          |                       |                |                                        | Barrère, et Monique Ban:ère. Enquête Démographique et de Santé, Tchad 1996-1997. Calverton, Maryland, USA: Bureau Central du Recensement et Macro International Inc.; 1998.                                                                                                                                                   |
| Chad    | 1997.75    | 2004.75  | dhs                                      | YES                   | NA             | DHS 2004                               | Ouagadjio, Bandomal, Kostelngar Nodjimadji, Tchobkréo Bagamla, Riradjim Madnodji, Joël Sibaye Tokindang, Ningam Ngakoutou, Joël Nodjimbatem Ngoniri, Caman Bédaou, Donato Koyalta, Bernard Barrère, Monique Barrère. 2004. Enquête Démographique et de Santé Tchad 2004. Calverton, Maryland, USA: INSEED et ORC Macro; 2005. |
| China   | 1990       | 1991     | misc                                     | YES                   | NA             | Chinese Health Statistical Digest 2008 | Ministry of Health. Chinese Health Statistical Digest 2008.                                                                                                                                                                                                                                                                   |
| China   | 1995       | 1996     | misc                                     | YES                   | NA             | Chinese Health Statistical Digest 2008 | Ministry of Health. Chinese Health Statistical Digest 2008.                                                                                                                                                                                                                                                                   |
| China   | 1997       | 1998     | misc                                     | YES                   | NA             | Chinese Health Statistical Digest 2004 | Ministry of Health. Chinese Health Statistical Digest 2004.                                                                                                                                                                                                                                                                   |
| China   | 1999       | 2000     | misc                                     | YES                   | NA             | Chinese Health Statistical Digest 2004 | Ministry of Health. Chinese Health Statistical Digest 2004.                                                                                                                                                                                                                                                                   |
| China   | 2000       | 2001     | misc                                     | YES                   | NA             | Chinese Health Statistical Digest 2008 | Ministry of Health. Chinese Health Statistical Digest 2008.                                                                                                                                                                                                                                                                   |



| Country | Start year | End year | Type (inq refers to a specialized study) | Included in modelling | Exclude-reason | Source                                 | Reference                                                   |
|---------|------------|----------|------------------------------------------|-----------------------|----------------|----------------------------------------|-------------------------------------------------------------|
| China   | 2001       | 2002     | misc                                     | YES                   | NA             | Chinese Health Statistical Digest 2008 | Ministry of Health. Chinese Health Statistical Digest 2008. |
| China   | 2002       | 2003     | misc                                     | YES                   | NA             | Chinese Health Statistical Digest 2008 | Ministry of Health. Chinese Health Statistical Digest 2008. |
| China   | 2003       | 2004     | misc                                     | YES                   | NA             | Chinese Health Statistical Digest 2008 | Ministry of Health. Chinese Health Statistical Digest 2008. |
| China   | 2004       | 2005     | misc                                     | YES                   | NA             | Chinese Health Statistical Digest 2008 | Ministry of Health. Chinese Health Statistical Digest 2008. |
| China   | 2005       | 2006     | misc                                     | YES                   | NA             | Chinese Health Statistical Digest 2008 | Ministry of Health. Chinese Health Statistical Digest 2008. |
| China   | 2006       | 2007     | misc                                     | YES                   | NA             | Chinese Health Statistical Digest 2008 | Ministry of Health. Chinese Health Statistical Digest 2008. |
| China   | 2007       | 2008     | misc                                     | YES                   | NA             | Chinese Health Statistical Digest 2008 | Ministry of Health. Chinese Health Statistical Digest 2008. |
| China   | 2008       | 2009     | misc                                     | YES                   | NA             | Chinese Health Statistical Digest 2013 | Ministry of Health. Chinese Health Statistical Digest 2013. |
| China   | 2009       | 2010     | misc                                     | YES                   | NA             | Chinese Health Statistical Digest 2013 | Ministry of Health. Chinese Health Statistical Digest 2013. |

| Country  | Start year | End year | Type (inq refers to a specialized study) | Included in modelling | Exclude-reason | Source                                 | Reference                                                                                                                                                                                                                                         |
|----------|------------|----------|------------------------------------------|-----------------------|----------------|----------------------------------------|---------------------------------------------------------------------------------------------------------------------------------------------------------------------------------------------------------------------------------------------------|
| China    | 2010       | 2011     | misc                                     | YES                   | NA             | Chinese Health Statistical Digest 2013 | Ministry of Health. Chinese Health Statistical Digest 2013.                                                                                                                                                                                       |
| China    | 2011       | 2012     | misc                                     | YES                   | NA             | Chinese Health Statistical Digest 2013 | Ministry of Health. Chinese Health Statistical Digest 2013.                                                                                                                                                                                       |
| China    | 2012       | 2013     | misc                                     | YES                   | NA             | Chinese Health Statistical Digest 2013 | Ministry of Health. Chinese Health Statistical Digest 2013.                                                                                                                                                                                       |
| China    | 2004       | 2006     | misc                                     | YES                   | NA             | Third Survey 2004-2005                 | China Third Retrospective Survey on Mortality 2004-2005 - summary.                                                                                                                                                                                |
| Colombia | 2002       | 2003     | inq                                      | YES                   | NA             | Estudio la Mortalidad Materna 2002     | Ministerio de la Procección Social, DANE, UNPFA. Estudio la Moraltida Maternal y Perinatal en Colombia en los Albores del Sieglo XXI. Colombia; 2006.                                                                                             |
| Comoros  | 2005.782   | 2012.782 | dhs                                      | YES                   | NA             | DHS 2012                               | Direction Générale de la Statistique et de la Prospective (DGSP) Comores et ICF International. l'Enquête Démographique et de Santé et à Indicateurs Multiples de l'Union des Comores (EDSC-MICS 12). ICF International: Calverton, MD, USA; 2014. |
| Congo    | 1998.482   | 2005.482 | dhs                                      | YES                   | NA             | DHS 2005                               | Centre National de la Statistique et des Études Économiques (CNSEE) et ORC Macro. Enquête Démographique et de Santé du Congo 2005. Calverton, Maryland, USA: CNSEE et ORC Macro; 2006.                                                            |
| Congo    | 2004.901   | 2011.901 | dhs                                      | YES                   | NA             | DHS 2011-2012                          | Centre Nationale de la Statistique et des Études Économiques (CNSEE) [Congo] et ICF International. Enquête Démographique et de Santé du Congo (EDSC-II) 2011-2012. Calverton, Maryland, USA: CNSEE et ICF International; 2013.                    |

| Country    | Start year | End year | Type (inq refers to a specialized study) | Included in modelling | Exclude-reason | Source     | Reference                                                                                                                                                   |
|------------|------------|----------|------------------------------------------|-----------------------|----------------|------------|-------------------------------------------------------------------------------------------------------------------------------------------------------------|
| Costa Rica | 2003       | 2004     | inq                                      | YES                   | NA             | BIRMM 2014 | Ministerio de Salud, Instituto Nacional de Estadística y Censos. Proceso de Búsqueda Intencional y Reclasificación de Mortalidad Materna. Costa Rica; 2014. |
| Costa Rica | 2004       | 2005     | inq                                      | YES                   | NA             | BIRMM 2014 | Ministerio de Salud, Instituto Nacional de Estadística y Censos. Proceso de Búsqueda Intencional y Reclasificación de Mortalidad Materna. Costa Rica; 2014. |
| Costa Rica | 2005       | 2006     | inq                                      | YES                   | NA             | BIRMM 2014 | Ministerio de Salud, Instituto Nacional de Estadística y Censos. Proceso de Búsqueda Intencional y Reclasificación de Mortalidad Materna. Costa Rica; 2014. |
| Costa Rica | 2006       | 2007     | inq                                      | YES                   | NA             | BIRMM 2014 | Ministerio de Salud, Instituto Nacional de Estadística y Censos. Proceso de Búsqueda Intencional y Reclasificación de Mortalidad Materna. Costa Rica; 2014. |
| Costa Rica | 2007       | 2008     | inq                                      | YES                   | NA             | BIRMM 2014 | Ministerio de Salud, Instituto Nacional de Estadística y Censos. Proceso de Búsqueda Intencional y Reclasificación de Mortalidad Materna. Costa Rica, 2014. |
| Costa Rica | 2008       | 2009     | inq                                      | YES                   | NA             | BIRMM 2014 | Ministerio de Salud, Instituto Nacional de Estadística y Censos. Proceso de Búsqueda Intencional y Reclasificación de Mortalidad Materna. Costa Rica; 2014. |
| Costa Rica | 2009       | 2010     | inq                                      | YES                   | NA             | BIRMM 2014 | Ministerio de Salud, Instituto Nacional de Estadística y Censos. Proceso de Búsqueda Intencional y Reclasificación de Mortalidad Materna. Costa Rica; 2014. |
| Costa Rica | 2010       | 2011     | inq                                      | YES                   | NA             | BIRMM 2014 | Ministerio de Salud, Instituto Nacional de Estadística y Censos. Proceso de Búsqueda Intencional y Reclasificación de Mortalidad Materna. Costa Rica; 2014. |
| Costa Rica | 2011       | 2012     | inq                                      | YES                   | NA             | BIRMM 2014 | Ministerio de Salud, Instituto Nacional de Estadística y Censos. Proceso de Búsqueda Intencional y Reclasificación de Mortalidad Materna. Costa Rica, 2014. |

| Country                               | Start year | End year   | Type (inq refers to a specialized study) | Included in modelling | Exclude-reason        | Source        | Reference                                                                                                                                                                                                                                                    |
|---------------------------------------|------------|------------|------------------------------------------|-----------------------|-----------------------|---------------|--------------------------------------------------------------------------------------------------------------------------------------------------------------------------------------------------------------------------------------------------------------|
| Costa Rica                            | 2012       | 2013       | inq                                      | YES                   | NA                    | BIRMM 2014    | Ministerio de Salud, Instituto Nacional de Estadística y Censos. Proceso de Búsqueda Intencional y Reclasificación de Mortalidad Materna. Costa Rica, 2014.                                                                                                  |
| Cote d'Ivoire                         | 1998.705   | 2005.705   | dhs                                      | YES                   | NA                    | AIS 2005      | Institut National de la Statistique (INS) et Ministère de la Lutte contre le Sida [Côte d'Ivoire] et ORC Macro. Enquête sur les Indicateurs du Sida, Côte d'Ivoire 2005. Calverton, Maryland, USA: INS et ORC Macro; 2006.                                   |
| Cote d'Ivoire                         | 1987.67    | 1994.67    | dhs                                      | YES                   | NA                    | DHS 1994      | Institut National de la Statistique, Ministère Délégué Auprès du Premier Ministre, Chargé de l'Economie, des Finances et du Plan, Macro International Inc. Enquête Démographique et de Santé 1994. Calverton, Maryland, USA: Macro International Inc.; 1995. |
| Cote d'Ivoire                         | 2005.143   | 2012.143   | dhs                                      | YES                   | NA                    | DHS 2011-2012 | Institut National de la Statistique (INS) et ICF International. Enquête Démographique et de Santé et à Indicateurs Multiples de Côte d'Ivoire 2011-2012. Calverton, Maryland, USA: INS et ICF International; 2012.                                           |
| Cuba                                  | 2012       | 2013       | inq                                      | YES                   | NA                    | MoH           | Ministry of Health; 20015.                                                                                                                                                                                                                                   |
| Democratic People's Republic of Korea | 2007.75    | 2008.74725 | misc                                     | NO                    | MMEIG data assessment | 2008 Census   | DPR of Korea Central Bureau of Statistics (2009); Country consultation 2010.                                                                                                                                                                                 |
| Democratic Republic of the Congo      | 2000.495   | 2007.495   | dhs                                      | YES                   | NA                    | DHS 2007      | Ministère du Plan et Macro International. Enquête Démographique et de Santé, République Démocratique du Congo 2007. Calverton, Maryland, USA.: Ministère du Plan et Macro International; 2008.                                                               |
| Democratic Republic of the Congo      | 2007.082   | 2014.082   | dhs                                      | YES                   | NA                    | DHS 2013-2014 | Ministère du Plan et Suivi de la Mise en oeuvre de la Révolution de la Modernité (MPSMRM), Ministère de la Santé Publique (MSP) et ICF International. Enquête                                                                                                |

| Country            | Start year | End year | Type (inq refers to a specialized study) | Included in modelling | Exclude-reason | Source                                                                                      | Reference                                                                                                                                                 |
|--------------------|------------|----------|------------------------------------------|-----------------------|----------------|---------------------------------------------------------------------------------------------|-----------------------------------------------------------------------------------------------------------------------------------------------------------|
|                    |            |          |                                          |                       |                |                                                                                             | Démographique et de Santé en République Démocratique du Congo 2013-2014. Rockville, Maryland, USA : MPSMRM, MSP et ICF International; 2014.               |
| Denmark            | 2002       | 2007     | inq                                      | YES                   | NA             | Maternal deaths in Denmark 2002-2006                                                        | Bodker B et al. Maternal deaths in Denmark 2002-2006. Acta Obstet Gynecol Scand. 2009;88:556-562.                                                         |
| Denmark            | 1985       | 1995     | inq                                      | YES                   | NA             | Maternal mortality in Denmark 1985-1994                                                     | Andersen BR et al. Maternal mortality in Denmark 1985-1994. Eur J Obstet Gyn-ol Reprod Biol. 2009; 42:124-8.                                              |
| Dominican Republic | 1999       | 2000     | inq                                      | YES                   | NA             | 1999-2007 Registro de Vigilancia Epidemiologica. 2008-2013 Registro de Estadísticas Vitales | 1999-2007 Registro de Vigilancia Epidemiologica. 2008-2013 Registro de Estadísticas Vitales (certificado medico de defuncion). Ministerio de Salud; 2015. |
| Dominican Republic | 2000       | 2001     | inq                                      | YES                   | NA             | 1999-2007 Registro de Vigilancia Epidemiologica. 2008-2013 Registro de Estadísticas Vitales | 1999-2007 Registro de Vigilancia Epidemiologica. 2008-2013 Registro de Estadísticas Vitales (certificado medico de defuncion). Ministerio de Salud; 2015. |

| Country            | Start year | End year | Type (inq refers to a specialized study) | Included in modelling | Exclude-reason | Source                                                                                      | Reference                                                                                                                                                 |
|--------------------|------------|----------|------------------------------------------|-----------------------|----------------|---------------------------------------------------------------------------------------------|-----------------------------------------------------------------------------------------------------------------------------------------------------------|
| Dominican Republic | 2001       | 2002     | inq                                      | YES                   | NA             | 1999-2007 Registro de Vigilancia Epidemiologica. 2008-2013 Registro de Estadísticas Vitales | 1999-2007 Registro de Vigilancia Epidemiologica. 2008-2013 Registro de Estadísticas Vitales (certificado medico de defuncion). Ministerio de Salud; 2015. |
| Dominican Republic | 2002       | 2003     | inq                                      | YES                   | NA             | 1999-2007 Registro de Vigilancia Epidemiologica. 2008-2013 Registro de Estadísticas Vitales | 1999-2007 Registro de Vigilancia Epidemiologica. 2008-2013 Registro de Estadísticas Vitales (certificado medico de defuncion). Ministerio de Salud; 2015. |
| Dominican Republic | 2003       | 2004     | inq                                      | YES                   | NA             | 1999-2007 Registro de Vigilancia Epidemiologica. 2008-2013 Registro de Estadísticas Vitales | 1999-2007 Registro de Vigilancia Epidemiologica. 2008-2013 Registro de Estadísticas Vitales (certificado medico de defuncion). Ministerio de Salud; 2015. |

| Country            | Start year | End year | Type (inq refers to a specialized study) | Included in modelling | Exclude-reason | Source                                                                                      | Reference                                                                                                                                                 |
|--------------------|------------|----------|------------------------------------------|-----------------------|----------------|---------------------------------------------------------------------------------------------|-----------------------------------------------------------------------------------------------------------------------------------------------------------|
| Dominican Republic | 2004       | 2005     | inq                                      | YES                   | NA             | 1999-2007 Registro de Vigilancia Epidemiologica. 2008-2013 Registro de Estadísticas Vitales | 1999-2007 Registro de Vigilancia Epidemiologica. 2008-2013 Registro de Estadísticas Vitales (certificado medico de defuncion). Ministerio de Salud; 2015. |
| Dominican Republic | 2005       | 2006     | inq                                      | YES                   | NA             | 1999-2007 Registro de Vigilancia Epidemiologica. 2008-2013 Registro de Estadísticas Vitales | 1999-2007 Registro de Vigilancia Epidemiologica. 2008-2013 Registro de Estadísticas Vitales (certificado medico de defuncion). Ministerio de Salud; 2015. |
| Dominican Republic | 2006       | 2007     | inq                                      | YES                   | NA             | 1999-2007 Registro de Vigilancia Epidemiologica. 2008-2013 Registro de Estadísticas Vitales | 1999-2007 Registro de Vigilancia Epidemiologica. 2008-2013 Registro de Estadísticas Vitales (certificado medico de defuncion). Ministerio de Salud; 2015. |

| Country            | Start year | End year | Type (inq refers to a specialized study) | Included in modelling | Exclude-reason | Source                                                                                         | Reference                                                                                                                                                 |
|--------------------|------------|----------|------------------------------------------|-----------------------|----------------|------------------------------------------------------------------------------------------------|-----------------------------------------------------------------------------------------------------------------------------------------------------------|
| Dominican Republic | 2007       | 2008     | inq                                      | YES                   | NA             | 1999-2007 Registro de Vigilancia Epidemiologica.<br>2008-2013 Registro de Estadísticas Vitales | 1999-2007 Registro de Vigilancia Epidemiologica. 2008-2013 Registro de Estadísticas Vitales (certificado medico de defuncion). Ministerio de Salud; 2015. |
| Dominican Republic | 2008       | 2009     | inq                                      | YES                   | NA             | 1999-2007 Registro de Vigilancia Epidemiologica.<br>2008-2013 Registro de Estadísticas Vitales | 1999-2007 Registro de Vigilancia Epidemiologica. 2008-2013 Registro de Estadísticas Vitales (certificado medico de defuncion). Ministerio de Salud; 2015. |
| Dominican Republic | 2009       | 2010     | inq                                      | YES                   | NA             | 1999-2007 Registro de Vigilancia Epidemiologica.<br>2008-2013 Registro de Estadísticas Vitales | 1999-2007 Registro de Vigilancia Epidemiologica. 2008-2013 Registro de Estadísticas Vitales (certificado medico de defuncion). Ministerio de Salud; 2015. |



| Country            | Start year | End year | Type (inq refers to a specialized study) | Included in modelling | Exclude-reason | Source                                                                                         | Reference                                                                                                                                                 |
|--------------------|------------|----------|------------------------------------------|-----------------------|----------------|------------------------------------------------------------------------------------------------|-----------------------------------------------------------------------------------------------------------------------------------------------------------|
| Dominican Republic | 2010       | 2011     | inq                                      | YES                   | NA             | 1999-2007 Registro de Vigilancia Epidemiologica.<br>2008-2013 Registro de Estadísticas Vitales | 1999-2007 Registro de Vigilancia Epidemiologica. 2008-2013 Registro de Estadísticas Vitales (certificado medico de defuncion). Ministerio de Salud; 2015. |
| Dominican Republic | 2011       | 2012     | inq                                      | YES                   | NA             | 1999-2007 Registro de Vigilancia Epidemiologica.<br>2008-2013 Registro de Estadísticas Vitales | 1999-2007 Registro de Vigilancia Epidemiologica. 2008-2013 Registro de Estadísticas Vitales (certificado medico de defuncion). Ministerio de Salud; 2015. |
| Dominican Republic | 2012       | 2013     | inq                                      | YES                   | NA             | 1999-2007 Registro de Vigilancia Epidemiologica.<br>2008-2013 Registro de Estadísticas Vitales | 1999-2007 Registro de Vigilancia Epidemiologica. 2008-2013 Registro de Estadísticas Vitales (certificado medico de defuncion). Ministerio de Salud; 2015. |

| Country            | Start year | End year | Type (inq refers to a specialized study) | Included in modelling | Exclude-reason | Source                                                                                      | Reference                                                                                                                                                                                                                           |
|--------------------|------------|----------|------------------------------------------|-----------------------|----------------|---------------------------------------------------------------------------------------------|-------------------------------------------------------------------------------------------------------------------------------------------------------------------------------------------------------------------------------------|
| Dominican Republic | 2013       | 2014     | inq                                      | YES                   | NA             | 1999-2007 Registro de Vigilancia Epidemiologica. 2008-2013 Registro de Estadísticas Vitales | 1999-2007 Registro de Vigilancia Epidemiologica. 2008-2013 Registro de Estadísticas Vitales (certificado medico de defuncion). Ministerio de Salud; 2015.                                                                           |
| Dominican Republic | 1995.724   | 2002.724 | dhs                                      | YES                   | NA             | DHS 2002                                                                                    | Centro de Estudios Sociales y Demográficos (CESDEM), Secretaría de Estado de Salud, Pública y Asistencia Social (SESPAS), ORC Macro. Encuesta Demográfica y de Salud 2002 (ENDESA 2002). Calverton, Maryland, USA: ORC Macro; 2003. |
| Dominican Republic | 2000.401   | 2007.401 | dhs                                      | YES                   | NA             | DHS 2007                                                                                    | Centro de Estudios Sociales y Demográficos (CESDEM) y Macro International Inc. Encuesta Demográfica y de Salud 2007. Santo Domingo, República Dominicana: CESDEM y Macro International Inc.; 2008.                                  |
| Ecuador            | 2008       | 2009     | inq                                      | YES                   | NA             | La vigilancia epidemiologica de la mortalidad materna en el Ecuador anos 2002 al 2011       | Dirección Nacional de Vigilancia Epidemiologica. La vigilancia epidemiologica de la mortalidad materna en el Ecuador anos 2002 al 2011. Ecuador; 2013.                                                                              |
| Ecuador            | 2009       | 2010     | inq                                      | YES                   | NA             | La vigilancia epidemiologica de la mortalidad materna en el Ecuador anos 2002 al 2011       | Dirección Nacional de Vigilancia Epidemiologica. La vigilancia epidemiologica de la mortalidad materna en el Ecuador anos 2002 al 2011. Ecuador; 2013.                                                                              |

| Country | Start year | End year | Type (inq refers to a specialized study) | Included in modelling | Exclude-reason | Source                                                                                | Reference                                                                                                                                                                                                                        |
|---------|------------|----------|------------------------------------------|-----------------------|----------------|---------------------------------------------------------------------------------------|----------------------------------------------------------------------------------------------------------------------------------------------------------------------------------------------------------------------------------|
| Ecuador | 2010       | 2011     | inq                                      | YES                   | NA             | La vigilancia epidemiologica de la mortalidad materna en el Ecuador anos 2002 al 2011 | Dirección Nacional de Vigilancia Epidemiologica. La vigilancia epidemiologica de la mortalidad materna en el Ecuador anos 2002 al 2011. Ecuador; 2013.                                                                           |
| Ecuador | 2011       | 2012     | inq                                      | YES                   | NA             | La vigilancia epidemiologica de la mortalidad materna en el Ecuador anos 2002 al 2011 | Dirección Nacional de Vigilancia Epidemiologica. La vigilancia epidemiologica de la mortalidad materna en el Ecuador anos 2002 al 2011. Ecuador; 2013.                                                                           |
| Ecuador | 2012       | 2013     | inq                                      | YES                   | NA             | La vigilancia epidemiologica de la mortalidad materna en el Ecuador 2012-2013         | Dirección Nacional de Vigilancia Epidemiologica. La vigilancia epidemiologica de la mortalidad materna en el Ecuador 2012-2013. Ecuador; 2015.                                                                                   |
| Ecuador | 2013       | 2014     | inq                                      | YES                   | NA             | La vigilancia epidemiologica de la mortalidad materna en el Ecuador 2012-2013         | Dirección Nacional de Vigilancia Epidemiologica. La vigilancia epidemiologica de la mortalidad materna en el Ecuador 2012-2013. Ecuador; 2015.                                                                                   |
| Ecuador | 1987.511   | 1994.511 | dhs                                      | YES                   | NA             | RHS 1994                                                                              | Centro de Estudios de Población y Paternidad Responsable (CEPAR), División de Salud Reproductiva de los Centros para el Control de Enfermedades (CDC). Encuesta de Salud Materna e Infantil (ENDEMAIN-94). Quito, Ecuador; 1995. |

| Country     | Start year | End year | Type (inq refers to a specialized study) | Included in modelling | Exclude-reason | Source          | Reference                                                                                                                                                                                                                                   |
|-------------|------------|----------|------------------------------------------|-----------------------|----------------|-----------------|---------------------------------------------------------------------------------------------------------------------------------------------------------------------------------------------------------------------------------------------|
| Ecuador     | 1994.284   | 2004.284 | dhs                                      | YES                   | NA             | RHS 2004        | Centro de Estudios de Población y Desarrollo Social (CEPAR), Centros para el Control y Prevención de Enfermedades (CDC). Encuesta Demográfica y de Salud Materna e Infantil (ENDEMAIN-2004). Informe Final. Quito, Ecuador; 2005.           |
| Egypt       | 1992.25    | 1993.16  | misc                                     | YES                   | NA             | NMMS 1992-1993  | Ministry of Health. National Maternal Mortality Study 1992-1993. Egypt; 1994.                                                                                                                                                               |
| Egypt       | 2000       | 2001     | misc                                     | YES                   | NA             | NMMS 2000       | Ministry of Health and Population. National Maternal Mortality Study 2000. Egypt; 2001.                                                                                                                                                     |
| Egypt       | 2004       | 2005     | misc                                     | YES                   | NA             | NMMSS 2004      | Ministry of Health and Population. National Maternal Mortality Surveillance System; 2004.                                                                                                                                                   |
| Egypt       | 2006       | 2007     | misc                                     | YES                   | NA             | NMMSS 2006      | Ministry of Health and Population. National Maternal Mortality Surveillance System; 2006.                                                                                                                                                   |
| El Salvador | 2005.42    | 2006.42  | inq                                      | YES                   | NA             | RAMOS 2005-2006 | Ministerio de Salud Pública y Asistencia Social. Línea de base de mortalidad materna en El Salvador, junio 2005-Mayo 2006: sistema activo de vigilancia epidemiológico de la mortalidad materna. San Salvador, El Salvador; 2006.           |
| El Salvador | 1988       | 1989     | dhs                                      | YES                   | NA             | RHS 1993        | Asociación Demográfica Salvadoreña (ADS), Division of Reproductive Health of the Centers for Disease Control and Prevention (CDC) . Encuesta Nacional de Salud Familiar de 1993 (FESAL-93). San Salvador, El Salvador; 1994.                |
| El Salvador | 1988.606   | 1998.606 | dhs                                      | YES                   | NA             | RHS 1998        | Asociación Demográfica Salvadoreña (ADS), Division of Reproductive Health of the Centers for Disease Control and Prevention (CDC) . Encuesta Nacional de Salud Familiar de 1998 (FESAL-98). Informe Final. San Salvador, El Salvador; 2000. |

| Country           | Start year | End year   | Type (inq refers to a specialized study) | Included in modelling | Exclude-reason | Source        | Reference                                                                                                                                                                                                                                          |
|-------------------|------------|------------|------------------------------------------|-----------------------|----------------|---------------|----------------------------------------------------------------------------------------------------------------------------------------------------------------------------------------------------------------------------------------------------|
| El Salvador       | 1993.065   | 2003.065   | dhs                                      | YES                   | NA             | RHS 2002-2003 | Asociación Demográfica Salvadoreña (ADS), Division of Reproductive Health of the Centers for Disease Control and Prevention (CDC). Encuesta Nacional de Salud Familiar de 2002/03 (FESAL-2002/03). Informe Final. San Salvador, El Salvador; 2004. |
| El Salvador       | 2008       | 2009       | misc                                     | YES                   | NA             | MoH 2009      | Ministry of Health. Surveillance (Programa Nacional sobre Maternidad Segura). 2009.                                                                                                                                                                |
| El Salvador       | 2007       | 2008       | misc                                     | YES                   | NA             | MoH 2009      | Ministry of Health. Surveillance (Programa Nacional sobre Maternidad Segura). 2009.                                                                                                                                                                |
| El Salvador       | 2006.35989 | 2007.37912 | misc                                     | YES                   | NA             | 2007 Census   | Presentation slides by El Salvador National Statistics Office "Census and health"                                                                                                                                                                  |
| Equatorial Guinea | 2001.723   | 2011.723   | dhs                                      | YES                   | NA             | DHS 2011      | Ministerio de Sanidad y Bienestar Social, Ministerio de Economía, Planificación e Inversiones Públicas, e ICF International. Encuesta Demográfica y de Salud (EDSGE-I) 2011. Calverton, Maryland, USA; 2012.                                       |
| Eritrea           | 1985.872   | 1995.872   | dhs                                      | YES                   | NA             | DHS 1995      | National Statistics Office [Eritrea] and Macro International Inc. Eritrea Demographic and Health Survey, 1995. Calverton, Maryland: National Statistics Office and Macro International Inc.; 1997.                                                 |
| Eritrea           | 2005.268   | 2010.268   | dhs                                      | YES                   | NA             | PHS 2010      | National Statistics Office (NSO) [Eritrea] and Fafo AIS. Eritrea Population and Health Survey 2010. Asmara, Eritrea: National Statistics Office and Fafo Institute for Applied International Studies; 2013.                                        |
| Ethiopia          | 1993.246   | 2000.246   | dhs                                      | YES                   | NA             | DHS 2000      | Central Statistical Authority [Ethiopia] and ORC Macro. Ethiopia Demographic and Health Survey 2000. Addis Ababa, Ethiopia and Calverton, Maryland, USA: Central Statistical Authority and ORC Macro; 2001.                                        |
| Ethiopia          | 1998.482   | 2005.482   | dhs                                      | YES                   | NA             | DHS 2005      | Central Statistical Agency, and ORC Macro. Ethiopia                                                                                                                                                                                                |

| Country  | Start year | End year | Type (inq refers to a specialized study) | Included in modelling | Exclude-reason | Source                                           | Reference                                                                                                                                                                                                             |
|----------|------------|----------|------------------------------------------|-----------------------|----------------|--------------------------------------------------|-----------------------------------------------------------------------------------------------------------------------------------------------------------------------------------------------------------------------|
|          |            |          |                                          |                       |                |                                                  | Demographic and Health Survey 2005. Addis Ababa, Ethiopia and Calverton, Maryland, USA: Central Statistical Agency and ORC Macro; 2006.                                                                               |
| Ethiopia | 2004.205   | 2011.205 | dhs                                      | YES                   | NA             | DHS 2011                                         | Central Statistical Agency [Ethiopia] and ICF International. Ethiopia Demographic and Health Survey 2011. Addis Ababa, Ethiopia and Calverton, Maryland, USA: Central Statistical Agency and ICF International; 2012. |
| Finland  | 1987       | 1995     | inq                                      | YES                   | NA             | Pregnancy-associated deaths in Finland 1987-1994 | Gissler M et al. Pregnancy-associated deaths in Finland 1987-1994 -definition problems and benefits of record linkage. Acta Obstet Gynecol Scand. 1997;76(7):651-7.                                                   |
| France   | 2001       | 2002     | inq                                      | YES                   | NA             | Confidential inquiry, France                     | Saucedo M, Deneux-Tharoux C, Bouvier-Colle MH ; Comité national d'experts sur la mortalité maternelle. Mortalité maternelle en France, 2007-2009. J Gynecol Obstet Biol Reprod. 2013;42(7):613-27                     |
| France   | 2002       | 2003     | inq                                      | YES                   | NA             | Confidential inquiry, France                     | Saucedo M, Deneux-Tharoux C, Bouvier-Colle MH ; Comité national d'experts sur la mortalité maternelle. Mortalité maternelle en France, 2007-2009. J Gynecol Obstet Biol Reprod. 2013;42(7):613-27                     |
| France   | 2003       | 2004     | inq                                      | YES                   | NA             | Confidential inquiry, France                     | Saucedo M, Deneux-Tharoux C, Bouvier-Colle MH ; Comité national d'experts sur la mortalité maternelle. Mortalité maternelle en France, 2007-2009. J Gynecol Obstet Biol Reprod. 2013;42(7):613-27                     |
| France   | 2004       | 2005     | inq                                      | YES                   | NA             | Confidential inquiry, France                     | Saucedo M, Deneux-Tharoux C, Bouvier-Colle MH ; Comité national d'experts sur la mortalité maternelle. Mortalité maternelle en France, 2007-2009. J Gynecol Obstet Biol Reprod. 2013;42(7):613-27                     |

| Country | Start year | End year | Type (inq refers to a specialized study) | Included in modelling | Exclude-reason | Source                       | Reference                                                                                                                                                                                                                                                                                           |
|---------|------------|----------|------------------------------------------|-----------------------|----------------|------------------------------|-----------------------------------------------------------------------------------------------------------------------------------------------------------------------------------------------------------------------------------------------------------------------------------------------------|
| France  | 2005       | 2006     | inq                                      | YES                   | NA             | Confidential inquiry, France | Saucedo M, Deneux-Tharaux C, Bouvier-Colle MH ; Comité national d'experts sur la mortalité maternelle. Mortalité maternelle en France, 2007-2009. J Gynecol Obstet Biol Reprod. 2013;42(7):613-27                                                                                                   |
| France  | 2006       | 2007     | inq                                      | YES                   | NA             | Confidential inquiry, France | Saucedo M, Deneux-Tharaux C, Bouvier-Colle MH ; Comité national d'experts sur la mortalité maternelle. Mortalité maternelle en France, 2007-2009. J Gynecol Obstet Biol Reprod. 2013;42(7):613-27                                                                                                   |
| France  | 2007       | 2008     | inq                                      | YES                   | NA             | Confidential inquiry, France | Saucedo M, Deneux-Tharaux C, Bouvier-Colle MH ; Comité national d'experts sur la mortalité maternelle. Mortalité maternelle en France, 2007-2009. J Gynecol Obstet Biol Reprod. 2013;42(7):613-27                                                                                                   |
| France  | 2008       | 2009     | inq                                      | YES                   | NA             | Confidential inquiry, France | Saucedo M, Deneux-Tharaux C, Bouvier-Colle MH ; Comité national d'experts sur la mortalité maternelle. Mortalité maternelle en France, 2007-2009. J Gynecol Obstet Biol Reprod. 2013;42(7):613-27                                                                                                   |
| France  | 2009       | 2010     | inq                                      | YES                   | NA             | Confidential inquiry, France | Saucedo M, Deneux-Tharaux C, Bouvier-Colle MH ; Comité national d'experts sur la mortalité maternelle. Mortalité maternelle en France, 2007-2009. J Gynecol Obstet Biol Reprod. 2013;42(7):613-27                                                                                                   |
| Gabon   | 1993.787   | 2000.787 | dhs                                      | YES                   | NA             | DHS 2000                     | Direction Générale de la Statistique et des Études Économiques (DGSEE) [Gabon] et ORC Macro. Enquête Démographique et de Santé Gabon 2000. Calverton, Maryland: Direction Générale de la Statistique et des Études Économiques, et Fonds des Nations Unies pour la Populations, et ORC Macro; 2001. |
| Gabon   | 2005.198   | 2012.198 | dhs                                      | YES                   | NA             | DHS 2012                     | Direction Générale de la Statistique (DGS) et ICF                                                                                                                                                                                                                                                   |

| Country   | Start year | End year   | Type (inq refers to a specialized study) | Included in modelling | Exclude-reason | Source                       | Reference                                                                                                                                                                                                                                                                          |
|-----------|------------|------------|------------------------------------------|-----------------------|----------------|------------------------------|------------------------------------------------------------------------------------------------------------------------------------------------------------------------------------------------------------------------------------------------------------------------------------|
|           |            |            |                                          |                       |                |                              | International. Enquête Démographique et de Santé du Gabon 2012. Calverton, Maryland, et Libreville, Gabon: DGS et ICF International, 2013.                                                                                                                                         |
| Gambia    | 2006.205   | 2013.205   | dhs                                      | YES                   | NA             | DHS 2013                     | The Gambia Bureau of Statistics (GBOS) and ICF International. The Gambia Demographic and Health Survey 2013. Banjul, The Gambia, and Rockville, Maryland, USA: GBOS and ICF International; 2014.                                                                                   |
| Georgia   | 2006       | 2007       | inq                                      | YES                   | NA             | RAMOS 2008                   | Serbanescu F, Tefft M, Shakhnazarova M, Williams D, Berdzuli N, Berg C. Reproductive Age Mortality Study, Georgia, 2008 - Part II: Maternal Mortality, Atlanta, GA, USA: Georgian National Center for Disease Control, JSI Research & Training Institute, Inc (JSI) and CDC; 2009. |
| Georgia   | 2012       | 2013       | inq                                      | YES                   | NA             | RAMOS 2014                   | Georgia Reproductive Age Mortality Study (RAMOS) 2014. Executive Summary; 2014.                                                                                                                                                                                                    |
| Ghana     | 2000.662   | 2007.662   | dhs                                      | YES                   | NA             | MHS 2007                     | Ghana Statistical Service (GSS), Ghana Health Service (GHS), and Macro International. Ghana Maternal Health Survey 2007. Calverton, Maryland, USA: GSS, GHS, and Macro International; 2009.                                                                                        |
| Ghana     | 2009.73626 | 2010.73626 | misc                                     | YES                   | NA             | 2010 Census                  | Population and Housing Census Summary Report of Final Results (2012)                                                                                                                                                                                                               |
| Guatemala | 1989       | 1990       | inq                                      | YES                   | NA             | Maternal mortality 1996-1998 | Schieber B, Stanton C. Estimación de la Mortalidad Materna en Guatemala Período 1996 -1998. Guatemala; 2000.                                                                                                                                                                       |
| Guatemala | 1996       | 1997       | inq                                      | YES                   | NA             | Maternal mortality 1996-1998 | Schieber B, Stanton C. Estimación de la Mortalidad Materna en Guatemala Período 1996 -1998. Guatemala; 2000.                                                                                                                                                                       |
| Guatemala | 1997       | 1998       | inq                                      | YES                   | NA             | Maternal mortality 1996-     | Schieber B, Stanton C. Estimación de la Mortalidad Materna en Guatemala Período 1996 -1998. Guatemala;                                                                                                                                                                             |



| Country   | Start year | End year | Type (inq refers to a specialized study) | Included in modelling | Exclude-reason | Source                       | Reference                                                                                                                                                                               |
|-----------|------------|----------|------------------------------------------|-----------------------|----------------|------------------------------|-----------------------------------------------------------------------------------------------------------------------------------------------------------------------------------------|
|           |            |          |                                          |                       |                | 1998                         | 2000.                                                                                                                                                                                   |
| Guatemala | 1998       | 1999     | inq                                      | YES                   | NA             | Maternal mortality 1996-1998 | Schieber B, Stanton C. Estimación de la Mortalidad Materna en Guatemala Período 1996 -1998. Guatemala; 2000.                                                                            |
| Guatemala | 2000       | 2001     | inq                                      | YES                   | NA             | Maternal mortality 2000      | Ministerio de Salud Pública y Asistencia Social. Línea Basal de Mortalidad Materna para el Año 2000. Informe Final. Guatemala; 2003.                                                    |
| Guatemala | 2007       | 2008     | inq                                      | YES                   | NA             | Maternal mortality 2007      | Secretaría de Planificación y Programación de la Presidencia Ministerio de Salud Pública y Asistencia Social. Estudio Nacional de Mortalidad Materna. Informe Final. Guatemala; 2011.   |
| Guatemala | 2013       | 2014     | inq                                      | YES                   | NA             | Maternal mortality 2013      | Ministerio de Salud Pública y Asistencia Social. Situación de la Mortalidad Materna. Informe de País 2013. Guatemala; 2014.                                                             |
| Guatemala | 1985.54    | 1990.54  | misc                                     | YES                   | NA             | DHS 1995                     | Instituto Nacional de Estadística (INE), Macro International Inc. Guatemala Encuesta Nacional de Salud Materno Infantil 1995. Calverton, Maryland, USA: Macro International Inc.; 1996. |
| Guatemala | 1990.54    | 1995.54  | misc                                     | YES                   | NA             | DHS 1995                     | Instituto Nacional de Estadística (INE), Macro International Inc. Guatemala Encuesta Nacional de Salud Materno Infantil 1995. Calverton, Maryland, USA: Macro International Inc.; 1996. |
| Guinea    | 1992.444   | 1999.444 | dhs                                      | YES                   | NA             | DHS 1999                     | Direction Nationale de la Statistique [Guinée] et Macro International Inc. Enquête Démographique et de Santé, Guinée 1999. Calverton, Maryland USA: Direction                           |

| Country       | Start year | End year   | Type (inq refers to a specialized study) | Included in modelling | Exclude-reason        | Source      | Reference                                                                                                                                                                                                                                                                                          |
|---------------|------------|------------|------------------------------------------|-----------------------|-----------------------|-------------|----------------------------------------------------------------------------------------------------------------------------------------------------------------------------------------------------------------------------------------------------------------------------------------------------|
|               |            |            |                                          |                       |                       |             | Nationale de la Statistique et Macro International Inc.; 2000.                                                                                                                                                                                                                                     |
| Guinea        | 1998.007   | 2005.007   | dhs                                      | YES                   | NA                    | DHS 2005    | Direction Nationale de la Statistique (DNS) (Guinée) et ORC Macro. Enquête Démographique et de Santé, Guinée 2005. Calverton, Maryland, USA: DNS et ORC Macro; 2006.                                                                                                                               |
| Guinea        | 2005.602   | 2012.602   | dhs                                      | YES                   | NA                    | DHS 2012    | Institut National de la Statistique, Ministère du Plan Ministère d'Etat de la Santé et de l'Hygiène Publique Conakry, Guinée Measure DHS. Enquête Démographique et de Santé et à Indicateurs Multiples (EDS-MICS-IV) Guinée 2012. ICF International Calverton, Maryland, U.S.A; 2013.              |
| Guinea-Bissau | 2008.16209 | 2009.15934 | misc                                     | NO                    | MMEIG data assessment | 2009 Census | Guinea-Bissau National Statistics Office (2009) Tema Mortalidade III RGPH/2009.                                                                                                                                                                                                                    |
| Haiti         | 1993.33    | 2000.33    | dhs                                      | YES                   | NA                    | DHS 2000    | Cayemittes, Michel, Marie Florence Placide, Bernard Barrère, Soumaïla Mariko, Blaise Sévère. Enquête Mortalité, Morbidité et Utilisation des Services, Haïti 2000. Calverton, Maryland, USA: Ministère de la Santé Publique et de la Population, Institut Haïtien de l'Enfance et ORC Macro; 2001. |

| Country  | Start year | End year | Type (inq refers to a specialized study) | Included in modelling | Exclude-reason | Source                       | Reference                                                                                                                                                                                                                                                                                                                                |
|----------|------------|----------|------------------------------------------|-----------------------|----------------|------------------------------|------------------------------------------------------------------------------------------------------------------------------------------------------------------------------------------------------------------------------------------------------------------------------------------------------------------------------------------|
| Haiti    | 1999.121   | 2006.121 | dhs                                      | YES                   | NA             | DHS 2005-2006                | Cayemittes, Michel, Marie Florence Placide, Soumaïla Mariko, Bernard Barrère, Blaise Sévère, Canez Alexandre. Enquête Mortalité, Morbidité et Utilisation des Services, Haïti, 2005-2006. Calverton, Maryland, USA: Ministère de la Santé Publique et de la Population, Institut Haïtien de l'Enfance et Macro International Inc.; 2007. |
| Honduras | 1997       | 1998     | inq                                      | YES                   | NA             | RAMOS 1997                   | Meléndez JH, Ochoa Vasque JC, Villanueva Y. Investigacion sobre mortalidad maternal y de mujers en edad reproductiva en Honduras. Informe final. Honduras; 1999.                                                                                                                                                                         |
| Honduras | 2010       | 2011     | inq                                      | YES                   | NA             | RAMOS 2010                   | Secretaría de Salud. Actualización de la razón de mortalidad materna, Honduras ano 2010. Tegucigalpa; 2013.                                                                                                                                                                                                                              |
| Honduras | 1990       | 1991     | inq                                      | YES                   | NA             | RAMOS 1990                   | Meléndez JH, Ochoa Vasque JC, Villanueva Y. Investigacion sobre mortalidad maternal y de mujers en edad reproductiva en Honduras. Informe final. Honduras; 1999.                                                                                                                                                                         |
| Honduras | 2012       | 2013     | misc                                     | YES                   | NA             | Honduras 2012                | Informe vigilancia de la mortalidad 2012.                                                                                                                                                                                                                                                                                                |
| Honduras | 2013       | 2014     | misc                                     | YES                   | NA             | Honduras 2013                | Informe vigilancia de la mortalidad 2013.                                                                                                                                                                                                                                                                                                |
| Honduras | 2000       | 2001     | misc                                     | YES                   | NA             | Census 2001                  |                                                                                                                                                                                                                                                                                                                                          |
| India    | 2011       | 2014     | misc                                     | YES                   | NA             | Maternal Mortality 2011-2013 | Office of Register General. Maternal Mortality Ratio Bulletin 2011-13. India; 2015.                                                                                                                                                                                                                                                      |
| India    | 2010       | 2013     | misc                                     | YES                   | NA             | Maternal Mortality 2010-2012 | Office of Register General. Special Bulletin on Maternal Mortality in India 2010-2012. India; 2013.                                                                                                                                                                                                                                      |

| Country   | Start year | End year | Type (inq refers to a specialized study) | Included in modelling | Exclude-reason | Source                        | Reference                                                                                                                                                                                                                                                                                |
|-----------|------------|----------|------------------------------------------|-----------------------|----------------|-------------------------------|------------------------------------------------------------------------------------------------------------------------------------------------------------------------------------------------------------------------------------------------------------------------------------------|
| India     | 2007       | 2010     | misc                                     | YES                   | NA             | Maternal Mortality 2007-2009  | Office of Register General. Special Bulletin on Maternal Mortality in India 2007-2009. India; 2011.                                                                                                                                                                                      |
| India     | 2004       | 2007     | misc                                     | YES                   | NA             | Maternal Mortality 2004-2006  | Office of Register General. Special Bulletin on Maternal Mortality in India 2004-2006. India; 2009.                                                                                                                                                                                      |
| India     | 1997       | 1999     | misc                                     | YES                   | NA             | Maternal Mortality 1997-1998  | Register General of India. Maternal Mortality in India: 1997-2003. Trends, Causes and Risk Factors. New Delhi; 2006.                                                                                                                                                                     |
| India     | 1999       | 2002     | misc                                     | YES                   | NA             | Maternal Mortality 1999-2001  | Register General of India. Maternal Mortality in India: 1997-2003. Trends, Causes and Risk Factors. New Delhi; 2006.                                                                                                                                                                     |
| India     | 1998       | 2000     | misc                                     | YES                   | NA             | NFHS-2: 1998-99               | International Institute for Population Sciences (IIPS) and ORC Macro. National Family Health Survey (NFHS-2), 1998-99: India. Mumbai: IIPS; 2000.                                                                                                                                        |
| India     | 2001       | 2004     | misc                                     | YES                   | NA             | Million Death Study 2001-2003 | Register General of India. Maternal Mortality in India: 1997-2003. Trends, Causes and Risk Factors. New Delhi; 2006.                                                                                                                                                                     |
| India     | 1991       | 1993     | misc                                     | YES                   | NA             | NFHS-1: 1992-93               | International Institute for Population Sciences (IIPS). National Family Health Survey (MCH and Family planning), India 1992-93. Mumbai: IIPS; 1995.                                                                                                                                      |
| Indonesia | 1987.705   | 1994.705 | dhs                                      | YES                   | NA             | DHS 1994                      | Central Bureau of Statistics (CBS) [Indonesia] and State Ministry of Population/National Family Planning Coordinating Board (NFPCB) and Ministry of Health (MOH) and Macro International Inc. (MI). Indonesia Demographic and Health Survey 1994. Calverton, Maryland: CBS and MI; 1995. |
| Indonesia | 1996.066   | 2003.066 | dhs                                      | YES                   | NA             | DHS 2002-2003                 | Badan Pusat Statistik-Statistics Indonesia (BPS) and ORC                                                                                                                                                                                                                                 |

| Country   | Start year | End year | Type (inq refers to a specialized study) | Included in modelling | Exclude-reason | Source              | Reference                                                                                                                                                                                                                                                                                      |
|-----------|------------|----------|------------------------------------------|-----------------------|----------------|---------------------|------------------------------------------------------------------------------------------------------------------------------------------------------------------------------------------------------------------------------------------------------------------------------------------------|
|           |            |          |                                          |                       |                |                     | Macro. Indonesia Demographic and Health Survey 2002-2003. Calverton, Maryland, USA: BPS and ORC Macro; 2003.                                                                                                                                                                                   |
| Indonesia | 2000.74    | 2007.74  | dhs                                      | YES                   | NA             | DHS 2007            | Statistics Indonesia (Badan Pusat Statistik-BPS) and Macro International. Indonesia Demographic and Health Survey 2007. Calverton, Maryland, USA: BPS and Macro International; 2008.                                                                                                           |
| Indonesia | 2005.463   | 2012.463 | dhs                                      | YES                   | NA             | DHS 2012            | Statistics Indonesia (Badan Pusat Statistik—BPS), National Population and Family Planning Board (BKKBN), and Kementerian Kesehatan (Kemenkes—MOH), and ICF International. Indonesia Demographic and Health Survey 2012. Jakarta, Indonesia: BPS, BKKBN, Kemenkes, and ICF International; 2013. |
| Iran      | 2002       | 2003     | misc                                     | YES                   | NA             | Surveillance System | Ministry of Health. Maternal Mortality Surveillance System. Iran; 2015.                                                                                                                                                                                                                        |
| Iran      | 2003       | 2004     | misc                                     | YES                   | NA             | Surveillance System | Ministry of Health. Maternal Mortality Surveillance System. Iran; 2015.                                                                                                                                                                                                                        |
| Iran      | 2004       | 2005     | misc                                     | YES                   | NA             | Surveillance System | Ministry of Health. Maternal Mortality Surveillance System. Iran; 2015.                                                                                                                                                                                                                        |
| Iran      | 2005       | 2006     | misc                                     | YES                   | NA             | Surveillance System | Ministry of Health. Maternal Mortality Surveillance System. Iran; 2015.                                                                                                                                                                                                                        |
| Iran      | 2006       | 2007     | misc                                     | YES                   | NA             | Surveillance System | Ministry of Health. Maternal Mortality Surveillance System. Iran; 2015.                                                                                                                                                                                                                        |
| Iran      | 2007       | 2008     | misc                                     | YES                   | NA             | Surveillance System | Ministry of Health. Maternal Mortality Surveillance System. Iran; 2015.                                                                                                                                                                                                                        |
| Iran      | 2008       | 2009     | misc                                     | YES                   | NA             | Surveillance System | Ministry of Health. Maternal Mortality Surveillance System. Iran; 2015.                                                                                                                                                                                                                        |

| Country | Start year | End year | Type (inq refers to a specialized study) | Included in modelling | Exclude-reason        | Source                    | Reference                                                                                                                |
|---------|------------|----------|------------------------------------------|-----------------------|-----------------------|---------------------------|--------------------------------------------------------------------------------------------------------------------------|
| Iran    | 2009       | 2010     | misc                                     | YES                   | NA                    | Surveillance System       | Ministry of Health. Maternal Mortality Surveillance System. Iran; 2015.                                                  |
| Iran    | 2010       | 2011     | misc                                     | YES                   | NA                    | Surveillance System       | Ministry of Health. Maternal Mortality Surveillance System. Iran; 2015.                                                  |
| Iran    | 2011       | 2012     | misc                                     | YES                   | NA                    | Surveillance System       | Ministry of Health. Maternal Mortality Surveillance System. Iran; 2015.                                                  |
| Iran    | 2012       | 2013     | misc                                     | YES                   | NA                    | Surveillance System       | Ministry of Health. Maternal Mortality Surveillance System. Iran; 2015.                                                  |
| Iran    | 2013       | 2014     | misc                                     | YES                   | NA                    | Surveillance System       | Ministry of Health. Maternal Mortality Surveillance System. Iran; 2015.                                                  |
| Iran    | 1995.87    | 1996.87  | misc                                     | YES                   | NA                    | Census 1996               |                                                                                                                          |
| Iraq    | 2001.886   | 2006.886 | dhs                                      | YES                   | NA                    | FHS 2006-2007             | Ministry of Health, Ministry of Planning and Development Cooperation, WHO. Iraq Family Health Survey 2006/7. Iraq; 2008. |
| Iraq    | 2011       | 2013     | misc                                     | YES                   | NA                    | IPMM-Iraq 2011-2012       | CSO Iraq. Poverty Map Maternal Mortality 2011-2012. Iraq; 2014.                                                          |
| Iraq    | 1992       | 2007     | misc                                     | YES                   | NA                    | IFHS 2006-2007            | Ministry of Health. Iraq Family Health Survey Report (IFHS) 2006-2007. Iraq; 2008.                                       |
| Iraq    | 1990       | 1999     | misc                                     | YES                   | NA                    | ICMMS 1999                | Ministry of Health. Iraq Child and Maternal Mortality Survey 1999. Iraq; 2000.                                           |
| Iraq    | 2002       | 2007     | misc                                     | YES                   | NA                    | IFHS 2006-2007            | Ministry of Health. Iraq Family Health Survey Report (IFHS) 2006-2007. Iraq; 2008.                                       |
| Ireland | 2009       | 2011     | inq                                      | YES                   | NA                    | MDE 2009-2011             | Confidential Maternal Death Enquiry in Ireland, Report for Triennium 2009-2011, Cork: MDE; 2012.                         |
| Jamaica | 1993       | 1994     | misc                                     | NO                    | No usable information | MM Committee Surveillance | From Country Consultation 2013. Personnel communication with Affette McCaw-Binns.                                        |

| Country | Start year | End year | Type (inq refers to a specialized study) | Included in modelling | Exclude-reason                  | Source                    | Reference                       |
|---------|------------|----------|------------------------------------------|-----------------------|---------------------------------|---------------------------|---------------------------------|
|         |            |          |                                          |                       | PM/MMR                          |                           |                                 |
| Jamaica | 1994       | 1995     | misc                                     | NO                    | No usable information on PM/MMR | MM Committee Surveillance | From Country Consultation 2013. |
| Jamaica | 1995       | 1996     | misc                                     | YES                   | NA                              | MM Committee Surveillance | From Country Consultation 2013. |
| Jamaica | 1998       | 1999     | misc                                     | YES                   | NA                              | MM Committee Surveillance | From Country Consultation 2013. |
| Jamaica | 1999       | 2000     | misc                                     | YES                   | NA                              | MM Committee Surveillance | From Country Consultation 2013. |
| Jamaica | 2000       | 2001     | misc                                     | YES                   | NA                              | MM Committee Surveillance | From Country Consultation 2013. |
| Jamaica | 2001       | 2002     | misc                                     | YES                   | NA                              | MM Committee Surveillance | From Country Consultation 2013. |
| Jamaica | 2002       | 2003     | misc                                     | YES                   | NA                              | MM Committee Surveillance | From Country Consultation 2013. |
| Jamaica | 2003       | 2004     | misc                                     | YES                   | NA                              | MM Committee Surveillance | From Country Consultation 2013. |
| Jamaica | 2004       | 2005     | misc                                     | YES                   | NA                              | MM Committee Surveillance | From Country Consultation 2013. |
| Jamaica | 2005       | 2006     | misc                                     | YES                   | NA                              | MM Committee Surveillance | From Country Consultation 2013. |
| Jamaica | 2006       | 2007     | misc                                     | YES                   | NA                              | MM Committee Surveillance | From Country Consultation 2013. |

| Country    | Start year | End year | Type (inq refers to a specialized study) | Included in modelling | Exclude-reason                  | Source                                                             | Reference                                                                                                                                                                   |
|------------|------------|----------|------------------------------------------|-----------------------|---------------------------------|--------------------------------------------------------------------|-----------------------------------------------------------------------------------------------------------------------------------------------------------------------------|
| Jamaica    | 2007       | 2008     | misc                                     | YES                   | NA                              | MM Committee Surveillance                                          | From Country Consultation 2013.                                                                                                                                             |
| Jamaica    | 2008       | 2009     | misc                                     | YES                   | NA                              | MM Committee Surveillance                                          | From Country Consultation 2013.                                                                                                                                             |
| Jamaica    | 2009       | 2010     | misc                                     | YES                   | NA                              | MM Committee Surveillance                                          | From Country Consultation 2013.                                                                                                                                             |
| Jamaica    | 2010       | 2011     | misc                                     | YES                   | NA                              | MM Committee Surveillance                                          | From Country Consultation 2013.                                                                                                                                             |
| Jamaica    | 2011       | 2012     | misc                                     | YES                   | NA                              | MM Committee Surveillance                                          | From Country Consultation 2013.                                                                                                                                             |
| Jamaica    | 2012       | 2013     | misc                                     | YES                   | NA                              | MM Committee Surveillance                                          | From Country Consultation 2013.                                                                                                                                             |
| Jamaica    | 1986.75    | 1987.67  | misc                                     | NO                    | No usable information on PM/MMR | MM Committee Surveillance                                          | From Country Consultation 2013.                                                                                                                                             |
| Japan      | 2005       | 2006     | inq                                      | YES                   | NA                              | Causes and ratio of maternal mortality, and its reliability, 2005. | Hidaka A. et al. [Causes and ratio of maternal mortality, and its reliability]. Sanfujinkachiryō [Treatment in Obstetrics and Gynecology]. 2009;99(1):85-C95. [in Japanese] |
| Jordan     | 2007       | 2009     | inq                                      | YES                   | NA                              | NMMS 2007-2008                                                     | The Higher Population Council. The National Maternal Mortality Study Jordan (2007-2008). Jordan; 2009.                                                                      |
| Jordan     | 1995.58    | 1996.5   | inq                                      | YES                   | NA                              | NMMS 1995-1996                                                     | National Maternal Mortality Study Jordan 1995-1996. Jordan; 1997.                                                                                                           |
| Kazakhstan | 2011       | 2012     | inq                                      | YES                   | NA                              | Confidential inquiry 2011-2013                                     | CCAC. Findings of a confidential audit of maternal mortality rates in the Republic of Kazakhstan 2011-2013. Kazakhstan; 2014.                                               |



| Country    | Start year | End year | Type (inq refers to a specialized study) | Included in modelling | Exclude-reason | Source                          | Reference                                                                                                                                                                                                                                                                                                       |
|------------|------------|----------|------------------------------------------|-----------------------|----------------|---------------------------------|-----------------------------------------------------------------------------------------------------------------------------------------------------------------------------------------------------------------------------------------------------------------------------------------------------------------|
| Kazakhstan | 2012       | 2013     | inq                                      | YES                   | NA             | Confidential inquiry 2011-2013  | CCAC. Findings of a confidential audit of maternal mortality rates in the Republic of Kazakhstan 2011-2013. Kazakhstan; 2014.                                                                                                                                                                                   |
| Kazakhstan | 2013       | 2014     | inq                                      | YES                   | NA             | Confidential inquiry 2011-2013  | CCAC. Findings of a confidential audit of maternal mortality rates in the Republic of Kazakhstan 2011-2013. Kazakhstan; 2014.                                                                                                                                                                                   |
| Kazakhstan | 2009       | 2010     | inq                                      | YES                   | NA             | Personal communication MoH 2014 | Email communication after mission 2014                                                                                                                                                                                                                                                                          |
| Kazakhstan | 2010       | 2011     | inq                                      | YES                   | NA             | Personal communication MoH 2014 | Email communication after mission 2014                                                                                                                                                                                                                                                                          |
| Kenya      | 1991.35    | 1998.35  | dhs                                      | YES                   | NA             | DHS 1998                        | National Council for Population and Development (NCPD), Central Bureau of Statistics (CBS) (Office of the Vice President and Ministry of Planning and National Development) [Kenya], and Macro International Inc. (MI). Kenya Demographic and Health Survey 1998. Calverton, Maryland: NDPD, CBS, and MI; 1999. |
| Kenya      | 1996.5     | 2003.5   | dhs                                      | YES                   | NA             | DHS 2003                        | Central Bureau of Statistics (CBS) [Kenya], Ministry of Health (MOH) [Kenya], and ORC Macro. Kenya Demographic and Health Survey 2003. Calverton, Maryland: CBS, MOH, and ORC Macro; 2004.                                                                                                                      |
| Kenya      | 2002.003   | 2009.003 | dhs                                      | YES                   | NA             | DHS 2008-2009                   | Kenya National Bureau of Statistics (KNBS) and ICF Macro. Kenya Demographic and Health Survey 2008-09. Calverton, Maryland: KNBS and ICF Macro; 2010.                                                                                                                                                           |
| Lao        | 2004.949   | 2011.949 | dhs                                      | YES                   | NA             | MICS 2011-12                    | Ministry of Health (MoH), Lao Statistics Bureau (LSB). The Lao Social Indicator Survey LSIS (MICS/DHS) 2011-12 (Multiple Indicator Cluster Survey/Demographic and                                                                                                                                               |

| Country | Start year | End year | Type (inq refers to a specialized study) | Included in modelling | Exclude-reason | Source        | Reference                                                                                                                                                                                                                                                                                                                                                                       |
|---------|------------|----------|------------------------------------------|-----------------------|----------------|---------------|---------------------------------------------------------------------------------------------------------------------------------------------------------------------------------------------------------------------------------------------------------------------------------------------------------------------------------------------------------------------------------|
|         |            |          |                                          |                       |                |               | Health Survey). Ministry of Health and Lao Statistics Bureau; 2012.                                                                                                                                                                                                                                                                                                             |
| Lao     | 1994.16    | 1995.16  | misc                                     | YES                   | NA             | Census-a 1995 | Lao National Statistics Office                                                                                                                                                                                                                                                                                                                                                  |
| Lao     | 2004.16    | 2005.16  | misc                                     | YES                   | NA             | Census 2005   | Lao National Statistics Office.                                                                                                                                                                                                                                                                                                                                                 |
| Lebanon | 2008       | 2009     | inq                                      | YES                   | NA             | RAMOS 2008    | Adib S et al. Maternal Mortality Ratio in Lebanon in 2008: A Hospital-Based Reproductive Age Mortality Survey (RAMOS). Lebanon; 2010.                                                                                                                                                                                                                                           |
| Lesotho | 1997.894   | 2004.894 | dhs                                      | YES                   | NA             | DHS 2004      | Ministry of Health and Social Welfare (MOHSW) [Lesotho], Bureau of Statistics (BOS) [Lesotho], and ORC Macro. Lesotho Demographic and Health Survey 2004. Calverton, Maryland: MOH, BOS, and ORC Macro; 2005.                                                                                                                                                                   |
| Lesotho | 2002.93    | 2009.93  | dhs                                      | YES                   | NA             | DHS 2009      | Ministry of Health and Social Welfare (MOHSW) [Lesotho] and ICF Macro. Lesotho Demographic and Health Survey 2009. Maseru, Lesotho: MOHSW and ICF Macro; 2010.                                                                                                                                                                                                                  |
| Lesotho | 1995.28    | 1996.28  | misc                                     | YES                   | NA             | Census 1996   |                                                                                                                                                                                                                                                                                                                                                                                 |
| Liberia | 2000.135   | 2007.135 | dhs                                      | YES                   | NA             | DHS 2007      | Liberia Institute of Statistics and Geo-Information Services (LISGIS) [Liberia], Ministry of Health and Social Welfare [Liberia], National AIDS Control Program [Liberia], and Macro International Inc. Liberia Demographic and Health Survey 2007. Monrovia, Liberia: Liberia Institute of Statistics and Geo-Information Services (LISGIS) and Macro International Inc; 2008. |
| Liberia | 2006.367   | 2013.367 | dhs                                      | YES                   | NA             | DHS 2013      | Liberia Institute of Statistics and Geo-Information Services (LISGIS), Ministry of Health and Social Welfare [Liberia], National AIDS Control Program [Liberia], and ICF International. Liberia Demographic and Health Survey 2013. Monrovia, Liberia: Liberia Institute of Statistics and                                                                                      |

| Country    | Start year | End year | Type (inq refers to a specialized study) | Included in modelling | Exclude-reason | Source        | Reference                                                                                                                                                                                                                                                               |
|------------|------------|----------|------------------------------------------|-----------------------|----------------|---------------|-------------------------------------------------------------------------------------------------------------------------------------------------------------------------------------------------------------------------------------------------------------------------|
|            |            |          |                                          |                       |                |               | Geo- Information Services (LISGIS) and ICF International; 2014.                                                                                                                                                                                                         |
| Libya      | 2009       | 2010     | misc                                     | YES                   | NA             |               | Vital registration.                                                                                                                                                                                                                                                     |
| Libya      | 2010       | 2011     | misc                                     | YES                   | NA             |               | Vital registration.                                                                                                                                                                                                                                                     |
| Madagascar | 1985       | 1986     | dhs                                      | YES                   | NA             | DHS 1992      | Centre National de Recherches sur l'Environnement, Macro International Inc. Enquête Nationale Démographique et Sanitaire Madagascar en 1992. Calverton, Maryland USA: Macro International Inc.; 1994.                                                                   |
| Madagascar | 1990.831   | 1997.831 | dhs                                      | YES                   | NA             | DHS 1997      | Direction de la Démographie et des Statistiques Sociales, Institut National de la Statistique (INSTAT) [Madagascar] et Macro International Inc. Enquête Démographique et de Santé, Madagascar 1997. Calverton, Maryland, USA: INSTAT et Macro International Inc.; 1998. |
| Madagascar | 1997.066   | 2004.066 | dhs                                      | YES                   | NA             | DHS 2003-2004 | Institut National de la Statistique (INSTAT) et ORC Macro. Enquête Démographique et de Santé de Madagascar 2003-2004. Calverton, Maryland, USA: INSTAT et ORC Macro; 2005.                                                                                              |
| Madagascar | 2002.261   | 2009.261 | dhs                                      | YES                   | NA             | DHS 2008-2009 | Institut National de la Statistique (INSTAT) et ICF Macro. Enquête Démographique et de Santé de Madagascar 2008-2009. Antananarivo, Madagascar: INSTAT et ICF Macro; 2010.                                                                                              |
| Malawi     | 1985.764   | 1992.764 | dhs                                      | YES                   | NA             | DHS 1992      | National Statistical Office and Macro International Inc. Malawi Demographic and Health Survey 1992. Calverton, Maryland USA: Macro International Inc.; 1994.                                                                                                            |
| Malawi     | 1993.701   | 2000.701 | dhs                                      | YES                   | NA             | DHS 2000      | National Statistical Office [Malawi] and ORC Macro. Malawi Demographic and Health Survey 2000. Zomba, Malawi and Calverton, Maryland, USA: National Statistical Office and ORC Macro; 2001.                                                                             |

| Country  | Start year | End year | Type (inq refers to a specialized study) | Included in modelling | Exclude-reason                  | Source         | Reference                                                                                                                                                          |
|----------|------------|----------|------------------------------------------|-----------------------|---------------------------------|----------------|--------------------------------------------------------------------------------------------------------------------------------------------------------------------|
| Malawi   | 1997.92    | 2004.92  | dhs                                      | YES                   | NA                              | DHS 2004       | National Statistical Office (NSO) [Malawi], and ORC Macro. Malawi Demographic and Health Survey 2004. Calverton, Maryland, USA: NSO and ORC Macro; 2005.           |
| Malawi   | 2003.665   | 2010.665 | dhs                                      | YES                   | NA                              | DHS 2010       | National Statistical Office (NSO), and ICF Macro. Malawi Demographic and Health Survey 2010. Zomba, Malawi, and Calverton, Maryland, USA: NSO and ICF Macro; 2011. |
| Malawi   | 2007.08    | 2014.08  | dhs                                      | NO                    | No usable information on PM/MMR | MES 2014       | National Statistical Office. Malawi MDG Endline Survey 2014, Key Findings. Zomba, Malawi: National Statistical Office; 2014.                                       |
| Malaysia | 1991       | 1992     | inq                                      | NO                    | No envelop found for CI         | CEMW 1995-1996 | Ministry of Health. Report on the Confidential Enquiries into Maternal deaths in Malaysia 1995-1996.                                                               |
| Malaysia | 1992       | 1993     | inq                                      | NO                    | No envelop found for CI         | CEMW 1995-1996 | Ministry of Health. Report on the Confidential Enquiries into Maternal deaths in Malaysia 1995-1996.                                                               |
| Malaysia | 1993       | 1994     | inq                                      | NO                    | No envelop found for CI         | CEMW 1995-1996 | Ministry of Health. Report on the Confidential Enquiries into Maternal deaths in Malaysia 1995-1996.                                                               |
| Malaysia | 1994       | 1995     | inq                                      | NO                    | No envelop found for CI         | CEMW 1995-1996 | Ministry of Health. Report on the Confidential Enquiries into Maternal deaths in Malaysia 1995-1996.                                                               |
| Malaysia | 1995       | 1996     | inq                                      | NO                    | No envelop found for CI         | CEMW 1995-1996 | Ministry of Health. Report on the Confidential Enquiries into Maternal deaths in Malaysia 1995-1996.                                                               |
| Malaysia | 1996       | 1997     | inq                                      | NO                    | No envelop found for CI         | CEMW 1995-1996 | Ministry of Health. Report on the Confidential Enquiries into Maternal deaths in Malaysia 1995-1996.                                                               |
| Mali     | 1989.121   | 1996.121 | dhs                                      | YES                   | NA                              | DHS 1995-1996  | Coulibaly, Salif, Fatoumata Dicko, Seydou Moussa Traoré,                                                                                                           |

| Country    | Start year | End year   | Type (inq refers to a specialized study) | Included in modelling | Exclude-reason | Source        | Reference                                                                                                                                                                                                                                                                                                                                                        |
|------------|------------|------------|------------------------------------------|-----------------------|----------------|---------------|------------------------------------------------------------------------------------------------------------------------------------------------------------------------------------------------------------------------------------------------------------------------------------------------------------------------------------------------------------------|
|            |            |            |                                          |                       |                |               | Ousmane Sidibé, Michka Seroussi et Bernard Barrère. Enquête Démographique et de Santé, Mali 1995-1996. Calverton, Maryland, USA: Cellule de Planification et de Statistique du Ministère de la Santé), Direction Nationale de la Statistique et de l'Informatique et Macro International Inc.; 1996.                                                             |
| Mali       | 1994.203   | 2001.203   | dhs                                      | YES                   | NA             | DHS 2001      | Cellule de Planification et de Statistique du Ministère de la Santé (CPS/MS), Direction Nationale de la Statistique et de l'Informatique (DNSI) et ORC Macro. Enquête Démographique et de Santé au Mali 2001. Calverton, Maryland, USA: CPS/MS, DNSI et ORC Macro; 2002.                                                                                         |
| Mali       | 1999.662   | 2006.662   | dhs                                      | YES                   | NA             | DHS 2006      | Cellule de Planification et de Statistique du Ministère de la Santé (CPS/MS), Direction Nationale de la Statistique et de l'Informatique du Ministère de l'Économie, de l'Industrie et du Commerce (DNSI/MEIC) et Macro International Inc. Enquête Démographique et de Santé du Mali 2006. Calverton, Maryland, USA: CPS/DNSI et Macro International Inc.; 2007. |
| Mali       | 2005.982   | 2012.982   | dhs                                      | YES                   | NA             | DHS 2012-2013 | Cellule de Planification et de Statistique (CPS/SSDSPF), Institut National de la Statistique (INSTAT/MPATP), INFO-STAT et ICF International. Enquête Démographique et de Santé au Mali 2012-2013. Rockville, Maryland, USA : CPS, INSTAT, INFO-STAT et ICF International; 2014.                                                                                  |
| Mali       | 2008.24725 | 2009.26374 | misc                                     | YES                   | NA             | 2009 Census   | Mali National Statistics Office (2012) Analytical Report Mortality.                                                                                                                                                                                                                                                                                              |
| Mauritania | 1993.624   | 2000.624   | dhs                                      | YES                   | NA             | DHS 2000-2001 | Office National de la Statistique (ONS) [Mauritanie] et ORC Macro. Enquête Démographique et de Santé Mauritanie 2000-2001. Calverton, Maryland, USA: ONS et ORC Macro; 2001.                                                                                                                                                                                     |

| Country    | Start year | End year | Type (inq refers to a specialized study) | Included in modelling | Exclude-reason | Source     | Reference                                                                                                                                 |
|------------|------------|----------|------------------------------------------|-----------------------|----------------|------------|-------------------------------------------------------------------------------------------------------------------------------------------|
| Mauritania | 2004.83    | 2011.83  | misc                                     | YES                   | NA             | Mics 2011  | Office National de la Statistique, UNICEF. Mauritanie Enquête par grappes d' indicateurs multiples 2011. Rapport Final. Mauritanie; 2014. |
| Mexico     | 1990       | 1991     | inq                                      | YES                   | NA             | BIRMM 2011 | Mexico, Secretaría de Salud. Búsqueda intencionada de muertes maternas en México. Informe 2011. Mexico; 2013.                             |
| Mexico     | 1991       | 1992     | inq                                      | YES                   | NA             | BIRMM 2011 | Mexico, Secretaría de Salud. Búsqueda intencionada de muertes maternas en México. Informe 2011. Mexico; 2013.                             |
| Mexico     | 1992       | 1993     | inq                                      | YES                   | NA             | BIRMM 2011 | Mexico, Secretaría de Salud. Búsqueda intencionada de muertes maternas en México. Informe 2011. Mexico; 2013.                             |
| Mexico     | 1993       | 1994     | inq                                      | YES                   | NA             | BIRMM 2011 | Mexico, Secretaría de Salud. Búsqueda intencionada de muertes maternas en México. Informe 2011. Mexico; 2013.                             |
| Mexico     | 1994       | 1995     | inq                                      | YES                   | NA             | BIRMM 2011 | Mexico, Secretaría de Salud. Búsqueda intencionada de muertes maternas en México. Informe 2011. Mexico; 2013.                             |
| Mexico     | 1995       | 1996     | inq                                      | YES                   | NA             | BIRMM 2011 | Mexico, Secretaría de Salud. Búsqueda intencionada de muertes maternas en México. Informe 2011. Mexico; 2013.                             |
| Mexico     | 1996       | 1997     | inq                                      | YES                   | NA             | BIRMM 2011 | Mexico, Secretaría de Salud. Búsqueda intencionada de muertes maternas en México. Informe 2011. Mexico; 2013.                             |
| Mexico     | 1997       | 1998     | inq                                      | YES                   | NA             | BIRMM 2011 | Mexico, Secretaría de Salud. Búsqueda intencionada de muertes maternas en México. Informe 2011. Mexico; 2013.                             |

| Country | Start year | End year | Type (inq refers to a specialized study) | Included in modelling | Exclude-reason | Source     | Reference                                                                                                     |
|---------|------------|----------|------------------------------------------|-----------------------|----------------|------------|---------------------------------------------------------------------------------------------------------------|
| Mexico  | 1998       | 1999     | inq                                      | YES                   | NA             | BIRMM 2011 | Mexico, Secretaría de Salud. Búsqueda intencionada de muertes maternas en México. Informe 2011. Mexico; 2013. |
| Mexico  | 1999       | 2000     | inq                                      | YES                   | NA             | BIRMM 2011 | Mexico, Secretaría de Salud. Búsqueda intencionada de muertes maternas en México. Informe 2011. Mexico; 2013. |
| Mexico  | 2000       | 2001     | inq                                      | YES                   | NA             | BIRMM 2011 | Mexico, Secretaría de Salud. Búsqueda intencionada de muertes maternas en México. Informe 2011. Mexico; 2013. |
| Mexico  | 2001       | 2002     | inq                                      | YES                   | NA             | BIRMM 2011 | Mexico, Secretaría de Salud. Búsqueda intencionada de muertes maternas en México. Informe 2011. Mexico; 2013. |
| Mexico  | 2002       | 2003     | inq                                      | YES                   | NA             | BIRMM 2014 | Mexico, Secretaría de Salud. Búsqueda intencionada de muertes maternas en México. Informe. Mexico; 2014.      |
| Mexico  | 2003       | 2004     | inq                                      | YES                   | NA             | BIRMM 2014 | Mexico, Secretaría de Salud. Búsqueda intencionada de muertes maternas en México. Informe. Mexico; 2014.      |
| Mexico  | 2004       | 2005     | inq                                      | YES                   | NA             | BIRMM 2014 | Mexico, Secretaría de Salud. Búsqueda intencionada de muertes maternas en México. Informe. Mexico; 2014.      |
| Mexico  | 2005       | 2006     | inq                                      | YES                   | NA             | BIRMM 2014 | Mexico, Secretaría de Salud. Búsqueda intencionada de muertes maternas en México. Informe. Mexico; 2014.      |
| Mexico  | 2006       | 2007     | inq                                      | YES                   | NA             | BIRMM 2014 | Mexico, Secretaría de Salud. Búsqueda intencionada de muertes maternas en México. Informe. Mexico; 2014.      |
| Mexico  | 2007       | 2008     | inq                                      | YES                   | NA             | BIRMM 2014 | Mexico, Secretaría de Salud. Búsqueda intencionada de muertes maternas en México. Informe. Mexico; 2014.      |
| Mexico  | 2008       | 2009     | inq                                      | YES                   | NA             | BIRMM 2014 | Mexico, Secretaría de Salud. Búsqueda intencionada de muertes maternas en México. Informe. Mexico; 2014.      |

| Country  | Start year | End year | Type (inq refers to a specialized study) | Included in modelling | Exclude-reason | Source     | Reference                                                                                                |
|----------|------------|----------|------------------------------------------|-----------------------|----------------|------------|----------------------------------------------------------------------------------------------------------|
| Mexico   | 2009       | 2010     | inq                                      | YES                   | NA             | BIRMM 2014 | Mexico, Secretaría de Salud. Búsqueda intencionada de muertes maternas en México. Informe. Mexico; 2014. |
| Mexico   | 2010       | 2011     | inq                                      | YES                   | NA             | BIRMM 2014 | Mexico, Secretaría de Salud. Búsqueda intencionada de muertes maternas en México. Informe. Mexico; 2014. |
| Mexico   | 2011       | 2012     | inq                                      | YES                   | NA             | BIRMM 2014 | Mexico, Secretaría de Salud. Búsqueda intencionada de muertes maternas en México. Informe. Mexico; 2014. |
| Mexico   | 2012       | 2013     | inq                                      | YES                   | NA             | BIRMM 2014 | Mexico, Secretaría de Salud. Búsqueda intencionada de muertes maternas en México. Informe. Mexico; 2014. |
| Mexico   | 2013       | 2014     | inq                                      | YES                   | NA             | BIRMM 2014 | Mexico, Secretaría de Salud. Búsqueda intencionada de muertes maternas en México. Informe. Mexico; 2014. |
| Mongolia | 1992       | 1993     | misc                                     | YES                   | NA             | MoHS 2015  | MoHS 2015. Country Consulation 2015.                                                                     |
| Mongolia | 1993       | 1994     | misc                                     | YES                   | NA             | MoHS 2015  | MoHS 2015. Country Consulation 2015.                                                                     |
| Mongolia | 1994       | 1995     | misc                                     | YES                   | NA             | MoHS 2015  | MoHS 2015. Country Consulation 2015.                                                                     |
| Mongolia | 1995       | 1996     | misc                                     | YES                   | NA             | MoHS 2015  | MoHS 2015. Country Consulation 2015.                                                                     |
| Mongolia | 1996       | 1997     | misc                                     | YES                   | NA             | MoHS 2015  | MoHS 2015. Country Consulation 2015.                                                                     |
| Mongolia | 1997       | 1998     | misc                                     | YES                   | NA             | MoHS 2015  | MoHS 2015. Country Consulation 2015.                                                                     |
| Mongolia | 1998       | 1999     | misc                                     | YES                   | NA             | MoHS 2015  | MoHS 2015. Country Consulation 2015.                                                                     |
| Mongolia | 1999       | 2000     | misc                                     | YES                   | NA             | MoHS 2015  | MoHS 2015. Country Consulation 2015.                                                                     |
| Mongolia | 2000       | 2001     | misc                                     | YES                   | NA             | MoHS 2015  | MoHS 2015. Country Consulation 2015.                                                                     |
| Mongolia | 2001       | 2002     | misc                                     | YES                   | NA             | MoHS 2015  | MoHS 2015. Country Consulation 2015.                                                                     |
| Mongolia | 2002       | 2003     | misc                                     | YES                   | NA             | MoHS 2015  | MoHS 2015. Country Consulation 2015.                                                                     |
| Mongolia | 2003       | 2004     | misc                                     | YES                   | NA             | MoHS 2015  | MoHS 2015. Country Consulation 2015.                                                                     |
| Mongolia | 2004       | 2005     | misc                                     | YES                   | NA             | MoHS 2015  | MoHS 2015. Country Consulation 2015.                                                                     |
| Mongolia | 2005       | 2006     | misc                                     | YES                   | NA             | MoHS 2015  | MoHS 2015. Country Consulation 2015.                                                                     |
| Mongolia | 2006       | 2007     | misc                                     | YES                   | NA             | MoHS 2015  | MoHS 2015. Country Consulation 2015.                                                                     |
| Mongolia | 2007       | 2008     | misc                                     | YES                   | NA             | MoHS 2015  | MoHS 2015. Country Consulation 2015.                                                                     |



| Country  | Start year | End year | Type (inq refers to a specialized study) | Included in modelling | Exclude-reason | Source                                 | Reference                                                                                                                                                                                                                     |
|----------|------------|----------|------------------------------------------|-----------------------|----------------|----------------------------------------|-------------------------------------------------------------------------------------------------------------------------------------------------------------------------------------------------------------------------------|
| Mongolia | 2008       | 2009     | misc                                     | YES                   | NA             | MoHS 2015                              | MoHS 2015. Country Consulation 2015.                                                                                                                                                                                          |
| Mongolia | 2009       | 2010     | misc                                     | YES                   | NA             | MoHS 2015                              | MoHS 2015. Country Consulation 2015.                                                                                                                                                                                          |
| Mongolia | 2010       | 2011     | misc                                     | YES                   | NA             | MoHS 2015                              | MoHS 2015. Country Consulation 2015.                                                                                                                                                                                          |
| Mongolia | 2011       | 2012     | misc                                     | YES                   | NA             | MoHS 2015                              | MoHS 2015. Country Consulation 2015.                                                                                                                                                                                          |
| Mongolia | 2012       | 2013     | misc                                     | YES                   | NA             | MoHS 2015                              | MoHS 2015. Country Consulation 2015.                                                                                                                                                                                          |
| Mongolia | 2013       | 2014     | misc                                     | YES                   | NA             | MoHS 2015                              | MoHS 2015. Country Consulation 2015.                                                                                                                                                                                          |
| Mongolia | 2014       | 2015     | misc                                     | YES                   | NA             | MoHS 2015                              | MoHS 2015. Country Consulation 2015.                                                                                                                                                                                          |
| Morocco  | 2009       | 2010     | inq                                      | YES                   | NA             | Confidential Inquiry 2009              | Abouchadi S, Belghiti Alaoui A, Meski FZ, De Brouwere V. Implementing a maternal mortality surveillance system in Morocco - challenges and opportunities. Trop Med Int Health. 2013;18(3):357-365.                            |
| Morocco  | 2010       | 2011     | inq                                      | YES                   | NA             | Confidential inquiry 2010              | Ministère de la Santé. Enquête confidentielle sur les des décès maternels de 2010 au Maroc. Deuxième rapport du Comité National d'Experts sur l'Audit Confidentiel des décès Maternels. Maroc; 2013.                          |
| Morocco  | 1993.975   | 2003.975 | dhs                                      | YES                   | NA             | DHS 2003-2004                          | Ministère de la Santé [Maroc], ORC Macro, et Ligue des États Arabes. Enquête sur la Population et la Santé Familiale (EPSF) 2003-2004. Calverton, Maryland, USA: Ministère de la Santé et ORC Macro; 2005.                    |
| Morocco  | 2009       | 2010     | misc                                     | YES                   | NA             | National Demographic Survey 2009-2010. | Haut-Commissariat au Plan du Royaume du Maroc. Enquête nationale démographique à passages répétés 2009-2010. Principaux résultats. Haut-Commissariat au Plan, Rabat; 2011.                                                    |
| Morocco  | 1992       | 1997     | misc                                     | YES                   | NA             | ENSME 1997                             | Ministère de la Santé (MS), Service des études et de l'information sanitaire (SEIS), PAPCHILD (Projet arabe pour la promotion de l'enfance). Enquête Nationale sur la Santé de la Mère et de l'Enfant (ENSME) 1997. MC, SEIS: |

| Country    | Start year | End year   | Type (inq refers to a specialized study) | Included in modelling | Exclude-reason | Source         | Reference                                                                                                                                                                                                                    |
|------------|------------|------------|------------------------------------------|-----------------------|----------------|----------------|------------------------------------------------------------------------------------------------------------------------------------------------------------------------------------------------------------------------------|
|            |            |            |                                          |                       |                |                | Maroc; 1999.                                                                                                                                                                                                                 |
| Morocco    | 1985.16    | 1992.16    | misc                                     | YES                   | NA             | DHS 1992       | Ministère de la Santé Publique, Macro International Inc. Enquête Nationale sur la Population et la Santé (ENPS-II) 1992. Columbia, Maryland, USA: Macro International Inc.; 1993.                                            |
| Mozambique | 1997.288   | 2004.288   | dhs                                      | YES                   | NA             | DHS 2003       | Moçambique Inquérito Demográfico e de Saúde 2003. Instituto Nacional de Estatística, Ministério da Saúde. ORC Macro. Calverton MD, USA: ORC Macro. 2005. Ministério da Saúde. ORC Macro. Calverton MD, USA: ORC Macro; 2005. |
| Mozambique | 2004.663   | 2011.663   | dhs                                      | YES                   | NA             | DHS 2011       | Instituto Nacional de Estatística, Ministério da Saúde, ICF International/Measure DHS. Moçambique Inquérito Demográfico e de Saúde 2011 - relatório preliminar. Calverton, MD USA; 2012.                                     |
| Mozambique | 2006.58242 | 2007.57967 | misc                                     | YES                   | NA             | INCAM          | Mozambique National Institute of Statistics; 2012                                                                                                                                                                            |
| Myanmar    | 1998.67    | 1999.67    | misc                                     | YES                   | NA             | NMS 1999       | Central Statistical Organization. National Mortality Survey 1999. Myanmar; 2000.                                                                                                                                             |
| Myanmar    | 2004.25    | 2005.25    | misc                                     | YES                   | NA             | NMMS 2004-2005 | Ministry of Health. Nationwide specific maternal mortality survey 2004-2005. Myanmar.                                                                                                                                        |
| Namibia    | 1985.705   | 1992.705   | dhs                                      | YES                   | NA             | DHS 1992       | Ministry of Health and Social Services, Macro International Inc. Namibia Demographic and Health Survey 1992. Columbia, Maryland, USA: Macro International Inc.; 1993.                                                        |
| Namibia    | 1993.841   | 2000.841   | dhs                                      | YES                   | NA             | DHS 2000       | Ministry of Health and Social Services (MOHSS) [Namibia]. Namibia Demographic and Health Survey 2000. Windhoek, Namibia: MOHSS; 2003.                                                                                        |
| Namibia    | 1999.995   | 2006.995   | dhs                                      | YES                   | NA             | DHS 2006-2007  | Ministry of Health and Social Services (MoHSS) [Namibia]                                                                                                                                                                     |

| Country | Start year | End year   | Type (inq refers to a specialized study) | Included in modelling | Exclude-reason                       | Source         | Reference                                                                                                                                                                                                                           |
|---------|------------|------------|------------------------------------------|-----------------------|--------------------------------------|----------------|-------------------------------------------------------------------------------------------------------------------------------------------------------------------------------------------------------------------------------------|
|         |            |            |                                          |                       |                                      |                | and Macro International Inc. Namibia Demographic and Health Survey 2006-07. Windhoek, Namibia and Calverton, Maryland, USA: MoHSS and Macro International Inc.; 2008.                                                               |
| Namibia | 2006.573   | 2013.573   | dhs                                      | YES                   | NA                                   | DHS 2013       | The Namibia Ministry of Health and Social Services (MoHSS) and ICF International. The Namibia Demographic and Health Survey 2013. Windhoek, Namibia, and Rockville, Maryland, USA: MoHSS and ICF International; 2014.               |
| Namibia | 2010.65659 | 2011.65659 | misc                                     | YES                   | NA                                   | 2011 Census    | Mortality Report (2014)                                                                                                                                                                                                             |
| Nepal   | 1989.246   | 1996.246   | dhs                                      | YES                   | NA                                   | DHS 1996       | Family Health Division, Ministry of Health, New ERA, Macro International Inc. Nepal Family Health Survey 1996. Calverton, Maryland, USA: Macro International Inc.; 1997.                                                            |
| Nepal   | 1999.363   | 2006.363   | dhs                                      | YES                   | NA                                   | DHS 2006       | Ministry of Health and Population (MOHP) [Nepal], New ERA, and Macro International Inc. Nepal Demographic and Health Survey 2006. Kathmandu, Nepal: Ministry of Health and Population, New ERA, and Macro International Inc.; 2007. |
| Nepal   | 2008.38    | 2009.38    | misc                                     | NO                    | Sub-national/sub-population coverage | NMMS 2008-2009 | Suvedi B K et al. Nepal Maternal Mortality and Morbidity Study 2008-2009: Summary of Preliminary Findings. Kathmandu, Nepal. Family Health division, Department of Health Services, Ministry of Health, Government of Nepal; 2009.  |
| Nepal   | 2010.45879 | 2011.47253 | misc                                     | YES                   | NA                                   | 2011 Census    | Population Monograph Vol 1                                                                                                                                                                                                          |

| Country     | Start year | End year | Type (inq refers to a specialized study) | Included in modelling | Exclude-reason              | Source                                                                 | Reference                                                                                                                                          |
|-------------|------------|----------|------------------------------------------|-----------------------|-----------------------------|------------------------------------------------------------------------|----------------------------------------------------------------------------------------------------------------------------------------------------|
| Netherlands | 1983       | 1993     | inq                                      | NO                    | Inquiry started before 1985 | Confidential enquiry into maternal deaths in The Netherlands 1983-1992 | Schuitmaker N, et al. Confidential enquiry into maternal deaths in The Netherlands 1983-1992. Eur J Obstet Gynecol Reprod Biol. 1998;79(1):57-C62. |
| Netherlands | 1993       | 2005     | inq                                      | YES                   | NA                          | Rise in maternal mortality in the Netherlands                          | Schutte J, et al. Rise in maternal mortality in the Netherlands. BJOG. 2010;117(4):399-406.                                                        |
| Netherlands | 1993       | 1994     | inq                                      | YES                   | NA                          | Confidential enquiry, 2013                                             | The Dutch Maternal Mortality Committee of the Netherlands Society of Obstetrics and Gynaecology. Provided during the 2013 CC.                      |
| Netherlands | 1994       | 1995     | inq                                      | YES                   | NA                          | Confidential enquiry, 2013                                             | The Dutch Maternal Mortality Committee of the Netherlands Society of Obstetrics and Gynaecology. Provided during the 2013 CC.                      |
| Netherlands | 1995       | 1996     | inq                                      | YES                   | NA                          | Confidential enquiry, 2013                                             | The Dutch Maternal Mortality Committee of the Netherlands Society of Obstetrics and Gynaecology. Provided during the 2013 CC.                      |
| Netherlands | 1996       | 1997     | inq                                      | YES                   | NA                          | Confidential enquiry, 2013                                             | The Dutch Maternal Mortality Committee of the Netherlands Society of Obstetrics and Gynaecology. Provided during the 2013 CC.                      |
| Netherlands | 1997       | 1998     | inq                                      | YES                   | NA                          | Confidential enquiry, 2013                                             | The Dutch Maternal Mortality Committee of the Netherlands Society of Obstetrics and Gynaecology. Provided during the 2013 CC.                      |
| Netherlands | 1998       | 1999     | inq                                      | YES                   | NA                          | Confidential enquiry, 2013                                             | The Dutch Maternal Mortality Committee of the Netherlands Society of Obstetrics and Gynaecology. Provided during the 2013 CC.                      |

| Country     | Start year | End year | Type (inq refers to a specialized study) | Included in modelling | Exclude-reason | Source                     | Reference                                                                                                                     |
|-------------|------------|----------|------------------------------------------|-----------------------|----------------|----------------------------|-------------------------------------------------------------------------------------------------------------------------------|
| Netherlands | 1999       | 2000     | inq                                      | YES                   | NA             | Confidential enquiry, 2013 | The Dutch Maternal Mortality Committee of the Netherlands Society of Obstetrics and Gynaecology. Provided during the 2013 CC. |
| Netherlands | 2000       | 2001     | inq                                      | YES                   | NA             | Confidential enquiry, 2013 | The Dutch Maternal Mortality Committee of the Netherlands Society of Obstetrics and Gynaecology. Provided during the 2013 CC. |
| Netherlands | 2001       | 2002     | inq                                      | YES                   | NA             | Confidential enquiry, 2013 | The Dutch Maternal Mortality Committee of the Netherlands Society of Obstetrics and Gynaecology. Provided during the 2013 CC. |
| Netherlands | 2002       | 2003     | inq                                      | YES                   | NA             | Confidential enquiry, 2013 | The Dutch Maternal Mortality Committee of the Netherlands Society of Obstetrics and Gynaecology. Provided during the 2013 CC. |
| Netherlands | 2003       | 2004     | inq                                      | YES                   | NA             | Confidential enquiry, 2013 | The Dutch Maternal Mortality Committee of the Netherlands Society of Obstetrics and Gynaecology. Provided during the 2013 CC. |
| Netherlands | 2004       | 2005     | inq                                      | YES                   | NA             | Confidential enquiry, 2013 | The Dutch Maternal Mortality Committee of the Netherlands Society of Obstetrics and Gynaecology. Provided during the 2013 CC. |
| Netherlands | 2005       | 2006     | inq                                      | YES                   | NA             | Confidential enquiry, 2013 | The Dutch Maternal Mortality Committee of the Netherlands Society of Obstetrics and Gynaecology. Provided during the 2013 CC. |
| Netherlands | 2006       | 2007     | inq                                      | YES                   | NA             | Confidential enquiry, 2013 | The Dutch Maternal Mortality Committee of the Netherlands Society of Obstetrics and Gynaecology. Provided during the 2013 CC. |
| Netherlands | 2007       | 2008     | inq                                      | YES                   | NA             | Confidential enquiry, 2013 | The Dutch Maternal Mortality Committee of the Netherlands Society of Obstetrics and Gynaecology. Provided during the 2013 CC. |

| Country     | Start year | End year | Type (inq refers to a specialized study) | Included in modelling | Exclude-reason | Source                     | Reference                                                                                                                                                             |
|-------------|------------|----------|------------------------------------------|-----------------------|----------------|----------------------------|-----------------------------------------------------------------------------------------------------------------------------------------------------------------------|
| Netherlands | 2008       | 2009     | inq                                      | YES                   | NA             | Confidential enquiry, 2013 | The Dutch Maternal Mortality Committee of the Netherlands Society of Obstetrics and Gynaecology. Provided during the 2013 CC.                                         |
| Netherlands | 2009       | 2010     | inq                                      | YES                   | NA             | Confidential enquiry, 2013 | The Dutch Maternal Mortality Committee of the Netherlands Society of Obstetrics and Gynaecology. Provided during the 2013 CC.                                         |
| Netherlands | 2010       | 2011     | inq                                      | YES                   | NA             | Confidential enquiry, 2013 | The Dutch Maternal Mortality Committee of the Netherlands Society of Obstetrics and Gynaecology. Provided during the 2013 CC.                                         |
| New Zealand | 2006       | 2007     | inq                                      | YES                   | NA             | Confidential enquiry, 2013 | PMMRC. Eighth Annual Report of the Perinatal and Maternal Mortality Review Committee: Reporting mortality 2012. Wellington: Health Quality & Safety Commission; 2014. |
| New Zealand | 2007       | 2008     | inq                                      | YES                   | NA             | Confidential enquiry, 2013 | PMMRC. Eighth Annual Report of the Perinatal and Maternal Mortality Review Committee: Reporting mortality 2012. Wellington: Health Quality & Safety Commission; 2014. |
| New Zealand | 2008       | 2009     | inq                                      | YES                   | NA             | Confidential enquiry, 2013 | PMMRC. Eighth Annual Report of the Perinatal and Maternal Mortality Review Committee: Reporting mortality 2012. Wellington: Health Quality & Safety Commission; 2014. |
| New Zealand | 2009       | 2010     | inq                                      | YES                   | NA             | Confidential enquiry, 2013 | PMMRC. Eighth Annual Report of the Perinatal and Maternal Mortality Review Committee: Reporting mortality 2012. Wellington: Health Quality & Safety Commission; 2014. |
| New Zealand | 2010       | 2011     | inq                                      | YES                   | NA             | Confidential enquiry, 2013 | PMMRC. Eighth Annual Report of the Perinatal and Maternal Mortality Review Committee: Reporting mortality 2012. Wellington: Health Quality & Safety                   |

| Country     | Start year | End year | Type (inq refers to a specialized study) | Included in modelling | Exclude-reason | Source                     | Reference                                                                                                                                                                                                                                          |
|-------------|------------|----------|------------------------------------------|-----------------------|----------------|----------------------------|----------------------------------------------------------------------------------------------------------------------------------------------------------------------------------------------------------------------------------------------------|
|             |            |          |                                          |                       |                |                            | Commission; 2014.                                                                                                                                                                                                                                  |
| New Zealand | 2011       | 2012     | inq                                      | YES                   | NA             | Confidential enquiry, 2013 | PMMRC. Eighth Annual Report of the Perinatal and Maternal Mortality Review Committee: Reporting mortality 2012. Wellington: Health Quality & Safety Commission; 2014.                                                                              |
| New Zealand | 2012       | 2013     | inq                                      | YES                   | NA             | Confidential enquiry, 2013 | PMMRC. Eighth Annual Report of the Perinatal and Maternal Mortality Review Committee: Reporting mortality 2012. Wellington: Health Quality & Safety Commission; 2014.                                                                              |
| Nicaragua   | 2004       | 2005.4   | misc                                     | YES                   | NA             | Census 2005                | Nicaragua National Statistics Office.                                                                                                                                                                                                              |
| Niger       | 1985.332   | 1992.332 | dhs                                      | YES                   | NA             | DHS 1992                   | Direction de la Statistique et des Comptes Natinaux, Direction Général du Plan, Ministère des Finances et du Plan, Macro International Inc. Enquête Démographique et de Santé Niger 1992. Columbia, Maryland, USA: Macro International Inc.; 1993. |
| Niger       | 1999.203   | 2006.203 | dhs                                      | YES                   | NA             | DHS 2006                   | Institut National de la Statistique (INS) et Macro International Inc. Enquête Démographique et de Santé et à Indicateurs Multiples du Niger 2006. Calverton, Maryland, USA: INS et Macro International Inc.; 2007.                                 |
| Niger       | 2005.294   | 2012.294 | dhs                                      | YES                   | NA             | DHS 2012                   | Institut National de la Statistique (INS) et ICF International. Enquête Démographique et de Santé et à Indicateurs Multiples du Niger 2012. Calverton, Maryland, USA : INS et ICF International; 2013.                                             |
| Nigeria     | 2001.621   | 2008.621 | dhs                                      | YES                   | NA             | DHS 2008                   | National Population Commission (NPC) [Nigeria] and IF Macro. Nigeria Demographic and Health Survey 2008. Abuja, Nigeria: National Population Commission and ICF                                                                                    |

| Country | Start year | End year | Type (inq refers to a specialized study) | Included in modelling | Exclude-reason | Source                              | Reference                                                                                                                                                                                        |
|---------|------------|----------|------------------------------------------|-----------------------|----------------|-------------------------------------|--------------------------------------------------------------------------------------------------------------------------------------------------------------------------------------------------|
|         |            |          |                                          |                       |                |                                     | Macro; 2009.                                                                                                                                                                                     |
| Nigeria | 2006.288   | 2013.288 | dhs                                      | YES                   | NA             | DHS 2013                            | National Population Commission (NPC) [Nigeria] and ICF International. Nigeria Demographic and Health Survey 2013. Abuja, Nigeria, and Rockville, Maryland, USA: NPC and ICF International; 2014. |
| Norway  | 2005       | 2010     | inq                                      | YES                   | NA             | Maternal deaths in Norway 2005-2009 | Vangen S et al. Maternal deaths in Norway 2005-2009. Tidsskr Nor Laegeforen. 2014;134(8):836-9.                                                                                                  |
| Oman    | 1991       | 1992     | misc                                     | YES                   | NA             | Surveillance                        | Maternal mortality Data 1991-2012 in the Sultanate of Oman. Oman; 2013.                                                                                                                          |
| Oman    | 1992       | 1993     | misc                                     | YES                   | NA             | Surveillance                        | Maternal mortality Data 1991-2012 in the Sultanate of Oman. Oman; 2013.                                                                                                                          |
| Oman    | 1993       | 1994     | misc                                     | YES                   | NA             | Surveillance                        | Maternal mortality Data 1991-2012 in the Sultanate of Oman. Oman; 2013.                                                                                                                          |
| Oman    | 1994       | 1995     | misc                                     | YES                   | NA             | Surveillance                        | Maternal mortality Data 1991-2012 in the Sultanate of Oman. Oman; 2013.                                                                                                                          |
| Oman    | 1995       | 1996     | misc                                     | YES                   | NA             | Surveillance                        | Maternal mortality Data 1991-2012 in the Sultanate of Oman. Oman; 2013.                                                                                                                          |
| Oman    | 1996       | 1997     | misc                                     | YES                   | NA             | Surveillance                        | Maternal mortality Data 1991-2012 in the Sultanate of Oman. Oman; 2013.                                                                                                                          |
| Oman    | 1997       | 1998     | misc                                     | YES                   | NA             | Surveillance                        | Maternal mortality Data 1991-2012 in the Sultanate of Oman. Oman; 2013.                                                                                                                          |
| Oman    | 1998       | 1999     | misc                                     | YES                   | NA             | Surveillance                        | Maternal mortality Data 1991-2012 in the Sultanate of Oman. Oman; 2013.                                                                                                                          |
| Oman    | 1999       | 2000     | misc                                     | YES                   | NA             | Surveillance                        | Maternal mortality Data 1991-2012 in the Sultanate of Oman. Oman; 2013.                                                                                                                          |



| Country  | Start year | End year | Type (inq refers to a specialized study) | Included in modelling | Exclude-reason | Source                              | Reference                                                               |
|----------|------------|----------|------------------------------------------|-----------------------|----------------|-------------------------------------|-------------------------------------------------------------------------|
| Oman     | 2000       | 2001     | misc                                     | YES                   | NA             | Surveillance                        | Maternal mortality Data 1991-2012 in the Sultanate of Oman. Oman; 2013. |
| Oman     | 2001       | 2002     | misc                                     | YES                   | NA             | Surveillance                        | Maternal mortality Data 1991-2012 in the Sultanate of Oman. Oman; 2013. |
| Oman     | 2002       | 2003     | misc                                     | YES                   | NA             | Surveillance                        | Maternal mortality Data 1991-2012 in the Sultanate of Oman. Oman; 2013. |
| Oman     | 2003       | 2004     | misc                                     | YES                   | NA             | Surveillance                        | Maternal mortality Data 1991-2012 in the Sultanate of Oman. Oman; 2013. |
| Oman     | 2004       | 2005     | misc                                     | YES                   | NA             | Surveillance                        | Maternal mortality Data 1991-2012 in the Sultanate of Oman. Oman; 2013. |
| Oman     | 2005       | 2006     | misc                                     | YES                   | NA             | Surveillance                        | Maternal mortality Data 1991-2012 in the Sultanate of Oman. Oman; 2013. |
| Oman     | 2006       | 2007     | misc                                     | YES                   | NA             | Vital Registration and Surveillance | Maternal mortality Data 1991-2012 in the Sultanate of Oman. Oman; 2013. |
| Oman     | 2007       | 2008     | misc                                     | YES                   | NA             | Vital Registration and Surveillance | Maternal mortality Data 1991-2012 in the Sultanate of Oman. Oman; 2013. |
| Oman     | 2008       | 2009     | misc                                     | YES                   | NA             | Vital Registration and Surveillance | Maternal mortality Data 1991-2012 in the Sultanate of Oman. Oman; 2013. |
| Oman     | 2009       | 2010     | misc                                     | YES                   | NA             | Vital Registration and Surveillance | Maternal mortality Data 1991-2012 in the Sultanate of Oman. Oman; 2013. |
| Oman     | 2010       | 2011     | misc                                     | YES                   | NA             | Vital Registration and Surveillance | Maternal mortality Data 1991-2012 in the Sultanate of Oman. Oman; 2013. |
| Oman     | 2011       | 2012     | misc                                     | YES                   | NA             | Vital Registration and Surveillance | Maternal mortality Data 1991-2012 in the Sultanate of Oman. Oman; 2013. |
| Oman     | 2012       | 2013     | misc                                     | YES                   | NA             | Vital Registration and Surveillance | Maternal mortality Data 1991-2012 in the Sultanate of Oman. Oman; 2013. |
| Pakistan | 2003.706   | 2006.706 | dhs                                      | YES                   | NA             | DHS 2006-2007                       | National Institute of Population Studies (NIPS) [Pakistan],             |

| Country  | Start year | End year | Type (inq refers to a specialized study) | Included in modelling | Exclude-reason        | Source          | Reference                                                                                                                                                                                                                                                              |
|----------|------------|----------|------------------------------------------|-----------------------|-----------------------|-----------------|------------------------------------------------------------------------------------------------------------------------------------------------------------------------------------------------------------------------------------------------------------------------|
|          |            |          |                                          |                       |                       |                 | and Macro International Inc. Pakistan Demographic and Health Survey 2006-07. Islamabad, Pakistan: National Institute of Population Studies and Macro International Inc.; 2008.                                                                                         |
| Paraguay | 1988.99    | 1995.99  | dhs                                      | YES                   | NA                    | RHS 1995        | Centro Paraguay de Estudios de Población (CEPEP), Centers for Disease Control and Prevention (CDC), United States Agency for International Development (USAID). Encuesta Nacional de Demografía y Salud Reproductiva 1995-1996, ENDSR-95/96. Asunción, Paraguay; 1997. |
| Paraguay | 1989       | 1990     | misc                                     | YES                   | NA                    | ENDSR 1995-1996 | Centro Paraguayo de Estudios de Población (CEPEP). Encuesta Nacional de Demografía y Salud Reproductiva 1995-1996. CEPEP, Paraguay; 1997.                                                                                                                              |
| Paraguay | 1985       | 1986     | misc                                     | YES                   | NA                    | ENDSR 1995-1996 | Centro Paraguayo de Estudios de Población (CEPEP). Encuesta Nacional de Demografía y Salud Reproductiva 1995-1996. CEPEP, Paraguay; 1997.                                                                                                                              |
| Paraguay | 1989       | 1996     | misc                                     | NO                    | MMEIG data assessment | ENDSR 1995-1996 | Centro Paraguayo de Estudios de Población (CEPEP). Encuesta Nacional de Demografía y Salud Reproductiva 1995-1996. CEPEP, Paraguay; 1997.                                                                                                                              |
| Paraguay | 2001       | 2002     | misc                                     | YES                   | NA                    | Census 2002     |                                                                                                                                                                                                                                                                        |
| Peru     | 1989.757   | 1996.757 | dhs                                      | YES                   | NA                    | DHS 1996        | Instituto Nacional de Estadística e Informática, Macro International Inc. Peru Encuesta Demográfica y de Salud Familiar 1996. Calverton, Maryland, USA: Macro International Inc; 1997.                                                                                 |
| Peru     | 1993.717   | 2000.717 | dhs                                      | YES                   | NA                    | DHS 2000        | Instituto Nacional de Estadística e Informática, Macro International Inc. Peru Encuesta Demográfica y de Salud Familiar 2000. Lima, Peru; 2001.                                                                                                                        |
| Peru     | 2002.448   | 2009.448 | dhs                                      | YES                   | NA                    | DHS 2009        | Instituto Nacional de Estadística e Informática, ORC Macro. Peru Encuesta Demográfica y de Salud Familiar -                                                                                                                                                            |

| Country | Start year | End year | Type (inq refers to a specialized study) | Included in modelling | Exclude-reason | Source                                     | Reference                                                                                                                                                             |
|---------|------------|----------|------------------------------------------|-----------------------|----------------|--------------------------------------------|-----------------------------------------------------------------------------------------------------------------------------------------------------------------------|
|         |            |          |                                          |                       |                |                                            | ENDES Continua, 2009 Calverton, MD, USA: ORC Macro; 2010.                                                                                                             |
| Peru    | 2003.453   | 2010.453 | dhs                                      | YES                   | NA             | DHS 2010                                   | Instituto Nacional de Estadística e Informática, ORC Macro. Peru Encuesta Demográfica y de Salud Familiar - ENDES Continua, 2010 Calverton, MD, USA: ORC Macro; 2011. |
| Peru    | 2002       | 2003     | misc                                     | YES                   | NA             | La Mortalidad Materna en el Peru 2002-2011 | Ministerio de Salud del Peru. La Mortalidad Materna en el Peru 2002-2011. Peru; 2013.                                                                                 |
| Peru    | 2003       | 2004     | misc                                     | YES                   | NA             | La Mortalidad Materna en el Peru 2002-2011 | Ministerio de Salud del Peru. La Mortalidad Materna en el Peru 2002-2011. Peru; 2013.                                                                                 |
| Peru    | 2004       | 2005     | misc                                     | YES                   | NA             | La Mortalidad Materna en el Peru 2002-2011 | Ministerio de Salud del Peru. La Mortalidad Materna en el Peru 2002-2011. Peru; 2013.                                                                                 |
| Peru    | 2005       | 2006     | misc                                     | YES                   | NA             | La Mortalidad Materna en el Peru 2002-2011 | Ministerio de Salud del Peru. La Mortalidad Materna en el Peru 2002-2011. Peru; 2013.                                                                                 |
| Peru    | 2006       | 2007     | misc                                     | YES                   | NA             | La Mortalidad Materna en el Peru 2002-2011 | Ministerio de Salud del Peru. La Mortalidad Materna en el Peru 2002-2011. Peru; 2013.                                                                                 |
| Peru    | 2007       | 2008     | misc                                     | YES                   | NA             | La Mortalidad Materna en el Peru 2002-2011 | Ministerio de Salud del Peru. La Mortalidad Materna en el Peru 2002-2011. Peru; 2013.                                                                                 |
| Peru    | 2008       | 2009     | misc                                     | YES                   | NA             | La Mortalidad Materna en el Peru 2002-2011 | Ministerio de Salud del Peru. La Mortalidad Materna en el Peru 2002-2011. Peru; 2013.                                                                                 |

| Country           | Start year | End year | Type (inq refers to a specialized study) | Included in modelling | Exclude-reason | Source                                     | Reference                                                                                                                                                                             |
|-------------------|------------|----------|------------------------------------------|-----------------------|----------------|--------------------------------------------|---------------------------------------------------------------------------------------------------------------------------------------------------------------------------------------|
| Peru              | 2009       | 2010     | misc                                     | YES                   | NA             | La Mortalidad Materna en el Peru 2002-2011 | Ministrerio de Salud del Peru. La Mortalidad Materna en el Peru 2002-2011. Peru; 2013.                                                                                                |
| Peru              | 2010       | 2011     | misc                                     | YES                   | NA             | La Mortalidad Materna en el Peru 2002-2011 | Ministrerio de Salud del Peru. La Mortalidad Materna en el Peru 2002-2011. Peru; 2013.                                                                                                |
| Peru              | 2011       | 2012     | misc                                     | YES                   | NA             | La Mortalidad Materna en el Peru 2002-2011 | Ministrerio de Salud del Peru. La Mortalidad Materna en el Peru 2002-2011. Peru; 2013.                                                                                                |
| Philippines       | 1986.37    | 1993.37  | dhs                                      | YES                   | NA             | DHS 1993                                   | National Statistics Office (NSO) [Philippines] and Macro International Inc. (MI). National Demographic Survey 1993. Calverton, Maryland: NSO and MI; 1994.                            |
| Philippines       | 2000.397   | 2007.397 | dhs                                      | YES                   | NA             | FPS 2006                                   | National Statistics Office (NSO). Family Planning Survey (FPS) 2006. Philippines; 2007.                                                                                               |
| Philippines       | 2004       | 2012     | misc                                     | YES                   | NA             | FHS 2011                                   | National Statistics Office. Family Health Survey 2011. Final Report. Philippines; 2012.                                                                                               |
| Philippines       | 1991       | 1998     | misc                                     | YES                   | NA             | NDHS 1998                                  | National Statistics Office (NSO)], Department of Health (DOH) [Philippines] and Macro International Inc. (MI). National Demographic and Health Survey 1998. Manila: NSO and MI; 1999. |
| Portugal          | 2001       | 2008     | inq                                      | YES                   | NA             | Maternal mortality 2001-2007               | Gomes MC, Ventura MT, Nunes RS. How many maternal deaths are there in Portugal? J Matern Fetal Neonatal Med. 2012;25(10):1975- 9.                                                     |
| Republic of Korea | 1995       | 1997     | inq                                      | YES                   | NA             | Maternal Deaths 1995-1996                  | Ministry of Health and Welfare. Maternal mortality Ratio and Causes of Death in 1995-1996 in Korea. Republic of Korea.                                                                |

| Country           | Start year | End year   | Type (inq refers to a specialized study) | Included in modelling | Exclude-reason        | Source         | Reference                                                                                                                                                                                                                               |
|-------------------|------------|------------|------------------------------------------|-----------------------|-----------------------|----------------|-----------------------------------------------------------------------------------------------------------------------------------------------------------------------------------------------------------------------------------------|
| Republic of Korea | 2010       | 2011       | inq                                      | YES                   | NA                    | KOSTAT 2015    | Statistics Korea; 2015.                                                                                                                                                                                                                 |
| Republic of Korea | 2011       | 2012       | inq                                      | YES                   | NA                    | KOSTAT 2015    | Statistics Korea; 2015.                                                                                                                                                                                                                 |
| Republic of Korea | 2012       | 2013       | inq                                      | YES                   | NA                    | KOSTAT 2015    | Statistics Korea; 2015.                                                                                                                                                                                                                 |
| Republic of Korea | 2013       | 2014       | inq                                      | YES                   | NA                    | KOSTAT 2015    | Statistics Korea; 2015.                                                                                                                                                                                                                 |
| Rwanda            | 1995.492   | 2000.492   | dhs                                      | YES                   | NA                    | DHS 2000       | Office National de la Population (ONAPO) [Rwanda] et ORC Macro. Enquête Démographique et de Santé, Rwanda 2000. Kigali, Rwanda et Calverton, Maryland, USA: Ministère de la Santé, Office National de la Population et ORC Macro; 2001. |
| Rwanda            | 1998.345   | 2005.345   | dhs                                      | YES                   | NA                    | DHS 2005       | Institut National de la Statistique du Rwanda (INSR) and ORC Macro. Rwanda Demographic and Health Survey 2005. Calverton, Maryland, USA: INSR and ORC Macro; 2006.                                                                      |
| Rwanda            | 2003.962   | 2010.962   | dhs                                      | YES                   | NA                    | DHS 2010       | National Institute of Statistics of Rwanda (NISR) [Rwanda], Ministry of Health (MOH) [Rwanda], and ICF International. Rwanda Demographic and Health Survey 2010. Calverton, Maryland, USA: NISR, MOH, and ICF International; 1012.      |
| Rwanda            | 2010       | 2015       | misc                                     | YES                   | NA                    | RDHS 2014-2015 | National Institute of Statistics of Rwanda. Rwanda Demographic and Health Survey. Key Findings. National Institute of Statistics: 2015.                                                                                                 |
| Rwanda            | 2011.62088 | 2012.62088 | misc                                     | NO                    | MMEIG data assessment | 2012 Census    | Rwanda National Statistics Office.                                                                                                                                                                                                      |

| Country               | Start year | End year | Type (inq refers to a specialized study) | Included in modelling | Exclude-reason | Source                               | Reference                                                                                                                                                                                                         |
|-----------------------|------------|----------|------------------------------------------|-----------------------|----------------|--------------------------------------|-------------------------------------------------------------------------------------------------------------------------------------------------------------------------------------------------------------------|
| Sao Tome and Principe | 2001.935   | 2008.935 | dhs                                      | YES                   | NA             | DHS 2008-2009                        | Instituto Nacional de Estatística (INE) [São Tomé e Príncipe], Ministério da Saúde, e ICF Macro. Inquérito Demográfico e Sanitário, São Tomé e Príncipe, IDS STP, 2008-2009. Calverton, Maryland, USA: INE; 2010. |
| Saudi Arabia          | 1997.42    | 1998.33  | misc                                     | YES                   | NA             | Mat Mort 1998                        | Preliminary Report on: Maternal Mortality 1998. Saudi Arabia.                                                                                                                                                     |
| Senegal               | 1986.051   | 1993.051 | dhs                                      | YES                   | NA             | DHS 1992-1993                        | Ministère de l'Economie des Finances et du Plan, Macro International Inc. Enquête Démographique et de Santé au Sénégal (EDS-II) 1992/93. Calverton, Maryland, USA: Macro International Inc.; 1994.                |
| Senegal               | 1998.262   | 2005.262 | dhs                                      | YES                   | NA             | DHS 2005                             | Ndiaye, Salif, et Mohamed Ayad. Enquête Démographique et de Santé au Sénégal 2005. Calverton, Maryland, USA: Centre de Recherche pour le Développement Humain [Sénégal] et ORC Macro; 2006.                       |
| Serbia                | 1992.42    | 1993     | inq                                      | YES                   | NA             | Maternal mortality in central Serbia | Ananijevi-Pandej J. [Maternal mortality in central Serbia]. Vojnosanit Pregl. 1995;52(5):465-9.                                                                                                                   |
| Sierra Leone          | 2001.397   | 2008.397 | dhs                                      | YES                   | NA             | DHS 2008                             | Statistics Sierra Leone (SSL) and ICF Macro. Sierra Leone Demographic and Health Survey 2008. Calverton, Maryland, USA: Statistics Sierra Leone (SSL) and ICF Macro; 2009.                                        |
| Sierra Leone          | 2006.621   | 2013.621 | dhs                                      | YES                   | NA             | DHS 2013                             | Statistics Sierra Leone (SSL) and ICF International. Sierra Leone Demographic and Health Survey 2013. Freetown, Sierra Leone and Rockville, Maryland, USA: SSL and ICF International; 2014                        |

| Country         | Start year | End year   | Type (inq refers to a specialized study) | Included in modelling | Exclude-reason | Source                     | Reference                                                                                                                                                                                                                                    |
|-----------------|------------|------------|------------------------------------------|-----------------------|----------------|----------------------------|----------------------------------------------------------------------------------------------------------------------------------------------------------------------------------------------------------------------------------------------|
| Singapore       | 1990       | 1996       | inq                                      | YES                   | NA             | Maternal deaths 1990-1999  | Lau G. Are maternal deaths on the ascent in Singapore? A review of maternal mortality as reflected by coronial casework from 1990 to 1999. Ann Acad Med Singapore. 2002;31(3):261-C275.                                                      |
| Singapore       | 1996       | 2000       | inq                                      | YES                   | NA             | Maternal deaths 1990-1999  | Lau G. Are maternal deaths on the ascent in Singapore? A review of maternal mortality as reflected by coronial casework from 1990 to 1999. Ann Acad Med Singapore. 2002;31(3):261-275.                                                       |
| Slovenia        | 2003       | 2006       | inq                                      | YES                   | NA             | National Surveillance 2014 | National Surveillance 2014 (data from Country Consultation 2015)                                                                                                                                                                             |
| Slovenia        | 2006       | 2011       | inq                                      | YES                   | NA             | National Surveillance 2014 | National Surveillance 2014 (data from Country Consultation 2015)                                                                                                                                                                             |
| Solomon Islands | 2008.89286 | 2009.89286 | misc                                     | YES                   | NA             | 2009 Census                | 2009 Population and Housing Census National Report Vol 1                                                                                                                                                                                     |
| South Africa    | 2011       | 2014       | inq                                      | YES                   | NA             | Confidential enquiry, 2015 | Saving Mothers 2011-2013: Executive Summary. South Africa; 2015.                                                                                                                                                                             |
| South Africa    | 2008       | 2011       | inq                                      | YES                   | NA             | Confidential enquiry, 2012 | Department of Health, National Committee on Confidential Enquires into Maternal Deaths. Saving Mothers 2008-2010: Fifth report on the Confidential Enquiries into Maternal Deaths in South Africa. Comprehensive Report. South Africa, 2012. |

| Country      | Start year | End year | Type (inq refers to a specialized study) | Included in modelling | Exclude-reason | Source                                   | Reference                                                                                                                                                                                                                                    |
|--------------|------------|----------|------------------------------------------|-----------------------|----------------|------------------------------------------|----------------------------------------------------------------------------------------------------------------------------------------------------------------------------------------------------------------------------------------------|
| South Africa | 2005       | 2008     | inq                                      | YES                   | NA             | Confidential enquiry, 2012               | Department of Health, National Committee on Confidential Enquires into Maternal Deaths. Saving Mothers 2008-2010: Fifth report on the Confidential Enquiries into Maternal Deaths in South Africa. Comprehensive Report. South Africa, 2012. |
| South Africa | 2002       | 2005     | inq                                      | YES                   | NA             | Confidential enquiry, 2012               | Department of Health, National Committee on Confidential Enquires into Maternal Deaths. Saving Mothers 2008-2010: Fifth report on the Confidential Enquiries into Maternal Deaths in South Africa. Comprehensive Report. South Africa, 2012. |
| South Africa | 1998       | 1999     | inq                                      | YES                   | NA             | Rapid mortality surveillance report 2013 | Dorrington RE, Bradshaw D, Laubscher R, Nannan N (2014). Rapid mortality surveillance report 2013. Cape Town: South African Medical Research Council. ISBN: 978-1-920618-33-9.                                                               |
| South Africa | 1999       | 2000     | inq                                      | YES                   | NA             | Rapid mortality surveillance report 2013 | Dorrington RE, Bradshaw D, Laubscher R, Nannan N (2014). Rapid mortality surveillance report 2013. Cape Town: South African Medical Research Council. ISBN: 978-1-920618-33-9.                                                               |
| South Africa | 2000       | 2001     | inq                                      | YES                   | NA             | Rapid mortality surveillance report 2013 | Dorrington RE, Bradshaw D, Laubscher R, Nannan N (2014). Rapid mortality surveillance report 2013. Cape Town: South African Medical Research Council.                                                                                        |
| South Africa | 2001       | 2002     | inq                                      | YES                   | NA             | Rapid mortality surveillance report 2013 | Dorrington RE, Bradshaw D, Laubscher R, Nannan N (2014). Rapid mortality surveillance report 2013. Cape Town: South African Medical Research Council. ISBN: 978-1-920618-33-9.                                                               |
| South Africa | 2002       | 2003     | inq                                      | YES                   | NA             | Rapid mortality surveillance report 2013 | Dorrington RE, Bradshaw D, Laubscher R, Nannan N (2014). Rapid mortality surveillance report 2013. Cape Town: South African Medical Research Council. ISBN: 978-                                                                             |



| Country      | Start year | End year | Type (inq refers to a specialized study) | Included in modelling | Exclude-reason | Source                                   | Reference                                                                                                                                                                      |
|--------------|------------|----------|------------------------------------------|-----------------------|----------------|------------------------------------------|--------------------------------------------------------------------------------------------------------------------------------------------------------------------------------|
|              |            |          |                                          |                       |                |                                          | 1-920618-33-9.                                                                                                                                                                 |
| South Africa | 2003       | 2004     | inq                                      | YES                   | NA             | Rapid mortality surveillance report 2013 | Dorrington RE, Bradshaw D, Laubscher R, Nannan N (2014). Rapid mortality surveillance report 2013. Cape Town: South African Medical Research Council. ISBN: 978-1-920618-33-9. |
| South Africa | 2004       | 2005     | inq                                      | YES                   | NA             | Rapid mortality surveillance report 2013 | Dorrington RE, Bradshaw D, Laubscher R, Nannan N (2014). Rapid mortality surveillance report 2013. Cape Town: South African Medical Research Council. ISBN: 978-1-920618-33-9. |
| South Africa | 2005       | 2006     | inq                                      | YES                   | NA             | Rapid mortality surveillance report 2013 | Dorrington RE, Bradshaw D, Laubscher R, Nannan N (2014). Rapid mortality surveillance report 2013. Cape Town: South African Medical Research Council. ISBN: 978-1-920618-33-9. |
| South Africa | 2006       | 2007     | inq                                      | YES                   | NA             | Rapid mortality surveillance report 2013 | Dorrington RE, Bradshaw D, Laubscher R, Nannan N (2014). Rapid mortality surveillance report 2013. Cape Town: South African Medical Research Council. ISBN: 978-1-920618-33-9. |
| South Africa | 2007       | 2008     | inq                                      | YES                   | NA             | Rapid mortality surveillance report 2013 | Dorrington RE, Bradshaw D, Laubscher R, Nannan N (2014). Rapid mortality surveillance report 2013. Cape Town: South African Medical Research Council. ISBN: 978-1-920618-33-9. |
| South Africa | 2008       | 2009     | inq                                      | YES                   | NA             | Rapid mortality surveillance report 2013 | Dorrington RE, Bradshaw D, Laubscher R, Nannan N (2014). Rapid mortality surveillance report 2013. Cape Town: South African Medical Research Council. ISBN: 978-1-920618-33-9. |

| Country      | Start year | End year  | Type (inq refers to a specialized study) | Included in modelling | Exclude-reason | Source                                   | Reference                                                                                                                                                                             |
|--------------|------------|-----------|------------------------------------------|-----------------------|----------------|------------------------------------------|---------------------------------------------------------------------------------------------------------------------------------------------------------------------------------------|
| South Africa | 2009       | 2010      | inq                                      | YES                   | NA             | Rapid mortality surveillance report 2013 | Dorrington RE, Bradshaw D, Laubscher R, Nannan N (2014). Rapid mortality surveillance report 2013. Cape Town: South African Medical Research Council. ISBN: 978-1-920618-33-9.        |
| South Africa | 2010       | 2011      | inq                                      | YES                   | NA             | Rapid mortality surveillance report 2013 | Dorrington RE, Bradshaw D, Laubscher R, Nannan N (2014). Rapid mortality surveillance report 2013. Cape Town: South African Medical Research Council. ISBN: 978-1-920618-33-9.        |
| South Africa | 2011       | 2012      | inq                                      | YES                   | NA             | Rapid mortality surveillance report 2013 | Dorrington RE, Bradshaw D, Laubscher R, Nannan N (2014). Rapid mortality surveillance report 2013. Cape Town: South African Medical Research Council. ISBN: 978-1-920618-33-9.        |
| South Africa | 2012       | 2013      | inq                                      | YES                   | NA             | Rapid mortality surveillance report 2013 | Dorrington RE, Bradshaw D, Laubscher R, Nannan N (2014). Rapid mortality surveillance report 2013. Cape Town: South African Medical Research Council. ISBN: 978-1-920618-33-9.        |
| South Africa | 2013       | 2014      | inq                                      | YES                   | NA             | Rapid mortality surveillance report 2013 | Dorrington RE, Bradshaw D, Laubscher R, Nannan N (2014). Rapid mortality surveillance report 2013. Cape Town: South African Medical Research Council. ISBN: 978-1-920618-33-9.        |
| South Africa | 1991.386   | 1998.386  | dhs                                      | YES                   | NA             | DHS 1998                                 | Department of Health, Medical Research Council, Macro-International. South Africa Demographic and Health Survey 1998. Full Report. Pretoria, South Africa: Department of Health;2000. |
| South Africa | 2000.77    | 2001.77   | misc                                     | YES                   | NA             | Census 2001                              | South Africa National Statistics Office.                                                                                                                                              |
| South Africa | 2006.14    | 2007.14   | misc                                     | YES                   | NA             | 2007 Community Survey                    | South Africa National Statistics Office.                                                                                                                                              |
| South Africa | 2010.7747  | 2011.7719 | misc                                     | YES                   | NA             | 2011 Census                              | South Africa National Statistics Office.                                                                                                                                              |

| Country     | Start year | End year | Type (inq refers to a specialized study) | Included in modelling | Exclude-reason | Source                    | Reference                                                                                                                                                                                                                                             |
|-------------|------------|----------|------------------------------------------|-----------------------|----------------|---------------------------|-------------------------------------------------------------------------------------------------------------------------------------------------------------------------------------------------------------------------------------------------------|
|             | 3          | 8        |                                          |                       |                |                           |                                                                                                                                                                                                                                                       |
| South Sudan | 2004       | 2006     | misc                                     | YES                   | NA             | SHHS 2006                 | Federal Ministry of Health, Government of National Unity, Ministry of Health, Government of Southern Sudan, Central Bureau of Statistics, and Southern Sudan Commission for Census. Sudan Household Health Survey 2006. National Report, Sudan; 2007. |
| South Sudan | 2007       | 2008     | misc                                     | YES                   | NA             | Census 2008               | South Sudan National Statistics Office.                                                                                                                                                                                                               |
| Sri Lanka   | 1995       | 1996     | misc                                     | YES                   | NA             | Family Health Bureau 2009 | Ministry of Health. Annual Report on Family Health Sri Lanka 2006-2007. Family Health Bureau. Sri Lanka; 2009.                                                                                                                                        |
| Sri Lanka   | 1996       | 1997     | misc                                     | YES                   | NA             | Family Health Bureau 2009 | Ministry of Health. Annual Report on Family Health Sri Lanka 2006-2007. Family Health Bureau. Sri Lanka; 2009.                                                                                                                                        |
| Sri Lanka   | 1997       | 1998     | misc                                     | YES                   | NA             | Family Health Bureau 2009 | Ministry of Health. Annual Report on Family Health Sri Lanka 2006-2007. Family Health Bureau. Sri Lanka; 2009.                                                                                                                                        |
| Sri Lanka   | 1998       | 1999     | misc                                     | YES                   | NA             | Family Health Bureau 2009 | Ministry of Health. Annual Report on Family Health Sri Lanka 2006-2007. Family Health Bureau. Sri Lanka; 2009.                                                                                                                                        |
| Sri Lanka   | 1999       | 2000     | misc                                     | YES                   | NA             | Family Health Bureau 2009 | Ministry of Health. Annual Report on Family Health Sri Lanka 2006-2007. Family Health Bureau. Sri Lanka; 2009.                                                                                                                                        |
| Sri Lanka   | 2000       | 2001     | misc                                     | YES                   | NA             | Family Health Bureau 2009 | Ministry of Health. Annual Report on Family Health Sri Lanka 2006-2007. Family Health Bureau. Sri Lanka; 2009.                                                                                                                                        |
| Sri Lanka   | 2001       | 2002     | misc                                     | YES                   | NA             | Family Health Bureau 2008 | Ministry of Healthcare and Nutrition. Overview of Maternal Mortality in Sri Lanka 2001-2005. Family Health Bureau. Sri Lanka; 2008.                                                                                                                   |
| Sri Lanka   | 2002       | 2003     | misc                                     | YES                   | NA             | Family Health Bureau 2008 | Ministry of Healthcare and Nutrition. Overview of Maternal Mortality in Sri Lanka 2001-2005. Family Health Bureau. Sri Lanka; 2008.                                                                                                                   |

| Country   | Start year | End year | Type (inq refers to a specialized study) | Included in modelling | Exclude-reason                  | Source                    | Reference                                                                                                                                                                |
|-----------|------------|----------|------------------------------------------|-----------------------|---------------------------------|---------------------------|--------------------------------------------------------------------------------------------------------------------------------------------------------------------------|
| Sri Lanka | 2003       | 2004     | misc                                     | YES                   | NA                              | Family Health Bureau 2008 | Ministry of Healthcare and Nutrition. Overview of Maternal Mortality in Sri Lanka 2001-2005. Family Health Bureau. Sri Lanka; 2008.                                      |
| Sri Lanka | 2004       | 2005     | misc                                     | YES                   | NA                              | Family Health Bureau 2008 | Ministry of Healthcare and Nutrition. Overview of Maternal Mortality in Sri Lanka 2001-2005. Family Health Bureau. Sri Lanka; 2008.                                      |
| Sri Lanka | 2005       | 2006     | misc                                     | YES                   | NA                              | Family Health Bureau 2008 | Ministry of Healthcare and Nutrition. Overview of Maternal Mortality in Sri Lanka 2001-2005. Family Health Bureau. Sri Lanka; 2008.                                      |
| Sri Lanka | 2006       | 2007     | misc                                     | YES                   | NA                              | Family Health Bureau 2014 | Ministry of Health. Annual Report on Family Health Sri Lanka 2012. Family Health Bureau. Sri Lanka; 2014.                                                                |
| Sri Lanka | 2007       | 2008     | misc                                     | YES                   | NA                              | Family Health Bureau 2014 | Ministry of Health. Annual Report on Family Health Sri Lanka 2012. Family Health Bureau. Sri Lanka; 2014.                                                                |
| Sri Lanka | 2008       | 2009     | misc                                     | YES                   | NA                              | Family Health Bureau 2014 | Ministry of Health. Annual Report on Family Health Sri Lanka 2012. Family Health Bureau. Sri Lanka; 2014.                                                                |
| Sri Lanka | 2009       | 2010     | misc                                     | YES                   | NA                              | Family Health Bureau 2014 | Ministry of Health. Annual Report on Family Health Sri Lanka 2012. Family Health Bureau. Sri Lanka; 2014.                                                                |
| Sri Lanka | 2010       | 2011     | misc                                     | YES                   | NA                              | Family Health Bureau 2014 | Ministry of Health. Annual Report on Family Health Sri Lanka 2012. Family Health Bureau. Sri Lanka; 2014.                                                                |
| Sri Lanka | 2011       | 2012     | misc                                     | YES                   | NA                              | Family Health Bureau 2014 | Ministry of Health. Annual Report on Family Health Sri Lanka 2012. Family Health Bureau. Sri Lanka; 2014.                                                                |
| Sri Lanka | 2012       | 2013     | misc                                     | YES                   | NA                              | Family Health Bureau 2014 | Ministry of Health. Annual Report on Family Health Sri Lanka 2012. Family Health Bureau. Sri Lanka; 2014.                                                                |
| Sudan     | 1983       | 1984     | dhs                                      | NO                    | reference period is before 1985 | DHS 1989-1990             | Department of Statistics, Ministry of Economic and National Planning, Macro International. Sudan Demographic and Health Survey 1989/1990. Columbia, Maryland, USA; 1991. |

| Country   | Start year | End year   | Type (inq refers to a specialized study) | Included in modelling | Exclude-reason | Source                                            | Reference                                                                                                                                                                                                                                             |
|-----------|------------|------------|------------------------------------------|-----------------------|----------------|---------------------------------------------------|-------------------------------------------------------------------------------------------------------------------------------------------------------------------------------------------------------------------------------------------------------|
| Sudan     | 2004       | 2006       | misc                                     | YES                   | NA             | SHHS 2006                                         | Federal Ministry of Health, Government of National Unity, Ministry of Health, Government of Southern Sudan, Central Bureau of Statistics, and Southern Sudan Commission for Census. Sudan Household Health Survey 2006. National Report, Sudan; 2007. |
| Sudan     | 2008       | 2010       | misc                                     | YES                   | NA             | SHHS 2010                                         | Federal Ministry of Health, Central Bureau of Statistics. Sudan Household and Health Survey -2, 2010, National report. Khartoum, Republic of Sudan: Federal Ministry of Health and Central Bureau of Statistics; 2012.                                |
| Sudan     | 2007       | 2008       | misc                                     | YES                   | NA             | Census 2008                                       | Sudan SNO.                                                                                                                                                                                                                                            |
| Suriname  | 1991       | 1994       | inq                                      | YES                   | NA             | Nationwide maternal mortality in Surinam, 1991-93 | Mungra A, van Kanten RW, Kanhai HH, van Roosmalen J. Nationwide maternal mortality in Surinam. Br J Obstet Gynaecol.1999;106(1):55-9.                                                                                                                 |
| Swaziland | 1999.83    | 2006.83    | dhs                                      | YES                   | NA             | DHS 2006-2007                                     | Central Statistical Office (CSO) [Swaziland], and Macro International Inc. Swaziland Demographic and Health Survey 2006-07. Mbabane, Swaziland: Central Statistical Office and Macro International Inc.; 2008.                                        |
| Swaziland | 2006.32143 | 2007.32143 | misc                                     | YES                   | NA             | 2007 Census                                       | Swaziland National Statistics Office.                                                                                                                                                                                                                 |
| Sweden    | 1988       | 2008       | inq                                      | YES                   | NA             | Maternal mortality in Sweden 1988-2007            | Esscher A, Hogberg U, Haglund B, Essen B. Maternal mortality in Sweden 1988–2007: more deaths than officially reported. Acta Obstet Gynecol Scand 2013,92(1):40-C6.€                                                                                  |

| Country                     | Start year | End year | Type (inq refers to a specialized study) | Included in modelling | Exclude-reason | Source                                 | Reference                                                                                                                                                                                 |
|-----------------------------|------------|----------|------------------------------------------|-----------------------|----------------|----------------------------------------|-------------------------------------------------------------------------------------------------------------------------------------------------------------------------------------------|
| Sweden                      | 1997       | 2006     | inq                                      | YES                   | NA             | Maternal mortality in Sweden 1997-2005 | Grunewald C, et al. Modradodligheten underskattad i Sverige. Lakartidningen. 2008;34(105):2250-C53.                                                                                       |
| Syrian Arab Republic        | 2008       | 2010     | misc                                     | YES                   | NA             | FHS 2009                               | Central Bureau of Statistics. Family Health Survey 2009. Syrian Arab Republic; 2010.                                                                                                      |
| Syrian Arab Republic        | 2008       | 2009     | misc                                     | YES                   | NA             | CBS 2008                               | Central Bureau of Statistics. 2012.                                                                                                                                                       |
| United Republic of Tanzania | 1989.718   | 1996.718 | dhs                                      | YES                   | NA             | DHS 1996                               | Bureau of Statistics [Tanzania] and Macro International Inc. Tanzania Demographic and Health Survey 1996. Calverton, Maryland: Bureau of Statistics and Macro International; 1997.        |
| United Republic of Tanzania | 1997.945   | 2004.945 | dhs                                      | YES                   | NA             | DHS 2004-2005                          | National Bureau of Statistics (NBS) [Tanzania] and ORC Macro. Tanzania Demographic and Health Survey 2004-05. Dar es Salaam, Tanzania: National Bureau of Statistics and ORC Macro; 2005. |
| United Republic of Tanzania | 2003.179   | 2010.179 | dhs                                      | YES                   | NA             | DHS 2010                               | National Bureau of Statistics (NBS) [Tanzania] and ICF Macro. Tanzania Demographic and Health Survey 2010. Dar es Salaam, Tanzania: NBS and ICF Macro; 2011.                              |
| Thailand                    | 1997       | 1998     | misc                                     | YES                   | NA             | Mat Mort Study 1997-1998               | Ministry of Public Health. Maternal Mortality in Thailand 1997-1998. Thailand; 2002.                                                                                                      |
| Thailand                    | 1998       | 1999     | misc                                     | YES                   | NA             | Mat Mort Study 1997-1998               | Ministry of Public Health. Maternal Mortality in Thailand 1997-1998. Thailand; 2002.                                                                                                      |
| Thailand                    | 2004       | 2005     | misc                                     | YES                   | NA             | MMR 2004                               | Ministry of Public Health. Maternal Mortality 2010 (data from country consultation 2010).                                                                                                 |
| Thailand                    | 2005       | 2006     | misc                                     | YES                   | NA             | MMR 2005                               | Ministry of Public Health. Maternal Mortality 2010 (data from country consultation 2010).                                                                                                 |

| Country     | Start year     | End year       | Type (inq refers to a specialized study) | Included in modelling | Exclude-reason | Source                   | Reference                                                                                                                                                                                                                                             |
|-------------|----------------|----------------|------------------------------------------|-----------------------|----------------|--------------------------|-------------------------------------------------------------------------------------------------------------------------------------------------------------------------------------------------------------------------------------------------------|
| Thailand    | 2006           | 2007           | misc                                     | YES                   | NA             | MMR 2006                 | Ministry of Public Health. Maternal Mortality 2010 (data from country consultation 2010).                                                                                                                                                             |
| Thailand    | 1995           | 1997           | misc                                     | YES                   | NA             | Mat Mort Study 1995-1996 | Ministry of Public Health. Maternal Mortality in Thailand 1995-1996. Thailand, 1998.                                                                                                                                                                  |
| Timor-Leste | 2002.854       | 2009.854       | dhs                                      | YES                   | NA             | DHS 2009-2010            | National Statistics Directorate (NSD) [Timor-Leste], Ministry of Finance [Timor-Leste], and ICF Macro. Timor-Leste Demographic and Health Survey 2009-10. Dili, Timor-Leste: NSD [Timor-Leste] and ICF Macro; 2010.                                   |
| Timor-Leste | 2009.5247<br>3 | 2010.5247<br>3 | misc                                     | YES                   | NA             | 2010 Census              | Analytical Report on Mortality Vol 6                                                                                                                                                                                                                  |
| Togo        | 1991.242       | 1998.242       | dhs                                      | YES                   | NA             | DHS 1998                 | Anipah, Kodjo, Gora Mboup, Afi Mawuèna Ouro-Gnao, Bassanté Boukpassi, Pierre Adadé Messan et Rissy Salami-Odjo. Enquête Démographique et de Santé, Togo 1998. Calverton, Maryland USA: Direction de la Statistique et Macro International Inc.; 1999. |
| Togo        | 2008.38        | 2014.38        | misc                                     | YES                   | NA             | DHS 2013                 | Ministère de la Planification, Maesure DSH, ICF International. Enquete Démographic et de Santé Togo 2013. Rapport Préliminaire. ICF International, Rockville, Maryland, USA; 2014.                                                                    |
| Tunisia     | 1993.5         | 1994.42        | misc                                     | YES                   | NA             | MMS 1993-1994            | Ministère de la Santé. Résultats de l'enquête nationale sur la mortalité maternelle en Tunisie 1993-1994. Tunisie; 1995.                                                                                                                              |
| Tunisia     | 2008           | 2009           | misc                                     | YES                   | NA             | MMS 2008                 | Ministère de la Santé. Résultats de l'enquête nationale sur la mortalité maternelle en Tunisie 2008. Rapport Préliminaire. Tunis; 2010.                                                                                                               |

| Country | Start year | End year | Type (inq refers to a specialized study) | Included in modelling | Exclude-reason | Source                              | Reference                                                                                                                                                                                                                                                                                                 |
|---------|------------|----------|------------------------------------------|-----------------------|----------------|-------------------------------------|-----------------------------------------------------------------------------------------------------------------------------------------------------------------------------------------------------------------------------------------------------------------------------------------------------------|
| Turkey  | 2005.41    | 2006.4   | inq                                      | YES                   | NA             | NMMS 2005                           | Hacettepe University Institute of Population Studies, ICON-INSTITUT Public Sector GmbH and BNB Consulting. National Maternal Mortality Study, 2005. Ministry of Health, General Directorate of Mother and Child Health and Family Planning and Delegation of European Commission to Turkey, Ankara; 2006. |
| Turkey  | 2012       | 2013     | misc                                     | YES                   | NA             | Maternal Mortality Data System 2013 | Ministry of Health. Maternal Mortality Data System. 2013 (Data from Country Consultation 2013)                                                                                                                                                                                                            |
| Turkey  | 2011       | 2012     | misc                                     | YES                   | NA             | Maternal Mortality Data System 2013 | Ministry of Health. Maternal Mortality Data System. 2013 (Data from Country Consultation 2013)                                                                                                                                                                                                            |
| Turkey  | 2010       | 2011     | misc                                     | YES                   | NA             | Maternal Mortality Data System 2013 | Ministry of Health. Maternal Mortality Data System. 2013 (Data from Country Consultation 2013)                                                                                                                                                                                                            |
| Turkey  | 2009       | 2010     | misc                                     | YES                   | NA             | Maternal Mortality Data System 2013 | Ministry of Health. Maternal Mortality Data System. 2013 (Data from Country Consultation 2013)                                                                                                                                                                                                            |
| Turkey  | 2008       | 2009     | misc                                     | YES                   | NA             | Maternal Mortality Data System 2013 | Ministry of Health. Maternal Mortality Data System. 2013 (Data from Country Consultation 2013)                                                                                                                                                                                                            |
| Turkey  | 2007       | 2008     | misc                                     | YES                   | NA             | Maternal Mortality Data System 2013 | Ministry of Health. Maternal Mortality Data System. 2013 (Data from Country Consultation 2013)                                                                                                                                                                                                            |
| Turkey  | 2013       | 2014     | misc                                     | YES                   | NA             | Maternal Mortality Data System 2015 | Maternal Mortality Data System 2015                                                                                                                                                                                                                                                                       |



| Country              | Start year | End year | Type (inq refers to a specialized study) | Included in modelling | Exclude-reason        | Source                                              | Reference                                                                                                                                                                                       |
|----------------------|------------|----------|------------------------------------------|-----------------------|-----------------------|-----------------------------------------------------|-------------------------------------------------------------------------------------------------------------------------------------------------------------------------------------------------|
| Turkey               | 2014       | 2015     | misc                                     | YES                   | NA                    | Maternal Mortality Data System 2015                 | Maternal Mortality Data System 2015                                                                                                                                                             |
| Uganda               | 1988.424   | 1995.424 | dhs                                      | YES                   | NA                    | DHS 1995                                            | Statistics Department [Uganda] and Macro International Inc. Uganda Demographic and Health Survey, 1995. Calverton, Maryland: Statistics Department [Uganda] and Macro International Inc.; 1996. |
| Uganda               | 1993.955   | 2000.955 | dhs                                      | YES                   | NA                    | DHS 2000-2001                                       | Uganda Bureau of Statistics (UBOS) and ORC Macro. Uganda Demographic and Health Survey 2000-2001. Calverton, Maryland, USA: UBOS and ORC Macro; 2001.                                           |
| Uganda               | 1999.551   | 2006.551 | dhs                                      | YES                   | NA                    | DHS 2006                                            | Uganda Bureau of Statistics (UBOS) and Macro International Inc. Uganda Demographic and Health Survey 2006. Calverton, Maryland, USA: UBOS and Macro International Inc.; 2007                    |
| Uganda               | 2004.705   | 2011.705 | dhs                                      | YES                   | NA                    | DHS 2011                                            | Uganda Bureau of Statistics (UBOS) and ICF International Inc. Uganda Demographic and Health Survey 2011. Kampala, Uganda: UBOS and Calverton, Maryland: ICF International Inc.; 2012.           |
| United Arab Emirates | 2008       | 2009     | misc                                     | NO                    | MMEIG data assessment | Annual Statistical Report for the Years 1990 - 2008 | Annual Statistical Report for the Years 1990 - 2008. Health Statistical Department, MOH, UAE.                                                                                                   |
| United Arab Emirates | 2005       | 2006     | misc                                     | NO                    | MMEIG data assessment | Annual Statistical Report for the Years 1990 - 2008 | Annual Statistical Report for the Years 1990 - 2008. Health Statistical Department, MOH, UAE.                                                                                                   |
| United Arab Emirates | 2000       | 2001     | misc                                     | NO                    | MMEIG data assessment | Annual Statistical Report for the Years 1990 - 2008 | Annual Statistical Report for the Years 1990 - 2008. Health Statistical Department, MOH, UAE.                                                                                                   |

| Country              | Start year | End year | Type (inq refers to a specialized study) | Included in modelling | Exclude-reason        | Source                                              | Reference                                                                                                                                                                                                                                                       |
|----------------------|------------|----------|------------------------------------------|-----------------------|-----------------------|-----------------------------------------------------|-----------------------------------------------------------------------------------------------------------------------------------------------------------------------------------------------------------------------------------------------------------------|
| United Arab Emirates | 1995       | 1996     | misc                                     | NO                    | MMEIG data assessment | Annual Statistical Report for the Years 1990 - 2008 | Annual Statistical Report for the Years 1990 - 2008. Health Statistical Department, MOH, UAE.                                                                                                                                                                   |
| United Arab Emirates | 1990       | 1991     | misc                                     | NO                    | MMEIG data assessment | Annual Statistical Report for the Years 1990 - 2008 | Annual Statistical Report for the Years 1990 - 2008. Health Statistical Department, MOH, UAE.                                                                                                                                                                   |
| United Kingdom       | 1985       | 1988     | inq                                      | YES                   | NA                    | CMACE, 2011                                         | Centre for Maternal and Child Enquiries (CMACE). Saving Mothers?? Lives: Reviewing maternal deaths to make motherhood safer: 2006-C2008. The eighth report on Confidential Enquiries into Maternal Deaths in the United Kingdom. BJOG.2011;118(Suppl.1):1-C203. |
| United Kingdom       | 1988       | 1991     | inq                                      | YES                   | NA                    | CMACE, 2011                                         | Centre for Maternal and Child Enquiries (CMACE). Saving Mothers?? Lives: Reviewing maternal deaths to make motherhood safer: 2006-C2008. The eighth report on Confidential Enquiries into Maternal Deaths in the United Kingdom. BJOG.2011;118(Suppl.1):1-C203. |
| United Kingdom       | 1991       | 1994     | inq                                      | YES                   | NA                    | CMACE, 2011                                         | Centre for Maternal and Child Enquiries (CMACE). Saving Mothers?? Lives: Reviewing maternal deaths to make motherhood safer: 2006-C2008. The eighth report on Confidential Enquiries into Maternal Deaths in the United Kingdom. BJOG.2011;118(Suppl.1):1-C203. |
| United Kingdom       | 1994       | 1997     | inq                                      | YES                   | NA                    | CMACE, 2011                                         | Centre for Maternal and Child Enquiries (CMACE). Saving Mothers?? Lives: Reviewing maternal deaths to make motherhood safer: 2006-C2008. The eighth report on Confidential Enquiries into Maternal Deaths in the United Kingdom. BJOG.2011;118(Suppl.1):1-C203. |

| Country        | Start year | End year | Type (inq refers to a specialized study) | Included in modelling | Exclude-reason | Source          | Reference                                                                                                                                                                                                                                                                                                                                                         |
|----------------|------------|----------|------------------------------------------|-----------------------|----------------|-----------------|-------------------------------------------------------------------------------------------------------------------------------------------------------------------------------------------------------------------------------------------------------------------------------------------------------------------------------------------------------------------|
| United Kingdom | 1997       | 2000     | inq                                      | YES                   | NA             | CMACE, 2011     | Centre for Maternal and Child Enquiries (CMACE). Saving Mothers?? Lives: Reviewing maternal deaths to make motherhood safer: 2006-C2008. The eighth report on Confidential Enquiries into Maternal Deaths in the United Kingdom. BJOG.2011;118(Suppl.1):1-C203.                                                                                                   |
| United Kingdom | 2000       | 2003     | inq                                      | YES                   | NA             | CMACE, 2011     | Centre for Maternal and Child Enquiries (CMACE). Saving Mothers Lives: Reviewing maternal deaths to make motherhood safer: 2006-2008. The eighth report on-onfidential Enquiries into Maternal Deaths in the United Kingdom. BJOG.2011;118(Suppl.1):1-203.                                                                                                        |
| United Kingdom | 2003       | 2006     | inq                                      | YES                   | NA             | CMACE, 2011     | Centre for Maternal and Child Enquiries (CMACE). Saving Mothers Lives: Reviewing maternal deaths to make motherhood safer: 2006-2008. The eighth report on-onfidential Enquiries into Maternal Deaths in the United Kingdom. BJOG.2011;118(Suppl.1):1-203.                                                                                                        |
| United Kingdom | 2006       | 2009     | inq                                      | YES                   | NA             | CMACE, 2011     | Centre for Maternal and Child Enquiries (CMACE). Saving Mothers Lives: Reviewing maternal deaths to make motherhood safer: 2006-2008. The eighth report on-onfidential Enquiries into Maternal Deaths in the United Kingdom. BJOG.2011;118(Suppl.1):1-203.                                                                                                        |
| United Kingdom | 2009       | 2012     | inq                                      | YES                   | NA             | MBRRACE-UK 2014 | Knight M, Kenyon S, Brokkehurst P, Neilson J, Shakespeare J, Kuri-zuk JJ (Eds.) on behalf of MBRR-EUK. Saving Lives, Improving Mothers??-are - Lessons learned to inform future maternity-are from the UK and Ireland-onfidential Enquiries into Maternal Deaths and Morbidity 2009-12. Oxford: National Perinatal Epidemiology Unit, University of Oxford; 2014. |

| Country                  | Start year | End year | Type (inq refers to a specialized study) | Included in modelling | Exclude-reason | Source                                                                      | Reference                                                                                                                                                                                                                                                                                                                                                         |
|--------------------------|------------|----------|------------------------------------------|-----------------------|----------------|-----------------------------------------------------------------------------|-------------------------------------------------------------------------------------------------------------------------------------------------------------------------------------------------------------------------------------------------------------------------------------------------------------------------------------------------------------------|
| United Kingdom           | 2010       | 2013     | inq                                      | YES                   | NA             | MBRRACE-UK 2014                                                             | Knight M, Kenyon S, Br-klehurst P, Neilson J, Shakespeare J, Kuri-zuk JJ (Eds.) on behalf of MBRR-EUK. Saving Lives, Improving Mothers??-are - Lessons learned to inform future maternity-are from the UK and Ireland-onfidential Enquiries into Maternal Deaths and Morbidity 2009-12. Oxford: National Perinatal Epidemiology Unit, University of Oxford; 2014. |
| United States of America | 1991       | 1998     | inq                                      | YES                   | NA             | Pregnancy-related mortality in the United States, 1991-1997                 | Berg CJ, Chang J, Callaghan WM, Whitehead SJ. Pregnancy-related mortality in the United States, 1991-1997. Obstet Gynecol, 2003, 101(2):289-96.                                                                                                                                                                                                                   |
| United States of America | 1995       | 1998     | inq                                      | YES                   | NA             | An assessment of pregnancy-related mortality in the United States 1995-1997 | MacKay AP, Berg CJ, Duran C, Chang J, Rosenberg H. An assessment of pregnancy-related mortality in the United States. Paediatric and Perinatal Epidemiology, 2005, 19(3):206-214.                                                                                                                                                                                 |
| United States of America | 1998       | 1999     | inq                                      | YES                   | NA             | Pregnancy-related mortality in the United States, 1998 to 2005              | Berg CJ, Callaghan WM, Syverson C, Henderson Z. Pregnancy-related mortality in the United States, 1998 to 2005. Obstet Gynecol. 2010 Dec;116(6):1302-9                                                                                                                                                                                                            |
| United States of America | 1999       | 2000     | inq                                      | YES                   | NA             | Pregnancy-related mortality in the United States, 1998 to 2005              | Berg CJ, Callaghan WM, Syverson C, Henderson Z. Pregnancy-related mortality in the United States, 1998 to 2005. Obstet Gynecol. 2010 Dec;116(6):1302-9                                                                                                                                                                                                            |

| Country                  | Start year | End year | Type (inq refers to a specialized study) | Included in modelling | Exclude-reason | Source                                                         | Reference                                                                                                                                                     |
|--------------------------|------------|----------|------------------------------------------|-----------------------|----------------|----------------------------------------------------------------|---------------------------------------------------------------------------------------------------------------------------------------------------------------|
| United States of America | 2000       | 2001     | inq                                      | YES                   | NA             | Pregnancy-related mortality in the United States, 1998 to 2005 | Berg CJ, Callaghan WM, Syverson C, Henderson Z. Pregnancy-related mortality in the United States, 1998 to 2005. <i>Obstet Gynecol.</i> 2010 Dec;116(6):1302-9 |
| United States of America | 2001       | 2002     | inq                                      | YES                   | NA             | Pregnancy-related mortality in the United States, 1998 to 2005 | Berg CJ, Callaghan WM, Syverson C, Henderson Z. Pregnancy-related mortality in the United States, 1998 to 2005. <i>Obstet Gynecol.</i> 2010 Dec;116(6):1302-9 |
| United States of America | 2002       | 2003     | inq                                      | YES                   | NA             | Pregnancy-related mortality in the United States, 1998 to 2005 | Berg CJ, Callaghan WM, Syverson C, Henderson Z. Pregnancy-related mortality in the United States, 1998 to 2005. <i>Obstet Gynecol.</i> 2010 Dec;116(6):1302-9 |
| United States of America | 2003       | 2004     | inq                                      | YES                   | NA             | Pregnancy-related mortality in the United States, 1998 to 2005 | Berg CJ, Callaghan WM, Syverson C, Henderson Z. Pregnancy-related mortality in the United States, 1998 to 2005. <i>Obstet Gynecol.</i> 2010 Dec;116(6):1302-9 |
| United States of America | 2004       | 2005     | inq                                      | YES                   | NA             | Pregnancy-related mortality in the United States, 1998 to 2005 | Berg CJ, Callaghan WM, Syverson C, Henderson Z. Pregnancy-related mortality in the United States, 1998 to 2005. <i>Obstet Gynecol.</i> 2010 Dec;116(6):1302-9 |
| United States of America | 2005       | 2006     | inq                                      | YES                   | NA             | Pregnancy-related mortality in the United States, 1998 to 2005 | Berg CJ, Callaghan WM, Syverson C, Henderson Z. Pregnancy-related mortality in the United States, 1998 to 2005. <i>Obstet Gynecol.</i> 2010 Dec;116(6):1302-9 |

| Country                  | Start year | End year | Type (inq refers to a specialized study) | Included in modelling | Exclude-reason                       | Source                                                       | Reference                                                                                                                                                                  |
|--------------------------|------------|----------|------------------------------------------|-----------------------|--------------------------------------|--------------------------------------------------------------|----------------------------------------------------------------------------------------------------------------------------------------------------------------------------|
| United States of America | 2006       | 2011     | inq                                      | YES                   | NA                                   | Pregnancy-related mortality in the United States, 2006-2010. | Creanga AA, Berg CJ, Syverson C, Seed K, Bruce FC, Callaghan WM. Pregnancy-related mortality in the United States, 2006-2010. <i>Obstet Gynecol.</i> 2015 Jan;125(1):5-12. |
| Uruguay                  | 2011       | 2012     | inq                                      | YES                   | NA                                   | Unidad de Información Nacional en Salud, MSP; 2014.          | Unidad de información Nacional en Salud, MSP; 2014.                                                                                                                        |
| Uruguay                  | 2012       | 2013     | inq                                      | YES                   | NA                                   | Unidad de Información Nacional en Salud, MSP; 2014.          | Unidad de información Nacional en Salud, MSP; 2014.                                                                                                                        |
| Uruguay                  | 2013       | 2014     | inq                                      | YES                   | NA                                   | Unidad de Información Nacional en Salud, MSP; 2014.          | Unidad de información Nacional en Salud, MSP; 2014.                                                                                                                        |
| Uruguay                  | 2014       | 2015     | inq                                      | YES                   | NA                                   | Unidad de Información Nacional en Salud, MSP; 2014.          | Unidad de información Nacional en Salud, MSP; 2014.                                                                                                                        |
| Viet Nam                 | 2006       | 2008     | inq                                      | YES                   | NA                                   | RAMOS 2006-2007                                              | Ministry of Health. National Maternal and Neonatal Survey in Viet Nam 2006-2007. Ha Noi; 2010.                                                                             |
| Viet Nam                 | 2000       | 2002     | misc                                     | NO                    | Sub-national/sub-population coverage | Maternal Mortality 2000-2001                                 | World Health Organization. Maternal Mortality in Viet Nam 2000-2001. An in-depth analysis of causes and determinants. Philippines; 2005.                                   |

| Country  | Start year | End year | Type (inq refers to a specialized study) | Included in modelling | Exclude-reason | Source                                     | Reference                                                                                                                                                                                                                                 |
|----------|------------|----------|------------------------------------------|-----------------------|----------------|--------------------------------------------|-------------------------------------------------------------------------------------------------------------------------------------------------------------------------------------------------------------------------------------------|
| Viet Nam | 2009       | 2010     | misc                                     | YES                   | NA             | Vietnam Population and Housing Census 2009 | Viet Nam National Statistics Office                                                                                                                                                                                                       |
| Yemen    | 1987.9     | 1997.9   | dhs                                      | YES                   | NA             | DHS 1997                                   | Central Statistical Organization (CSO) [Yemen]] and Macro International Inc. (MI). Yemen Demographic and Maternal and Child Health Survey 1997. Calverton, Maryland, USA: CSO and MI; 1998.                                               |
| Yemen    | 2011.92    | 2013.92  | misc                                     | YES                   | NA             | NHDS 2013                                  | Ministry of Public Health and Population, Central Statistical Organization, PAPFAM, Maesure DHS, ICF International. National Health and Demographic Survey 2103. Preliminary report. Maryland, USA; 2014.                                 |
| Yemen    | 2001       | 2003     | misc                                     | YES                   | NA             | YFHS 2003                                  | Ministry of Public Health and Population. Yemen Family Health Survey 2003. Pan Arab Project for Family Health (PAPFAM). Yemen; 2004.                                                                                                      |
| Zambia   | 1989.775   | 1996.775 | dhs                                      | YES                   | NA             | DHS 1996                                   | Central Statistical Office [Zambia] and Ministry of Health and Macro International Inc. Zambia Demographic and Health Survey, 1996. Calverton, Maryland: Central Statistical Office and Macro International Inc.; 1997.                   |
| Zambia   | 1995.121   | 2002.121 | dhs                                      | YES                   | NA             | DHS 2001-2002                              | Central Statistical Office [Zambia], Central Board of Health [Zambia], and ORC Macro. Zambia Demographic and Health Survey 2001-2002. Calverton, Maryland, USA: Central Statistical Office, Central Board of Health, and ORC Macro; 2003. |
| Zambia   | 2000.537   | 2007.537 | dhs                                      | YES                   | NA             | DHS 2007                                   | Central Statistical Office (CSO), Ministry of Health (MOH), Tropical Diseases Research Centre (TDRC), University of Zambia, and Macro International Inc. Zambia Demographic and Health Survey 2007. Calverton,                            |

| Country  | Start year | End year | Type (inq refers to a specialized study) | Included in modelling | Exclude-reason | Source              | Reference                                                                                                                                                                                                 |
|----------|------------|----------|------------------------------------------|-----------------------|----------------|---------------------|-----------------------------------------------------------------------------------------------------------------------------------------------------------------------------------------------------------|
|          |            |          |                                          |                       |                |                     | Maryland, USA: CSO and Macro International Inc.; 2009.                                                                                                                                                    |
| Zambia   | 2006.953   | 2013.953 | dhs                                      | YES                   | NA             | DHS 2013-2014       | Central Statistical Office, Ministry of Health, the DHS Program, ICF International. Zambia Demographic and Health Survey 2013-14. Preliminary Report. ICF International: Rockville, Maryland, USA; 2014.  |
| Zambia   | 2009.8     | 2010.8   | misc                                     | YES                   | NA             | 2010 Census         | Zambia National Statistics Office 2012.                                                                                                                                                                   |
| Zimbabwe | 2006       | 2007     | inq                                      | YES                   | NA             | Mat Mort Study 2007 | Ministry of Health and Child Welfare. Maternal and perinatal Mortality Study 2007. Zimbabwe; 2008.                                                                                                        |
| Zimbabwe | 1987.78    | 1994.78  | dhs                                      | YES                   | NA             | DHS 1994            | Central Statistical Office [Zimbabwe] and Macro International Inc. Zimbabwe Demographic and Health Survey, 1994. Calverton, Maryland, USA: Central Statistical Office and Macro International Inc.; 1995. |
| Zimbabwe | 1992.8     | 1999.8   | dhs                                      | YES                   | NA             | DHS 1999            | Central Statistical Office [Zimbabwe] and Macro International Inc. Zimbabwe Demographic and Health Survey 1999. Calverton, Maryland, USA: Central Statistical Office and Macro International Inc.; 2000.  |
| Zimbabwe | 1998.9     | 2005.9   | dhs                                      | YES                   | NA             | DHS 2005-2006       | Central Statistical Office (CSO) [Zimbabwe] and Macro International Inc. Zimbabwe Demographic and Health Survey 2005-06. Calverton, Maryland, USA: CSO and Macro International Inc.; 2007.                |
| Zimbabwe | 2003.986   | 2010.986 | dhs                                      | YES                   | NA             | DHS 2010-2011       | Zimbabwe National Statistics Agency (ZIMSTAT) and ICF International. Zimbabwe Demographic and Health Survey 2010-11. Calverton, Maryland: ZIMSTAT and ICF International Inc.; 2012.                       |
| Zimbabwe | 2007.205   | 2014.205 | dhs                                      | YES                   | NA             | MICS 2014           | Zimbabwe National Statistics Agency (ZIMSTAT), Zimbabwe Multiple Indicator Cluster Survey 2014, Final Report. Harare, Zimbabwe; 2015.                                                                     |
| Zimbabwe | 1991.6     | 1992.6   | misc                                     | YES                   | NA             | Census-a 1992       | Zimbabwe National Statistics Office                                                                                                                                                                       |



| <b>Country</b> | <b>Start year</b> | <b>End year</b> | <b>Type (inq refers to a specialized study)</b> | <b>Included in modelling</b> | <b>Exclude-reason</b> | <b>Source</b> | <b>Reference</b>                    |
|----------------|-------------------|-----------------|-------------------------------------------------|------------------------------|-----------------------|---------------|-------------------------------------|
| Zimbabwe       | 2001.7            | 2002.7          | misc                                            | YES                          | NA                    | Census 2002   | Zimbabwe National Statistics Office |
| Zimbabwe       | 2011.6            | 2012.7          | misc                                            | YES                          | NA                    | 2012 Census   | Zimbabwe National Statistics Office |

**Table 3. Maternal mortality ratio and maternal deaths for 1990, 2000, and 2015, and the annualized rates of reduction for 1990-2000, 2000-2015, and 1990-2015 for MDG regions and 183 countries. Numbers in parentheses refer to 80% UIs.**

| Region                    | MMR (per 100,000 live births) |                  |                  | Number of maternal deaths |                           |                           | ARR (%)          |                   |                  |
|---------------------------|-------------------------------|------------------|------------------|---------------------------|---------------------------|---------------------------|------------------|-------------------|------------------|
|                           | 1990                          | 2000             | 2015             | 1990                      | 2000                      | 2015                      | 1990-2000        | 2000-2015         | 1990-2015        |
| World                     | 385 (359 to 427)              | 341 (325 to 370) | 216 (207 to 249) | 532000 (496000 to 590000) | 442000 (422000 to 479000) | 303000 (291000 to 349000) | 1.2 (0.5 to 2)   | 3 (2.1 to 3.4)    | 2.3 (1.7 to 2.7) |
| Developed regions         | 23 (22 to 25)                 | 17 (16 to 18)    | 12 (11 to 14)    | 3500 (3400 to 3700)       | 2200 (2100 to 2300)       | 1700 (1500 to 1900)       | 3.3 (2.6 to 3.9) | 2.2 (1.4 to 2.8)  | 2.6 (2.1 to 3)   |
| Northern Africa           | 171 (145 to 204)              | 113 (101 to 133) | 70 (56 to 92)    | 6400 (5500 to 7700)       | 3600 (3300 to 4300)       | 3100 (2500 to 4100)       | 4.1 (2.4 to 5.5) | 3.2 (1.7 to 4.6)  | 3.6 (2.4 to 4.5) |
| Sub-Saharan Africa        | 987 (898 to 1120)             | 846 (787 to 941) | 546 (511 to 652) | 223000 (203000 to 254000) | 236000 (220000 to 263000) | 201000 (188000 to 240000) | 1.5 (0.7 to 2.4) | 2.9 (1.7 to 3.5)  | 2.4 (1.6 to 2.8) |
| Caucasus and Central Asia | 69 (65 to 73)                 | 50 (48 to 54)    | 33 (27 to 45)    | 1300 (1300 to 1400)       | 720 (680 to 780)          | 610 (500 to 830)          | 3.1 (2.2 to 4)   | 2.9 (0.8 to 4.2)  | 3 (1.7 to 3.8)   |
| Eastern Asia              | 95 (79 to 114)                | 59 (53 to 67)    | 27 (23 to 33)    | 26000 (22000 to 31000)    | 9700 (8700 to 11000)      | 4800 (4000 to 5800)       | 4.8 (3 to 6.3)   | 5 (3.9 to 6.5)    | 5 (4 to 6)       |
| South-eastern Asia        | 320 (277 to 376)              | 201 (179 to 228) | 110 (95 to 142)  | 39000 (33000 to 45000)    | 23000 (21000 to 26000)    | 13000 (11000 to 17000)    | 4.7 (3.3 to 5.9) | 4 (2.4 to 4.9)    | 4.3 (3.1 to 5)   |
| Southern Asia             | 538 (457 to 641)              | 377 (340 to 429) | 176 (153 to 216) | 210000 (179000 to 251000) | 148000 (133000 to 169000) | 66000 (58000 to 81000)    | 3.6 (2 to 4.9)   | 5.1 (3.9 to 6.2)  | 4.5 (3.5 to 5.2) |
| Western Asia              | 160 (132 to 199)              | 122 (105 to 147) | 91 (73 to 125)   | 6700 (5600 to 8400)       | 5400 (4700 to 6600)       | 4700 (3800 to 6500)       | 2.7 (1 to 4.4)   | 1.9 (-0.2 to 3.5) | 2.2 (0.8 to 3.4) |
| Caribbean                 | 276 (213 to 353)              | 214 (174 to 269) | 175 (130 to 265) | 2300 (1800 to 2900)       | 1700 (1300 to 2100)       | 1300 (930 to 1900)        | 2.5 (0 to 4.5)   | 1.4 (-0.9 to 3)   | 1.8 (0 to 3.1)   |
| Latin America             | 124 (118 to 132)              | 91 (89 to 94)    | 60 (57 to 66)    | 14000 (13000 to 15000)    | 10000 (9800 to 10000)     | 6000 (5700 to 6700)       | 3.1 (2.6 to 3.7) | 2.8 (2.1 to 3.2)  | 2.9 (2.5 to 3.3) |
| Oceania                   | 391 (242 to 673)              | 292 (166 to 559) | 187 (95 to 381)  | 780 (480 to 1300)         | 710 (400 to 1400)         | 500 (260 to 1000)         | 2.9 (0.1 to 5.6) | 3 (0.7 to 5.3)    | 3 (1.1 to 4.9)   |

| Country     | MMR (per 100,000 live births) |                    |                  | Number of maternal deaths |                        |                      | ARR (%)            |                    |                     |
|-------------|-------------------------------|--------------------|------------------|---------------------------|------------------------|----------------------|--------------------|--------------------|---------------------|
|             | 1990                          | 2000               | 2015             | 1990                      | 2000                   | 2015                 | 1990-2000          | 2000-2015          | 1990-2015           |
| Afghanistan | 1340 (878 to 1950)            | 1100 (745 to 1570) | 396 (253 to 620) | 8400 (5500 to 12000)      | 11000 (7200 to 15000)  | 4300 (2700 to 6700)  | 2 (-0.5 to 4.3)    | 6.8 (4.4 to 8.9)   | 4.9 (3 to 6.4)      |
| Albania     | 71 (58 to 88)                 | 43 (33 to 56)      | 29 (16 to 46)    | 56 (46 to 69)             | 22 (17 to 29)          | 11 (6 to 18)         | 5 (1.6 to 8.3)     | 2.8 (-0.4 to 6.3)  | 3.7 (1.6 to 6.2)    |
| Algeria     | 216 (141 to 327)              | 170 (118 to 241)   | 140 (82 to 244)  | 1800 (1200 to 2700)       | 1000 (720 to 1500)     | 1300 (770 to 2300)   | 2.4 (-1.1 to 5.2)  | 1.3 (-1.4 to 3.8)  | 1.8 (-0.8 to 3.5)   |
| Angola      | 1160 (627 to 2020)            | 924 (472 to 1730)  | 477 (221 to 988) | 6800 (3700 to 12000)      | 7200 (3700 to 13000)   | 5400 (2500 to 11000) | 2.2 (-0.6 to 5.2)  | 4.4 (2 to 6.8)     | 3.5 (1.5 to 5.5)    |
| Argentina   | 72 (64 to 80)                 | 60 (54 to 65)      | 52 (44 to 63)    | 510 (460 to 570)          | 430 (390 to 470)       | 390 (340 to 480)     | 1.9 (0.6 to 3.1)   | 0.9 (-0.6 to 2)    | 1.3 (0.3 to 2)      |
| Armenia     | 58 (51 to 65)                 | 40 (35 to 46)      | 25 (21 to 31)    | 43 (38 to 49)             | 16 (14 to 19)          | 10 (8 to 12)         | 3.8 (2.1 to 5.1)   | 3 (1.7 to 4.4)     | 3.3 (2.4 to 4.2)    |
| Australia   | 8 (7 to 9)                    | 9 (8 to 10)        | 6 (5 to 7)       | 21 (18 to 23)             | 21 (19 to 24)          | 19 (16 to 24)        | -0.5 (-2.6 to 0.9) | 2.4 (1.1 to 3.9)   | 1.3 (0.1 to 2)      |
| Austria     | 8 (7 to 10)                   | 5 (4 to 6)         | 4 (3 to 5)       | 7 (6 to 9)                | 4 (4 to 5)             | 3 (2 to 4)           | 3.9 (2.1 to 6.7)   | 2.3 (0.5 to 3.8)   | 2.9 (2 to 4.2)      |
| Azerbaijan  | 64 (56 to 74)                 | 48 (42 to 55)      | 25 (17 to 35)    | 130 (110 to 150)          | 68 (59 to 77)          | 48 (32 to 67)        | 2.8 (1.1 to 4.6)   | 4.4 (2.2 to 6.9)   | 3.8 (2.3 to 5.4)    |
| Bahamas     | 46 (34 to 61)                 | 61 (50 to 74)      | 80 (53 to 124)   | 3 (2 to 4)                | 3 (3 to 4)             | 5 (3 to 7)           | -2.9 (-5.9 to 0.1) | -1.8 (-4.9 to 1.1) | -2.2 (-4.4 to -0.1) |
| Bahrain     | 26 (20 to 33)                 | 21 (18 to 26)      | 15 (12 to 19)    | 4 (3 to 5)                | 3 (3 to 4)             | 3 (2 to 4)           | 1.9 (-0.6 to 3.5)  | 2.3 (0.7 to 3.8)   | 2.1 (0.7 to 3.2)    |
| Bangladesh  | 569 (446 to 715)              | 399 (322 to 496)   | 176 (125 to 280) | 21000 (17000 to 27000)    | 14000 (12000 to 18000) | 5500 (3900 to 8800)  | 3.6 (0.5 to 5.8)   | 5.4 (2.7 to 7.4)   | 4.7 (2.5 to 6.1)    |
| Barbados    | 58 (47 to 72)                 | 48 (38 to 58)      | 27 (19 to 37)    | 2 (2 to 3)                | 2 (1 to 2)             | 1 (1 to 1)           | 2 (-0.1 to 4.9)    | 3.8 (1.8 to 6.1)   | 3 (1.8 to 4.8)      |
| Belarus     | 33 (28 to 38)                 | 26 (22 to 31)      | 4 (3 to 6)       | 46 (40 to 53)             | 23 (20 to 28)          | 5 (3 to 7)           | 2.1 (0 to 4.3)     | 12.1 (9.4 to 14.6) | 8.1 (6.4 to 9.6)    |
| Belgium     | 9 (7 to 10)                   | 9 (8 to 11)        | 7 (5 to 10)      | 10 (8 to 12)              | 10 (9 to 12)           | 9 (7 to 13)          | -0.7 (-3.3 to 1.1) | 1.8 (-0.3 to 3.6)  | 0.8 (-0.8 to 1.9)   |
| Belize      | 54 (45 to 65)                 | 53 (45 to 62)      | 28 (20 to 36)    | 4 (3 to 4)                | 4 (3 to 5)             | 2 (2 to 3)           | 0.3 (-1.8 to 1.9)  | 4.3 (2.7 to 6.5)   | 2.7 (1.6 to 4)      |

| Country                  | MMR (per 100,000 live births) |                     |                   | Number of maternal deaths |                     |                     | ARR (%)             |                   |                   |
|--------------------------|-------------------------------|---------------------|-------------------|---------------------------|---------------------|---------------------|---------------------|-------------------|-------------------|
|                          | 1990                          | 2000                | 2015              | 1990                      | 2000                | 2015                | 1990-2000           | 2000-2015         | 1990-2015         |
| Benin                    | 576 (453 to 726)              | 572 (448 to 732)    | 405 (279 to 633)  | 1300 (1100 to 1700)       | 1700 (1300 to 2200) | 1600 (1100 to 2500) | 0.1 (-2.8 to 2.1)   | 2.3 (-0.2 to 4.4) | 1.4 (-0.6 to 2.8) |
| Bhutan                   | 945 (697 to 1260)             | 423 (328 to 538)    | 148 (101 to 241)  | 180 (140 to 250)          | 66 (51 to 84)       | 20 (14 to 32)       | 8 (5.2 to 10.8)     | 7 (3.5 to 9.4)    | 7.4 (5 to 9.1)    |
| Bolivia                  | 425 (340 to 527)              | 334 (272 to 416)    | 206 (140 to 351)  | 1000 (830 to 1300)        | 860 (700 to 1100)   | 520 (360 to 890)    | 2.4 (-0.4 to 4.8)   | 3.2 (0 to 5.6)    | 2.9 (0.5 to 4.5)  |
| Bosnia and Herzegovina   | 28 (23 to 33)                 | 17 (12 to 24)       | 11 (7 to 17)      | 18 (15 to 21)             | 7 (5 to 9)          | 4 (2 to 6)          | 4.6 (2.1 to 7.5)    | 2.9 (0.8 to 5)    | 3.6 (2.1 to 5.4)  |
| Botswana                 | 243 (149 to 352)              | 311 (261 to 361)    | 129 (102 to 172)  | 120 (71 to 170)           | 150 (120 to 170)    | 72 (57 to 95)       | -2.5 (-6.3 to 0.3)  | 5.9 (3.5 to 7.6)  | 2.5 (0.1 to 4.2)  |
| Brazil                   | 104 (91 to 119)               | 66 (64 to 67)       | 44 (36 to 54)     | 3800 (3300 to 4400)       | 2400 (2400 to 2500) | 1300 (1100 to 1600) | 4.6 (3.2 to 6)      | 2.7 (1.3 to 4)    | 3.5 (2.5 to 4.5)  |
| Brunei Darussalam        | 35 (25 to 48)                 | 31 (25 to 39)       | 23 (15 to 30)     | 3 (2 to 4)                | 2 (2 to 3)          | 2 (1 to 2)          | 1.3 (-2.4 to 3.9)   | 2.1 (0.1 to 5.3)  | 1.8 (0.3 to 3.7)  |
| Bulgaria                 | 25 (21 to 29)                 | 21 (18 to 25)       | 11 (8 to 14)      | 26 (22 to 30)             | 14 (12 to 16)       | 7 (5 to 10)         | 1.6 (-0.6 to 3.5)   | 4.4 (2.2 to 6.8)  | 3.3 (2 to 4.6)    |
| Burkina Faso             | 727 (549 to 978)              | 547 (432 to 686)    | 371 (257 to 509)  | 3000 (2300 to 4100)       | 2900 (2300 to 3700) | 2700 (1800 to 3600) | 2.8 (0.8 to 5.6)    | 2.6 (0.7 to 4.9)  | 2.7 (1.3 to 4.4)  |
| Burundi                  | 1220 (848 to 1760)            | 954 (682 to 1310)   | 712 (471 to 1050) | 3400 (2400 to 4900)       | 2800 (2000 to 3800) | 3500 (2300 to 5100) | 2.5 (0.1 to 4.9)    | 2 (-0.1 to 4.1)   | 2.2 (0.6 to 3.7)  |
| Cabo Verde               | 256 (141 to 460)              | 83 (45 to 162)      | 42 (20 to 95)     | 35 (20 to 64)             | 10 (6 to 20)        | 5 (2 to 10)         | 11.2 (8.2 to 13.7)  | 4.5 (2.2 to 7)    | 7.2 (5.2 to 9.2)  |
| Cambodia                 | 1020 (727 to 1350)            | 484 (396 to 596)    | 161 (117 to 213)  | 3900 (2800 to 5200)       | 1700 (1400 to 2000) | 590 (440 to 790)    | 7.5 (4.2 to 9.6)    | 7.4 (5.4 to 9.5)  | 7.4 (5.6 to 8.9)  |
| Cameroon                 | 728 (566 to 926)              | 750 (615 to 918)    | 596 (440 to 881)  | 3900 (3100 to 5000)       | 4900 (4000 to 6000) | 5100 (3700 to 7500) | -0.3 (-2.8 to 1.8)  | 1.5 (-0.9 to 3.3) | 0.8 (-1 to 2)     |
| Canada                   | 7 (7 to 8)                    | 9 (9 to 10)         | 7 (5 to 9)        | 29 (26 to 32)             | 31 (28 to 34)       | 27 (20 to 36)       | -2.2 (-3.7 to -0.8) | 1.9 (0 to 4.2)    | 0.3 (-0.9 to 1.6) |
| Central African Republic | 1290 (979 to 1720)            | 1200 (836 to 1750)  | 882 (508 to 1500) | 1600 (1200 to 2100)       | 1800 (1200 to 2600) | 1400 (830 to 2500)  | 0.7 (-2 to 3.4)     | 2.1 (-0.2 to 4.5) | 1.5 (-0.4 to 3.4) |
| Chad                     | 1450 (1100 to 1700)           | 1370 (1070 to 1670) | 856 (560 to 1350) | 4400 (3300 to 5800)       | 5900 (4600 to 7600) | 5400 (3500 to 8500) | 0.5 (-2.1 to 2.6)   | 3.1 (0.8 to 5.5)  | 2.1 (0.2 to 3.7)  |

| Country                               | MMR (per 100,000 live births) |                   |                   | Number of maternal deaths |                        |                        | ARR (%)             |                   |                    |
|---------------------------------------|-------------------------------|-------------------|-------------------|---------------------------|------------------------|------------------------|---------------------|-------------------|--------------------|
|                                       | 1990                          | 2000              | 2015              | 1990                      | 2000                   | 2015                   | 1990-2000           | 2000-2015         | 1990-2015          |
|                                       | 1900)                         | 1790)             |                   |                           |                        |                        |                     |                   |                    |
| Chile                                 | 57 (51 to 64)                 | 31 (27 to 34)     | 22 (18 to 26)     | 160 (150 to 180)          | 78 (69 to 86)          | 52 (43 to 62)          | 6.1 (4.7 to 7.9)    | 2.2 (0.8 to 3.5)  | 3.8 (3 to 4.7)     |
| China                                 | 97 (80 to 117)                | 58 (52 to 65)     | 27 (22 to 32)     | 25000 (21000 to 30000)    | 9000 (8100 to 10000)   | 4400 (3600 to 5300)    | 5.1 (3.4 to 6.7)    | 5.2 (4 to 6.8)    | 5.2 (4.2 to 6.3)   |
| Colombia                              | 118 (94 to 142)               | 97 (90 to 104)    | 64 (56 to 81)     | 1100 (850 to 1300)        | 820 (770 to 880)       | 480 (420 to 600)       | 2 (-0.2 to 3.7)     | 2.7 (1.1 to 3.7)  | 2.4 (1 to 3.3)     |
| Comoros                               | 635 (414 to 961)              | 499 (324 to 765)  | 335 (207 to 536)  | 110 (73 to 170)           | 100 (67 to 160)        | 88 (55 to 140)         | 2.4 (0 to 4.9)      | 2.6 (0.6 to 4.9)  | 2.6 (1 to 4.2)     |
| Congo                                 | 603 (421 to 857)              | 653 (492 to 864)  | 442 (300 to 638)  | 550 (380 to 780)          | 790 (590 to 1000)      | 740 (500 to 1100)      | -0.8 (-3.7 to 1.3)  | 2.6 (0.7 to 4.9)  | 1.2 (-0.3 to 2.7)  |
| Costa Rica                            | 43 (38 to 48)                 | 38 (35 to 43)     | 25 (20 to 29)     | 36 (32 to 40)             | 29 (26 to 33)          | 18 (14 to 20)          | 1.3 (-0.3 to 2.4)   | 2.7 (1.8 to 4.5)  | 2.2 (1.5 to 3.1)   |
| Cote d'Ivoire                         | 745 (577 to 964)              | 671 (522 to 856)  | 645 (458 to 909)  | 3900 (3000 to 5100)       | 4500 (3500 to 5700)    | 5400 (3800 to 7600)    | 1 (-0.8 to 3)       | 0.3 (-1.7 to 2.1) | 0.6 (-0.7 to 1.9)  |
| Croatia                               | 10 (8 to 12)                  | 11 (9 to 13)      | 8 (6 to 11)       | 5 (4 to 6)                | 5 (4 to 6)             | 3 (3 to 4)             | -1.2 (-3.7 to 1.1)  | 1.7 (-0.4 to 4.1) | 0.6 (-0.8 to 1.9)  |
| Cuba                                  | 58 (51 to 65)                 | 43 (39 to 47)     | 39 (33 to 47)     | 100 (91 to 120)           | 62 (57 to 68)          | 45 (37 to 54)          | 3.1 (1.6 to 4.7)    | 0.6 (-0.9 to 2)   | 1.6 (0.7 to 2.5)   |
| Cyprus                                | 16 (10 to 26)                 | 15 (9 to 25)      | 7 (4 to 12)       | 2 (1 to 4)                | 2 (1 to 3)             | 1 (0 to 2)             | 0.3 (-2.2 to 3.4)   | 5.4 (3.2 to 8)    | 3.3 (1.7 to 5.4)   |
| Czech Republic                        | 14 (12 to 17)                 | 7 (6 to 8)        | 4 (3 to 6)        | 18 (16 to 22)             | 6 (5 to 7)             | 5 (3 to 6)             | 7.1 (4.8 to 9.7)    | 3.2 (1 to 5.7)    | 4.8 (3.3 to 6.4)   |
| Democratic People's Republic of Korea | 75 (40 to 144)                | 128 (63 to 262)   | 82 (37 to 190)    | 320 (170 to 610)          | 520 (260 to 1100)      | 300 (130 to 680)       | -5.3 (-8.2 to -2.4) | 2.9 (0.5 to 5.4)  | -0.4 (-2.3 to 1.6) |
| Democratic Republic of the Congo      | 879 (610 to 1250)             | 874 (639 to 1160) | 693 (509 to 1010) | 15000 (10000 to 21000)    | 20000 (15000 to 26000) | 22000 (16000 to 33000) | 0.1 (-2.4 to 3.1)   | 1.5 (-1.7 to 3.6) | 1 (-1.1 to 2.4)    |
| Denmark                               | 11 (9 to 12)                  | 9 (8 to 10)       | 6 (5 to 9)        | 7 (6 to 8)                | 6 (5 to 7)             | 4 (3 to 5)             | 1.6 (0 to 3.1)      | 2.2 (0 to 3.6)    | 2 (0.6 to 2.9)     |

| Country            | MMR (per 100,000 live births) |                   |                   | Number of maternal deaths |                        |                       | ARR (%)            |                    |                   |
|--------------------|-------------------------------|-------------------|-------------------|---------------------------|------------------------|-----------------------|--------------------|--------------------|-------------------|
|                    | 1990                          | 2000              | 2015              | 1990                      | 2000                   | 2015                  | 1990-2000          | 2000-2015          | 1990-2015         |
| Djibouti           | 517 (291 to 907)              | 401 (218 to 759)  | 229 (111 to 482)  | 120 (66 to 210)           | 90 (49 to 170)         | 50 (24 to 110)        | 2.6 (-0.1 to 5.2)  | 3.7 (1.4 to 6)     | 3.3 (1.4 to 5.1)  |
| Dominican Republic | 198 (133 to 292)              | 79 (74 to 83)     | 92 (77 to 111)    | 420 (280 to 630)          | 170 (160 to 180)       | 200 (170 to 240)      | 9.2 (5.2 to 13.2)  | -1.1 (-2.4 to 0.2) | 3.1 (1.3 to 4.7)  |
| Ecuador            | 185 (164 to 211)              | 103 (91 to 116)   | 64 (57 to 71)     | 570 (500 to 650)          | 320 (290 to 370)       | 210 (190 to 240)      | 5.9 (4.2 to 7.7)   | 3.2 (2.1 to 4.3)   | 4.3 (3.6 to 5)    |
| Egypt              | 106 (90 to 128)               | 63 (56 to 71)     | 33 (26 to 39)     | 2000 (1700 to 2400)       | 1100 (960 to 1200)     | 820 (650 to 960)      | 5.3 (3.7 to 6.9)   | 4.3 (3.1 to 6.2)   | 4.7 (3.8 to 5.9)  |
| El Salvador        | 157 (134 to 185)              | 84 (75 to 95)     | 54 (40 to 69)     | 260 (220 to 300)          | 120 (100 to 130)       | 57 (42 to 73)         | 6.2 (4.5 to 8.1)   | 3 (1.2 to 5.2)     | 4.3 (3 to 5.7)    |
| Equatorial Guinea  | 1310 (819 to 2080)            | 702 (457 to 1060) | 342 (207 to 542)  | 230 (140 to 370)          | 150 (96 to 220)        | 100 (61 to 160)       | 6.3 (3.4 to 8.8)   | 4.8 (2.6 to 6.9)   | 5.4 (3.6 to 7)    |
| Eritrea            | 1590 (1160 to 2150)           | 733 (527 to 995)  | 501 (332 to 750)  | 2100 (1500 to 2800)       | 960 (690 to 1300)      | 880 (580 to 1300)     | 7.8 (5.4 to 9.9)   | 2.5 (0.4 to 4.5)   | 4.6 (3 to 6)      |
| Estonia            | 42 (35 to 51)                 | 26 (21 to 31)     | 9 (6 to 14)       | 9 (7 to 11)               | 3 (3 to 4)             | 1 (1 to 2)            | 5 (2.5 to 7.4)     | 6.8 (4.1 to 9.7)   | 6.1 (4.3 to 7.9)  |
| Ethiopia           | 1250 (906 to 1640)            | 897 (718 to 1100) | 353 (247 to 567)  | 29000 (21000 to 38000)    | 26000 (21000 to 32000) | 11000 (7900 to 18000) | 3.3 (0.6 to 5.7)   | 6.2 (2.9 to 8.3)   | 5 (2.7 to 6.5)    |
| Fiji               | 63 (47 to 98)                 | 42 (33 to 53)     | 30 (23 to 41)     | 14 (10 to 21)             | 8 (7 to 11)            | 5 (4 to 7)            | 4.1 (1.9 to 8.2)   | 2.2 (0 to 4.2)     | 3 (1.6 to 5)      |
| Finland            | 6 (5 to 7)                    | 5 (4 to 6)        | 3 (2 to 3)        | 4 (3 to 5)                | 3 (2 to 3)             | 2 (1 to 2)            | 2.3 (0.5 to 4.7)   | 3.9 (2.4 to 6.4)   | 3.3 (2.1 to 5.1)  |
| France             | 15 (13 to 16)                 | 12 (11 to 13)     | 8 (7 to 10)       | 110 (96 to 120)           | 89 (82 to 96)          | 66 (51 to 81)         | 2 (0.6 to 3.6)     | 2.3 (0.8 to 4)     | 2.2 (1.2 to 3.4)  |
| Gabon              | 422 (290 to 599)              | 405 (298 to 550)  | 291 (197 to 442)  | 150 (100 to 210)          | 170 (120 to 220)       | 150 (100 to 230)      | 0.4 (-2.7 to 2.7)  | 2.2 (0.1 to 4.1)   | 1.5 (-0.5 to 2.9) |
| Gambia             | 1030 (672 to 1490)            | 887 (609 to 1250) | 706 (484 to 1030) | 440 (290 to 640)          | 500 (340 to 700)       | 590 (400 to 860)      | 1.4 (-1.4 to 3.7)  | 1.5 (-0.9 to 3.5)  | 1.5 (-0.4 to 2.9) |
| Georgia            | 34 (29 to 40)                 | 37 (30 to 44)     | 36 (28 to 47)     | 31 (26 to 37)             | 21 (17 to 25)          | 19 (15 to 25)         | -0.7 (-2.9 to 1.6) | 0.2 (-2 to 2.1)    | -0.2 (-1.4 to 1)  |
| Germany            | 11 (10 to 13)                 | 8 (7 to 9)        | 6 (5 to 8)        | 92 (81 to 110)            | 61 (53 to 68)          | 42 (36 to 53)         | 3.1 (1.8 to 5.4)   | 1.8 (0 to 2.9)     | 2.3 (1.5 to 3.2)  |

| Country       | MMR (per 100,000 live births) |                   |                   | Number of maternal deaths |                          |                        | ARR (%)             |                    |                     |
|---------------|-------------------------------|-------------------|-------------------|---------------------------|--------------------------|------------------------|---------------------|--------------------|---------------------|
|               | 1990                          | 2000              | 2015              | 1990                      | 2000                     | 2015                   | 1990-2000           | 2000-2015          | 1990-2015           |
| Ghana         | 634 (436 to 911)              | 467 (342 to 645)  | 319 (216 to 458)  | 3600 (2500 to 5200)       | 3100 (2200 to 4200)      | 2800 (1900 to 4000)    | 3.1 (0.6 to 5.4)    | 2.5 (0.7 to 4.8)   | 2.7 (1.3 to 4.4)    |
| Greece        | 5 (4 to 6)                    | 4 (3 to 4)        | 3 (2 to 4)        | 5 (4 to 6)                | 4 (3 to 4)               | 3 (2 to 4)             | 3.5 (1.5 to 5.9)    | 0.7 (-1.5 to 2.9)  | 1.8 (0.6 to 3.3)    |
| Grenada       | 41 (30 to 53)                 | 29 (21 to 38)     | 27 (19 to 42)     | 1 (1 to 1)                | 1 (0 to 1)               | 1 (0 to 1)             | 3.4 (1.1 to 6.4)    | 0.5 (-3.1 to 2.5)  | 1.7 (-0.4 to 3)     |
| Guatemala     | 205 (194 to 217)              | 178 (170 to 186)  | 88 (77 to 100)    | 720 (680 to 770)          | 730 (690 to 760)         | 380 (340 to 440)       | 1.4 (0.7 to 2.2)    | 4.7 (3.8 to 5.7)   | 3.4 (2.8 to 4)      |
| Guinea        | 1040 (782 to 1360)            | 976 (787 to 1200) | 679 (504 to 927)  | 3000 (2300 to 3900)       | 3700 (3000 to 4500)      | 3100 (2300 to 4300)    | 0.7 (-1.9 to 2.6)   | 2.4 (0.5 to 4.1)   | 1.7 (0.2 to 2.9)    |
| Guinea-Bissau | 907 (512 to 1540)             | 800 (417 to 1450) | 549 (273 to 1090) | 440 (250 to 740)          | 430 (220 to 780)         | 370 (180 to 740)       | 1.3 (-1.6 to 4)     | 2.5 (0.2 to 4.7)   | 2 (0.2 to 3.8)      |
| Guyana        | 171 (141 to 197)              | 210 (185 to 241)  | 229 (184 to 301)  | 41 (34 to 47)             | 40 (35 to 46)            | 34 (27 to 45)          | -2.1 (-4.4 to -0.6) | -0.6 (-2.3 to 0.9) | -1.2 (-2.6 to -0.3) |
| Haiti         | 625 (434 to 842)              | 505 (386 to 664)  | 359 (236 to 601)  | 1700 (1100 to 2200)       | 1300 (1000 to 1800)      | 950 (620 to 1600)      | 2.1 (-1.2 to 4.4)   | 2.3 (-0.6 to 4.5)  | 2.2 (-0.2 to 3.8)   |
| Honduras      | 272 (256 to 290)              | 133 (115 to 154)  | 129 (99 to 166)   | 510 (480 to 550)          | 260 (230 to 300)         | 220 (170 to 280)       | 7.2 (5.6 to 8.8)    | 0.2 (-1.7 to 2.2)  | 3 (2 to 4.1)        |
| Hungary       | 24 (21 to 28)                 | 15 (12 to 18)     | 17 (12 to 22)     | 30 (26 to 35)             | 14 (11 to 17)            | 15 (11 to 21)          | 5 (2.7 to 7.5)      | -0.8 (-3.3 to 1.5) | 1.5 (0.2 to 2.7)    |
| Iceland       | 7 (5 to 9)                    | 5 (3 to 7)        | 3 (2 to 6)        | 0 (0 to 0)                | 0 (0 to 0)               | 0 (0 to 0)             | 3.6 (1.4 to 6.9)    | 1.9 (-0.4 to 4.7)  | 2.6 (1.1 to 4.8)    |
| India         | 556 (445 to 685)              | 374 (324 to 437)  | 174 (139 to 217)  | 152000 (122000 to 188000) | 104000 (90000 to 122000) | 45000 (36000 to 56000) | 4 (1.8 to 5.6)      | 5.1 (3.7 to 6.7)   | 4.6 (3.5 to 5.7)    |
| Indonesia     | 446 (347 to 564)              | 265 (213 to 324)  | 126 (93 to 179)   | 21000 (16000 to 26000)    | 12000 (9700 to 15000)    | 6400 (4700 to 9000)    | 5.2 (2.9 to 7.1)    | 4.9 (2.7 to 6.7)   | 5 (3.4 to 6.3)      |
| Iran          | 123 (98 to 171)               | 51 (43 to 60)     | 25 (21 to 31)     | 2300 (1800 to 3100)       | 620 (530 to 730)         | 340 (280 to 410)       | 8.9 (7 to 12)       | 4.7 (3.1 to 6.1)   | 6.4 (5.3 to 7.8)    |
| Iraq          | 107 (79 to 151)               | 63 (50 to 79)     | 50 (35 to 69)     | 710 (530 to 1000)         | 520 (420 to 660)         | 620 (430 to 850)       | 5.3 (2.8 to 8.7)    | 1.5 (-0.6 to 4.2)  | 3.1 (1.5 to 5.2)    |

| Country    | MMR (per 100,000 live births) |                    |                   | Number of maternal deaths |                      |                      | ARR (%)            |                   |                    |
|------------|-------------------------------|--------------------|-------------------|---------------------------|----------------------|----------------------|--------------------|-------------------|--------------------|
|            | 1990                          | 2000               | 2015              | 1990                      | 2000                 | 2015                 | 1990-2000          | 2000-2015         | 1990-2015          |
| Ireland    | 11 (9 to 13)                  | 9 (8 to 11)        | 8 (6 to 11)       | 6 (5 to 7)                | 5 (5 to 6)           | 5 (4 to 7)           | 1.7 (0 to 3.5)     | 1.4 (-1.3 to 2.8) | 1.5 (-0.1 to 2.4)  |
| Israel     | 11 (10 to 13)                 | 8 (7 to 9)         | 5 (4 to 6)        | 11 (10 to 13)             | 10 (9 to 12)         | 9 (7 to 11)          | 2.9 (1.4 to 4.4)   | 3 (1.7 to 4.4)    | 3 (2.1 to 3.9)     |
| Italy      | 8 (7 to 9)                    | 5 (4 to 6)         | 4 (3 to 5)        | 44 (39 to 51)             | 27 (23 to 31)        | 18 (14 to 24)        | 4.6 (2.6 to 6.8)   | 2 (0.2 to 4)      | 3 (1.8 to 4.4)     |
| Jamaica    | 79 (64 to 97)                 | 89 (79 to 100)     | 89 (70 to 115)    | 49 (39 to 59)             | 50 (44 to 56)        | 43 (34 to 55)        | -1.2 (-3.4 to 0.9) | 0.1 (-1.9 to 1.7) | -0.4 (-1.9 to 0.8) |
| Japan      | 14 (12 to 15)                 | 10 (9 to 11)       | 5 (4 to 7)        | 170 (150 to 200)          | 110 (99 to 130)      | 56 (43 to 71)        | 3.4 (1.7 to 5)     | 3.8 (2 to 5.8)    | 3.6 (2.6 to 4.8)   |
| Jordan     | 110 (88 to 140)               | 77 (66 to 92)      | 58 (44 to 75)     | 130 (100 to 170)          | 110 (98 to 140)      | 110 (89 to 150)      | 3.6 (1 to 6.1)     | 1.9 (0 to 3.9)    | 2.6 (1.2 to 4.1)   |
| Kazakhstan | 78 (69 to 88)                 | 65 (57 to 75)      | 12 (10 to 15)     | 300 (260 to 340)          | 160 (140 to 180)     | 45 (36 to 56)        | 1.8 (-0.1 to 3.6)  | 11.3 (9.7 to 13)  | 7.5 (6.5 to 8.5)   |
| Kenya      | 687 (518 to 899)              | 759 (615 to 947)   | 510 (344 to 754)  | 6800 (5100 to 8900)       | 9100 (7400 to 11000) | 8000 (5400 to 12000) | -1 (-3.5 to 1.1)   | 2.7 (0.5 to 4.9)  | 1.2 (-0.5 to 2.8)  |
| Kiribati   | 234 (169 to 330)              | 166 (113 to 241)   | 90 (51 to 152)    | 6 (4 to 9)                | 4 (3 to 6)           | 3 (2 to 5)           | 3.4 (0.9 to 6.7)   | 4.1 (1.7 to 6.8)  | 3.8 (2 to 6)       |
| Kuwait     | 7 (5 to 8)                    | 7 (6 to 8)         | 4 (3 to 6)        | 3 (2 to 3)                | 3 (3 to 4)           | 3 (2 to 4)           | -0.4 (-2.6 to 1.5) | 3.6 (1.4 to 5.1)  | 2 (0.4 to 3)       |
| Kyrgyzstan | 80 (71 to 90)                 | 74 (64 to 84)      | 76 (59 to 96)     | 110 (96 to 120)           | 79 (69 to 91)        | 120 (91 to 150)      | 0.8 (-0.9 to 2.7)  | -0.2 (-2 to 1.6)  | 0.2 (-0.9 to 1.3)  |
| Lao        | 905 (638 to 1230)             | 546 (417 to 720)   | 197 (136 to 307)  | 1700 (1200 to 2300)       | 930 (710 to 1200)    | 350 (240 to 550)     | 5.1 (1.5 to 7.6)   | 6.8 (3.9 to 9.1)  | 6.1 (3.9 to 7.7)   |
| Latvia     | 48 (41 to 57)                 | 30 (25 to 35)      | 18 (13 to 26)     | 17 (15 to 20)             | 6 (5 to 7)           | 4 (3 to 5)           | 4.8 (2.7 to 7.1)   | 3.2 (0.8 to 5.7)  | 3.9 (2.3 to 5.4)   |
| Lebanon    | 74 (50 to 109)                | 42 (30 to 59)      | 15 (10 to 22)     | 50 (34 to 74)             | 26 (18 to 37)        | 13 (9 to 19)         | 5.7 (3.1 to 8)     | 6.9 (4.4 to 8.8)  | 6.4 (4.6 to 7.8)   |
| Lesotho    | 629 (422 to 908)              | 649 (492 to 861)   | 487 (310 to 871)  | 360 (240 to 510)          | 380 (290 to 500)     | 300 (190 to 530)     | -0.3 (-4.3 to 2.6) | 1.9 (-1.5 to 4.1) | 1 (-1.9 to 2.9)    |
| Liberia    | 1500 (1030 to 1980)           | 1270 (972 to 1620) | 725 (527 to 1030) | 1400 (990 to 1900)        | 1500 (1200 to 1900)  | 1100 (820 to 1600)   | 1.7 (-1.3 to 3.6)  | 3.7 (1.2 to 5.5)  | 2.9 (0.8 to 4.2)   |



| Country    | MMR (per 100,000 live births) |                   |                   | Number of maternal deaths |                     |                     | ARR (%)            |                    |                   |
|------------|-------------------------------|-------------------|-------------------|---------------------------|---------------------|---------------------|--------------------|--------------------|-------------------|
|            | 1990                          | 2000              | 2015              | 1990                      | 2000                | 2015                | 1990-2000          | 2000-2015          | 1990-2015         |
| Libya      | 39 (22 to 67)                 | 17 (11 to 27)     | 9 (6 to 15)       | 49 (28 to 85)             | 20 (13 to 31)       | 12 (7 to 19)        | 8.4 (4.4 to 12.7)  | 3.9 (0.9 to 8)     | 5.7 (2.8 to 8.8)  |
| Lithuania  | 29 (24 to 34)                 | 16 (14 to 20)     | 10 (7 to 14)      | 16 (13 to 19)             | 5 (5 to 7)          | 3 (2 to 4)          | 5.7 (3.3 to 8.1)   | 3.3 (1 to 5.8)     | 4.3 (2.8 to 5.8)  |
| Luxembourg | 12 (9 to 15)                  | 13 (10 to 16)     | 10 (7 to 16)      | 1 (0 to 1)                | 1 (1 to 1)          | 1 (0 to 1)          | -0.8 (-4.1 to 1.8) | 1.8 (-1.3 to 4)    | 0.8 (-1.6 to 2.6) |
| Madagascar | 778 (625 to 963)              | 536 (441 to 657)  | 353 (256 to 484)  | 4100 (3300 to 5100)       | 3500 (2900 to 4300) | 2900 (2100 to 4000) | 3.7 (1.7 to 5.4)   | 2.8 (0.9 to 4.8)   | 3.2 (1.8 to 4.5)  |
| Malawi     | 957 (726 to 1240)             | 890 (703 to 1140) | 634 (422 to 1080) | 4300 (3200 to 5500)       | 4400 (3500 to 5700) | 4200 (2800 to 7200) | 0.7 (-2.7 to 3.4)  | 2.3 (-0.7 to 4.6)  | 1.6 (-0.7 to 3.3) |
| Malaysia   | 79 (57 to 99)                 | 58 (50 to 66)     | 40 (32 to 53)     | 410 (290 to 510)          | 300 (260 to 350)    | 200 (160 to 270)    | 3.1 (0.2 to 5)     | 2.5 (0.2 to 3.9)   | 2.7 (0.8 to 3.9)  |
| Maldives   | 677 (411 to 1040)             | 163 (120 to 221)  | 68 (45 to 108)    | 62 (38 to 95)             | 10 (8 to 14)        | 5 (3 to 8)          | 14.2 (9.9 to 17.5) | 5.9 (2.2 to 8.7)   | 9.2 (6.2 to 11.6) |
| Mali       | 1010 (802 to 1260)            | 834 (682 to 997)  | 587 (448 to 823)  | 4200 (3300 to 5200)       | 4500 (3700 to 5400) | 4400 (3400 to 6200) | 1.9 (-0.1 to 4)    | 2.3 (0 to 3.9)     | 2.2 (0.6 to 3.2)  |
| Malta      | 13 (10 to 17)                 | 15 (11 to 20)     | 9 (6 to 15)       | 1 (1 to 1)                | 1 (0 to 1)          | 0 (0 to 1)          | -1.5 (-5.5 to 1.7) | 3.6 (0.6 to 6.2)   | 1.6 (-0.9 to 3.3) |
| Mauritania | 859 (566 to 1230)             | 813 (596 to 1100) | 602 (399 to 984)  | 710 (470 to 1000)         | 850 (620 to 1100)   | 810 (540 to 1300)   | 0.6 (-3.6 to 3.3)  | 2 (-1.2 to 4.2)    | 1.4 (-1.2 to 3.2) |
| Mauritius  | 81 (68 to 95)                 | 40 (33 to 49)     | 53 (38 to 77)     | 18 (15 to 21)             | 8 (7 to 10)         | 7 (5 to 11)         | 7 (4.4 to 9.6)     | -1.9 (-4.9 to 0.9) | 1.6 (0.1 to 3.1)  |
| Mexico     | 90 (88 to 92)                 | 77 (75 to 78)     | 38 (34 to 42)     | 2200 (2200 to 2300)       | 1900 (1900 to 1900) | 890 (790 to 1000)   | 1.6 (1.2 to 1.9)   | 4.7 (3.9 to 5.5)   | 3.4 (3 to 3.9)    |
| Micronesia | 183 (99 to 315)               | 153 (77 to 298)   | 100 (46 to 211)   | 6 (3 to 10)               | 5 (2 to 10)         | 2 (1 to 5)          | 1.8 (-1.4 to 4.7)  | 2.9 (0.5 to 5.5)   | 2.4 (0.4 to 4.4)  |
| Mongolia   | 186 (144 to 239)              | 161 (140 to 186)  | 44 (35 to 55)     | 130 (100 to 170)          | 75 (65 to 86)       | 30 (24 to 38)       | 1.4 (-1.4 to 4.2)  | 8.6 (6.8 to 10.6)  | 5.8 (4.4 to 7.1)  |
| Montenegro | 10 (6 to 16)                  | 11 (7 to 17)      | 7 (4 to 12)       | 1 (1 to 2)                | 1 (1 to 1)          | 1 (0 to 1)          | -1.3 (-3.9 to 2.4) | 3 (0.6 to 5.9)     | 1.3 (-0.5 to 3.9) |
| Morocco    | 317 (241 to 387)              | 221 (186 to 279)  | 121 (93 to 142)   | 2300 (1800 to 2800)       | 1400 (1200 to 1700) | 850 (650 to 990)    | 3.6 (0.1 to 5.5)   | 4 (2.5 to 6.7)     | 3.8 (2.7 to 5.1)  |

| Country                        | MMR (per 100,000 live births) |                    |                   | Number of maternal deaths |                        |                        | ARR (%)            |                   |                   |
|--------------------------------|-------------------------------|--------------------|-------------------|---------------------------|------------------------|------------------------|--------------------|-------------------|-------------------|
|                                | 1990                          | 2000               | 2015              | 1990                      | 2000                   | 2015                   | 1990-2000          | 2000-2015         | 1990-2015         |
| Mozambique                     | 1390 (992 to 1880)            | 915 (706 to 1160)  | 489 (360 to 686)  | 8700 (6200 to 12000)      | 7500 (5800 to 9500)    | 5300 (3900 to 7500)    | 4.2 (1.8 to 6.7)   | 4.2 (1.8 to 5.9)  | 4.2 (2.5 to 5.5)  |
| Myanmar                        | 453 (317 to 636)              | 308 (234 to 408)   | 178 (121 to 284)  | 5100 (3600 to 7200)       | 3600 (2700 to 4700)    | 1700 (1100 to 2700)    | 3.9 (1.2 to 6.3)   | 3.6 (0.8 to 5.7)  | 3.7 (1.6 to 5.3)  |
| Namibia                        | 338 (250 to 449)              | 352 (275 to 453)   | 265 (172 to 423)  | 180 (130 to 240)          | 210 (160 to 270)       | 190 (120 to 310)       | -0.4 (-3.6 to 2.4) | 1.9 (-1.3 to 4.8) | 1 (-1.3 to 3.1)   |
| Nepal                          | 901 (683 to 1200)             | 548 (412 to 713)   | 258 (176 to 425)  | 6600 (5000 to 8800)       | 4200 (3100 to 5400)    | 1500 (1000 to 2500)    | 5 (2.2 to 7.6)     | 5 (1.5 to 7.5)    | 5 (2.6 to 6.8)    |
| Netherlands                    | 12 (10 to 13)                 | 14 (13 to 15)      | 7 (5 to 9)        | 22 (19 to 25)             | 28 (26 to 31)          | 12 (9 to 16)           | -2 (-3.8 to -0.5)  | 4.7 (2.9 to 7.2)  | 2 (1.1 to 3.3)    |
| New Zealand                    | 18 (16 to 21)                 | 12 (10 to 14)      | 11 (9 to 14)      | 10 (9 to 12)              | 7 (6 to 8)             | 7 (5 to 9)             | 3.6 (2.2 to 5.9)   | 0.7 (-1.4 to 2.1) | 1.9 (0.8 to 2.9)  |
| Nicaragua                      | 173 (142 to 210)              | 202 (174 to 234)   | 150 (115 to 196)  | 260 (210 to 310)          | 270 (240 to 320)       | 180 (140 to 240)       | -1.5 (-4.1 to 1)   | 2 (0 to 4)        | 0.6 (-0.7 to 1.9) |
| Niger                          | 873 (691 to 1090)             | 794 (639 to 996)   | 553 (411 to 752)  | 3800 (3000 to 4800)       | 4800 (3800 to 6000)    | 5400 (4000 to 7400)    | 1 (-1.3 to 2.6)    | 2.4 (0.6 to 4.2)  | 1.8 (0.4 to 3)    |
| Nigeria                        | 1350 (893 to 1820)            | 1170 (866 to 1520) | 814 (596 to 1180) | 57000 (38000 to 77000)    | 62000 (46000 to 81000) | 58000 (42000 to 84000) | 1.4 (-1.6 to 3.5)  | 2.4 (-0.5 to 4.2) | 2 (-0.2 to 3.3)   |
| Norway                         | 7 (6 to 8)                    | 7 (6 to 8)         | 5 (4 to 6)        | 4 (4 to 5)                | 4 (3 to 5)             | 3 (2 to 4)             | 0.4 (-1.6 to 2)    | 2.3 (0.4 to 3.9)  | 1.5 (0.3 to 2.5)  |
| Occupied Palestinian Territory | 118 (64 to 213)               | 72 (36 to 141)     | 45 (21 to 99)     | 120 (63 to 210)           | 87 (43 to 170)         | 69 (32 to 150)         | 5 (2.1 to 7.9)     | 3 (0.6 to 5.5)    | 3.8 (1.8 to 5.8)  |
| Oman                           | 30 (24 to 38)                 | 20 (18 to 24)      | 17 (13 to 24)     | 21 (17 to 27)             | 11 (10 to 13)          | 14 (10 to 19)          | 4 (1.2 to 6.7)     | 1.1 (-1.2 to 3.4) | 2.3 (0.6 to 3.8)  |
| Pakistan                       | 431 (288 to 656)              | 306 (208 to 446)   | 178 (111 to 283)  | 19000 (12000 to 28000)    | 14000 (9200 to 20000)  | 9700 (6100 to 15000)   | 3.4 (0.8 to 5.7)   | 3.6 (1.3 to 5.9)  | 3.5 (1.8 to 5.1)  |
| Panama                         | 102 (86 to 119)               | 82 (72 to 92)      | 94 (77 to 121)    | 66 (55 to 77)             | 57 (51 to 65)          | 71 (58 to 91)          | 2.2 (0.4 to 3.8)   | -1 (-2.8 to 0.6)  | 0.3 (-1 to 1.4)   |
| Papua New Guinea               | 470 (265 to 843)              | 342 (177 to 682)   | 215 (98 to 457)   | 690 (390 to 1200)         | 640 (330 to 1300)      | 460 (210 to 980)       | 3.2 (0.1 to 6.1)   | 3.1 (0.7 to 5.7)  | 3.1 (1.1 to 5.3)  |
| Paraguay                       | 150 (124 to 178)              | 158 (142 to 176)   | 132 (107 to 163)  | 210 (180 to 250)          | 230 (200 to 250)       | 190 (150 to 230)       | -0.5 (-2.7 to 1.2) | 1.2 (-0.3 to 2.7) | 0.5 (-0.7 to 1.6) |

| Country               | MMR (per 100,000 live births) |                    |                  | Number of maternal deaths |                     |                     | ARR (%)            |                   |                    |
|-----------------------|-------------------------------|--------------------|------------------|---------------------------|---------------------|---------------------|--------------------|-------------------|--------------------|
|                       | 1990                          | 2000               | 2015             | 1990                      | 2000                | 2015                | 1990-2000          | 2000-2015         | 1990-2015          |
| Peru                  | 251 (207 to 325)              | 140 (124 to 164)   | 68 (54 to 80)    | 1700 (1400 to 2100)       | 880 (780 to 1000)   | 420 (330 to 490)    | 5.8 (4 to 8)       | 4.8 (3.6 to 6.9)  | 5.2 (4.2 to 6.7)   |
| Philippines           | 152 (126 to 175)              | 124 (110 to 138)   | 114 (87 to 175)  | 3100 (2600 to 3600)       | 2900 (2600 to 3200) | 2700 (2000 to 4100) | 2 (0 to 3.6)       | 0.5 (-2.3 to 2.3) | 1.1 (-0.8 to 2.4)  |
| Poland                | 17 (15 to 19)                 | 8 (7 to 10)        | 3 (2 to 4)       | 97 (85 to 110)            | 31 (26 to 36)       | 12 (9 to 16)        | 7.2 (5.3 to 9.3)   | 6.5 (4.2 to 8.8)  | 6.8 (5.4 to 8.2)   |
| Portugal              | 17 (15 to 20)                 | 13 (12 to 15)      | 10 (9 to 13)     | 20 (17 to 22)             | 15 (13 to 17)       | 8 (7 to 11)         | 2.6 (1.5 to 4.4)   | 1.8 (-0.2 to 2.9) | 2.1 (1.1 to 2.9)   |
| Puerto Rico           | 26 (23 to 30)                 | 22 (19 to 25)      | 14 (10 to 18)    | 17 (15 to 19)             | 12 (11 to 14)       | 6 (4 to 8)          | 1.9 (0.2 to 3.3)   | 2.8 (1.5 to 5.3)  | 2.4 (1.5 to 3.9)   |
| Qatar                 | 29 (18 to 43)                 | 24 (17 to 33)      | 13 (9 to 19)     | 3 (2 to 4)                | 3 (2 to 4)          | 3 (2 to 5)          | 1.9 (-1.8 to 4.2)  | 4.3 (1.4 to 6.6)  | 3.3 (0.8 to 4.9)   |
| Republic of Korea     | 21 (19 to 24)                 | 16 (14 to 18)      | 11 (9 to 13)     | 140 (130 to 160)          | 85 (76 to 95)       | 50 (42 to 60)       | 3.2 (1.5 to 4.8)   | 2.3 (1 to 3.8)    | 2.6 (1.8 to 3.5)   |
| Republic of Moldova   | 51 (45 to 58)                 | 49 (43 to 56)      | 23 (19 to 28)    | 41 (37 to 47)             | 24 (20 to 27)       | 10 (8 to 12)        | 0.4 (-1.1 to 2.3)  | 5.1 (3.3 to 6.4)  | 3.2 (2.3 to 4.2)   |
| Romania               | 124 (108 to 141)              | 51 (44 to 58)      | 31 (22 to 44)    | 390 (340 to 450)          | 110 (98 to 130)     | 56 (40 to 79)       | 8.9 (7 to 10.8)    | 3.2 (0.7 to 5.7)  | 5.5 (4 to 6.9)     |
| Russian Federation    | 63 (56 to 72)                 | 57 (50 to 64)      | 25 (18 to 33)    | 1300 (1100 to 1400)       | 750 (670 to 850)    | 450 (330 to 600)    | 1.1 (-0.7 to 2.8)  | 5.6 (3.5 to 7.8)  | 3.8 (2.5 to 5.1)   |
| Rwanda                | 1300 (943 to 1690)            | 1020 (825 to 1230) | 290 (208 to 389) | 4200 (3000 to 5400)       | 3200 (2600 to 3800) | 1100 (750 to 1400)  | 2.4 (-0.4 to 4.5)  | 8.4 (6.5 to 10.6) | 6 (4.5 to 7.5)     |
| Saint Lucia           | 45 (36 to 57)                 | 54 (43 to 68)      | 48 (32 to 72)    | 2 (1 to 2)                | 2 (1 to 2)          | 1 (1 to 2)          | -1.8 (-4.7 to 1.1) | 0.8 (-2.2 to 3.8) | -0.2 (-2.1 to 1.6) |
| Samoa                 | 156 (84 to 279)               | 93 (48 to 181)     | 51 (24 to 115)   | 8 (5 to 15)               | 5 (3 to 10)         | 2 (1 to 6)          | 5.2 (2.2 to 7.9)   | 3.9 (1.2 to 6.5)  | 4.4 (2.4 to 6.3)   |
| Sao Tome and Principe | 330 (202 to 527)              | 222 (138 to 357)   | 156 (83 to 268)  | 15 (9 to 24)              | 12 (7 to 19)        | 10 (5 to 17)        | 3.9 (1.3 to 7.3)   | 2.4 (0.2 to 5.1)  | 3 (1.2 to 5.4)     |
| Saudi Arabia          | 46 (32 to 67)                 | 23 (16 to 34)      | 12 (7 to 20)     | 270 (190 to 390)          | 130 (92 to 190)     | 72 (42 to 120)      | 6.8 (4.2 to 9.6)   | 4.7 (2.3 to 7.1)  | 5.5 (3.7 to 7.5)   |
| Senegal               | 540 (425 to 688)              | 488 (382 to 626)   | 315 (214 to 468) | 1800 (1400 to 2300)       | 1900 (1500 to 2500) | 1800 (1200 to 2700) | 1 (-1 to 3)        | 2.9 (0.7 to 5)    | 2.2 (0.7 to 3.6)   |

| Country                       | MMR (per 100,000 live births) |                     |                    | Number of maternal deaths |                     |                     | ARR (%)             |                   |                    |
|-------------------------------|-------------------------------|---------------------|--------------------|---------------------------|---------------------|---------------------|---------------------|-------------------|--------------------|
|                               | 1990                          | 2000                | 2015               | 1990                      | 2000                | 2015                | 1990-2000           | 2000-2015         | 1990-2015          |
| Serbia                        | 14 (10 to 18)                 | 17 (13 to 21)       | 17 (12 to 24)      | 19 (15 to 26)             | 20 (16 to 25)       | 15 (11 to 22)       | -2 (-4.8 to 1.2)    | 0 (-3.2 to 2.8)   | -0.8 (-2.8 to 0.9) |
| Sierra Leone                  | 2630 (1780 to 3640)           | 2650 (1980 to 3460) | 1360 (999 to 1980) | 4700 (3200 to 6500)       | 5000 (3700 to 6500) | 3100 (2300 to 4500) | -0.1 (-2.8 to 2.2)  | 4.4 (1.6 to 6.2)  | 2.6 (0.5 to 4)     |
| Singapore                     | 12 (10 to 15)                 | 18 (15 to 22)       | 10 (6 to 17)       | 7 (6 to 8)                | 9 (8 to 11)         | 5 (3 to 8)          | -4 (-7 to -1)       | 4.1 (0.7 to 7.4)  | 0.8 (-1.4 to 2.9)  |
| Slovakia                      | 11 (9 to 14)                  | 8 (7 to 9)          | 6 (4 to 7)         | 9 (7 to 11)               | 4 (4 to 5)          | 3 (2 to 4)          | 3.6 (1.6 to 5.2)    | 2.3 (1.1 to 4.1)  | 2.8 (1.8 to 4)     |
| Slovenia                      | 12 (9 to 14)                  | 12 (10 to 15)       | 9 (6 to 14)        | 3 (2 to 3)                | 2 (2 to 3)          | 2 (1 to 3)          | -0.6 (-3.4 to 1.6)  | 2.4 (-0.5 to 4.5) | 1.2 (-1 to 2.6)    |
| Solomon Islands               | 364 (241 to 550)              | 214 (146 to 321)    | 114 (75 to 175)    | 46 (30 to 69)             | 32 (21 to 47)       | 19 (13 to 30)       | 5.3 (2.9 to 7.8)    | 4.2 (2.2 to 6.4)  | 4.6 (3.1 to 6.4)   |
| Somalia                       | 1210 (707 to 1980)            | 1080 (594 to 1870)  | 732 (361 to 1390)  | 3700 (2100 to 6000)       | 3800 (2100 to 6700) | 3400 (1700 to 6600) | 1.2 (-1.4 to 3.8)   | 2.6 (0.3 to 5)    | 2 (0.3 to 3.9)     |
| South Africa                  | 108 (74 to 159)               | 85 (83 to 87)       | 138 (124 to 154)   | 1200 (800 to 1700)        | 930 (910 to 950)    | 1500 (1400 to 1700) | 2.4 (-1.4 to 6.3)   | -3.3 (-4 to -2.5) | -1 (-2.5 to 0.6)   |
| South Sudan                   | 1730 (1180 to 2440)           | 1310 (970 to 1760)  | 789 (523 to 1150)  | 4600 (3100 to 6500)       | 3700 (2800 to 5000) | 3500 (2300 to 5100) | 2.8 (-0.3 to 5)     | 3.4 (1.3 to 6)    | 3.1 (1.4 to 4.7)   |
| Spain                         | 6 (6 to 7)                    | 5 (5 to 6)          | 5 (4 to 6)         | 26 (23 to 29)             | 21 (19 to 24)       | 21 (17 to 26)       | 1.9 (0.6 to 3.3)    | 0.4 (-1.4 to 1.6) | 1 (-0.1 to 1.8)    |
| Sri Lanka                     | 75 (65 to 90)                 | 57 (52 to 63)       | 30 (26 to 38)      | 270 (230 to 320)          | 200 (180 to 220)    | 98 (84 to 120)      | 2.7 (1.4 to 4.6)    | 4.3 (2.5 to 5.3)  | 3.6 (2.6 to 4.5)   |
| St Vincent and the Grenadines | 58 (47 to 75)                 | 74 (58 to 92)       | 45 (34 to 63)      | 2 (1 to 2)                | 2 (1 to 2)          | 1 (1 to 1)          | -2.4 (-4.5 to 0.8)  | 3.3 (0.5 to 5.1)  | 1.1 (-0.5 to 2.4)  |
| Sudan                         | 744 (529 to 1050)             | 544 (410 to 729)    | 311 (214 to 433)   | 6300 (4500 to 8900)       | 6100 (4600 to 8200) | 4100 (2800 to 5700) | 3.1 (0.6 to 5.4)    | 3.7 (1.7 to 6.6)  | 3.5 (2 to 5.4)     |
| Suriname                      | 127 (104 to 155)              | 259 (219 to 312)    | 155 (110 to 220)   | 14 (12 to 17)             | 27 (23 to 33)       | 15 (11 to 21)       | -7.1 (-9.8 to -4.5) | 3.4 (0.9 to 6.1)  | -0.8 (-2.4 to 0.8) |
| Swaziland                     | 635 (390 to 995)              | 586 (403 to 846)    | 389 (251 to 627)   | 230 (140 to 370)          | 200 (140 to 290)    | 150 (95 to 240)     | 0.8 (-2.3 to 3.1)   | 2.7 (0.3 to 4.4)  | 2 (-0.1 to 3.4)    |

| Country              | MMR (per 100,000 live births) |                   |                  | Number of maternal deaths |                       |                      | ARR (%)            |                    |                  |
|----------------------|-------------------------------|-------------------|------------------|---------------------------|-----------------------|----------------------|--------------------|--------------------|------------------|
|                      | 1990                          | 2000              | 2015             | 1990                      | 2000                  | 2015                 | 1990-2000          | 2000-2015          | 1990-2015        |
| Sweden               | 8 (7 to 9)                    | 5 (5 to 6)        | 4 (3 to 5)       | 9 (8 to 10)               | 5 (4 to 6)            | 5 (4 to 6)           | 3.4 (1.6 to 4.8)   | 1.9 (0 to 3)       | 2.5 (1.2 to 3.3) |
| Switzerland          | 8 (7 to 10)                   | 7 (6 to 8)        | 5 (4 to 7)       | 7 (5 to 8)                | 5 (4 to 6)            | 4 (4 to 6)           | 2 (0.2 to 3.6)     | 1.7 (-0.5 to 3)    | 1.8 (0.3 to 2.8) |
| Syrian Arab Republic | 123 (81 to 177)               | 73 (52 to 102)    | 68 (48 to 97)    | 550 (360 to 790)          | 360 (260 to 510)      | 300 (210 to 430)     | 5.2 (2 to 7.4)     | 0.5 (-2.1 to 2.7)  | 2.4 (0.3 to 3.9) |
| Tajikistan           | 107 (93 to 126)               | 68 (58 to 80)     | 32 (19 to 51)    | 230 (200 to 270)          | 130 (110 to 150)      | 82 (50 to 130)       | 4.5 (2.3 to 6.8)   | 5.1 (1.8 to 8.3)   | 4.8 (2.9 to 7)   |
| Tanzania             | 997 (775 to 1280)             | 842 (671 to 1050) | 398 (281 to 570) | 11000 (8700 to 14000)     | 12000 (9600 to 15000) | 8200 (5800 to 12000) | 1.7 (-0.4 to 3.6)  | 5 (3 to 7)         | 3.7 (2.2 to 5)   |
| TFYR Macedonia       | 14 (11 to 18)                 | 12 (10 to 14)     | 8 (5 to 10)      | 5 (4 to 6)                | 3 (3 to 4)            | 2 (1 to 2)           | 1.6 (-0.3 to 4.1)  | 3 (1.1 to 5.1)     | 2.4 (1.2 to 4.1) |
| Thailand             | 40 (34 to 48)                 | 25 (22 to 28)     | 20 (14 to 32)    | 430 (360 to 520)          | 220 (200 to 250)      | 140 (100 to 230)     | 4.7 (2.6 to 7)     | 1.3 (-1.7 to 3.9)  | 2.7 (0.8 to 4.3) |
| Timor-Leste          | 1080 (741 to 1510)            | 694 (517 to 925)  | 215 (150 to 300) | 350 (240 to 490)          | 260 (190 to 350)      | 94 (66 to 130)       | 4.4 (1.6 to 6.7)   | 7.8 (5.7 to 10.2)  | 6.5 (4.8 to 8)   |
| Togo                 | 568 (430 to 759)              | 491 (367 to 649)  | 368 (255 to 518) | 910 (690 to 1200)         | 950 (710 to 1300)     | 940 (650 to 1300)    | 1.5 (-0.7 to 4)    | 1.9 (0.2 to 4)     | 1.7 (0.5 to 3.2) |
| Tonga                | 75 (41 to 132)                | 97 (50 to 190)    | 124 (57 to 270)  | 2 (1 to 4)                | 3 (1 to 5)            | 3 (1 to 7)           | -2.6 (-5.6 to 0.3) | -1.6 (-4 to 0.8)   | -2 (-4 to 0)     |
| Trinidad and Tobago  | 90 (80 to 103)                | 62 (54 to 70)     | 63 (49 to 80)    | 23 (20 to 26)             | 12 (10 to 13)         | 12 (9 to 15)         | 3.8 (2.5 to 5.4)   | -0.1 (-1.7 to 1.4) | 1.5 (0.5 to 2.5) |
| Tunisia              | 131 (96 to 175)               | 84 (62 to 115)    | 62 (42 to 92)    | 280 (210 to 370)          | 140 (100 to 190)      | 130 (86 to 190)      | 4.4 (1.7 to 6.6)   | 2 (-0.1 to 4)      | 3 (1.4 to 4.3)   |
| Turkey               | 97 (63 to 149)                | 79 (59 to 108)    | 16 (12 to 21)    | 1400 (890 to 2100)        | 1100 (810 to 1500)    | 210 (160 to 270)     | 2.1 (-1.9 to 5.8)  | 10.7 (8.1 to 13.4) | 7.2 (5.2 to 9.1) |
| Turkmenistan         | 82 (72 to 95)                 | 59 (41 to 80)     | 42 (20 to 73)    | 110 (94 to 120)           | 63 (44 to 86)         | 47 (22 to 82)        | 3.4 (-0.2 to 7.3)  | 2.2 (-1 to 6.1)    | 2.7 (0.4 to 5.8) |
| Uganda               | 687 (544 to 877)              | 620 (503 to 766)  | 343 (247 to 493) | 5900 (4700 to 7600)       | 7200 (5800 to 8800)   | 5700 (4100 to 8200)  | 1 (-0.8 to 3)      | 3.9 (1.7 to 5.8)   | 2.8 (1.3 to 4.1) |
| Ukraine              | 46 (41 to 52)                 | 34 (30 to 39)     | 24 (19 to 32)    | 290 (260 to 330)          | 140 (120 to 160)      | 120 (91 to 160)      | 3.1 (1.4 to 4.9)   | 2.2 (0.2 to 4.1)   | 2.6 (1.4 to 3.7) |

| Country                  | MMR (per 100,000 live births) |                  |                  | Number of maternal deaths |                     |                     | ARR (%)             |                    |                    |
|--------------------------|-------------------------------|------------------|------------------|---------------------------|---------------------|---------------------|---------------------|--------------------|--------------------|
|                          | 1990                          | 2000             | 2015             | 1990                      | 2000                | 2015                | 1990-2000           | 2000-2015          | 1990-2015          |
| United Arab Emirates     | 17 (10 to 29)                 | 8 (5 to 14)      | 6 (3 to 11)      | 8 (5 to 13)               | 4 (2 to 7)          | 6 (3 to 11)         | 7.2 (4.3 to 10.8)   | 2.1 (-0.2 to 5.2)  | 4.1 (2.2 to 6.8)   |
| United Kingdom           | 10 (9 to 11)                  | 12 (11 to 12)    | 9 (8 to 11)      | 78 (73 to 83)             | 80 (76 to 86)       | 74 (62 to 87)       | -1.4 (-2.3 to -0.5) | 1.6 (0.5 to 2.8)   | 0.4 (-0.3 to 1.2)  |
| United States of America | 12 (11 to 13)                 | 12 (12 to 12)    | 14 (12 to 16)    | 470 (420 to 520)          | 480 (460 to 490)    | 550 (480 to 650)    | -0.2 (-1.3 to 0.9)  | -0.9 (-2.1 to 0.1) | -0.6 (-1.4 to 0.1) |
| Uruguay                  | 37 (32 to 44)                 | 31 (26 to 36)    | 15 (11 to 19)    | 21 (18 to 25)             | 17 (14 to 20)       | 7 (5 to 9)          | 1.9 (-0.1 to 4)     | 4.9 (2.8 to 7.2)   | 3.7 (2.4 to 5.1)   |
| Uzbekistan               | 54 (48 to 62)                 | 34 (30 to 39)    | 36 (20 to 65)    | 380 (330 to 430)          | 190 (170 to 220)    | 240 (130 to 430)    | 4.5 (2.6 to 6.4)    | -0.3 (-4.3 to 3.7) | 1.6 (-0.8 to 4)    |
| Vanuatu                  | 225 (126 to 406)              | 144 (73 to 276)  | 78 (36 to 169)   | 12 (7 to 22)              | 9 (4 to 17)         | 5 (2 to 12)         | 4.5 (1.6 to 7.5)    | 4 (1.5 to 6.5)     | 4.2 (2.3 to 6.2)   |
| Venezuela                | 94 (83 to 105)                | 90 (80 to 100)   | 95 (77 to 124)   | 540 (480 to 610)          | 520 (470 to 580)    | 570 (460 to 740)    | 0.4 (-1.1 to 1.9)   | -0.4 (-2.3 to 1.2) | -0.1 (-1.3 to 0.9) |
| Viet Nam                 | 139 (92 to 186)               | 81 (61 to 102)   | 54 (41 to 74)    | 2700 (1800 to 3700)       | 1100 (860 to 1400)  | 860 (650 to 1200)   | 5.5 (2.3 to 7.6)    | 2.7 (0 to 4.6)     | 3.8 (1.6 to 5.2)   |
| Yemen                    | 547 (389 to 736)              | 440 (337 to 573) | 385 (274 to 582) | 3500 (2500 to 4700)       | 3100 (2400 to 4000) | 3300 (2300 to 5000) | 2.2 (-0.8 to 4.5)   | 0.9 (-2.1 to 3)    | 1.4 (-0.8 to 3)    |
| Zambia                   | 577 (449 to 757)              | 541 (441 to 666) | 224 (162 to 306) | 2200 (1700 to 2900)       | 2500 (2100 to 3100) | 1400 (1000 to 2000) | 0.6 (-1.1 to 2.8)   | 5.9 (4.3 to 7.6)   | 3.8 (2.6 to 5.2)   |
| Zimbabwe                 | 440 (351 to 523)              | 590 (534 to 664) | 443 (363 to 563) | 1700 (1400 to 2000)       | 2400 (2200 to 2700) | 2400 (2000 to 3000) | -2.9 (-5.2 to -1.6) | 1.9 (0.3 to 3.4)   | 0 (-1.4 to 0.9)    |

**Table 4. Life time risk and maternal mortality rate in 1990, 2000 and 2015 for MDG regions and 183 countries. Numbers in parentheses refer to 80% UIs.**

| Region                    | Life time risk of maternal death; 1 in: |                     |                     | MMrate (*1,000)        |                        |                        |
|---------------------------|-----------------------------------------|---------------------|---------------------|------------------------|------------------------|------------------------|
|                           | 1990                                    | 2000                | 2015                | 1990                   | 2000                   | 2015                   |
| World                     | 73 (78 to 66)                           | 100 (110 to 96)     | 180 (190 to 160)    | 0.406 (0.378 to 0.45)  | 0.282 (0.269 to 0.306) | 0.164 (0.157 to 0.189) |
| Developed regions         | 2400 (2500 to 2200)                     | 3900 (4100 to 3700) | 4900 (5300 to 4300) | 0.012 (0.012 to 0.013) | 0.007 (0.007 to 0.008) | 0.006 (0.005 to 0.007) |
| Northern Africa           | 130 (150 to 110)                        | 300 (330 to 250)    | 450 (550 to 340)    | 0.233 (0.199 to 0.279) | 0.099 (0.088 to 0.116) | 0.065 (0.052 to 0.085) |
| Sub-Saharan Africa        | 16 (18 to 14)                           | 21 (23 to 19)       | 36 (39 to 30)       | 1.942 (1.768 to 2.211) | 1.533 (1.426 to 1.705) | 0.853 (0.798 to 1.018) |
| Caucasus and Central Asia | 360 (380 to 330)                        | 760 (810 to 710)    | 1100 (1300 to 790)  | 0.082 (0.078 to 0.087) | 0.038 (0.036 to 0.041) | 0.027 (0.022 to 0.037) |
| Eastern Asia              | 370 (450 to 310)                        | 1100 (1200 to 970)  | 2300 (2800 to 1900) | 0.078 (0.065 to 0.094) | 0.026 (0.023 to 0.03)  | 0.013 (0.01 to 0.015)  |
| South-eastern Asia        | 87 (100 to 74)                          | 180 (200 to 160)    | 380 (440 to 300)    | 0.342 (0.296 to 0.403) | 0.161 (0.143 to 0.182) | 0.076 (0.066 to 0.098) |
| Southern Asia             | 40 (47 to 34)                           | 72 (80 to 63)       | 210 (240 to 170)    | 0.758 (0.644 to 0.903) | 0.413 (0.373 to 0.471) | 0.14 (0.122 to 0.172)  |
| Western Asia              | 130 (150 to 100)                        | 210 (250 to 180)    | 360 (440 to 260)    | 0.23 (0.191 to 0.288)  | 0.136 (0.117 to 0.164) | 0.082 (0.065 to 0.112) |
| Caribbean                 | 110 (140 to 85)                         | 170 (210 to 140)    | 250 (330 to 160)    | 0.271 (0.209 to 0.346) | 0.173 (0.14 to 0.217)  | 0.118 (0.088 to 0.179) |
| Latin America             | 220 (230 to 210)                        | 380 (390 to 370)    | 760 (800 to 690)    | 0.131 (0.125 to 0.14)  | 0.077 (0.075 to 0.079) | 0.038 (0.036 to 0.042) |
| Oceania                   | 54 (87 to 31)                           | 76 (130 to 40)      | 150 (290 to 72)     | 0.569 (0.351 to 0.978) | 0.395 (0.225 to 0.757) | 0.203 (0.104 to 0.415) |

| Country     | Life time risk of maternal death; 1 in: |                        |                        | MMrate (*1,000)        |                        |                        |
|-------------|-----------------------------------------|------------------------|------------------------|------------------------|------------------------|------------------------|
|             | 1990                                    | 2000                   | 2015                   | 1990                   | 2000                   | 2015                   |
| Afghanistan | 10 (15 to 7)                            | 12 (18 to 8)           | 52 (81 to 33)          | 3.232 (2.118 to 4.71)  | 2.614 (1.776 to 3.747) | 0.58 (0.37 to 0.907)   |
| Albania     | 430 (520 to 350)                        | 1100 (1400 to 810)     | 1900 (3400 to 1200)    | 0.068 (0.055 to 0.084) | 0.028 (0.021 to 0.036) | 0.015 (0.009 to 0.025) |
| Algeria     | 97 (150 to 64)                          | 240 (340 to 170)       | 240 (400 to 140)       | 0.304 (0.198 to 0.459) | 0.124 (0.086 to 0.176) | 0.122 (0.072 to 0.213) |
| Angola      | 12 (22 to 7)                            | 15 (30 to 8)           | 32 (70 to 16)          | 2.785 (1.512 to 4.857) | 2.127 (1.085 to 3.986) | 0.966 (0.447 to 2)     |
| Argentina   | 440 (490 to 400)                        | 620 (690 to 560)       | 790 (930 to 650)       | 0.066 (0.059 to 0.073) | 0.047 (0.042 to 0.051) | 0.037 (0.031 to 0.044) |
| Armenia     | 610 (690 to 540)                        | 1500 (1800 to 1300)    | 2300 (2900 to 1900)    | 0.048 (0.042 to 0.054) | 0.019 (0.016 to 0.022) | 0.012 (0.01 to 0.015)  |
| Australia   | 6300 (7300 to 5600)                     | 6600 (7200 to 5900)    | 8700 (10300 to 7000)   | 0.005 (0.004 to 0.005) | 0.004 (0.004 to 0.005) | 0.003 (0.003 to 0.004) |
| Austria     | 8100 (9500 to 6700)                     | 13300 (16100 to 11500) | 18200 (23100 to 14600) | 0.004 (0.003 to 0.004) | 0.002 (0.002 to 0.003) | 0.002 (0.001 to 0.002) |
| Azerbaijan  | 420 (490 to 370)                        | 980 (1100 to 870)      | 1600 (2400 to 1200)    | 0.069 (0.06 to 0.079)  | 0.03 (0.026 to 0.034)  | 0.018 (0.012 to 0.025) |
| Bahamas     | 730 (970 to 550)                        | 770 (930 to 630)       | 660 (1000 to 430)      | 0.04 (0.03 to 0.054)   | 0.038 (0.032 to 0.047) | 0.044 (0.029 to 0.068) |
| Bahrain     | 880 (1200 to 690)                       | 1500 (1800 to 1300)    | 3000 (3700 to 2300)    | 0.033 (0.025 to 0.042) | 0.019 (0.016 to 0.023) | 0.01 (0.008 to 0.012)  |
| Bangladesh  | 34 (44 to 27)                           | 67 (83 to 54)          | 240 (340 to 150)       | 0.878 (0.688 to 1.103) | 0.442 (0.357 to 0.55)  | 0.123 (0.087 to 0.195) |
| Barbados    | 880 (1100 to 700)                       | 1200 (1500 to 990)     | 2100 (3100 to 1600)    | 0.033 (0.027 to 0.041) | 0.024 (0.019 to 0.029) | 0.014 (0.009 to 0.018) |
| Belarus     | 1600 (1800 to 1300)                     | 3300 (3800 to 2800)    | 13800 (19500 to 9400)  | 0.018 (0.016 to 0.022) | 0.009 (0.008 to 0.011) | 0.002 (0.001 to 0.003) |
| Belgium     | 6900 (8400 to 5900)                     | 6800 (7900 to 5800)    | 8000 (10200 to 5800)   | 0.004 (0.003 to 0.005) | 0.004 (0.004 to 0.005) | 0.004 (0.003 to 0.005) |



| Country                | Life time risk of maternal death; 1 in: |                     |                      | MMrate (*1,000)        |                        |                        |
|------------------------|-----------------------------------------|---------------------|----------------------|------------------------|------------------------|------------------------|
|                        | 1990                                    | 2000                | 2015                 | 1990                   | 2000                   | 2015                   |
| Belize                 | 340 (410 to 280)                        | 460 (530 to 390)    | 1300 (1700 to 980)   | 0.085 (0.071 to 0.102) | 0.064 (0.055 to 0.075) | 0.023 (0.017 to 0.03)  |
| Benin                  | 26 (33 to 21)                           | 29 (37 to 23)       | 51 (74 to 32)        | 1.185 (0.932 to 1.495) | 1.08 (0.846 to 1.38)   | 0.602 (0.414 to 0.94)  |
| Bhutan                 | 20 (27 to 15)                           | 62 (80 to 49)       | 310 (450 to 190)     | 1.594 (1.175 to 2.122) | 0.5 (0.388 to 0.637)   | 0.096 (0.066 to 0.157) |
| Bolivia                | 47 (58 to 38)                           | 70 (87 to 56)       | 160 (230 to 91)      | 0.651 (0.521 to 0.807) | 0.426 (0.346 to 0.53)  | 0.19 (0.129 to 0.323)  |
| Bosnia and Herzegovina | 1900 (2300 to 1600)                     | 4200 (6100 to 3100) | 6800 (10900 to 4500) | 0.015 (0.013 to 0.018) | 0.007 (0.005 to 0.009) | 0.004 (0.003 to 0.006) |
| Botswana               | 84 (140 to 58)                          | 110 (130 to 97)     | 270 (340 to 200)     | 0.36 (0.22 to 0.52)    | 0.327 (0.275 to 0.379) | 0.114 (0.09 to 0.152)  |
| Brazil                 | 300 (350 to 260)                        | 590 (600 to 580)    | 1200 (1500 to 1000)  | 0.097 (0.084 to 0.111) | 0.049 (0.048 to 0.05)  | 0.023 (0.019 to 0.029) |
| Brunei Darussalam      | 680 (950 to 510)                        | 1300 (1600 to 1000) | 2300 (3400 to 1700)  | 0.043 (0.03 to 0.057)  | 0.023 (0.018 to 0.028) | 0.012 (0.008 to 0.017) |
| Bulgaria               | 2300 (2700 to 2000)                     | 4100 (4800 to 3400) | 6200 (8400 to 4600)  | 0.012 (0.011 to 0.014) | 0.007 (0.006 to 0.008) | 0.005 (0.003 to 0.006) |
| Burkina Faso           | 20 (27 to 15)                           | 29 (36 to 23)       | 48 (70 to 35)        | 1.553 (1.172 to 2.09)  | 1.114 (0.881 to 1.397) | 0.636 (0.441 to 0.873) |
| Burundi                | 12 (17 to 8)                            | 17 (24 to 13)       | 23 (35 to 16)        | 2.749 (1.906 to 3.956) | 1.894 (1.355 to 2.592) | 1.323 (0.876 to 1.949) |
| Cabo Verde             | 64 (120 to 36)                          | 300 (550 to 150)    | 900 (1900 to 400)    | 0.459 (0.253 to 0.824) | 0.097 (0.053 to 0.189) | 0.032 (0.015 to 0.072) |
| Cambodia               | 18 (25 to 13)                           | 57 (70 to 46)       | 210 (290 to 160)     | 1.795 (1.277 to 2.38)  | 0.534 (0.437 to 0.658) | 0.139 (0.102 to 0.185) |
| Cameroon               | 21 (27 to 16)                           | 23 (28 to 19)       | 35 (47 to 23)        | 1.506 (1.17 to 1.915)  | 1.383 (1.135 to 1.694) | 0.904 (0.666 to 1.335) |
| Canada                 | 7400 (8200 to 6700)                     | 7400 (8100 to 6700) | 8800 (12200 to 6700) | 0.004 (0.004 to 0.004) | 0.004 (0.004 to 0.004) | 0.003 (0.002 to 0.004) |

| Country                               | Life time risk of maternal death; 1 in: |                        |                        | MMrate (*1,000)        |                        |                        |
|---------------------------------------|-----------------------------------------|------------------------|------------------------|------------------------|------------------------|------------------------|
|                                       | 1990                                    | 2000                   | 2015                   | 1990                   | 2000                   | 2015                   |
| Central African Republic              | 14 (18 to 10)                           | 17 (25 to 12)          | 27 (47 to 16)          | 2.353 (1.781 to 3.136) | 2.006 (1.392 to 2.917) | 1.181 (0.68 to 2.013)  |
| Chad                                  | 9 (12 to 7)                             | 10 (13 to 8)           | 18 (28 to 12)          | 3.444 (2.617 to 4.526) | 3.298 (2.578 to 4.294) | 1.746 (1.141 to 2.744) |
| Chile                                 | 630 (710 to 560)                        | 1500 (1700 to 1400)    | 2600 (3100 to 2100)    | 0.046 (0.041 to 0.052) | 0.019 (0.017 to 0.021) | 0.011 (0.009 to 0.013) |
| China                                 | 360 (430 to 300)                        | 1100 (1300 to 1000)    | 2400 (2900 to 2000)    | 0.081 (0.067 to 0.098) | 0.026 (0.023 to 0.029) | 0.012 (0.01 to 0.015)  |
| Colombia                              | 250 (310 to 210)                        | 400 (430 to 370)       | 800 (910 to 630)       | 0.118 (0.094 to 0.142) | 0.073 (0.068 to 0.079) | 0.036 (0.032 to 0.046) |
| Comoros                               | 25 (38 to 16)                           | 38 (59 to 25)          | 66 (110 to 41)         | 1.243 (0.811 to 1.882) | 0.805 (0.523 to 1.235) | 0.458 (0.283 to 0.732) |
| Congo                                 | 31 (44 to 22)                           | 31 (41 to 23)          | 45 (66 to 31)          | 1.017 (0.709 to 1.444) | 1.066 (0.803 to 1.411) | 0.687 (0.466 to 0.992) |
| Costa Rica                            | 640 (720 to 570)                        | 1000 (1100 to 920)     | 2100 (2600 to 1800)    | 0.045 (0.04 to 0.051)  | 0.028 (0.025 to 0.031) | 0.014 (0.011 to 0.016) |
| Cote d'Ivoire                         | 21 (27 to 16)                           | 27 (35 to 21)          | 32 (44 to 22)          | 1.525 (1.181 to 1.973) | 1.229 (0.957 to 1.569) | 1.018 (0.723 to 1.434) |
| Croatia                               | 6400 (7700 to 5300)                     | 6300 (7500 to 5200)    | 7900 (10600 to 6000)   | 0.005 (0.004 to 0.005) | 0.005 (0.004 to 0.006) | 0.004 (0.003 to 0.005) |
| Cuba                                  | 830 (940 to 740)                        | 1400 (1500 to 1300)    | 1800 (2100 to 1500)    | 0.035 (0.031 to 0.039) | 0.021 (0.019 to 0.023) | 0.016 (0.014 to 0.02)  |
| Cyprus                                | 2400 (3800 to 1500)                     | 3600 (6100 to 2200)    | 9400 (17100 to 5300)   | 0.012 (0.008 to 0.02)  | 0.008 (0.005 to 0.013) | 0.003 (0.002 to 0.005) |
| Czech Republic                        | 4100 (4800 to 3400)                     | 12000 (14500 to 10100) | 14800 (21000 to 10900) | 0.007 (0.006 to 0.008) | 0.002 (0.002 to 0.003) | 0.002 (0.001 to 0.003) |
| Democratic People's Republic of Korea | 530 (990 to 280)                        | 340 (700 to 170)       | 660 (1500 to 290)      | 0.055 (0.029 to 0.105) | 0.086 (0.042 to 0.177) | 0.044 (0.02 to 0.102)  |
| Democratic Republic of the Congo      | 17 (24 to 12)                           | 17 (23 to 13)          | 24 (33 to 17)          | 1.891 (1.311 to 2.693) | 1.888 (1.379 to 2.498) | 1.288 (0.946 to 1.883) |

| Country            | Life time risk of maternal death; 1 in: |                        |                        | MMrate (*1,000)        |                        |                        |
|--------------------|-----------------------------------------|------------------------|------------------------|------------------------|------------------------|------------------------|
|                    | 1990                                    | 2000                   | 2015                   | 1990                   | 2000                   | 2015                   |
| Denmark            | 5700 (6600 to 5000)                     | 6100 (7100 to 5300)    | 9500 (12000 to 6900)   | 0.005 (0.004 to 0.006) | 0.005 (0.004 to 0.005) | 0.003 (0.002 to 0.004) |
| Djibouti           | 35 (62 to 20)                           | 59 (110 to 31)         | 140 (300 to 68)        | 0.879 (0.494 to 1.542) | 0.522 (0.284 to 0.988) | 0.211 (0.102 to 0.444) |
| Dominican Republic | 120 (180 to 83)                         | 380 (410 to 360)       | 400 (490 to 330)       | 0.239 (0.16 to 0.353)  | 0.077 (0.072 to 0.081) | 0.073 (0.06 to 0.088)  |
| Ecuador            | 130 (150 to 110)                        | 300 (330 to 260)       | 580 (660 to 520)       | 0.225 (0.198 to 0.255) | 0.099 (0.088 to 0.112) | 0.05 (0.044 to 0.056)  |
| Egypt              | 190 (220 to 160)                        | 450 (510 to 400)       | 810 (1000 to 700)      | 0.156 (0.132 to 0.187) | 0.064 (0.057 to 0.073) | 0.036 (0.028 to 0.042) |
| El Salvador        | 150 (180 to 130)                        | 380 (420 to 330)       | 890 (1200 to 700)      | 0.197 (0.168 to 0.232) | 0.078 (0.069 to 0.088) | 0.033 (0.024 to 0.042) |
| Equatorial Guinea  | 12 (20 to 8)                            | 27 (41 to 18)          | 61 (100 to 38)         | 2.581 (1.608 to 4.093) | 1.212 (0.789 to 1.838) | 0.515 (0.312 to 0.818) |
| Eritrea            | 11 (15 to 8)                            | 27 (38 to 20)          | 43 (65 to 29)          | 2.9 (2.121 to 3.914)   | 1.188 (0.855 to 1.613) | 0.691 (0.459 to 1.035) |
| Estonia            | 1200 (1500 to 1000)                     | 3100 (3700 to 2500)    | 6300 (9500 to 4300)    | 0.023 (0.019 to 0.028) | 0.009 (0.008 to 0.011) | 0.005 (0.003 to 0.007) |
| Ethiopia           | 12 (16 to 9)                            | 18 (23 to 15)          | 64 (92 to 40)          | 2.699 (1.961 to 3.556) | 1.78 (1.425 to 2.192)  | 0.465 (0.326 to 0.748) |
| Fiji               | 400 (550 to 260)                        | 730 (920 to 580)       | 1200 (1600 to 920)     | 0.073 (0.054 to 0.113) | 0.04 (0.032 to 0.051)  | 0.024 (0.018 to 0.032) |
| Finland            | 9600 (11400 to 7900)                    | 13000 (15300 to 11000) | 21700 (31100 to 17000) | 0.003 (0.003 to 0.004) | 0.002 (0.002 to 0.003) | 0.001 (0.001 to 0.002) |
| France             | 3800 (4300 to 3300)                     | 4700 (5100 to 4300)    | 6100 (7900 to 5000)    | 0.008 (0.007 to 0.009) | 0.006 (0.006 to 0.007) | 0.005 (0.004 to 0.006) |
| Gabon              | 41 (60 to 29)                           | 52 (71 to 38)          | 85 (130 to 56)         | 0.732 (0.502 to 1.039) | 0.599 (0.441 to 0.814) | 0.356 (0.241 to 0.541) |
| Gambia             | 15 (23 to 10)                           | 18 (27 to 13)          | 24 (35 to 17)          | 2.094 (1.372 to 3.048) | 1.691 (1.162 to 2.377) | 1.252 (0.859 to 1.828) |

| Country       | Life time risk of maternal death; 1 in: |                        |                        | MMrate (*1,000)        |                        |                        |
|---------------|-----------------------------------------|------------------------|------------------------|------------------------|------------------------|------------------------|
|               | 1990                                    | 2000                   | 2015                   | 1990                   | 2000                   | 2015                   |
| Georgia       | 1200 (1500 to 1100)                     | 1700 (2100 to 1400)    | 1500 (1900 to 1100)    | 0.023 (0.02 to 0.027)  | 0.017 (0.014 to 0.02)  | 0.02 (0.015 to 0.025)  |
| Germany       | 6100 (6900 to 5100)                     | 9300 (10600 to 8400)   | 11700 (13800 to 9400)  | 0.005 (0.004 to 0.006) | 0.003 (0.003 to 0.003) | 0.002 (0.002 to 0.003) |
| Ghana         | 28 (41 to 20)                           | 46 (62 to 33)          | 74 (110 to 52)         | 1.09 (0.749 to 1.565)  | 0.679 (0.497 to 0.937) | 0.406 (0.275 to 0.582) |
| Greece        | 13100 (15700 to 11000)                  | 21400 (26200 to 17800) | 23700 (32800 to 18000) | 0.002 (0.002 to 0.003) | 0.001 (0.001 to 0.002) | 0.001 (0.001 to 0.002) |
| Grenada       | 540 (720 to 410)                        | 1300 (1800 to 950)     | 1500 (2200 to 960)     | 0.054 (0.04 to 0.071)  | 0.023 (0.017 to 0.031) | 0.019 (0.013 to 0.03)  |
| Guatemala     | 86 (91 to 81)                           | 110 (120 to 110)       | 330 (370 to 290)       | 0.349 (0.329 to 0.37)  | 0.257 (0.246 to 0.269) | 0.09 (0.079 to 0.102)  |
| Guinea        | 14 (19 to 11)                           | 17 (21 to 14)          | 29 (39 to 21)          | 2.206 (1.655 to 2.869) | 1.849 (1.491 to 2.282) | 1.064 (0.79 to 1.453)  |
| Guinea-Bissau | 17 (30 to 10)                           | 22 (43 to 12)          | 38 (77 to 19)          | 1.85 (1.044 to 3.138)  | 1.417 (0.738 to 2.564) | 0.829 (0.413 to 1.643) |
| Guyana        | 140 (170 to 120)                        | 150 (170 to 130)       | 170 (210 to 130)       | 0.207 (0.171 to 0.239) | 0.205 (0.18 to 0.234)  | 0.175 (0.141 to 0.23)  |
| Haiti         | 31 (44 to 23)                           | 49 (64 to 37)          | 90 (140 to 54)         | 1.008 (0.699 to 1.357) | 0.642 (0.49 to 0.843)  | 0.332 (0.218 to 0.554) |
| Honduras      | 64 (68 to 60)                           | 170 (200 to 150)       | 300 (390 to 230)       | 0.464 (0.436 to 0.495) | 0.175 (0.151 to 0.203) | 0.099 (0.076 to 0.127) |
| Hungary       | 2400 (2800 to 2100)                     | 5300 (6500 to 4400)    | 4400 (5800 to 3300)    | 0.012 (0.01 to 0.014)  | 0.005 (0.004 to 0.007) | 0.007 (0.005 to 0.009) |
| Iceland       | 6400 (8700 to 4600)                     | 10700 (15800 to 7400)  | 14600 (26200 to 9000)  | 0.005 (0.003 to 0.006) | 0.003 (0.002 to 0.004) | 0.002 (0.001 to 0.003) |
| India         | 41 (51 to 33)                           | 75 (87 to 64)          | 220 (280 to 180)       | 0.741 (0.592 to 0.912) | 0.4 (0.346 to 0.467)   | 0.134 (0.107 to 0.166) |
| Indonesia     | 65 (84 to 52)                           | 140 (180 to 120)       | 320 (430 to 220)       | 0.456 (0.355 to 0.577) | 0.208 (0.167 to 0.255) | 0.091 (0.068 to 0.13)  |

| Country    | Life time risk of maternal death; 1 in: |                        |                        | MMrate (*1,000)        |                        |                        |
|------------|-----------------------------------------|------------------------|------------------------|------------------------|------------------------|------------------------|
|            | 1990                                    | 2000                   | 2015                   | 1990                   | 2000                   | 2015                   |
| Iran       | 160 (200 to 120)                        | 820 (970 to 700)       | 2000 (2400 to 1600)    | 0.186 (0.148 to 0.258) | 0.036 (0.03 to 0.042)  | 0.014 (0.012 to 0.018) |
| Iraq       | 160 (210 to 110)                        | 310 (390 to 250)       | 420 (600 to 300)       | 0.184 (0.137 to 0.261) | 0.093 (0.074 to 0.118) | 0.07 (0.049 to 0.096)  |
| Ireland    | 4400 (5300 to 3800)                     | 5400 (6400 to 4600)    | 6100 (7700 to 4300)    | 0.006 (0.005 to 0.008) | 0.005 (0.005 to 0.006) | 0.005 (0.004 to 0.007) |
| Israel     | 2900 (3300 to 2500)                     | 4100 (4700 to 3600)    | 6200 (7600 to 5100)    | 0.01 (0.009 to 0.012)  | 0.007 (0.006 to 0.008) | 0.005 (0.004 to 0.006) |
| Italy      | 9400 (10700 to 8100)                    | 15000 (17500 to 13000) | 19700 (26500 to 15100) | 0.003 (0.003 to 0.004) | 0.002 (0.002 to 0.002) | 0.001 (0.001 to 0.002) |
| Jamaica    | 360 (440 to 290)                        | 400 (450 to 350)       | 520 (650 to 400)       | 0.082 (0.066 to 0.1)   | 0.074 (0.066 to 0.084) | 0.057 (0.045 to 0.073) |
| Japan      | 5200 (5800 to 4600)                     | 7600 (8500 to 6600)    | 13400 (17300 to 10500) | 0.006 (0.005 to 0.006) | 0.004 (0.003 to 0.004) | 0.002 (0.002 to 0.003) |
| Jordan     | 150 (190 to 120)                        | 290 (340 to 240)       | 490 (640 to 380)       | 0.19 (0.152 to 0.243)  | 0.1 (0.085 to 0.12)    | 0.059 (0.045 to 0.077) |
| Kazakhstan | 410 (460 to 360)                        | 780 (900 to 680)       | 3000 (3700 to 2400)    | 0.072 (0.064 to 0.082) | 0.038 (0.033 to 0.043) | 0.01 (0.008 to 0.012)  |
| Kenya      | 23 (30 to 17)                           | 28 (34 to 22)          | 42 (63 to 29)          | 1.336 (1.007 to 1.749) | 1.221 (0.989 to 1.524) | 0.716 (0.484 to 1.059) |
| Kiribati   | 88 (120 to 62)                          | 150 (220 to 100)       | 300 (520 to 180)       | 0.344 (0.249 to 0.484) | 0.202 (0.137 to 0.292) | 0.098 (0.056 to 0.166) |
| Kuwait     | 5600 (7100 to 4600)                     | 4500 (5300 to 3900)    | 10300 (13000 to 7600)  | 0.005 (0.004 to 0.006) | 0.006 (0.005 to 0.007) | 0.003 (0.002 to 0.004) |
| Kyrgyzstan | 280 (320 to 250)                        | 480 (550 to 420)       | 390 (500 to 310)       | 0.105 (0.093 to 0.119) | 0.061 (0.053 to 0.07)  | 0.075 (0.059 to 0.095) |
| Lao        | 18 (25 to 13)                           | 41 (53 to 31)          | 150 (220 to 97)        | 1.739 (1.225 to 2.367) | 0.744 (0.568 to 0.982) | 0.195 (0.134 to 0.304) |
| Latvia     | 1100 (1300 to 930)                      | 3000 (3600 to 2500)    | 3500 (5000 to 2400)    | 0.026 (0.022 to 0.031) | 0.01 (0.008 to 0.011)  | 0.008 (0.006 to 0.012) |

| Country    | Life time risk of maternal death; 1 in: |                     |                      | MMrate (*1,000)        |                        |                        |
|------------|-----------------------------------------|---------------------|----------------------|------------------------|------------------------|------------------------|
|            | 1990                                    | 2000                | 2015                 | 1990                   | 2000                   | 2015                   |
| Lebanon    | 400 (590 to 270)                        | 980 (1400 to 700)   | 3700 (5300 to 2400)  | 0.073 (0.05 to 0.108)  | 0.029 (0.021 to 0.042) | 0.008 (0.005 to 0.012) |
| Lesotho    | 31 (47 to 22)                           | 42 (55 to 32)       | 61 (96 to 34)        | 0.976 (0.655 to 1.41)  | 0.832 (0.63 to 1.102)  | 0.533 (0.34 to 0.953)  |
| Liberia    | 11 (16 to 8)                            | 14 (18 to 11)       | 28 (39 to 20)        | 3.028 (2.081 to 3.989) | 2.226 (1.704 to 2.844) | 1.069 (0.777 to 1.524) |
| Libya      | 580 (1000 to 330)                       | 2100 (3200 to 1300) | 4200 (6800 to 2600)  | 0.051 (0.029 to 0.088) | 0.014 (0.009 to 0.022) | 0.007 (0.004 to 0.011) |
| Lithuania  | 1700 (2000 to 1400)                     | 4700 (5700 to 3900) | 6300 (8700 to 4500)  | 0.017 (0.014 to 0.02)  | 0.006 (0.005 to 0.007) | 0.005 (0.003 to 0.006) |
| Luxembourg | 5000 (6600 to 3800)                     | 4500 (5700 to 3600) | 6500 (9300 to 4000)  | 0.006 (0.004 to 0.008) | 0.006 (0.005 to 0.008) | 0.004 (0.003 to 0.007) |
| Madagascar | 20 (25 to 16)                           | 32 (39 to 26)       | 60 (83 to 44)        | 1.553 (1.248 to 1.922) | 0.962 (0.792 to 1.179) | 0.5 (0.362 to 0.685)   |
| Malawi     | 17 (22 to 13)                           | 20 (25 to 15)       | 29 (44 to 17)        | 1.945 (1.476 to 2.516) | 1.81 (1.43 to 2.327)   | 1.065 (0.708 to 1.819) |
| Malaysia   | 330 (460 to 260)                        | 590 (690 to 520)    | 1200 (1500 to 920)   | 0.088 (0.063 to 0.11)  | 0.049 (0.042 to 0.056) | 0.024 (0.019 to 0.031) |
| Maldives   | 23 (38 to 15)                           | 190 (260 to 140)    | 600 (900 to 380)     | 1.33 (0.807 to 2.04)   | 0.151 (0.11 to 0.204)  | 0.048 (0.032 to 0.077) |
| Mali       | 14 (18 to 11)                           | 17 (21 to 15)       | 27 (35 to 19)        | 2.289 (1.817 to 2.852) | 1.843 (1.505 to 2.203) | 1.157 (0.882 to 1.62)  |
| Malta      | 3600 (4800 to 2800)                     | 4300 (5700 to 3200) | 8300 (12600 to 4900) | 0.008 (0.006 to 0.01)  | 0.007 (0.005 to 0.009) | 0.003 (0.002 to 0.006) |
| Mauritania | 20 (30 to 14)                           | 23 (31 to 17)       | 36 (55 to 22)        | 1.538 (1.013 to 2.2)   | 1.329 (0.975 to 1.796) | 0.821 (0.545 to 1.343) |
| Mauritius  | 480 (560 to 410)                        | 1200 (1500 to 990)  | 1300 (1800 to 900)   | 0.061 (0.052 to 0.072) | 0.024 (0.019 to 0.029) | 0.022 (0.016 to 0.032) |
| Mexico     | 280 (290 to 270)                        | 420 (430 to 410)    | 1100 (1300 to 1000)  | 0.104 (0.101 to 0.106) | 0.07 (0.068 to 0.071)  | 0.026 (0.023 to 0.029) |

| Country                        | Life time risk of maternal death; 1 in: |                     |                       | MMrate (*1,000)        |                        |                        |
|--------------------------------|-----------------------------------------|---------------------|-----------------------|------------------------|------------------------|------------------------|
|                                | 1990                                    | 2000                | 2015                  | 1990                   | 2000                   | 2015                   |
| Micronesia                     | 110 (200 to 63)                         | 160 (320 to 82)     | 310 (670 to 150)      | 0.276 (0.149 to 0.474) | 0.186 (0.094 to 0.361) | 0.095 (0.044 to 0.201) |
| Mongolia                       | 120 (160 to 94)                         | 260 (300 to 220)    | 800 (1000 to 630)     | 0.244 (0.19 to 0.314)  | 0.114 (0.099 to 0.131) | 0.036 (0.029 to 0.046) |
| Montenegro                     | 4400 (7200 to 2800)                     | 4800 (7600 to 3100) | 8300 (15600 to 4800)  | 0.007 (0.004 to 0.01)  | 0.006 (0.004 to 0.009) | 0.003 (0.002 to 0.006) |
| Morocco                        | 76 (100 to 62)                          | 170 (200 to 130)    | 320 (420 to 270)      | 0.389 (0.296 to 0.475) | 0.177 (0.149 to 0.223) | 0.091 (0.07 to 0.106)  |
| Mozambique                     | 11 (16 to 8)                            | 19 (25 to 15)       | 40 (54 to 28)         | 2.886 (2.064 to 3.913) | 1.725 (1.331 to 2.179) | 0.825 (0.607 to 1.157) |
| Myanmar                        | 63 (90 to 45)                           | 110 (150 to 85)     | 260 (380 to 160)      | 0.481 (0.337 to 0.675) | 0.266 (0.202 to 0.352) | 0.114 (0.077 to 0.181) |
| Namibia                        | 56 (76 to 42)                           | 74 (95 to 58)       | 100 (160 to 64)       | 0.534 (0.396 to 0.711) | 0.434 (0.339 to 0.558) | 0.292 (0.19 to 0.467)  |
| Nepal                          | 21 (27 to 16)                           | 41 (55 to 32)       | 150 (230 to 94)       | 1.505 (1.141 to 2.011) | 0.731 (0.549 to 0.95)  | 0.19 (0.13 to 0.313)   |
| Netherlands                    | 5200 (5900 to 4600)                     | 4100 (4400 to 3700) | 8700 (12000 to 6800)  | 0.006 (0.005 to 0.006) | 0.007 (0.007 to 0.008) | 0.003 (0.002 to 0.004) |
| New Zealand                    | 2500 (2900 to 2200)                     | 4100 (4900 to 3600) | 4500 (5600 to 3600)   | 0.011 (0.01 to 0.013)  | 0.007 (0.006 to 0.008) | 0.006 (0.005 to 0.008) |
| Nicaragua                      | 110 (130 to 89)                         | 140 (160 to 120)    | 270 (350 to 210)      | 0.274 (0.224 to 0.331) | 0.211 (0.182 to 0.245) | 0.108 (0.083 to 0.141) |
| Niger                          | 15 (19 to 12)                           | 16 (20 to 13)       | 23 (31 to 17)         | 2.125 (1.682 to 2.652) | 1.952 (1.572 to 2.451) | 1.332 (0.988 to 1.808) |
| Nigeria                        | 12 (18 to 9)                            | 15 (20 to 11)       | 22 (30 to 15)         | 2.684 (1.778 to 3.635) | 2.207 (1.631 to 2.869) | 1.404 (1.027 to 2.028) |
| Norway                         | 7300 (8600 to 6200)                     | 7700 (9000 to 6600) | 11500 (14800 to 8700) | 0.004 (0.003 to 0.005) | 0.004 (0.003 to 0.004) | 0.003 (0.002 to 0.003) |
| Occupied Palestinian Territory | 120 (210 to 64)                         | 240 (470 to 120)    | 490 (1100 to 220)     | 0.254 (0.138 to 0.459) | 0.123 (0.062 to 0.243) | 0.06 (0.027 to 0.13)   |

| Country             | Life time risk of maternal death; 1 in: |                      |                        | MMrate (*1,000)        |                        |                        |
|---------------------|-----------------------------------------|----------------------|------------------------|------------------------|------------------------|------------------------|
|                     | 1990                                    | 2000                 | 2015                   | 1990                   | 2000                   | 2015                   |
| Oman                | 460 (570 to 360)                        | 1300 (1500 to 1100)  | 1900 (2500 to 1300)    | 0.065 (0.051 to 0.082) | 0.023 (0.02 to 0.027)  | 0.016 (0.011 to 0.022) |
| Pakistan            | 38 (56 to 25)                           | 69 (100 to 47)       | 140 (230 to 91)        | 0.795 (0.531 to 1.208) | 0.428 (0.291 to 0.624) | 0.203 (0.127 to 0.324) |
| Panama              | 280 (330 to 240)                        | 400 (460 to 360)     | 420 (510 to 330)       | 0.105 (0.088 to 0.123) | 0.072 (0.063 to 0.081) | 0.069 (0.057 to 0.089) |
| Papua New Guinea    | 44 (79 to 25)                           | 63 (120 to 32)       | 120 (270 to 58)        | 0.697 (0.392 to 1.248) | 0.483 (0.251 to 0.964) | 0.241 (0.11 to 0.512)  |
| Paraguay            | 130 (160 to 110)                        | 160 (180 to 150)     | 270 (330 to 220)       | 0.216 (0.179 to 0.256) | 0.176 (0.158 to 0.197) | 0.107 (0.087 to 0.132) |
| Peru                | 96 (120 to 74)                          | 230 (250 to 190)     | 570 (730 to 490)       | 0.306 (0.252 to 0.395) | 0.13 (0.115 to 0.151)  | 0.051 (0.04 to 0.06)   |
| Philippines         | 140 (170 to 120)                        | 200 (220 to 180)     | 280 (370 to 190)       | 0.206 (0.172 to 0.239) | 0.146 (0.13 to 0.163)  | 0.103 (0.078 to 0.158) |
| Poland              | 2800 (3200 to 2500)                     | 9500 (11200 to 8200) | 22100 (30200 to 16300) | 0.01 (0.009 to 0.012)  | 0.003 (0.003 to 0.004) | 0.001 (0.001 to 0.002) |
| Portugal            | 3600 (4100 to 3200)                     | 5000 (5800 to 4500)  | 8200 (9700 to 6400)    | 0.008 (0.007 to 0.009) | 0.006 (0.005 to 0.006) | 0.004 (0.003 to 0.004) |
| Puerto Rico         | 1600 (1800 to 1400)                     | 2400 (2700 to 2000)  | 4300 (5900 to 3500)    | 0.018 (0.016 to 0.021) | 0.012 (0.011 to 0.014) | 0.007 (0.005 to 0.008) |
| Qatar               | 780 (1300 to 530)                       | 1200 (1700 to 880)   | 3500 (5100 to 2400)    | 0.037 (0.023 to 0.054) | 0.024 (0.017 to 0.033) | 0.008 (0.006 to 0.012) |
| Republic of Korea   | 2500 (2800 to 2200)                     | 4500 (5000 to 4000)  | 7200 (8800 to 6100)    | 0.012 (0.01 to 0.013)  | 0.006 (0.006 to 0.007) | 0.004 (0.003 to 0.005) |
| Republic of Moldova | 780 (880 to 690)                        | 1400 (1700 to 1300)  | 3200 (3900 to 2600)    | 0.037 (0.033 to 0.042) | 0.02 (0.018 to 0.023)  | 0.009 (0.007 to 0.011) |
| Romania             | 420 (480 to 370)                        | 1400 (1700 to 1300)  | 2300 (3300 to 1700)    | 0.07 (0.061 to 0.08)   | 0.02 (0.017 to 0.023)  | 0.012 (0.009 to 0.017) |
| Russian Federation  | 820 (930 to 730)                        | 1500 (1700 to 1400)  | 2300 (3100 to 1700)    | 0.035 (0.031 to 0.04)  | 0.019 (0.017 to 0.022) | 0.013 (0.009 to 0.017) |



| Country               | Life time risk of maternal death; 1 in: |                      |                       | MMrate (*1,000)        |                        |                        |
|-----------------------|-----------------------------------------|----------------------|-----------------------|------------------------|------------------------|------------------------|
|                       | 1990                                    | 2000                 | 2015                  | 1990                   | 2000                   | 2015                   |
| Rwanda                | 12 (17 to 9)                            | 21 (26 to 17)        | 85 (120 to 63)        | 2.659 (1.925 to 3.447) | 1.606 (1.3 to 1.941)   | 0.353 (0.253 to 0.473) |
| Saint Lucia           | 550 (700 to 440)                        | 720 (910 to 580)     | 1100 (1600 to 720)    | 0.053 (0.042 to 0.067) | 0.04 (0.032 to 0.05)   | 0.026 (0.018 to 0.04)  |
| Samoa                 | 130 (240 to 73)                         | 230 (450 to 120)     | 500 (1100 to 220)     | 0.225 (0.122 to 0.403) | 0.127 (0.065 to 0.248) | 0.058 (0.027 to 0.129) |
| Sao Tome and Principe | 47 (76 to 29)                           | 79 (130 to 49)       | 140 (260 to 79)       | 0.643 (0.395 to 1.03)  | 0.38 (0.235 to 0.609)  | 0.219 (0.116 to 0.375) |
| Saudi Arabia          | 350 (500 to 240)                        | 1000 (1500 to 730)   | 3100 (5200 to 1800)   | 0.084 (0.058 to 0.122) | 0.028 (0.019 to 0.04)  | 0.009 (0.006 to 0.016) |
| Senegal               | 28 (35 to 22)                           | 36 (46 to 28)        | 61 (90 to 41)         | 1.088 (0.857 to 1.387) | 0.84 (0.656 to 1.076)  | 0.489 (0.333 to 0.727) |
| Serbia                | 3400 (4600 to 2600)                     | 3300 (4200 to 2600)  | 3900 (5300 to 2700)   | 0.008 (0.006 to 0.011) | 0.009 (0.007 to 0.011) | 0.007 (0.005 to 0.011) |
| Sierra Leone          | 7 (10 to 5)                             | 7 (9 to 5)           | 17 (23 to 12)         | 5.241 (3.556 to 7.27)  | 5.264 (3.925 to 6.873) | 1.977 (1.453 to 2.875) |
| Singapore             | 4000 (4900 to 3300)                     | 3500 (4300 to 2900)  | 8200 (13100 to 5000)  | 0.007 (0.006 to 0.009) | 0.008 (0.007 to 0.01)  | 0.003 (0.002 to 0.006) |
| Slovakia              | 4200 (5100 to 3400)                     | 9800 (11400 to 8200) | 12100 (15600 to 9800) | 0.007 (0.006 to 0.008) | 0.003 (0.003 to 0.004) | 0.002 (0.002 to 0.003) |
| Slovenia              | 5700 (7000 to 4700)                     | 6900 (8400 to 5600)  | 7000 (9900 to 4400)   | 0.005 (0.004 to 0.006) | 0.004 (0.003 to 0.005) | 0.004 (0.003 to 0.007) |
| Solomon Islands       | 47 (72 to 31)                           | 93 (140 to 62)       | 220 (330 to 140)      | 0.651 (0.431 to 0.985) | 0.325 (0.221 to 0.486) | 0.135 (0.089 to 0.207) |
| Somalia               | 13 (22 to 8)                            | 13 (24 to 8)         | 22 (44 to 11)         | 2.551 (1.49 to 4.183)  | 2.381 (1.316 to 4.138) | 1.438 (0.71 to 2.738)  |
| South Africa          | 240 (340 to 160)                        | 410 (420 to 400)     | 300 (330 to 270)      | 0.126 (0.087 to 0.186) | 0.077 (0.075 to 0.079) | 0.104 (0.094 to 0.116) |
| South Sudan           | 9 (14 to 7)                             | 13 (17 to 10)        | 26 (39 to 18)         | 3.491 (2.382 to 4.911) | 2.488 (1.84 to 3.341)  | 1.199 (0.795 to 1.745) |

| Country                       | Life time risk of maternal death; 1 in: |                        |                        | MMrate (*1,000)        |                        |                        |
|-------------------------------|-----------------------------------------|------------------------|------------------------|------------------------|------------------------|------------------------|
|                               | 1990                                    | 2000                   | 2015                   | 1990                   | 2000                   | 2015                   |
| Spain                         | 10900 (12300 to 9700)                   | 14300 (16300 to 12700) | 14700 (17600 to 11600) | 0.003 (0.002 to 0.003) | 0.002 (0.002 to 0.002) | 0.002 (0.002 to 0.002) |
| Sri Lanka                     | 500 (570 to 420)                        | 760 (840 to 690)       | 1600 (1800 to 1300)    | 0.059 (0.051 to 0.071) | 0.039 (0.035 to 0.042) | 0.018 (0.016 to 0.023) |
| St Vincent and the Grenadines | 480 (600 to 370)                        | 520 (660 to 420)       | 1100 (1400 to 760)     | 0.061 (0.049 to 0.078) | 0.057 (0.044 to 0.071) | 0.027 (0.02 to 0.038)  |
| Sudan                         | 22 (31 to 16)                           | 33 (43 to 24)          | 72 (100 to 52)         | 1.406 (1 to 1.987)     | 0.931 (0.703 to 1.249) | 0.418 (0.288 to 0.583) |
| Suriname                      | 210 (260 to 170)                        | 130 (150 to 110)       | 270 (380 to 190)       | 0.139 (0.114 to 0.169) | 0.227 (0.191 to 0.273) | 0.108 (0.077 to 0.154) |
| Swaziland                     | 27 (45 to 18)                           | 46 (67 to 32)          | 76 (120 to 47)         | 1.128 (0.692 to 1.767) | 0.775 (0.533 to 1.119) | 0.439 (0.284 to 0.707) |
| Sweden                        | 6700 (7800 to 5900)                     | 11600 (13100 to 10300) | 12900 (15400 to 9900)  | 0.004 (0.004 to 0.005) | 0.002 (0.002 to 0.003) | 0.002 (0.002 to 0.003) |
| Switzerland                   | 7600 (9000 to 6400)                     | 10000 (11700 to 8700)  | 12400 (15500 to 9300)  | 0.004 (0.003 to 0.005) | 0.003 (0.002 to 0.003) | 0.002 (0.002 to 0.003) |
| Syrian Arab Republic          | 150 (220 to 100)                        | 330 (460 to 230)       | 440 (620 to 310)       | 0.201 (0.133 to 0.291) | 0.089 (0.064 to 0.125) | 0.066 (0.046 to 0.094) |
| Tajikistan                    | 150 (180 to 130)                        | 340 (400 to 290)       | 790 (1300 to 490)      | 0.194 (0.168 to 0.226) | 0.087 (0.074 to 0.102) | 0.037 (0.022 to 0.059) |
| Tanzania                      | 16 (21 to 13)                           | 22 (28 to 18)          | 45 (64 to 32)          | 1.947 (1.514 to 2.499) | 1.541 (1.228 to 1.925) | 0.668 (0.472 to 0.956) |
| TFYR Macedonia                | 3000 (3800 to 2400)                     | 4900 (5800 to 4100)    | 8500 (11700 to 6400)   | 0.01 (0.008 to 0.012)  | 0.006 (0.005 to 0.007) | 0.003 (0.002 to 0.005) |
| Thailand                      | 1100 (1300 to 890)                      | 2400 (2700 to 2100)    | 3600 (5200 to 2300)    | 0.027 (0.023 to 0.033) | 0.012 (0.011 to 0.014) | 0.008 (0.006 to 0.013) |
| Timor-Leste                   | 17 (25 to 12)                           | 20 (26 to 15)          | 82 (120 to 59)         | 1.845 (1.265 to 2.578) | 1.549 (1.154 to 2.064) | 0.359 (0.252 to 0.502) |
| Togo                          | 28 (38 to 21)                           | 38 (51 to 29)          | 58 (84 to 41)          | 1.082 (0.818 to 1.445) | 0.82 (0.614 to 1.085)  | 0.529 (0.366 to 0.744) |

| Country                  | Life time risk of maternal death; 1 in: |                     |                      | MMrate (*1,000)        |                        |                        |
|--------------------------|-----------------------------------------|---------------------|----------------------|------------------------|------------------------|------------------------|
|                          | 1990                                    | 2000                | 2015                 | 1990                   | 2000                   | 2015                   |
| Tonga                    | 290 (540 to 170)                        | 250 (480 to 130)    | 230 (510 to 110)     | 0.099 (0.054 to 0.174) | 0.119 (0.06 to 0.231)  | 0.128 (0.058 to 0.278) |
| Trinidad and Tobago      | 400 (460 to 350)                        | 890 (1000 to 780)   | 860 (1100 to 680)    | 0.073 (0.064 to 0.083) | 0.033 (0.029 to 0.037) | 0.034 (0.026 to 0.043) |
| Tunisia                  | 210 (280 to 150)                        | 540 (740 to 400)    | 710 (1000 to 480)    | 0.141 (0.103 to 0.189) | 0.053 (0.039 to 0.072) | 0.041 (0.028 to 0.06)  |
| Turkey                   | 290 (450 to 190)                        | 470 (620 to 340)    | 3000 (3900 to 2300)  | 0.1 (0.065 to 0.153)   | 0.063 (0.047 to 0.086) | 0.01 (0.008 to 0.013)  |
| Turkmenistan             | 240 (270 to 210)                        | 560 (800 to 410)    | 940 (2000 to 540)    | 0.123 (0.107 to 0.142) | 0.053 (0.037 to 0.072) | 0.031 (0.015 to 0.055) |
| Uganda                   | 21 (26 to 16)                           | 25 (30 to 20)       | 47 (65 to 33)        | 1.567 (1.242 to 2.002) | 1.408 (1.143 to 1.74)  | 0.657 (0.473 to 0.945) |
| Ukraine                  | 1200 (1400 to 1100)                     | 2700 (3100 to 2400) | 2600 (3400 to 2000)  | 0.024 (0.021 to 0.027) | 0.011 (0.01 to 0.012)  | 0.011 (0.008 to 0.014) |
| United Arab Emirates     | 1200 (2000 to 690)                      | 3800 (6800 to 2200) | 7900 (16400 to 4200) | 0.025 (0.015 to 0.042) | 0.008 (0.004 to 0.013) | 0.004 (0.002 to 0.007) |
| United Kingdom           | 5200 (5500 to 4900)                     | 5100 (5400 to 4800) | 5800 (6900 to 4900)  | 0.006 (0.005 to 0.006) | 0.006 (0.005 to 0.006) | 0.005 (0.004 to 0.006) |
| United States of America | 4100 (4600 to 3700)                     | 4300 (4500 to 4200) | 3800 (4400 to 3200)  | 0.007 (0.006 to 0.008) | 0.007 (0.006 to 0.007) | 0.008 (0.006 to 0.009) |
| Uruguay                  | 1000 (1200 to 850)                      | 1400 (1600 to 1200) | 3300 (4400 to 2500)  | 0.029 (0.025 to 0.034) | 0.021 (0.018 to 0.025) | 0.009 (0.007 to 0.011) |
| Uzbekistan               | 370 (420 to 320)                        | 980 (1100 to 860)   | 1000 (1800 to 560)   | 0.078 (0.069 to 0.09)  | 0.03 (0.026 to 0.034)  | 0.029 (0.016 to 0.052) |
| Vanuatu                  | 85 (150 to 47)                          | 150 (300 to 79)     | 360 (780 to 160)     | 0.354 (0.198 to 0.639) | 0.195 (0.099 to 0.374) | 0.082 (0.037 to 0.177) |
| Venezuela                | 270 (300 to 240)                        | 360 (400 to 320)    | 420 (520 to 320)     | 0.108 (0.096 to 0.121) | 0.082 (0.073 to 0.09)  | 0.07 (0.056 to 0.09)   |
| Viet Nam                 | 180 (270 to 130)                        | 560 (740 to 440)    | 870 (1100 to 640)    | 0.164 (0.109 to 0.219) | 0.052 (0.039 to 0.066) | 0.033 (0.025 to 0.045) |

| Country  | Life time risk of maternal death; 1 in: |               |                | MMrate (*1,000)        |                        |                        |
|----------|-----------------------------------------|---------------|----------------|------------------------|------------------------|------------------------|
|          | 1990                                    | 2000          | 2015           | 1990                   | 2000                   | 2015                   |
| Yemen    | 21 (30 to 16)                           | 37 (48 to 28) | 60 (85 to 40)  | 1.417 (1.008 to 1.907) | 0.816 (0.624 to 1.062) | 0.497 (0.353 to 0.751) |
| Zambia   | 27 (35 to 21)                           | 34 (42 to 28) | 79 (110 to 58) | 1.208 (0.939 to 1.585) | 1.063 (0.866 to 1.307) | 0.387 (0.281 to 0.528) |
| Zimbabwe | 43 (53 to 36)                           | 49 (55 to 44) | 52 (63 to 41)  | 0.721 (0.576 to 0.857) | 0.792 (0.717 to 0.89)  | 0.597 (0.489 to 0.758) |

**Table 5. Indirect AIDS MMR (maternal deaths per 100,000 live births), total number of HIV/AIDS attributed maternal deaths, and percentage of maternal deaths attributed to HIV/AIDS, for 1990, 2000 and 2015 for MDG regions and 183 countries.**

| Region                       | Indirect AIDS MMR<br>(maternal deaths per<br>100,000 live births) |      |      | Total # of HIV/AIDS<br>attributed maternal<br>deaths |       |      | % of maternal deaths attributed to HIV/AIDS |           |           |
|------------------------------|-------------------------------------------------------------------|------|------|------------------------------------------------------|-------|------|---------------------------------------------|-----------|-----------|
|                              | 1990                                                              | 2000 | 2015 | 1990                                                 | 2000  | 2015 | 1990-2000                                   | 2000-2015 | 1990-2015 |
| World                        | 1                                                                 | 8    | 3    | 1600                                                 | 10000 | 4700 | 0.3                                         | 2.3       | 1.6       |
| Developed regions            | 0                                                                 | 0    | 1    | 19                                                   | 34    | 87   | 0.5                                         | 1.5       | 5.2       |
| Northern Africa              | 0                                                                 | 0    | 0    | 1                                                    | 4     | 10   | 0                                           | 0.1       | 0.3       |
| Sub-Saharan<br>Africa        | 7                                                                 | 34   | 11   | 1500                                                 | 9500  | 4000 | 0.7                                         | 4         | 2         |
| Caucasus and<br>Central Asia | 0                                                                 | 0    | 0    | 0                                                    | 2     | 8    | 0                                           | 0.3       | 1.4       |
| Eastern Asia                 | 0                                                                 | 0    | 0    | 0                                                    | 13    | 43   | 0                                           | 0.1       | 0.9       |
| South-eastern<br>Asia        | 0                                                                 | 1    | 1    | 1                                                    | 92    | 150  | 0                                           | 0.4       | 1.2       |
| Southern Asia                | 0                                                                 | 1    | 1    | 5                                                    | 290   | 310  | 0                                           | 0.2       | 0.5       |
| Western Asia                 | 0                                                                 | 0    | 0    | 0                                                    | 1     | 5    | 0                                           | 0         | 0.1       |
| Caribbean                    | 4                                                                 | 13   | 3    | 33                                                   | 100   | 20   | 1.4                                         | 6.1       | 1.6       |
| Latin America                | 0                                                                 | 1    | 1    | 17                                                   | 85    | 51   | 0.1                                         | 0.8       | 0.8       |
| Oceania                      | 0                                                                 | 2    | 1    | 0                                                    | 6     | 3    | 0                                           | 0.8       | 0.6       |

| Country     | Indirect AIDS MMR<br>(maternal deaths per<br>100,000 live births) |      |      | Total # of HIV/AIDS<br>attributed maternal deaths |      |      | % of maternal deaths attributed to HIV/AIDS |           |           |
|-------------|-------------------------------------------------------------------|------|------|---------------------------------------------------|------|------|---------------------------------------------|-----------|-----------|
|             | 1990                                                              | 2000 | 2015 | 1990                                              | 2000 | 2015 | 1990-2000                                   | 2000-2015 | 1990-2015 |
| Afghanistan | 0                                                                 | 0    | 0    | 0                                                 | 1    | 1    | 0                                           | 0         | 0         |
| Albania     | 0                                                                 | 0    | 0    | 0                                                 | 0    | 0    | 0                                           | 0         | 0         |
| Algeria     | 0                                                                 | 0    | 1    | 1                                                 | 2    | 6    | 0                                           | 0.2       | 0.4       |
| Angola      | 2                                                                 | 10   | 5    | 10                                                | 79   | 61   | 0.1                                         | 1.1       | 1.1       |
| Argentina   | 0                                                                 | 1    | 1    | 1                                                 | 5    | 4    | 0.2                                         | 1.1       | 1.1       |
| Armenia     | 0                                                                 | 0    | 0    | 0                                                 | 0    | 0    | 0                                           | 0.1       | 0.9       |
| Australia   | 0                                                                 | 0    | 0    | 0                                                 | 0    | 0    | 0.3                                         | 0.1       | 0         |
| Austria     | 0                                                                 | 0    | 0    | 0                                                 | 0    | 0    | 0.2                                         | 0.7       | 1.3       |
| Azerbaijan  | 0                                                                 | 0    | 0    | 0                                                 | 0    | 0    | 0                                           | 0.1       | 0.7       |
| Bahamas     | 6                                                                 | 19   | 4    | 0                                                 | 1    | 0    | 13.8                                        | 31.5      | 4.6       |
| Bahrain     | 0                                                                 | 0    | 0    | 0                                                 | 0    | 0    | 0.3                                         | 0.6       | 0.3       |
| Bangladesh  | 0                                                                 | 0    | 0    | 0                                                 | 0    | 0    | 0                                           | 0         | 0         |
| Barbados    | 0                                                                 | 1    | 0    | 0                                                 | 0    | 0    | 0.1                                         | 2.3       | 0.9       |

| Country                   | Indirect AIDS MMR<br>(maternal deaths per<br>100,000 live births) |      |      | Total # of HIV/AIDS<br>attributed maternal deaths |      |      | % of maternal deaths attributed to HIV/AIDS |           |           |
|---------------------------|-------------------------------------------------------------------|------|------|---------------------------------------------------|------|------|---------------------------------------------|-----------|-----------|
|                           | 1990                                                              | 2000 | 2015 | 1990                                              | 2000 | 2015 | 1990-2000                                   | 2000-2015 | 1990-2015 |
| Belarus                   | 0                                                                 | 0    | 1    | 0                                                 | 0    | 1    | 0                                           | 0.2       | 30.1      |
| Belgium                   | 0                                                                 | 0    | 0    | 0                                                 | 0    | 0    | 0.1                                         | 0.5       | 0.5       |
| Belize                    | 0                                                                 | 1    | 1    | 0                                                 | 0    | 0    | 0.1                                         | 2.1       | 2.5       |
| Benin                     | 0                                                                 | 9    | 4    | 1                                                 | 27   | 16   | 0.1                                         | 1.6       | 1         |
| Bhutan                    | 0                                                                 | 0    | 1    | 0                                                 | 0    | 0    | 0                                           | 0         | 0.7       |
| Bolivia                   | 0                                                                 | 1    | 0    | 0                                                 | 2    | 1    | 0                                           | 0.3       | 0.2       |
| Bosnia and<br>Herzegovina | 0                                                                 | 0    | 0    | 0                                                 | 0    | 0    | 0                                           | 0         | 0         |
| Botswana                  | 5                                                                 | 163  | 23   | 3                                                 | 78   | 13   | 2.2                                         | 52.5      | 18        |
| Brazil                    | 0                                                                 | 1    | 1    | 7                                                 | 26   | 18   | 0.2                                         | 1.1       | 1.4       |
| Brunei<br>Darussalam      | 0                                                                 | 0    | 0    | 0                                                 | 0    | 0    | 0.2                                         | 0.5       | 0.3       |
| Bulgaria                  | 0                                                                 | 0    | 0    | 0                                                 | 0    | 0    | 0                                           | 0.3       | 2.6       |
| Burkina Faso              | 11                                                                | 31   | 4    | 45                                                | 170  | 26   | 1.5                                         | 5.6       | 1         |
| Burundi                   | 4                                                                 | 37   | 2    | 11                                                | 110  | 11   | 0.3                                         | 3.8       | 0.3       |

| Country                        | Indirect AIDS MMR<br>(maternal deaths per<br>100,000 live births) |      |      | Total # of HIV/AIDS<br>attributed maternal deaths |      |      | % of maternal deaths attributed to HIV/AIDS |           |           |
|--------------------------------|-------------------------------------------------------------------|------|------|---------------------------------------------------|------|------|---------------------------------------------|-----------|-----------|
|                                | 1990                                                              | 2000 | 2015 | 1990                                              | 2000 | 2015 | 1990-2000                                   | 2000-2015 | 1990-2015 |
| Cabo Verde                     | 0                                                                 | 4    | 0    | 0                                                 | 1    | 0    | 0.2                                         | 5         | 0.4       |
| Cambodia                       | 0                                                                 | 5    | 2    | 0                                                 | 18   | 6    | 0                                           | 1.1       | 1         |
| Cameroon                       | 1                                                                 | 26   | 18   | 4                                                 | 170  | 150  | 0.1                                         | 3.4       | 3.1       |
| Canada                         | 0                                                                 | 0    | 0    | 1                                                 | 0    | 0    | 2.7                                         | 0.8       | 0.6       |
| Central<br>African<br>Republic | 11                                                                | 58   | 31   | 13                                                | 85   | 51   | 0.8                                         | 4.8       | 3.5       |
| Chad                           | 6                                                                 | 27   | 9    | 17                                                | 120  | 56   | 0.4                                         | 2         | 1         |
| Chile                          | 0                                                                 | 0    | 0    | 0                                                 | 0    | 0    | 0.1                                         | 0.3       | 0.2       |
| China                          | 0                                                                 | 0    | 0    | 0                                                 | 13   | 42   | 0                                           | 0.1       | 1         |
| Colombia                       | 0                                                                 | 0    | 0    | 0                                                 | 2    | 1    | 0                                           | 0.3       | 0.2       |
| Comoros                        | 0                                                                 | 0    | 0    | 0                                                 | 0    | 0    | 0                                           | 0         | 0.1       |
| Congo                          | 20                                                                | 50   | 20   | 18                                                | 60   | 33   | 3.3                                         | 7.6       | 4.4       |
| Costa Rica                     | 0                                                                 | 0    | 0    | 0                                                 | 0    | 0    | 0.1                                         | 0.5       | 0.6       |
| Cote d'Ivoire                  | 24                                                                | 63   | 27   | 130                                               | 420  | 230  | 3.2                                         | 9.4       | 4.2       |



| Country                                        | Indirect AIDS MMR<br>(maternal deaths per<br>100,000 live births) |      |      | Total # of HIV/AIDS<br>attributed maternal deaths |      |      | % of maternal deaths attributed to HIV/AIDS |           |           |
|------------------------------------------------|-------------------------------------------------------------------|------|------|---------------------------------------------------|------|------|---------------------------------------------|-----------|-----------|
|                                                | 1990                                                              | 2000 | 2015 | 1990                                              | 2000 | 2015 | 1990-2000                                   | 2000-2015 | 1990-2015 |
| Croatia                                        | 0                                                                 | 0    | 0    | 0                                                 | 0    | 0    | 0                                           | 0         | 0.1       |
| Cuba                                           | 0                                                                 | 0    | 0    | 0                                                 | 0    | 0    | 0                                           | 0.2       | 0.2       |
| Cyprus                                         | 0                                                                 | 0    | 0    | 0                                                 | 0    | 0    | 0                                           | 0         | 0         |
| Czech<br>Republic                              | 0                                                                 | 0    | 0    | 0                                                 | 0    | 0    | 0                                           | 0         | 0.1       |
| Democratic<br>People's<br>Republic of<br>Korea | 0                                                                 | 0    | 0    | 0                                                 | 0    | 0    | 0                                           | 0         | 0.1       |
| Democratic<br>Republic of<br>the Congo         | 6                                                                 | 11   | 7    | 110                                               | 250  | 240  | 0.7                                         | 1.3       | 1.1       |
| Denmark                                        | 0                                                                 | 0    | 0    | 0                                                 | 0    | 0    | 0.7                                         | 0.3       | 0.4       |
| Djibouti                                       | 0                                                                 | 14   | 12   | 0                                                 | 3    | 3    | 0.1                                         | 3.5       | 5.1       |
| Dominican<br>Republic                          | 1                                                                 | 7    | 1    | 1                                                 | 16   | 2    | 0.3                                         | 9.4       | 0.9       |
| Ecuador                                        | 0                                                                 | 1    | 0    | 1                                                 | 4    | 1    | 0.1                                         | 1.2       | 0.6       |
| Egypt                                          | 0                                                                 | 0    | 0    | 0                                                 | 0    | 1    | 0                                           | 0         | 0.1       |

| Country              | Indirect AIDS MMR<br>(maternal deaths per<br>100,000 live births) |      |      | Total # of HIV/AIDS<br>attributed maternal deaths |      |      | % of maternal deaths attributed to HIV/AIDS |           |           |
|----------------------|-------------------------------------------------------------------|------|------|---------------------------------------------------|------|------|---------------------------------------------|-----------|-----------|
|                      | 1990                                                              | 2000 | 2015 | 1990                                              | 2000 | 2015 | 1990-2000                                   | 2000-2015 | 1990-2015 |
| El Salvador          | 1                                                                 | 3    | 2    | 1                                                 | 4    | 2    | 0.4                                         | 3.2       | 3.1       |
| Equatorial<br>Guinea | 2                                                                 | 17   | 19   | 0                                                 | 4    | 6    | 0.2                                         | 2.5       | 5.6       |
| Eritrea              | 4                                                                 | 21   | 2    | 5                                                 | 27   | 3    | 0.2                                         | 2.8       | 0.3       |
| Estonia              | 0                                                                 | 0    | 0    | 0                                                 | 0    | 0    | 0                                           | 0         | 2.6       |
| Ethiopia             | 4                                                                 | 28   | 5    | 90                                                | 810  | 160  | 0.3                                         | 3.1       | 1.4       |
| Fiji                 | 0                                                                 | 0    | 0    | 0                                                 | 0    | 0    | 0.1                                         | 0.4       | 0.8       |
| Finland              | 0                                                                 | 0    | 0    | 0                                                 | 0    | 0    | 0.2                                         | 0.3       | 0.1       |
| France               | 0                                                                 | 0    | 0    | 4                                                 | 1    | 0    | 3.3                                         | 1         | 0.4       |
| Gabon                | 3                                                                 | 29   | 16   | 1                                                 | 12   | 8    | 0.7                                         | 7.1       | 5.5       |
| Gambia               | 0                                                                 | 3    | 2    | 0                                                 | 2    | 1    | 0                                           | 0.3       | 0.2       |
| Georgia              | 0                                                                 | 0    | 1    | 0                                                 | 0    | 0    | 0                                           | 0.1       | 1.4       |
| Germany              | 0                                                                 | 0    | 0    | 0                                                 | 0    | 0    | 0.2                                         | 0.5       | 0.1       |
| Ghana                | 2                                                                 | 15   | 1    | 10                                                | 98   | 10   | 0.3                                         | 3.2       | 0.4       |
| Greece               | 0                                                                 | 0    | 0    | 0                                                 | 0    | 0    | 2.5                                         | 3.6       | 4.6       |
| Grenada              | 0                                                                 | 0    | 0    | 0                                                 | 0    | 0    | 0.4                                         | 1.3       | 0.8       |

| Country           | Indirect AIDS MMR<br>(maternal deaths per<br>100,000 live births) |      |      | Total # of HIV/AIDS<br>attributed maternal deaths |      |      | % of maternal deaths attributed to HIV/AIDS |           |           |
|-------------------|-------------------------------------------------------------------|------|------|---------------------------------------------------|------|------|---------------------------------------------|-----------|-----------|
|                   | 1990                                                              | 2000 | 2015 | 1990                                              | 2000 | 2015 | 1990-2000                                   | 2000-2015 | 1990-2015 |
| Guatemala         | 0                                                                 | 2    | 3    | 0                                                 | 8    | 13   | 0                                           | 1.1       | 3.4       |
| Guinea            | 2                                                                 | 10   | 2    | 5                                                 | 37   | 11   | 0.2                                         | 1         | 0.4       |
| Guinea-<br>Bissau | 0                                                                 | 8    | 26   | 0                                                 | 5    | 18   | 0                                           | 1.1       | 4.7       |
| Guyana            | 0                                                                 | 2    | 1    | 0                                                 | 0    | 0    | 0.1                                         | 1.1       | 0.3       |
| Haiti             | 11                                                                | 29   | 6    | 30                                                | 77   | 16   | 1.8                                         | 5.7       | 1.7       |
| Honduras          | 1                                                                 | 8    | 1    | 3                                                 | 16   | 2    | 0.5                                         | 6.1       | 1.1       |
| Hungary           | 0                                                                 | 0    | 0    | 0                                                 | 0    | 0    | 0.1                                         | 0.1       | 0.1       |
| Iceland           | 0                                                                 | 0    | 0    | 0                                                 | 0    | 0    | 0.3                                         | 0         | 0.6       |
| India             | 0                                                                 | 1    | 1    | 5                                                 | 280  | 280  | 0                                           | 0.3       | 0.6       |
| Indonesia         | 0                                                                 | 0    | 2    | 0                                                 | 2    | 89   | 0                                           | 0         | 1.4       |
| Iran              | 0                                                                 | 0    | 0    | 0                                                 | 0    | 3    | 0                                           | 0         | 1         |
| Iraq              | 0                                                                 | 0    | 0    | 0                                                 | 0    | 0    | 0                                           | 0         | 0         |
| Ireland           | 0                                                                 | 0    | 0    | 0                                                 | 0    | 0    | 0                                           | 0         | 0.4       |
| Israel            | 0                                                                 | 0    | 0    | 0                                                 | 0    | 0    | 0.1                                         | 0.2       | 0.3       |

| Country    | Indirect AIDS MMR<br>(maternal deaths per<br>100,000 live births) |      |      | Total # of HIV/AIDS<br>attributed maternal deaths |      |      | % of maternal deaths attributed to HIV/AIDS |           |           |
|------------|-------------------------------------------------------------------|------|------|---------------------------------------------------|------|------|---------------------------------------------|-----------|-----------|
|            | 1990                                                              | 2000 | 2015 | 1990                                              | 2000 | 2015 | 1990-2000                                   | 2000-2015 | 1990-2015 |
| Italy      | 0                                                                 | 0    | 0    | 1                                                 | 1    | 0    | 2.7                                         | 3.8       | 2.6       |
| Jamaica    | 2                                                                 | 12   | 3    | 1                                                 | 7    | 1    | 2.3                                         | 13.5      | 3         |
| Japan      | 0                                                                 | 0    | 0    | 0                                                 | 0    | 0    | 0                                           | 0         | 0         |
| Jordan     | 0                                                                 | 0    | 0    | 0                                                 | 0    | 0    | 0                                           | 0         | 0         |
| Kazakhstan | 0                                                                 | 0    | 0    | 0                                                 | 0    | 1    | 0                                           | 0         | 1.5       |
| Kenya      | 4                                                                 | 72   | 12   | 39                                                | 870  | 190  | 0.6                                         | 9.5       | 2.3       |
| Kiribati   | 0                                                                 | 0    | 0    | 0                                                 | 0    | 0    | 0                                           | 0         | 0         |
| Kuwait     | 0                                                                 | 0    | 0    | 0                                                 | 0    | 0    | 0.1                                         | 0         | 0.1       |
| Kyrgyzstan | 0                                                                 | 0    | 0    | 0                                                 | 0    | 0    | 0                                           | 0         | 0.1       |
| Lao        | 0                                                                 | 0    | 1    | 0                                                 | 0    | 2    | 0                                           | 0         | 0.6       |
| Latvia     | 0                                                                 | 0    | 0    | 0                                                 | 0    | 0    | 0                                           | 0.1       | 2.1       |
| Lebanon    | 0                                                                 | 0    | 0    | 0                                                 | 0    | 0    | 0.1                                         | 0.4       | 1.7       |
| Lesotho    | 0                                                                 | 102  | 62   | 0                                                 | 60   | 38   | 0.1                                         | 15.8      | 12.8      |
| Liberia    | 0                                                                 | 13   | 3    | 0                                                 | 16   | 5    | 0                                           | 1.1       | 0.5       |
| Libya      | 0                                                                 | 0    | 0    | 0                                                 | 0    | 0    | 0                                           | 0         | 0         |

| Country    | Indirect AIDS MMR<br>(maternal deaths per<br>100,000 live births) |      |      | Total # of HIV/AIDS<br>attributed maternal deaths |      |      | % of maternal deaths attributed to HIV/AIDS |           |           |
|------------|-------------------------------------------------------------------|------|------|---------------------------------------------------|------|------|---------------------------------------------|-----------|-----------|
|            | 1990                                                              | 2000 | 2015 | 1990                                              | 2000 | 2015 | 1990-2000                                   | 2000-2015 | 1990-2015 |
| Lithuania  | 0                                                                 | 0    | 0    | 0                                                 | 0    | 0    | 0                                           | 0.1       | 1.7       |
| Luxembourg | 0                                                                 | 0    | 0    | 0                                                 | 0    | 0    | 0                                           | 0.3       | 0.1       |
| Madagascar | 0                                                                 | 5    | 4    | 1                                                 | 30   | 30   | 0                                           | 0.9       | 1         |
| Malawi     | 46                                                                | 137  | 19   | 210                                               | 680  | 120  | 4.8                                         | 15.4      | 2.9       |
| Malaysia   | 0                                                                 | 0    | 0    | 1                                                 | 2    | 1    | 0.2                                         | 0.7       | 0.7       |
| Maldives   | 0                                                                 | 0    | 0    | 0                                                 | 0    | 0    | 0                                           | 0         | 0.1       |
| Mali       | 1                                                                 | 12   | 3    | 4                                                 | 65   | 23   | 0.1                                         | 1.5       | 0.5       |
| Malta      | 0                                                                 | 0    | 0    | 0                                                 | 0    | 0    | 0                                           | 0.2       | 0         |
| Mauritania | 0                                                                 | 2    | 5    | 0                                                 | 2    | 7    | 0                                           | 0.3       | 0.9       |
| Mauritius  | 0                                                                 | 0    | 0    | 0                                                 | 0    | 0    | 0                                           | 0.2       | 0.6       |
| Mexico     | 0                                                                 | 0    | 0    | 2                                                 | 5    | 2    | 0.1                                         | 0.3       | 0.3       |
| Micronesia | 0                                                                 | 0    | 0    | 0                                                 | 0    | 0    | 0                                           | 0         | 0         |
| Mongolia   | 0                                                                 | 0    | 0    | 0                                                 | 0    | 0    | 0                                           | 0         | 0.8       |
| Montenegro | 0                                                                 | 0    | 0    | 0                                                 | 0    | 0    | 0                                           | 0         | 0         |

| Country                              | Indirect AIDS MMR<br>(maternal deaths per<br>100,000 live births) |      |      | Total # of HIV/AIDS<br>attributed maternal deaths |      |      | % of maternal deaths attributed to HIV/AIDS |           |           |
|--------------------------------------|-------------------------------------------------------------------|------|------|---------------------------------------------------|------|------|---------------------------------------------|-----------|-----------|
|                                      | 1990                                                              | 2000 | 2015 | 1990                                              | 2000 | 2015 | 1990-2000                                   | 2000-2015 | 1990-2015 |
| Morocco                              | 0                                                                 | 0    | 0    | 0                                                 | 1    | 3    | 0                                           | 0.1       | 0.3       |
| Mozambique                           | 0                                                                 | 40   | 52   | 2                                                 | 330  | 570  | 0                                           | 4.4       | 10.7      |
| Myanmar                              | 0                                                                 | 1    | 1    | 0                                                 | 10   | 10   | 0                                           | 0.3       | 0.6       |
| Namibia                              | 2                                                                 | 63   | 11   | 1                                                 | 37   | 8    | 0.5                                         | 17.9      | 4.3       |
| Nepal                                | 0                                                                 | 0    | 1    | 0                                                 | 3    | 3    | 0                                           | 0.1       | 0.2       |
| Netherlands                          | 0                                                                 | 0    | 0    | 0                                                 | 0    | 0    | 0.2                                         | 0.4       | 0.3       |
| New Zealand                          | 0                                                                 | 0    | 0    | 0                                                 | 0    | 0    | 0.3                                         | 0         | 0.1       |
| Nicaragua                            | 0                                                                 | 0    | 0    | 0                                                 | 0    | 0    | 0                                           | 0         | 0.2       |
| Niger                                | 0                                                                 | 4    | 3    | 1                                                 | 23   | 32   | 0                                           | 0.5       | 0.6       |
| Nigeria                              | 2                                                                 | 17   | 8    | 89                                                | 920  | 570  | 0.2                                         | 1.5       | 1         |
| Norway                               | 0                                                                 | 0    | 0    | 0                                                 | 0    | 0    | 0.2                                         | 0.5       | 0.2       |
| Occupied<br>Palestinian<br>Territory | 0                                                                 | 0    | 0    | 0                                                 | 0    | 0    | 0                                           | 0         | 0         |

| Country                | Indirect AIDS MMR<br>(maternal deaths per<br>100,000 live births) |      |      | Total # of HIV/AIDS<br>attributed maternal deaths |      |      | % of maternal deaths attributed to HIV/AIDS |           |           |
|------------------------|-------------------------------------------------------------------|------|------|---------------------------------------------------|------|------|---------------------------------------------|-----------|-----------|
|                        | 1990                                                              | 2000 | 2015 | 1990                                              | 2000 | 2015 | 1990-2000                                   | 2000-2015 | 1990-2015 |
| Oman                   | 0                                                                 | 0    | 1    | 0                                                 | 0    | 0    | 0.1                                         | 0.3       | 3.2       |
| Pakistan               | 0                                                                 | 0    | 0    | 0                                                 | 1    | 17   | 0                                           | 0         | 0.2       |
| Panama                 | 0                                                                 | 1    | 0    | 0                                                 | 1    | 0    | 0.3                                         | 1.8       | 0.4       |
| Papua New<br>Guinea    | 0                                                                 | 3    | 1    | 0                                                 | 5    | 3    | 0                                           | 0.9       | 0.7       |
| Paraguay               | 0                                                                 | 0    | 1    | 0                                                 | 0    | 1    | 0.1                                         | 0.2       | 0.4       |
| Peru                   | 0                                                                 | 1    | 0    | 1                                                 | 8    | 1    | 0.1                                         | 0.9       | 0.3       |
| Philippines            | 0                                                                 | 0    | 0    | 0                                                 | 0    | 0    | 0                                           | 0         | 0         |
| Poland                 | 0                                                                 | 0    | 0    | 0                                                 | 0    | 0    | 0.1                                         | 0.3       | 0.7       |
| Portugal               | 0                                                                 | 1    | 1    | 0                                                 | 1    | 0    | 0.4                                         | 3.9       | 4.9       |
| Puerto Rico            | 0                                                                 | 0    | 0    | 0                                                 | 0    | 0    | 0                                           | 0         | 0         |
| Qatar                  | 0                                                                 | 0    | 0    | 0                                                 | 0    | 0    | 0                                           | 0         | 0.2       |
| Republic of<br>Korea   | 0                                                                 | 0    | 0    | 0                                                 | 0    | 0    | 0                                           | 0         | 0         |
| Republic of<br>Moldova | 0                                                                 | 0    | 0    | 0                                                 | 0    | 0    | 0                                           | 0.1       | 0.5       |

| Country               | Indirect AIDS MMR<br>(maternal deaths per<br>100,000 live births) |      |      | Total # of HIV/AIDS<br>attributed maternal deaths |      |      | % of maternal deaths attributed to HIV/AIDS |           |           |
|-----------------------|-------------------------------------------------------------------|------|------|---------------------------------------------------|------|------|---------------------------------------------|-----------|-----------|
|                       | 1990                                                              | 2000 | 2015 | 1990                                              | 2000 | 2015 | 1990-2000                                   | 2000-2015 | 1990-2015 |
| Romania               | 0                                                                 | 0    | 0    | 0                                                 | 0    | 0    | 0                                           | 0.1       | 0.3       |
| Russian Federation    | 0                                                                 | 0    | 3    | 1                                                 | 6    | 62   | 0.1                                         | 0.9       | 13.7      |
| Rwanda                | 19                                                                | 47   | 4    | 62                                                | 150  | 16   | 1.5                                         | 4.6       | 1.5       |
| Saint Lucia           | 0                                                                 | 1    | 0    | 0                                                 | 0    | 0    | 0.8                                         | 1.5       | 0.9       |
| Samoa                 | 0                                                                 | 0    | 0    | 0                                                 | 0    | 0    | 0                                           | 0         | 0         |
| Sao Tome and Principe | 1                                                                 | 3    | 2    | 0                                                 | 0    | 0    | 0.2                                         | 1.5       | 1         |
| Saudi Arabia          | 0                                                                 | 0    | 0    | 0                                                 | 0    | 0    | 0                                           | 0         | 0         |
| Senegal               | 0                                                                 | 2    | 5    | 2                                                 | 9    | 27   | 0.1                                         | 0.4       | 1.5       |
| Serbia                | 0                                                                 | 0    | 0    | 0                                                 | 0    | 0    | 0.4                                         | 0.4       | 0.3       |
| Sierra Leone          | 0                                                                 | 3    | 6    | 0                                                 | 6    | 15   | 0                                           | 0.1       | 0.5       |
| Singapore             | 0                                                                 | 0    | 0    | 0                                                 | 0    | 0    | 0                                           | 0         | 0         |
| Slovakia              | 0                                                                 | 0    | 0    | 0                                                 | 0    | 0    | 0                                           | 0         | 0         |



| Country                             | Indirect AIDS MMR<br>(maternal deaths per<br>100,000 live births) |      |      | Total # of HIV/AIDS<br>attributed maternal deaths |      |      | % of maternal deaths attributed to HIV/AIDS |           |           |
|-------------------------------------|-------------------------------------------------------------------|------|------|---------------------------------------------------|------|------|---------------------------------------------|-----------|-----------|
|                                     | 1990                                                              | 2000 | 2015 | 1990                                              | 2000 | 2015 | 1990-2000                                   | 2000-2015 | 1990-2015 |
| Slovenia                            | 0                                                                 | 0    | 0    | 0                                                 | 0    | 0    | 0                                           | 0         | 0.1       |
| Solomon<br>Islands                  | 0                                                                 | 0    | 0    | 0                                                 | 0    | 0    | 0                                           | 0         | 0         |
| Somalia                             | 0                                                                 | 4    | 4    | 0                                                 | 13   | 18   | 0                                           | 0.3       | 0.5       |
| South Africa                        | 0                                                                 | 39   | 44   | 1                                                 | 430  | 490  | 0.1                                         | 46.2      | 32.1      |
| South Sudan                         | 0                                                                 | 14   | 11   | 0                                                 | 40   | 50   | 0                                           | 1.1       | 1.4       |
| Spain                               | 0                                                                 | 0    | 0    | 1                                                 | 1    | 0    | 5.3                                         | 5.1       | 0.9       |
| Sri Lanka                           | 0                                                                 | 0    | 0    | 0                                                 | 0    | 0    | 0                                           | 0         | 0.4       |
| St Vincent<br>and the<br>Grenadines | 1                                                                 | 1    | 1    | 0                                                 | 0    | 0    | 0.9                                         | 1.9       | 2         |
| Sudan                               | 0                                                                 | 2    | 2    | 1                                                 | 23   | 27   | 0                                           | 0.4       | 0.7       |
| Suriname                            | 0                                                                 | 4    | 1    | 0                                                 | 0    | 0    | 0.2                                         | 1.5       | 0.7       |
| Swaziland                           | 0                                                                 | 95   | 72   | 0                                                 | 33   | 27   | 0                                           | 16.3      | 18.6      |
| Sweden                              | 0                                                                 | 0    | 0    | 0                                                 | 0    | 0    | 0.6                                         | 0.2       | 0.1       |

| Country                 | Indirect AIDS MMR<br>(maternal deaths per<br>100,000 live births) |      |      | Total # of HIV/AIDS<br>attributed maternal deaths |      |      | % of maternal deaths attributed to HIV/AIDS |           |           |
|-------------------------|-------------------------------------------------------------------|------|------|---------------------------------------------------|------|------|---------------------------------------------|-----------|-----------|
|                         | 1990                                                              | 2000 | 2015 | 1990                                              | 2000 | 2015 | 1990-2000                                   | 2000-2015 | 1990-2015 |
| Switzerland             | 0                                                                 | 0    | 0    | 0                                                 | 0    | 0    | 2.2                                         | 3.6       | 0.5       |
| Syrian Arab<br>Republic | 0                                                                 | 0    | 0    | 0                                                 | 0    | 0    | 0                                           | 0         | 0         |
| Tajikistan              | 0                                                                 | 0    | 1    | 0                                                 | 0    | 2    | 0                                           | 0.1       | 2.2       |
| Tanzania                | 12                                                                | 60   | 10   | 140                                               | 860  | 200  | 1.2                                         | 7.1       | 2.4       |
| TFYR<br>Macedonia       | 0                                                                 | 0    | 0    | 0                                                 | 0    | 0    | 0                                           | 0         | 0         |
| Thailand                | 0                                                                 | 6    | 4    | 1                                                 | 55   | 28   | 0.1                                         | 24.3      | 19.3      |
| Timor-Leste             | 0                                                                 | 0    | 0    | 0                                                 | 0    | 0    | 0                                           | 0         | 0         |
| Togo                    | 2                                                                 | 23   | 13   | 3                                                 | 45   | 34   | 0.3                                         | 4.7       | 3.6       |
| Tonga                   | 0                                                                 | 0    | 0    | 0                                                 | 0    | 0    | 0                                           | 0         | 0         |
| Trinidad and<br>Tobago  | 1                                                                 | 4    | 0    | 0                                                 | 1    | 0    | 0.7                                         | 5.9       | 0.6       |
| Tunisia                 | 0                                                                 | 0    | 0    | 0                                                 | 0    | 0    | 0                                           | 0.1       | 0.1       |
| Turkey                  | 0                                                                 | 0    | 0    | 0                                                 | 0    | 0    | 0                                           | 0         | 0         |

| Country                     | Indirect AIDS MMR<br>(maternal deaths per<br>100,000 live births) |      |      | Total # of HIV/AIDS<br>attributed maternal deaths |      |      | % of maternal deaths attributed to HIV/AIDS |           |           |
|-----------------------------|-------------------------------------------------------------------|------|------|---------------------------------------------------|------|------|---------------------------------------------|-----------|-----------|
|                             | 1990                                                              | 2000 | 2015 | 1990                                              | 2000 | 2015 | 1990-2000                                   | 2000-2015 | 1990-2015 |
| Turkmenistan                | 0                                                                 | 0    | 0    | 0                                                 | 0    | 0    | 0                                           | 0         | 0         |
| Uganda                      | 33                                                                | 86   | 11   | 290                                               | 990  | 180  | 4.8                                         | 13.9      | 3.1       |
| Ukraine                     | 0                                                                 | 1    | 3    | 0                                                 | 6    | 16   | 0                                           | 4.3       | 13.5      |
| United Arab<br>Emirates     | 0                                                                 | 0    | 0    | 0                                                 | 0    | 0    | 0                                           | 0         | 0         |
| United<br>Kingdom           | 0                                                                 | 0    | 0    | 1                                                 | 0    | 0    | 0.7                                         | 0.2       | 0.5       |
| United States<br>of America | 0                                                                 | 0    | 0    | 9                                                 | 16   | 5    | 2                                           | 3.4       | 1         |
| Uruguay                     | 0                                                                 | 0    | 0    | 0                                                 | 0    | 0    | 0.1                                         | 1.1       | 2.4       |
| Uzbekistan                  | 0                                                                 | 0    | 1    | 0                                                 | 2    | 5    | 0                                           | 1         | 2.1       |
| Vanuatu                     | 0                                                                 | 0    | 0    | 0                                                 | 0    | 0    | 0                                           | 0         | 0         |
| Venezuela                   | 0                                                                 | 0    | 0    | 1                                                 | 2    | 2    | 0.1                                         | 0.3       | 0.4       |
| Viet Nam                    | 0                                                                 | 0    | 1    | 0                                                 | 6    | 15   | 0                                           | 0.5       | 1.8       |
| Yemen                       | 0                                                                 | 0    | 0    | 0                                                 | 1    | 4    | 0                                           | 0         | 0.1       |

| Country  | Indirect AIDS MMR<br>(maternal deaths per<br>100,000 live births) |      |      | Total # of HIV/AIDS<br>attributed maternal deaths |      |      | % of maternal deaths attributed to HIV/AIDS |           |           |
|----------|-------------------------------------------------------------------|------|------|---------------------------------------------------|------|------|---------------------------------------------|-----------|-----------|
|          | 1990                                                              | 2000 | 2015 | 1990                                              | 2000 | 2015 | 1990-2000                                   | 2000-2015 | 1990-2015 |
| Zambia   | 44                                                                | 112  | 21   | 170                                               | 520  | 140  | 7.6                                         | 20.6      | 9.4       |
| Zimbabwe | 18                                                                | 196  | 21   | 70                                                | 800  | 110  | 4.1                                         | 33.1      | 4.7       |

**Table 6. Comparison of UN MMEIG 2015 and GBD 2013 estimates for the number of maternal deaths for 1990 and 2013 for the world and MDG regions, and the regional contribution to the global differences in maternal deaths for both years.**

| Region                    | 1990                      |          |                                            | 2013                      |          |                                            |
|---------------------------|---------------------------|----------|--------------------------------------------|---------------------------|----------|--------------------------------------------|
|                           | MMEIG 2015                | GBD 2013 | Regional Contribution to global difference | MMEIG 2015                | GBD 2013 | Regional Contribution to global difference |
| World                     | 532000 (496000 to 590000) | 374000   | 100%                                       | 315000 (303000 to 356000) | 292000   | 100%                                       |
| Southern Asia             | 210000 (179000 to 251000) | 175000   | 22.20%                                     | 73000 (64000 to 87000)    | 108000   | -149%                                      |
| Other                     | 3500 (3400 to 3700)       | 3700     | -0.10%                                     | 1700 (1600 to 1900)       | 1700     | -0.10%                                     |
| Northern Africa           | 6400 (5500 to 7700)       | 4400     | 1.30%                                      | 3300 (2700 to 4200)       | 1600     | 7%                                         |
| Sub-Saharan Africa        | 223000 (203000 to 254000) | 107000   | 73.40%                                     | 204000 (192000 to 238000) | 146000   | 246.60%                                    |
| Latin America             | 14000 (13000 to 15000)    | 9500     | 2.60%                                      | 6500 (6300 to 7000)       | 6500     | -0.10%                                     |
| Caucasus and Central Asia | 1300 (1300 to 1400)       | 1100     | 0.20%                                      | 640 (530 to 840)          | 540      | 0.40%                                      |
| Caribbean                 | 2300 (1800 to 2900)       | 1600     | 0.40%                                      | 1300 (1000 to 1900)       | 1000     | 1.20%                                      |
| Western Asia              | 6700 (5600 to 8400)       | 4400     | 1.50%                                      | 4800 (3900 to 6400)       | 3500     | 5.50%                                      |
| South-eastern Asia        | 39000 (33000 to 45000)    | 35000    | 2.40%                                      | 14000 (12000 to 18000)    | 18000    | -15.50%                                    |
| Eastern Asia              | 26000 (22000 to 31000)    | 32000    | -3.60%                                     | 5300 (4500 to 6200)       | 3600     | 7.20%                                      |
| Oceania                   | 780 (480 to 1300)         | 1200     | -0.30%                                     | 520 (270 to 1100)         | 1300     | -3.40%                                     |

## 5. REFERENCES

1. International Comparison Program database. The World Bank; 2014. (<http://data.worldbank.org/indicator/NY.GDP.PCAP.PP.KD>). Accessed 10 Nov 2014].
2. World population prospects: The 2015 Revision. New York: United Nations Population Division; 2015.
3. UNICEF global databases 2015, based on MICS, DHS and other nationally representative sources. (<http://data.unicef.org/>).

## 6. Supplementary figures

**Figure 1. Comparison of UN MMEIG 2015 and 2014 estimates for the MMR (left) and a decomposition of differences into differences that are due to changes in inputs and differences due to changes in modelling approach (right) for 1990 (top row) and 2013 (bottom row).** Countries for which the absolute relative difference in MMR is greater than 20% and corresponds to an absolute difference of at least 10 deaths per 100,000 live births are highlighted in the left column and differences are decomposed for this set of selected countries in the right column.

**Figure 2. UN MMEIG country estimates.** Top row: Data series and estimates of the PM (proportion of all-cause deaths that are maternal) and the MMR (number of maternal deaths per 100,000 live births) for all countries. MMEIG 2015 estimates are illustrated by the solid red lines and 80% uncertainty intervals are shown by the red shaded areas. Reported (unadjusted) and adjusted observations are displayed. The vertical line with each adjusted observation indicates the approximate 80% confidence interval for the PM or MMR associated with that observation, based on point estimates for reporting adjustments and total error variance. Bottom row: Covariates GDP, GFR and SAB, the ratio of all-cause mortality (the envelope) to the number of births (black) and ratio of non-AIDS mortality to the number of births (red), the non-AIDS MMR and the AIDS MMR.

**Figure 3. Comparison of UN MMEIG and GBD 2013 MMR estimates (country plots).** MMEIG 2015 estimates are illustrated by the solid red lines and 80% uncertainty intervals are shown by the red shaded areas. GBD 2013 estimates are added in green. Data displayed are from the UN MMEIG database. Reported (unadjusted) and adjusted observations are displayed. The vertical line with each adjusted observation indicates the approximate 80% confidence interval for the MMR associated with that observation, based on point estimates for reporting adjustments and total error variance.



MMR in 1990

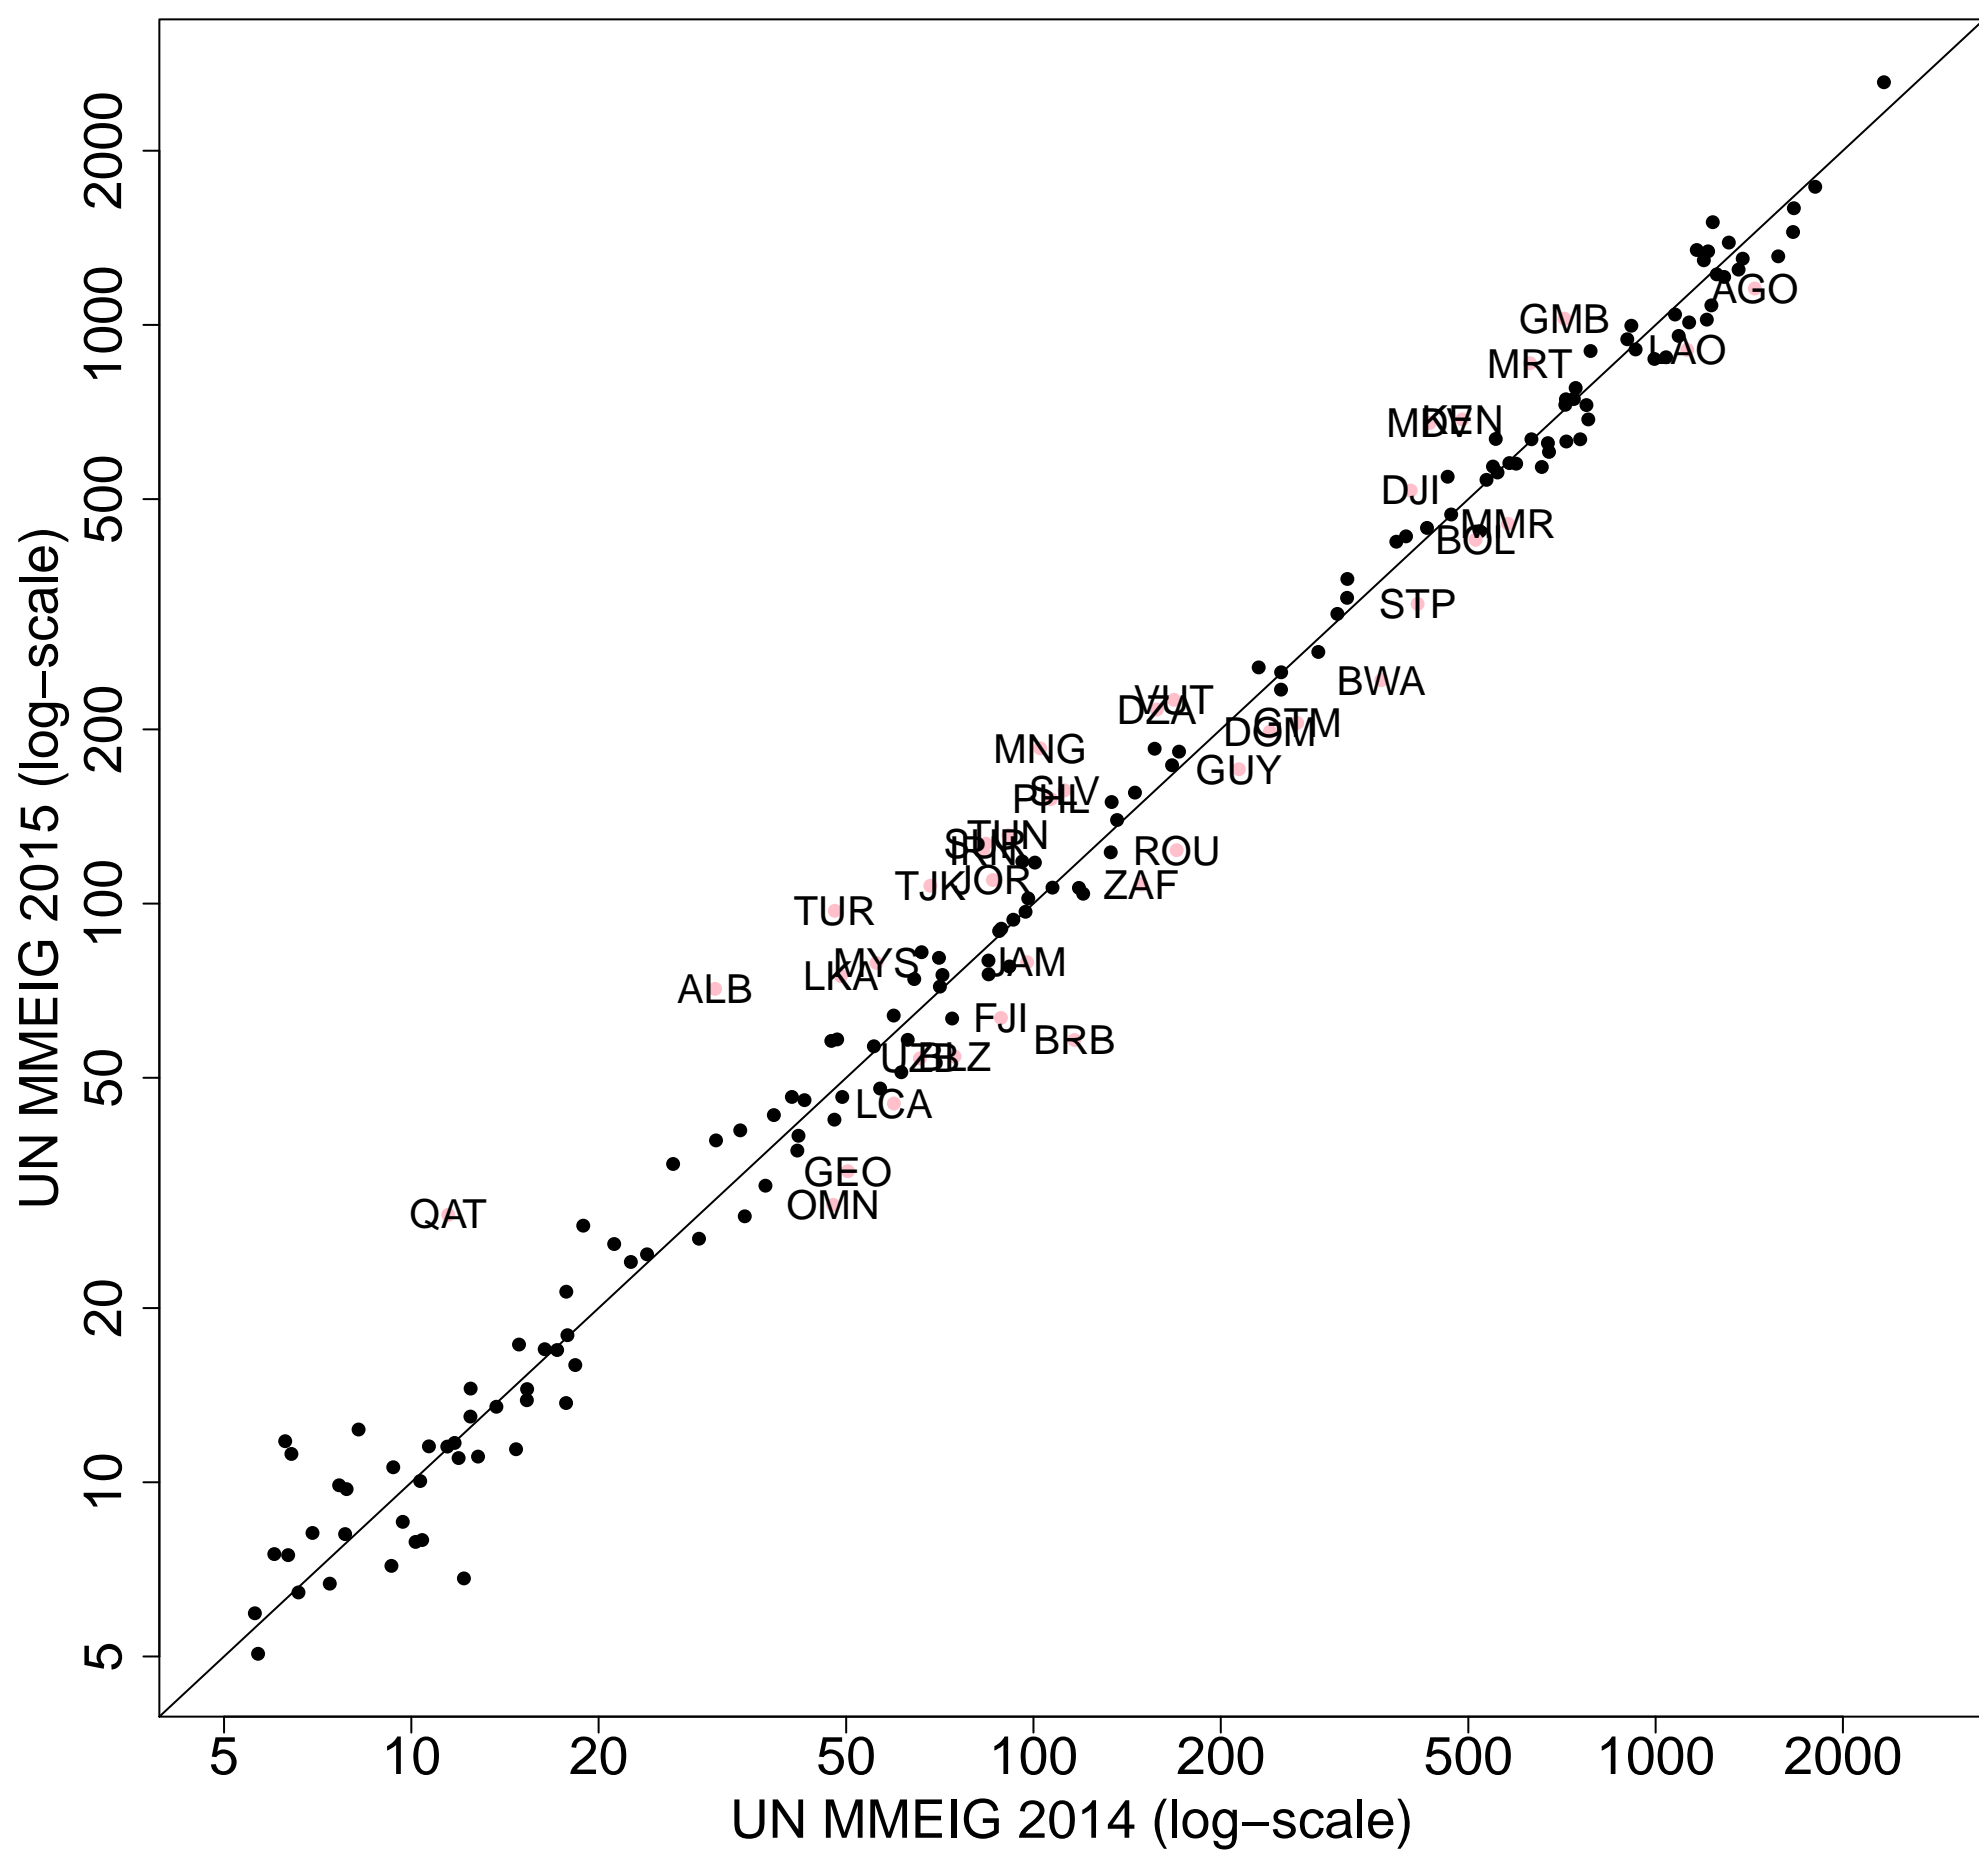

MMR in 1990

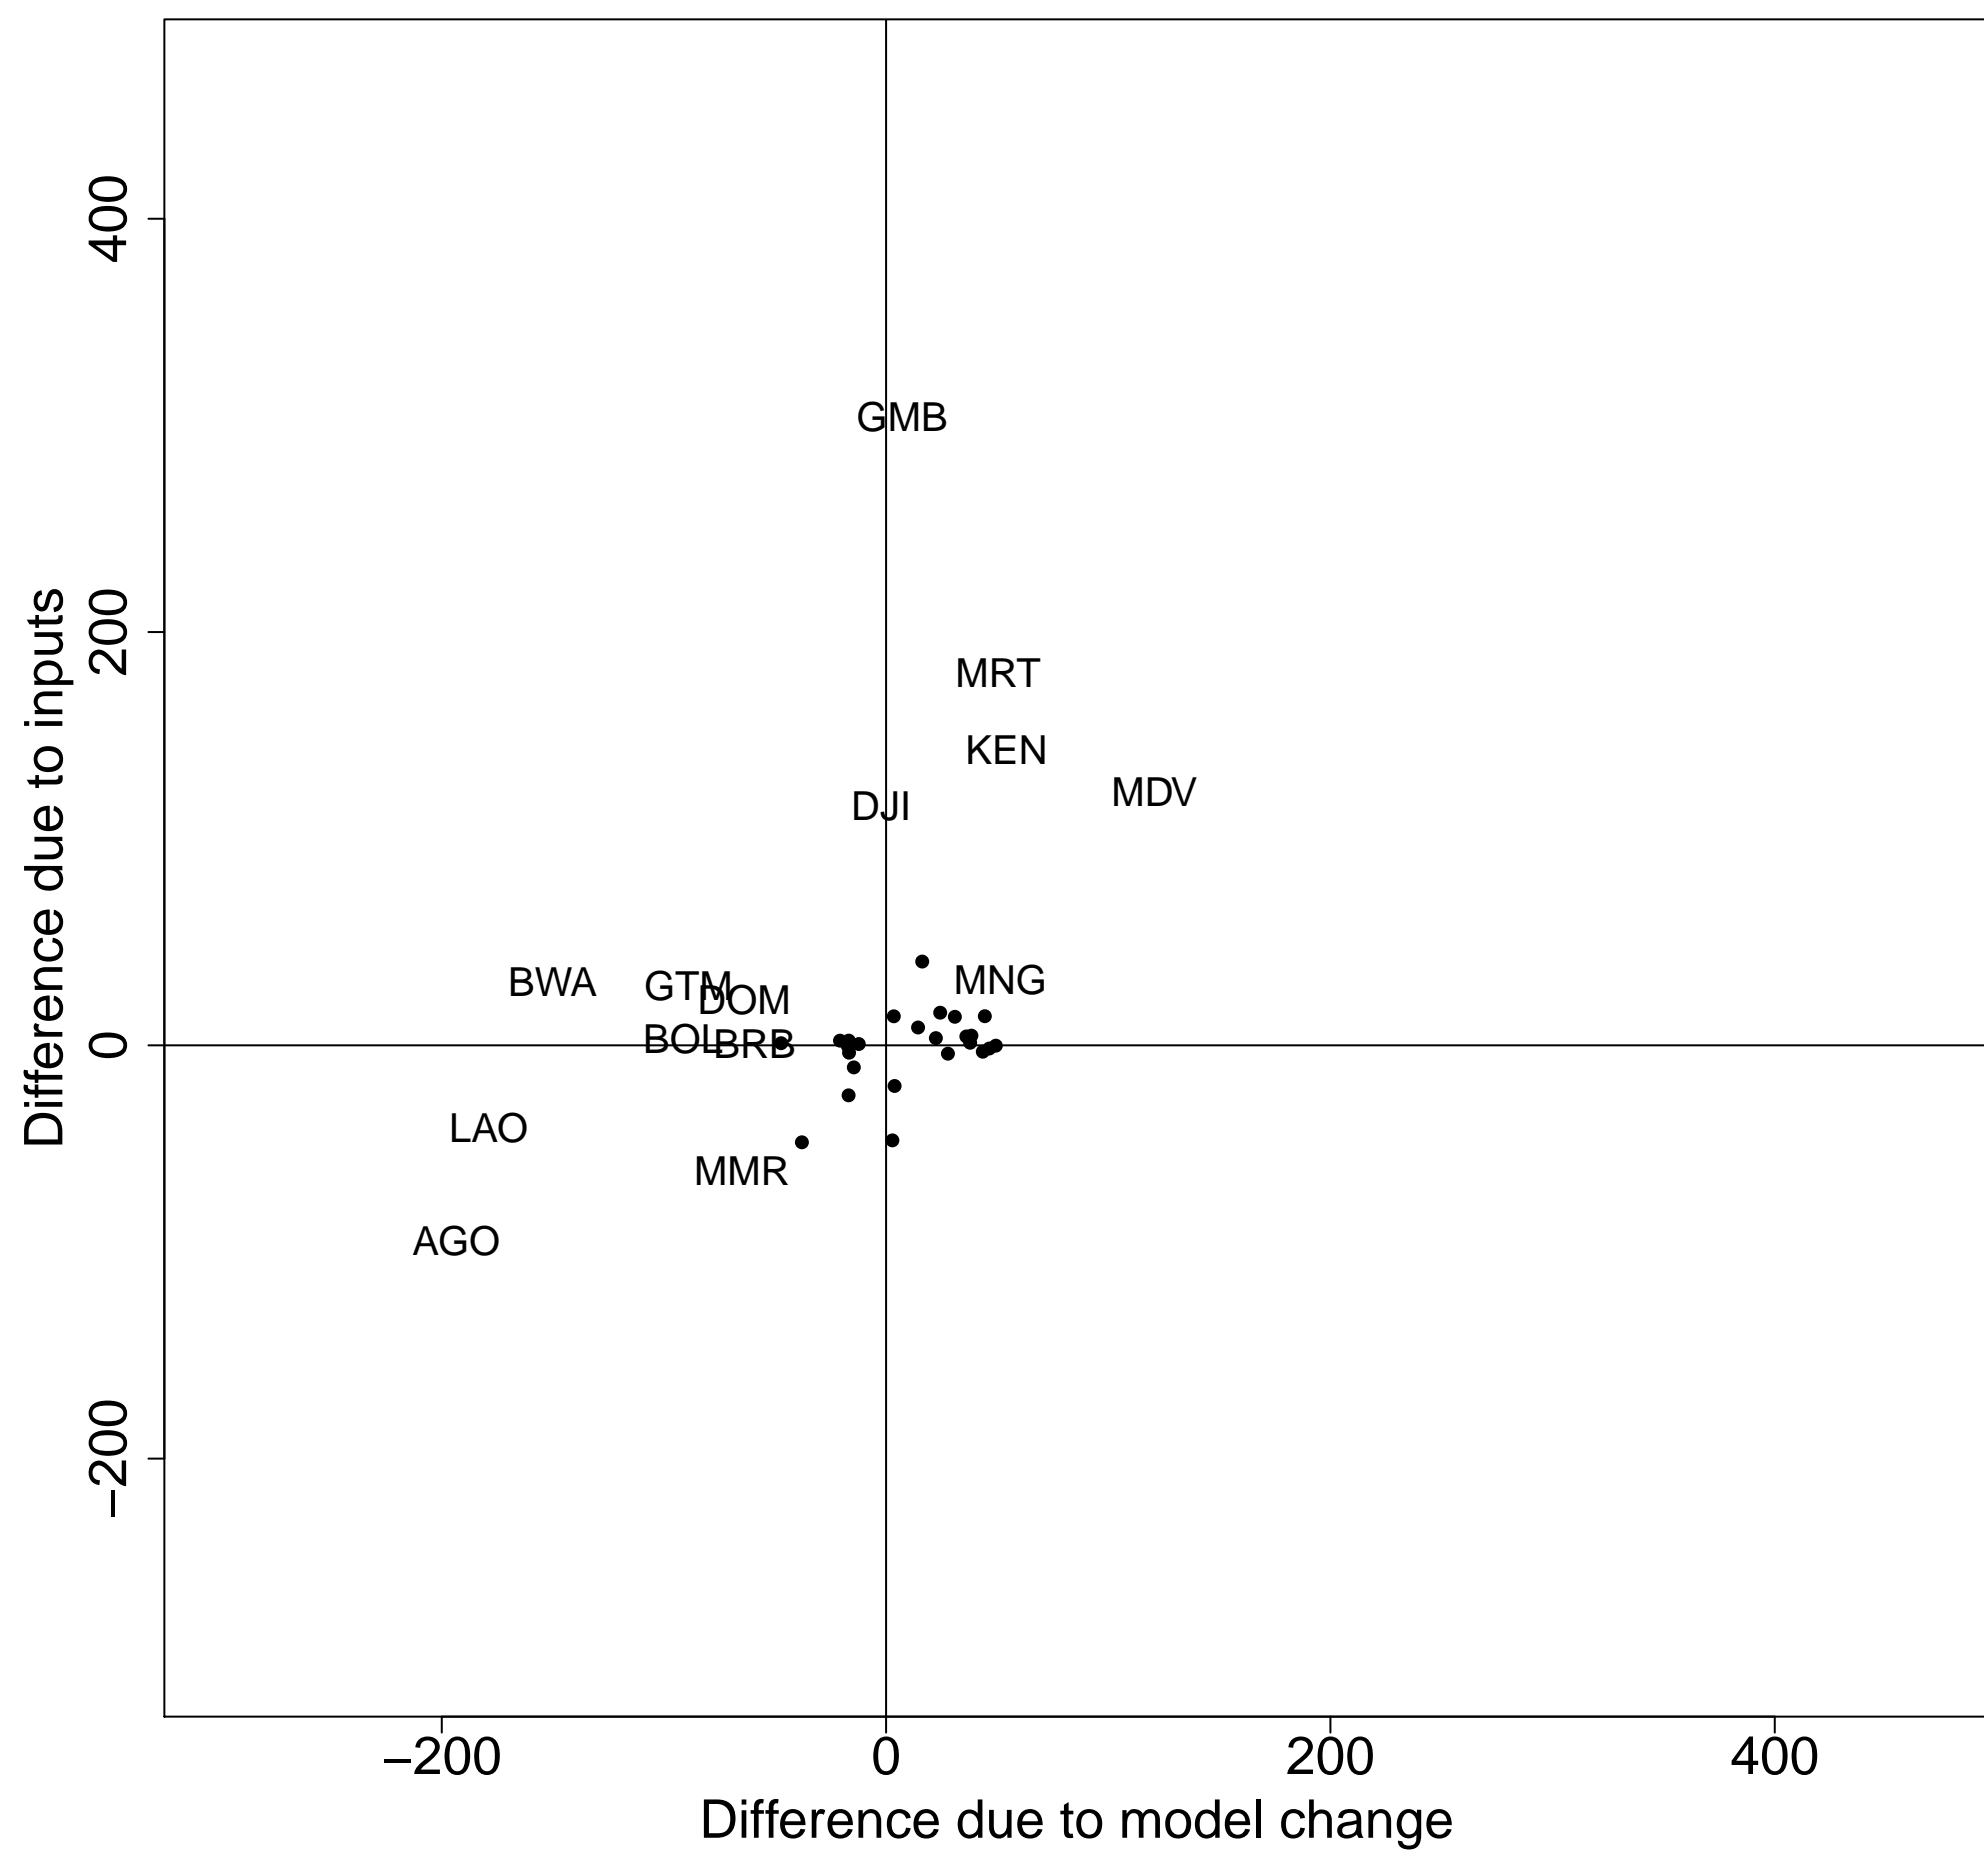

MMR in 2013

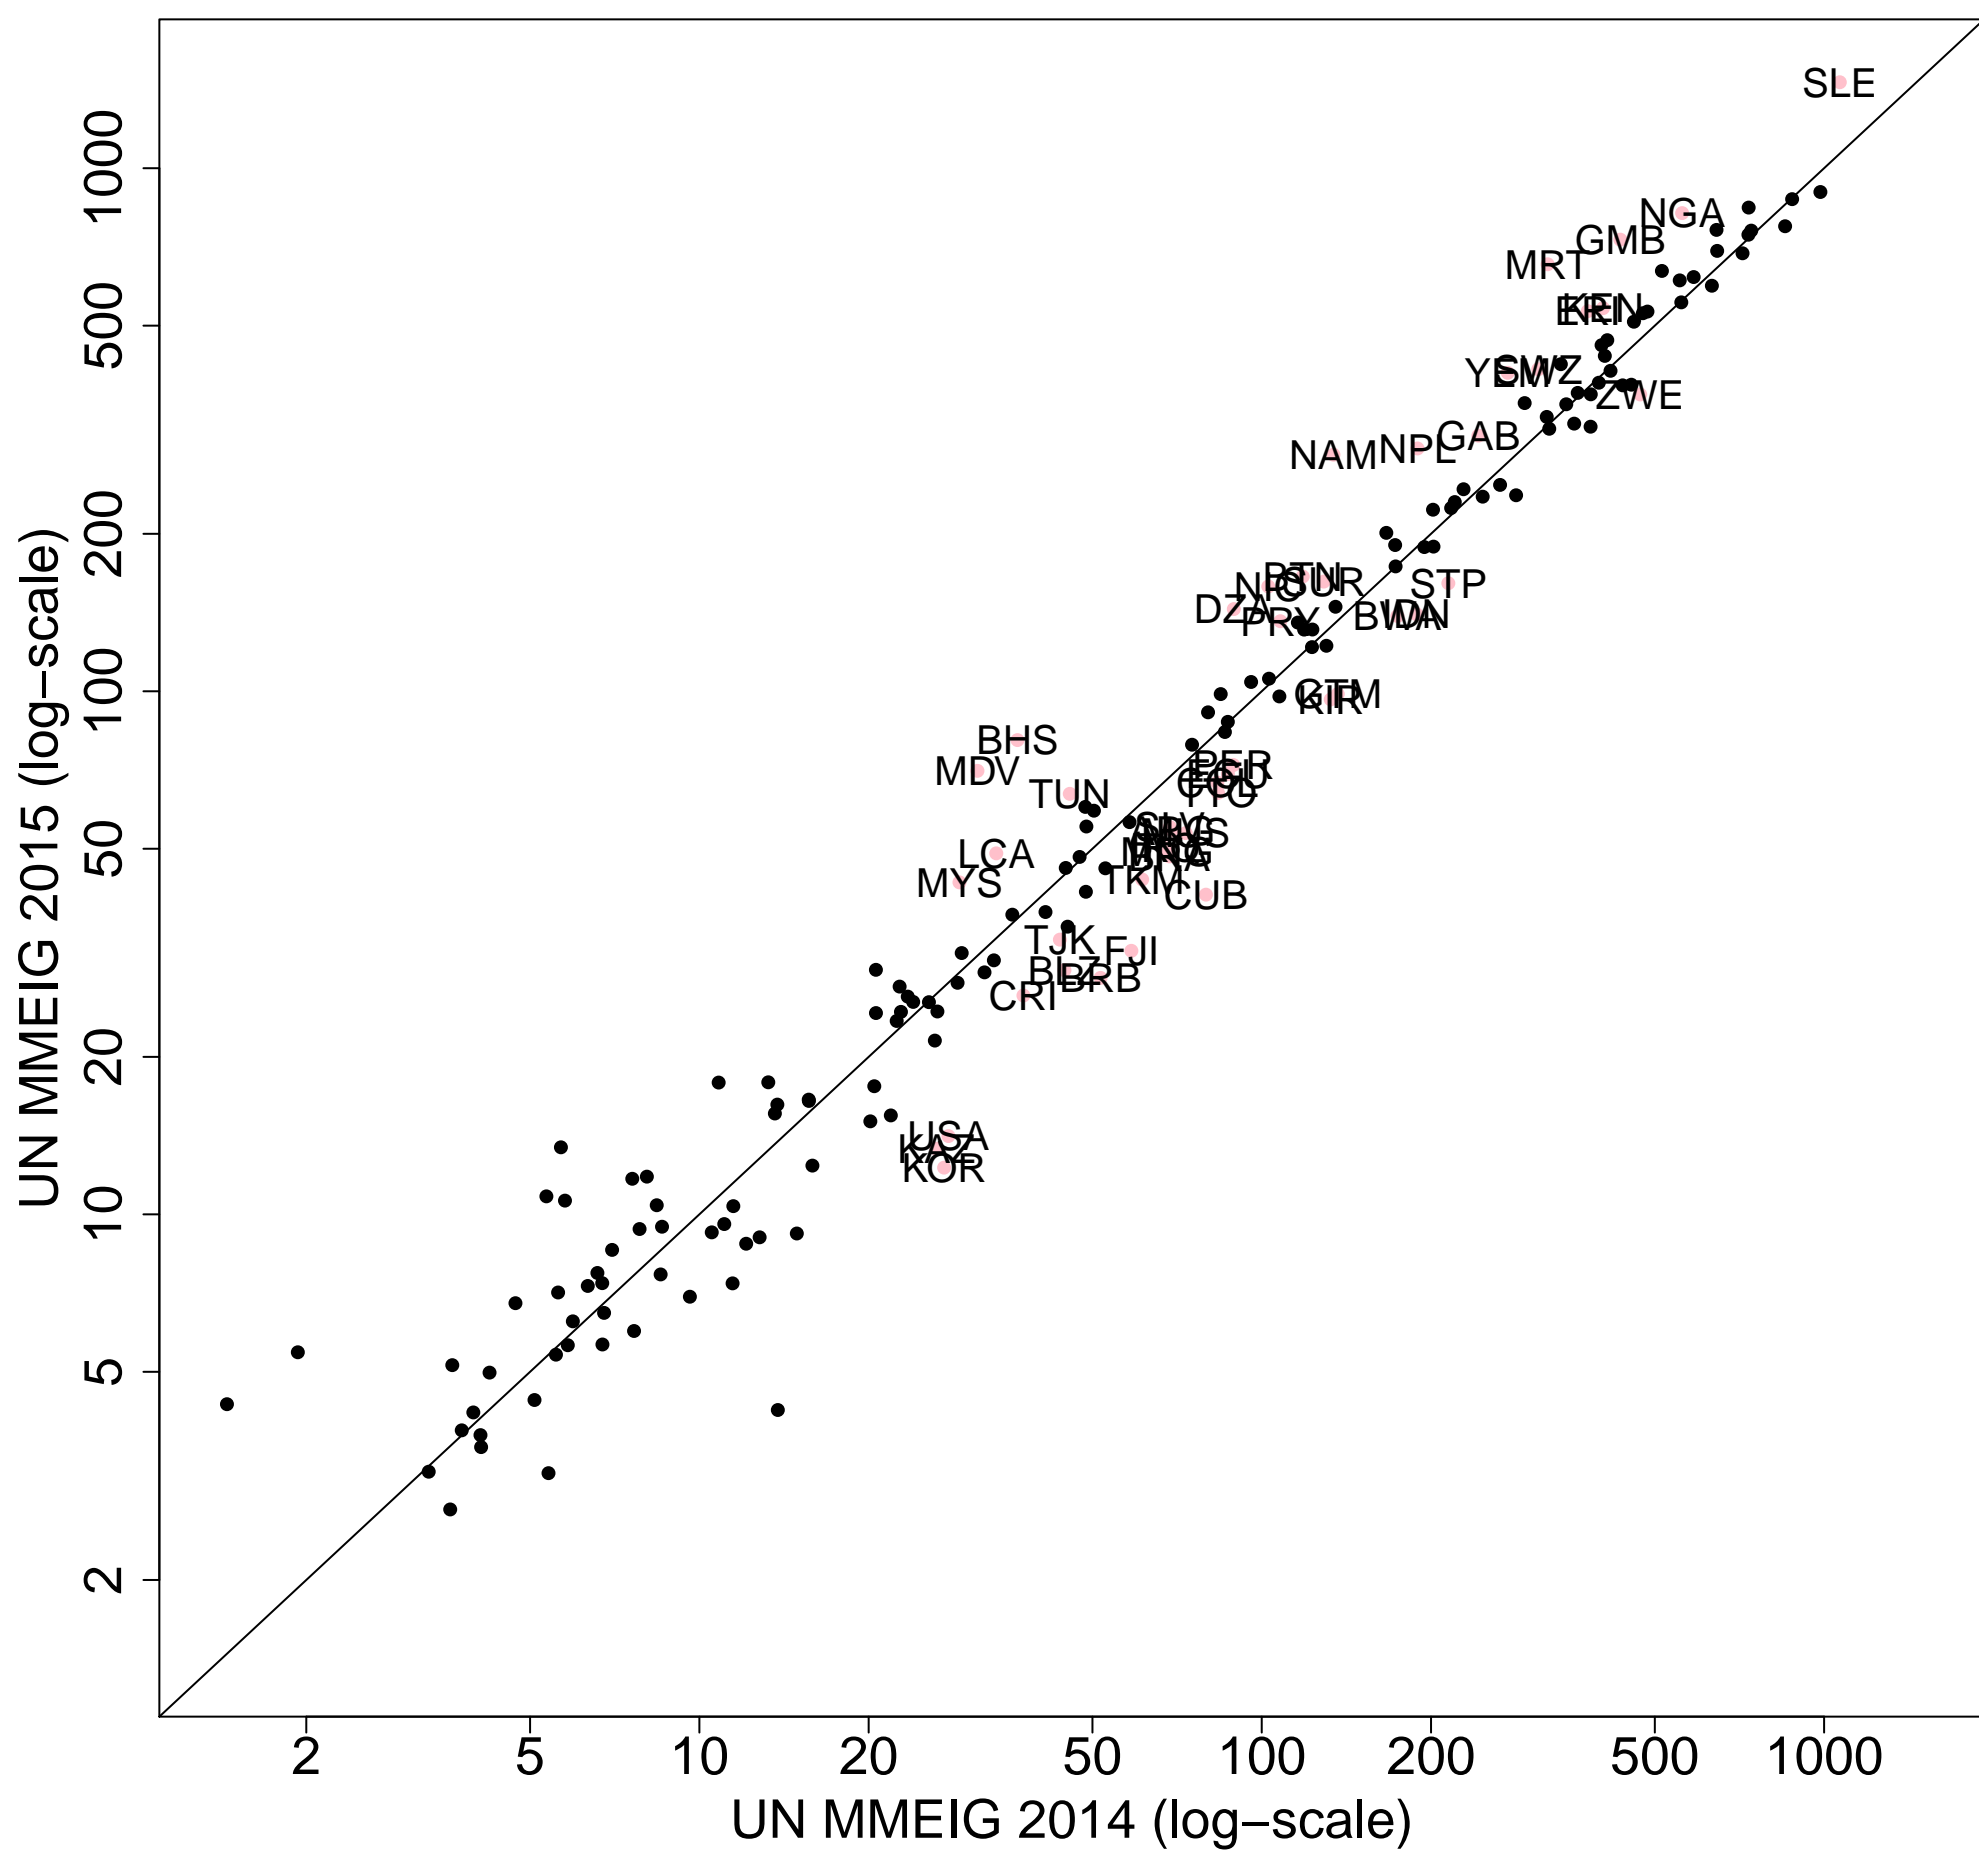

MMR in 2013

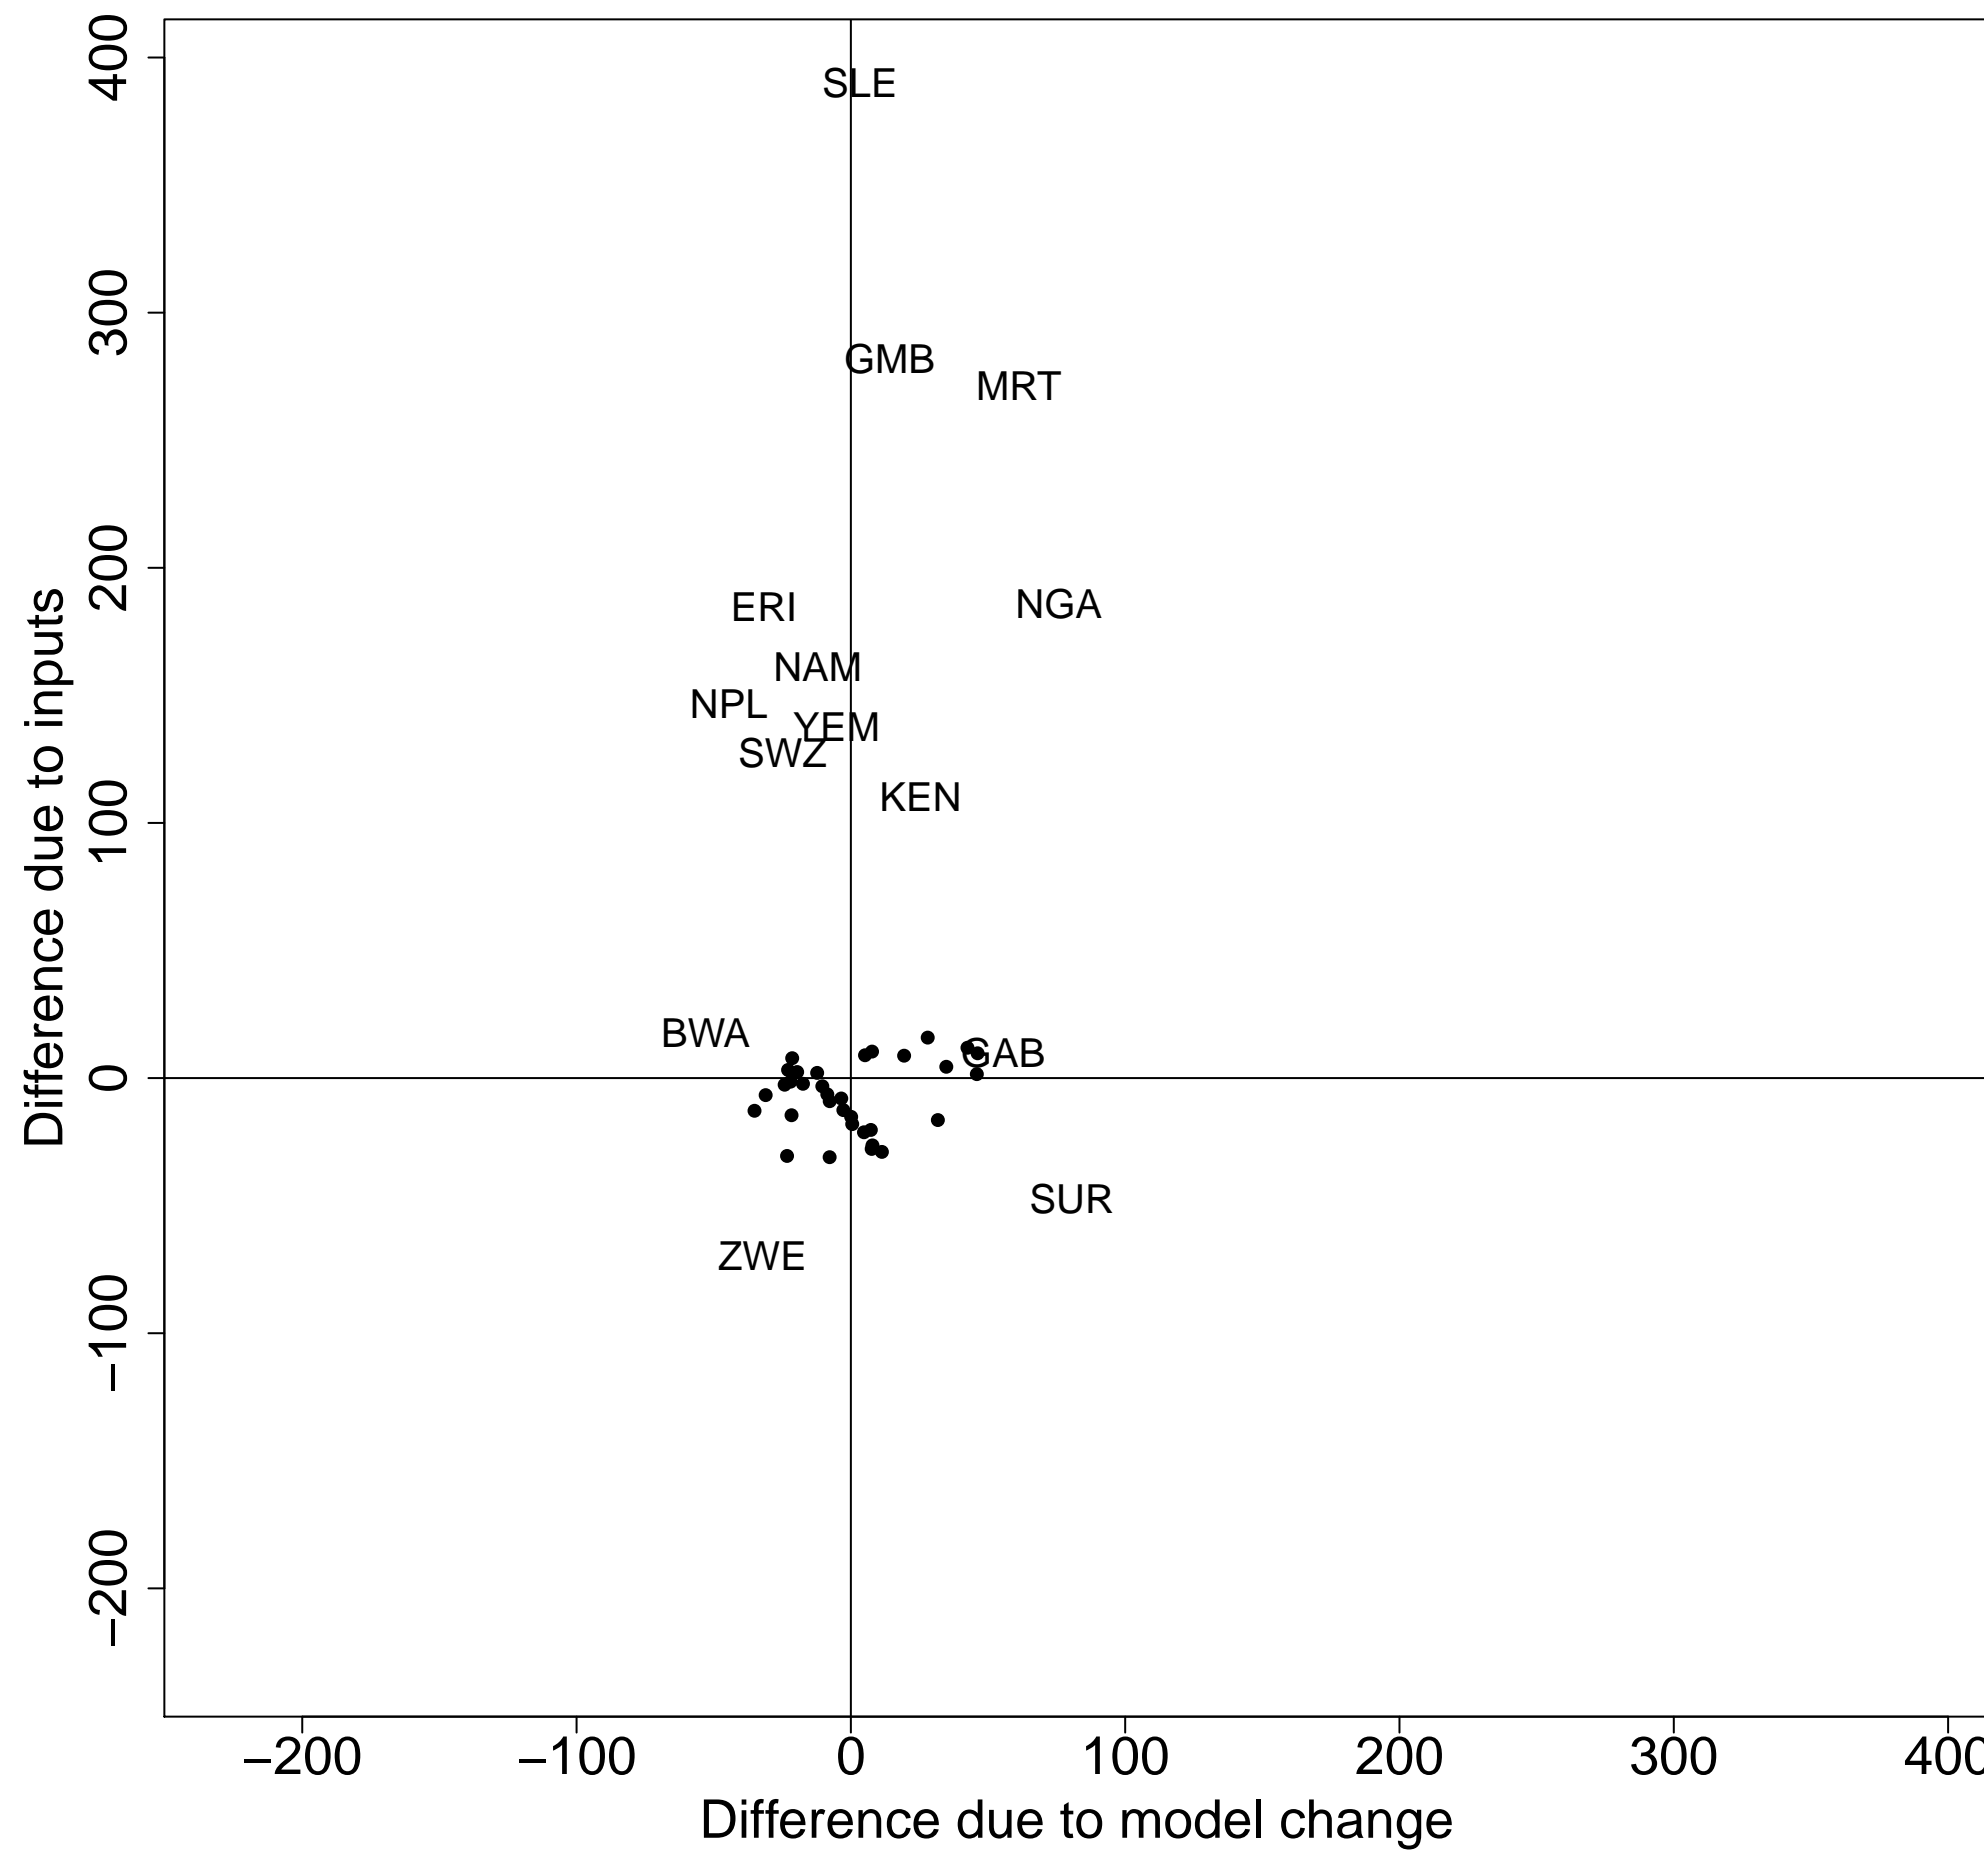



Afghanistan [AFG]  
(Southern Asia)

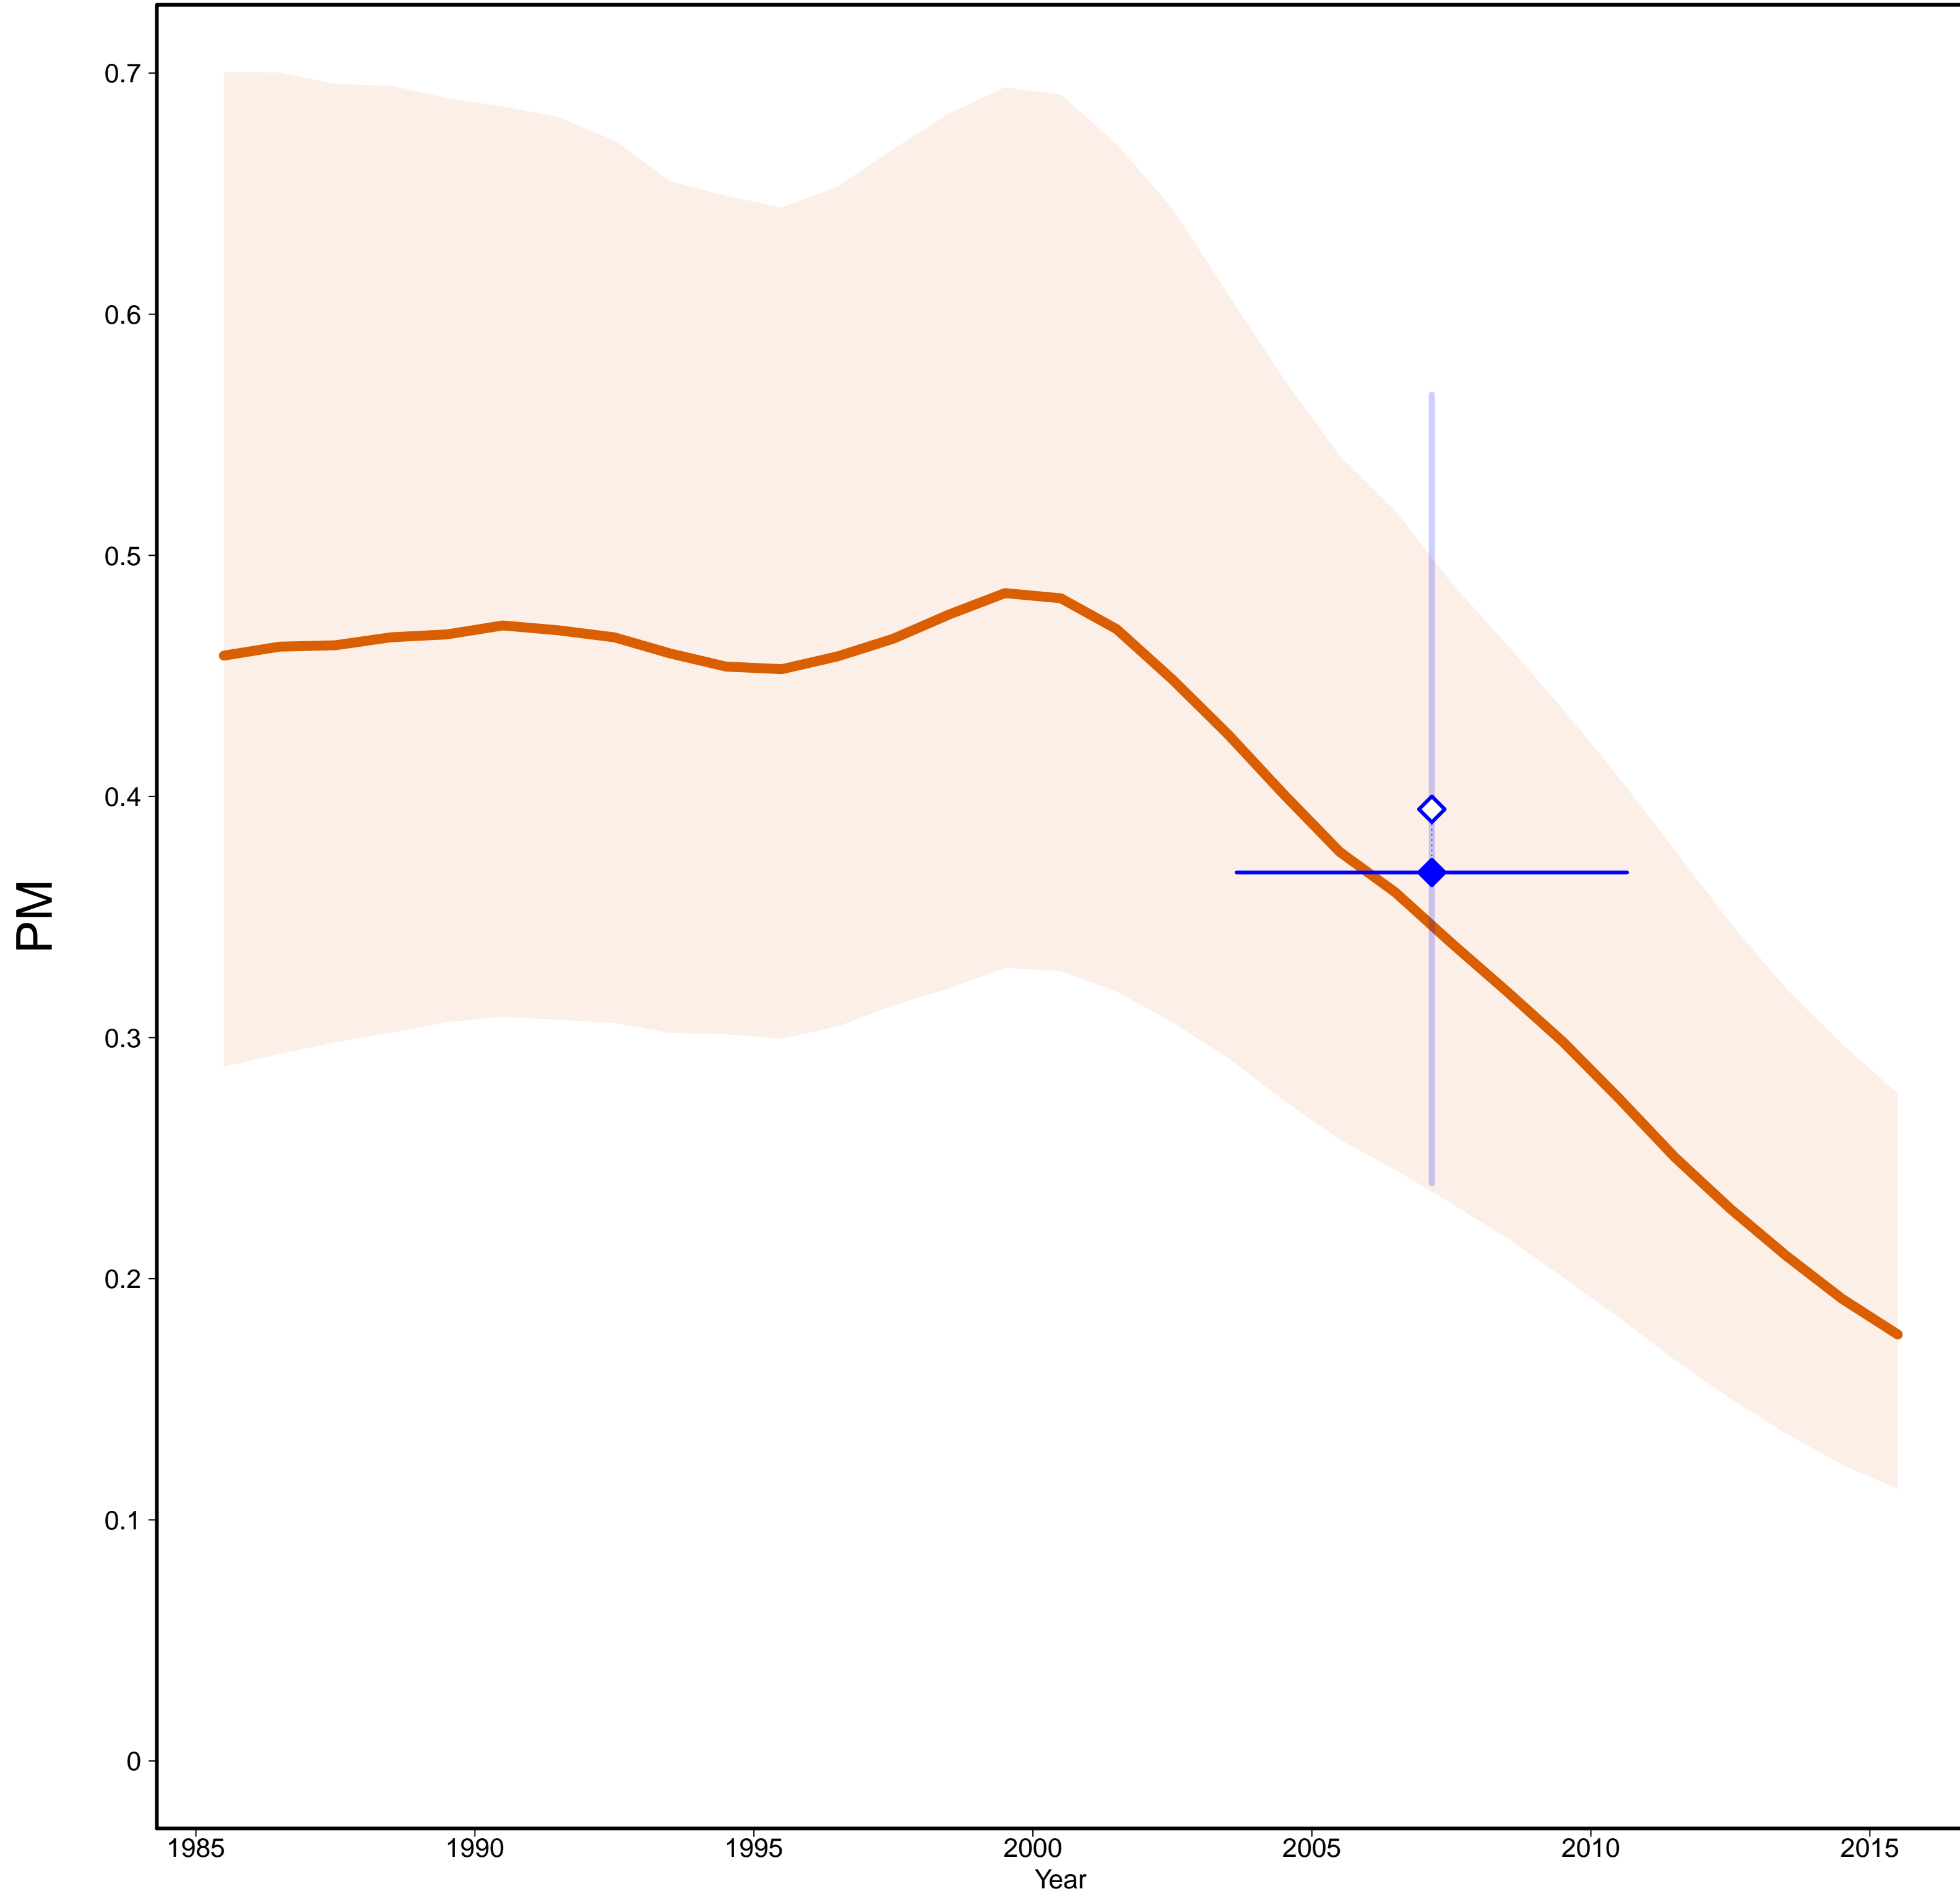

Afghanistan [AFG]  
(Southern Asia)

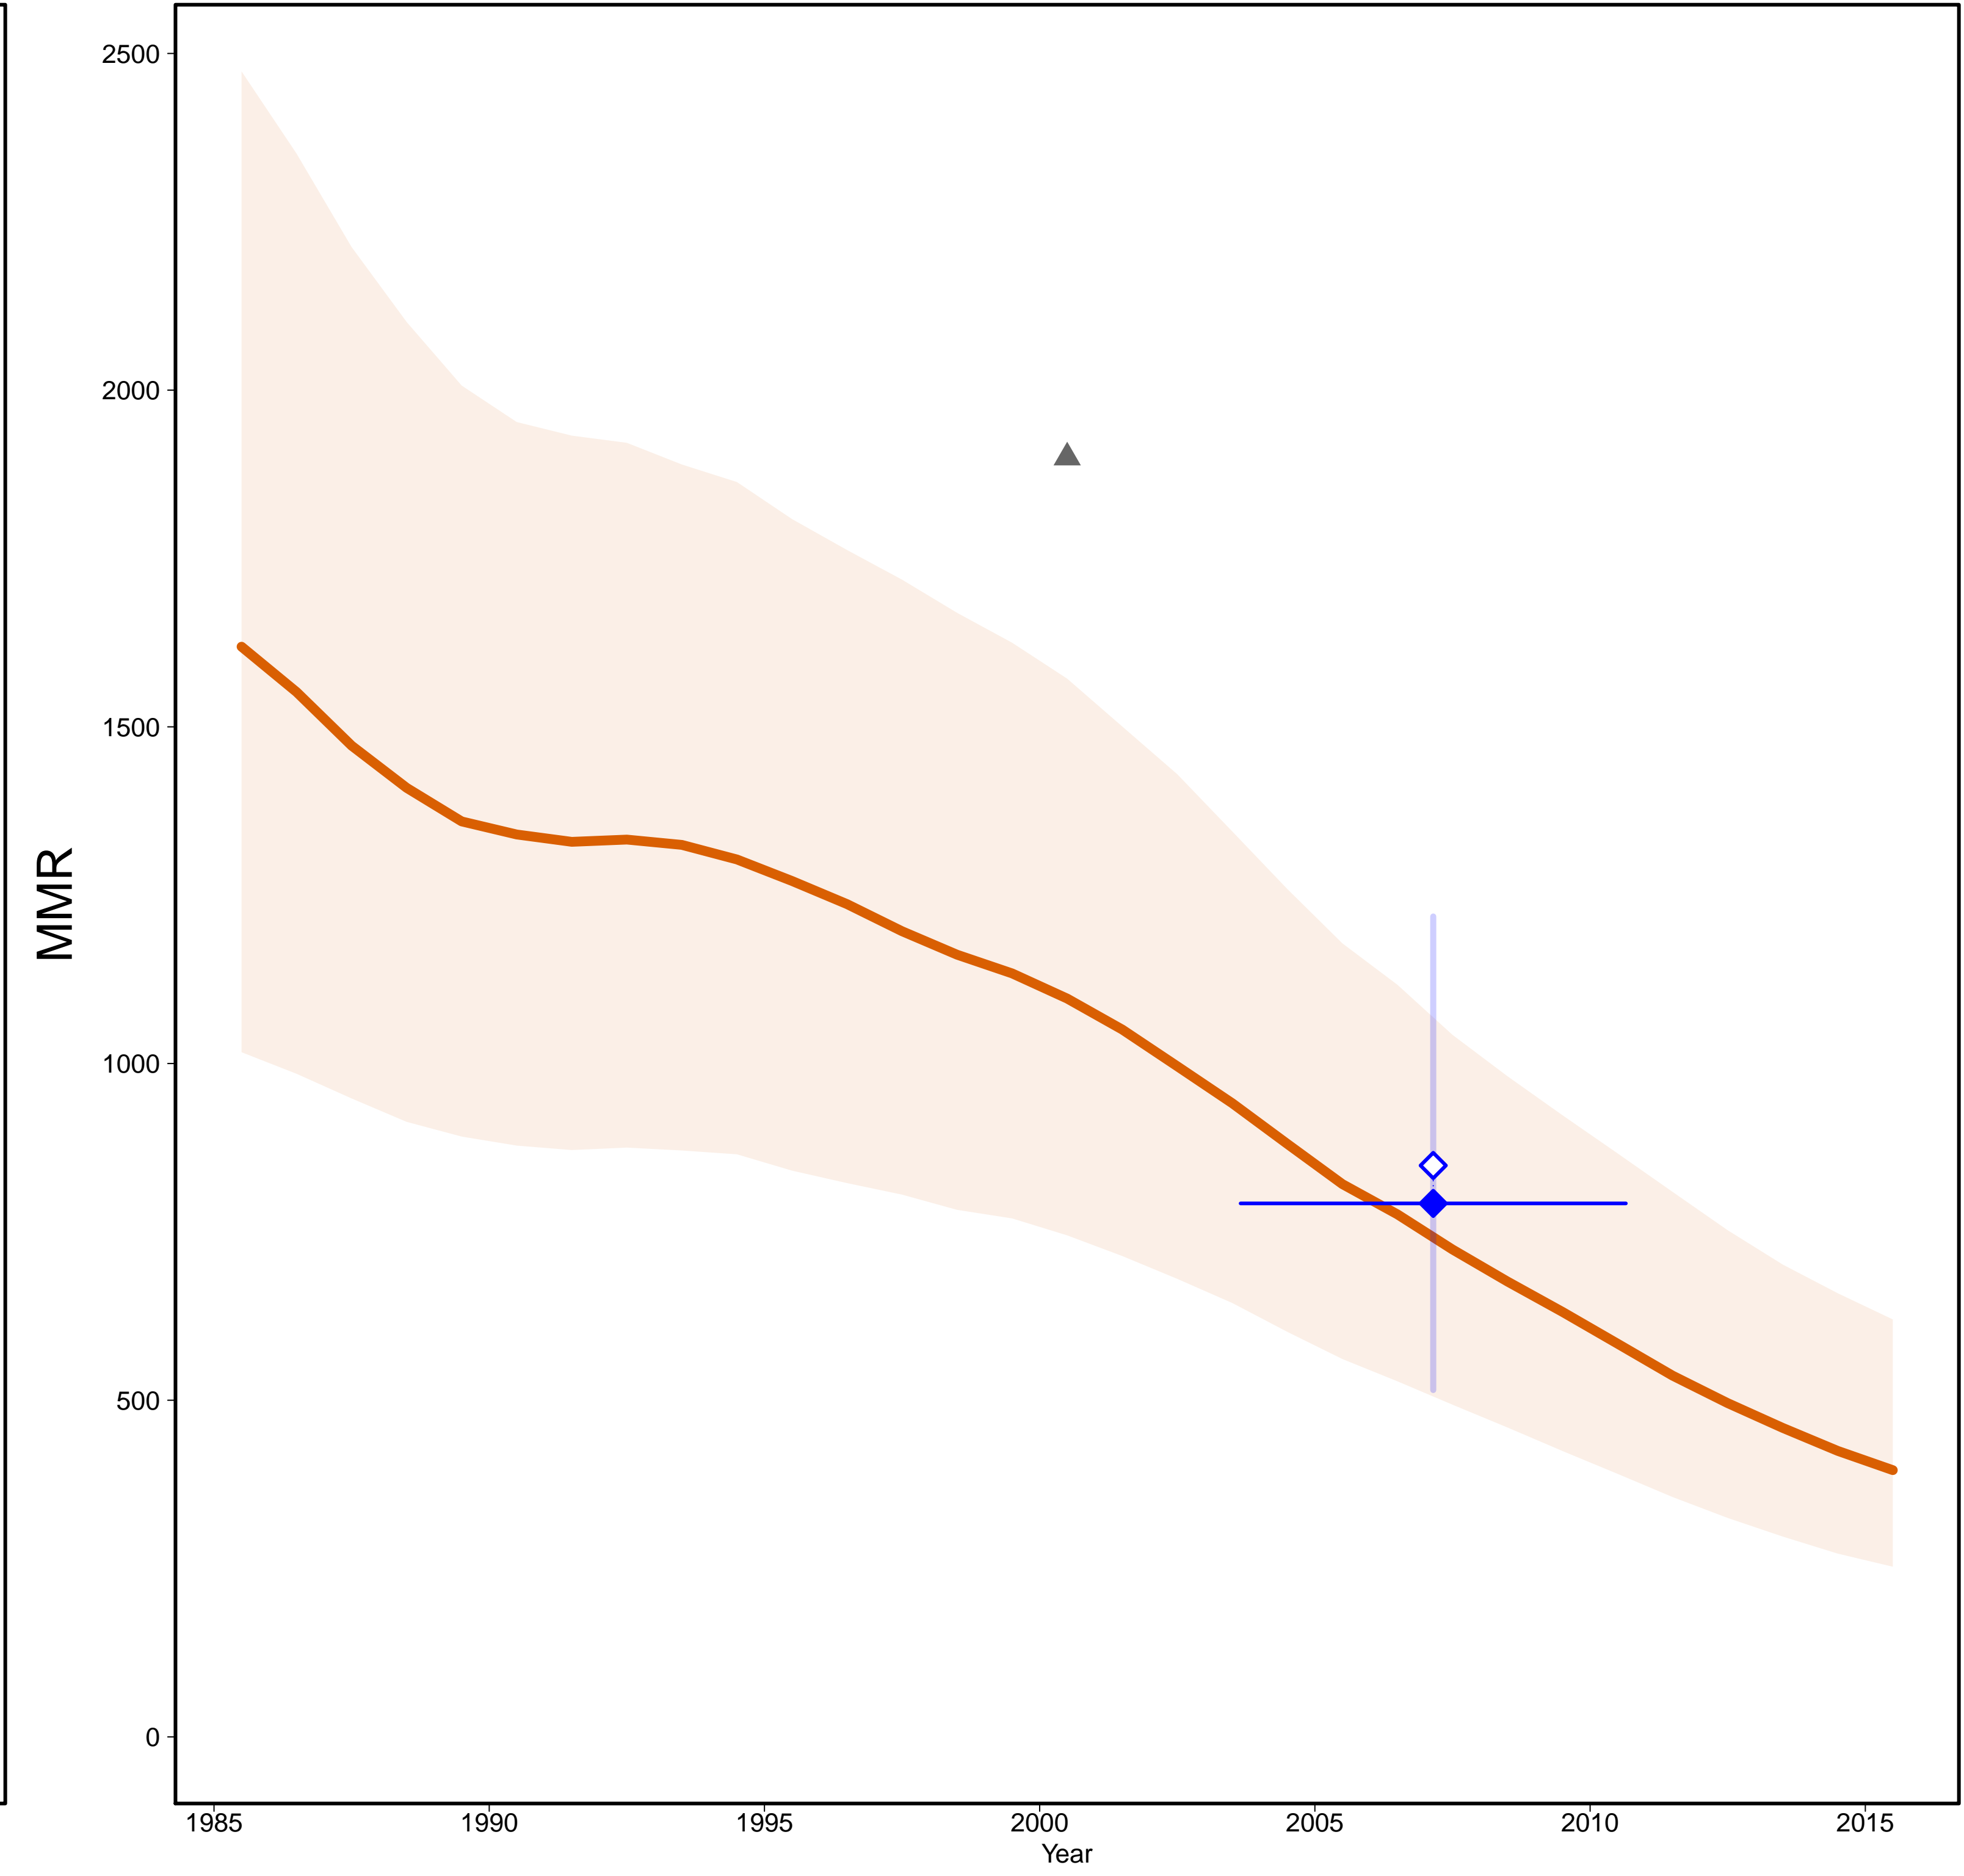

- Estimates —
- MMR Database 2015 —
- ◇ Observed Data
- ◆ Adjusted Data
- Data type —
- ◆ DHS
- ▲ Excluded misc. studies

Gross Domestic Product

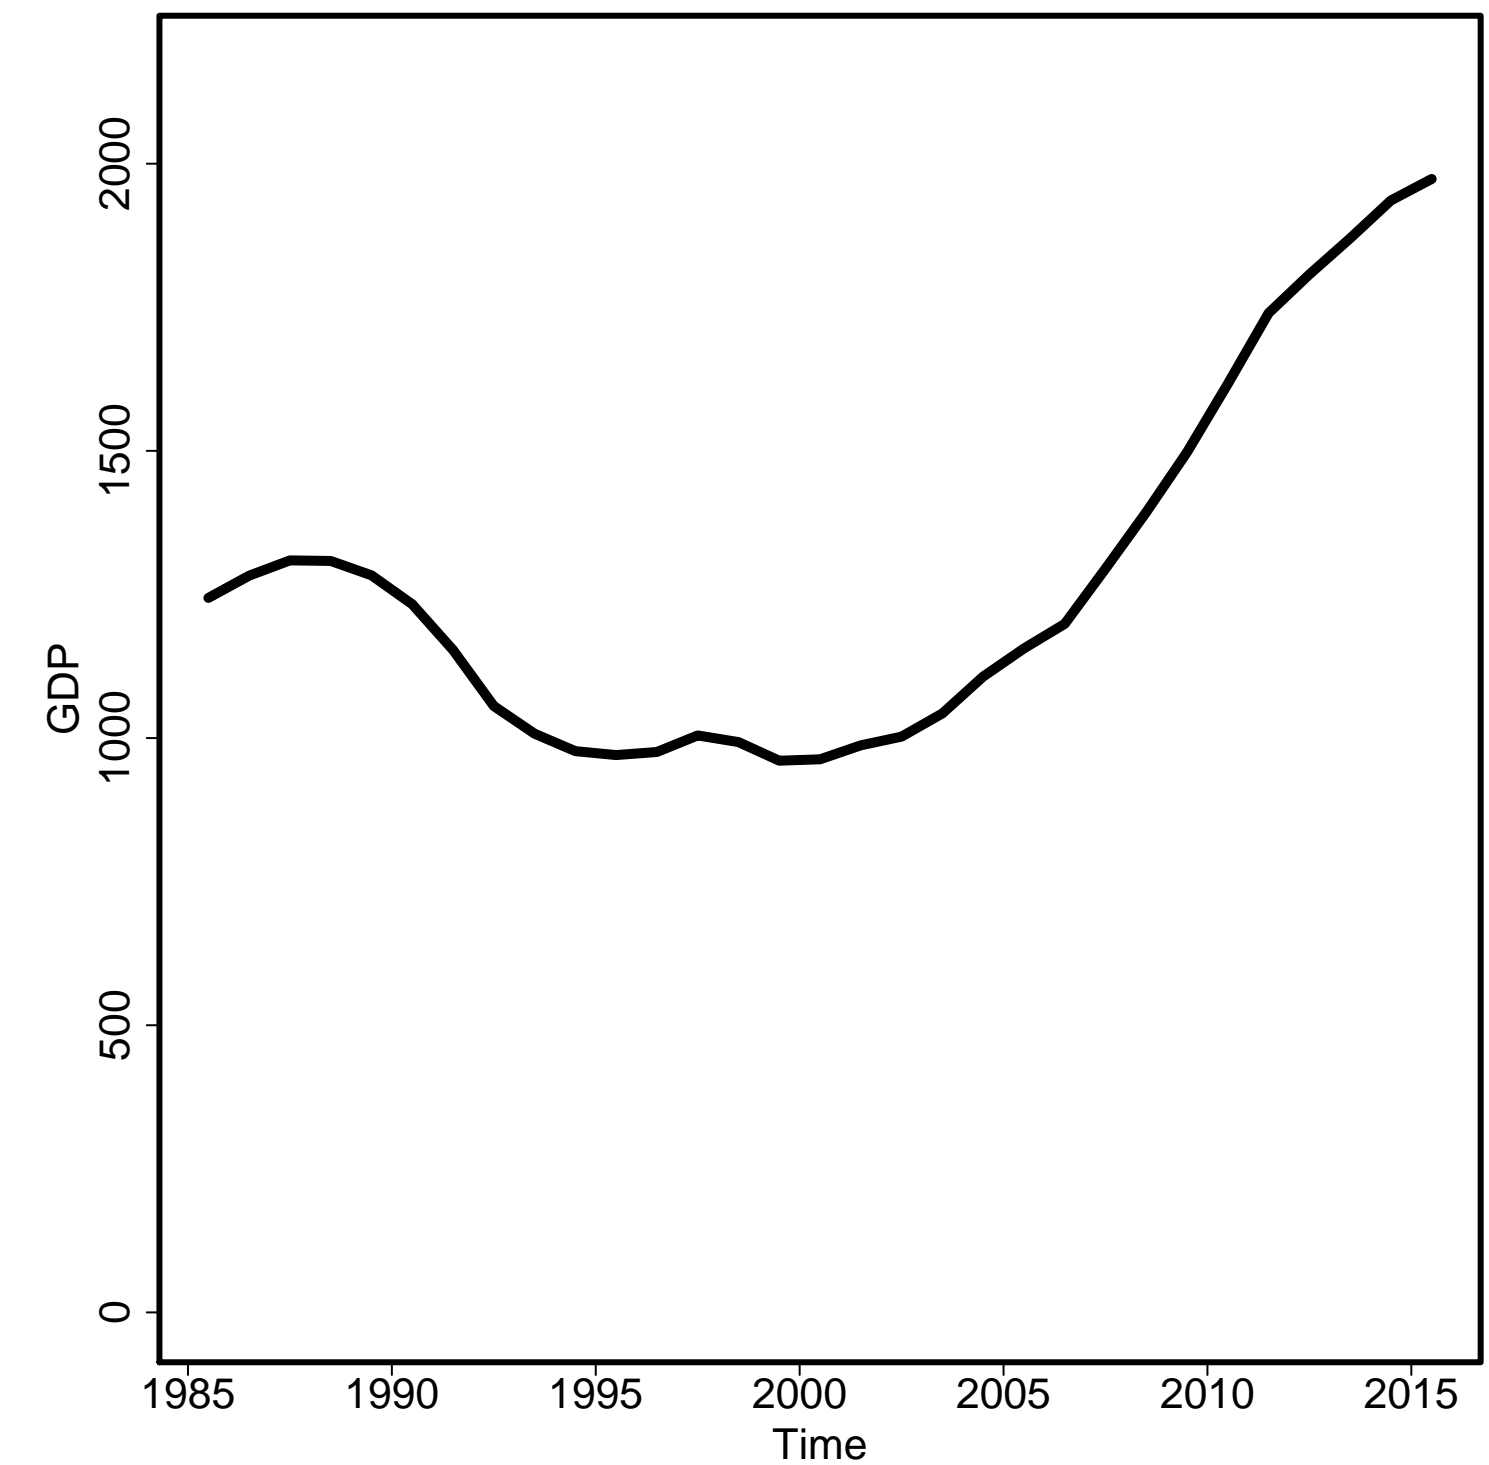

General Fertility Rate

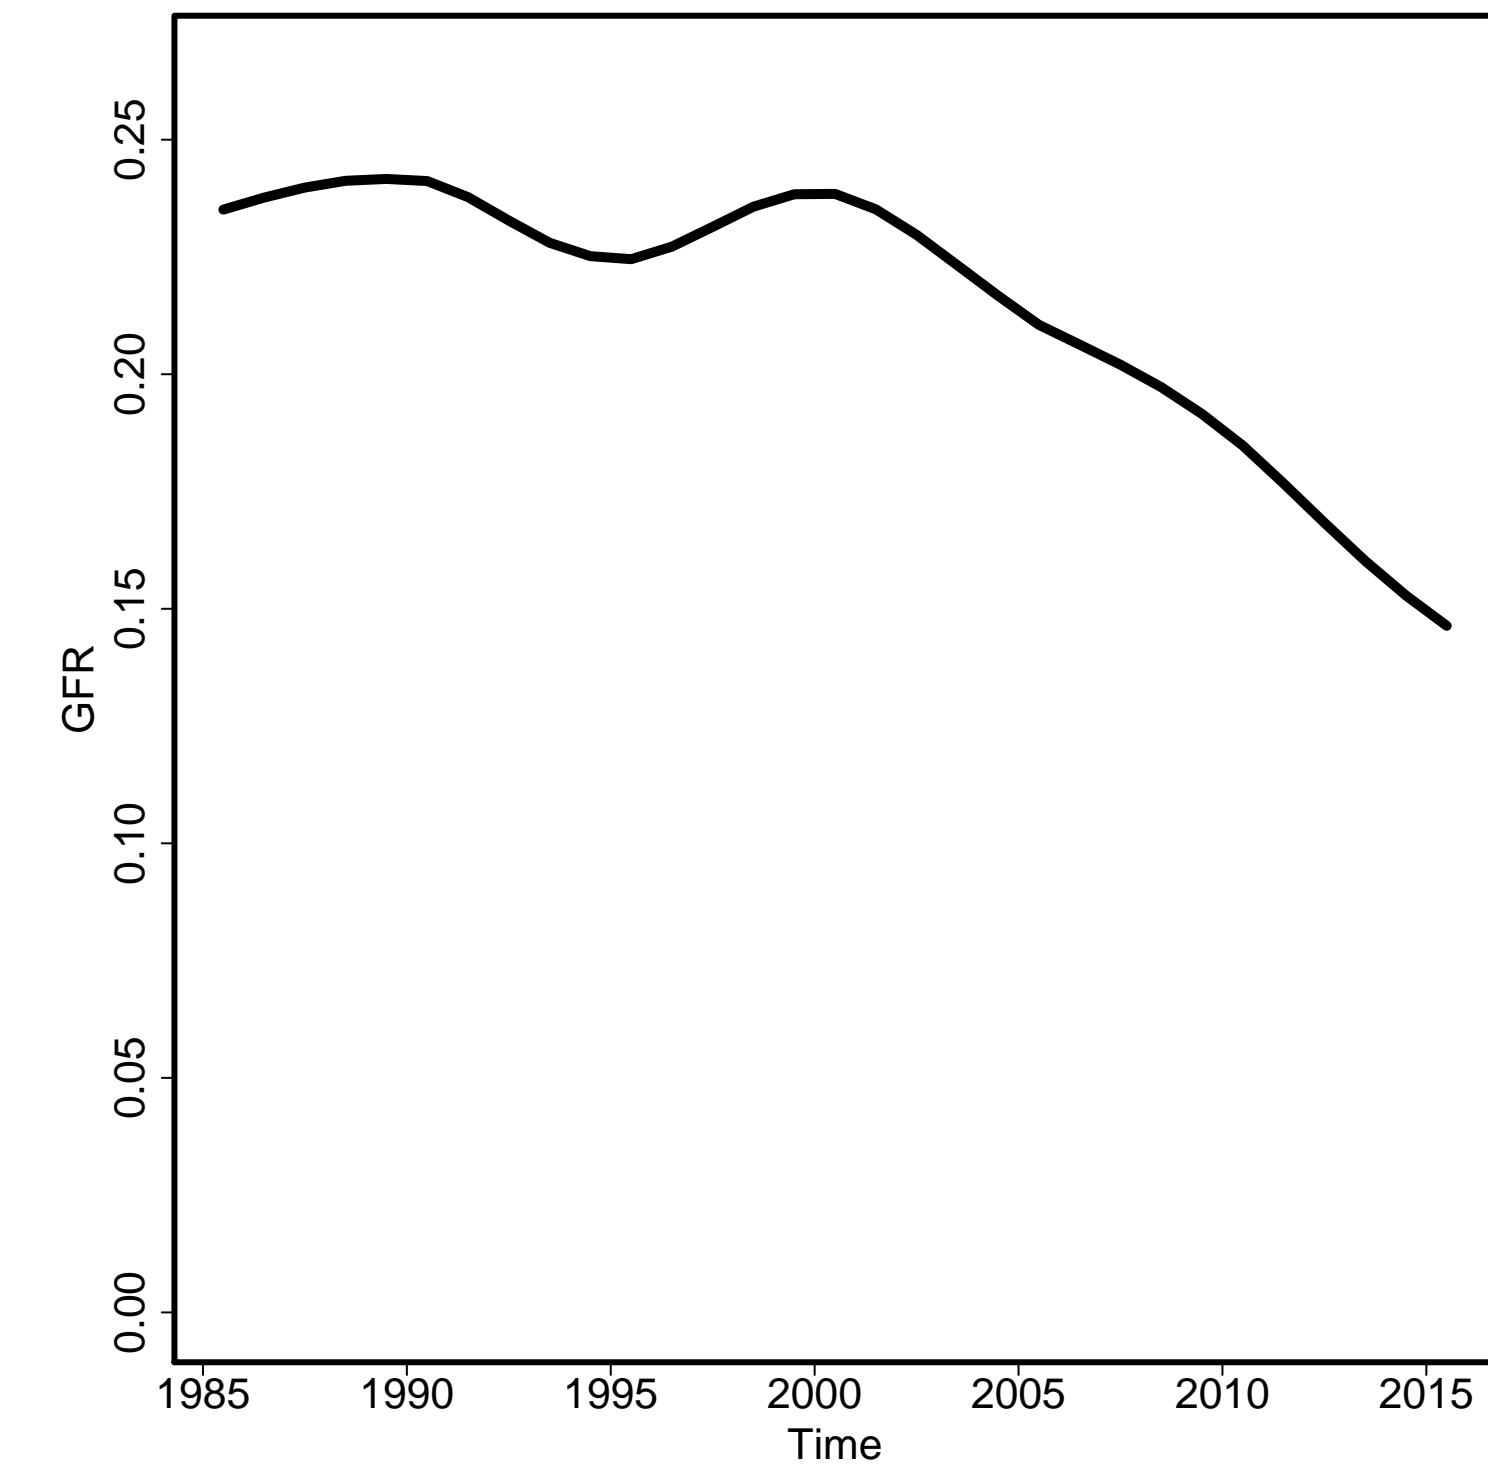

Skilled Attendance to Birth

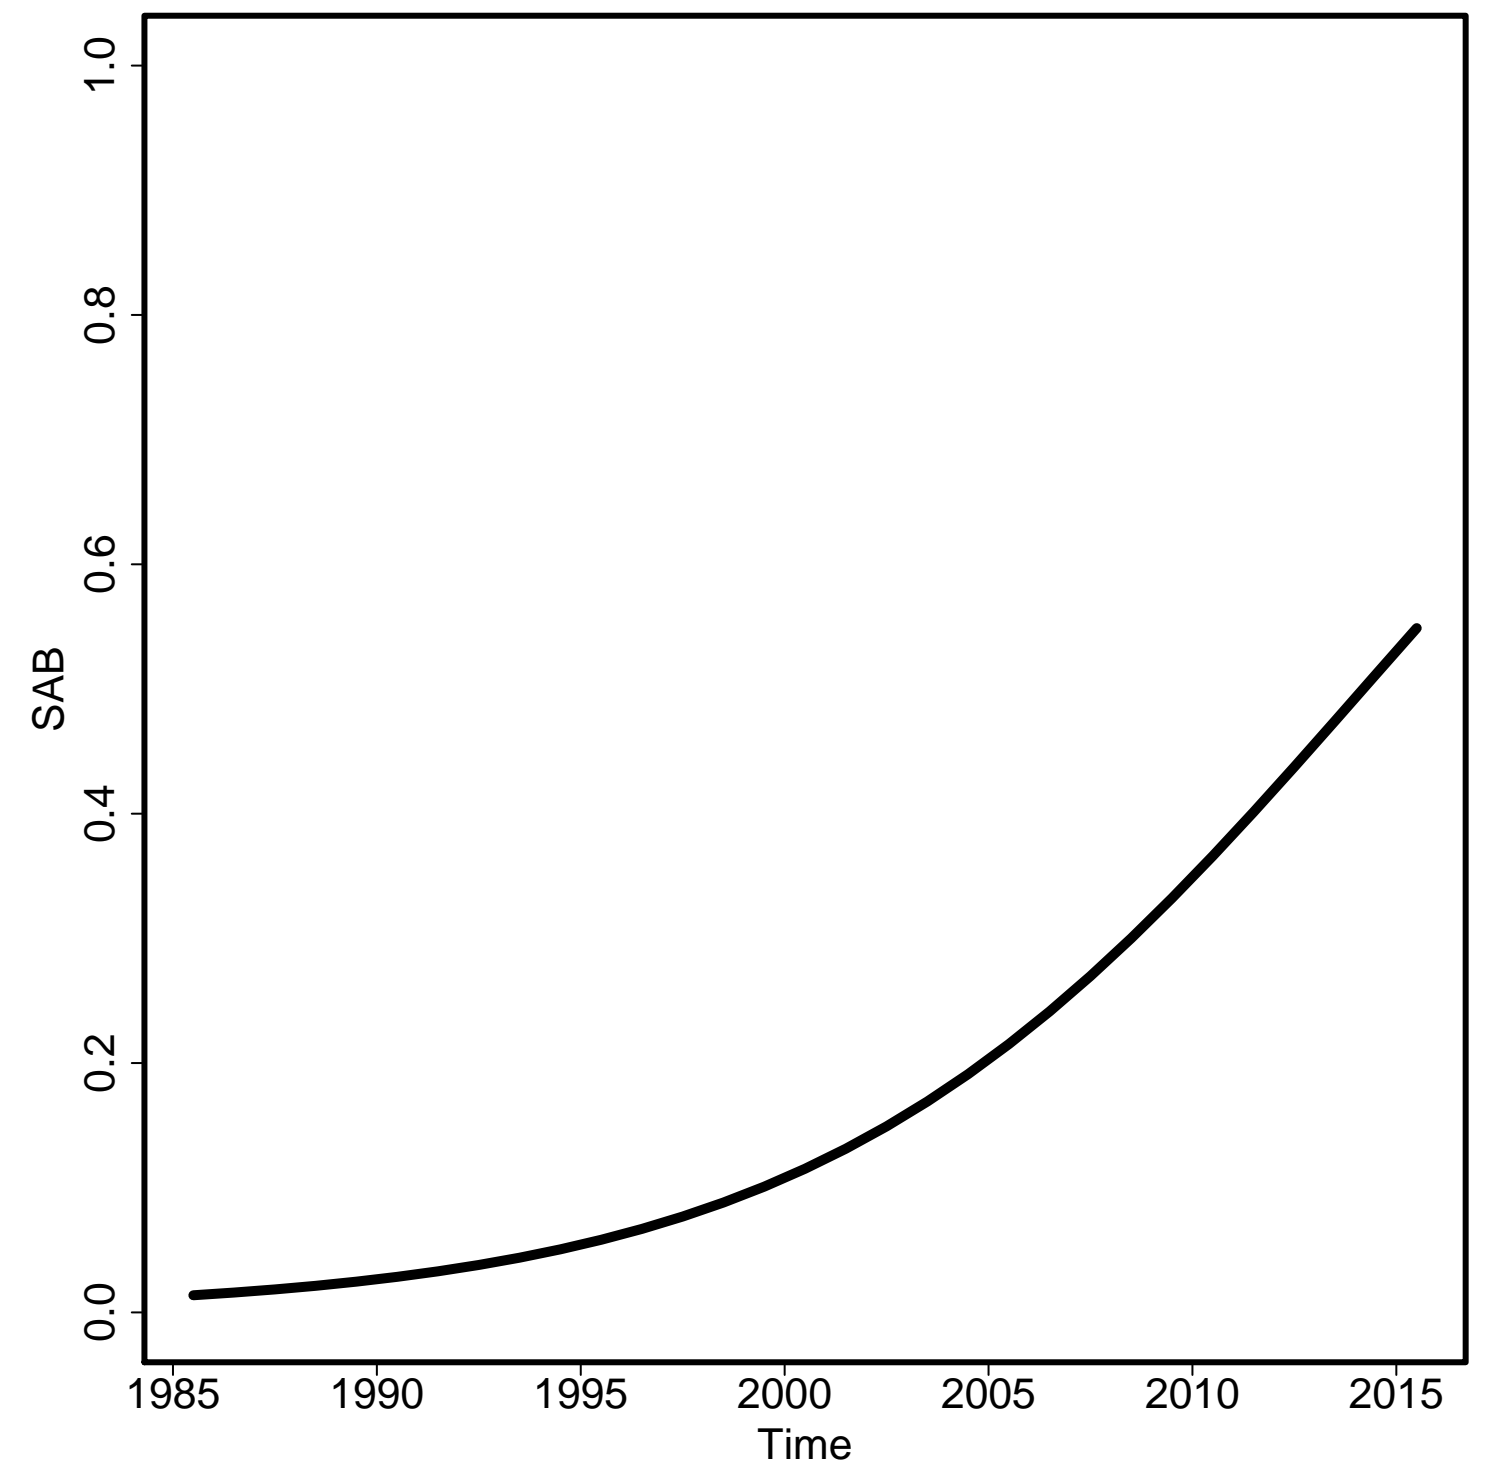

Envelope/Births

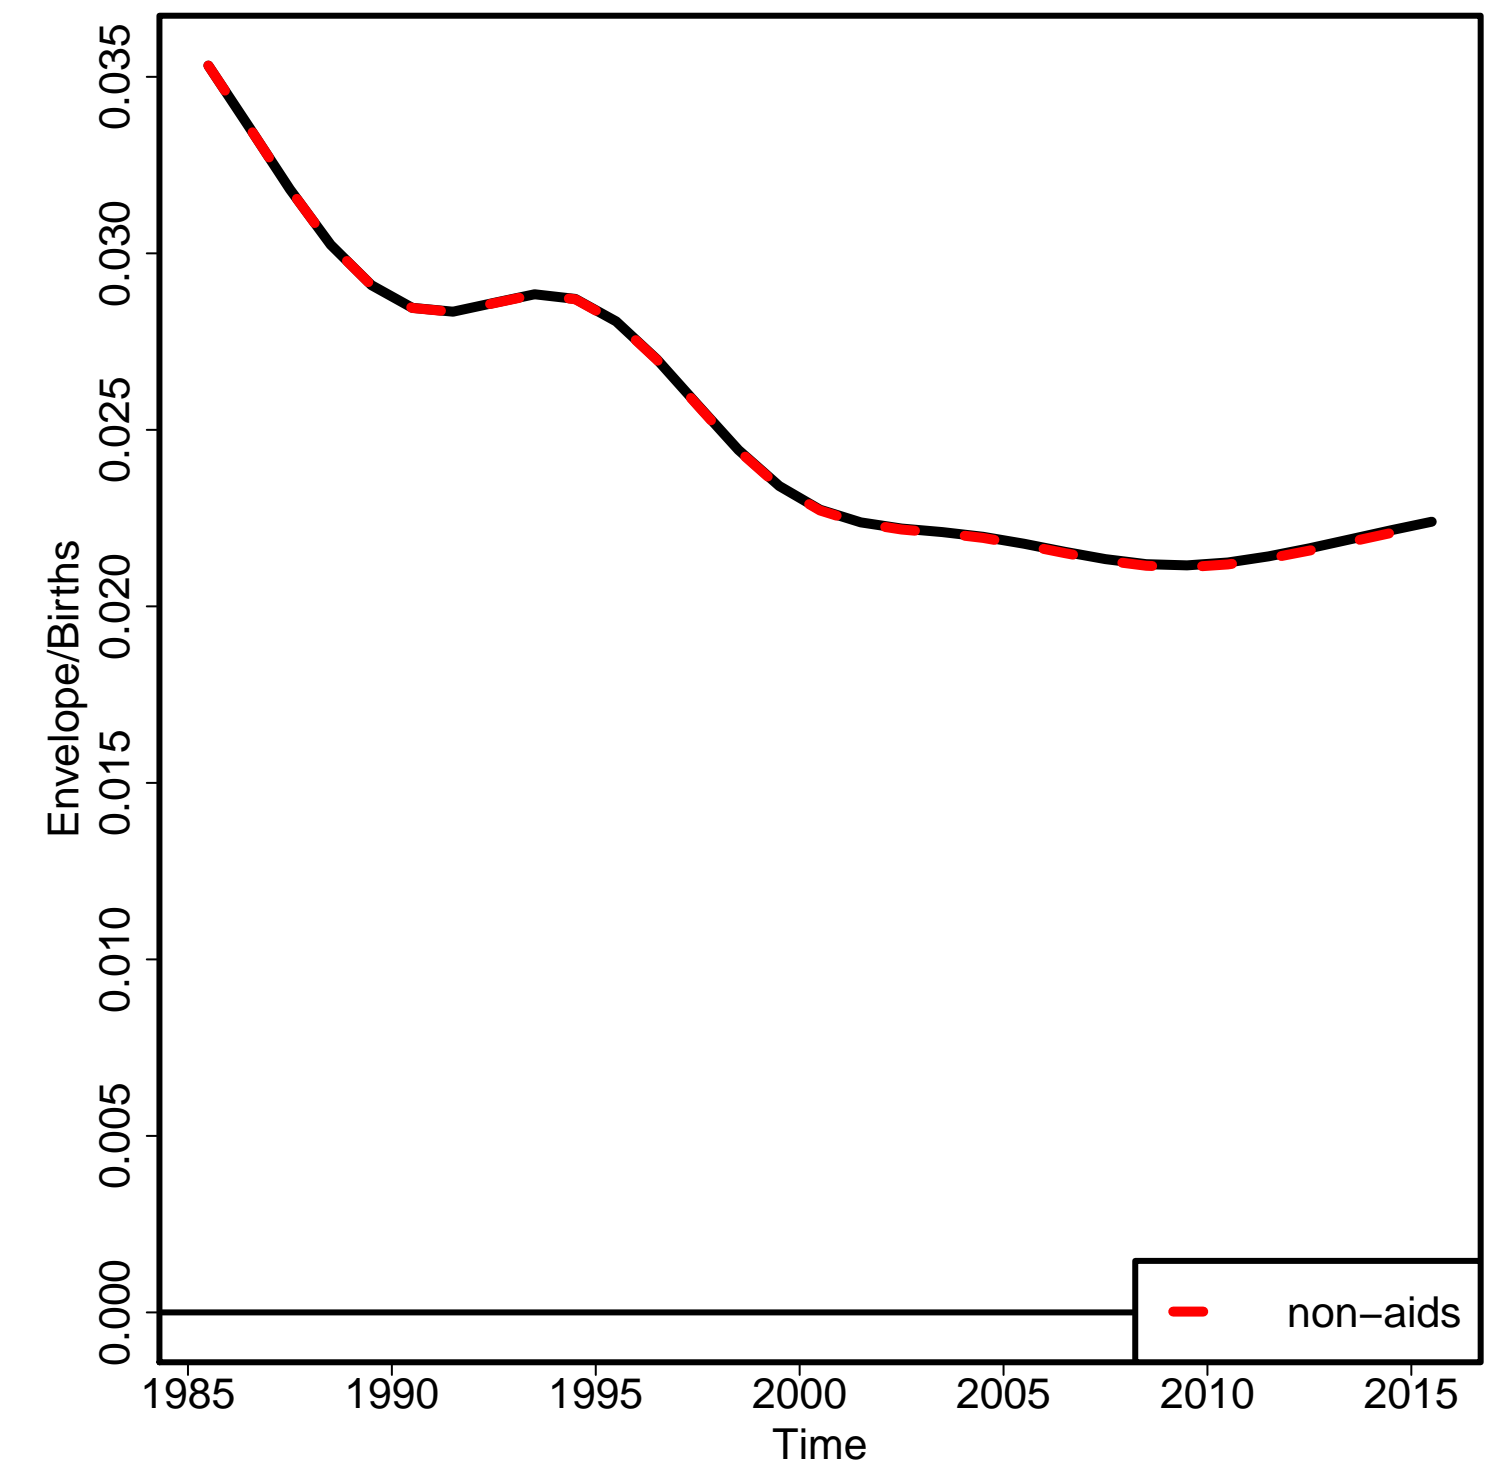

Non-aids MMR

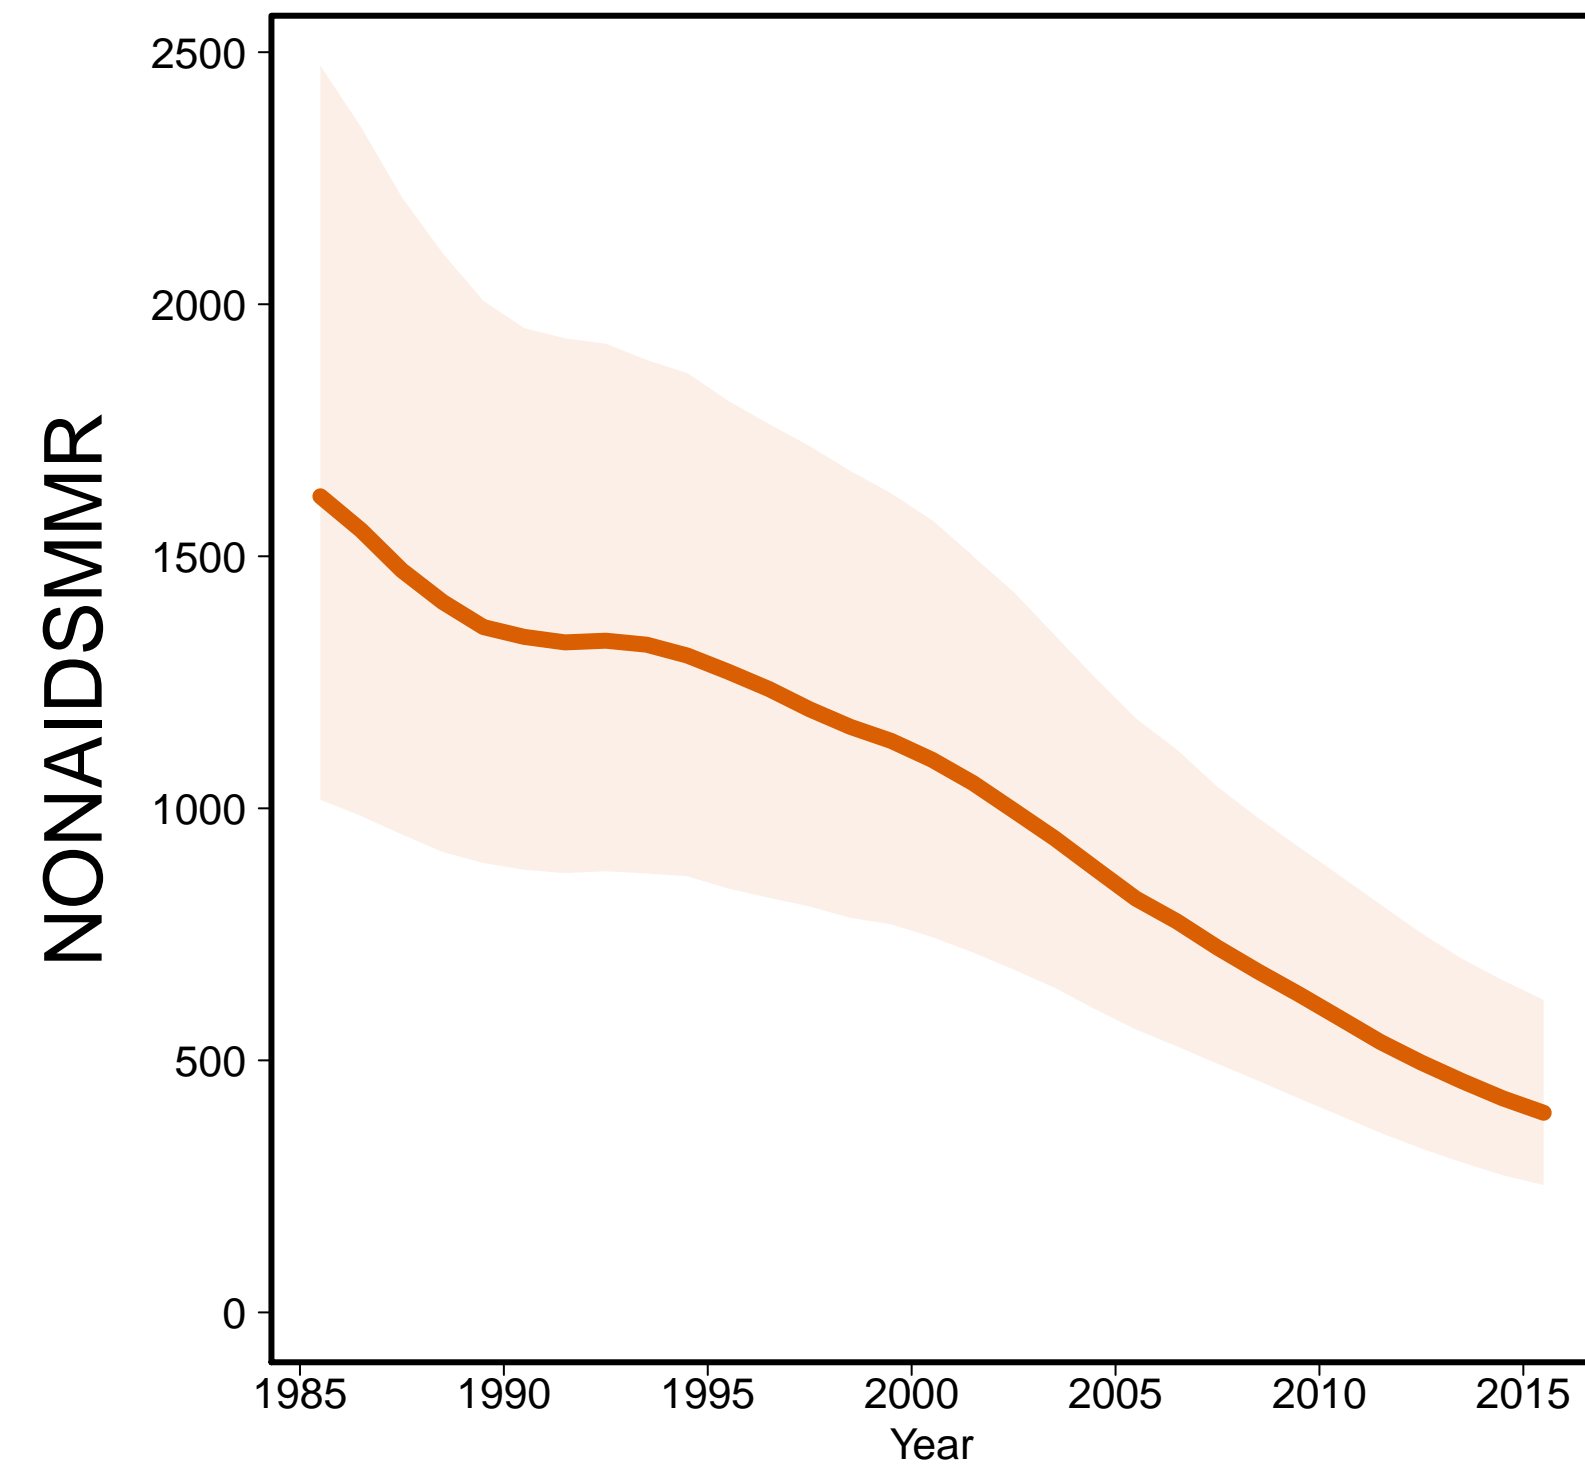

Aids MMR

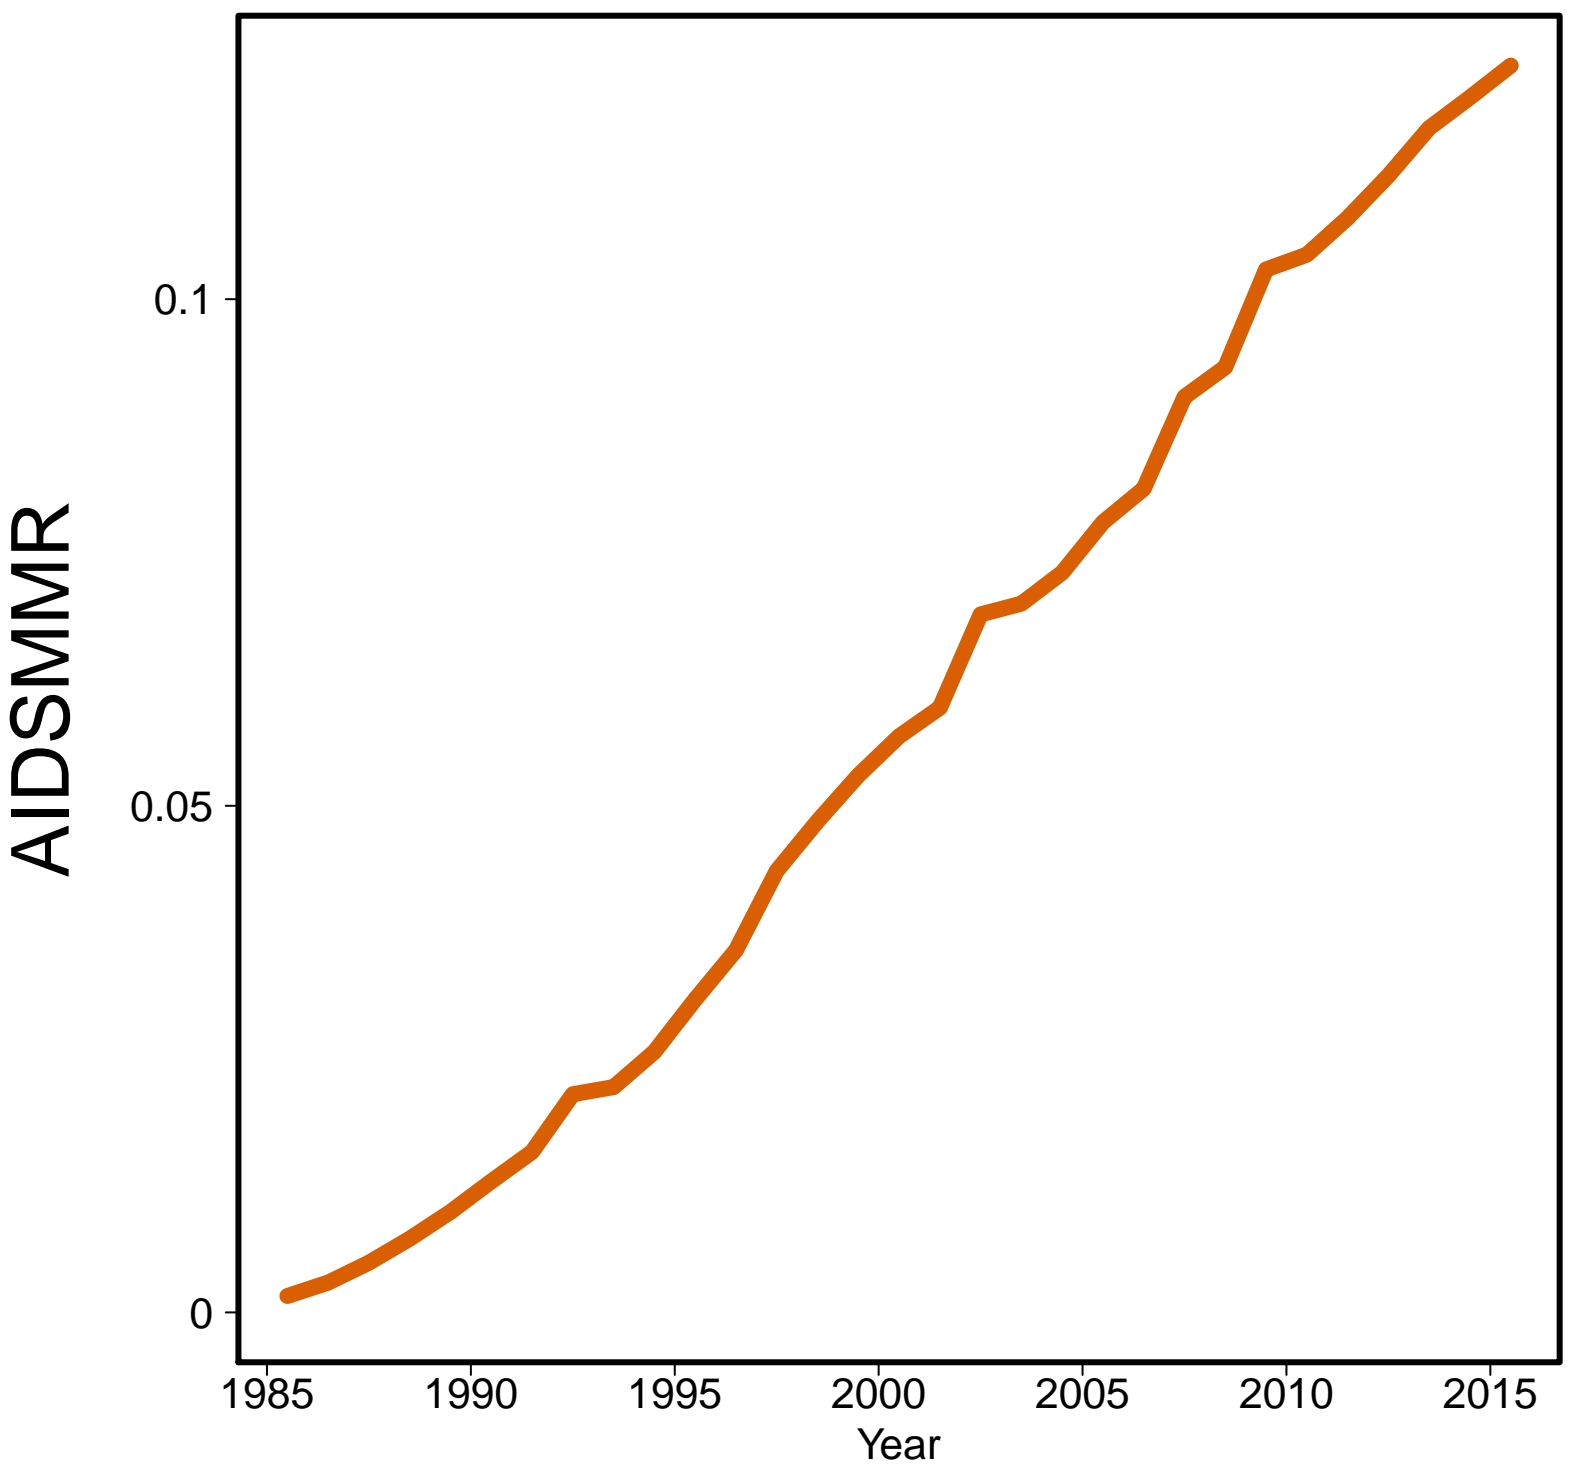

Albania [ALB]  
(Transition countries of South-Eastern Europe)

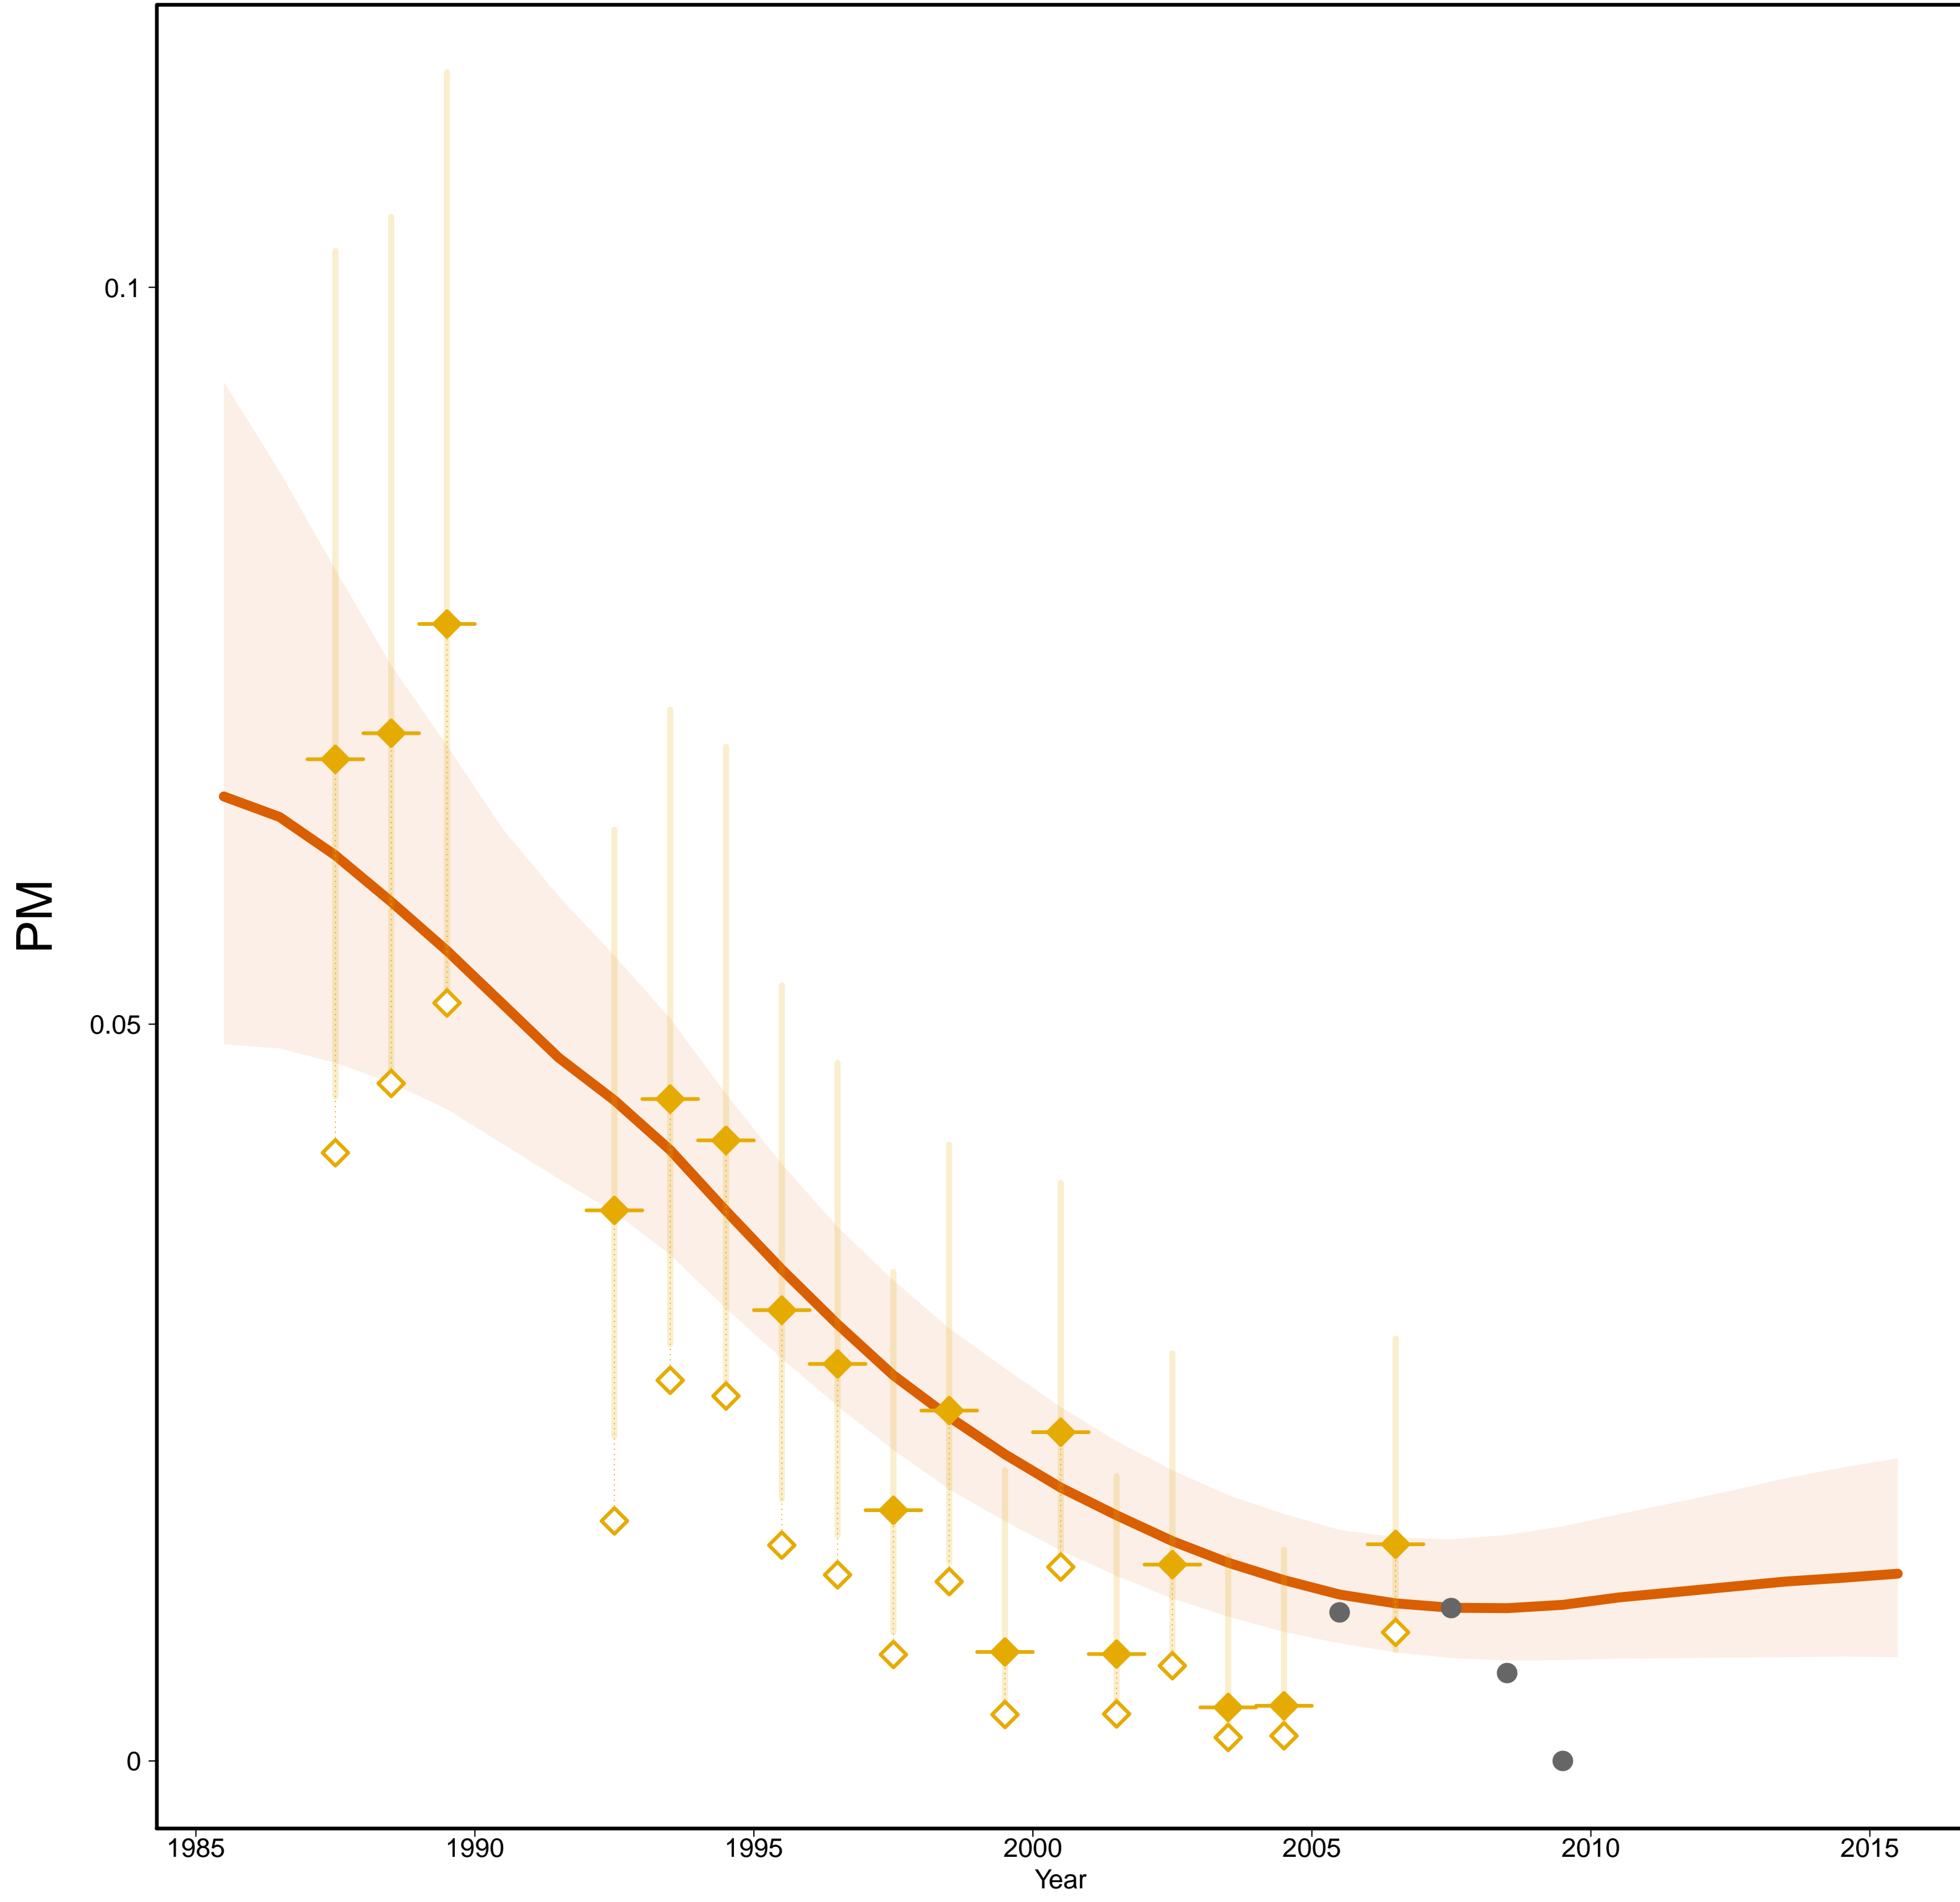

Albania [ALB]  
(Transition countries of South-Eastern Europe)

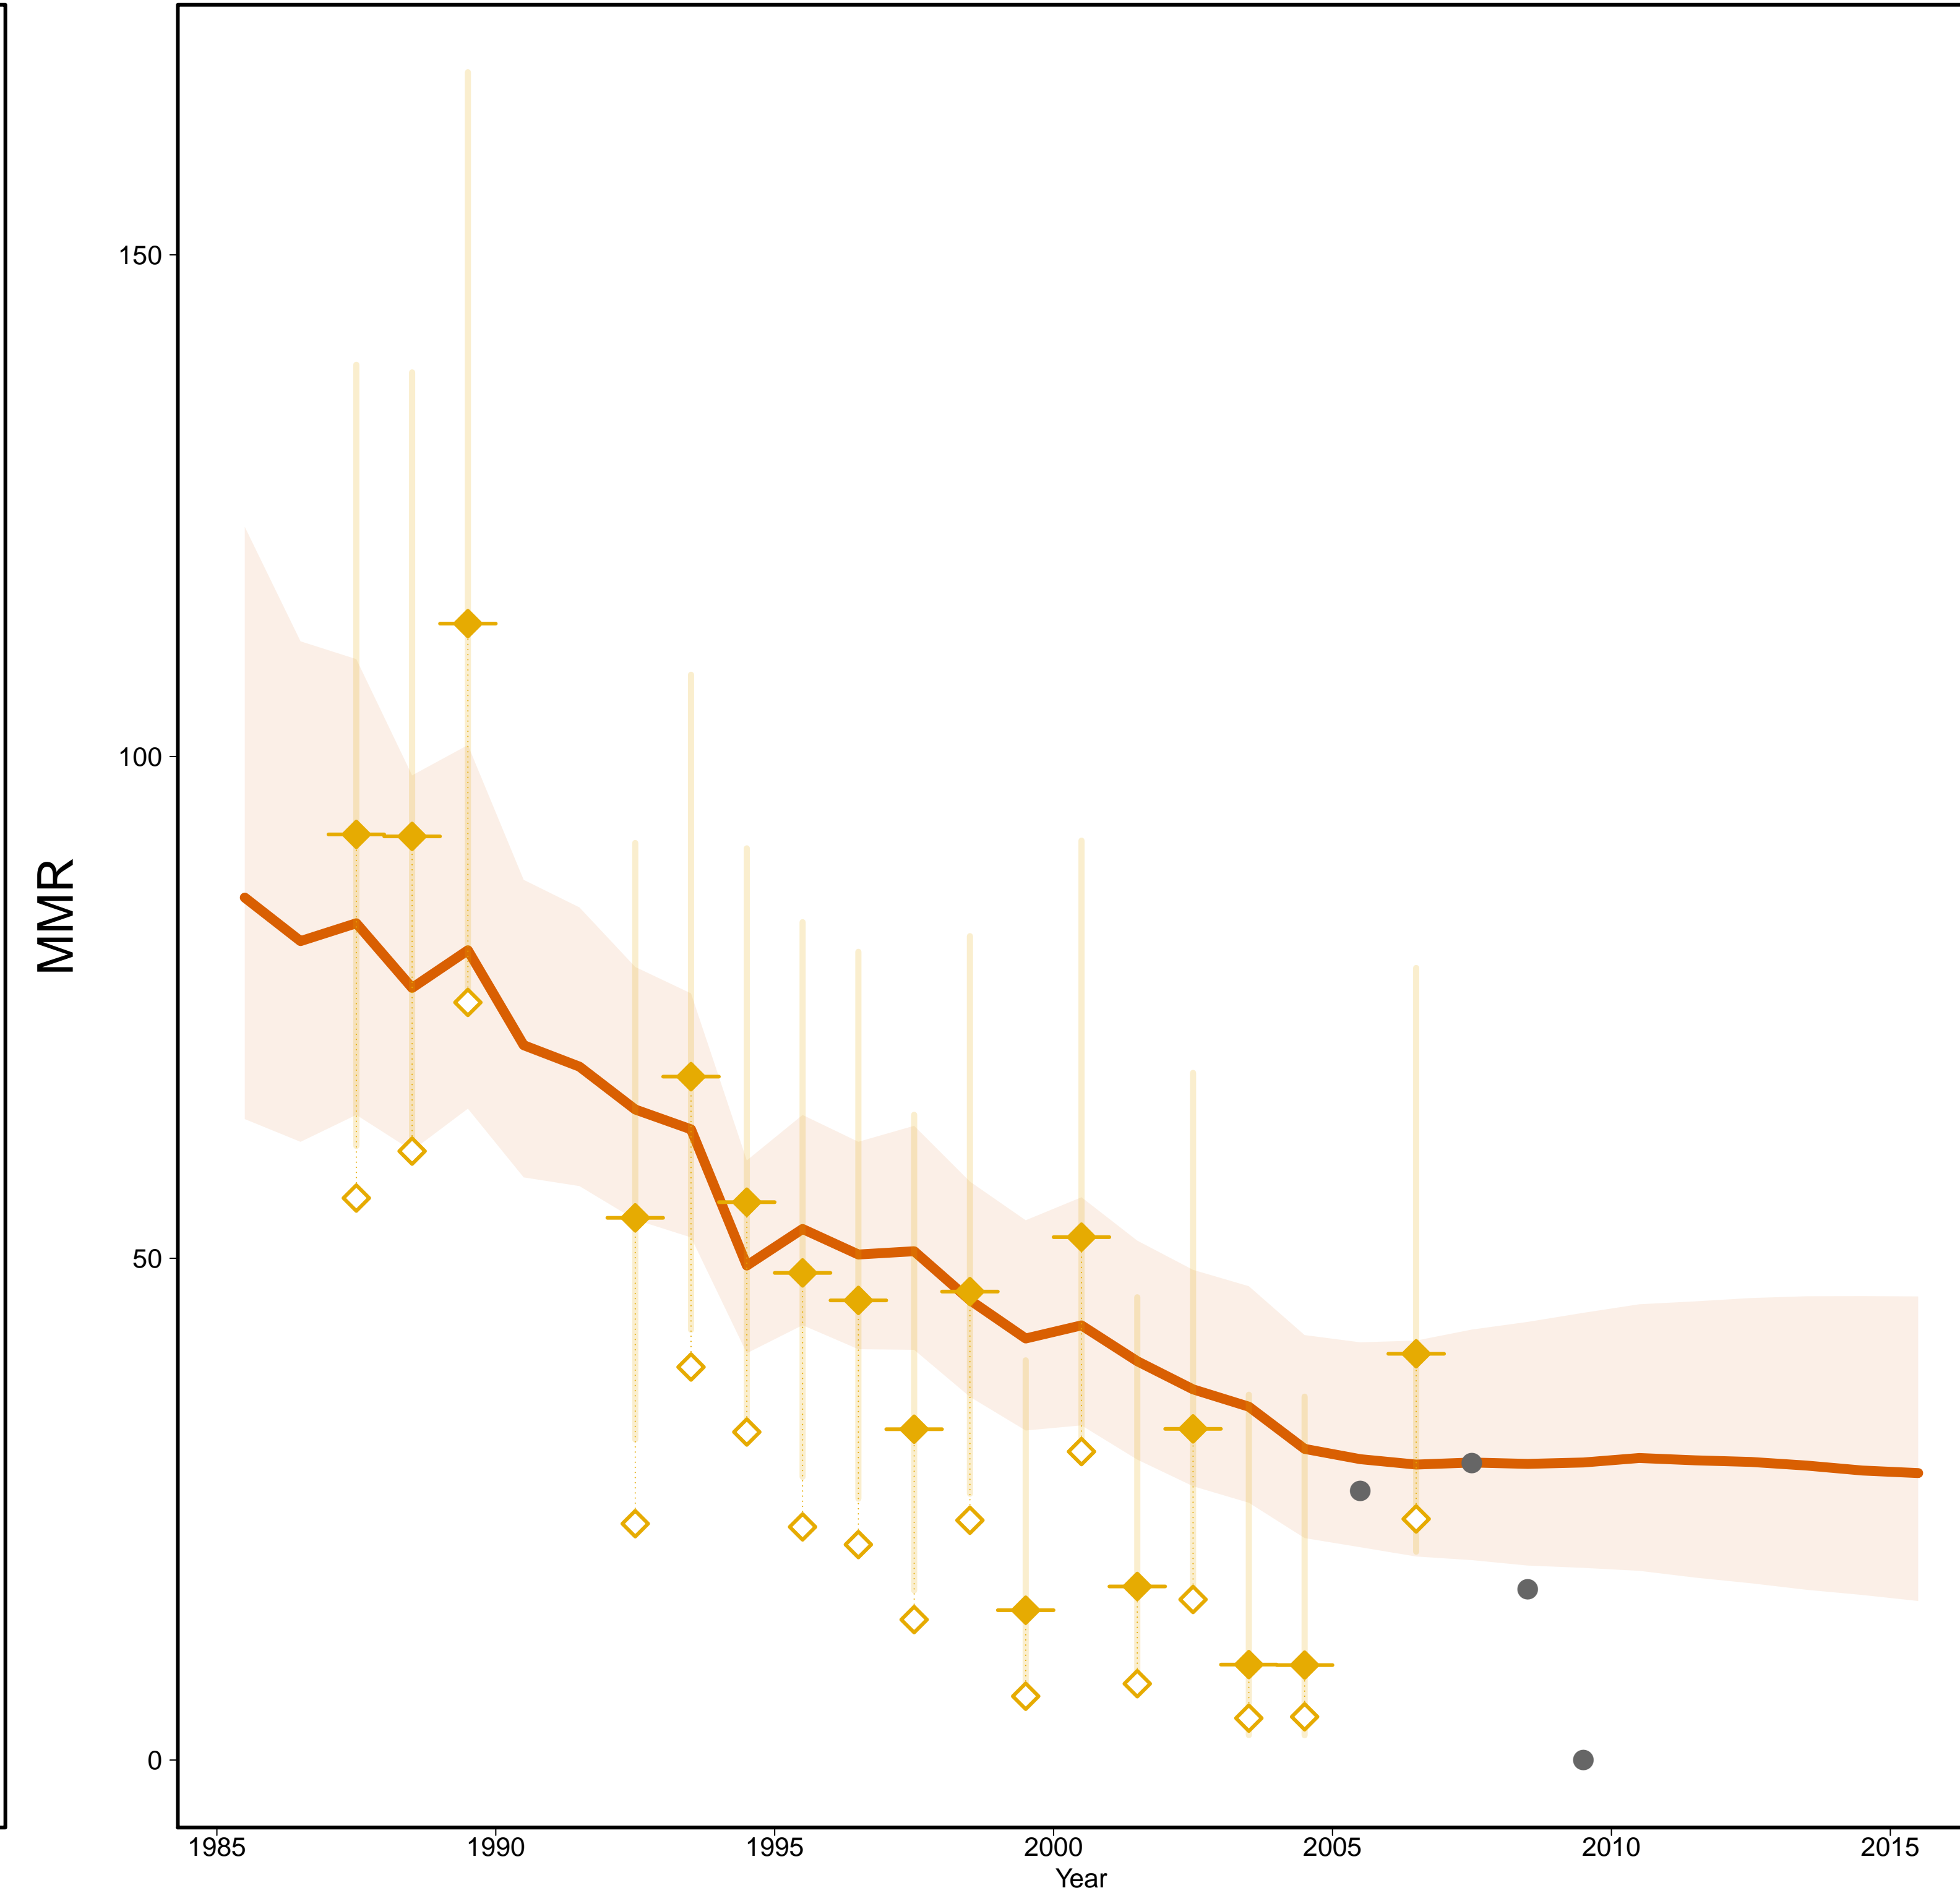

- Estimates –
- Mlate
- MMR Database 2015 –
- ◇ Observed Data
- ◆ Adjusted Data
- Data type –
- ◆ VR
- Excluded VR data (data quality issues)

Gross Domestic Product

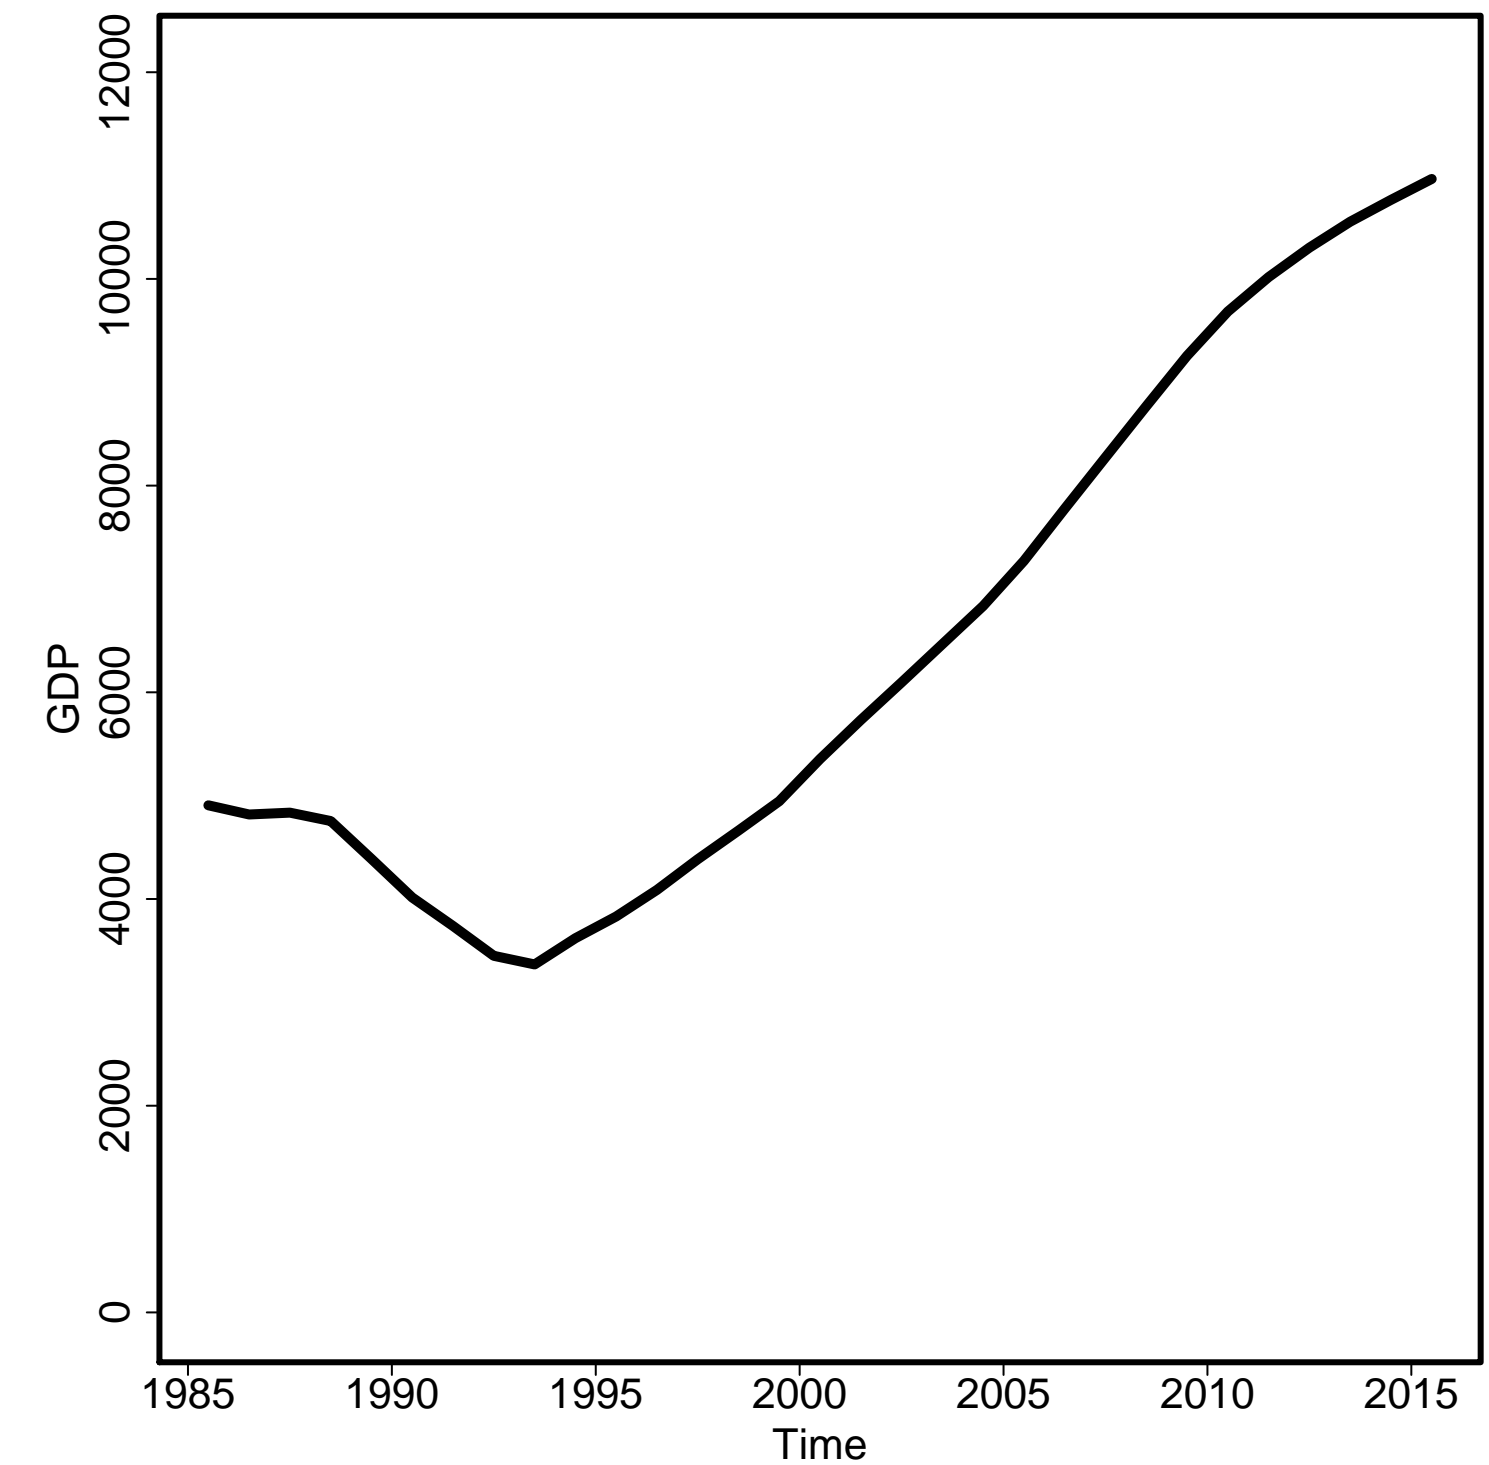

General Fertility Rate

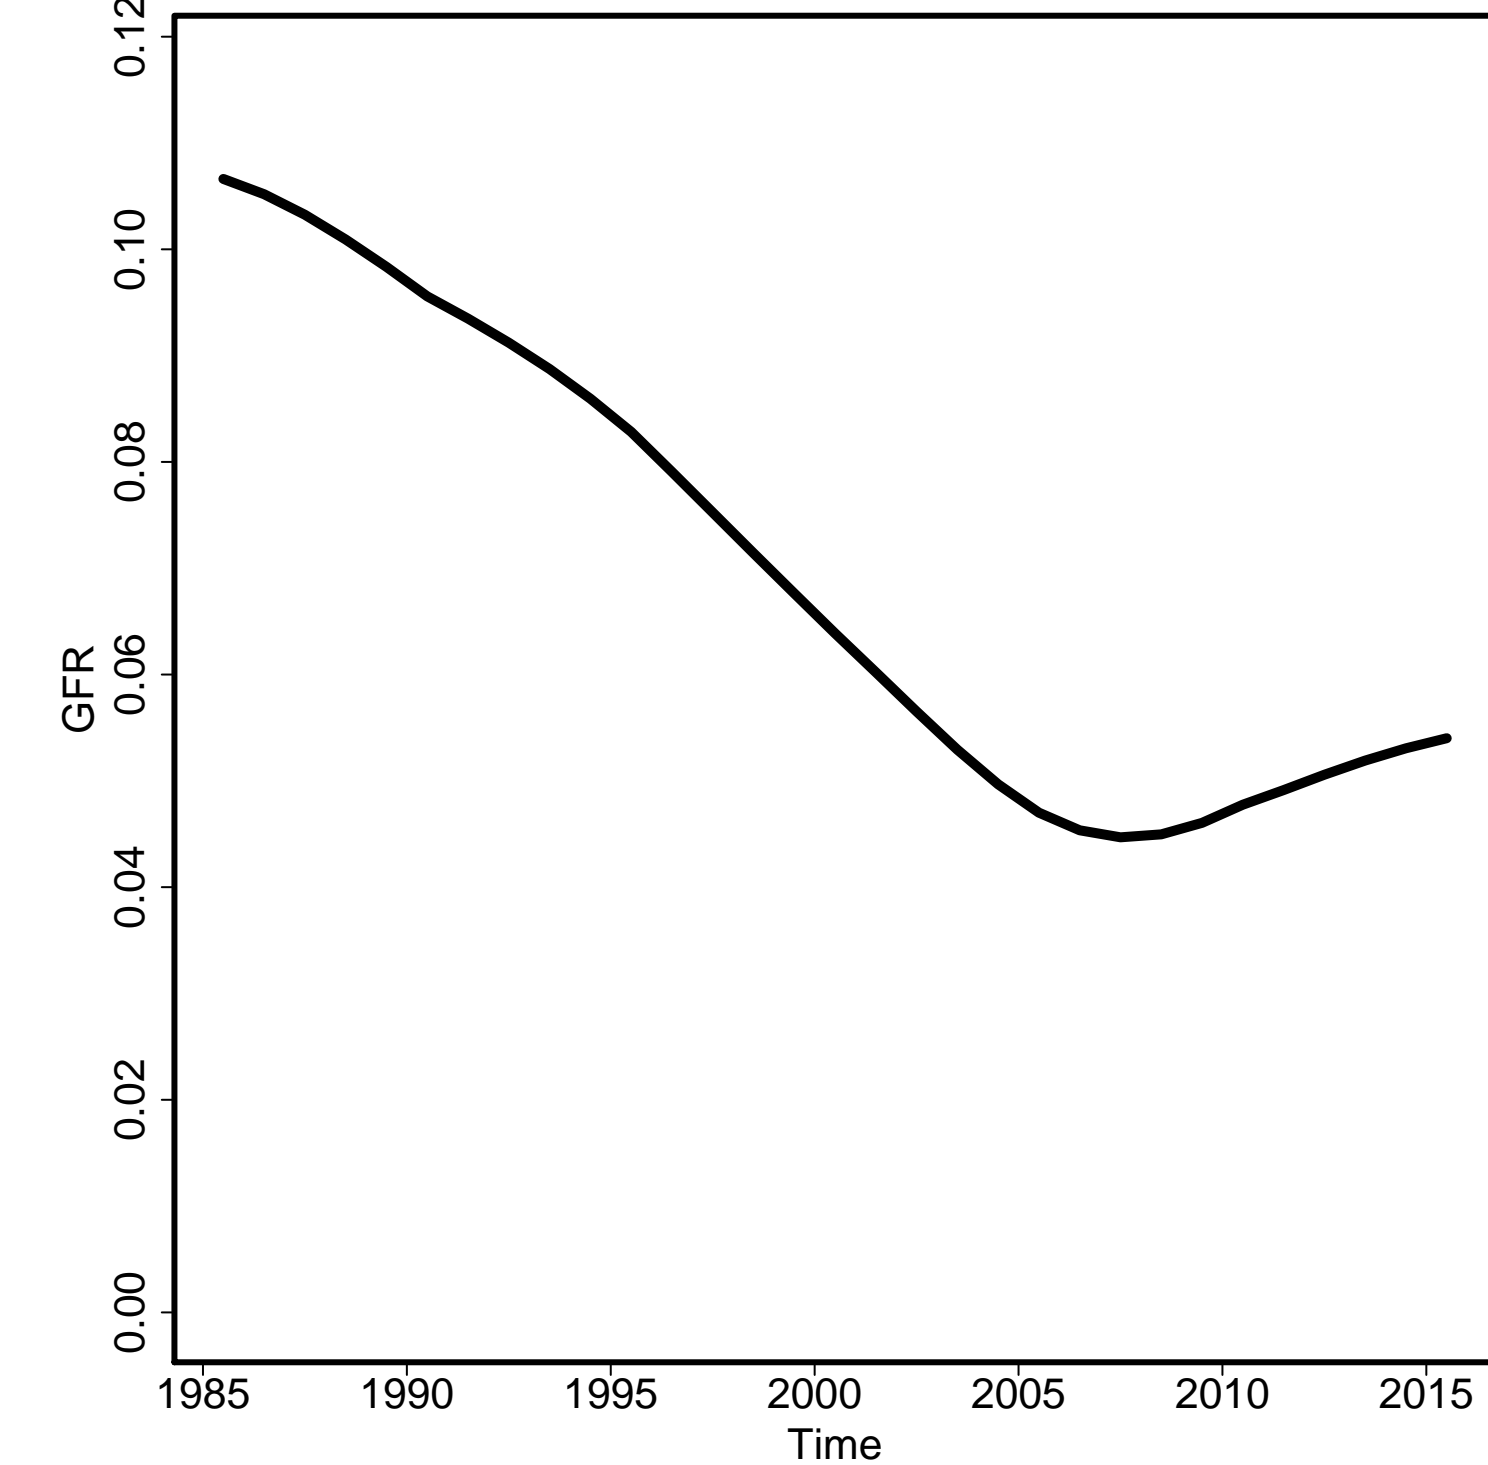

Skilled Attendance to Birth

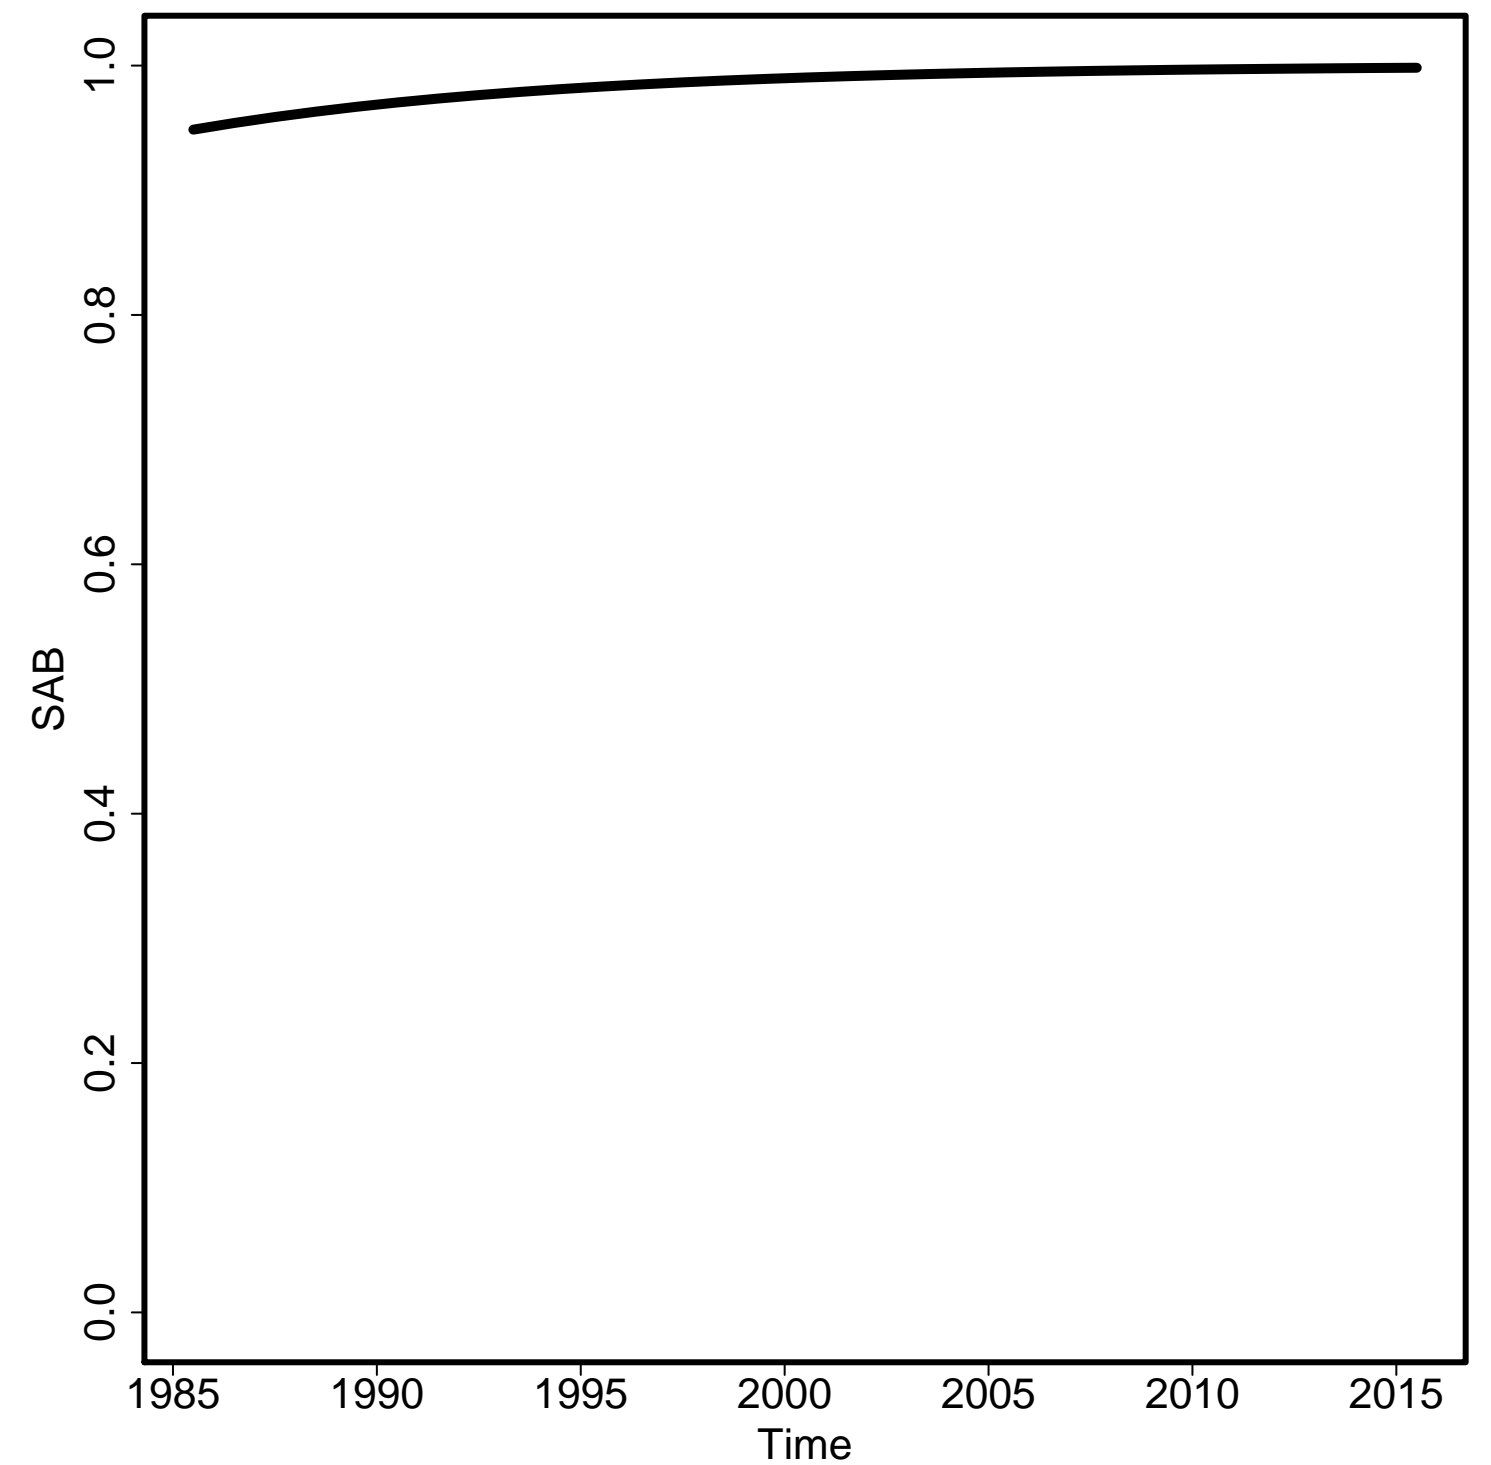

Envelope/Births

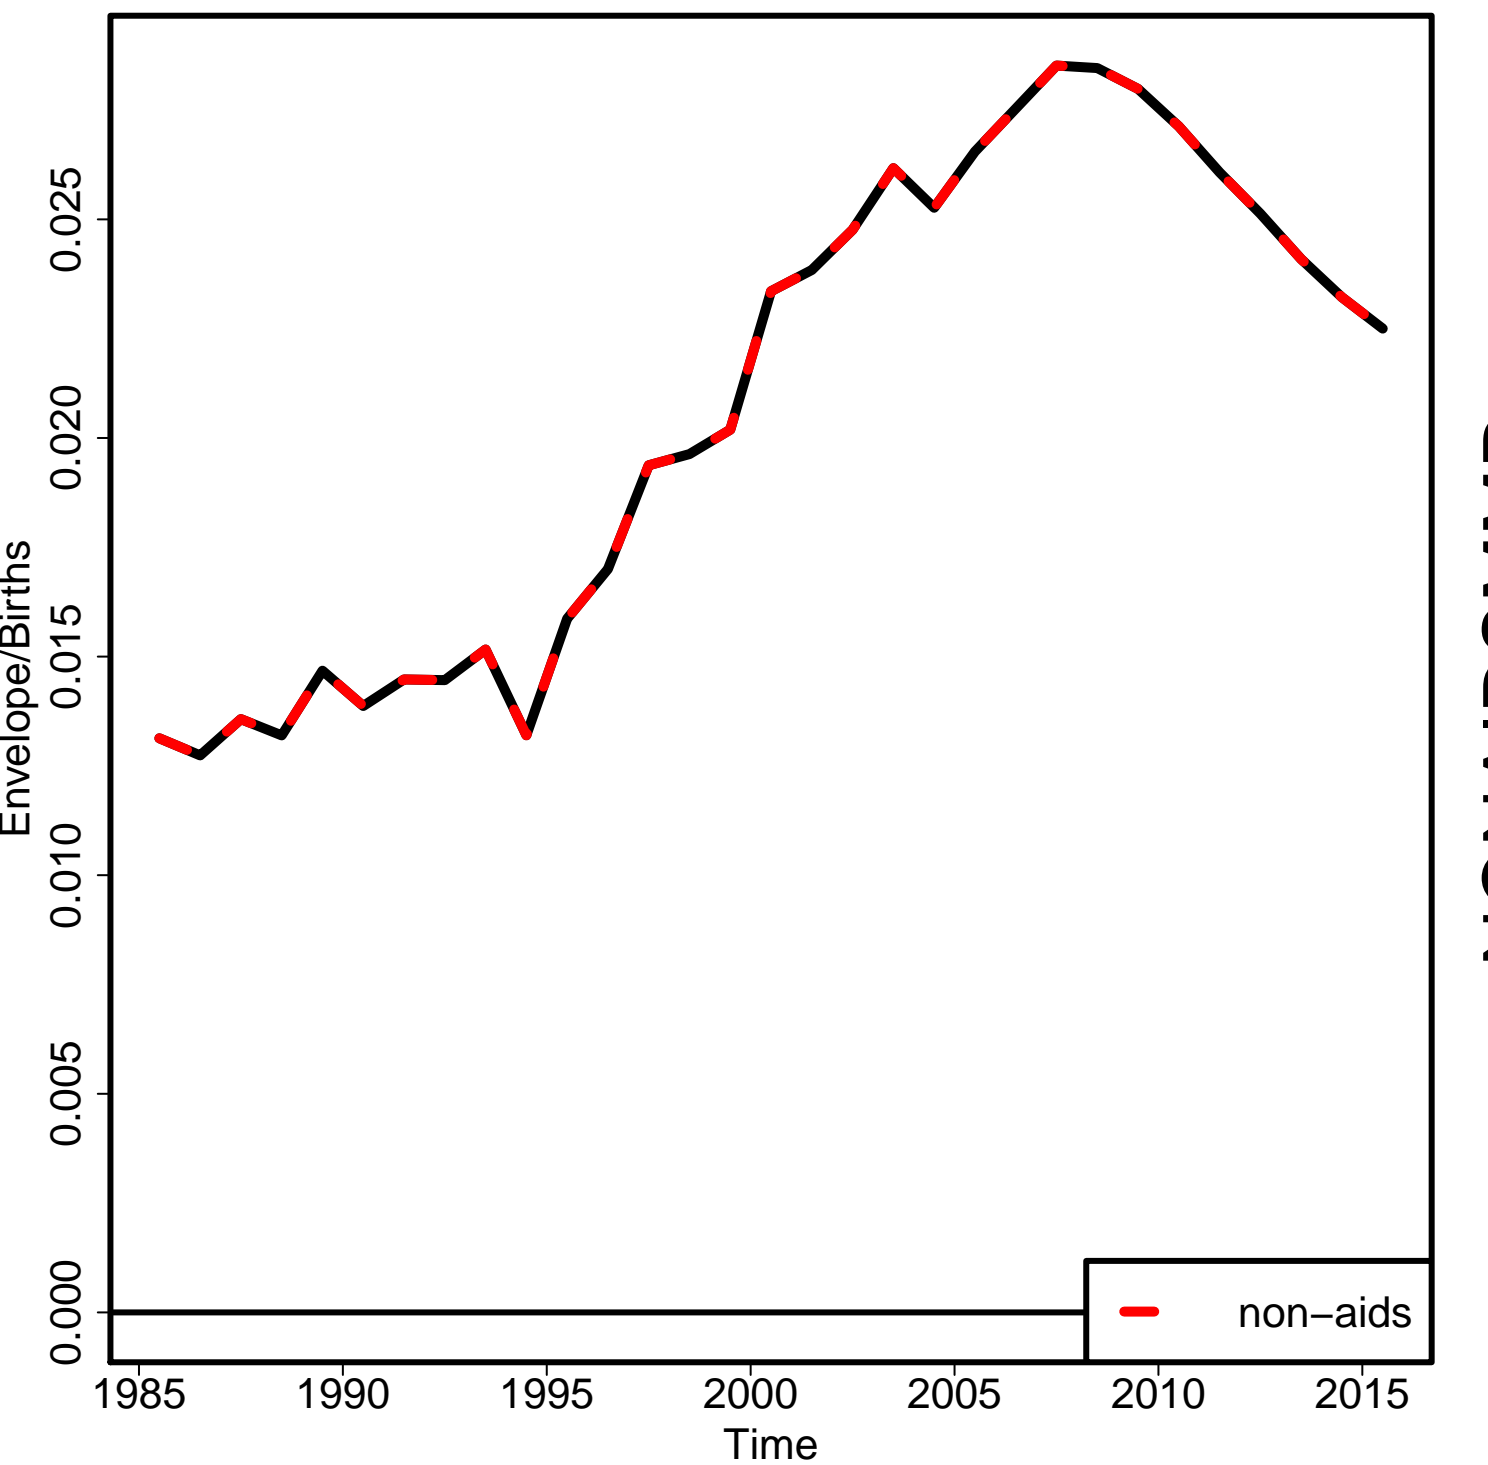

Non-aids MMR

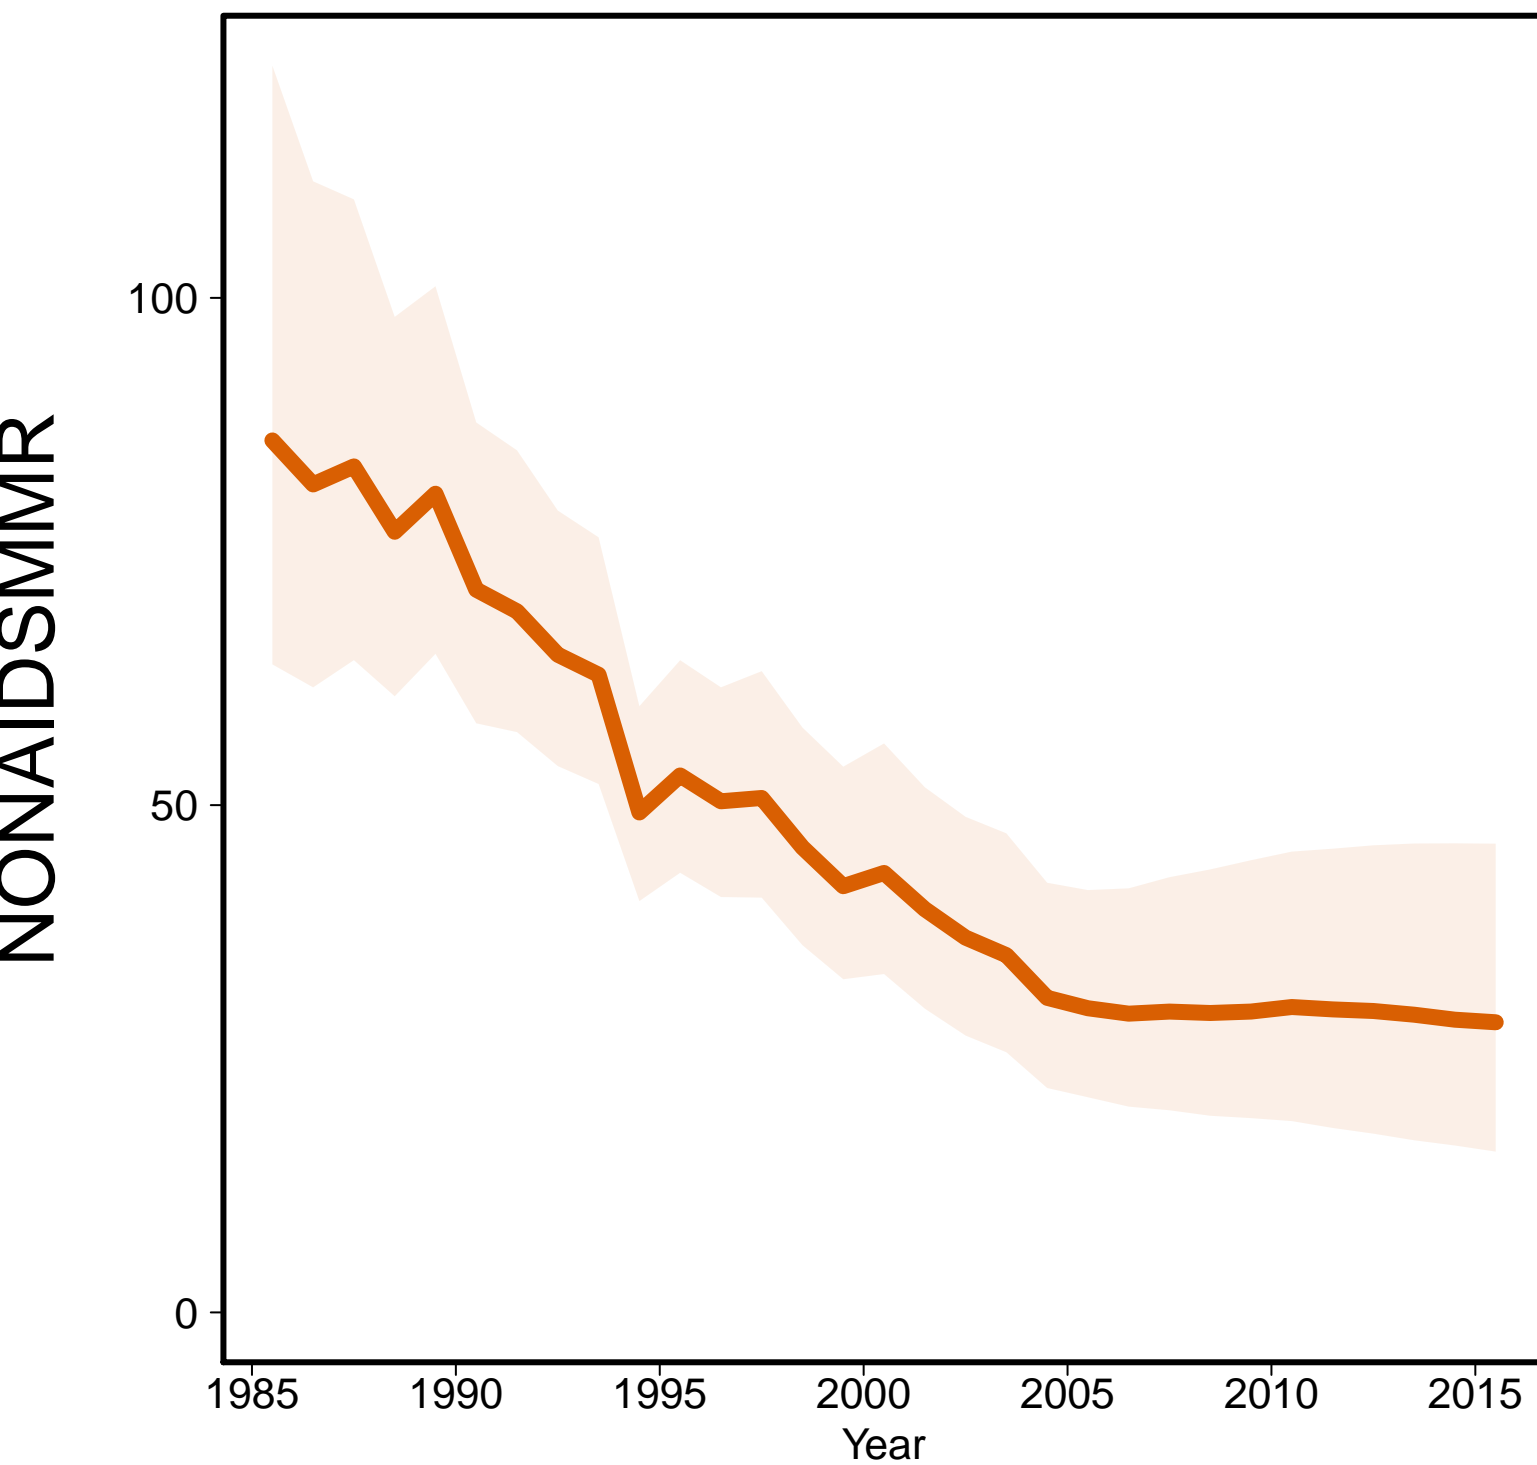

Aids MMR

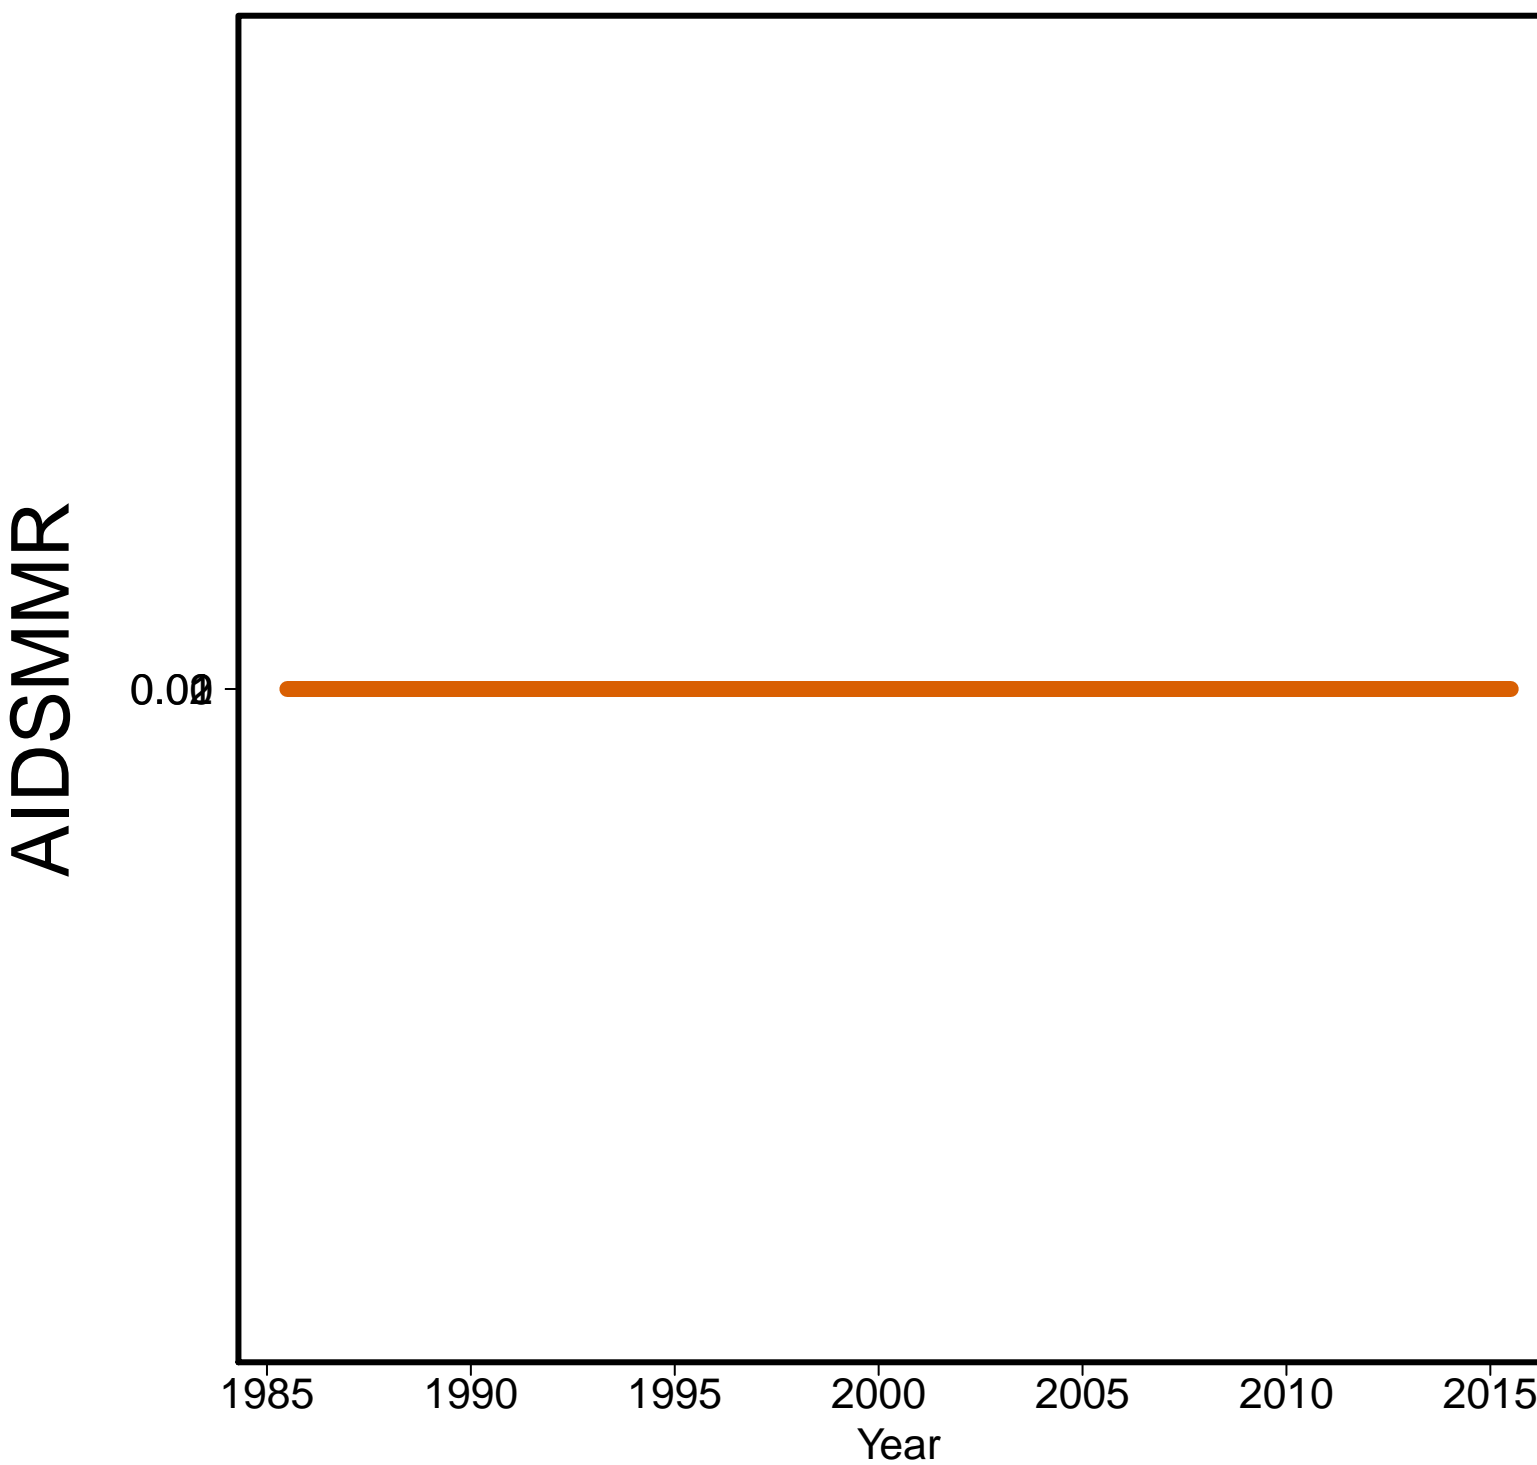

Algeria [DZA]  
(Northern Africa)

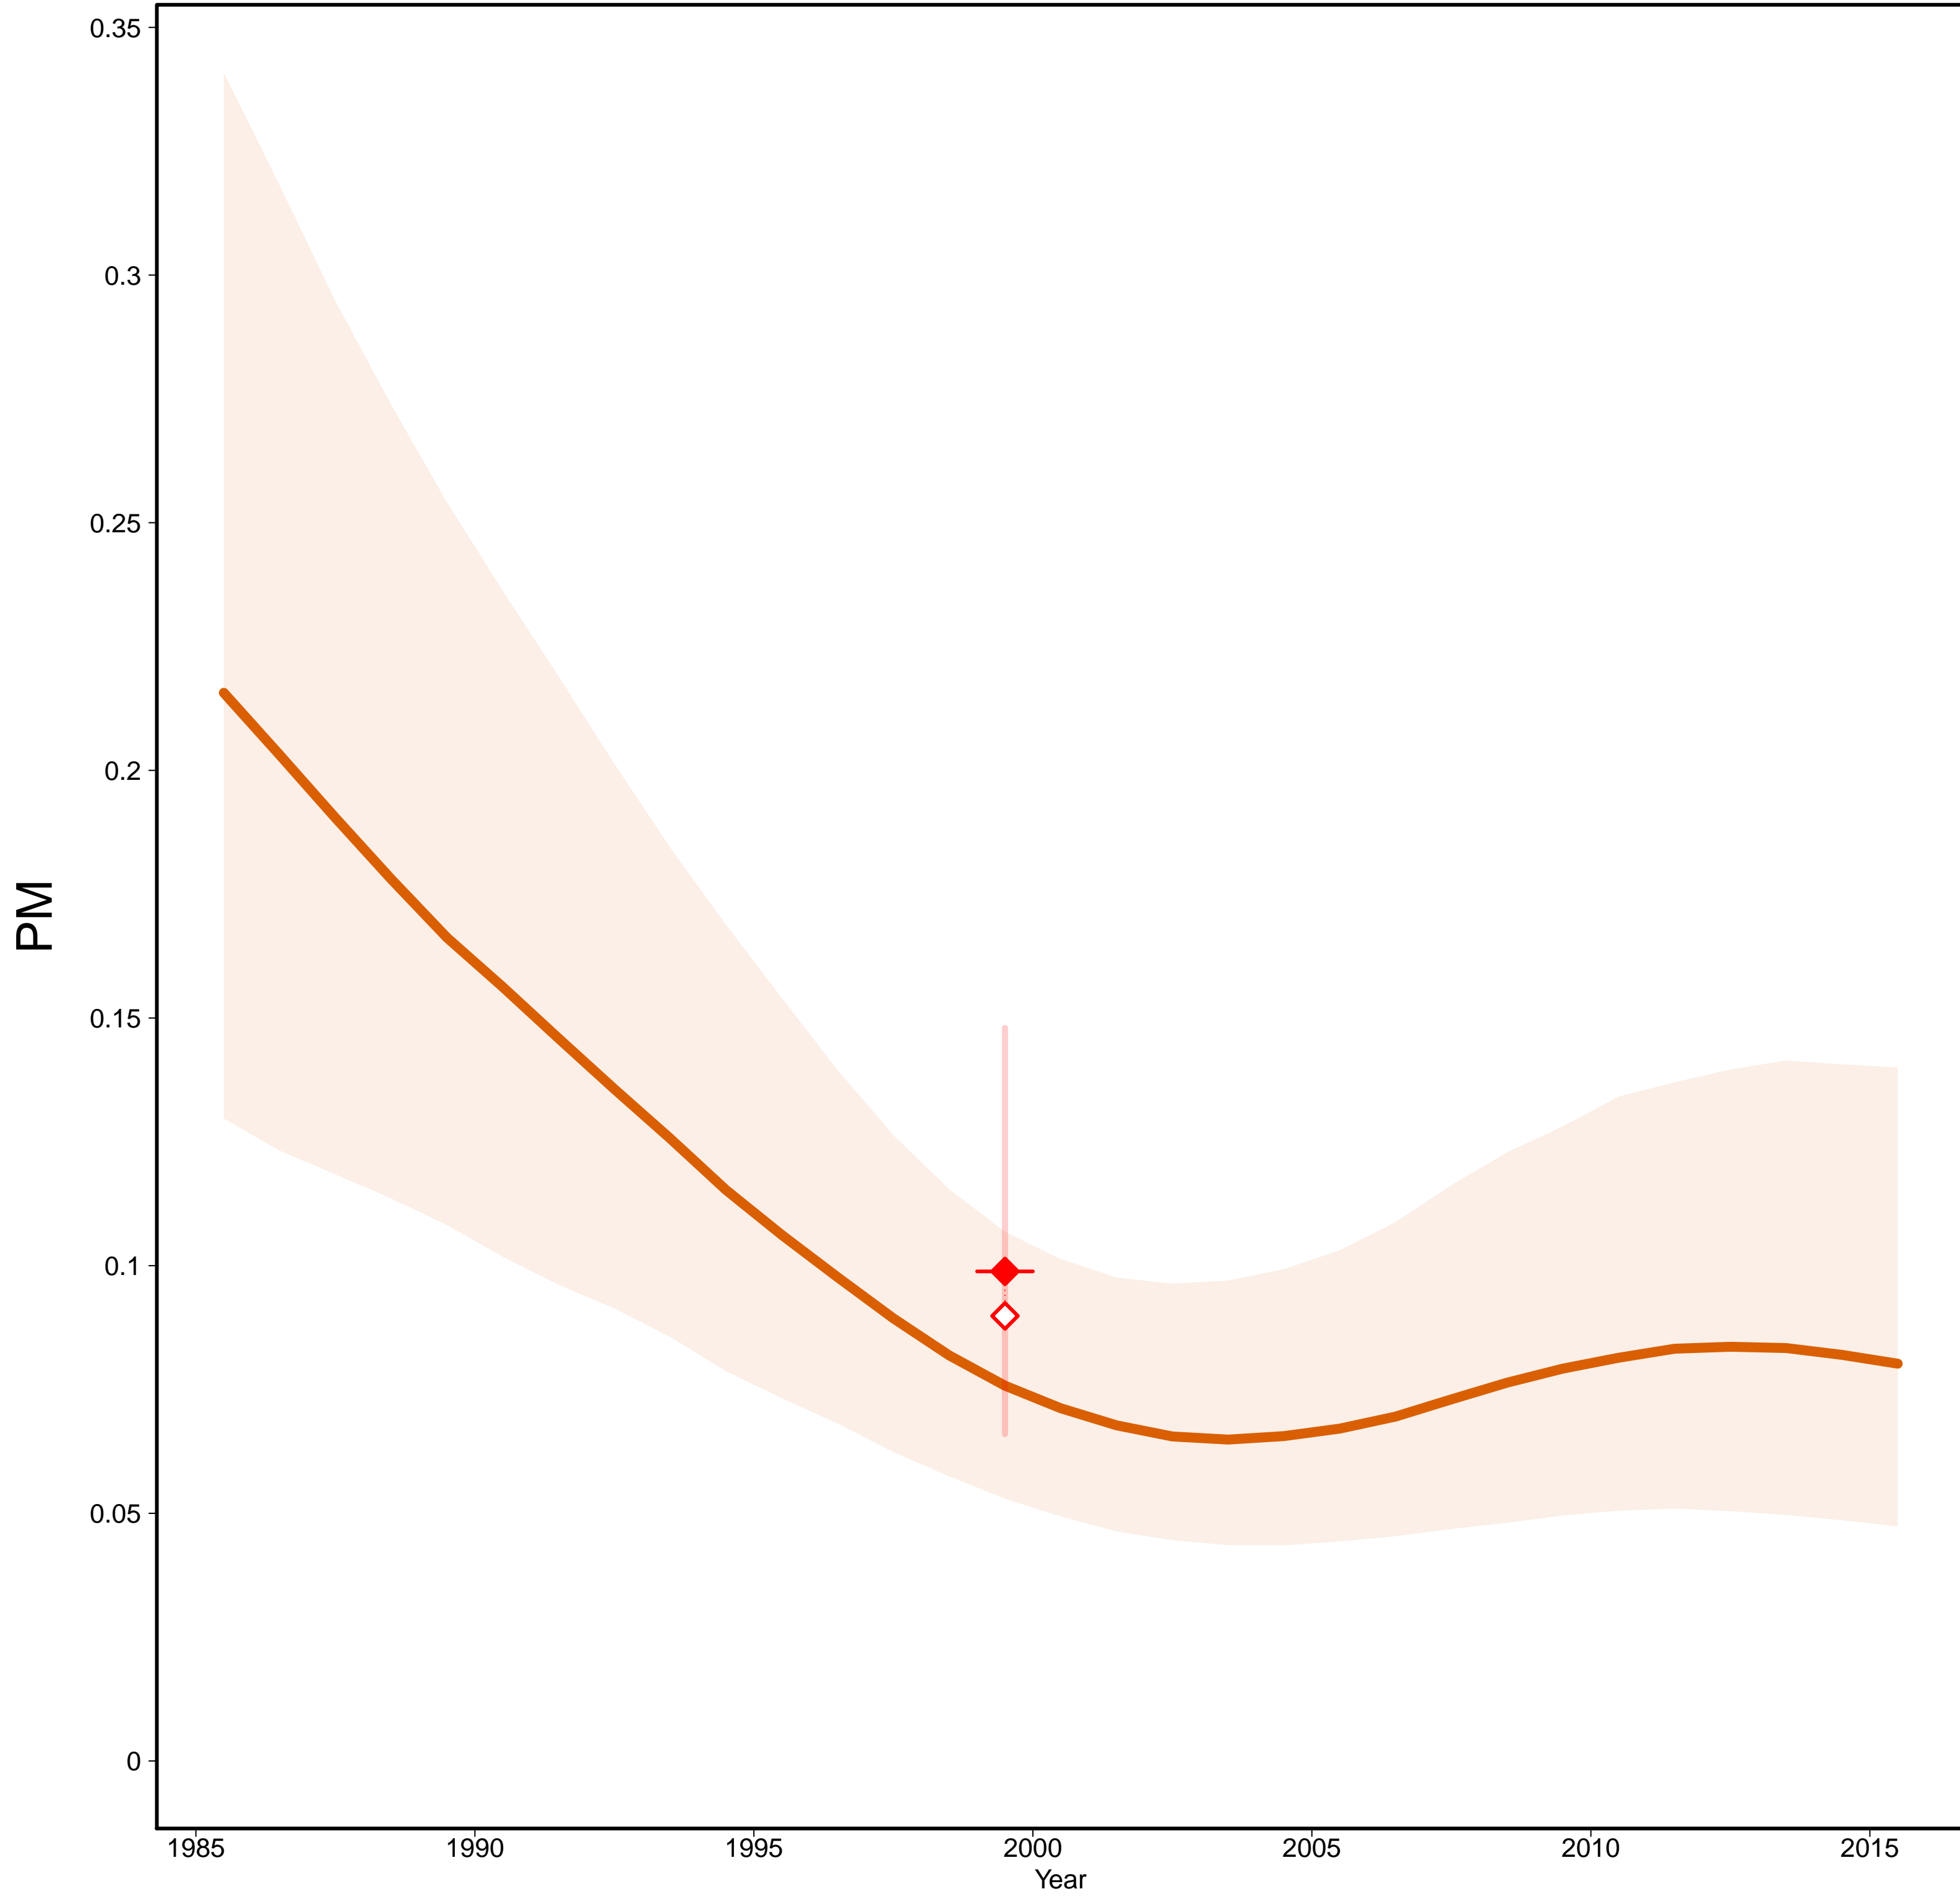

Algeria [DZA]  
(Northern Africa)

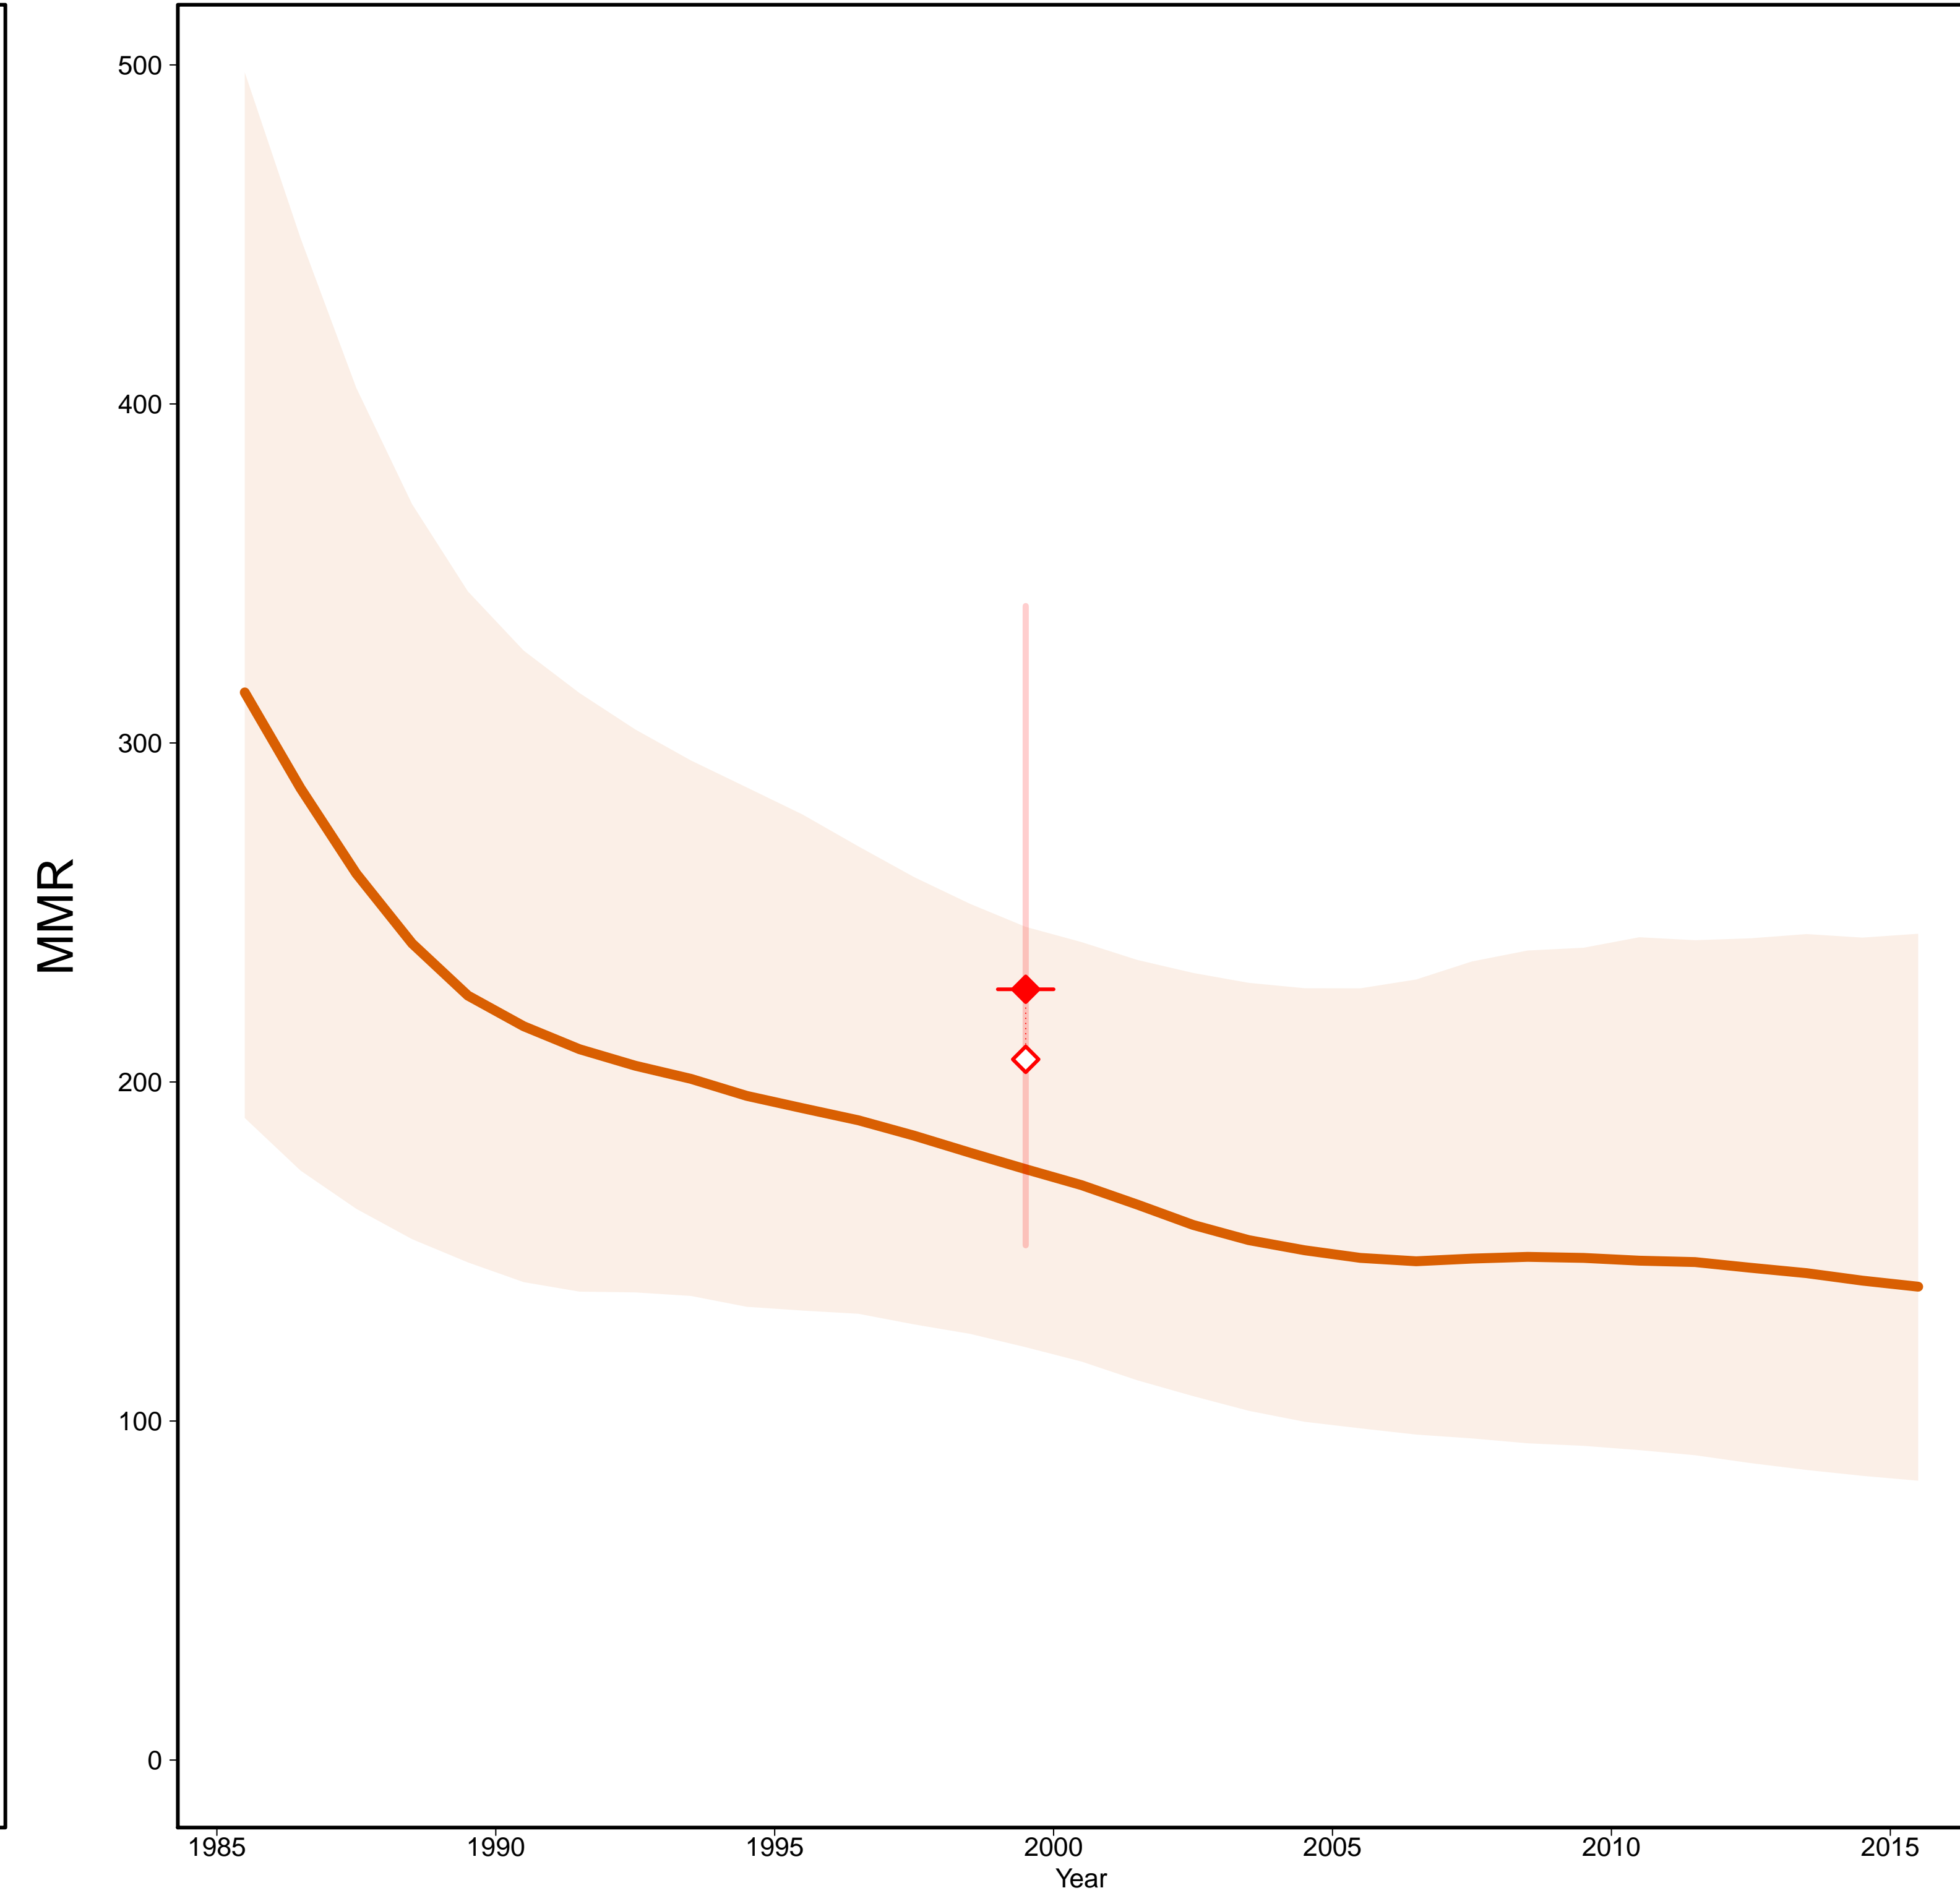

- Estimates —
- MMR Database 2015 —
- ◇ Observed Data
- ◆ Adjusted Data
- Data type —
- ◆ Misc. studies

Gross Domestic Product

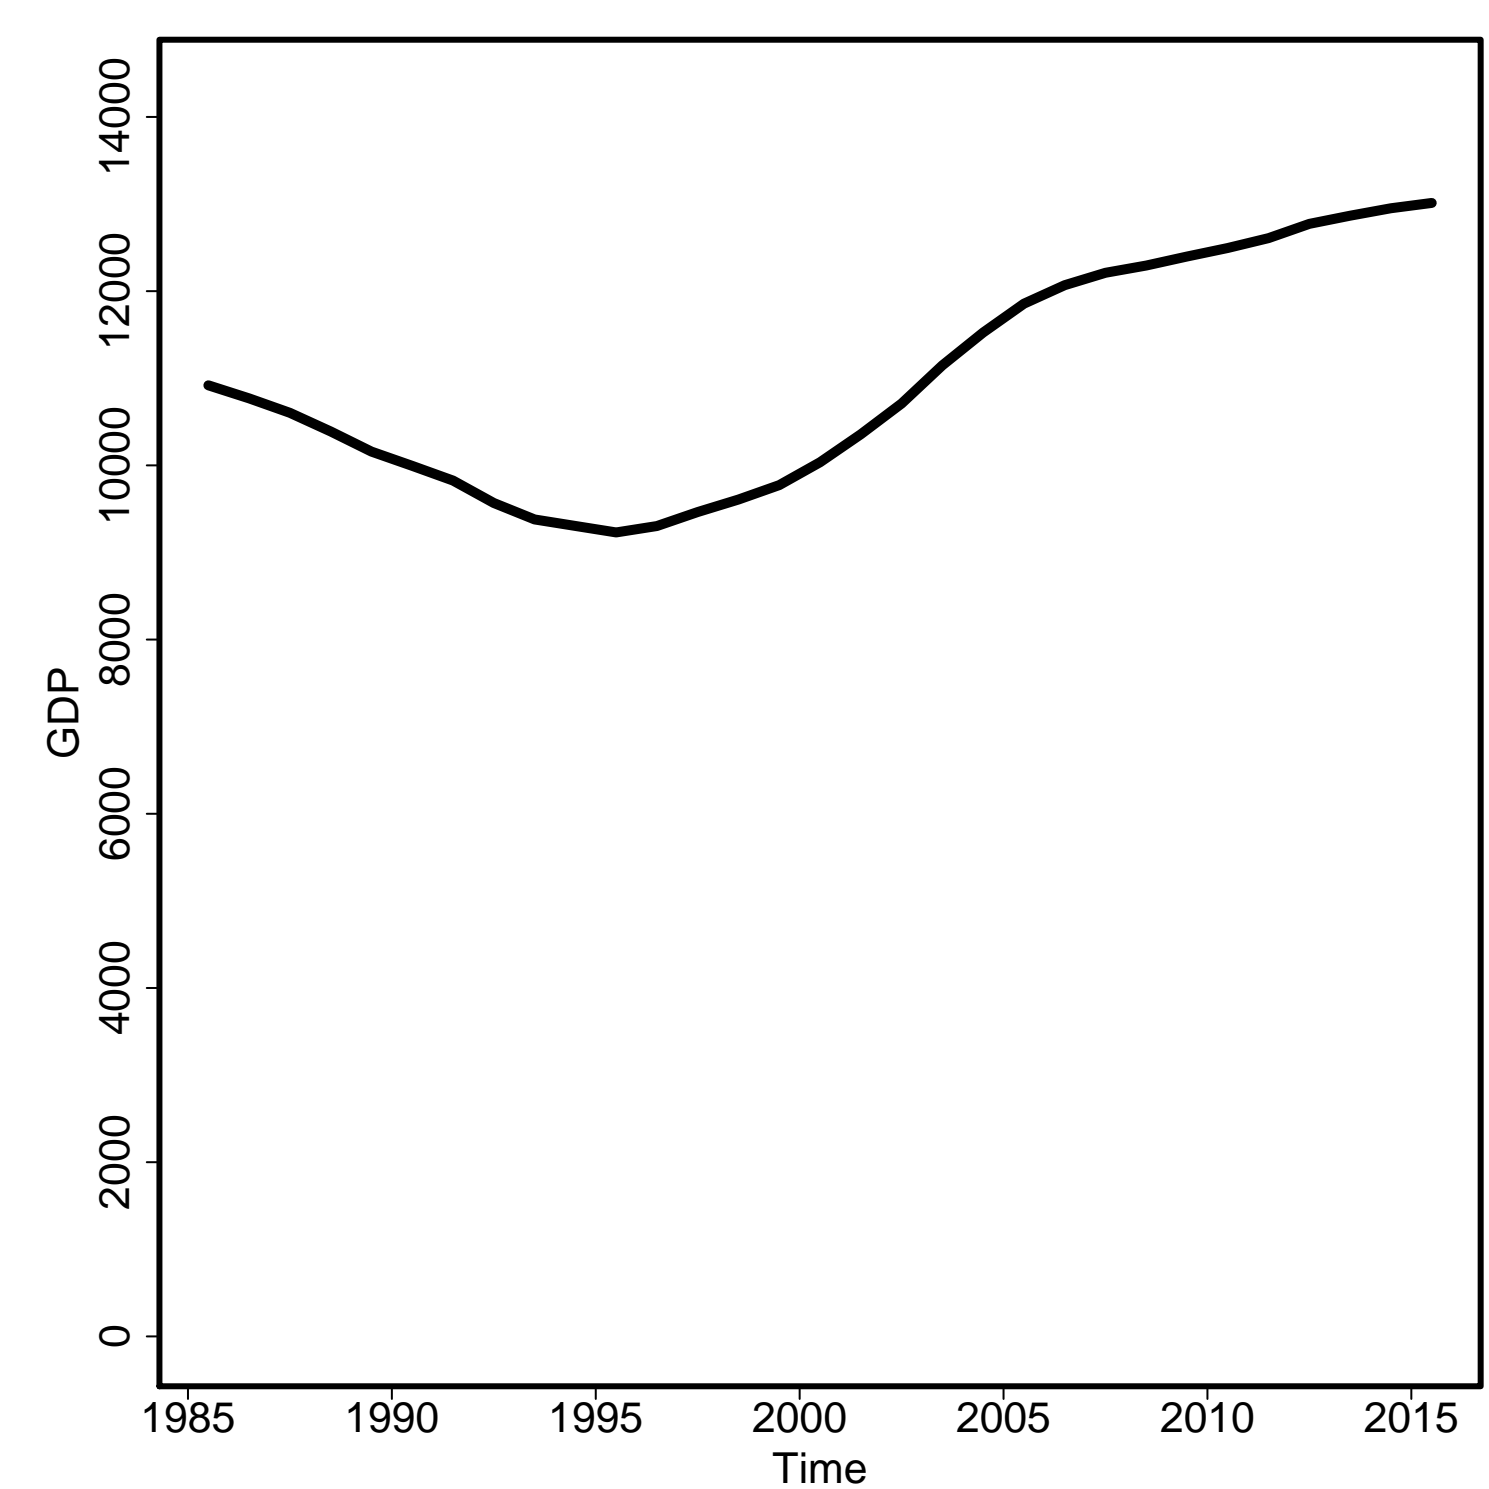

General Fertility Rate

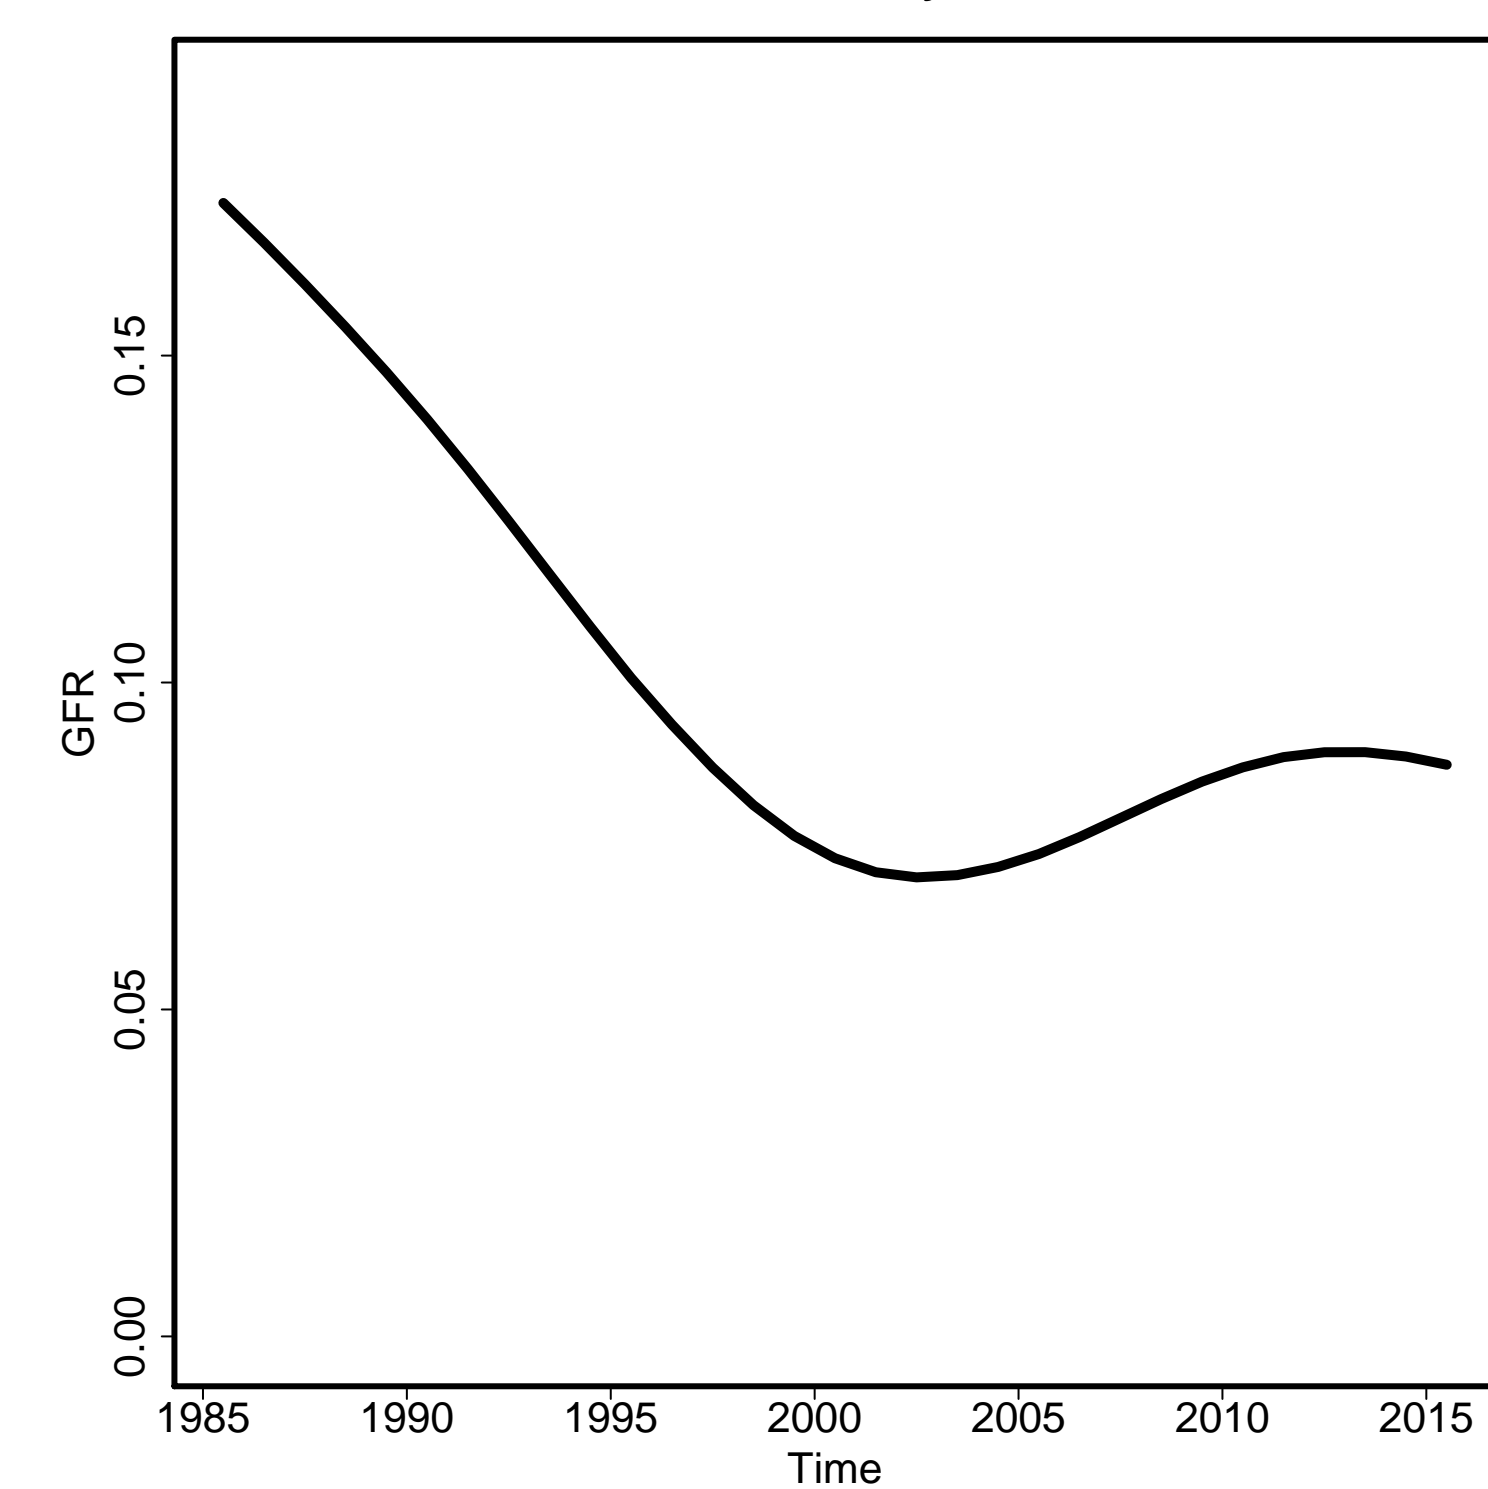

Skilled Attendance to Birth

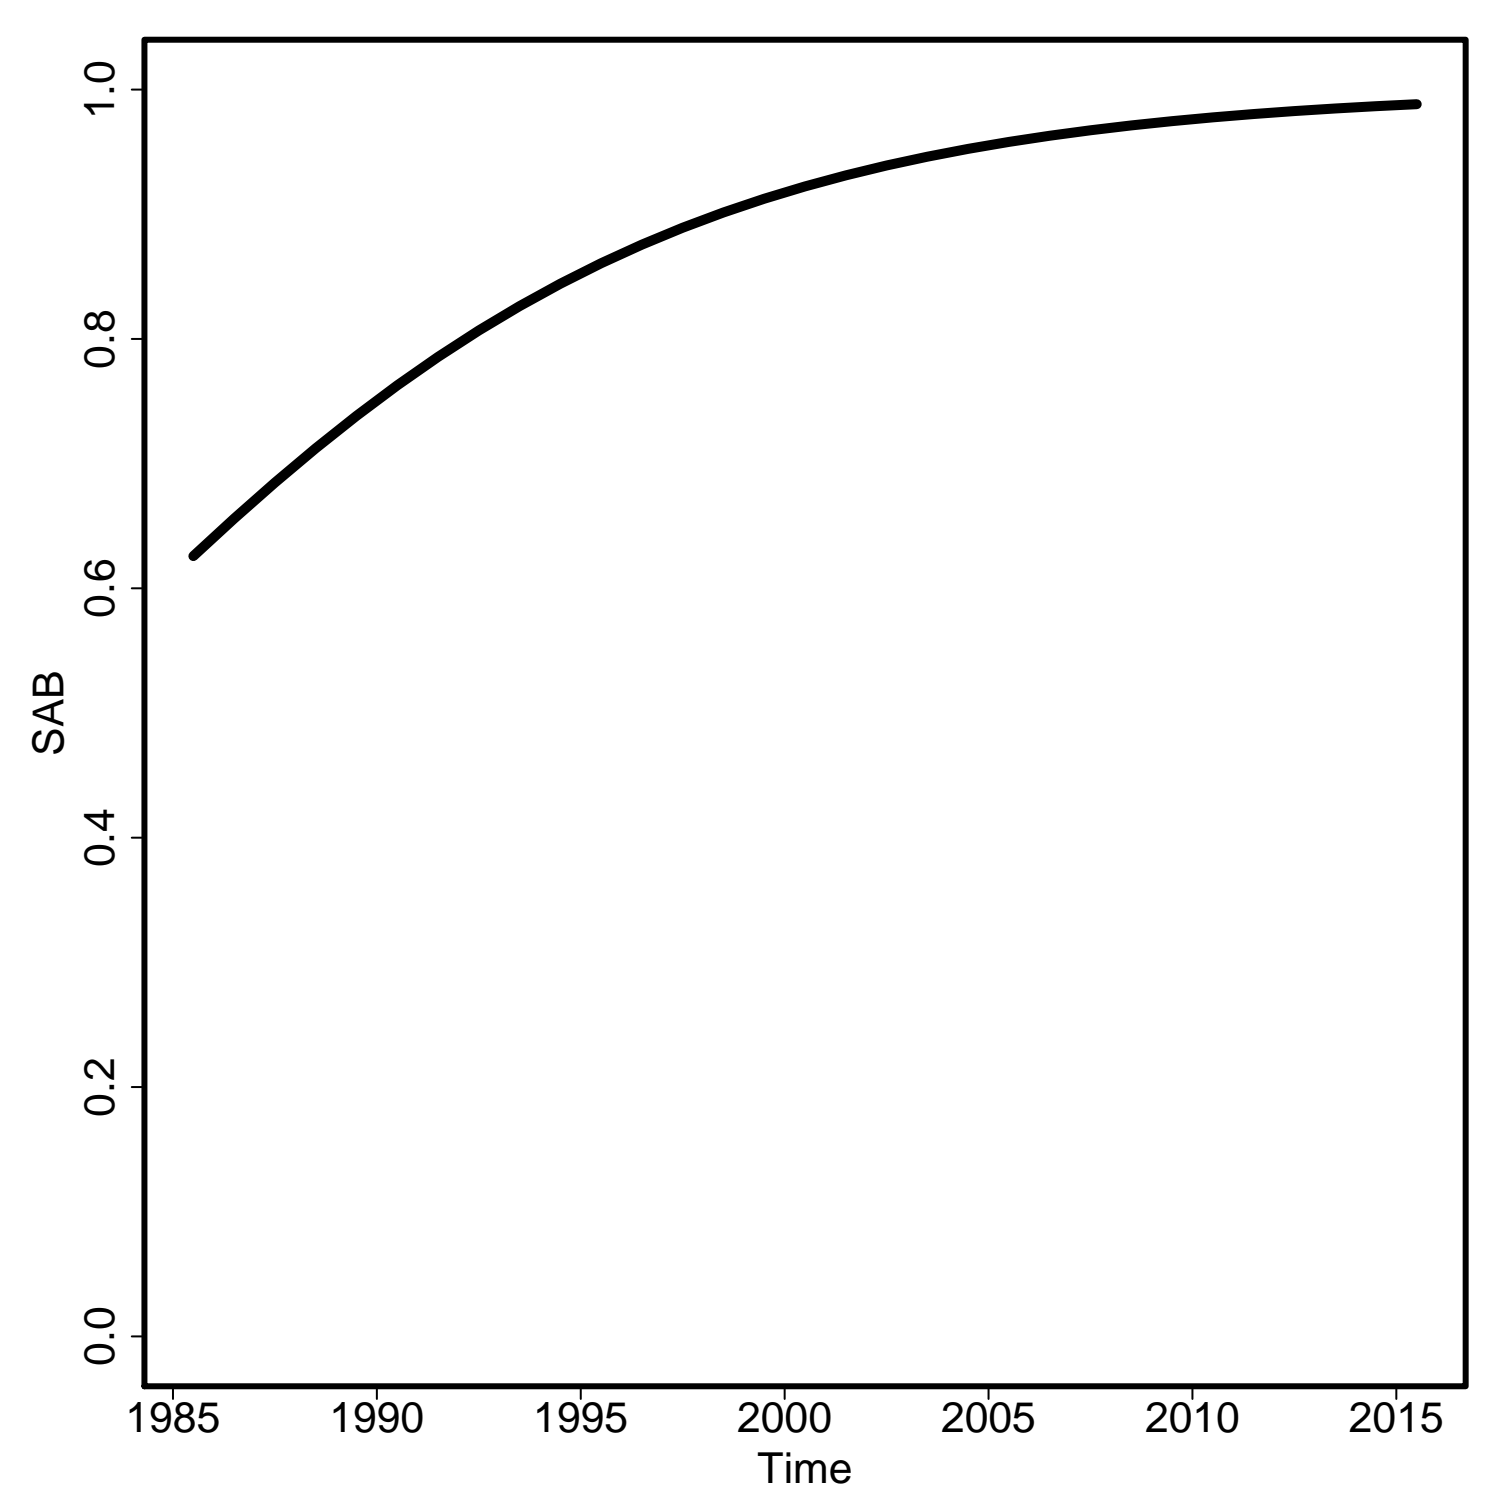

Envelope/Births

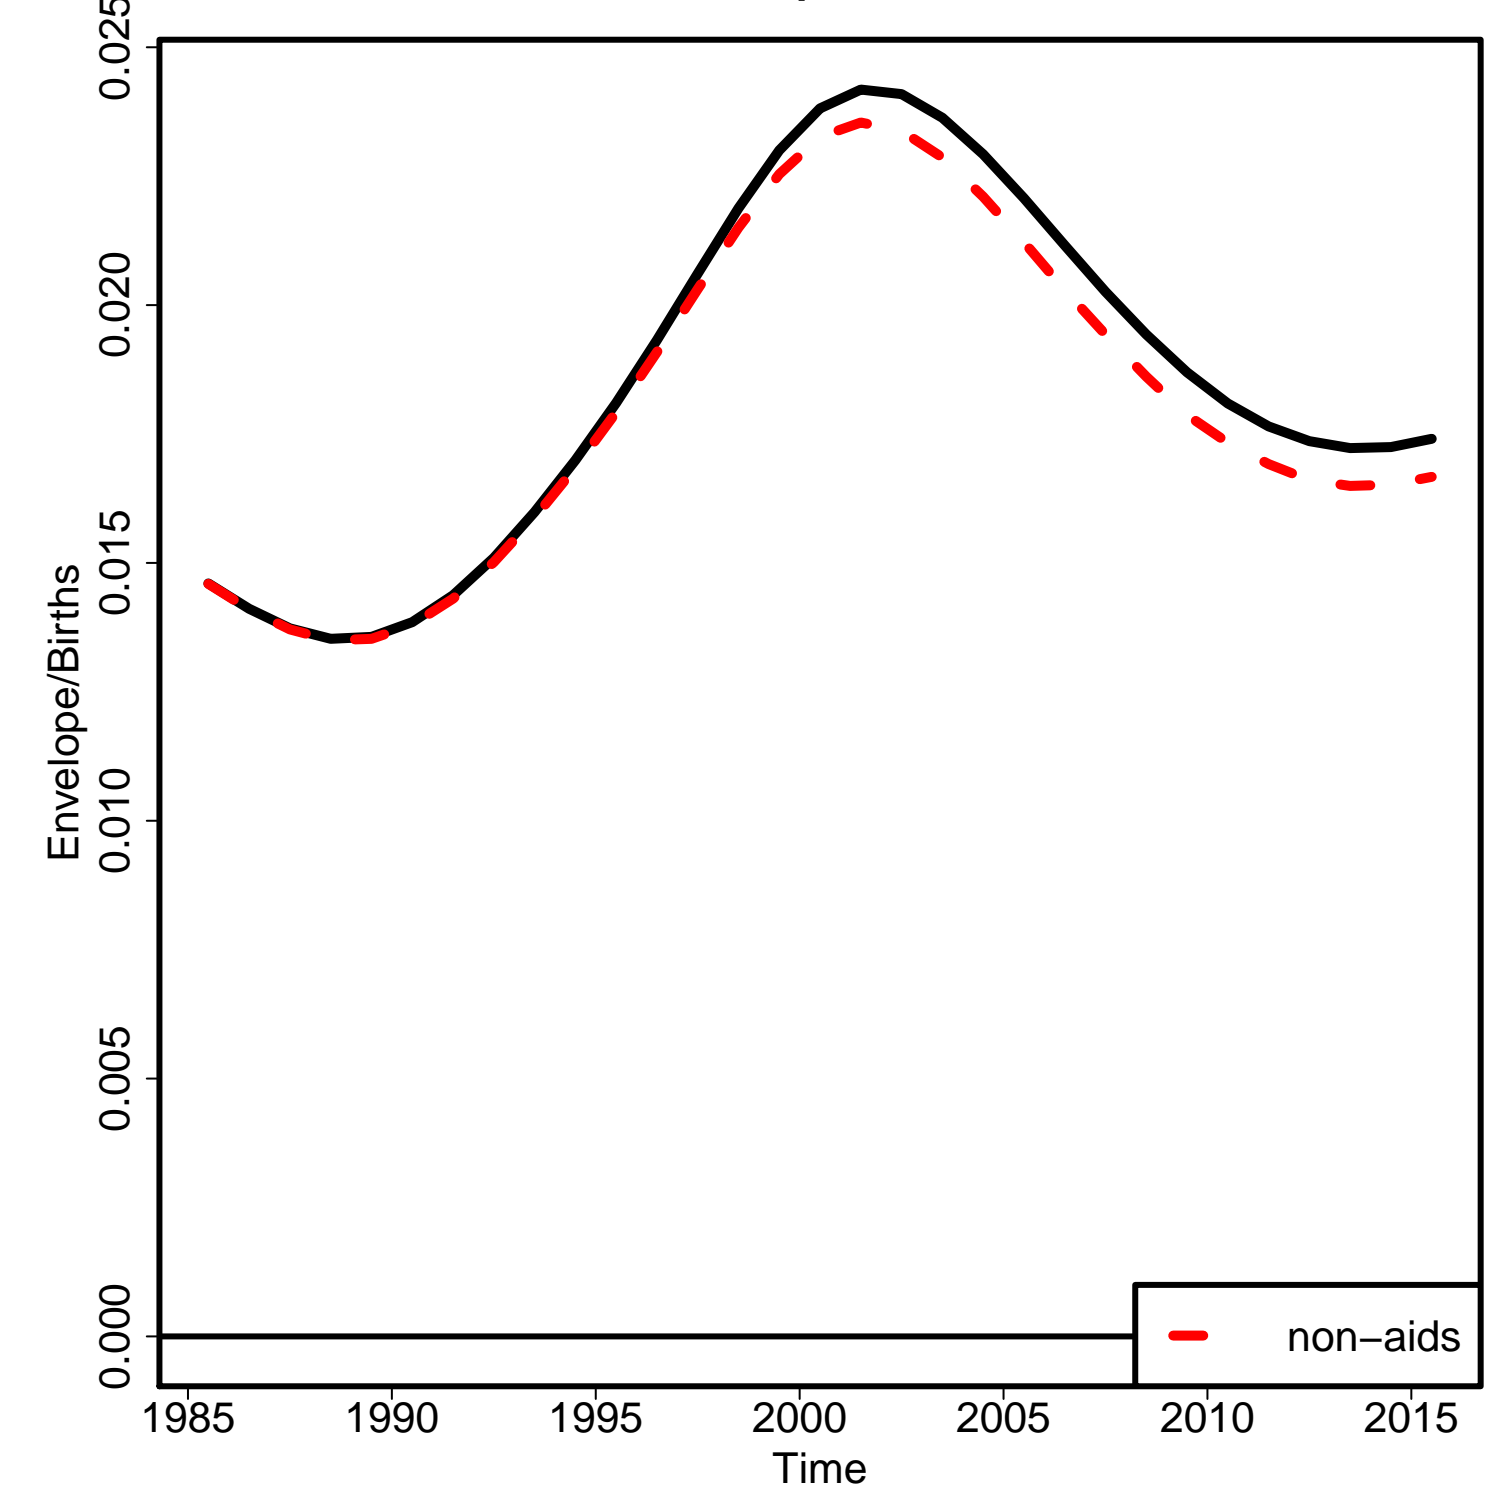

Non-aids MMR

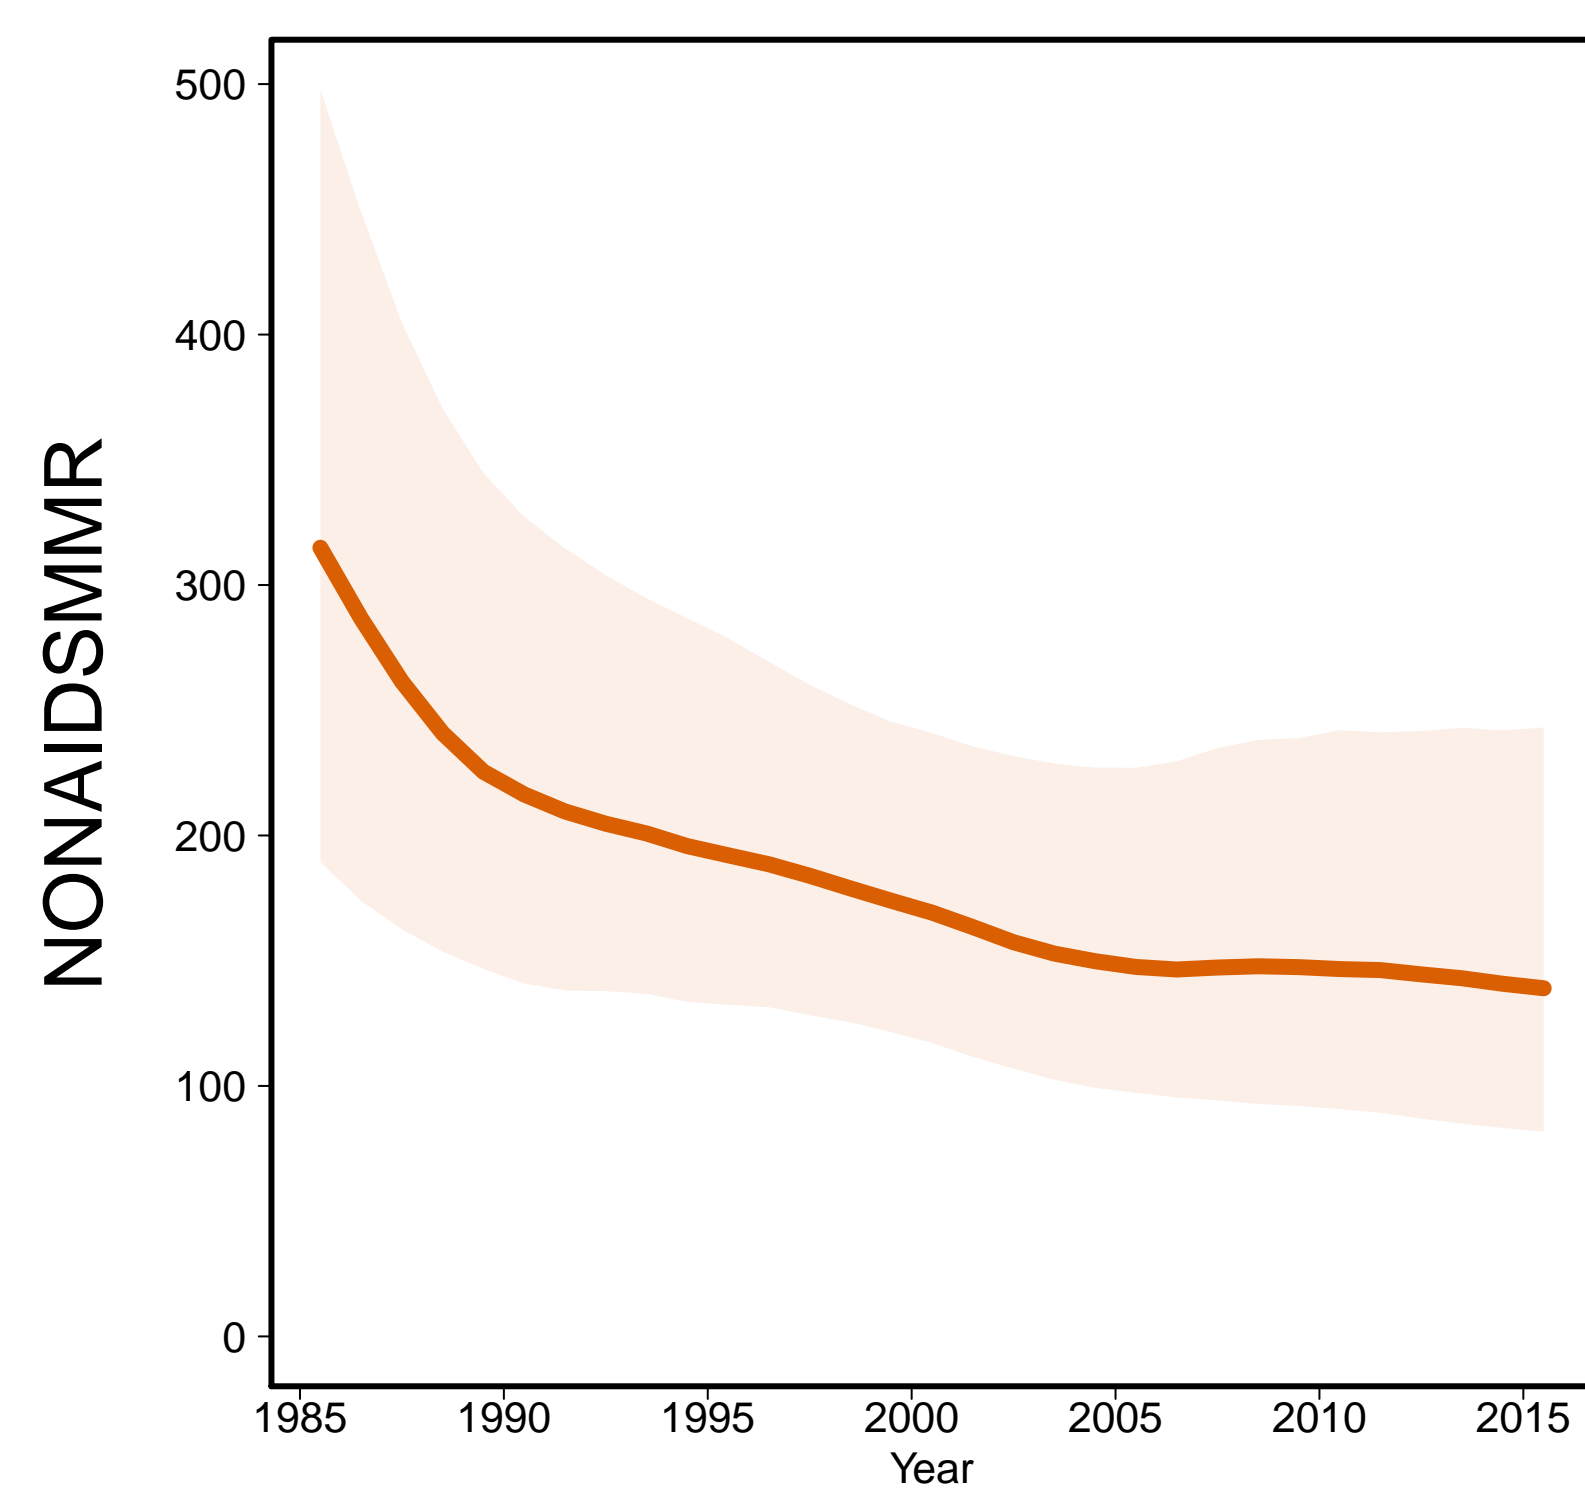

Aids MMR

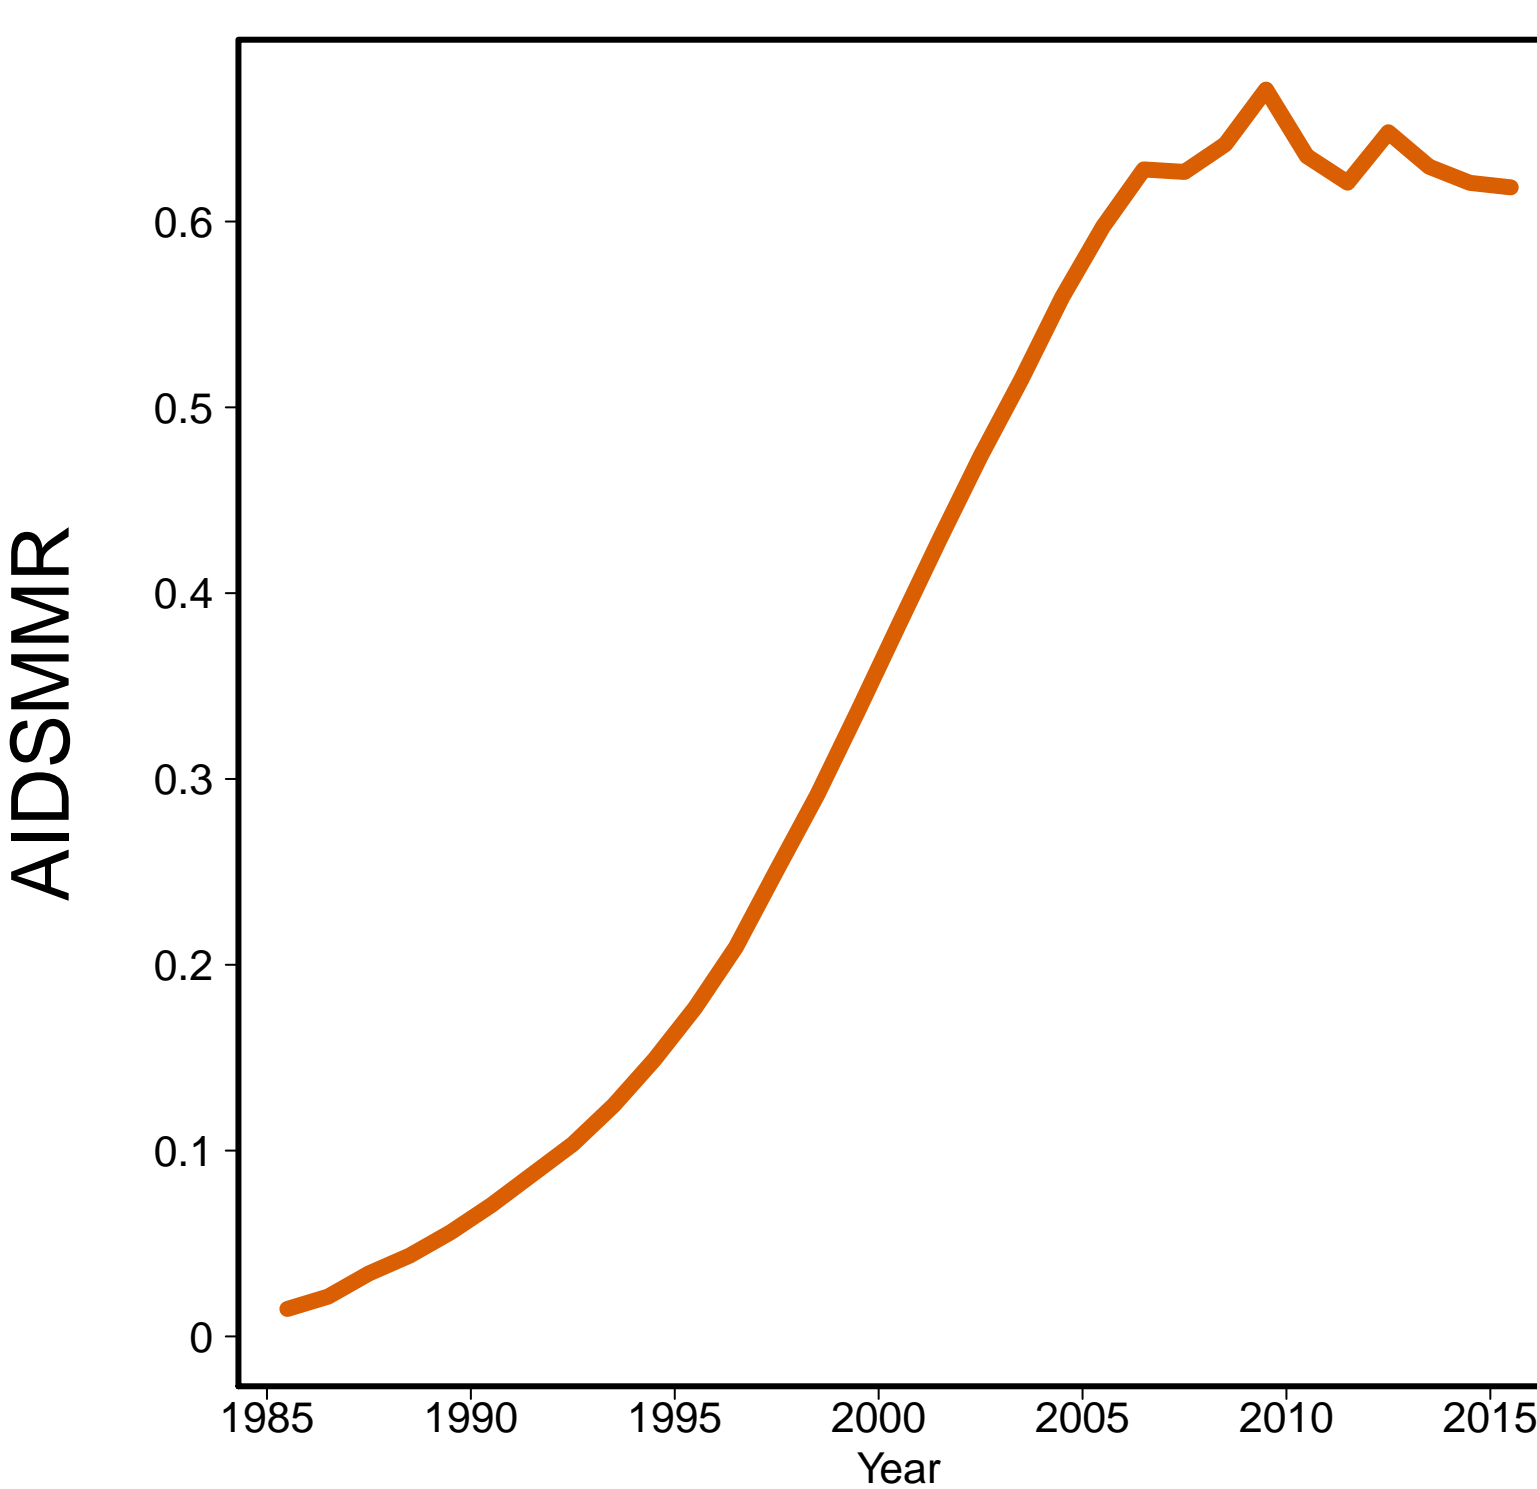

Angola [AGO]  
(Middle Africa)

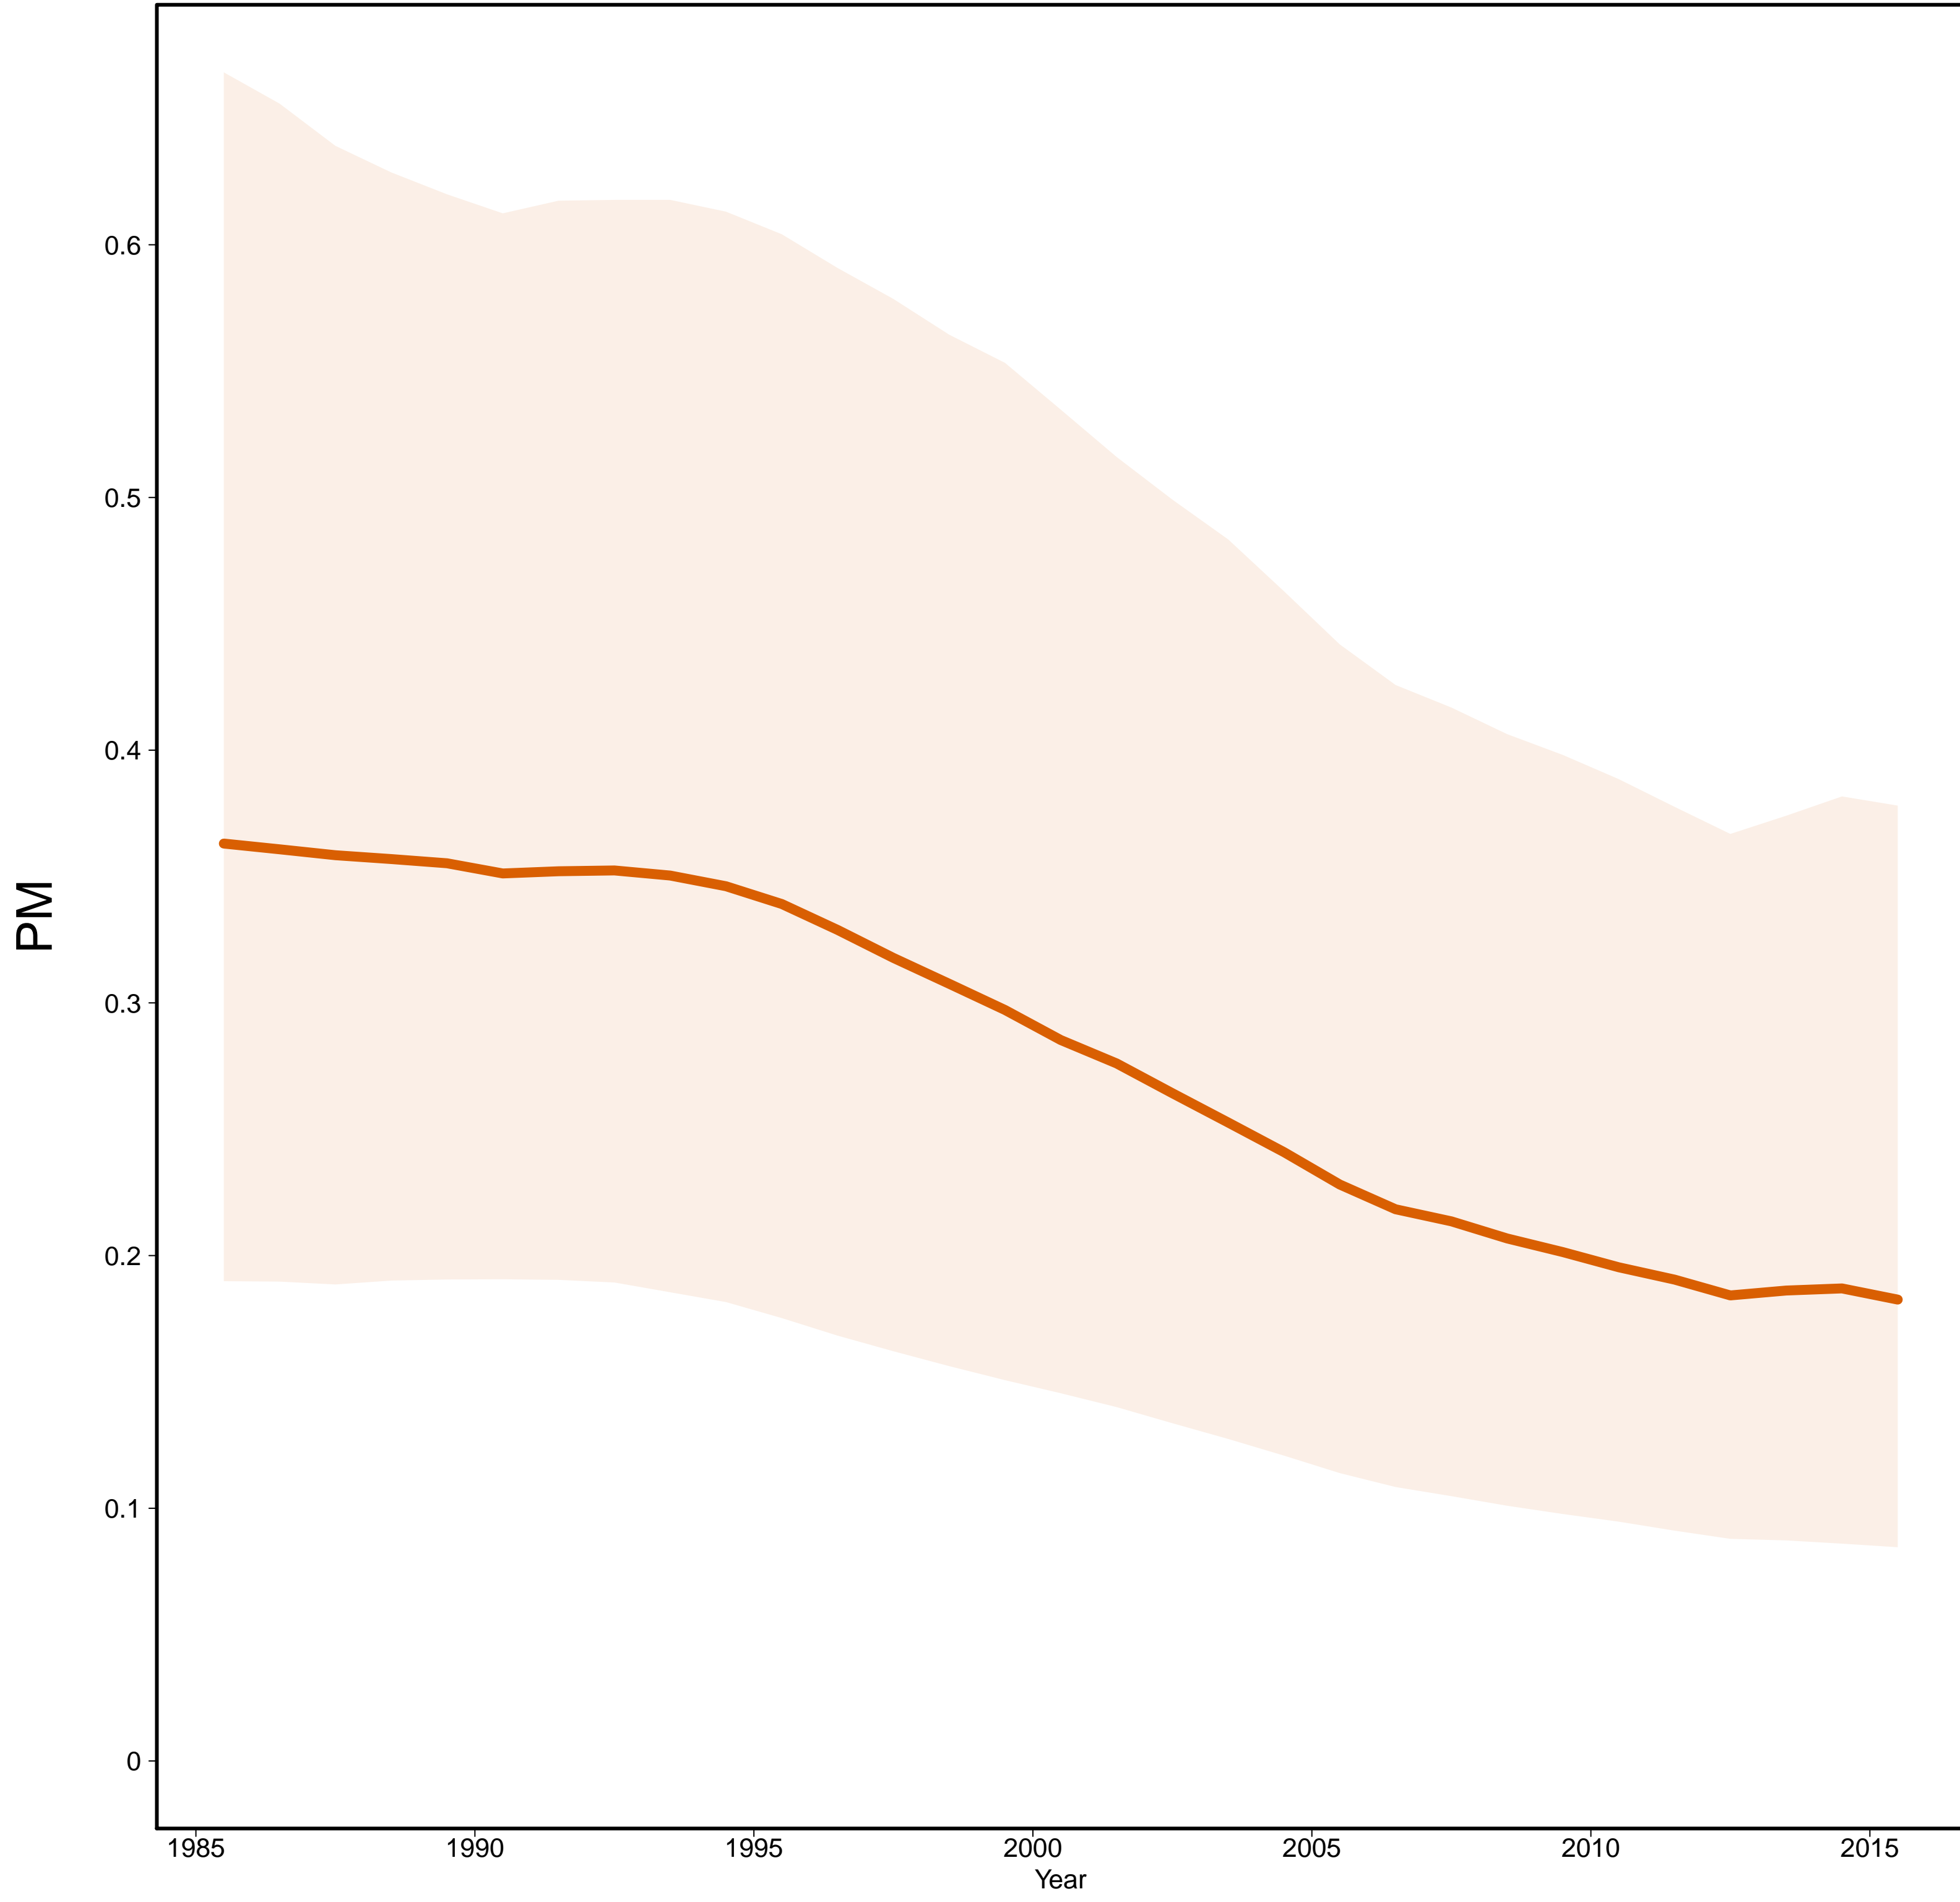

Angola [AGO]  
(Middle Africa)

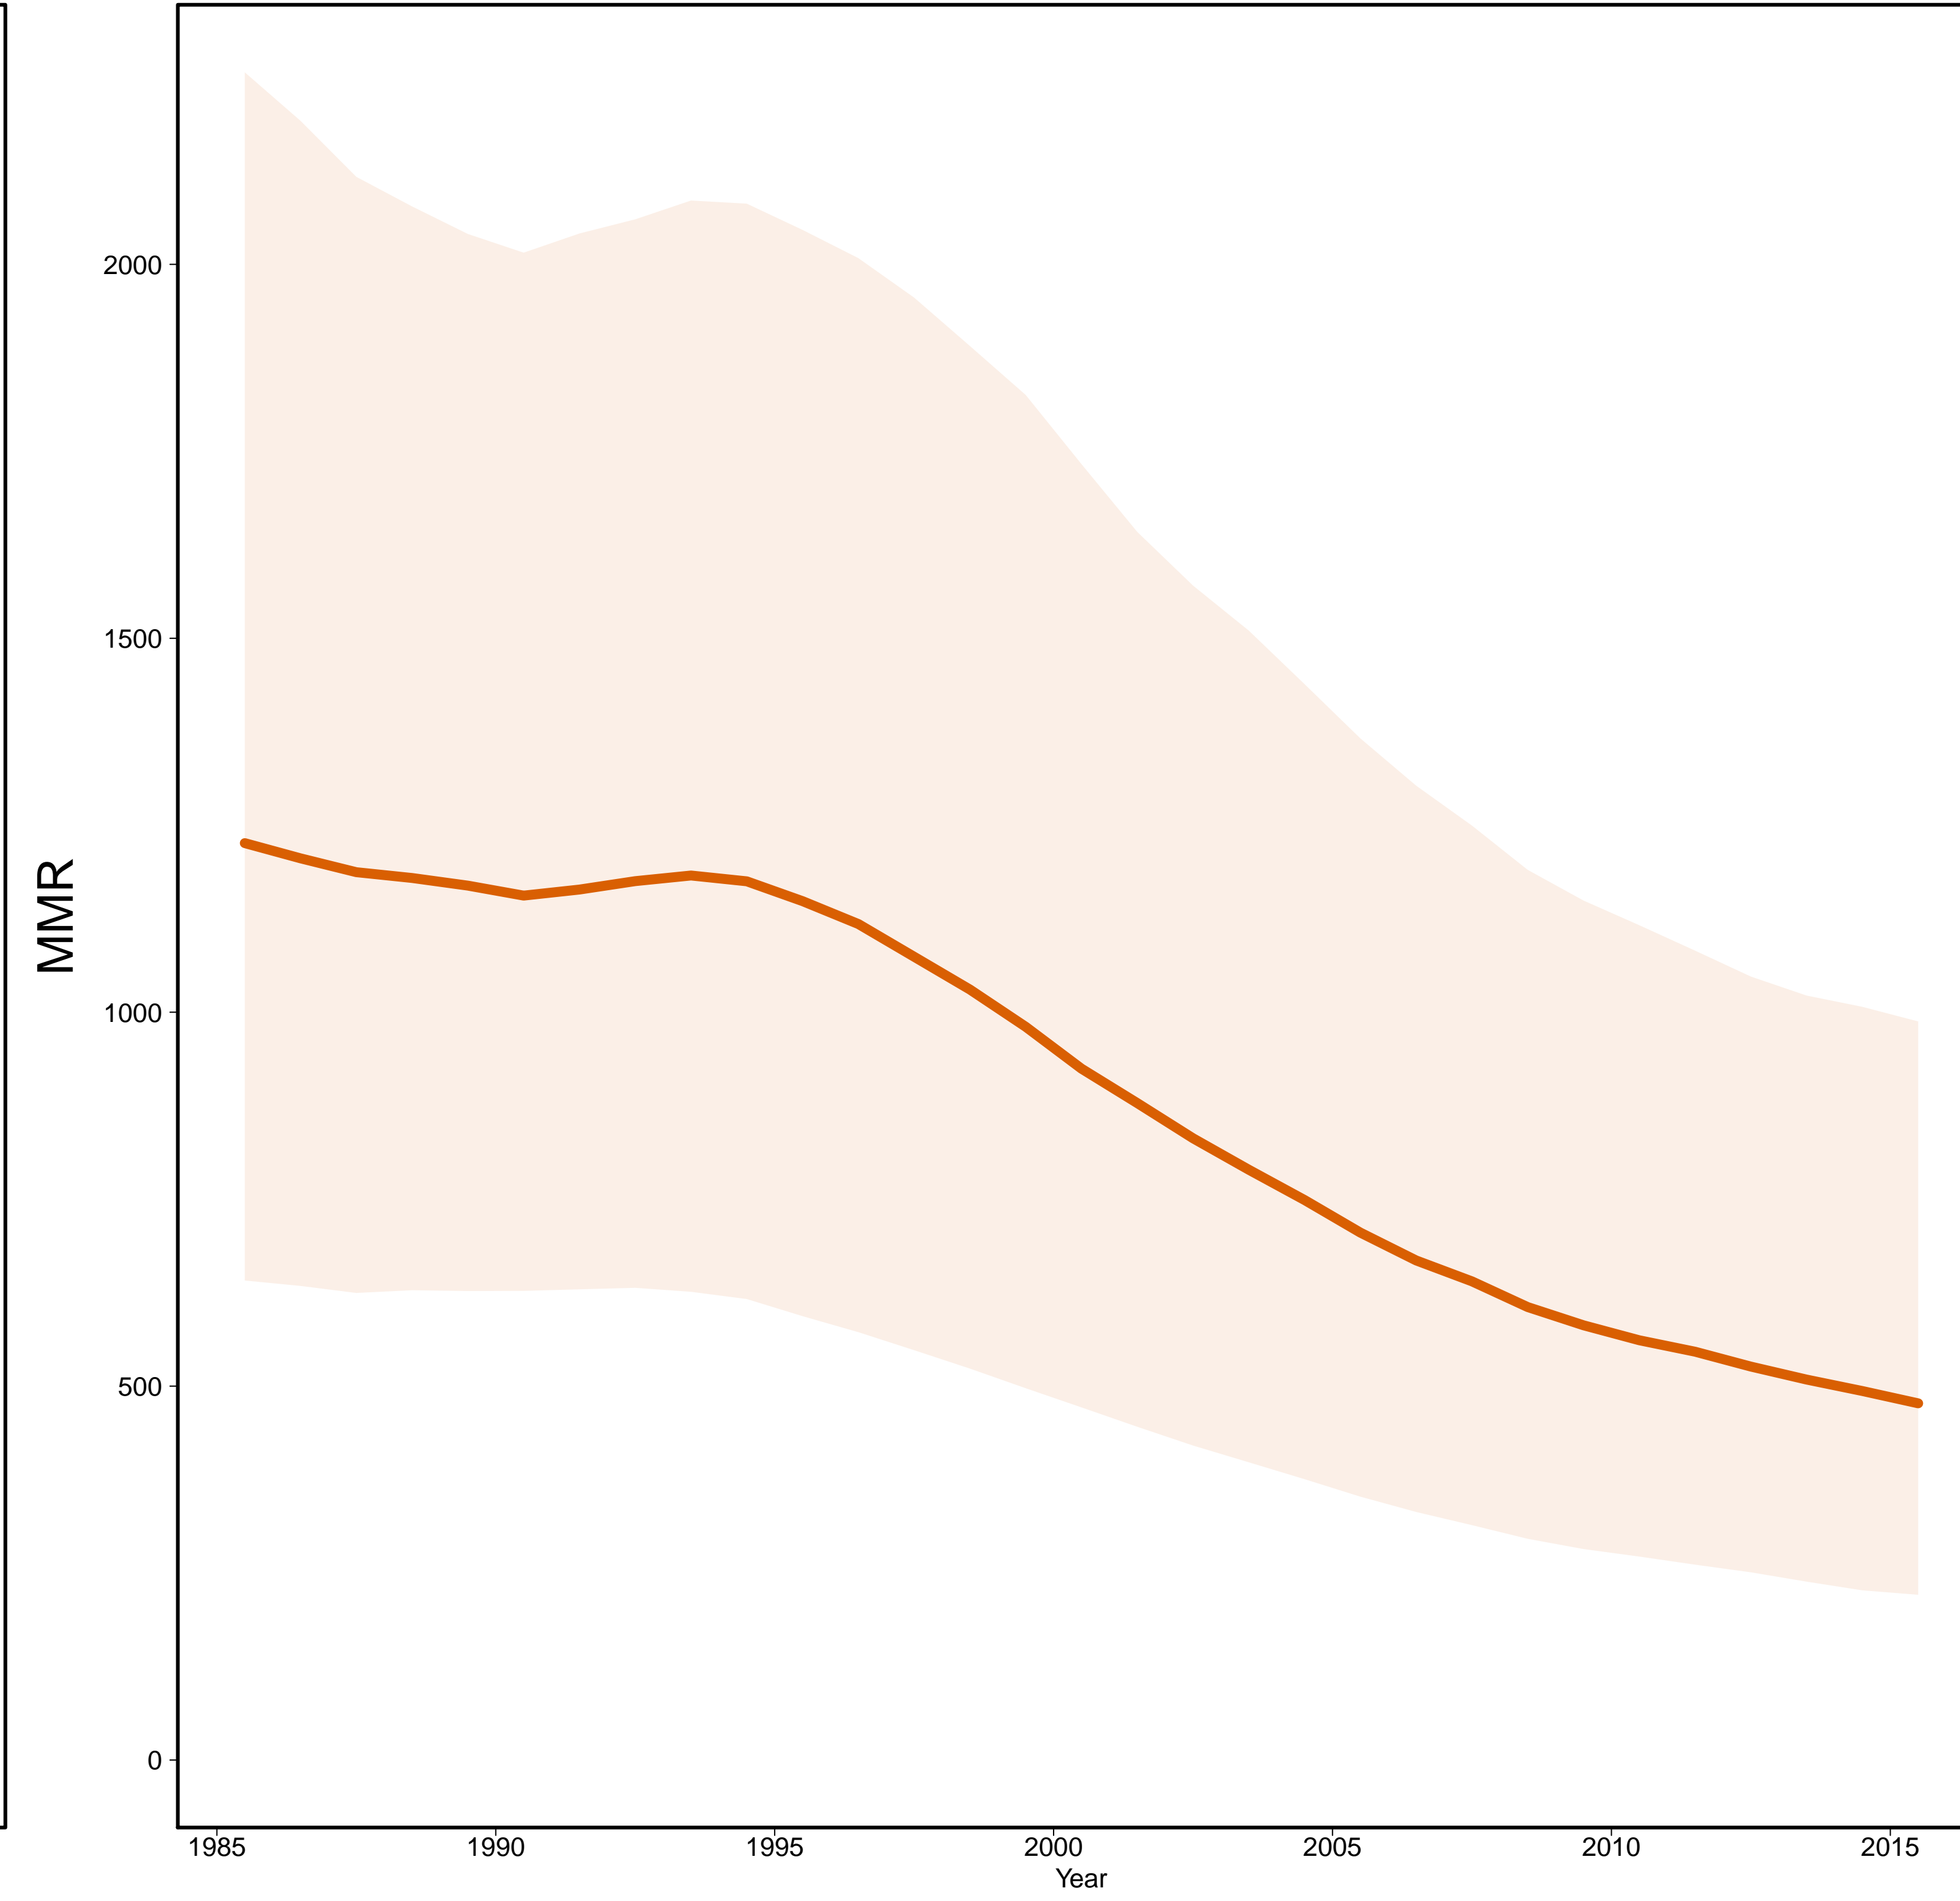

– Estimates –  
 Mlate  
 – MMR Database 2015 –

Gross Domestic Product

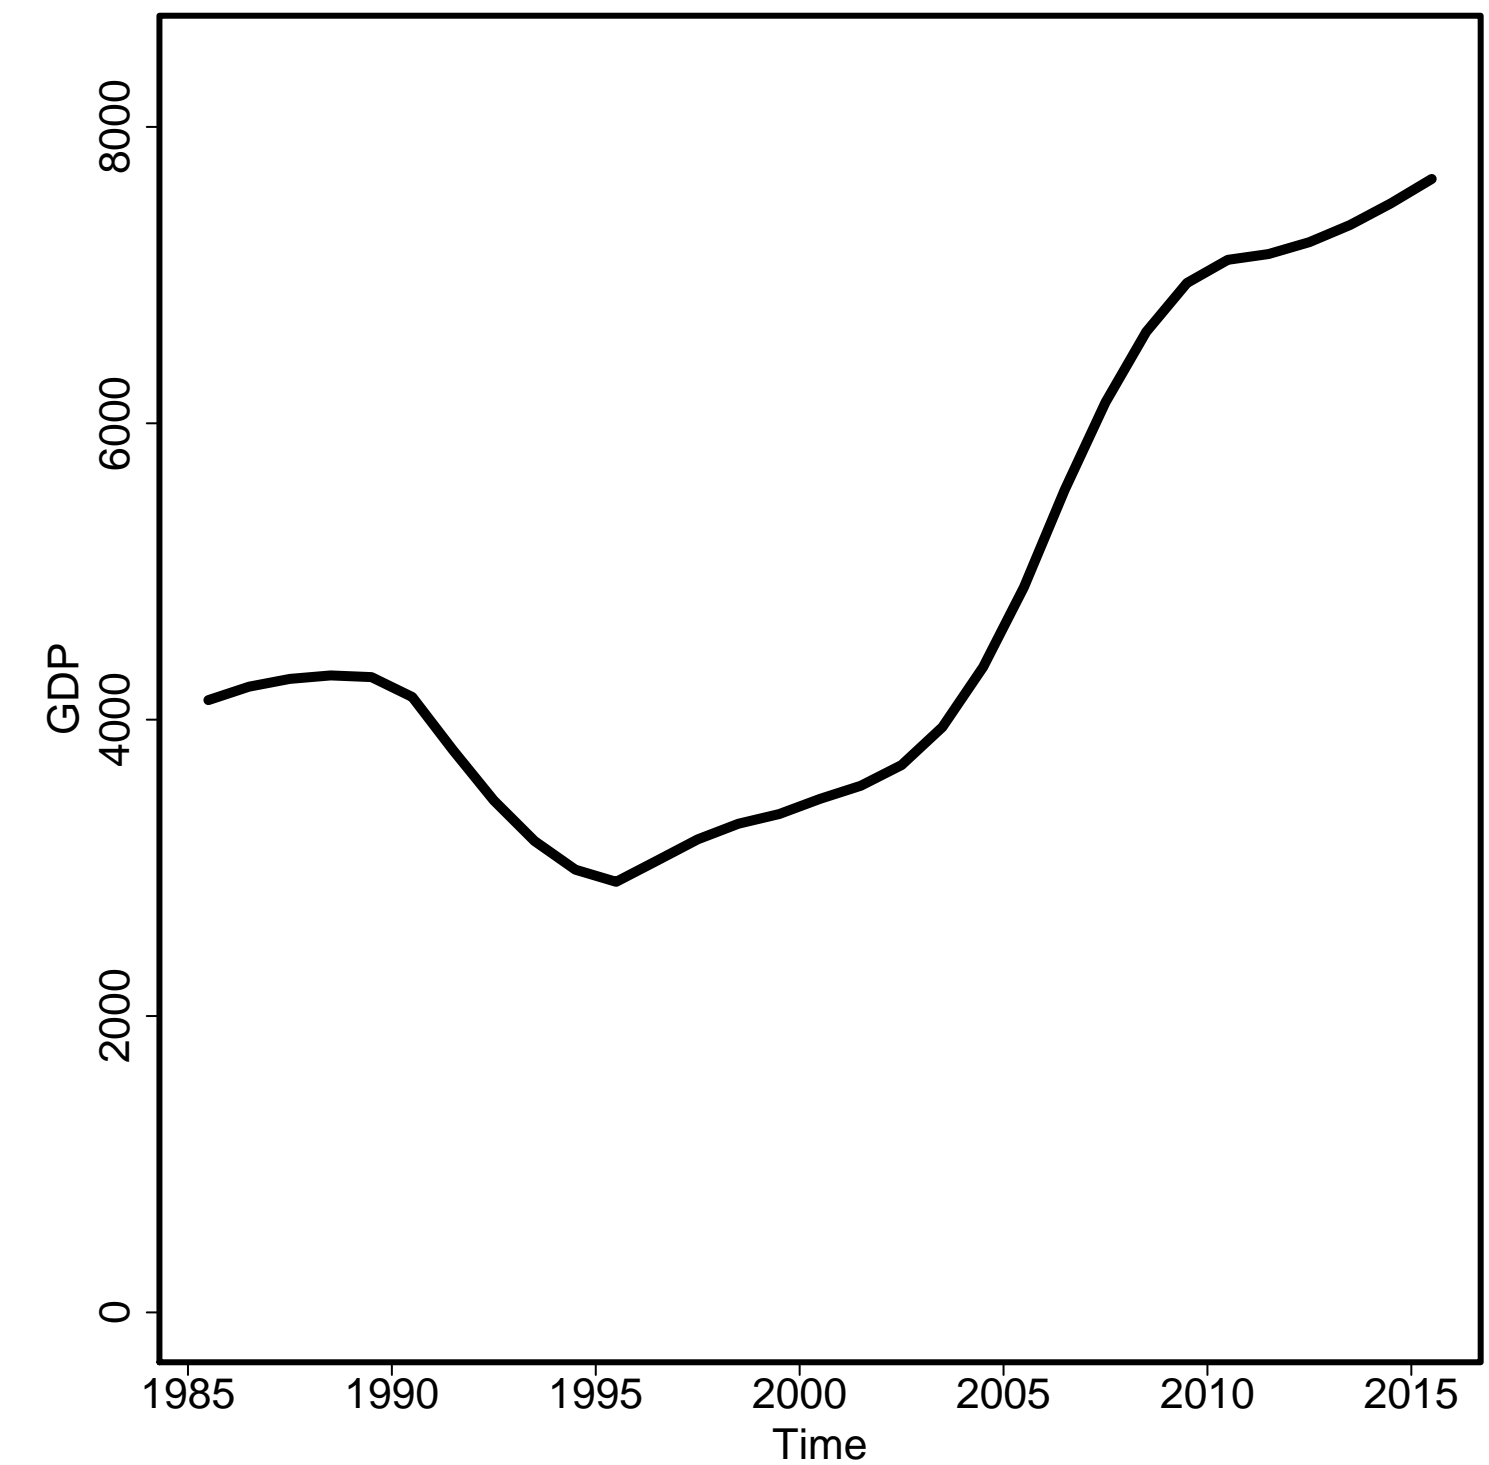

General Fertility Rate

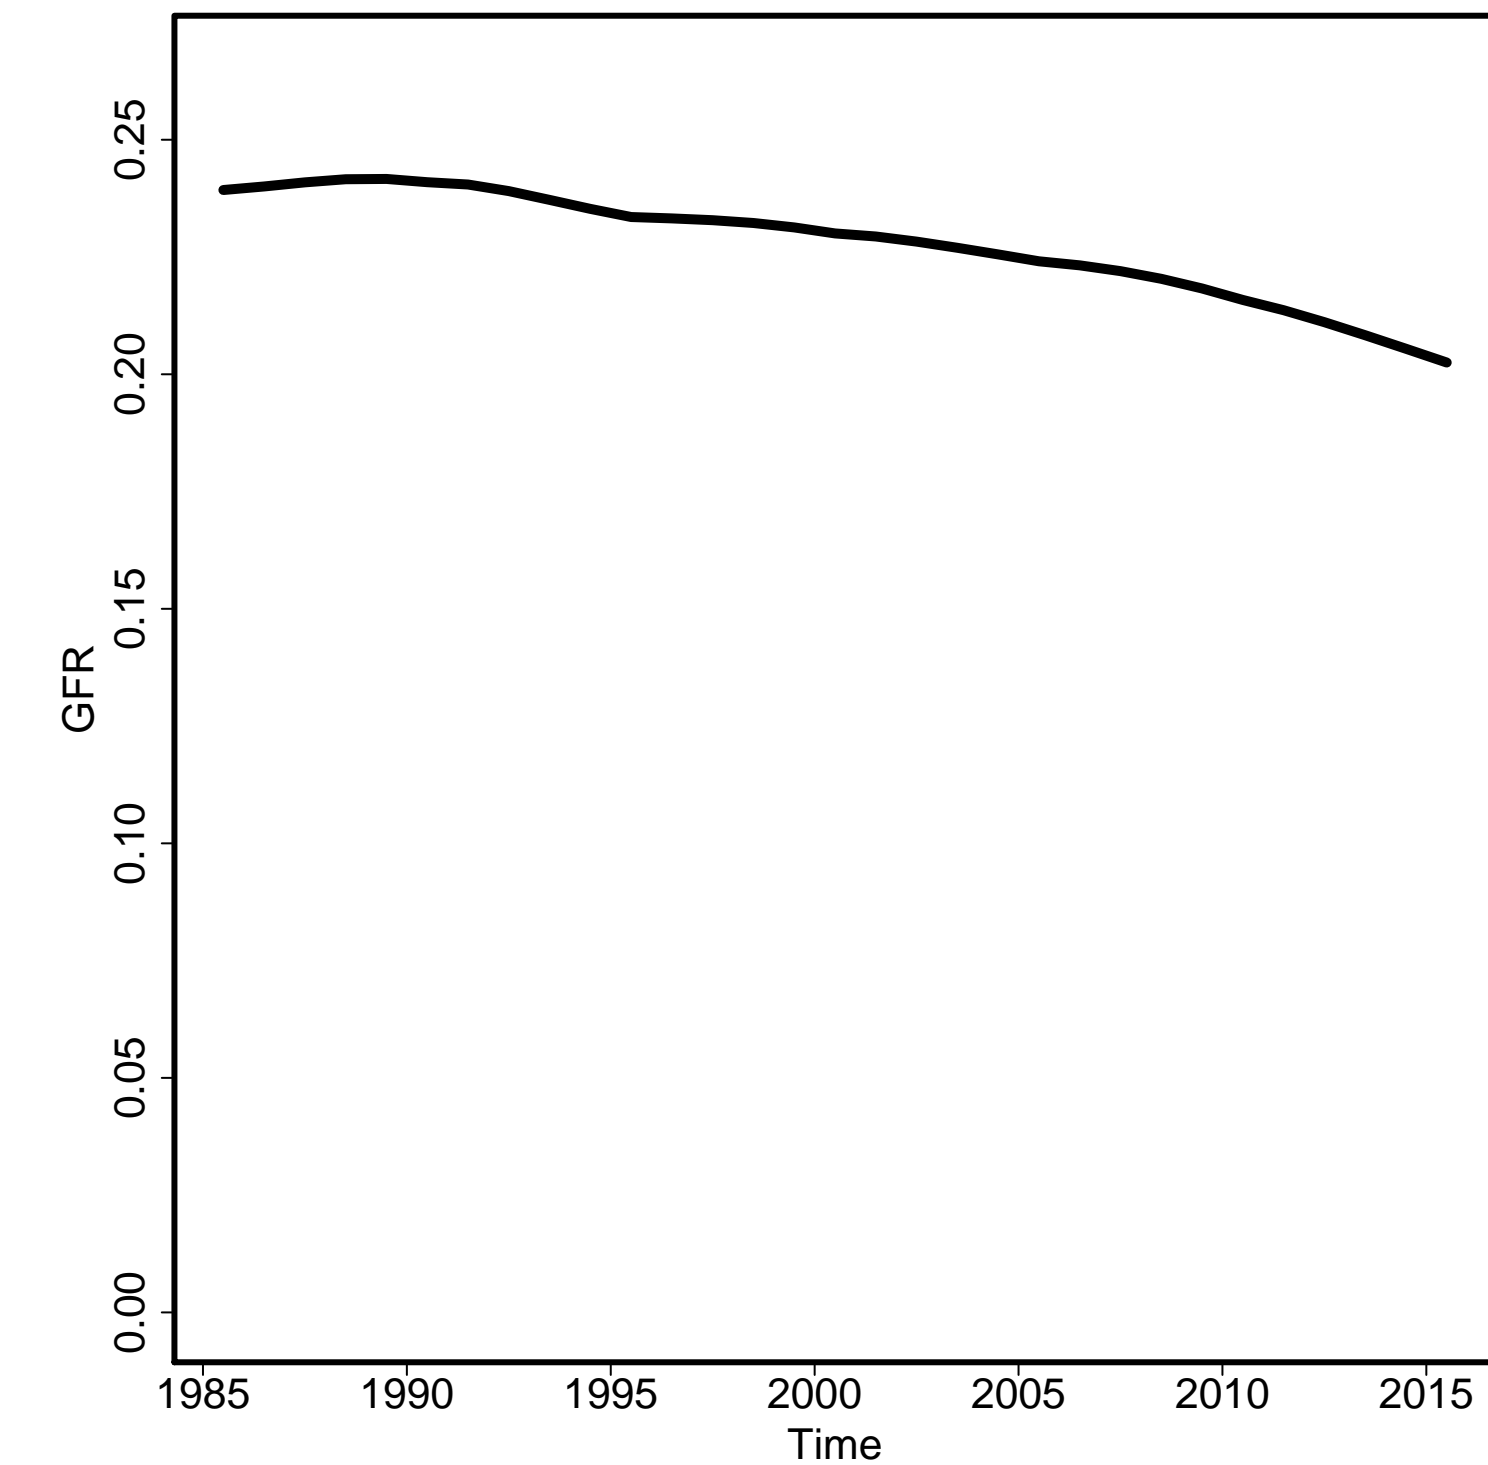

Skilled Attendance to Birth

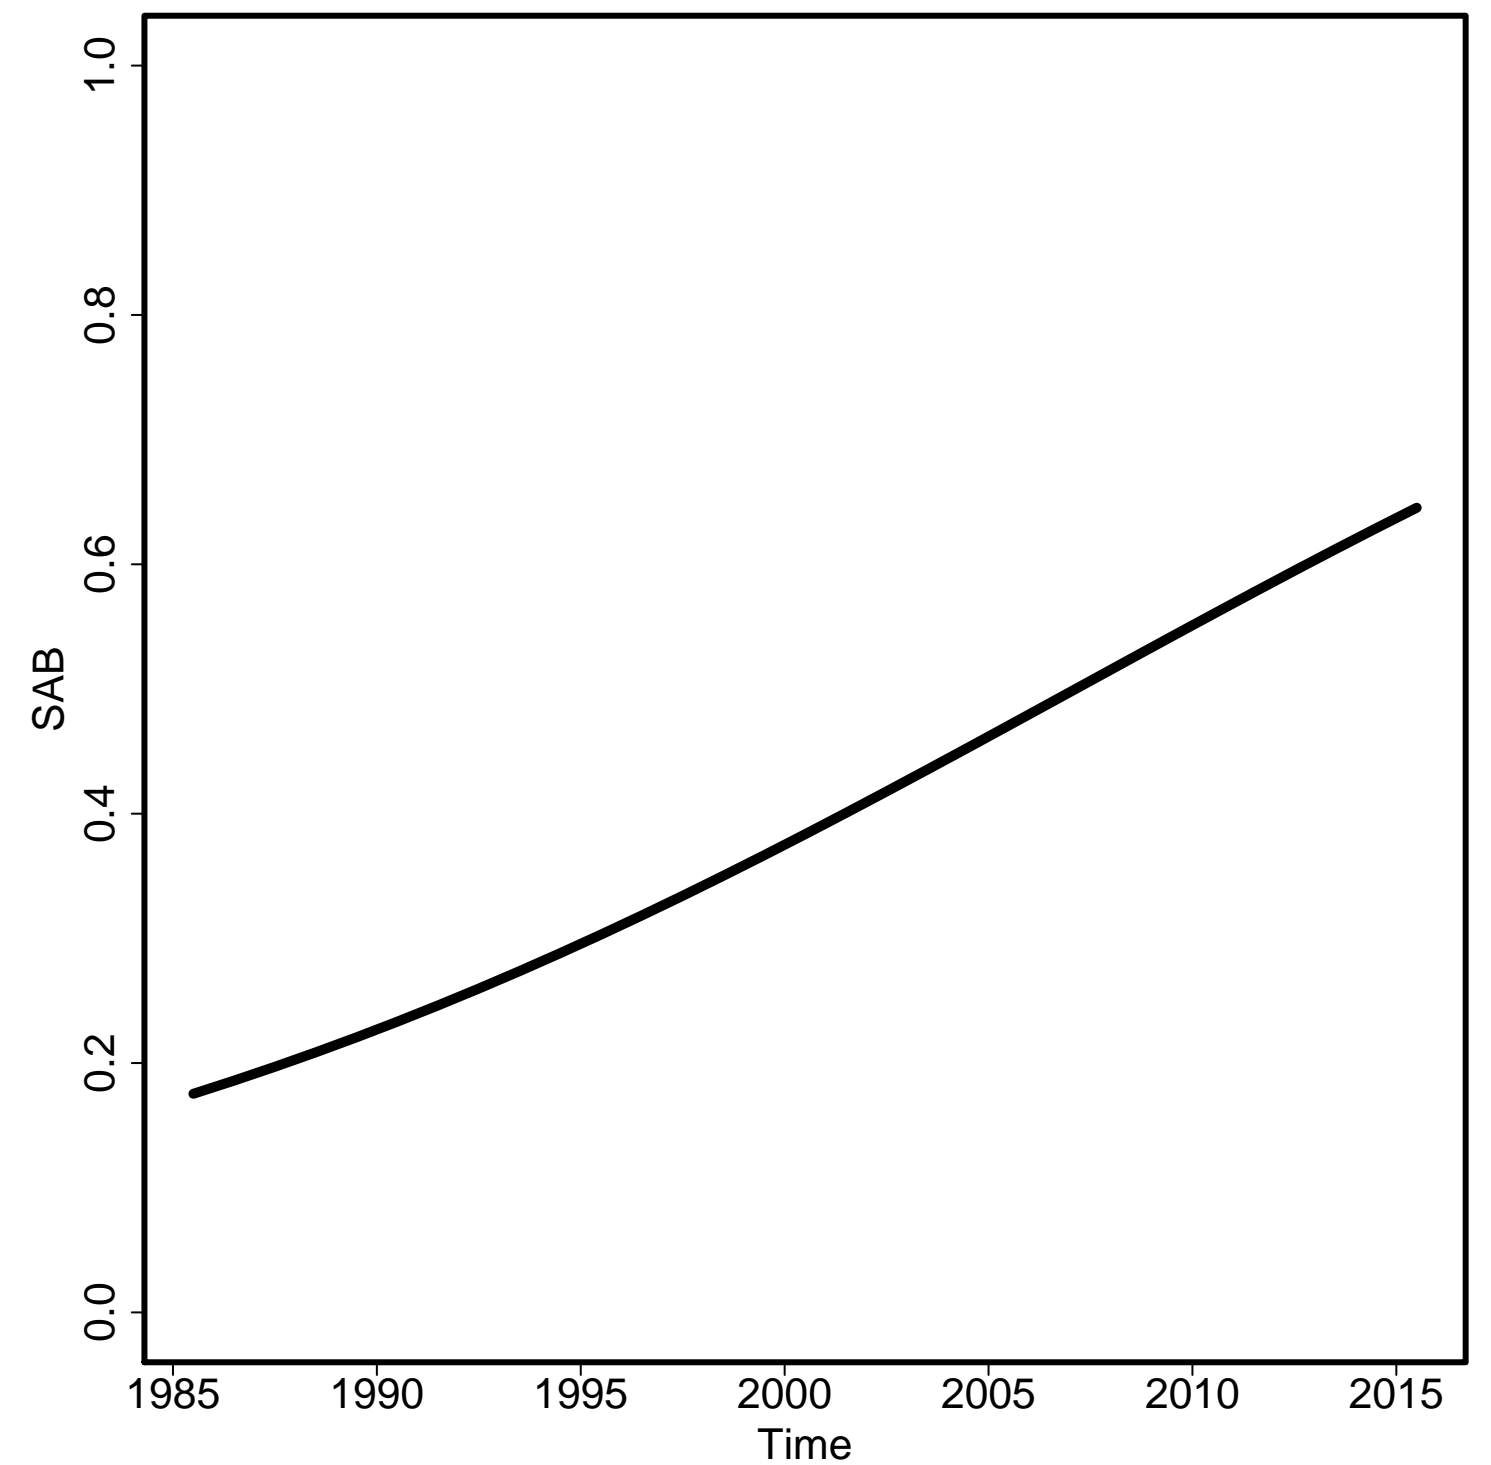

Envelope/Births

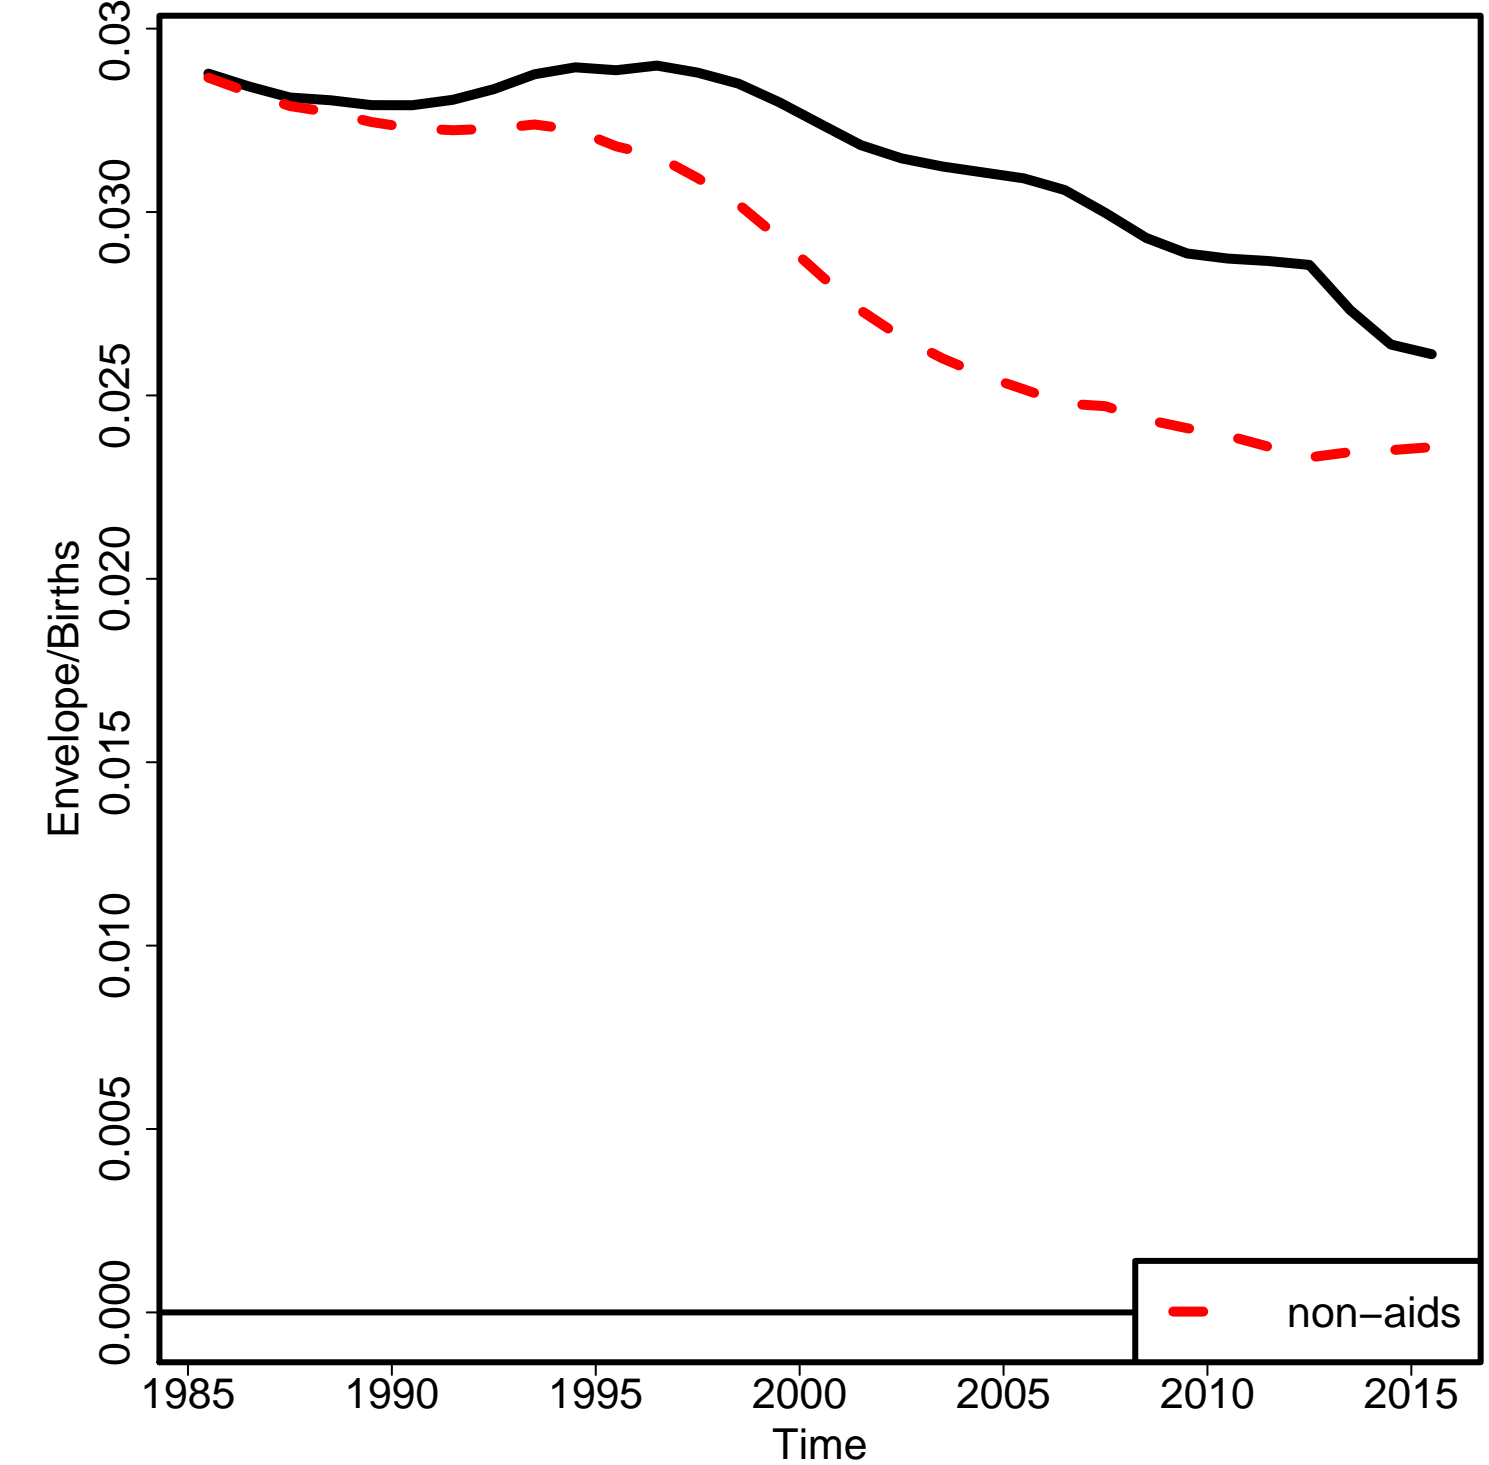

Non-aids MMR

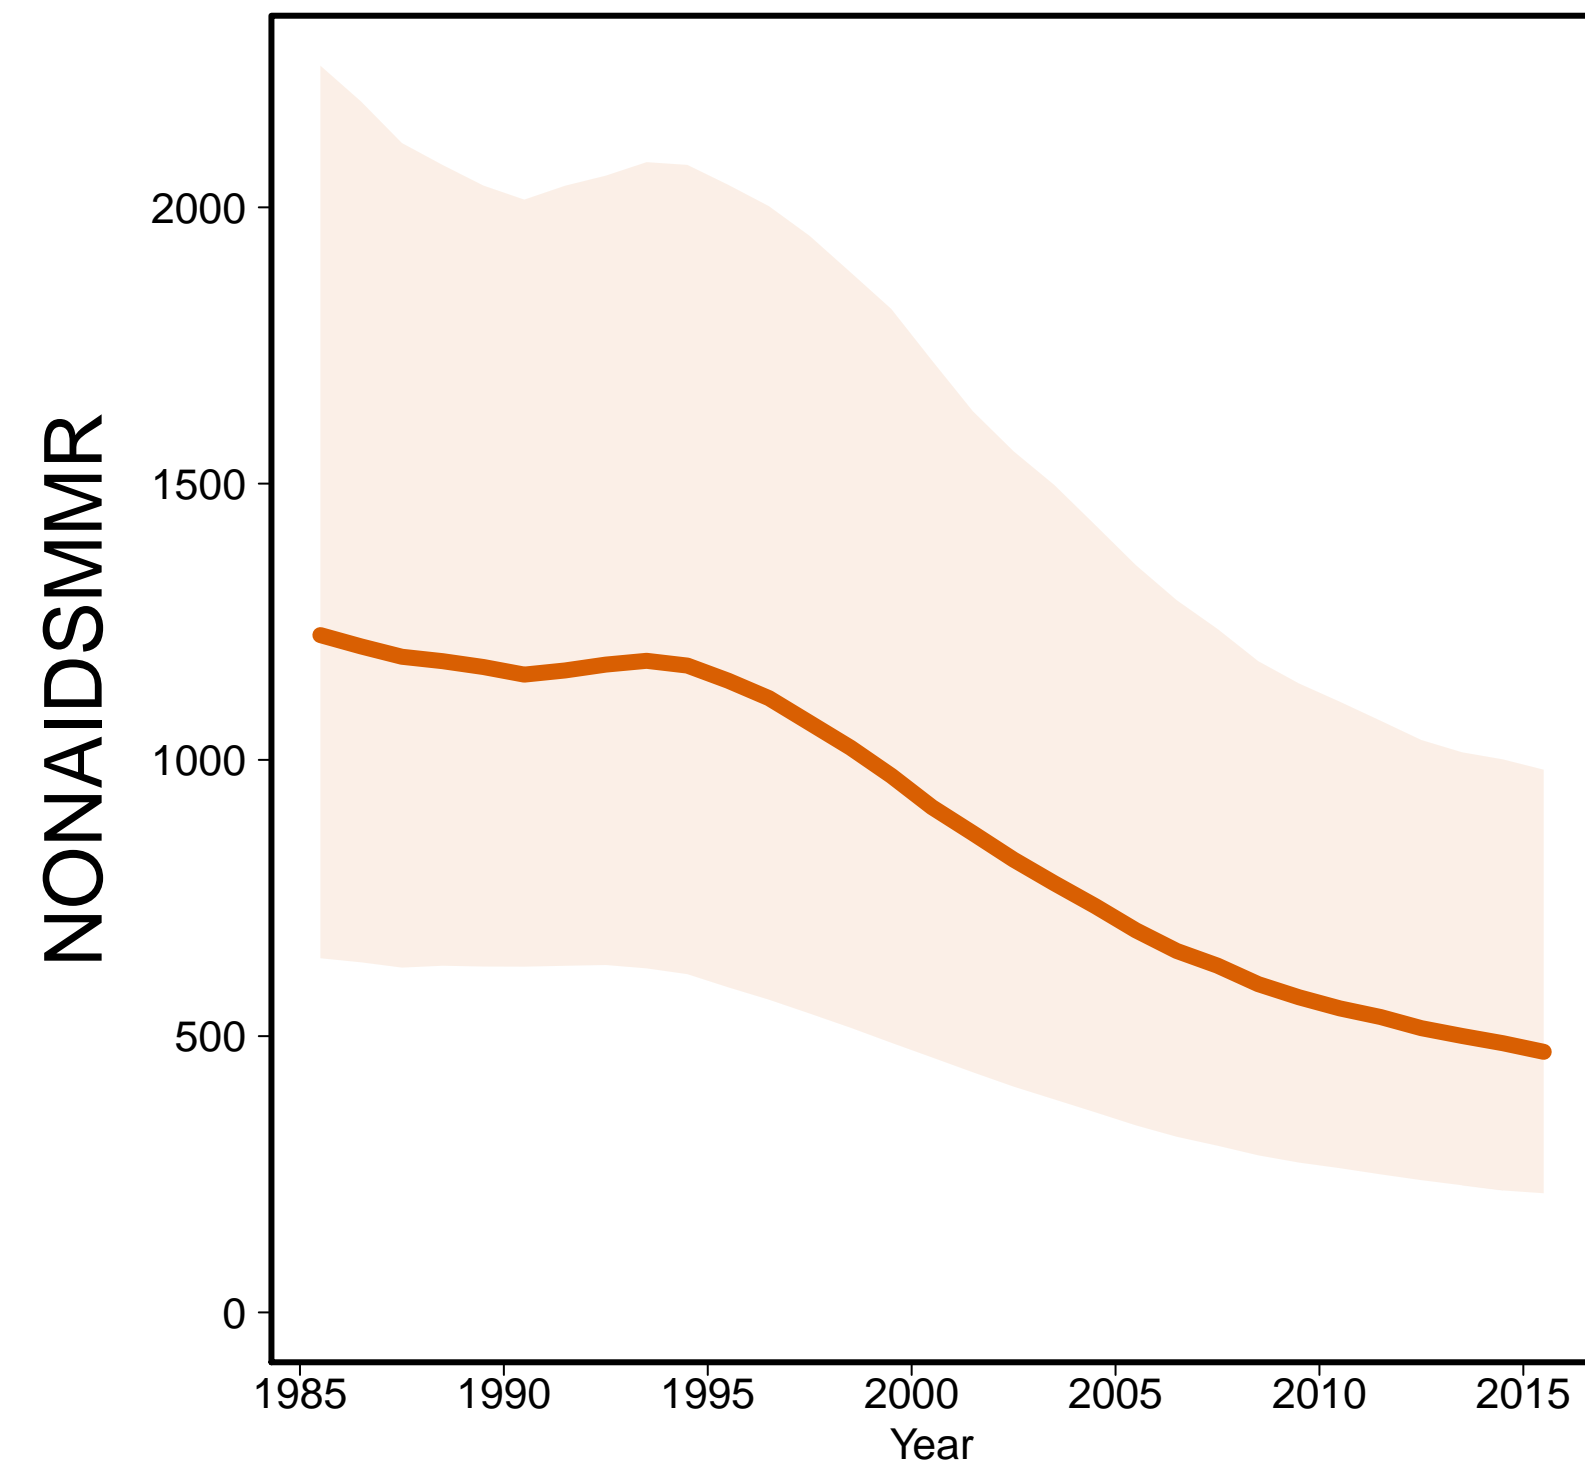

Aids MMR

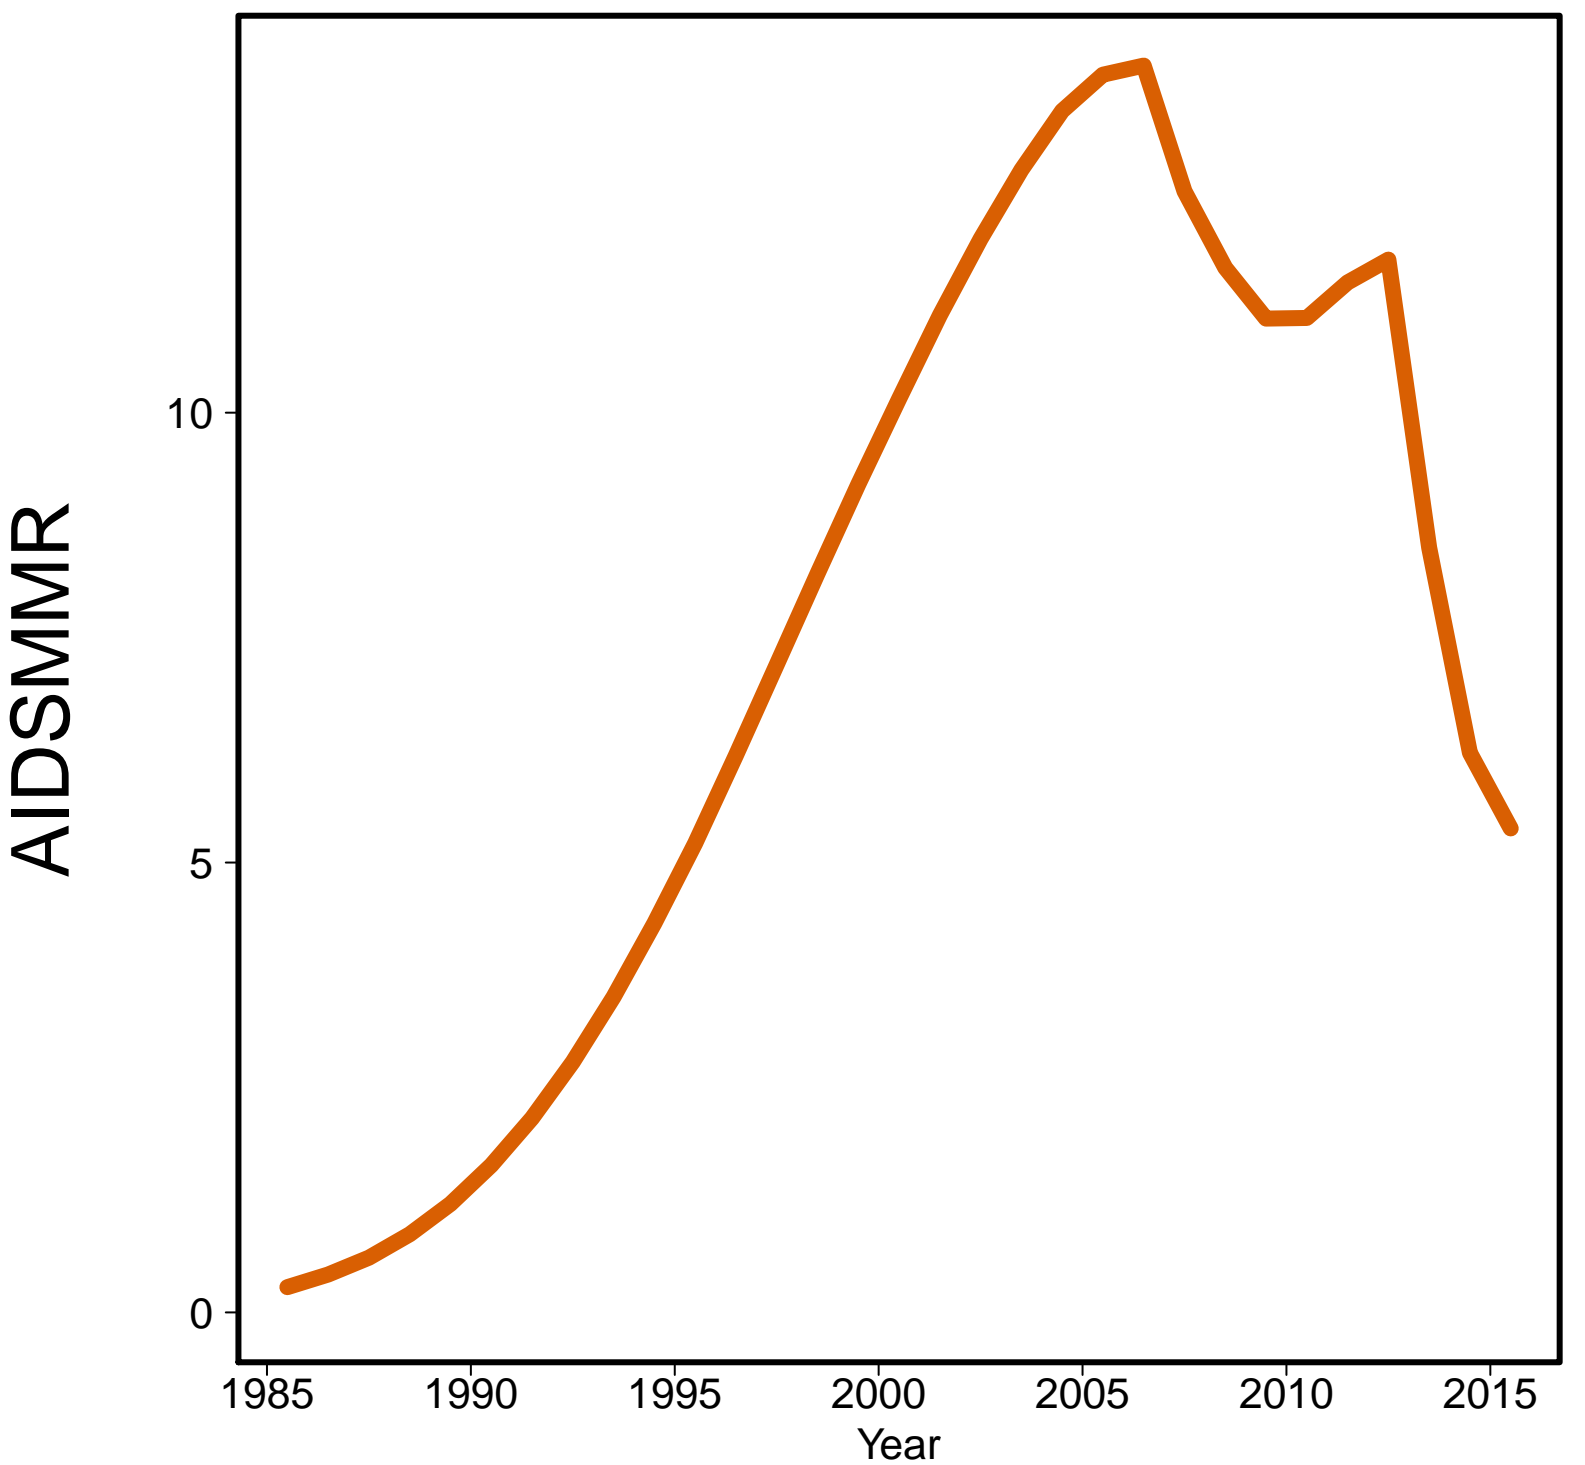

Argentina [ARG]  
(South America)

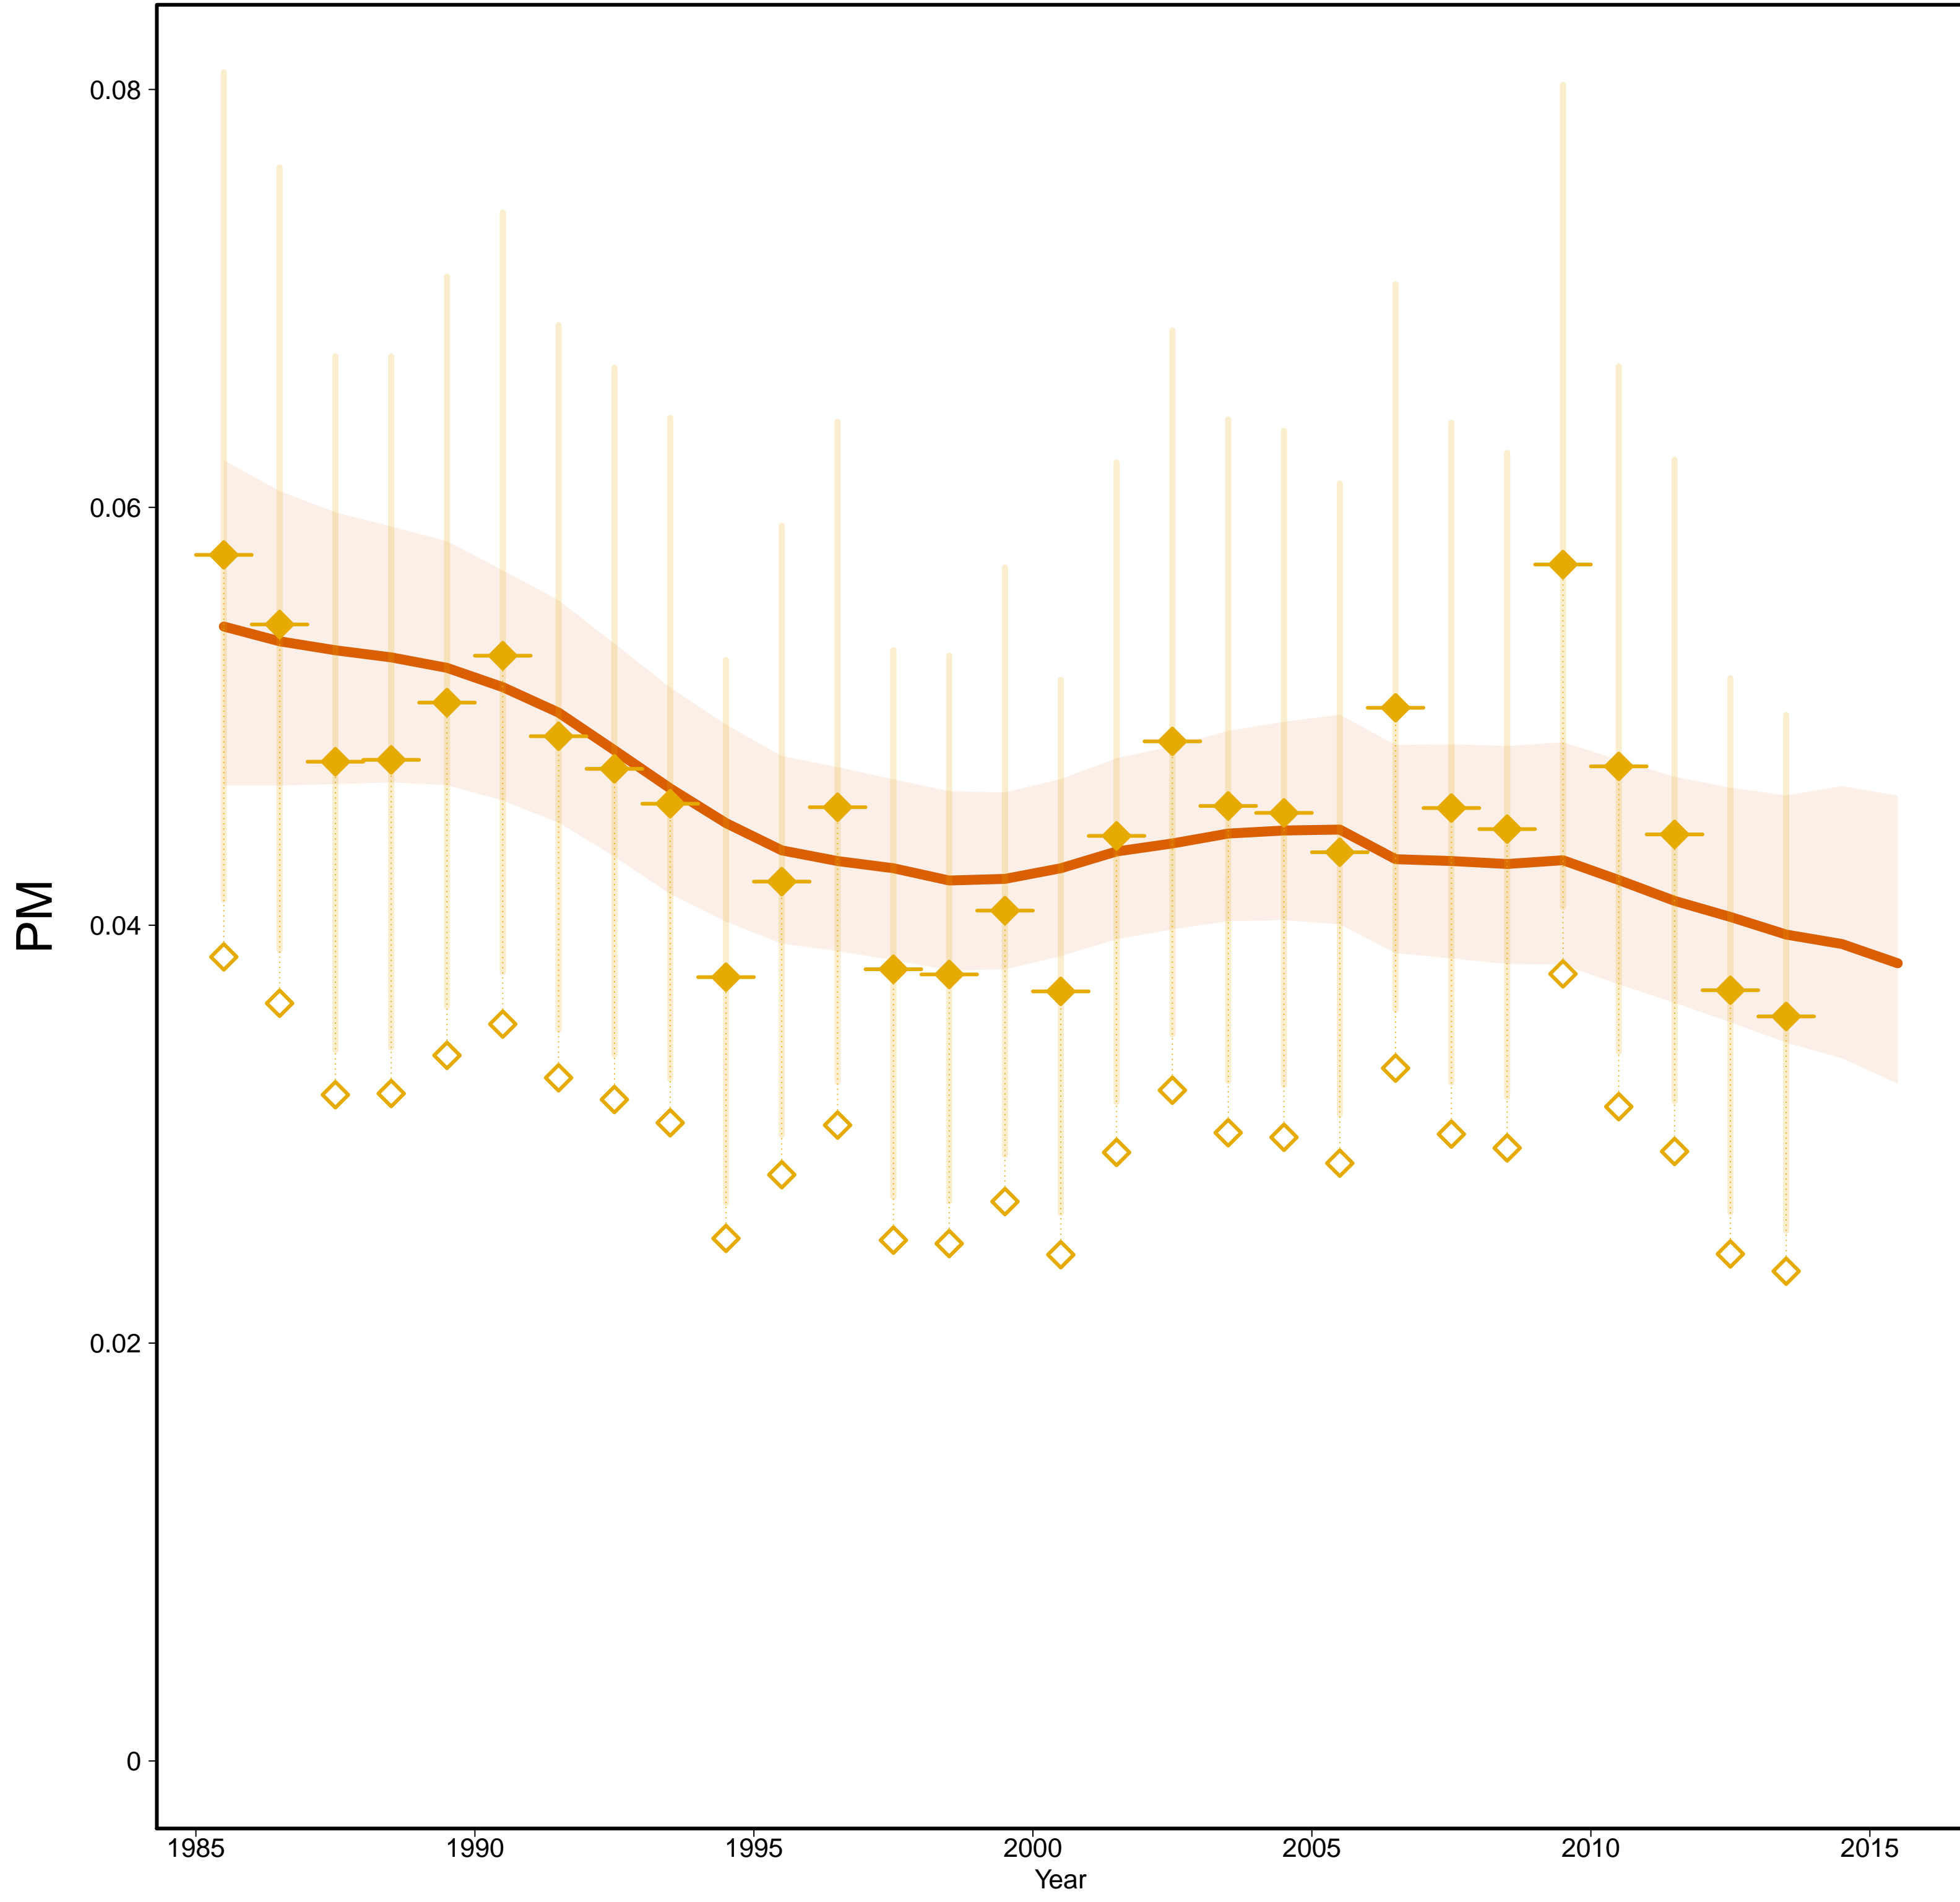

Argentina [ARG]  
(South America)

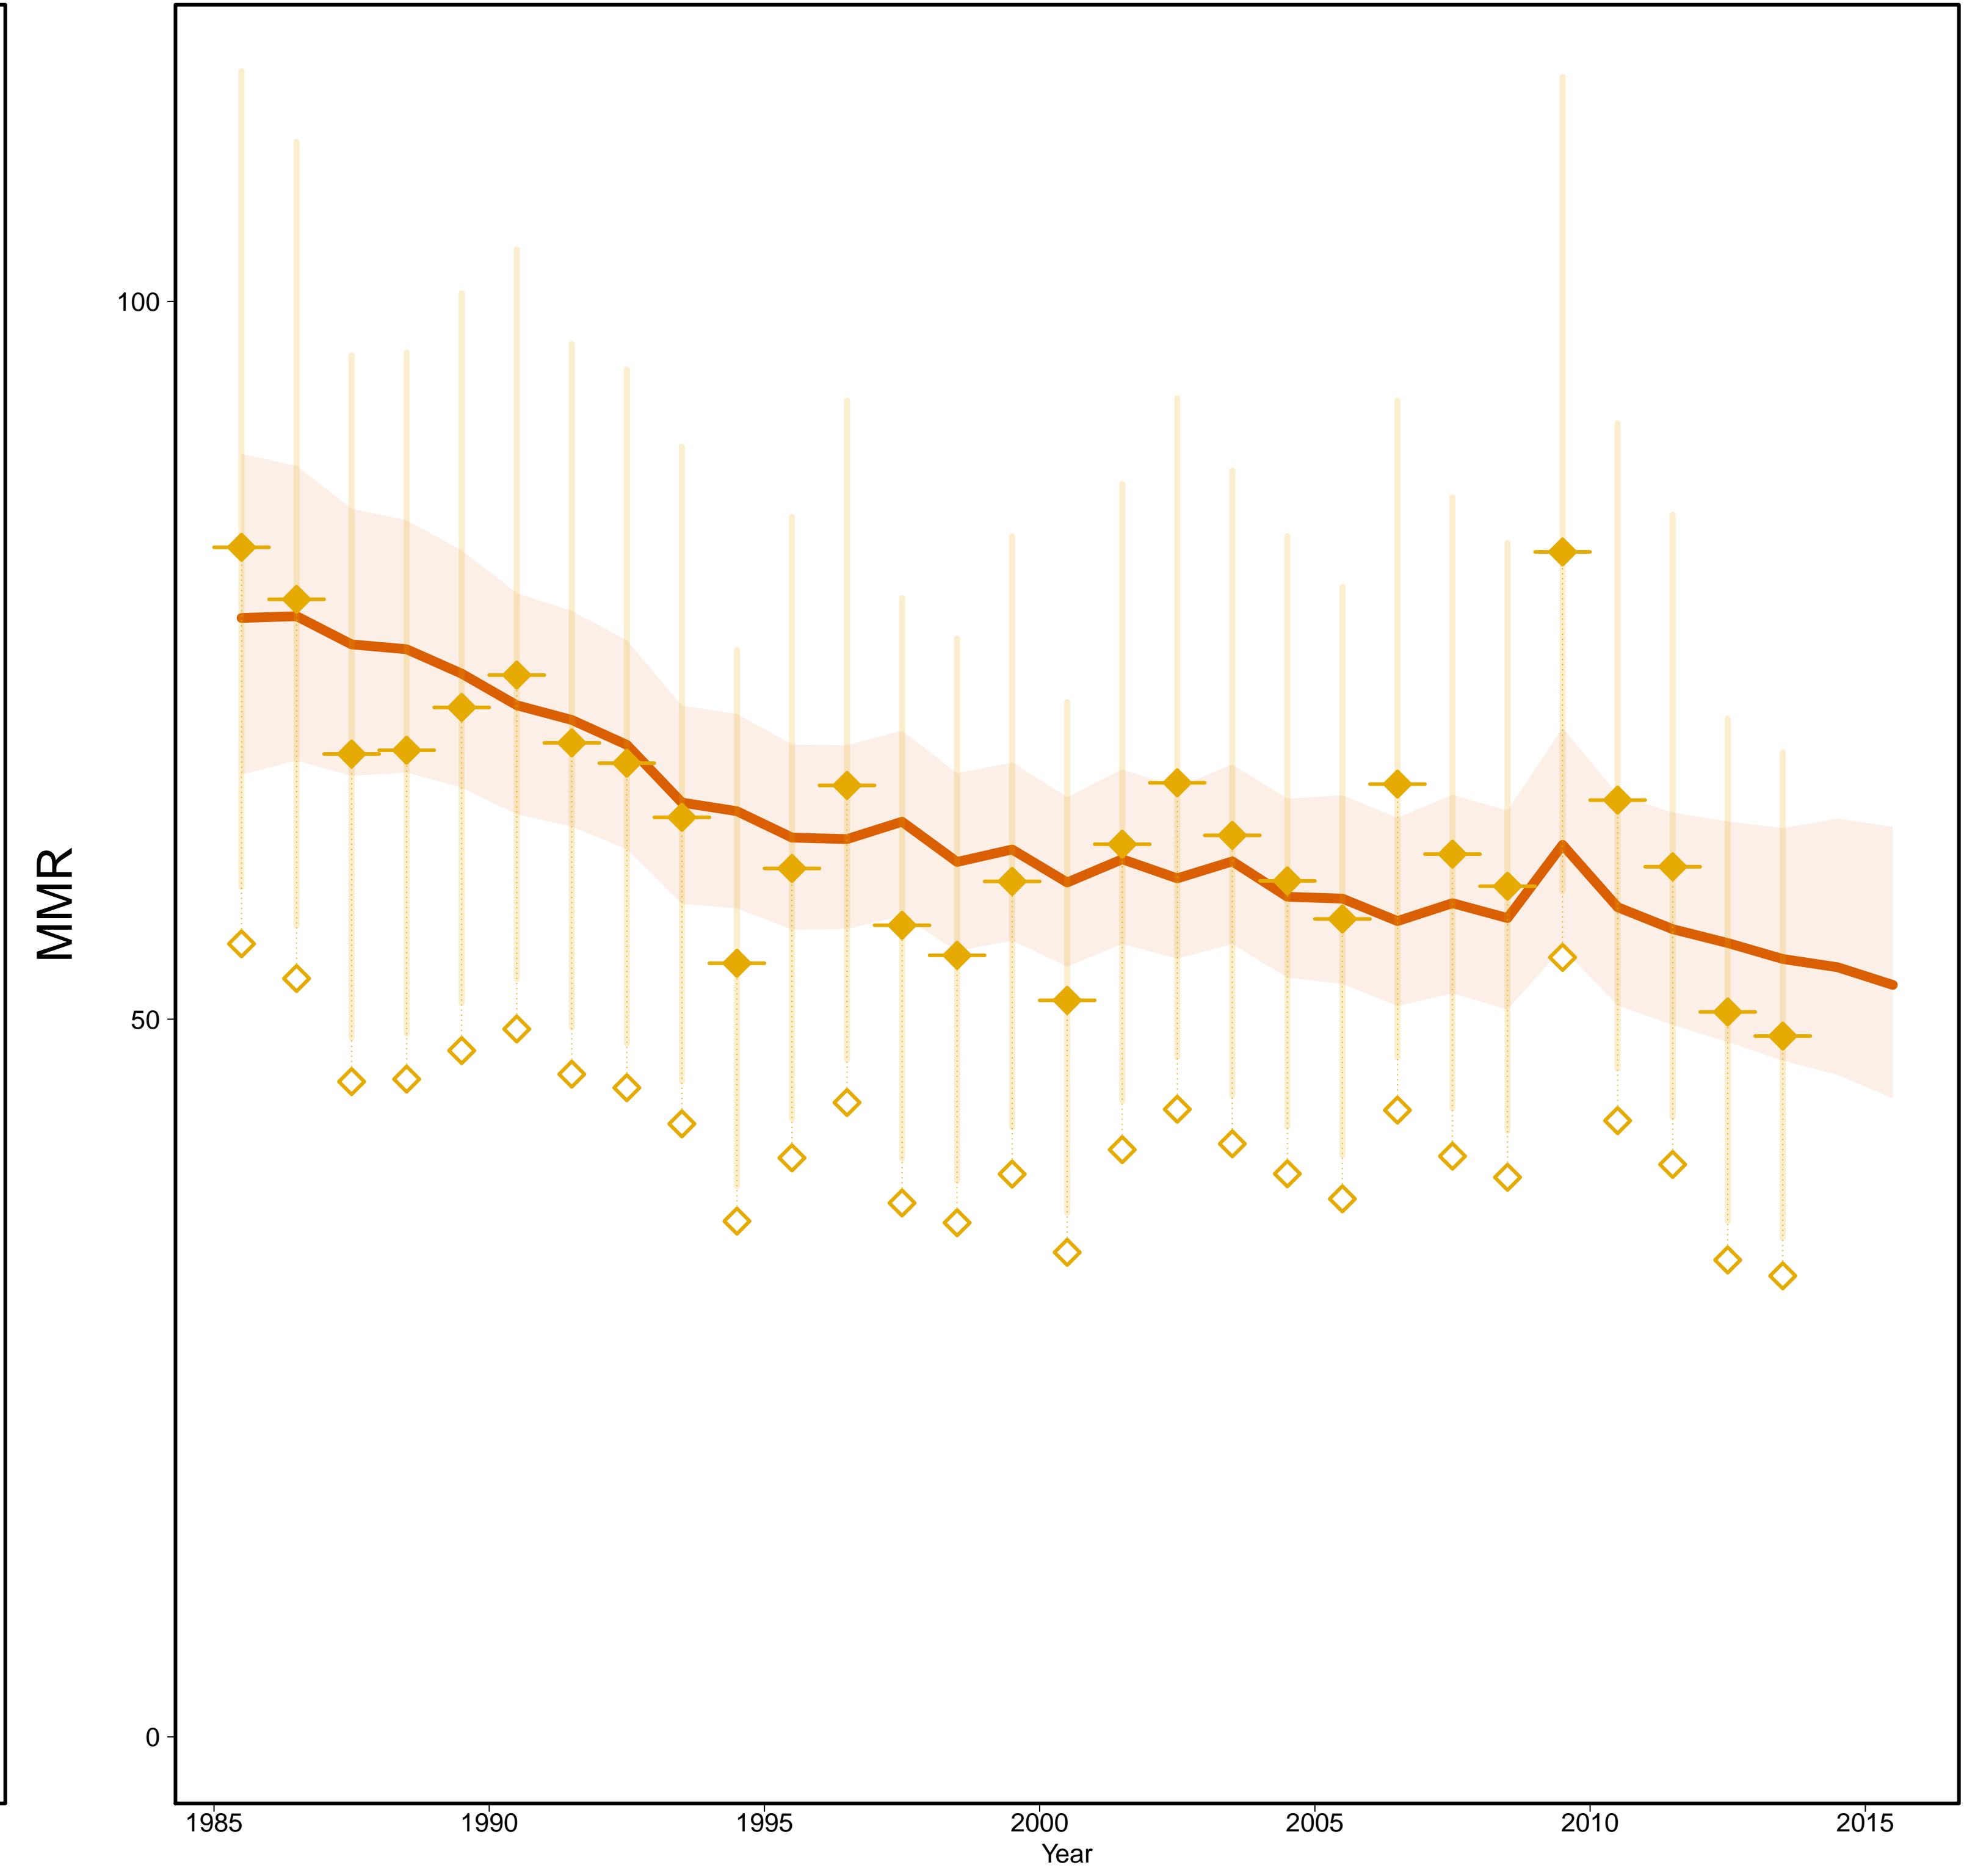

- Estimates —
- MMR Database 2015 —
- ◇ Observed Data
- ◆ Adjusted Data
- Data type —
- ◆ VR

Gross Domestic Product

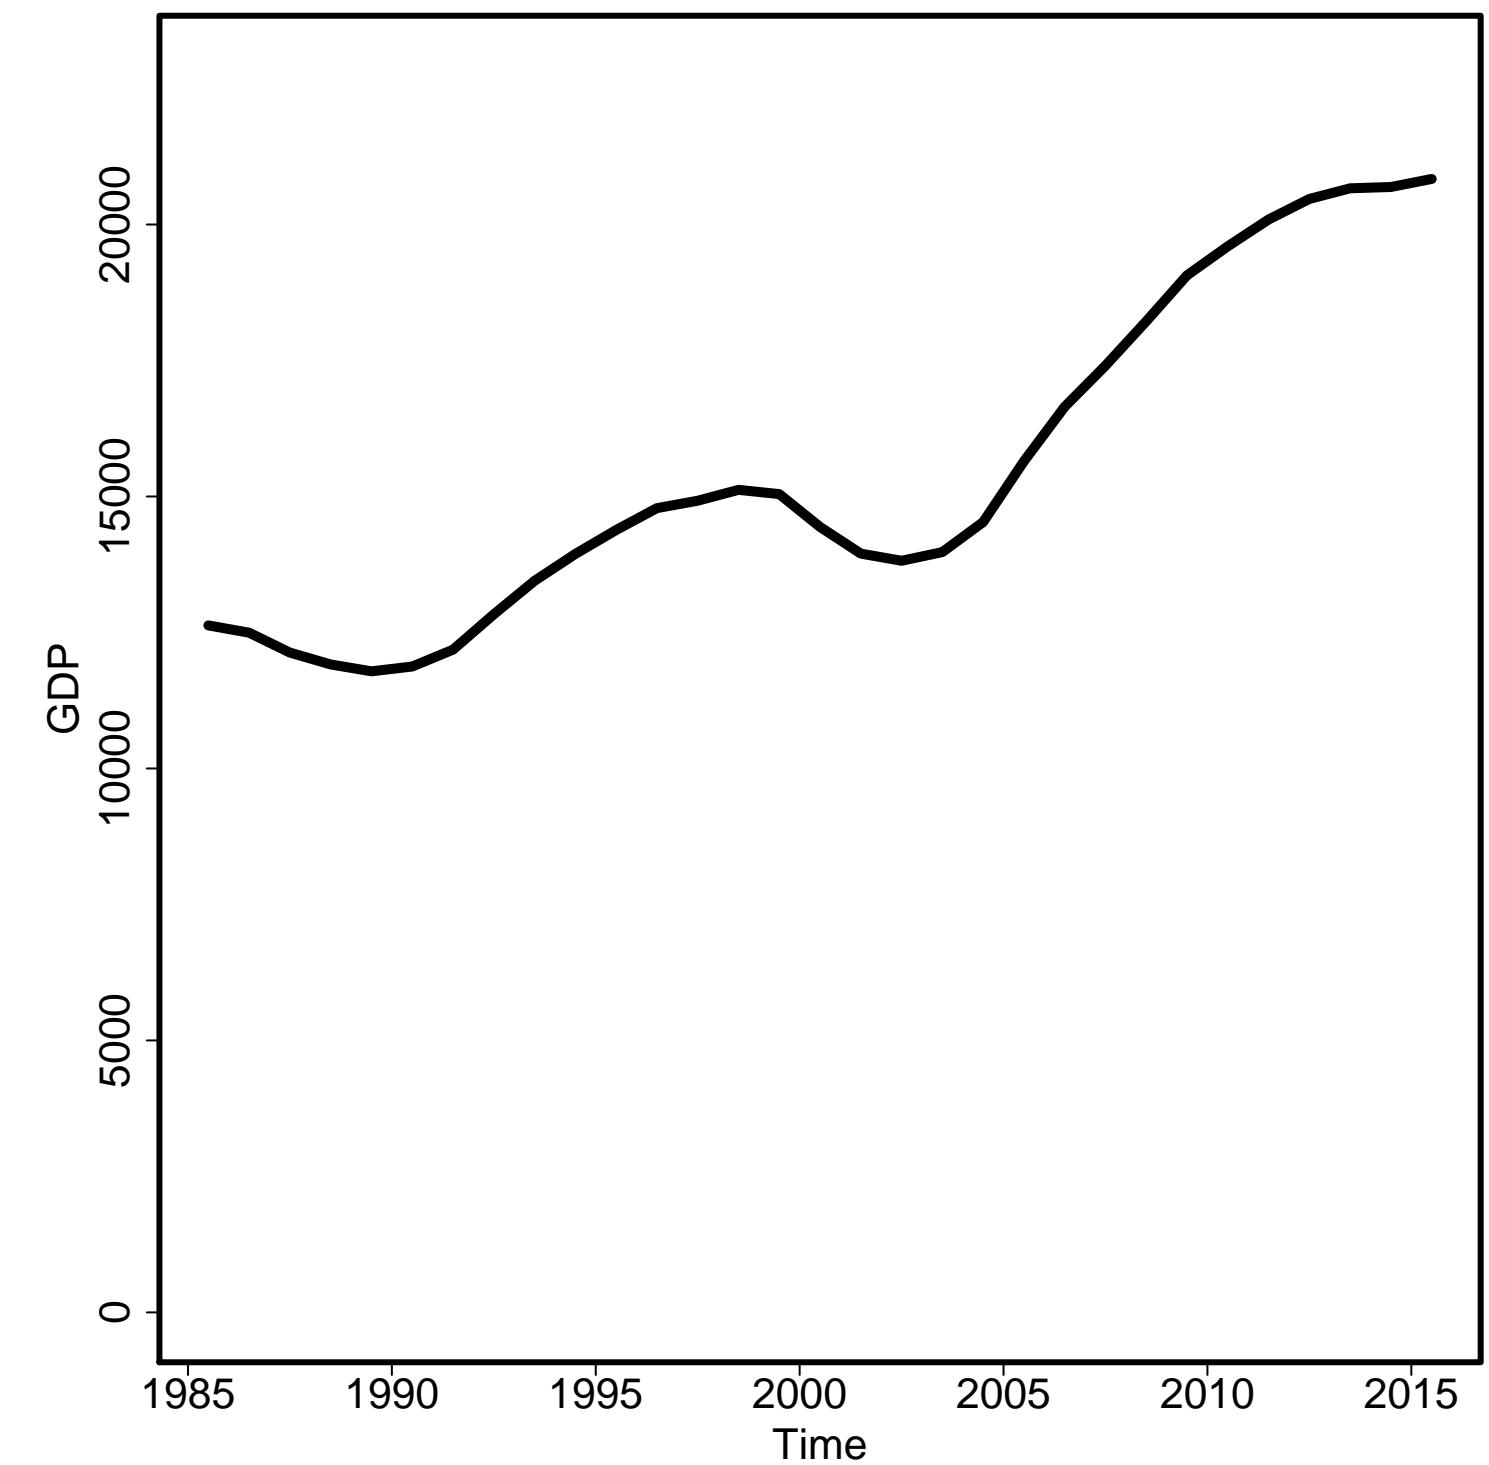

General Fertility Rate

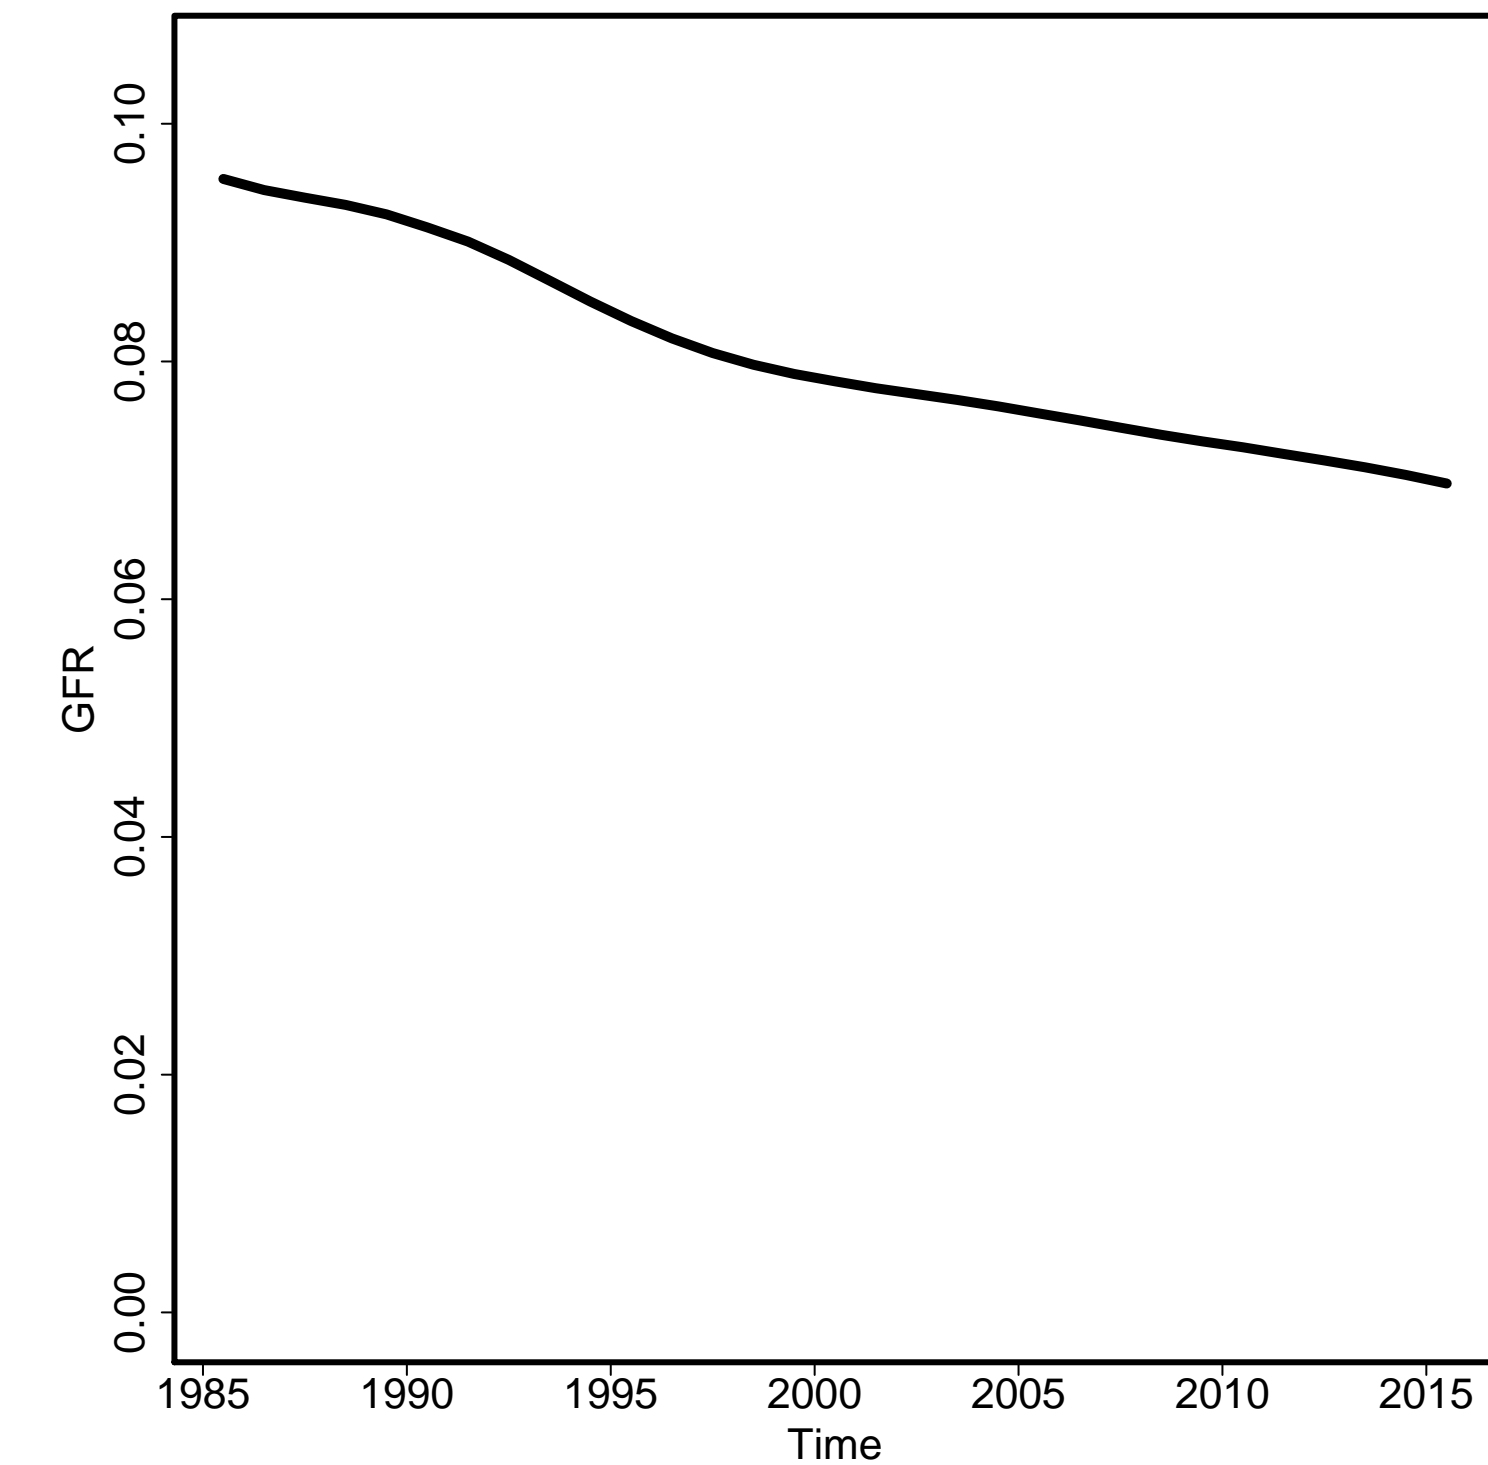

Skilled Attendance to Birth

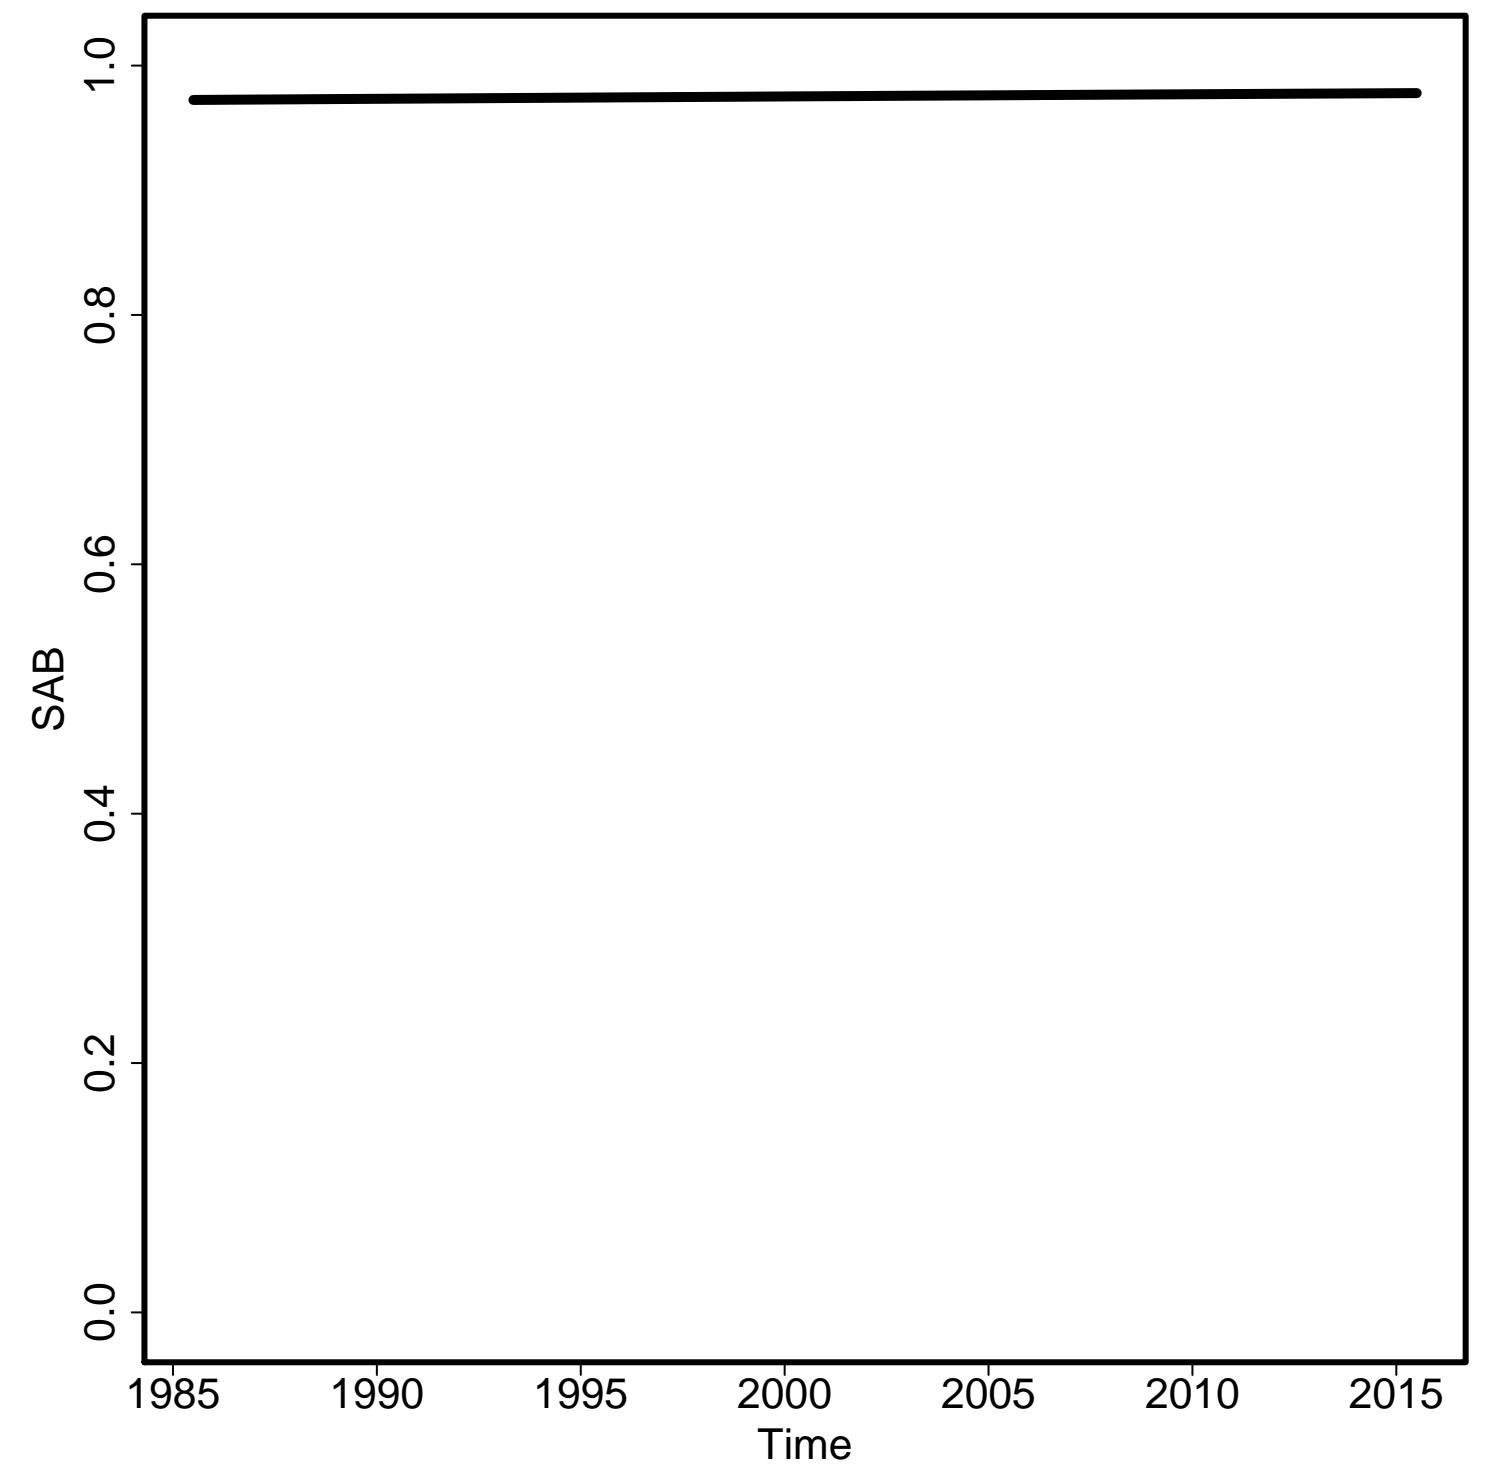

Envelope/Births

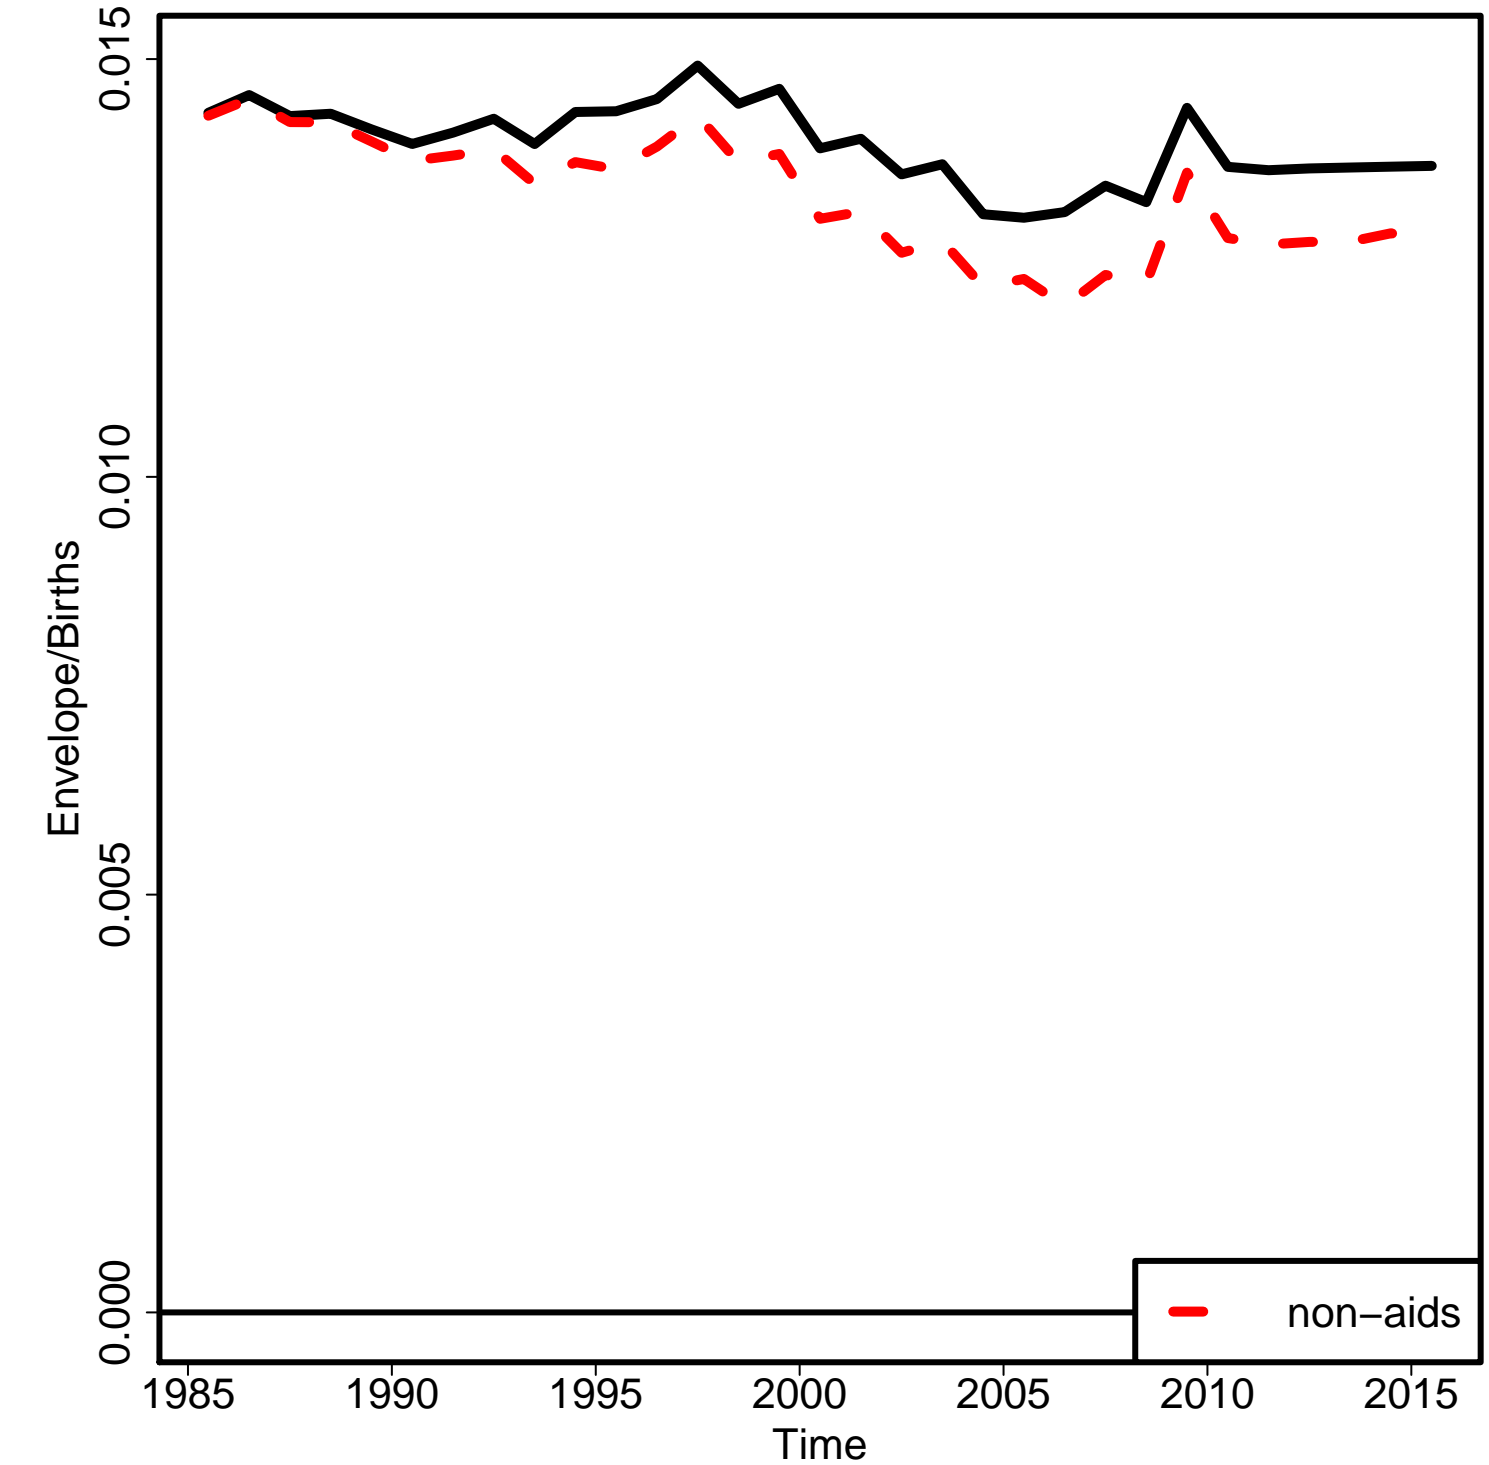

Non-aids MMR

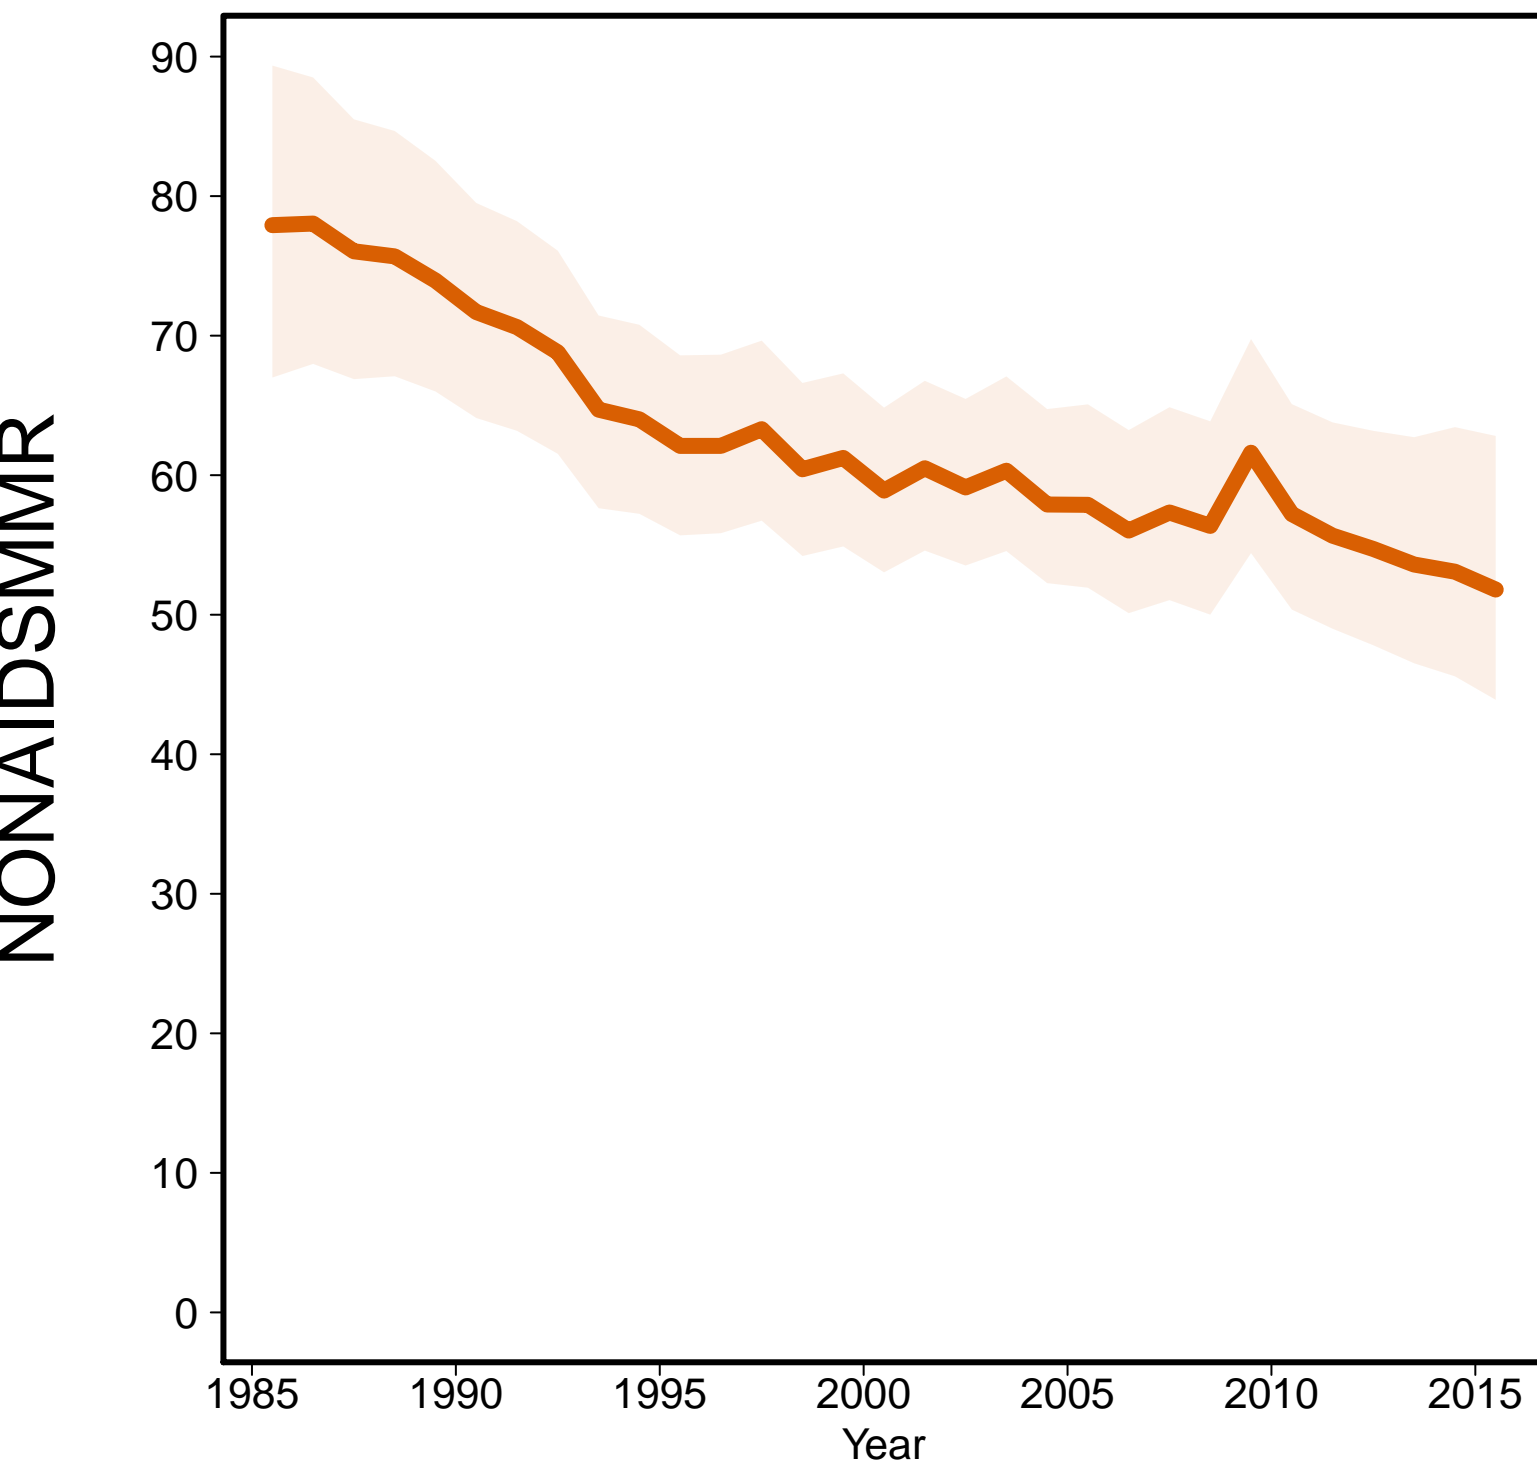

Aids MMR

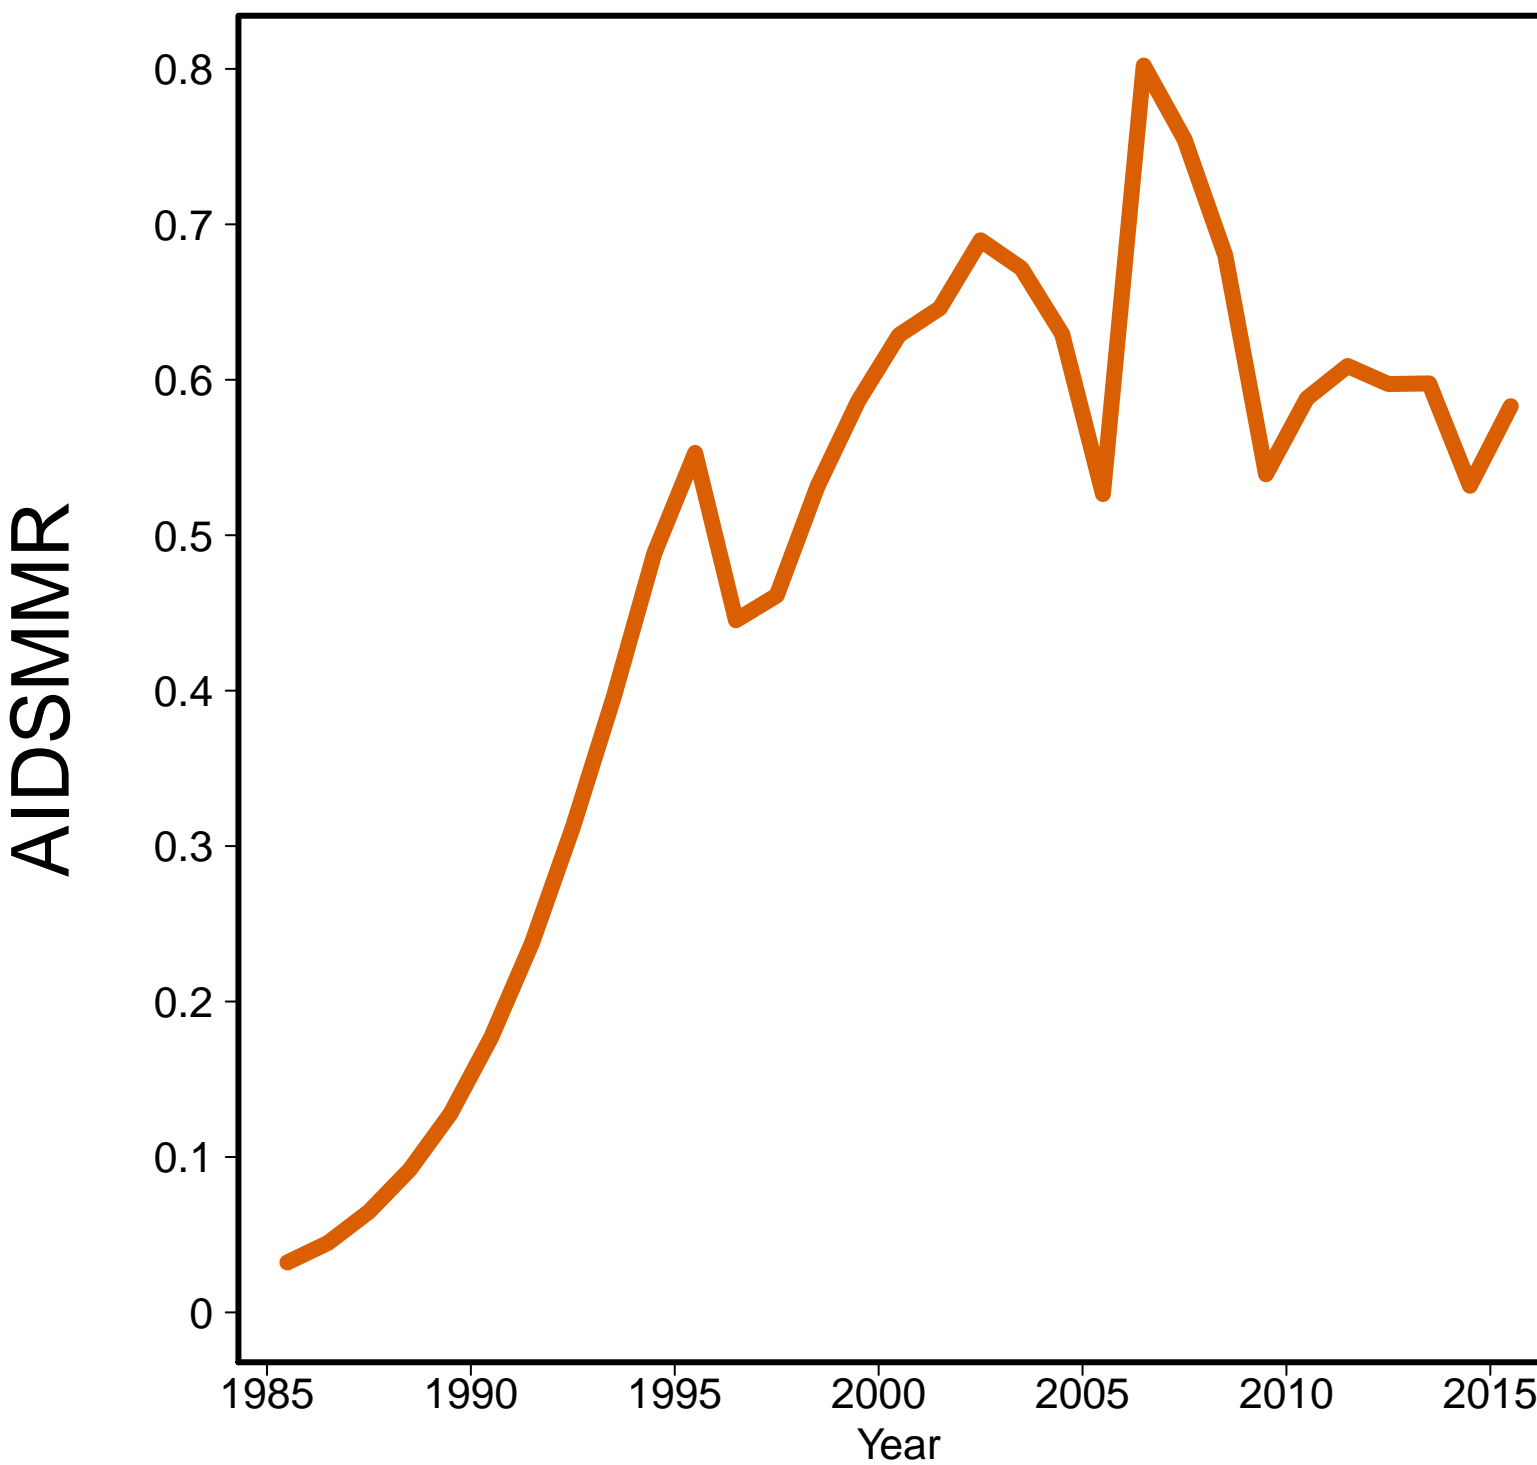

Armenia [ARM]  
(Western Asia)

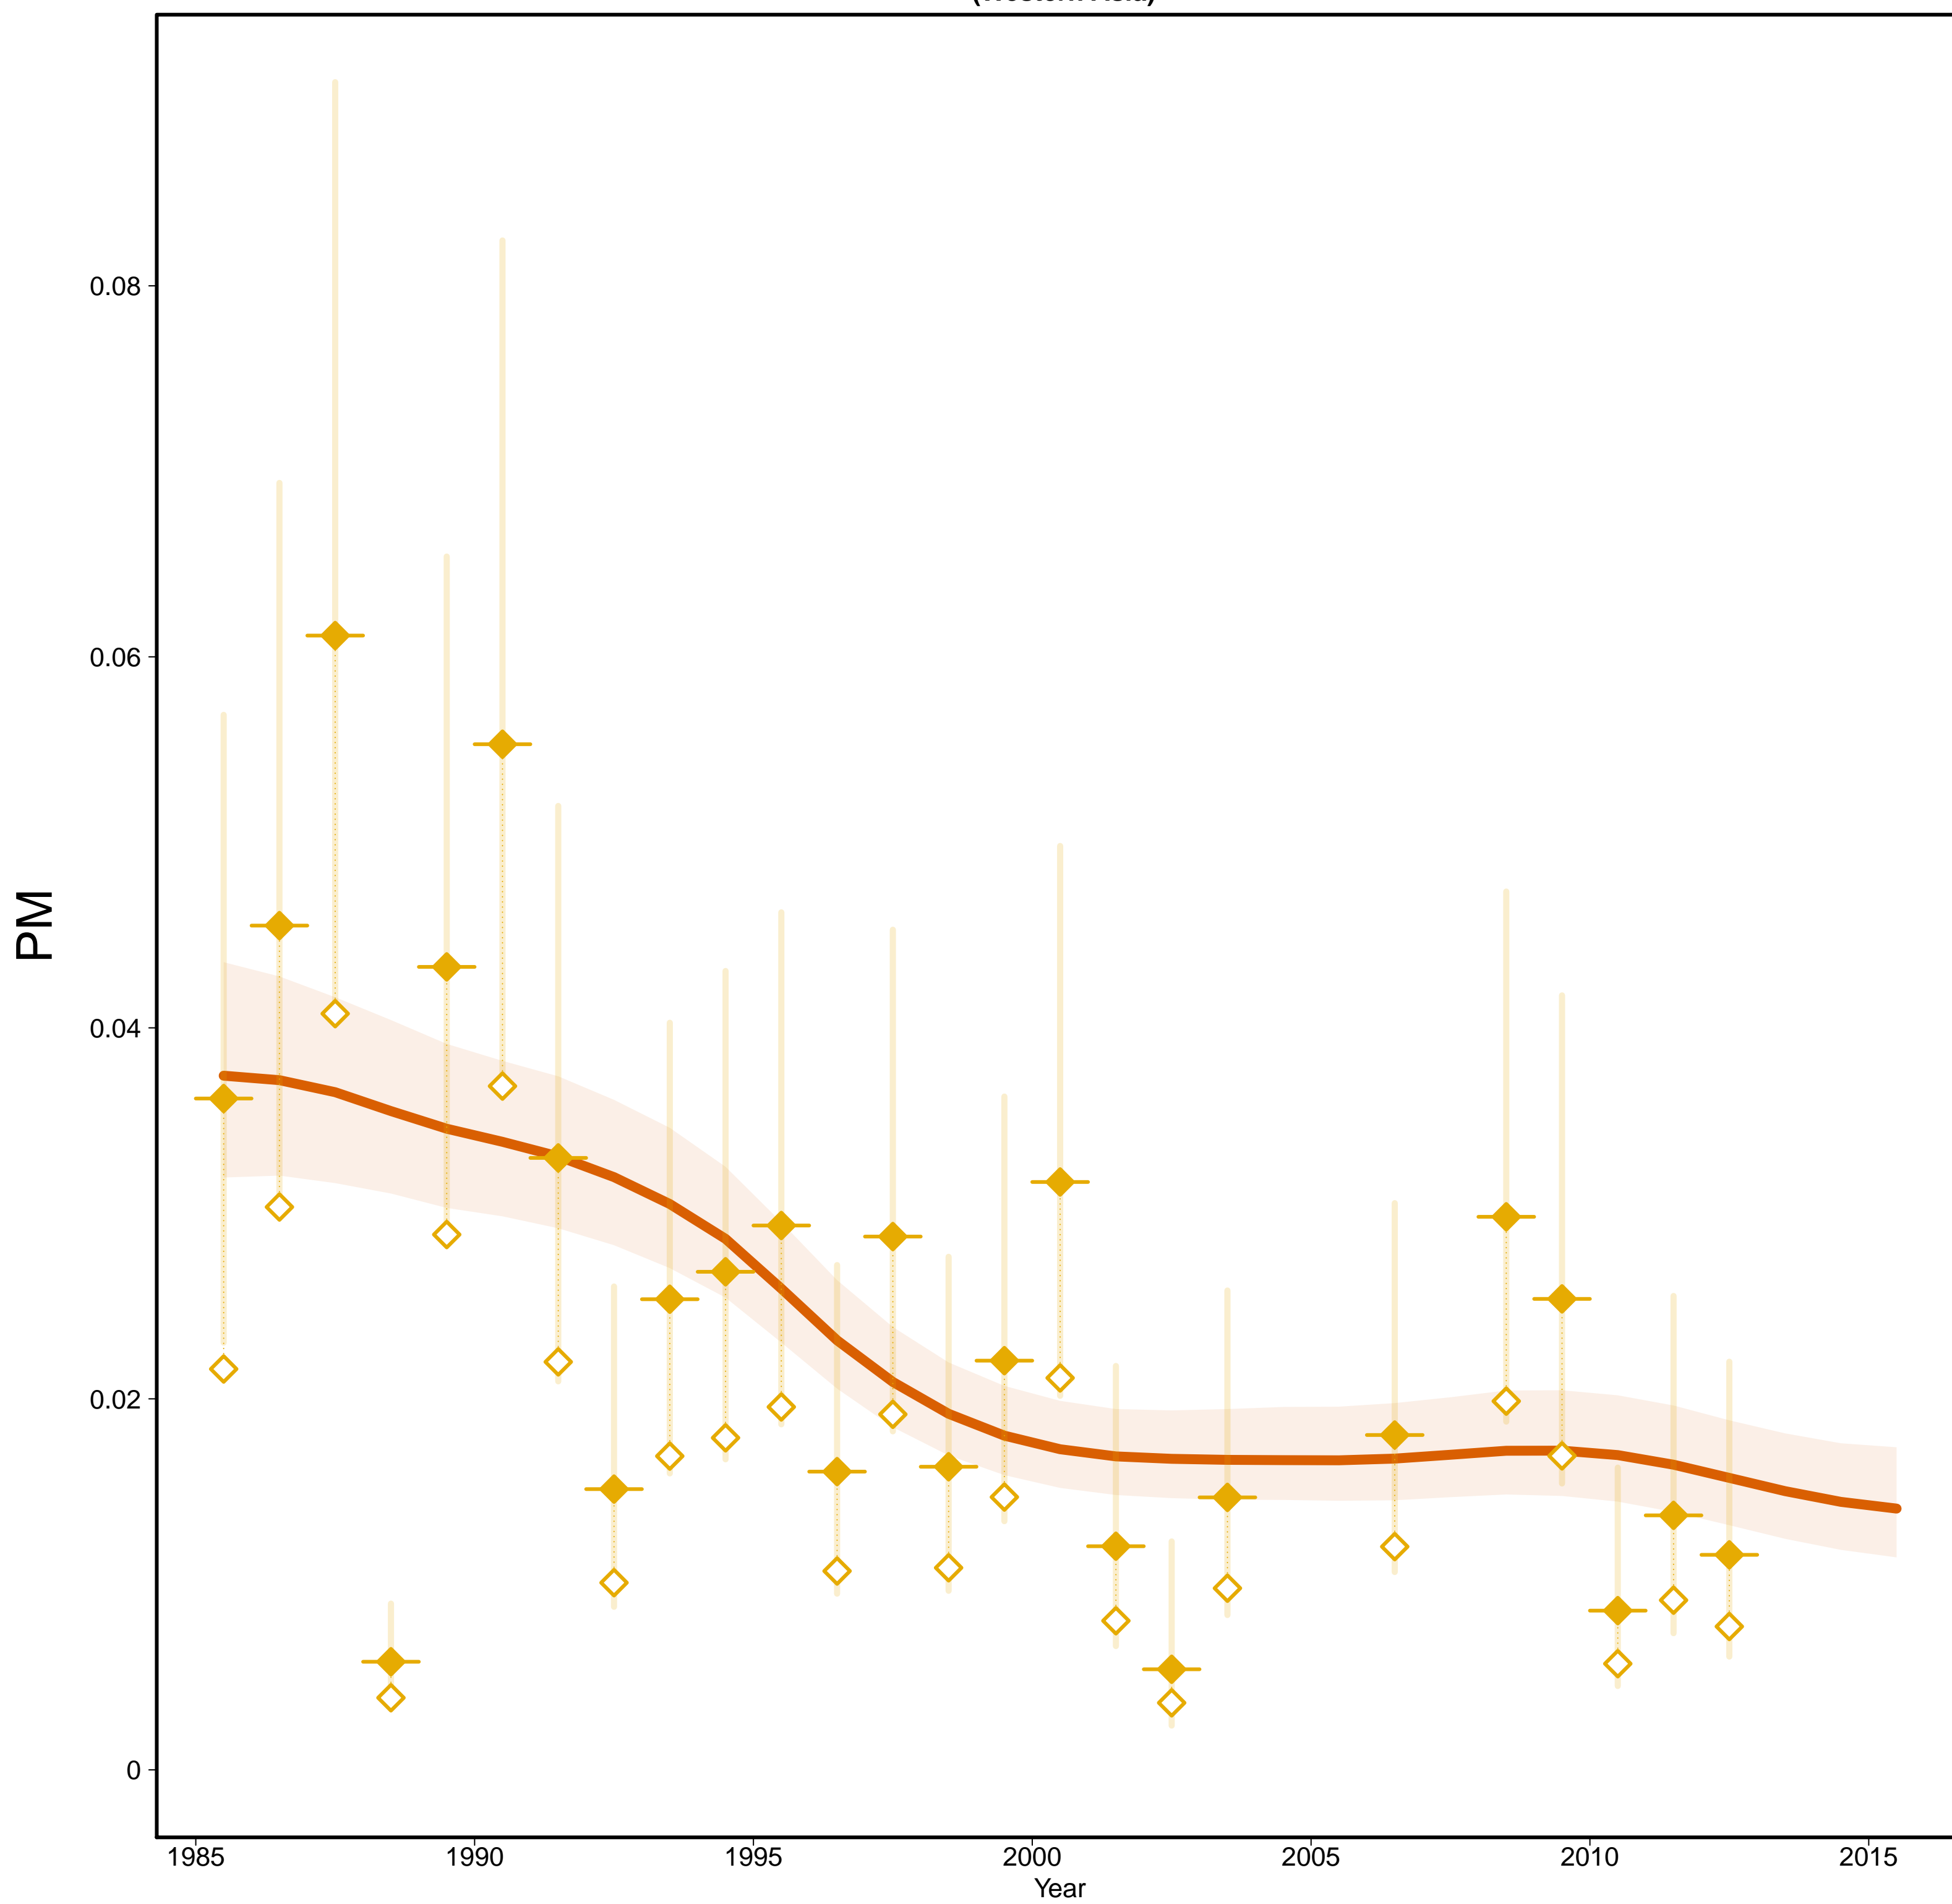

Armenia [ARM]  
(Western Asia)

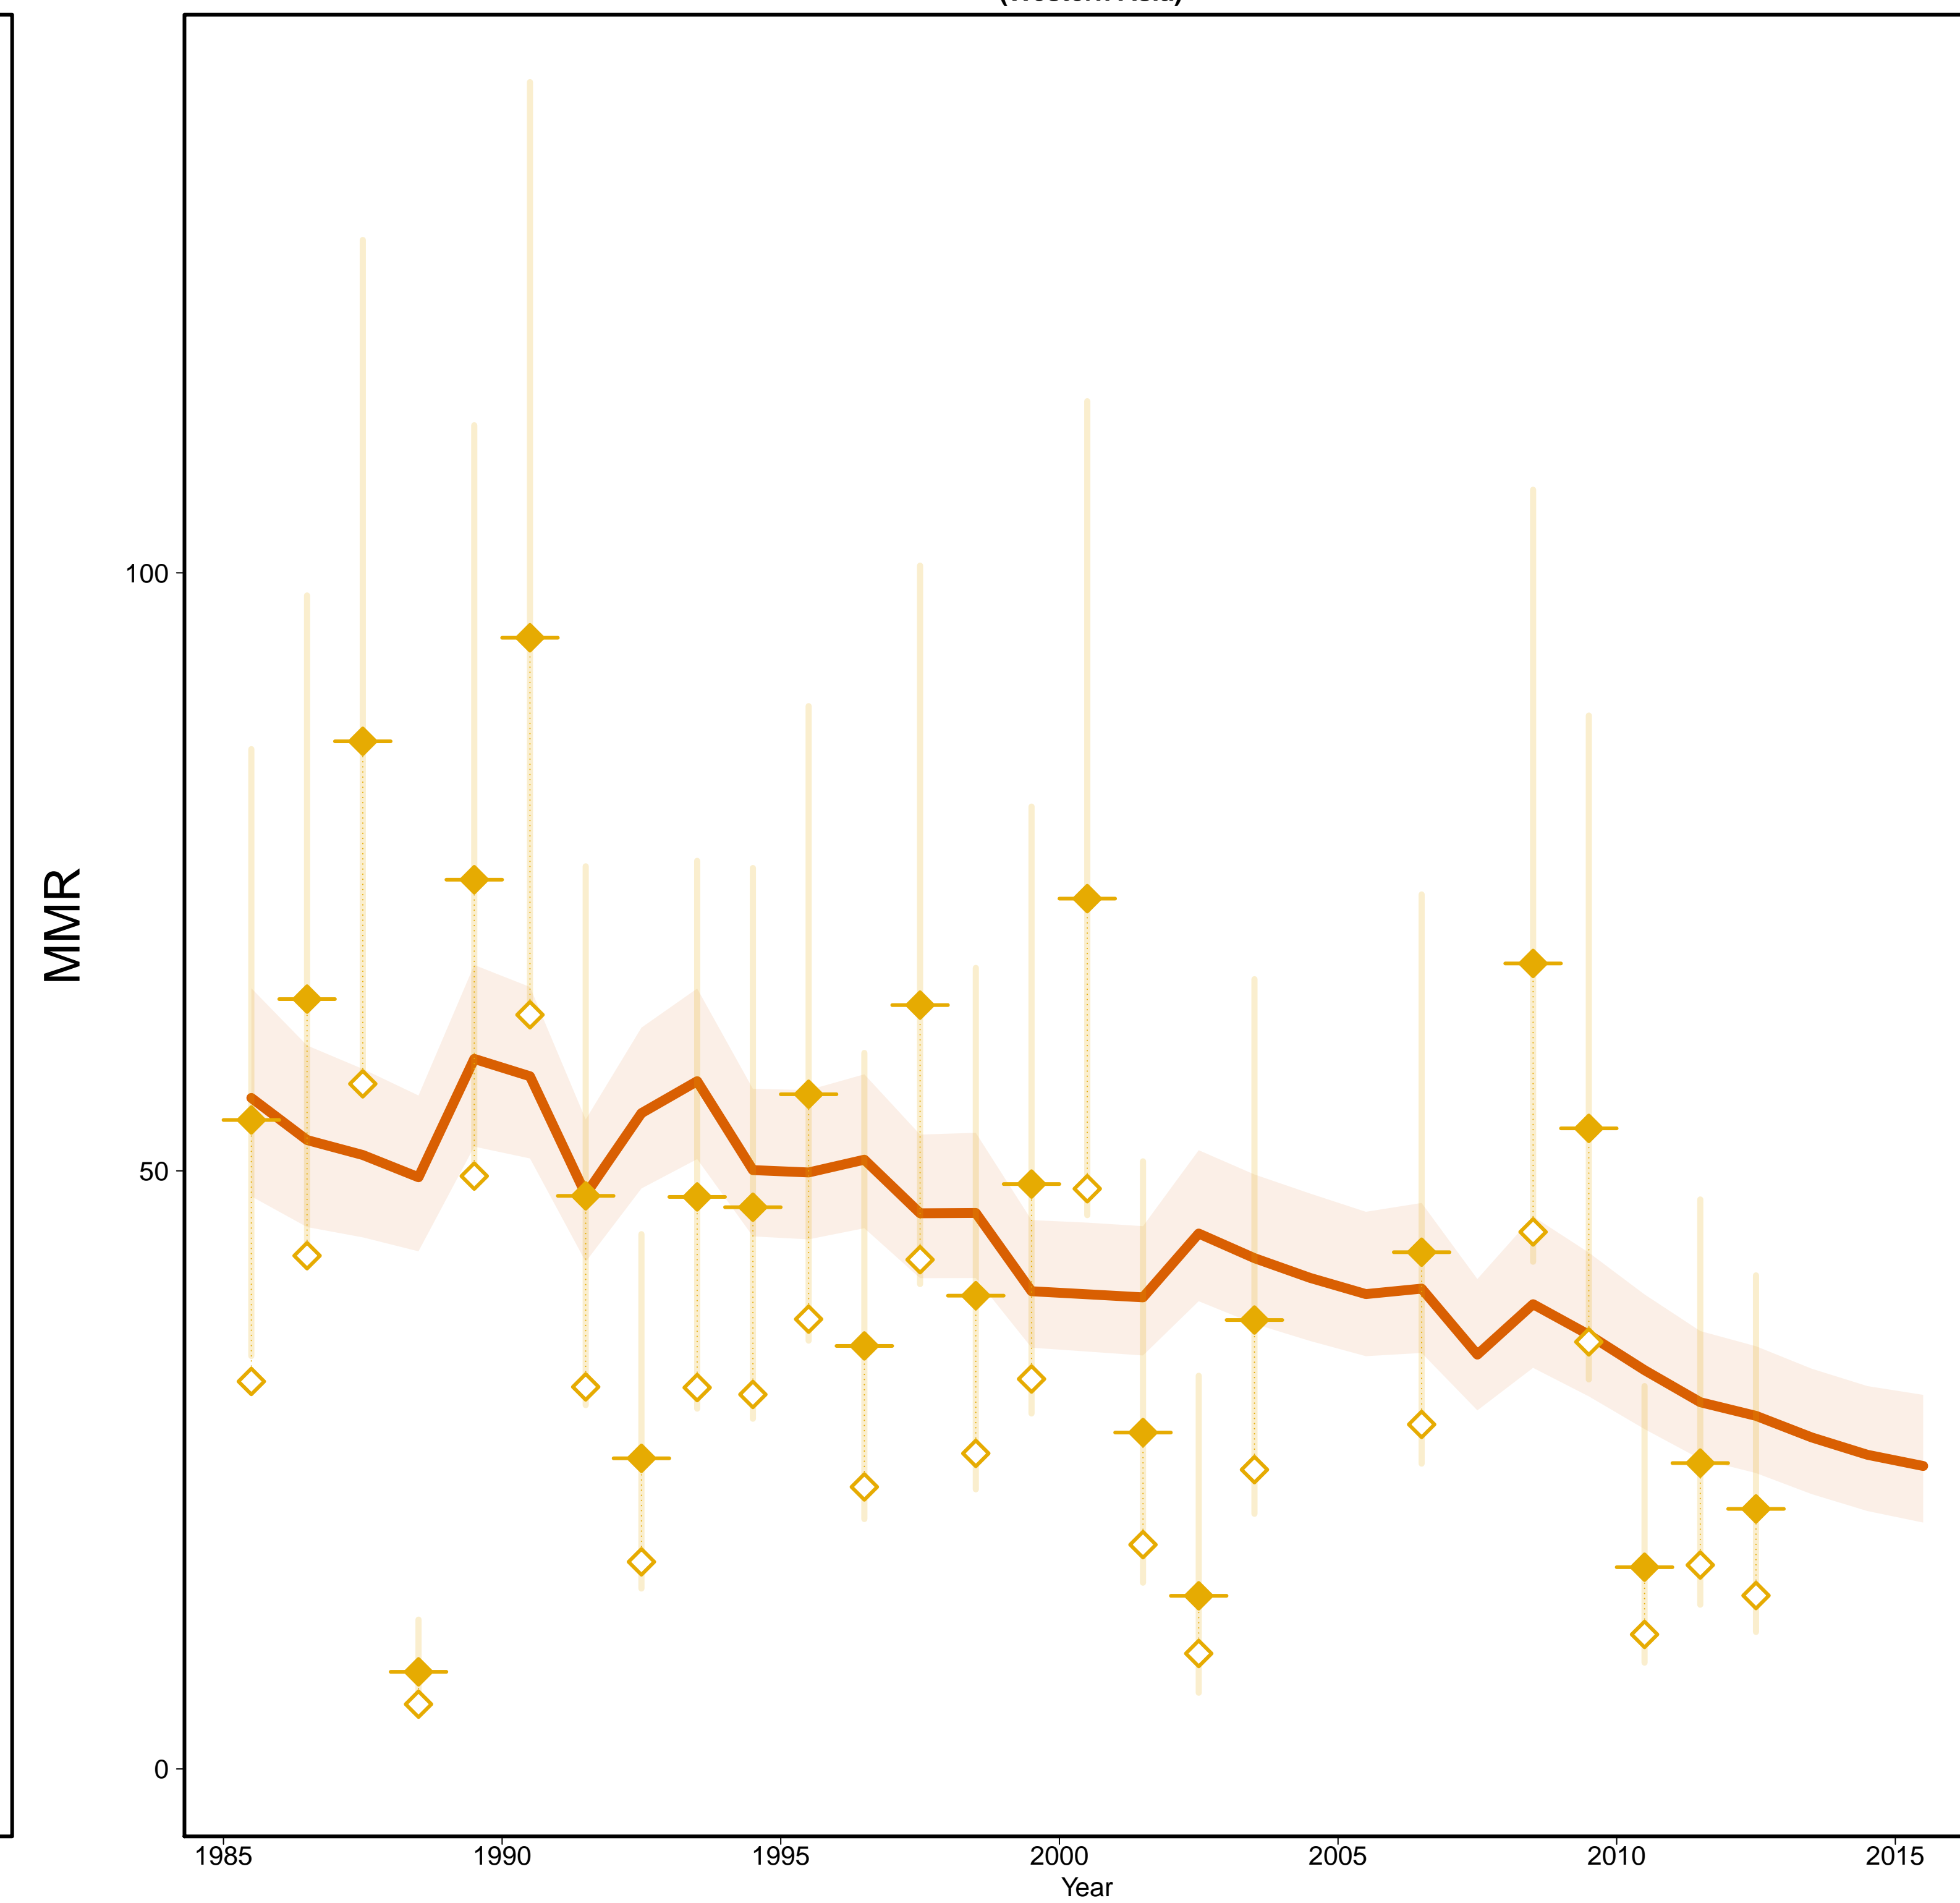

- Estimates —
- MMR Database 2015 —
- ◇ Observed Data
- ◆ Adjusted Data
- Data type —
- ◆ VR

Gross Domestic Product

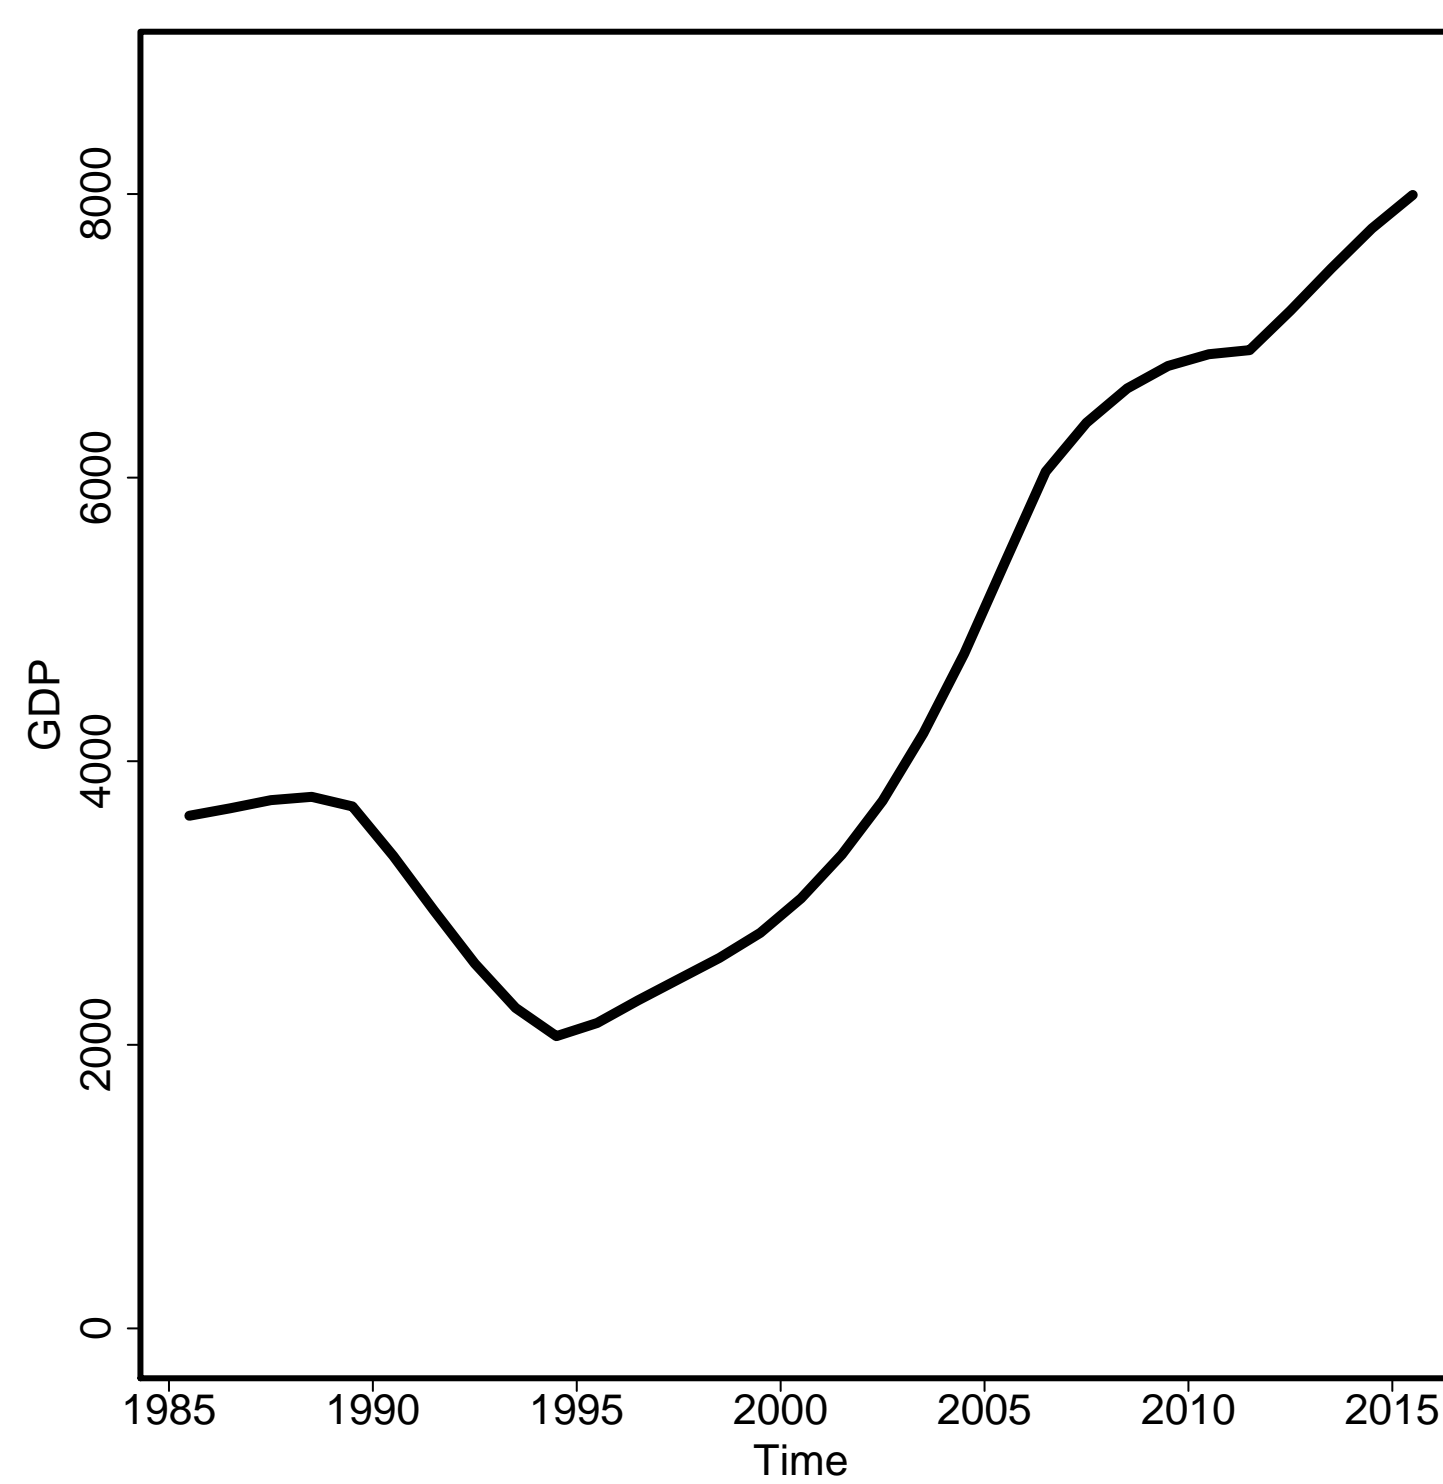

General Fertility Rate

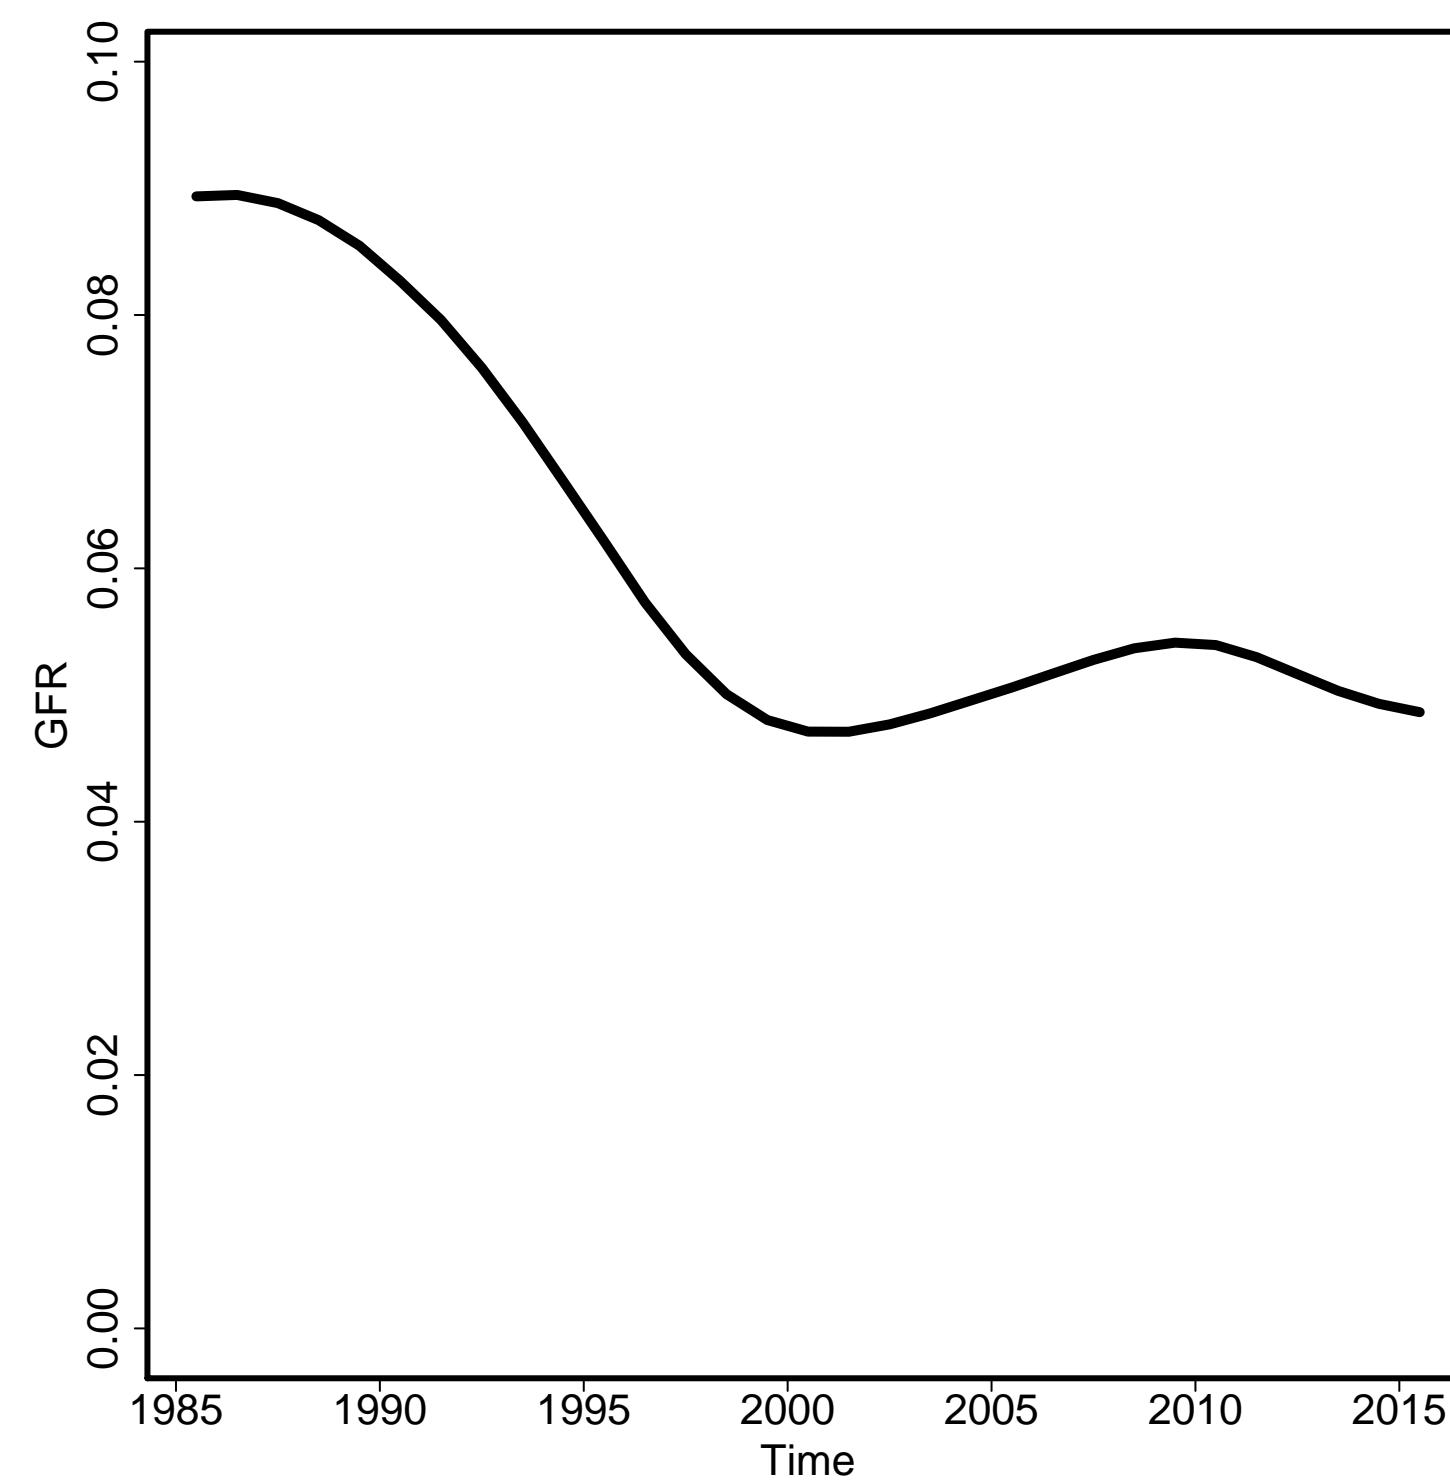

Skilled Attendance to Birth

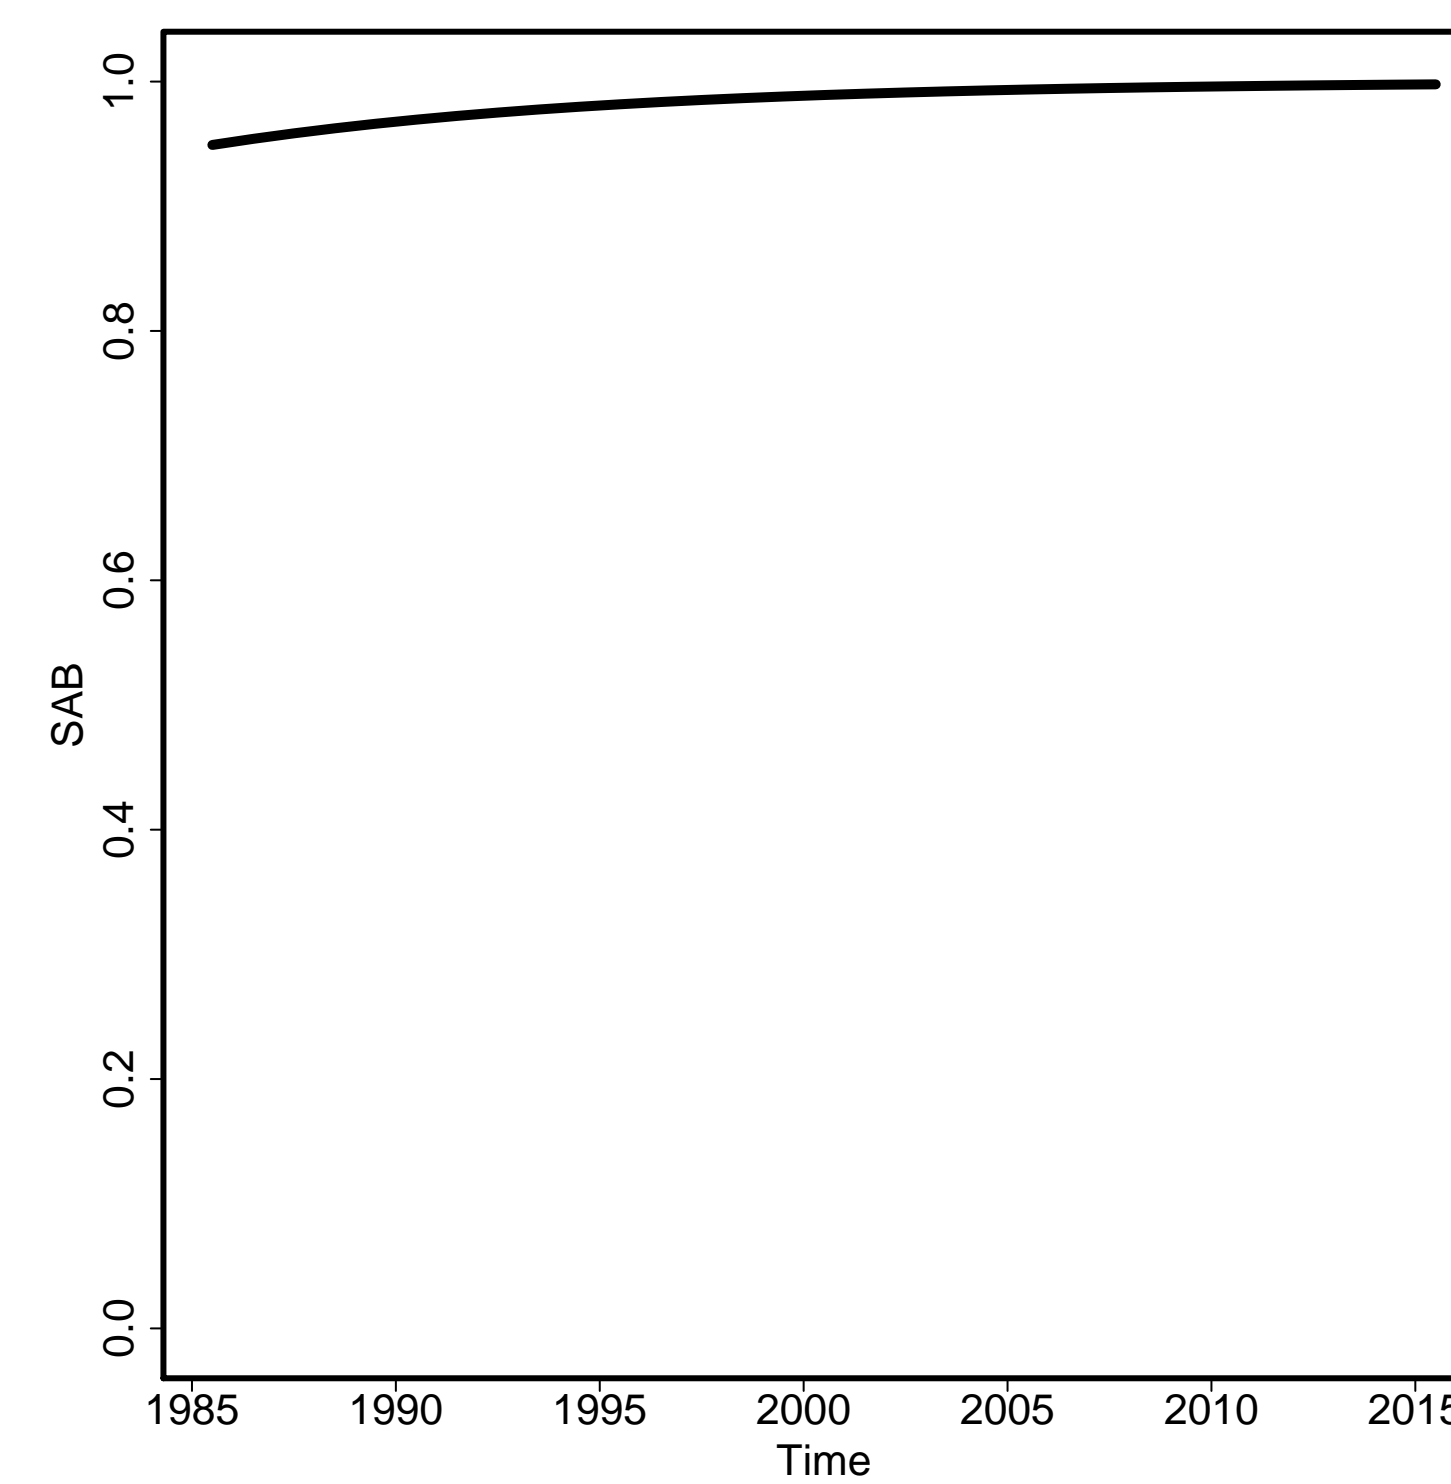

Envelope/Births

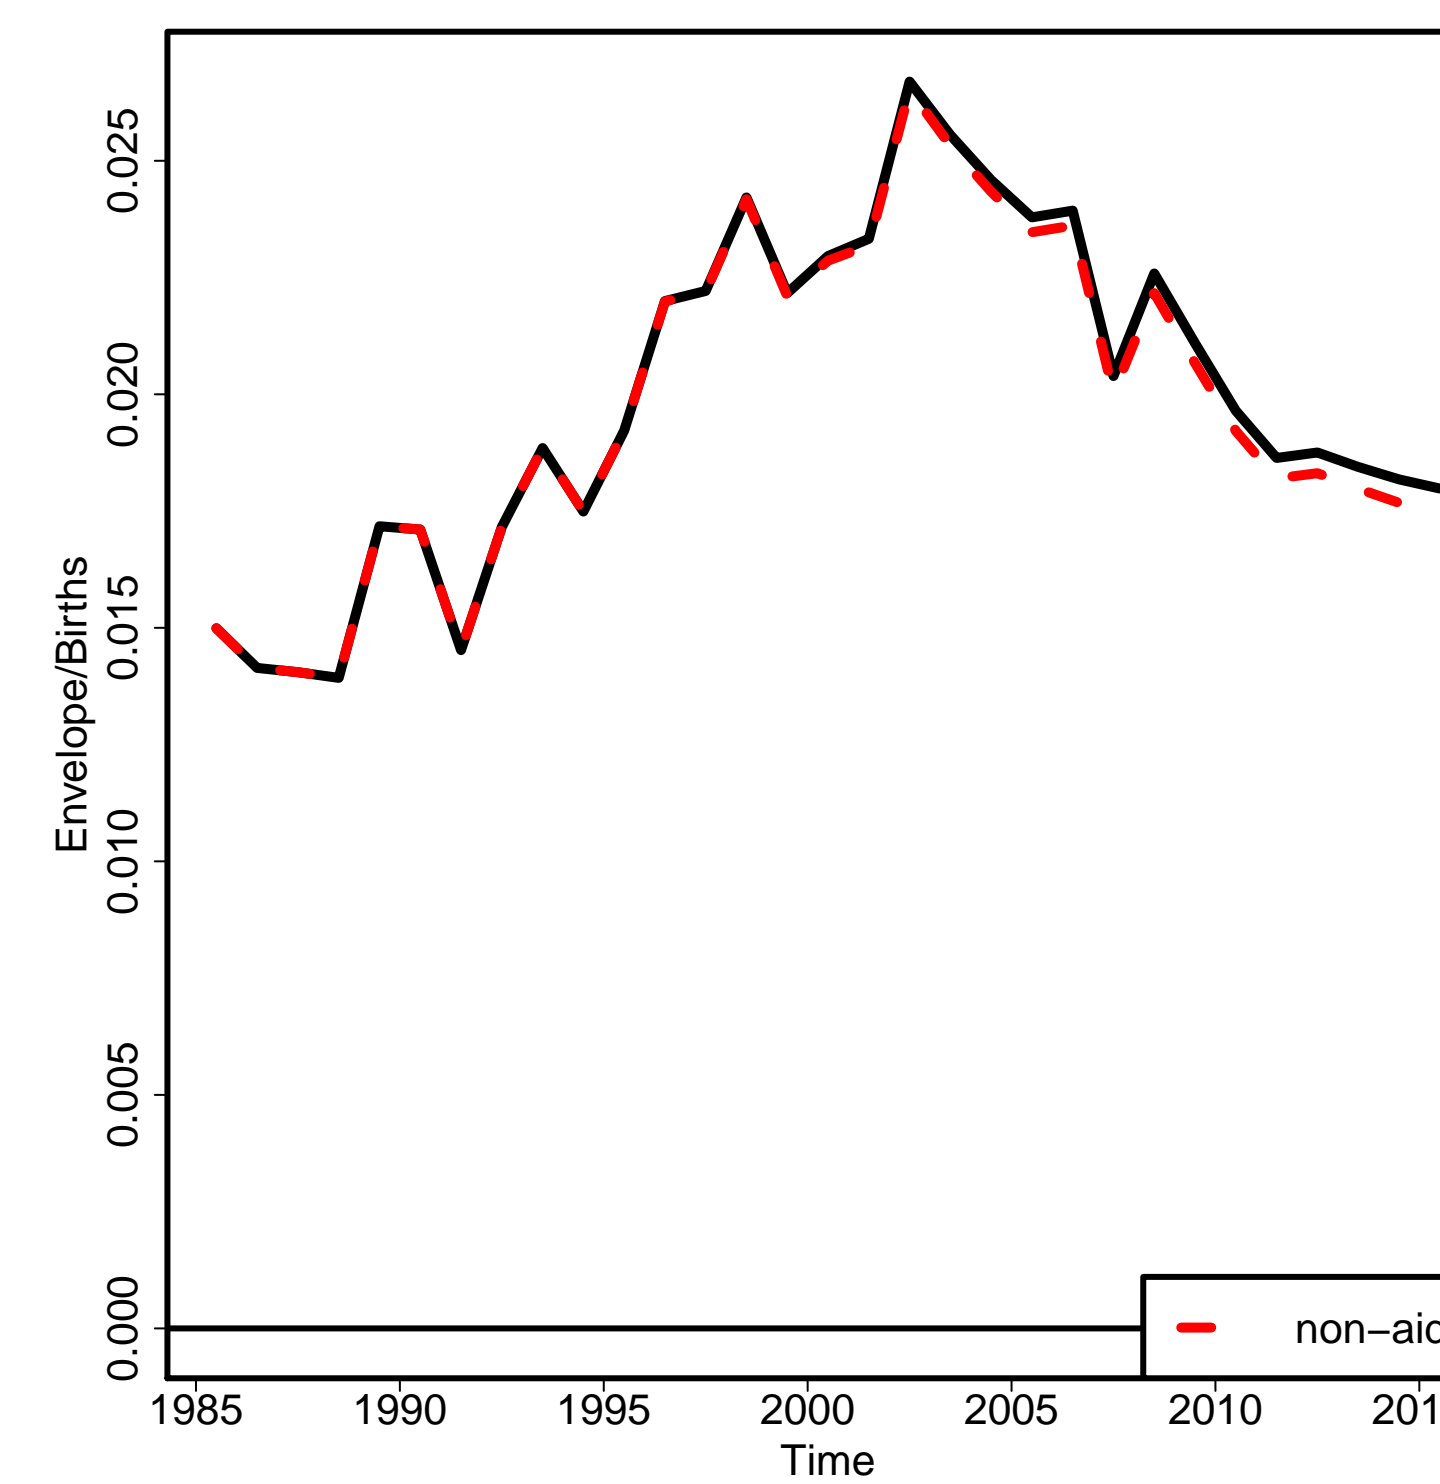

Non-aids MMR

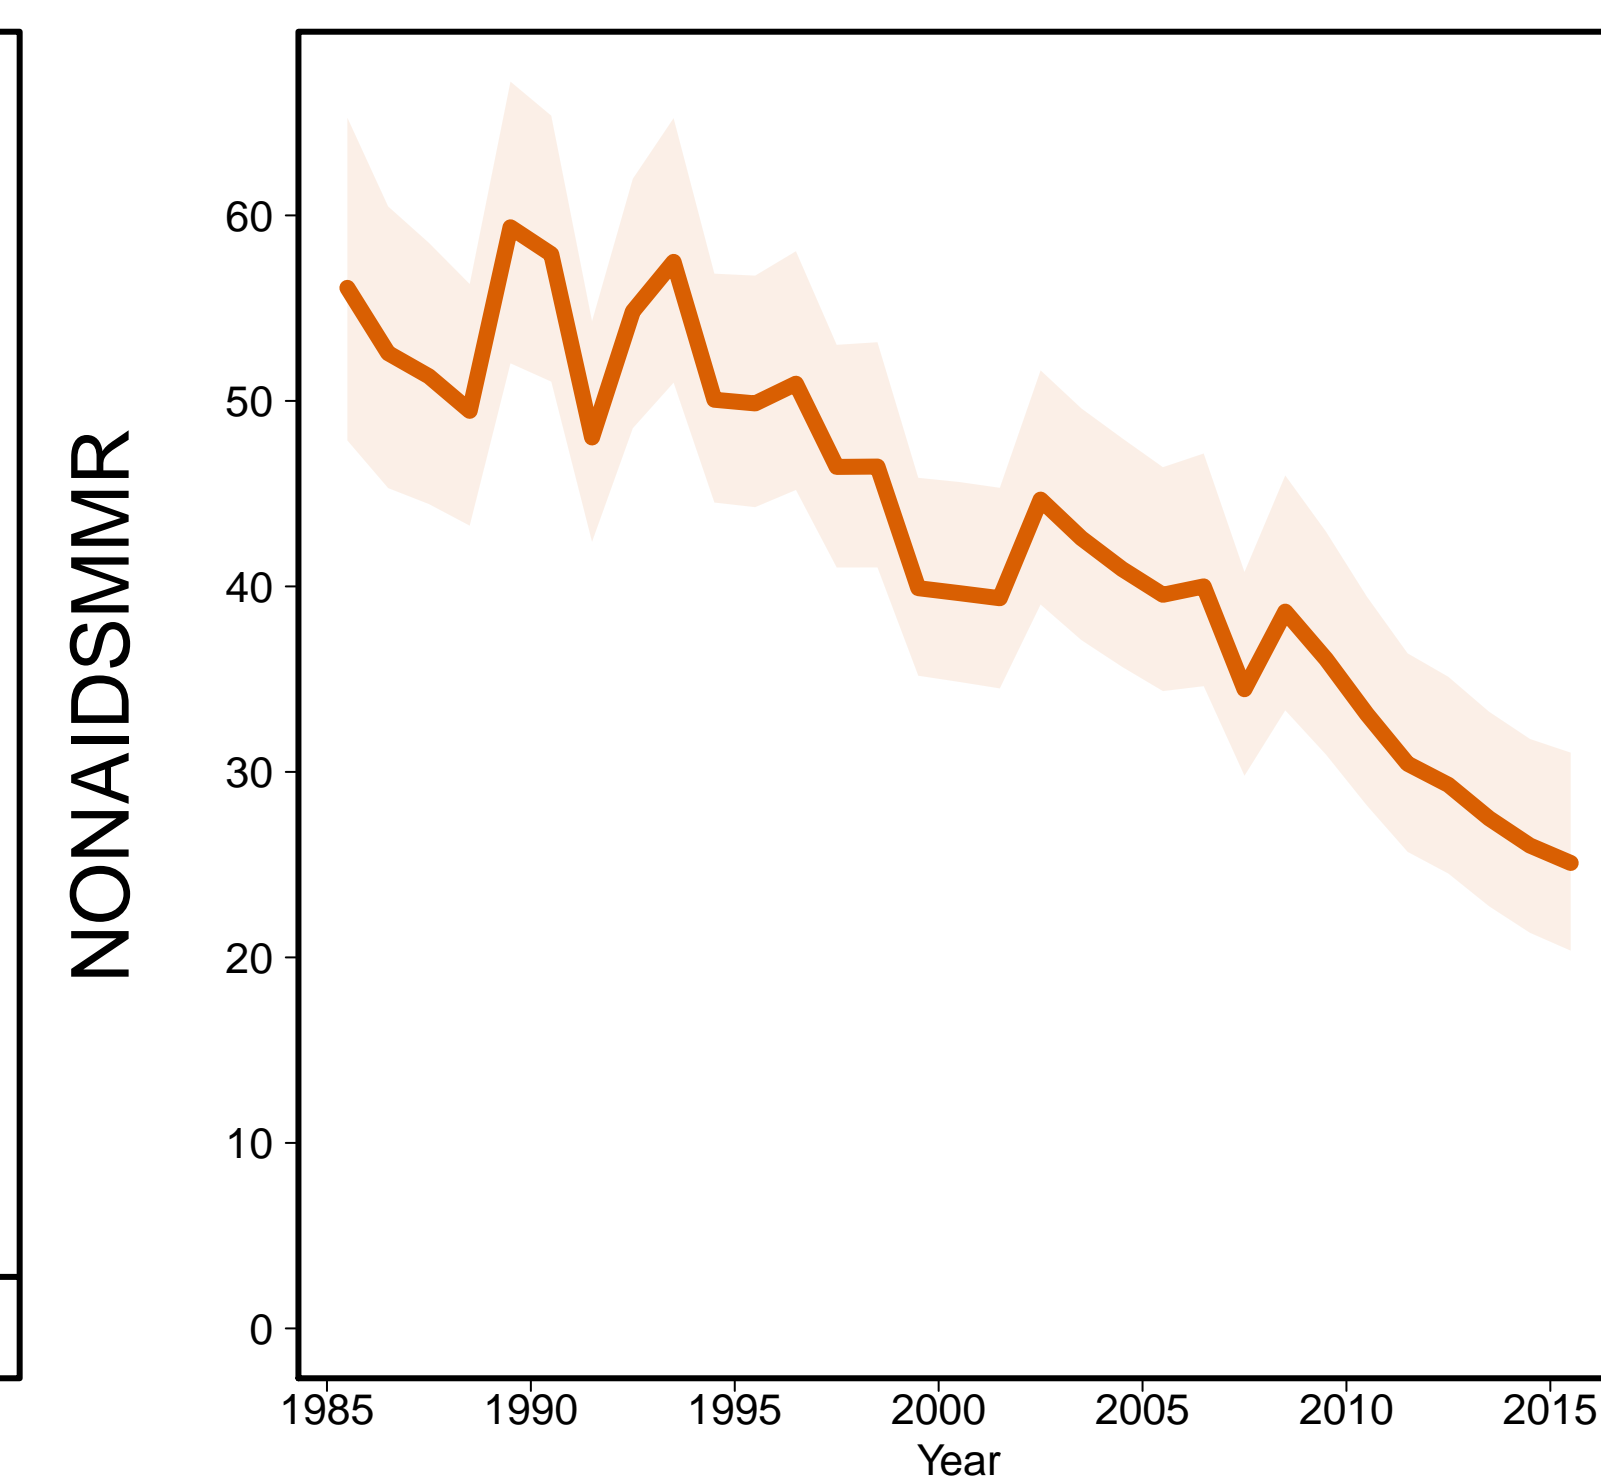

Aids MMR

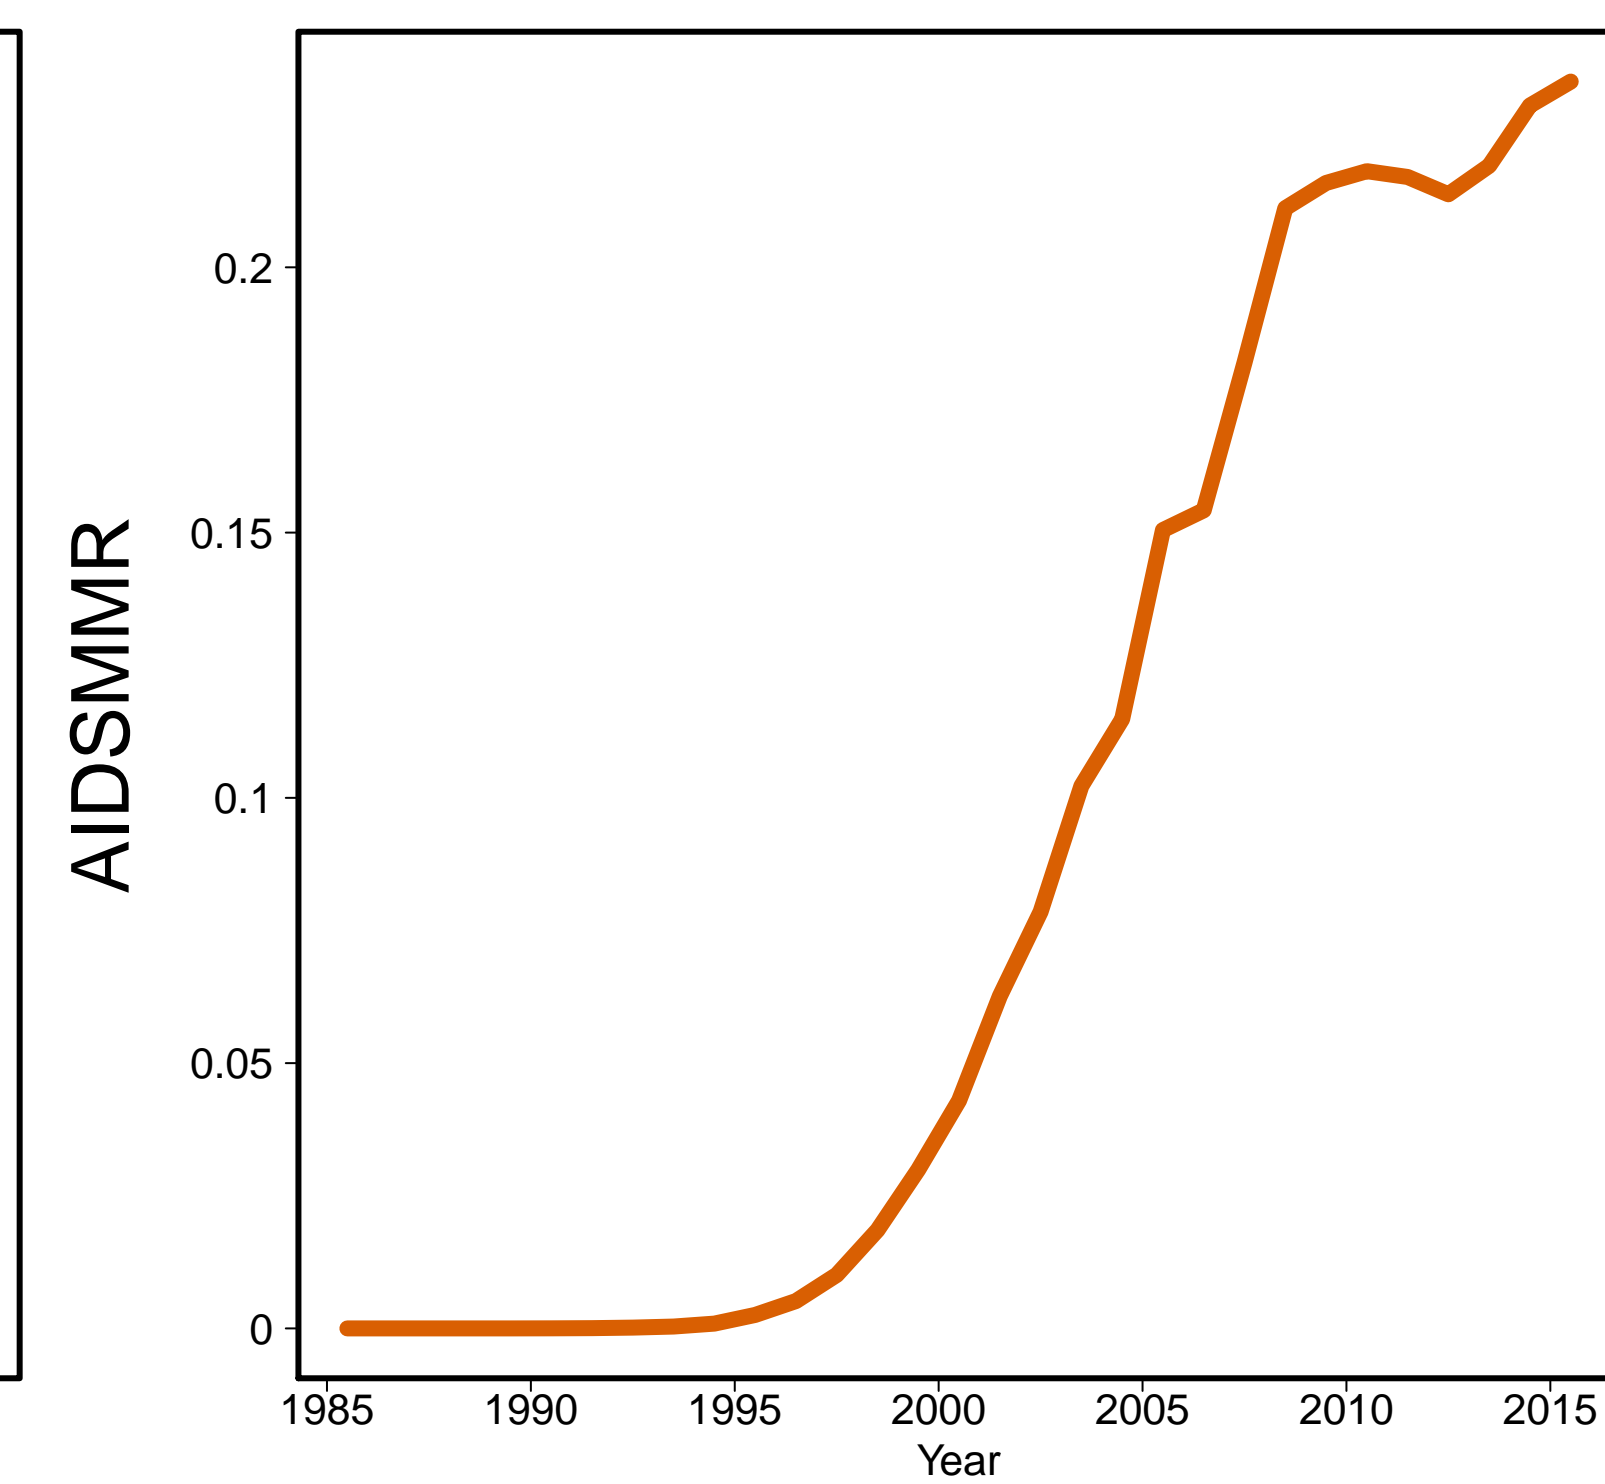

Australia [AUS]  
(Developed regions)

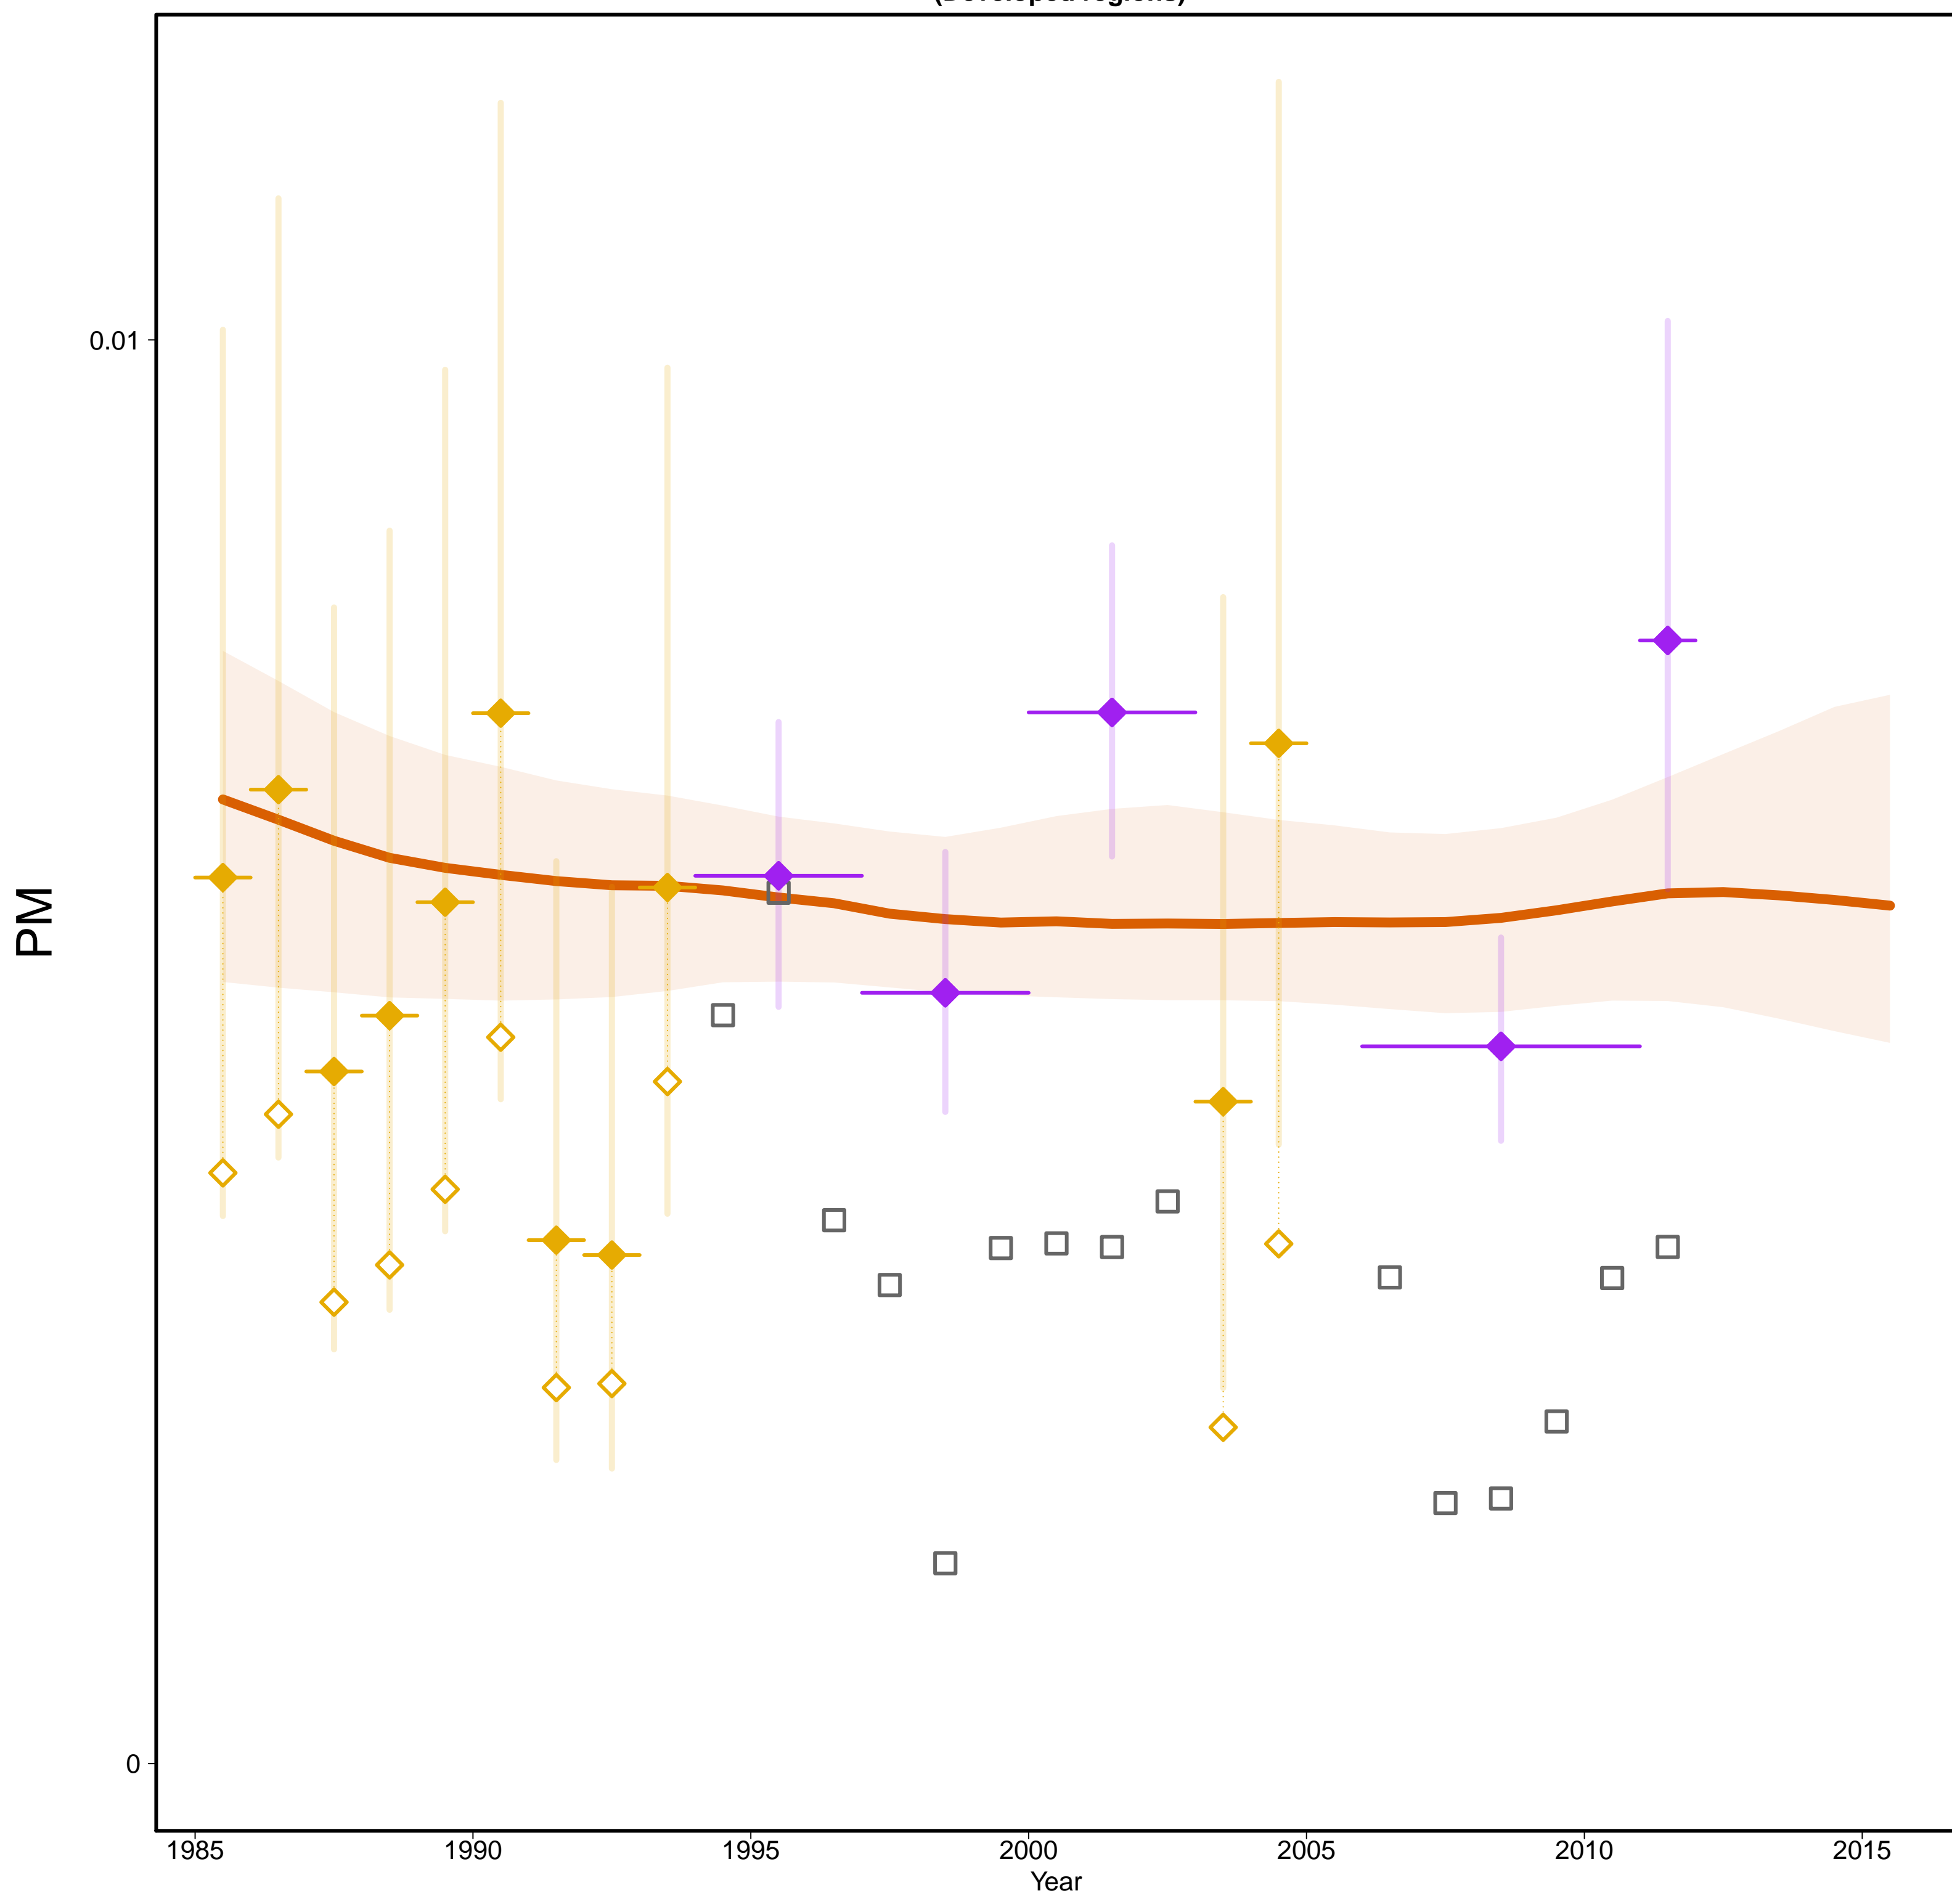

Australia [AUS]  
(Developed regions)

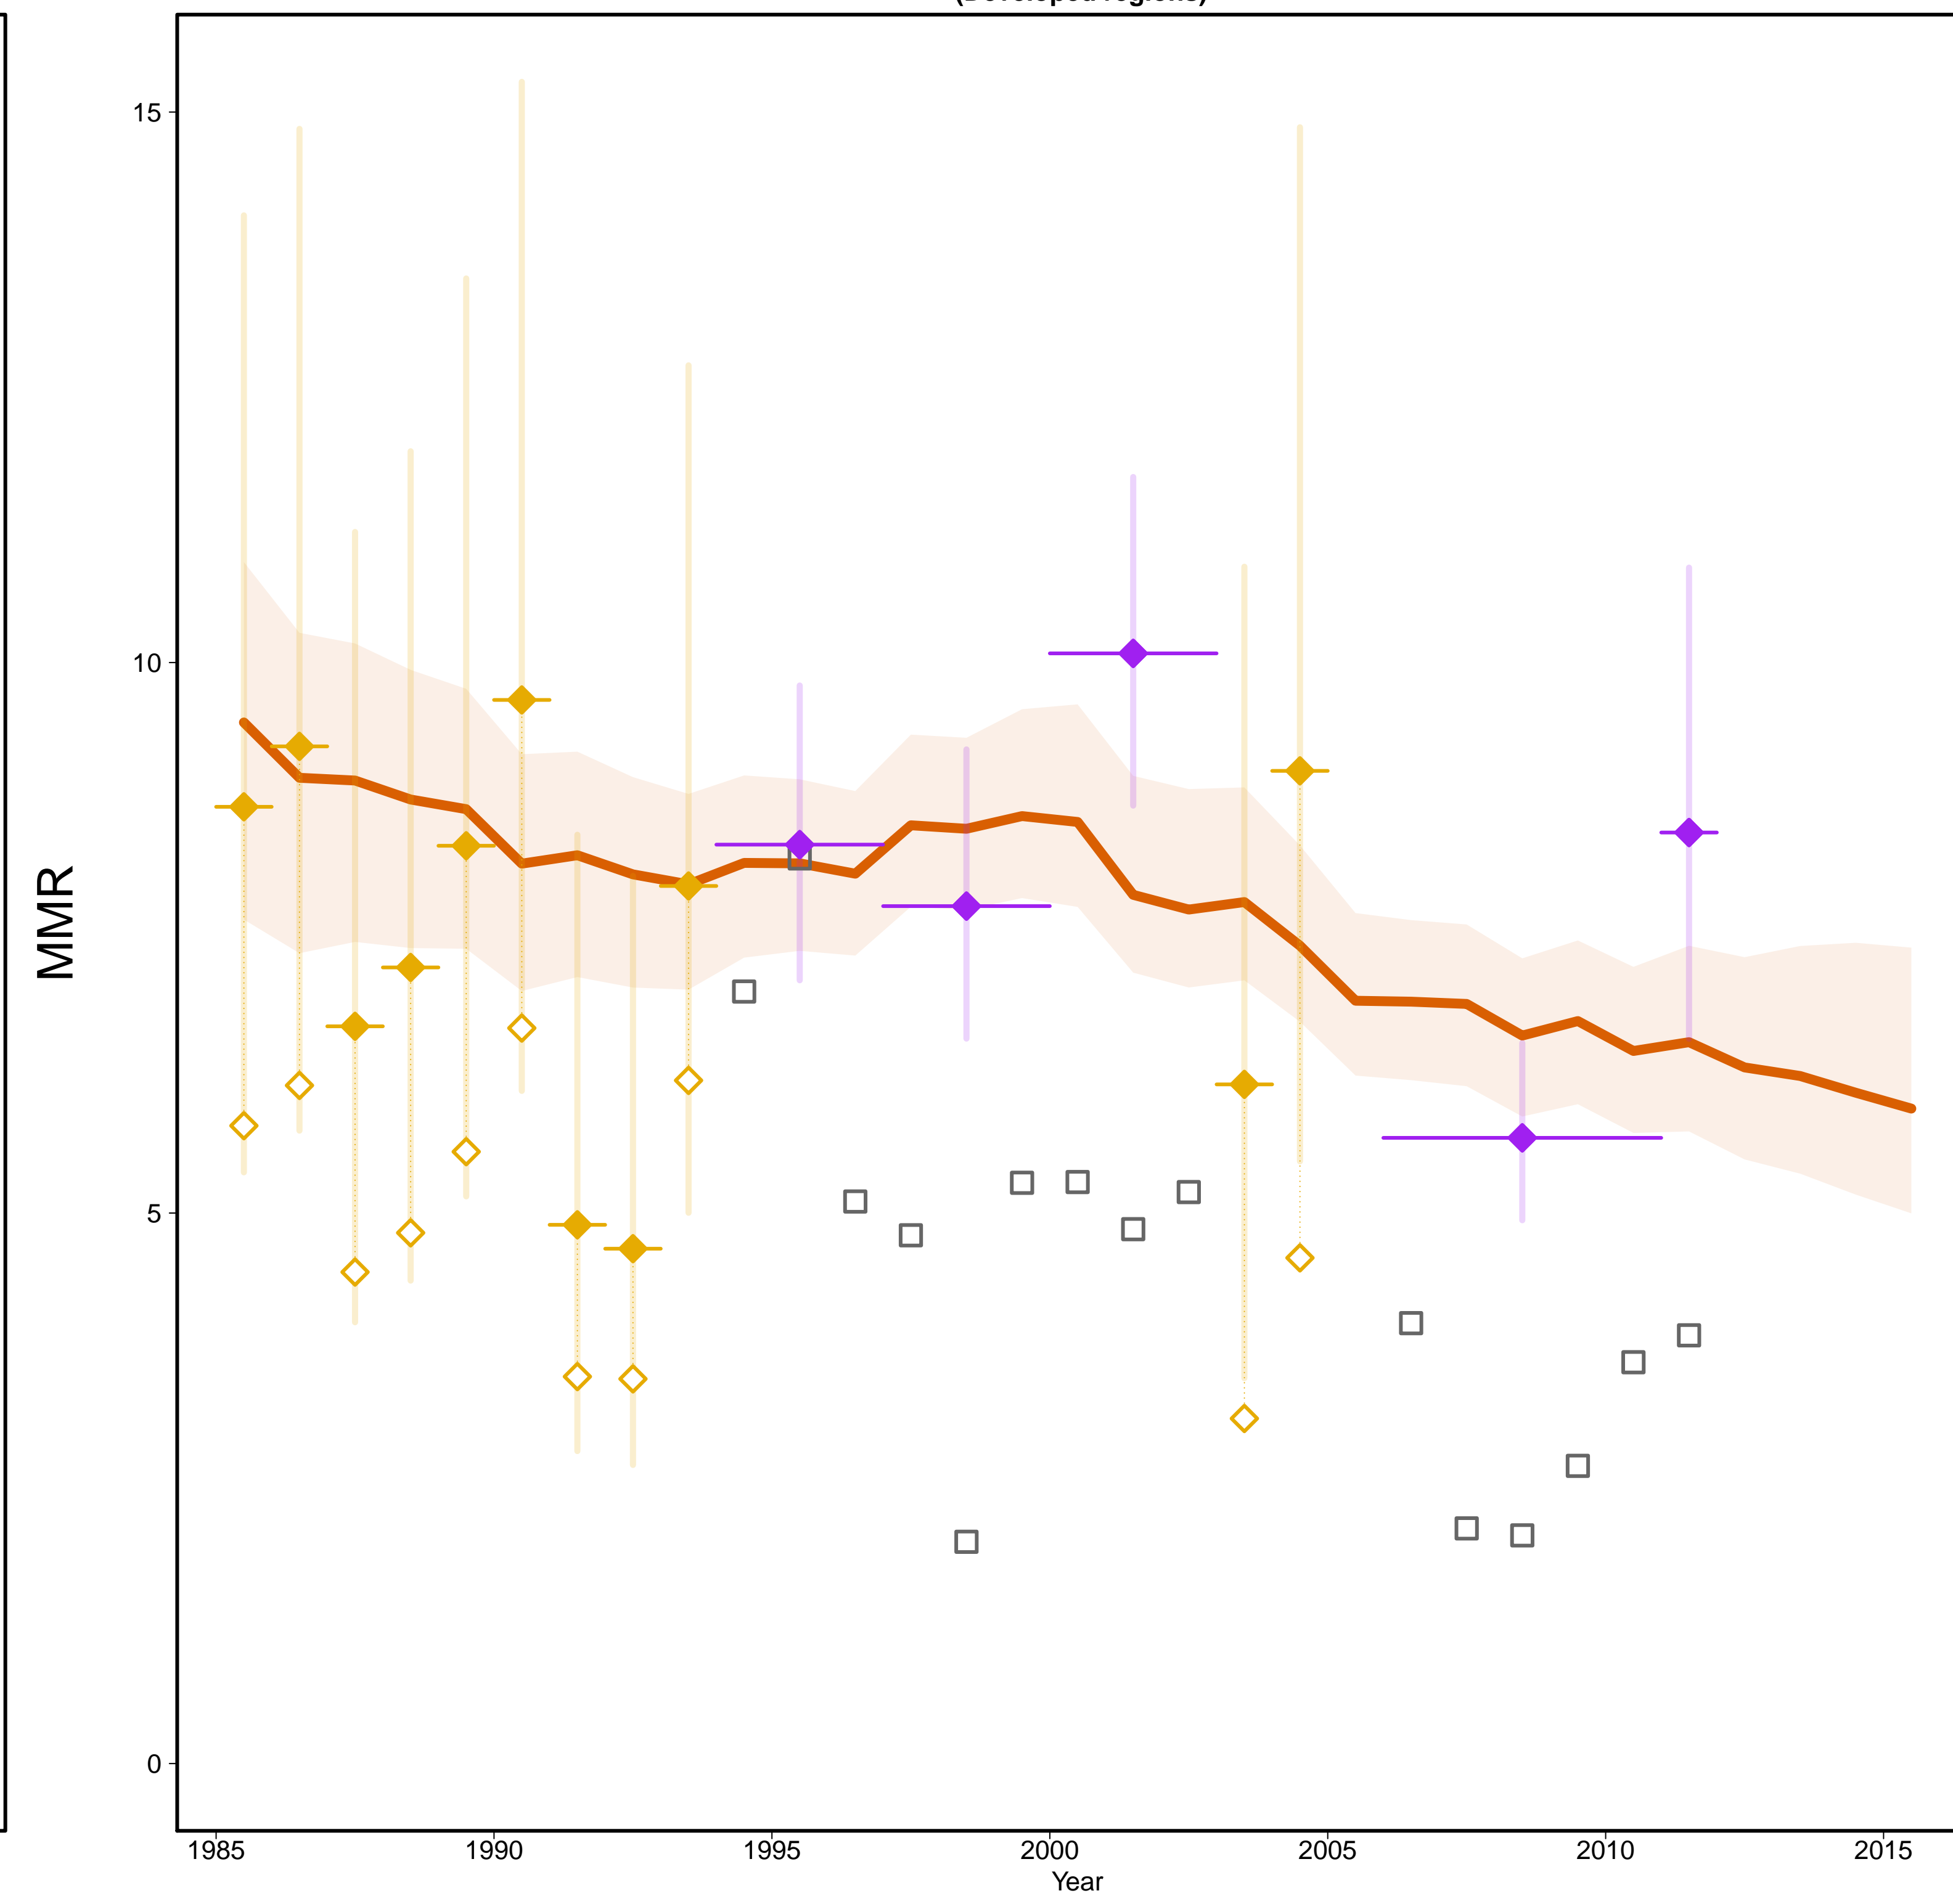

- Estimates –
- Mlate
- MMR Database 2015 –
- ◇ Observed Data
- ◆ Adjusted Data
- Data type –
- ◆ VR
- ◆ Spec. studies
- Excluded VR data  
(overlap with specialized study)

Gross Domestic Product

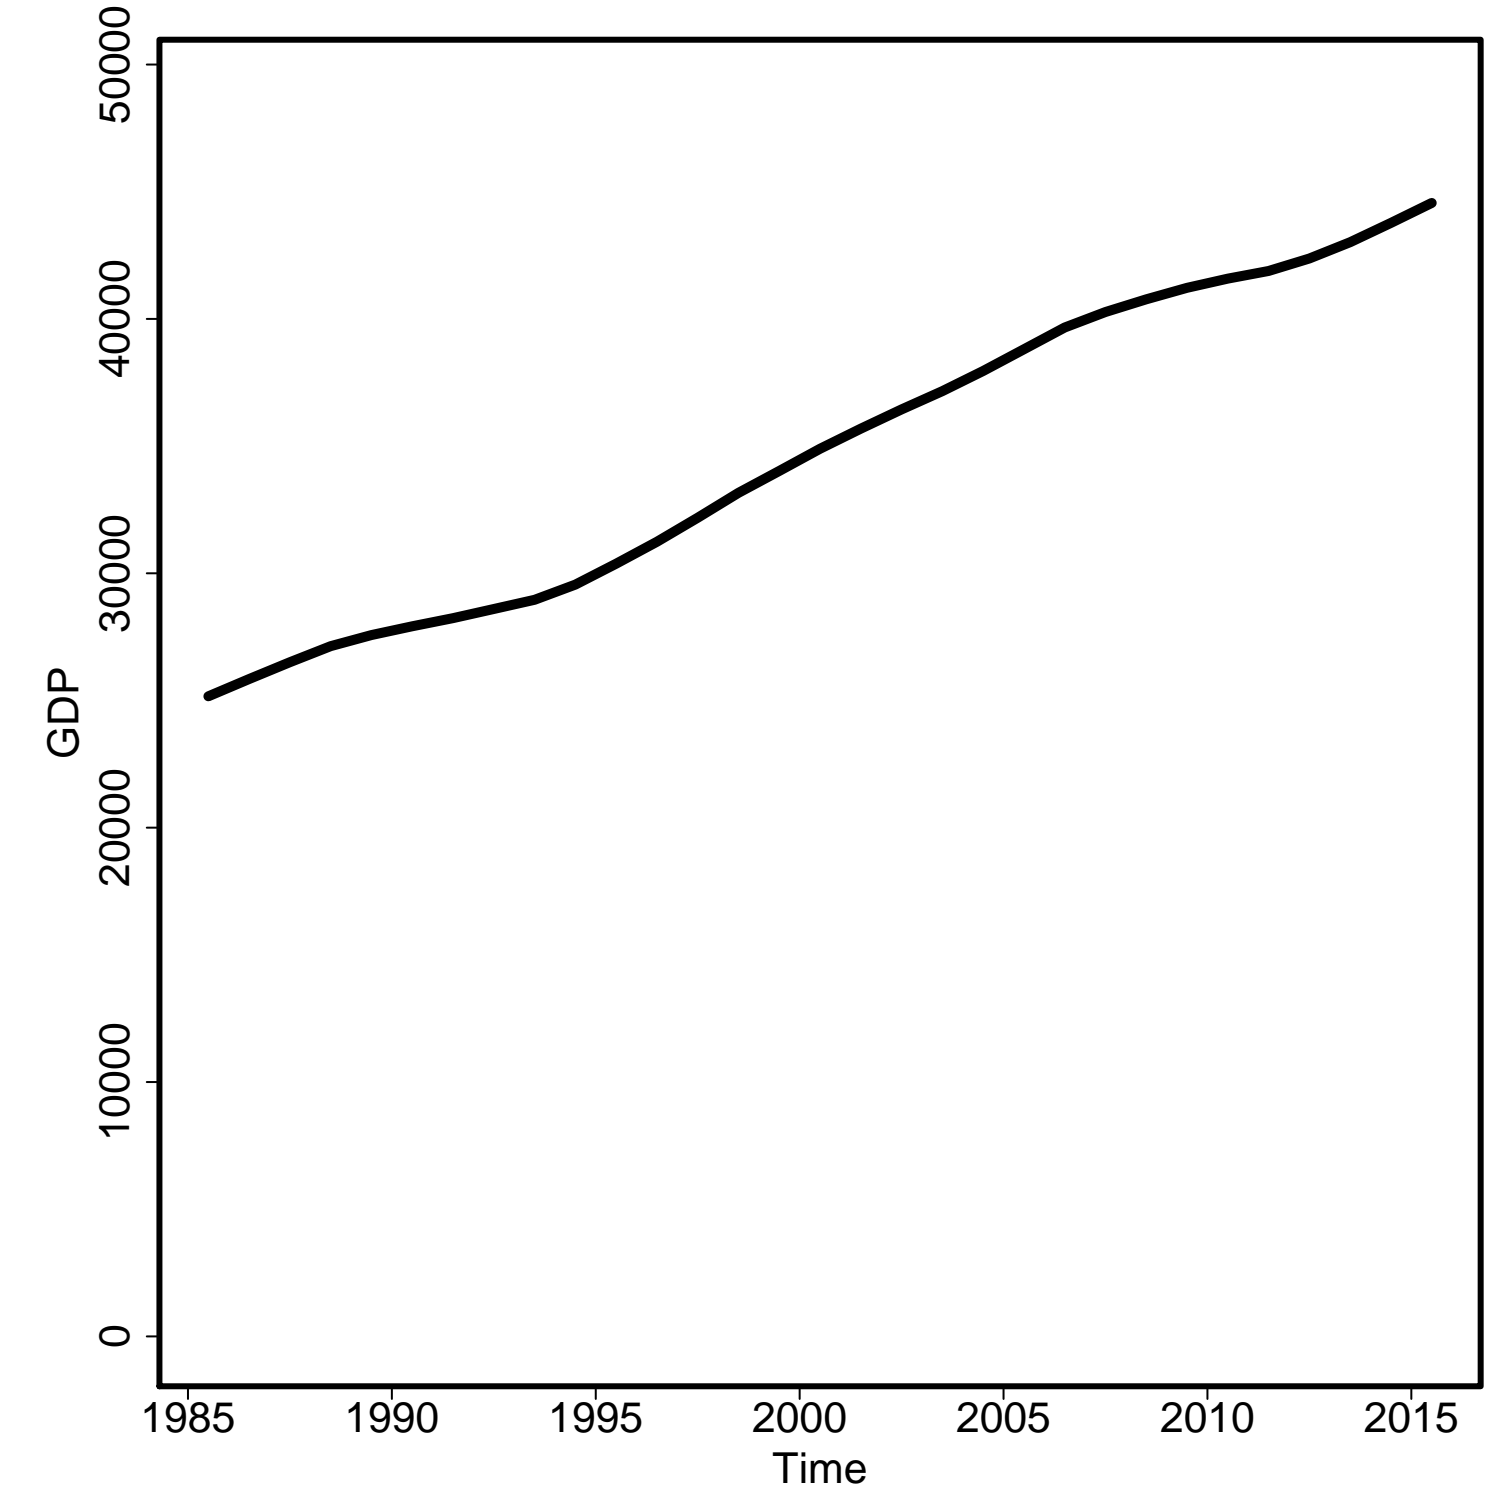

General Fertility Rate

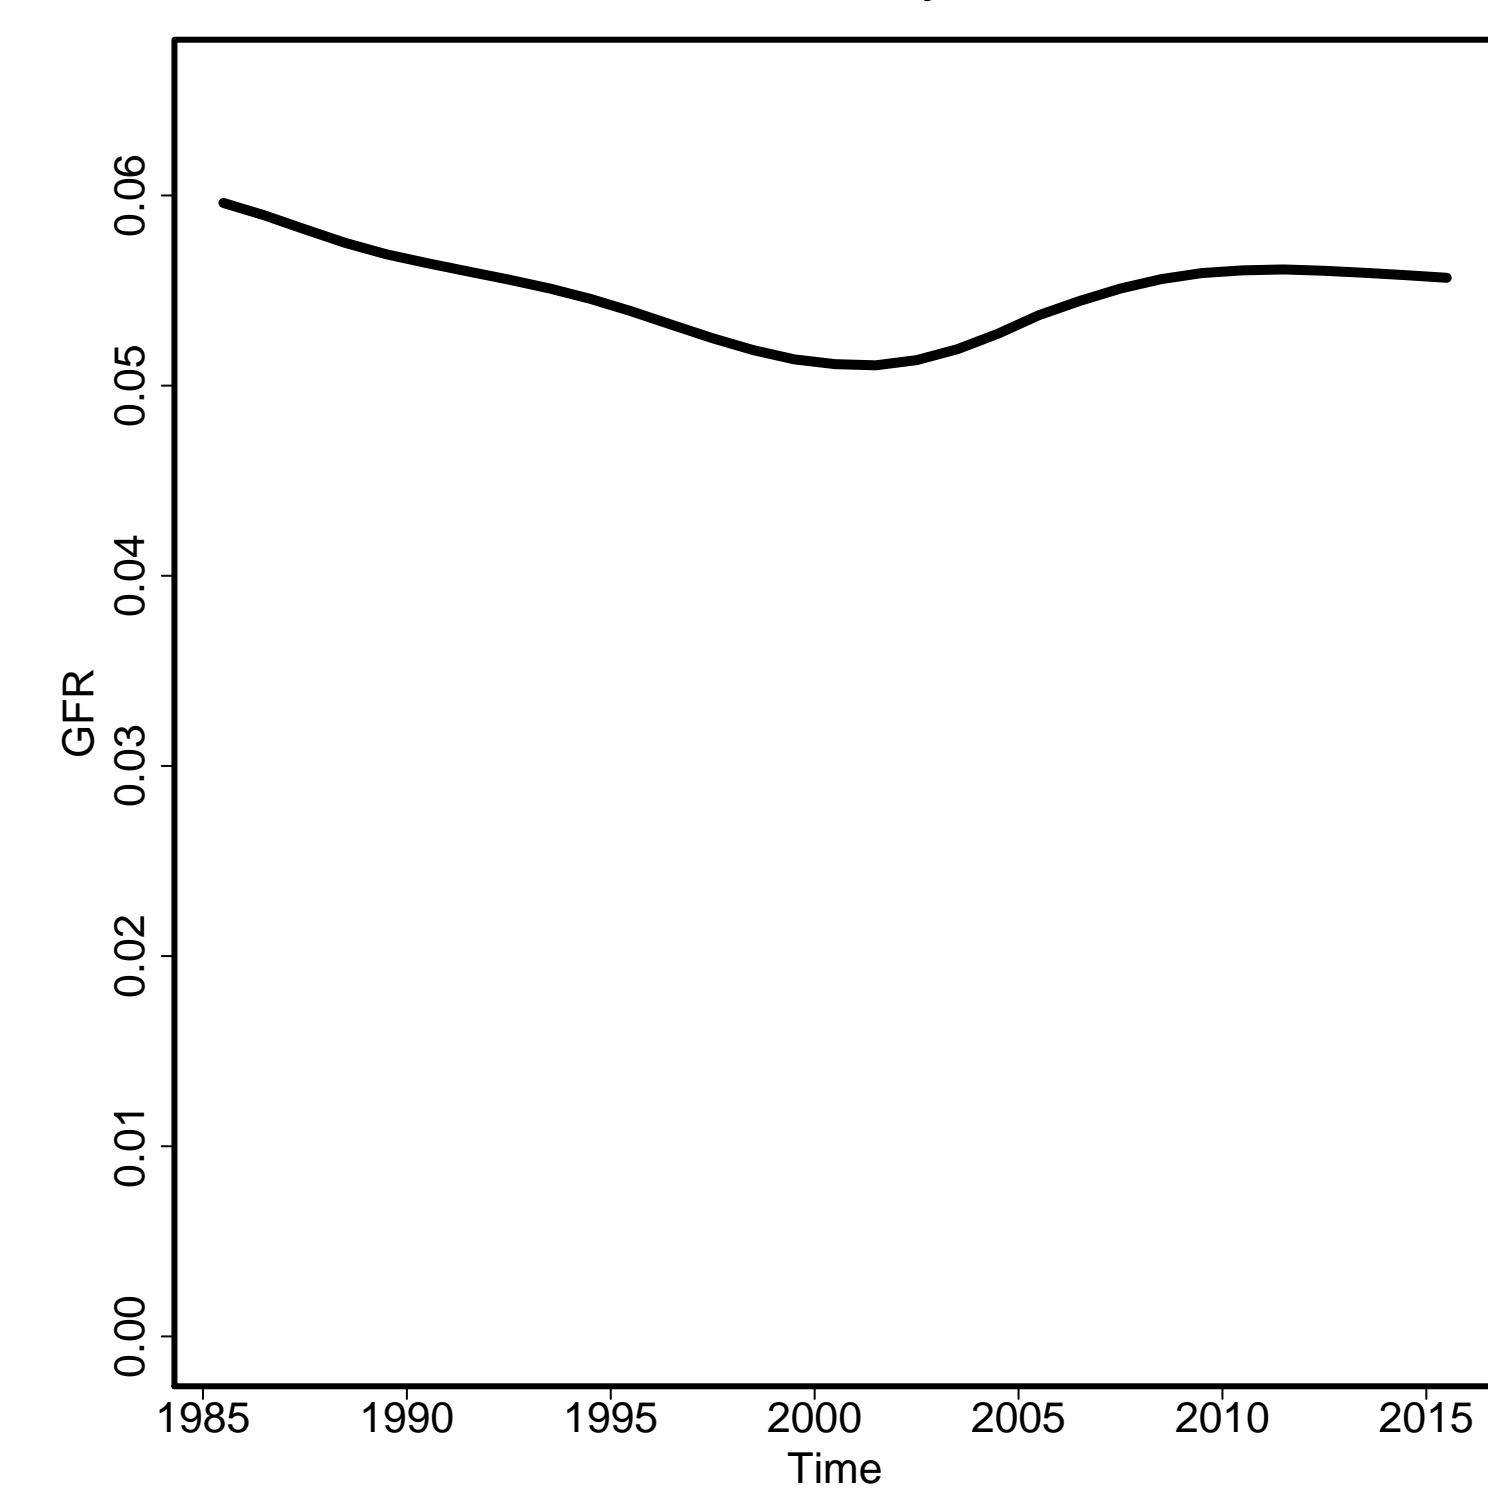

Skilled Attendance to Birth

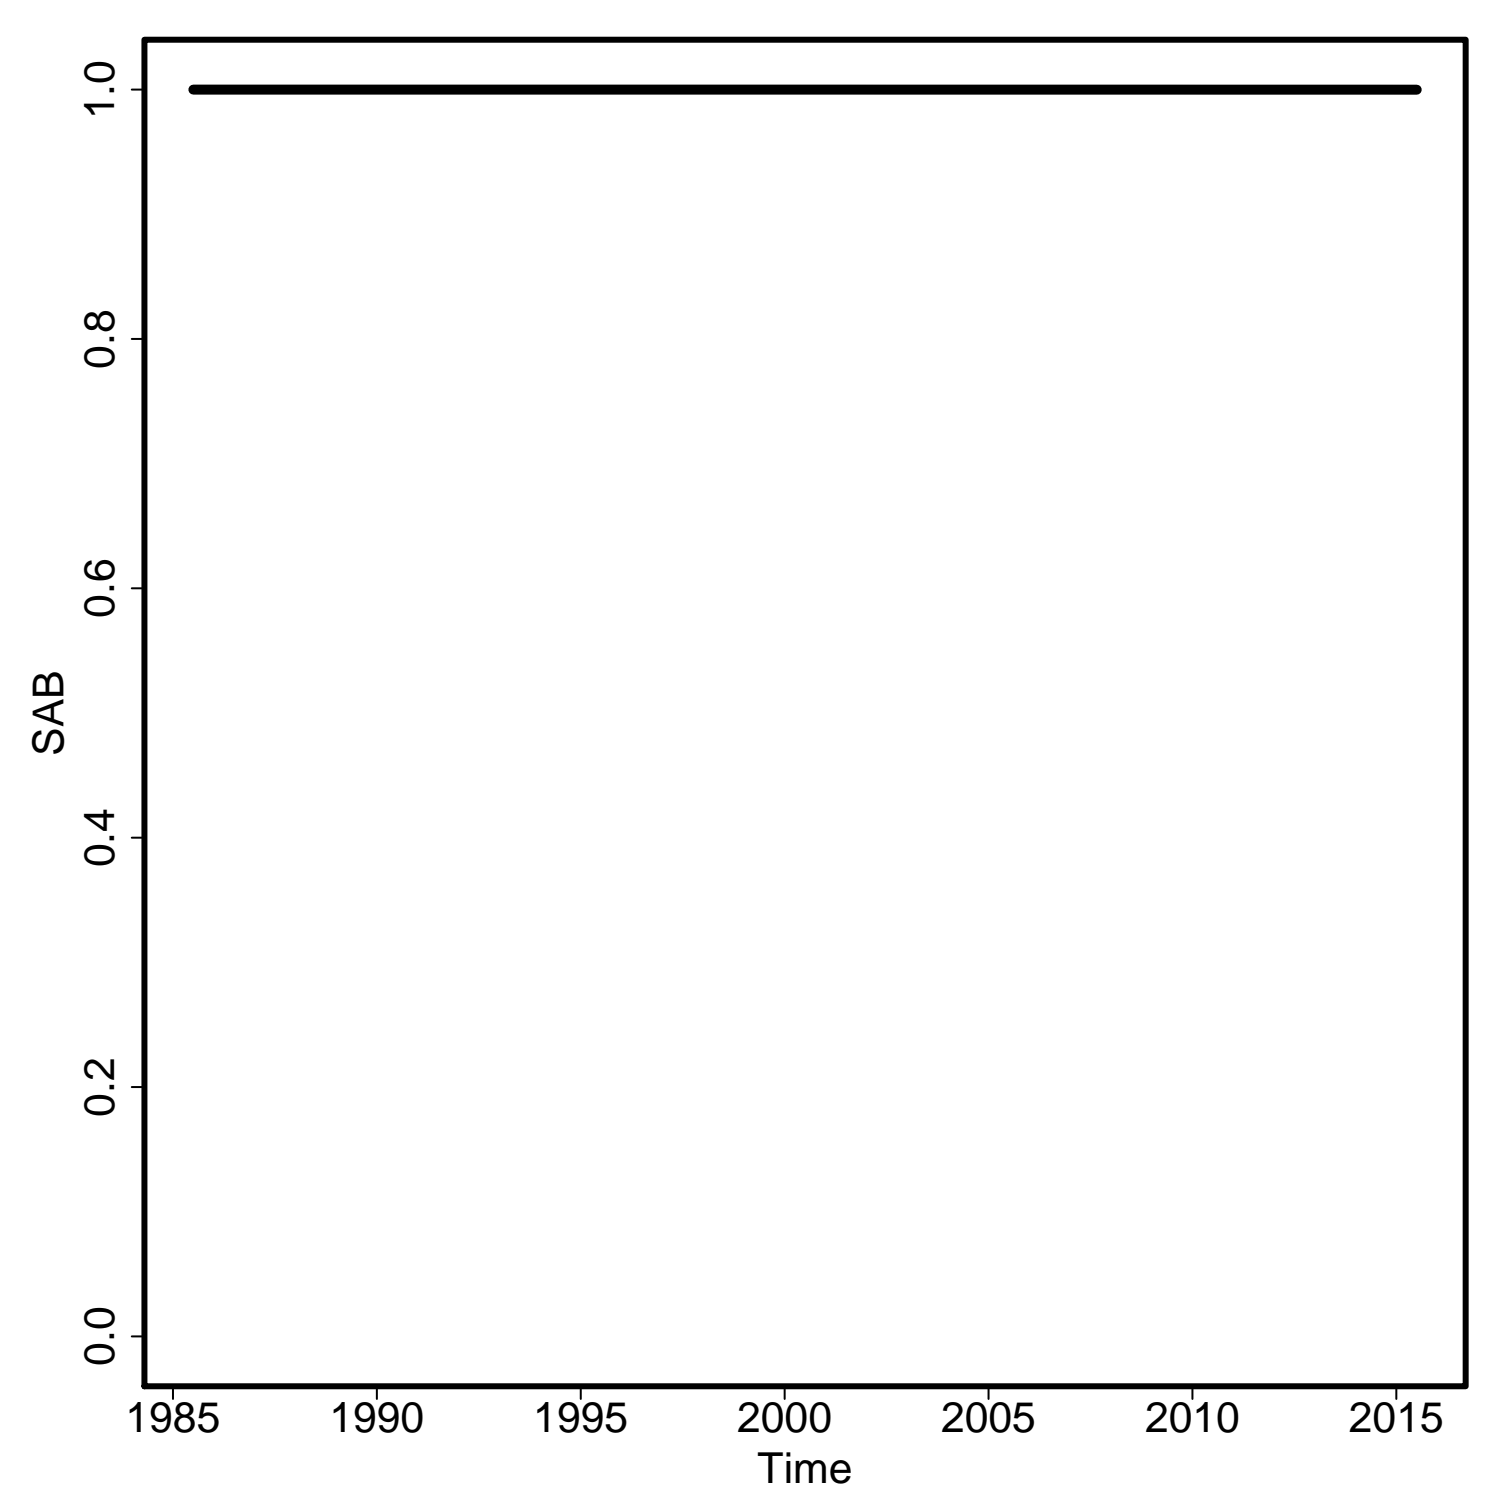

Envelope/Births

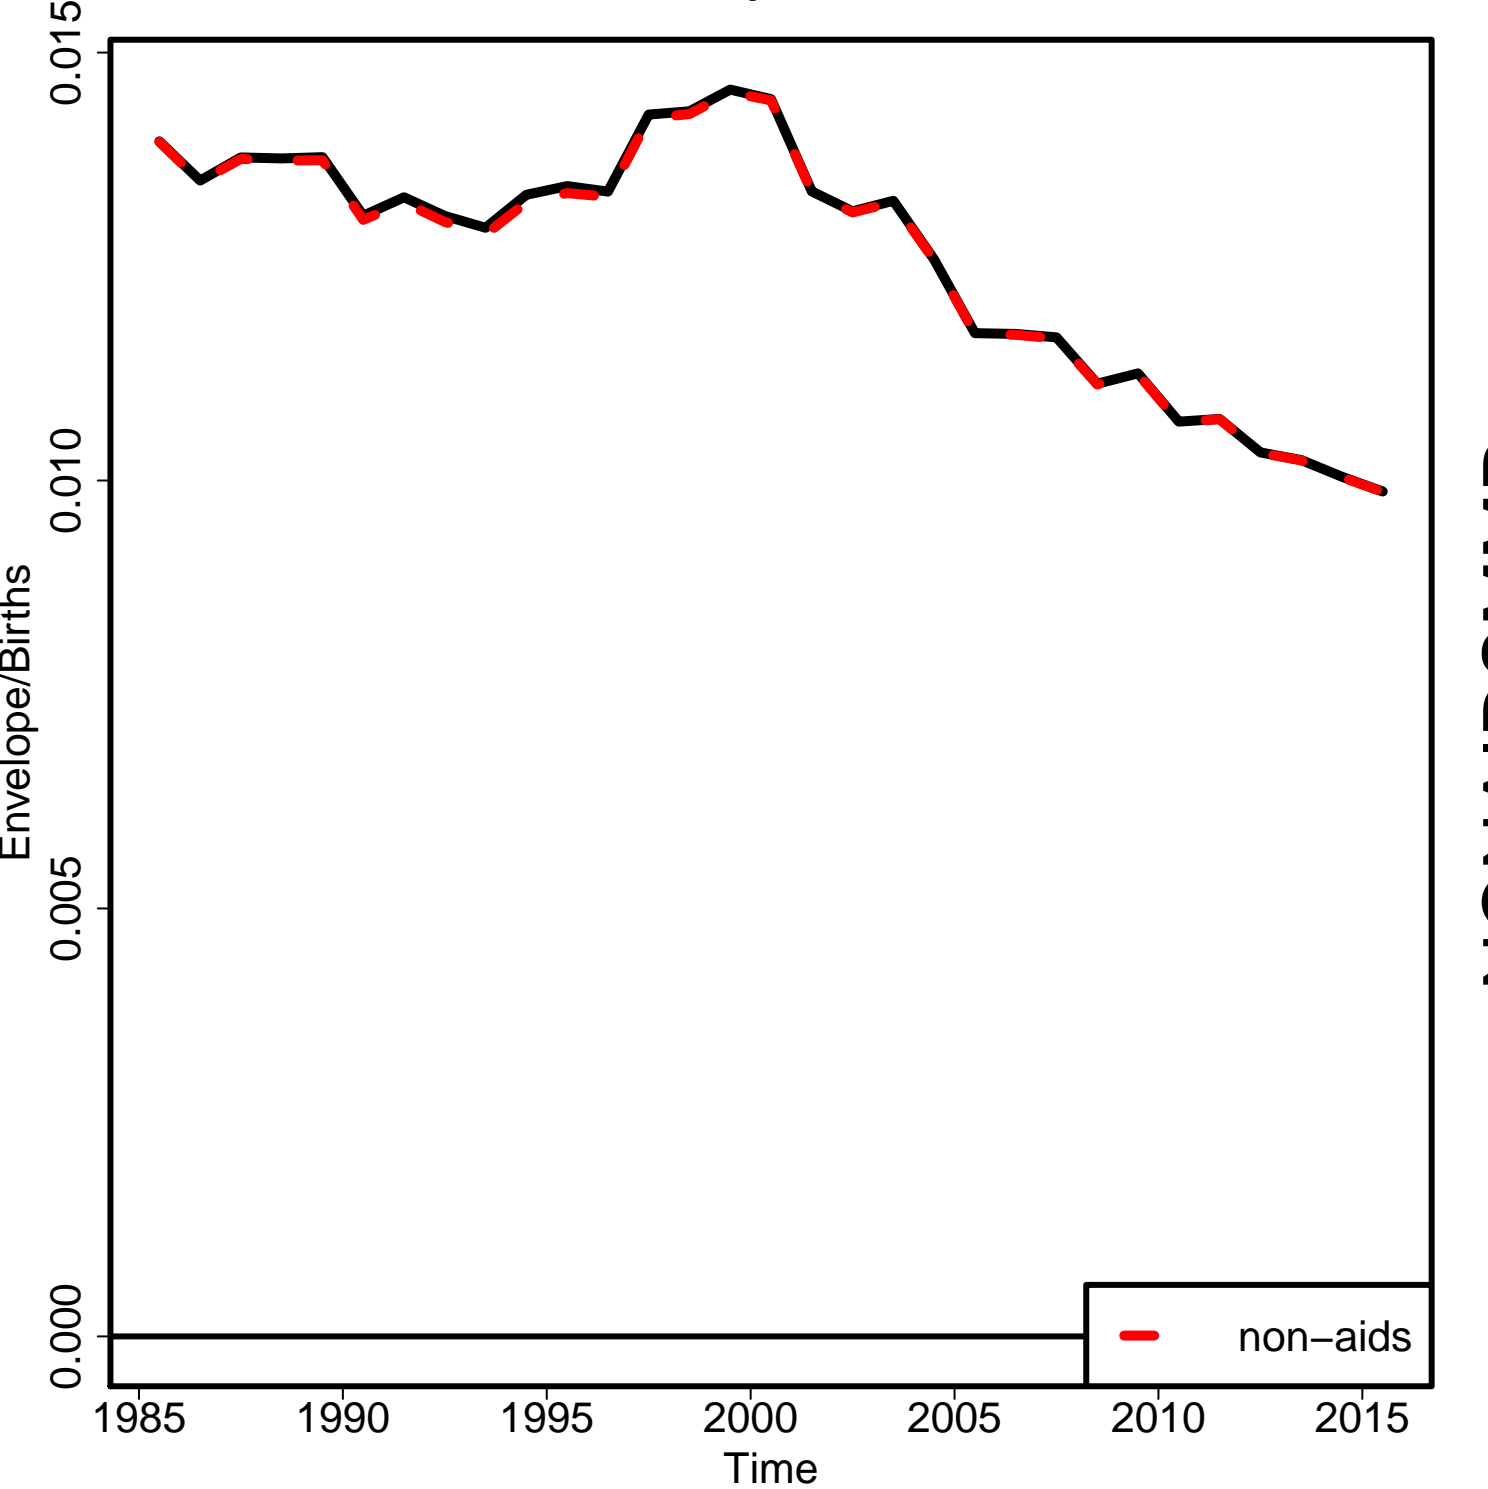

Non-aids MMR

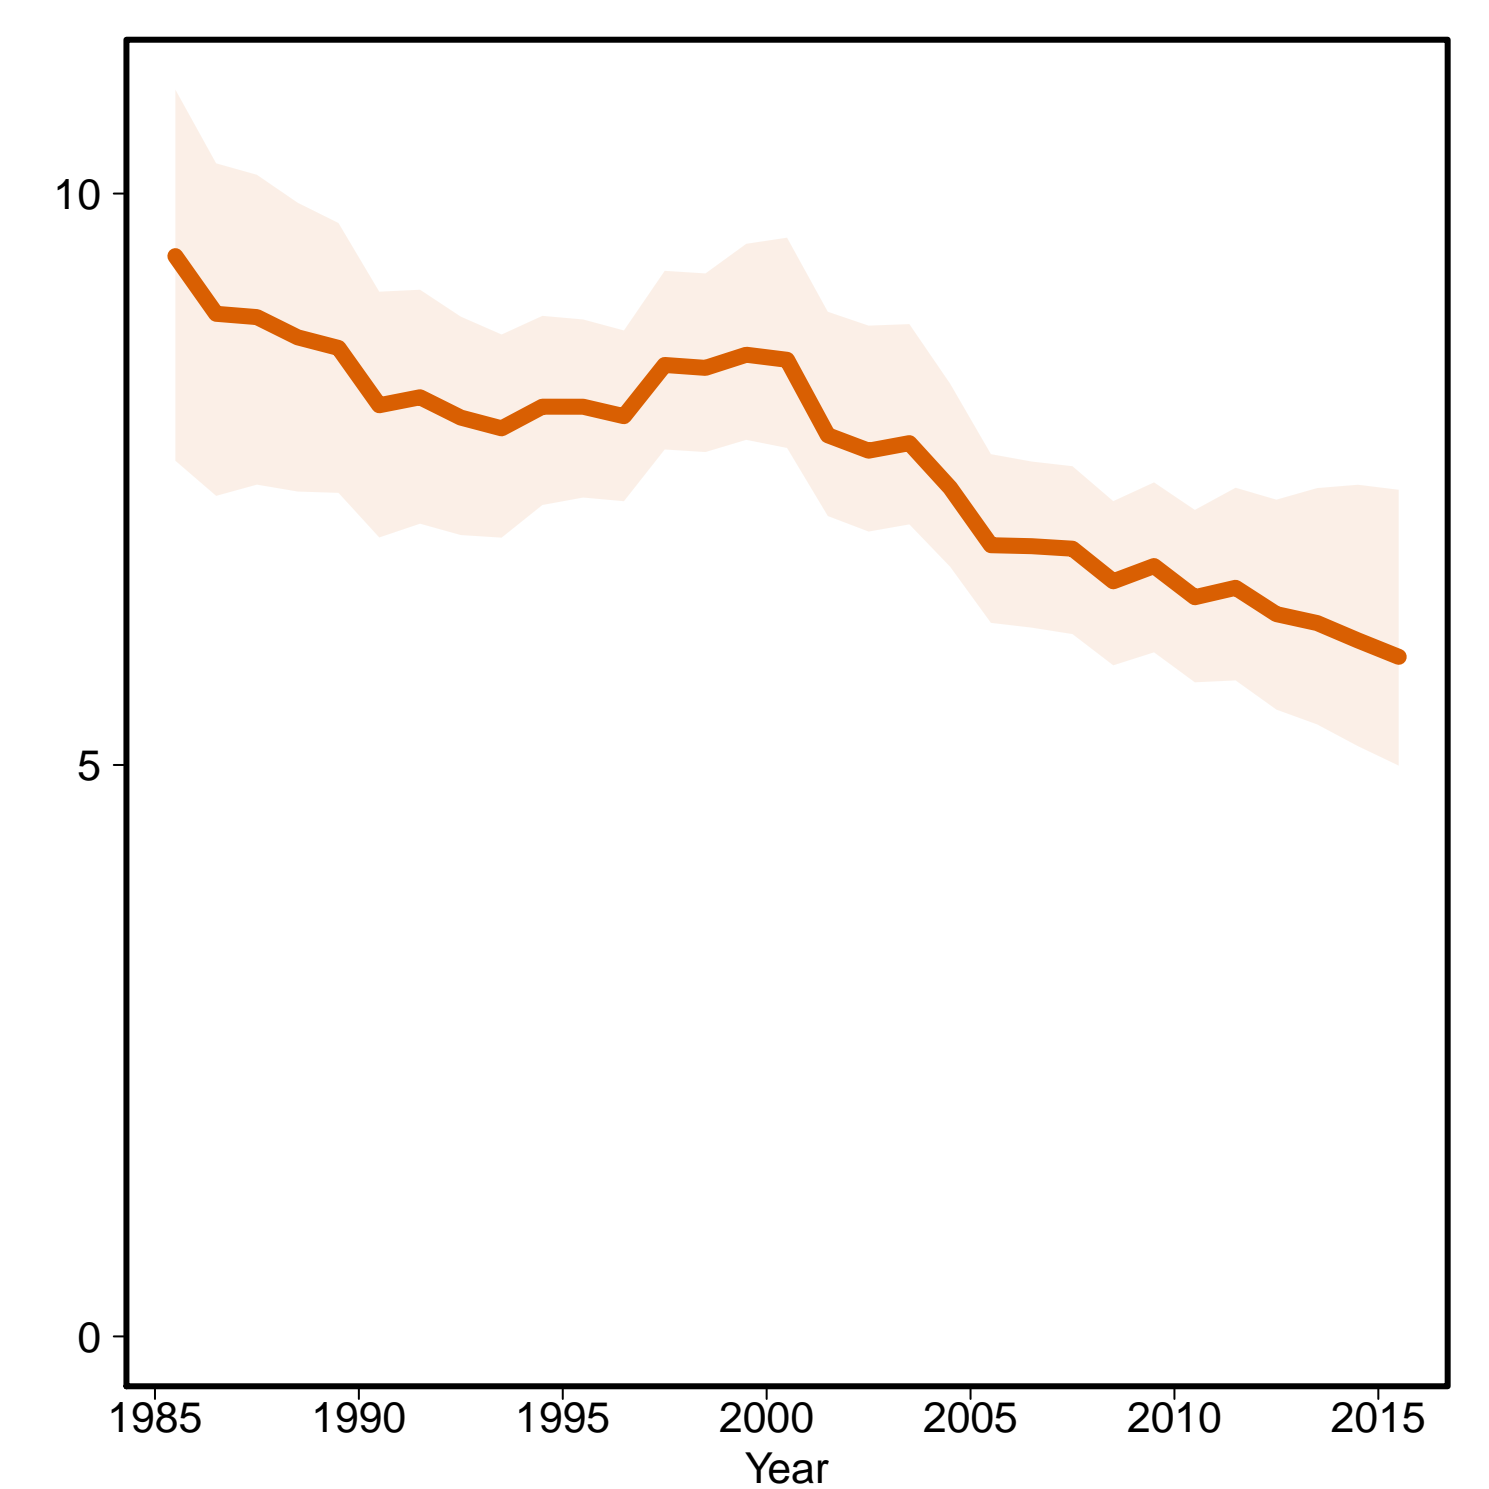

Aids MMR

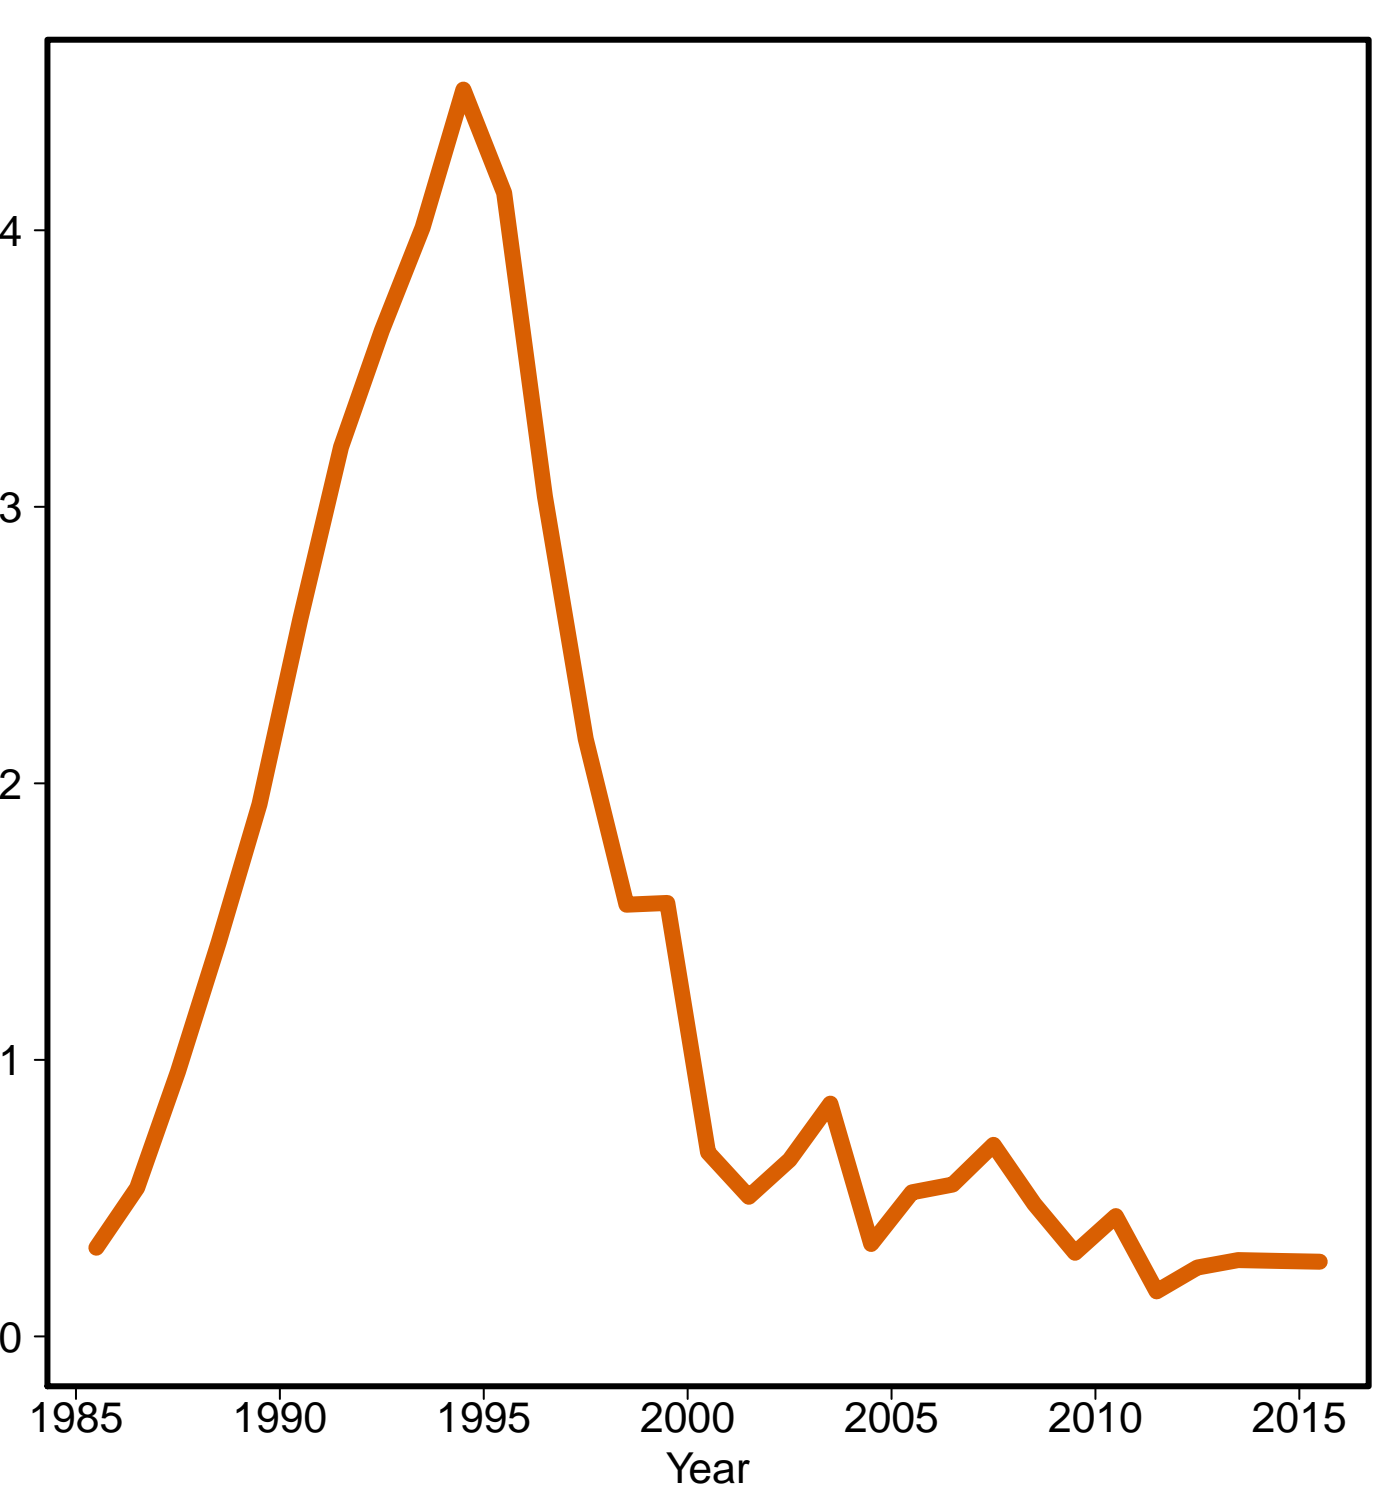

Austria [AUT]  
(Developed regions)

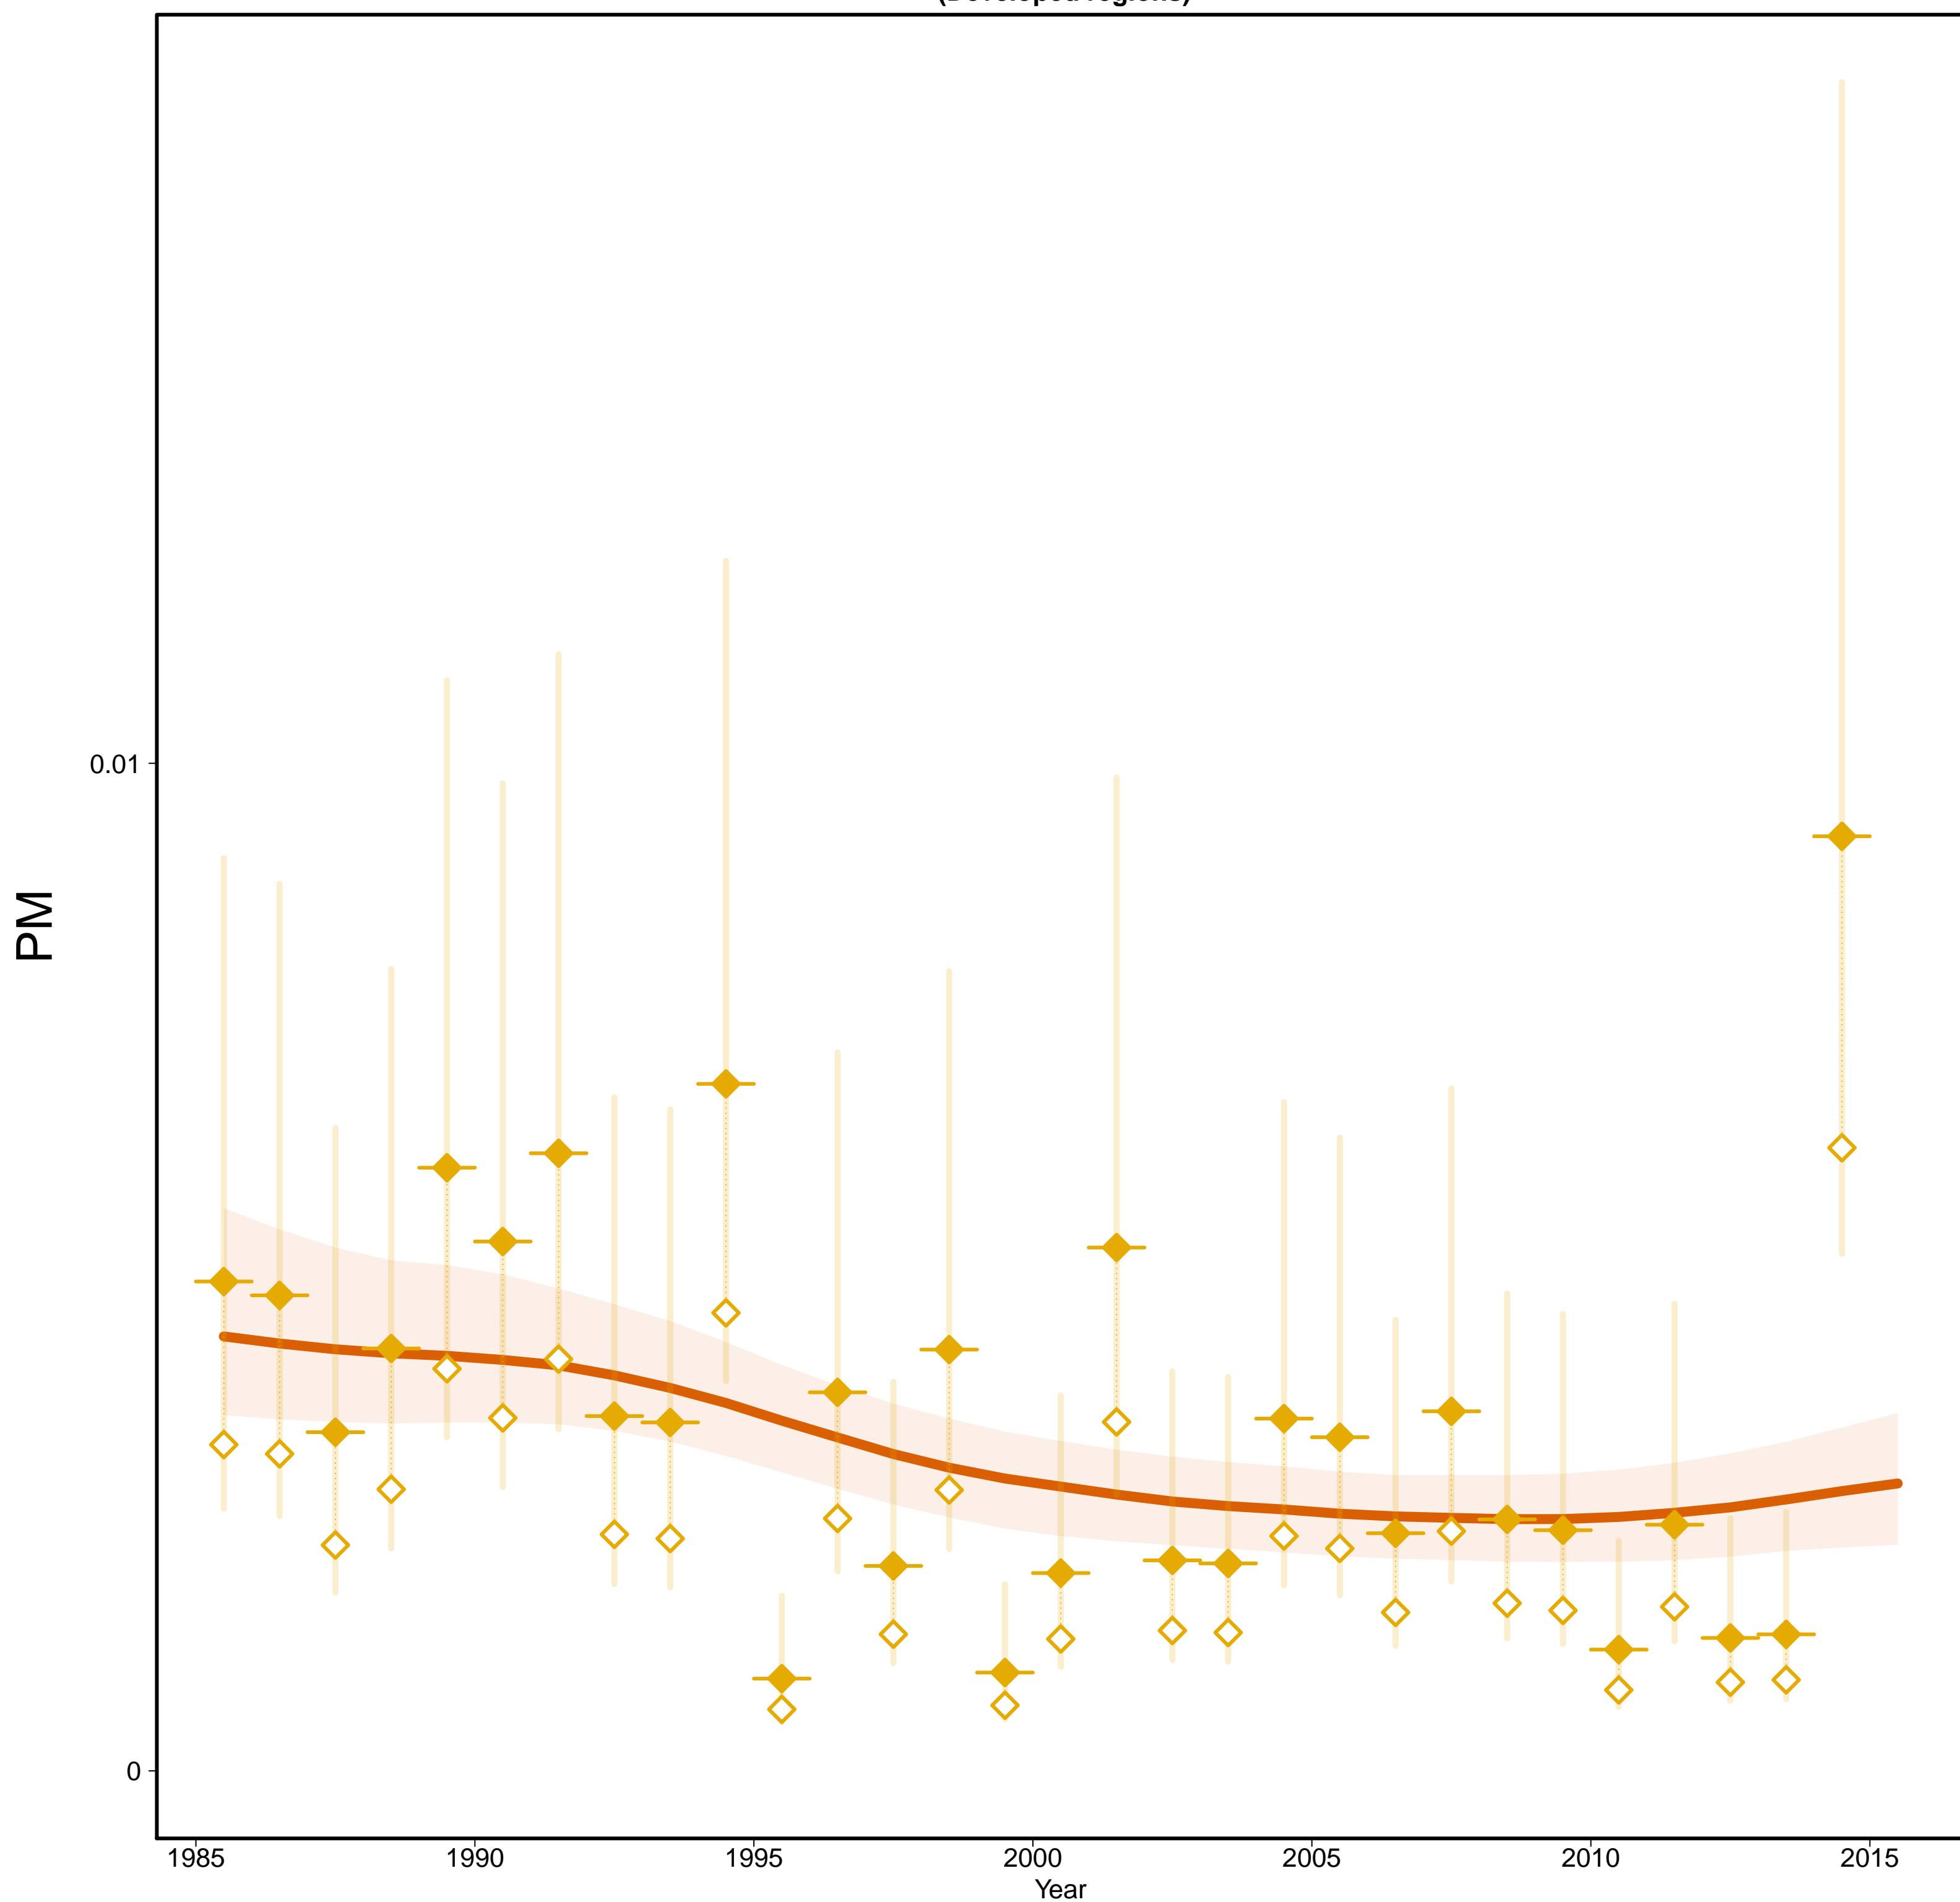

Austria [AUT]  
(Developed regions)

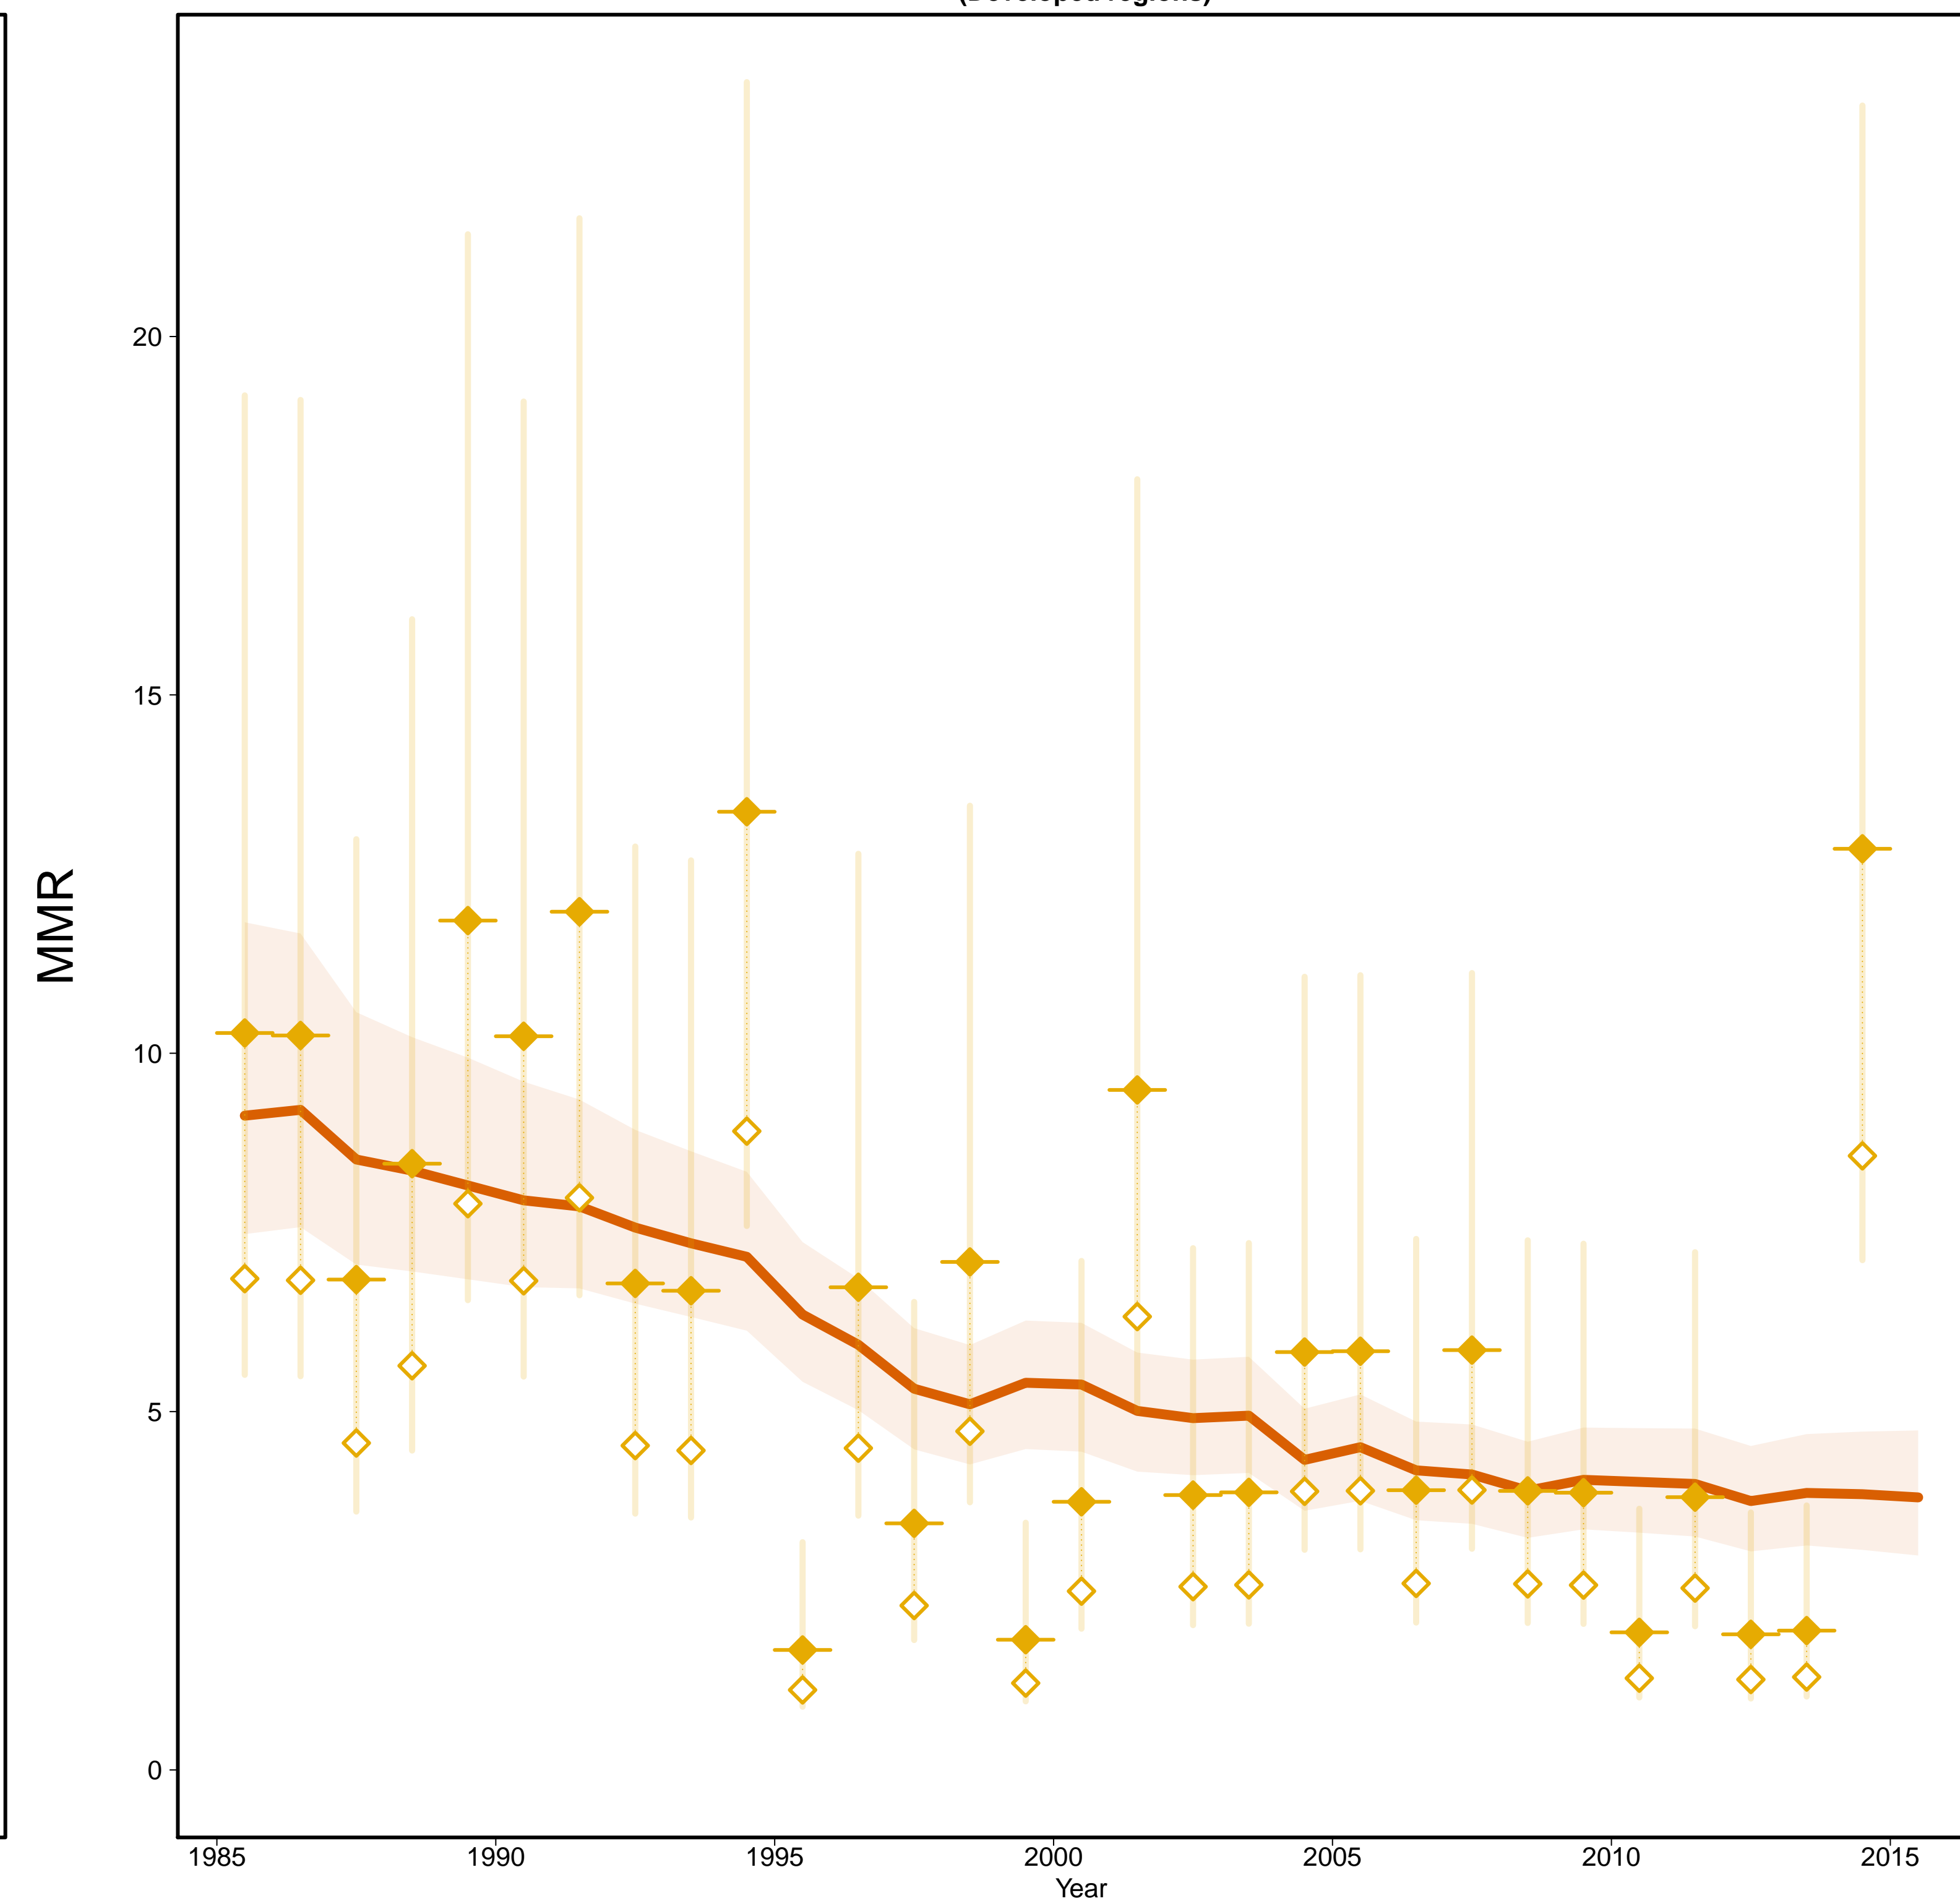

- Estimates —
- MMR Database 2015 —
- ◇ Observed Data
- ◆ Adjusted Data
- Data type —
- ◆ VR

Gross Domestic Product

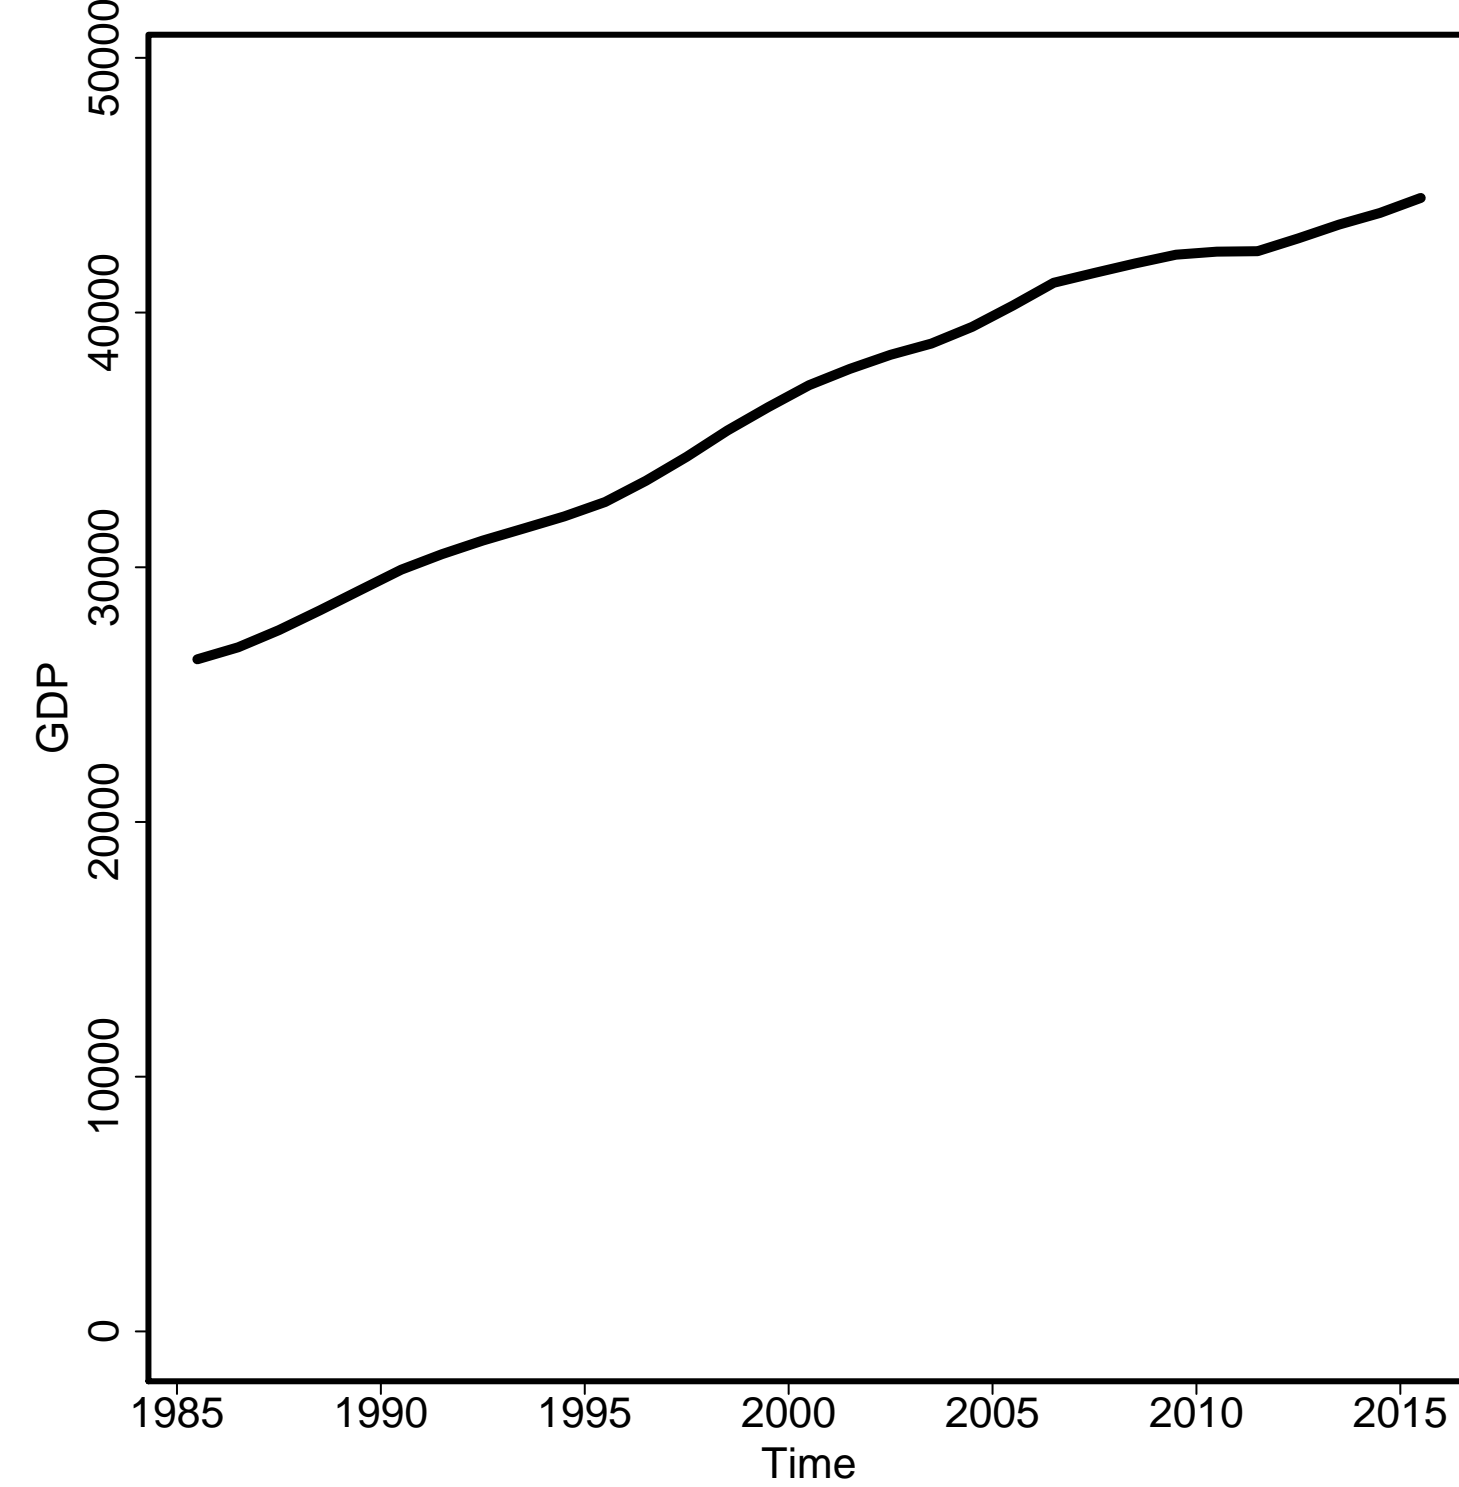

General Fertility Rate

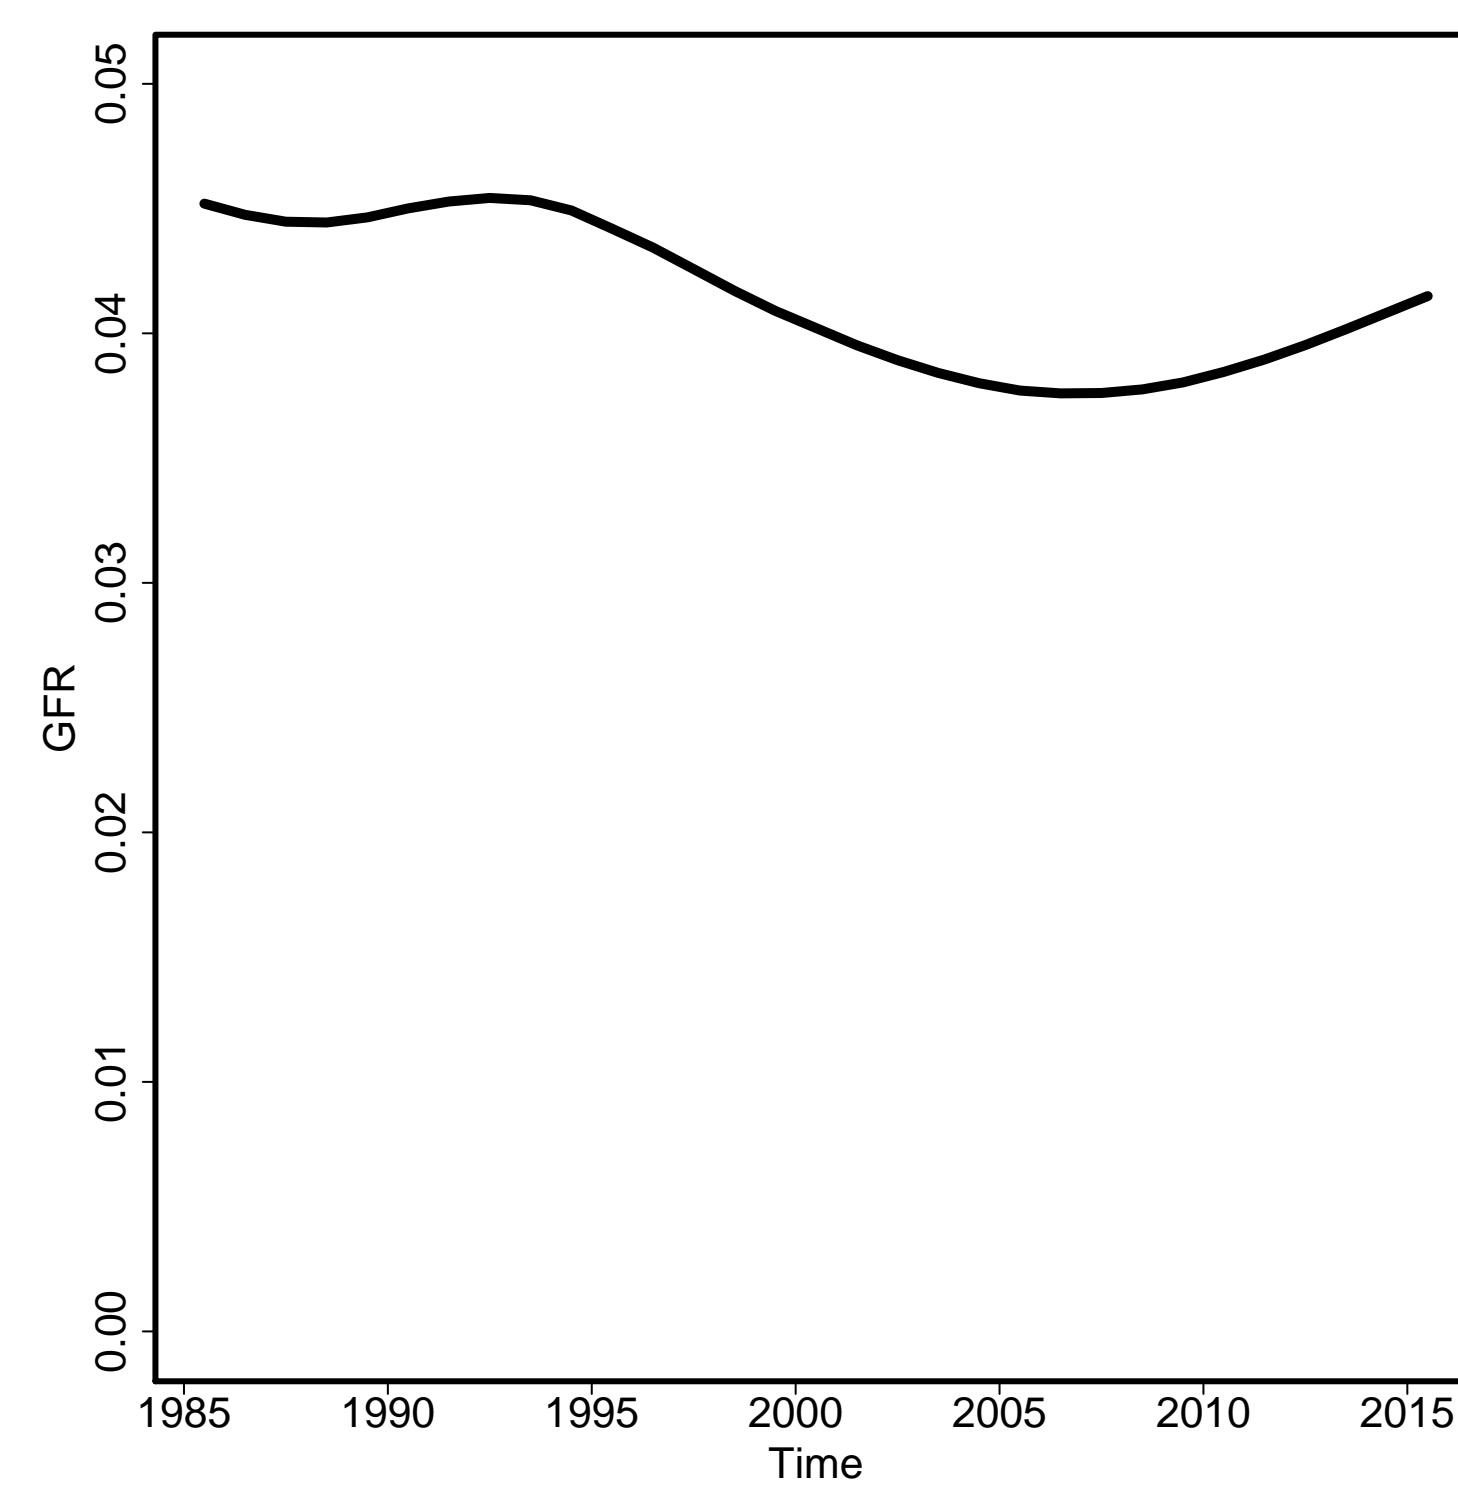

Skilled Attendance to Birth

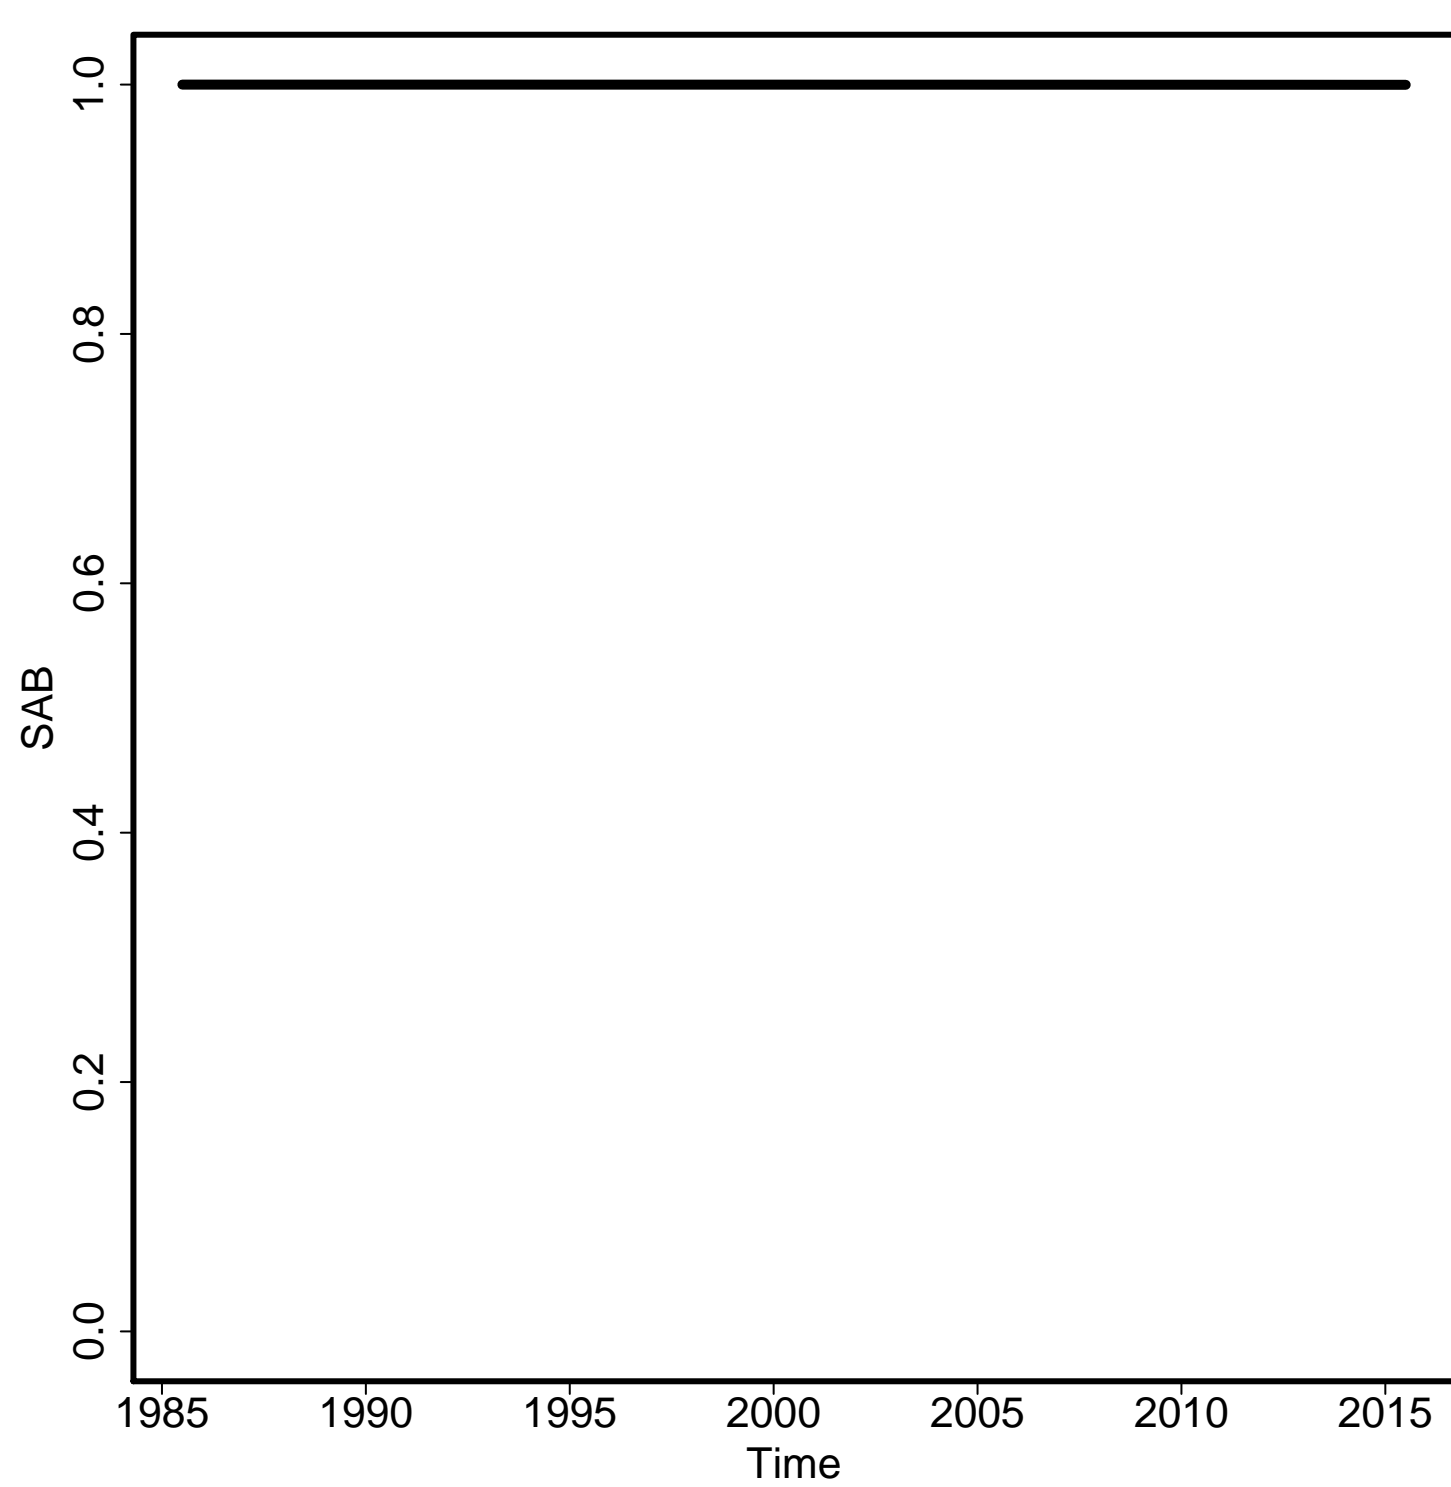

Envelope/Births

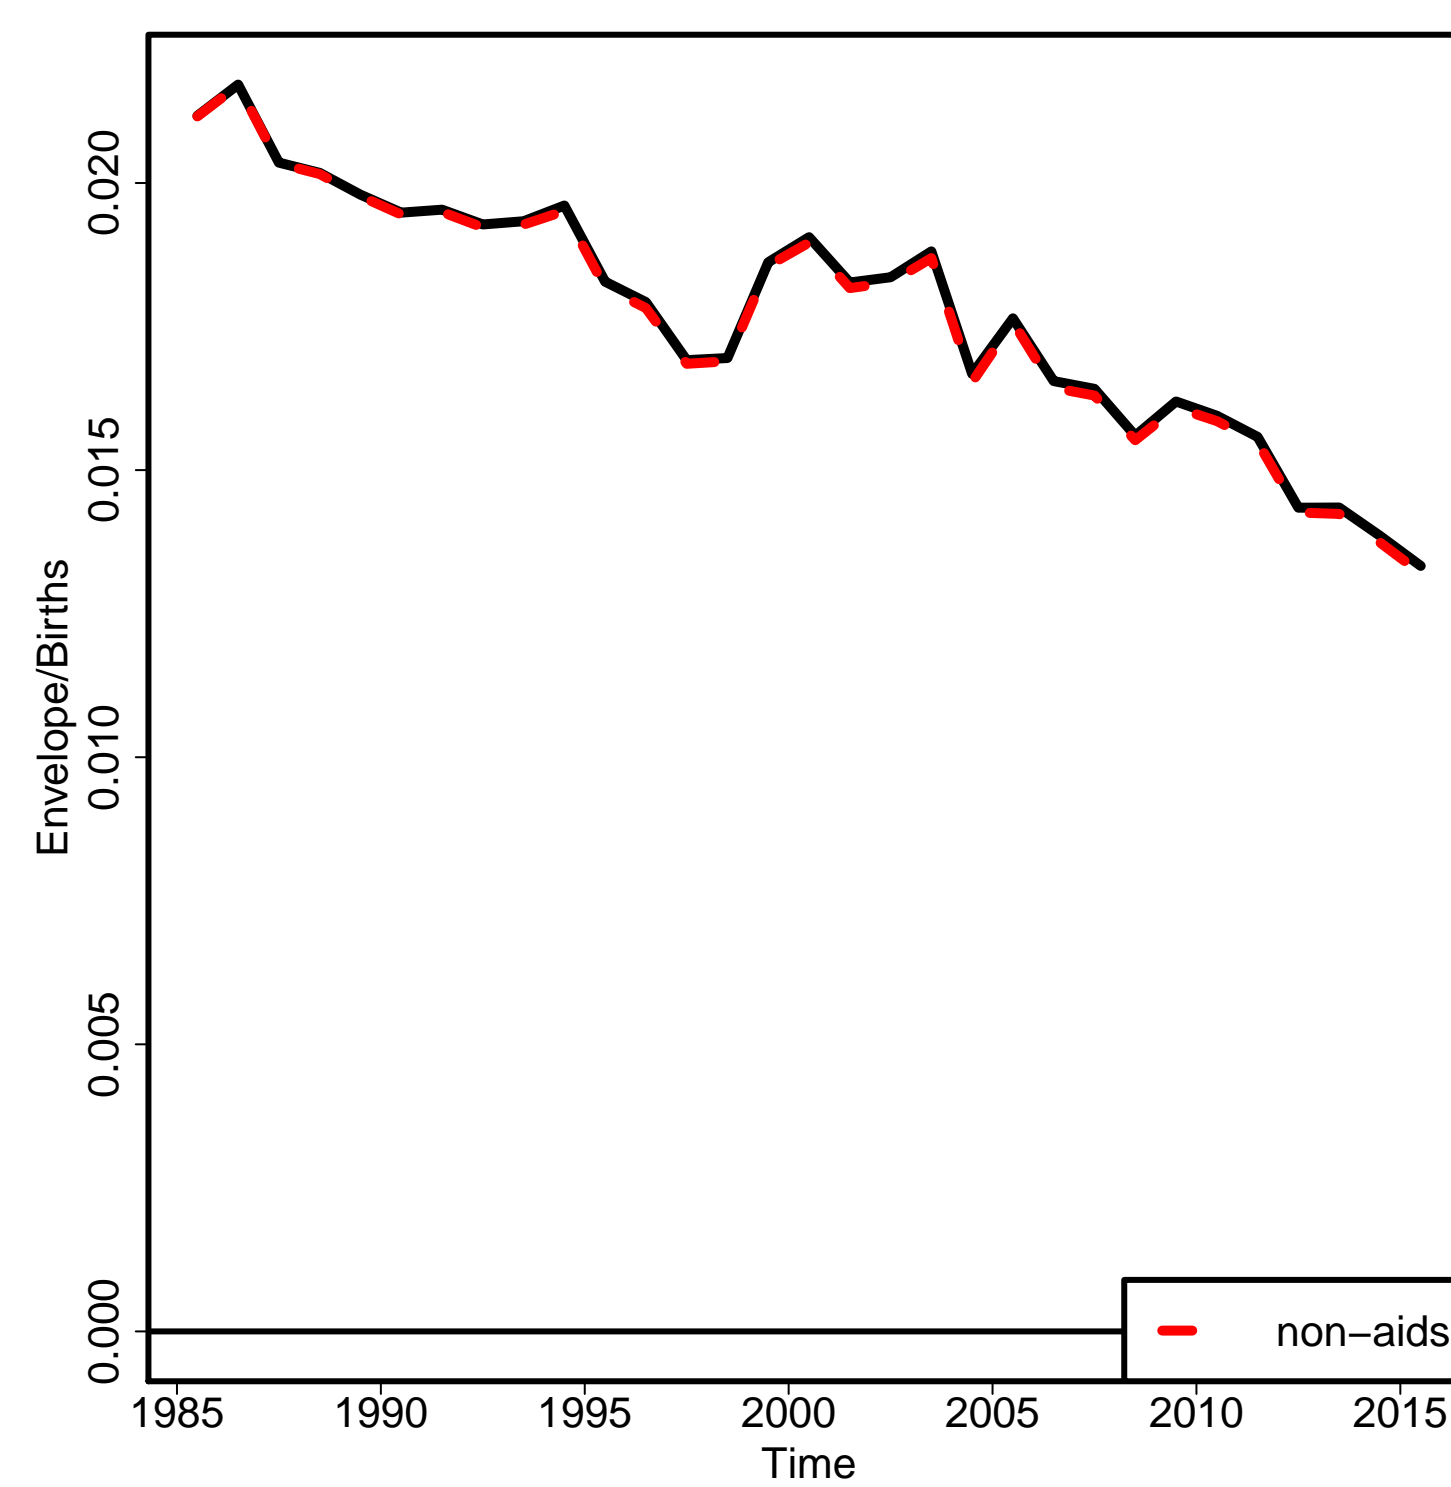

Non-aid MMR

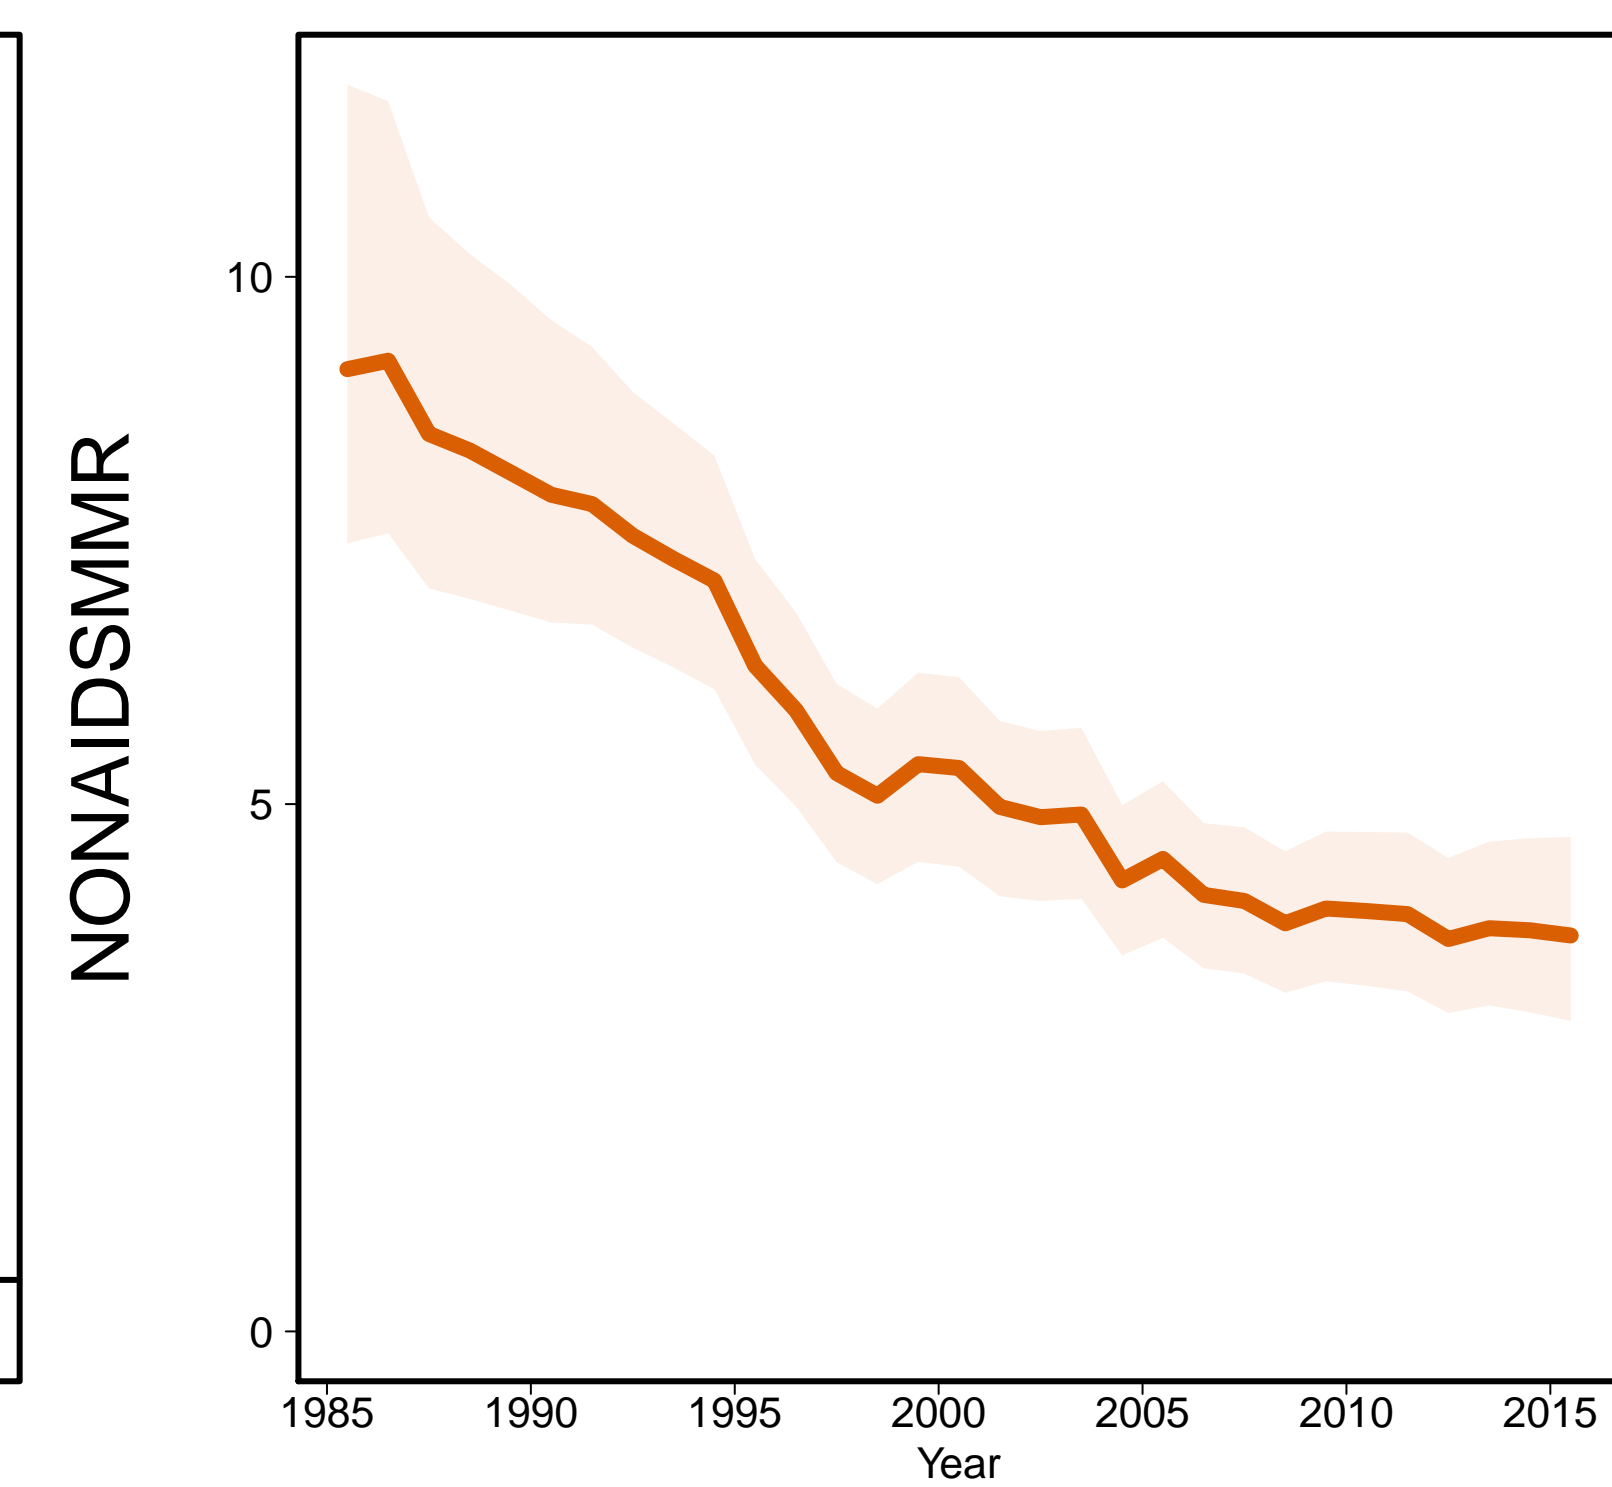

Aids MMR

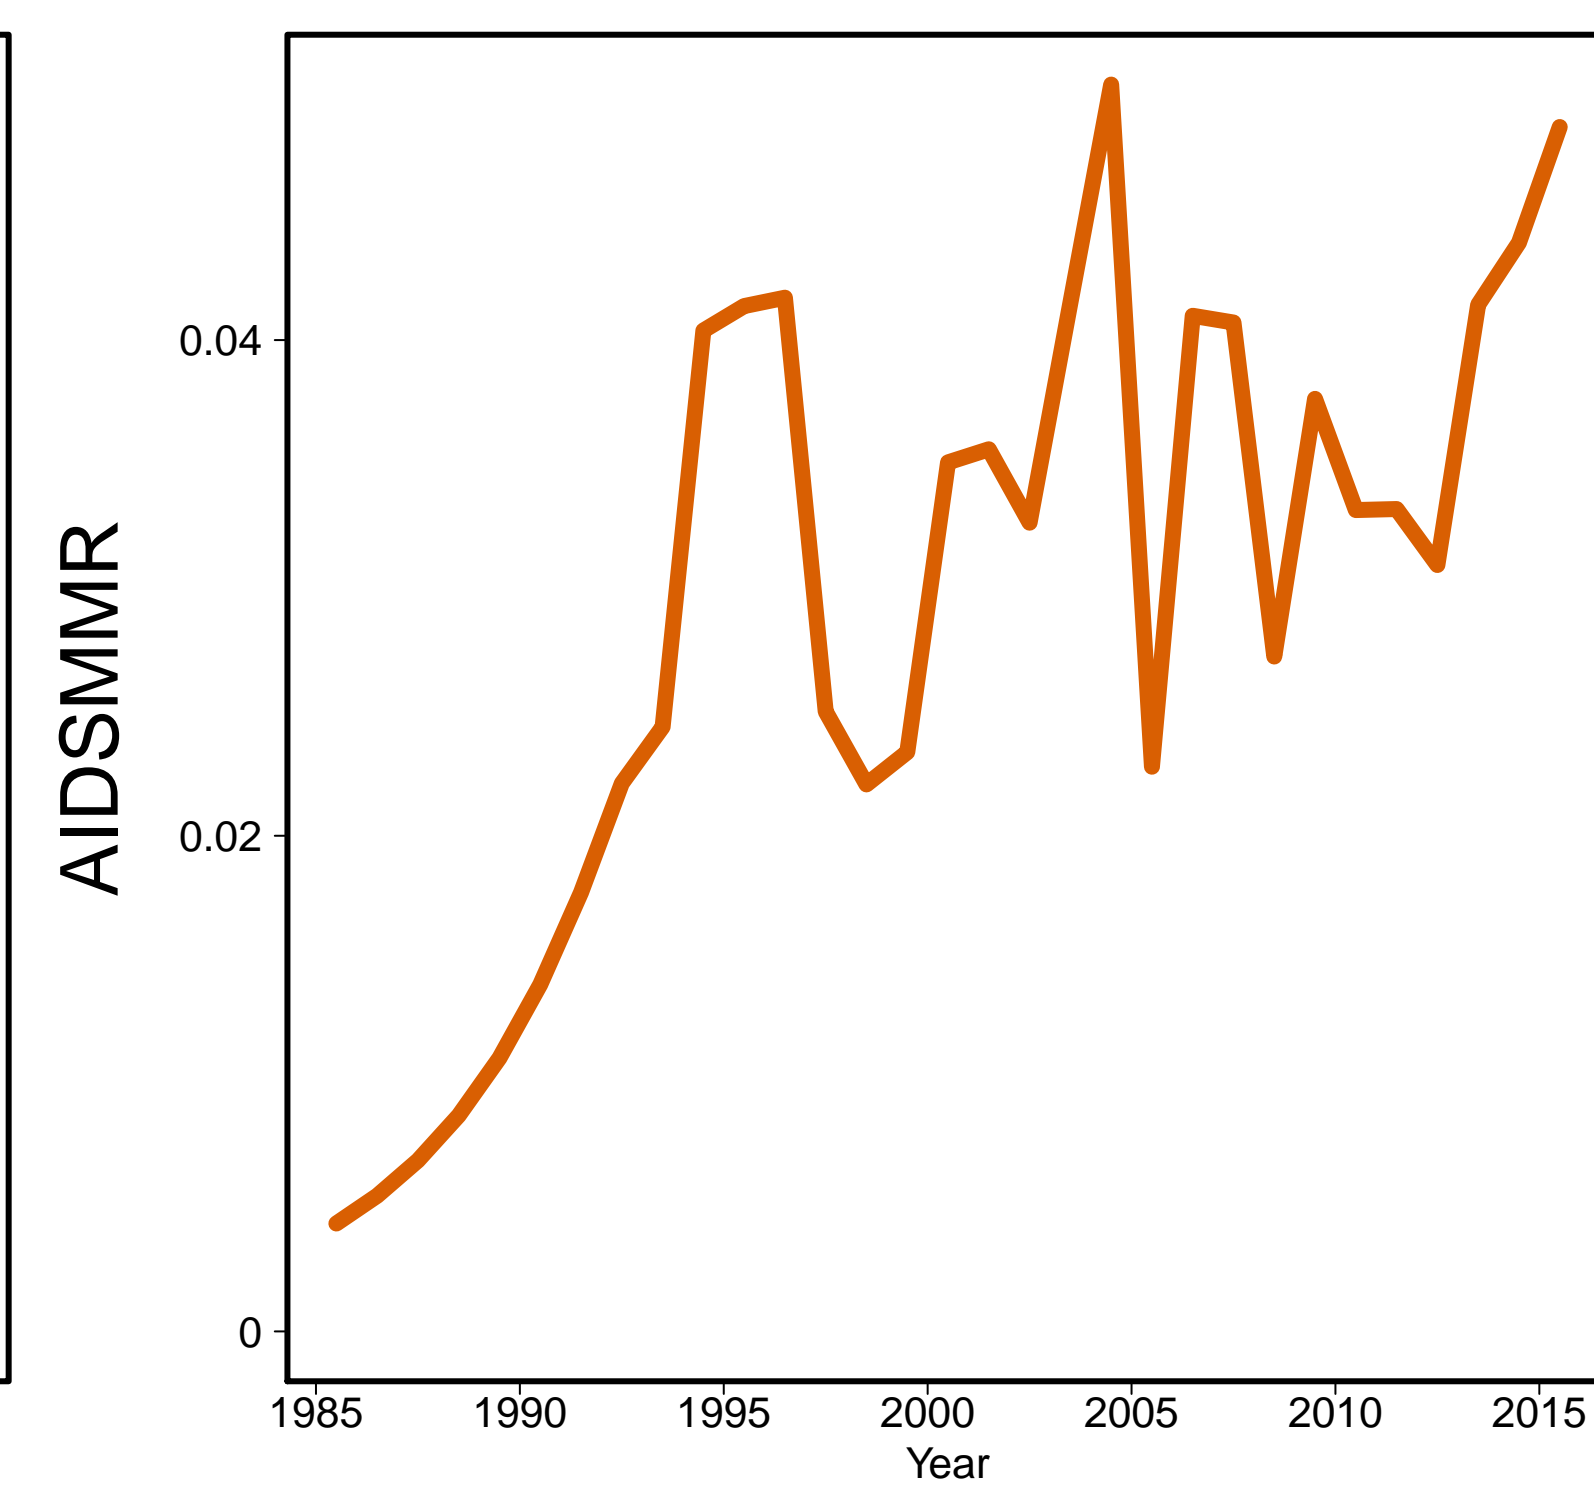



Azerbaijan [AZE]  
(Western Asia)

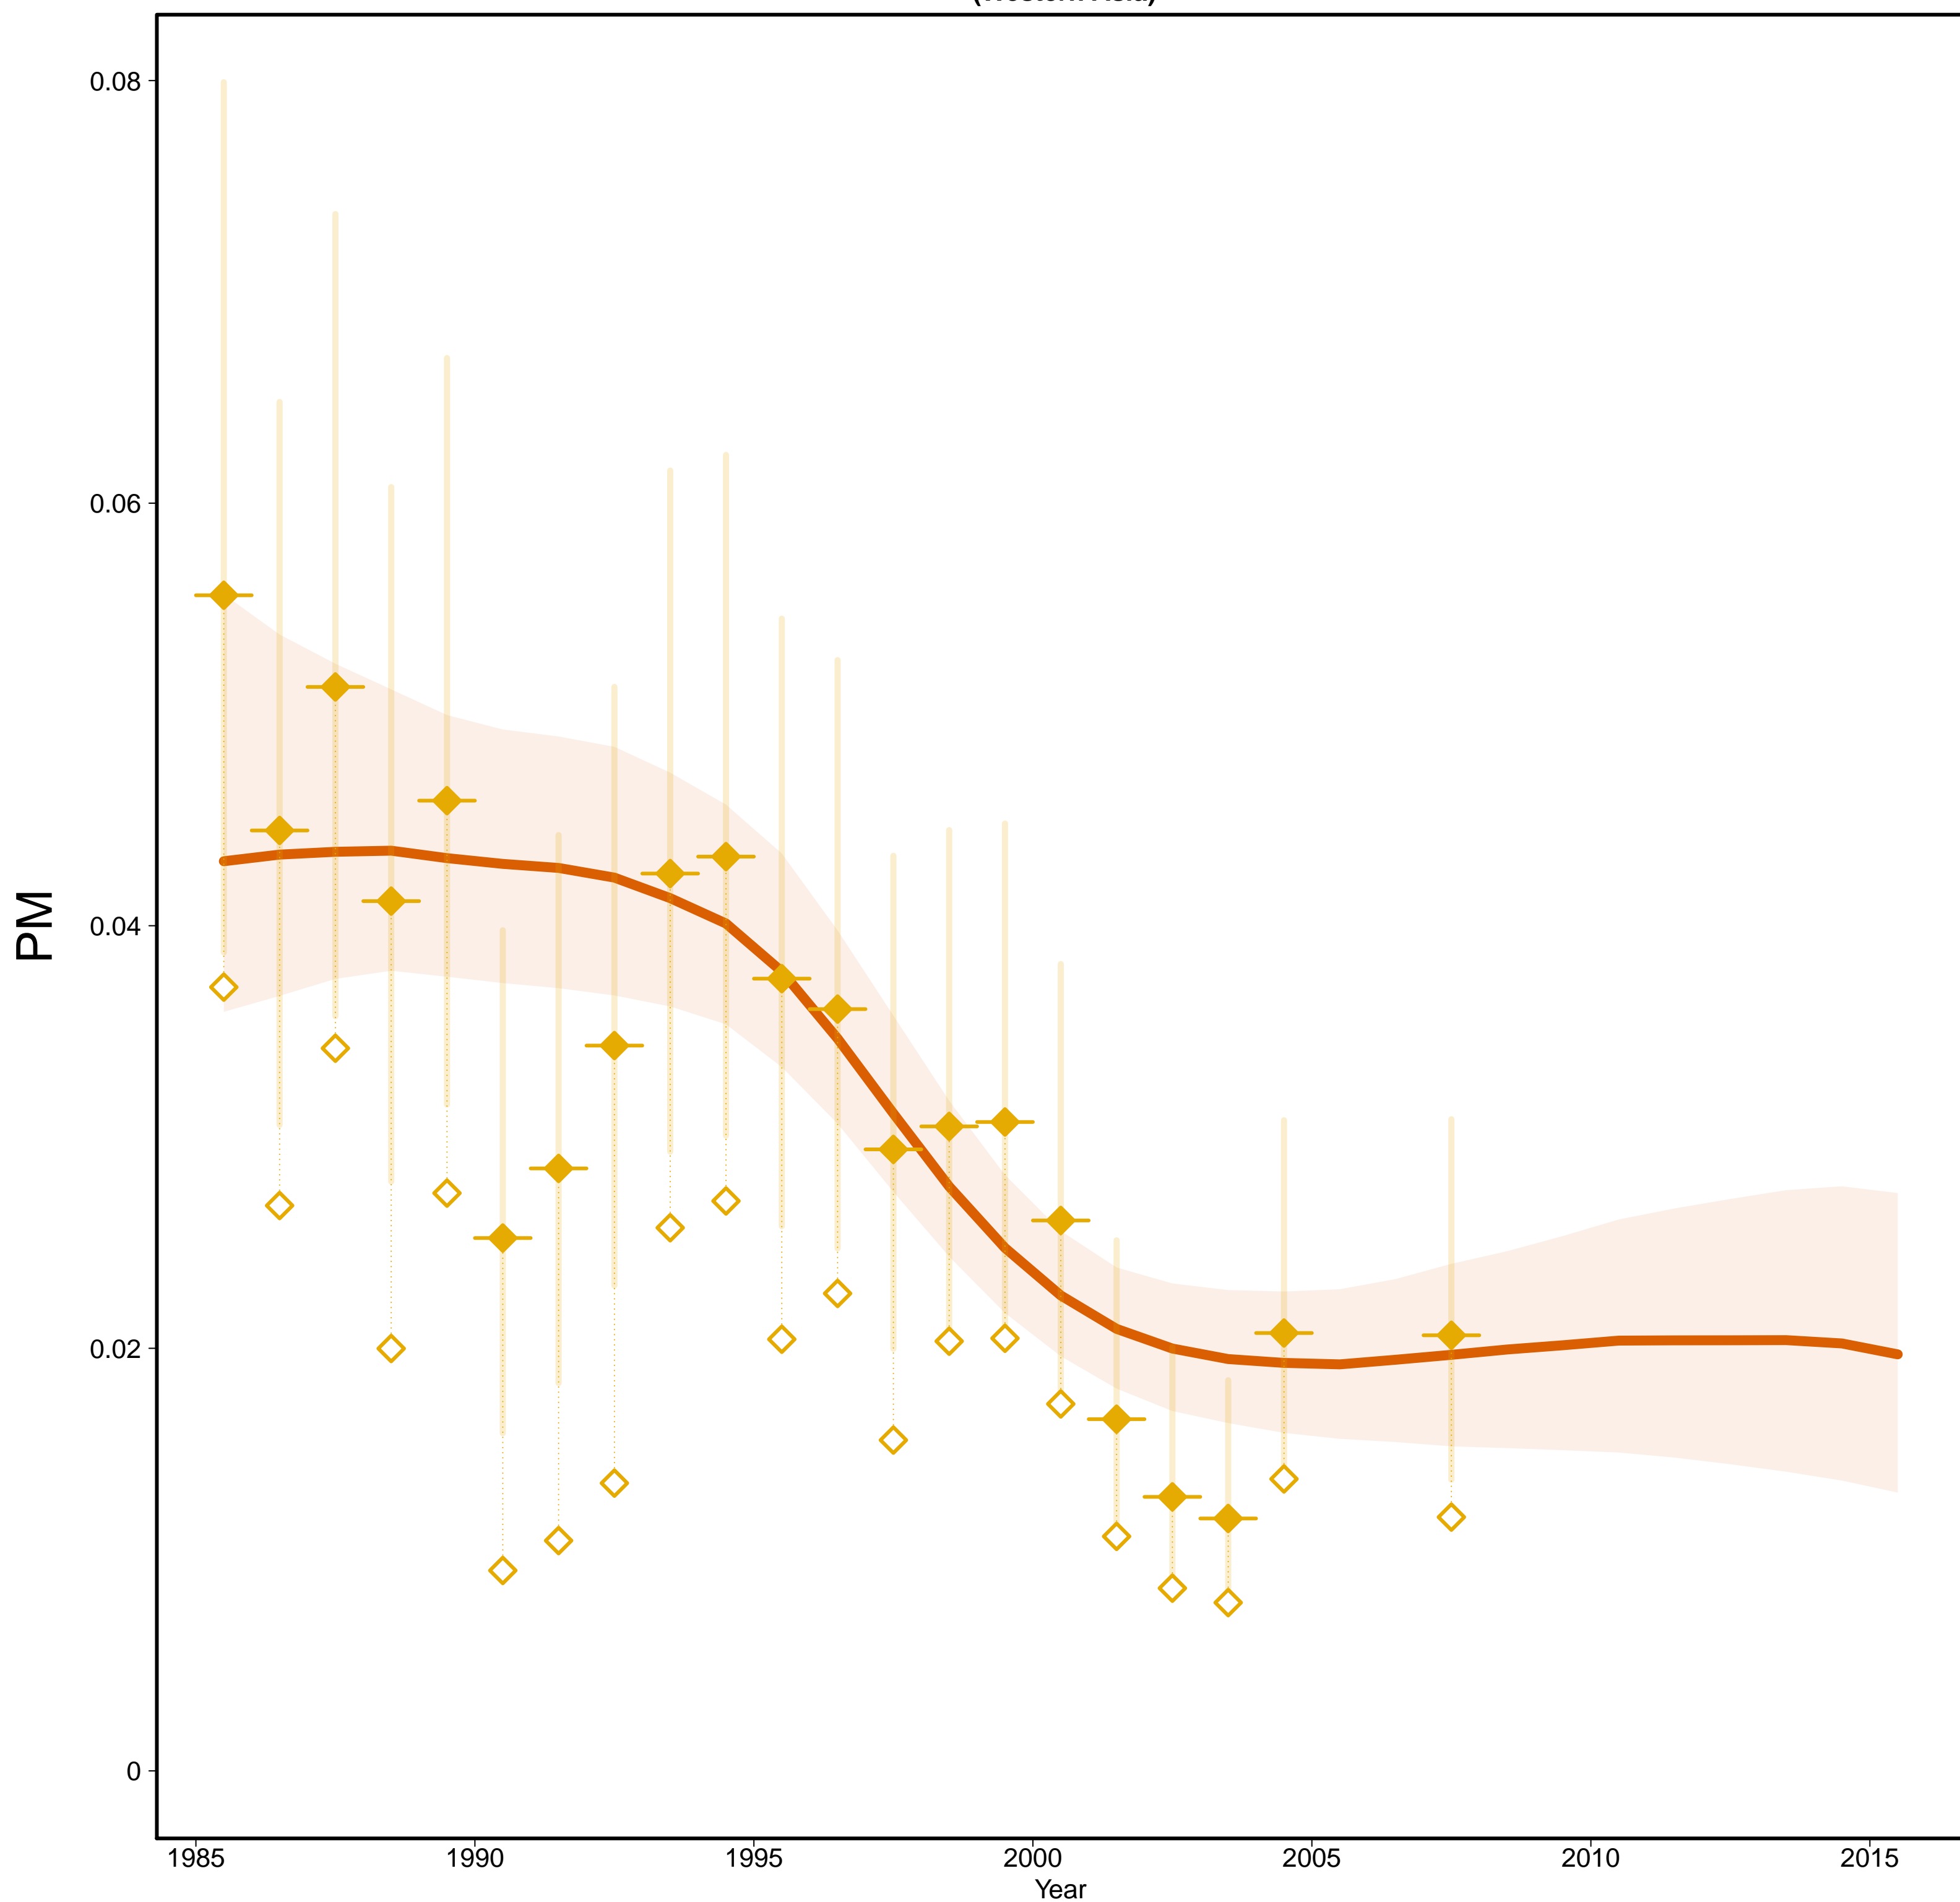

Azerbaijan [AZE]  
(Western Asia)

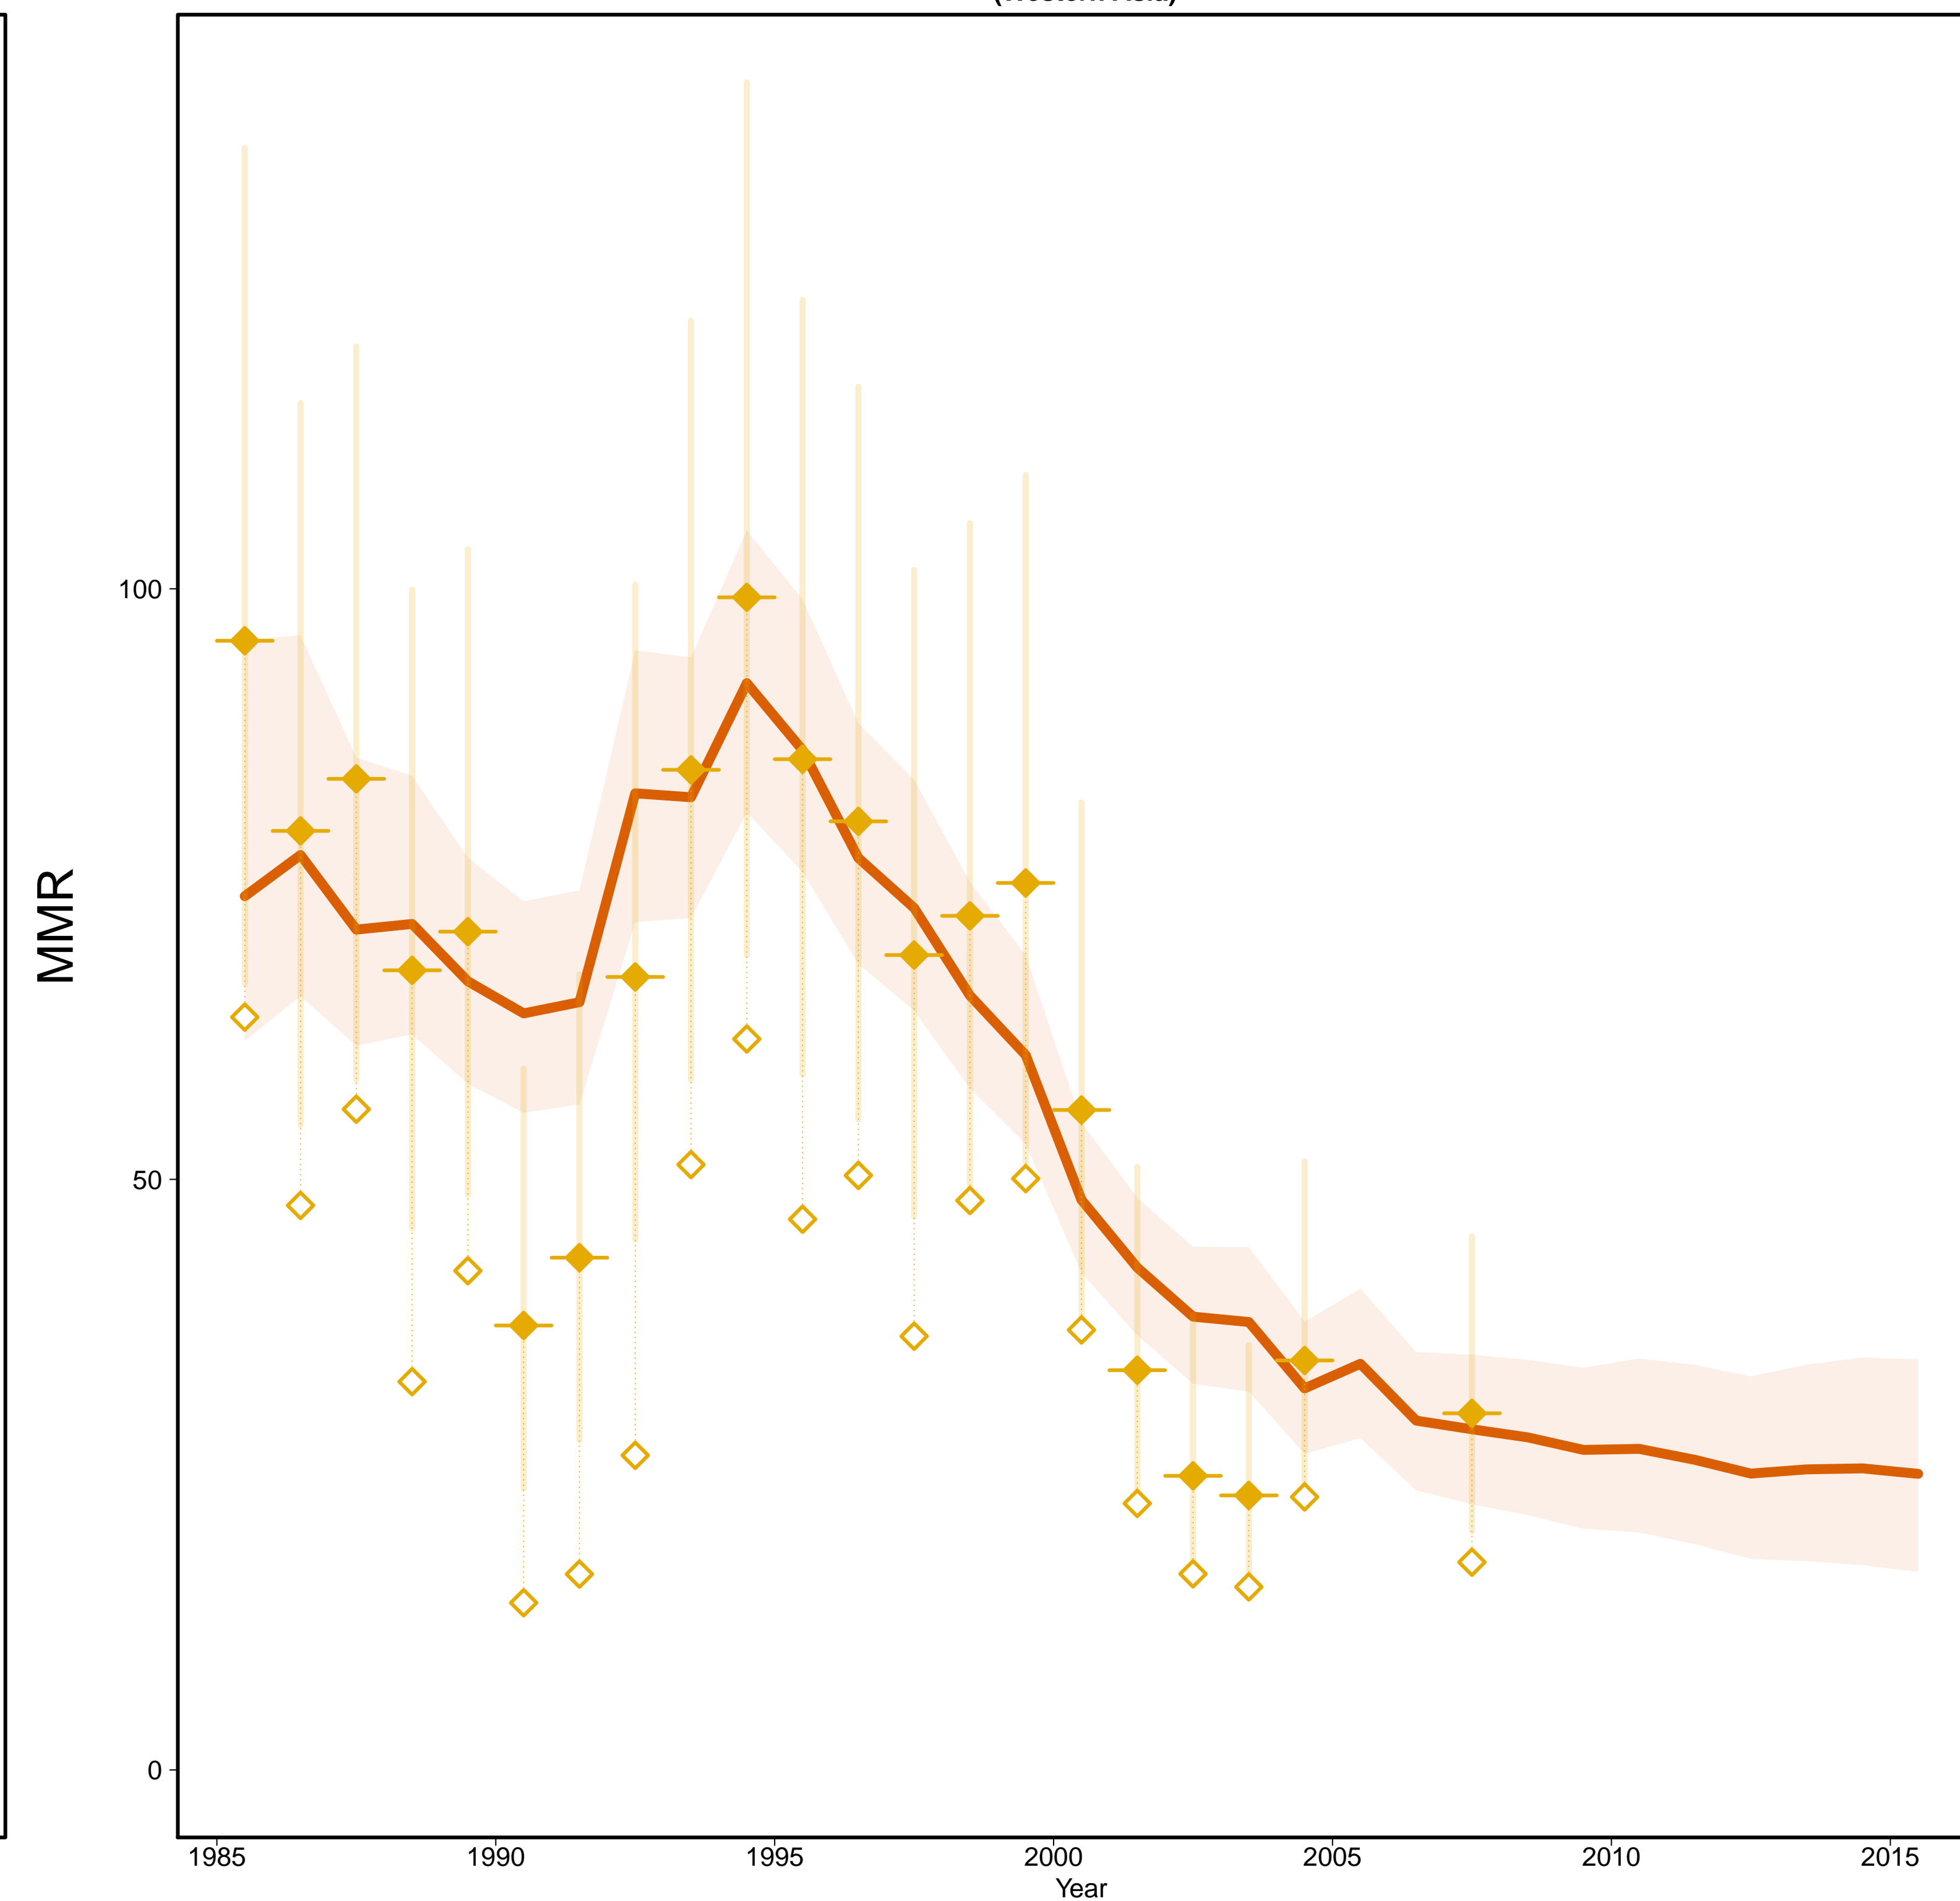

- Estimates —
- MMR Database 2015 —
- ◇ Observed Data
- ◆ Adjusted Data
- Data type —
- ◆ VR

Gross Domestic Product

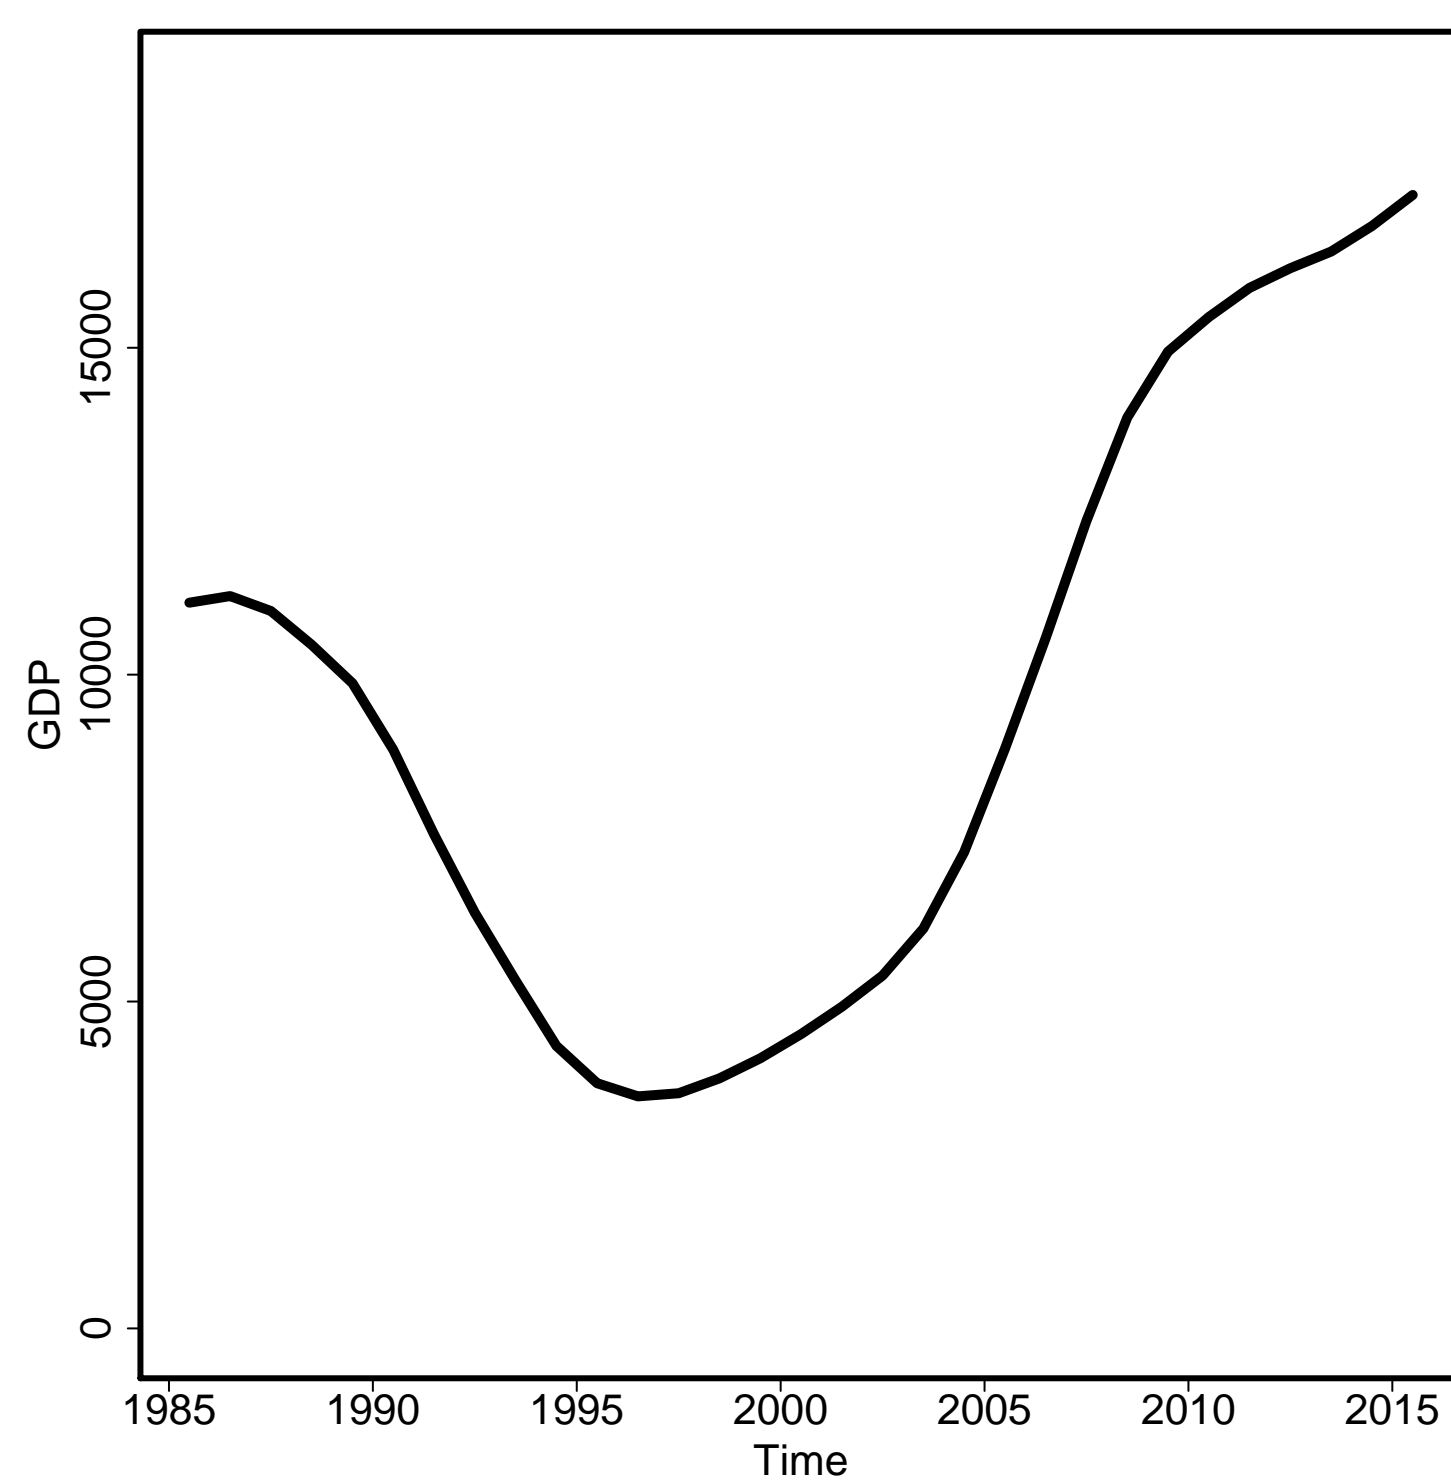

General Fertility Rate

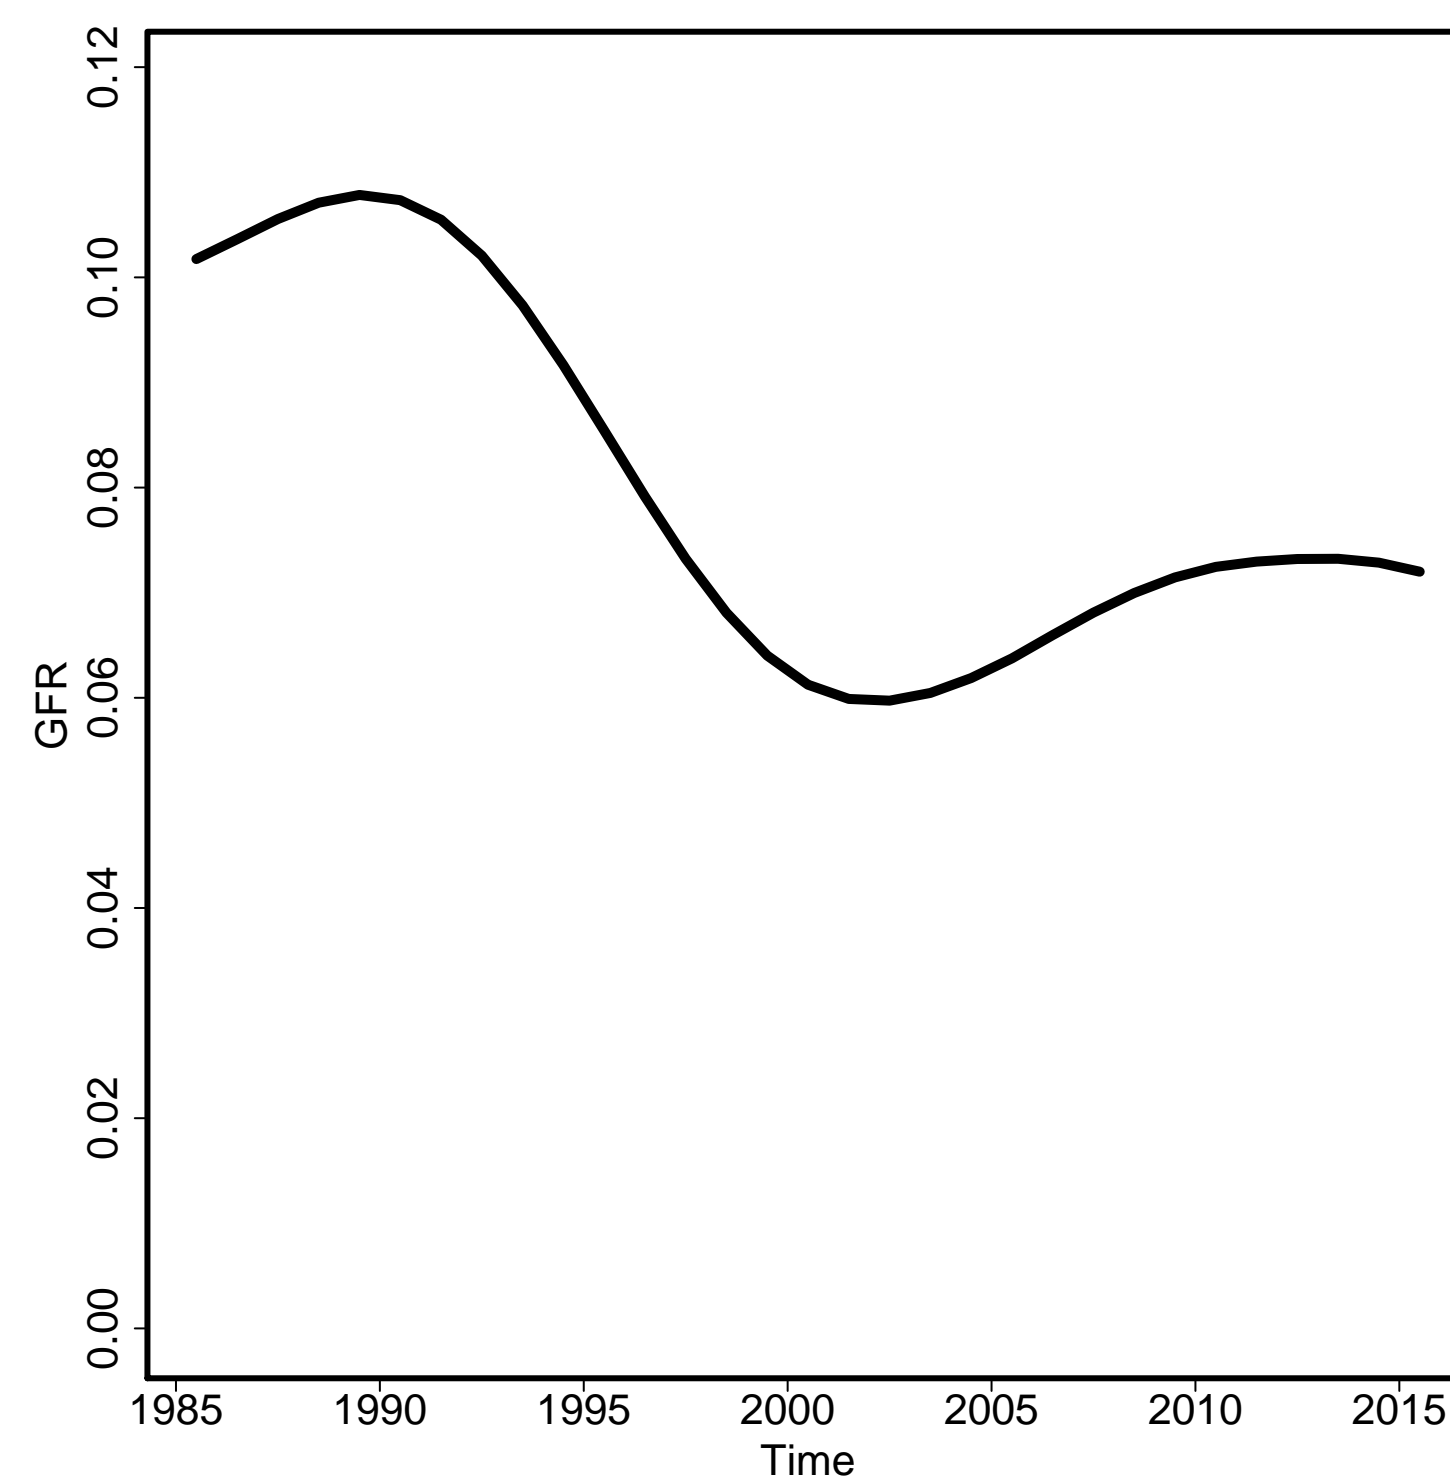

Skilled Attendance to Birth

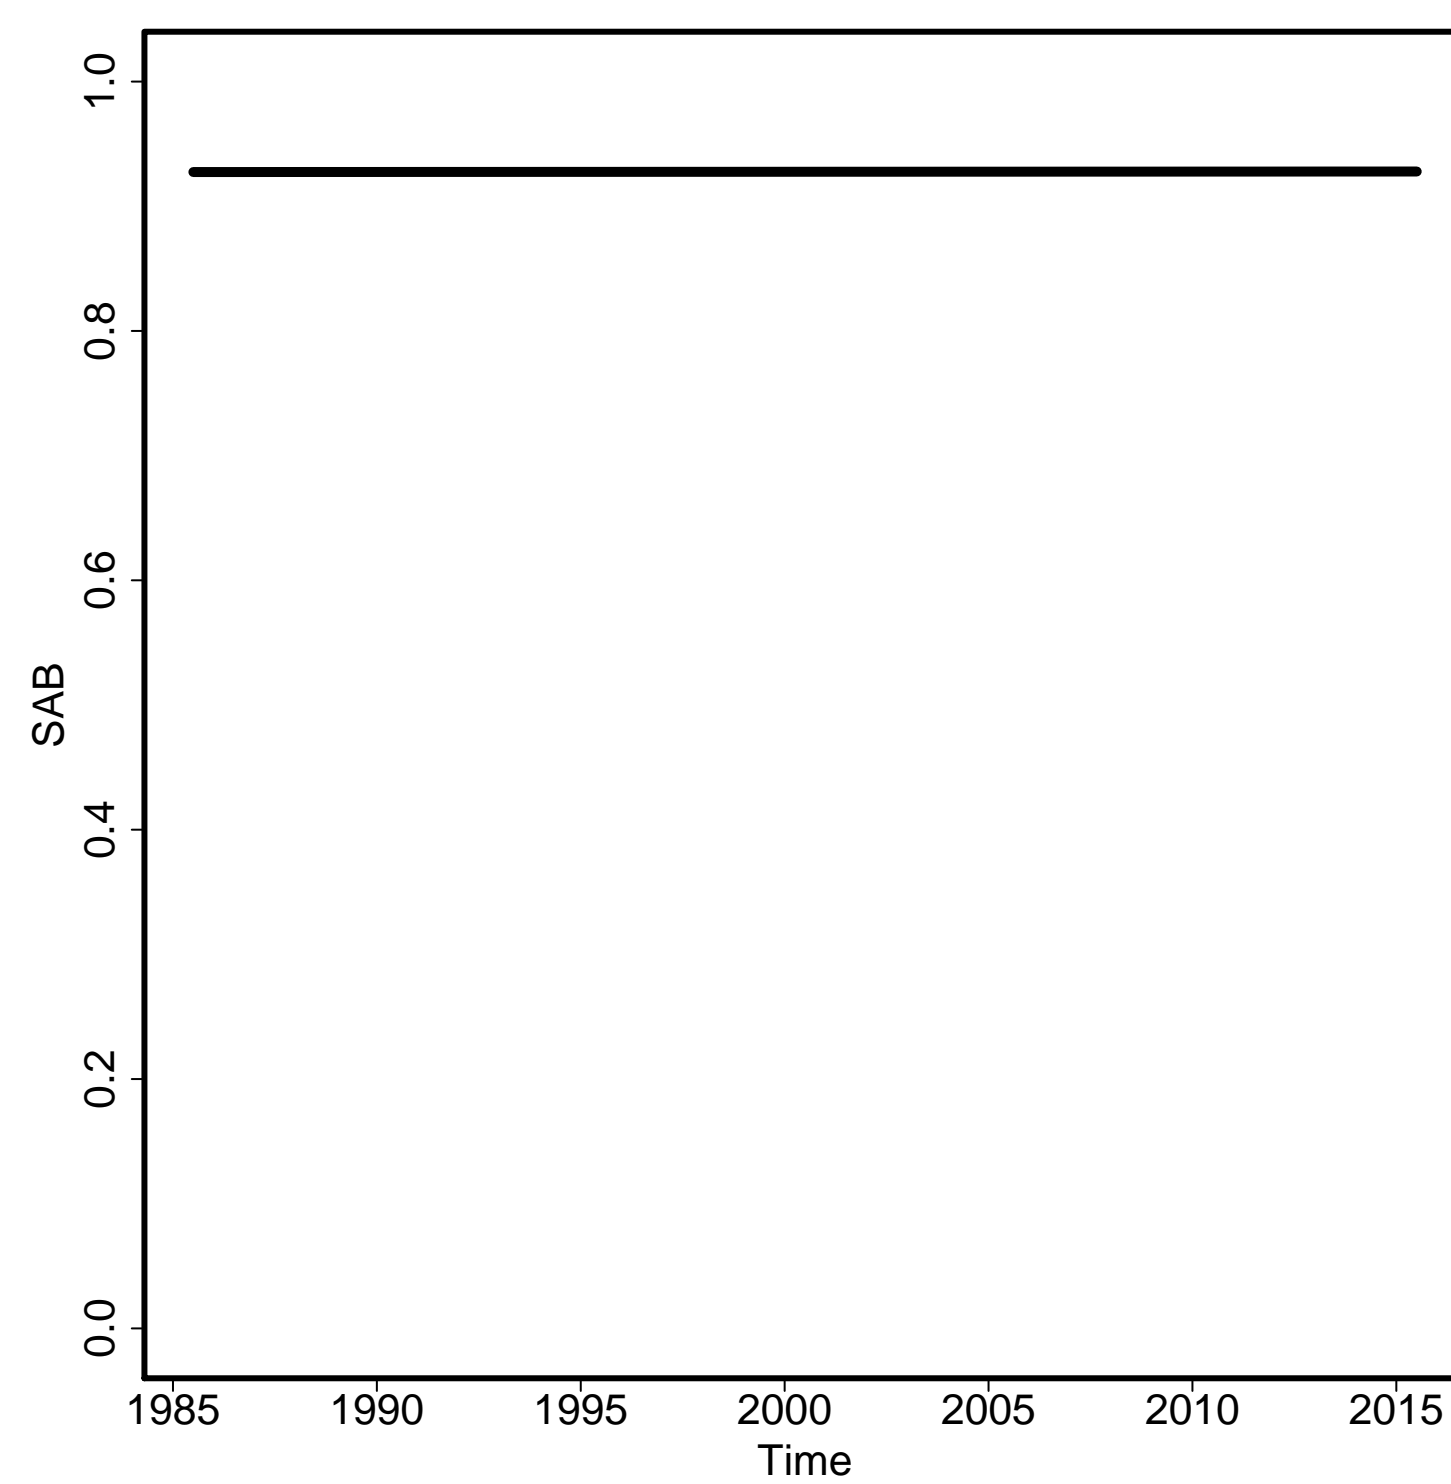

Envelope/Births

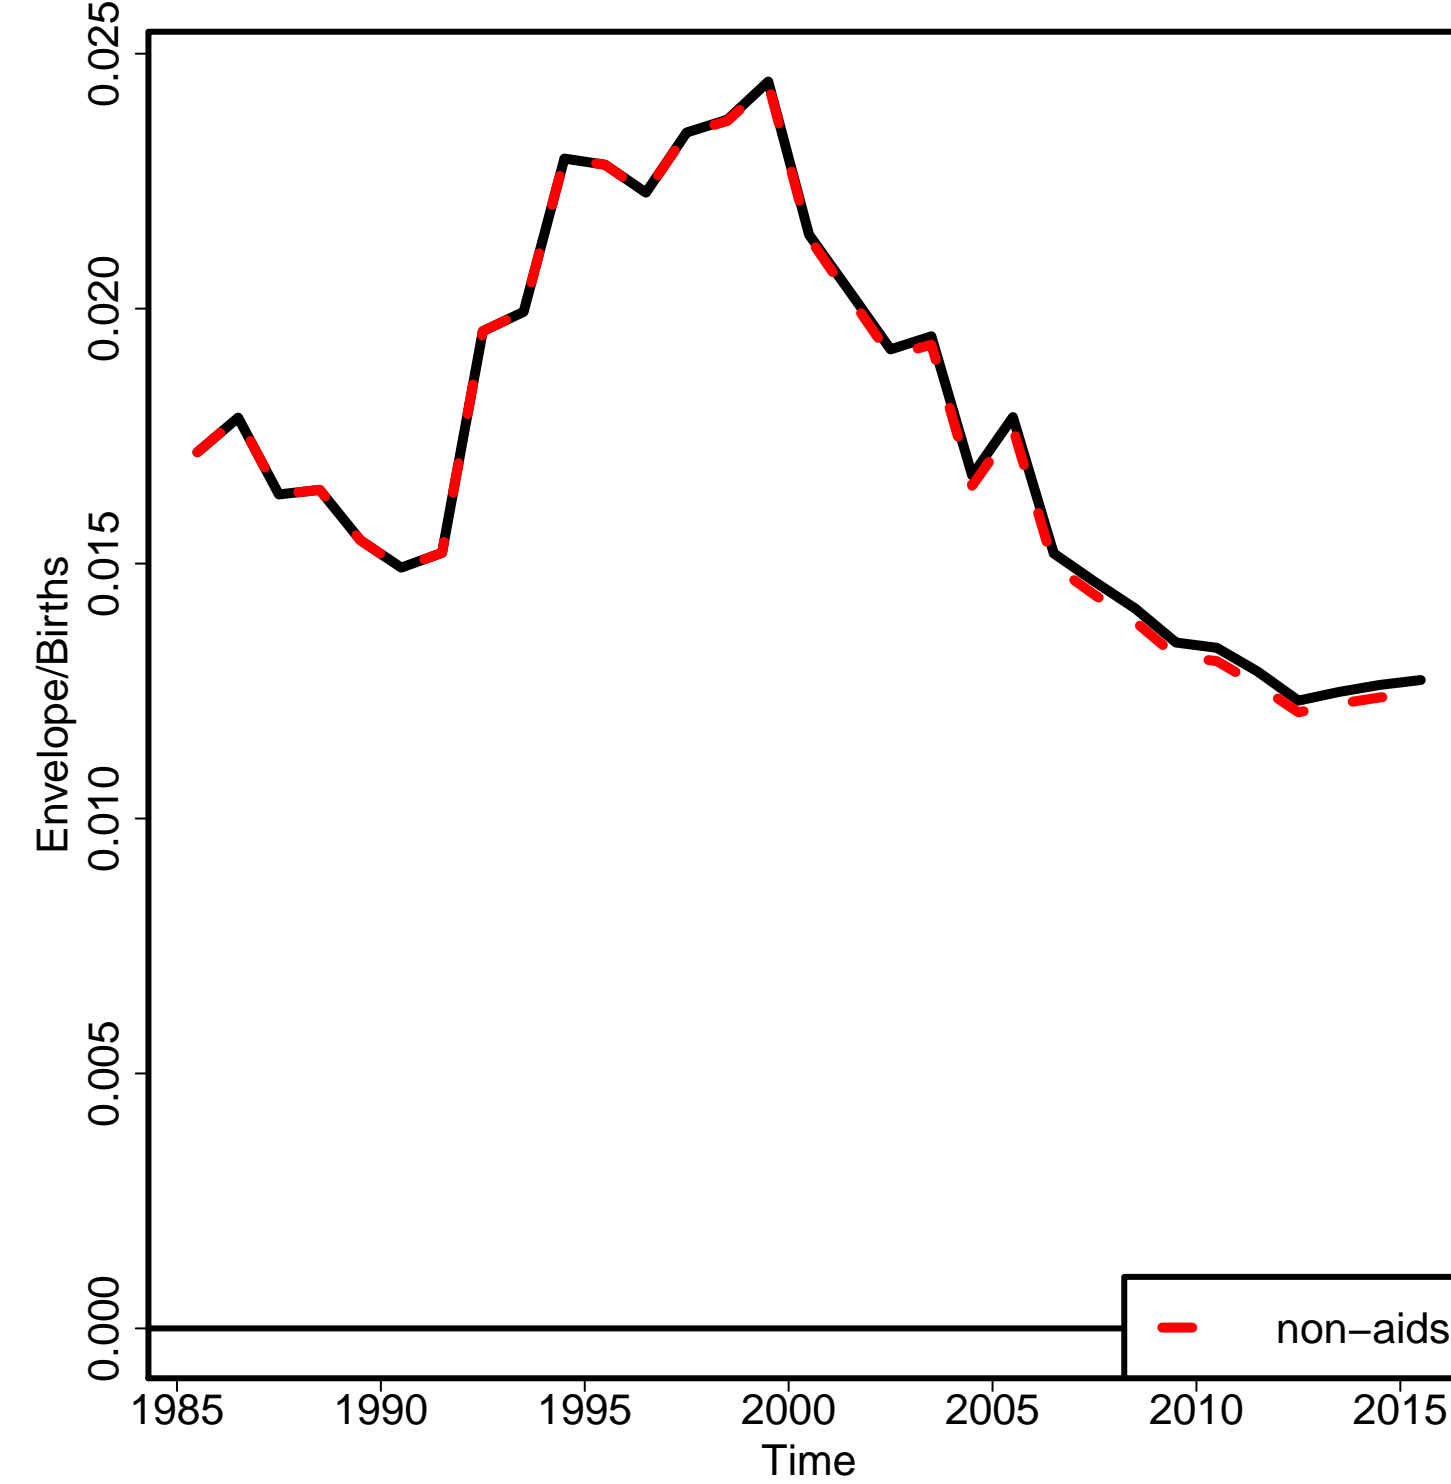

Non-aids MMR

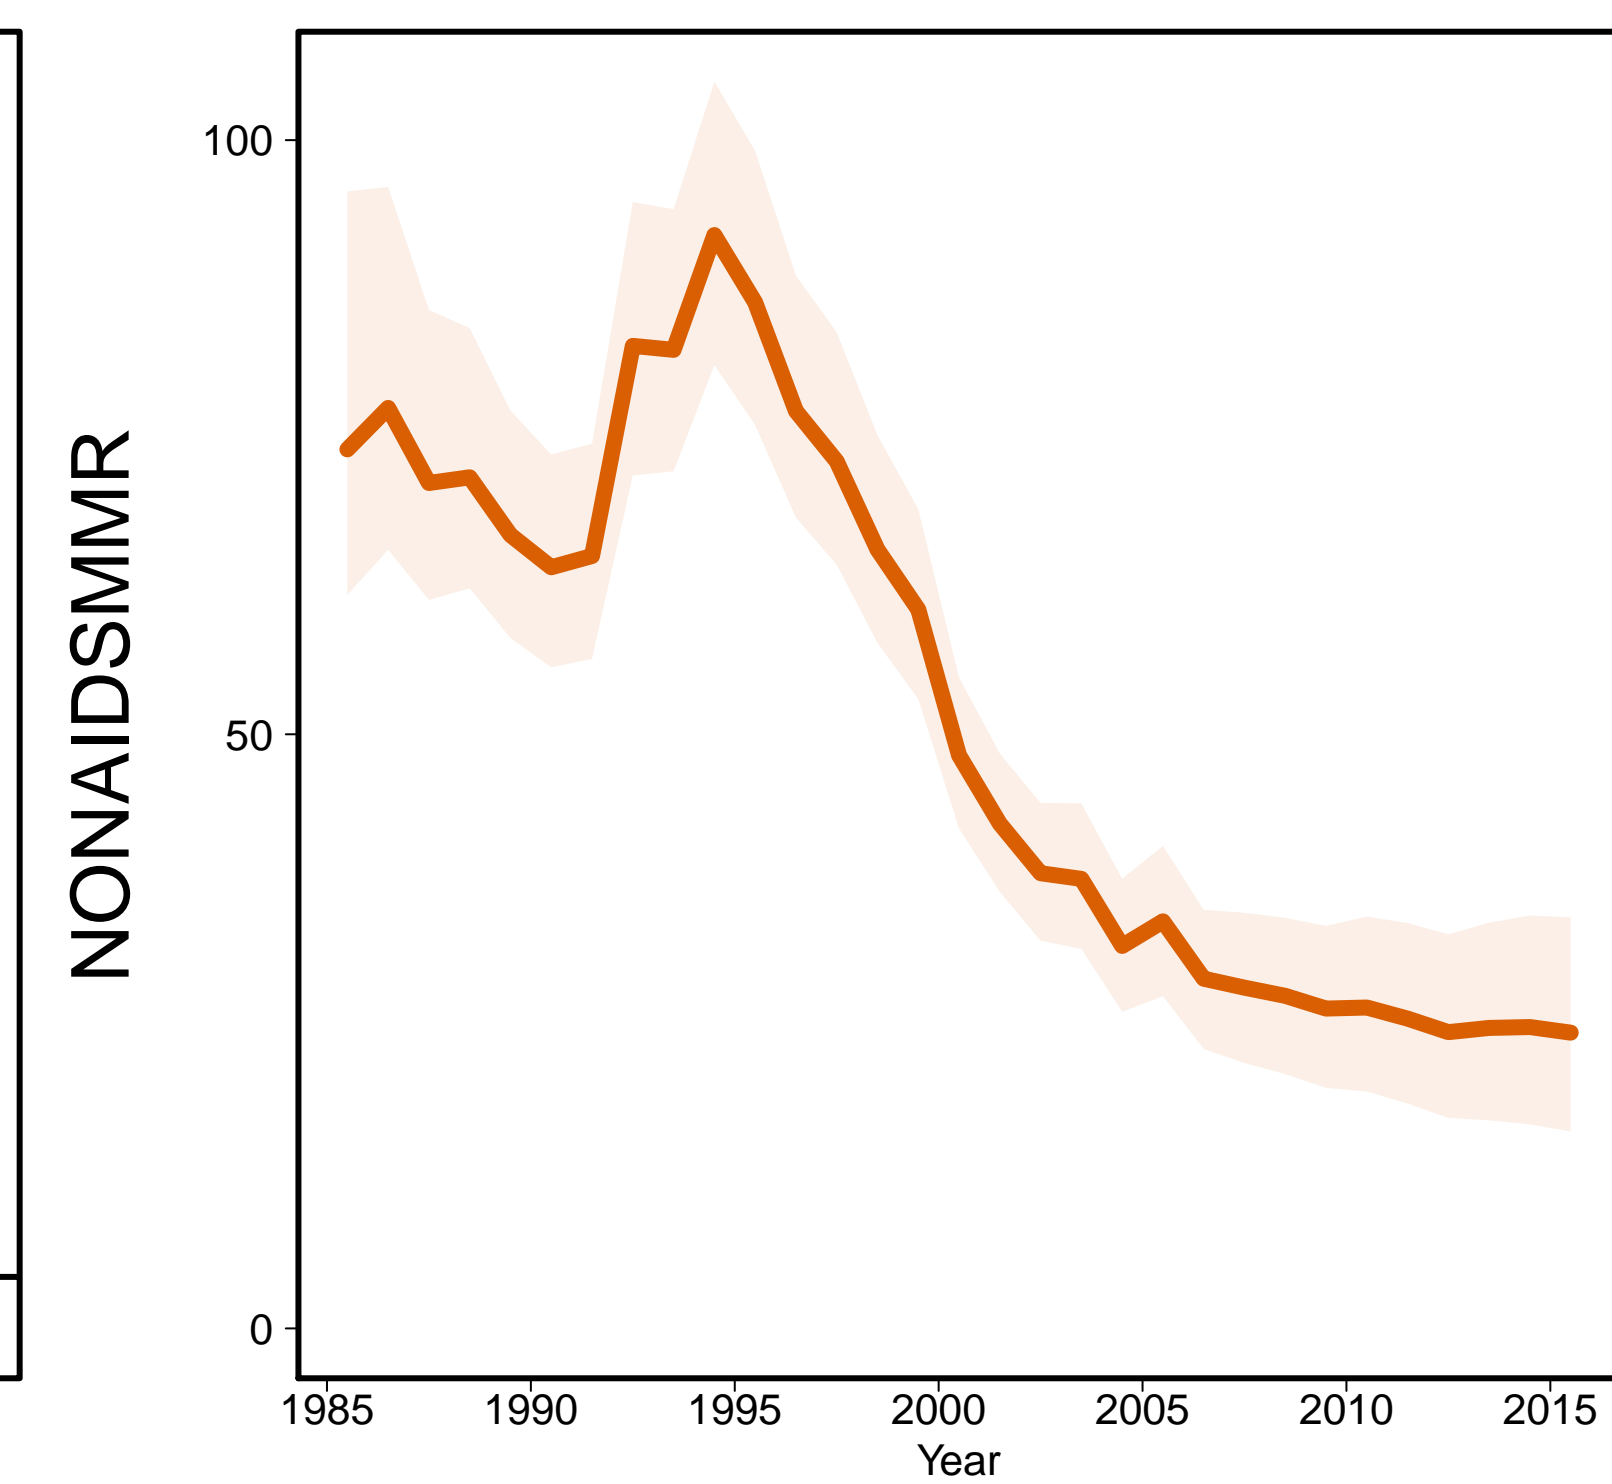

Aids MMR

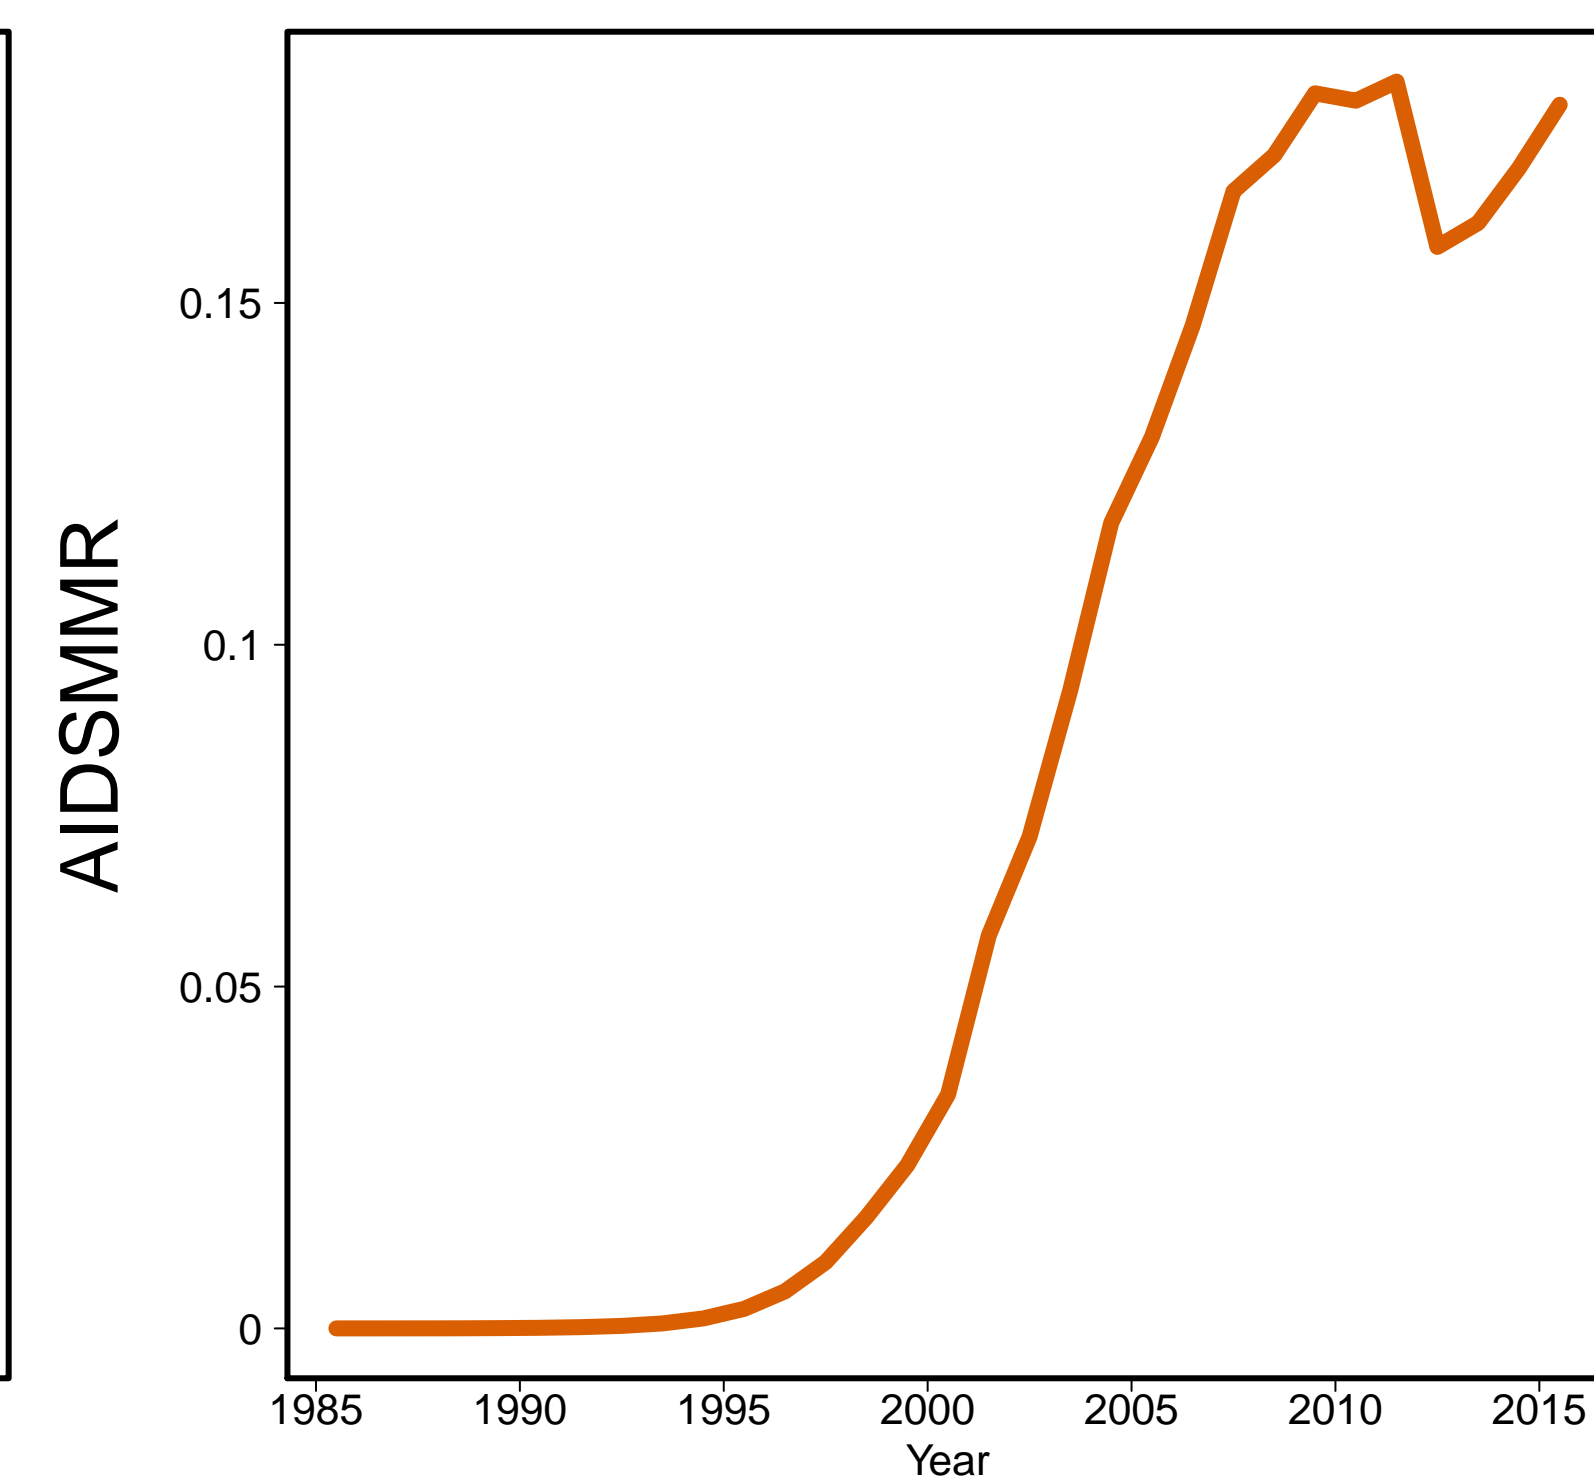

Bahamas [BHS]  
(Caribbean)

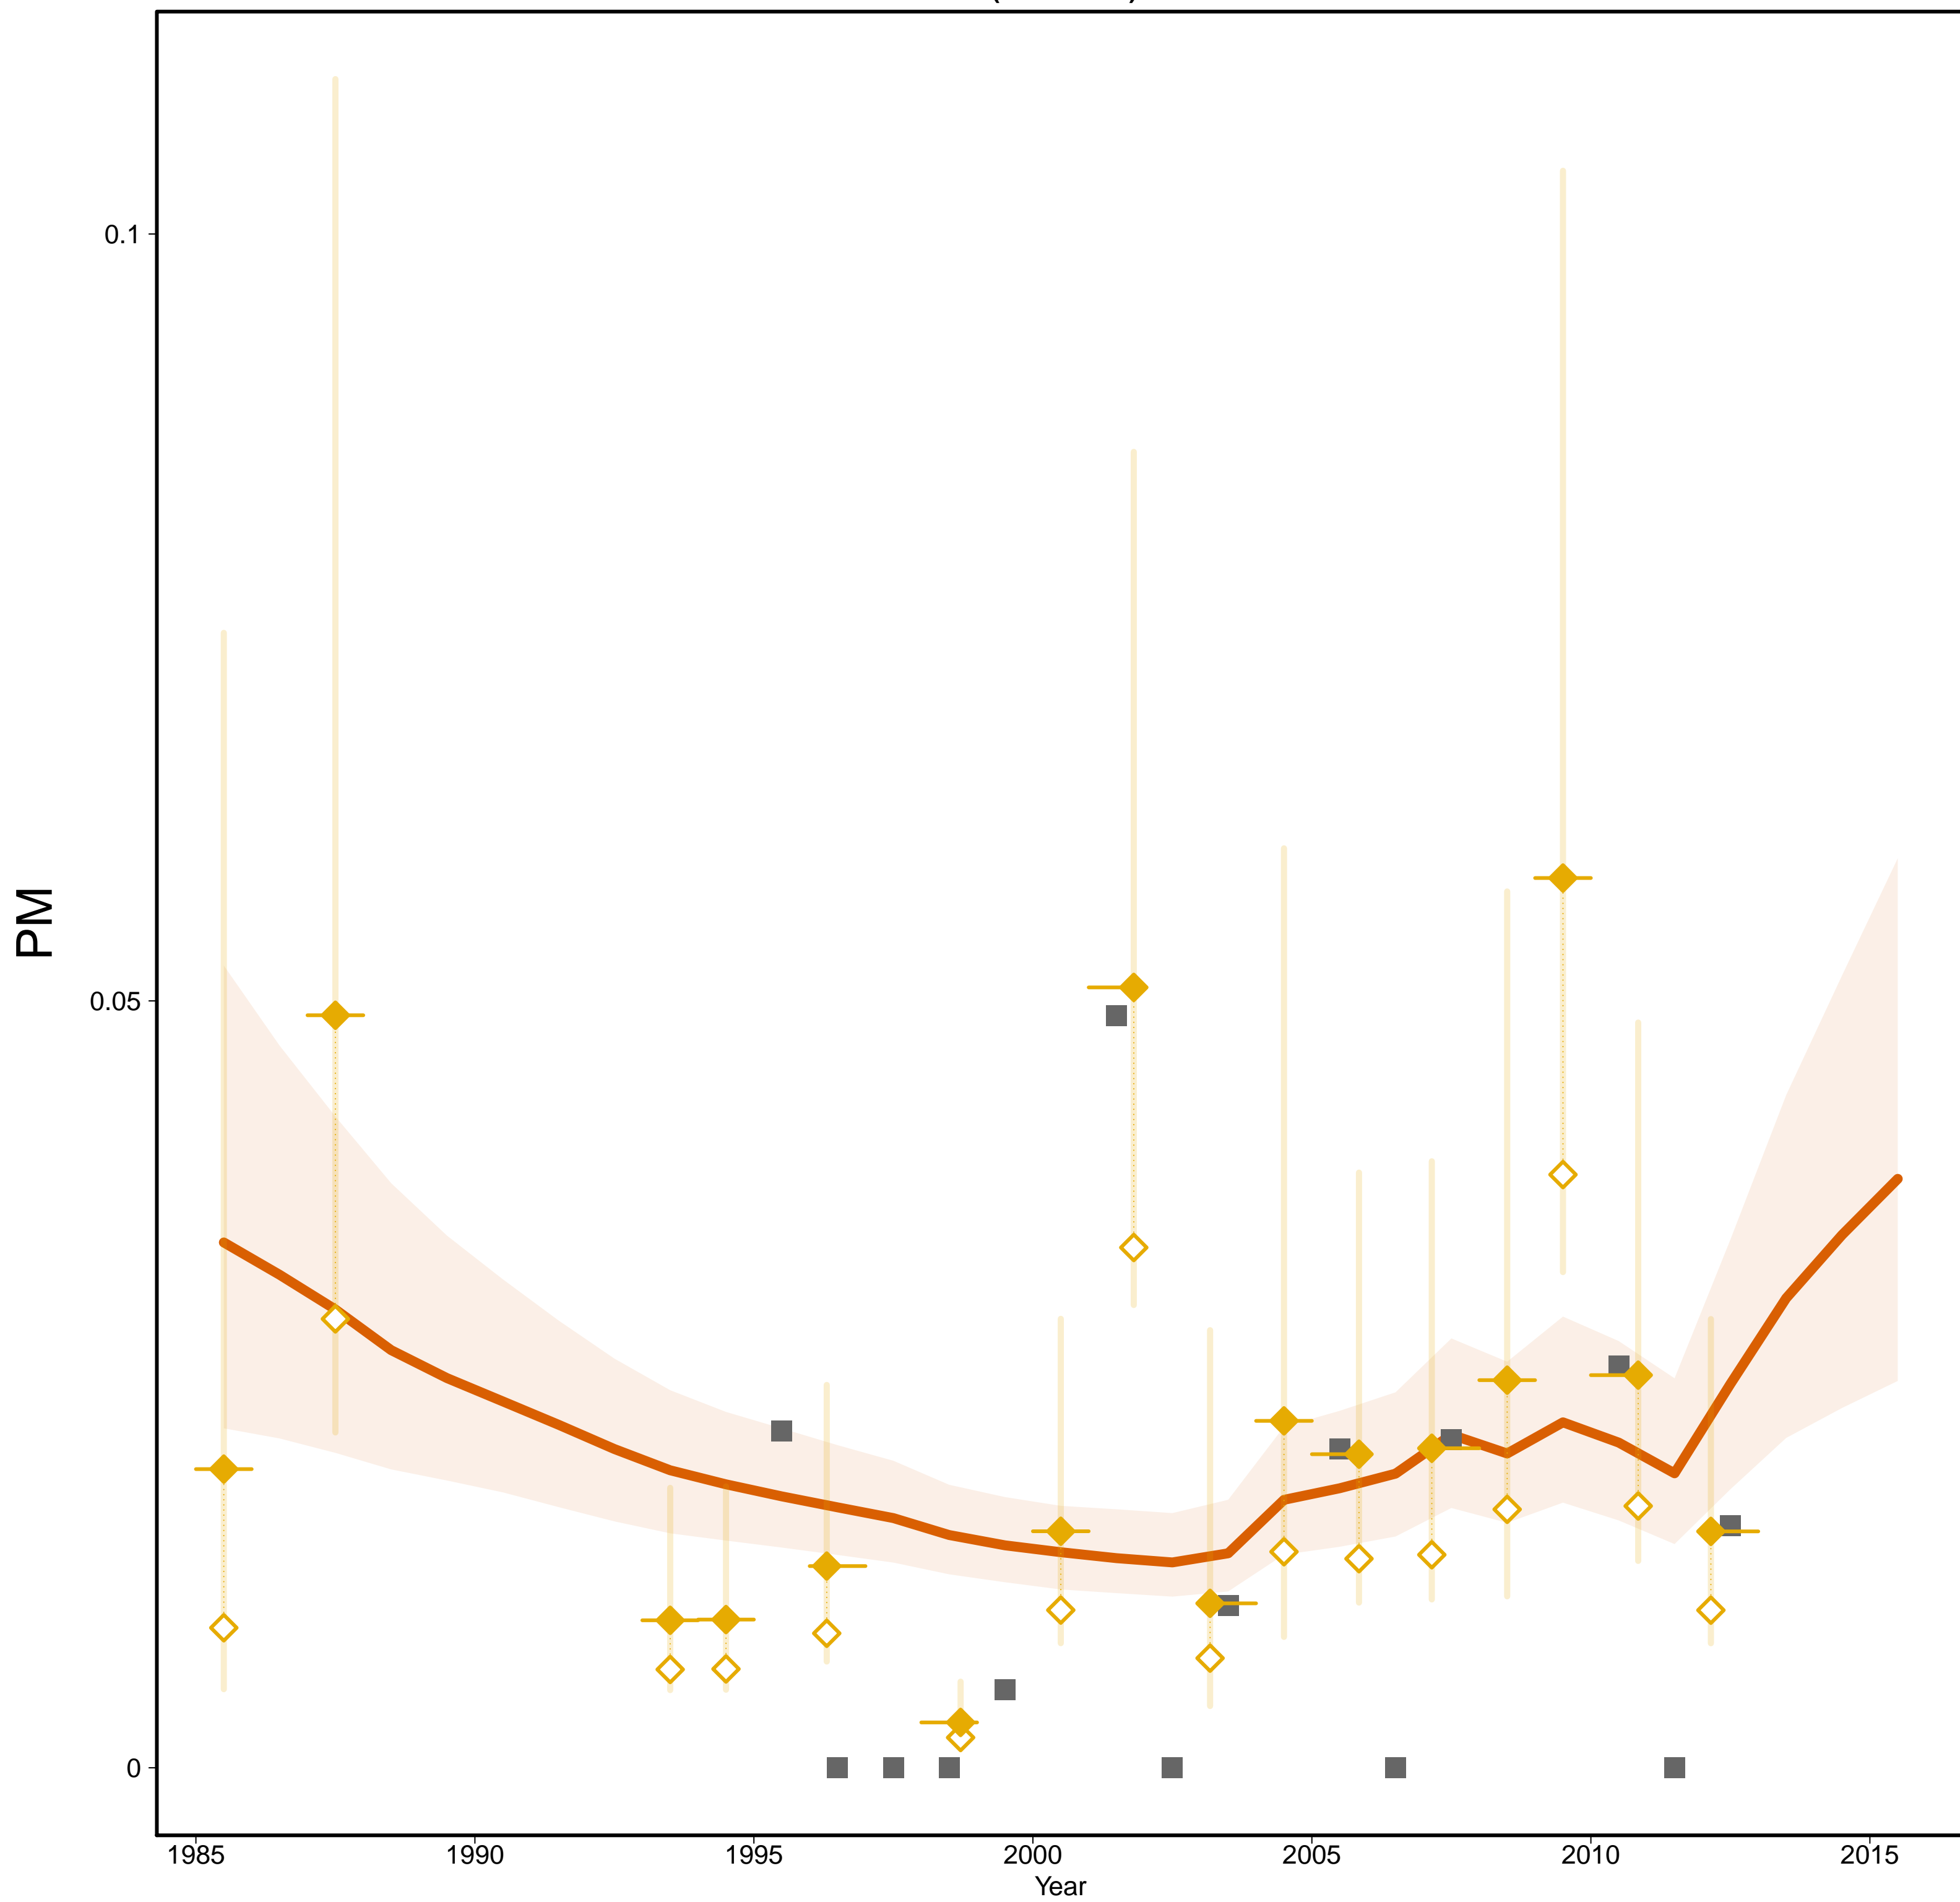

Bahamas [BHS]  
(Caribbean)

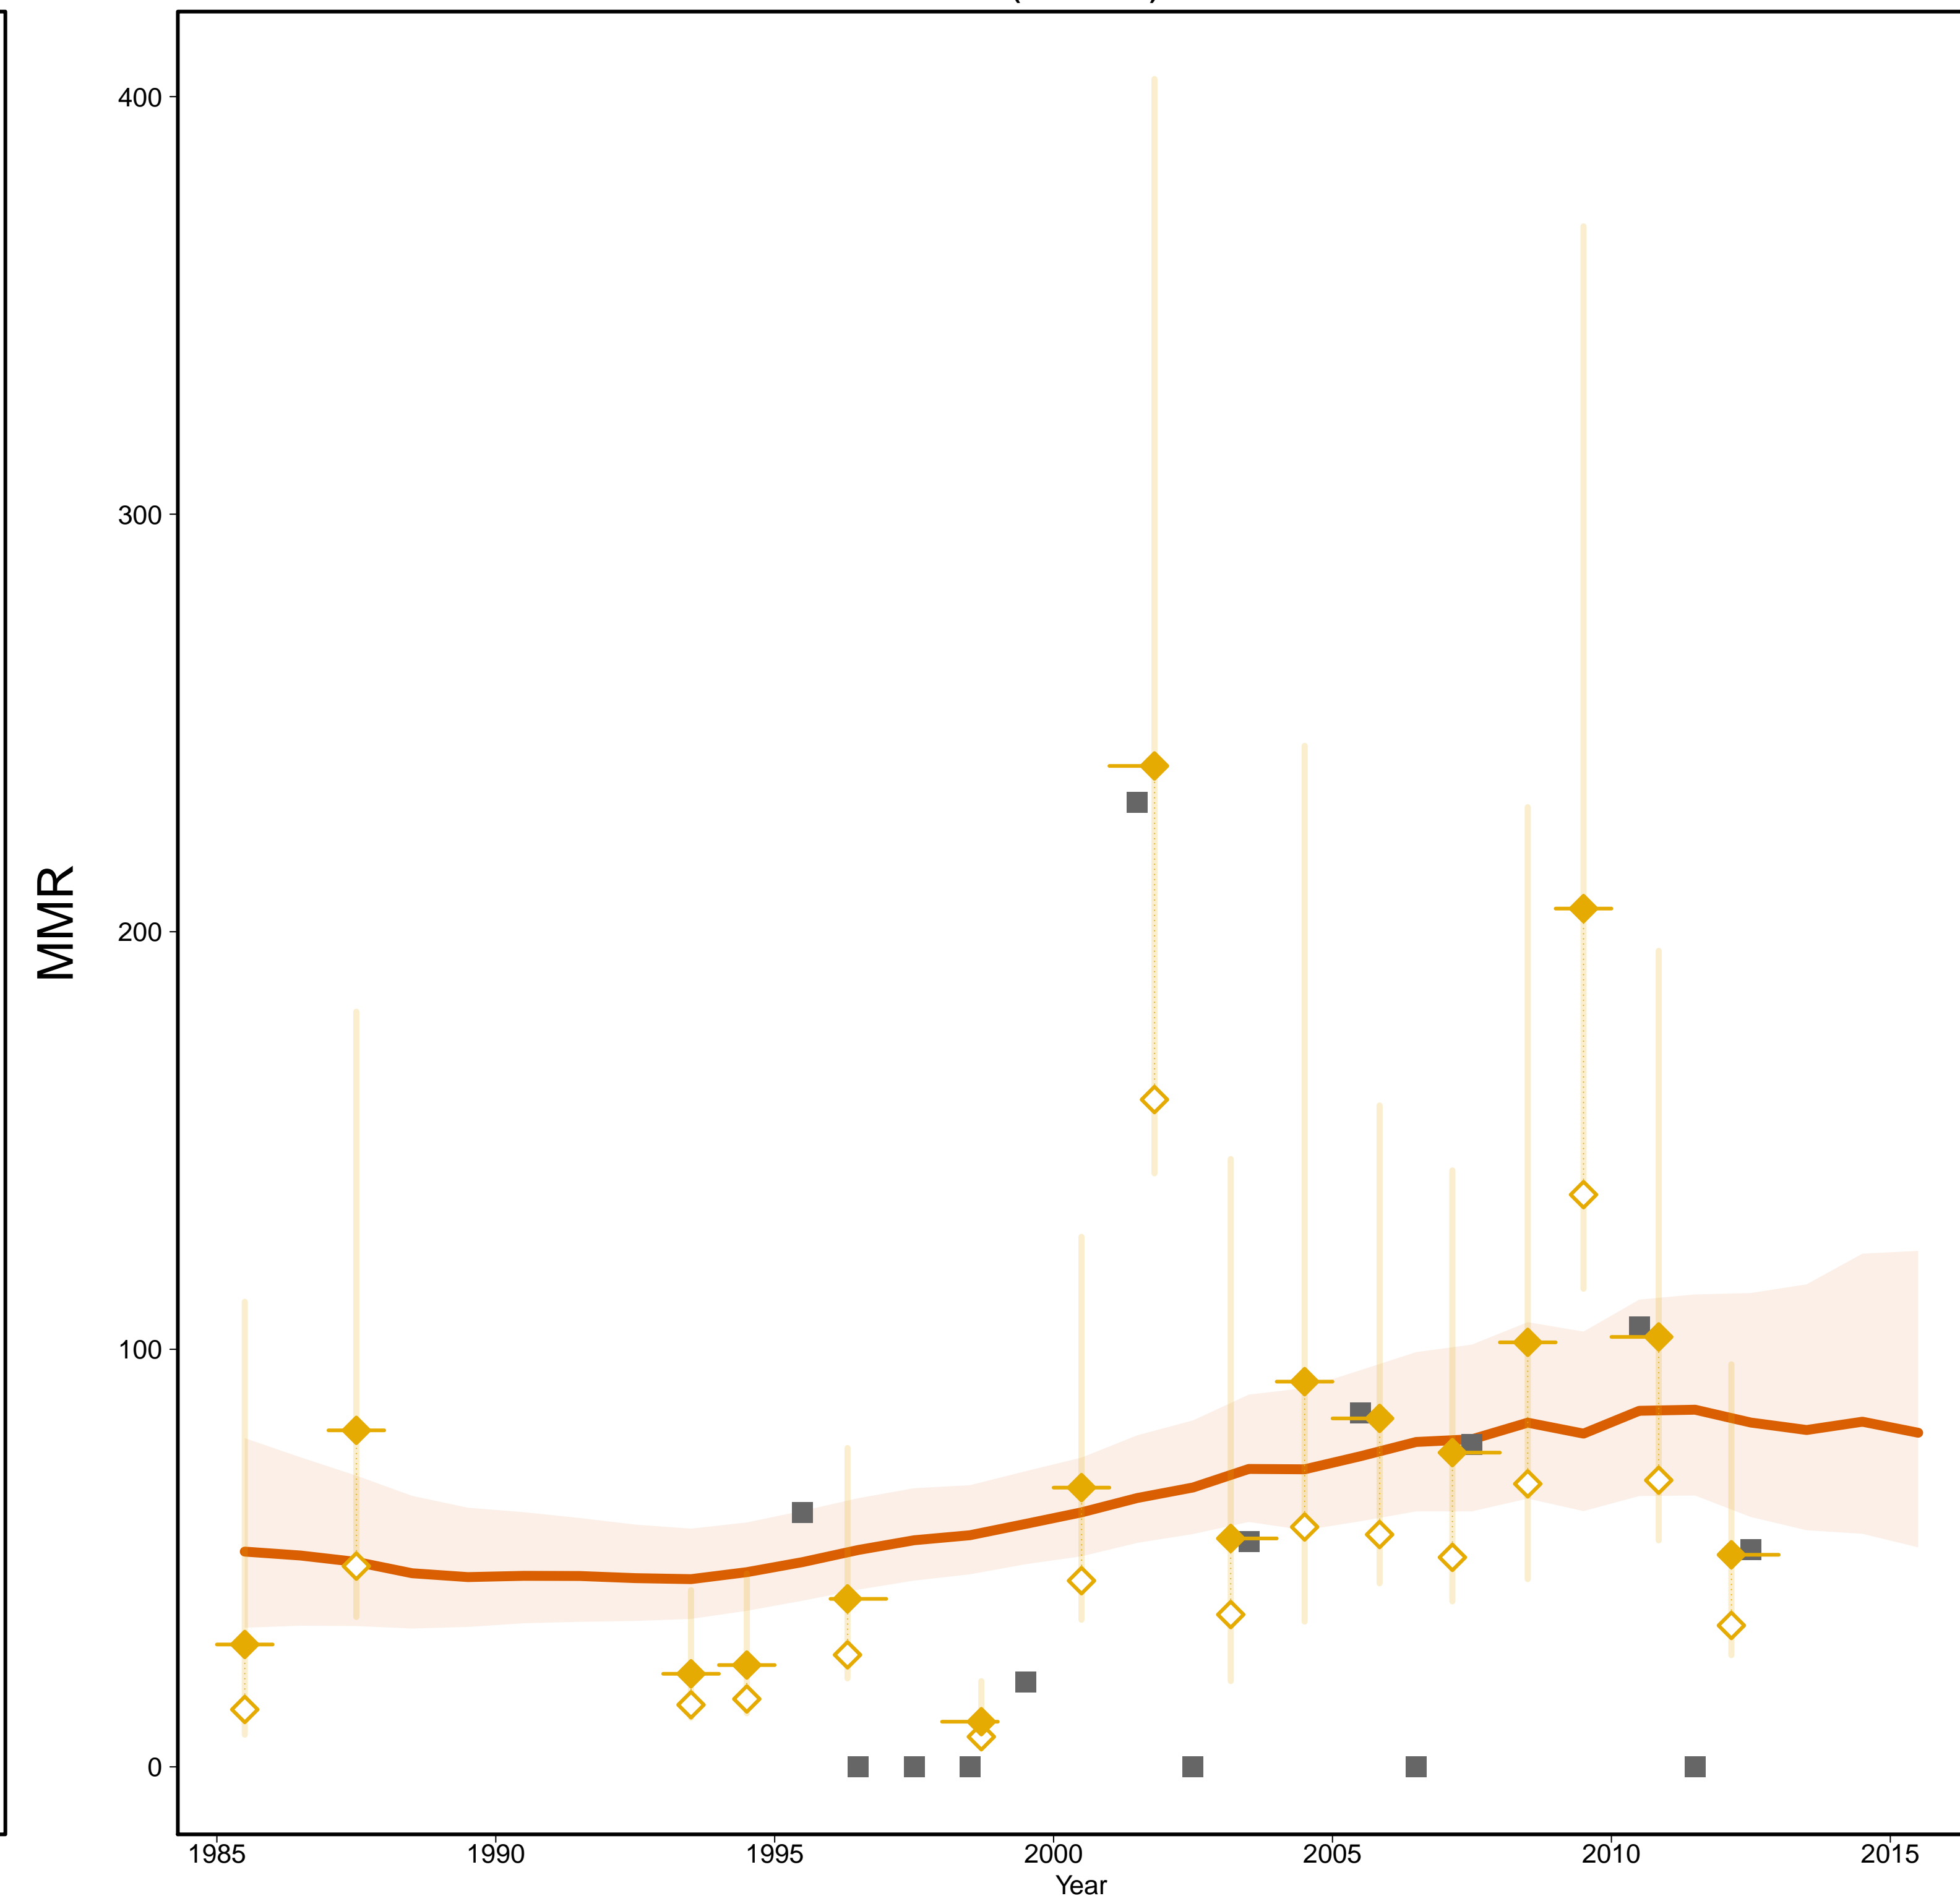

- Estimates –
- Mlate
- MMR Database 2015 –
- ◇ Observed Data
- ◆ Adjusted Data
- Data type –
- ◆ VR
- Reported VR before recalc. (related to 0 obs. mat. death)

Gross Domestic Product

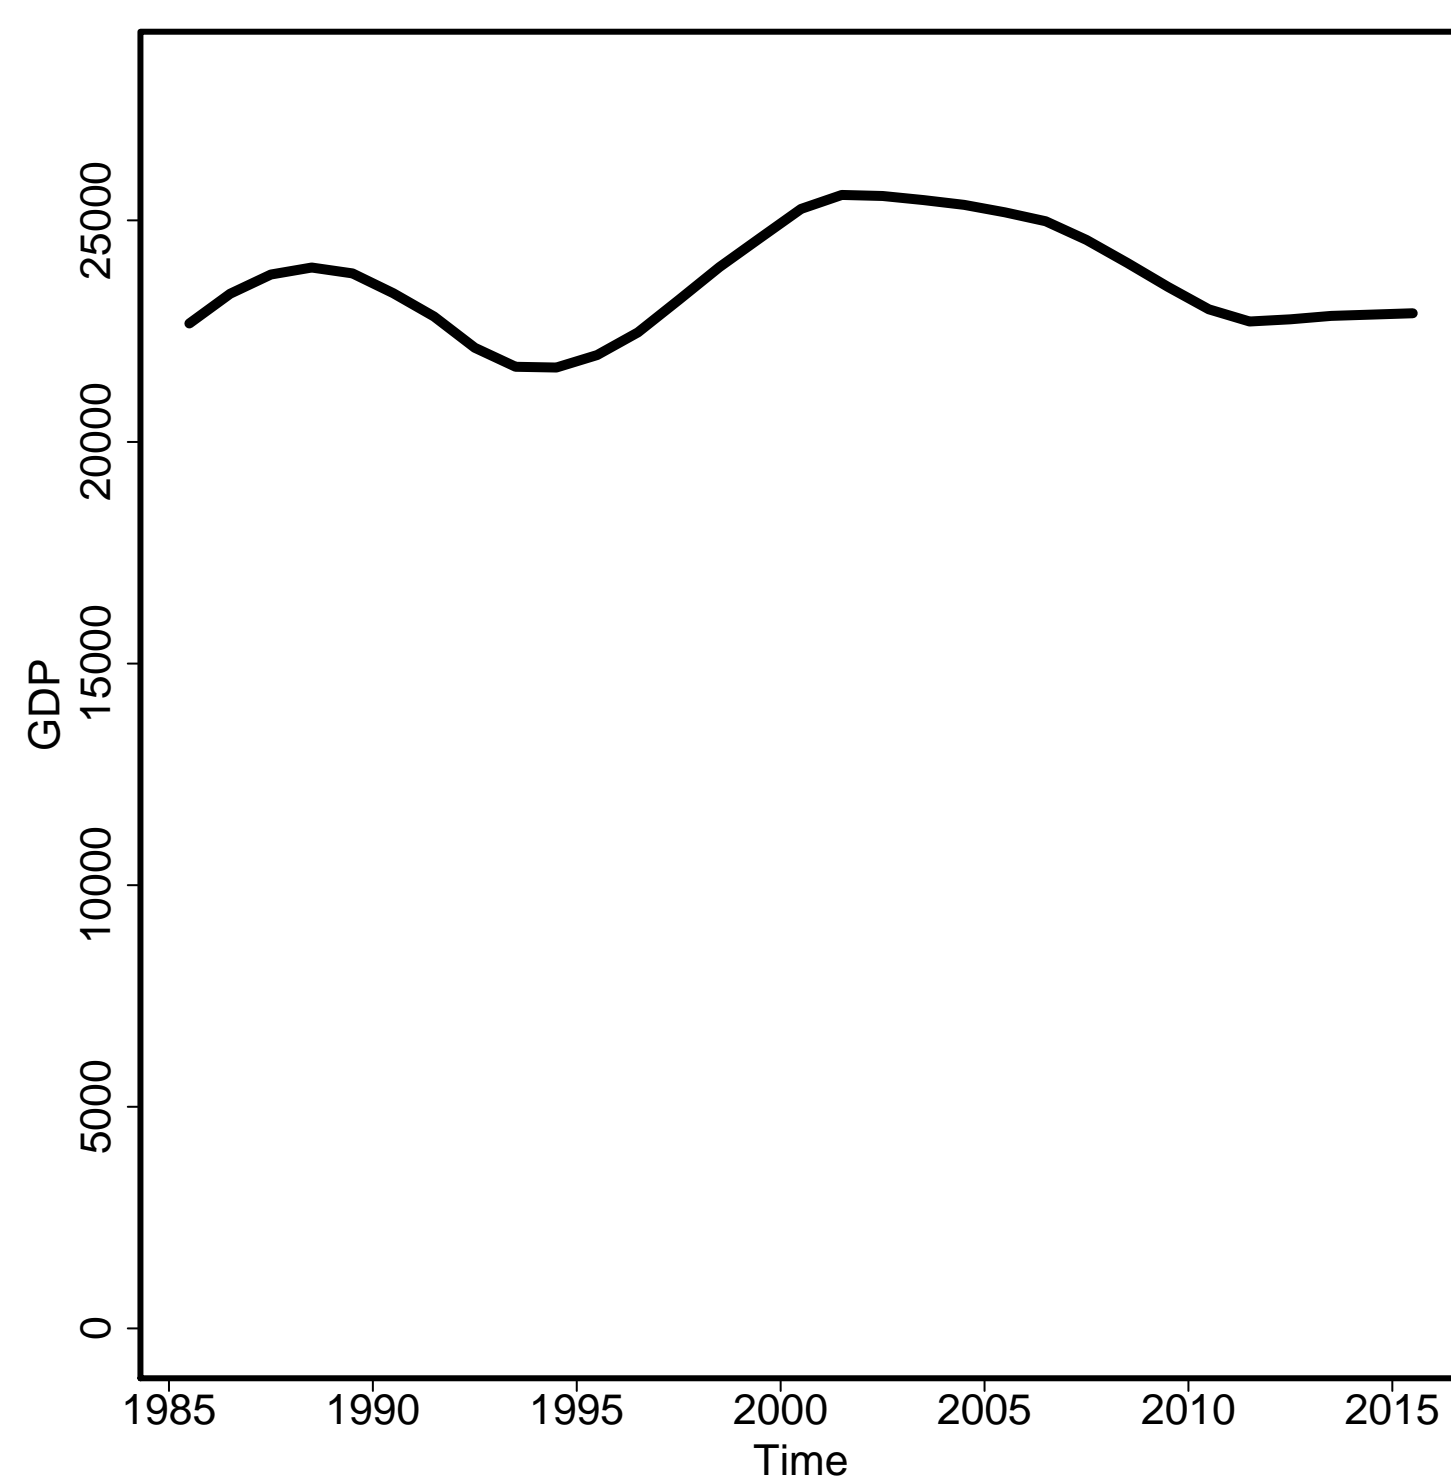

General Fertility Rate

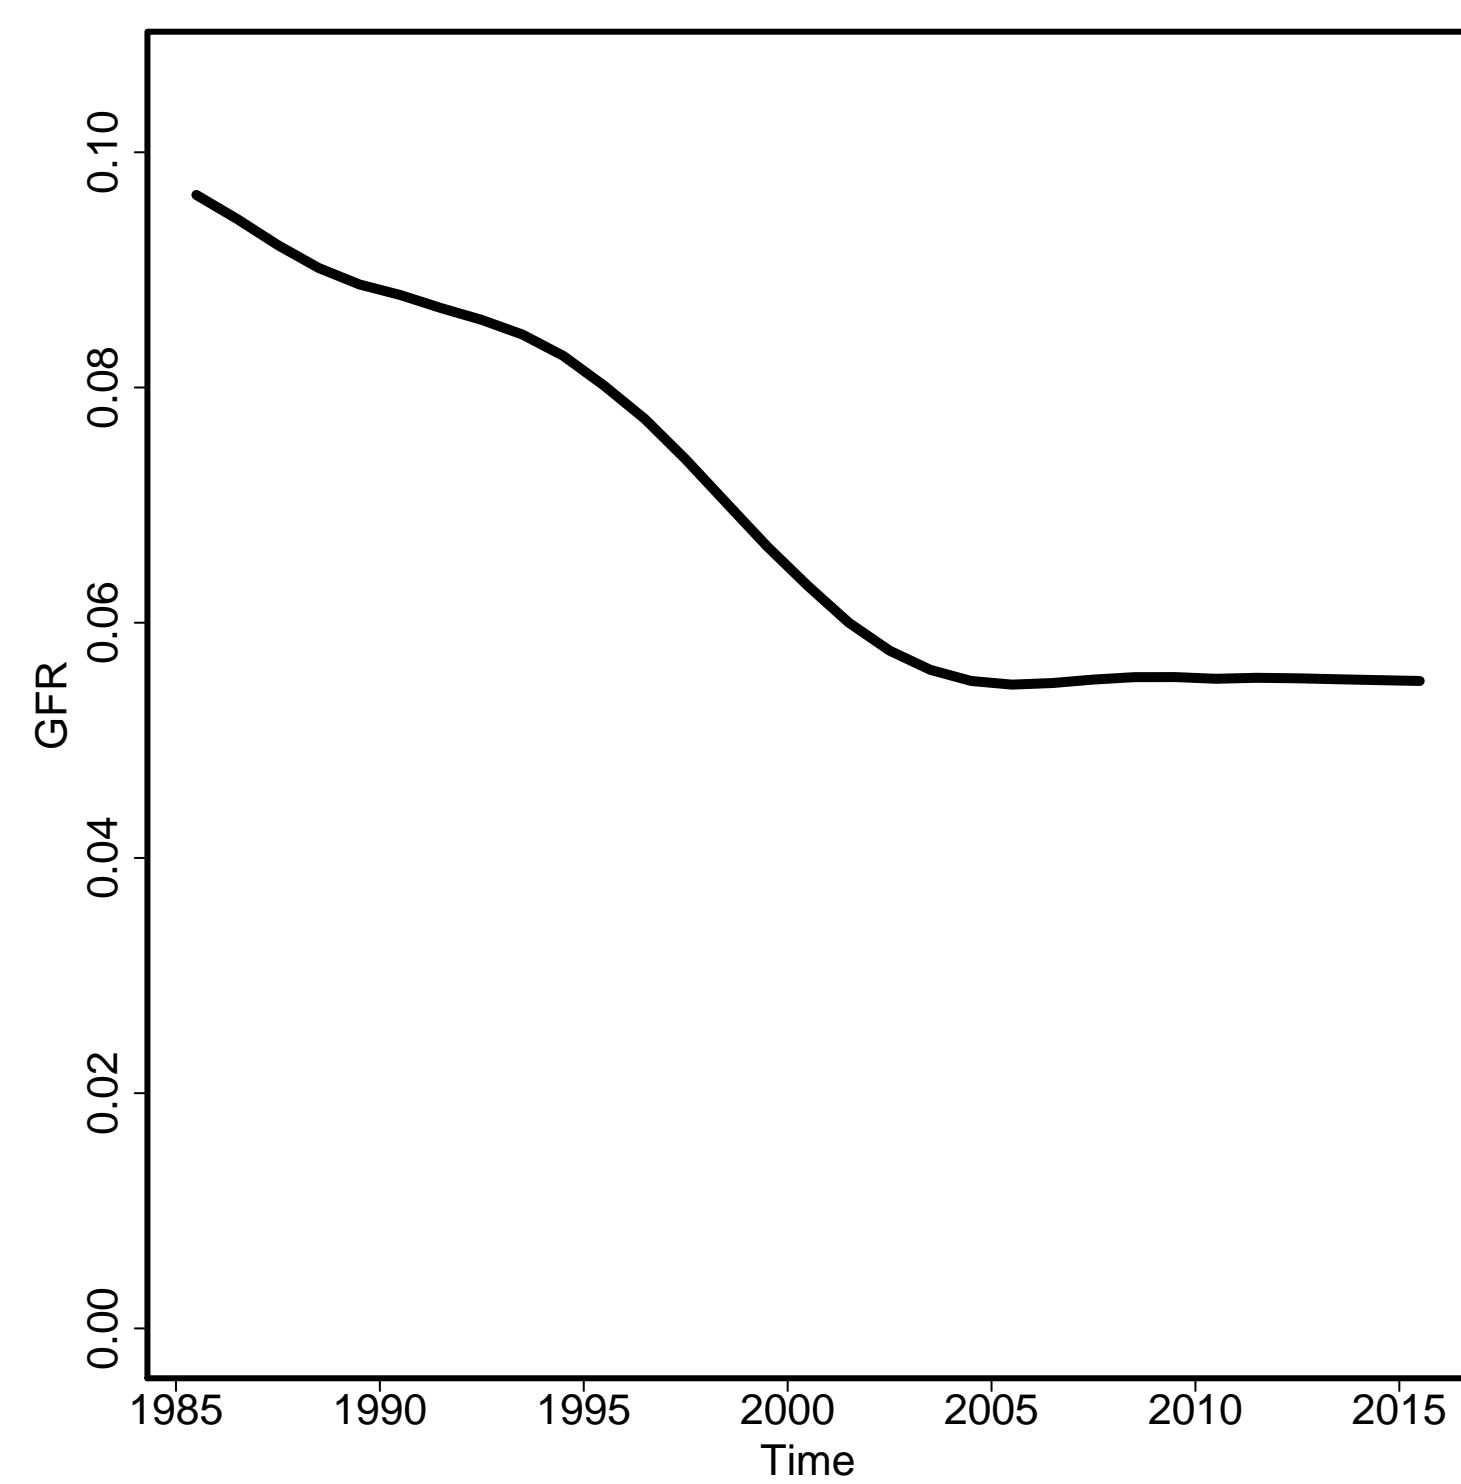

Skilled Attendance to Birth

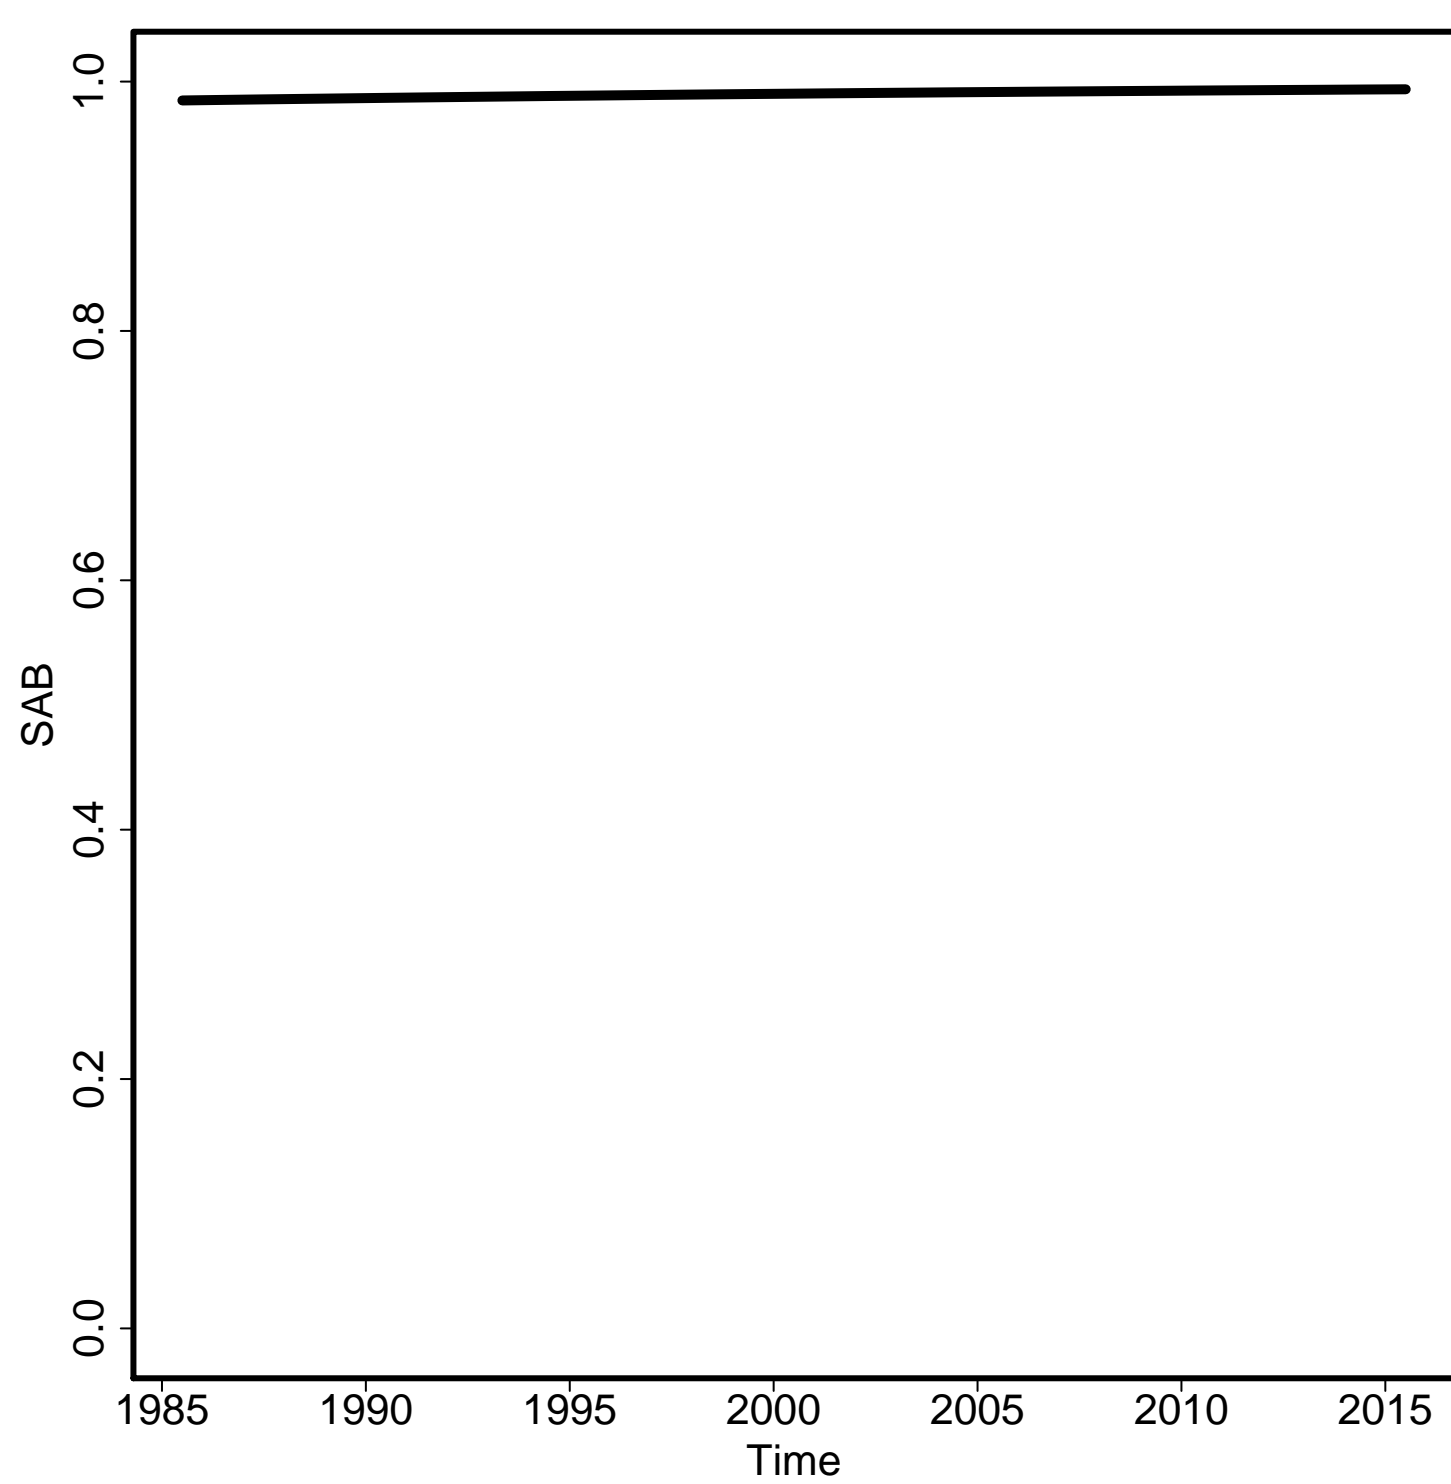

Envelope/Births

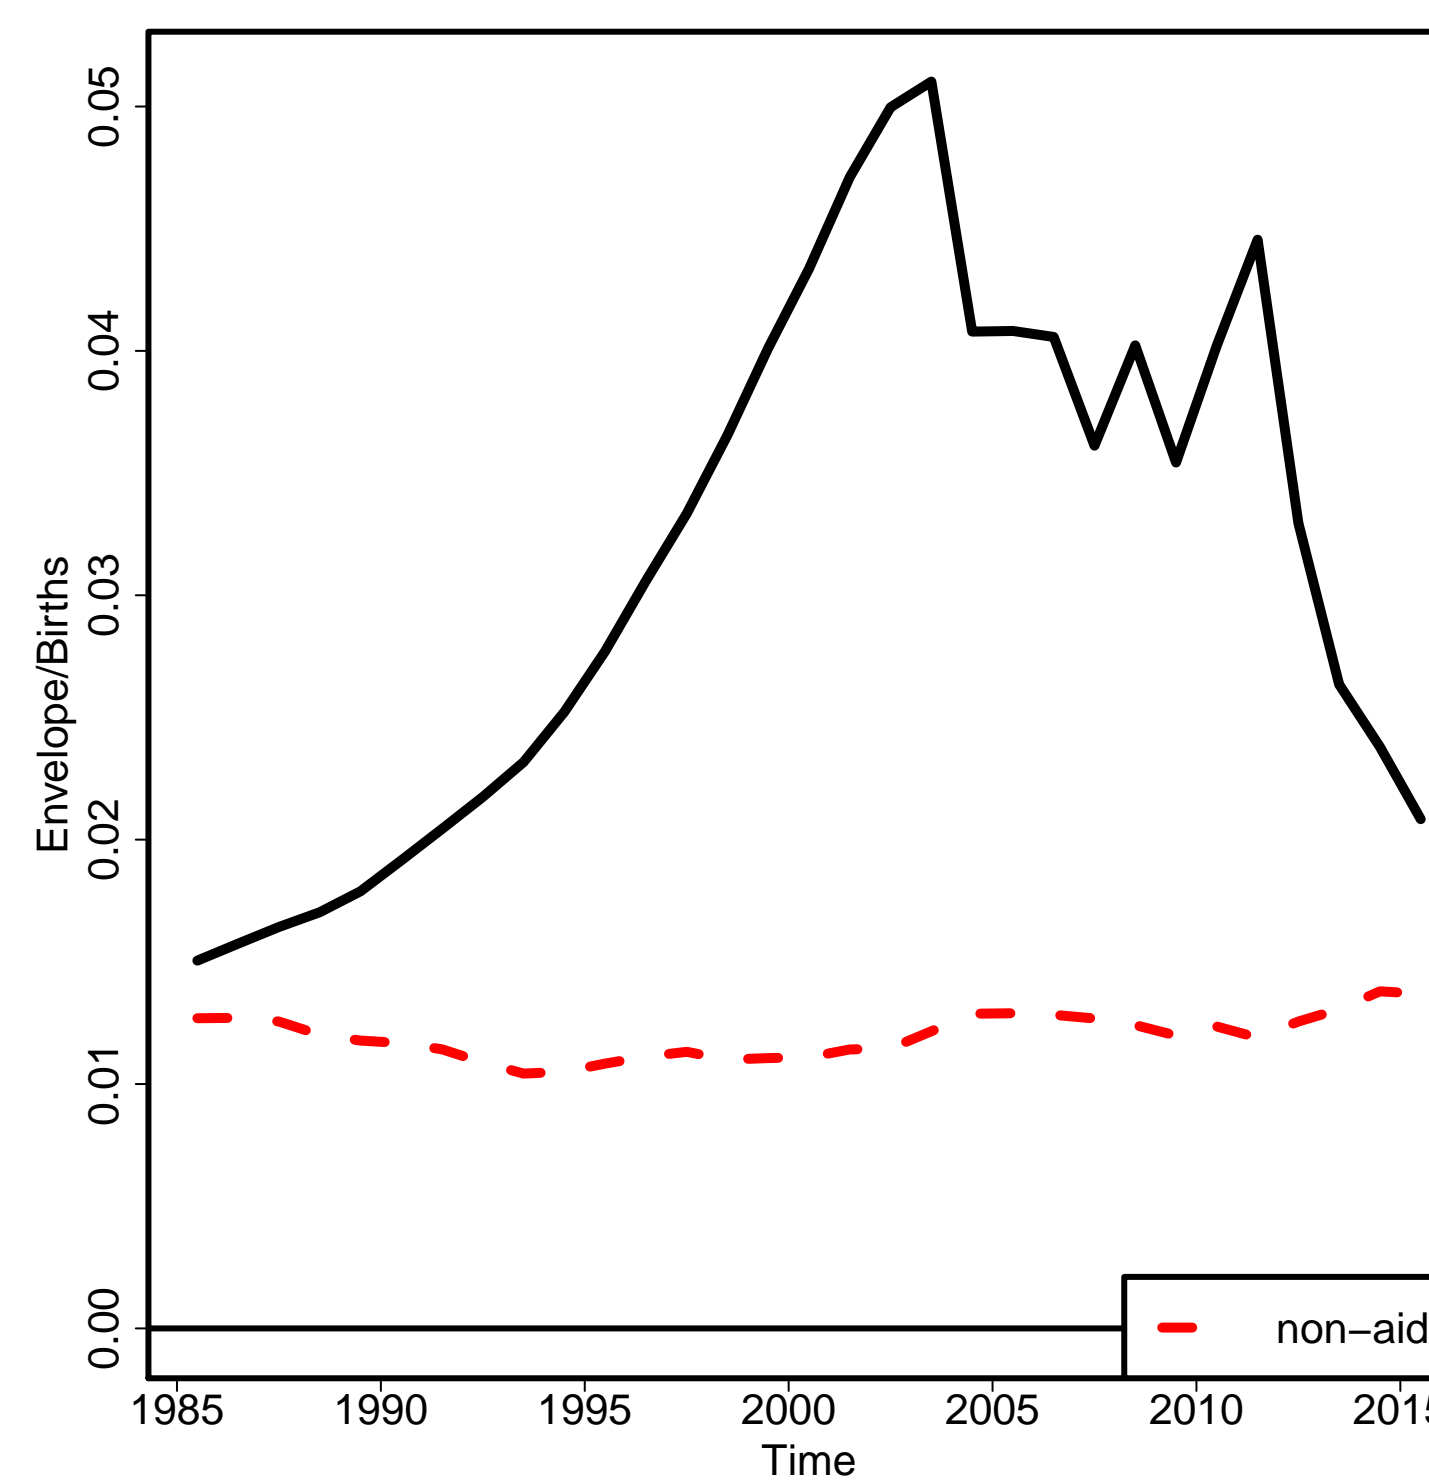

Non-aids MMR

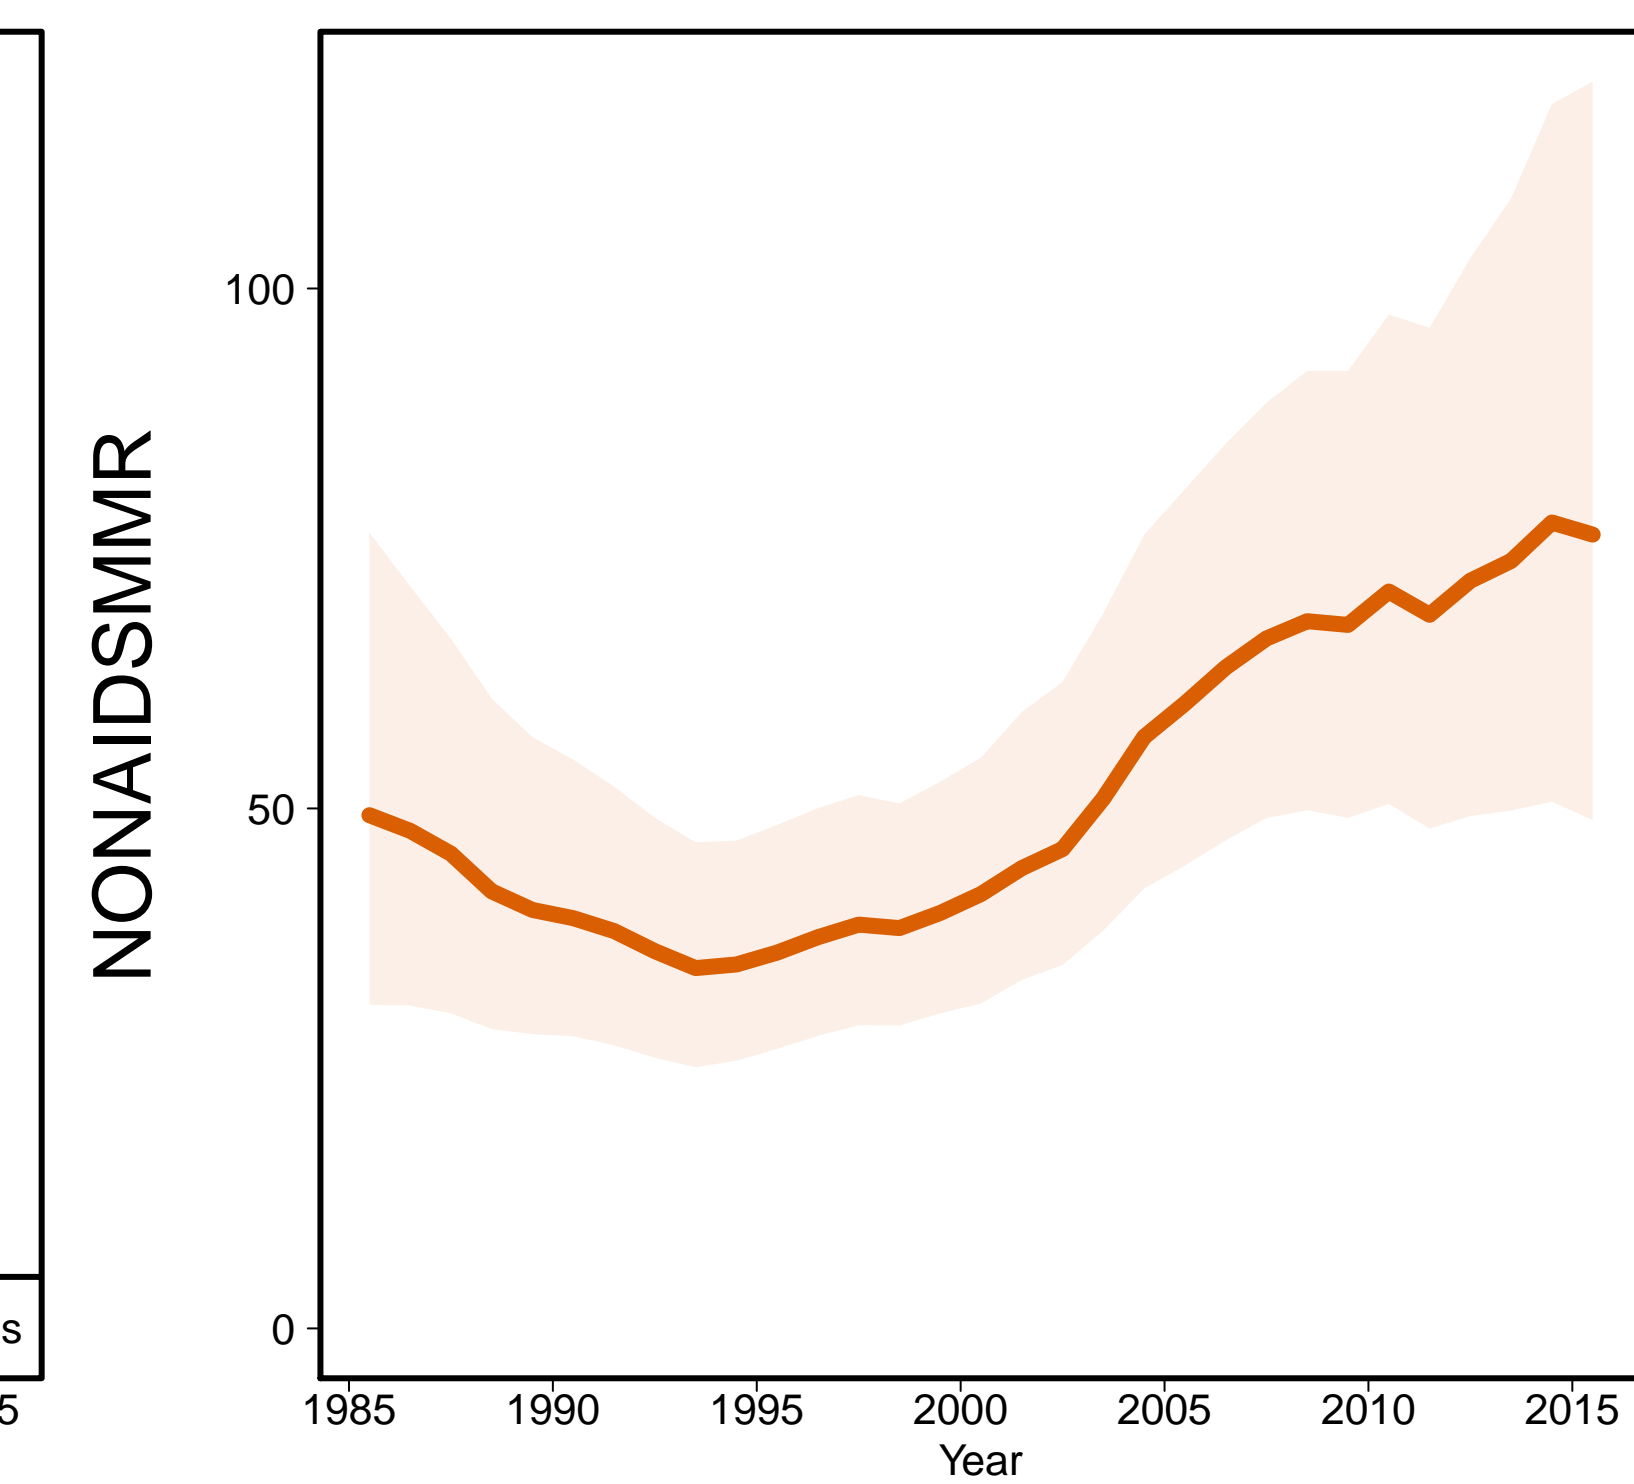

Aids MMR

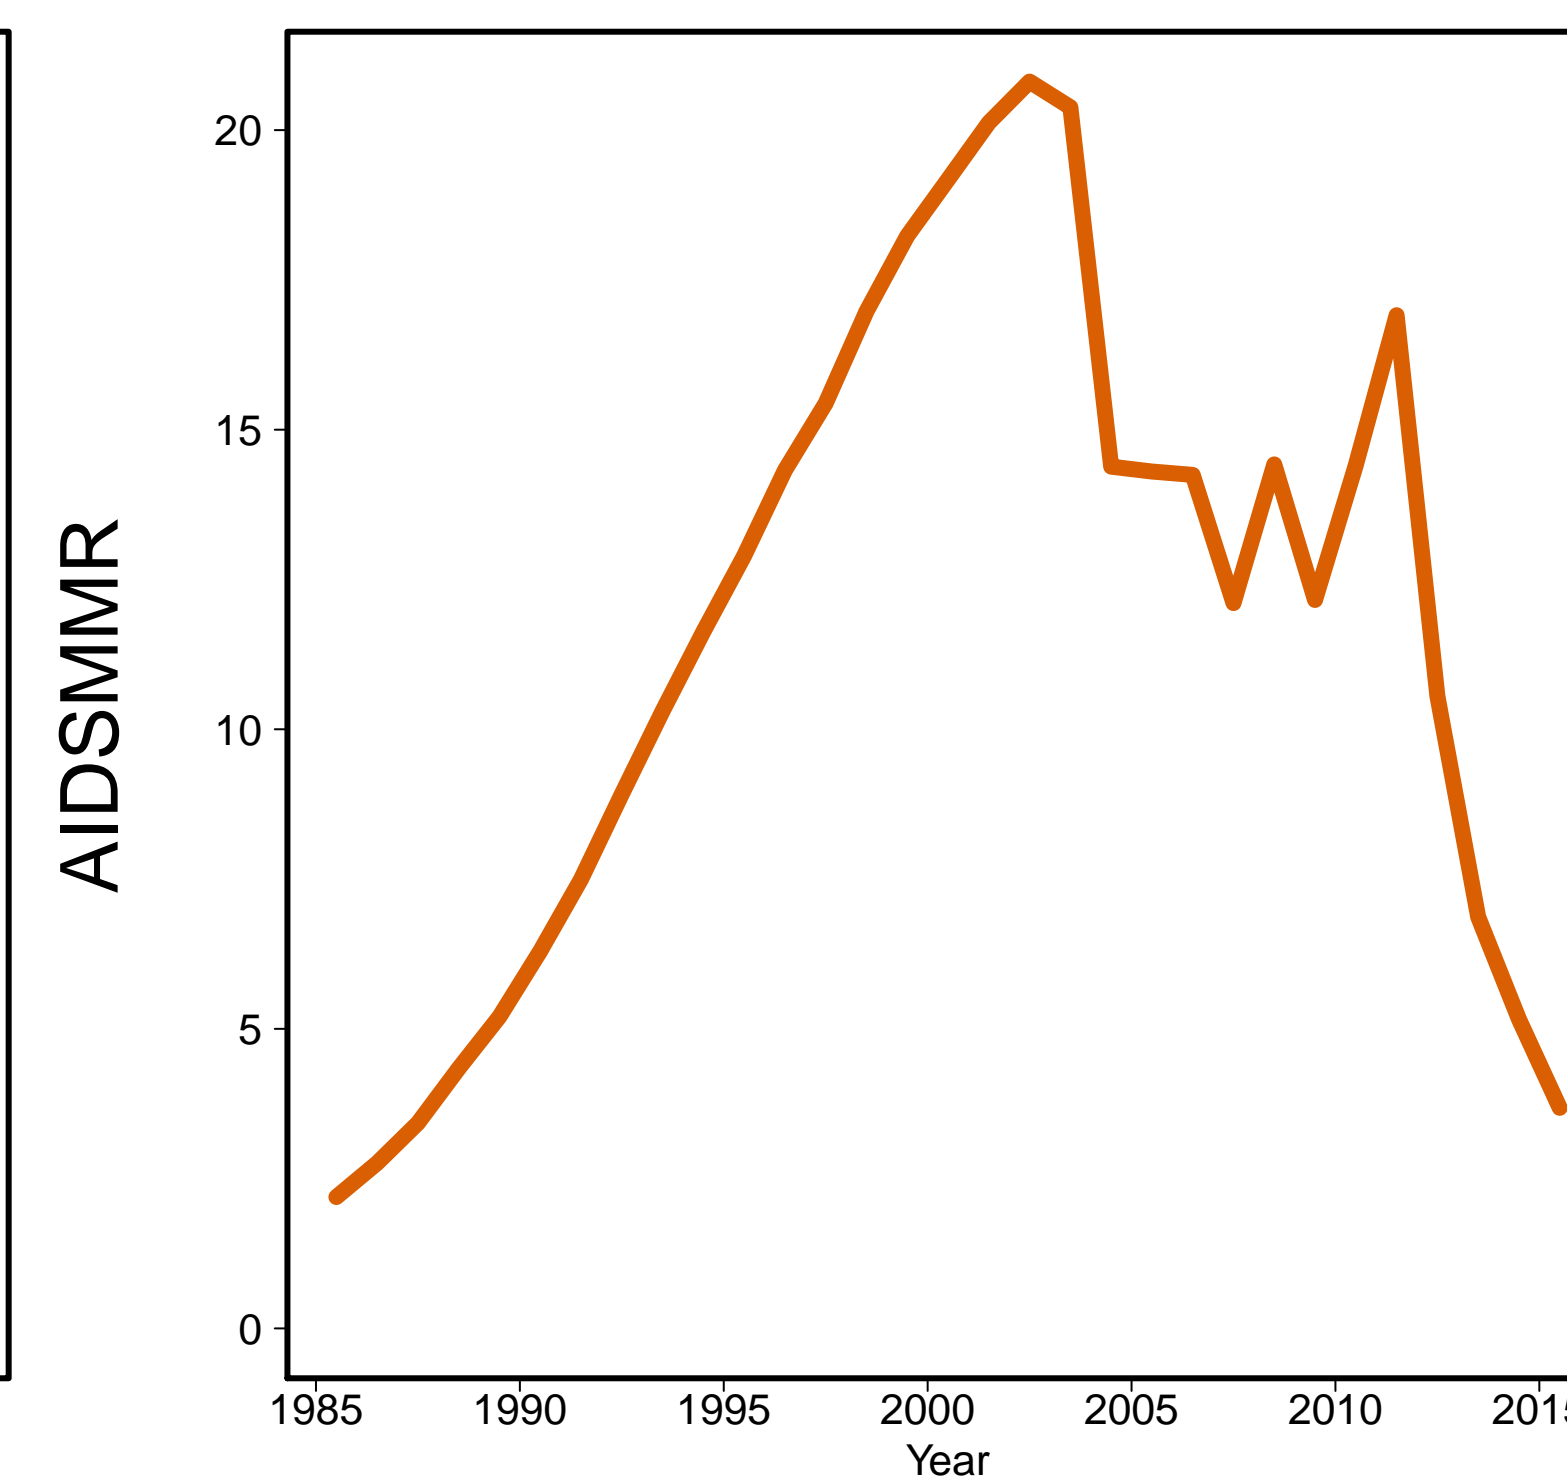

Bahrain [BHR]  
(Western Asia)

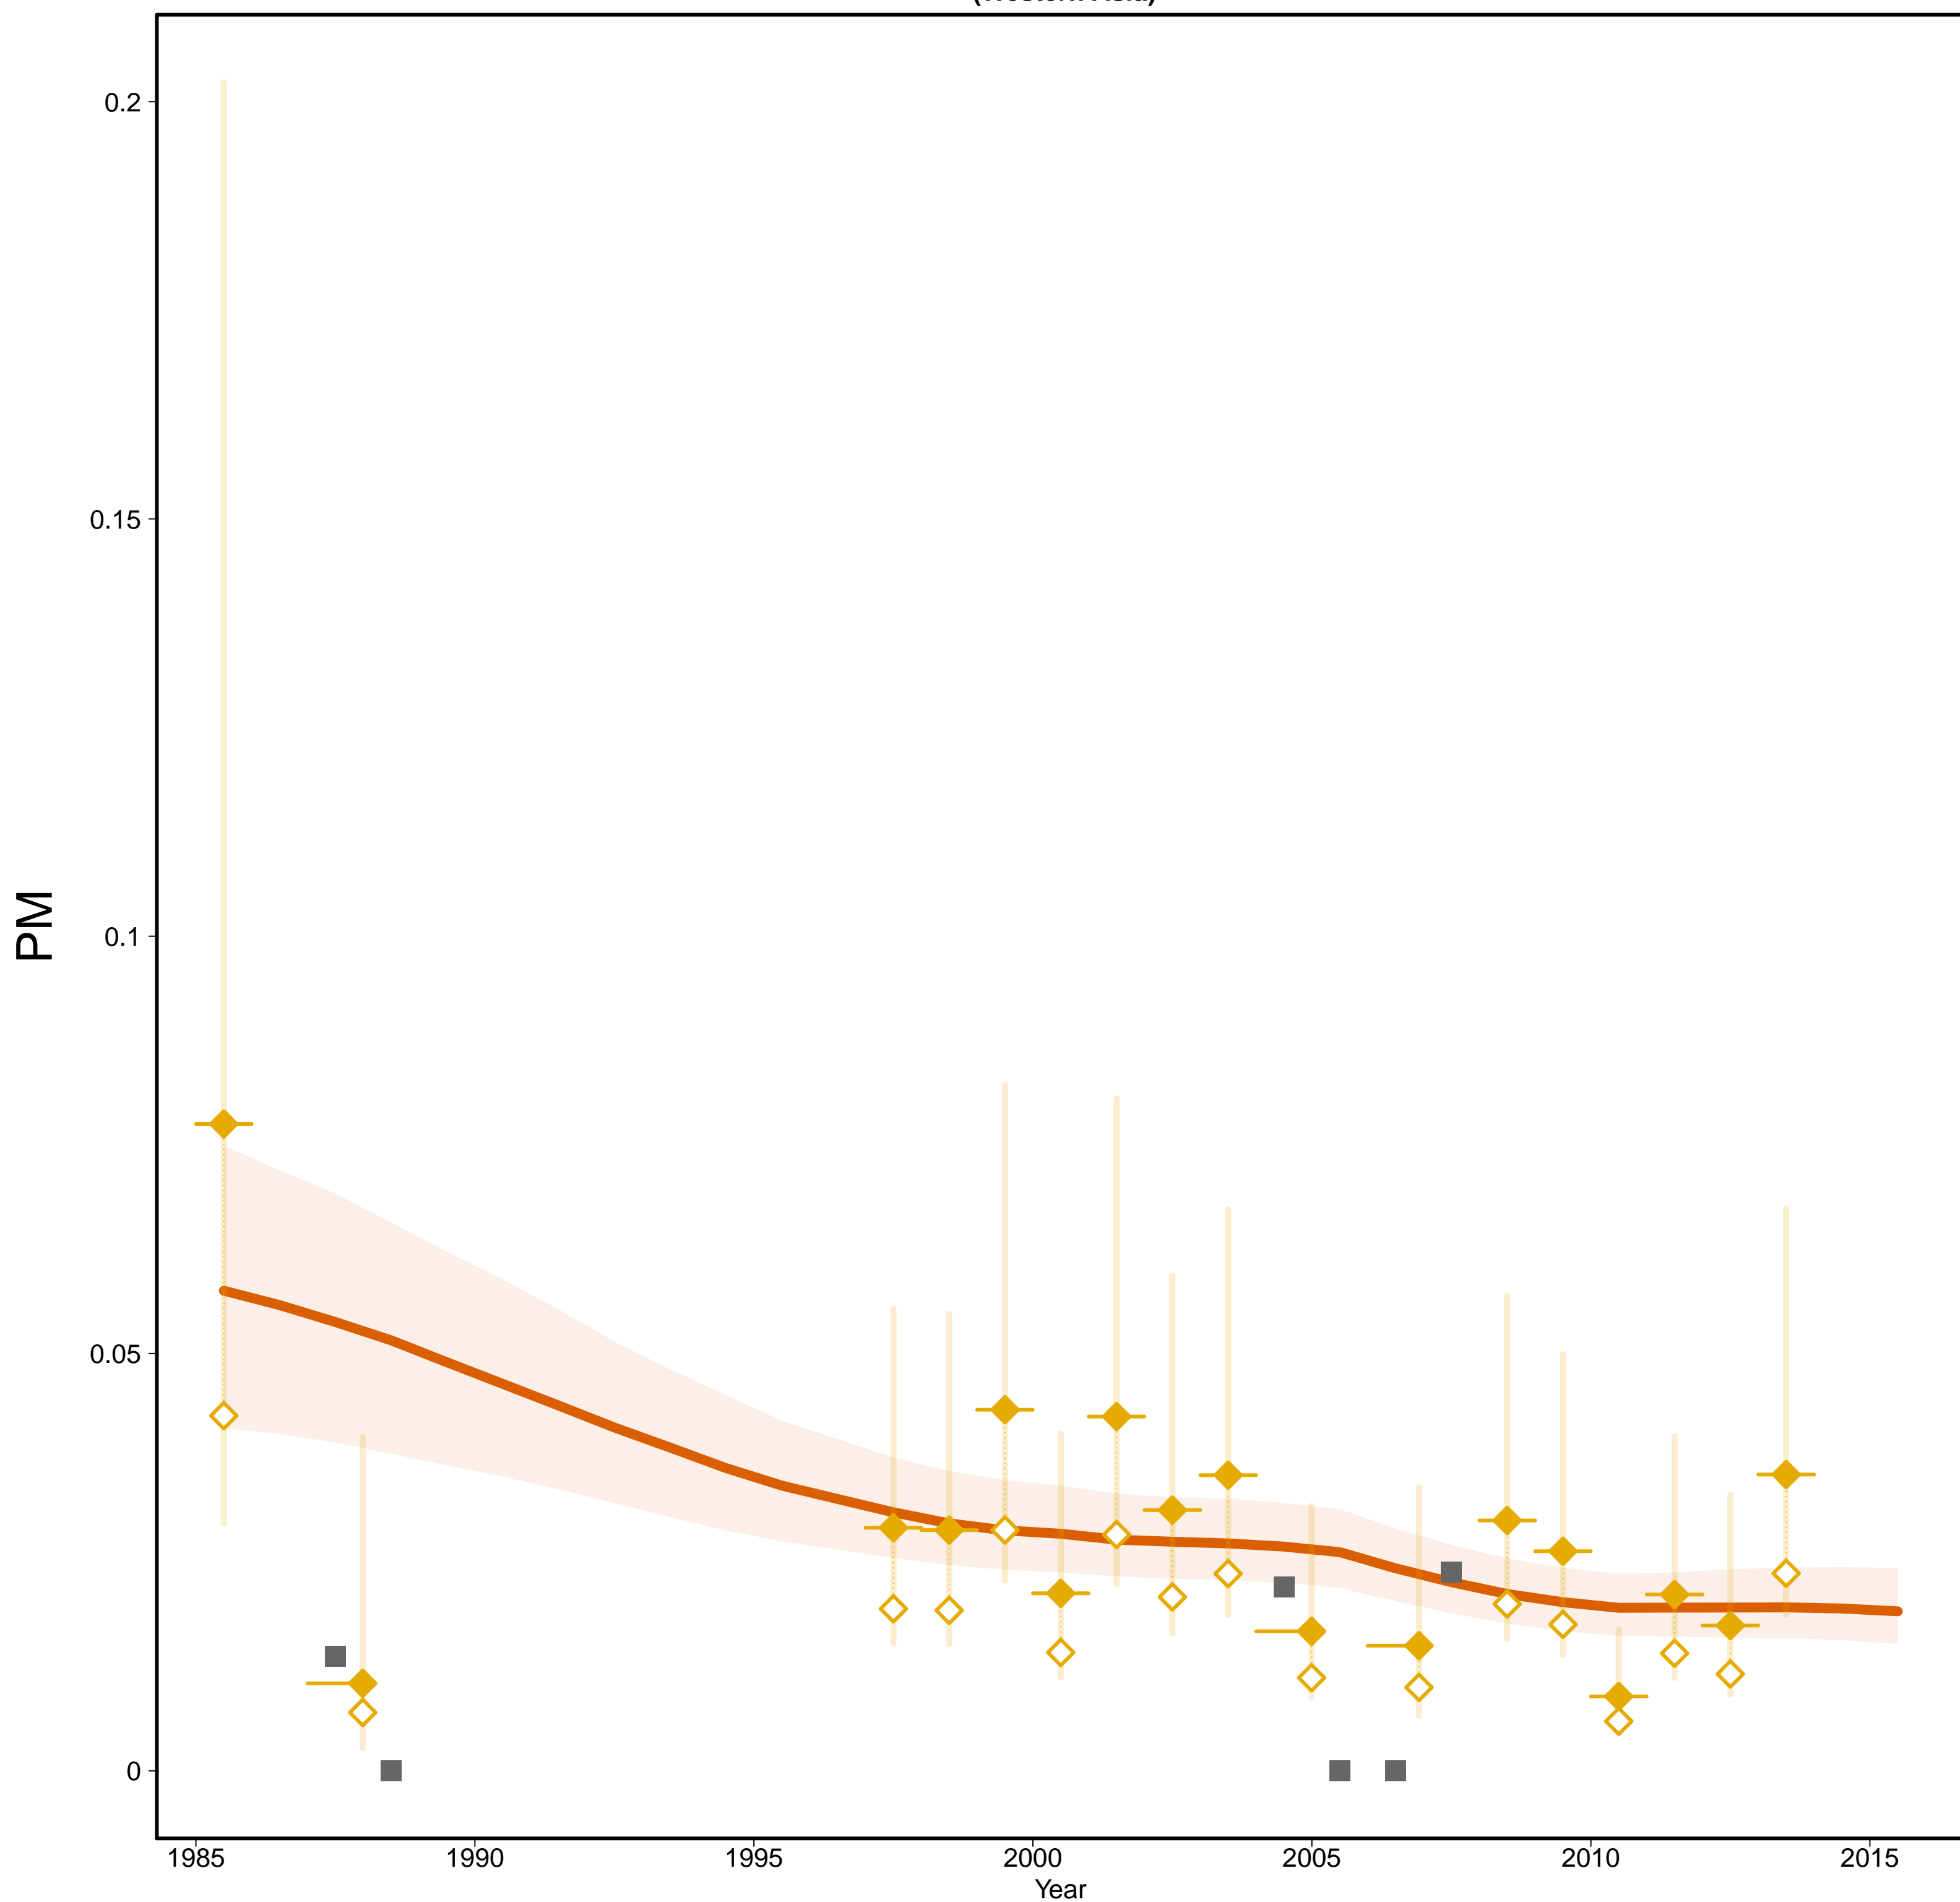

Bahrain [BHR]  
(Western Asia)

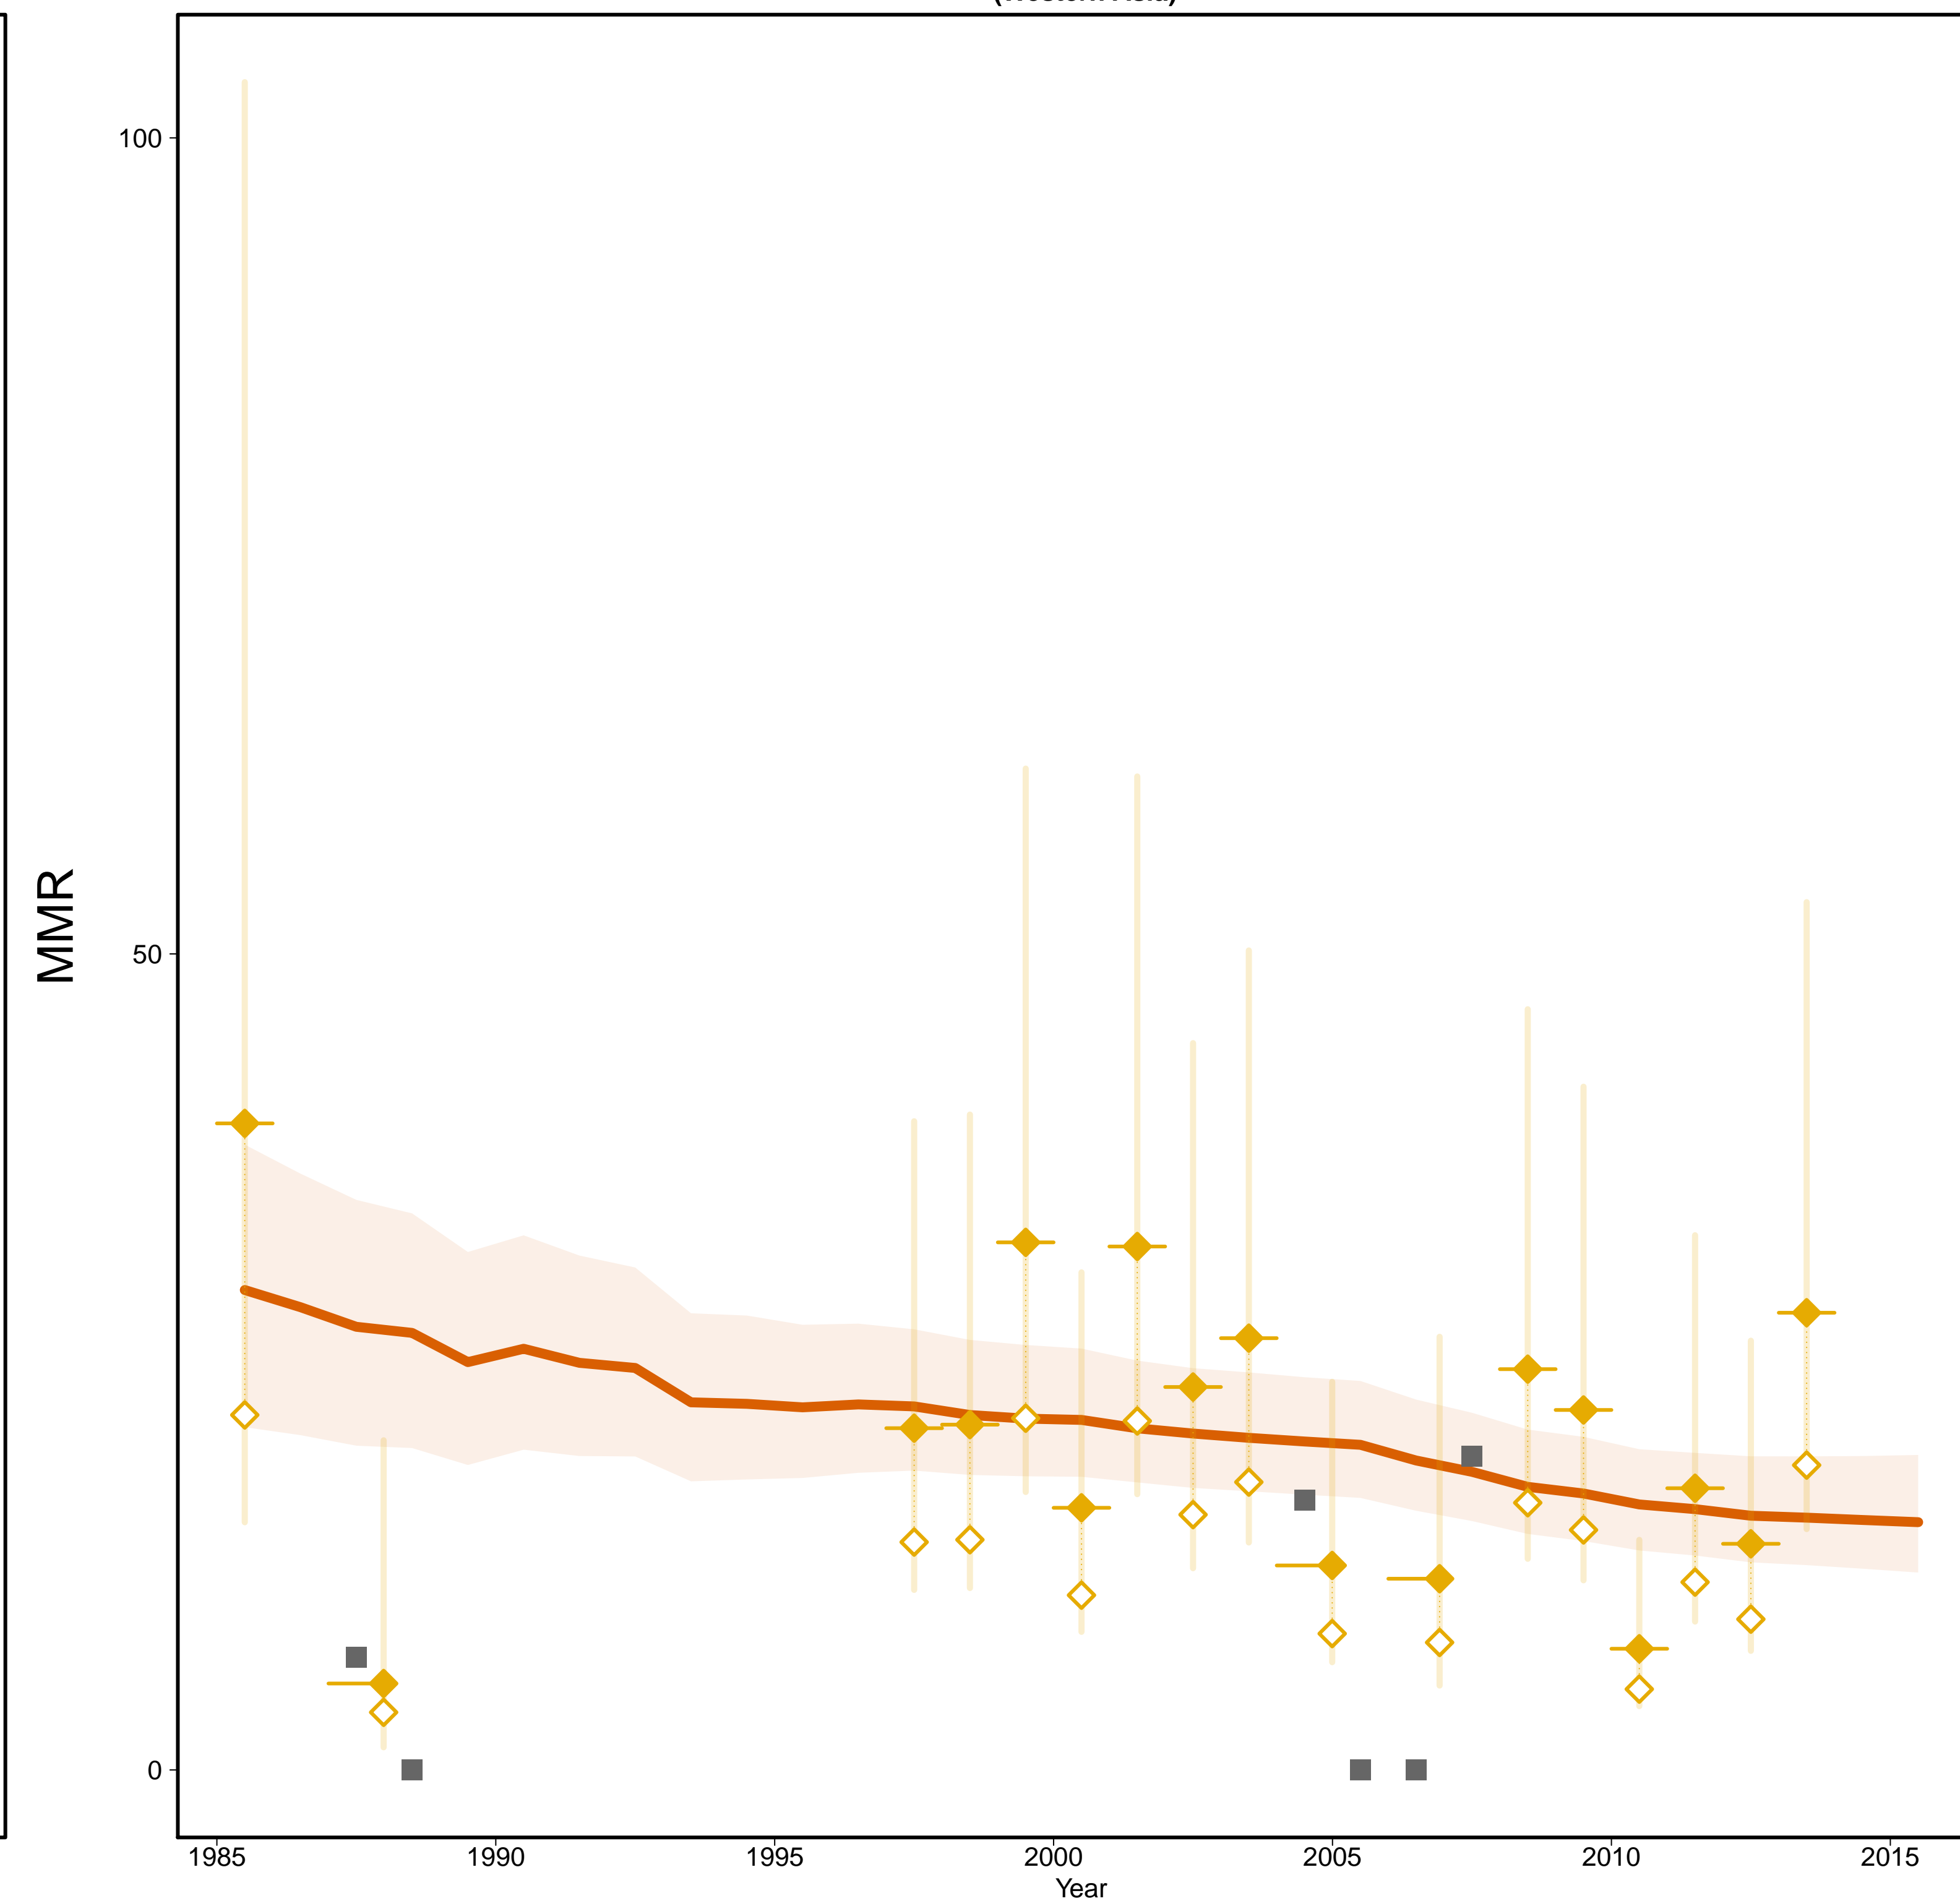

- Estimates –
- Mlate
- MMR Database 2015 –
- ◇ Observed Data
- ◆ Adjusted Data
- Data type –
- ◆ VR
- Reported VR before recalc.  
(related to 0 obs. mat. death)

Gross Domestic Product

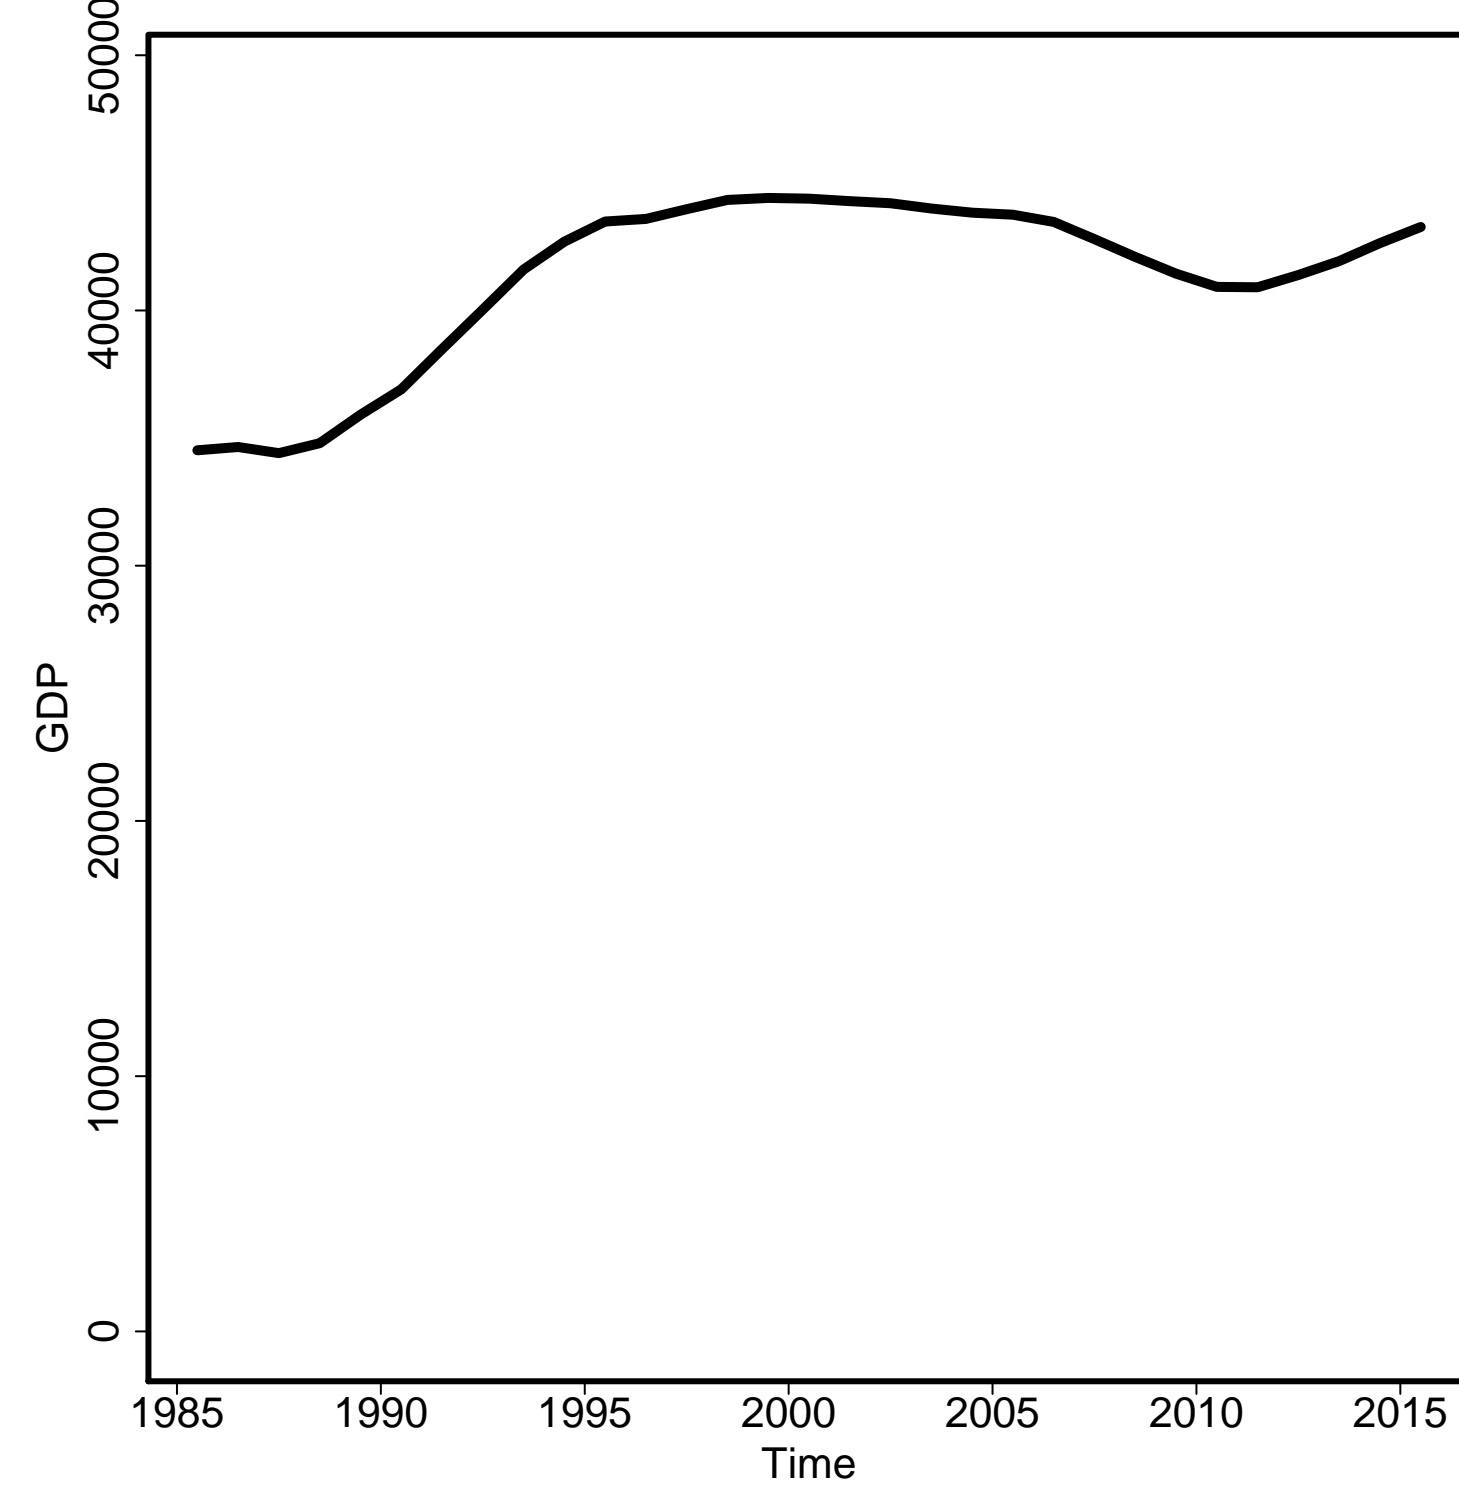

General Fertility Rate

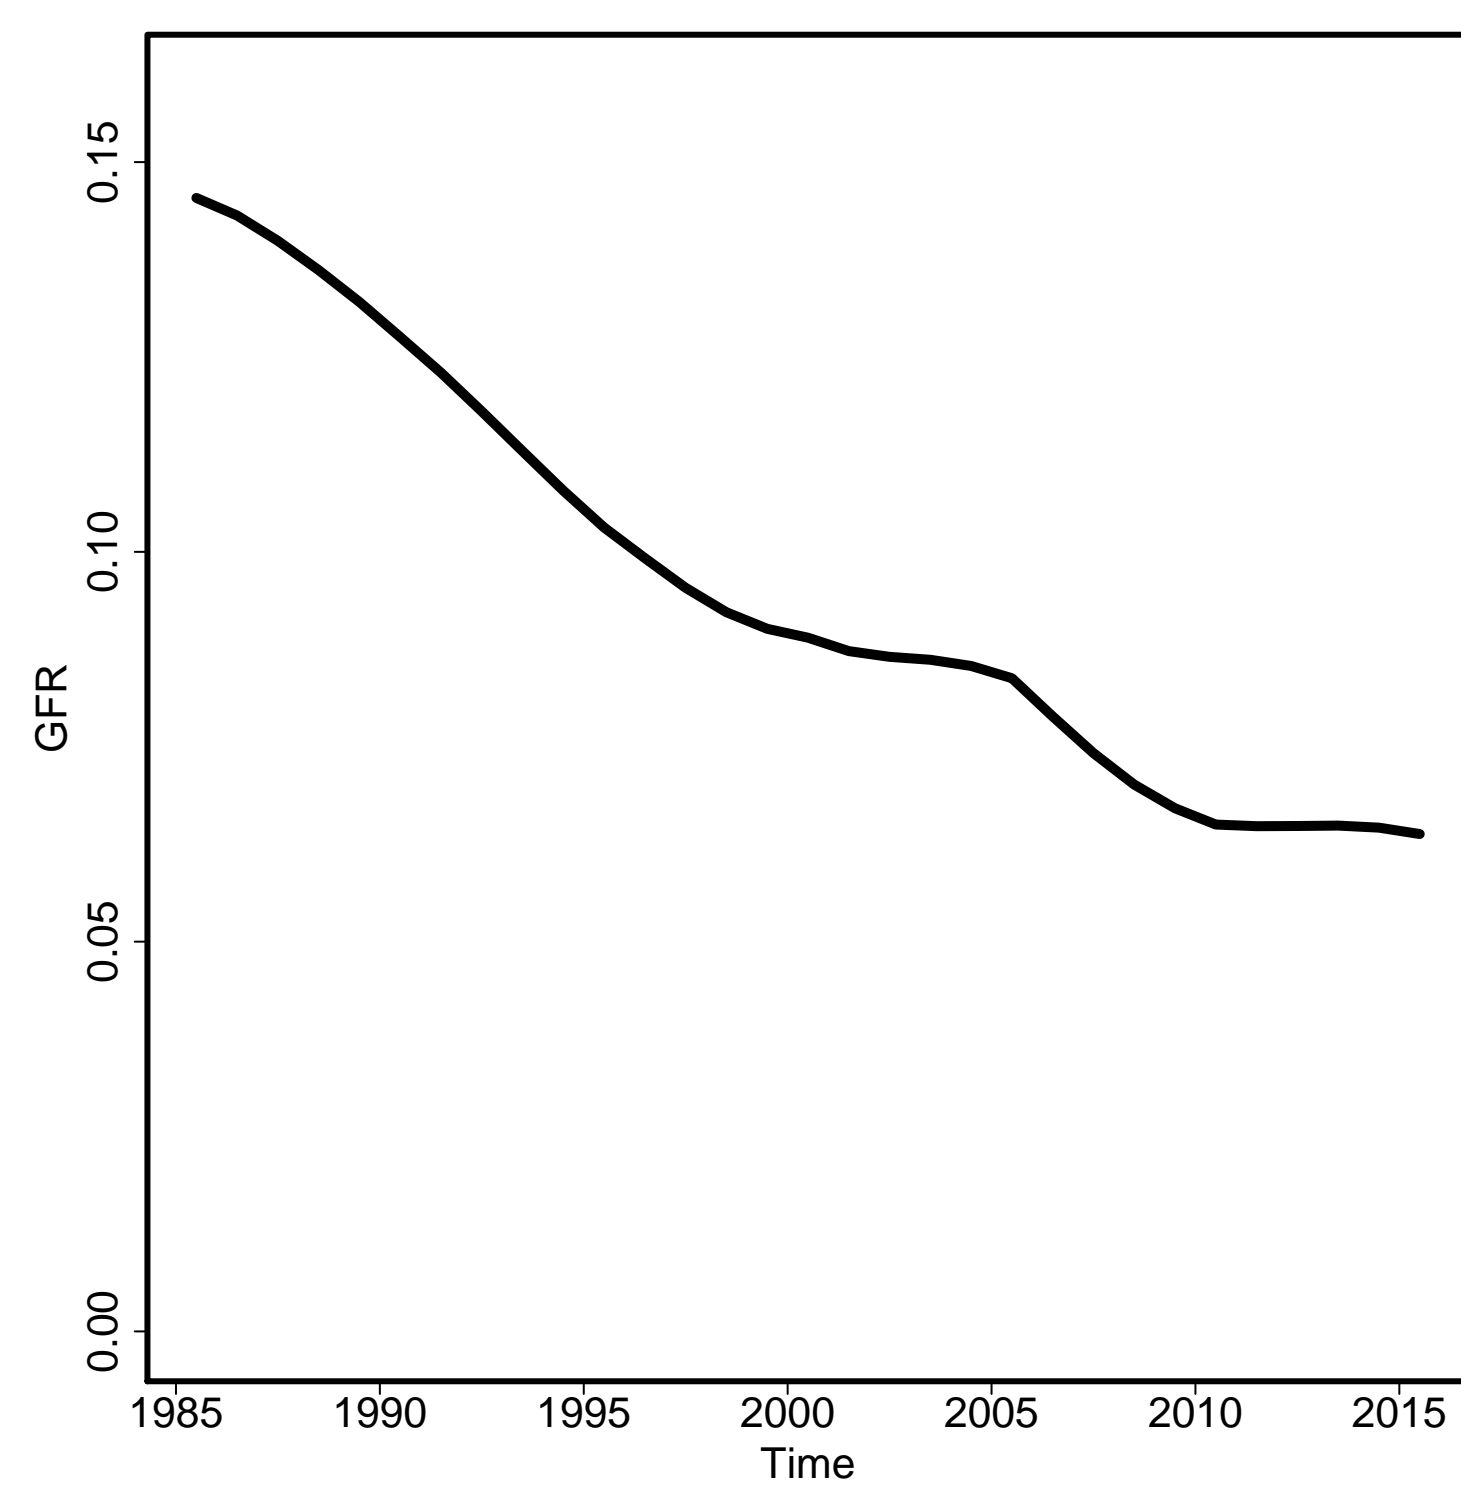

Skilled Attendance to Birth

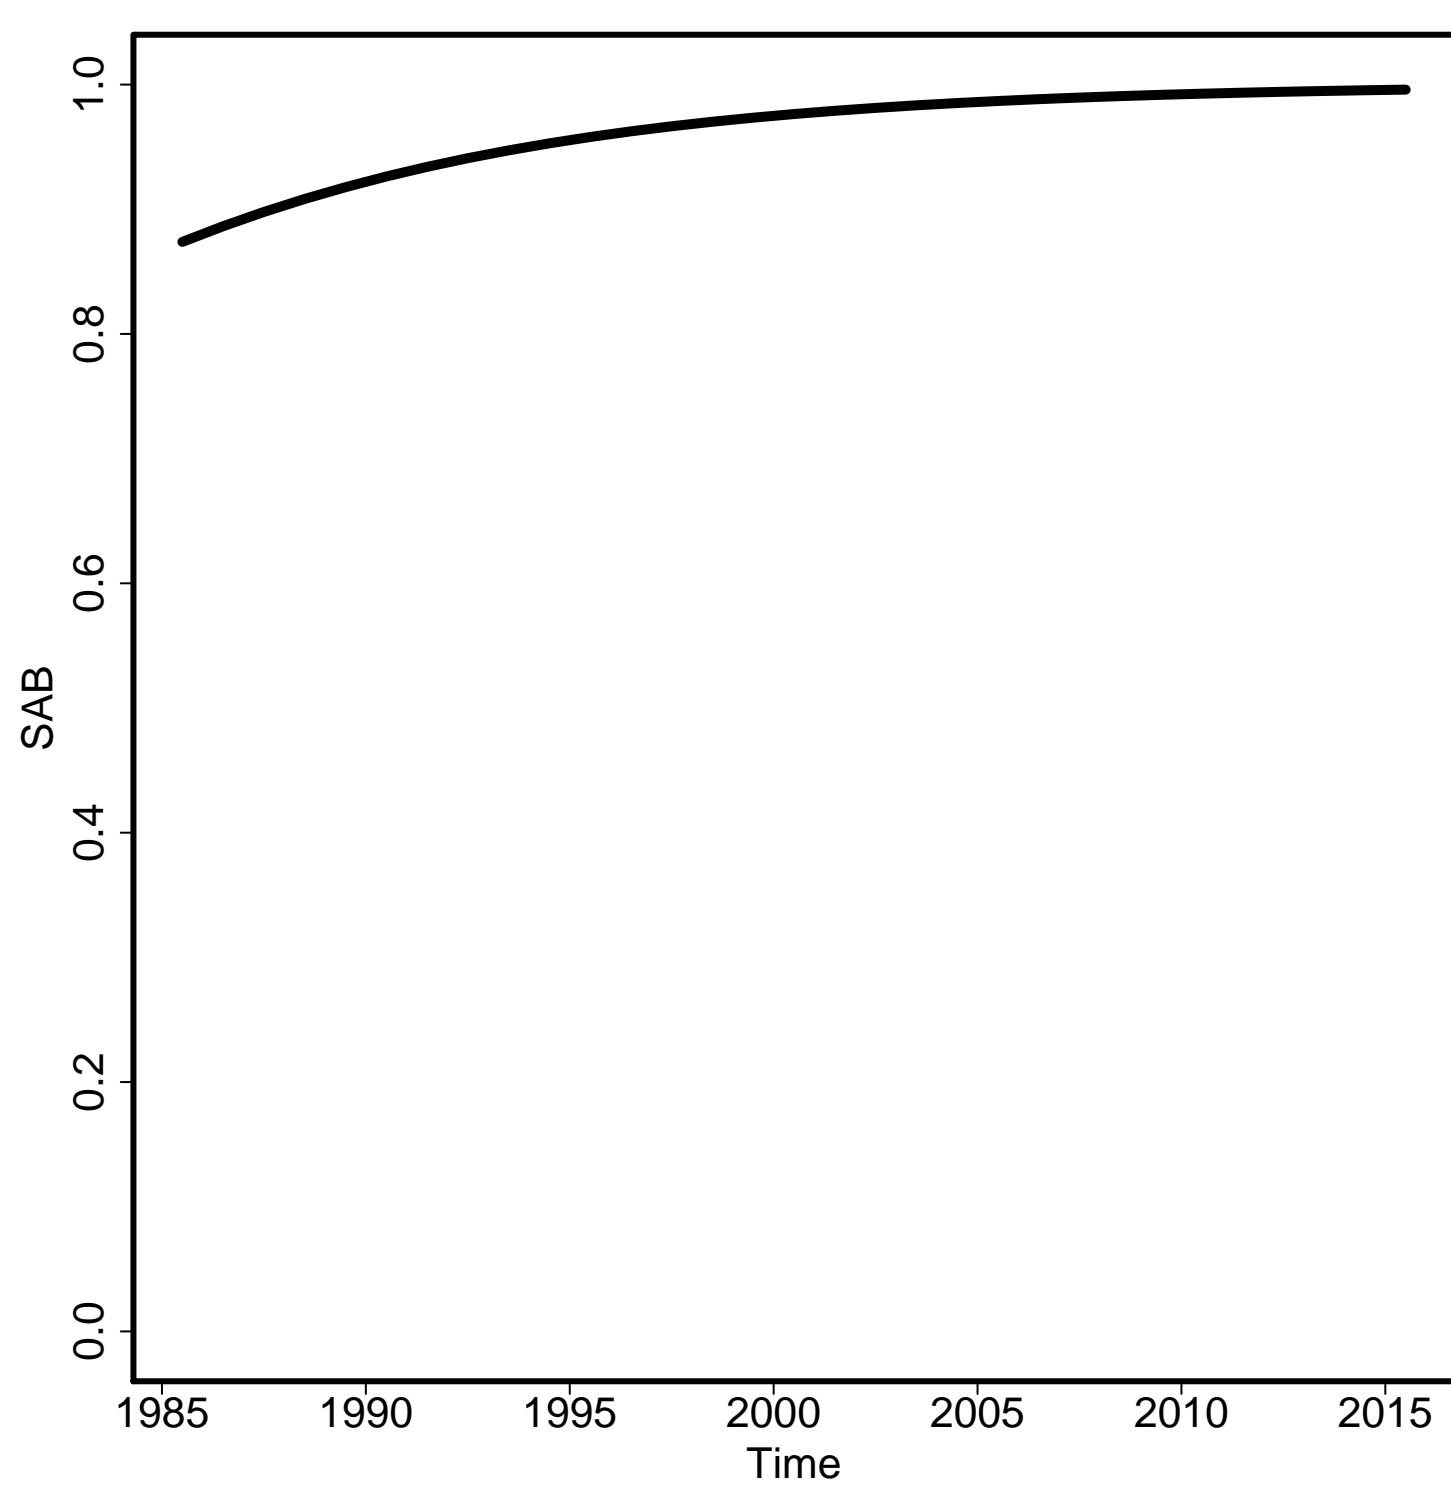

Envelope/Births

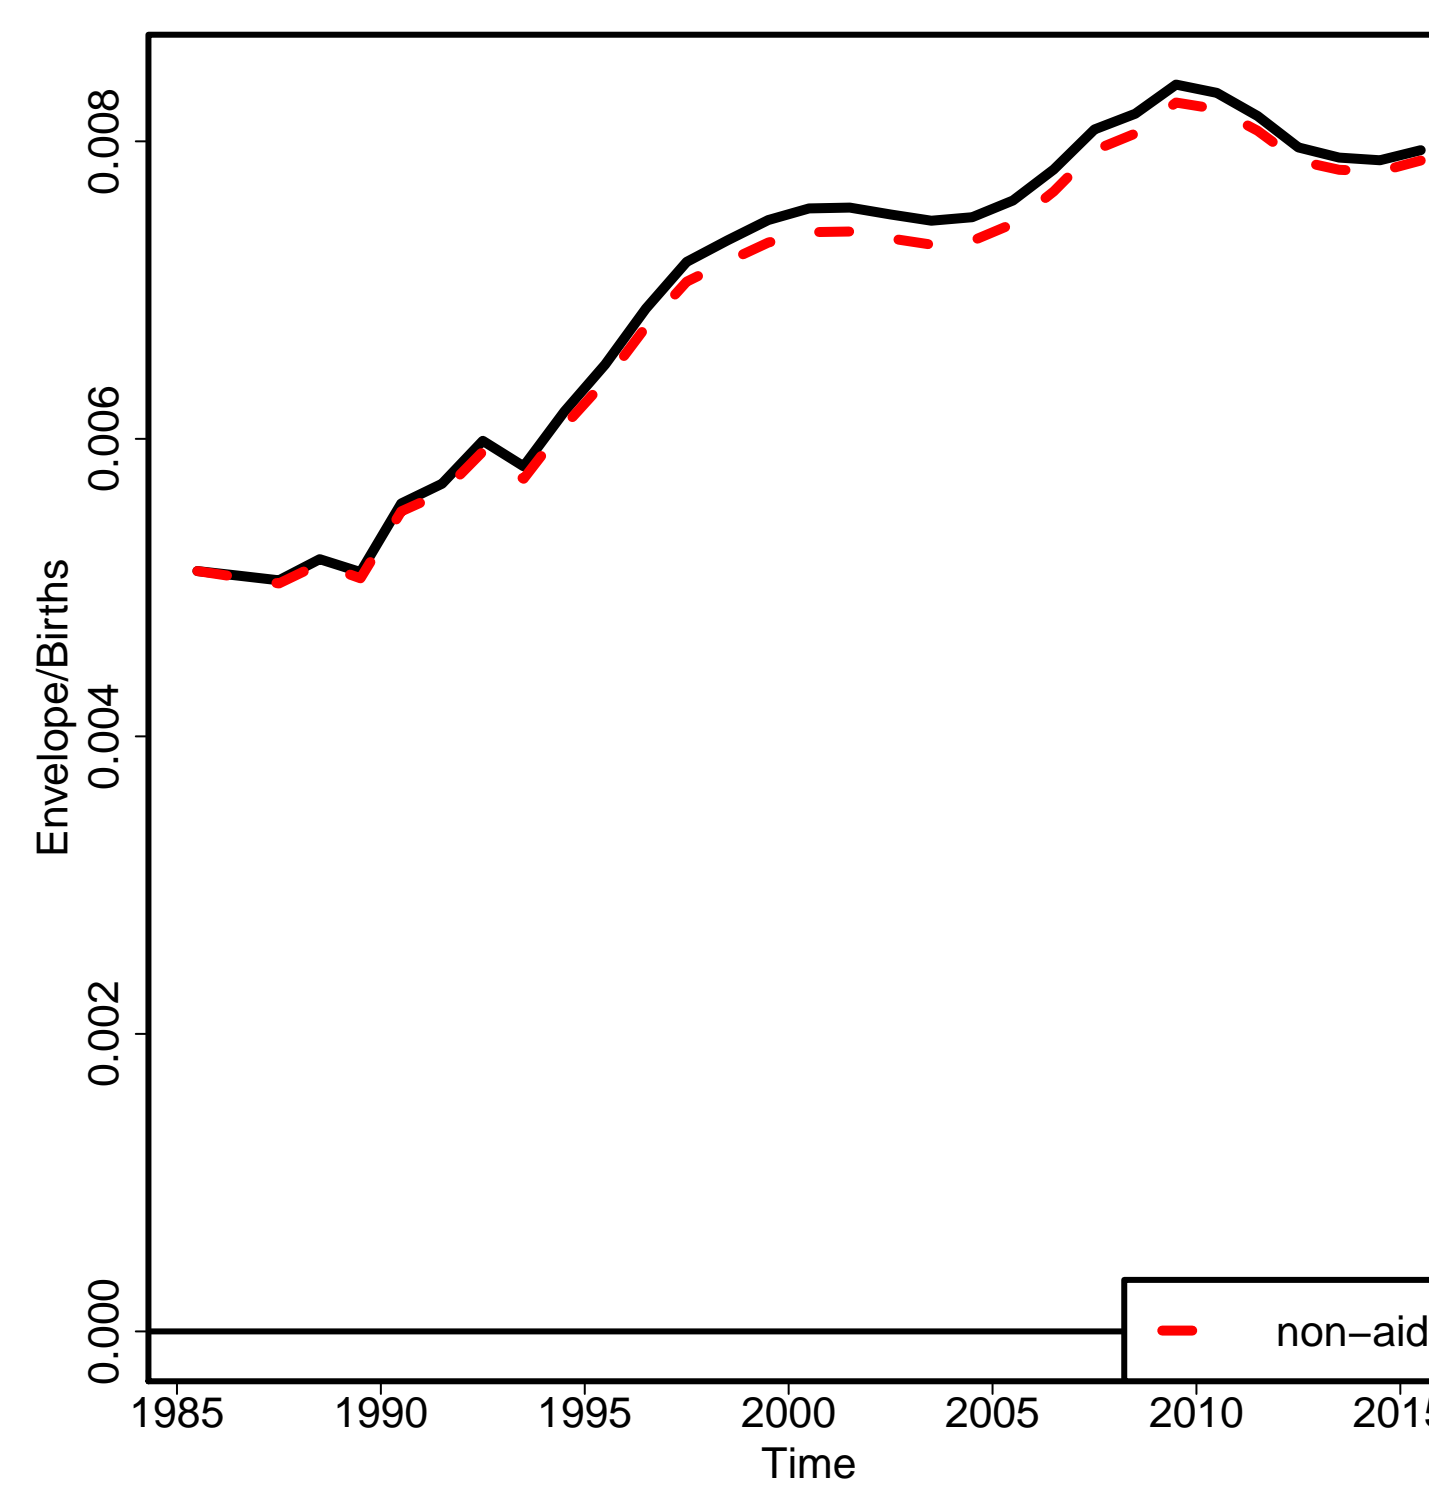

Non-aids MMR

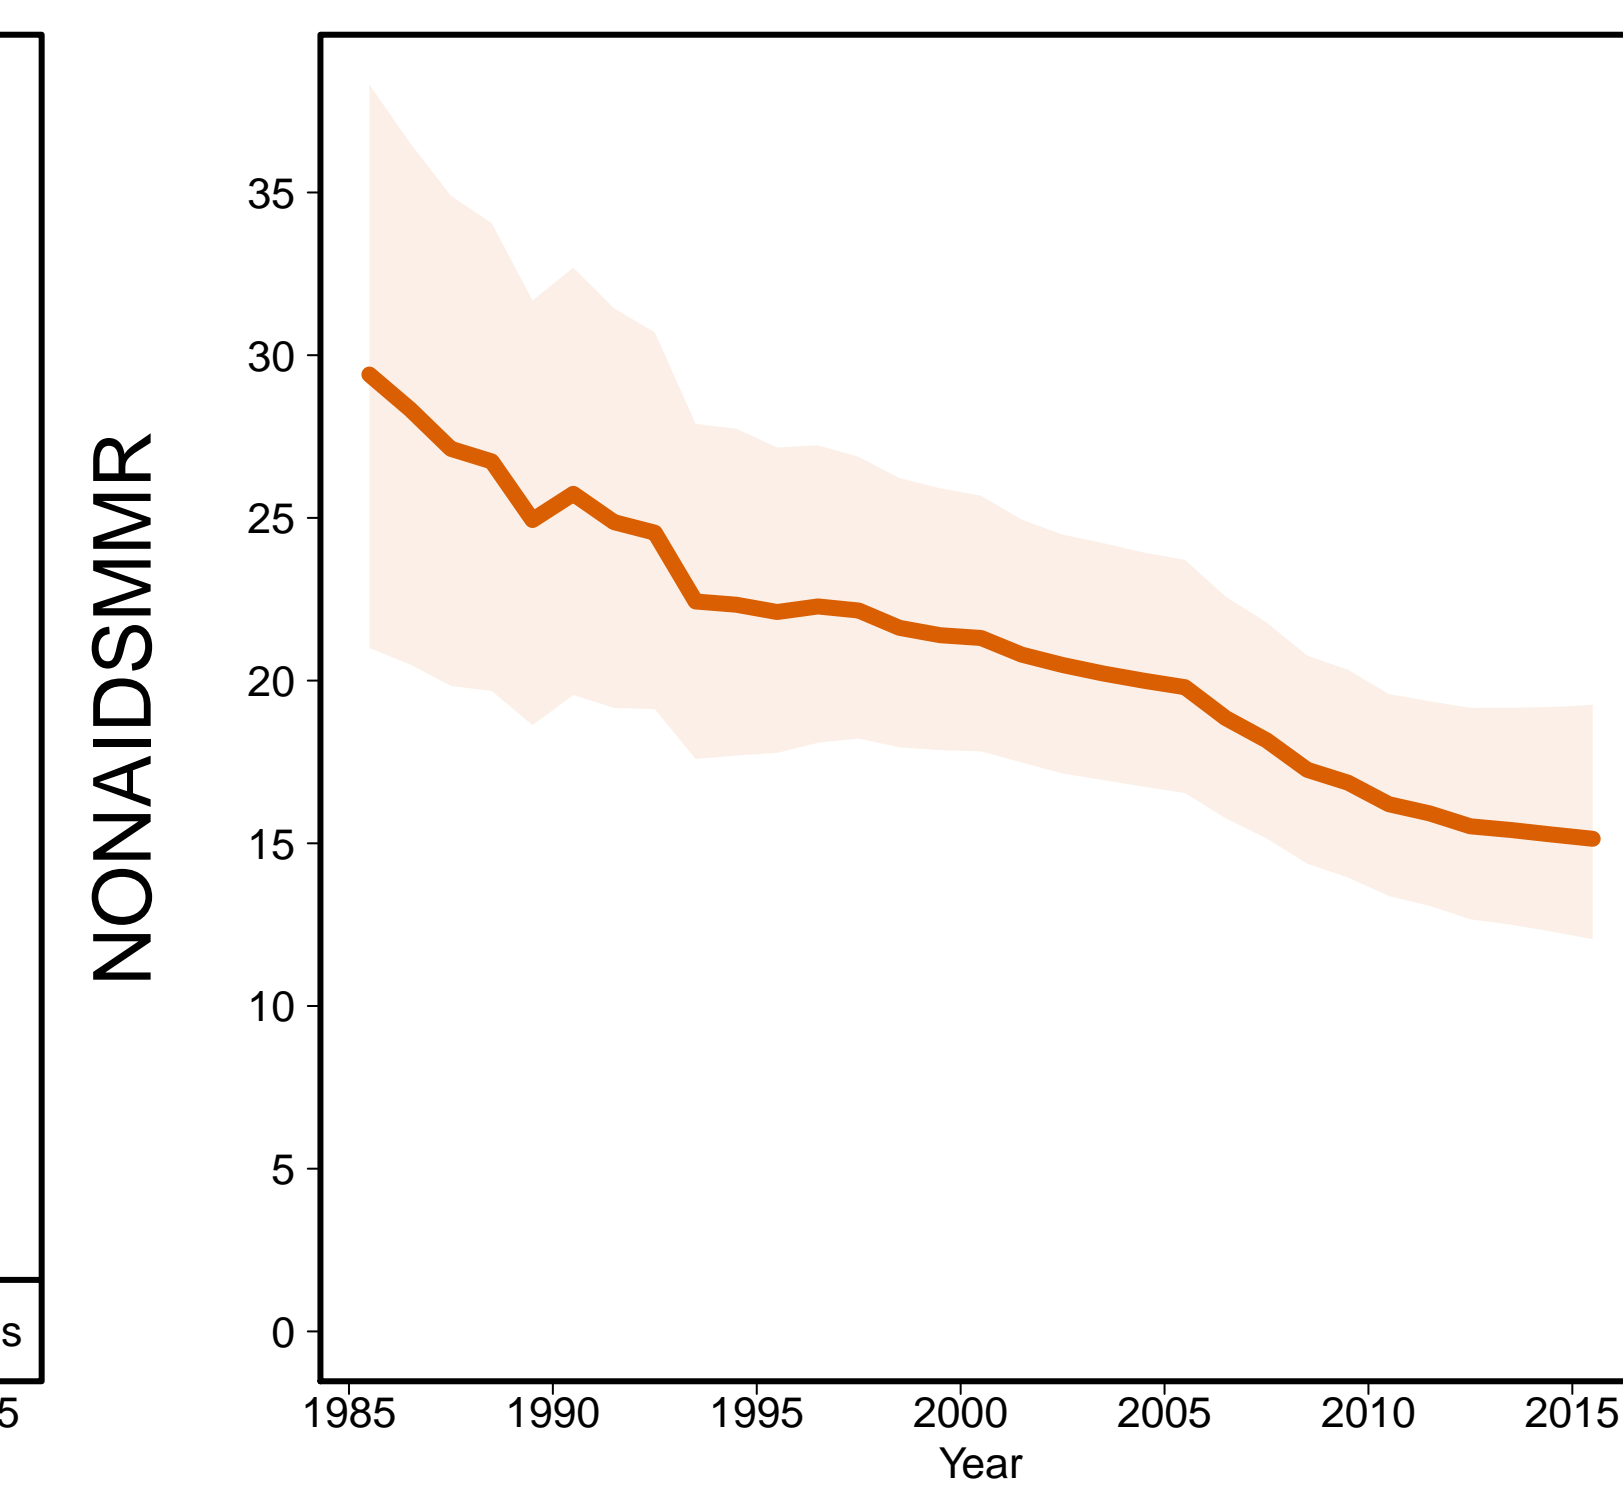

Aids MMR

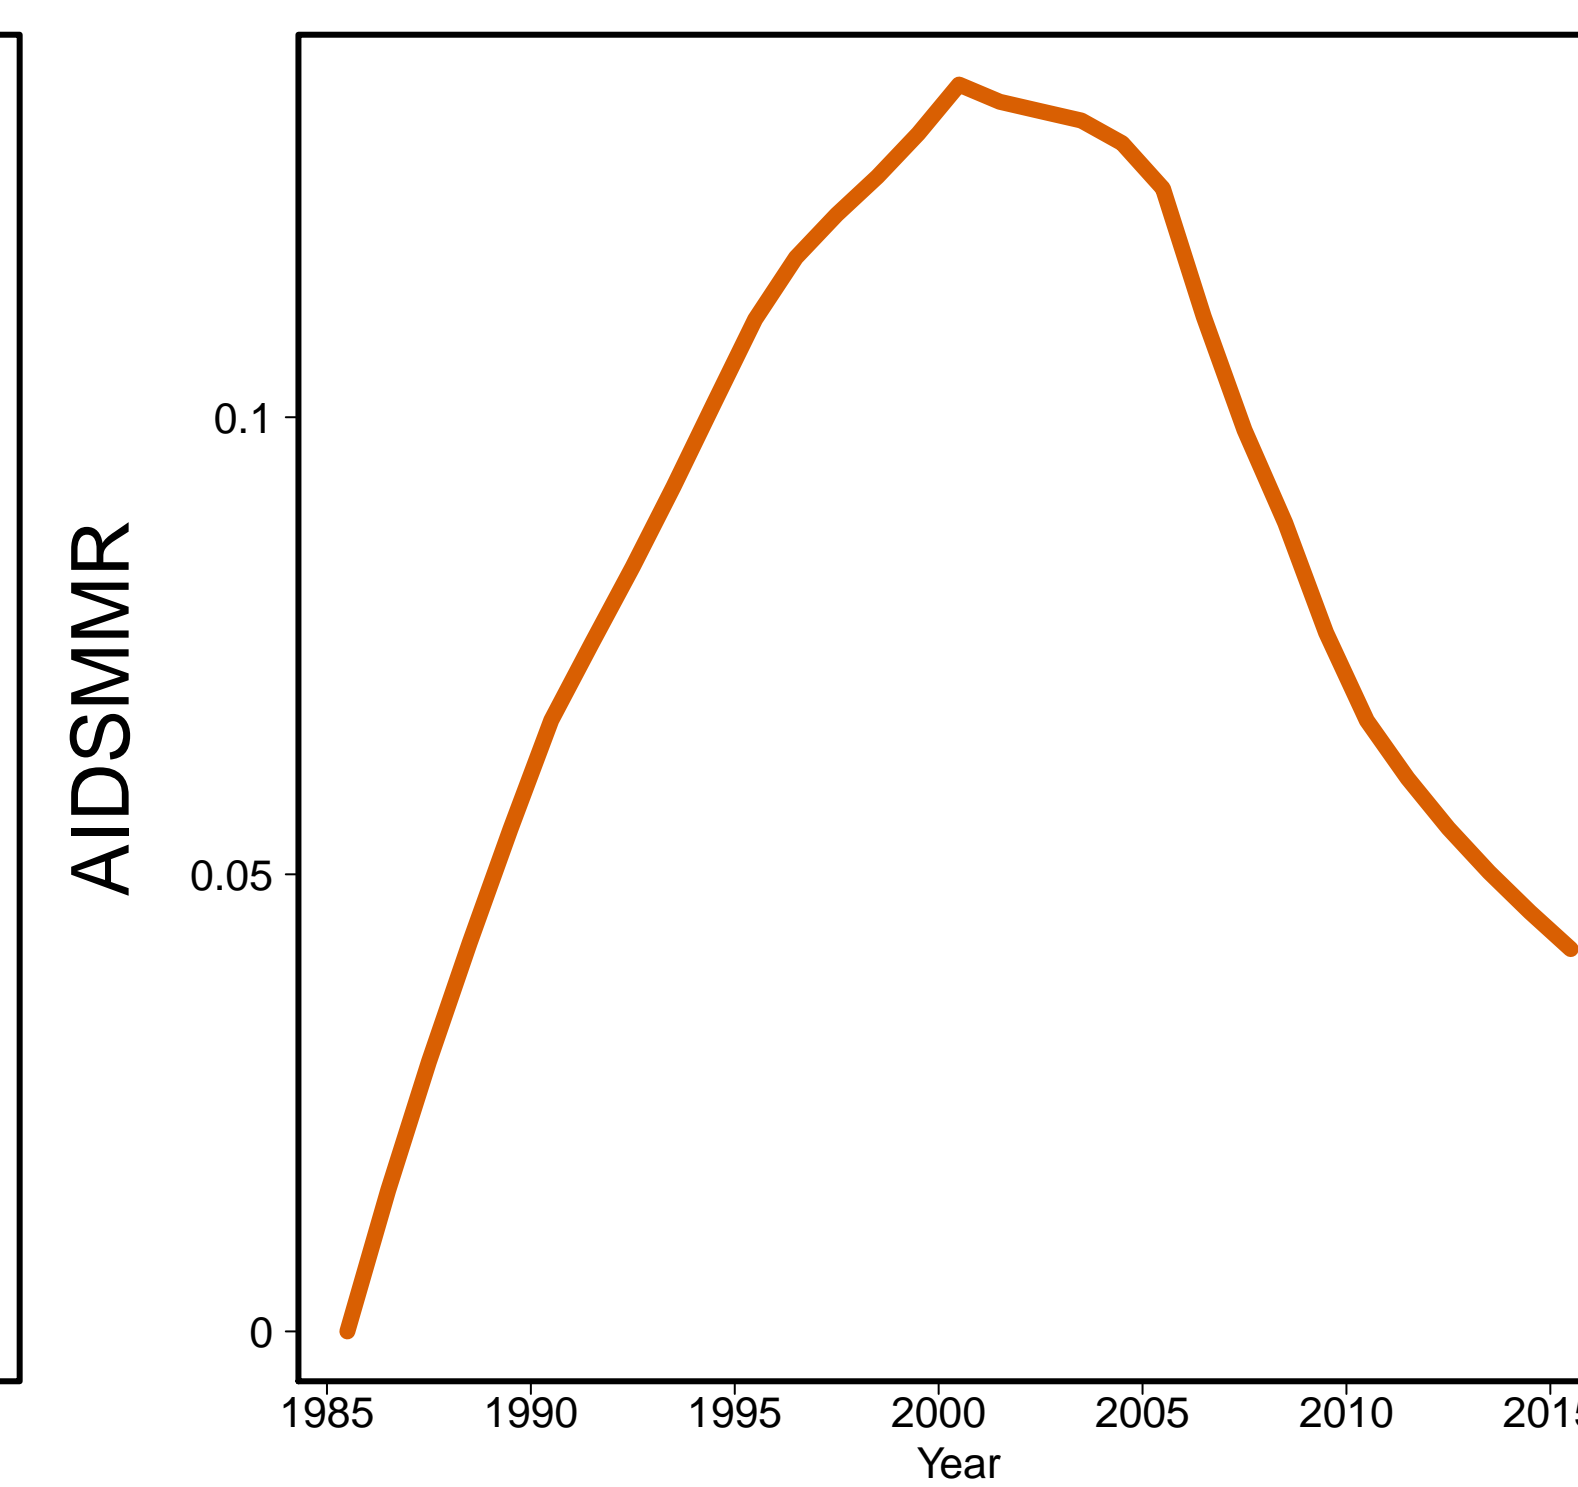

Bangladesh [BGD]  
(Southern Asia)

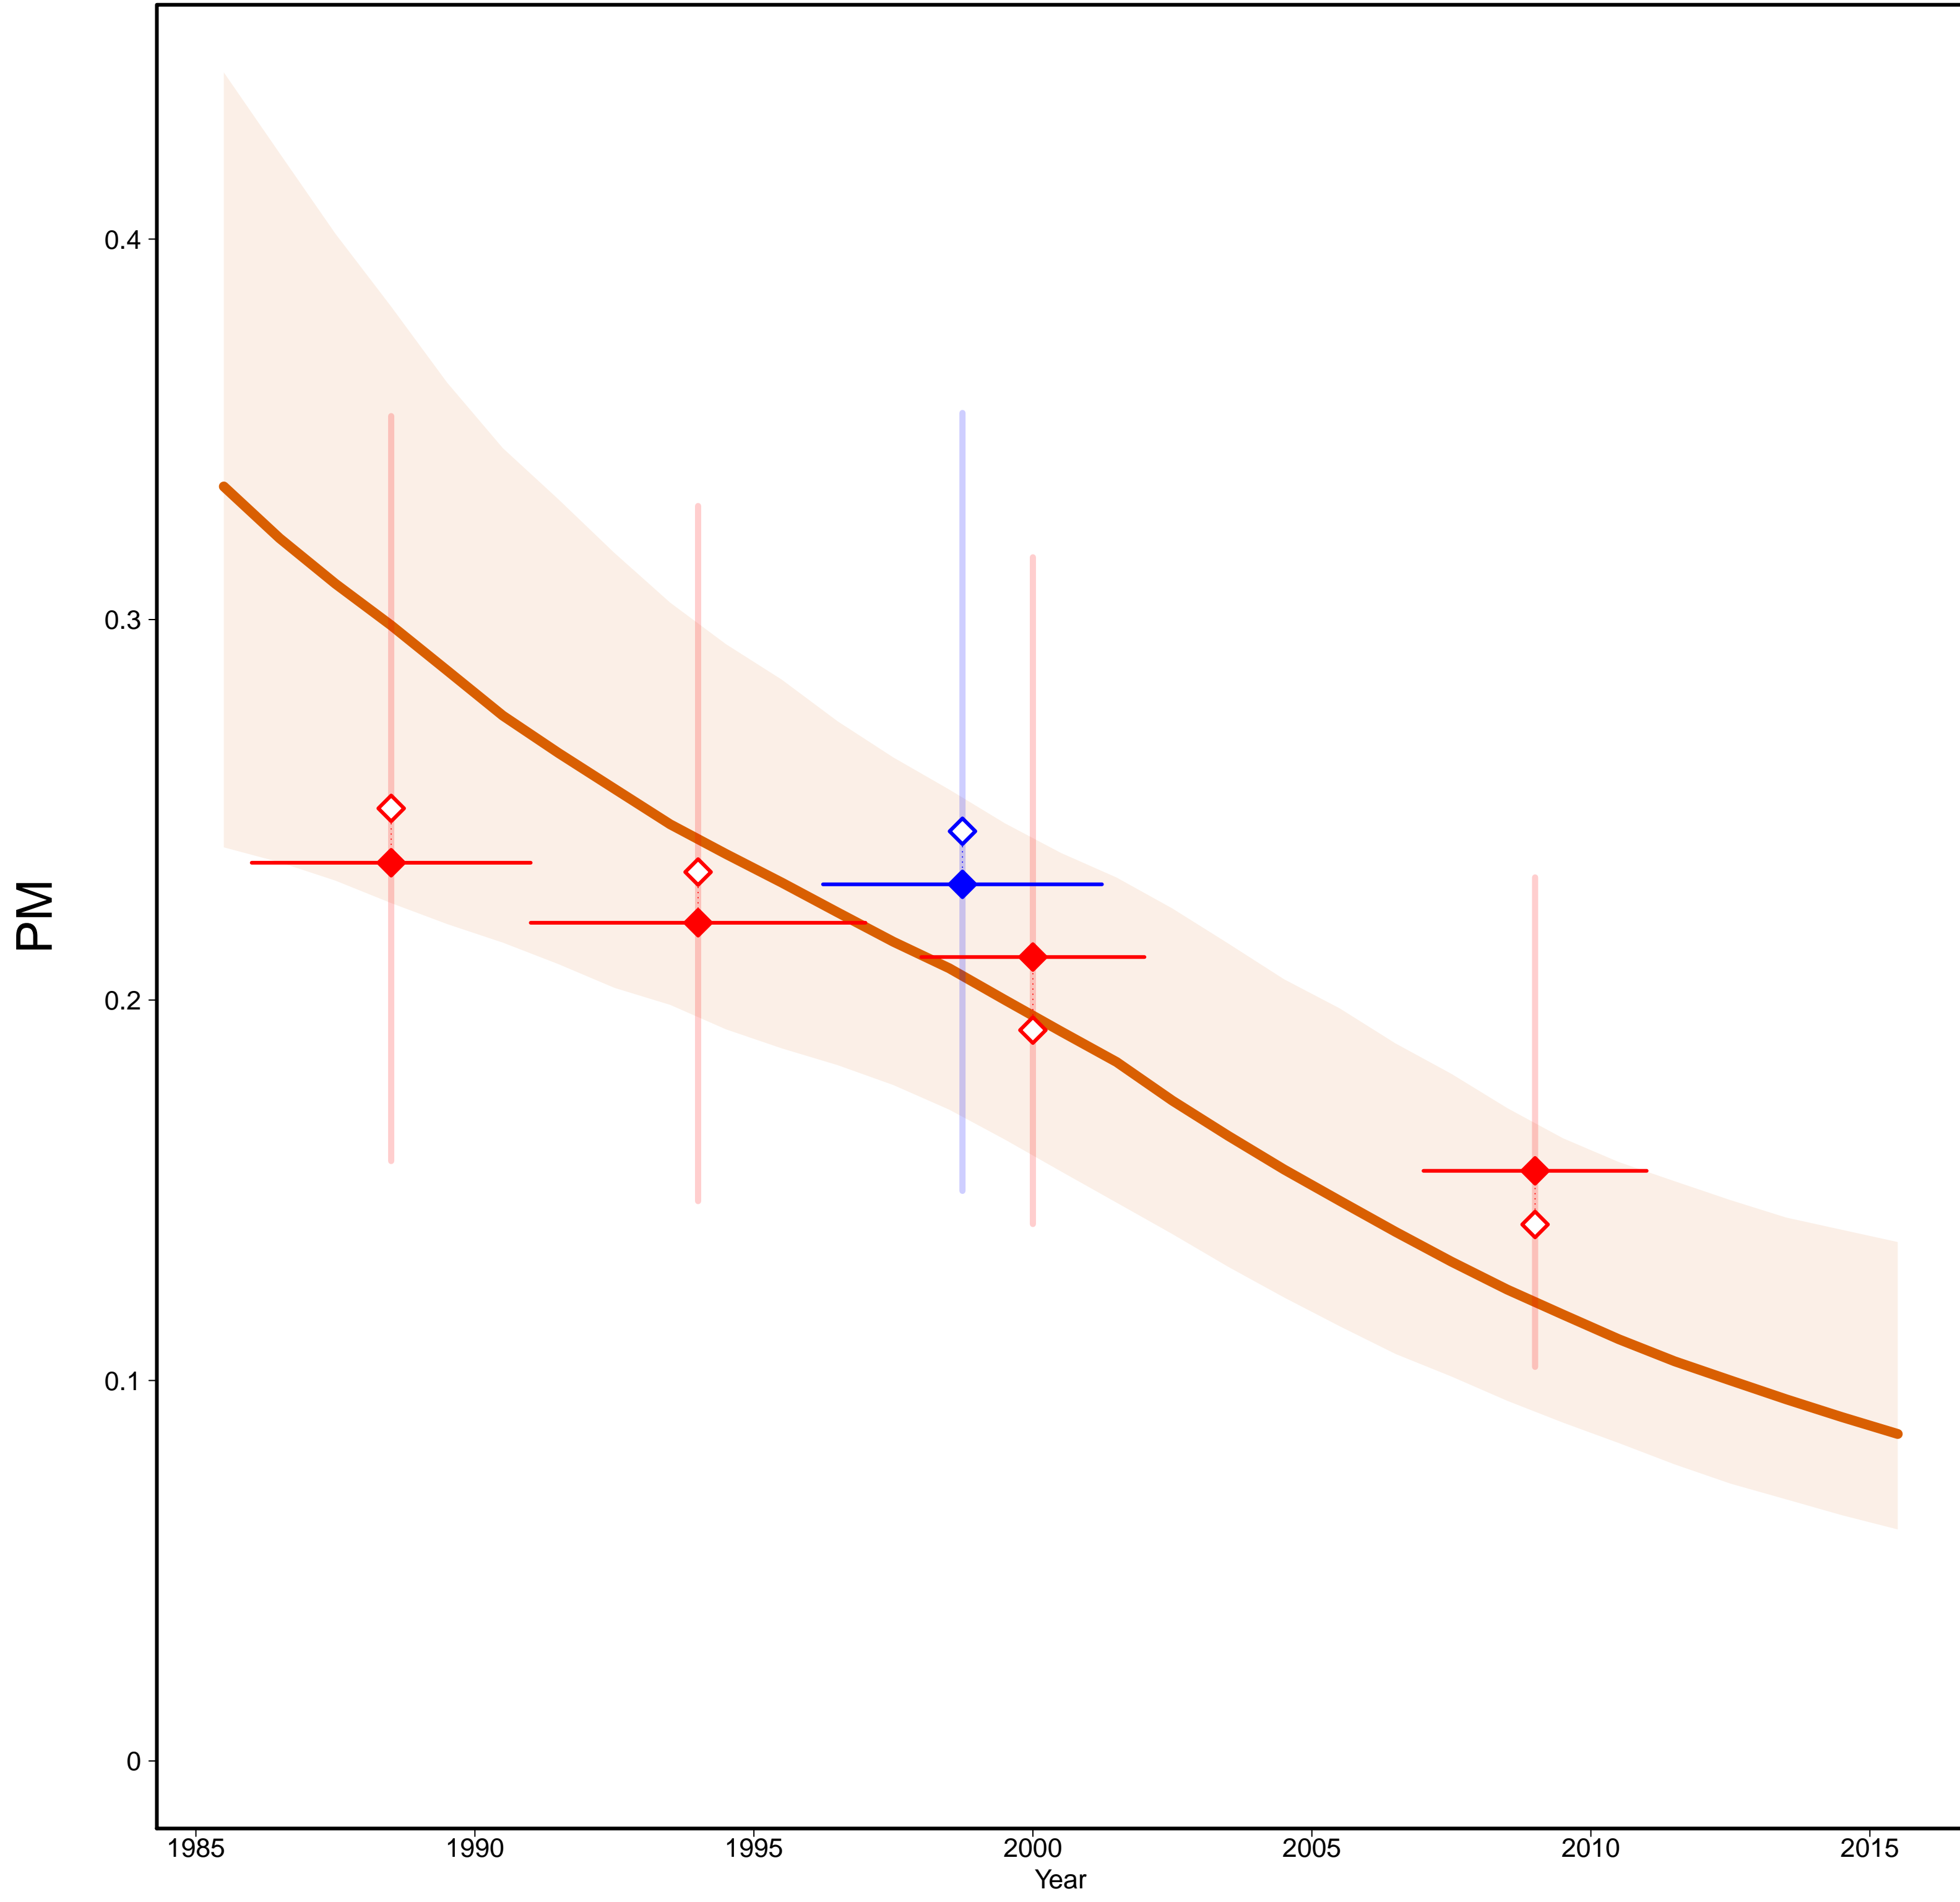

Bangladesh [BGD]  
(Southern Asia)

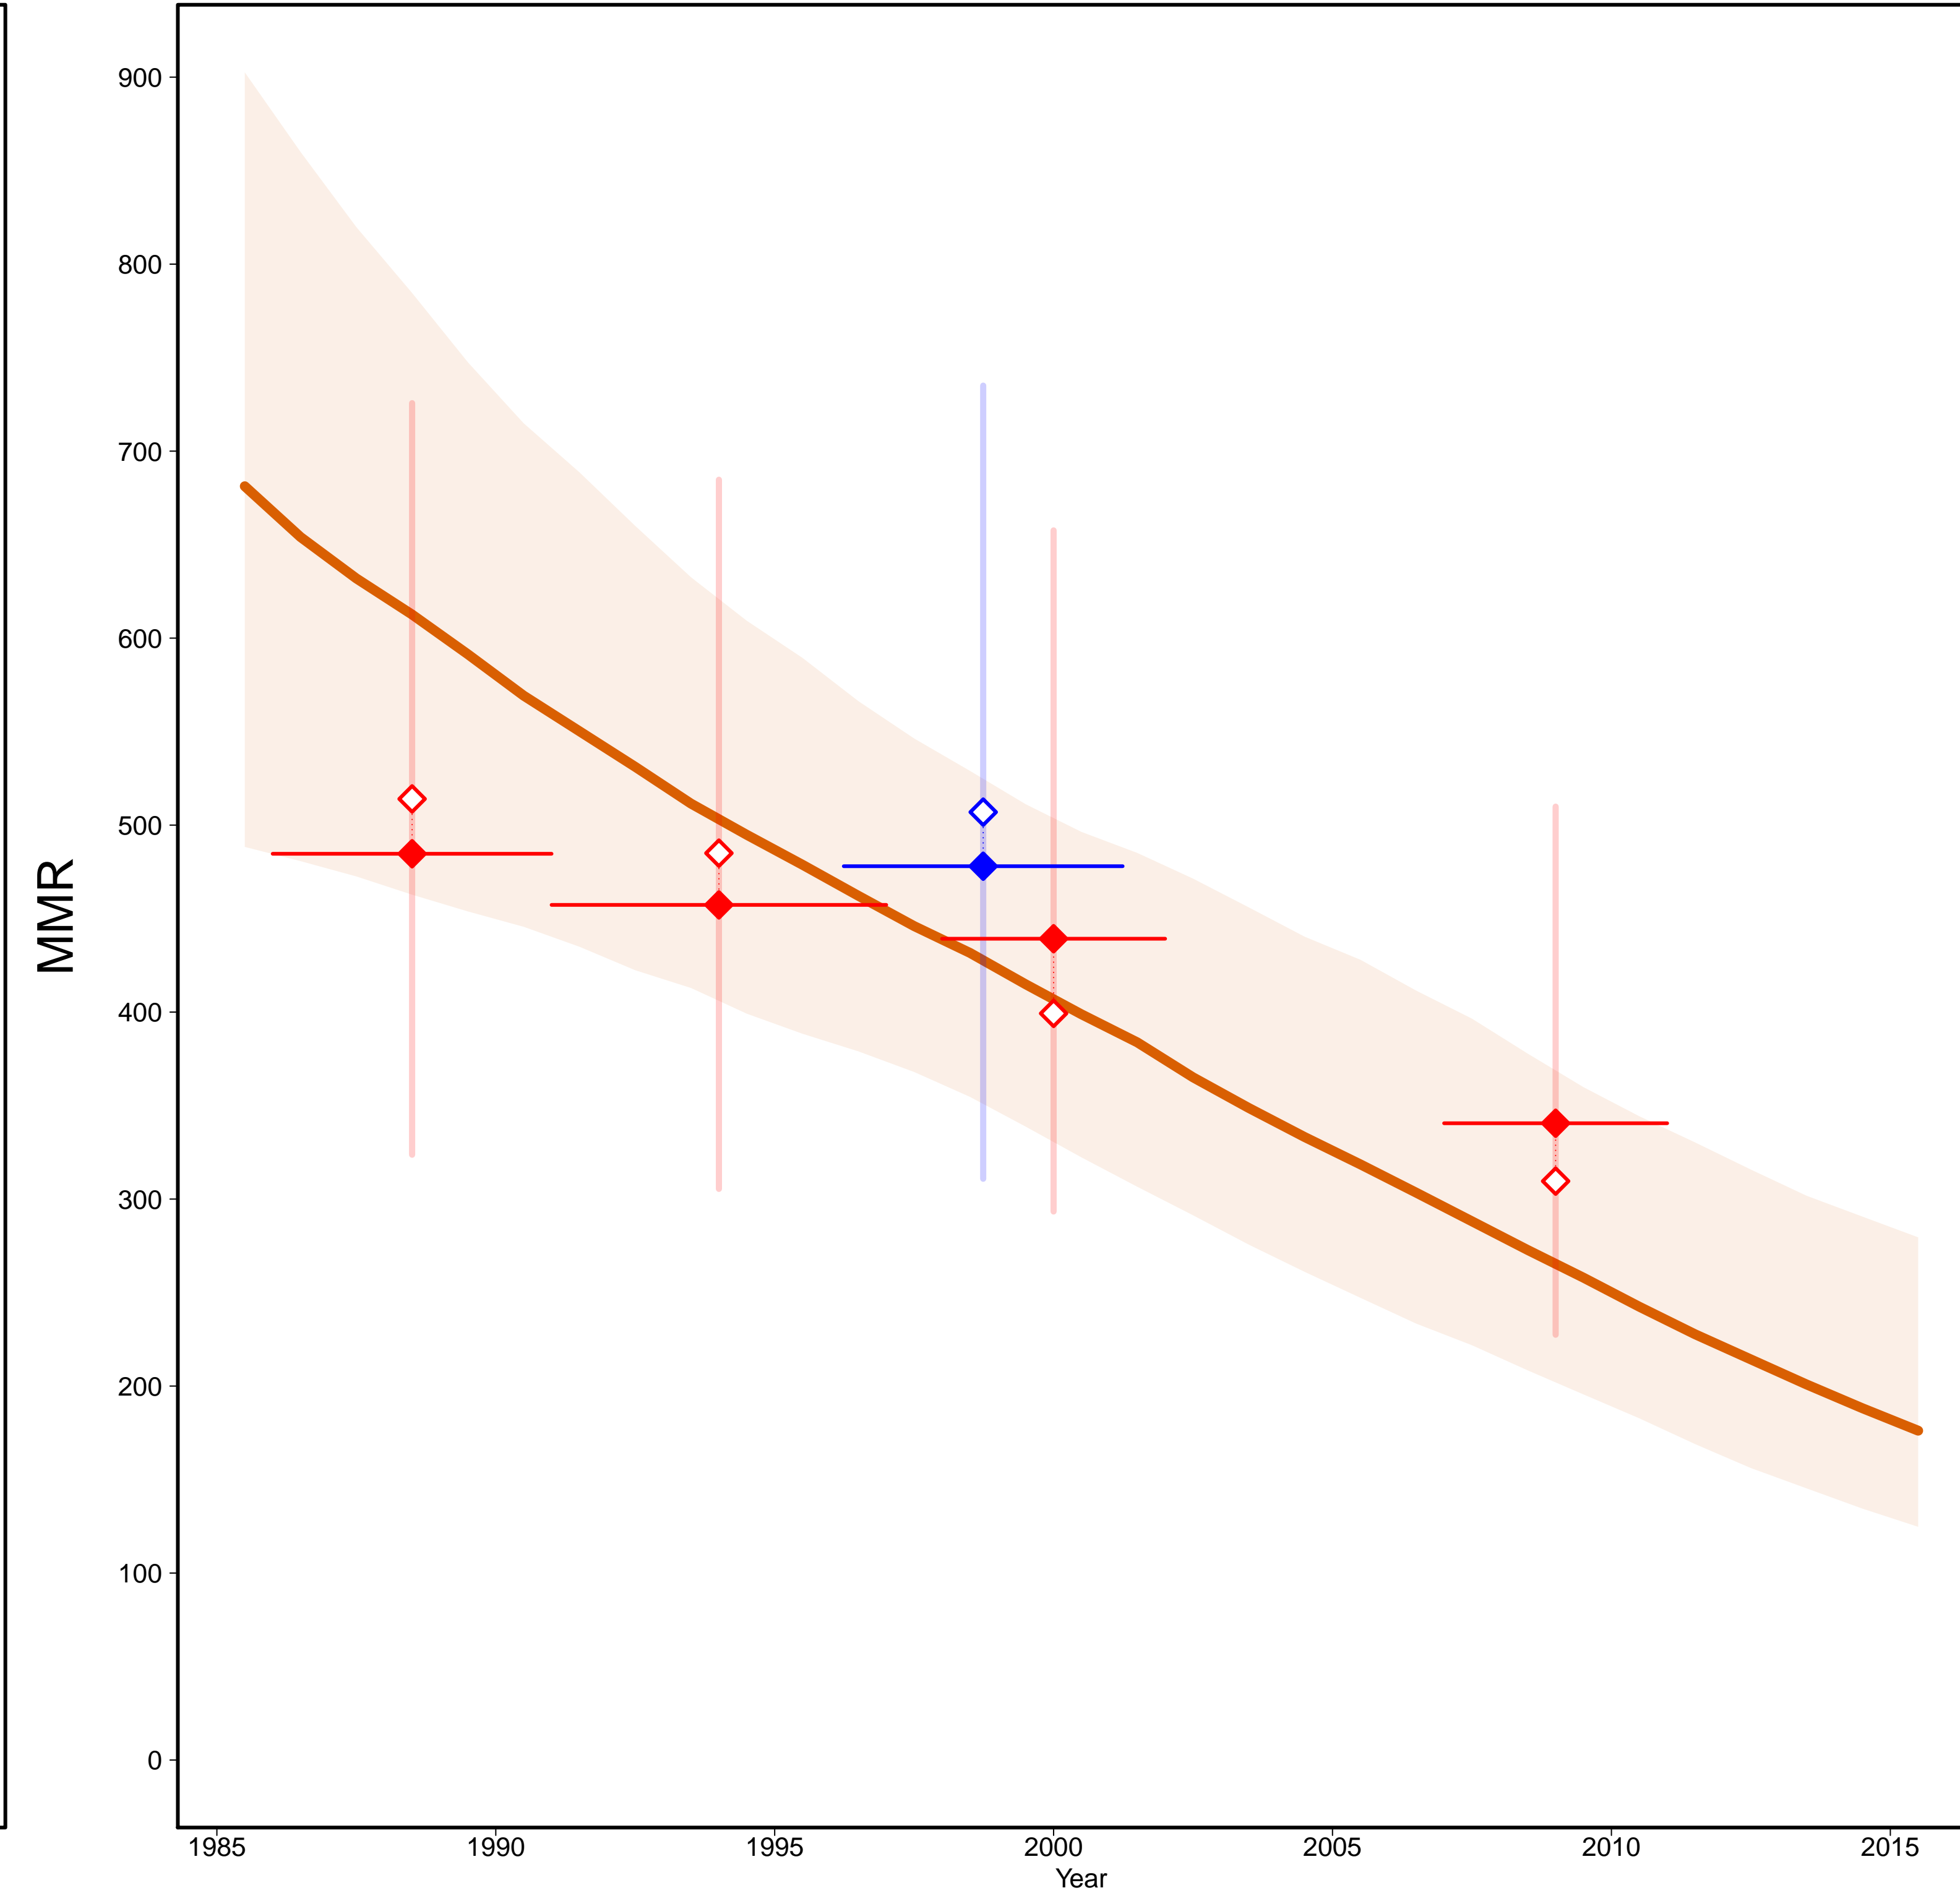

- Estimates —
- MMR Database 2015 —
- ◇ Observed Data
- ◆ Adjusted Data
- Data type —
- ◆ DHS
- ◆ Misc. studies

Gross Domestic Product

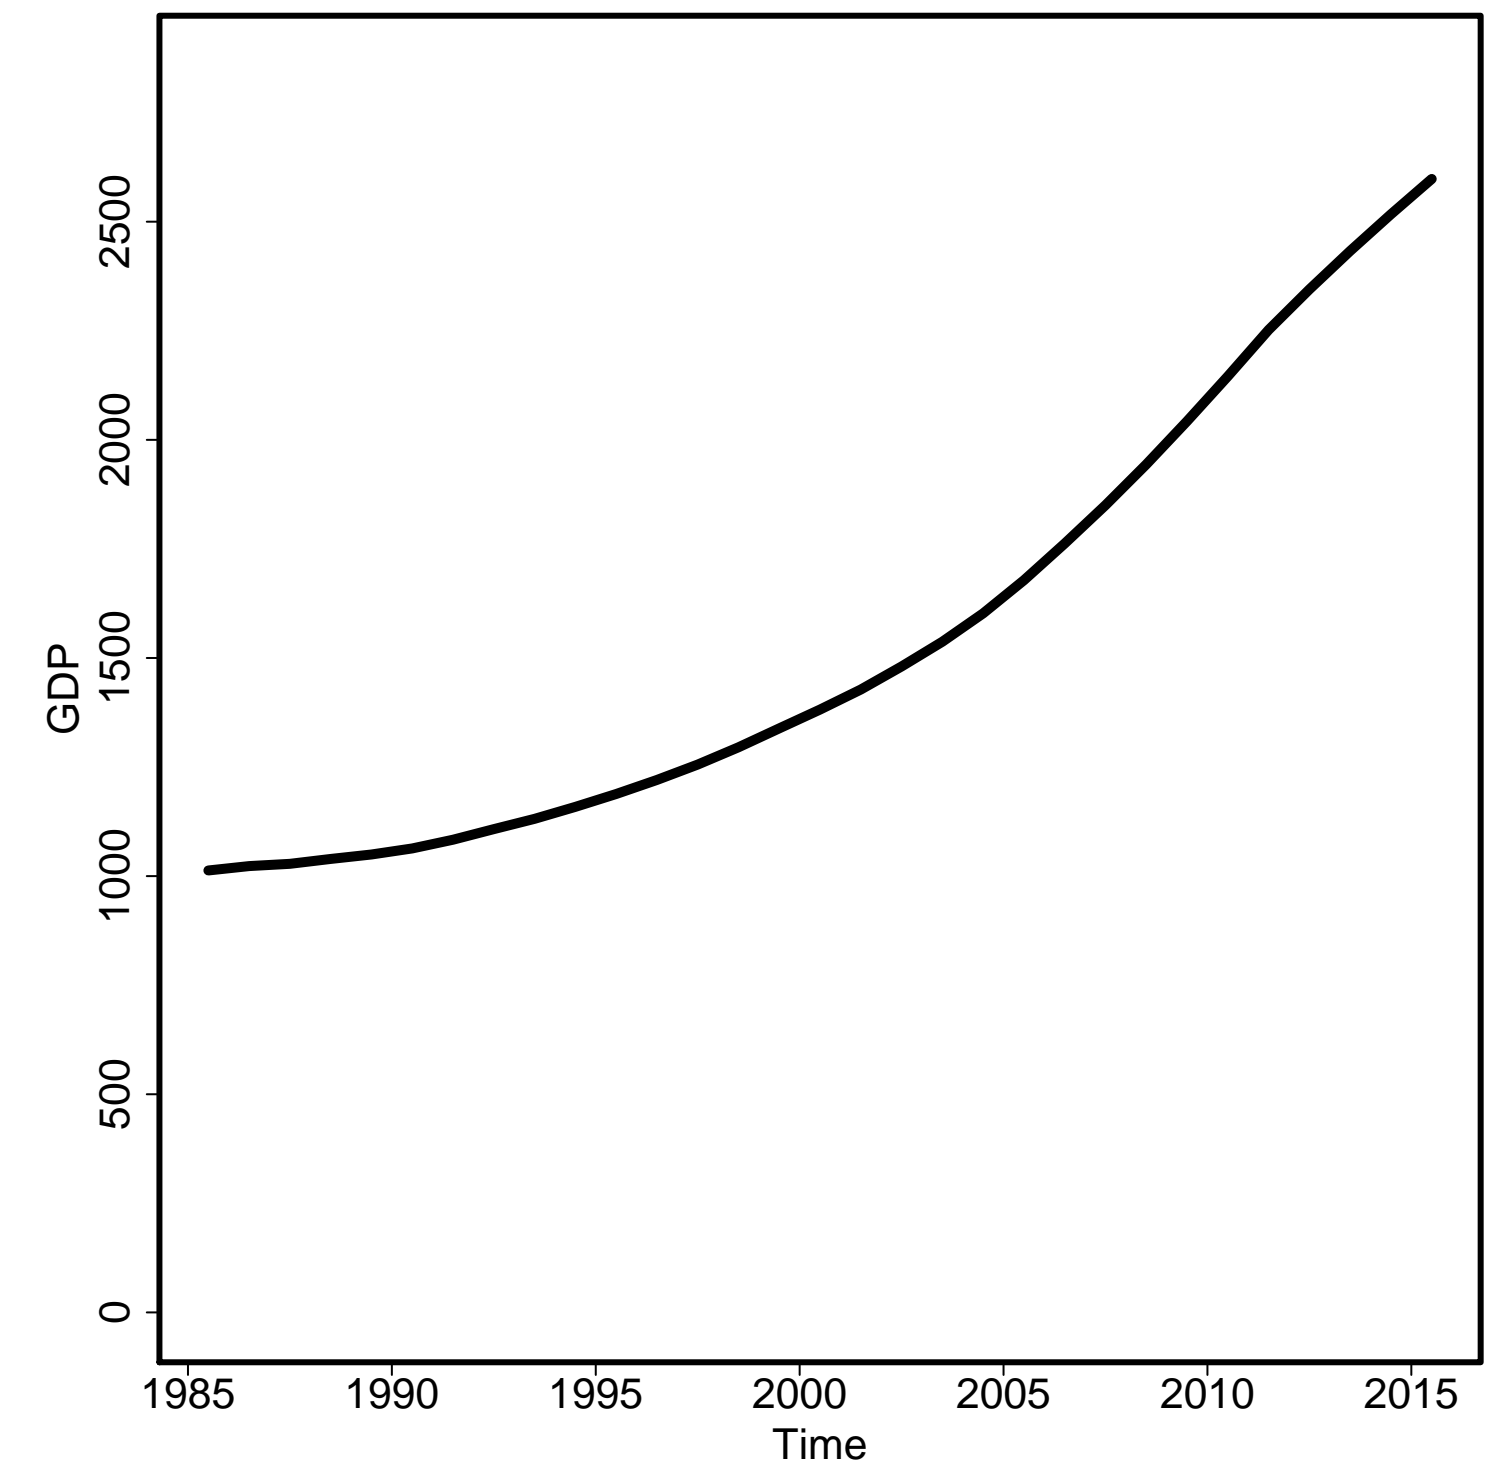

General Fertility Rate

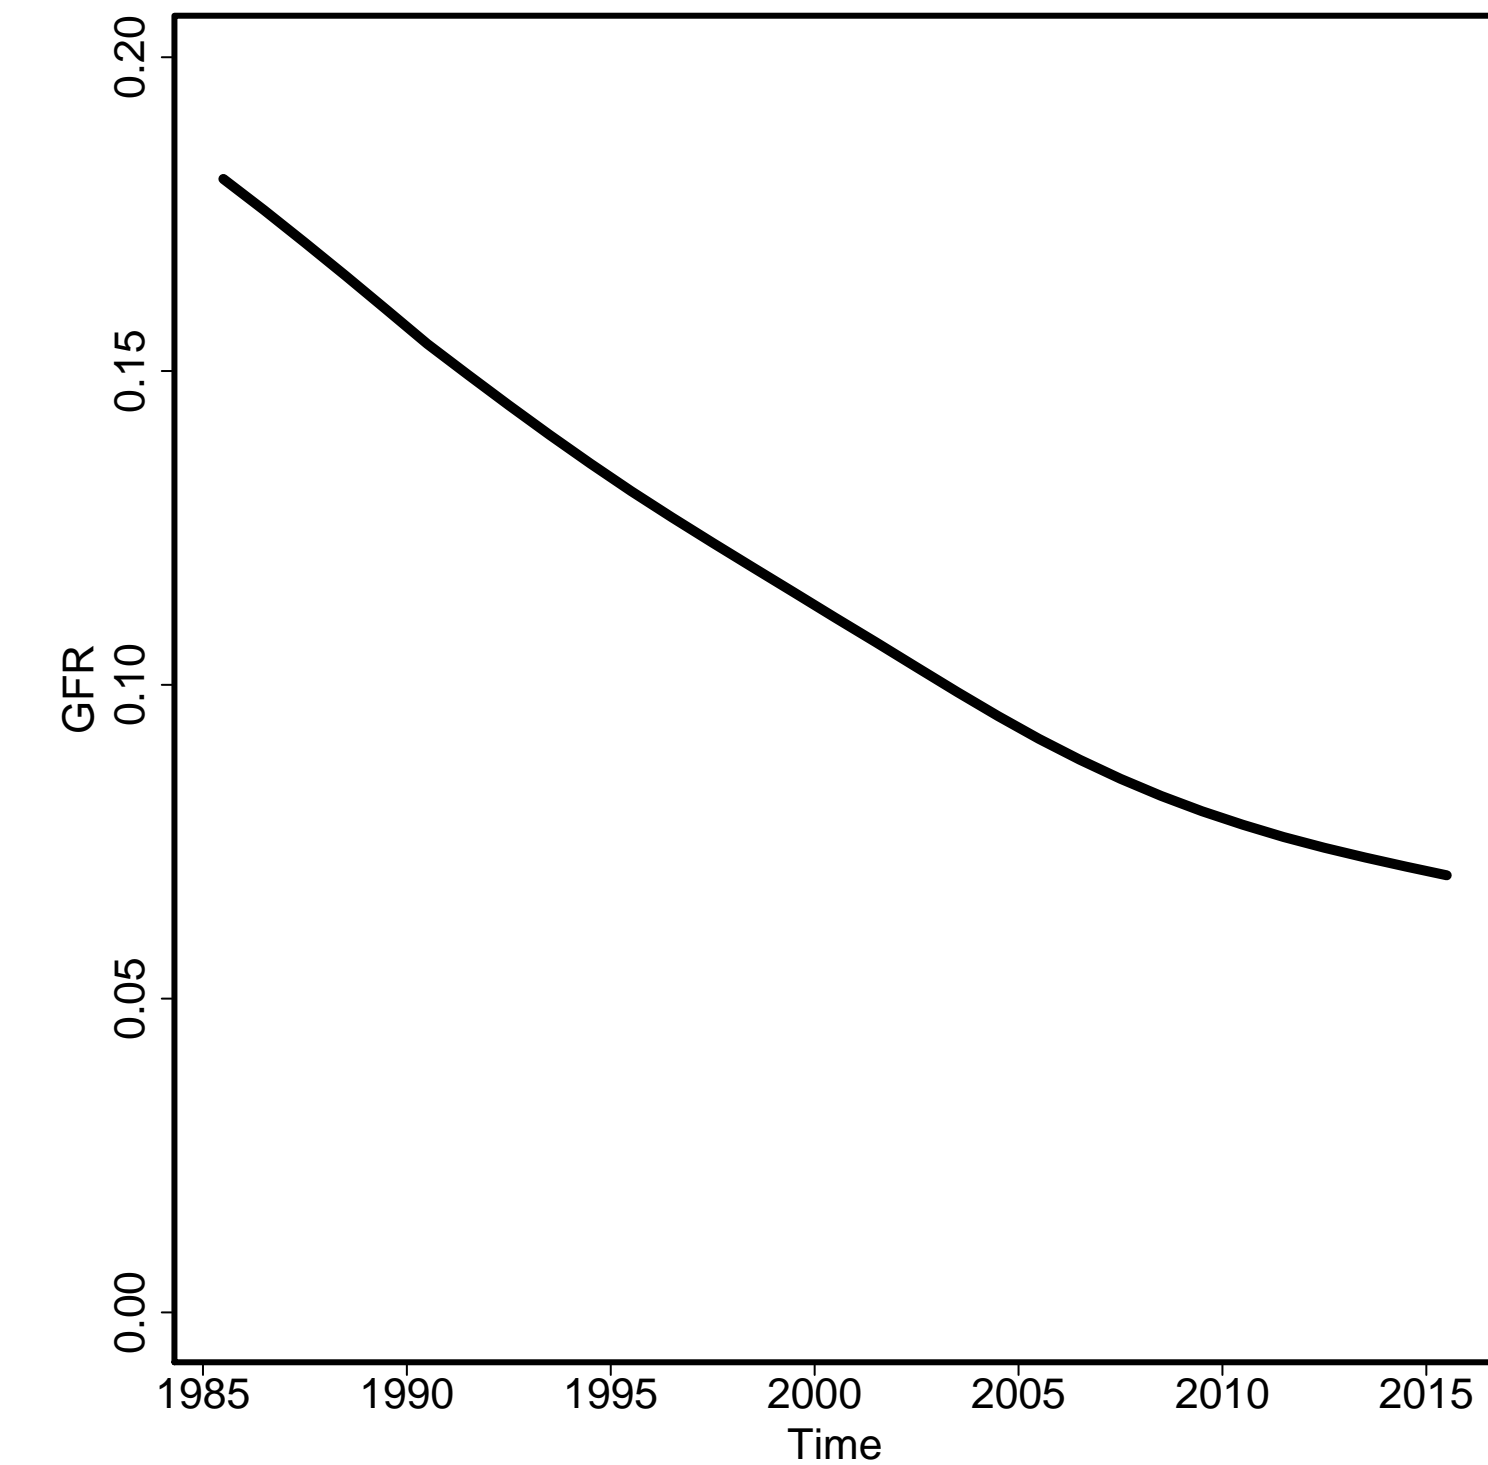

Skilled Attendance to Birth

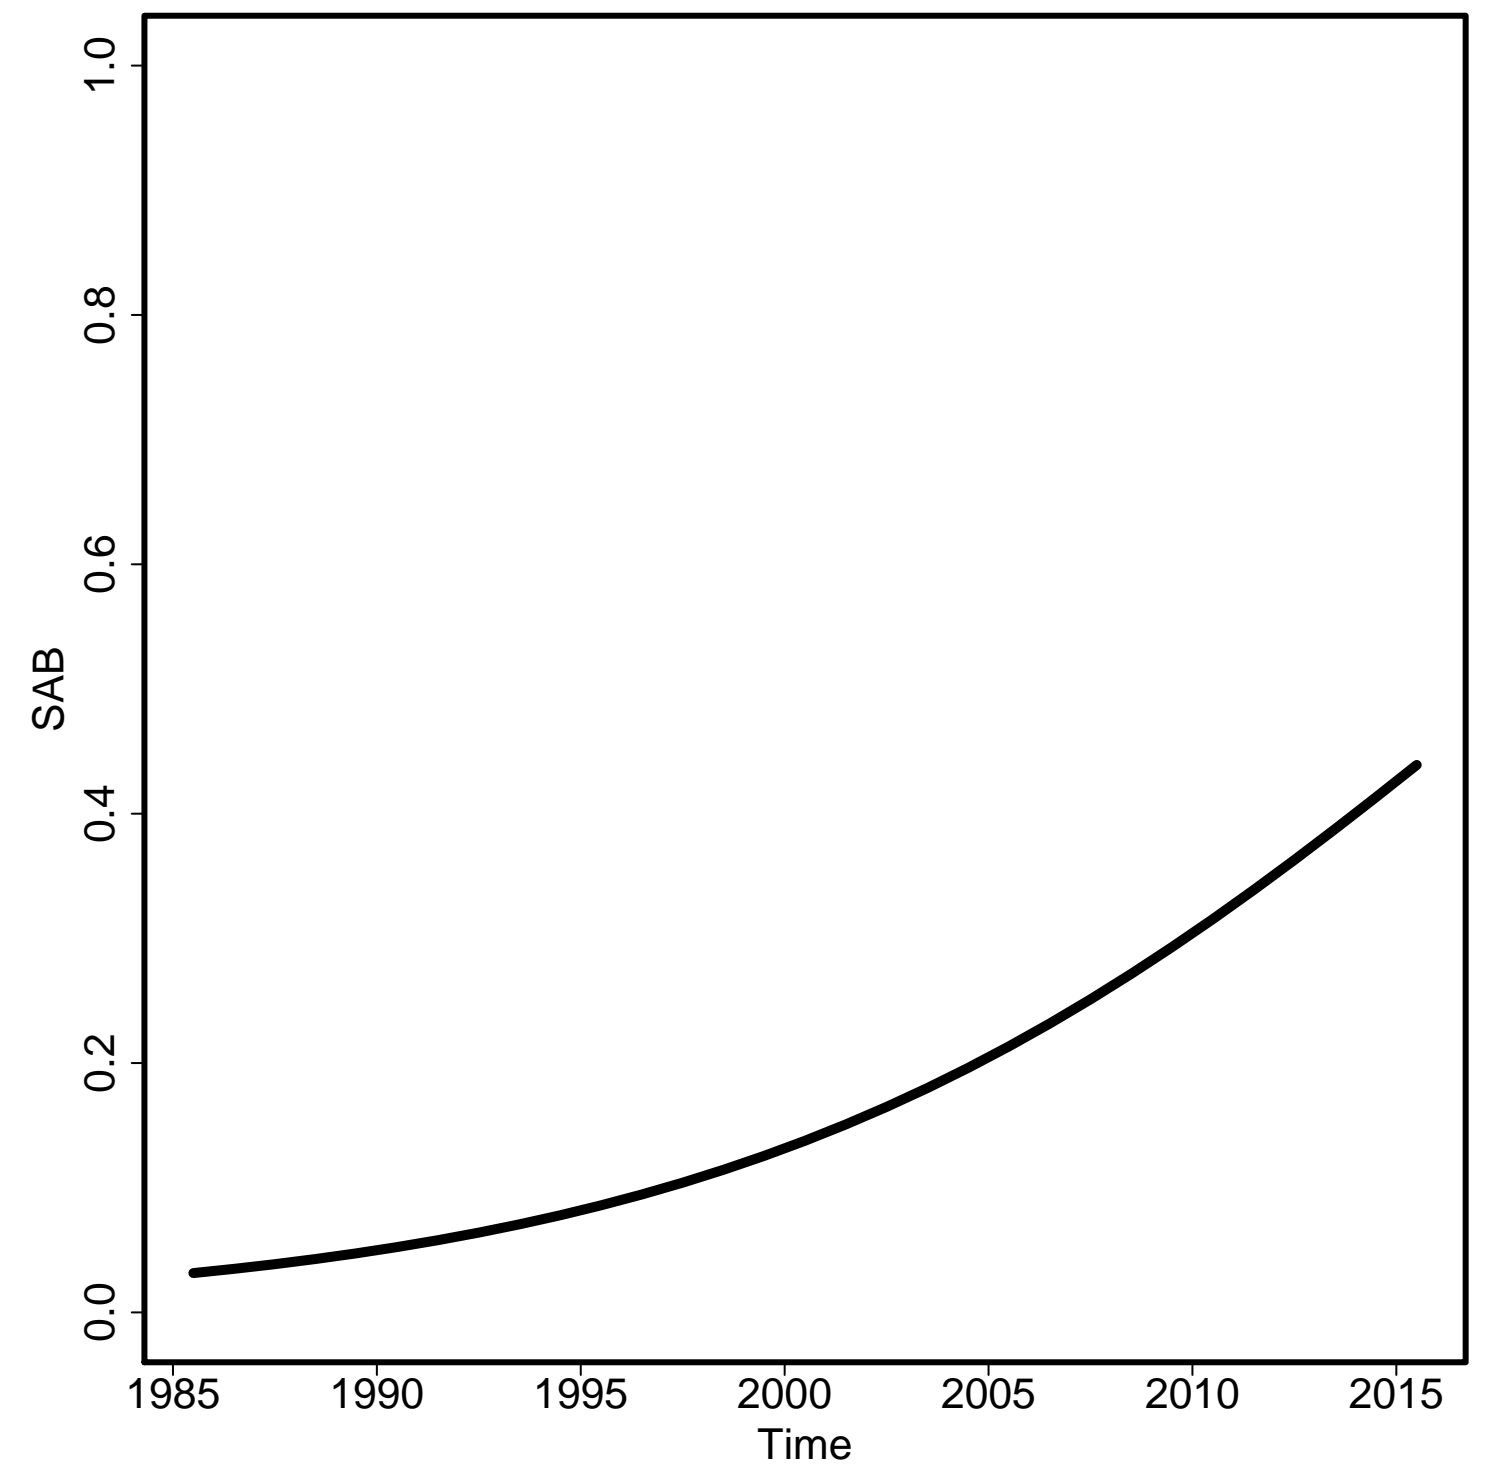

Envelope/Births

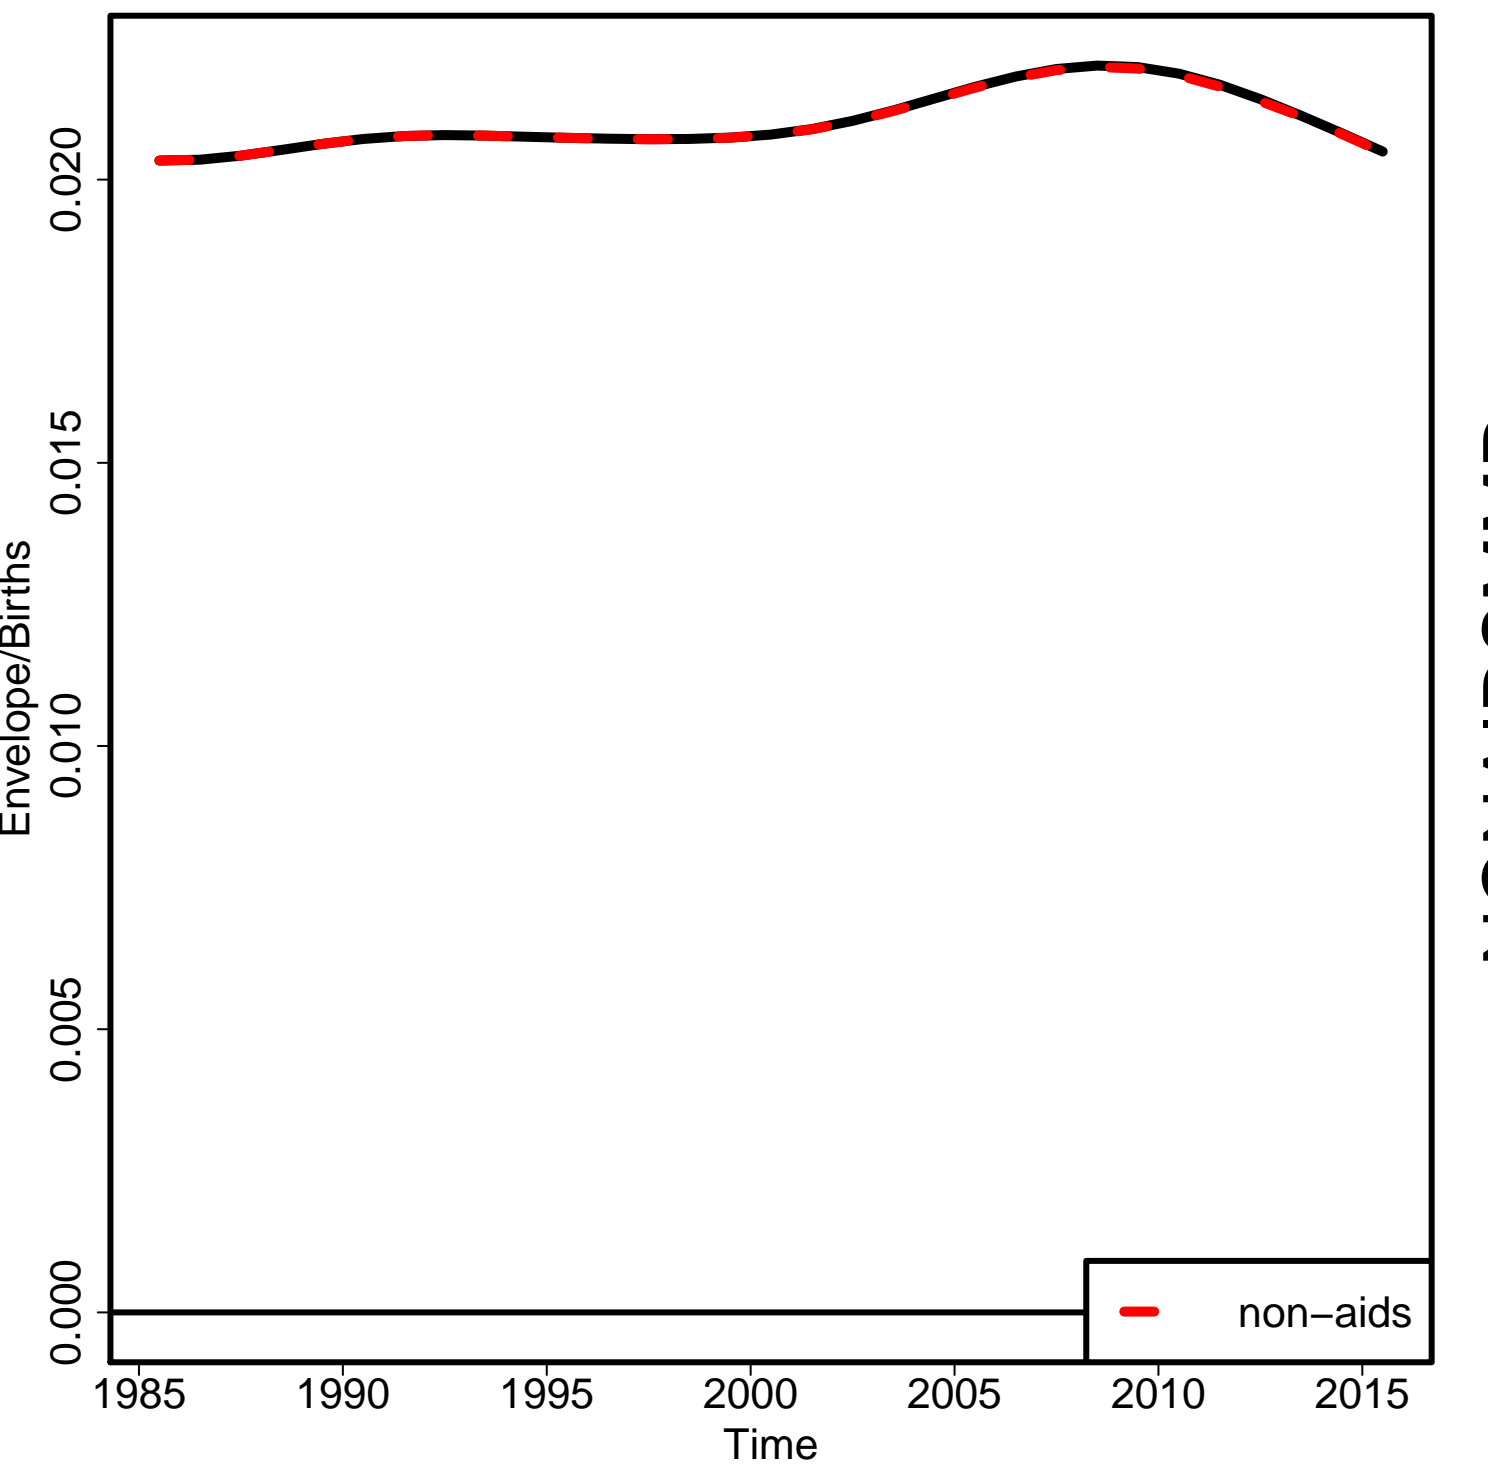

Non-aids MMR

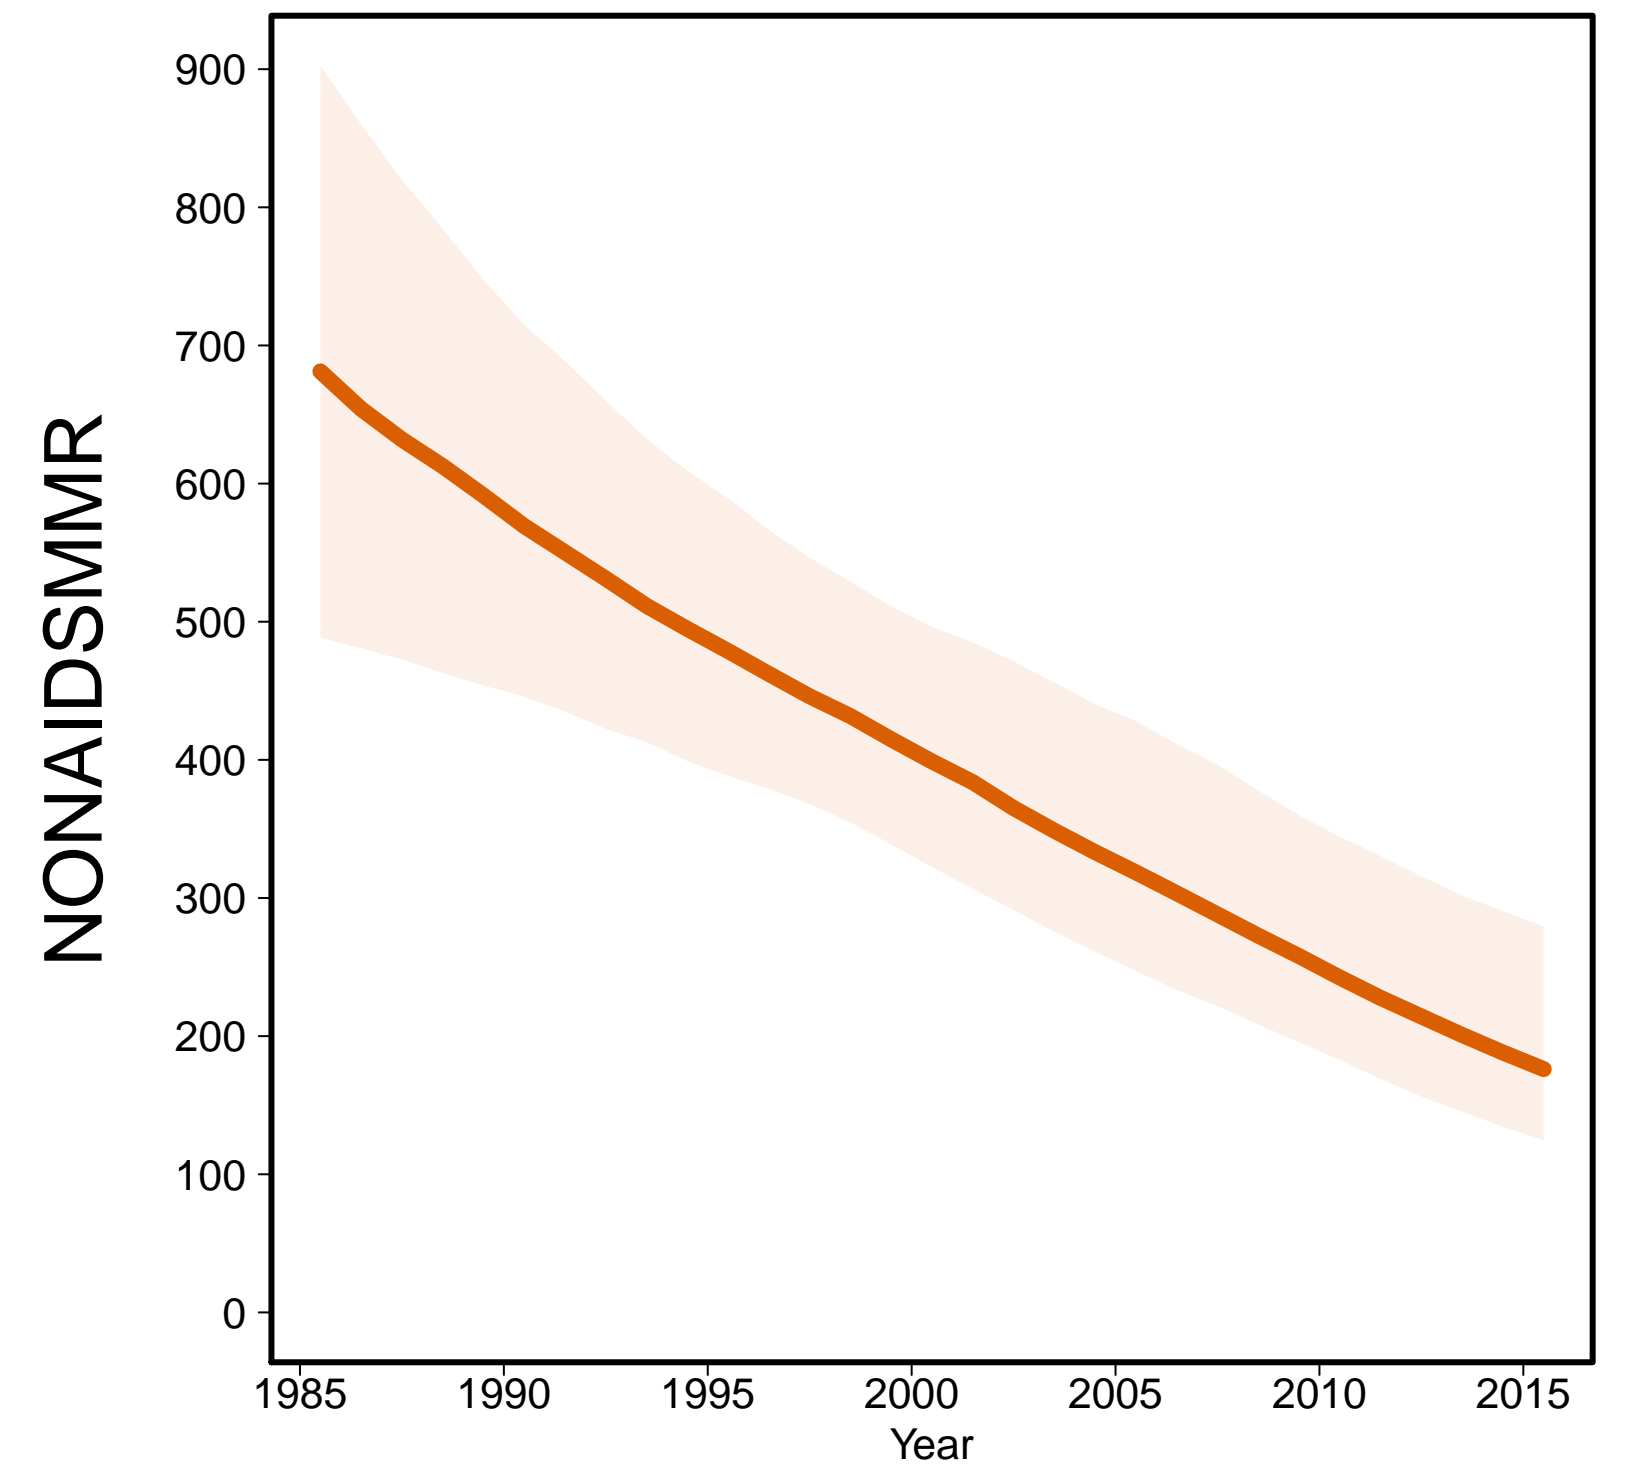

Aids MMR

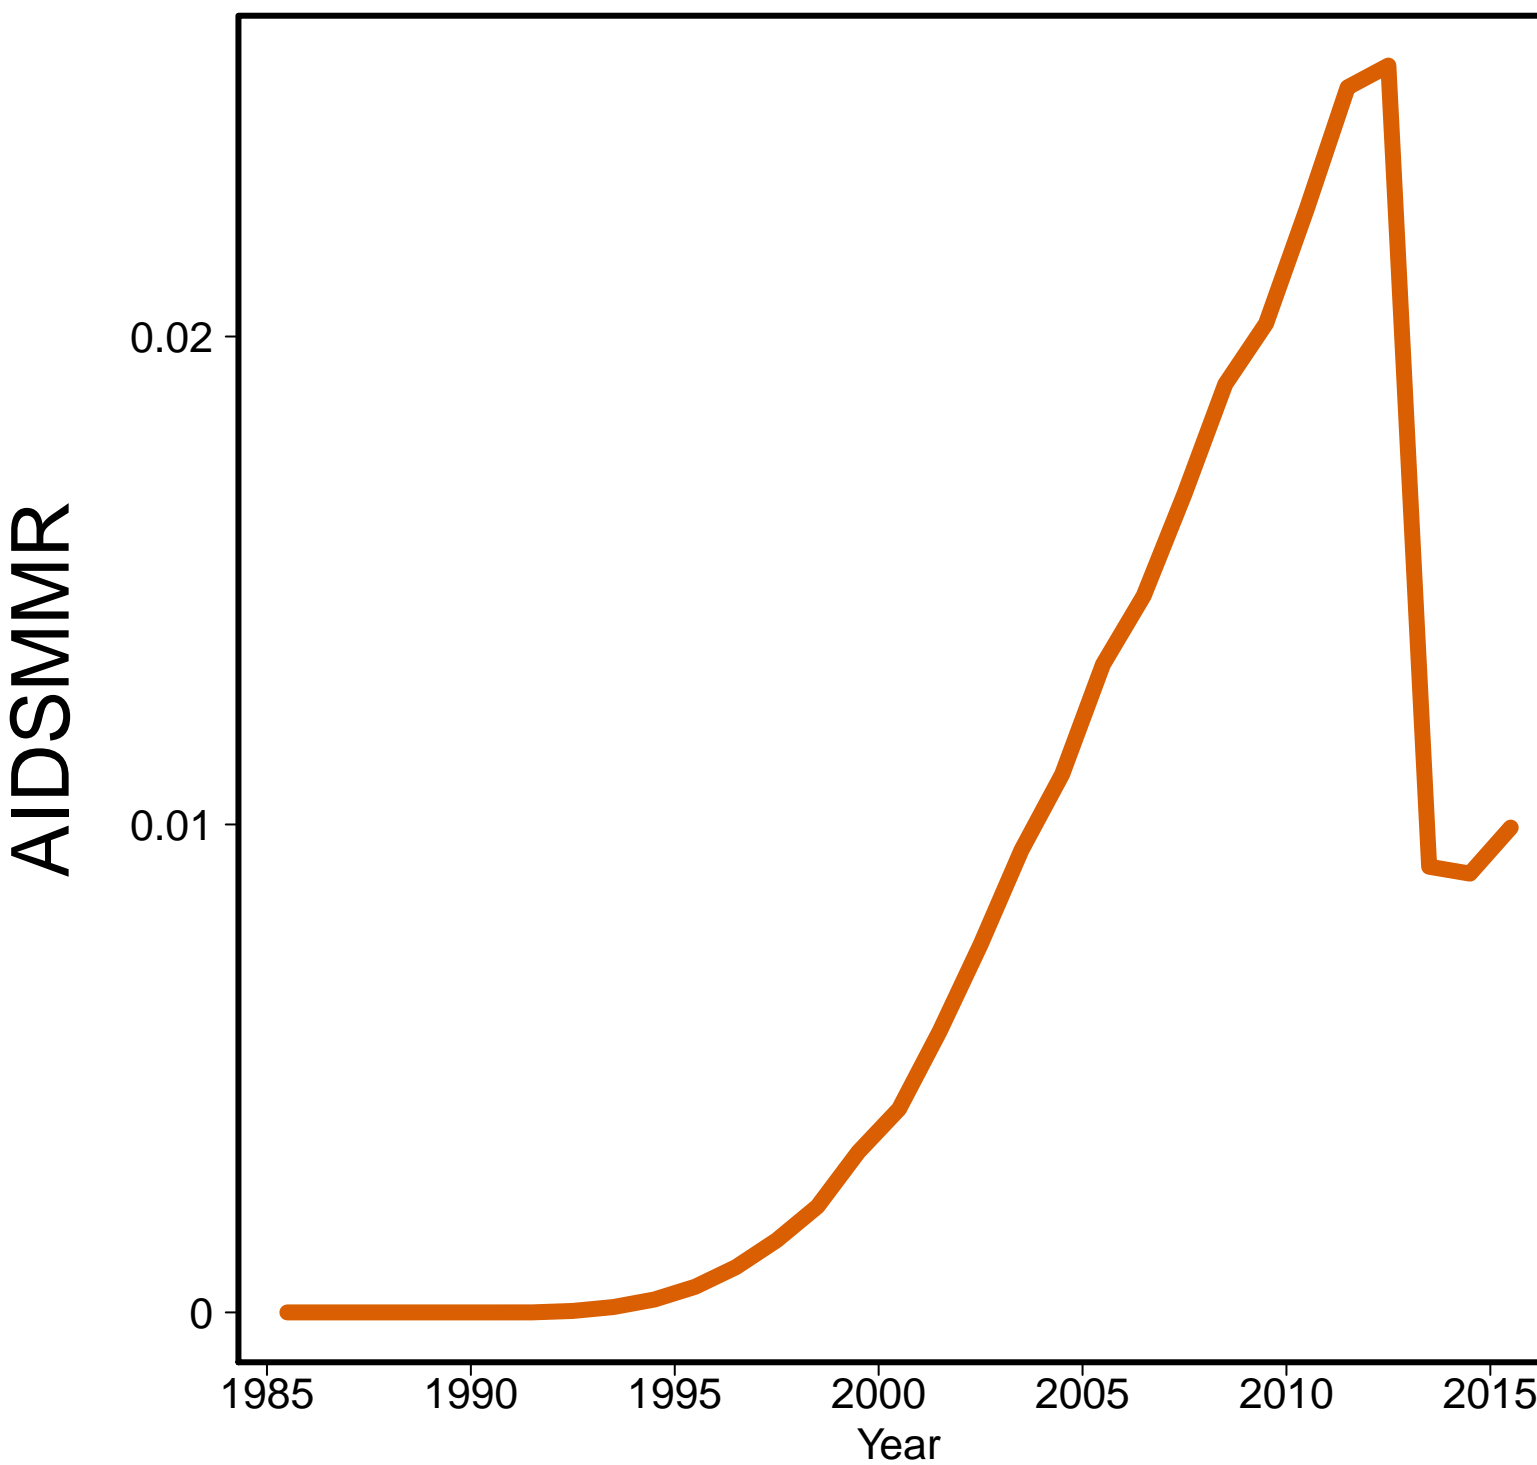

Barbados [BRB]  
(Caribbean)

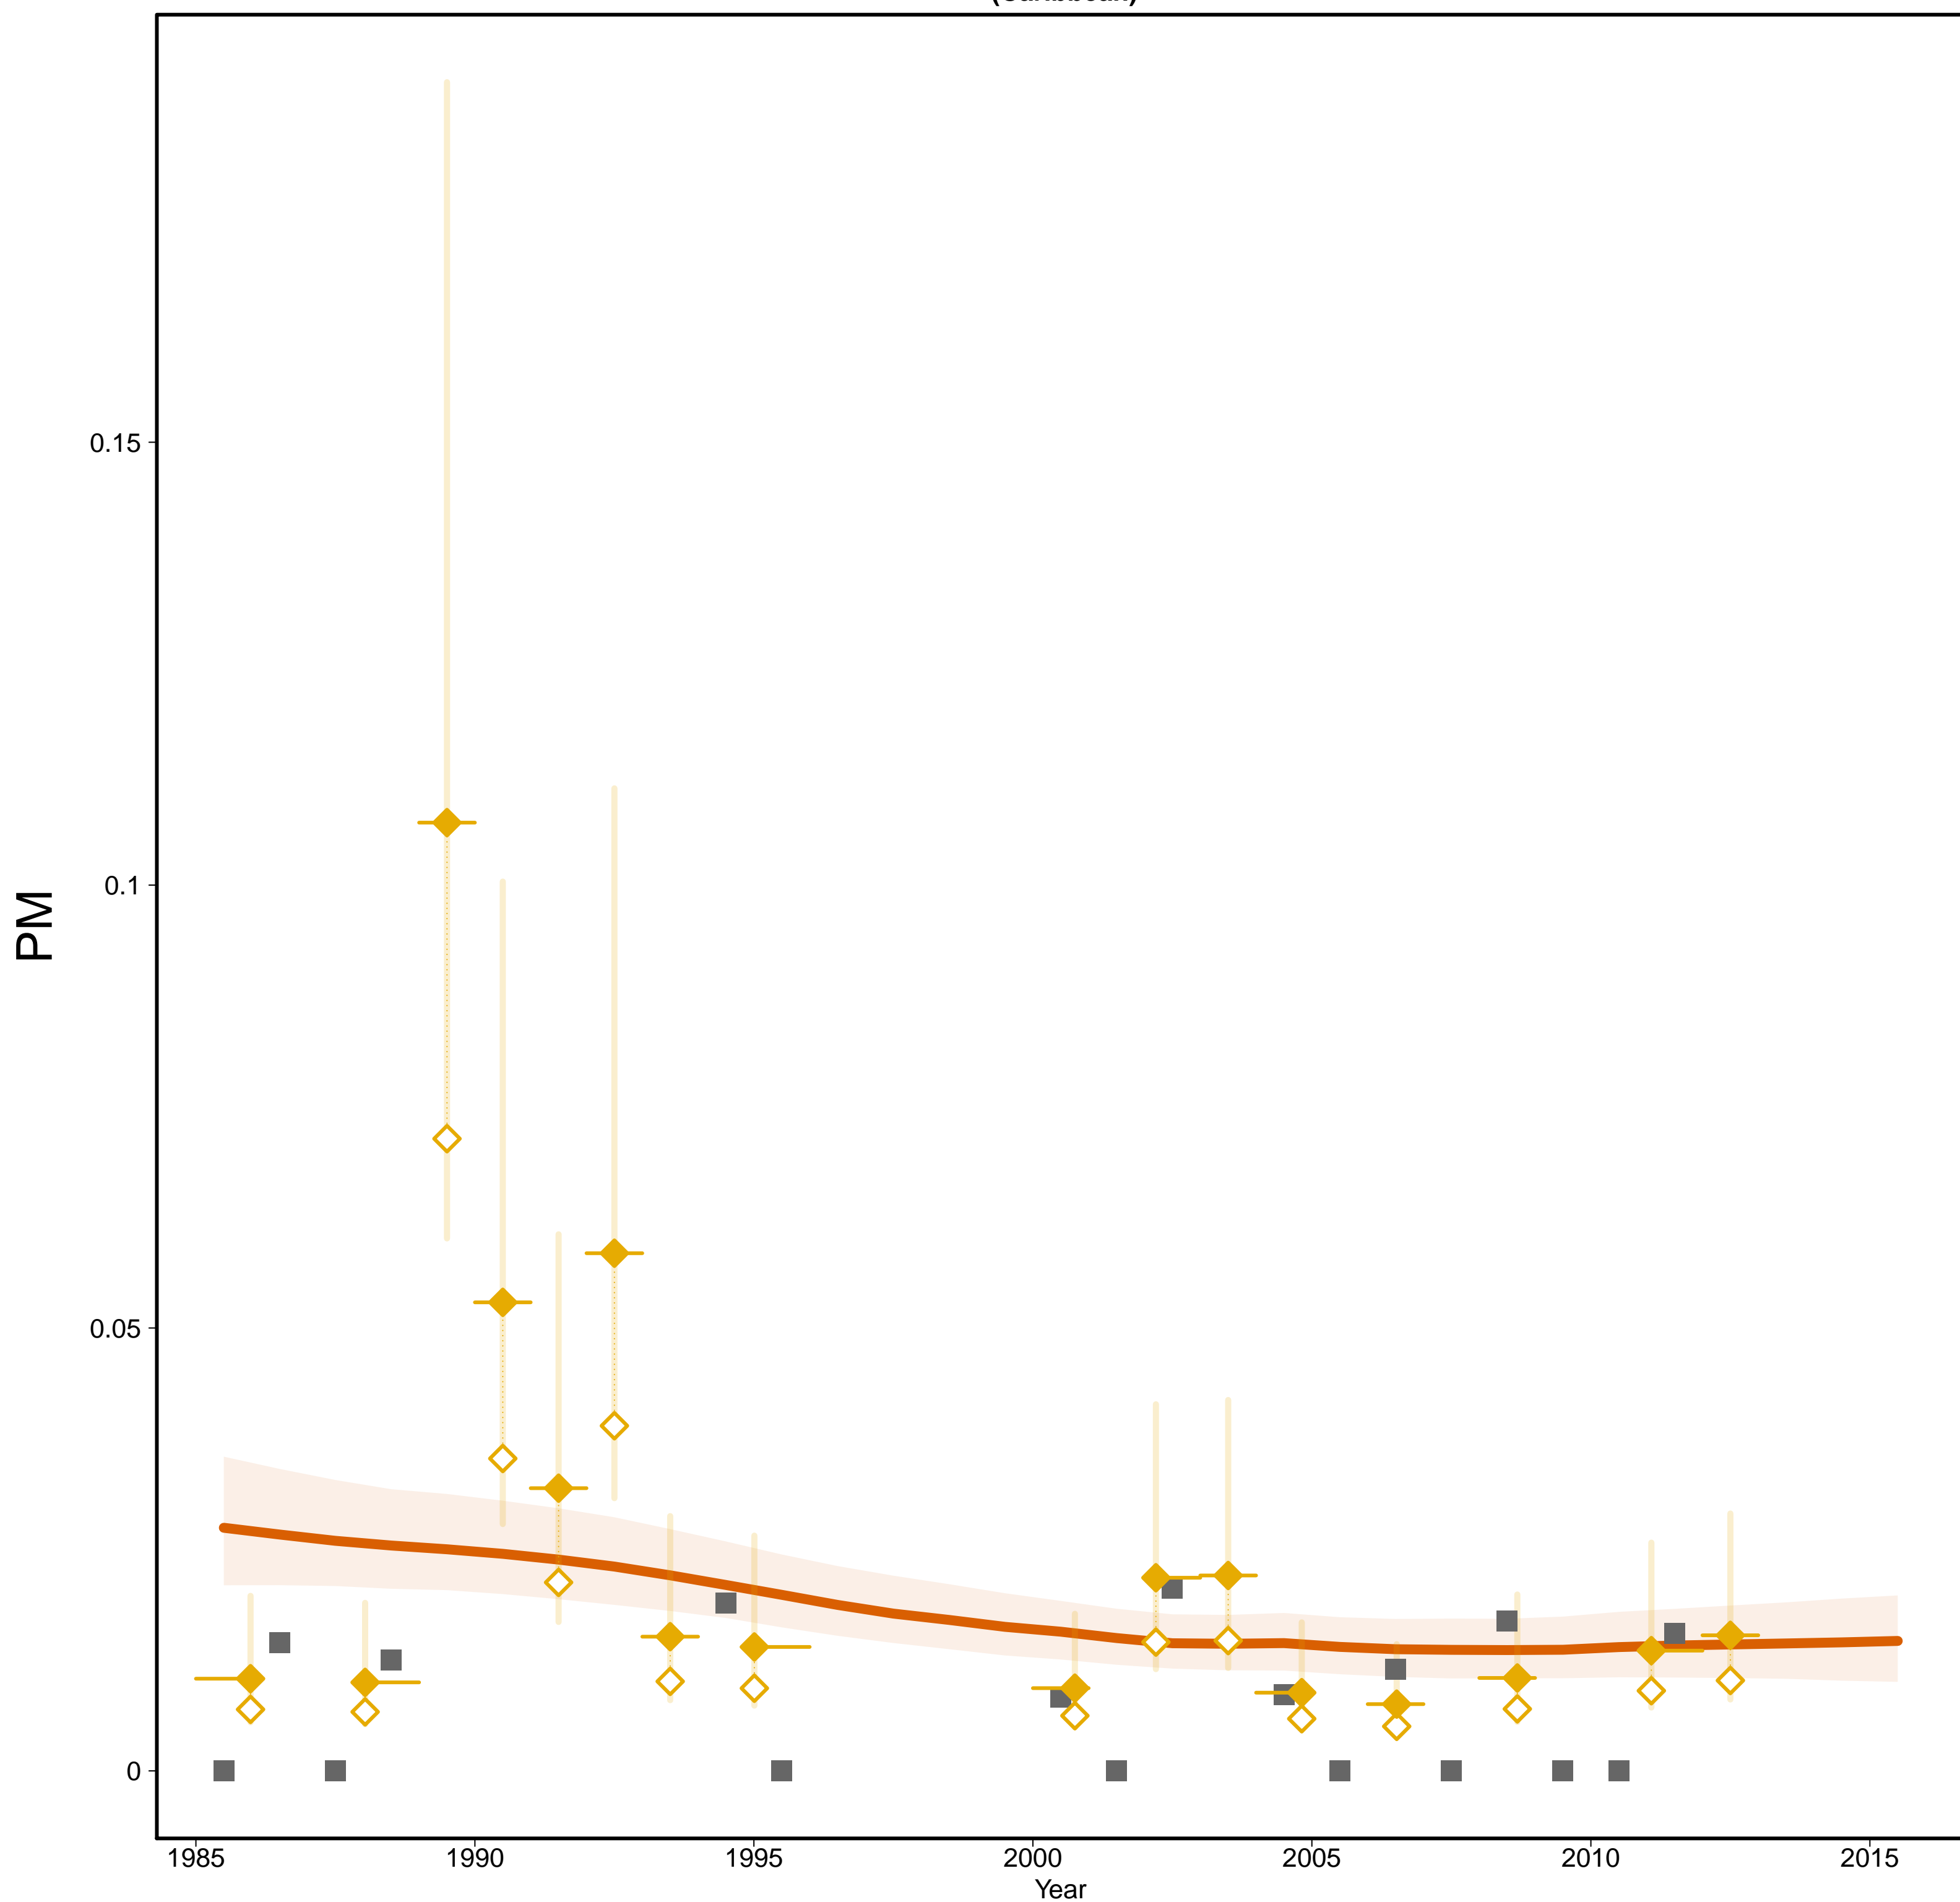

Barbados [BRB]  
(Caribbean)

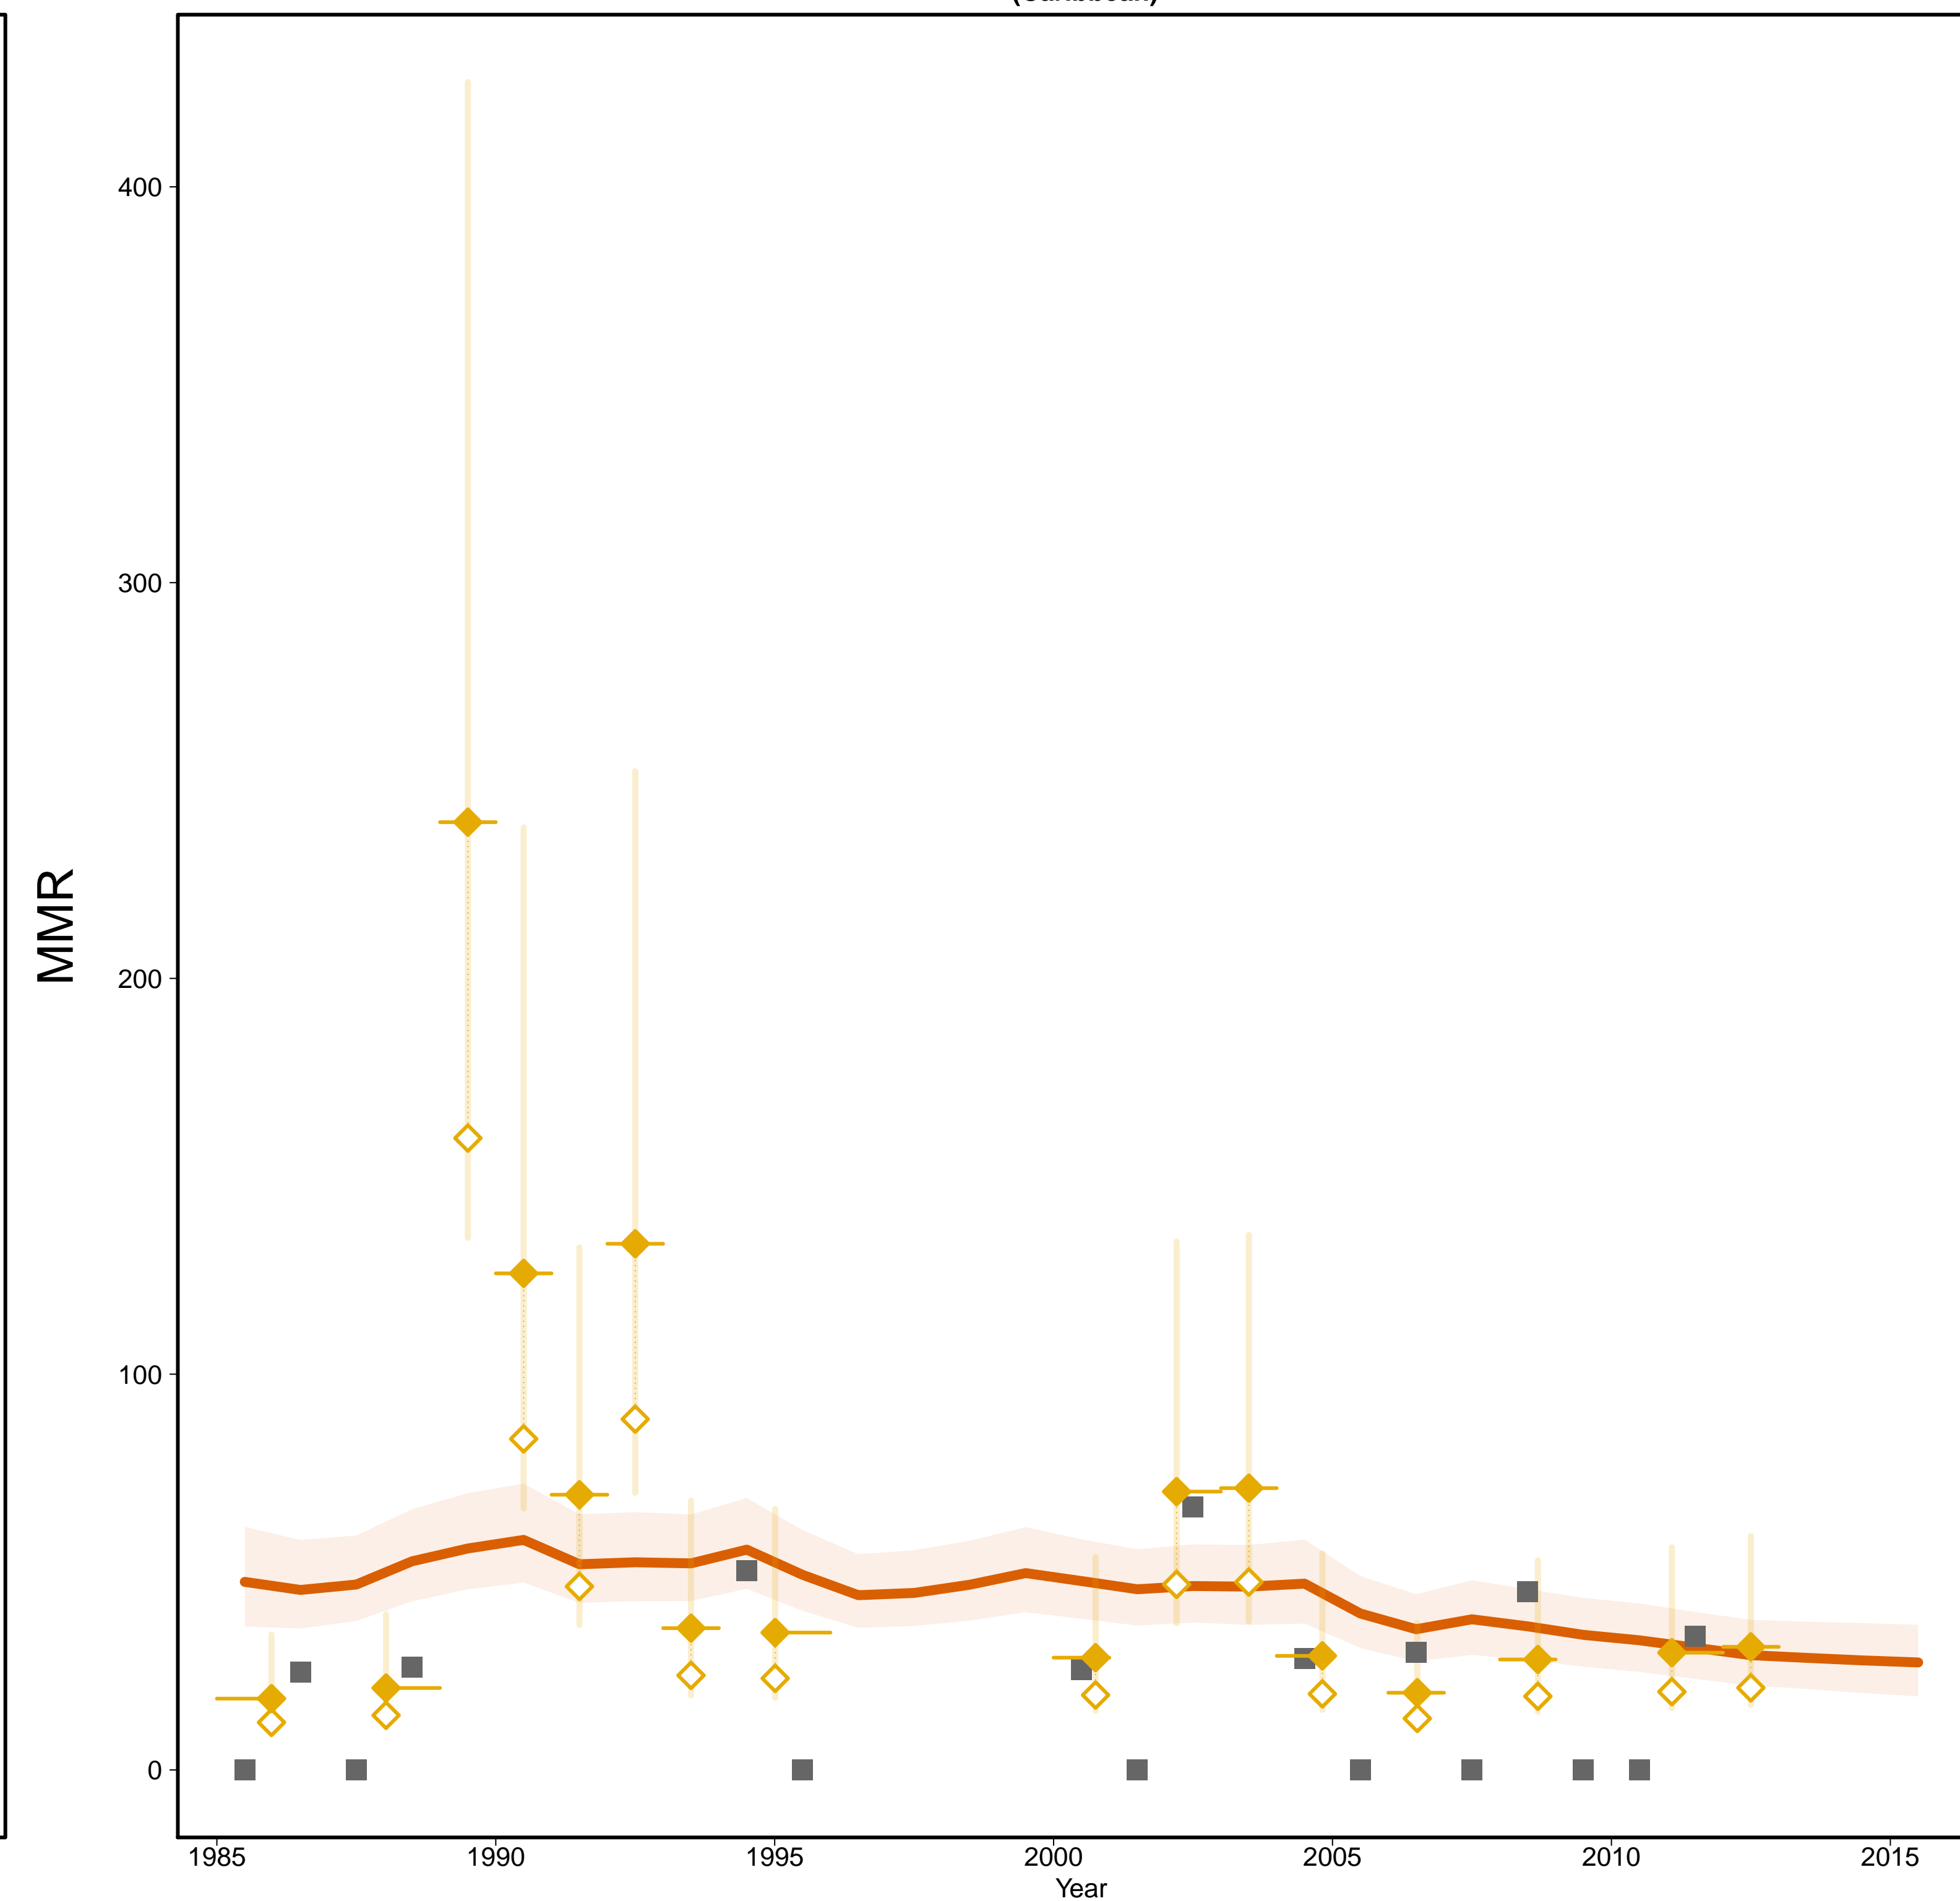

- Estimates –
- Mlate
- MMR Database 2015 –
- ◇ Observed Data
- ◆ Adjusted Data
- Data type –
- ◆ VR
- Reported VR before recalc.  
(related to 0 obs. mat. death)

Gross Domestic Product

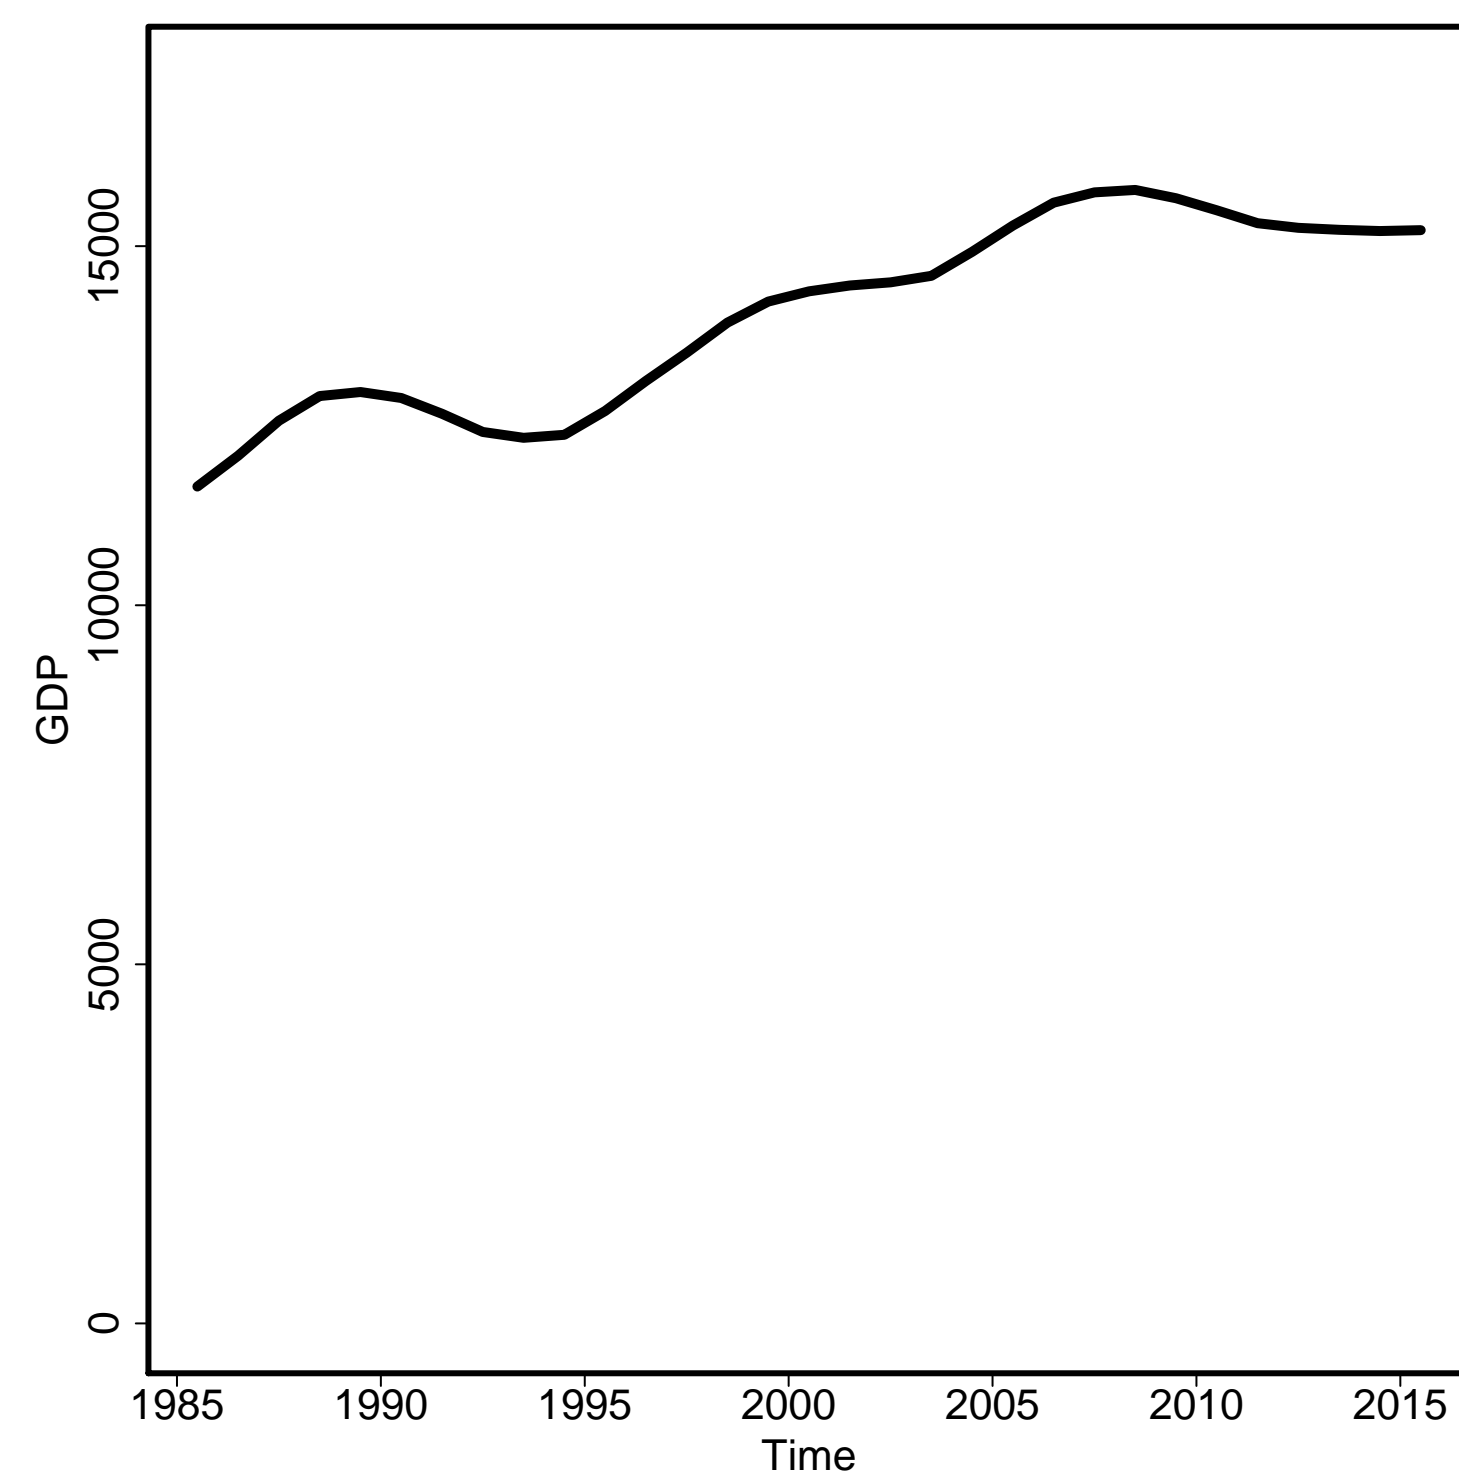

General Fertility Rate

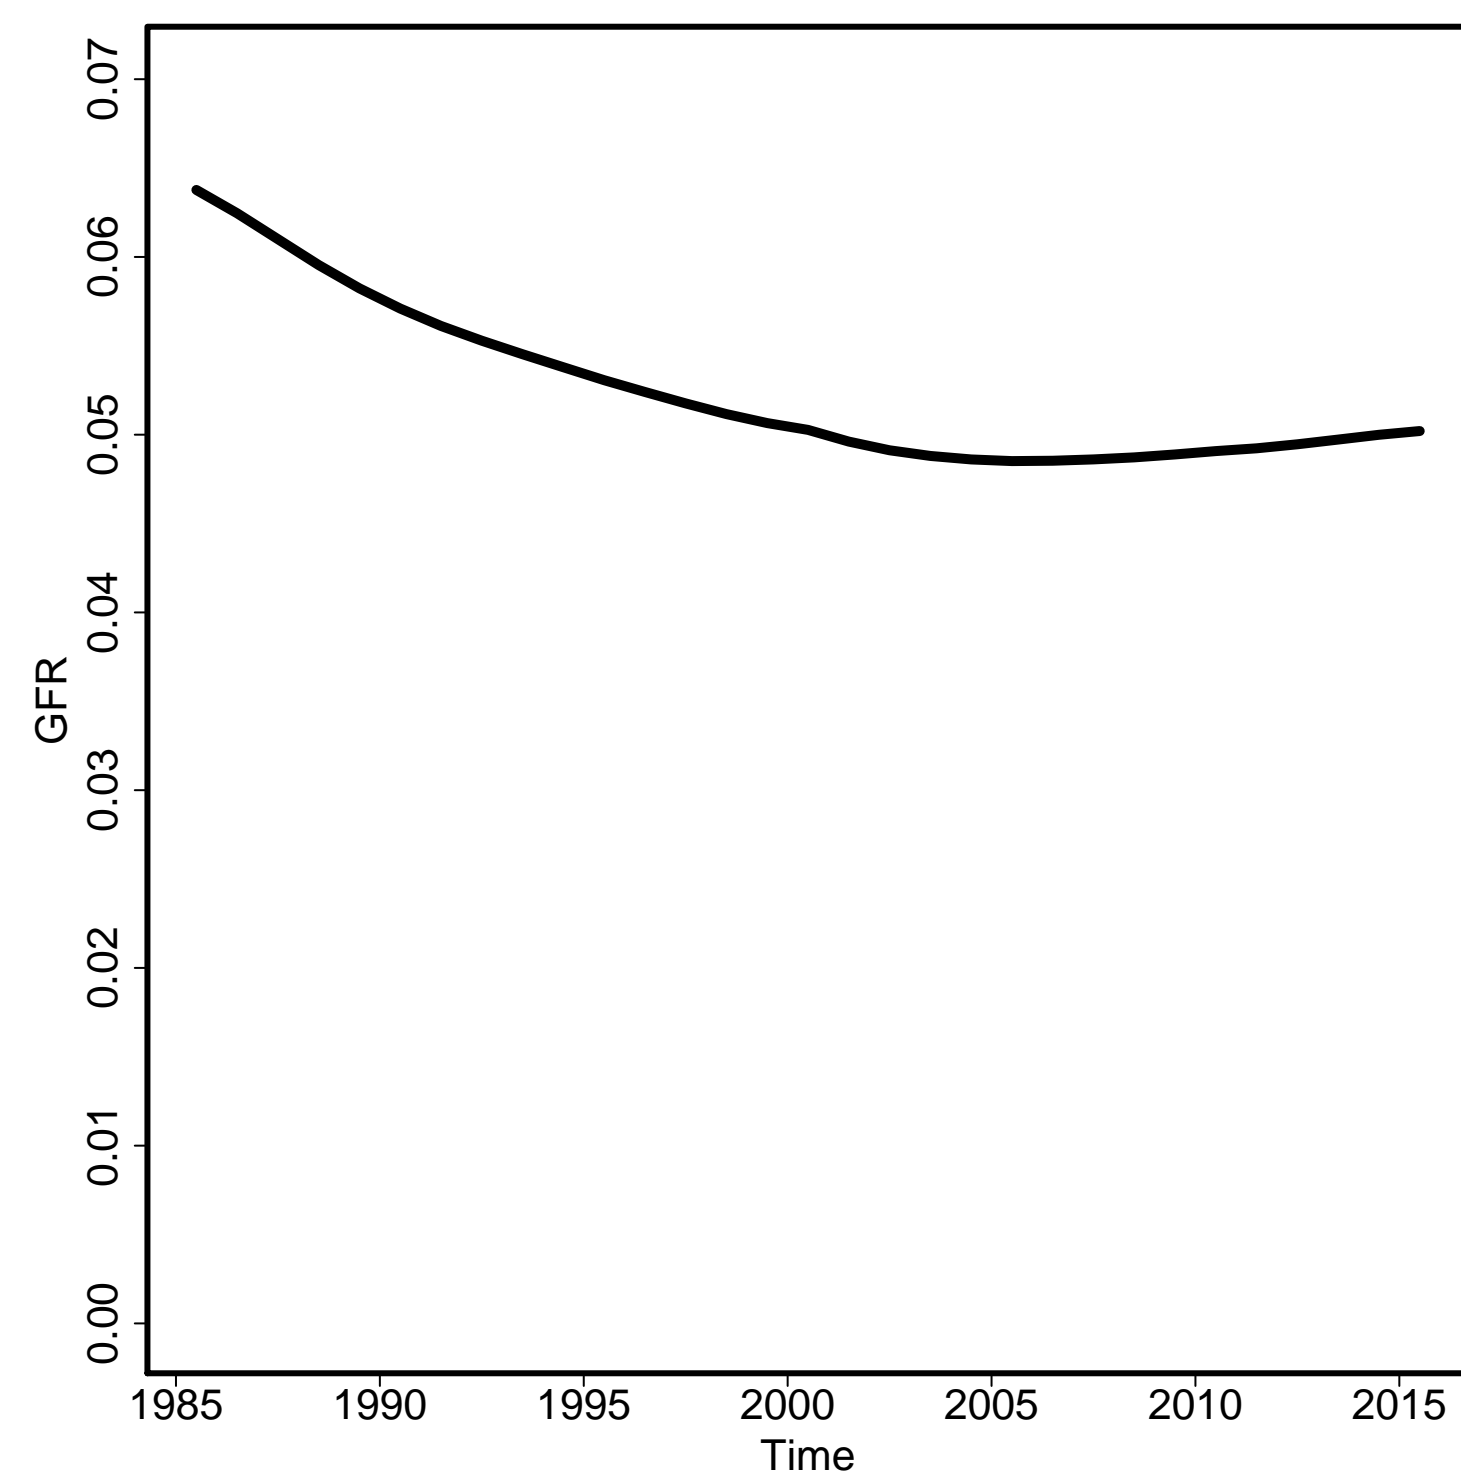

Skilled Attendance to Birth

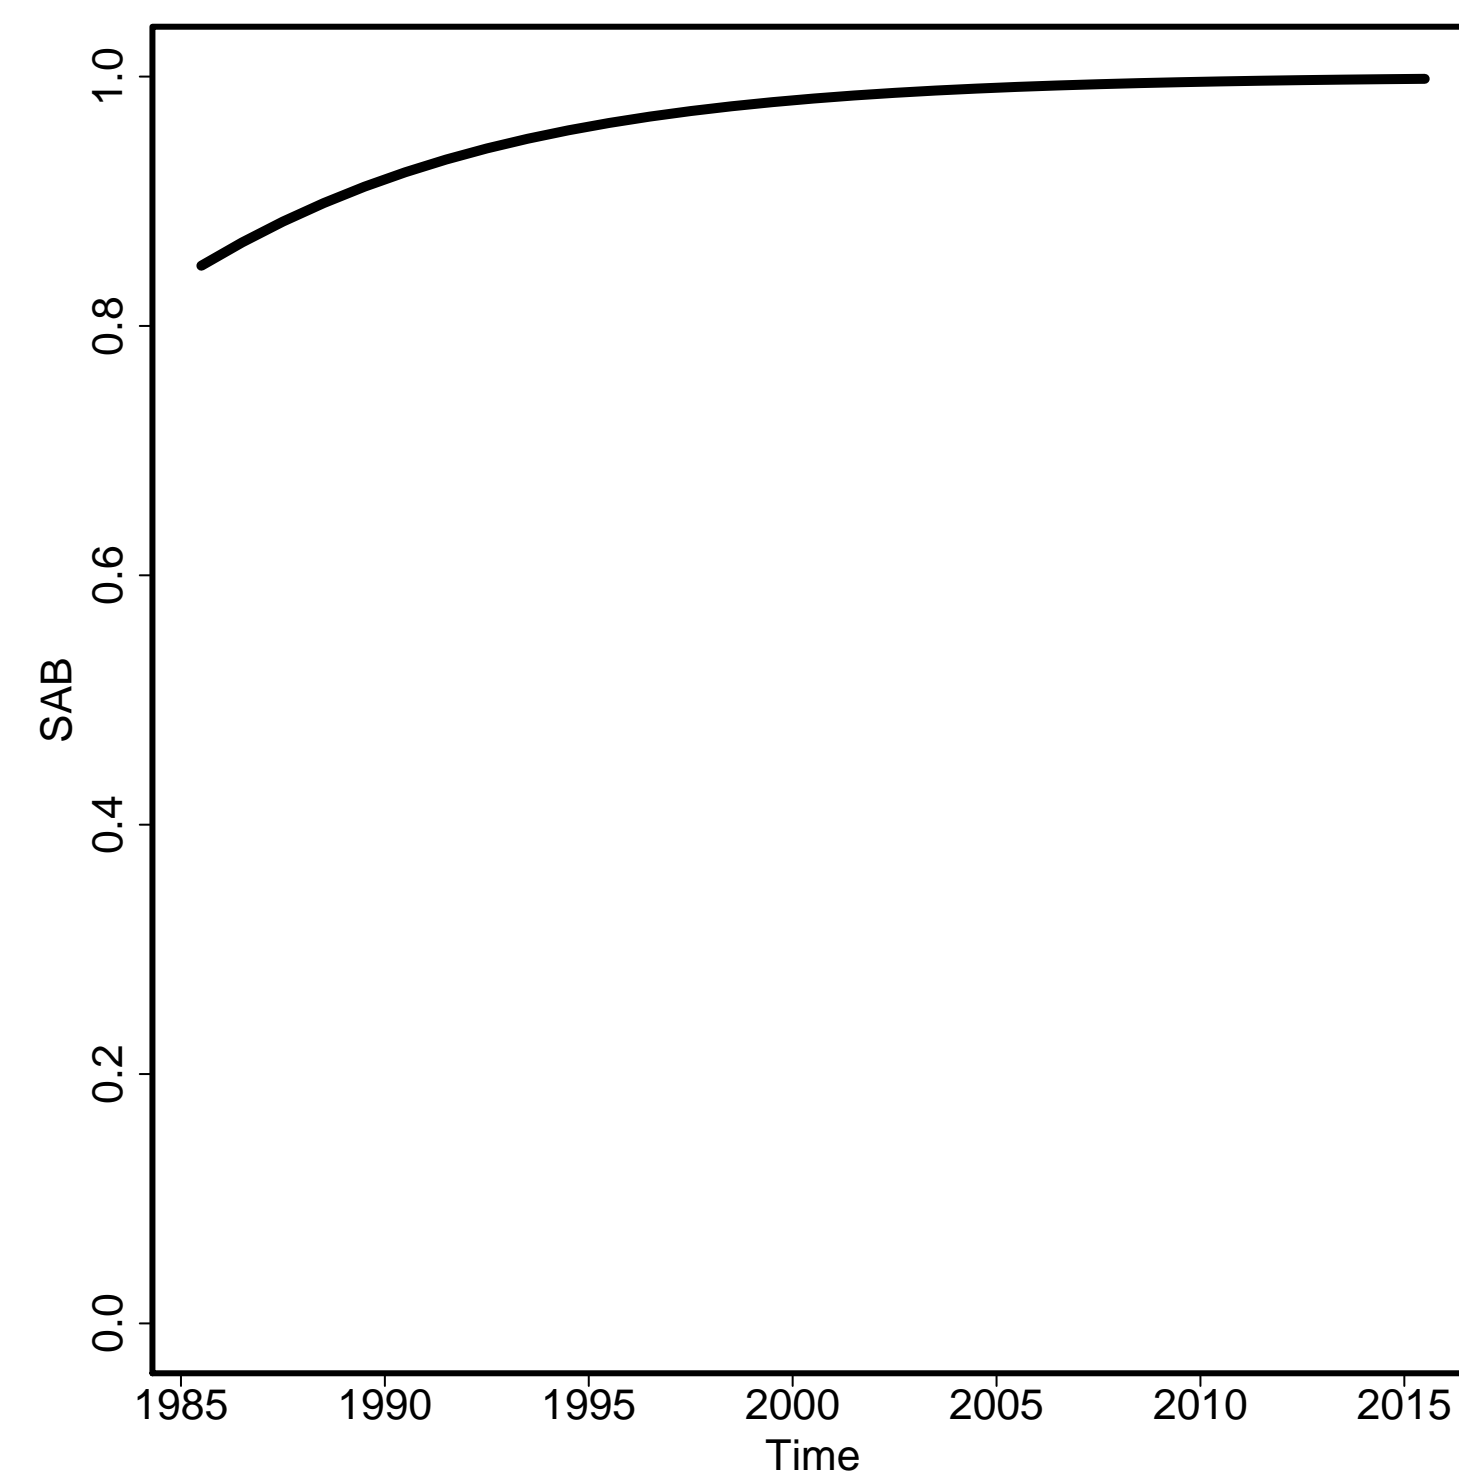

Envelope/Births

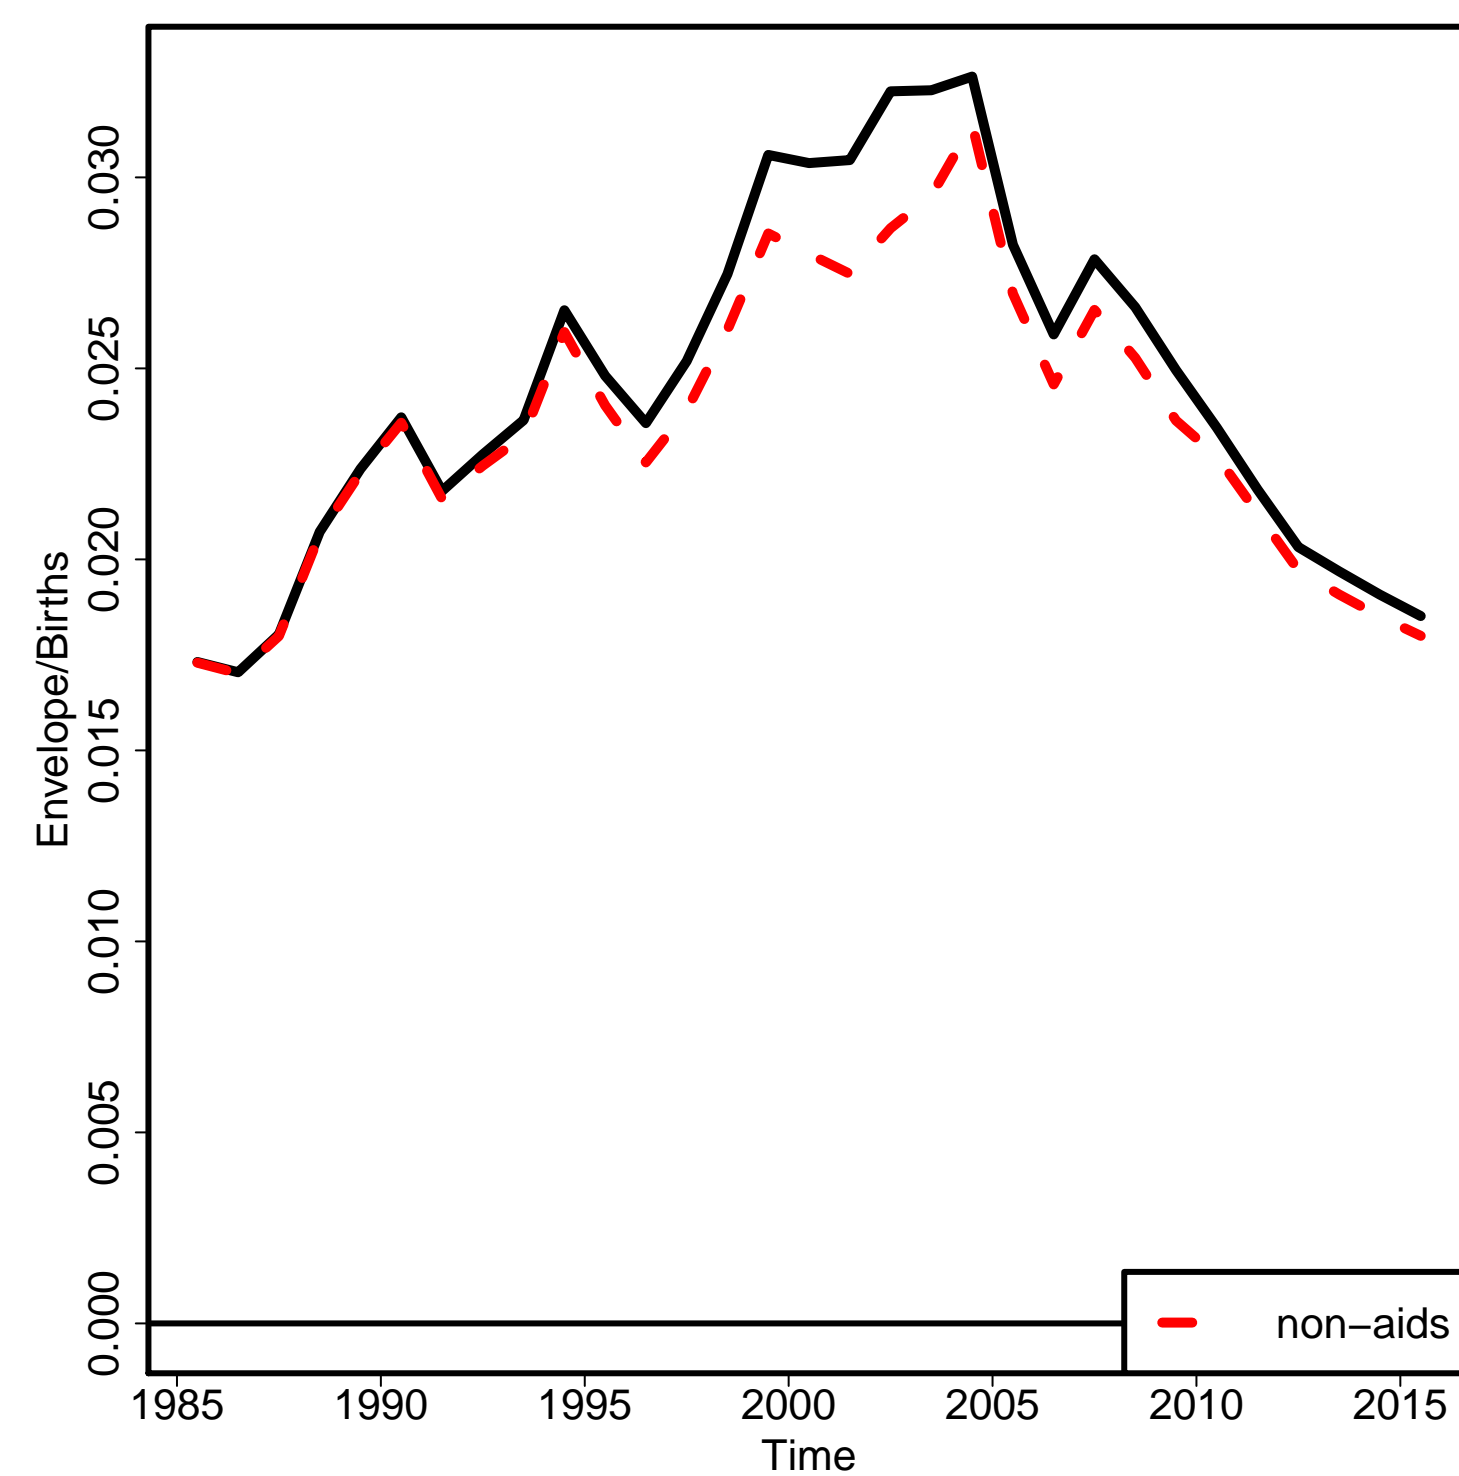

Non-aids MMR

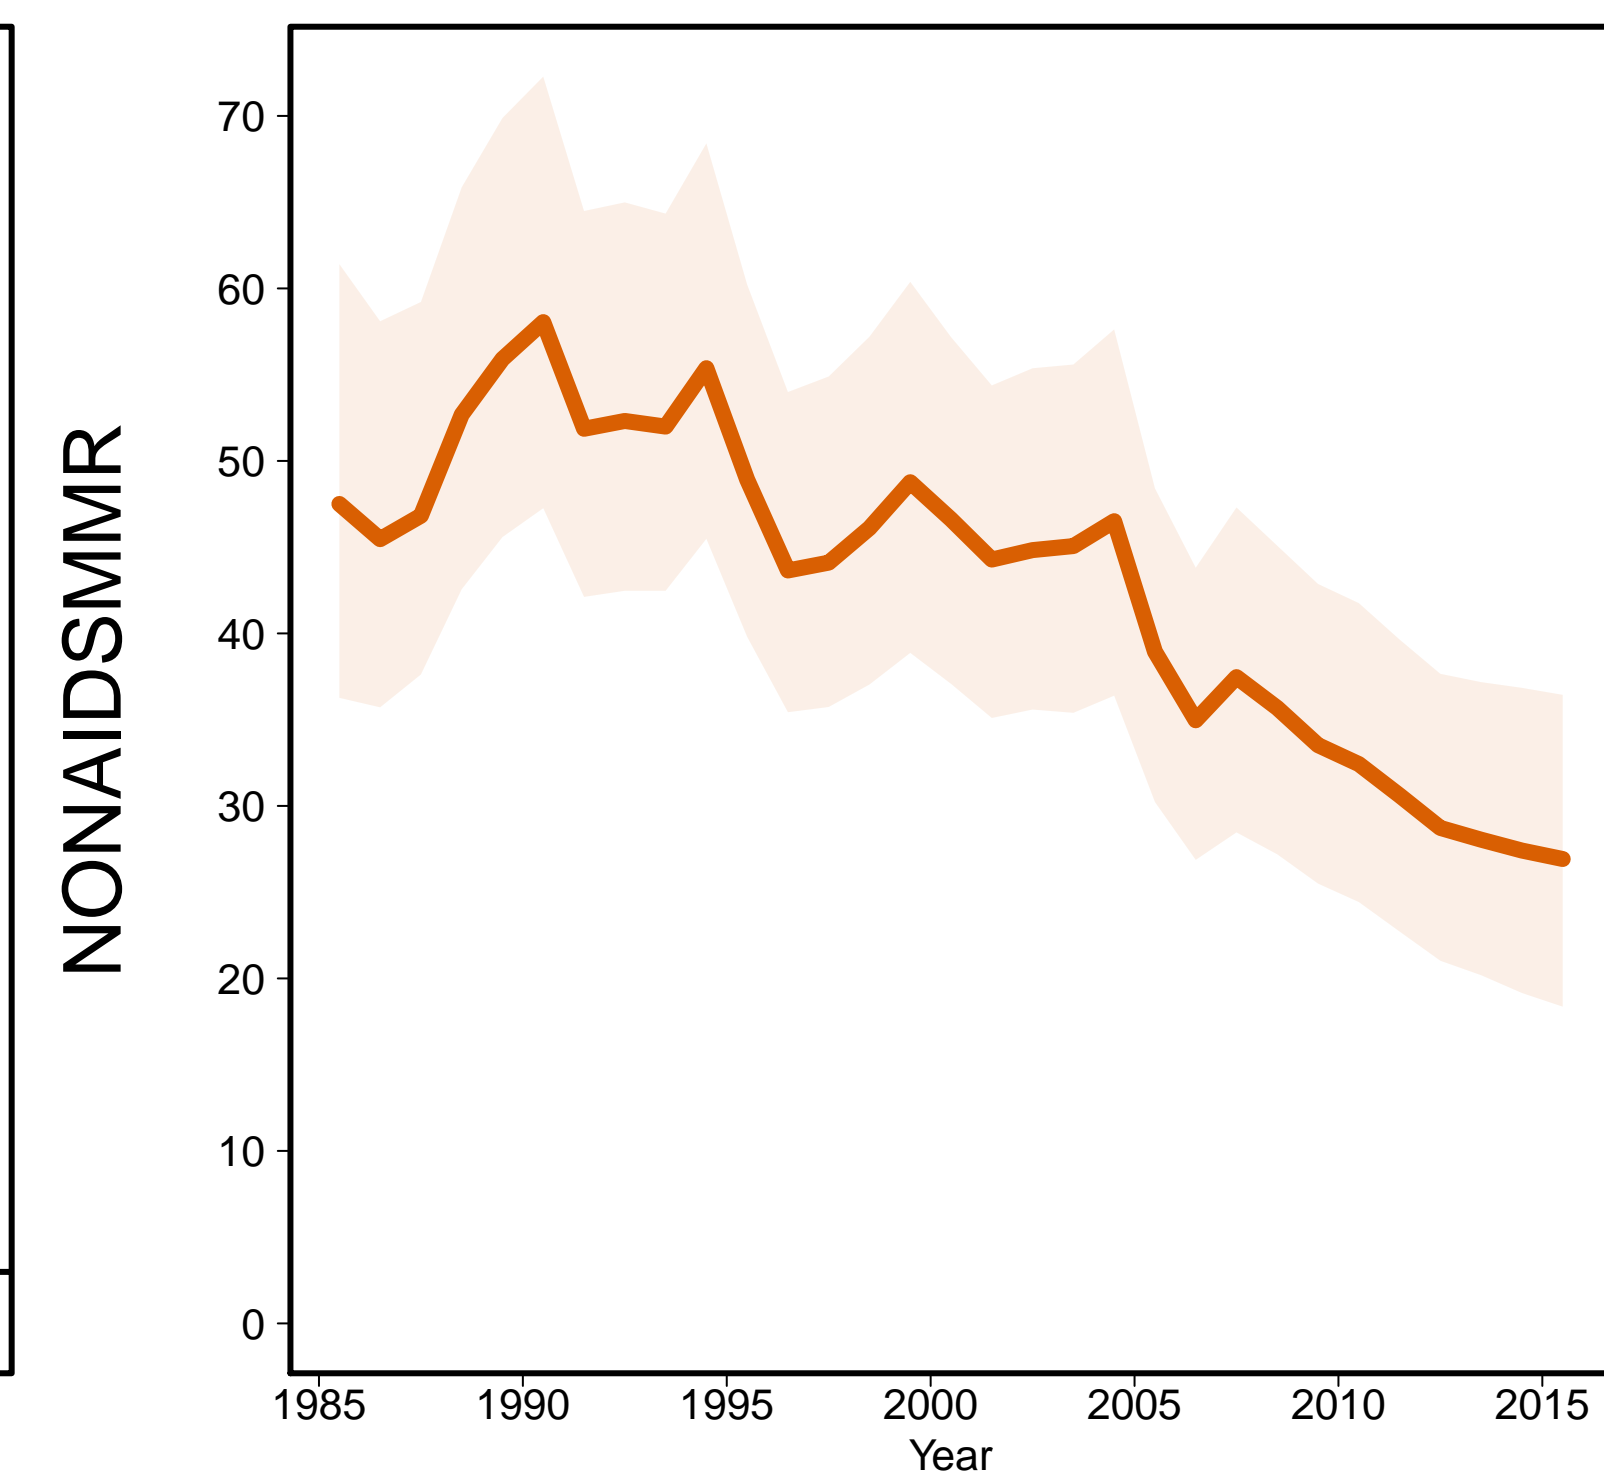

Aids MMR

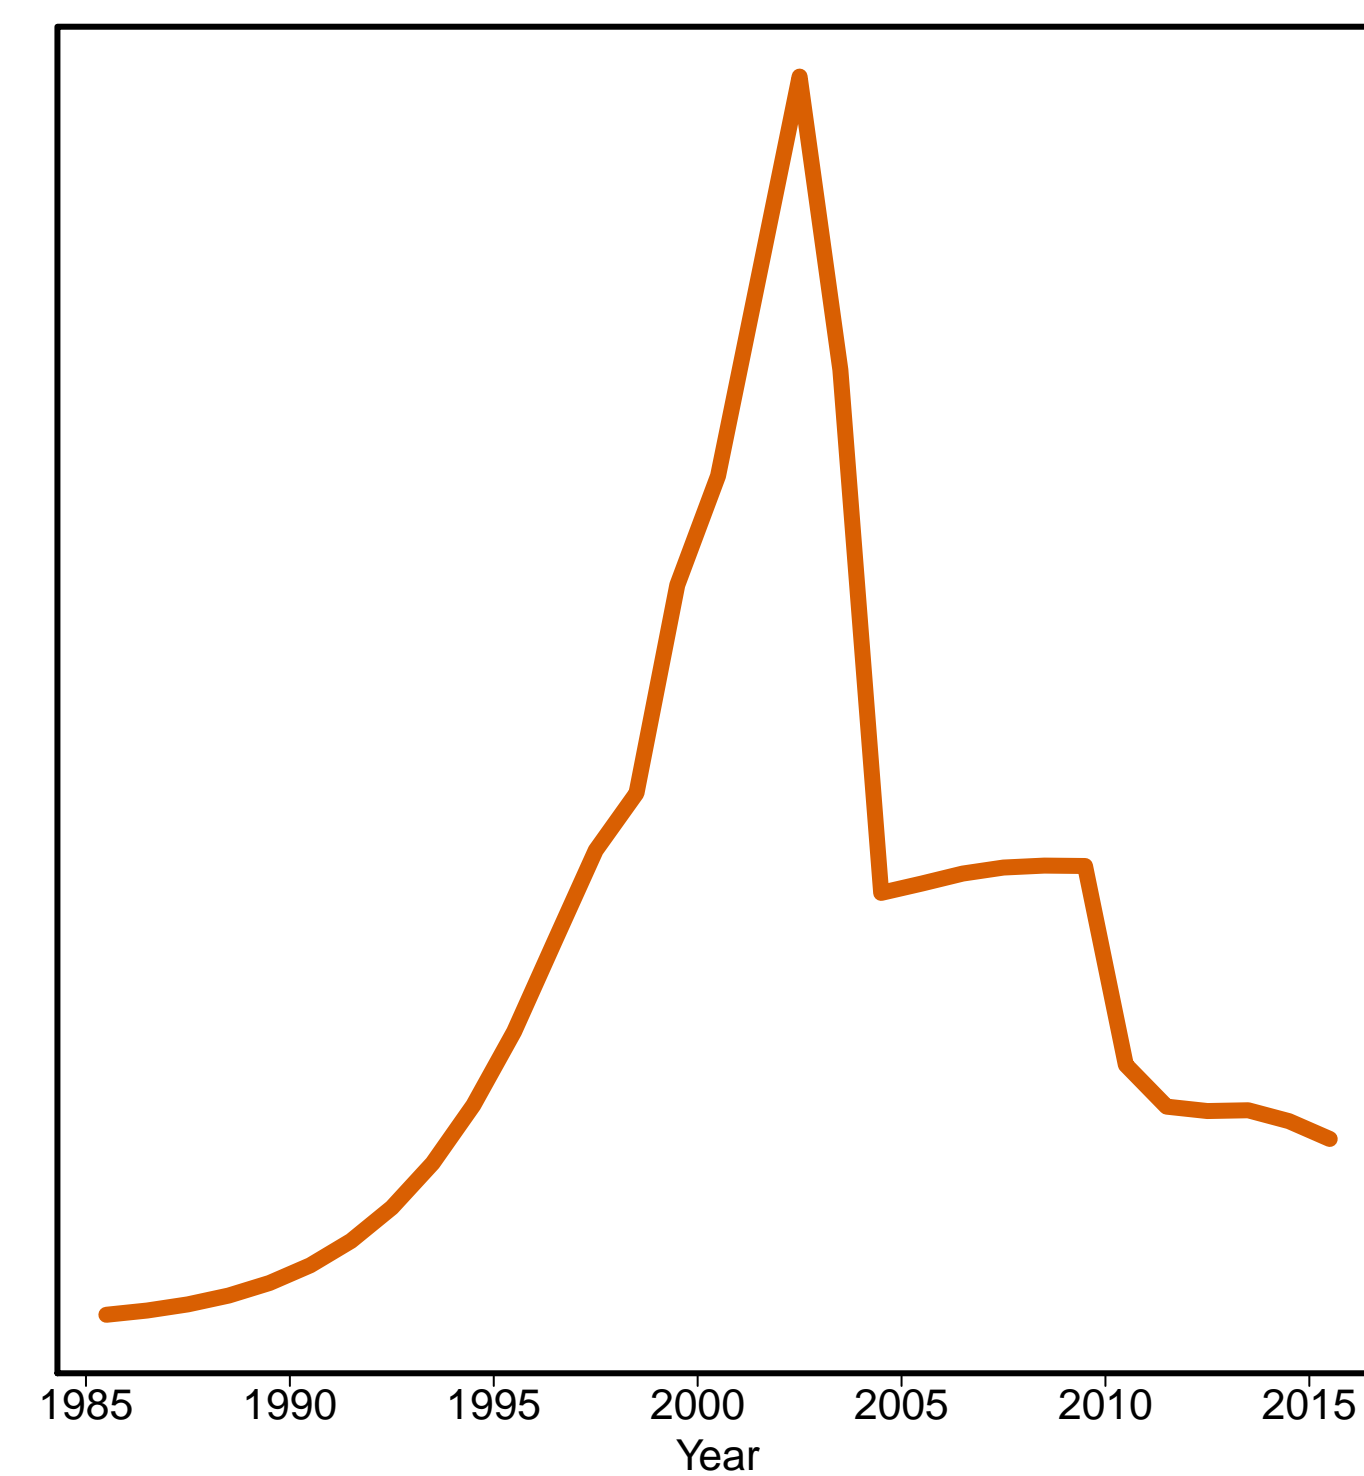

Belarus [BLR]  
(Developed regions)

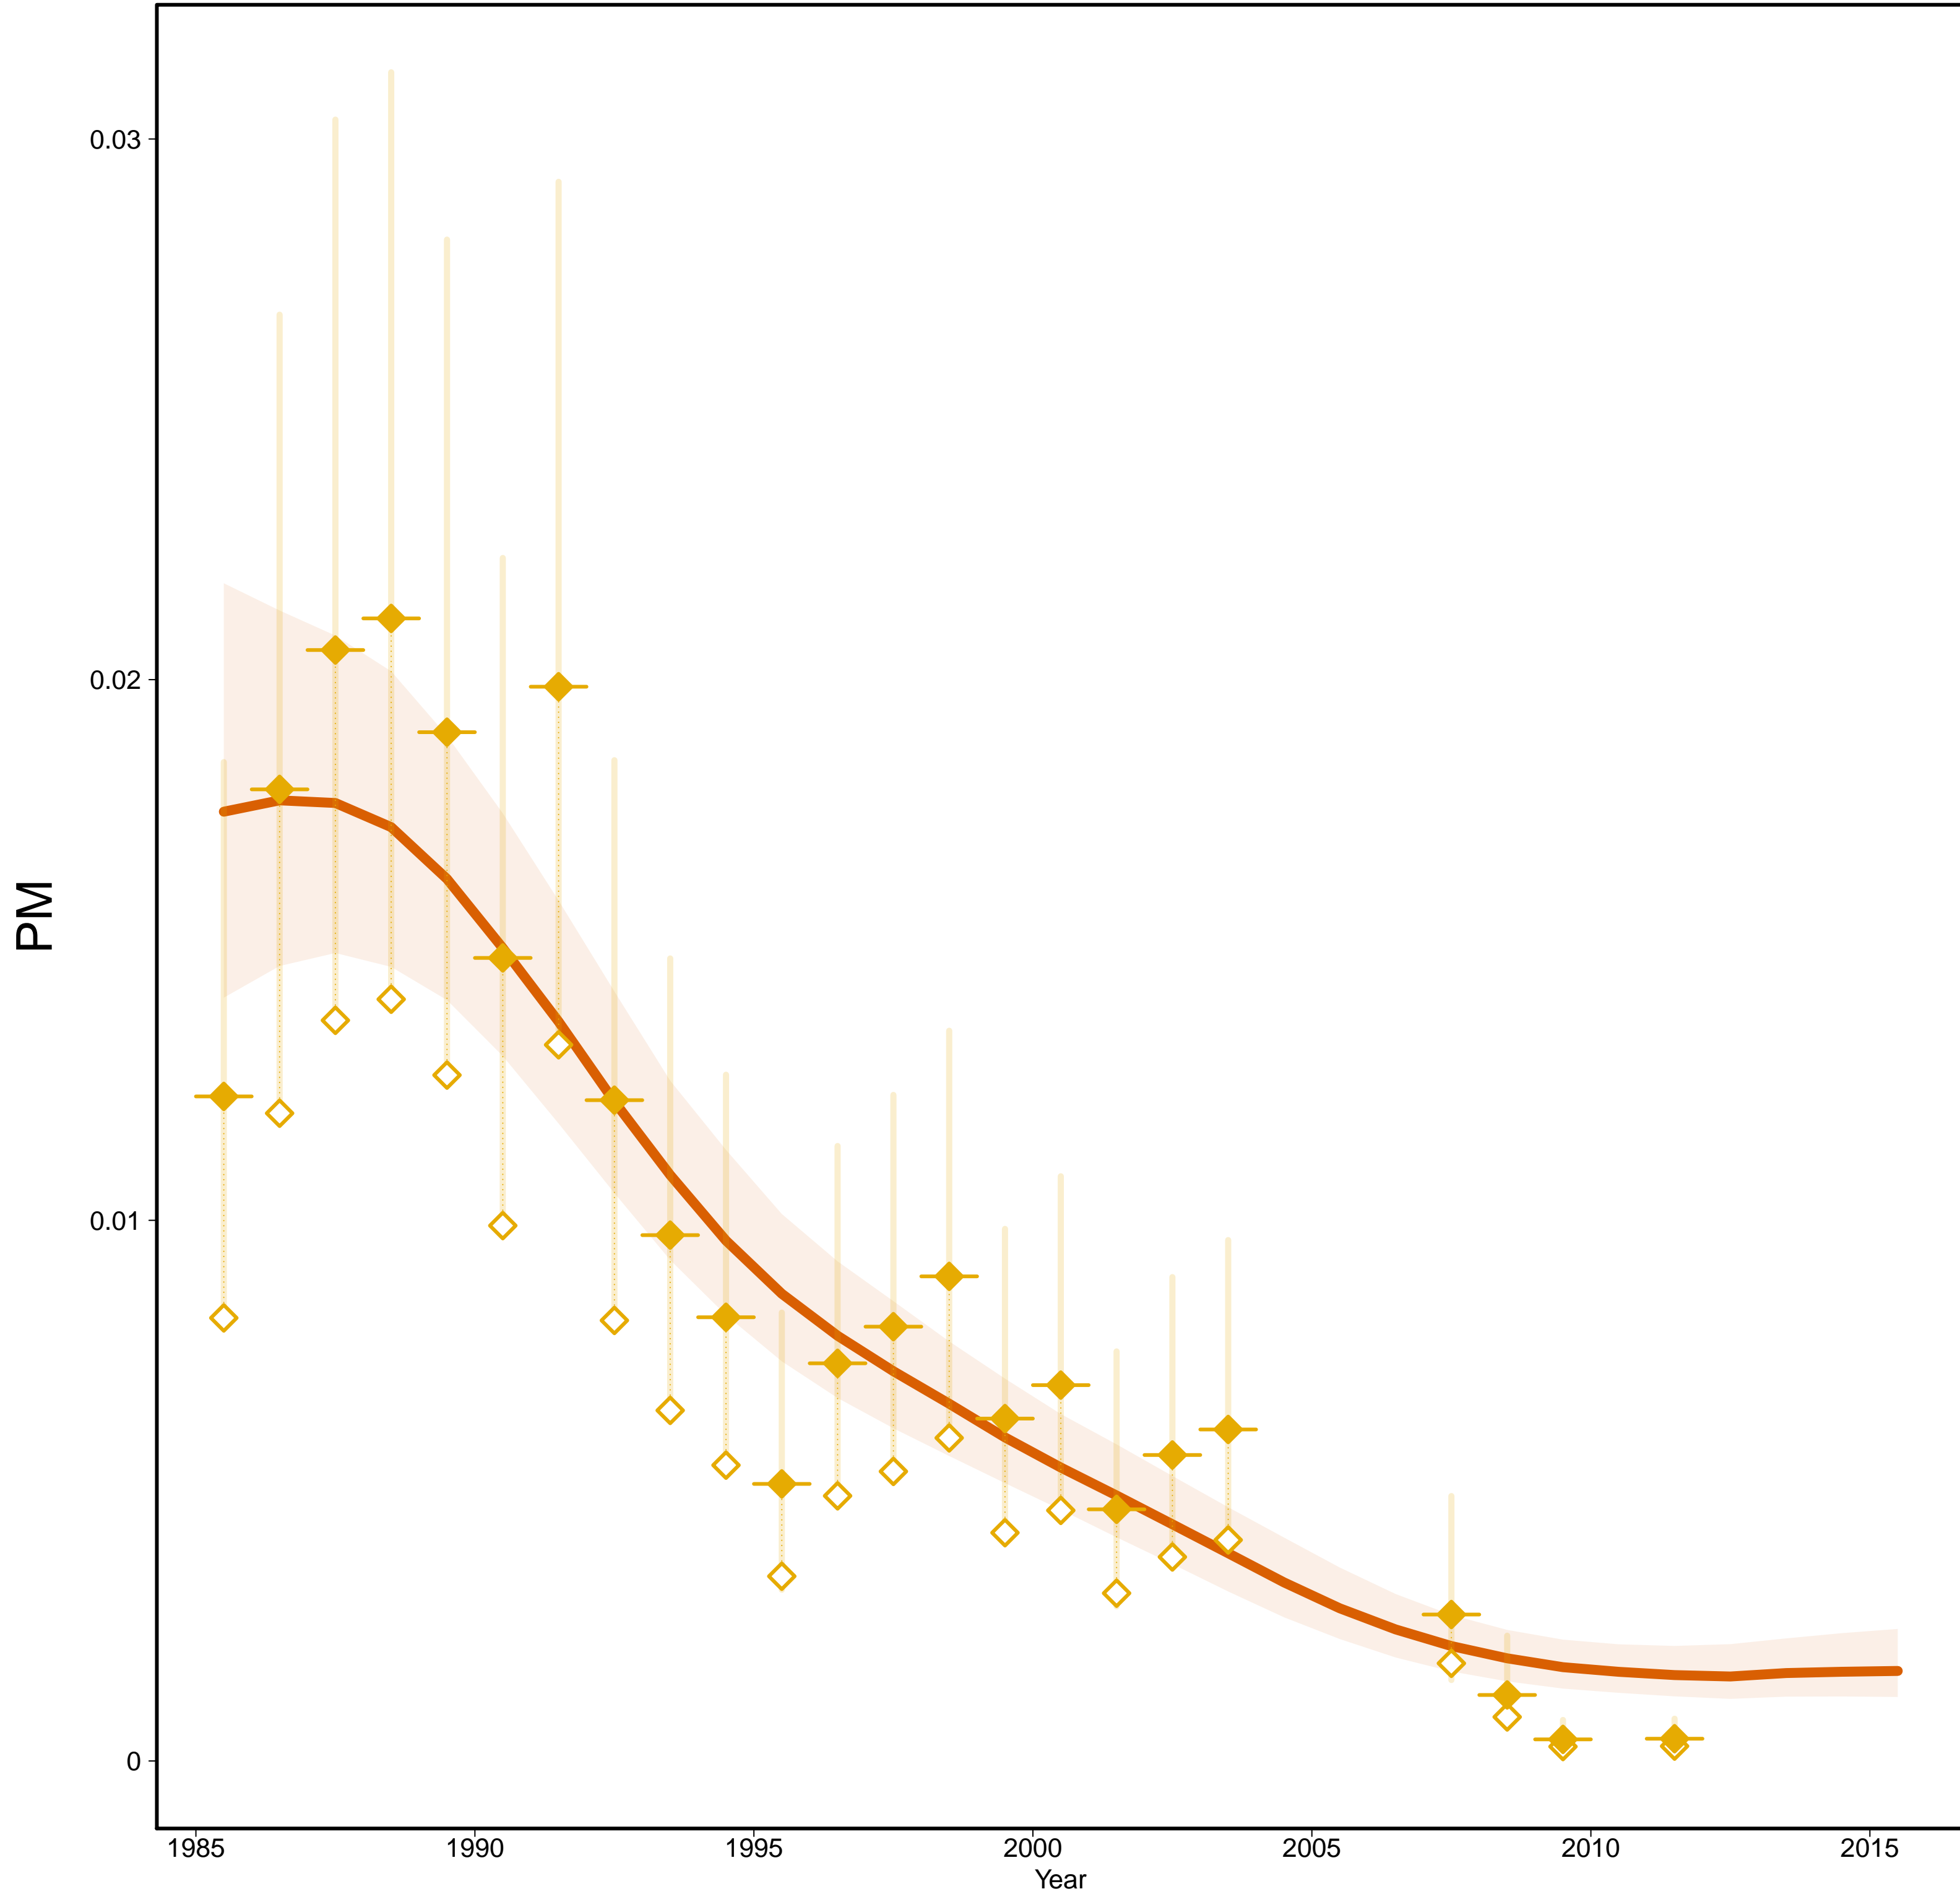

Belarus [BLR]  
(Developed regions)

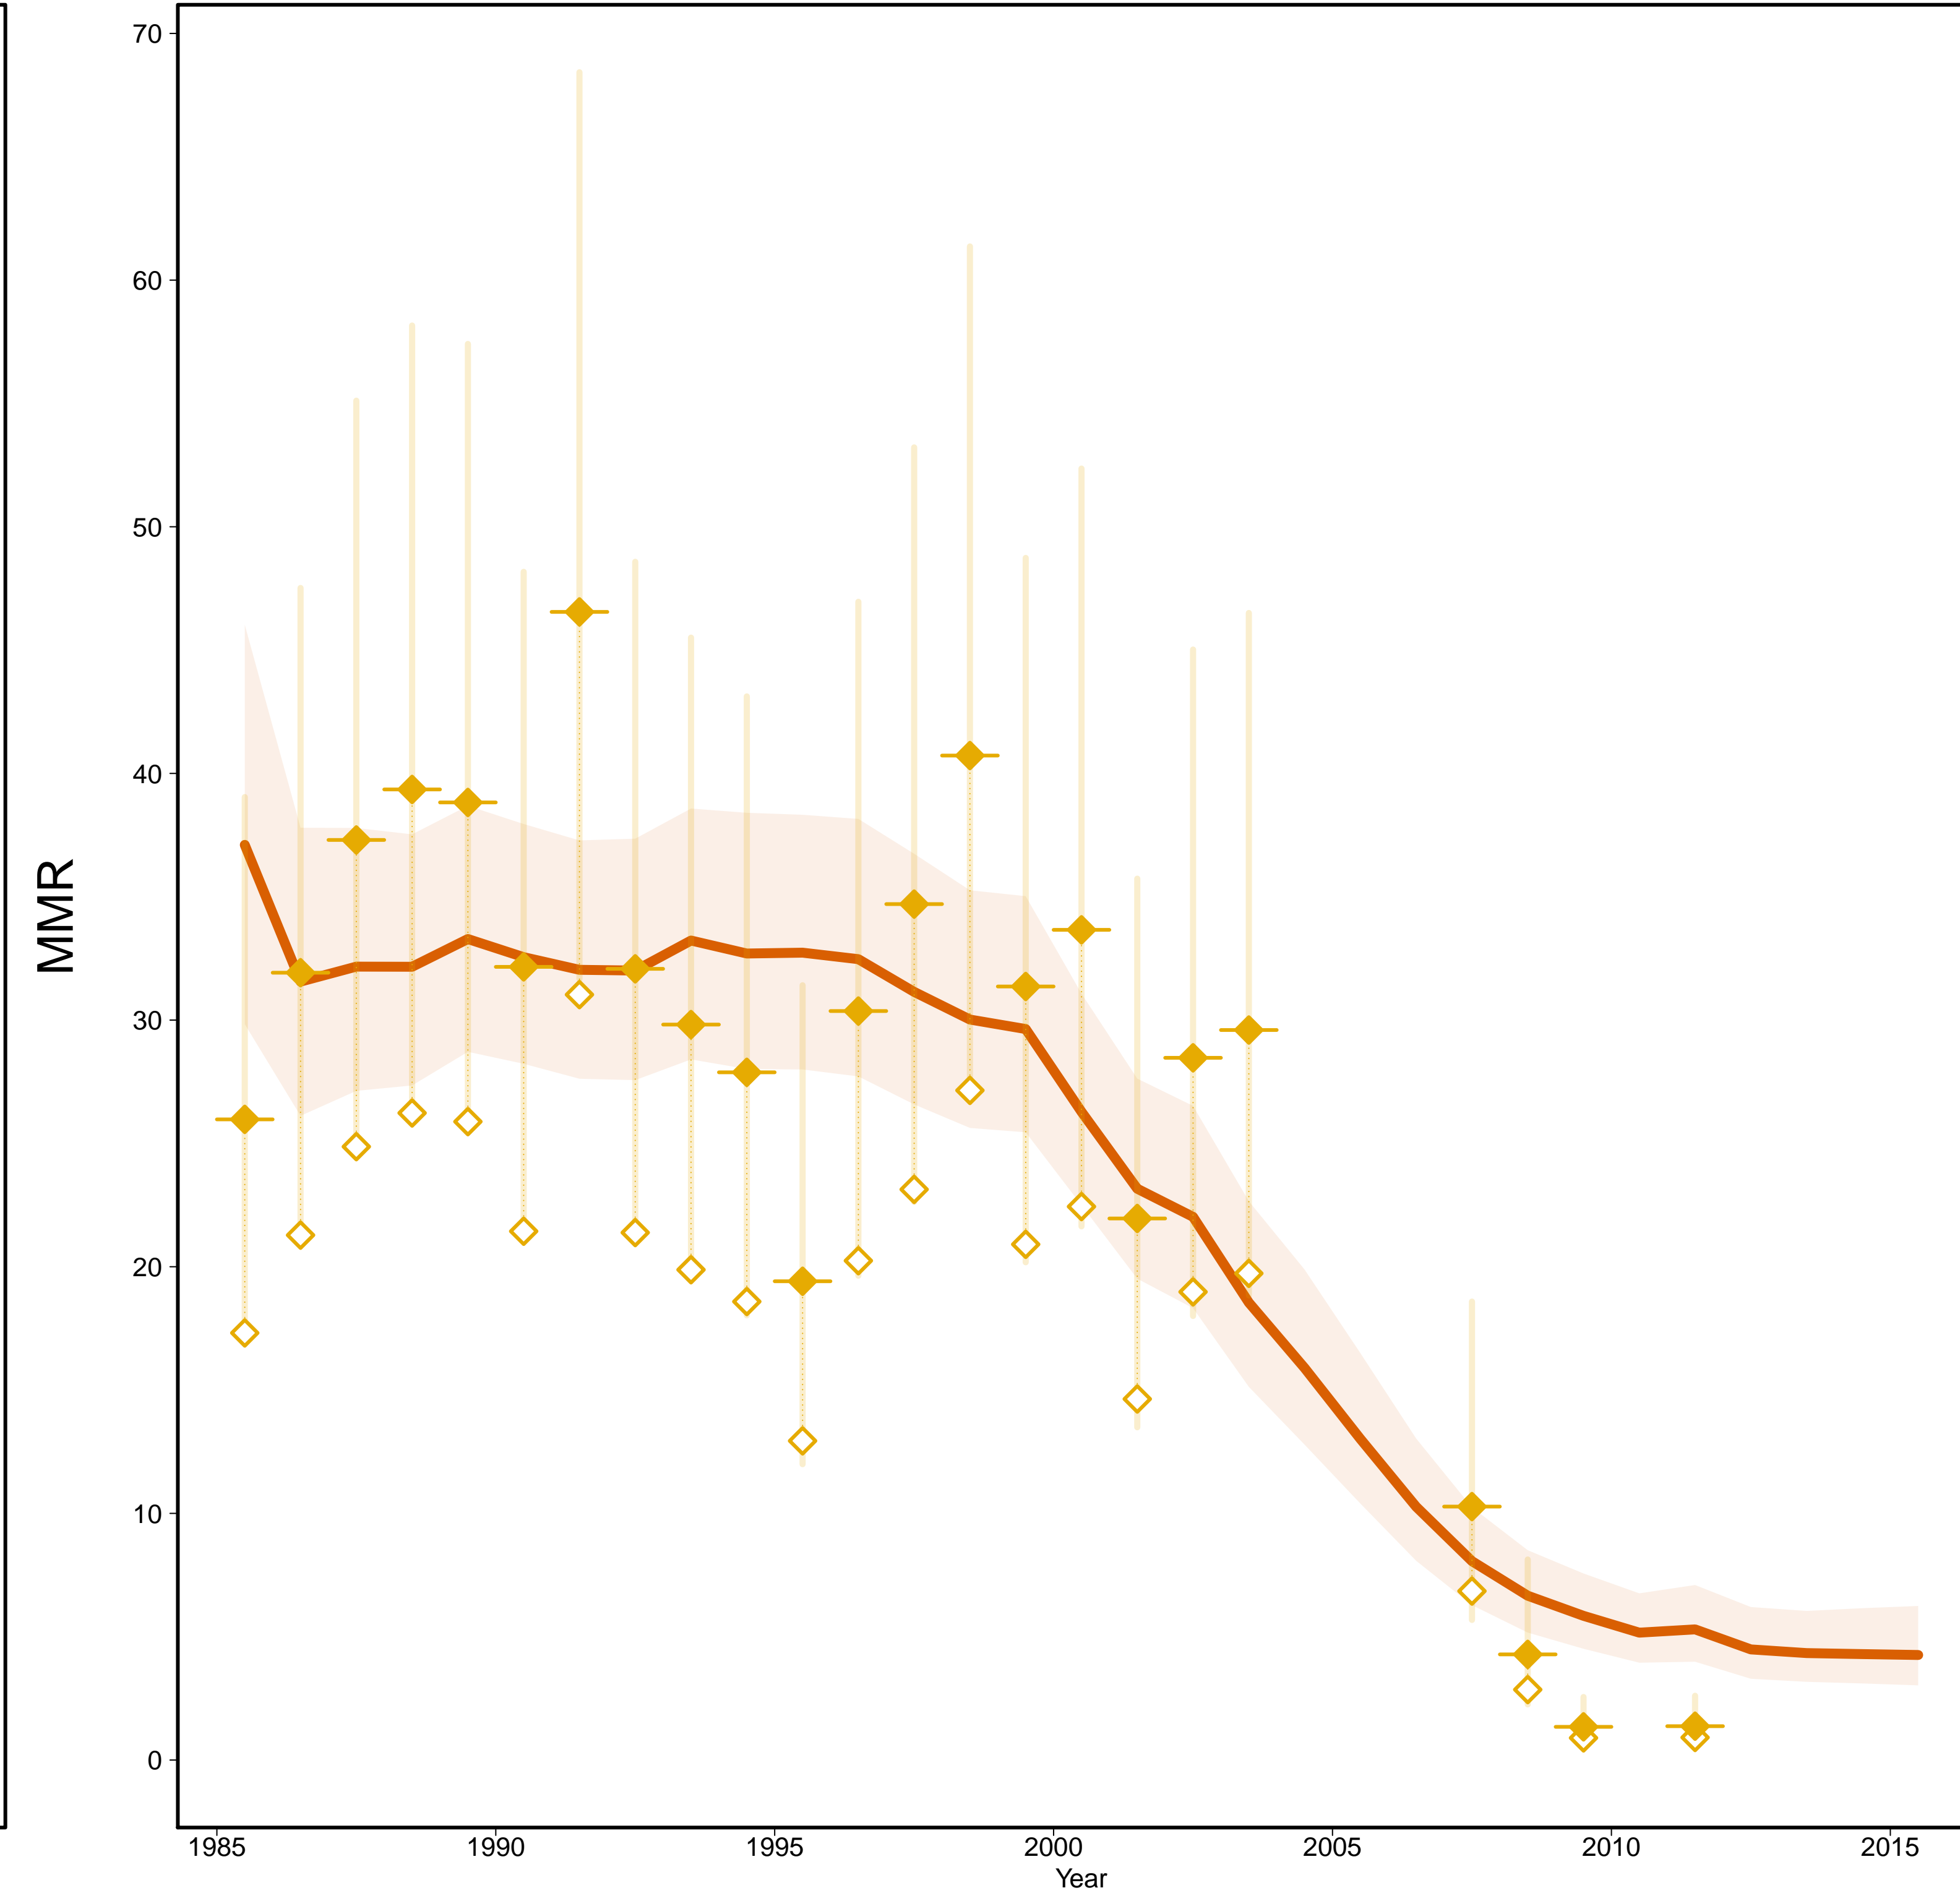

- Estimates —
- MMR Database 2015 —
- ◇ Observed Data
- ◆ Adjusted Data
- Data type —
- ◆ VR

Gross Domestic Product

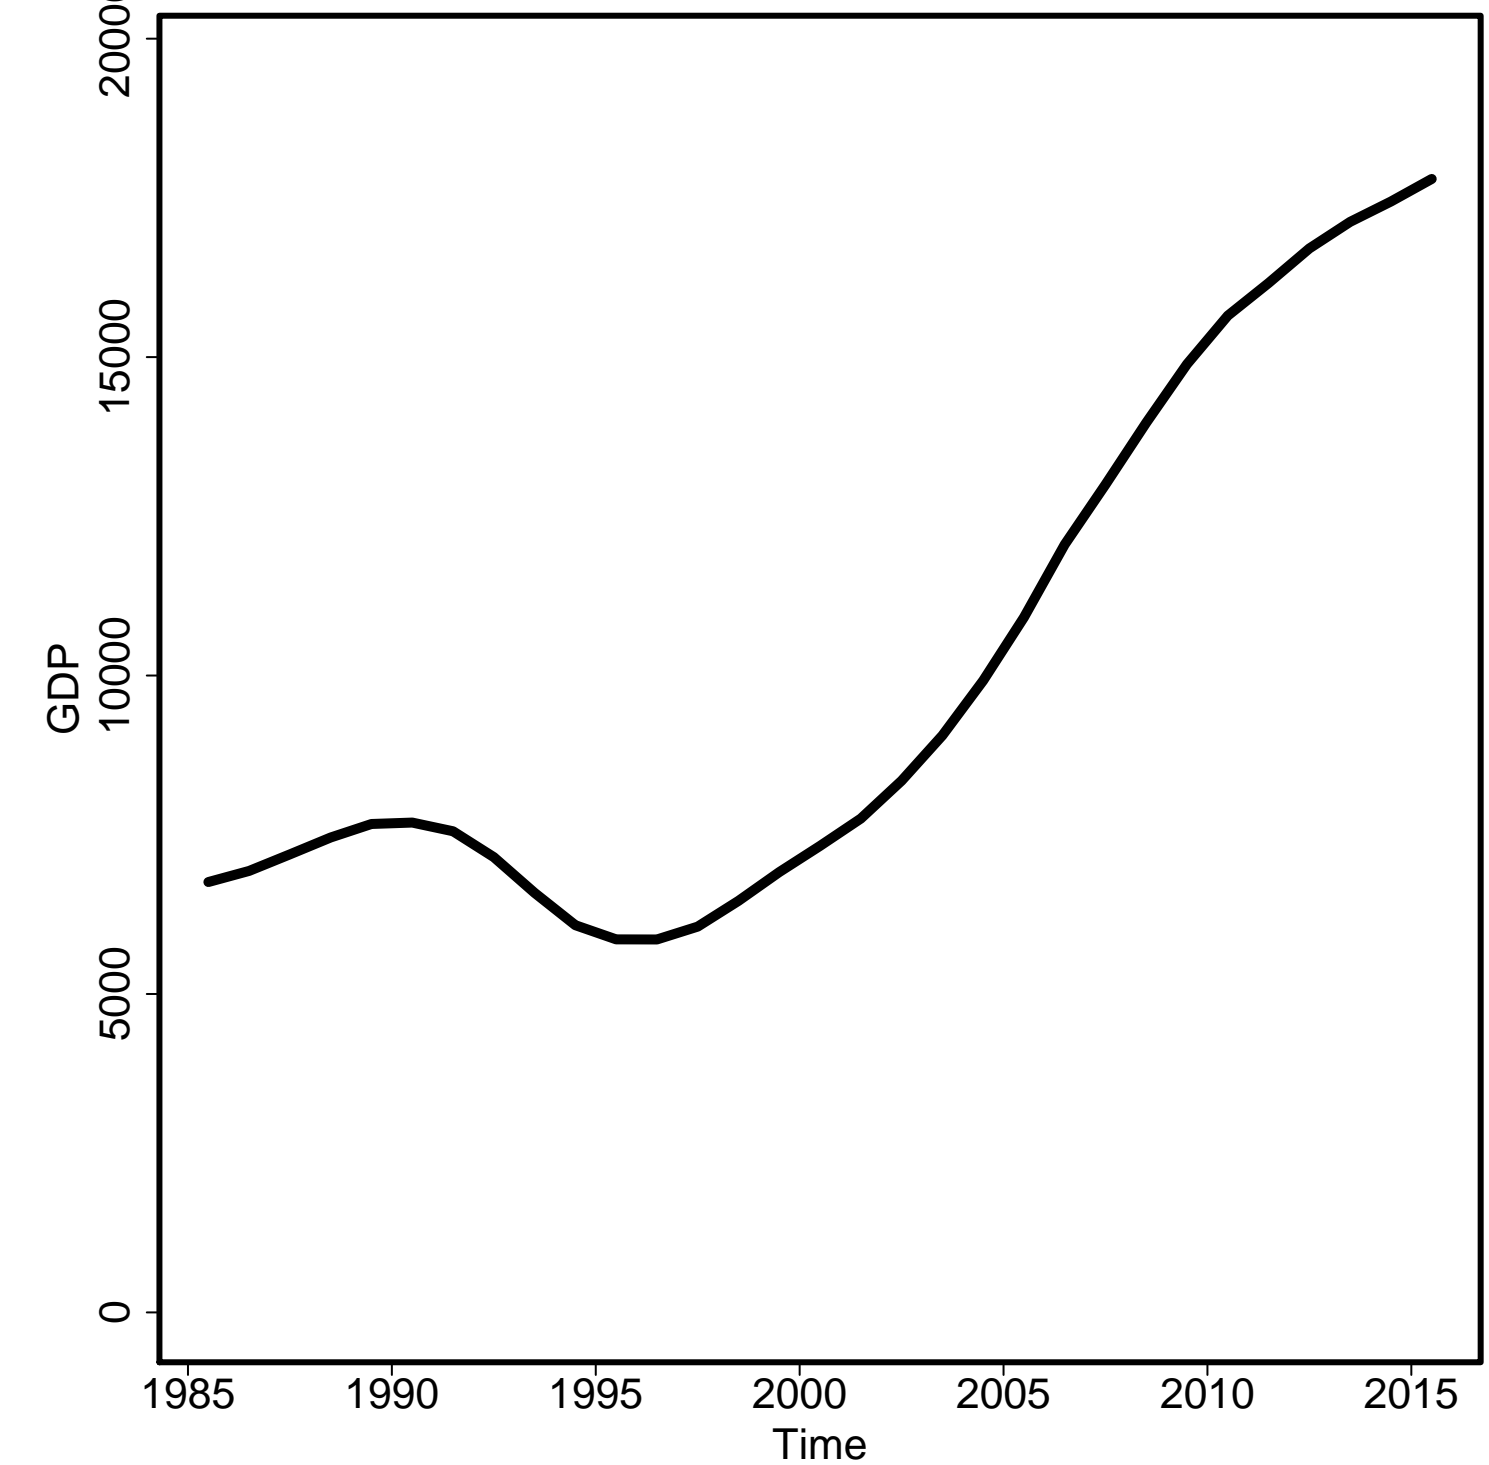

General Fertility Rate

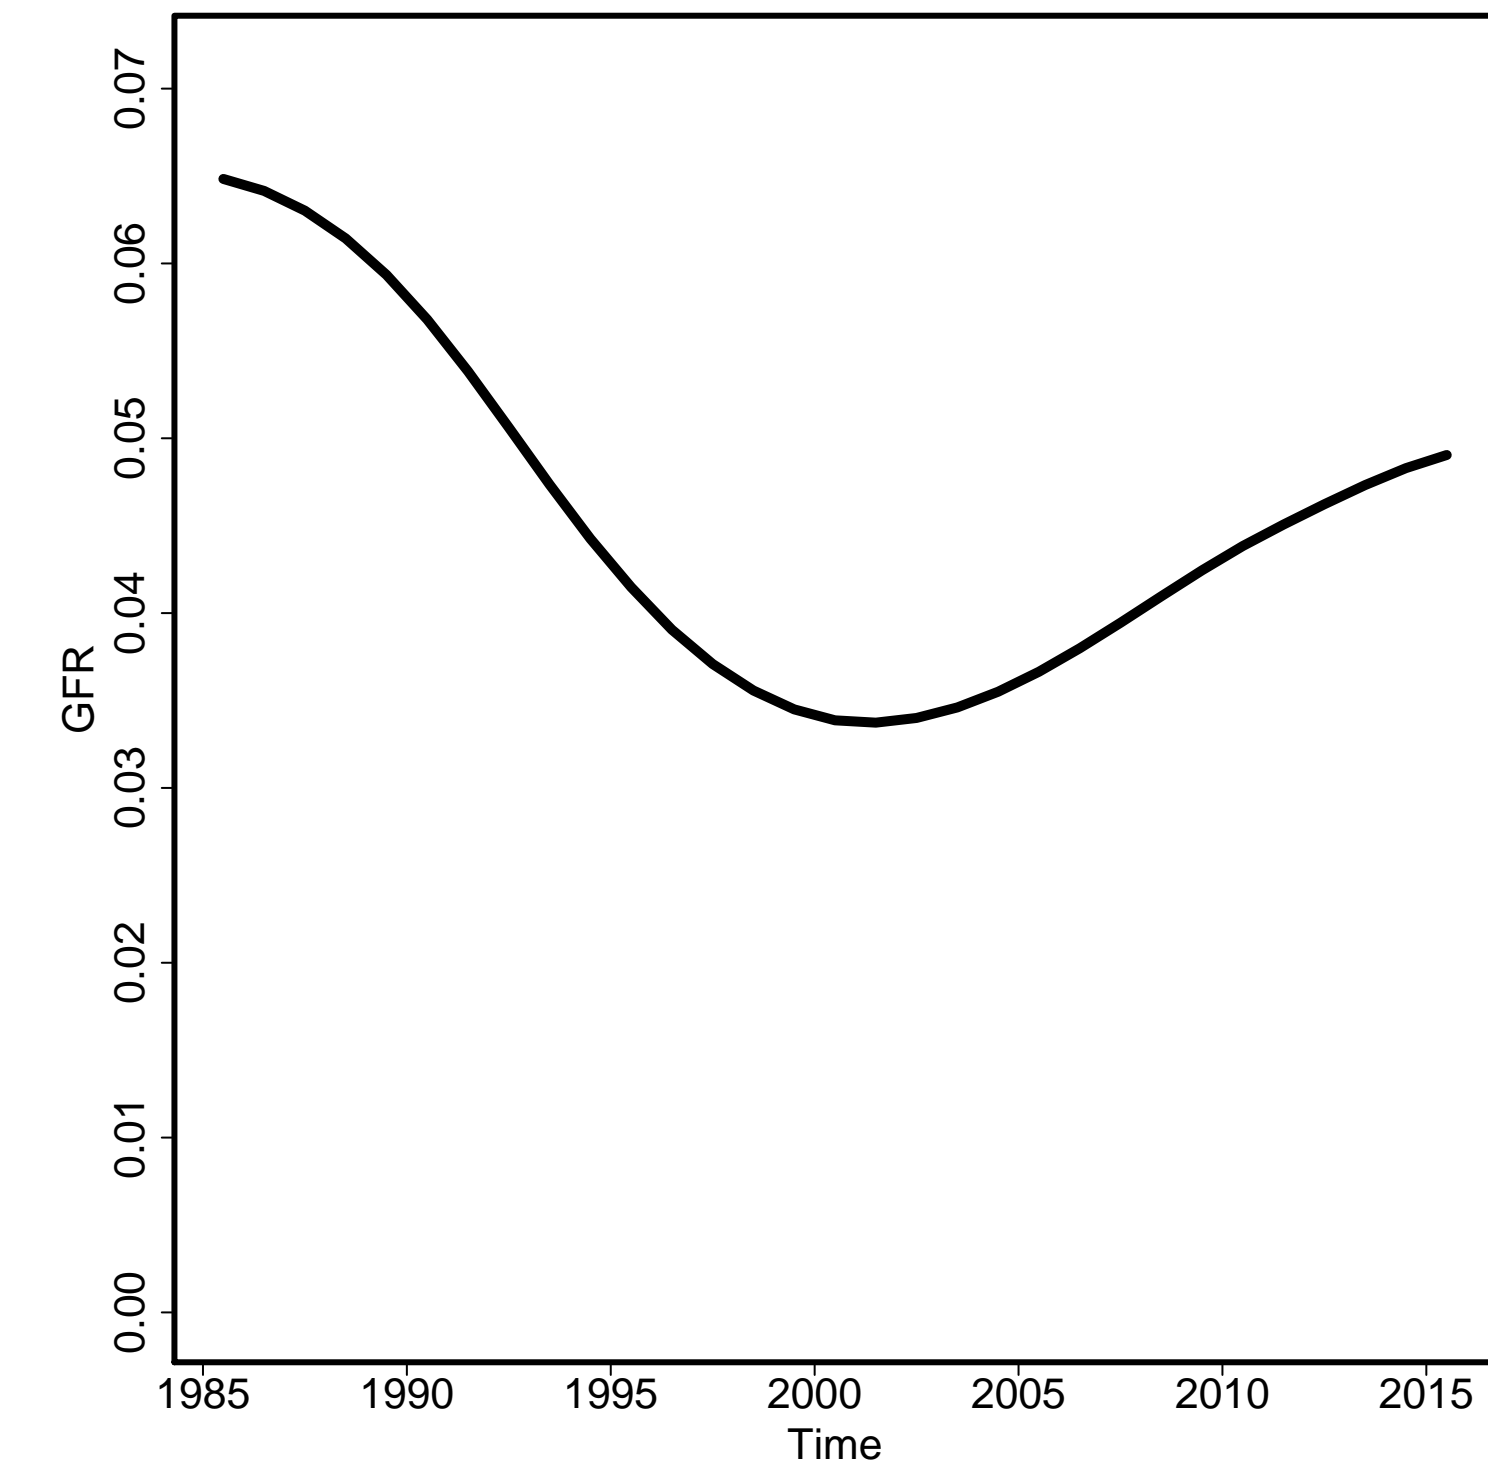

Skilled Attendance to Birth

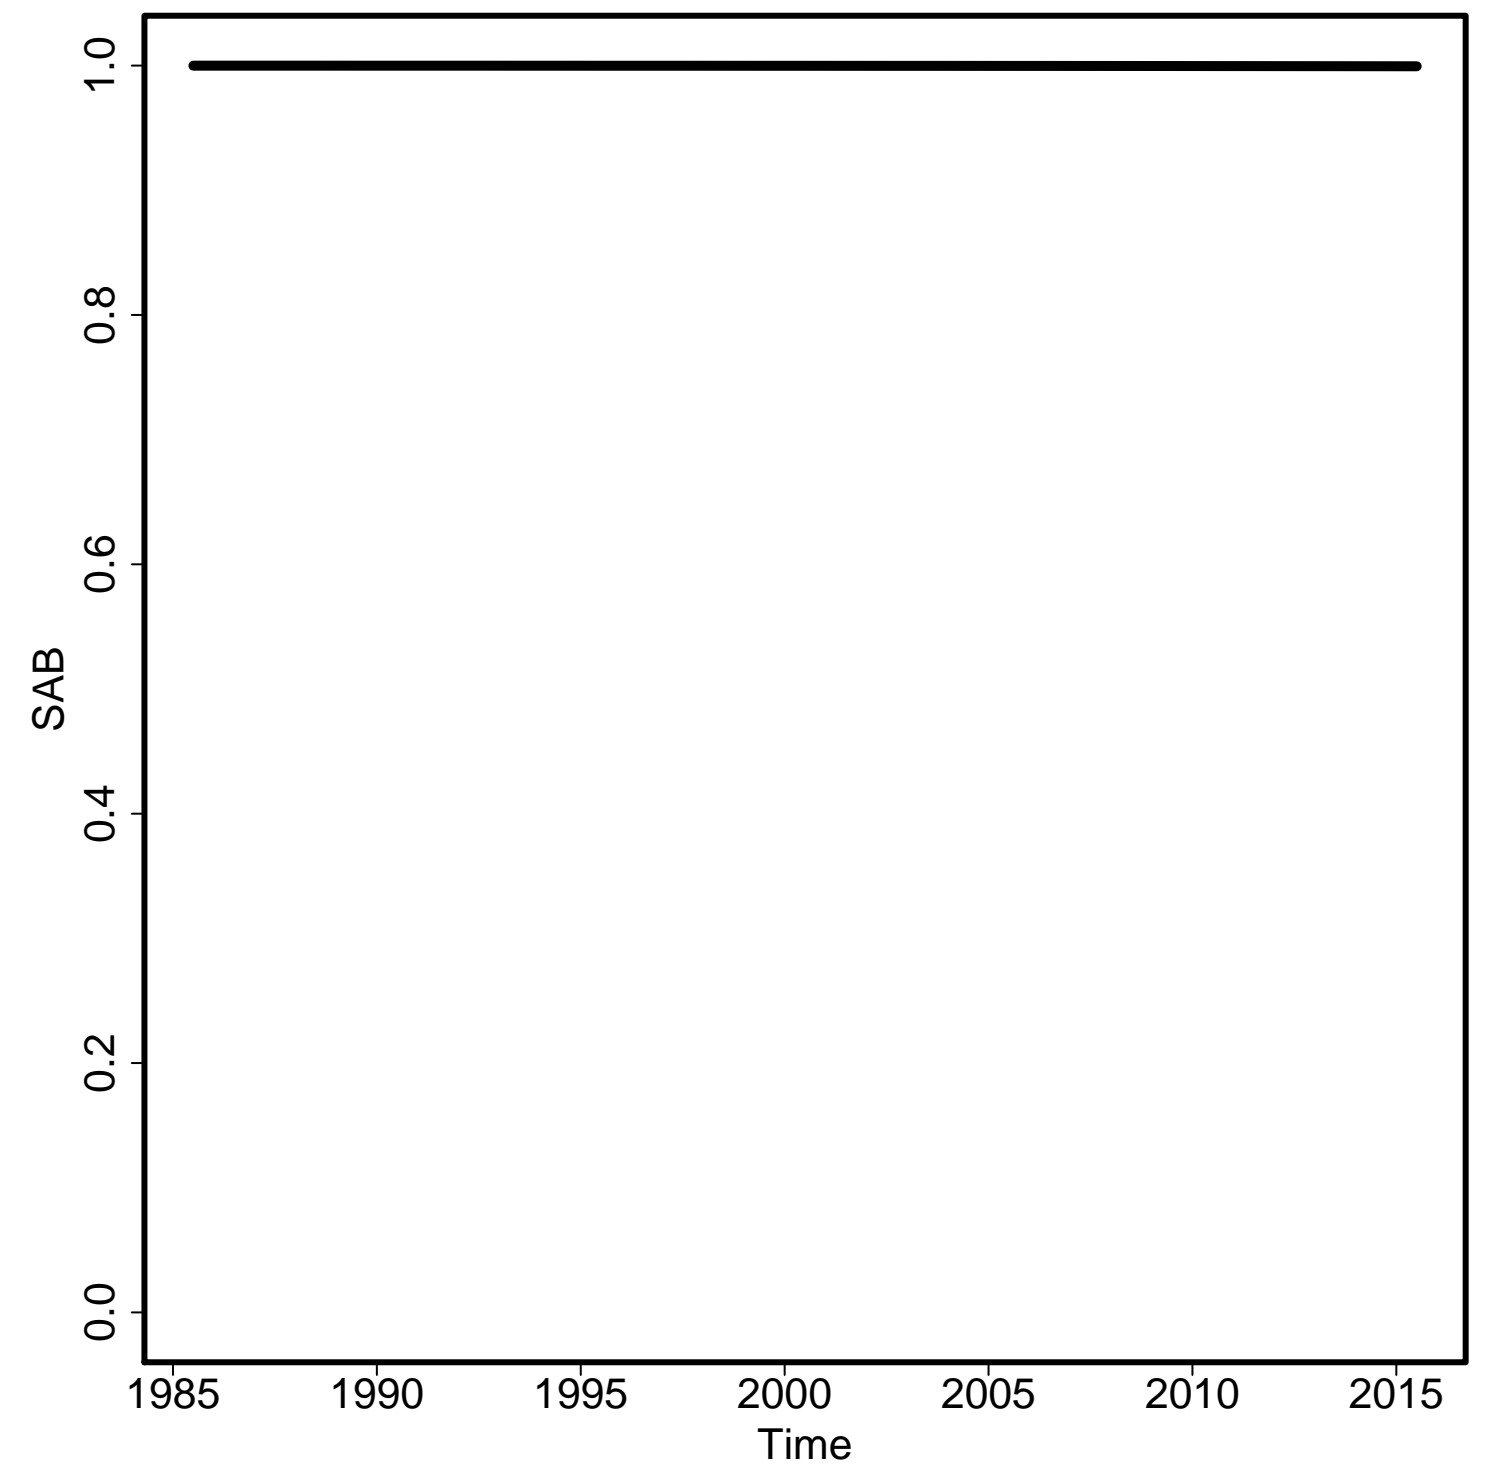

Envelope/Births

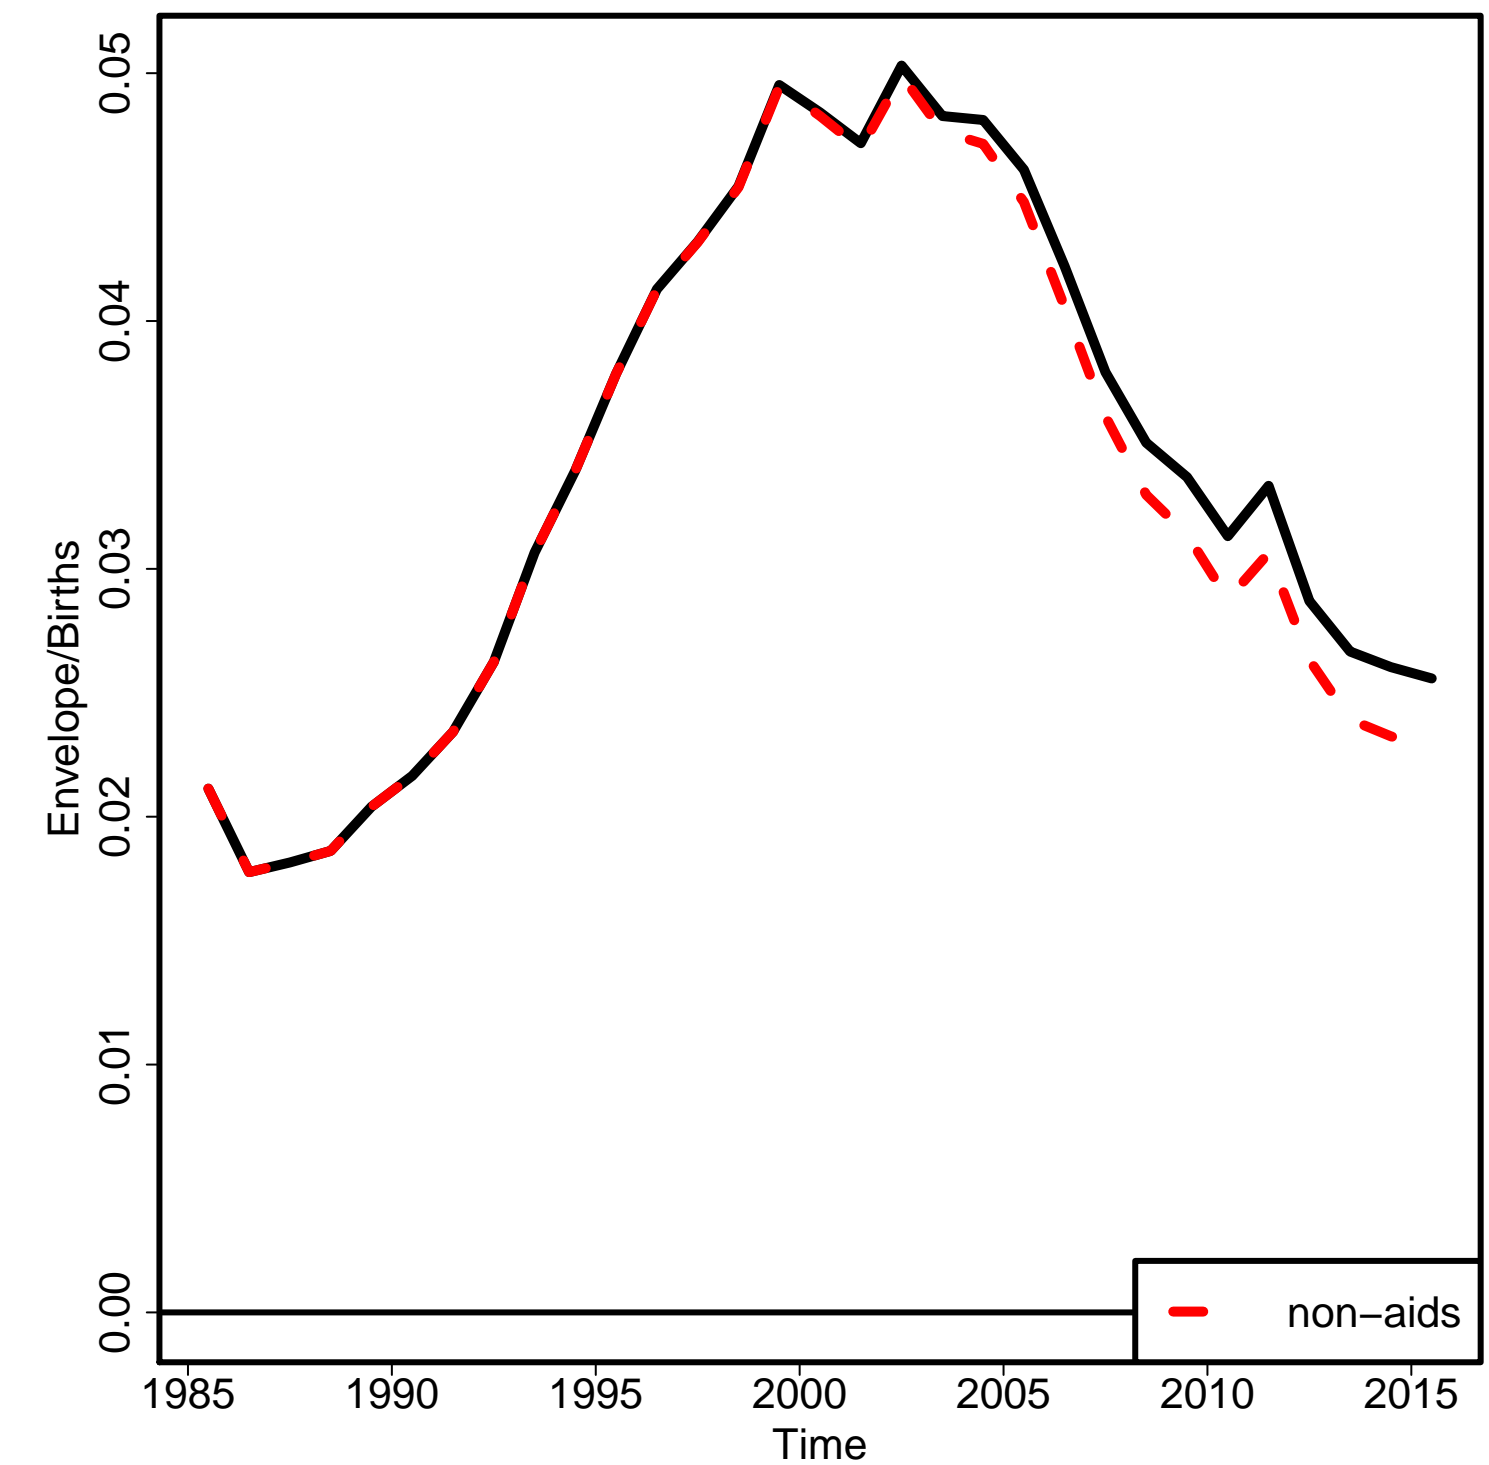

Non-aids MMR

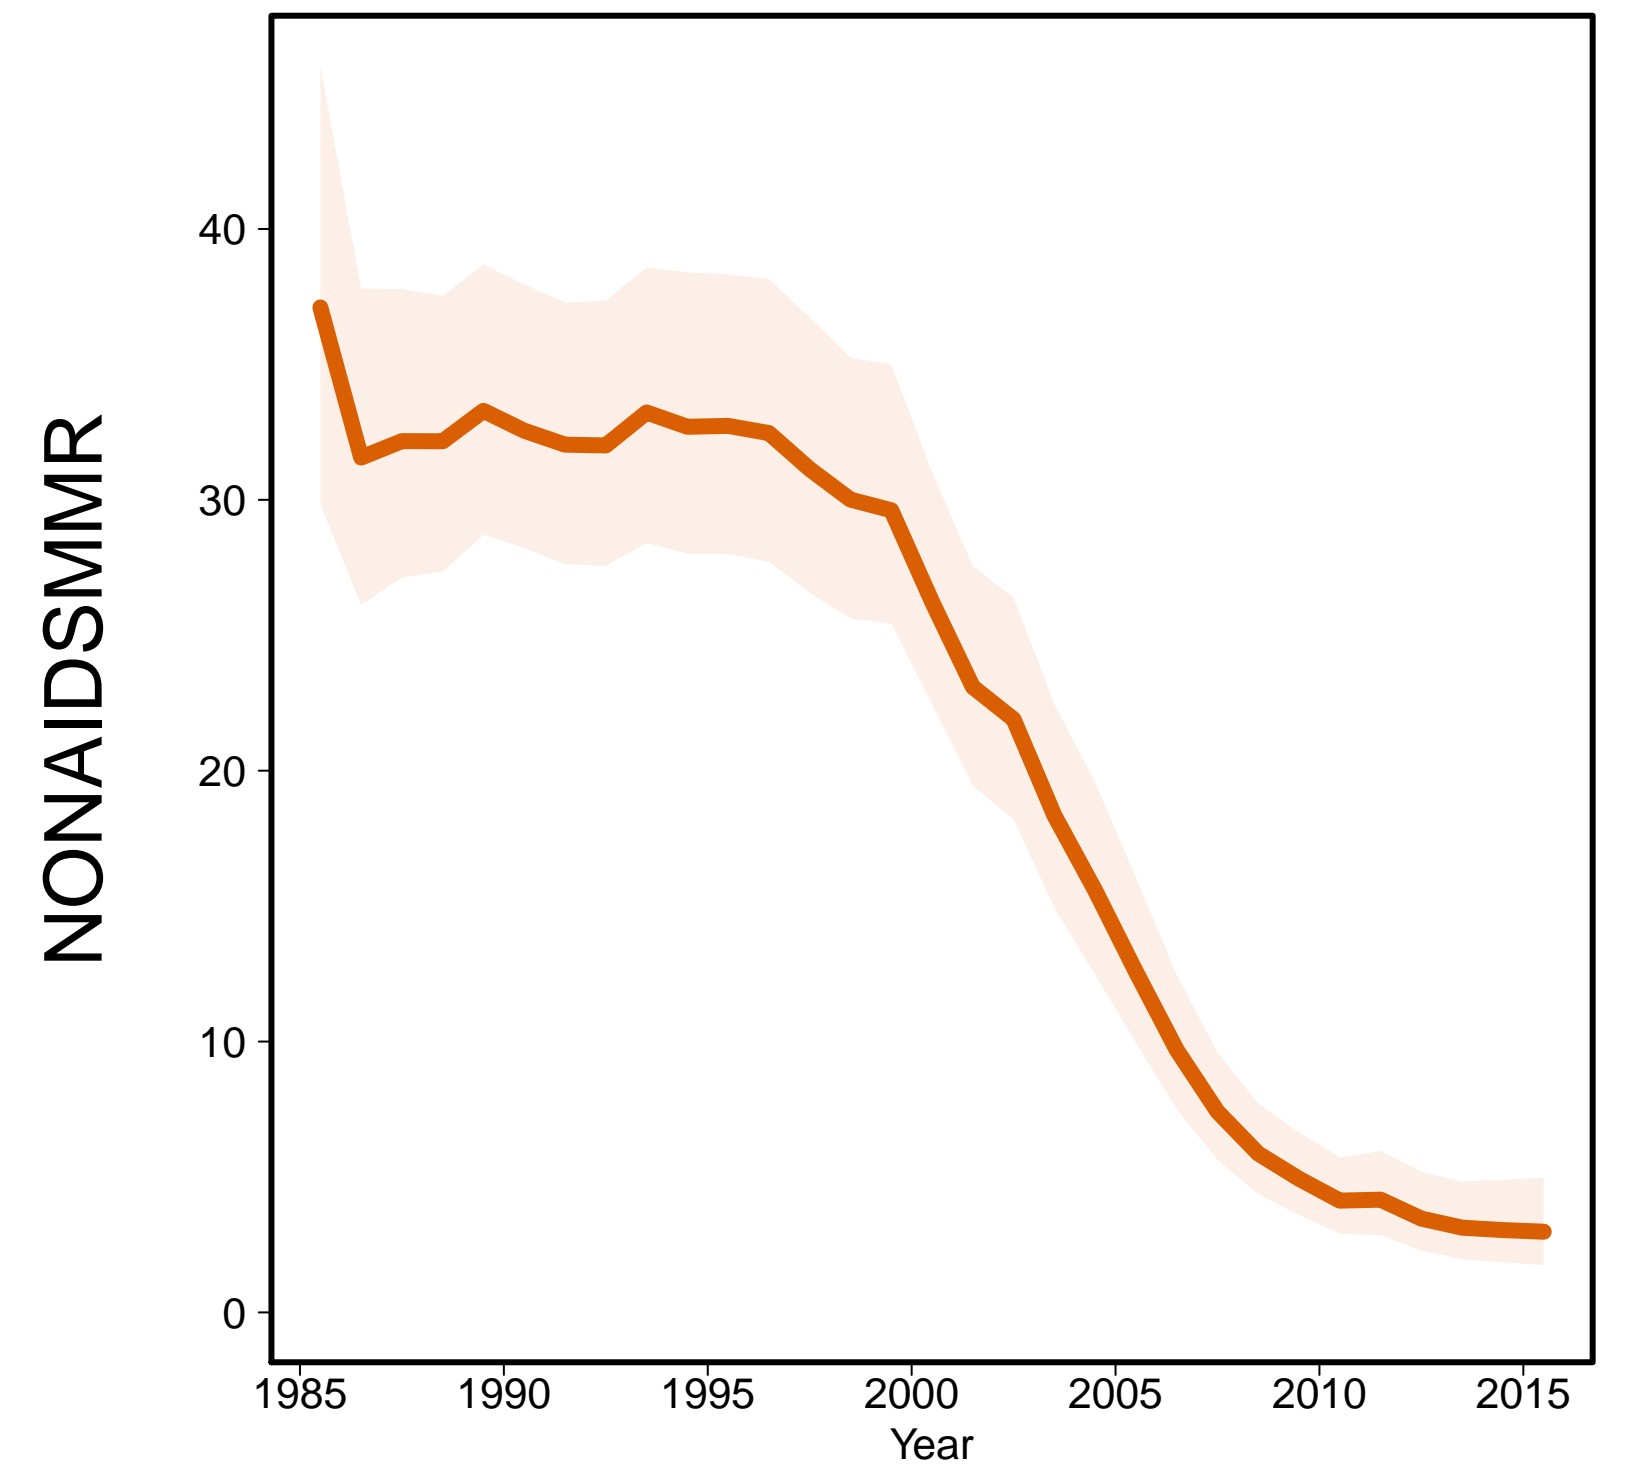

Aids MMR

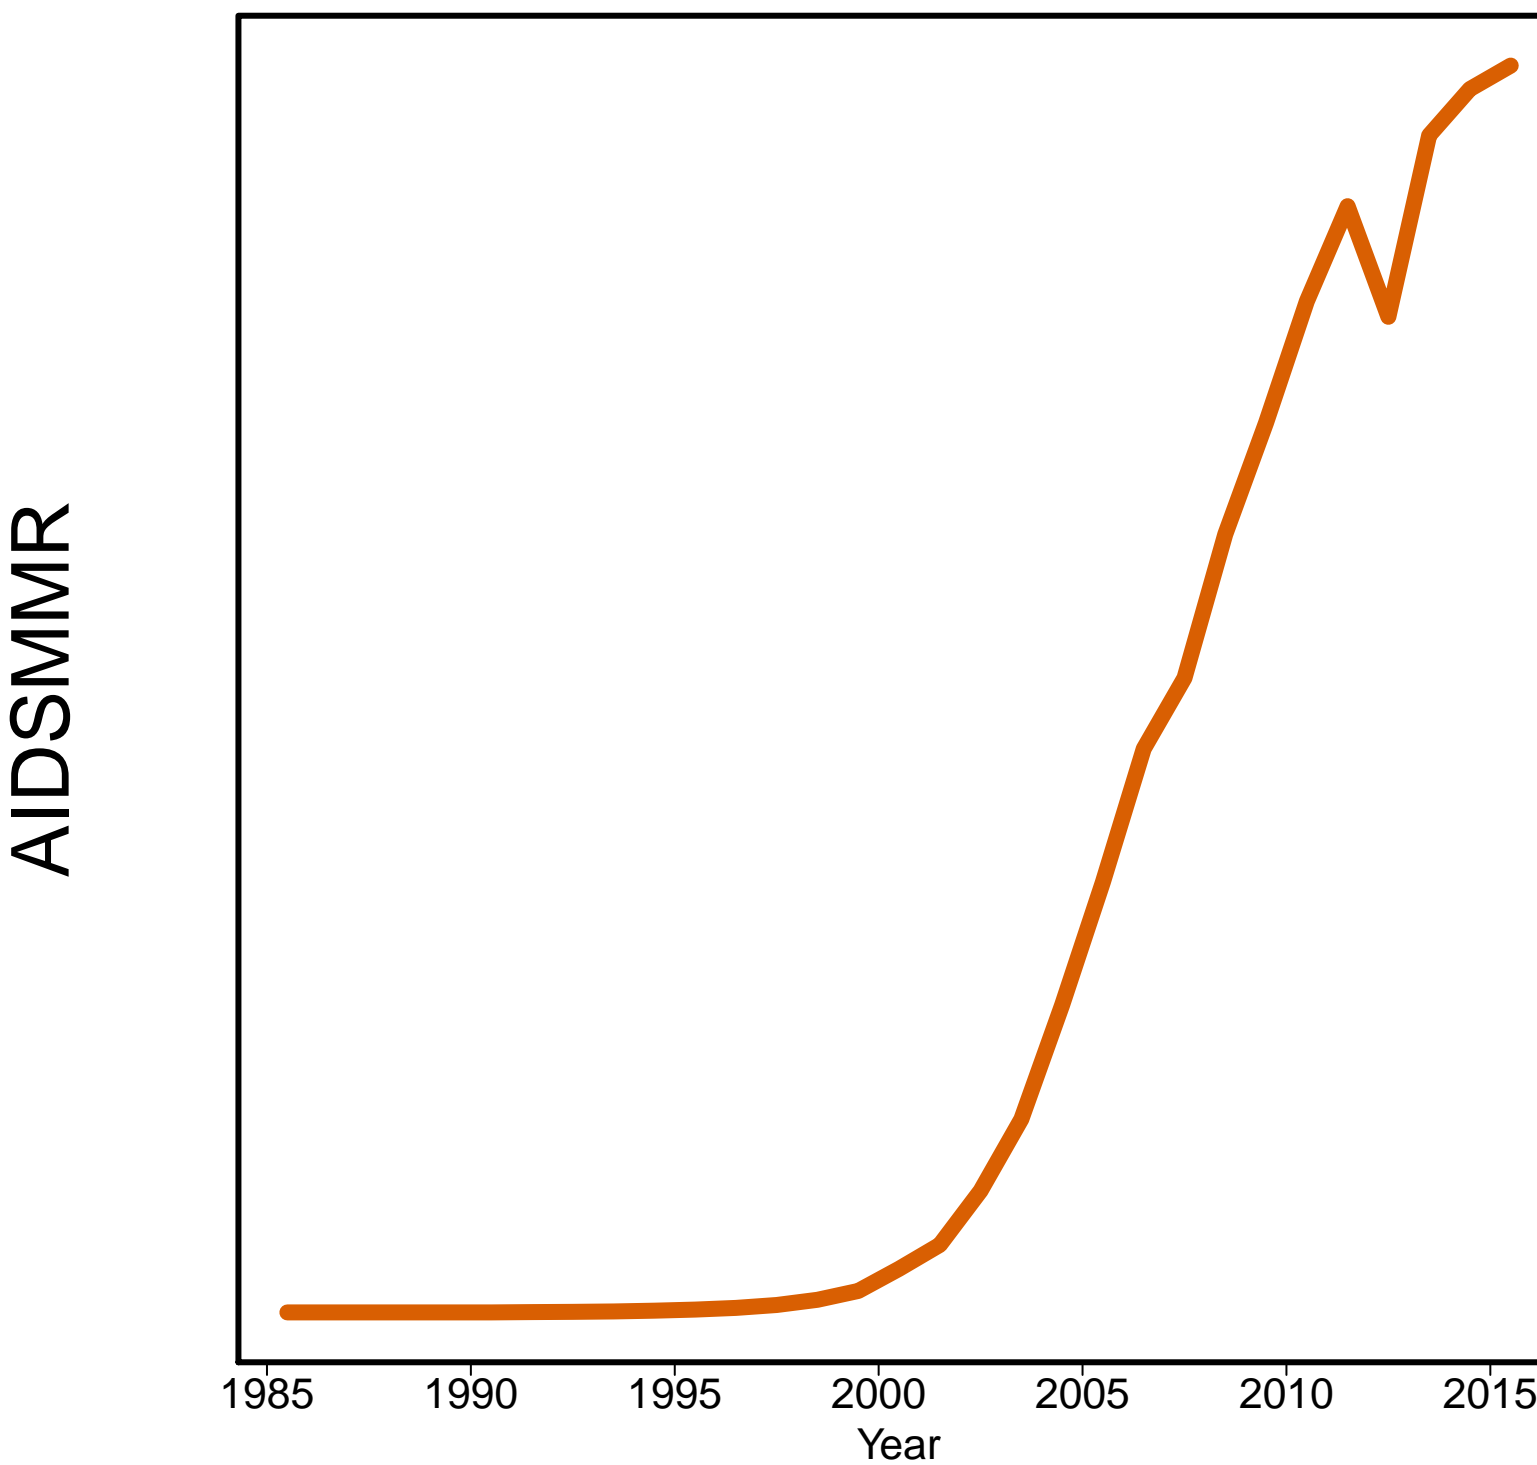

Belgium [BEL]  
(Developed regions)

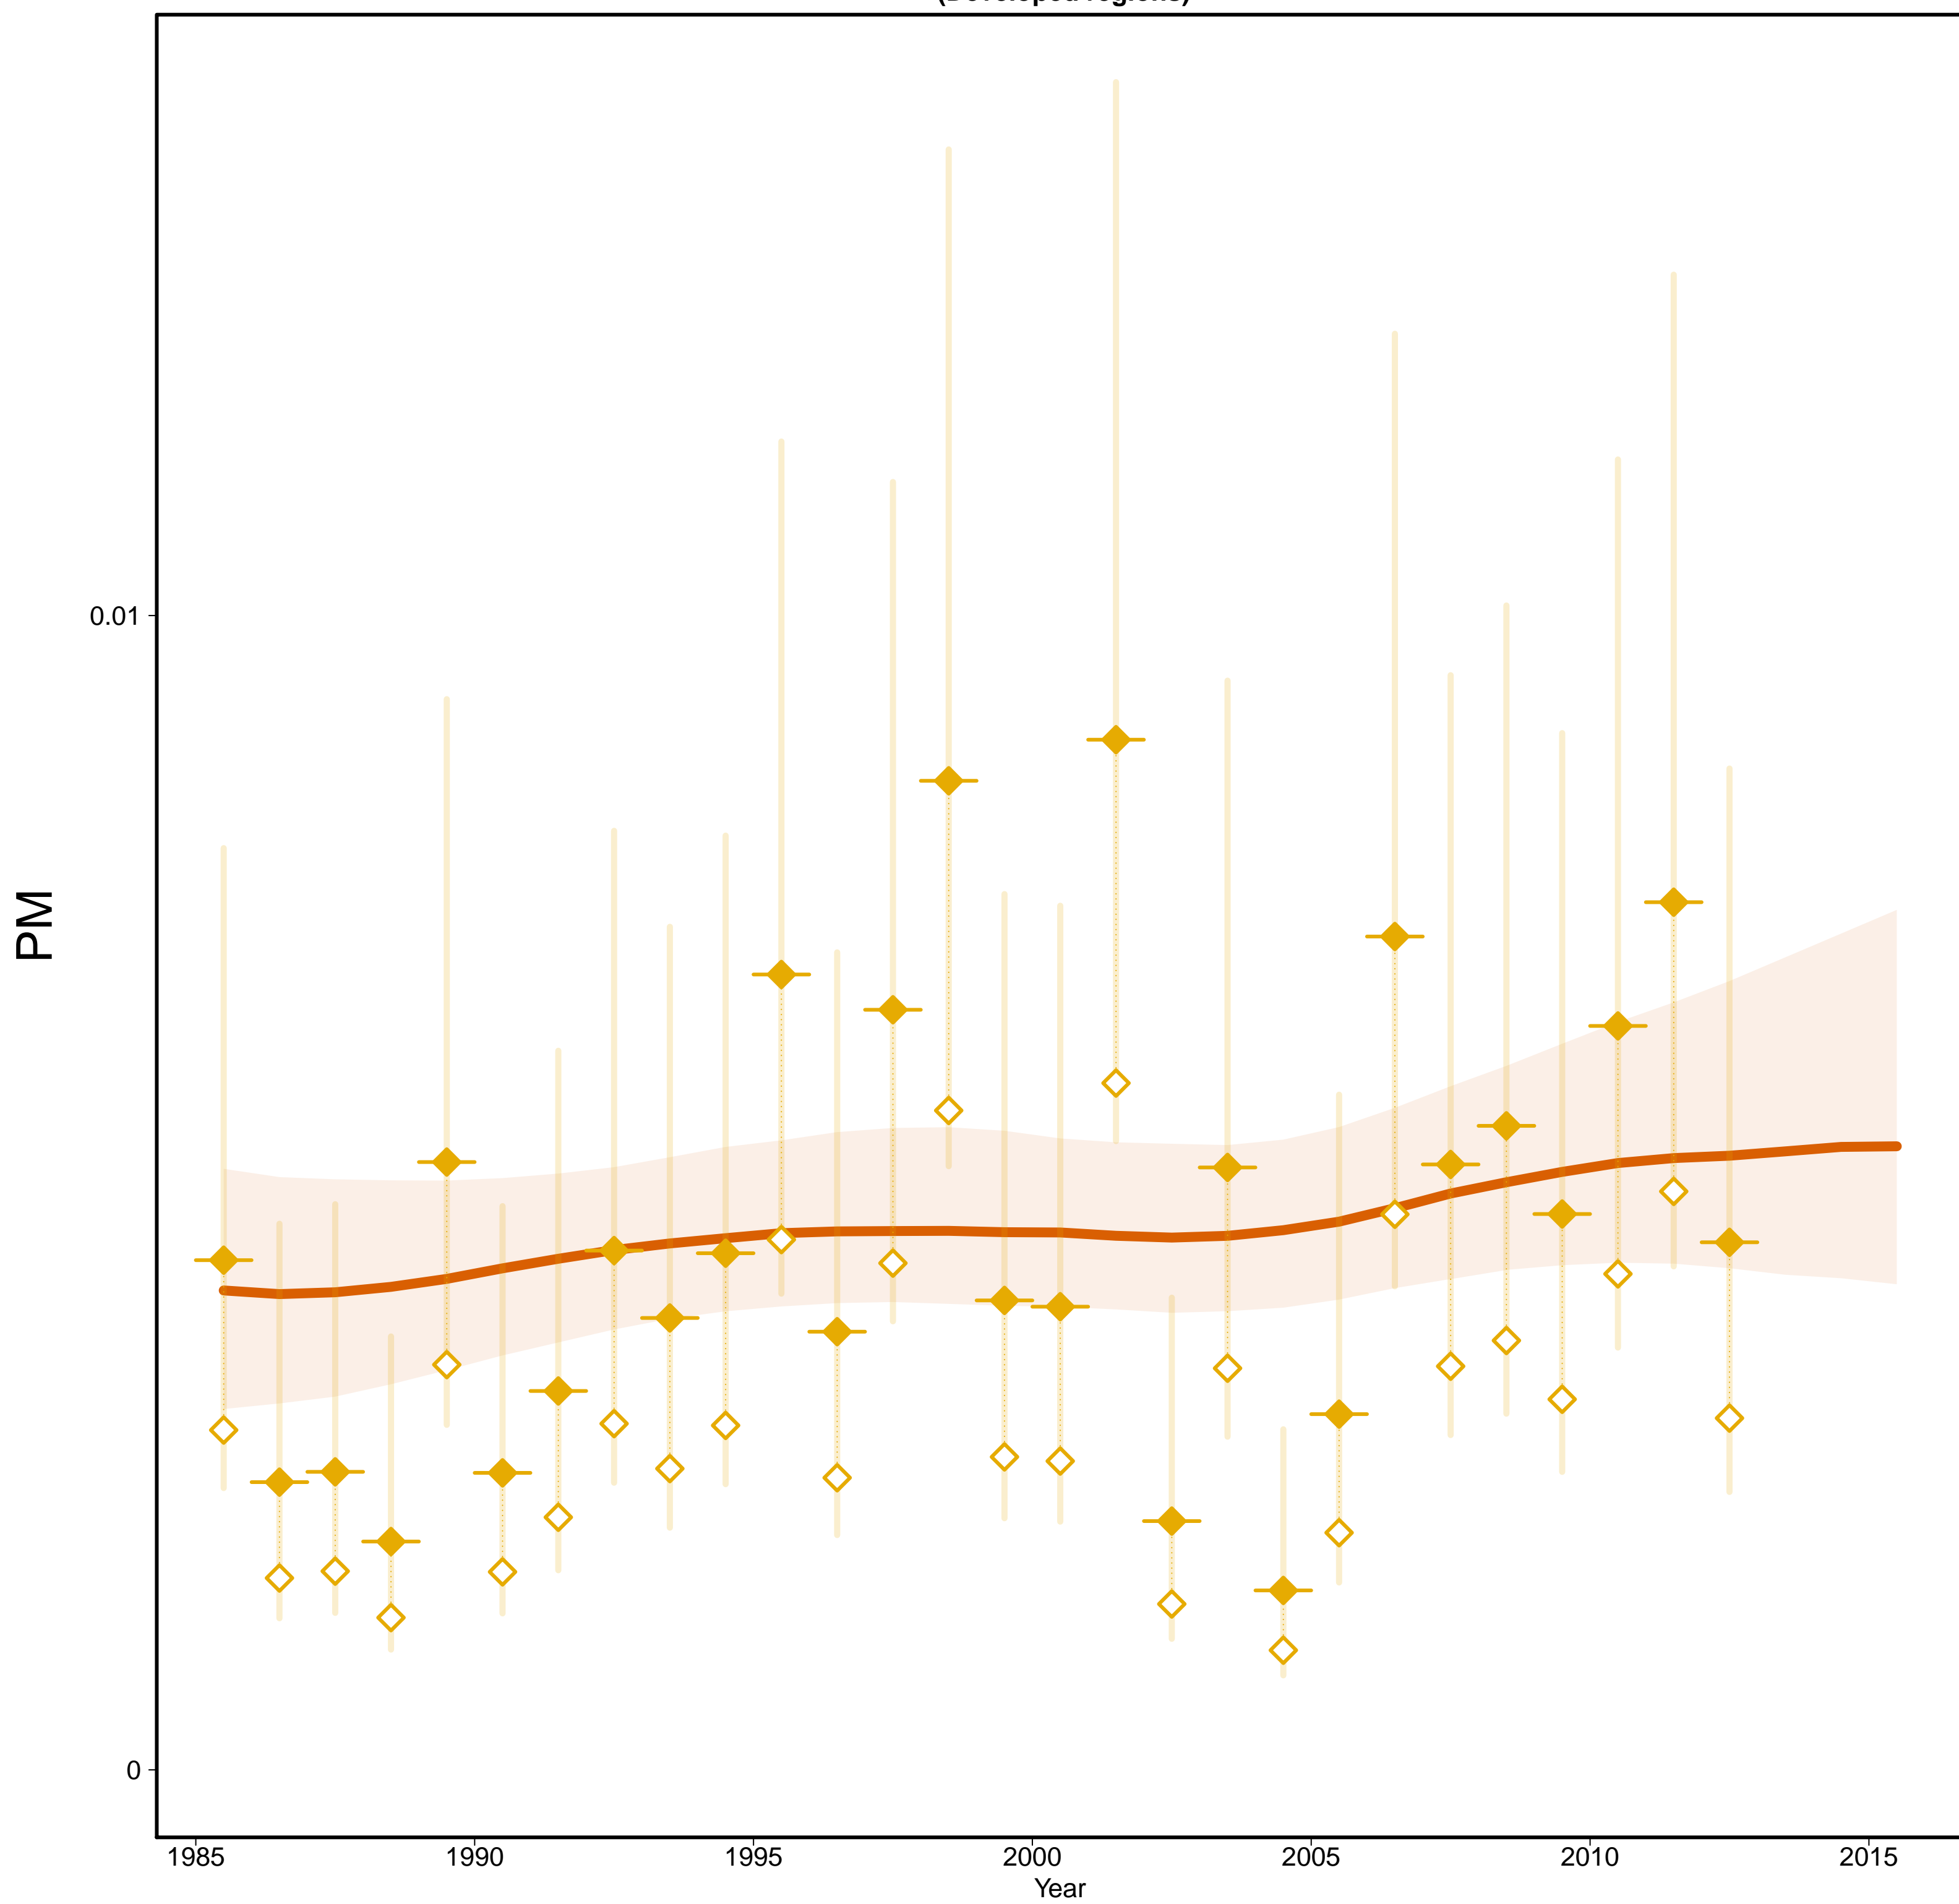

Belgium [BEL]  
(Developed regions)

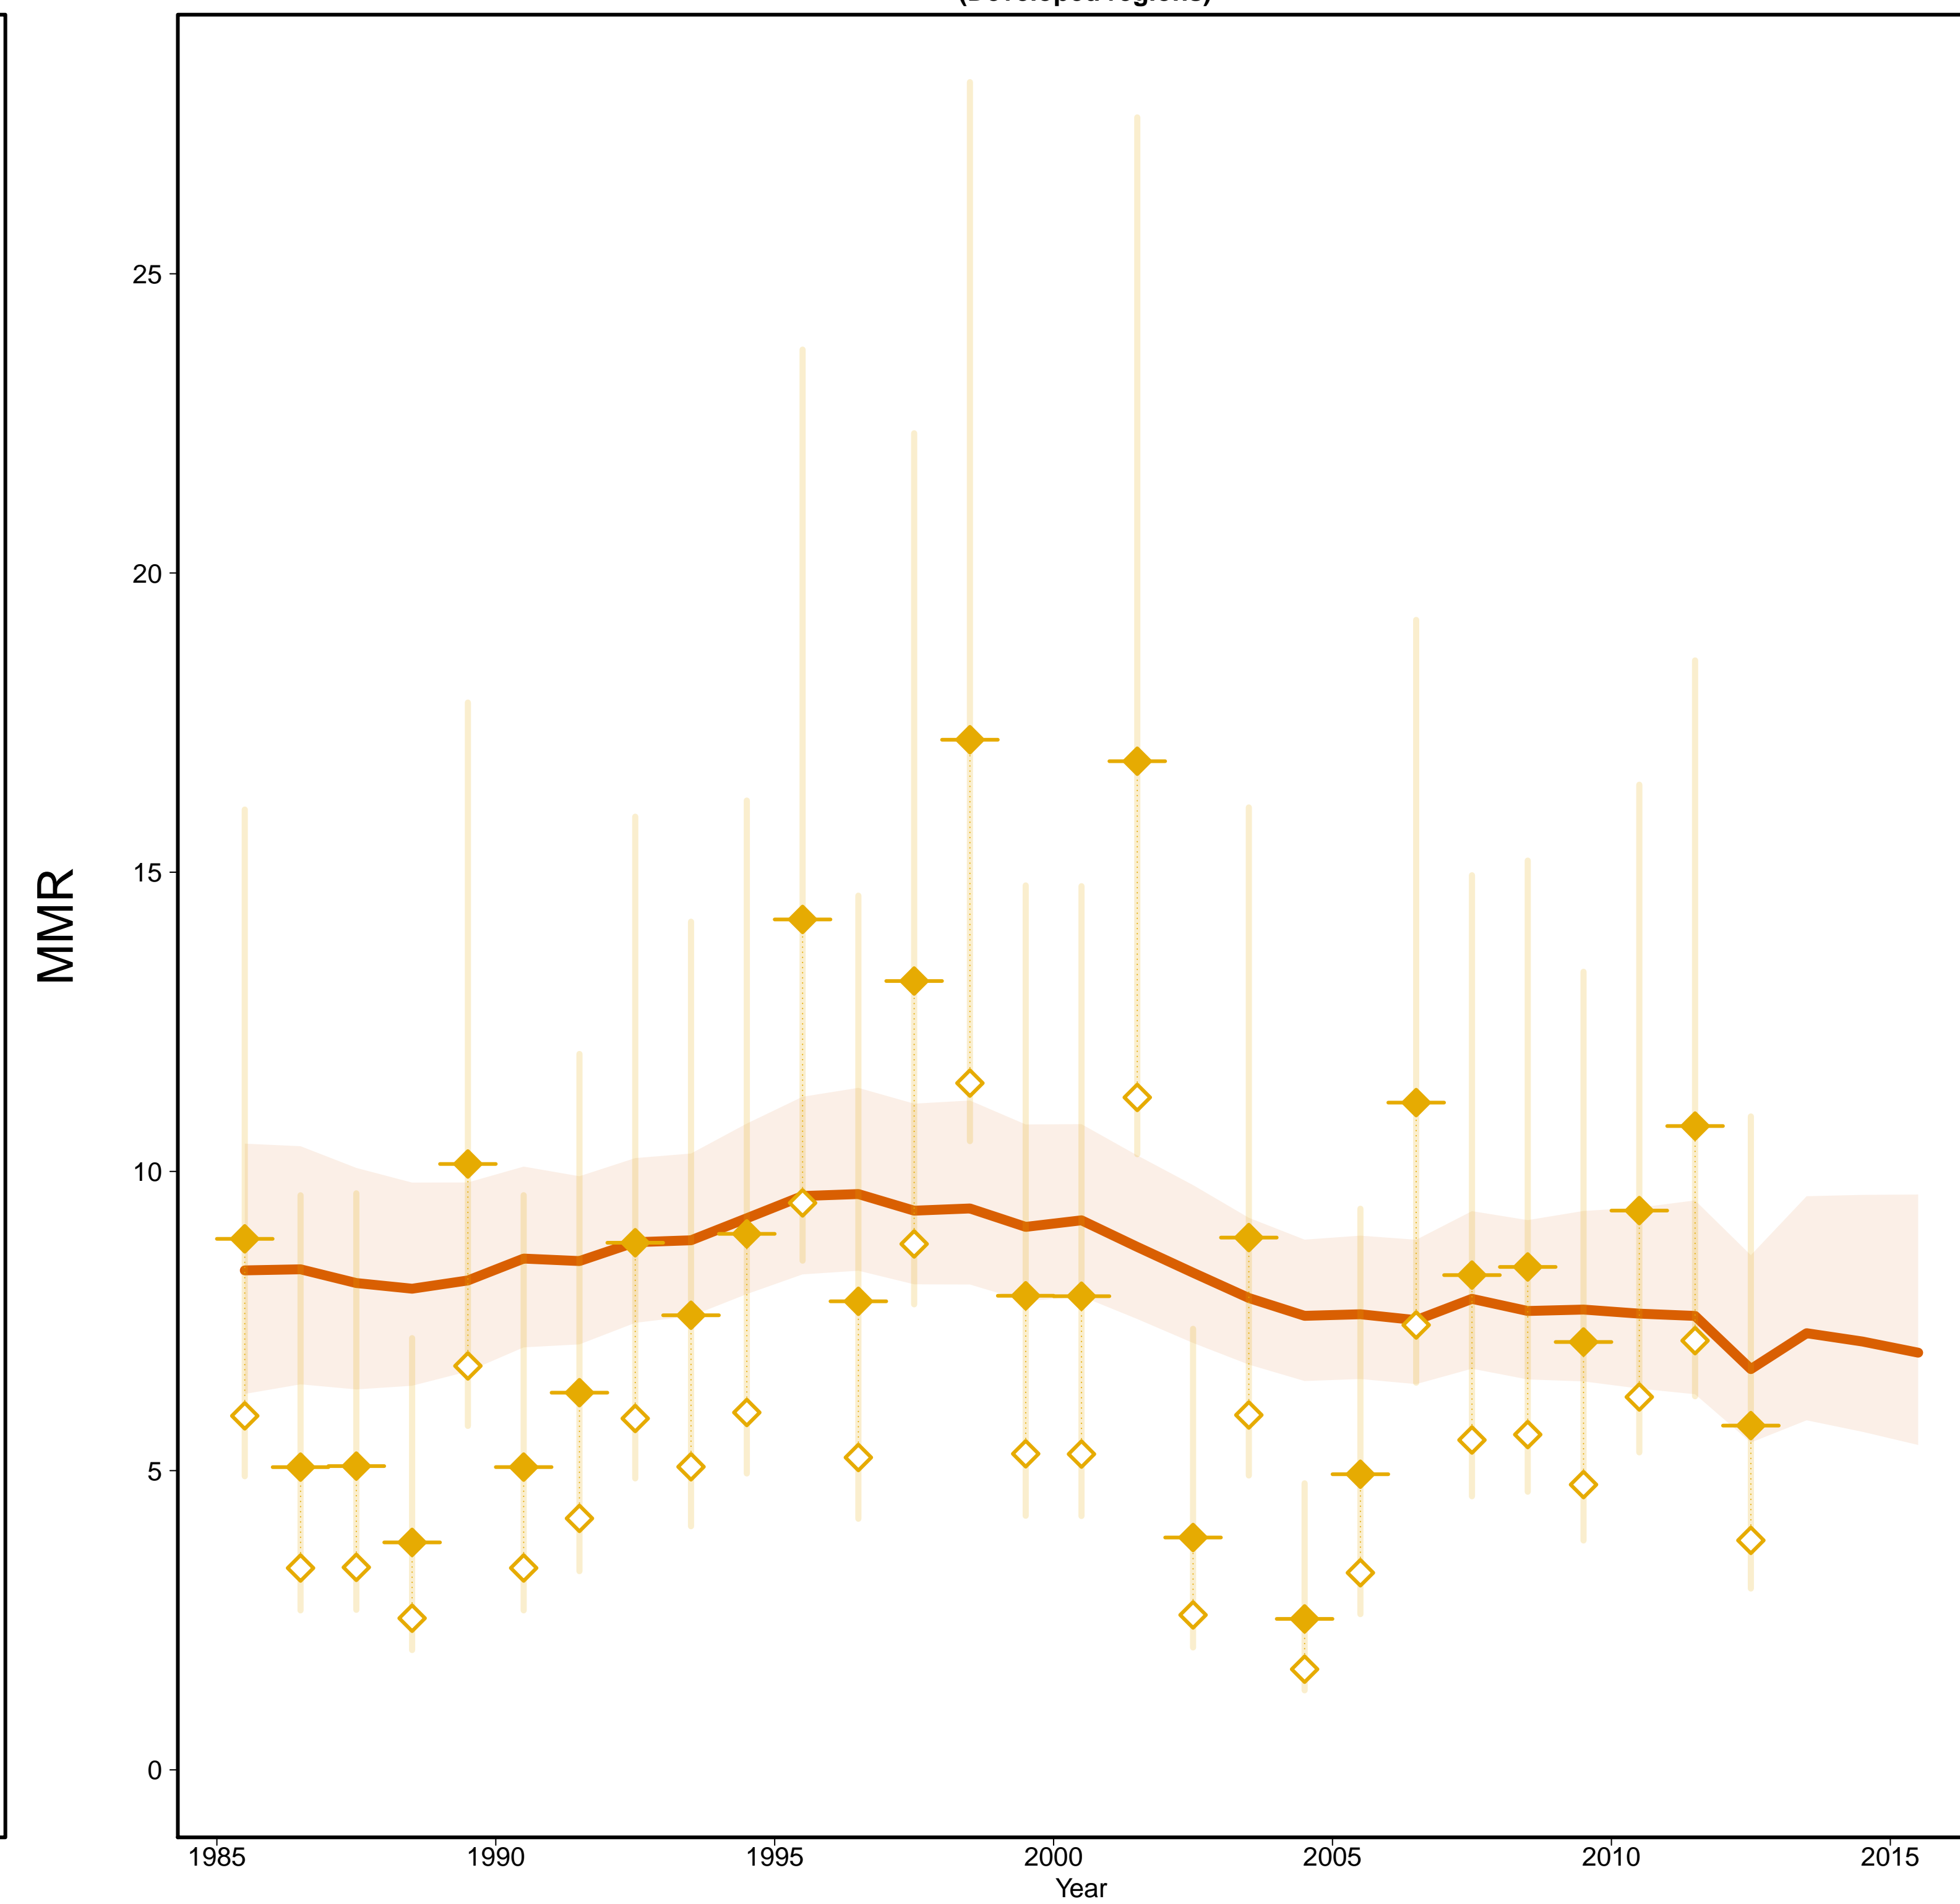

- Estimates —
- MMR Database 2015 —
- ◇ Observed Data
- ◆ Adjusted Data
- Data type —
- ◆ VR

Gross Domestic Product

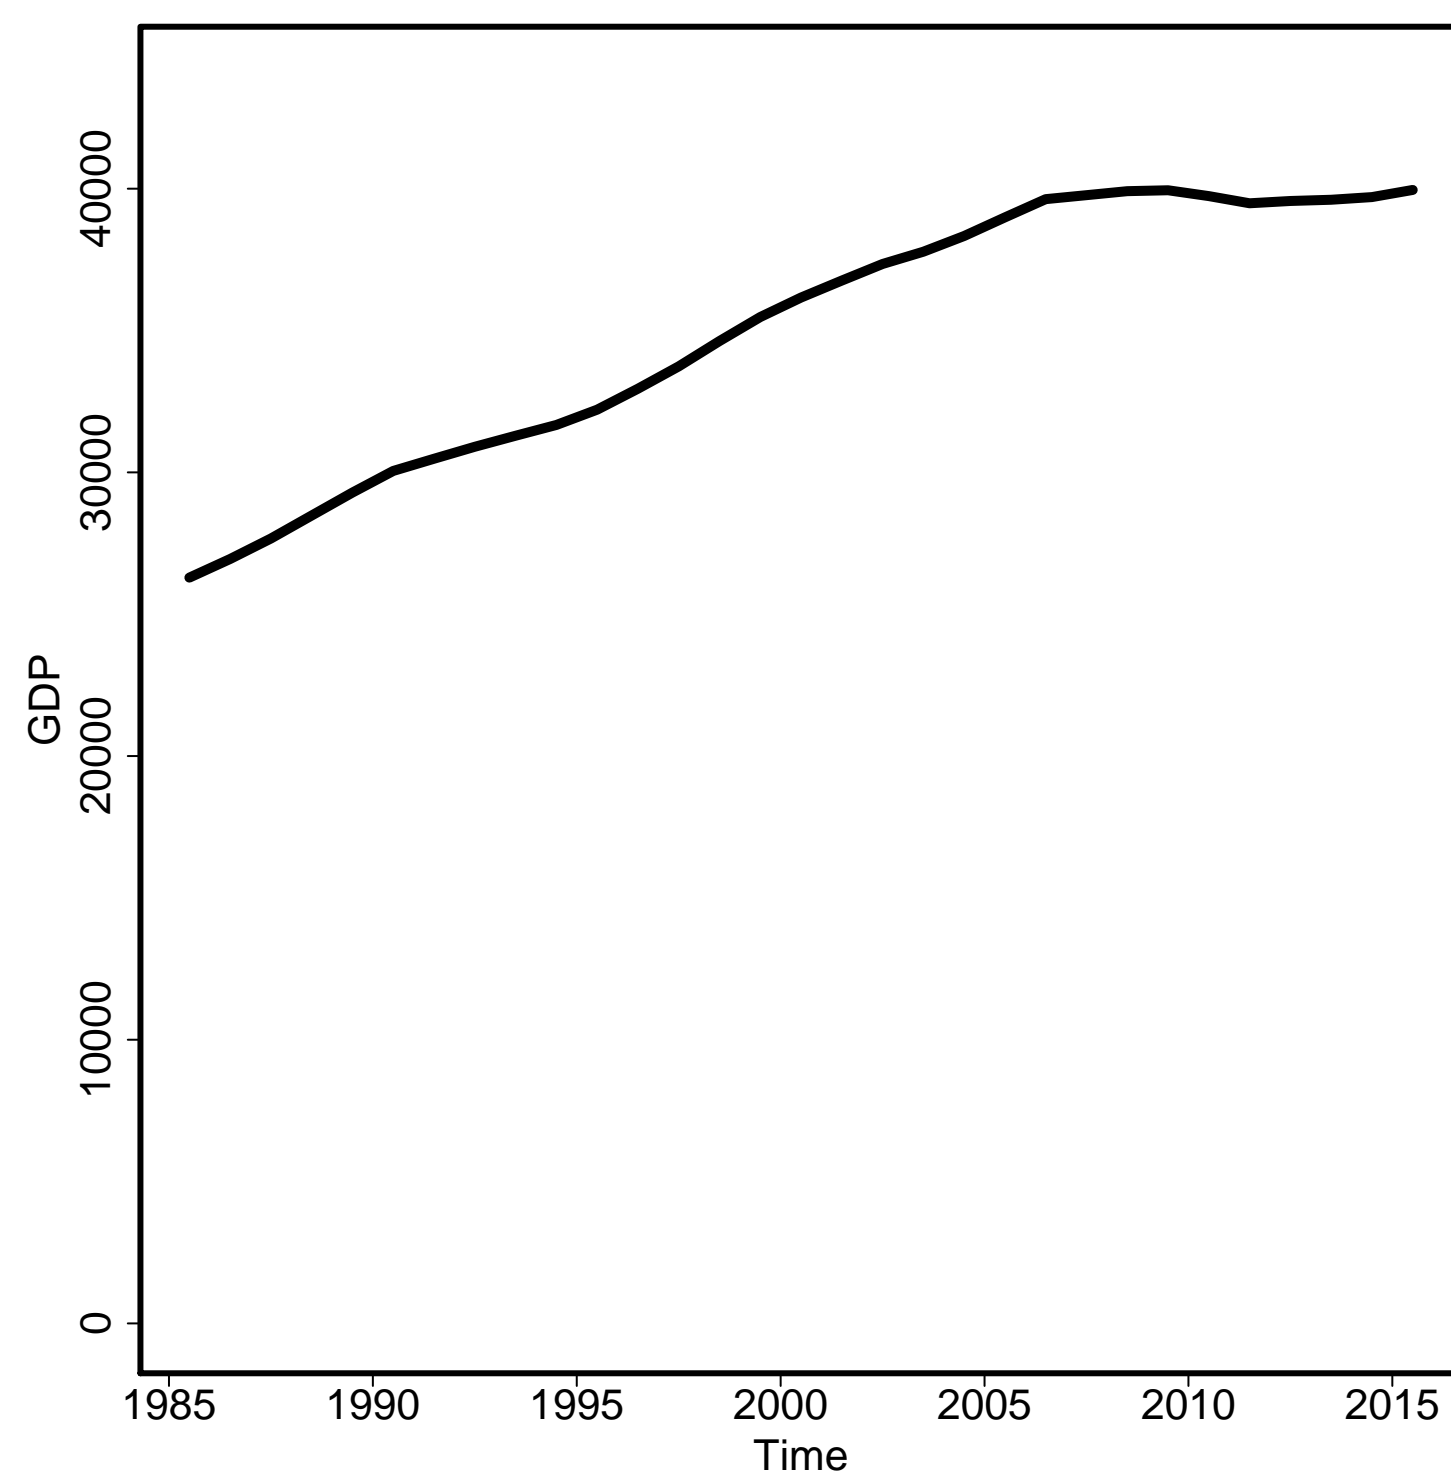

General Fertility Rate

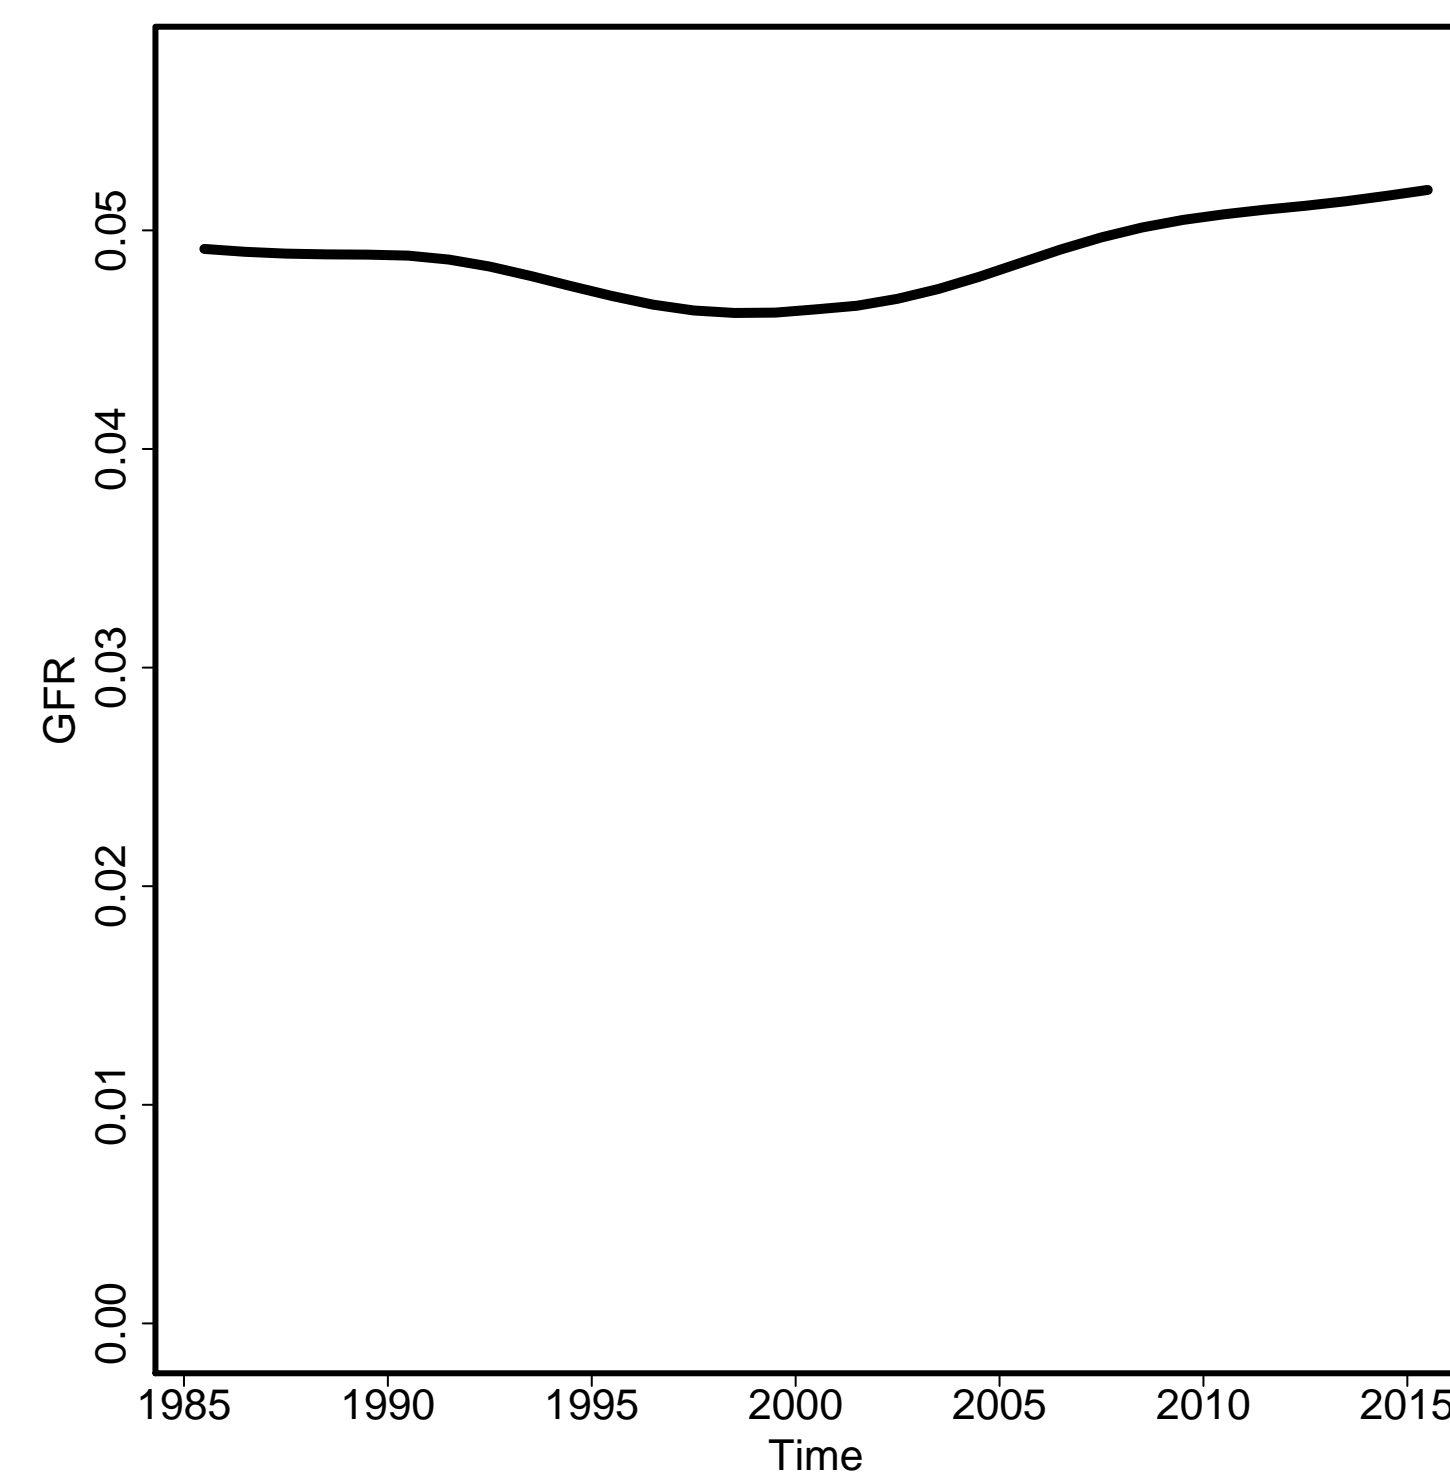

Skilled Attendance to Birth

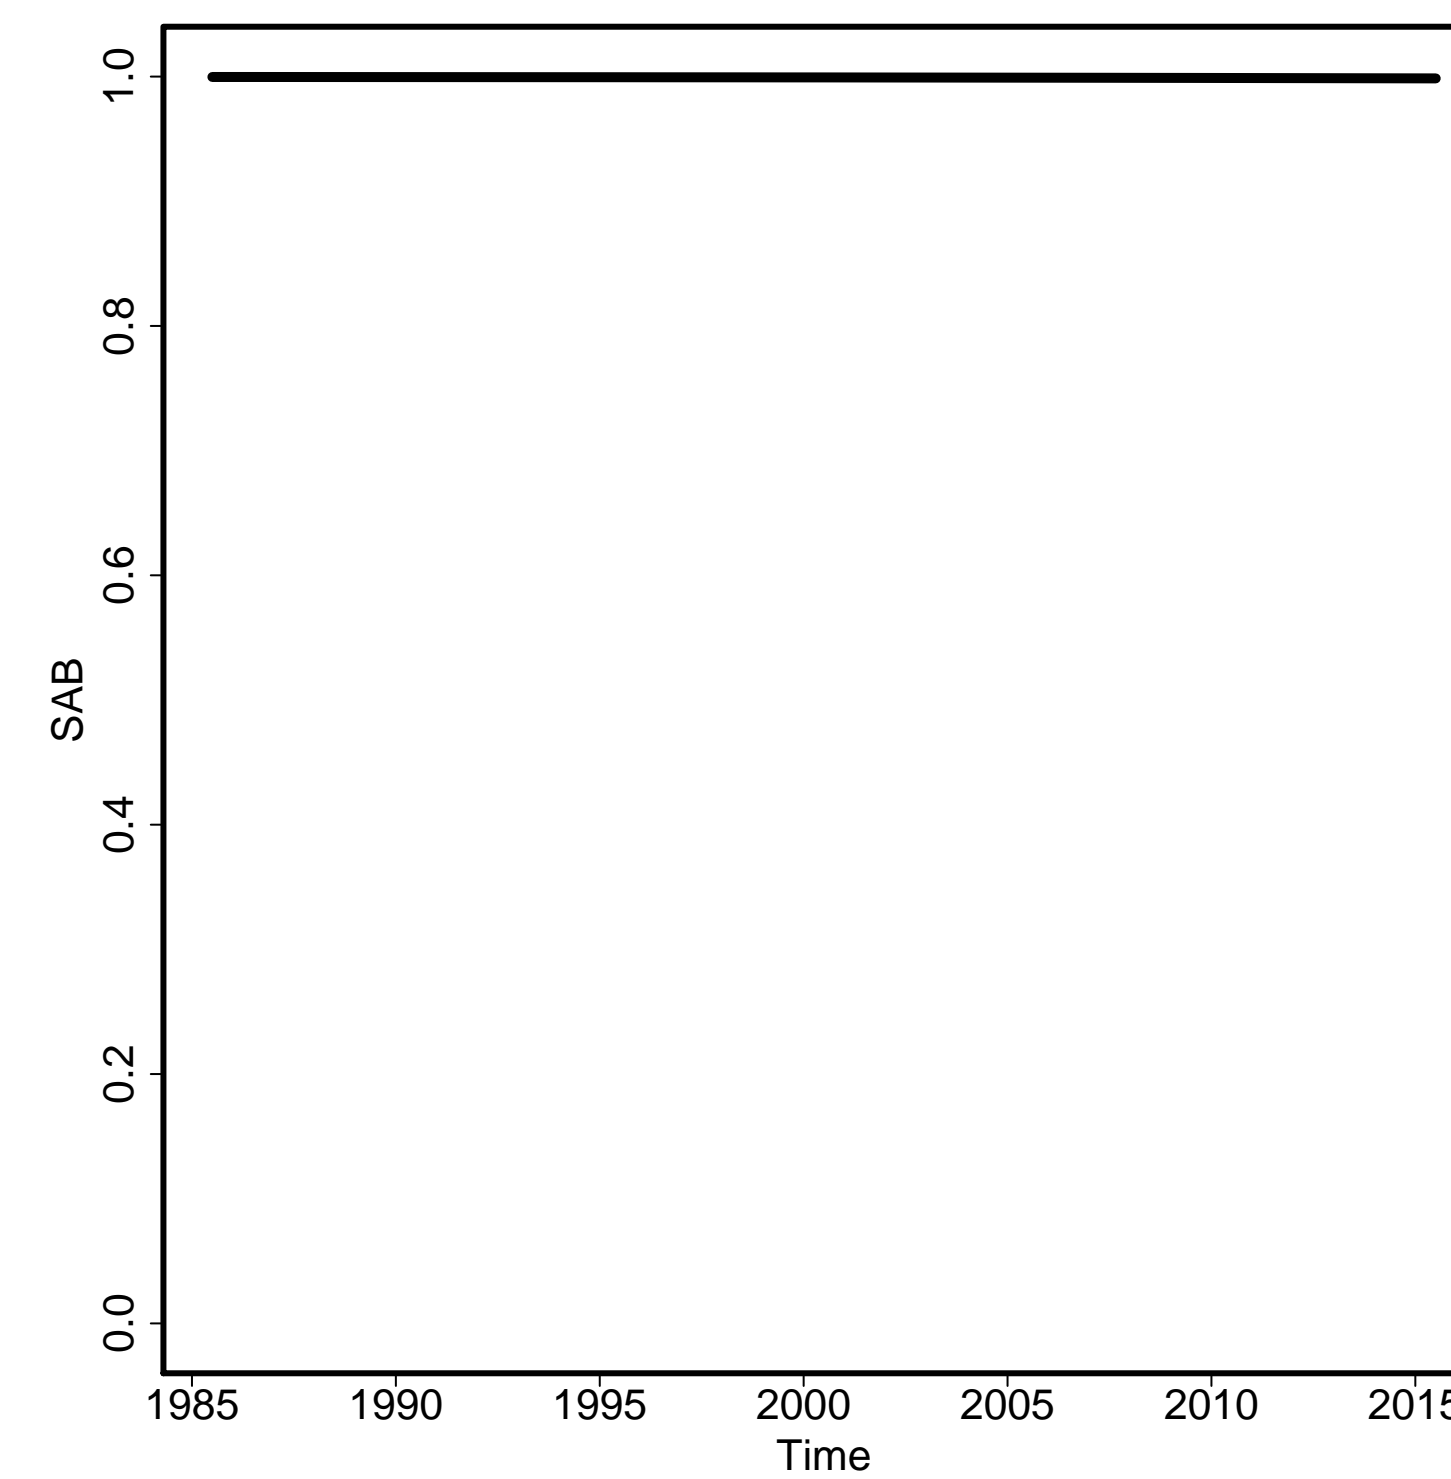

Envelope/Births

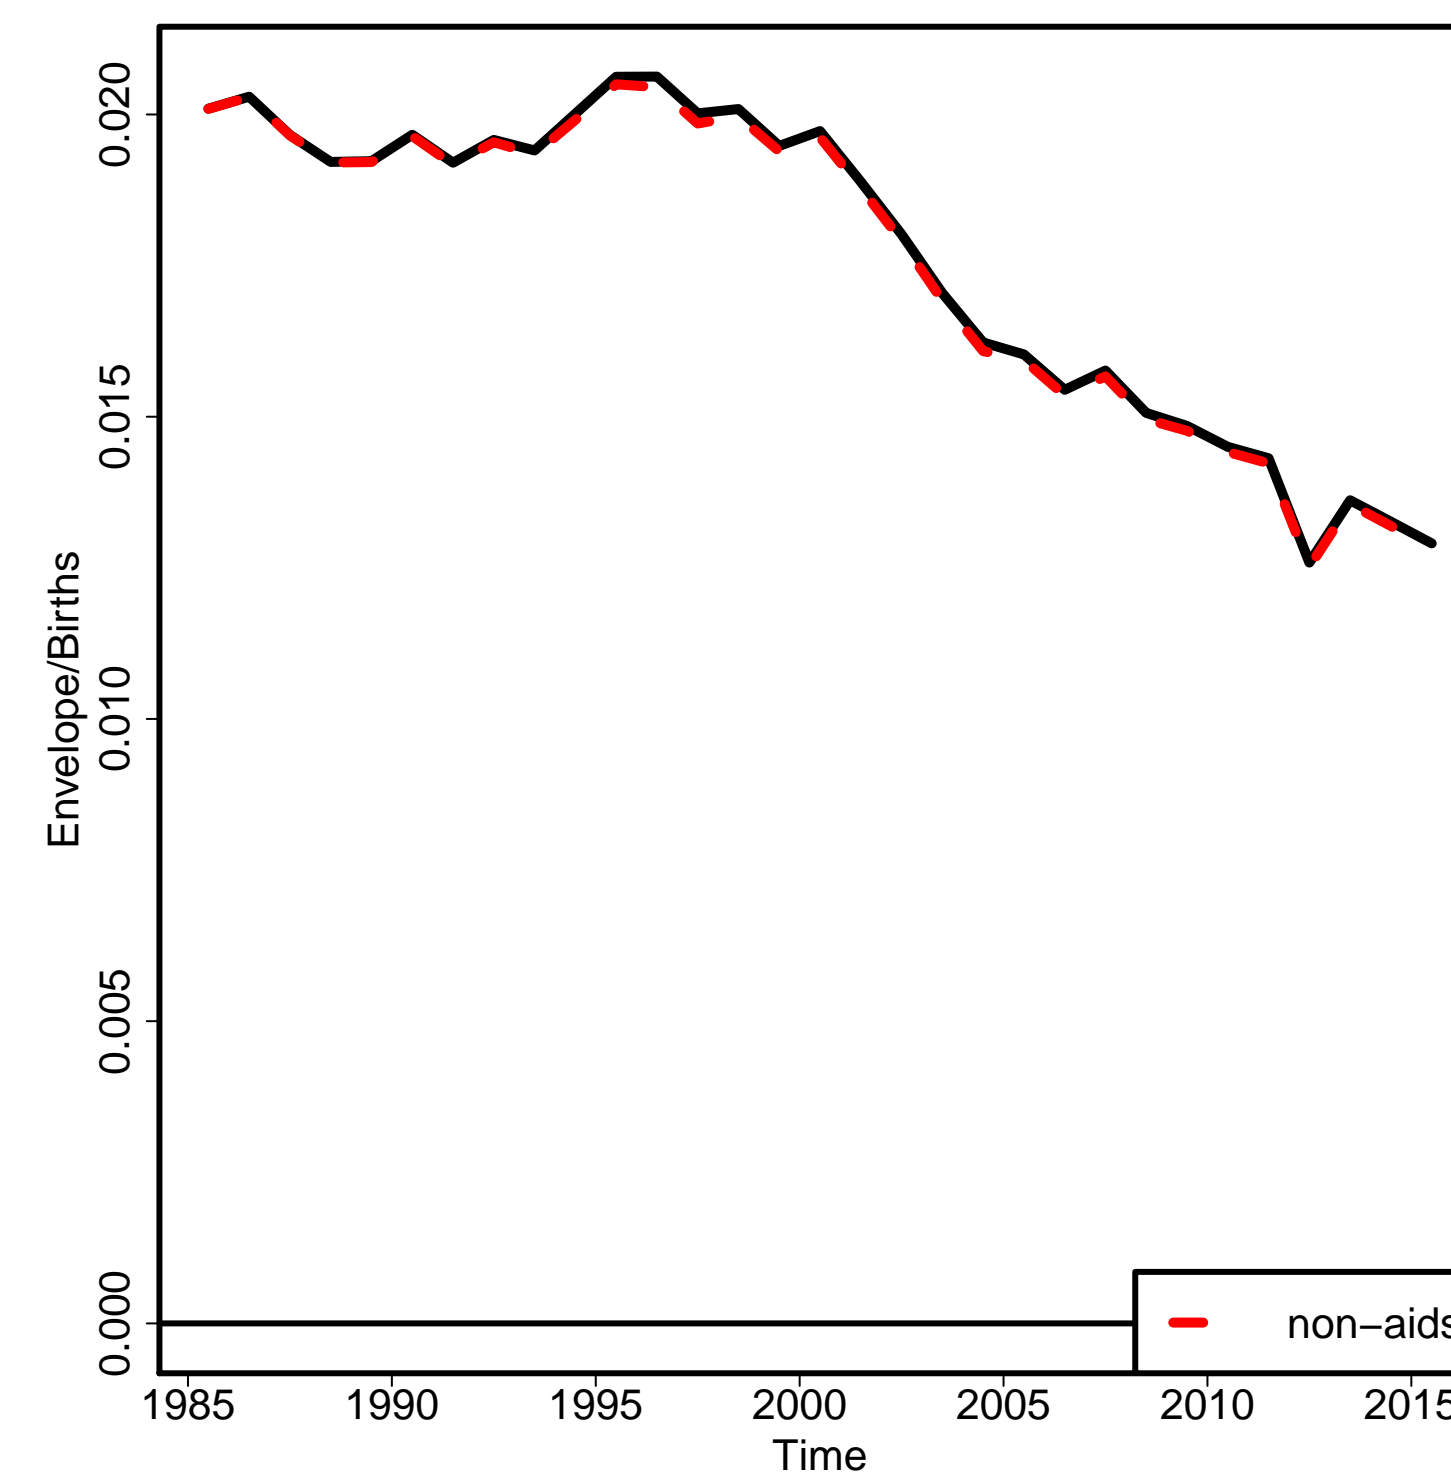

Non-aid MMR

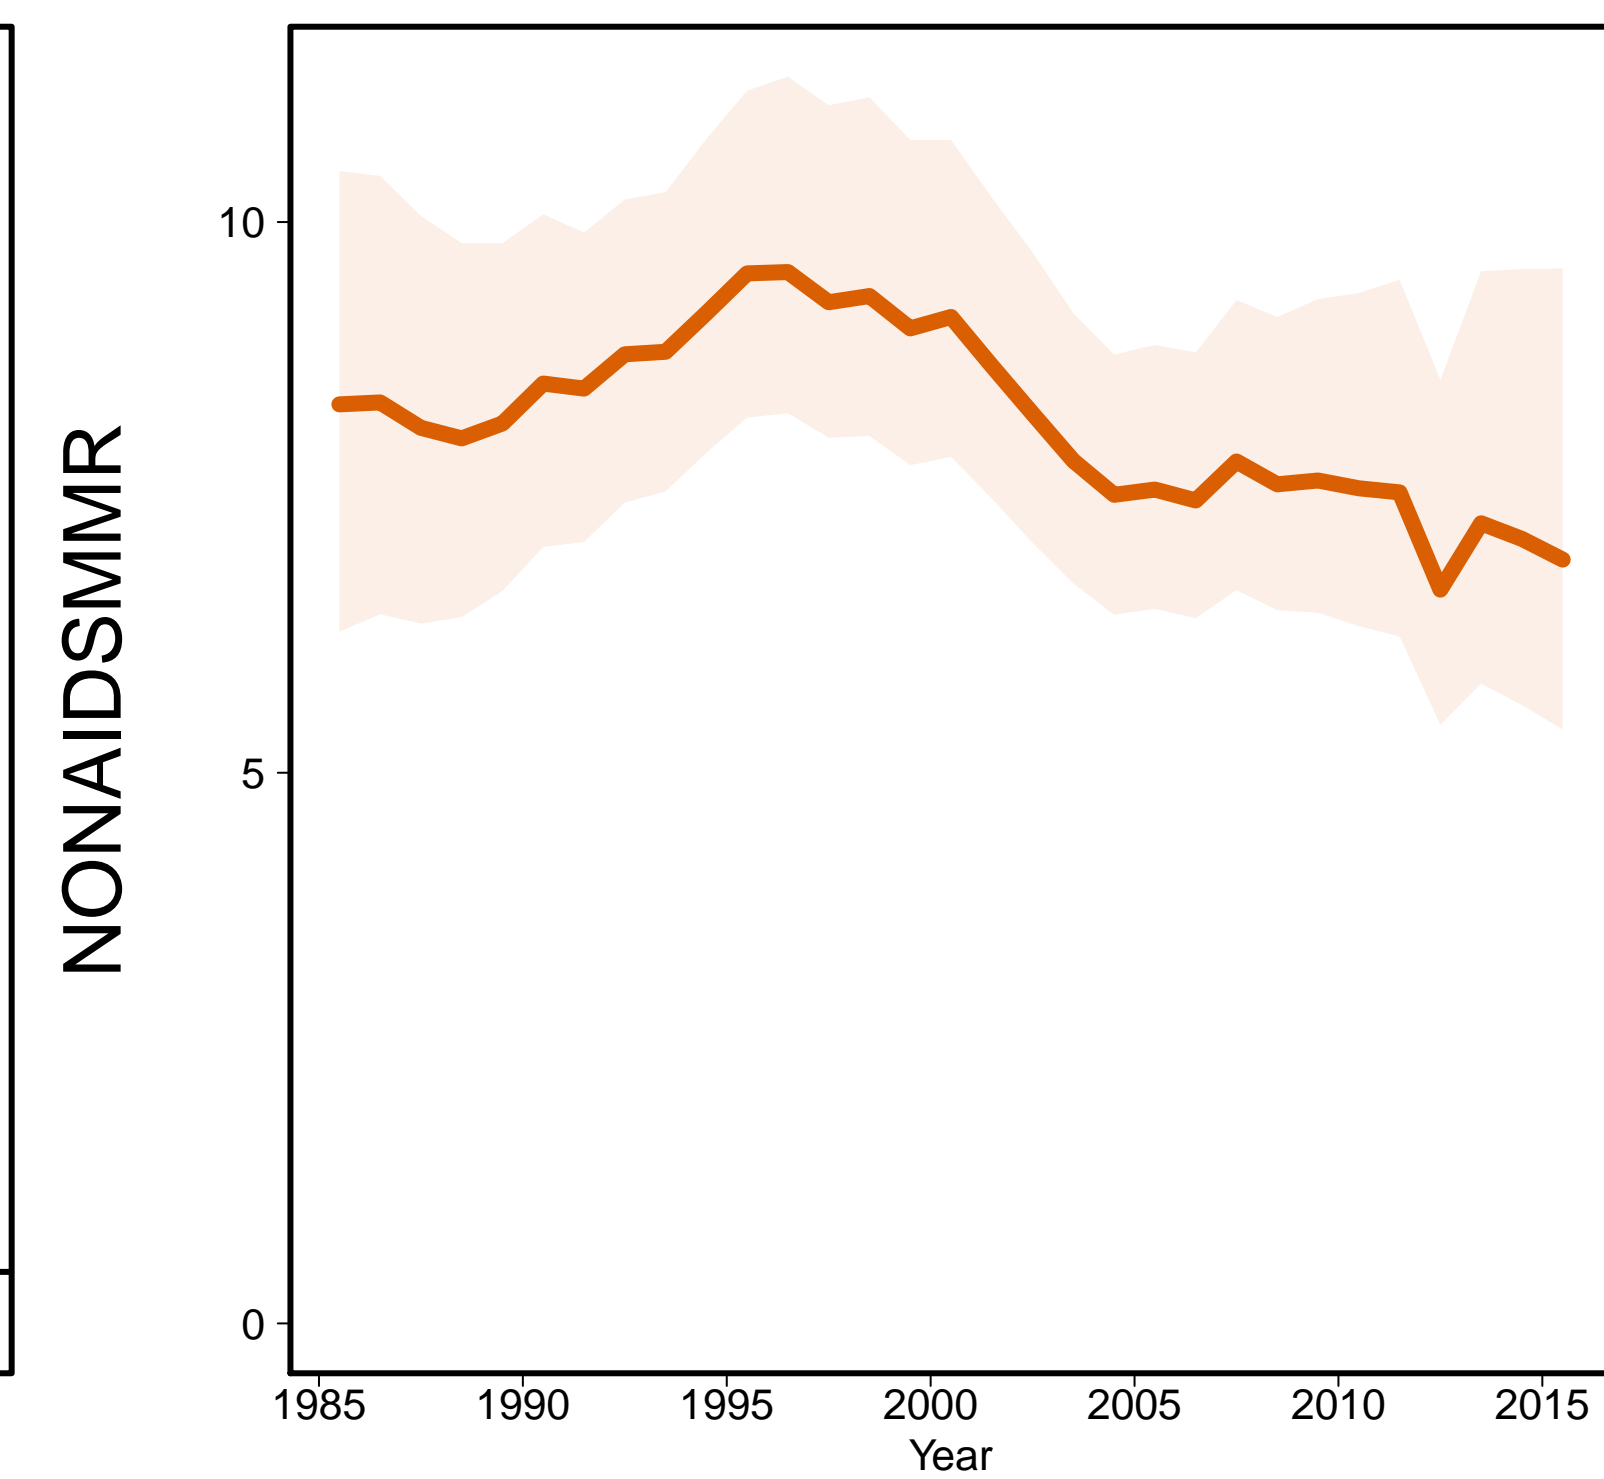

Aids MMR

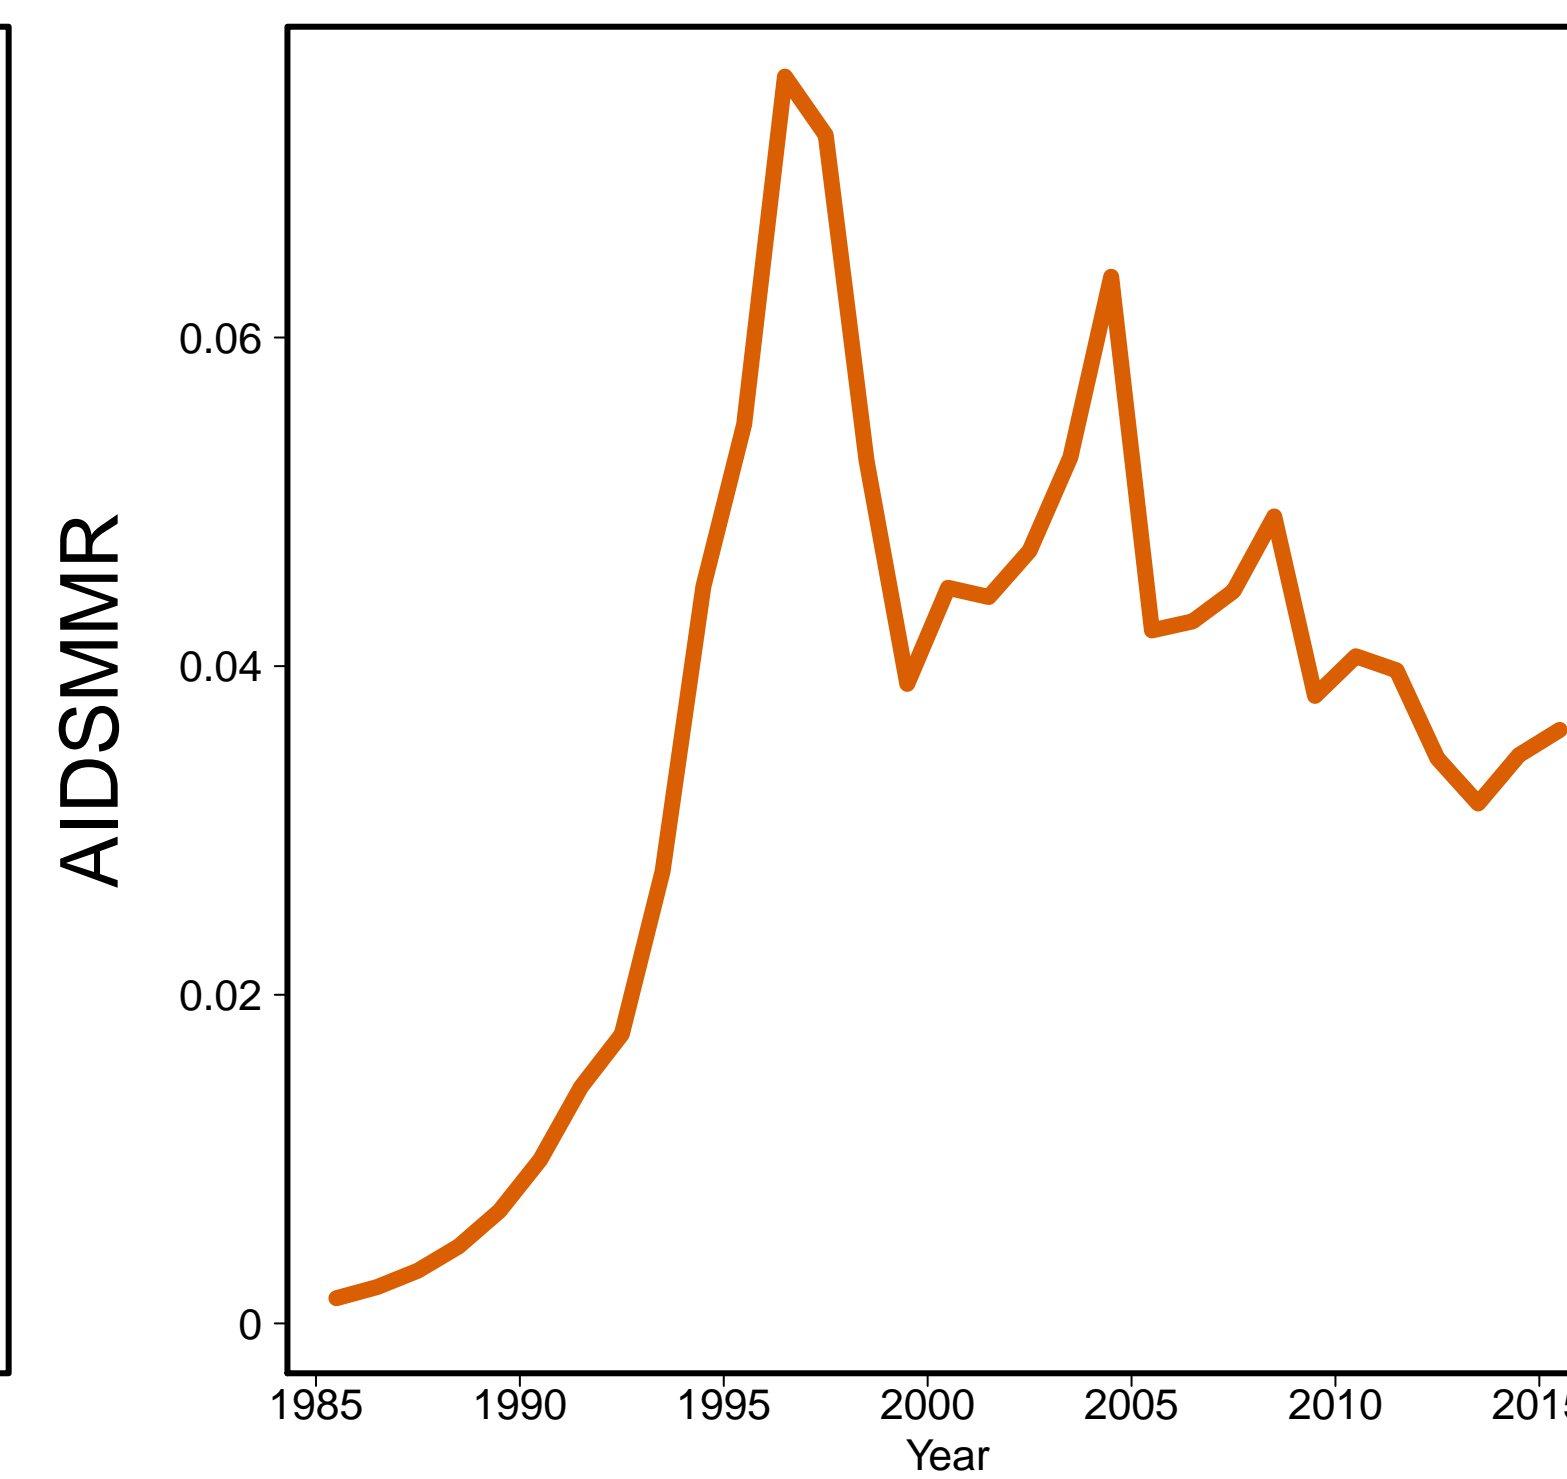

Belize [BLZ]  
(Central America)

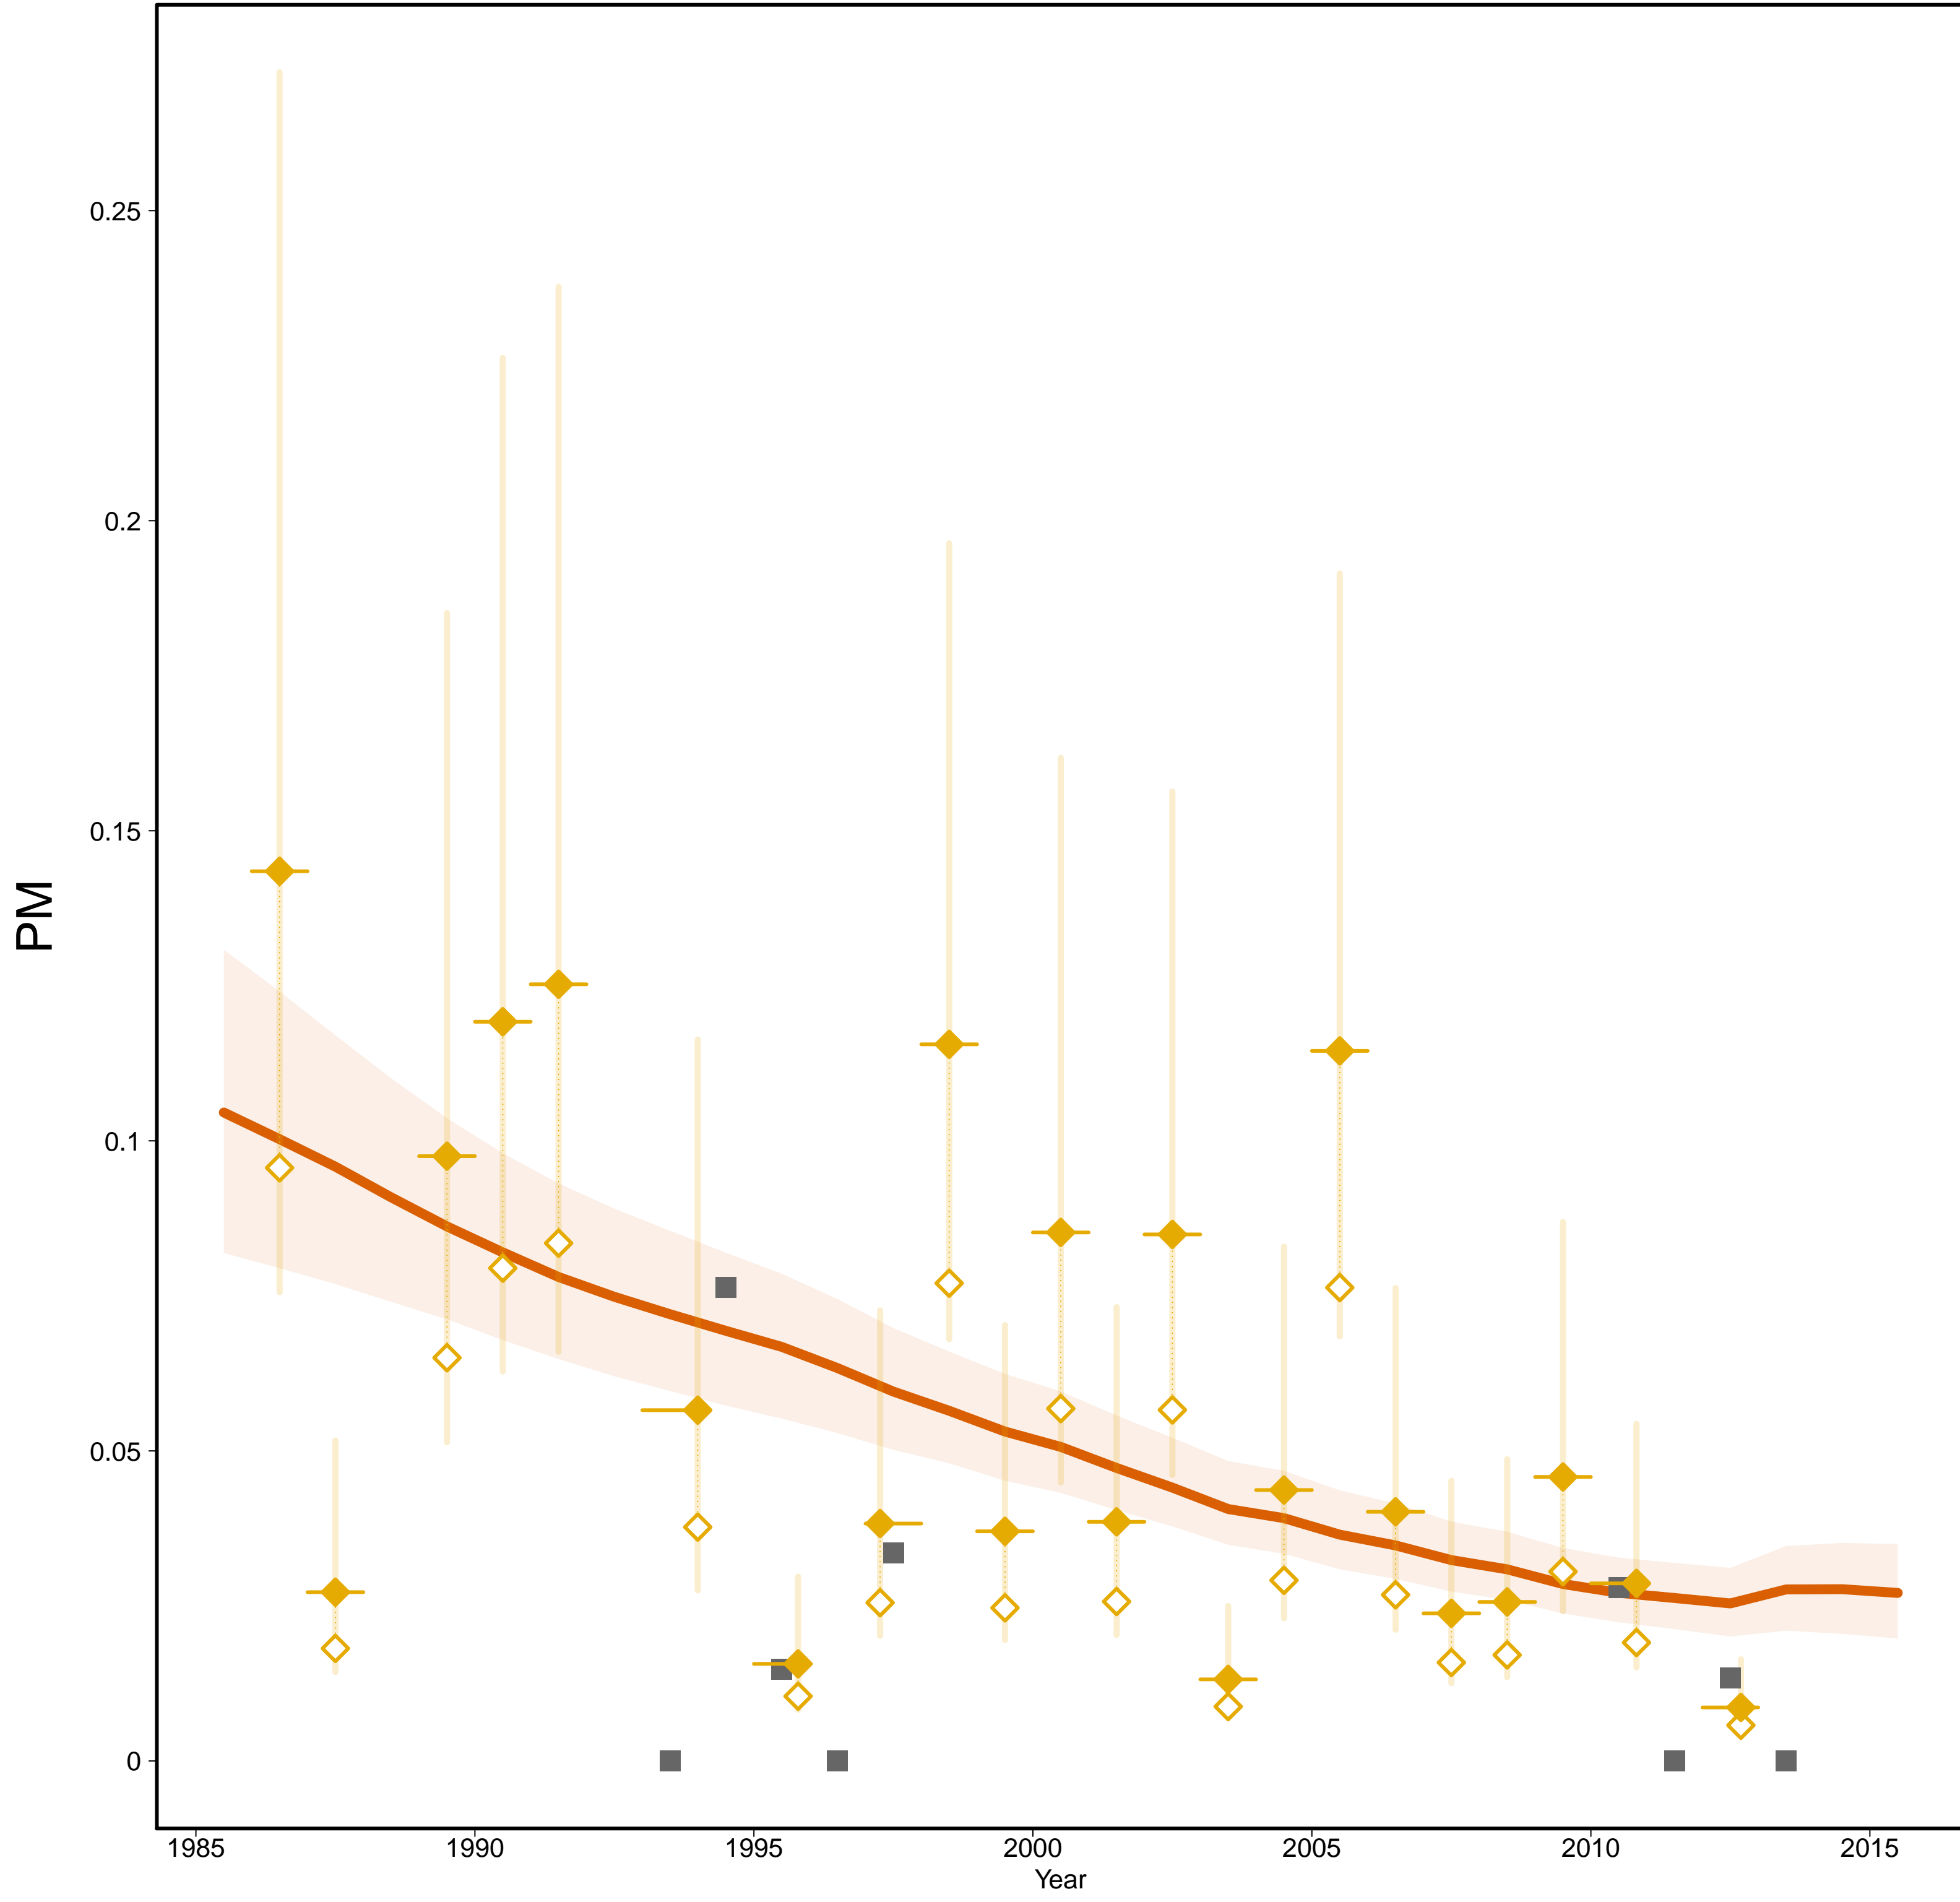

Belize [BLZ]  
(Central America)

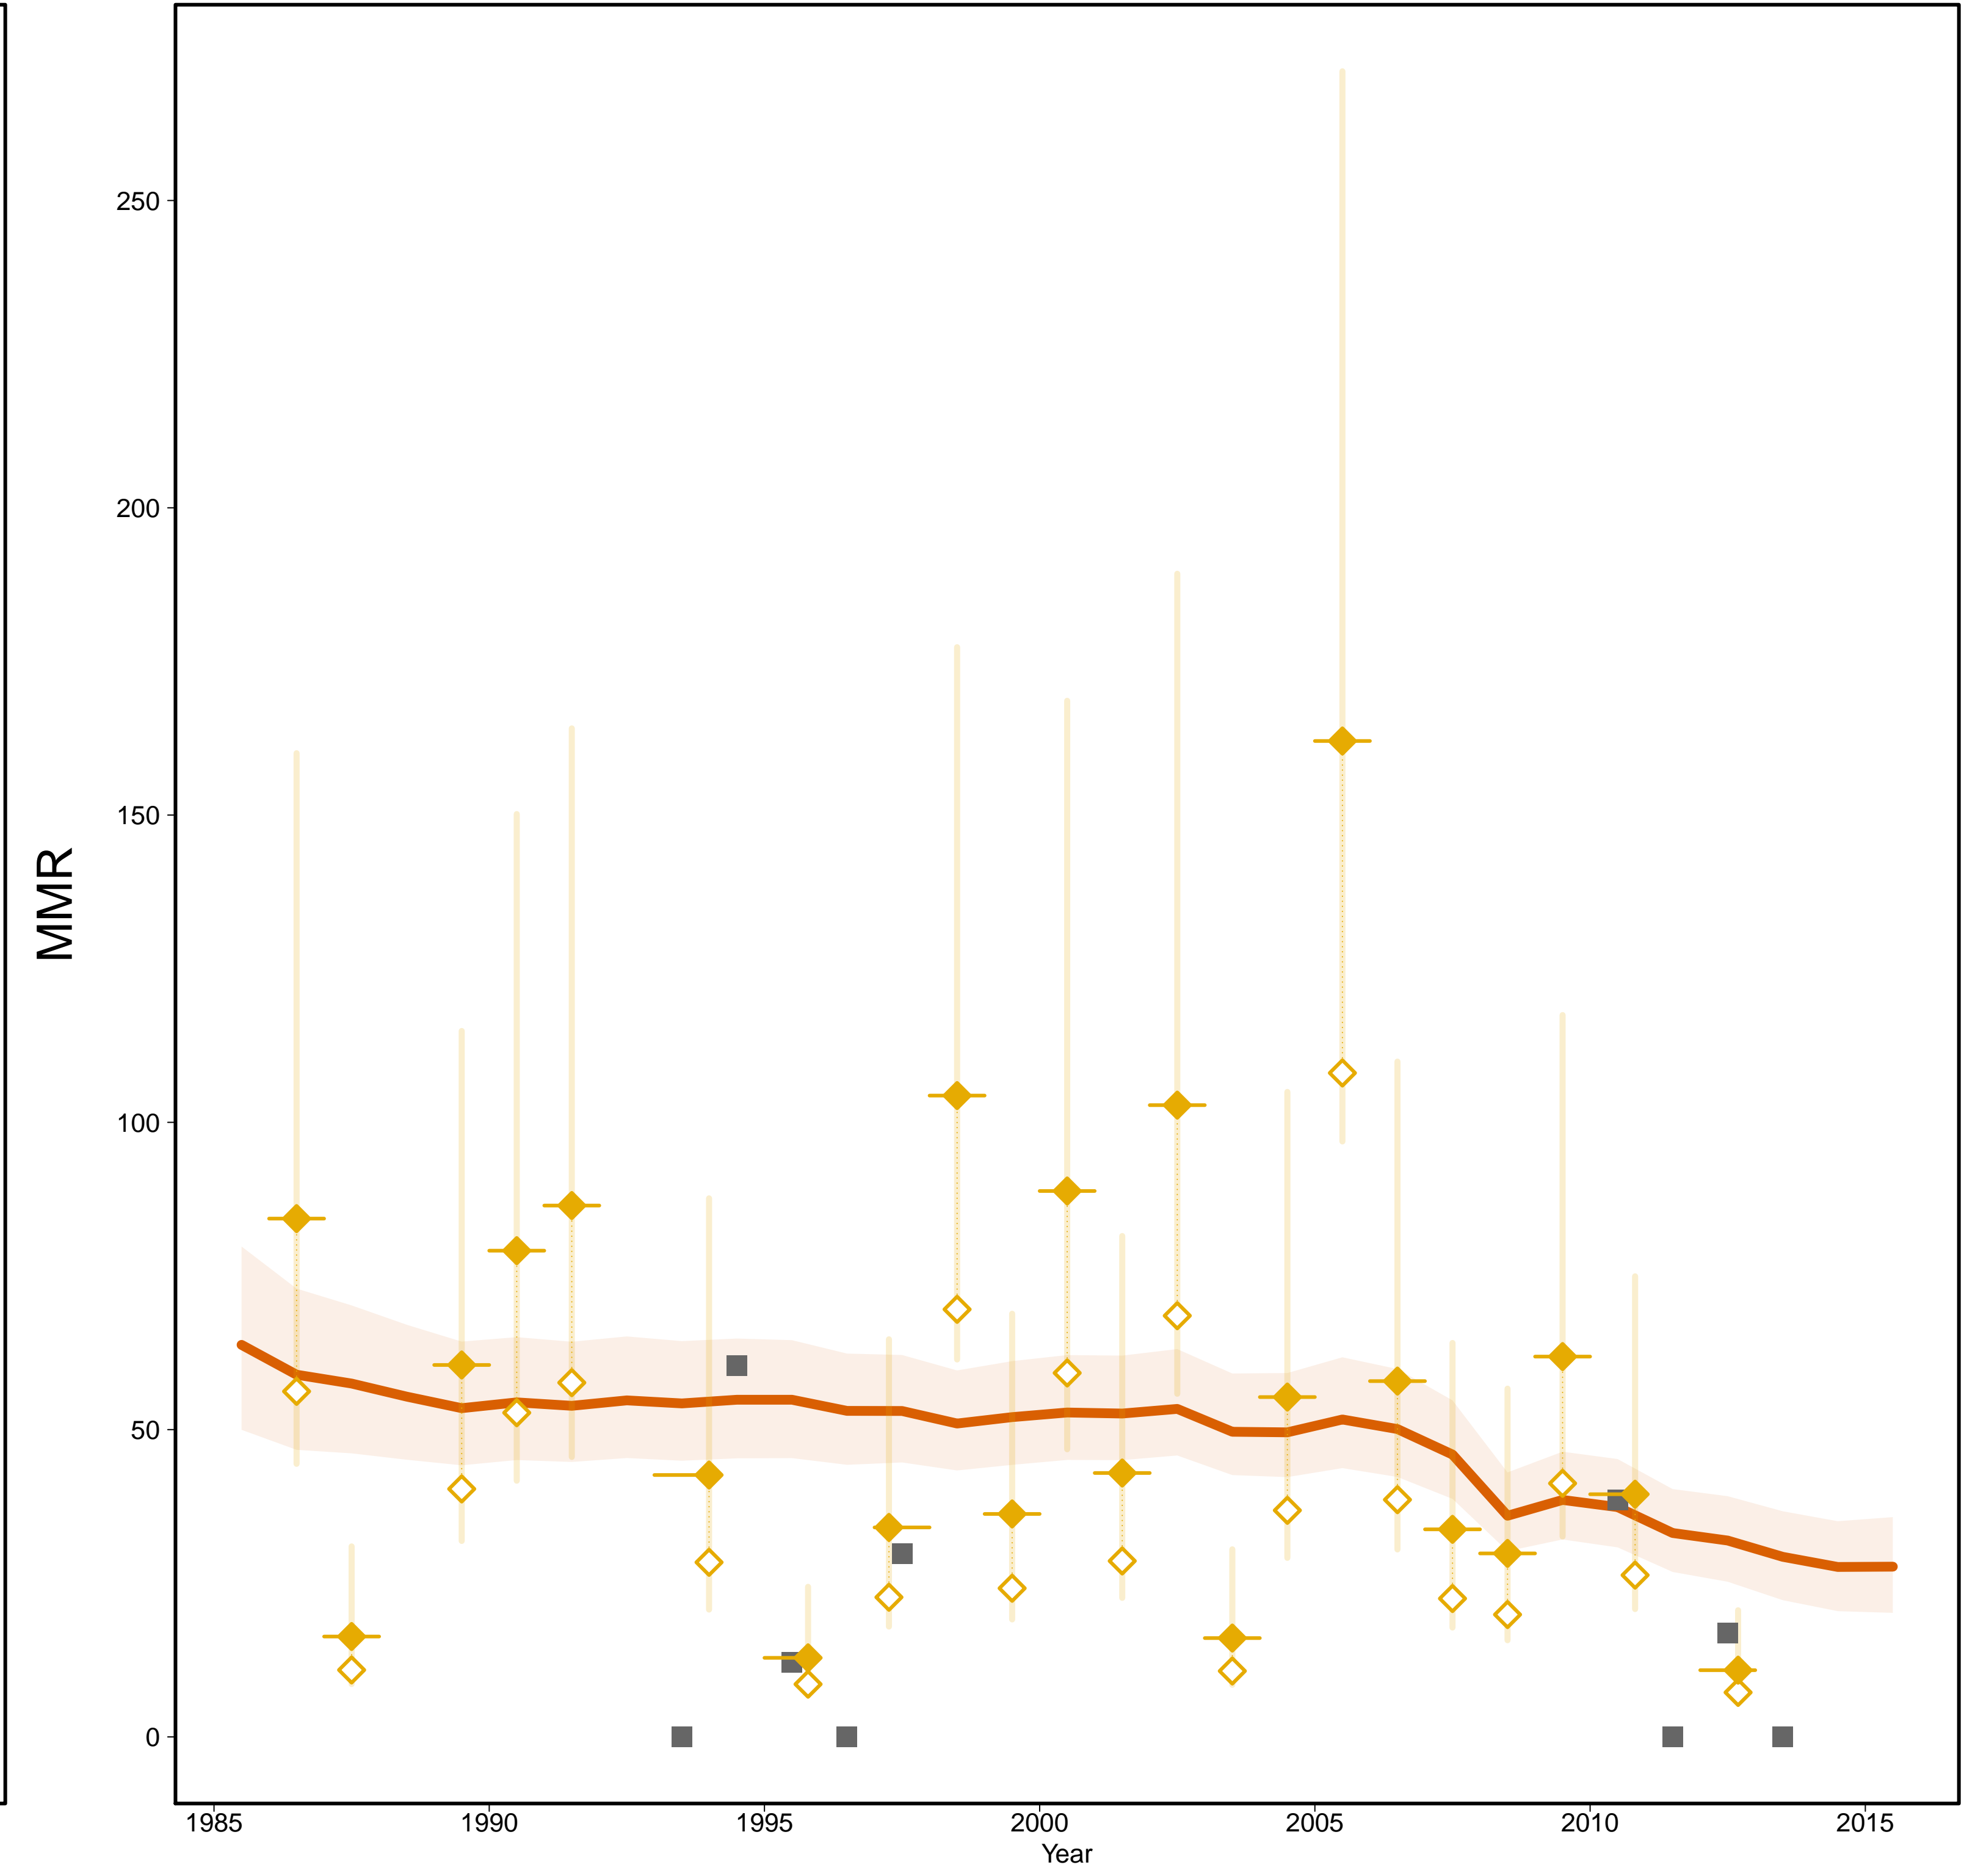

- Estimates —
- MMR Database 2015 —
- ◇ Observed Data
- ◆ Adjusted Data
- Data type —
- ◆ VR
- Reported VR before recalc.  
(related to 0 obs. mat. death)

Gross Domestic Product

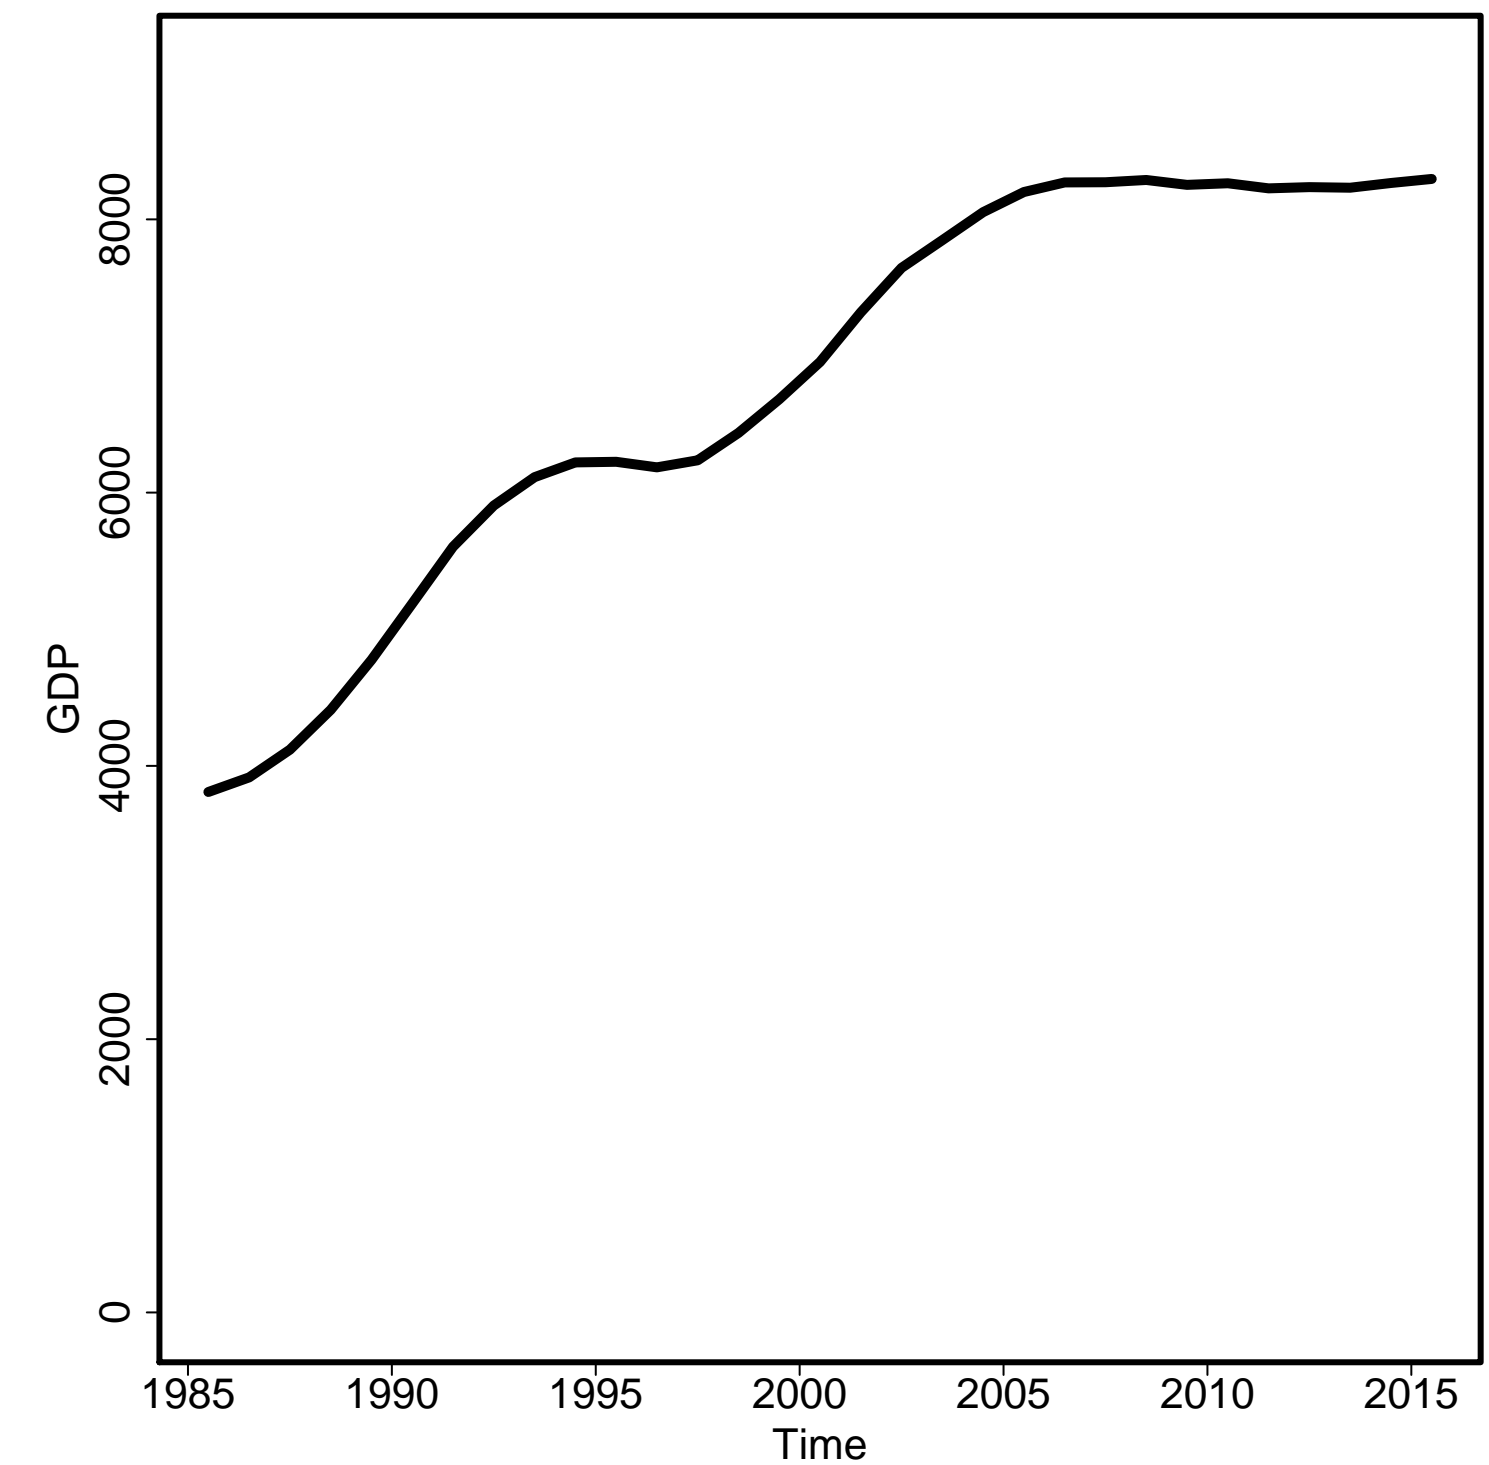

General Fertility Rate

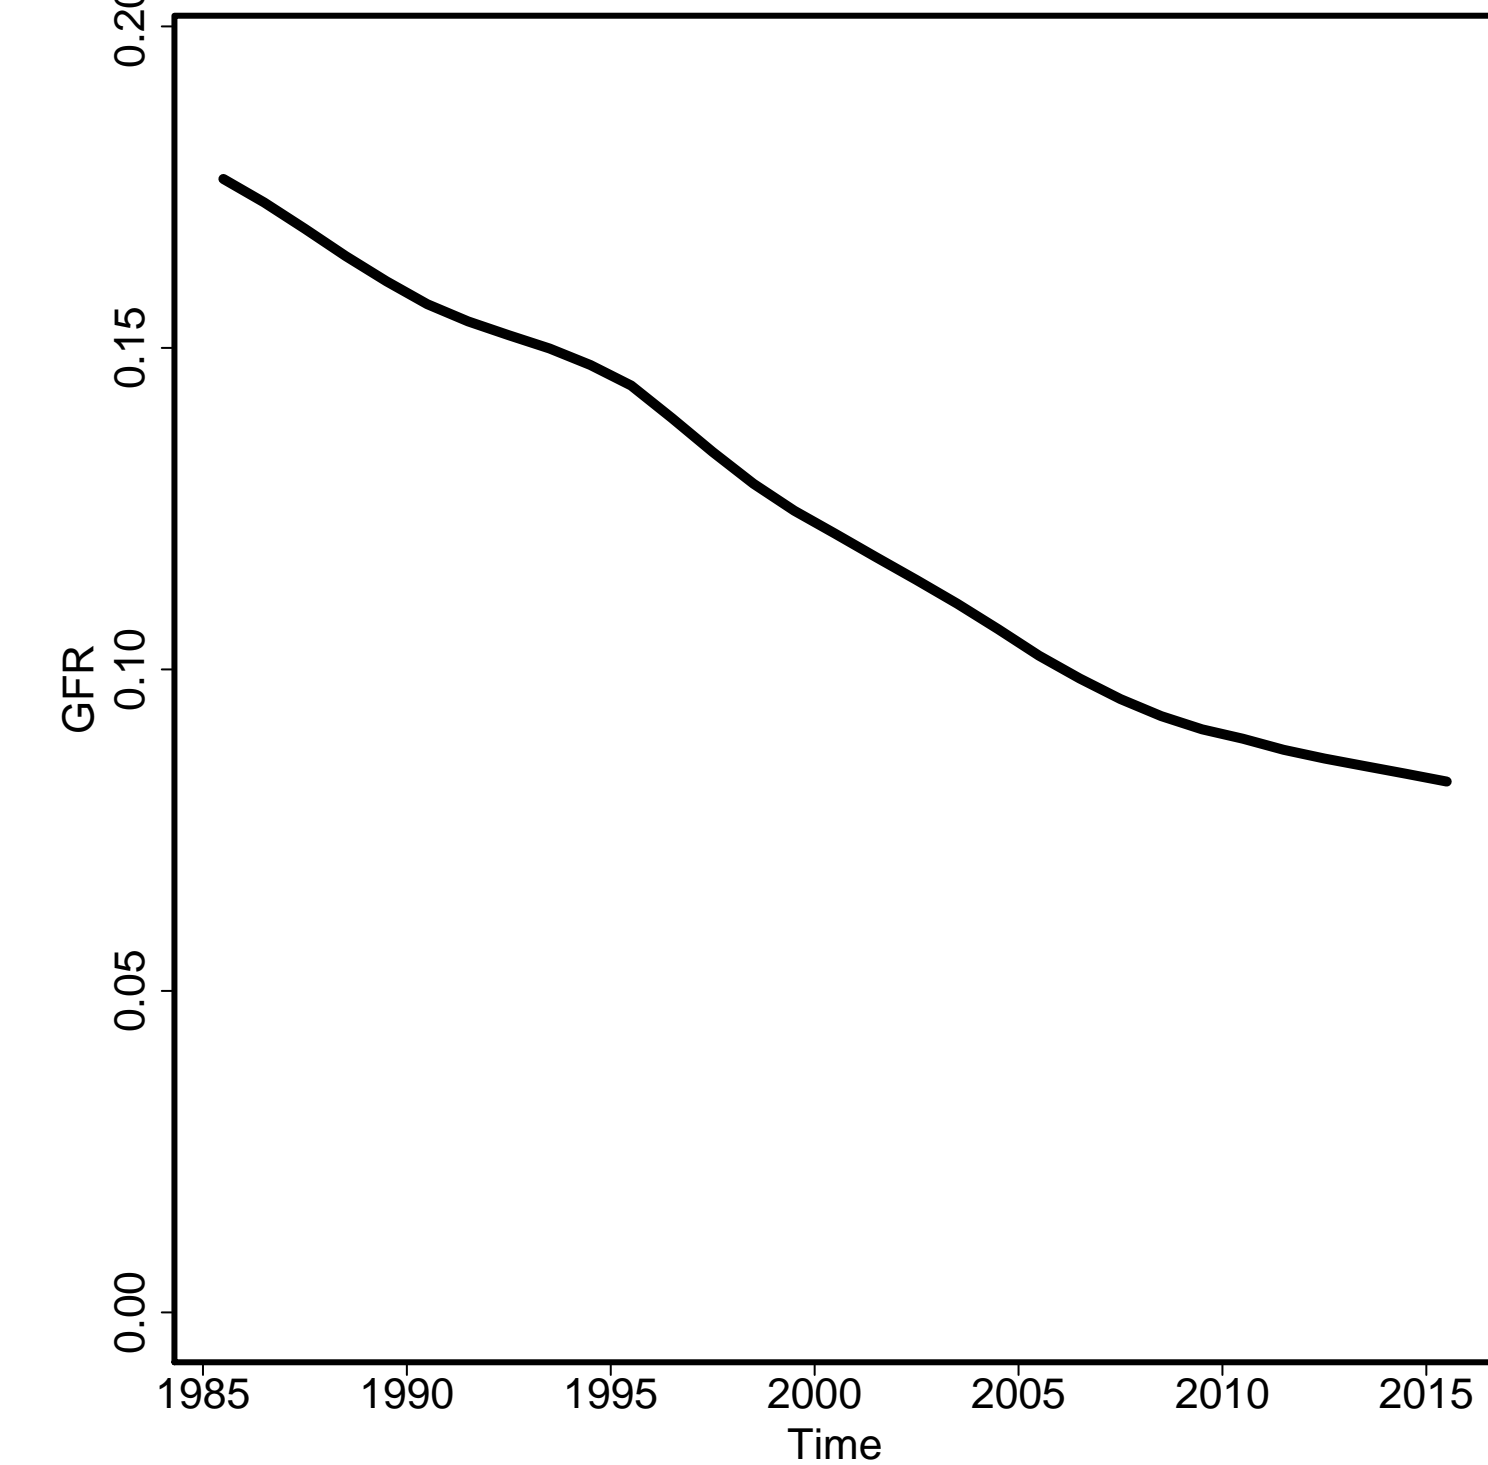

Skilled Attendance to Birth

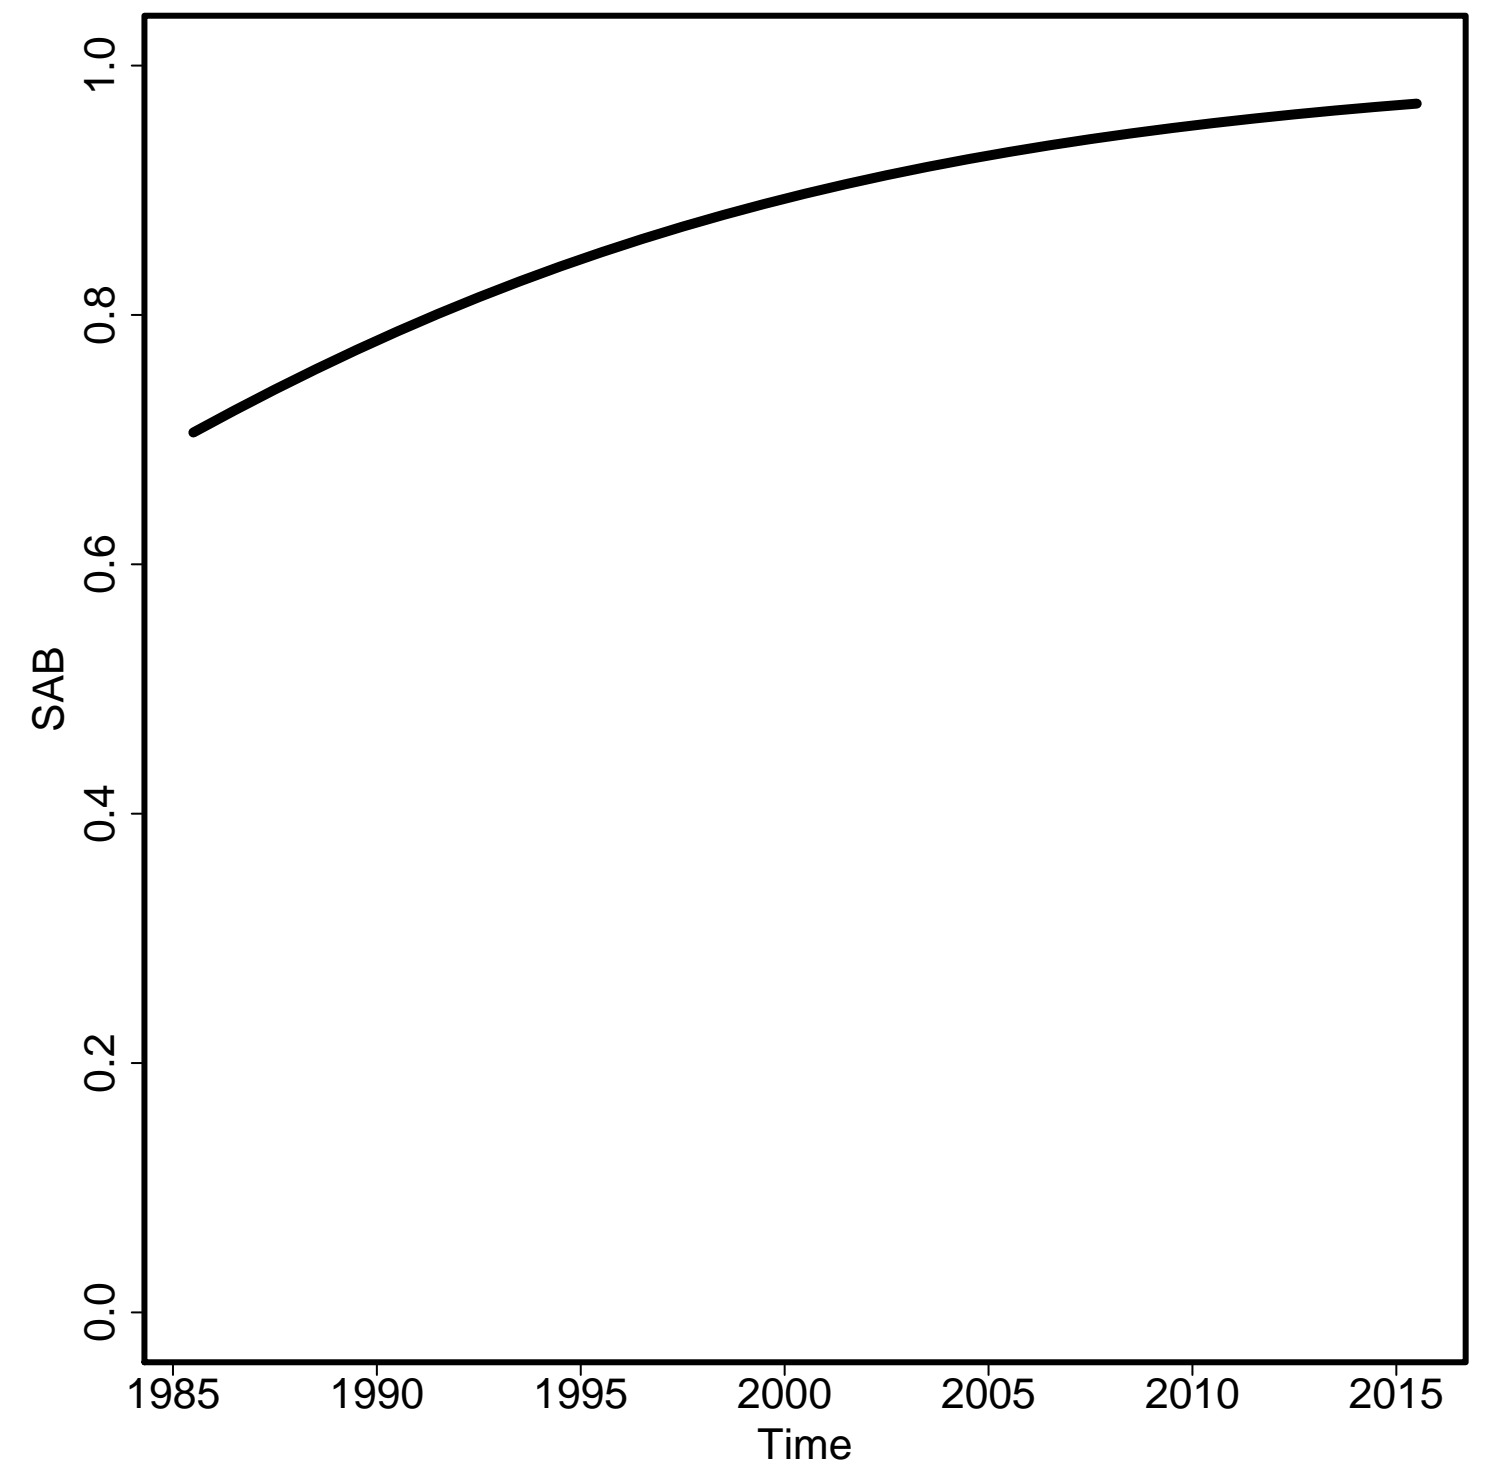

Envelope/Births

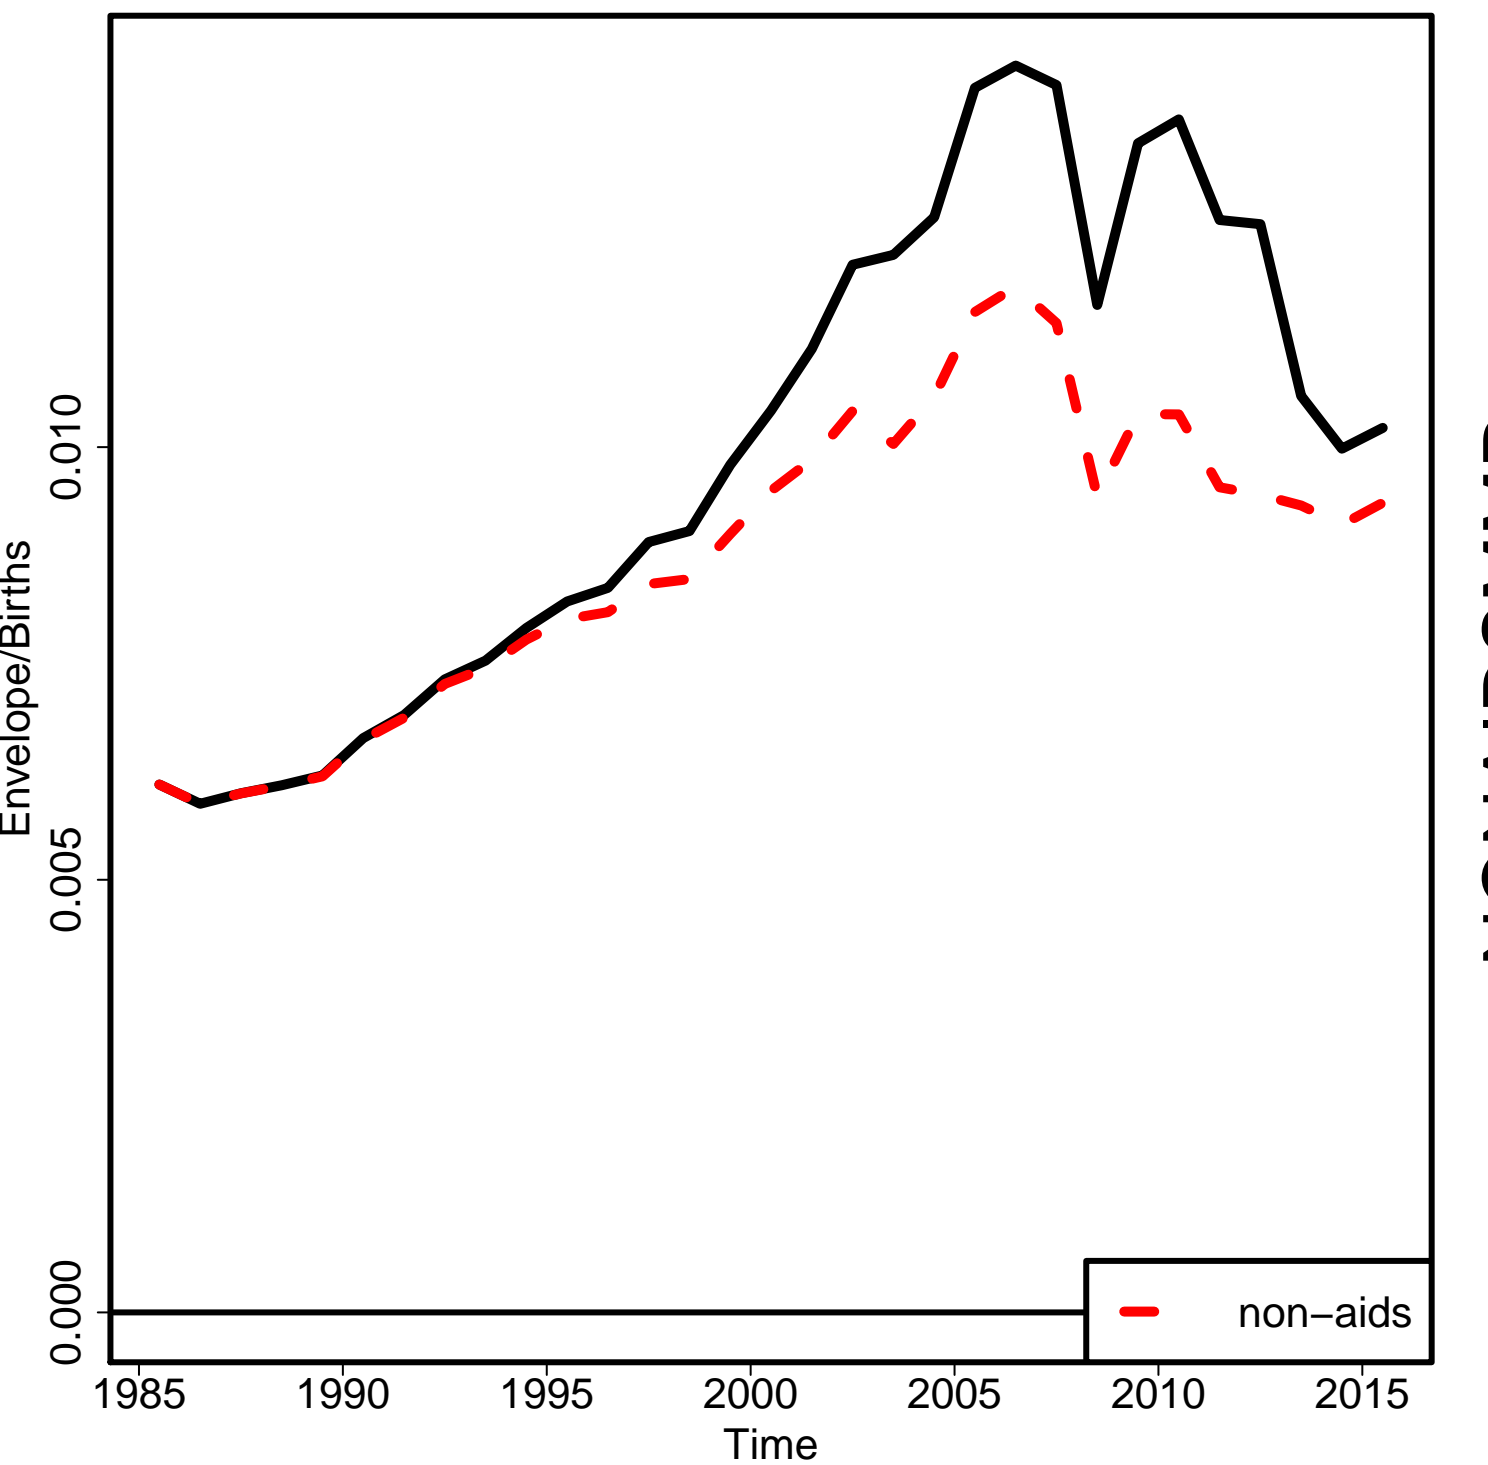

Non-aids MMR

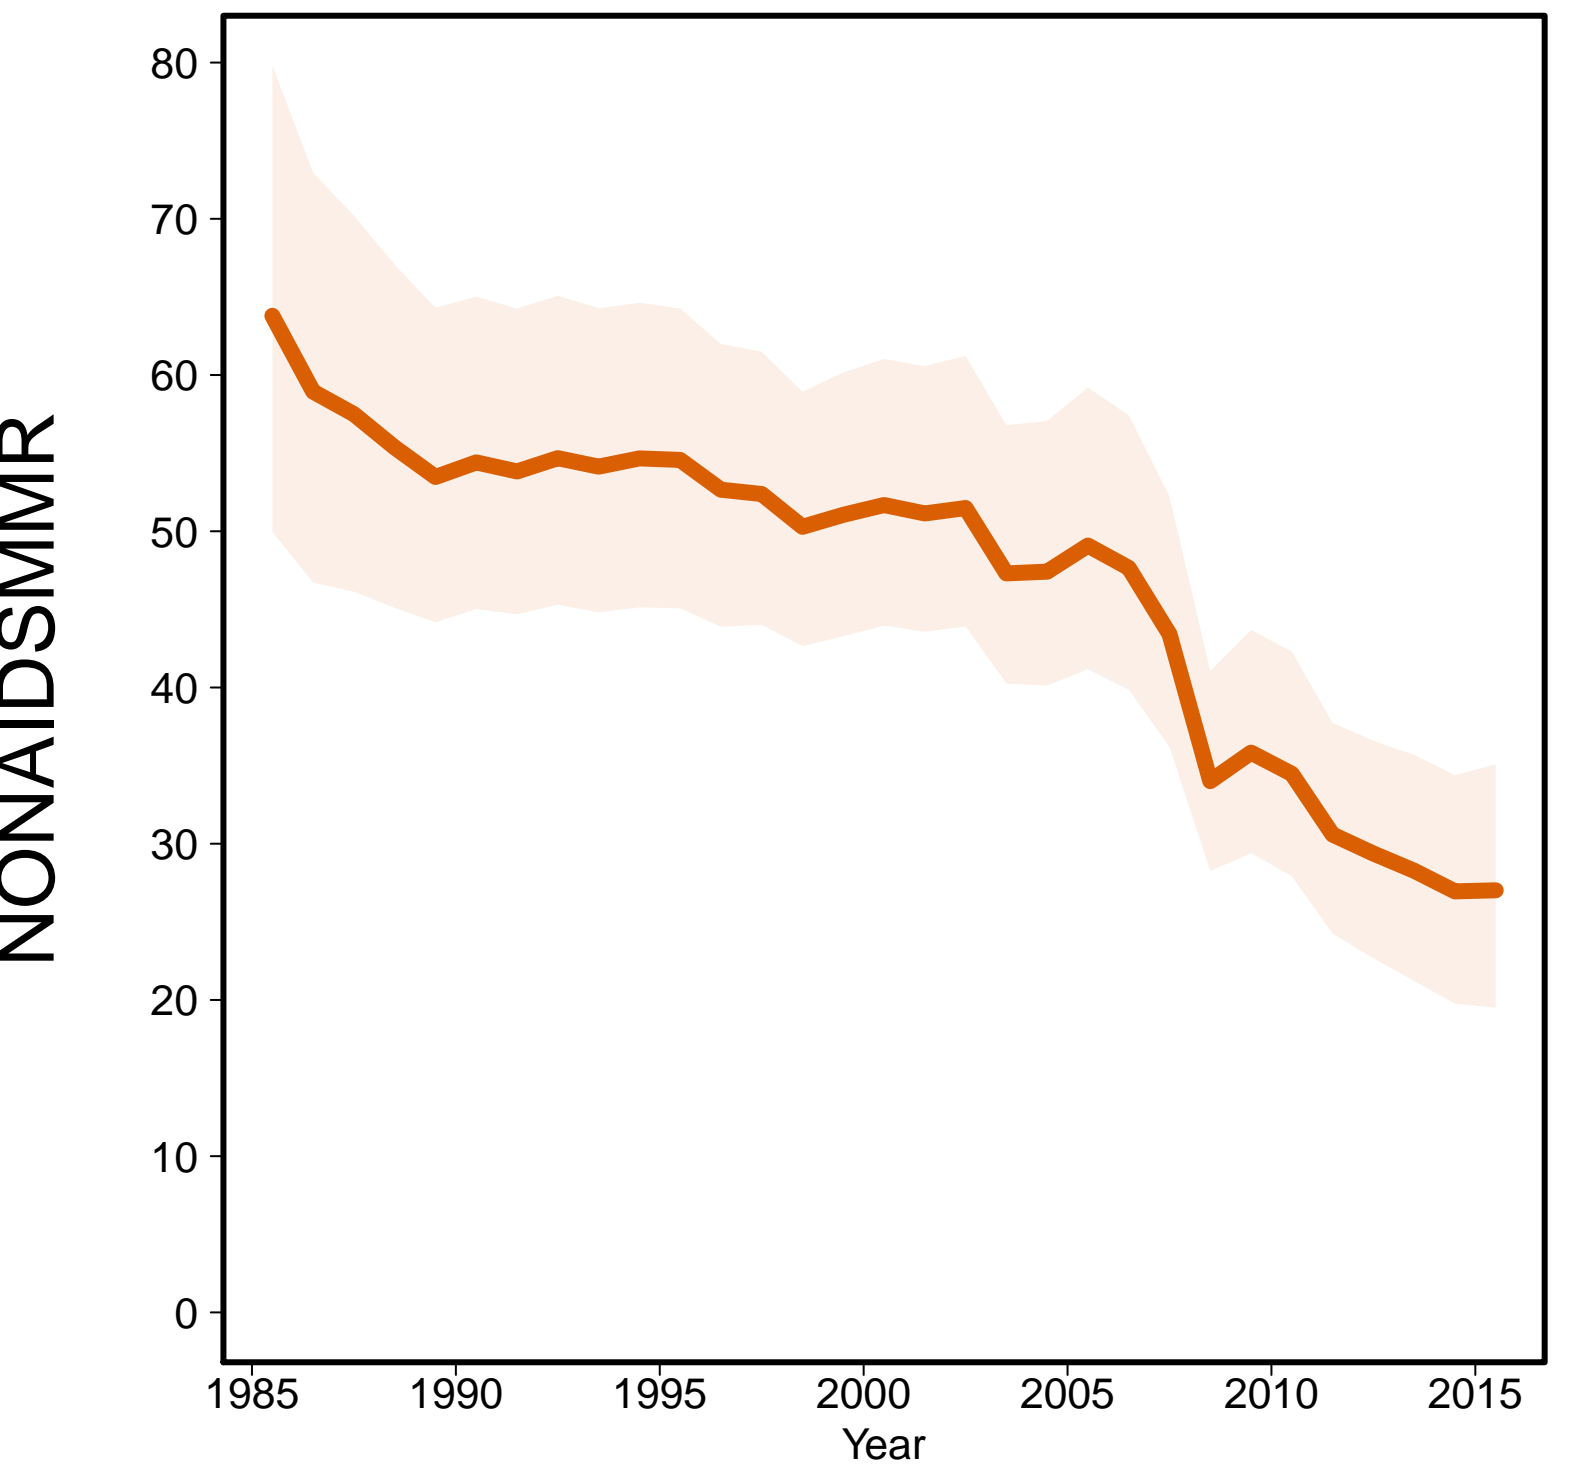

Aids MMR

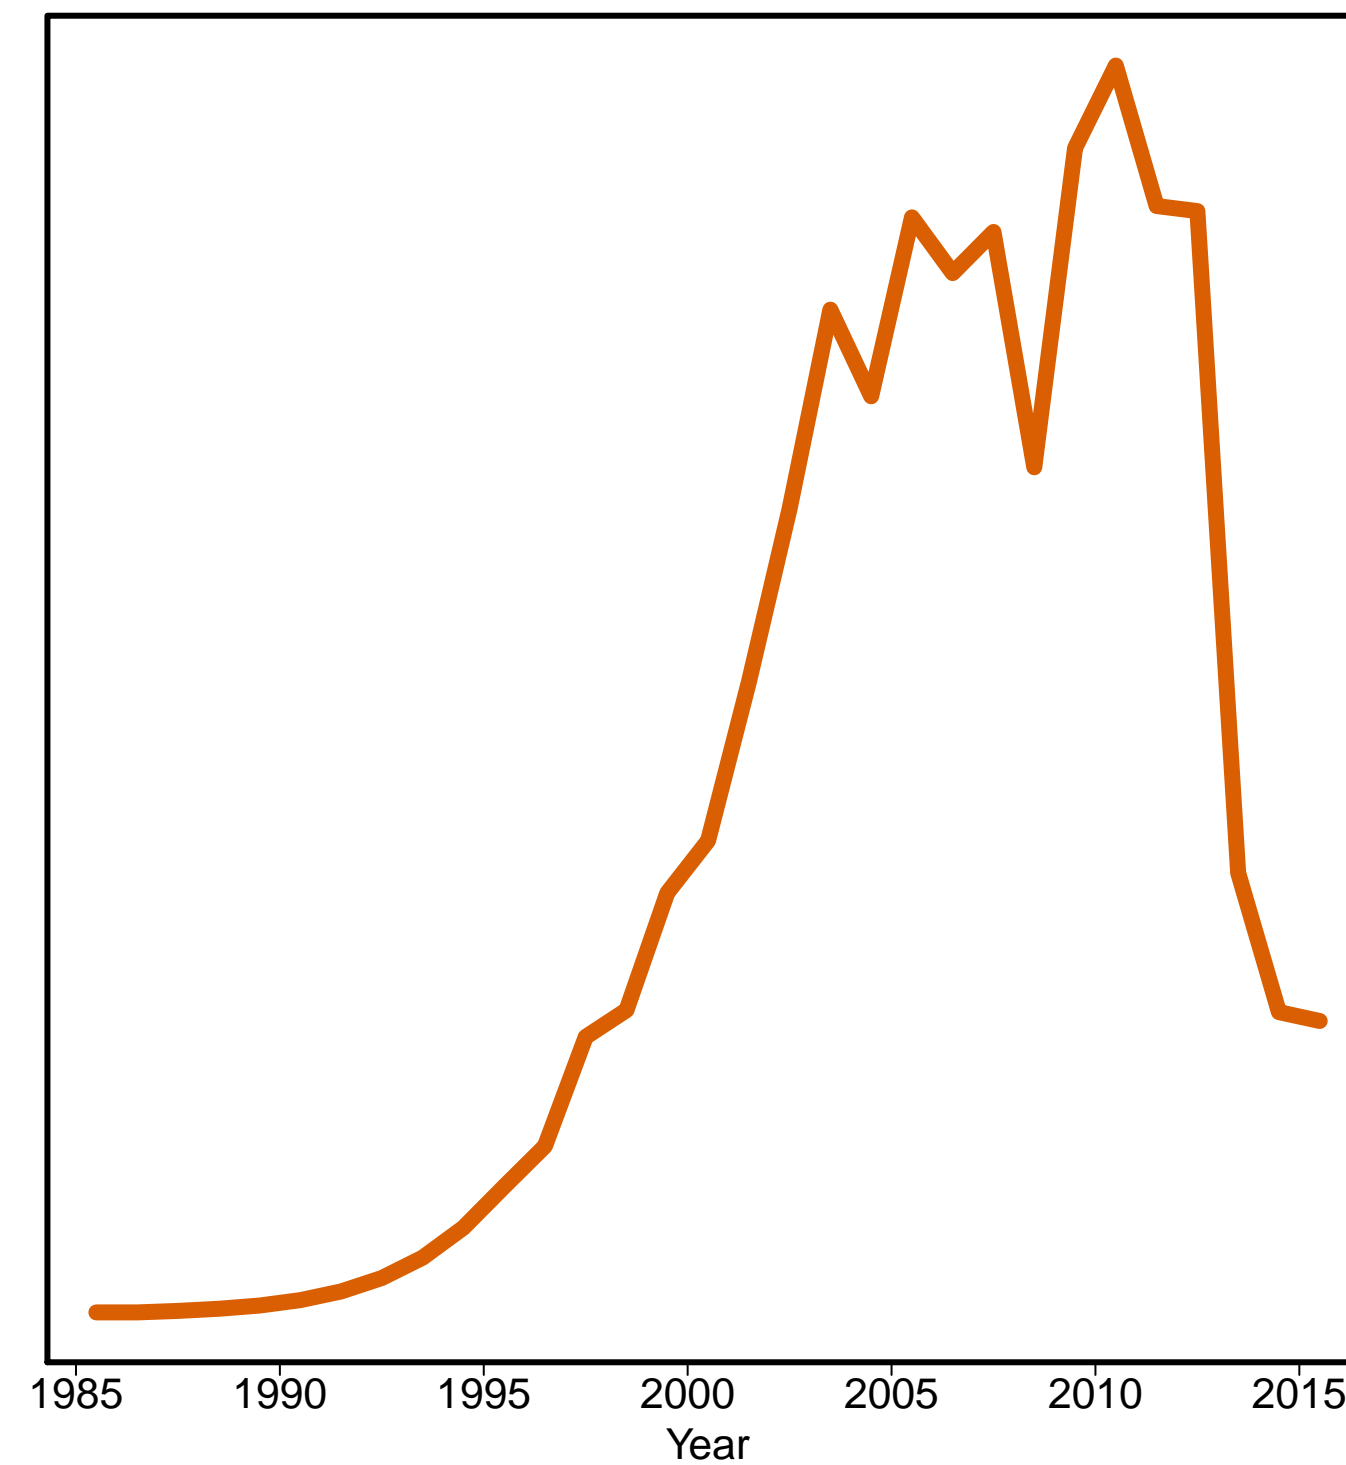



Benin [BEN]  
(Western Africa)

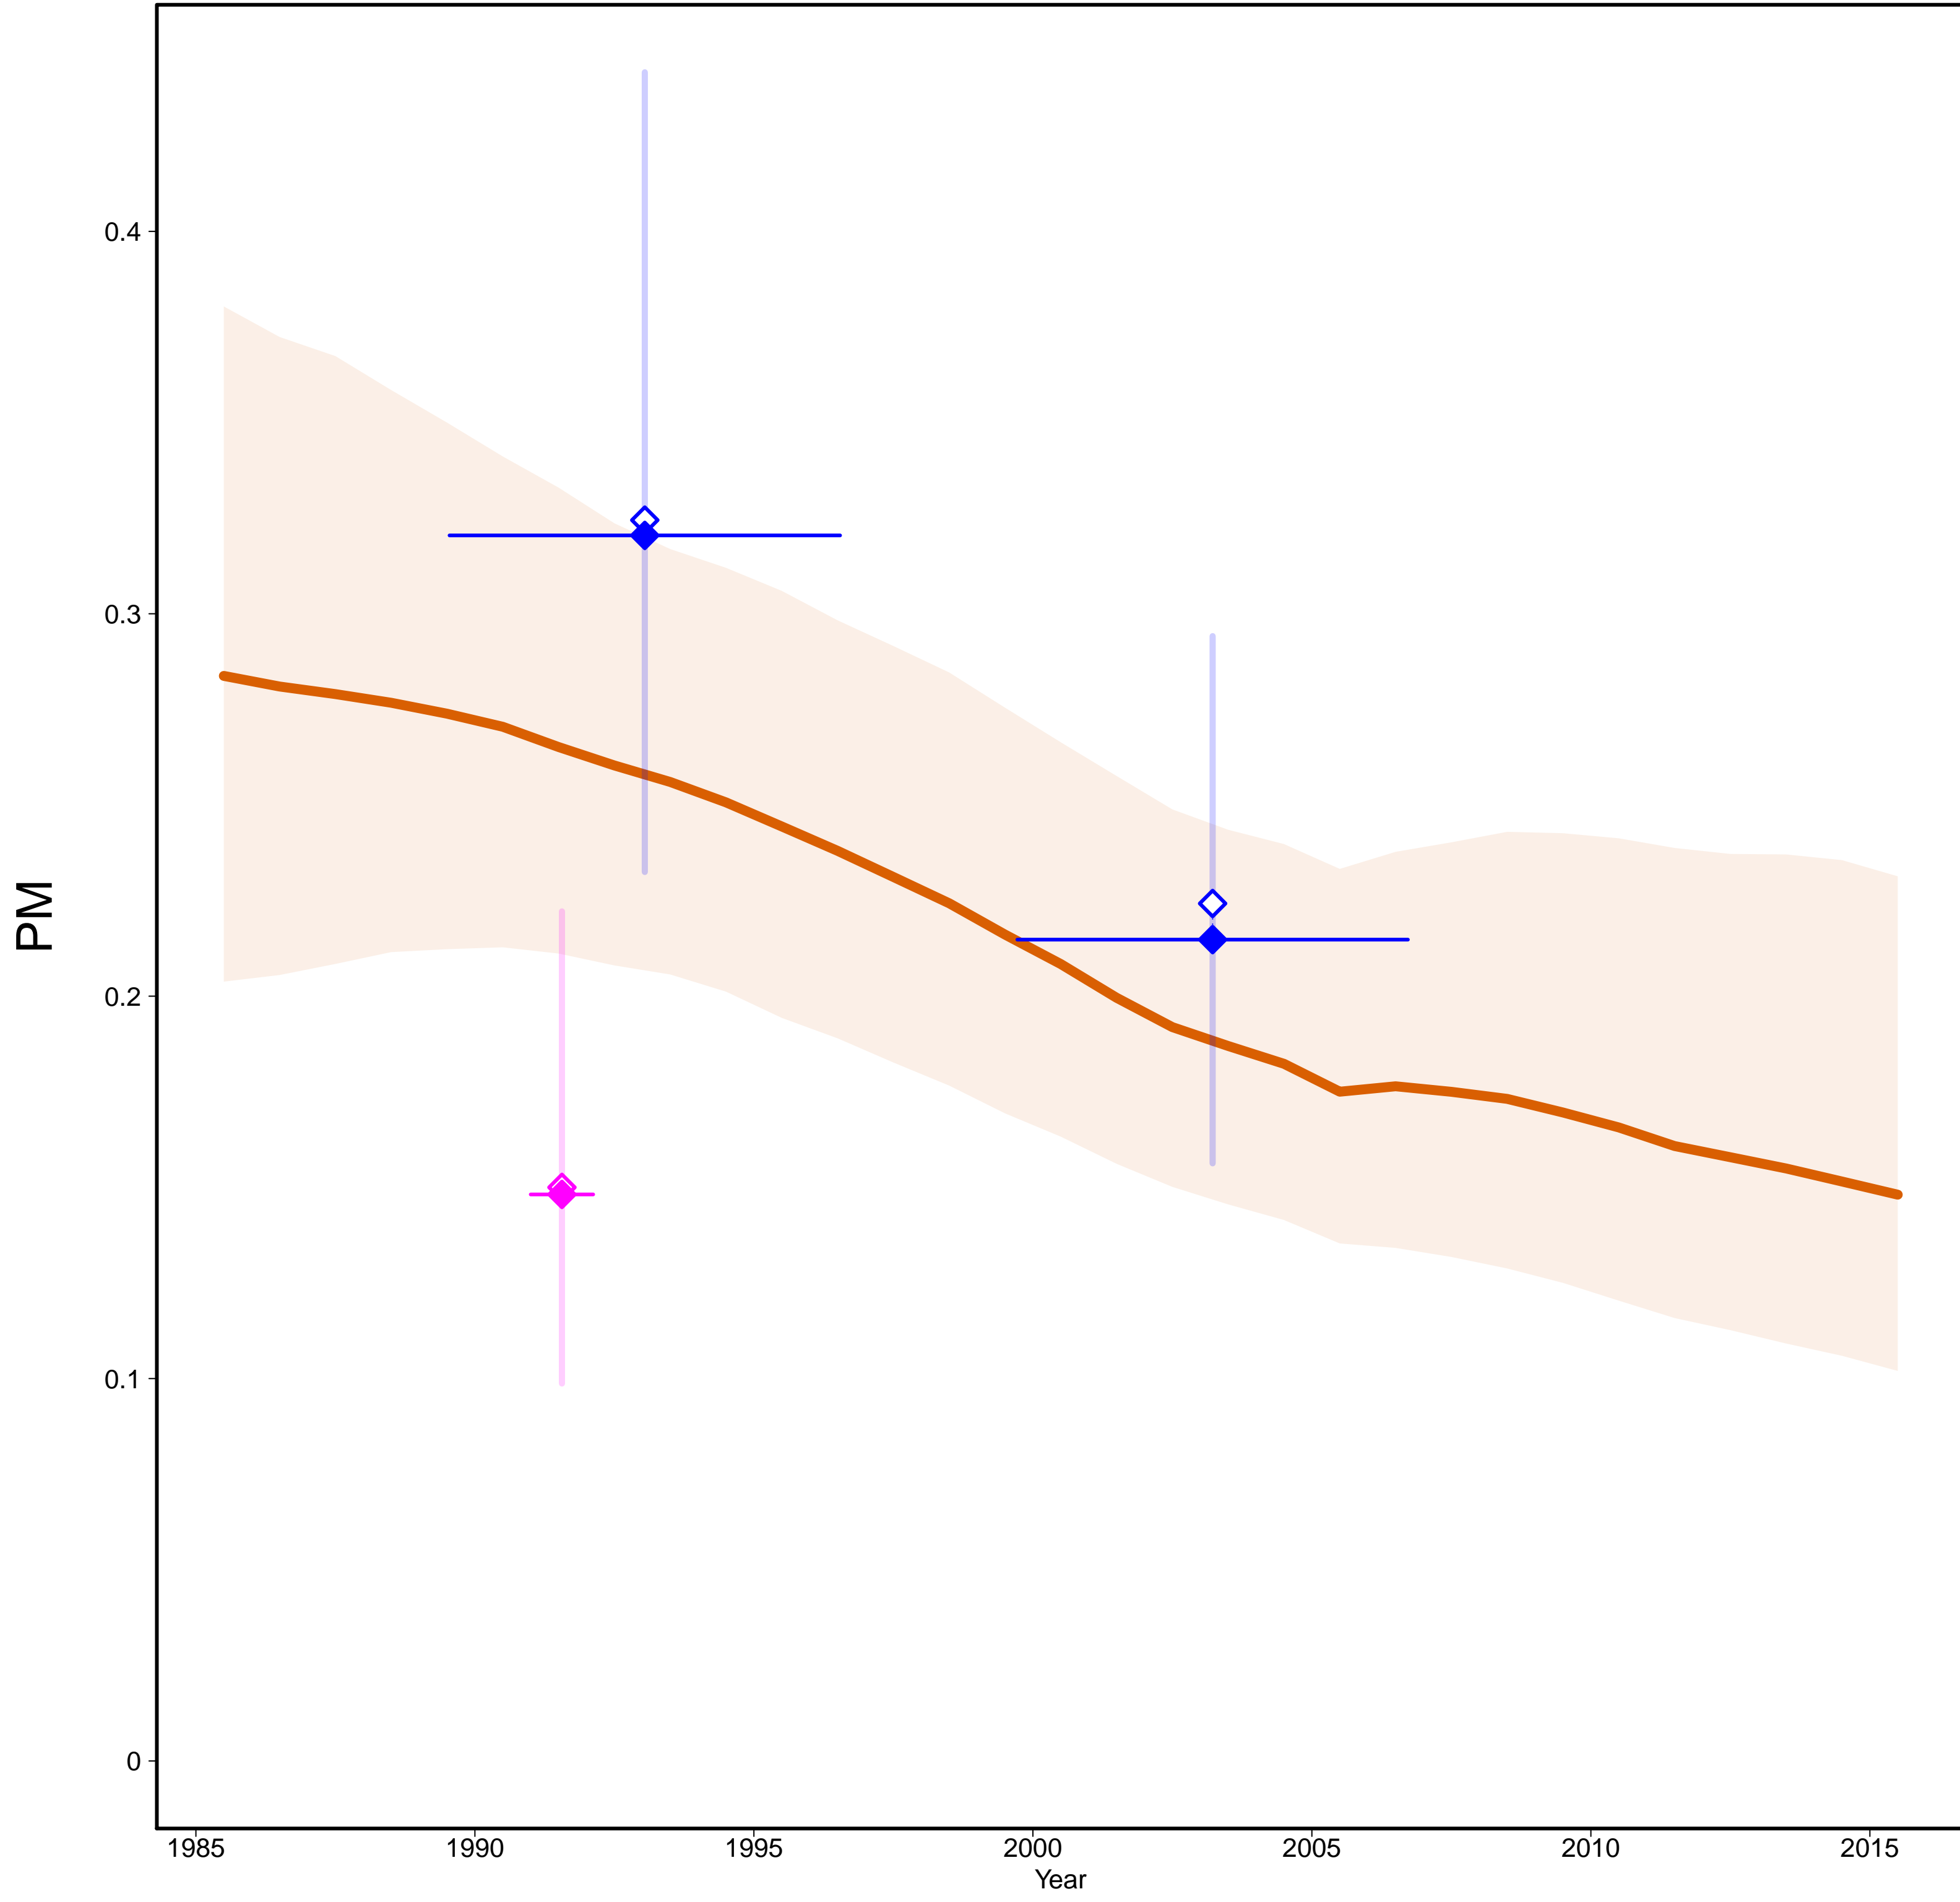

Benin [BEN]  
(Western Africa)

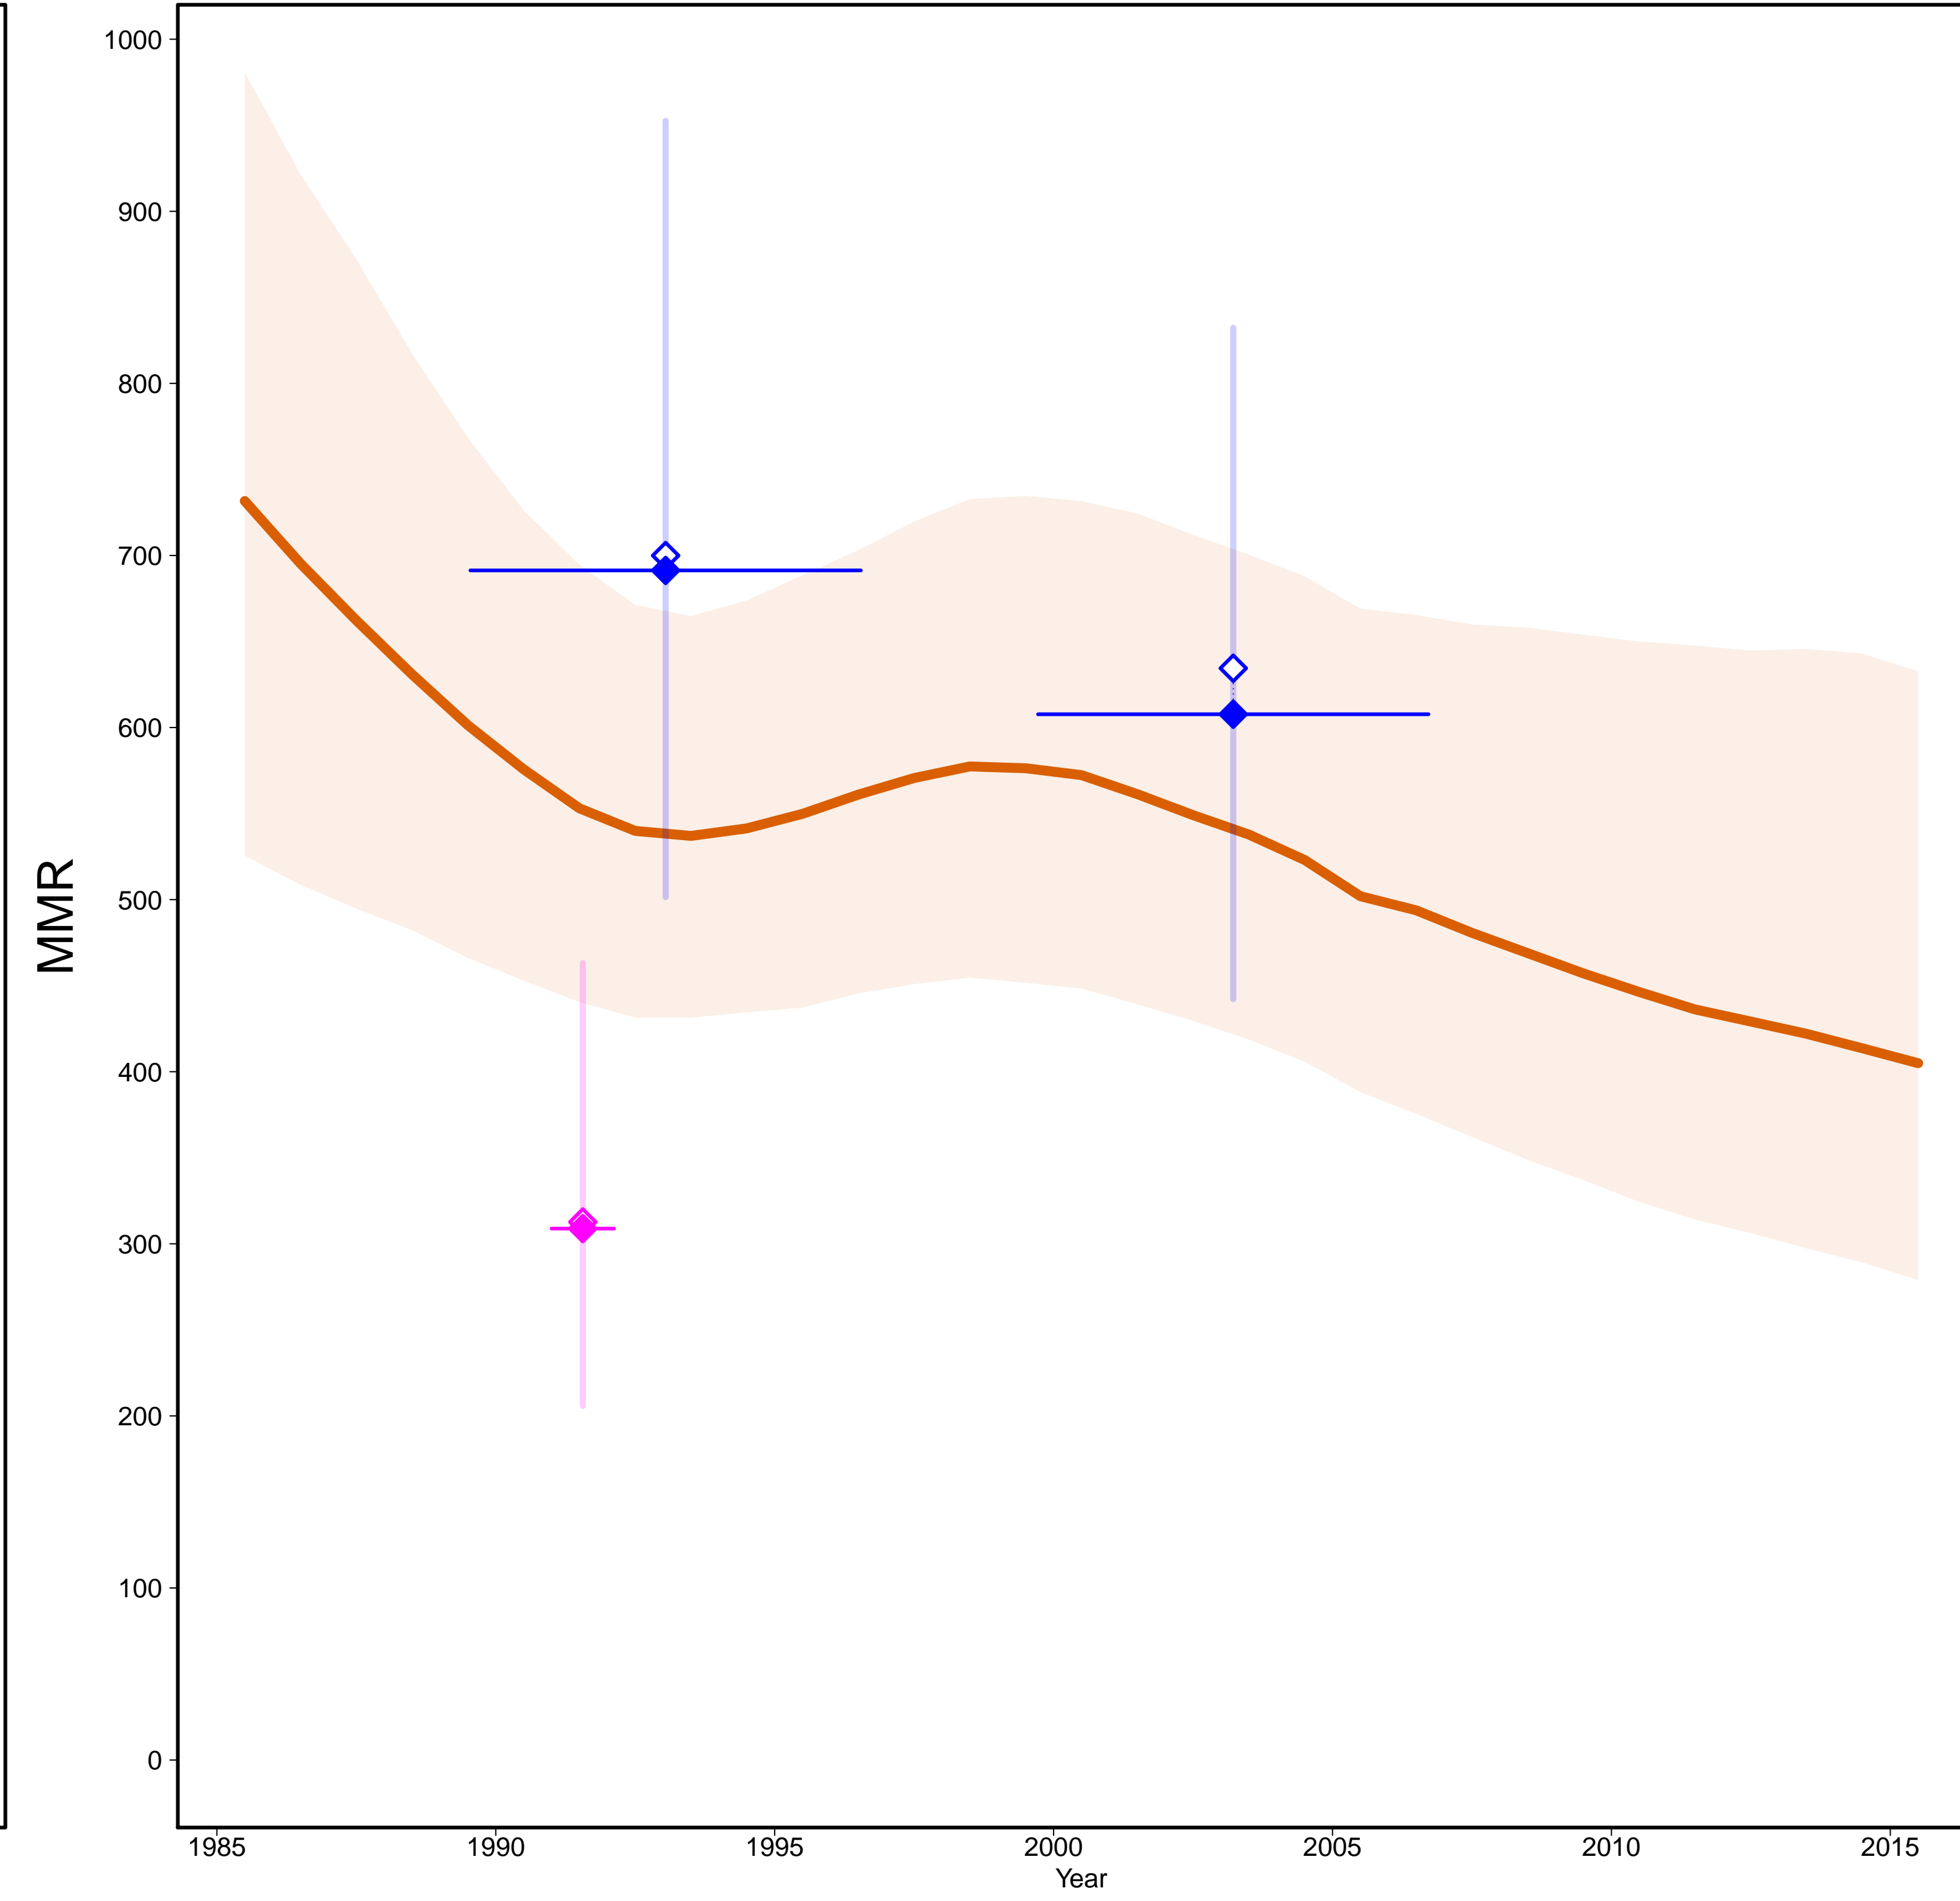

- Estimates —
- MMR Database 2015 —
- ◇ Observed Data
- ◆ Adjusted Data
- Data type —
- ◆ DHS
- ◆ Census

Gross Domestic Product

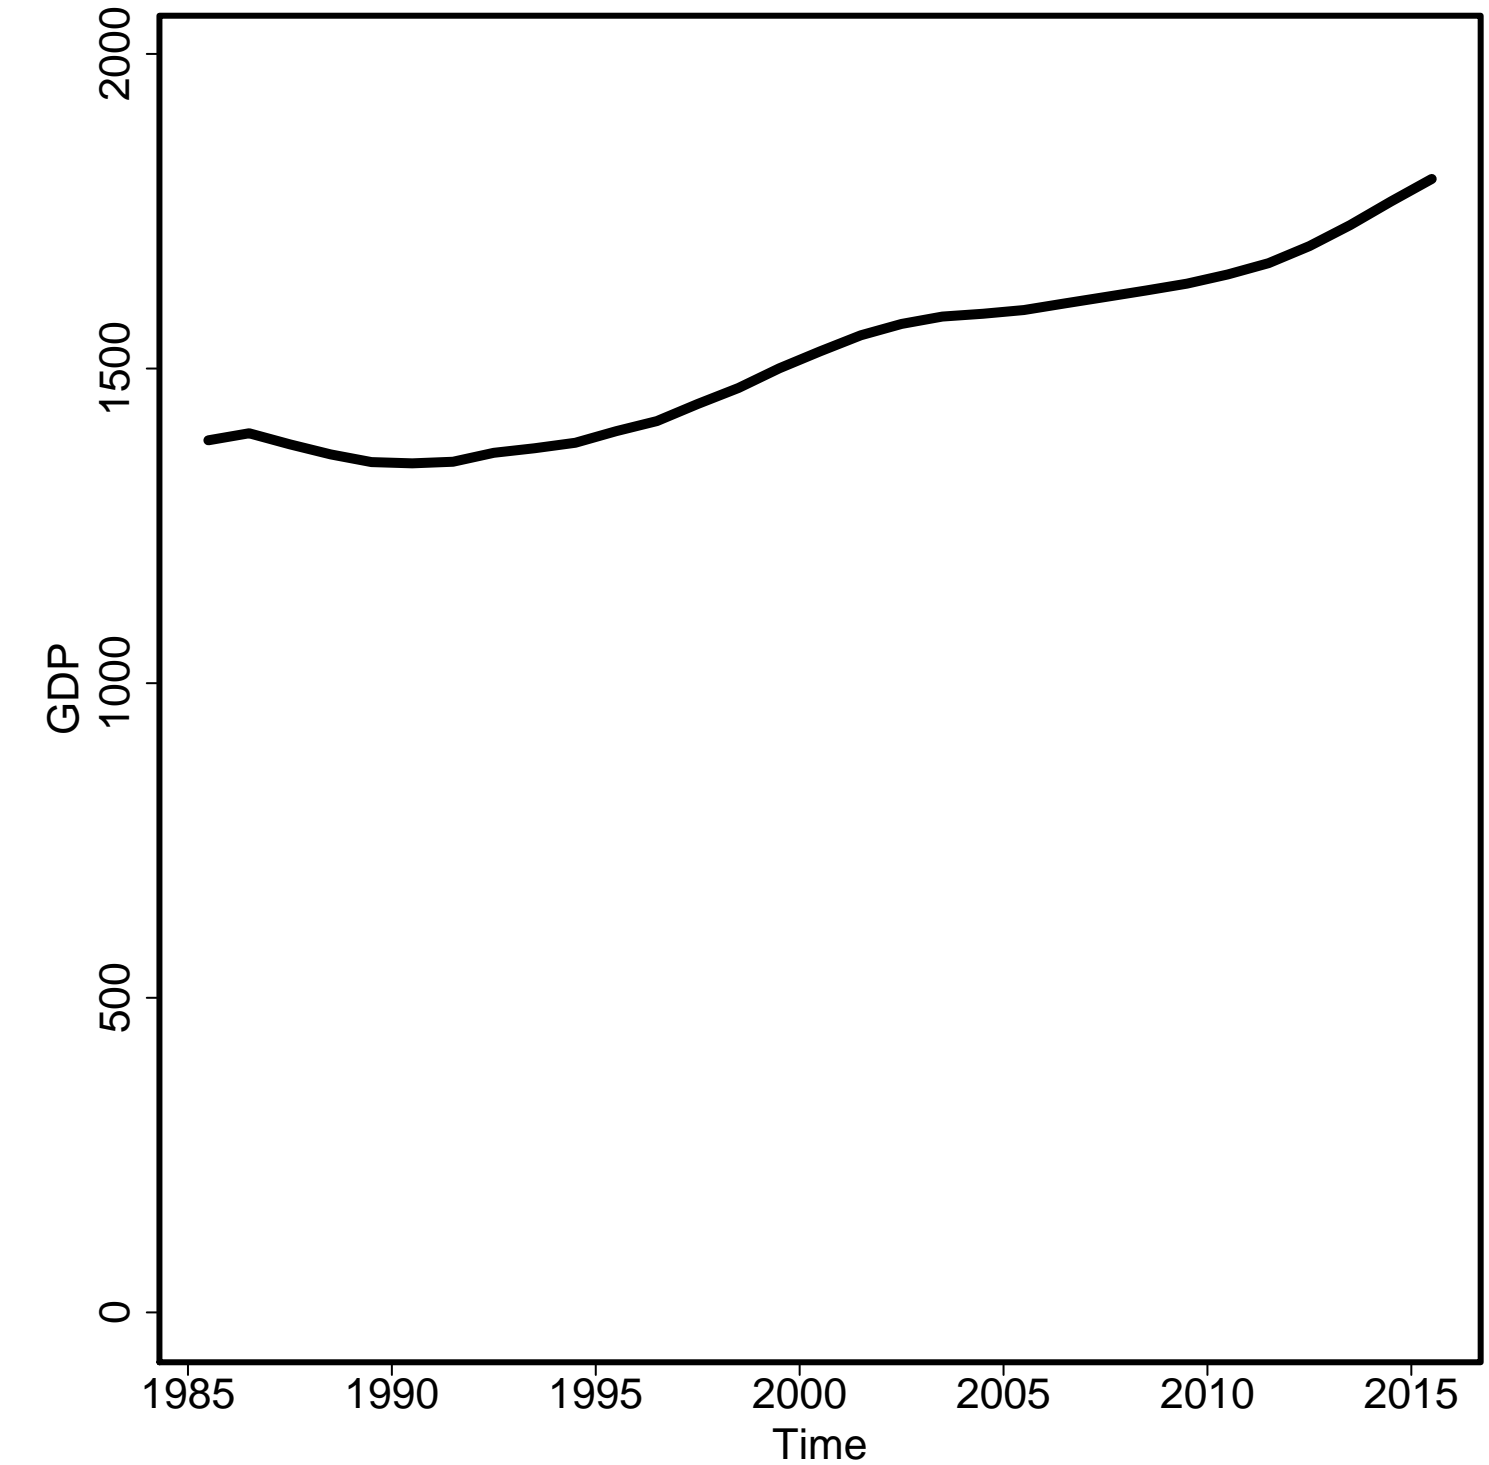

General Fertility Rate

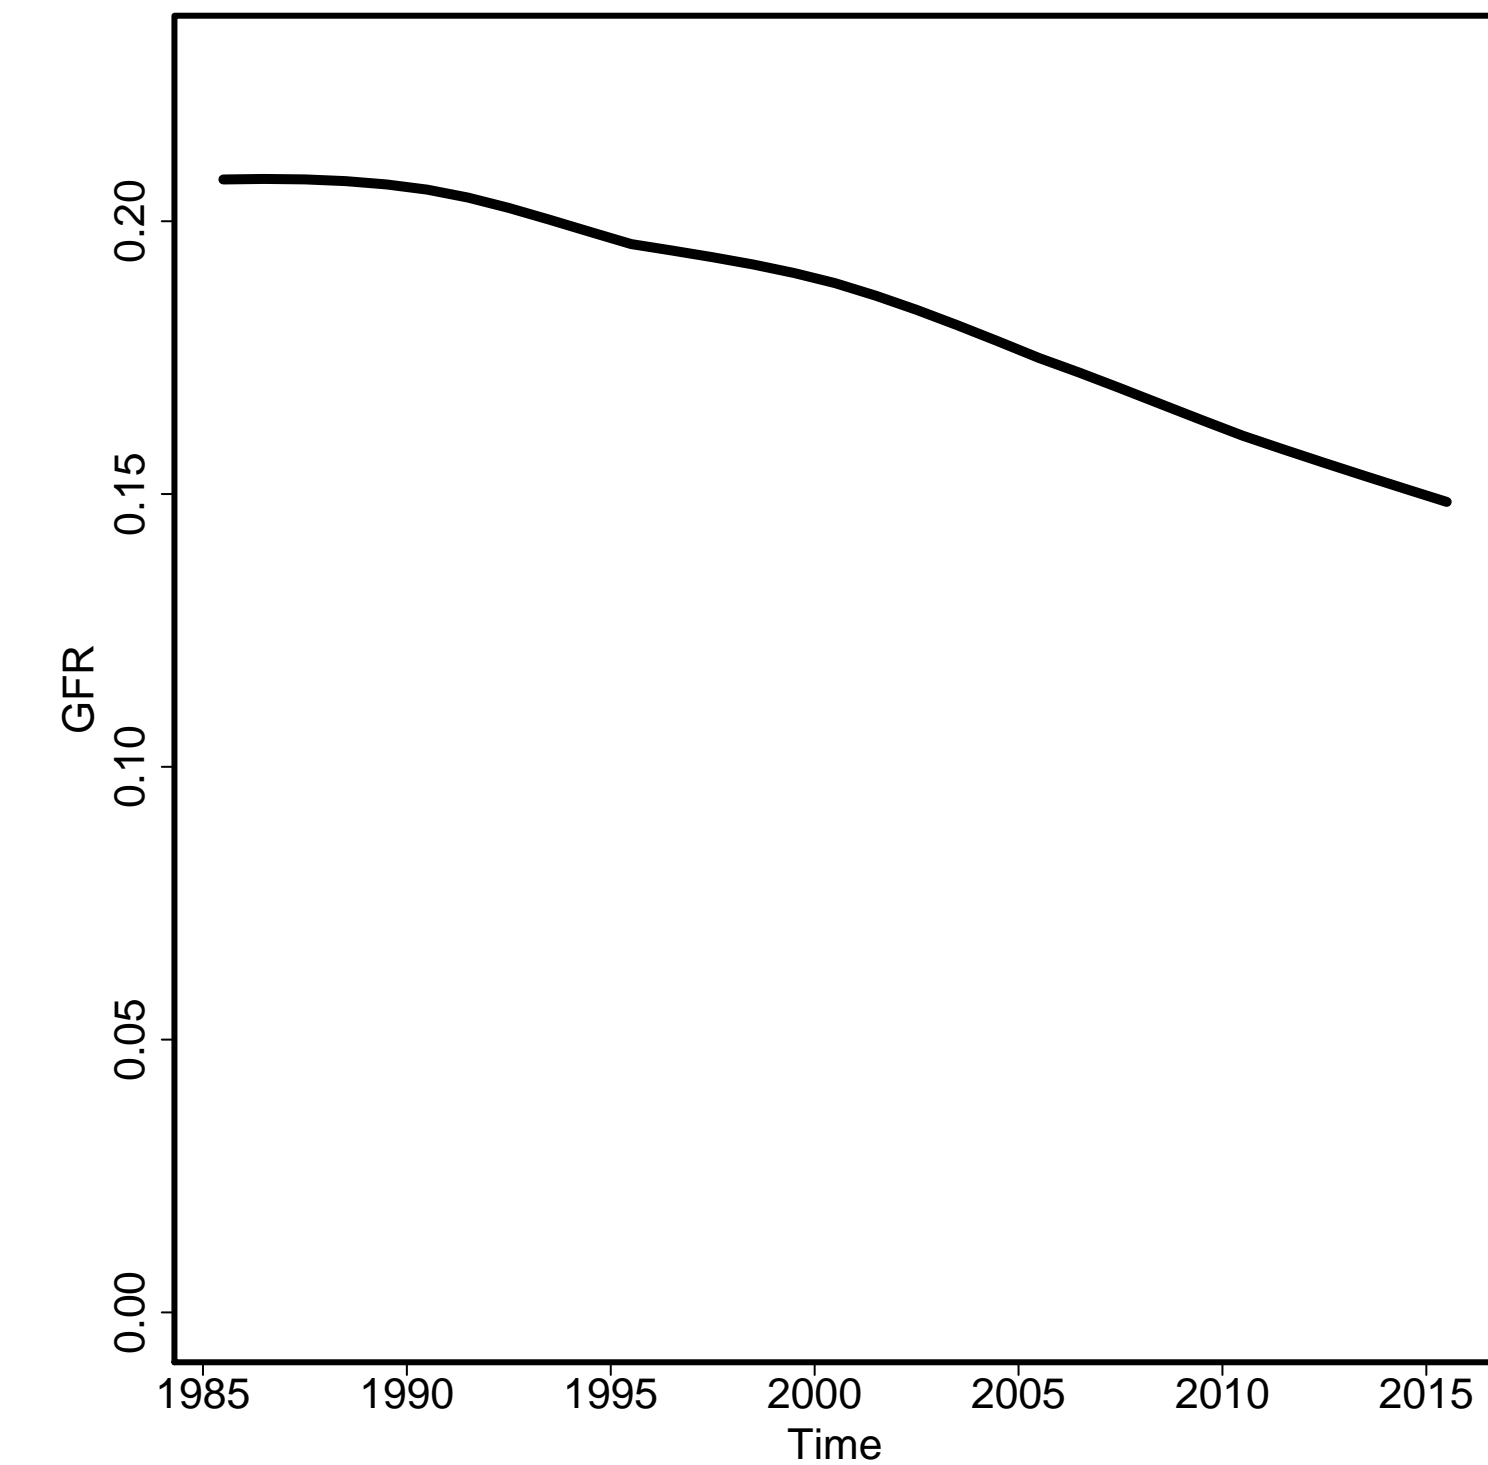

Skilled Attendance to Birth

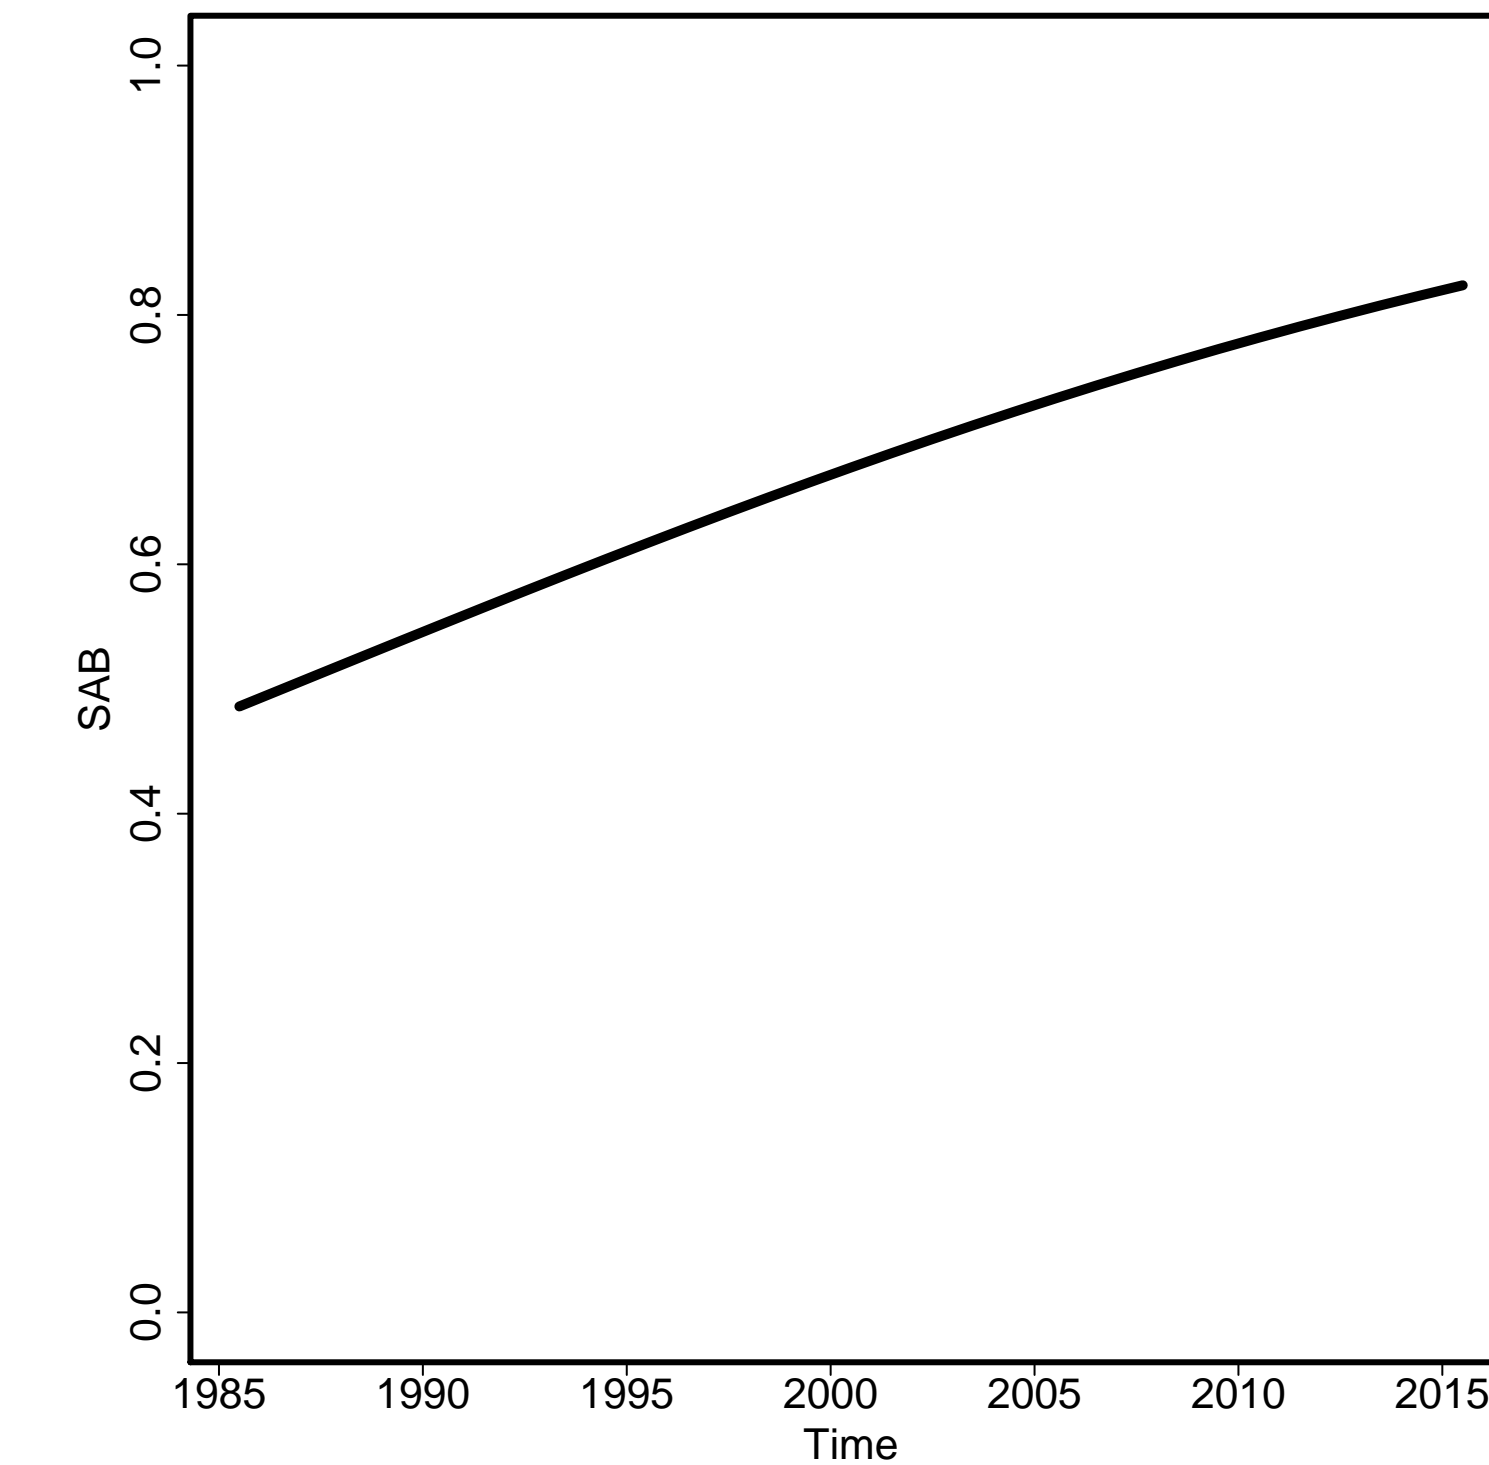

Envelope/Births

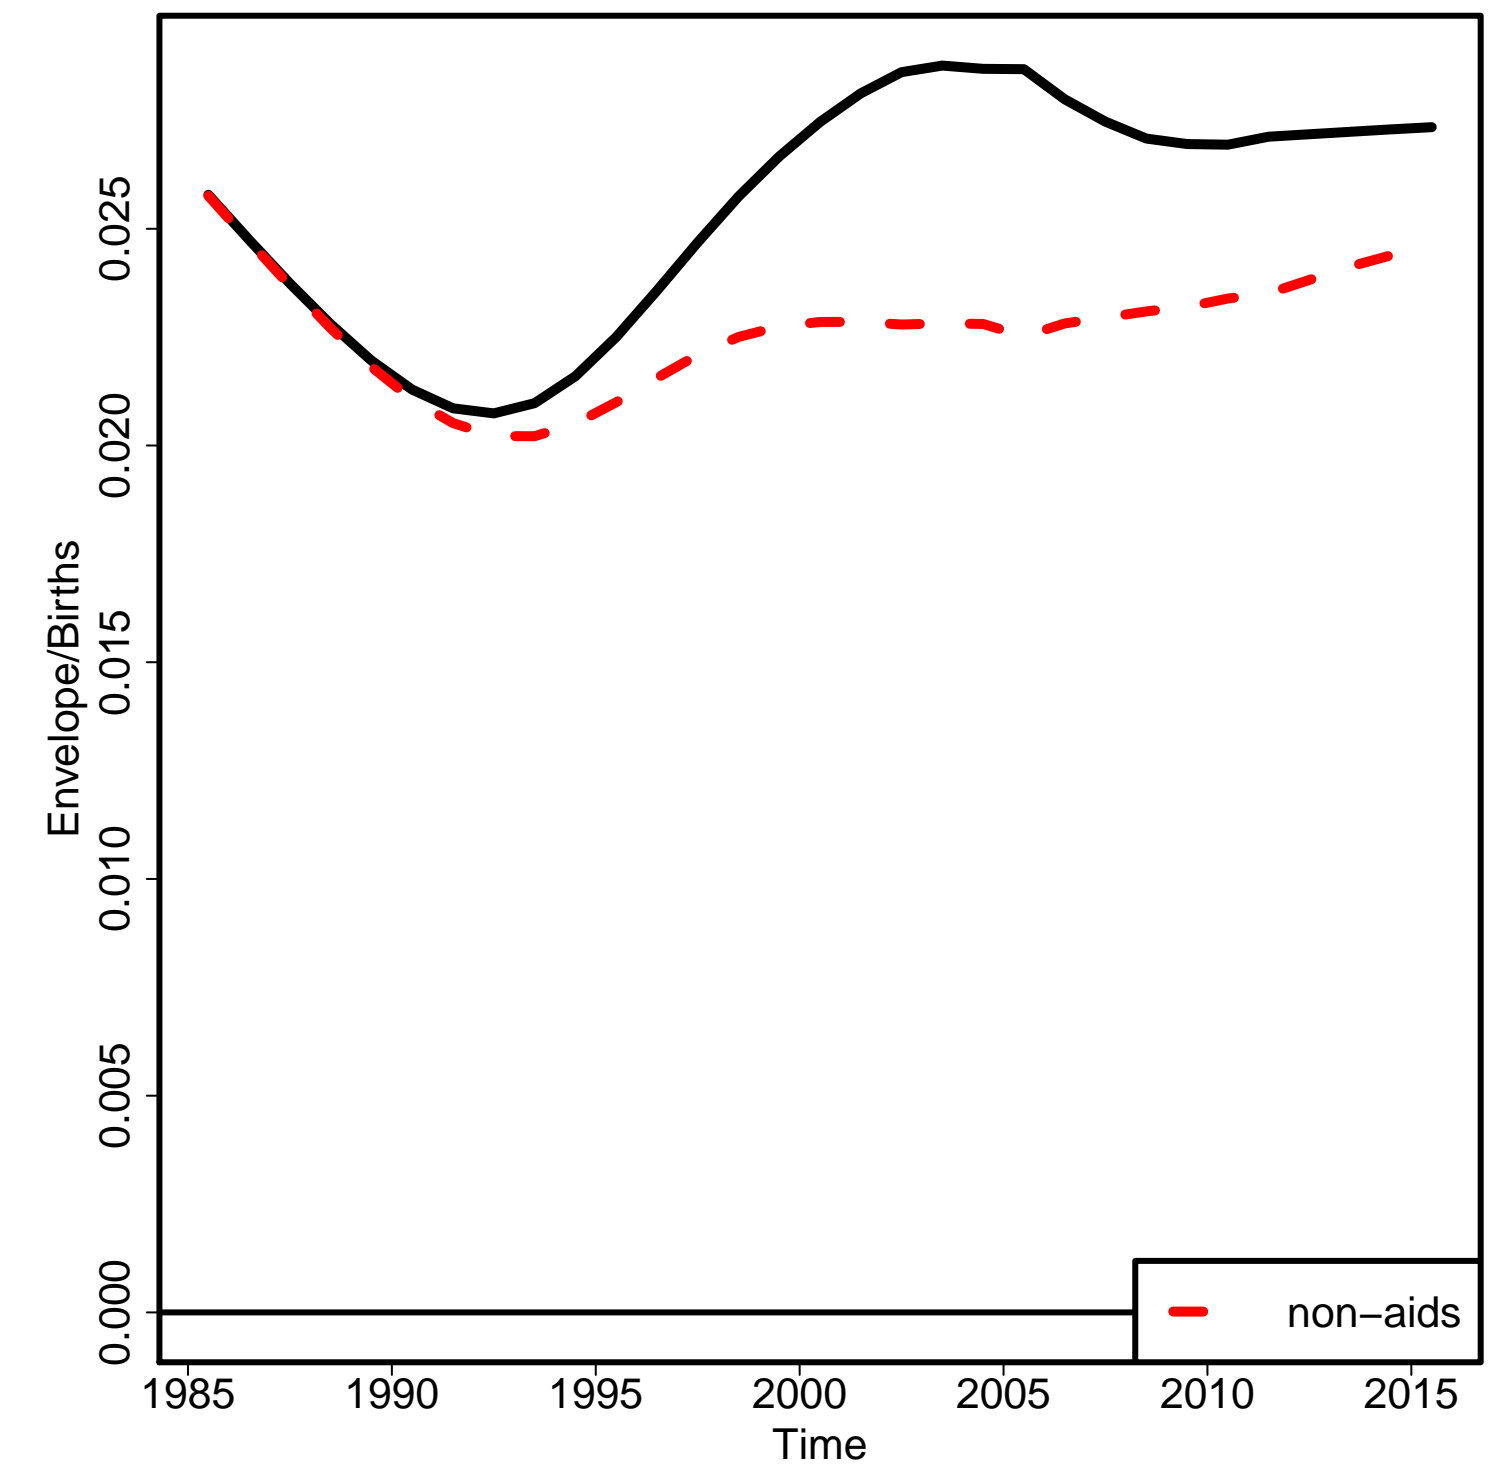

Non-aids MMR

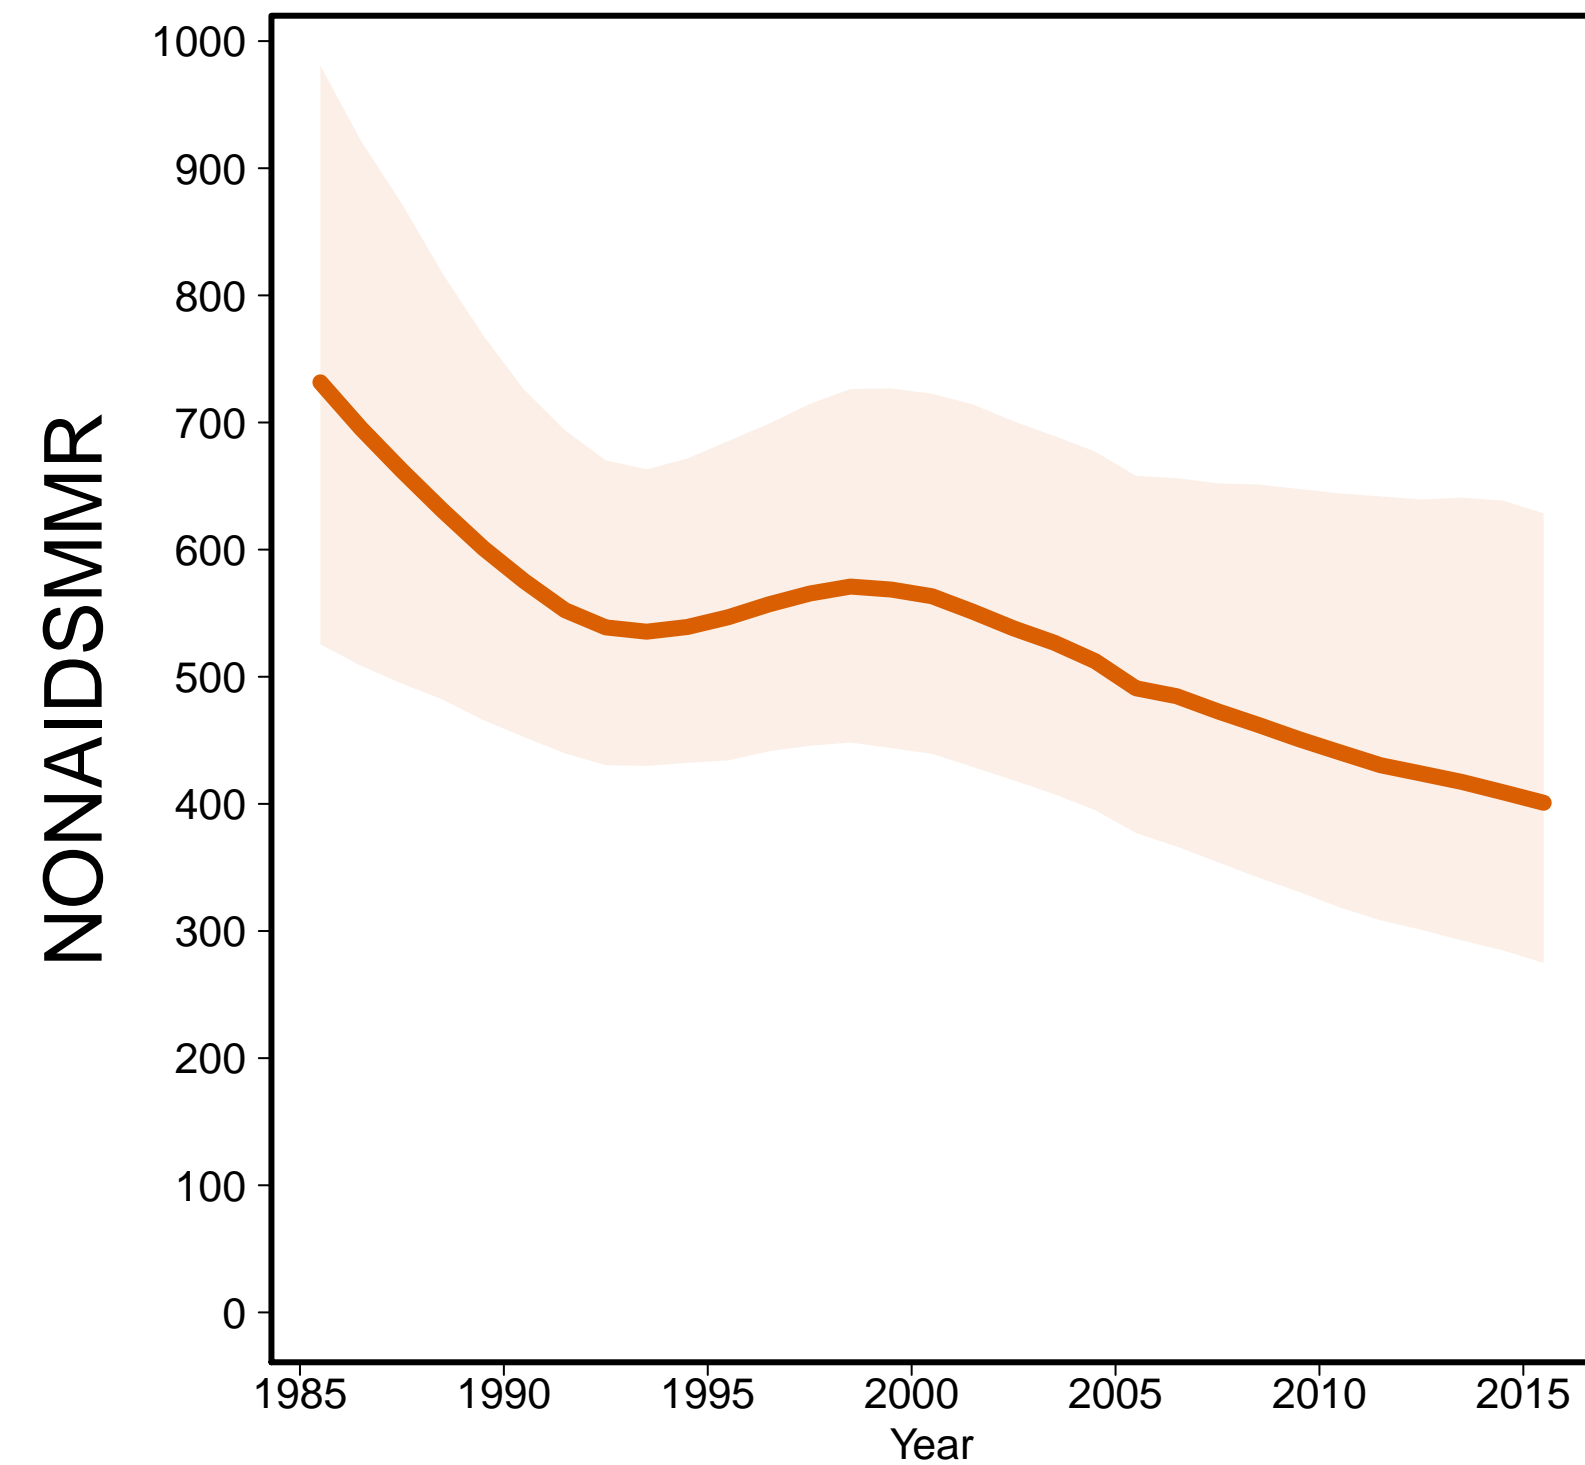

Aids MMR

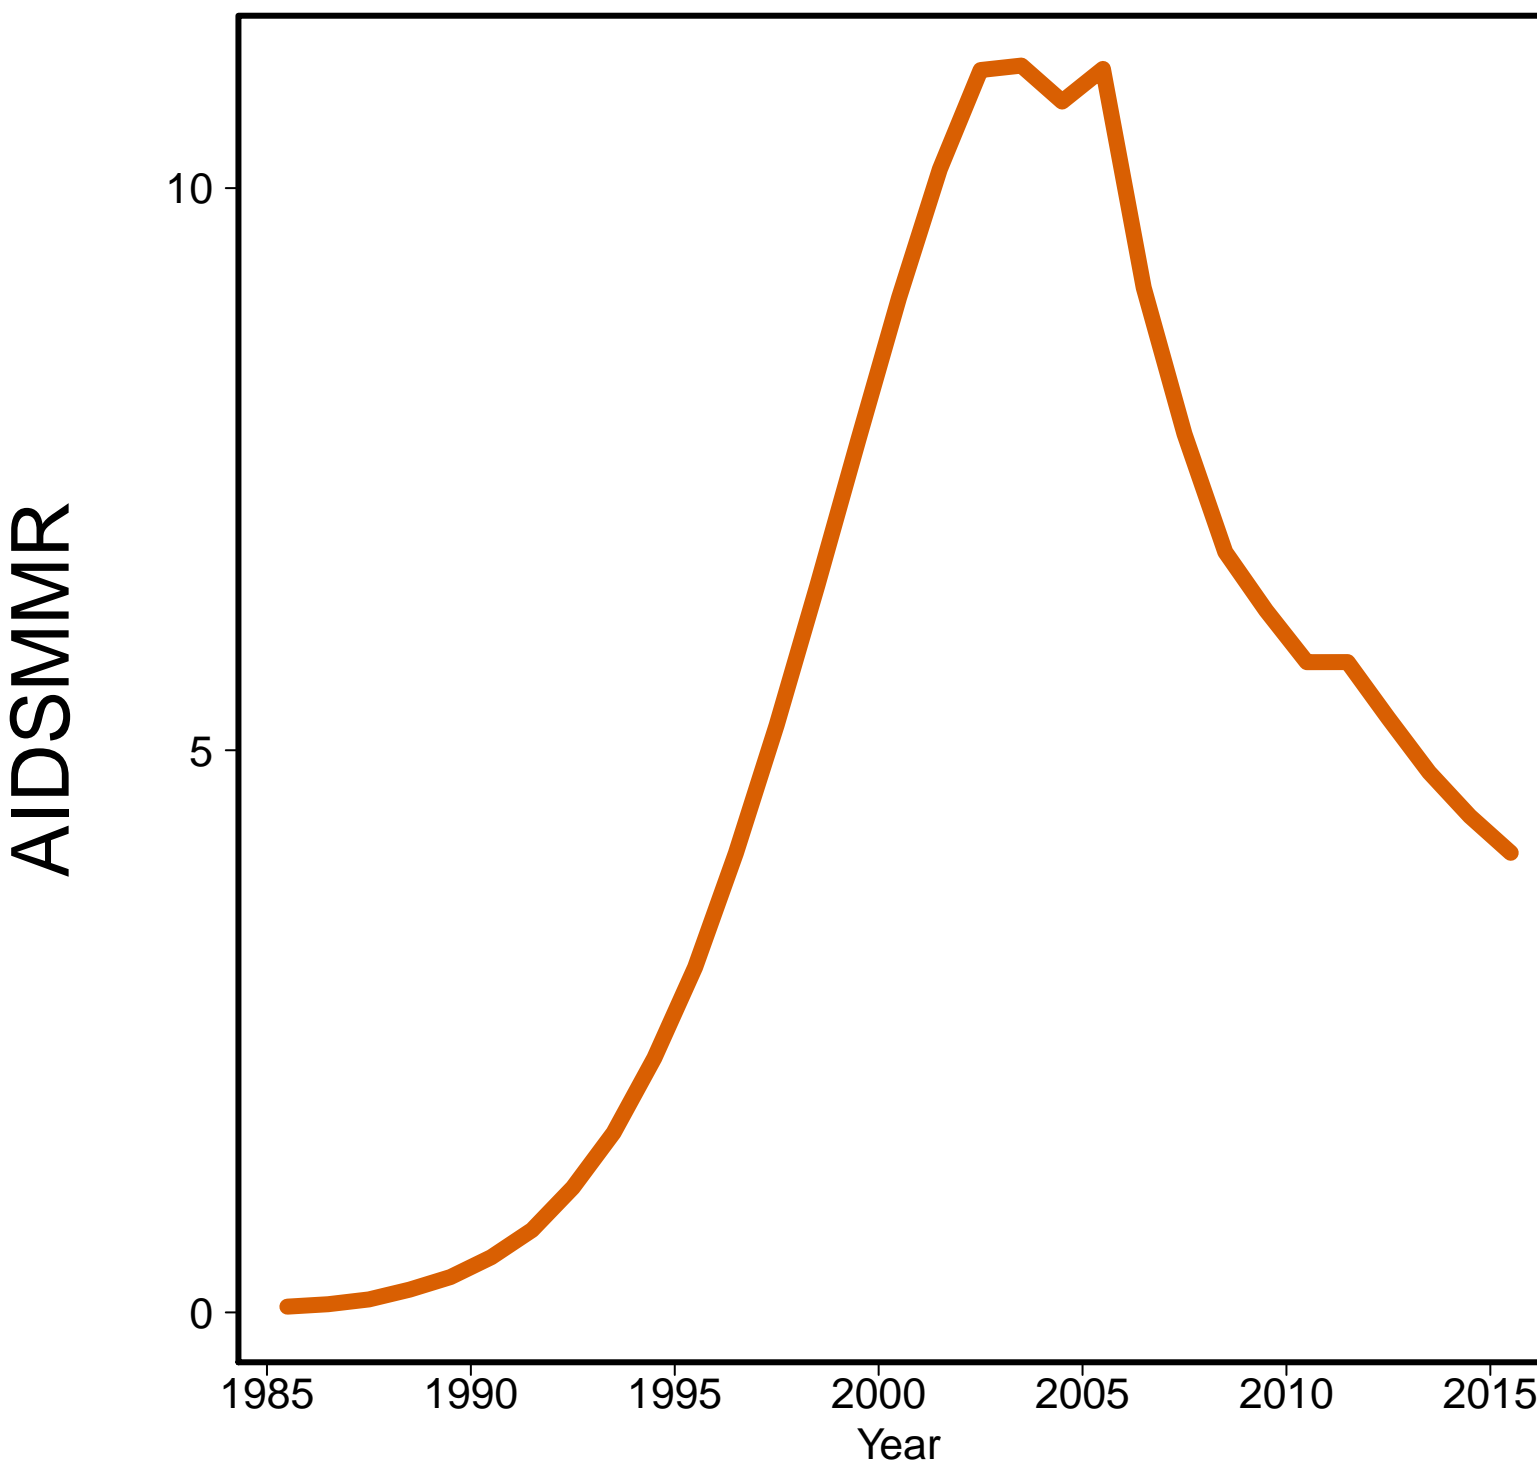

Bhutan [BTN]  
(Southern Asia)

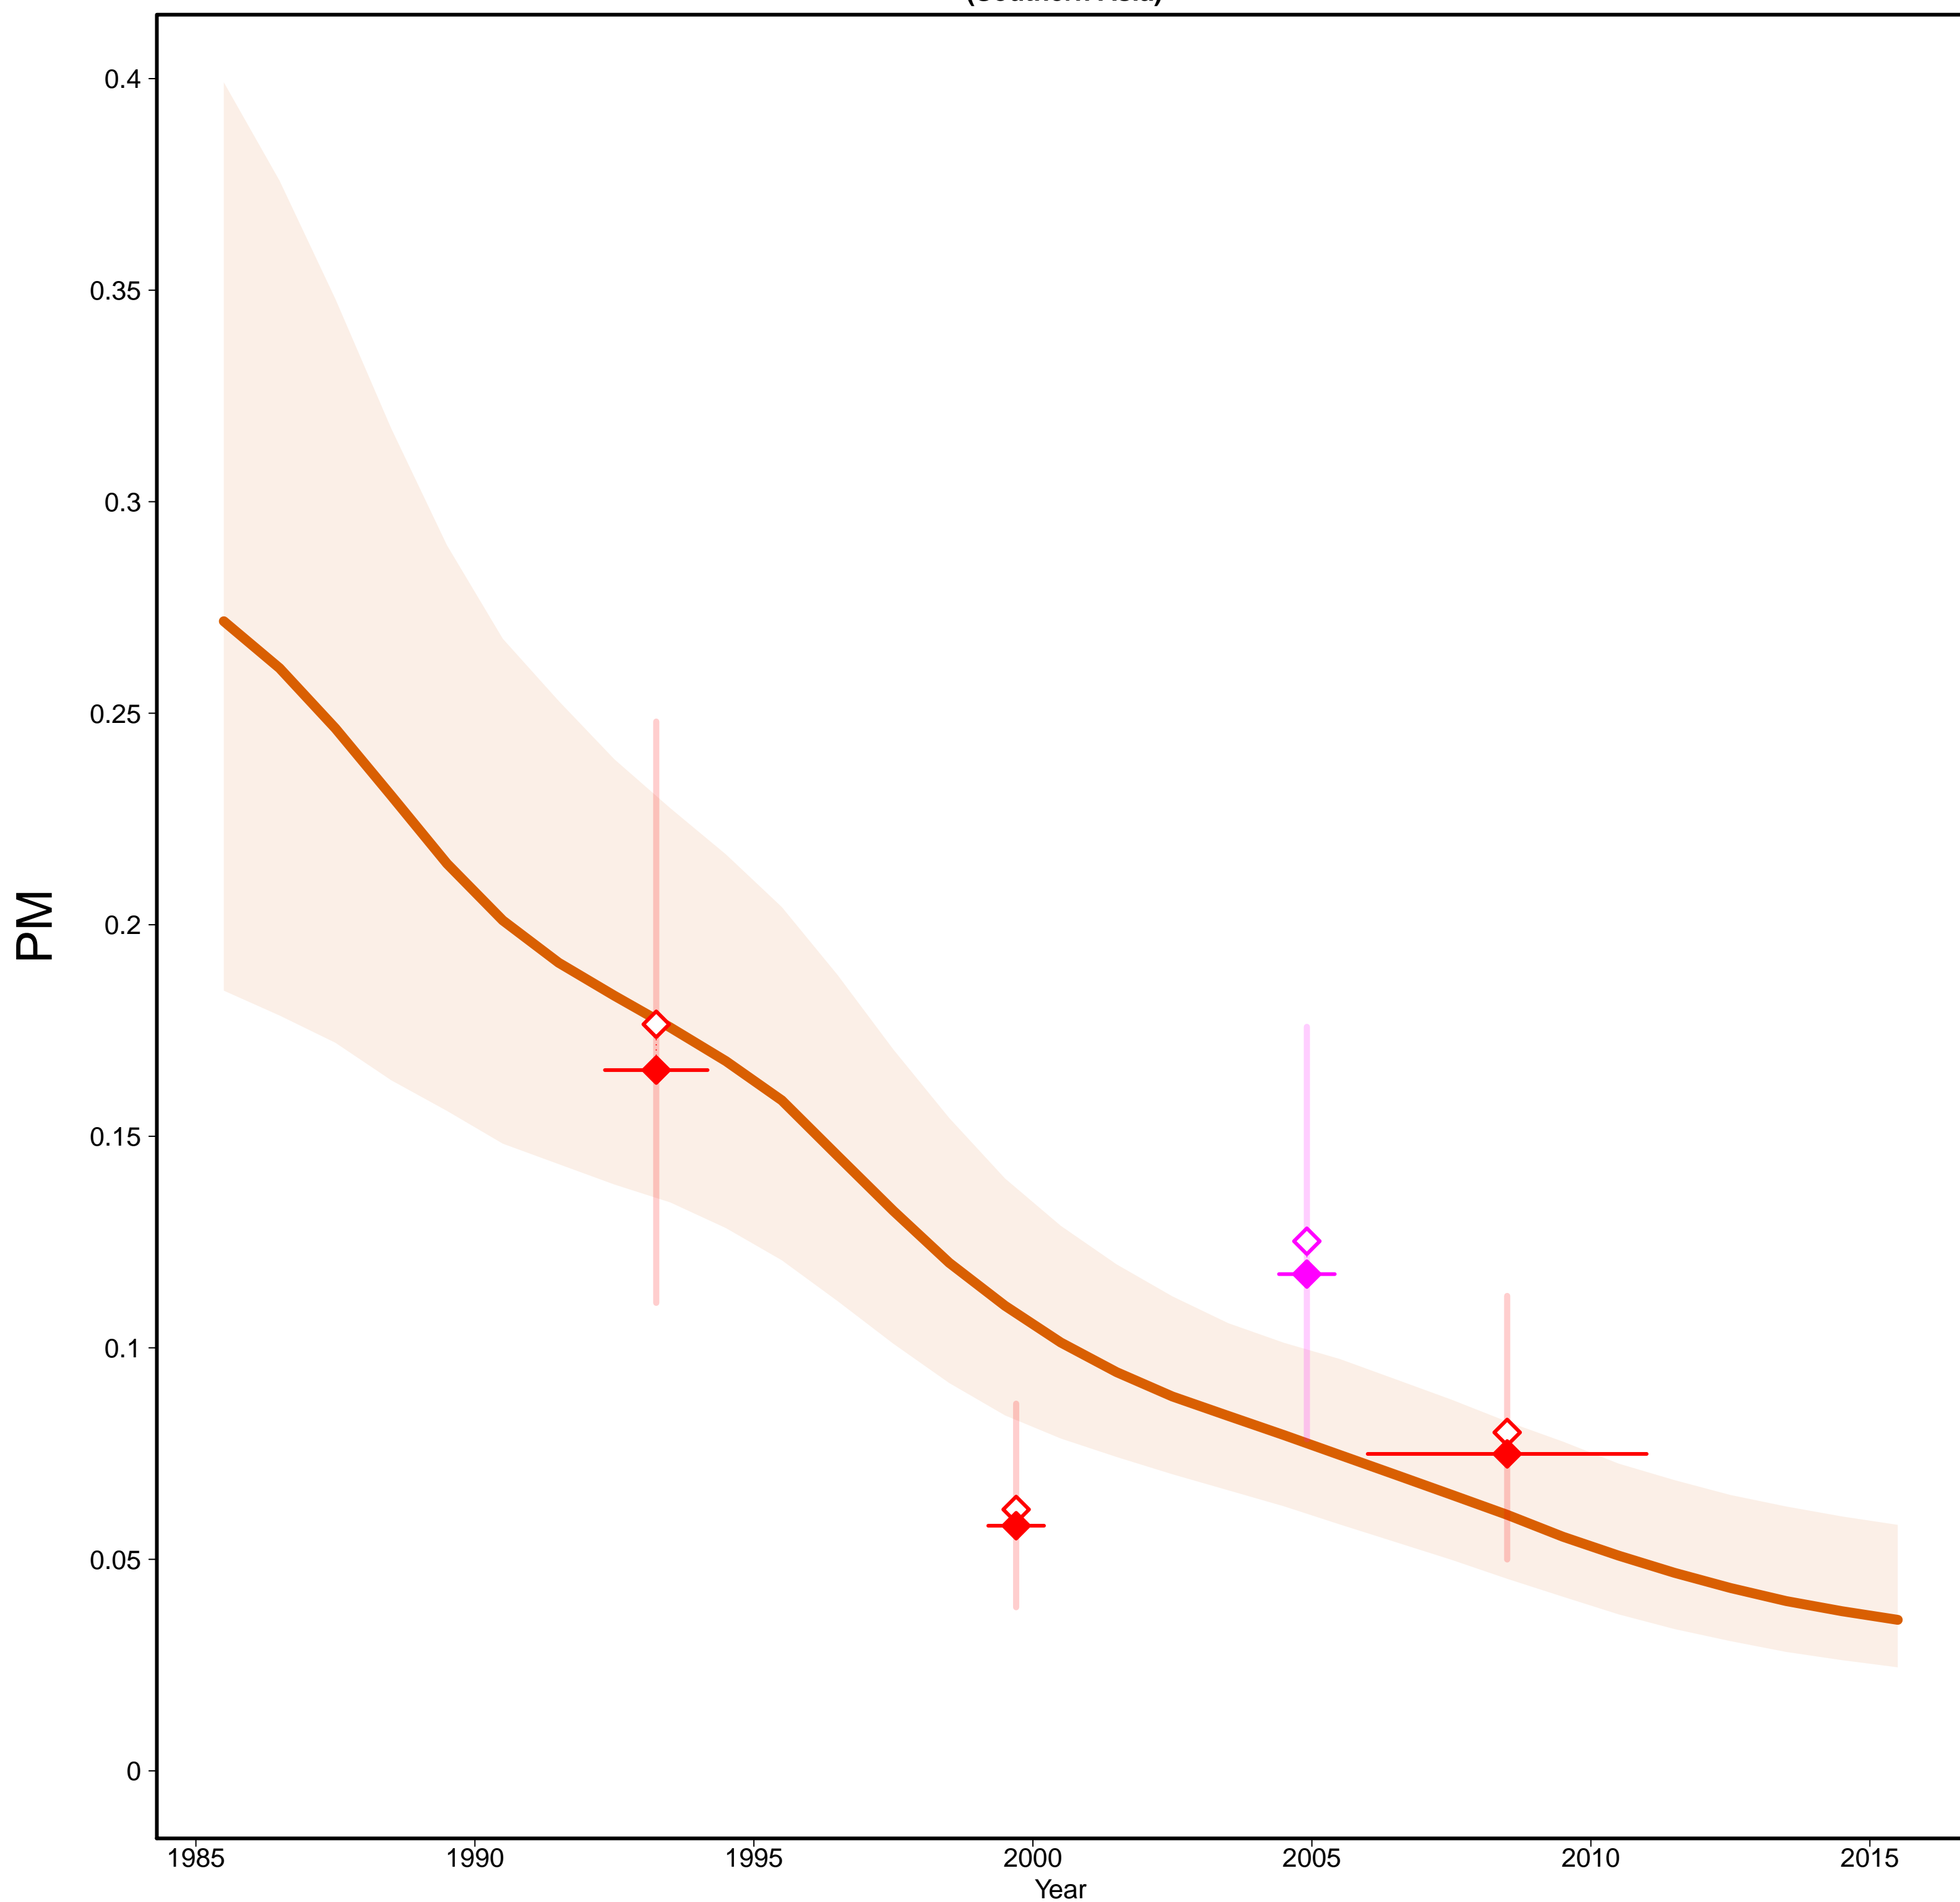

Bhutan [BTN]  
(Southern Asia)

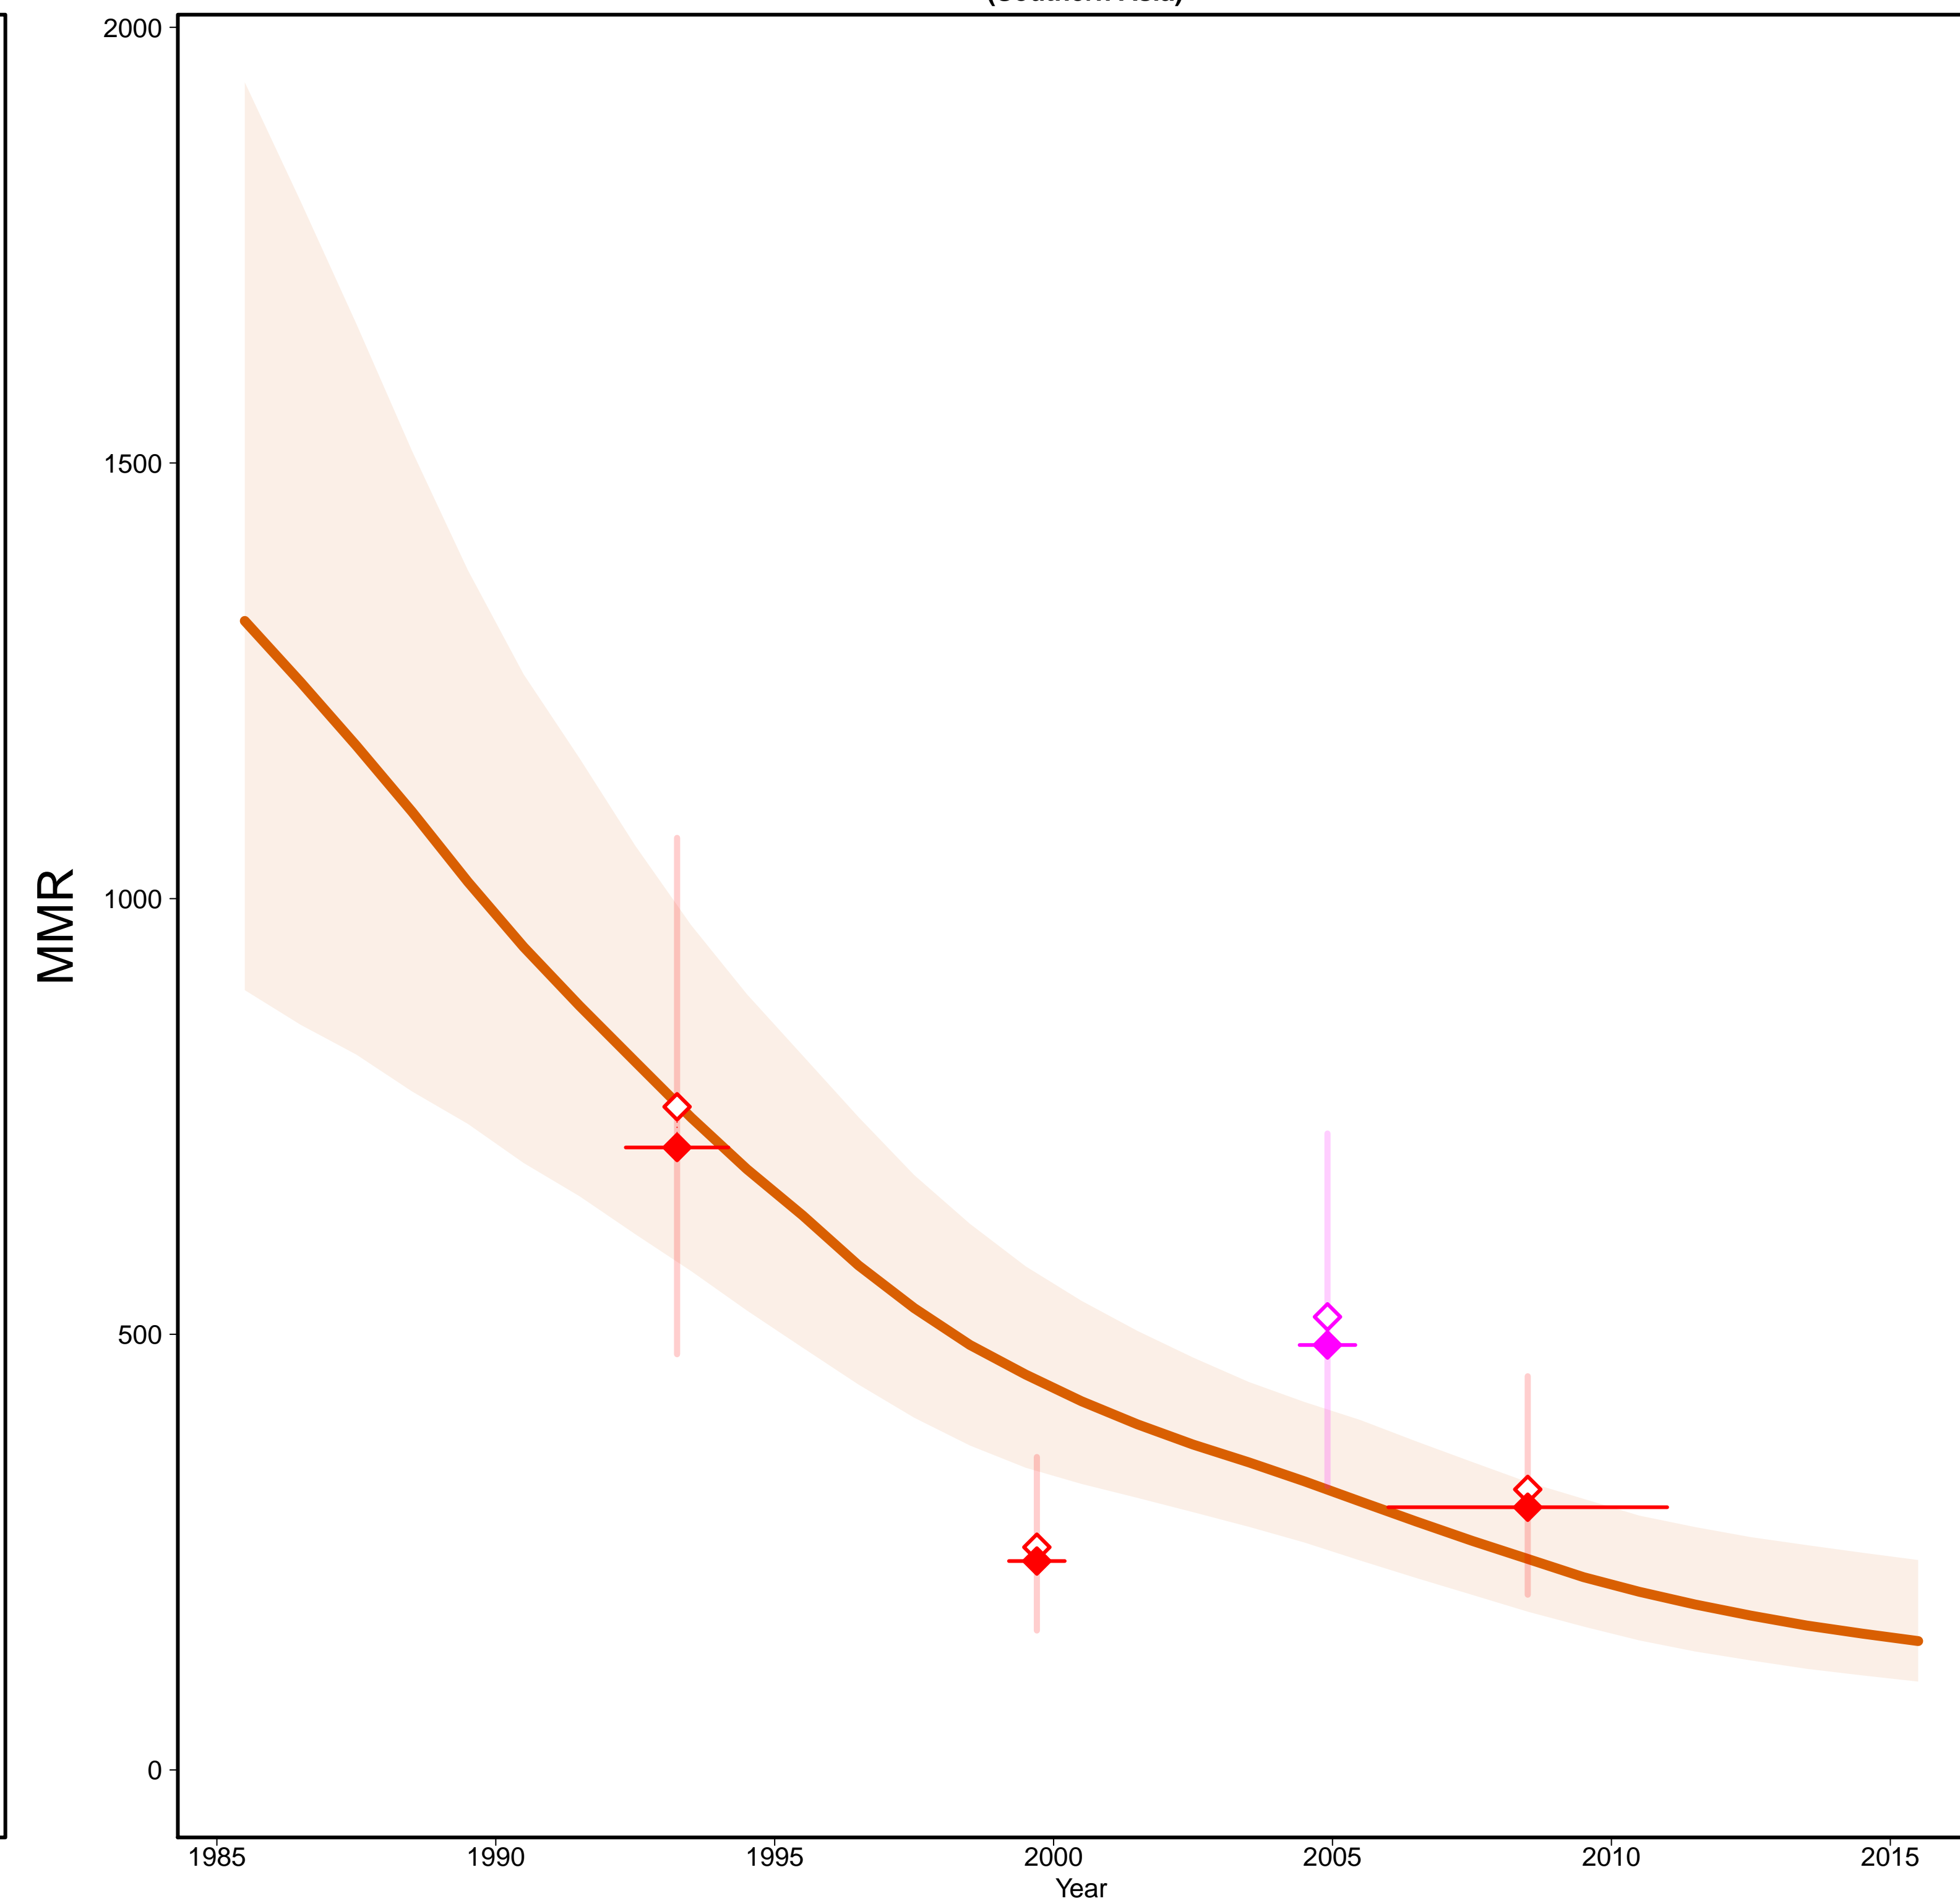

- Estimates —
- MMR Database 2015 —
- ◇ Observed Data
- ◆ Adjusted Data
- Data type —
- ◆ Census
- ◆ Misc. studies

Gross Domestic Product

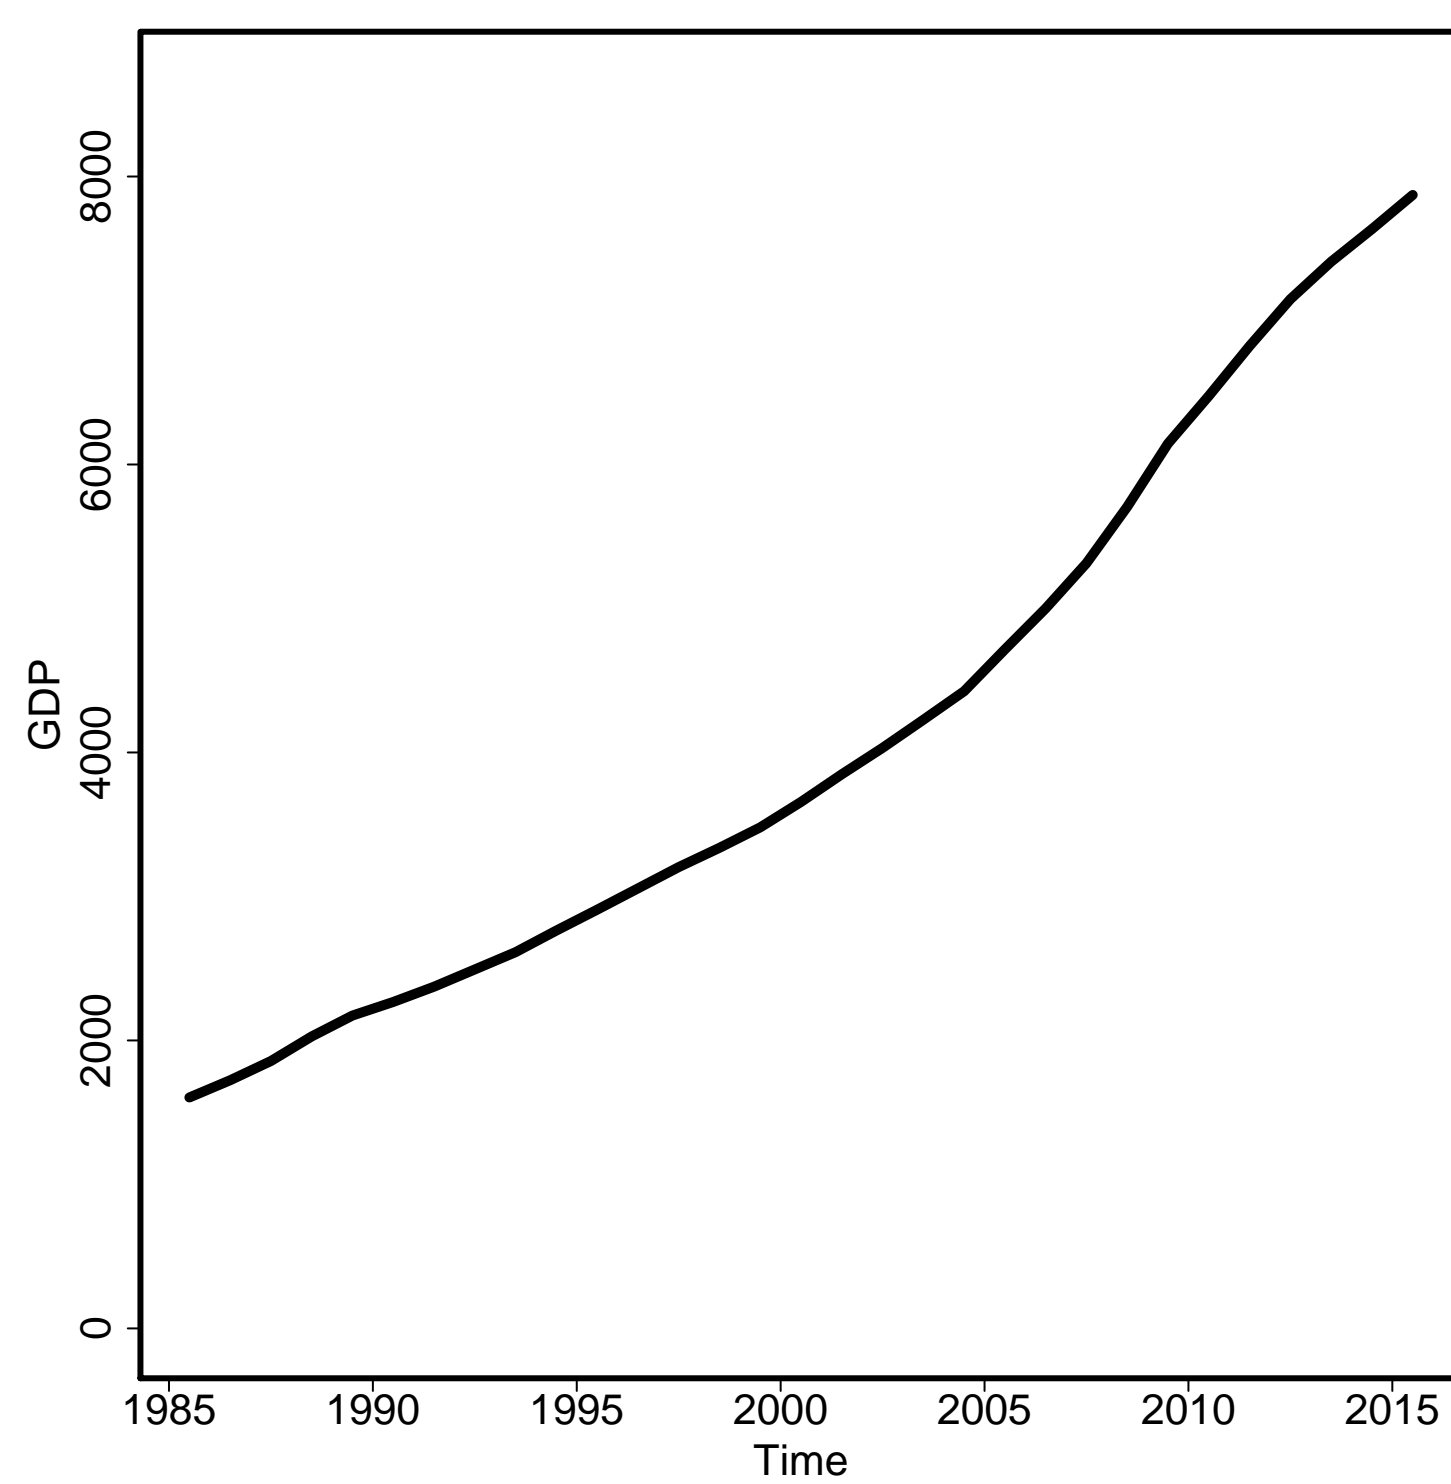

General Fertility Rate

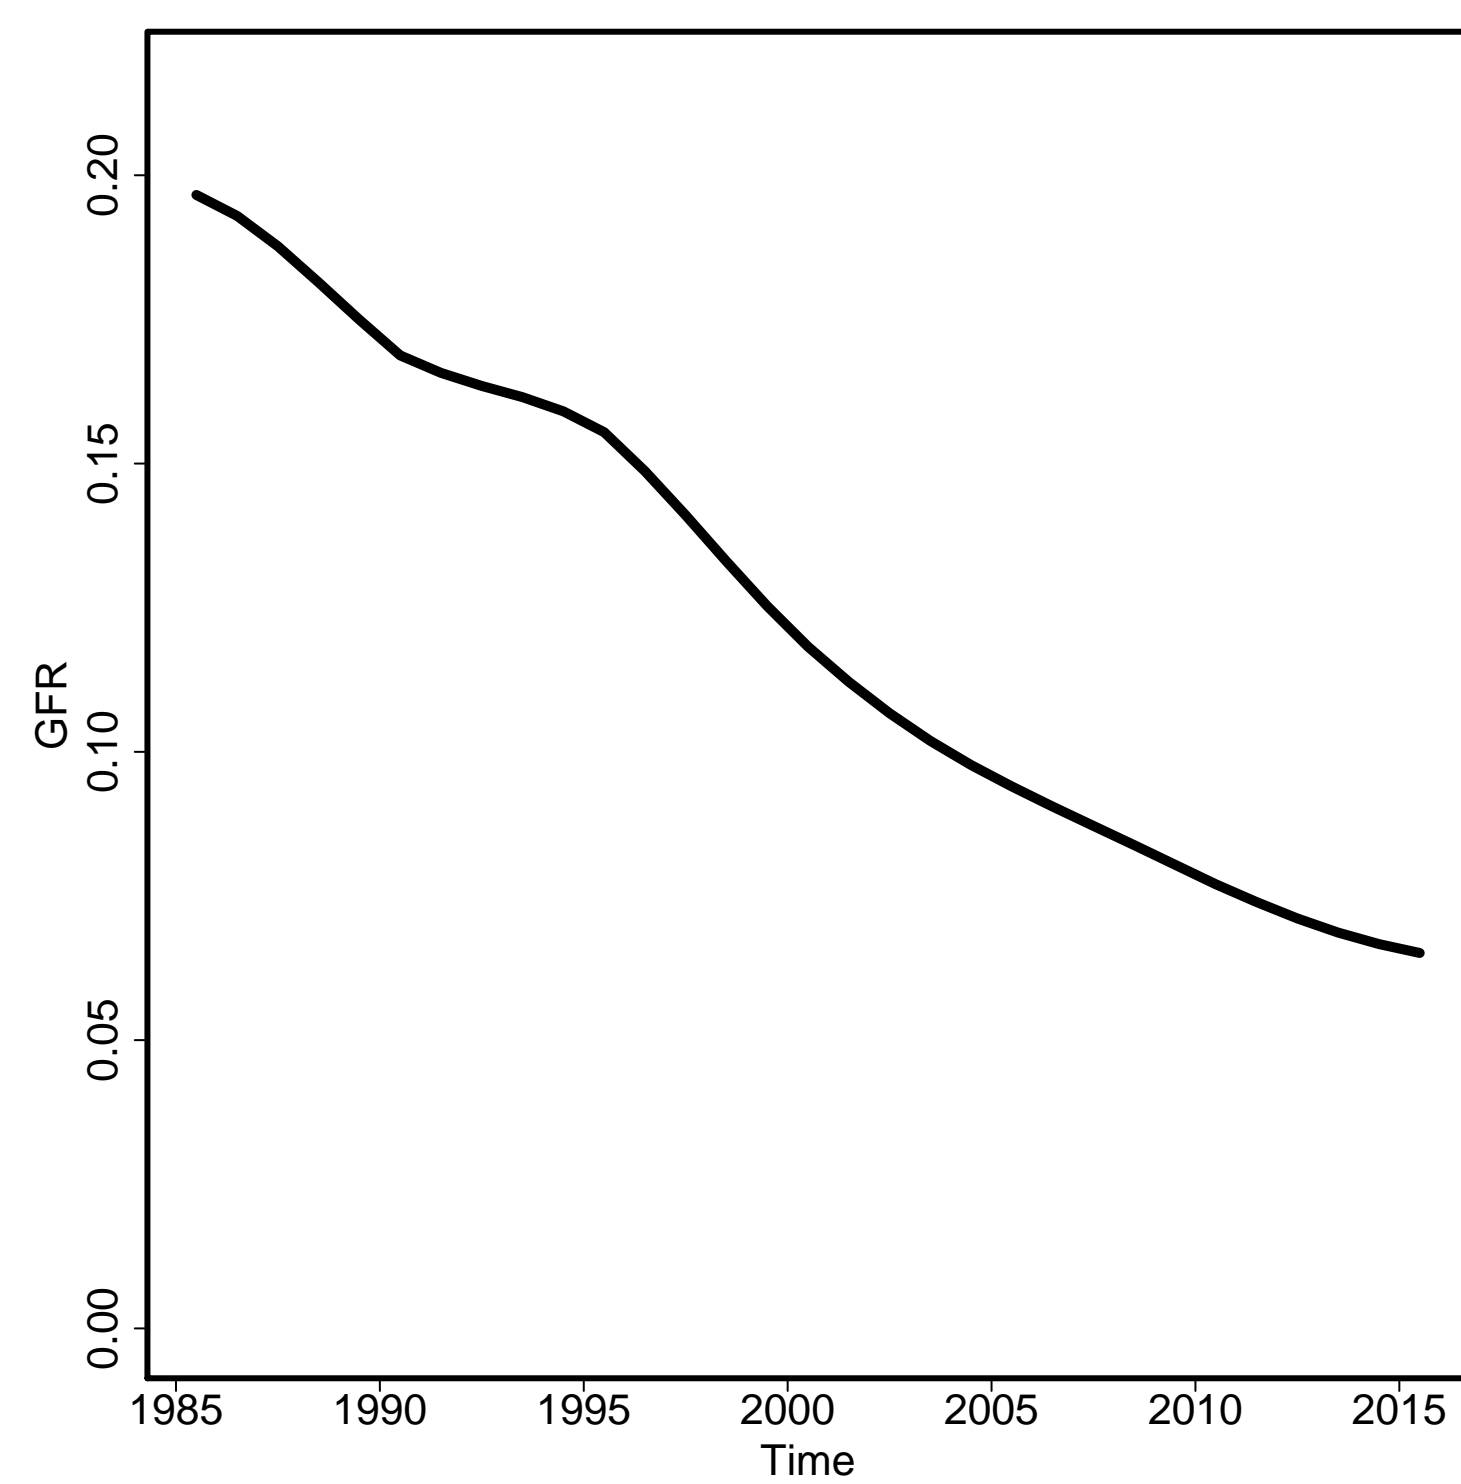

Skilled Attendance to Birth

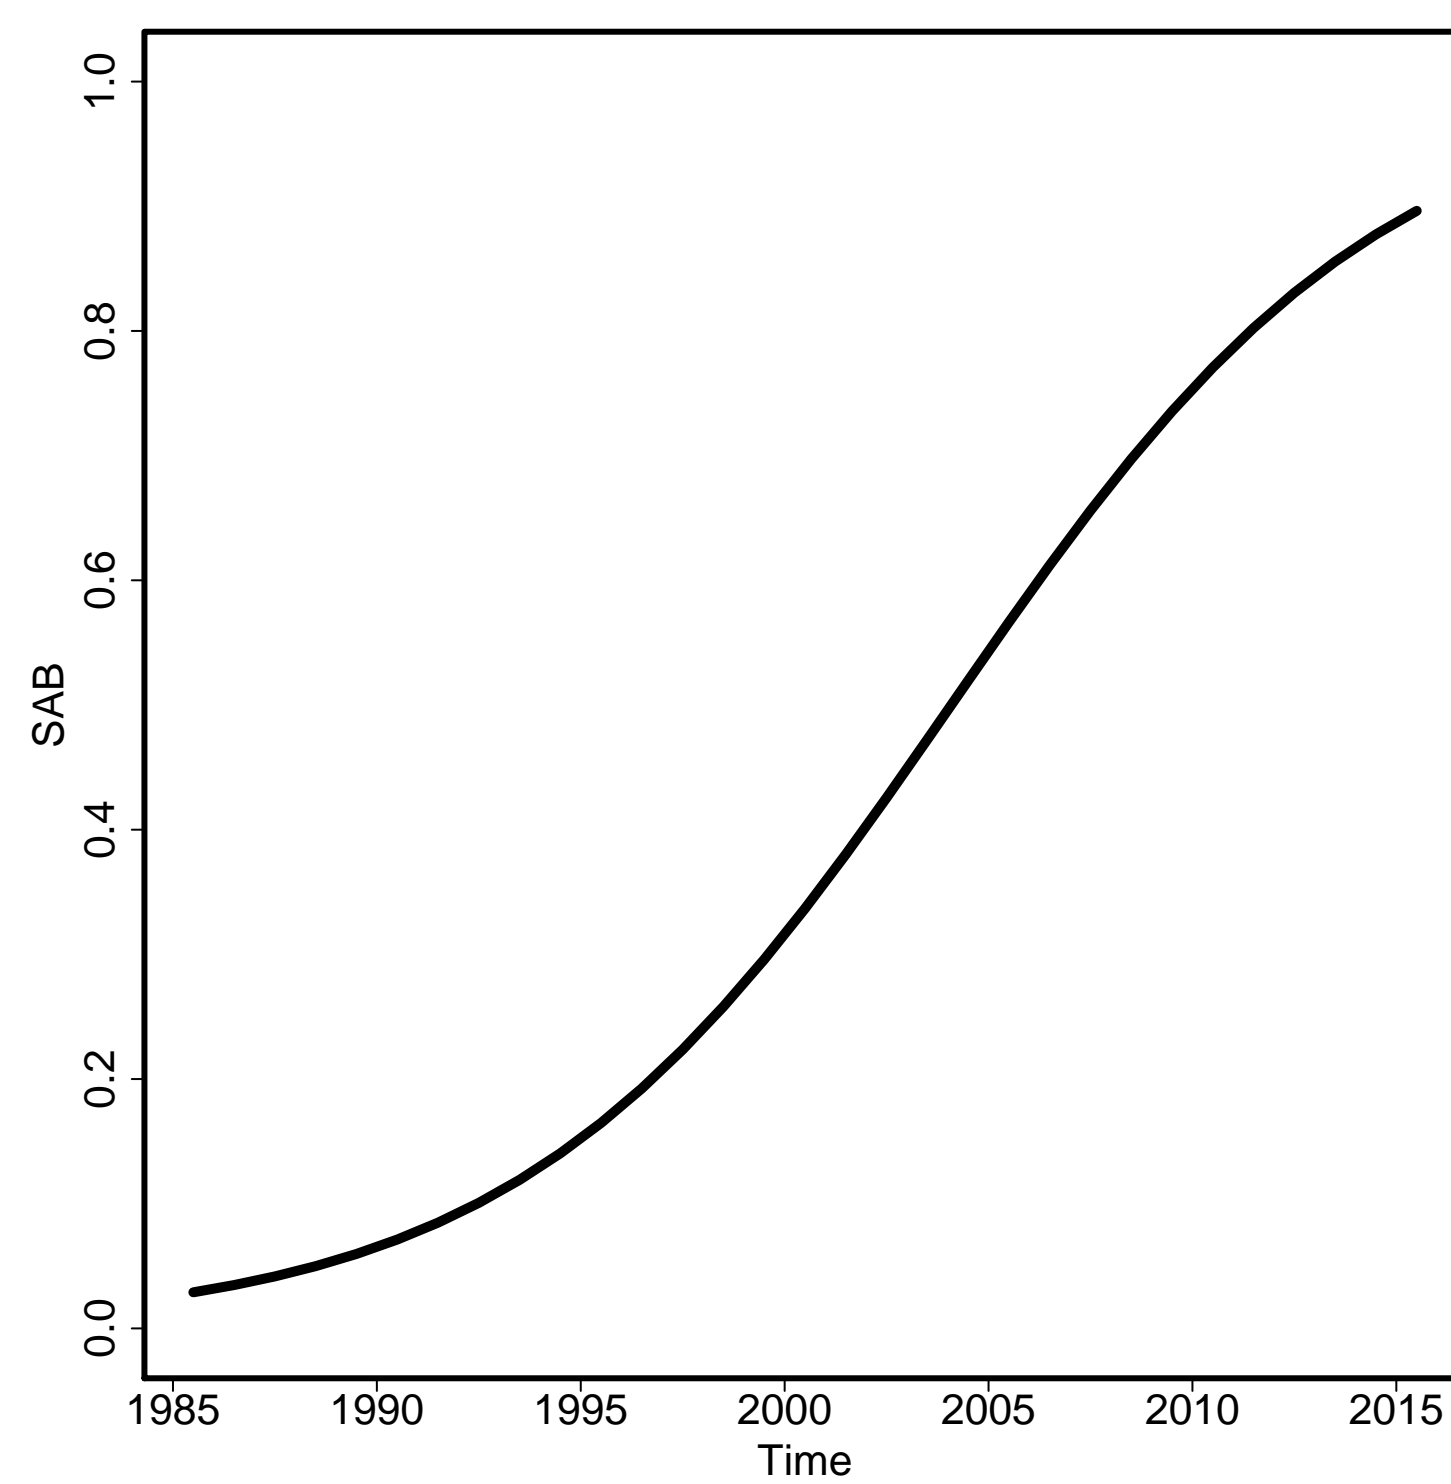

Envelope/Births

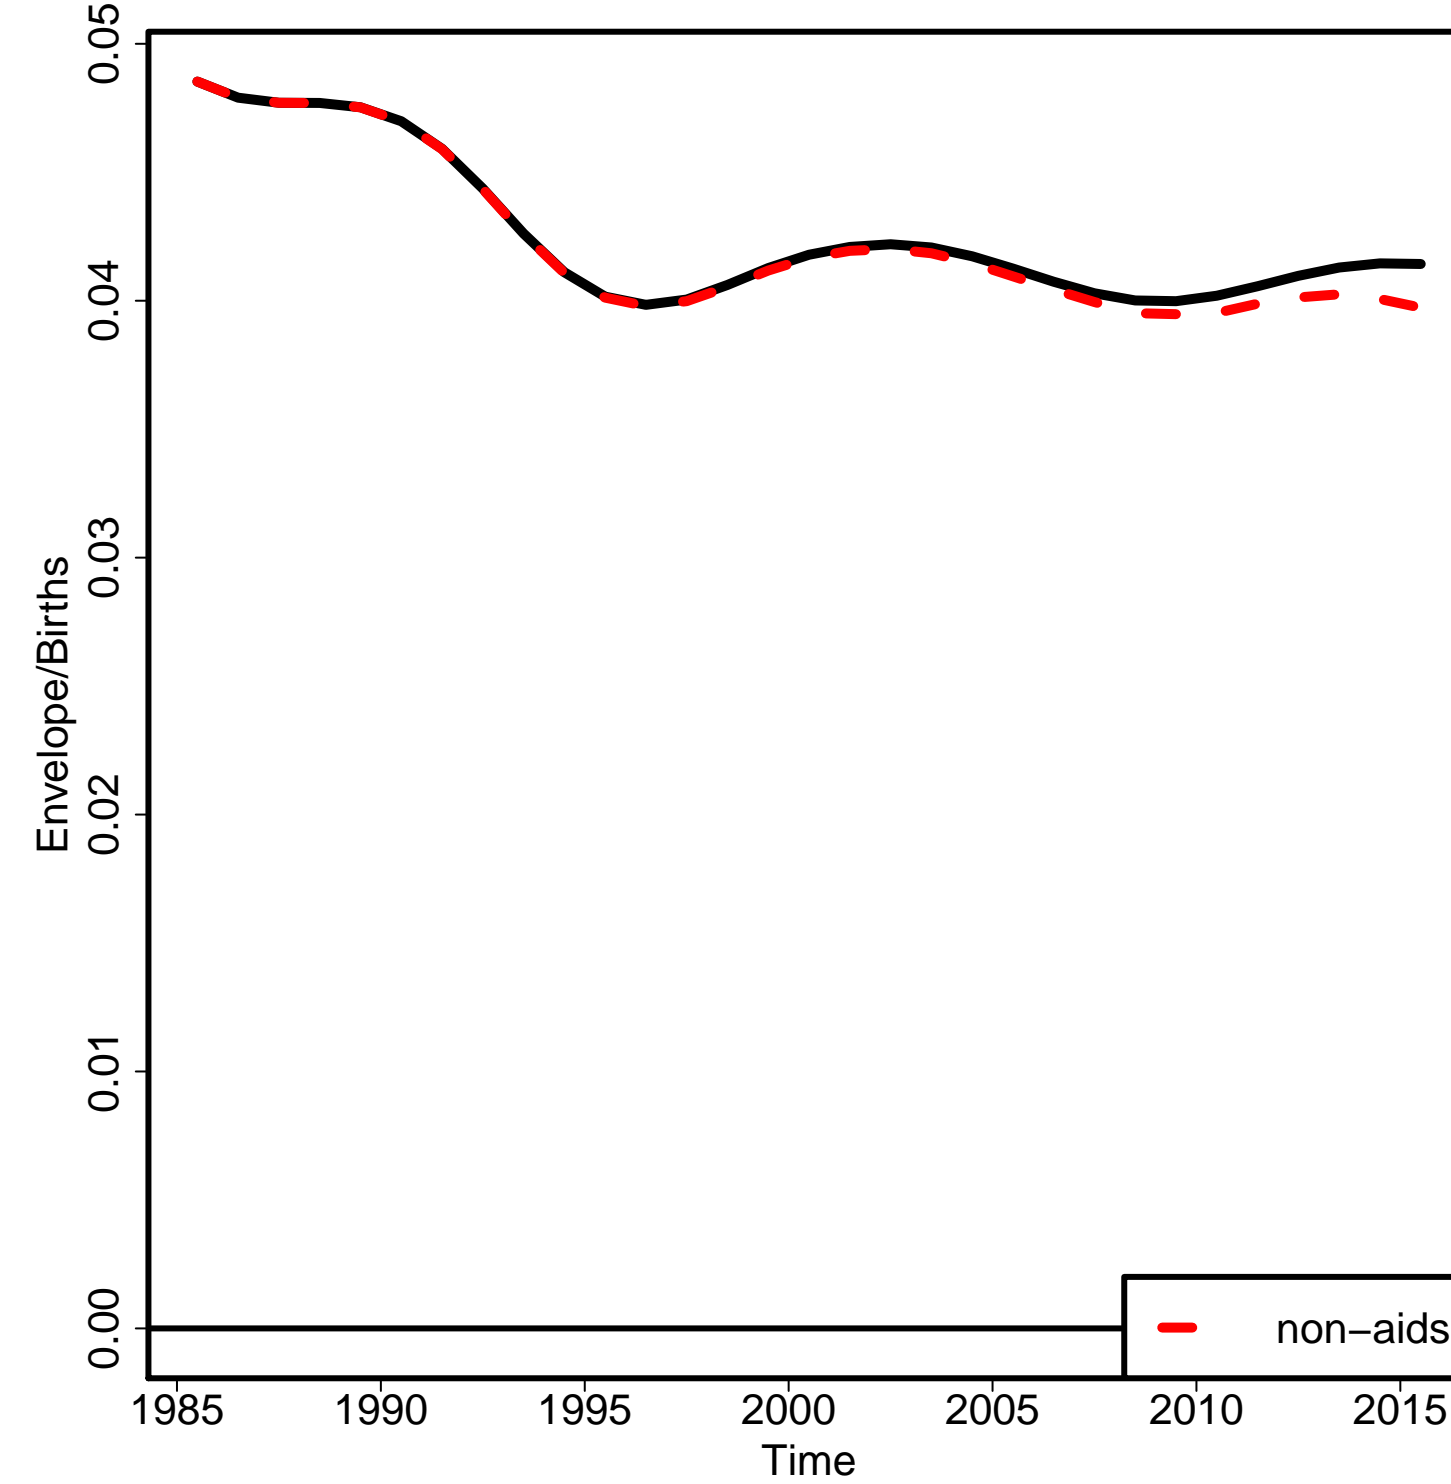

Non-aids MMR

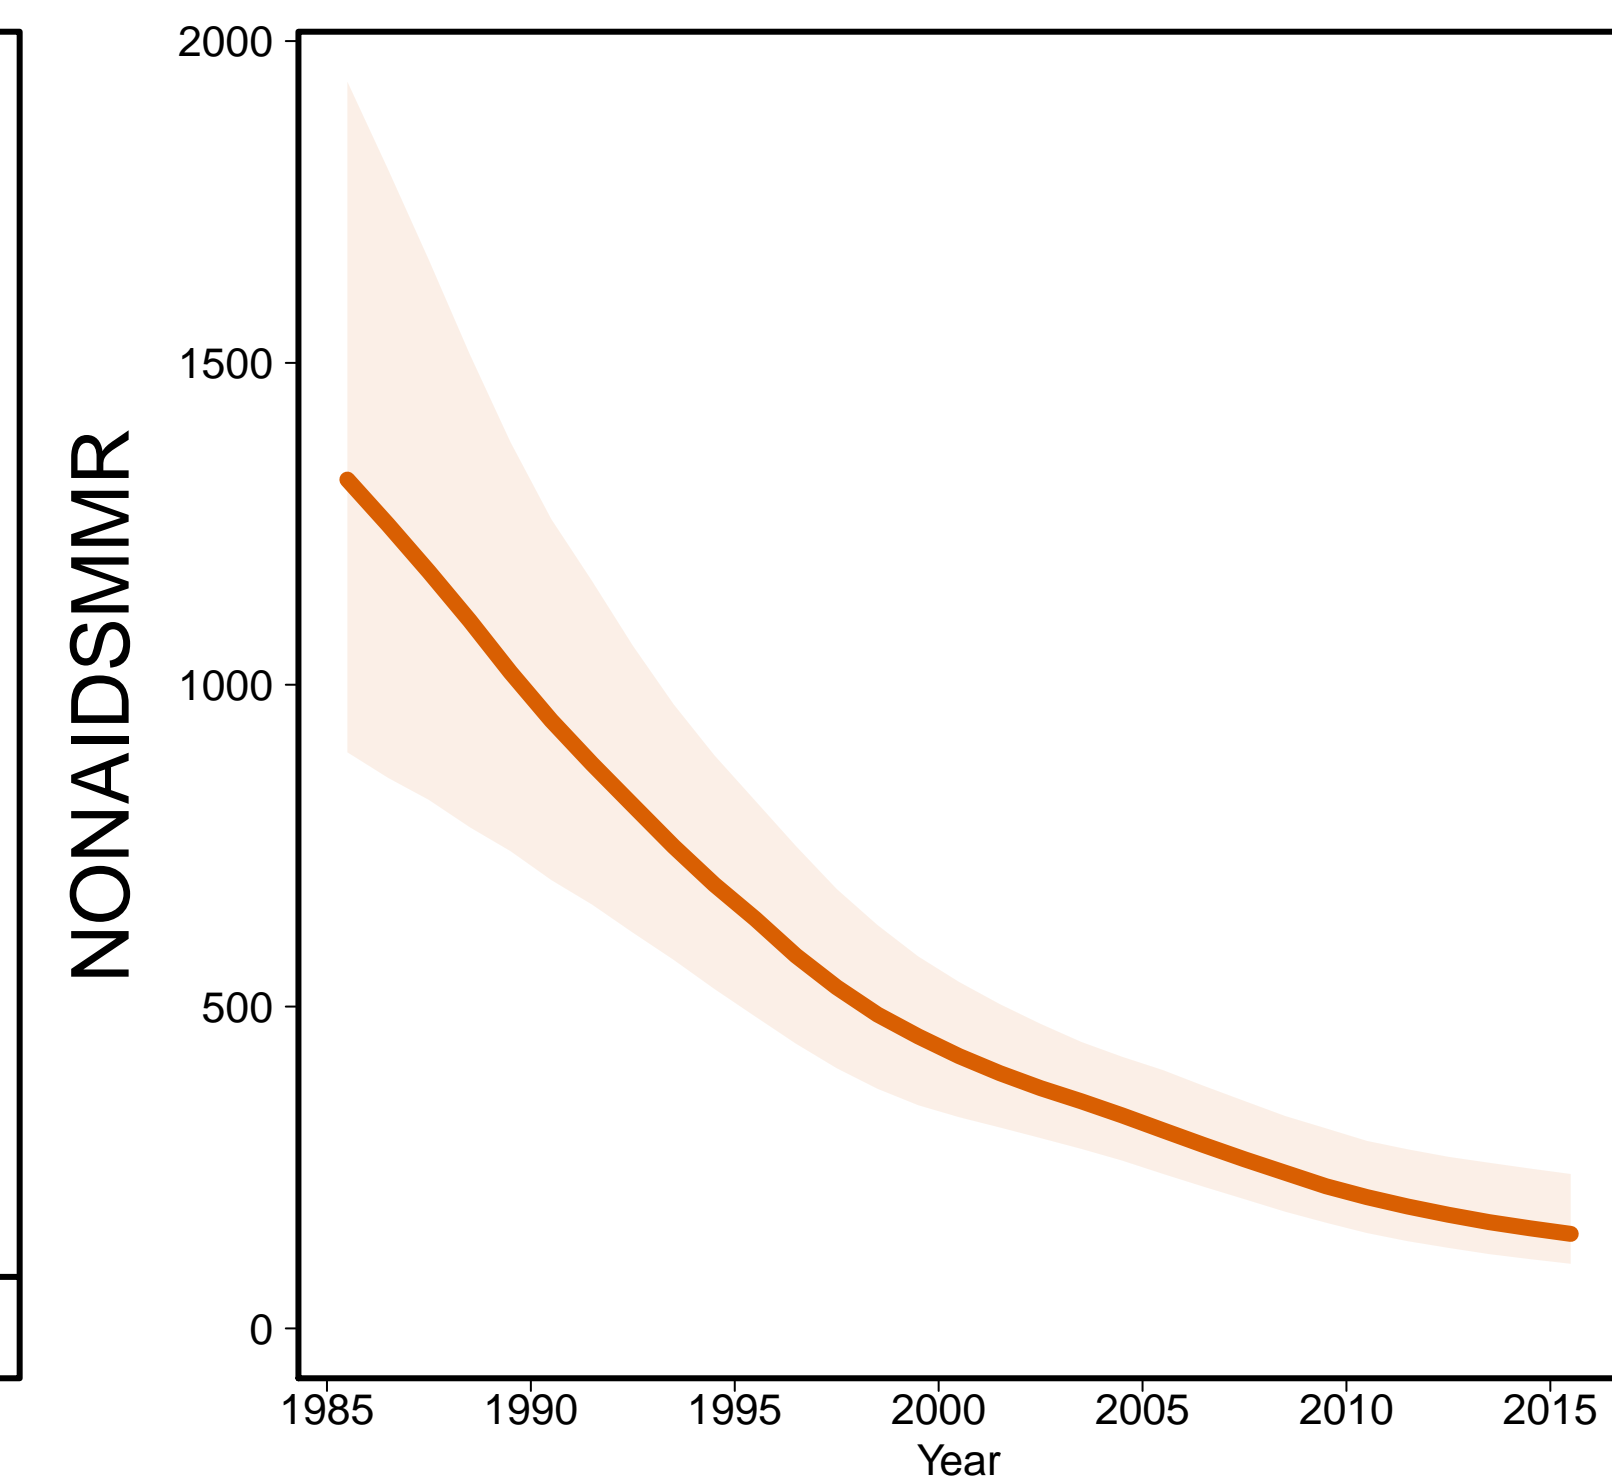

Aids MMR

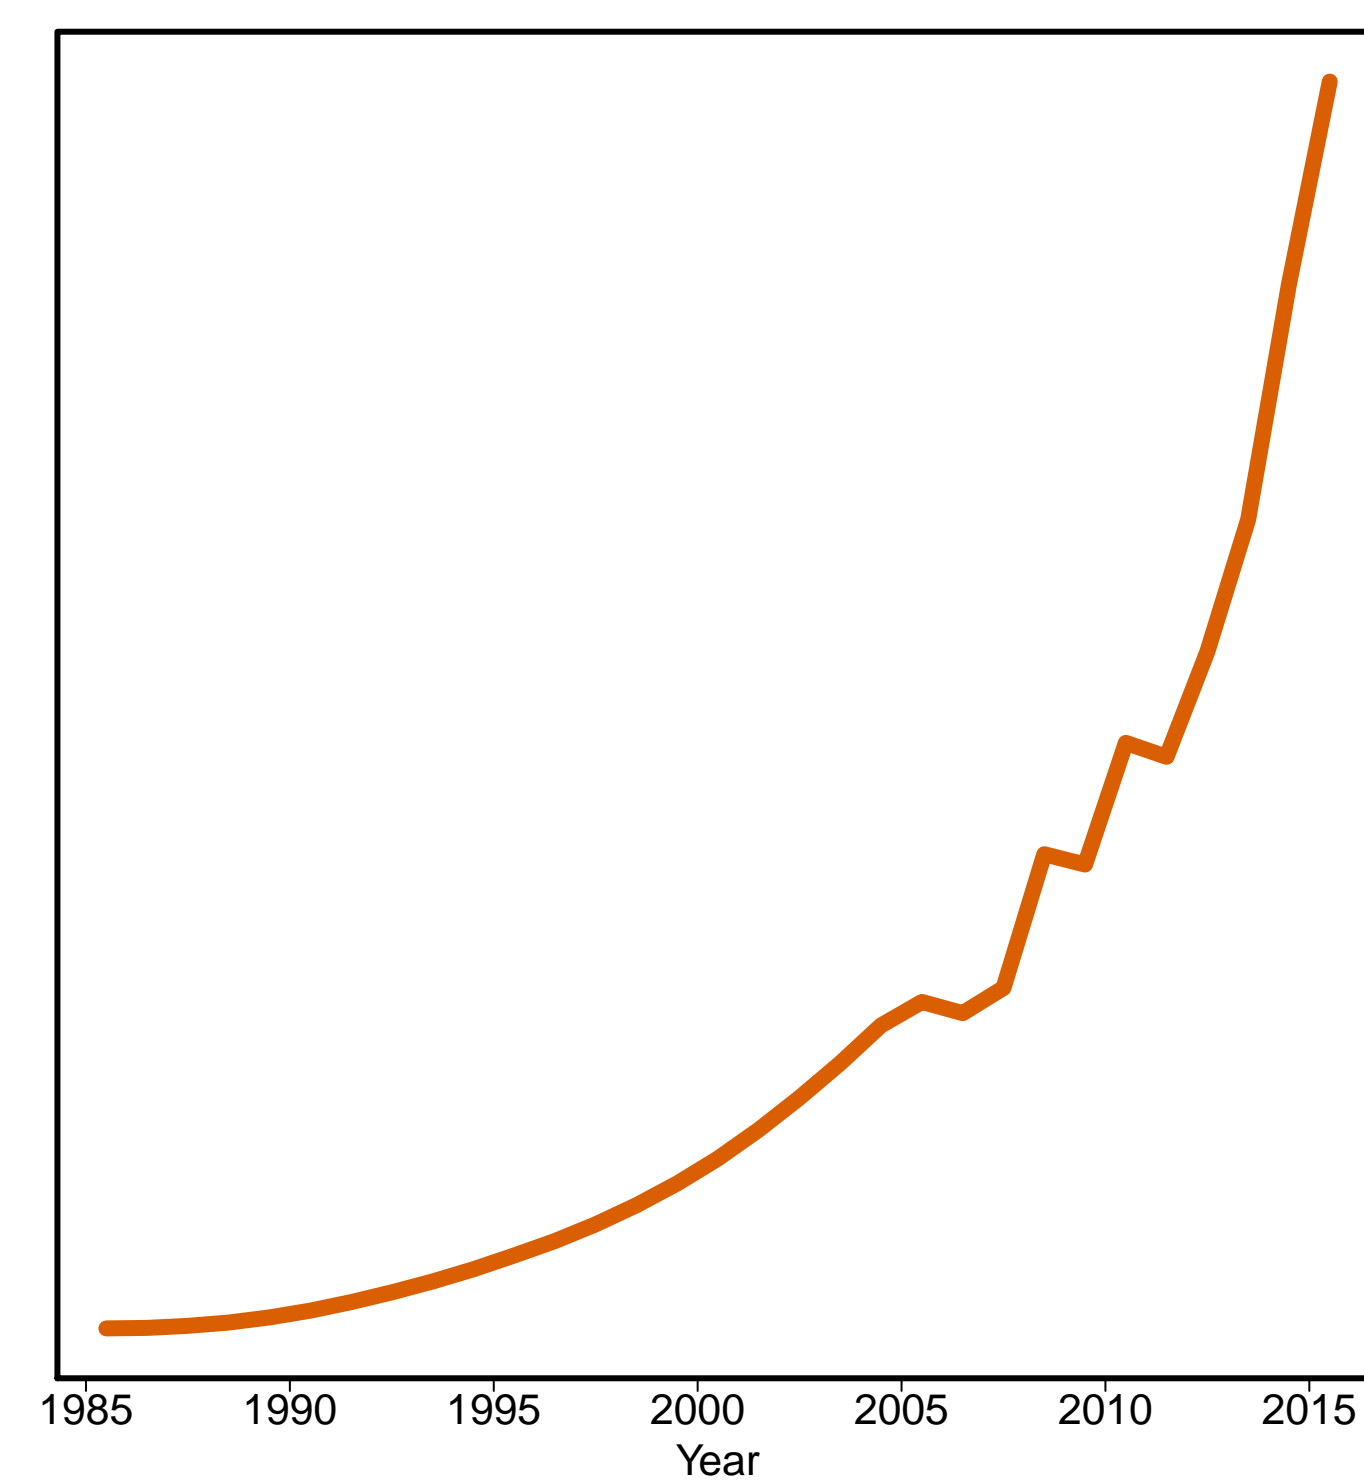

Bolivia [BOL]  
(South America)

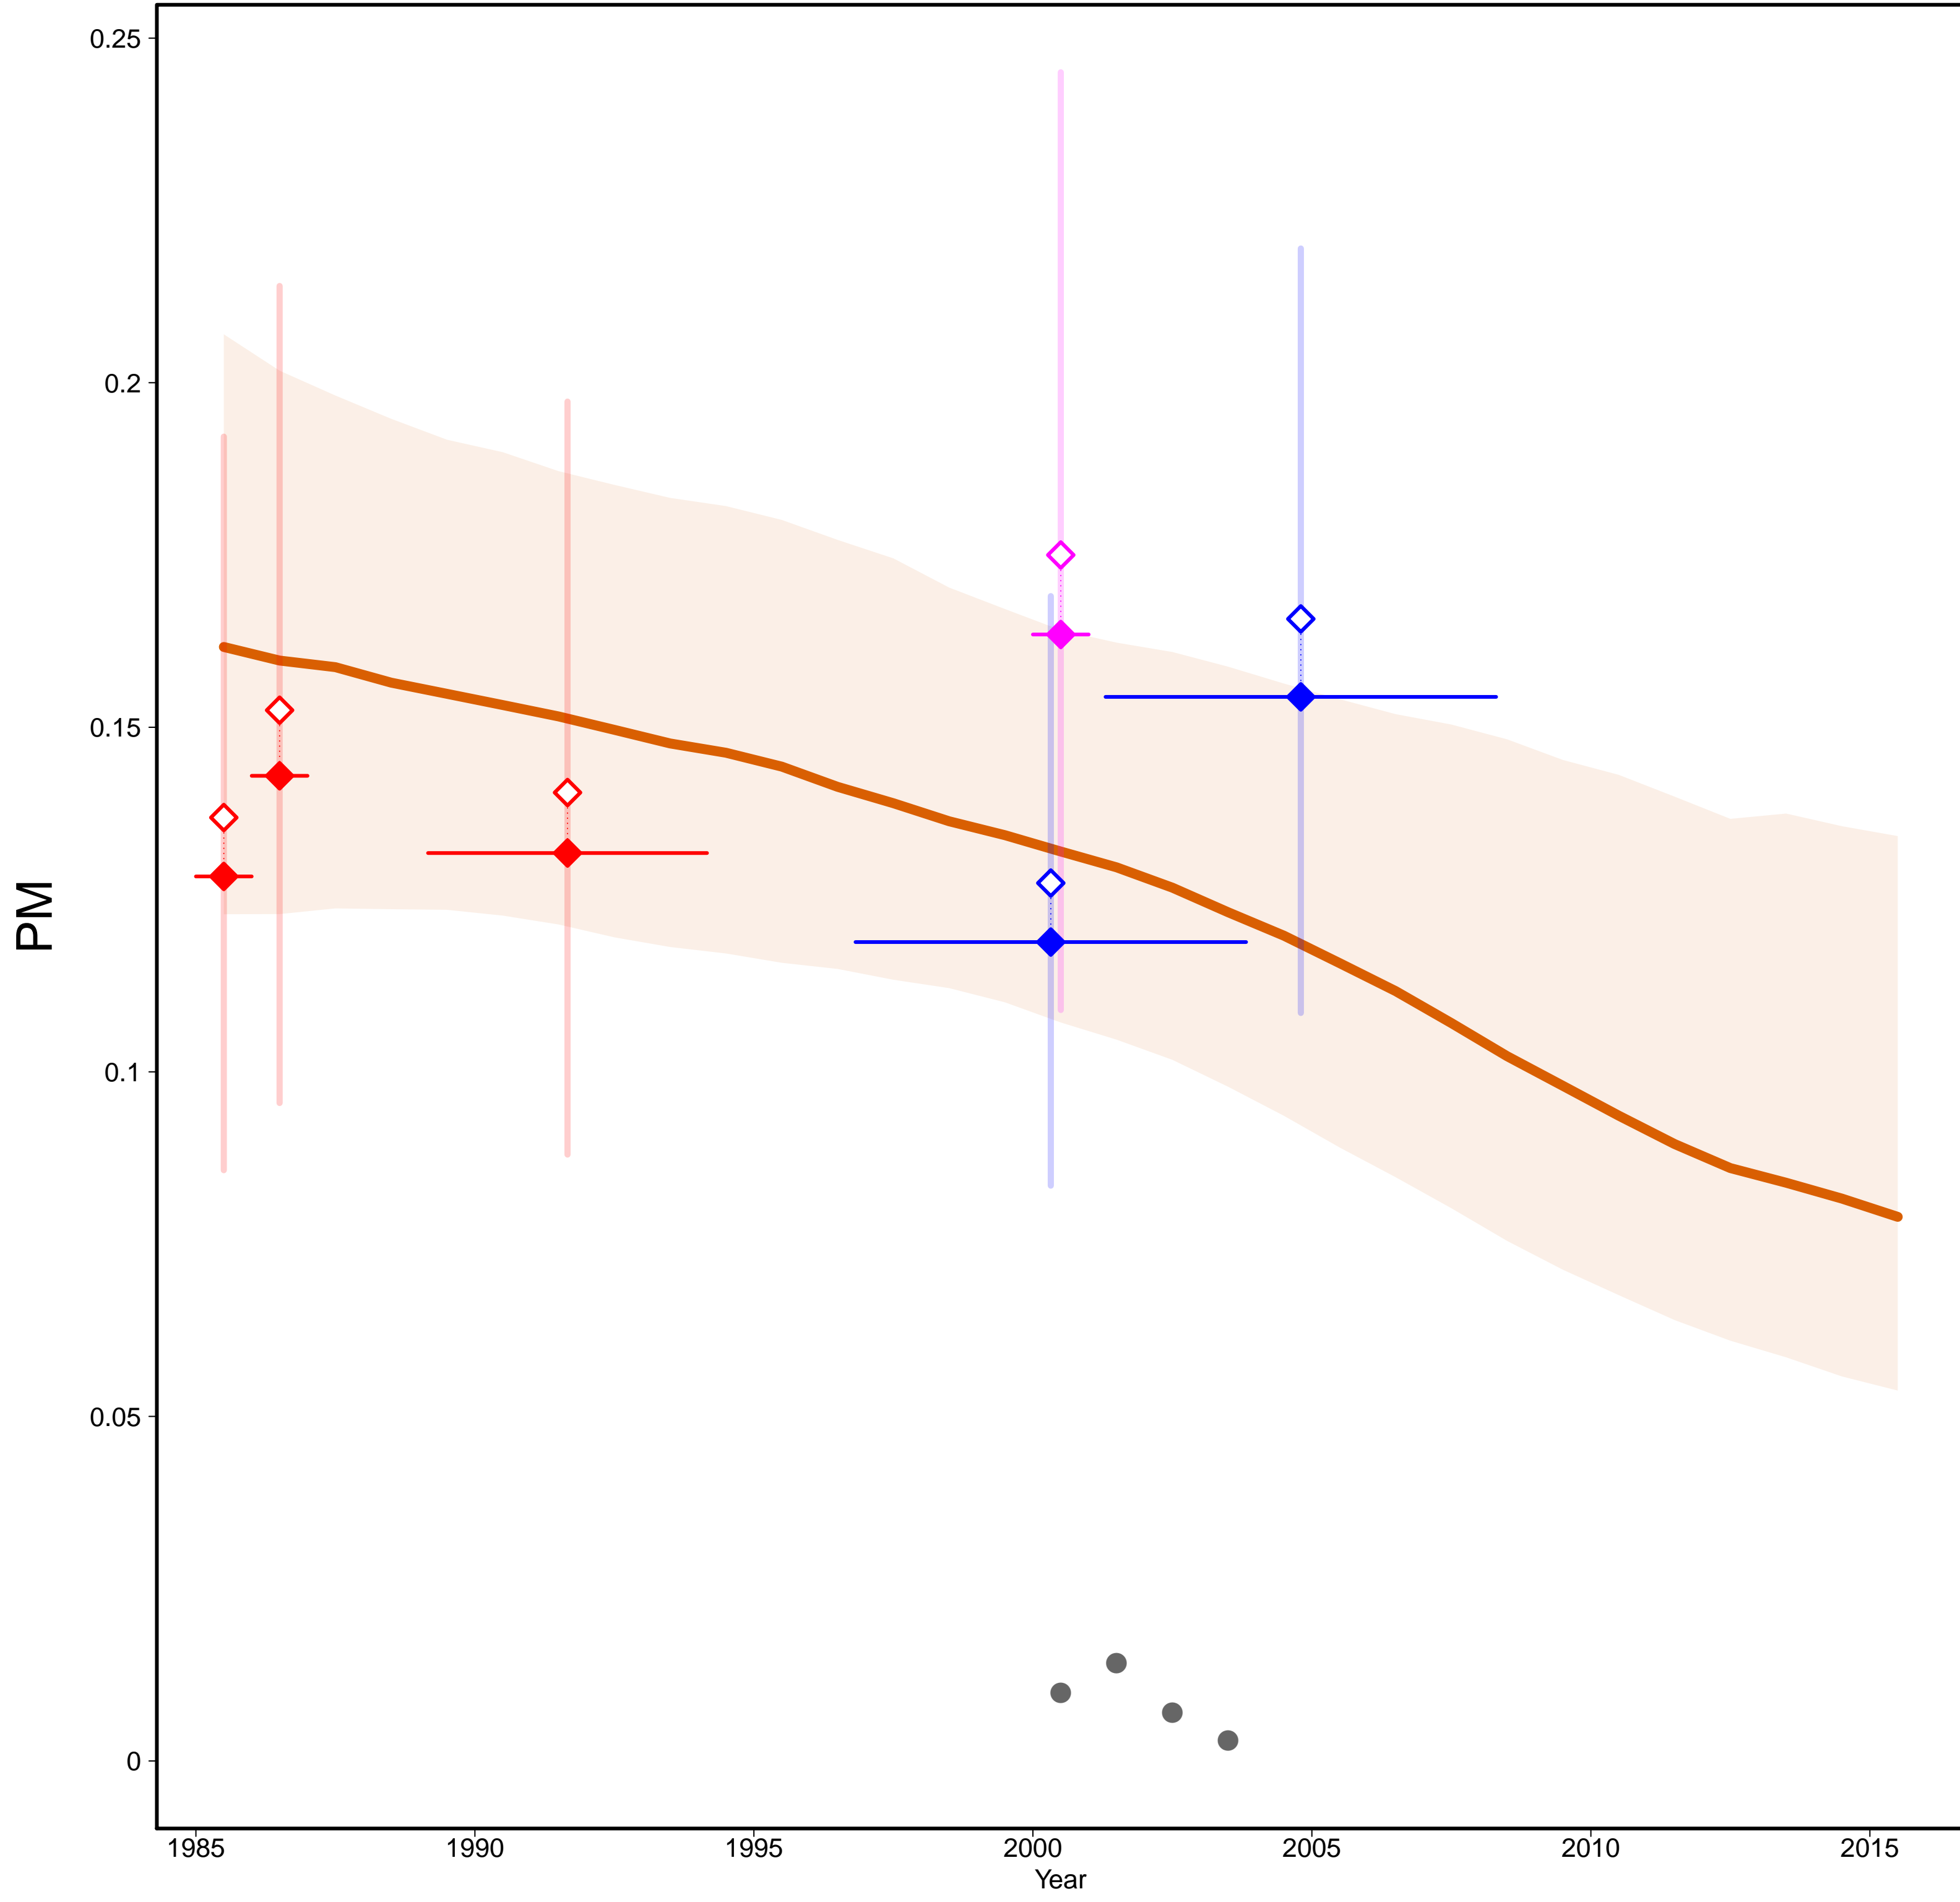

Bolivia [BOL]  
(South America)

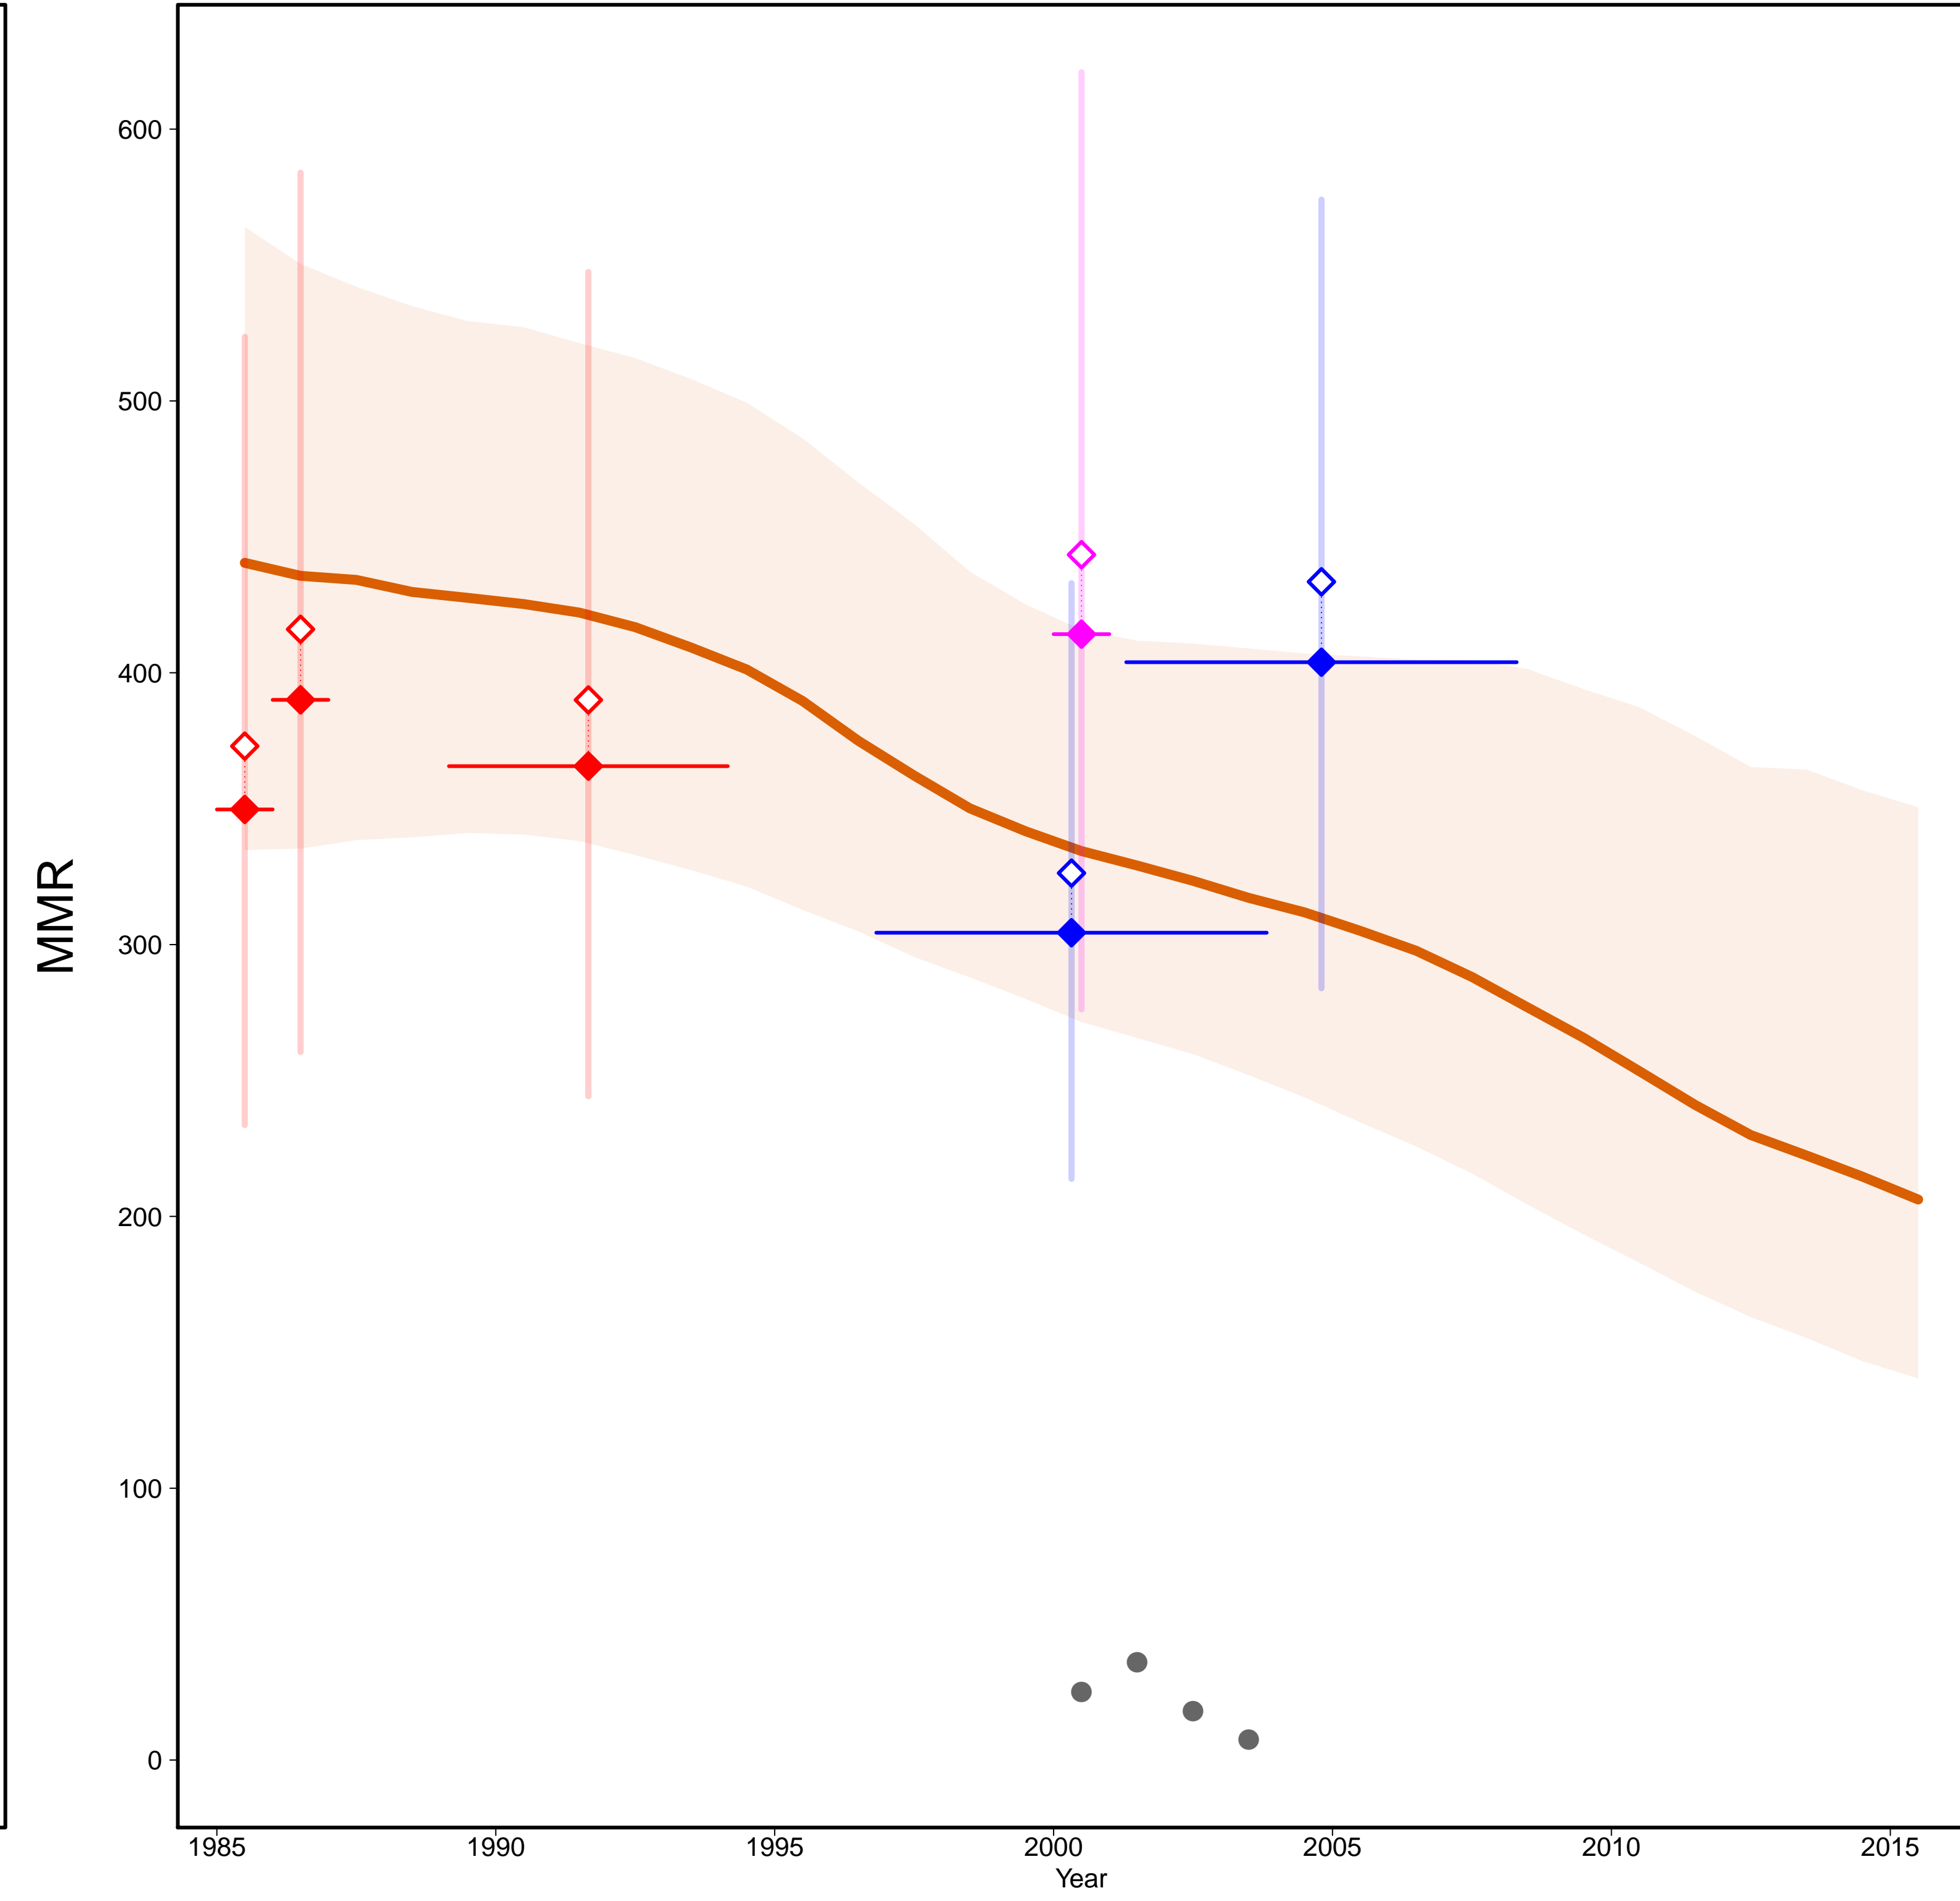

- Estimates —
- MMR Database 2015 —
- ◇ Observed Data
- ◆ Adjusted Data
- Data type —
- ◆ DHS
- ◆ Census
- ◆ Misc. studies
- Excluded VR data  
(data quality issues)

Gross Domestic Product

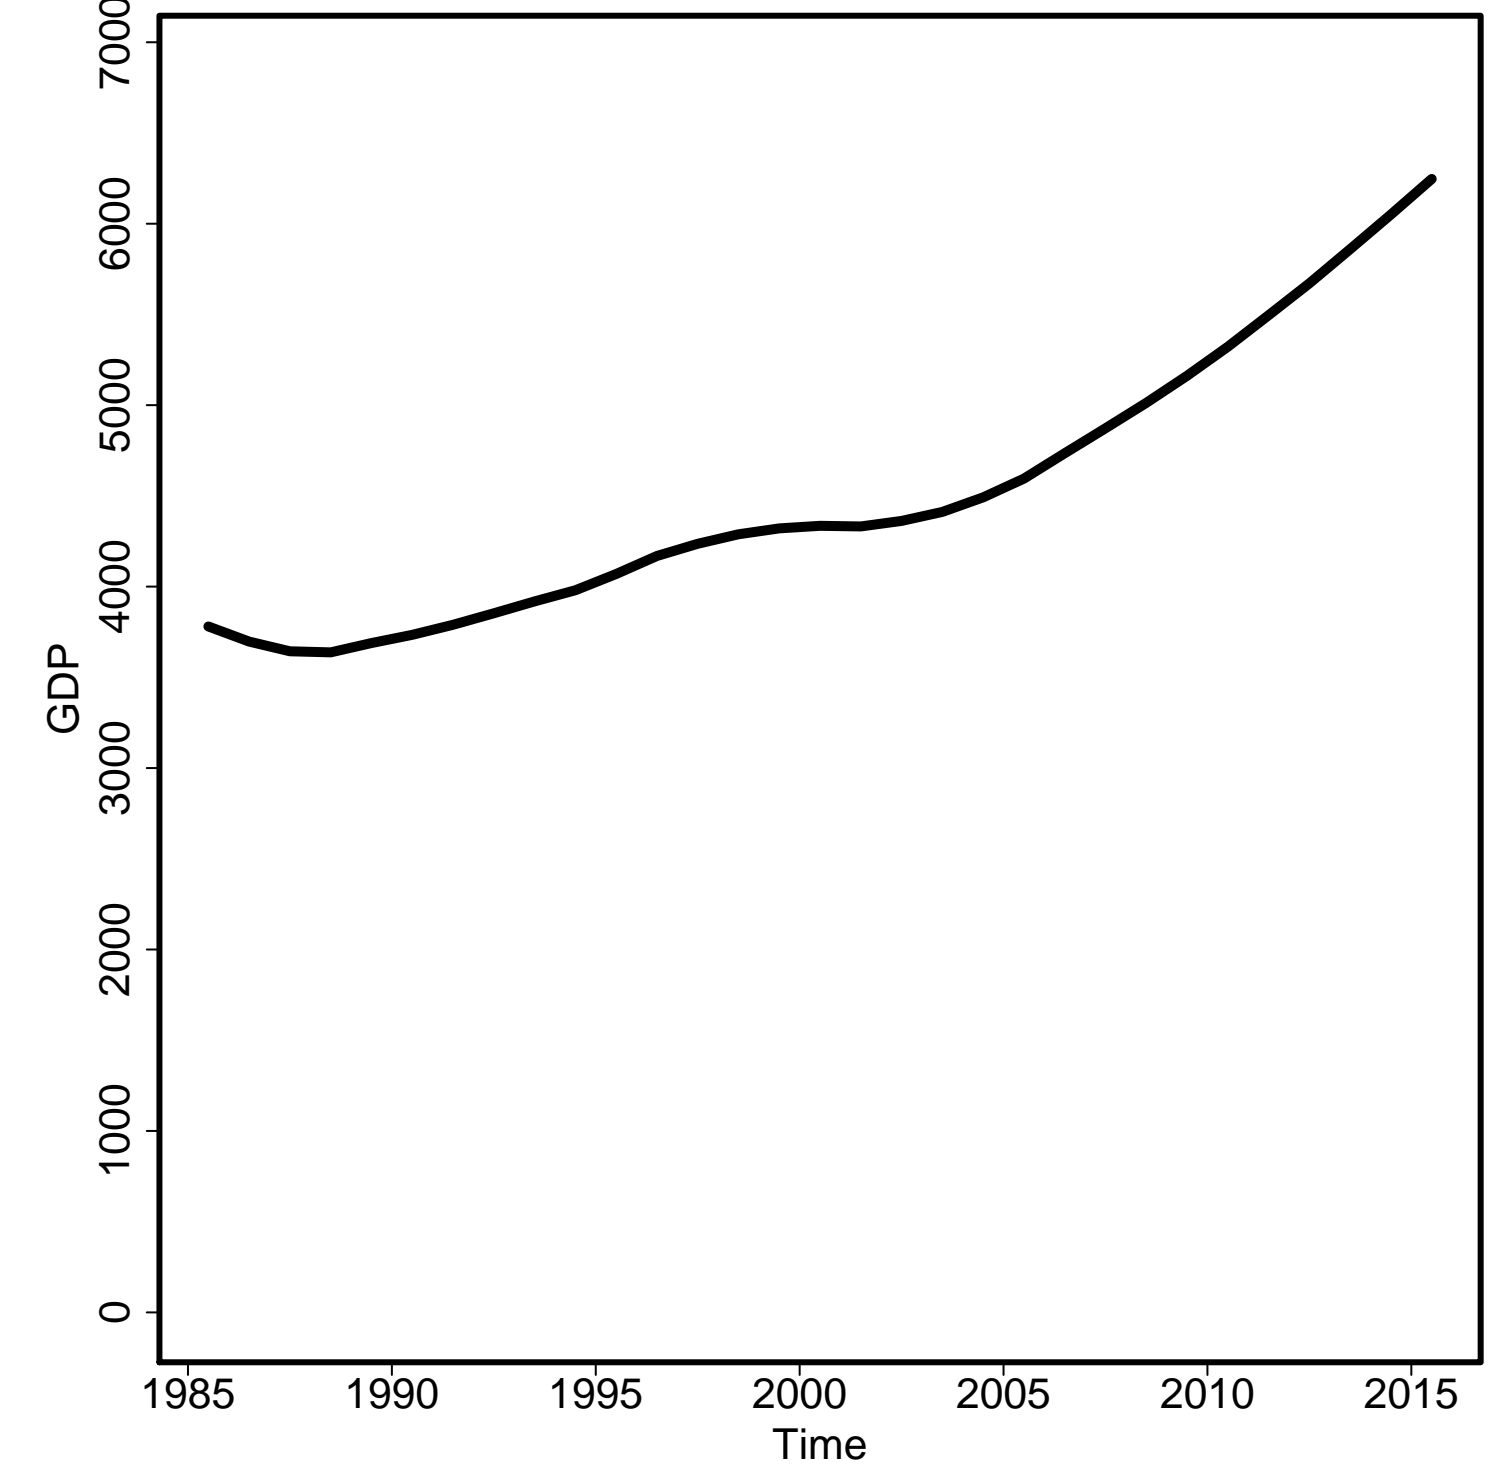

General Fertility Rate

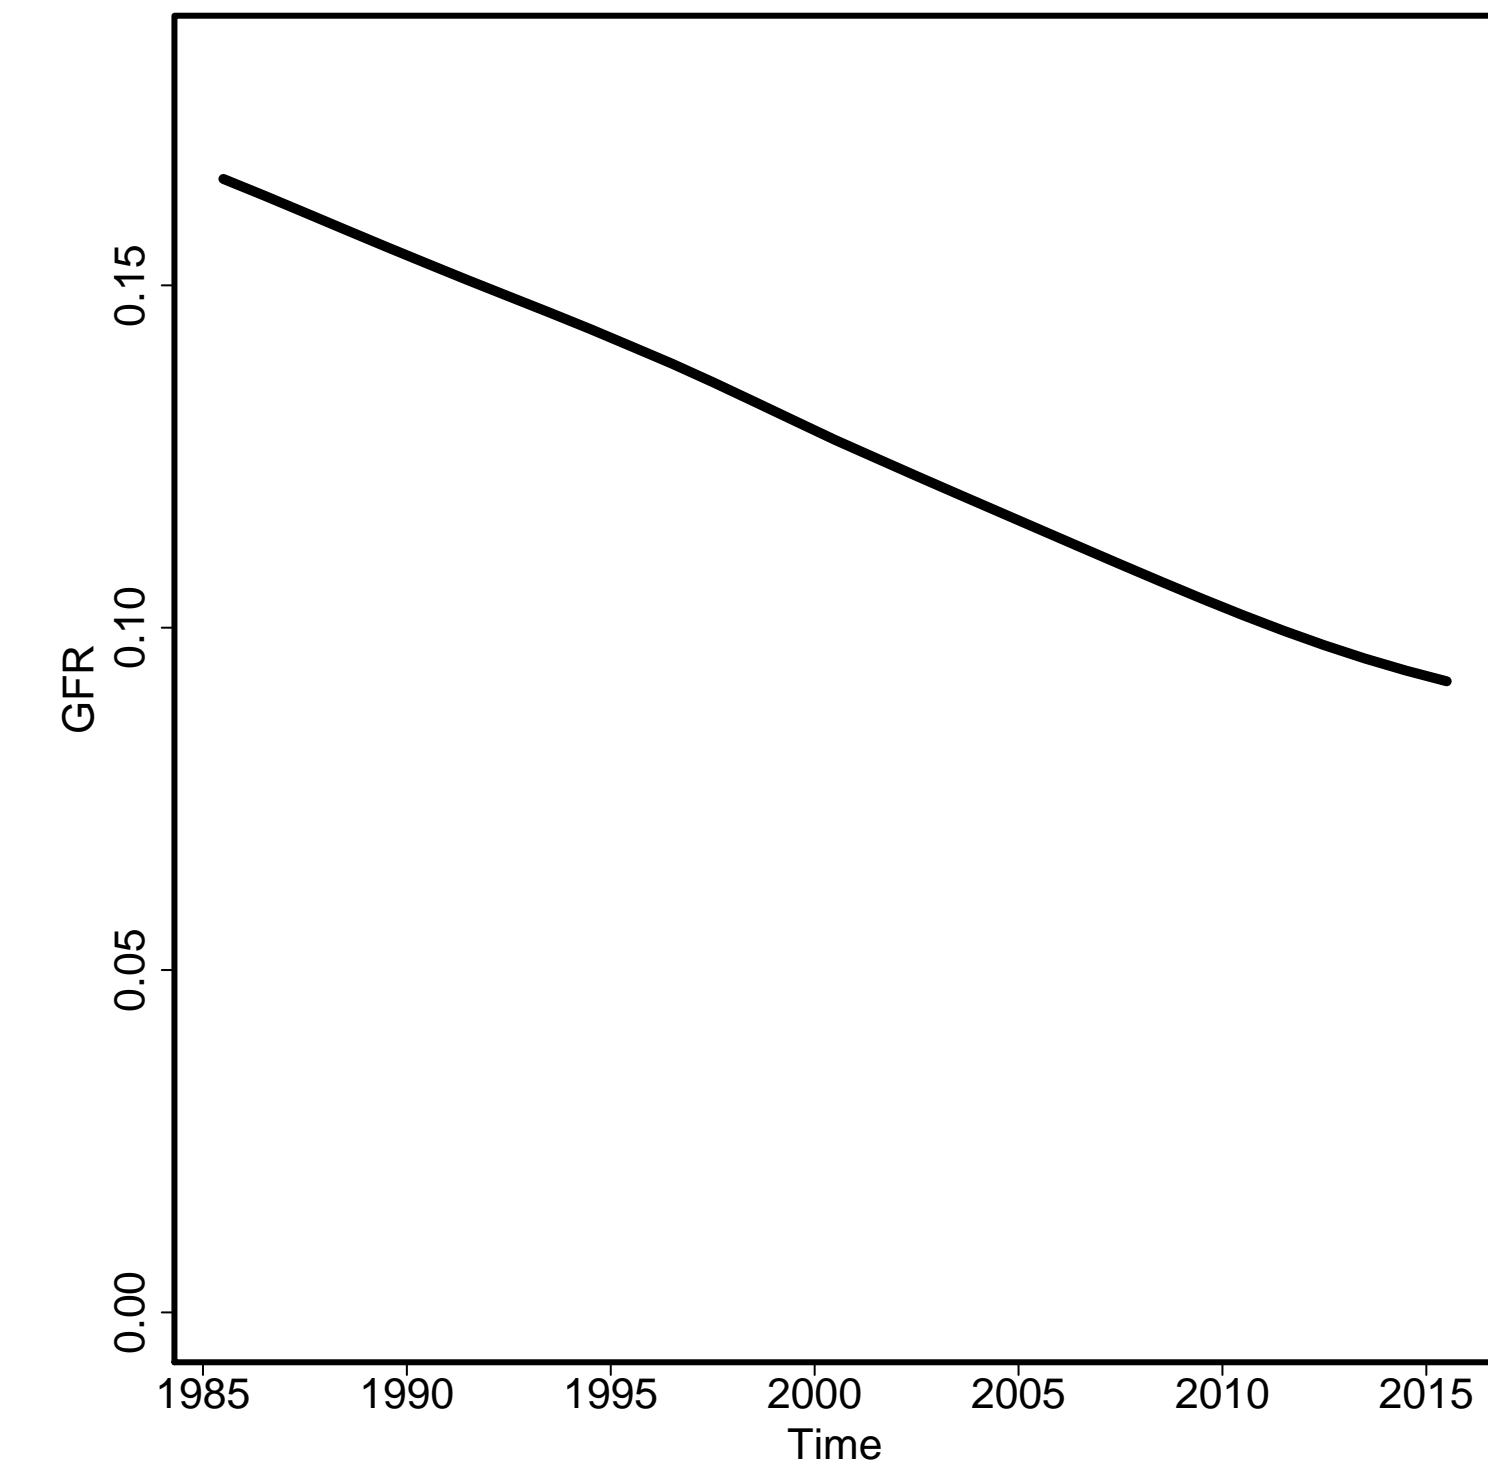

Skilled Attendance to Birth

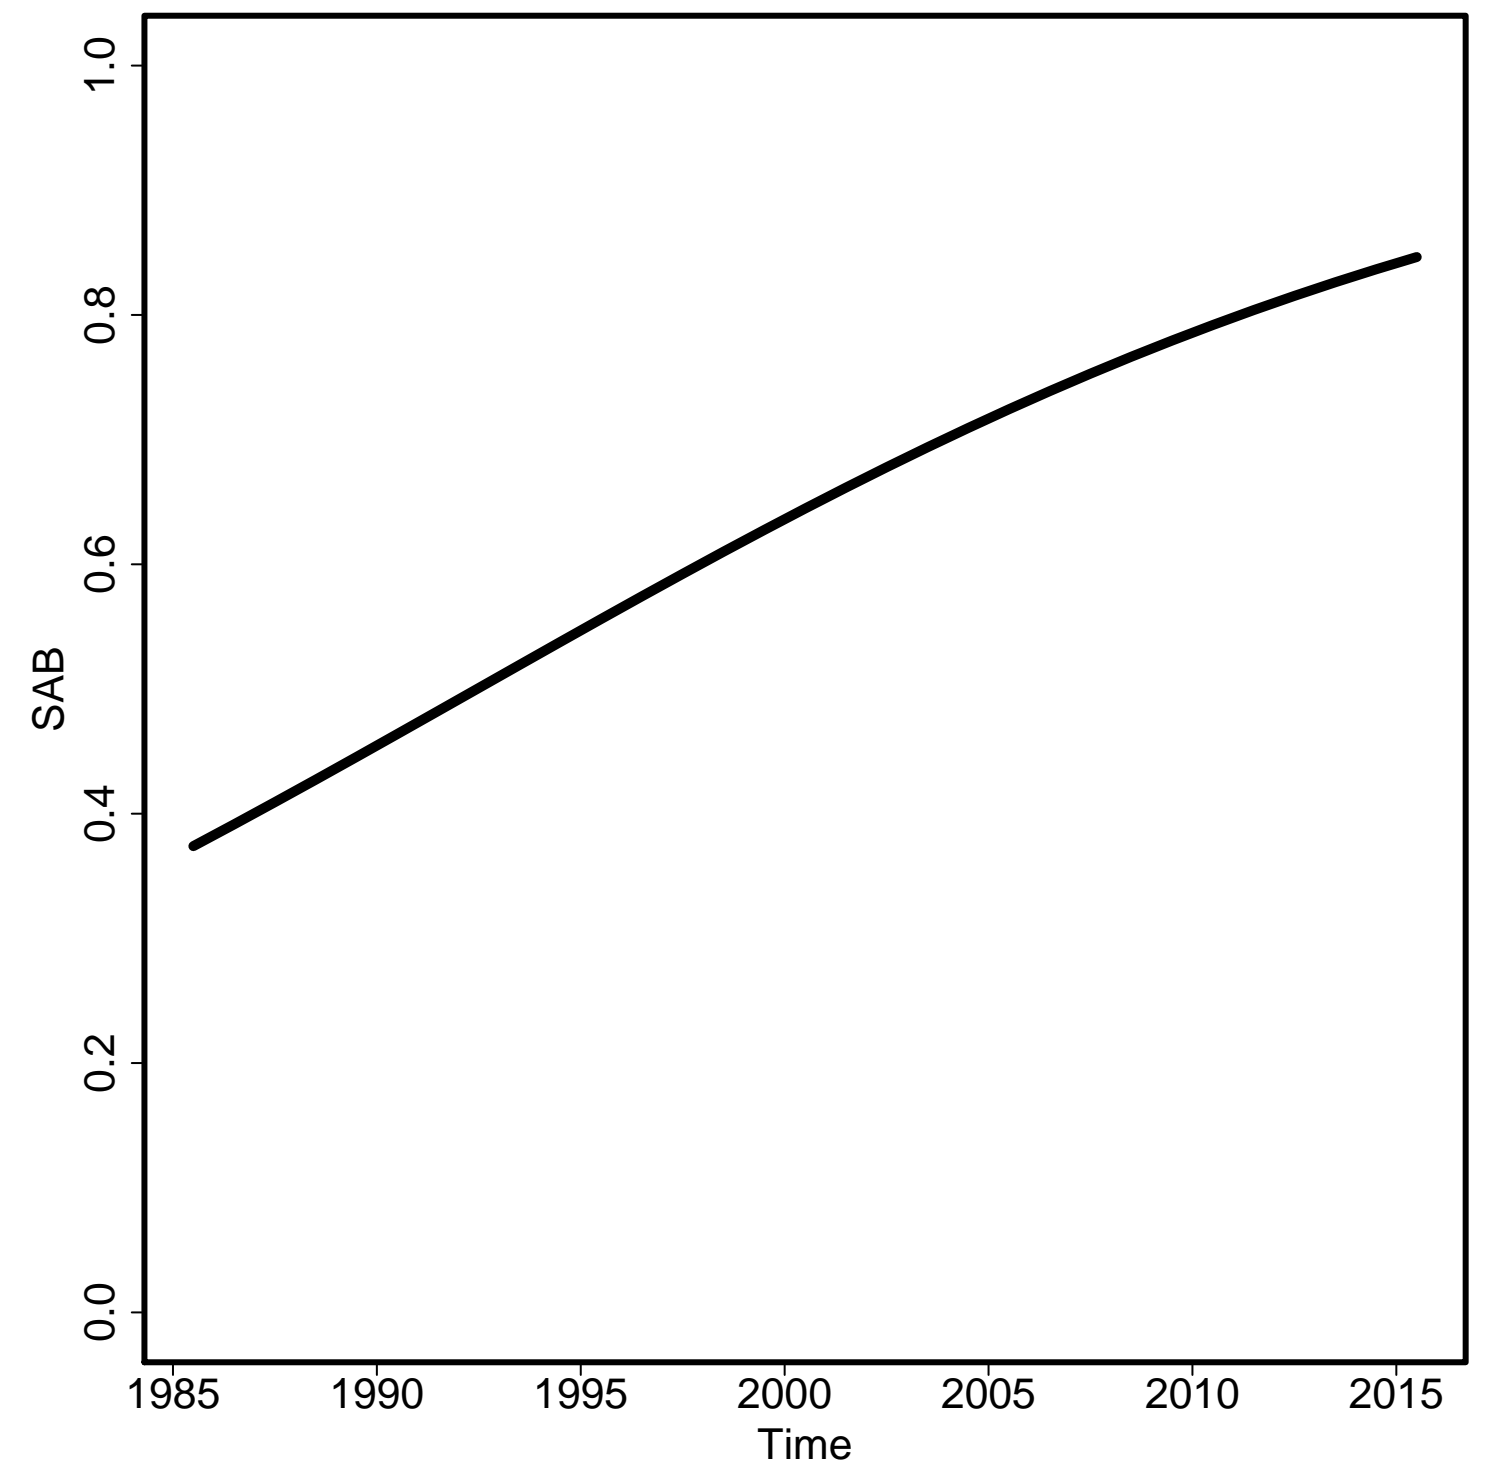

Envelope/Births

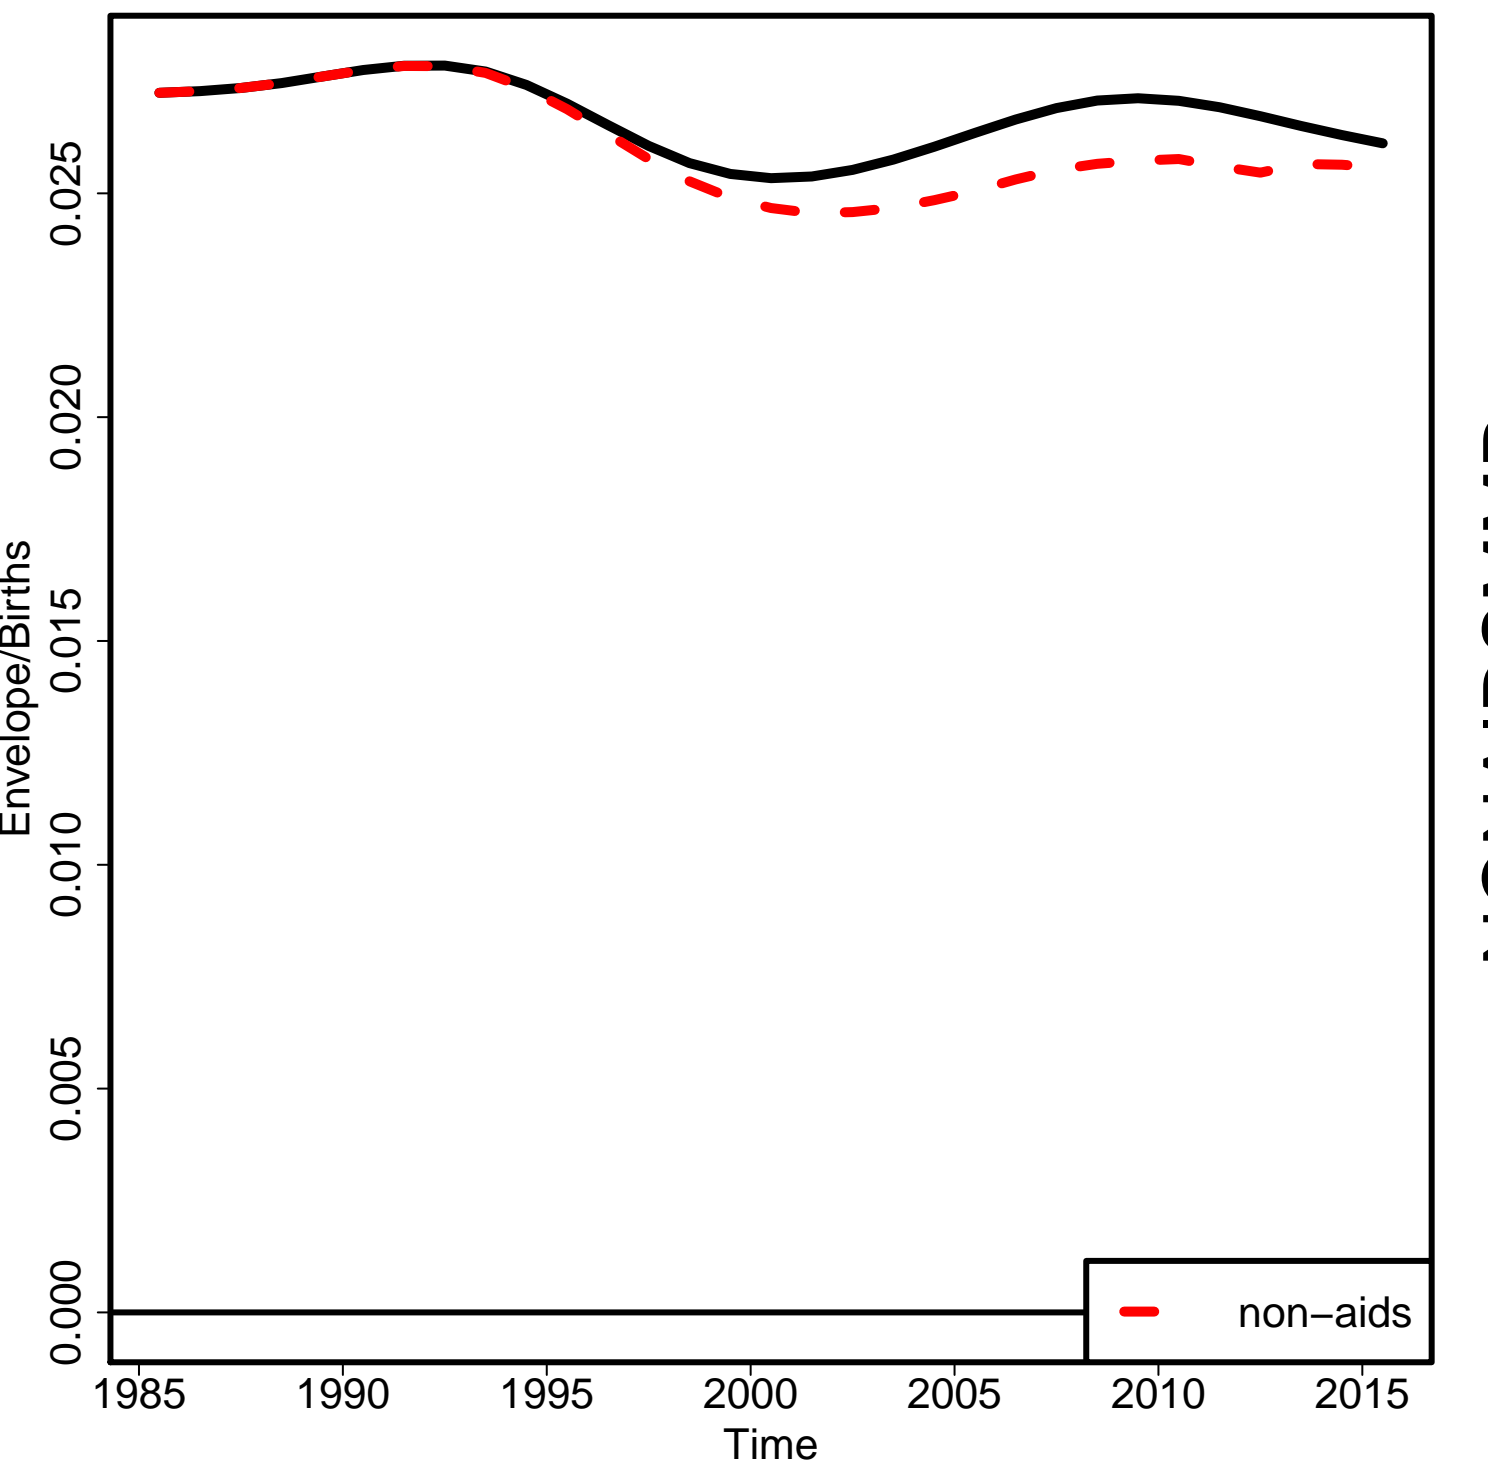

Non-aids MMR

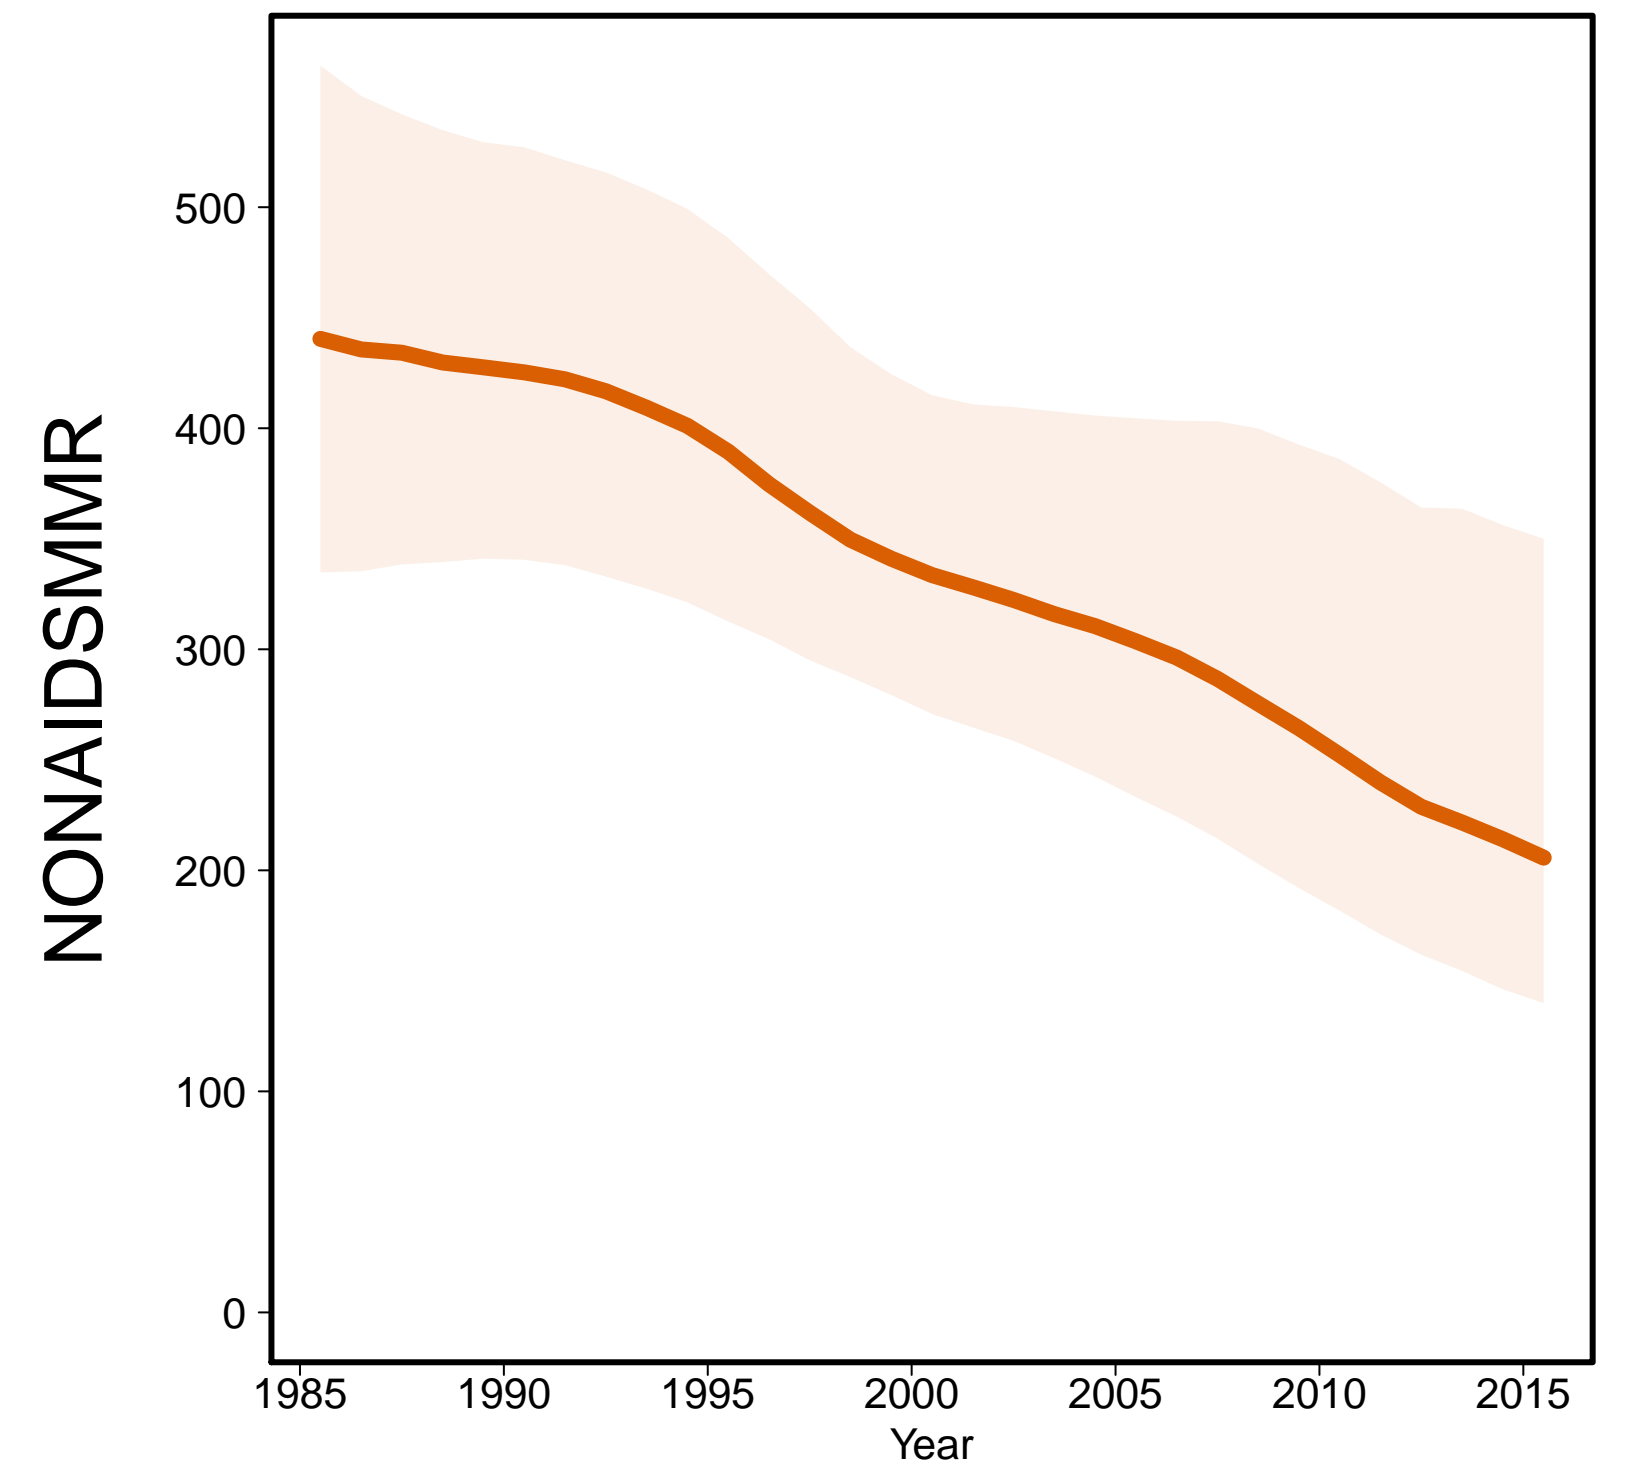

Aids MMR

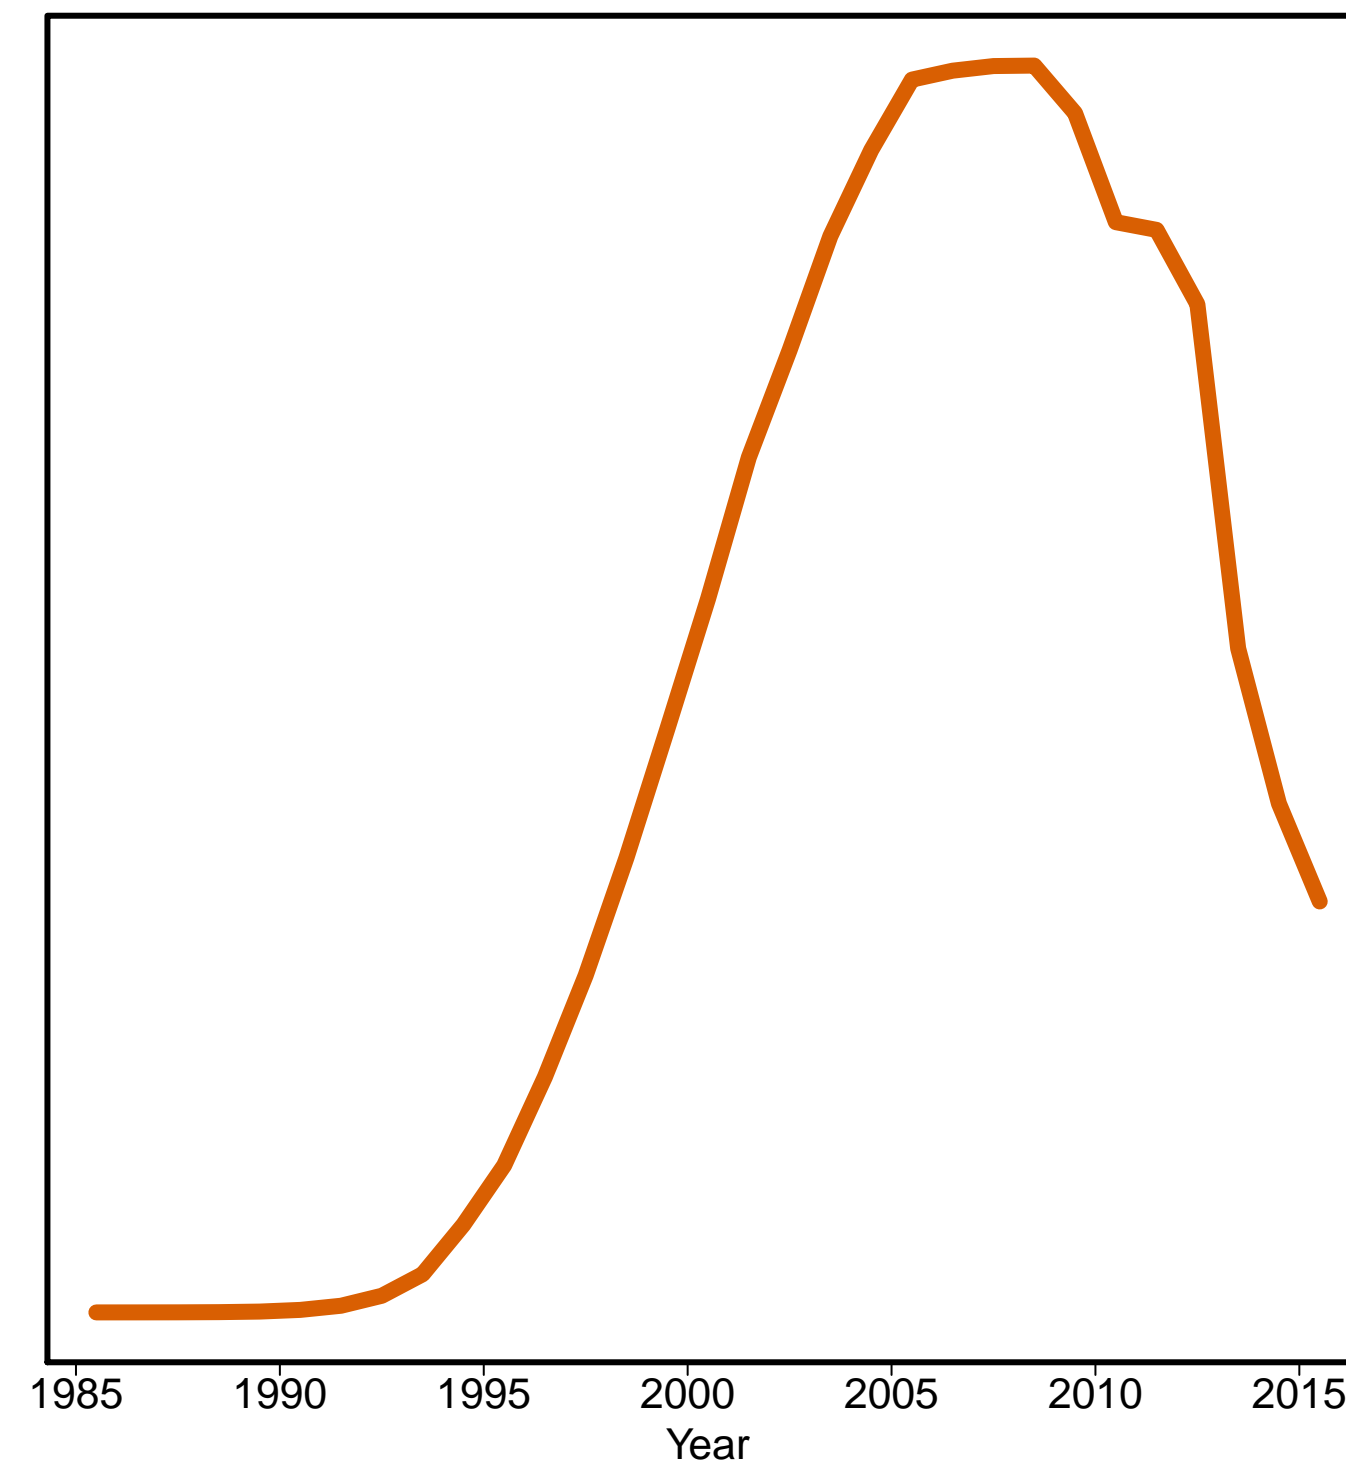

Bosnia and Herzegovina [BIH]  
(Transition countries of South-Eastern Europe)

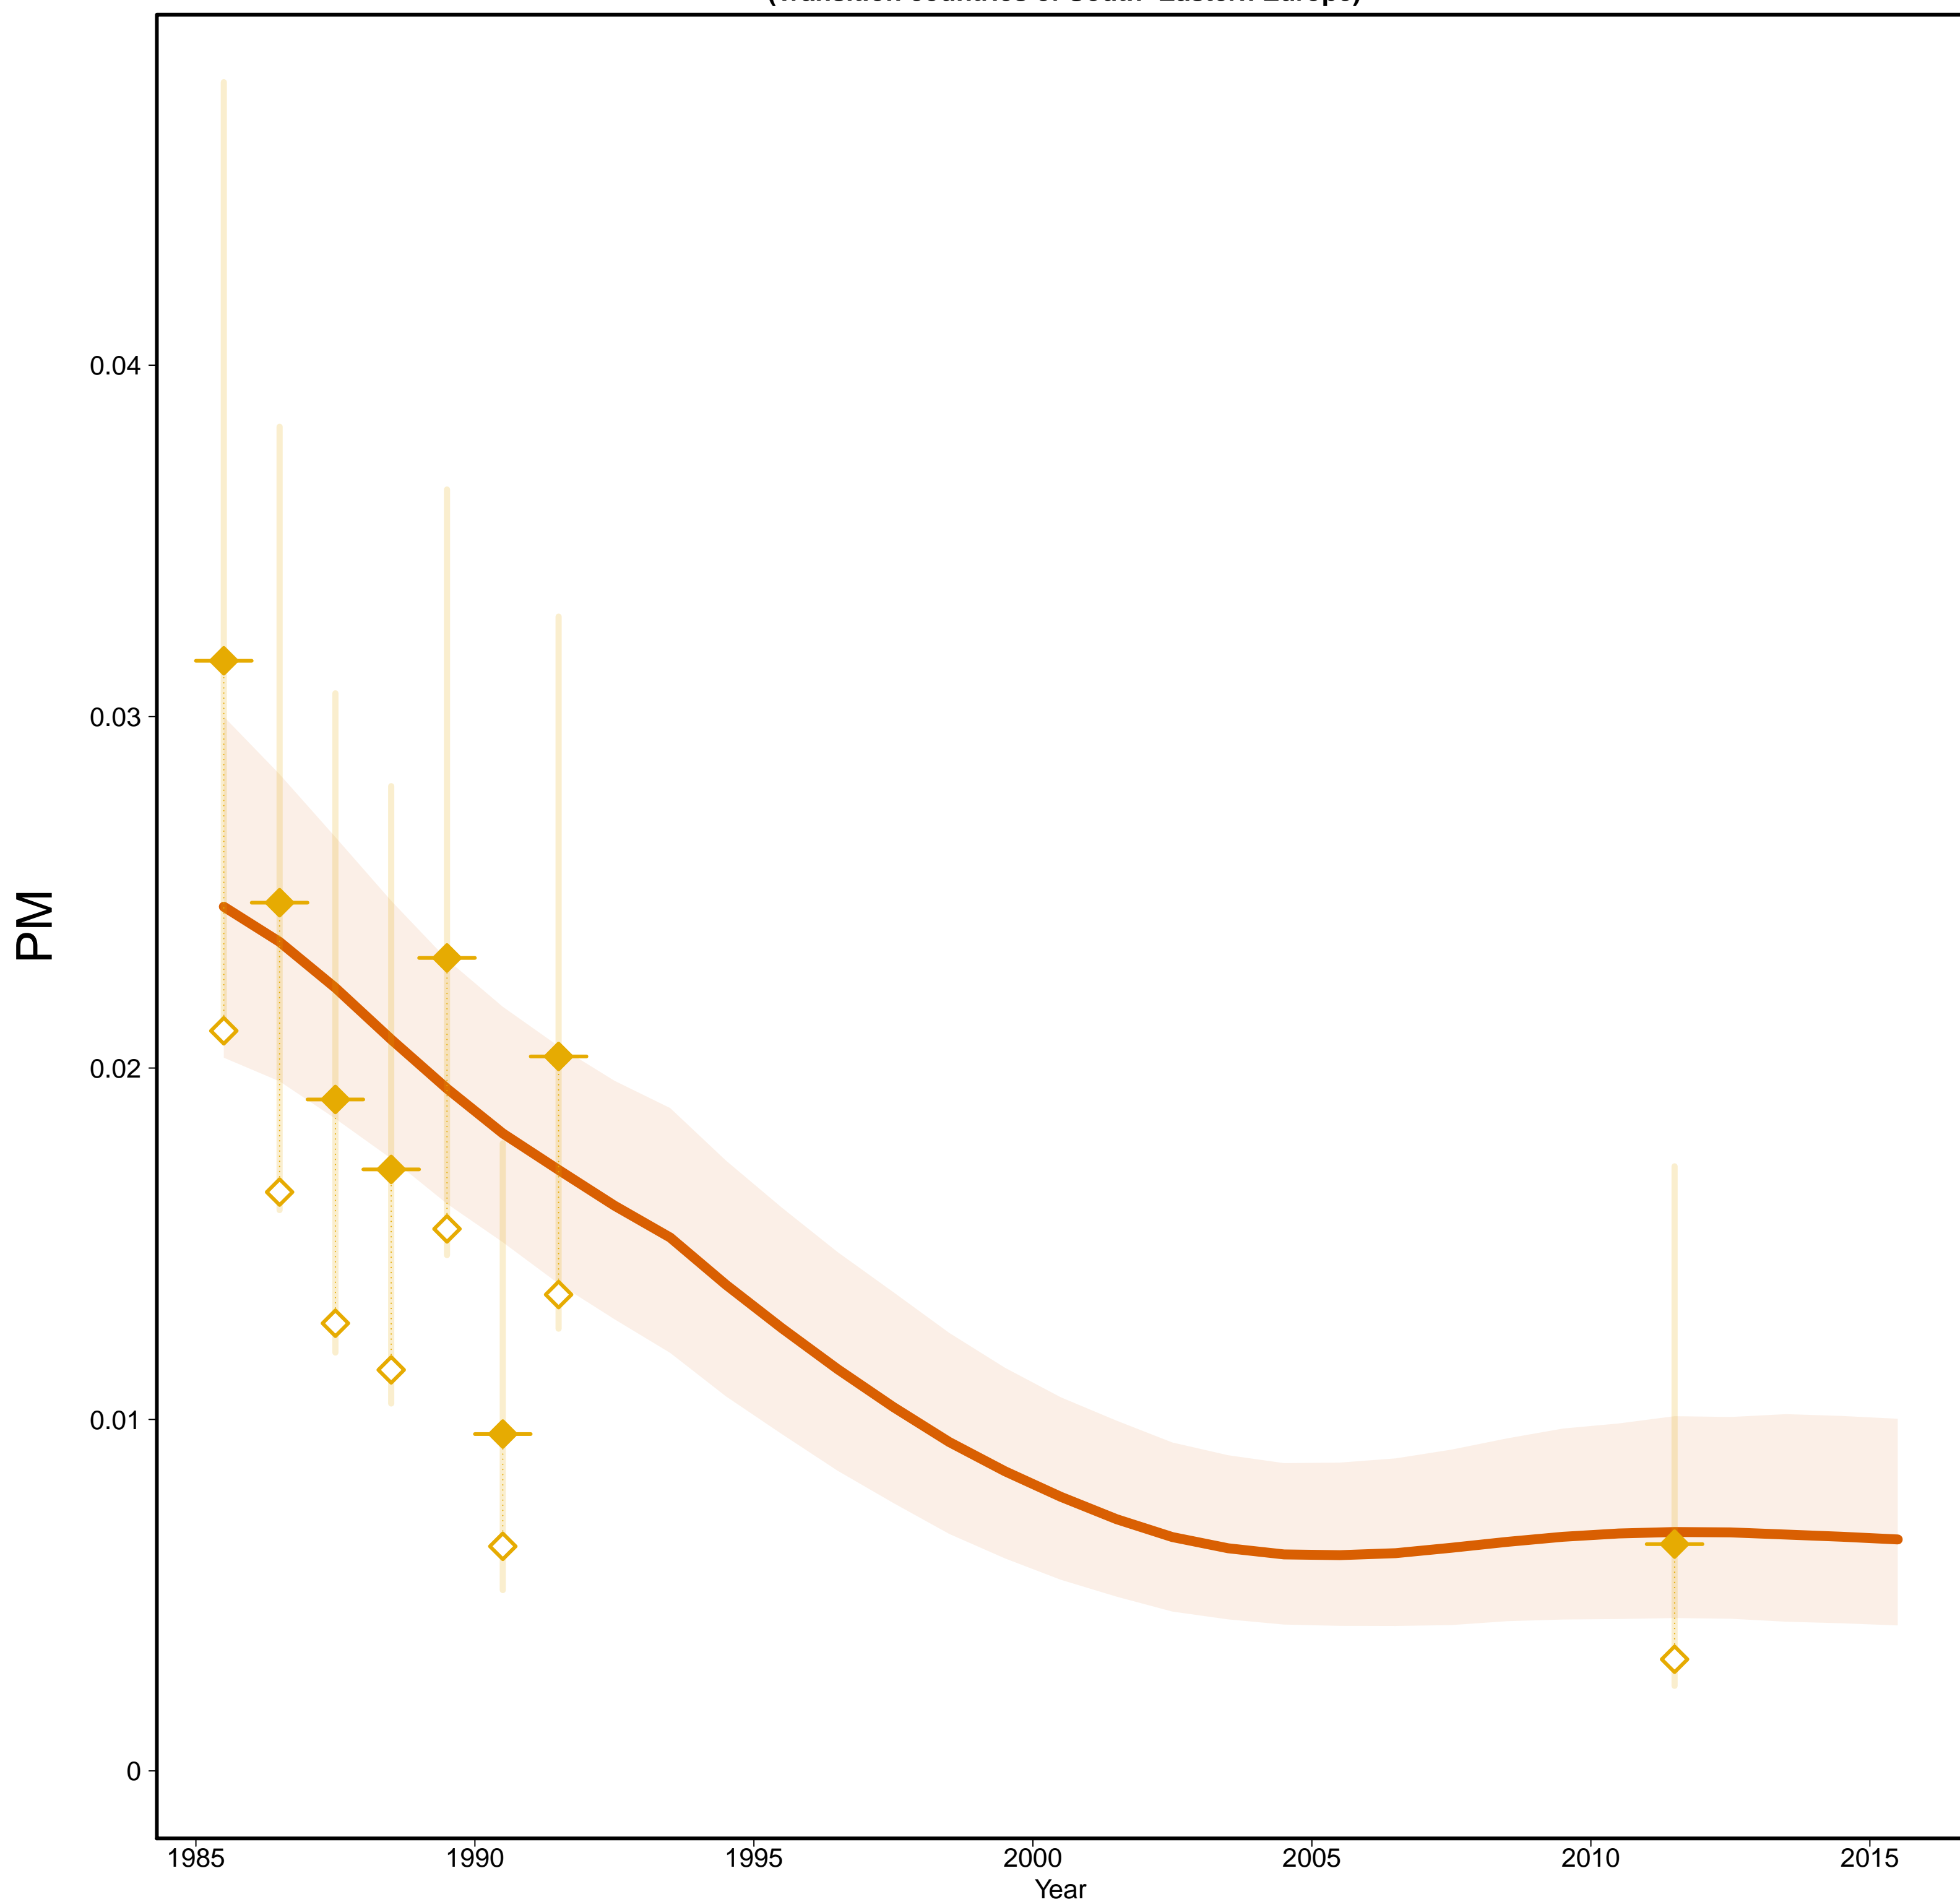

Bosnia and Herzegovina [BIH]  
(Transition countries of South-Eastern Europe)

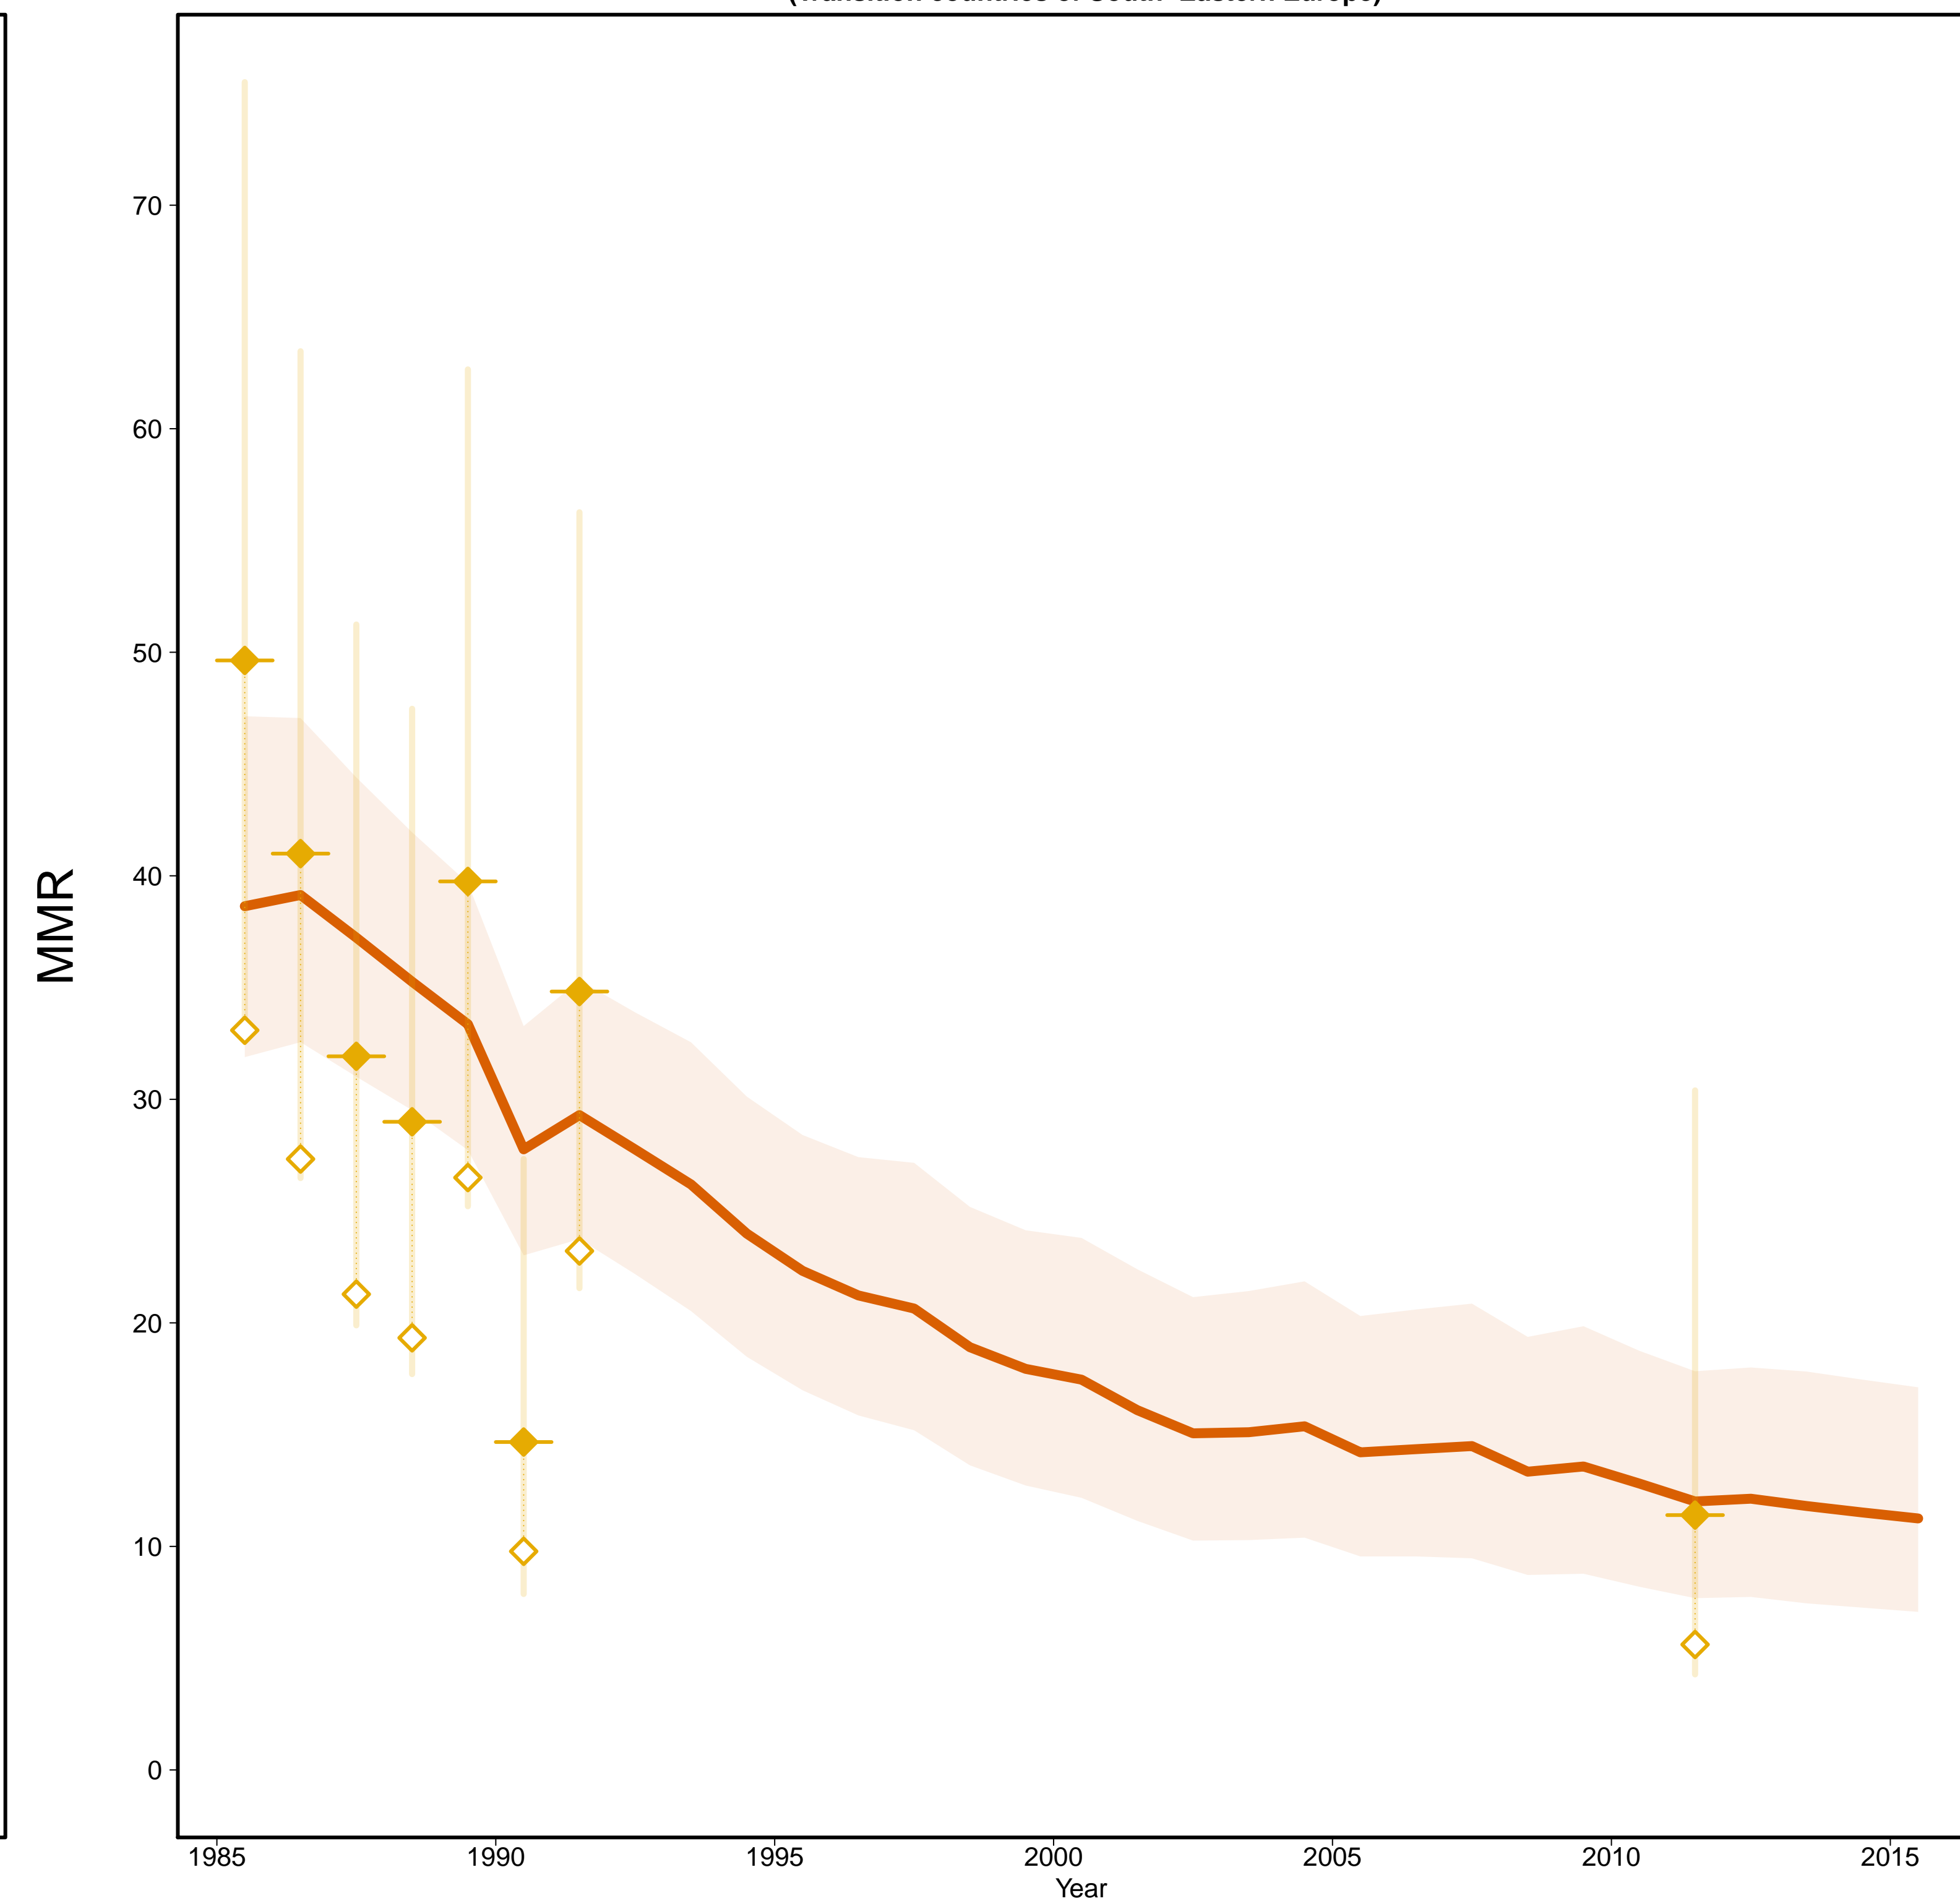

- Estimates —
- Mlate
- MMR Database 2015 —
- ◇ Observed Data
- ◆ Adjusted Data
- Data type —
- ◆ VR

Gross Domestic Product

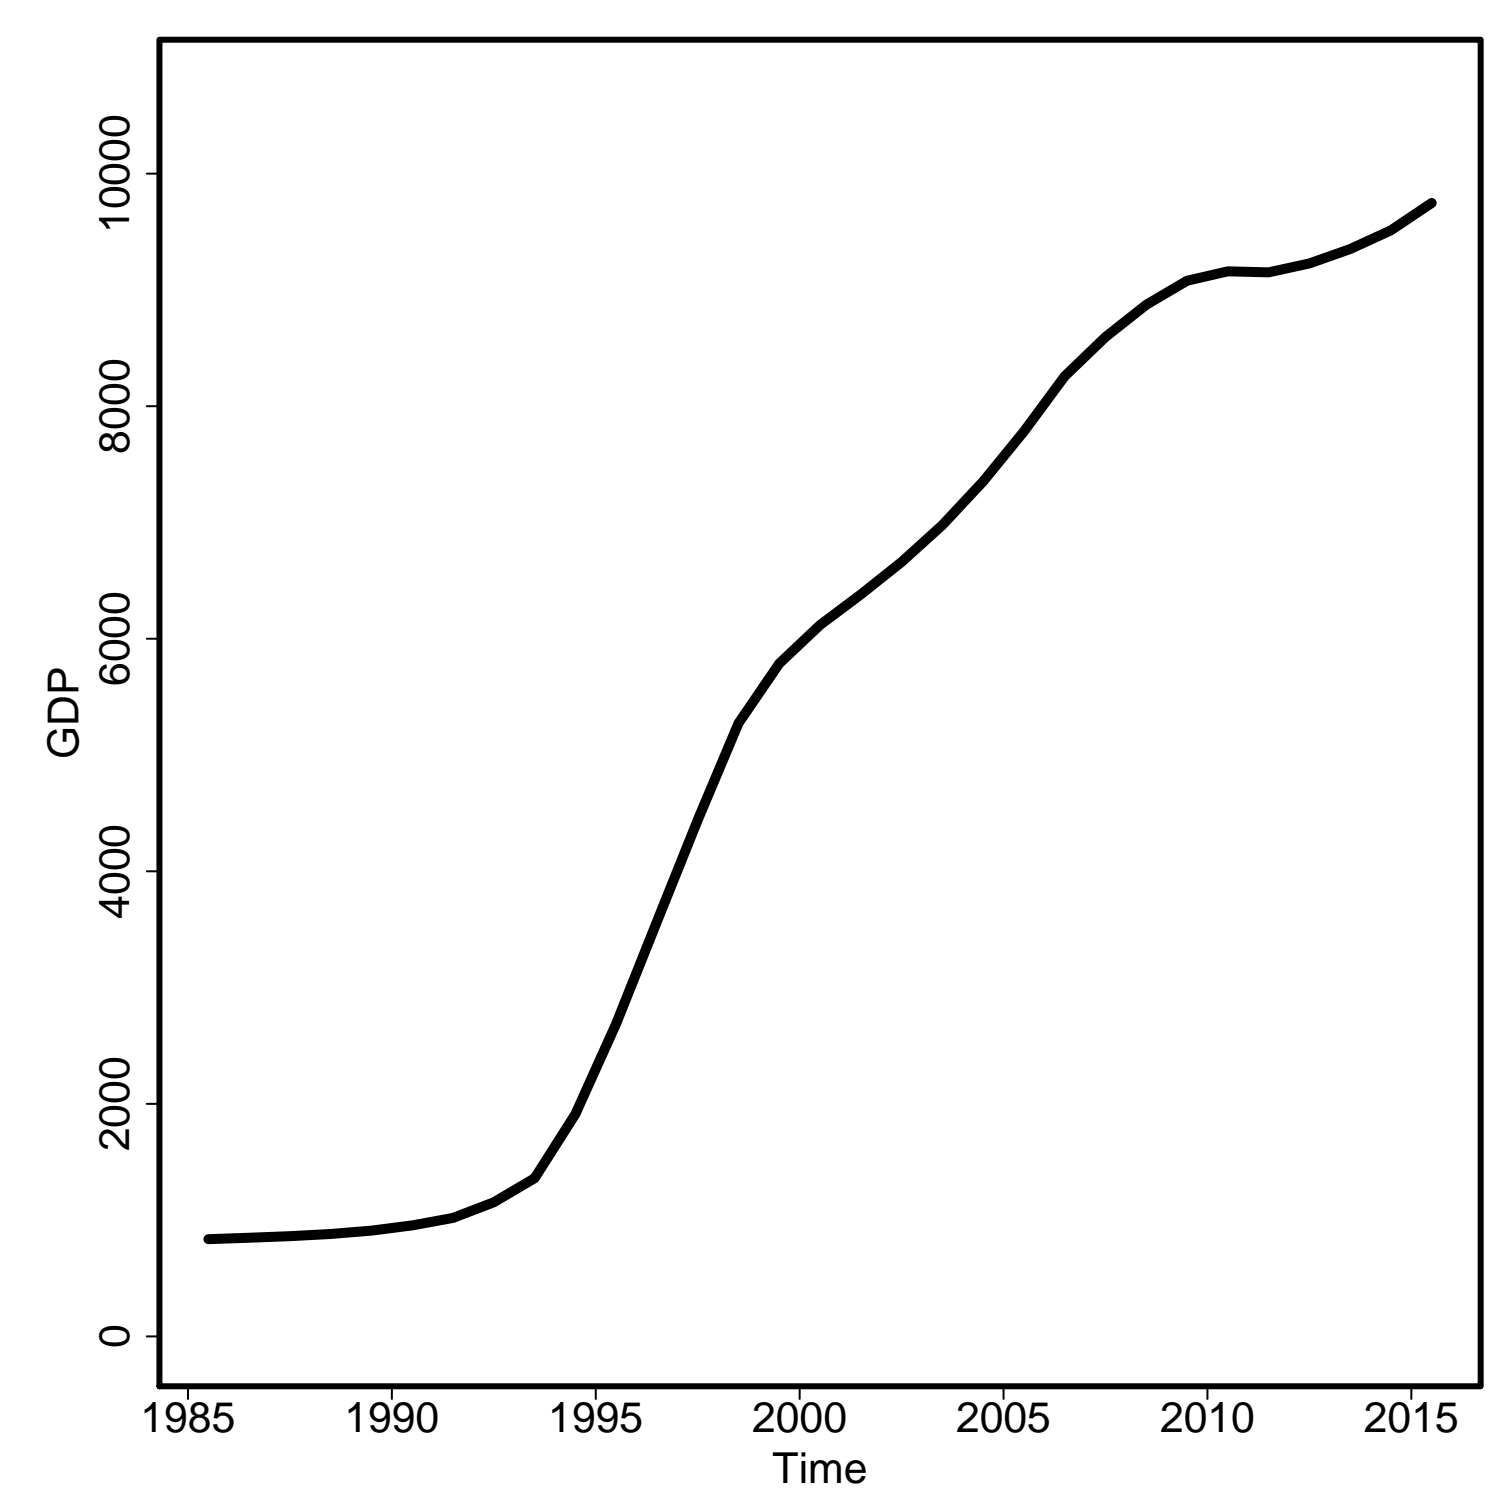

General Fertility Rate

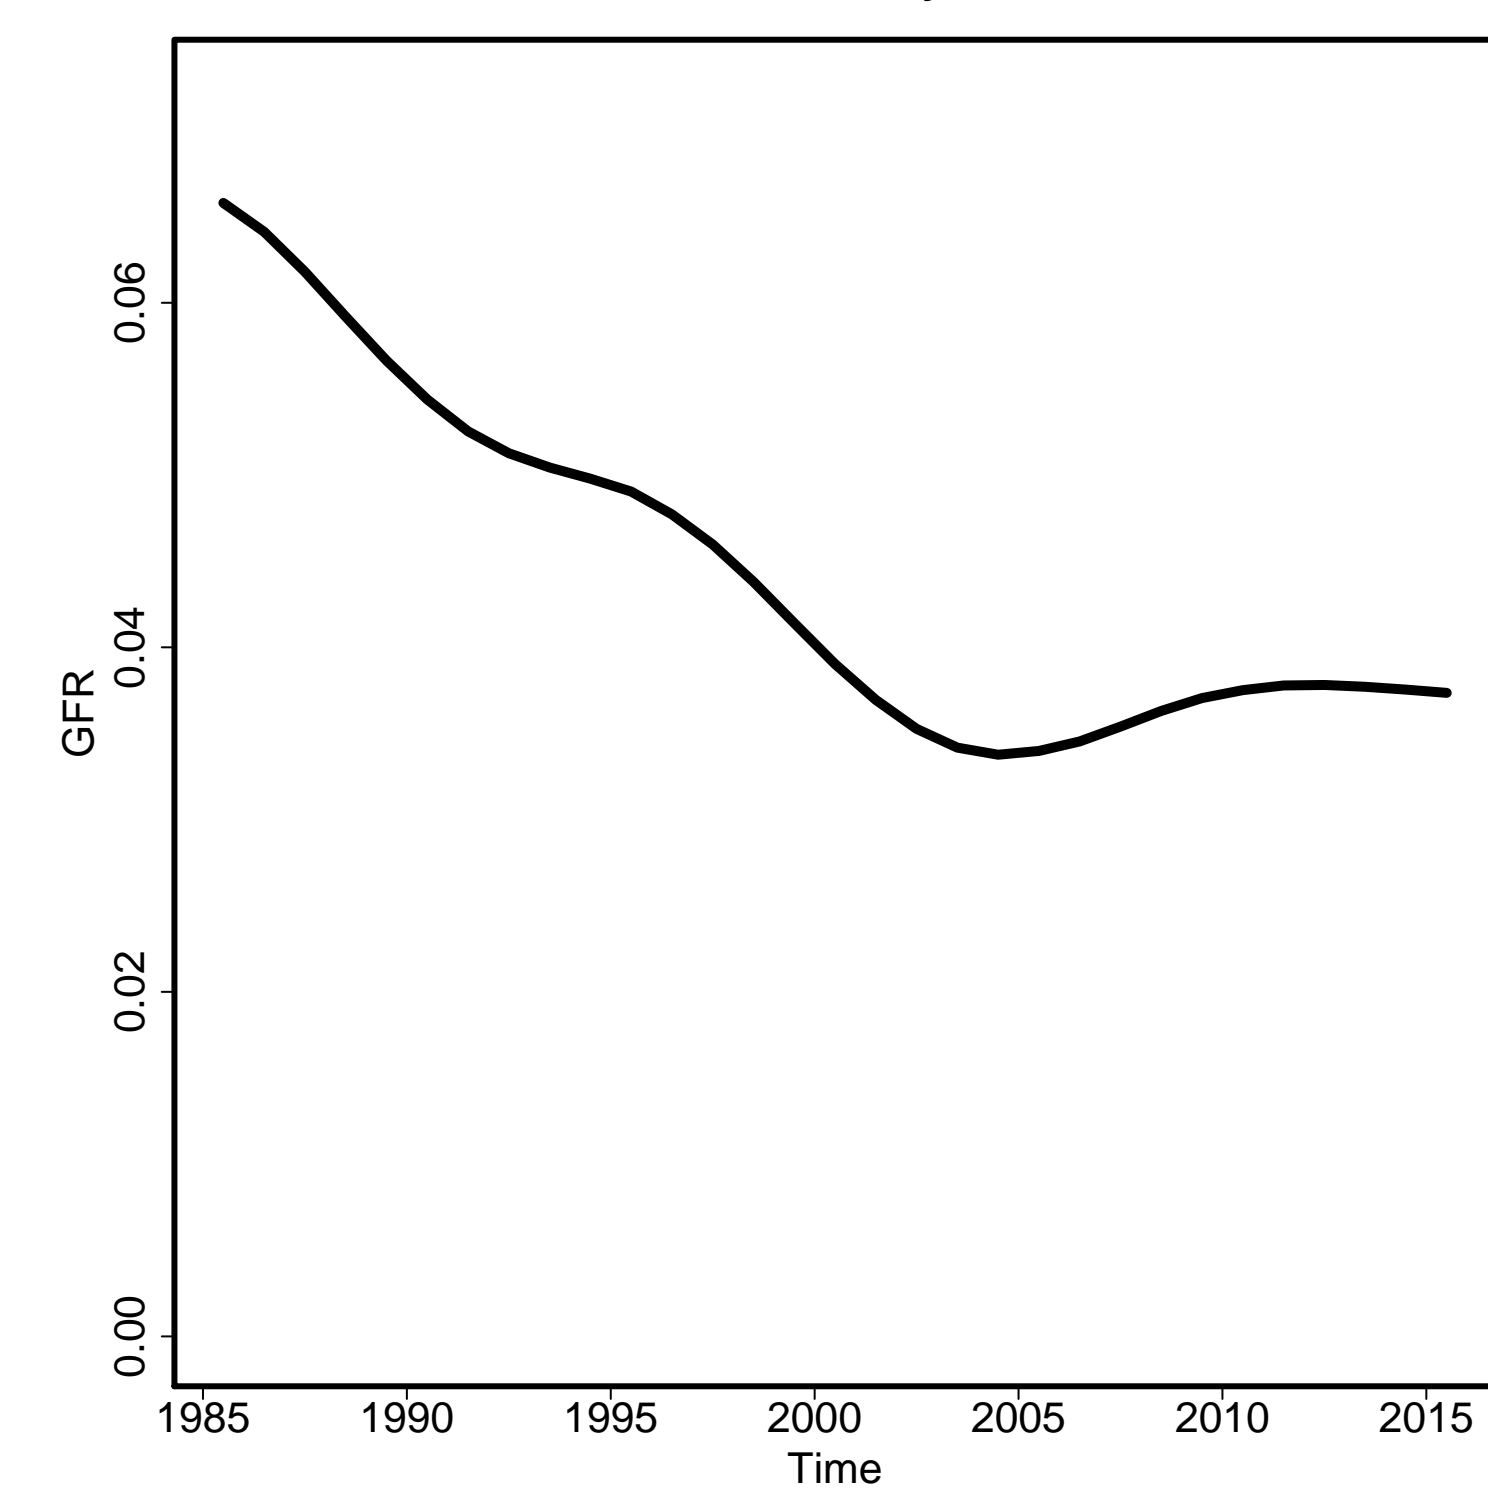

Skilled Attendance to Birth

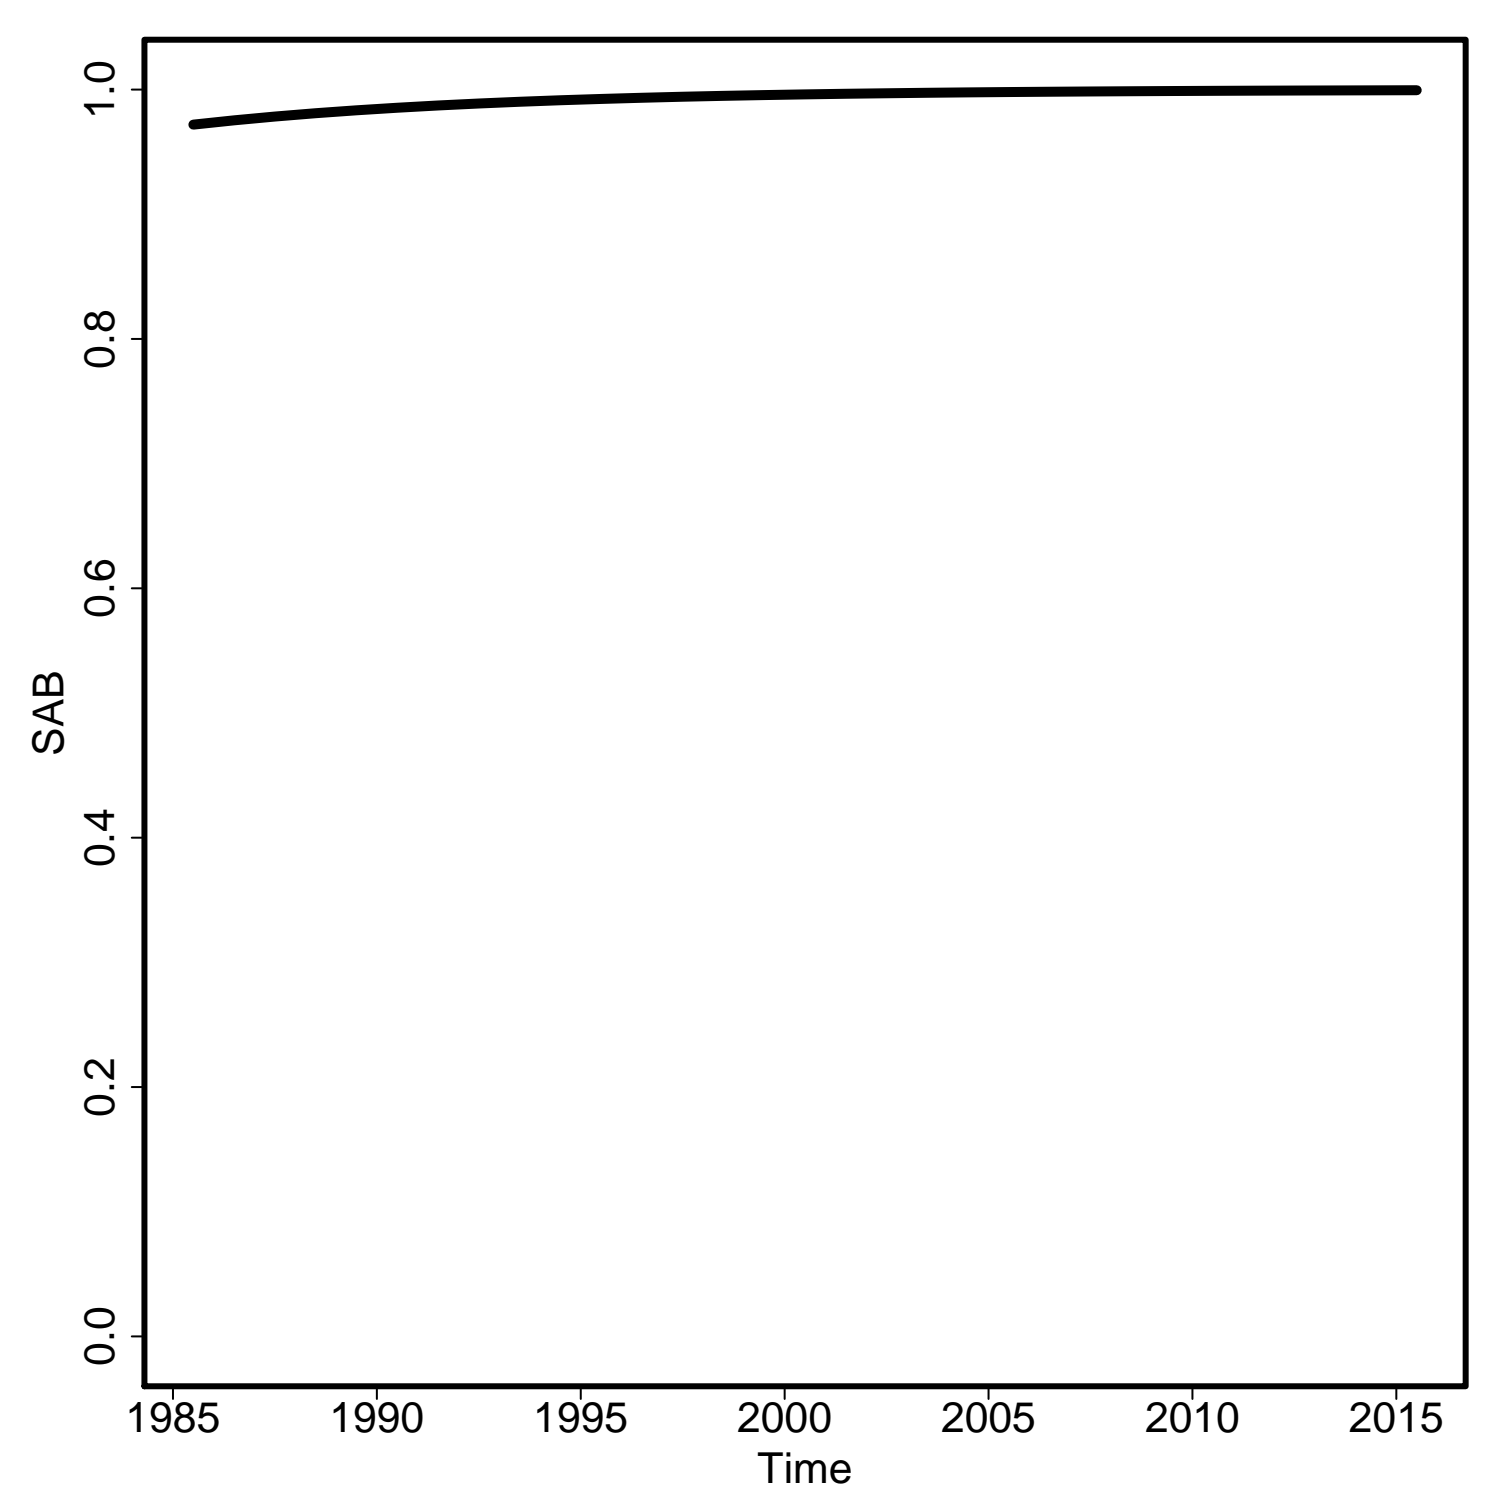

Envelope/Births

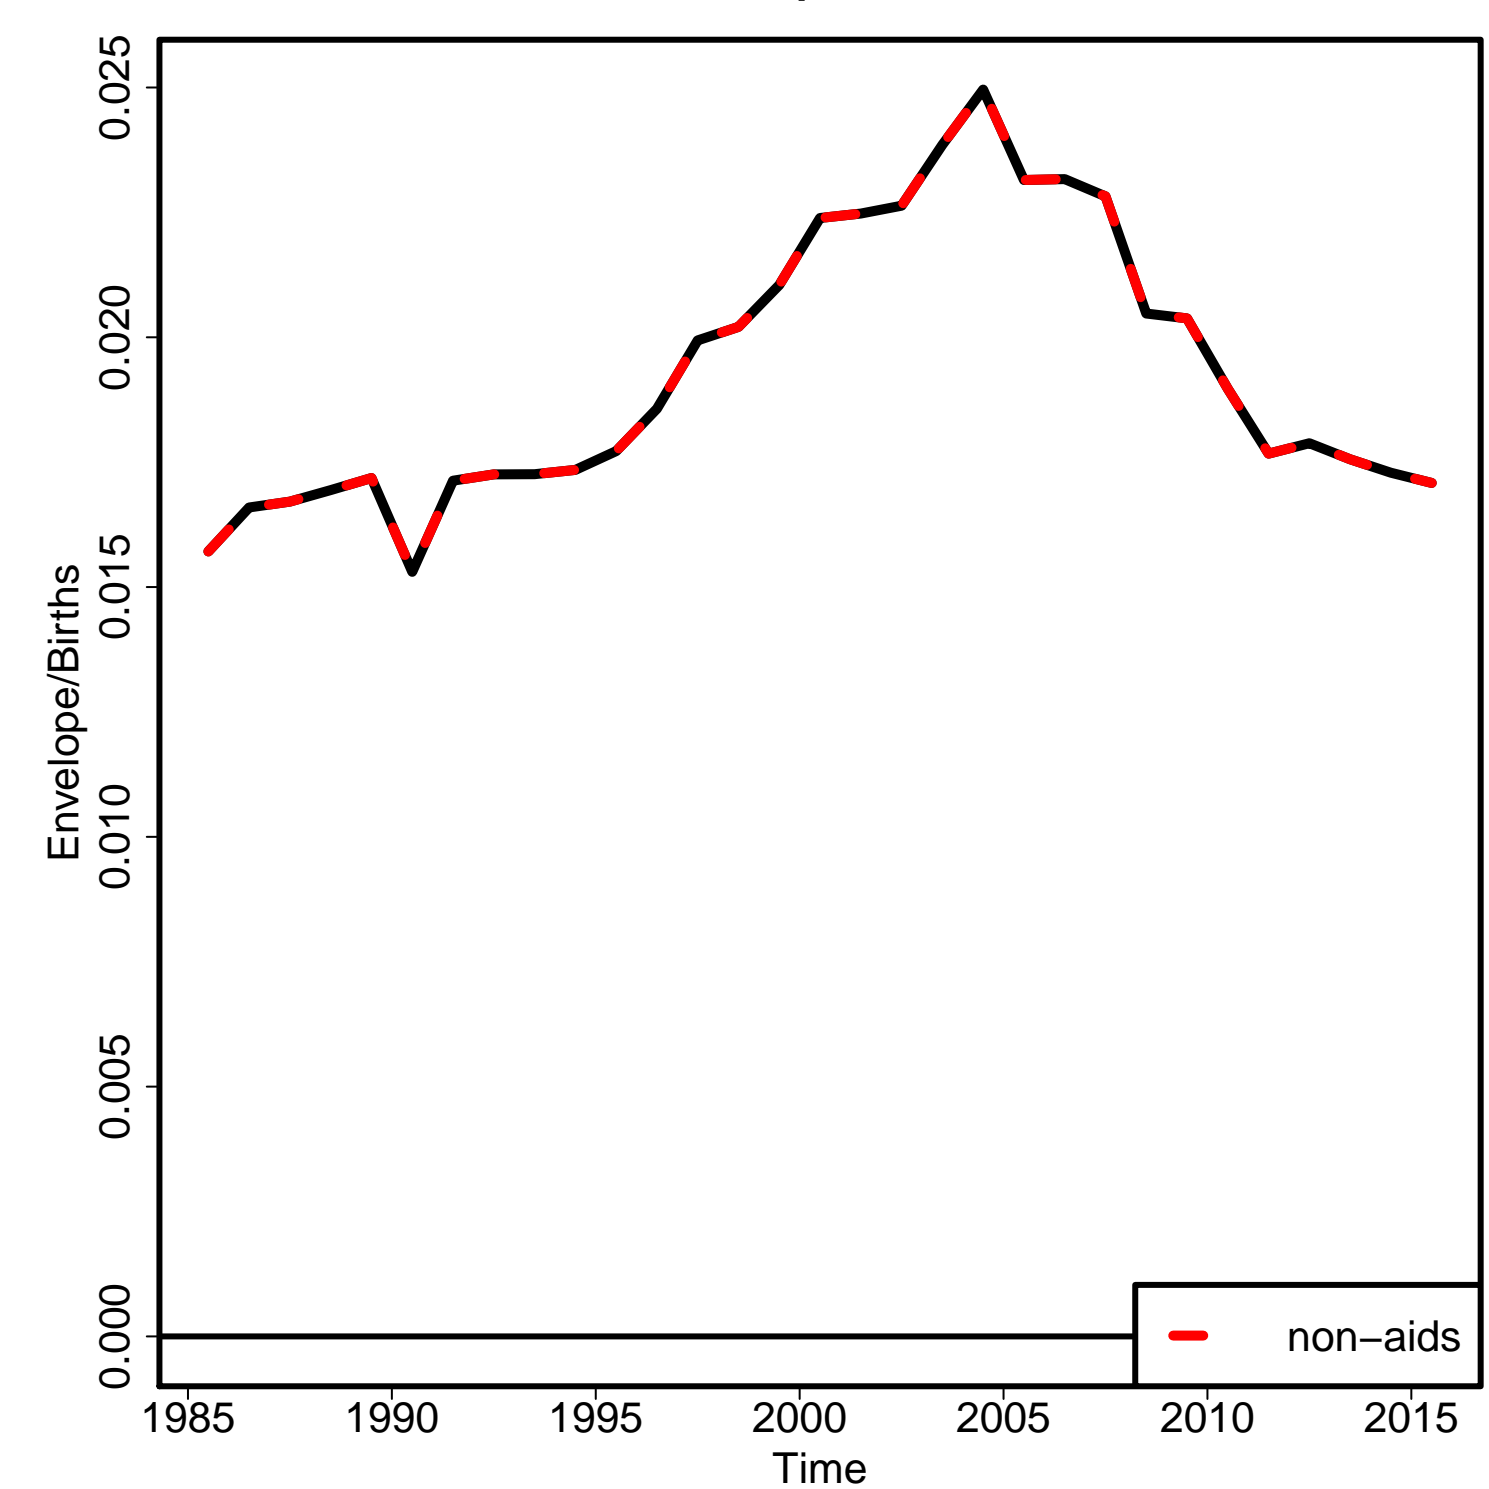

Non-aids MMR

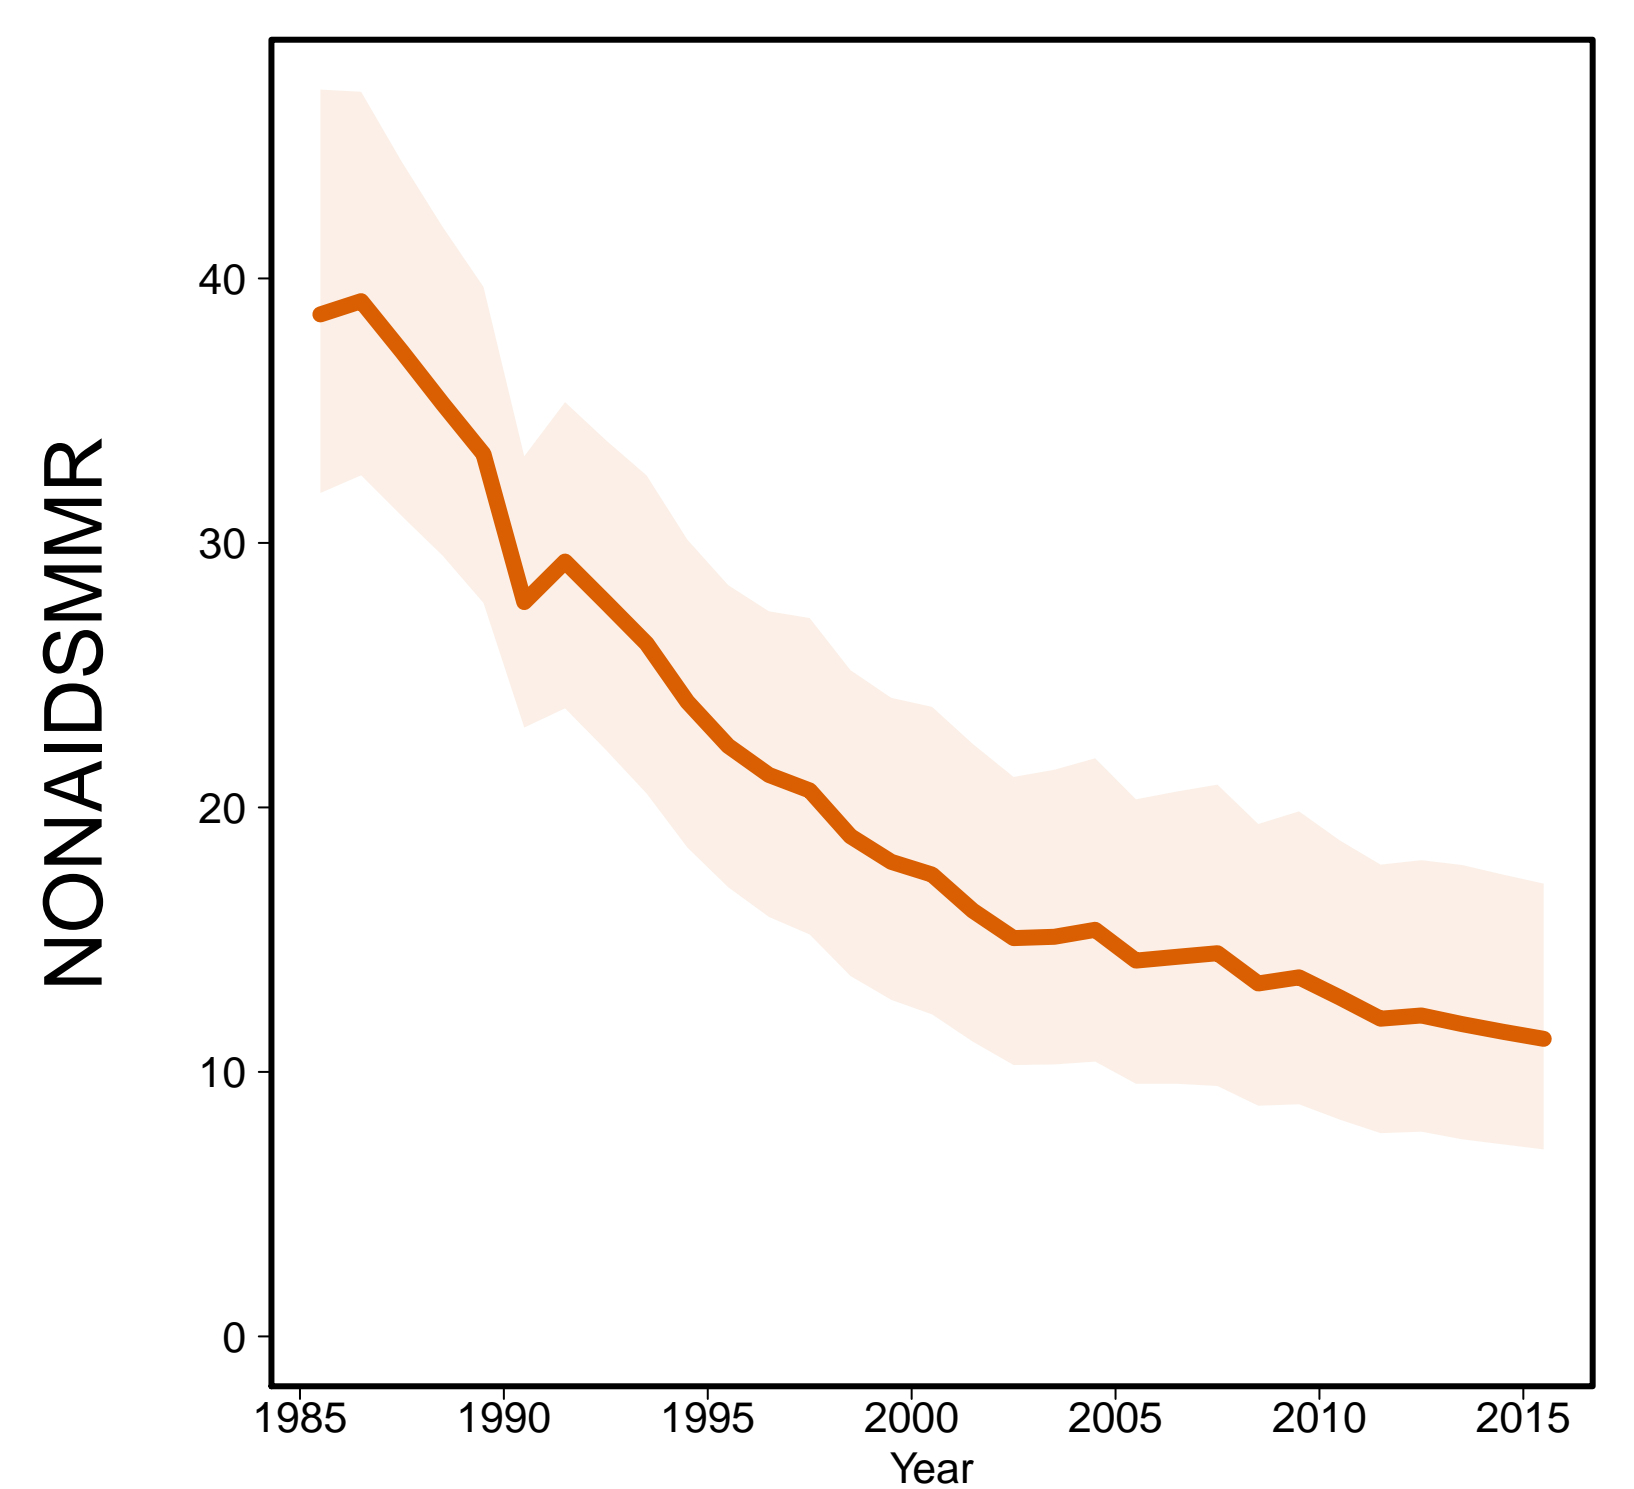

Aids MMR

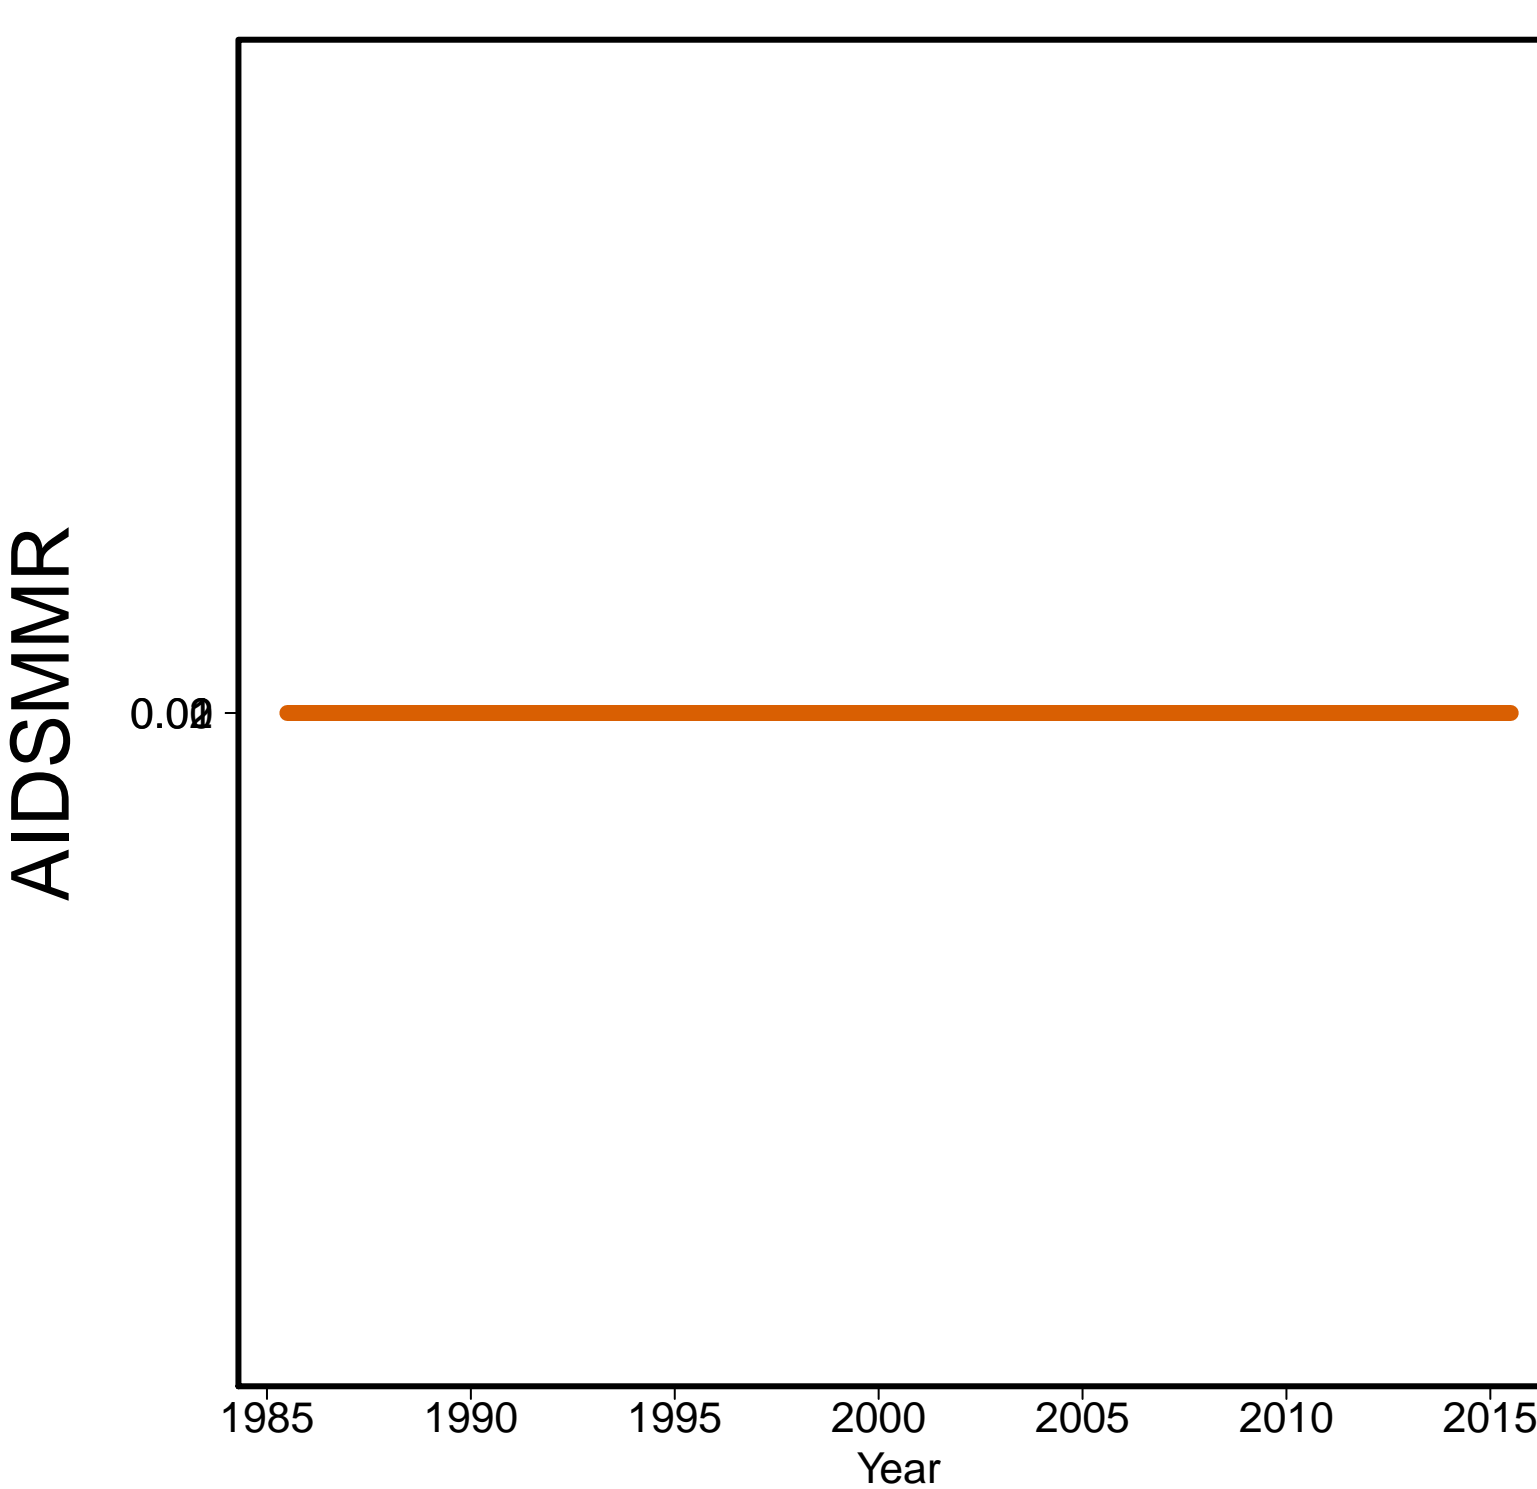

Botswana [BWA]  
(Southern Africa)

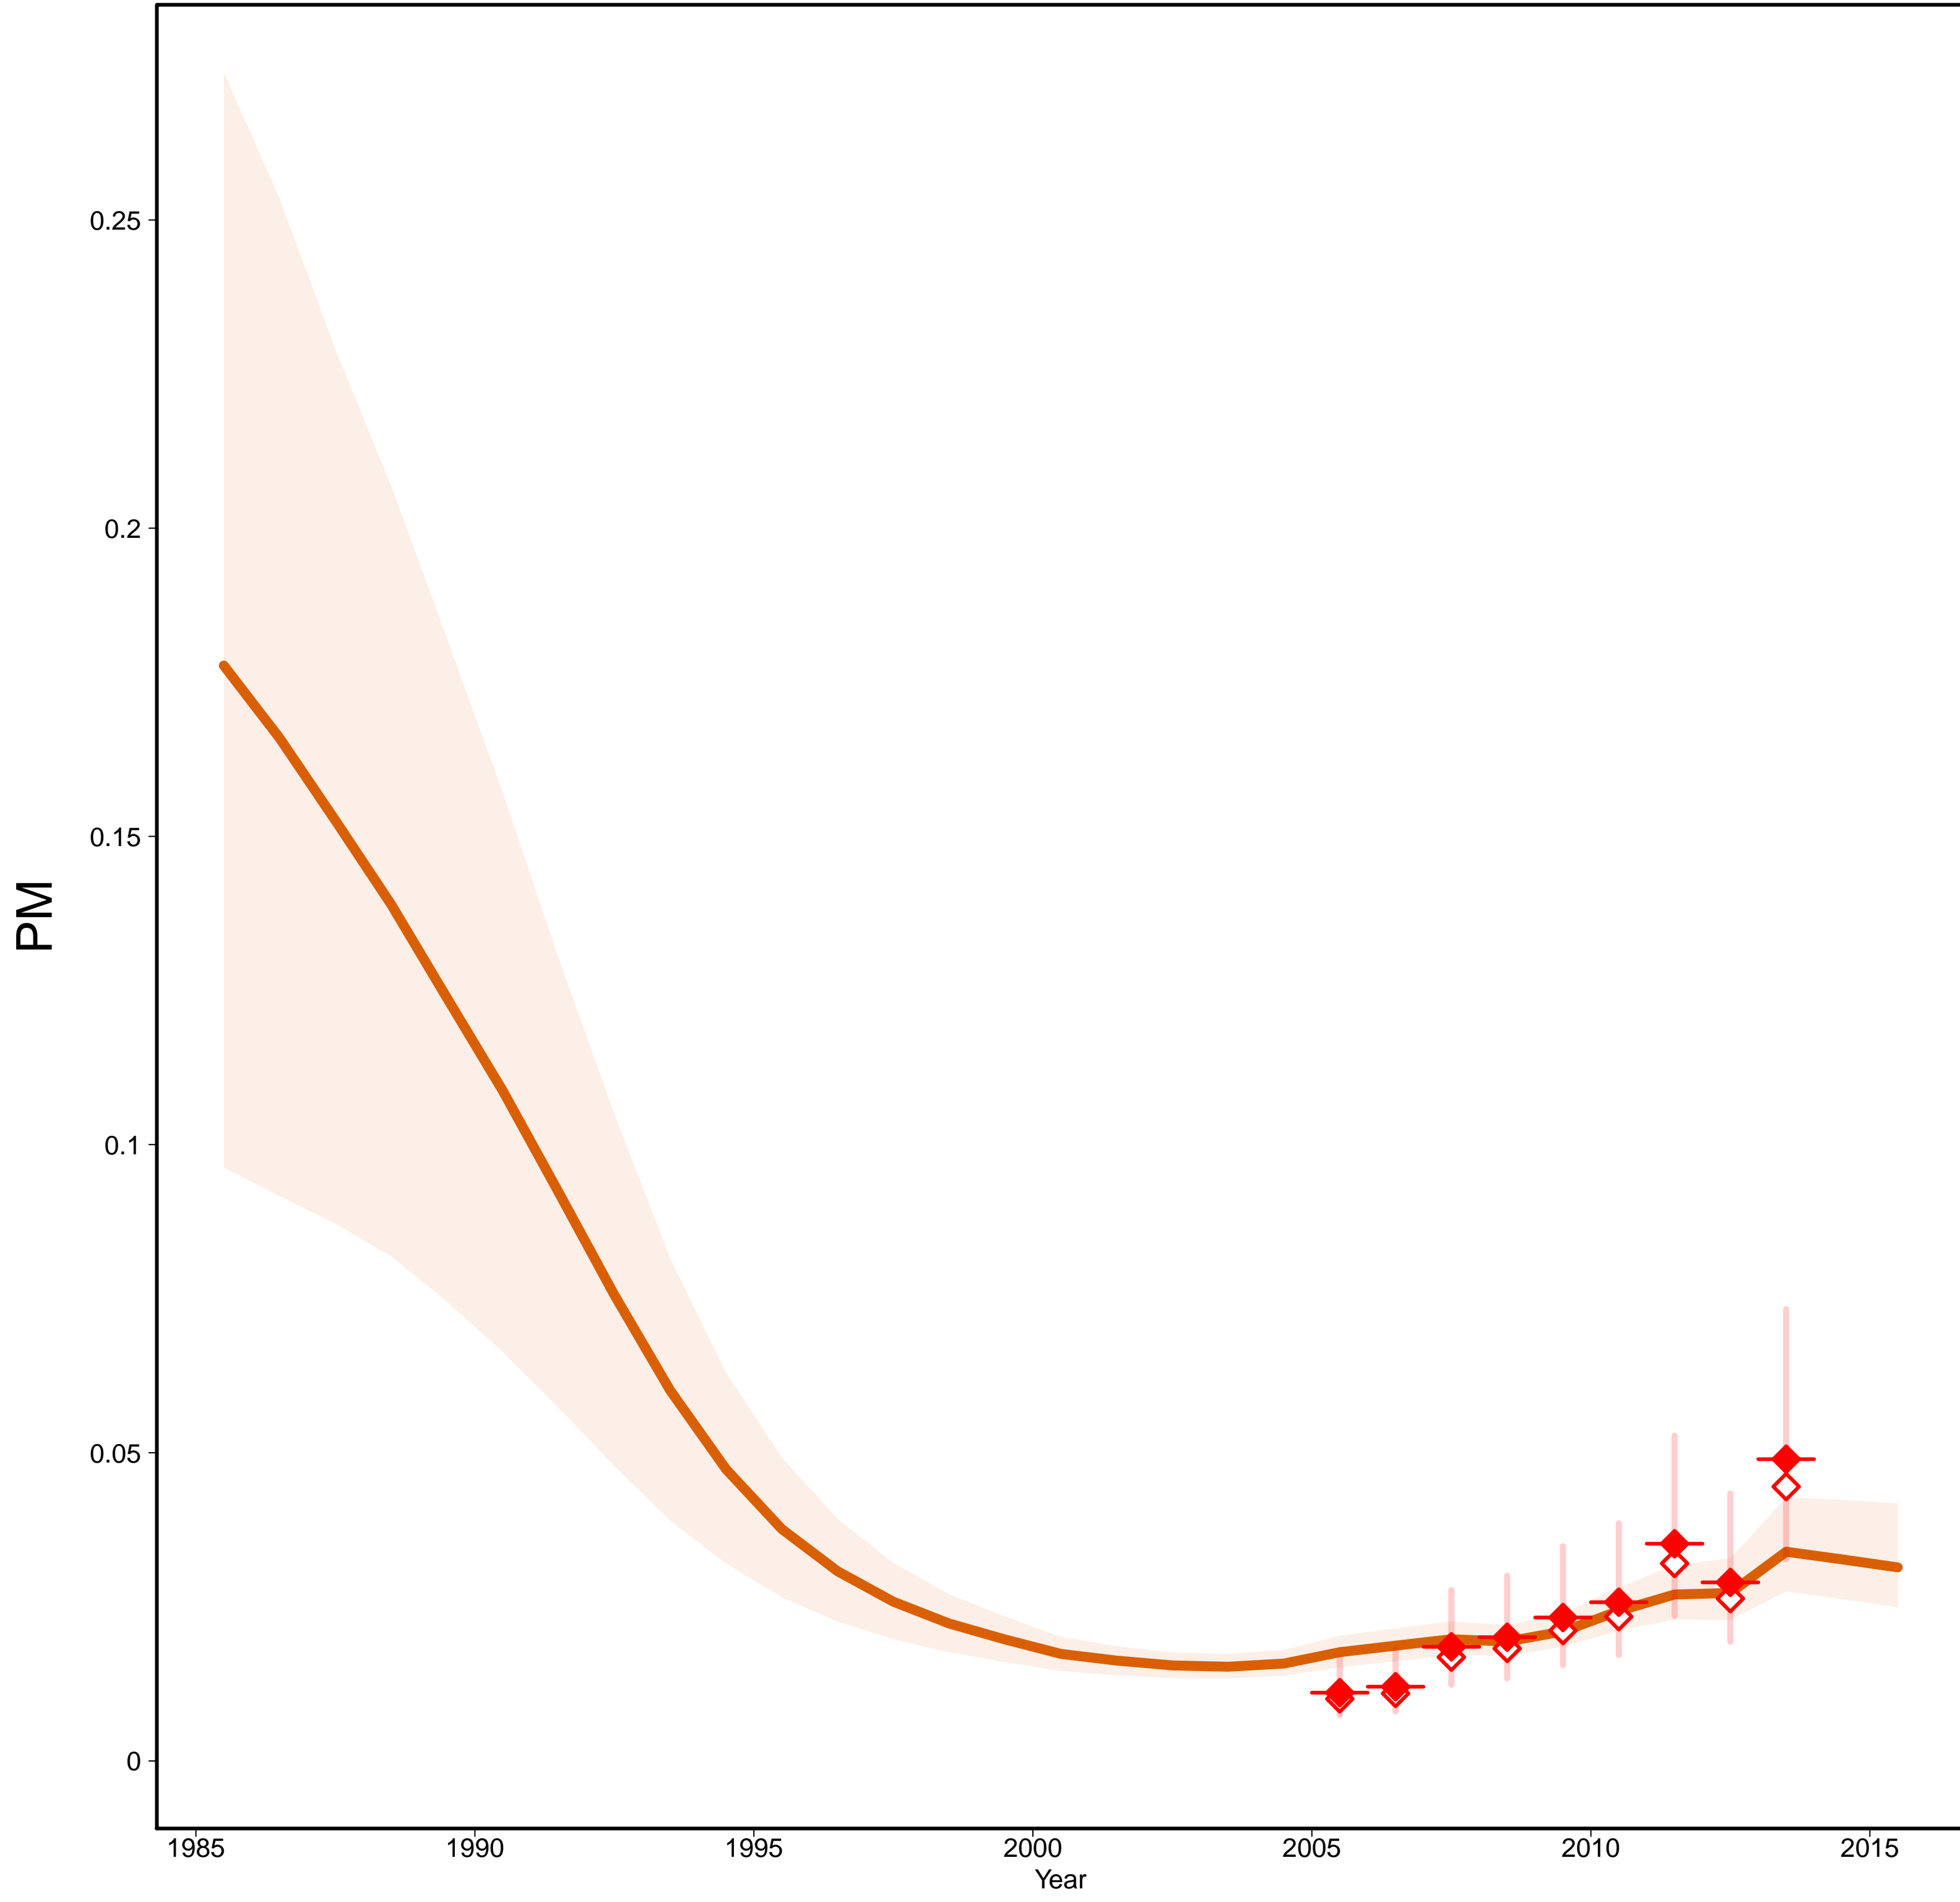

Botswana [BWA]  
(Southern Africa)

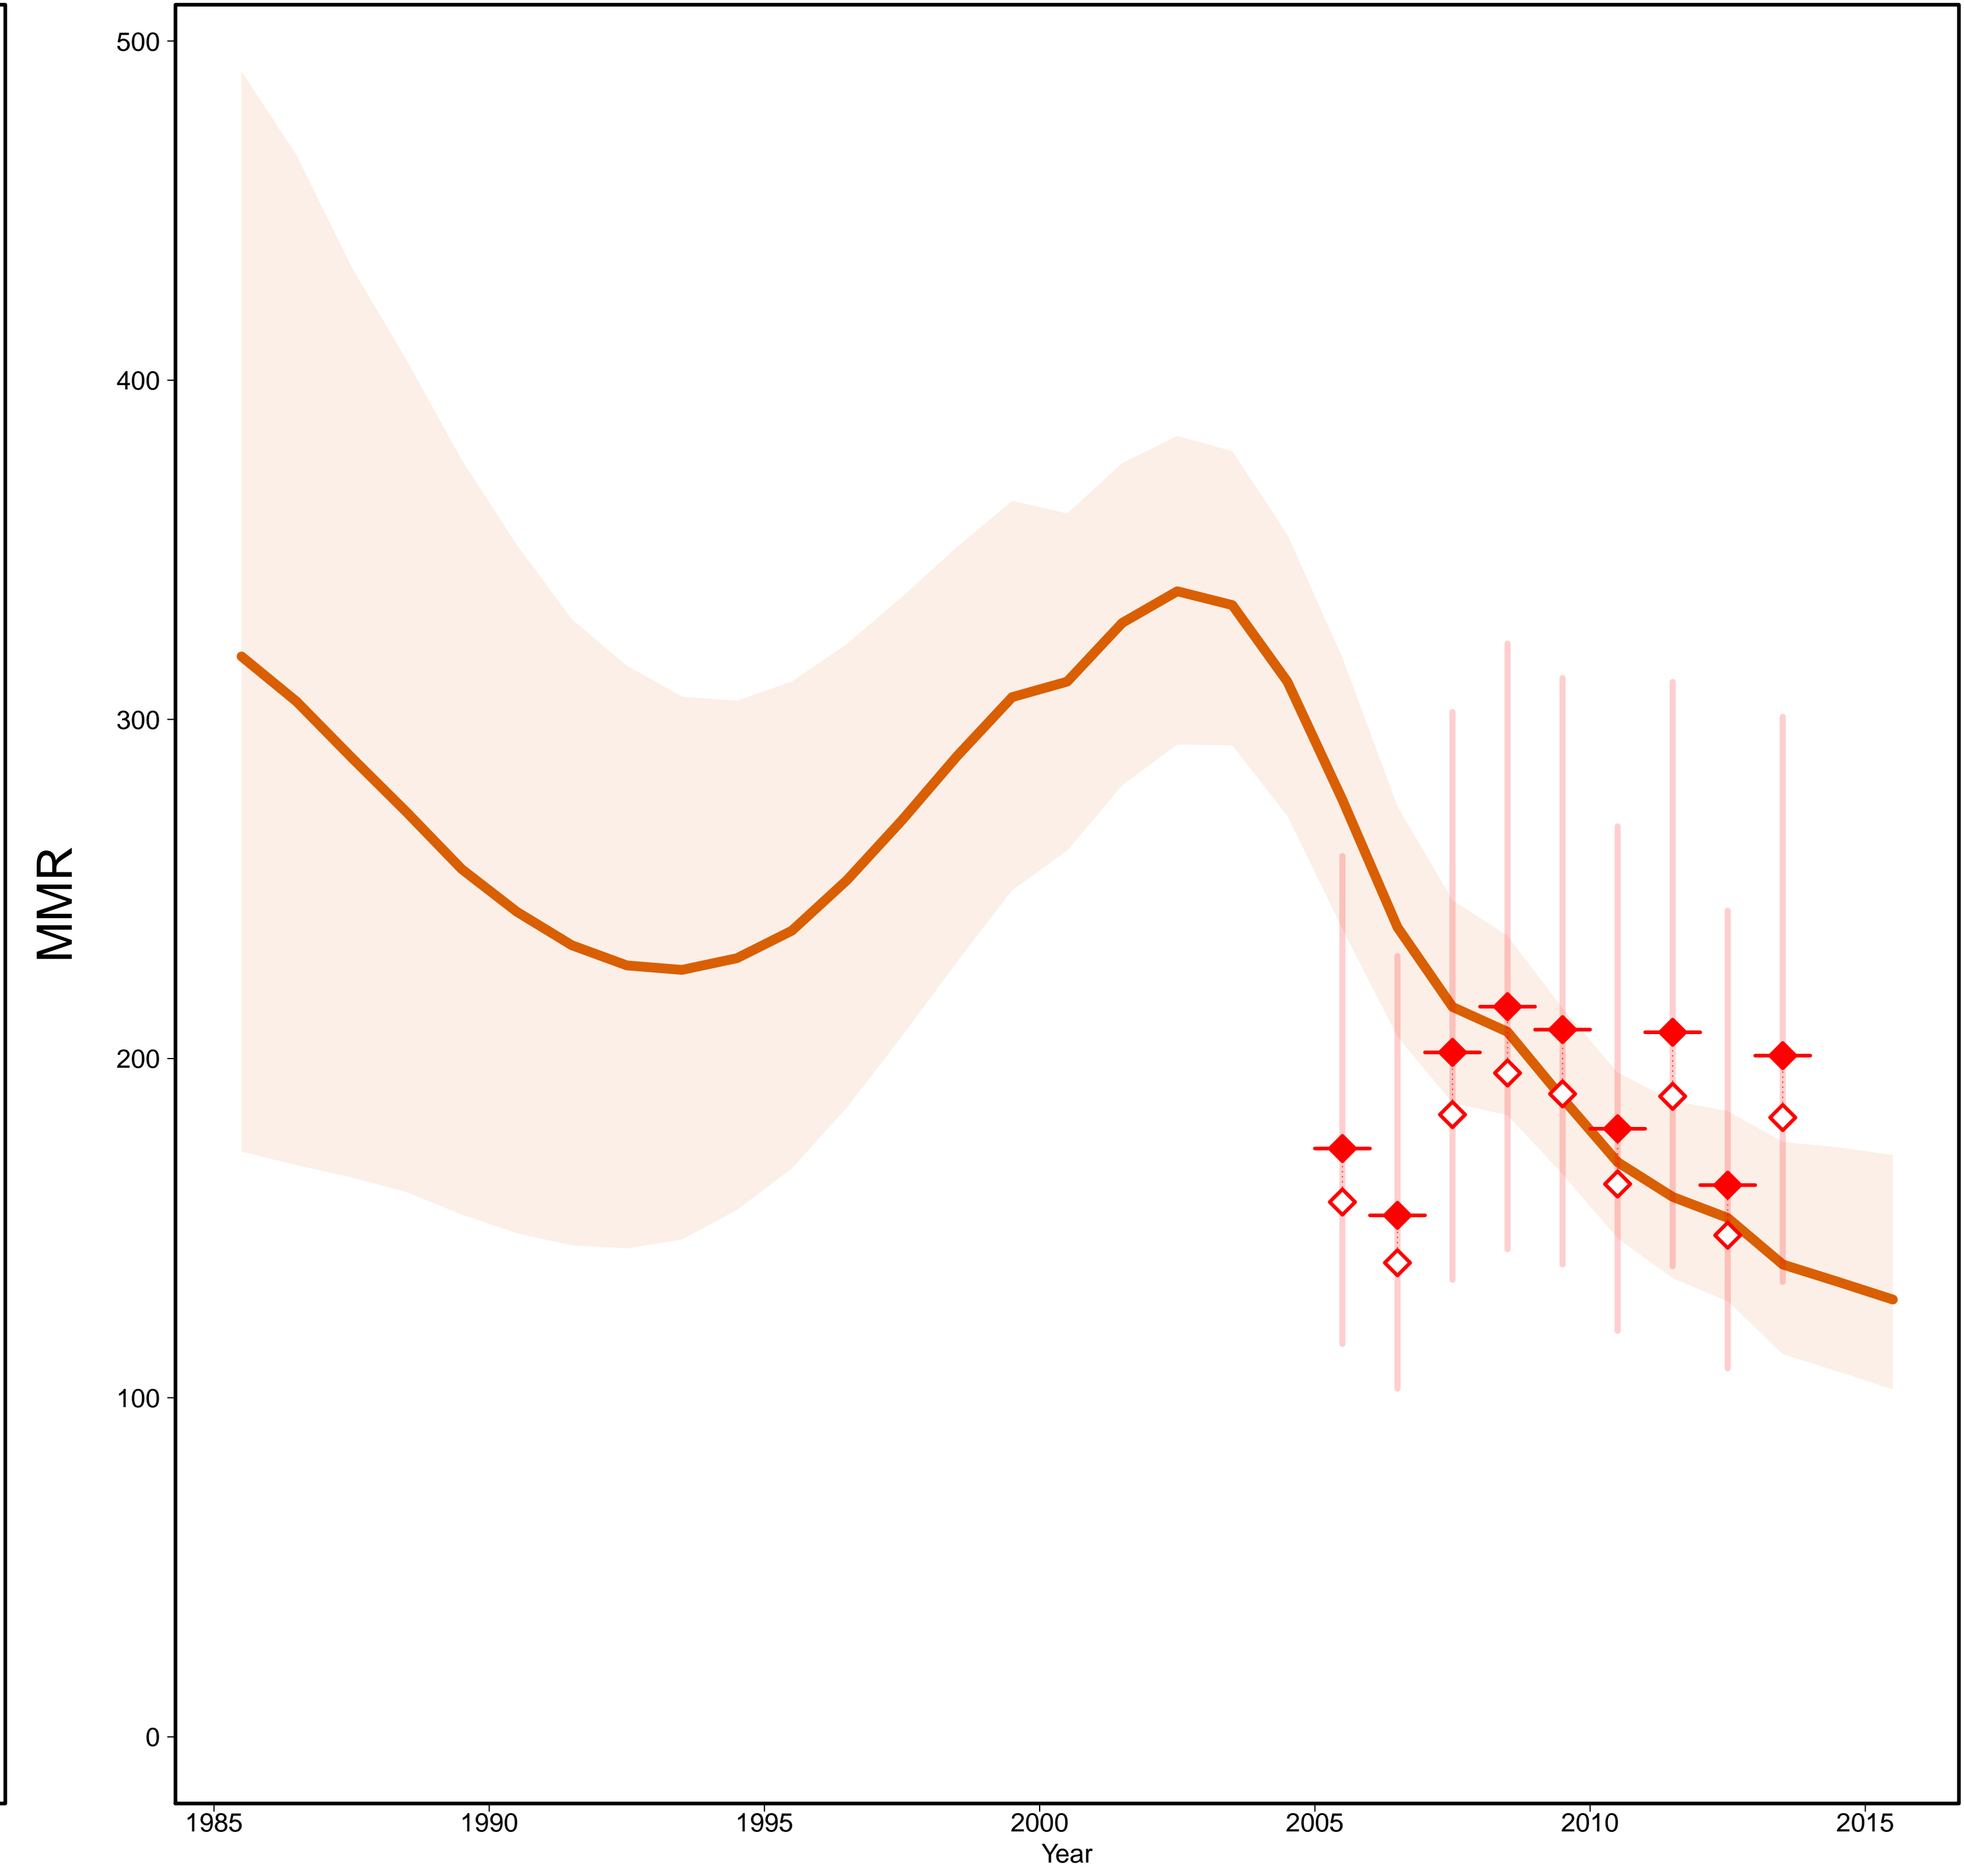

- Estimates —
- MMR Database 2015 —
- ◇ Observed Data
- ◆ Adjusted Data
- Data type —
- ◆ Misc. studies

Gross Domestic Product

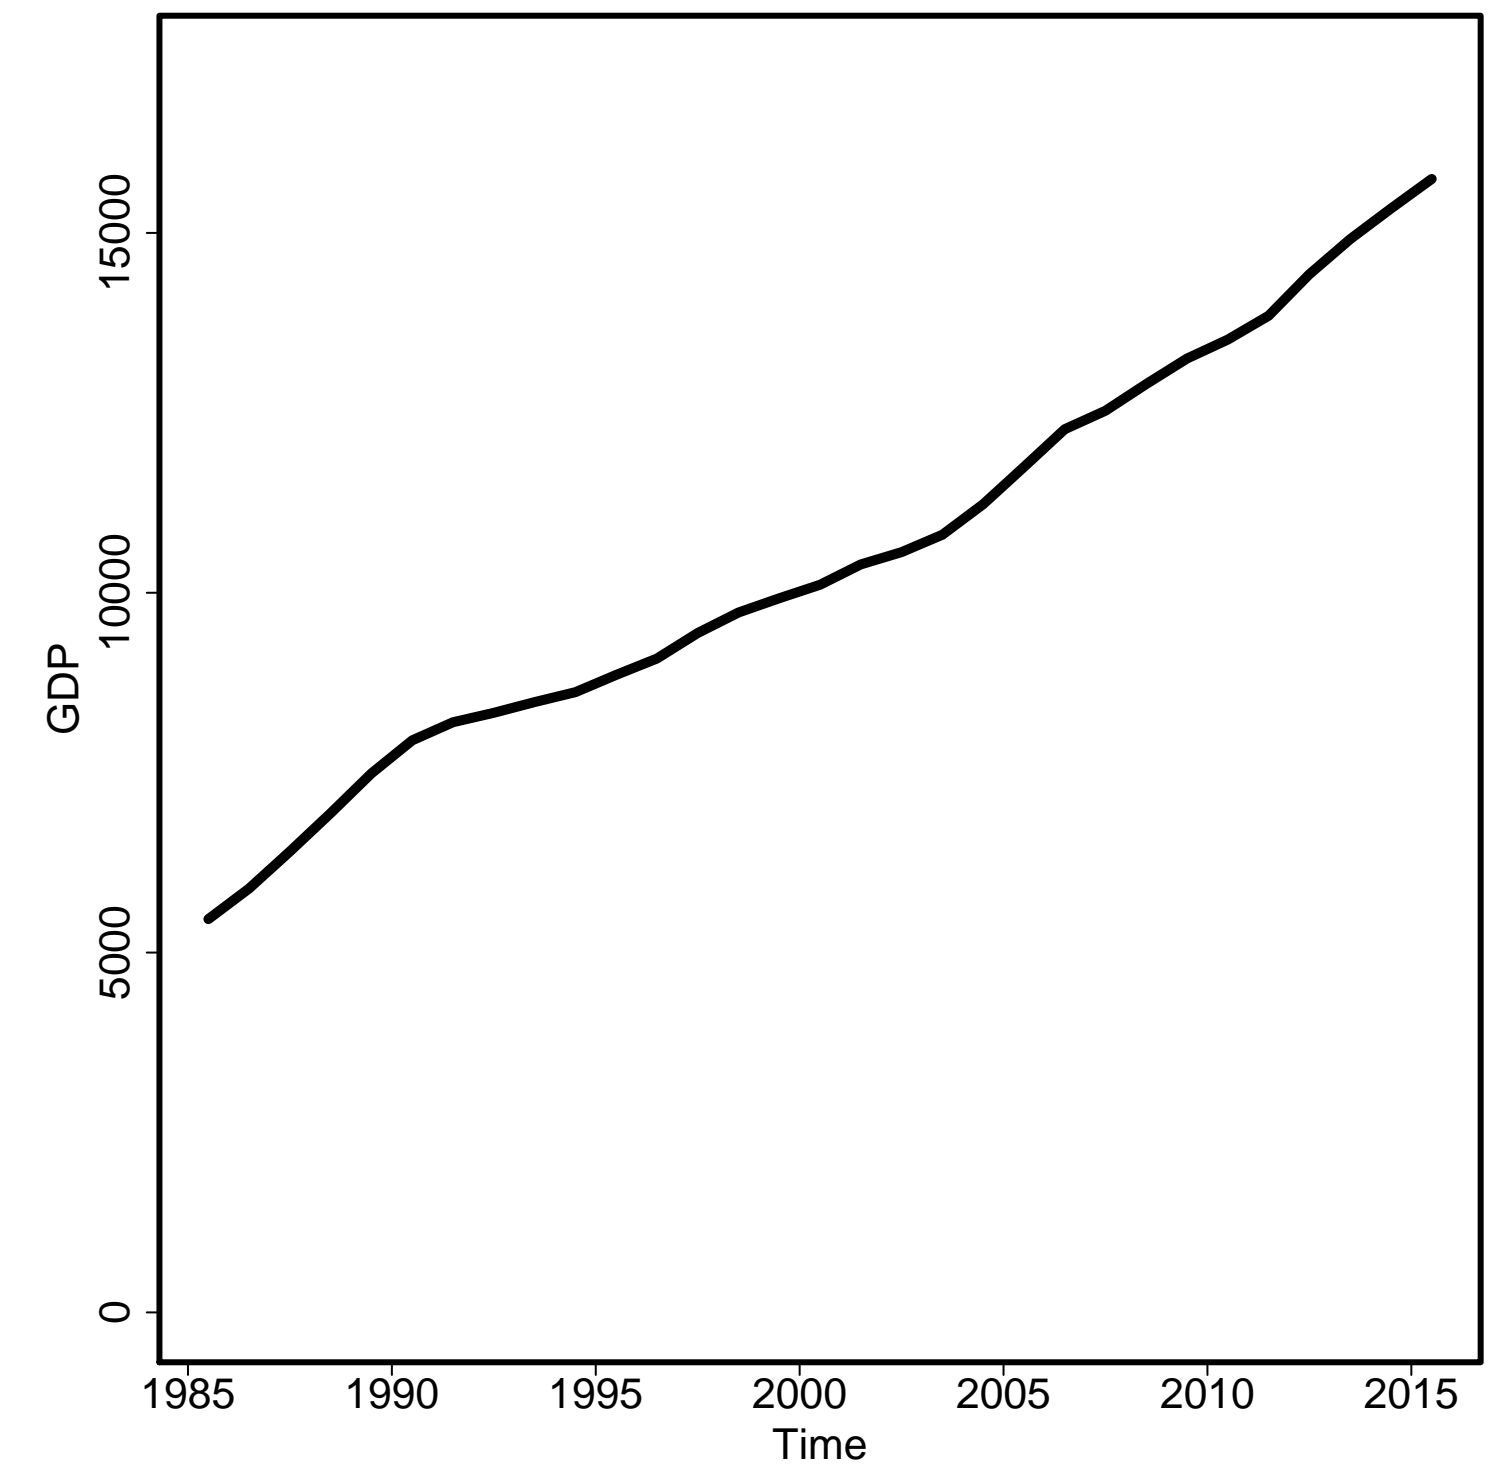

General Fertility Rate

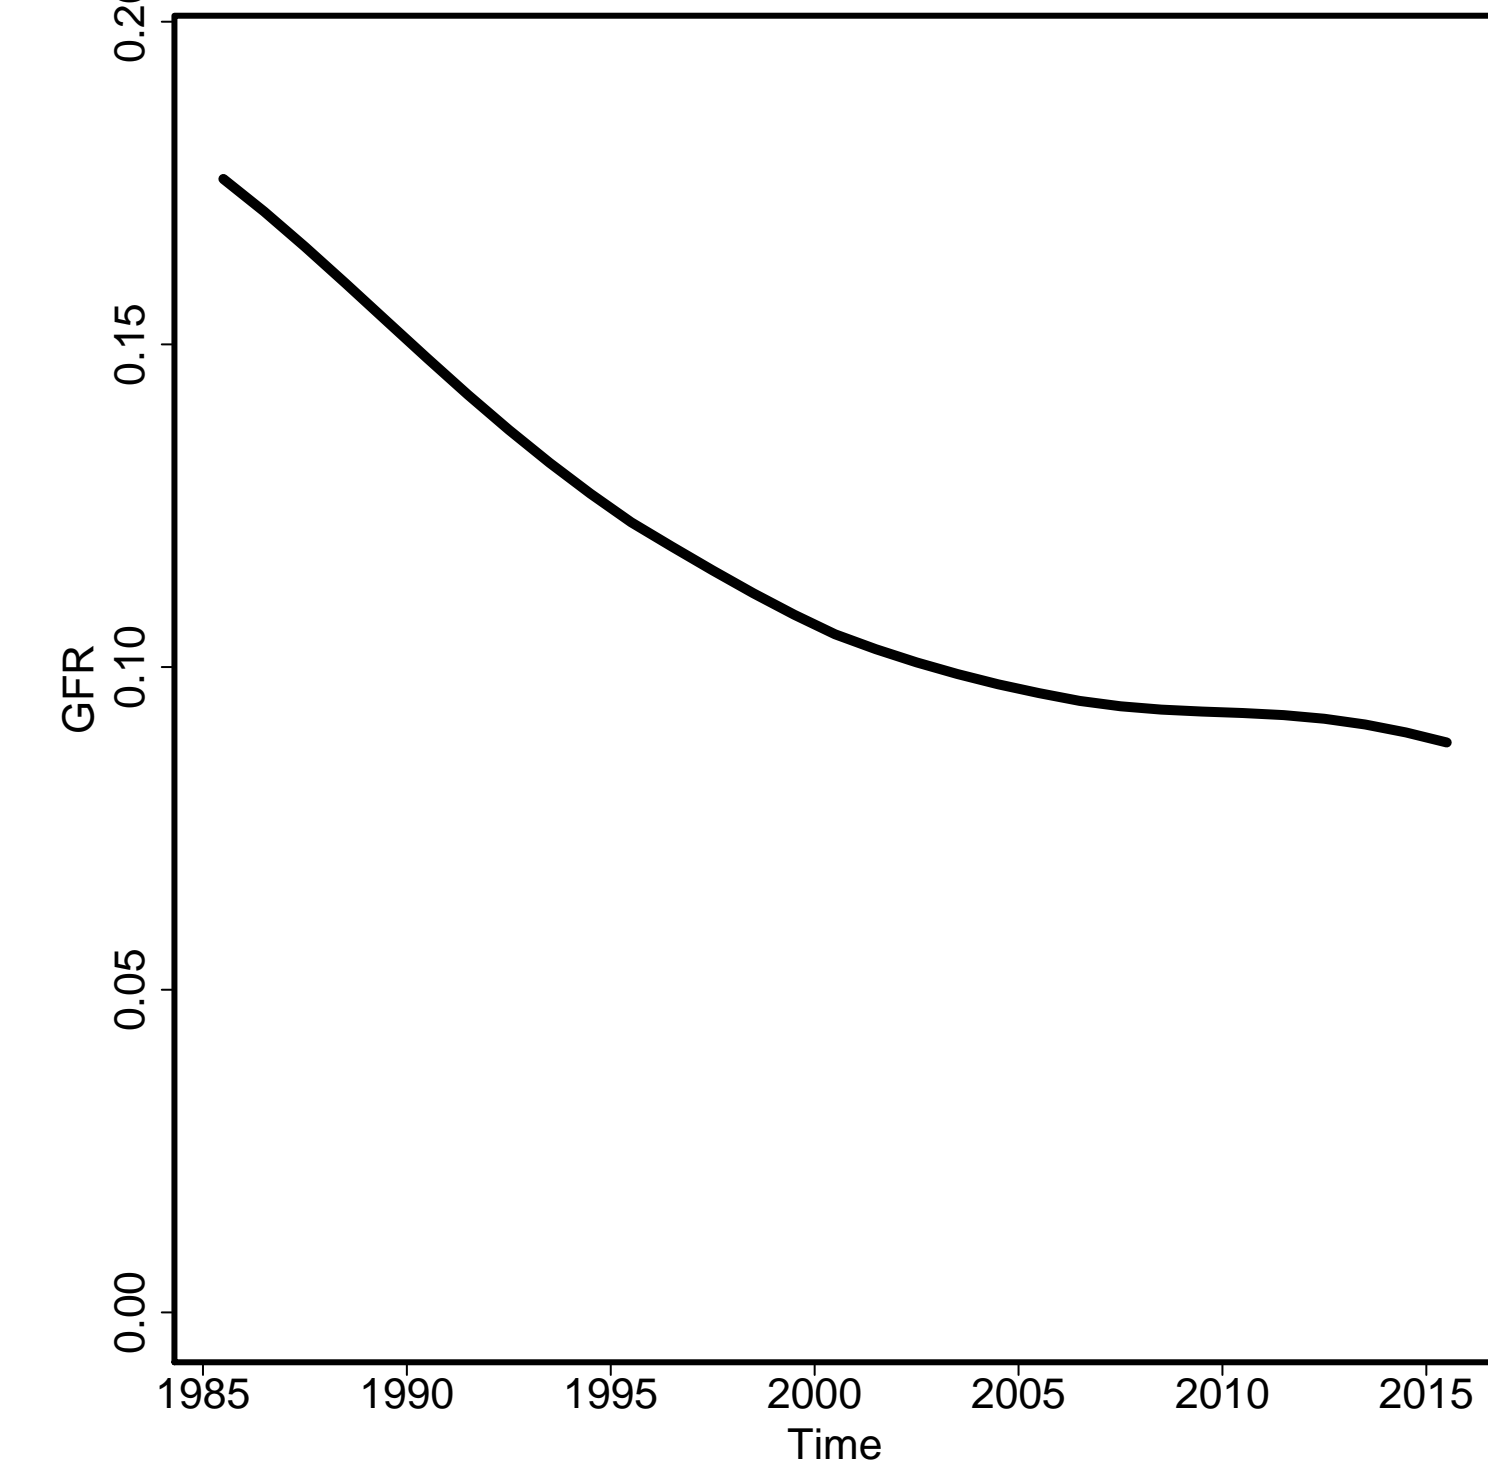

Skilled Attendance to Birth

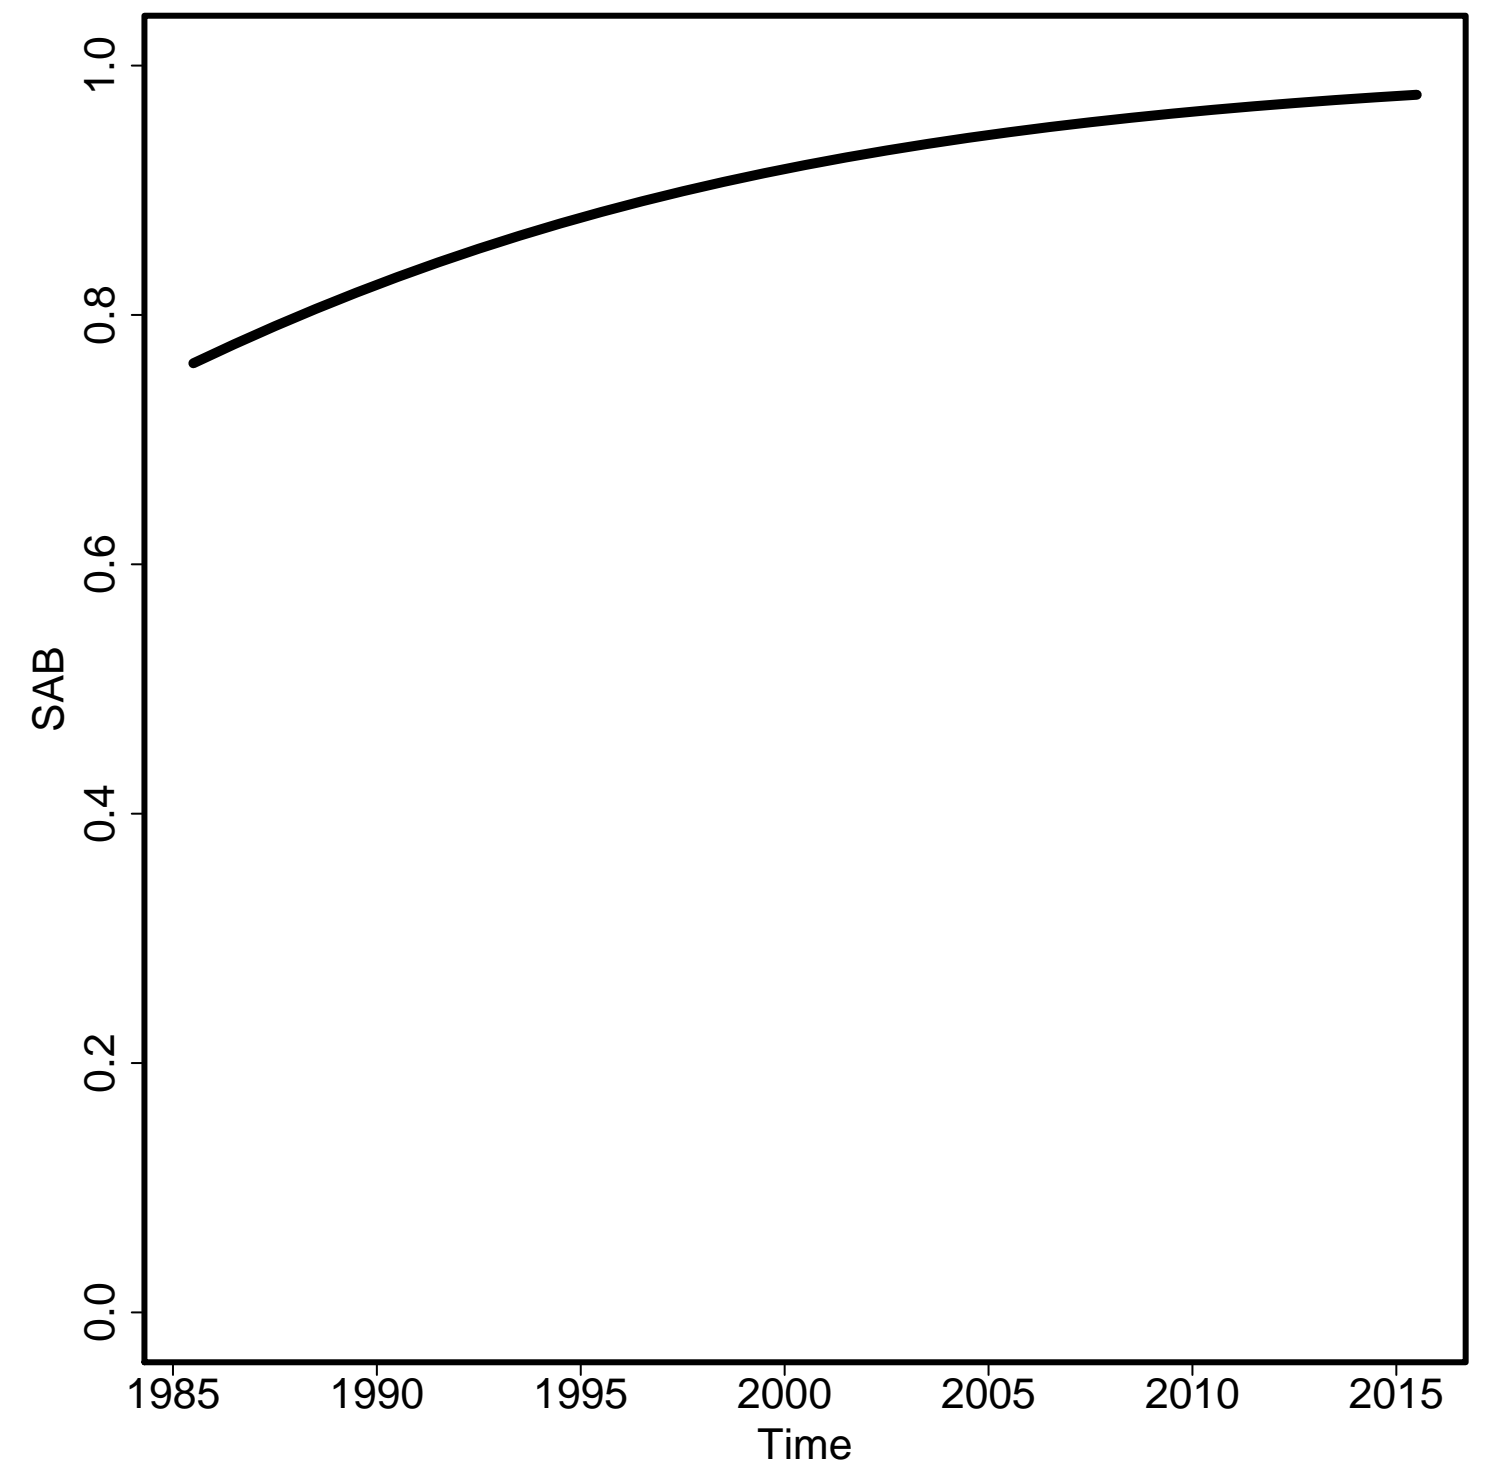

Envelope/Births

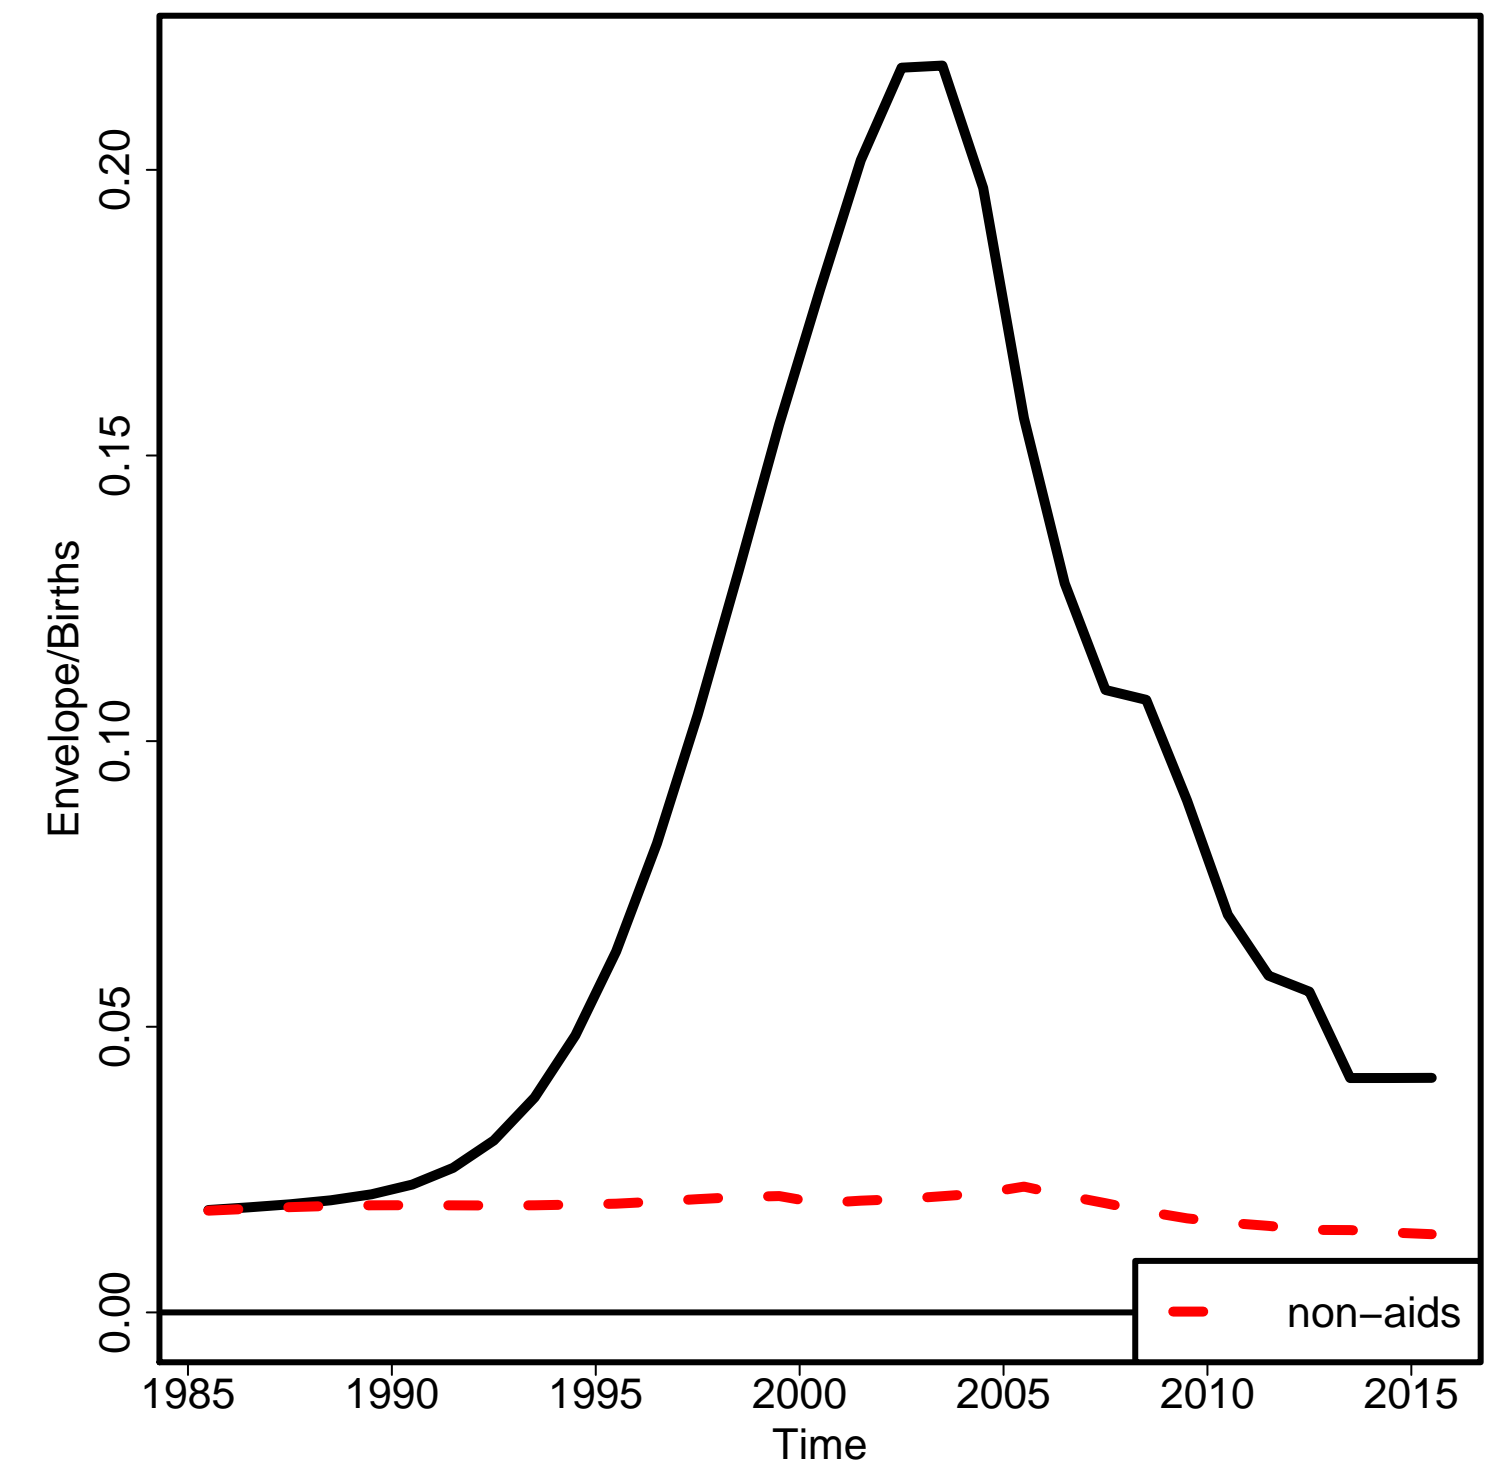

Non-aids MMR

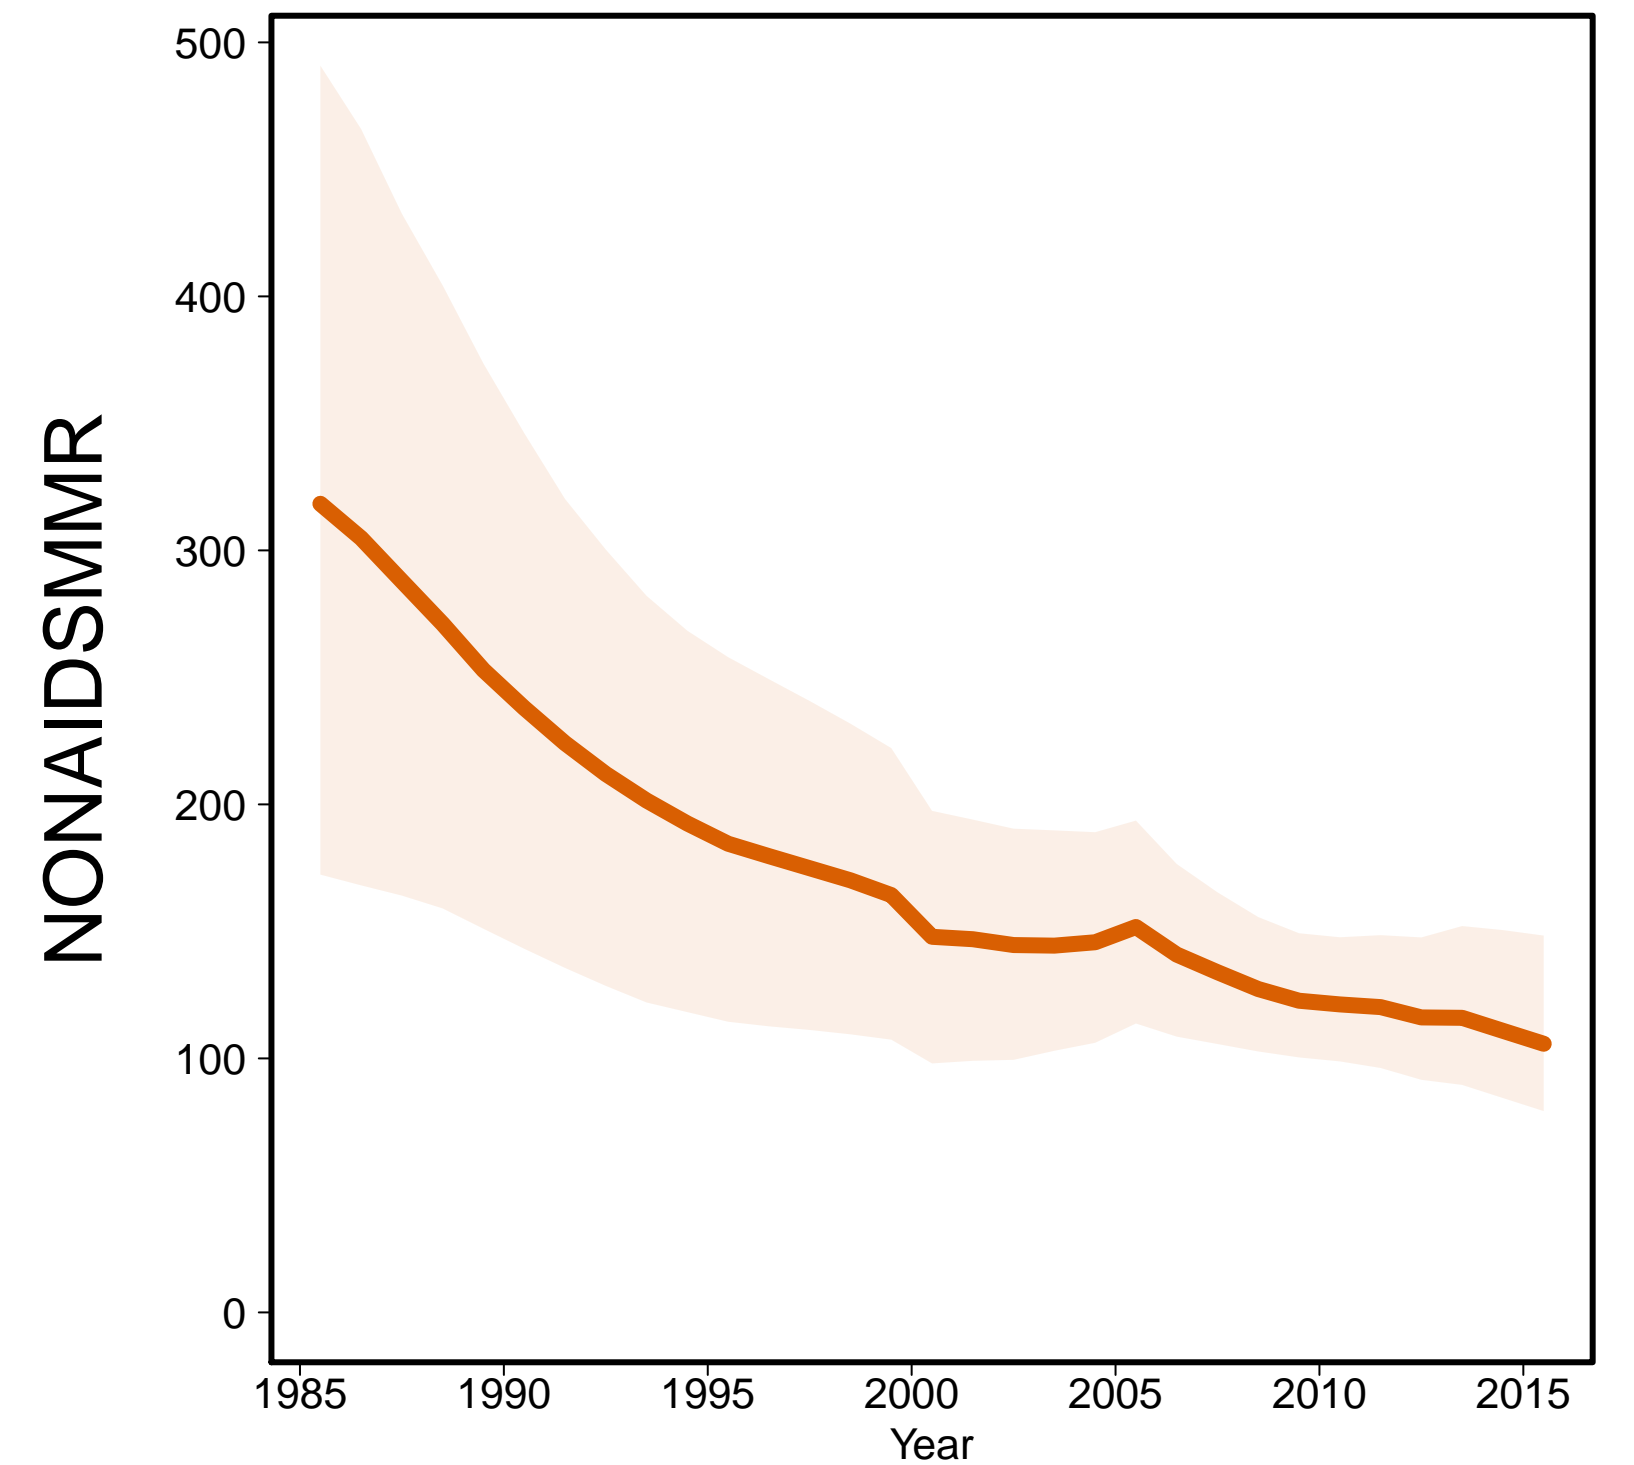

Aids MMR

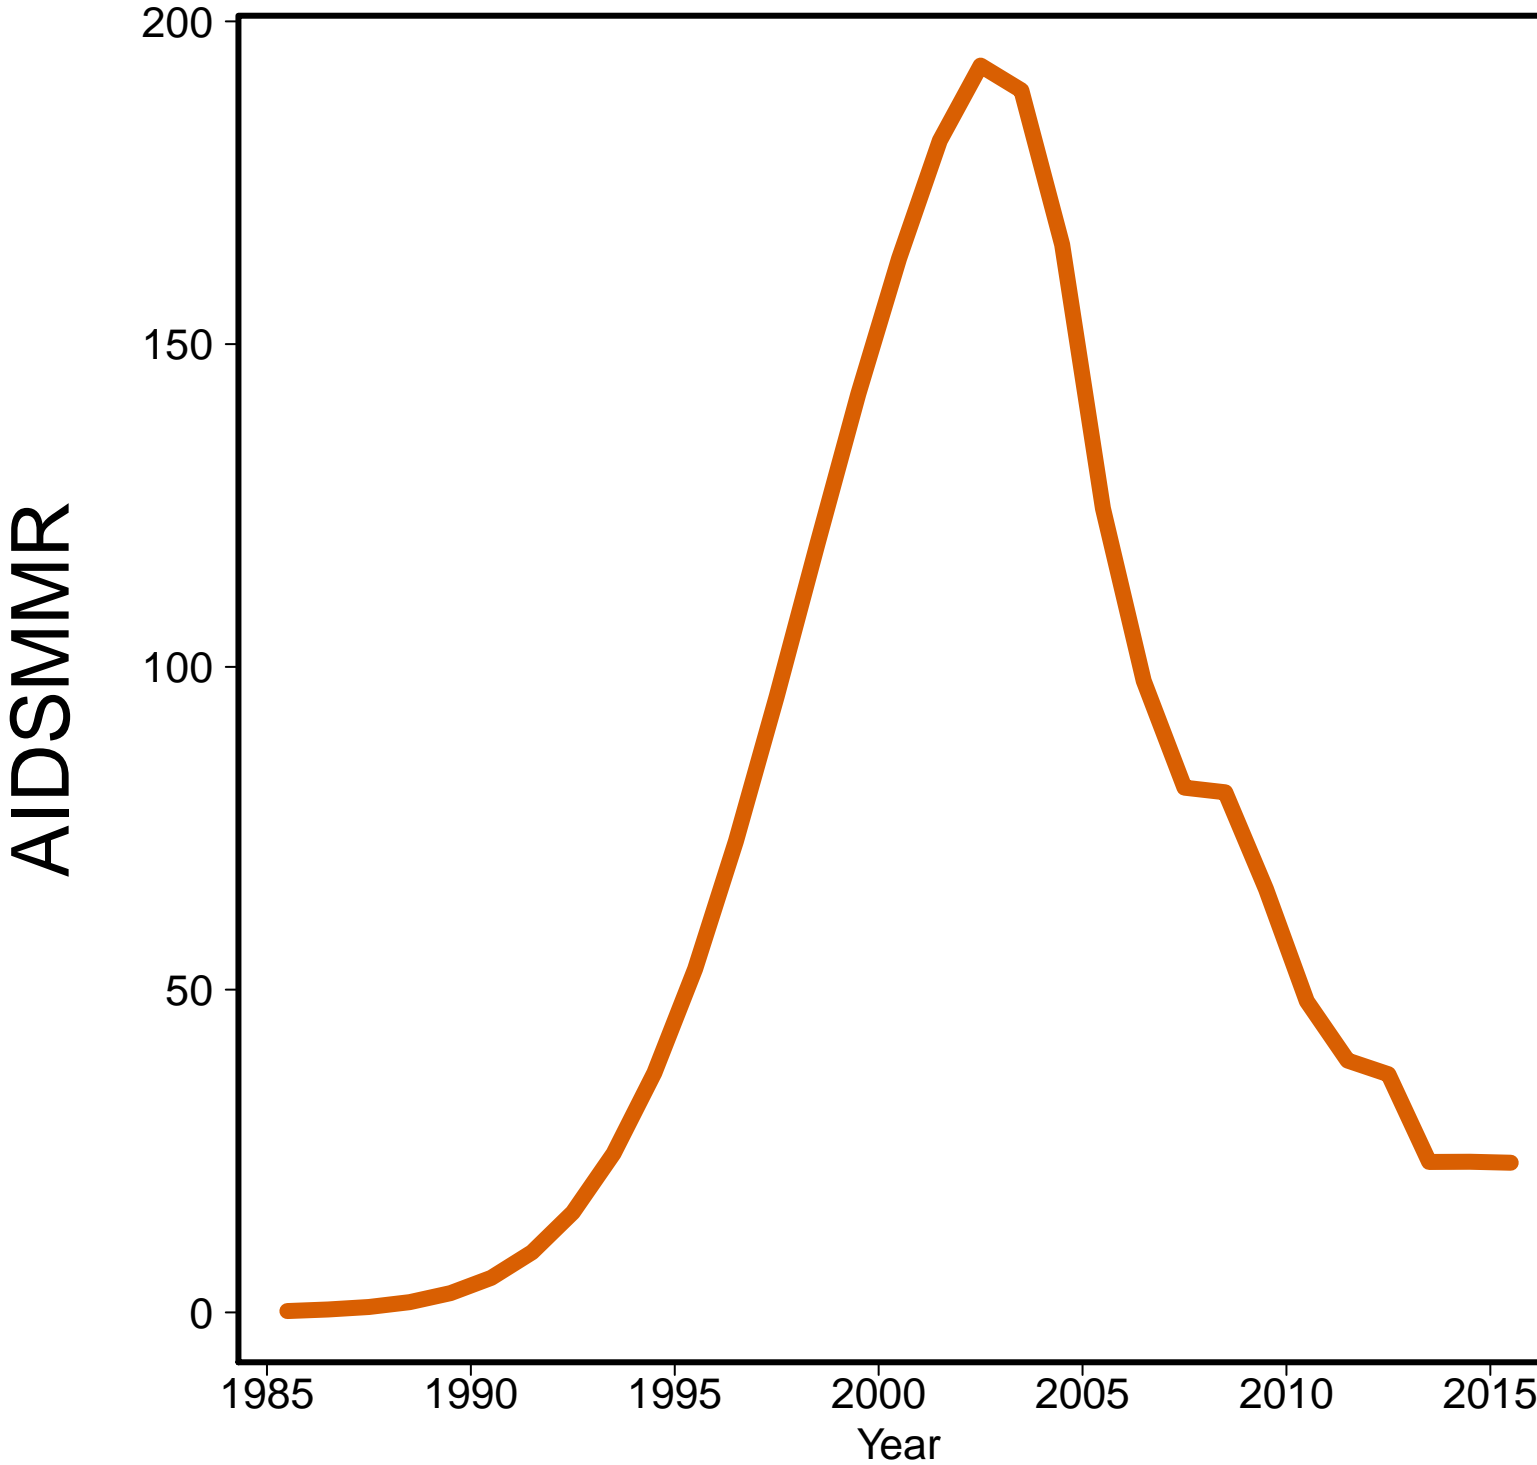

Brazil [BRA]  
(South America)

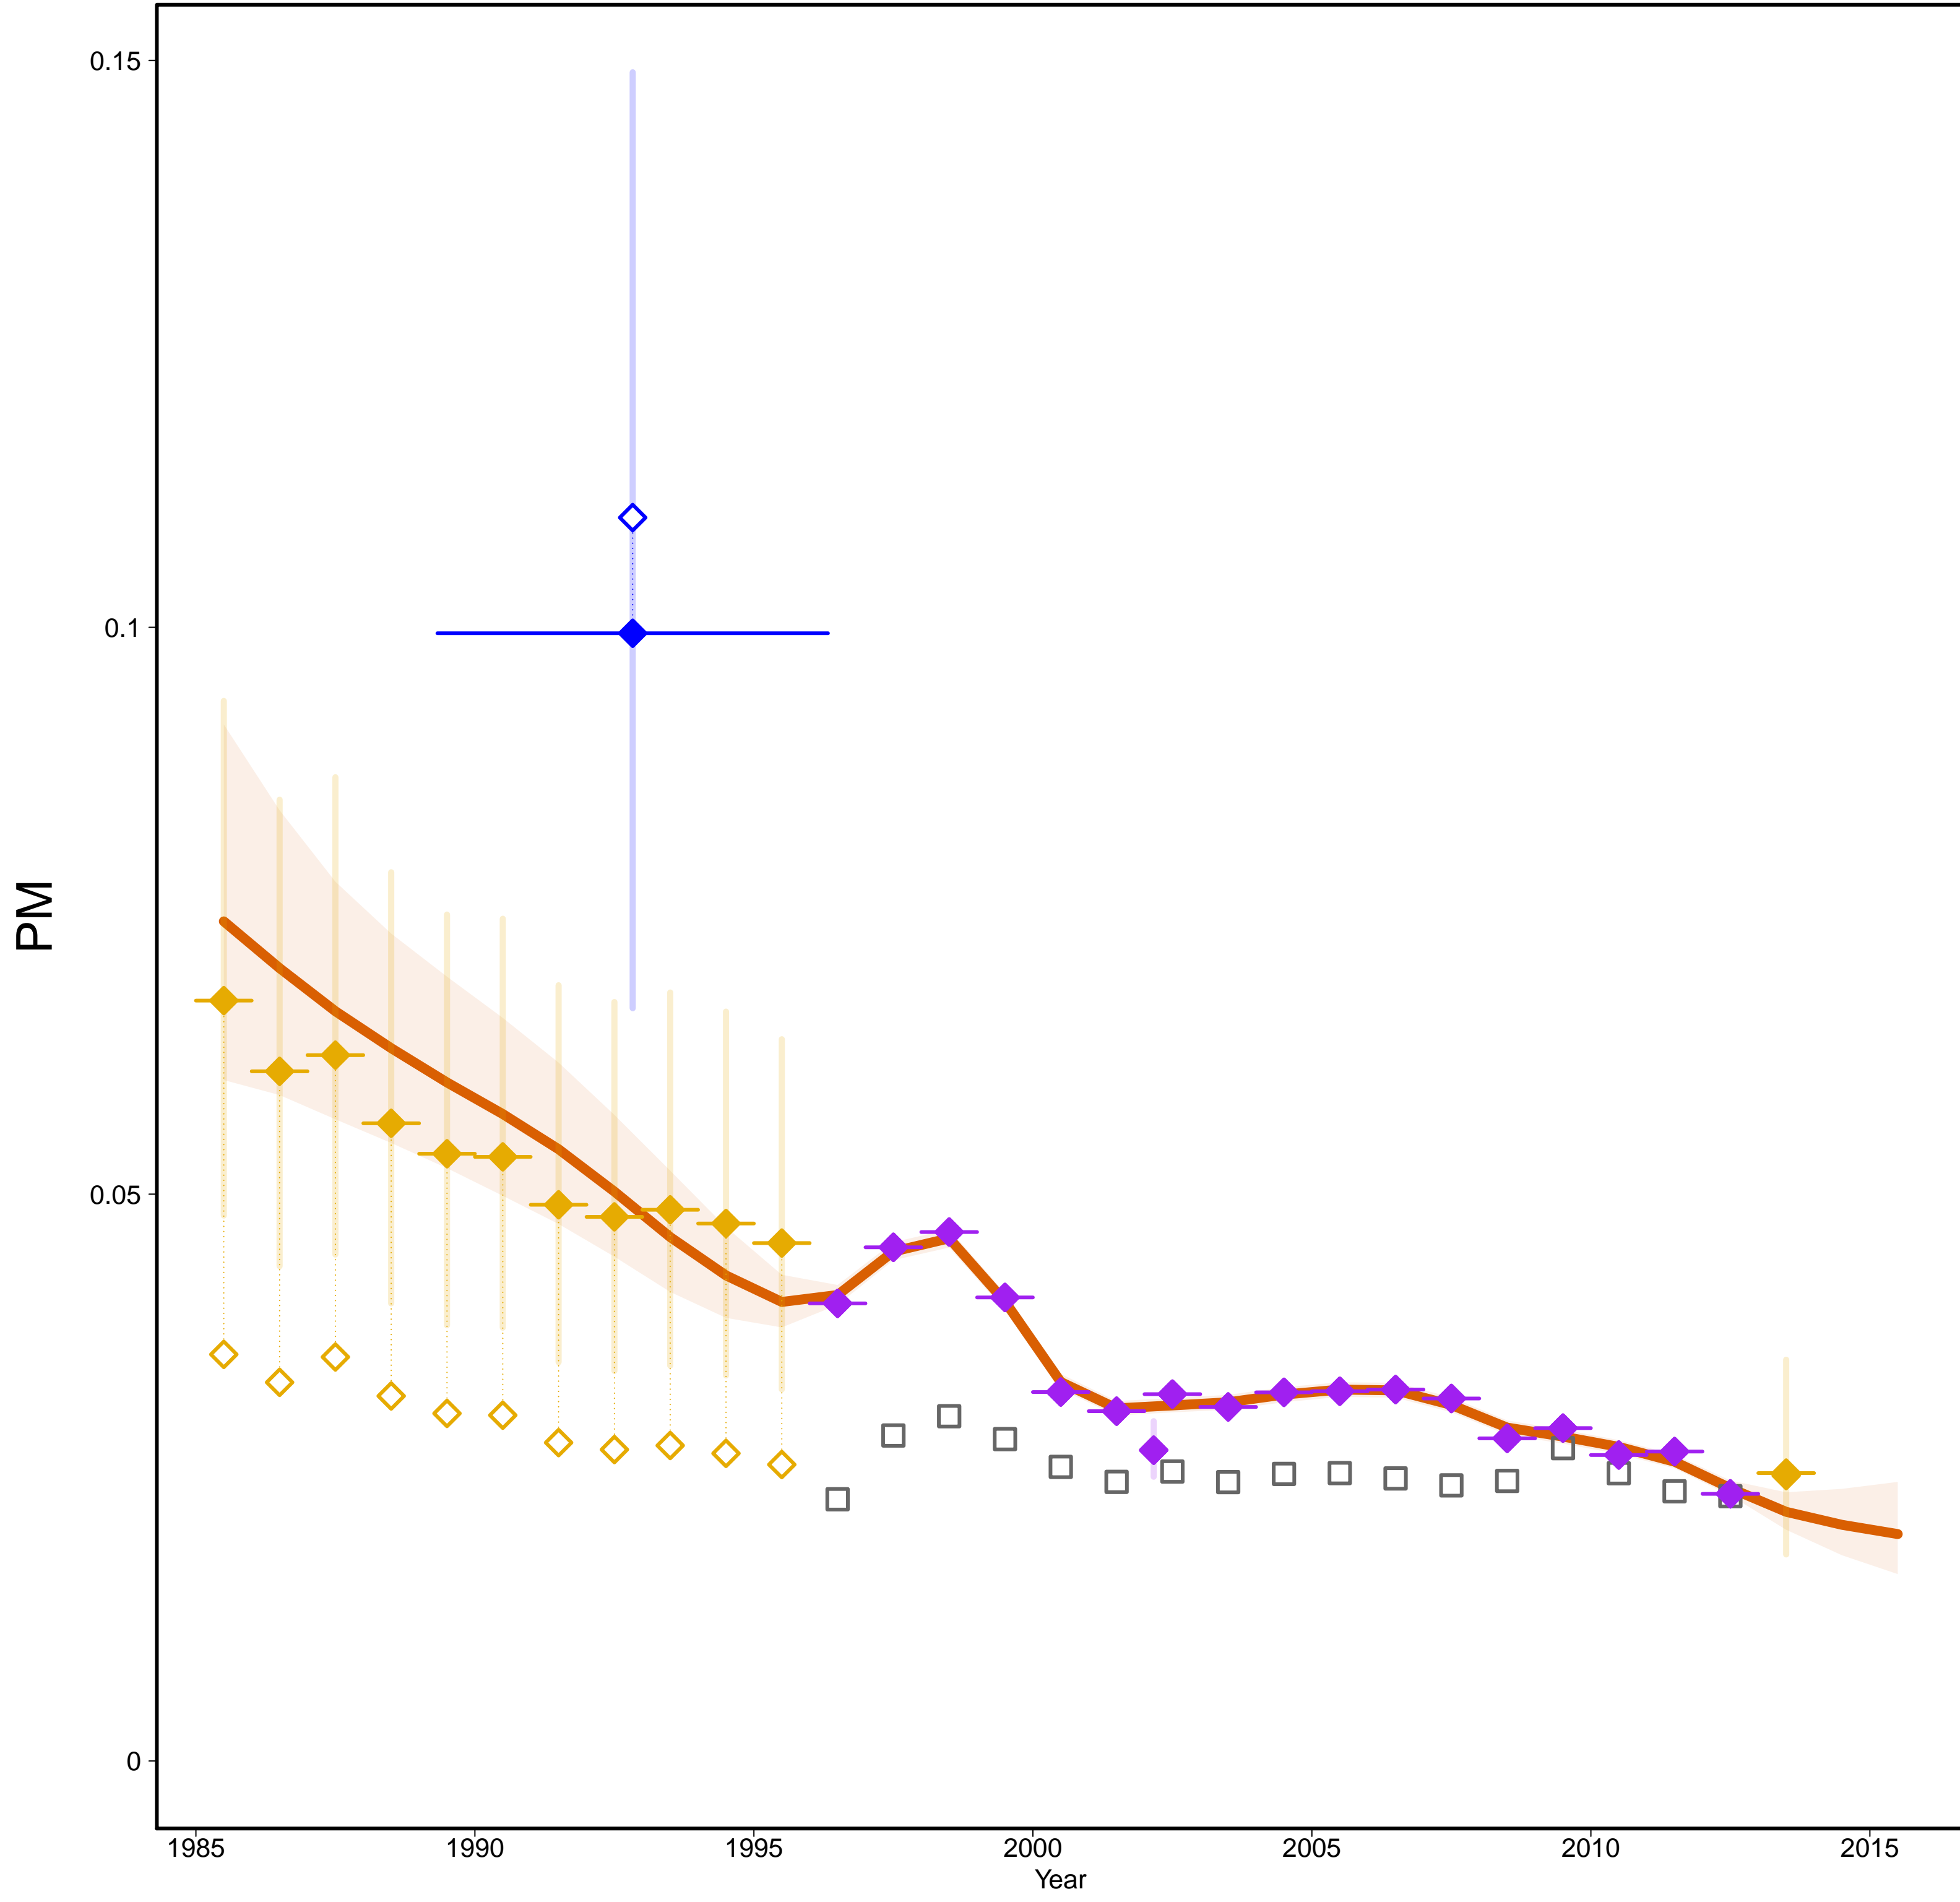

Brazil [BRA]  
(South America)

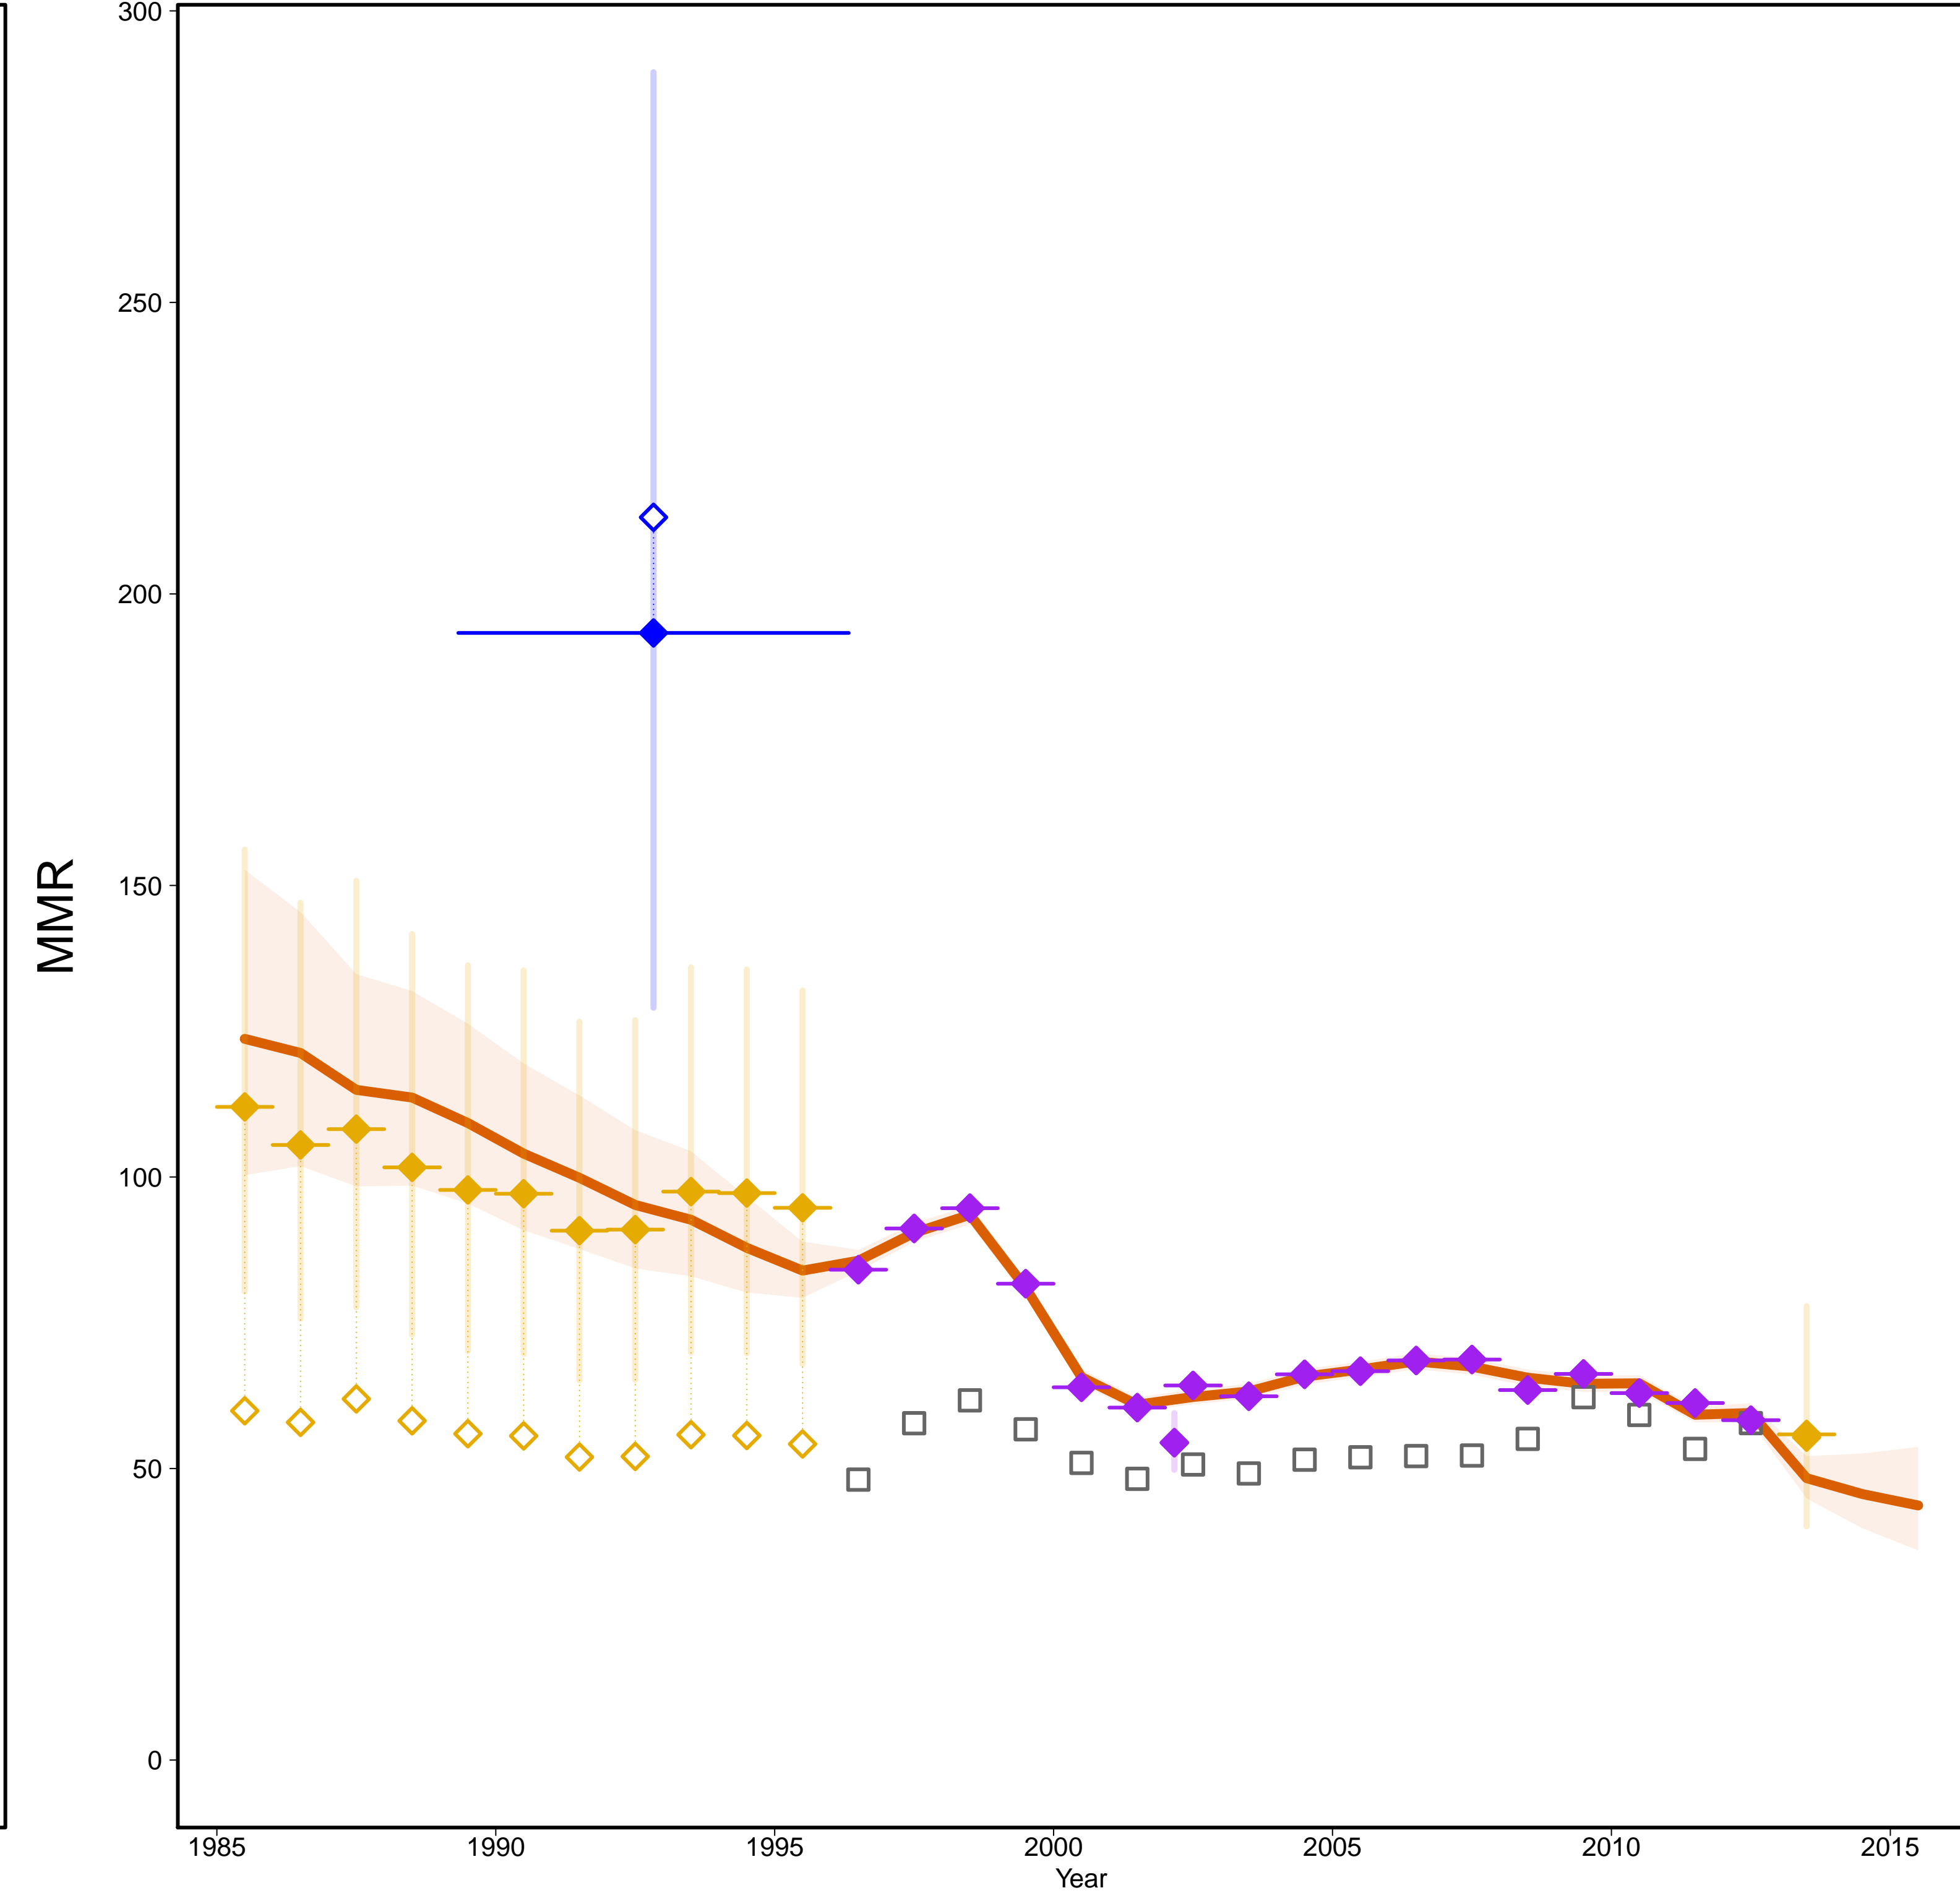

- Estimates —
- MMR Database 2015 —
- ◇ Observed Data
- ◆ Adjusted Data
- Data type —
- ◆ VR
- ◆ Spec. studies
- ◆ DHS
- Excluded VR data  
(overlap with specialized study)

Gross Domestic Product

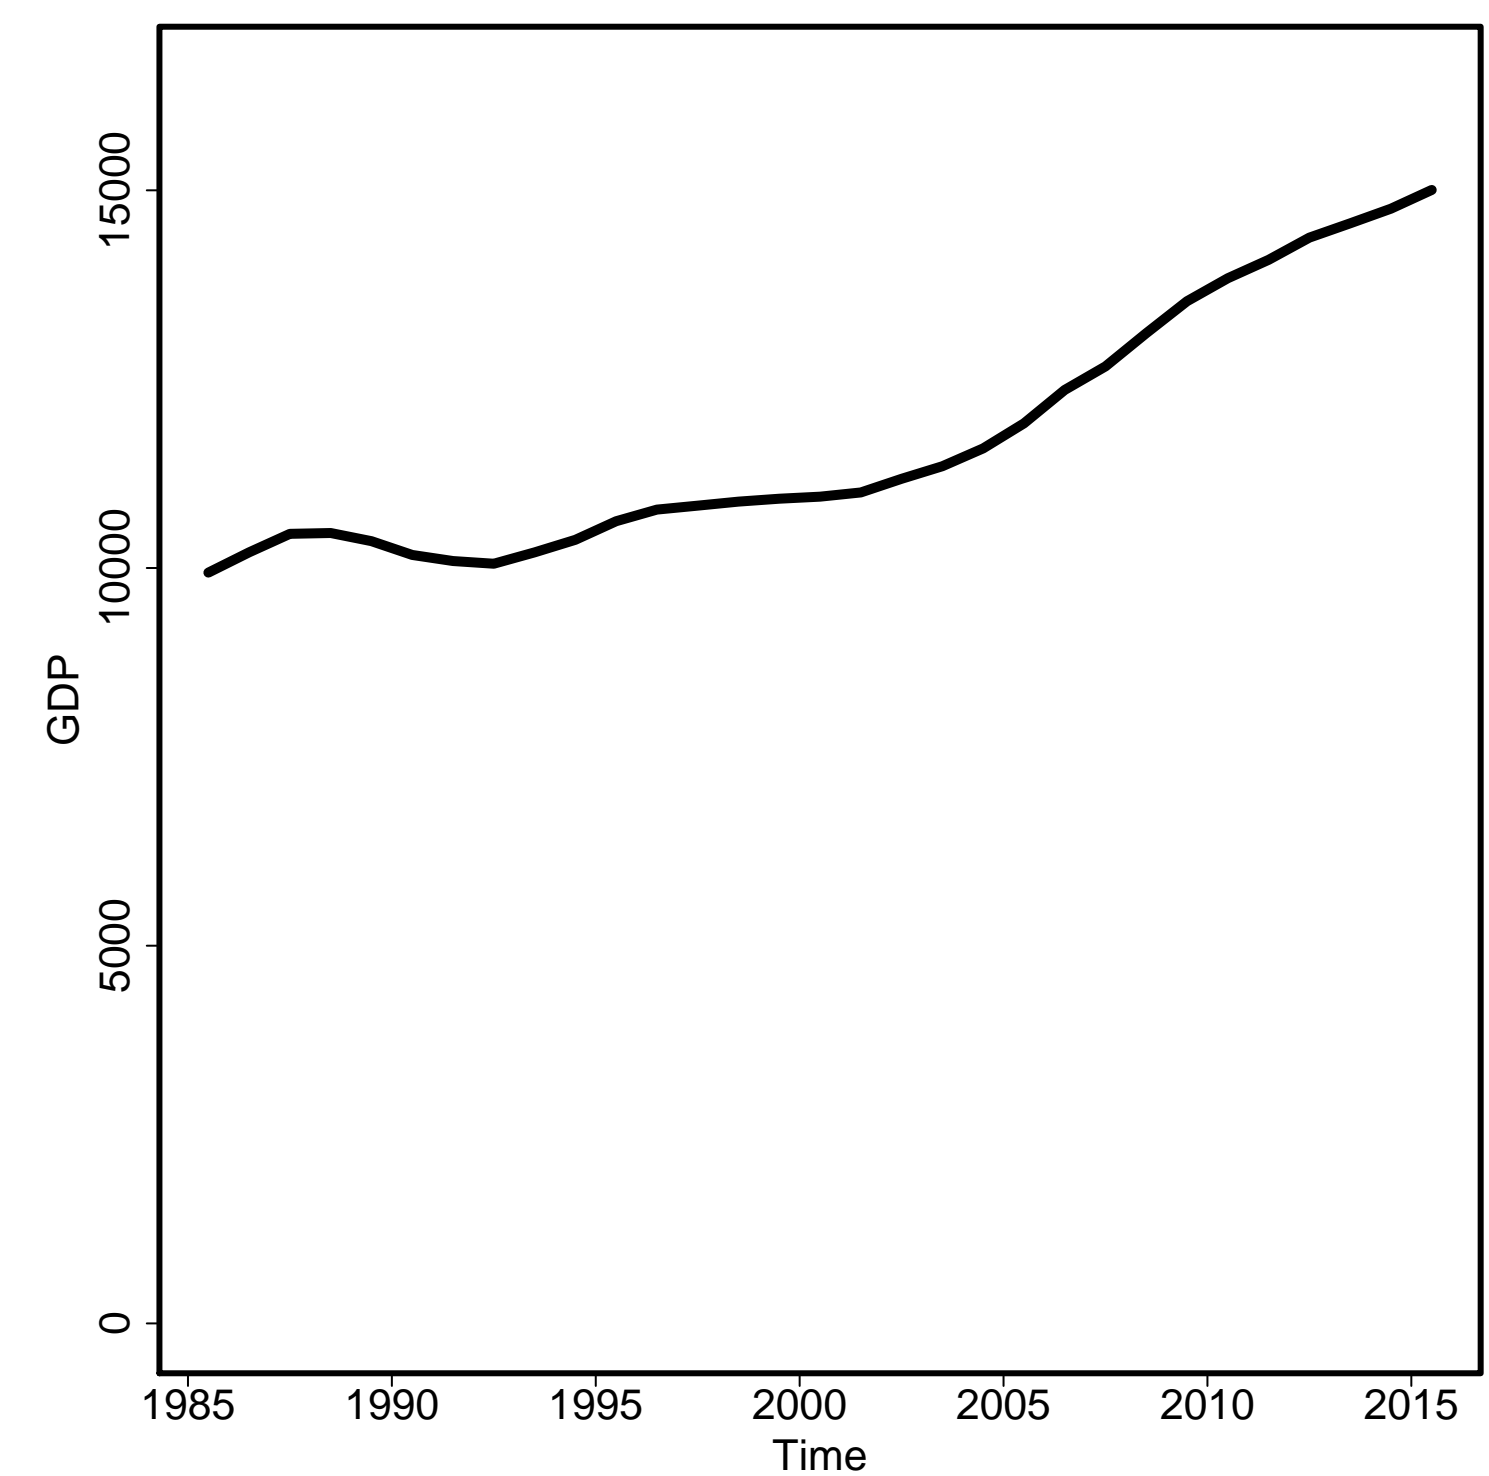

General Fertility Rate

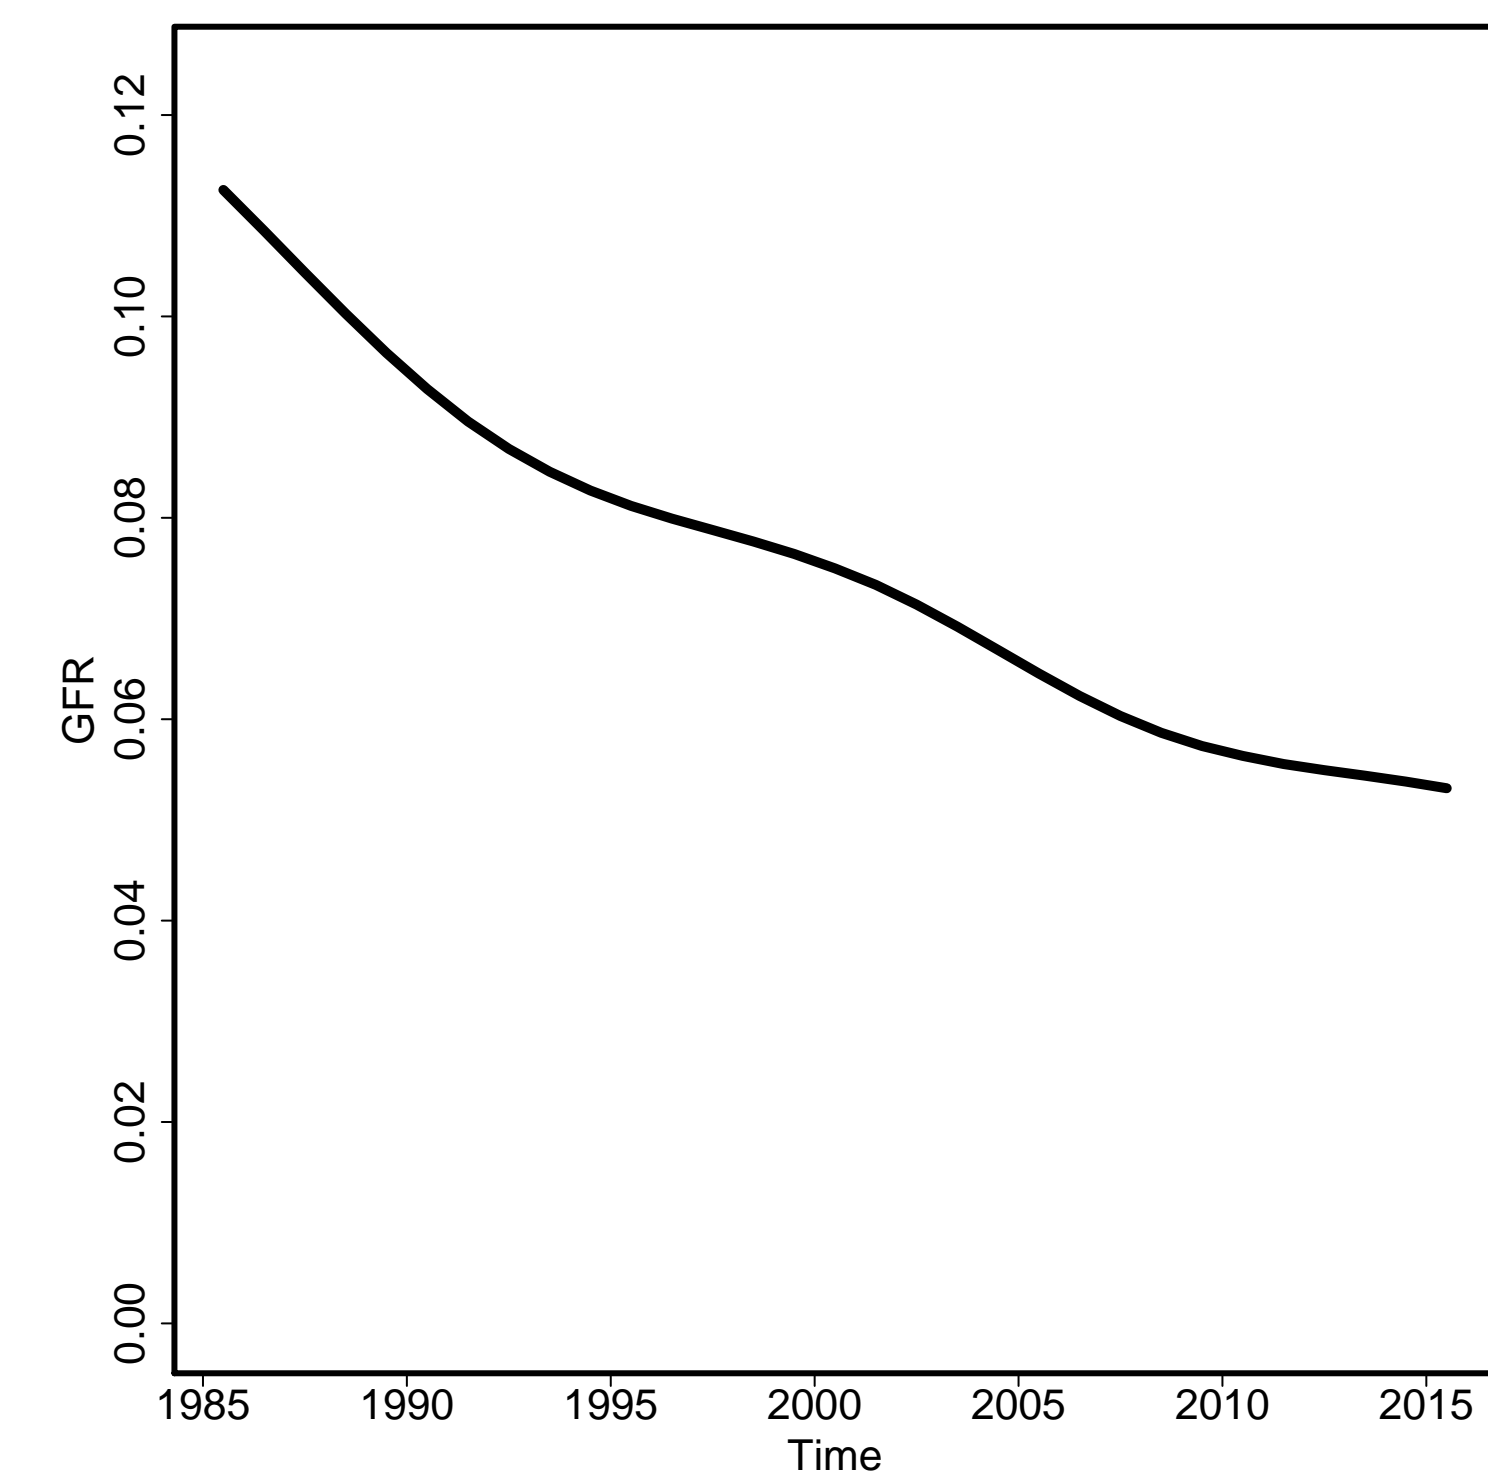

Skilled Attendance to Birth

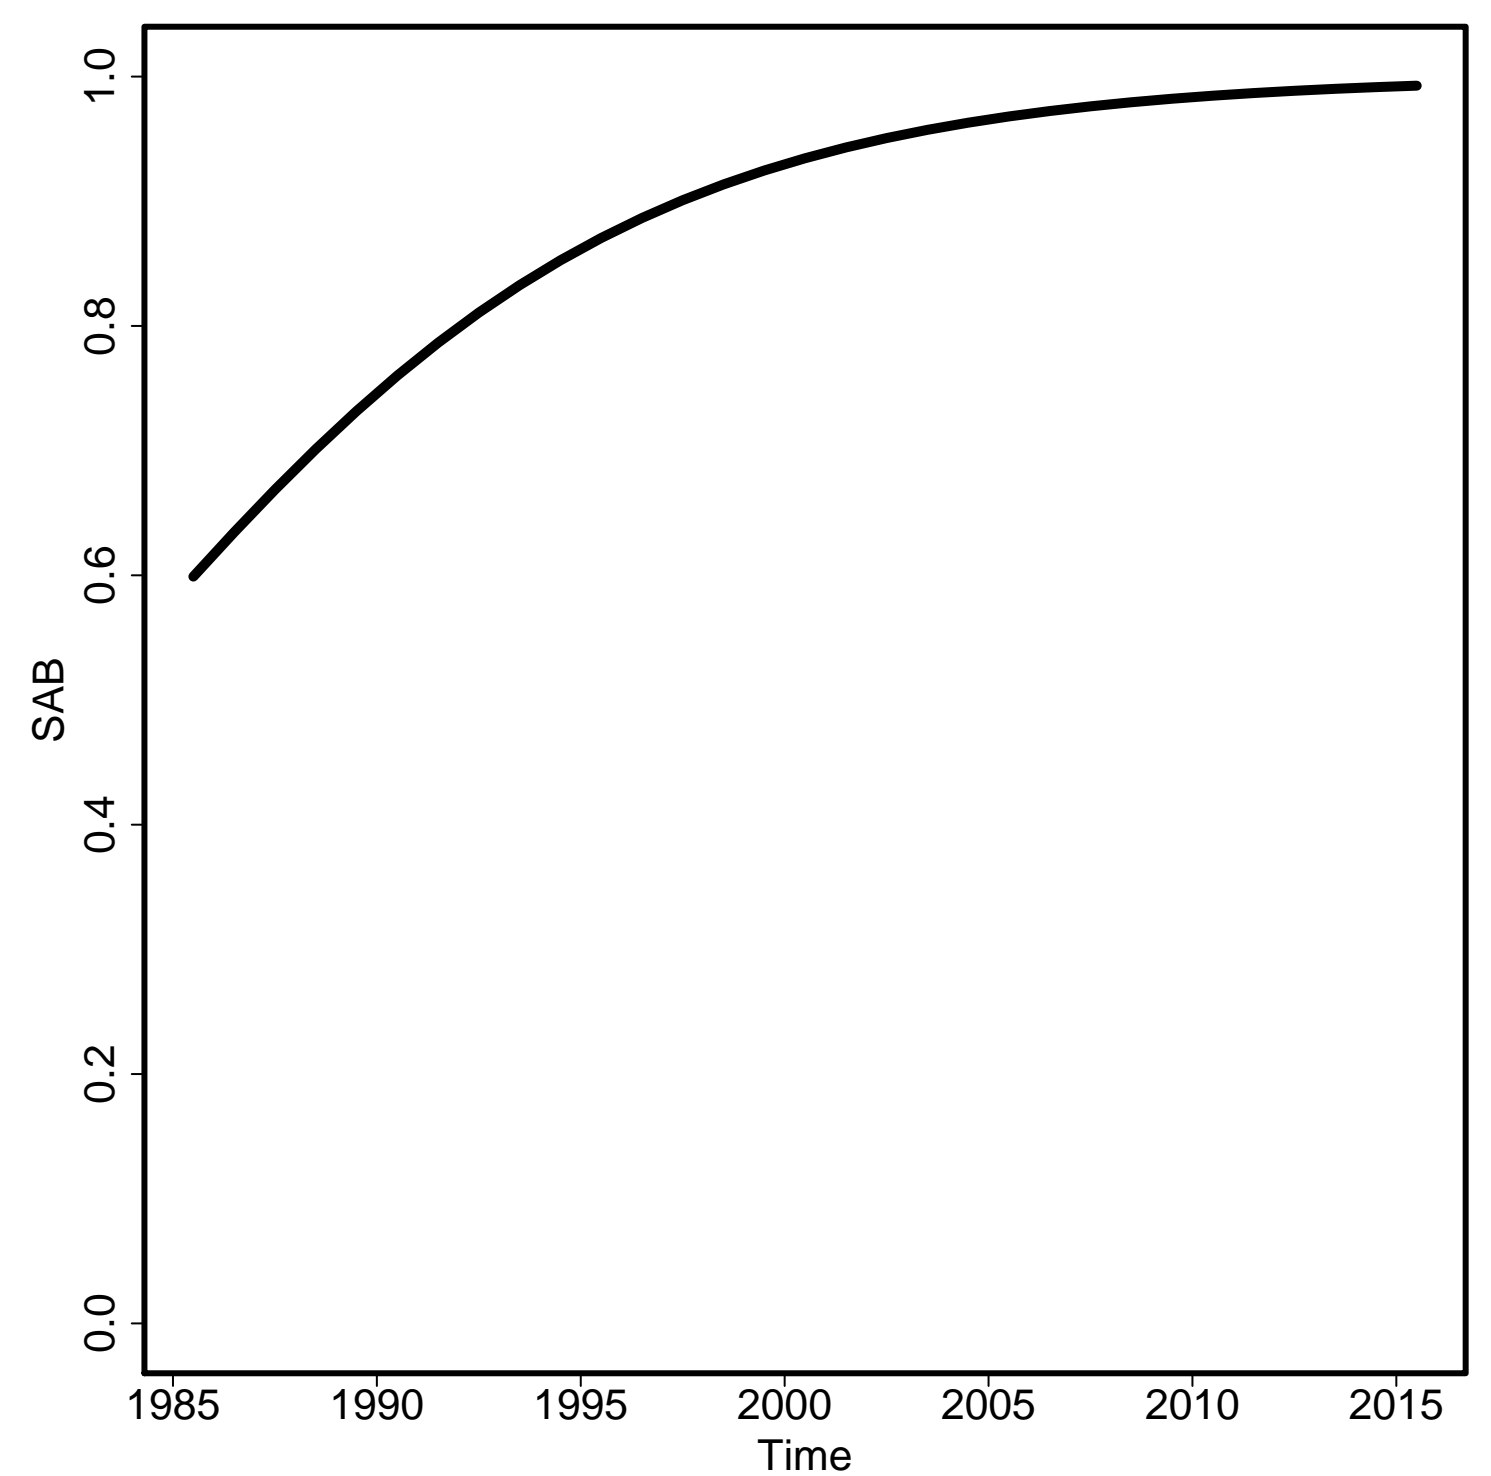

Envelope/Births

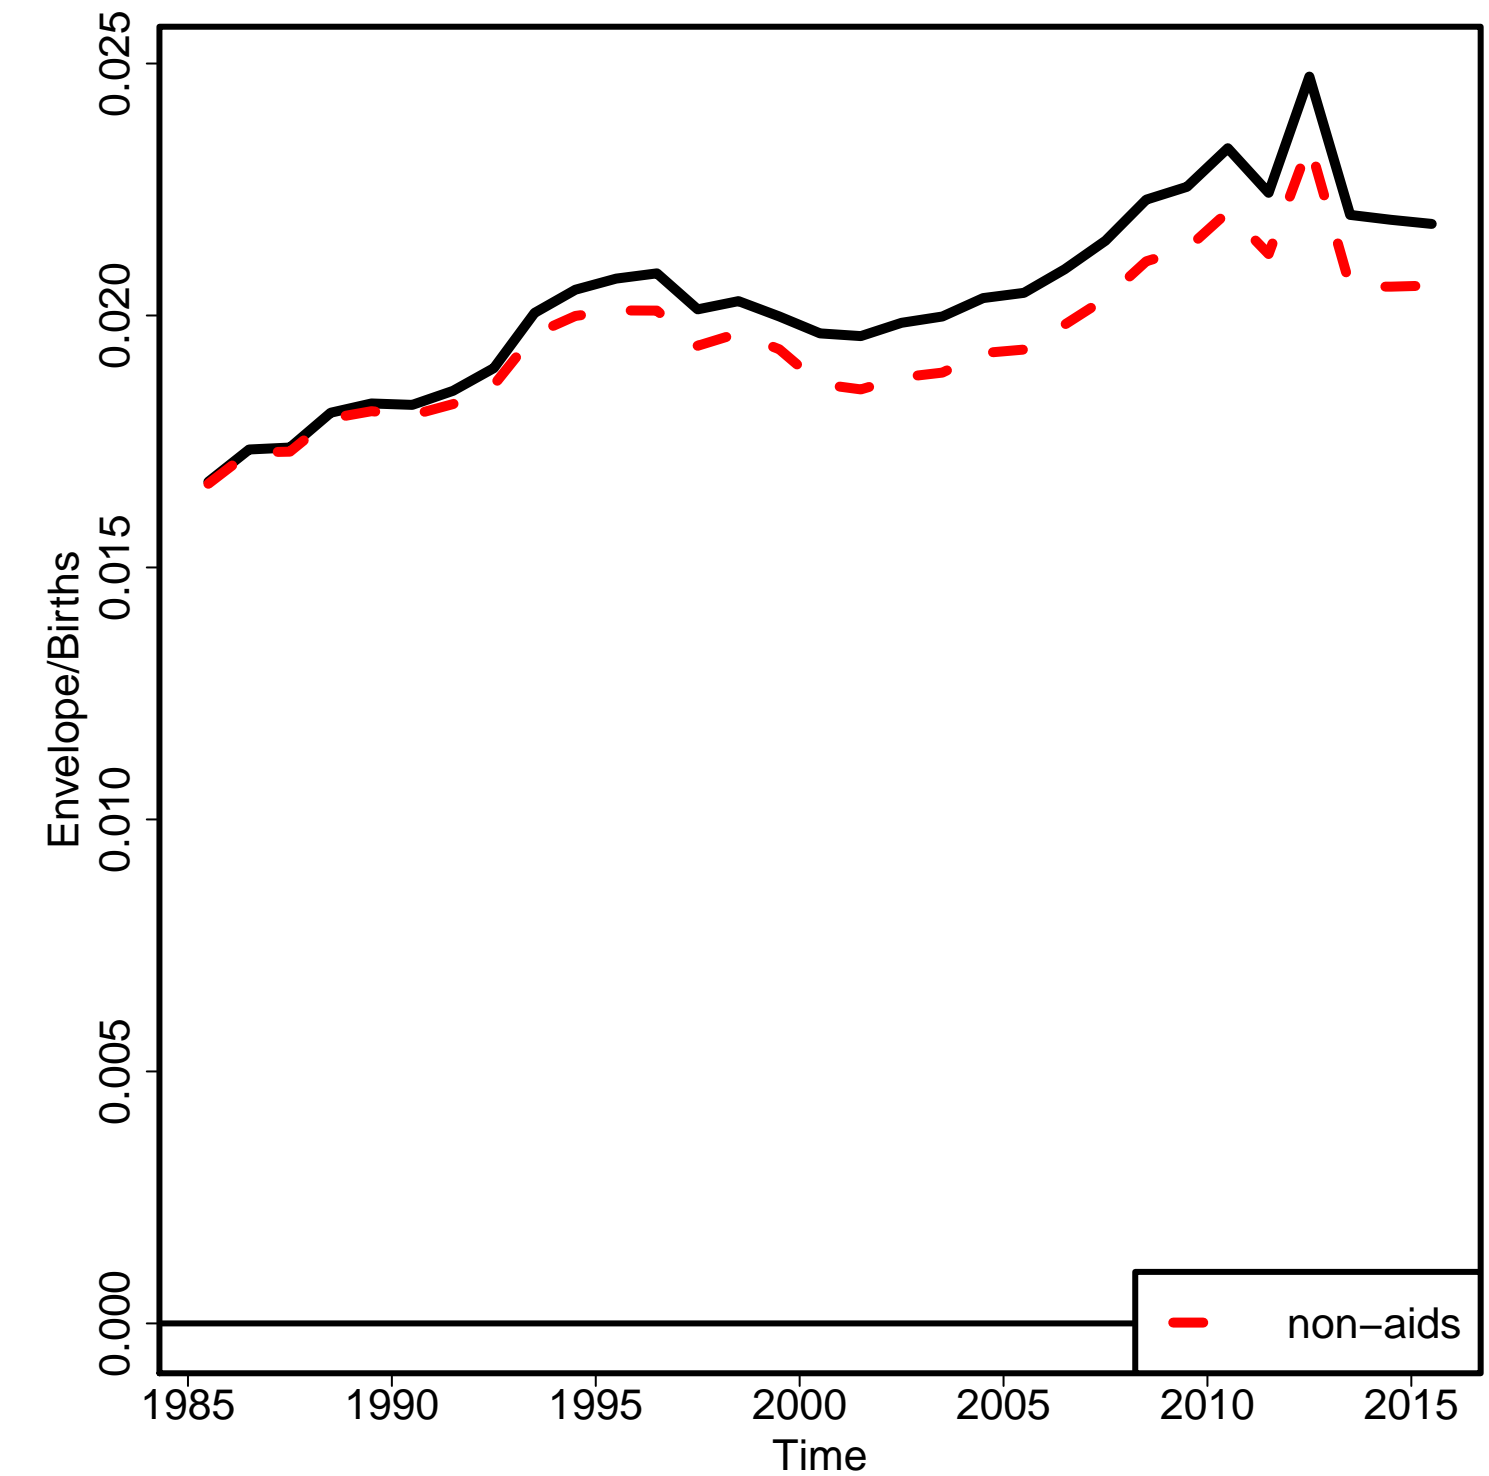

Non-aids MMR

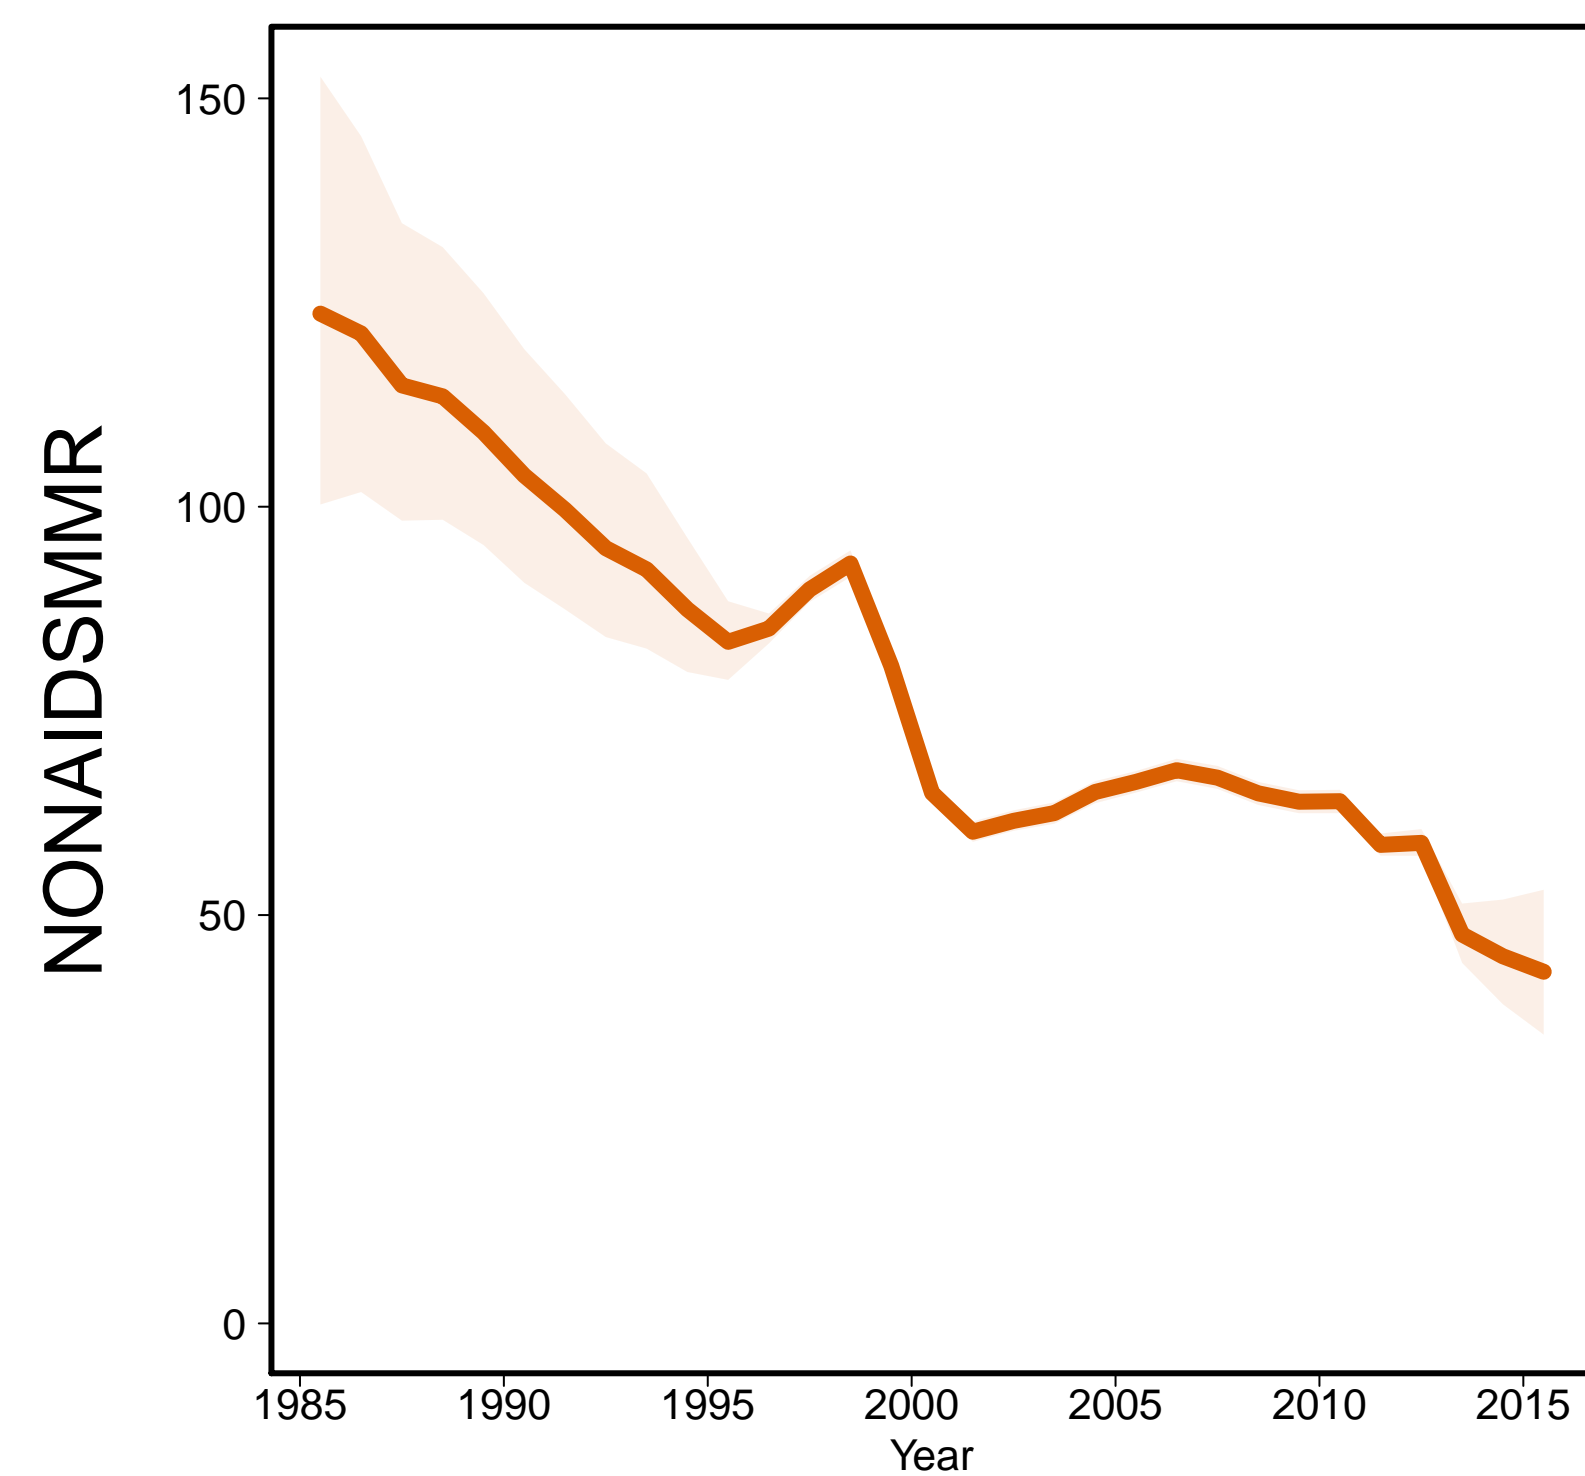

Aids MMR

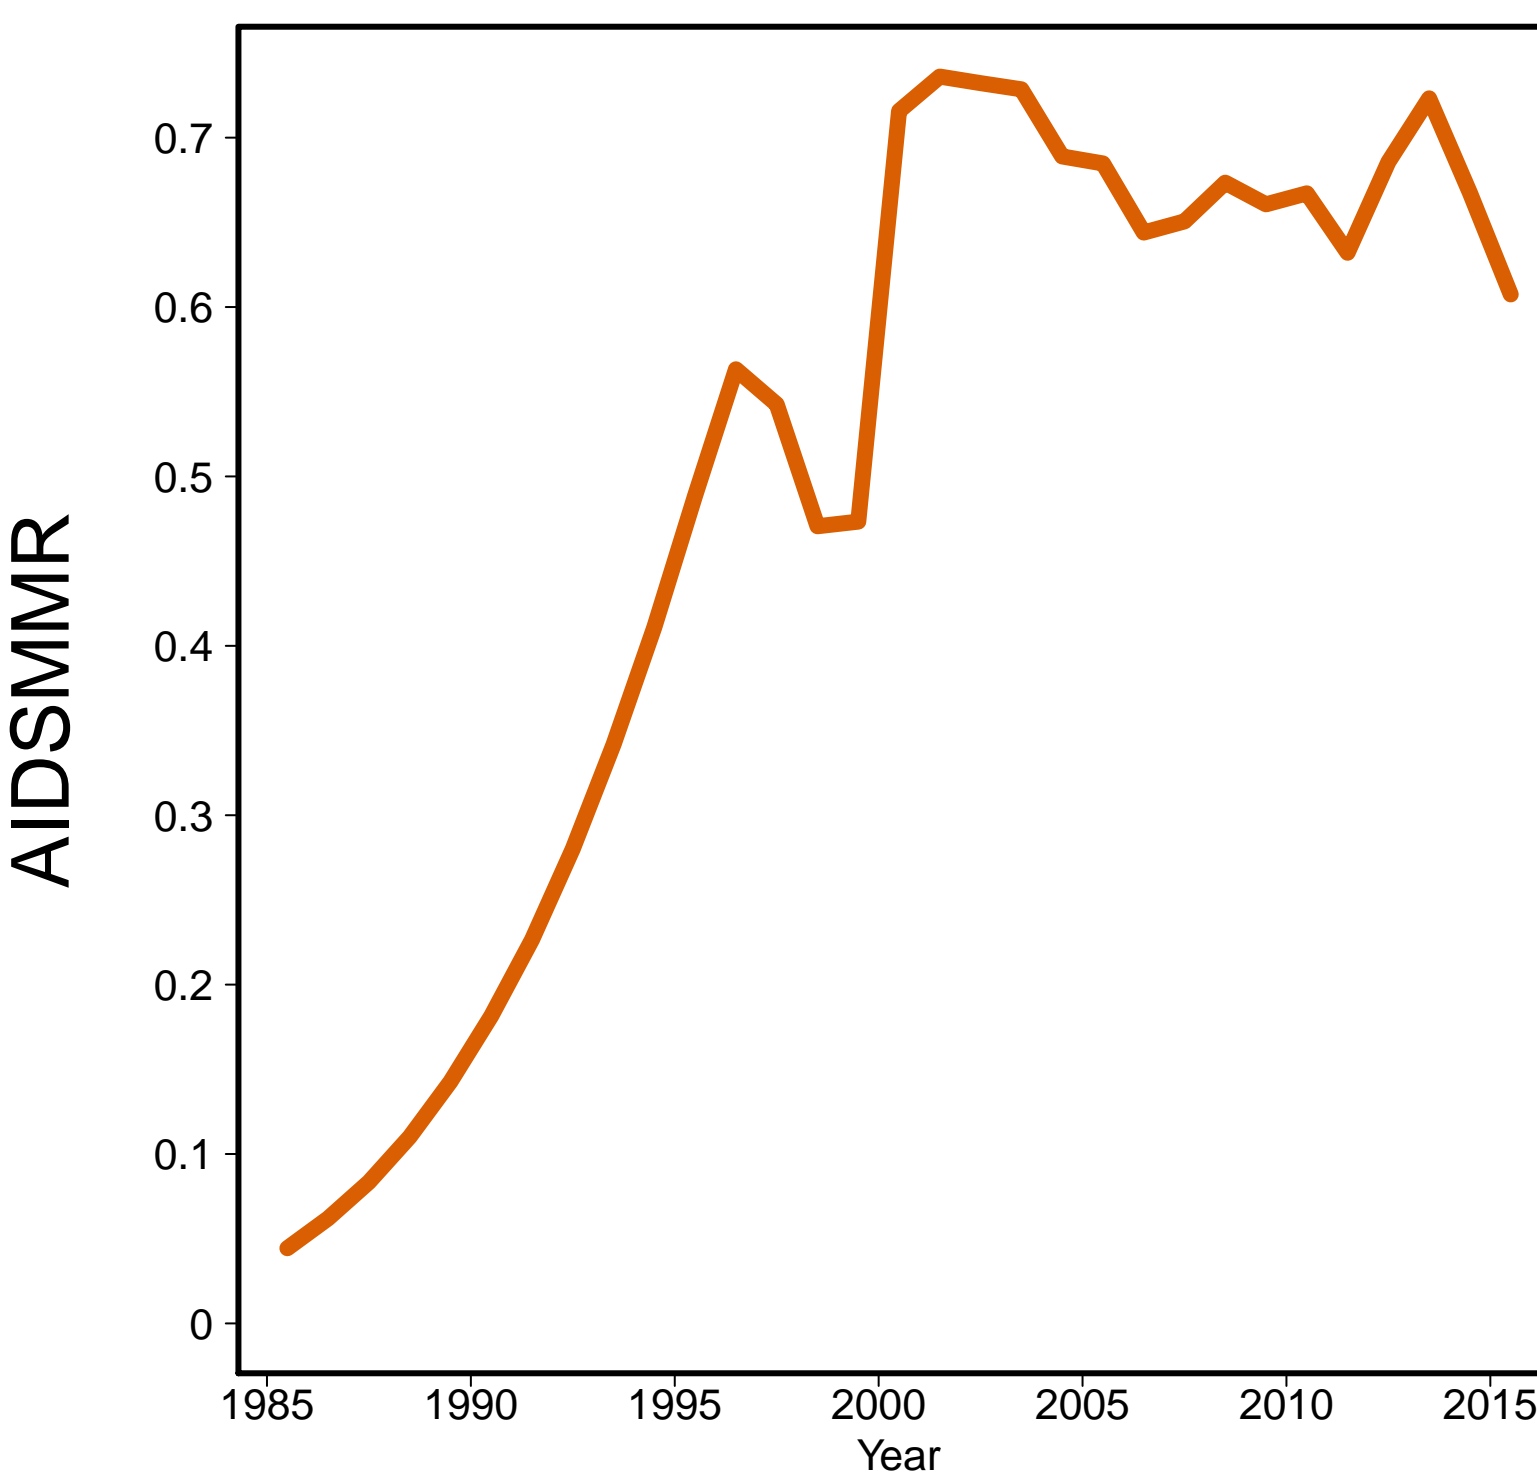

Brunei Darussalam [BRN]  
(South-Eastern Asia / Oceania)

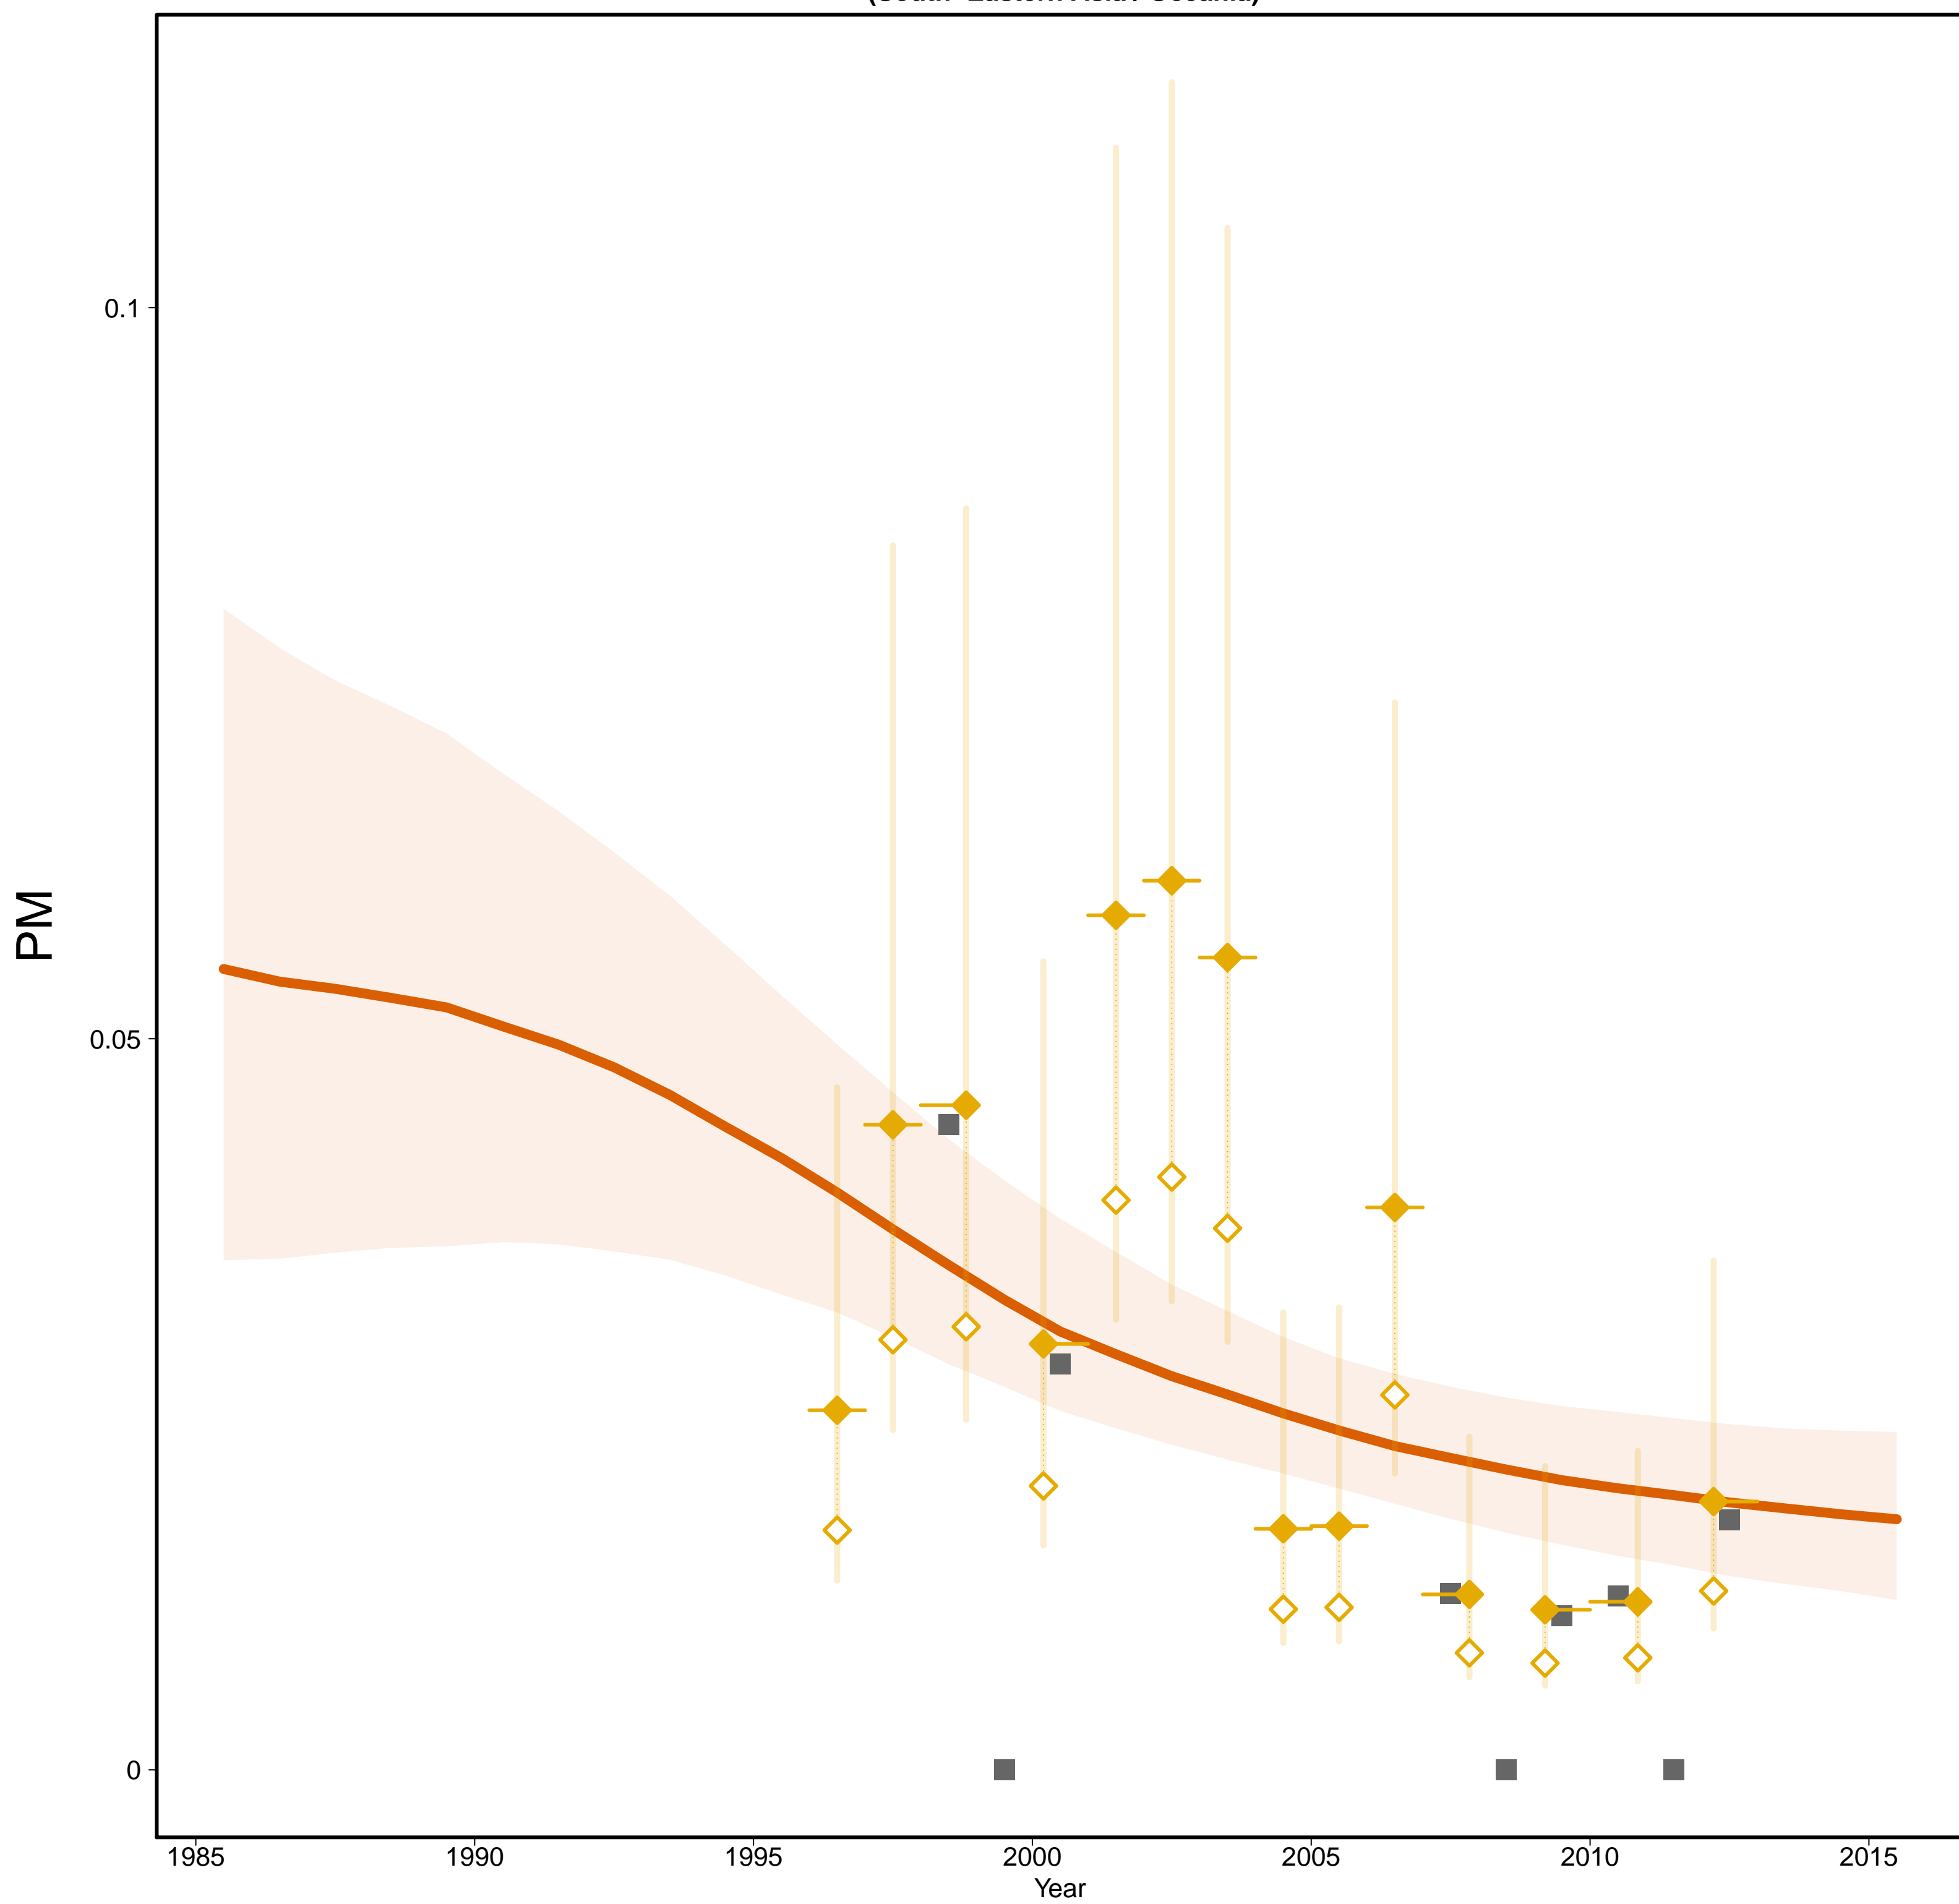

Brunei Darussalam [BRN]  
(South-Eastern Asia / Oceania)

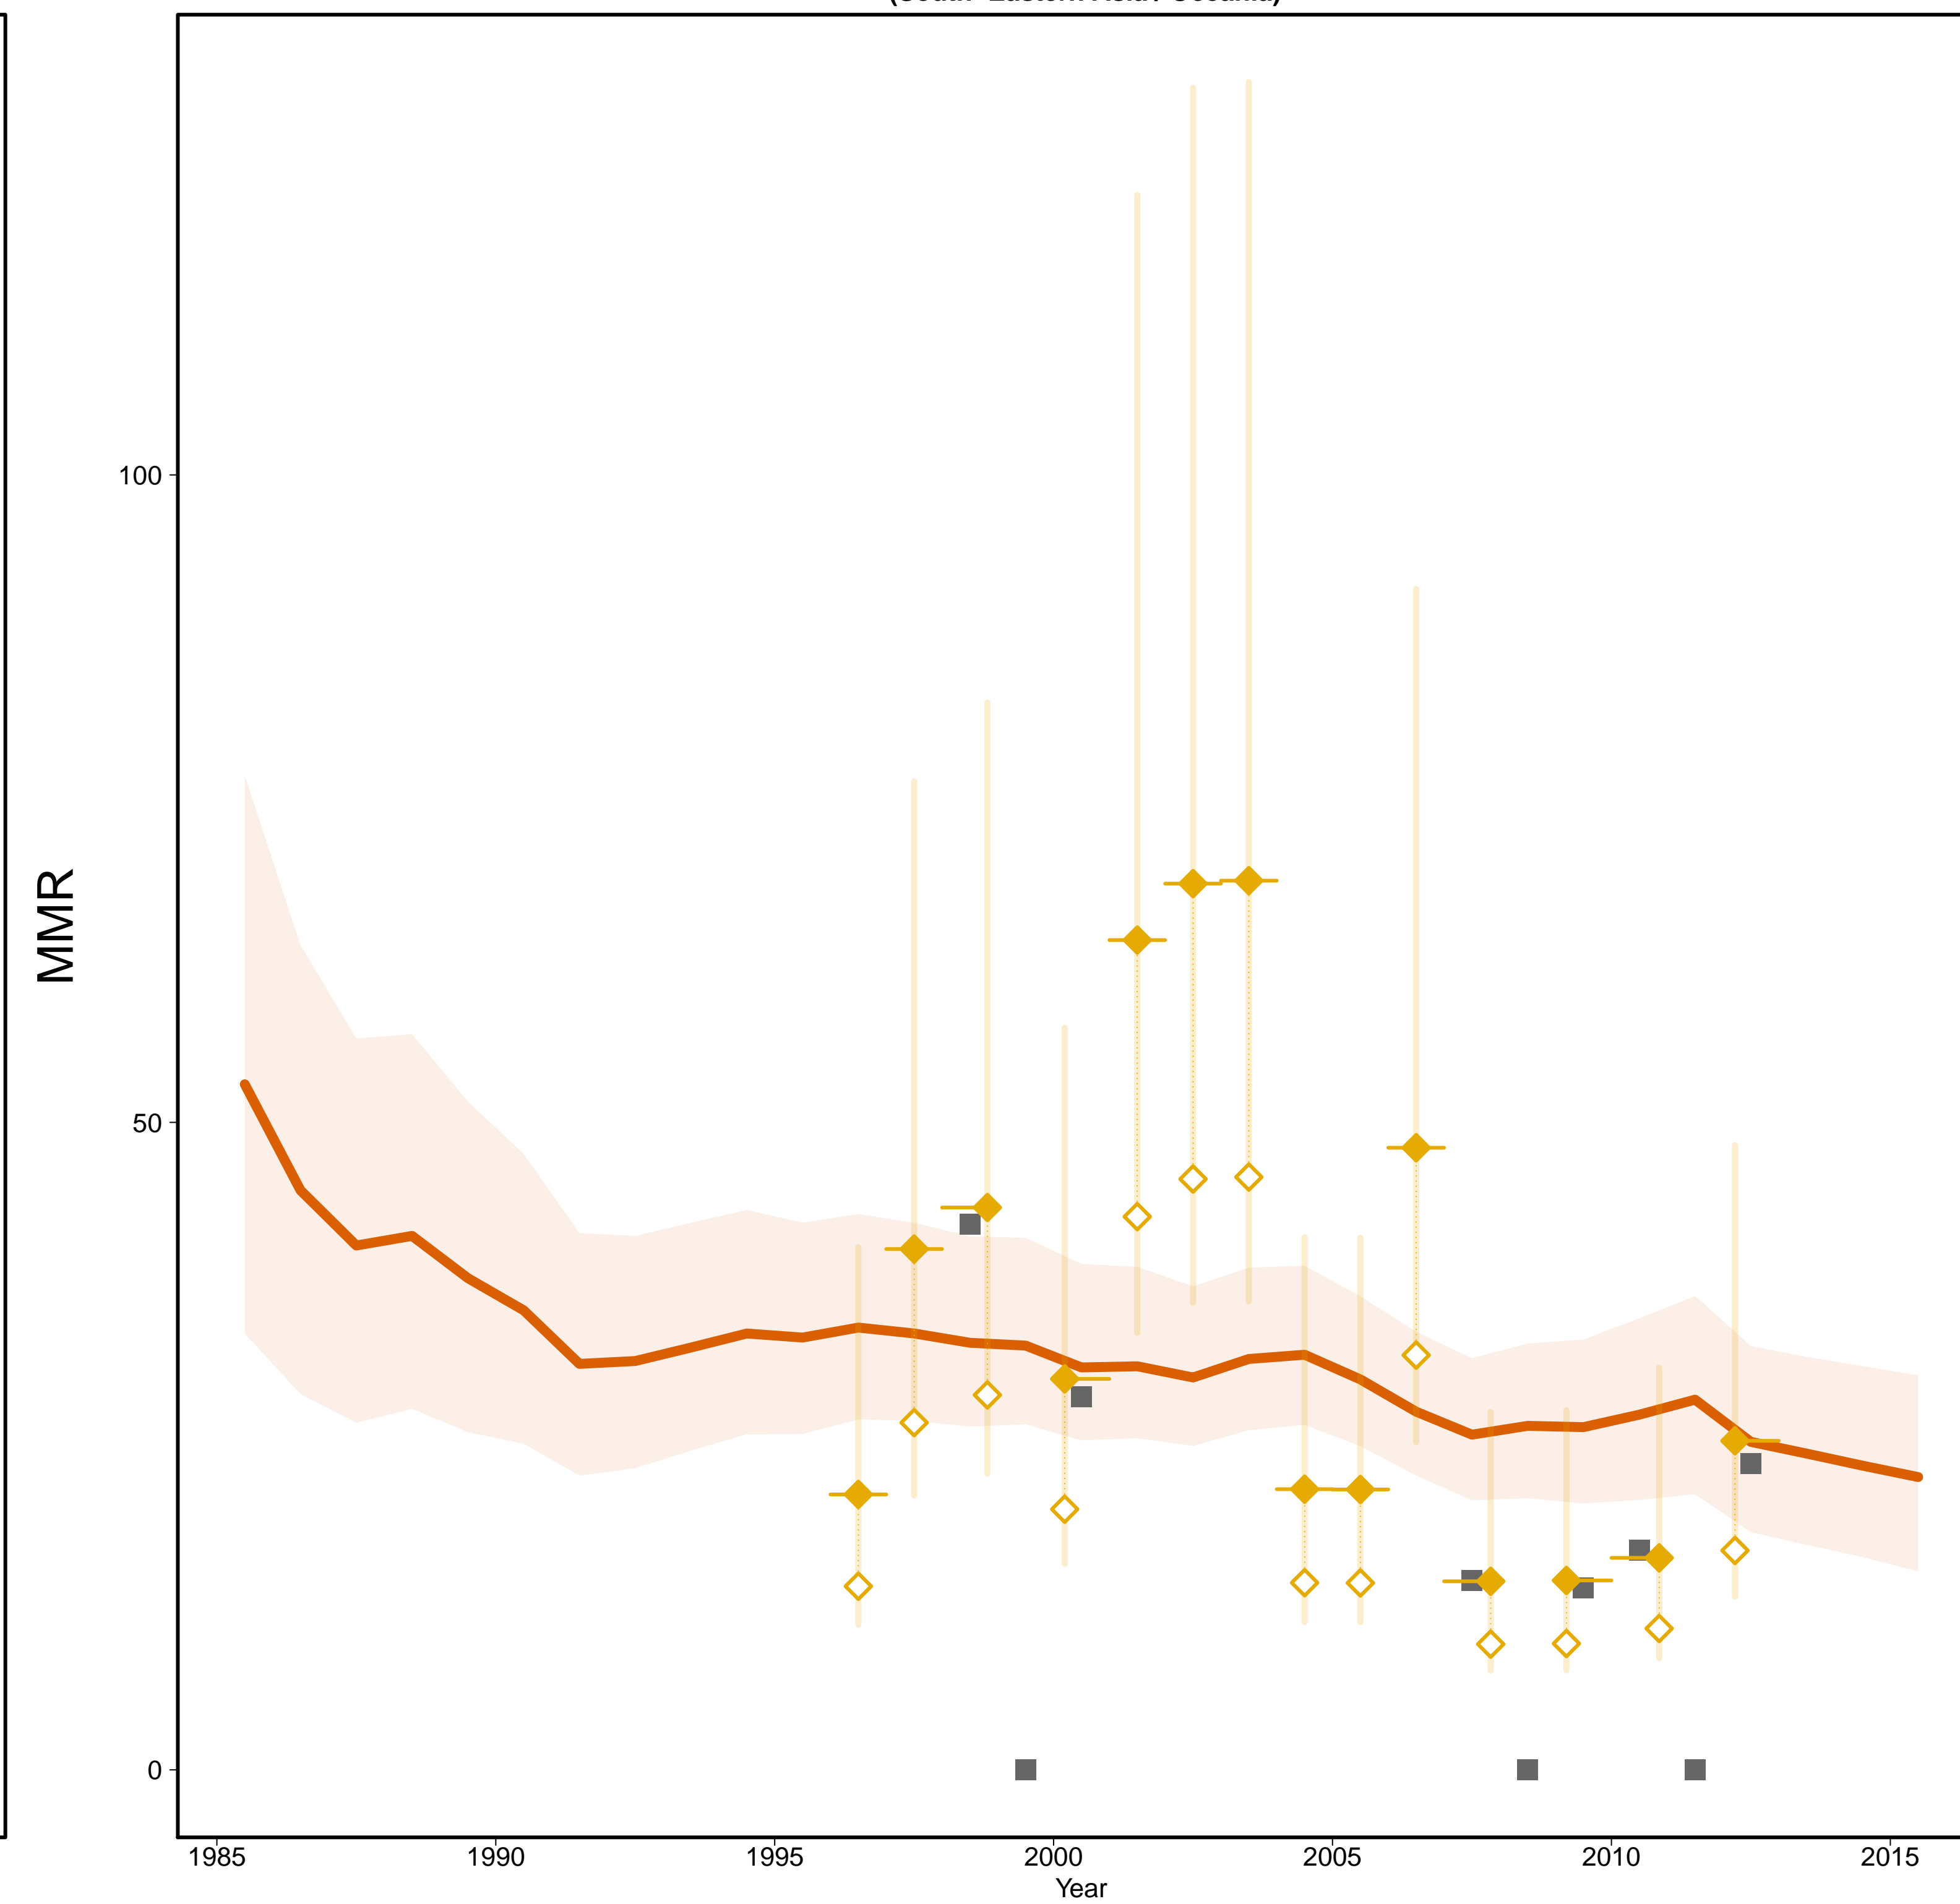

- Estimates –
- Mlate
- MMR Database 2015 –
- ◇ Observed Data
- ◆ Adjusted Data
- Data type –
- ◆ VR
- Reported VR before recalc.  
(related to 0 obs. mat. death)

Gross Domestic Product

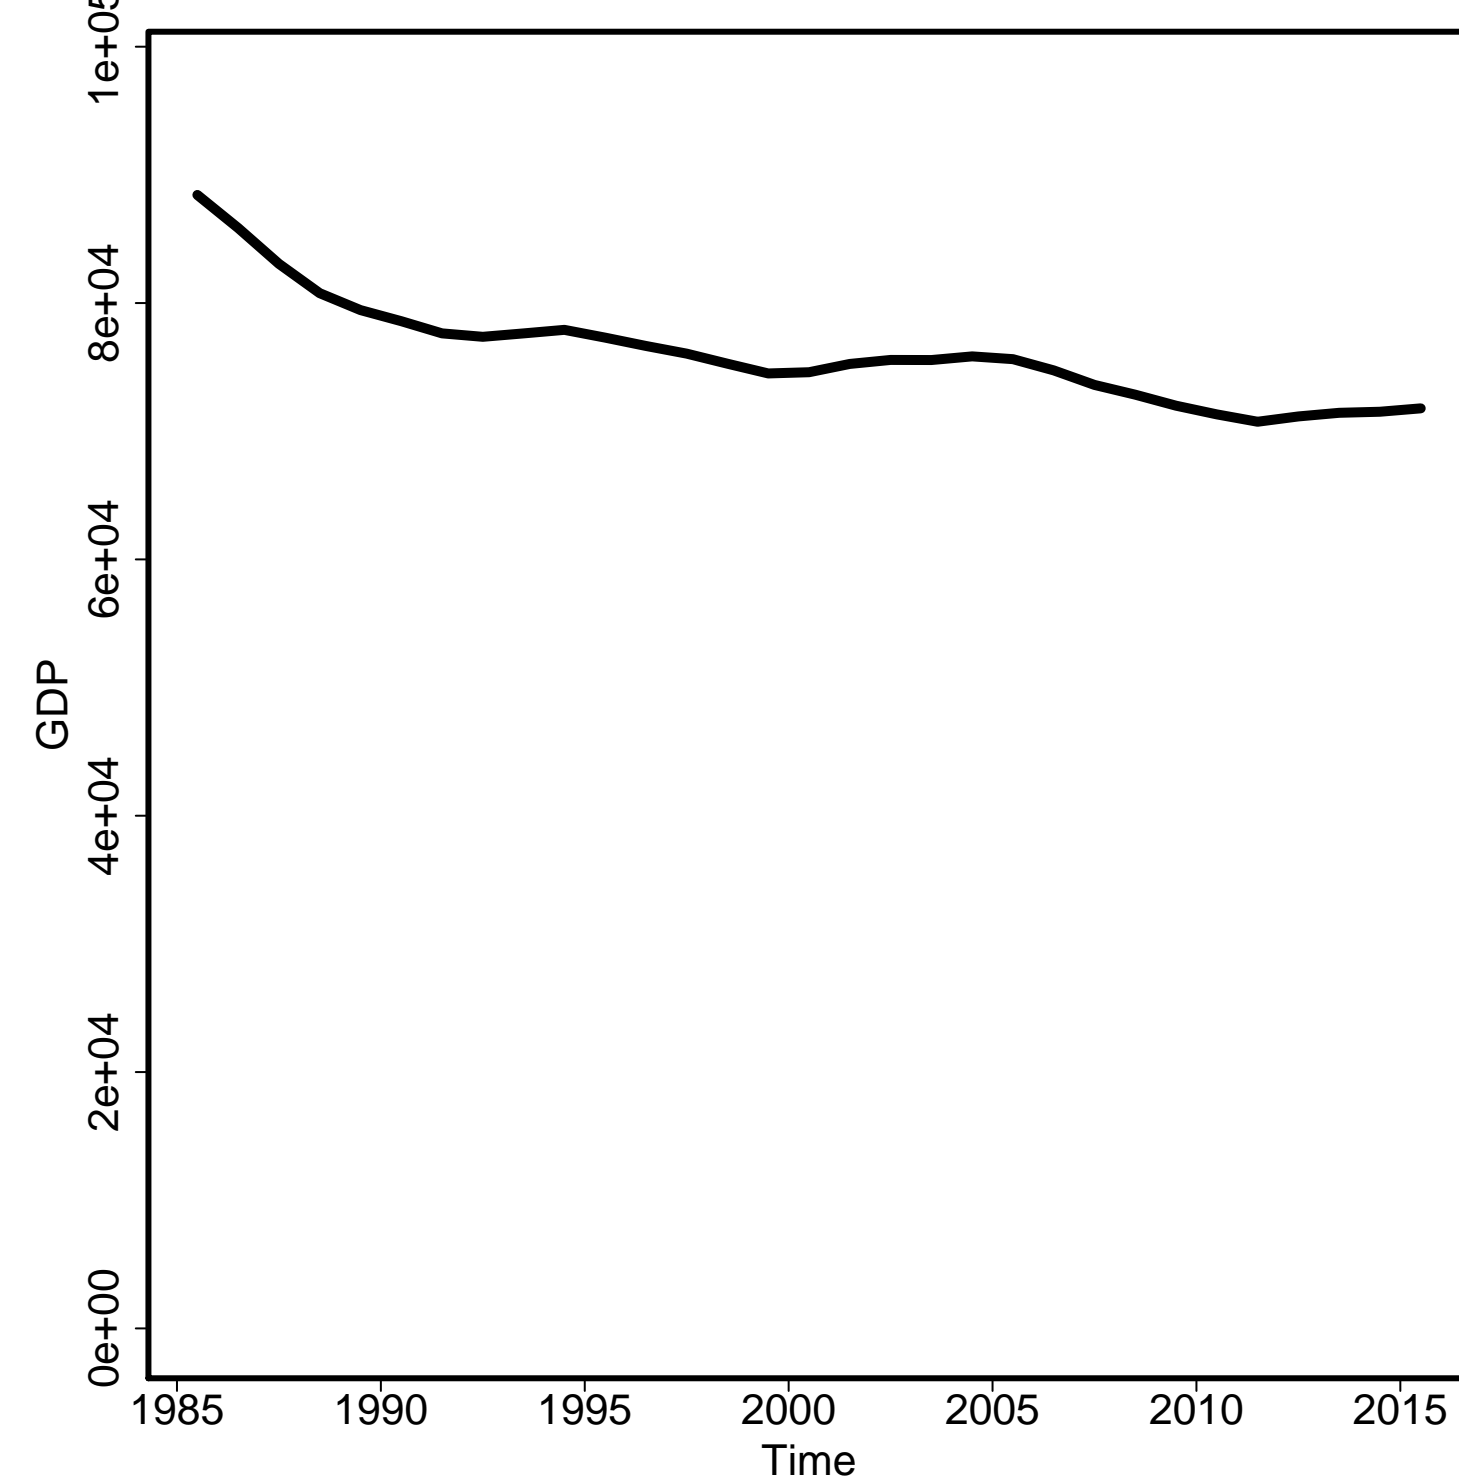

General Fertility Rate

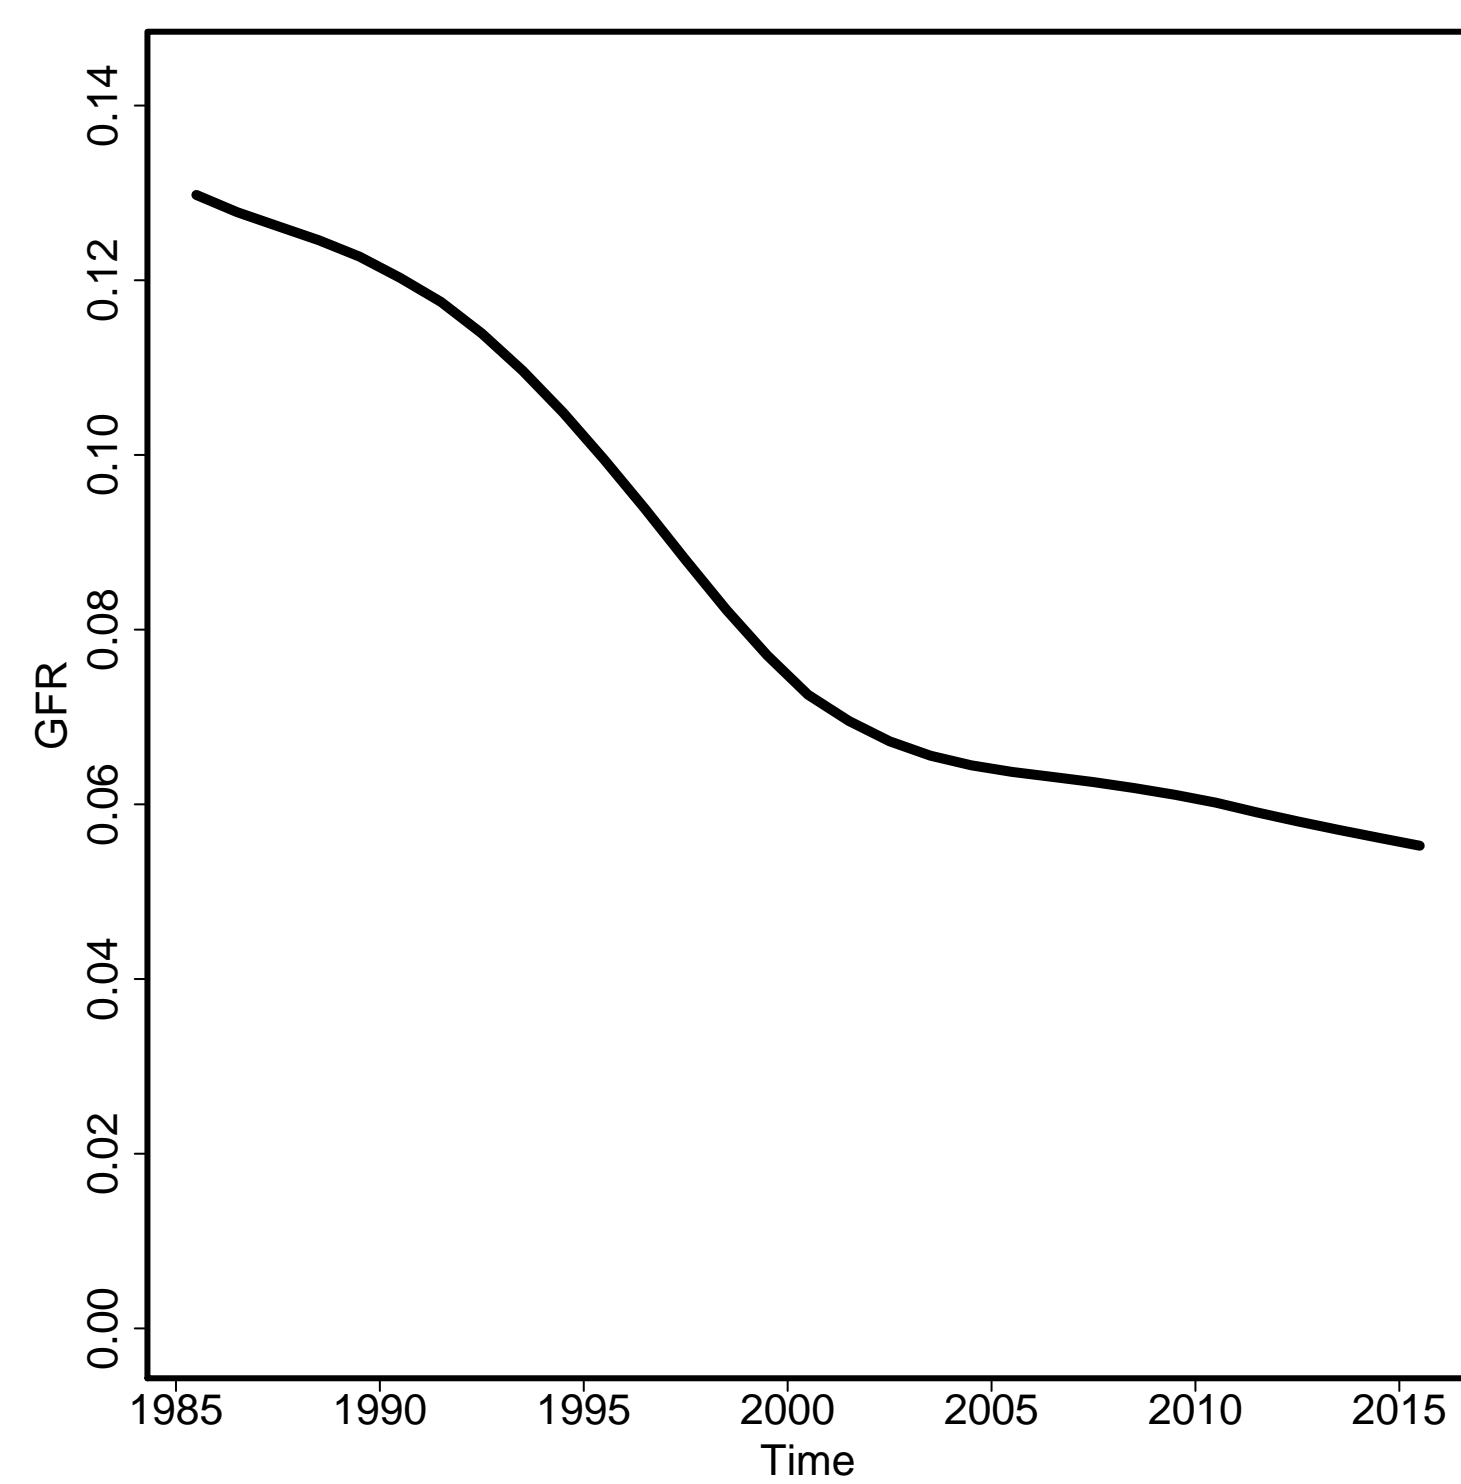

Skilled Attendance to Birth

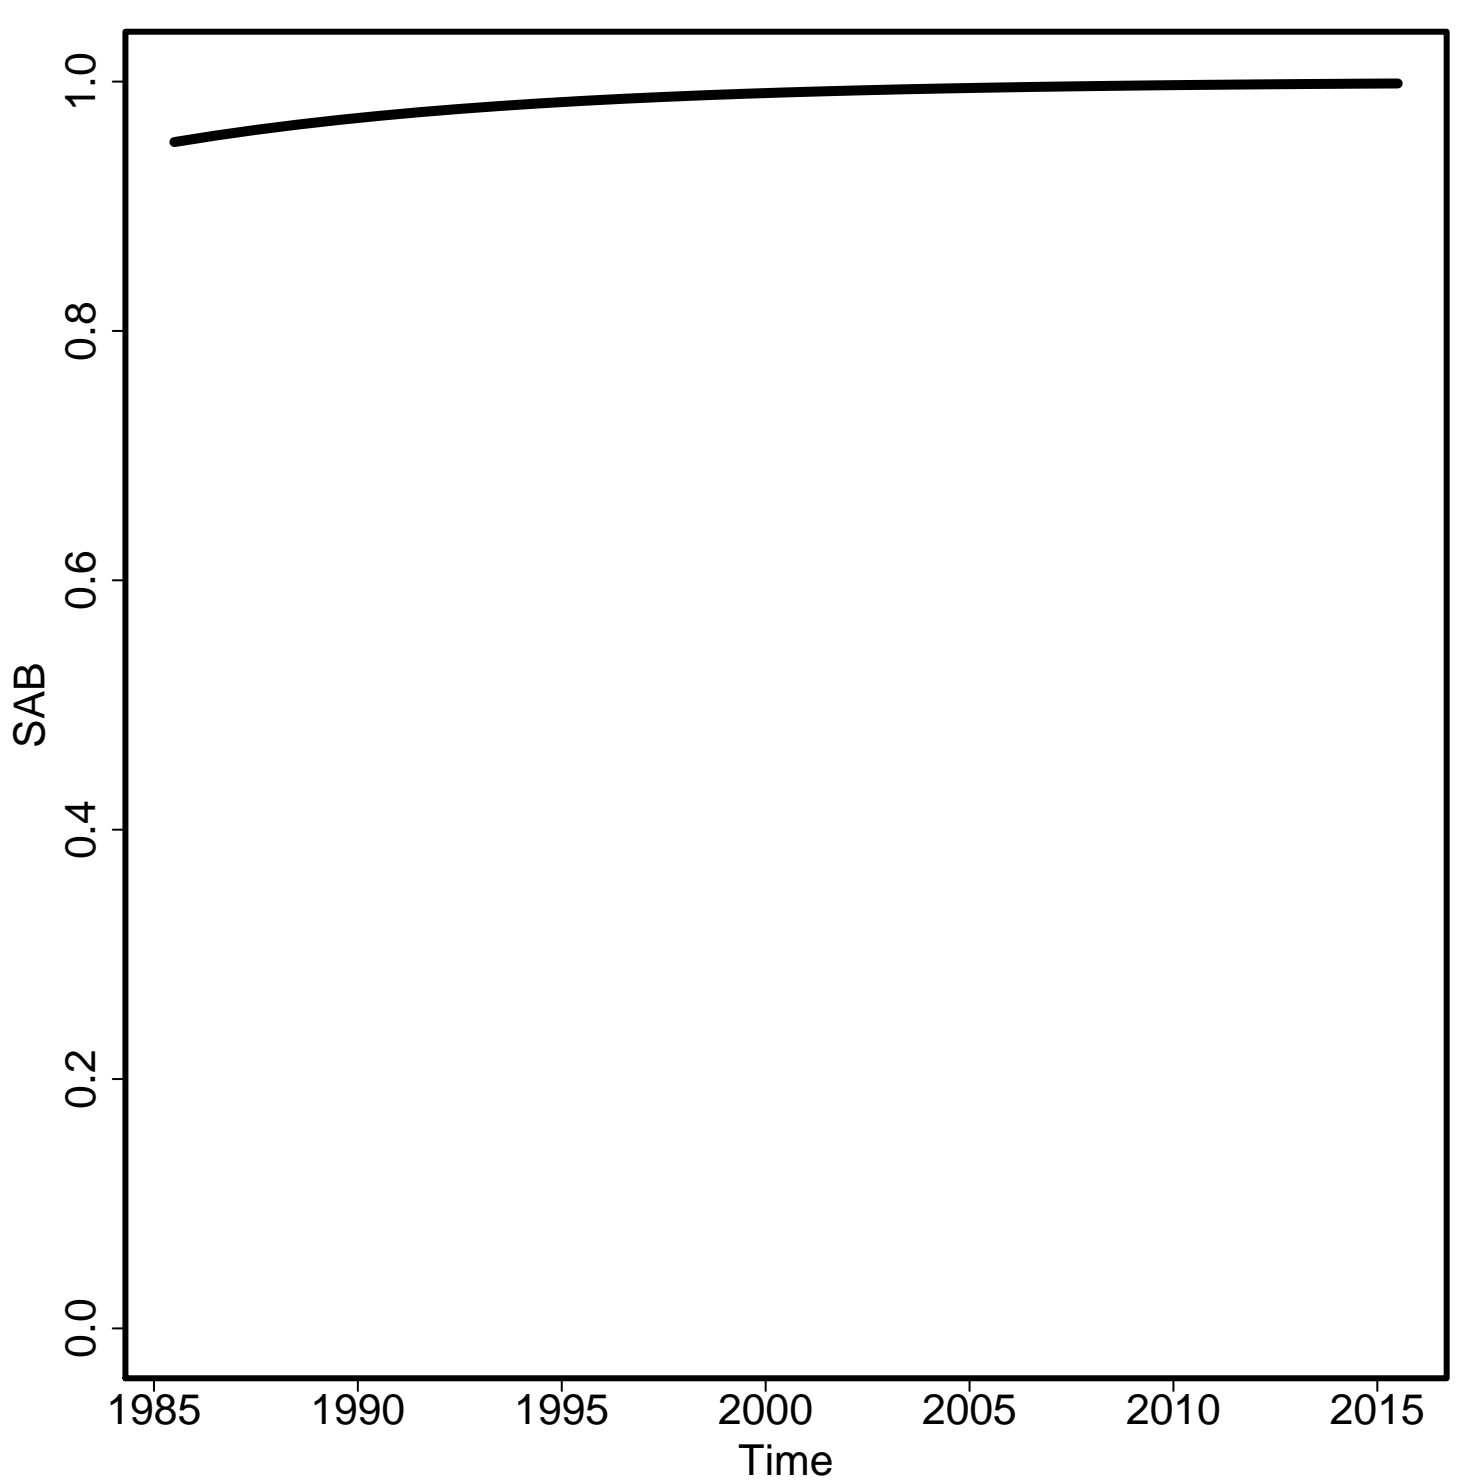

Envelope/Births

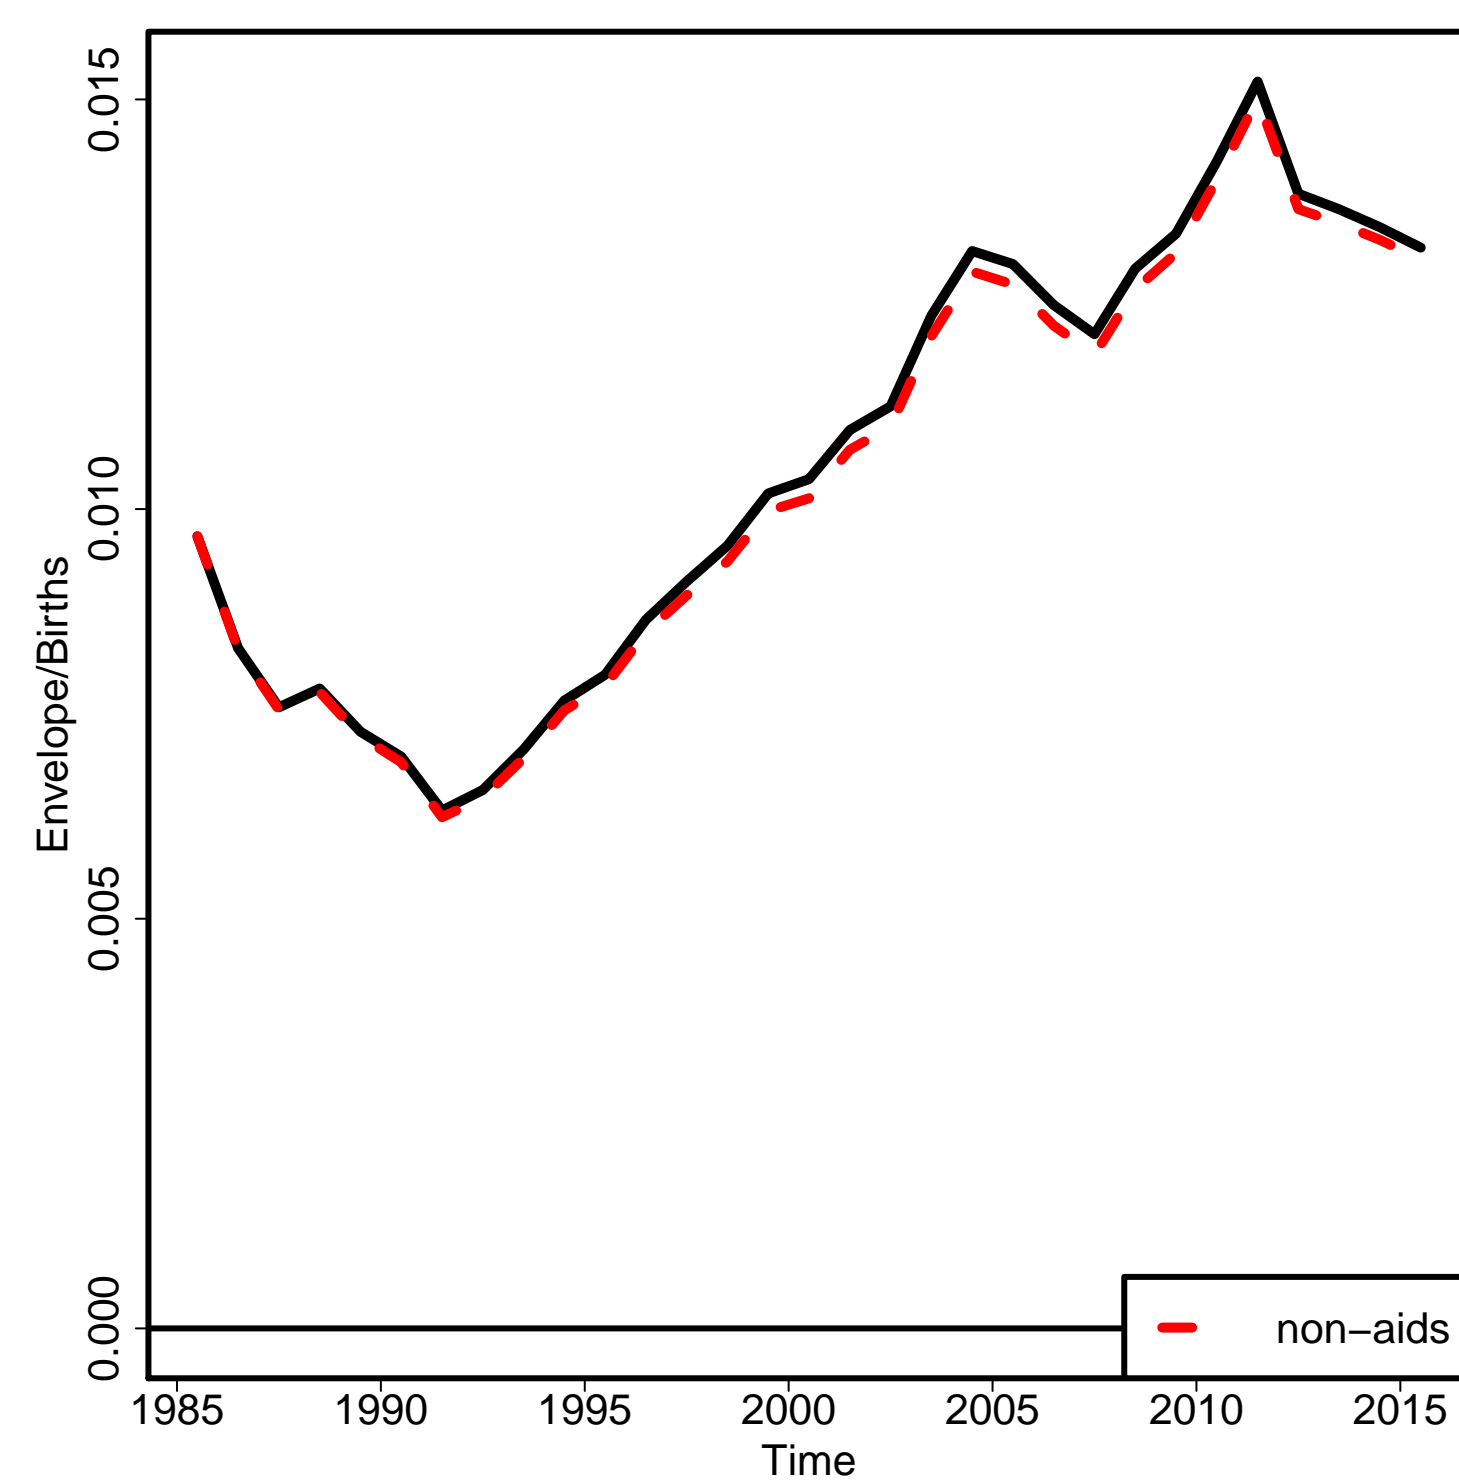

Non-aids MMR

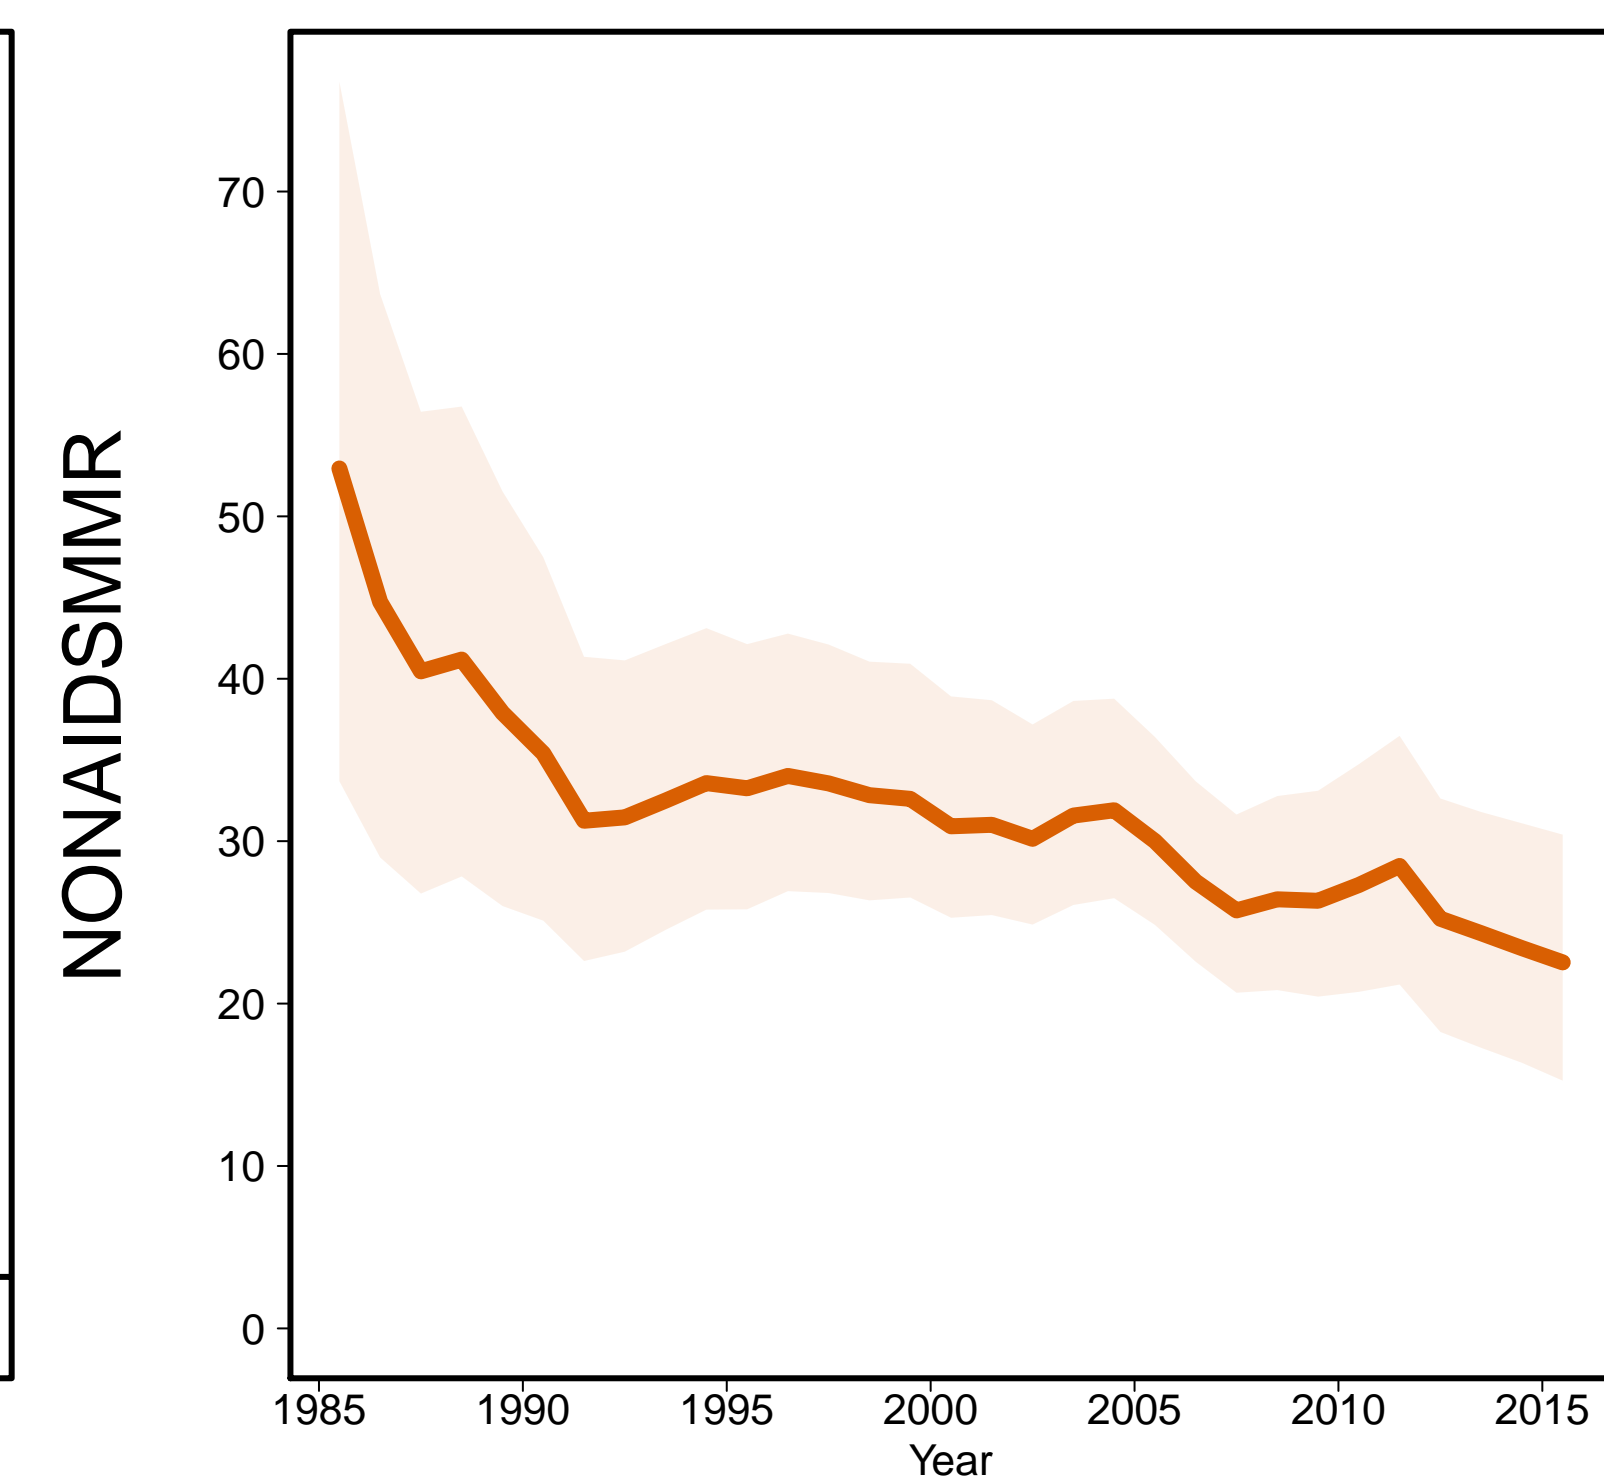

Aids MMR

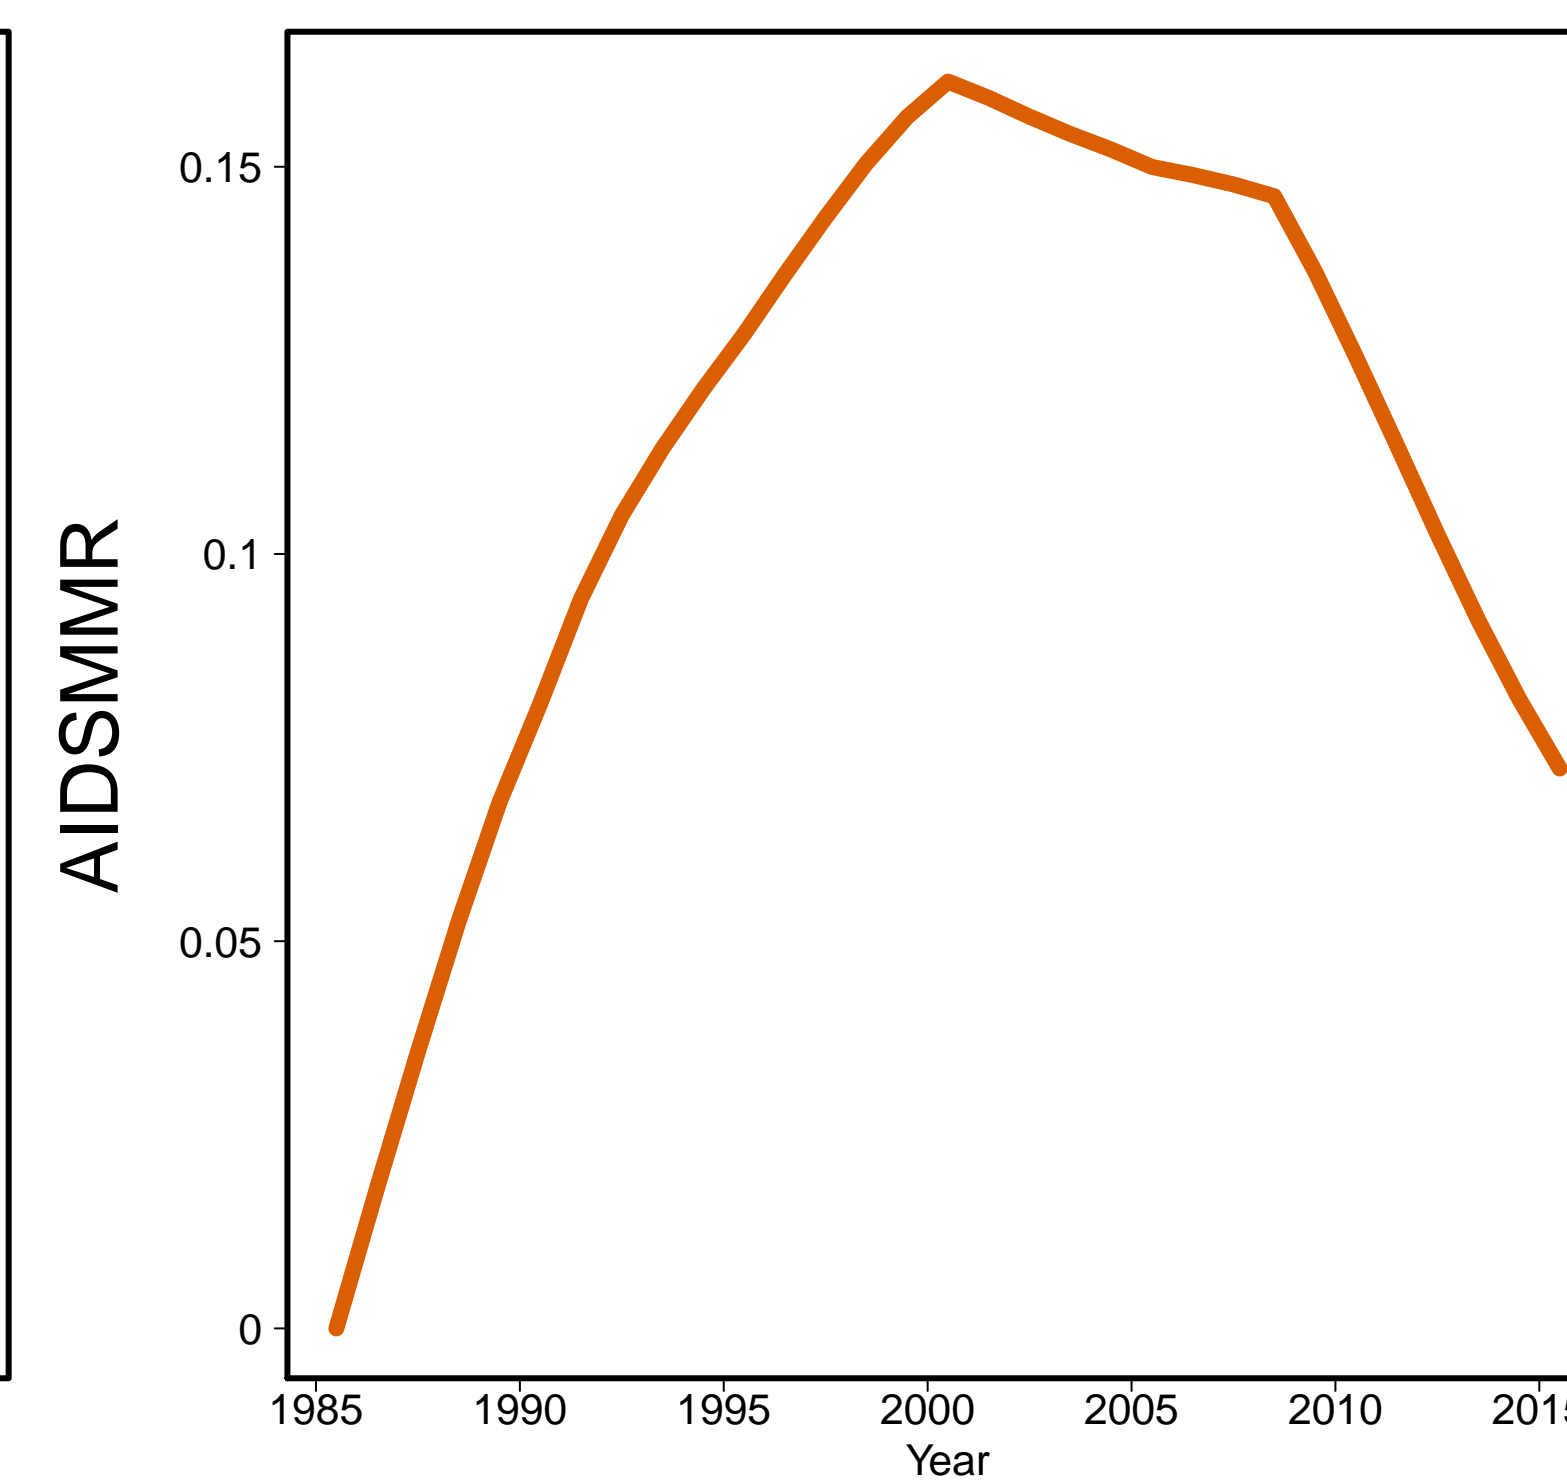

Bulgaria [BGR]  
(Developed regions)

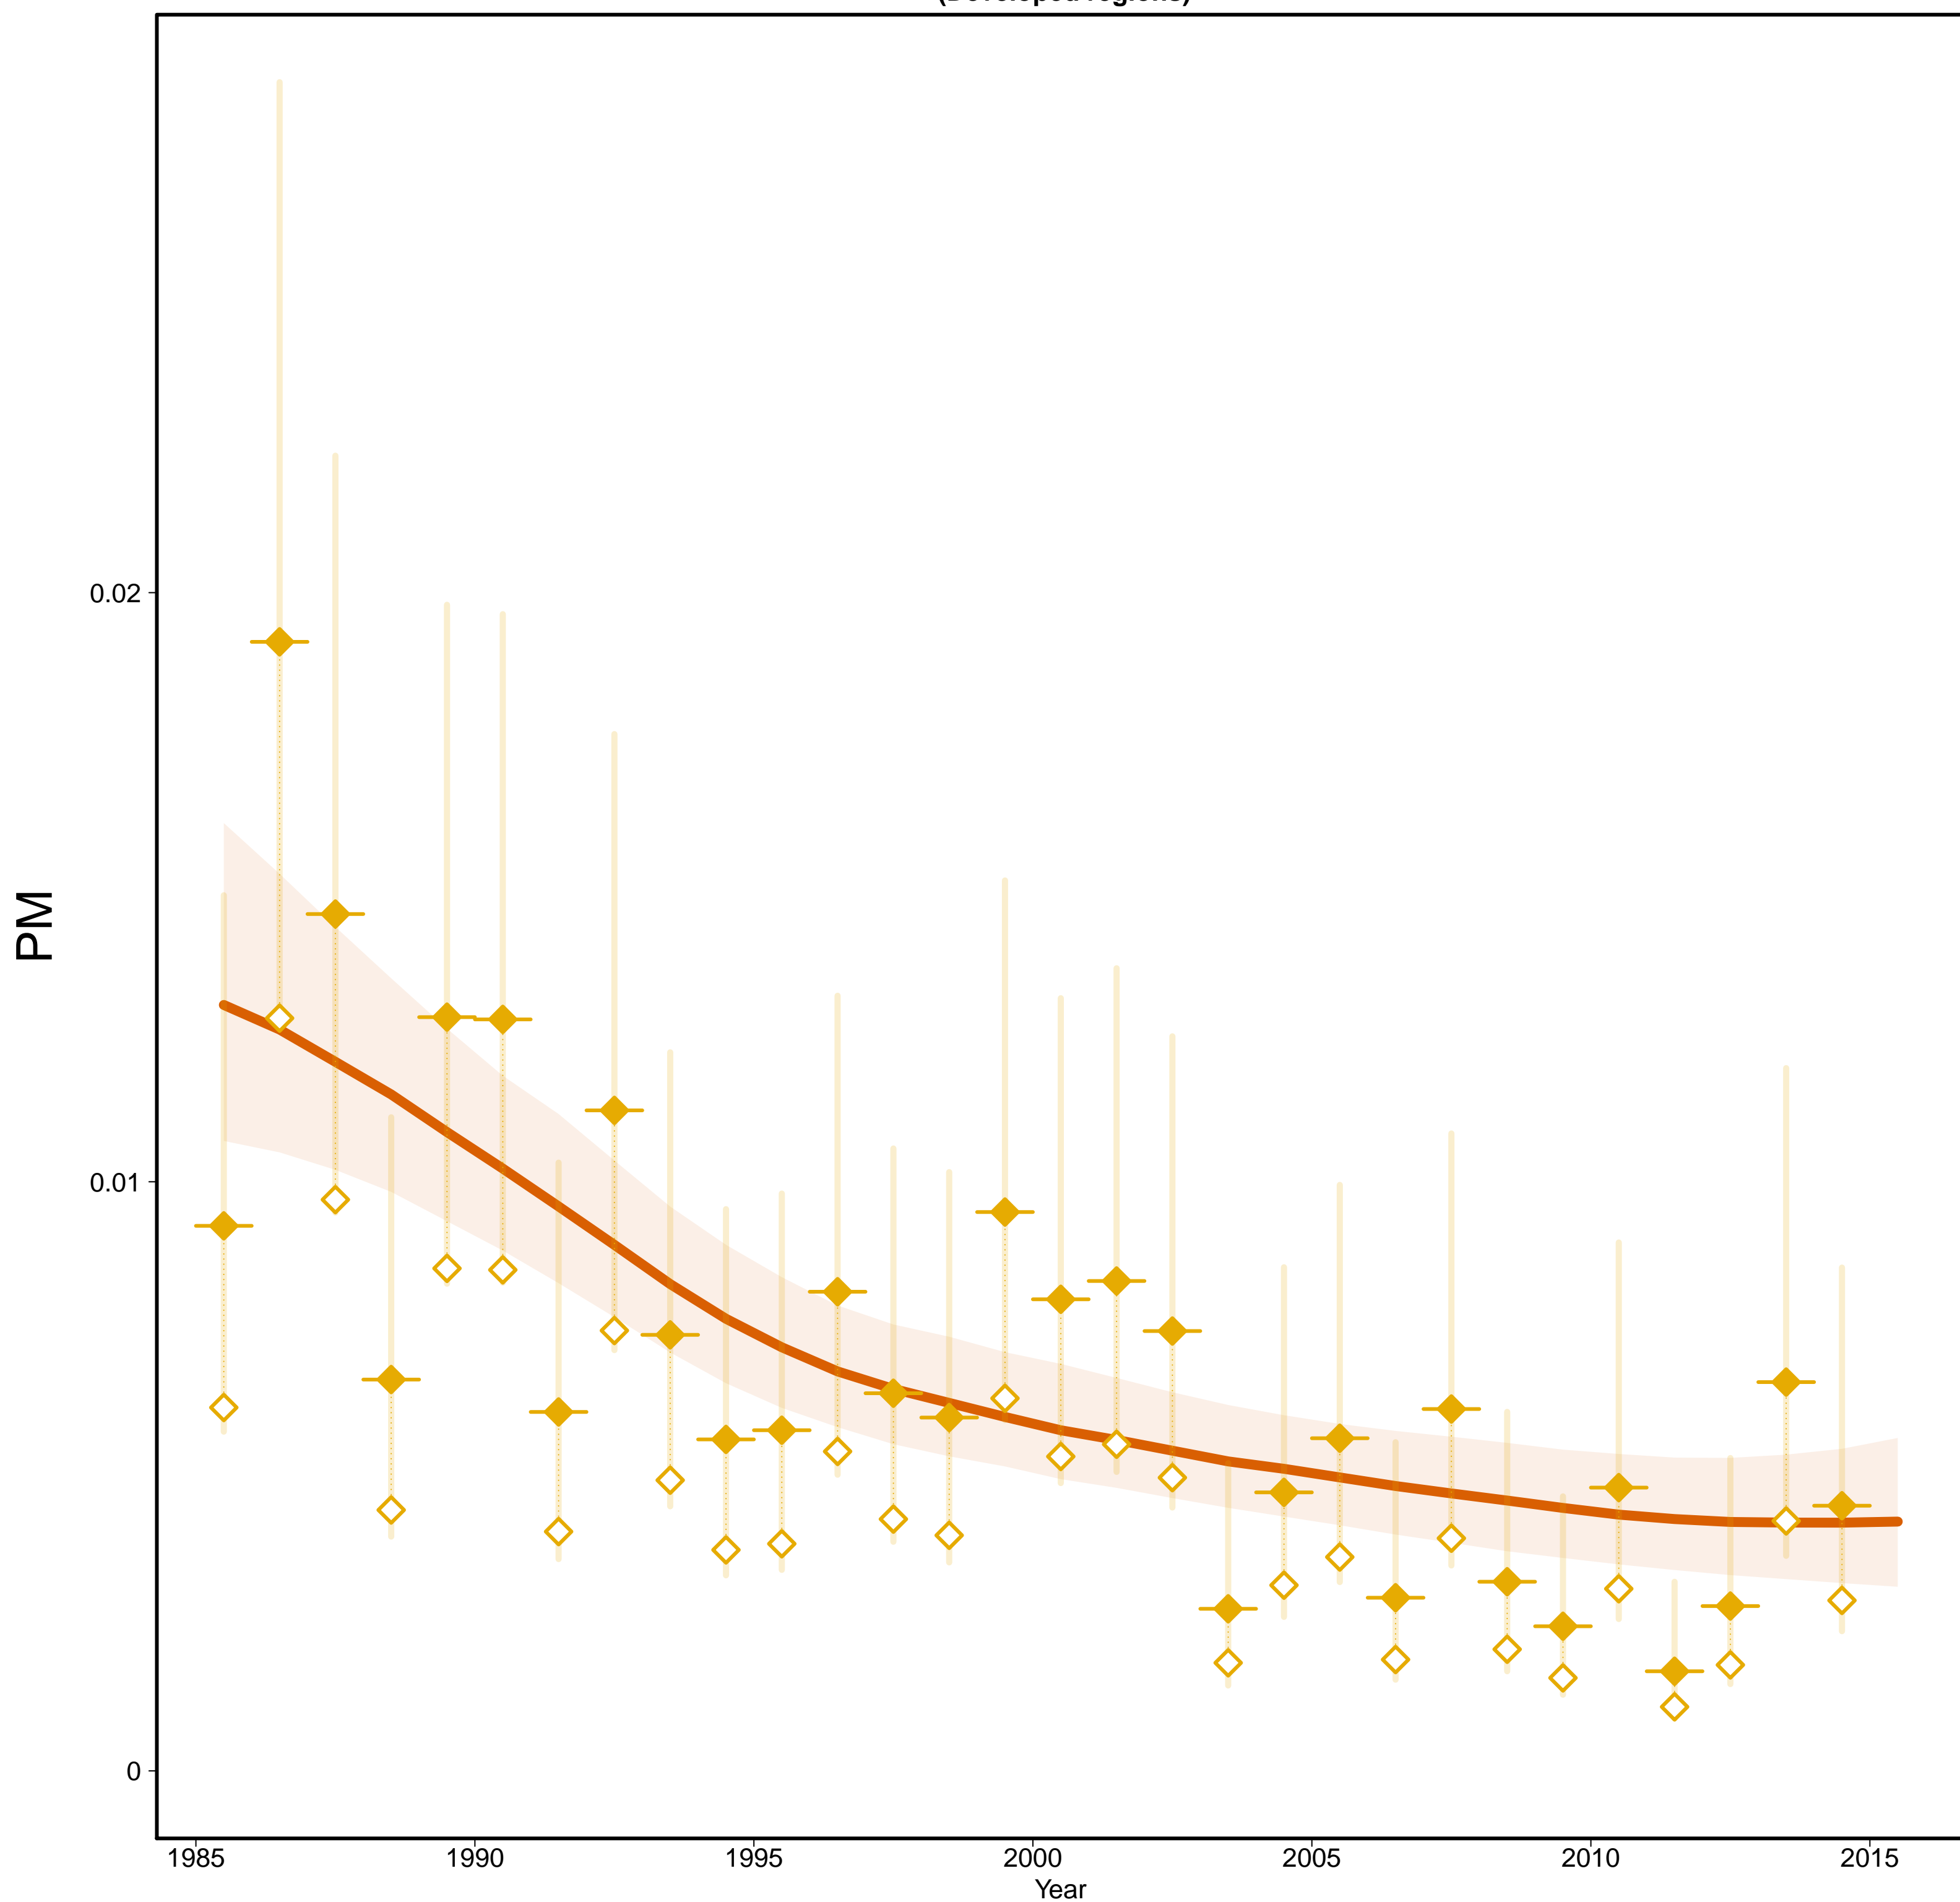

Bulgaria [BGR]  
(Developed regions)

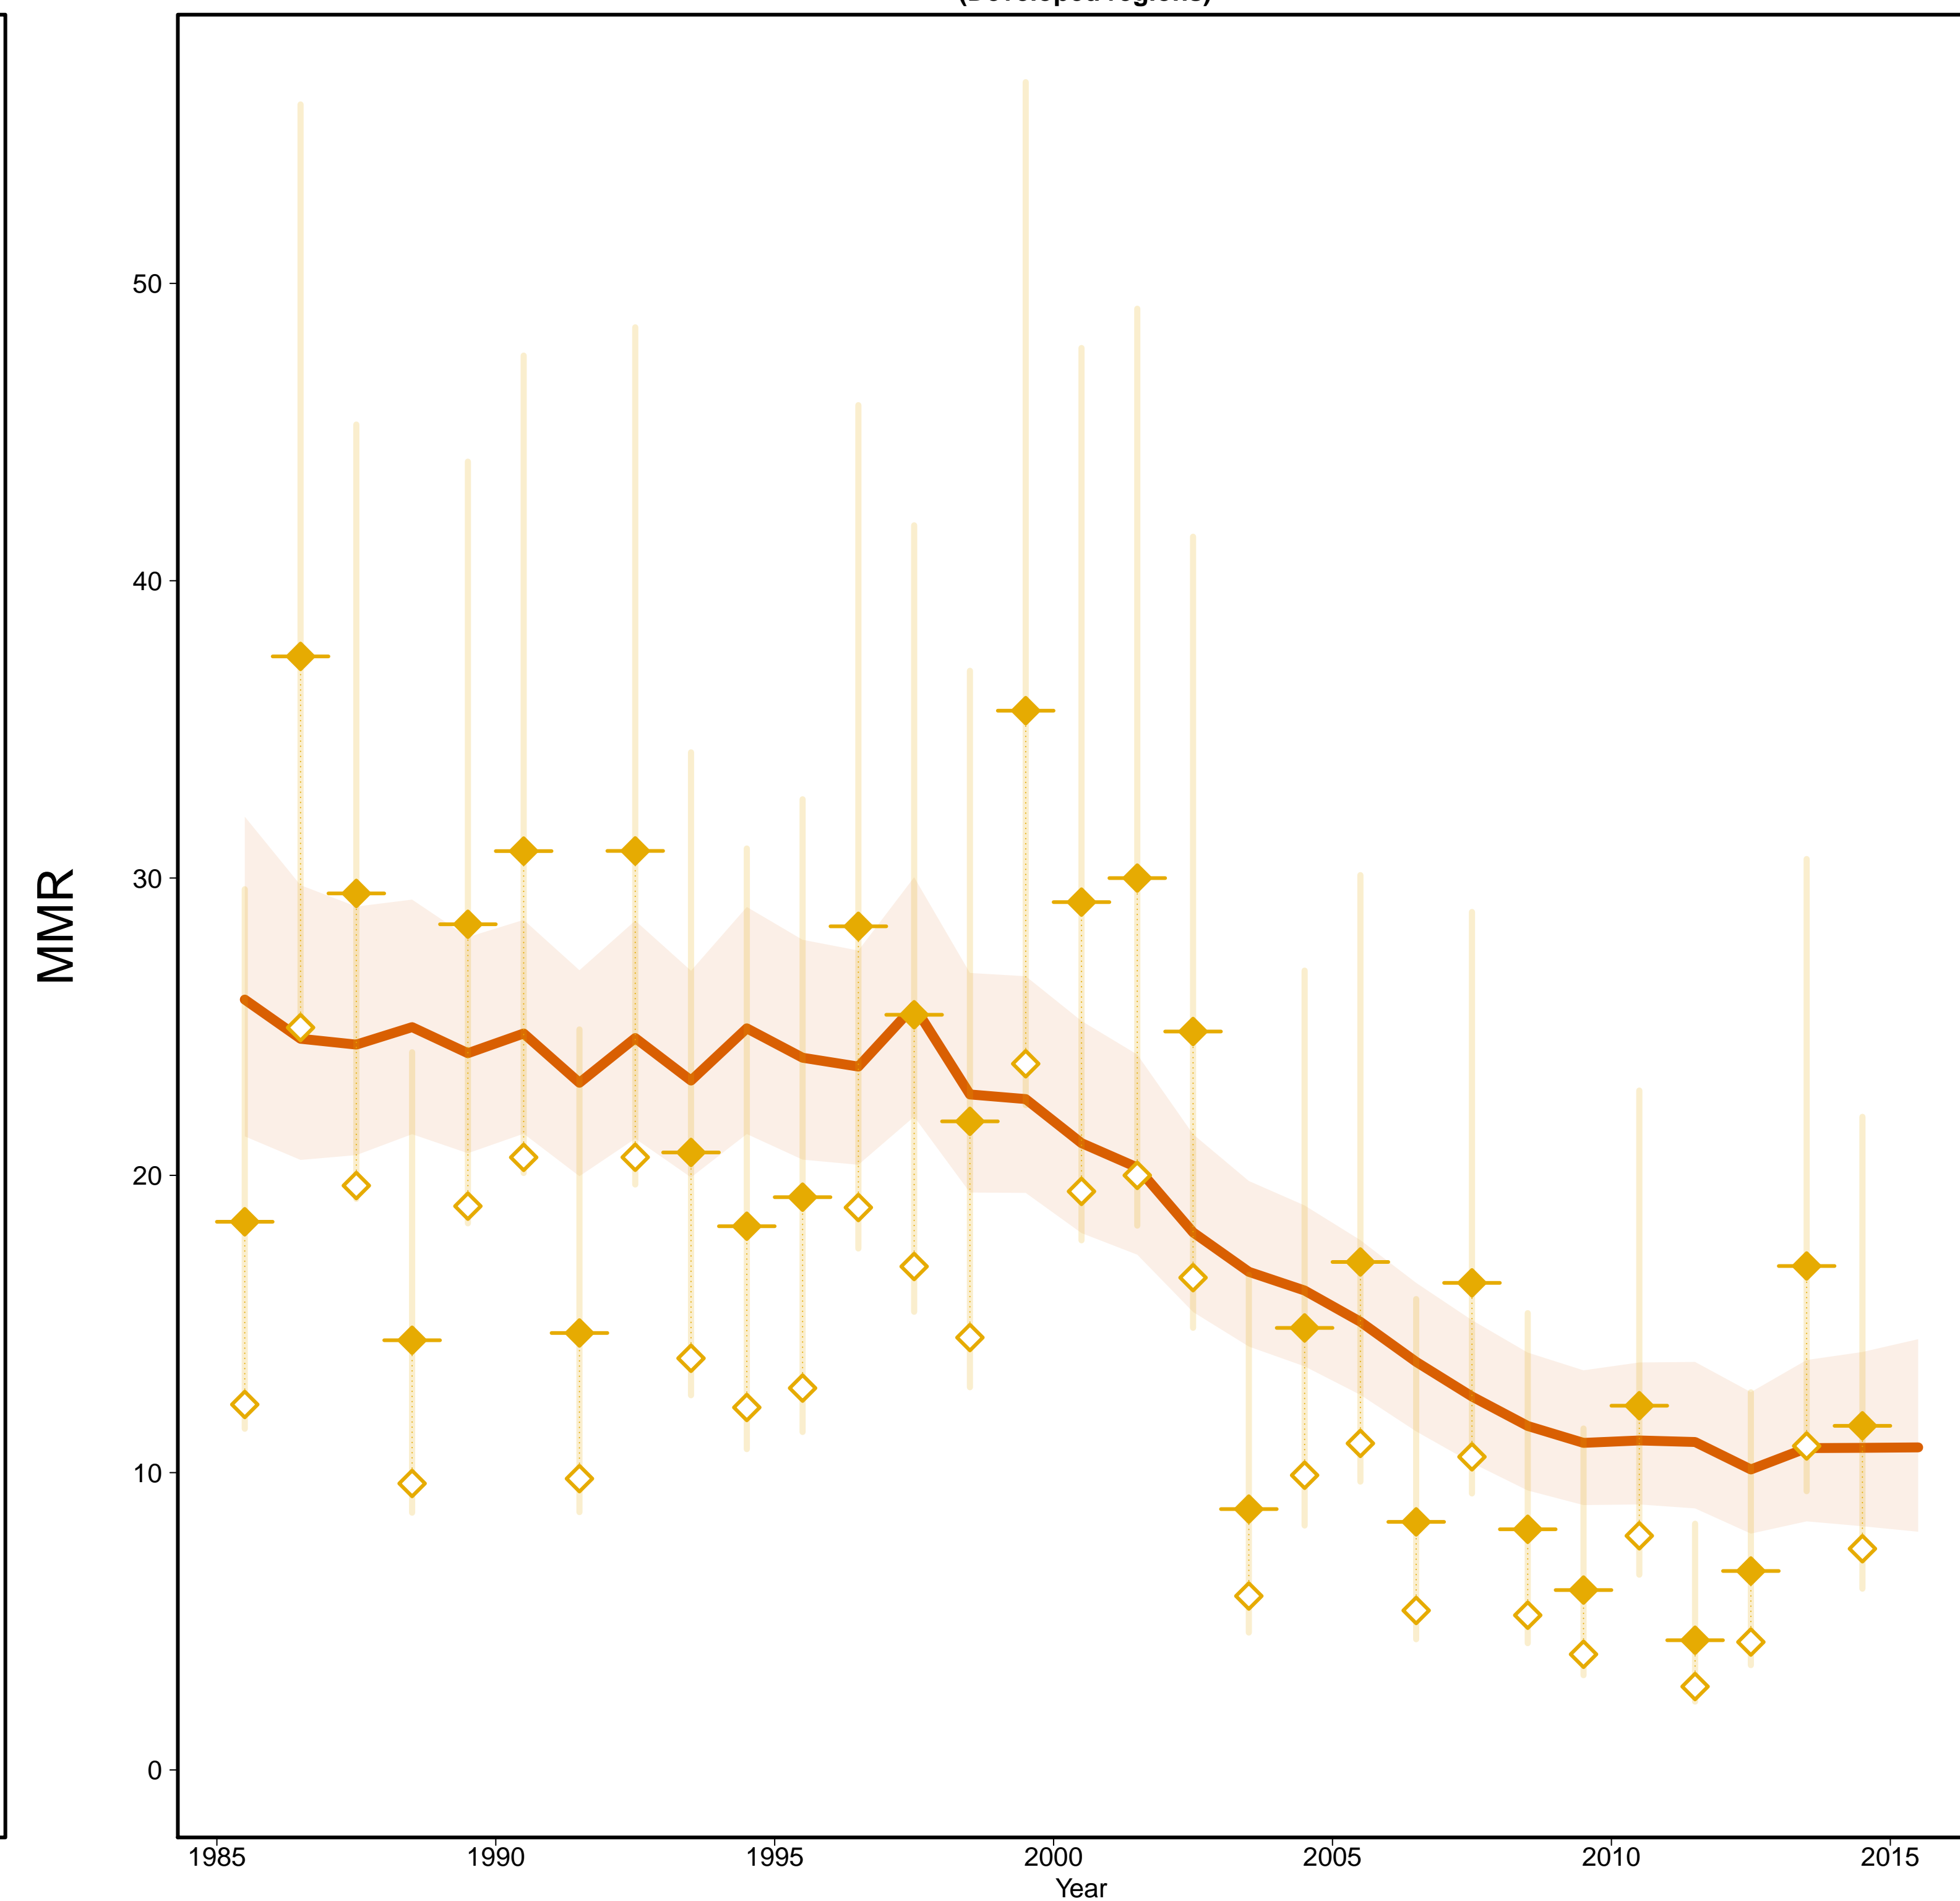

- Estimates —
- MMR Database 2015 —
- ◇ Observed Data
- ◆ Adjusted Data
- Data type —
- ◆ VR

Gross Domestic Product

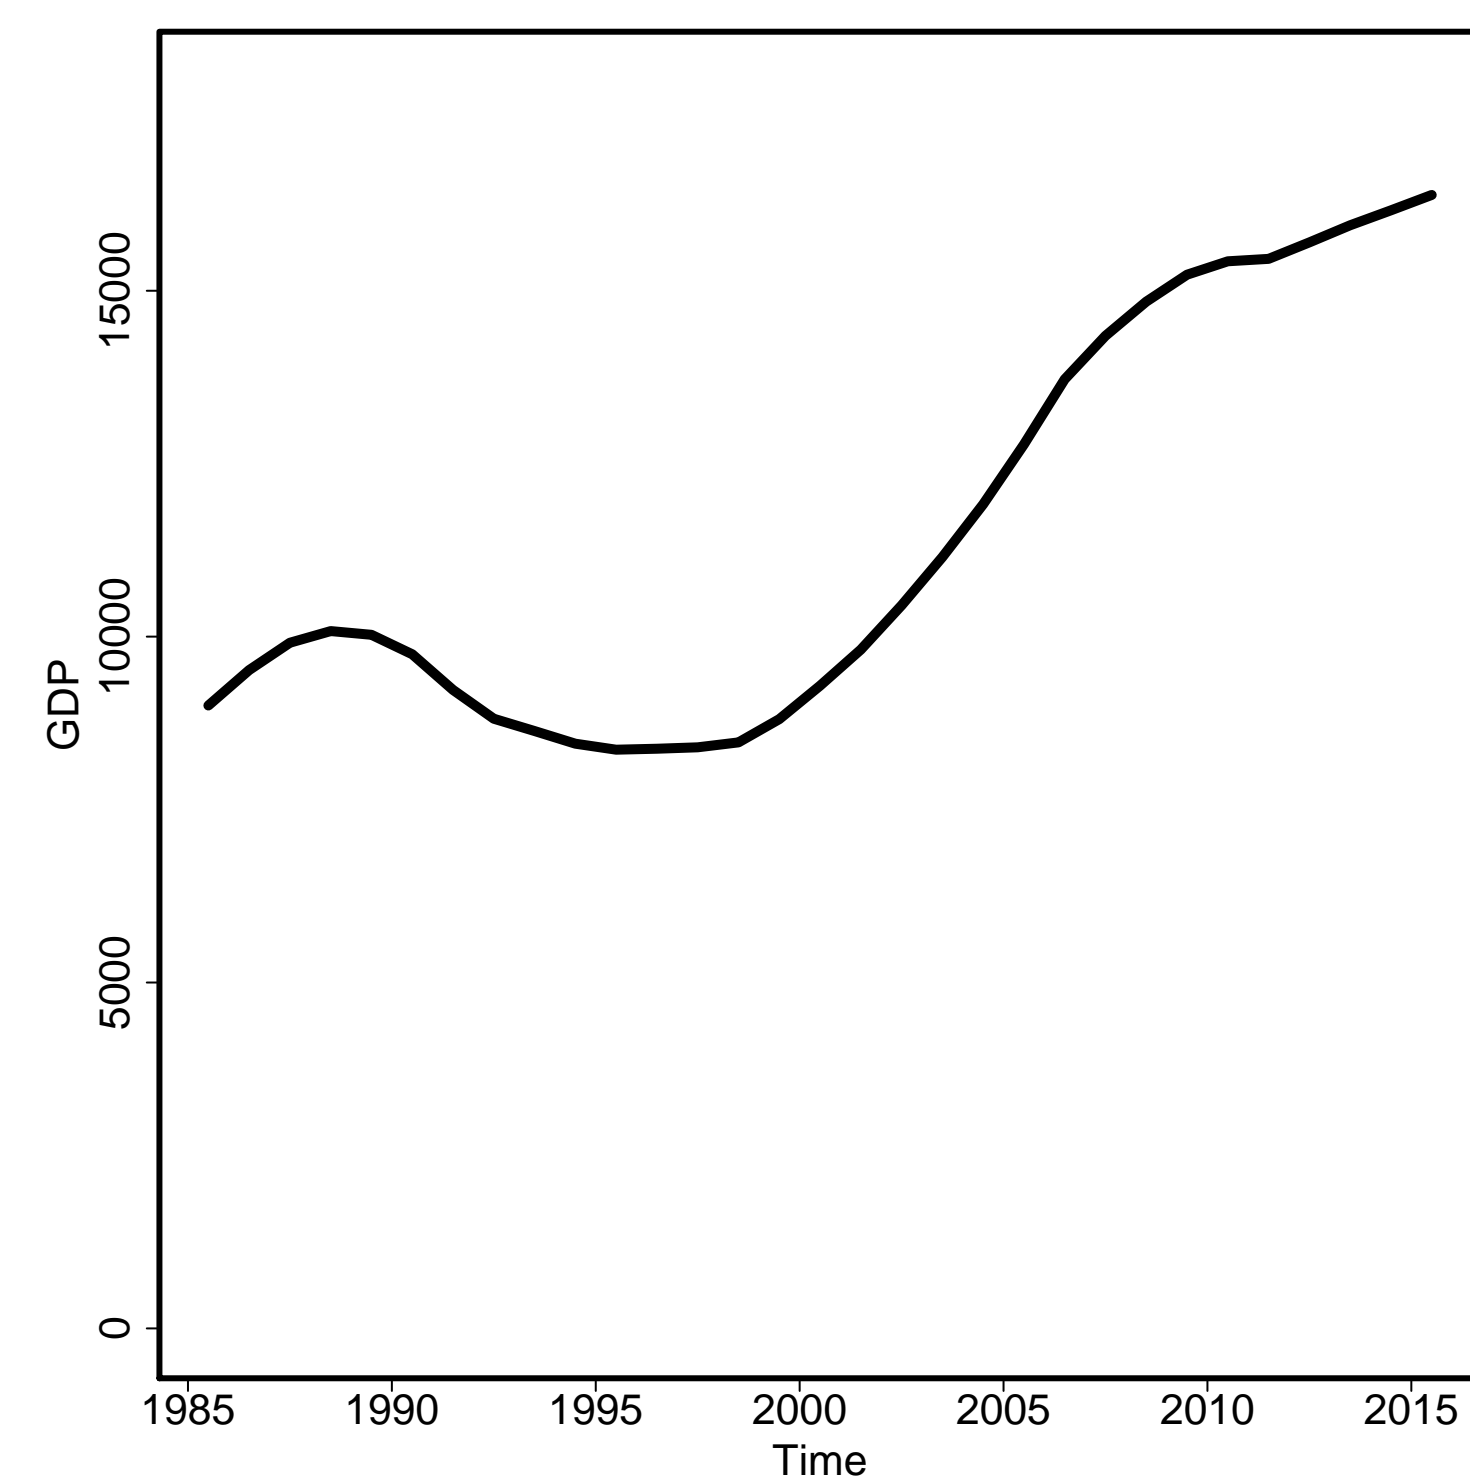

General Fertility Rate

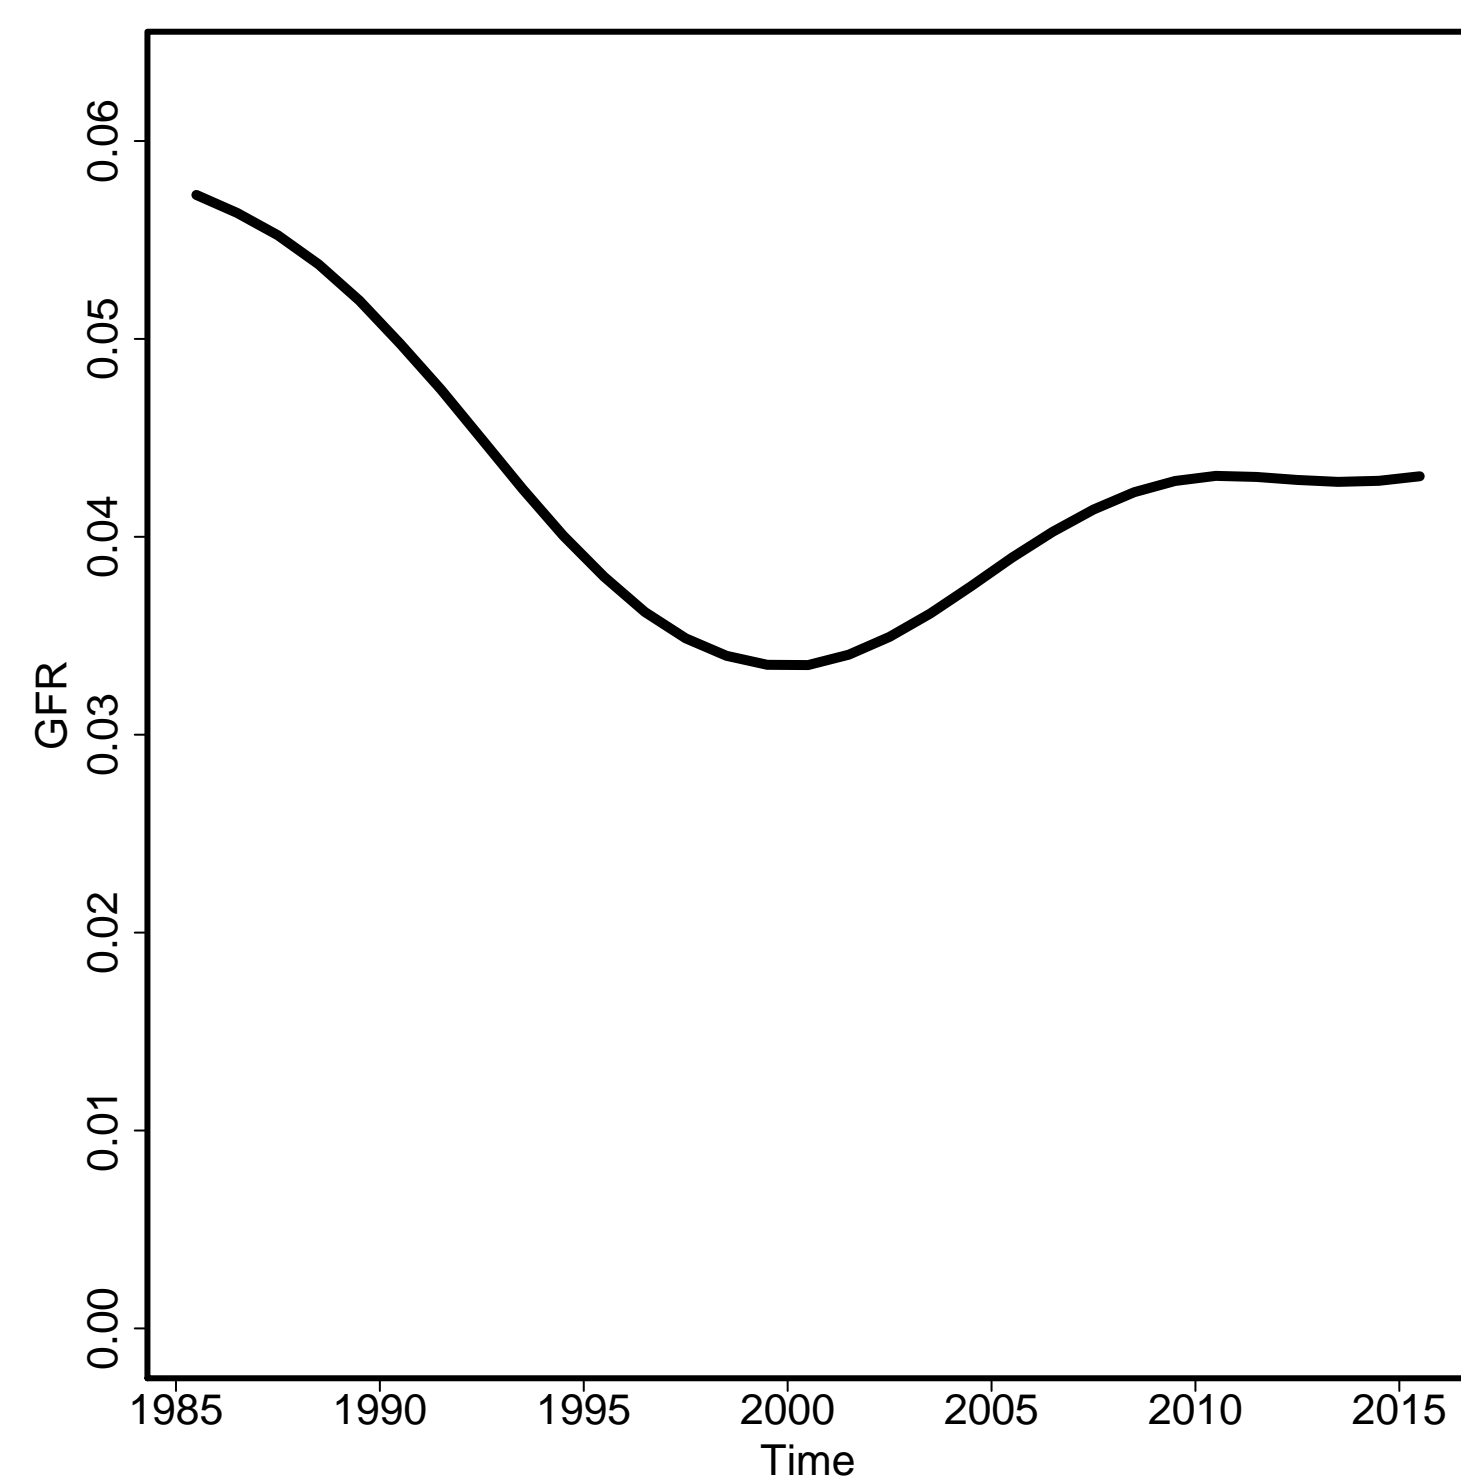

Skilled Attendance to Birth

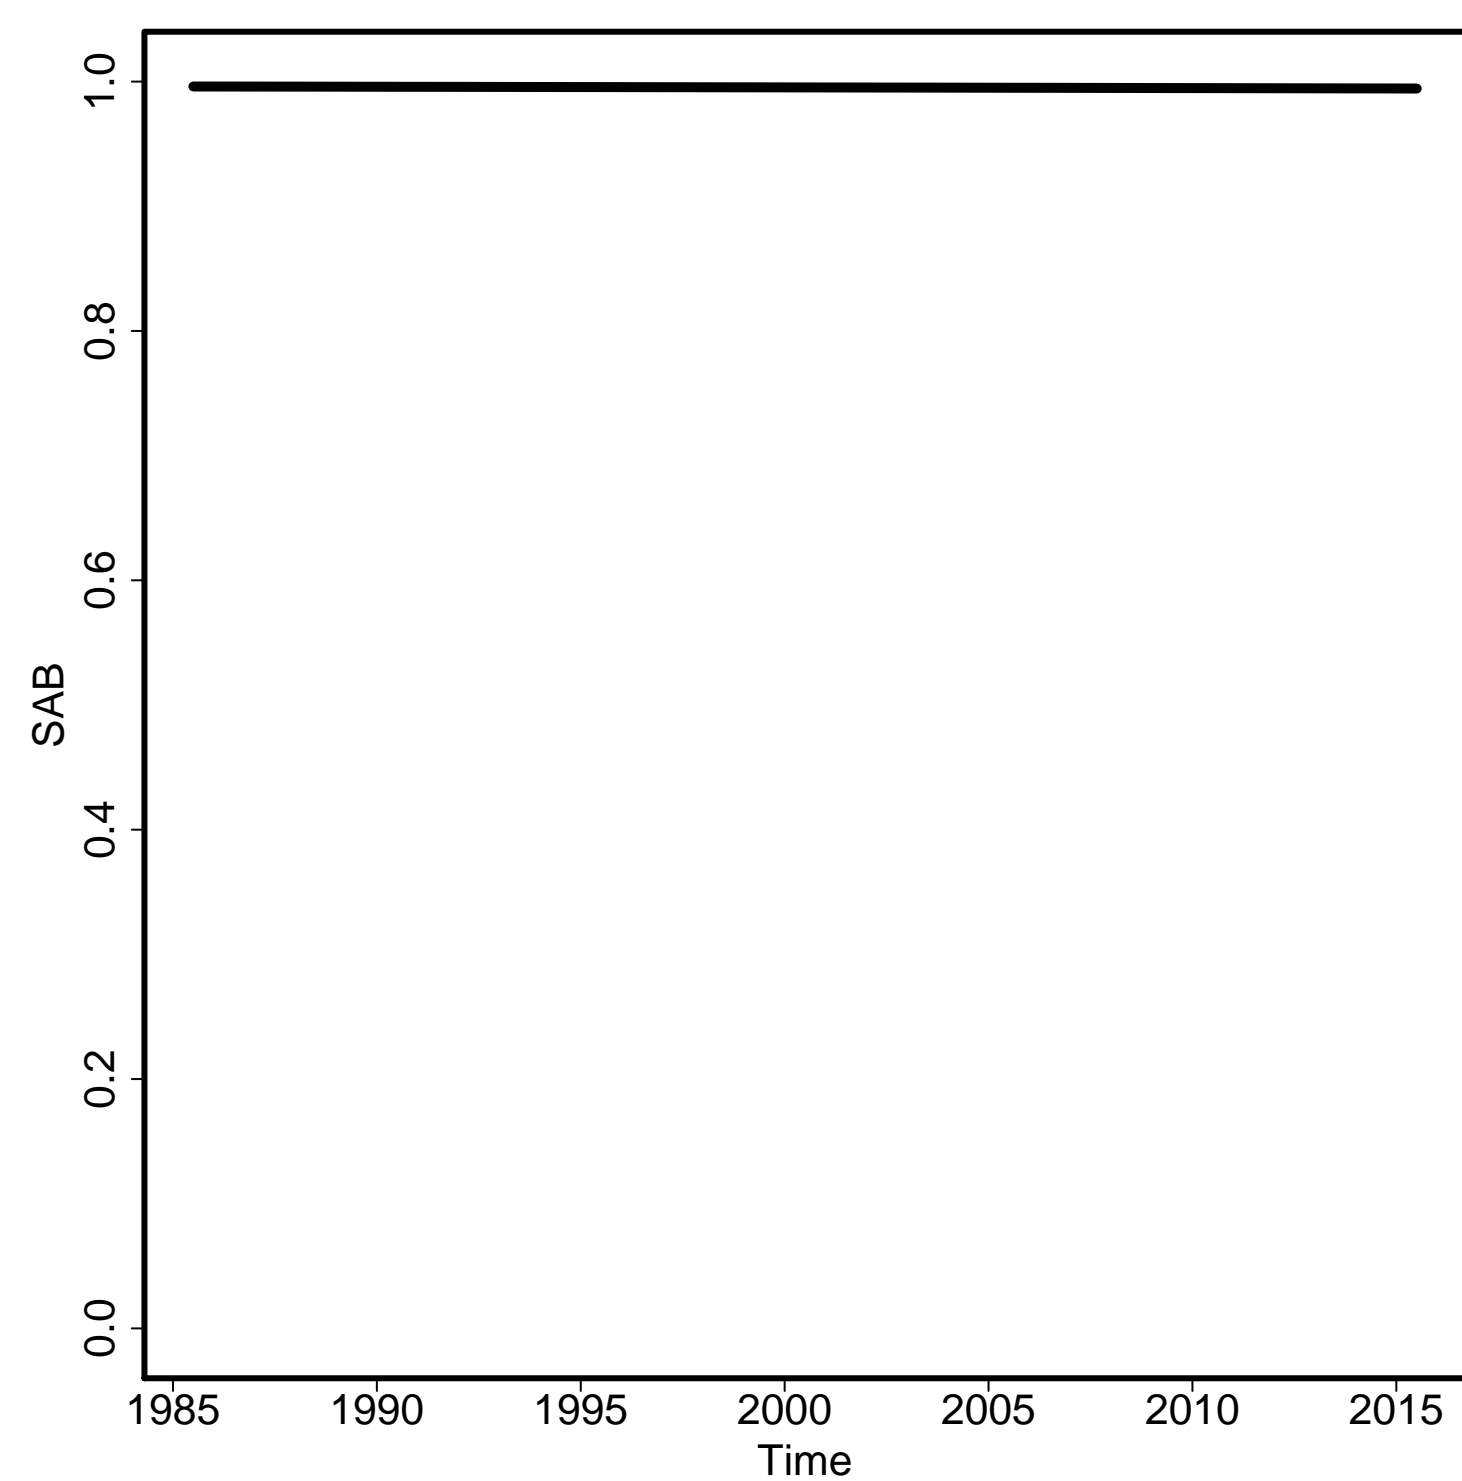

Envelope/Births

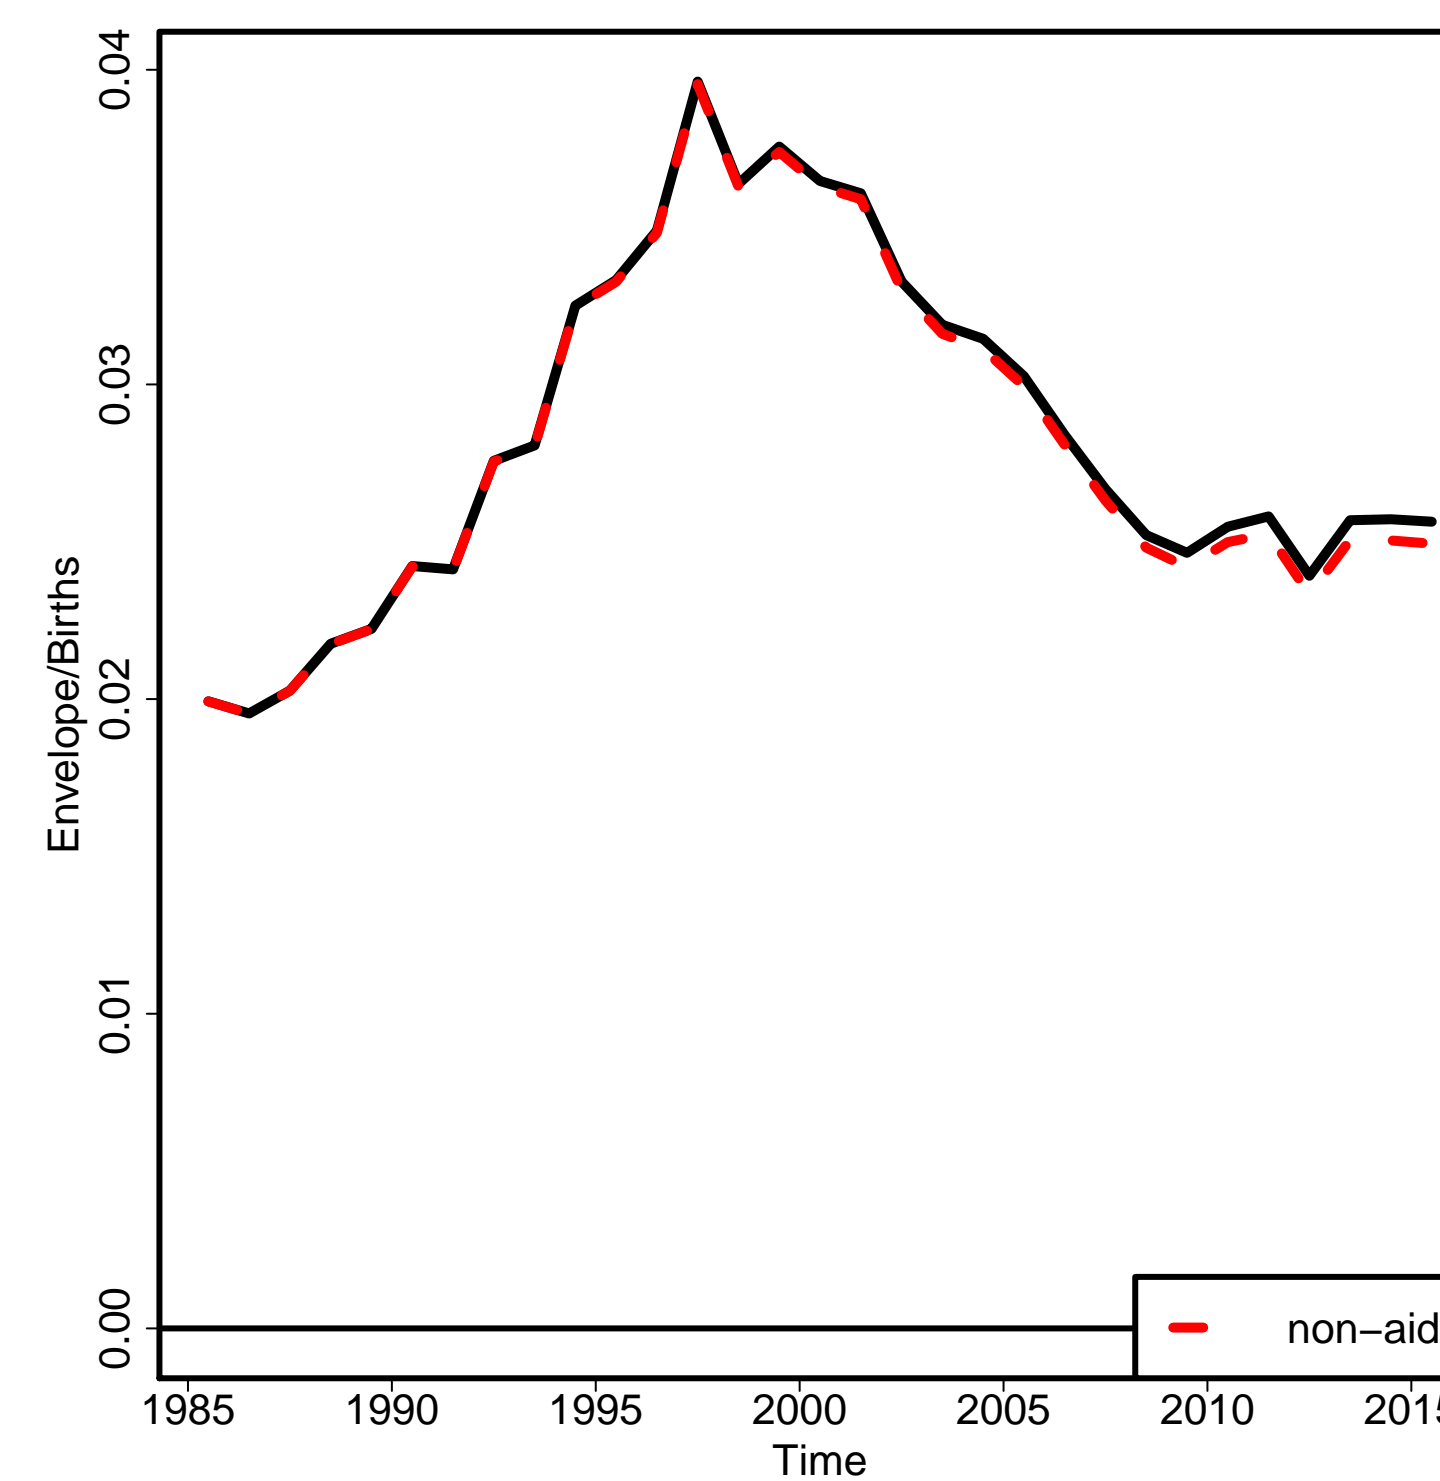

Non-aids MMR

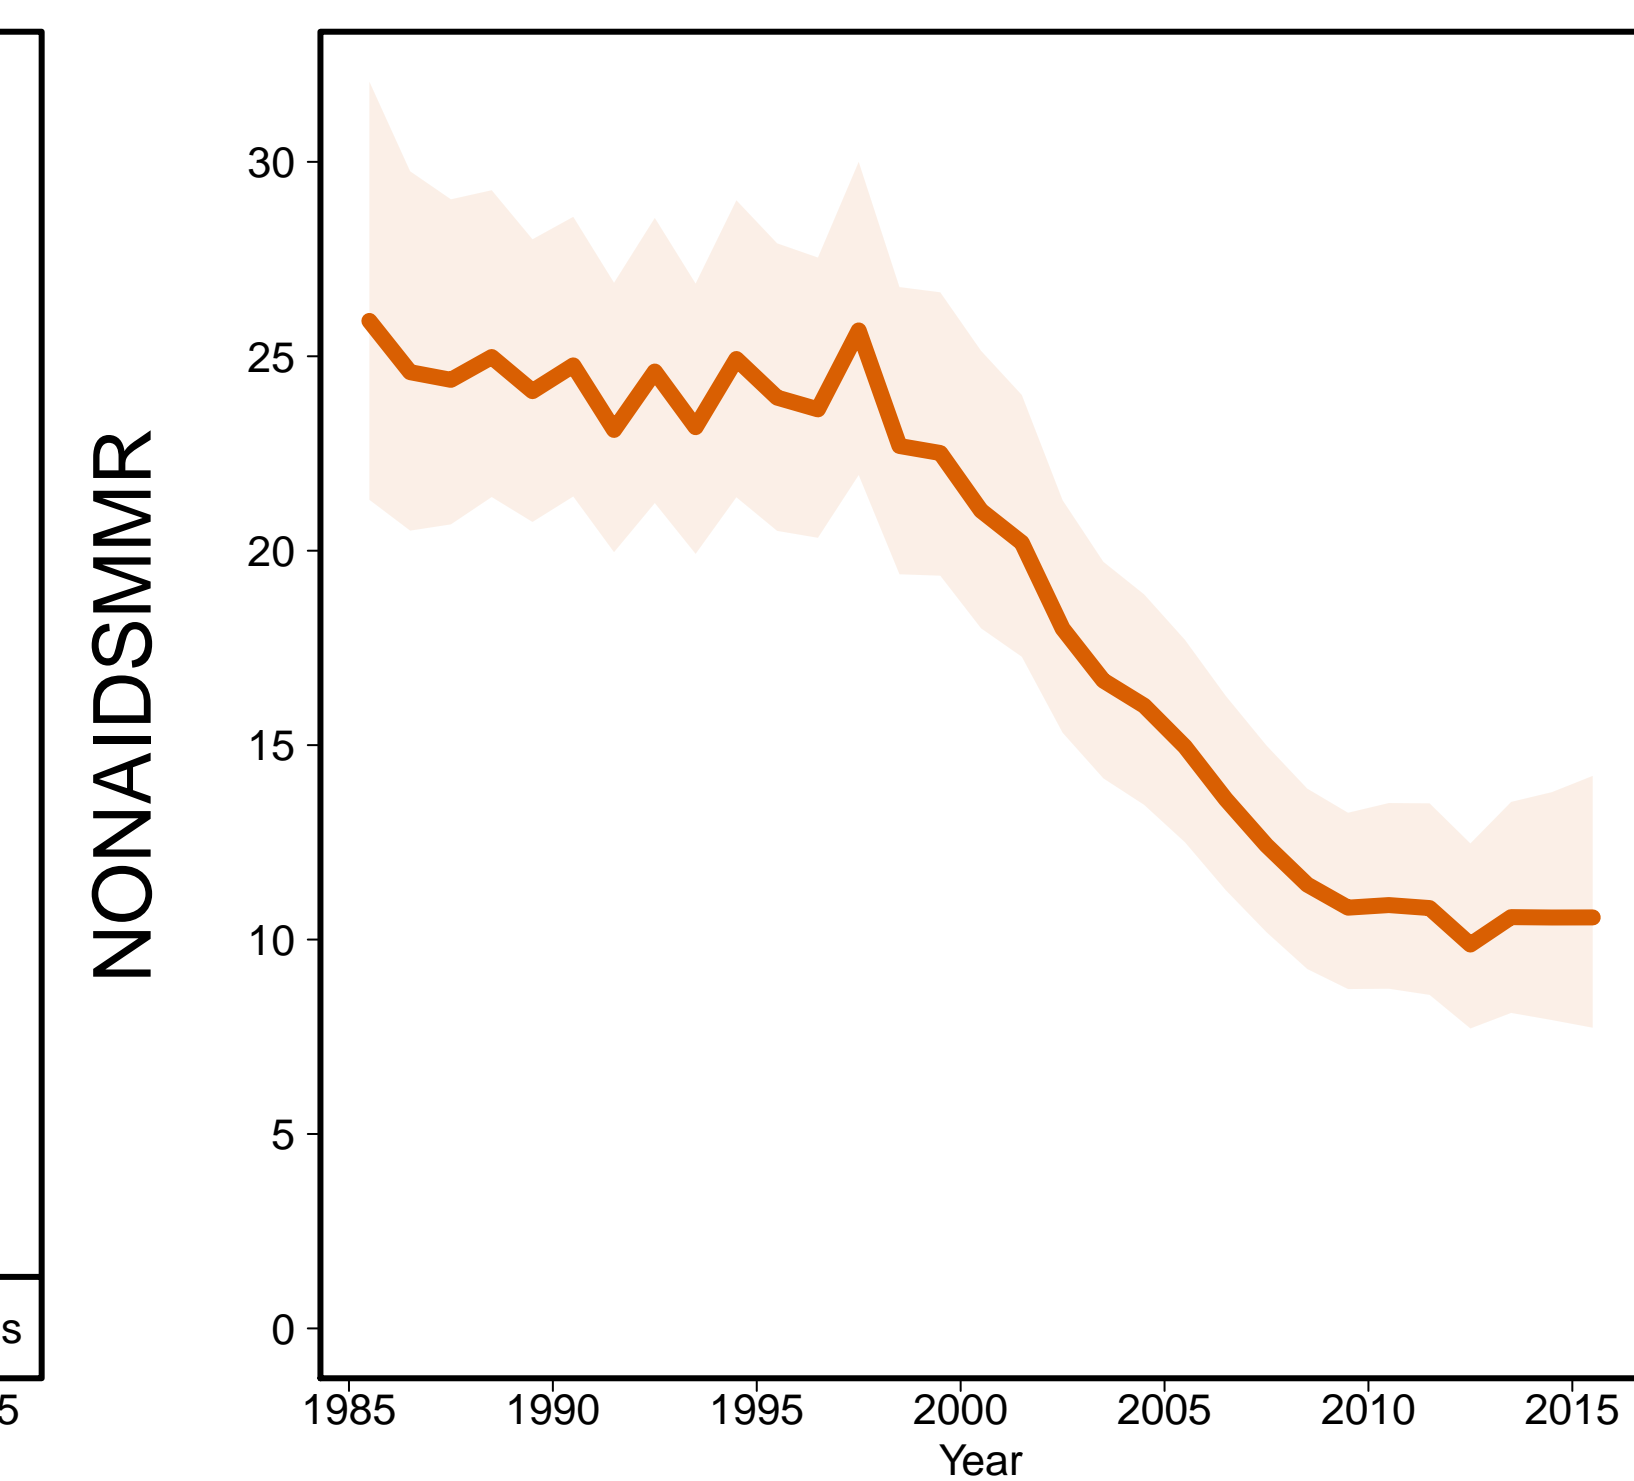

Aids MMR

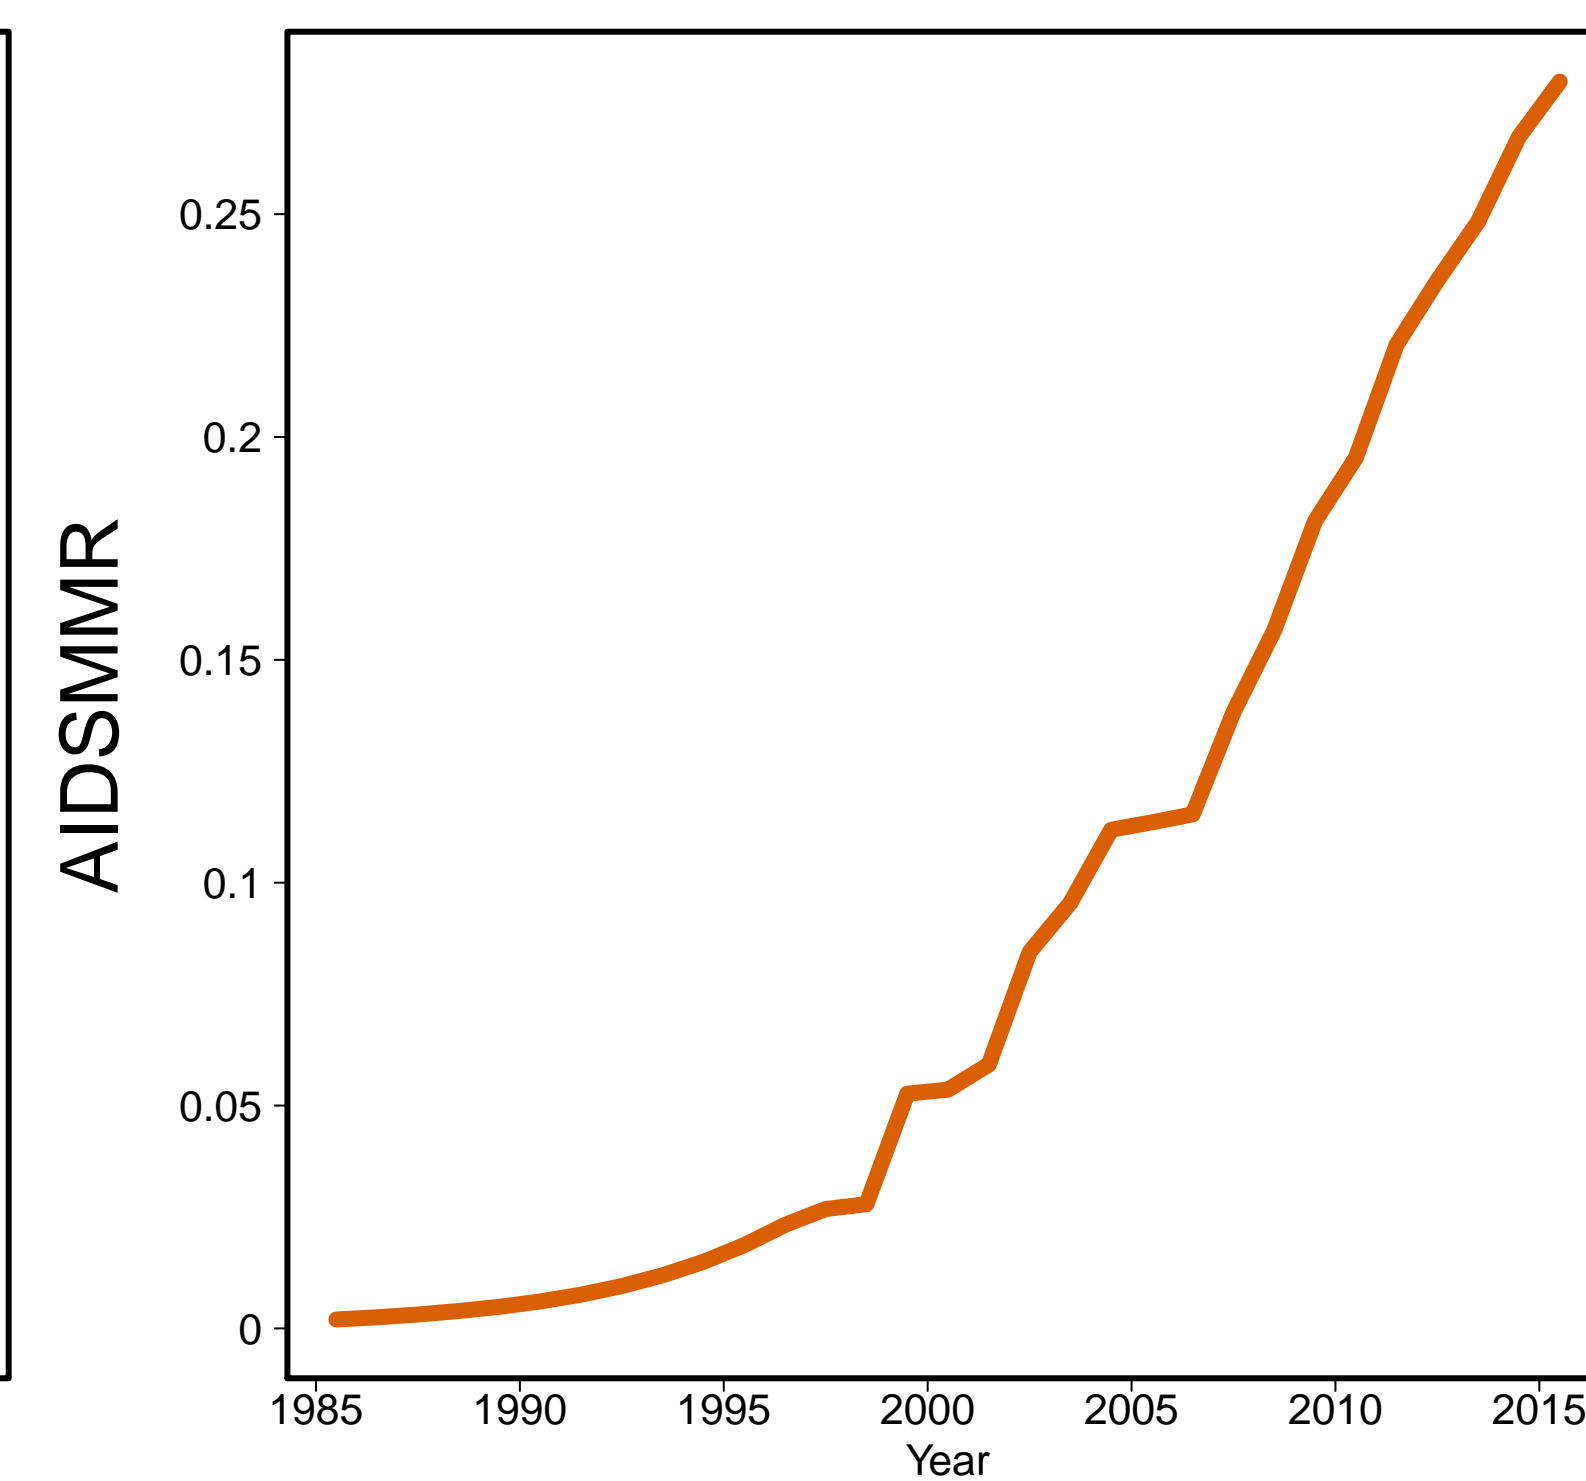



Burkina Faso [BFA]  
(Western Africa)

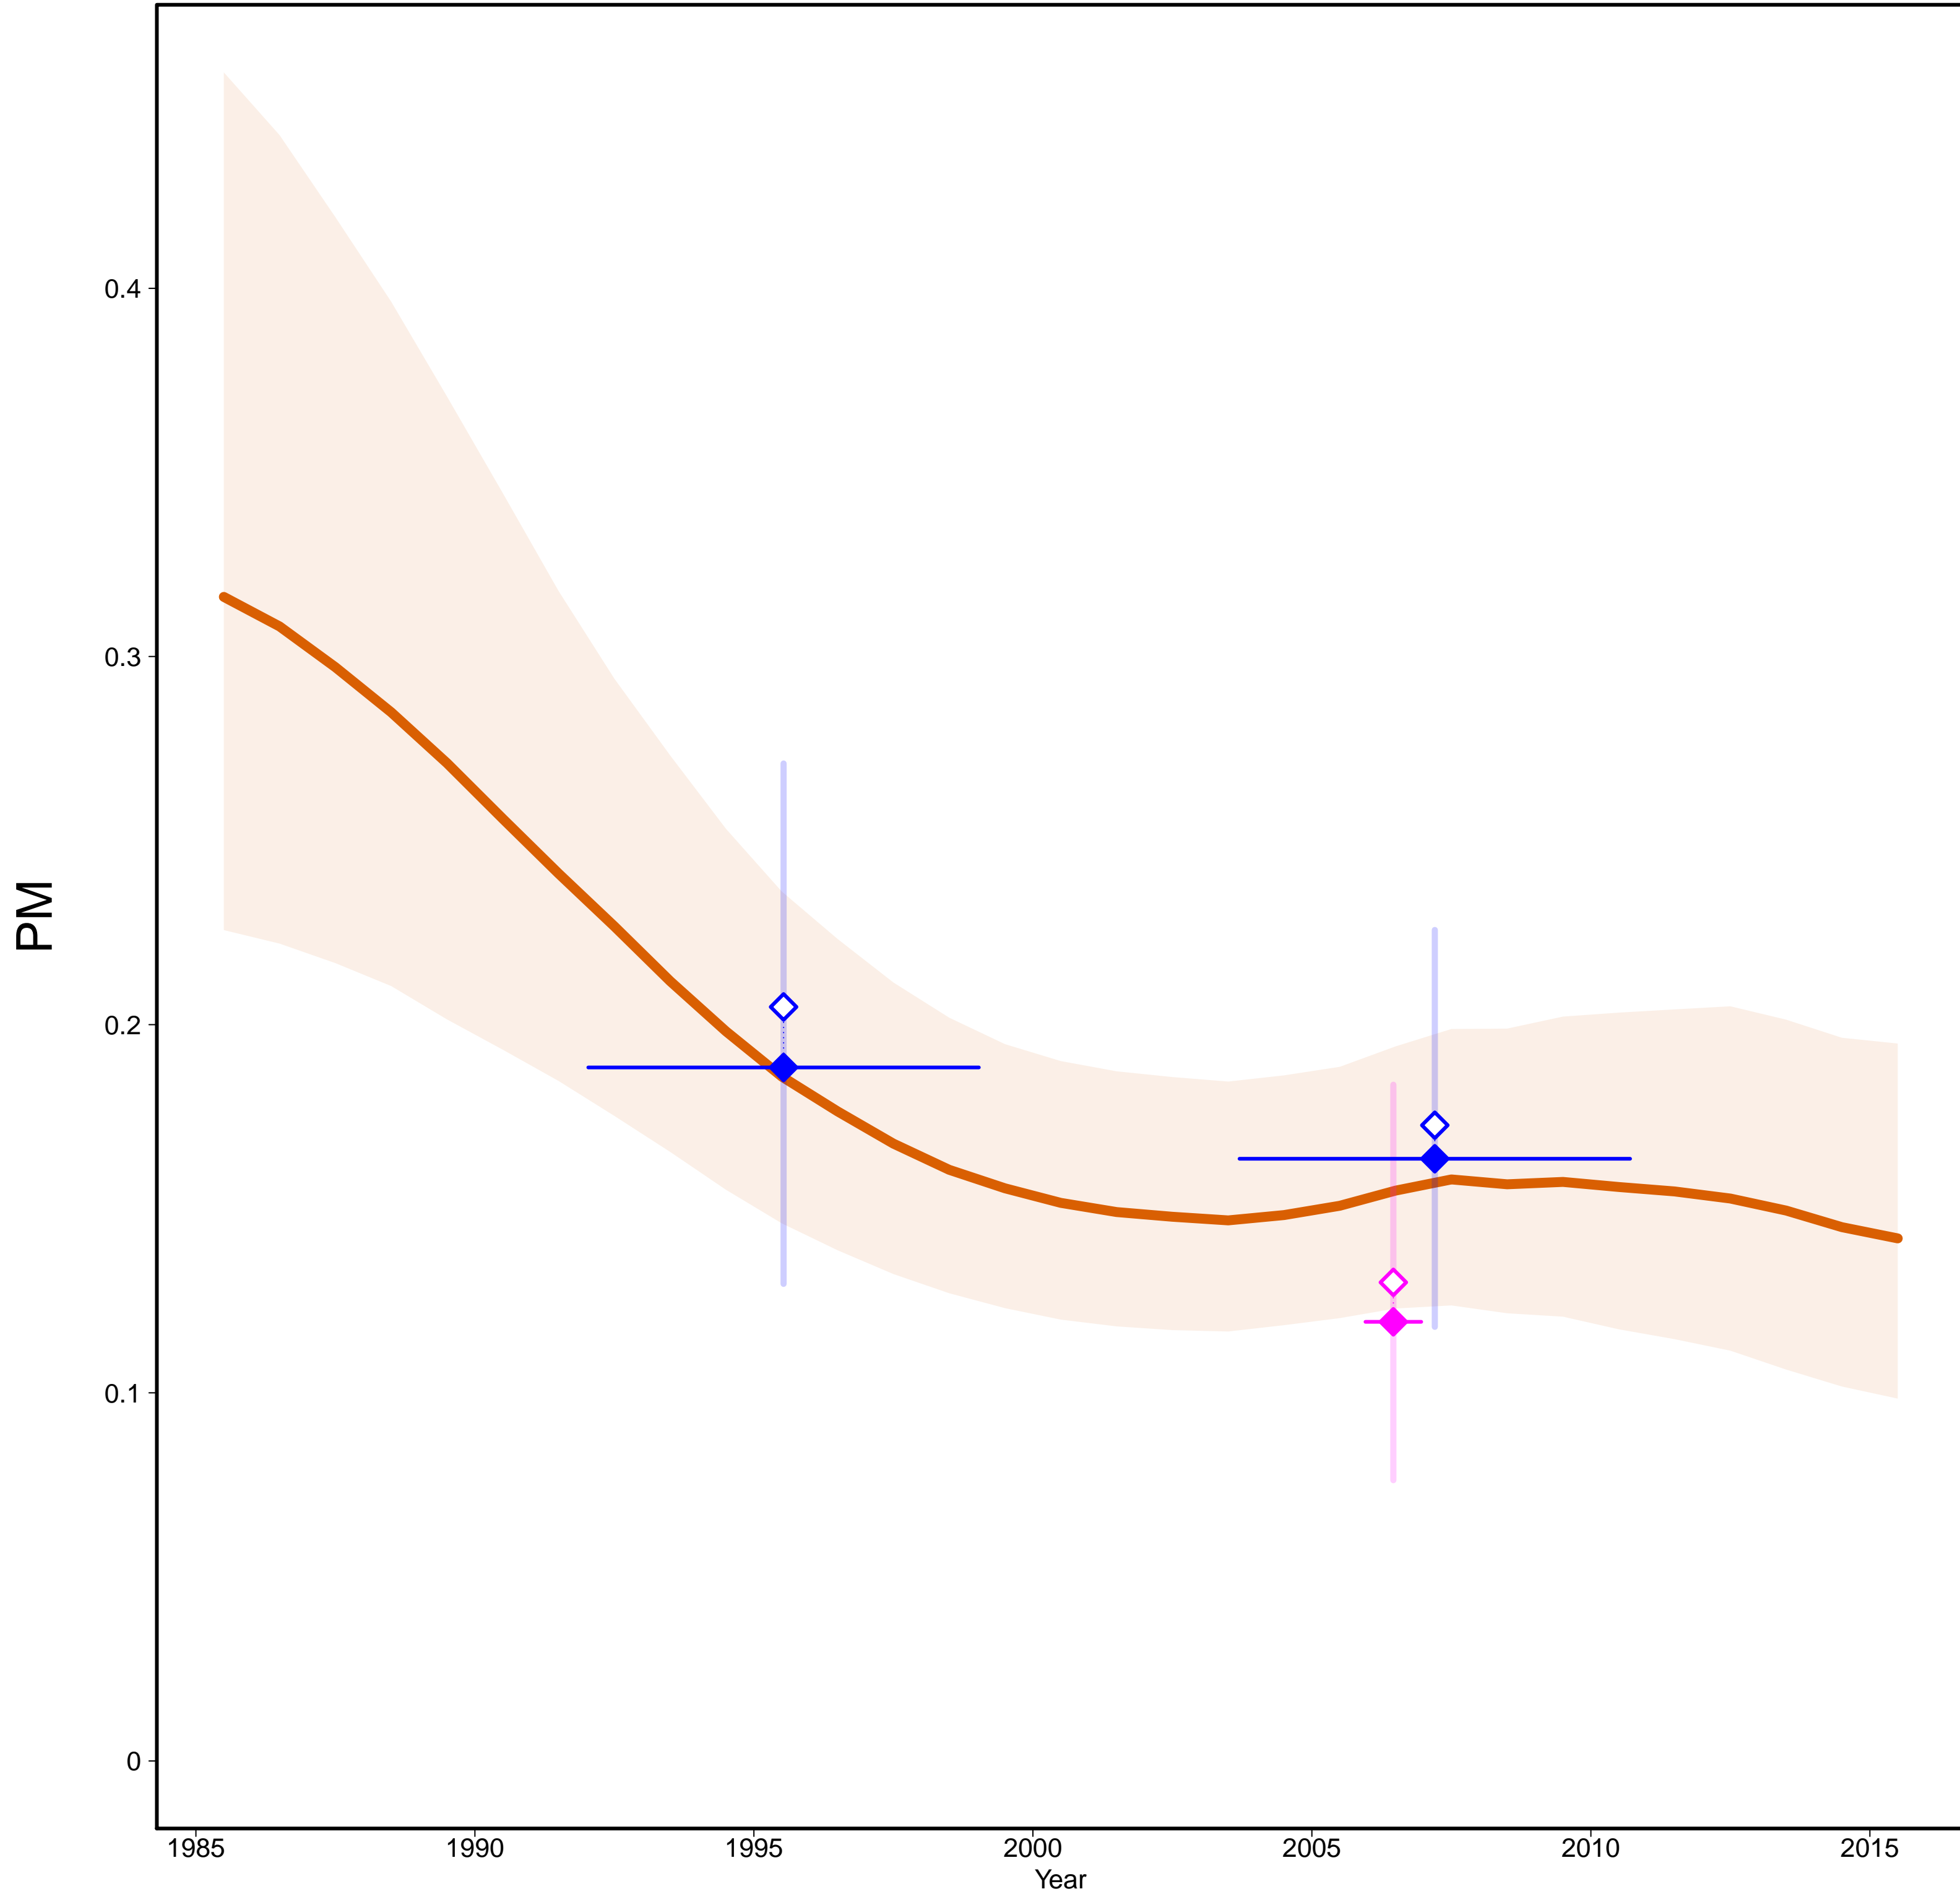

Burkina Faso [BFA]  
(Western Africa)

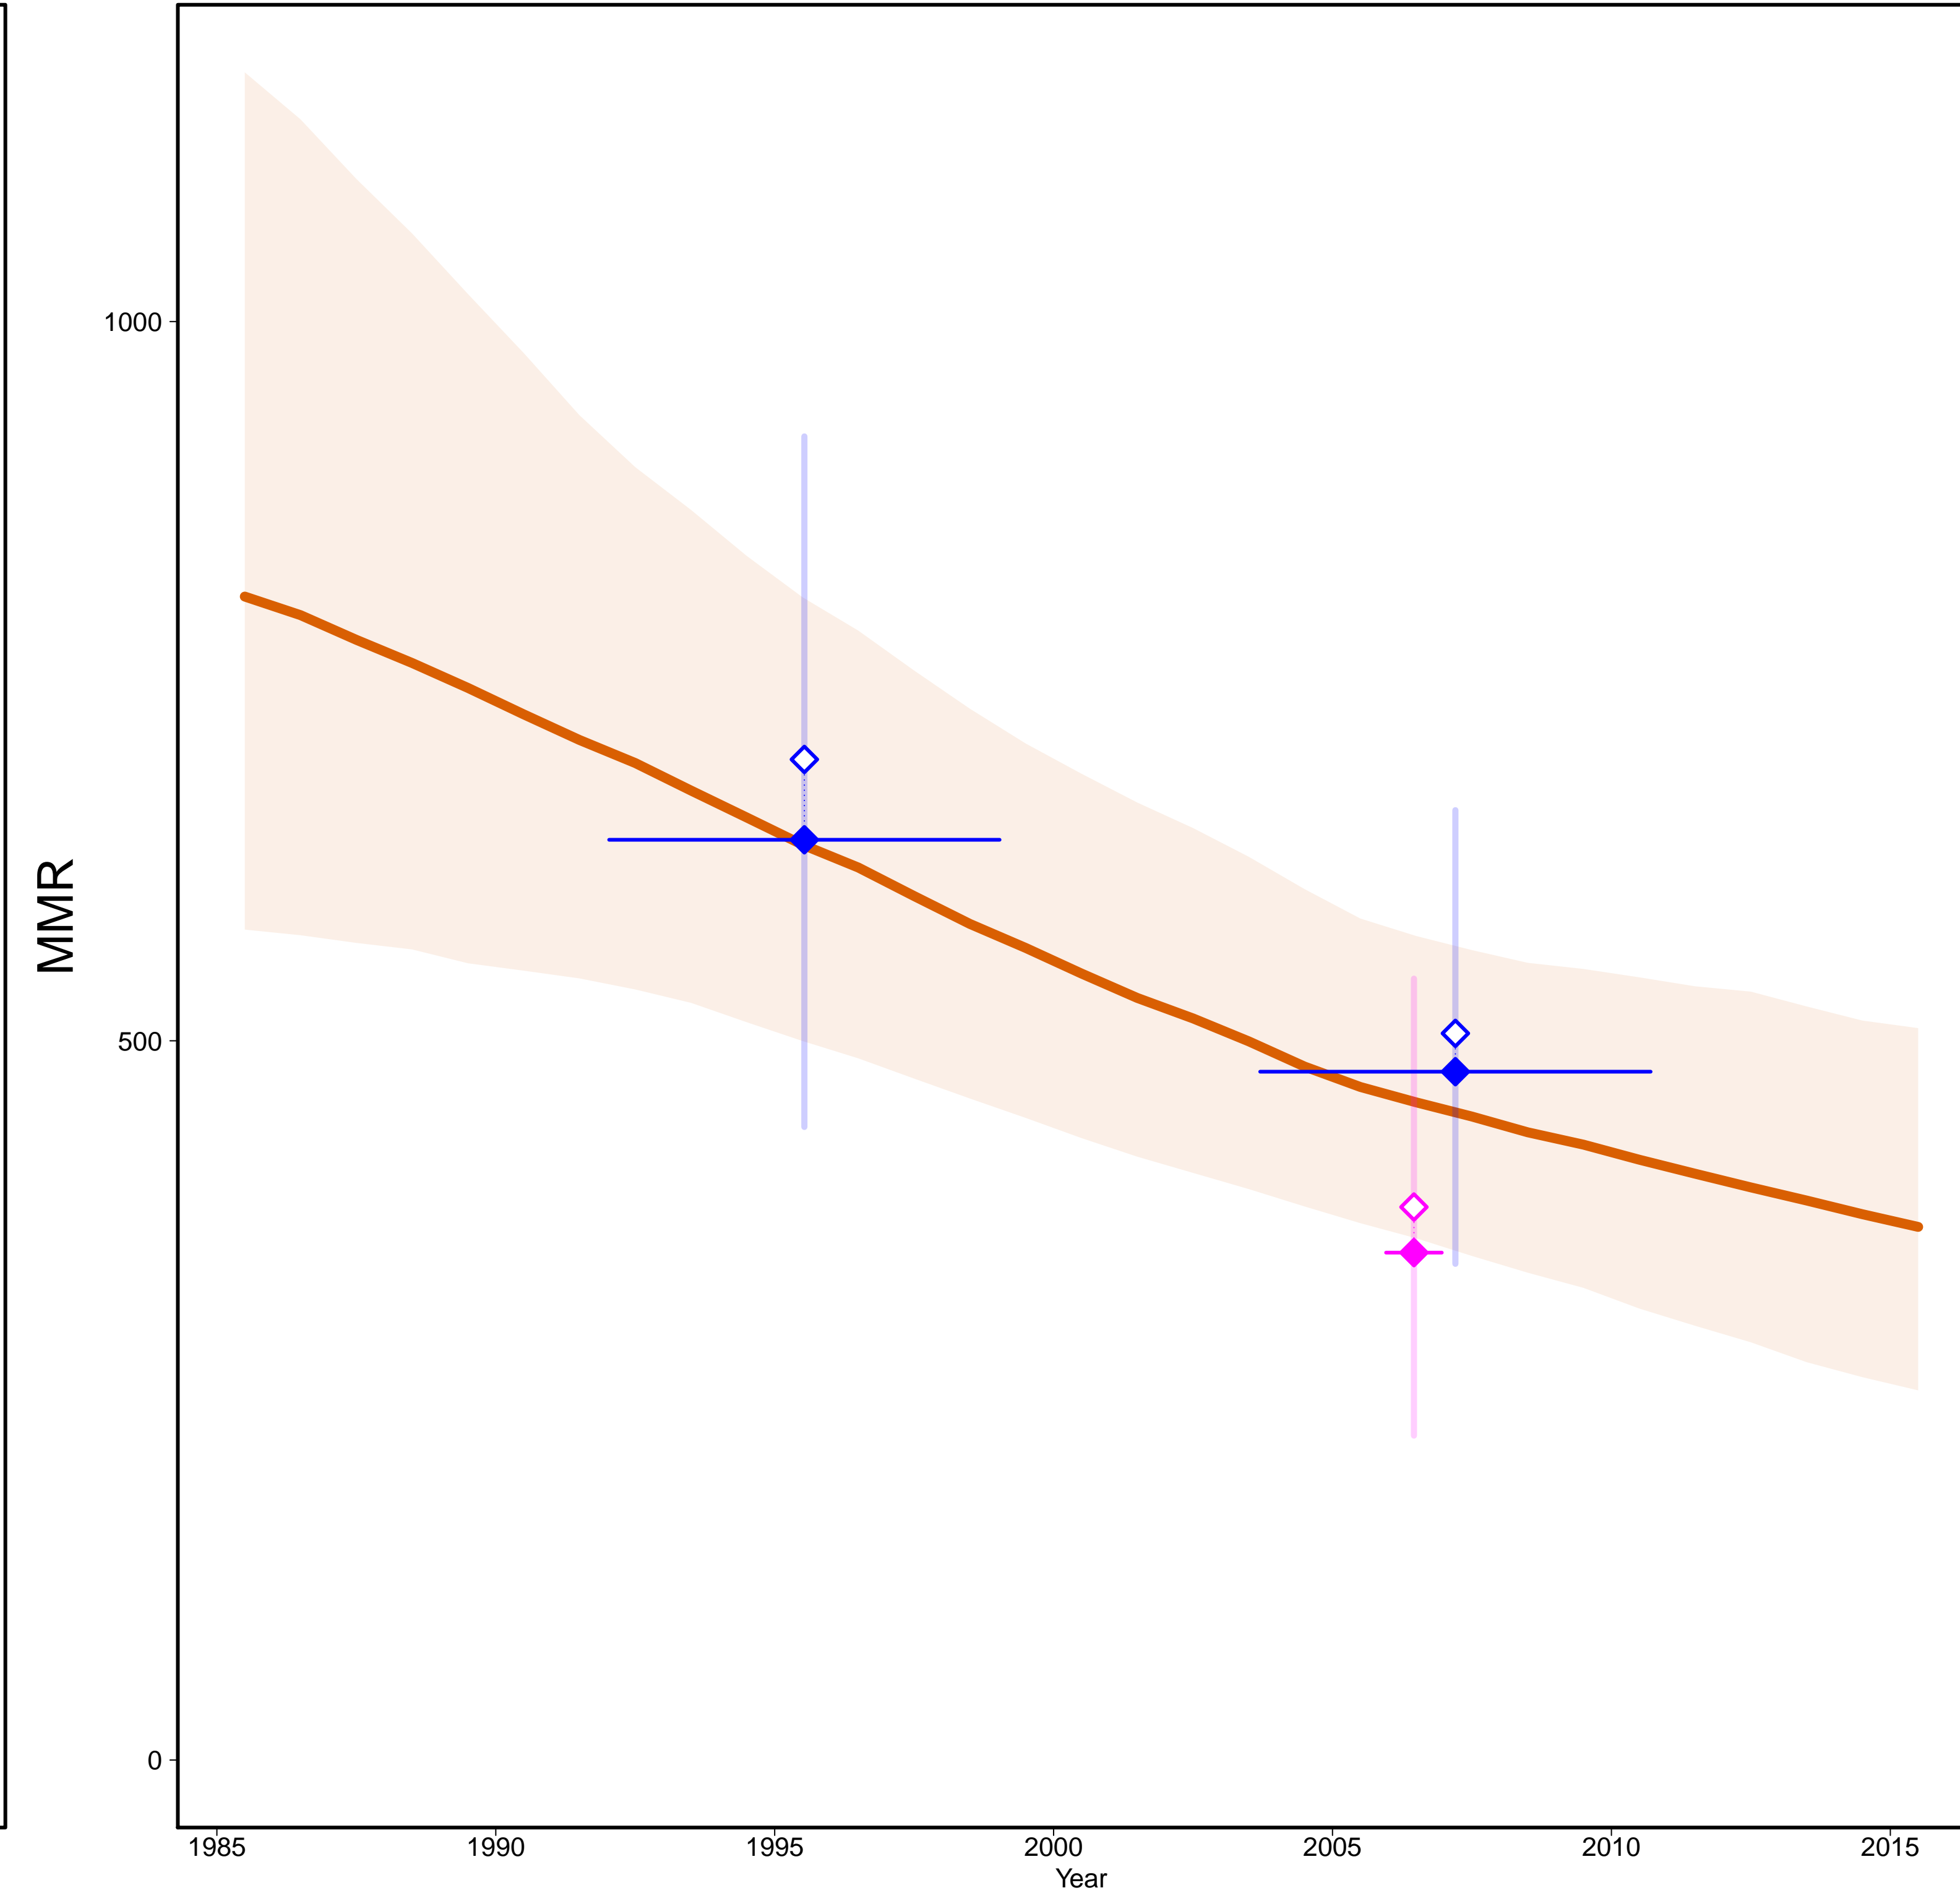

- Estimates —
- MMR Database 2015 —
- ◇ Observed Data
- ◆ Adjusted Data
- Data type —
- ◆ DHS
- ◆ Census

Gross Domestic Product

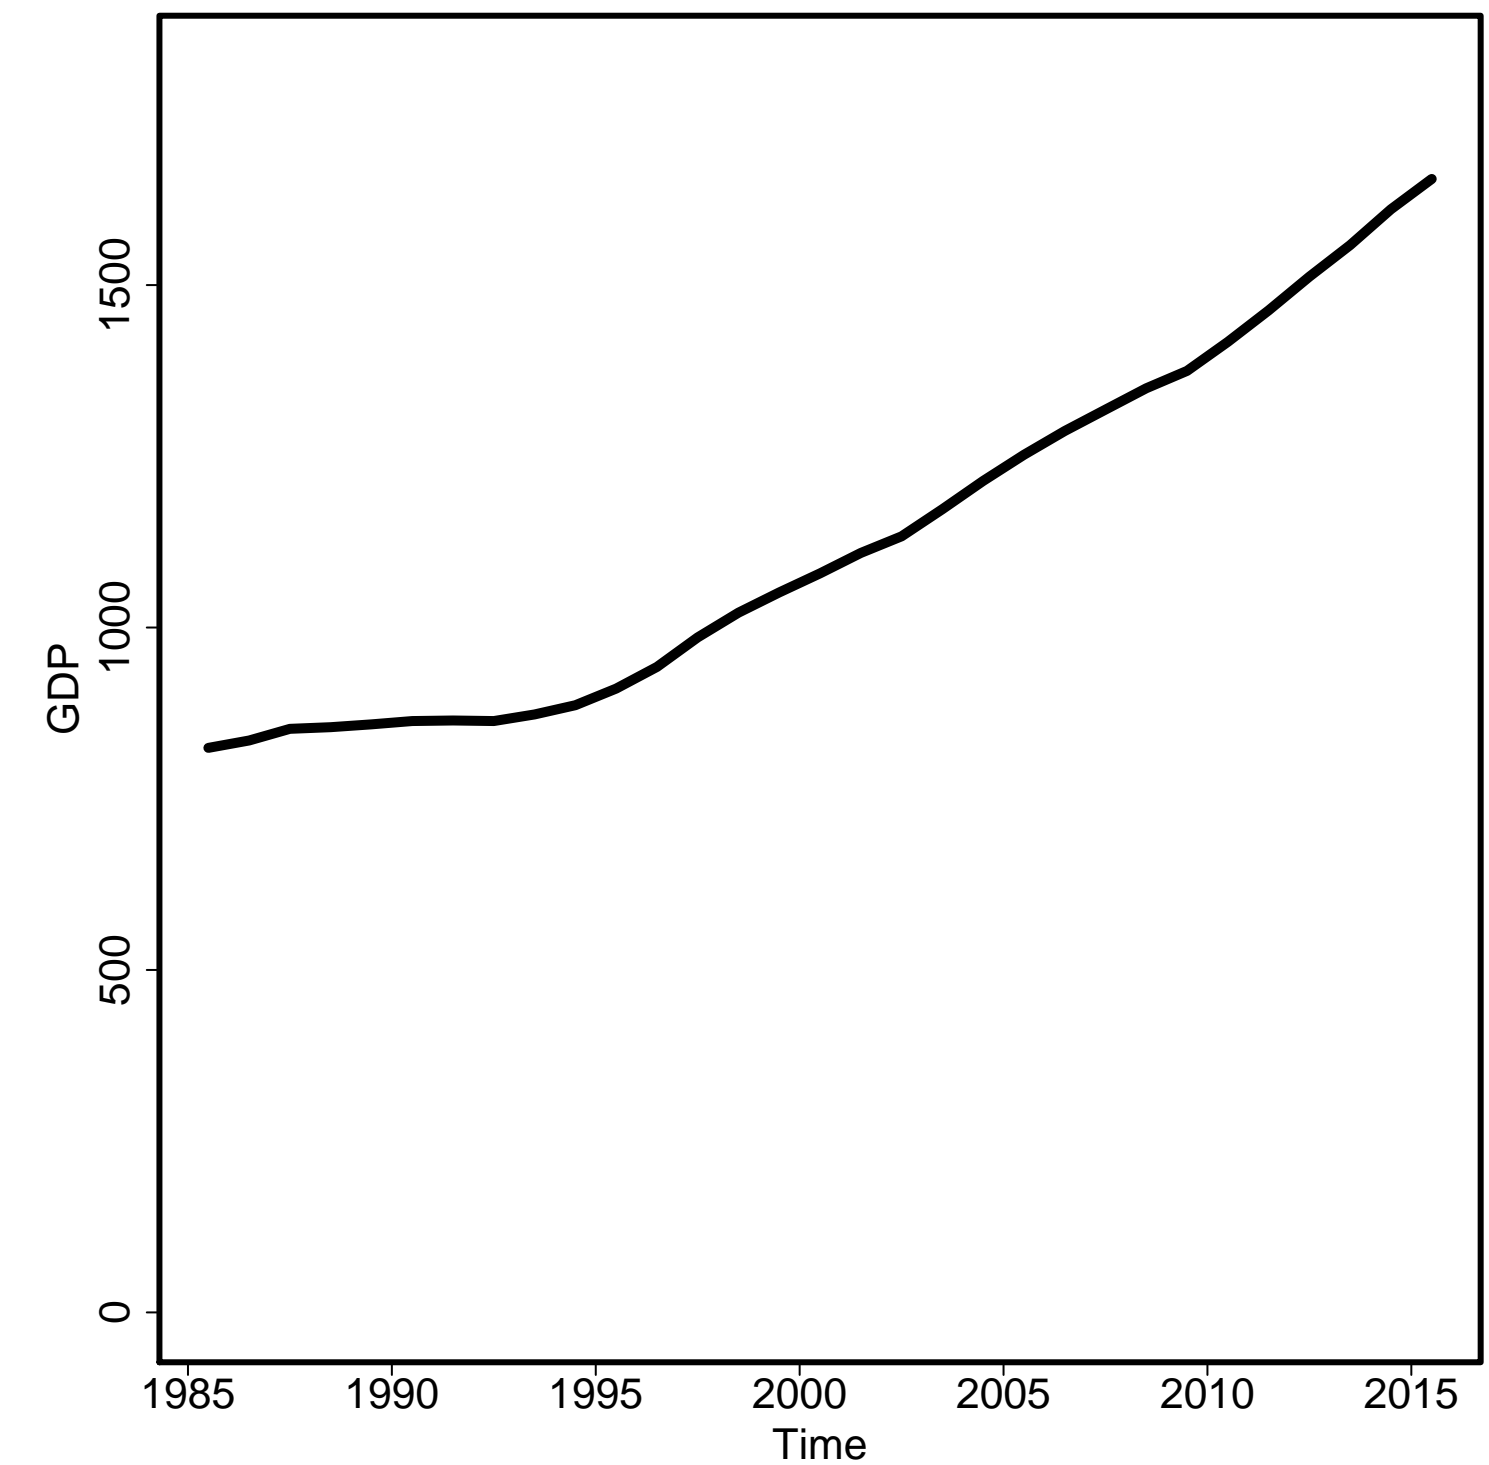

General Fertility Rate

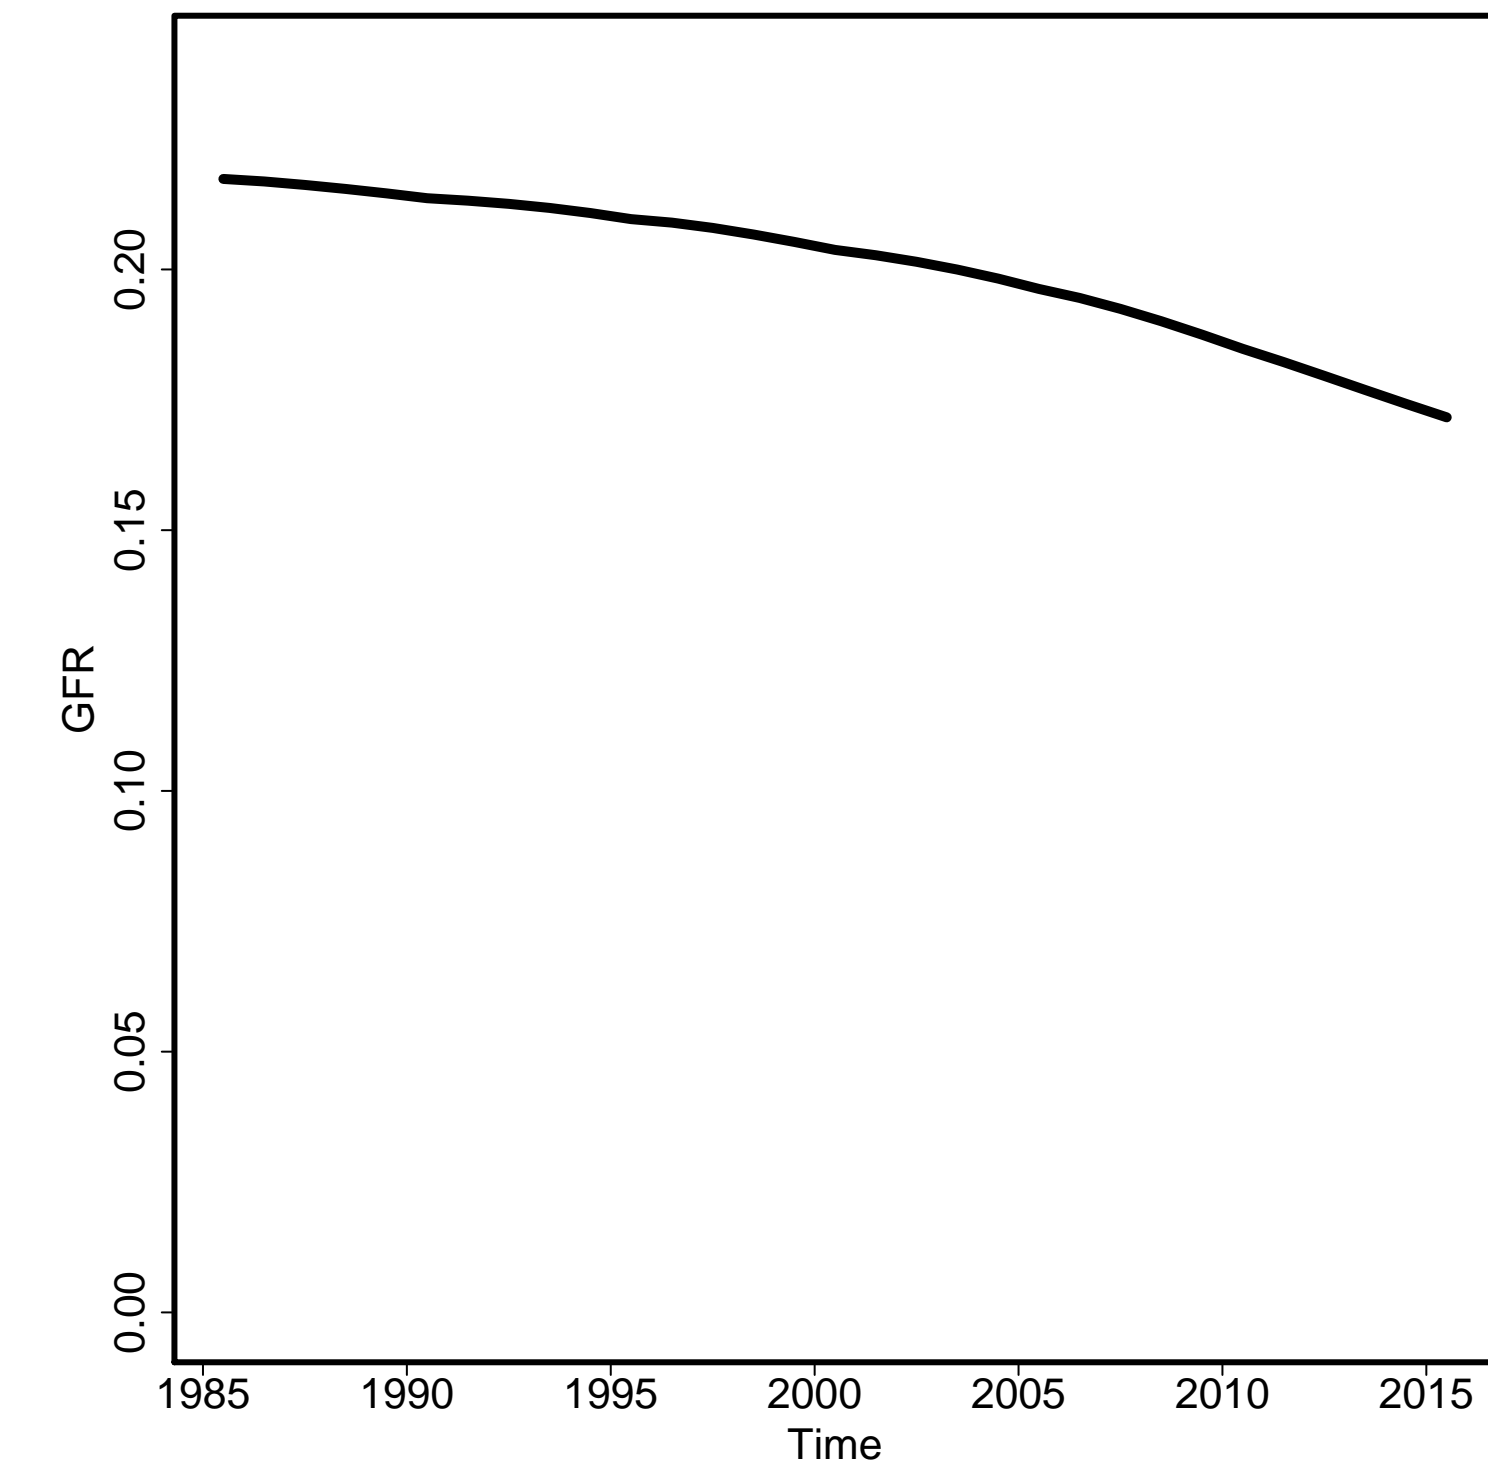

Skilled Attendance to Birth

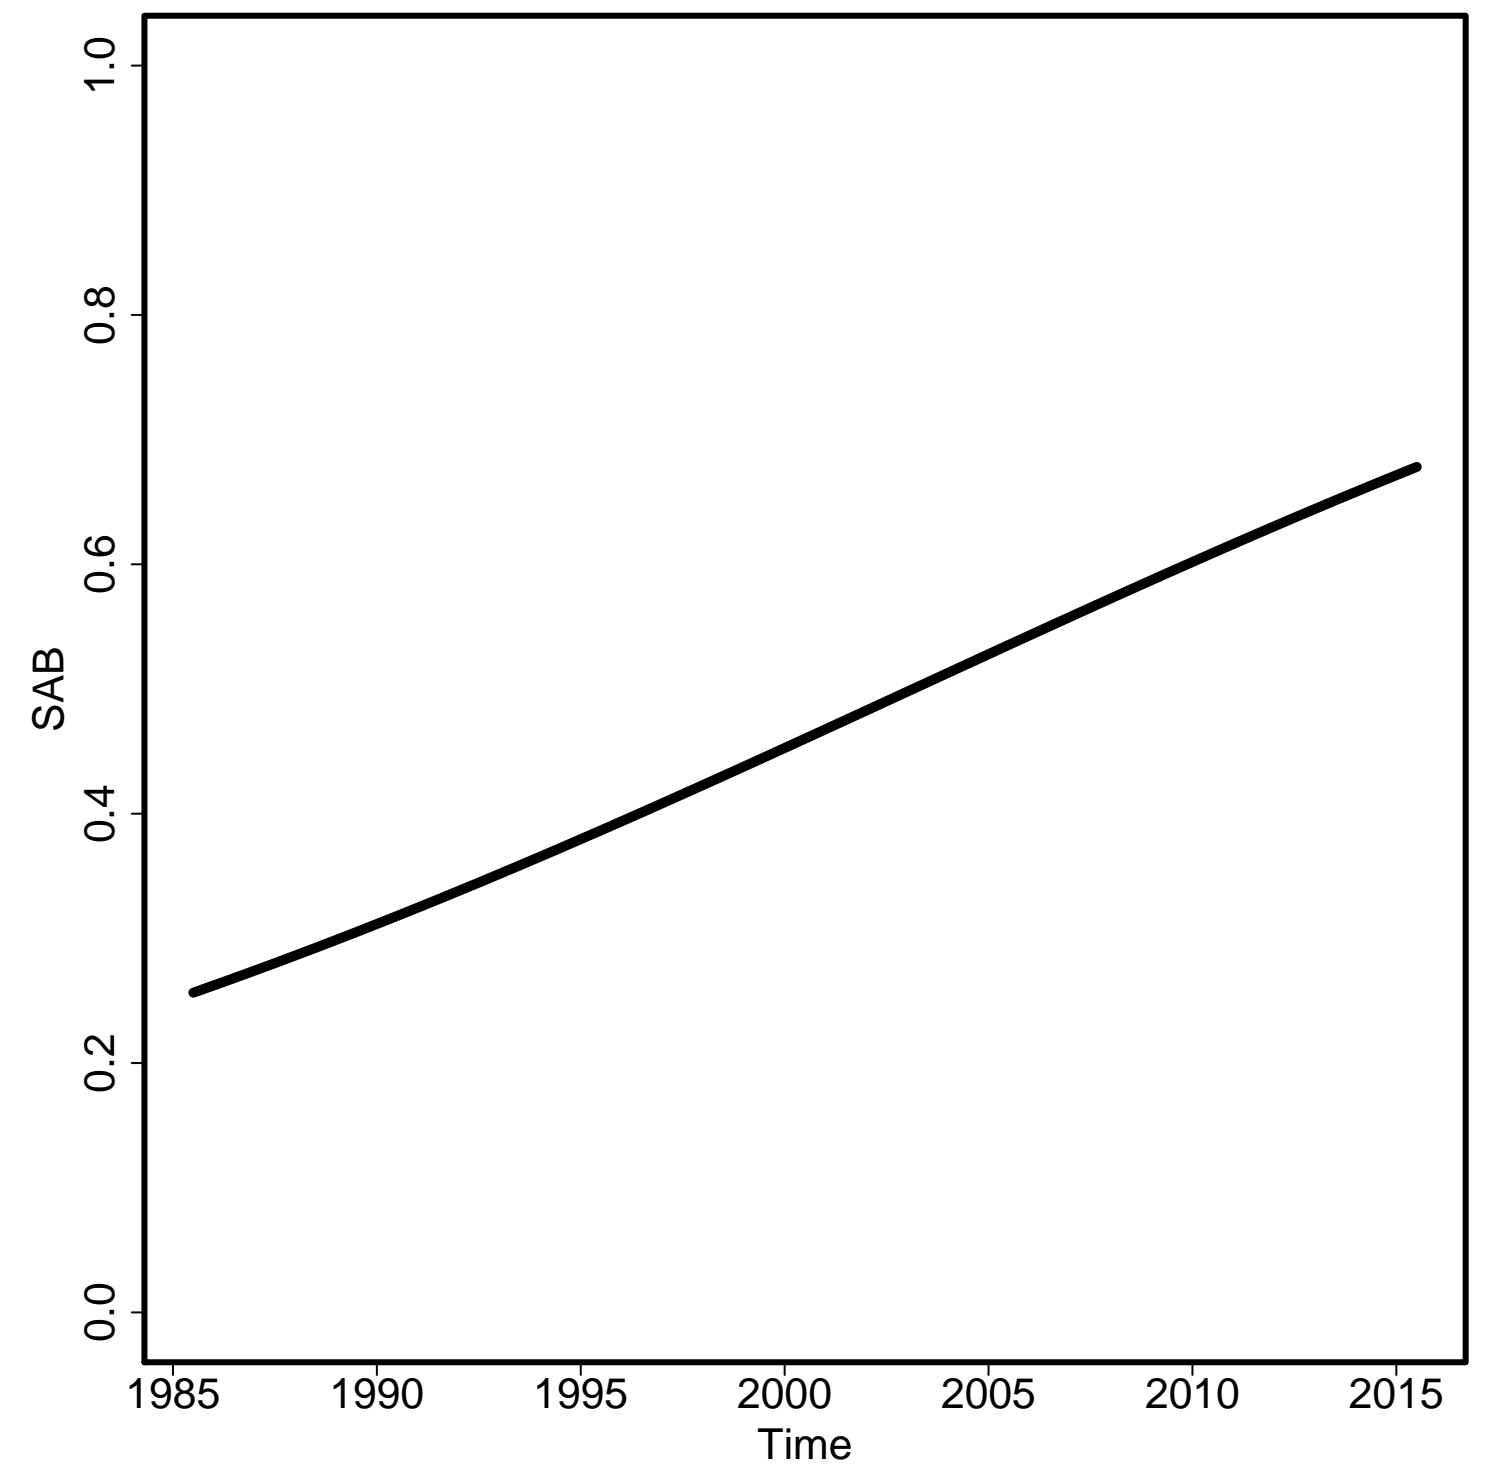

Envelope/Births

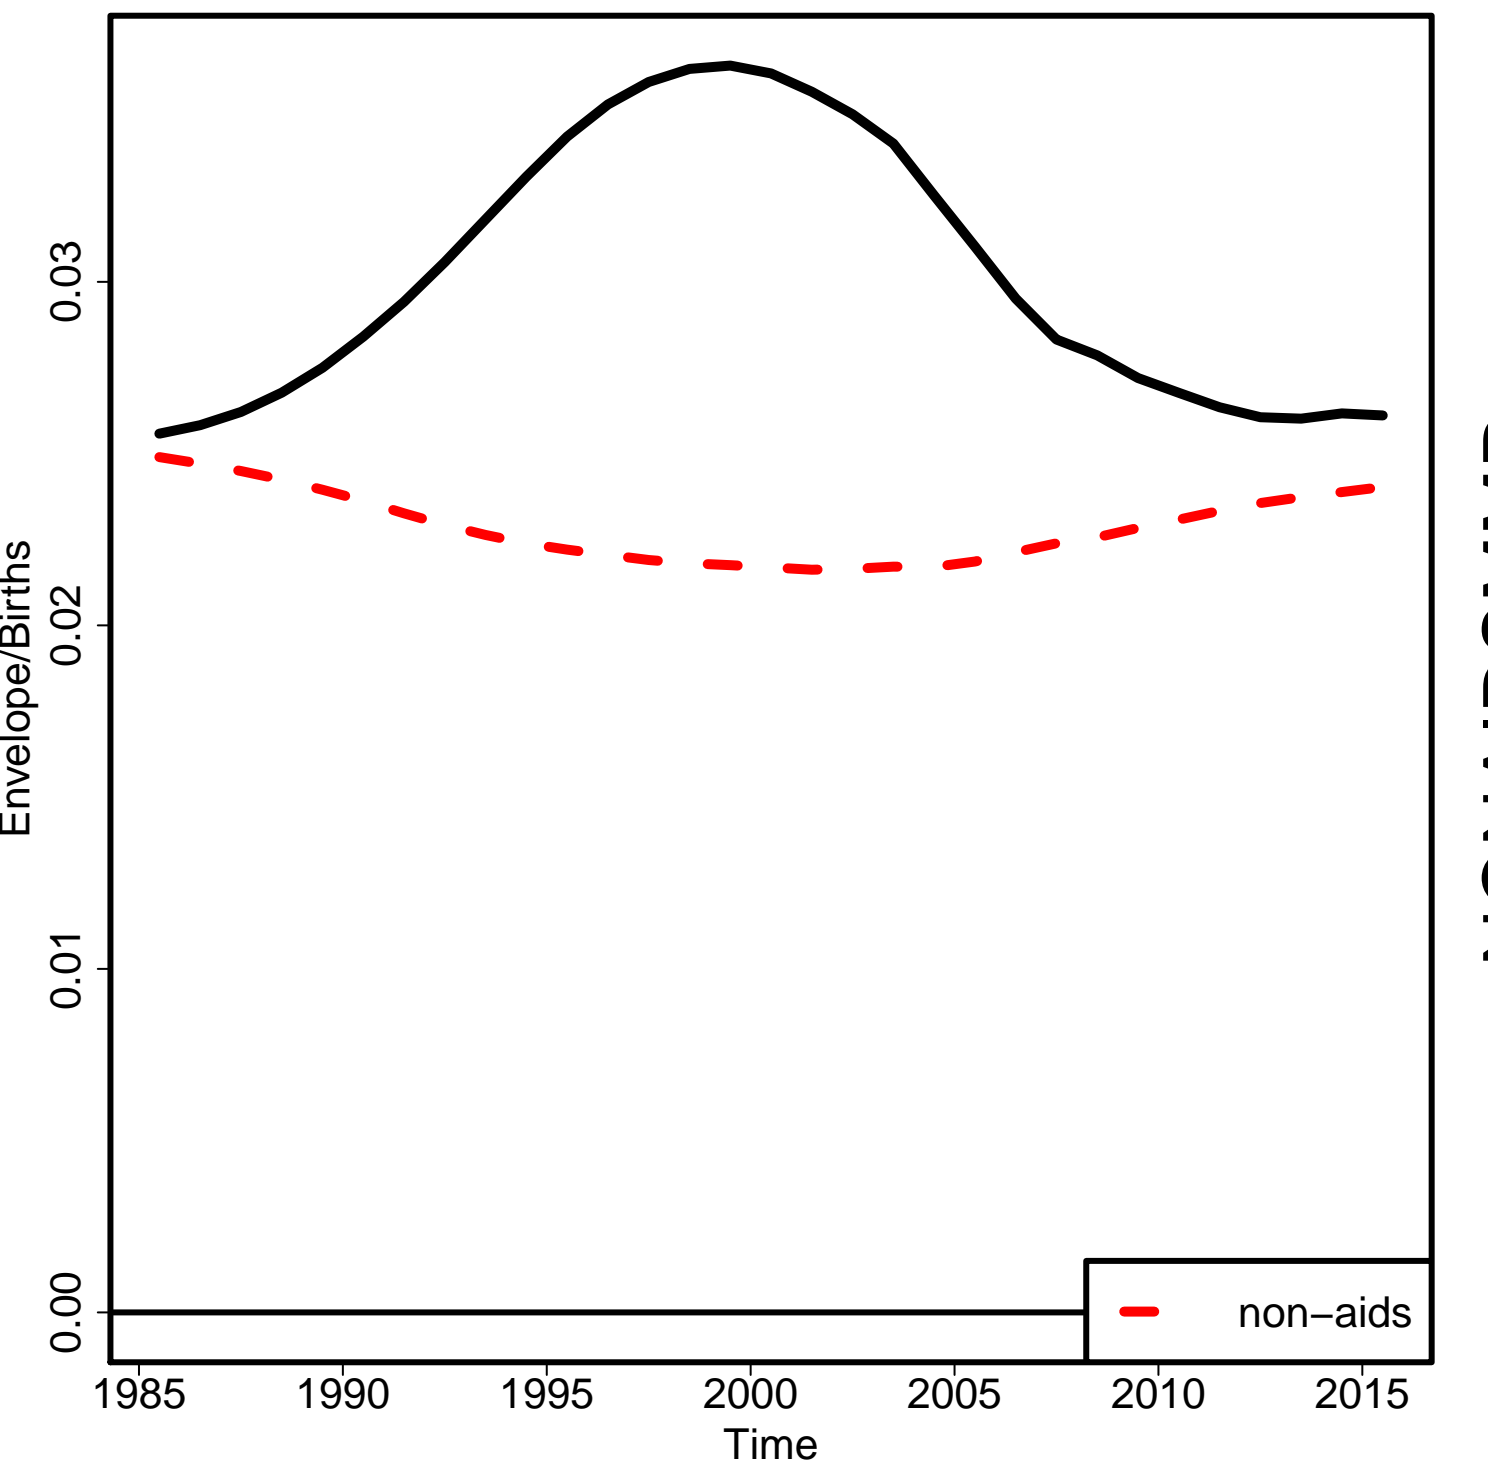

Non-aids MMR

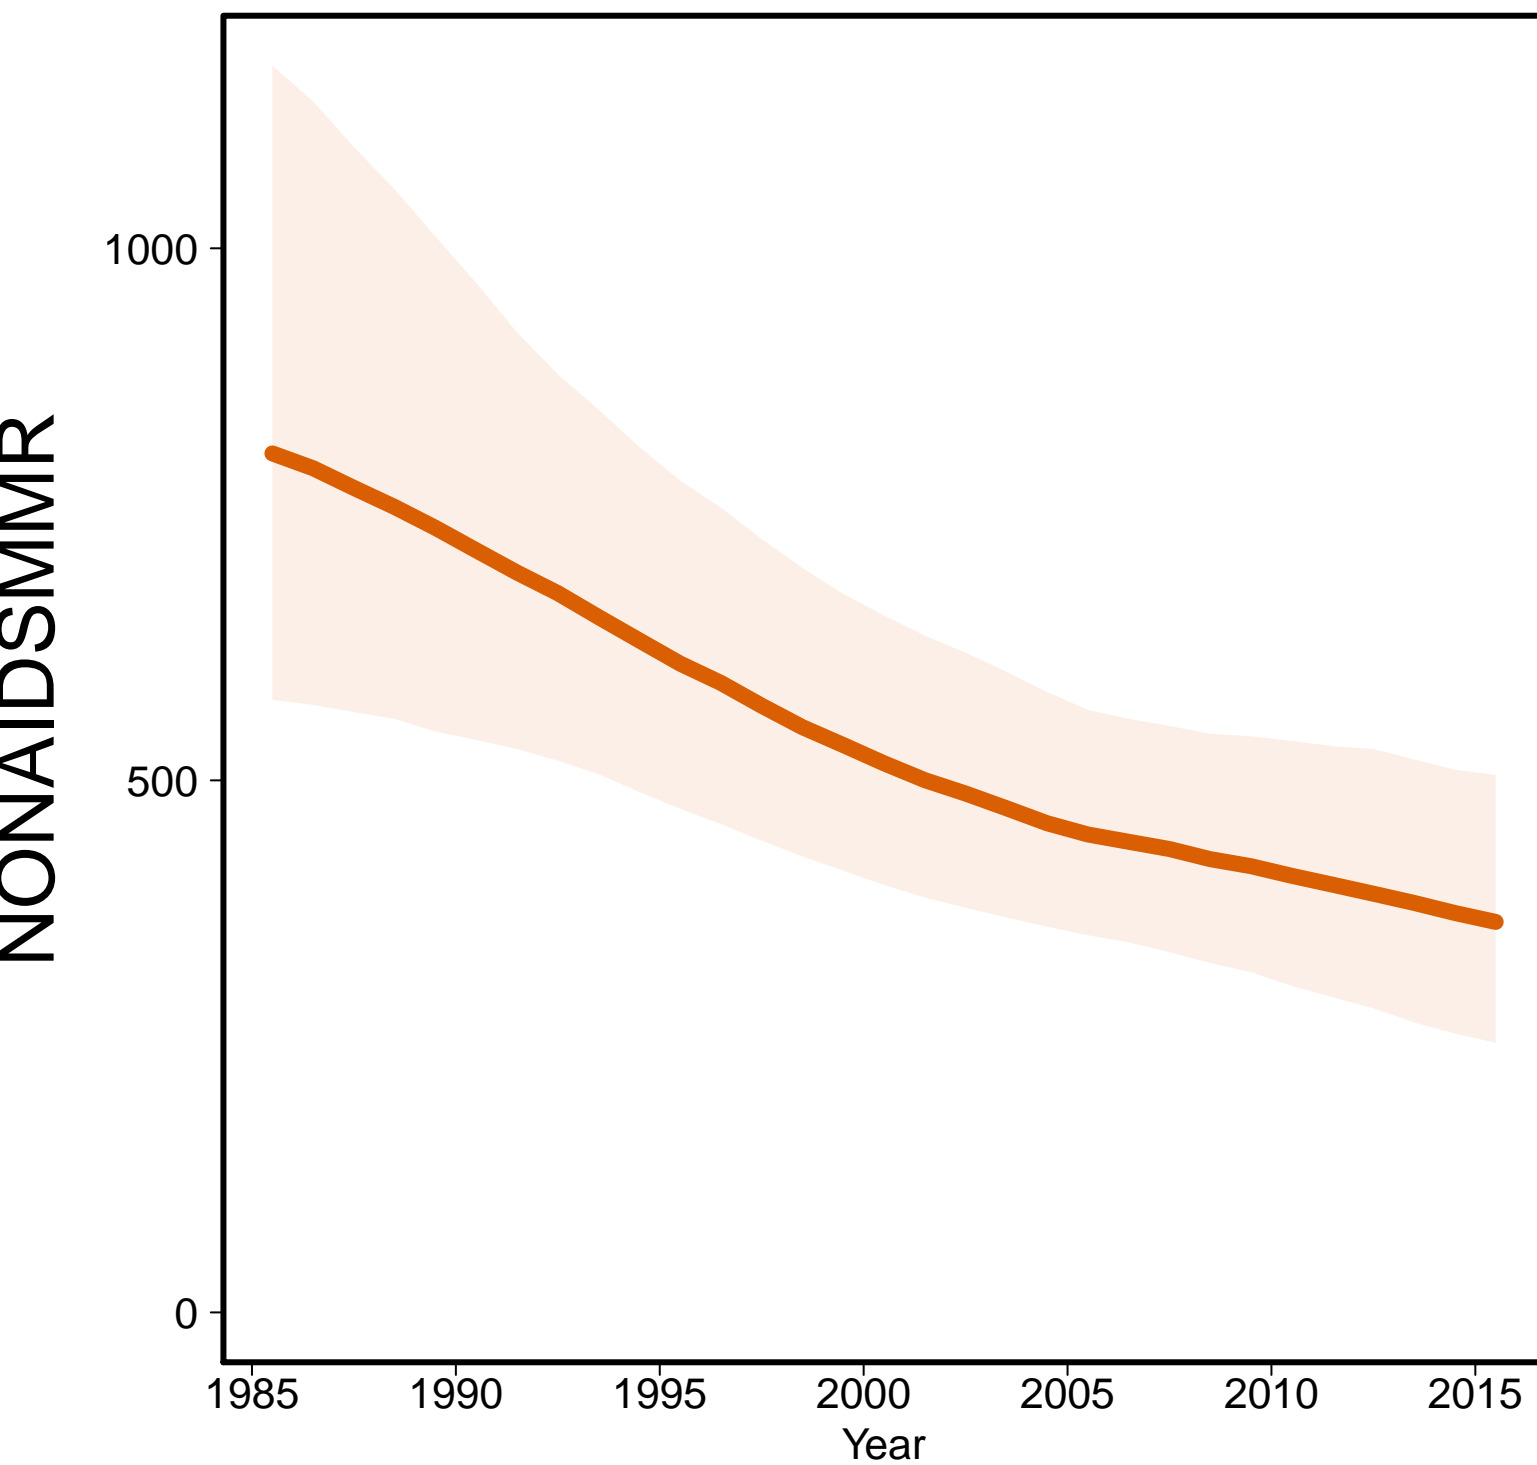

Aids MMR

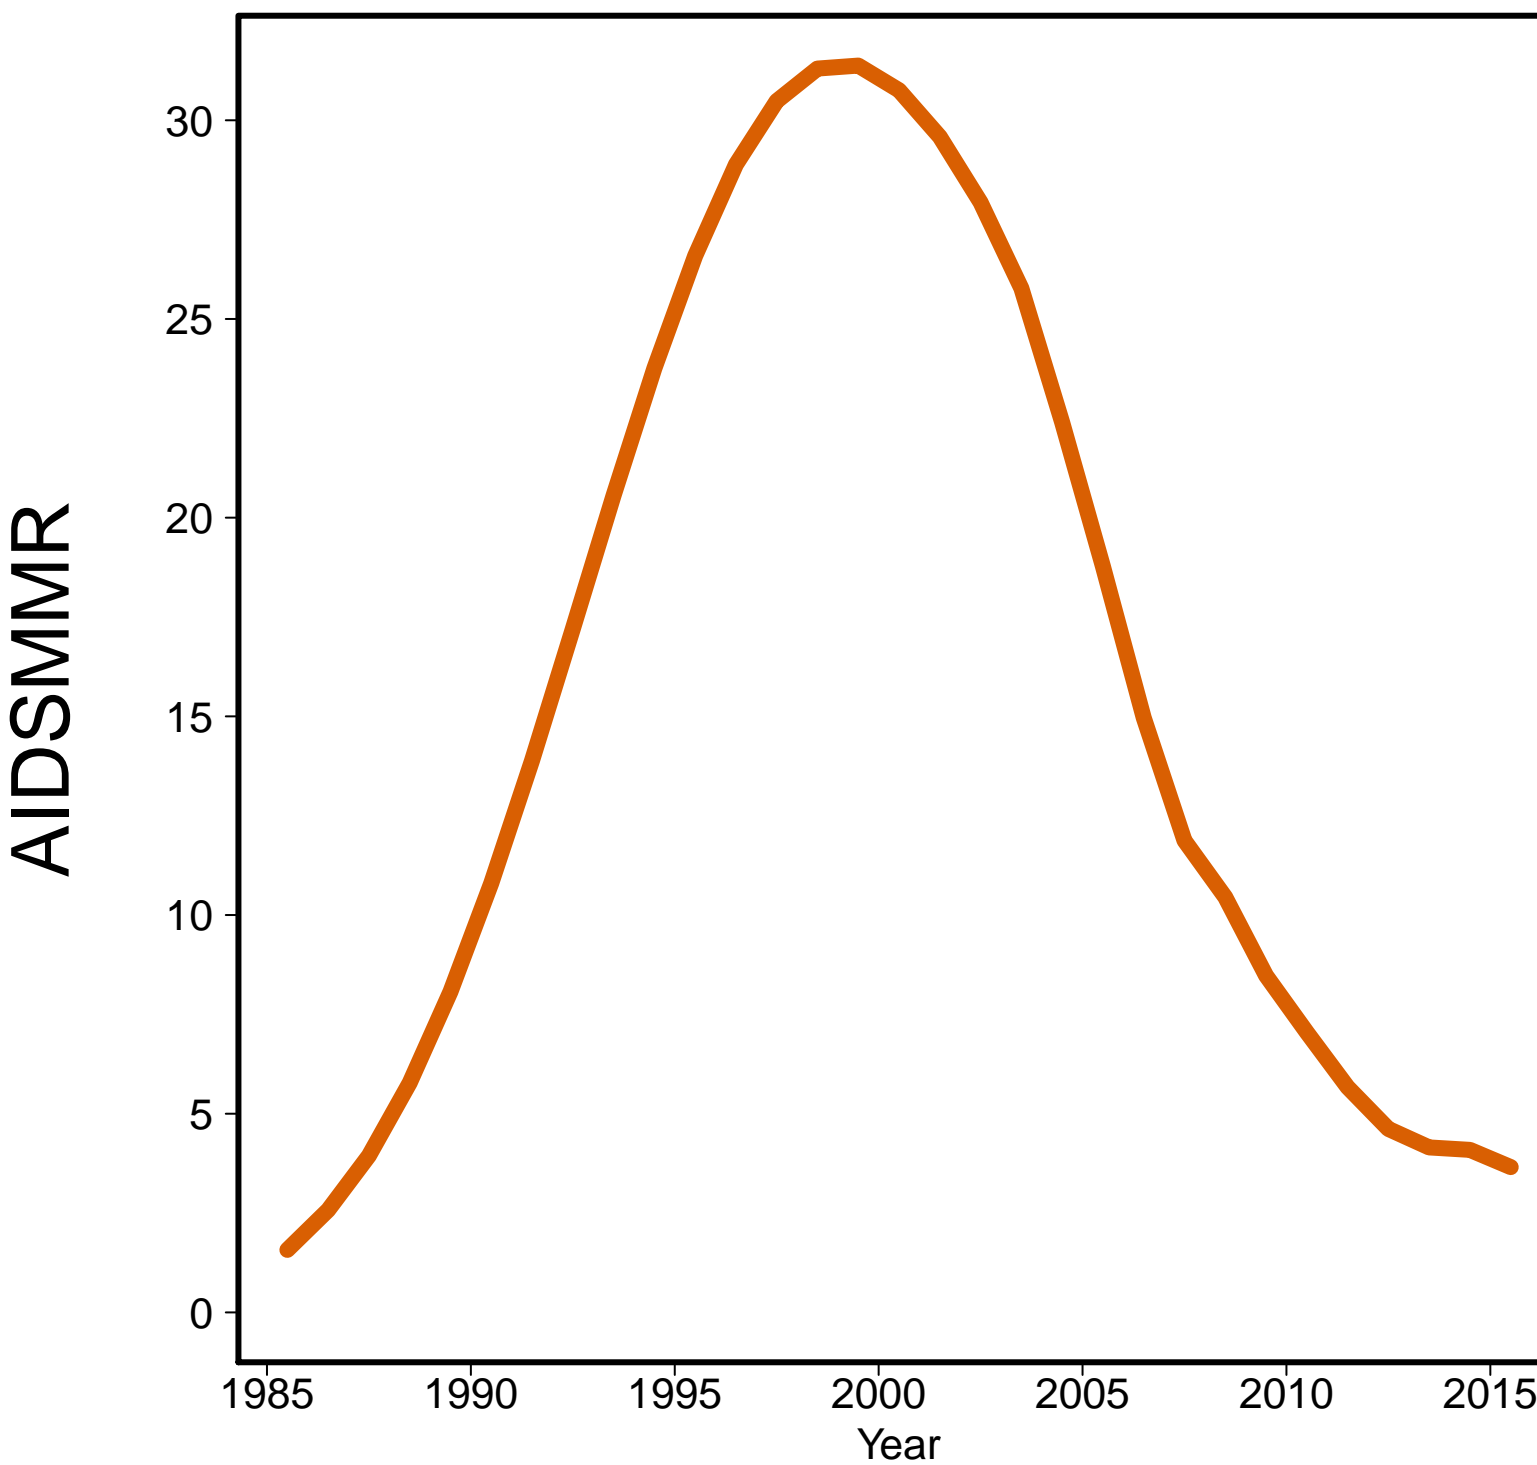

Burundi [BDI]  
(Eastern Africa)

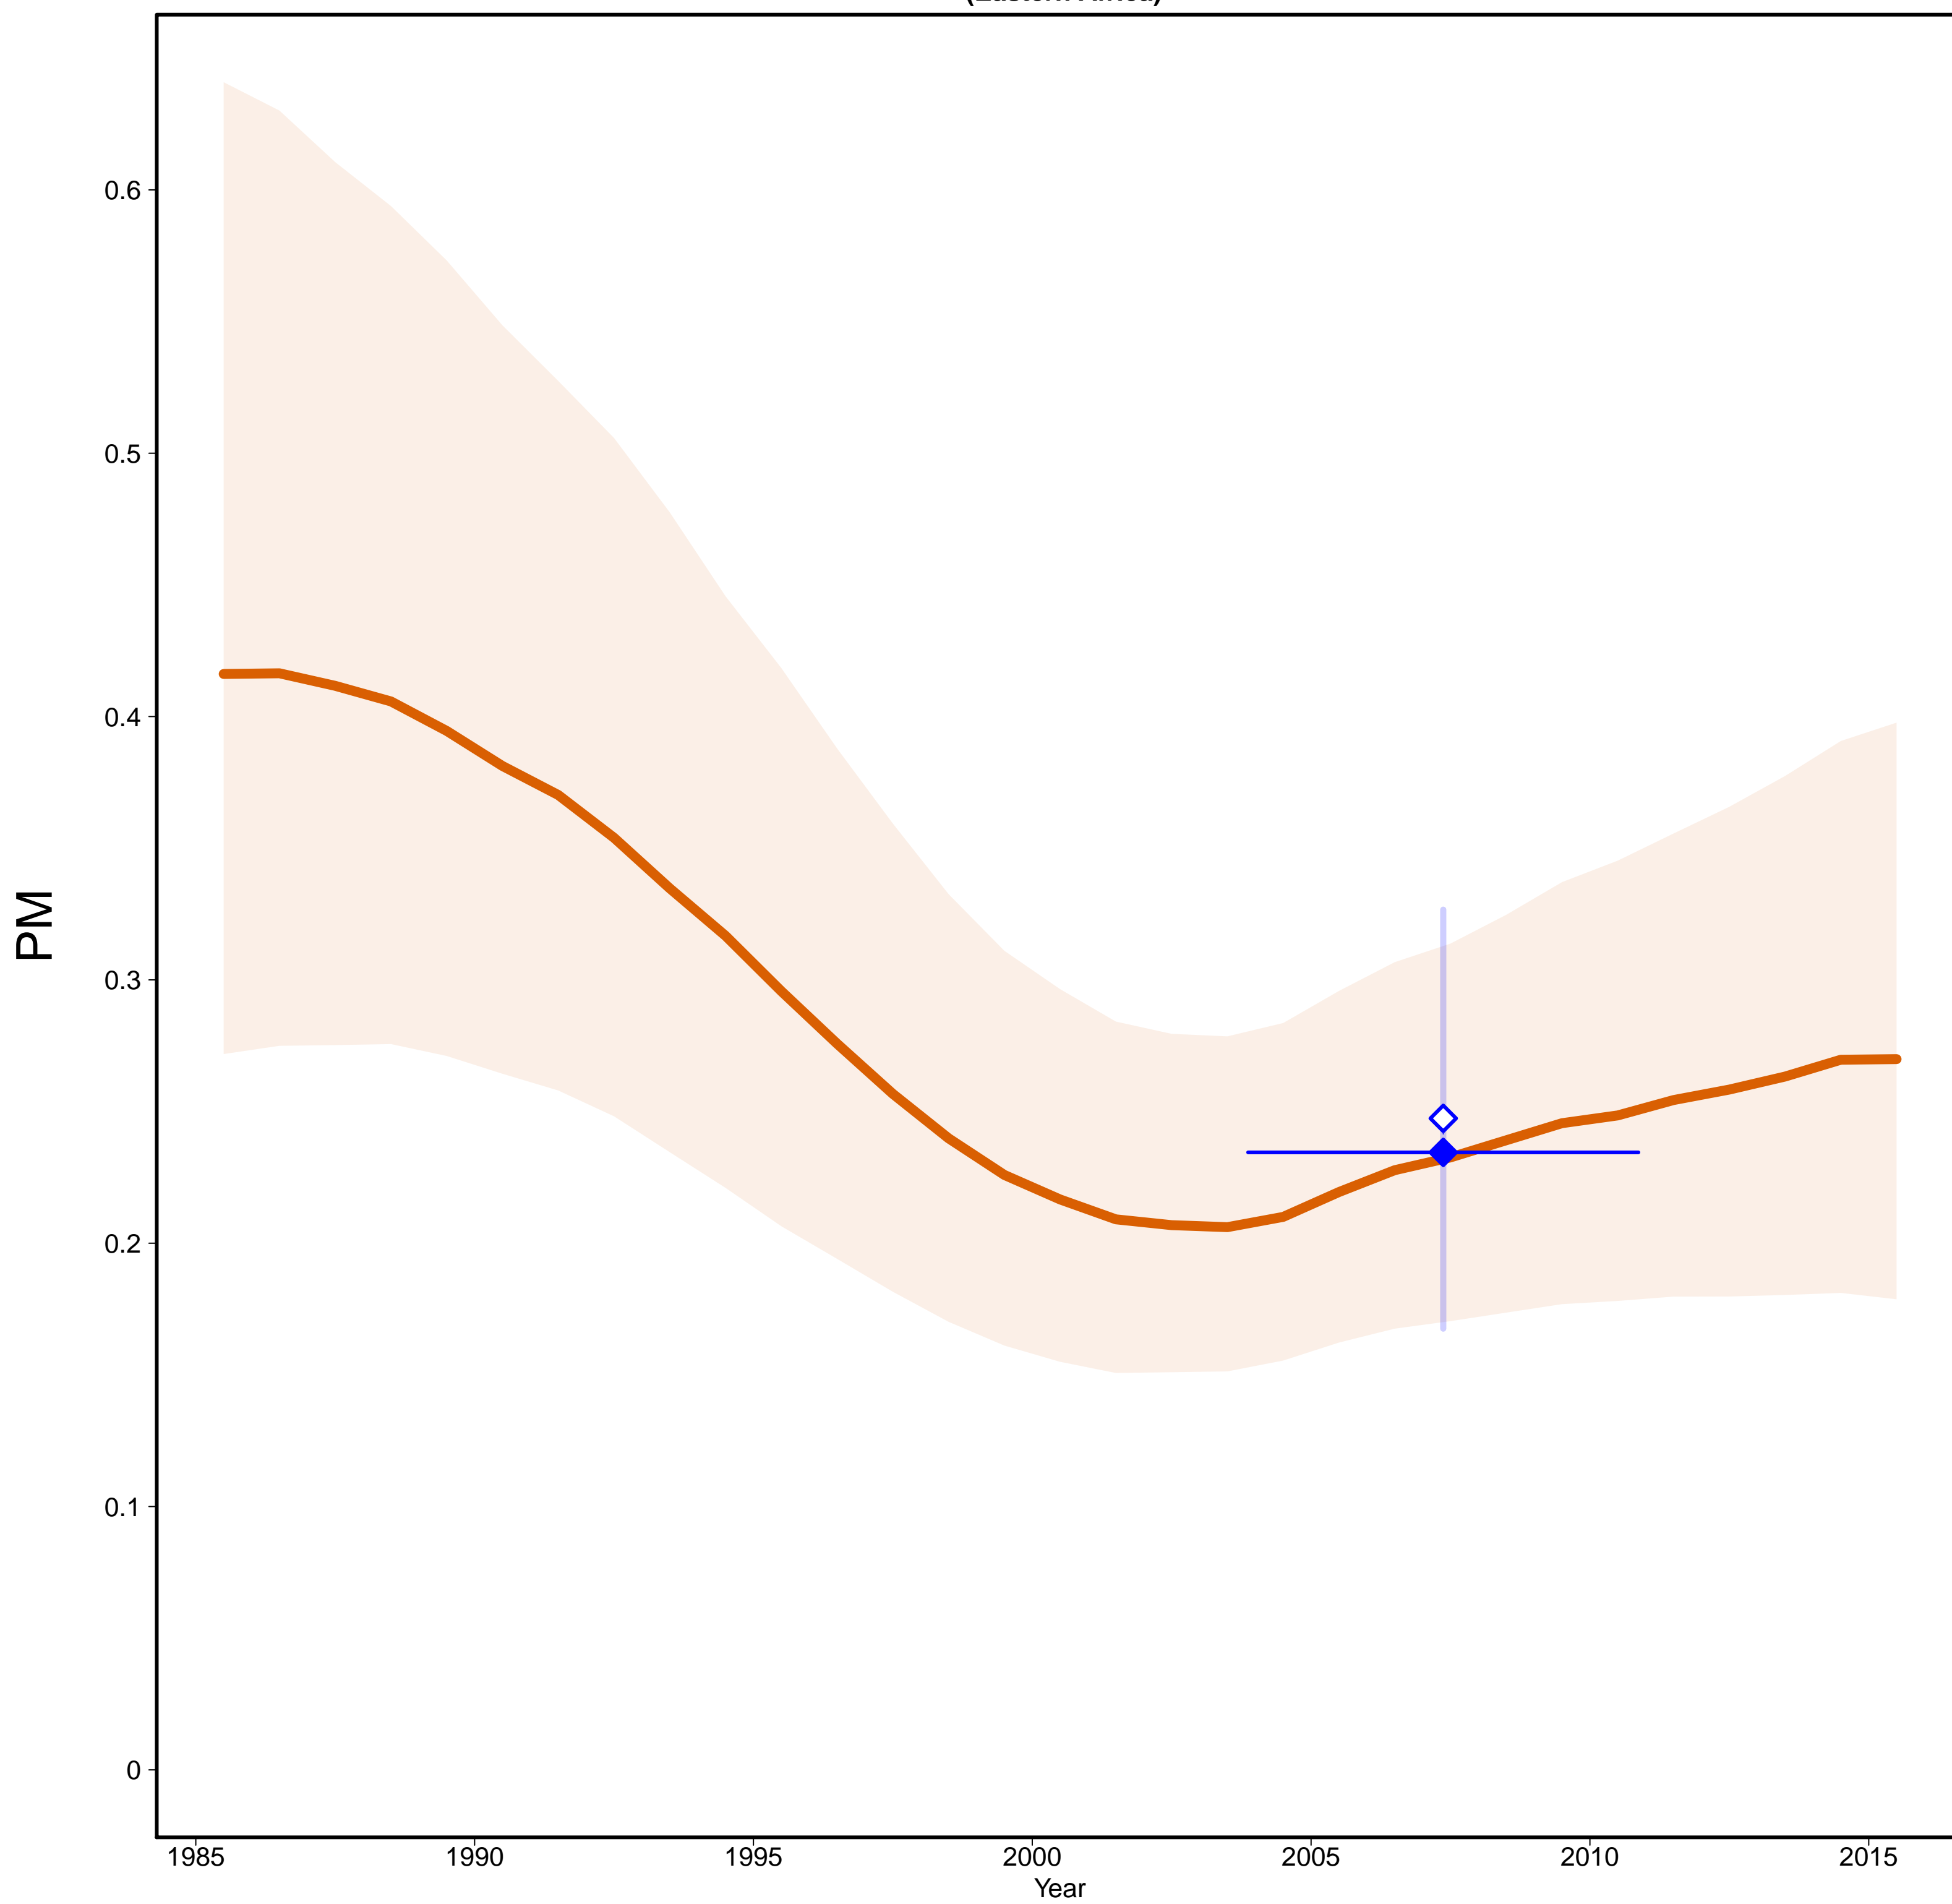

Burundi [BDI]  
(Eastern Africa)

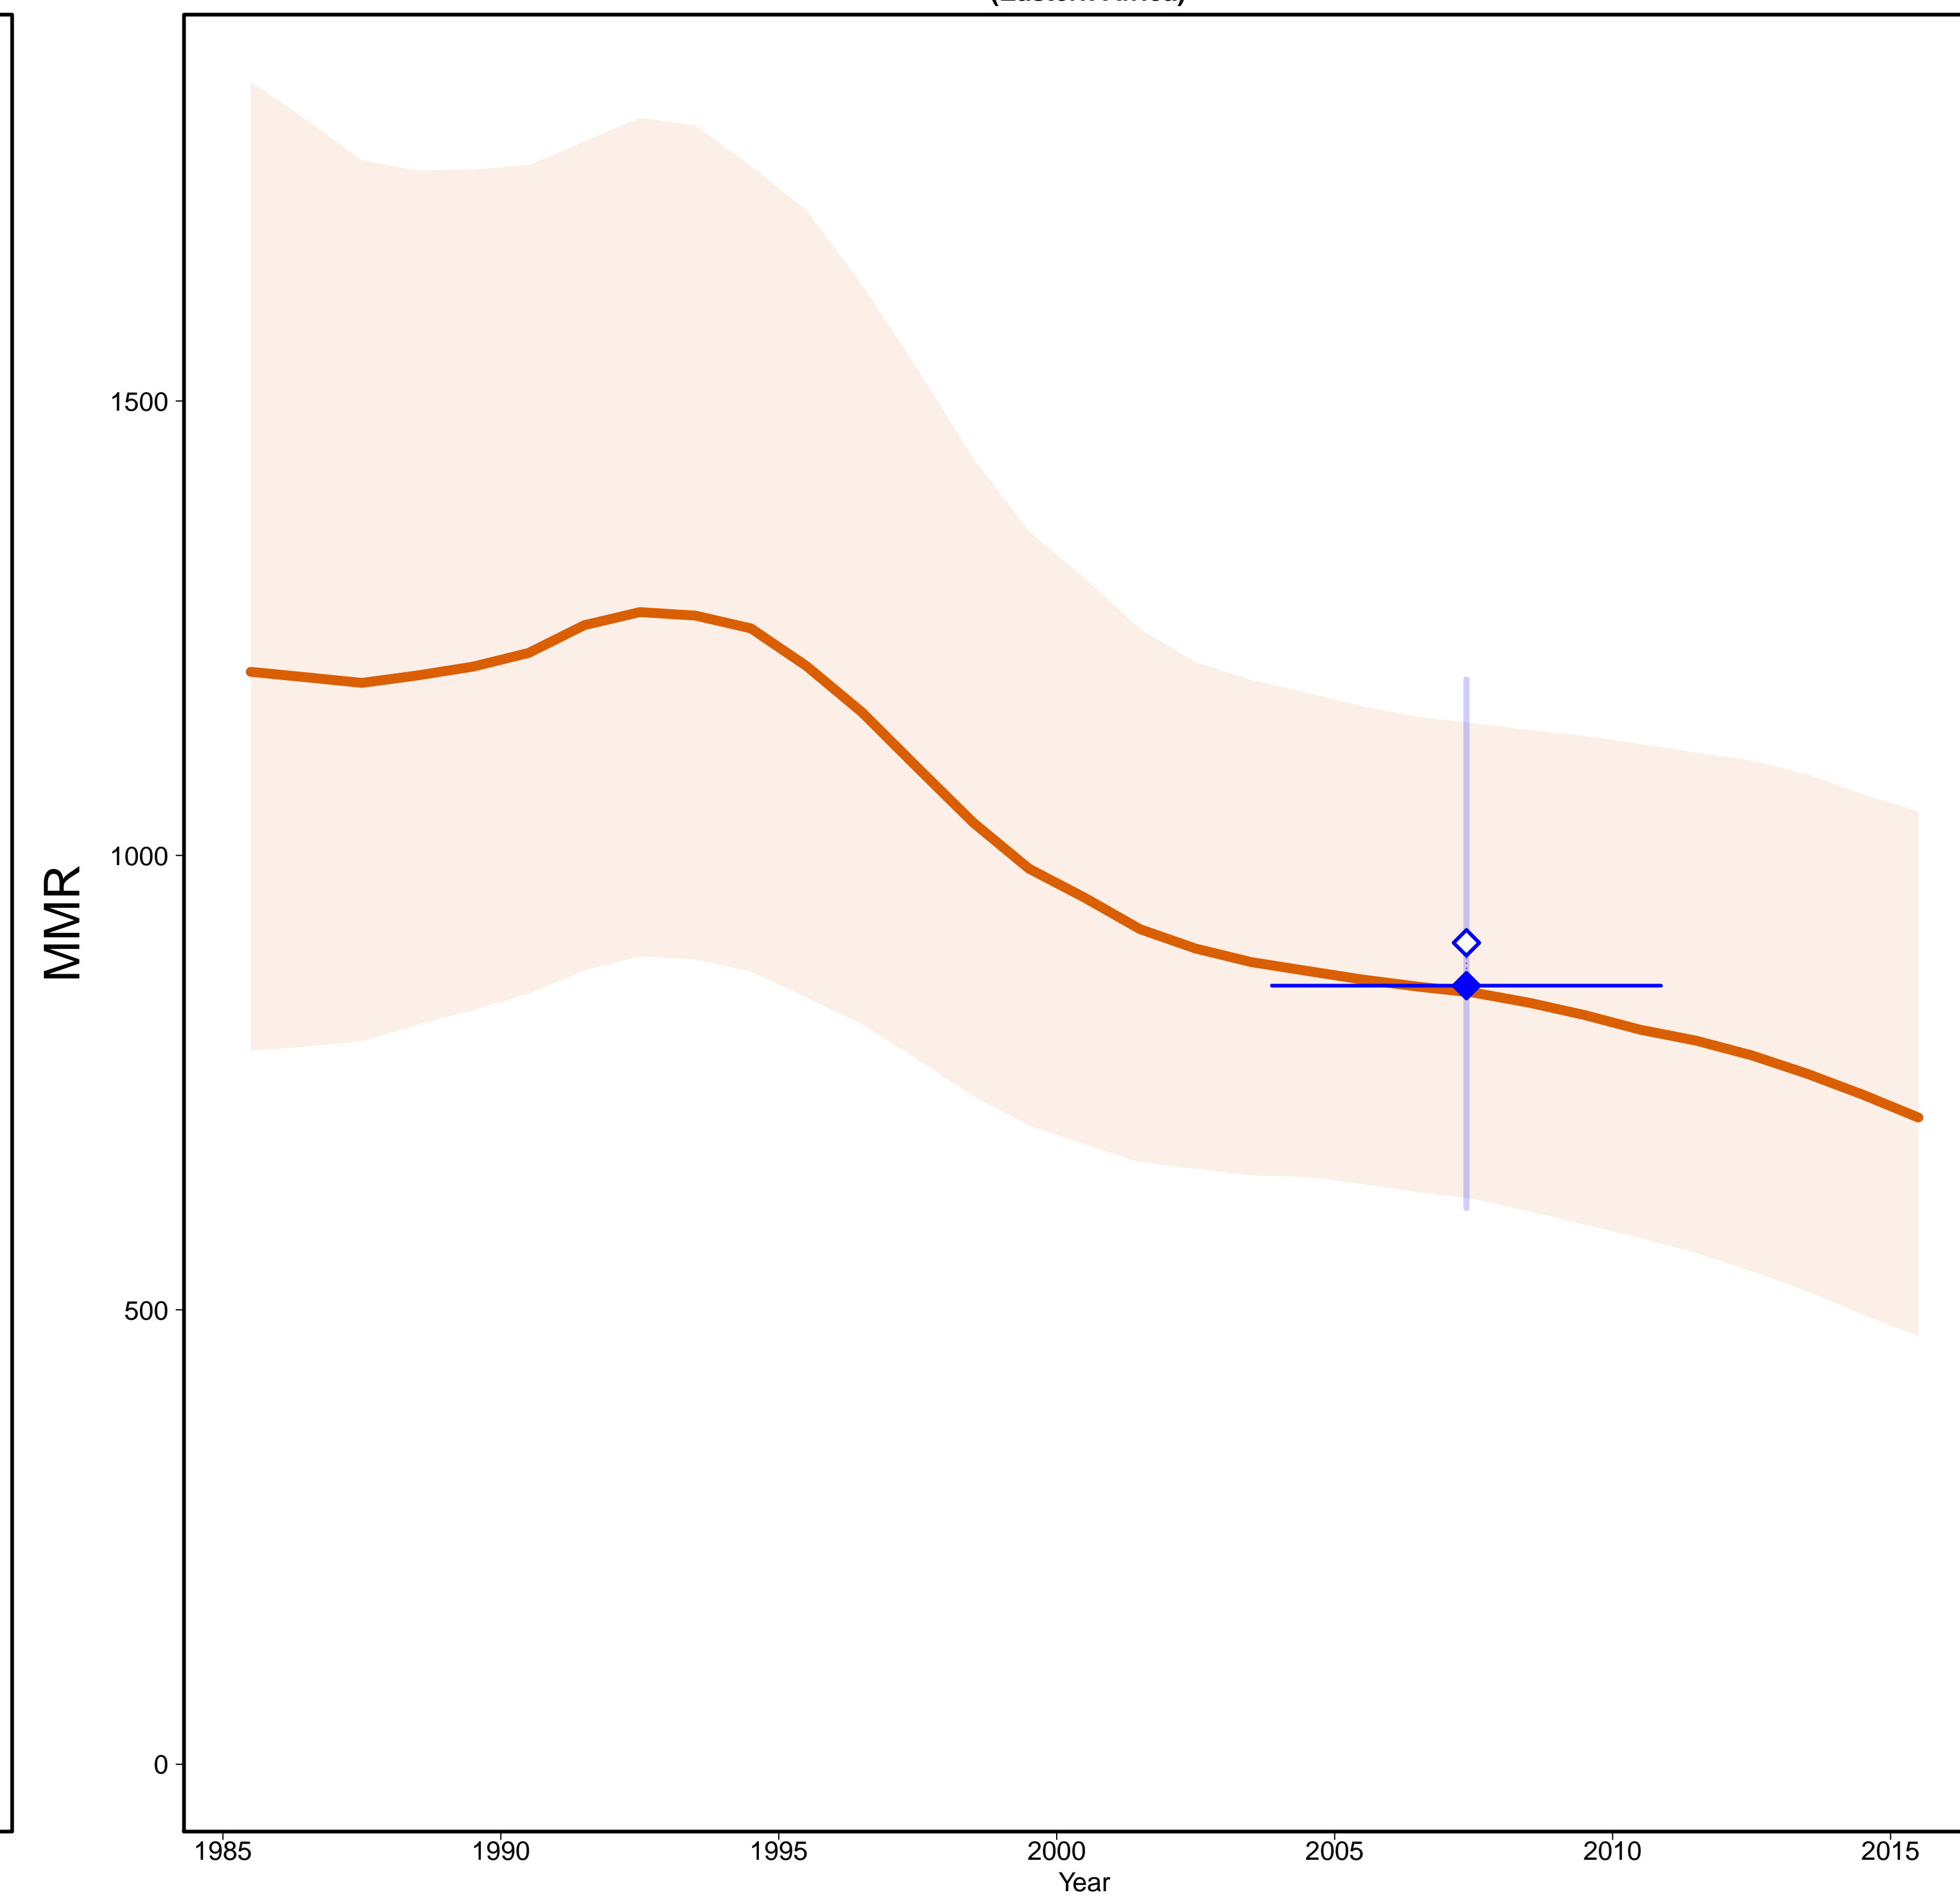

- Estimates —
- MMR Database 2015 —
- ◇ Observed Data
- ◆ Adjusted Data
- Data type —
- ◆ DHS

Gross Domestic Product

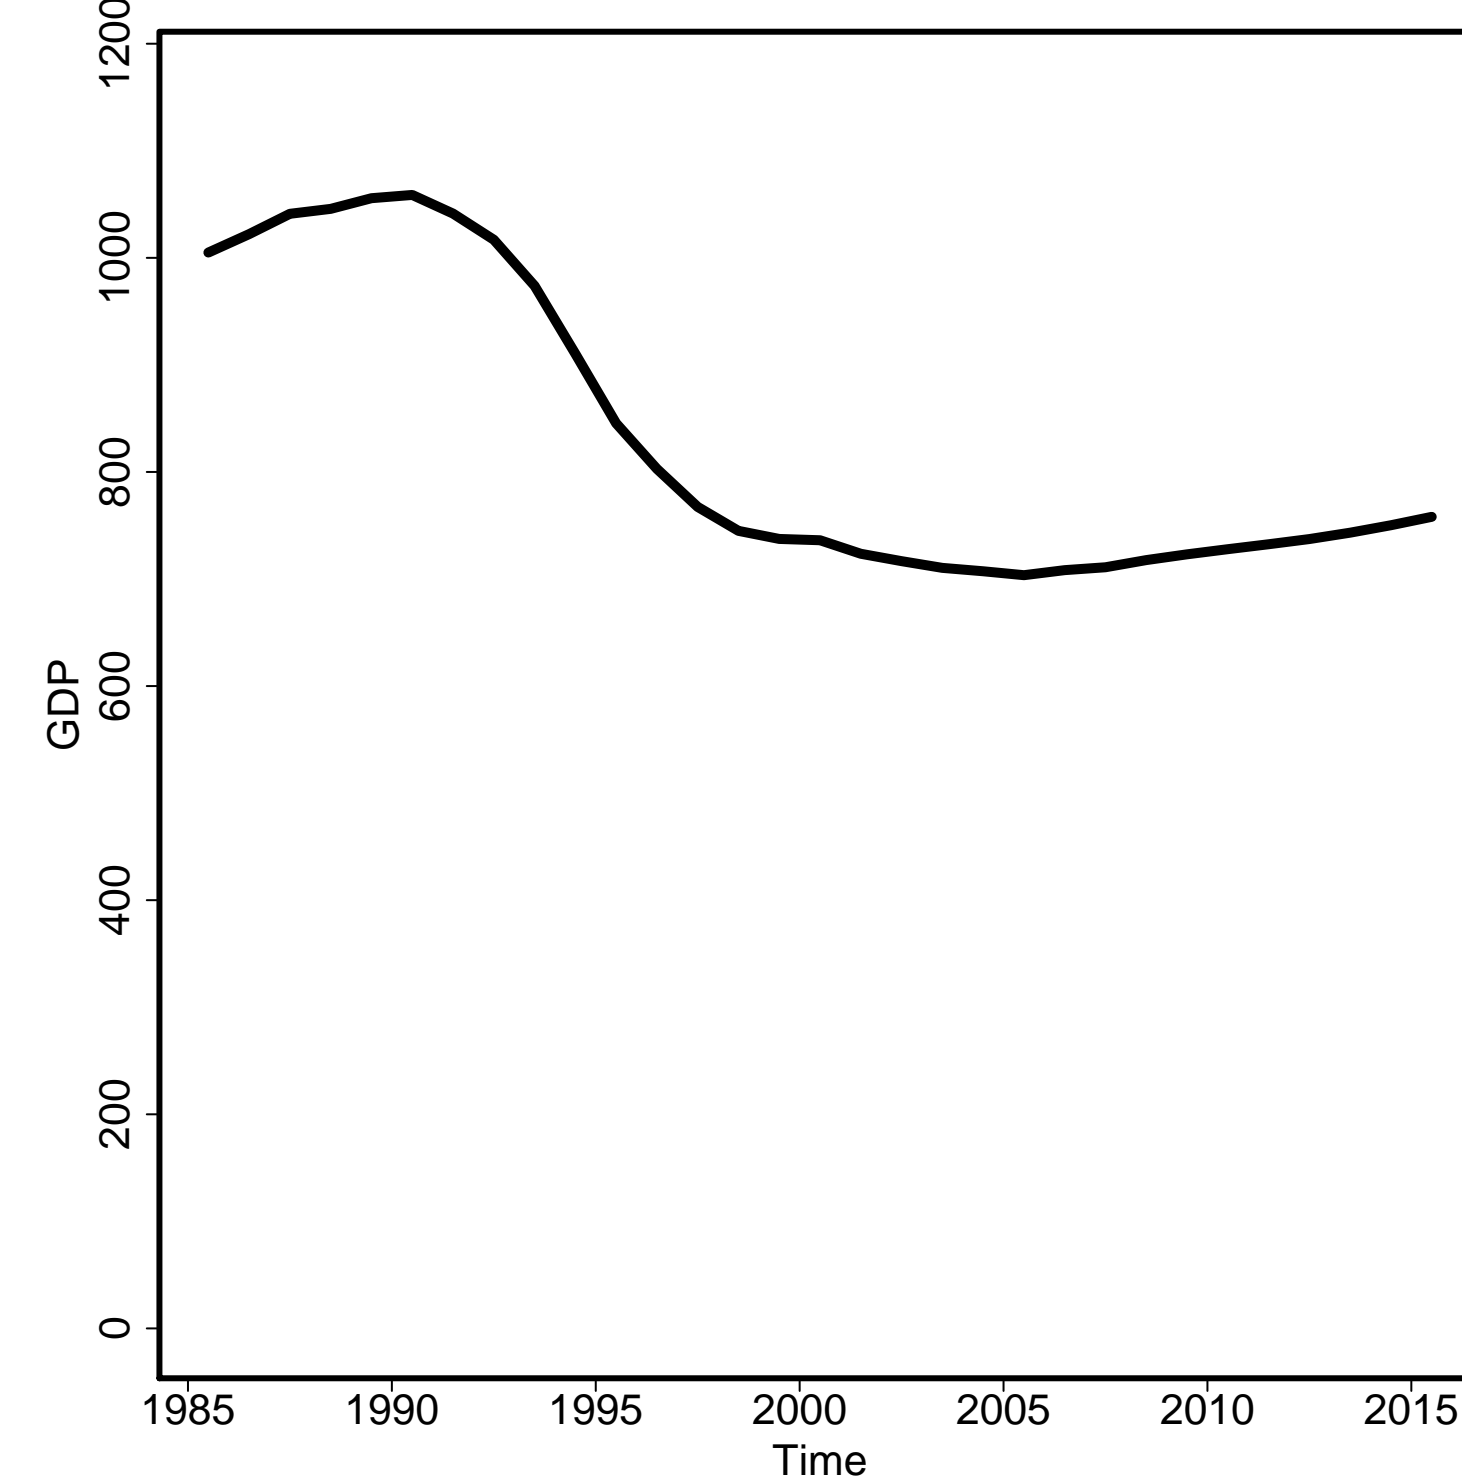

General Fertility Rate

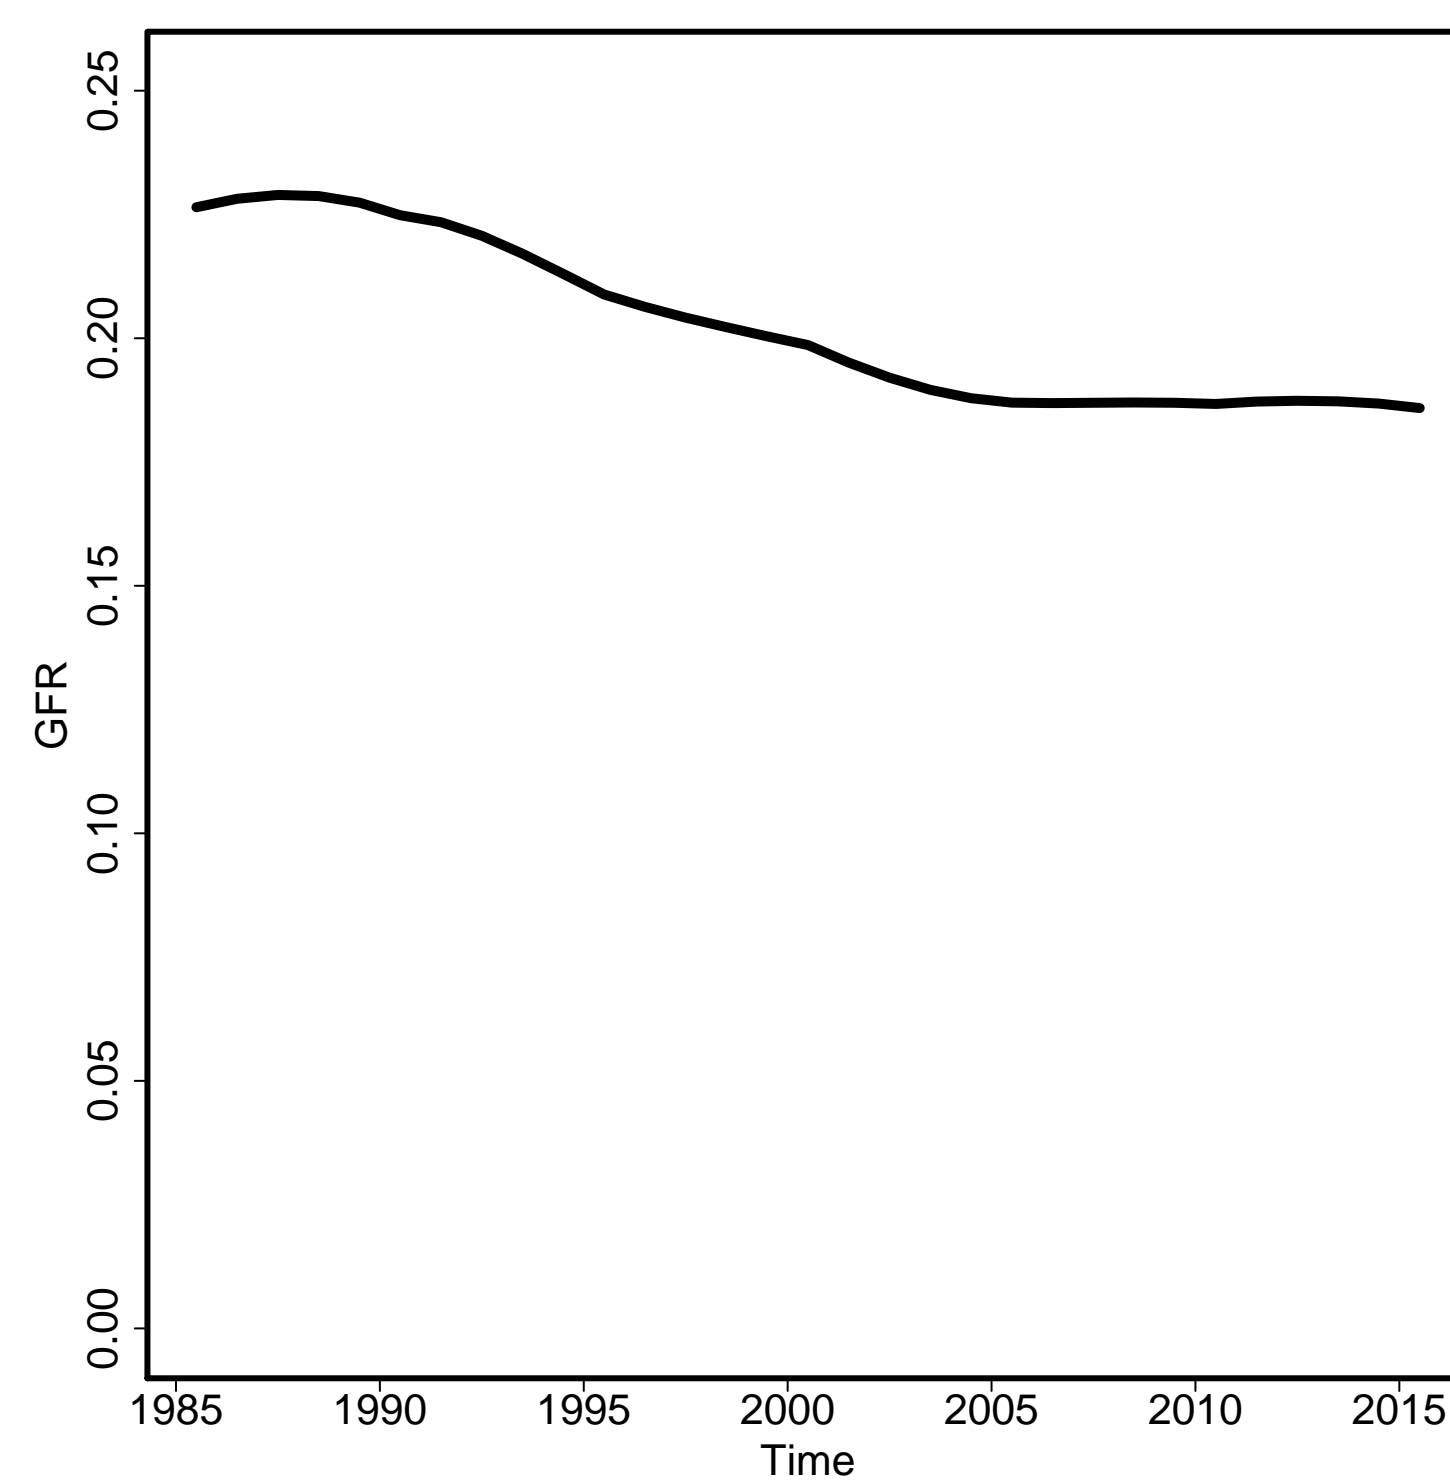

Skilled Attendance to Birth

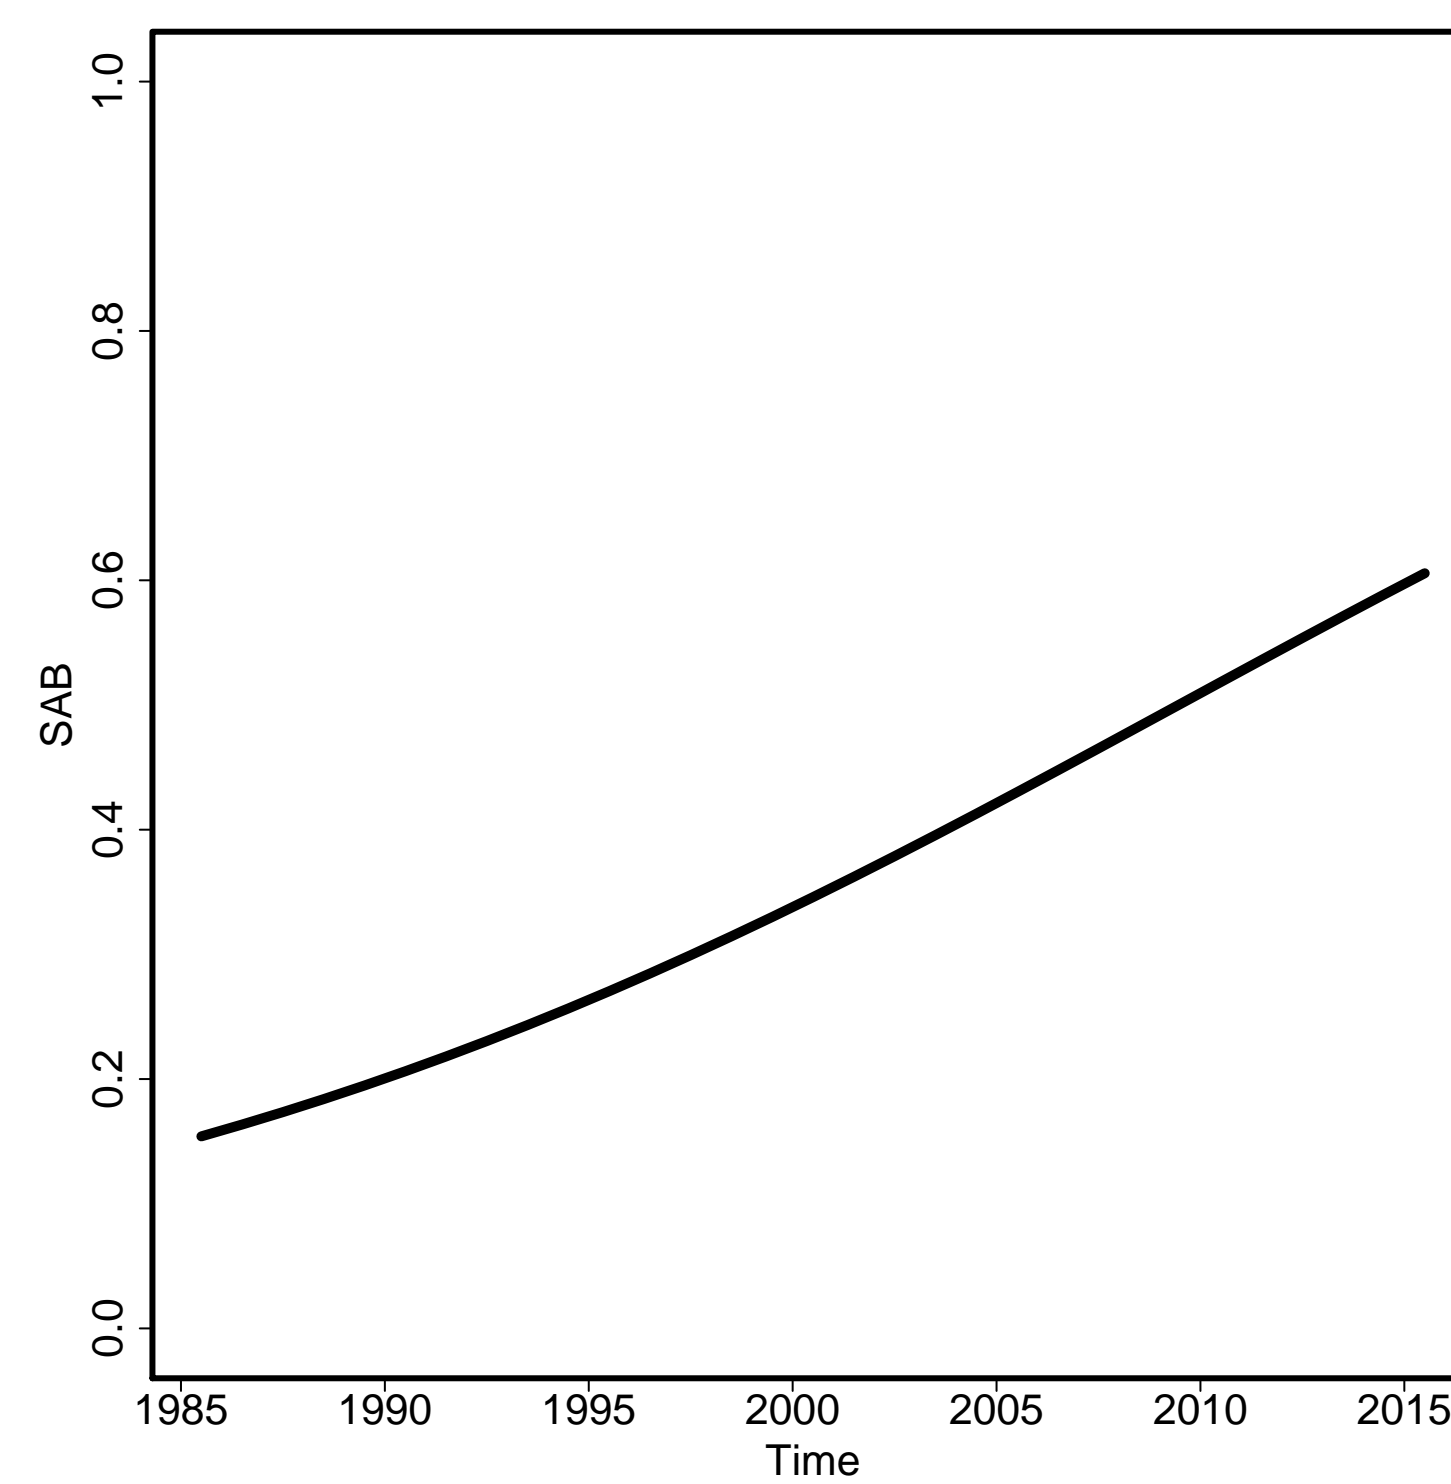

Envelope/Births

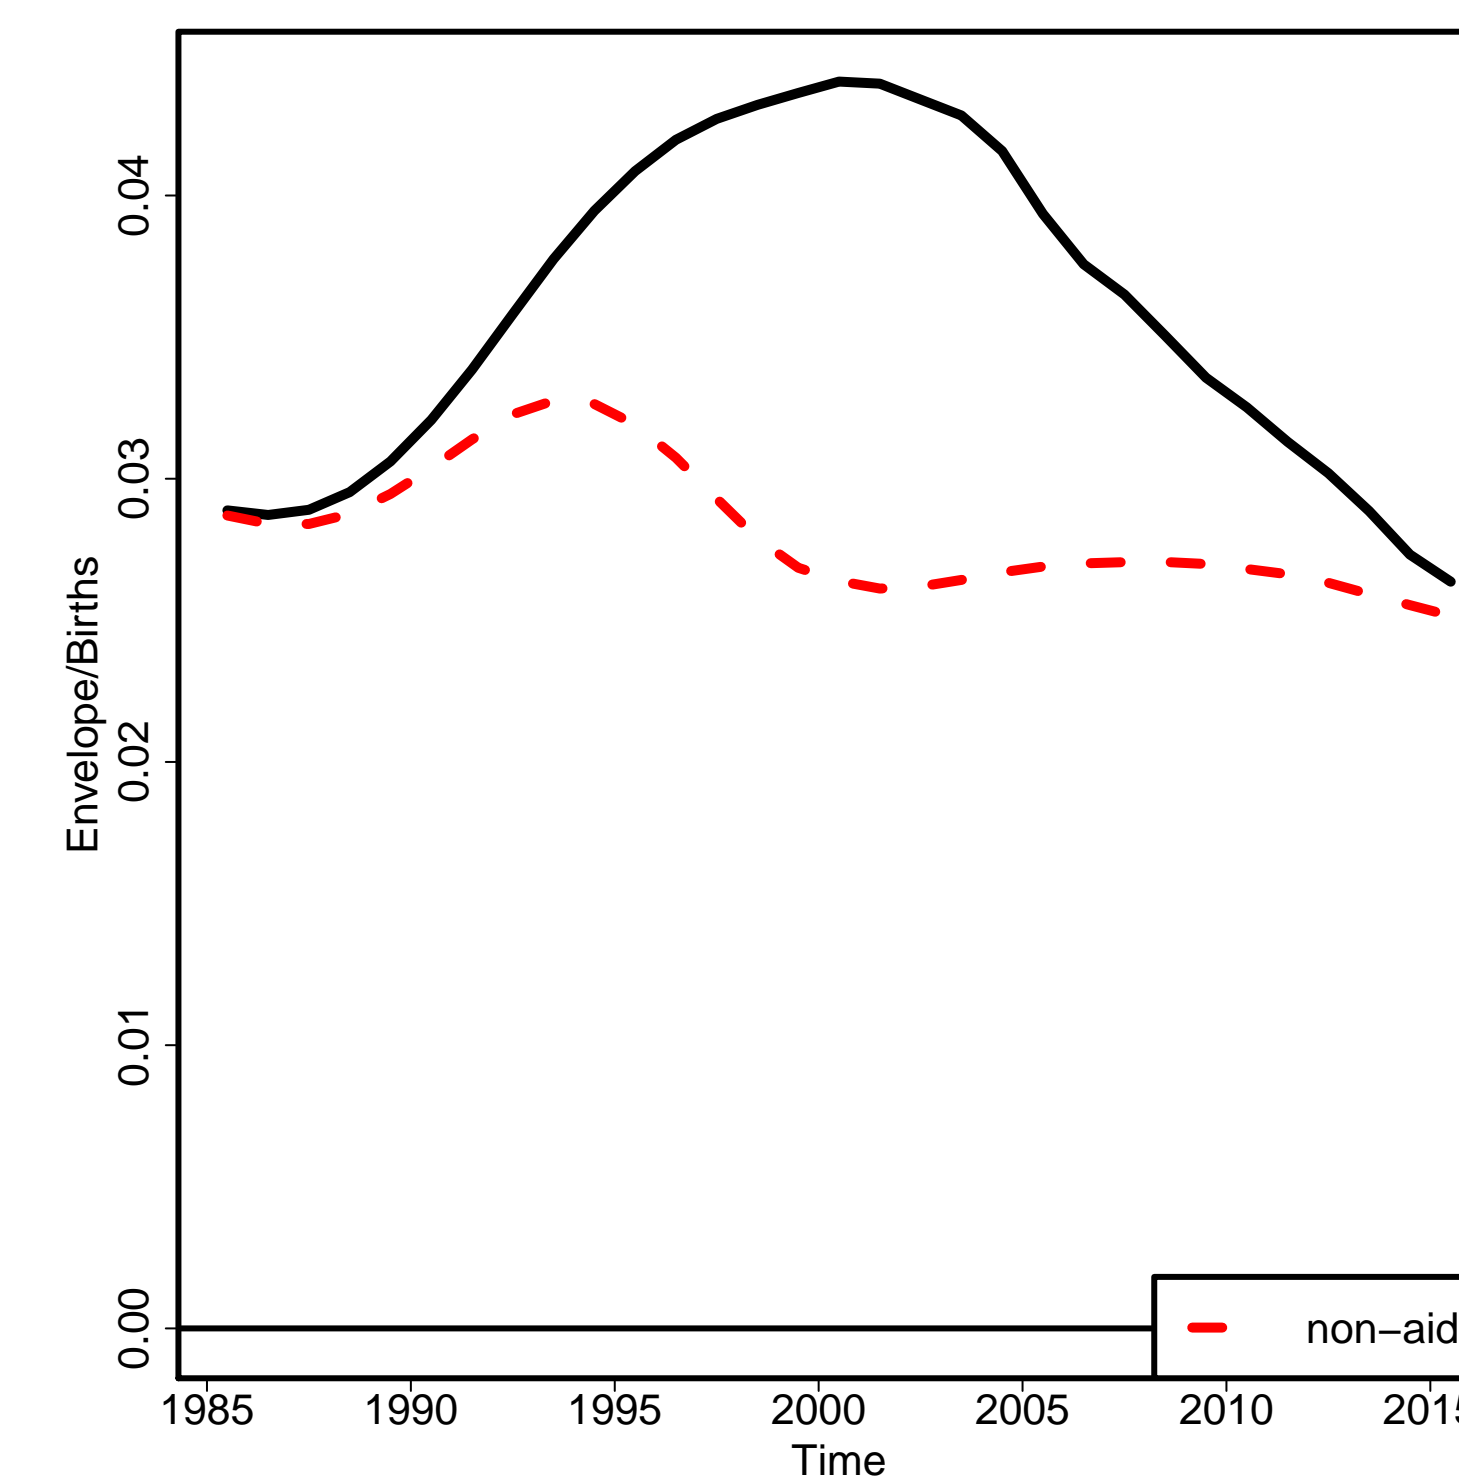

Non-aids MMR

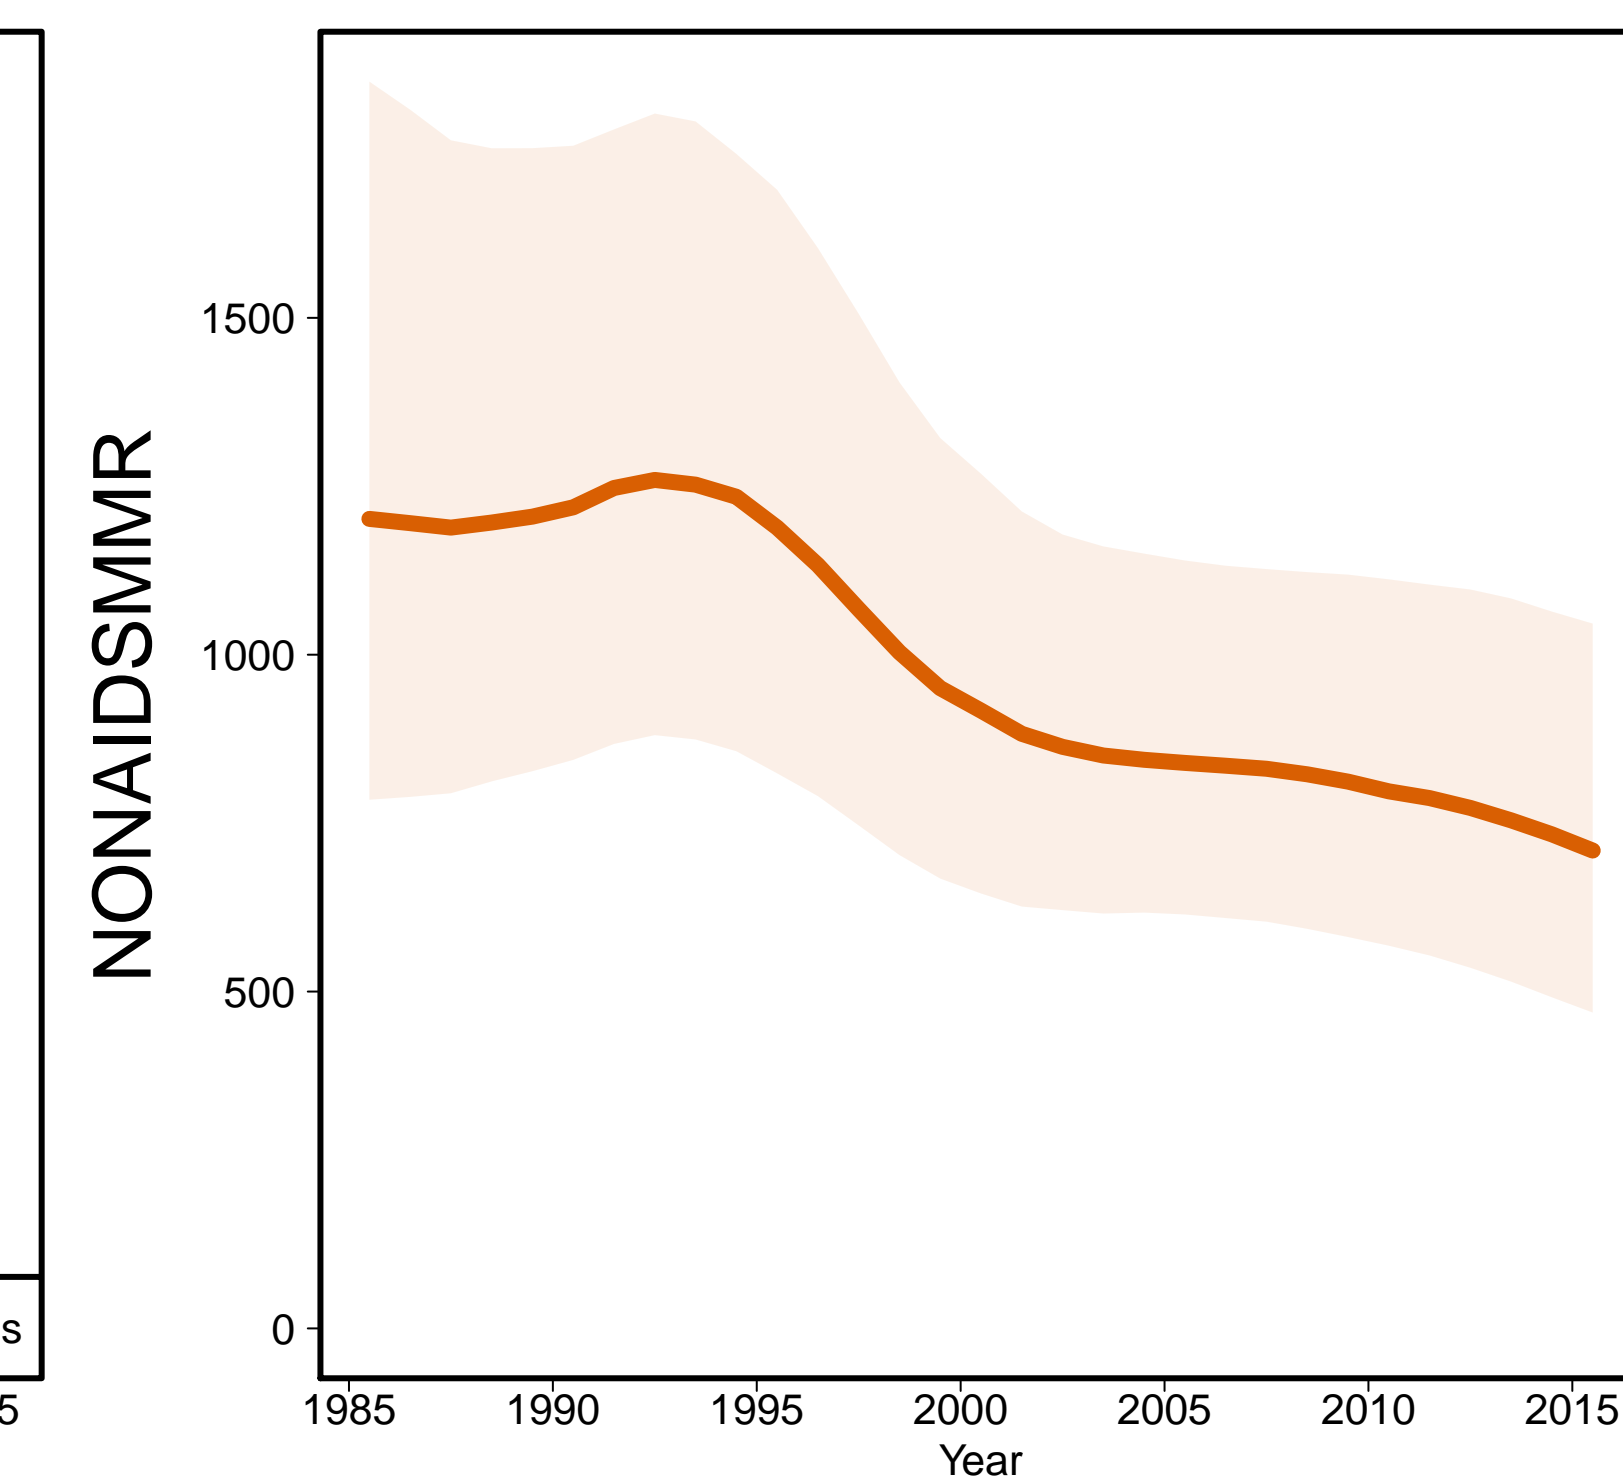

Aids MMR

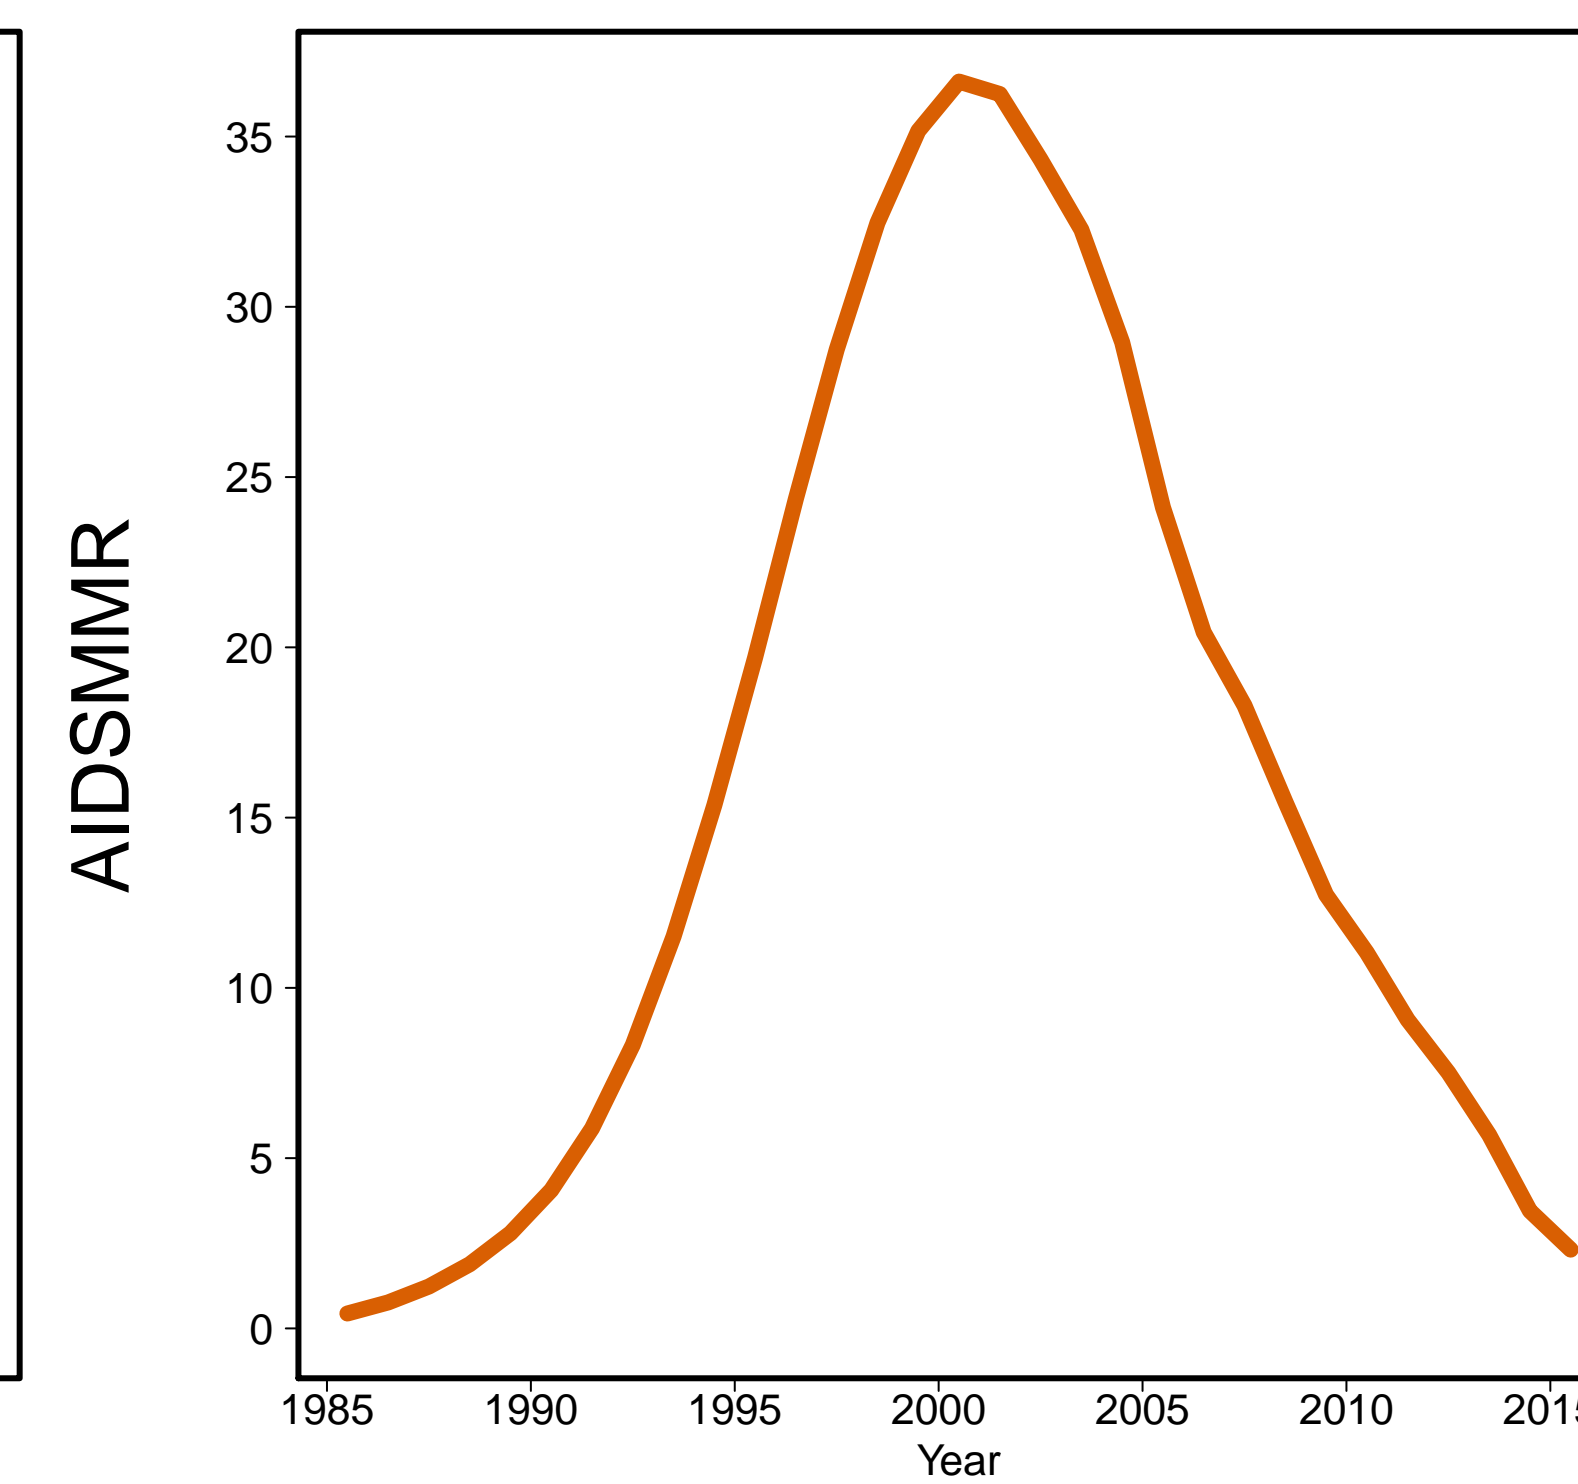

Cabo Verde [CPV]  
(Western Africa)

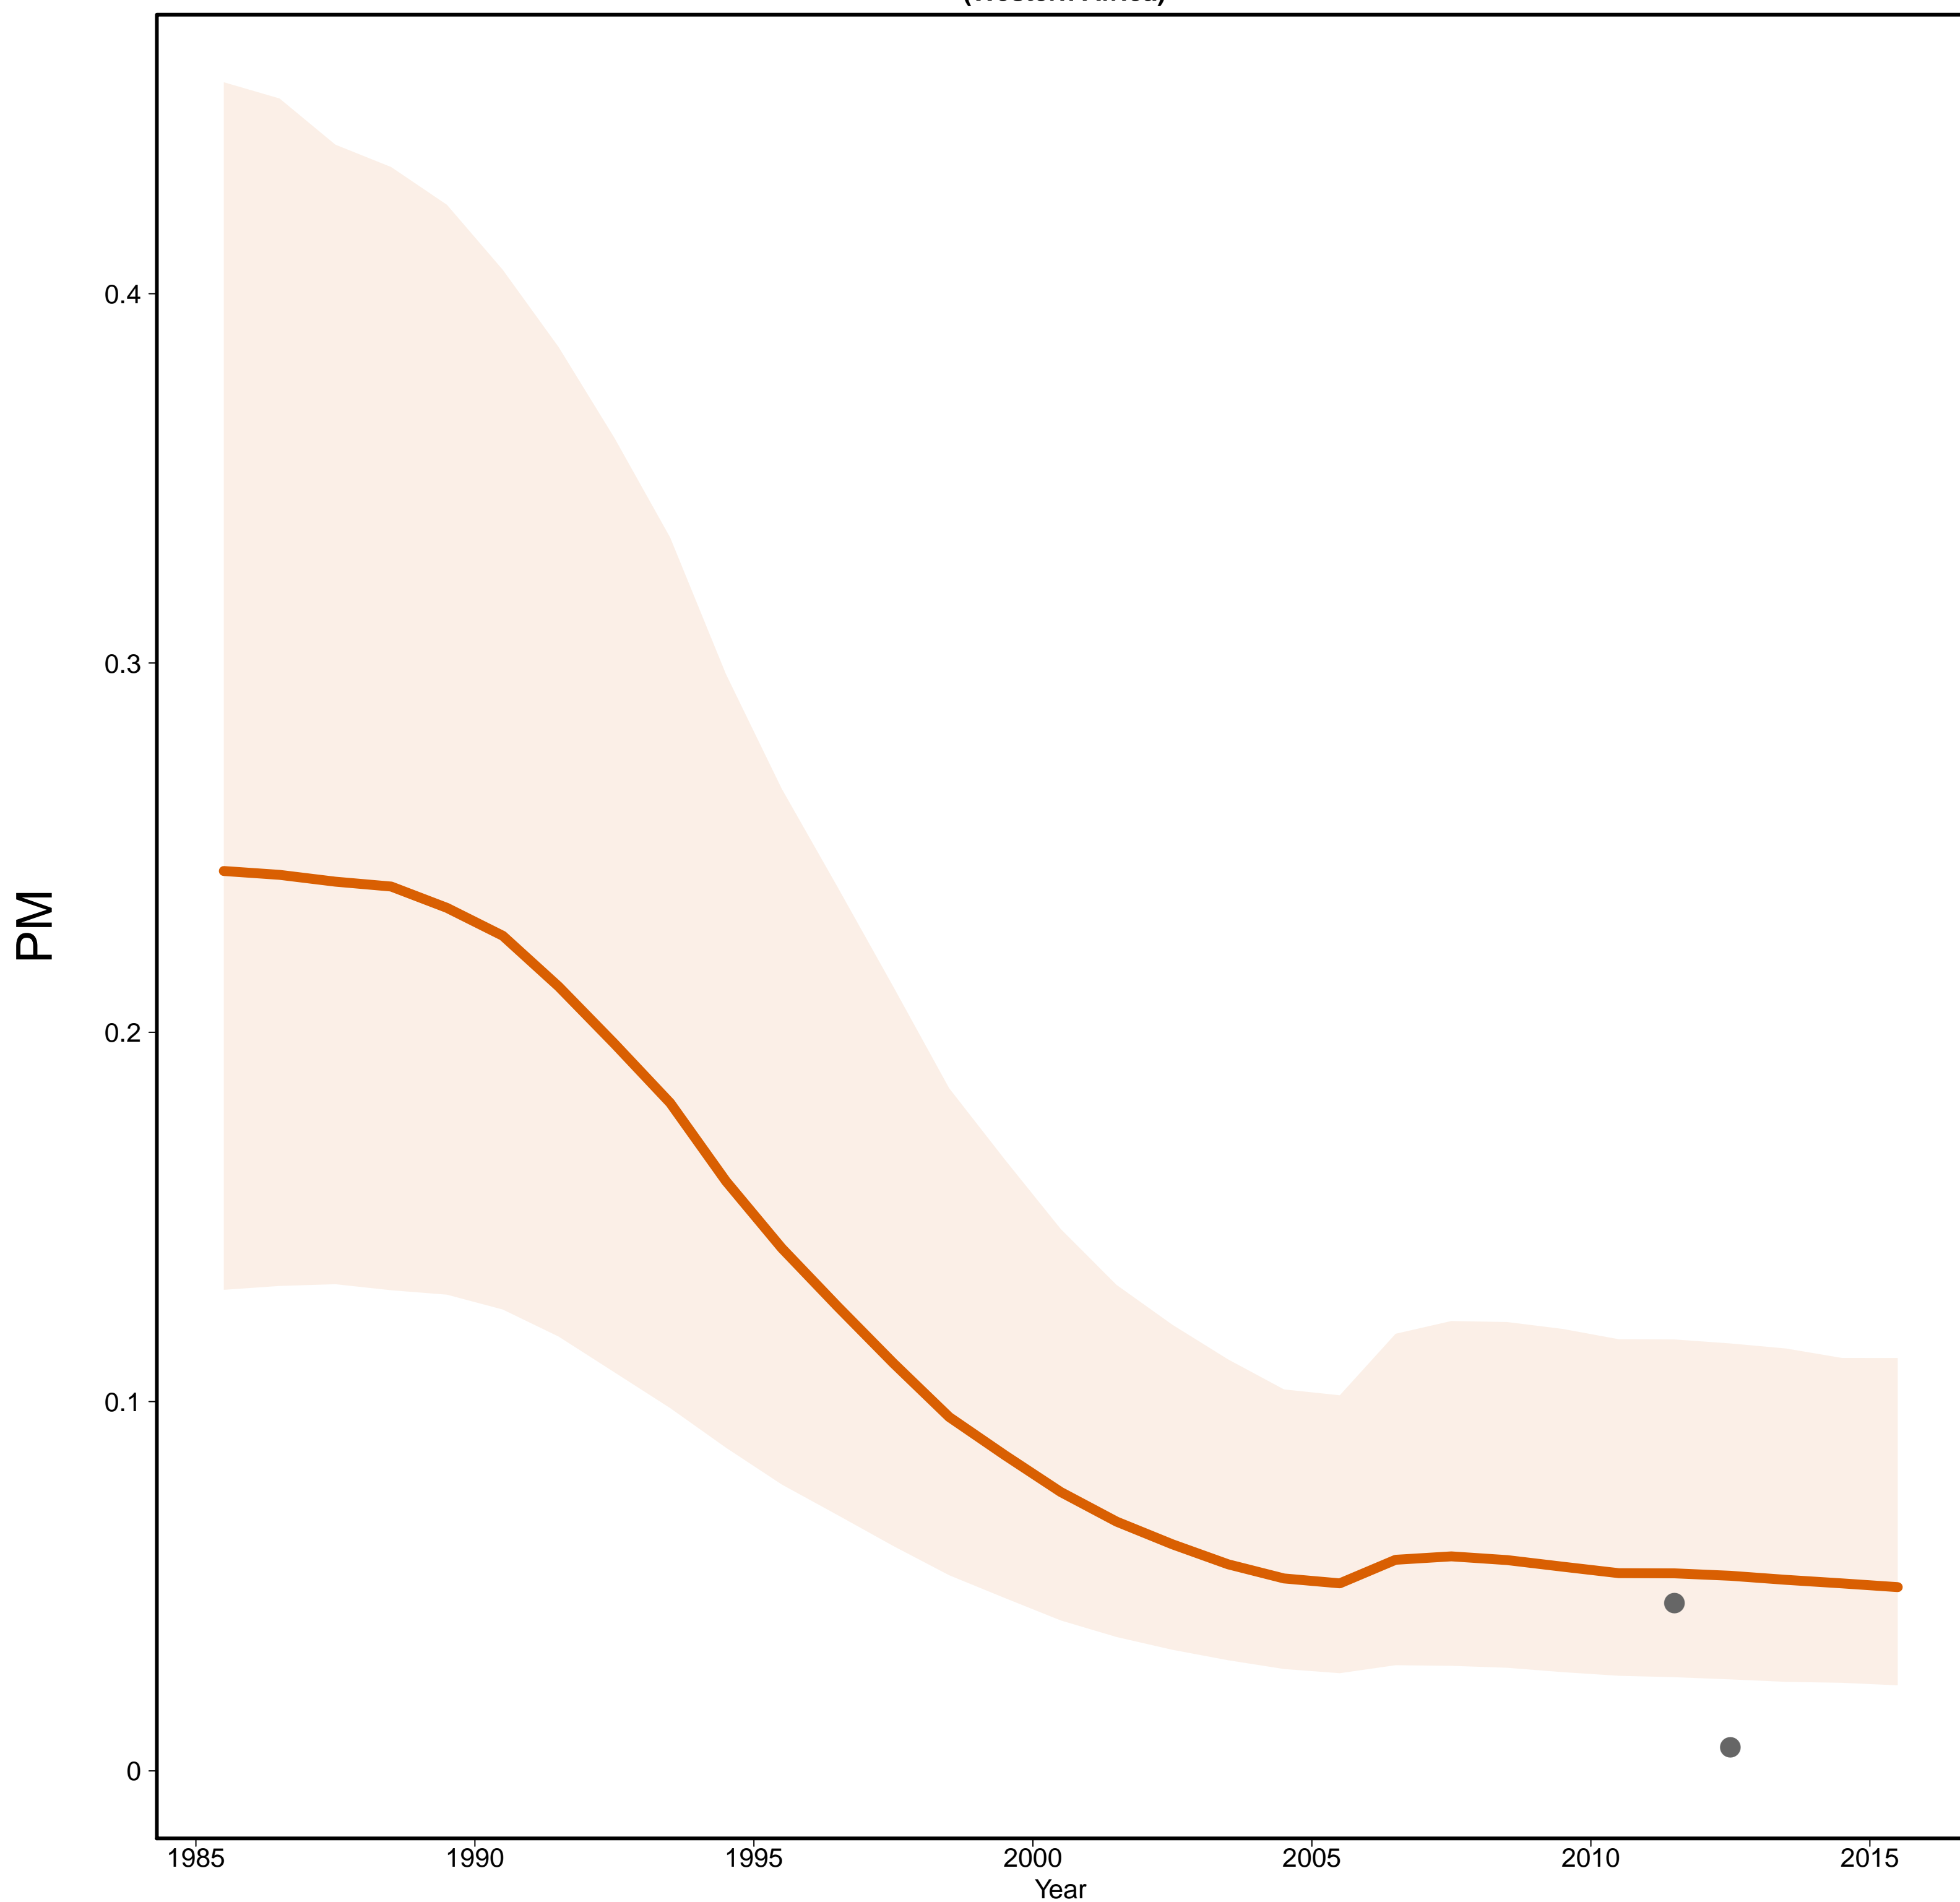

Cabo Verde [CPV]  
(Western Africa)

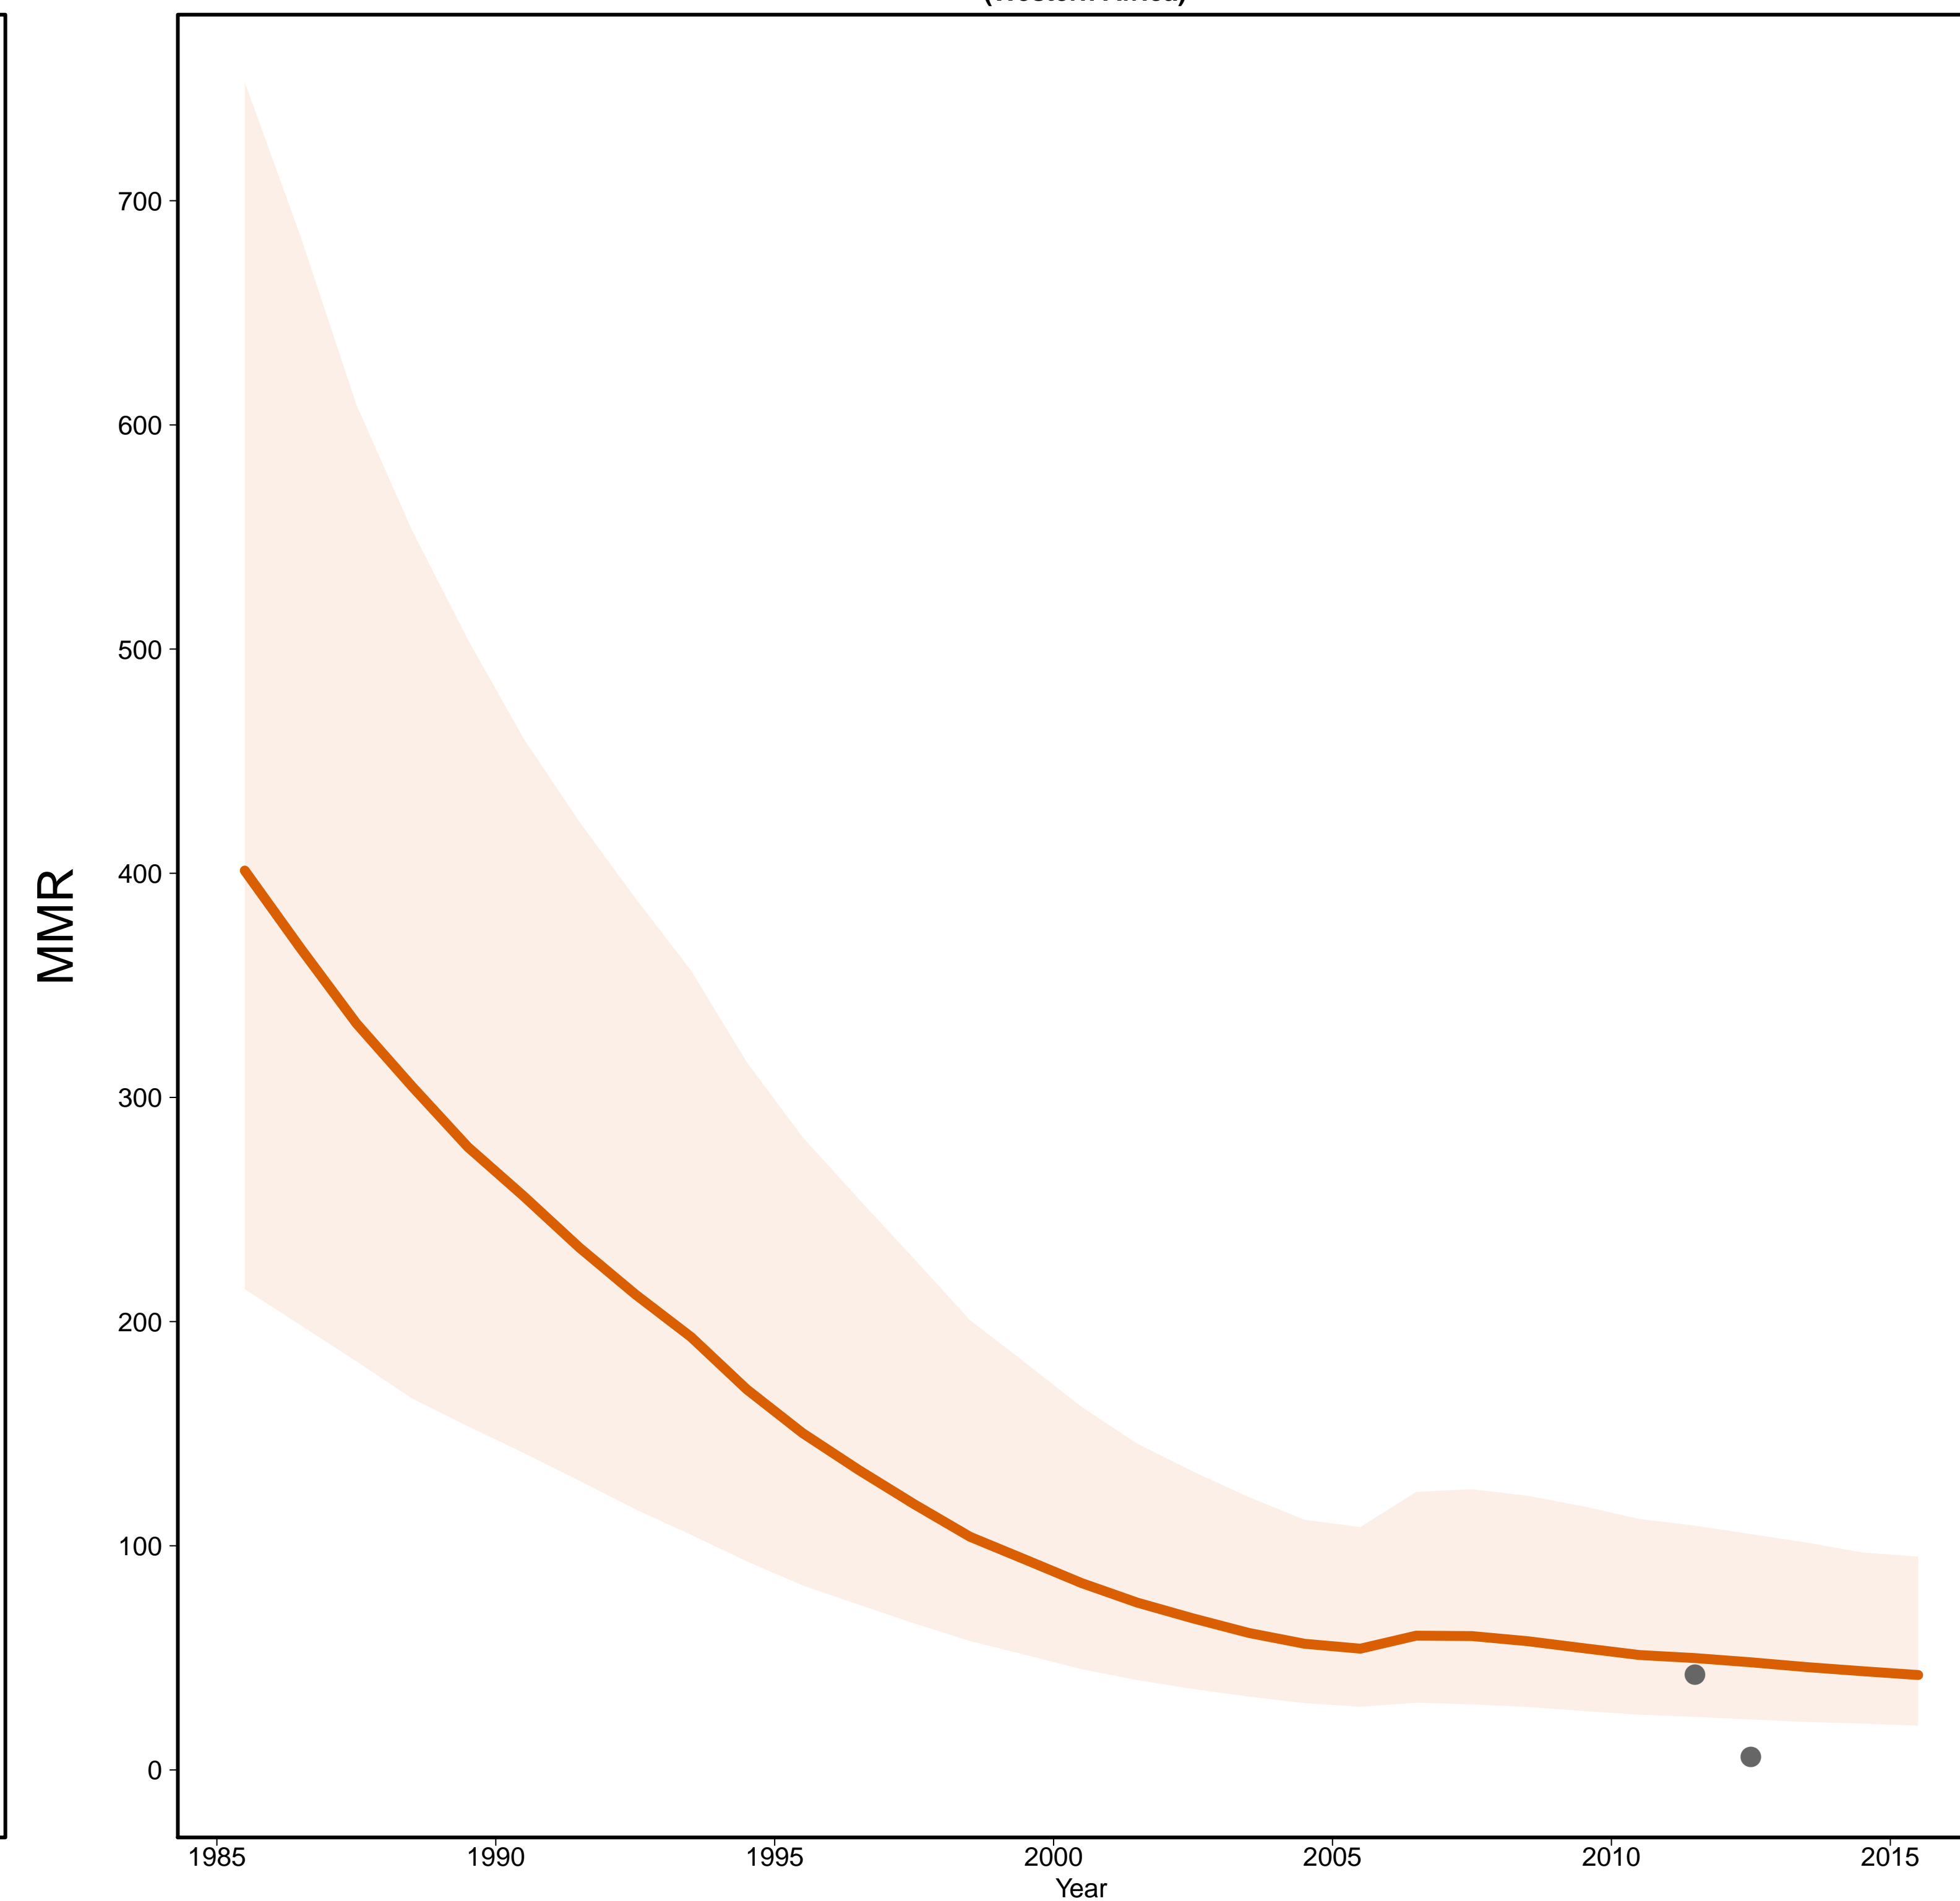

- Estimates –
- Mlate
- MMR Database 2015 –
- ◇ Observed Data
- ◆ Adjusted Data
- Data type –
- Excluded VR data  
(data quality issues)

Gross Domestic Product

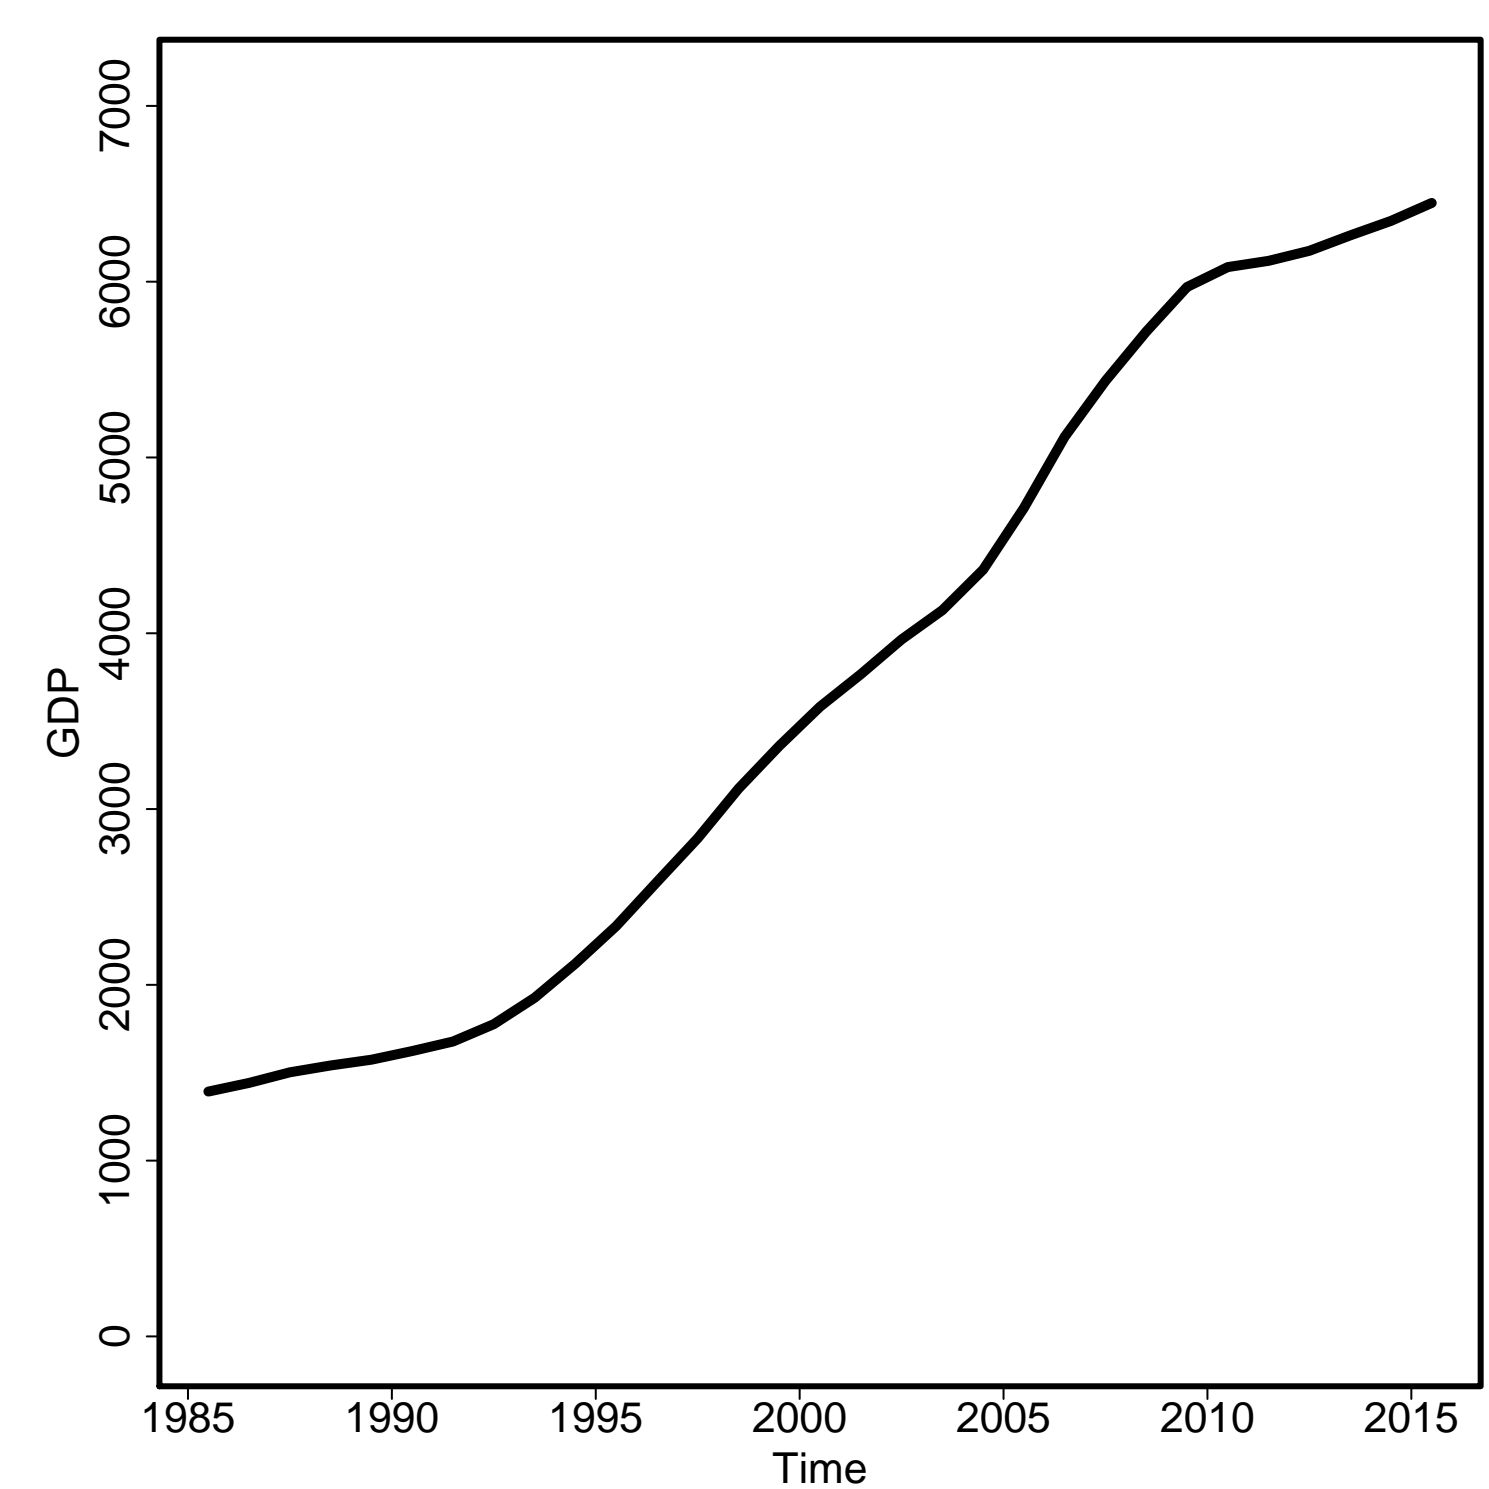

General Fertility Rate

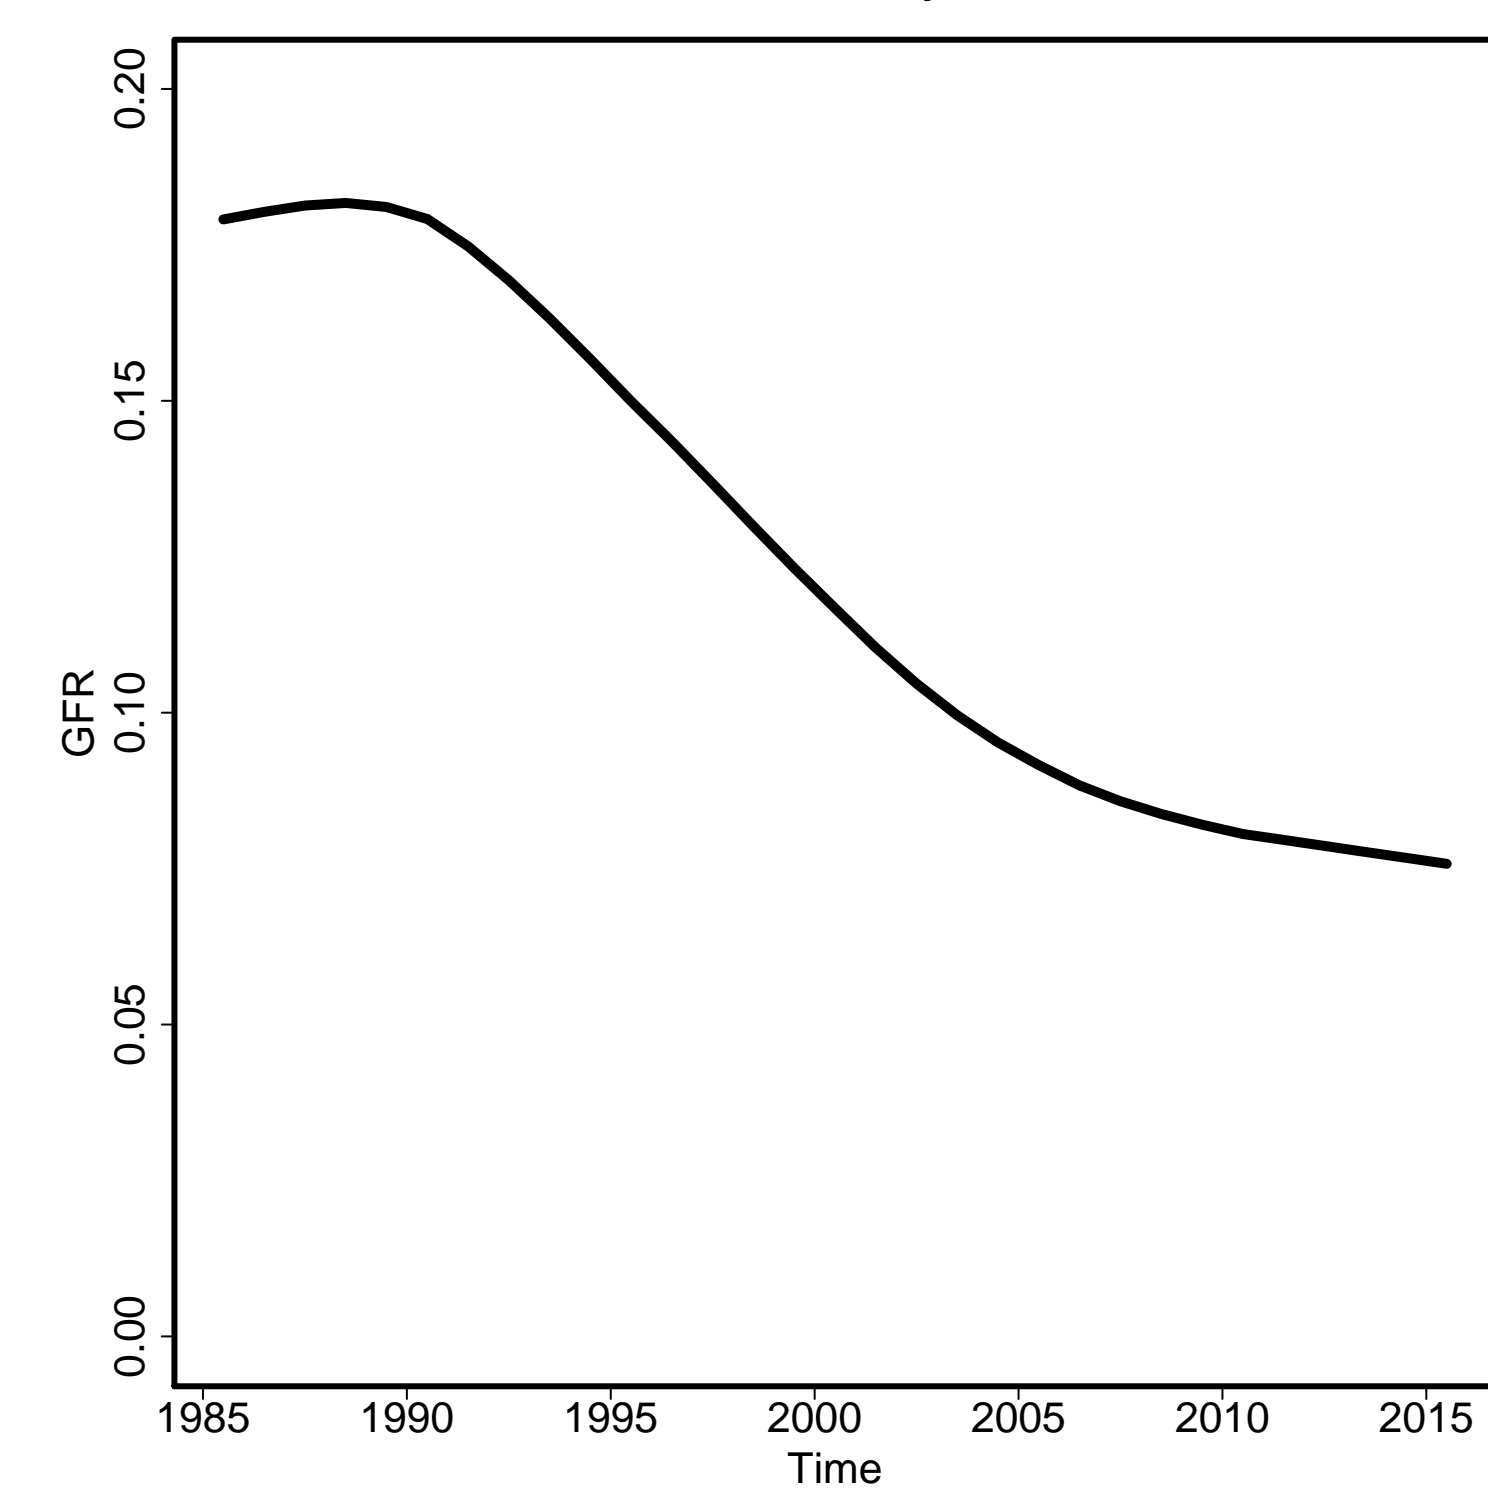

Skilled Attendance to Birth

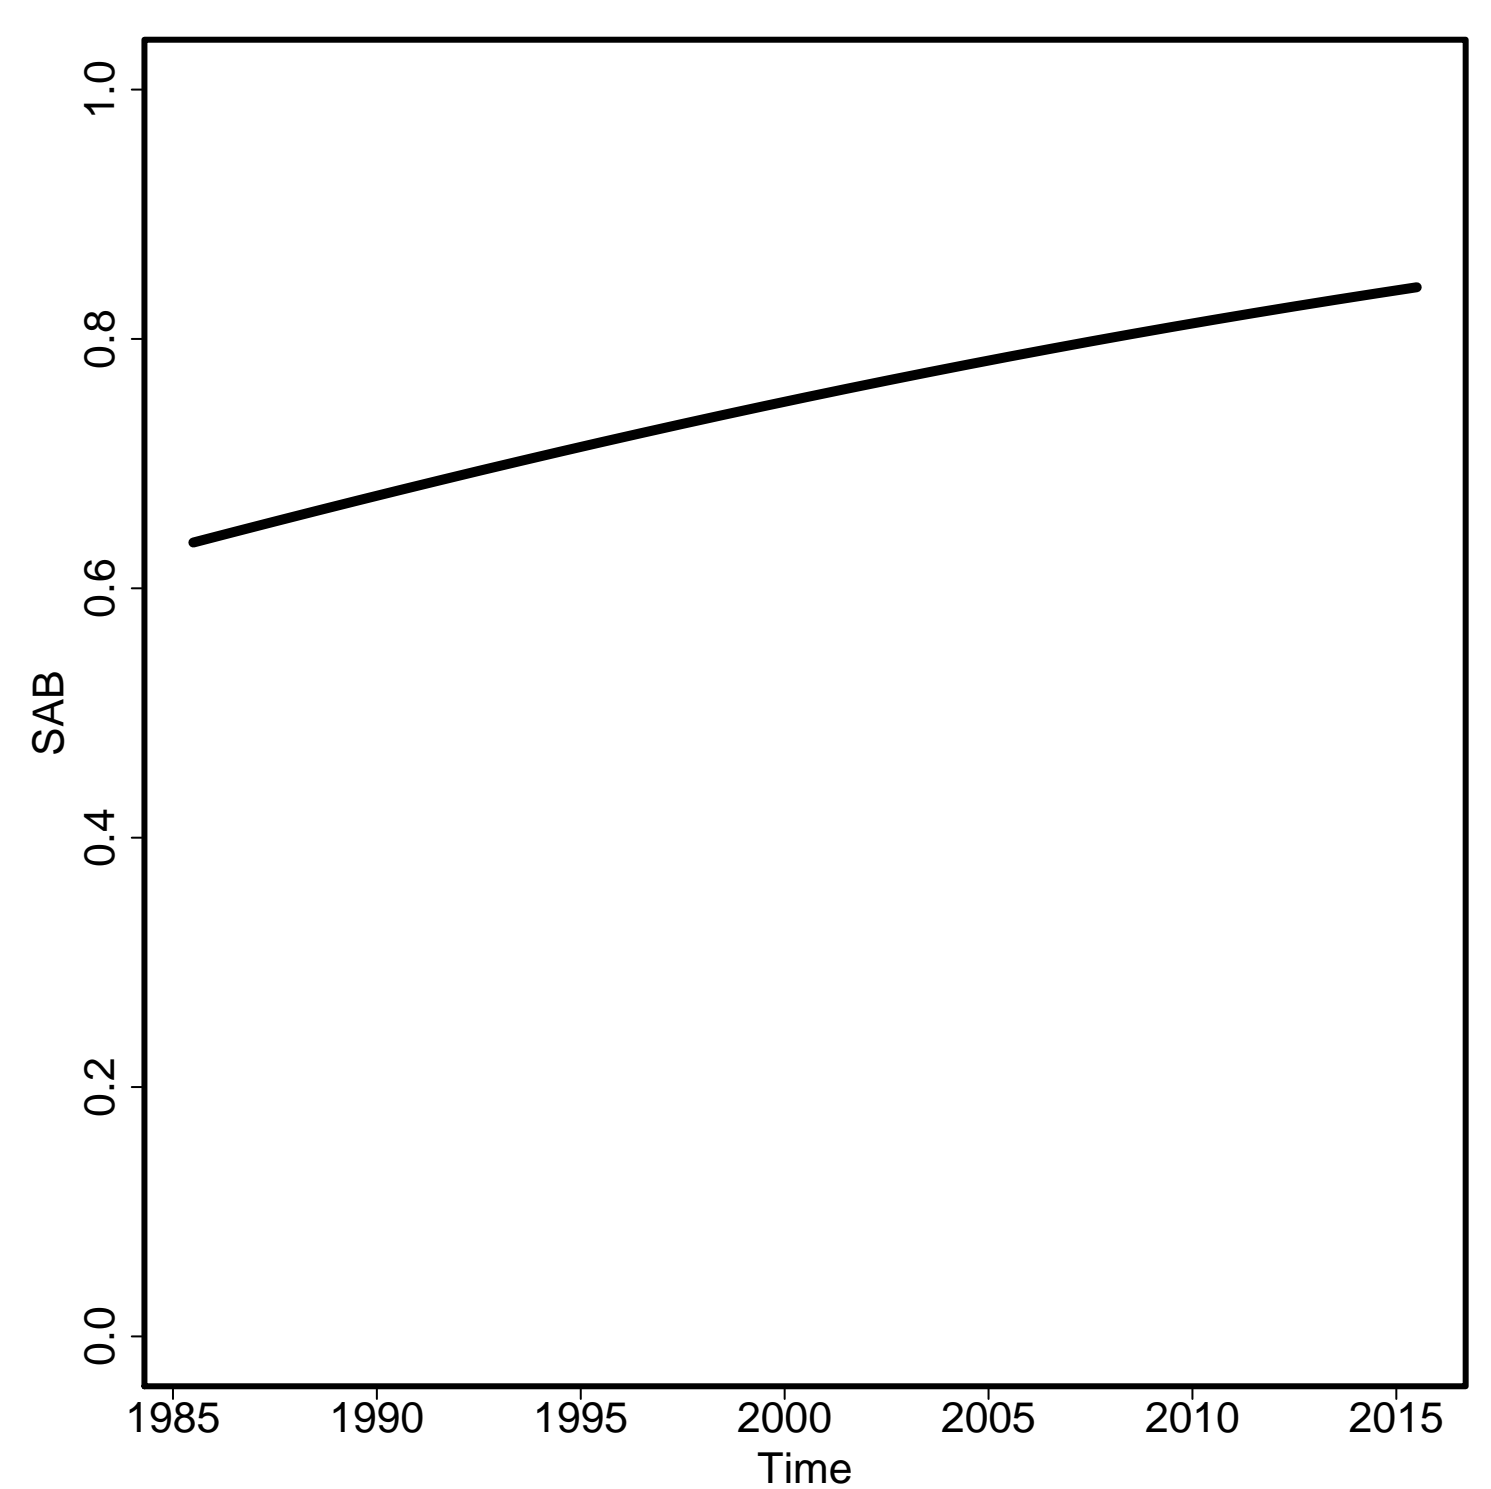

Envelope/Births

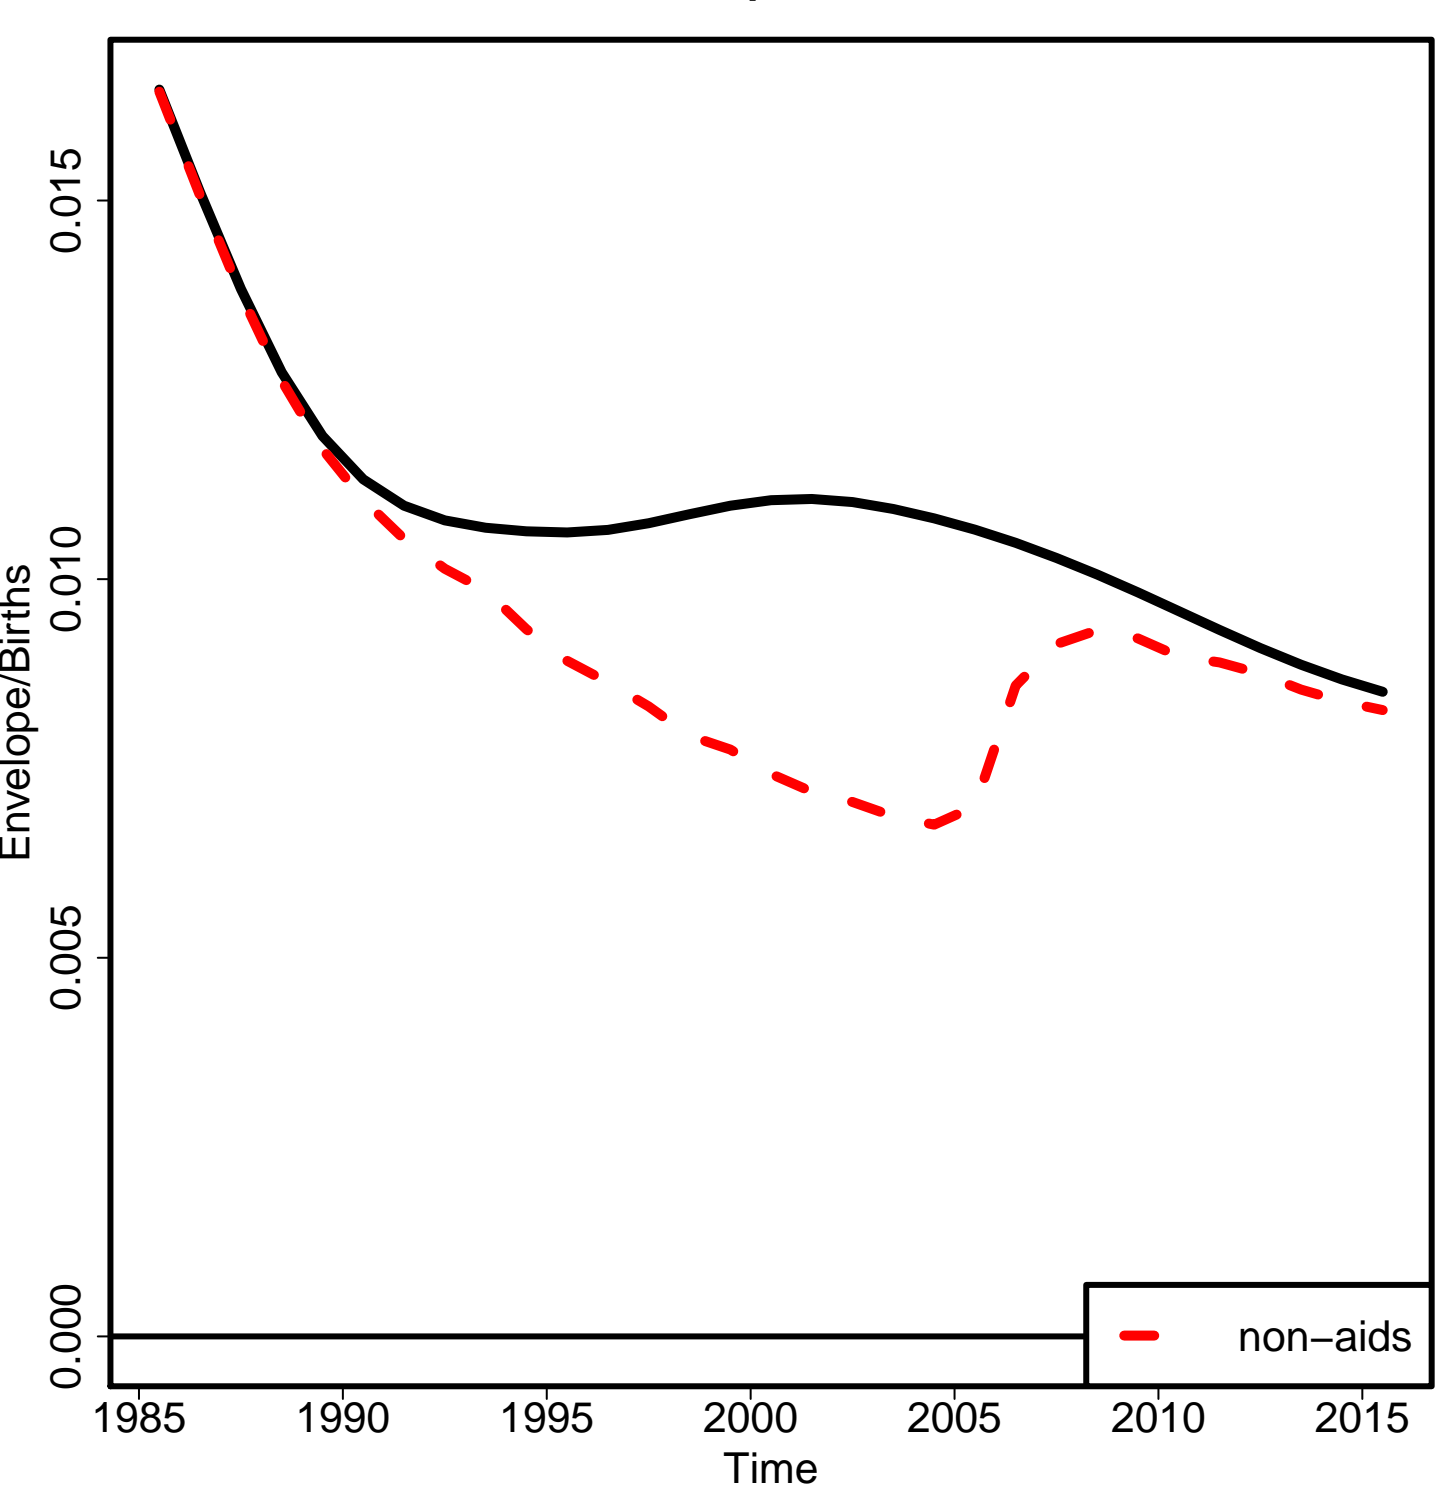

Non-aids MMR

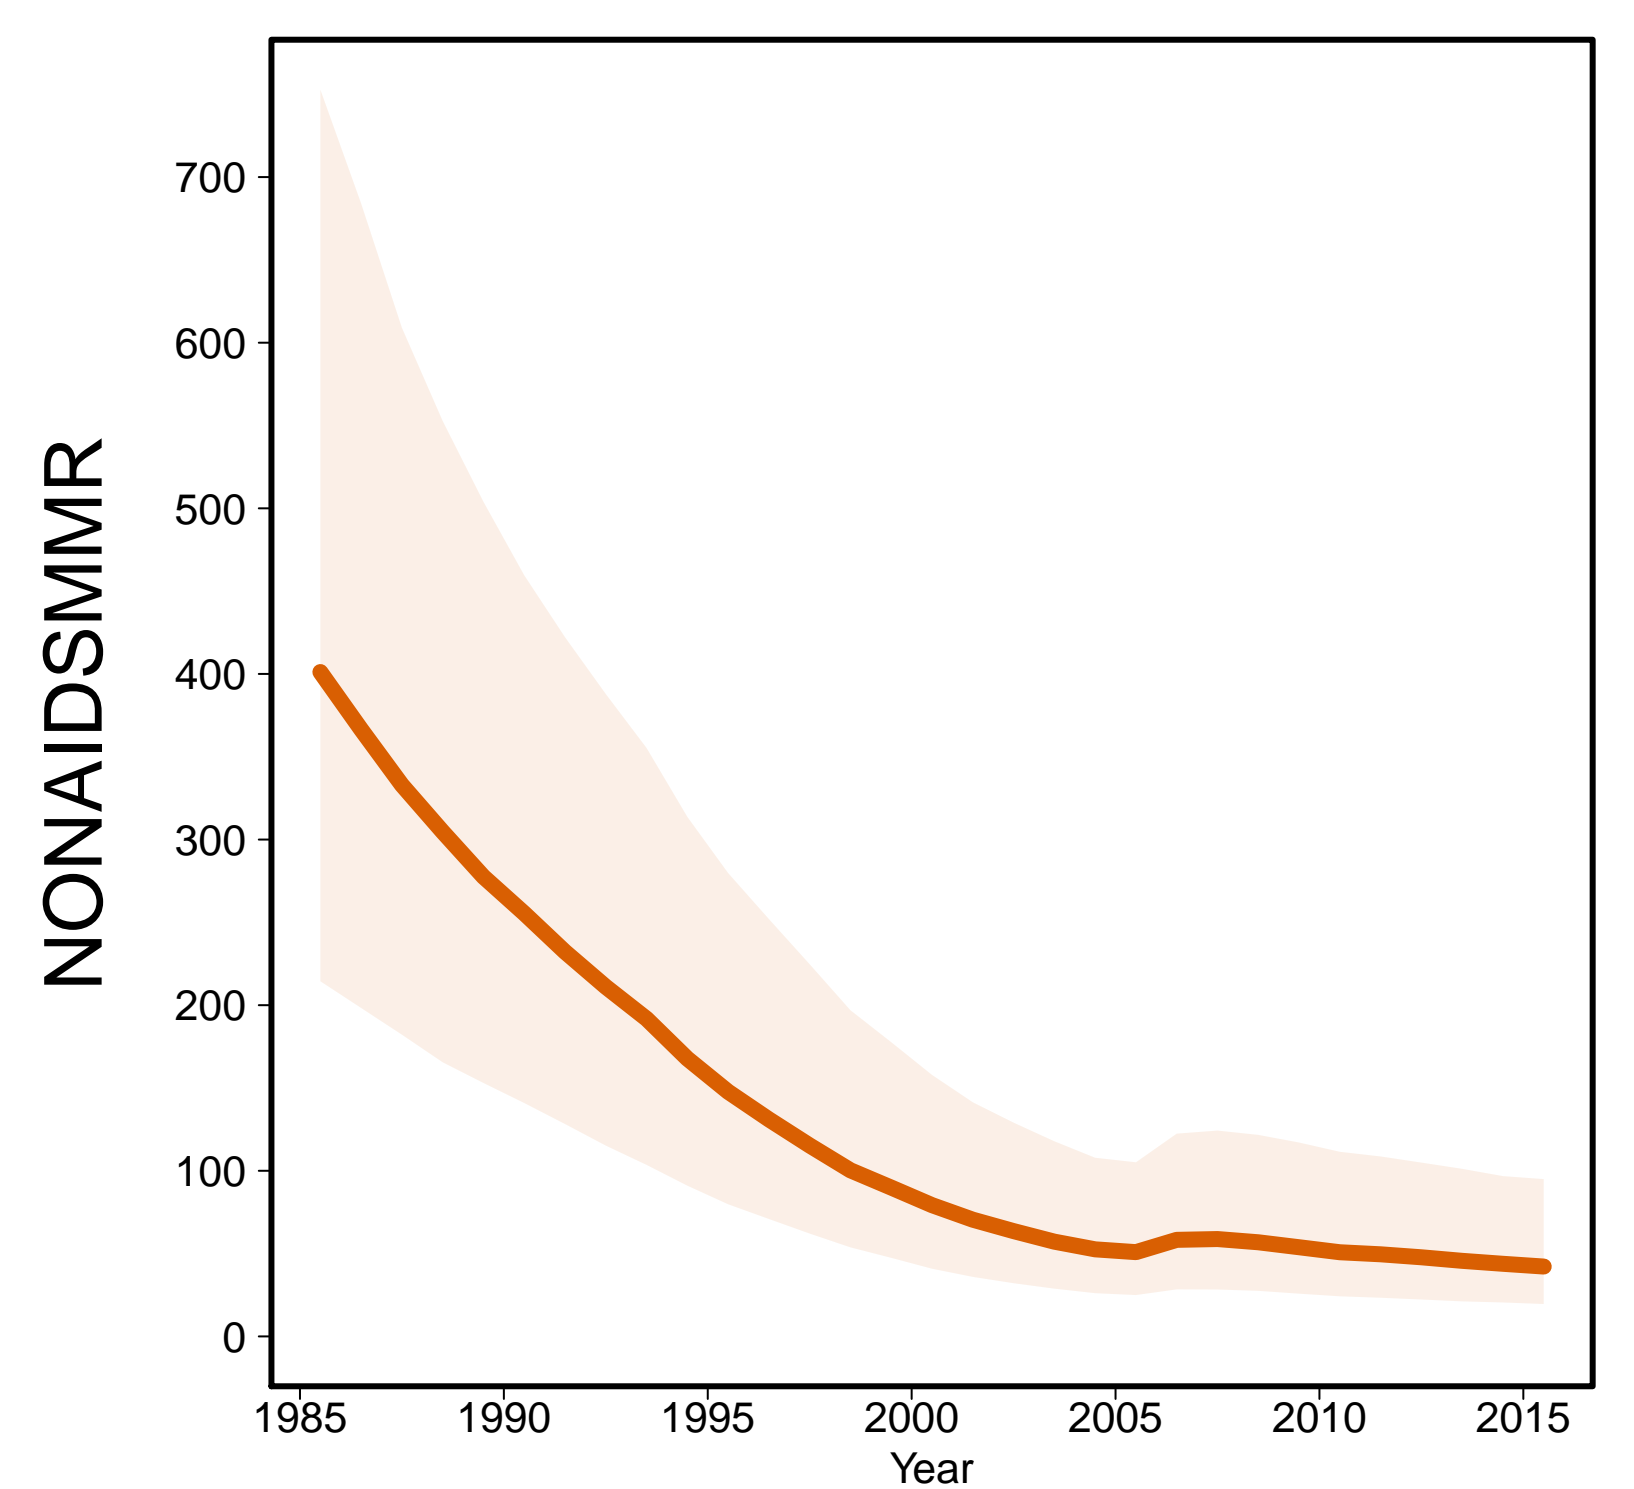

Aids MMR

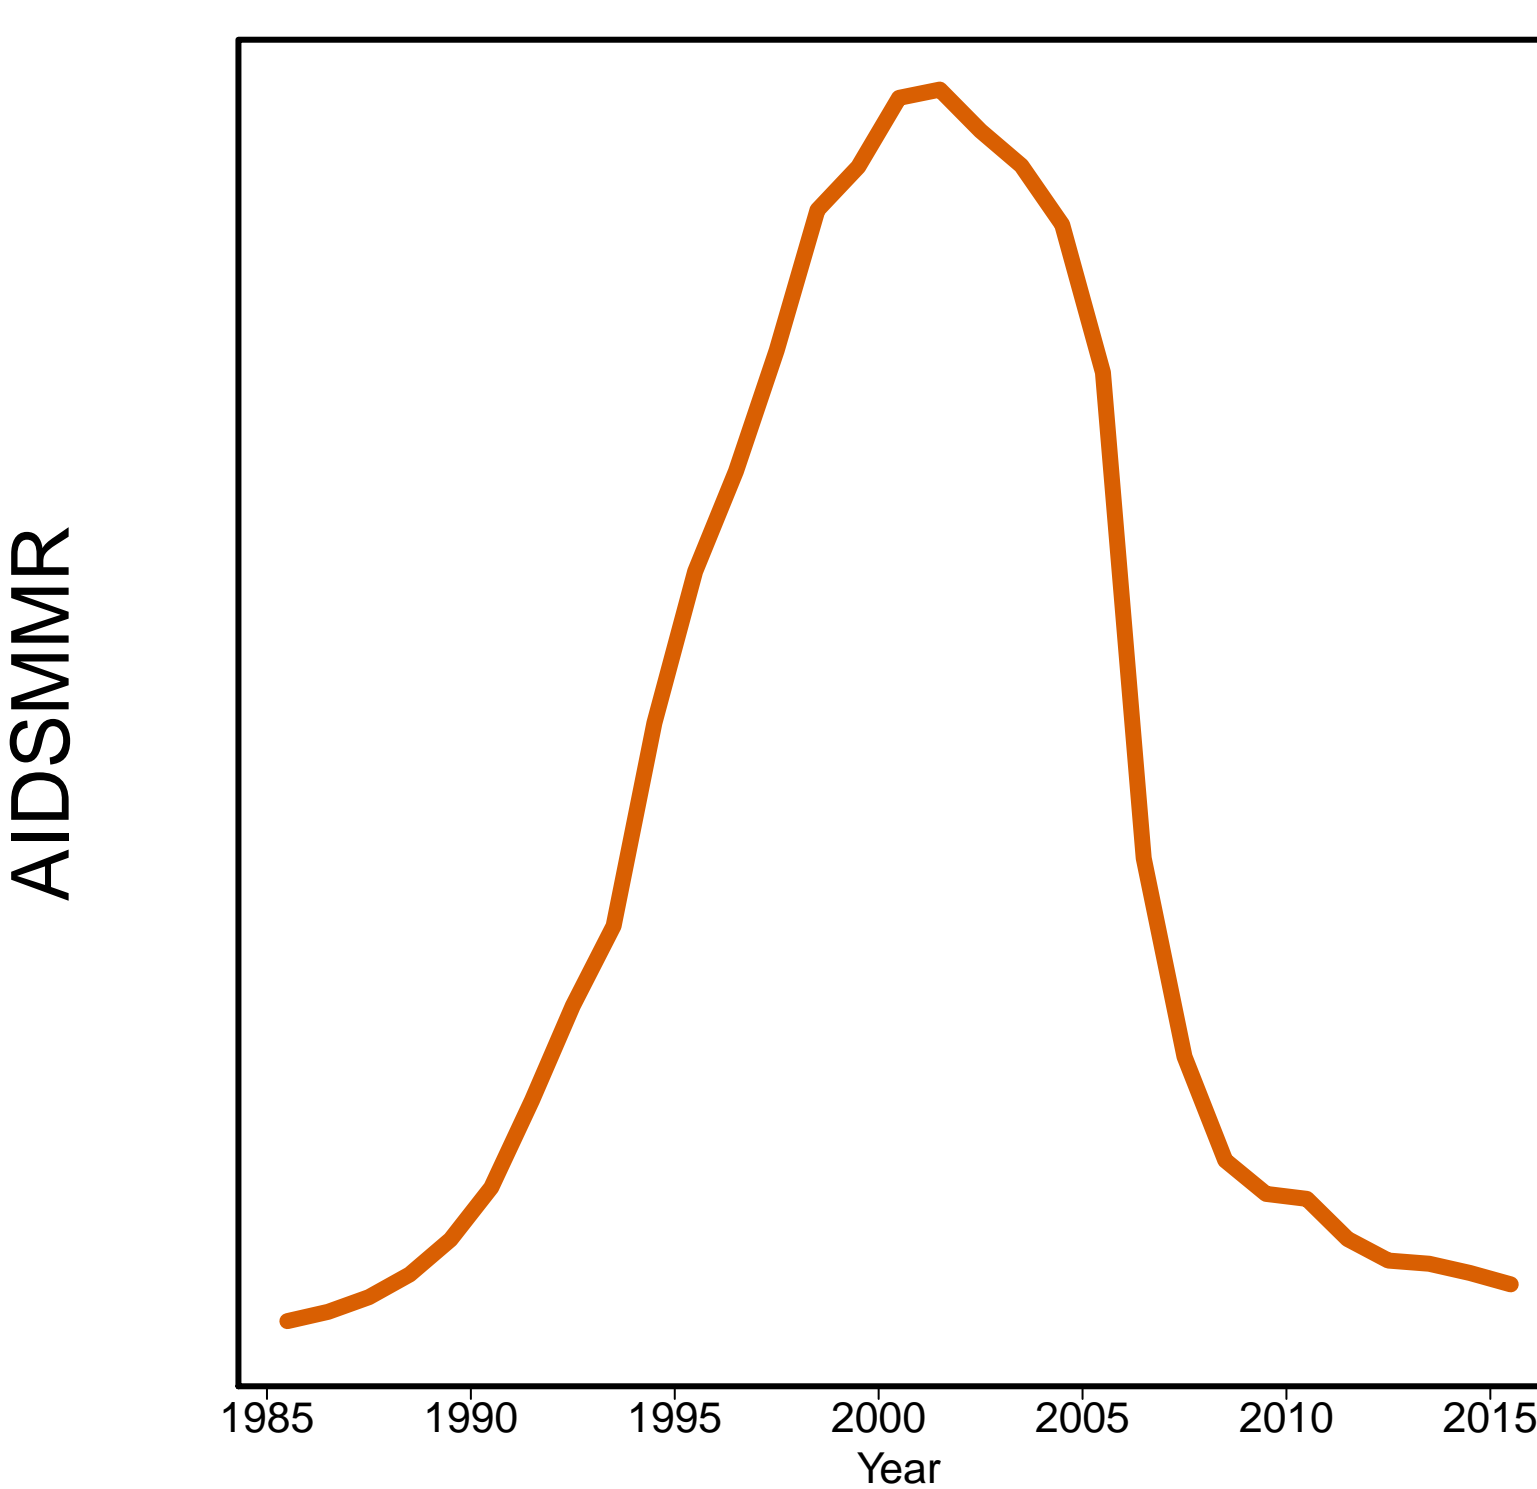

Cambodia [KHM]  
(South-Eastern Asia / Oceania)

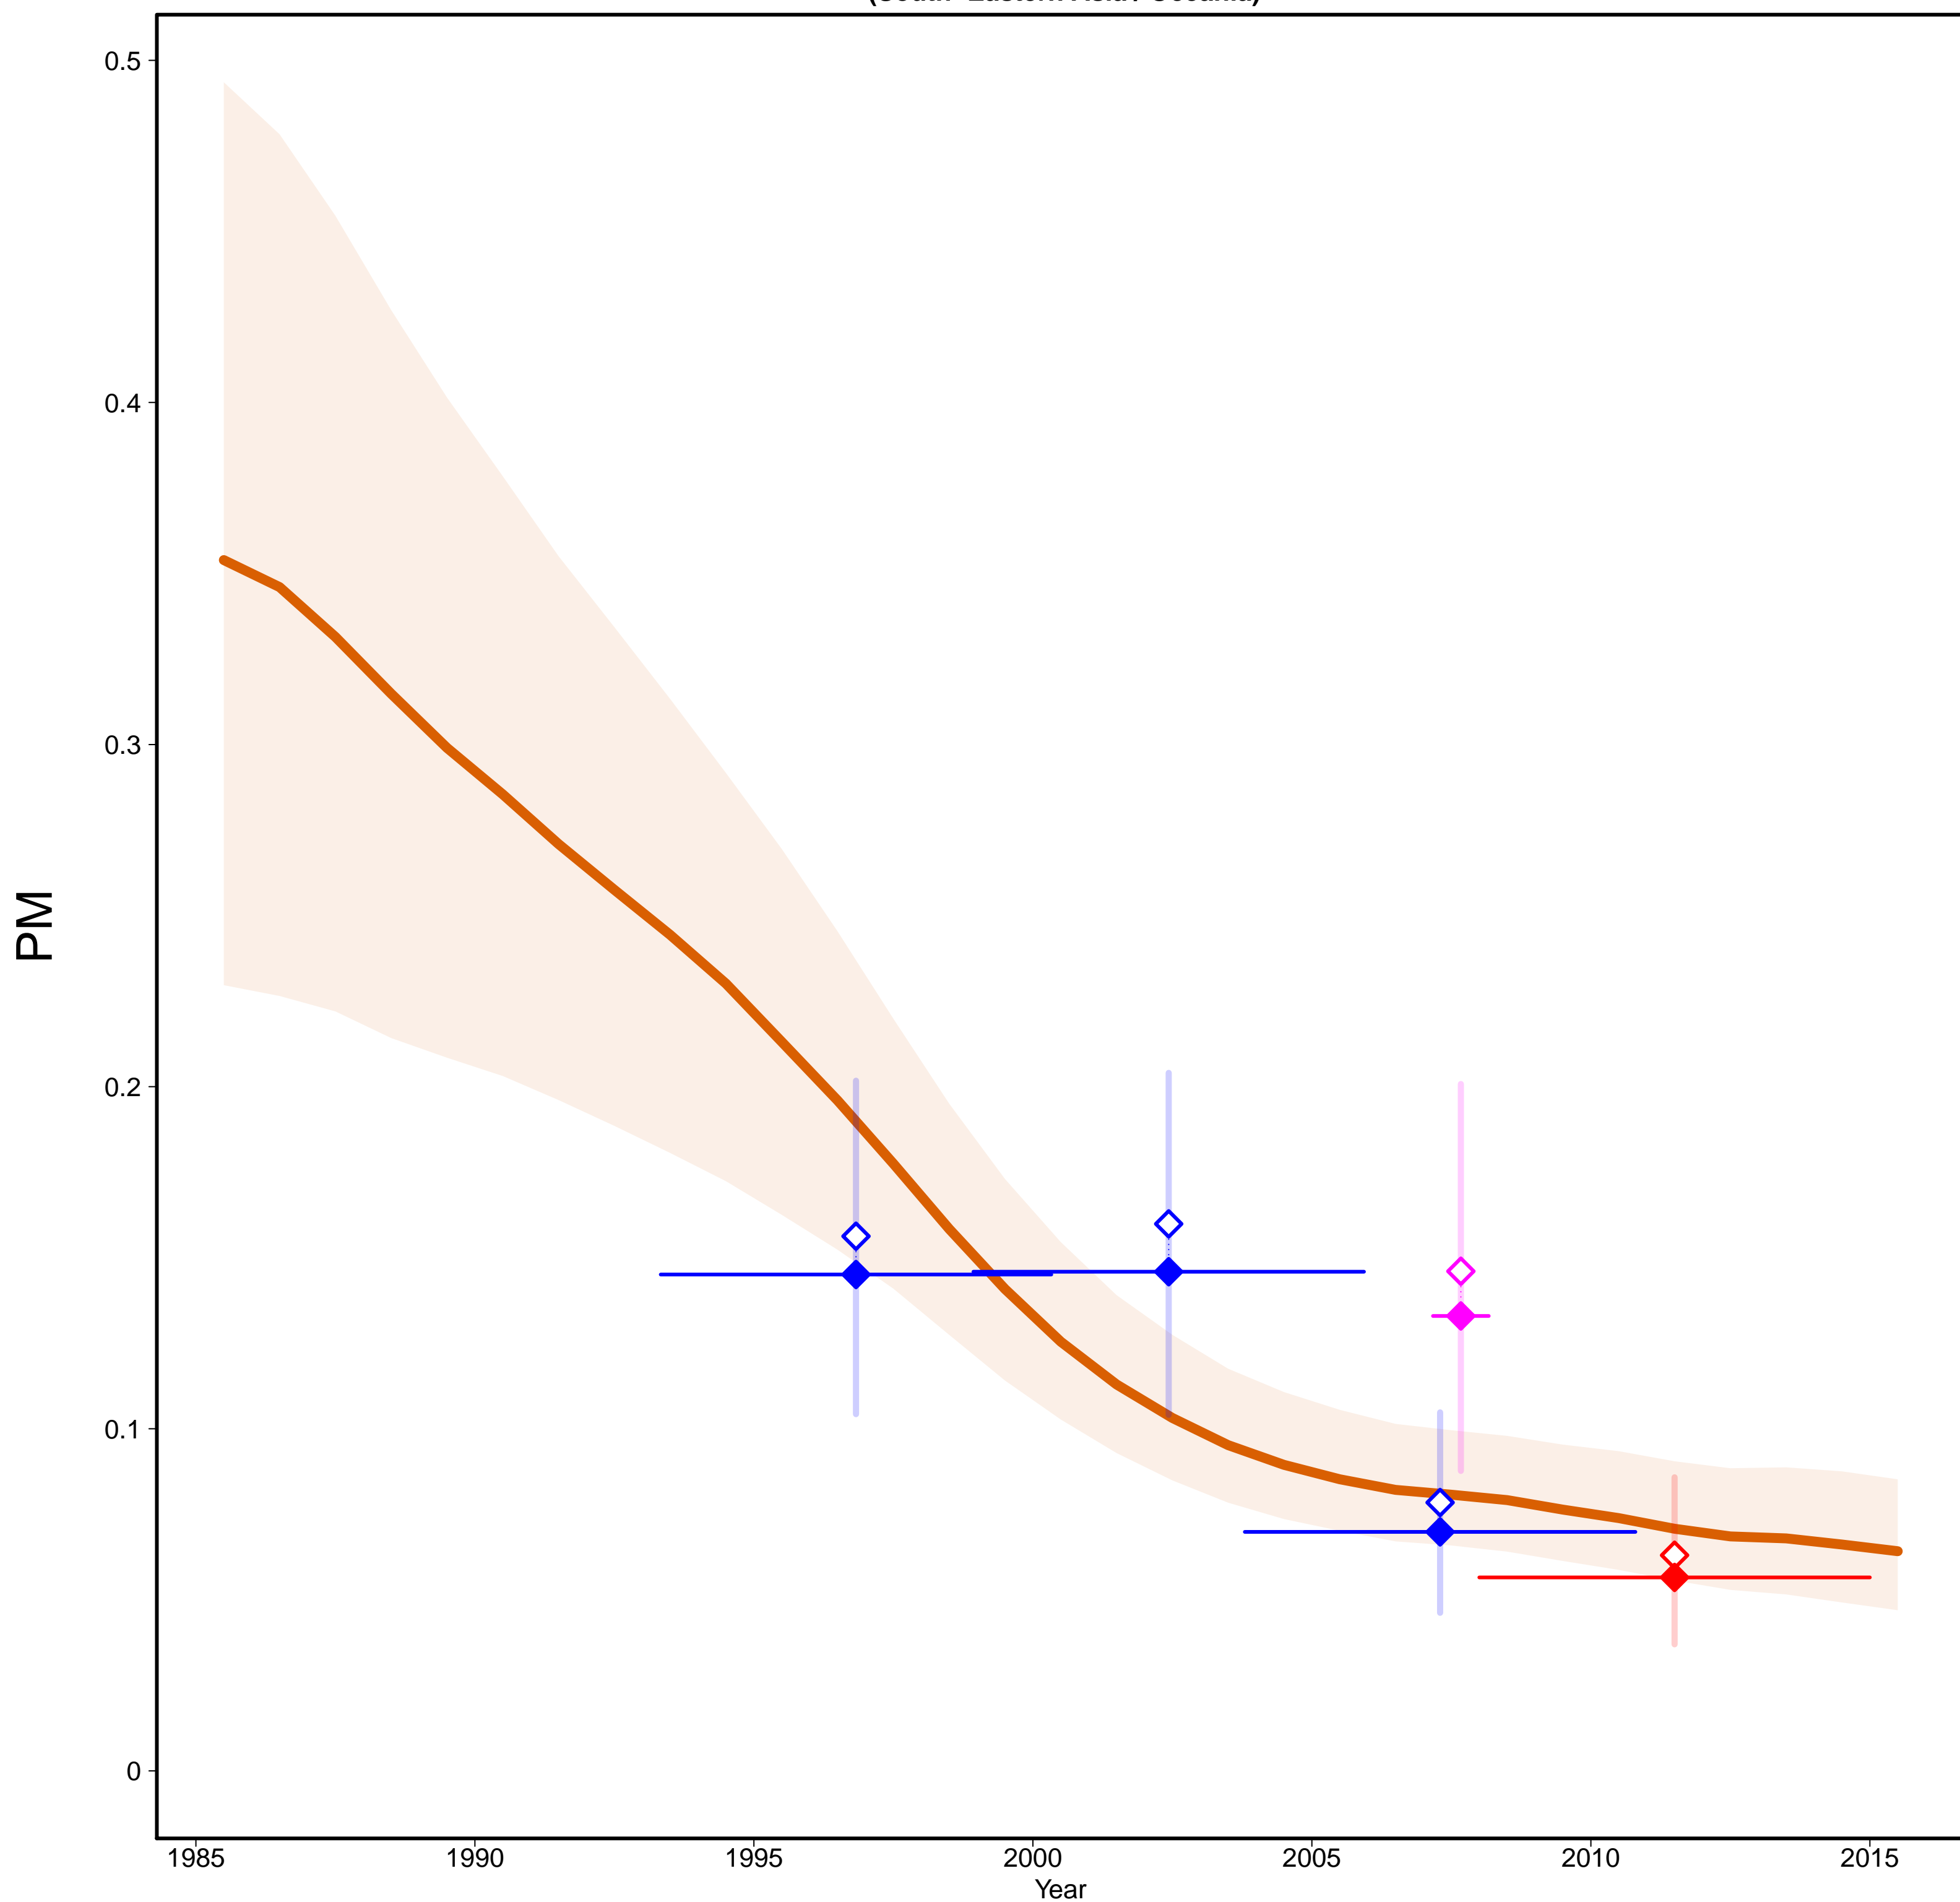

Cambodia [KHM]  
(South-Eastern Asia / Oceania)

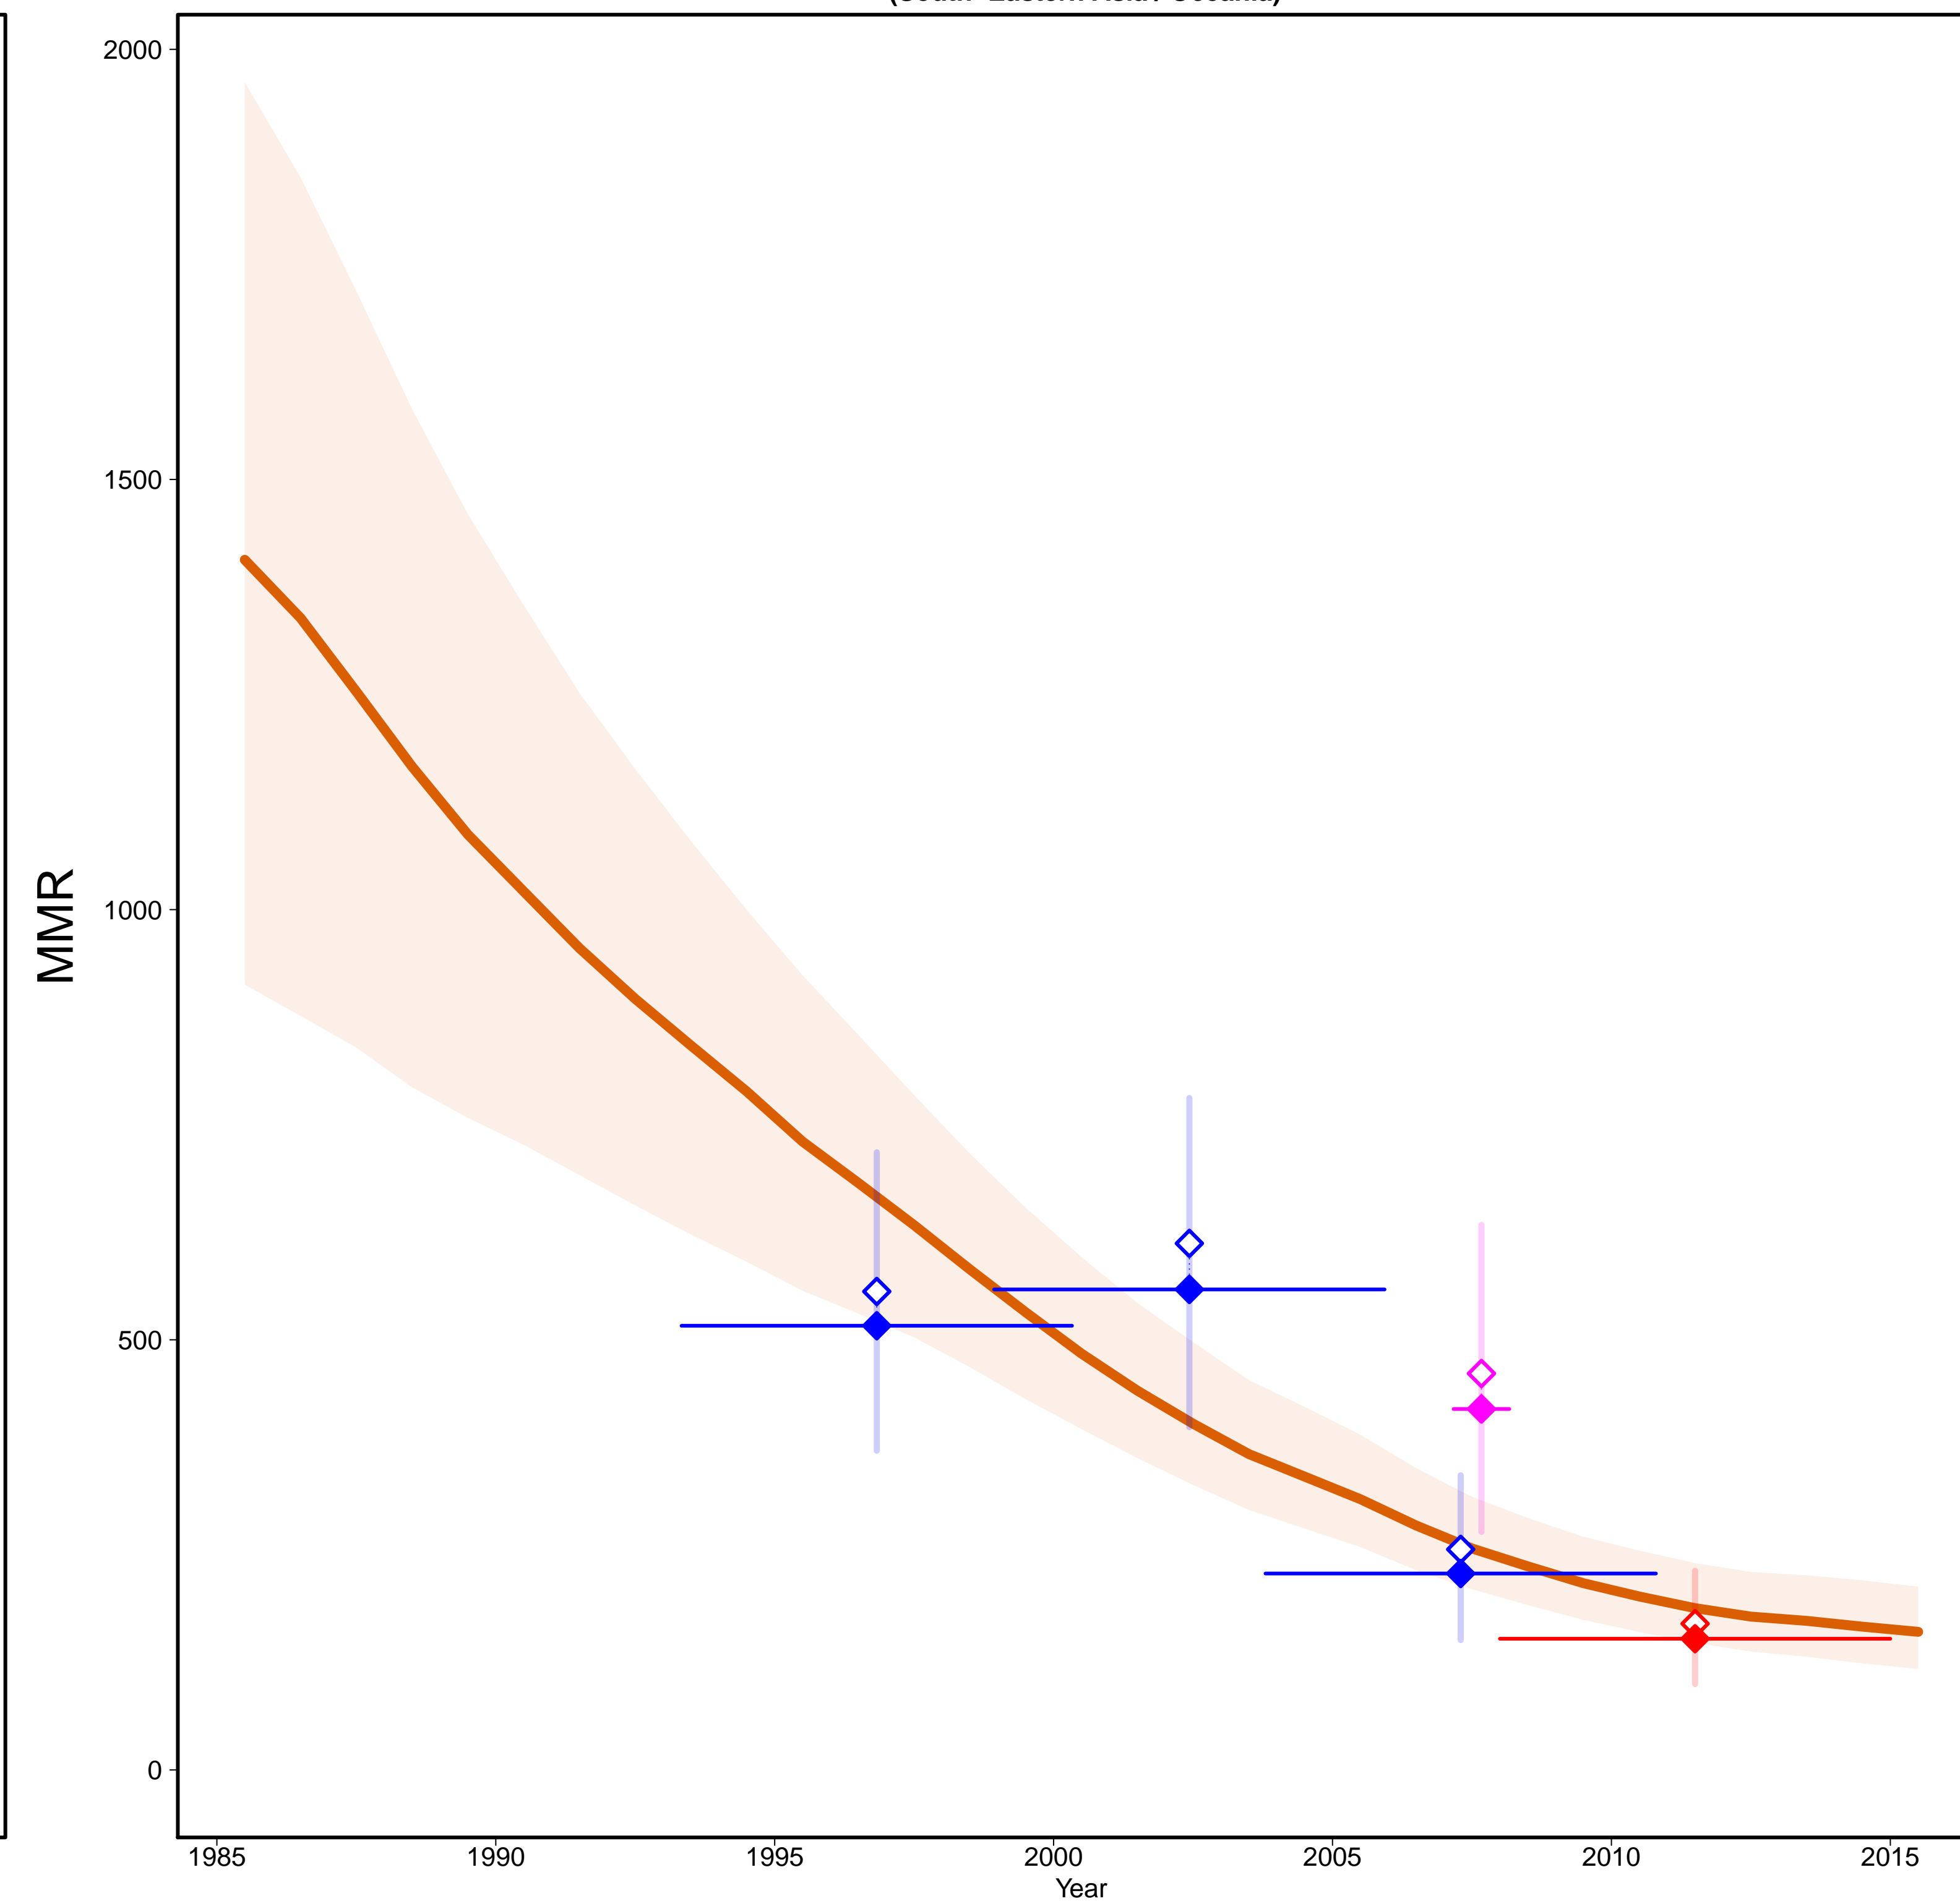

- Estimates —
- MMR Database 2015 —
- ◇ Observed Data
- ◆ Adjusted Data
- Data type —
- ◆ DHS
- ◆ Census
- ◆ Misc. studies

Gross Domestic Product

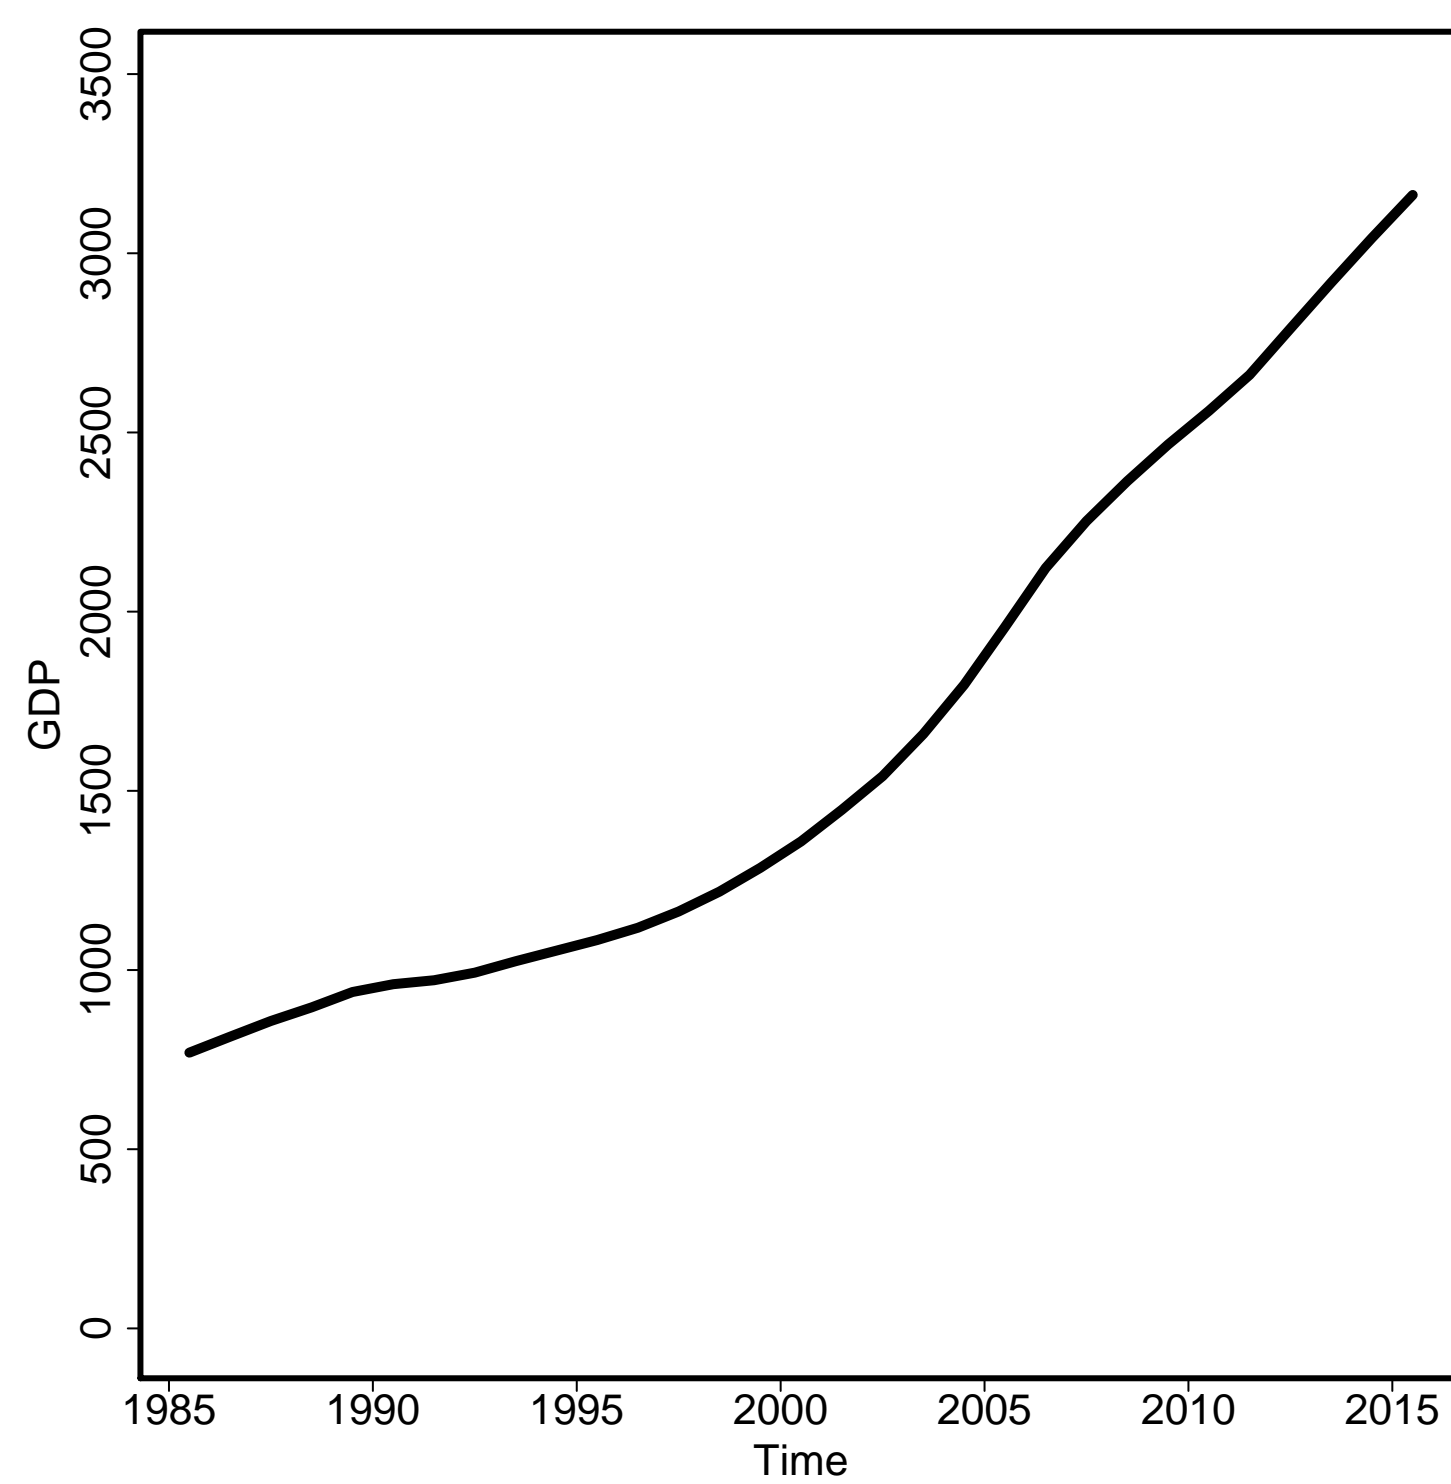

General Fertility Rate

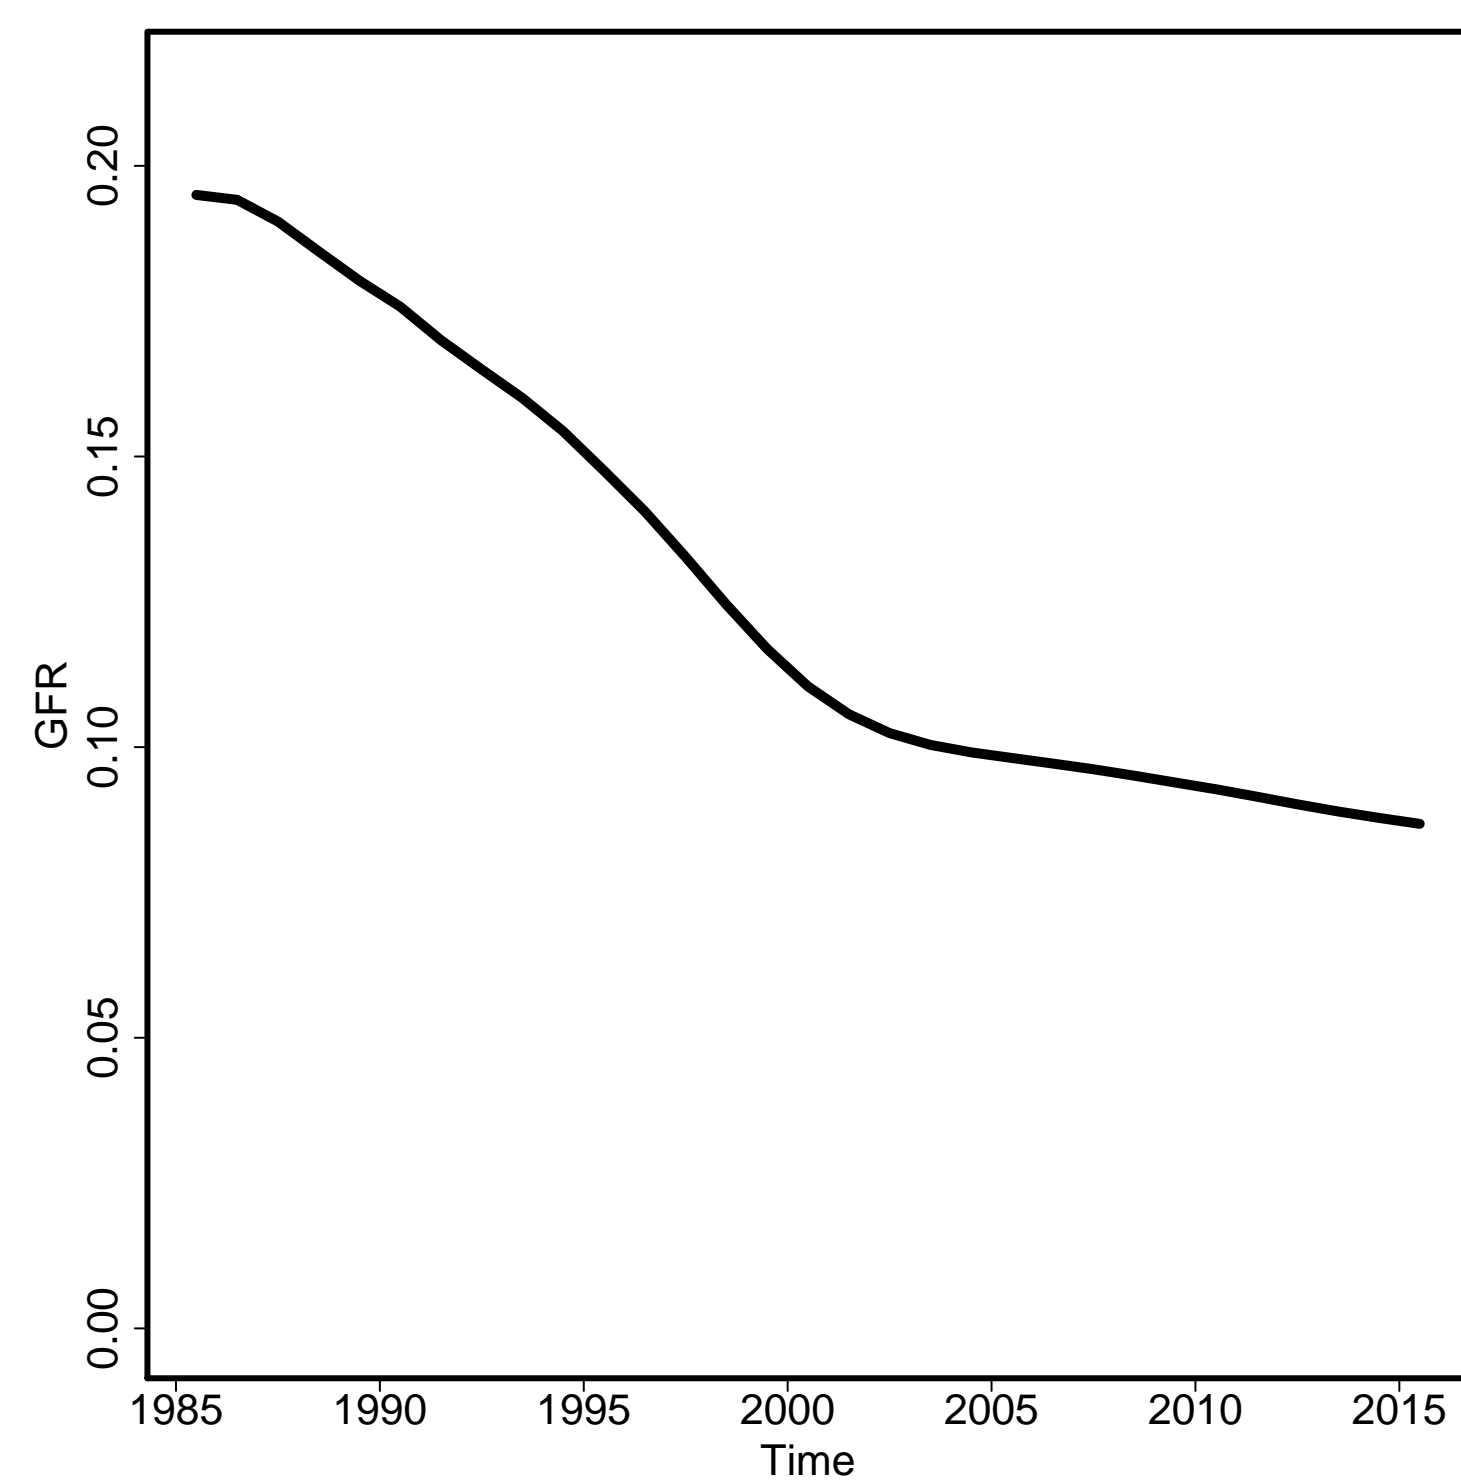

Skilled Attendance to Birth

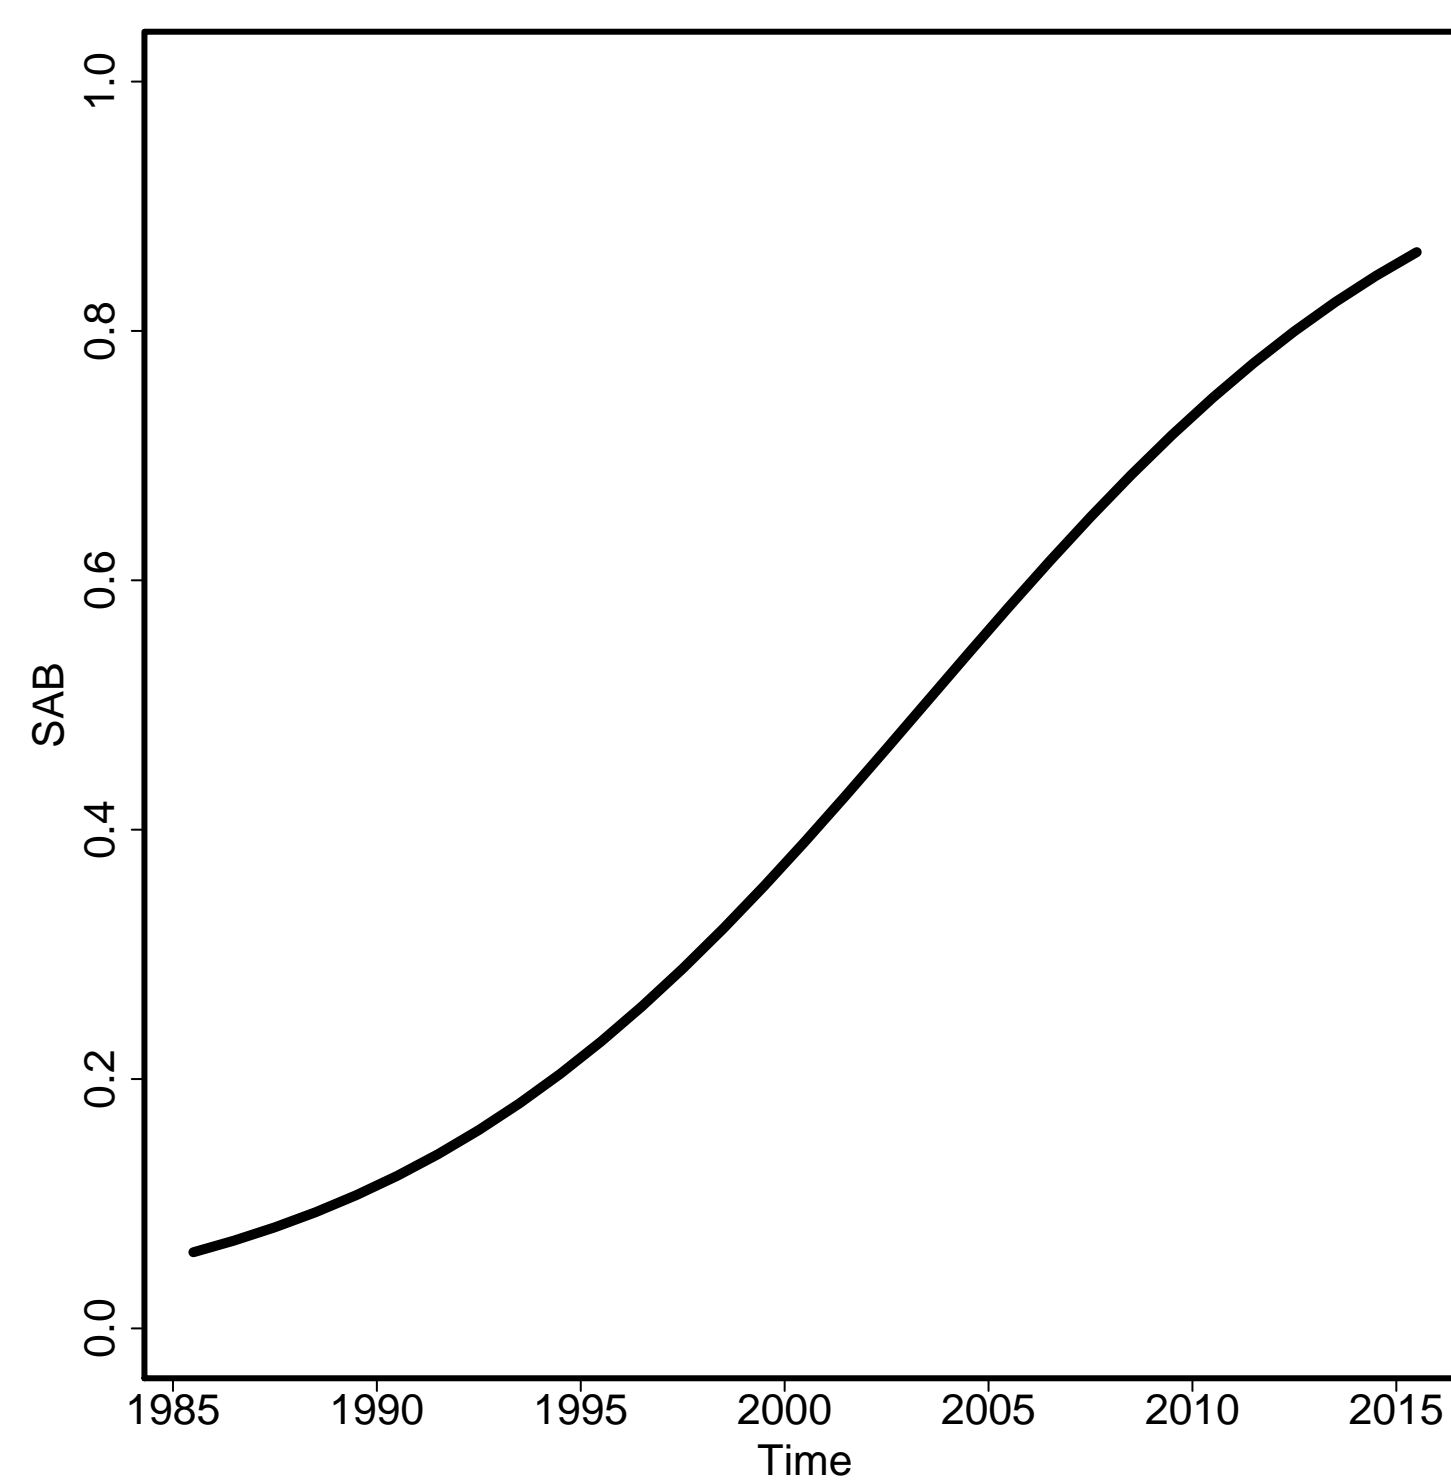

Envelope/Births

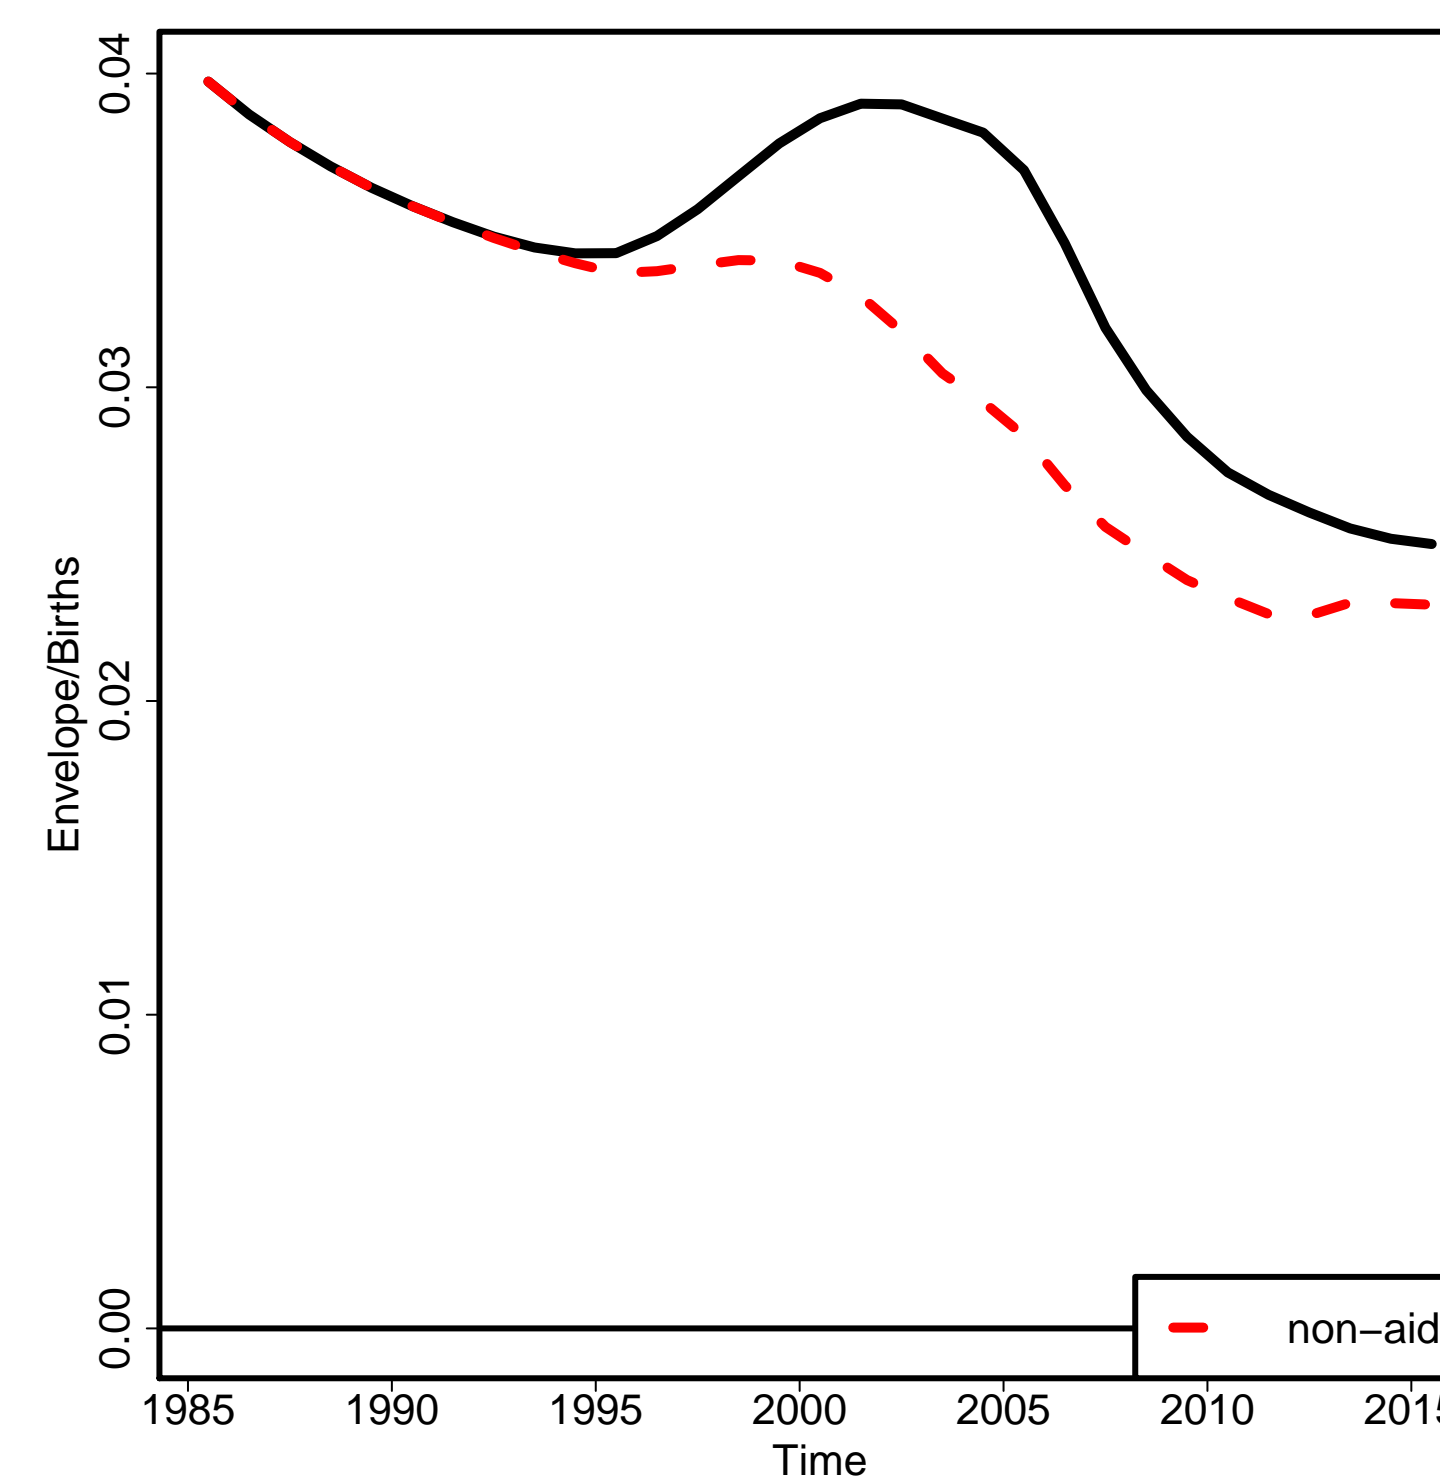

Non-aids MMR

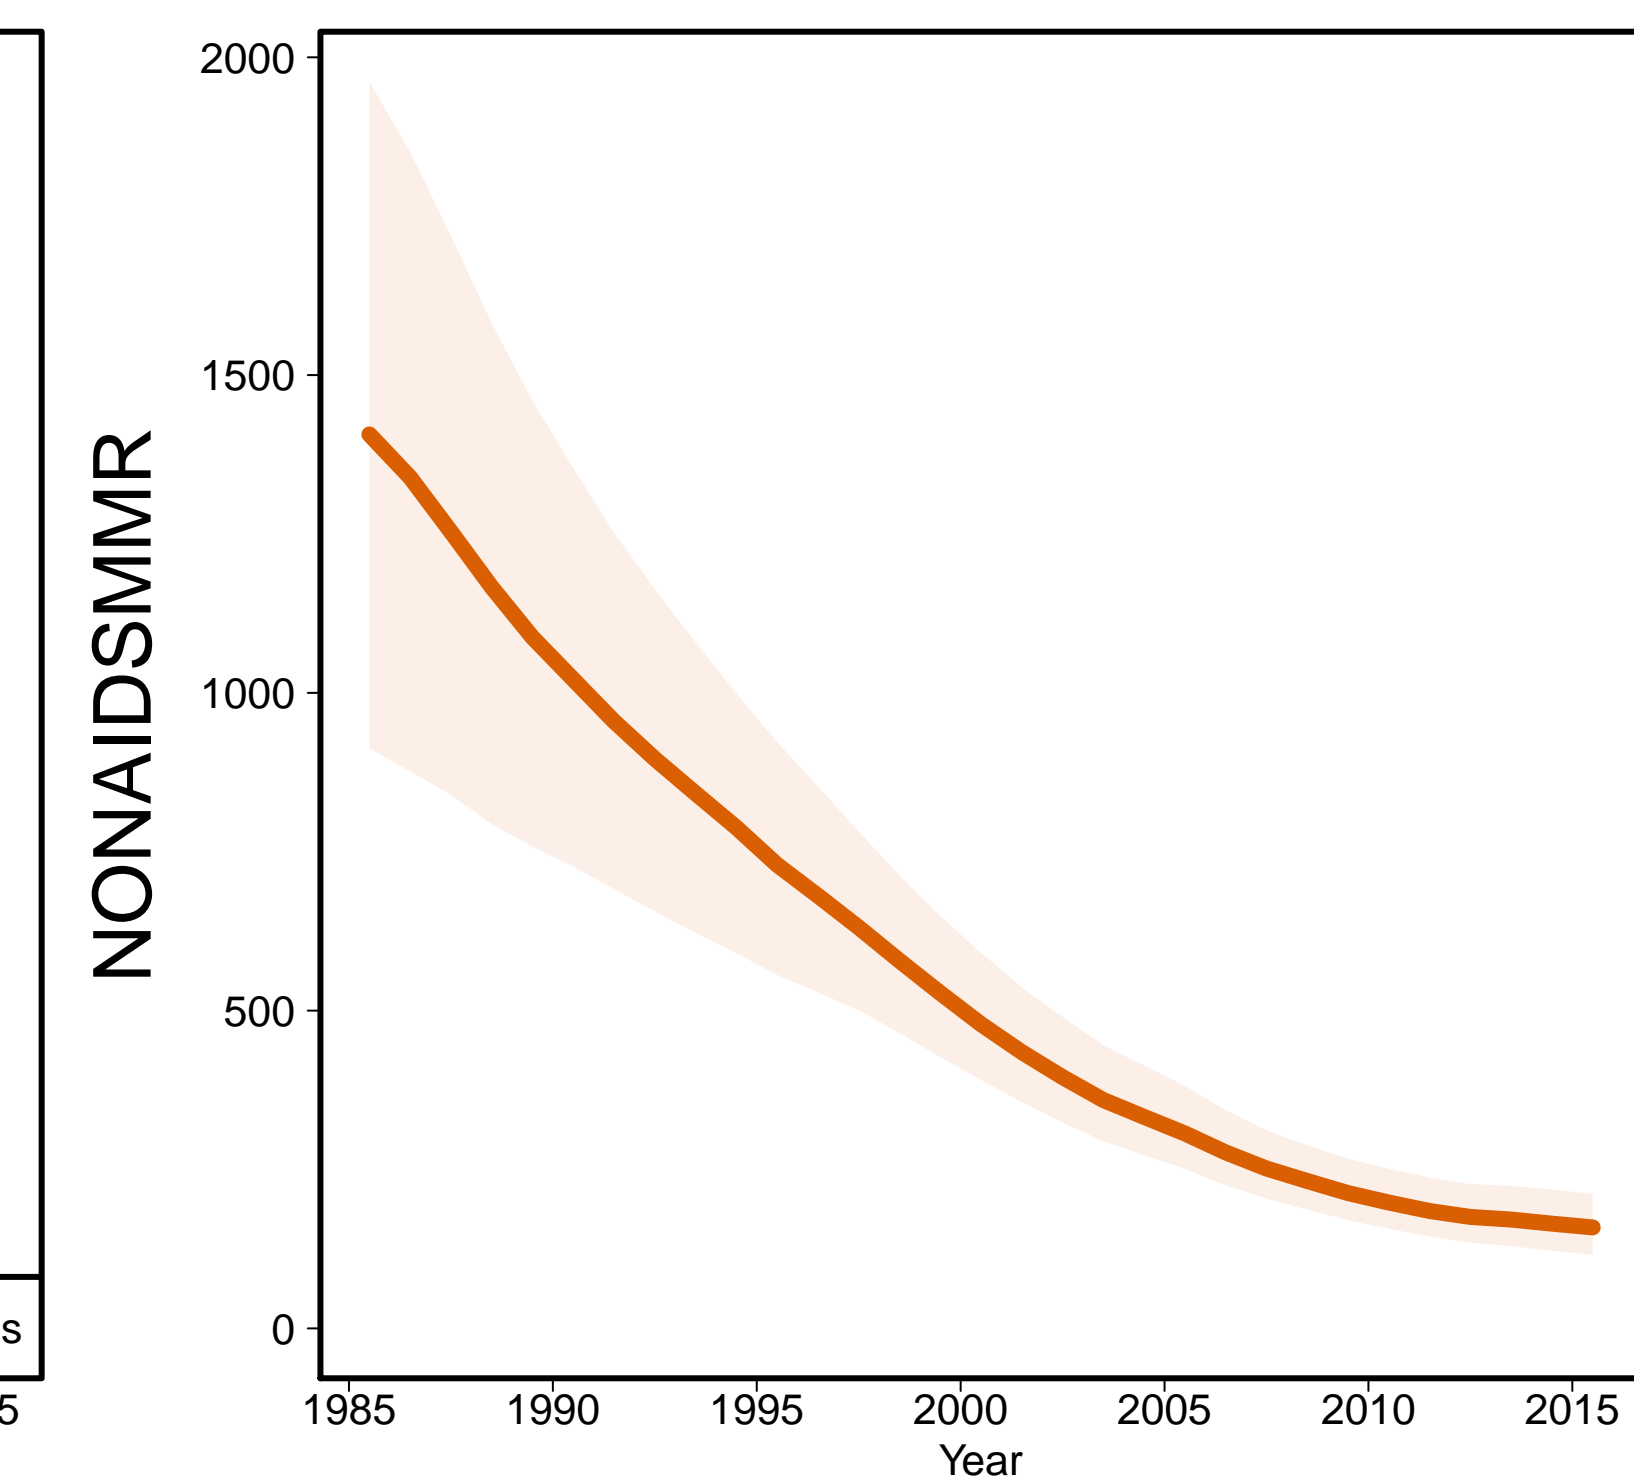

Aids MMR

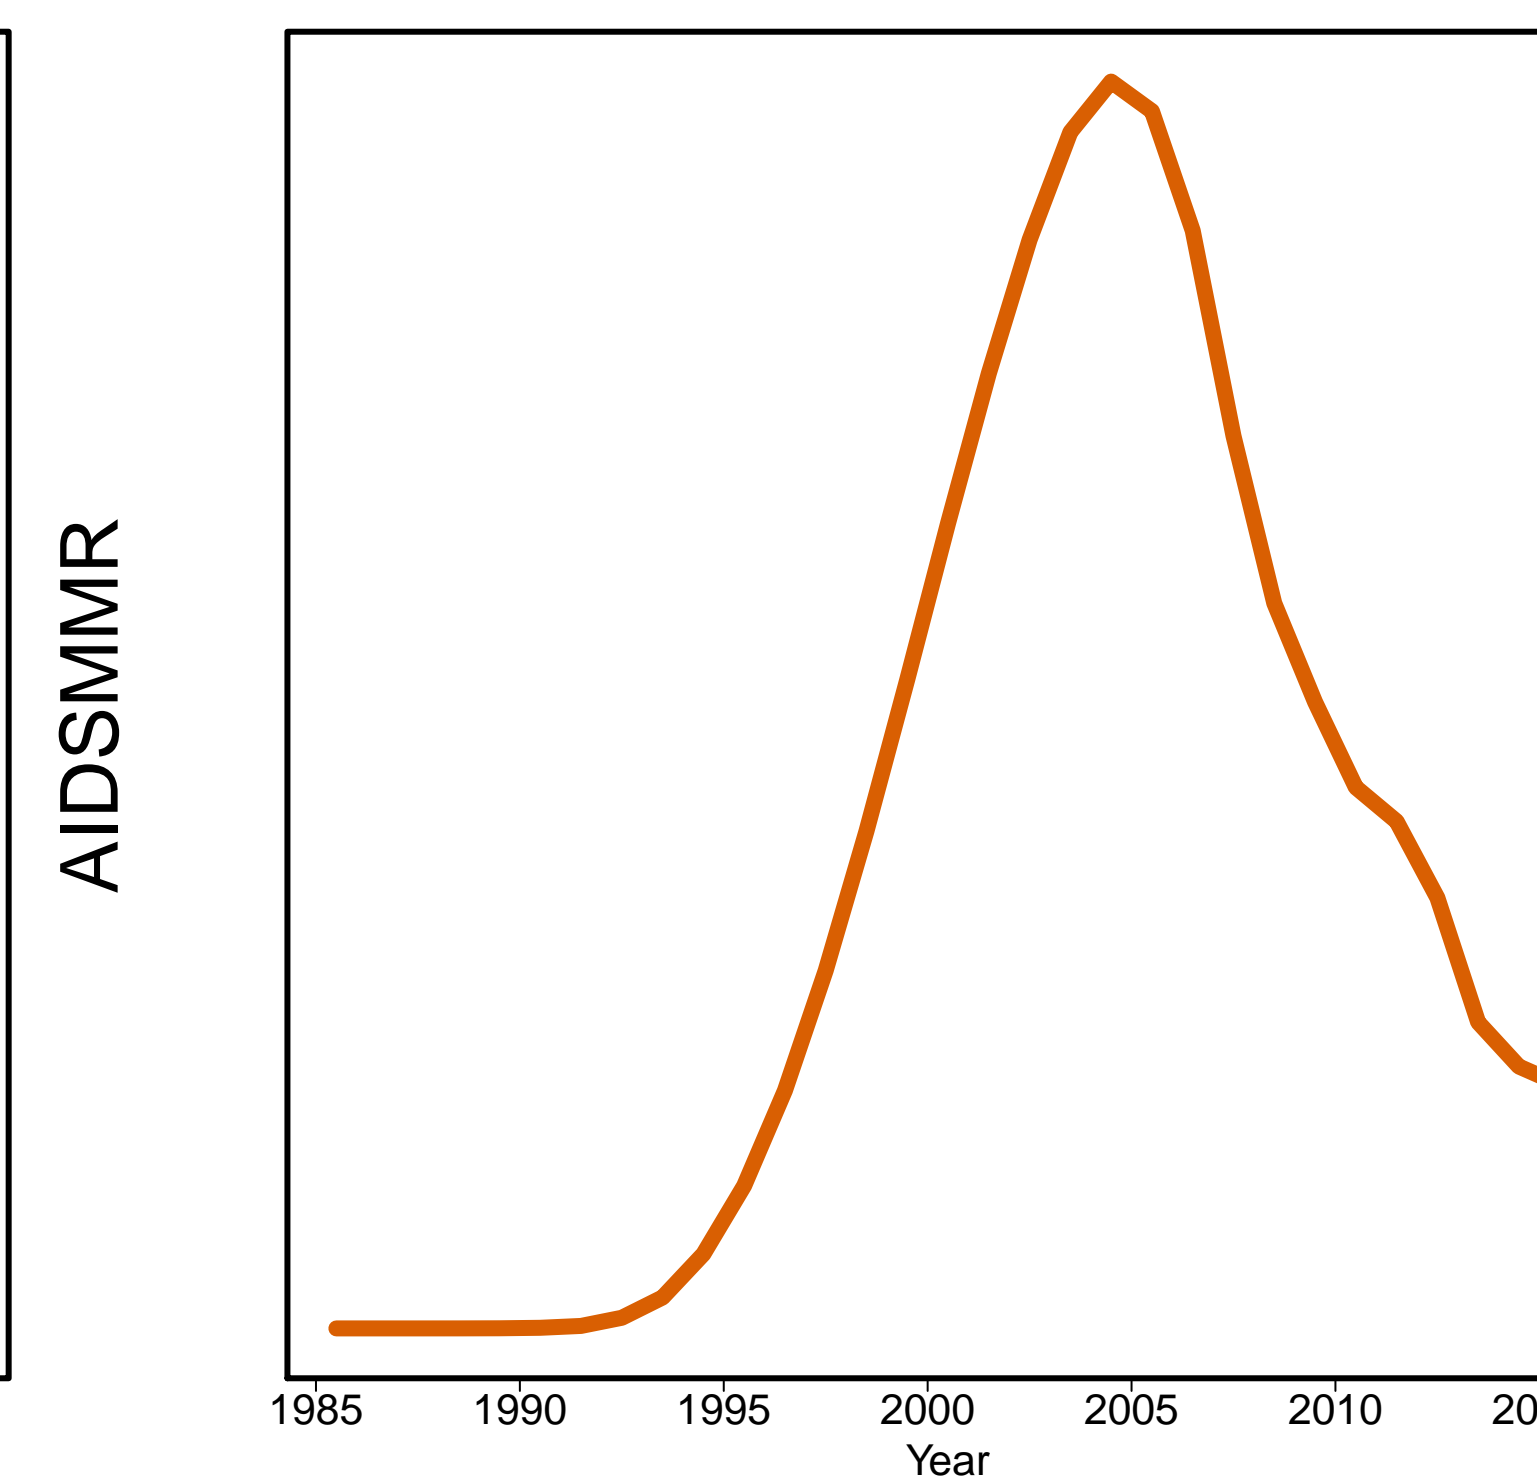

Cameroon [CMR]  
(Middle Africa)

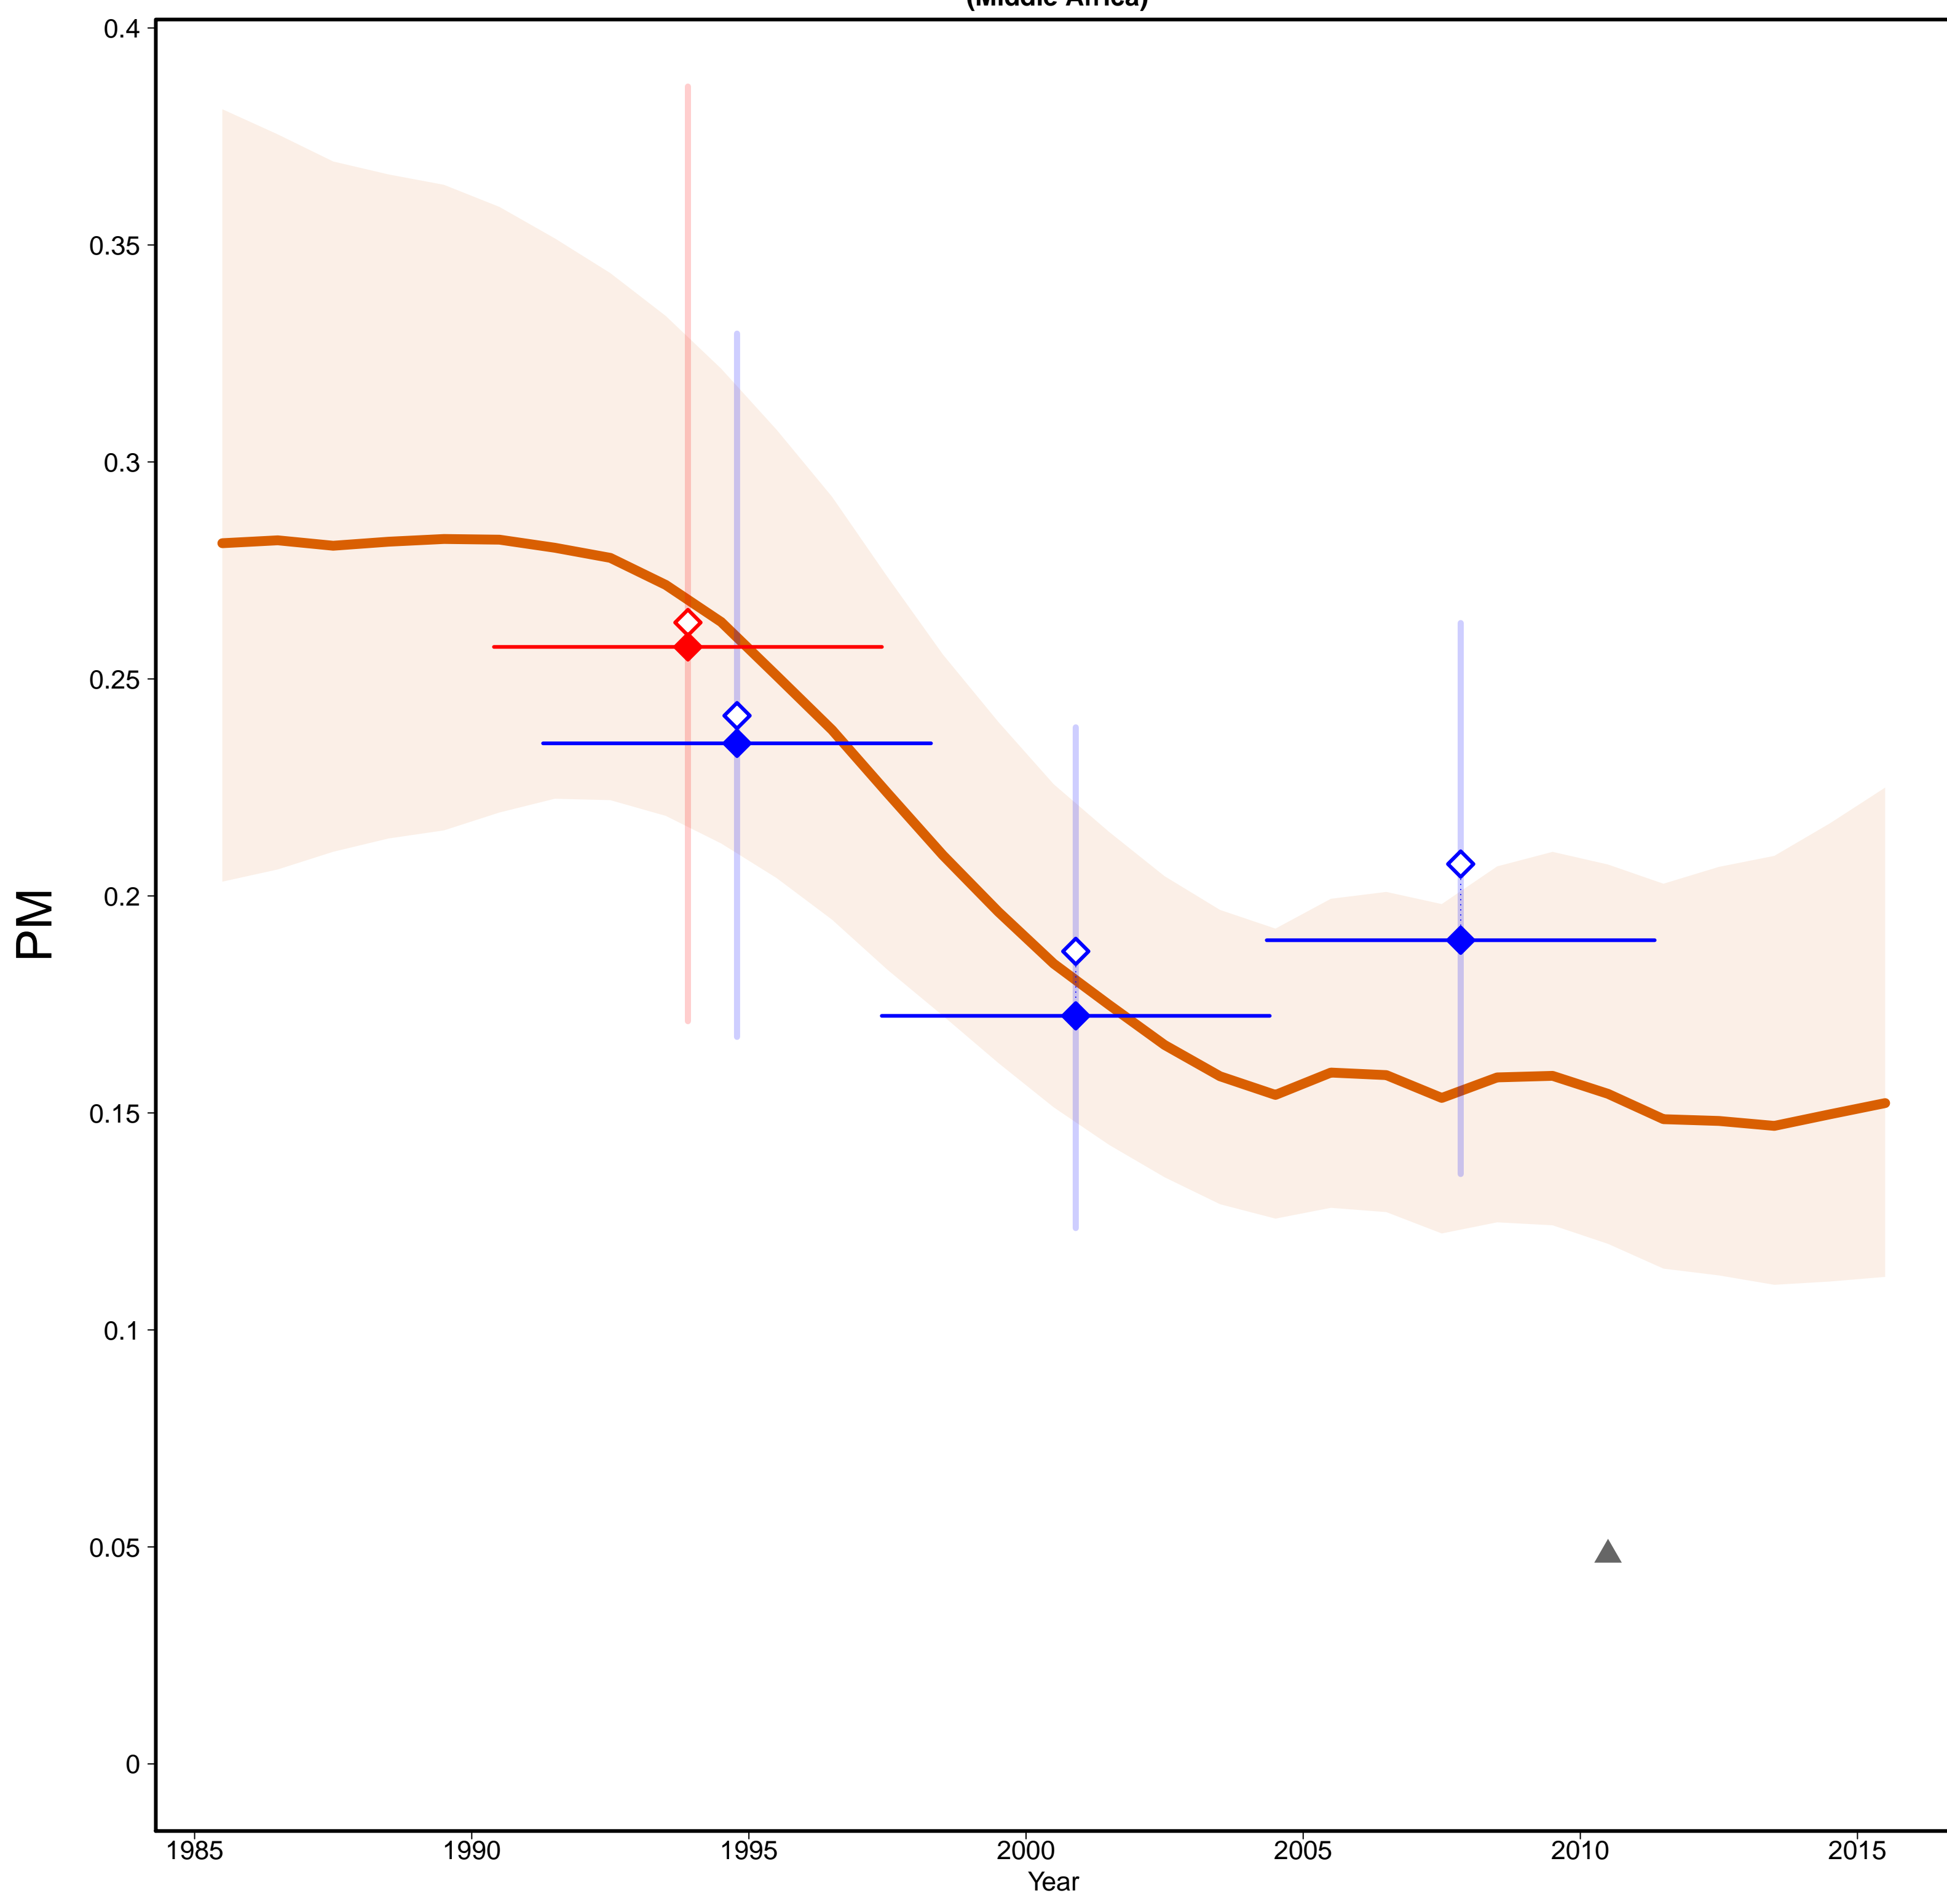

Cameroon [CMR]  
(Middle Africa)

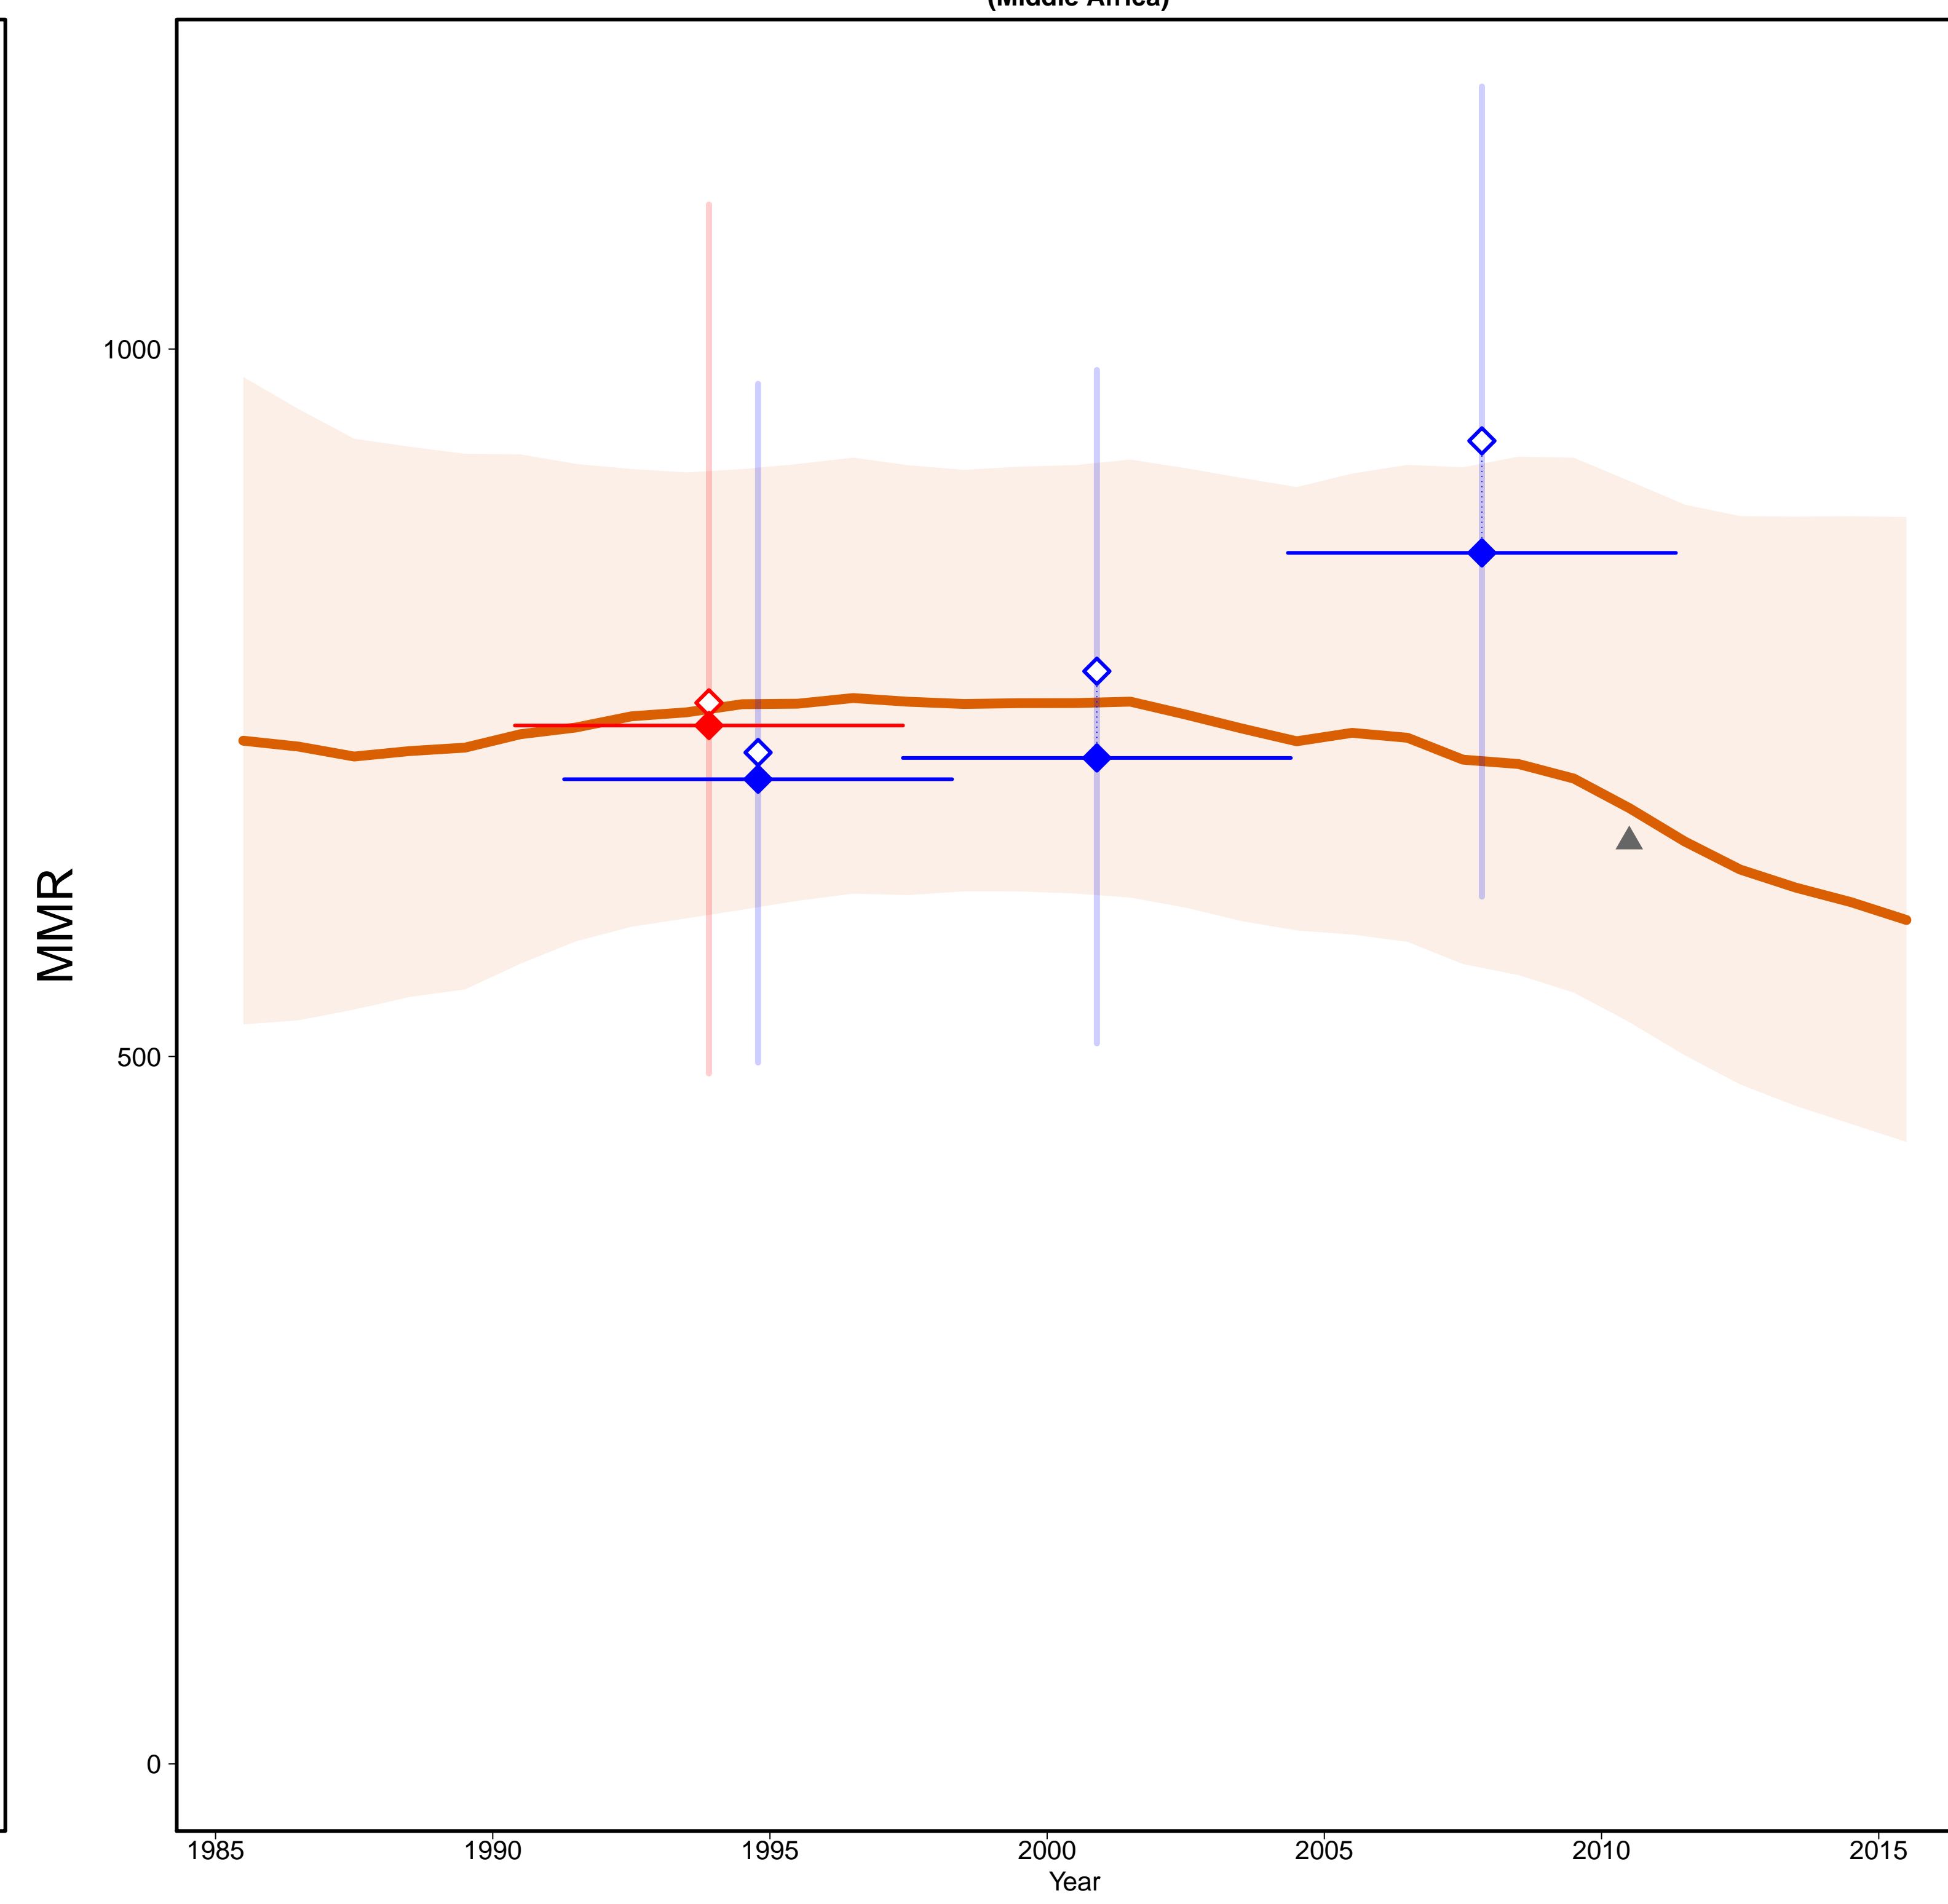

- Estimates —
- MMR Database 2015 —
- ◇ Observed Data
- ◆ Adjusted Data
- Data type —
- ◆ DHS
- ◆ Misc. studies
- ▲ Excluded misc. studies

Gross Domestic Product

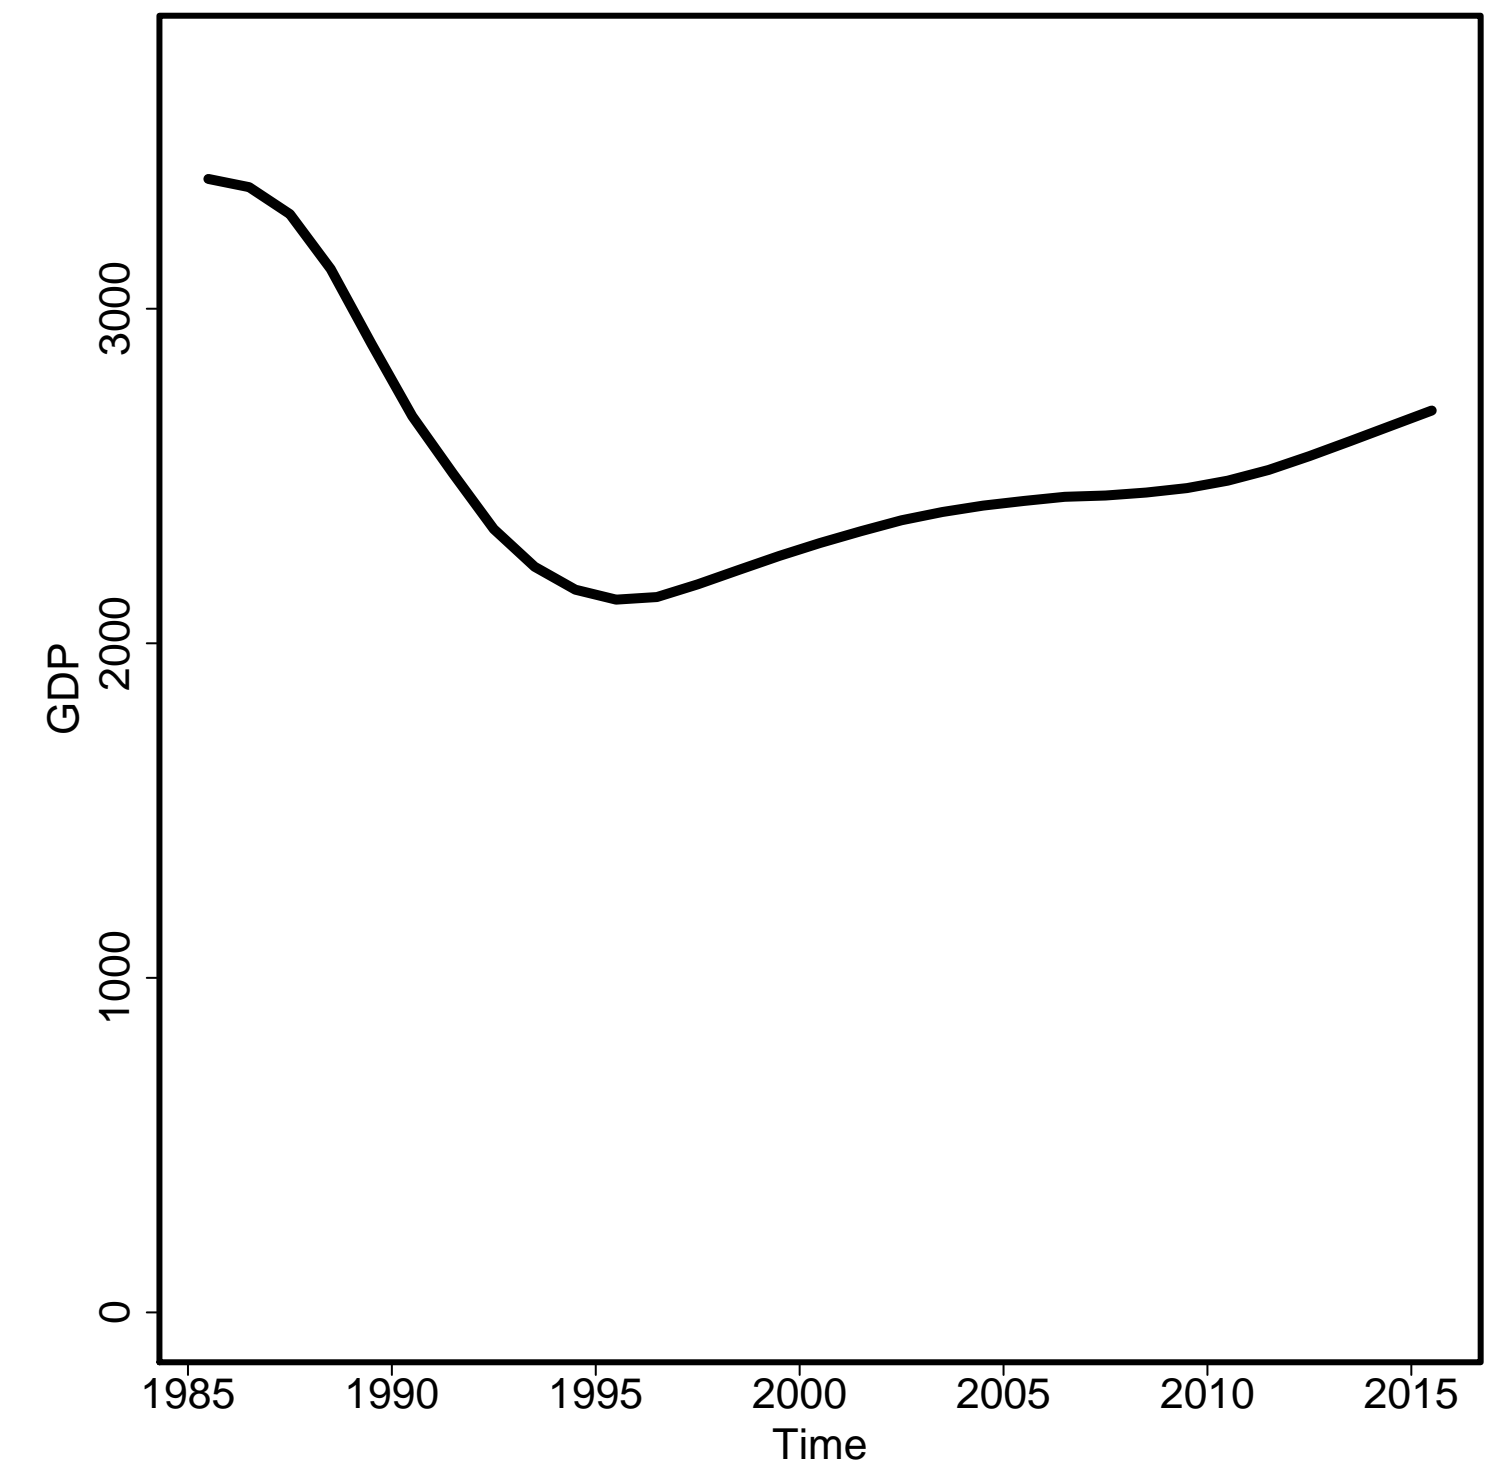

General Fertility Rate

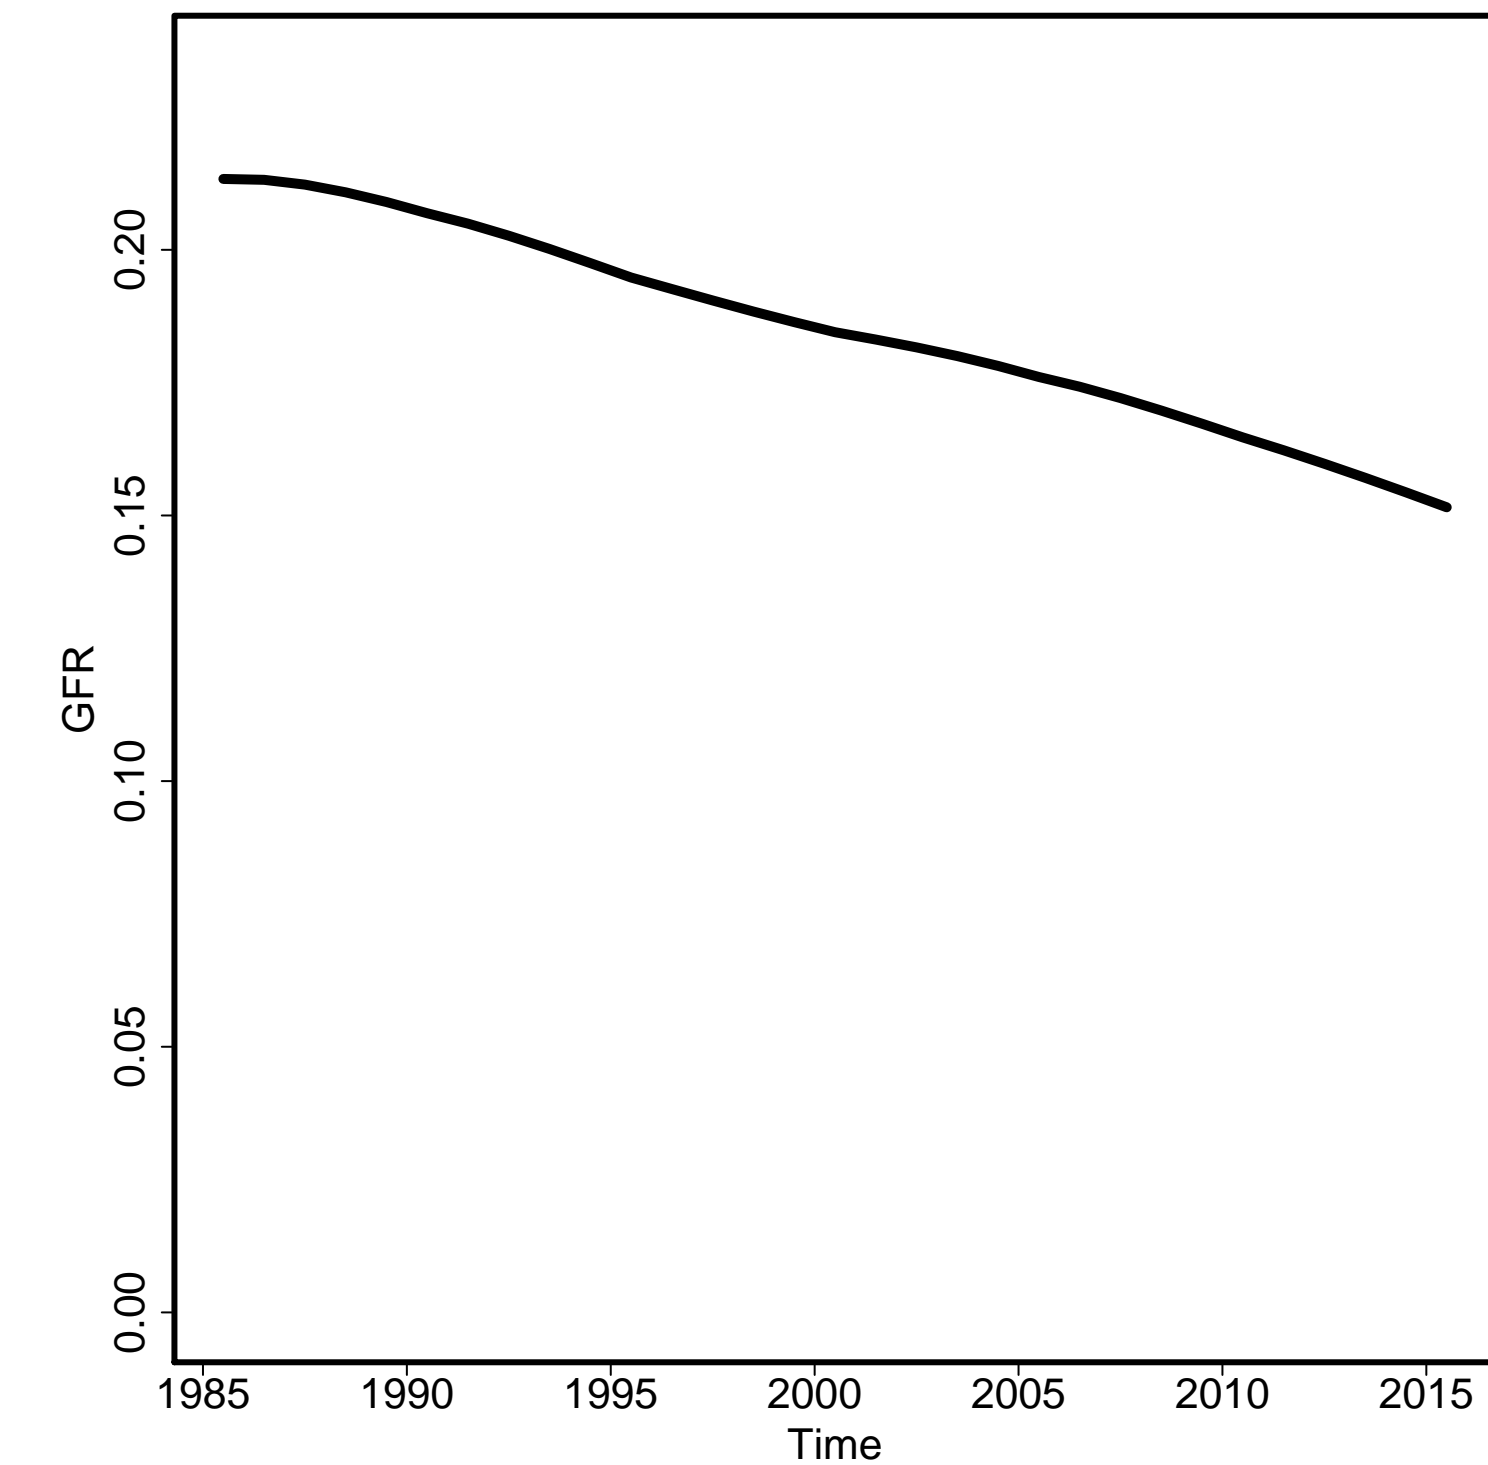

Skilled Attendance to Birth

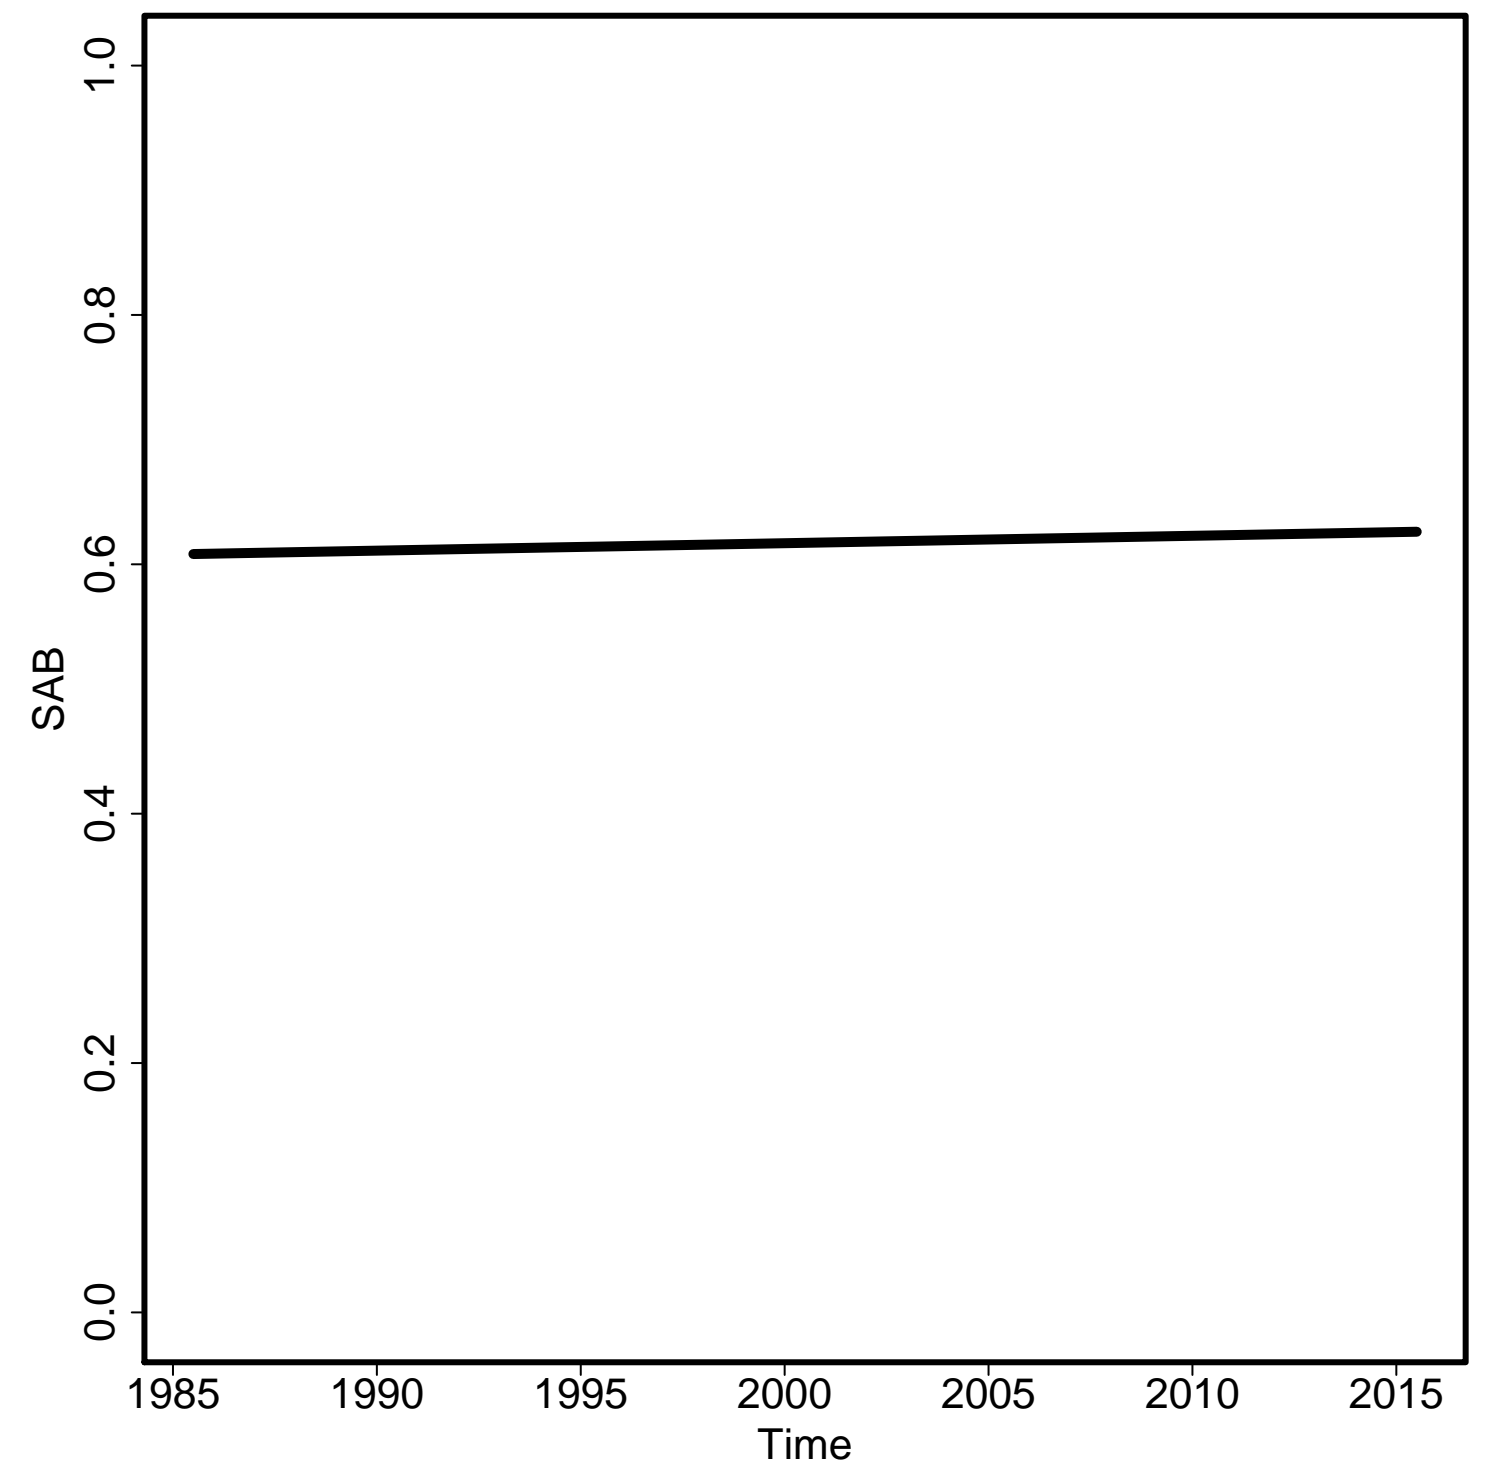

Envelope/Births

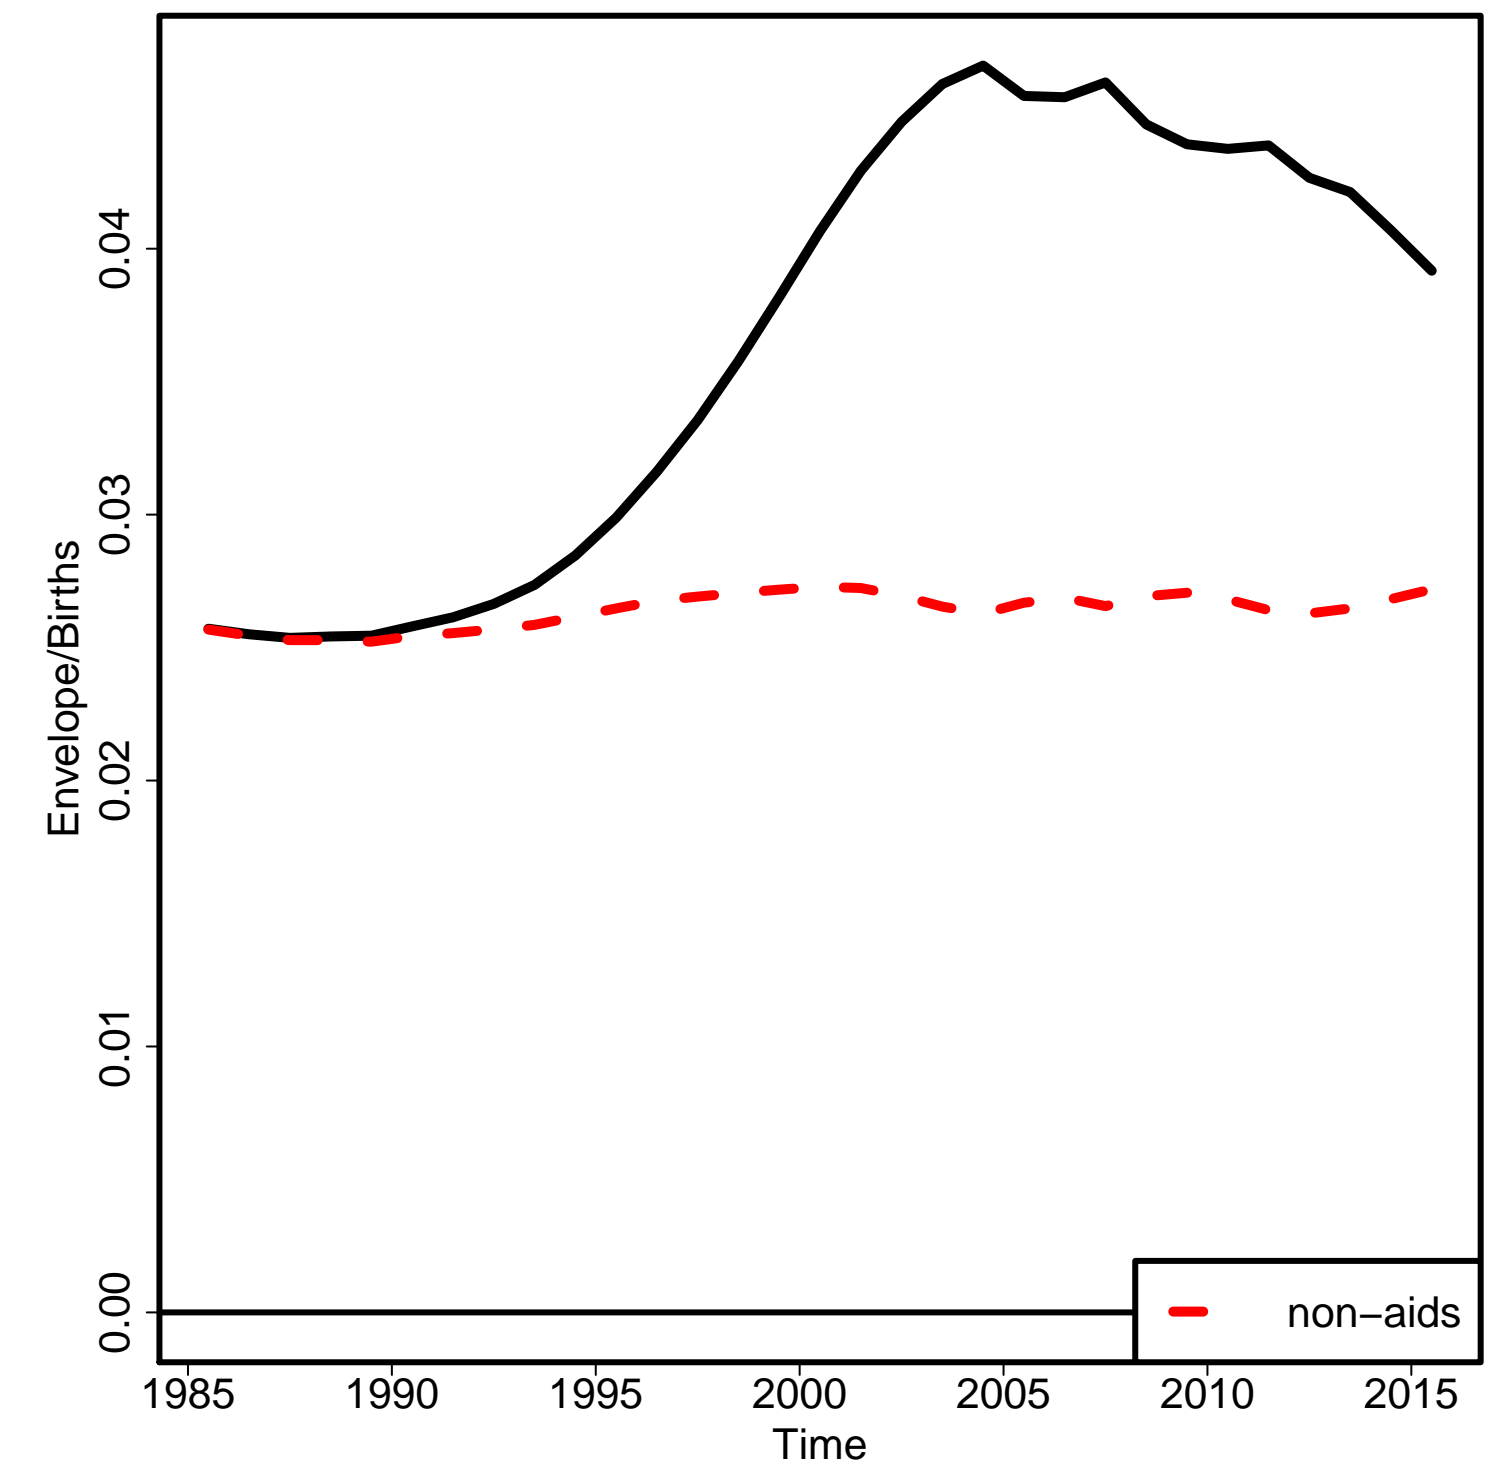

Non-aids MMR

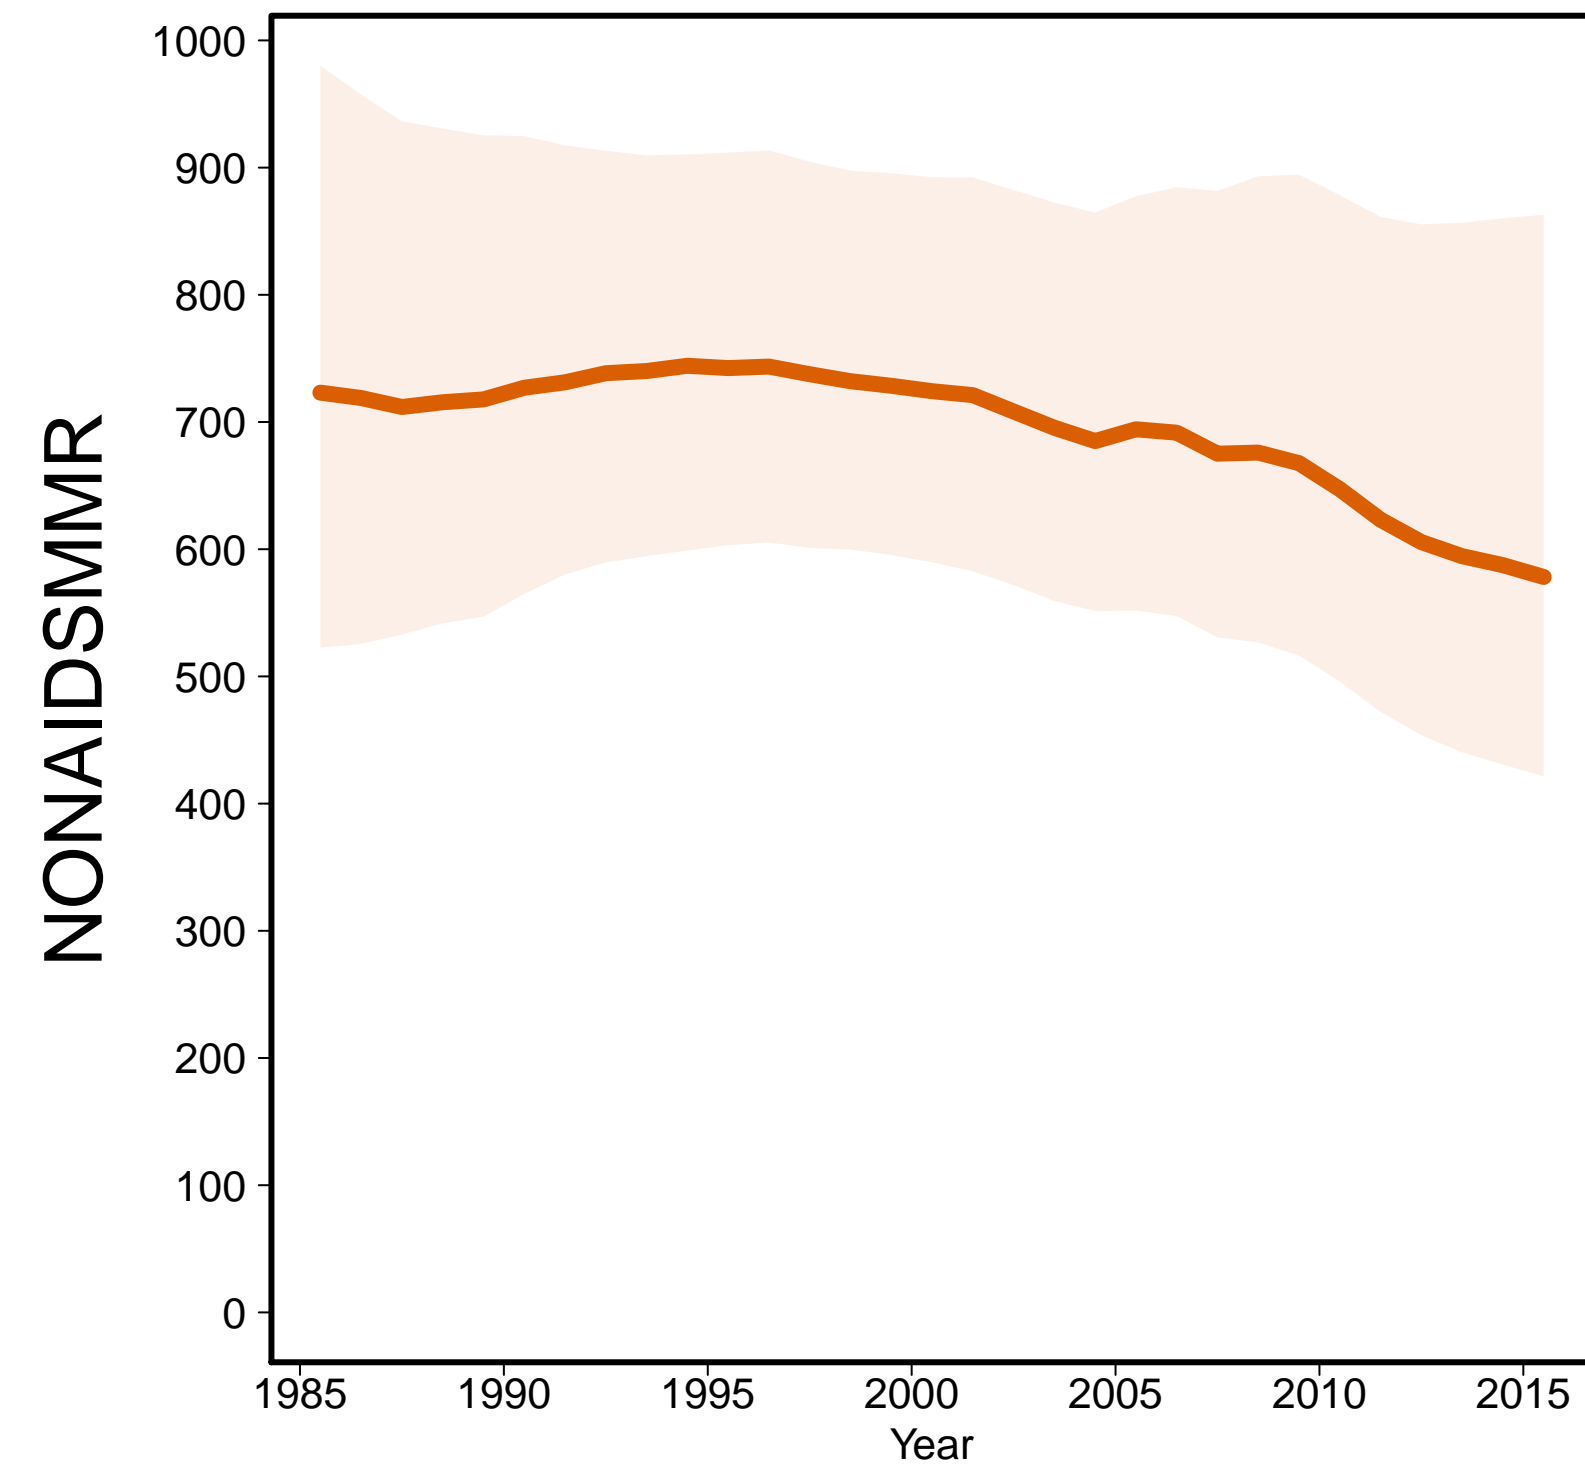

Aids MMR

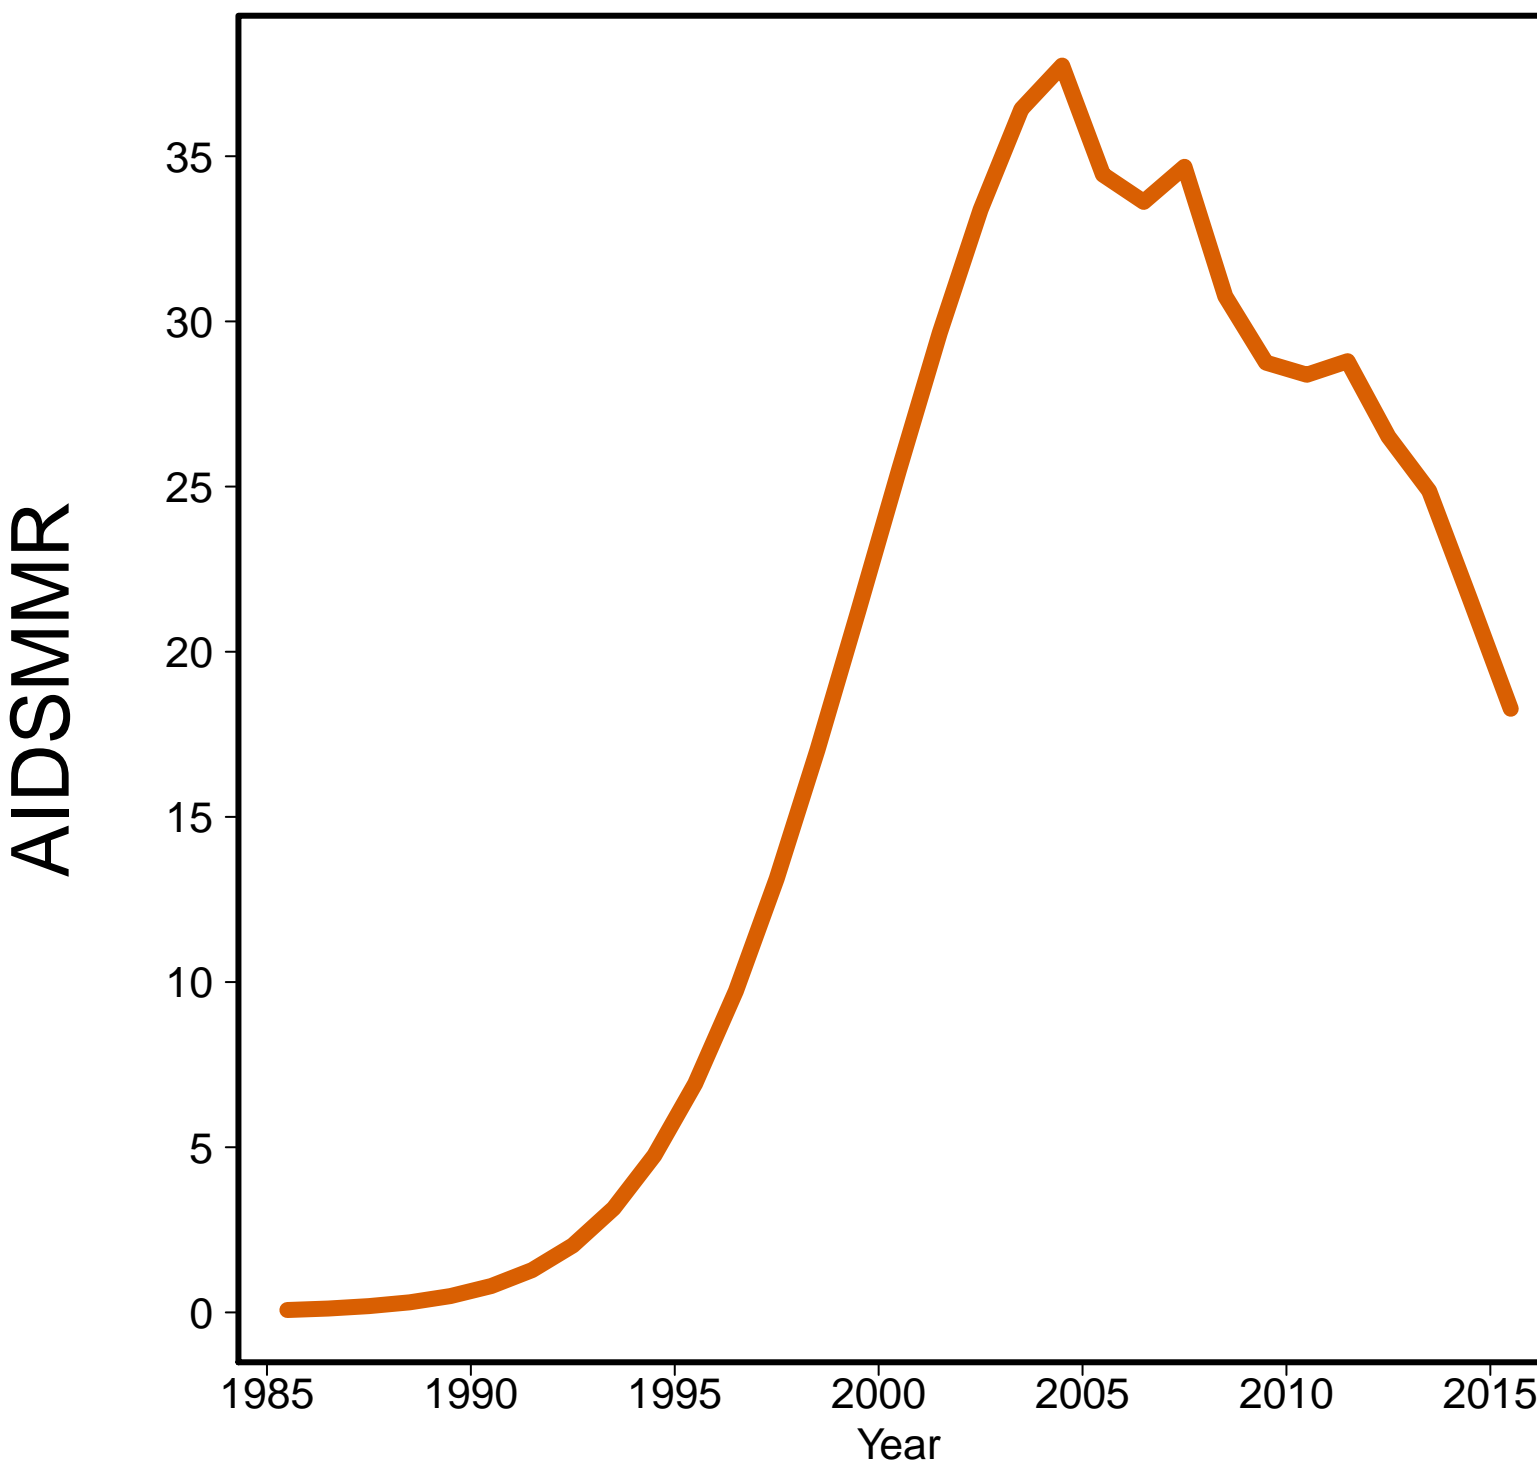

Canada [CAN]  
(Developed regions)

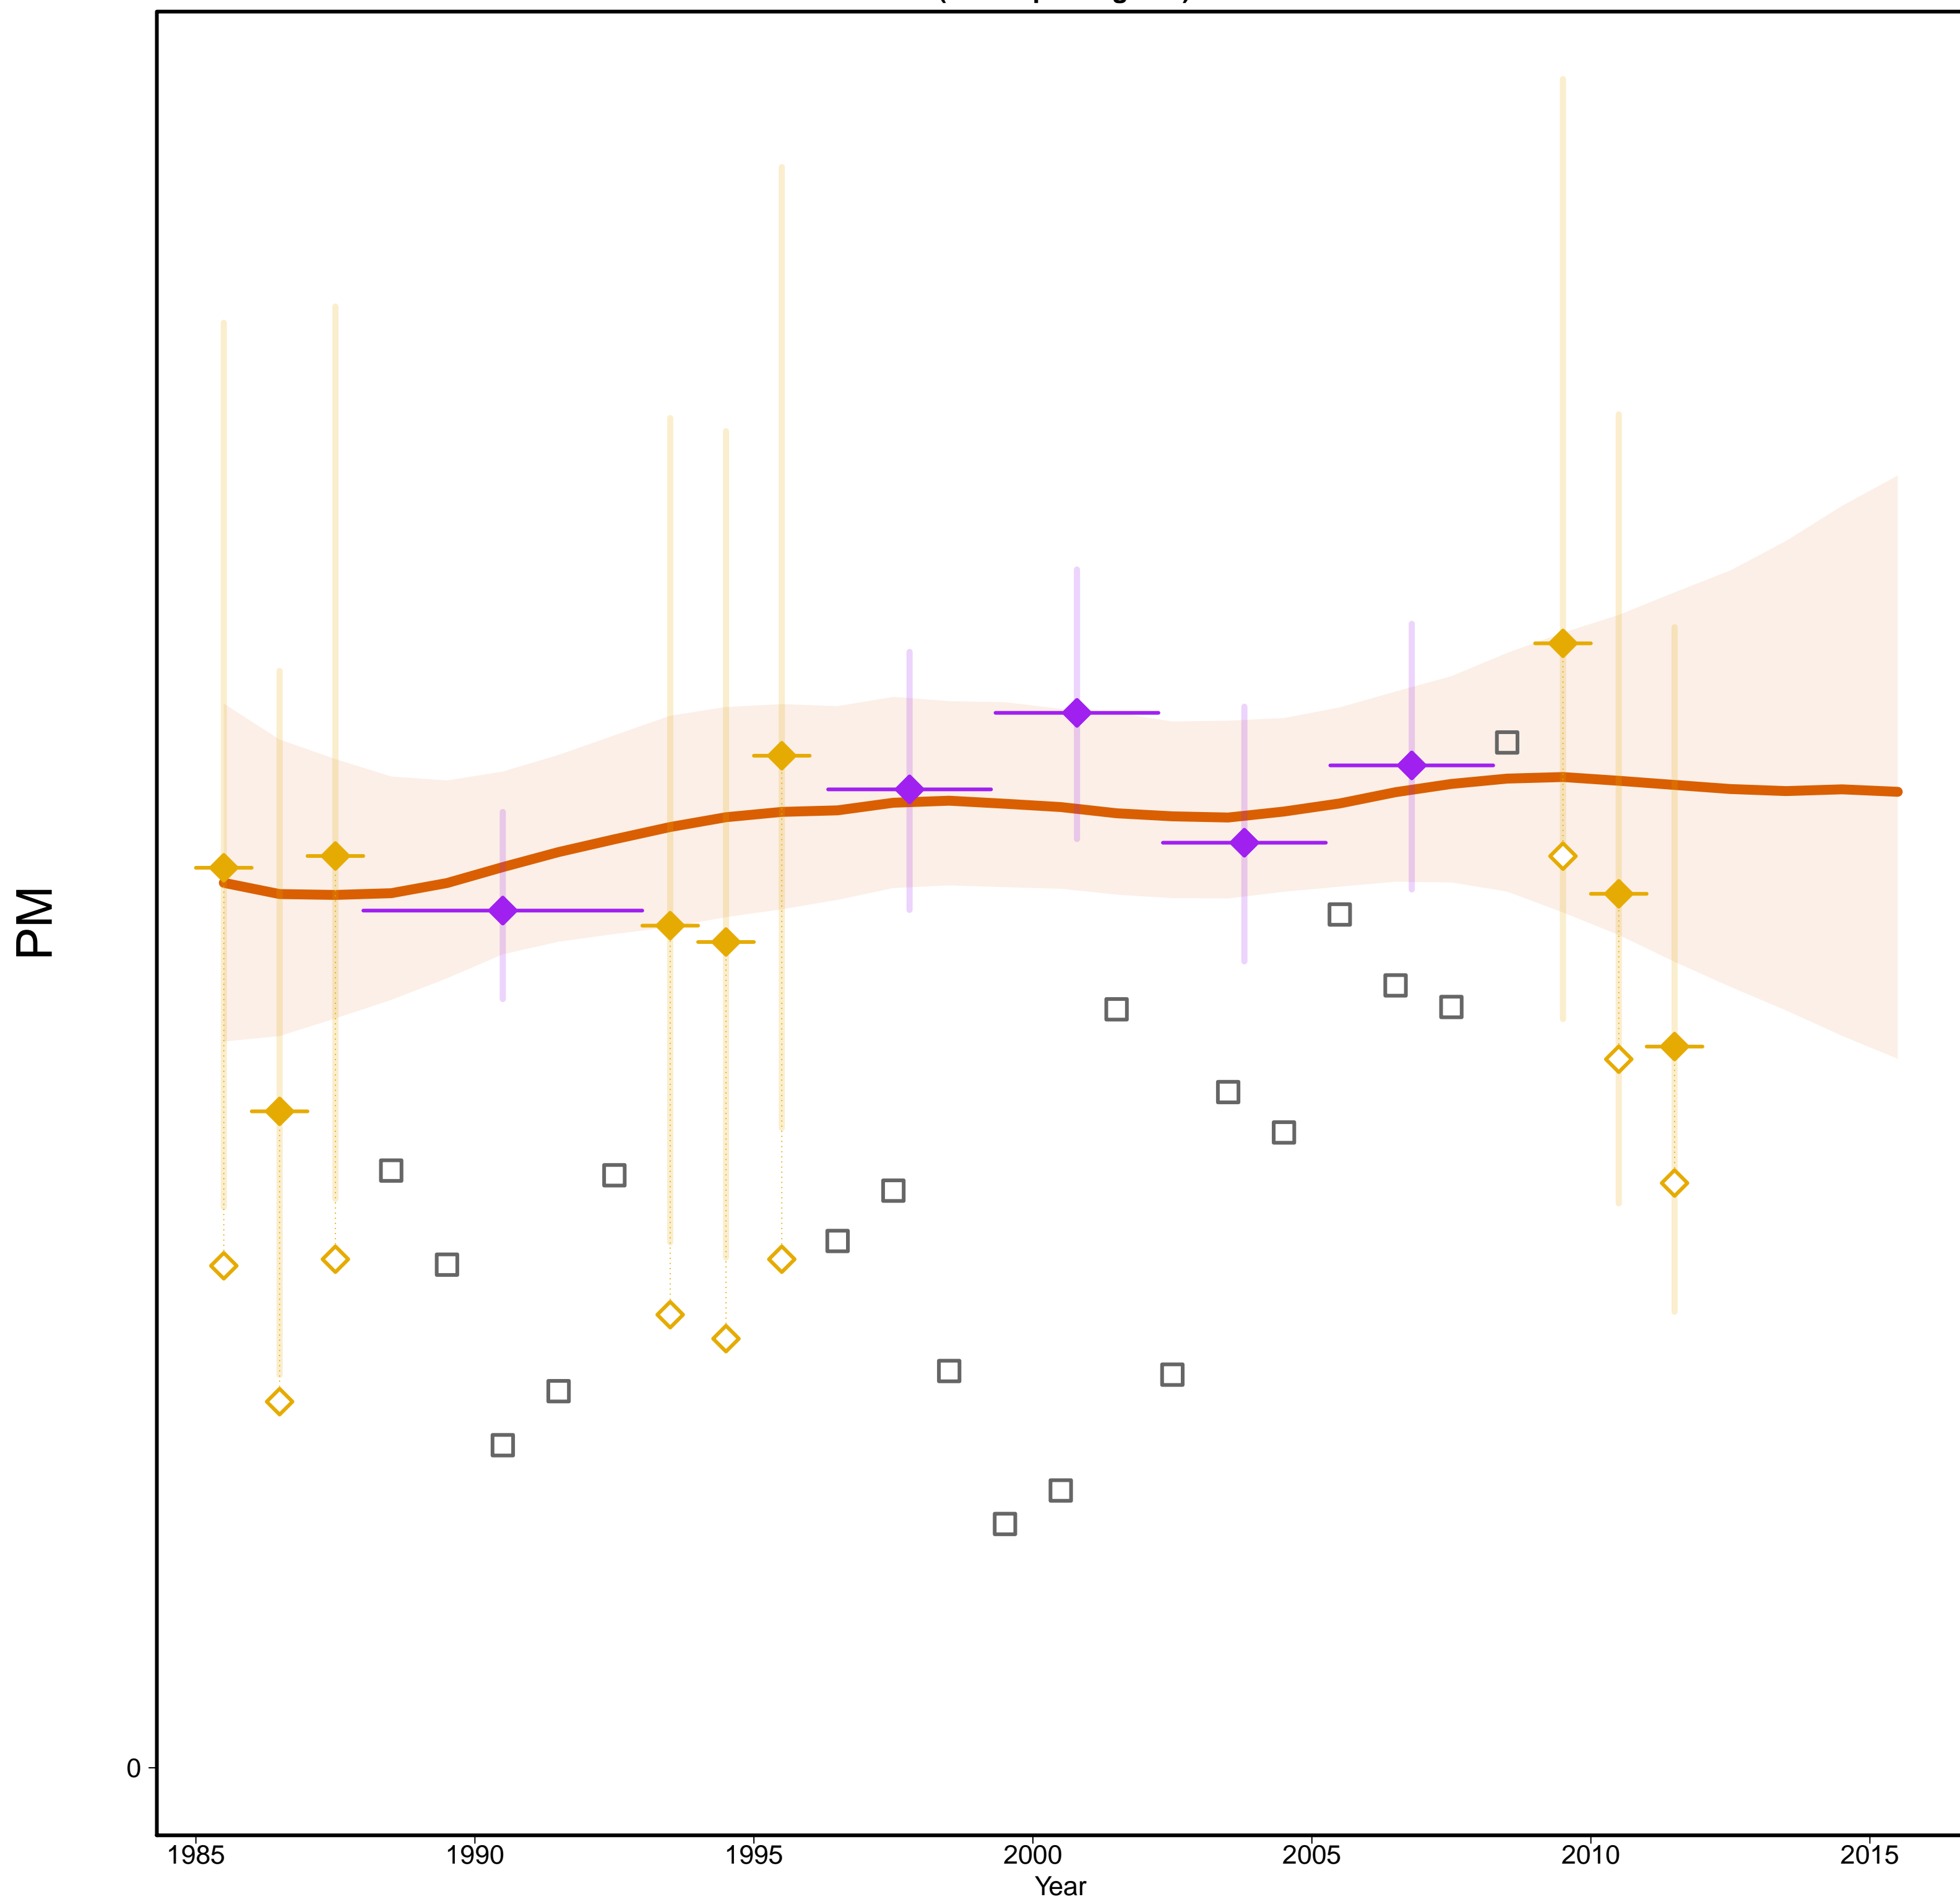

Canada [CAN]  
(Developed regions)

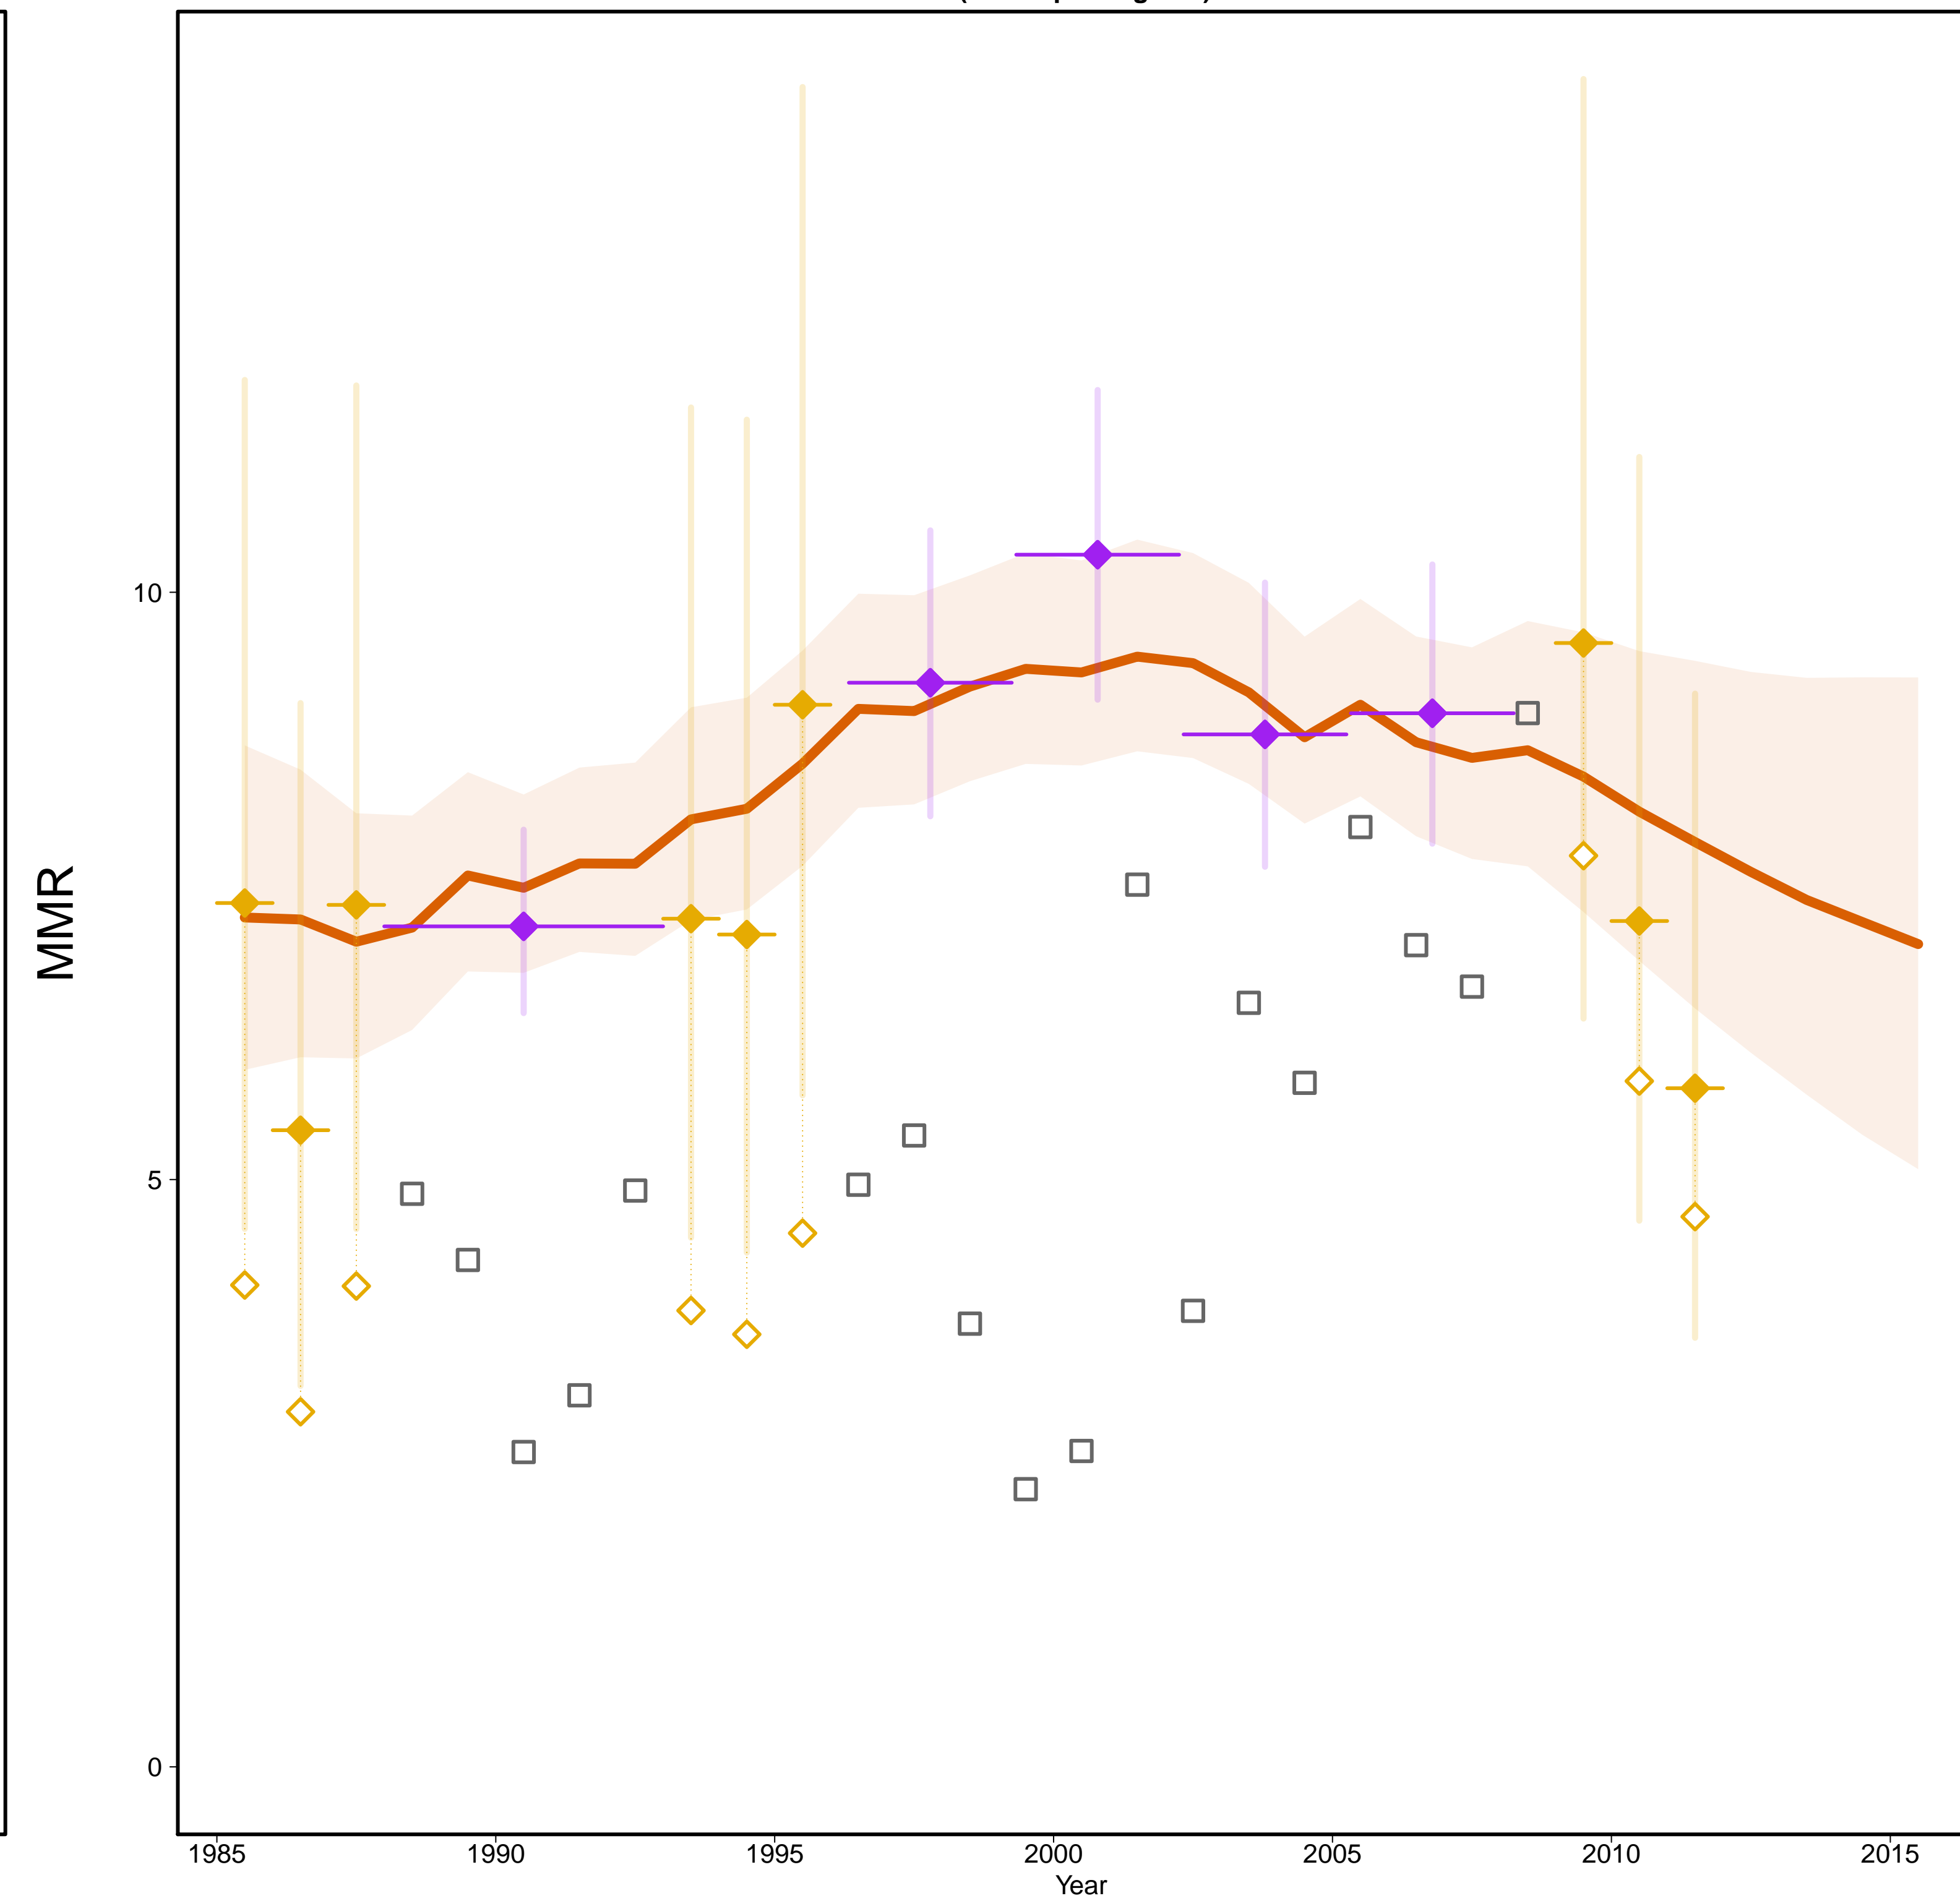

- Estimates –
- Mlate
- MMR Database 2015 –
- ◇ Observed Data
- ◆ Adjusted Data
- Data type –
- ◆ VR
- ◆ Spec. studies
- Excluded VR data  
(overlap with specialized study)

Gross Domestic Product

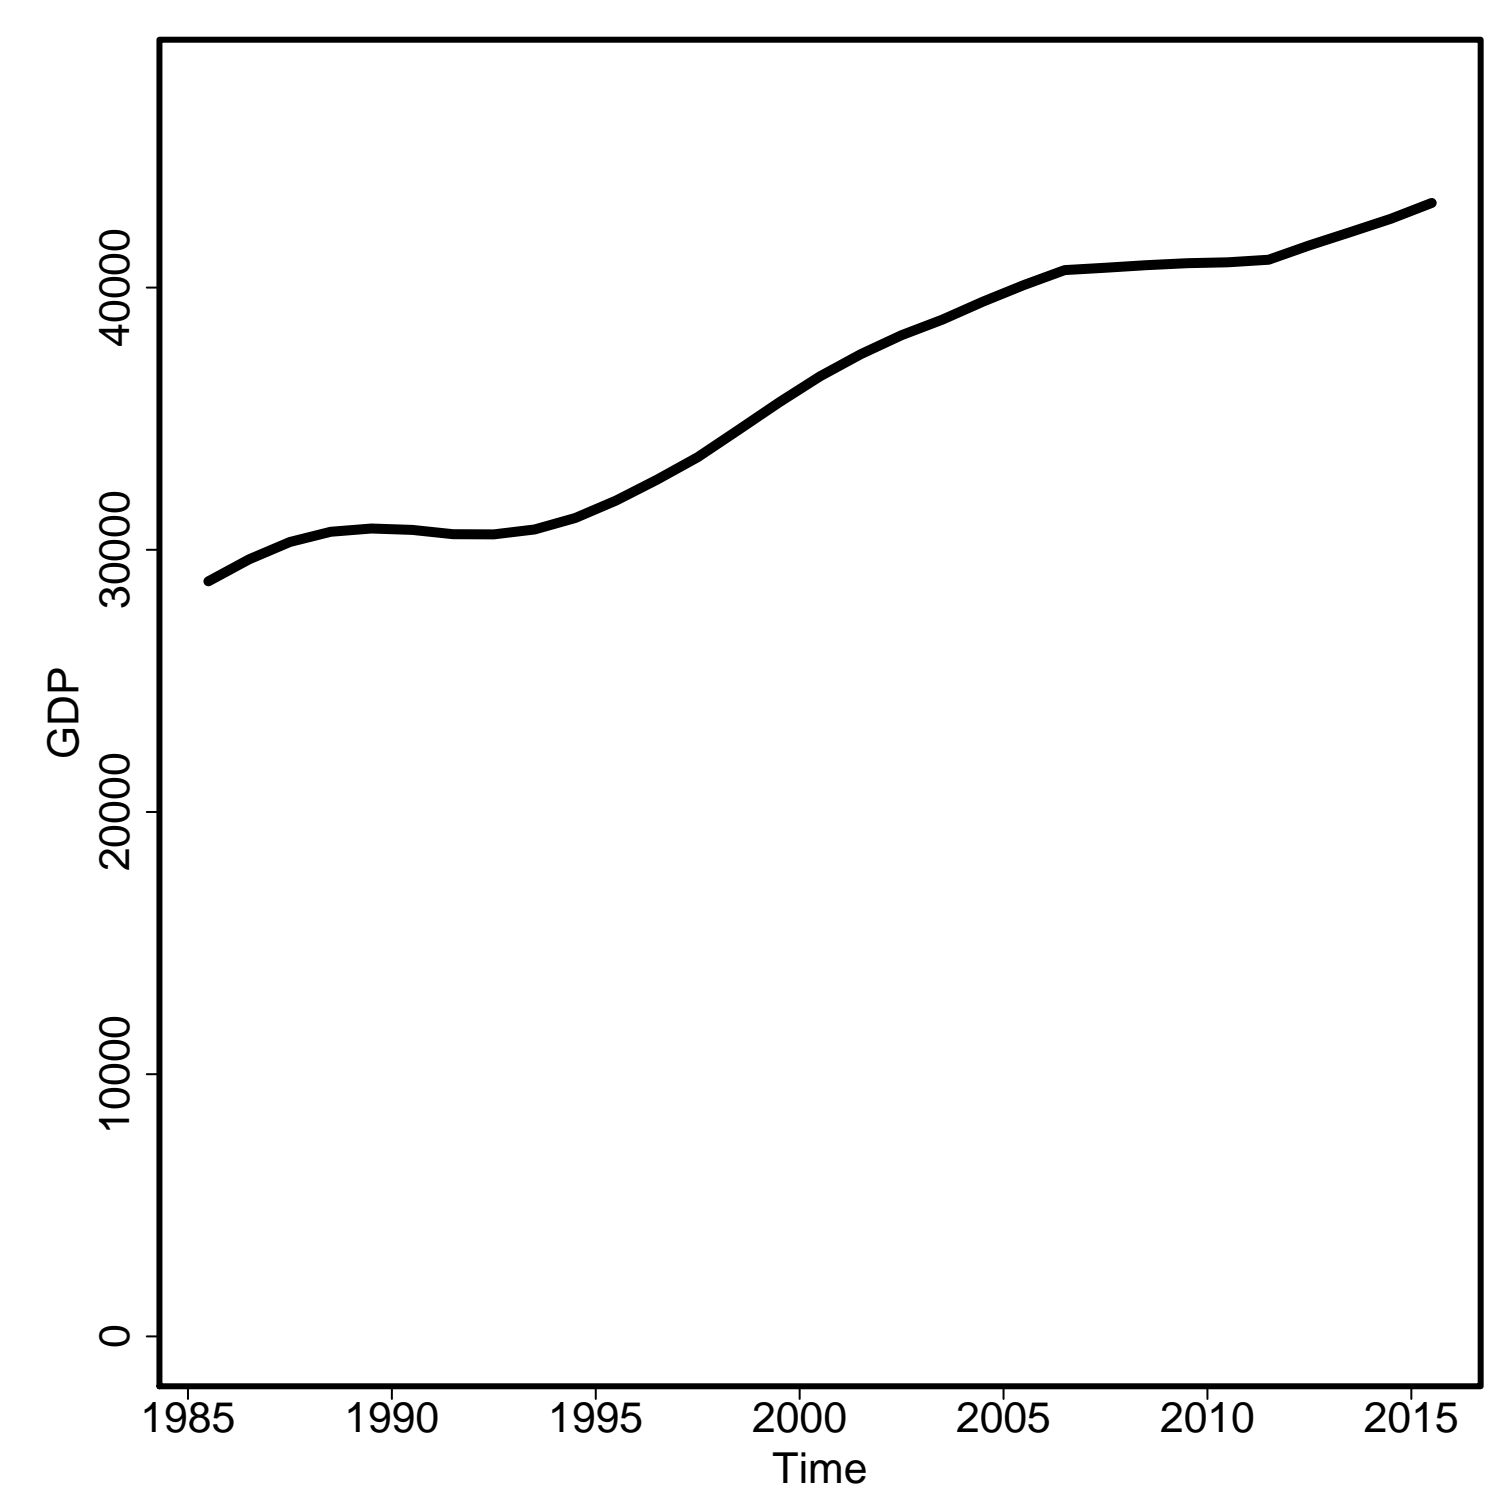

General Fertility Rate

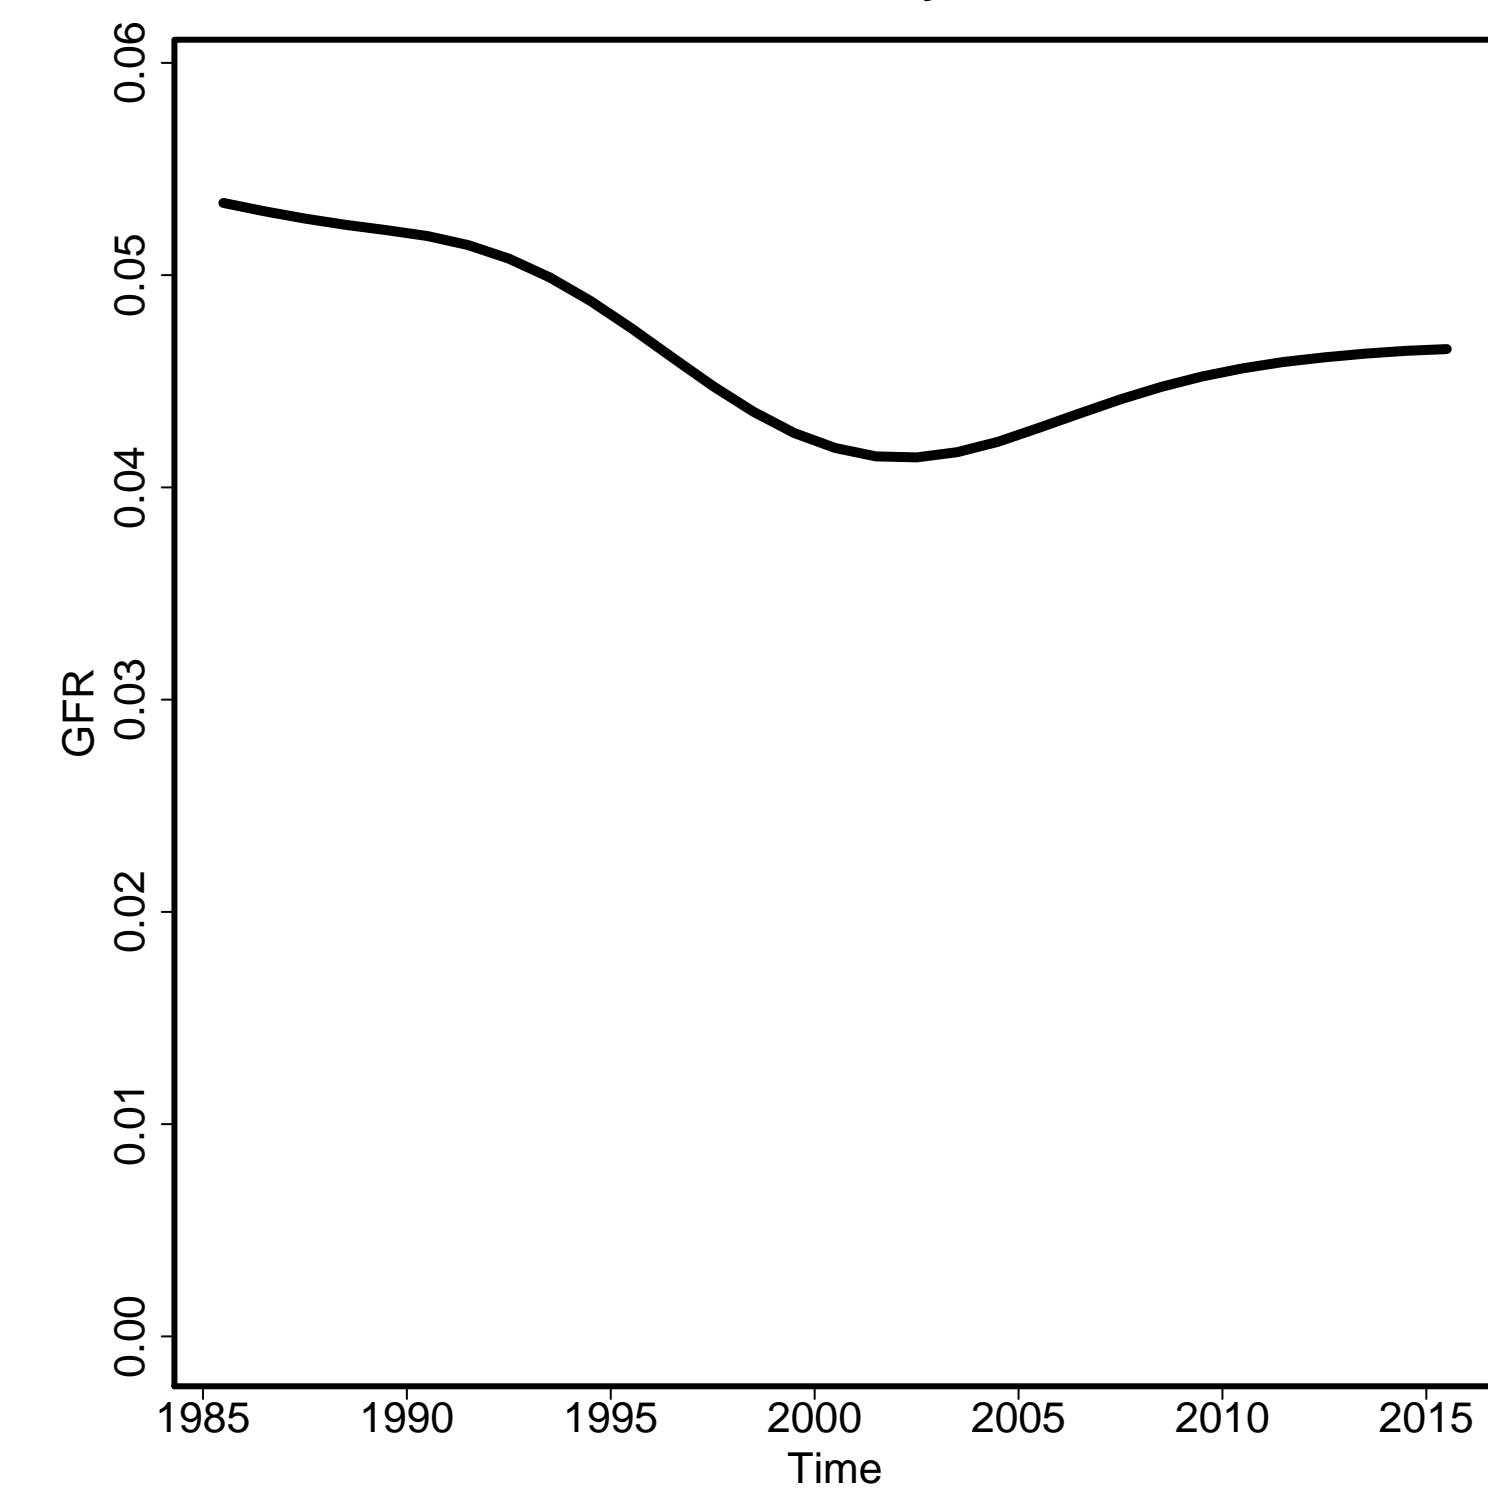

Skilled Attendance to Birth

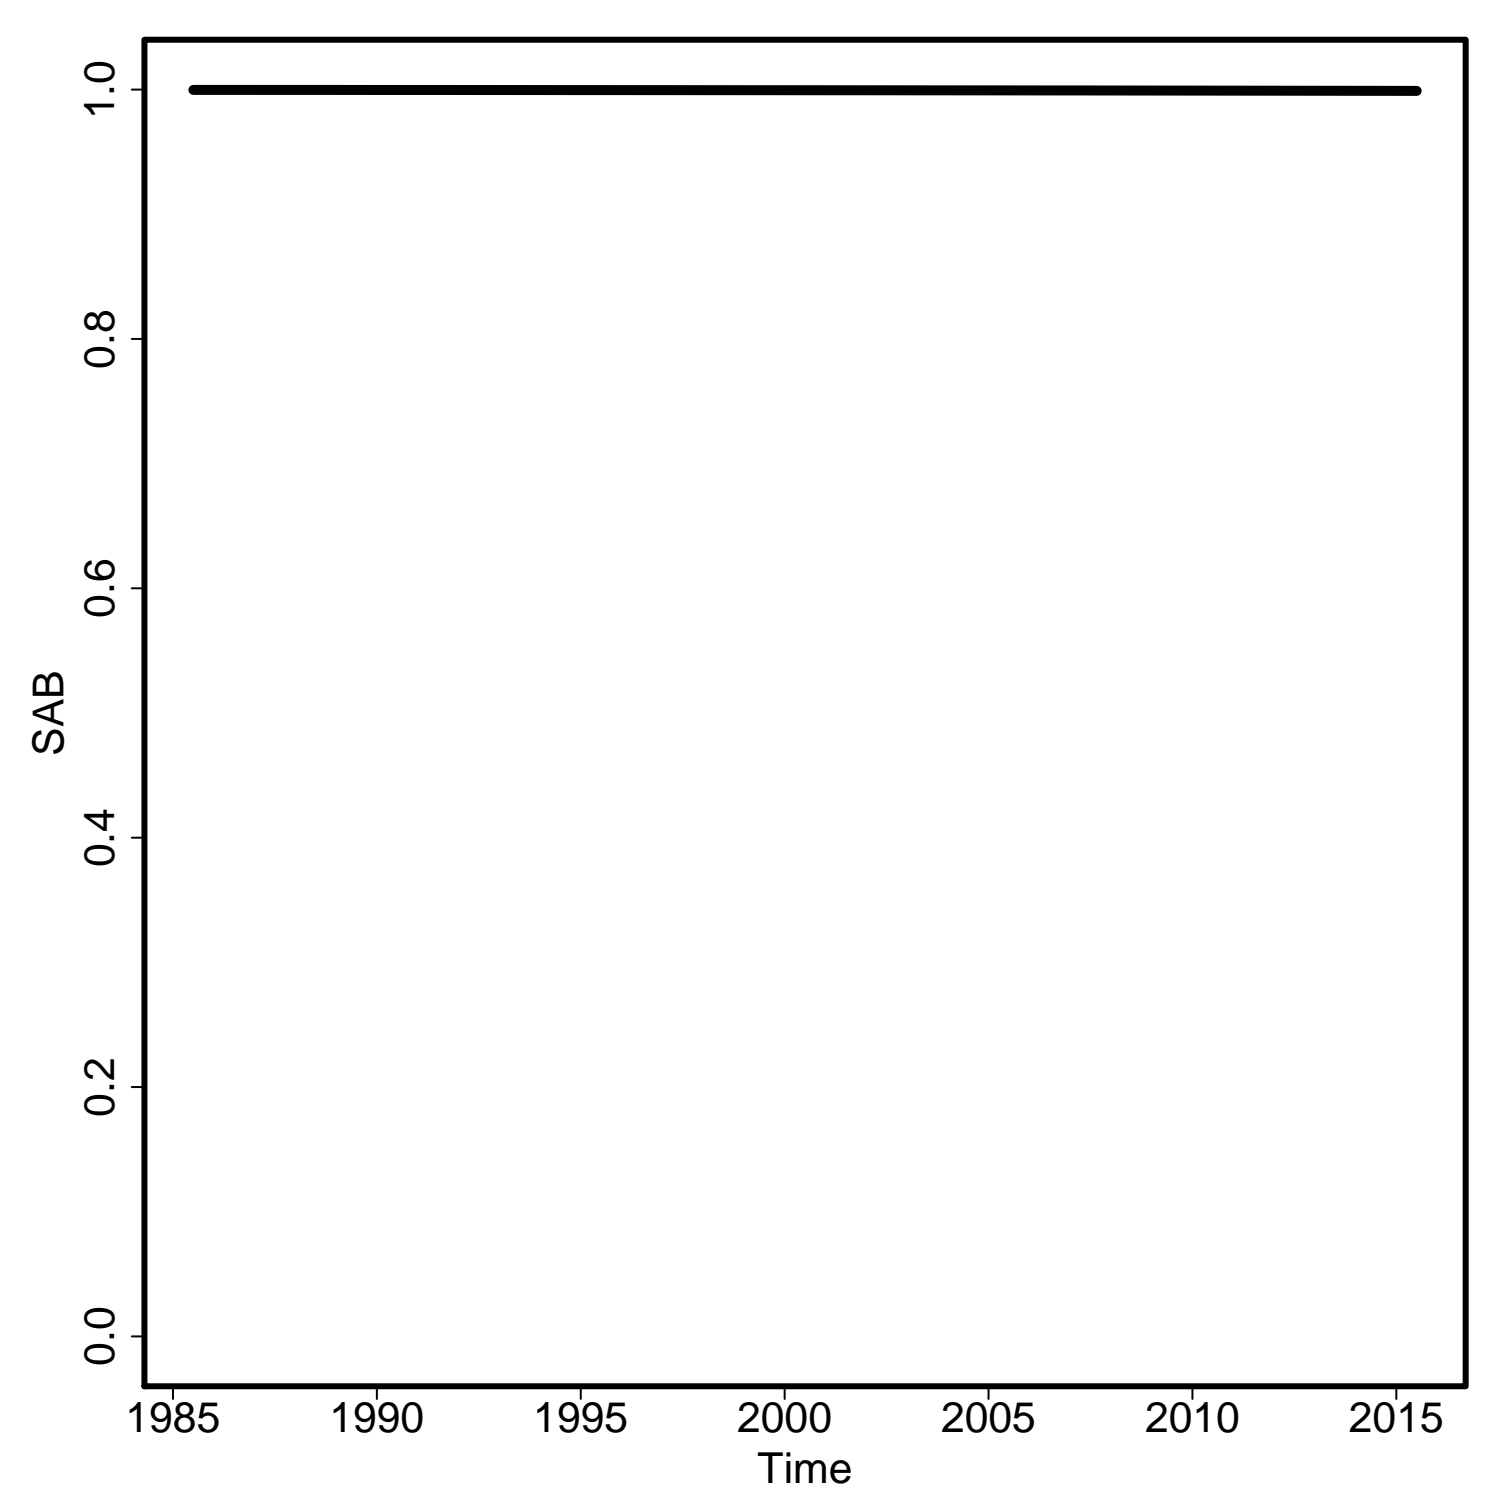

Envelope/Births

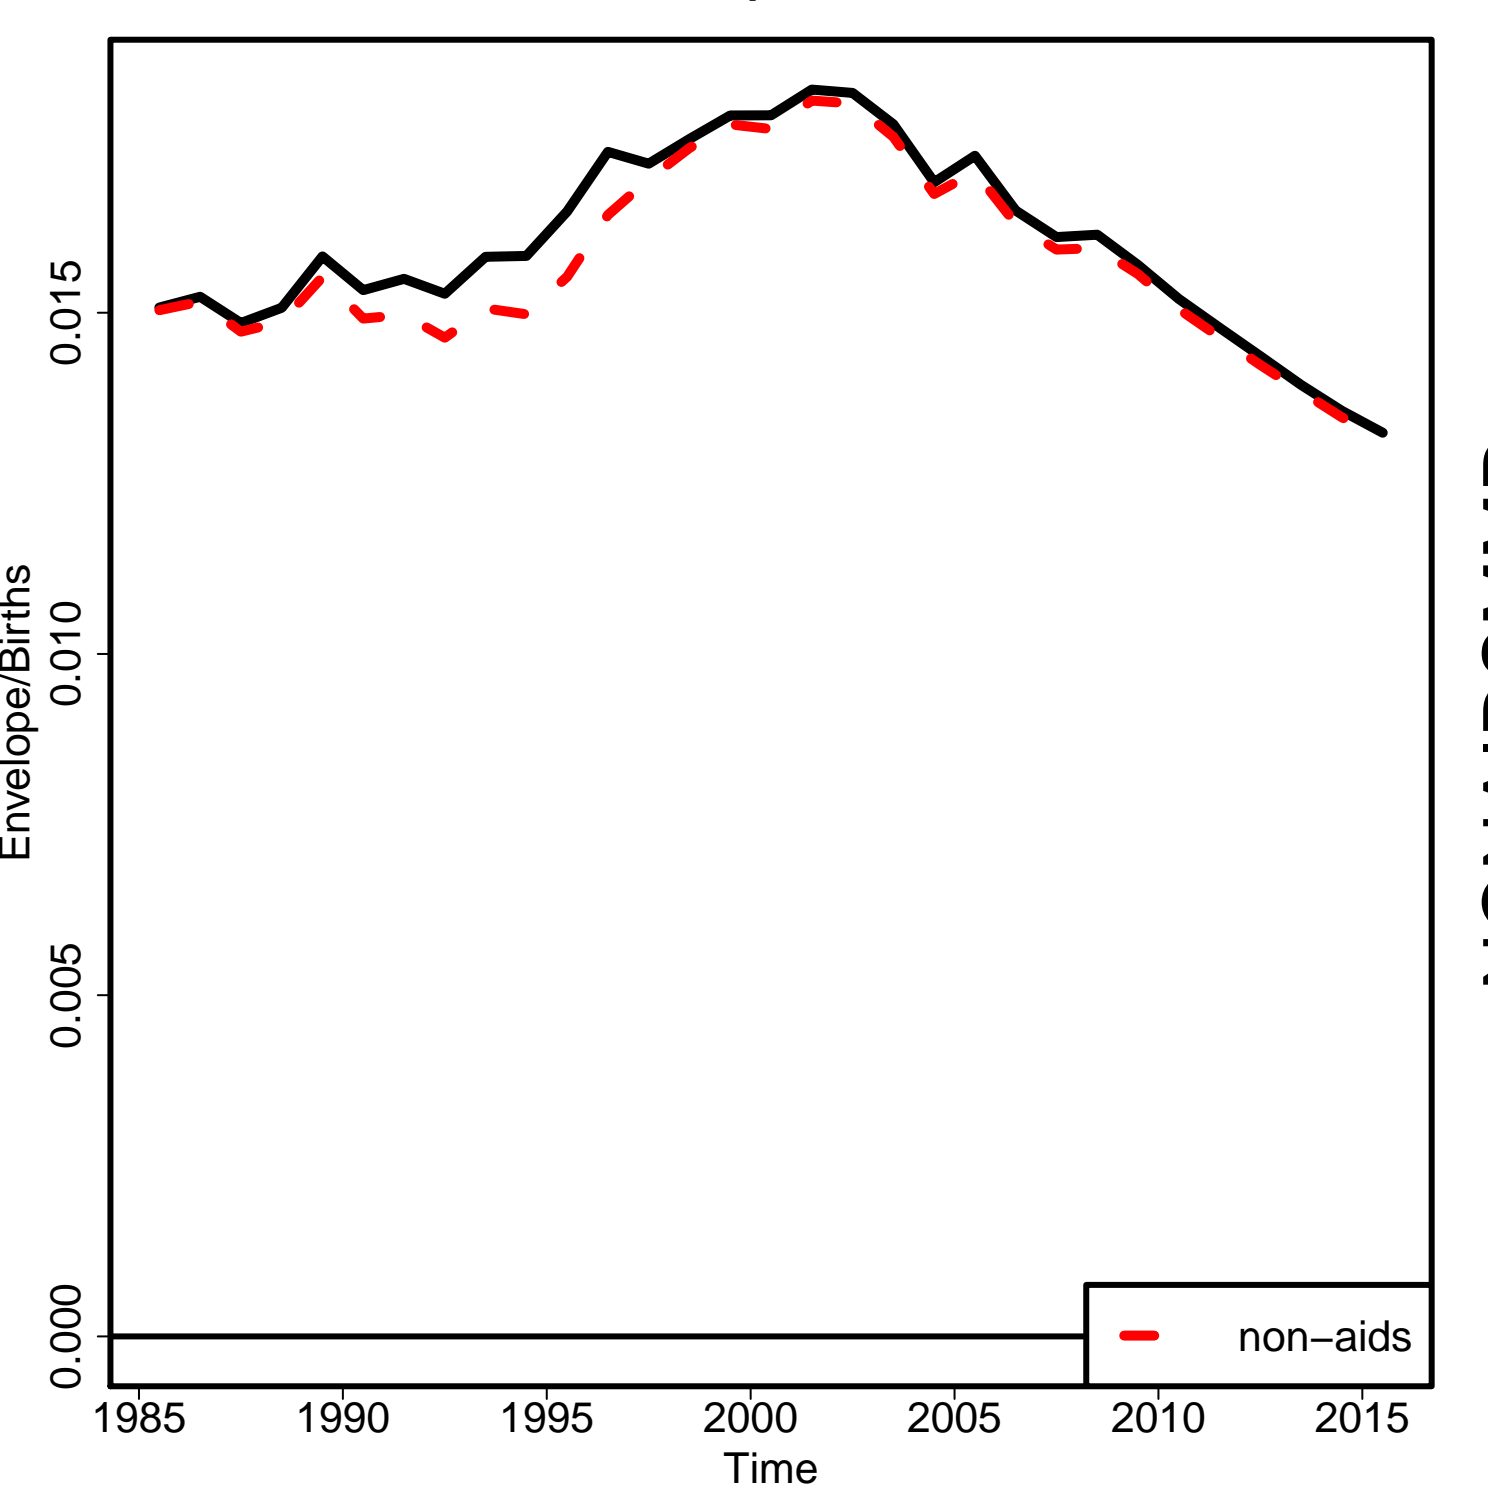

Non-aids MMR

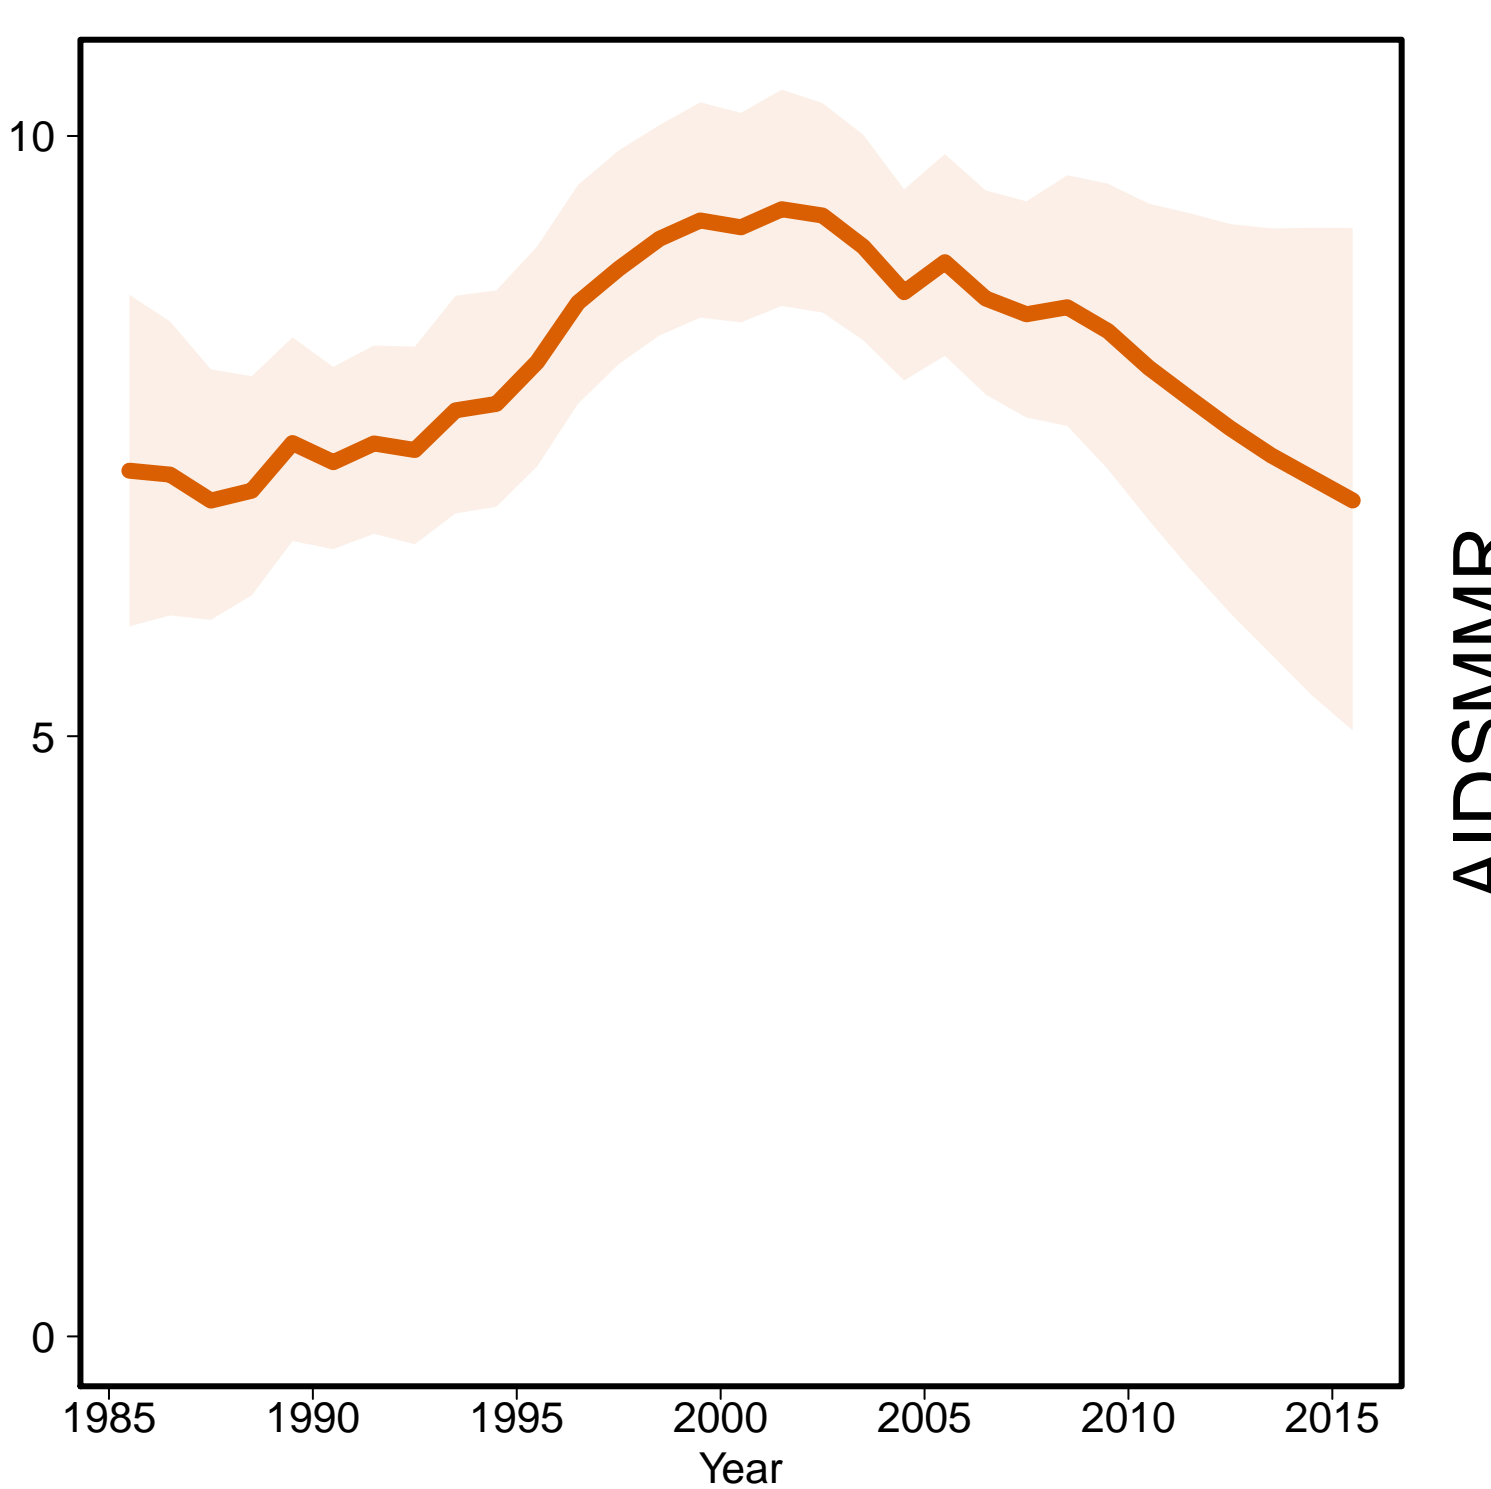

Aids MMR

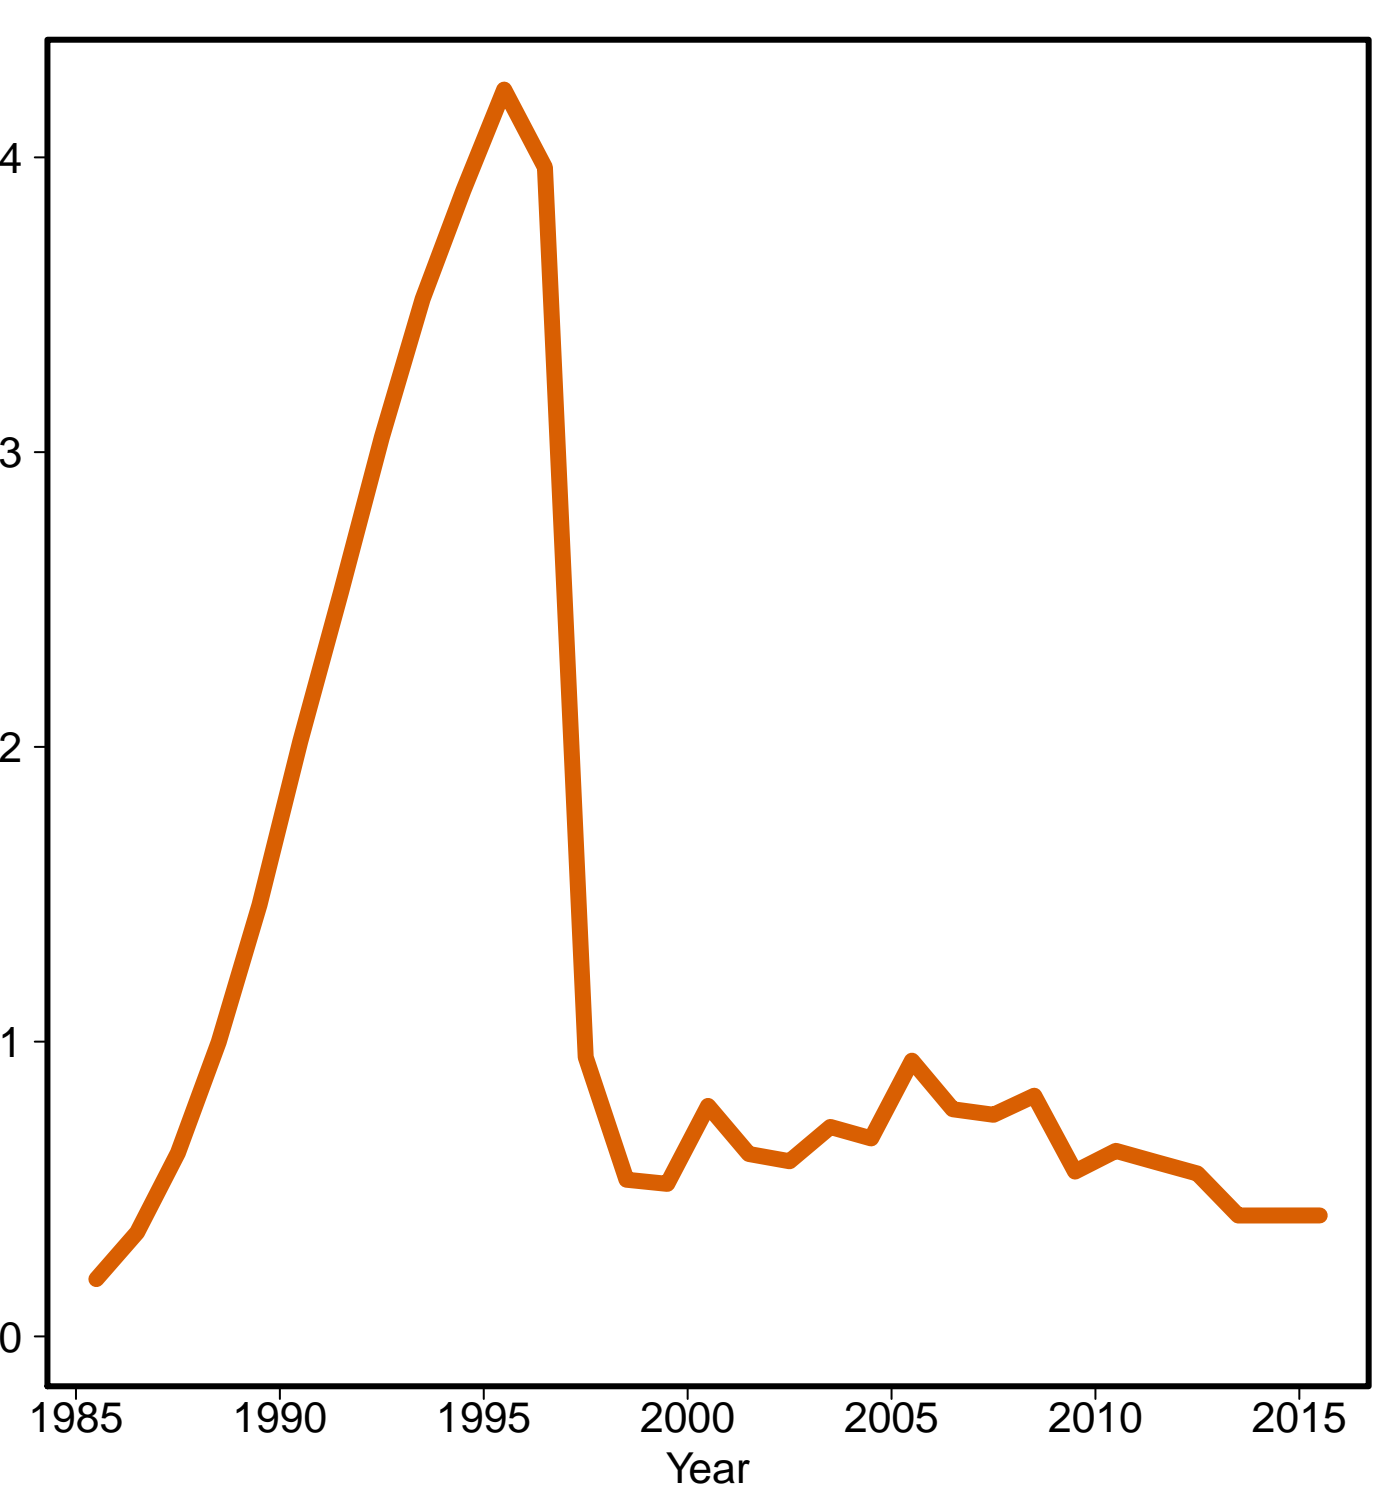

Central African Republic [CAF]  
(Middle Africa)

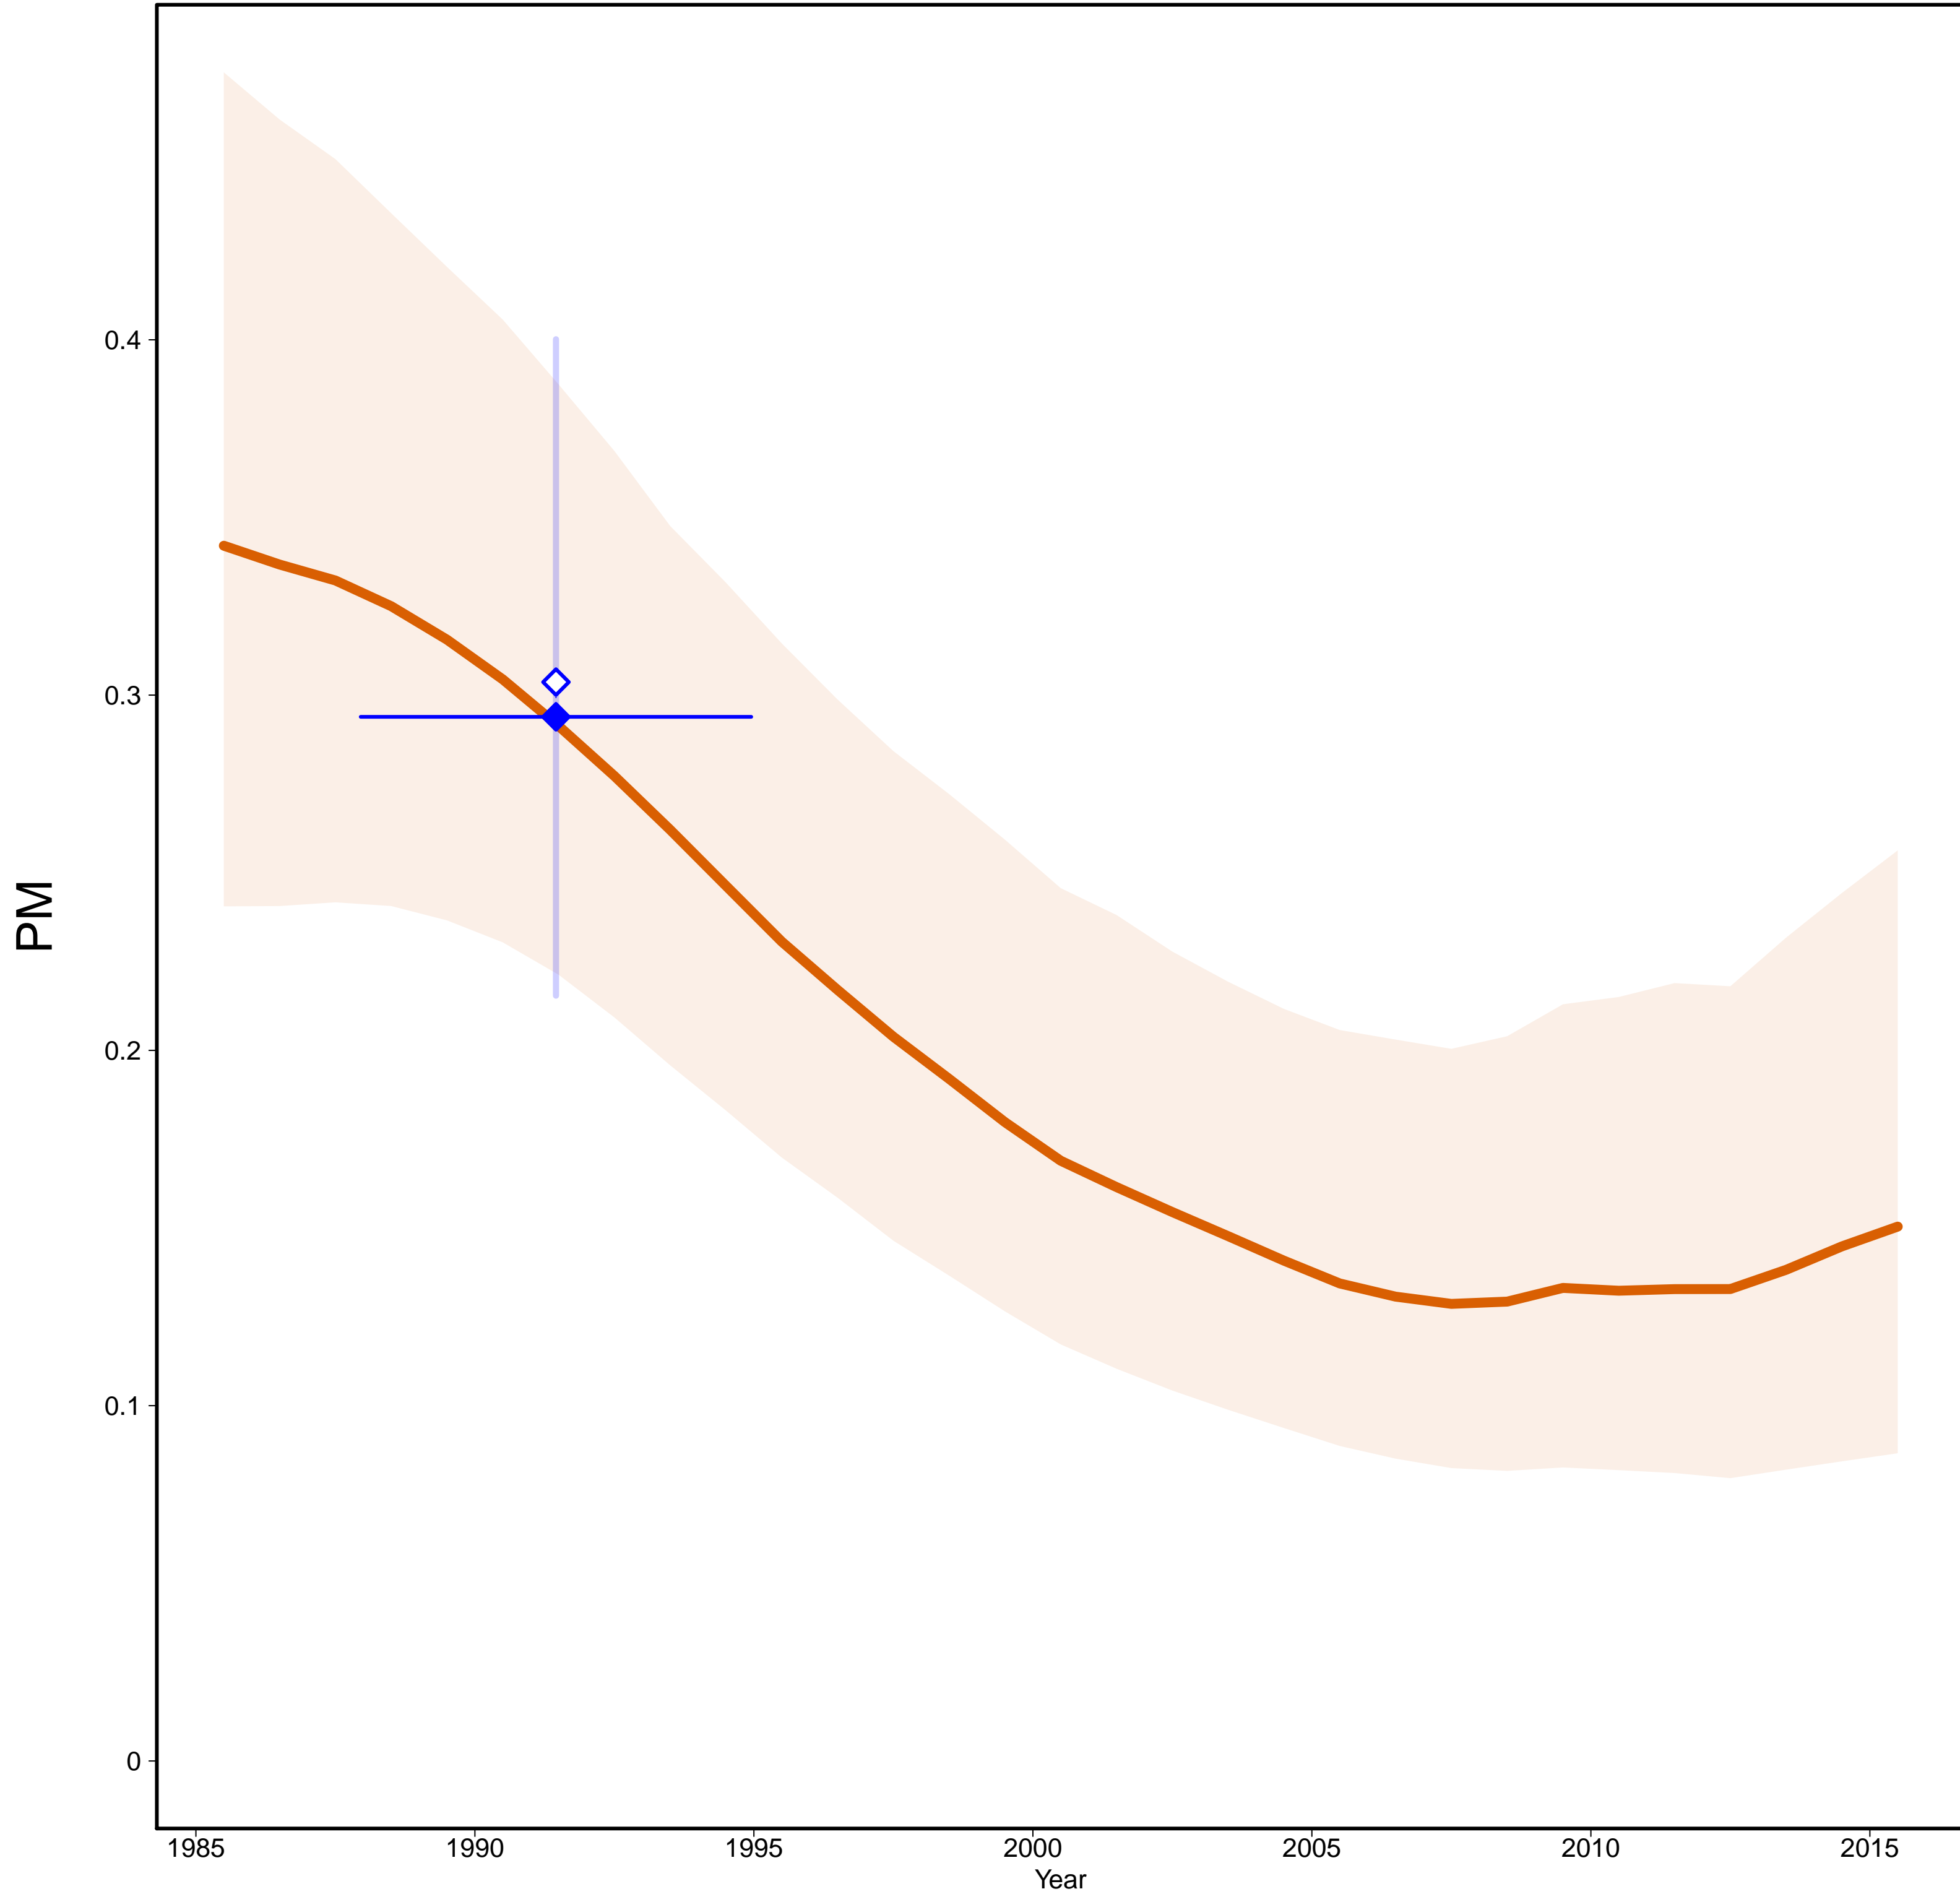

Central African Republic [CAF]  
(Middle Africa)

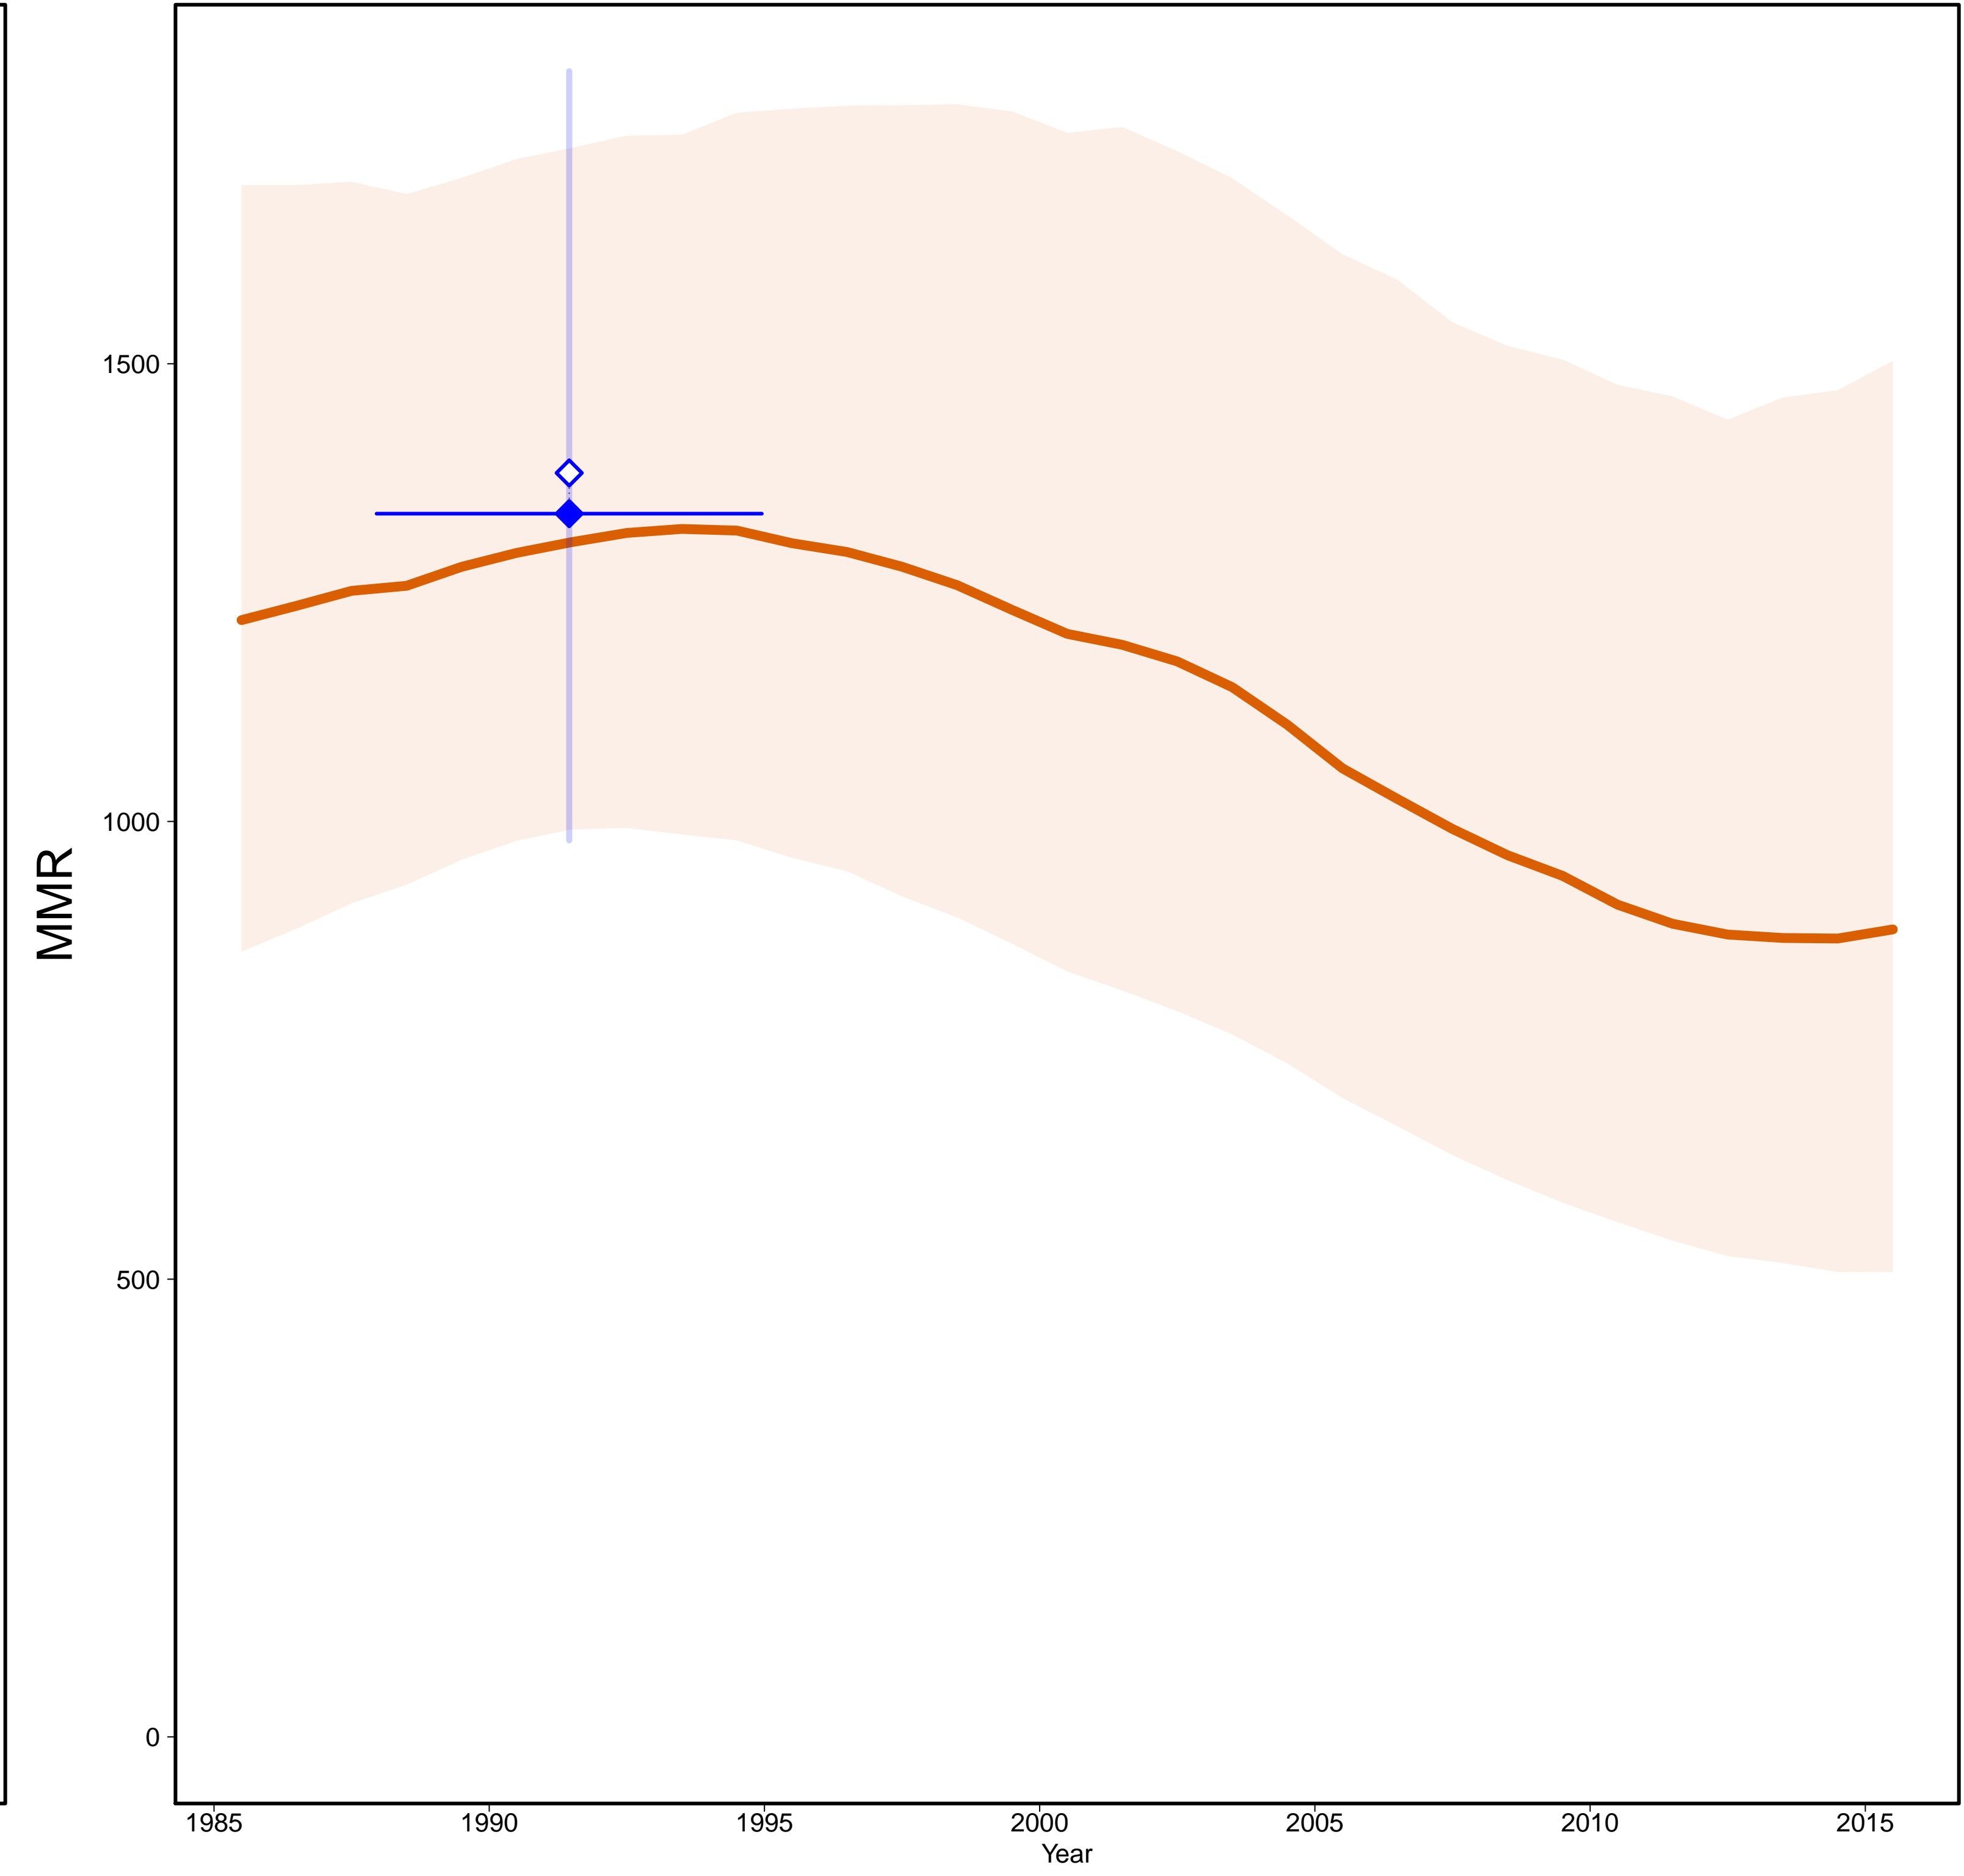

- Estimates —
- MMR Database 2015 —
- ◇ Observed Data
- ◆ Adjusted Data
- Data type —
- ◆ DHS

Gross Domestic Product

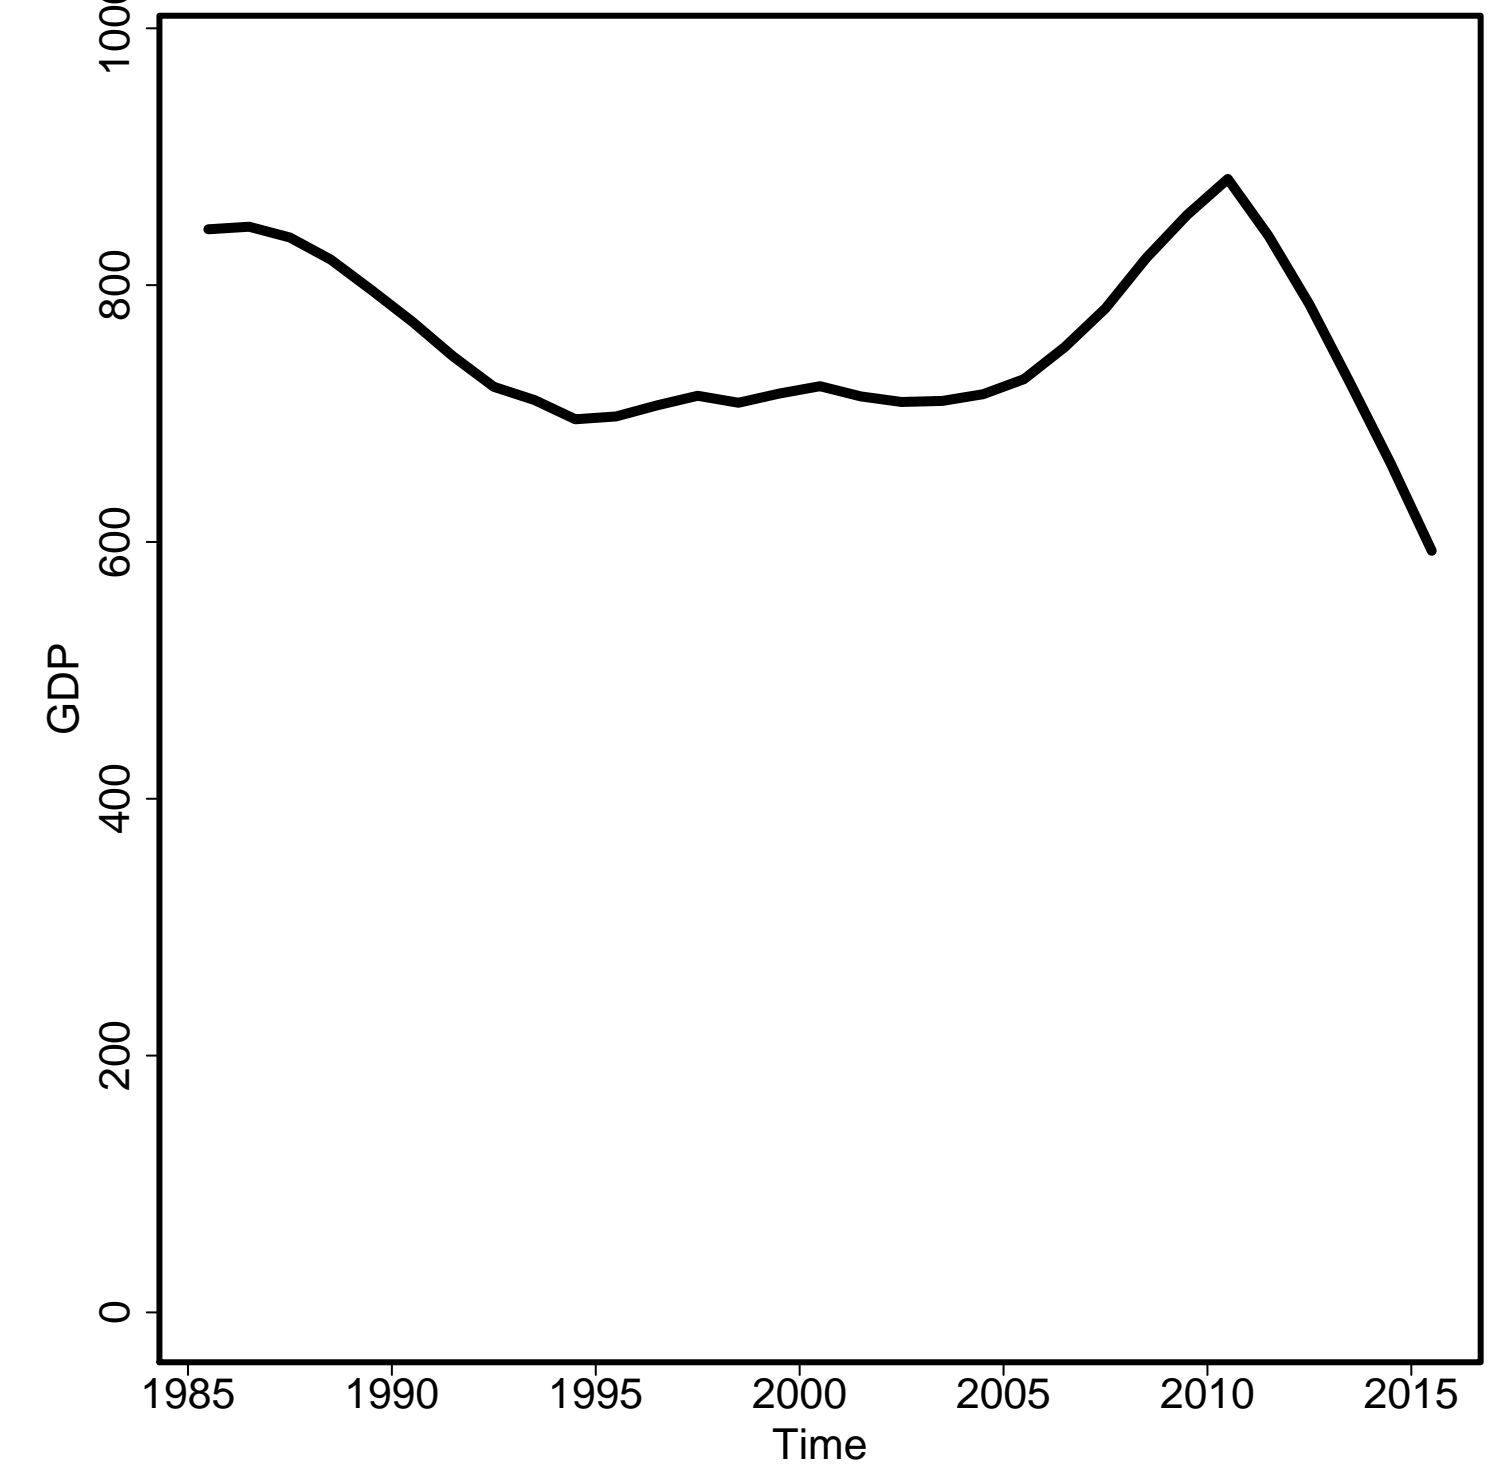

General Fertility Rate

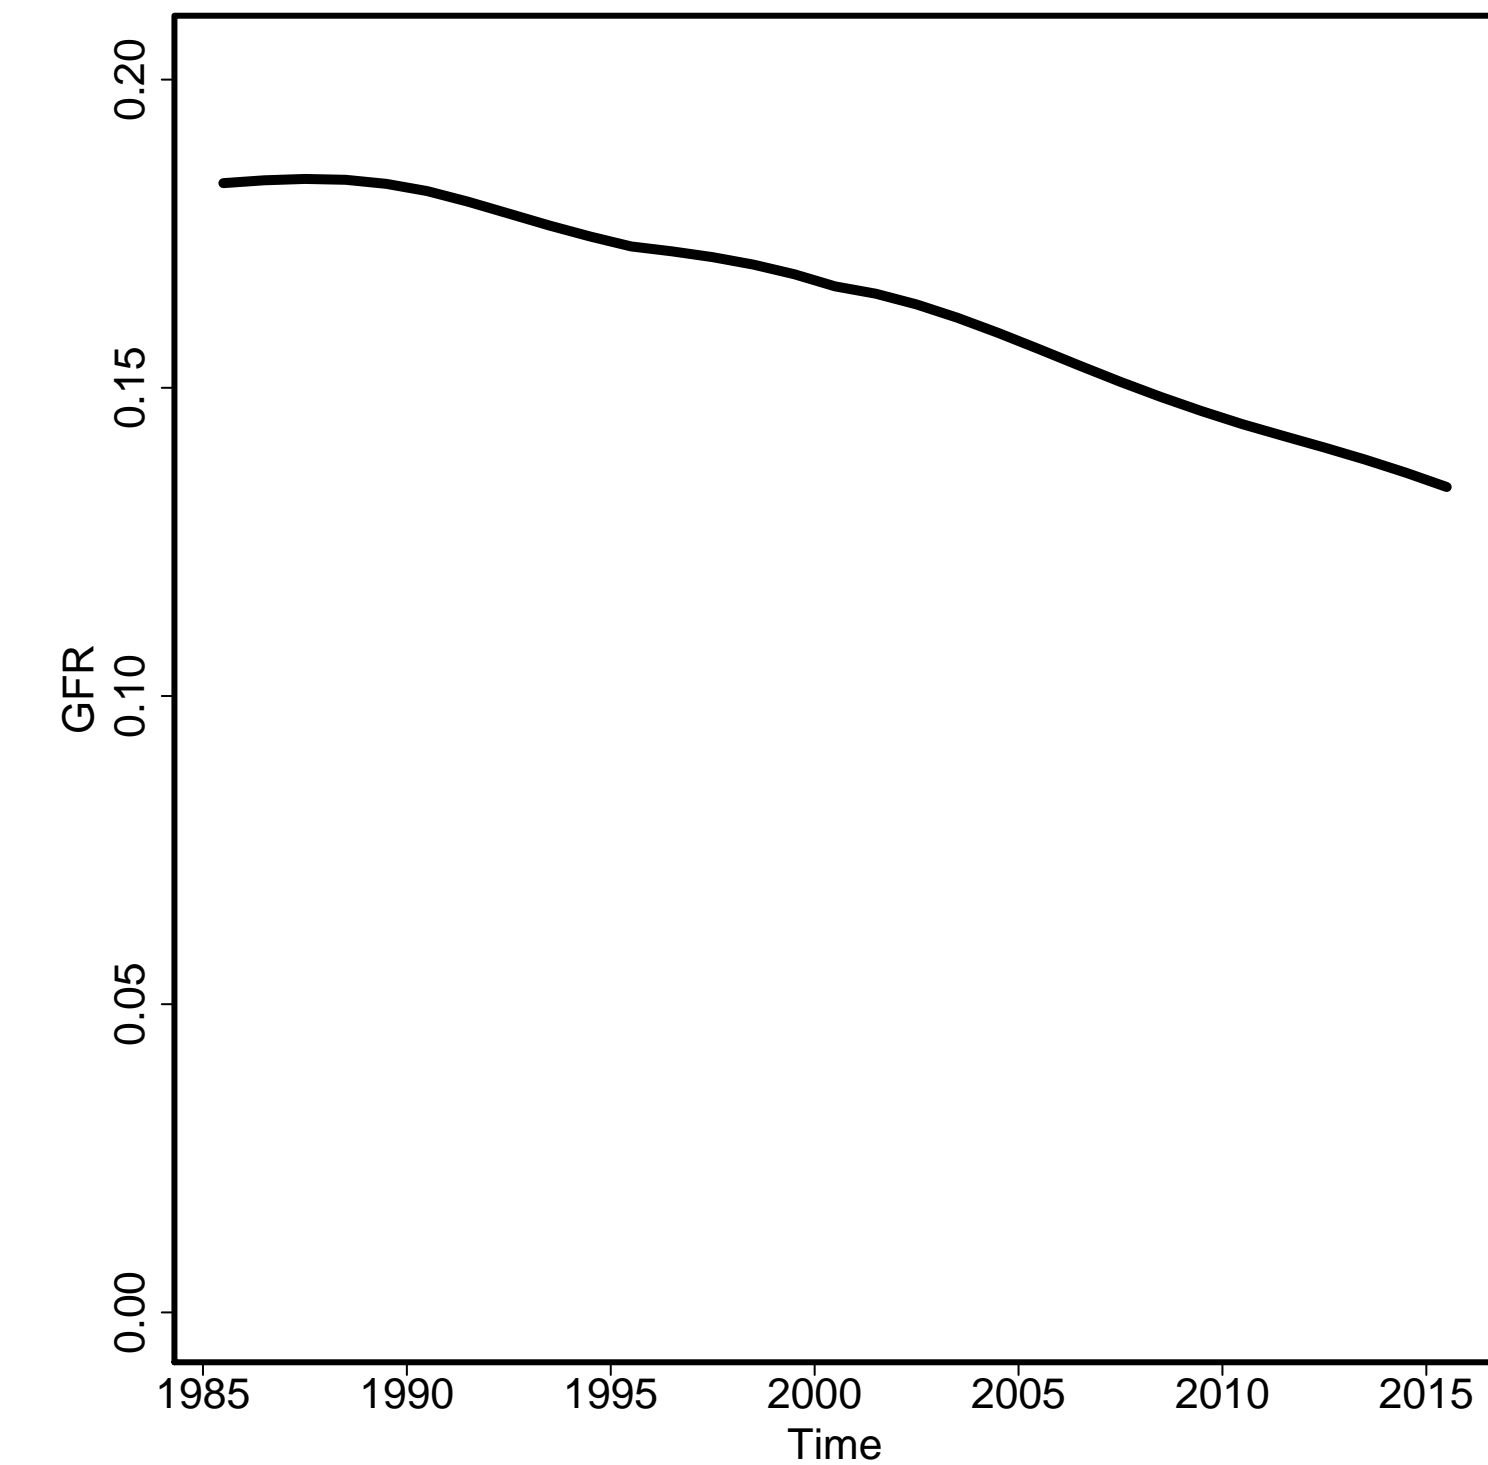

Skilled Attendance to Birth

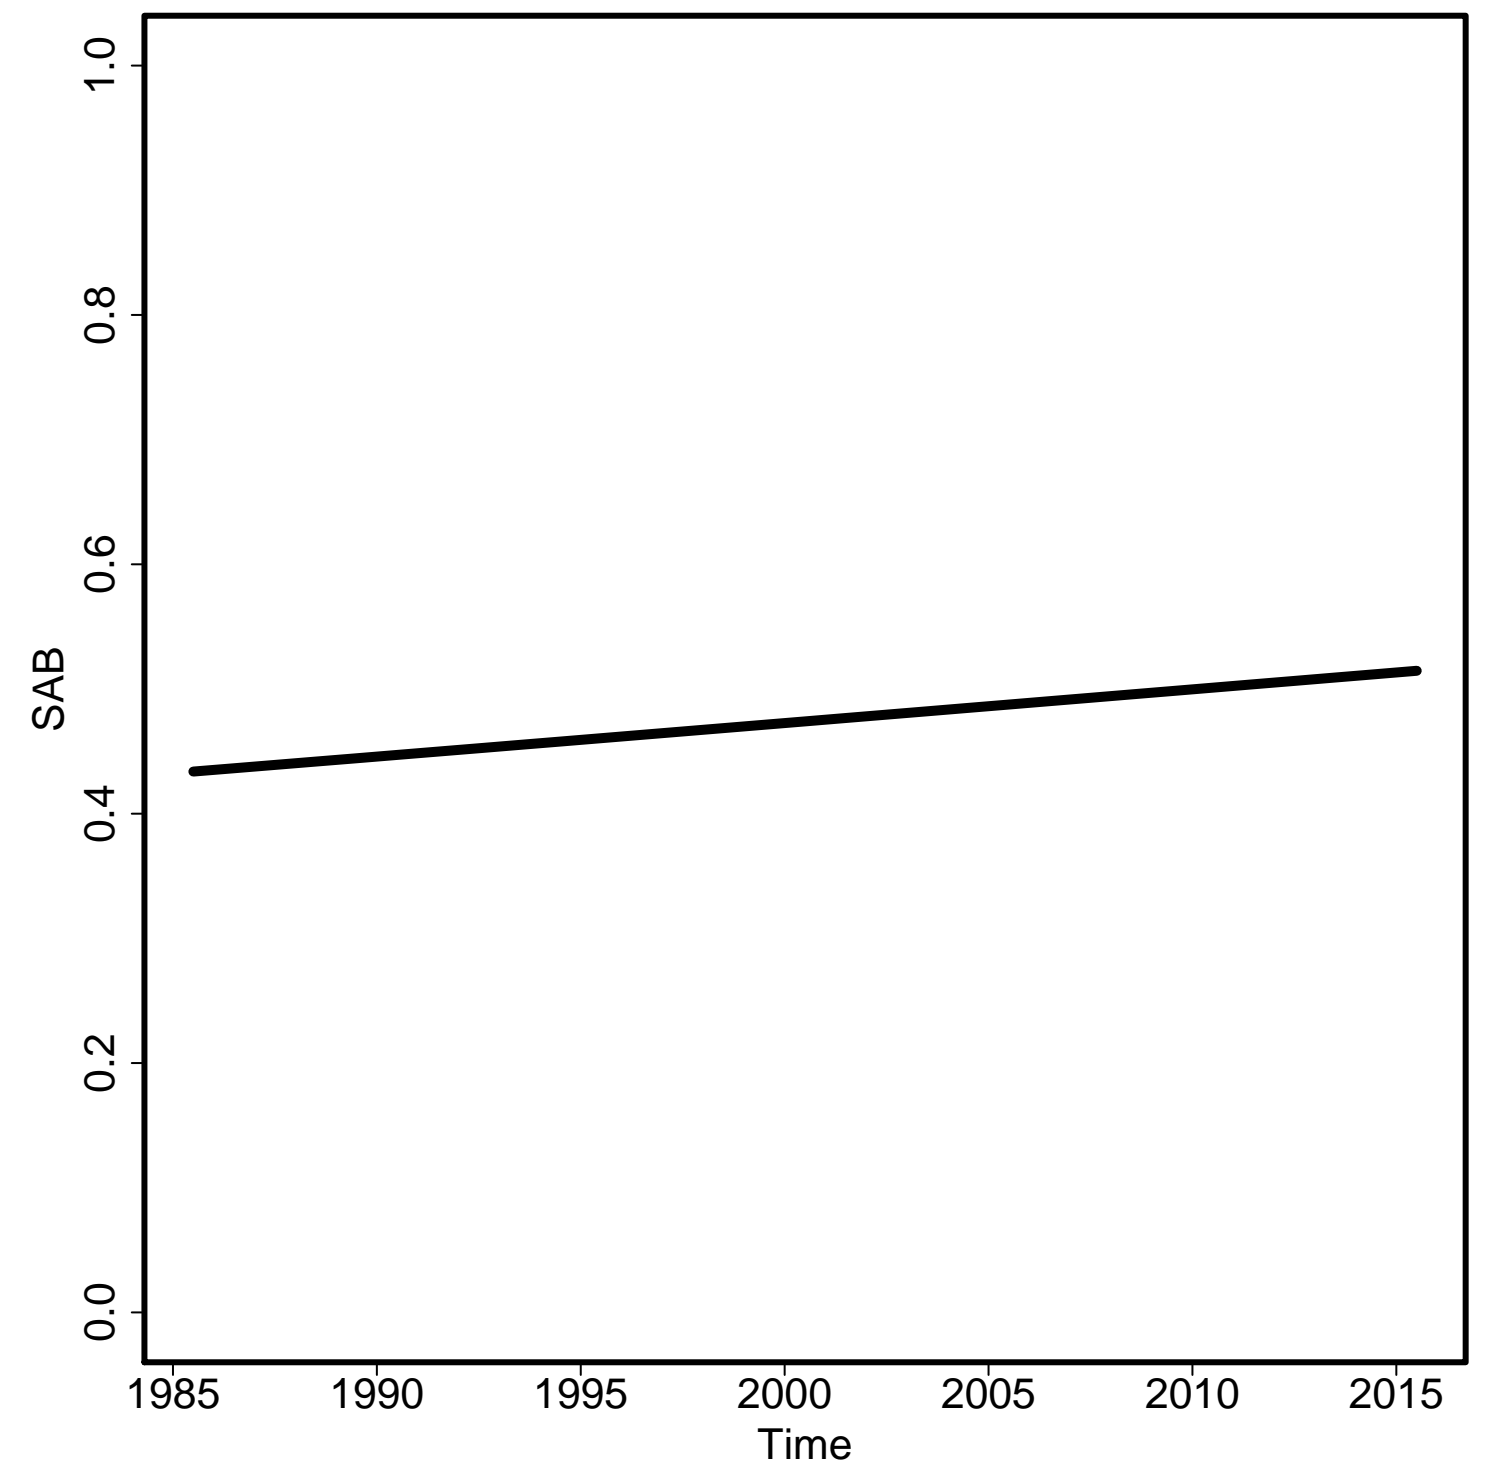

Envelope/Births

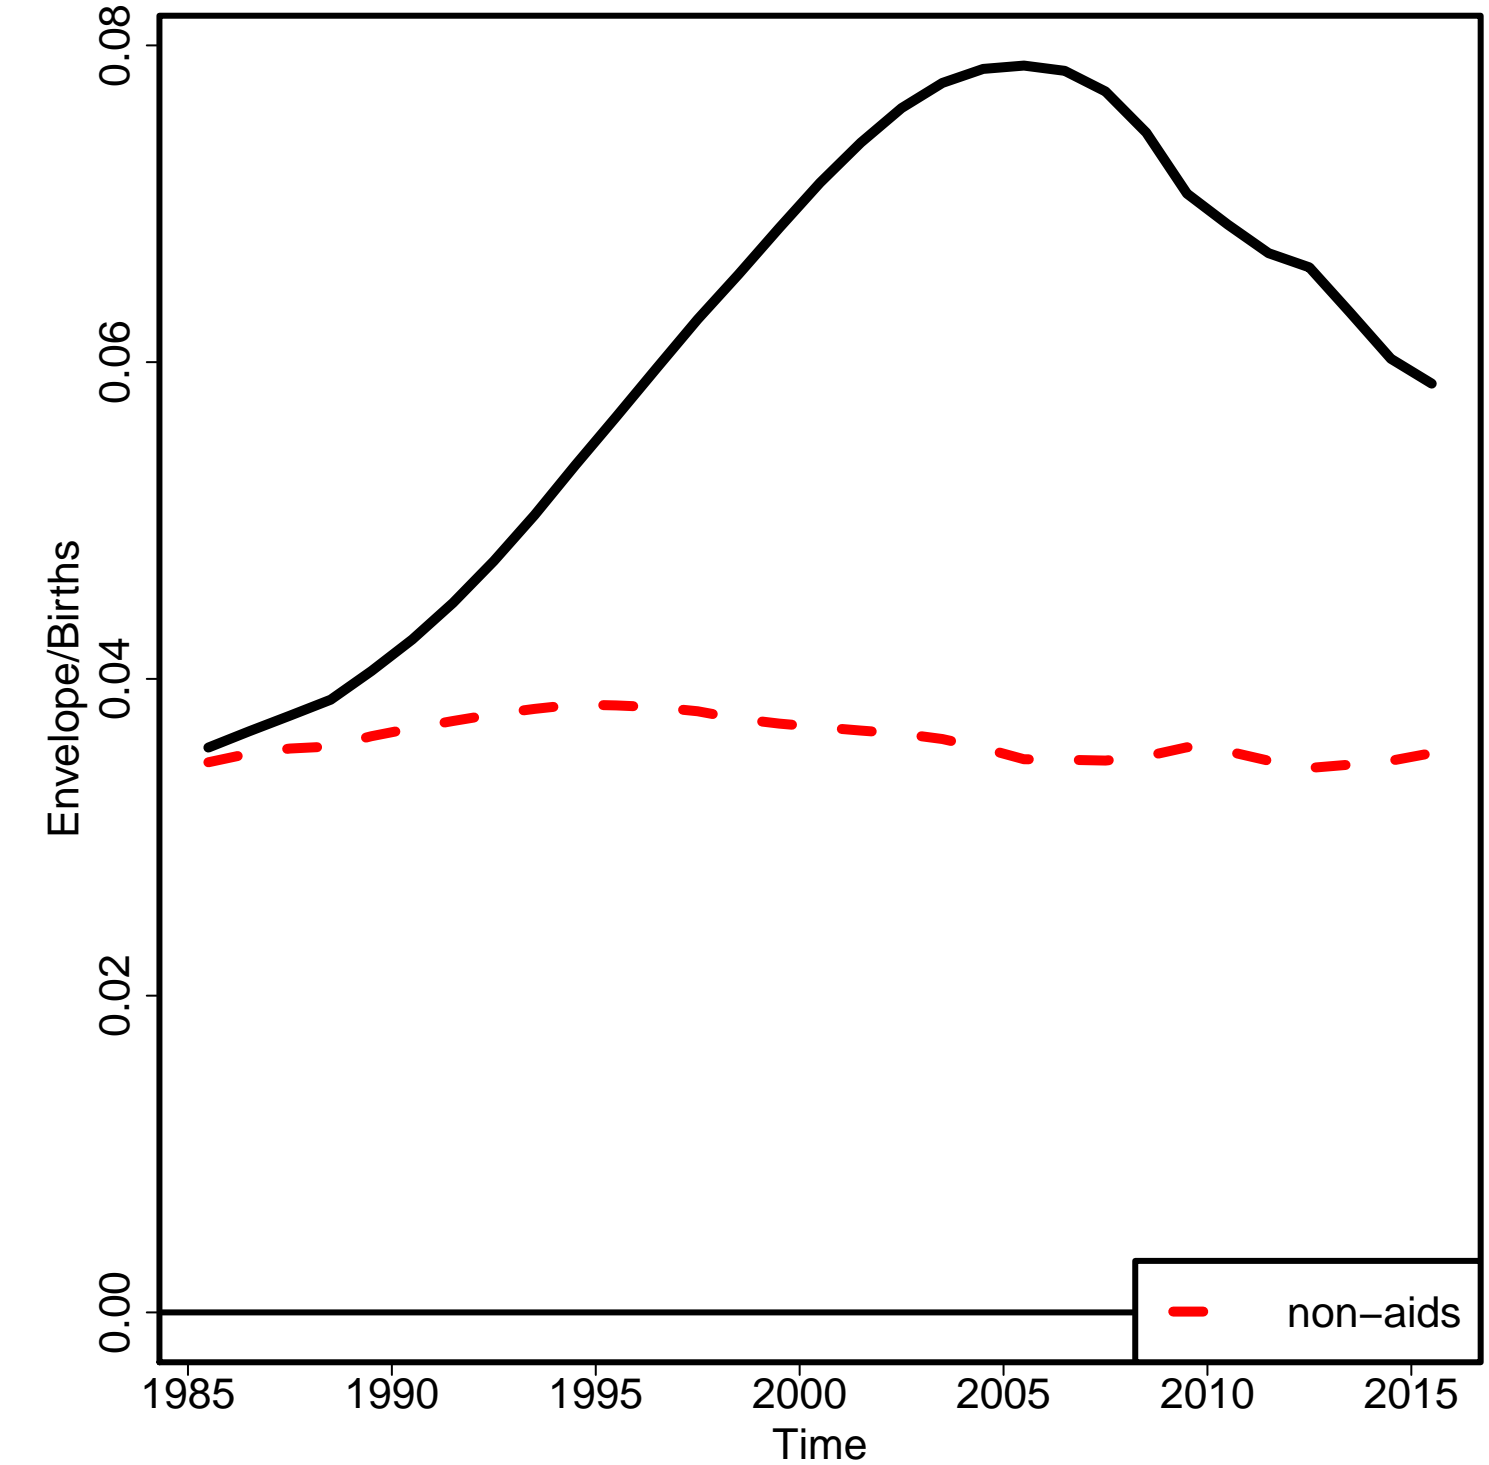

Non-aids MMR

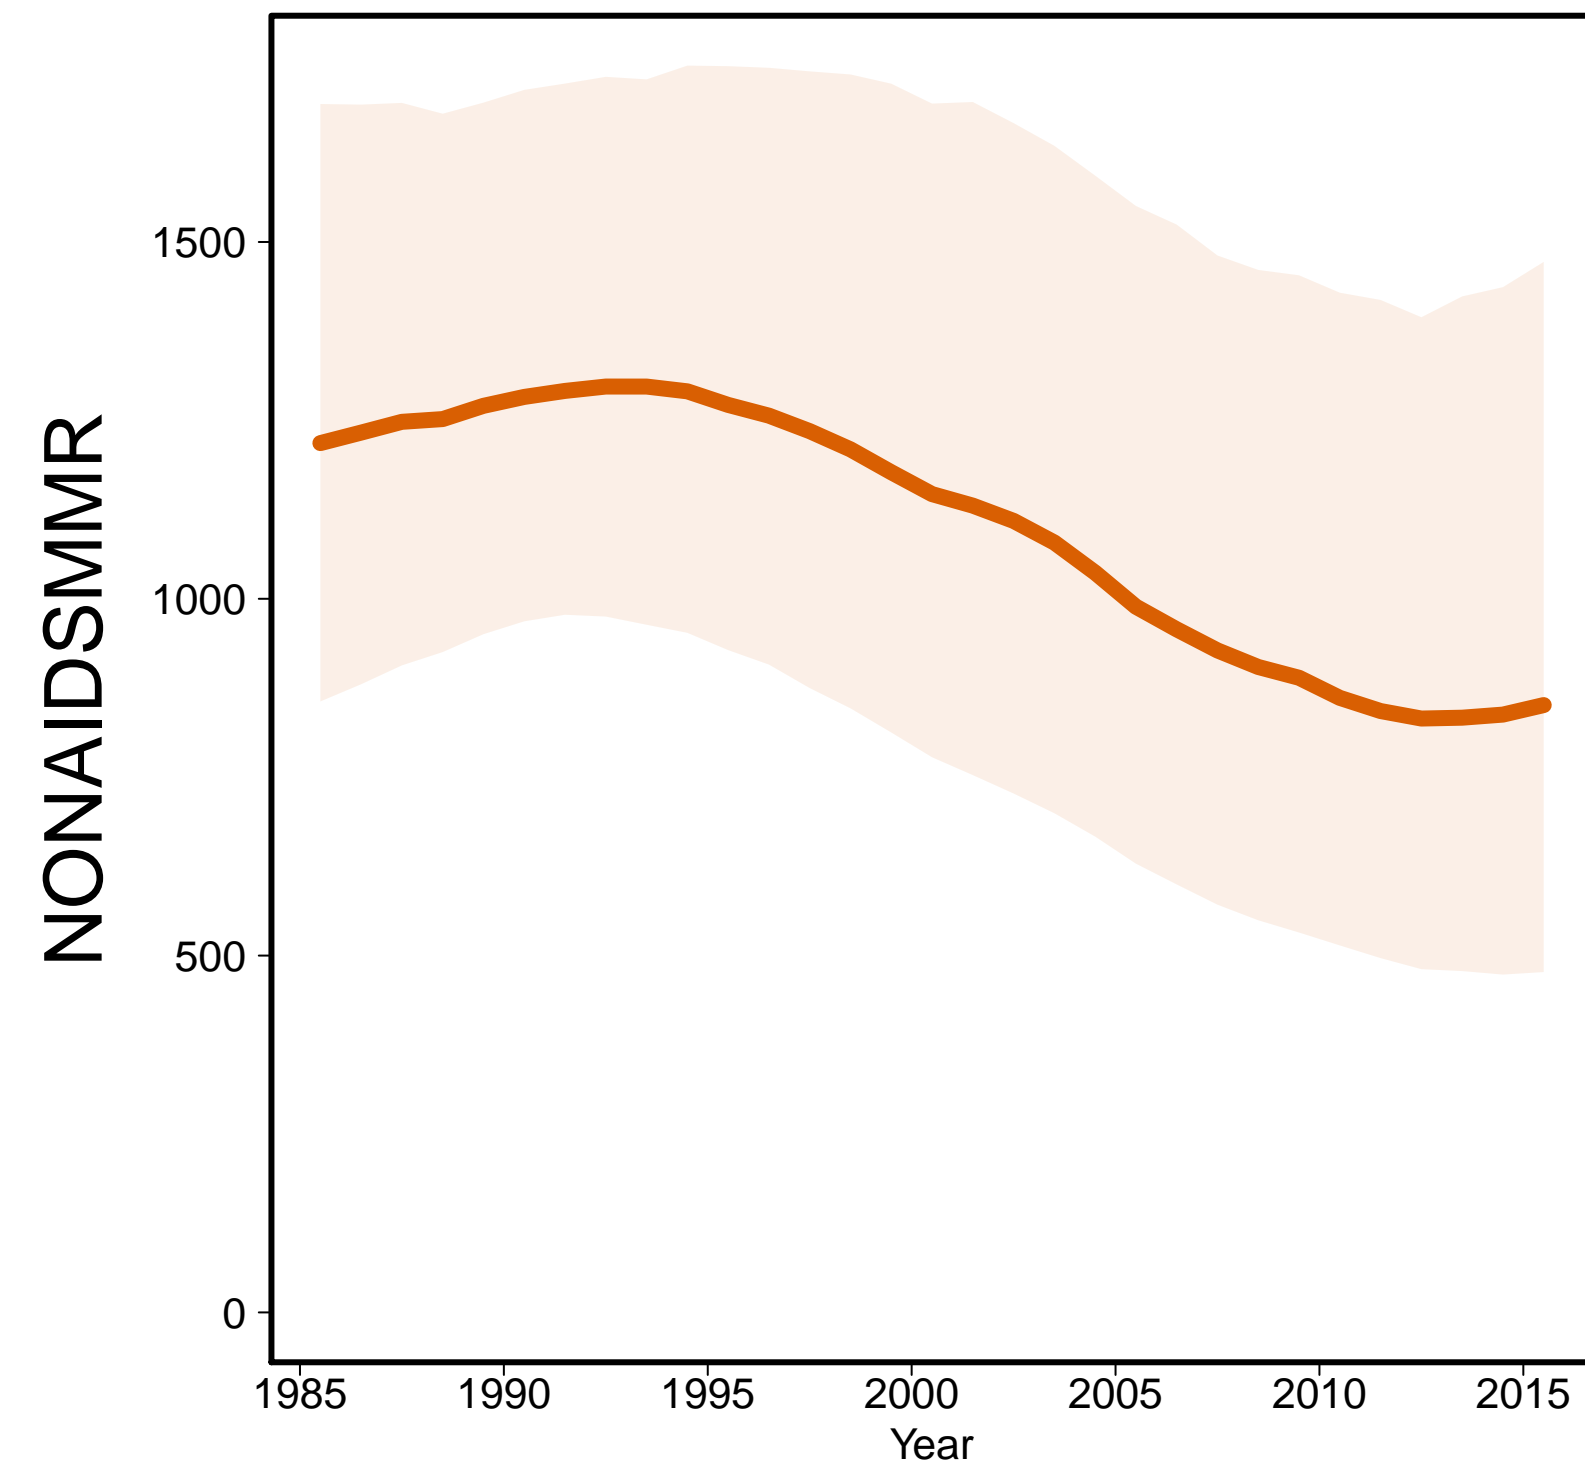

Aids MMR

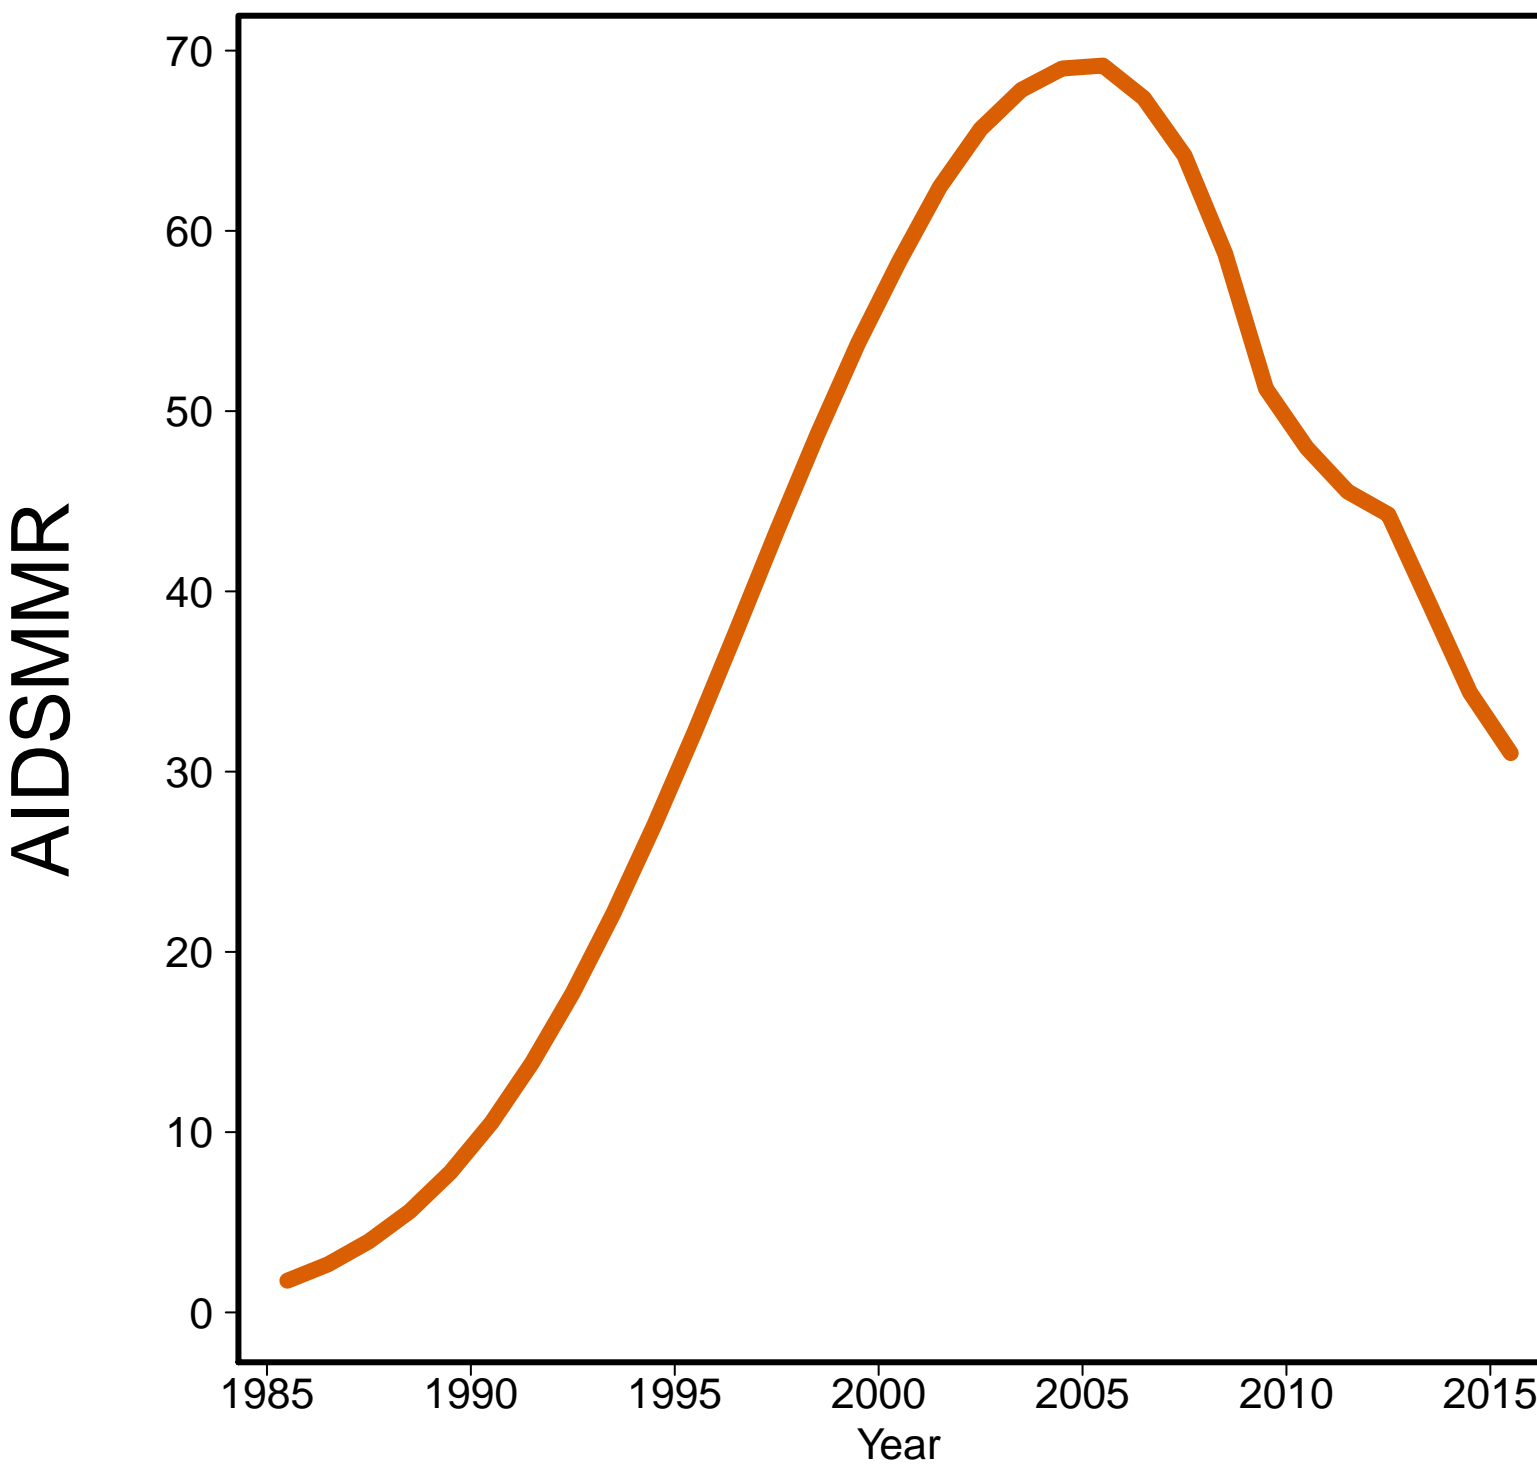

Chad [TCD]  
(Middle Africa)

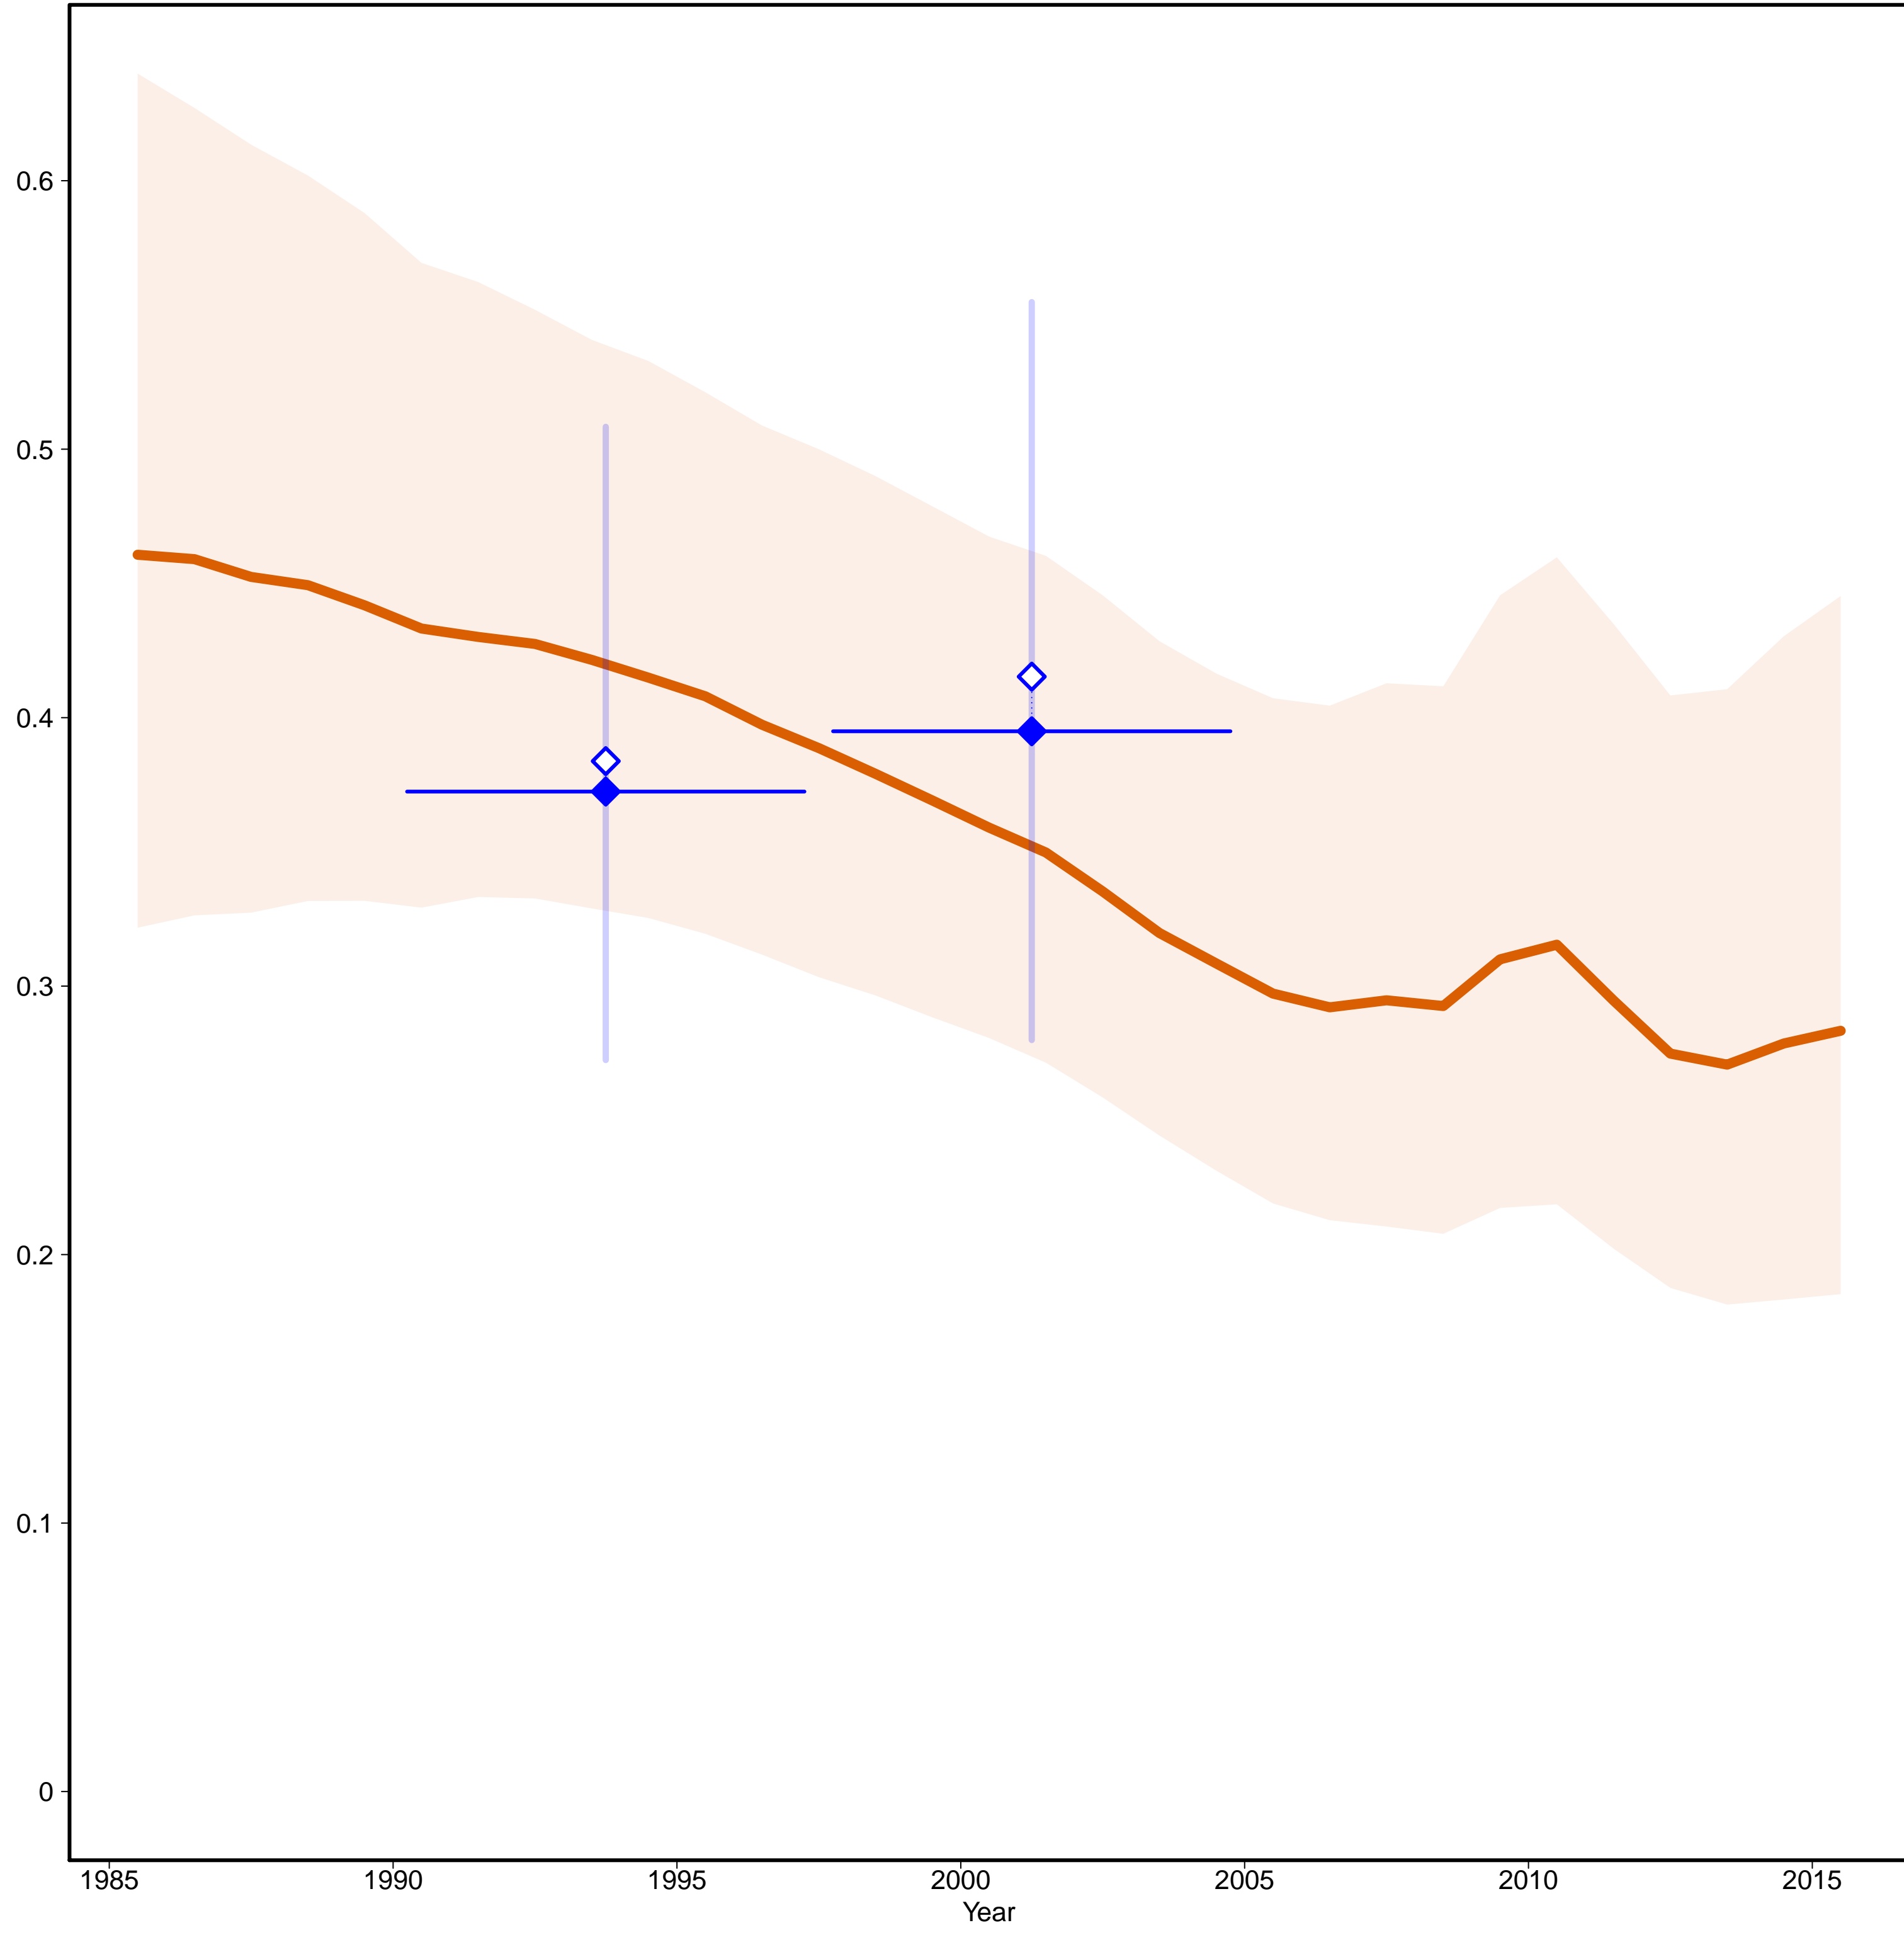

Chad [TCD]  
(Middle Africa)

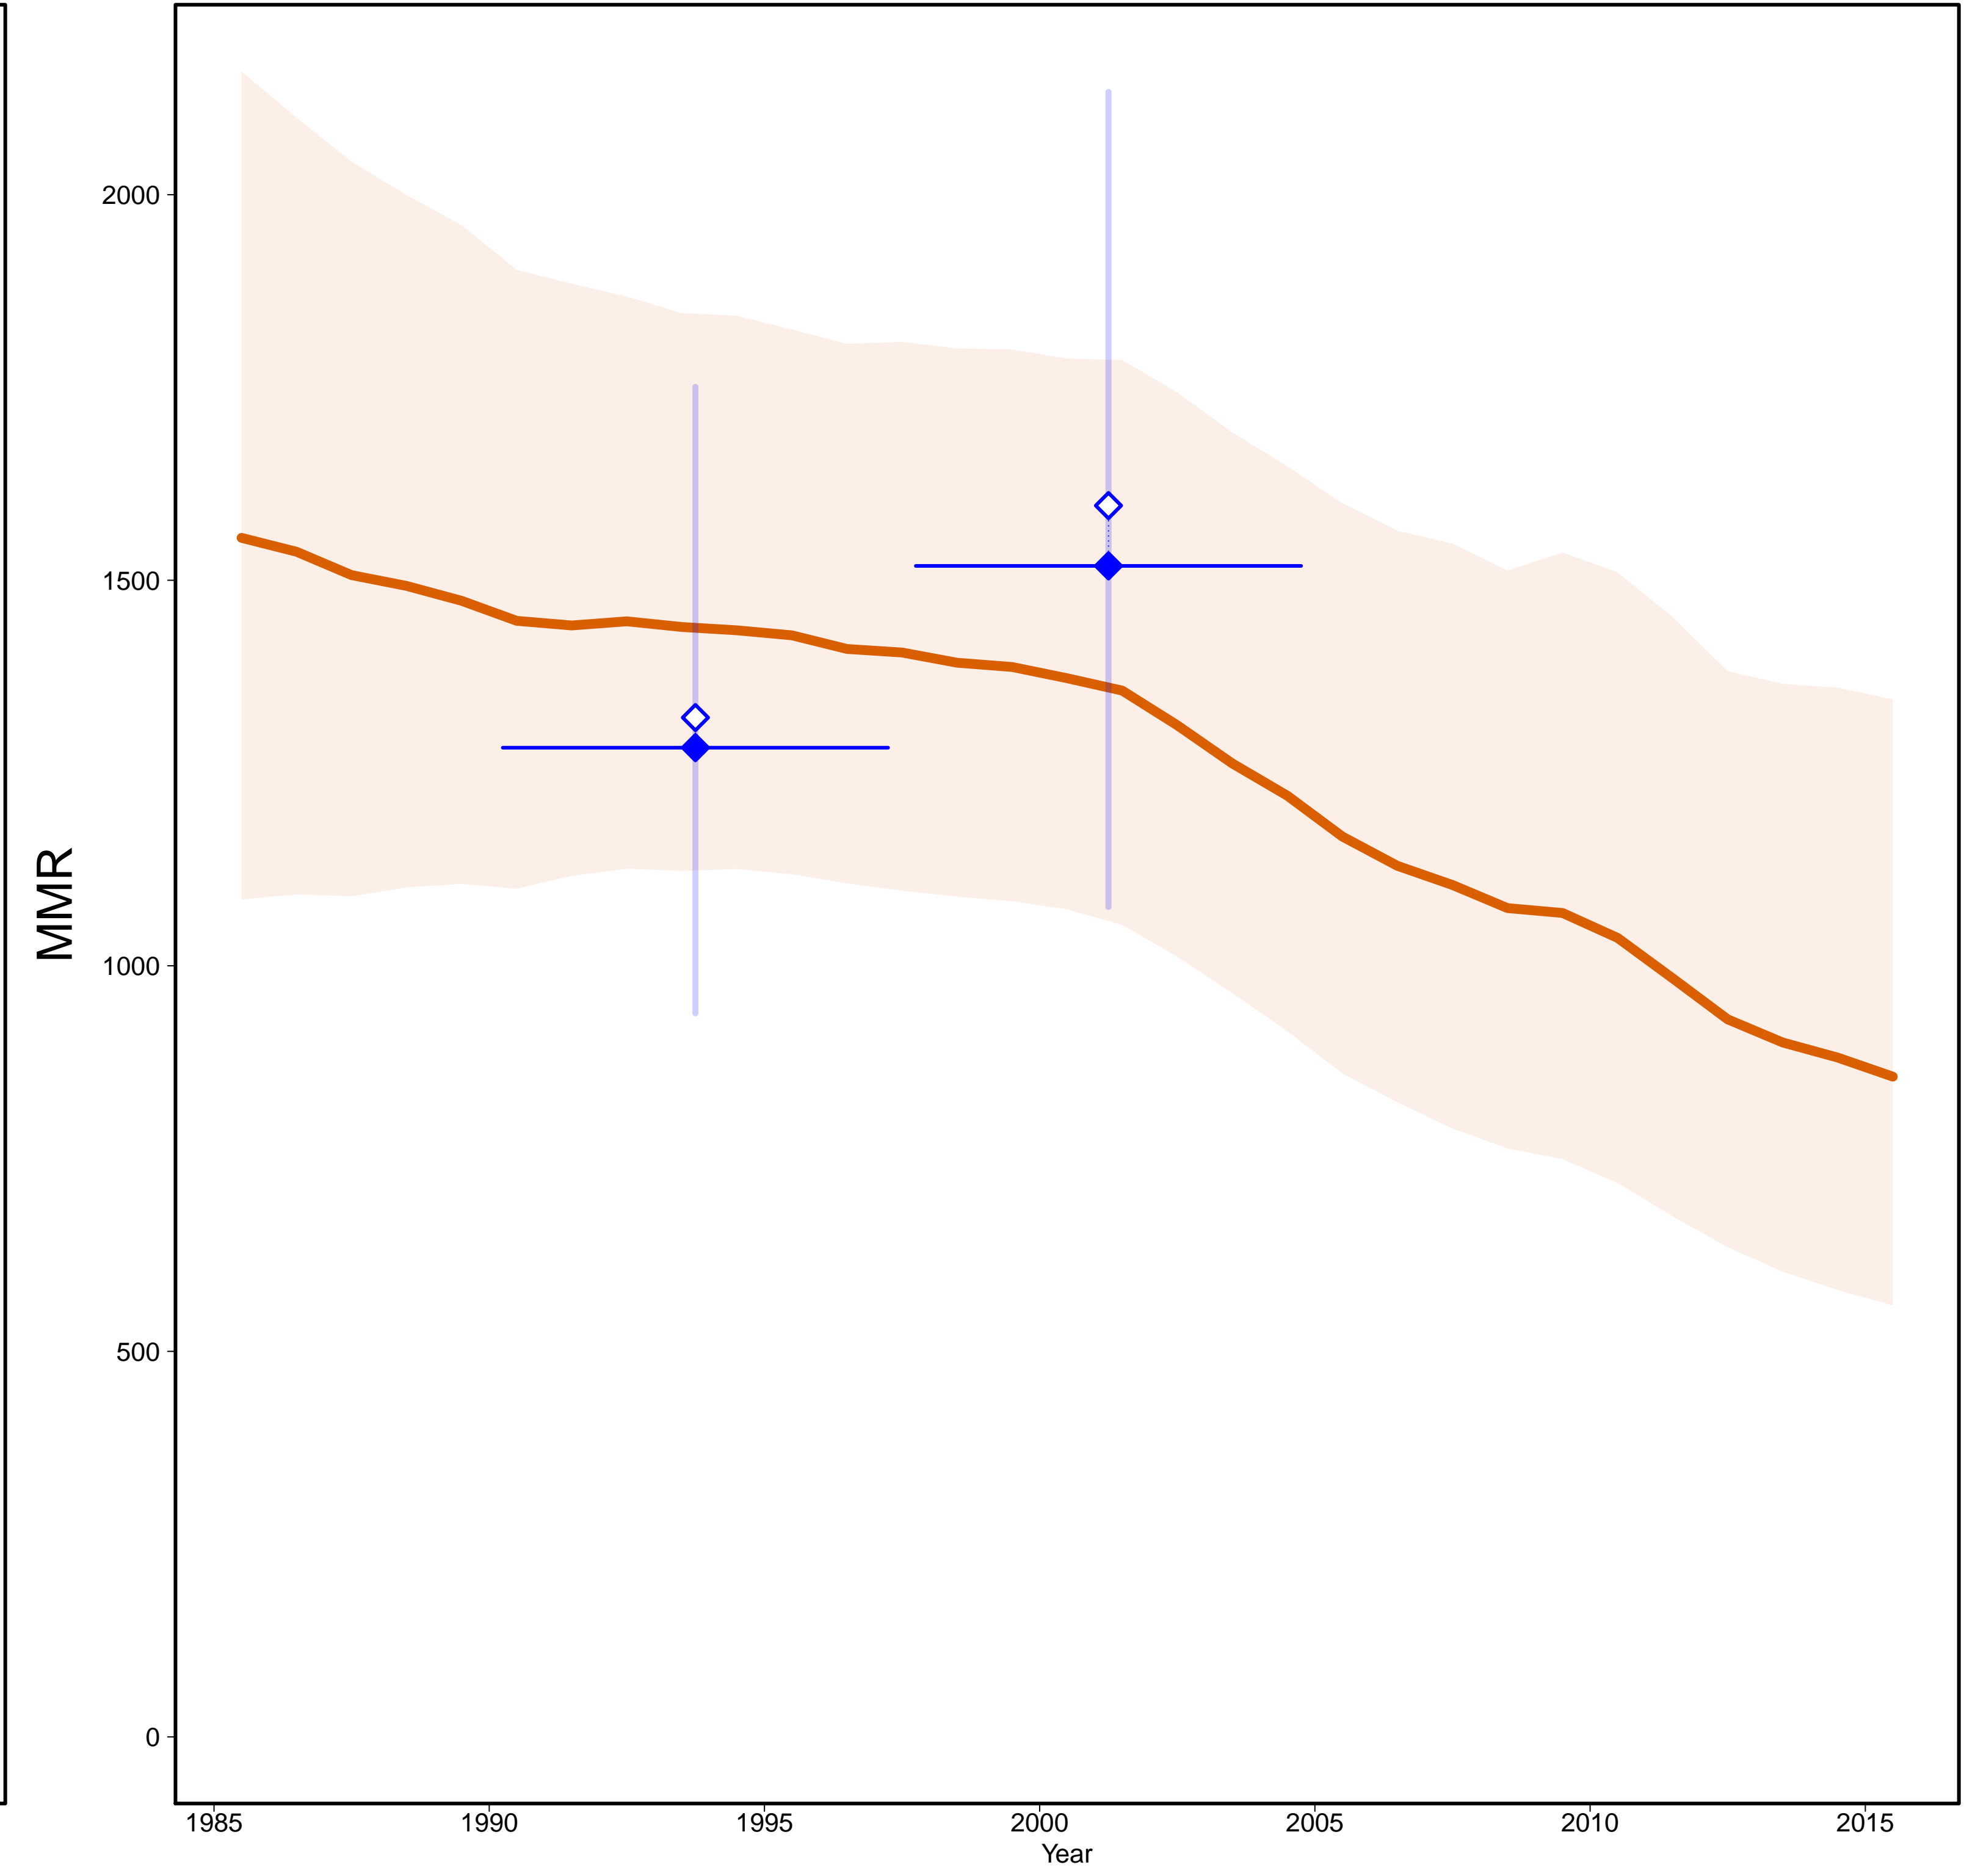

- Estimates —
- MMR Database 2015 —
- ◇ Observed Data
- ◆ Adjusted Data
- Data type —
- ◆ DHS

Gross Domestic Product

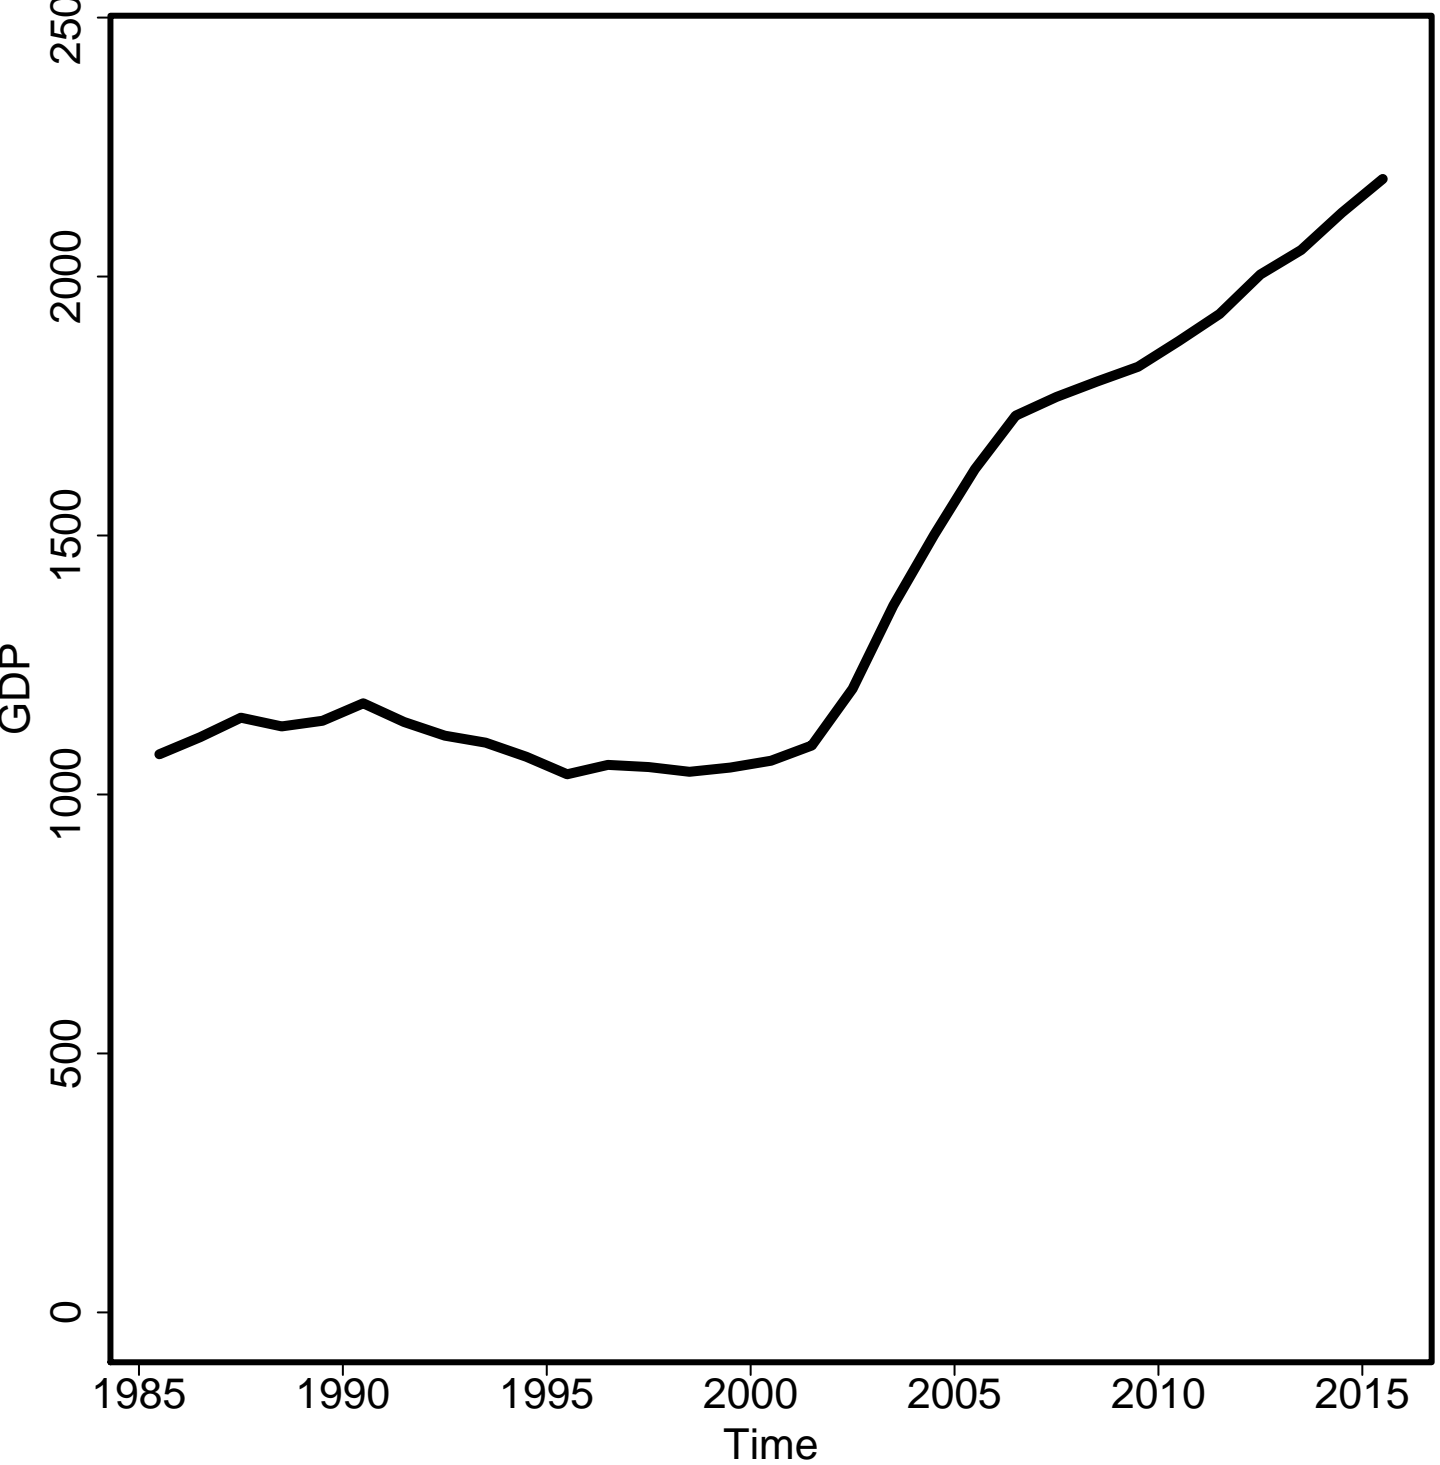

General Fertility Rate

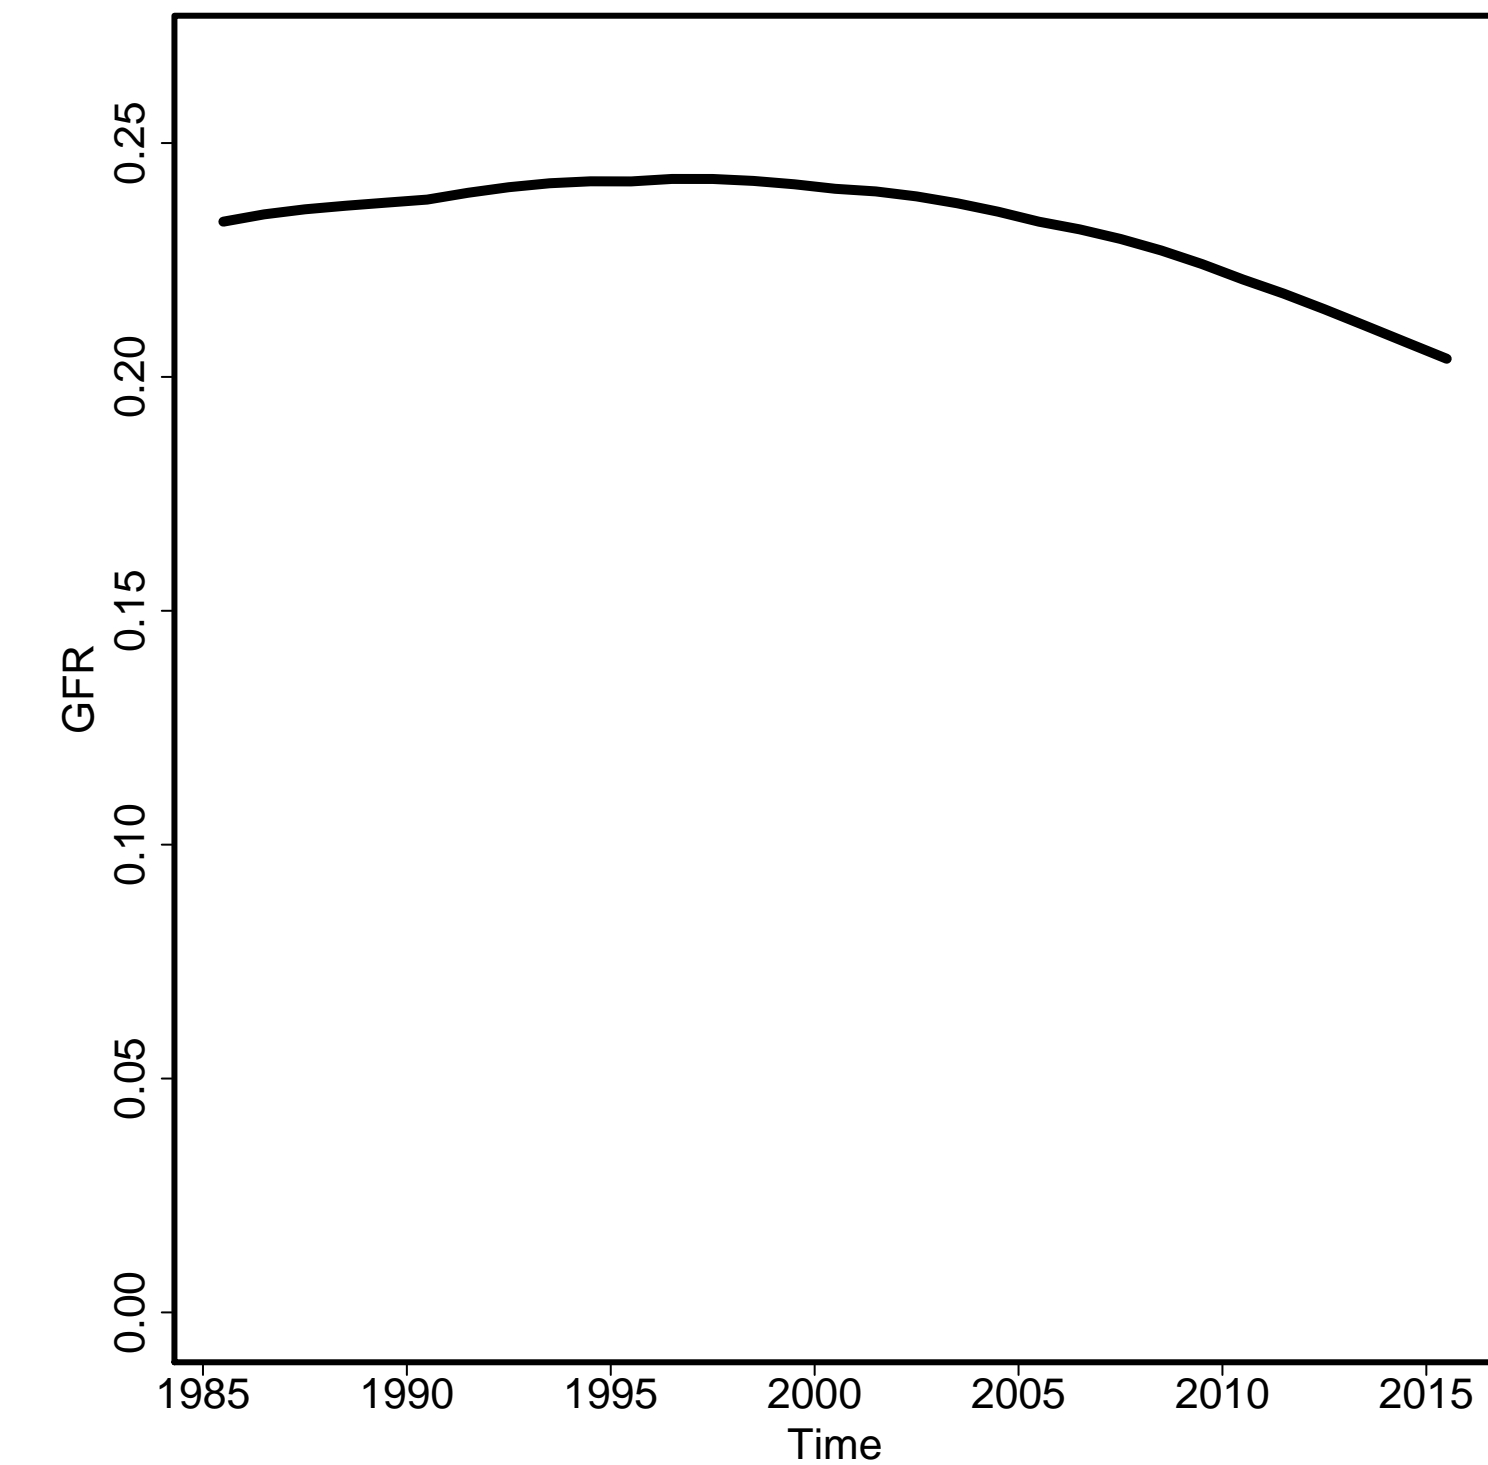

Skilled Attendance to Birth

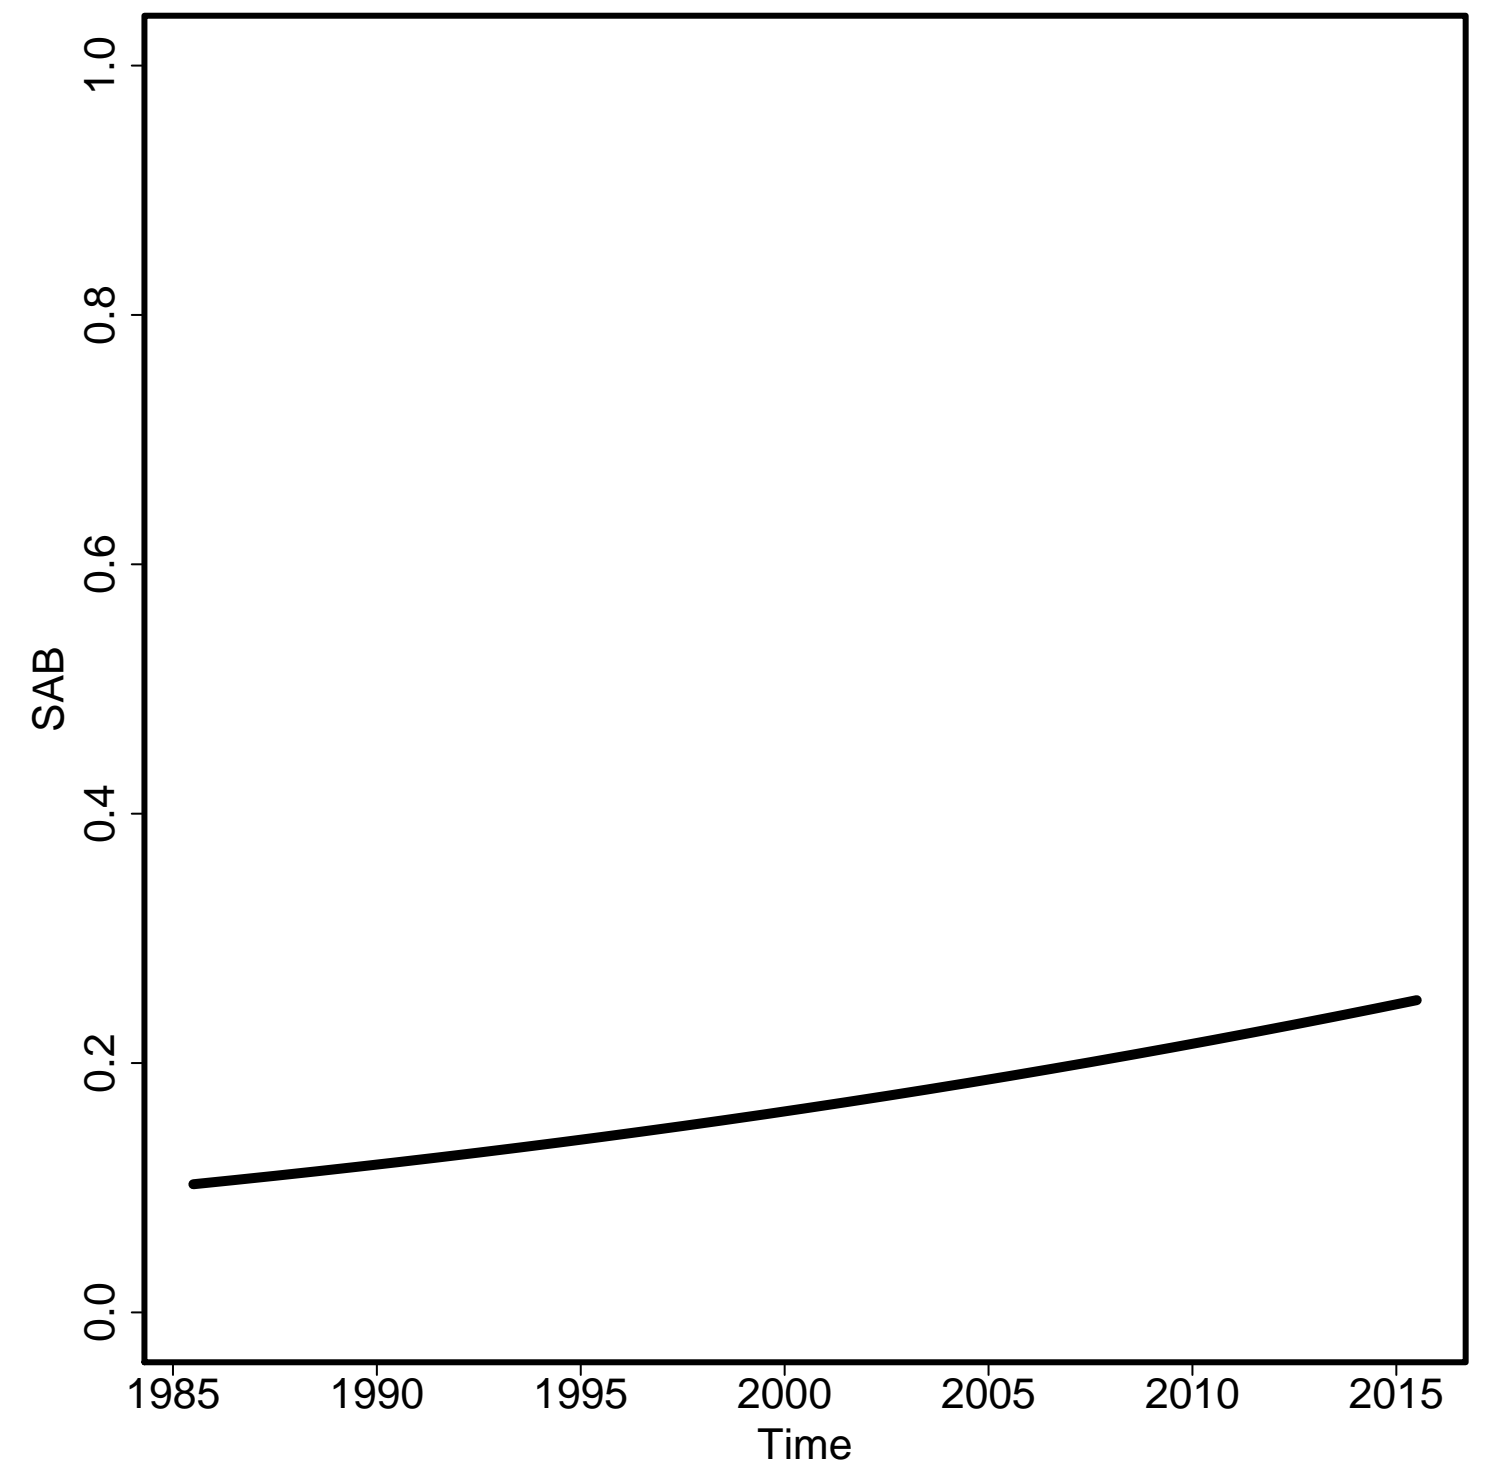

Envelope/Births

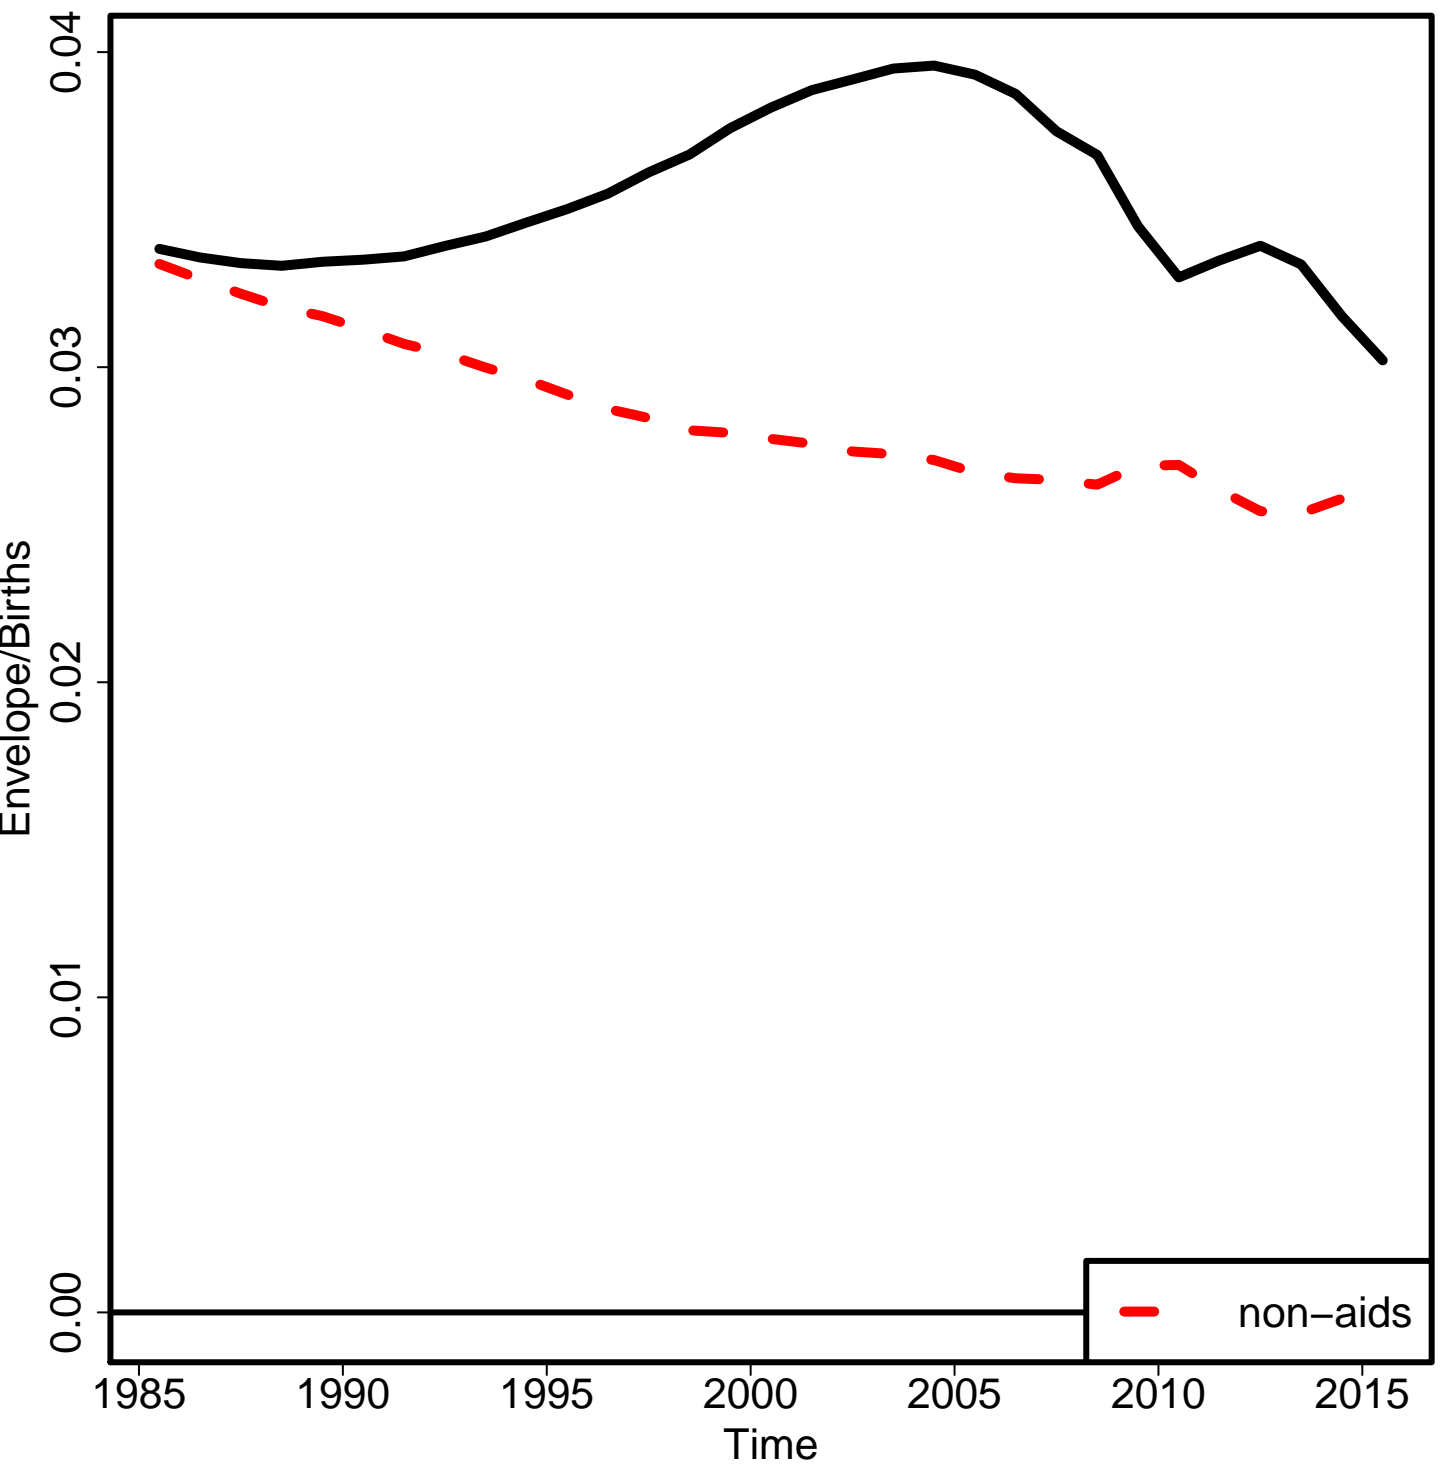

Non-aids MMR

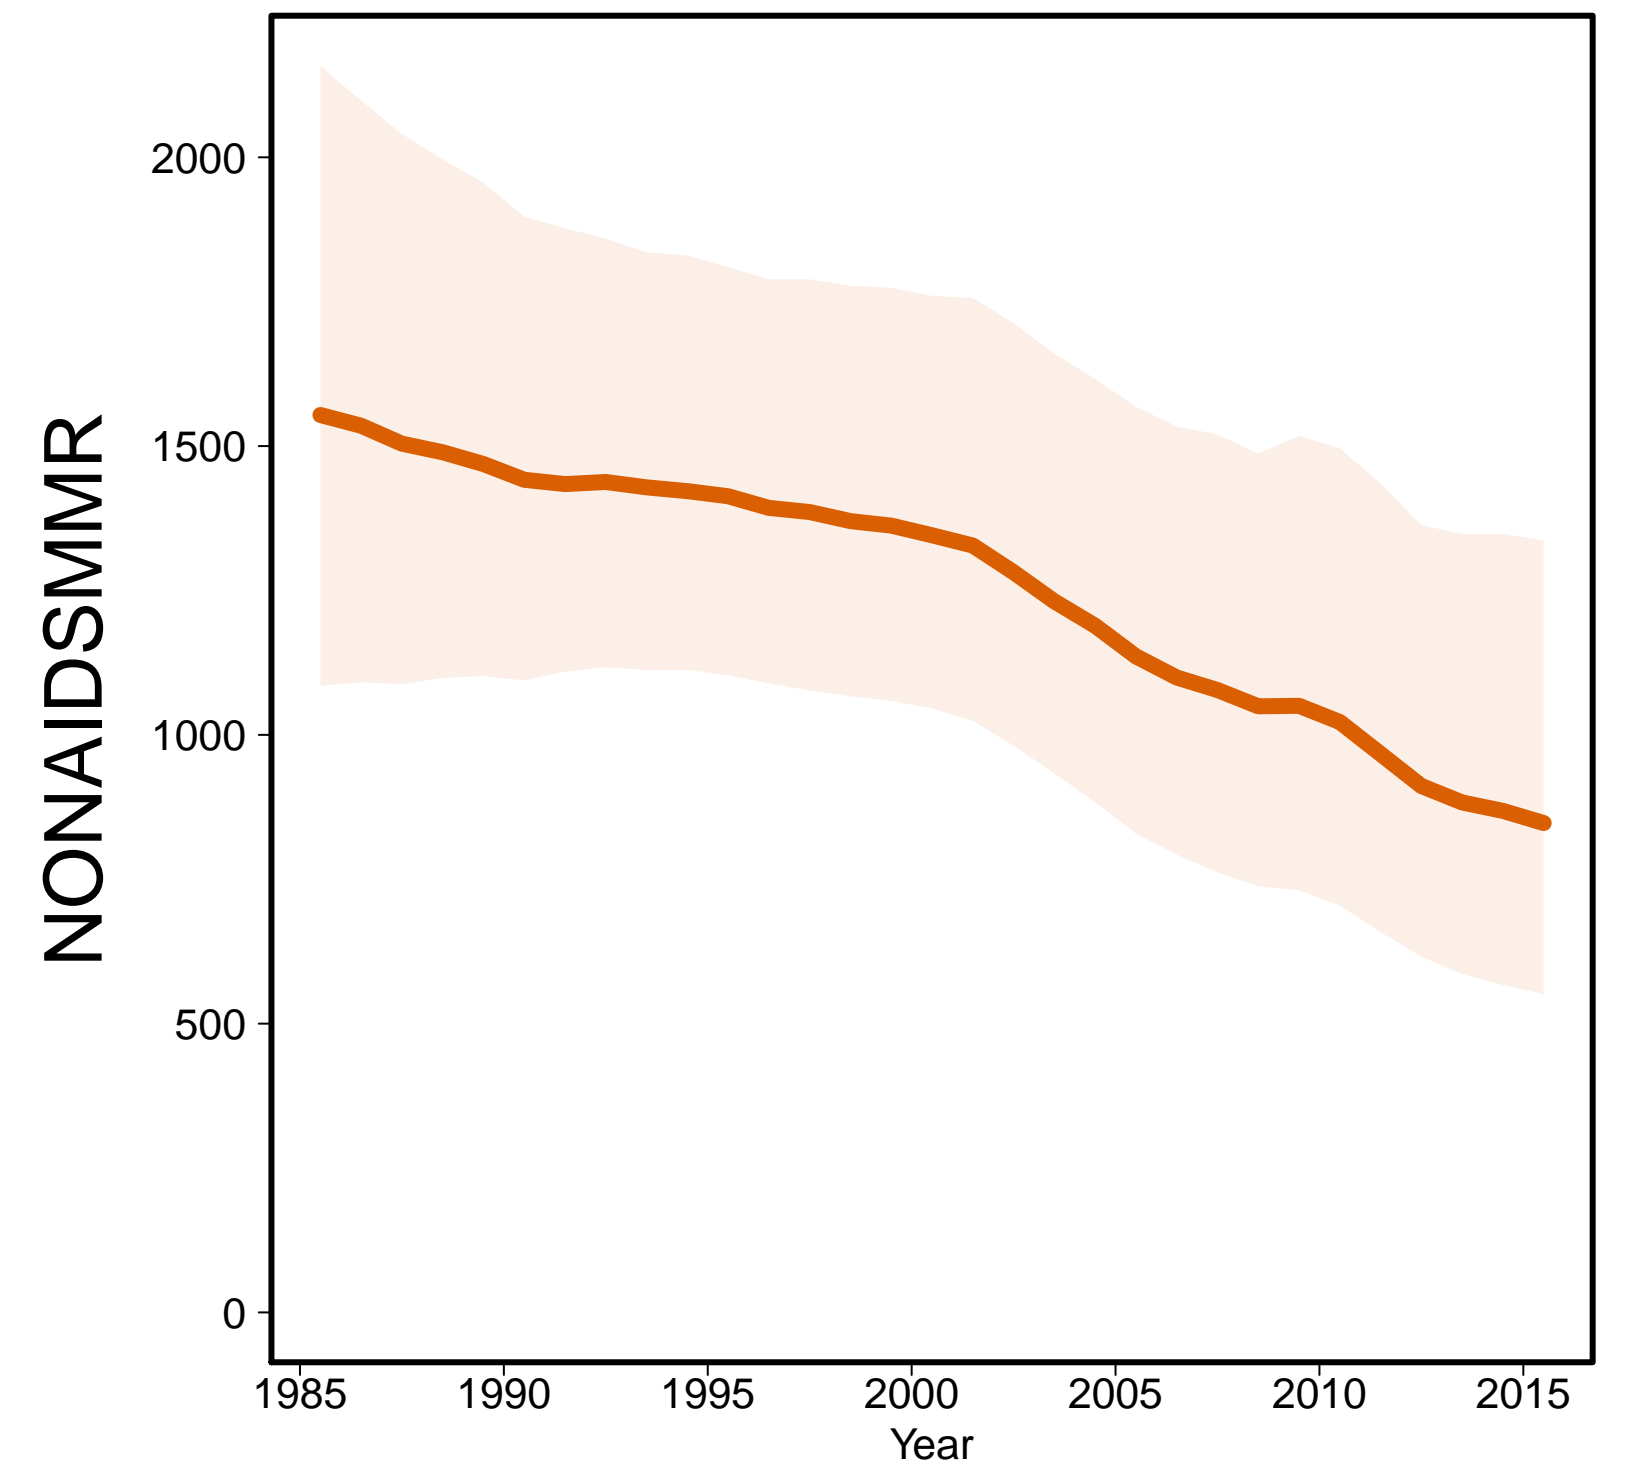

Aids MMR

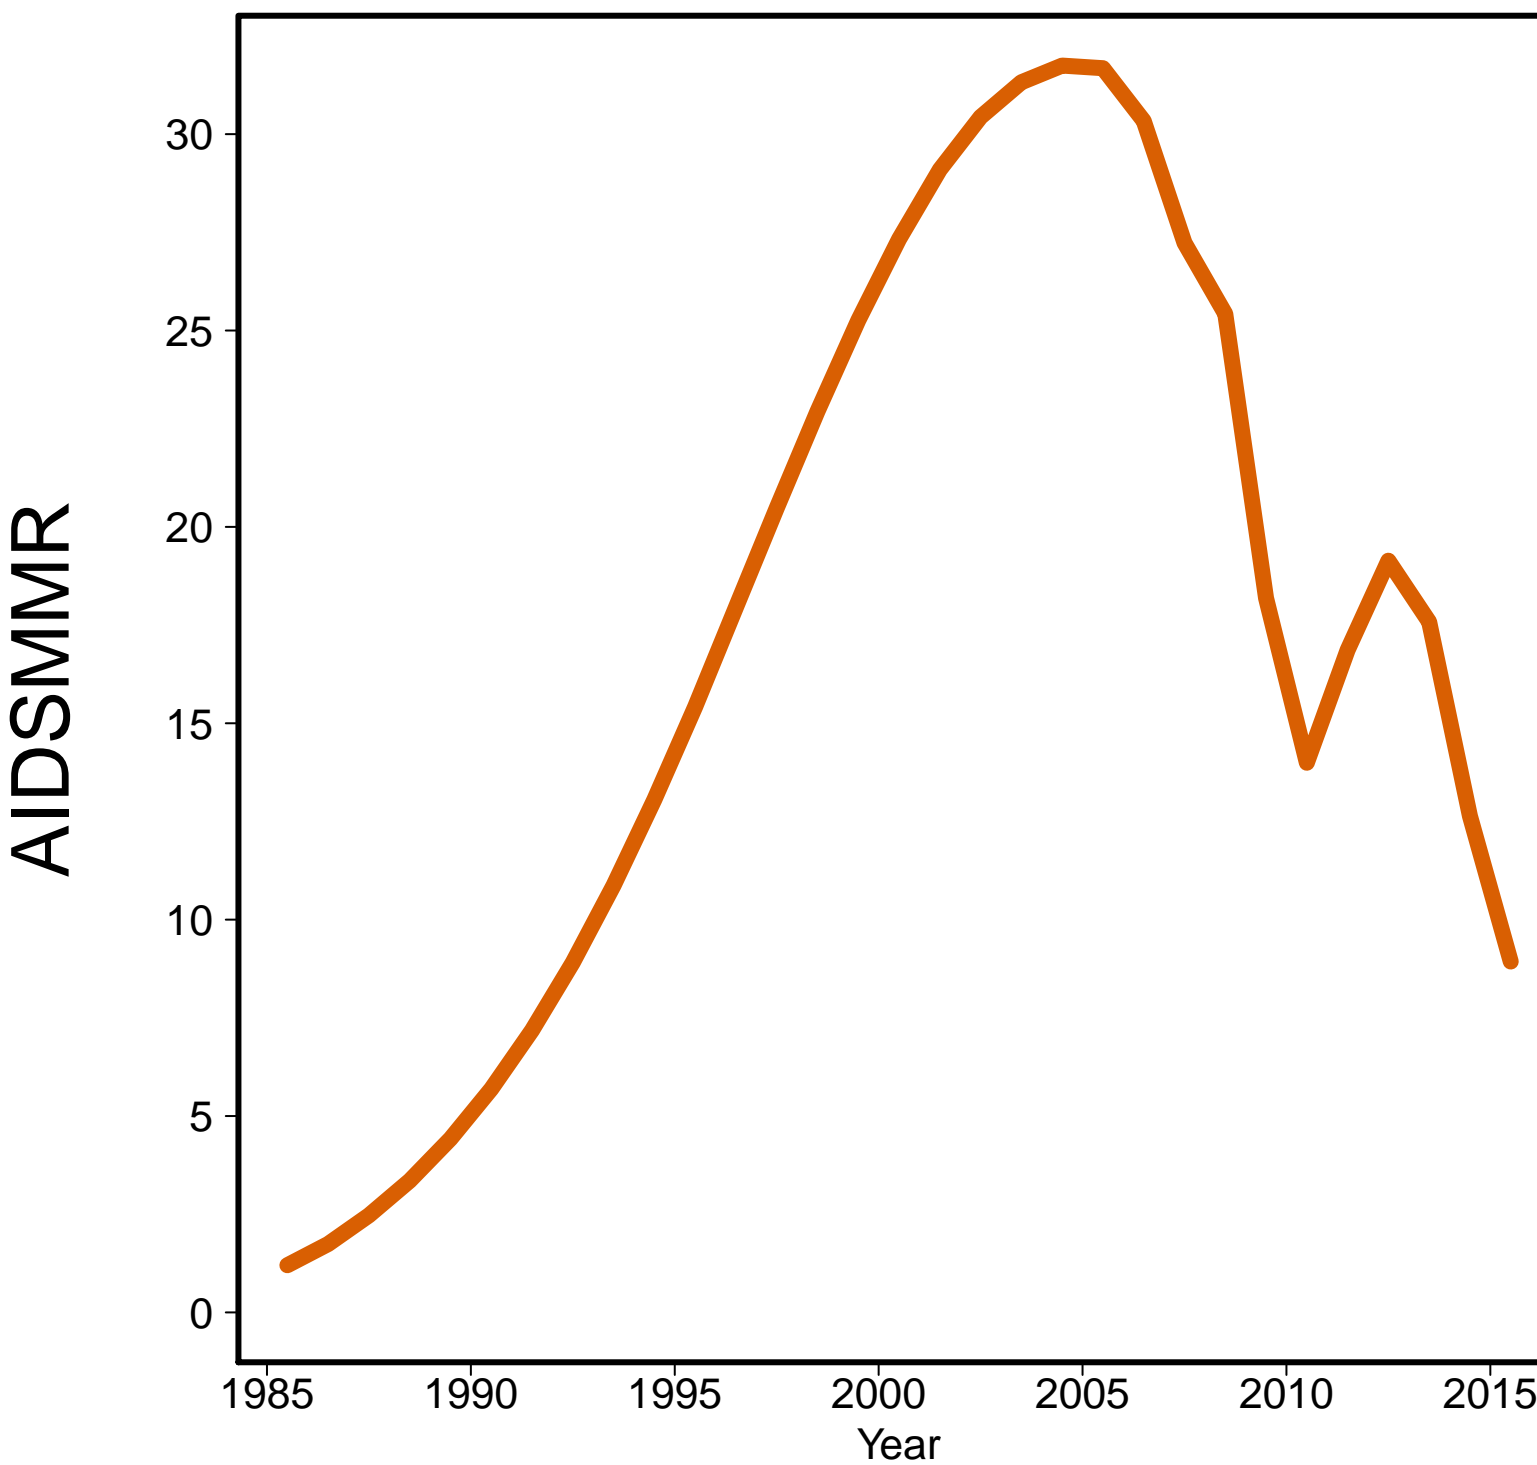



Chile [CHL]  
(South America)

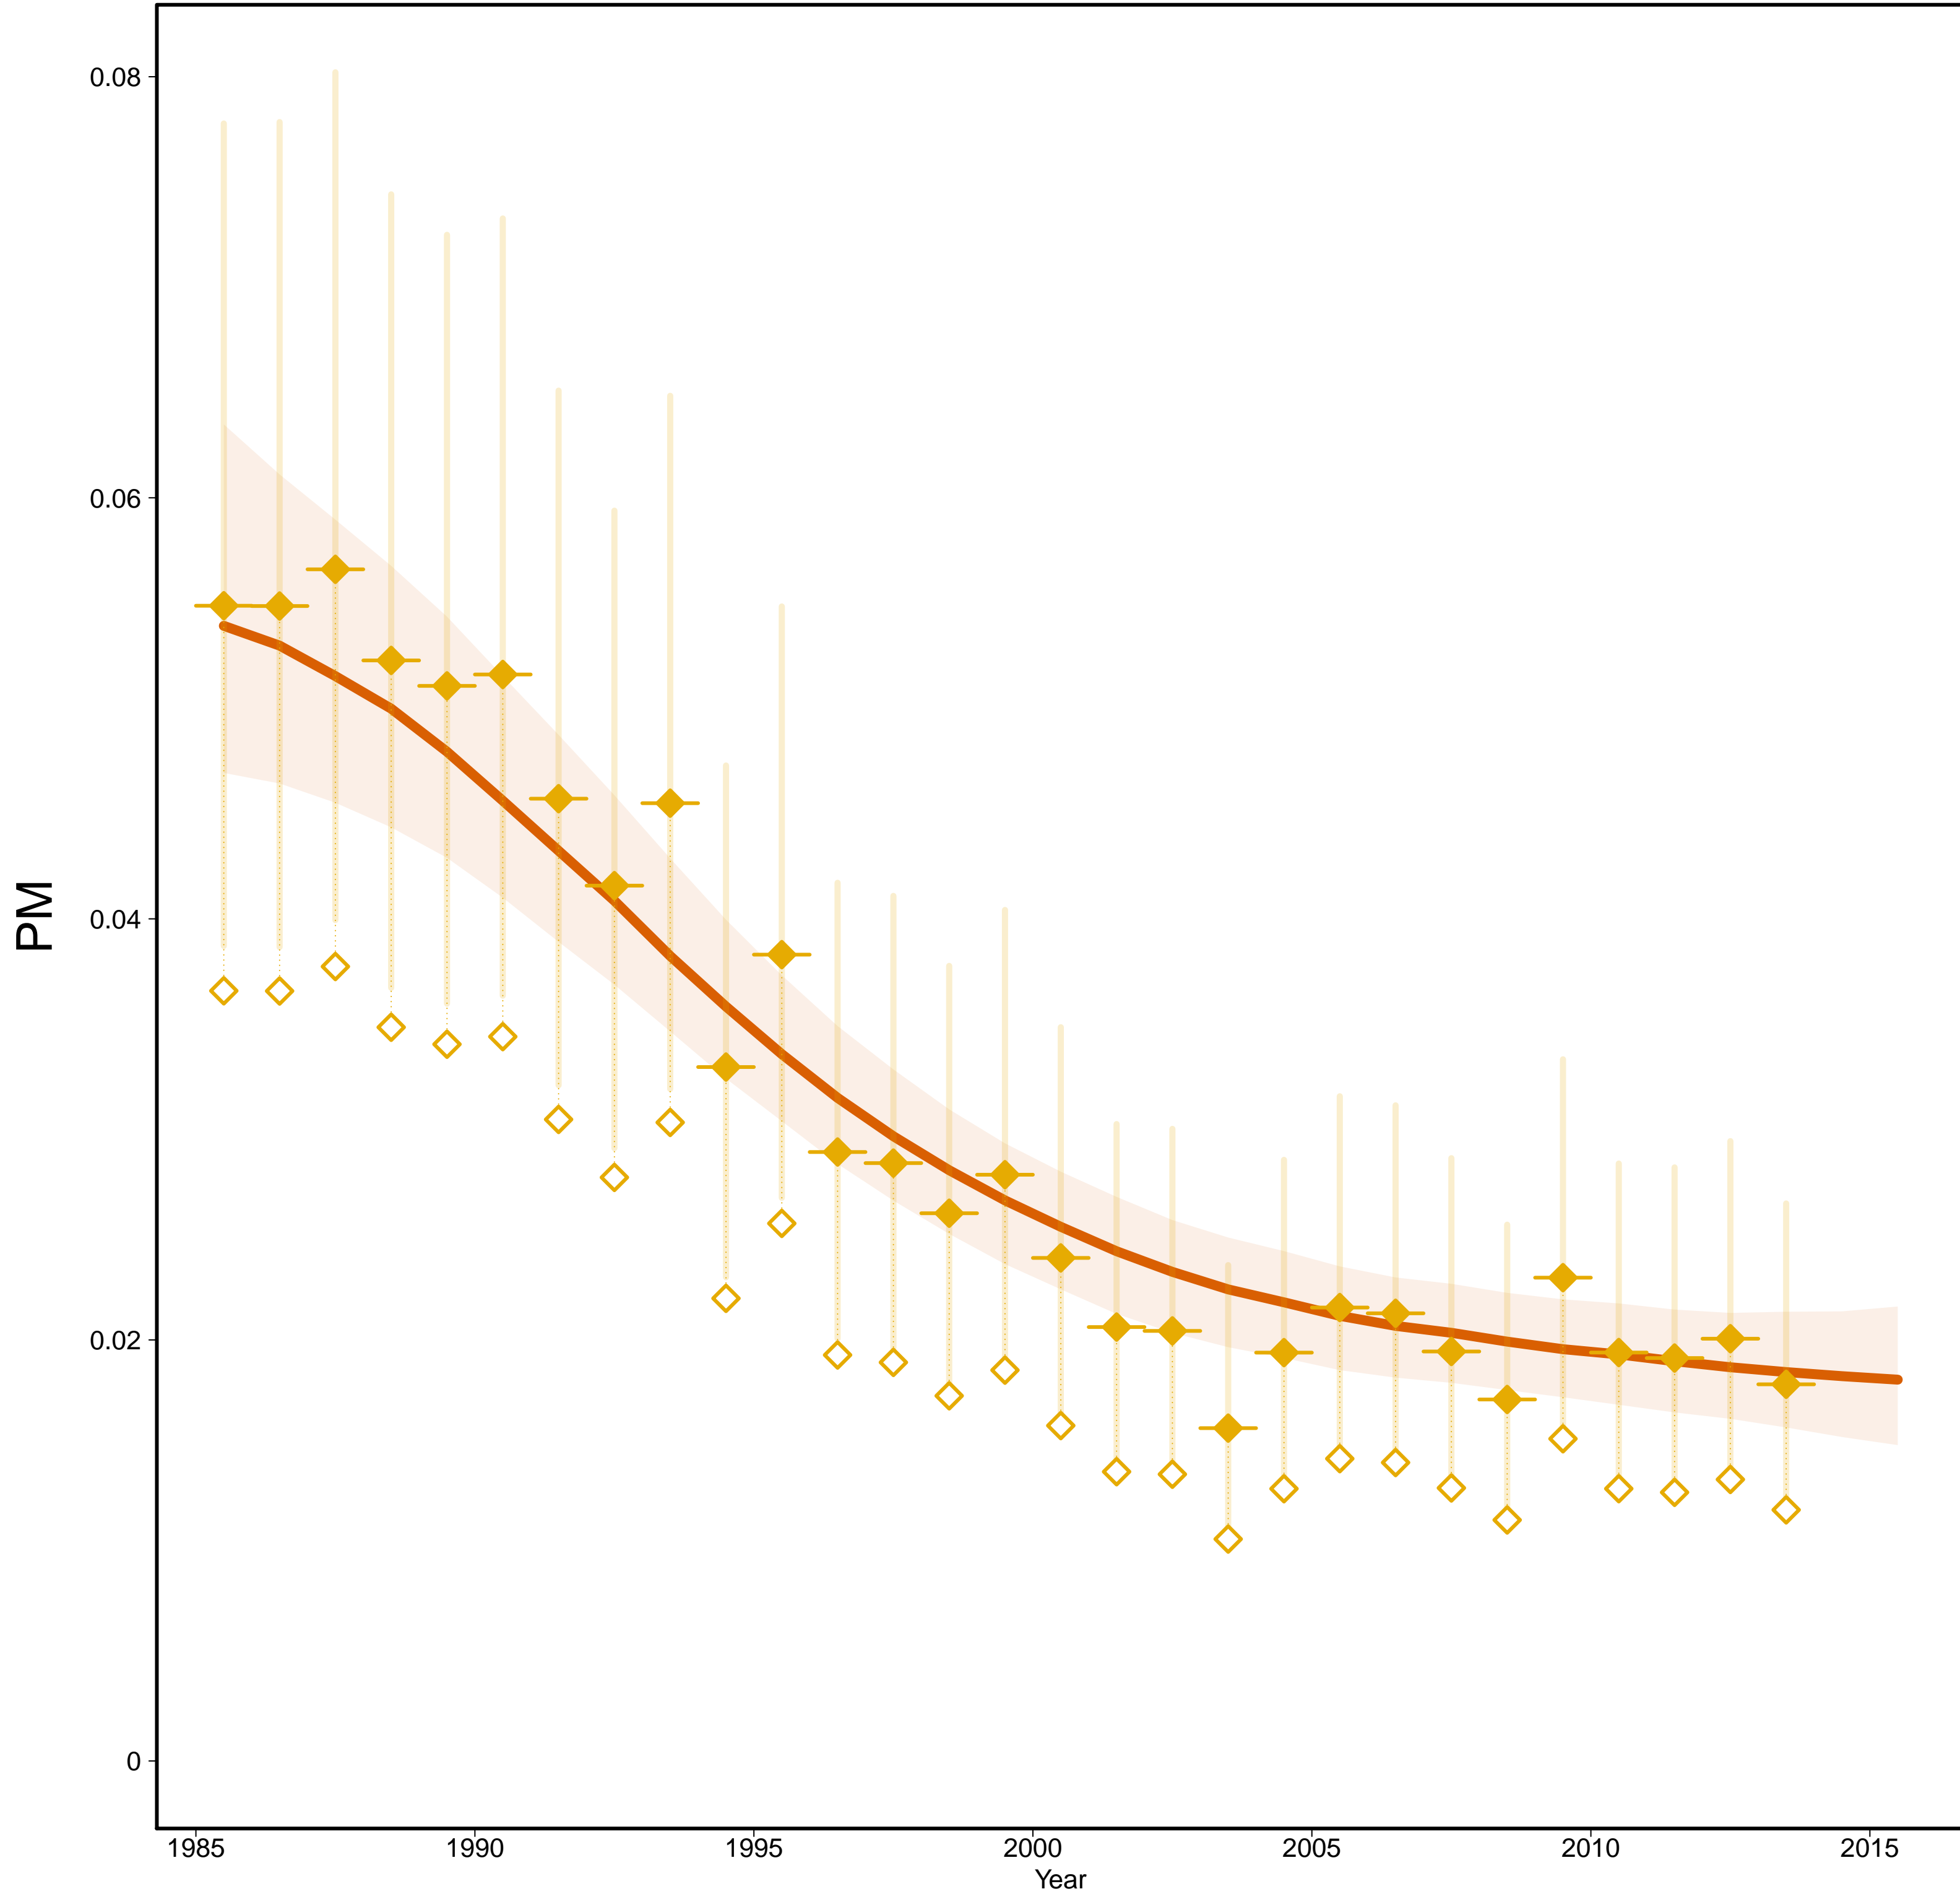

Chile [CHL]  
(South America)

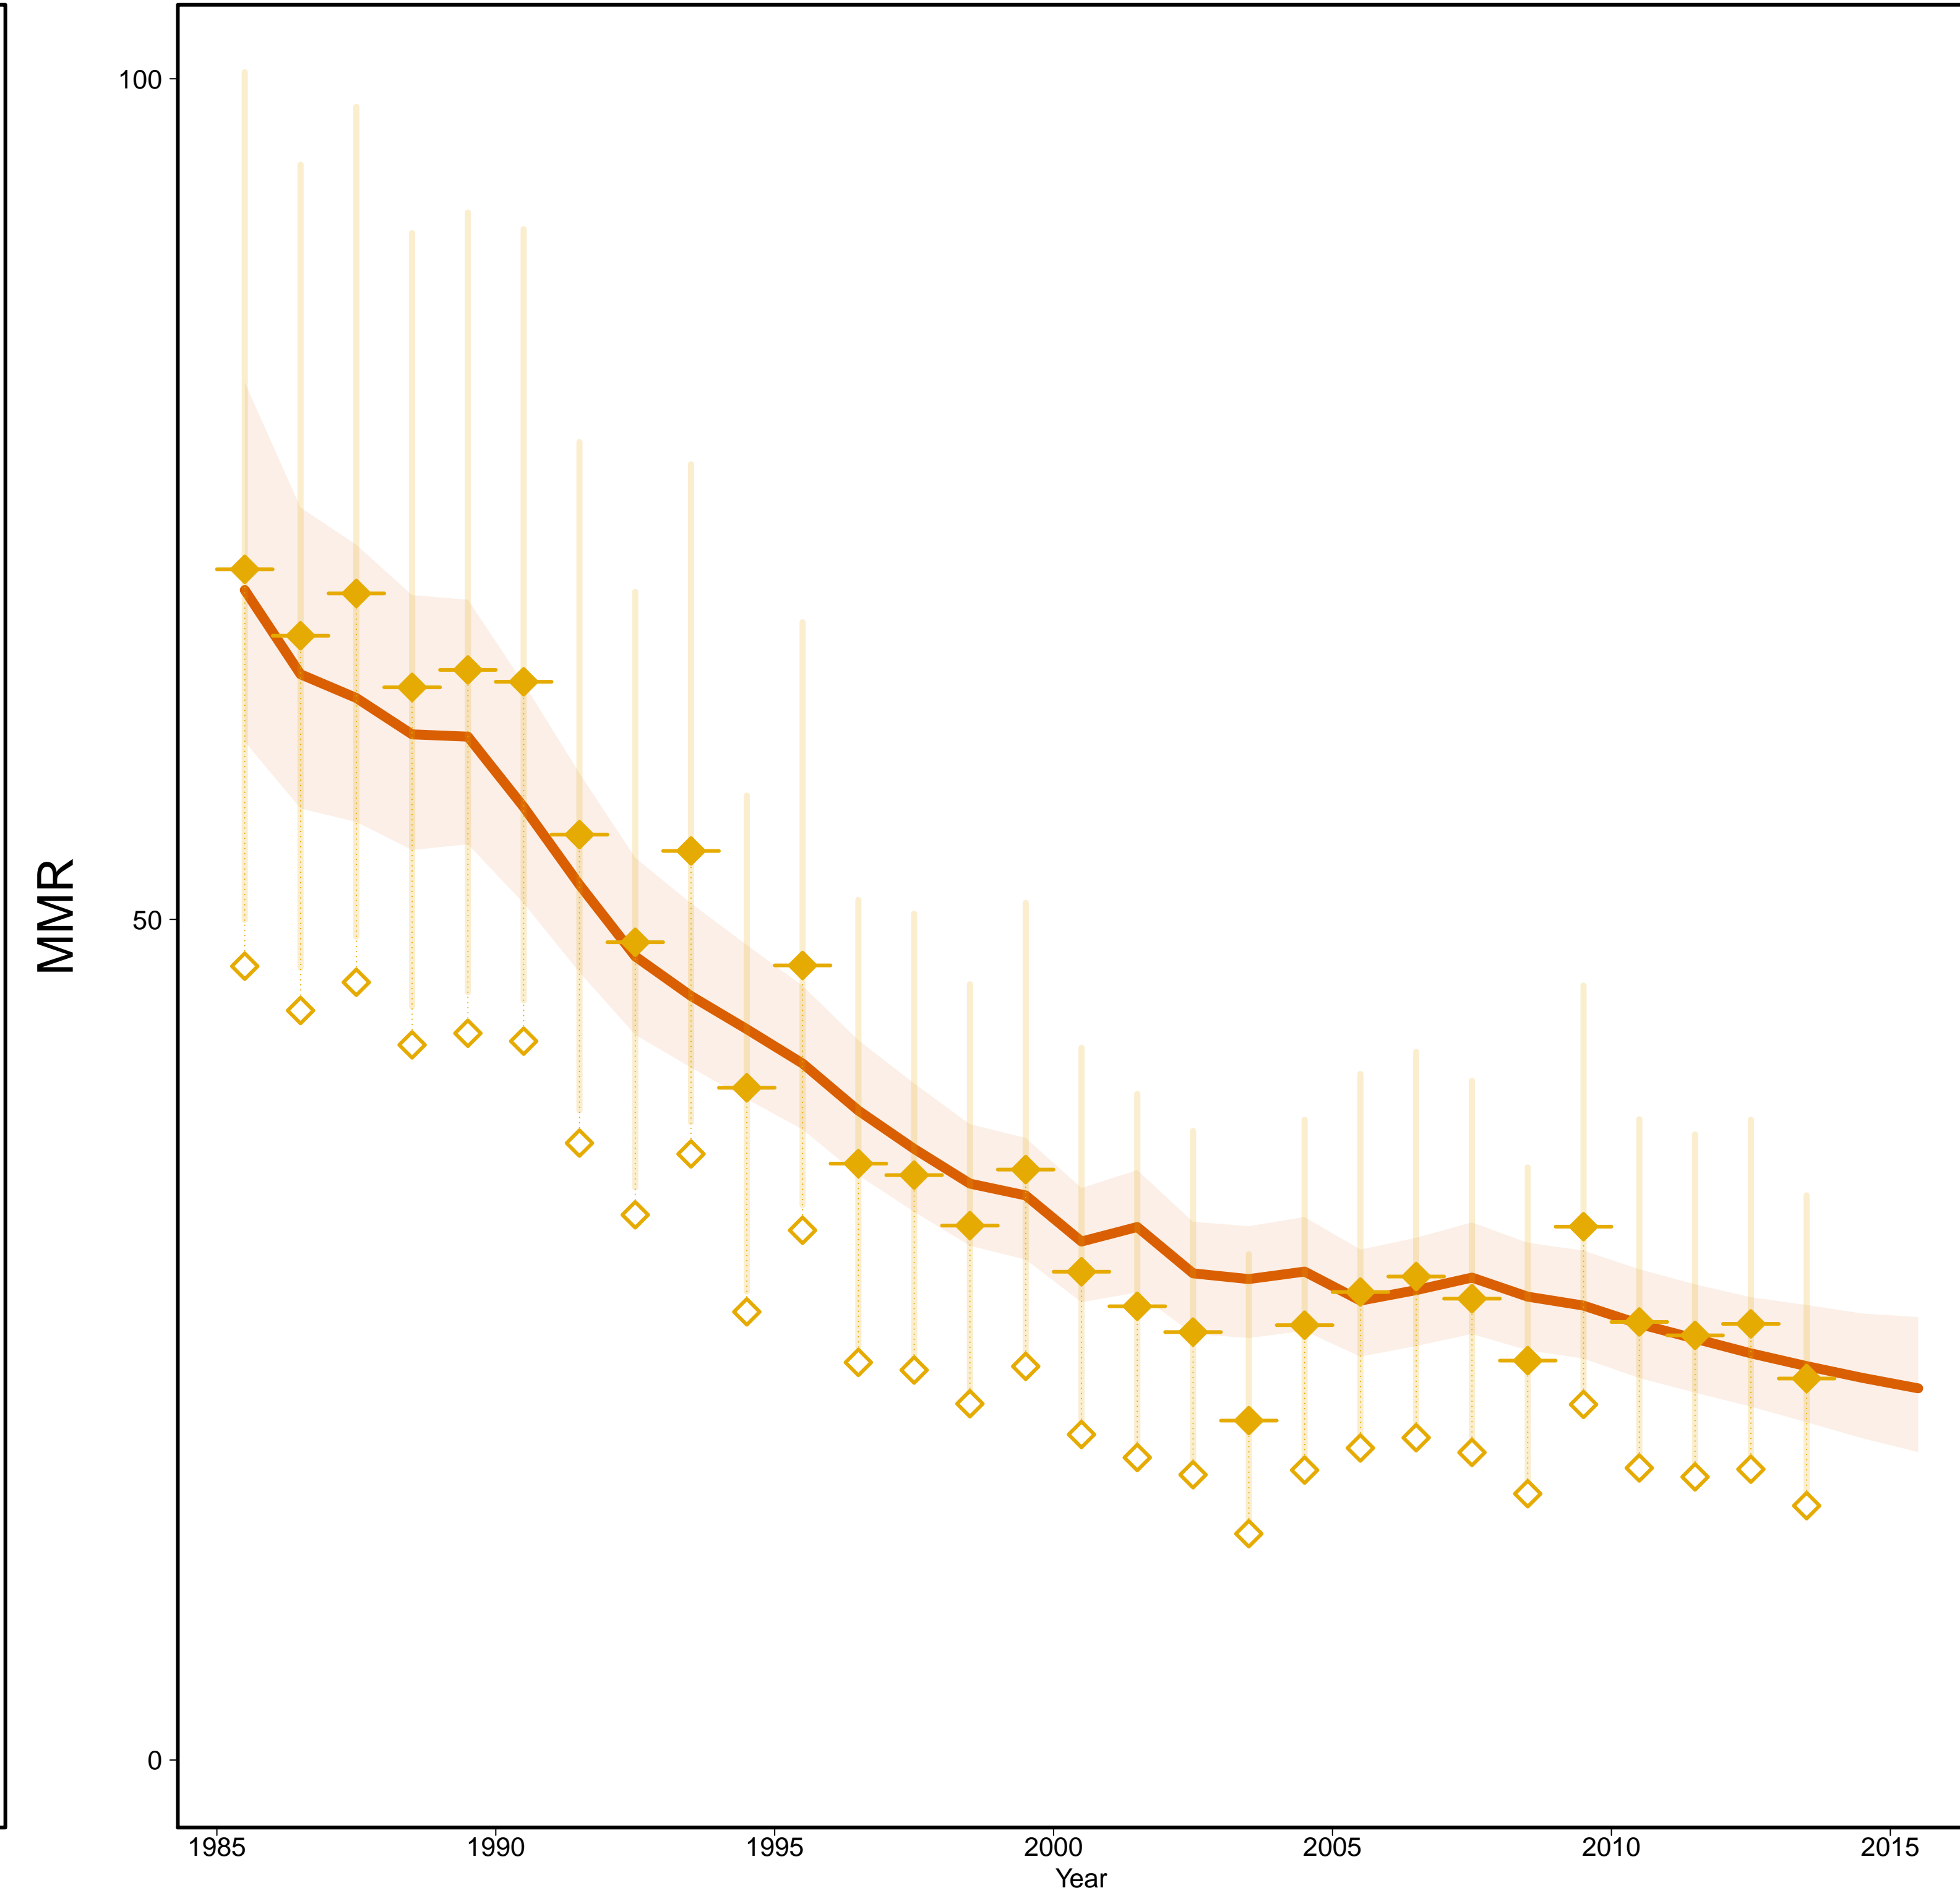

- Estimates —
- Mlate
- MMR Database 2015 —
- ◇ Observed Data
- ◆ Adjusted Data
- Data type —
- ◆ VR

Gross Domestic Product

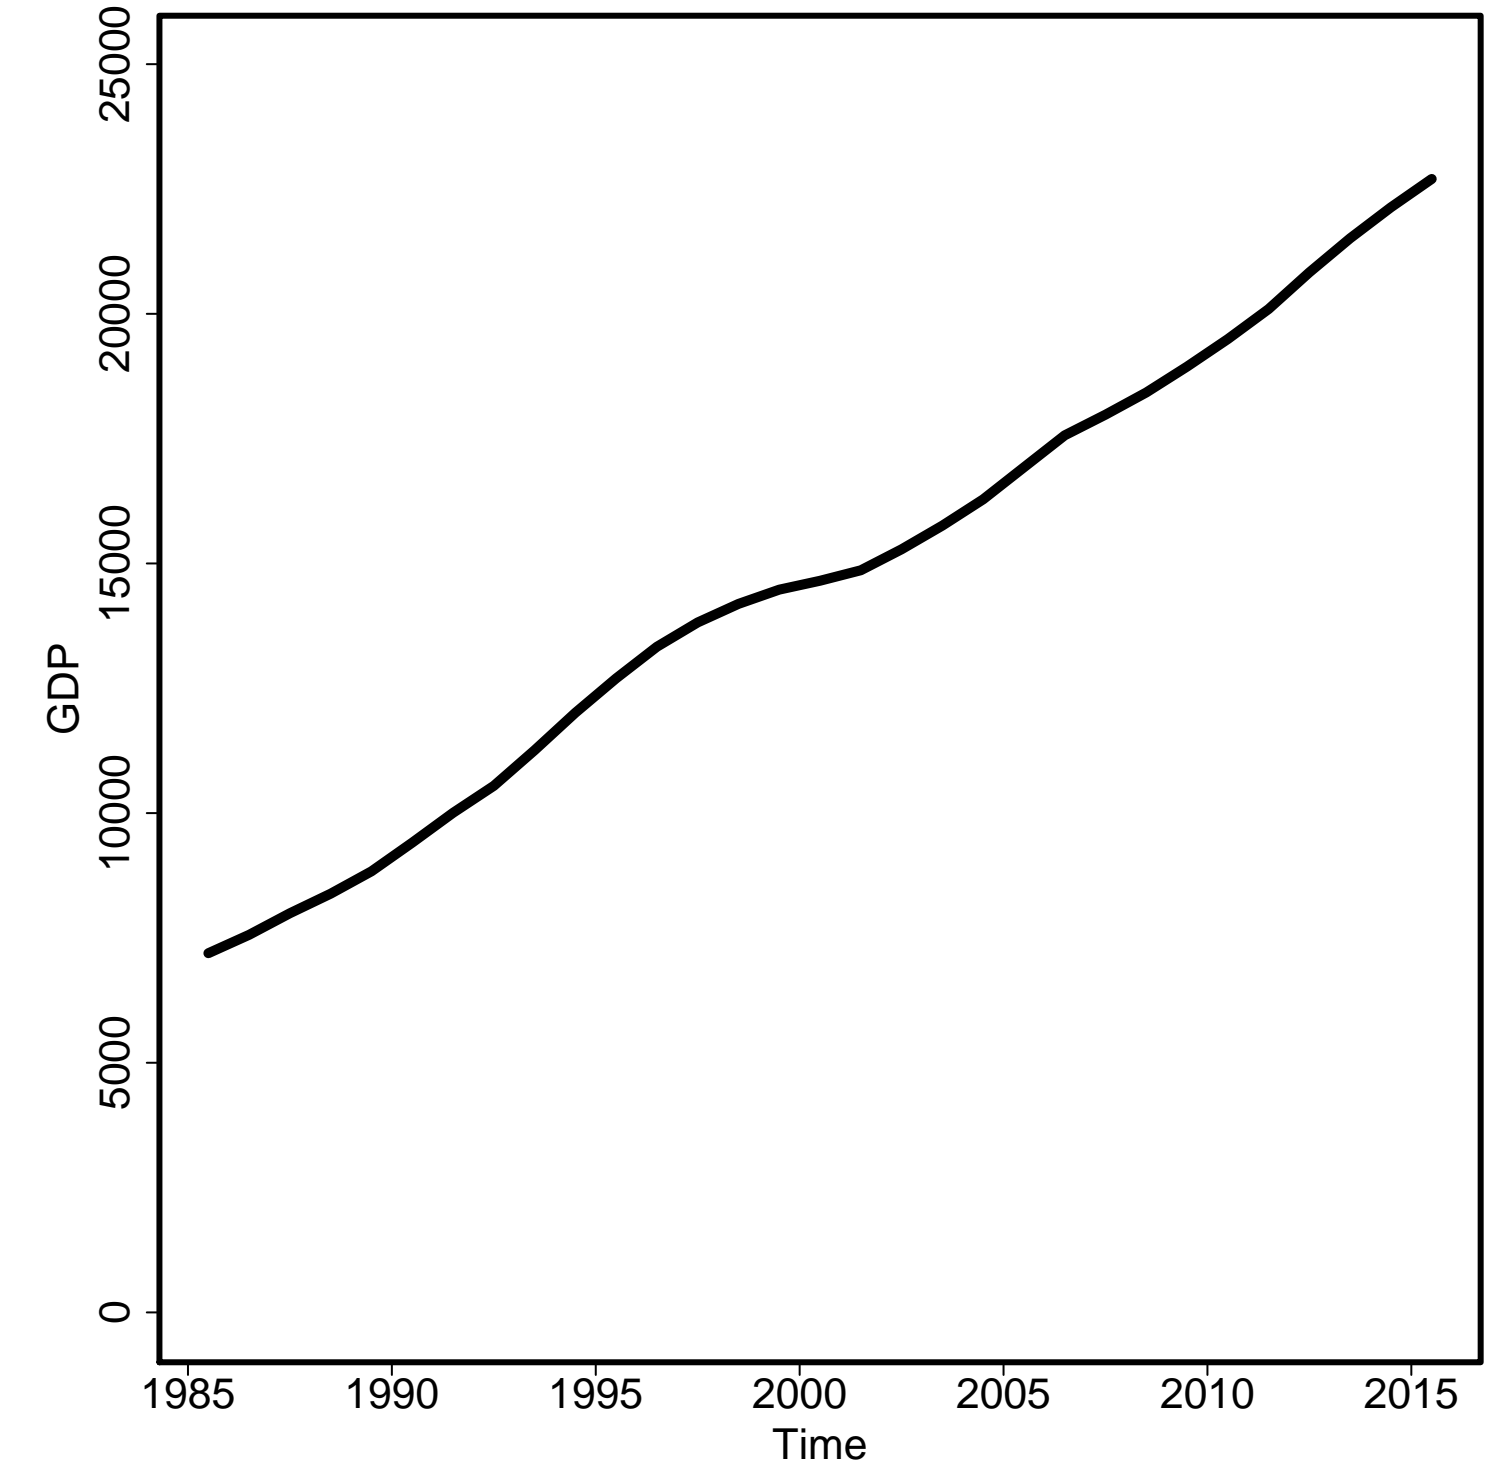

General Fertility Rate

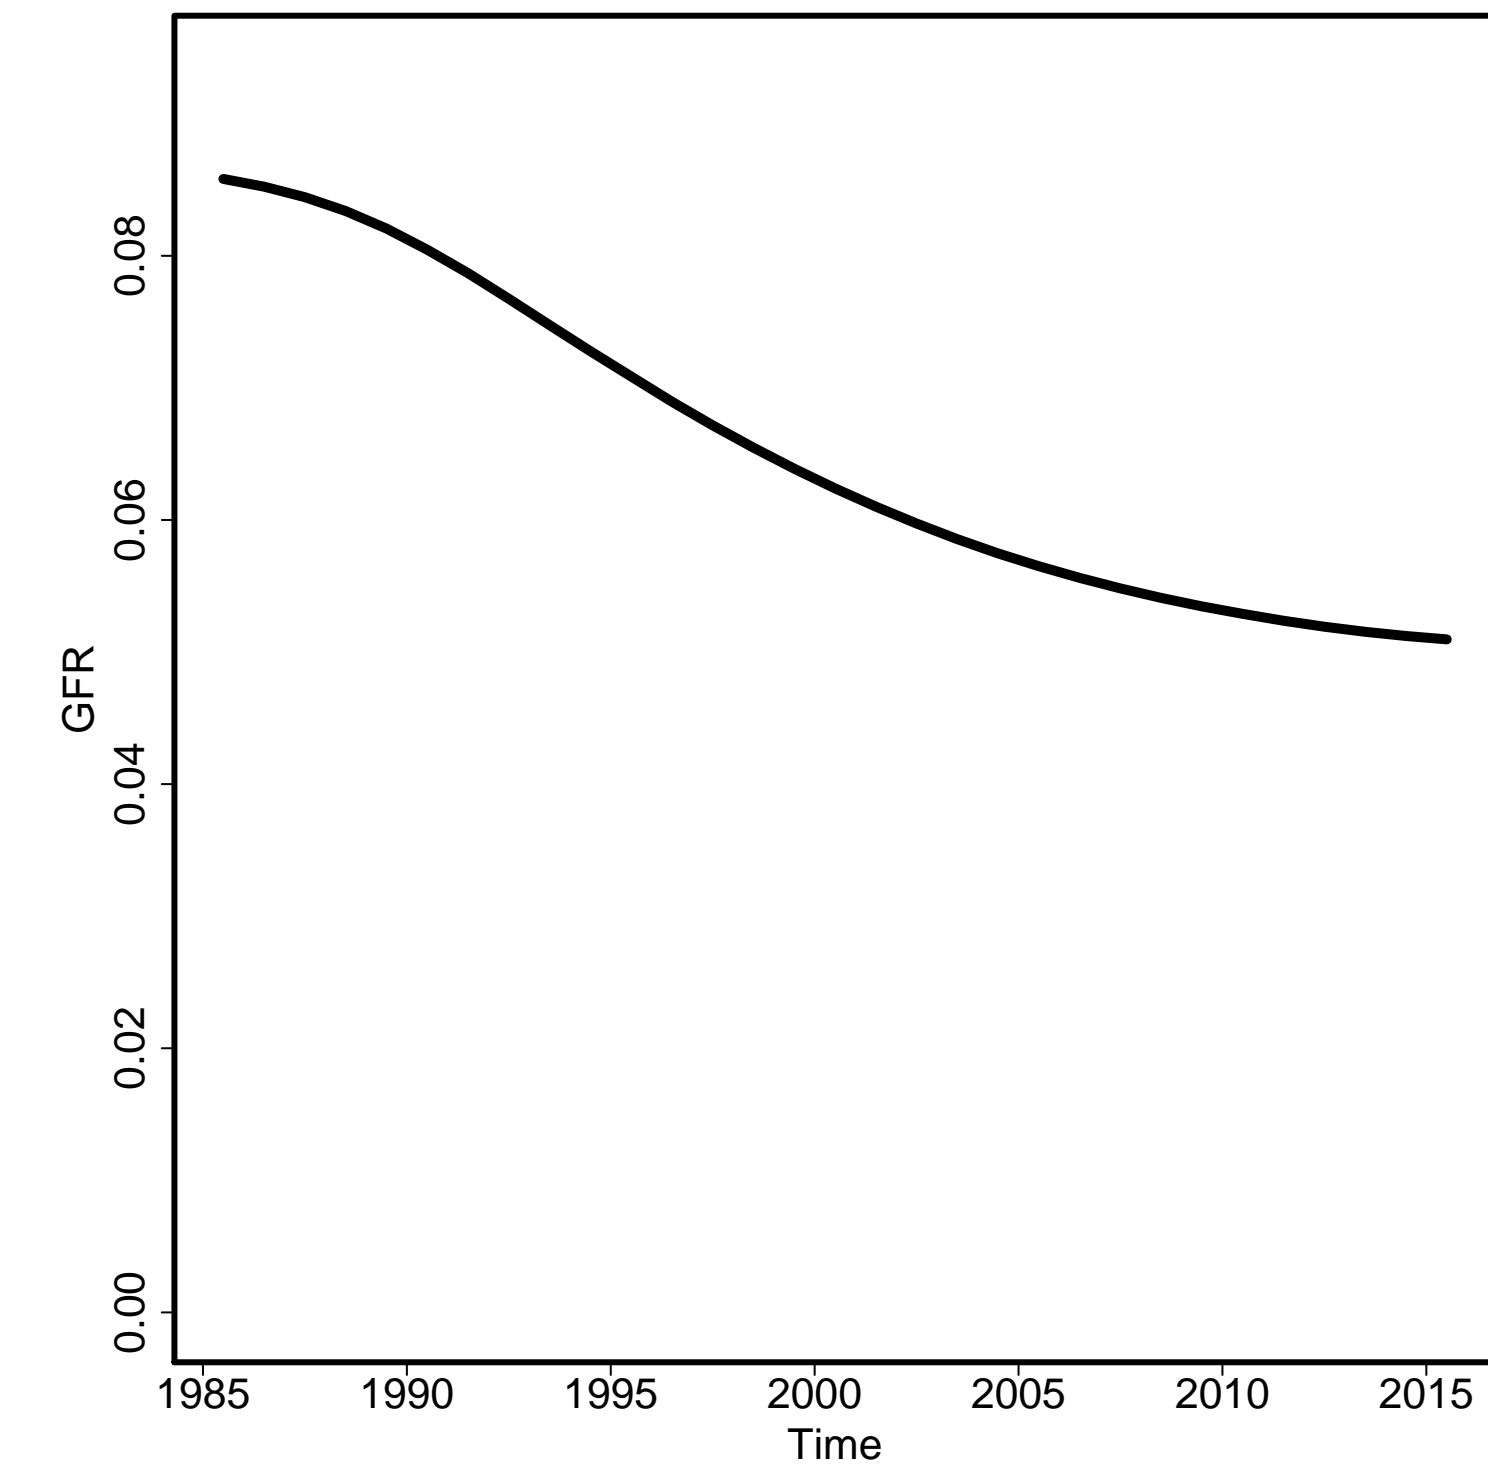

Skilled Attendance to Birth

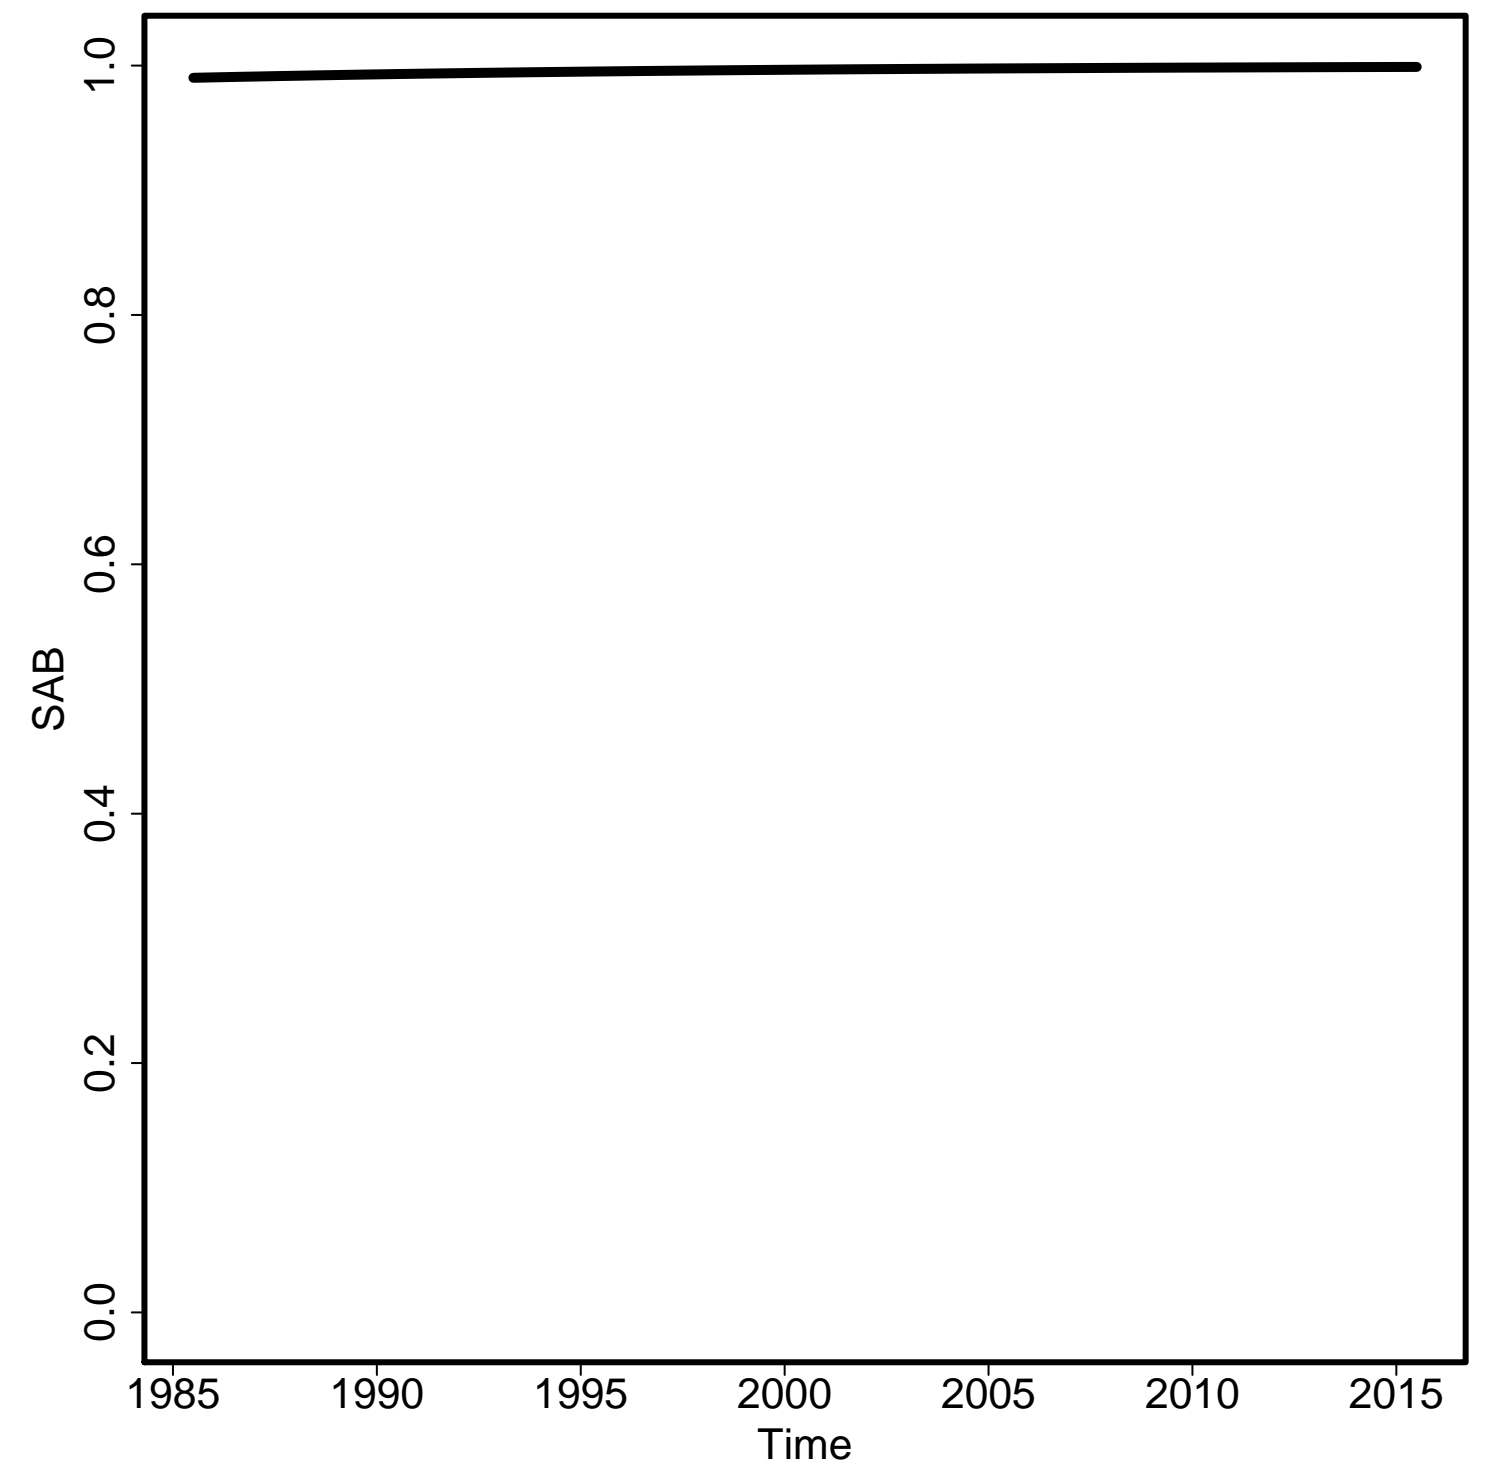

Envelope/Births

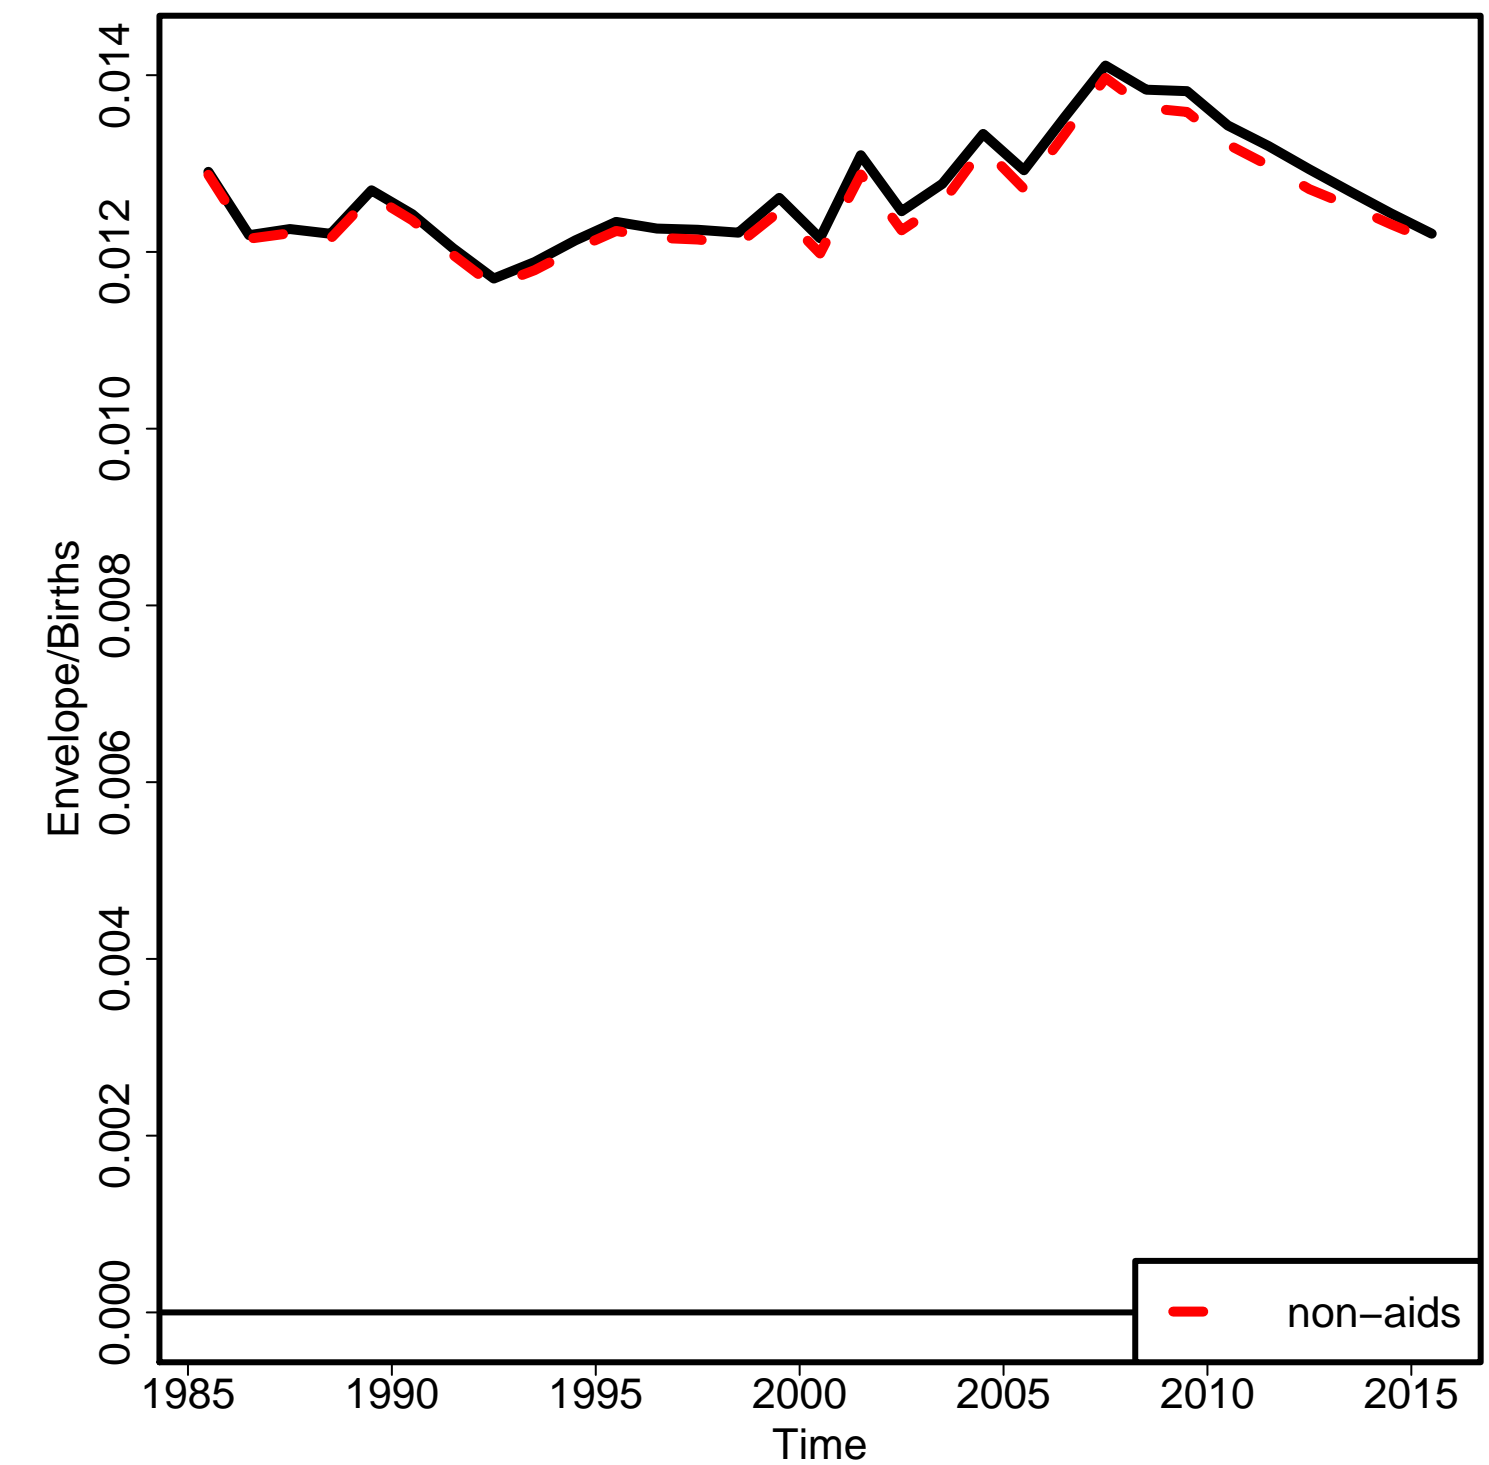

Non-aids MMR

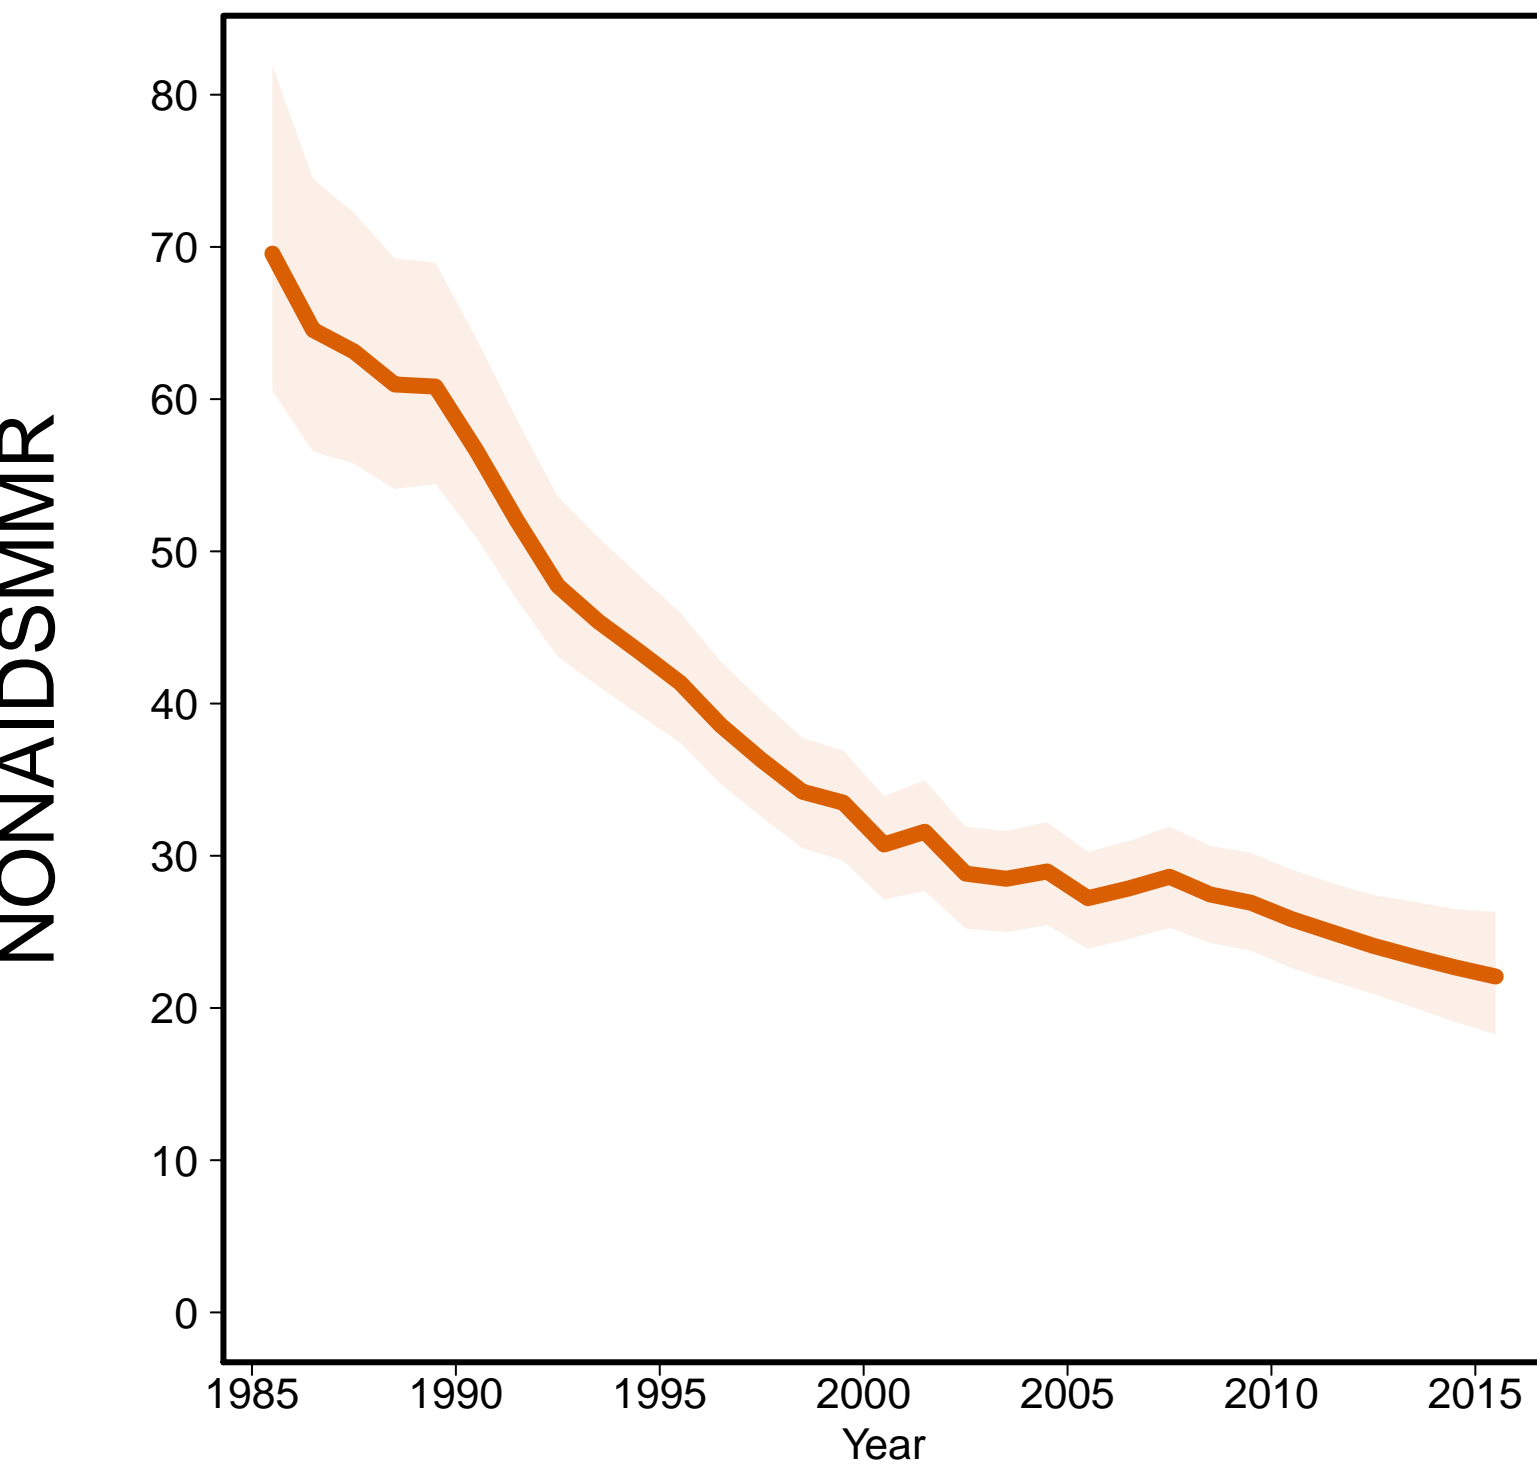

Aids MMR

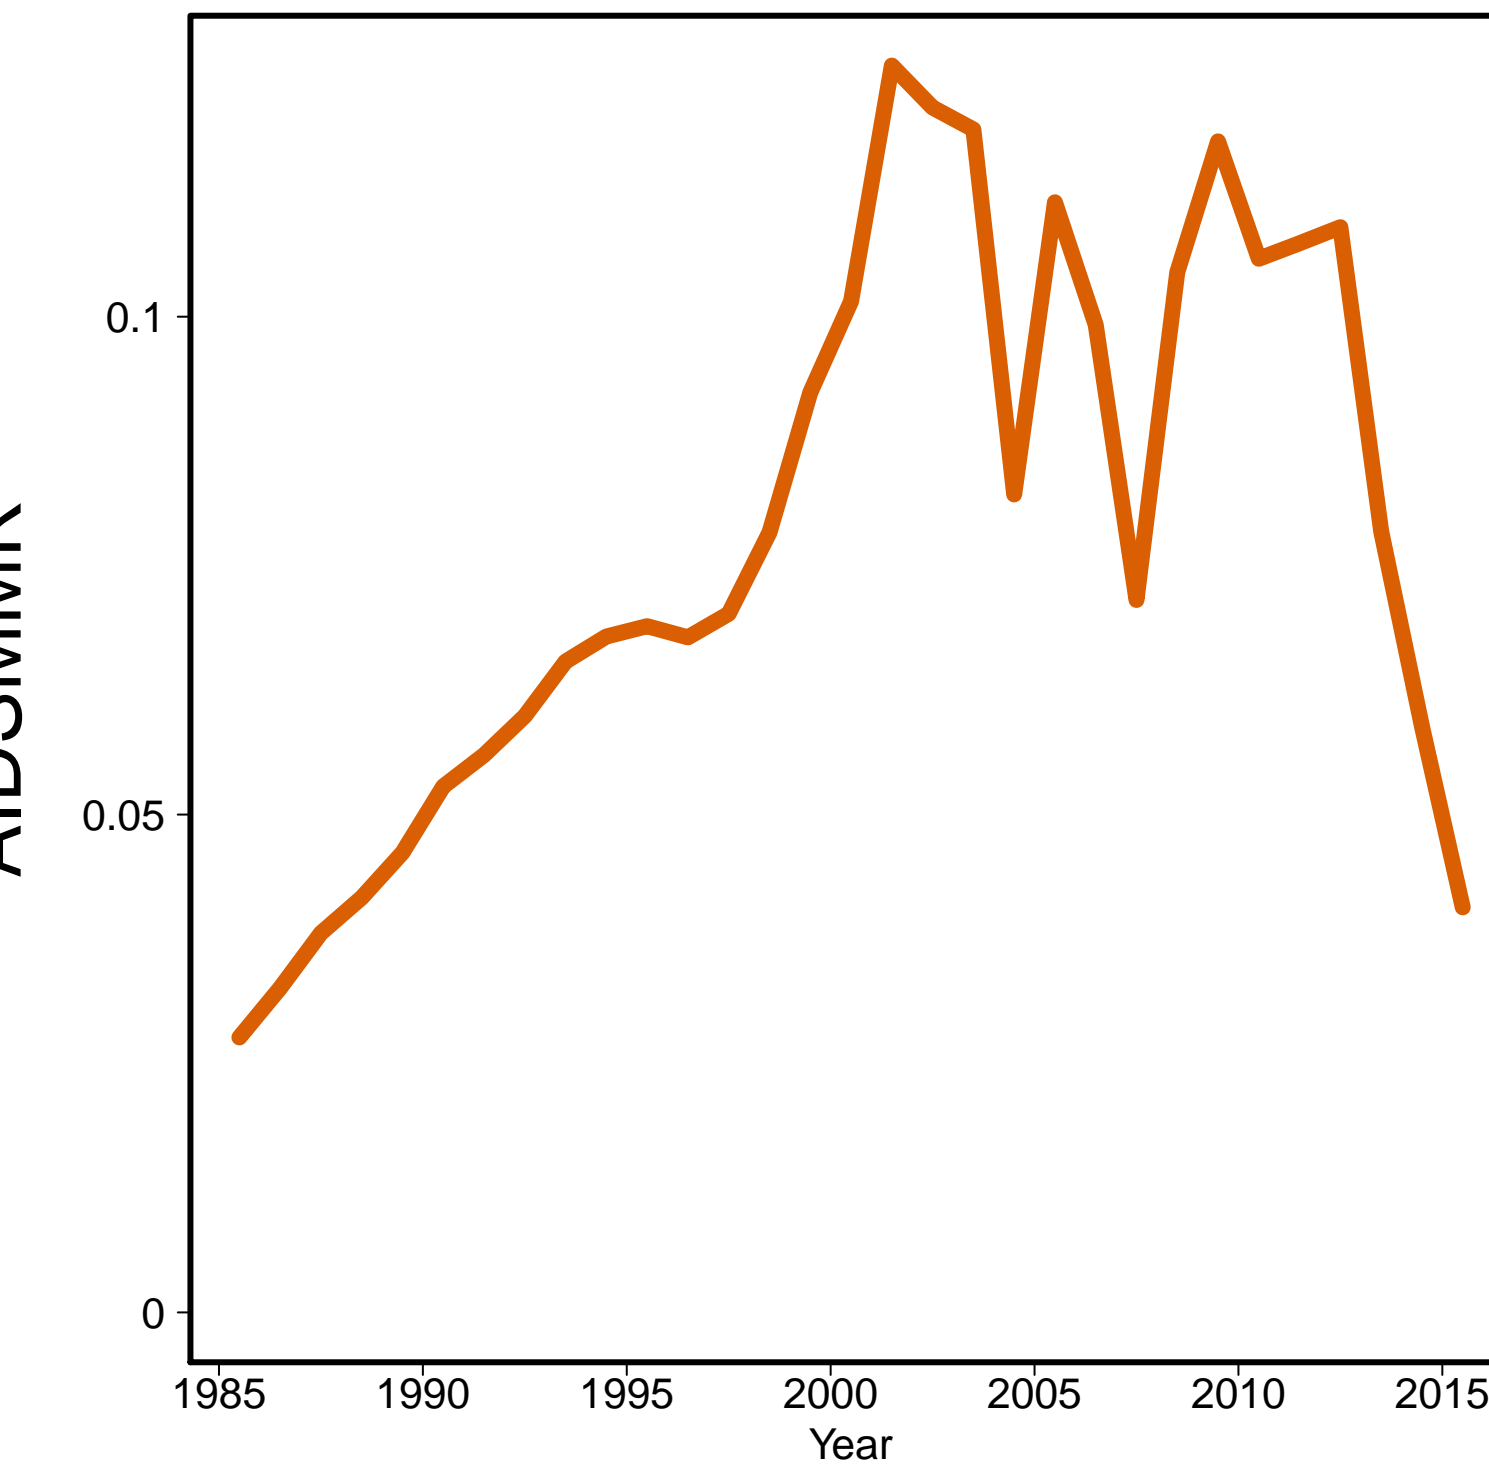

China [CHN]  
(Eastern Asia)

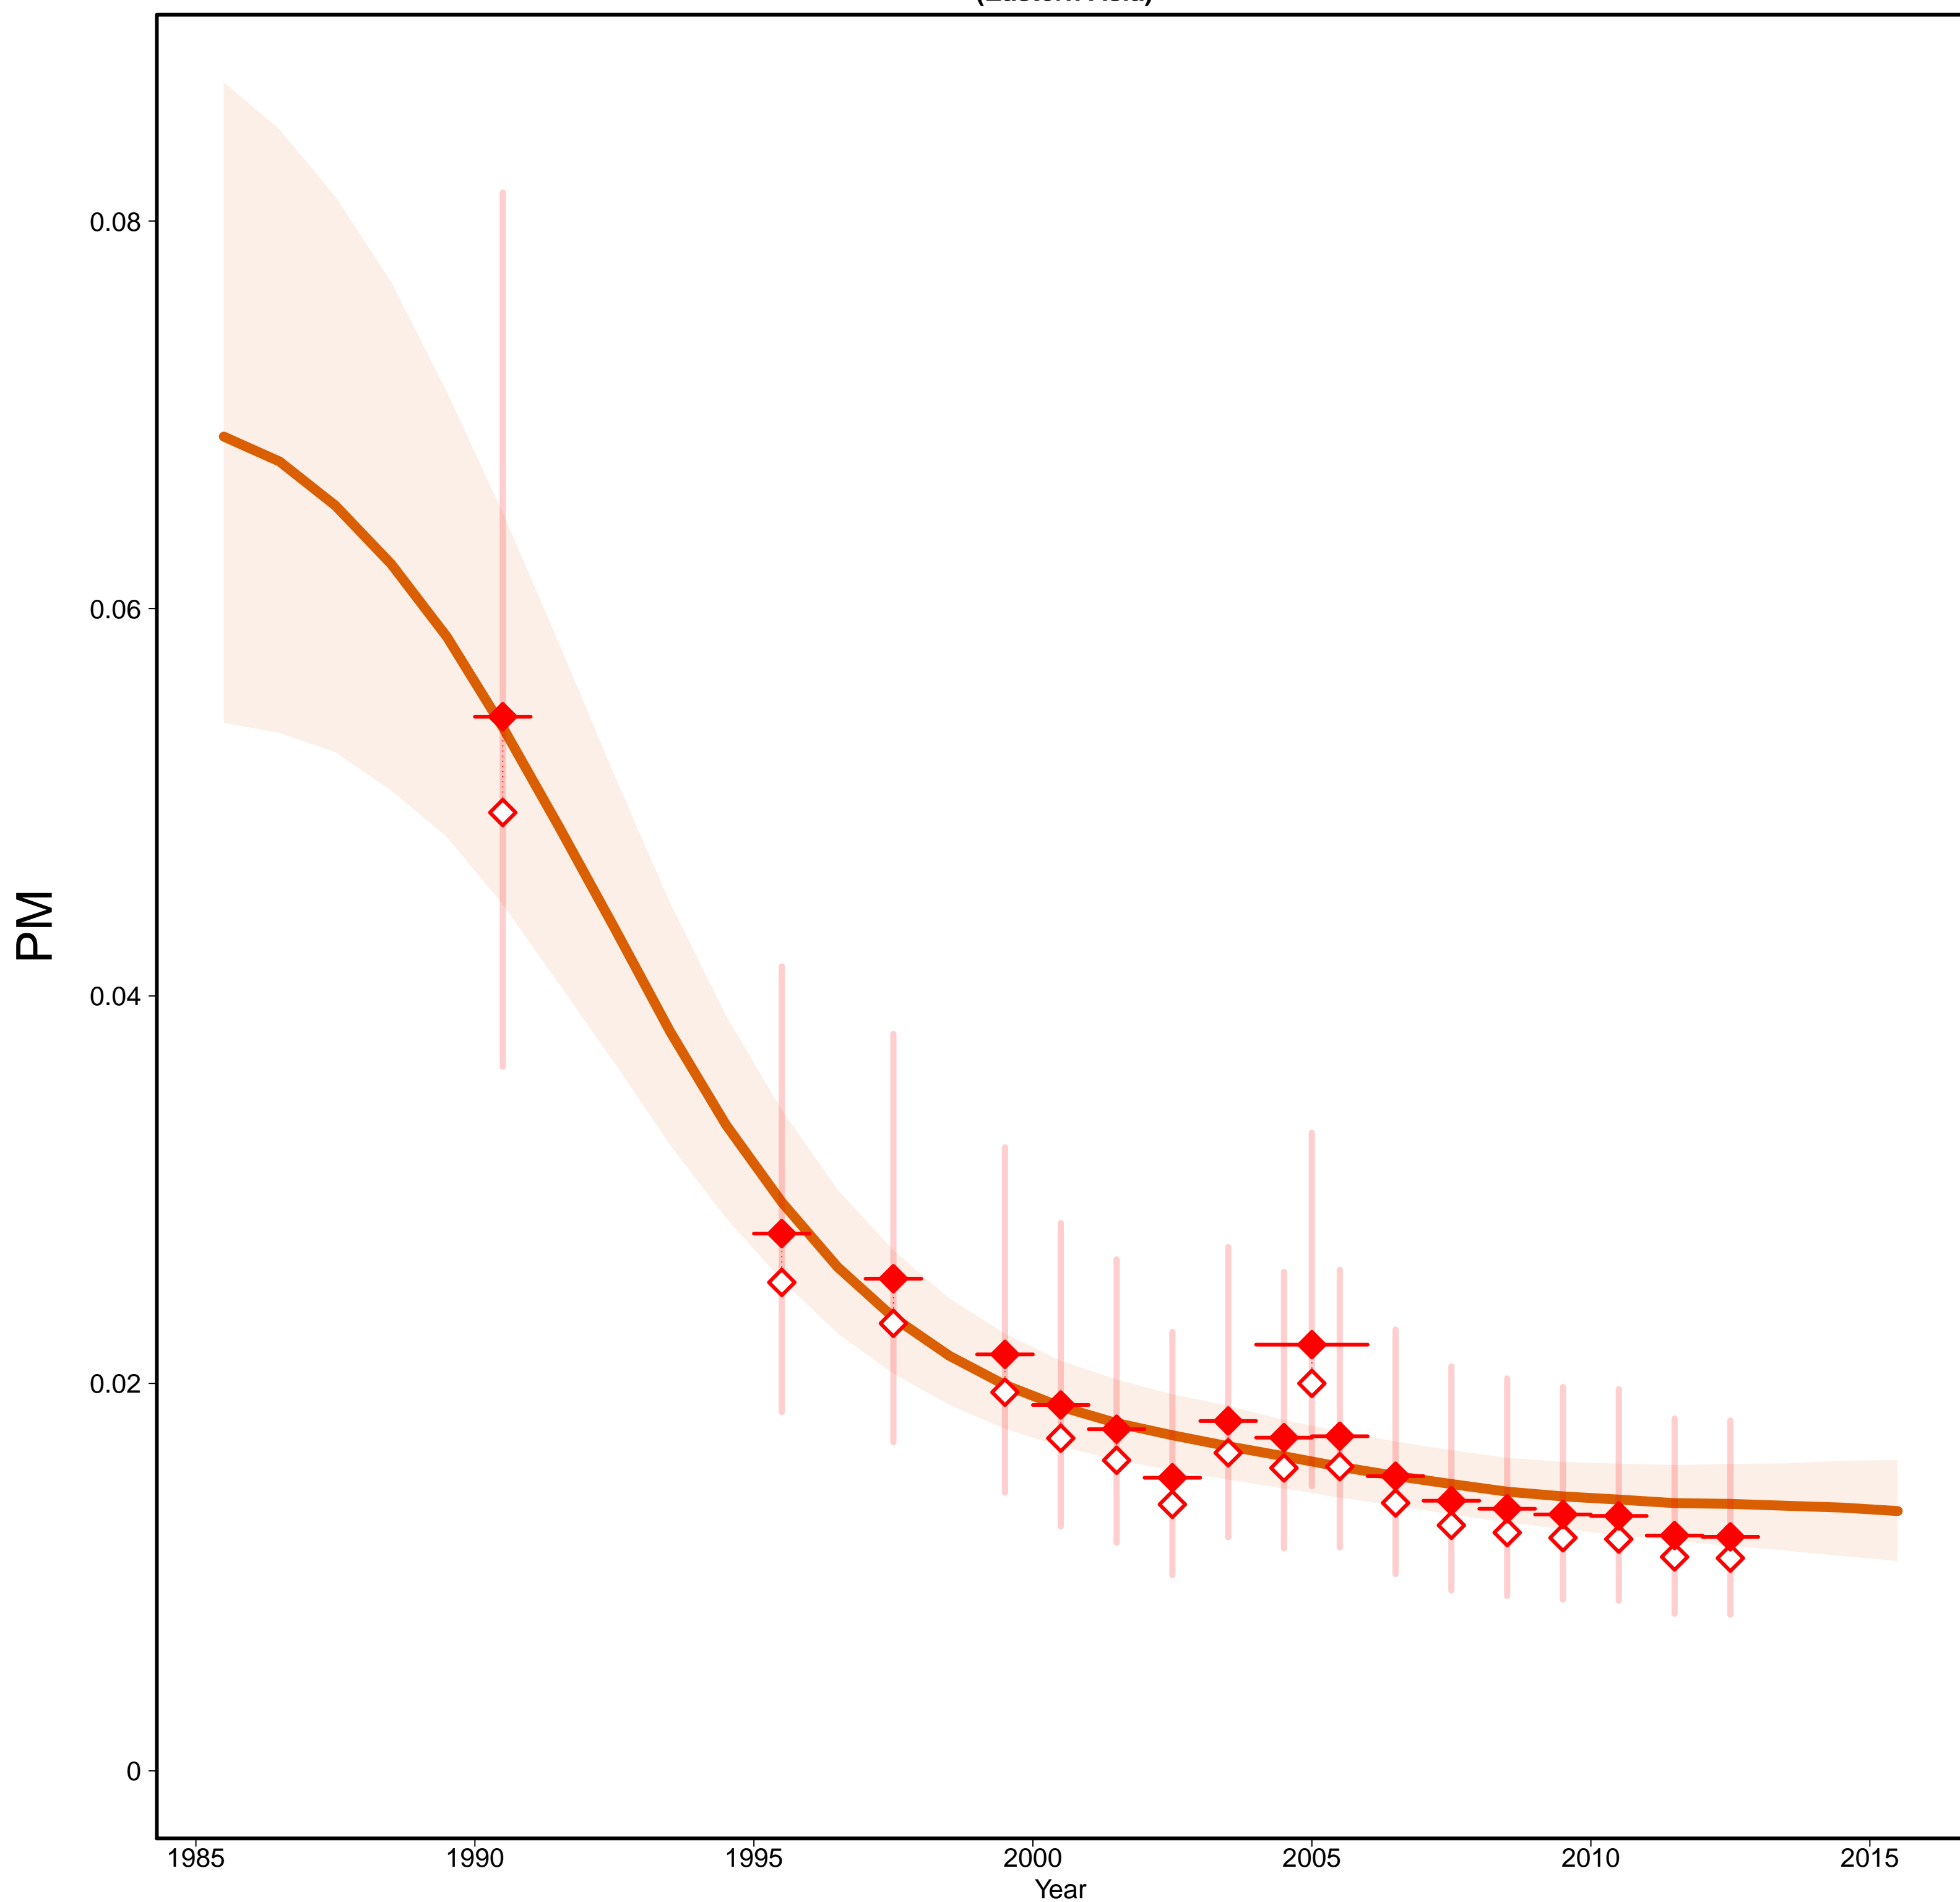

China [CHN]  
(Eastern Asia)

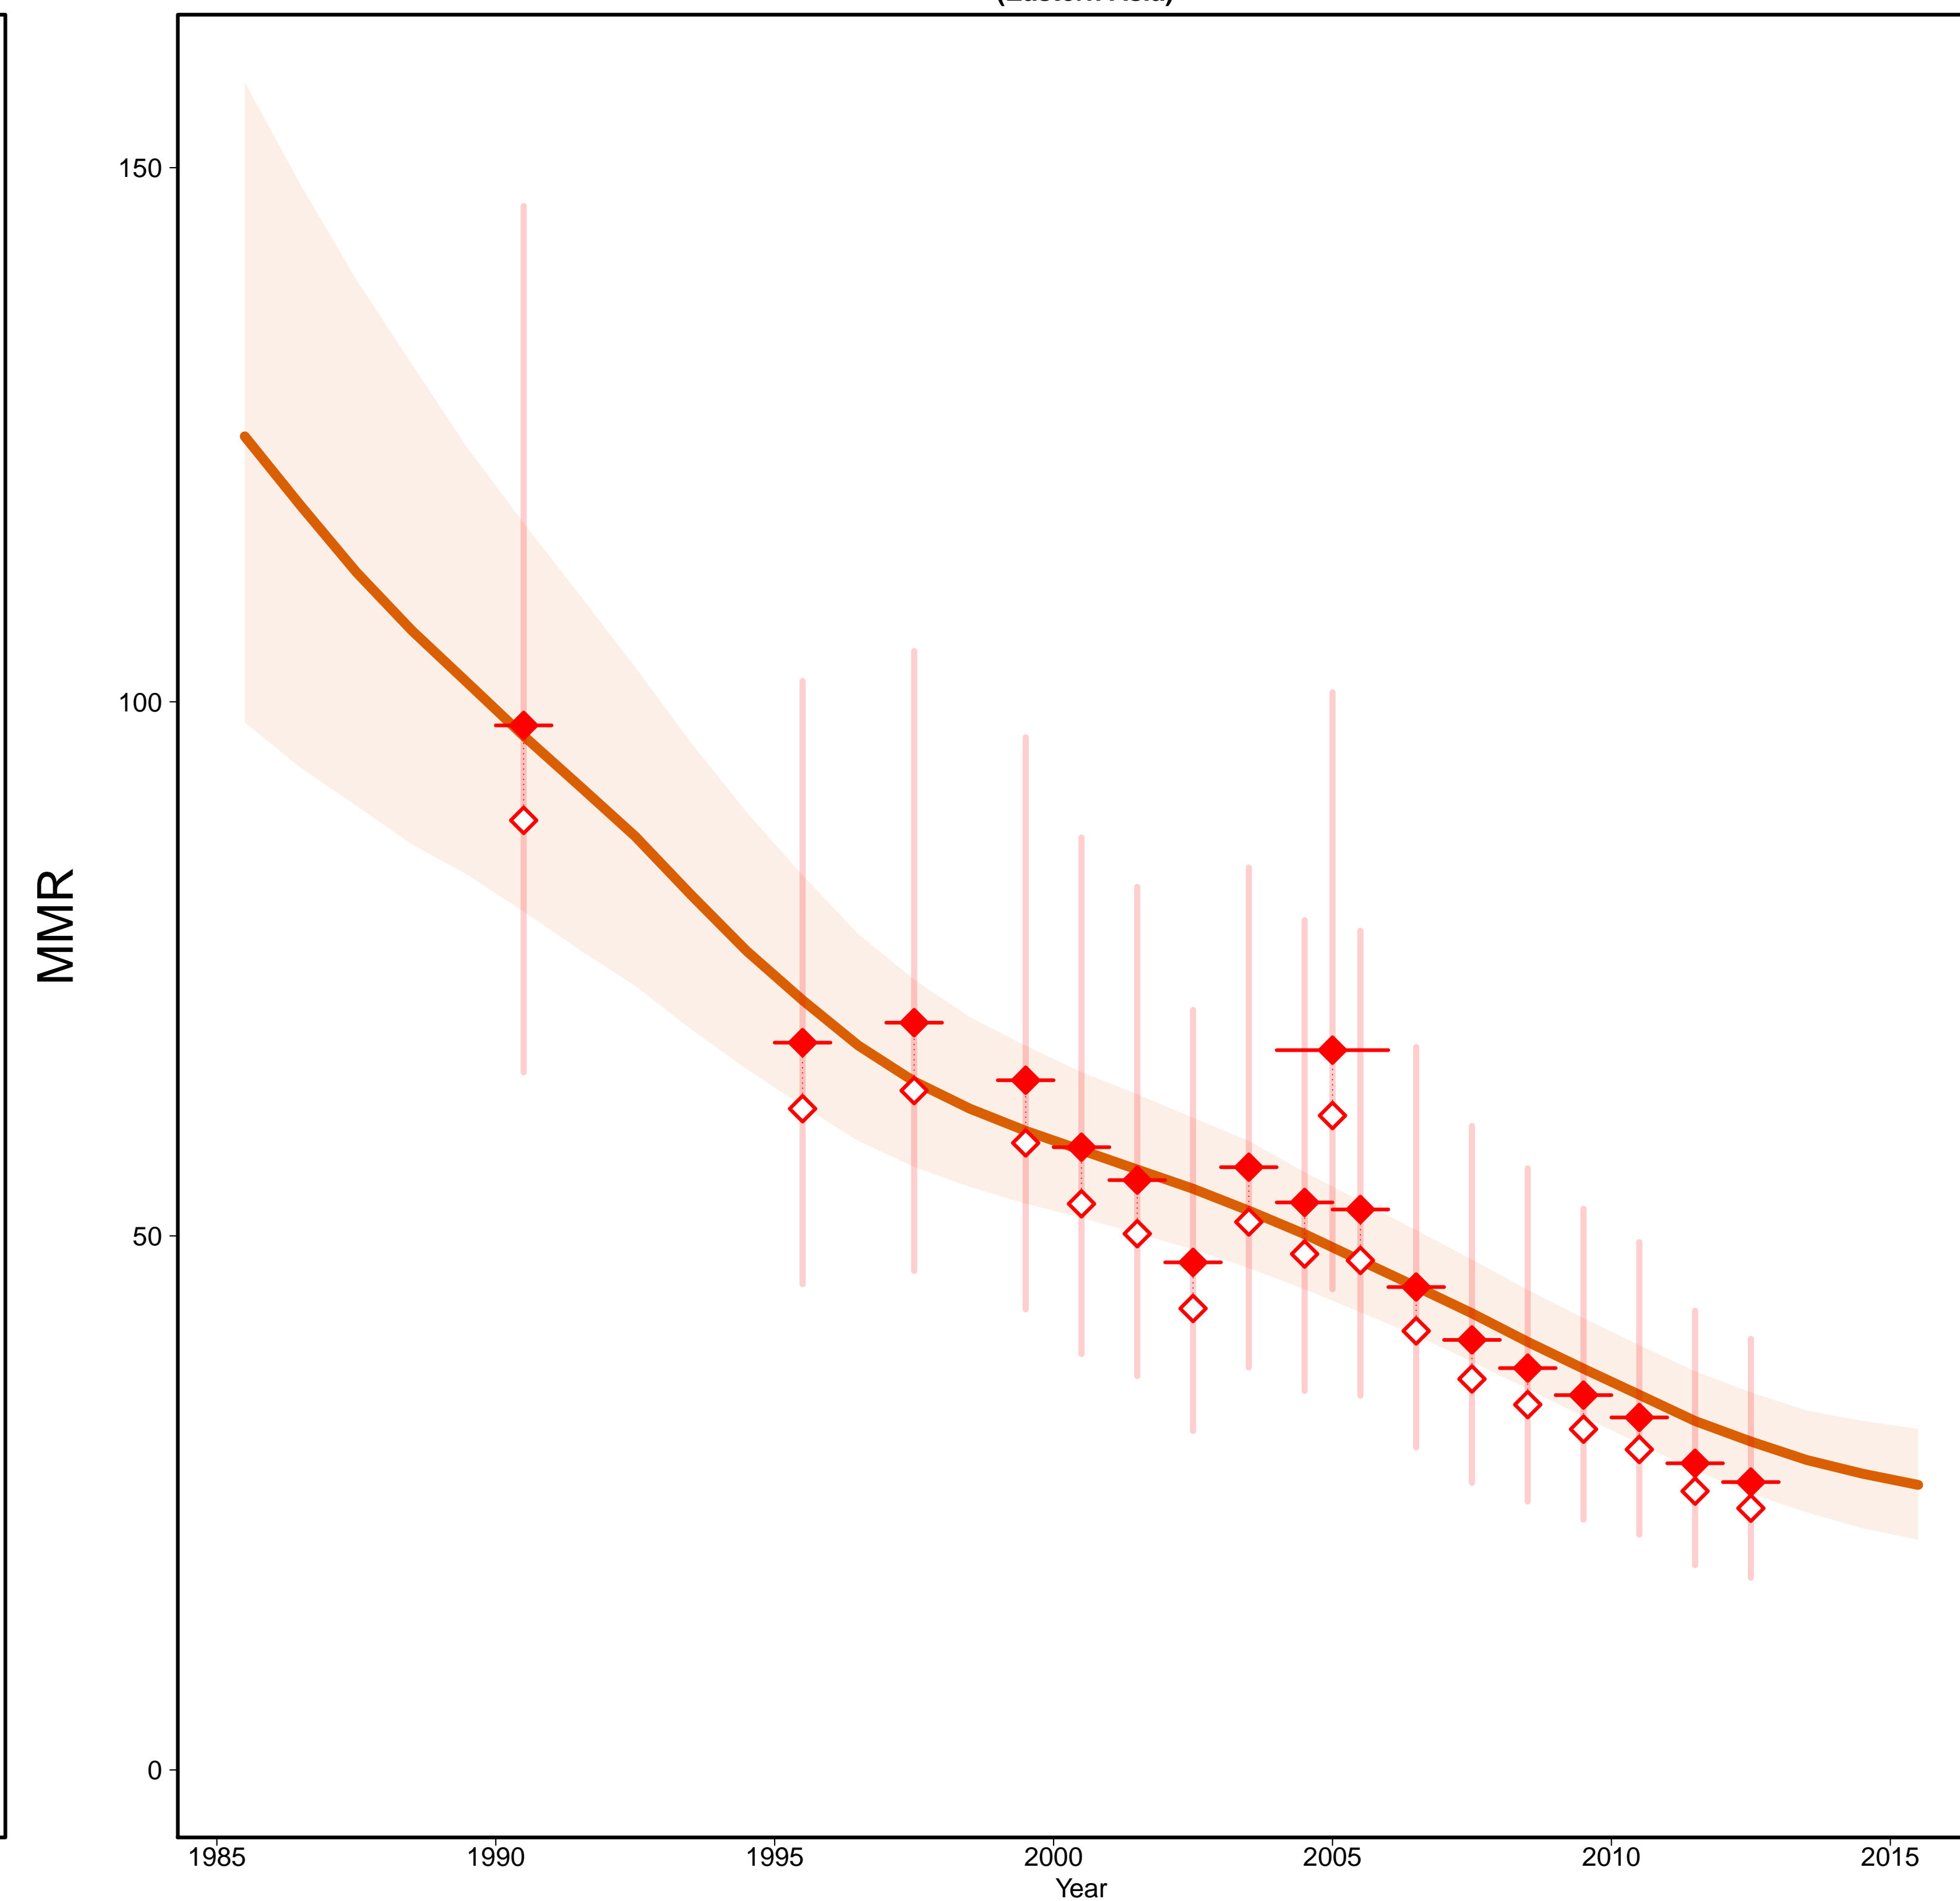

- Estimates —
- MMR Database 2015 —
- ◇ Observed Data
- ◆ Adjusted Data
- Data type —
- ◆ Misc. studies

Gross Domestic Product

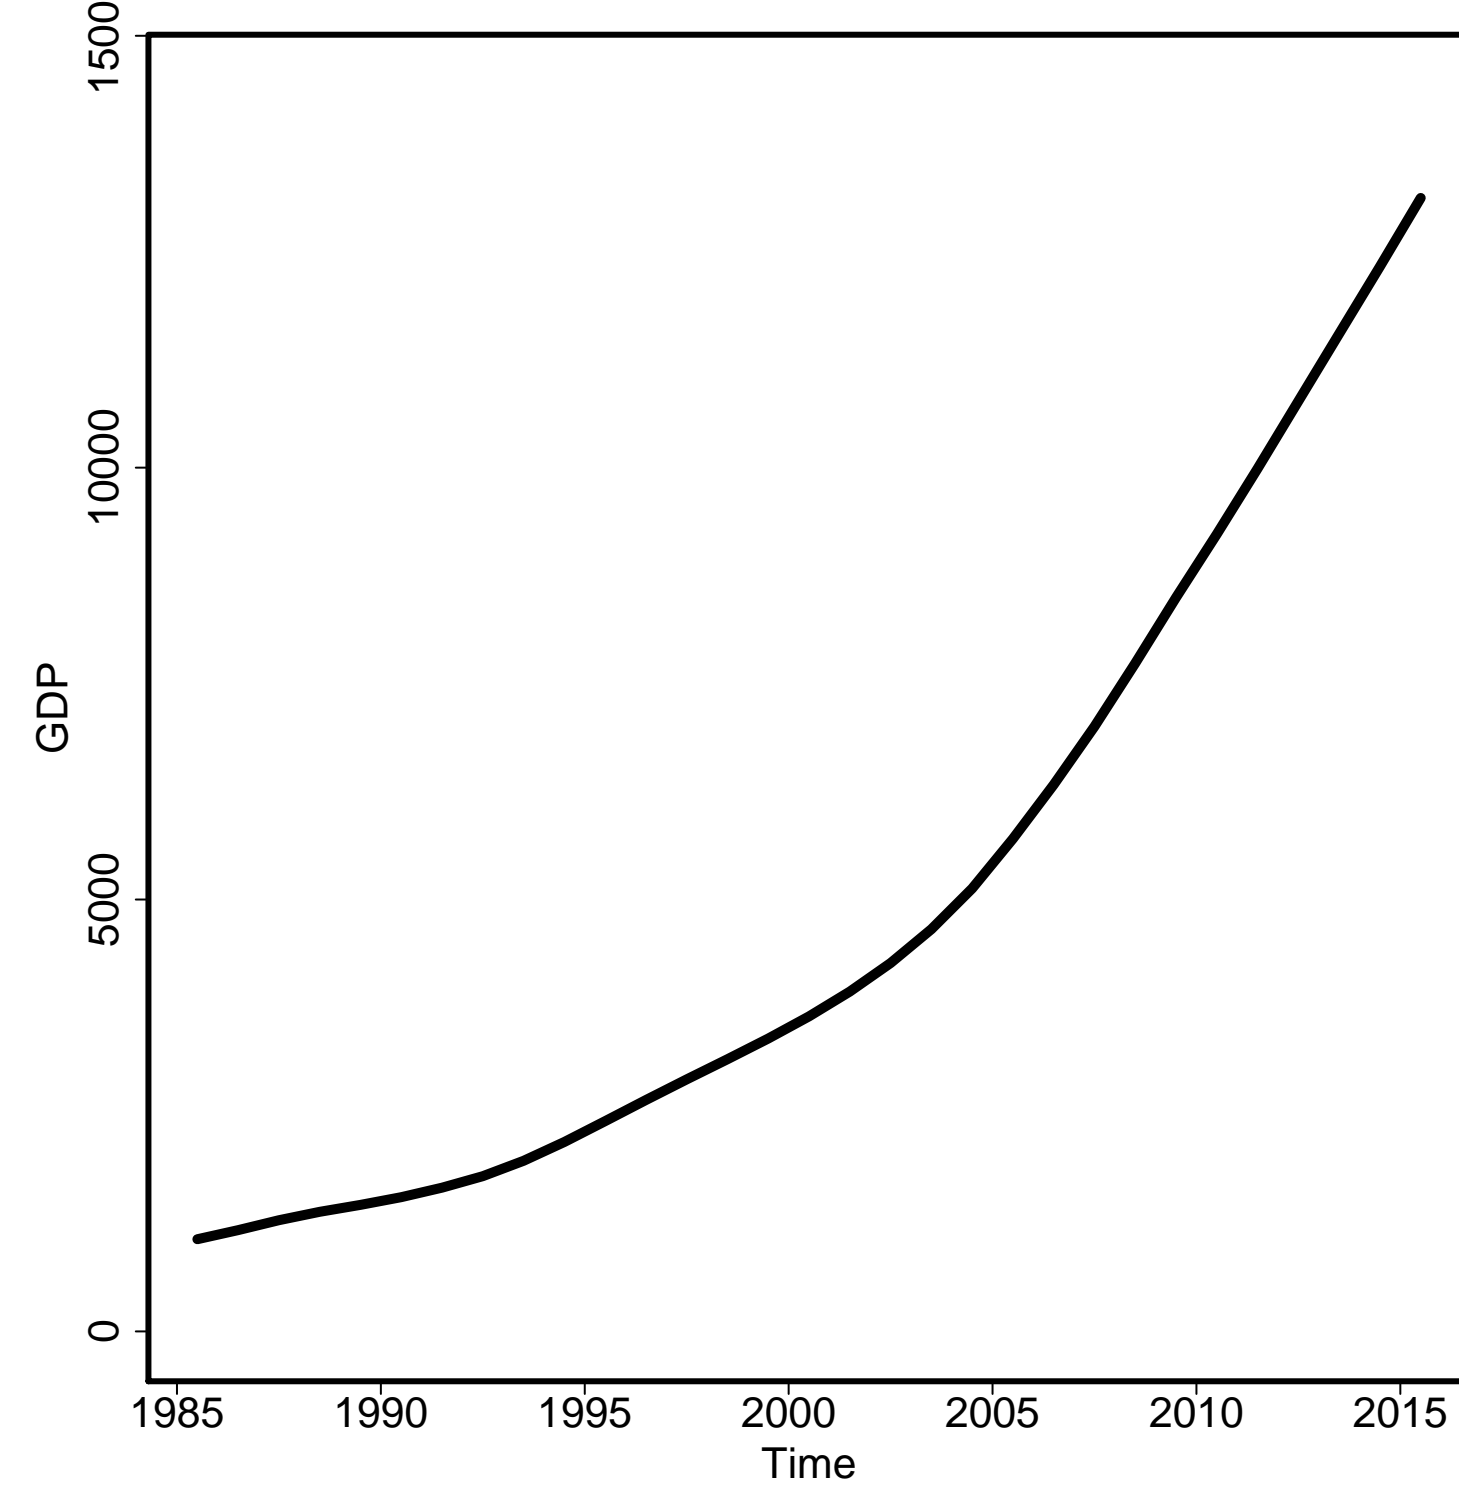

General Fertility Rate

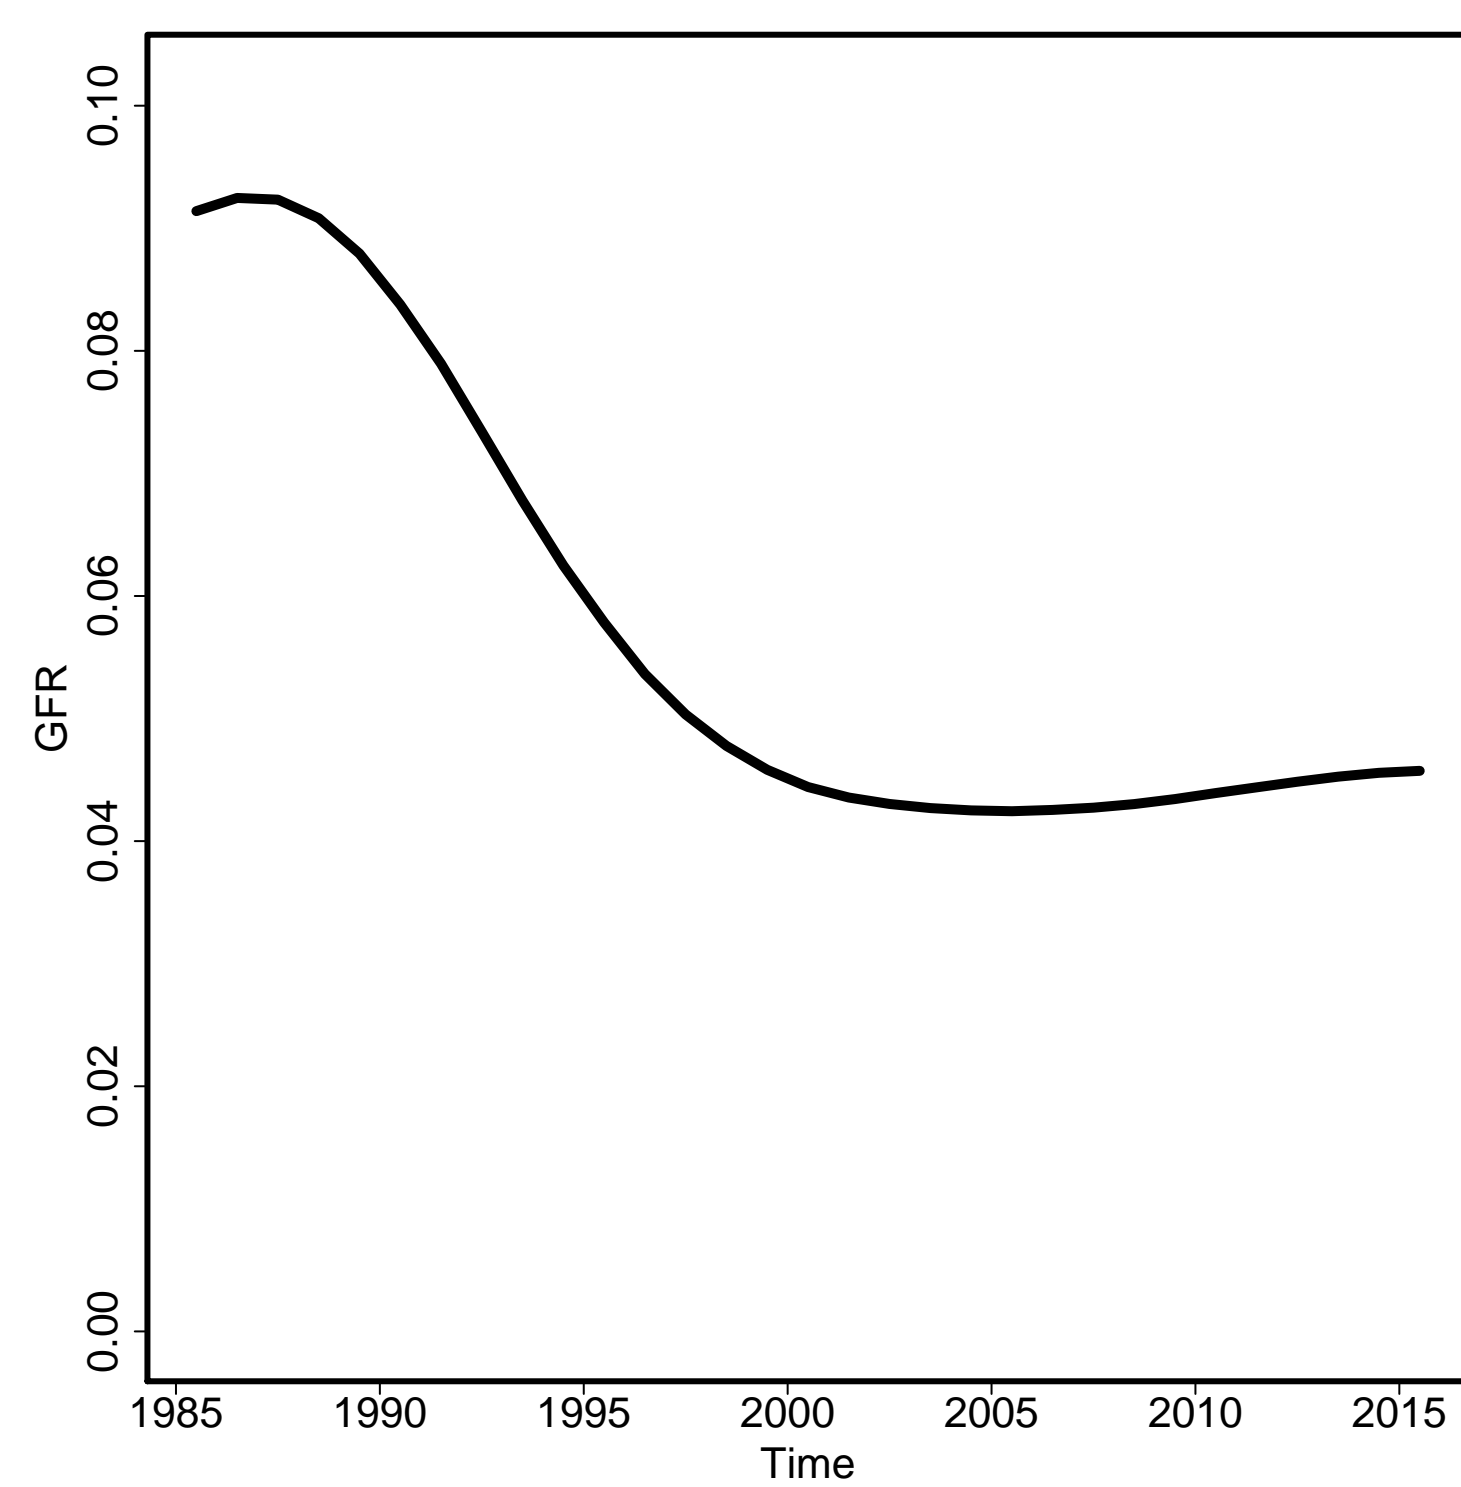

Skilled Attendance to Birth

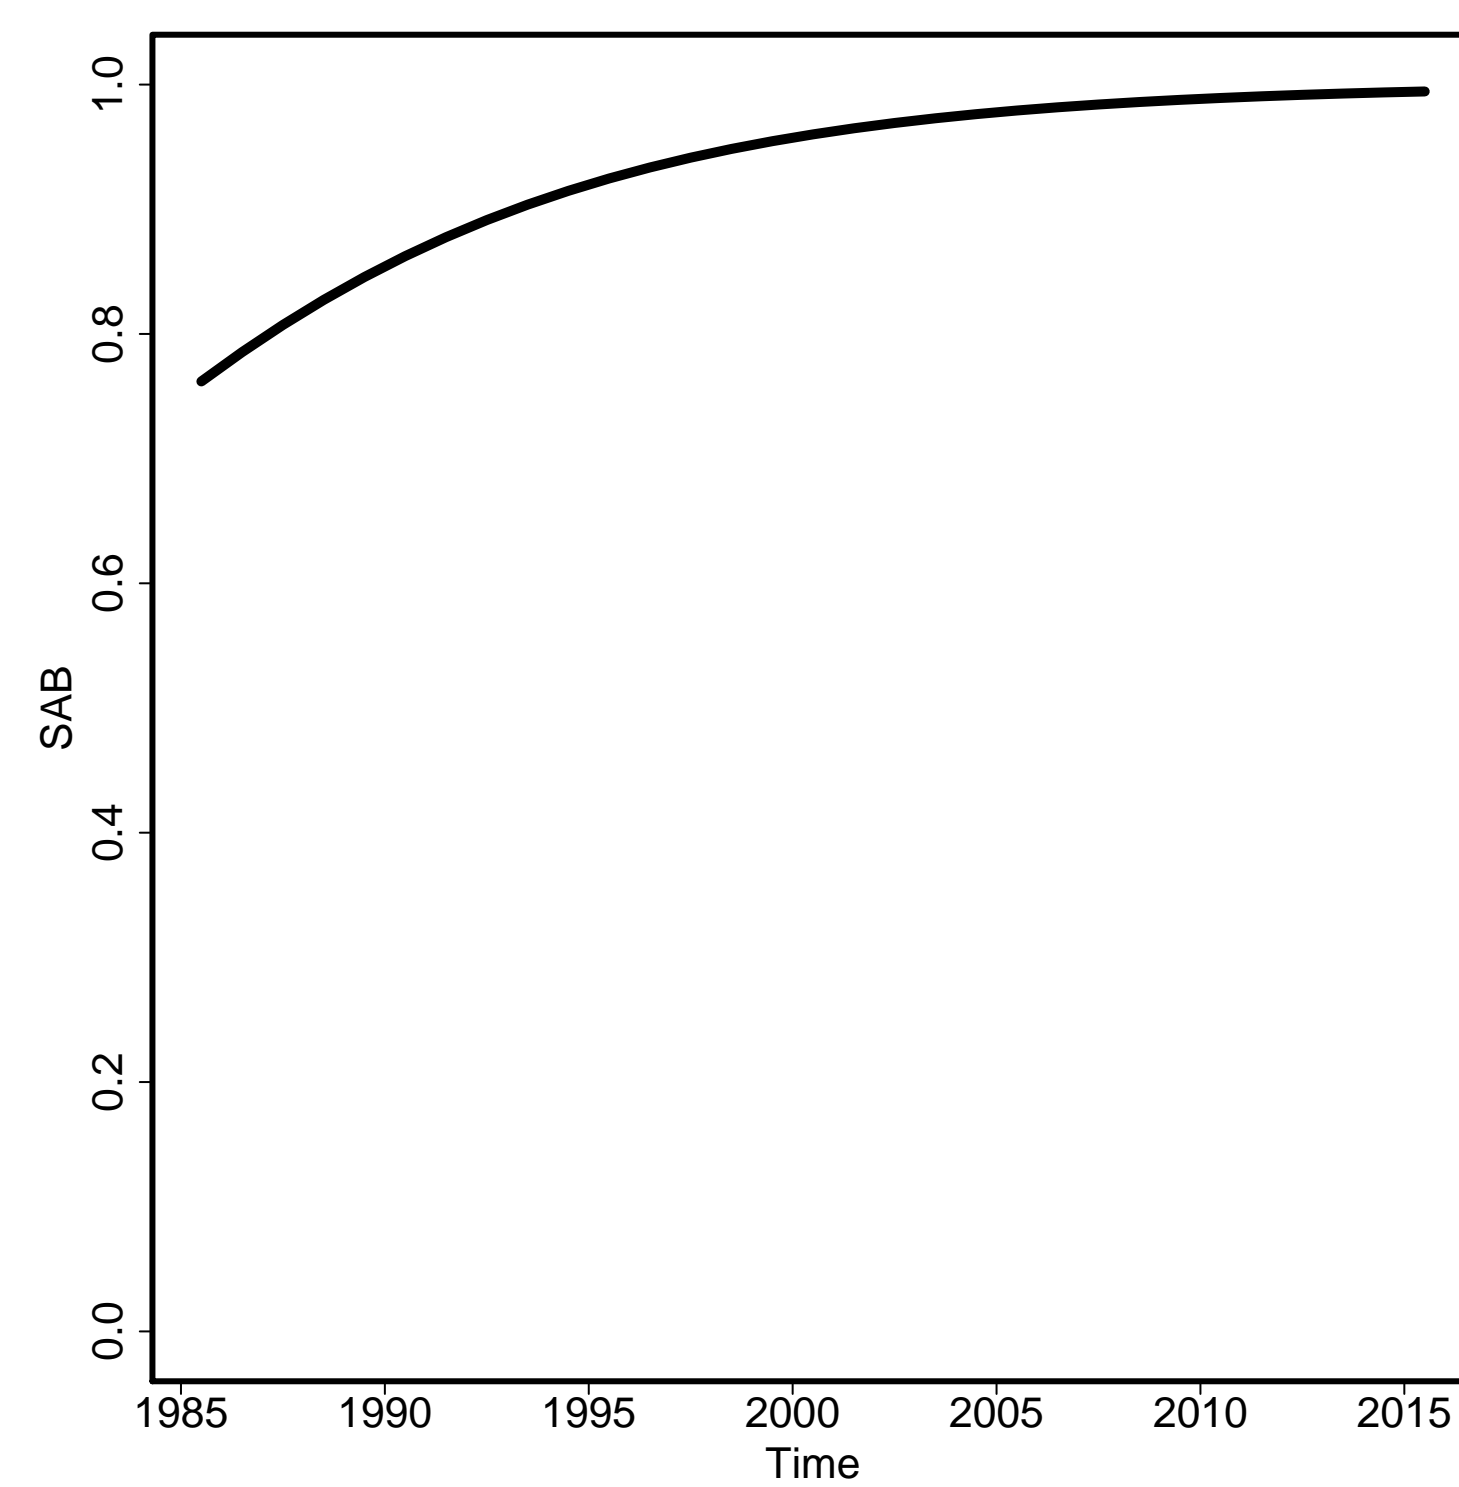

Envelope/Births

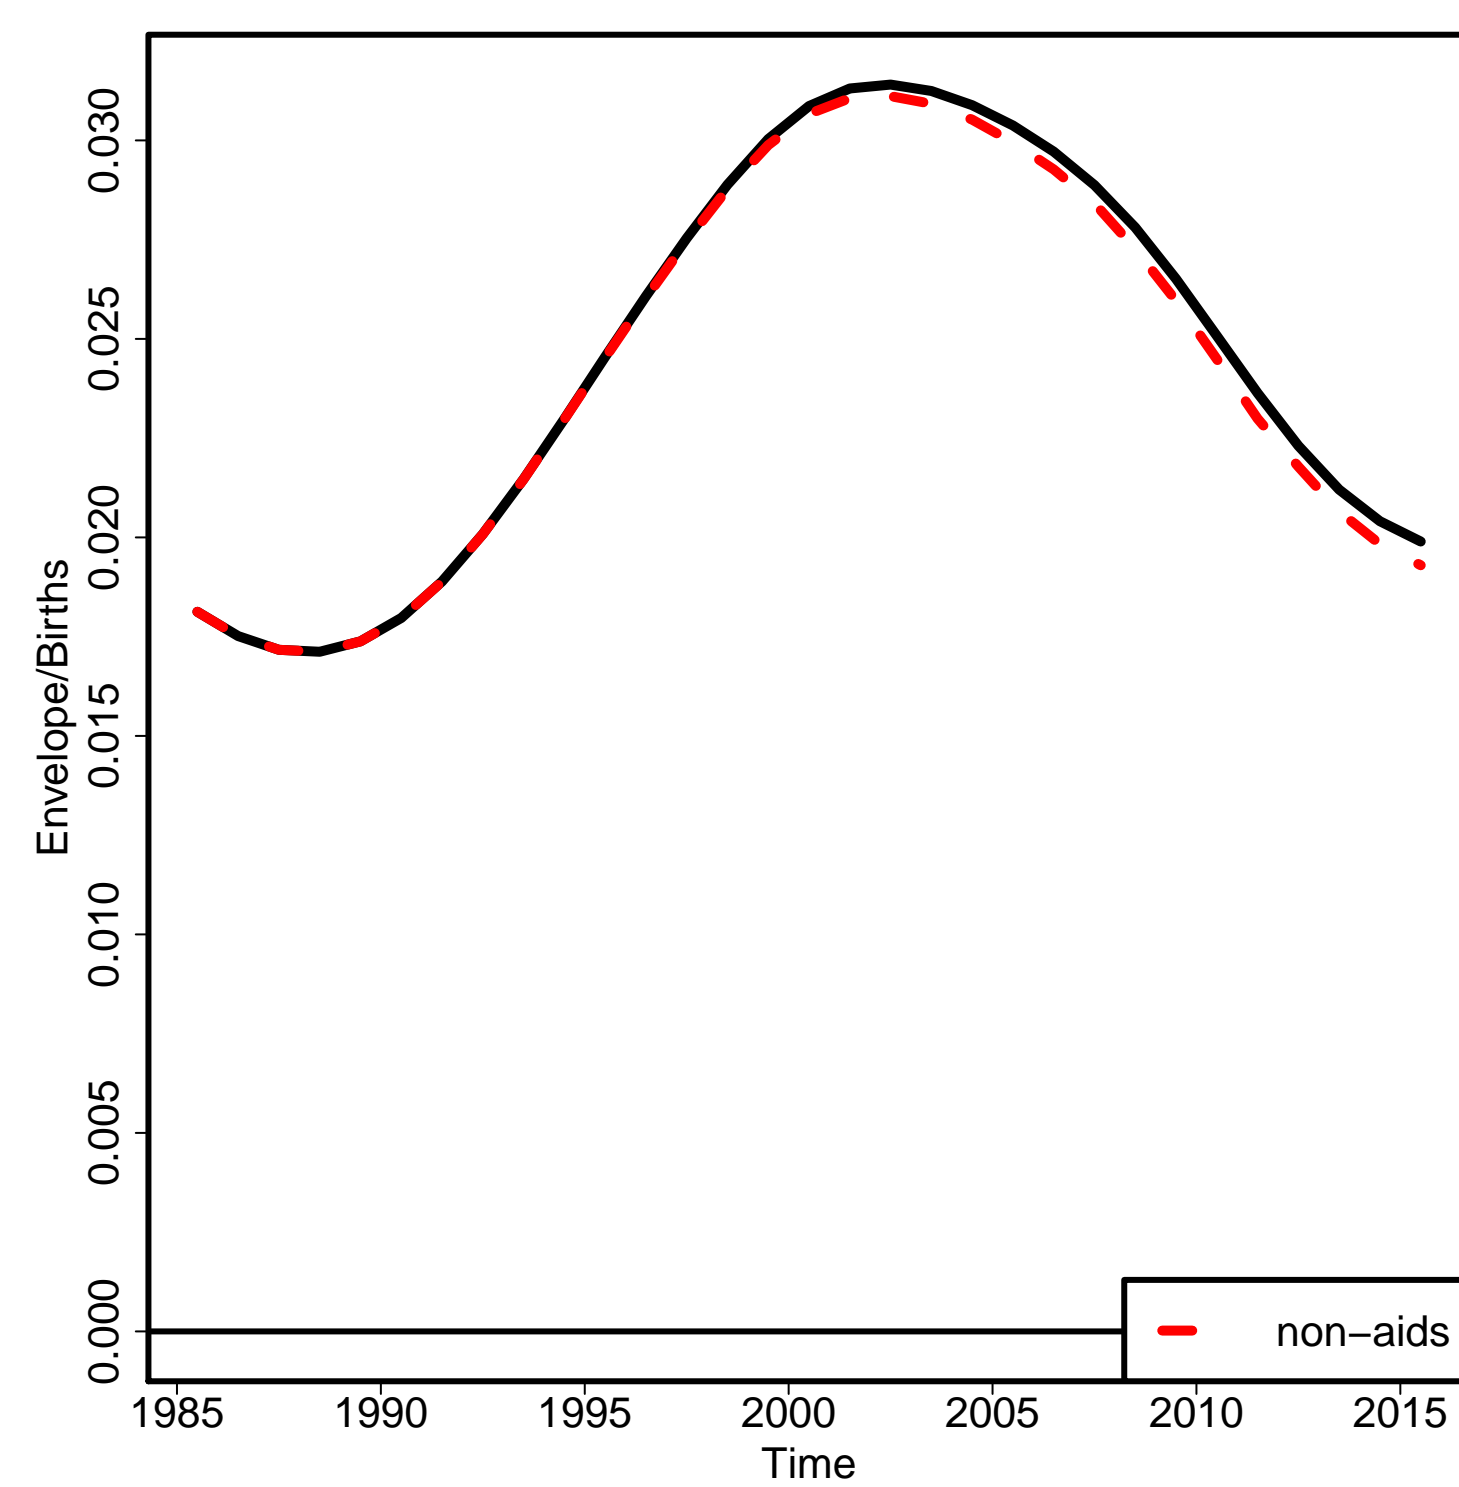

Non-aids MMR

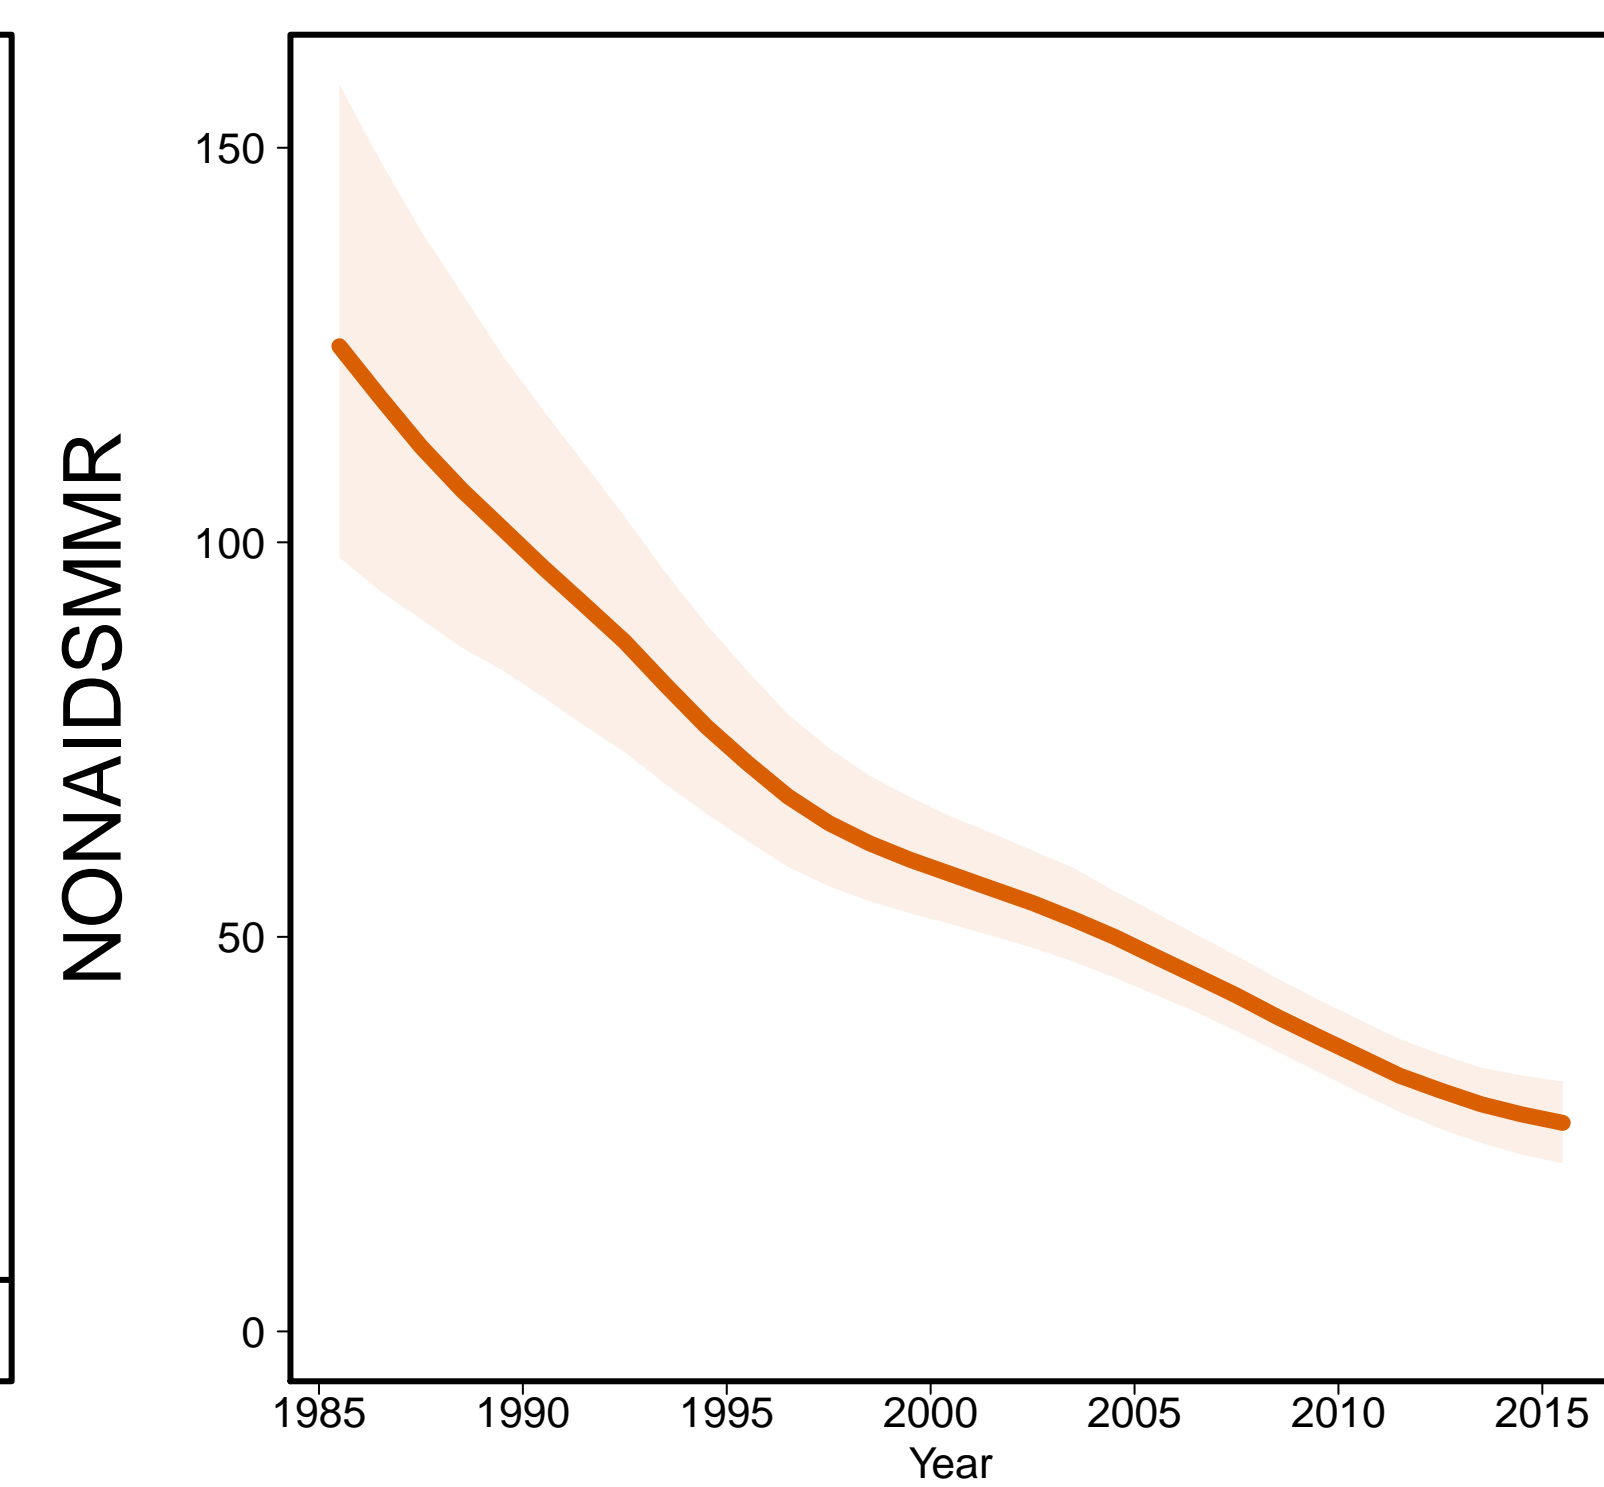

Aids MMR

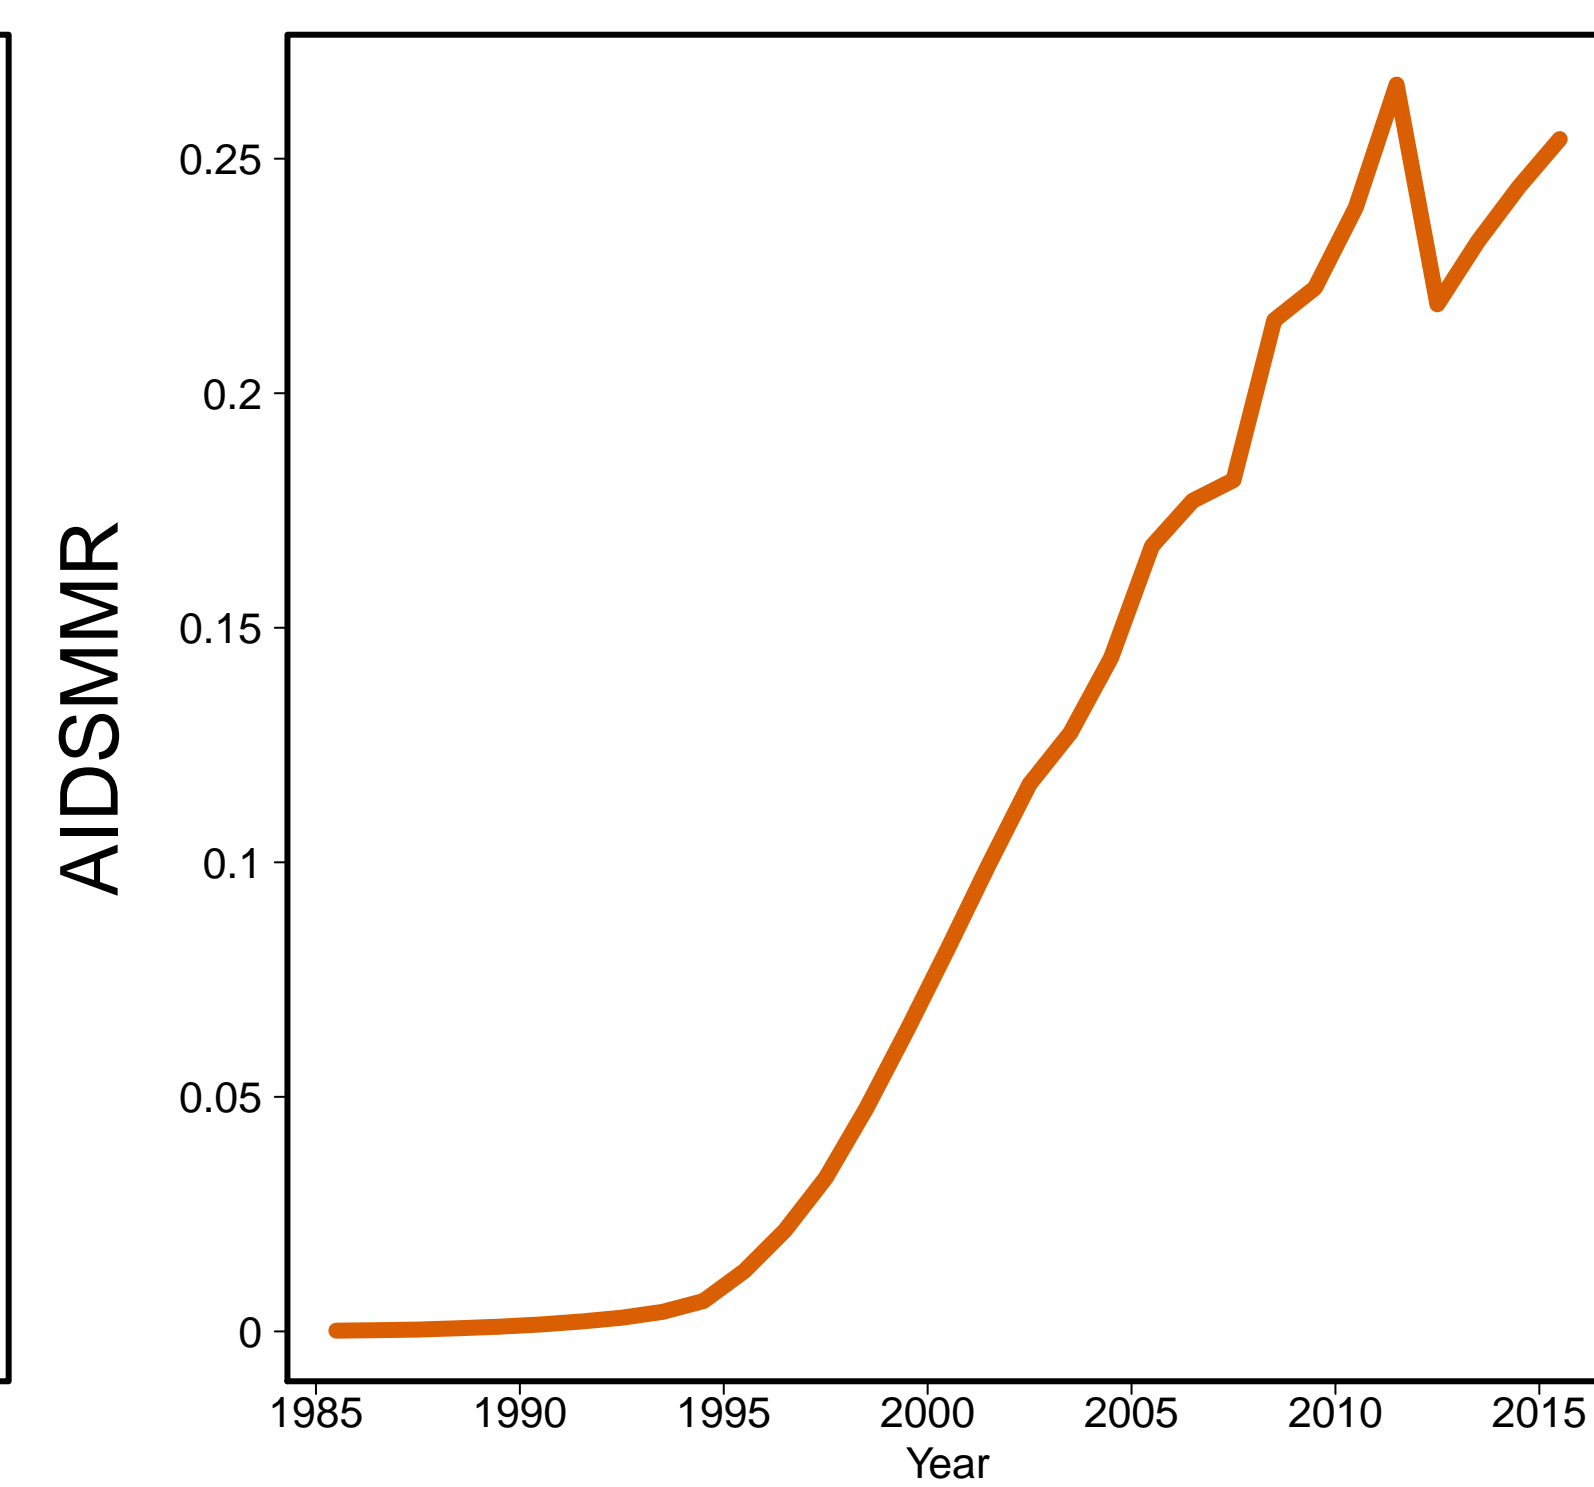

Colombia [COL]  
(South America)

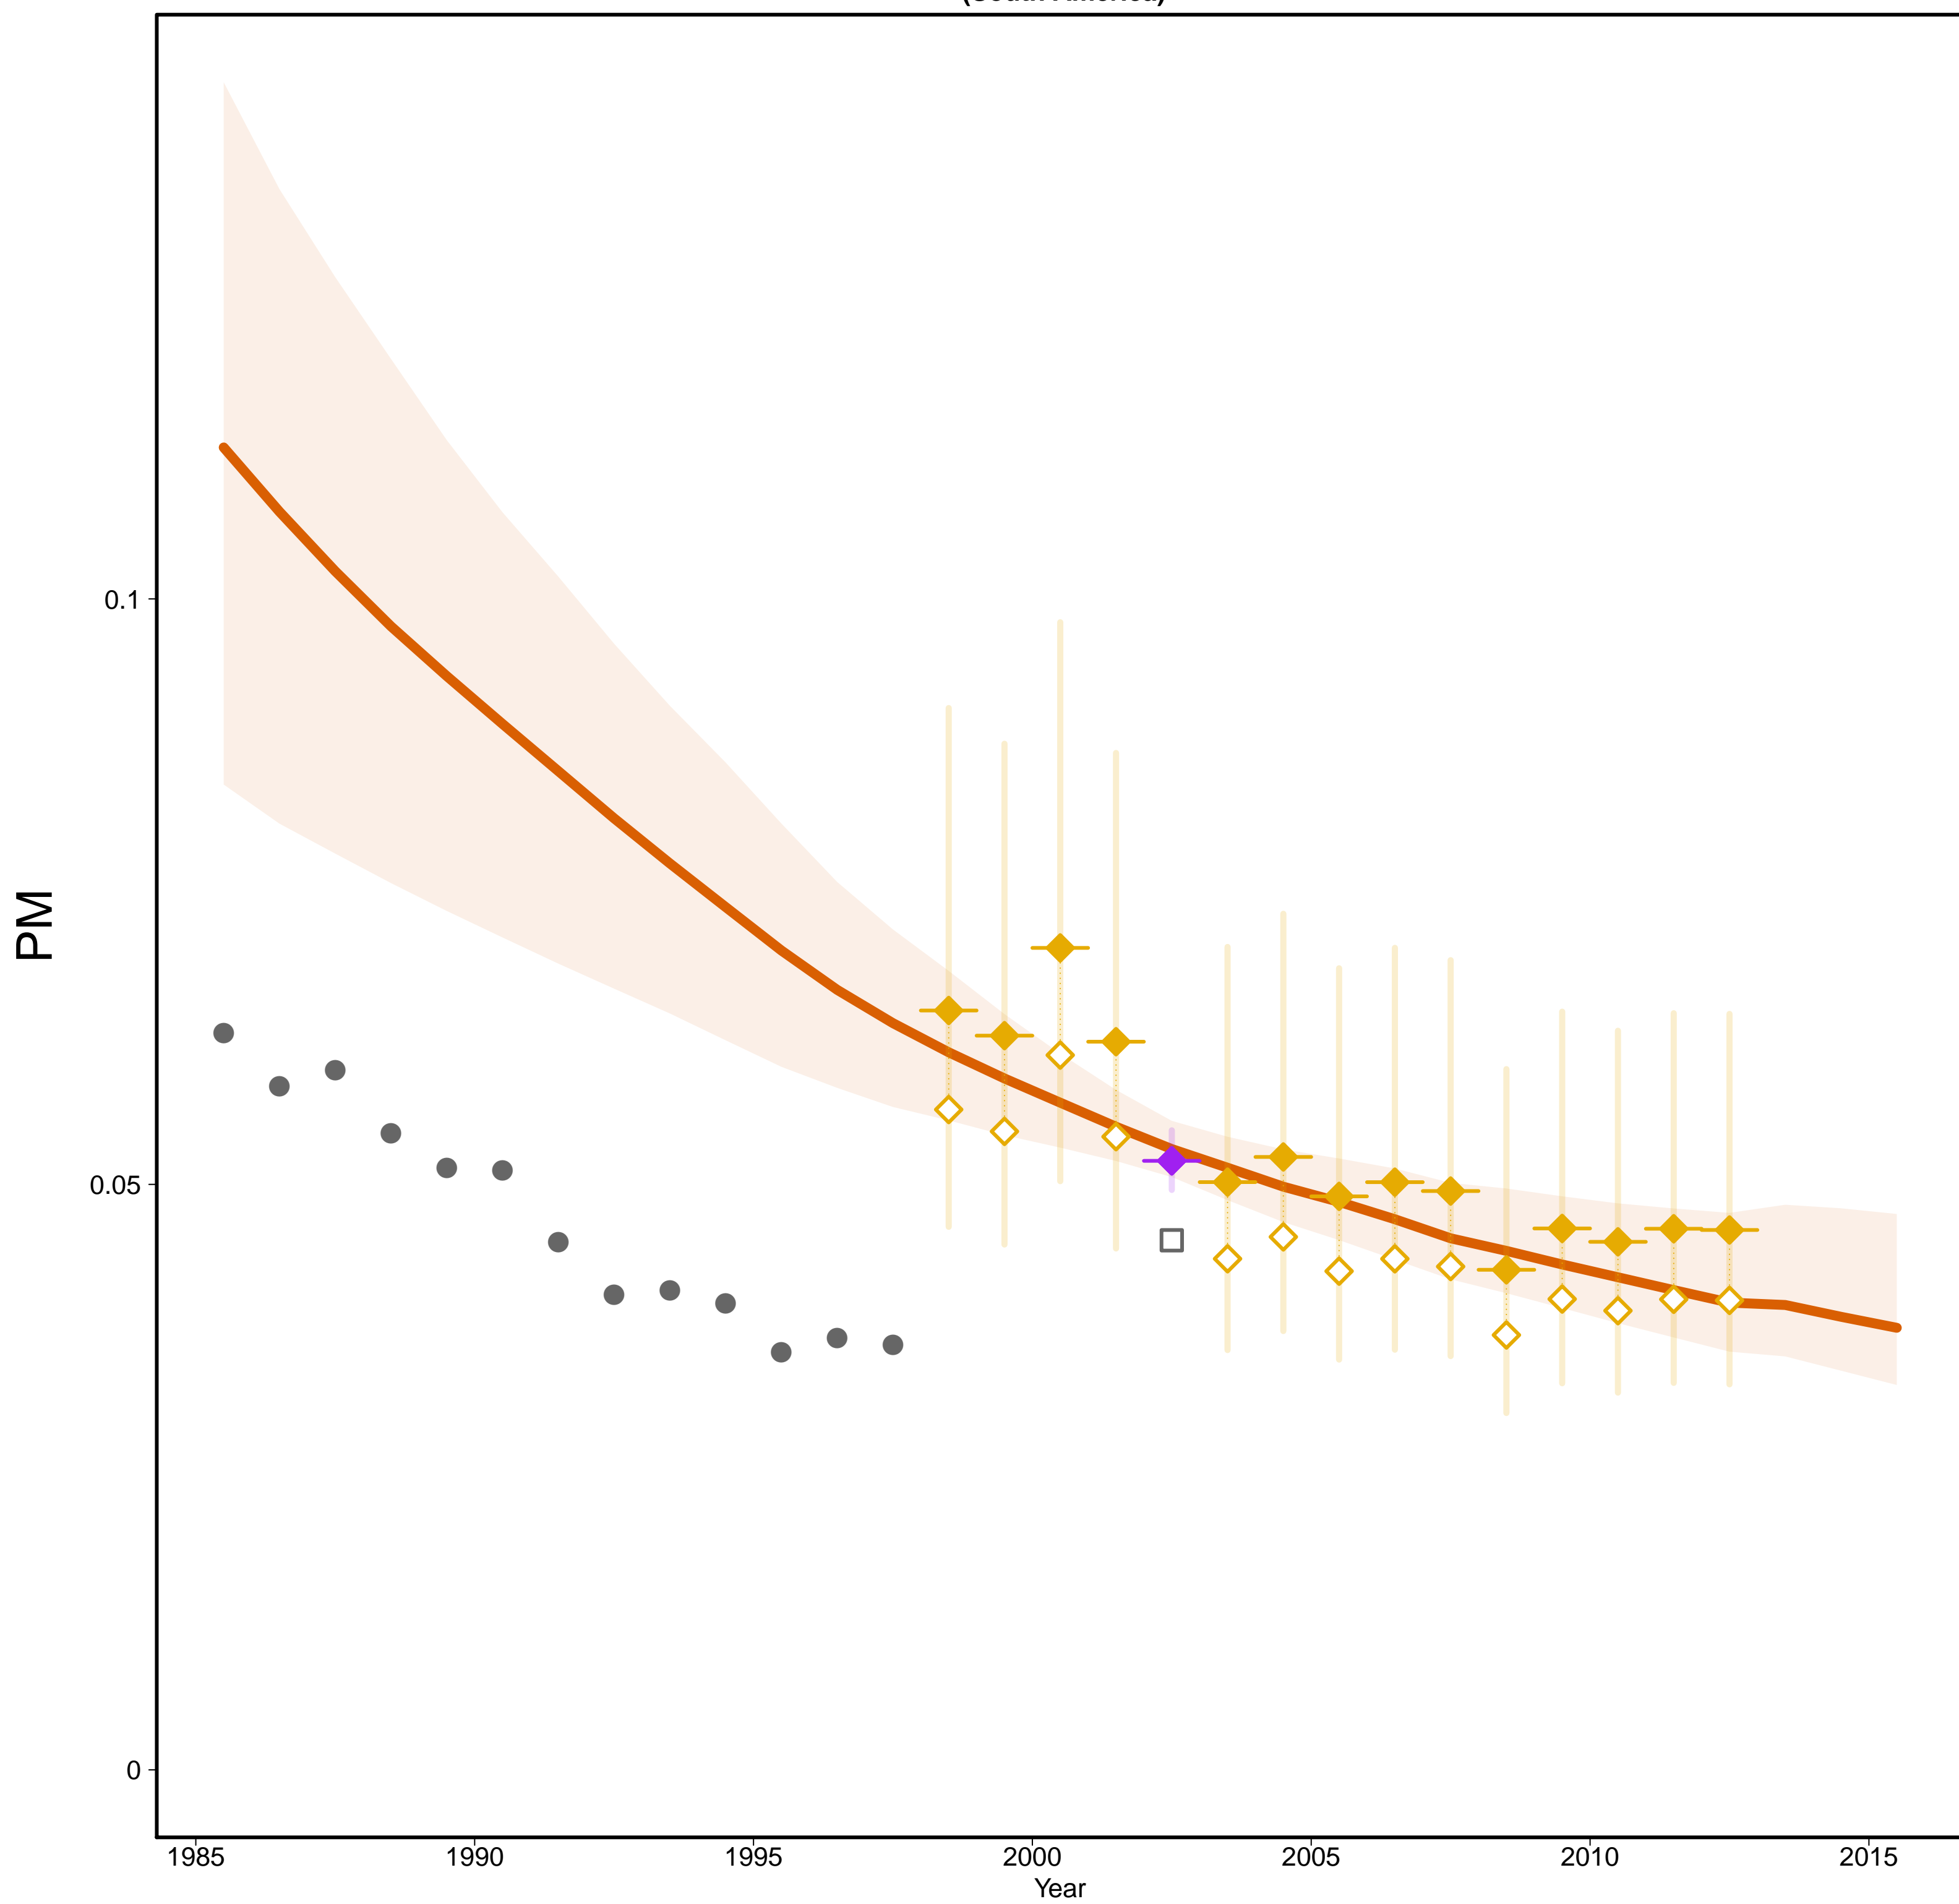

Colombia [COL]  
(South America)

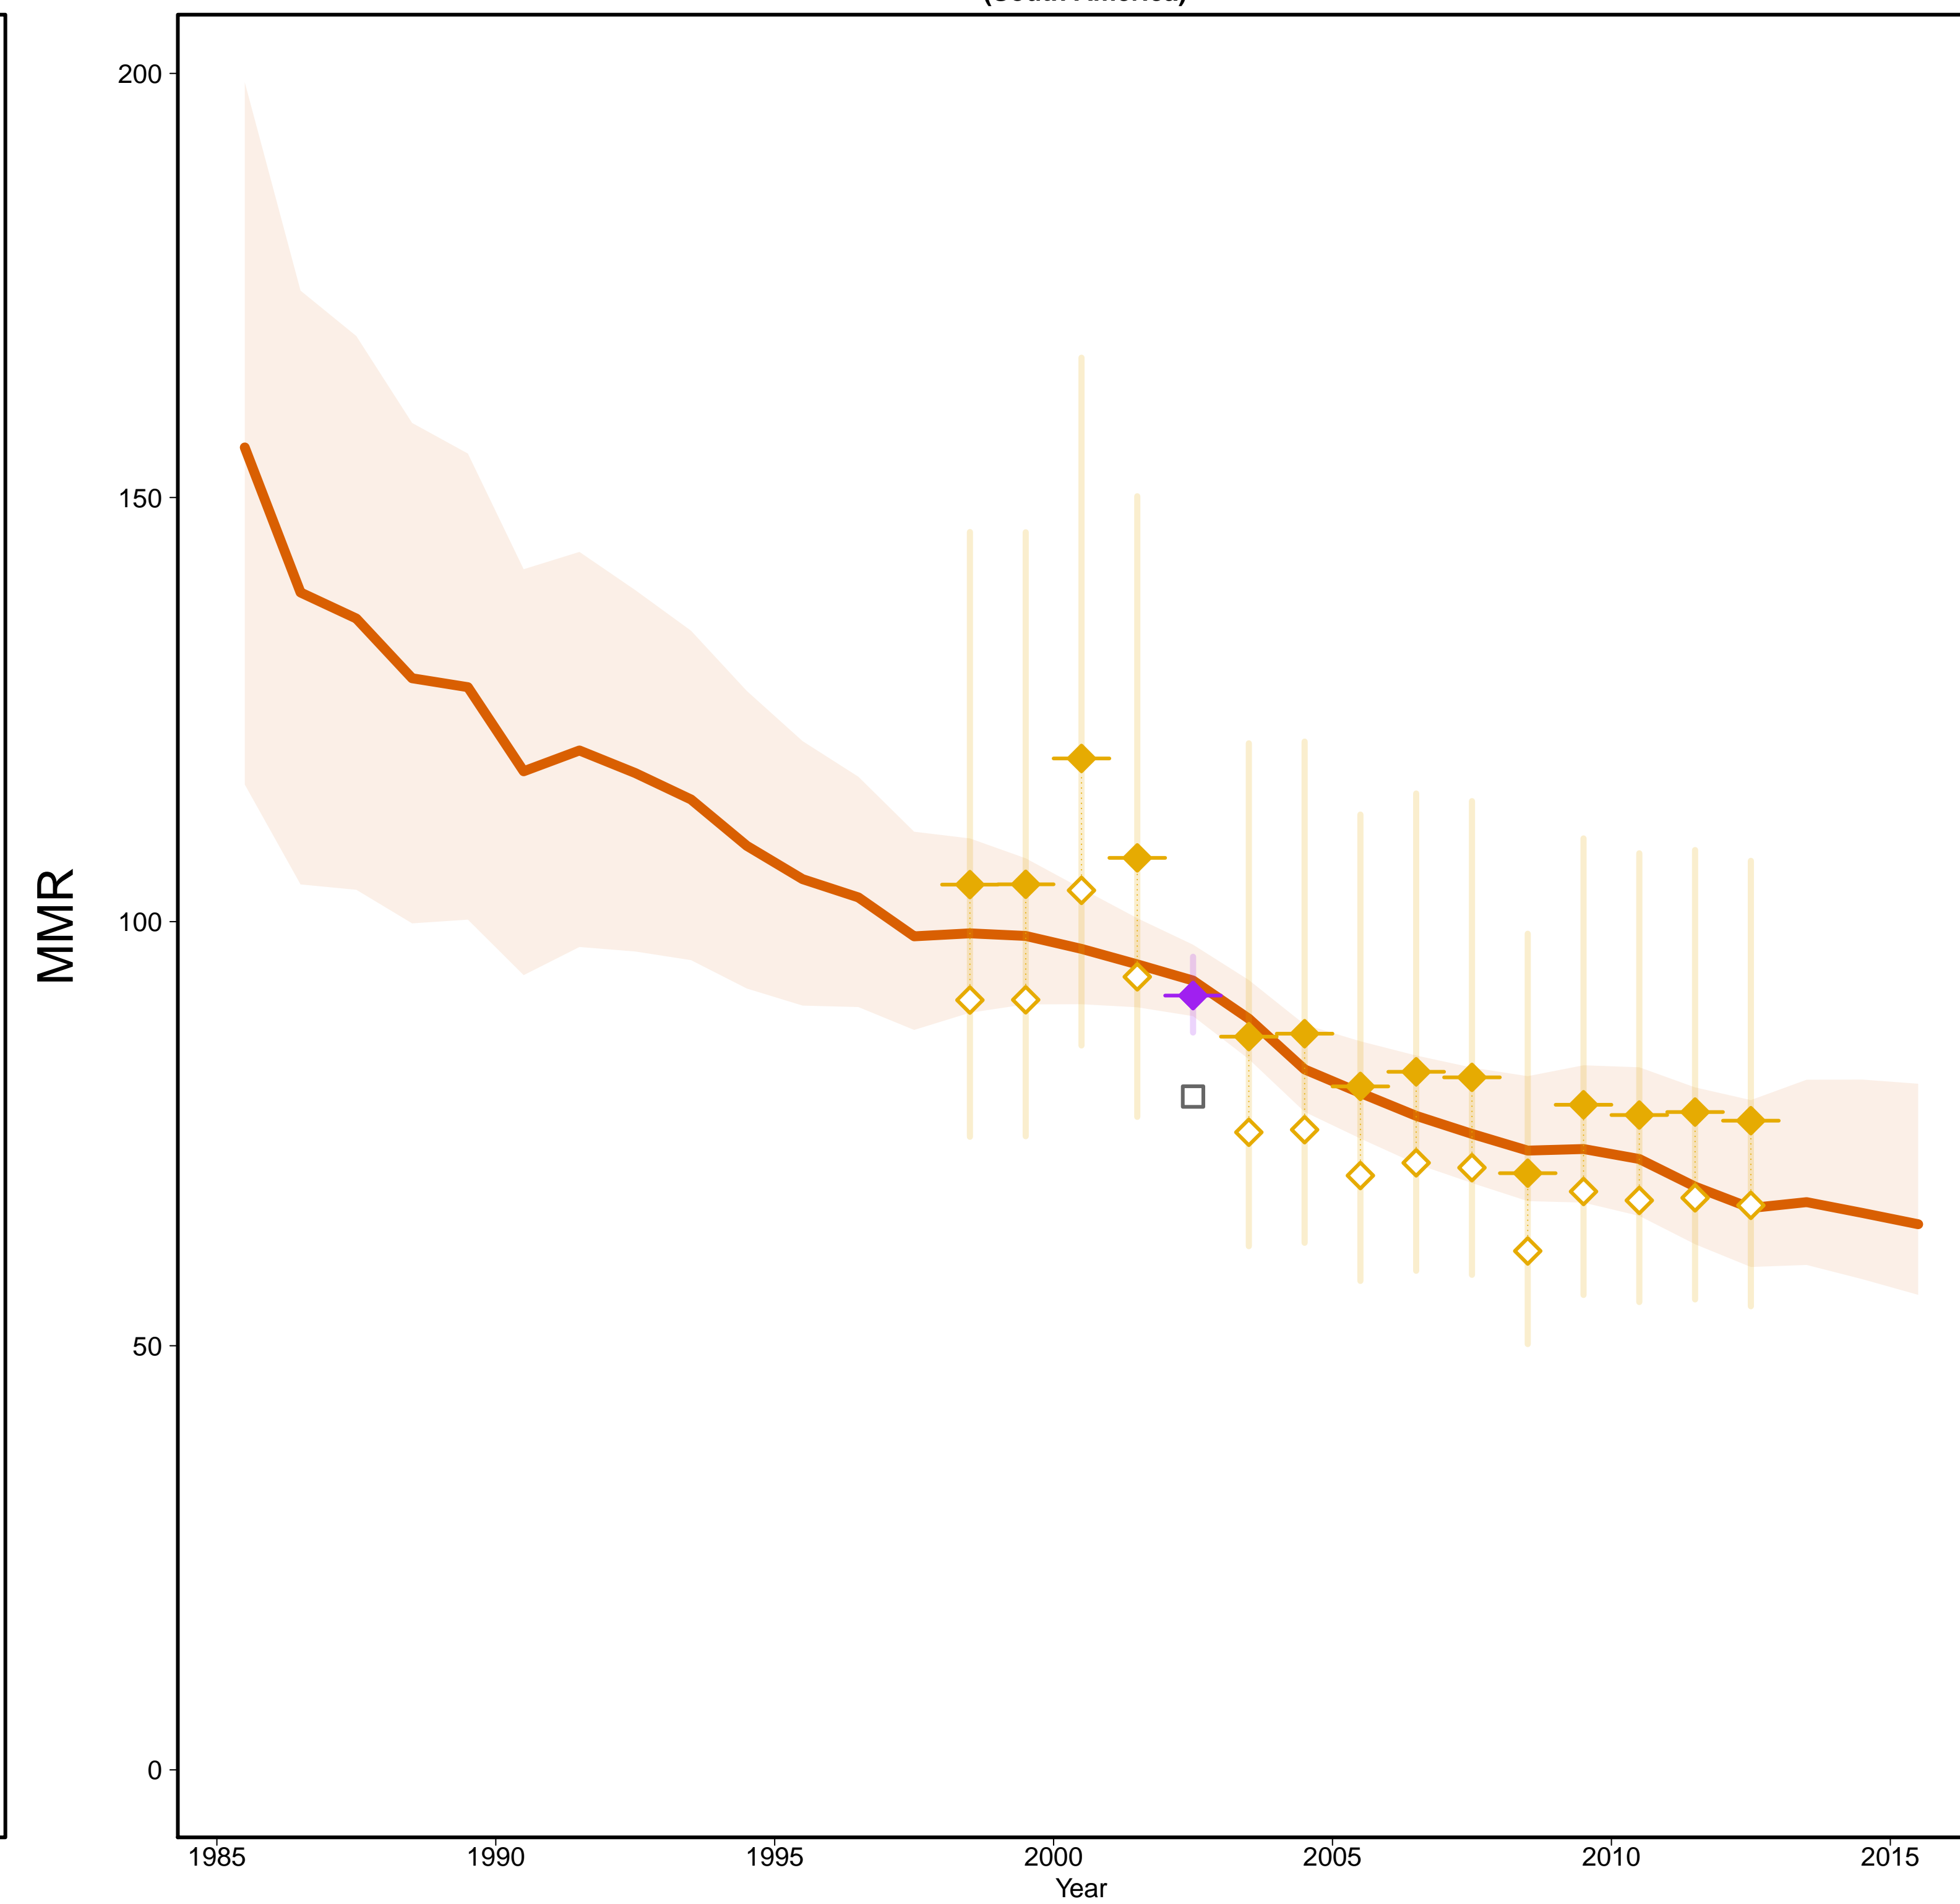

- Estimates —
- MMR Database 2015 —
- ◇ Observed Data
- ◆ Adjusted Data
- Data type —
- ◆ VR
- ◆ Spec. studies
- Excluded VR data (data quality issues)
- Excluded VR data (overlap with specialized study)

Gross Domestic Product

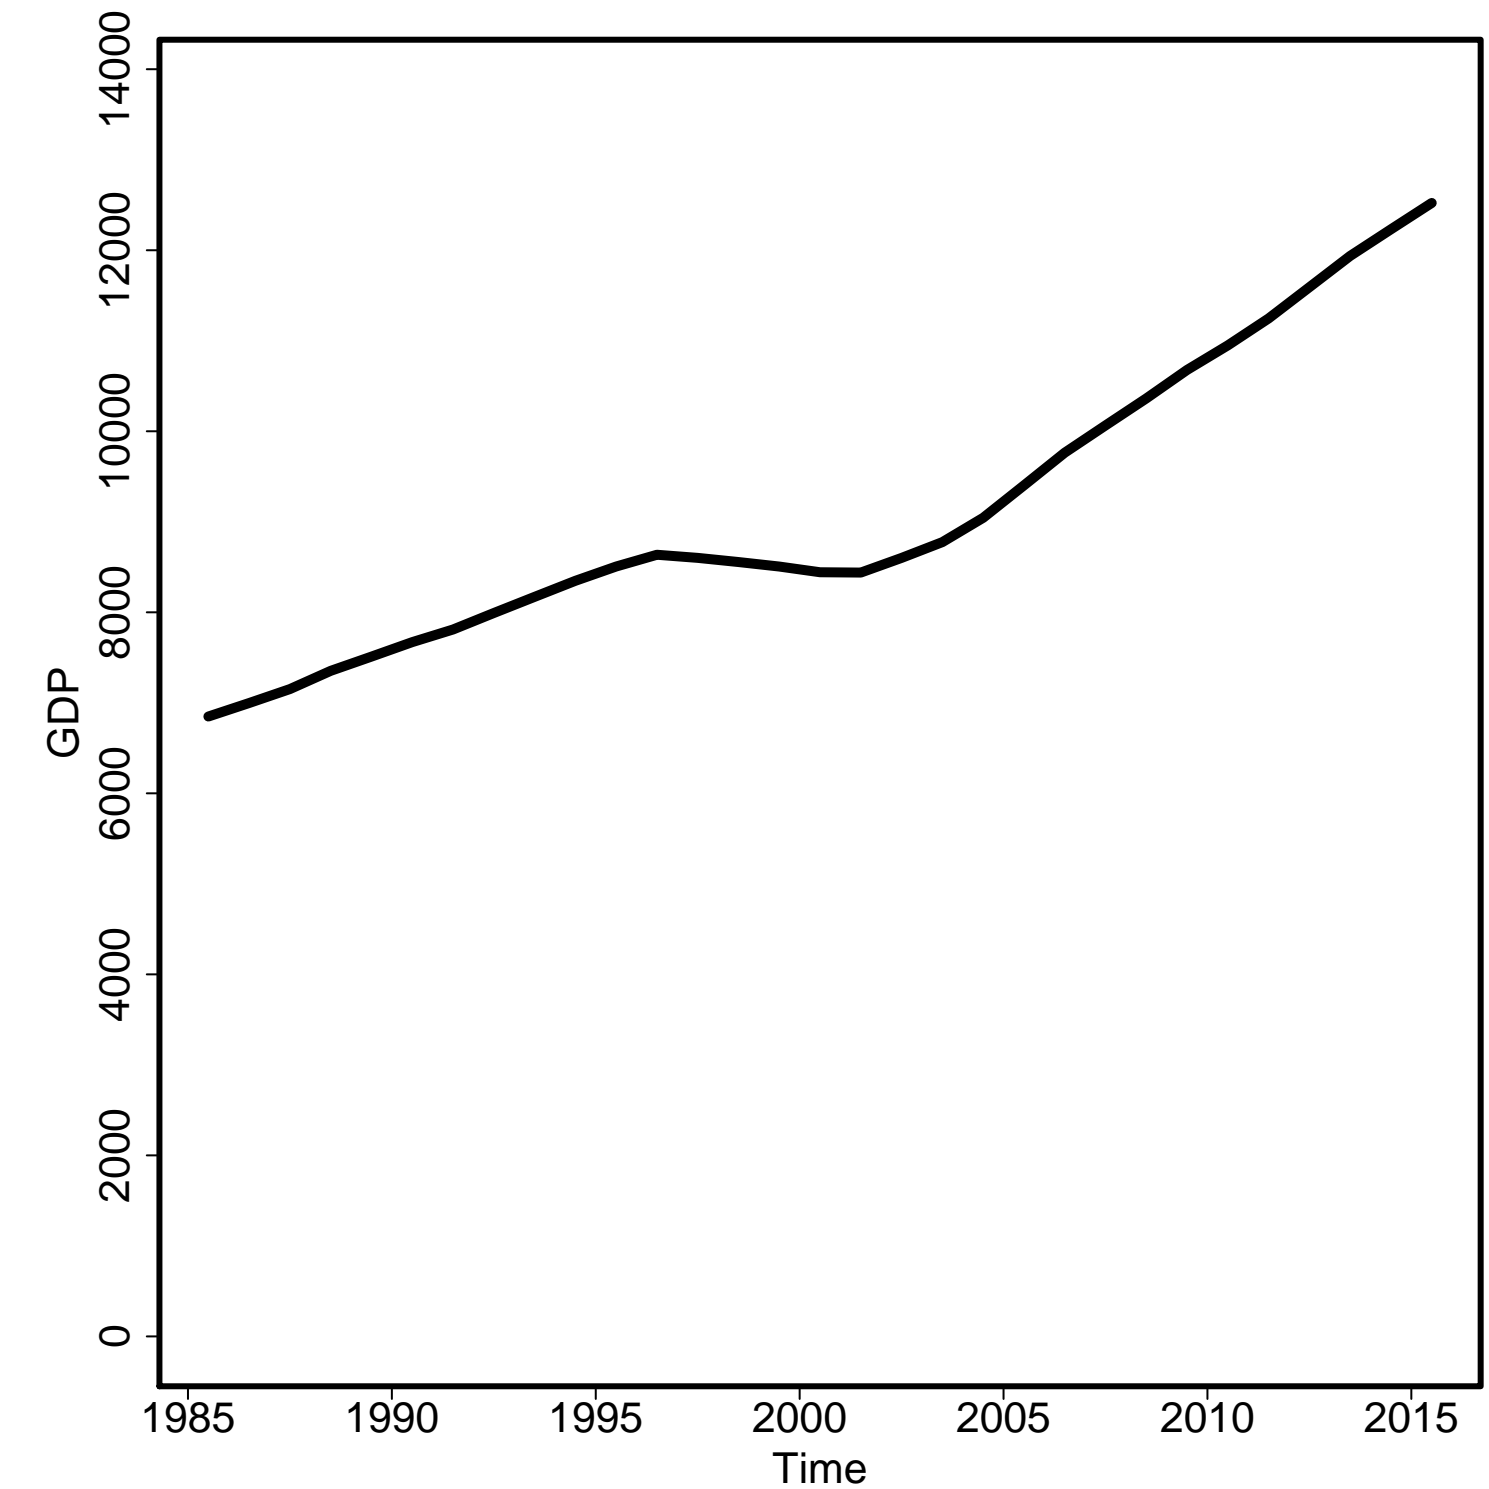

General Fertility Rate

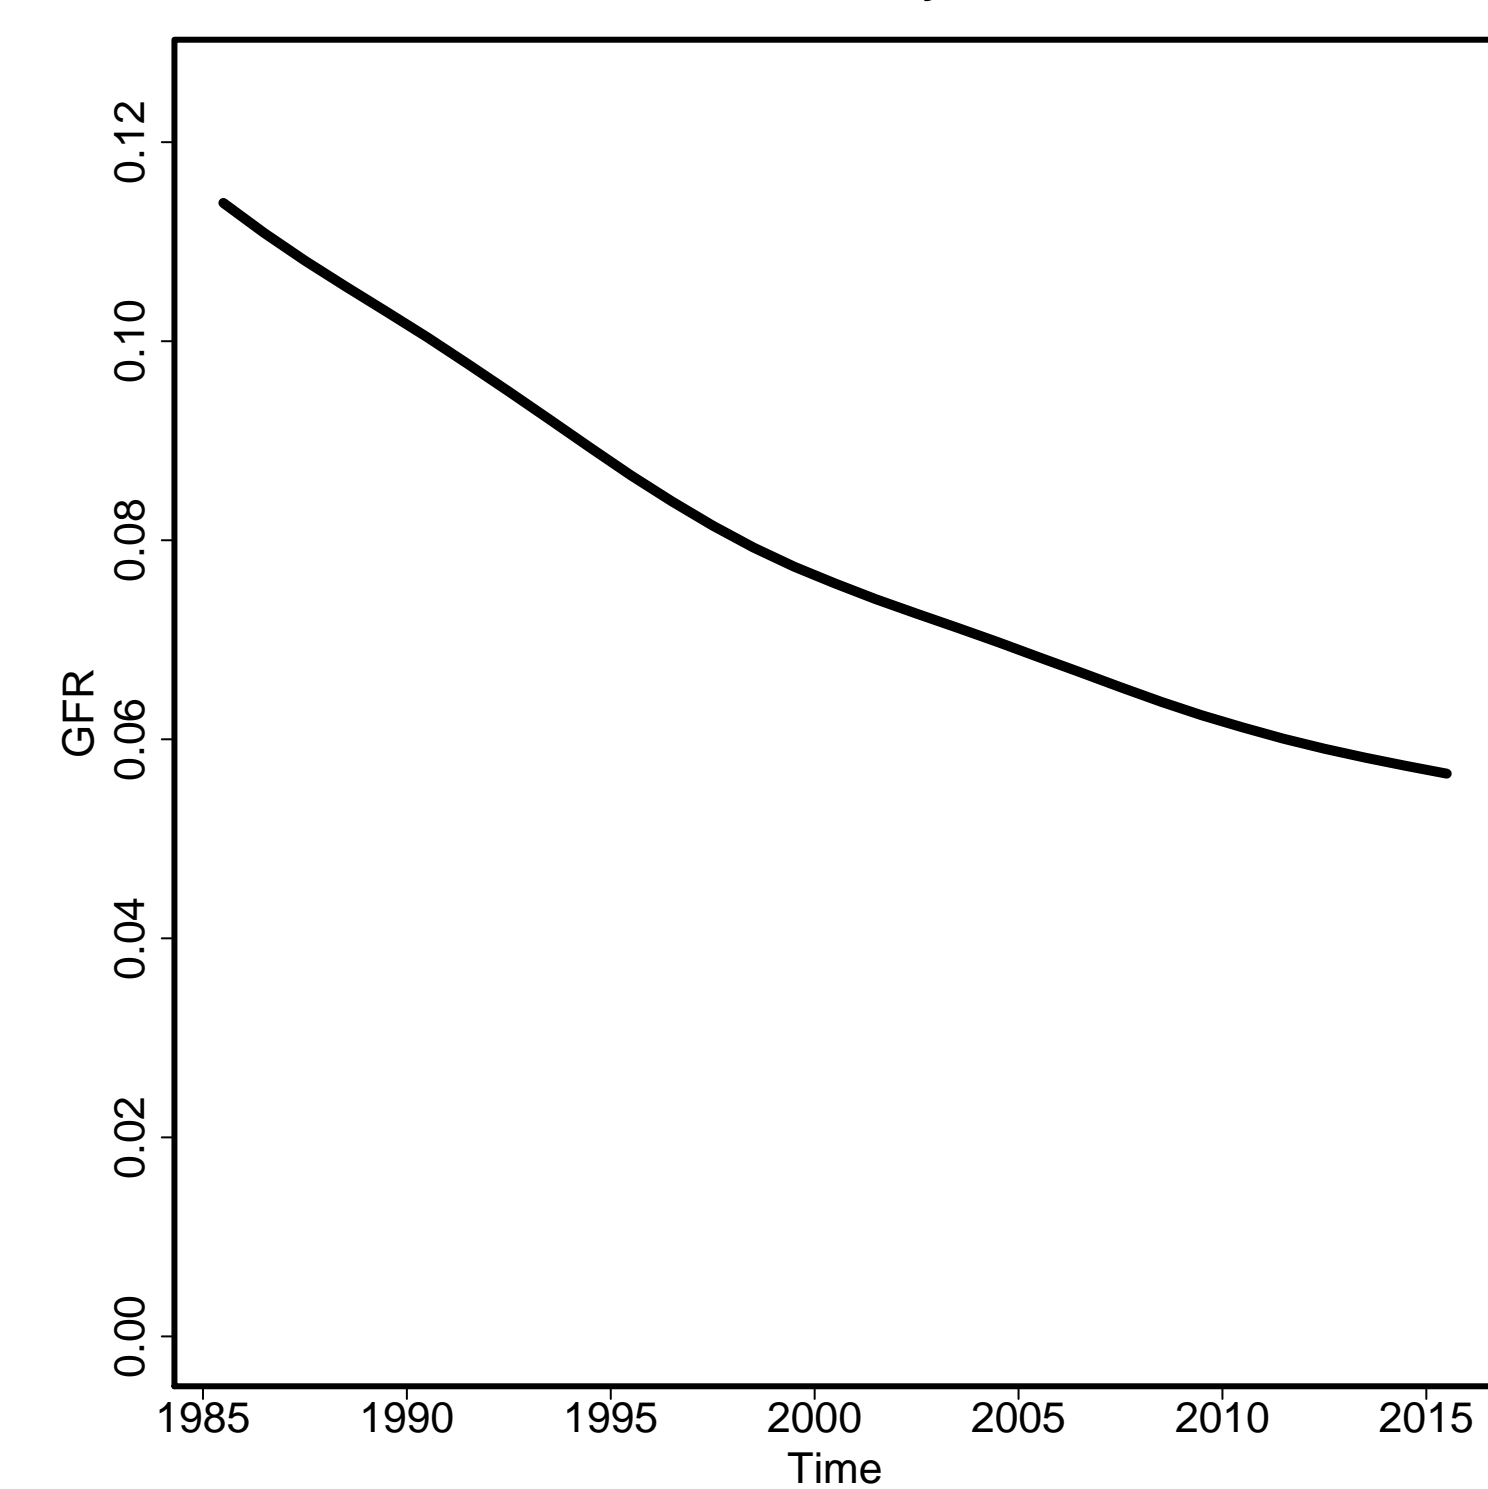

Skilled Attendance to Birth

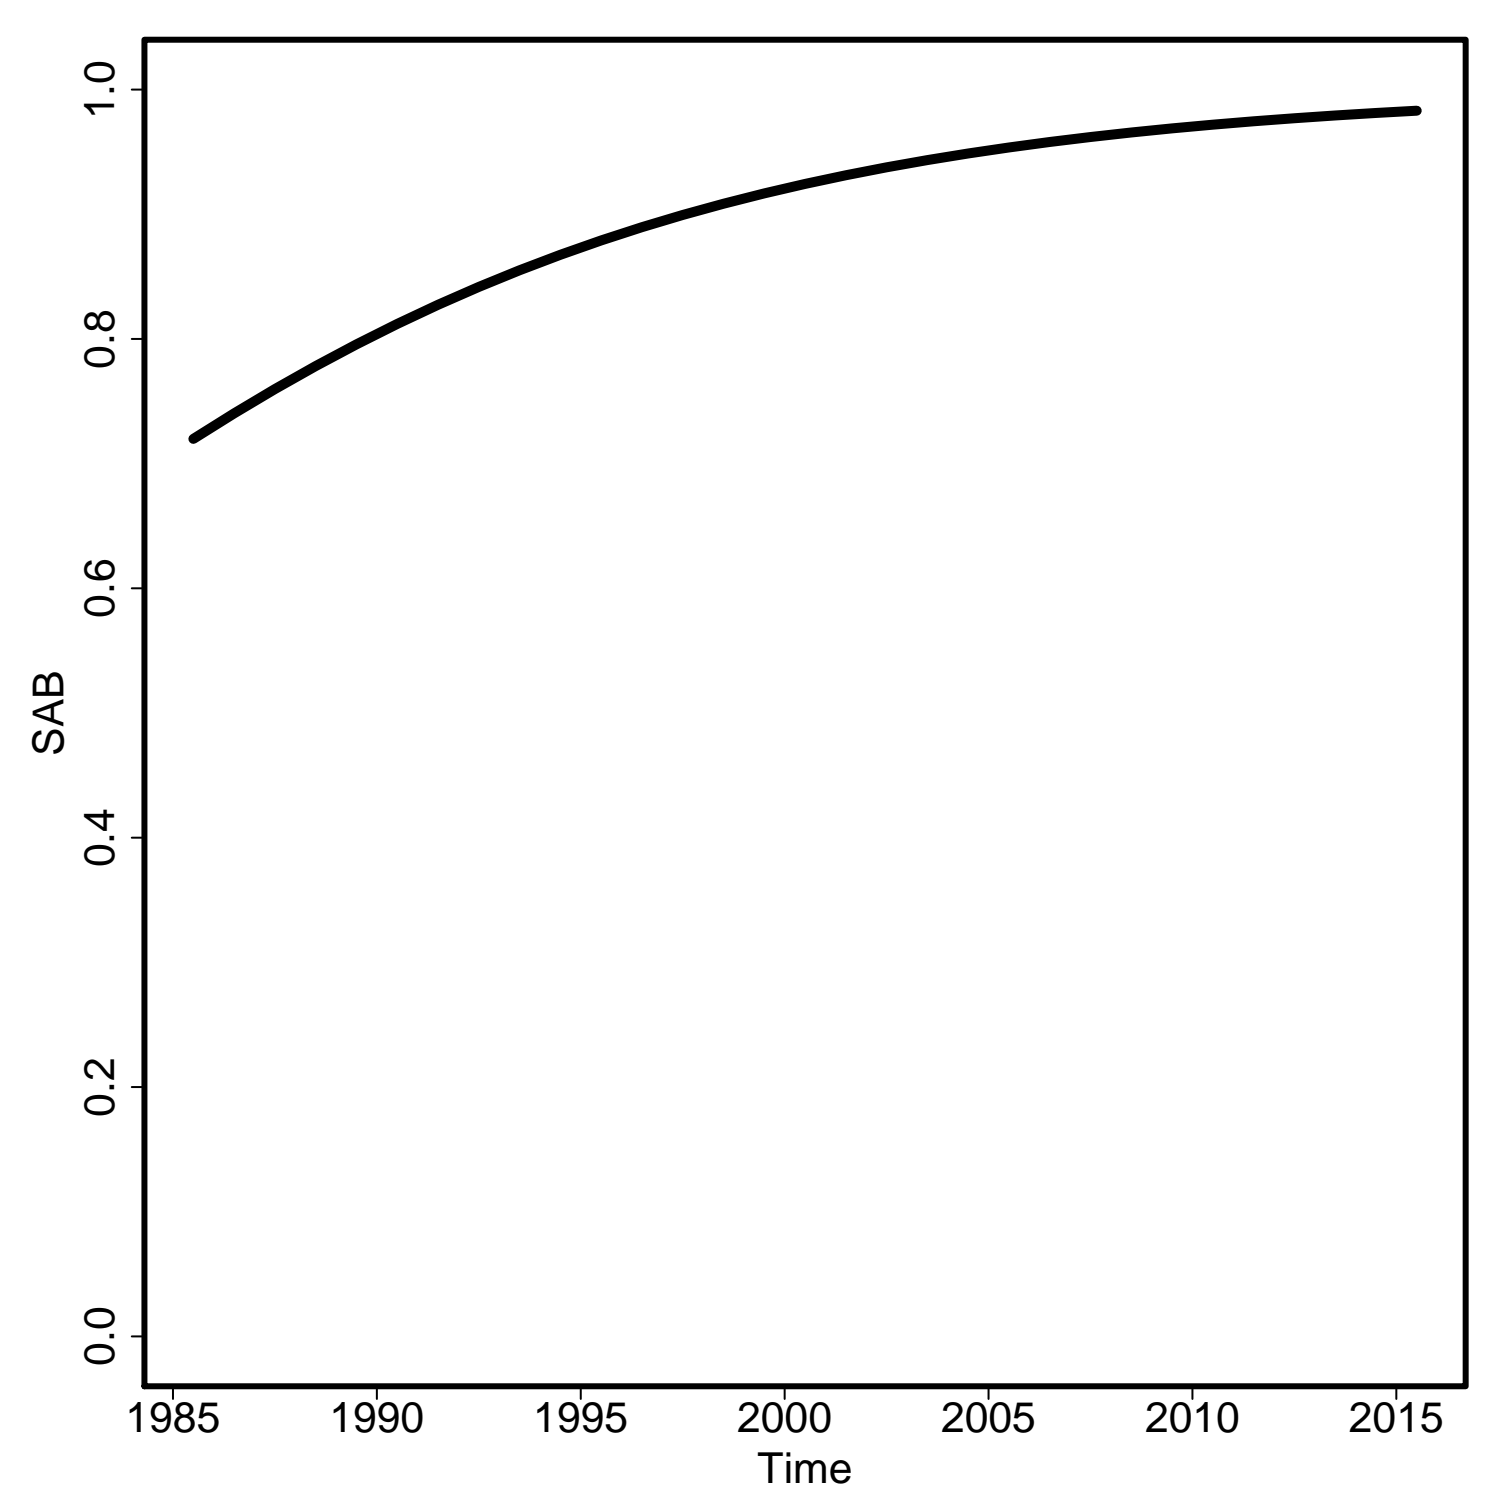

Envelope/Births

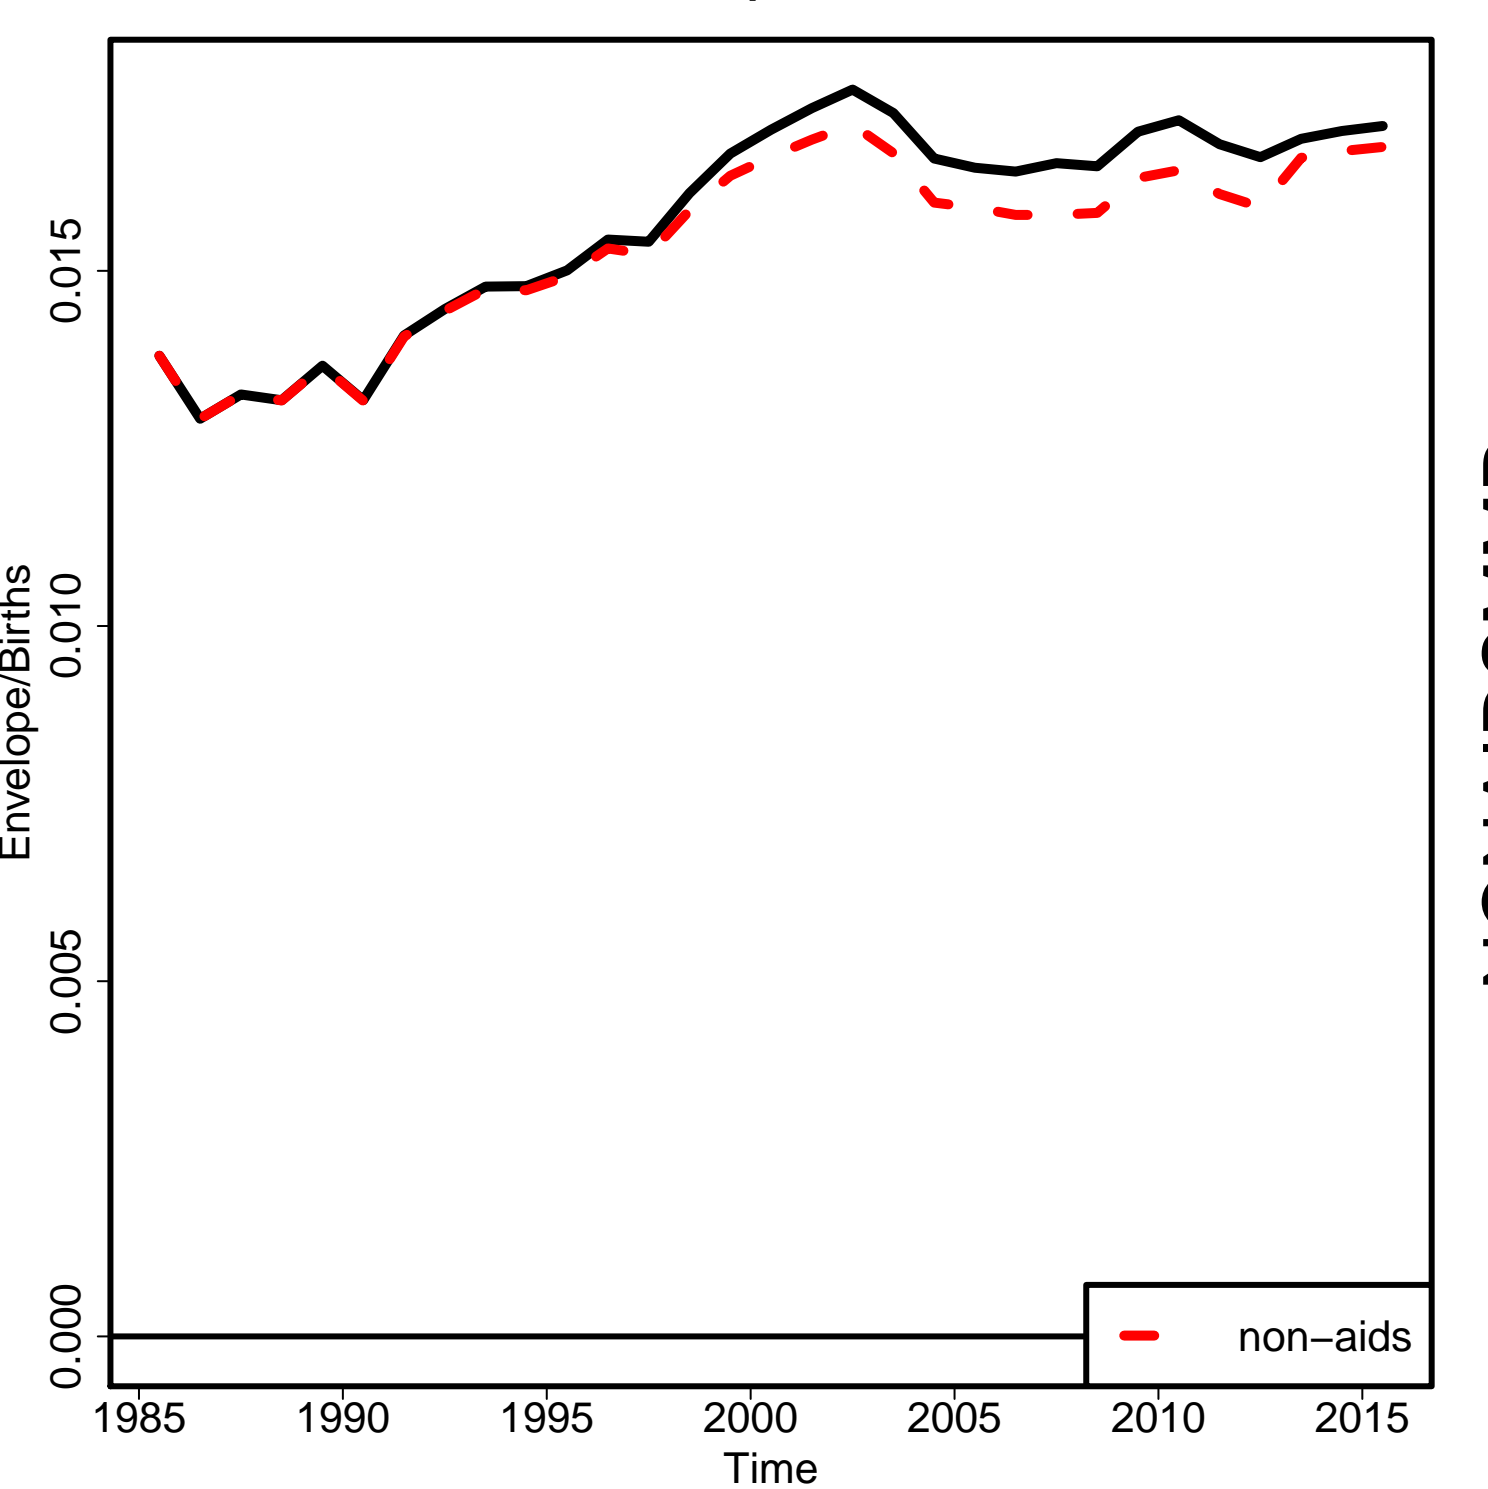

Non-aids MMR

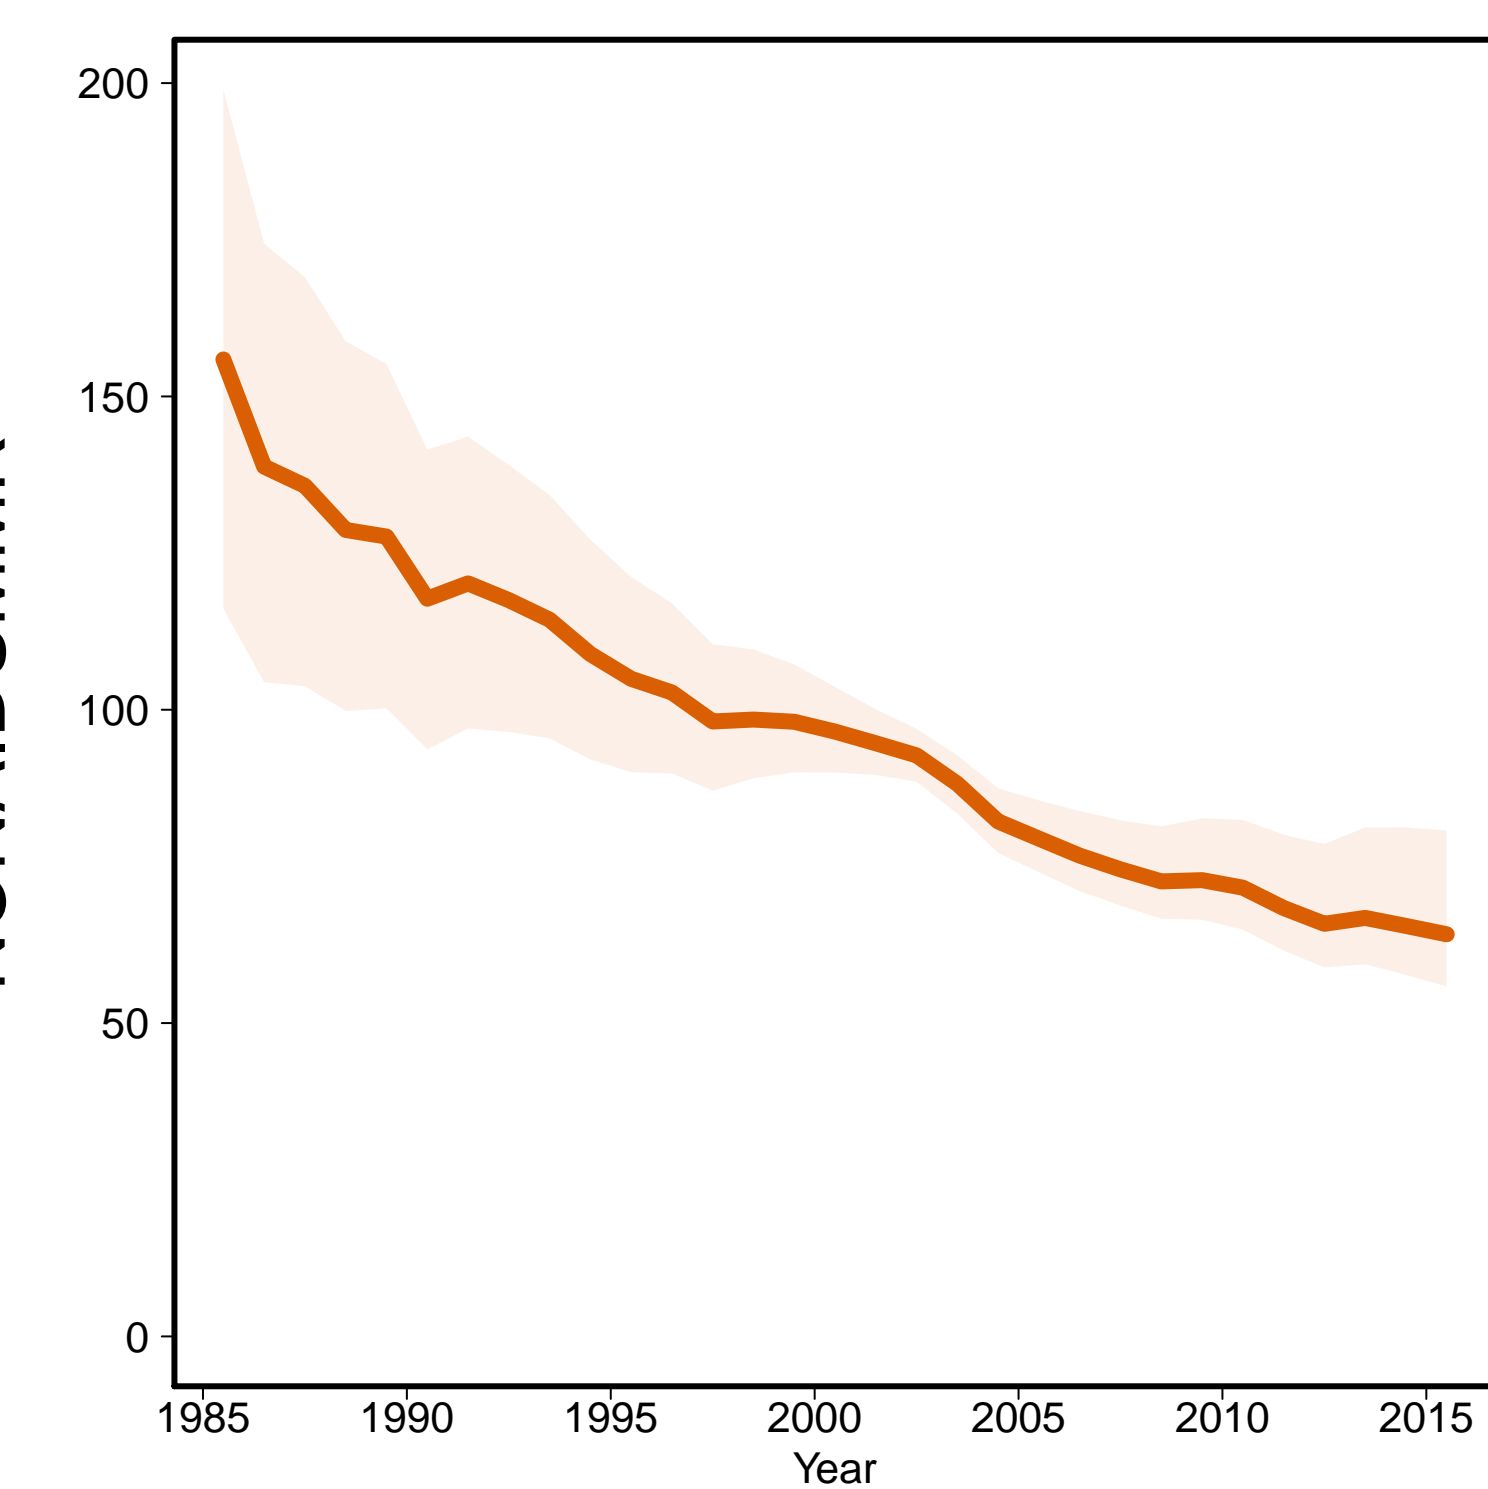

Aids MMR

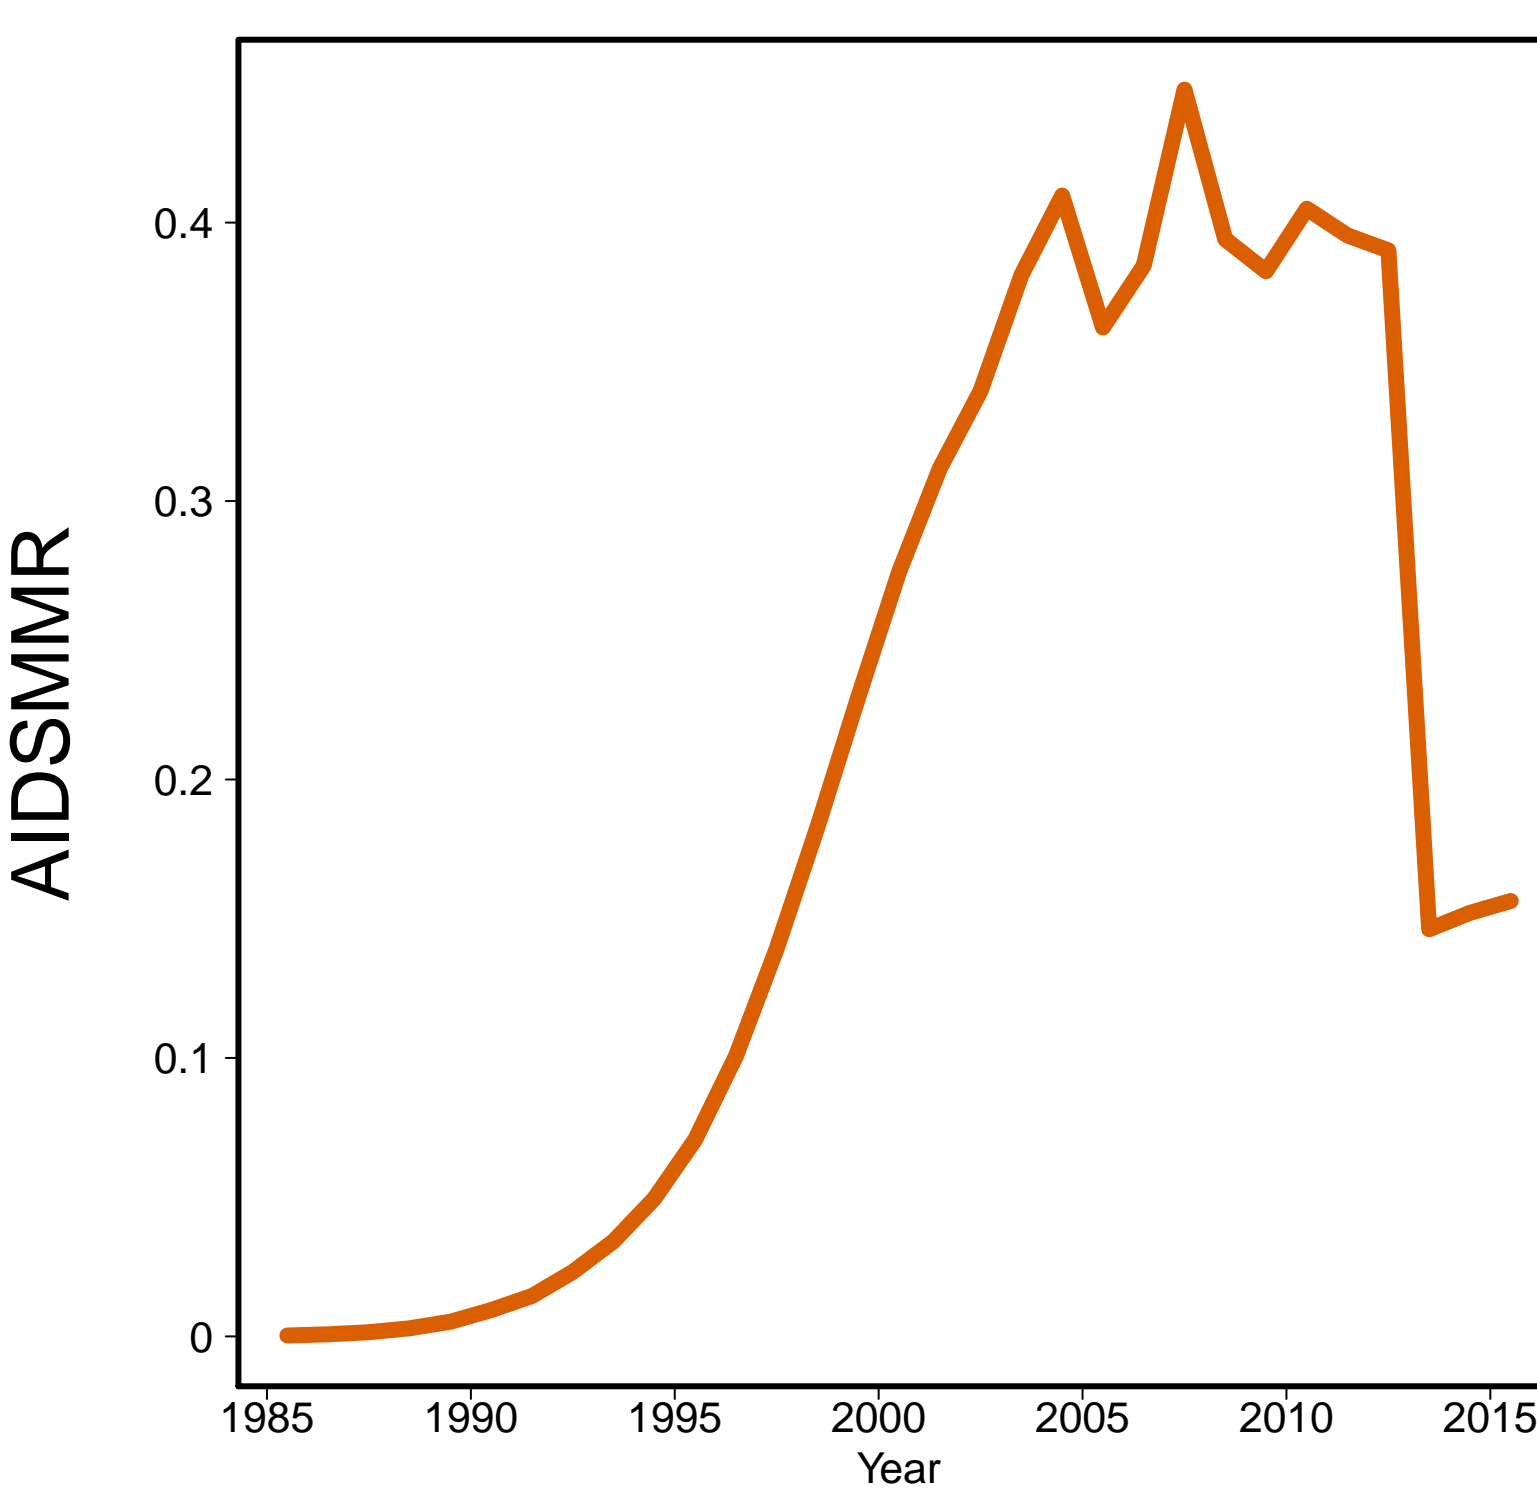

Comoros [COM]  
(Eastern Africa)

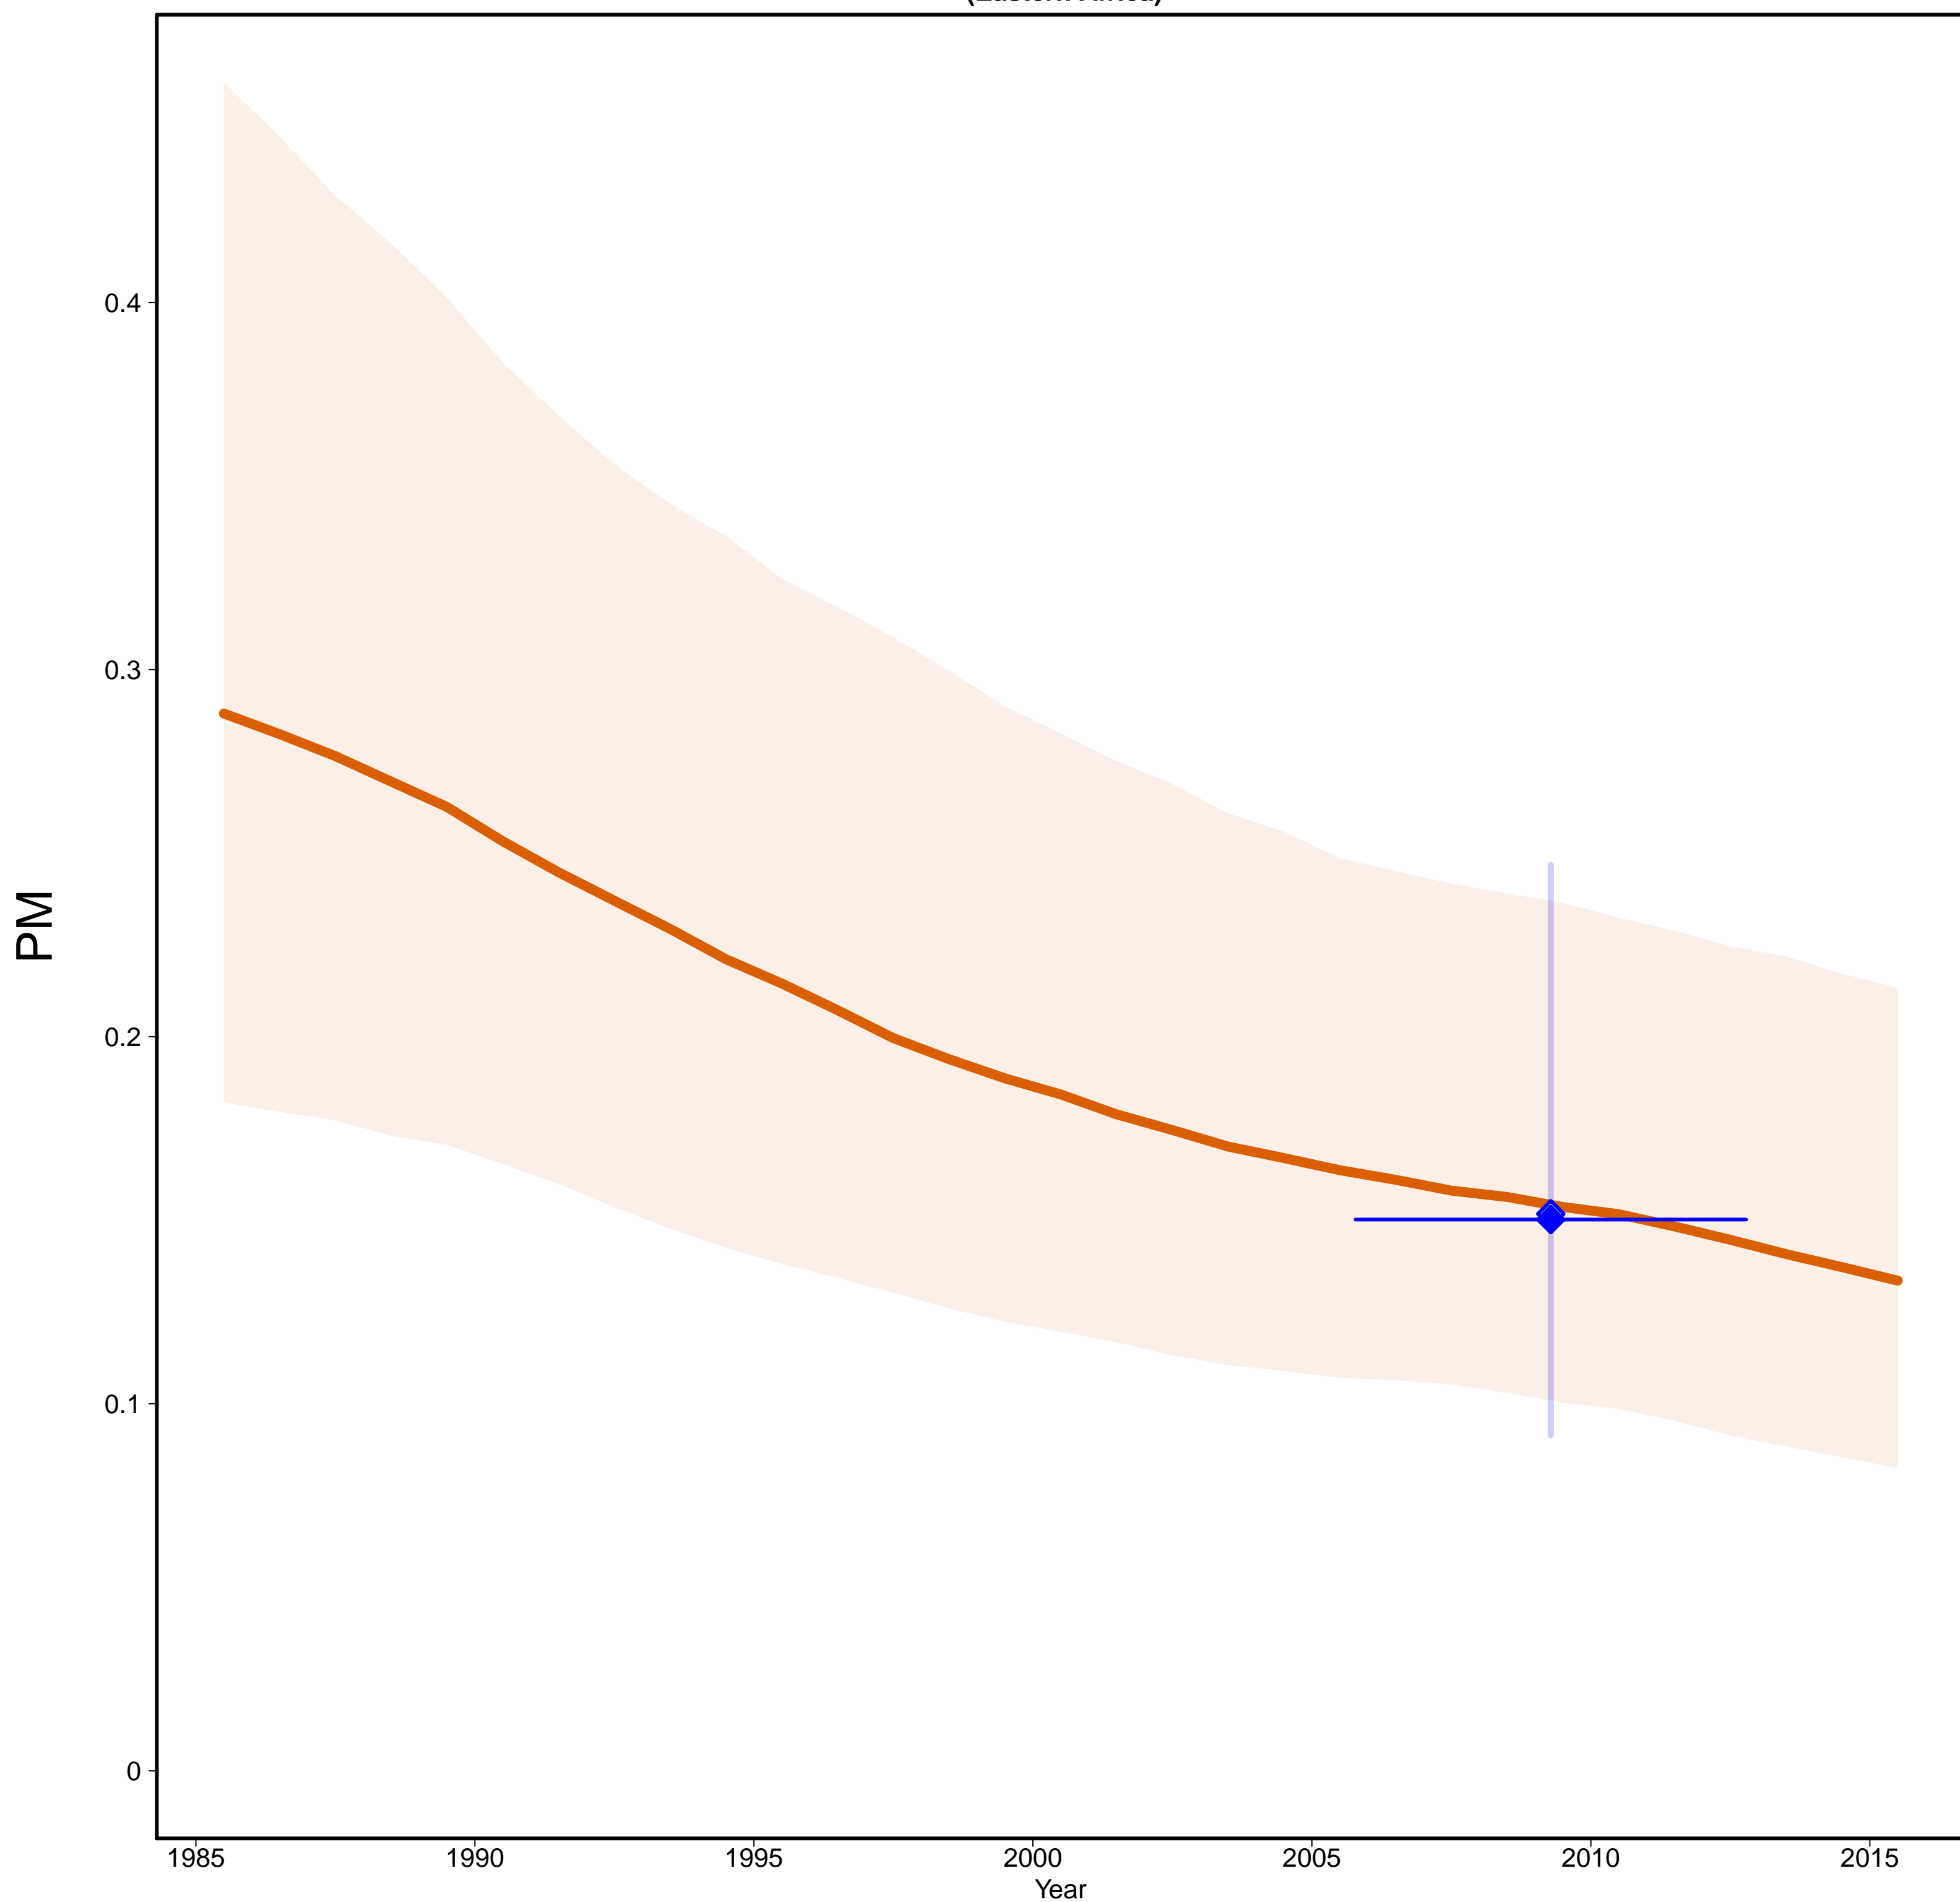

Comoros [COM]  
(Eastern Africa)

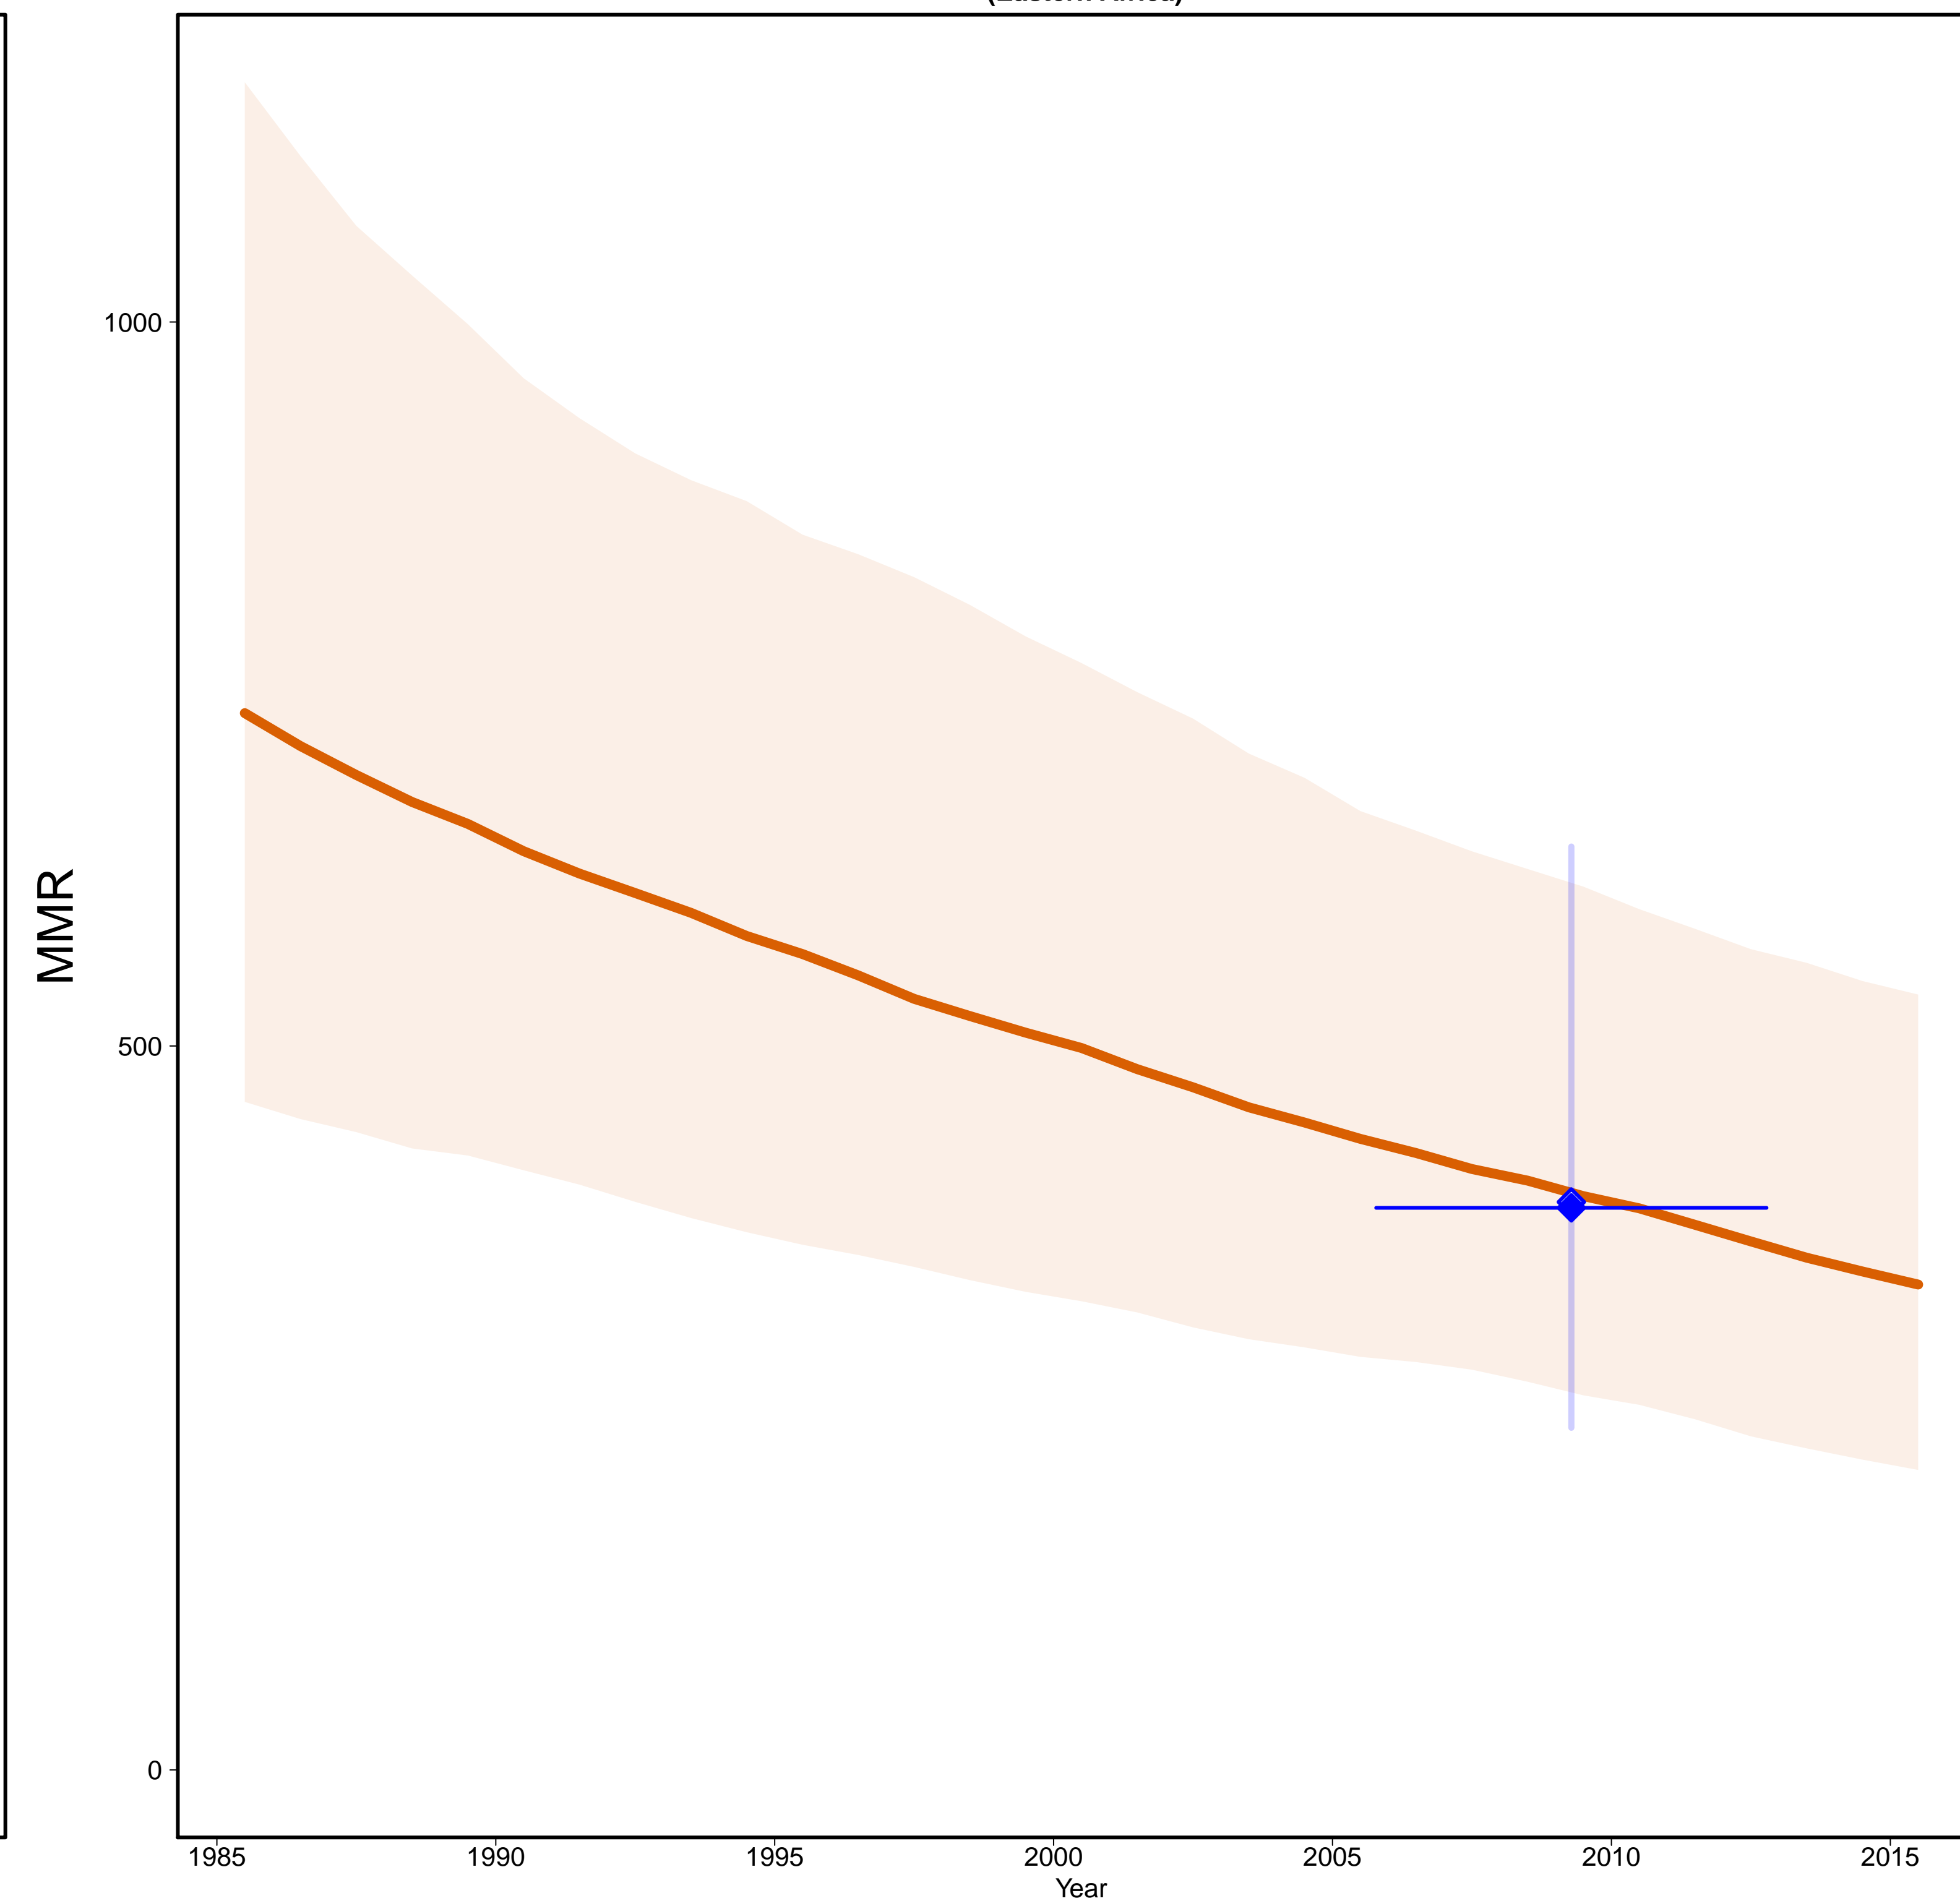

- Estimates —
- MMR Database 2015 —
- ◇ Observed Data
- ◆ Adjusted Data
- Data type —
- ◆ DHS

Gross Domestic Product

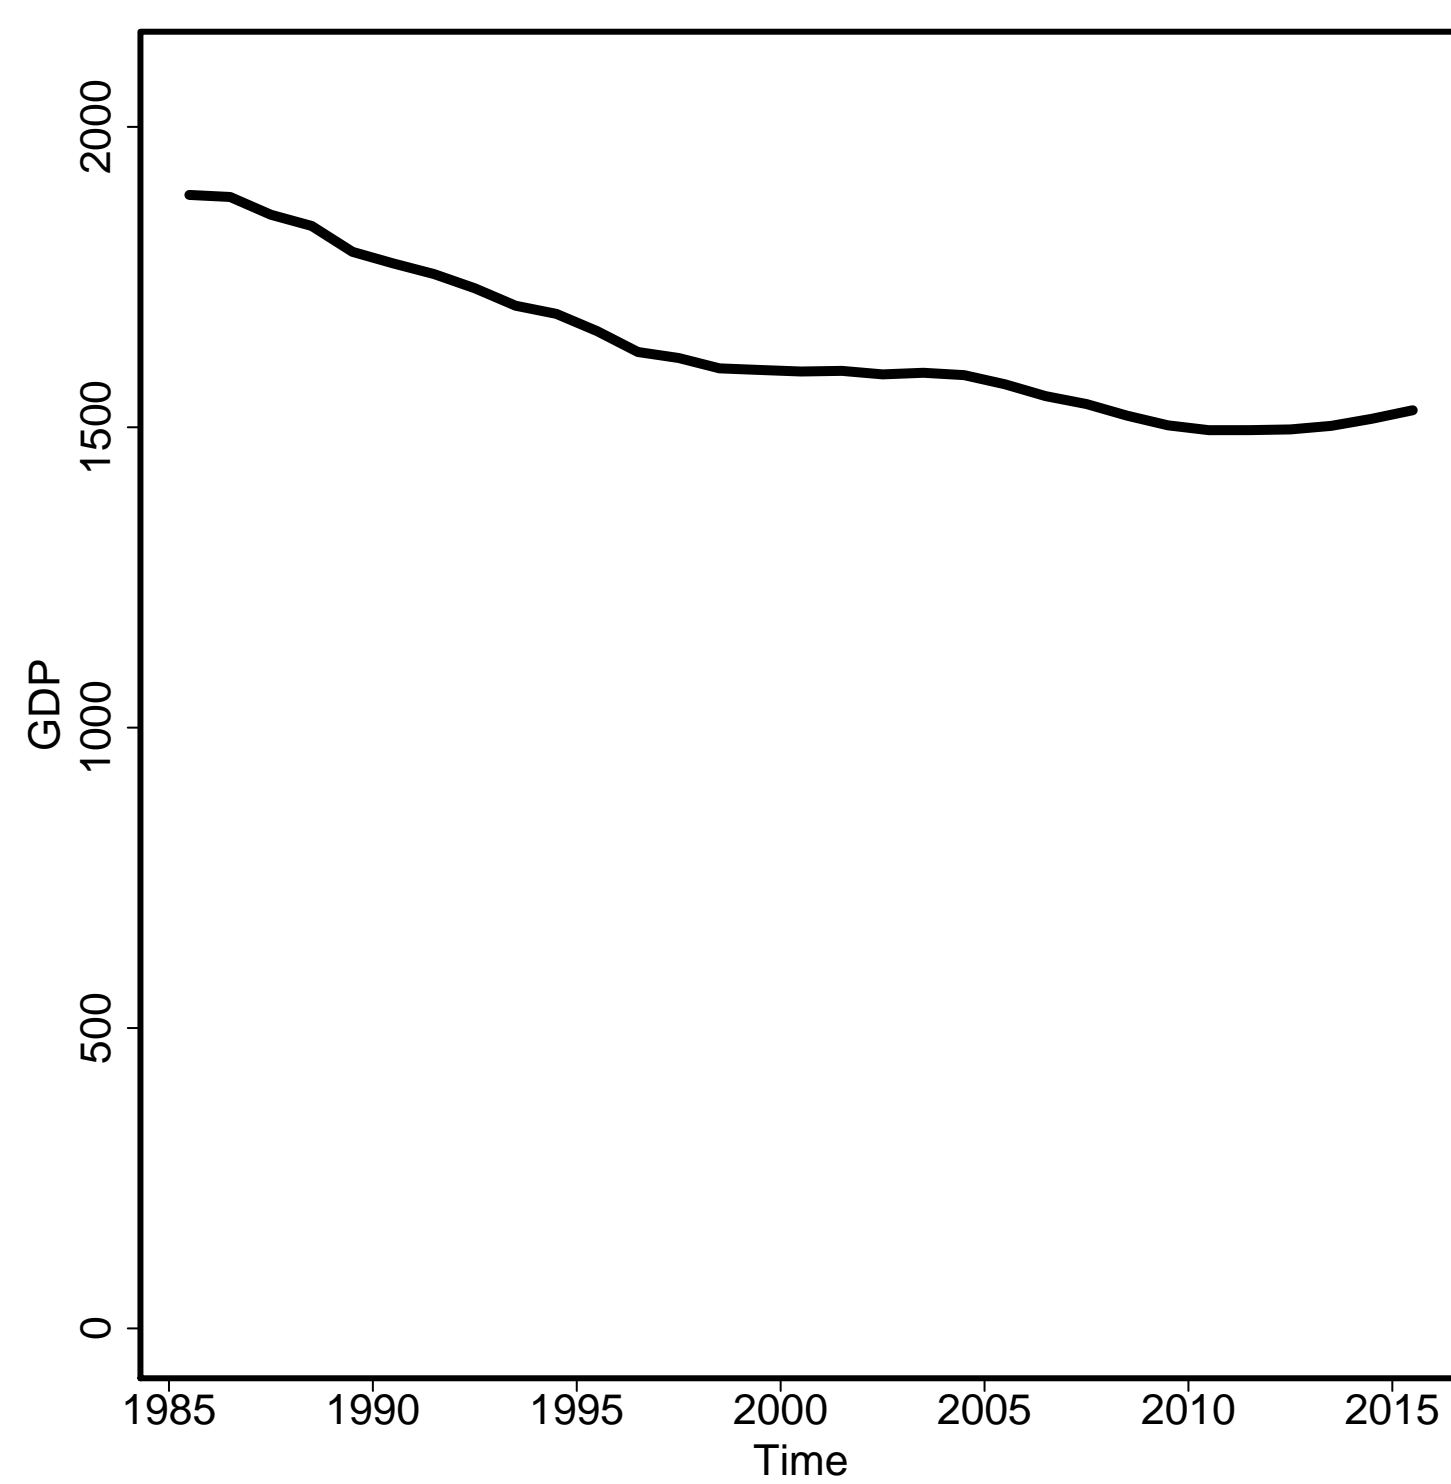

General Fertility Rate

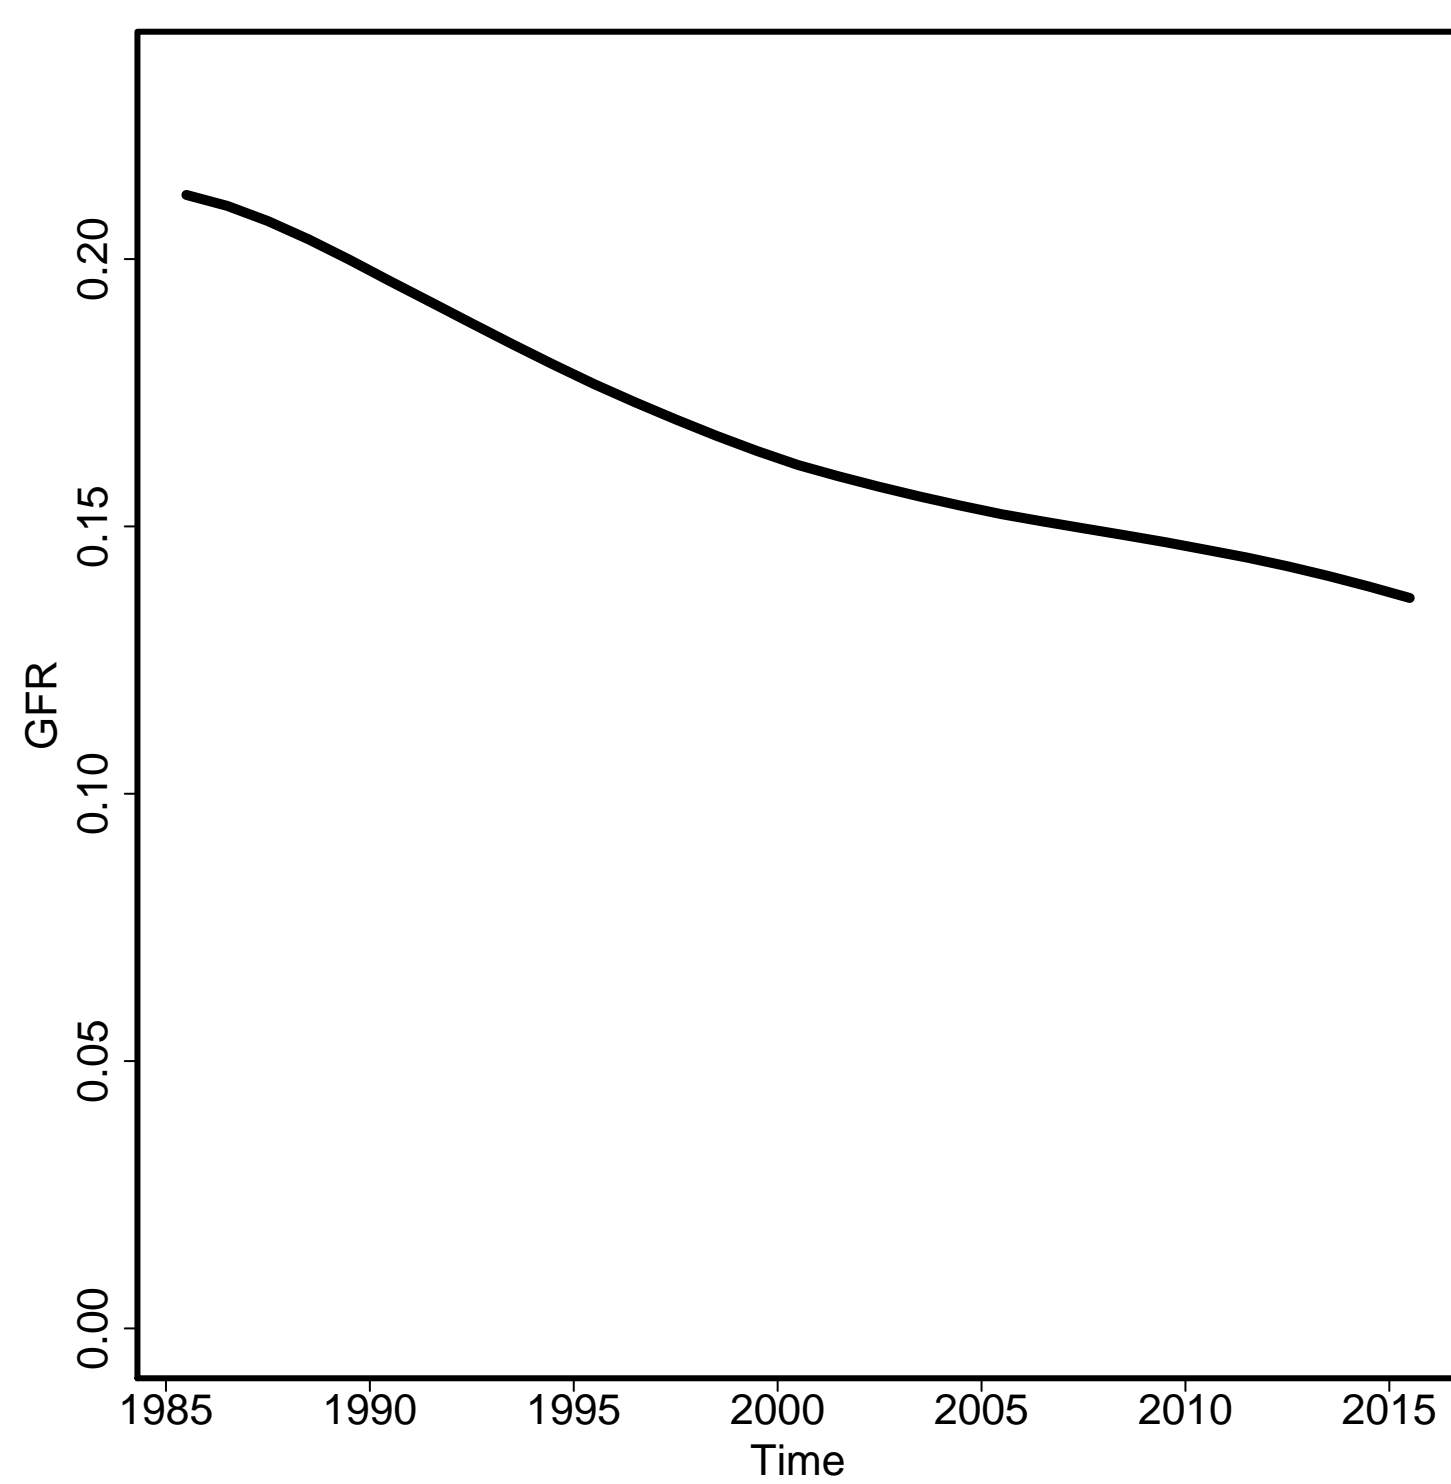

Skilled Attendance to Birth

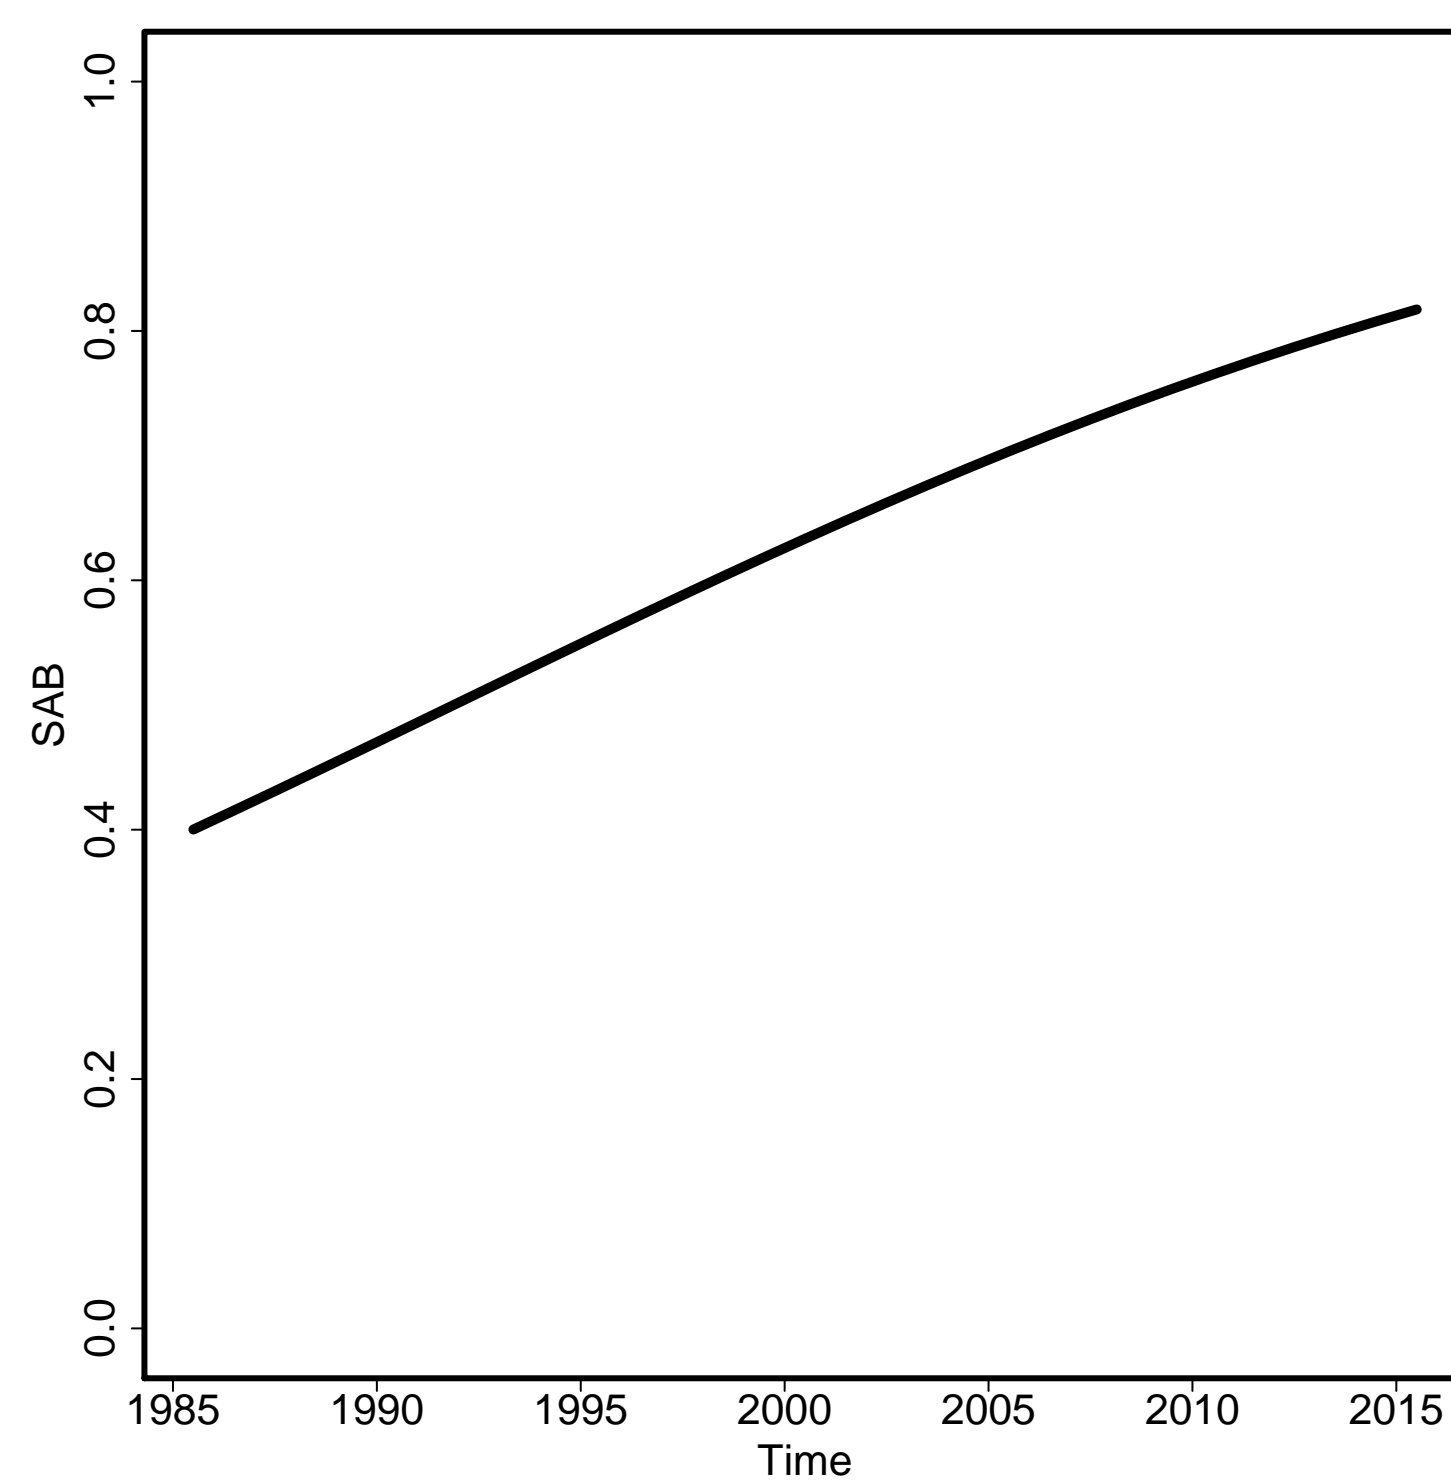

Envelope/Births

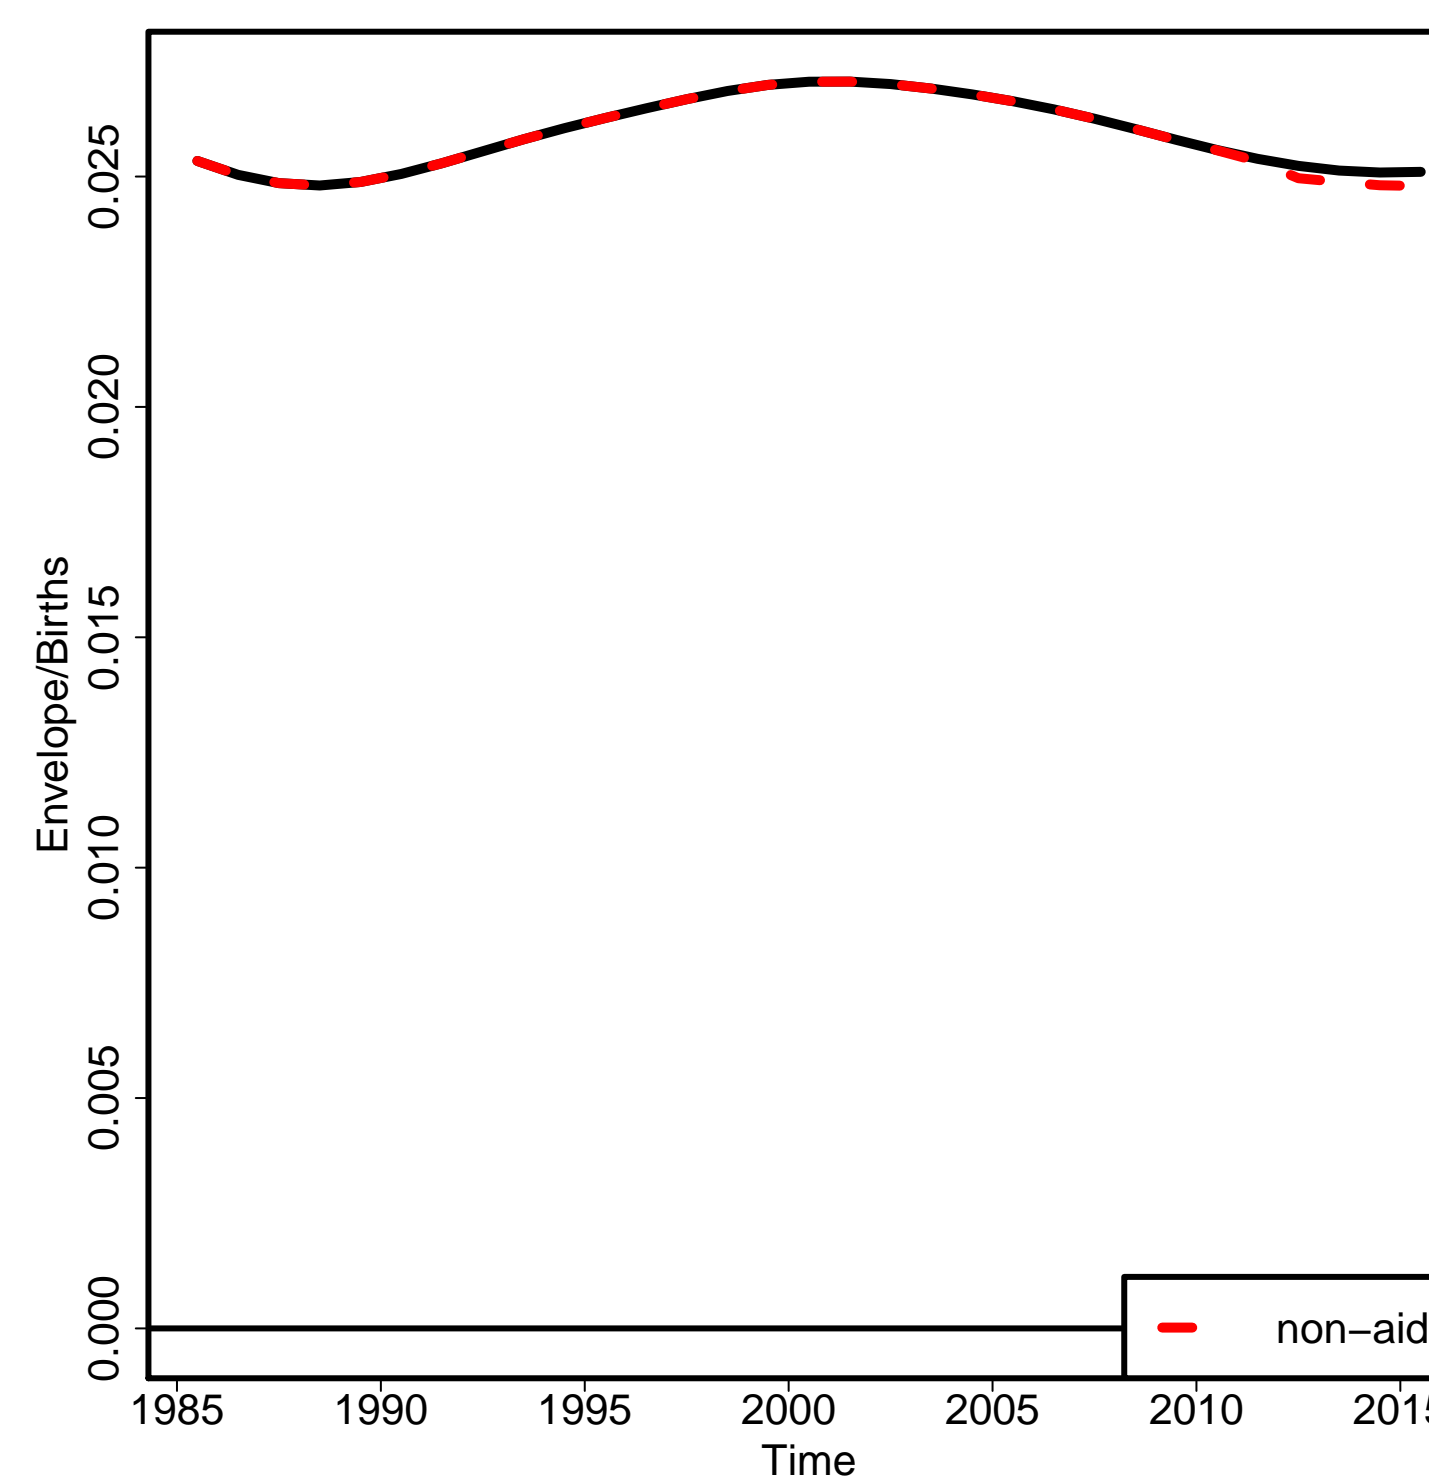

Non-aids MMR

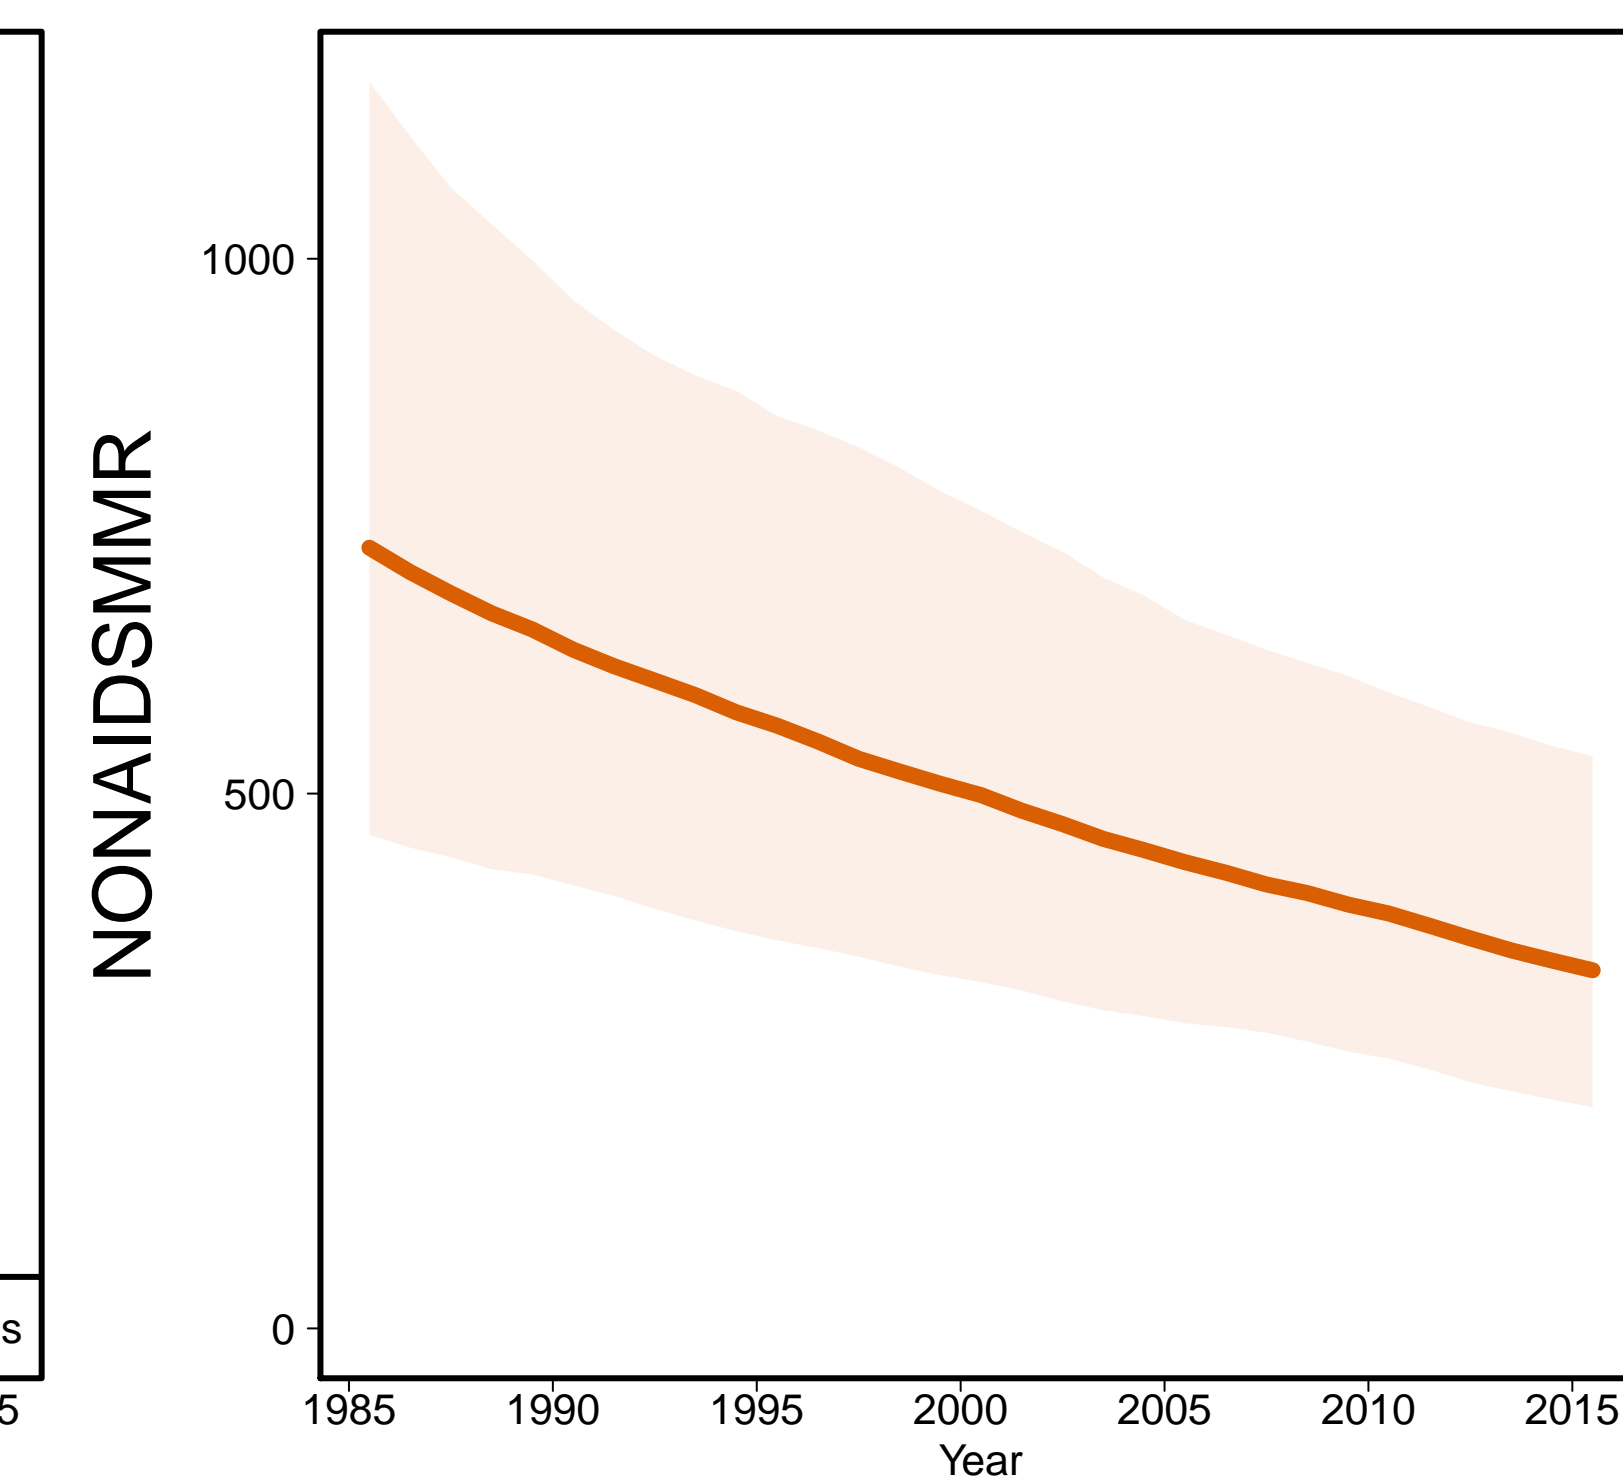

Aids MMR

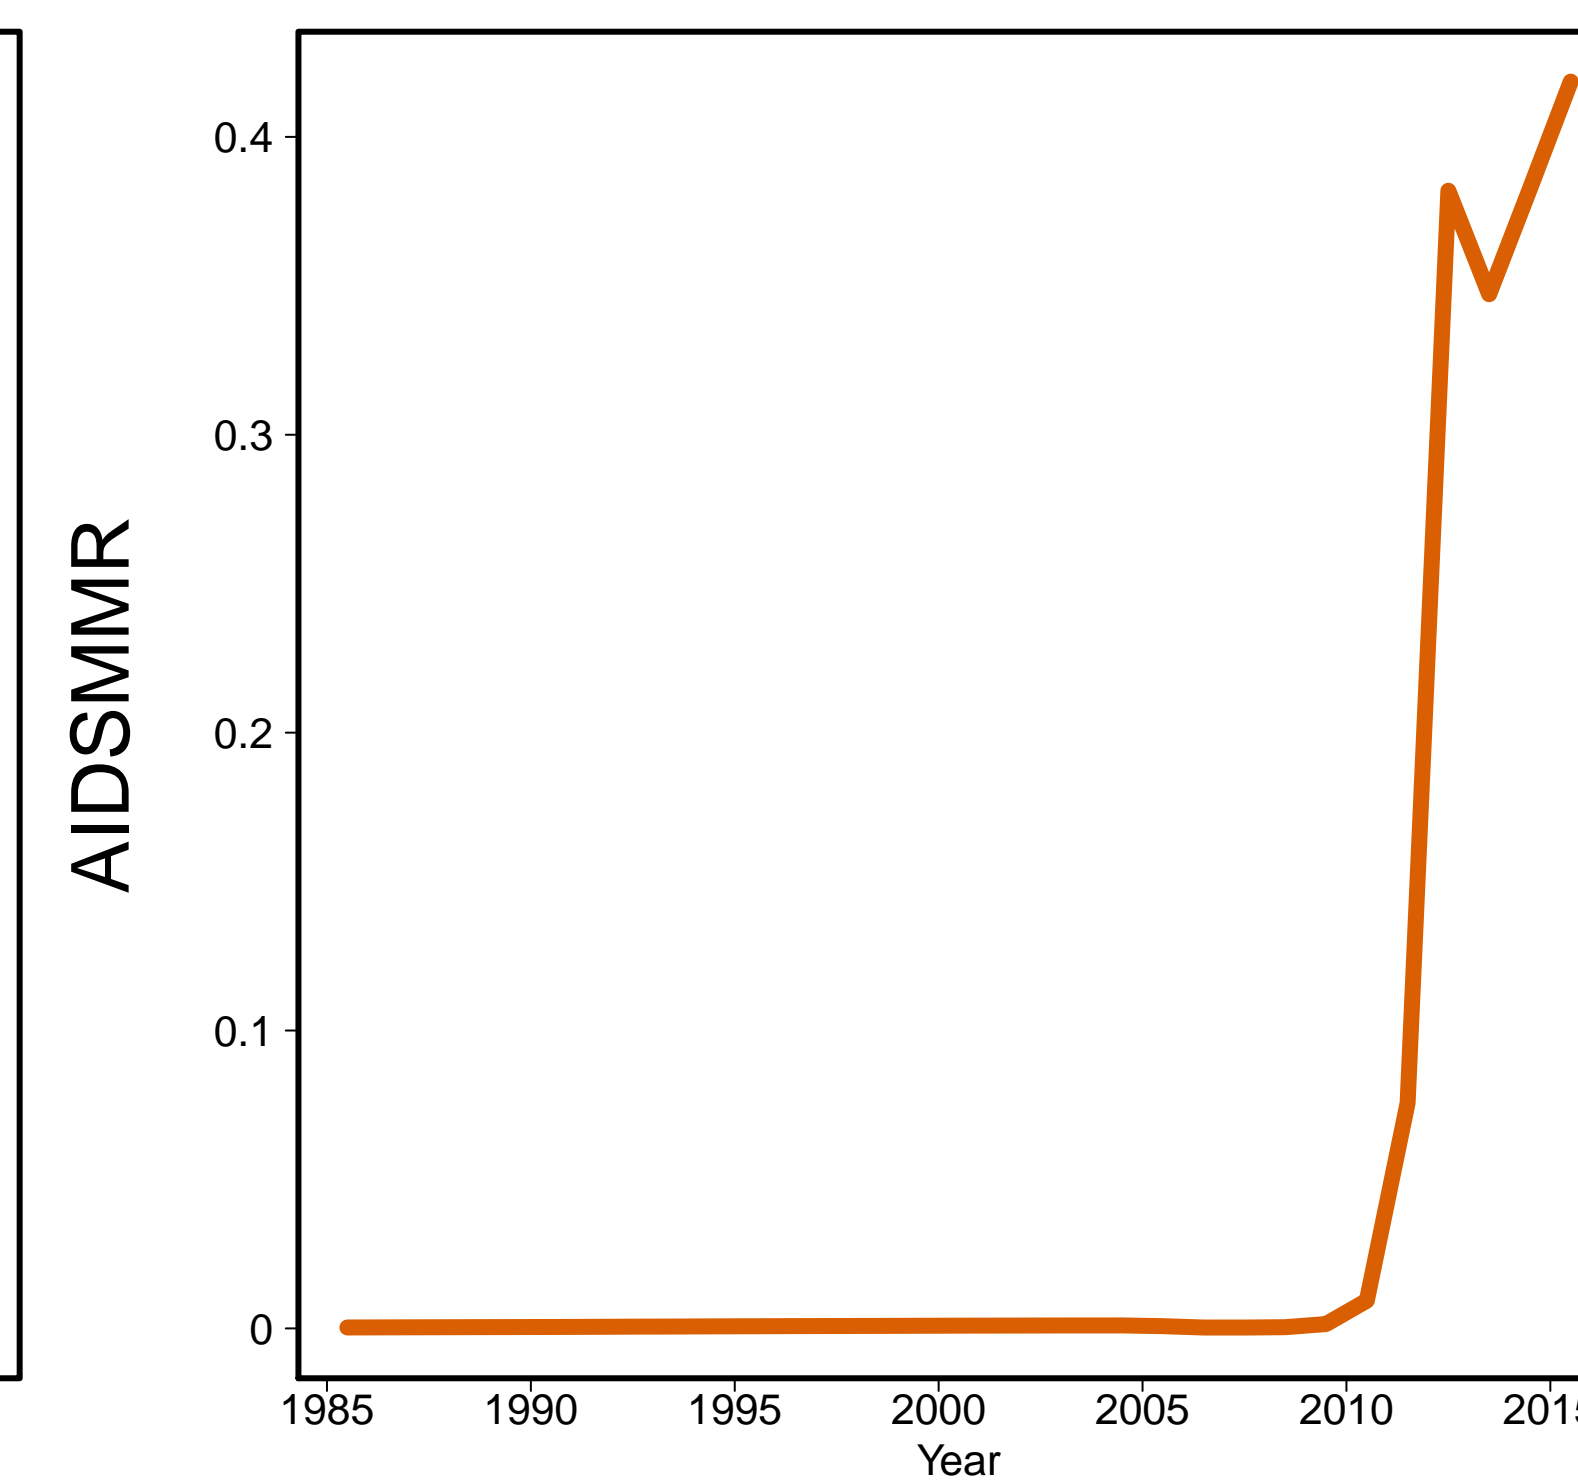

Congo [COG]  
(Middle Africa)

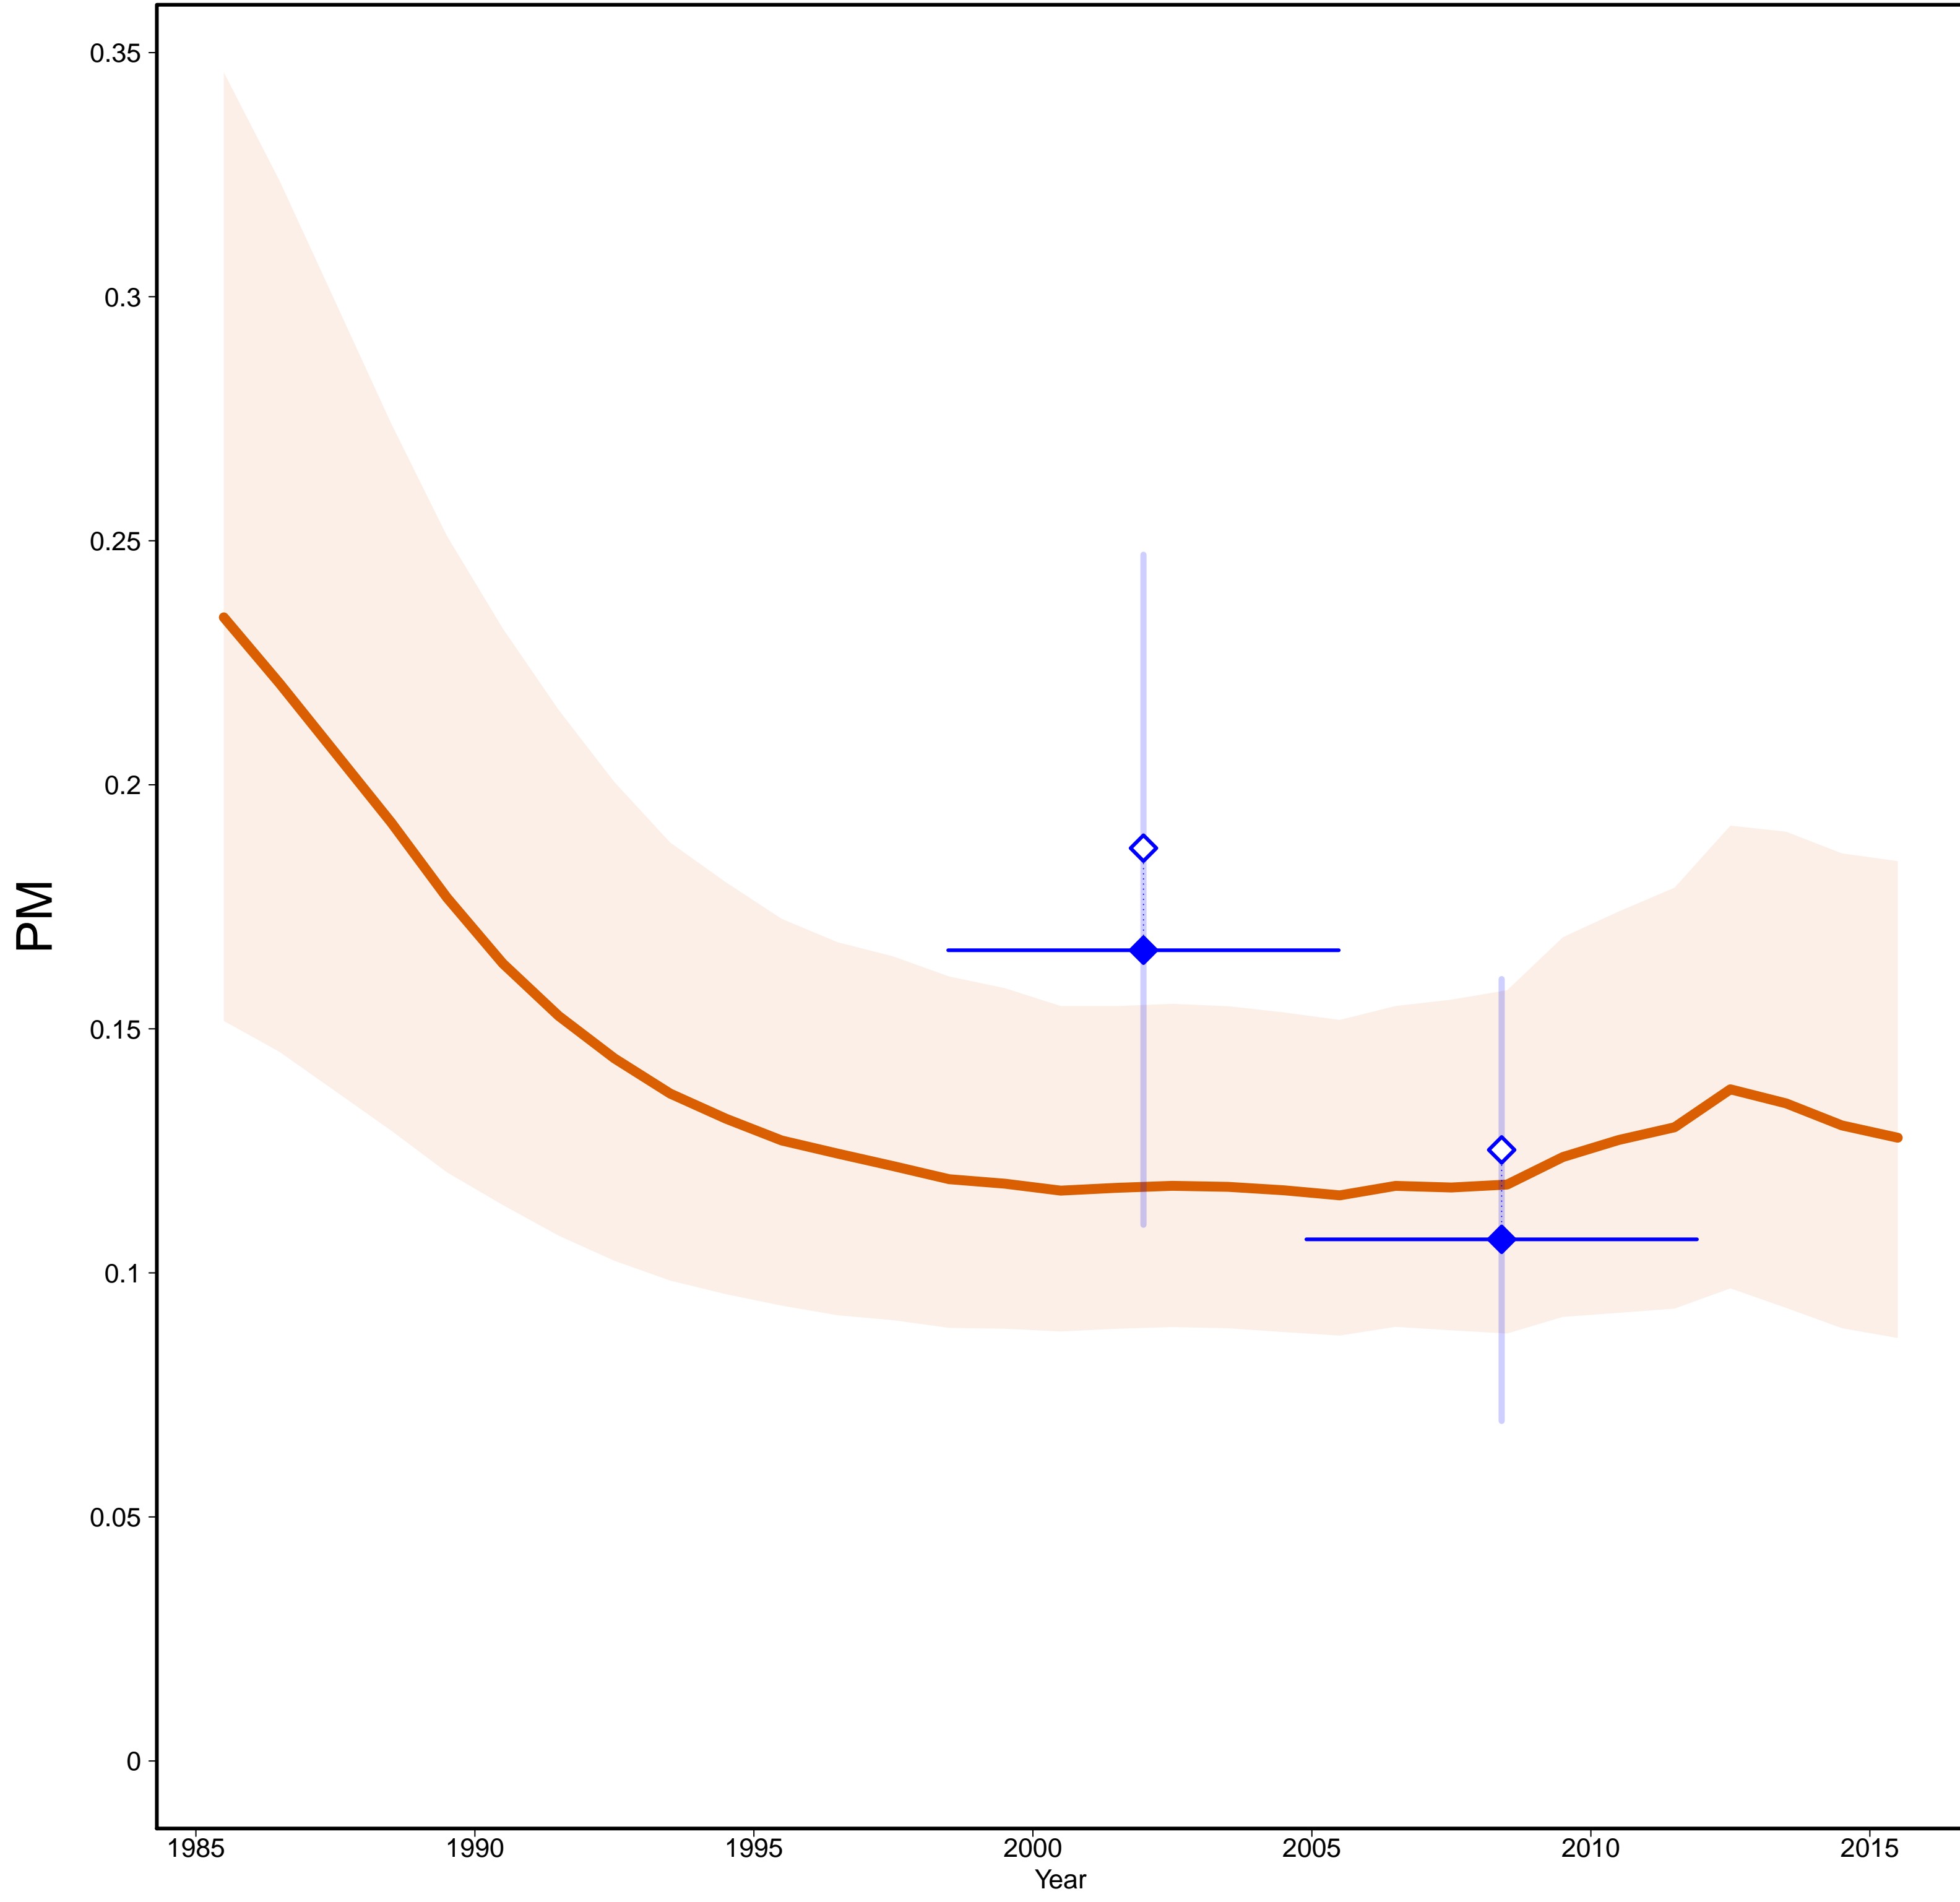

Congo [COG]  
(Middle Africa)

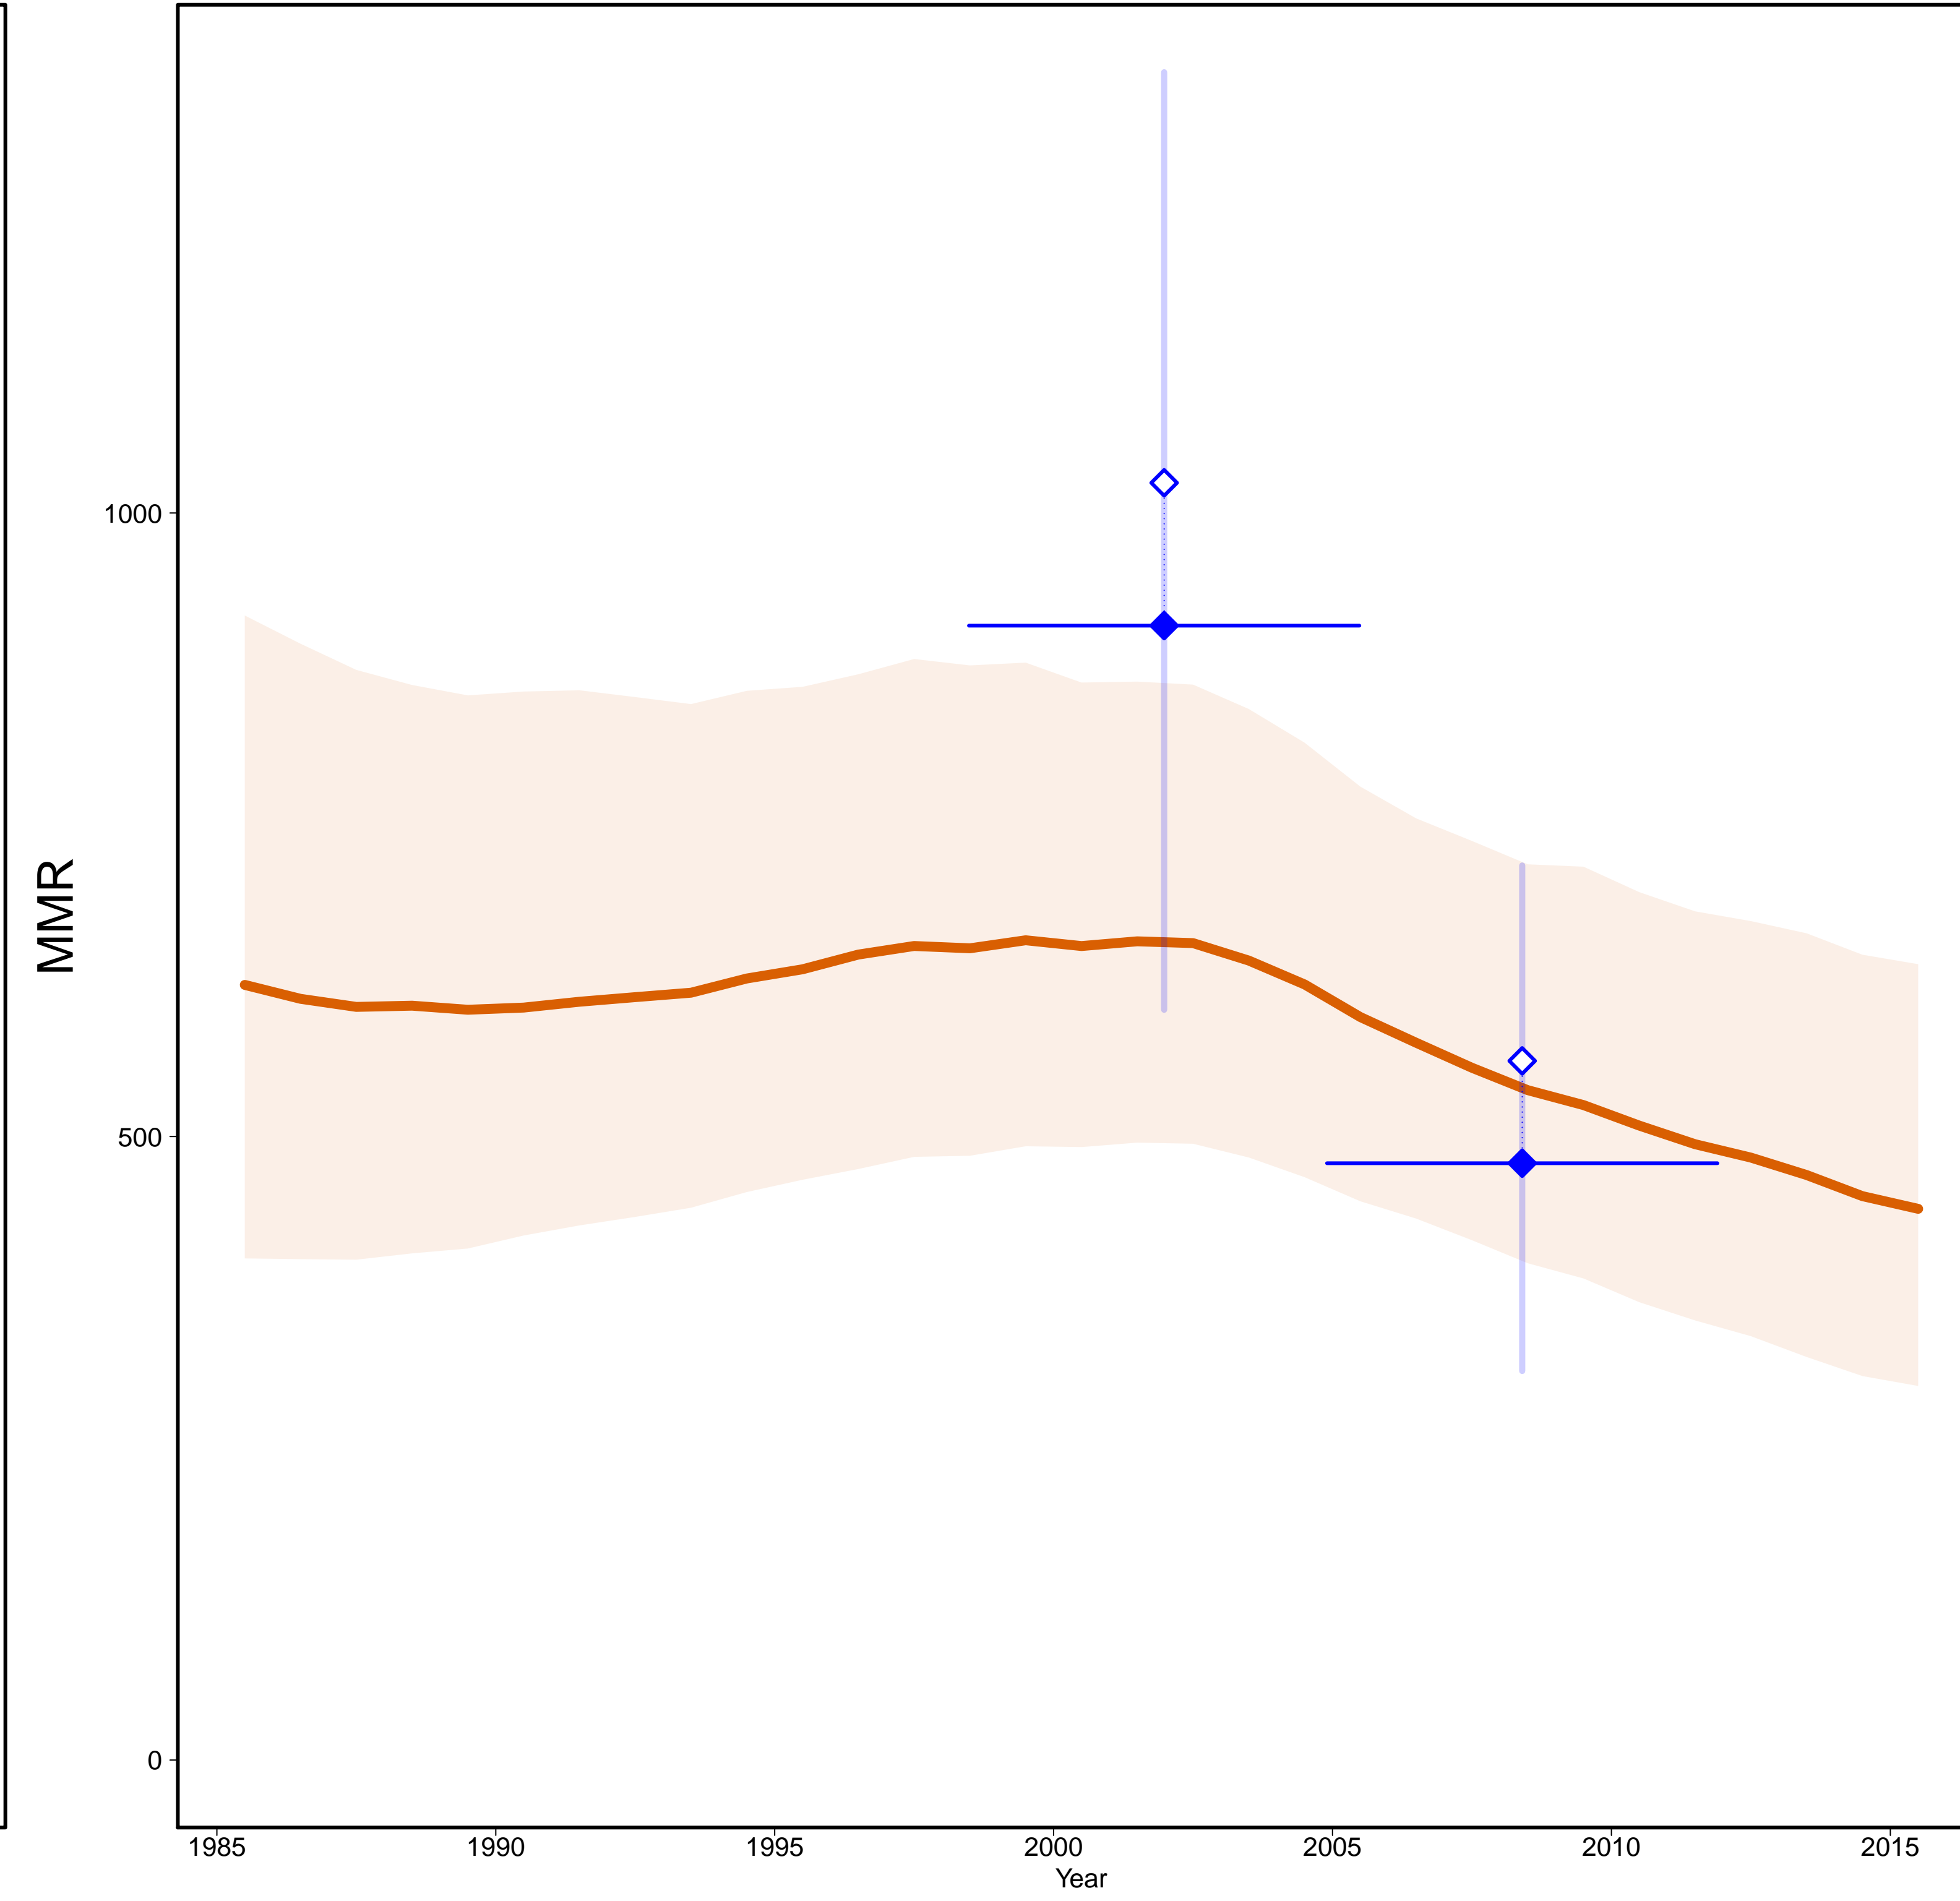

- Estimates —
- MMR Database 2015 —
- ◇ Observed Data
- ◆ Adjusted Data
- Data type —
- ◆ DHS

Gross Domestic Product

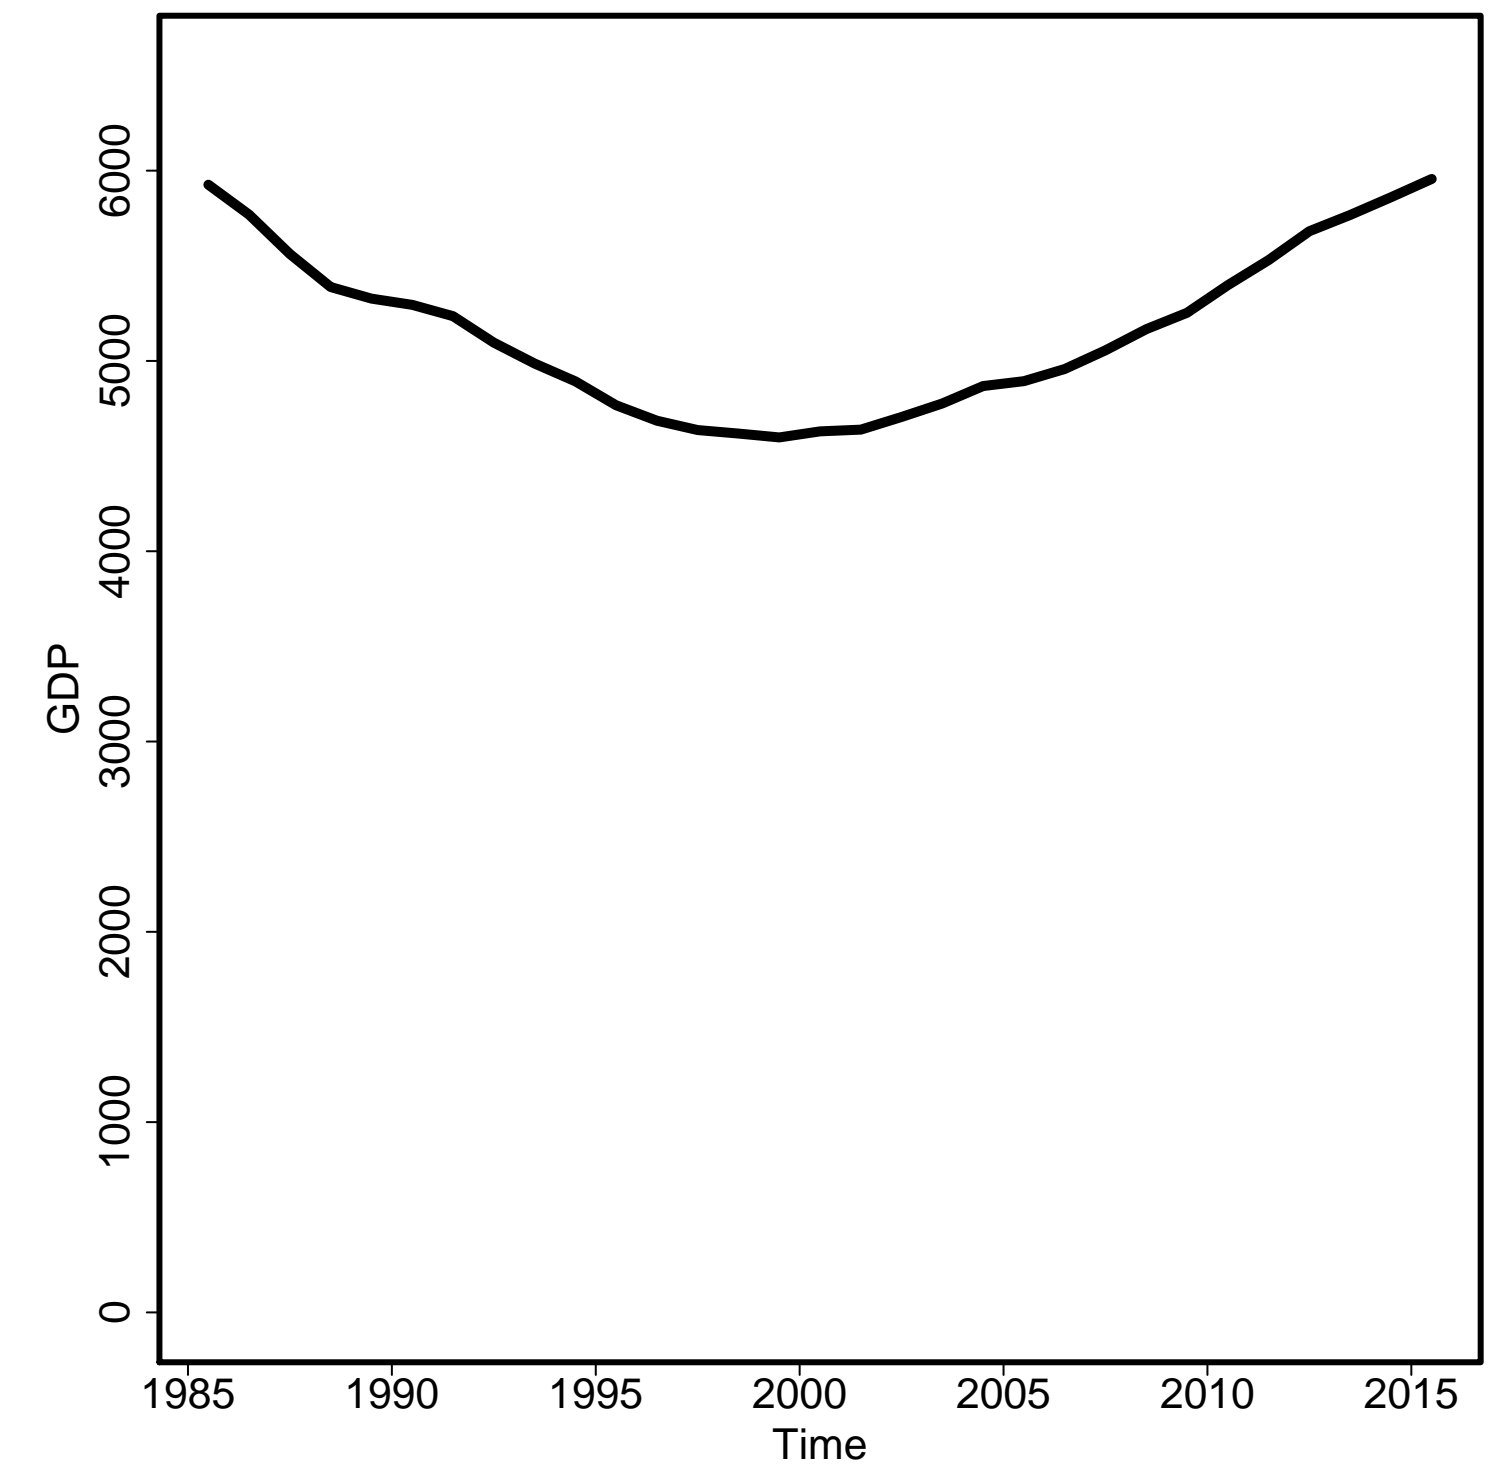

General Fertility Rate

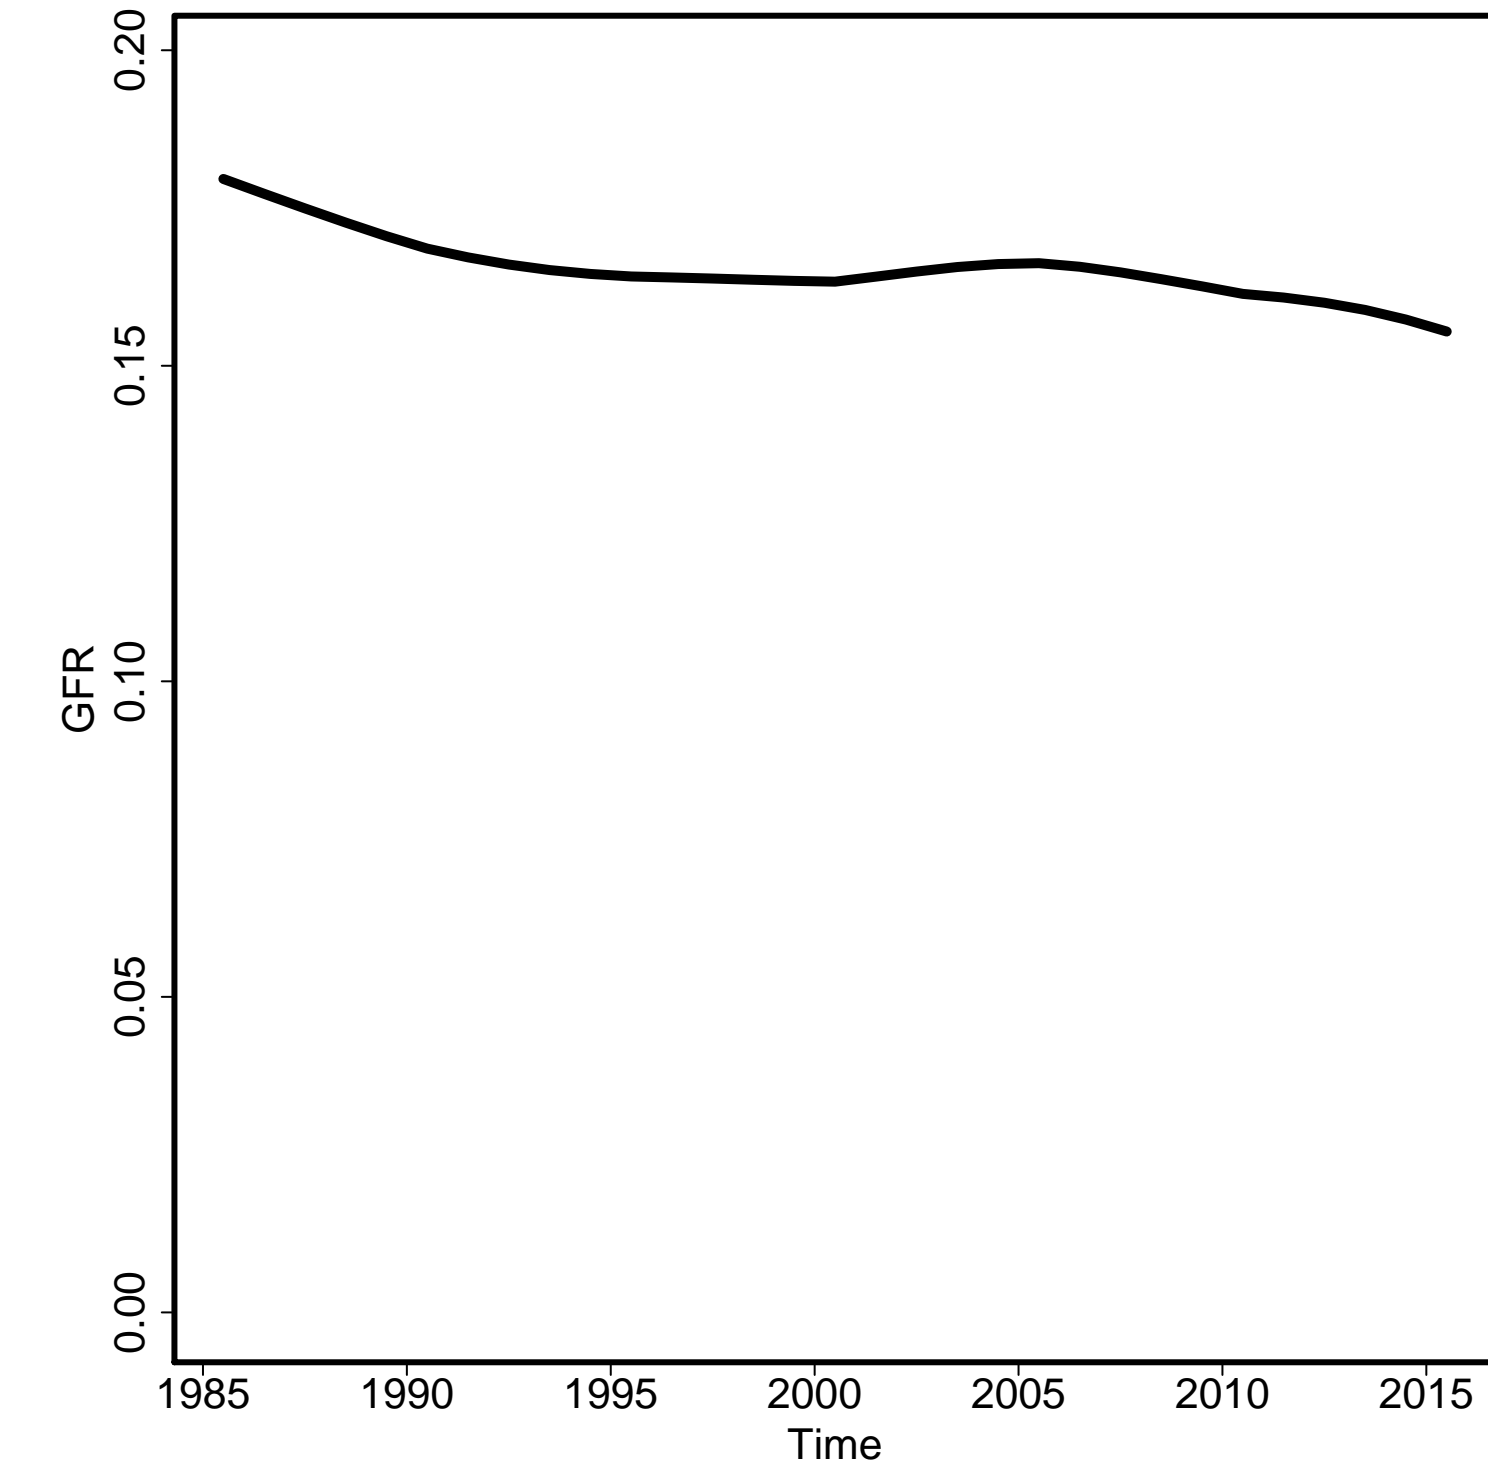

Skilled Attendance to Birth

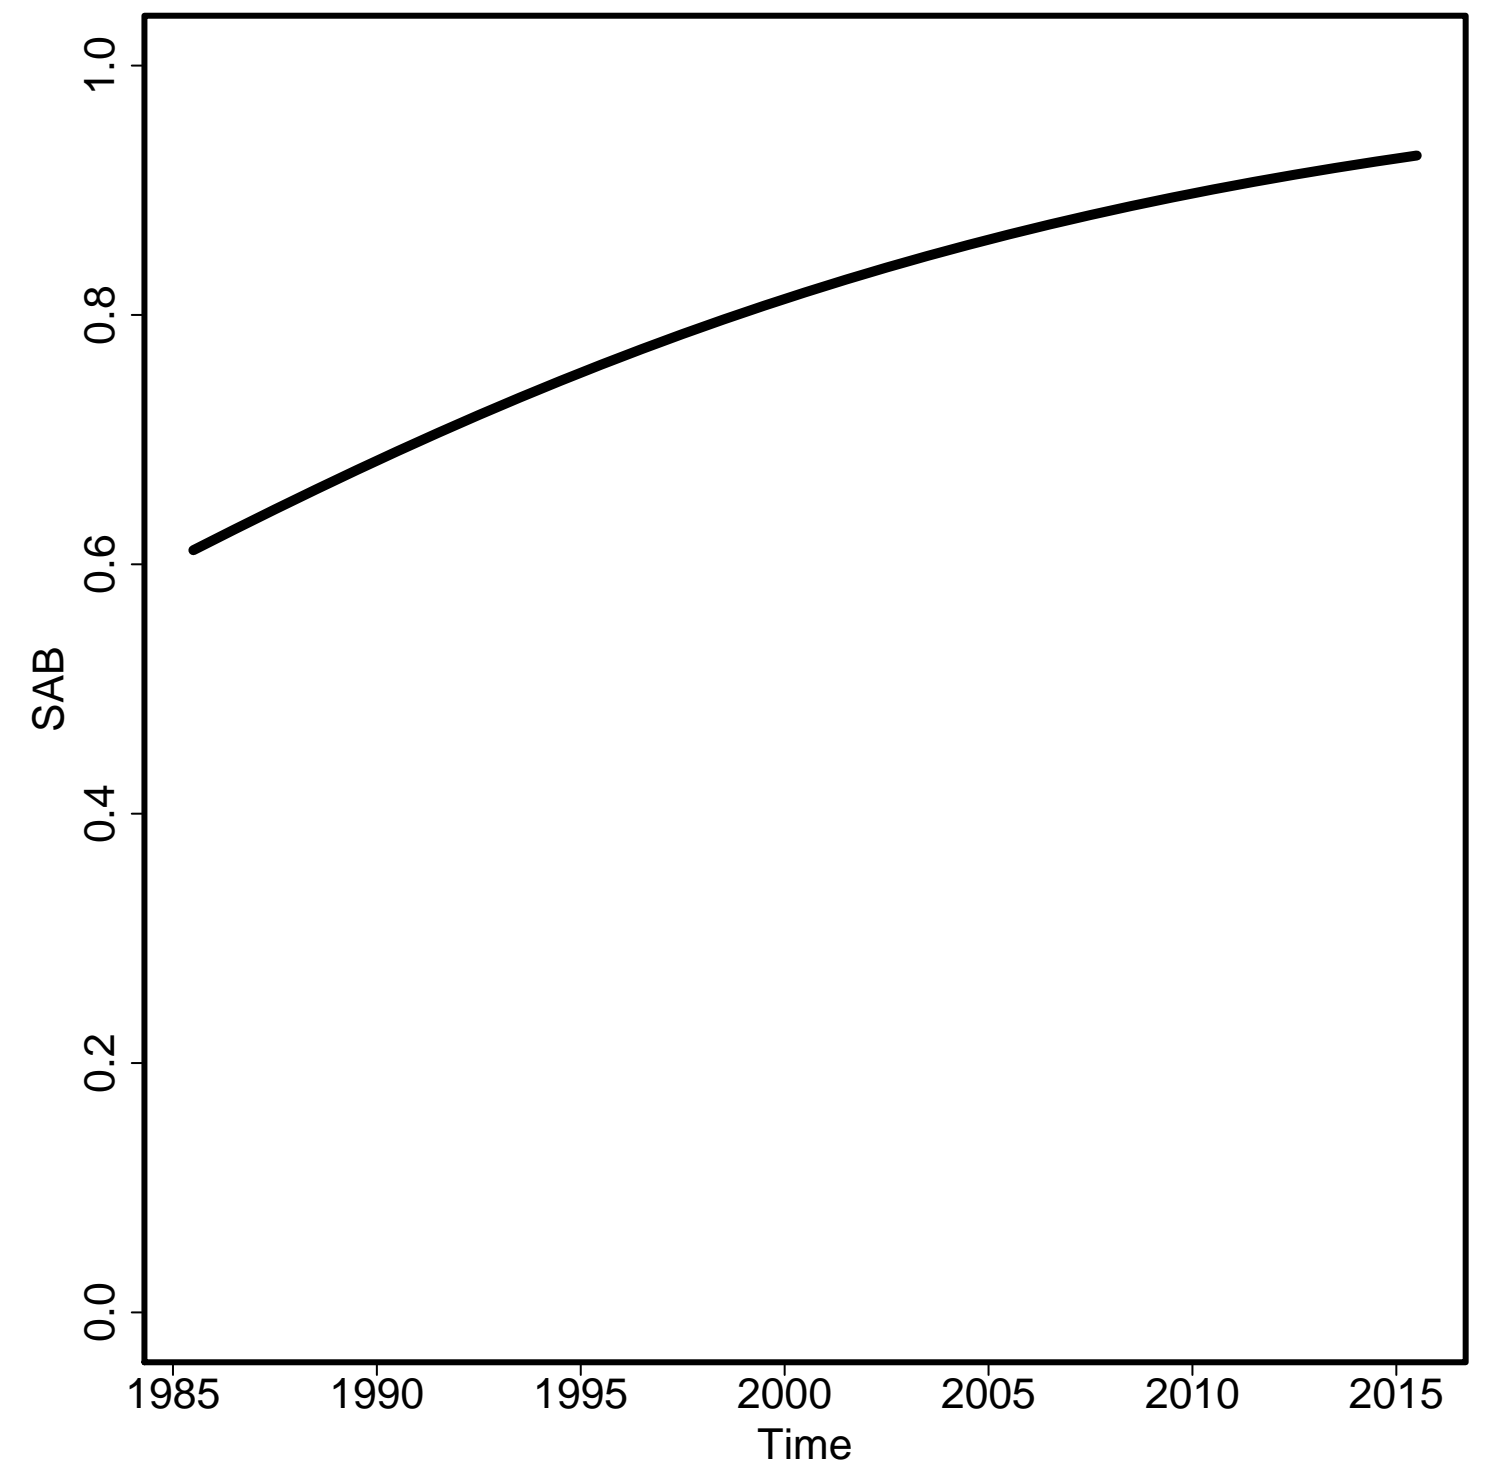

Envelope/Births

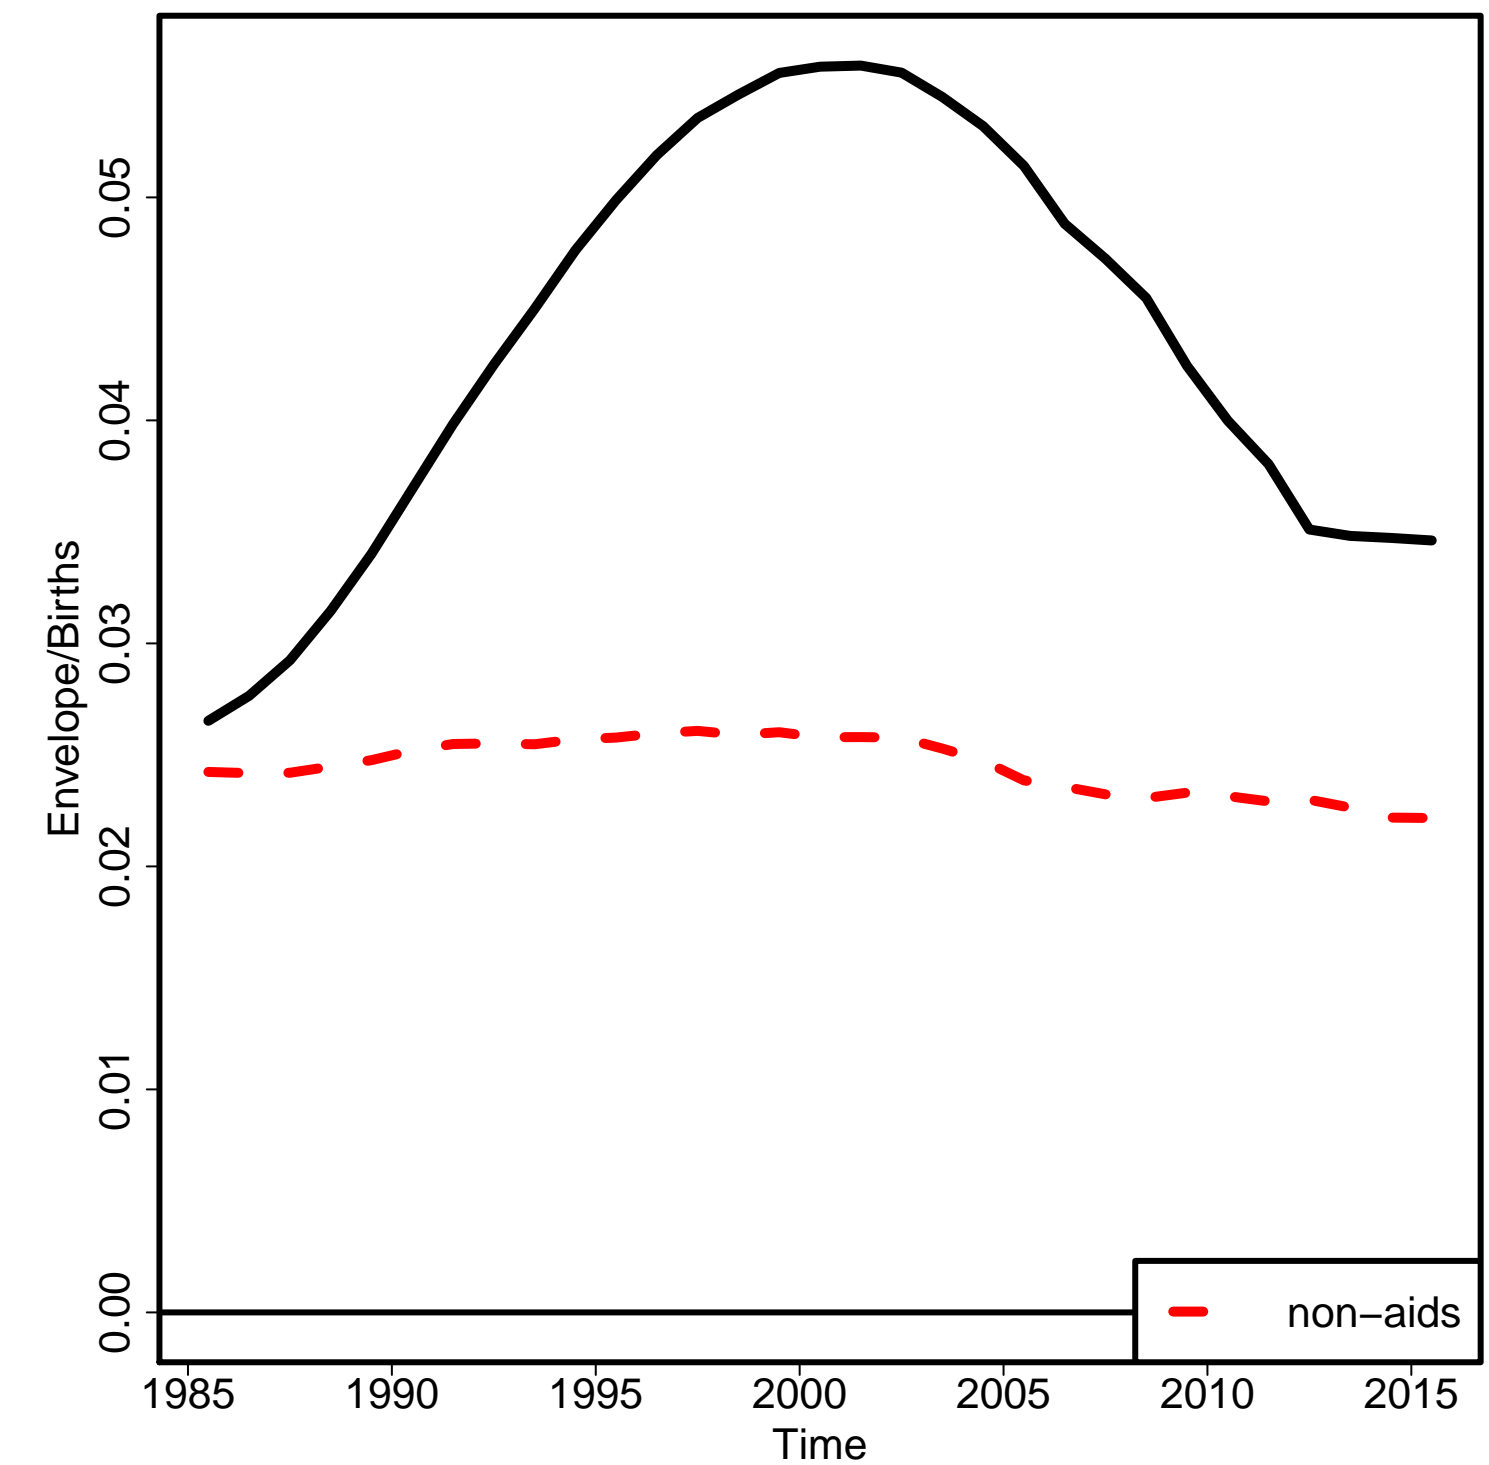

Non-aids MMR

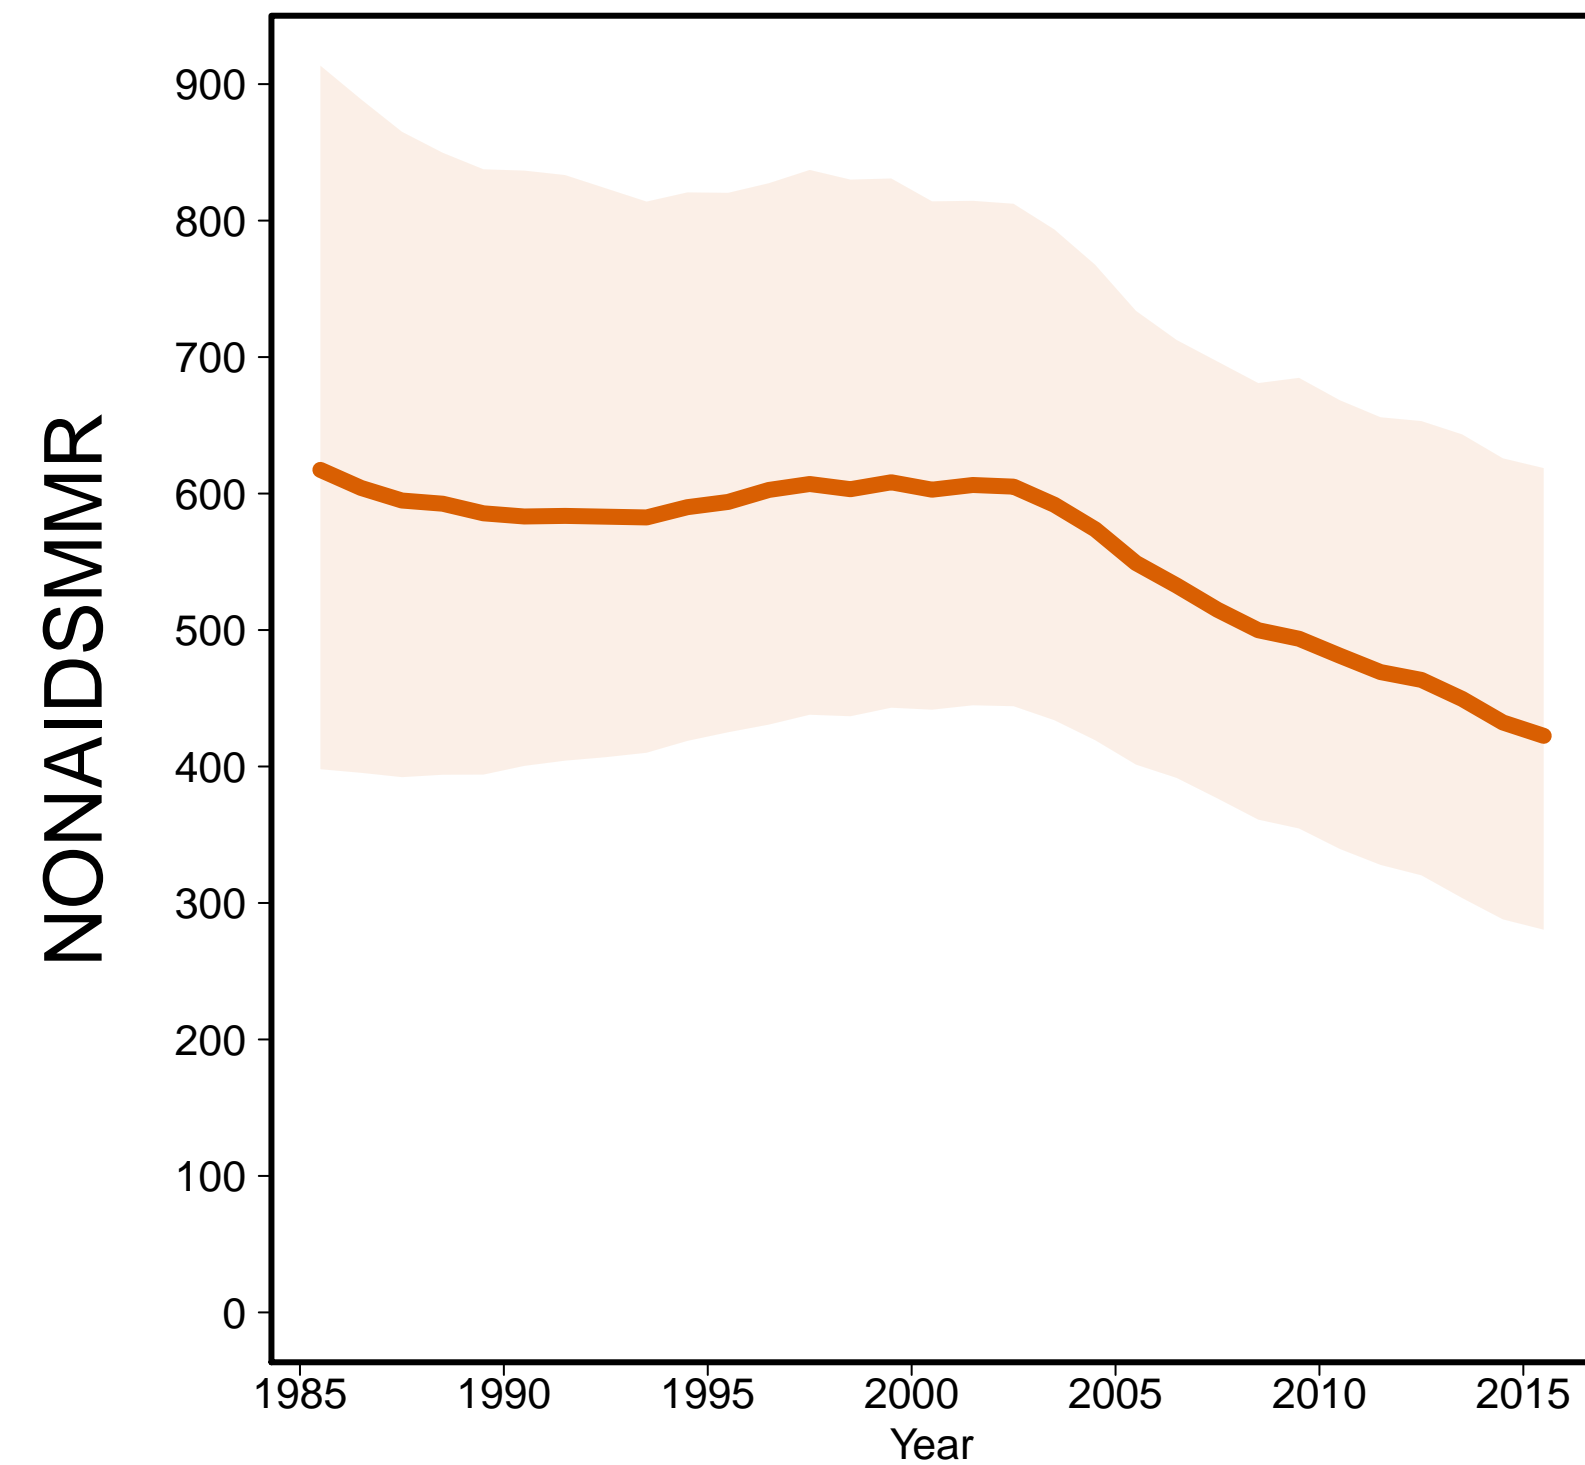

Aids MMR

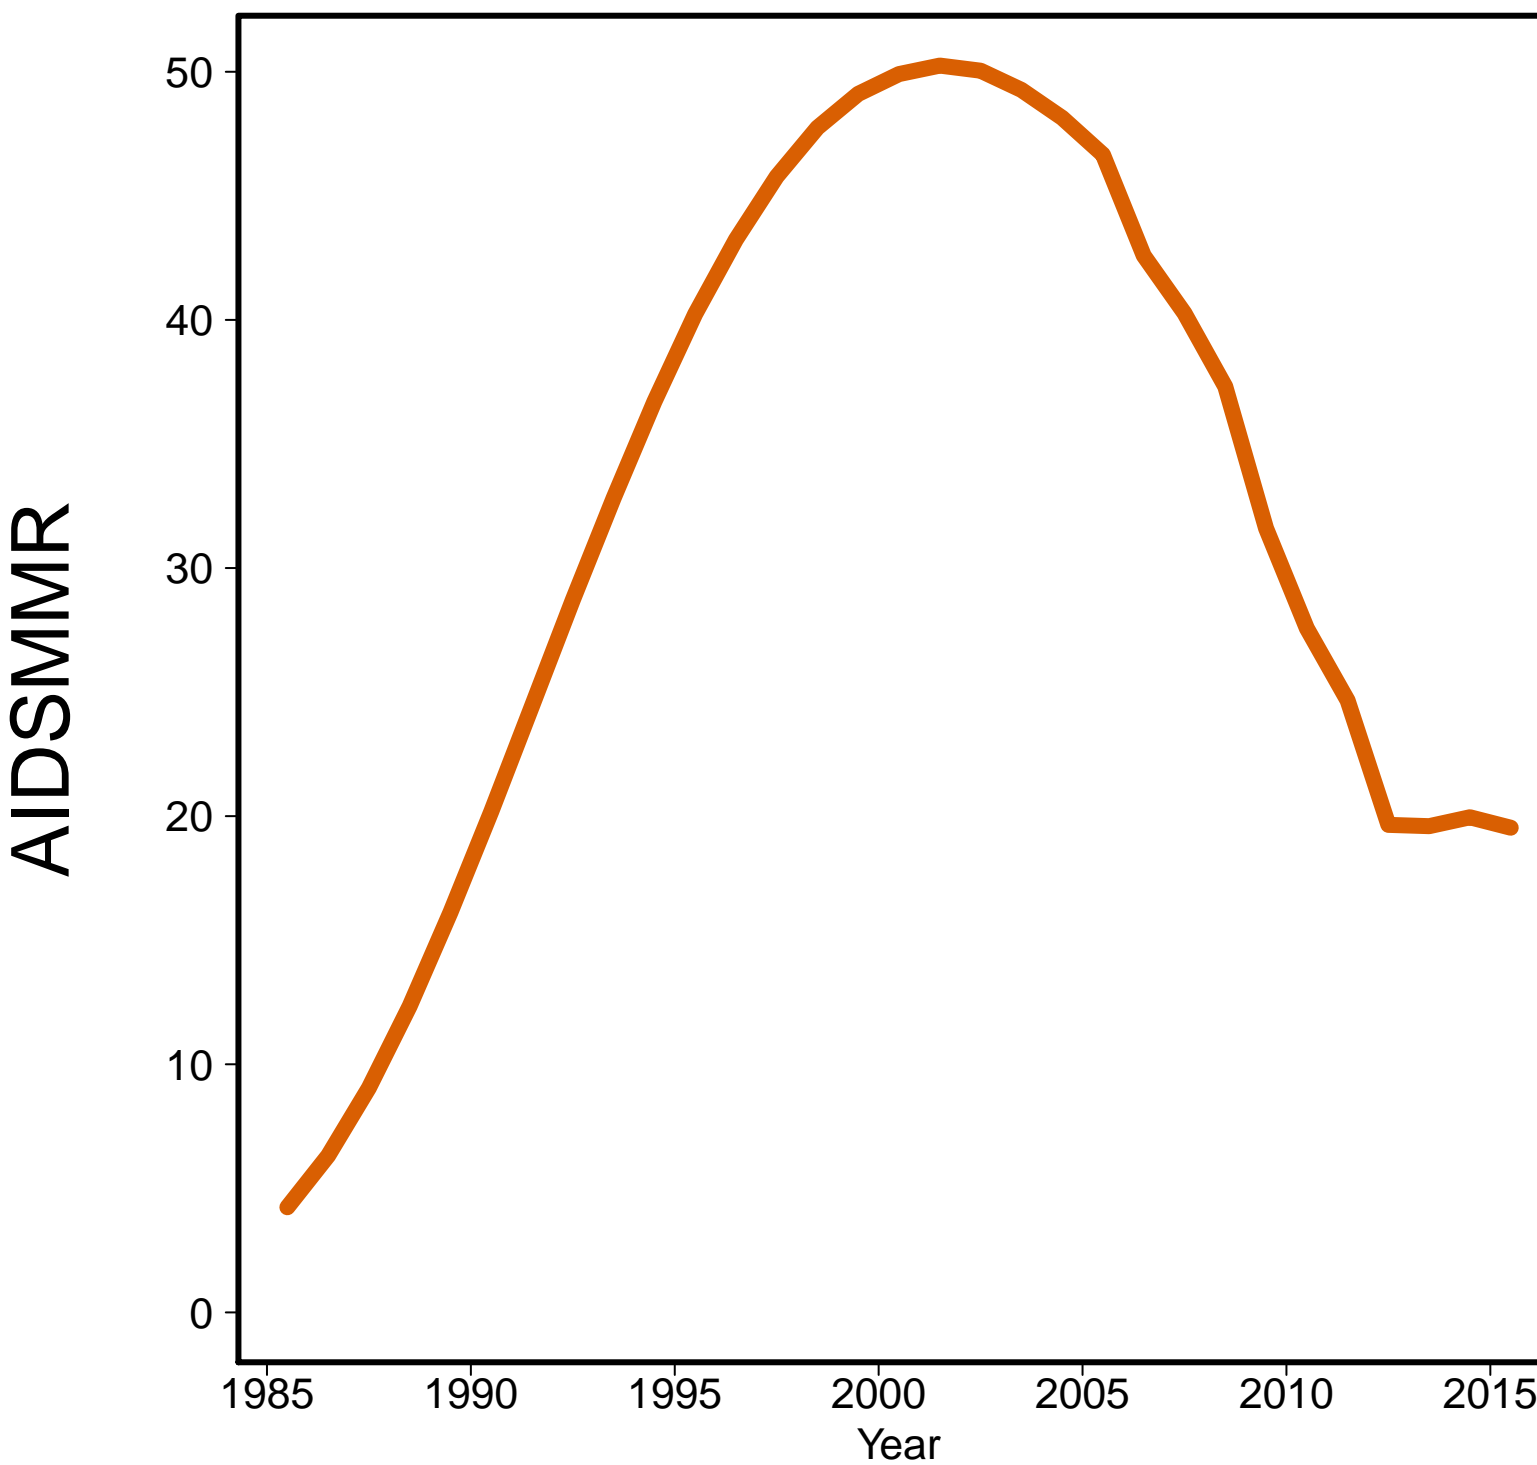

Costa Rica [CRI]  
(Central America)

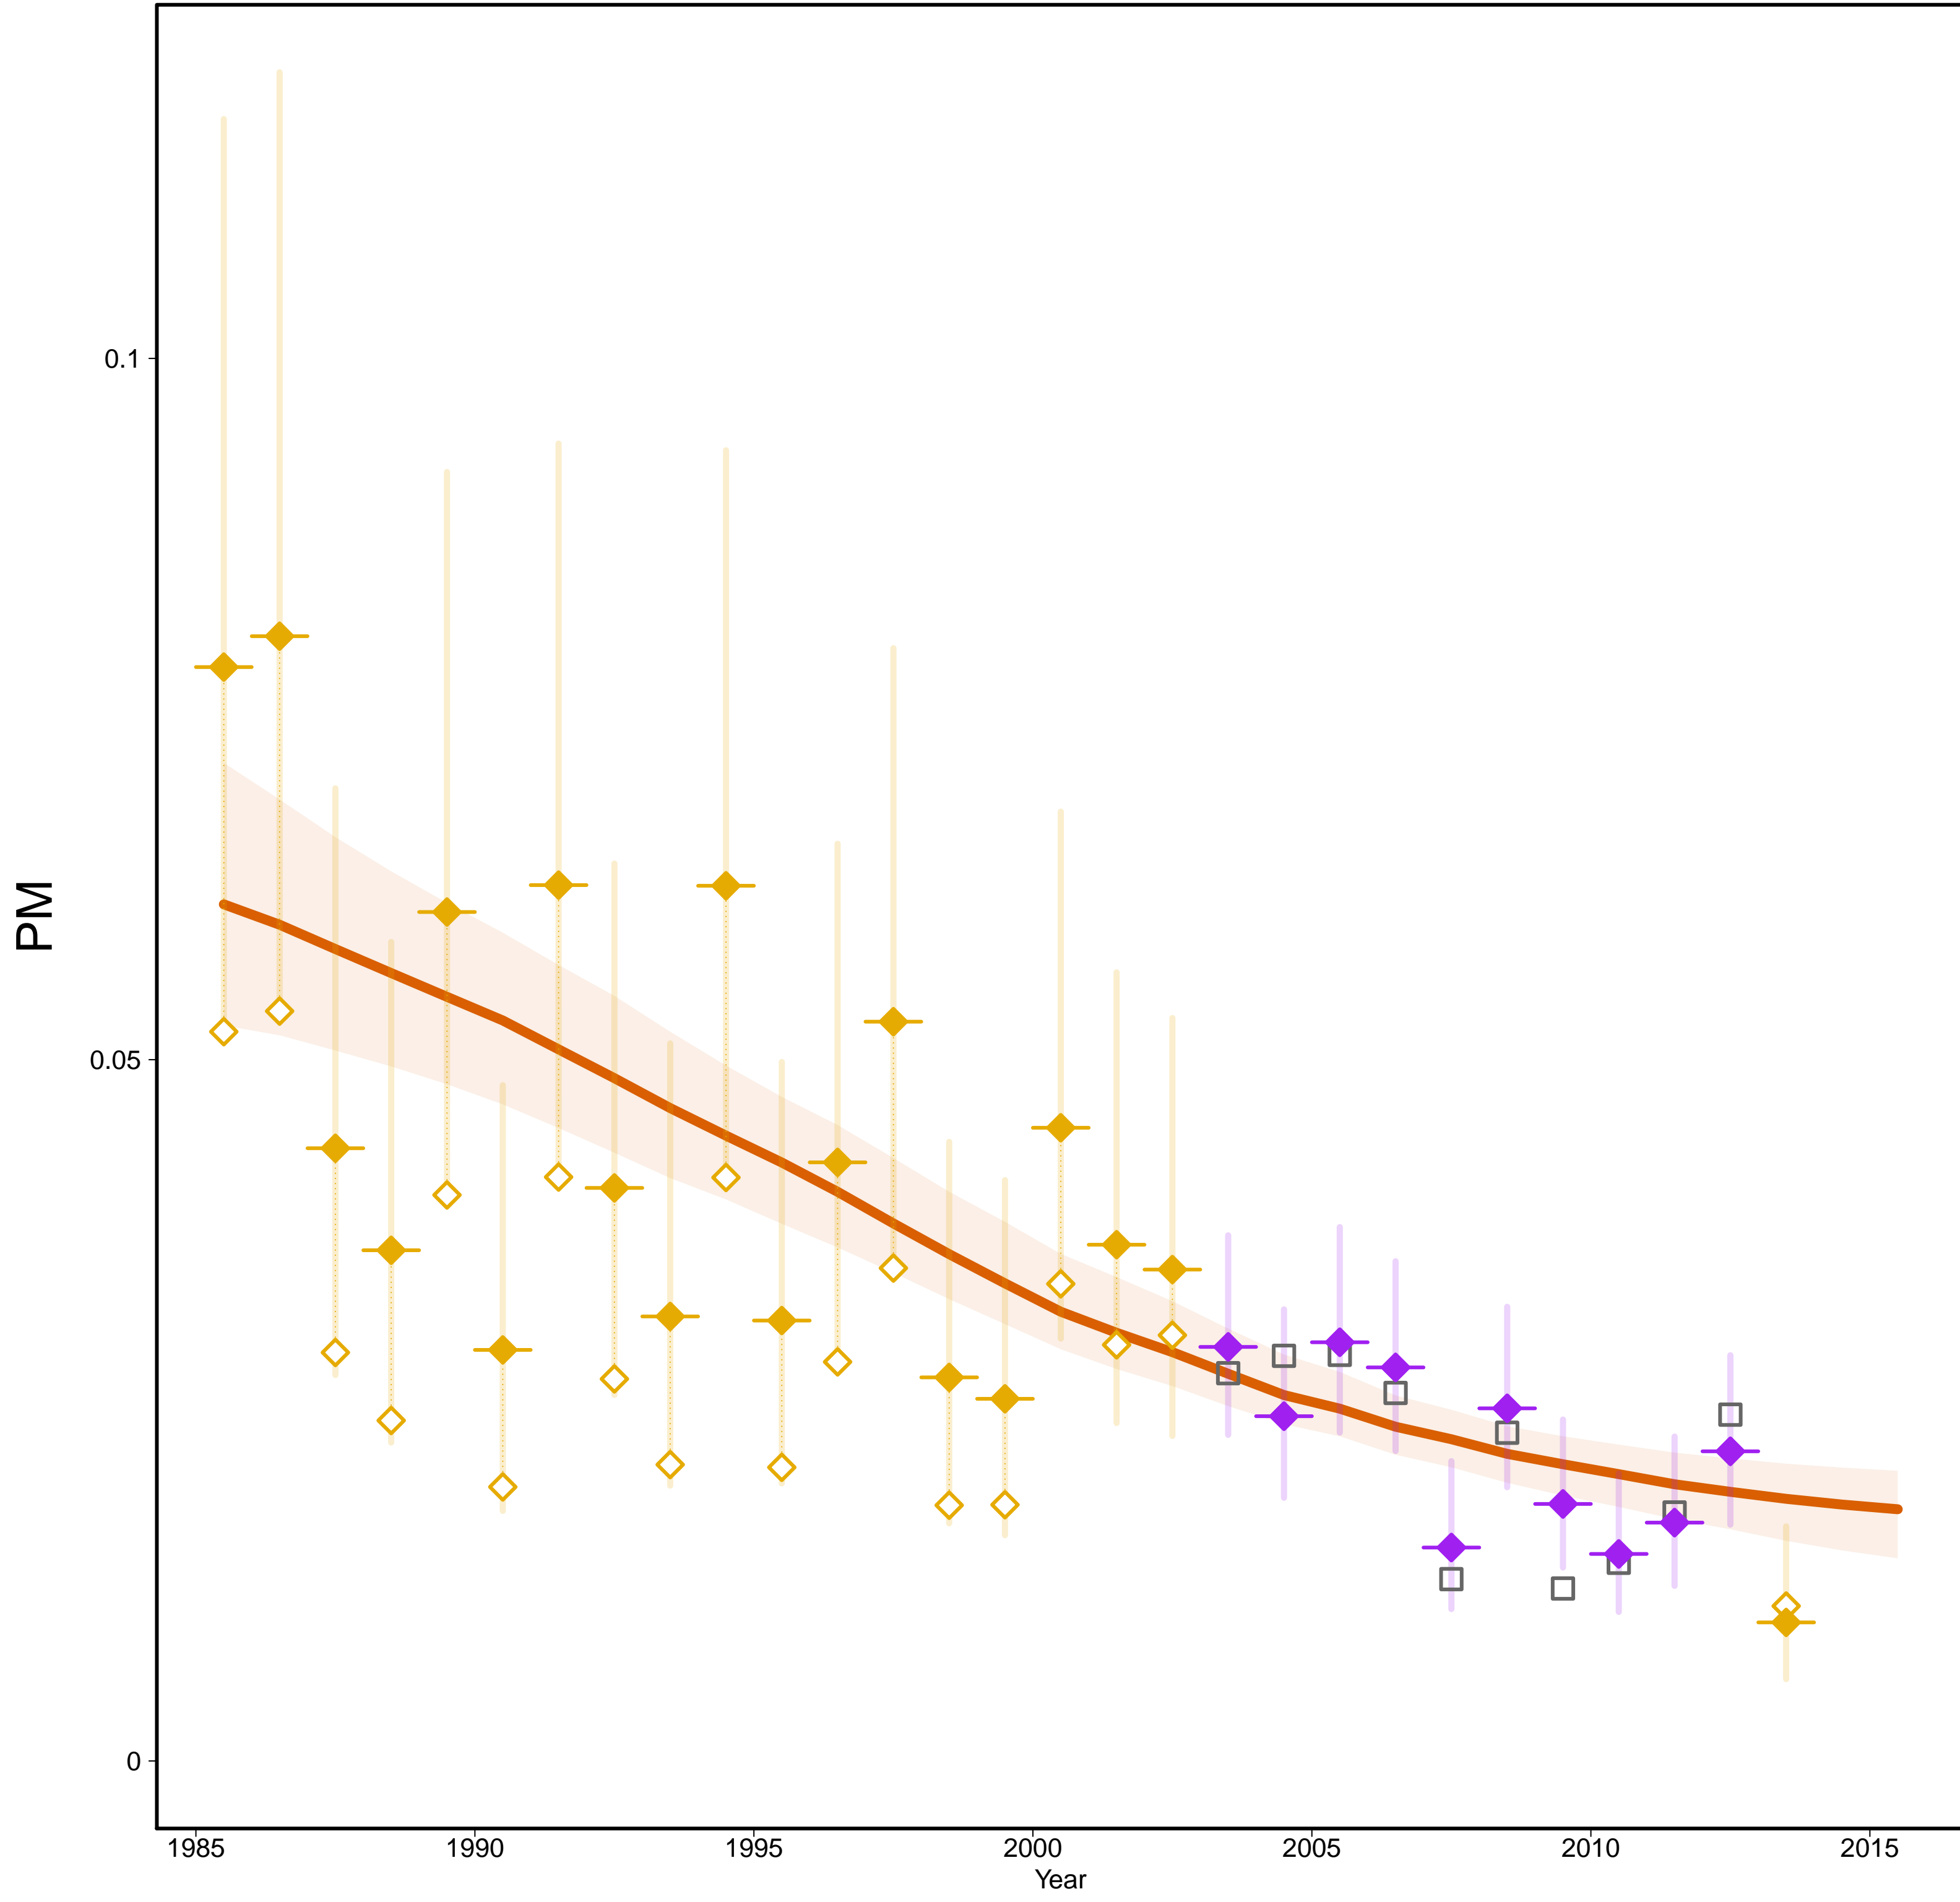

Costa Rica [CRI]  
(Central America)

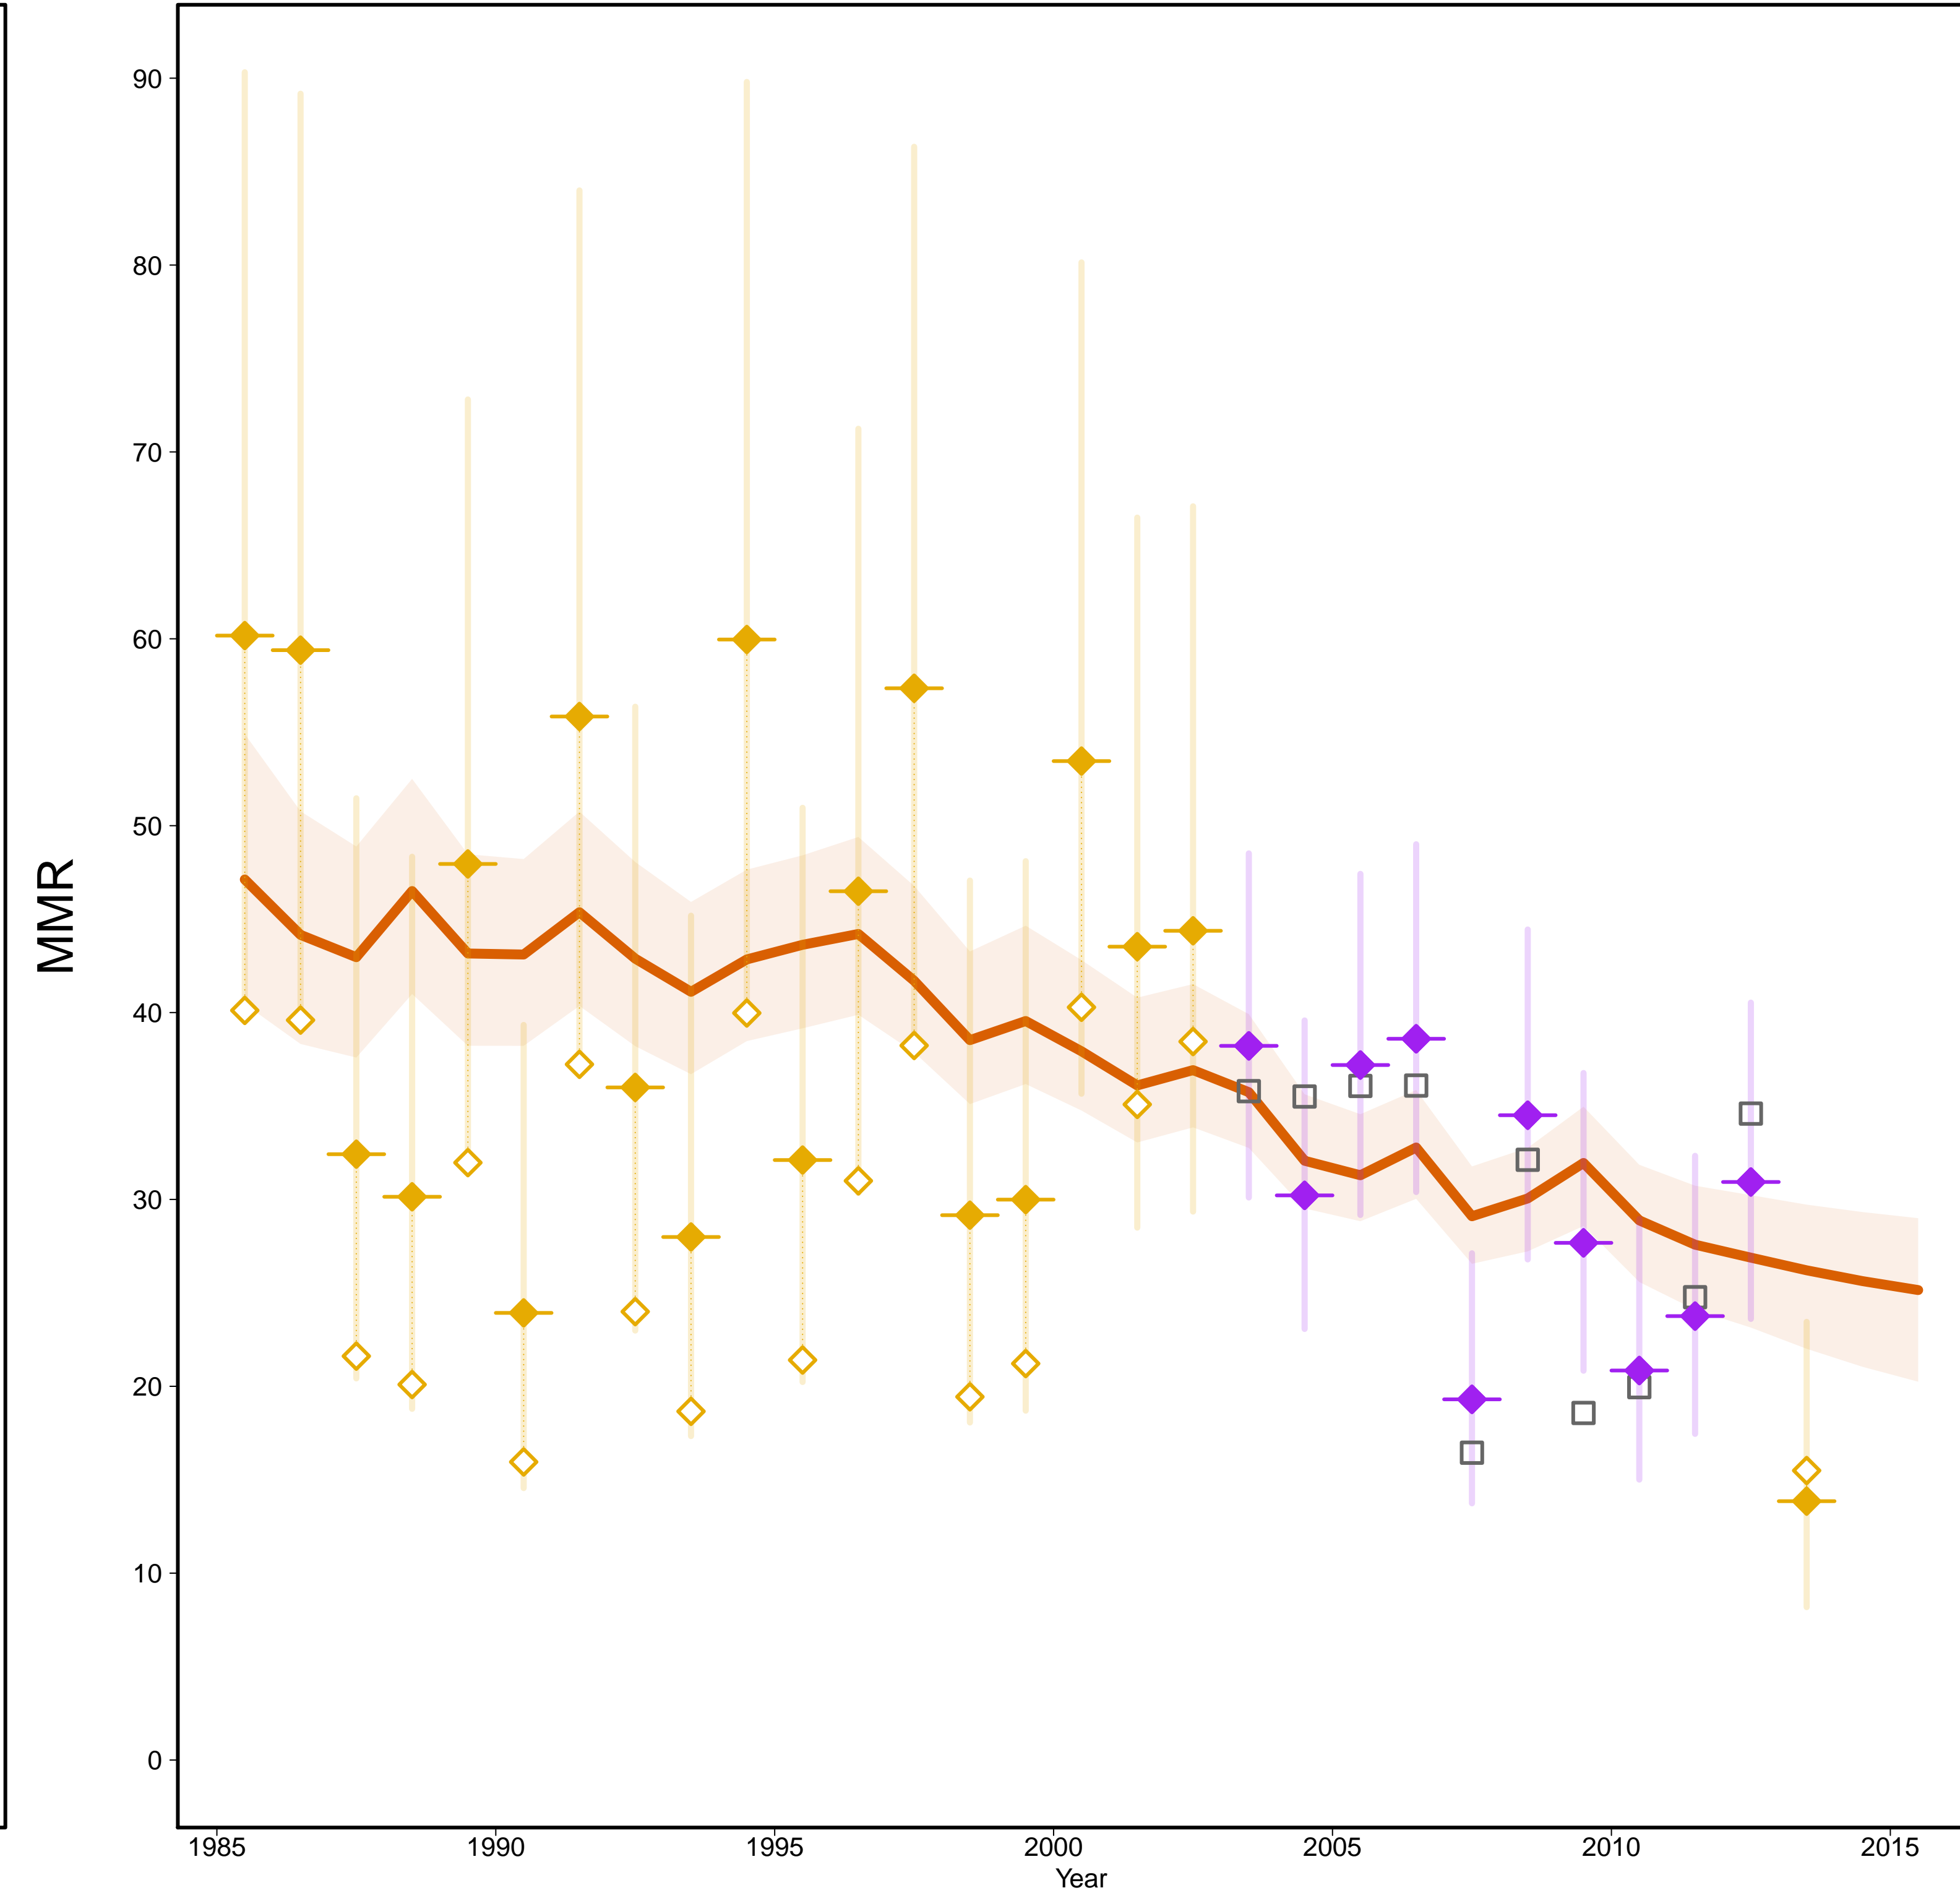

- Estimates —
- MMR Database 2015 —
- ◇ Observed Data
- ◆ Adjusted Data
- Data type —
- ◆ VR
- ◆ Spec. studies
- Excluded VR data  
(overlap with specialized study)

Gross Domestic Product

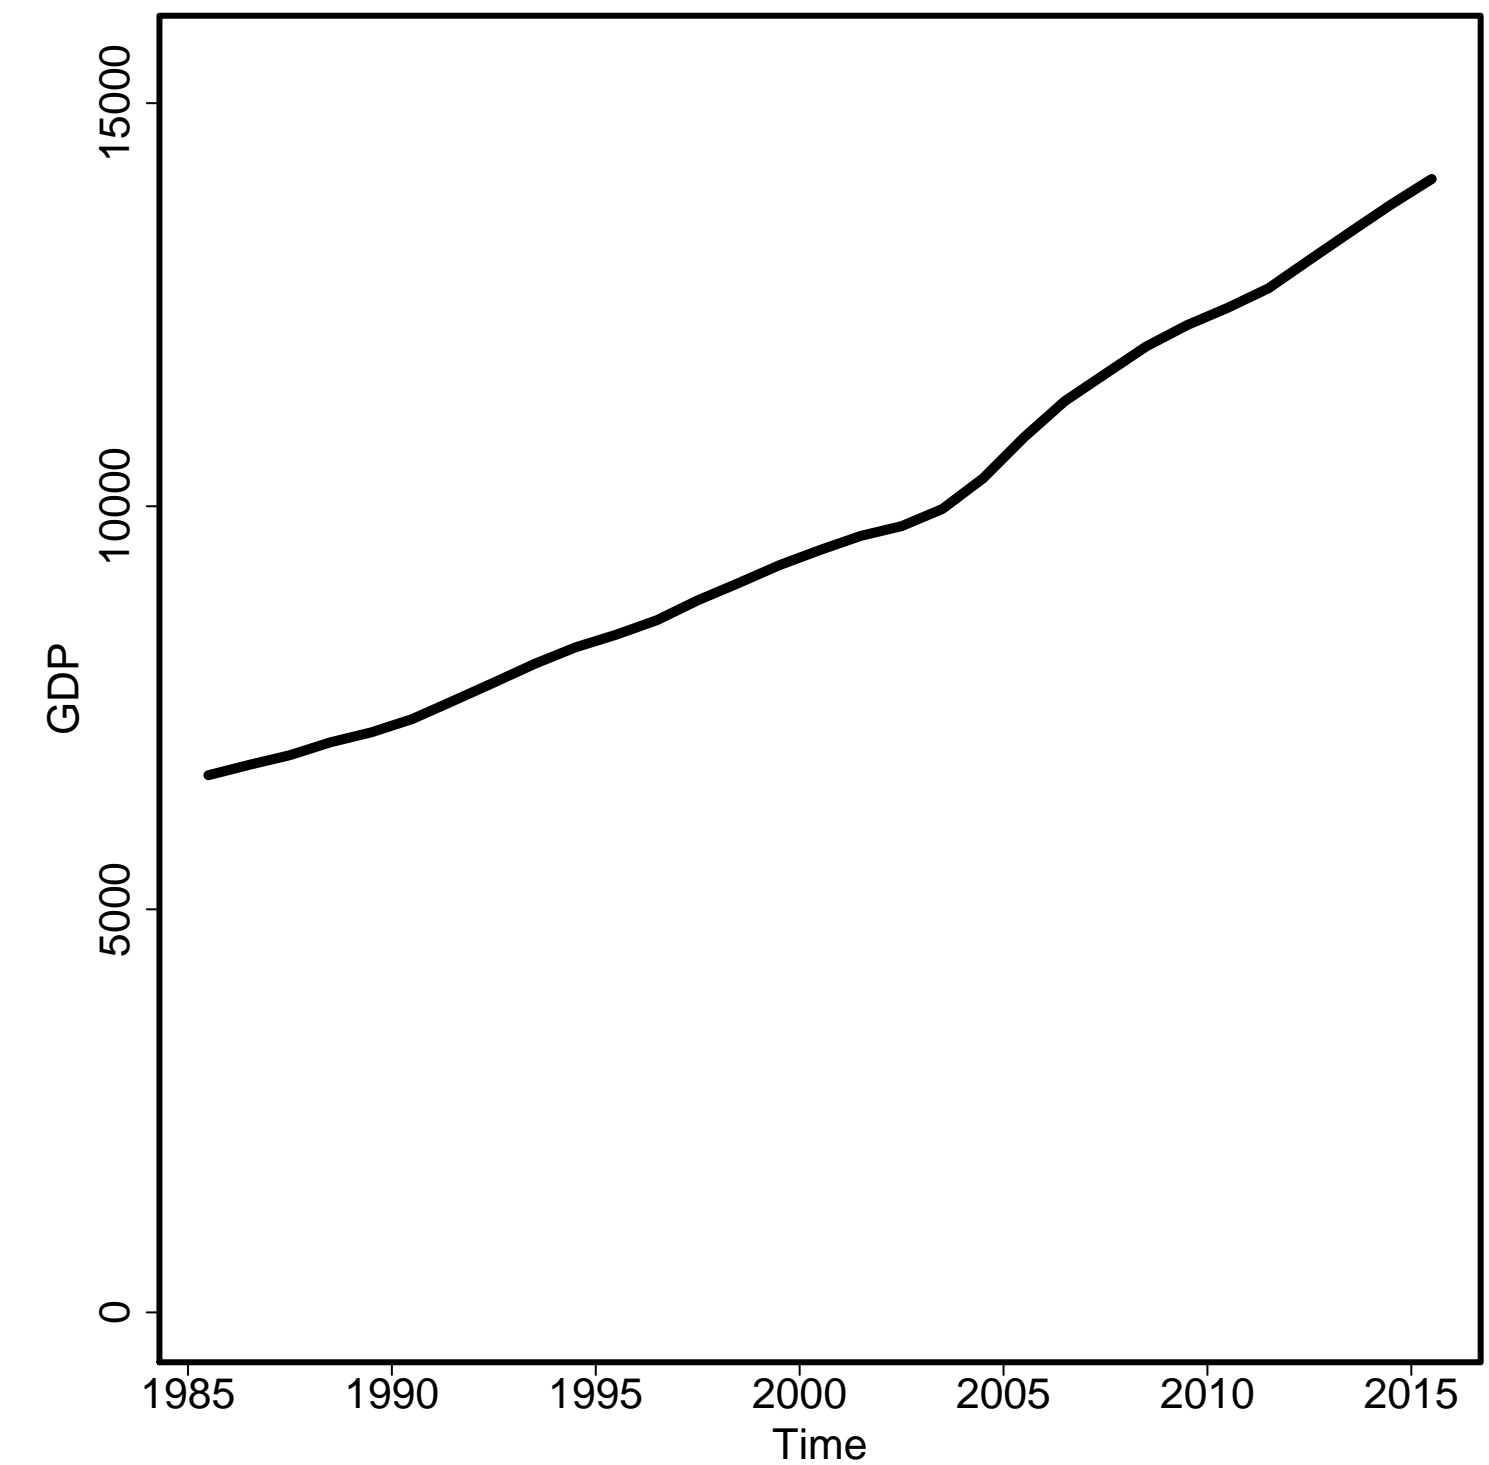

General Fertility Rate

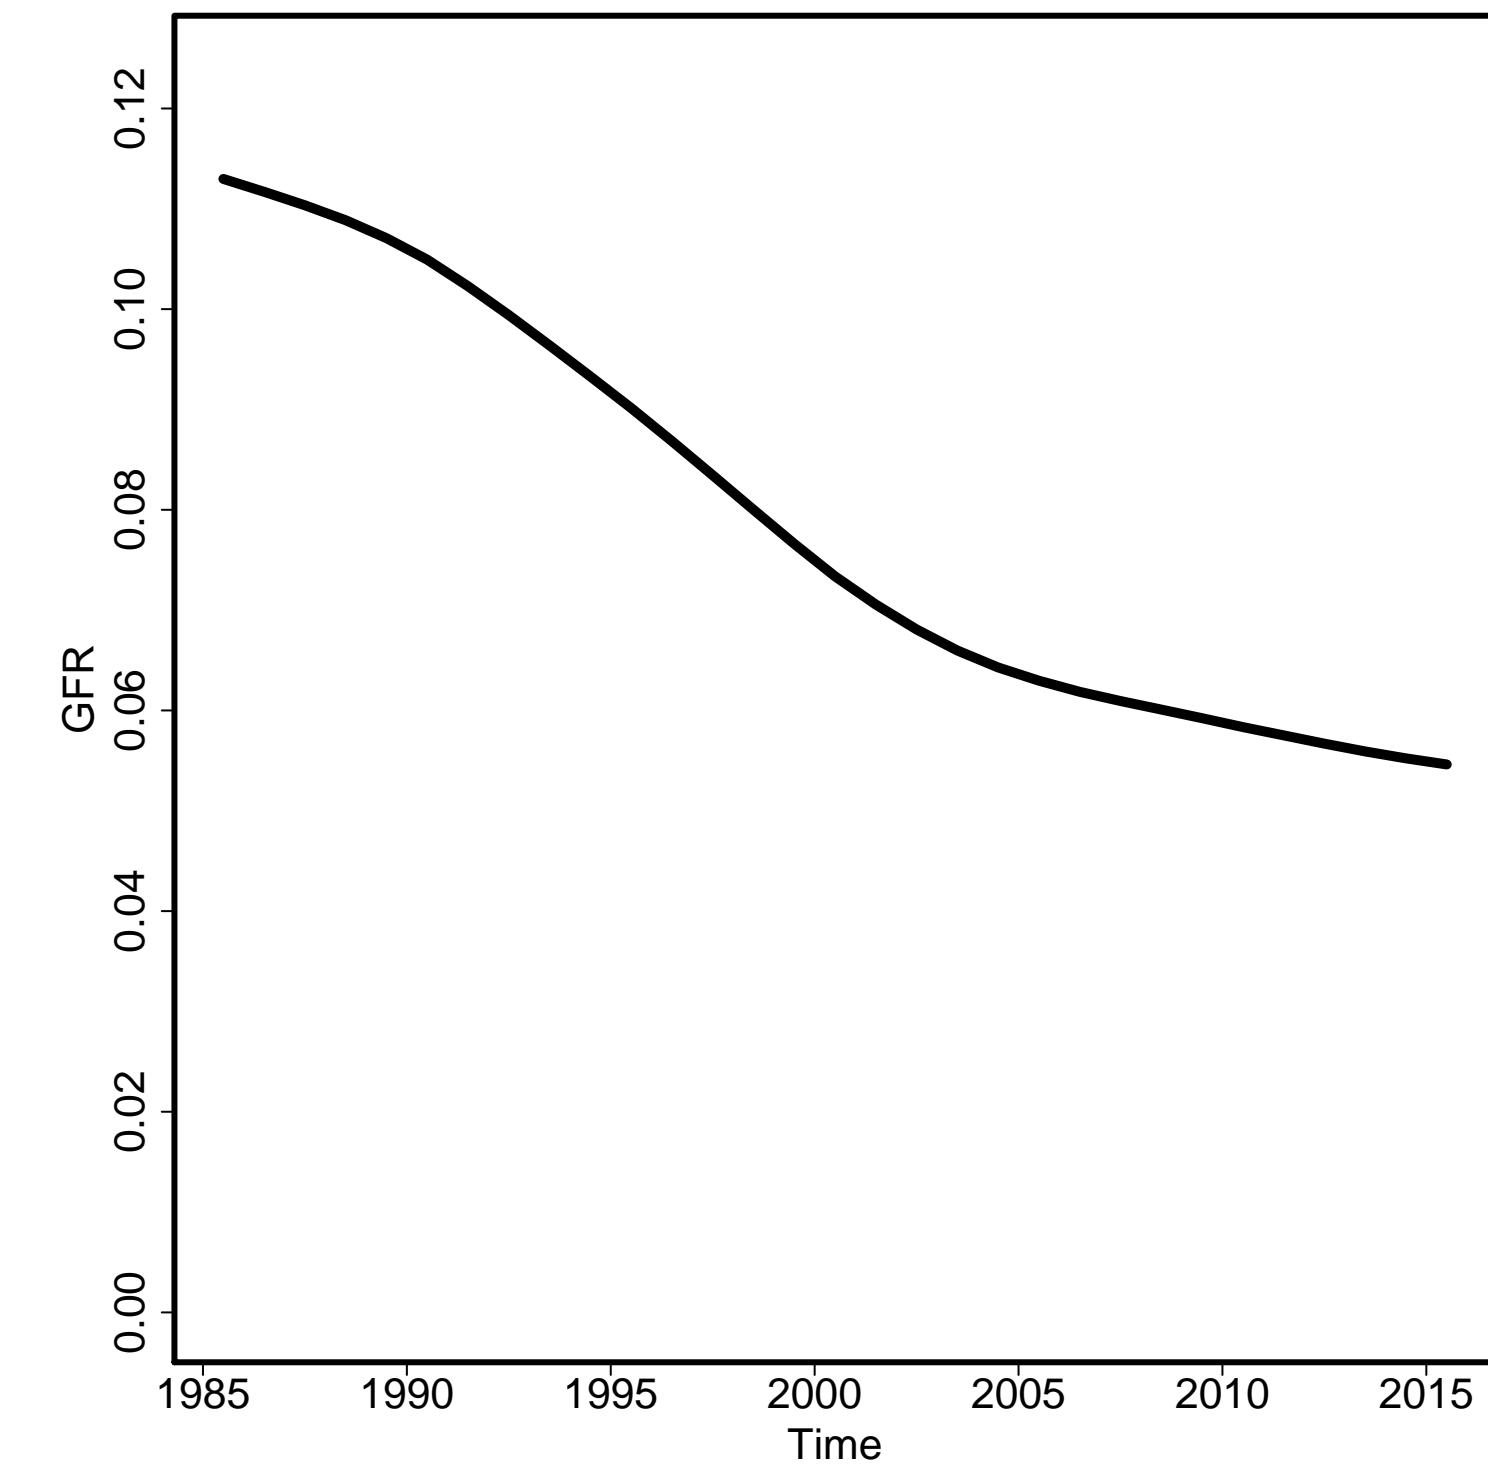

Skilled Attendance to Birth

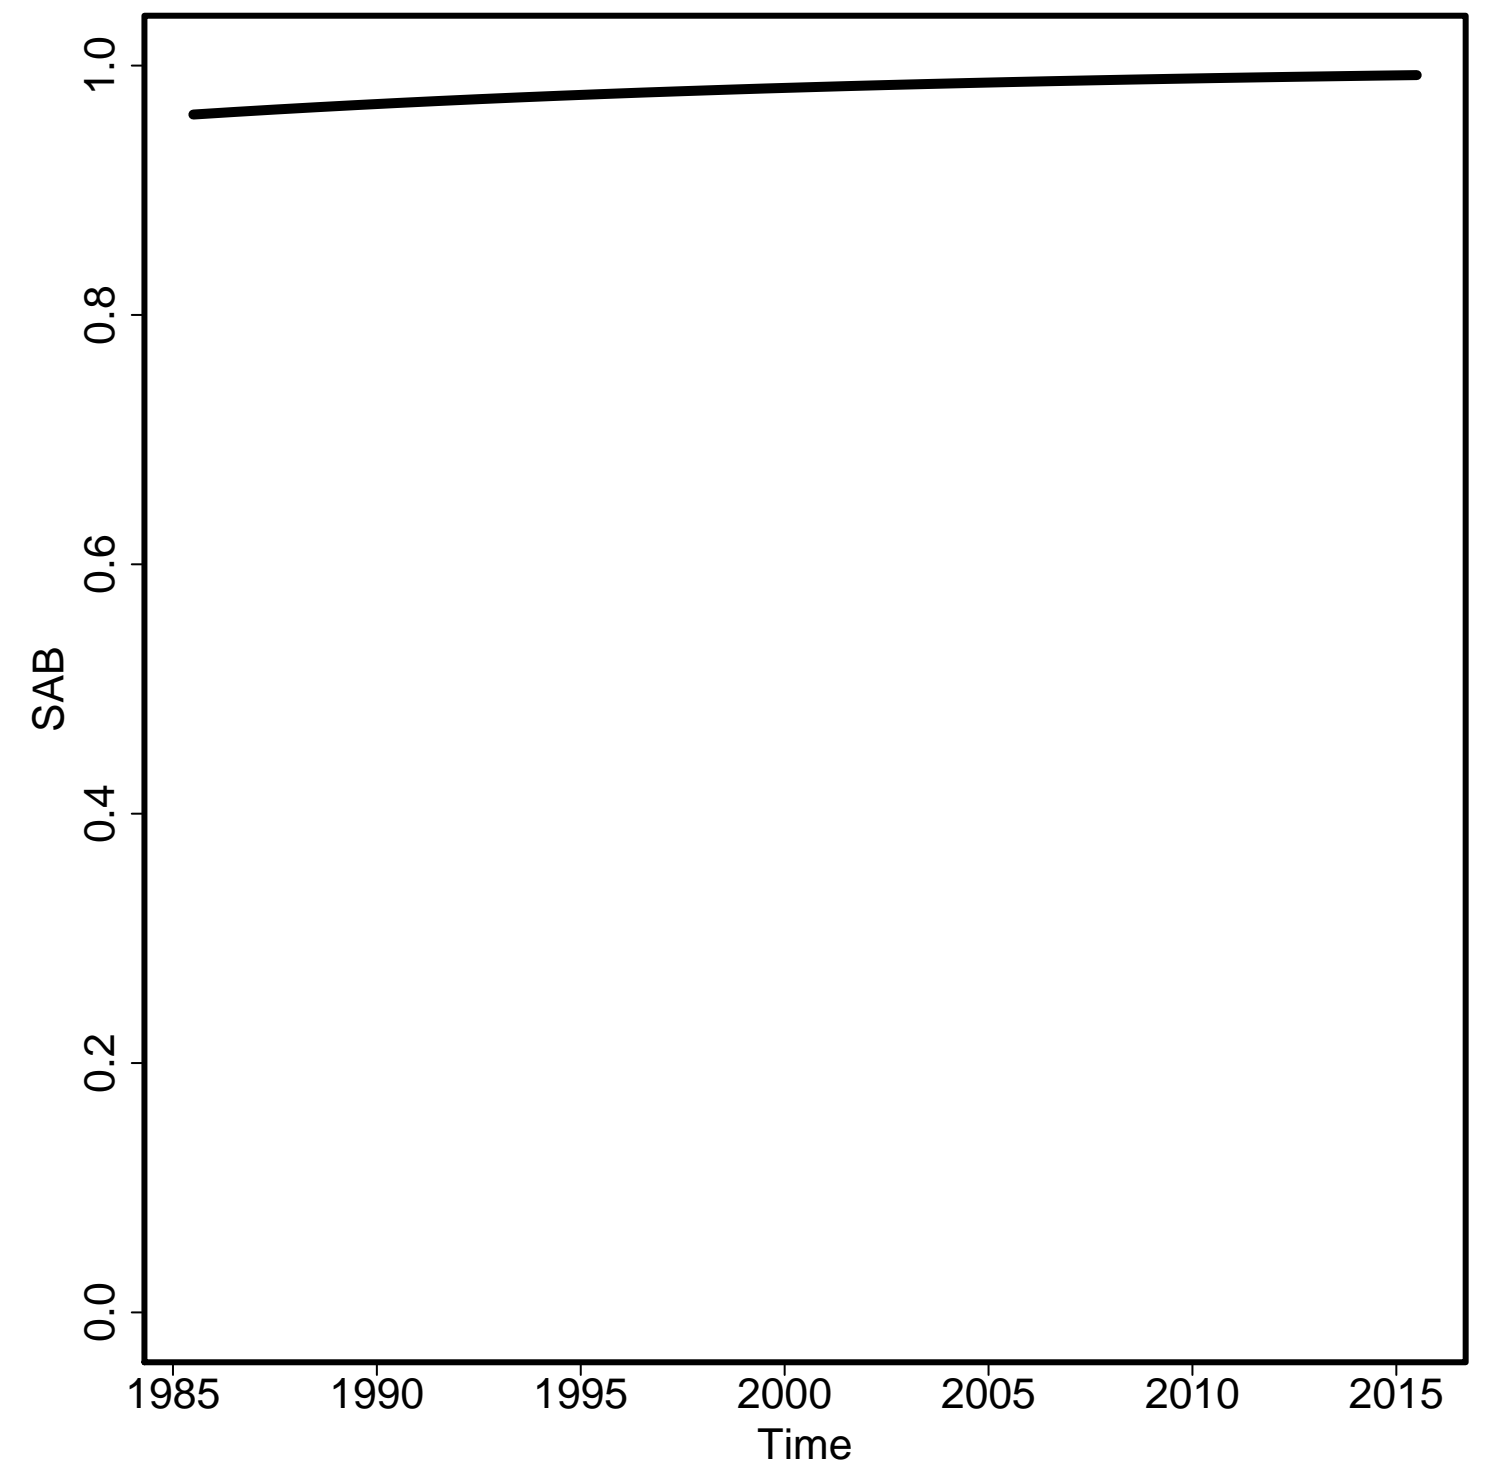

Envelope/Births

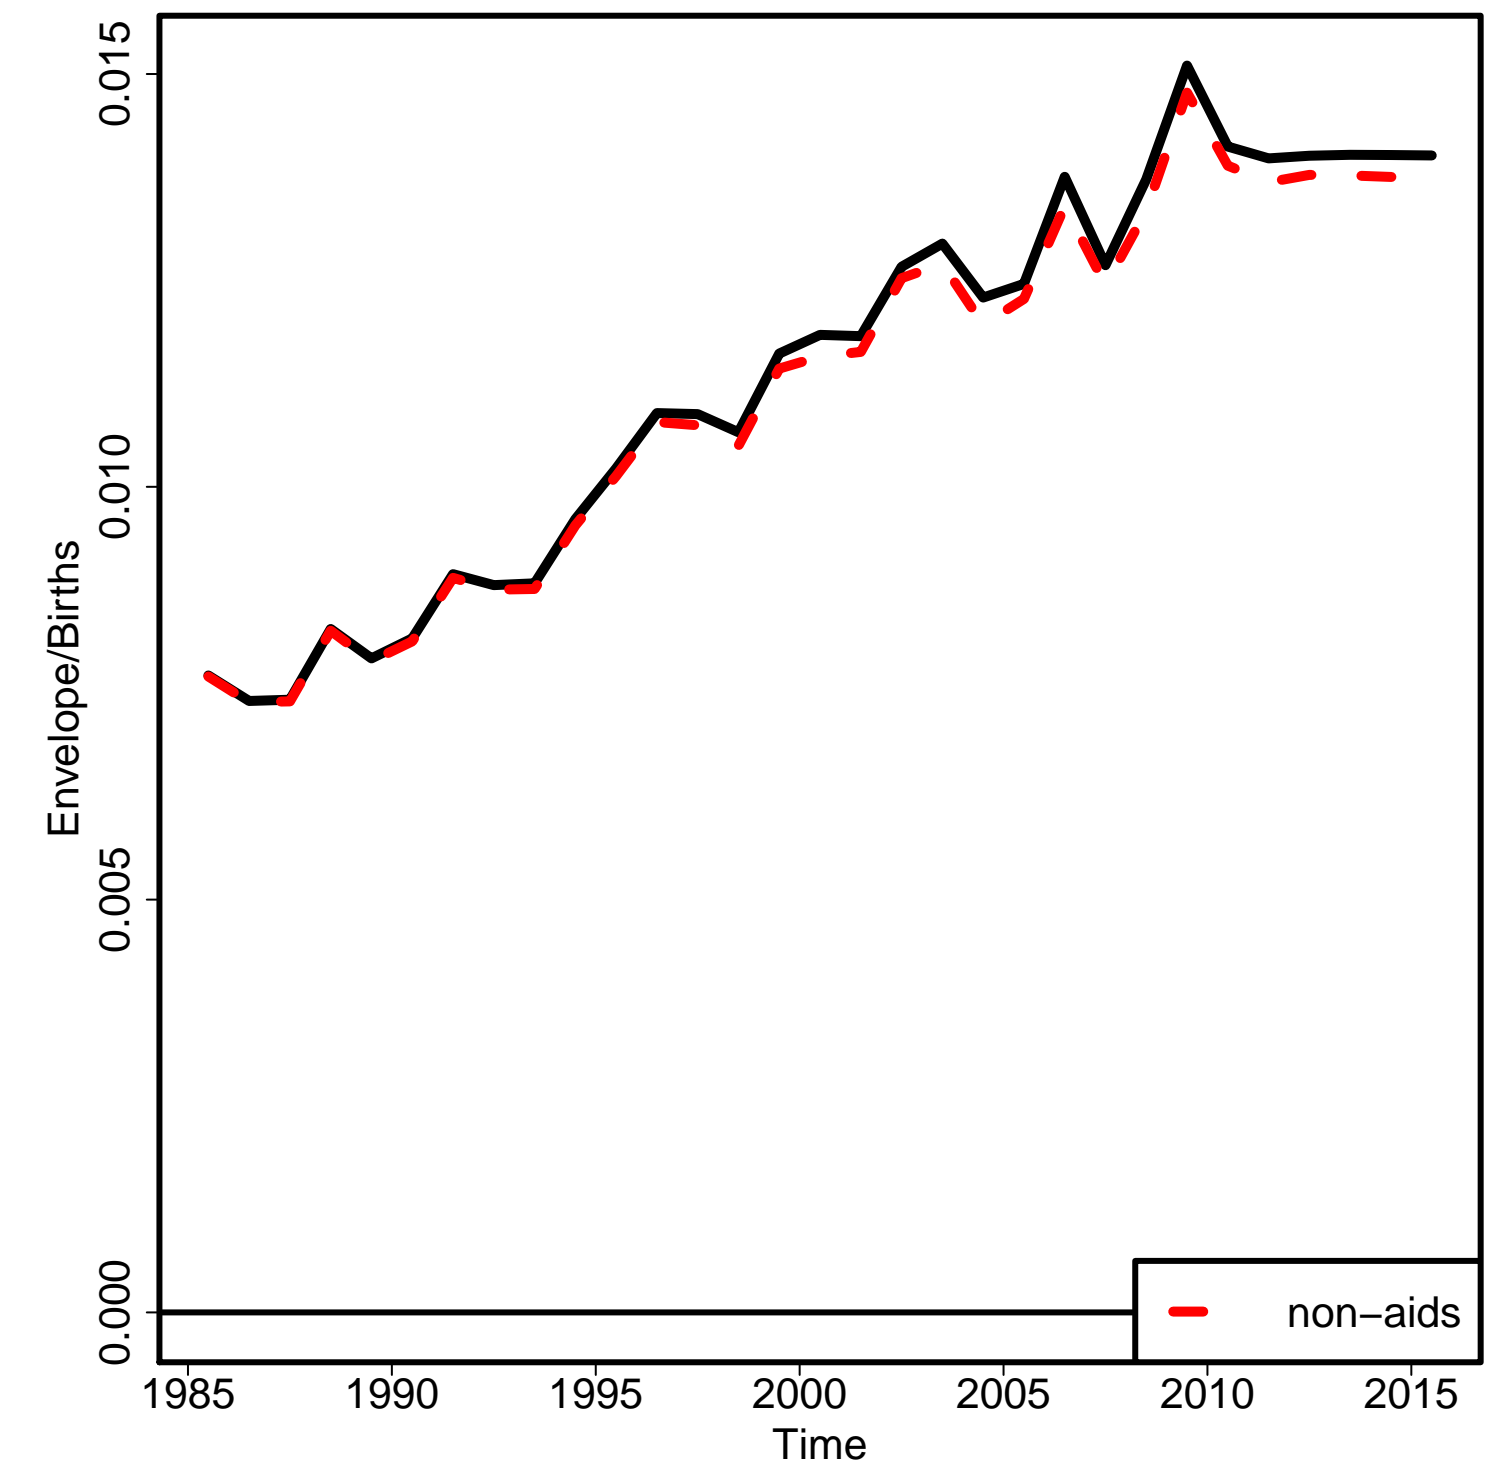

Non-aids MMR

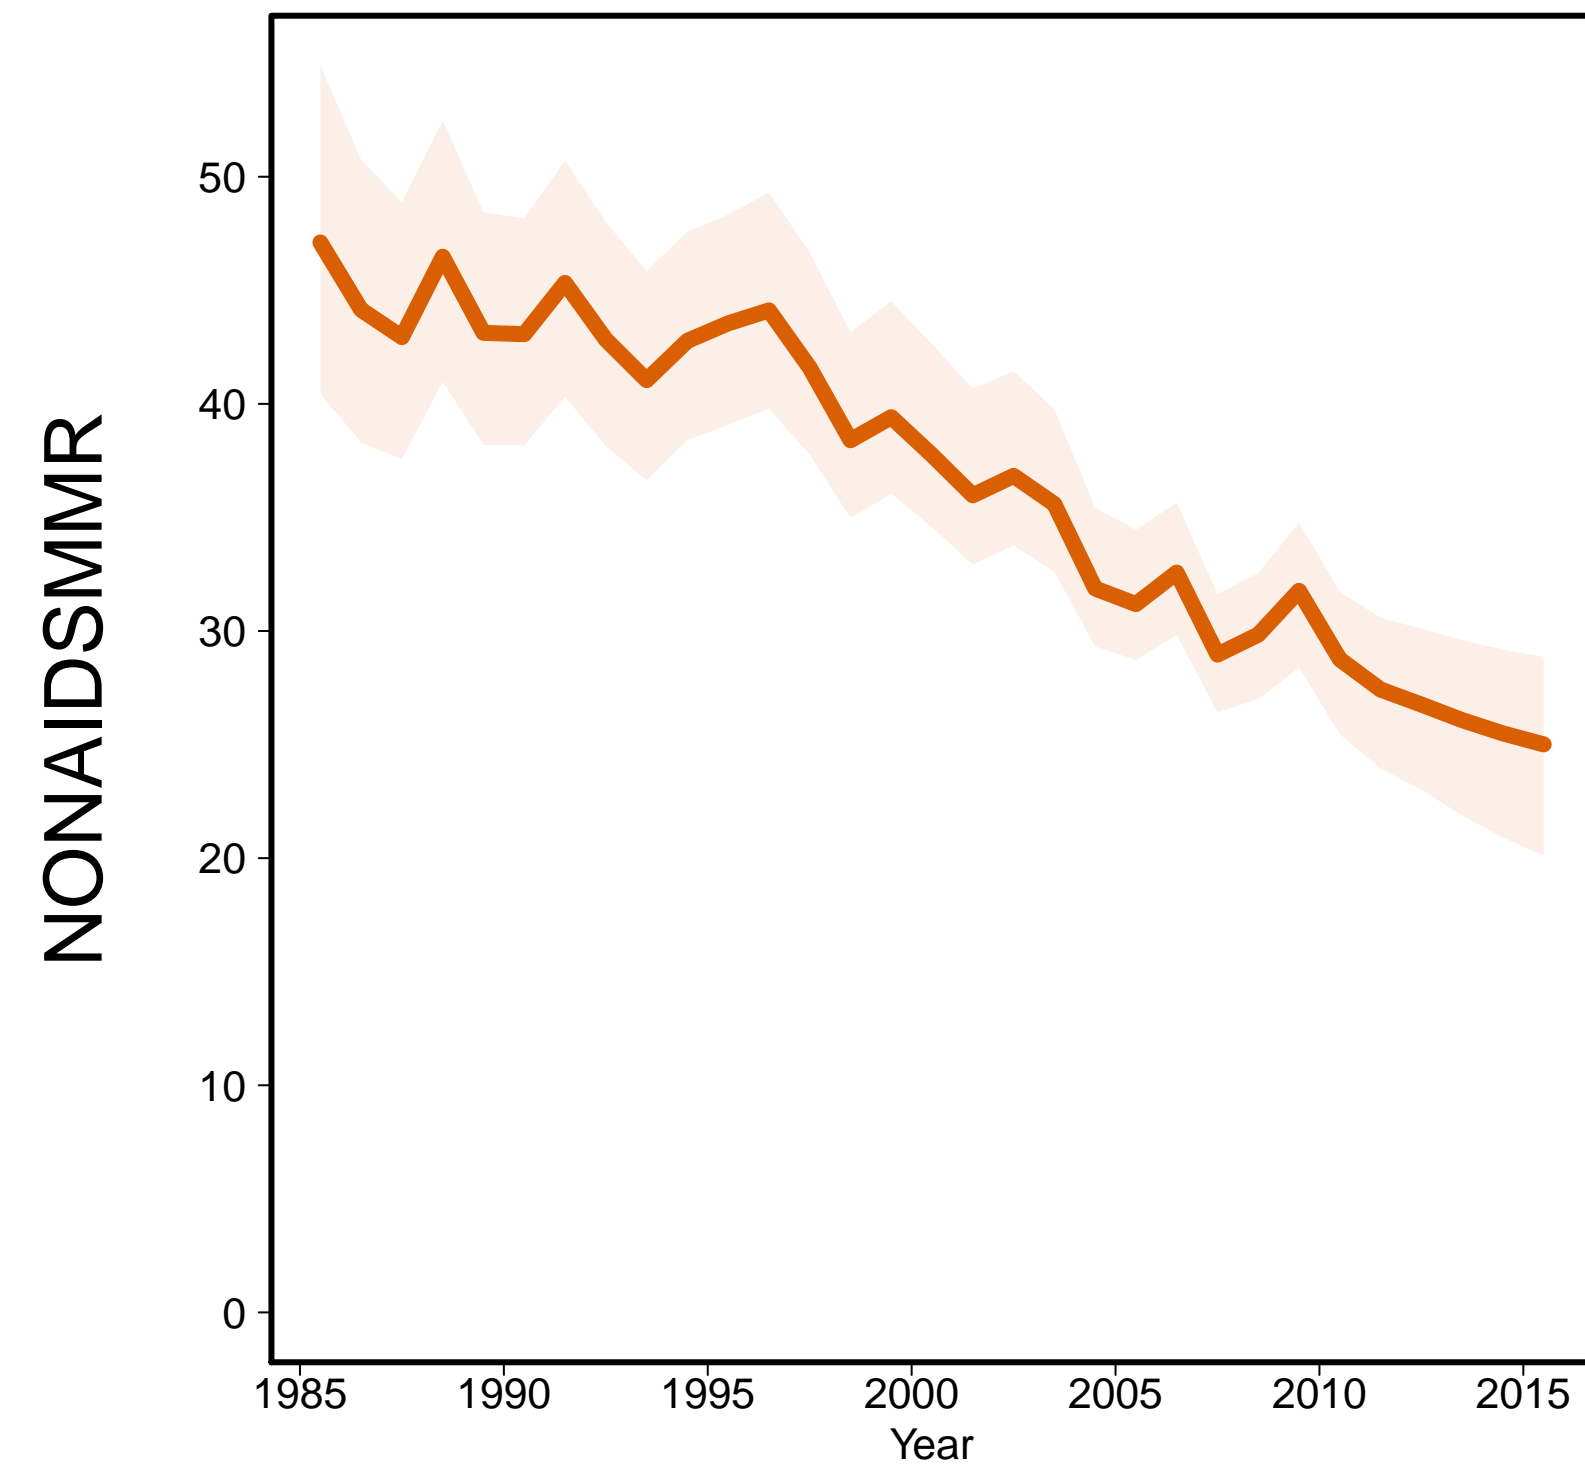

Aids MMR

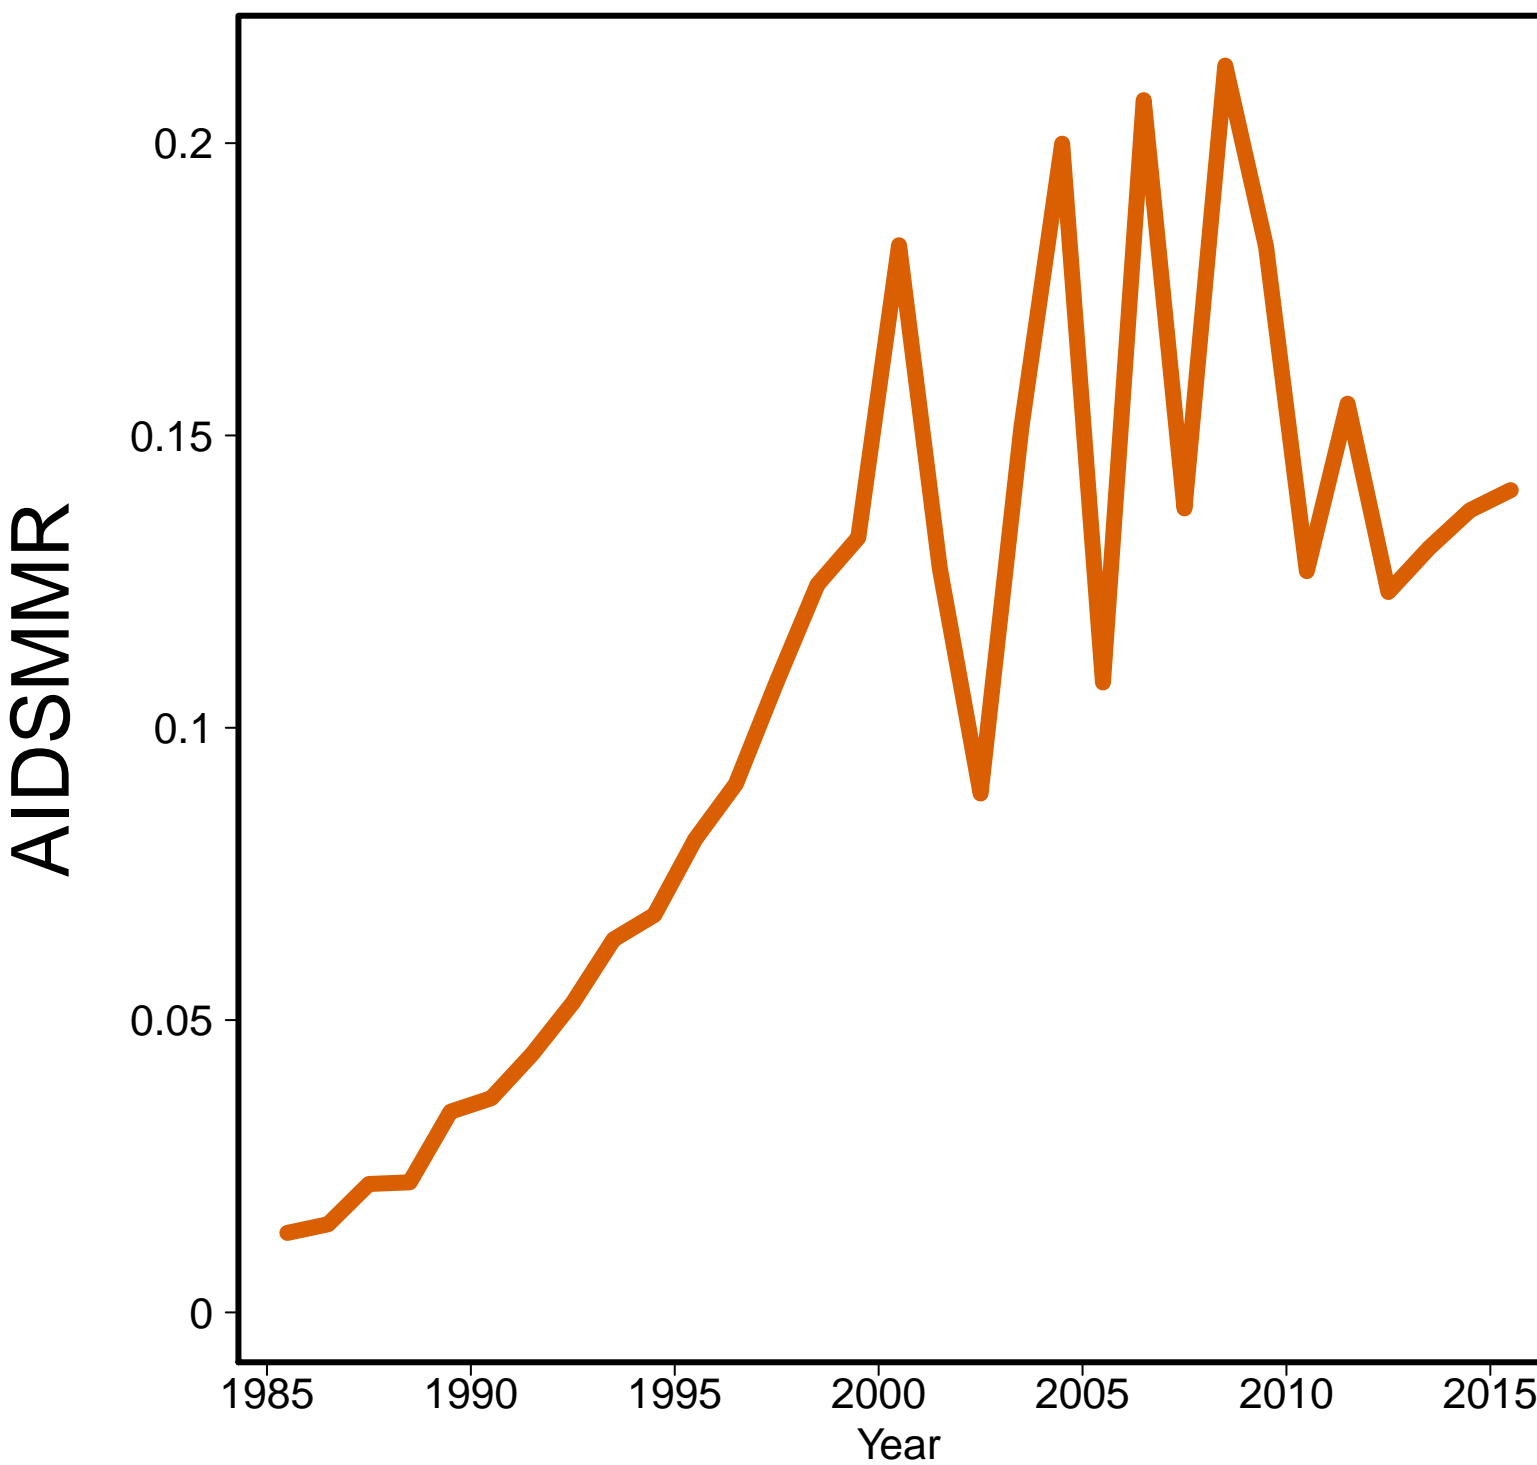

Cote d'Ivoire [CIV]  
(Western Africa)

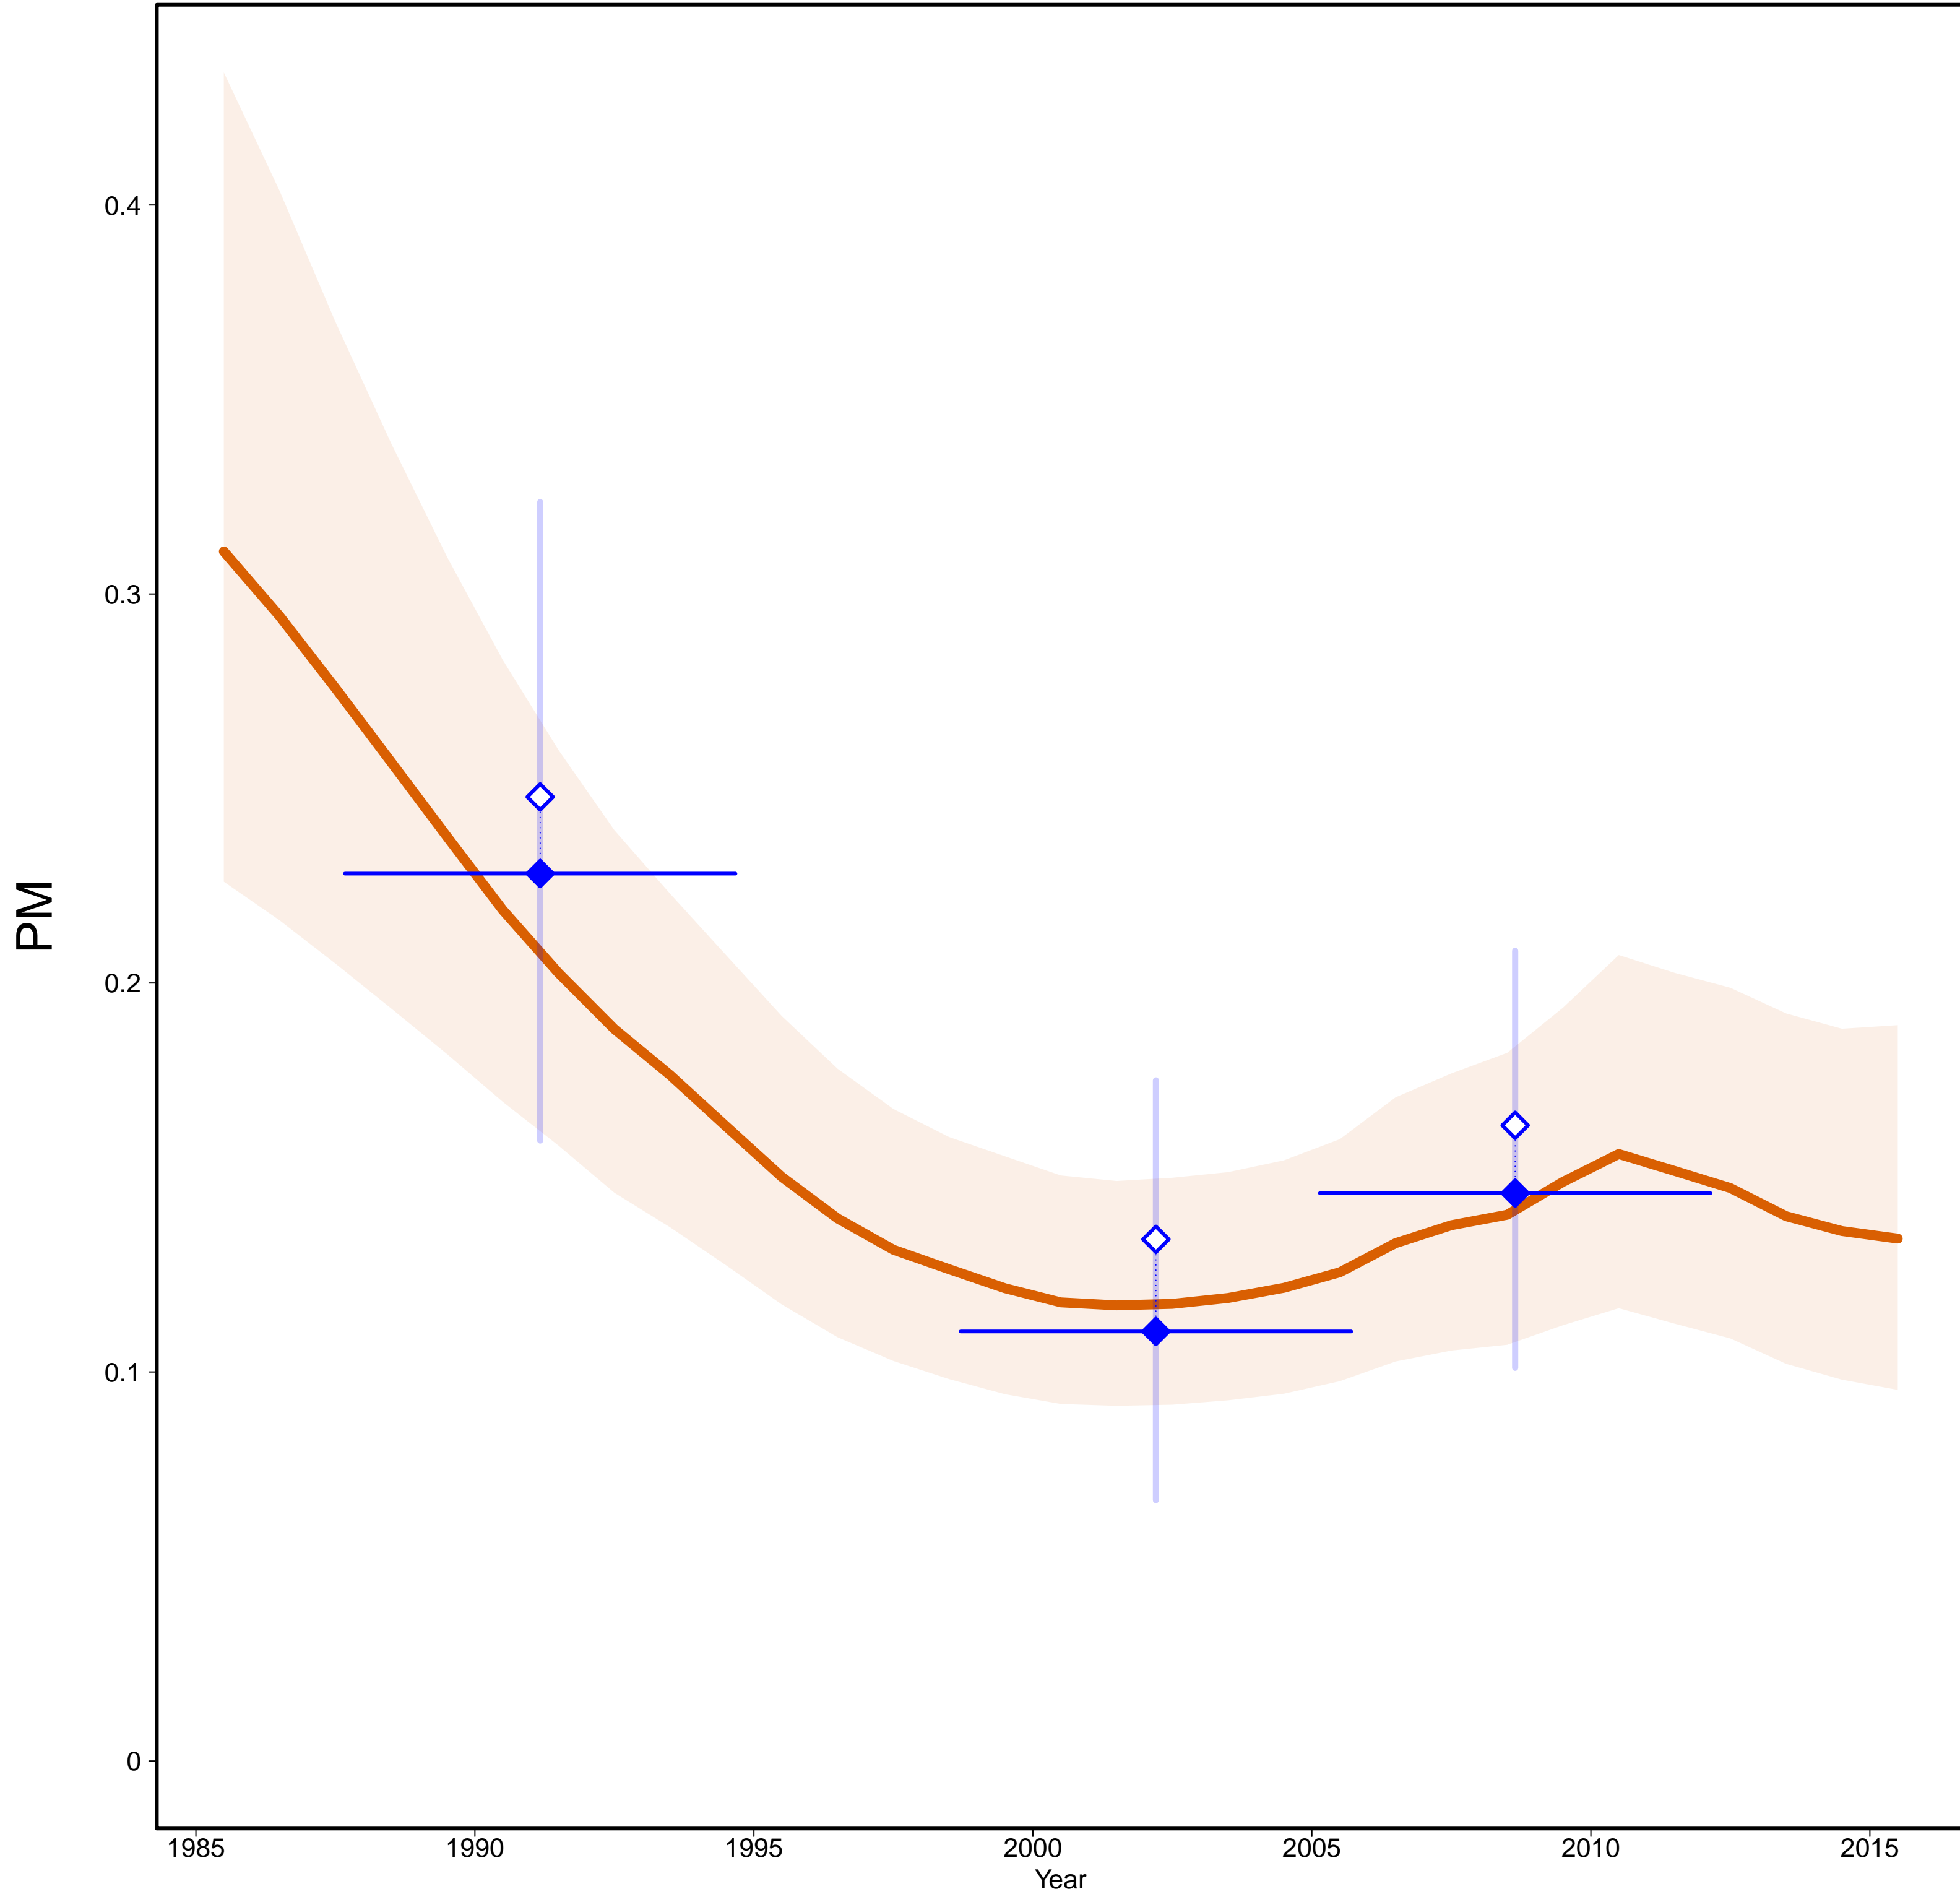

Cote d'Ivoire [CIV]  
(Western Africa)

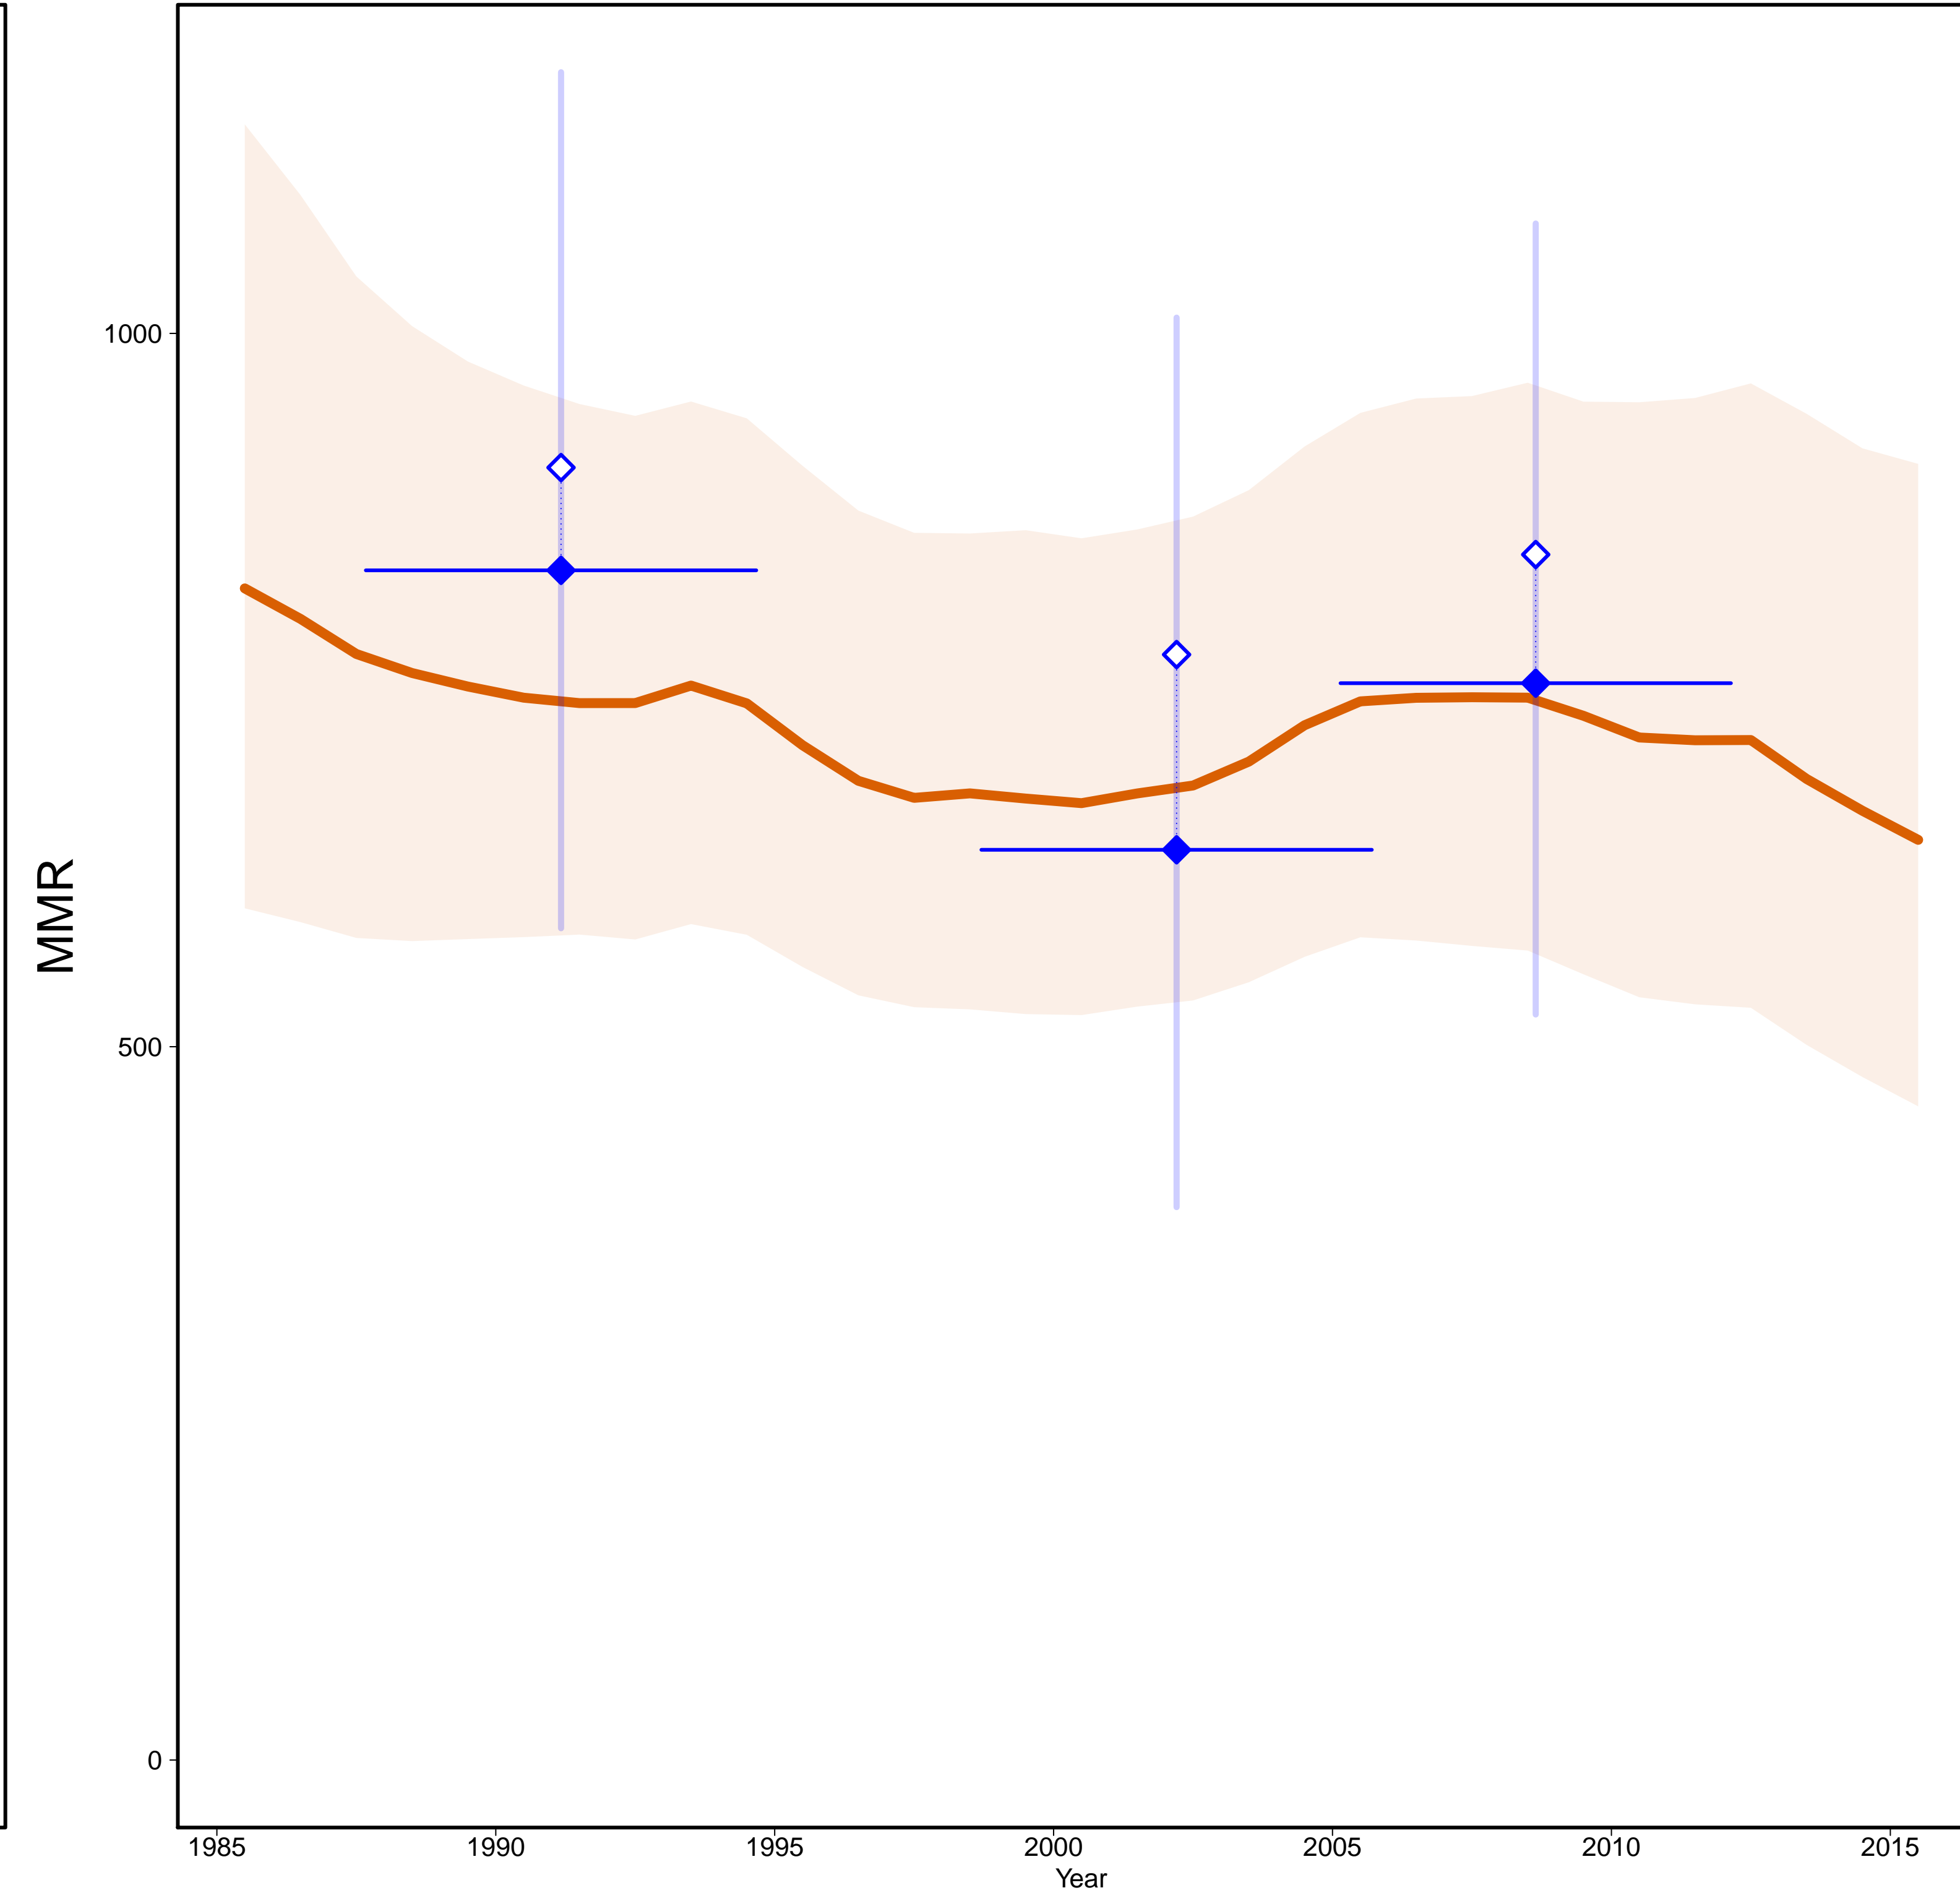

- Estimates —
- MMR Database 2015 —
- ◇ Observed Data
- ◆ Adjusted Data
- Data type —
- ◆ DHS

Gross Domestic Product

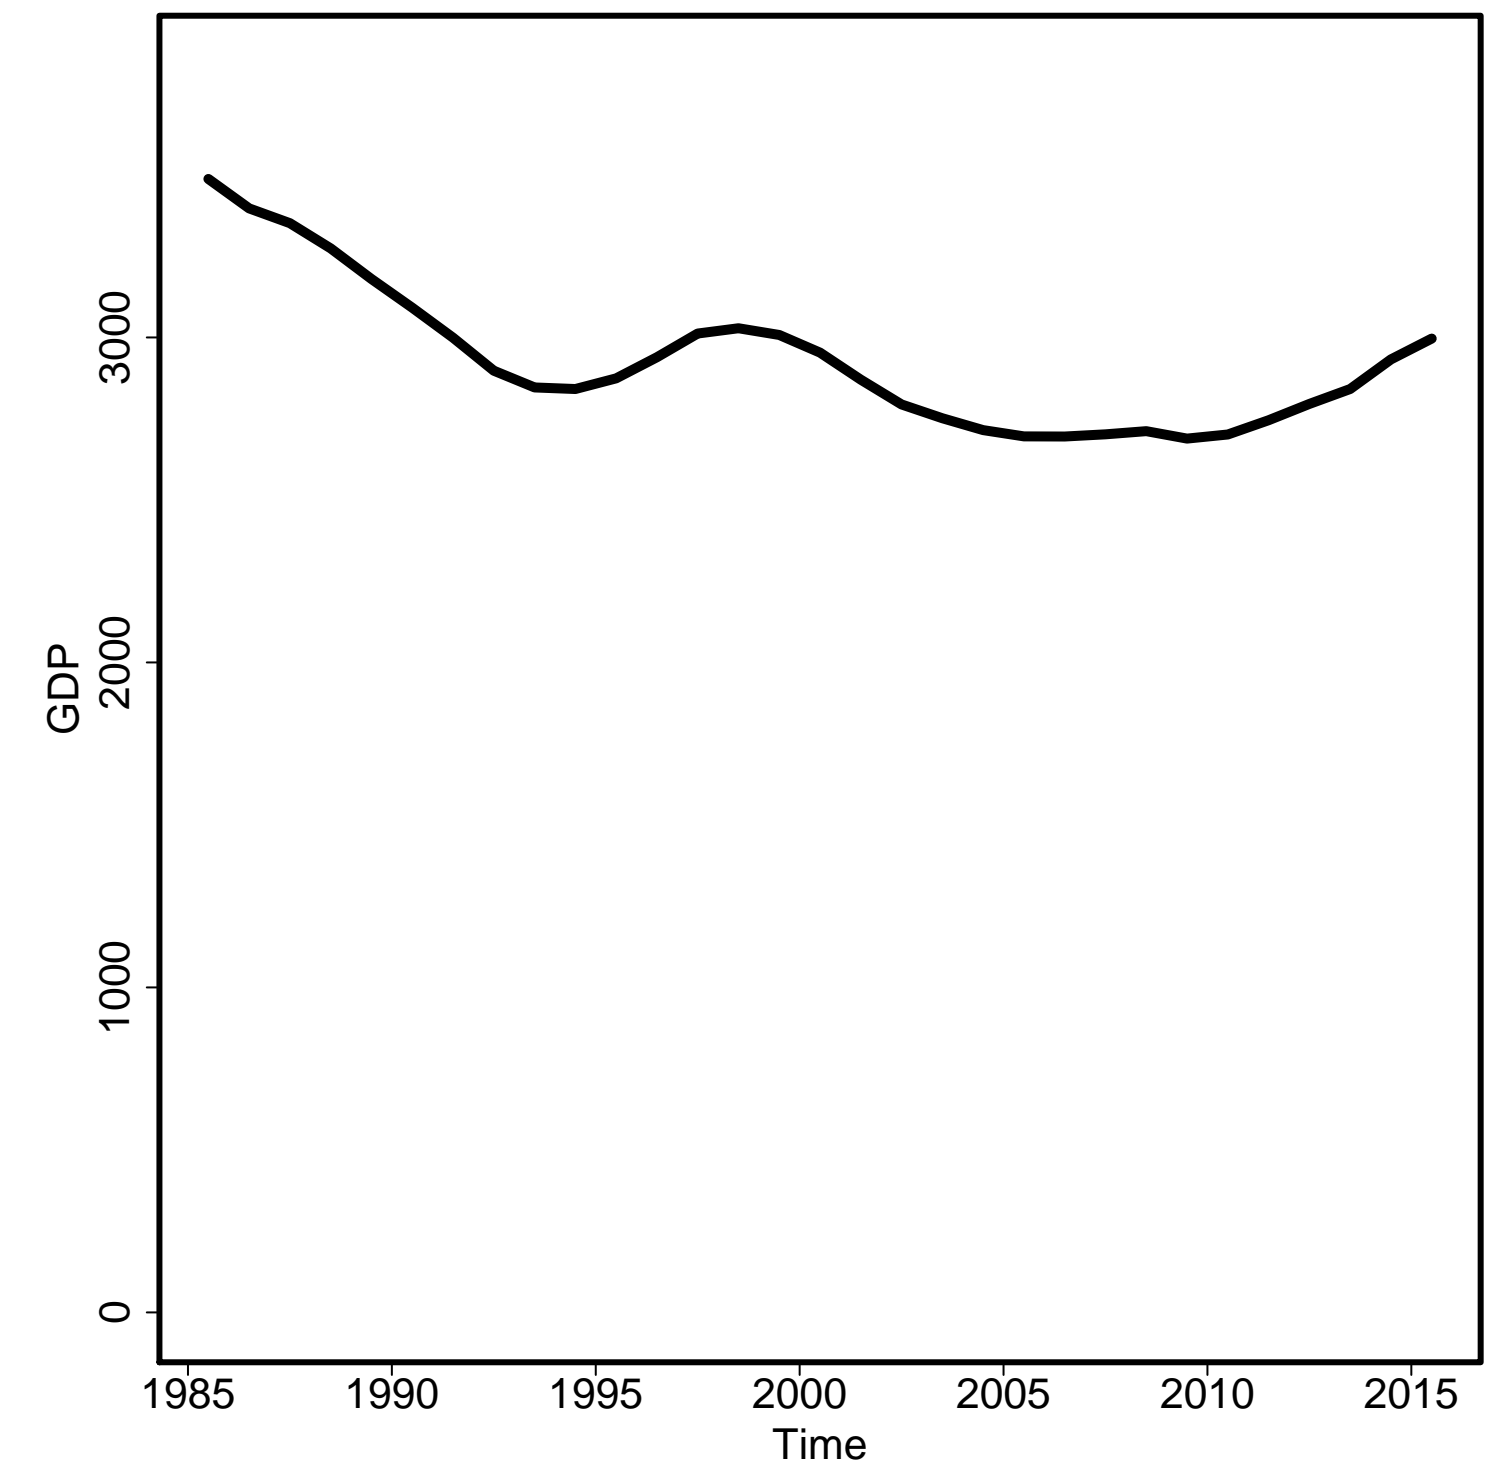

General Fertility Rate

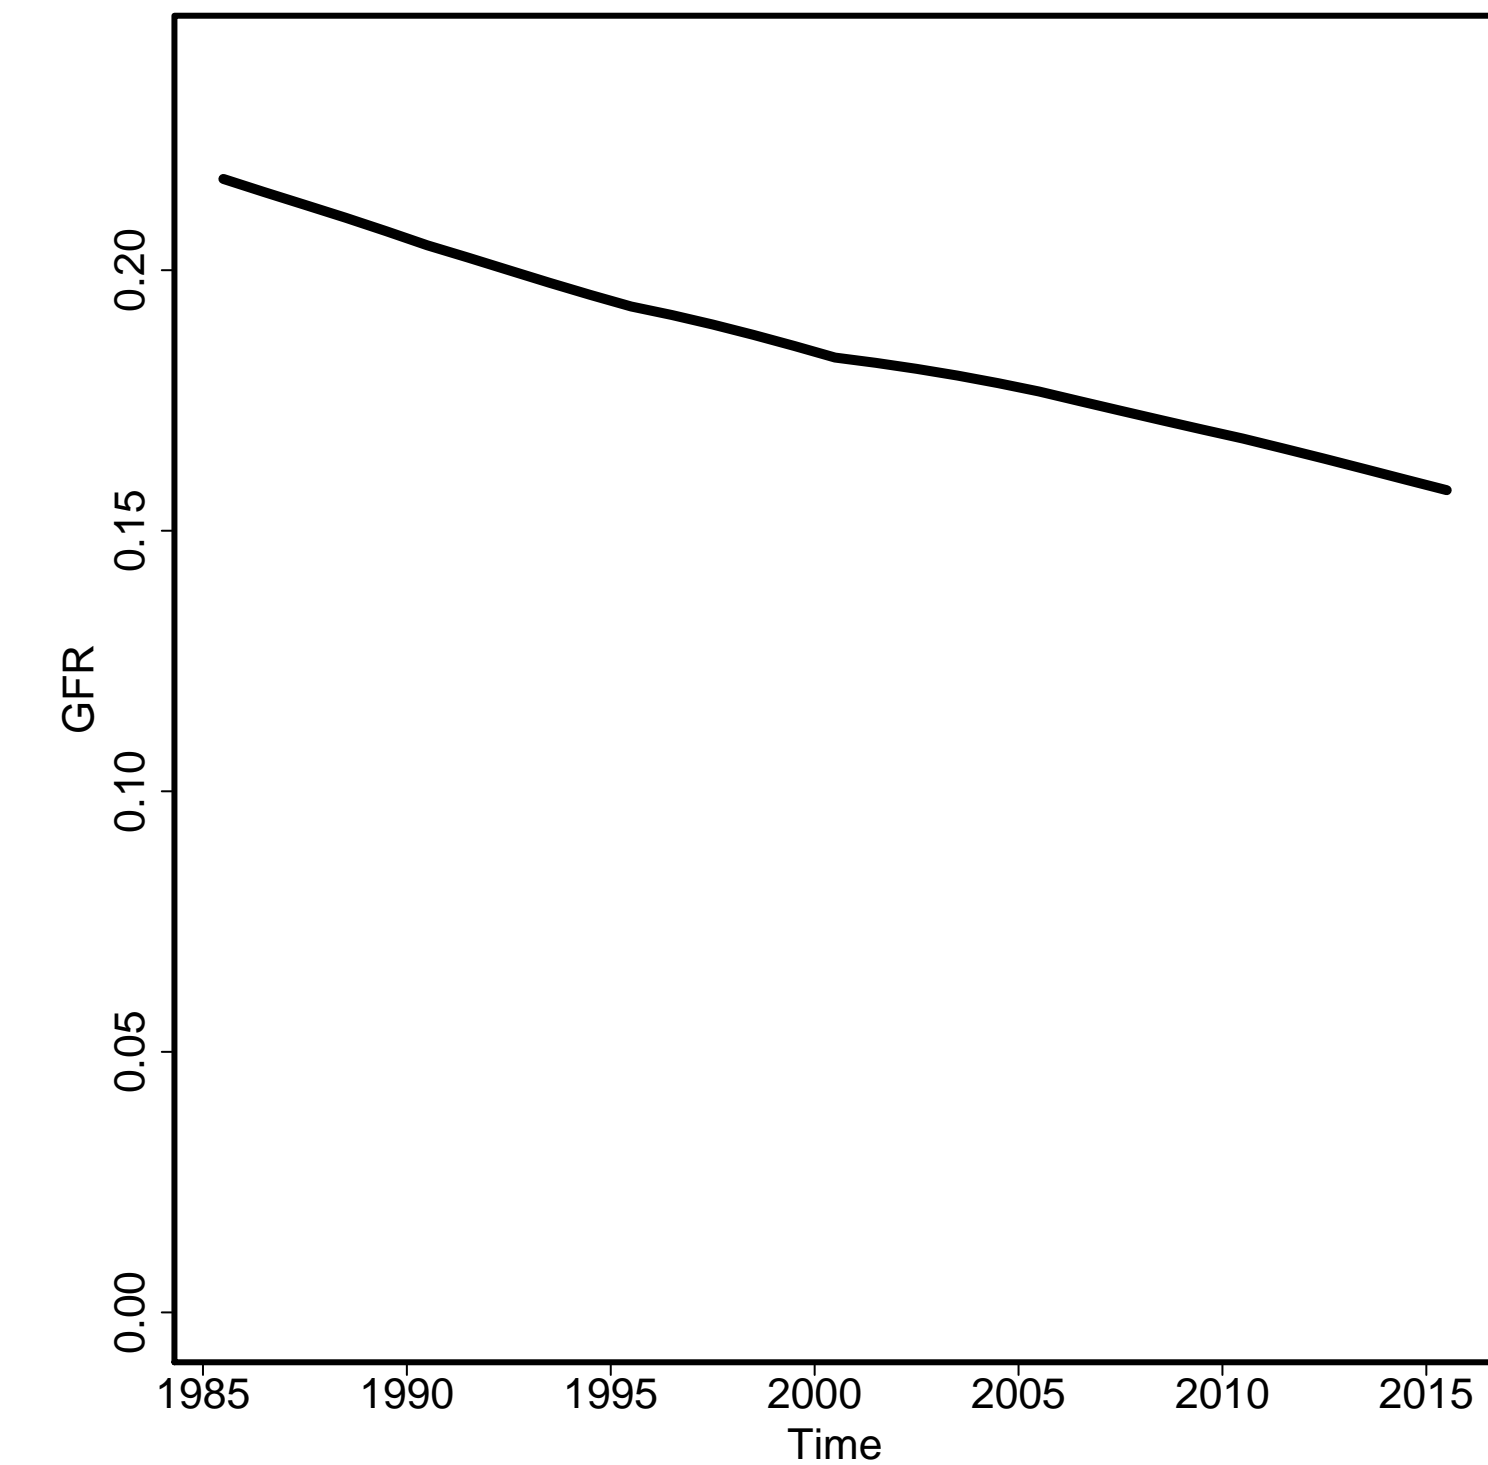

Skilled Attendance to Birth

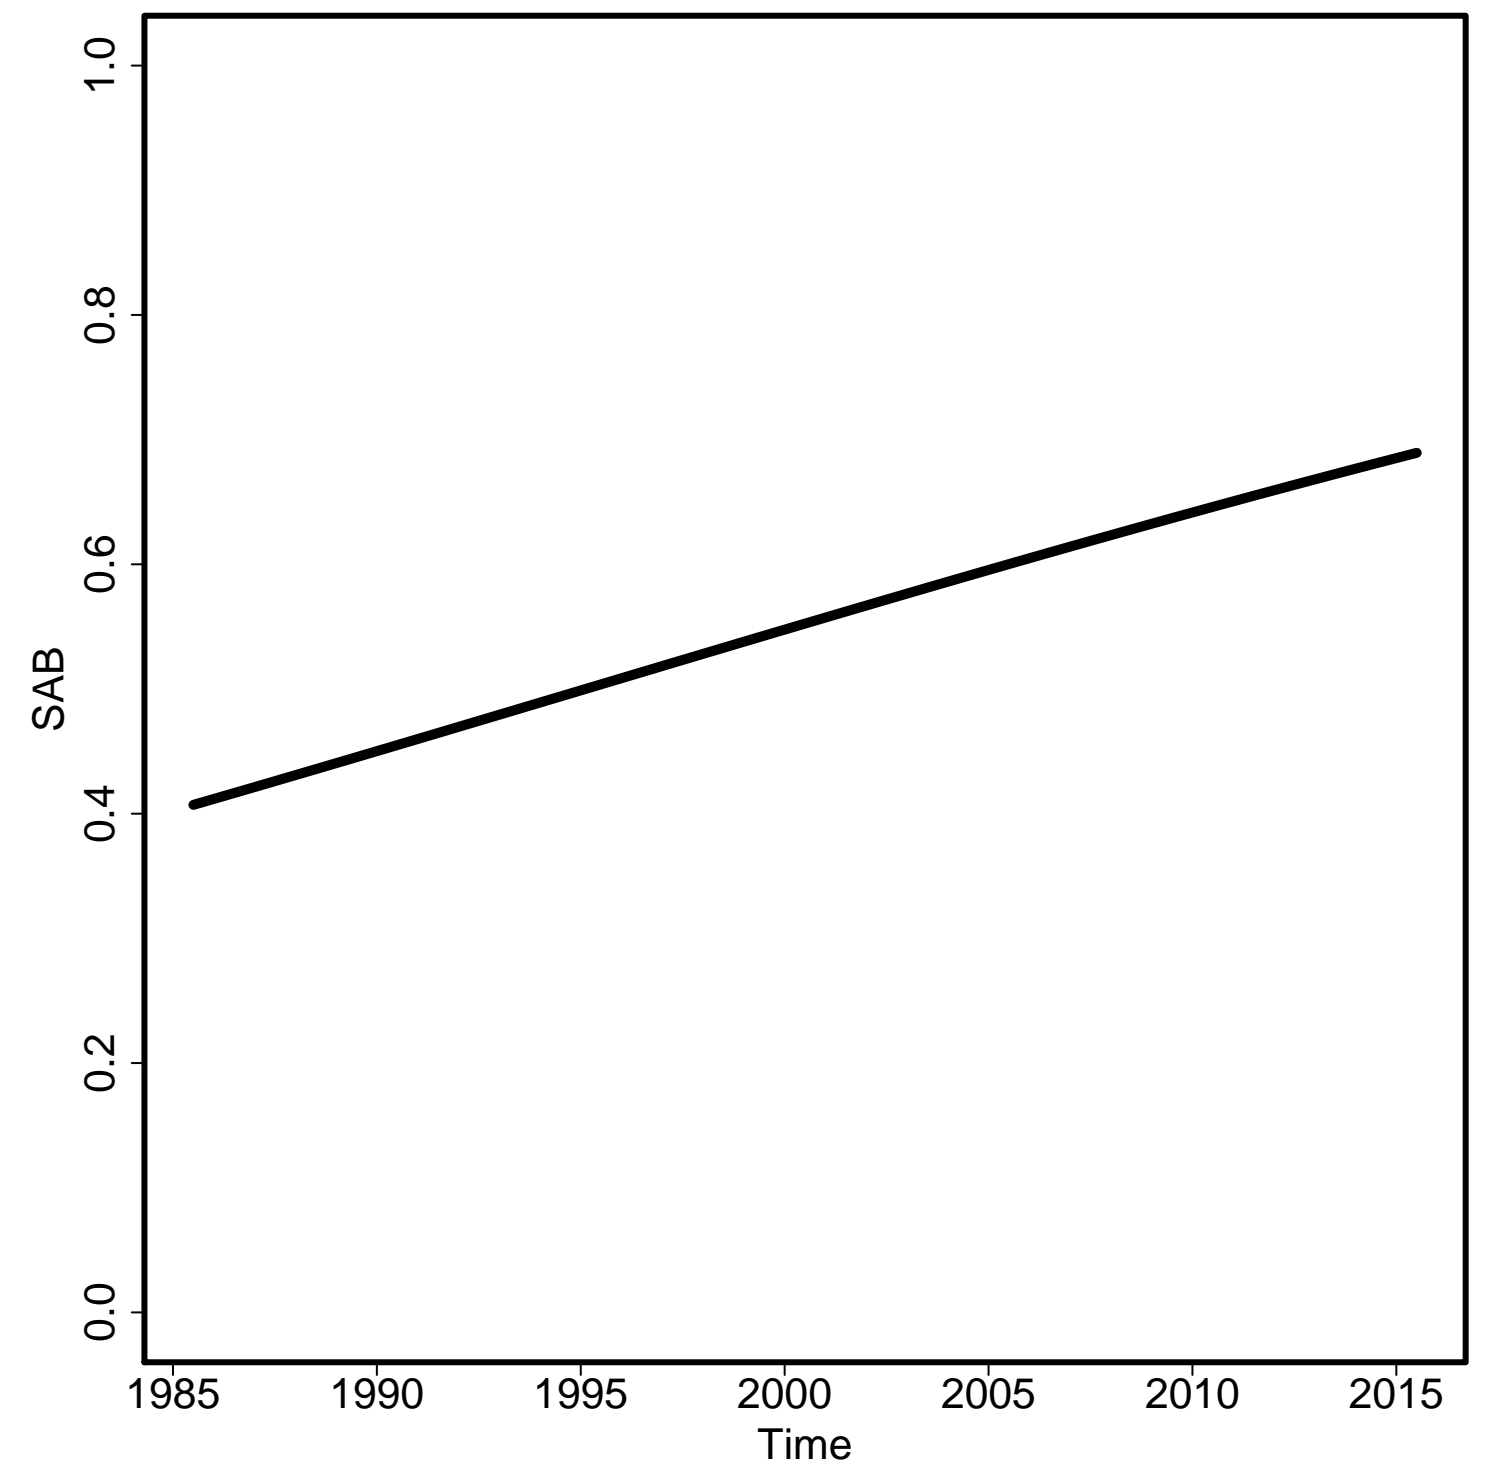

Envelope/Births

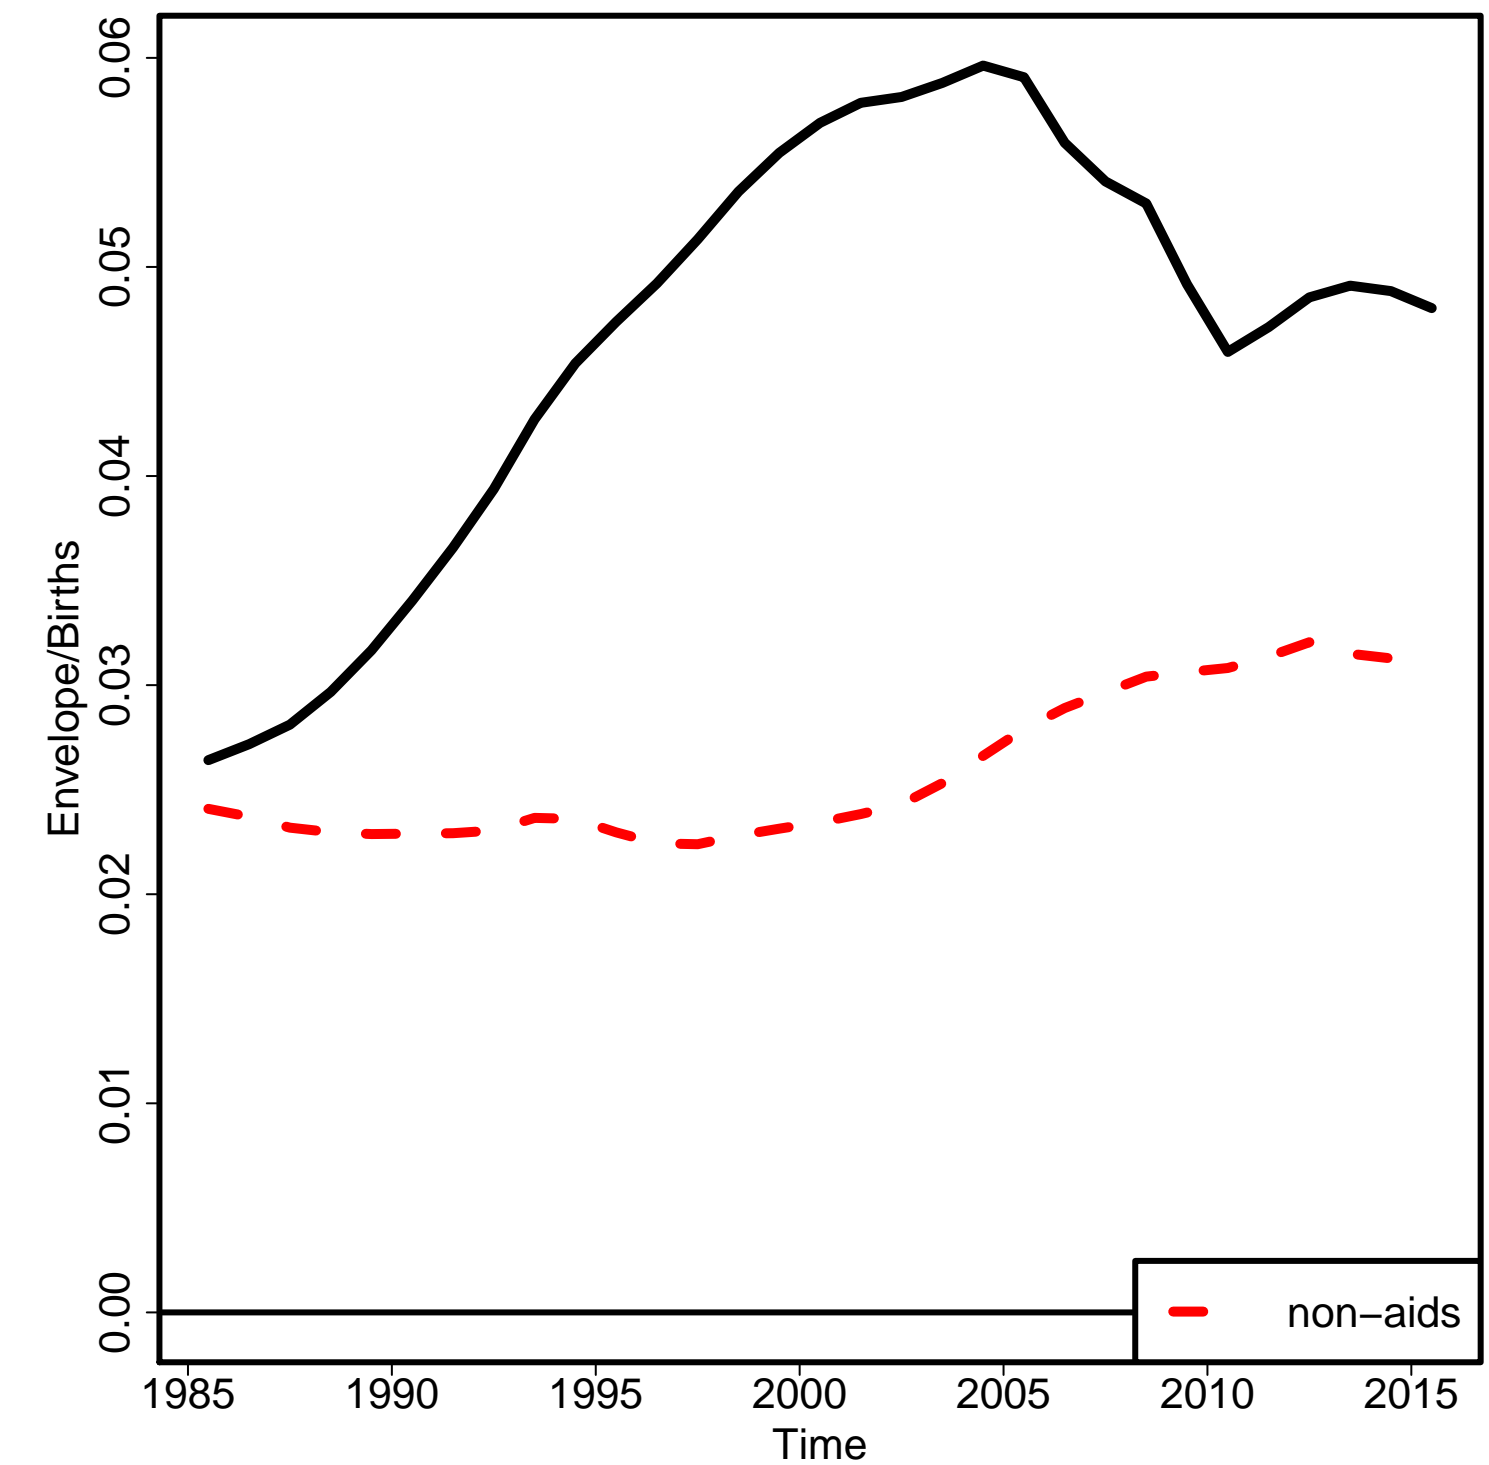

Non-aids MMR

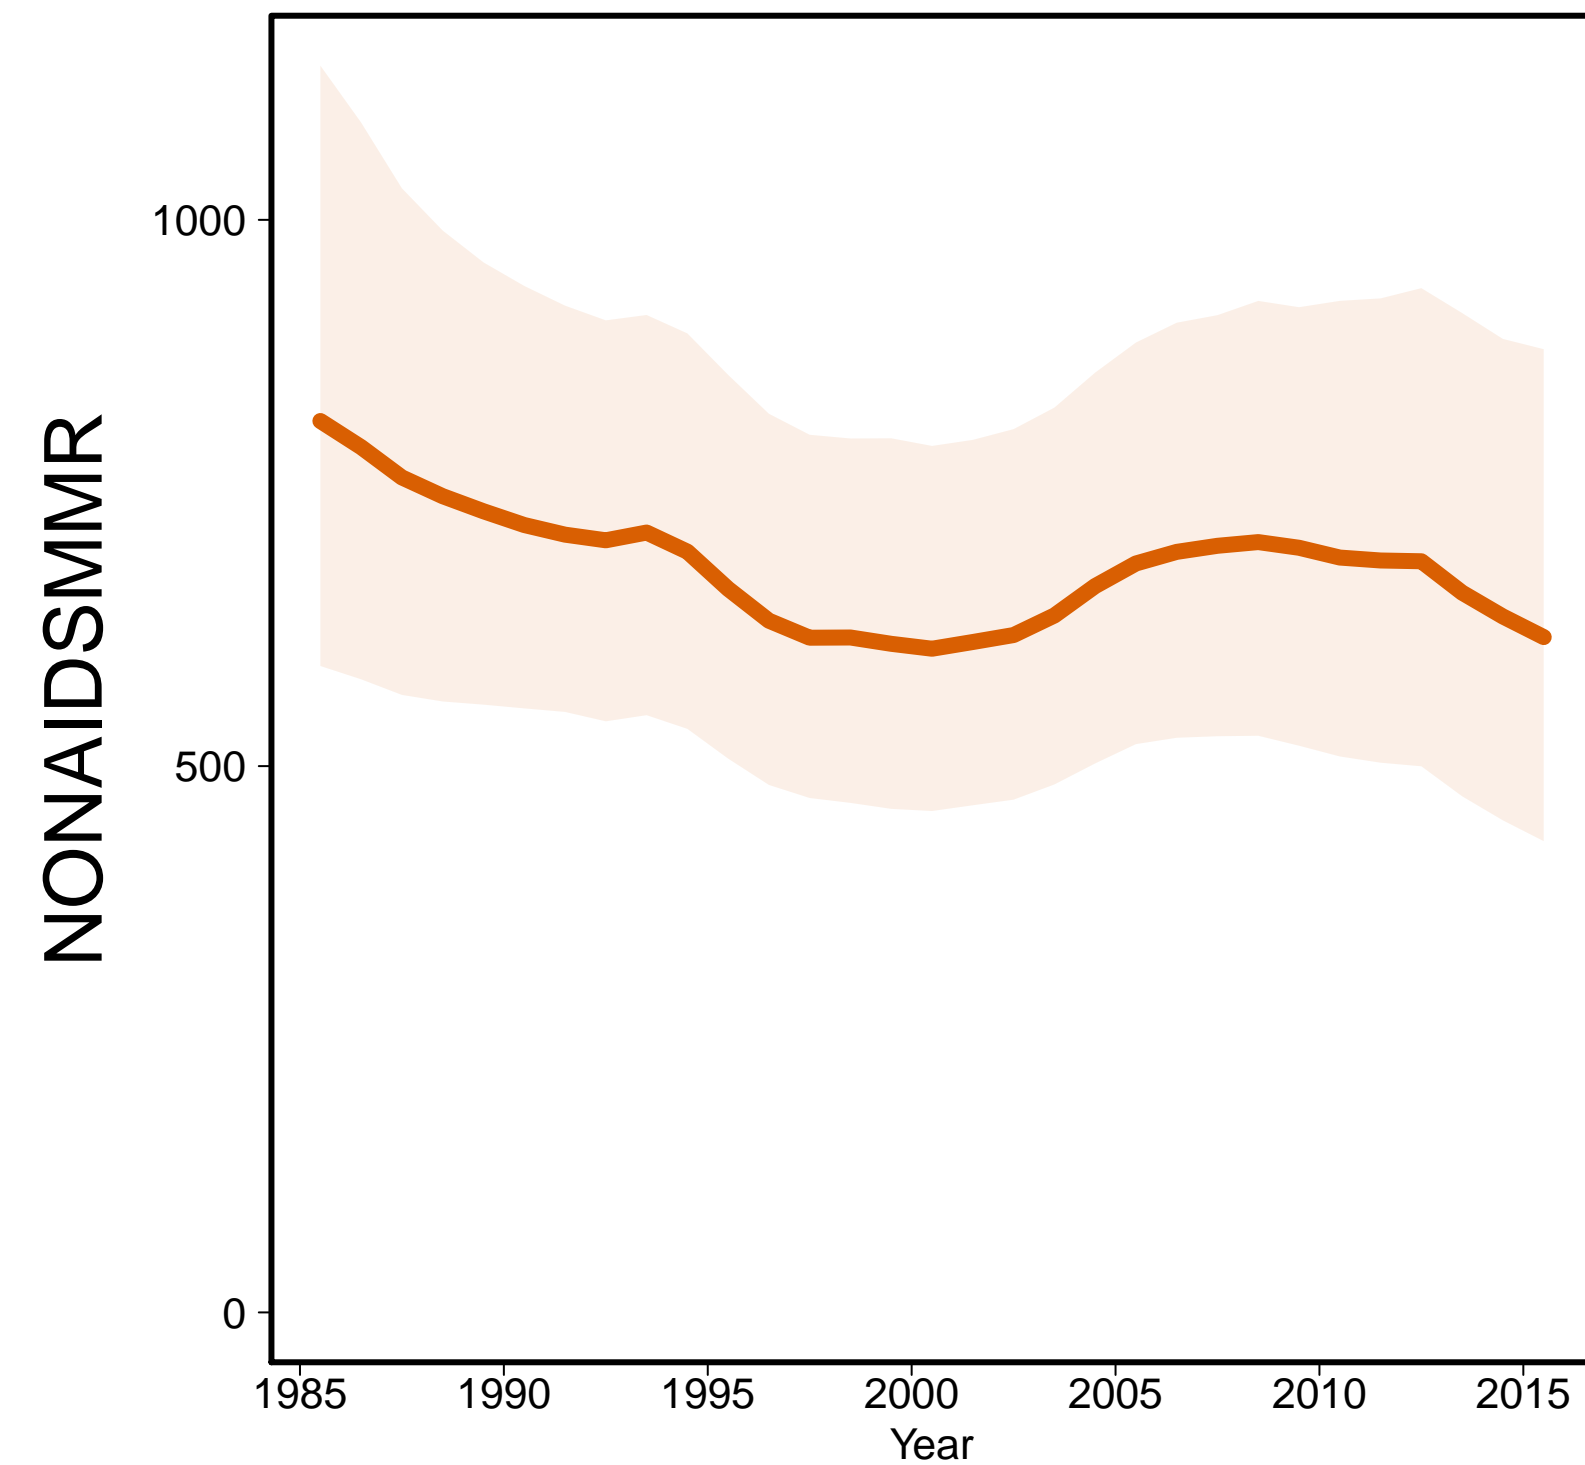

Aids MMR

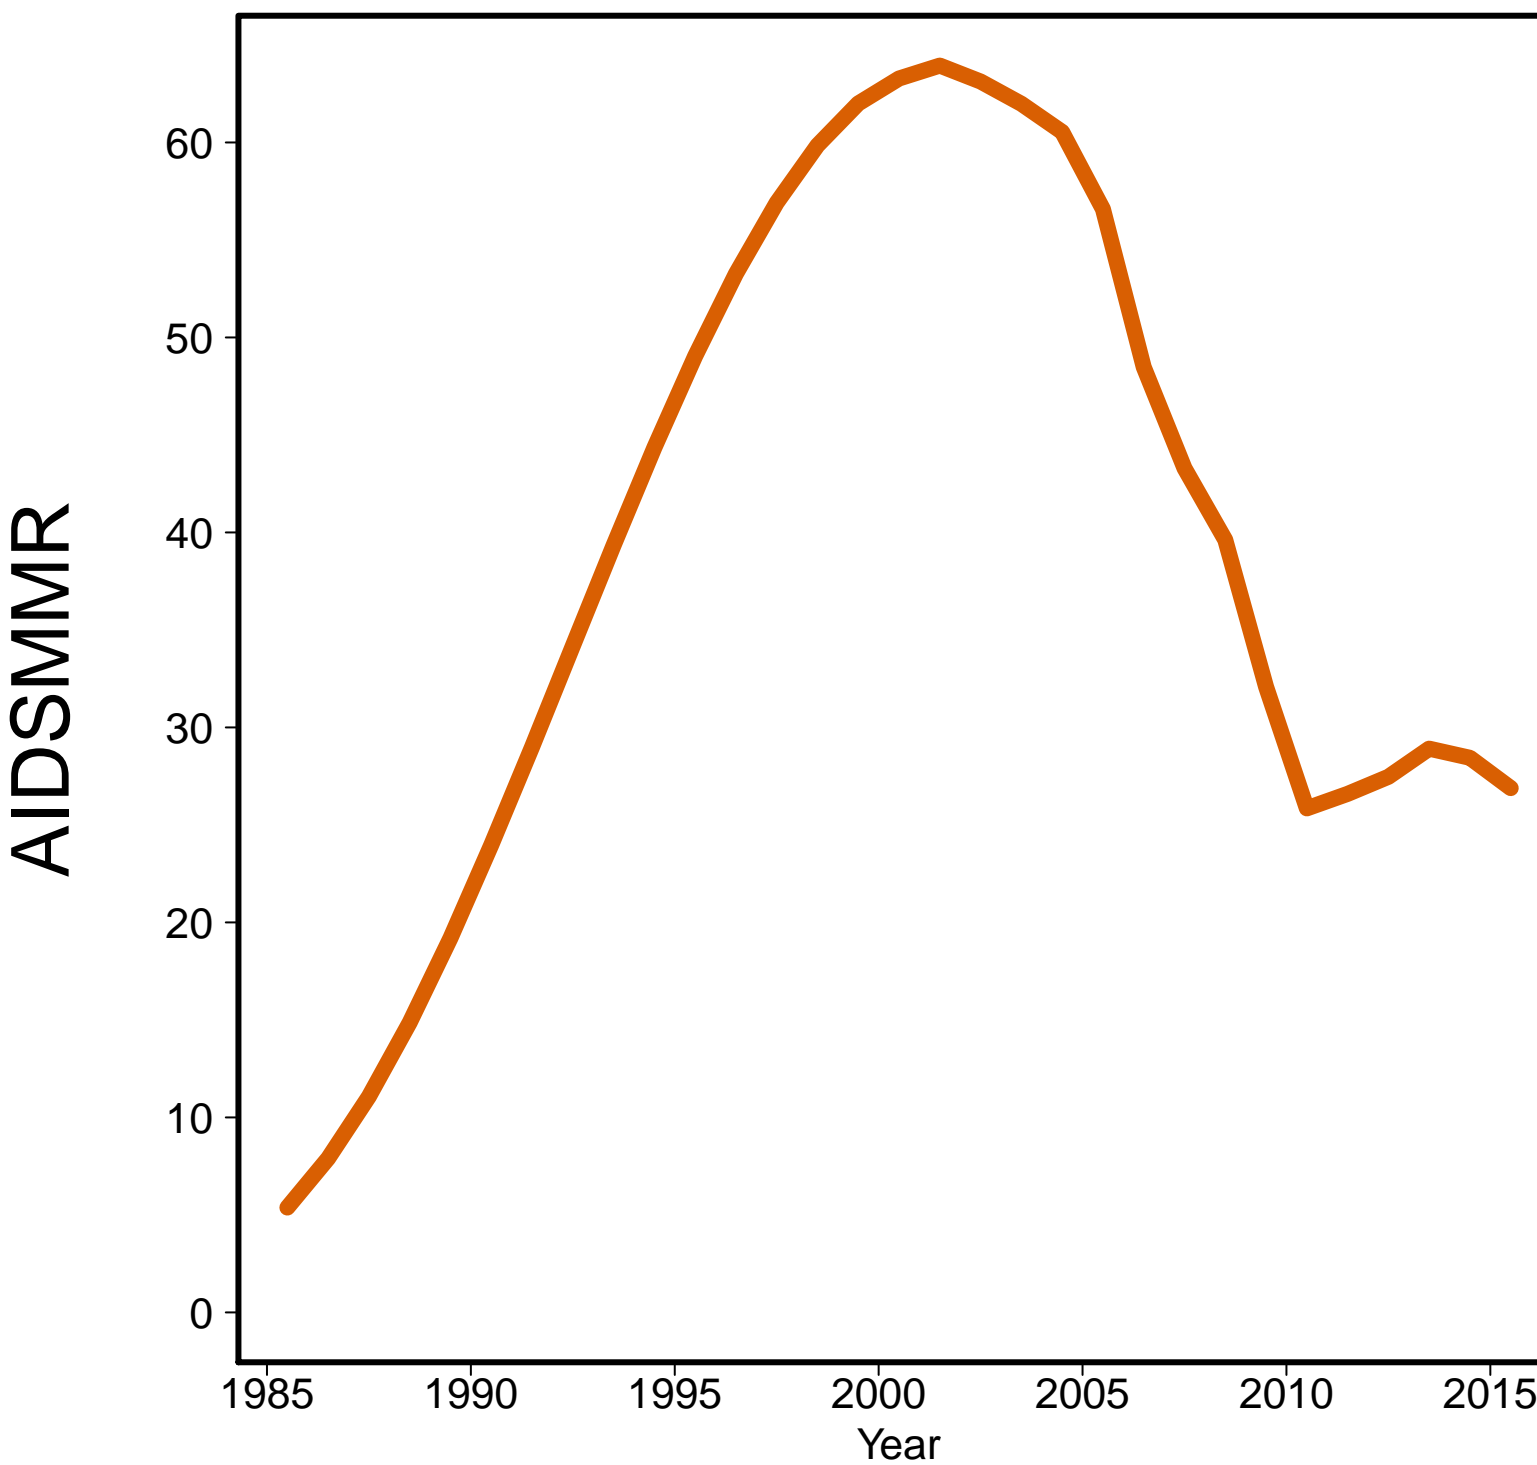

Croatia [HRV]  
(Transition countries of South-Eastern Europe)

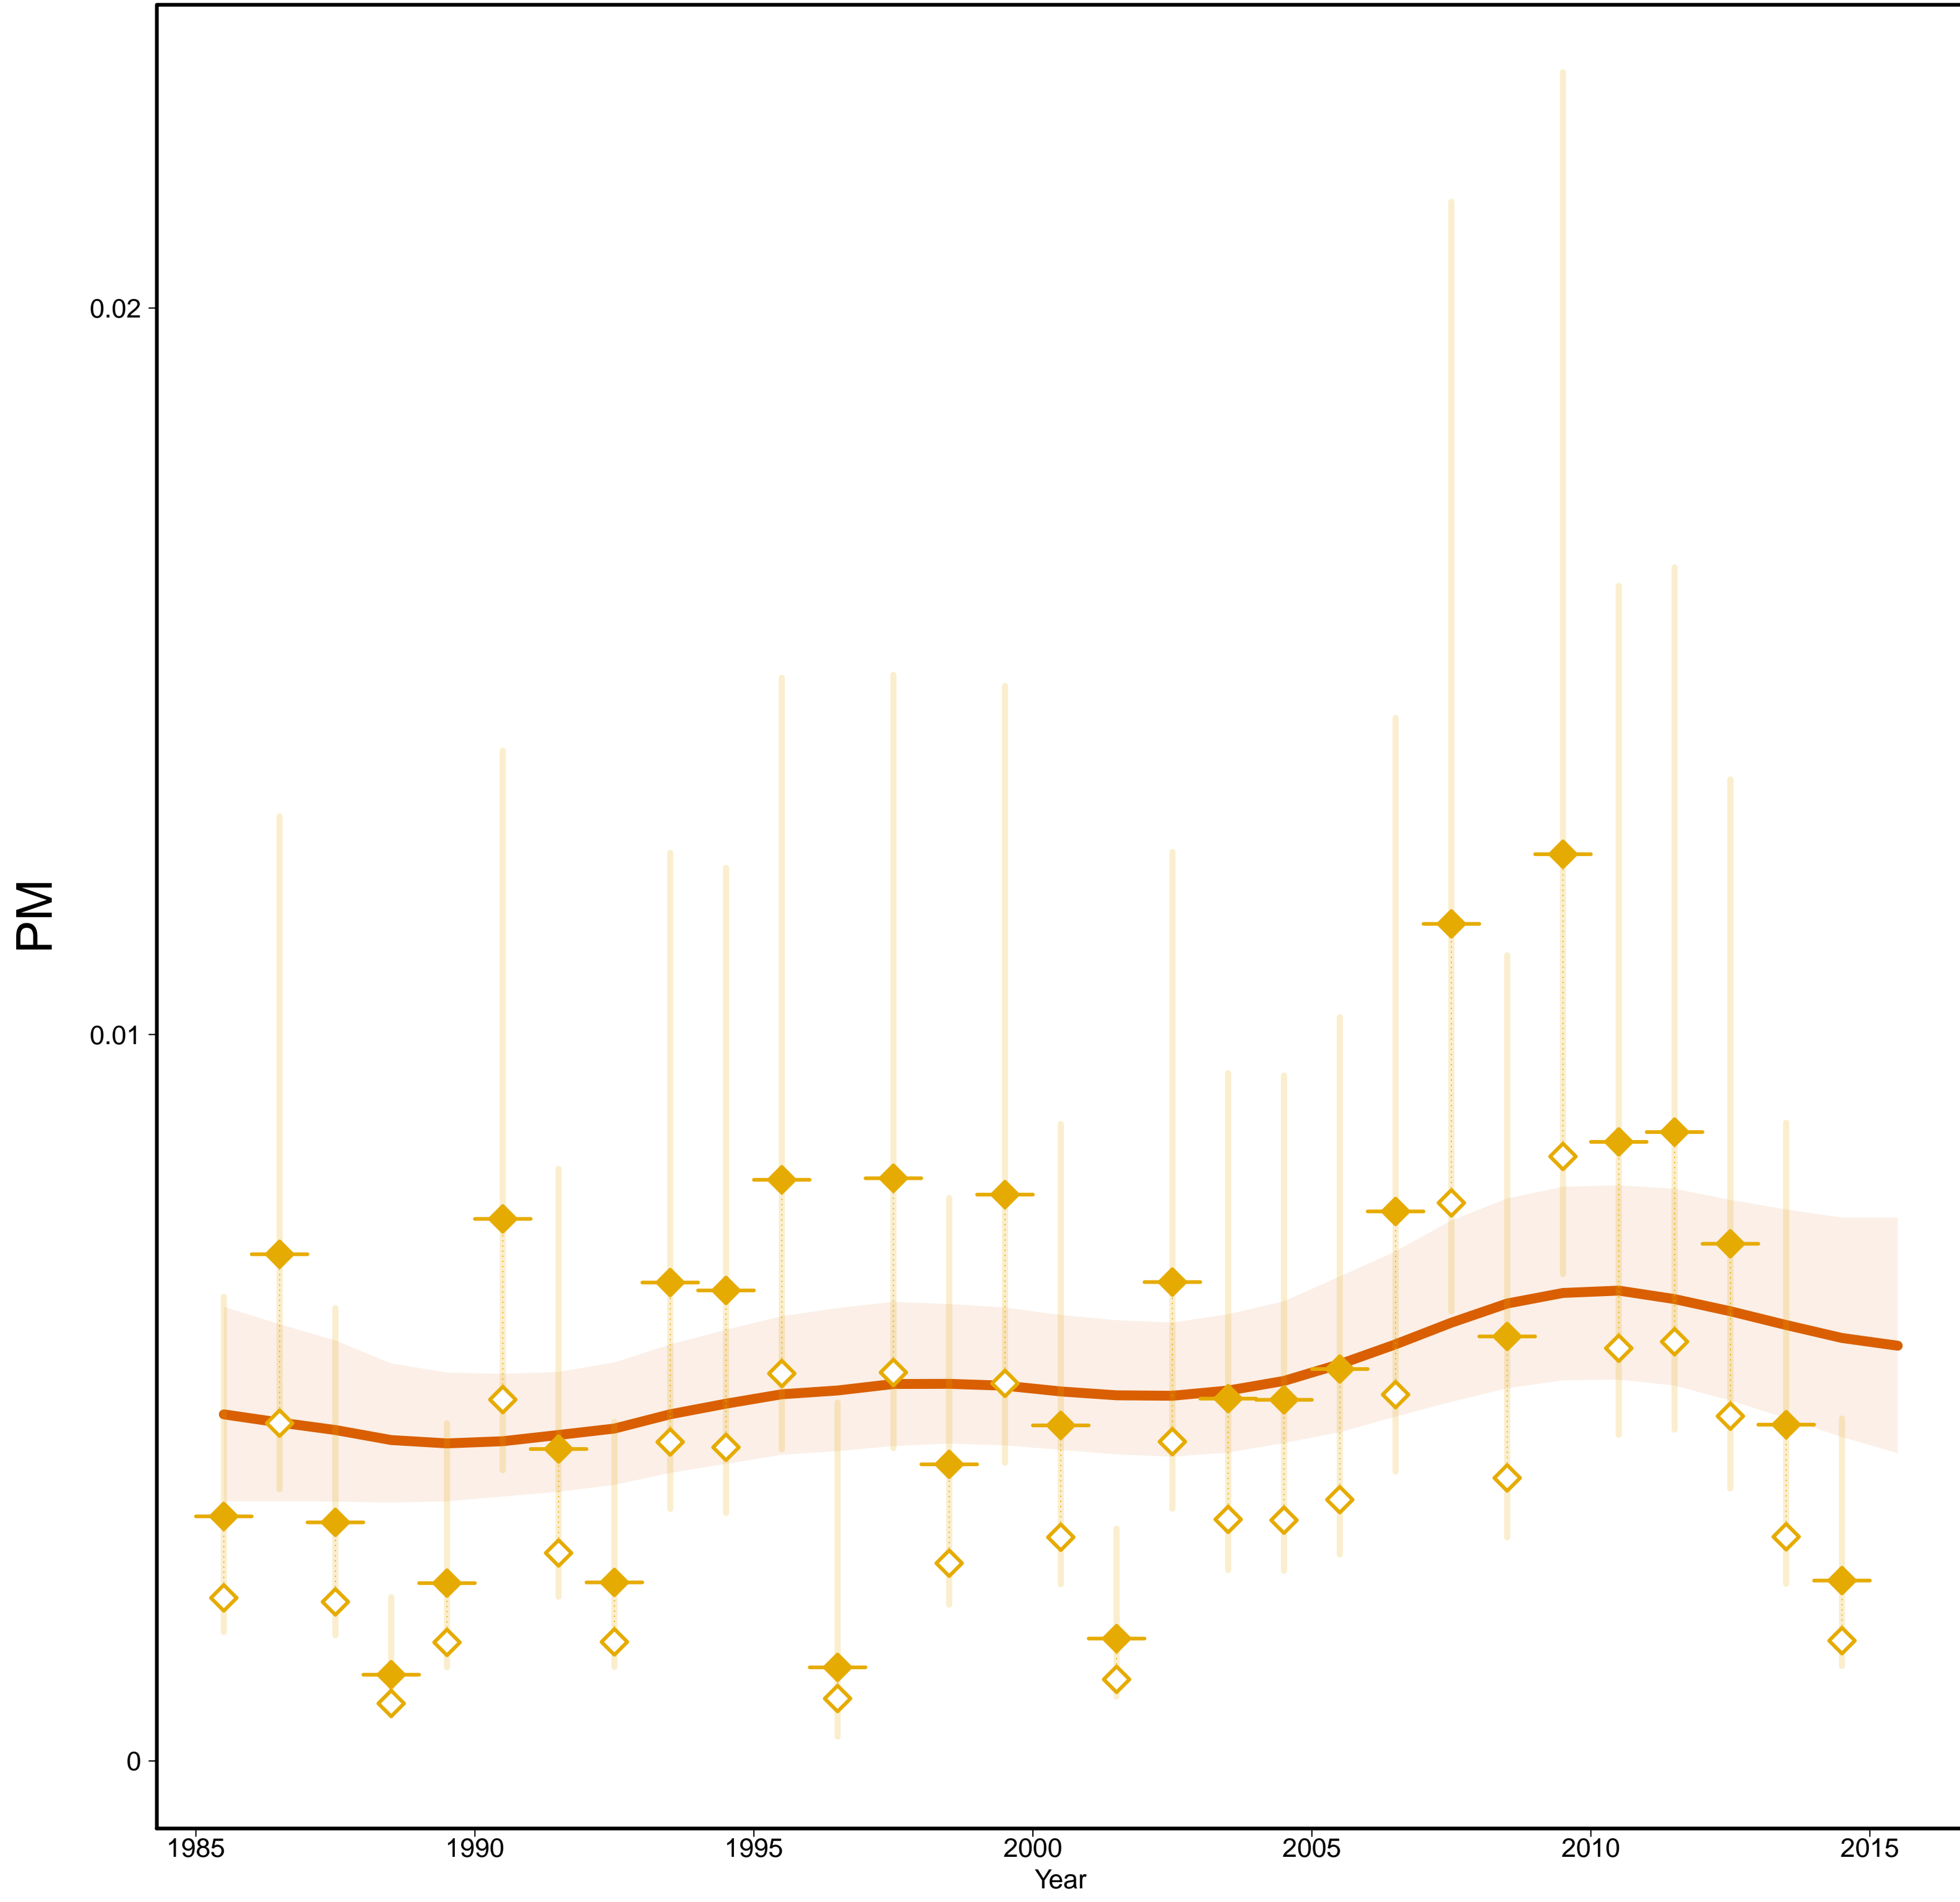

Croatia [HRV]  
(Transition countries of South-Eastern Europe)

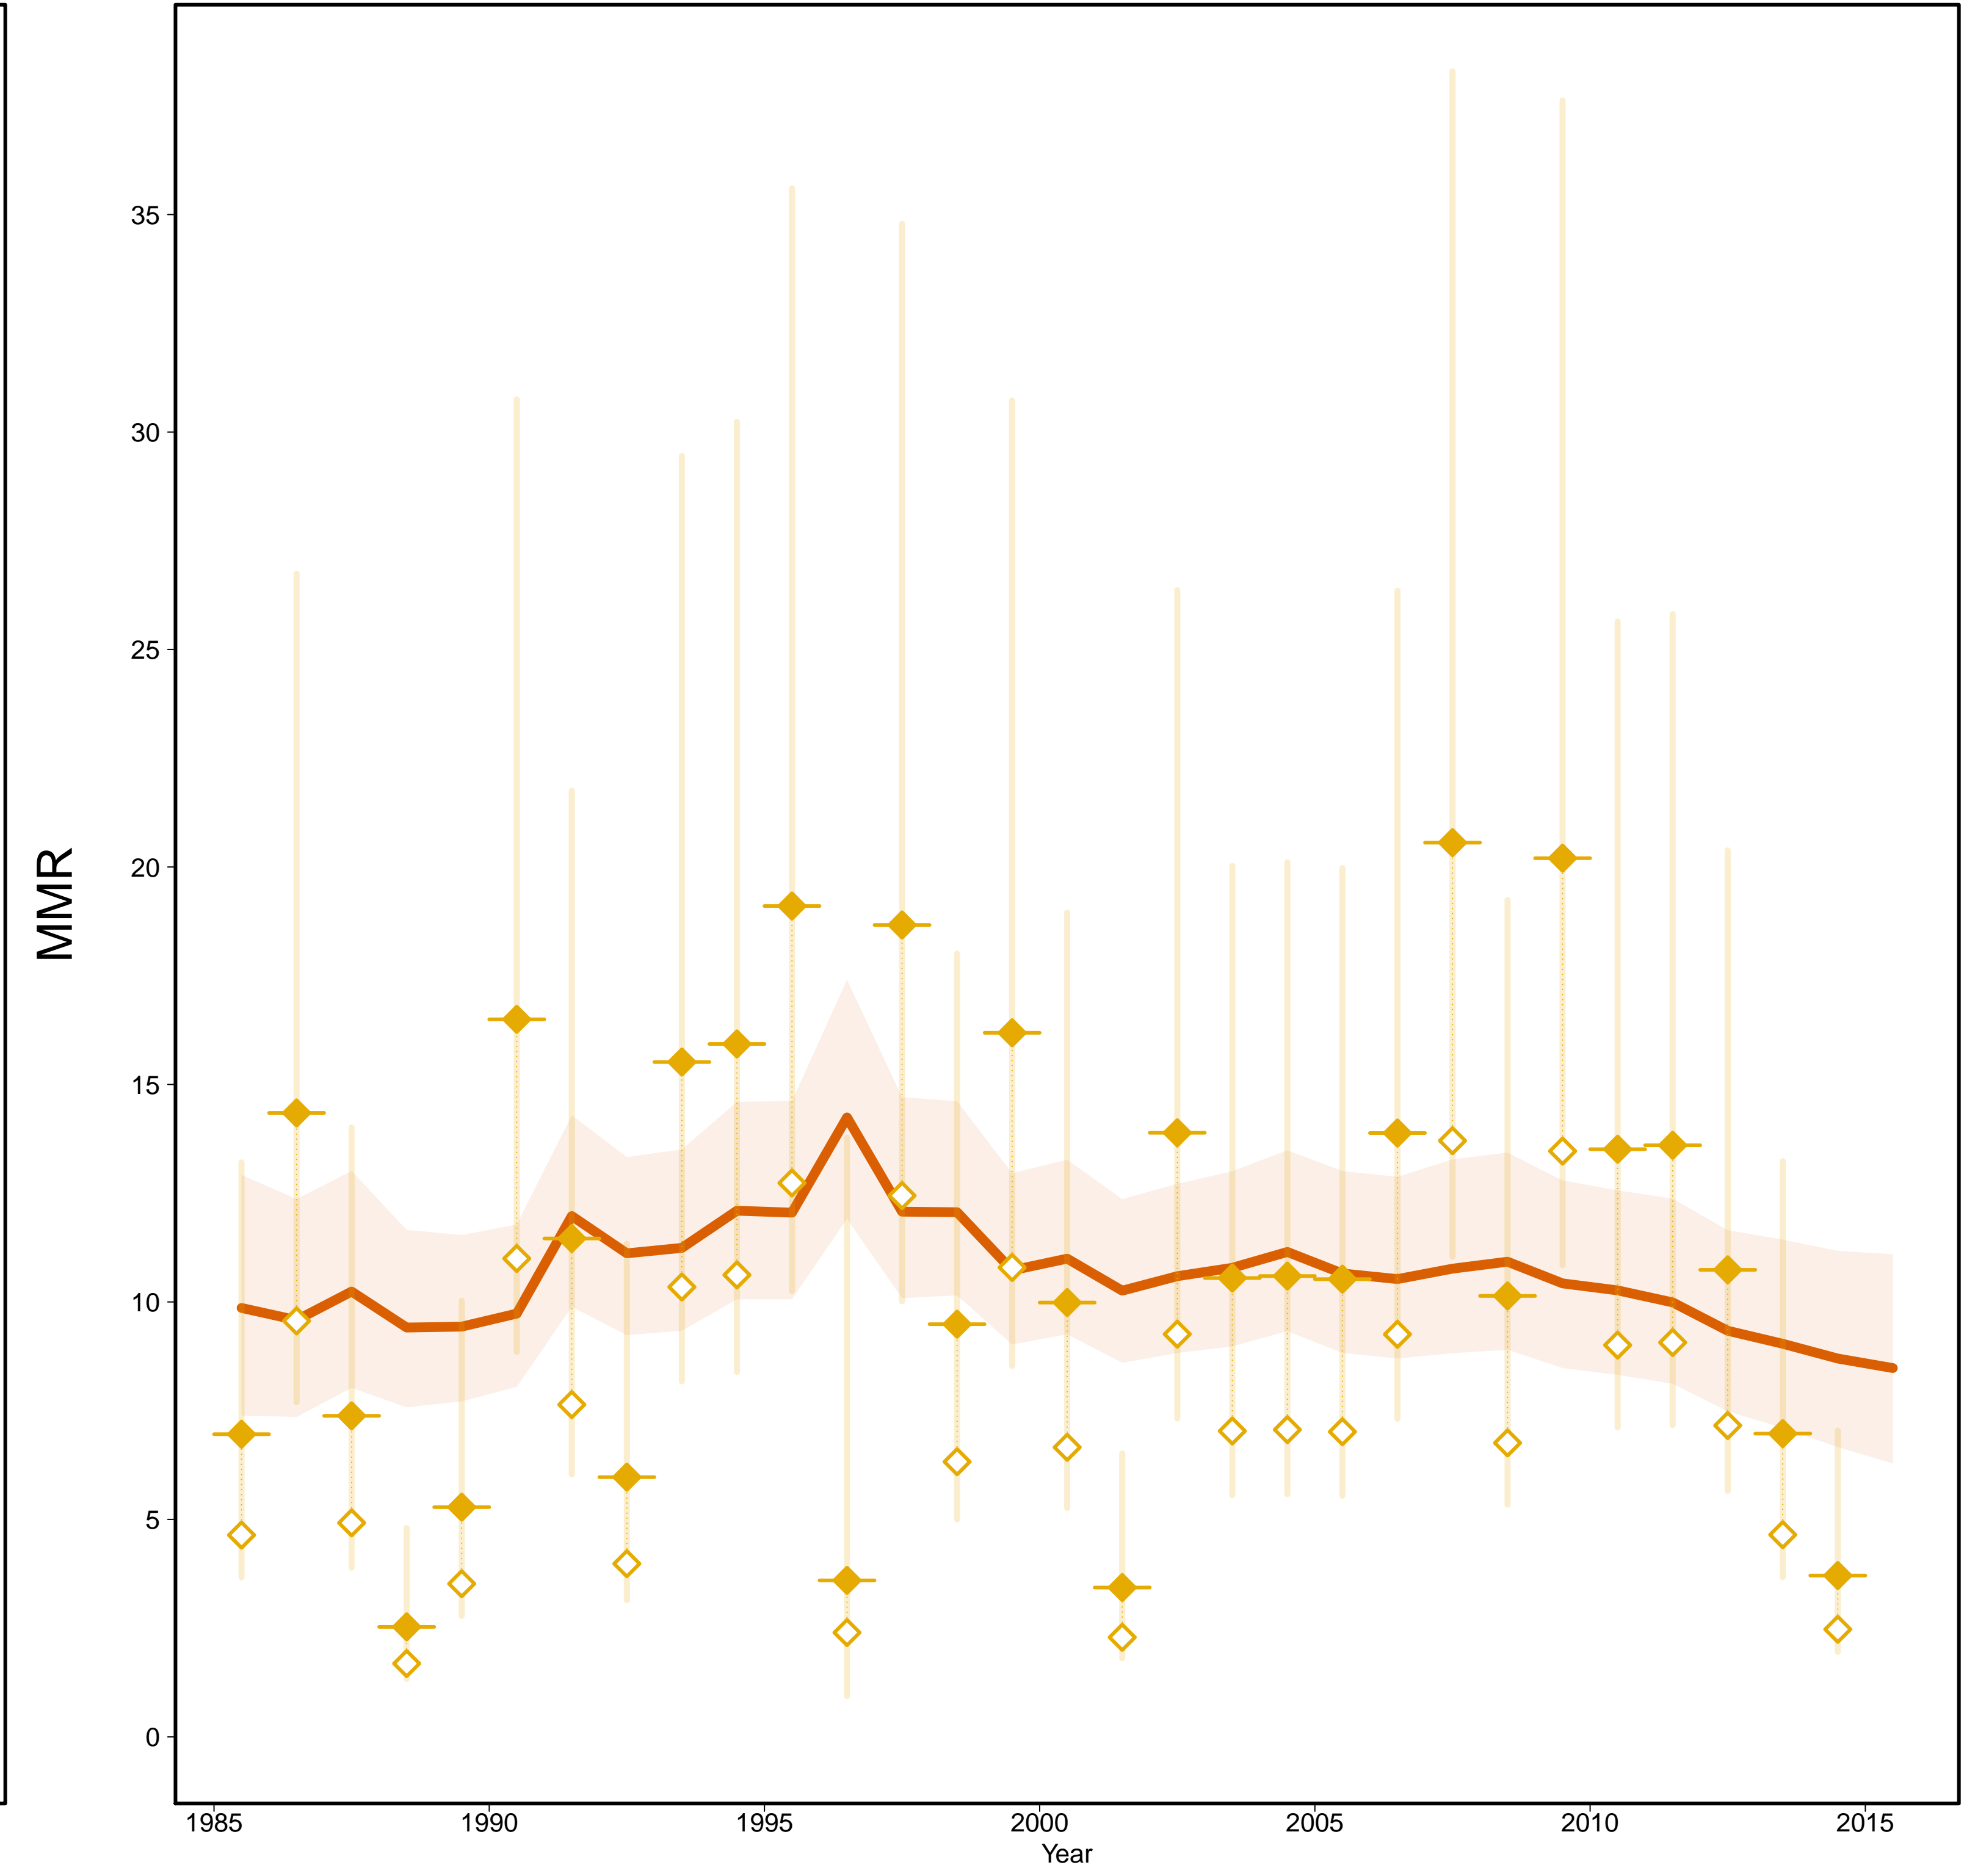

- Estimates —
- MMR Database 2015 —
- ◇ Observed Data
- ◆ Adjusted Data
- Data type —
- ◆ VR

Gross Domestic Product

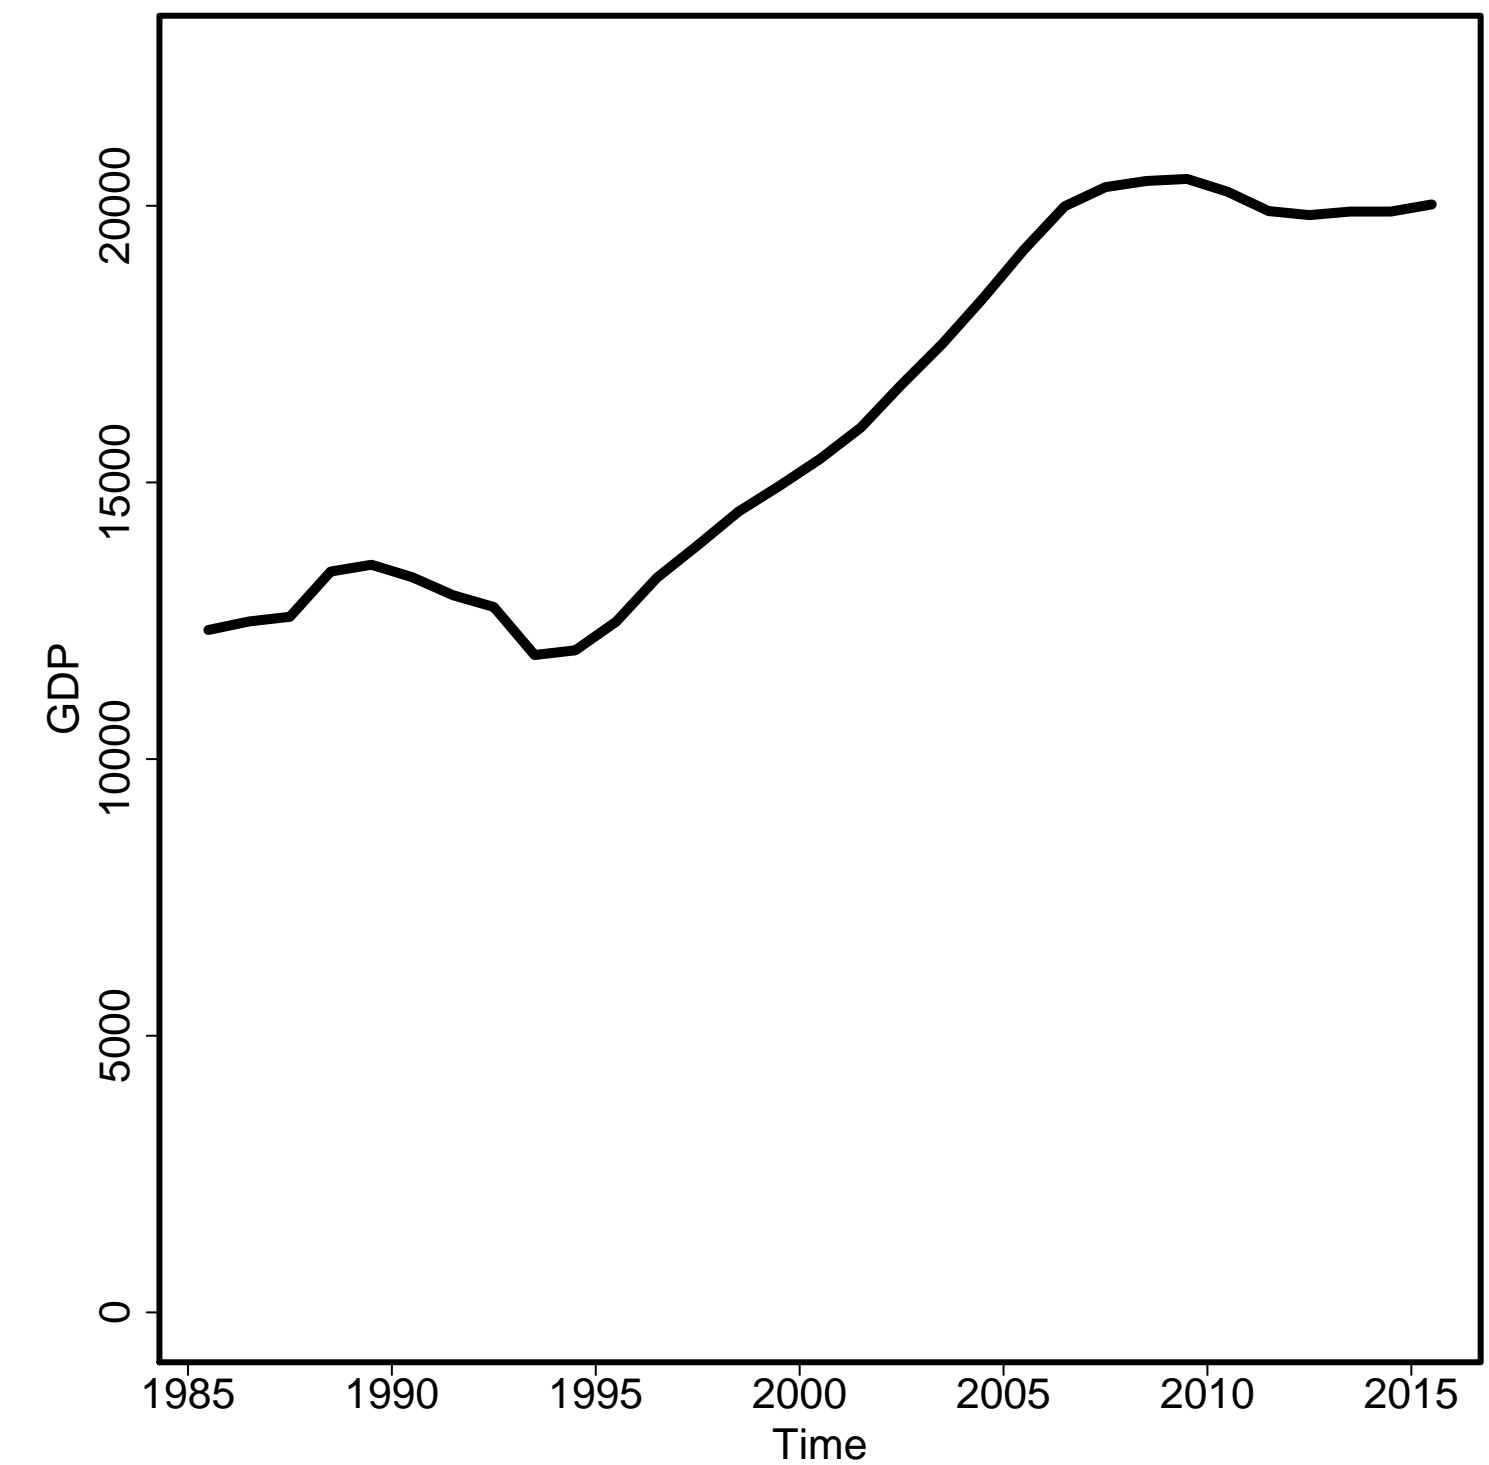

General Fertility Rate

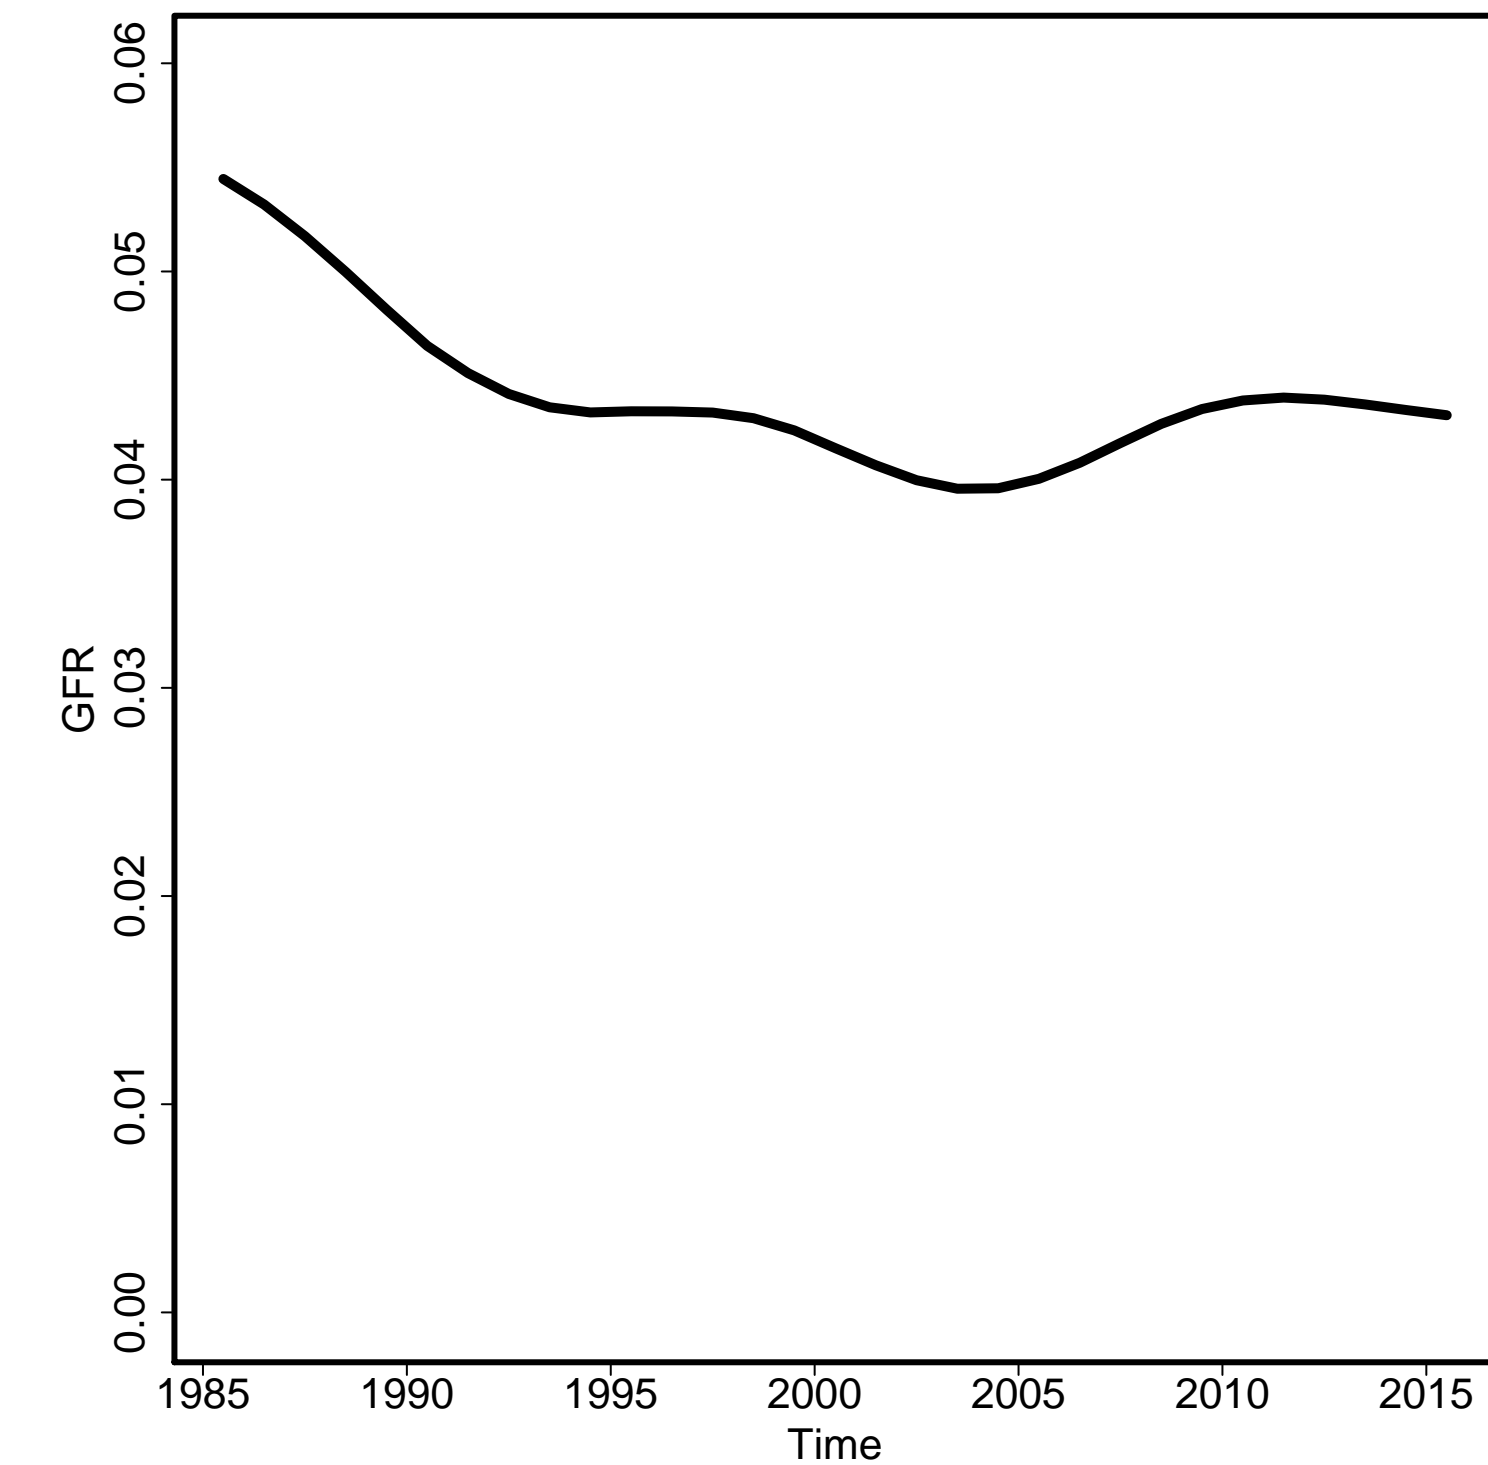

Skilled Attendance to Birth

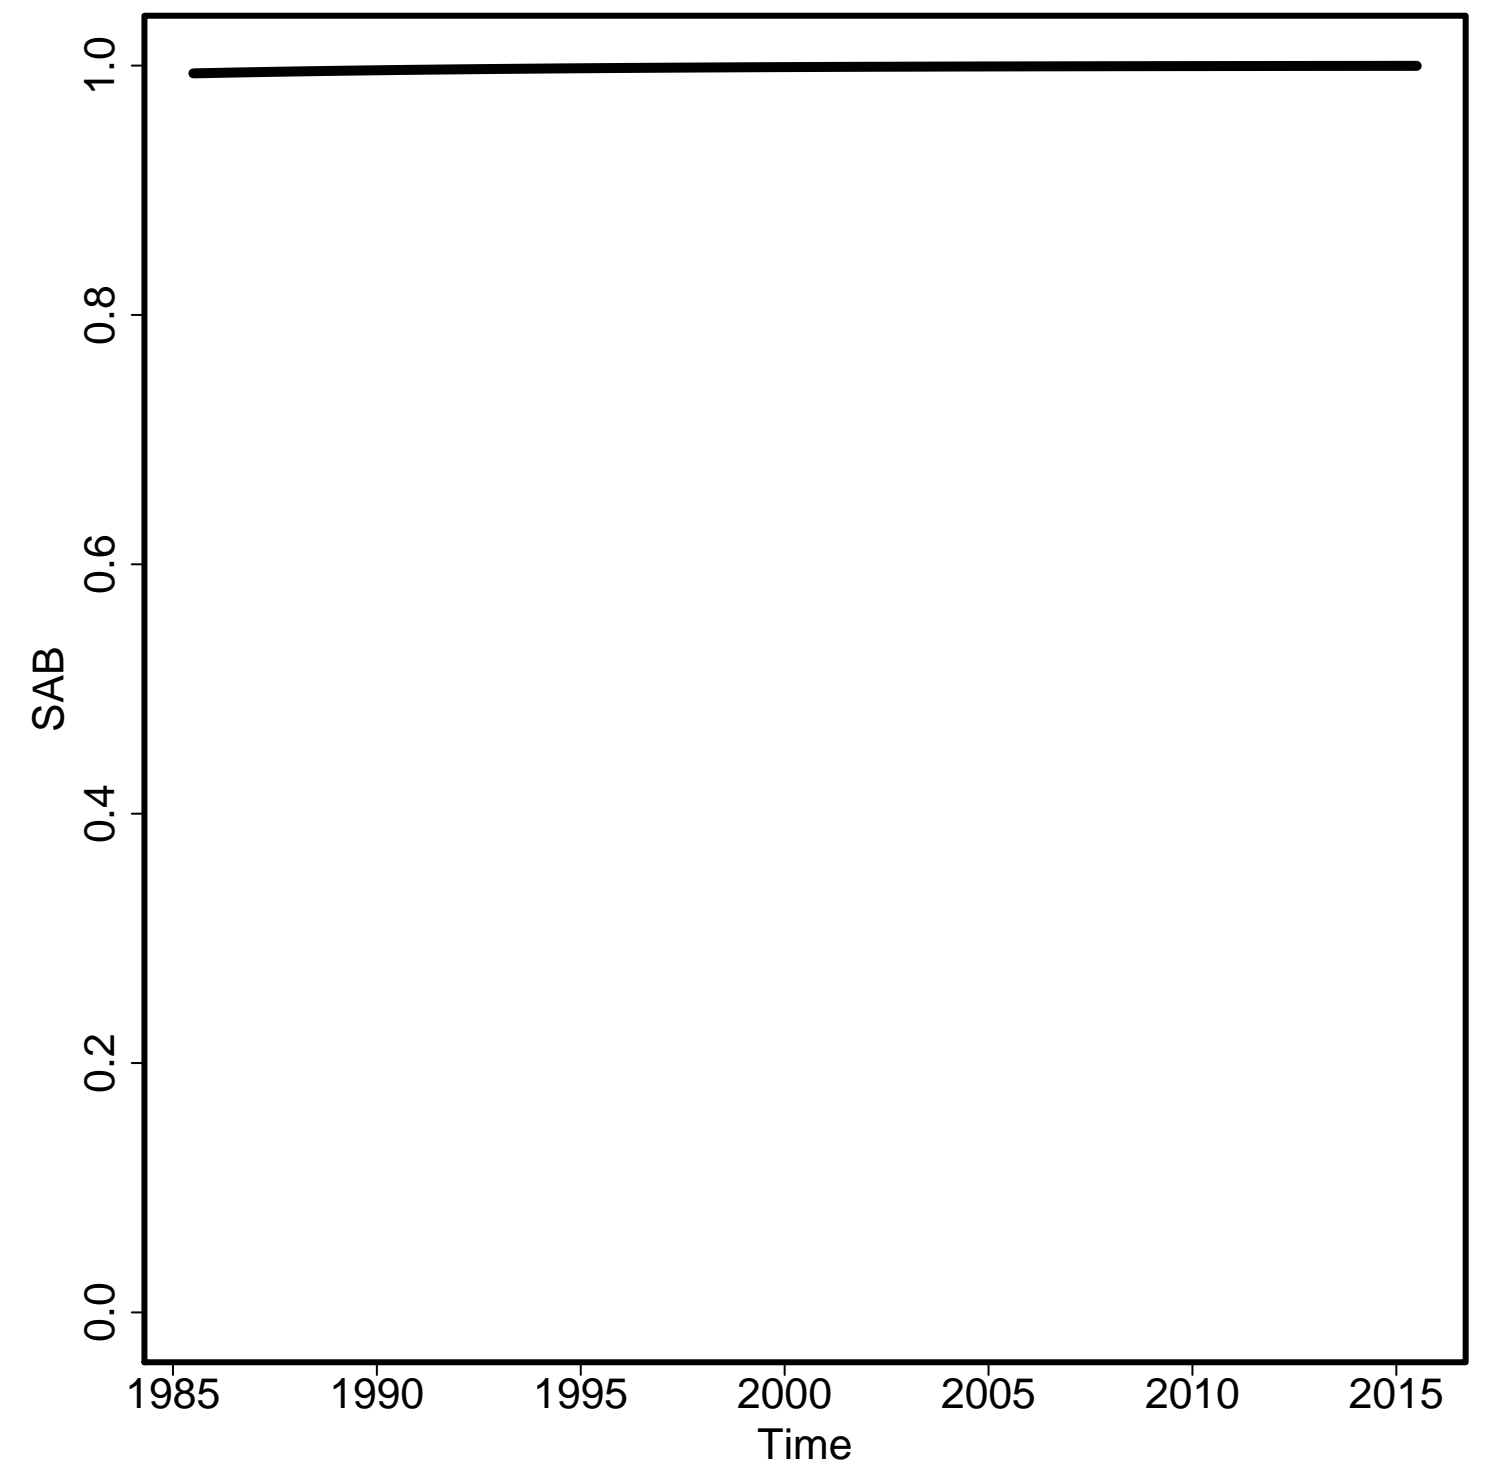

Envelope/Births

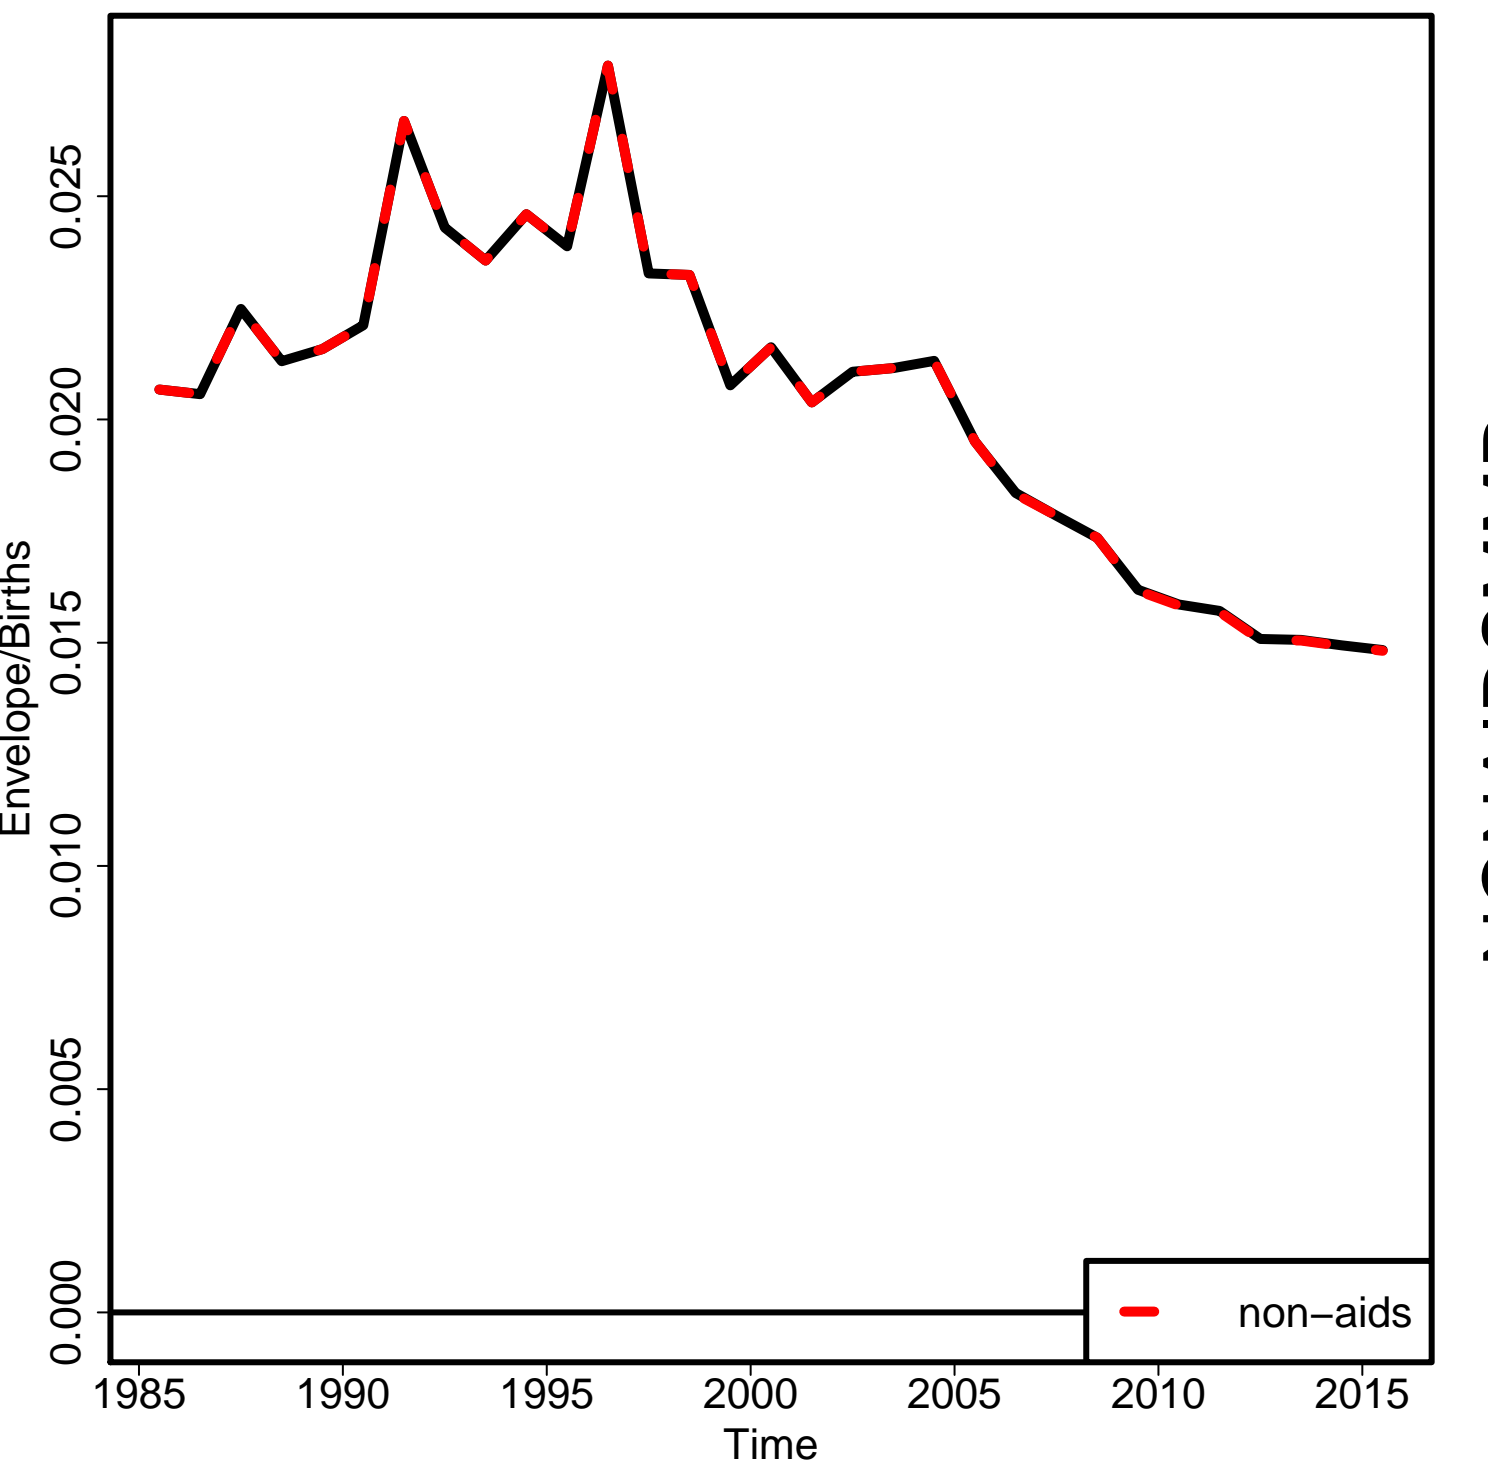

Non-aids MMR

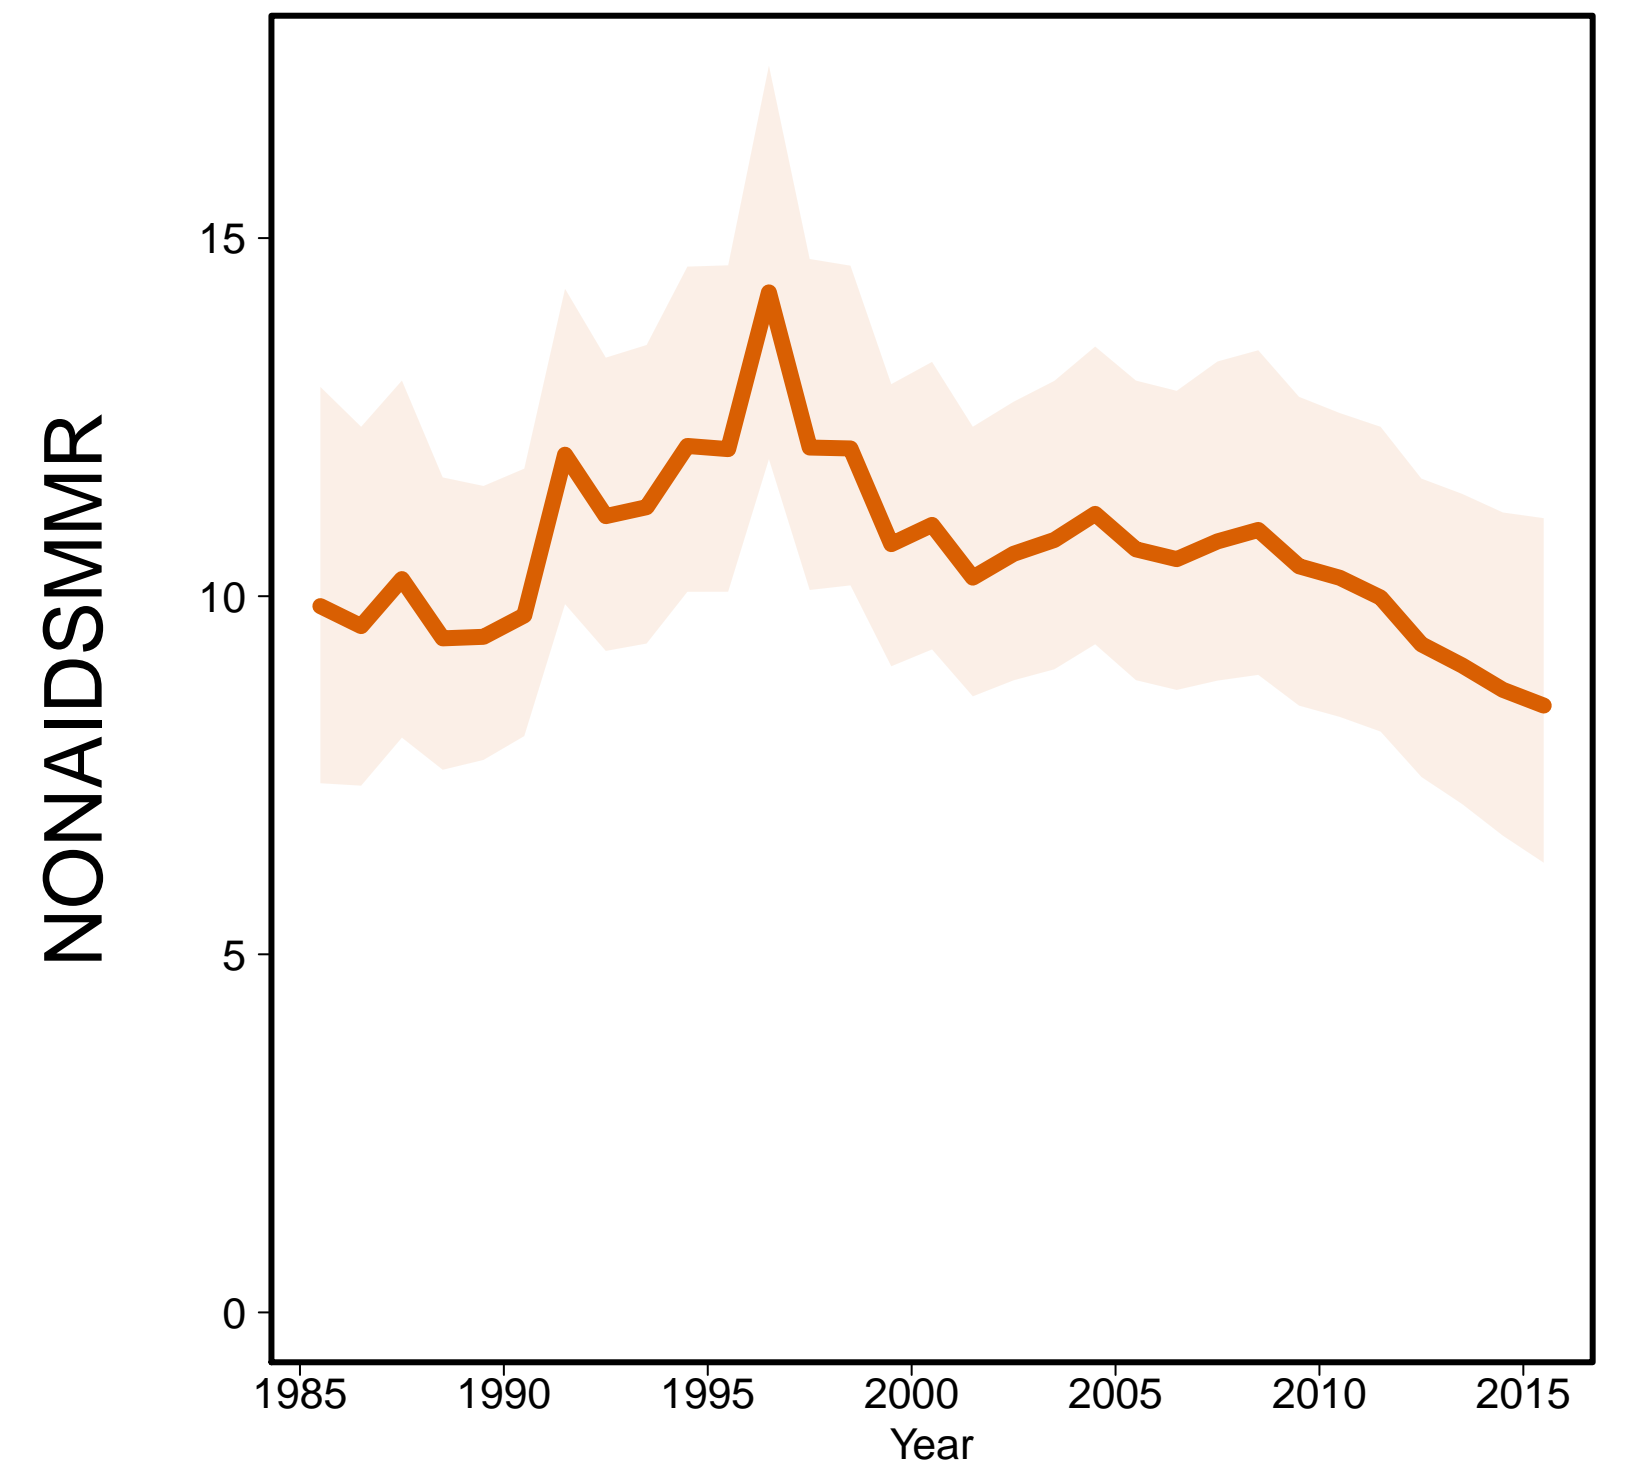

Aids MMR

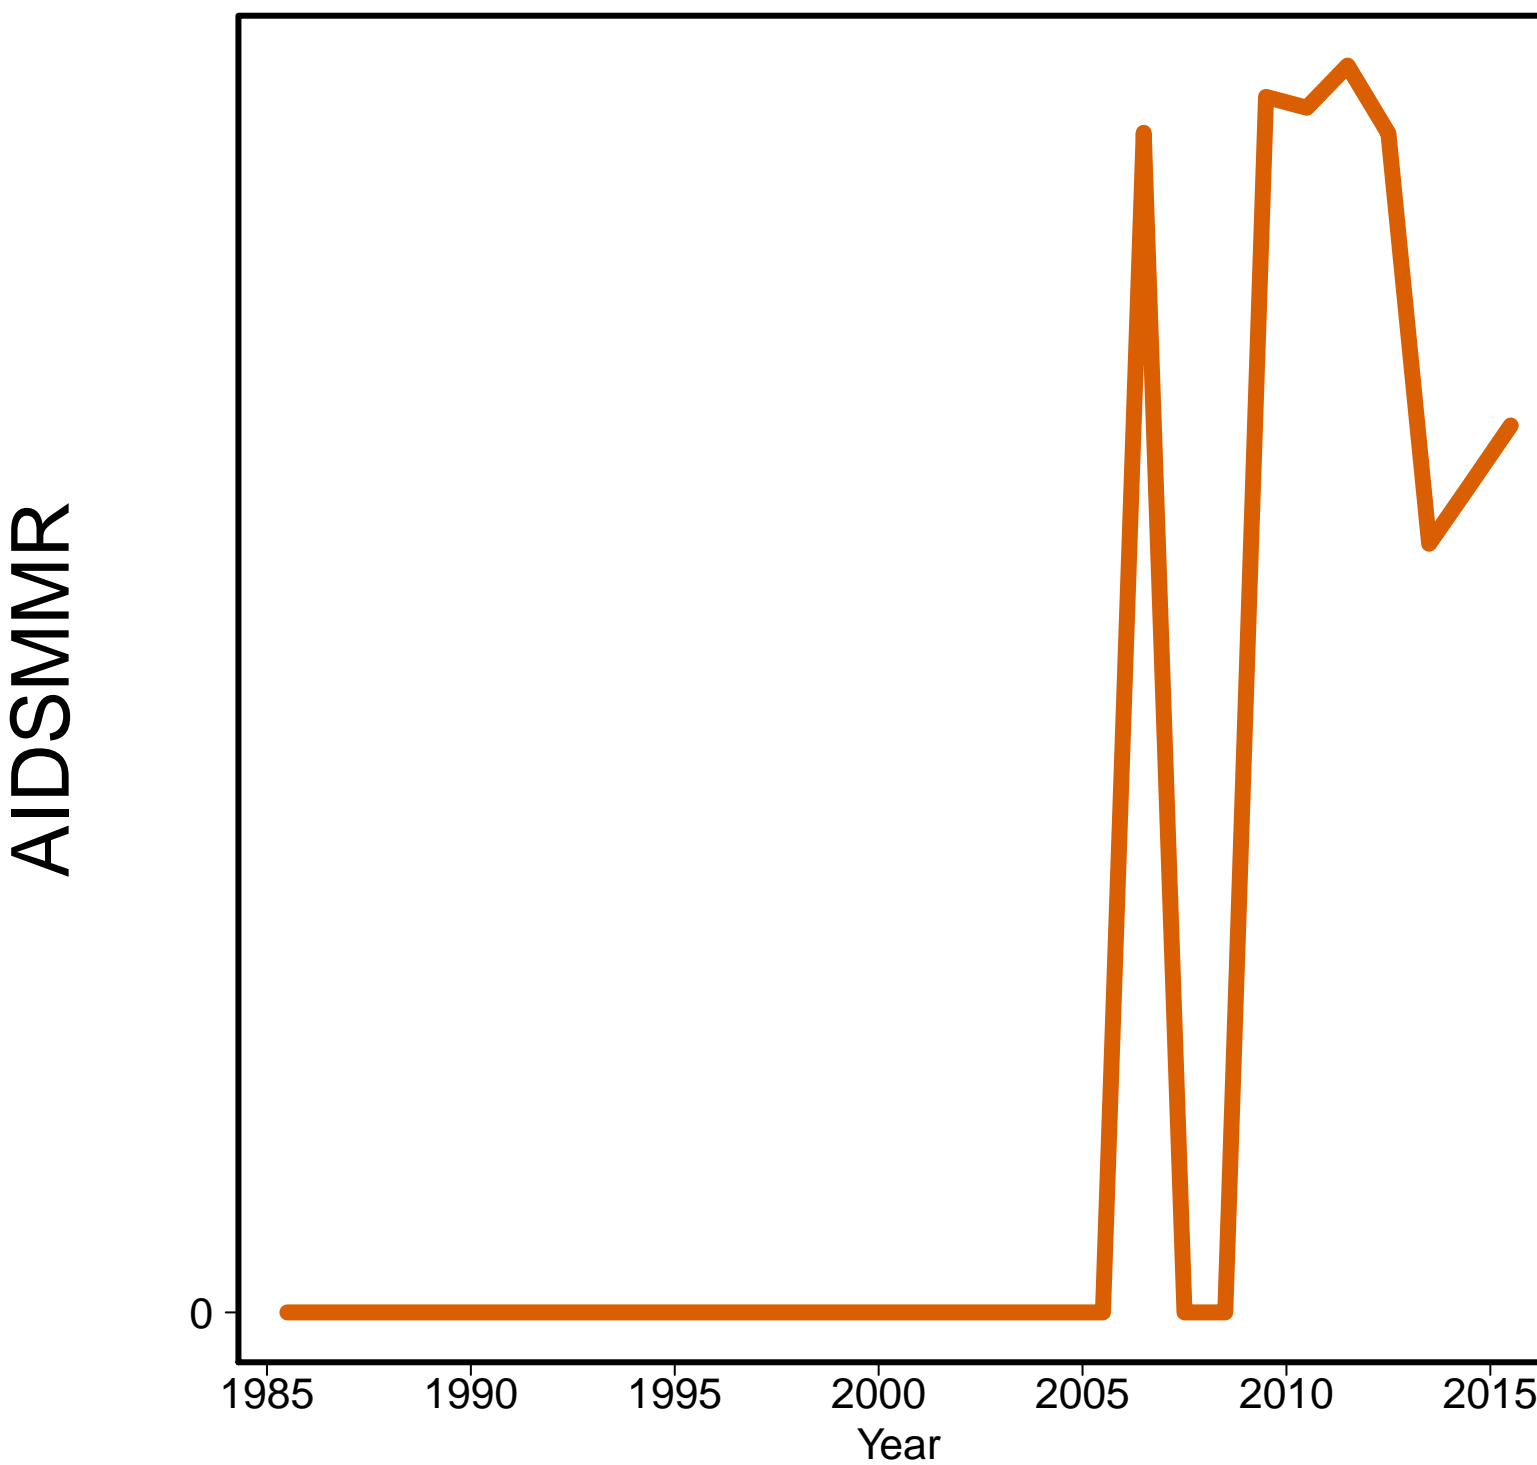



Cuba [CUB]  
(Caribbean)

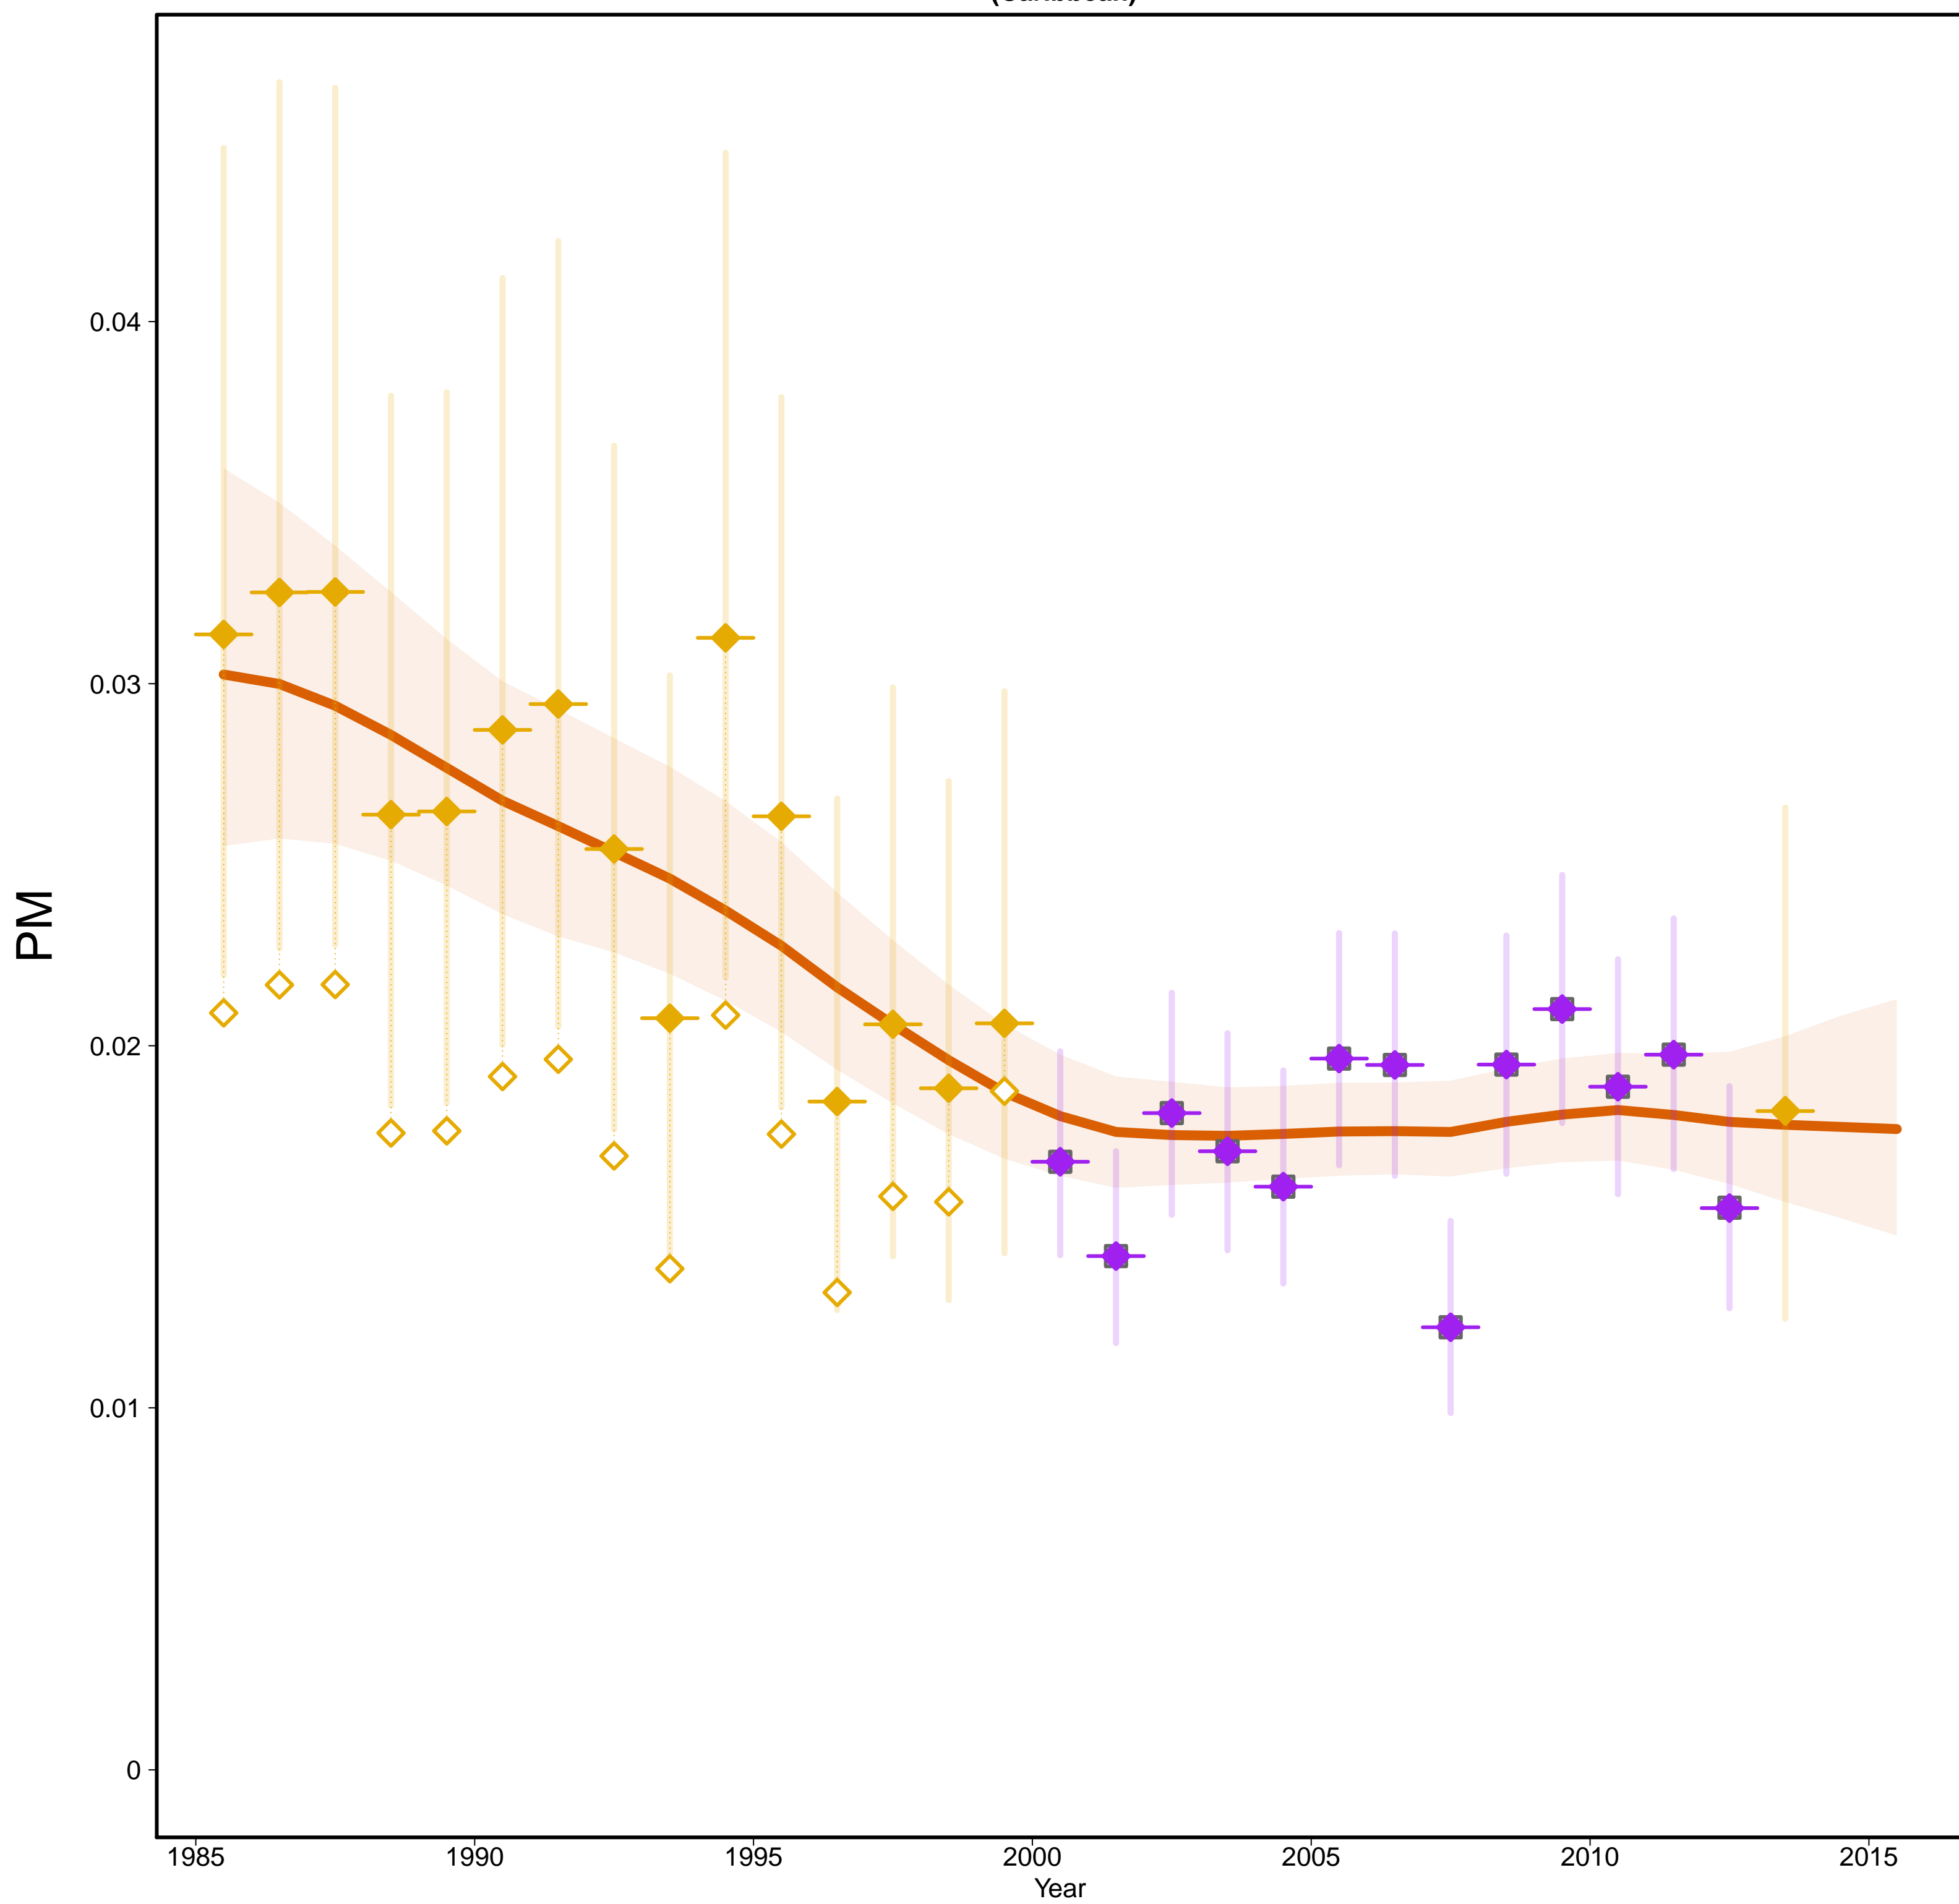

Cuba [CUB]  
(Caribbean)

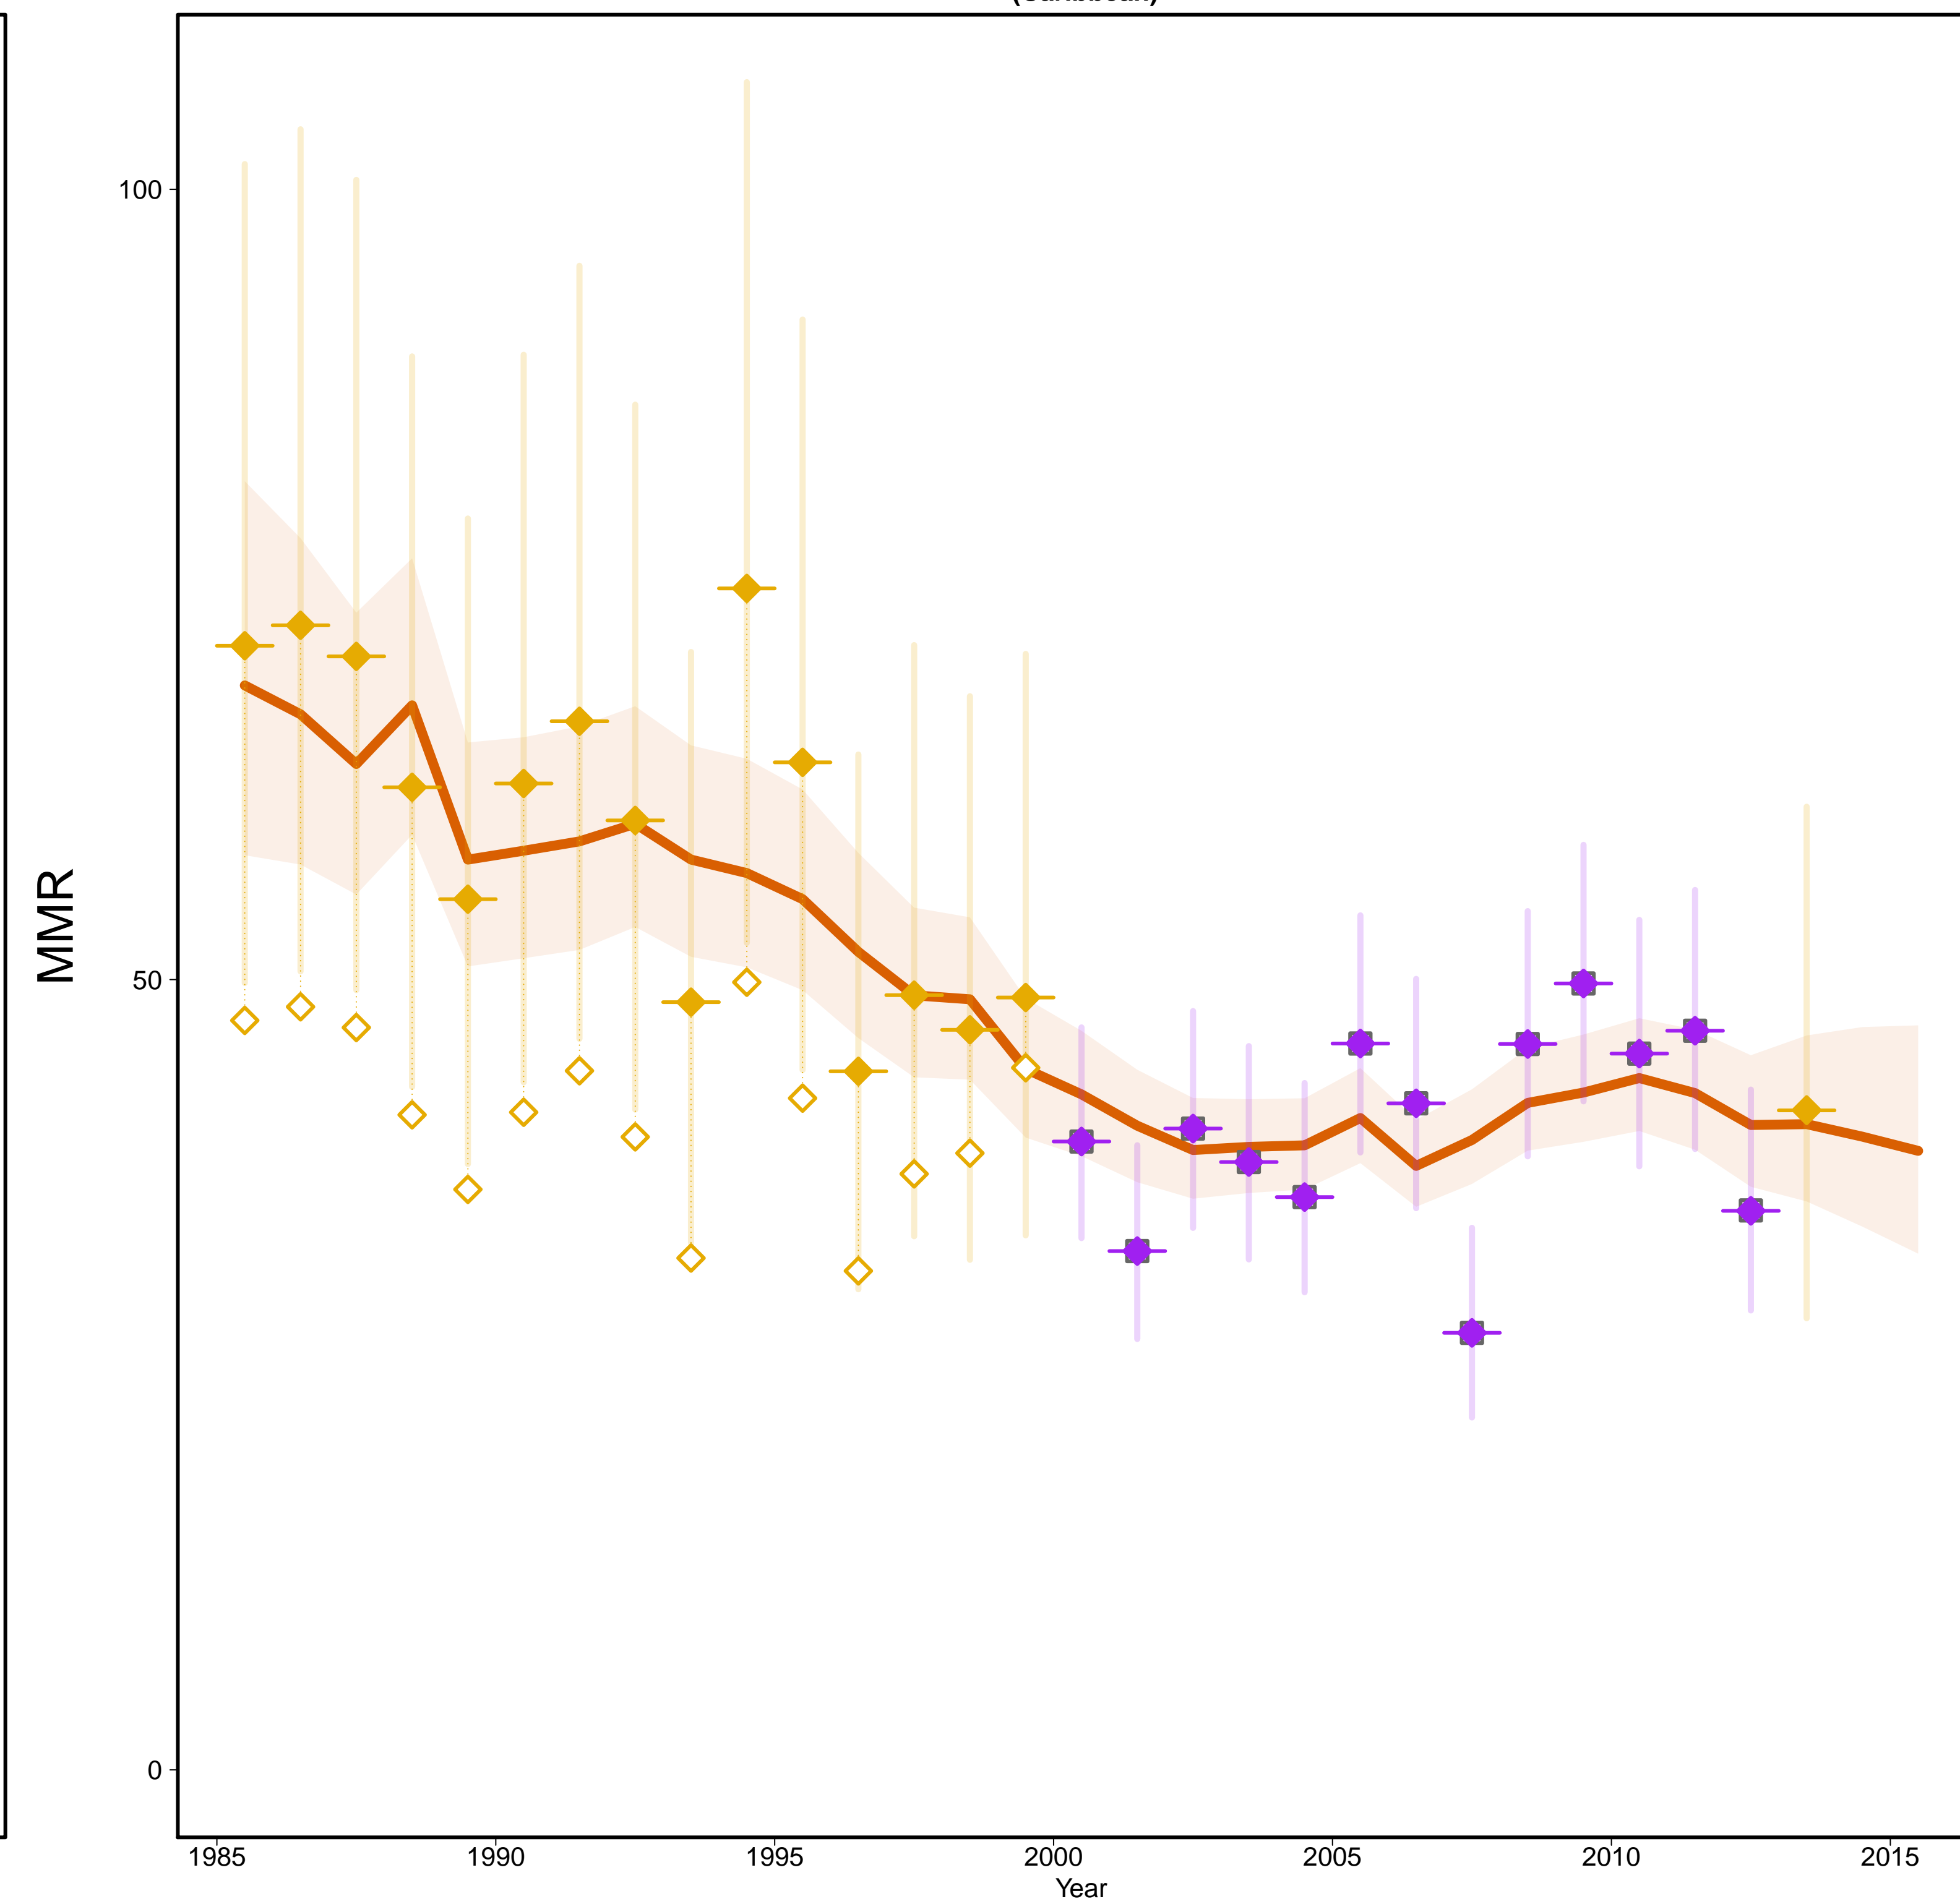

- Estimates —
- MMR Database 2015 —
- ◇ Observed Data
- ◆ Adjusted Data
- Data type —
- ◆ VR
- ◆ Spec. studies
- Excluded VR data  
(overlap with specialized study)

Gross Domestic Product

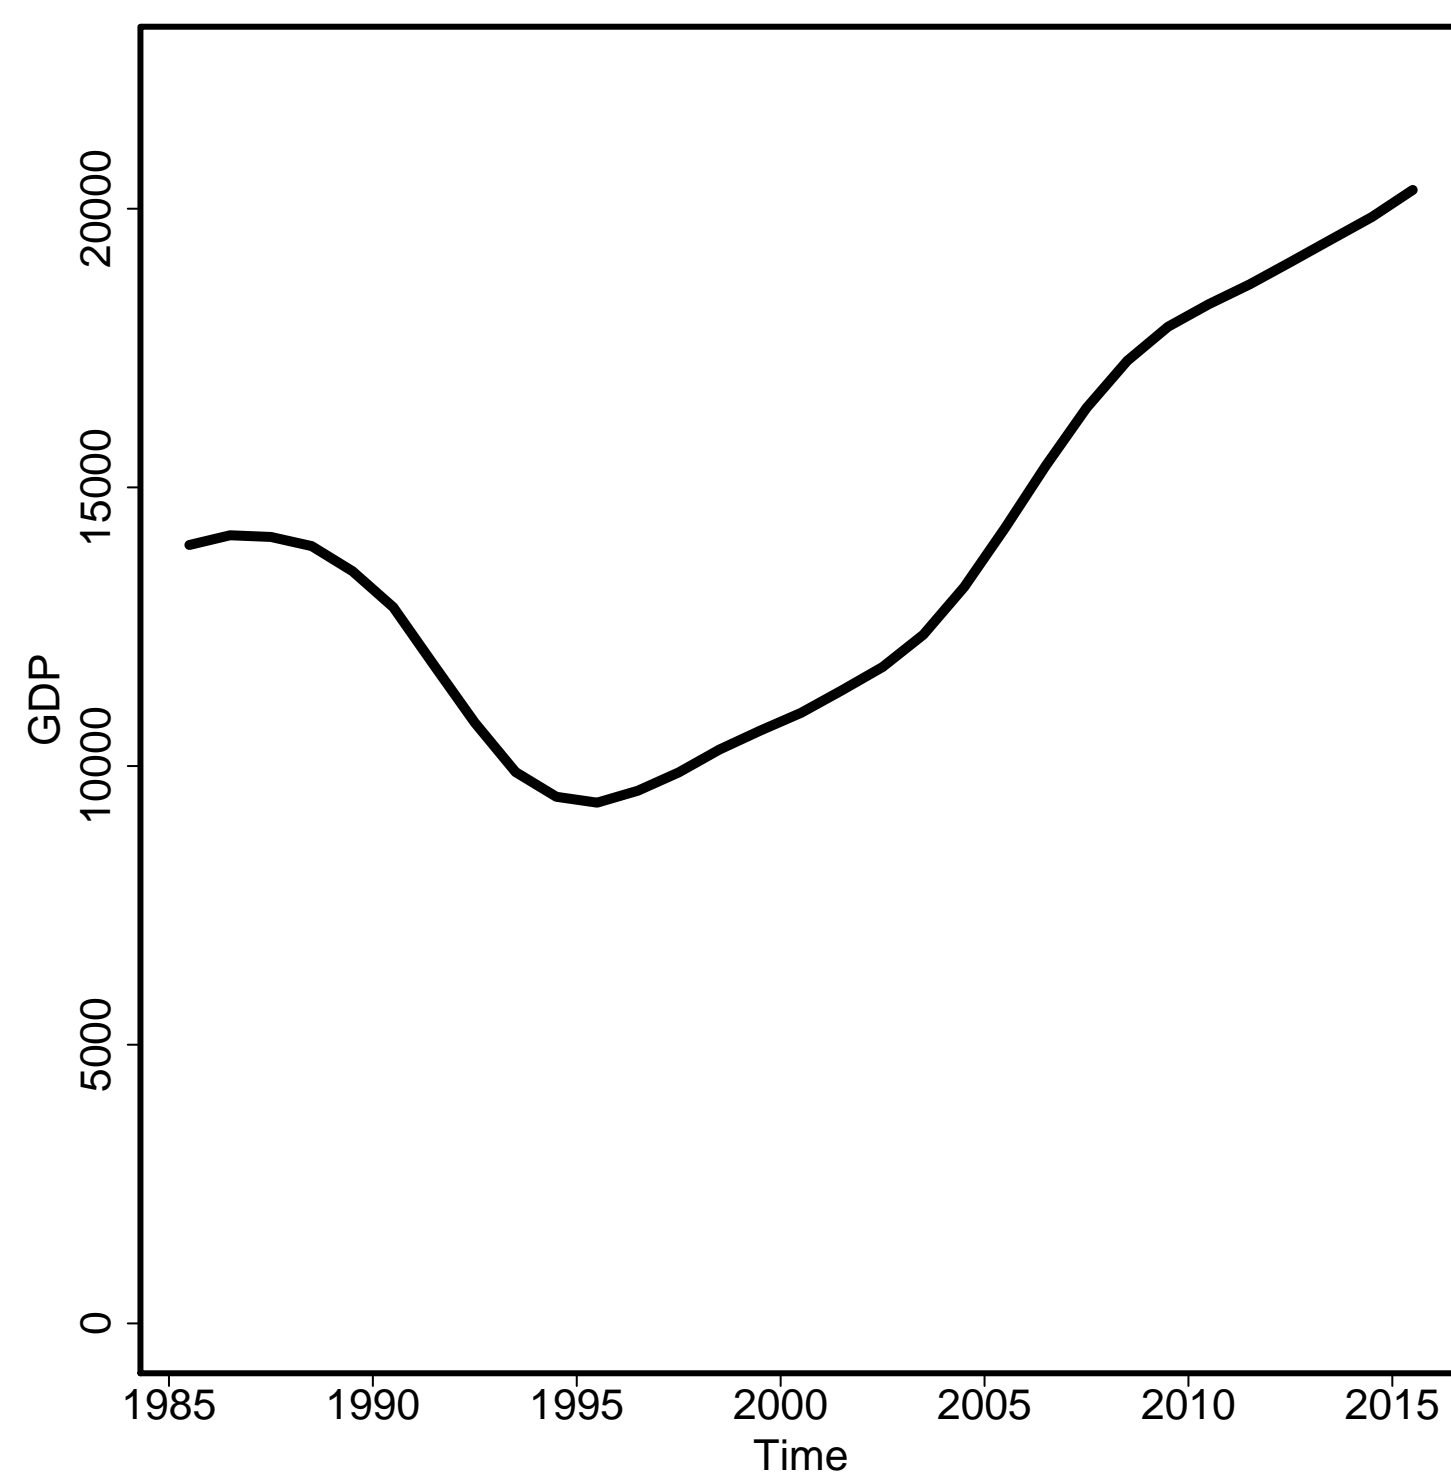

General Fertility Rate

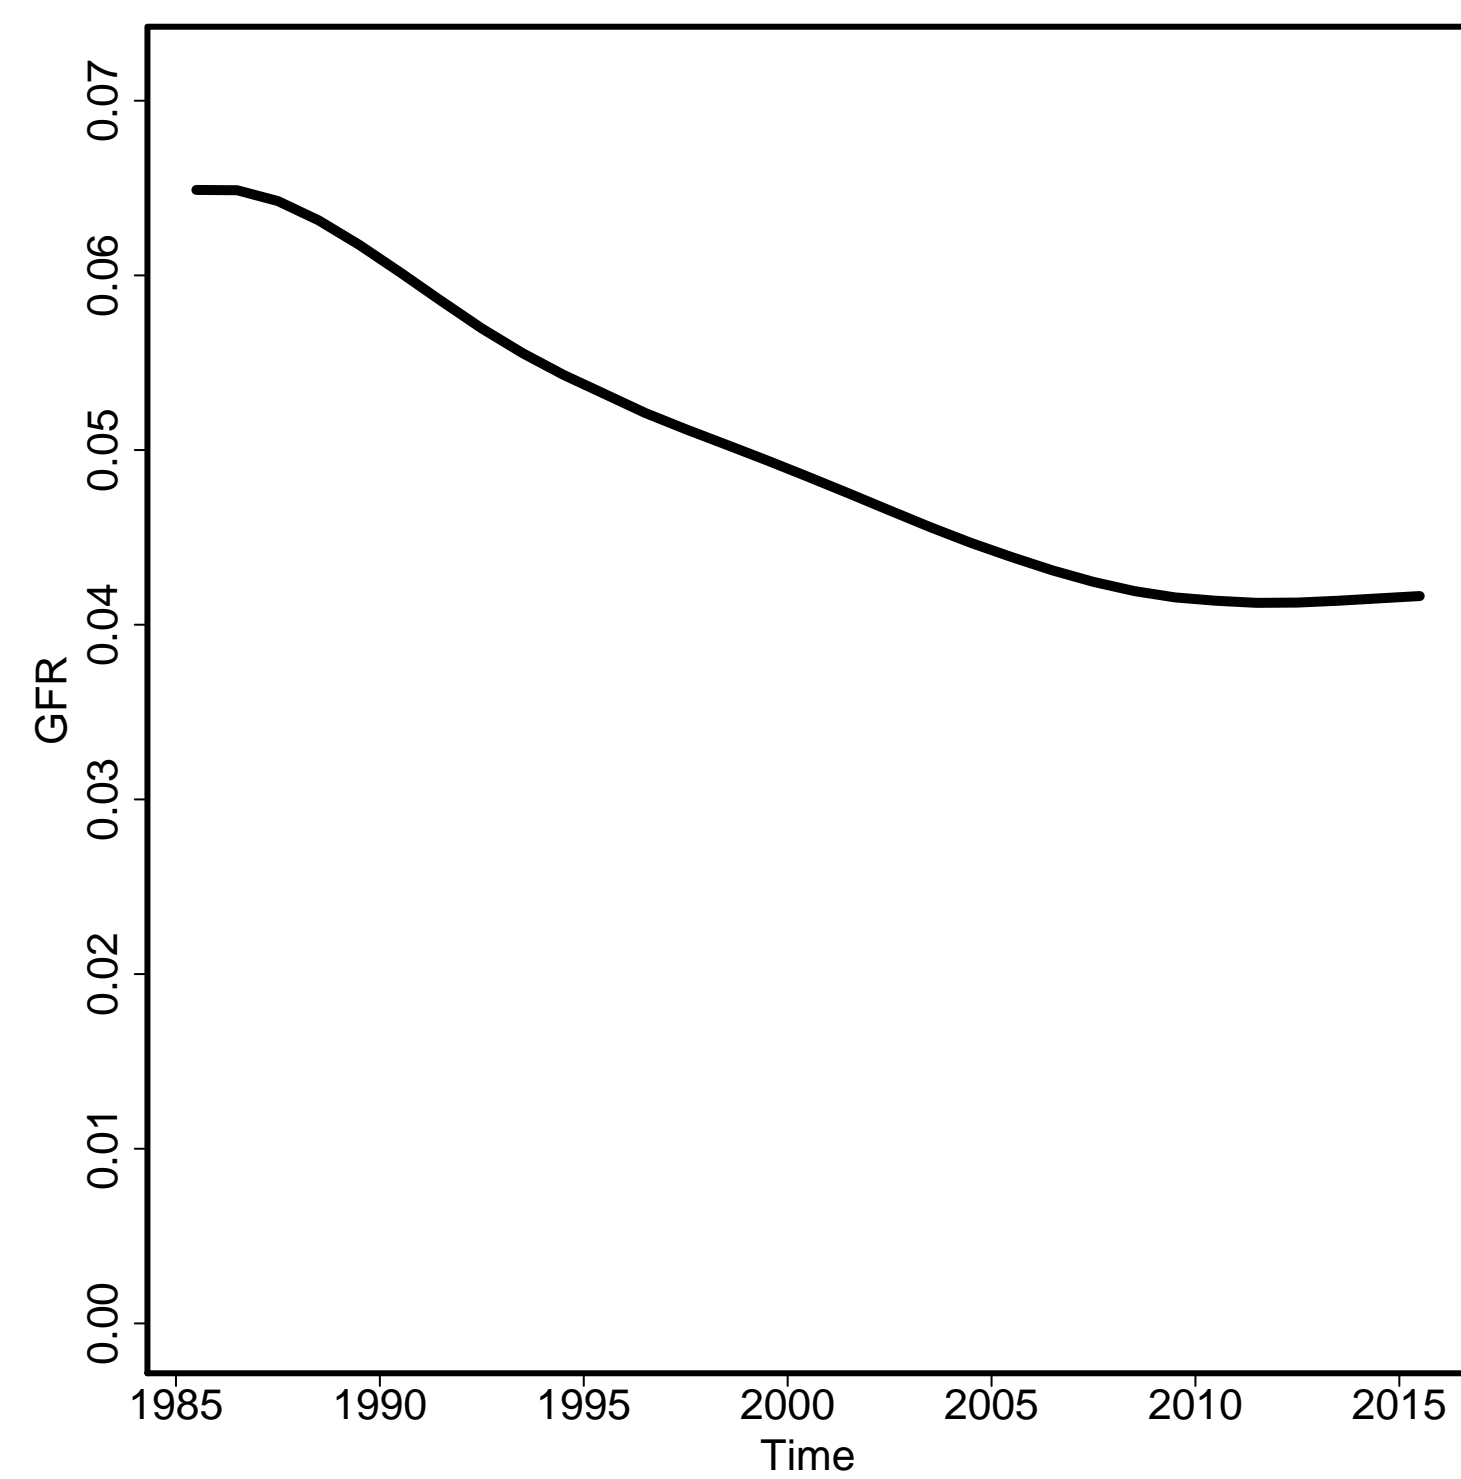

Skilled Attendance to Birth

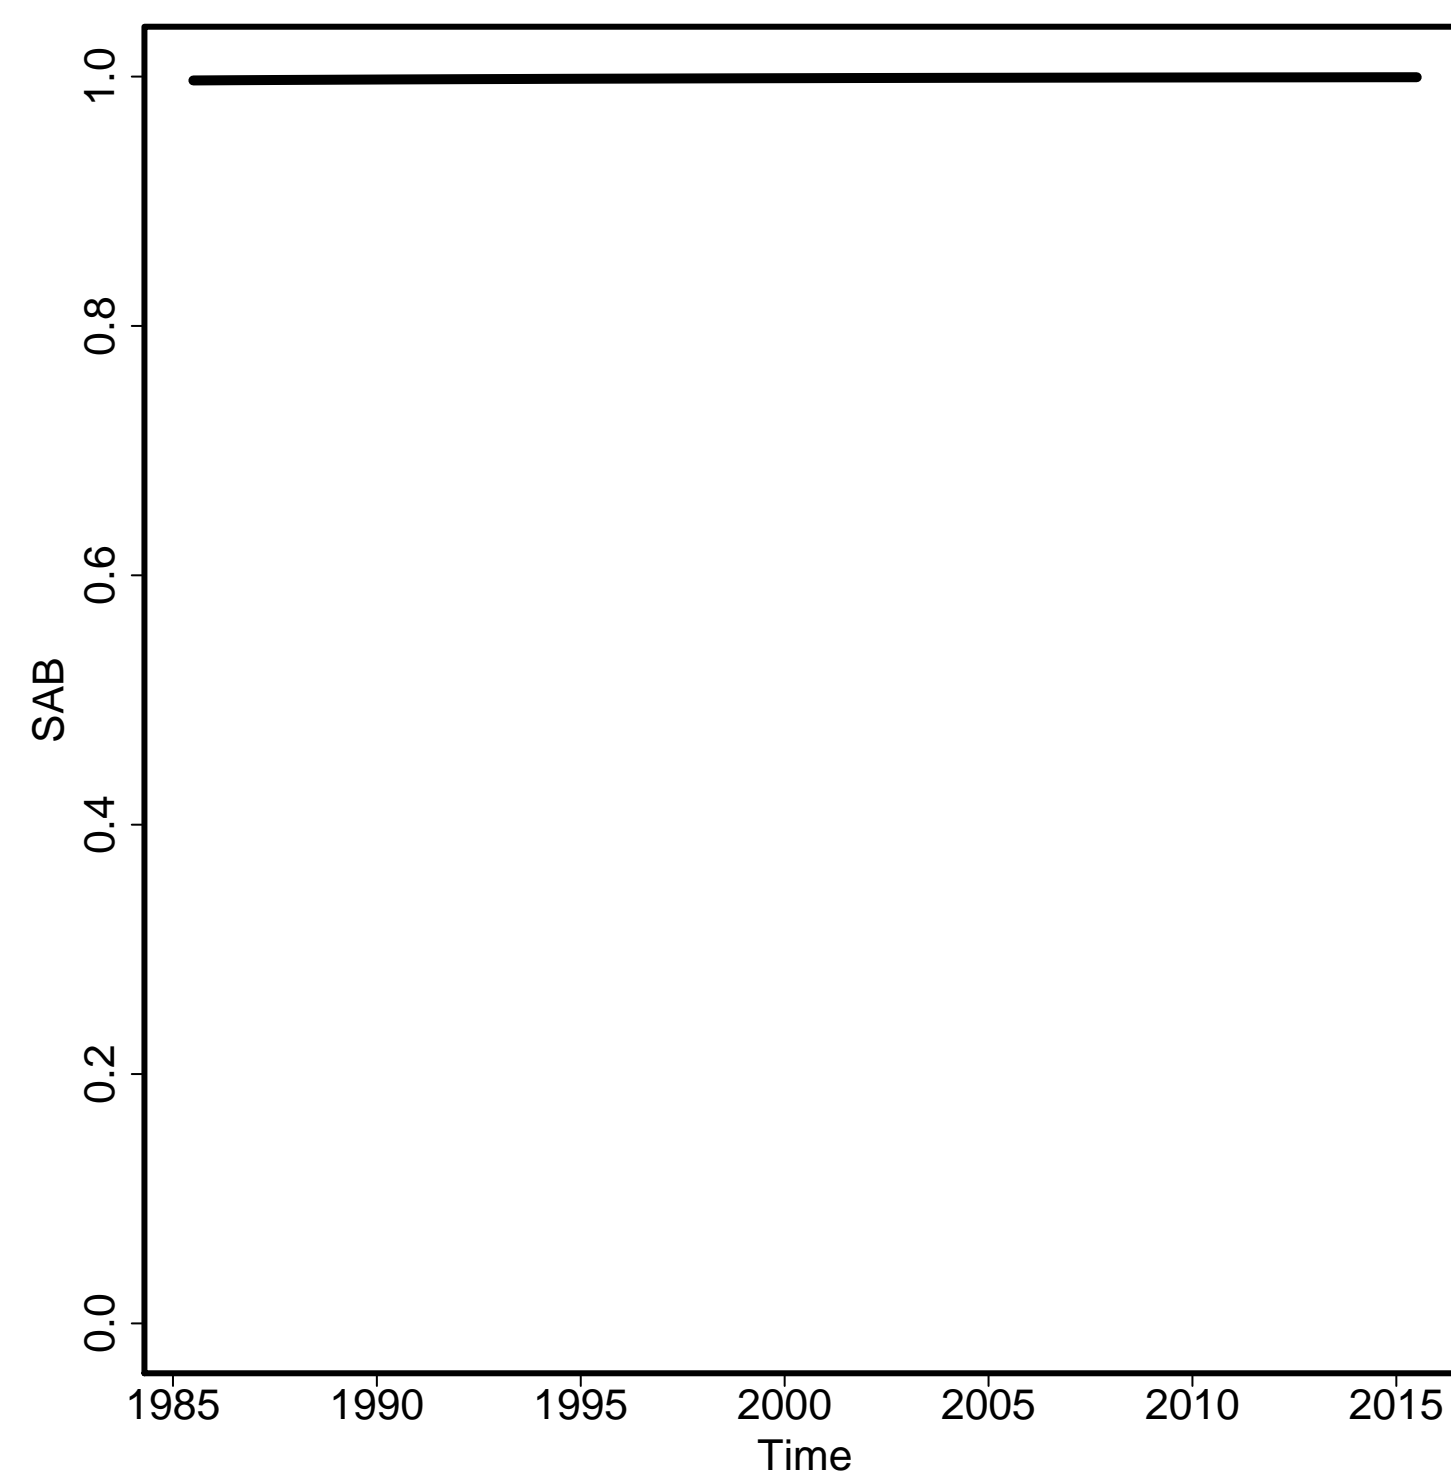

Envelope/Births

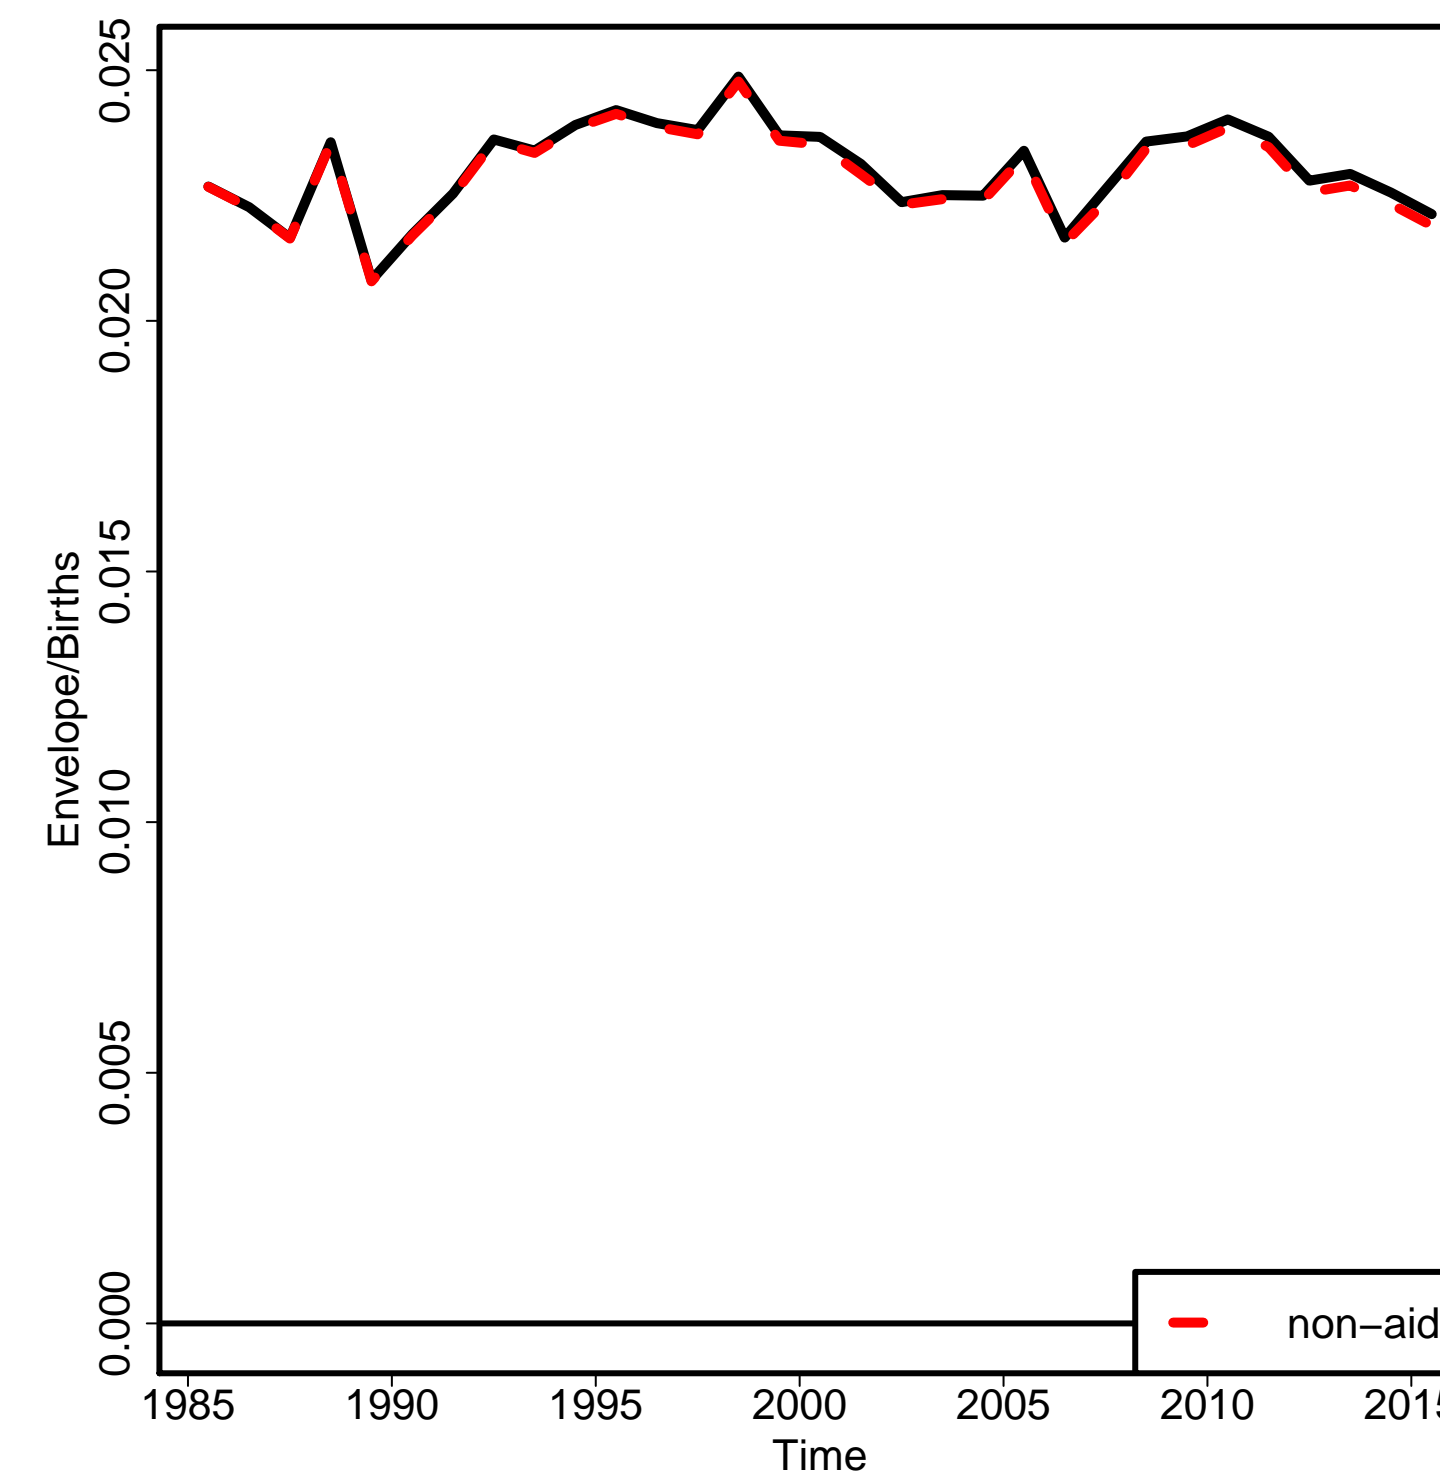

Non-aid MMR

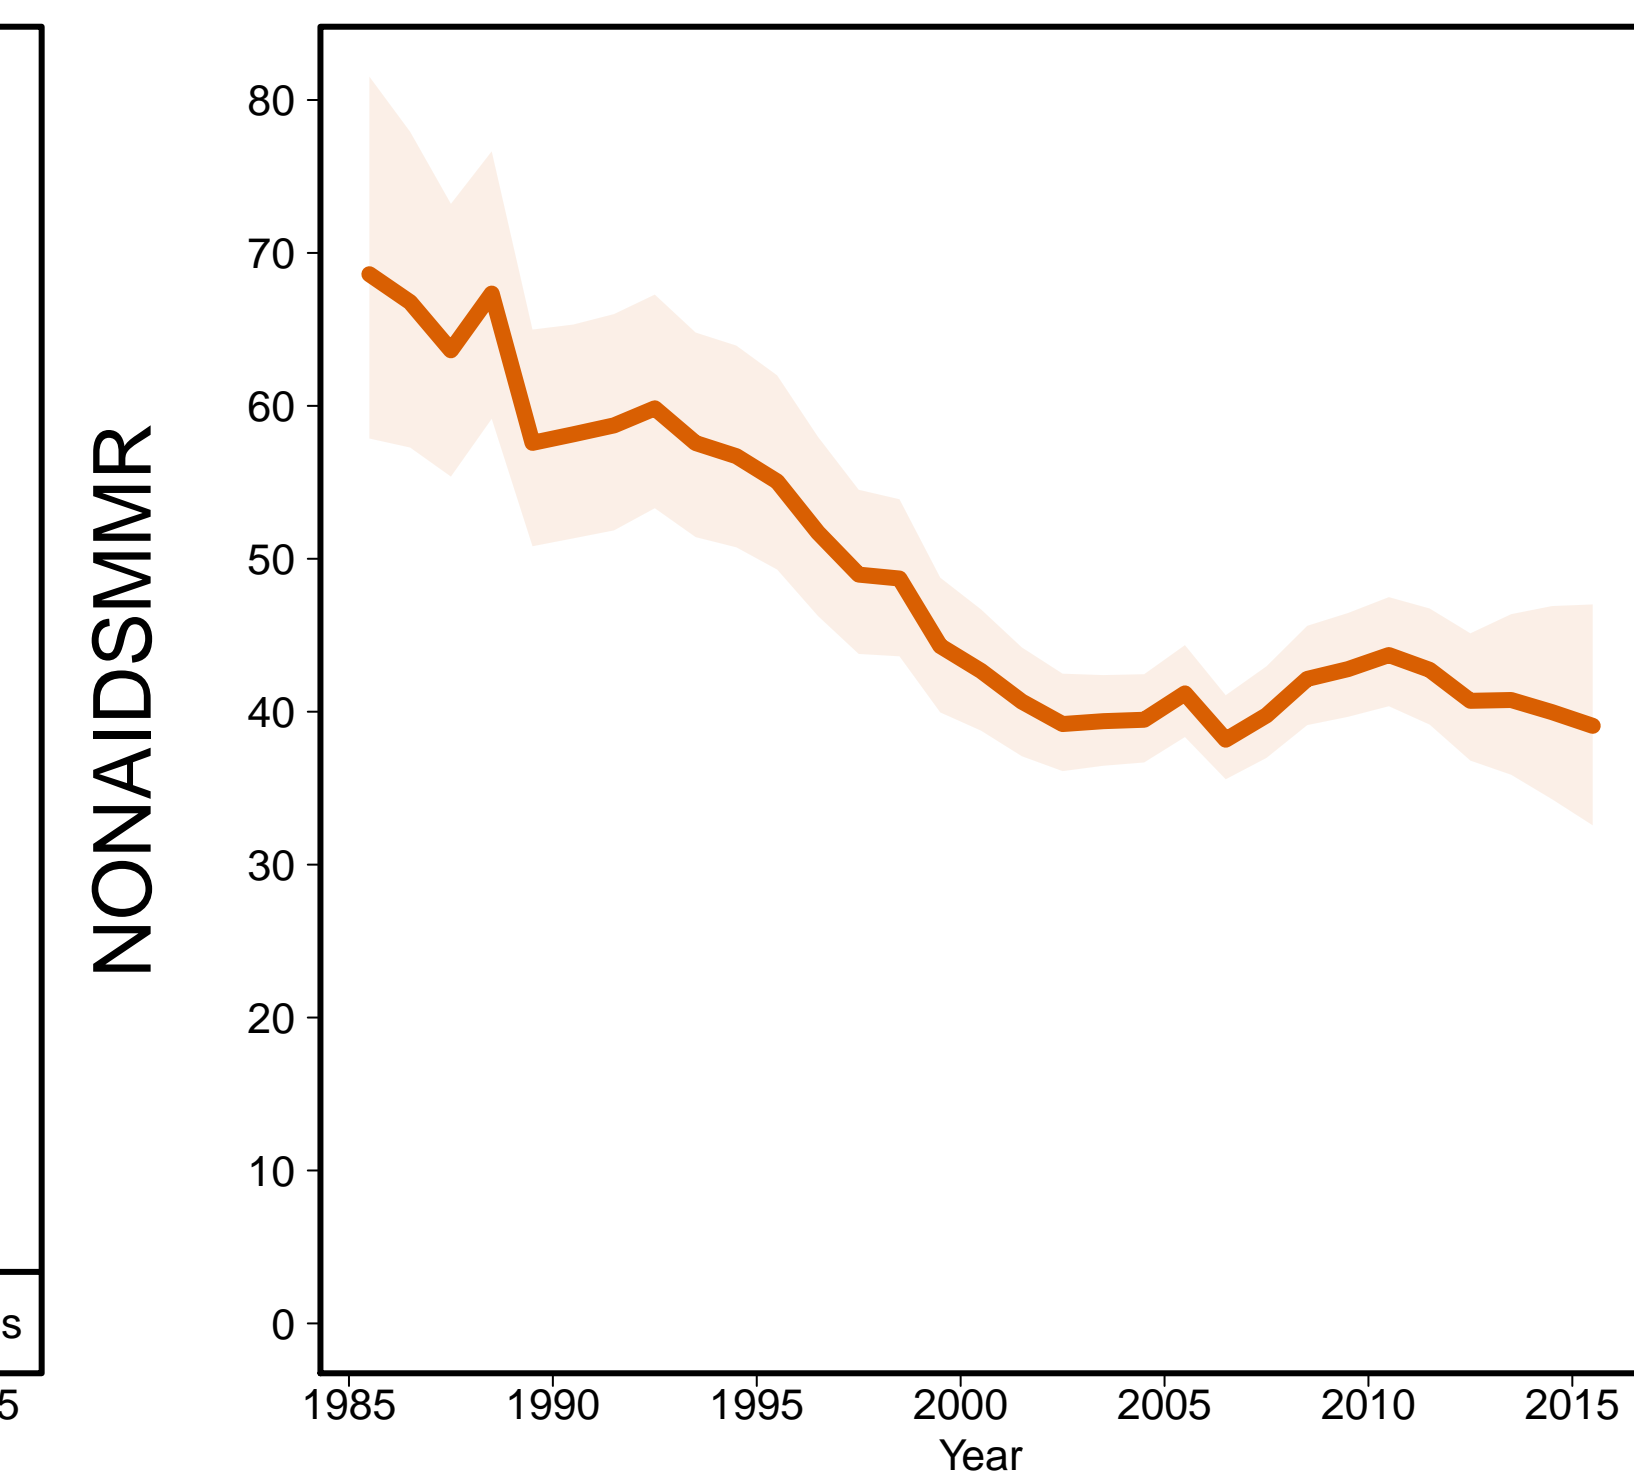

Aids MMR

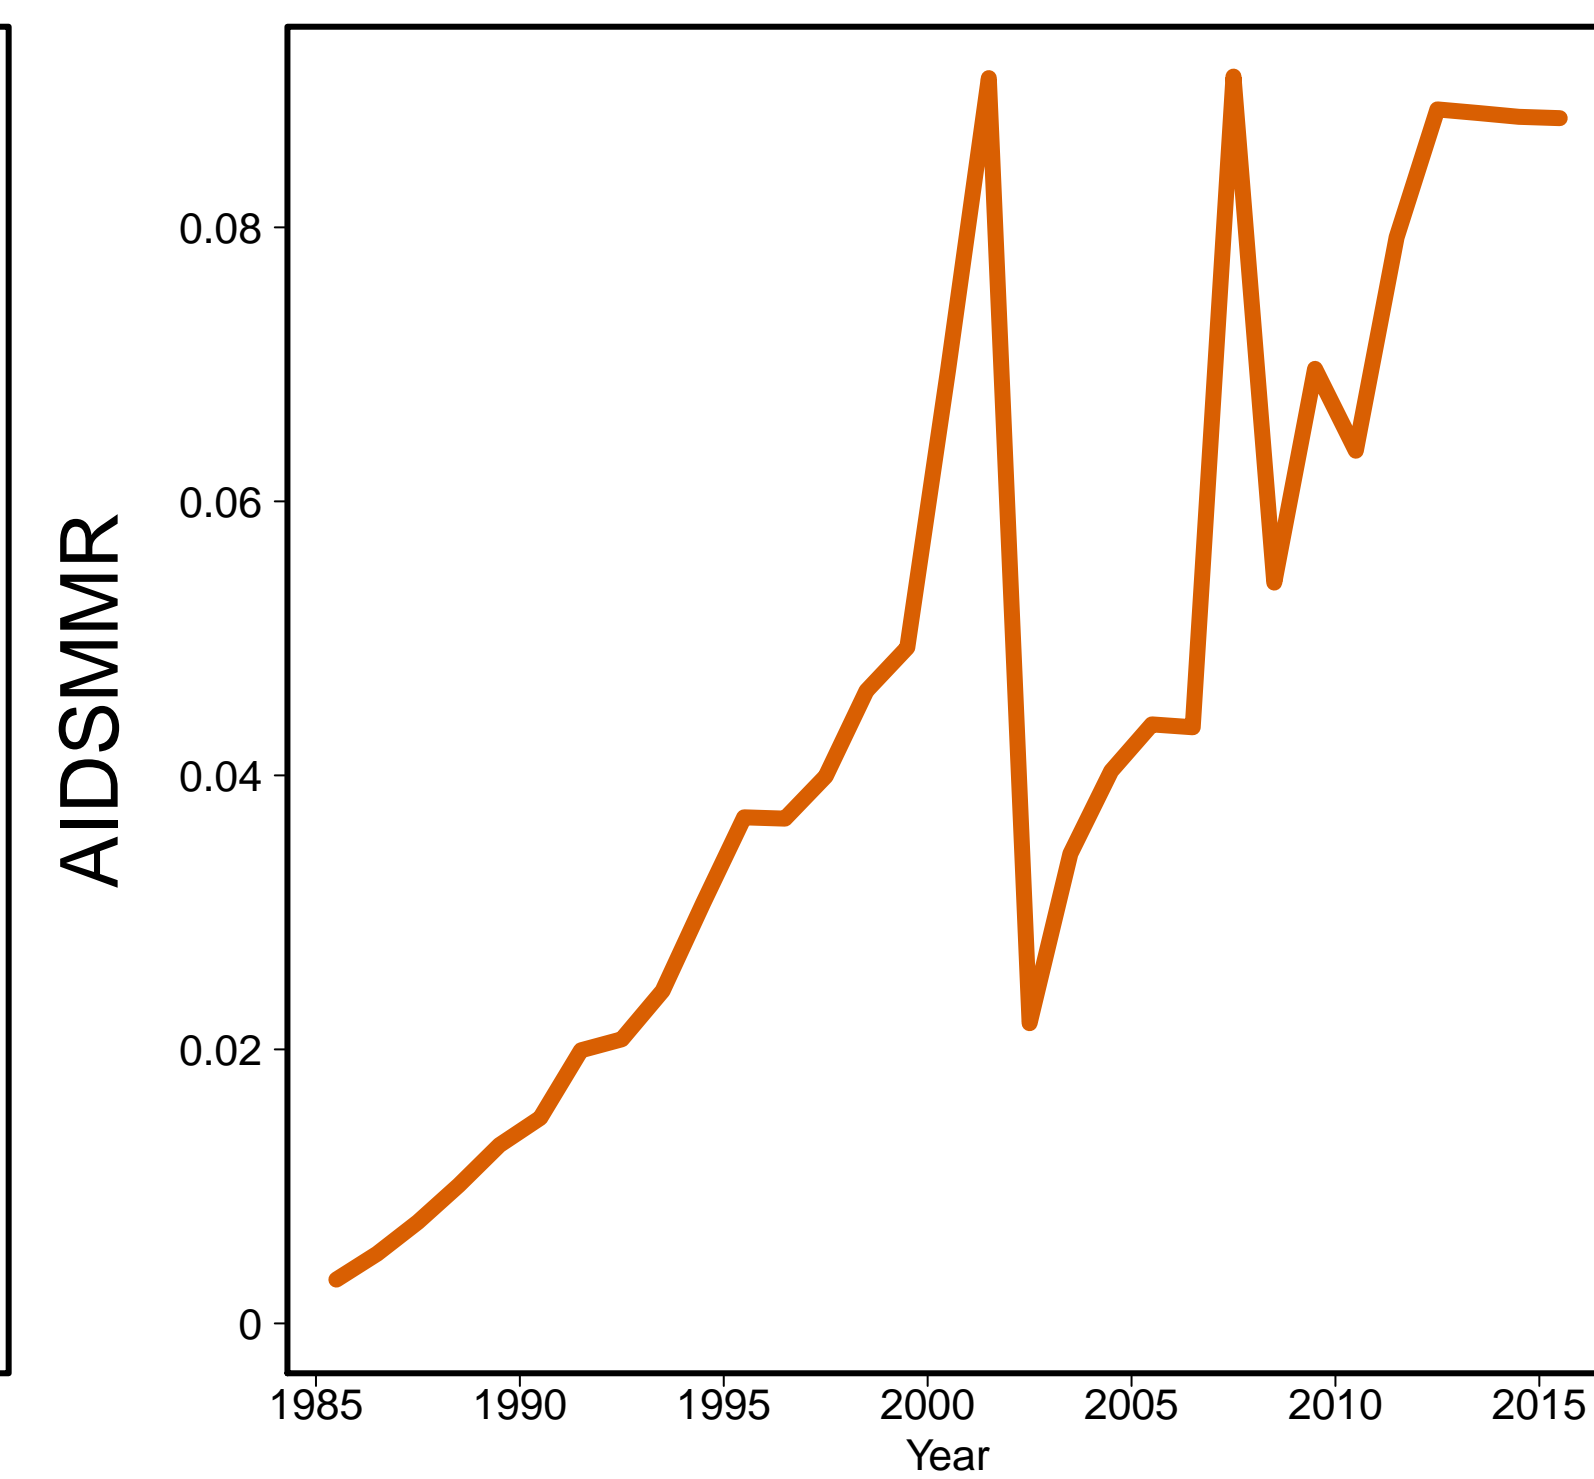

Cyprus [CYP]  
(Western Asia)

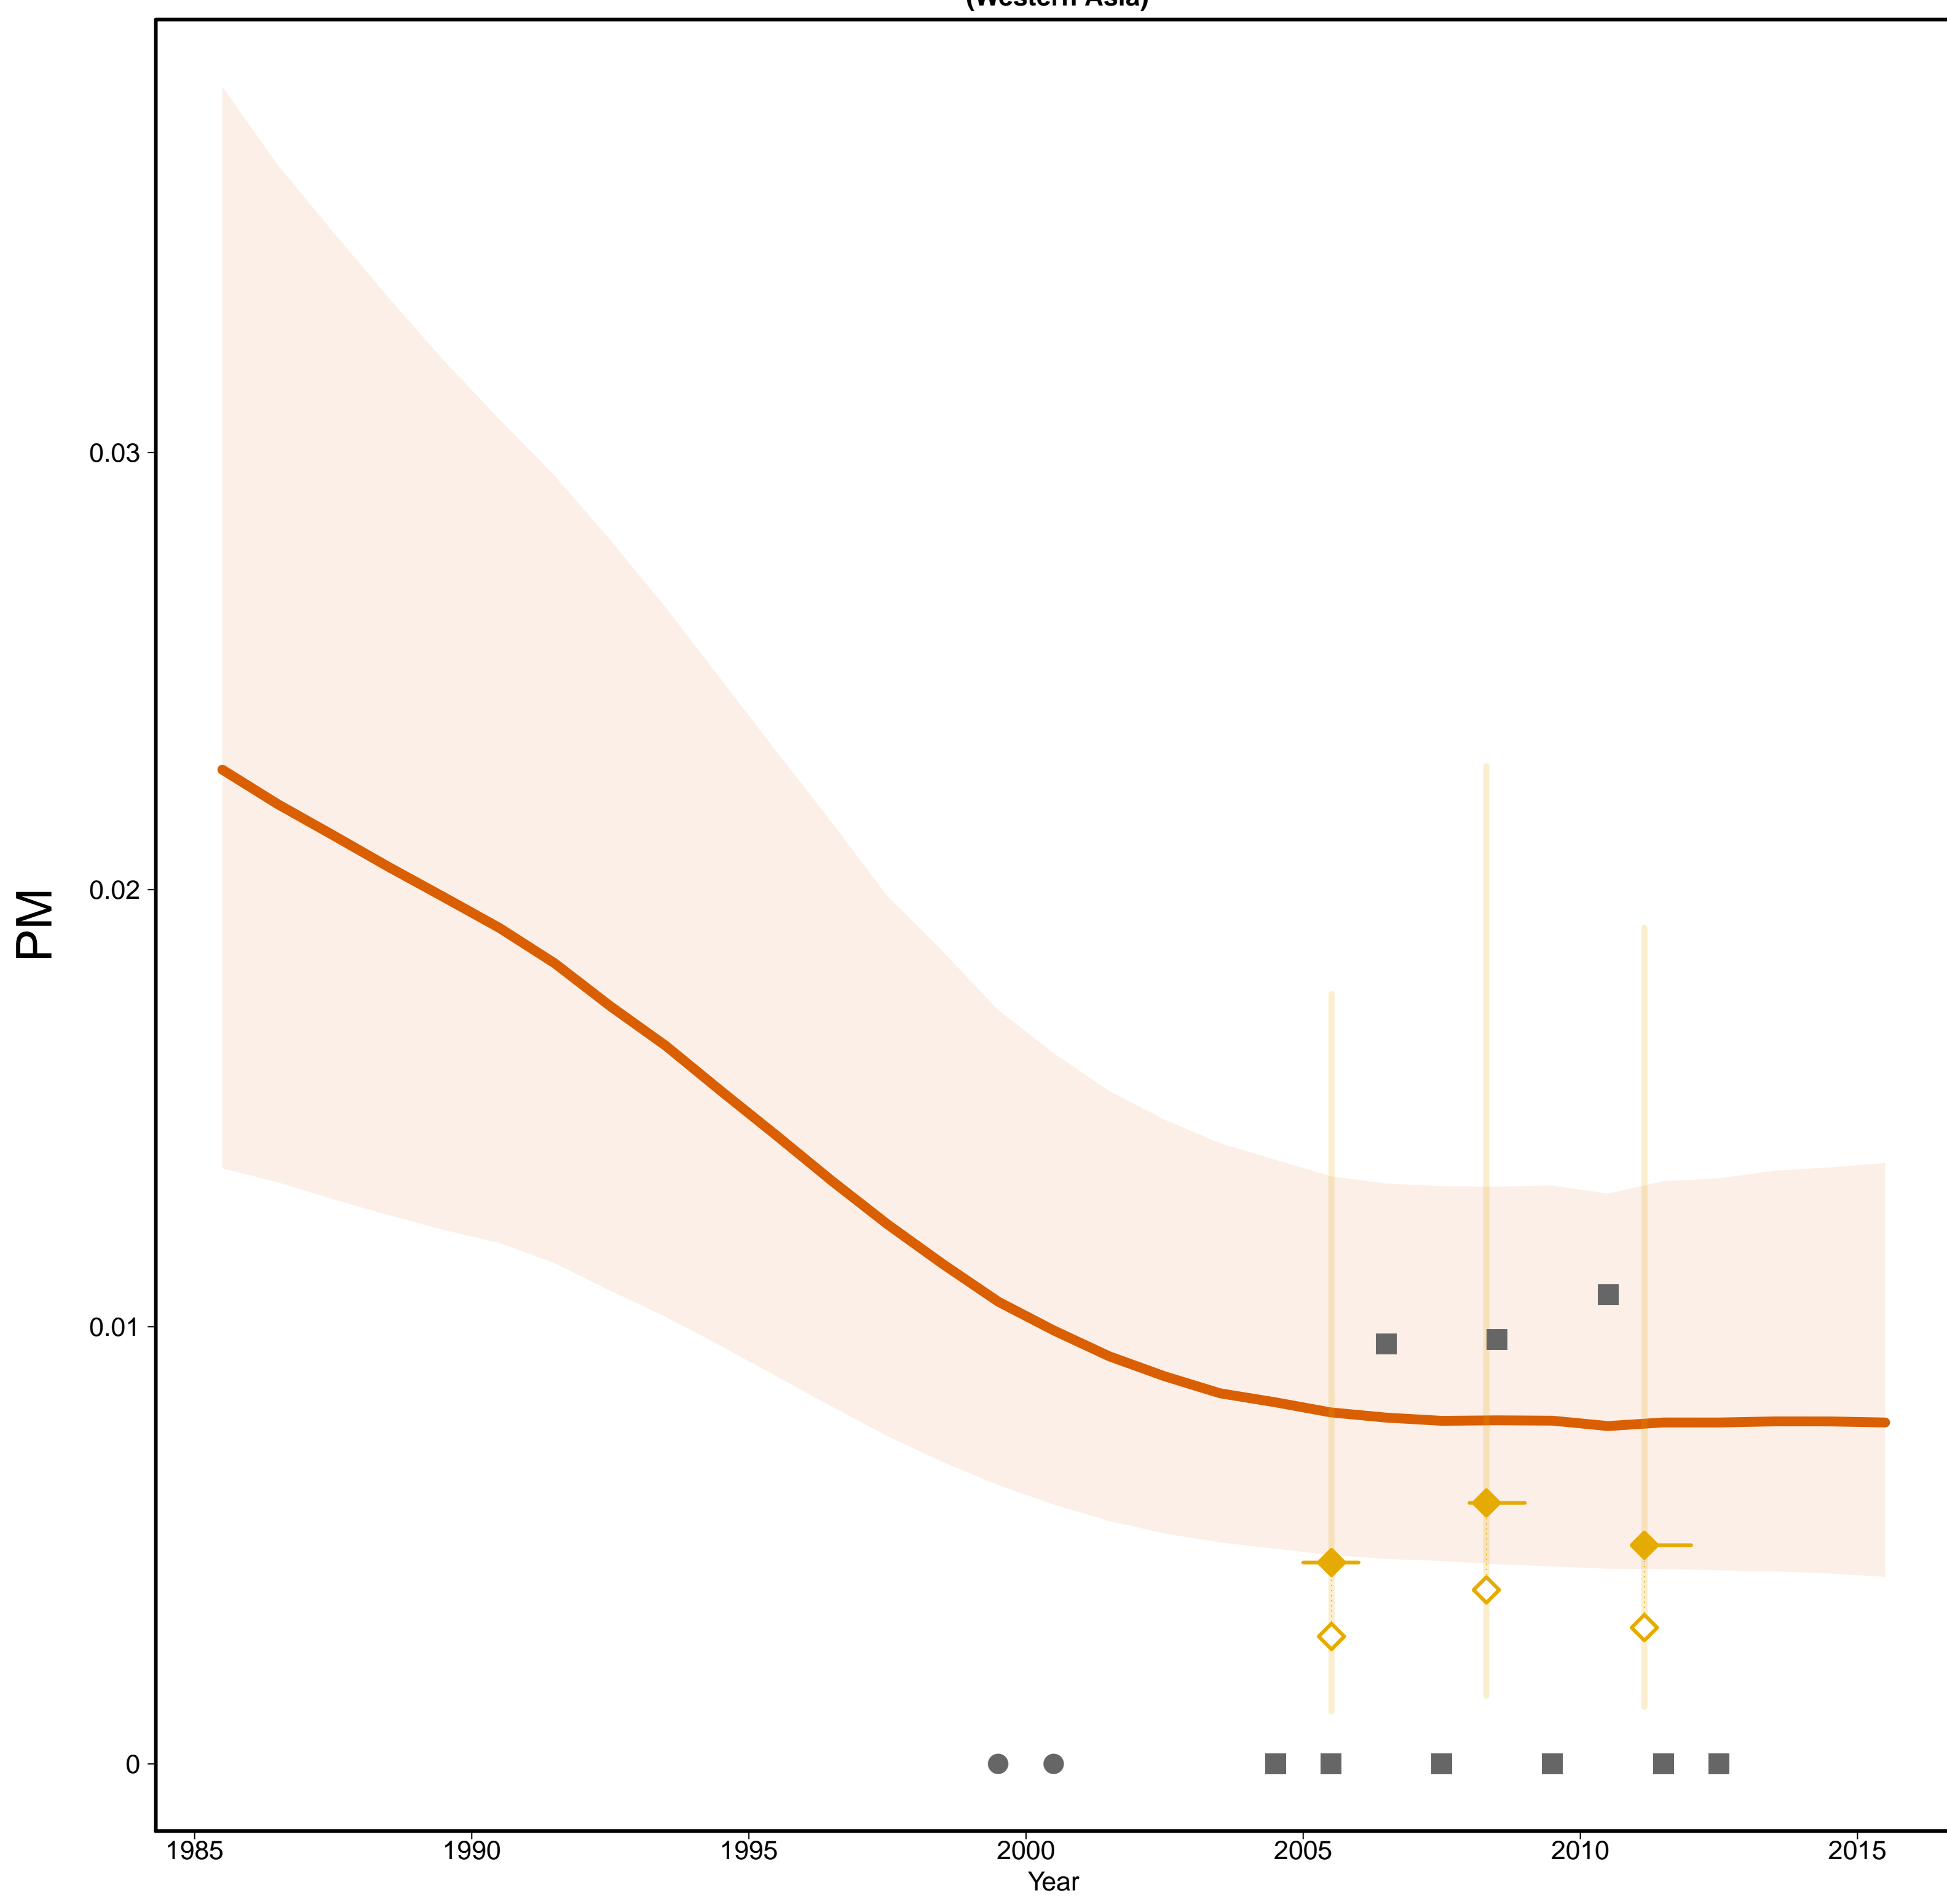

Cyprus [CYP]  
(Western Asia)

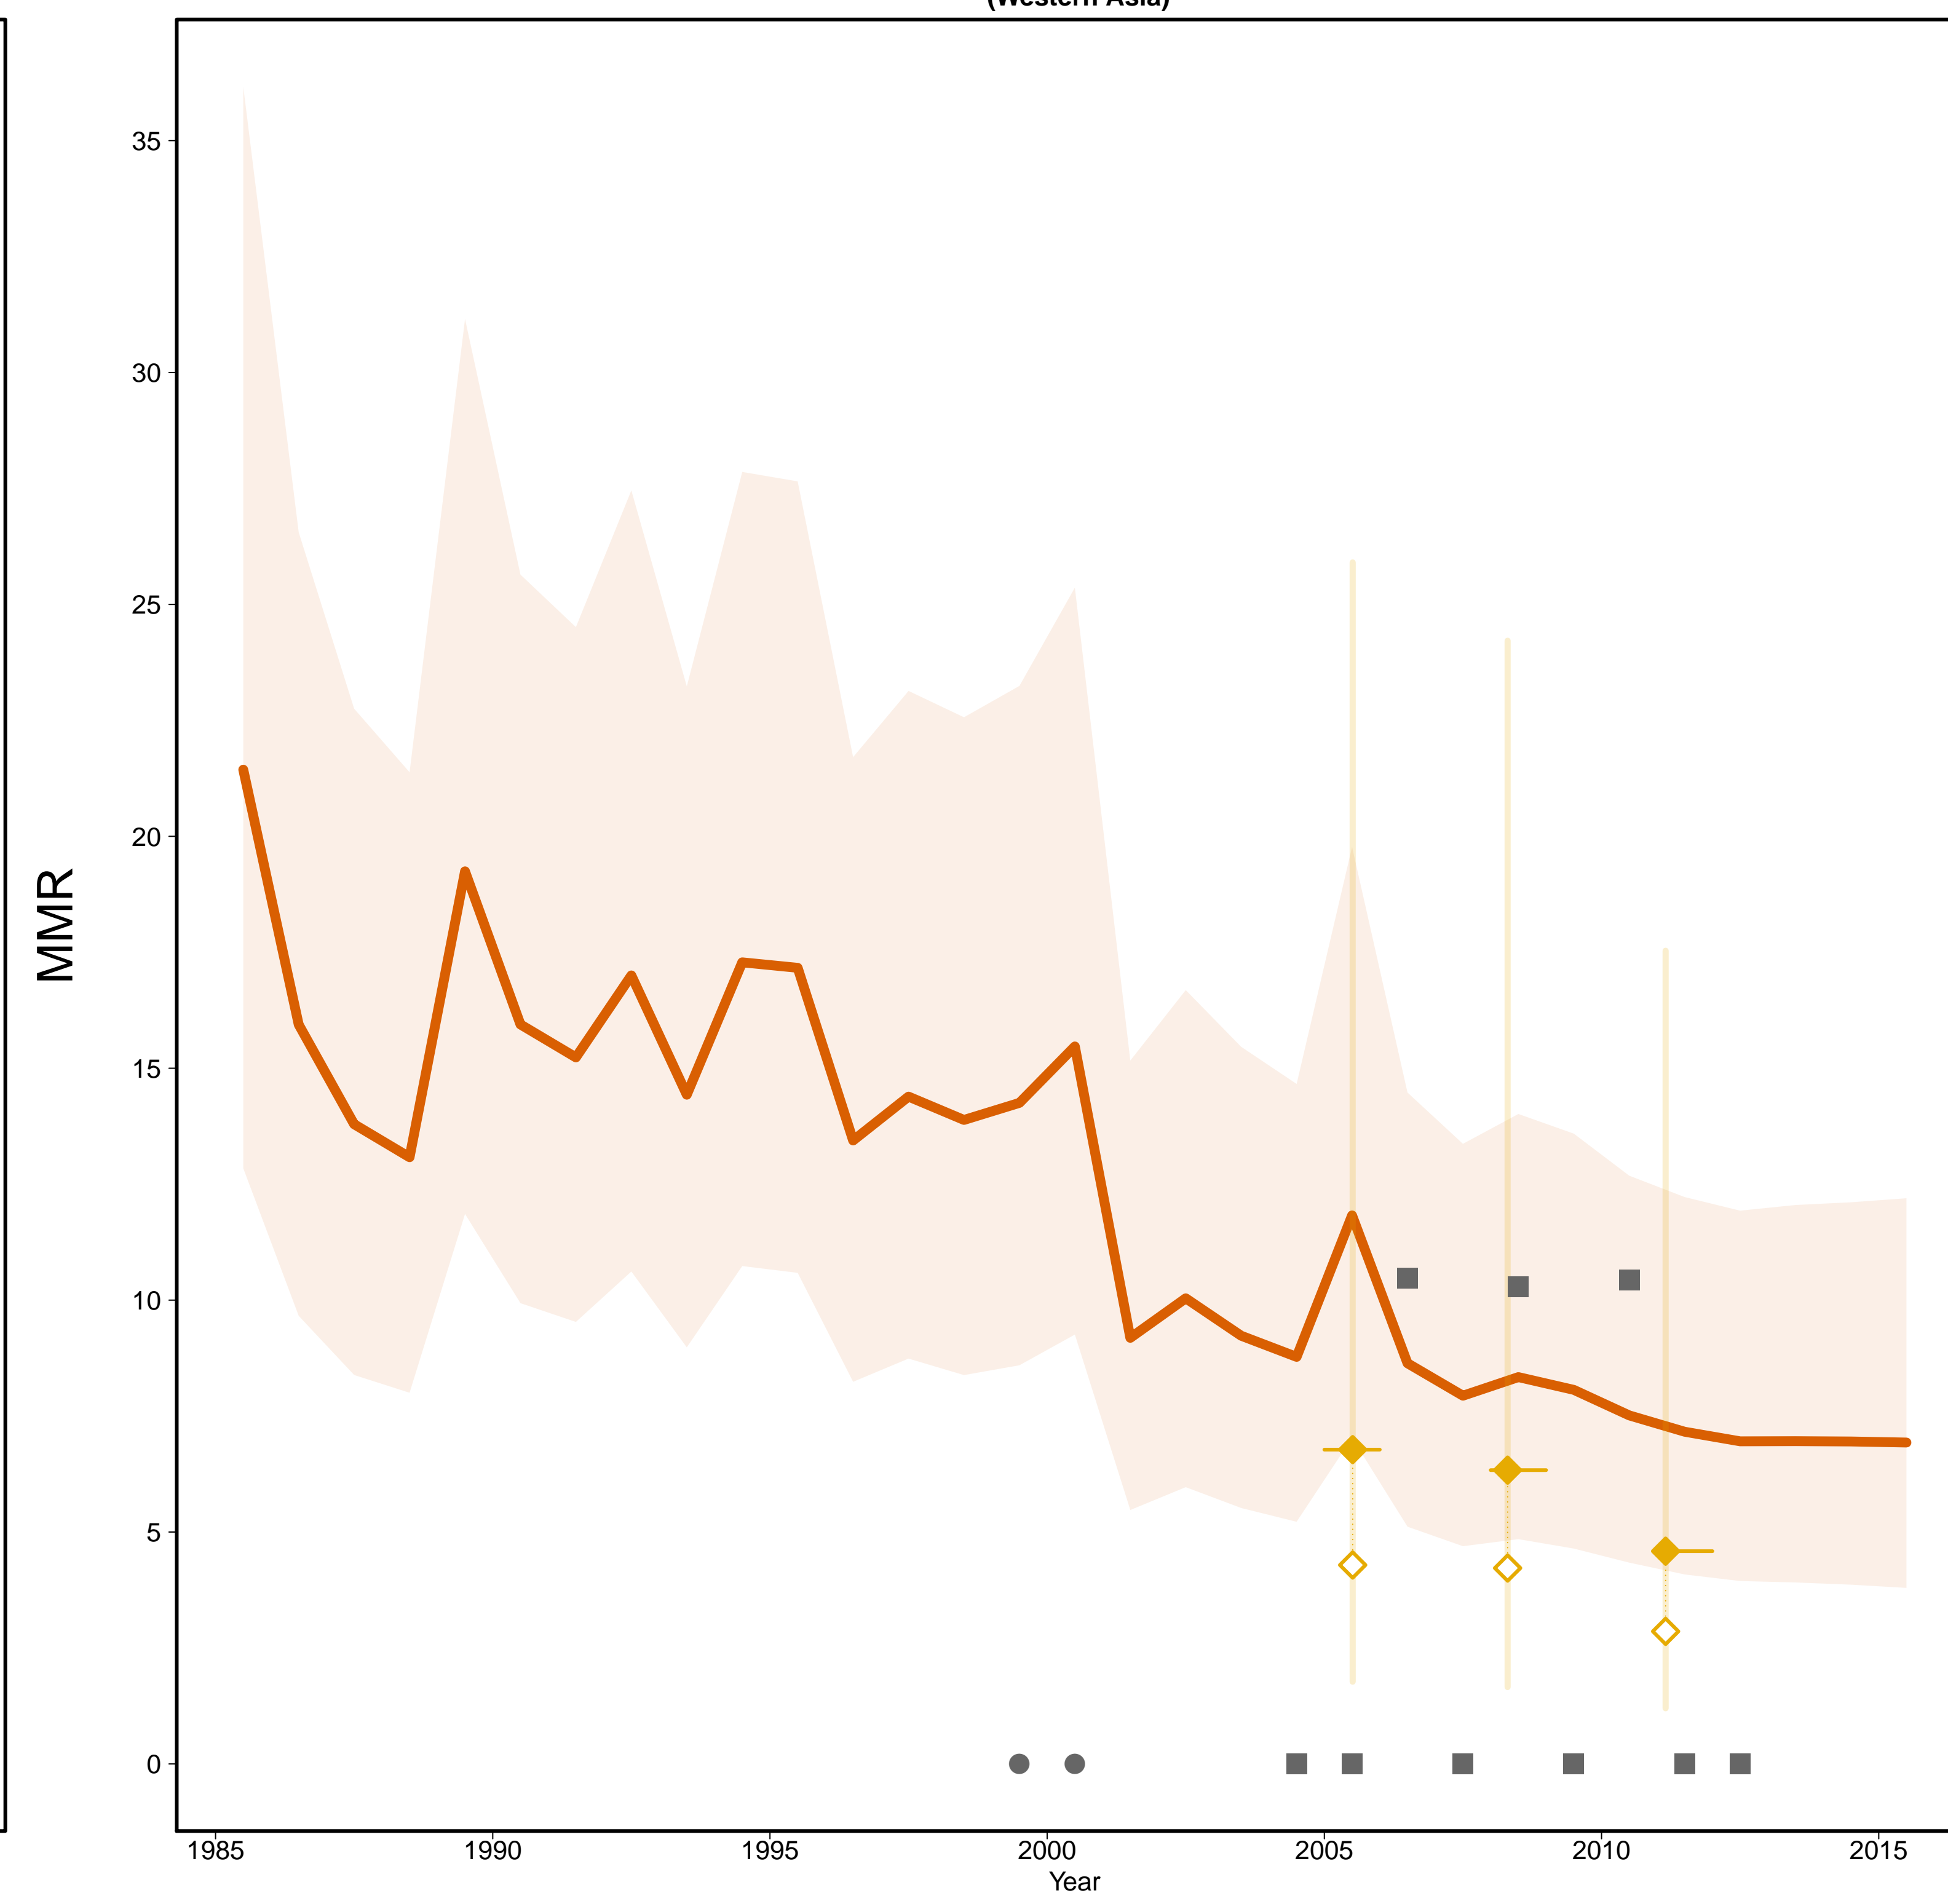

- Estimates –
- Mlate
- MMR Database 2015 –
- ◇ Observed Data
- ◆ Adjusted Data
- Data type –
- ◆ VR
- Reported VR before recal.  
(related to 0 obs. mat. death)
- Excluded VR data  
(data quality issues)

Gross Domestic Product

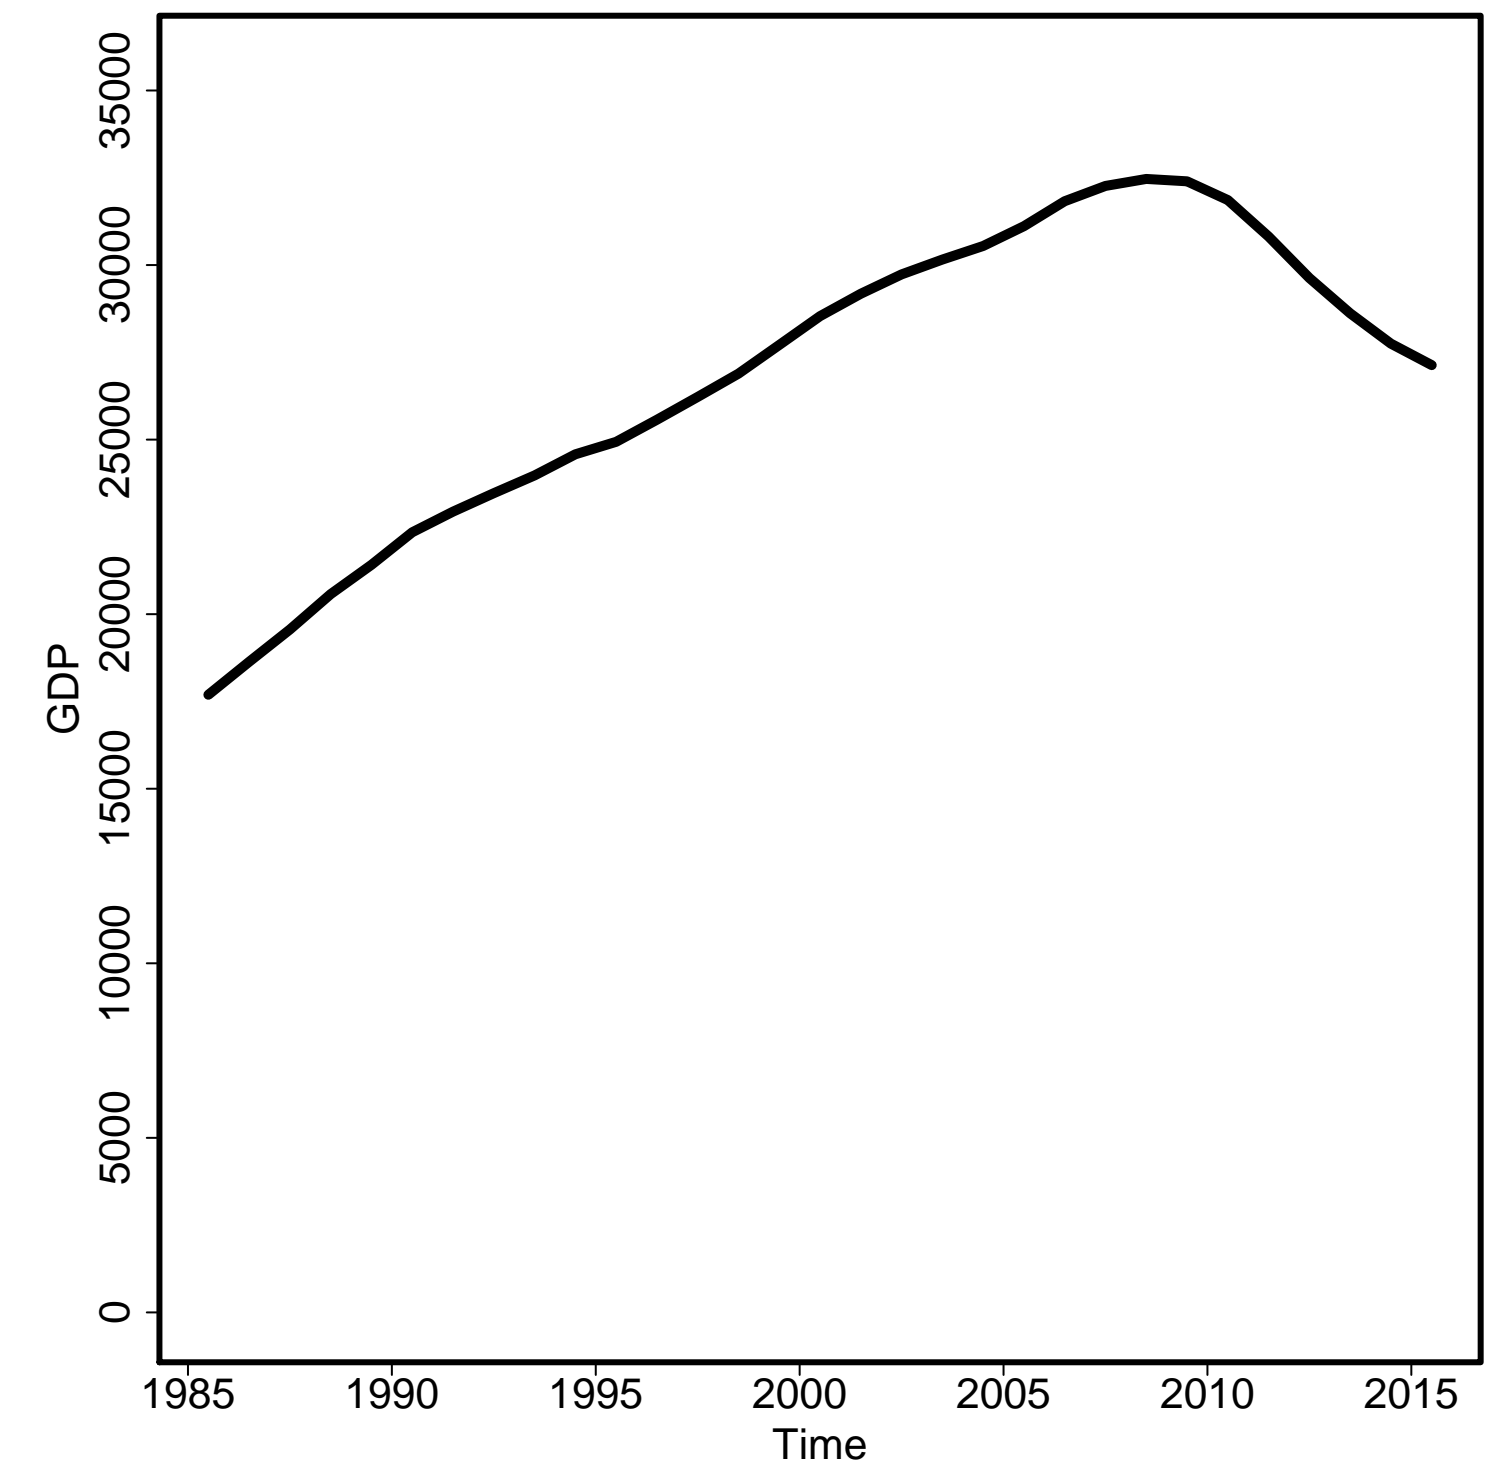

General Fertility Rate

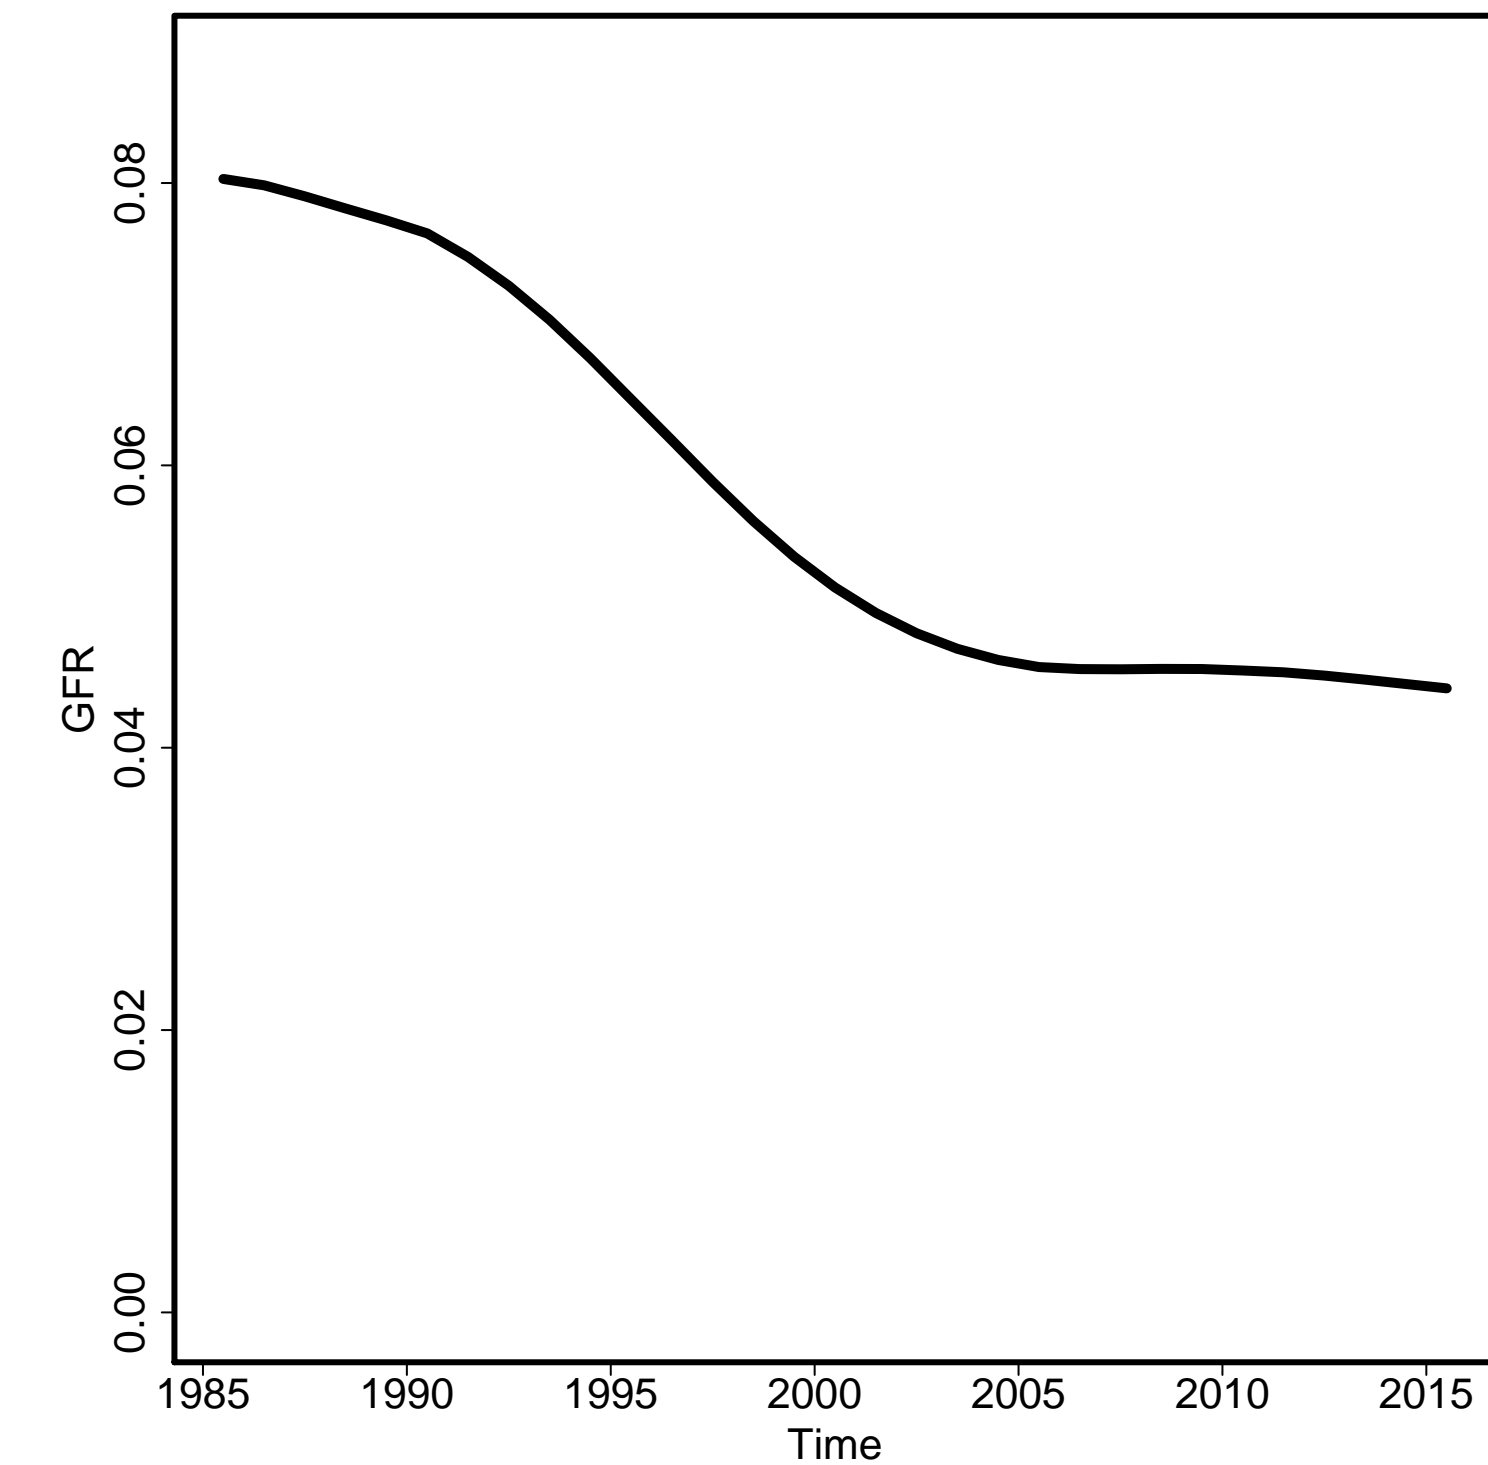

Skilled Attendance to Birth

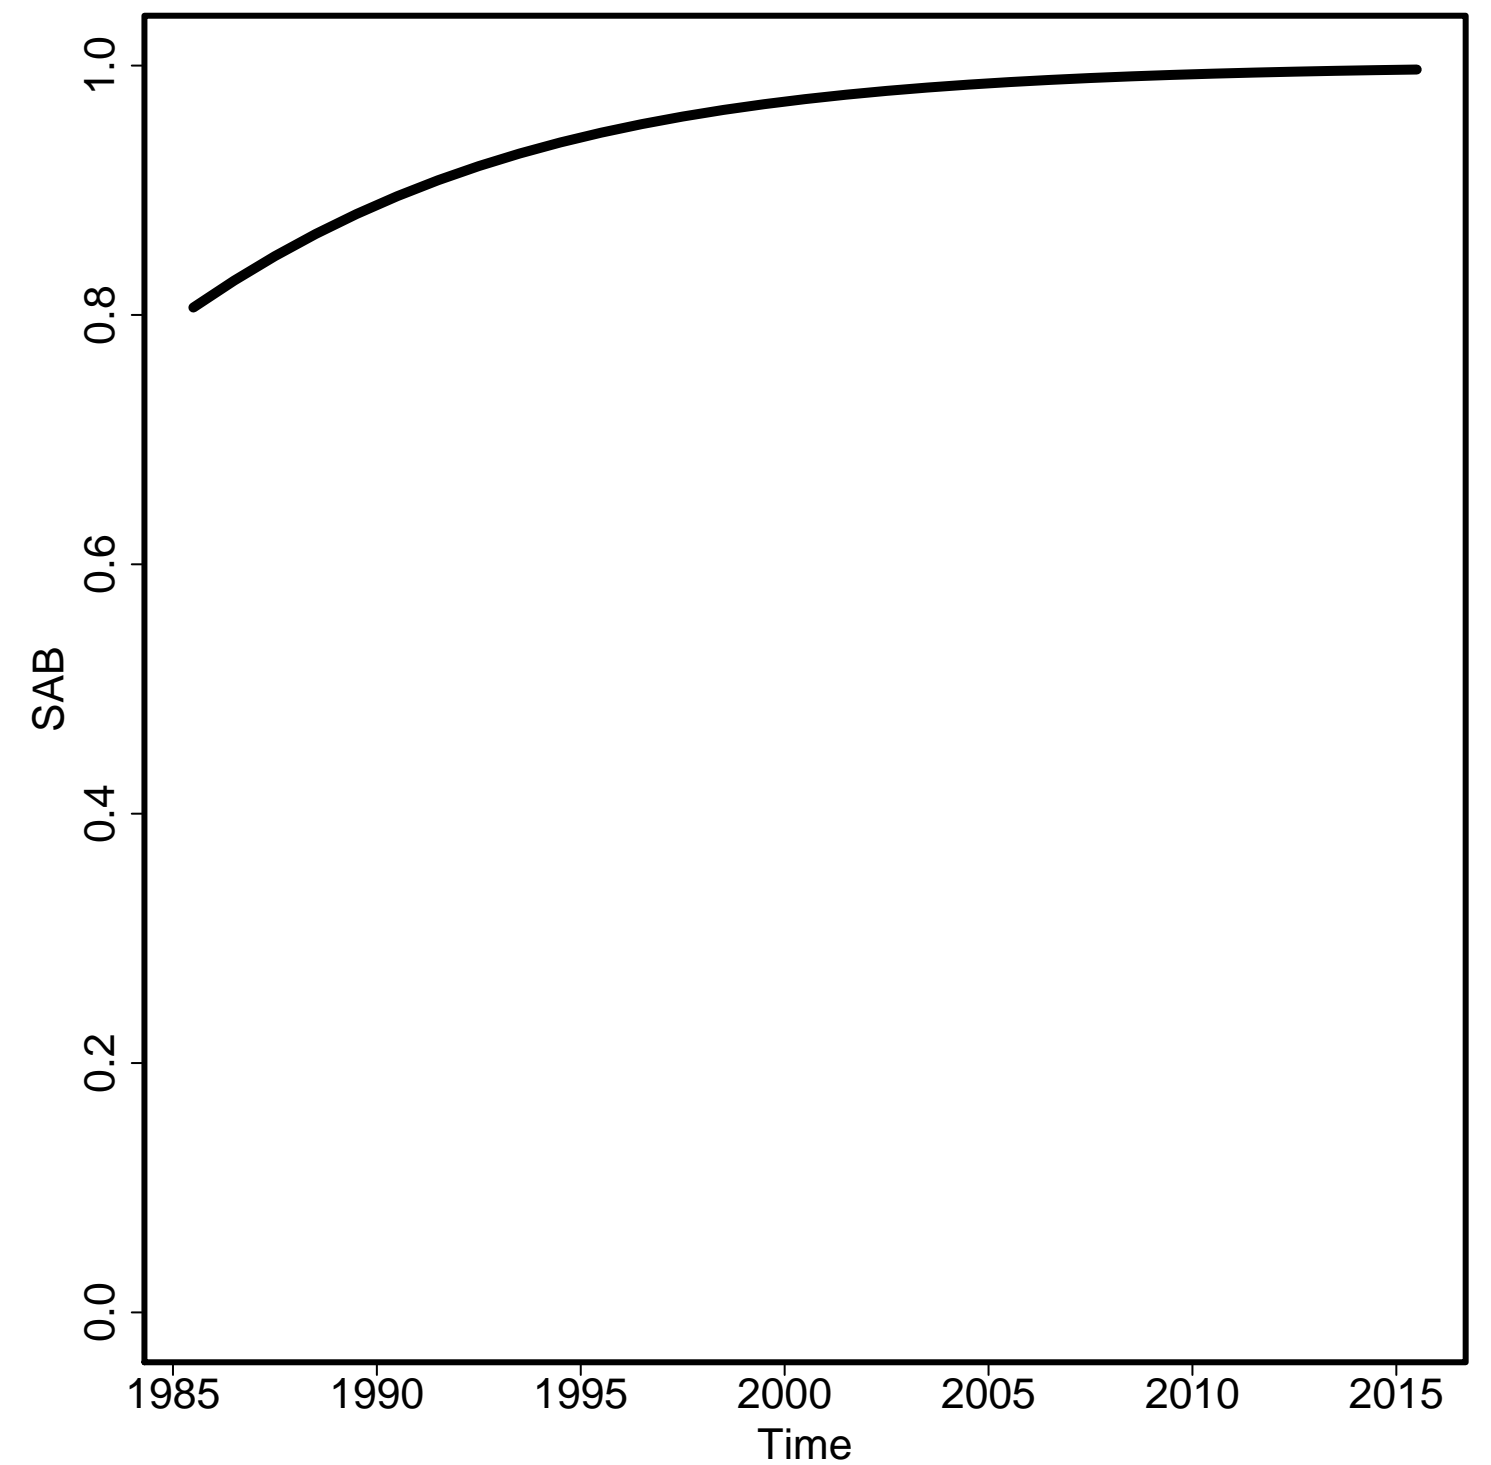

Envelope/Births

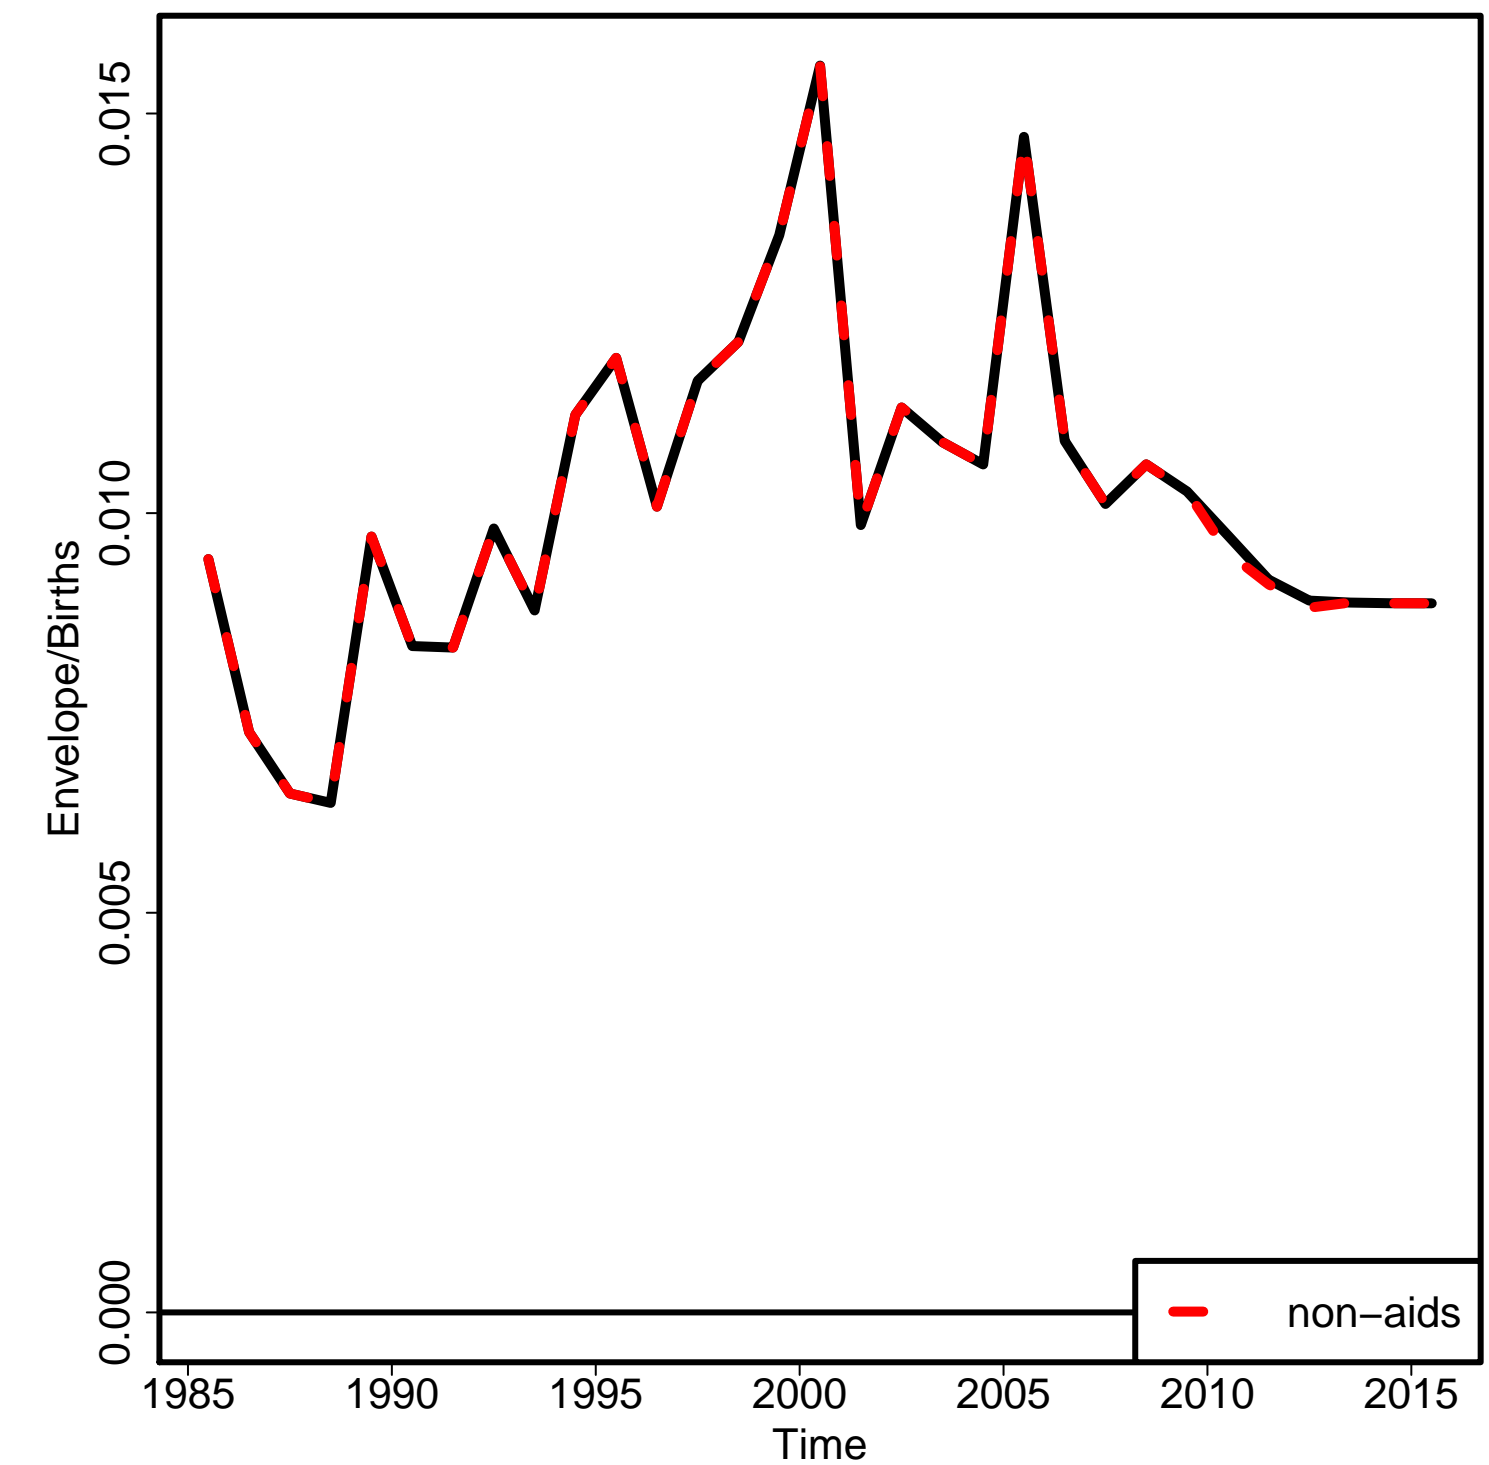

Non-aids MMR

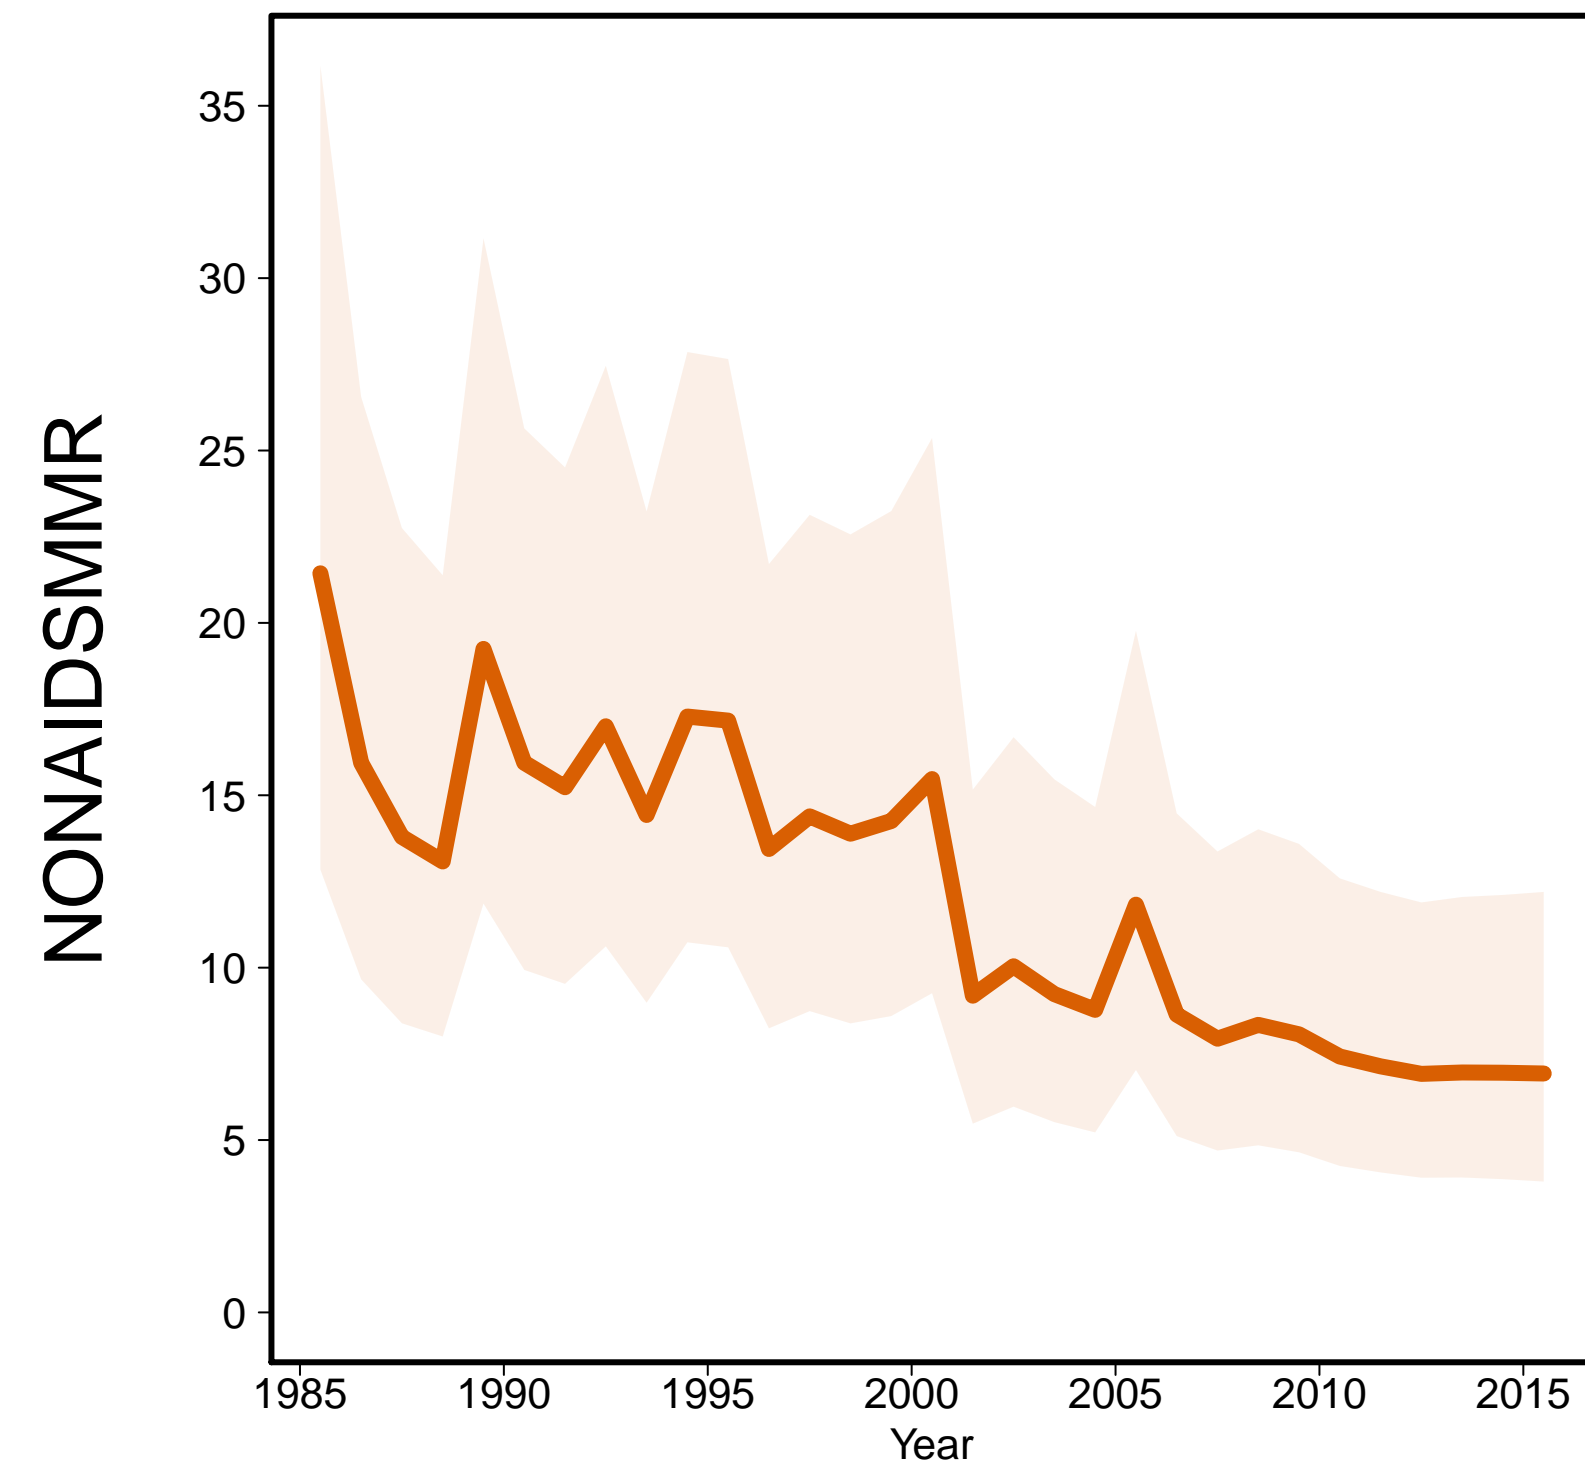

Aids MMR

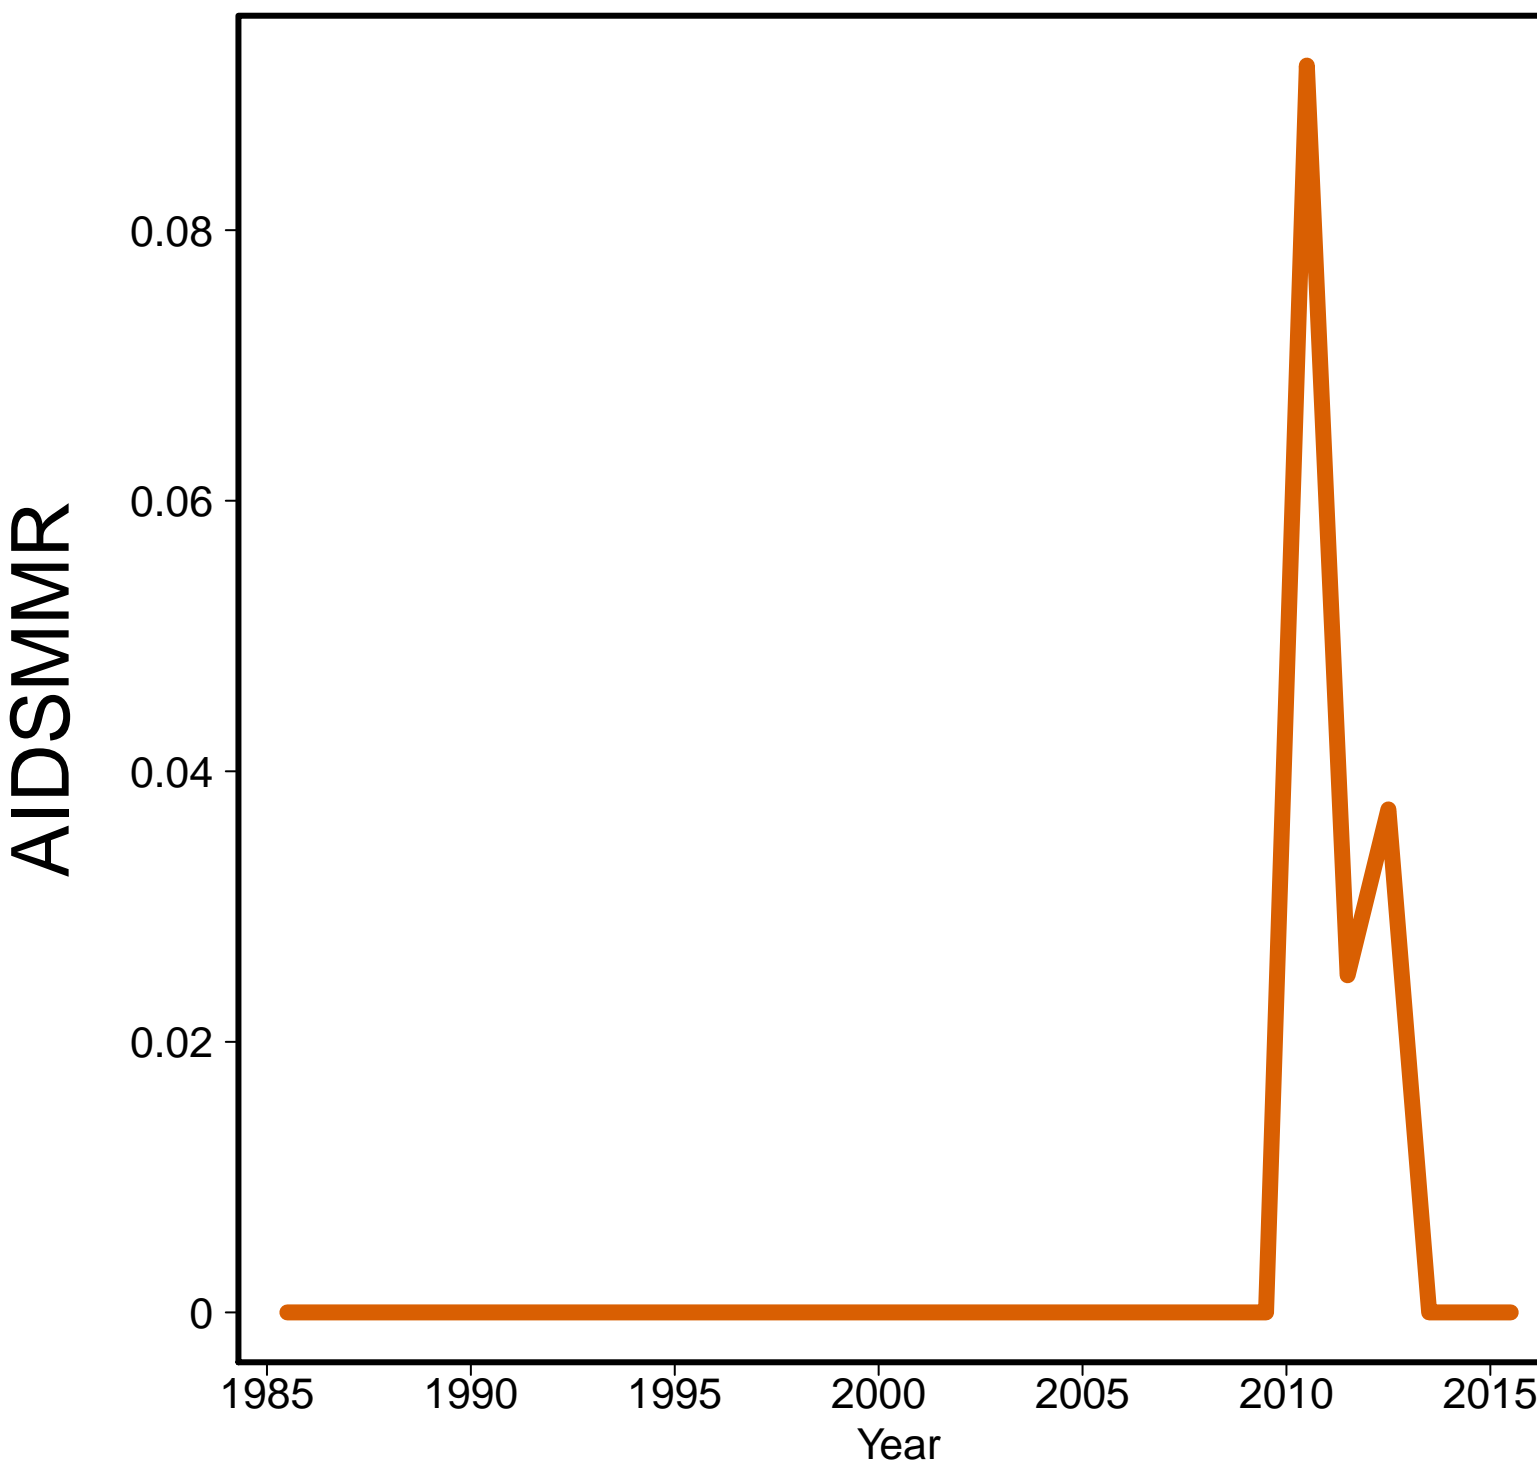

Czech Republic [CZE]  
(Developed regions)

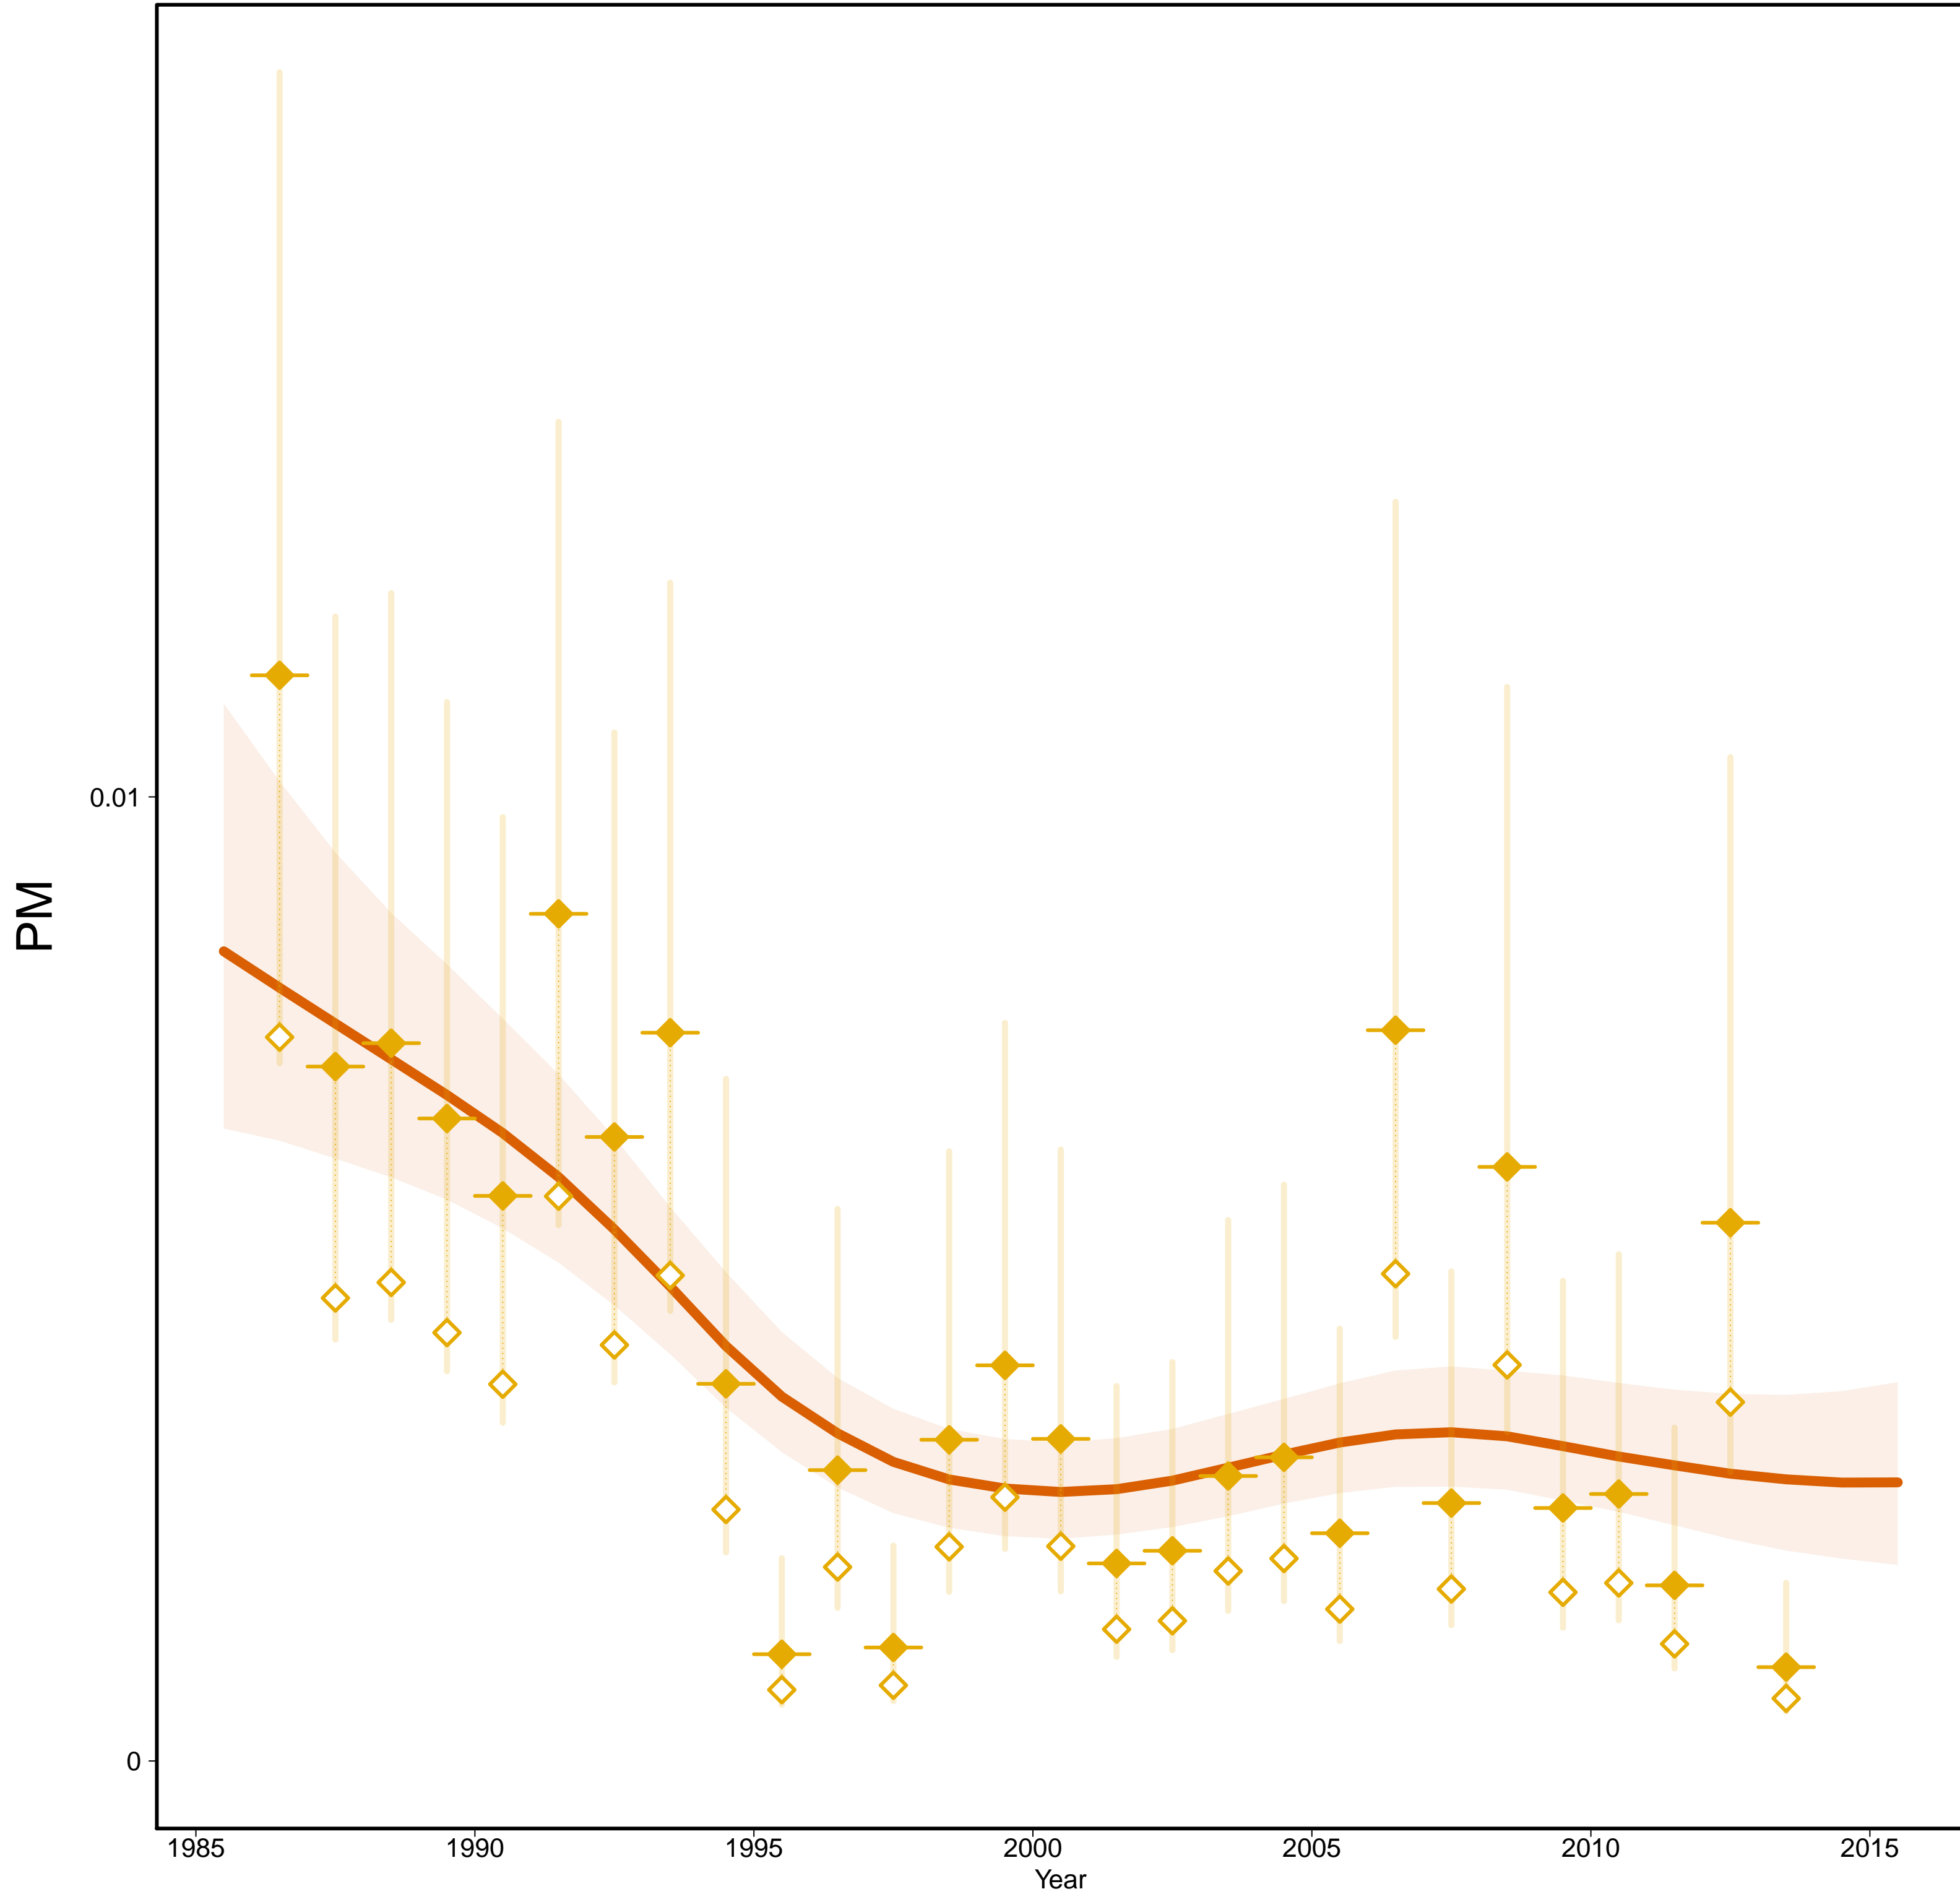

Czech Republic [CZE]  
(Developed regions)

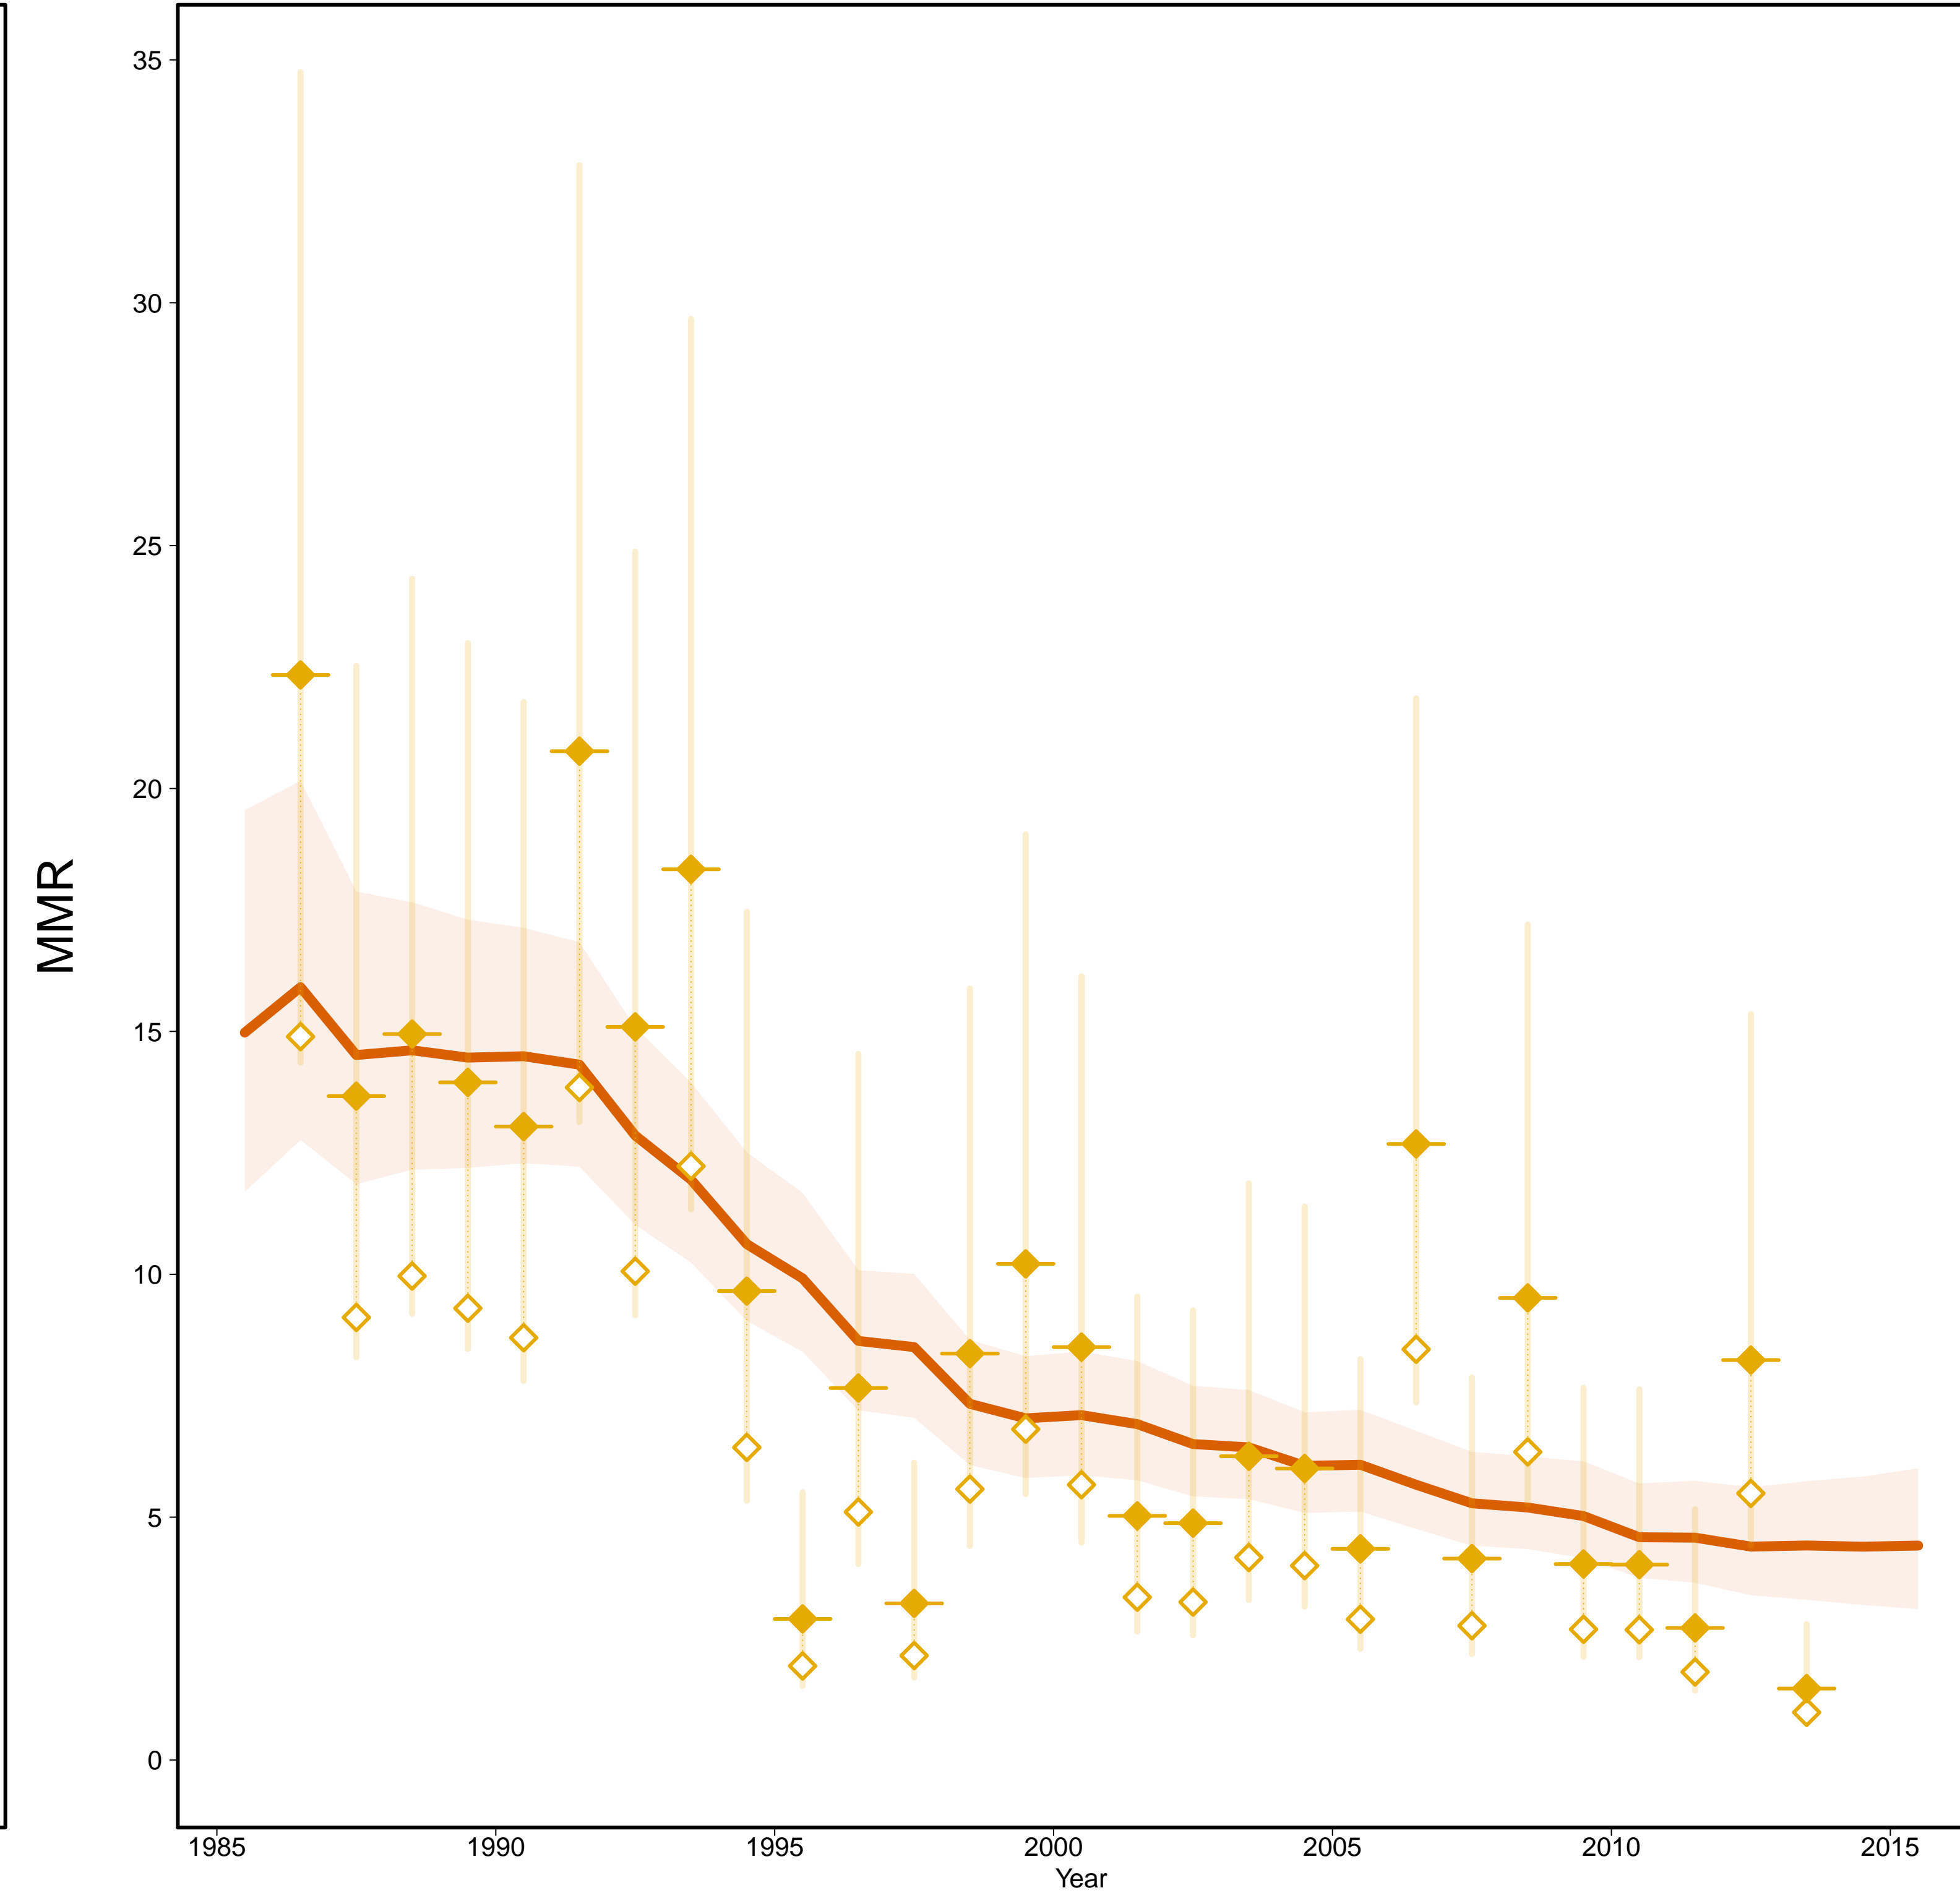

- Estimates —
- MMR Database 2015 —
- ◇ Observed Data
- ◆ Adjusted Data
- Data type —
- ◆ VR

Gross Domestic Product

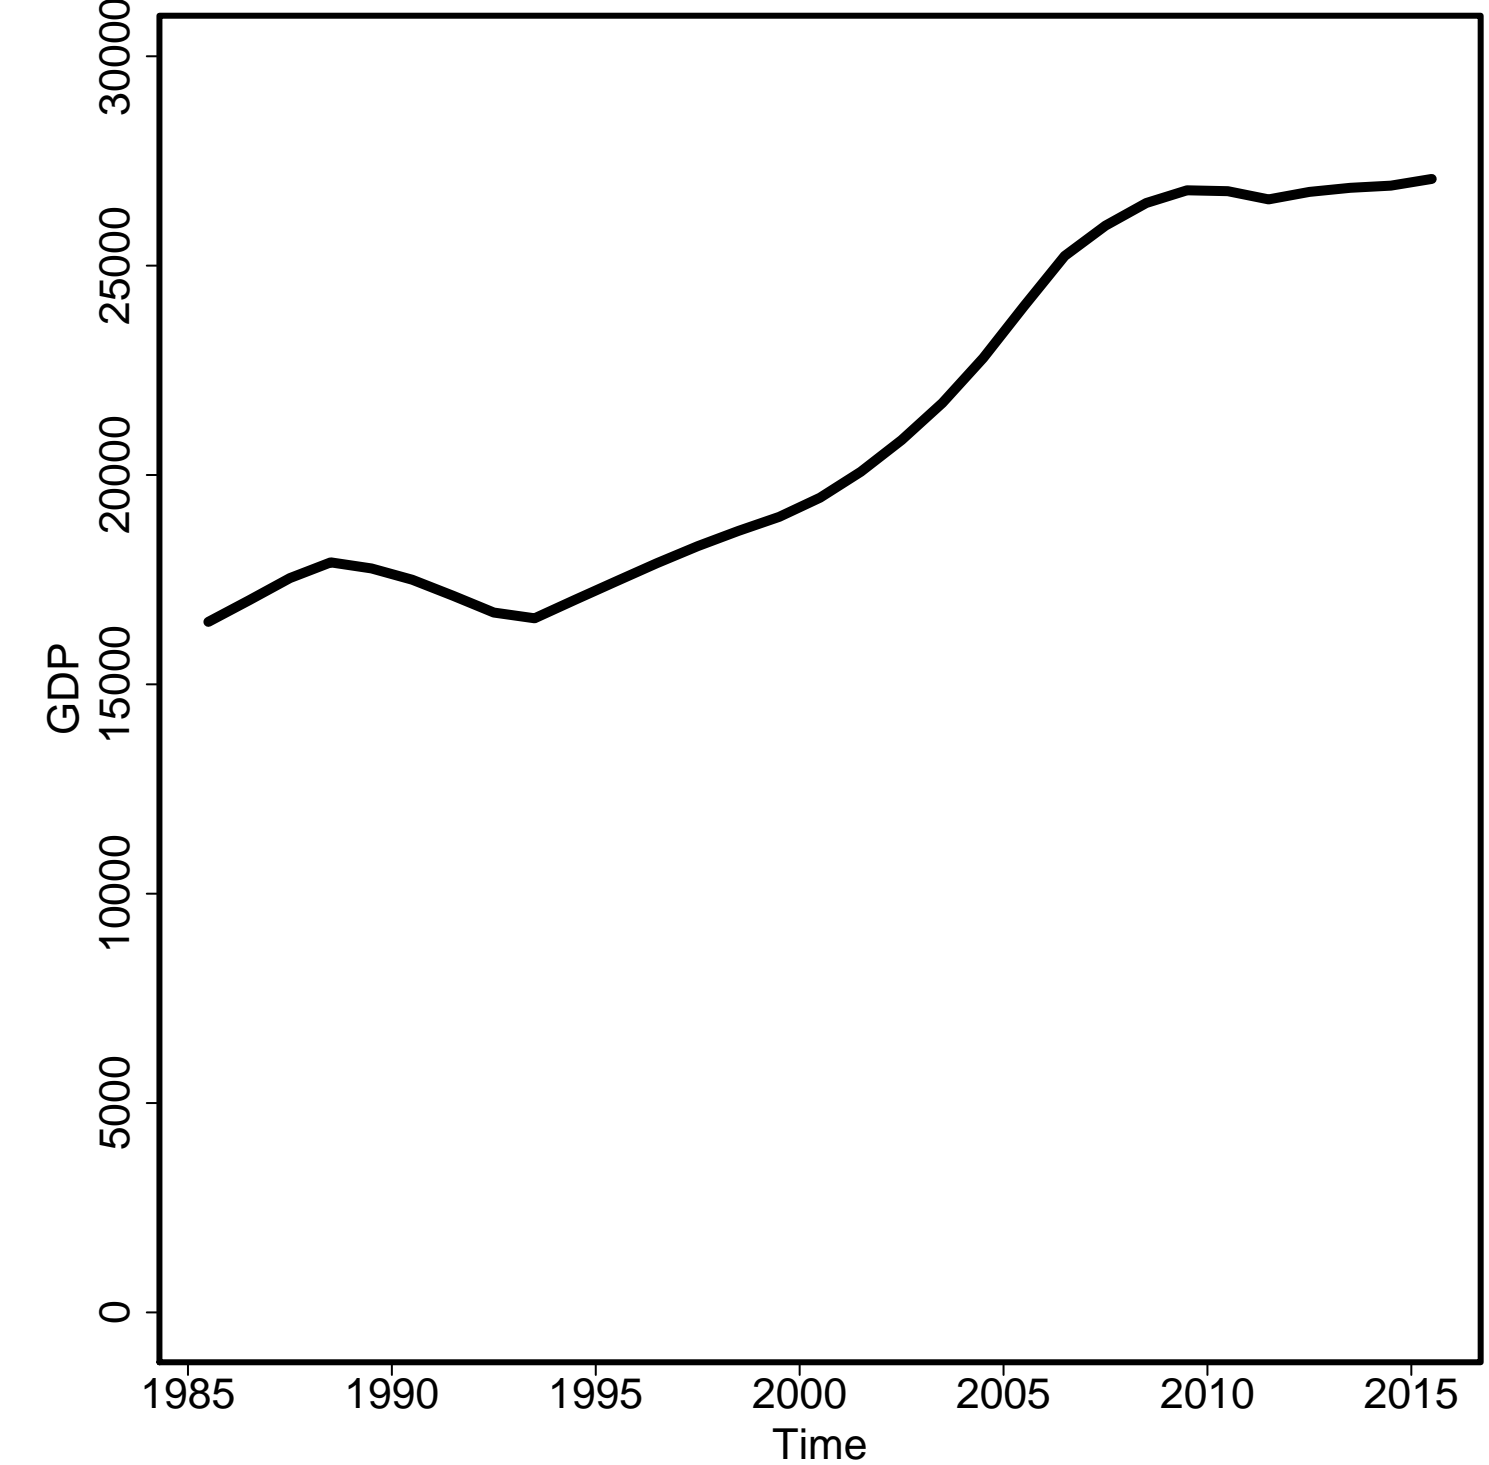

General Fertility Rate

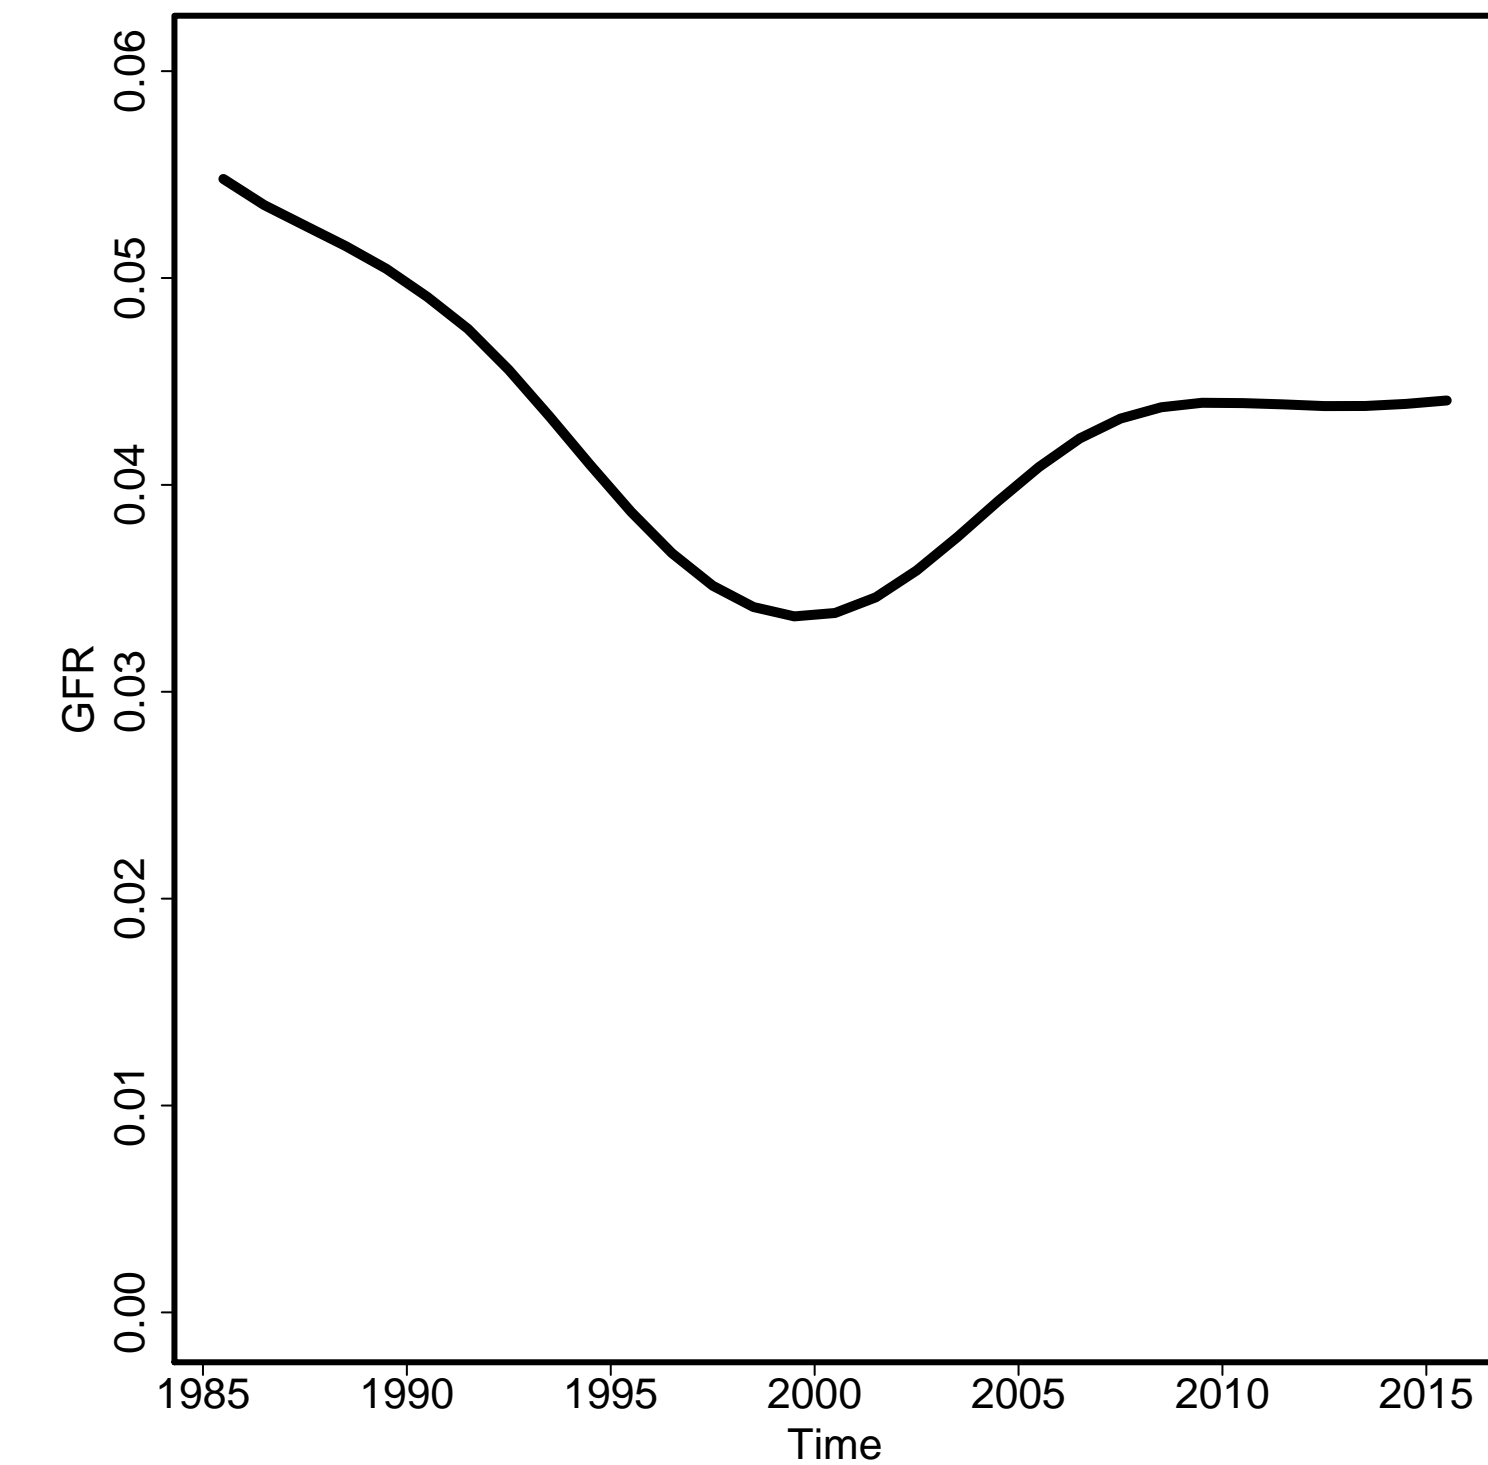

Skilled Attendance to Birth

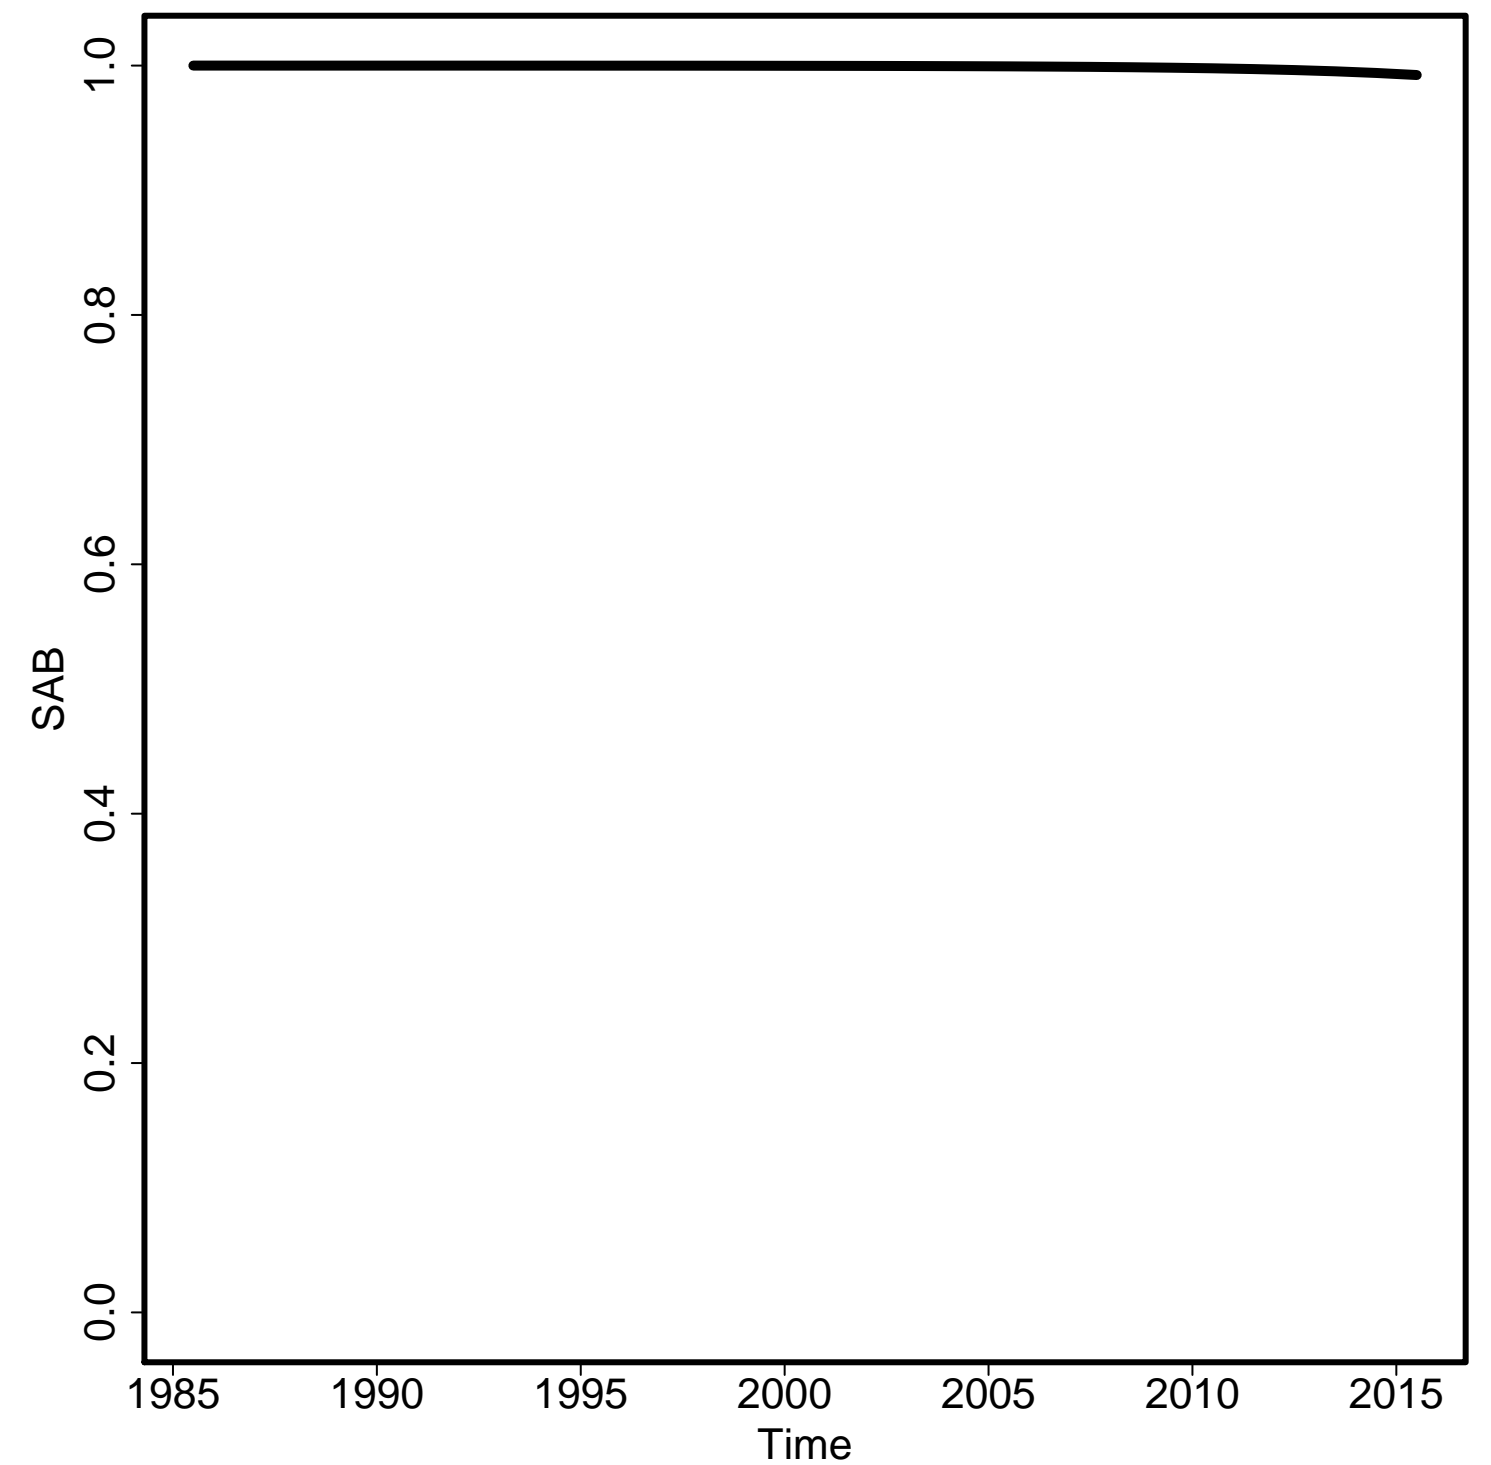

Envelope/Births

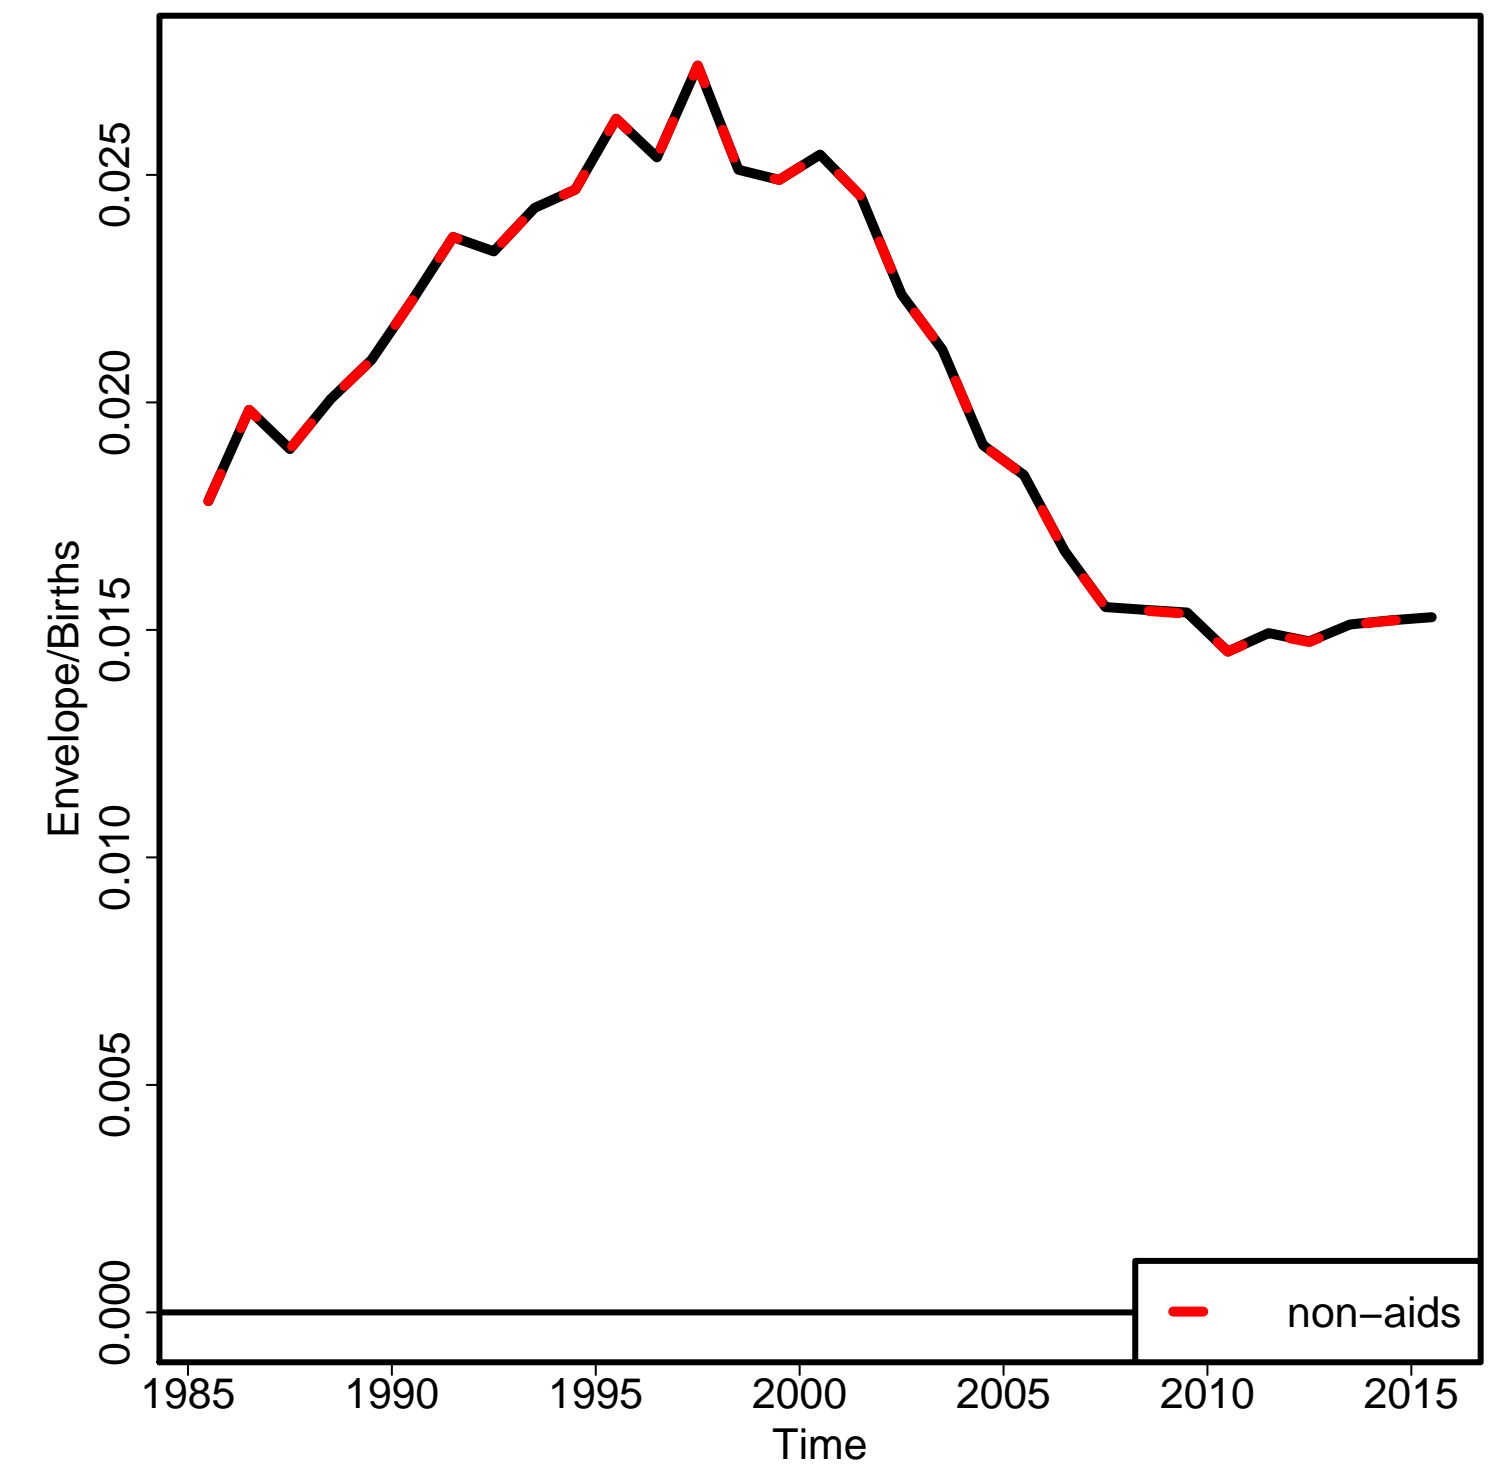

Non-aid MMR

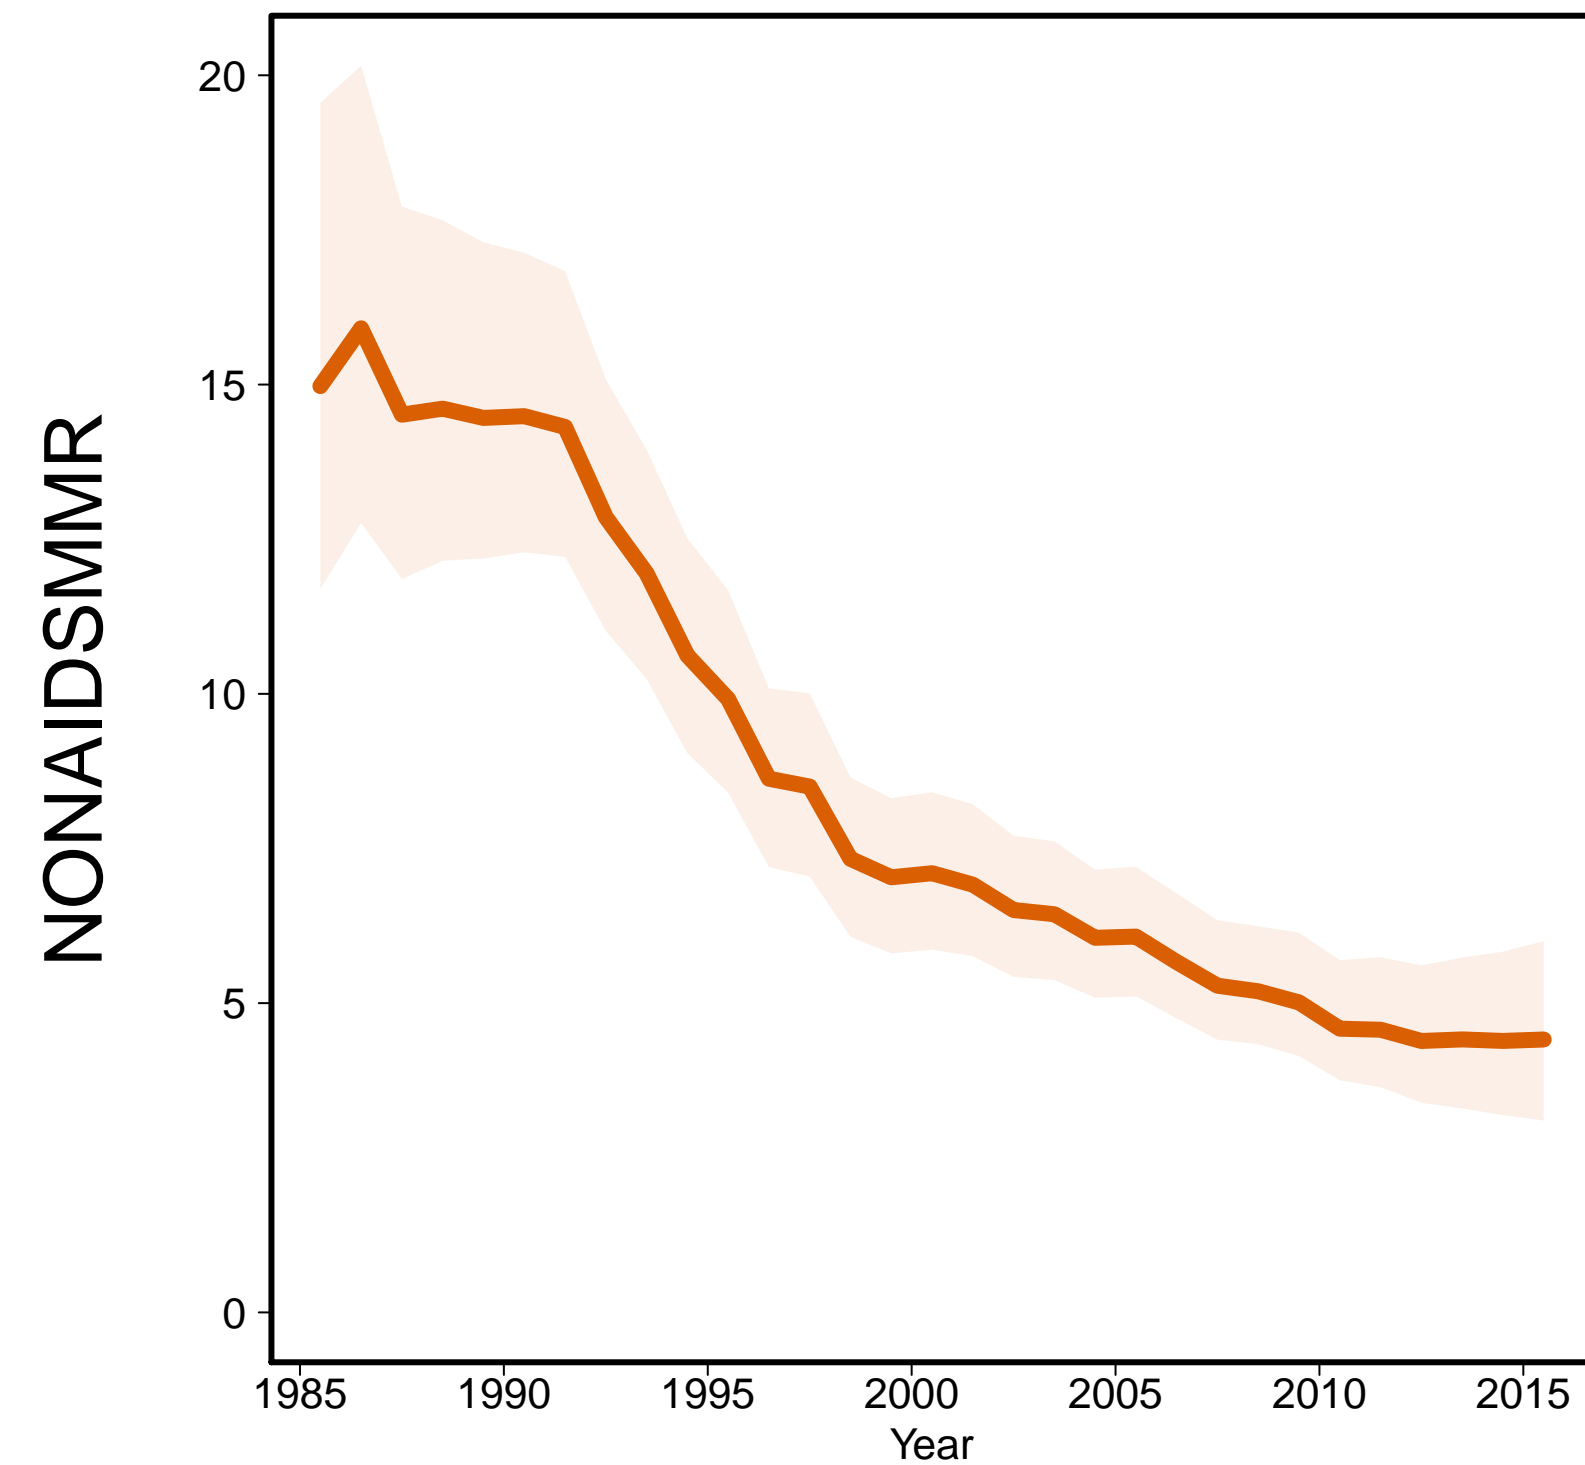

Aids MMR

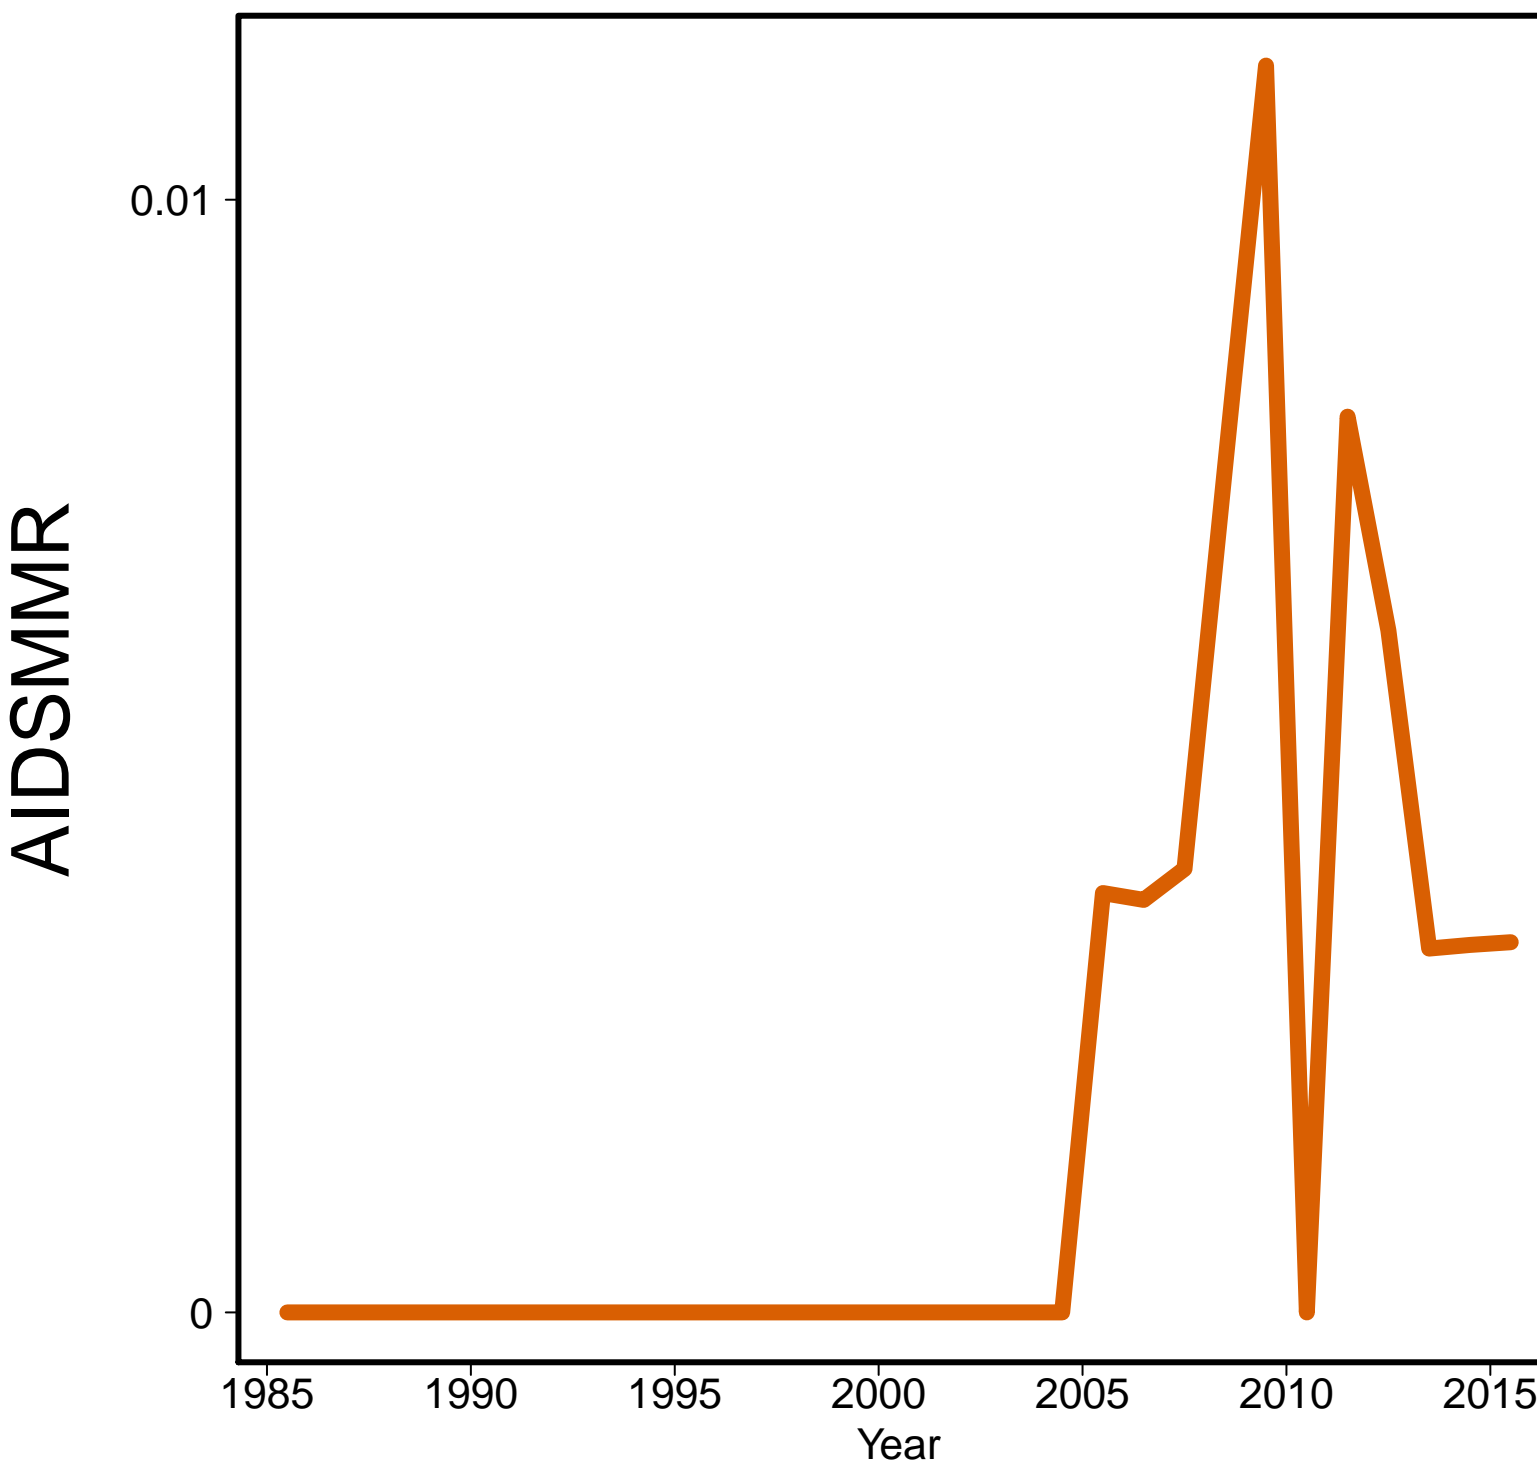

Democratic People's Republic of Korea [PRK]  
(Eastern Asia)

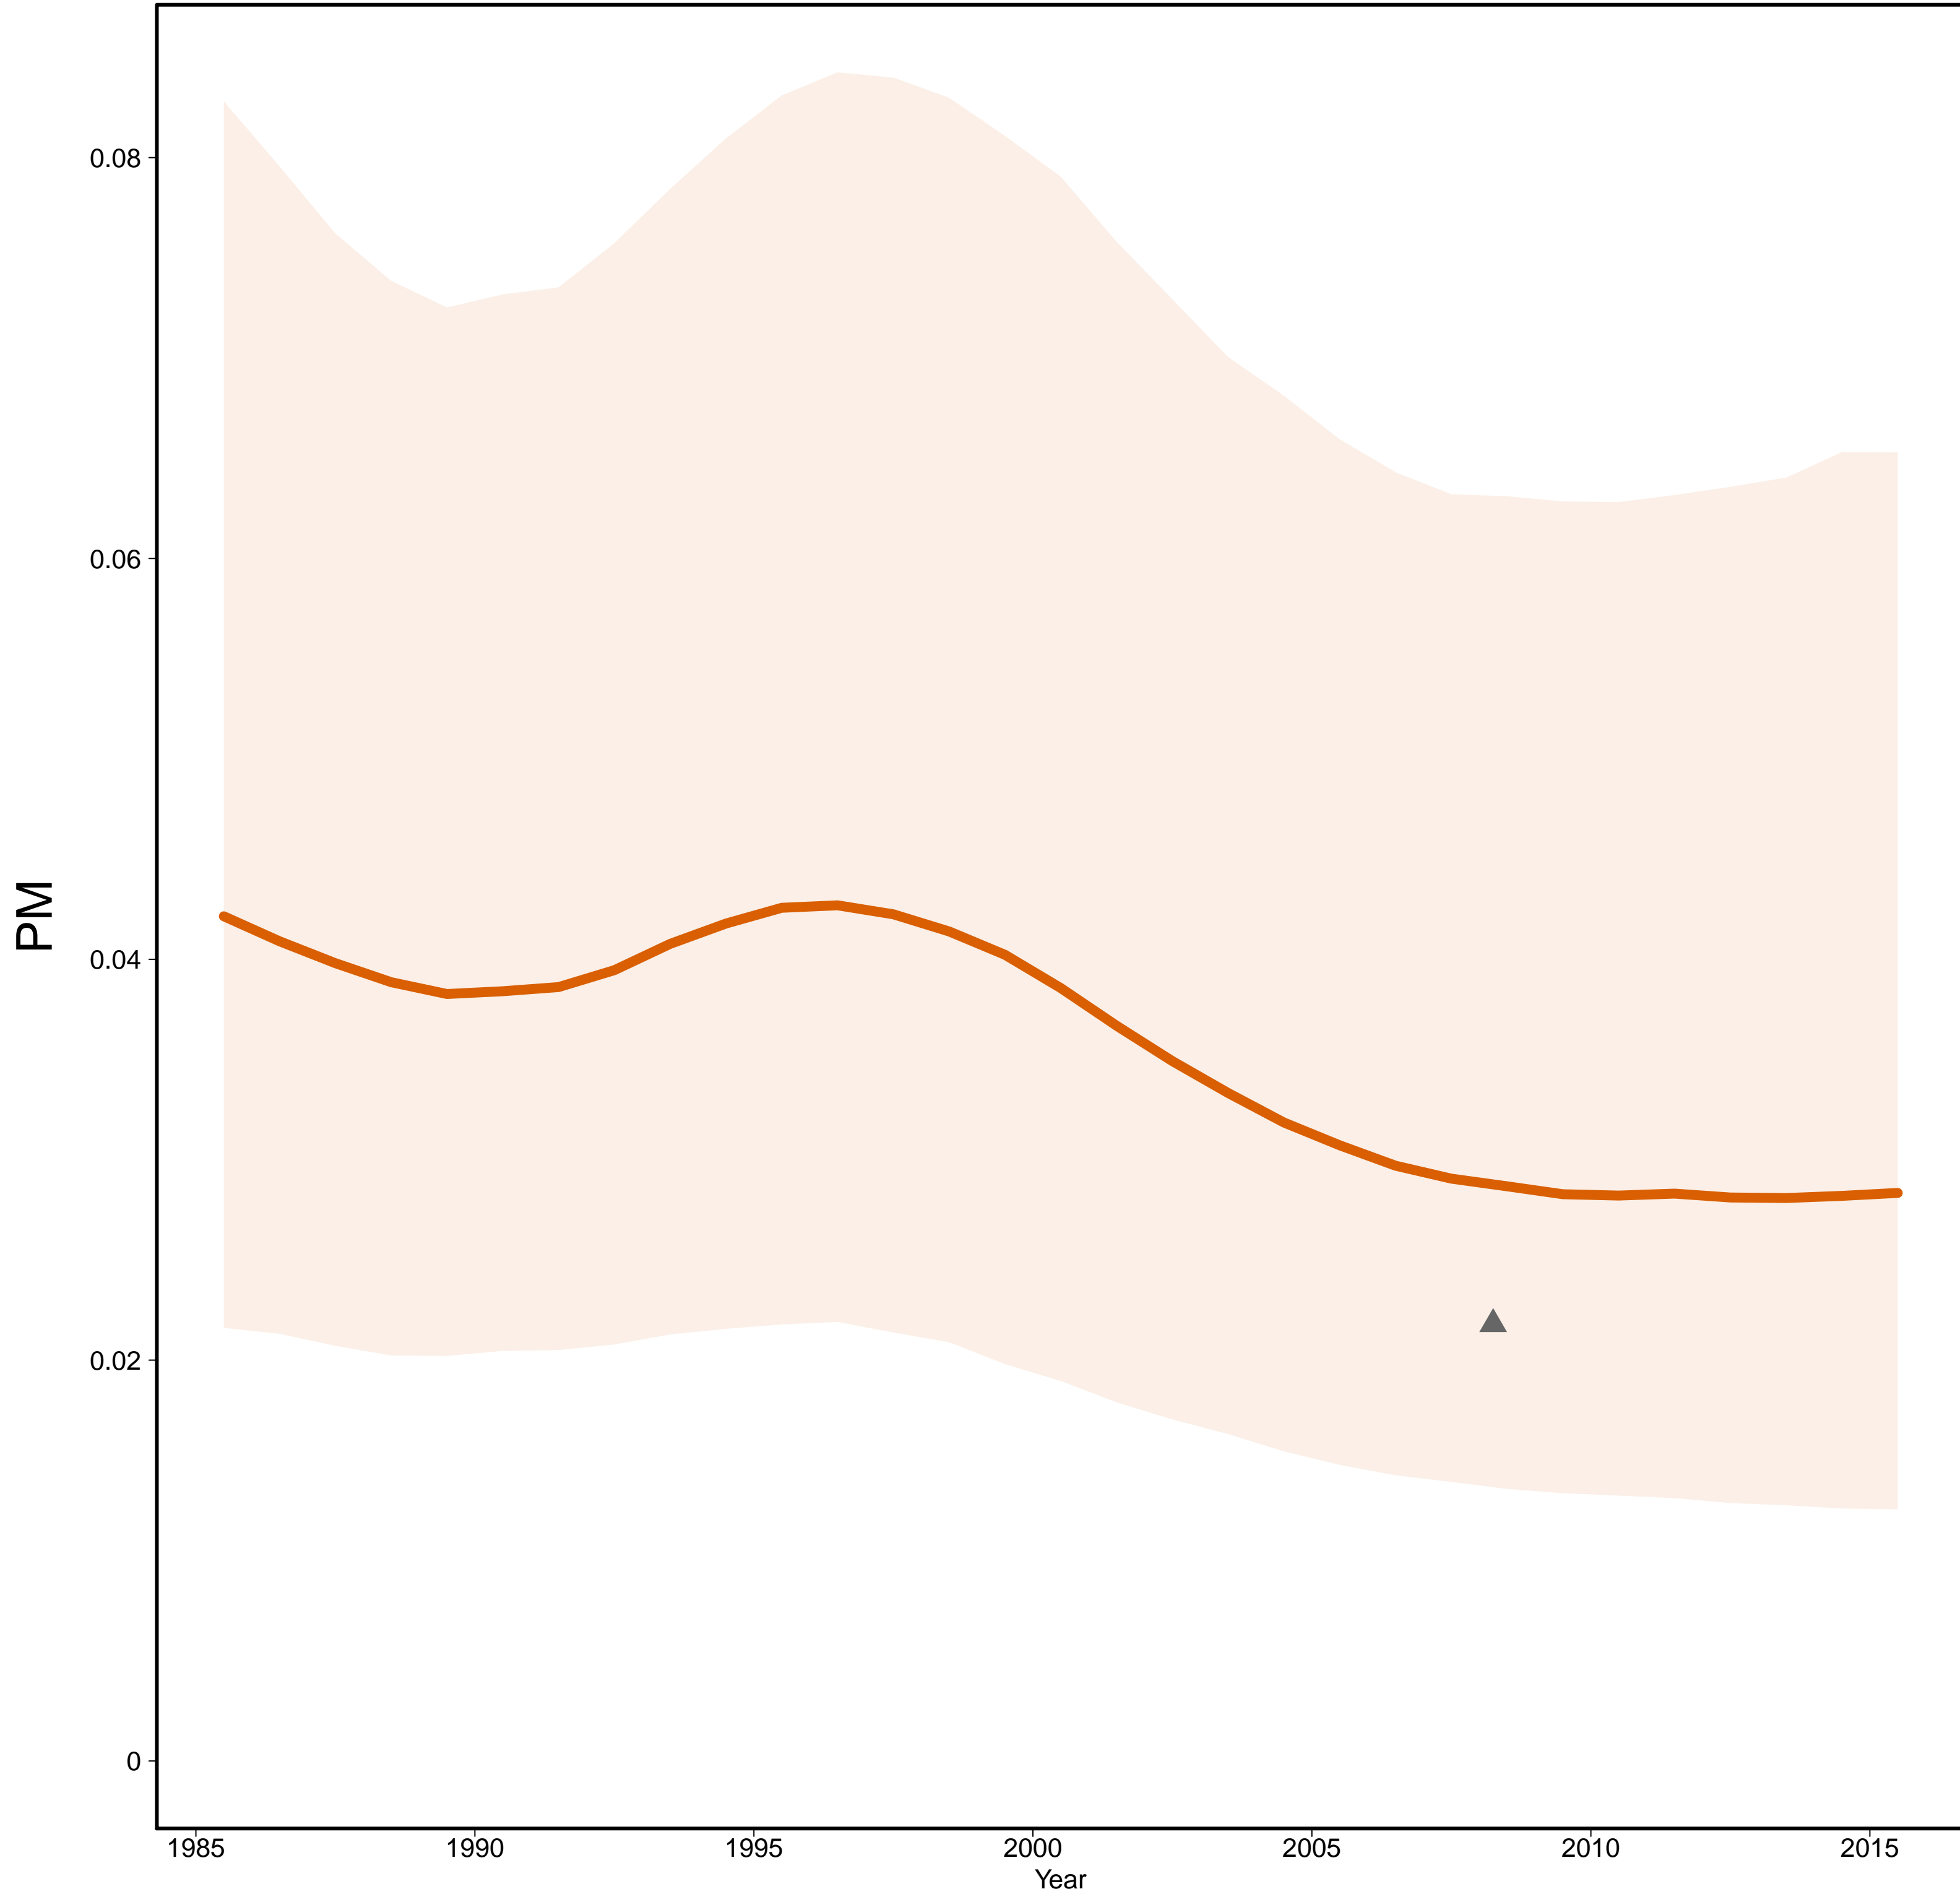

Democratic People's Republic of Korea [PRK]  
(Eastern Asia)

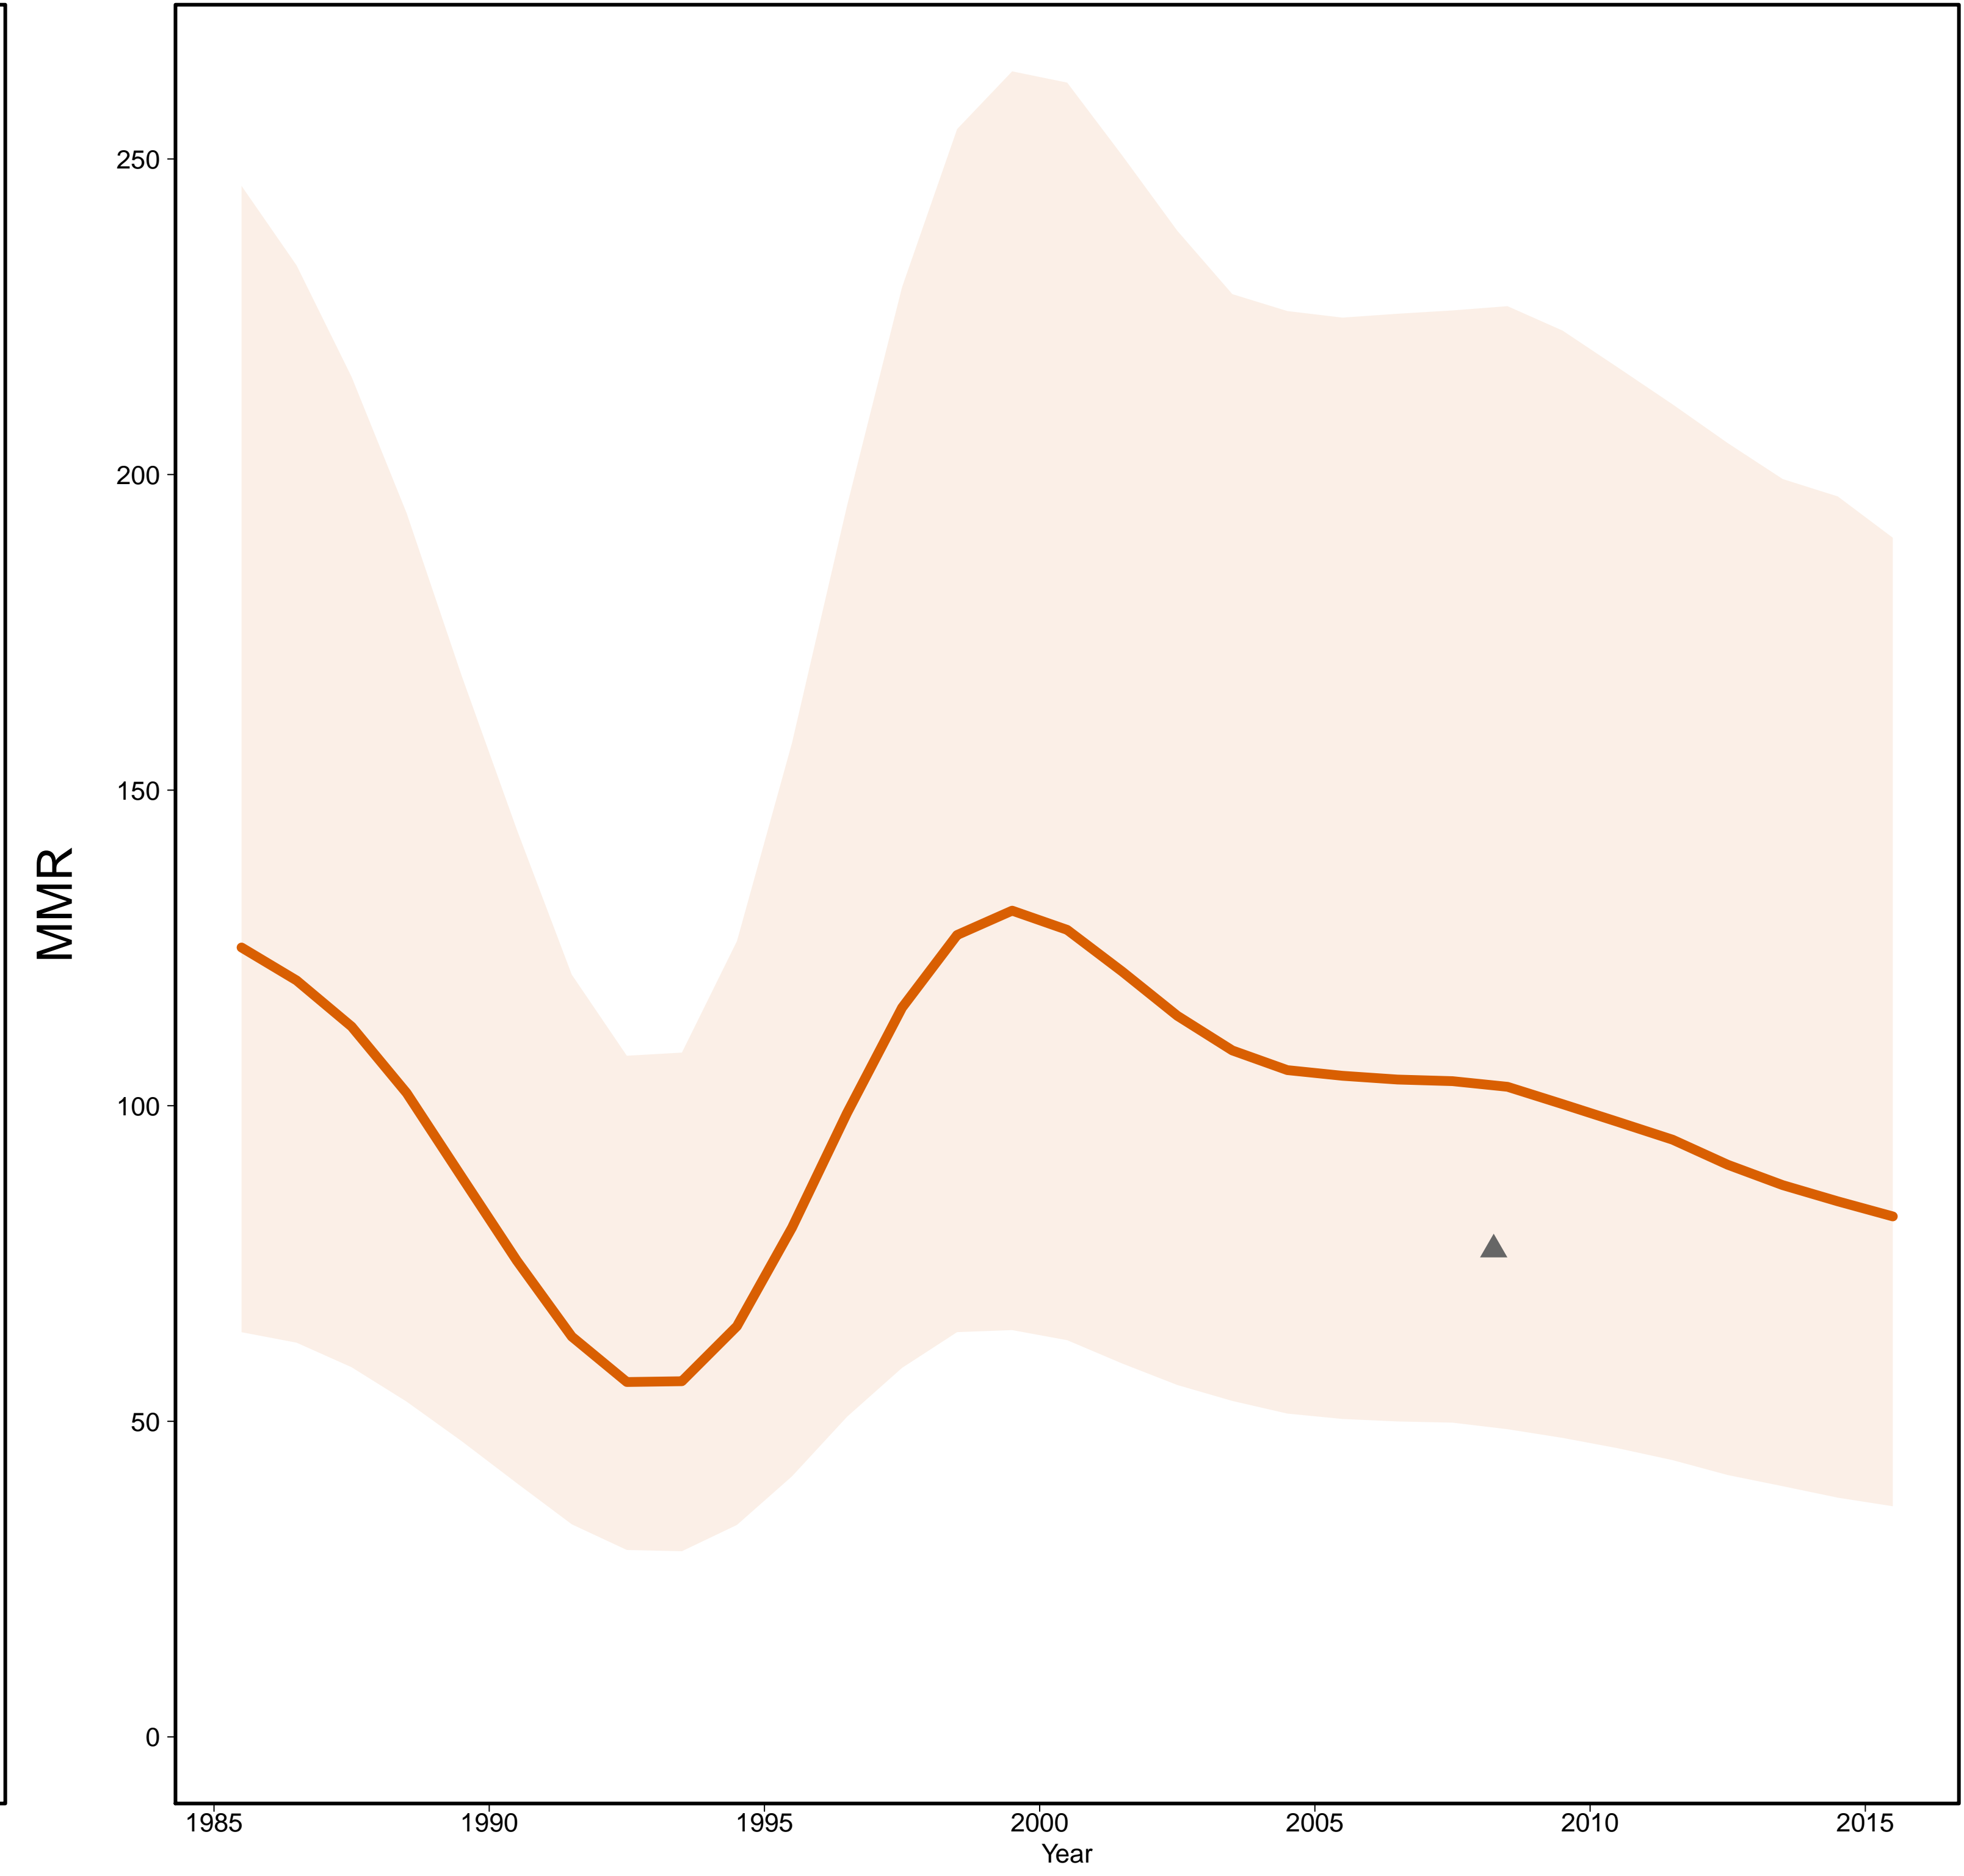

- Estimates –
- Mlate
- MMR Database 2015 –
- ◊ Observed Data
- ◆ Adjusted Data
- Data type –
- ▲ Excluded misc. studies

Gross Domestic Product

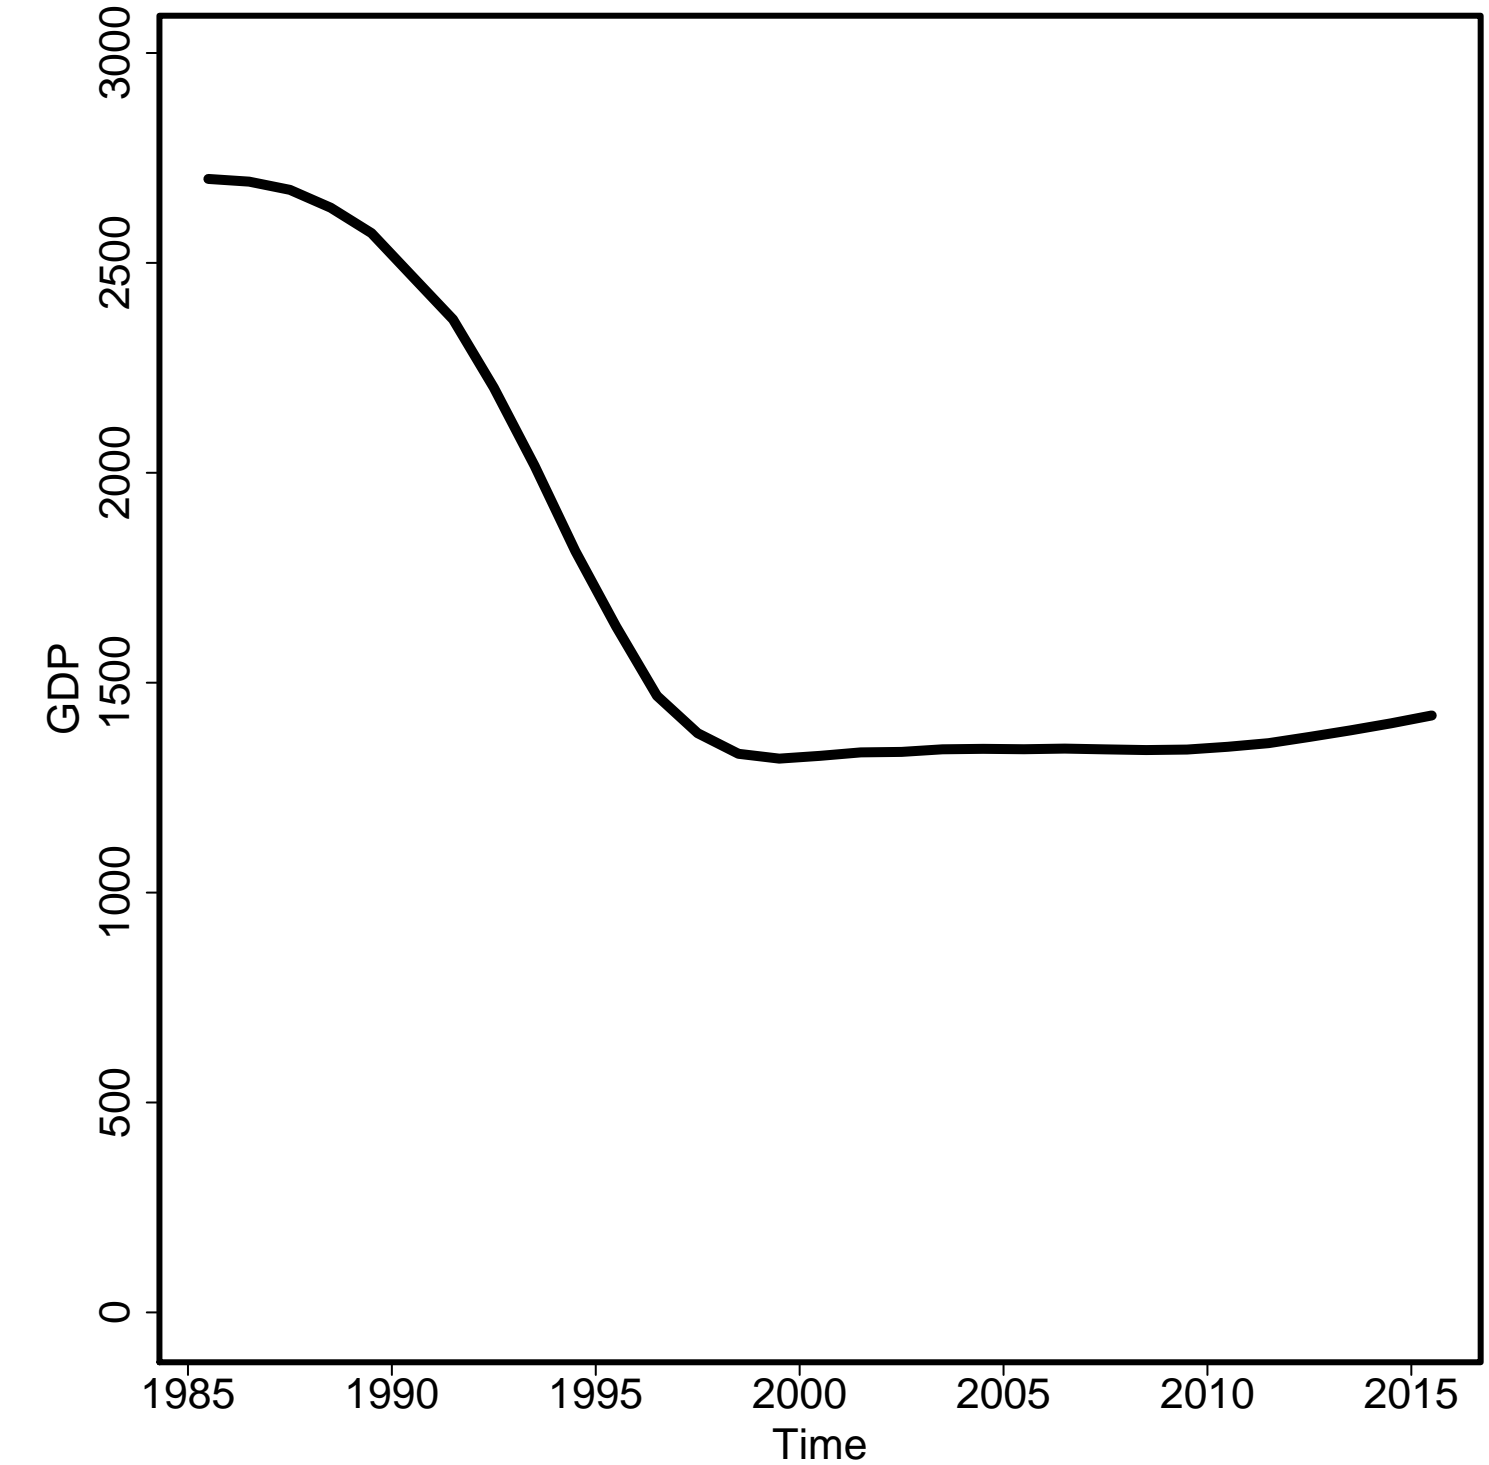

General Fertility Rate

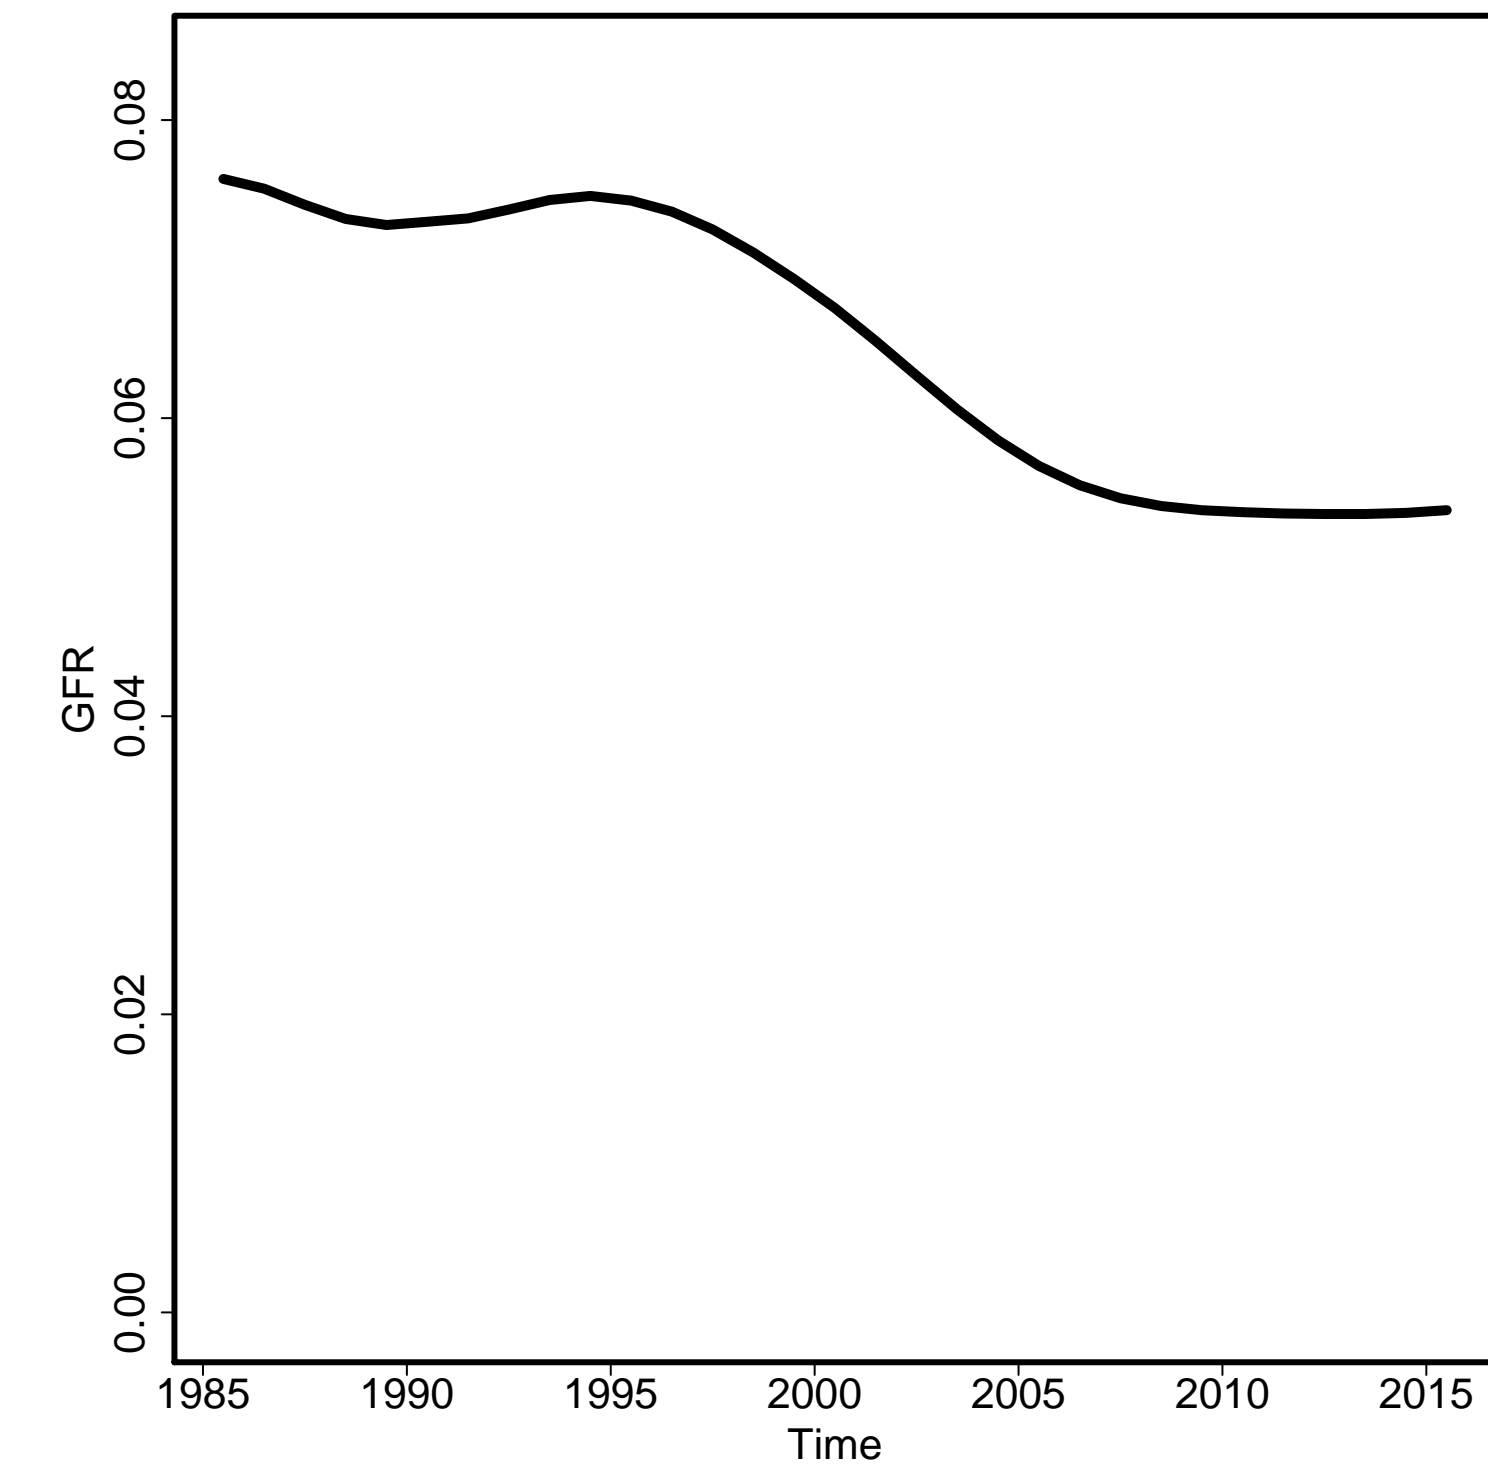

Skilled Attendance to Birth

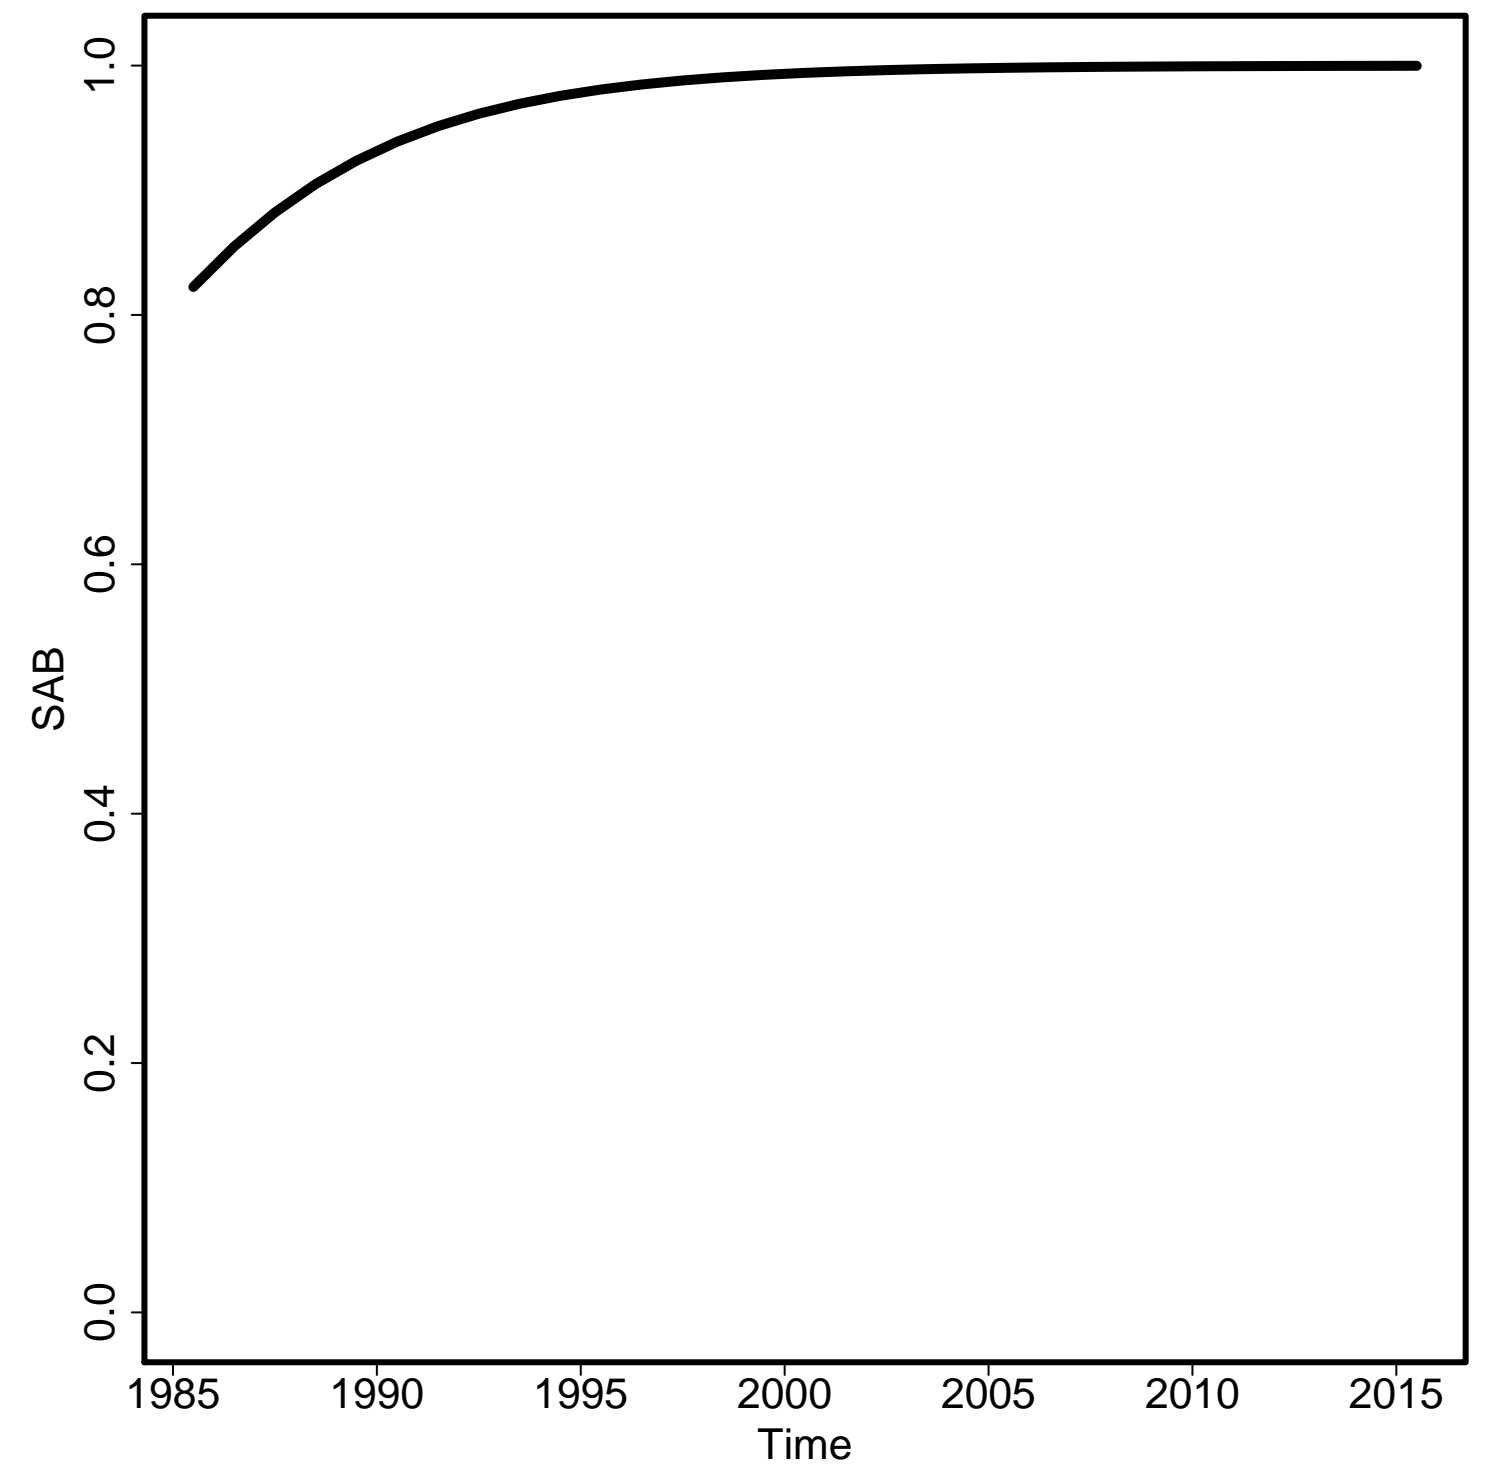

Envelope/Births

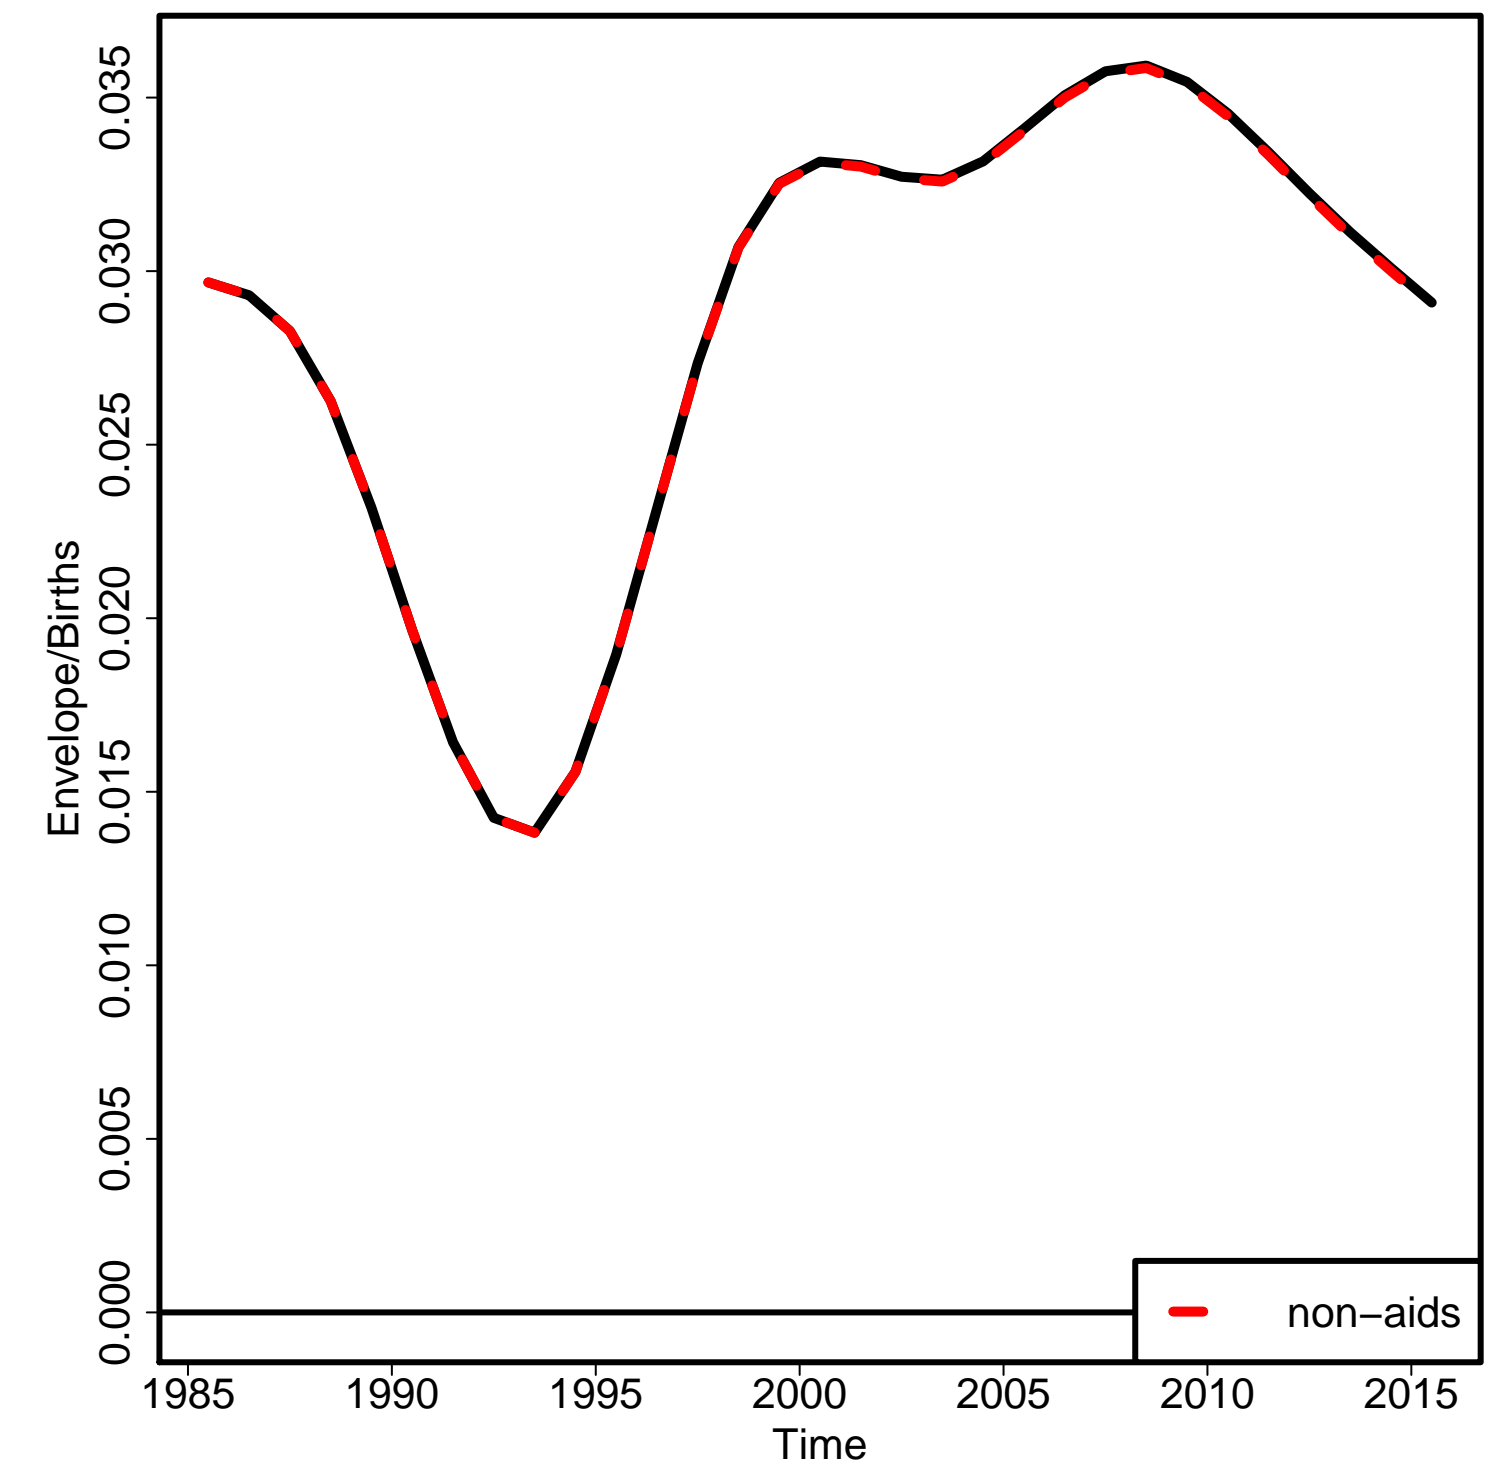

Non-aids MMR

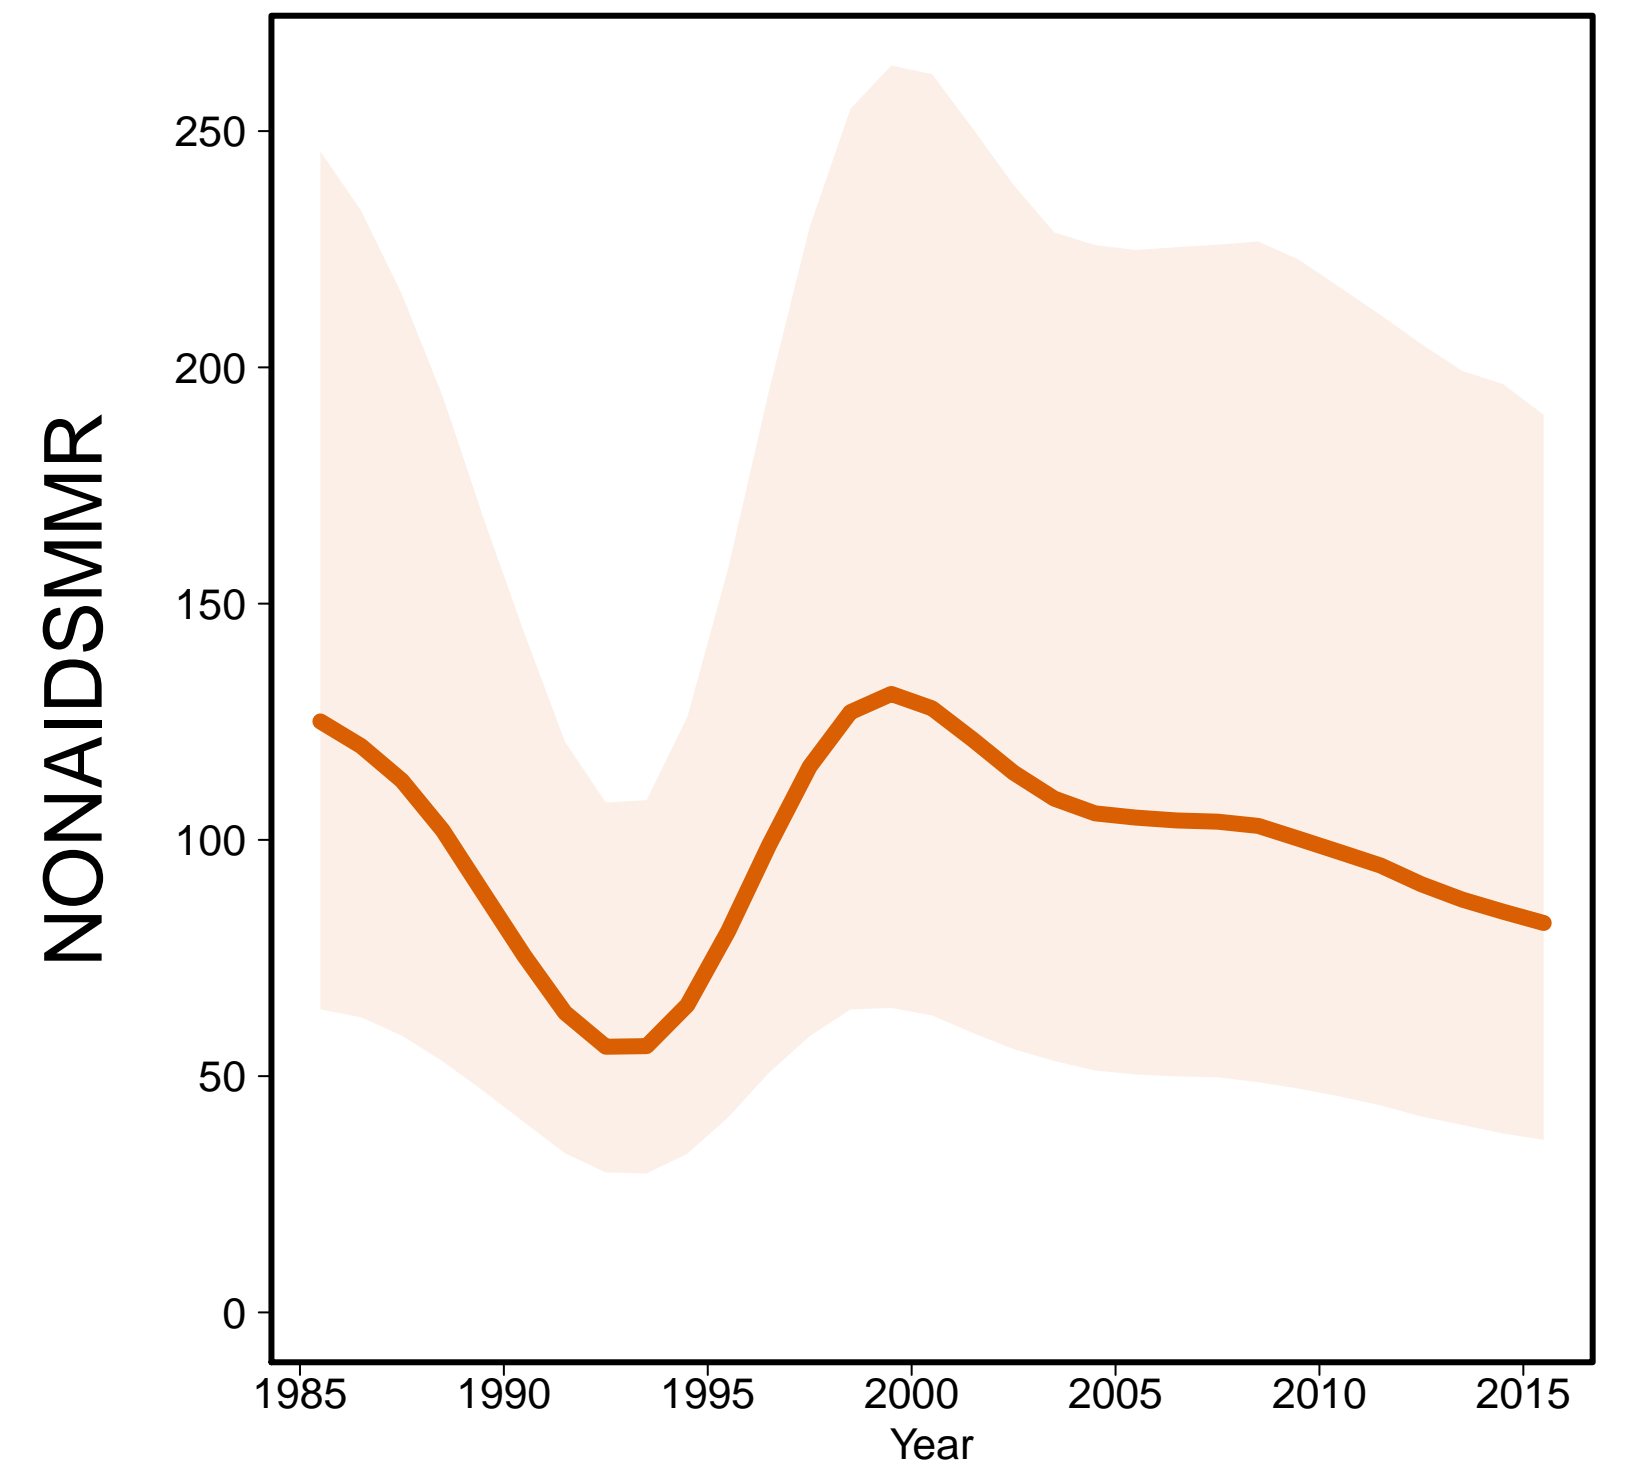

Aids MMR

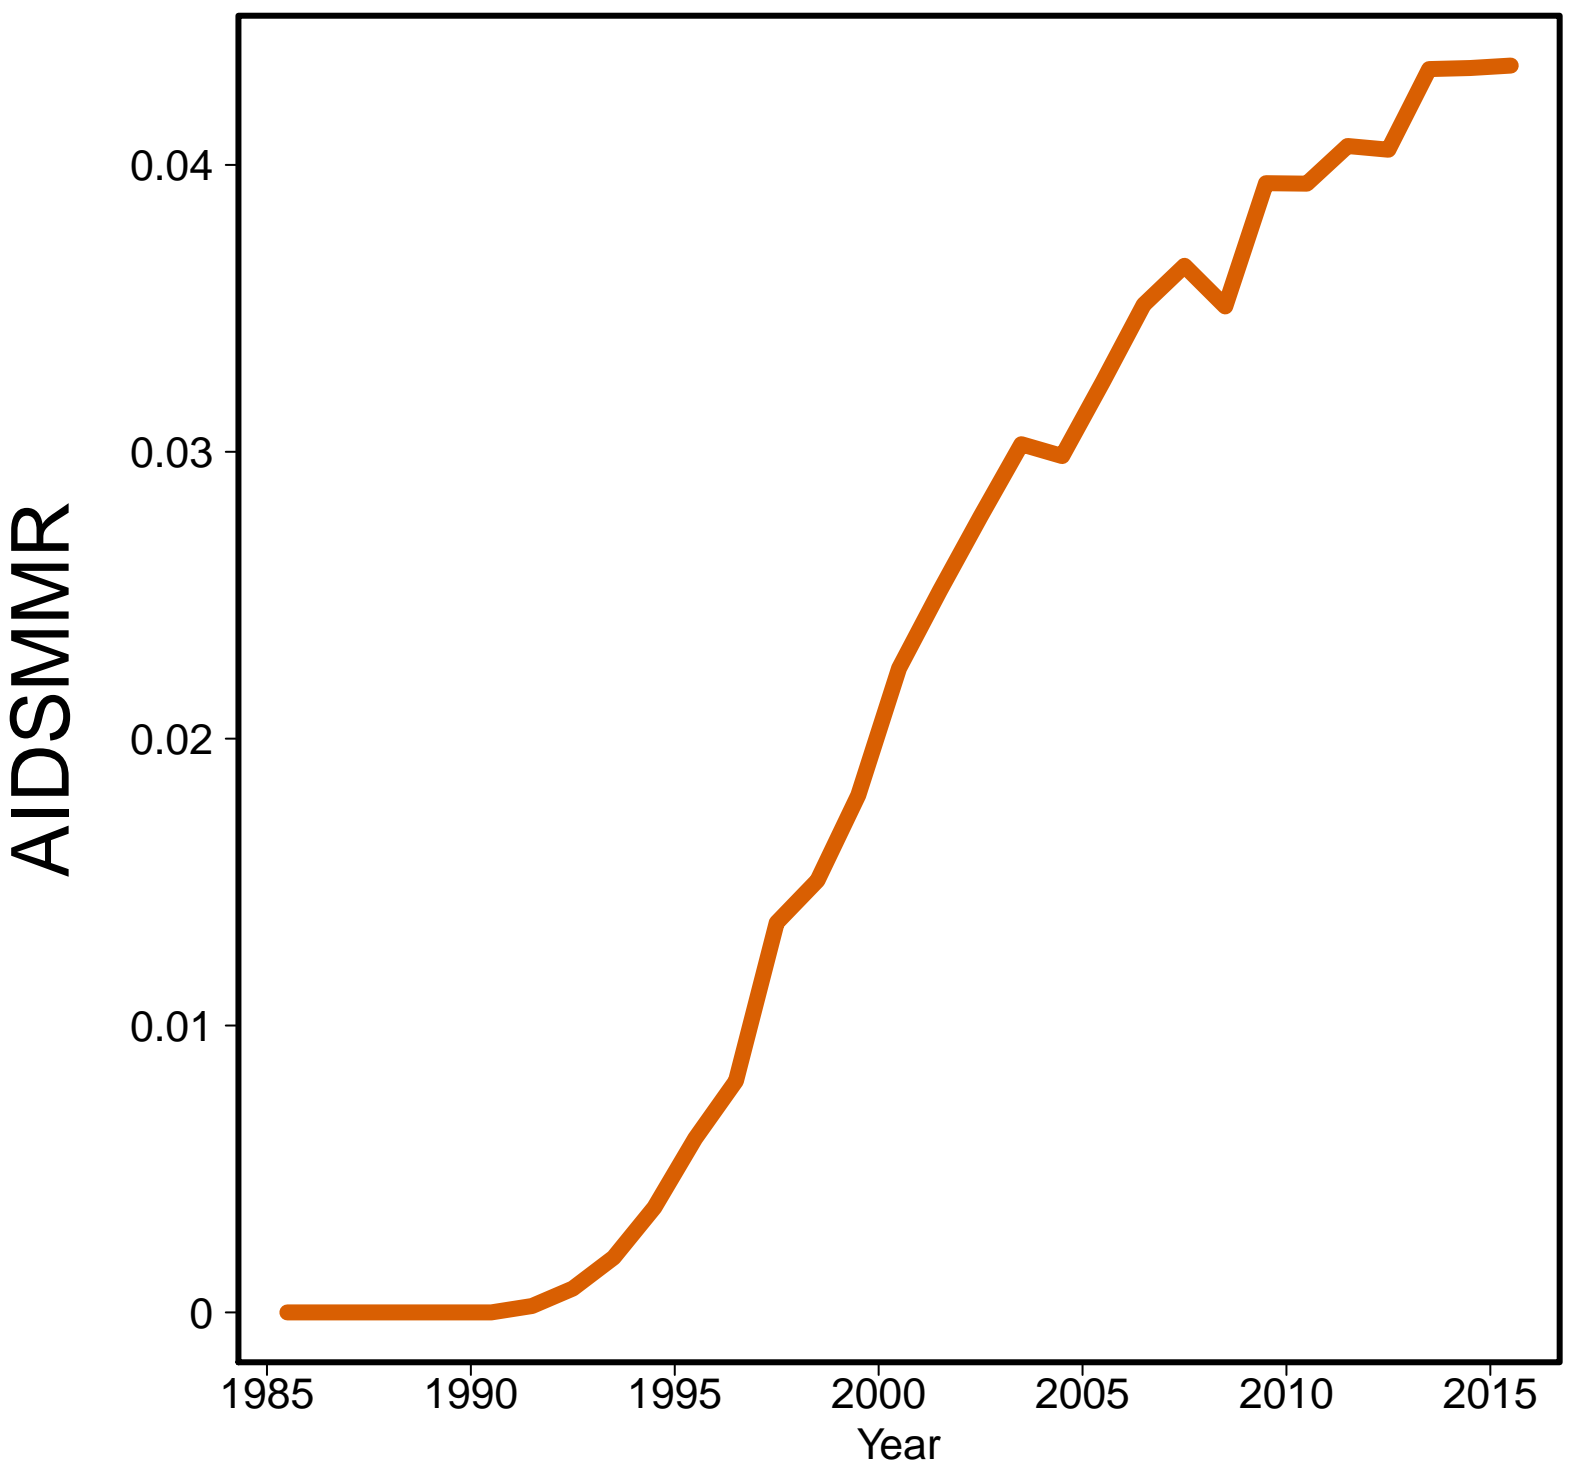

Democratic Republic of the Congo [COD]  
(Middle Africa)

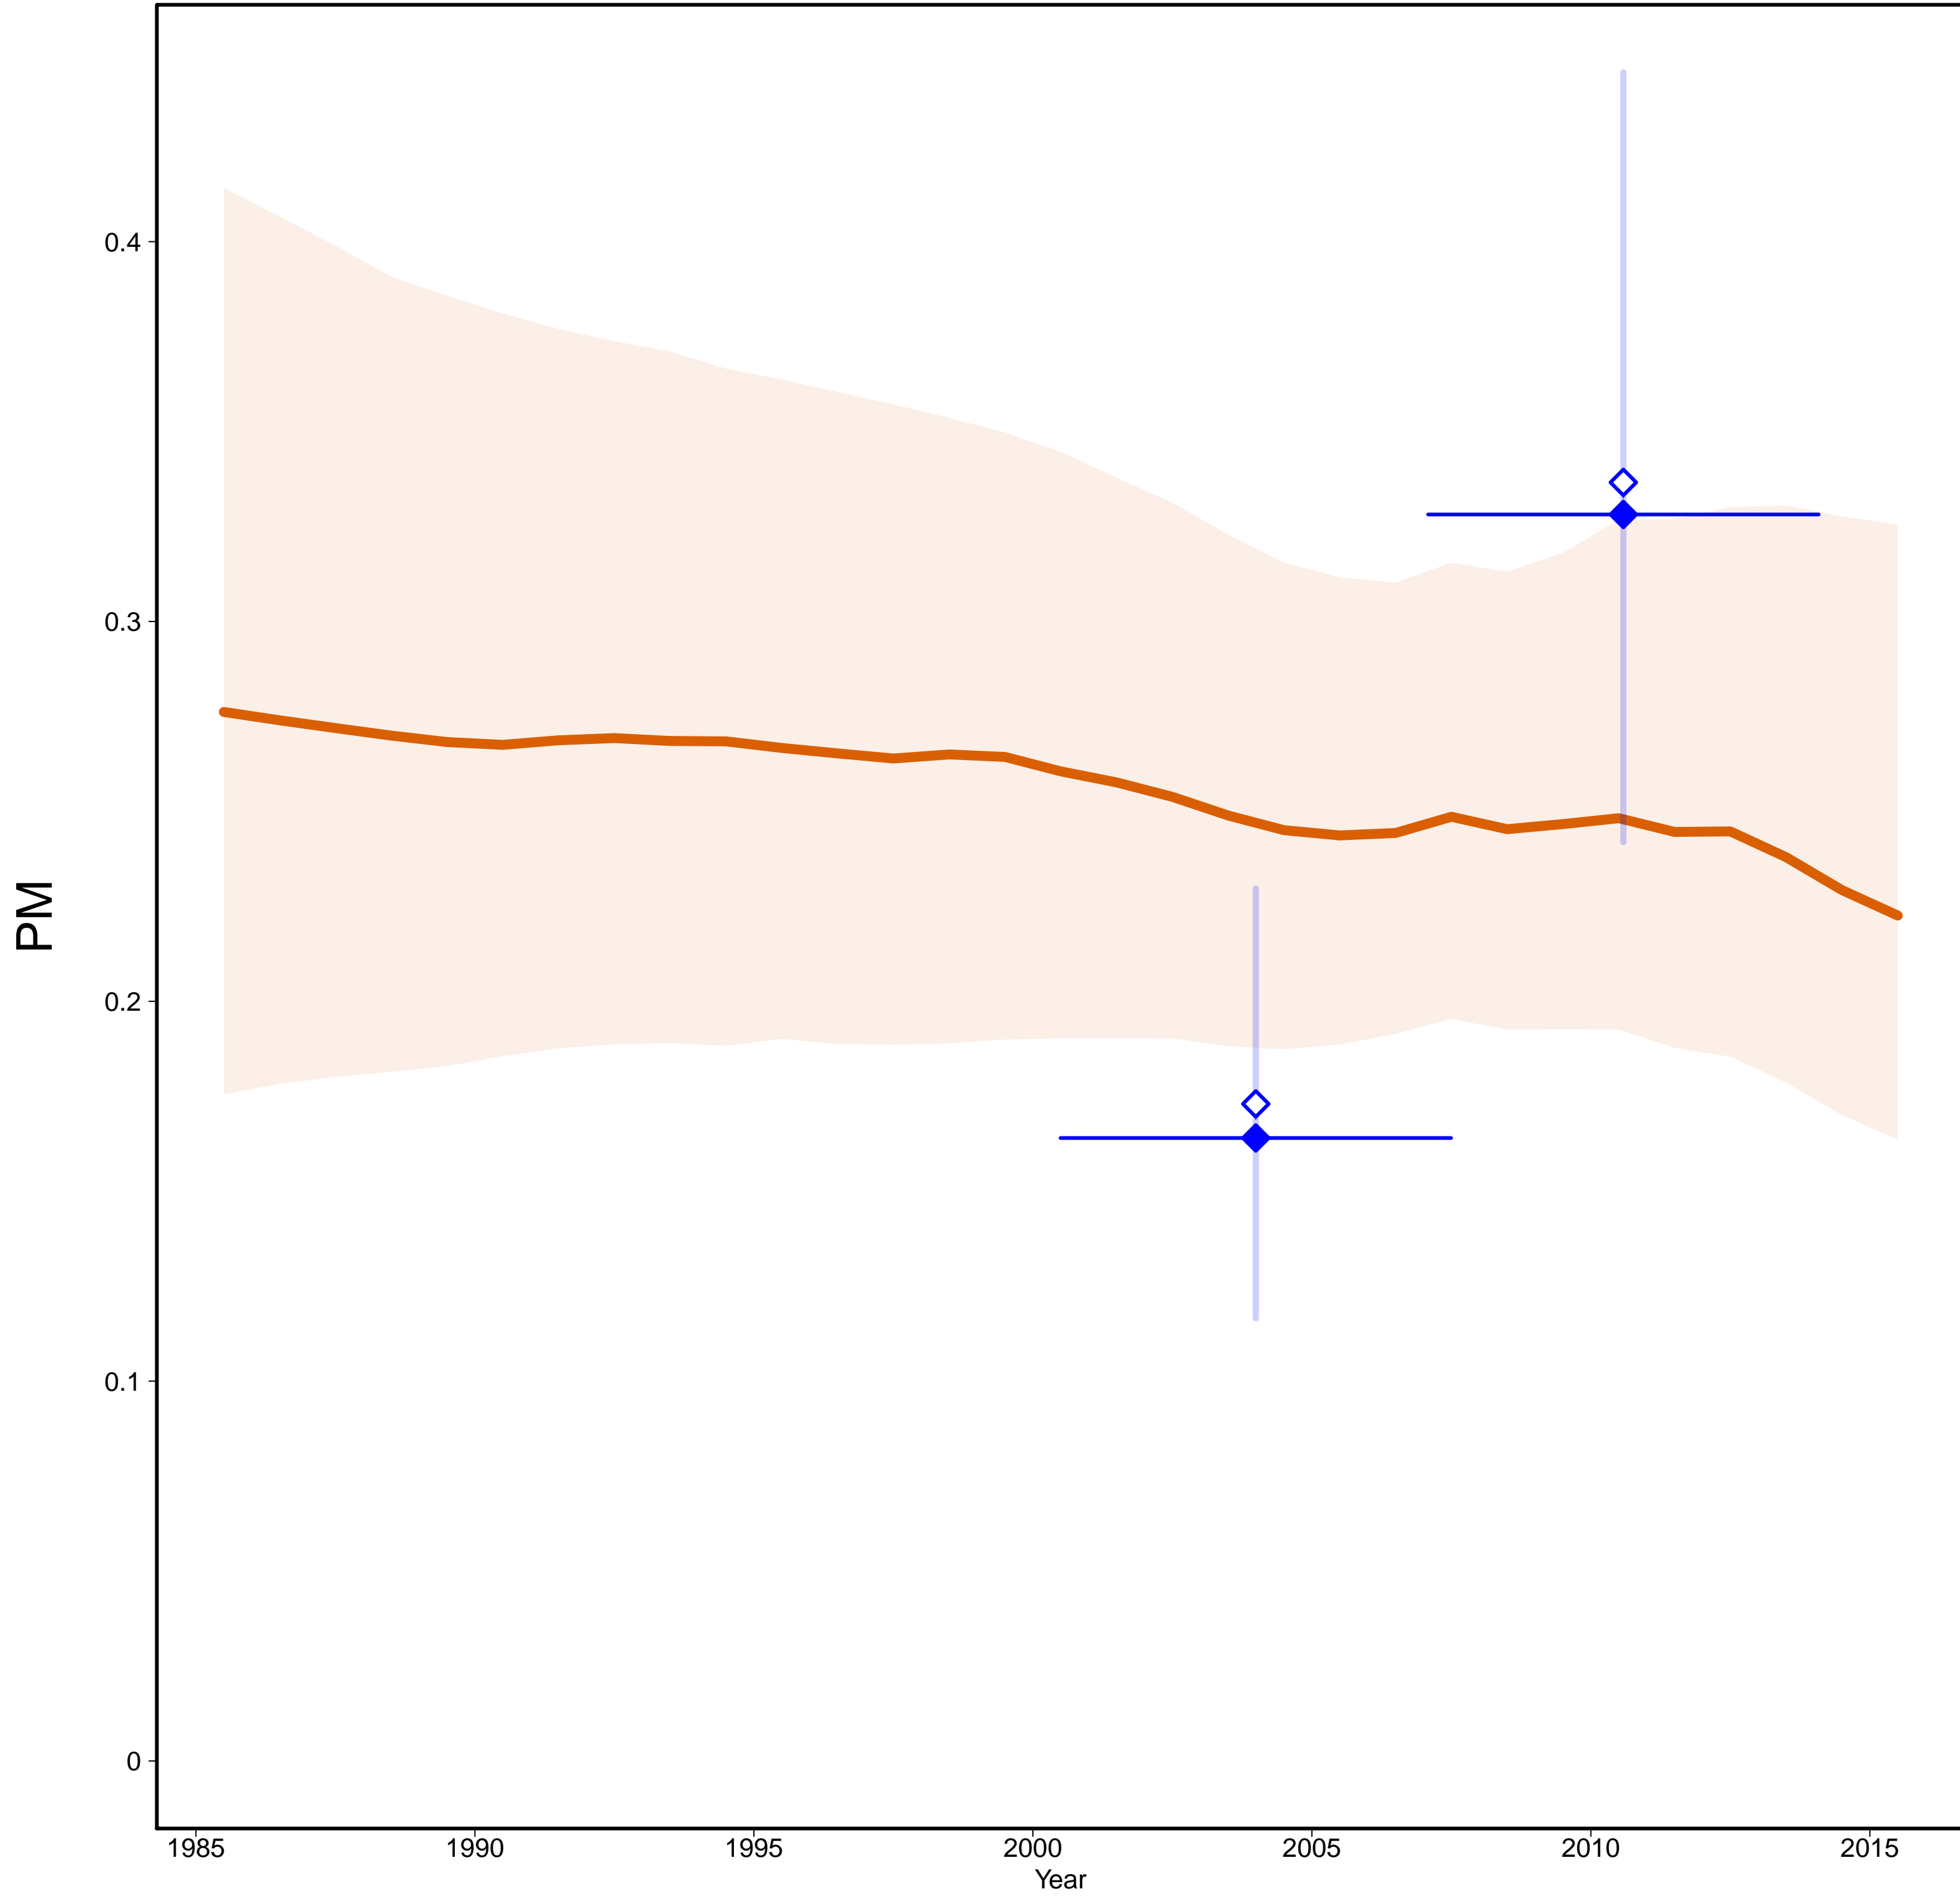

Democratic Republic of the Congo [COD]  
(Middle Africa)

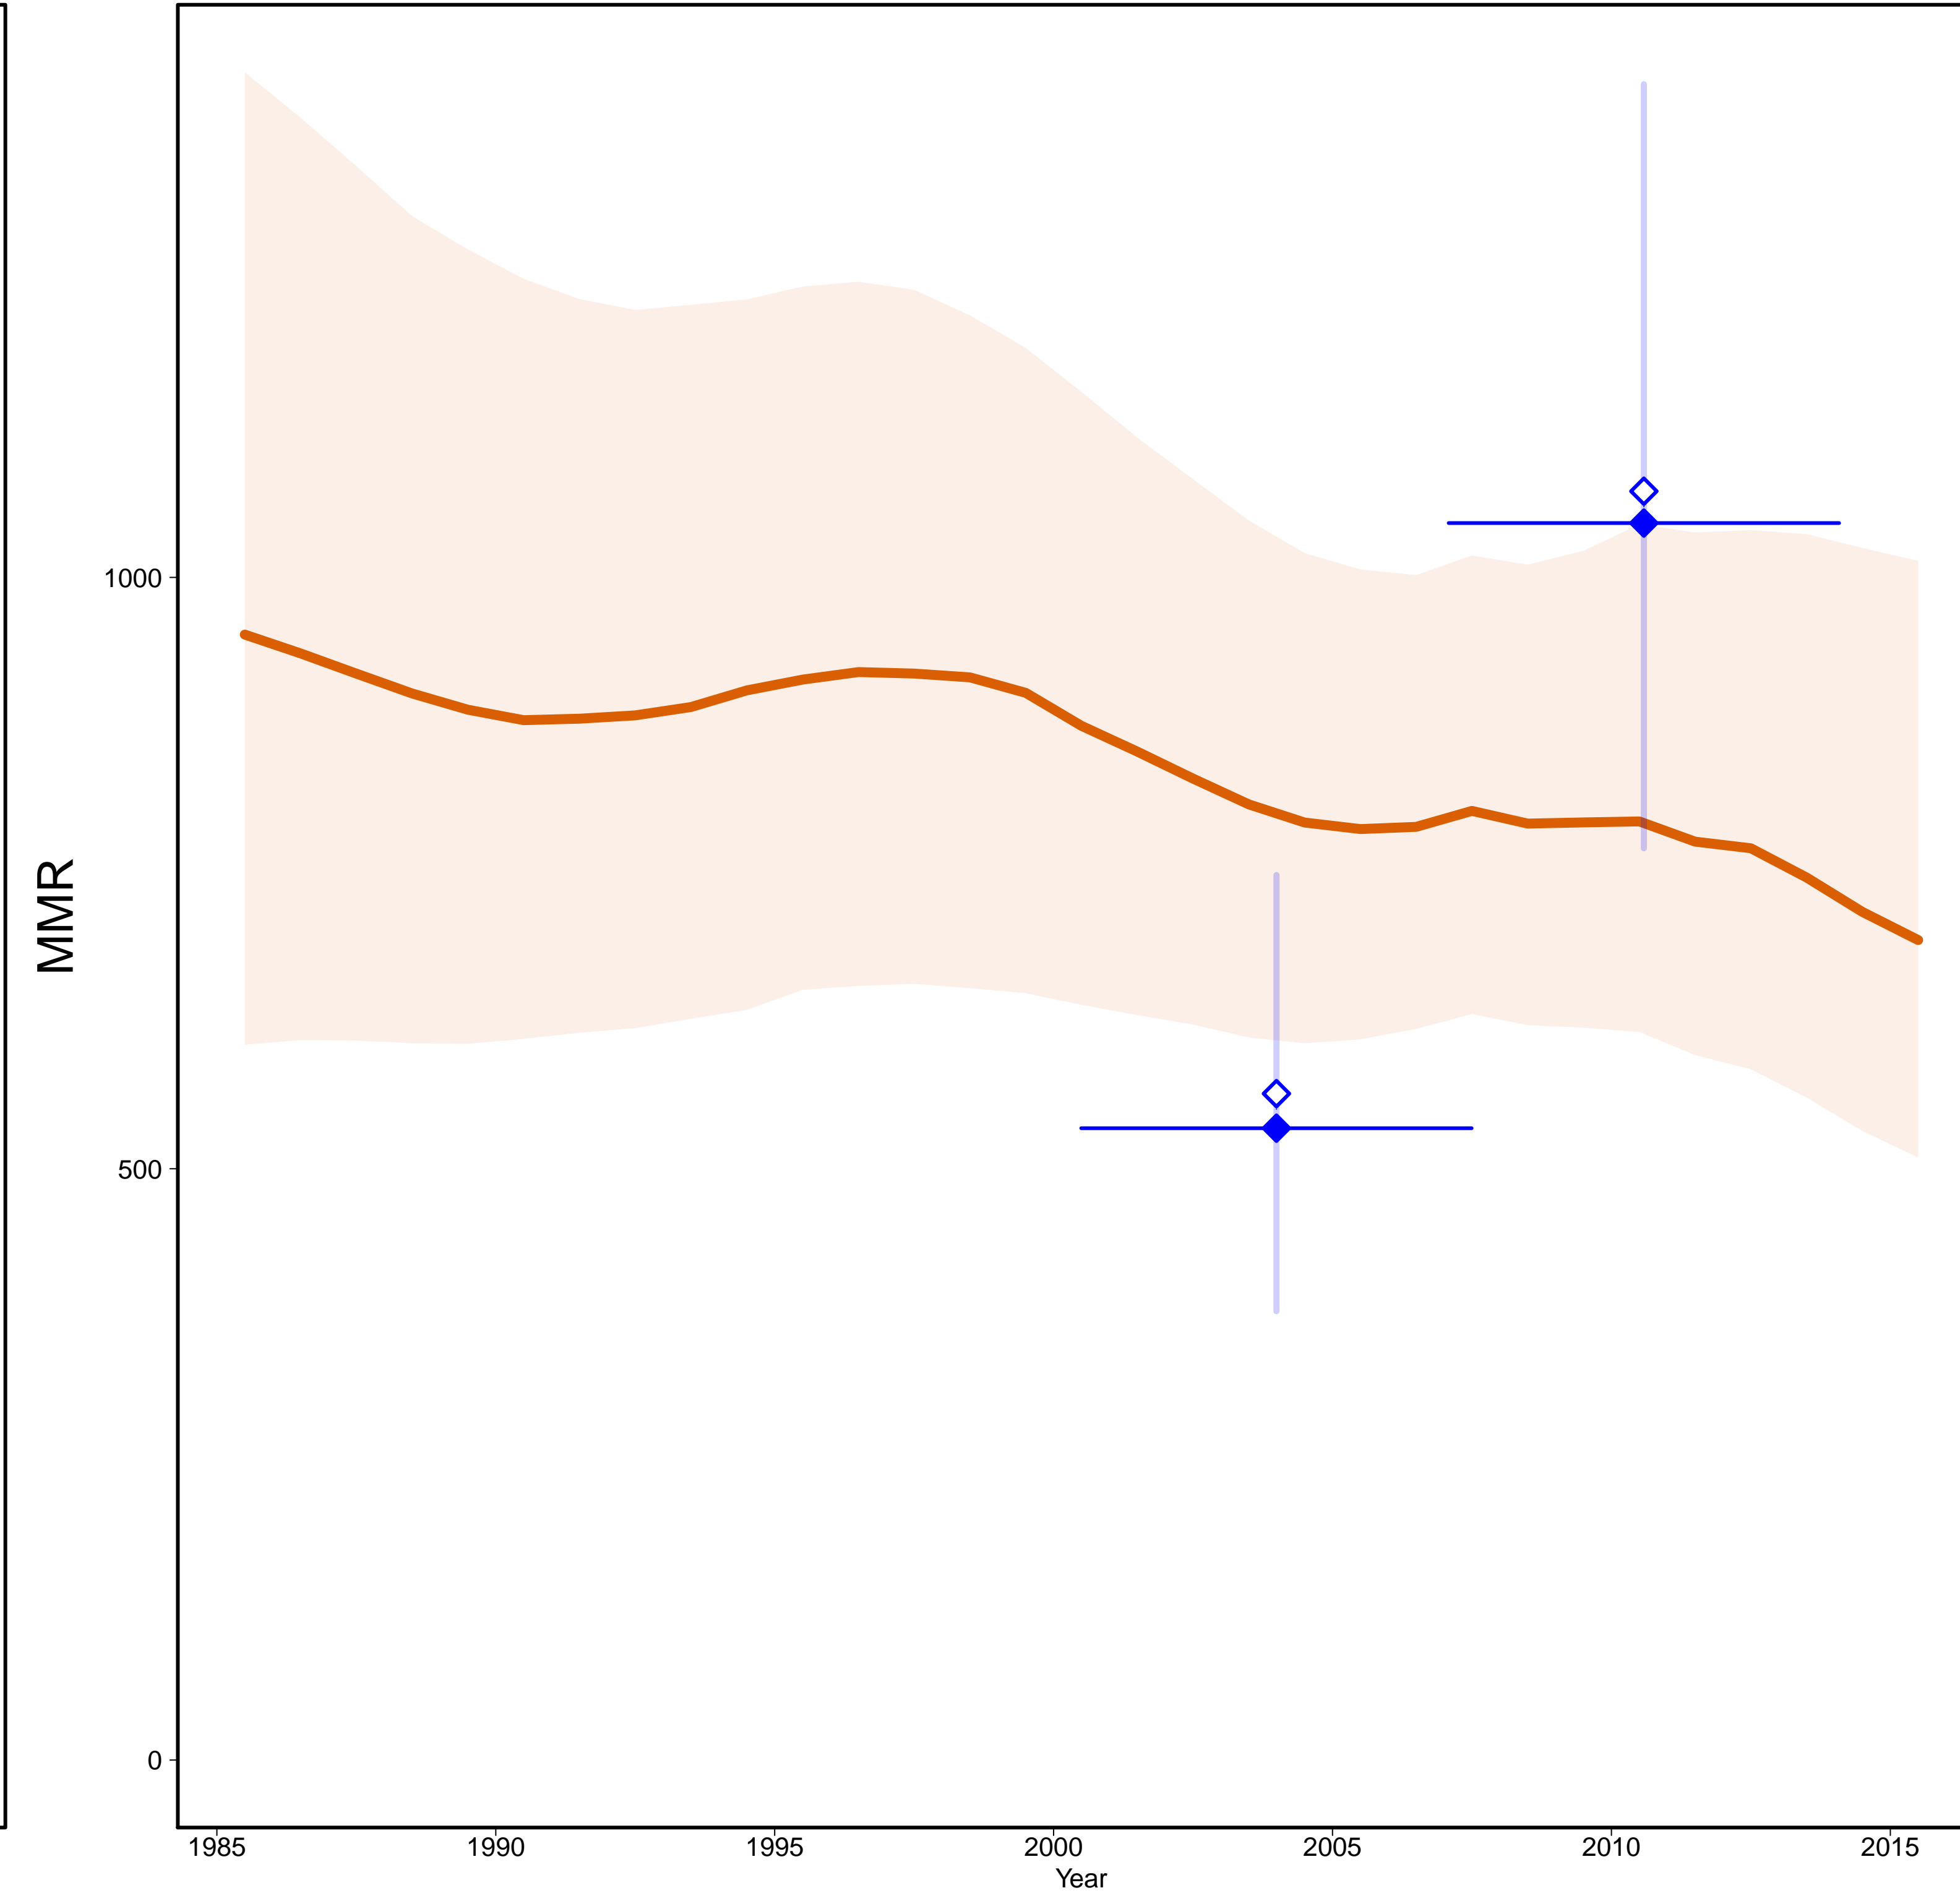

- Estimates —
- MMR Database 2015 —
- ◇ Observed Data
- ◆ Adjusted Data
- Data type —
- ◆ DHS

Gross Domestic Product

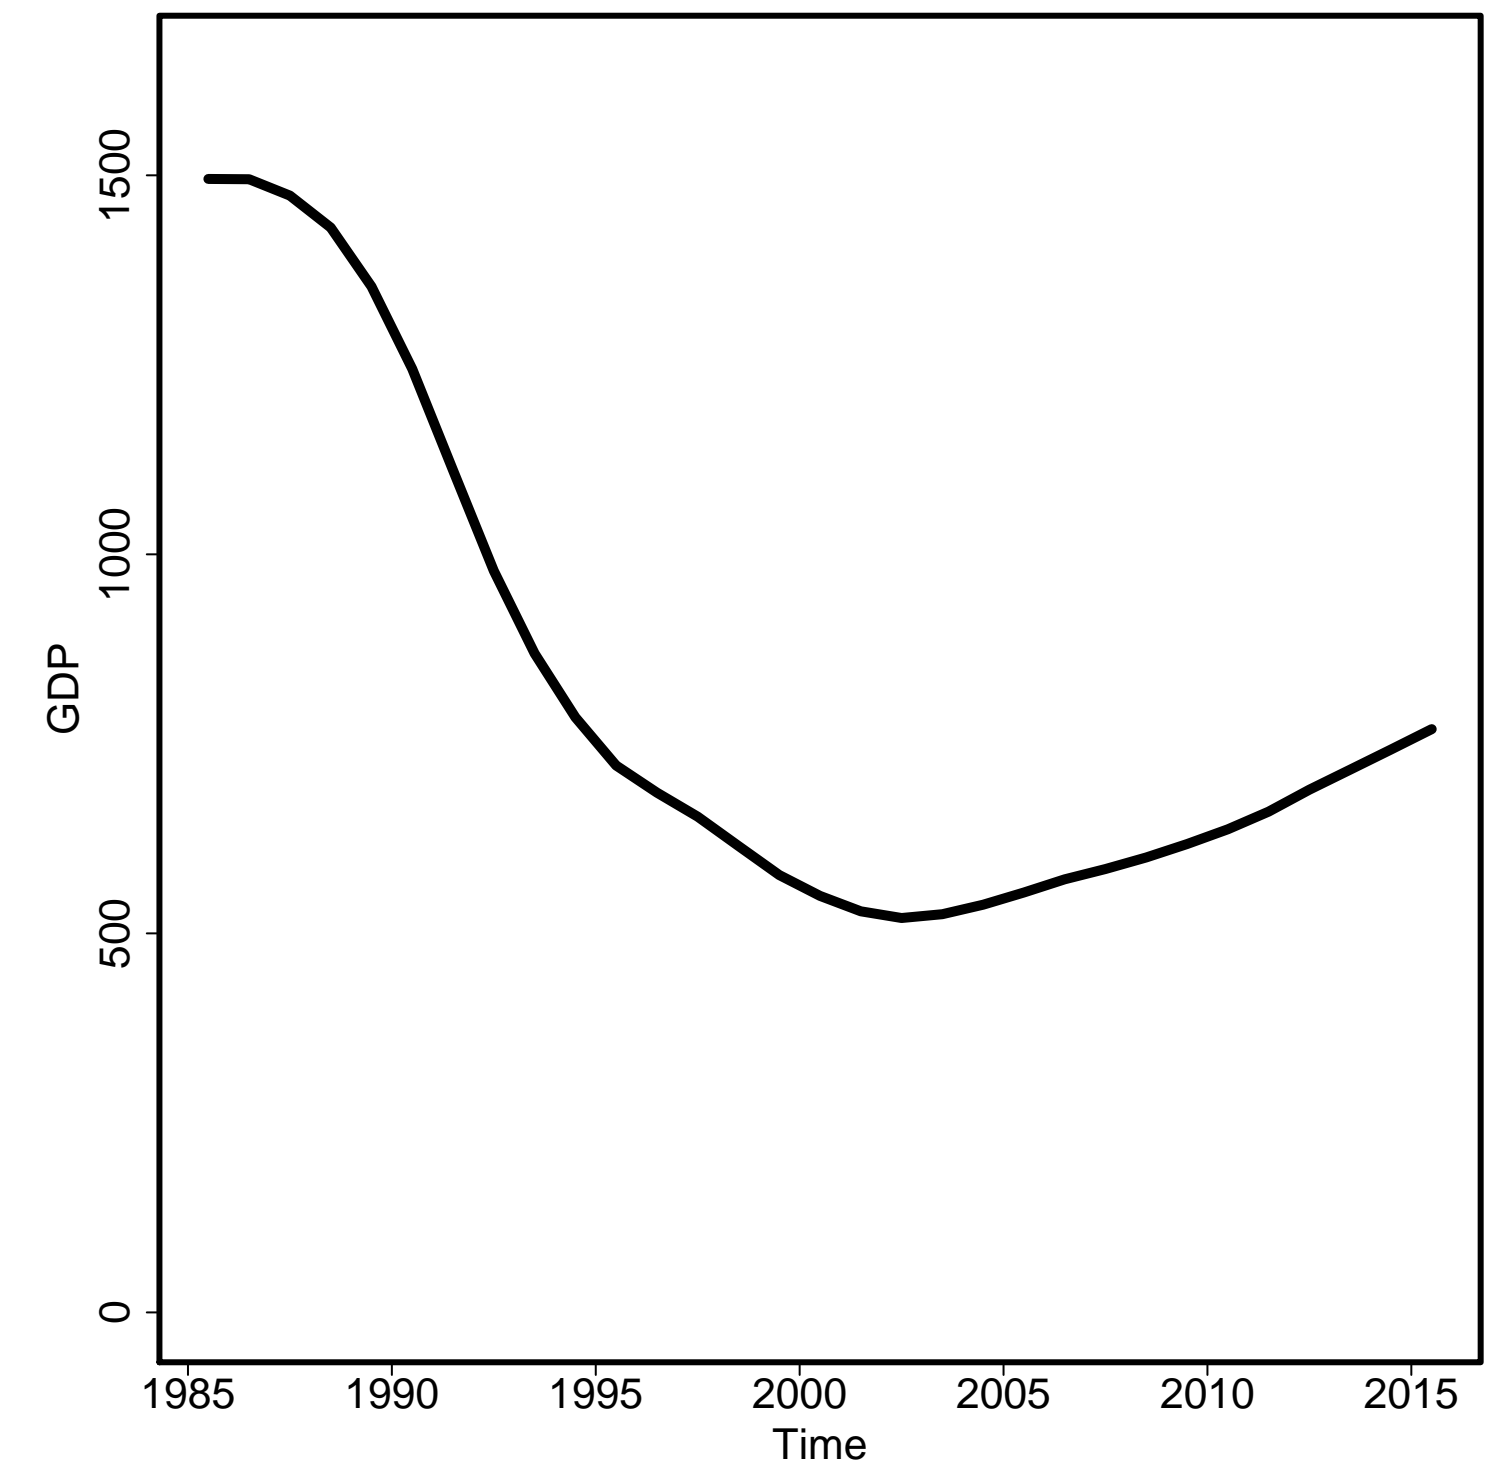

General Fertility Rate

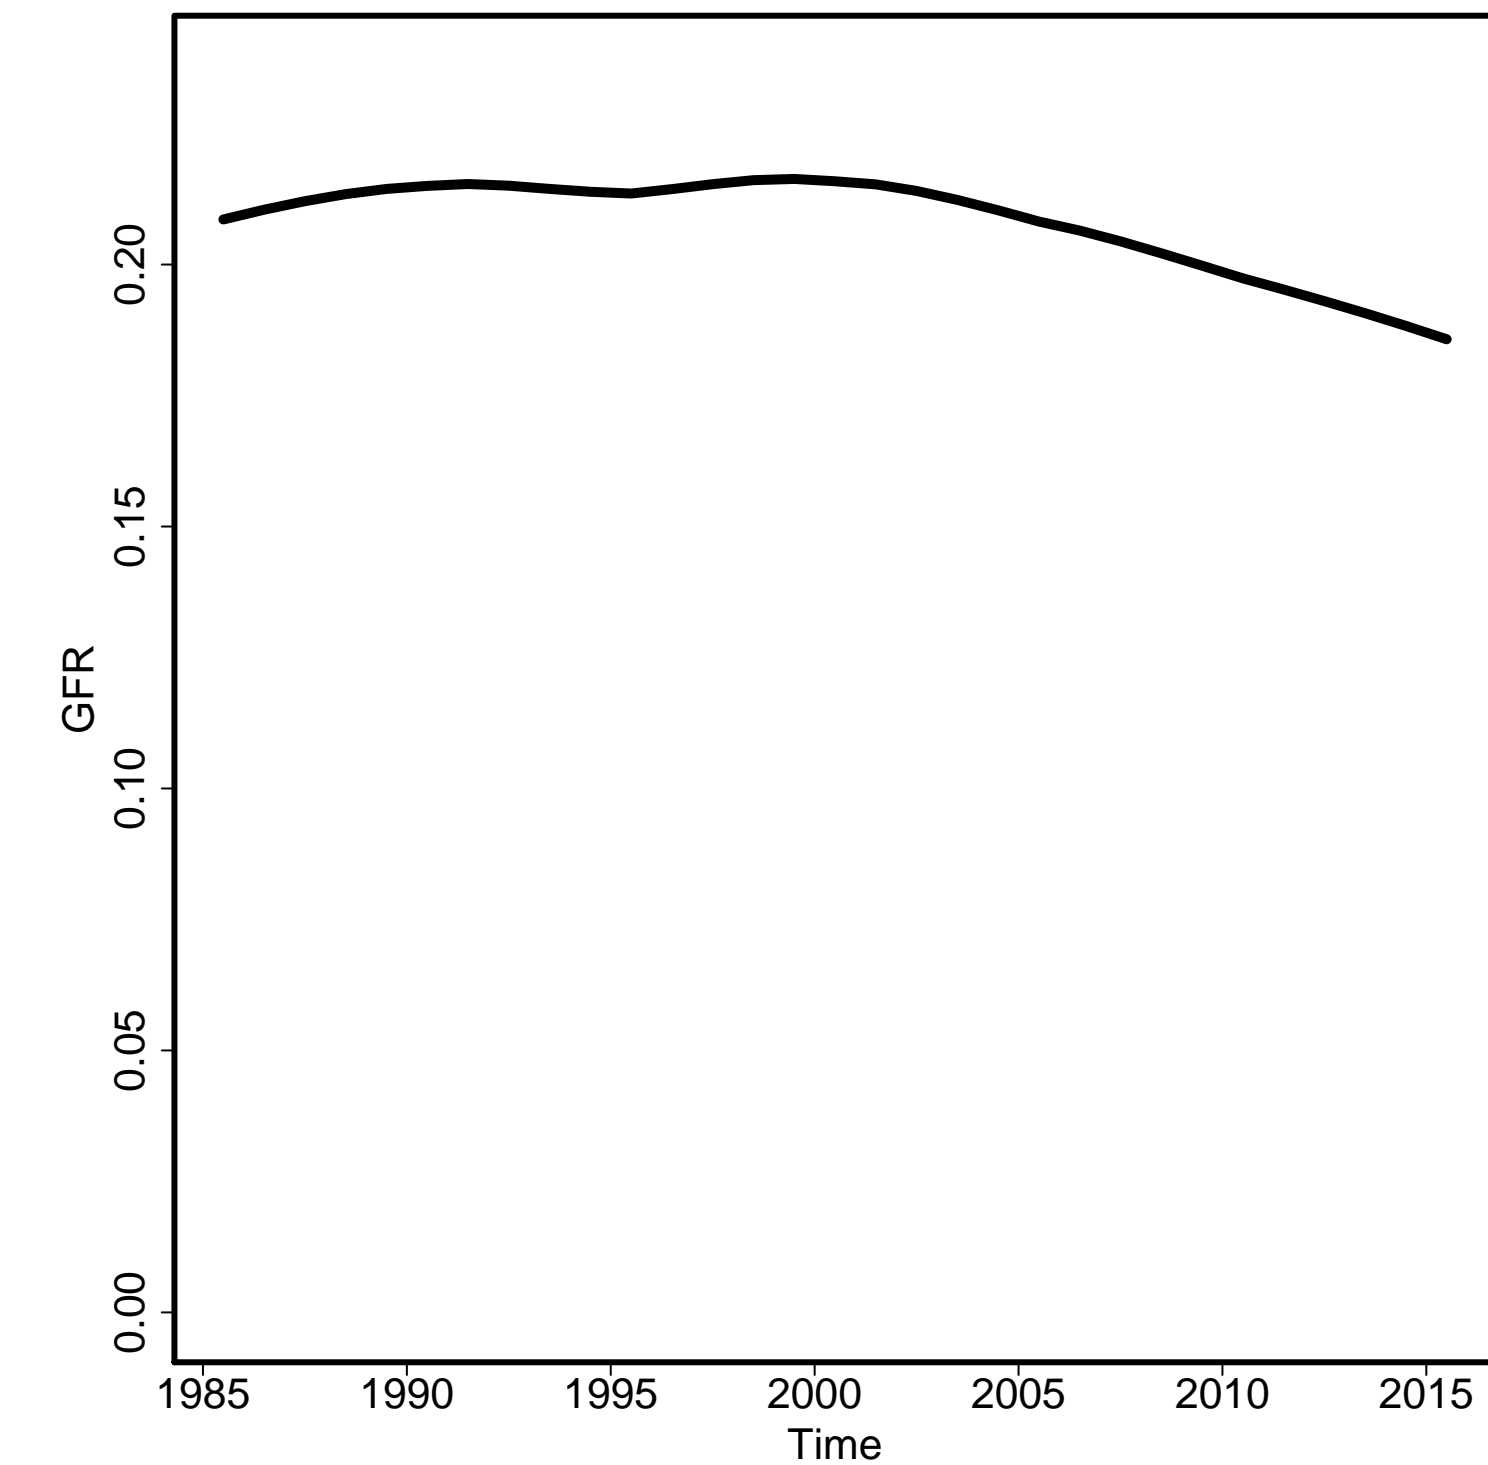

Skilled Attendance to Birth

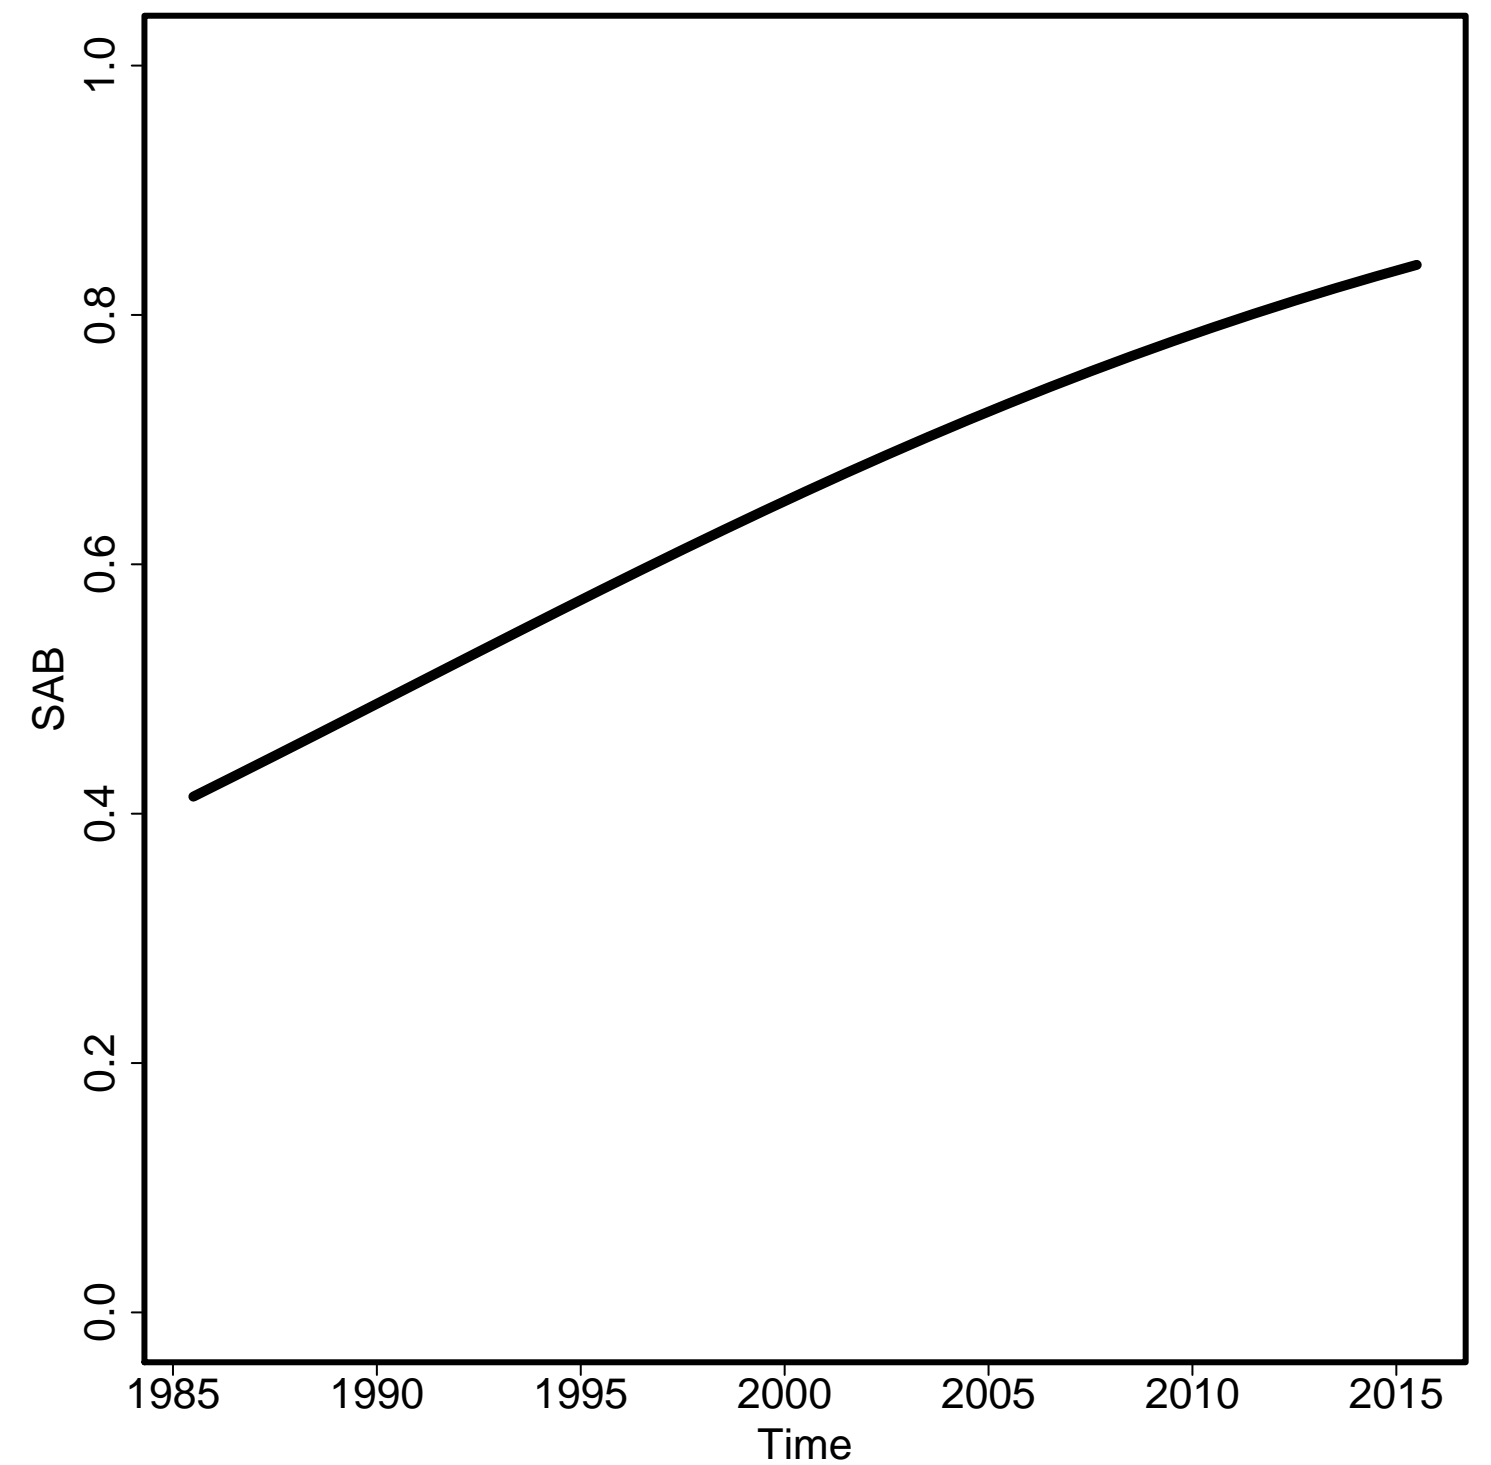

Envelope/Births

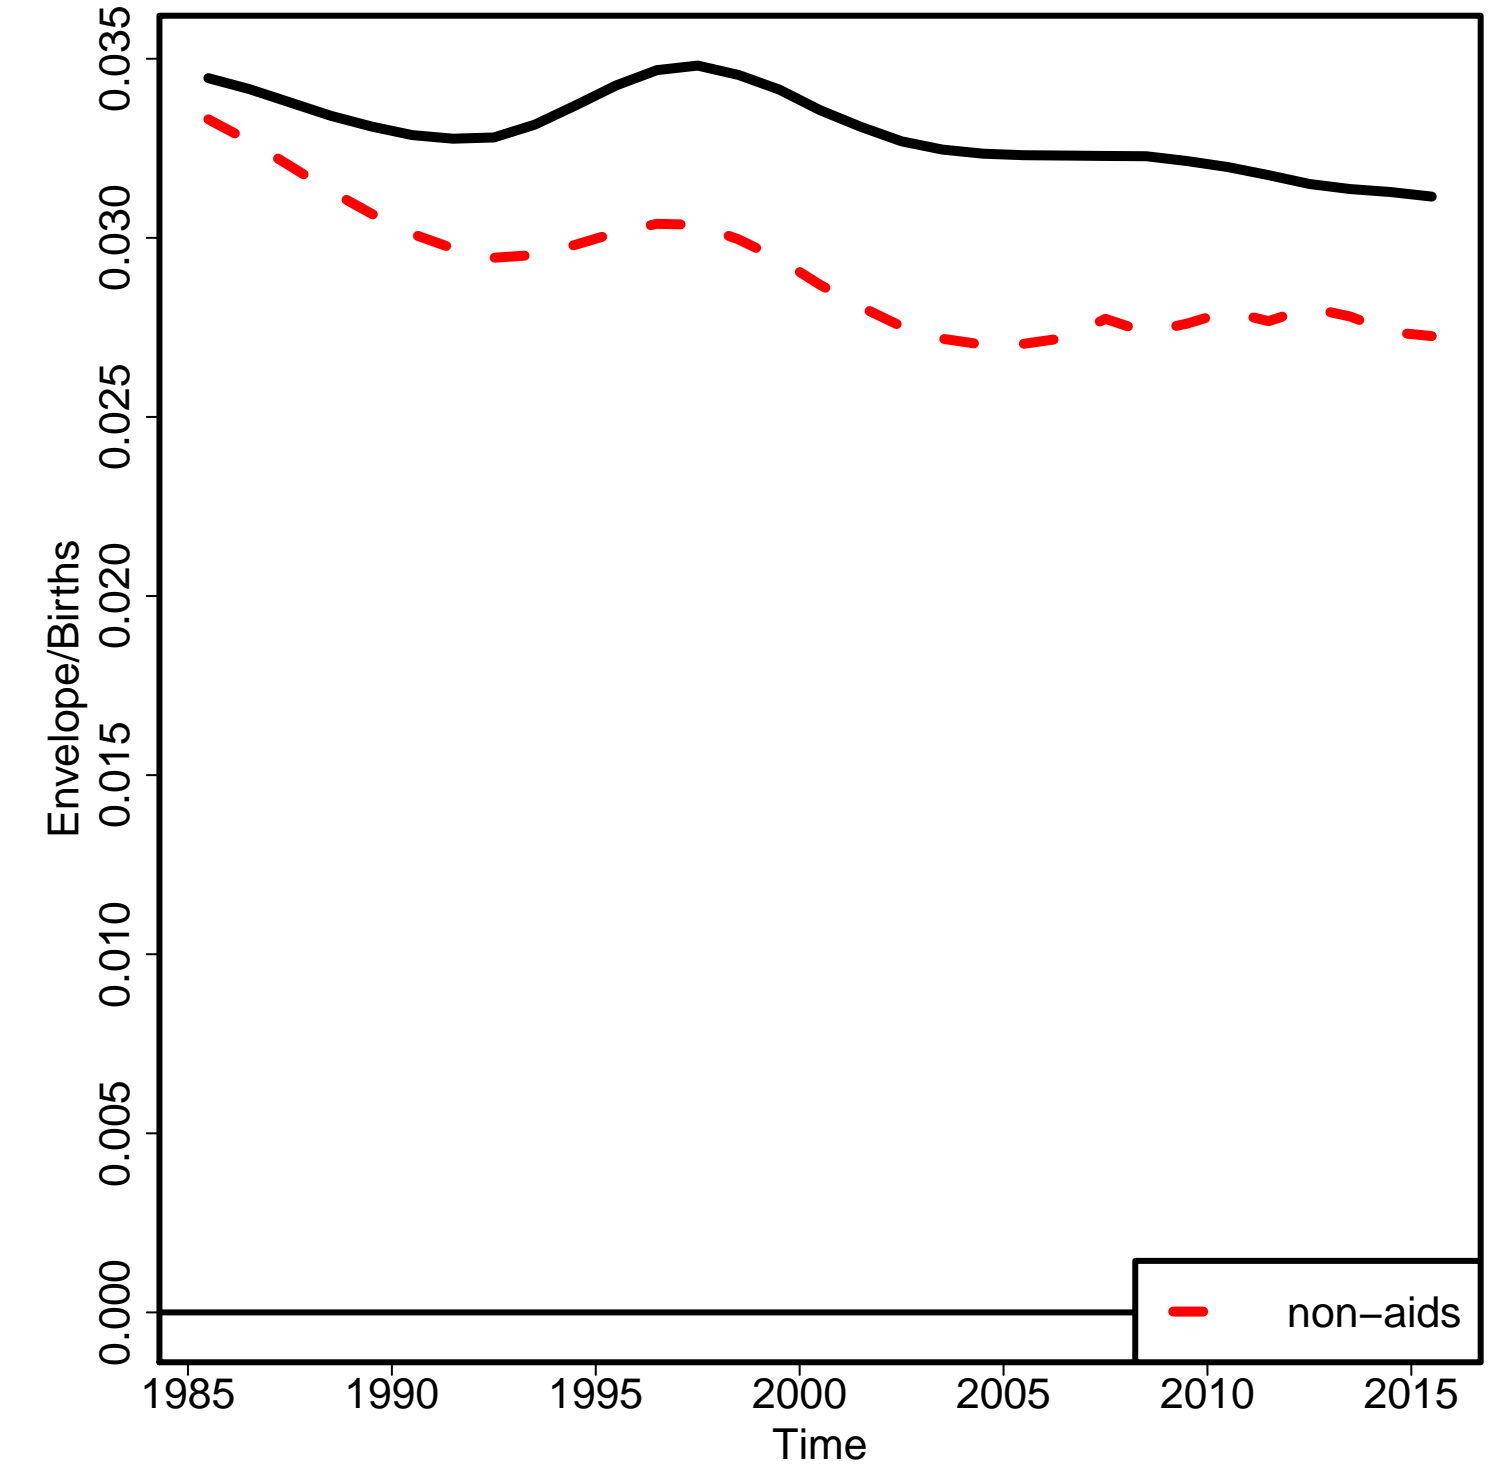

Non-aids MMR

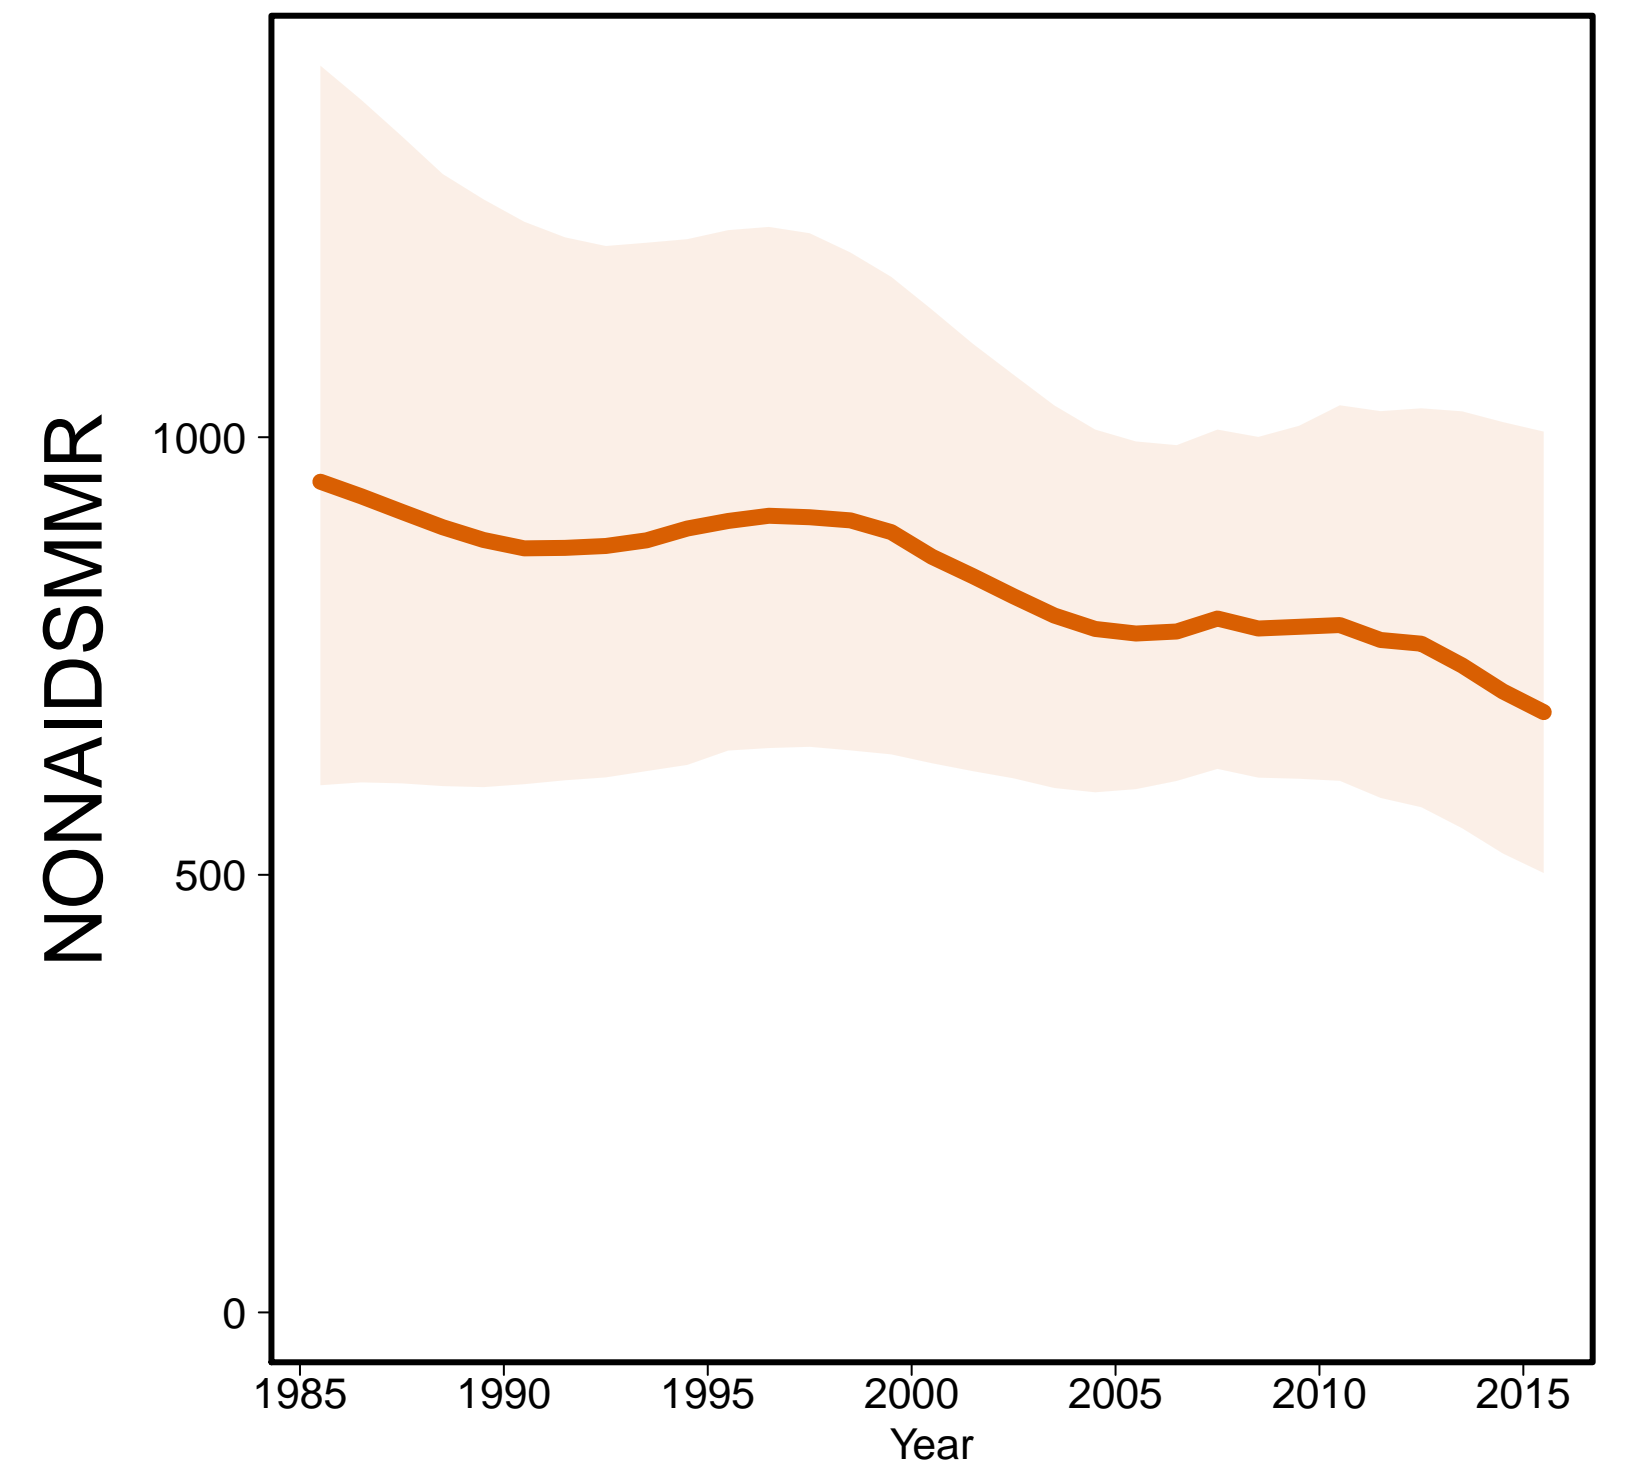

Aids MMR

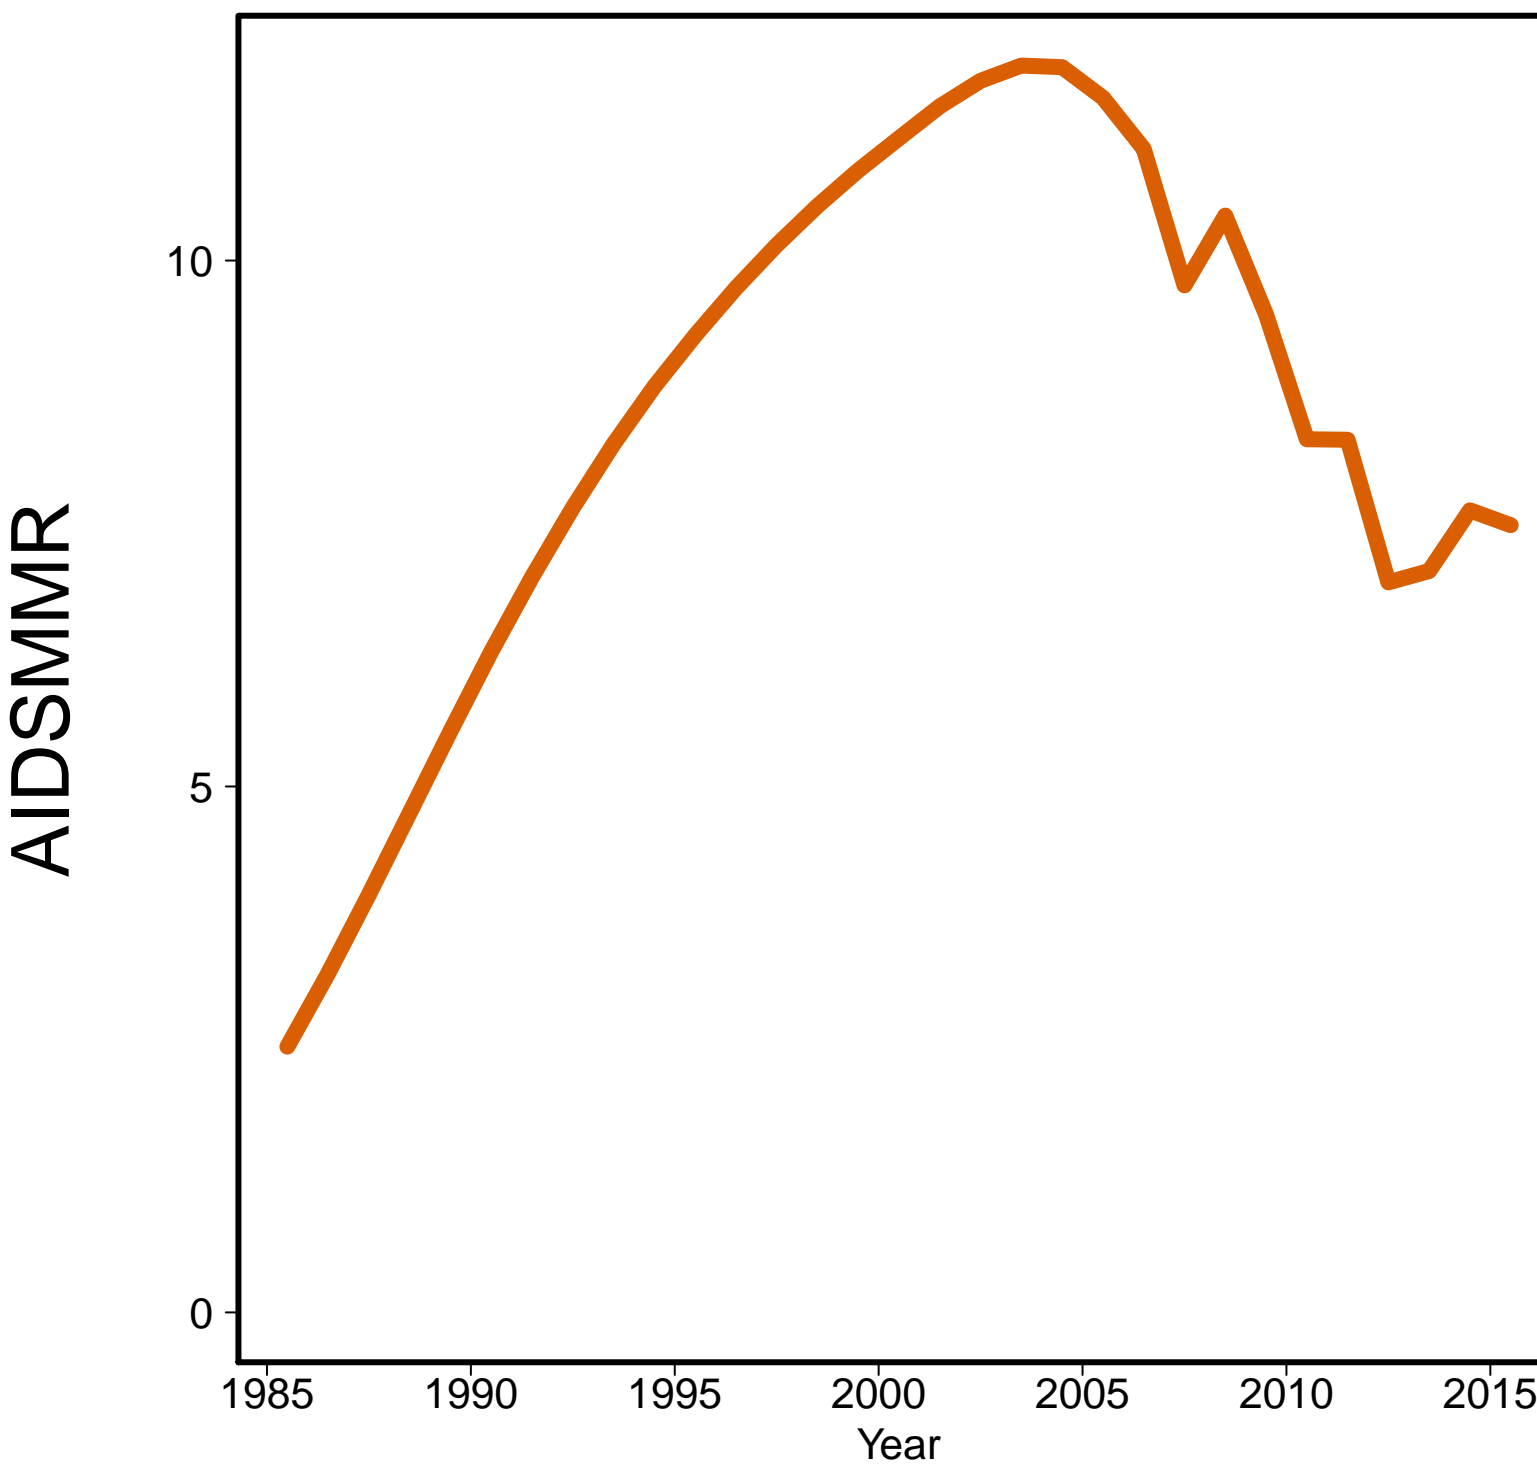

Denmark [DNK]  
(Developed regions)

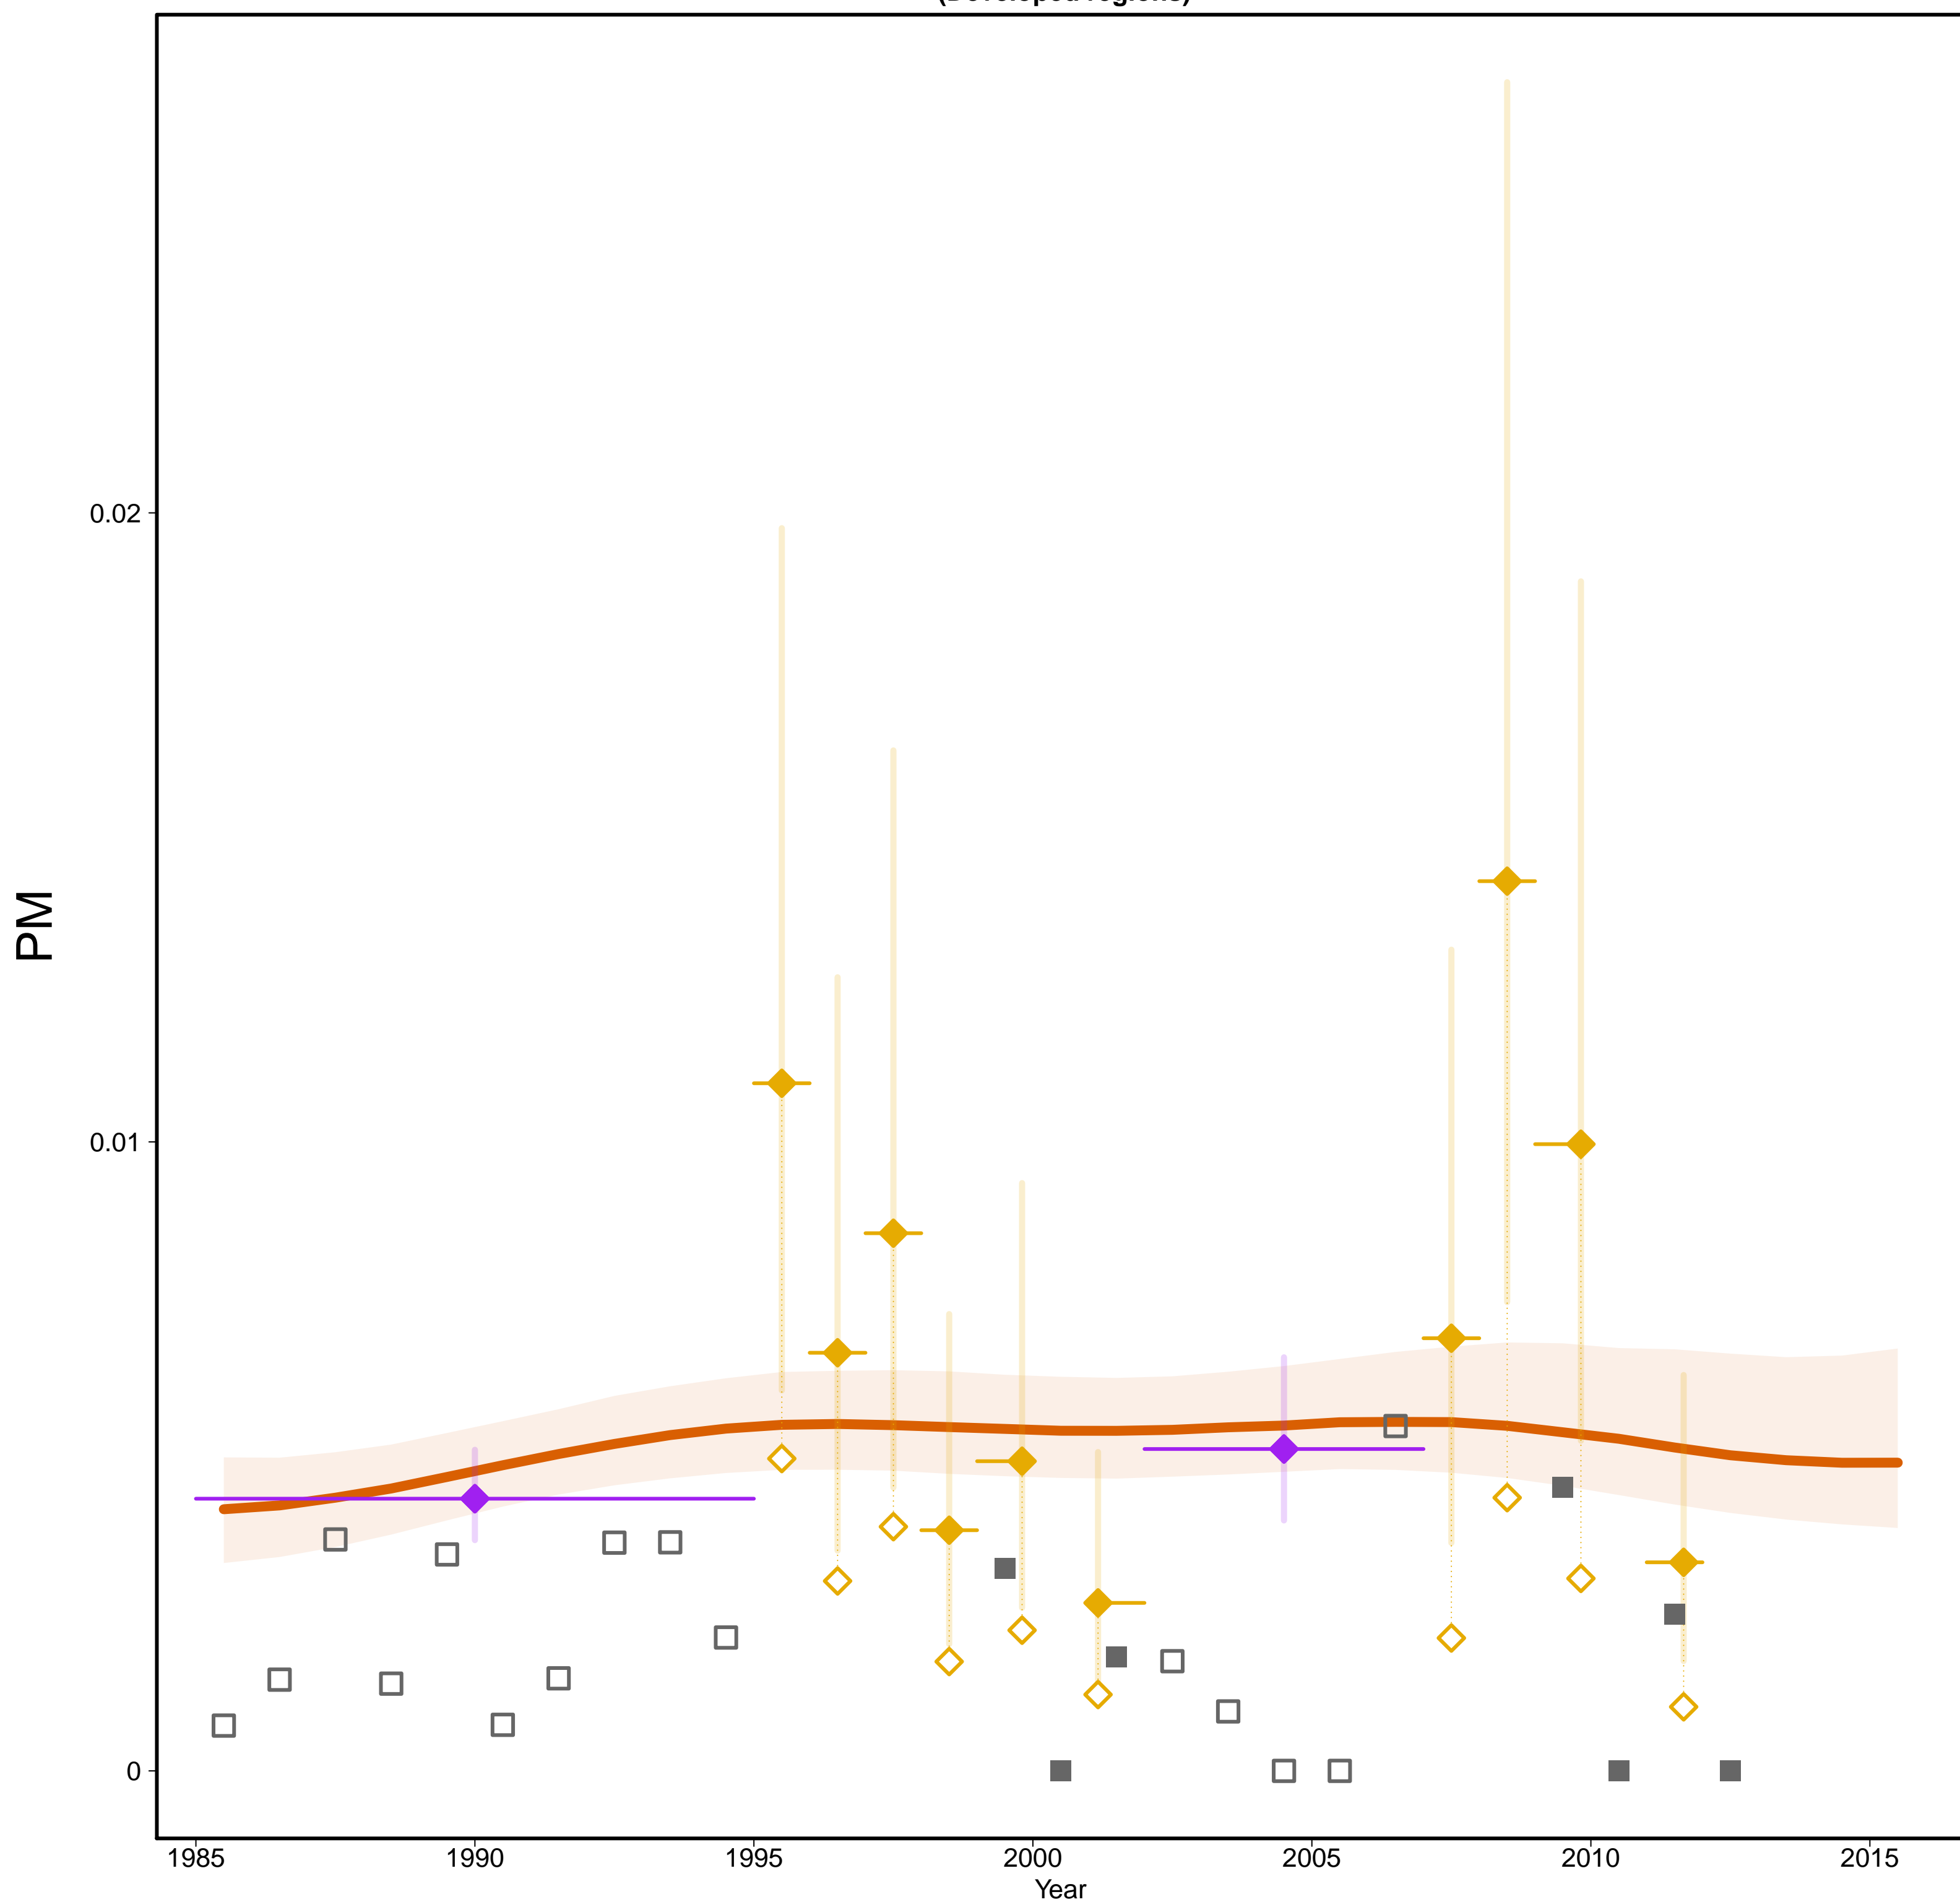

Denmark [DNK]  
(Developed regions)

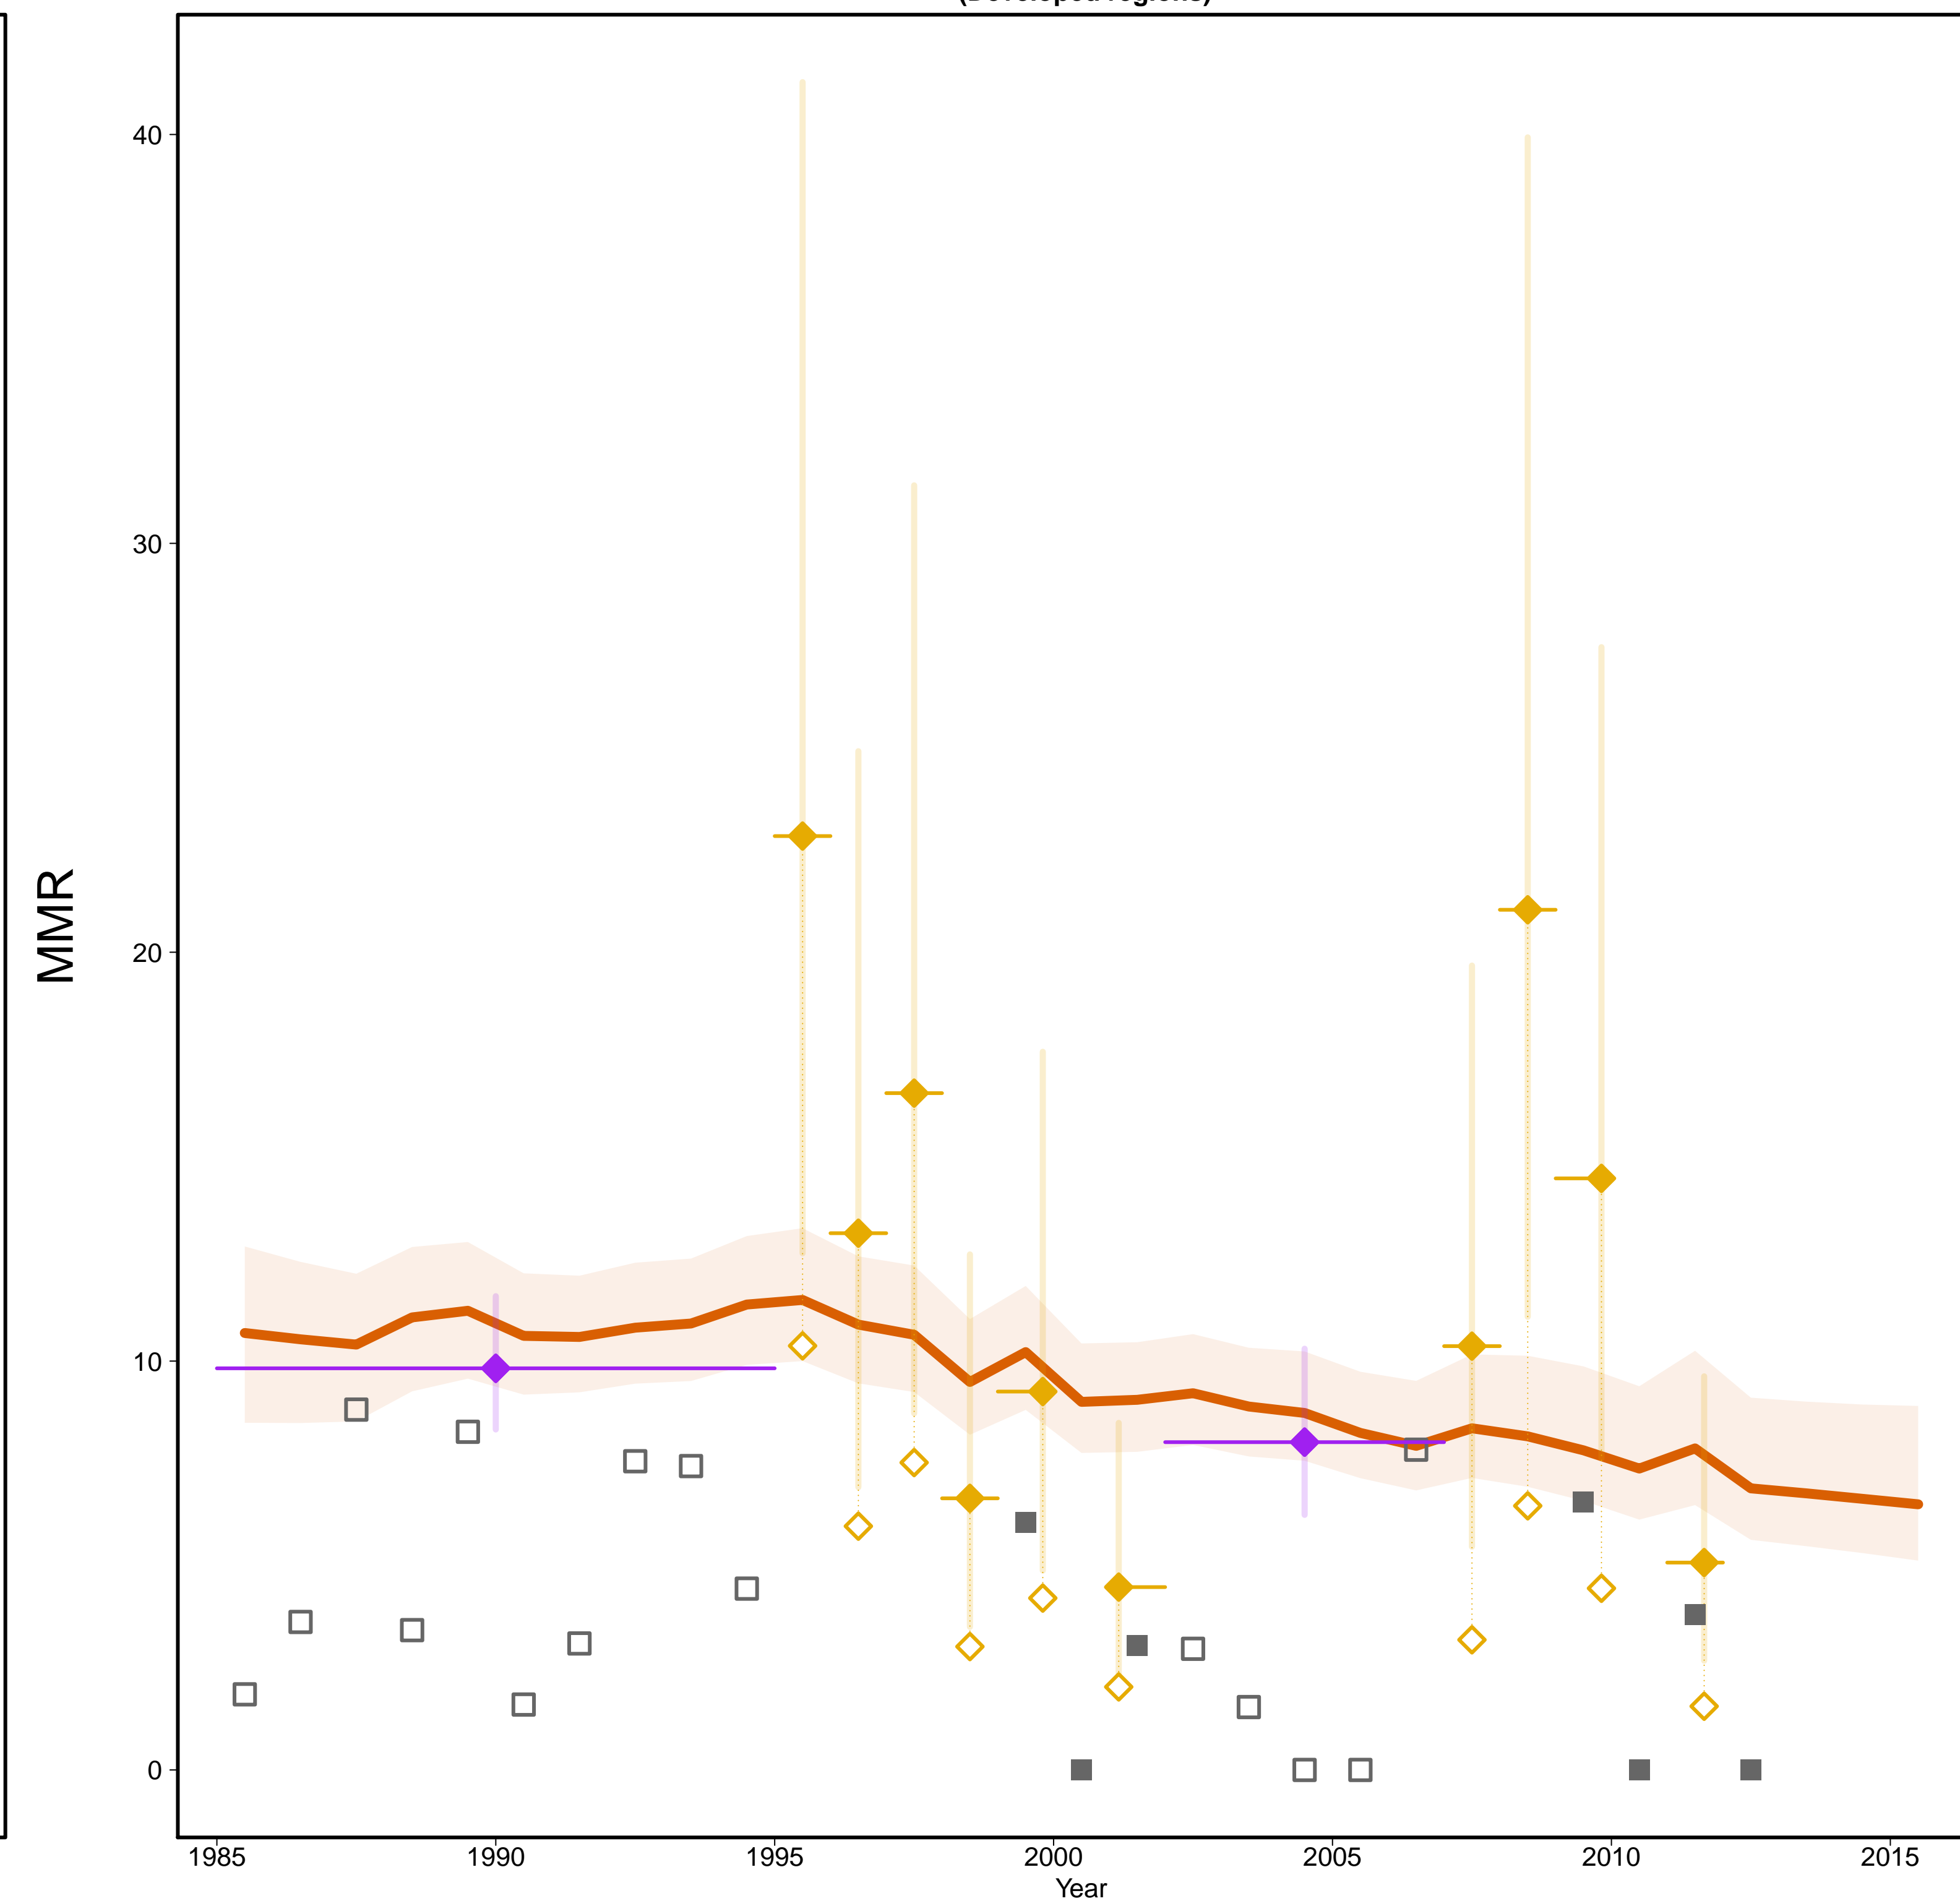

- Estimates —
- MMR Database 2015 —
- ◇ Observed Data
- ◆ Adjusted Data
- Data type —
- ◆ VR
- ◆ Spec. studies
- Reported VR before recalc.  
(related to 0 obs. mat. death)
- Excluded VR data  
(overlap with specialized study)

Gross Domestic Product

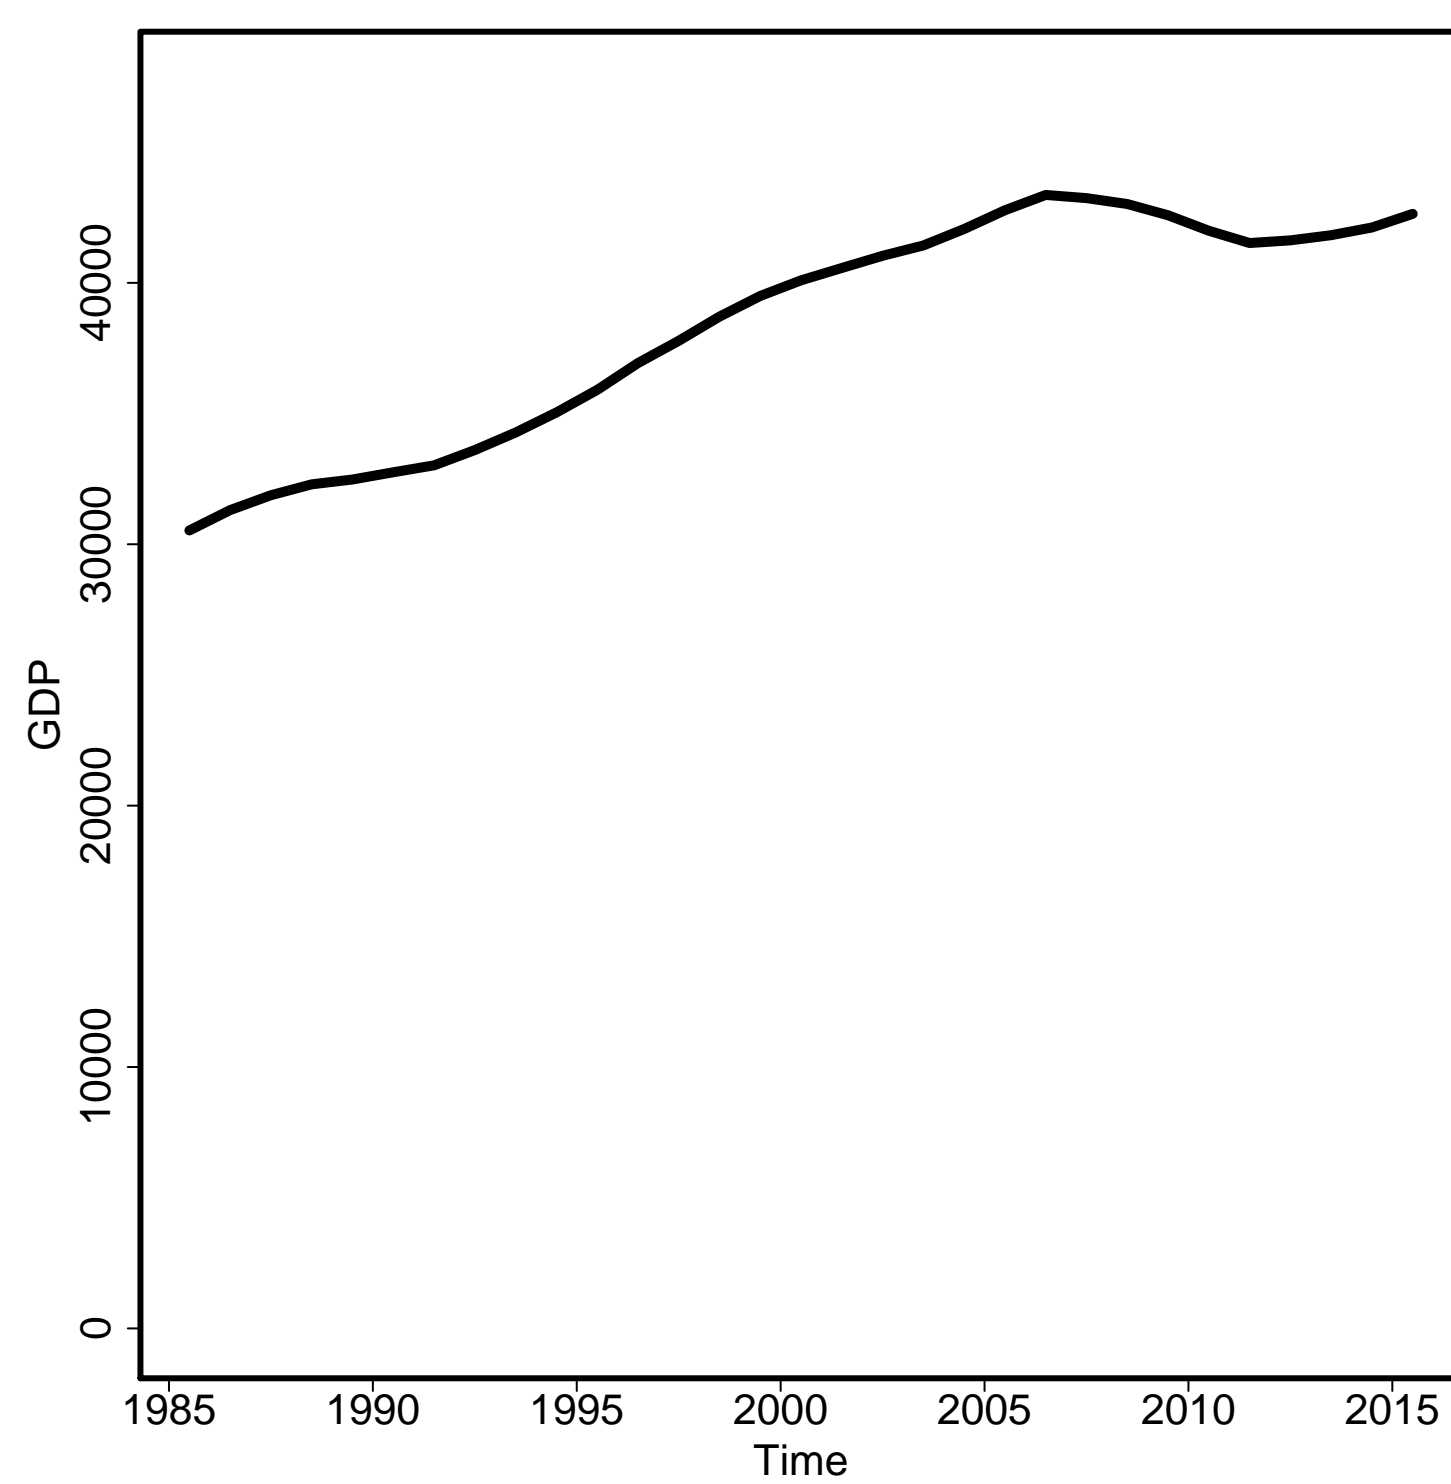

General Fertility Rate

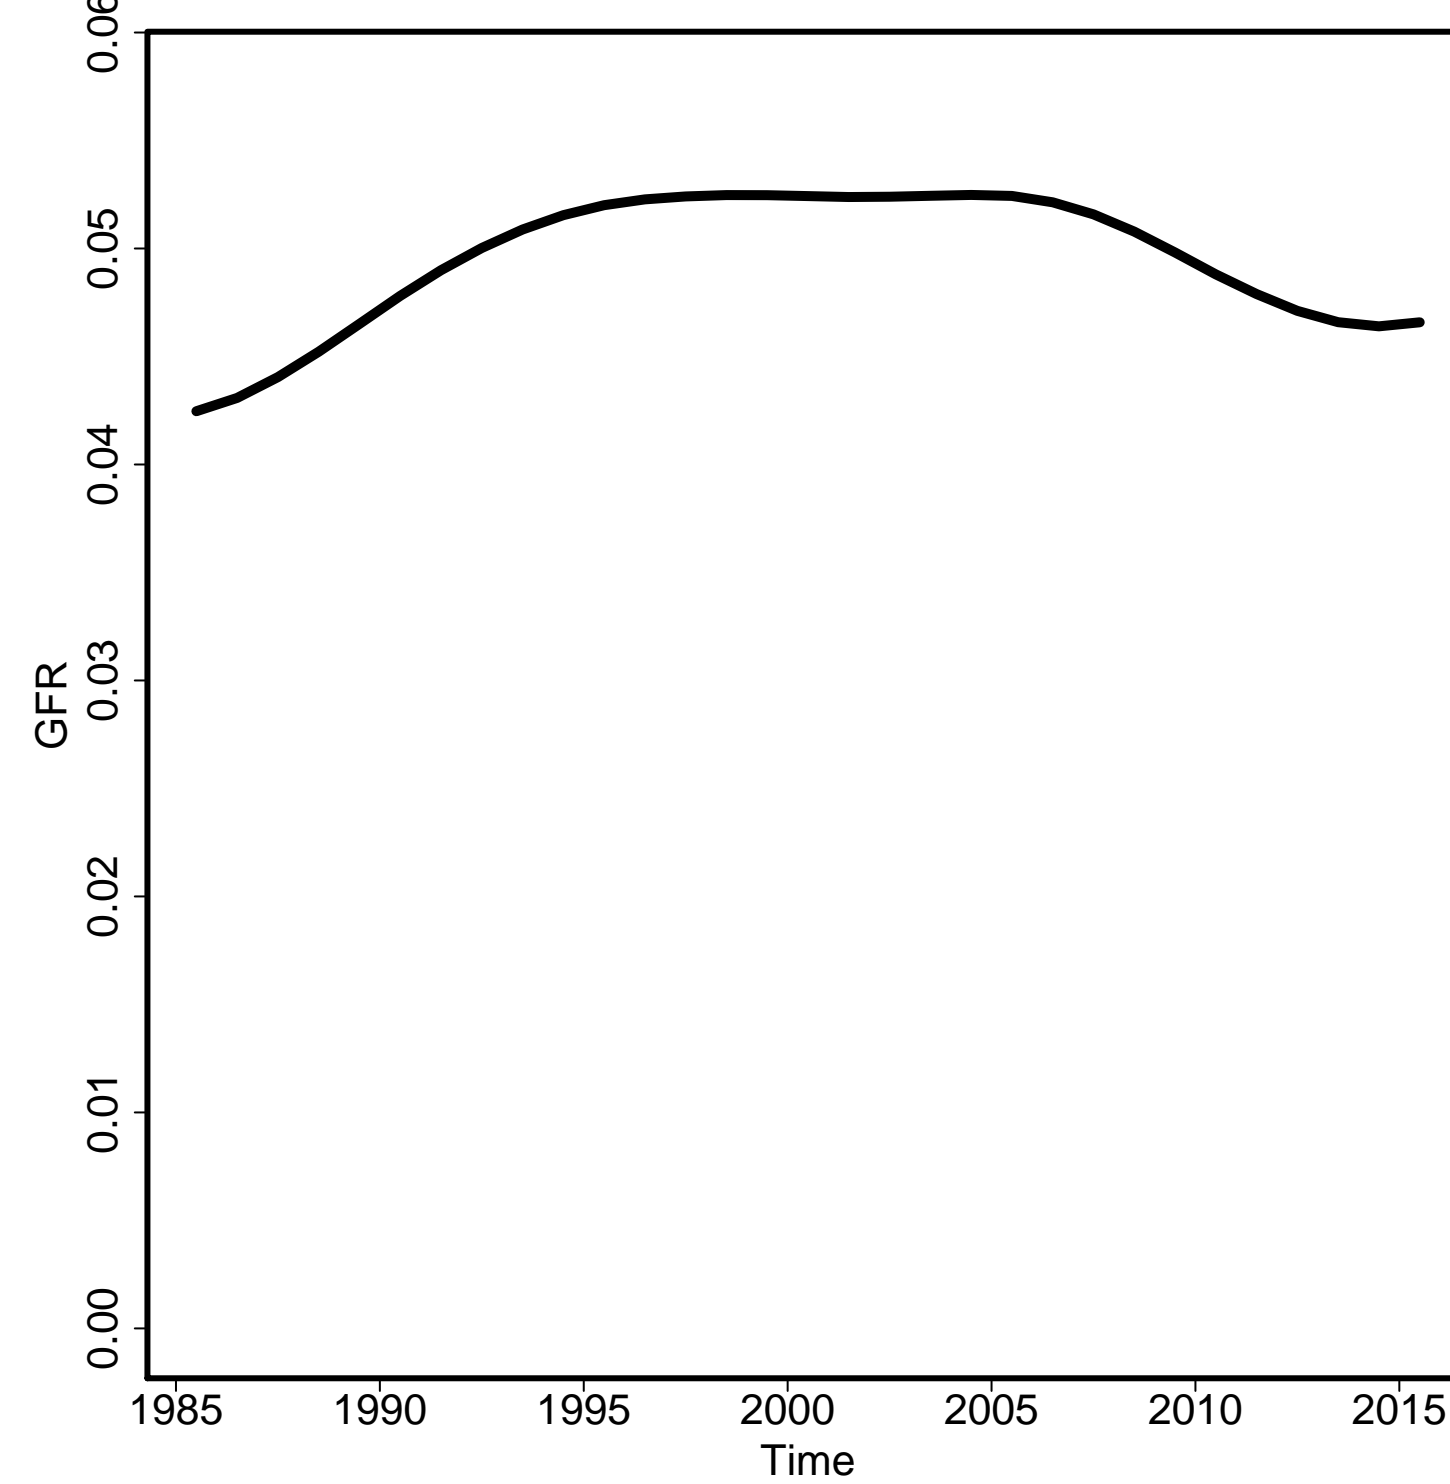

Skilled Attendance to Birth

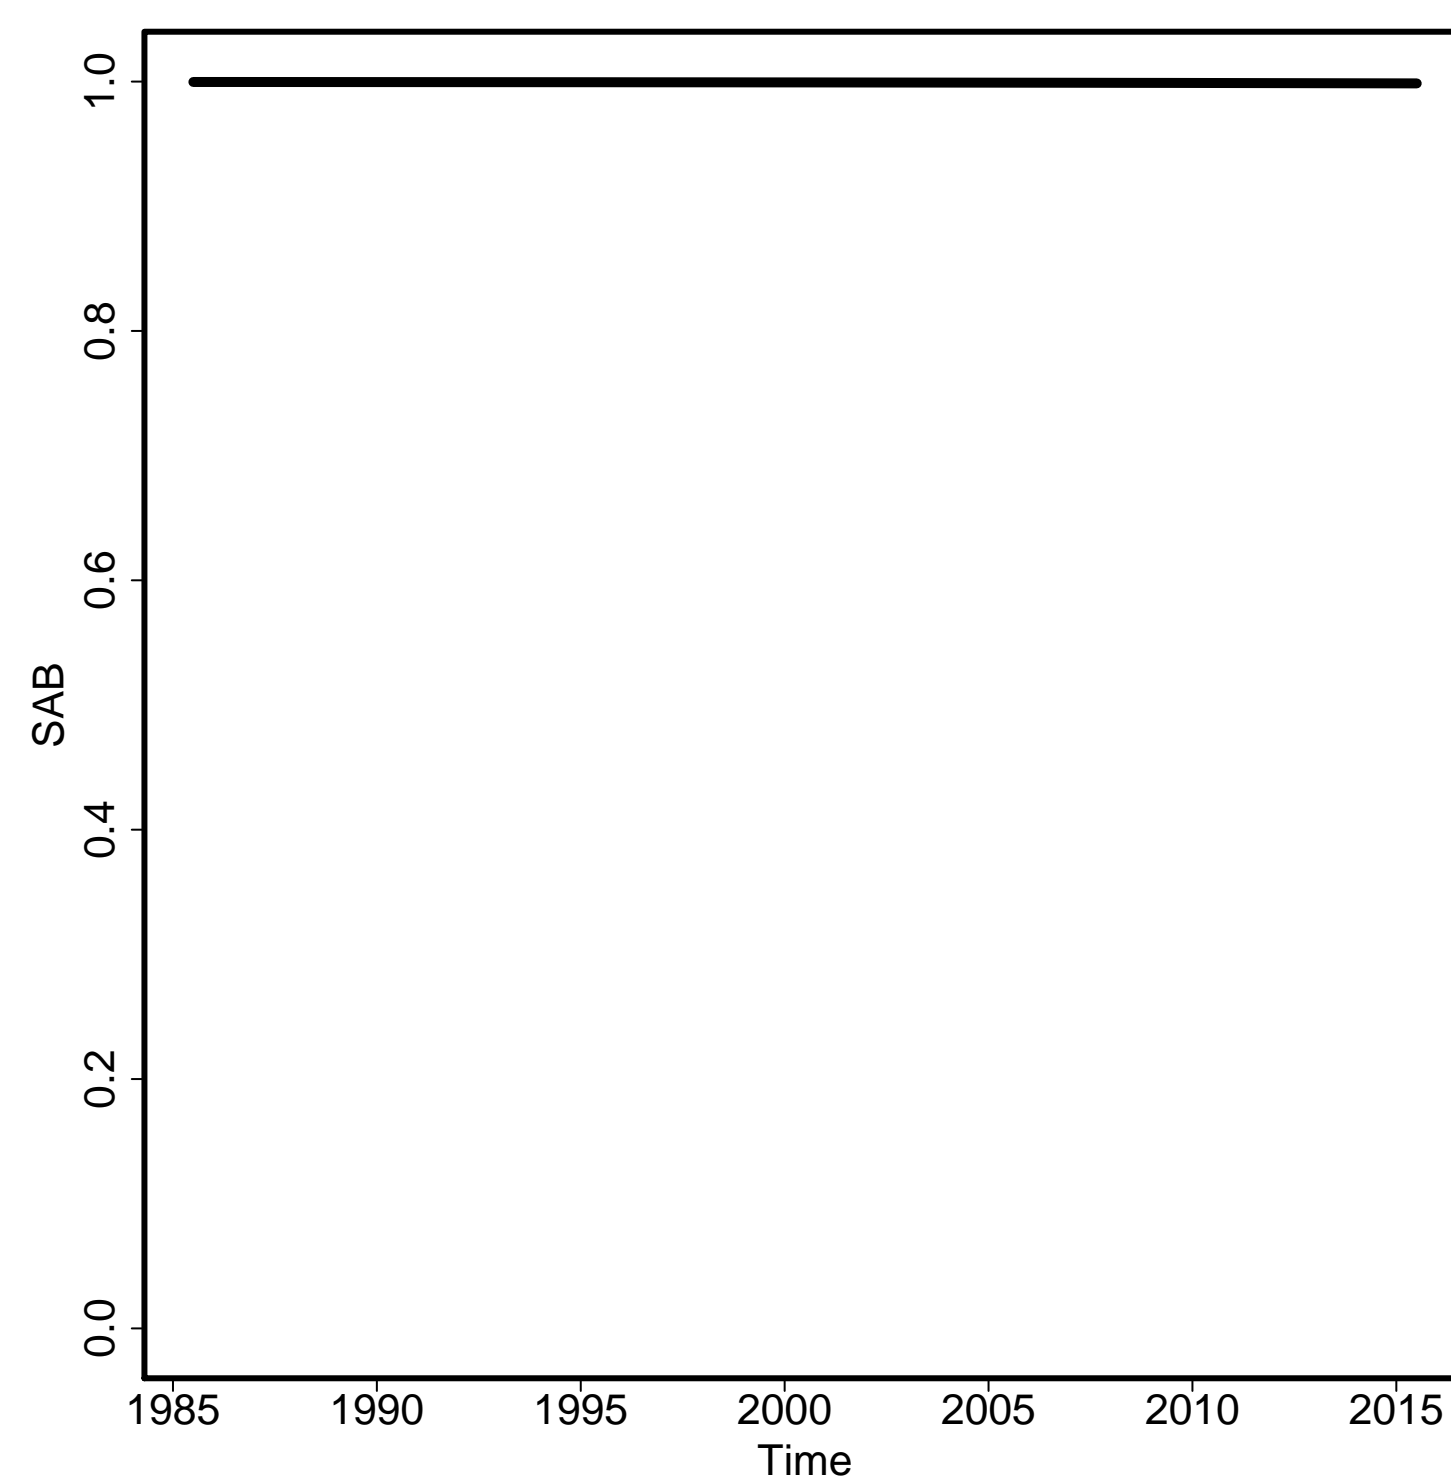

Envelope/Births

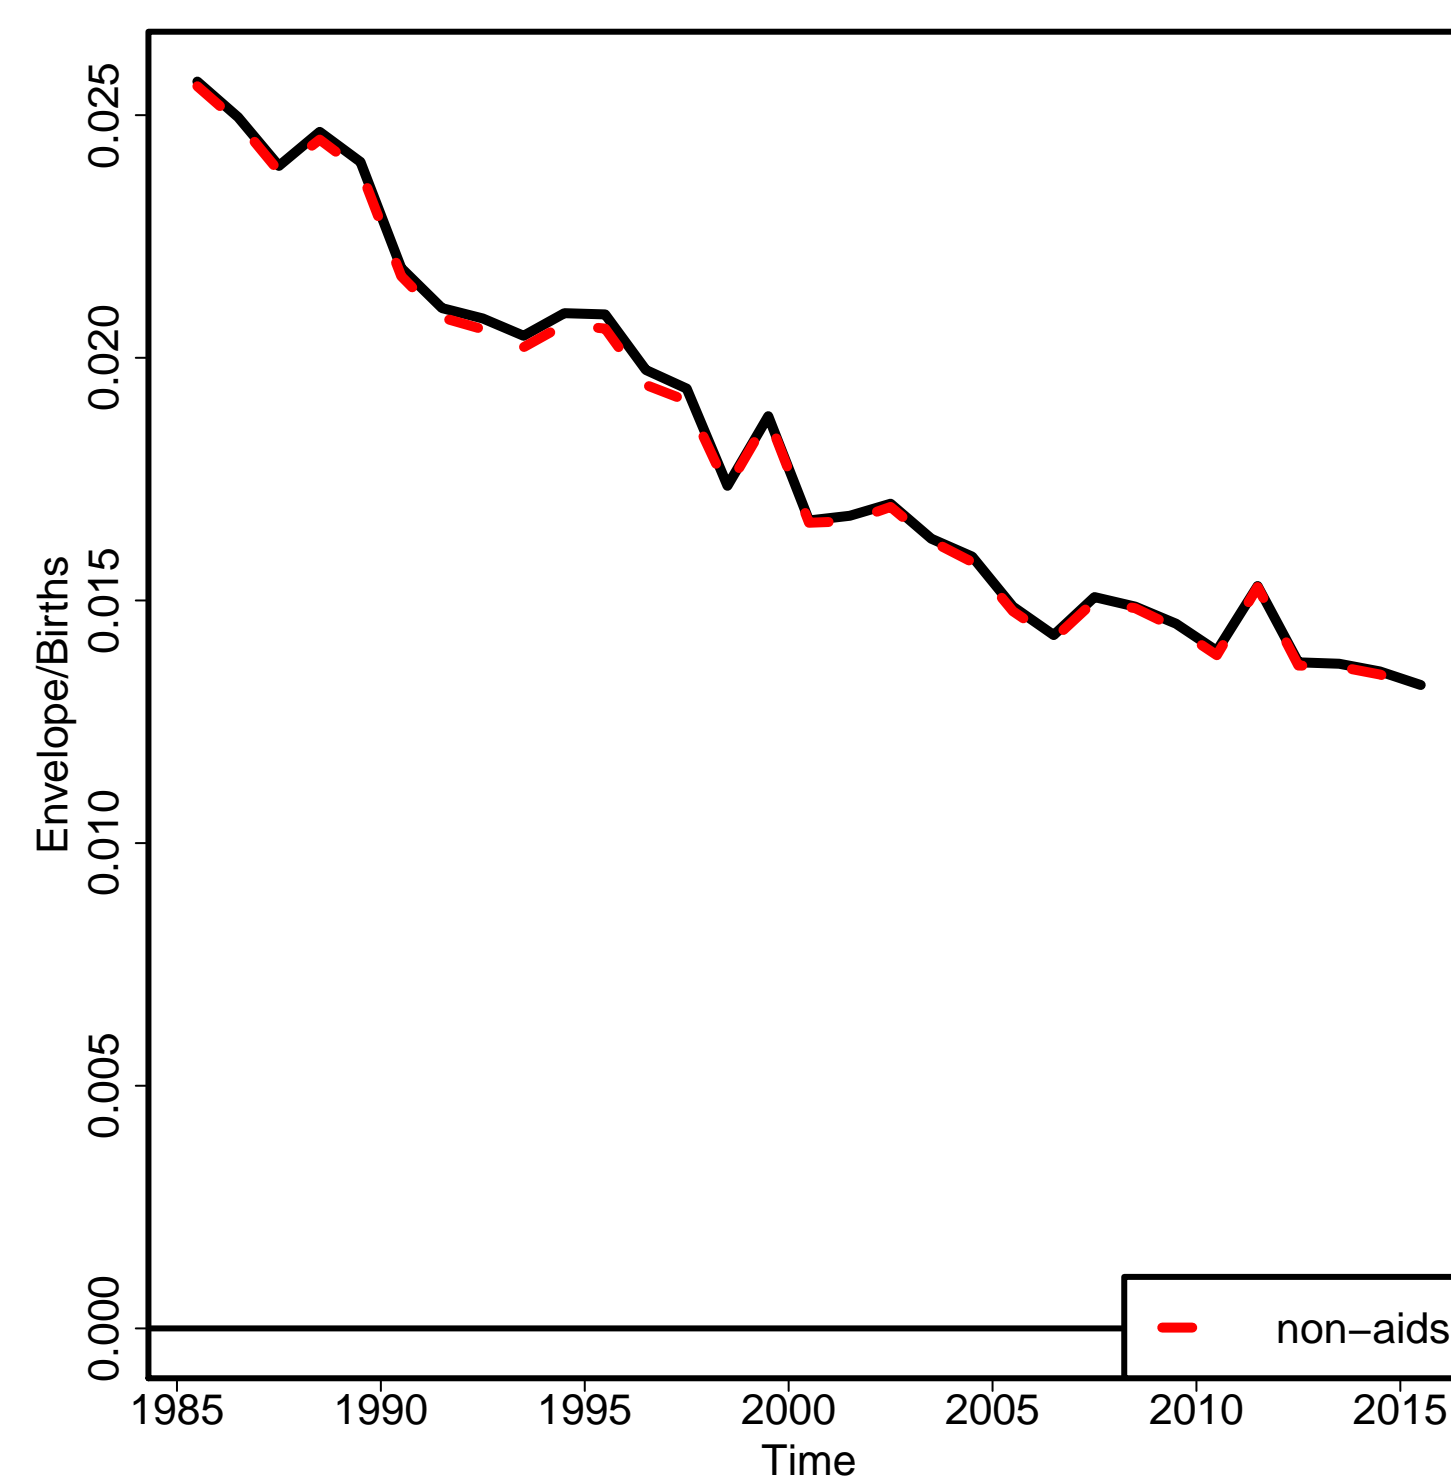

Non-aids MMR

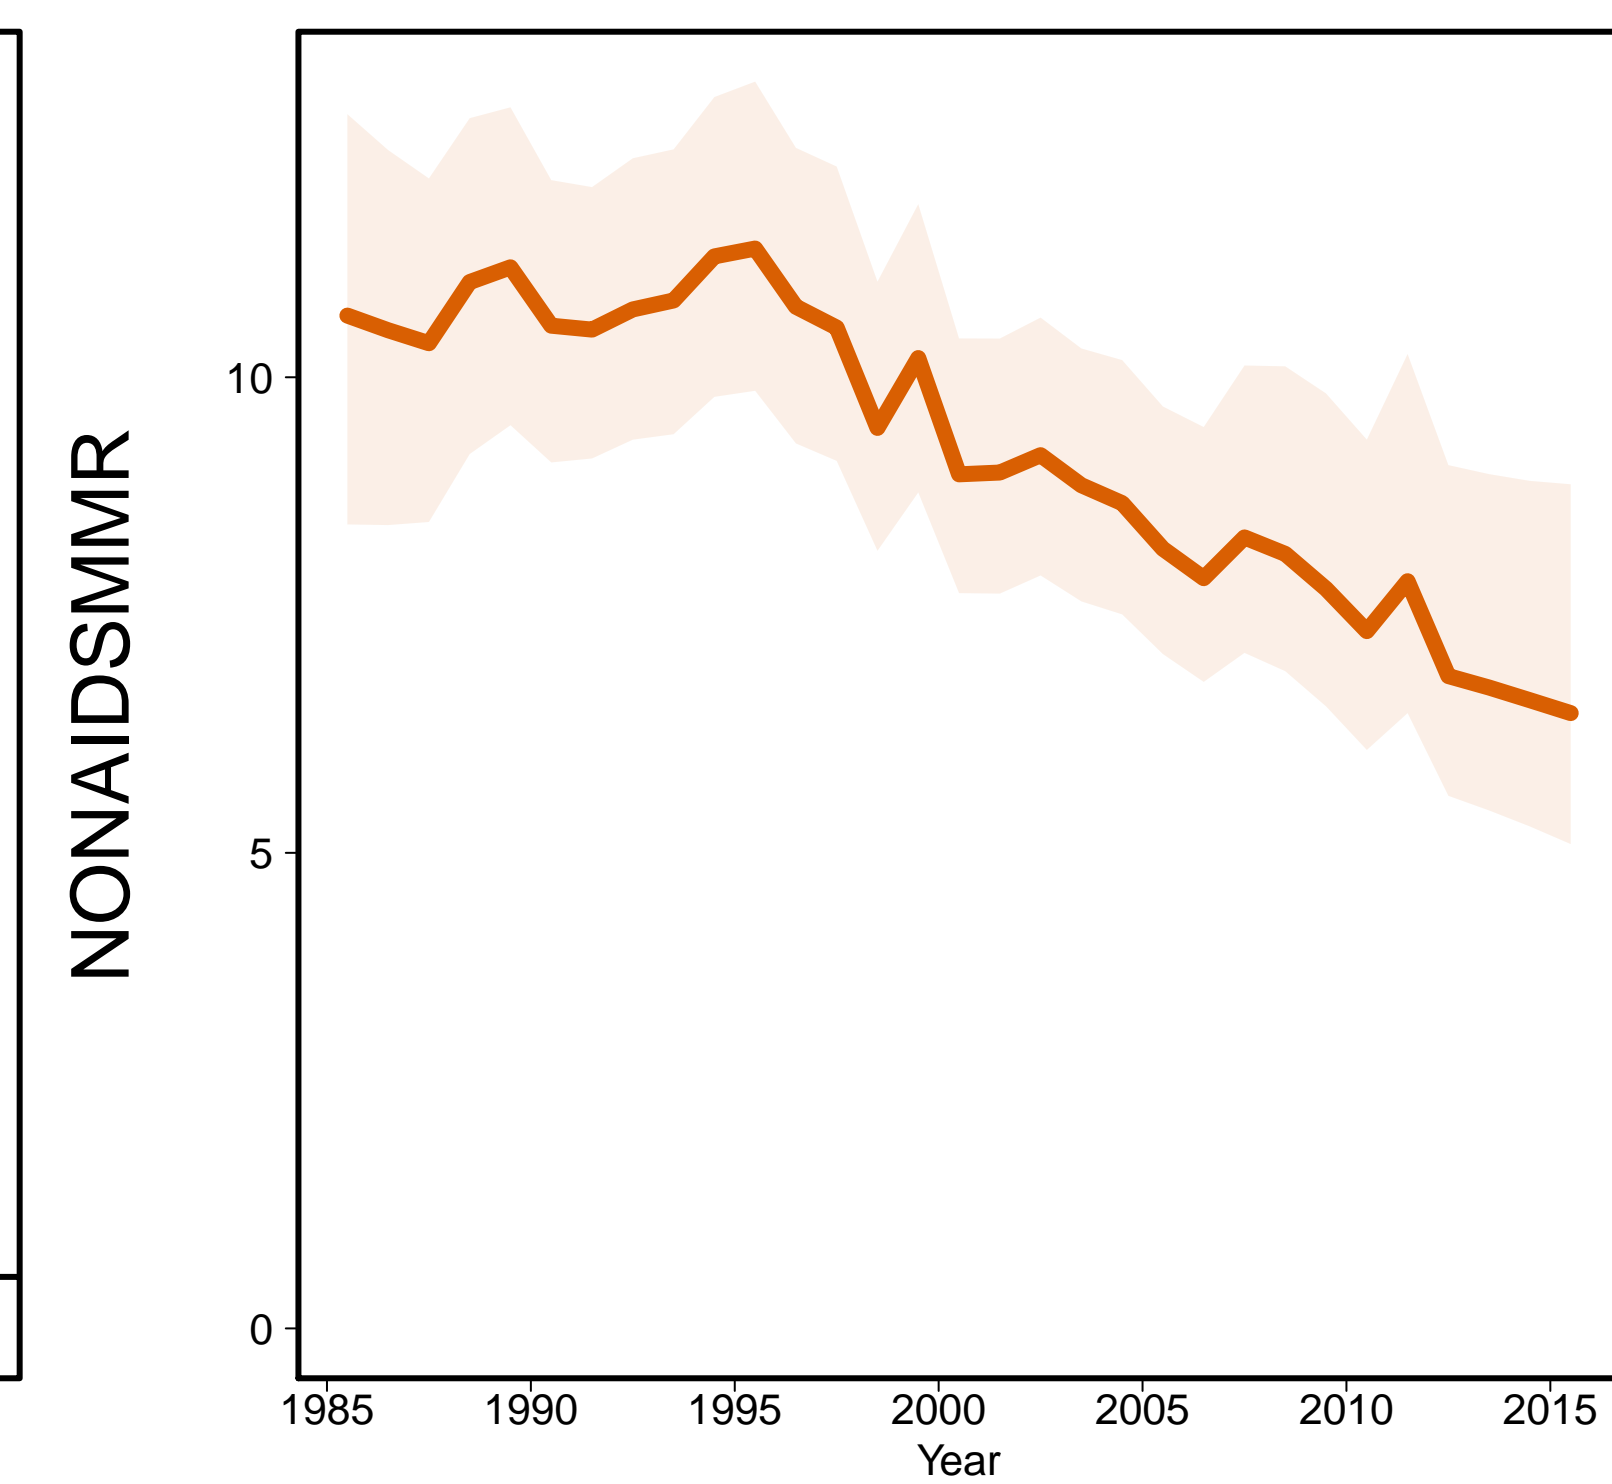

Aids MMR

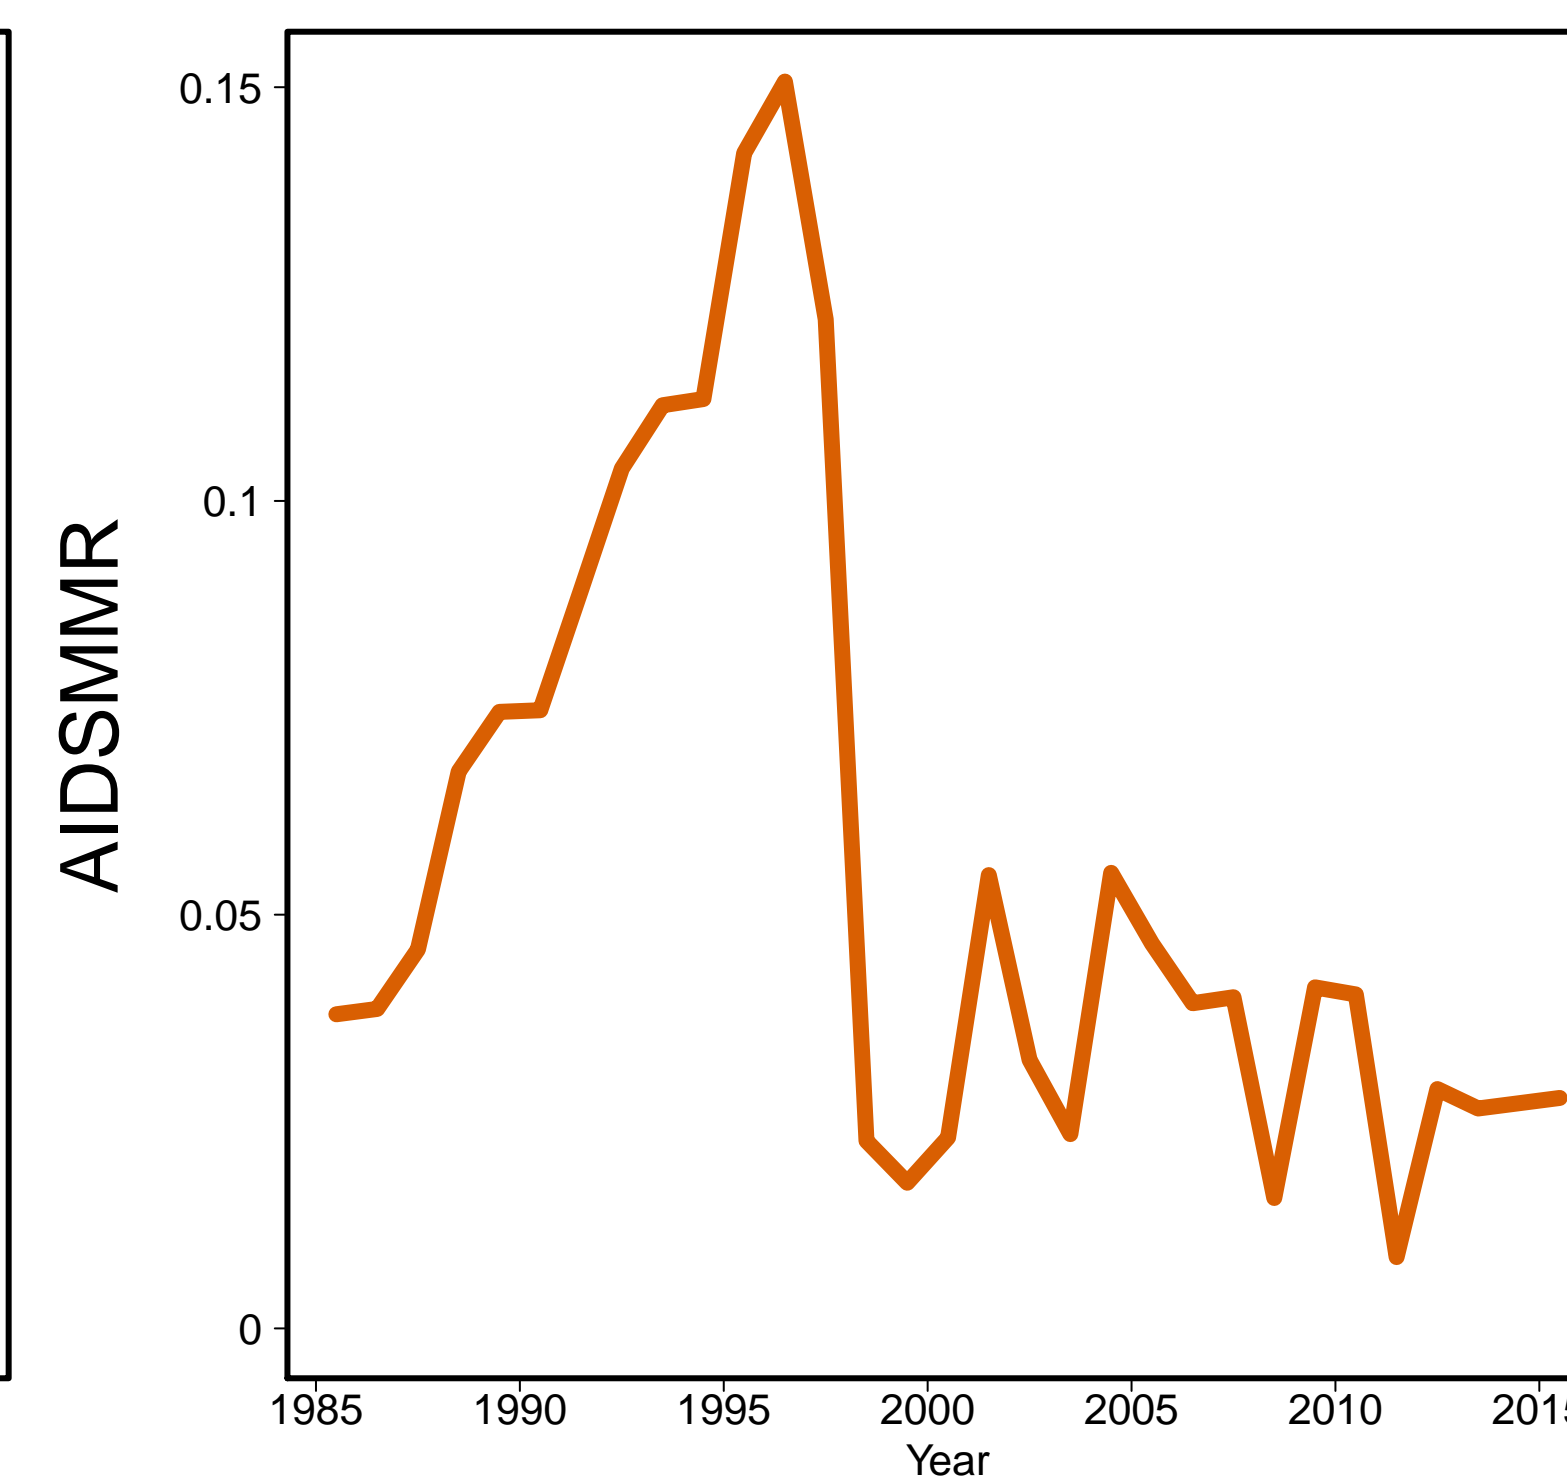

Djibouti [DJJ]  
(Eastern Africa)

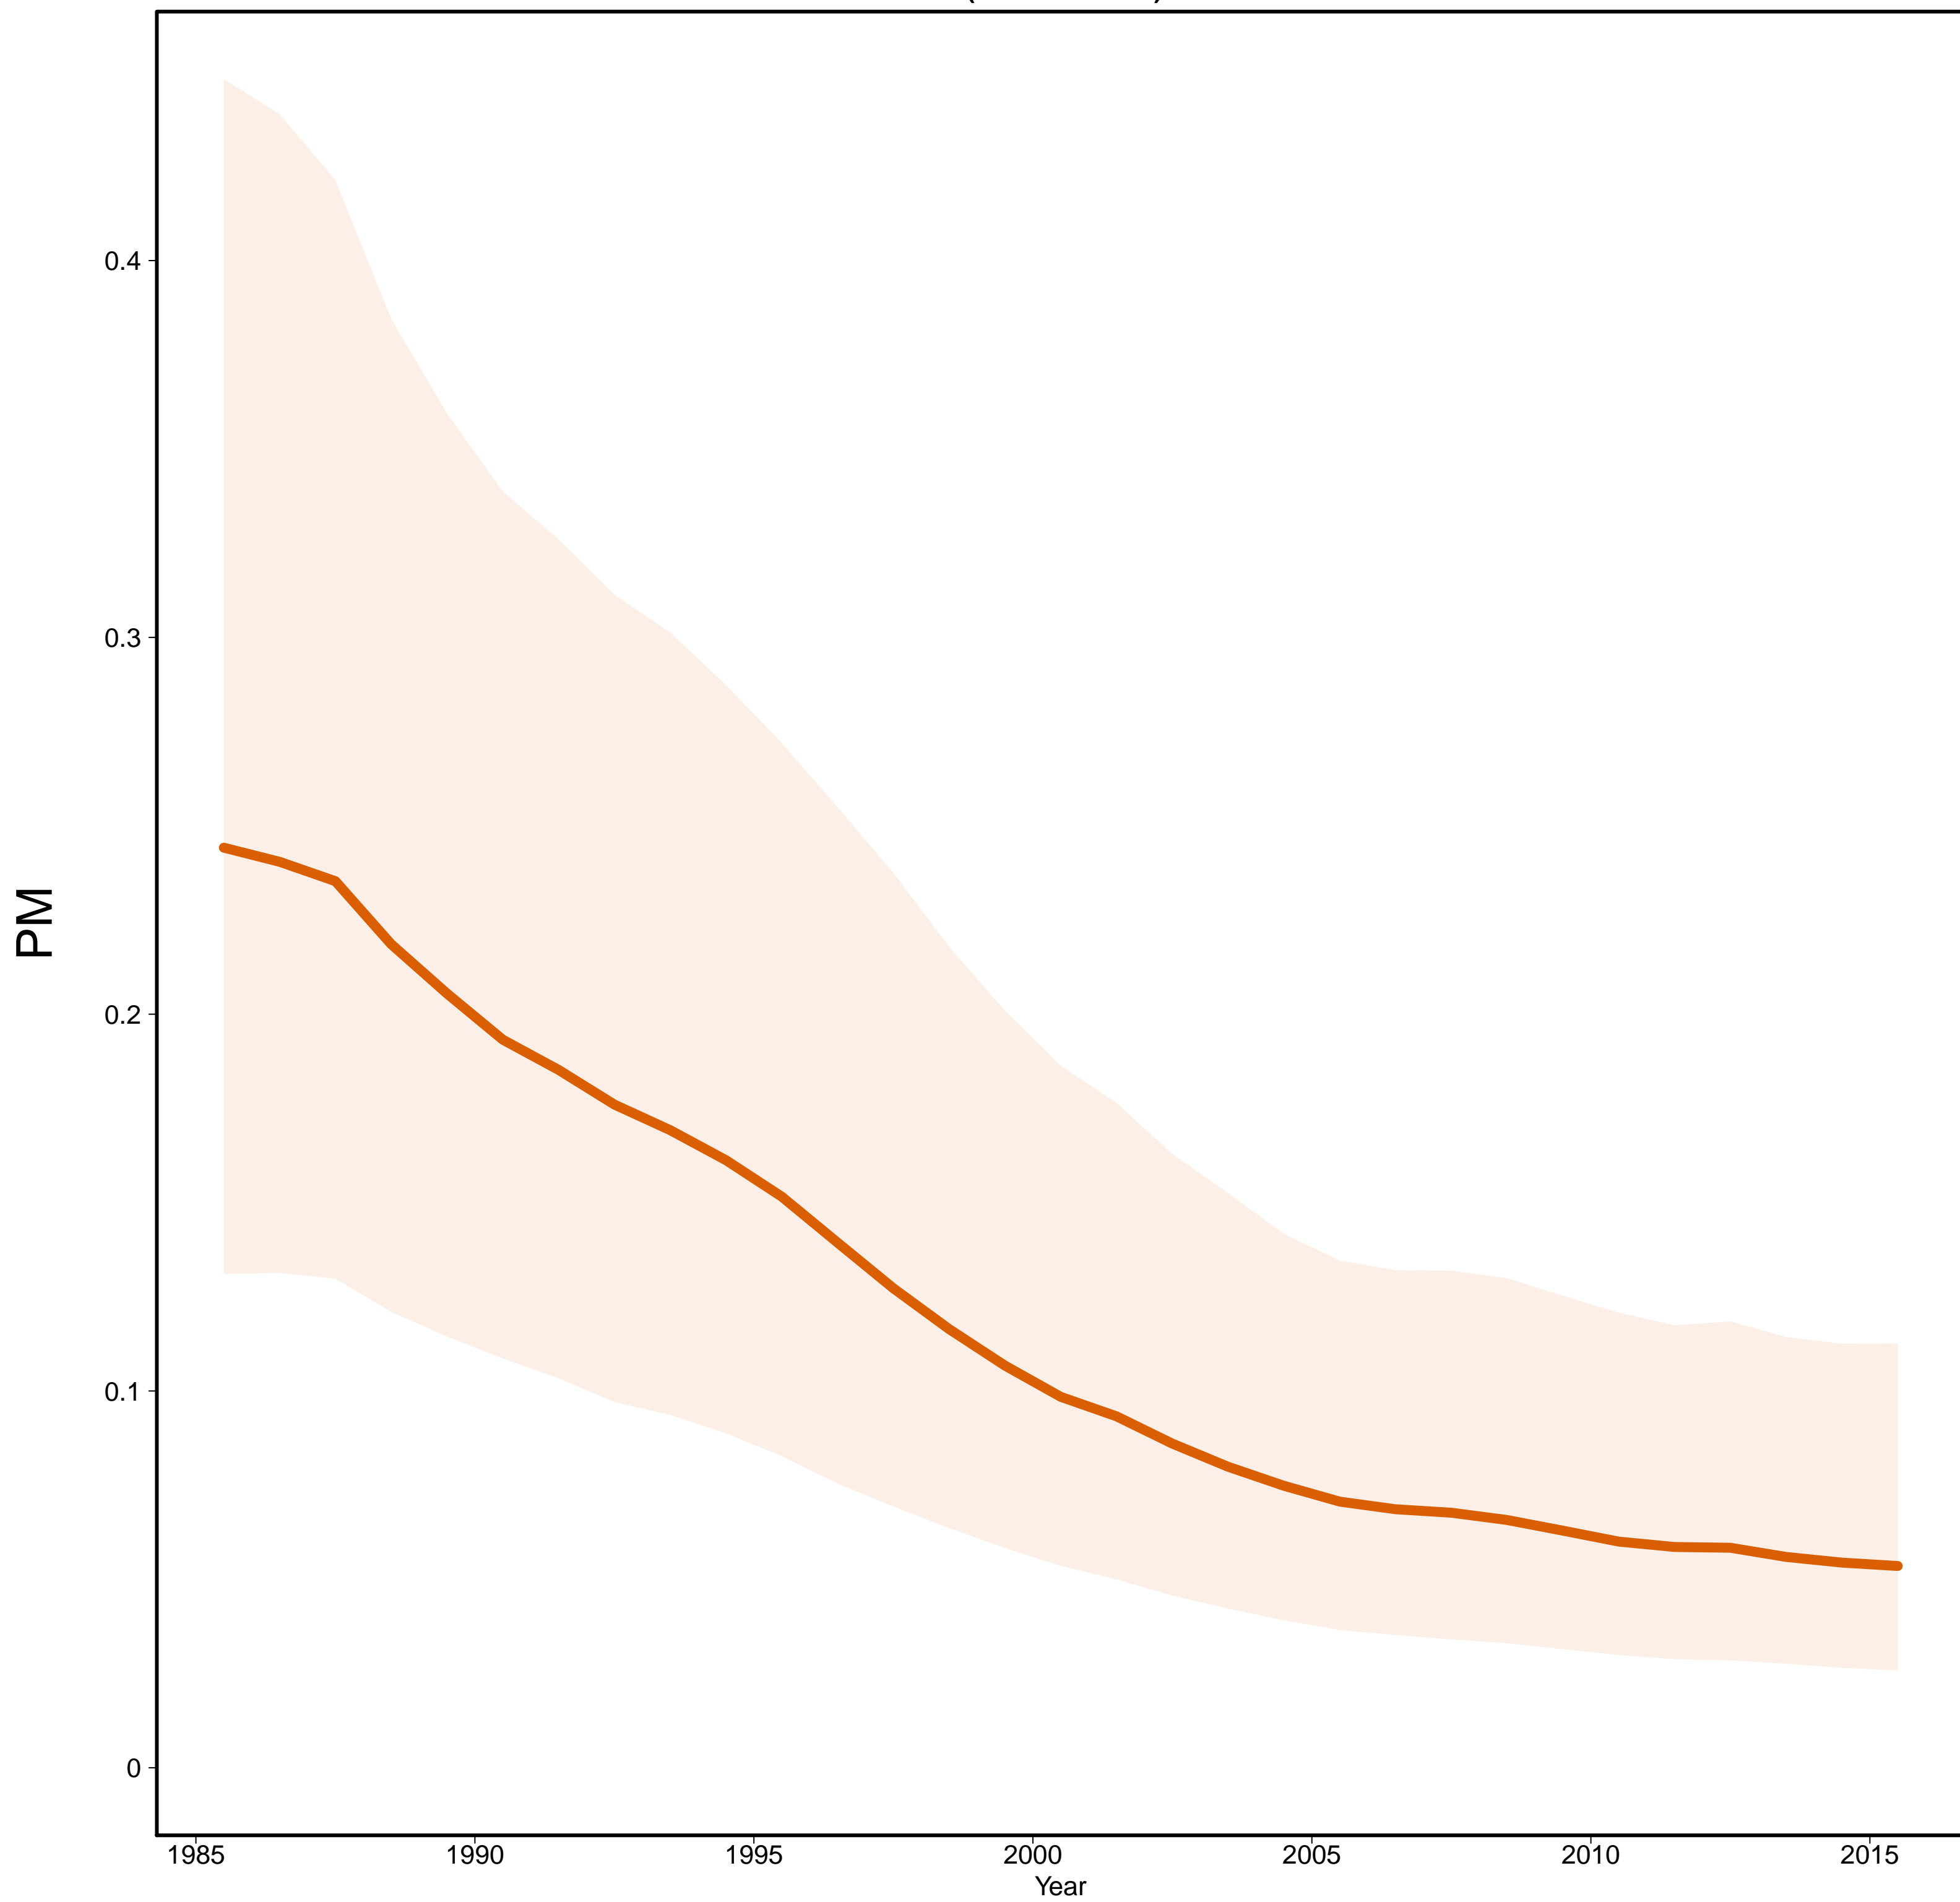

Djibouti [DJJ]  
(Eastern Africa)

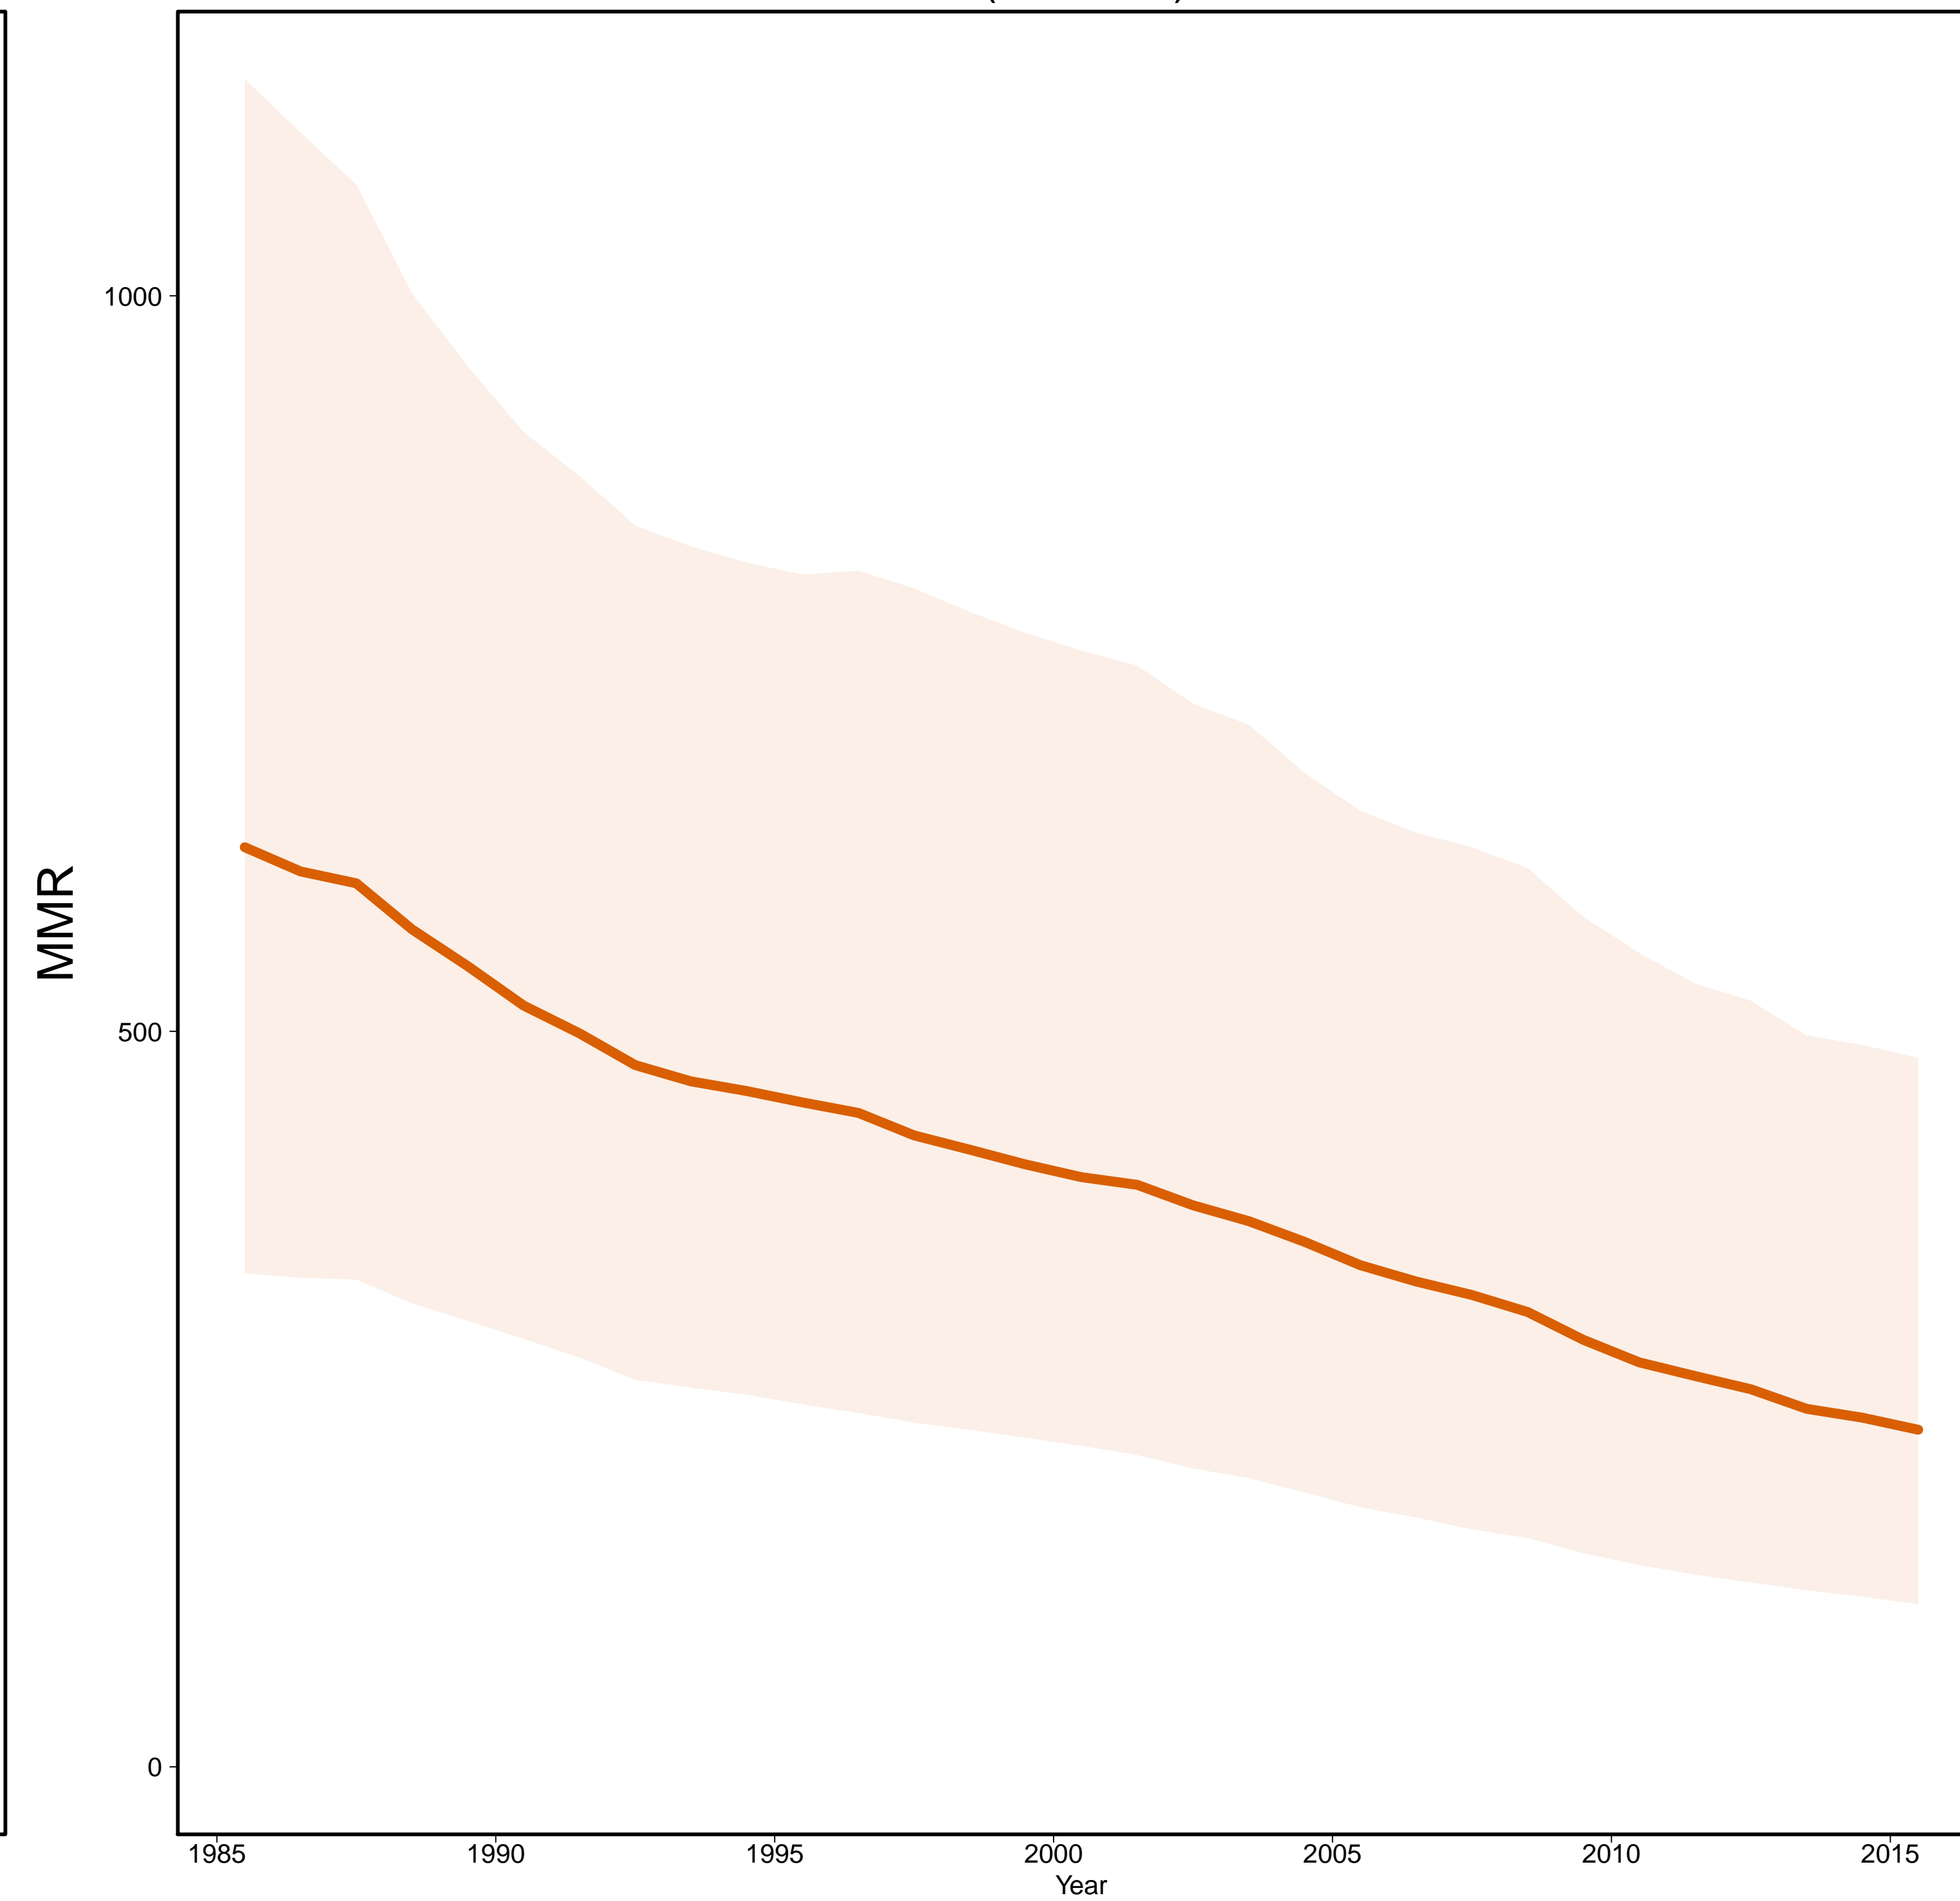

– Estimates –  
 Mlate  
 – MMR Database 2015 –

Gross Domestic Product

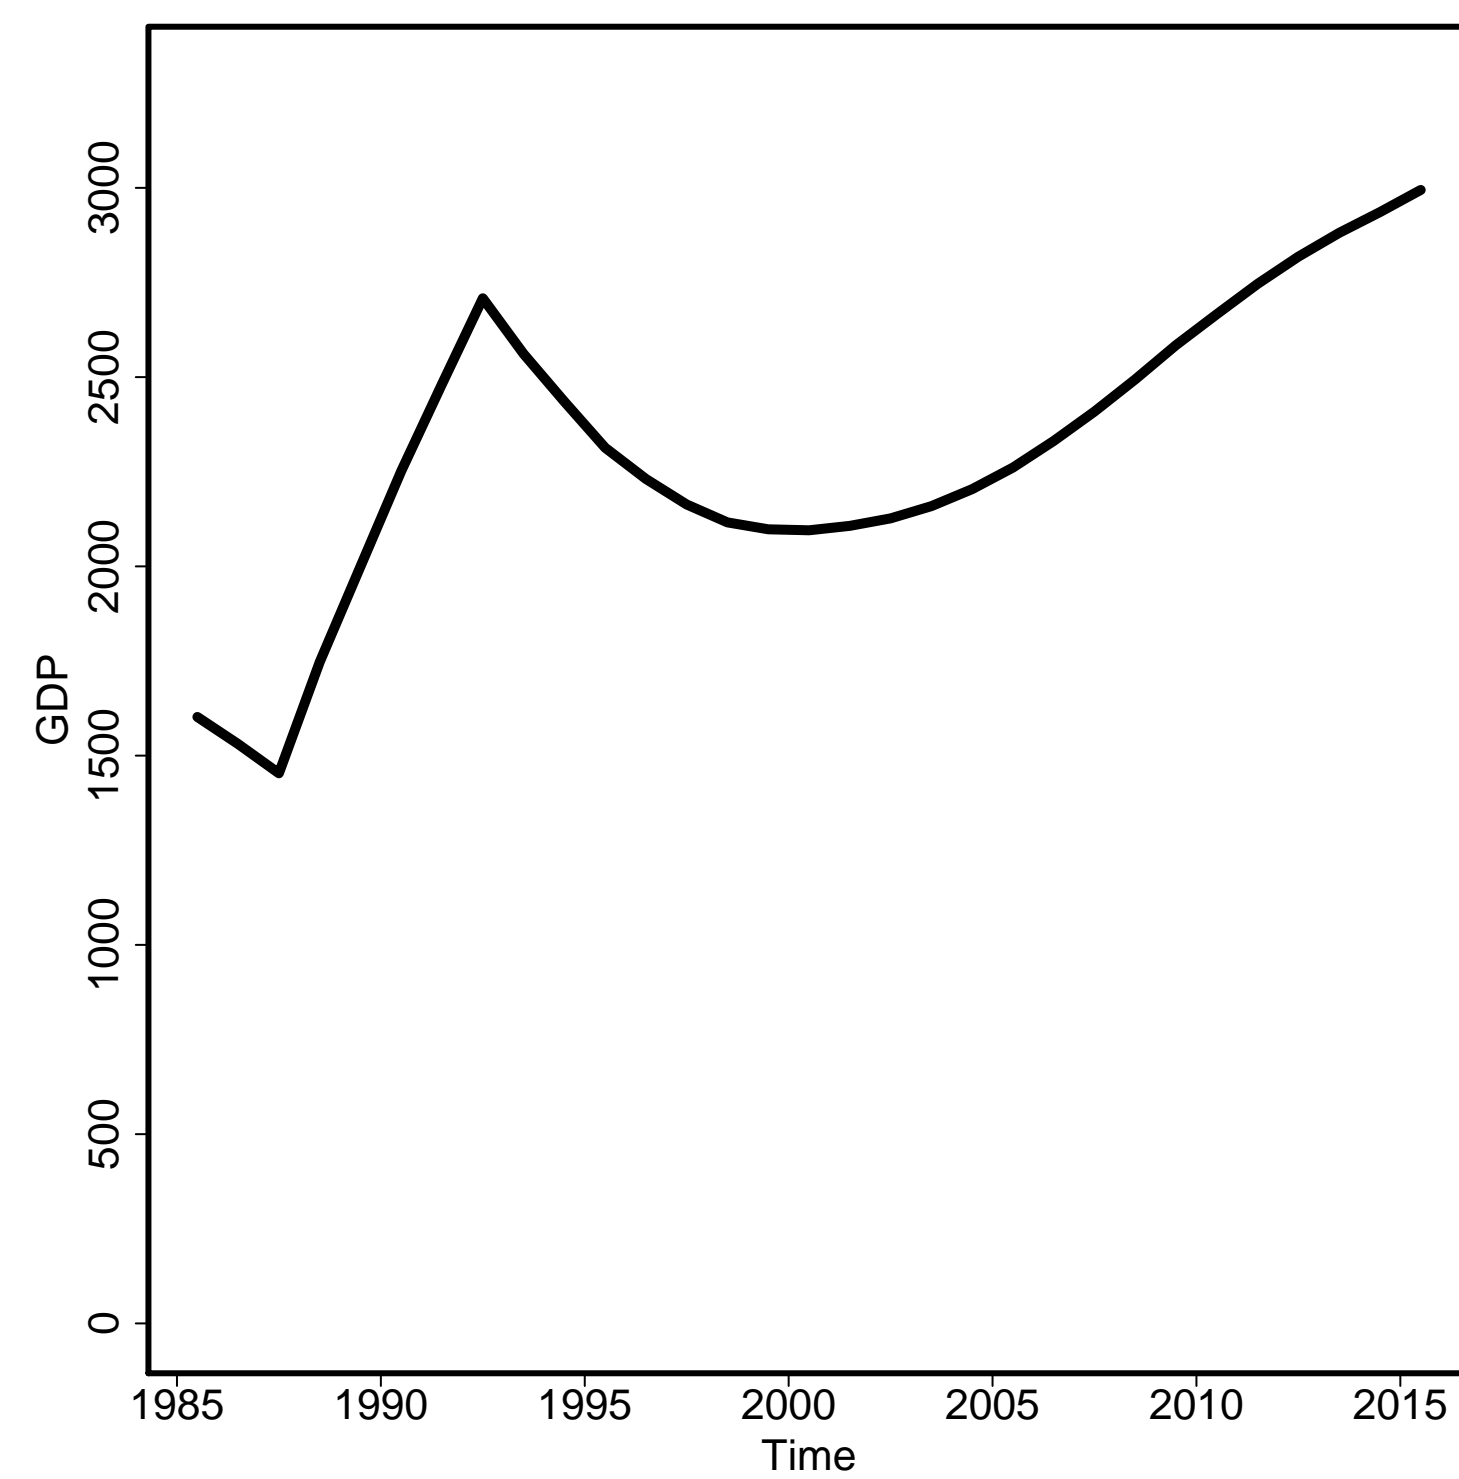

General Fertility Rate

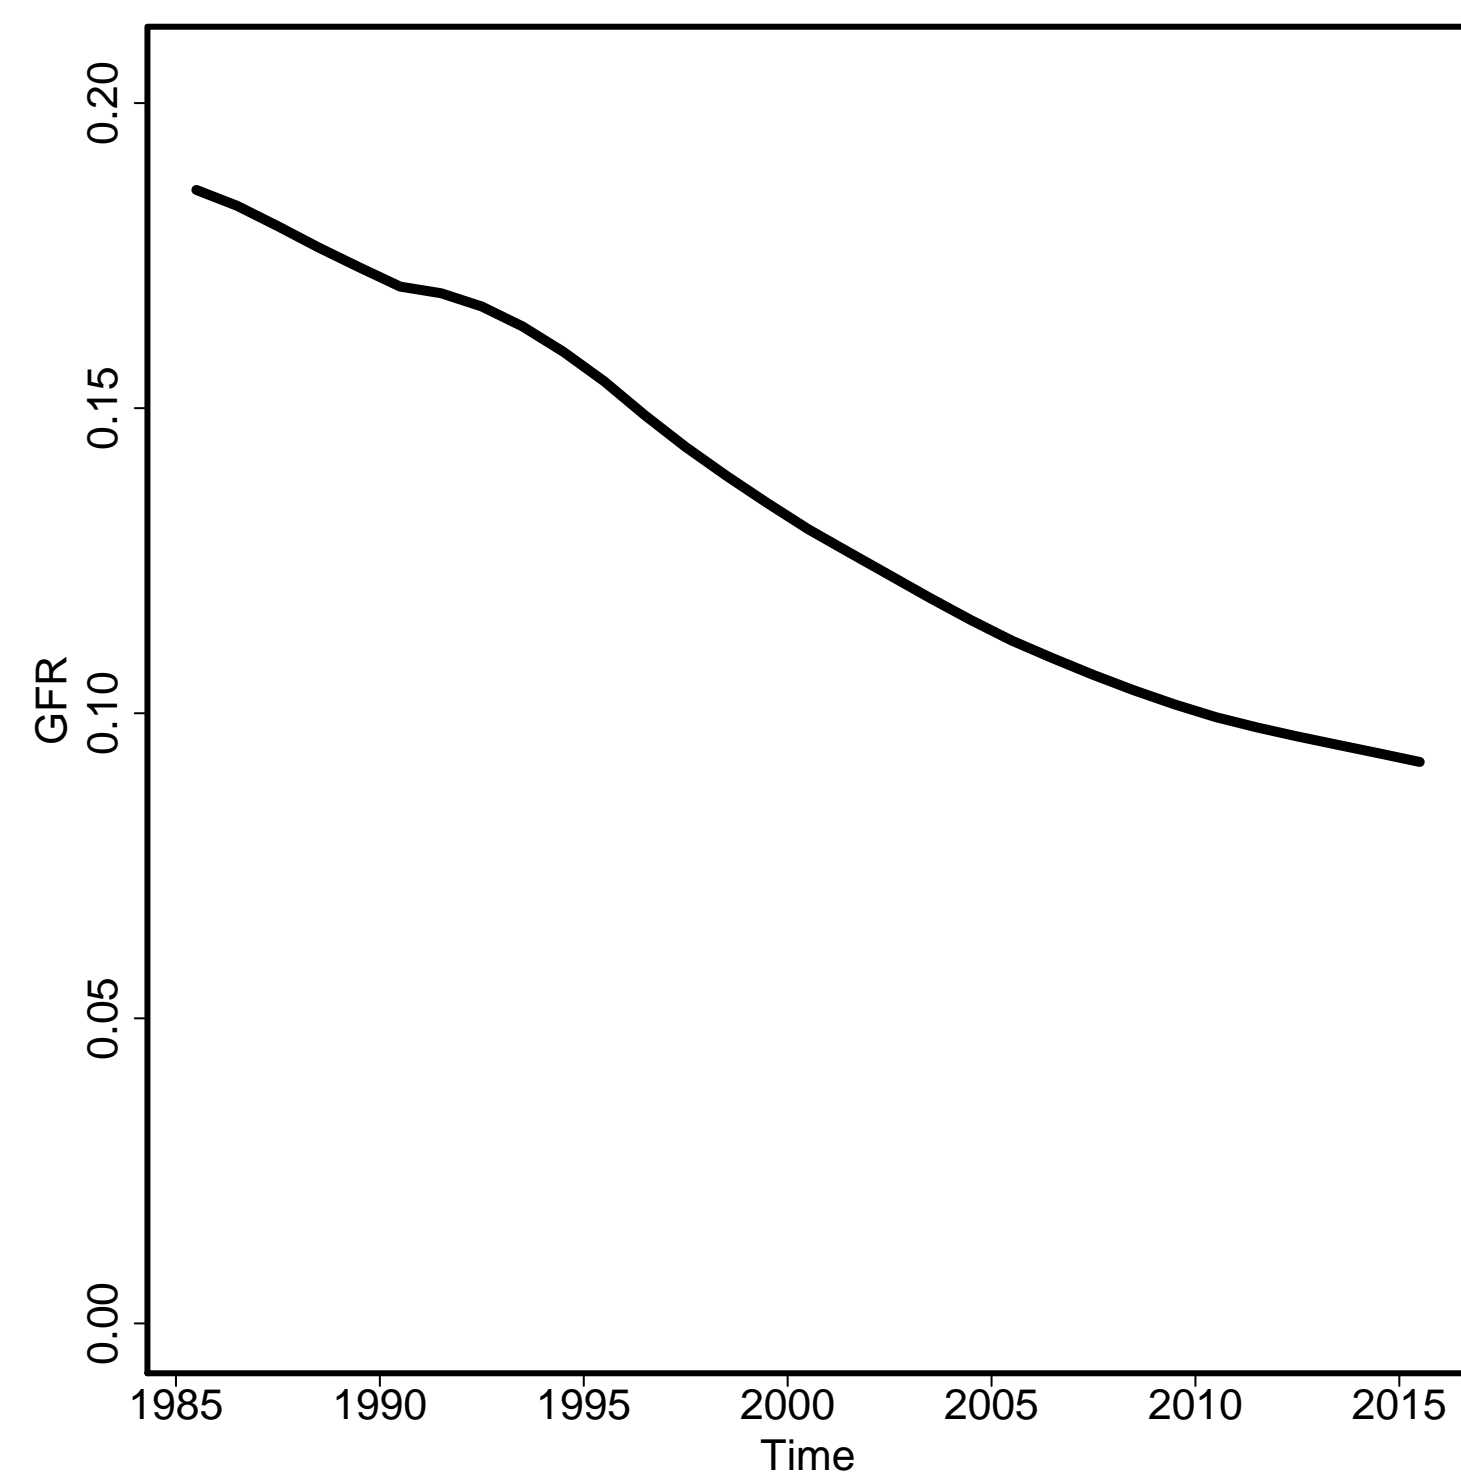

Skilled Attendance to Birth

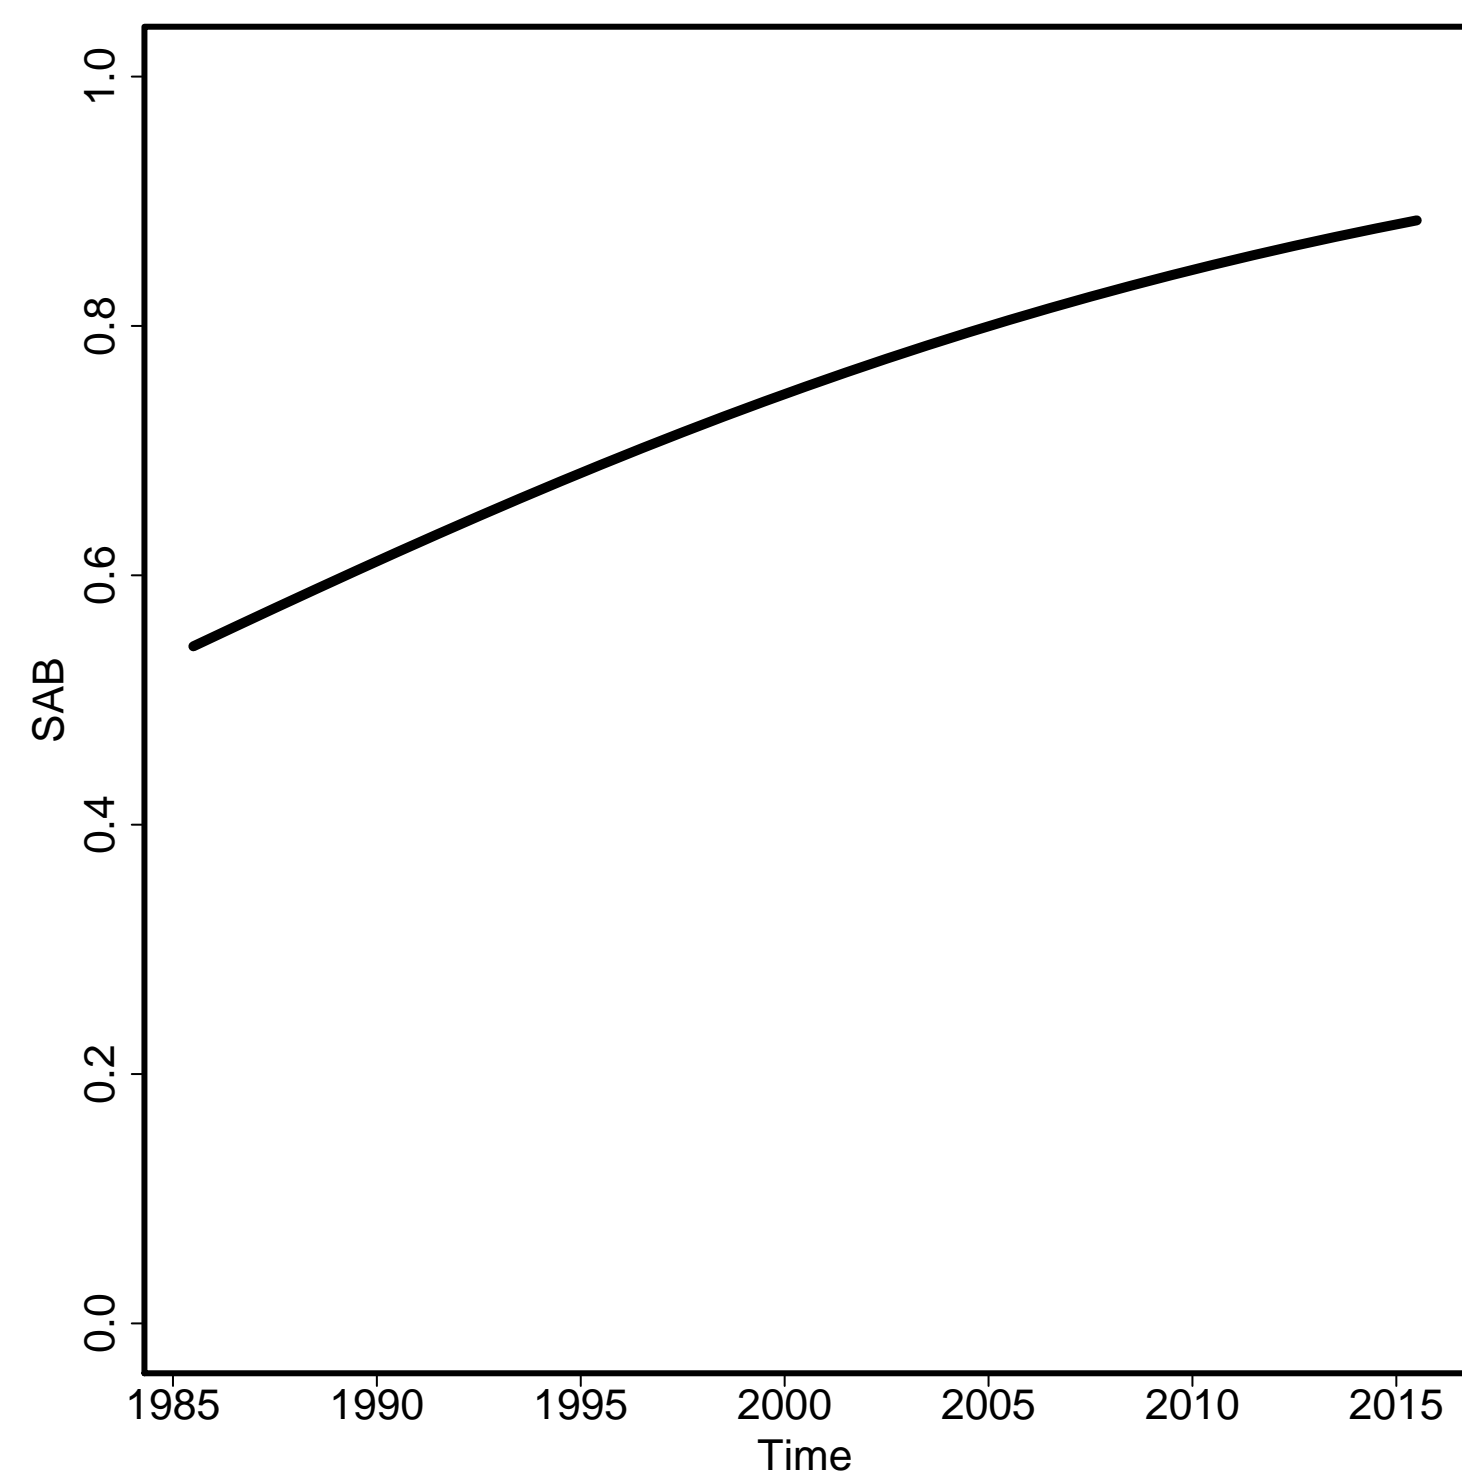

Envelope/Births

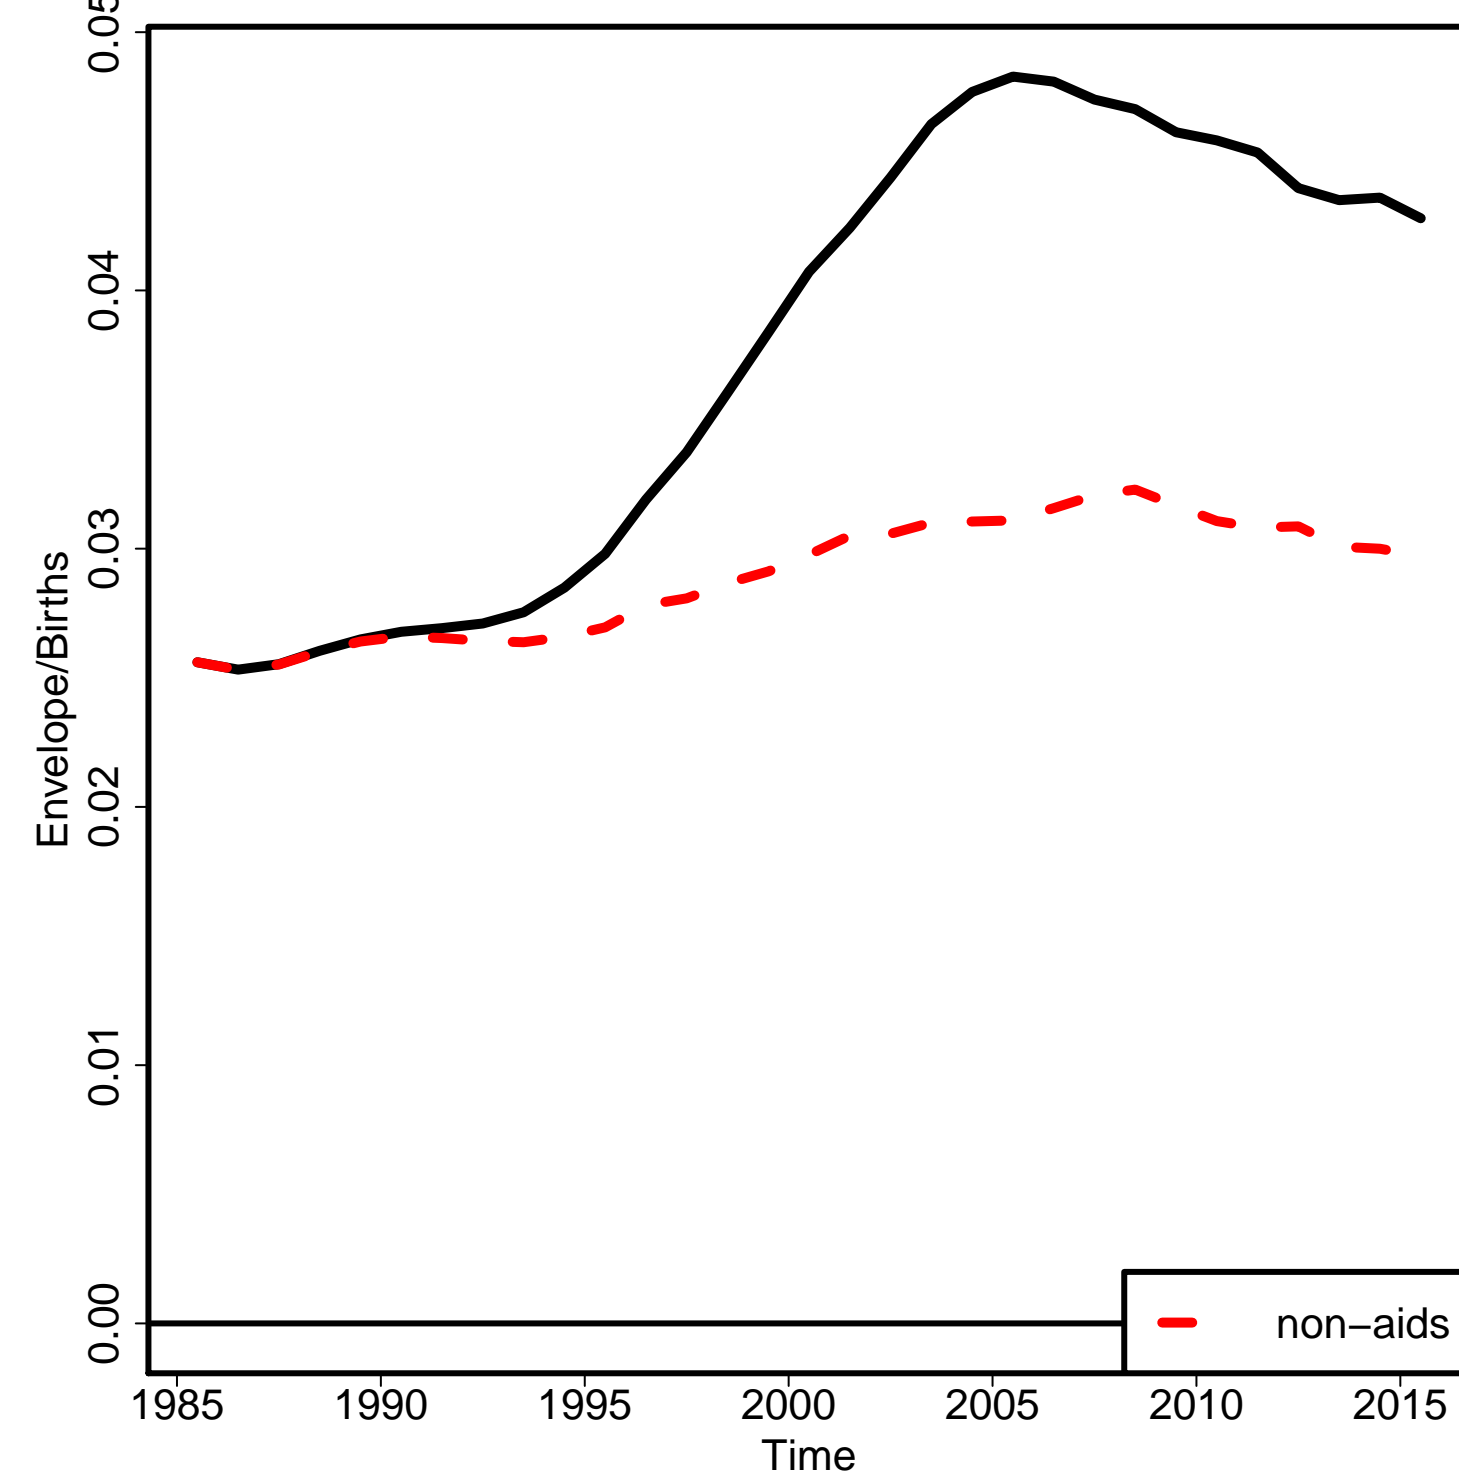

Non-aids MMR

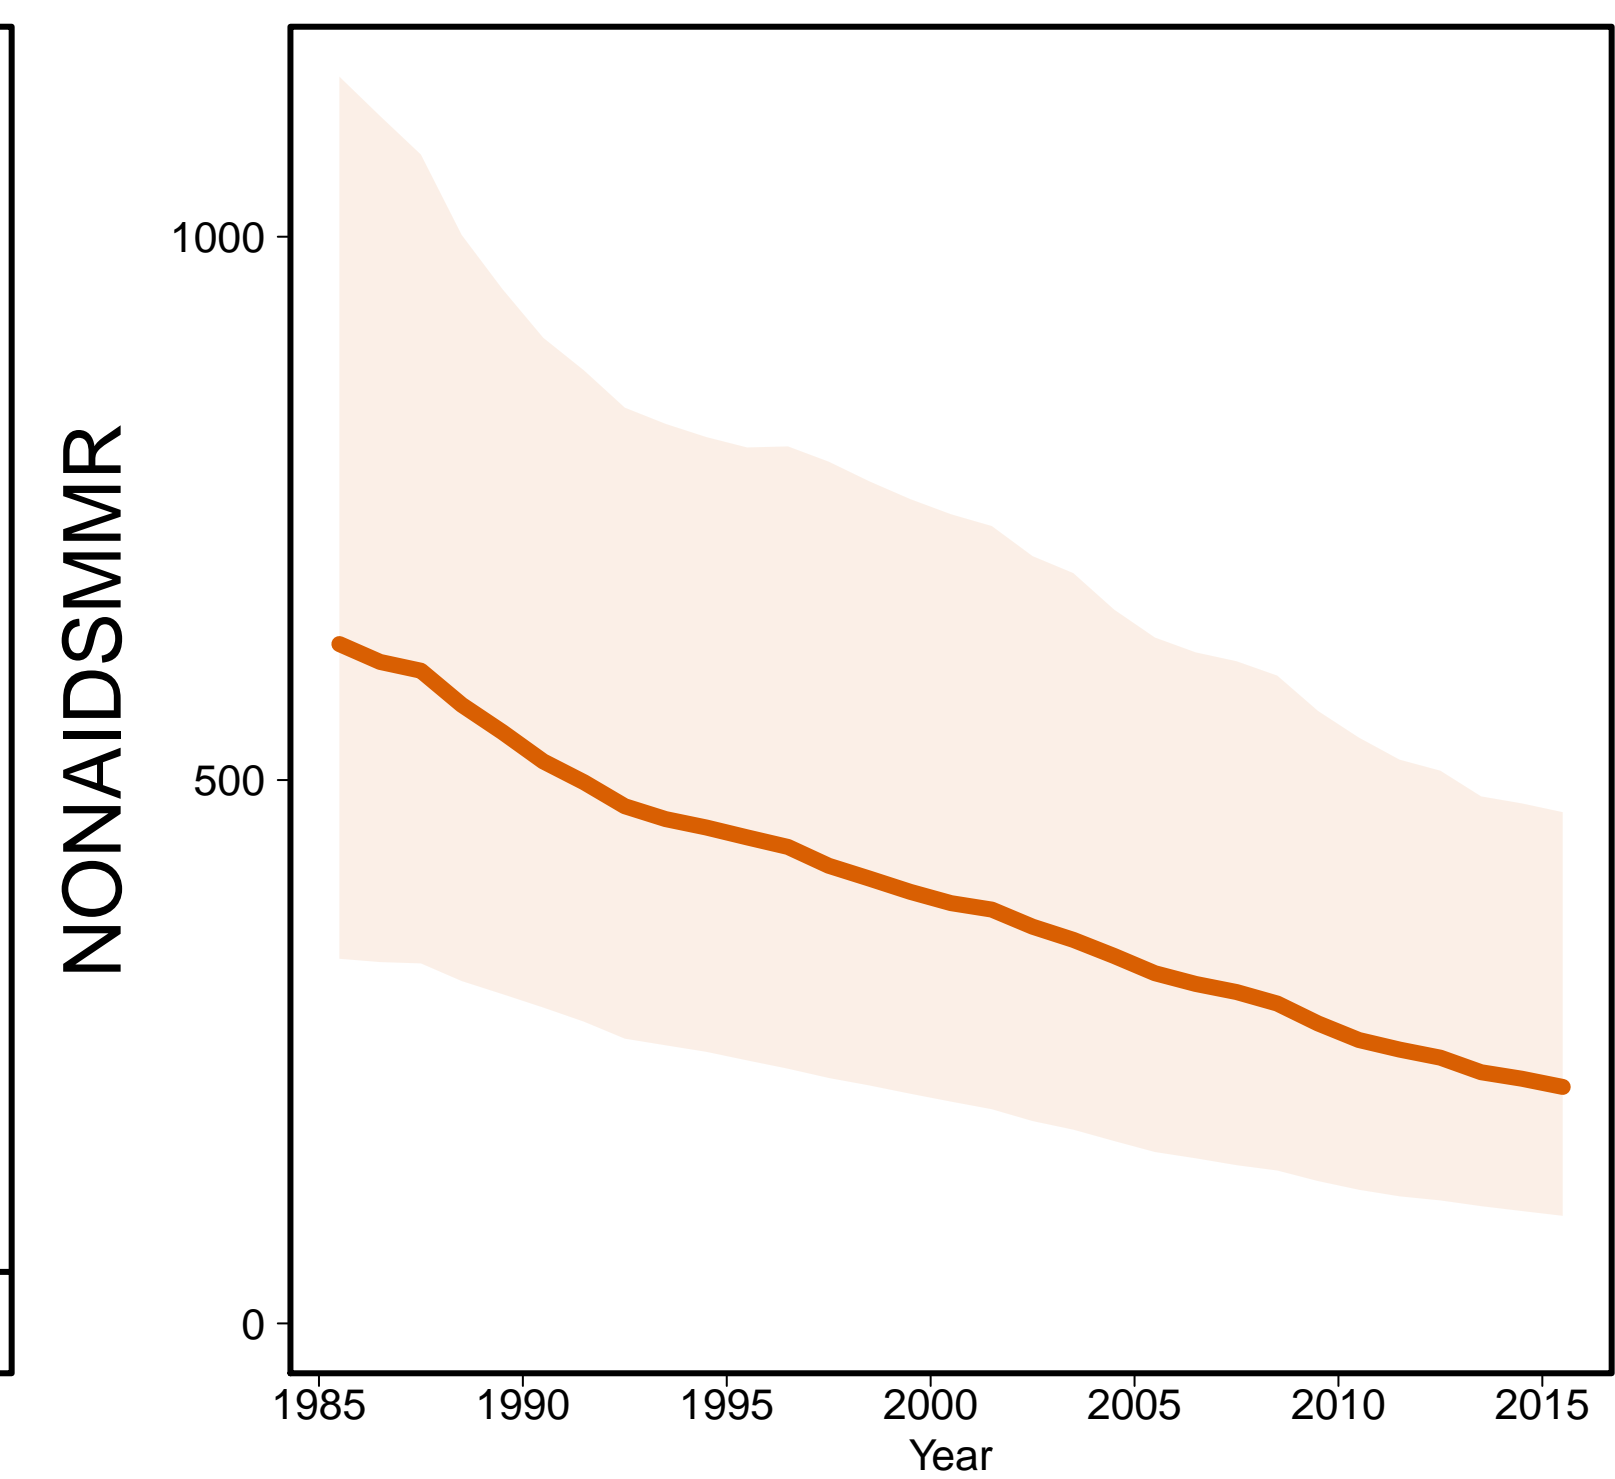

Aids MMR

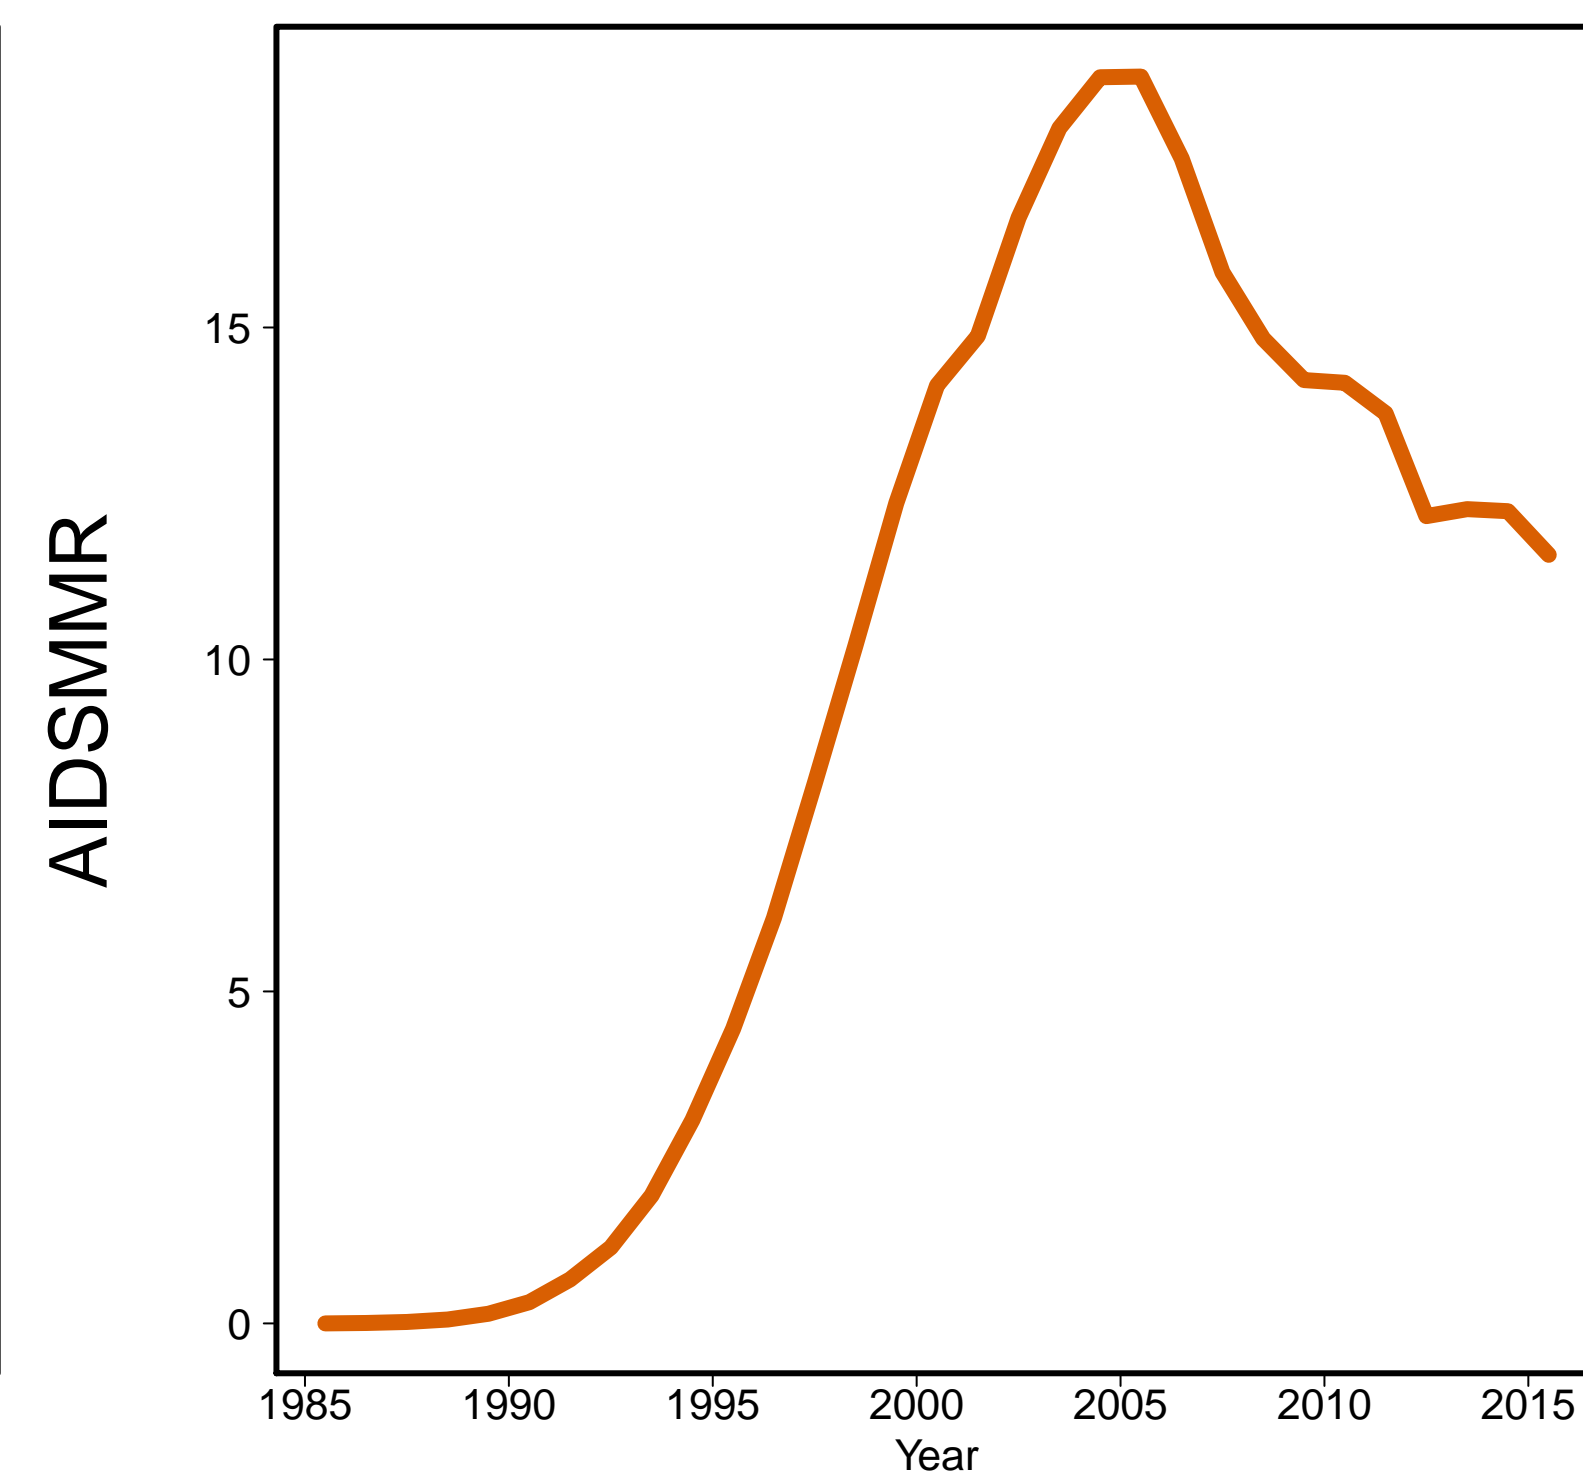

Dominican Republic [DOM]  
(Caribbean)

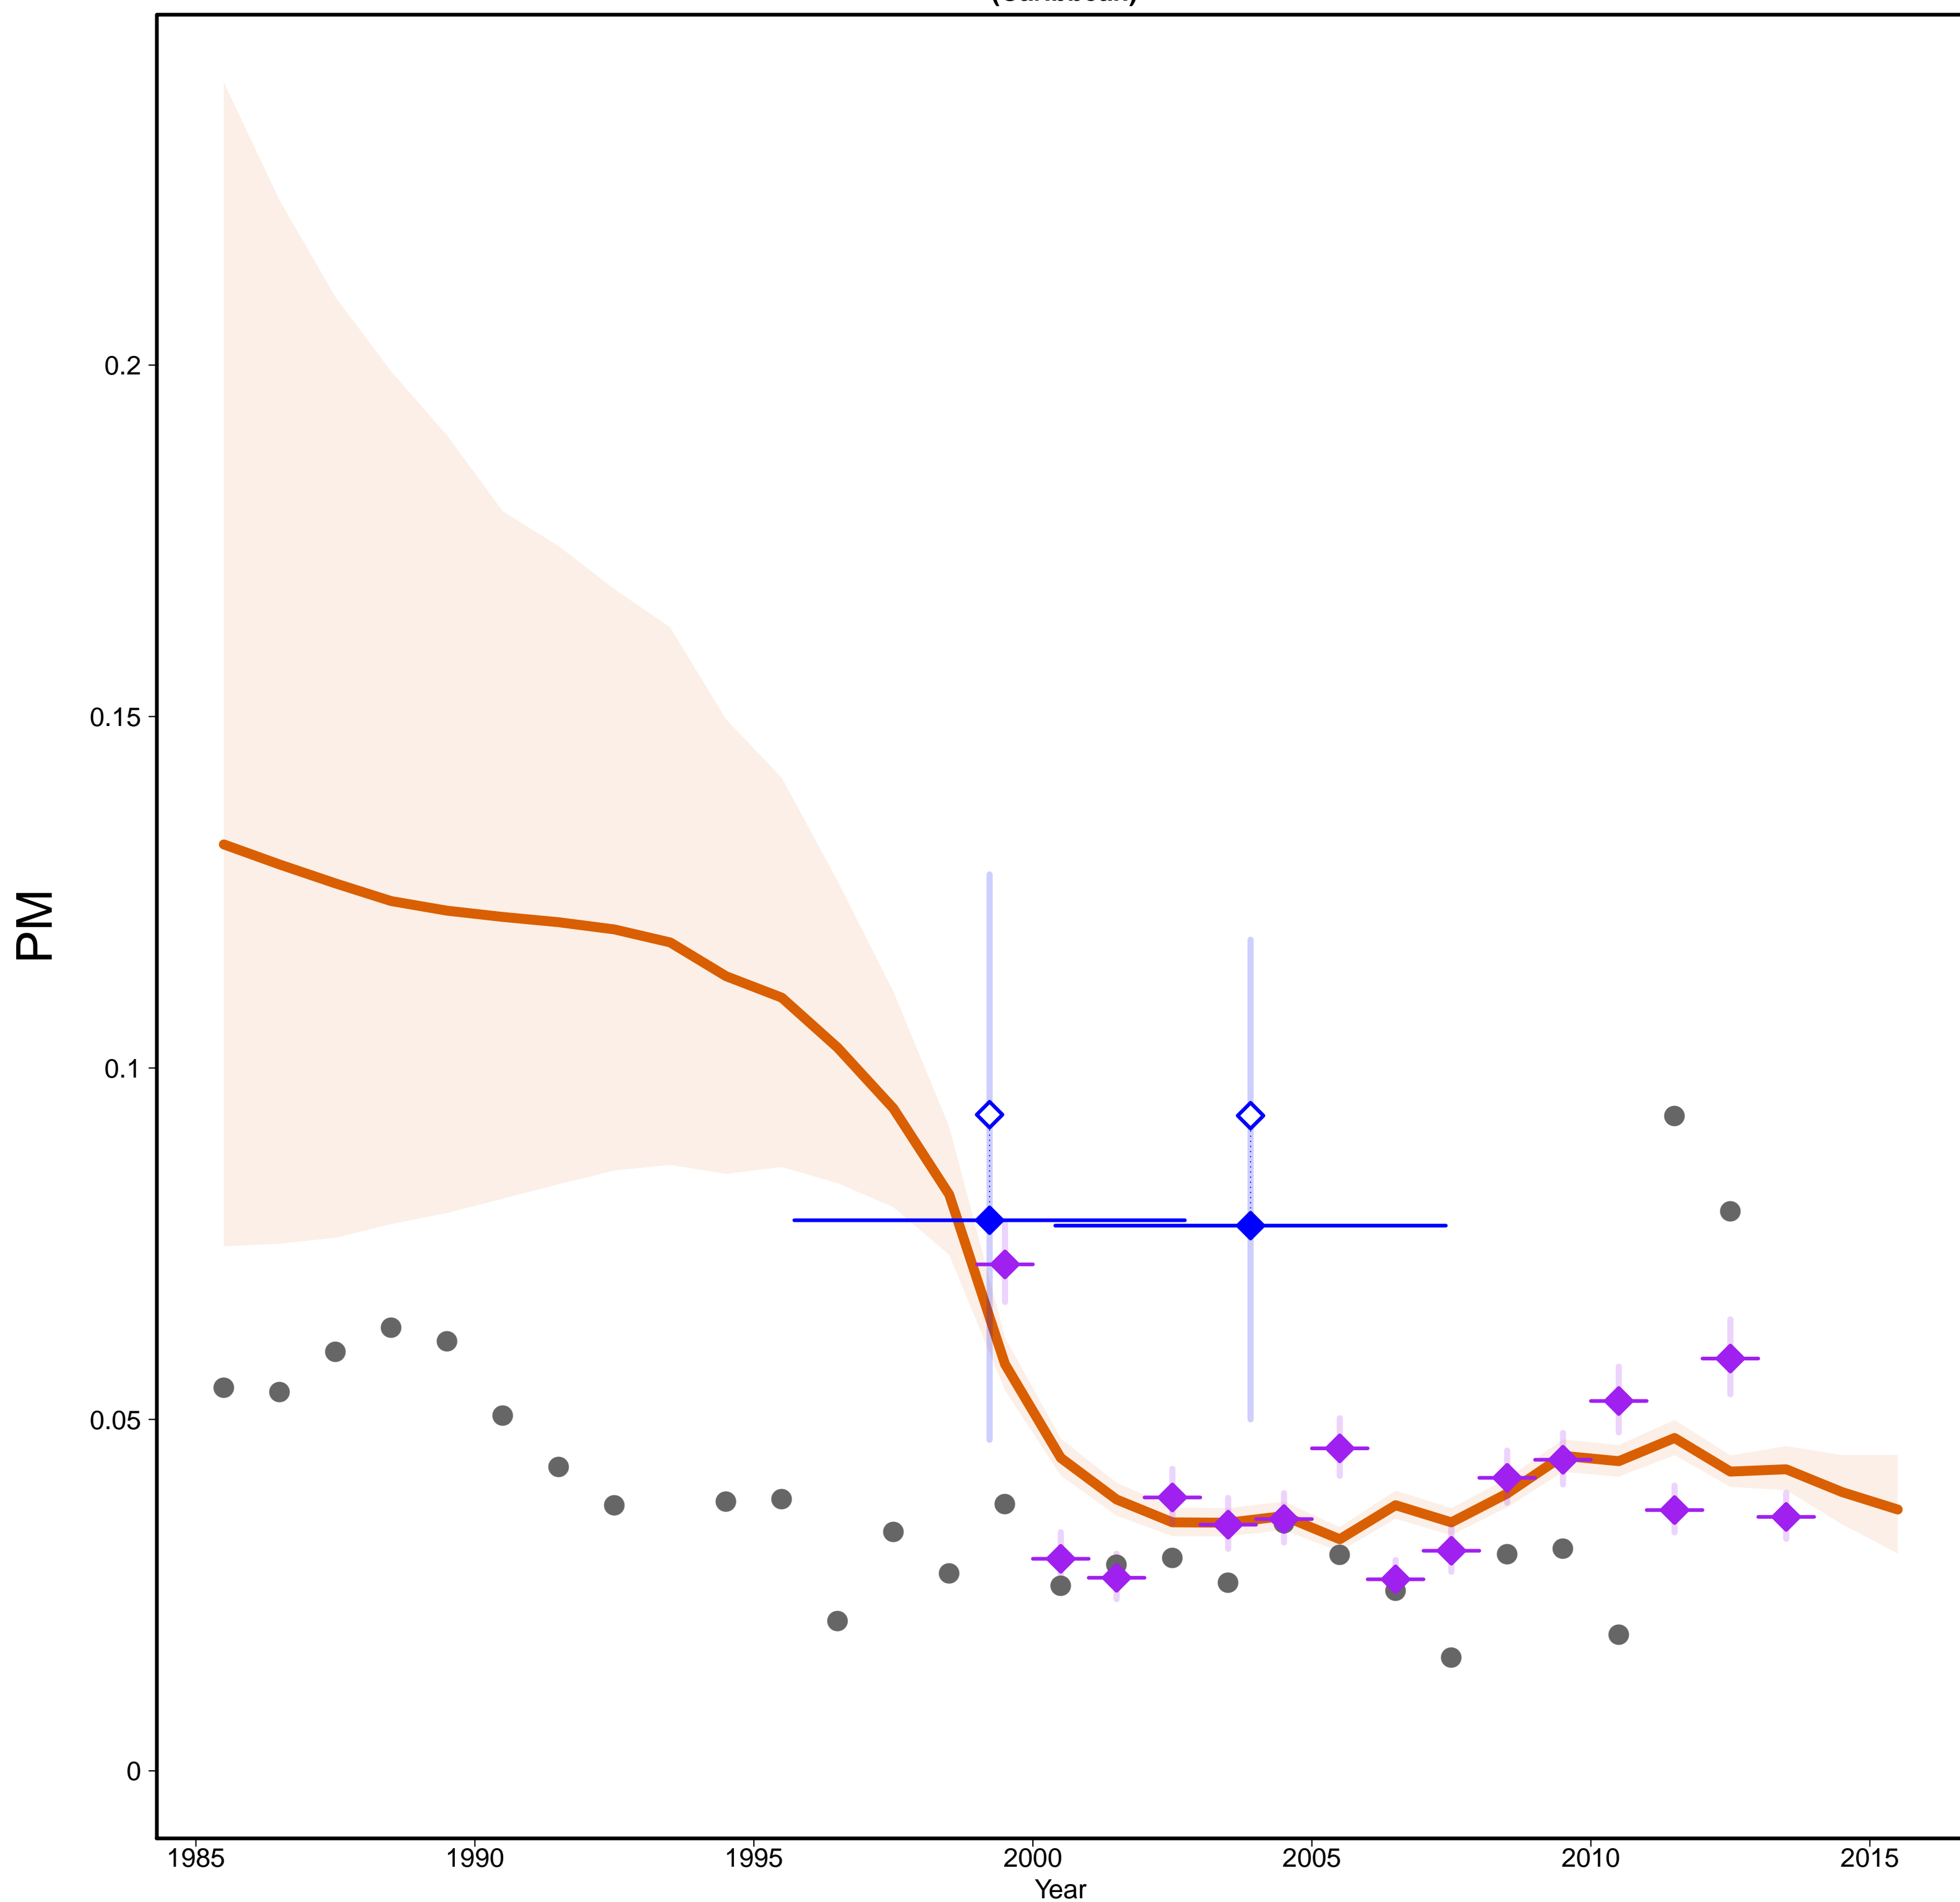

Dominican Republic [DOM]  
(Caribbean)

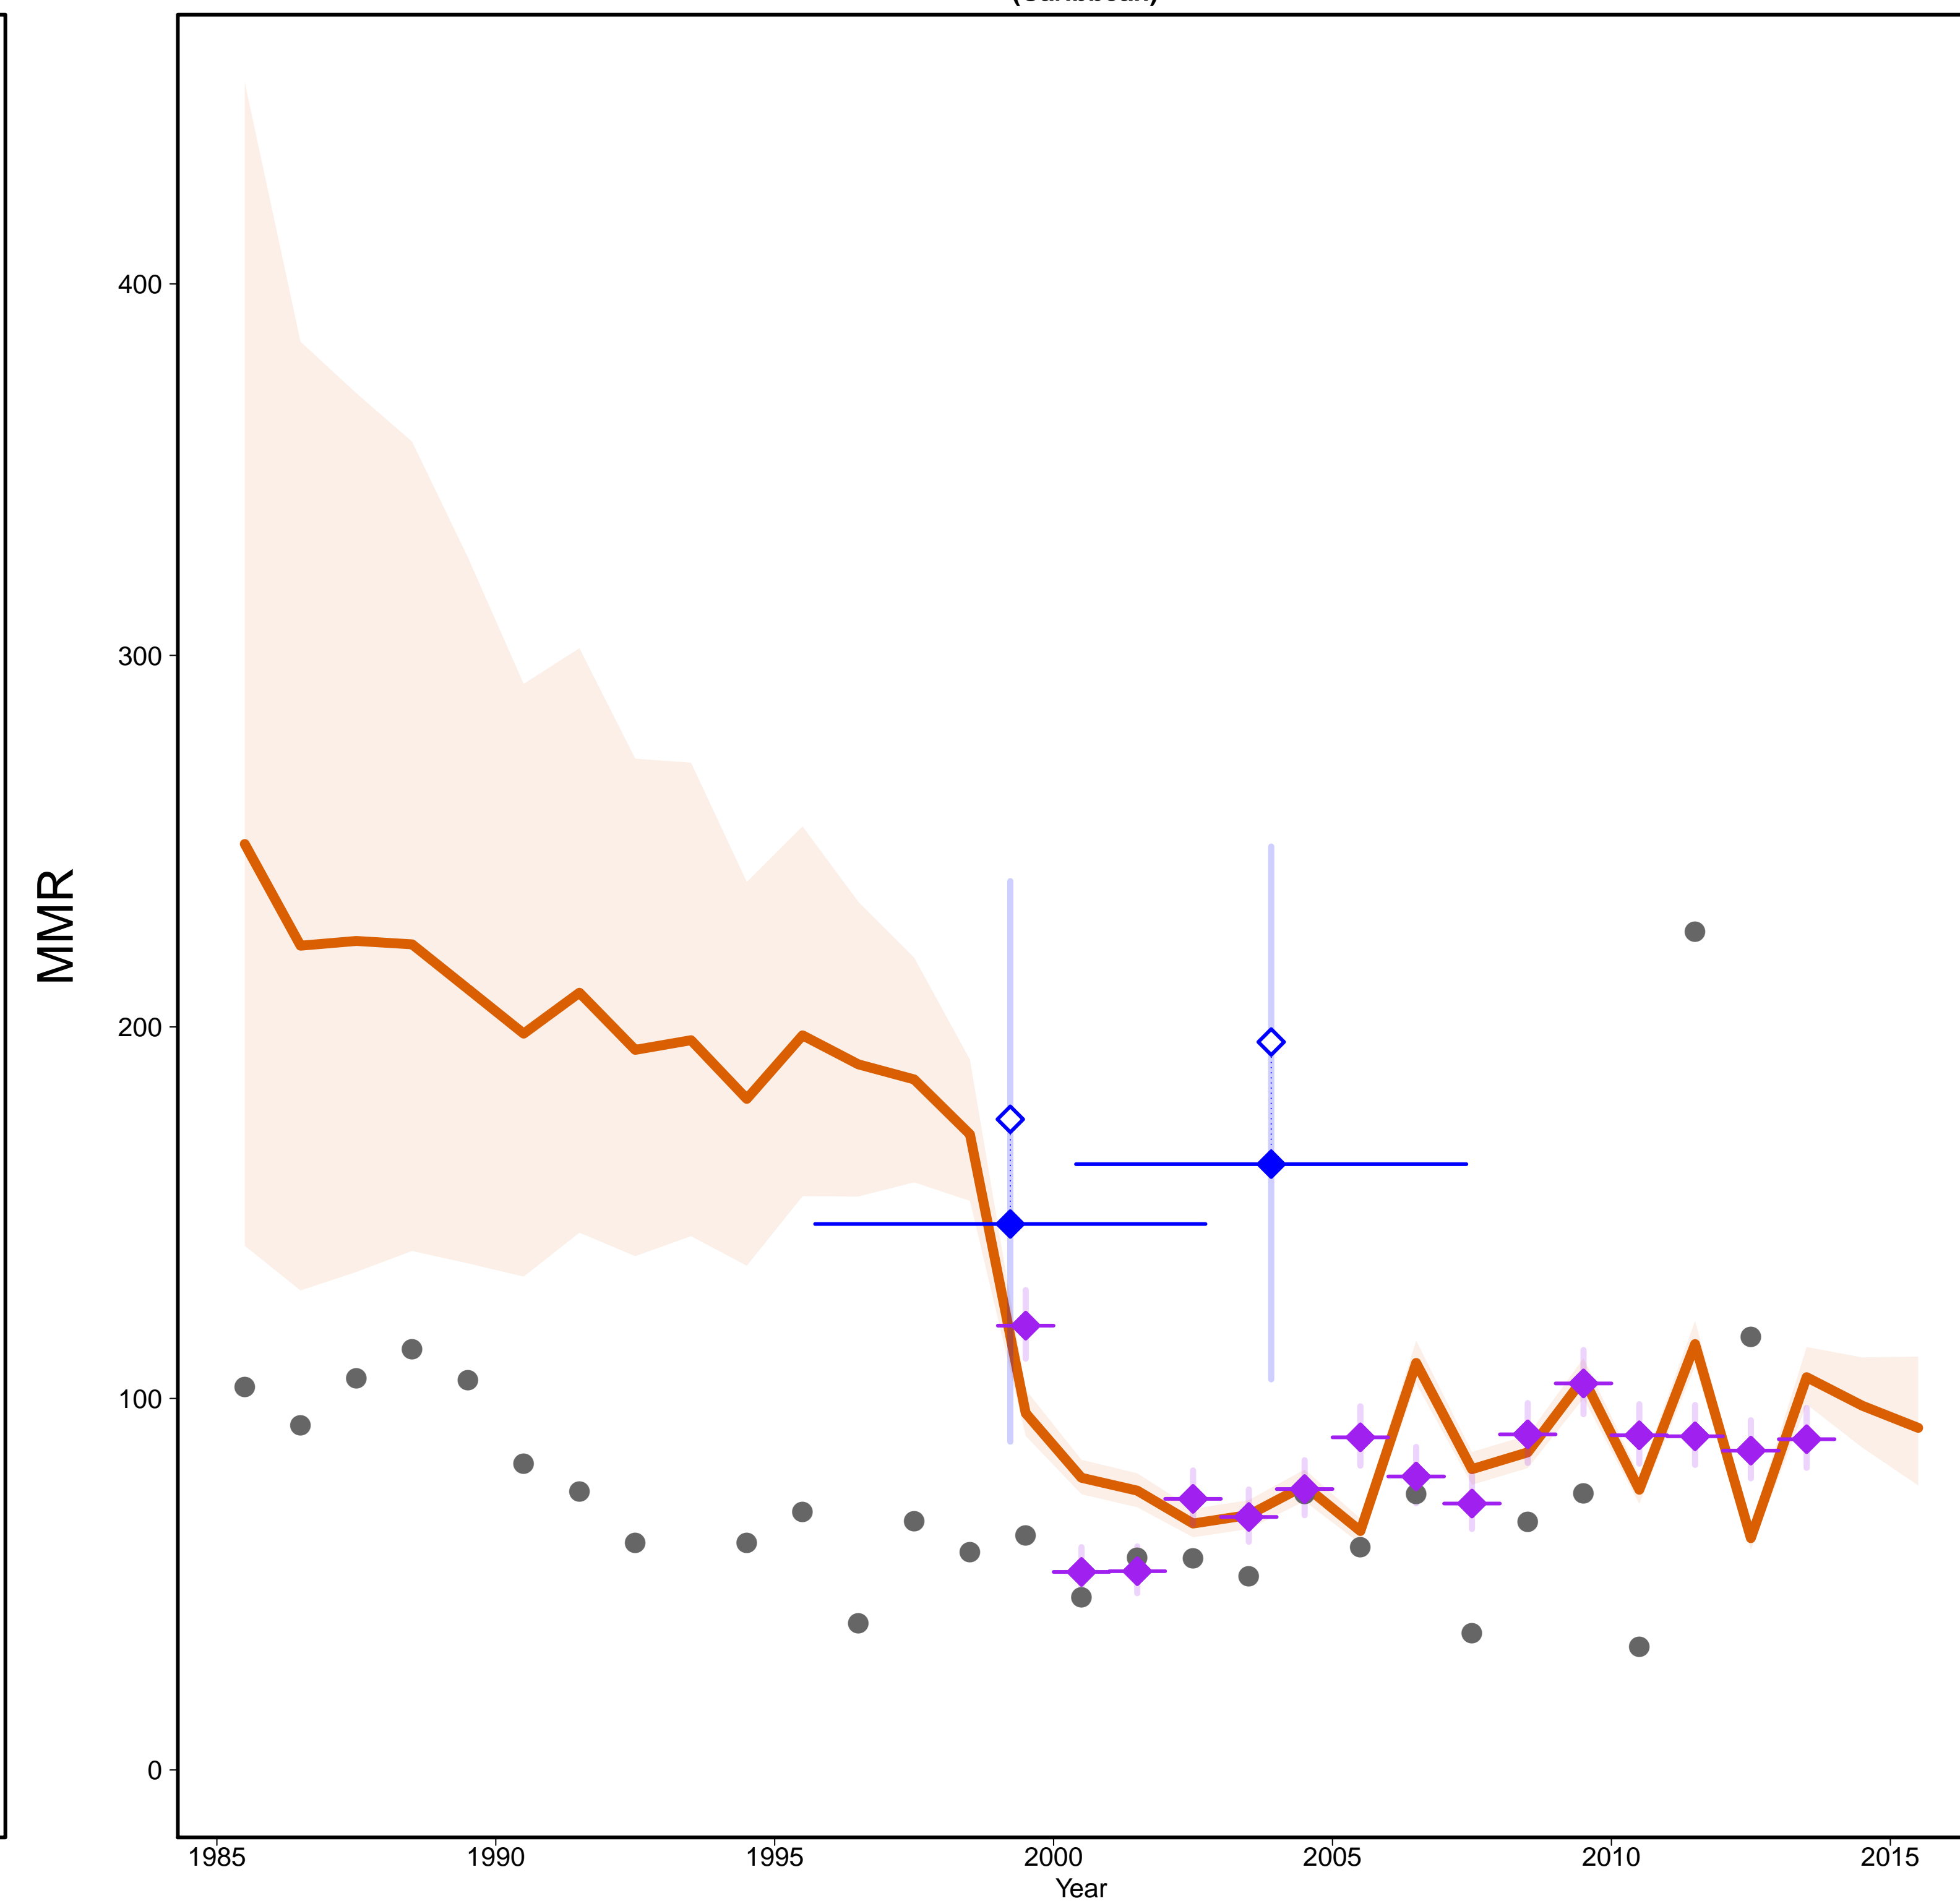

- Estimates –
- Mlate
- MMR Database 2015 –
- ◇ Observed Data
- ◆ Adjusted Data
- Data type –
- ◆ Spec. studies
- ◆ DHS
- Excluded VR data  
(data quality issues)

Gross Domestic Product

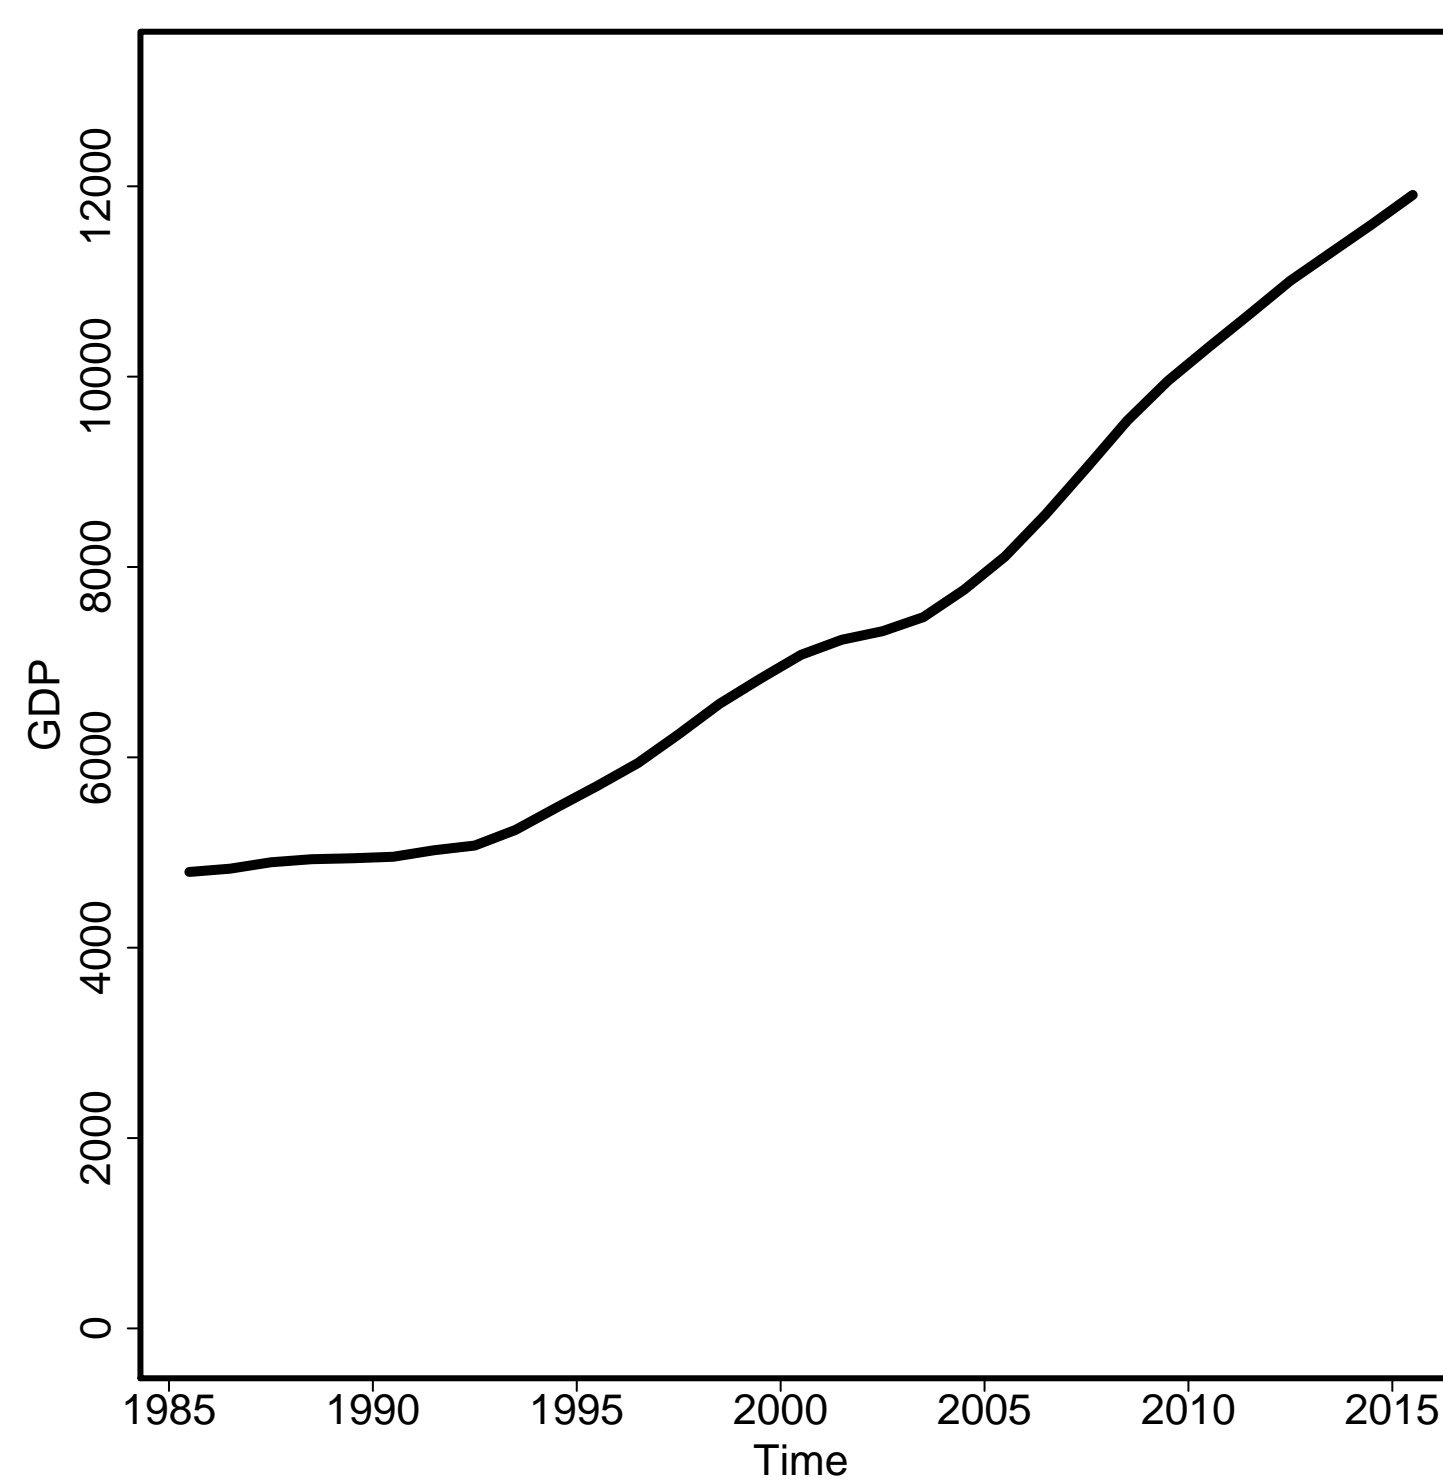

General Fertility Rate

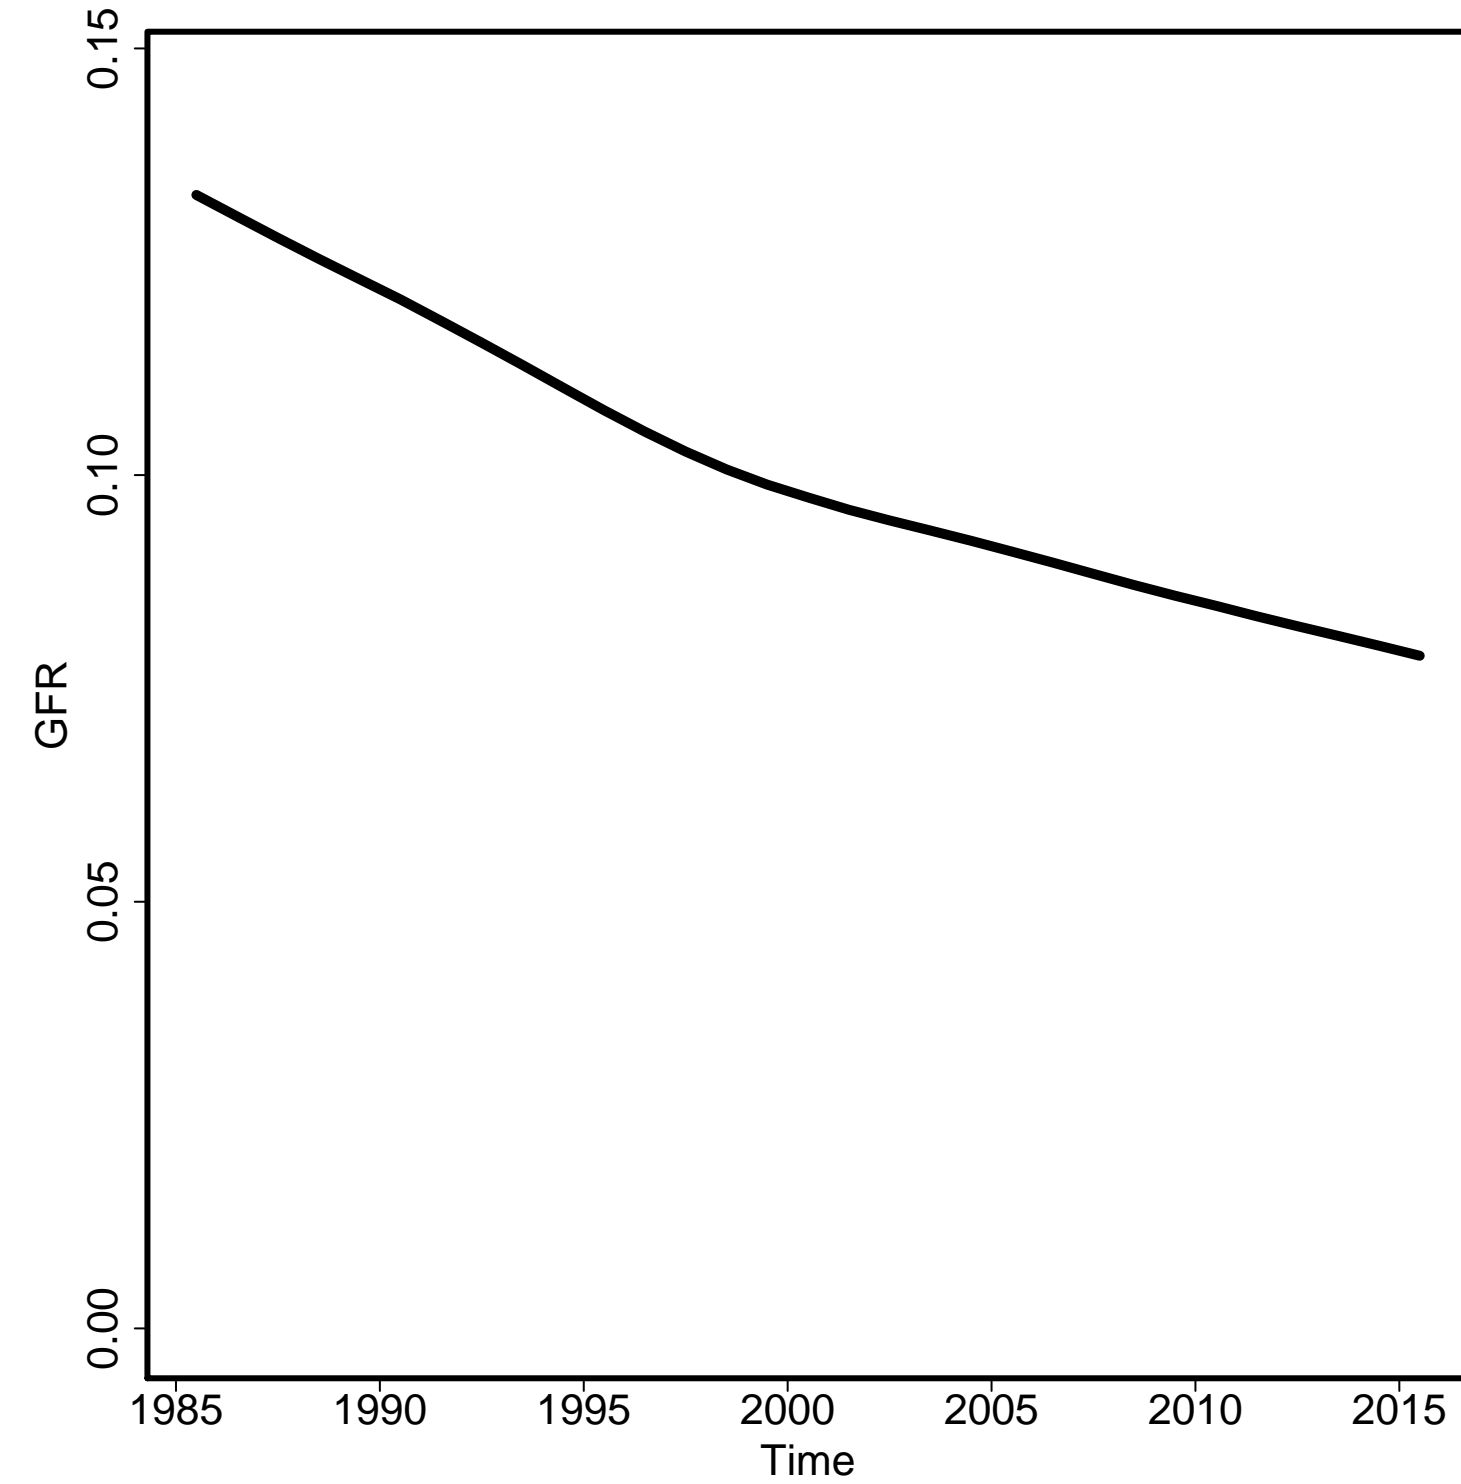

Skilled Attendance to Birth

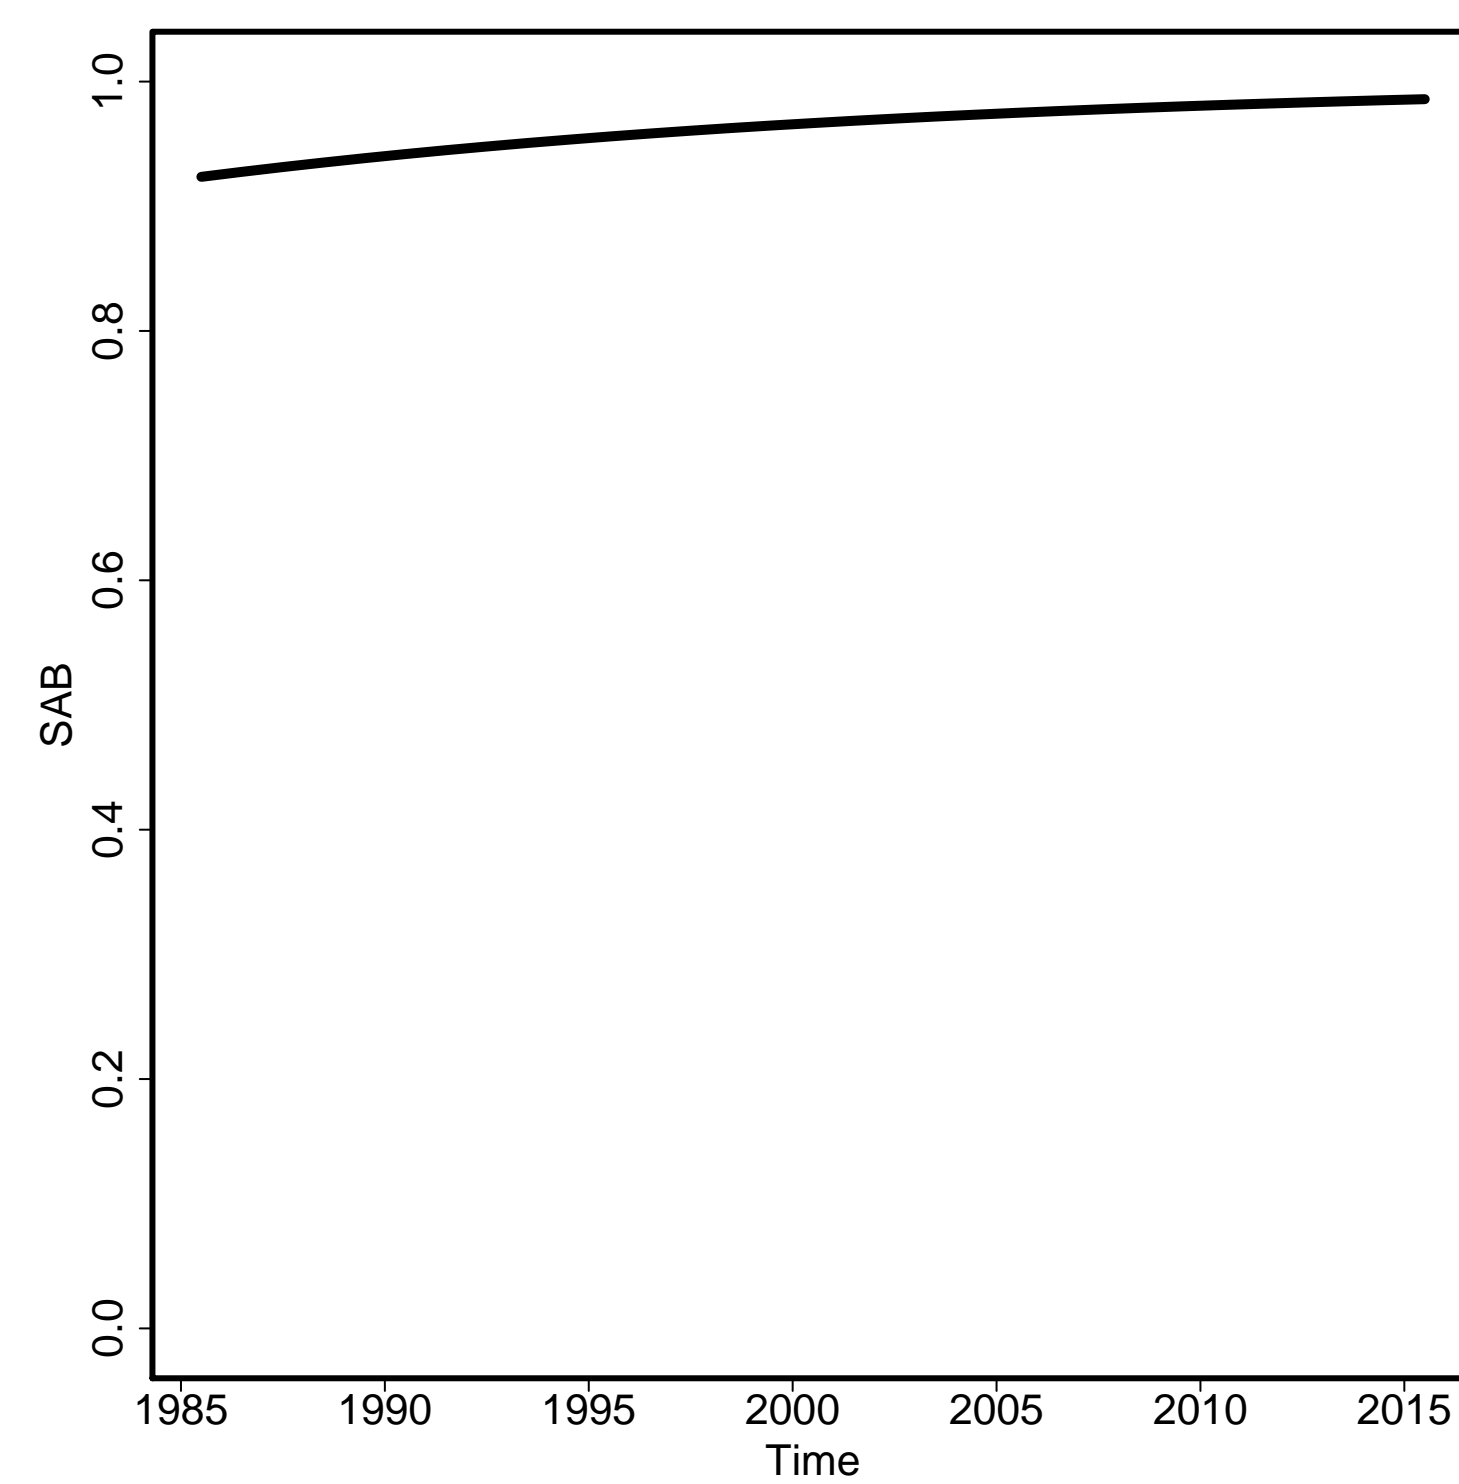

Envelope/Births

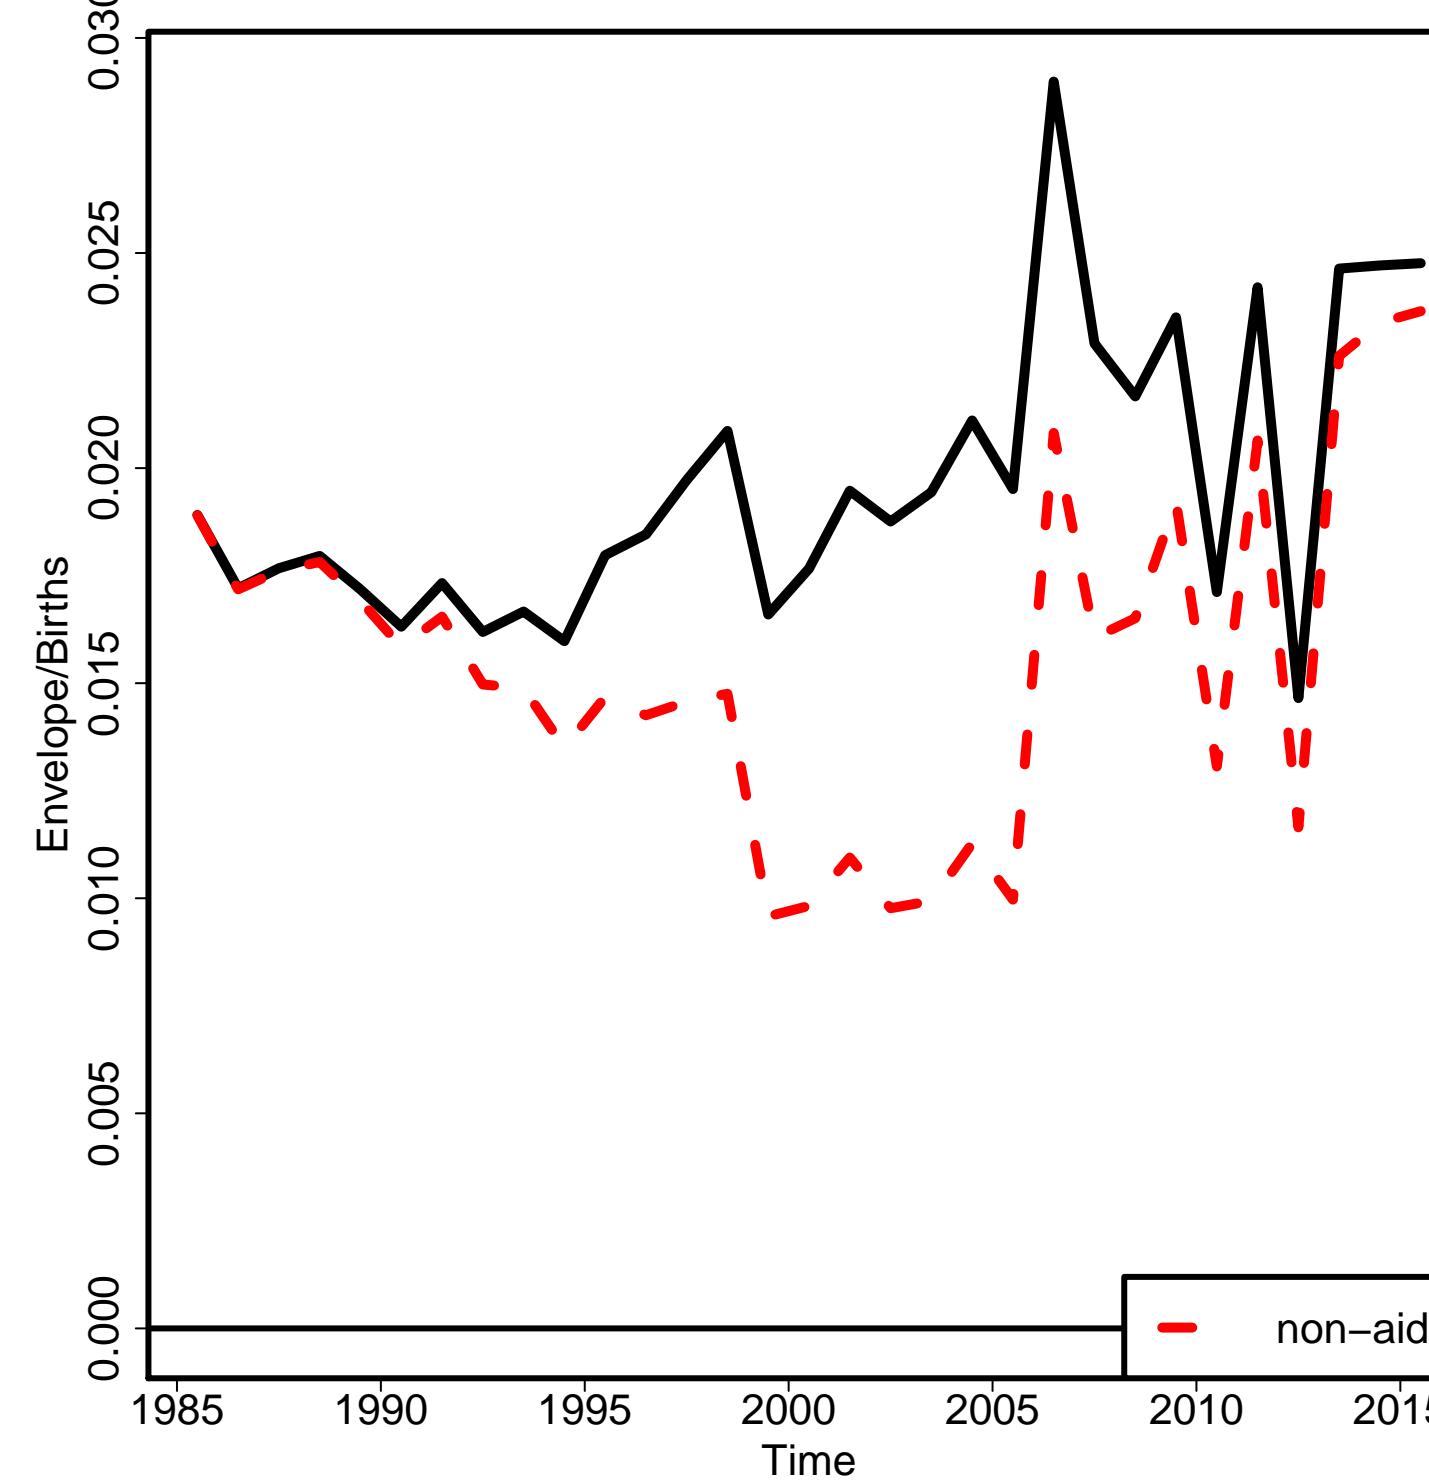

Non-aids MMR

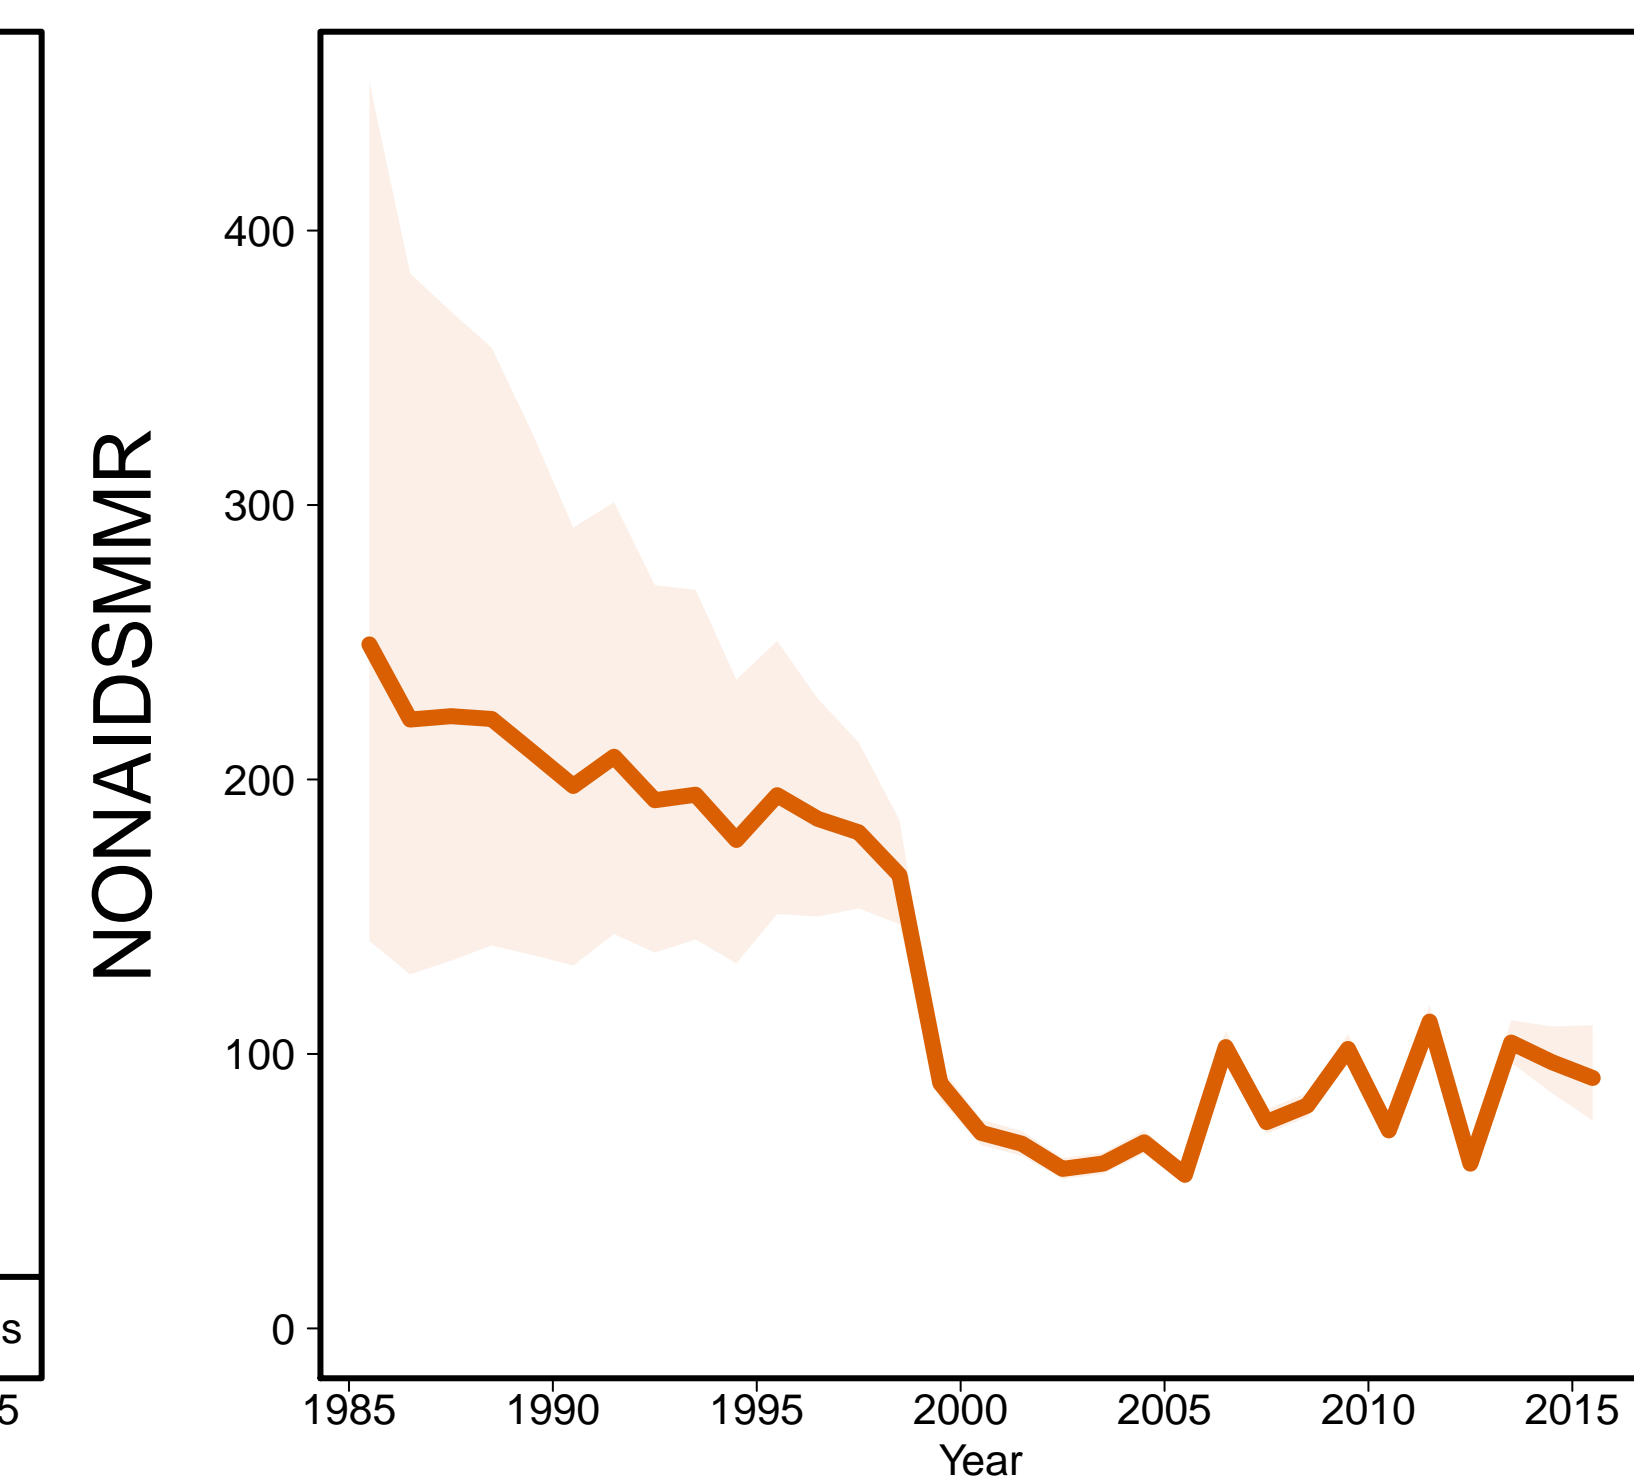

Aids MMR

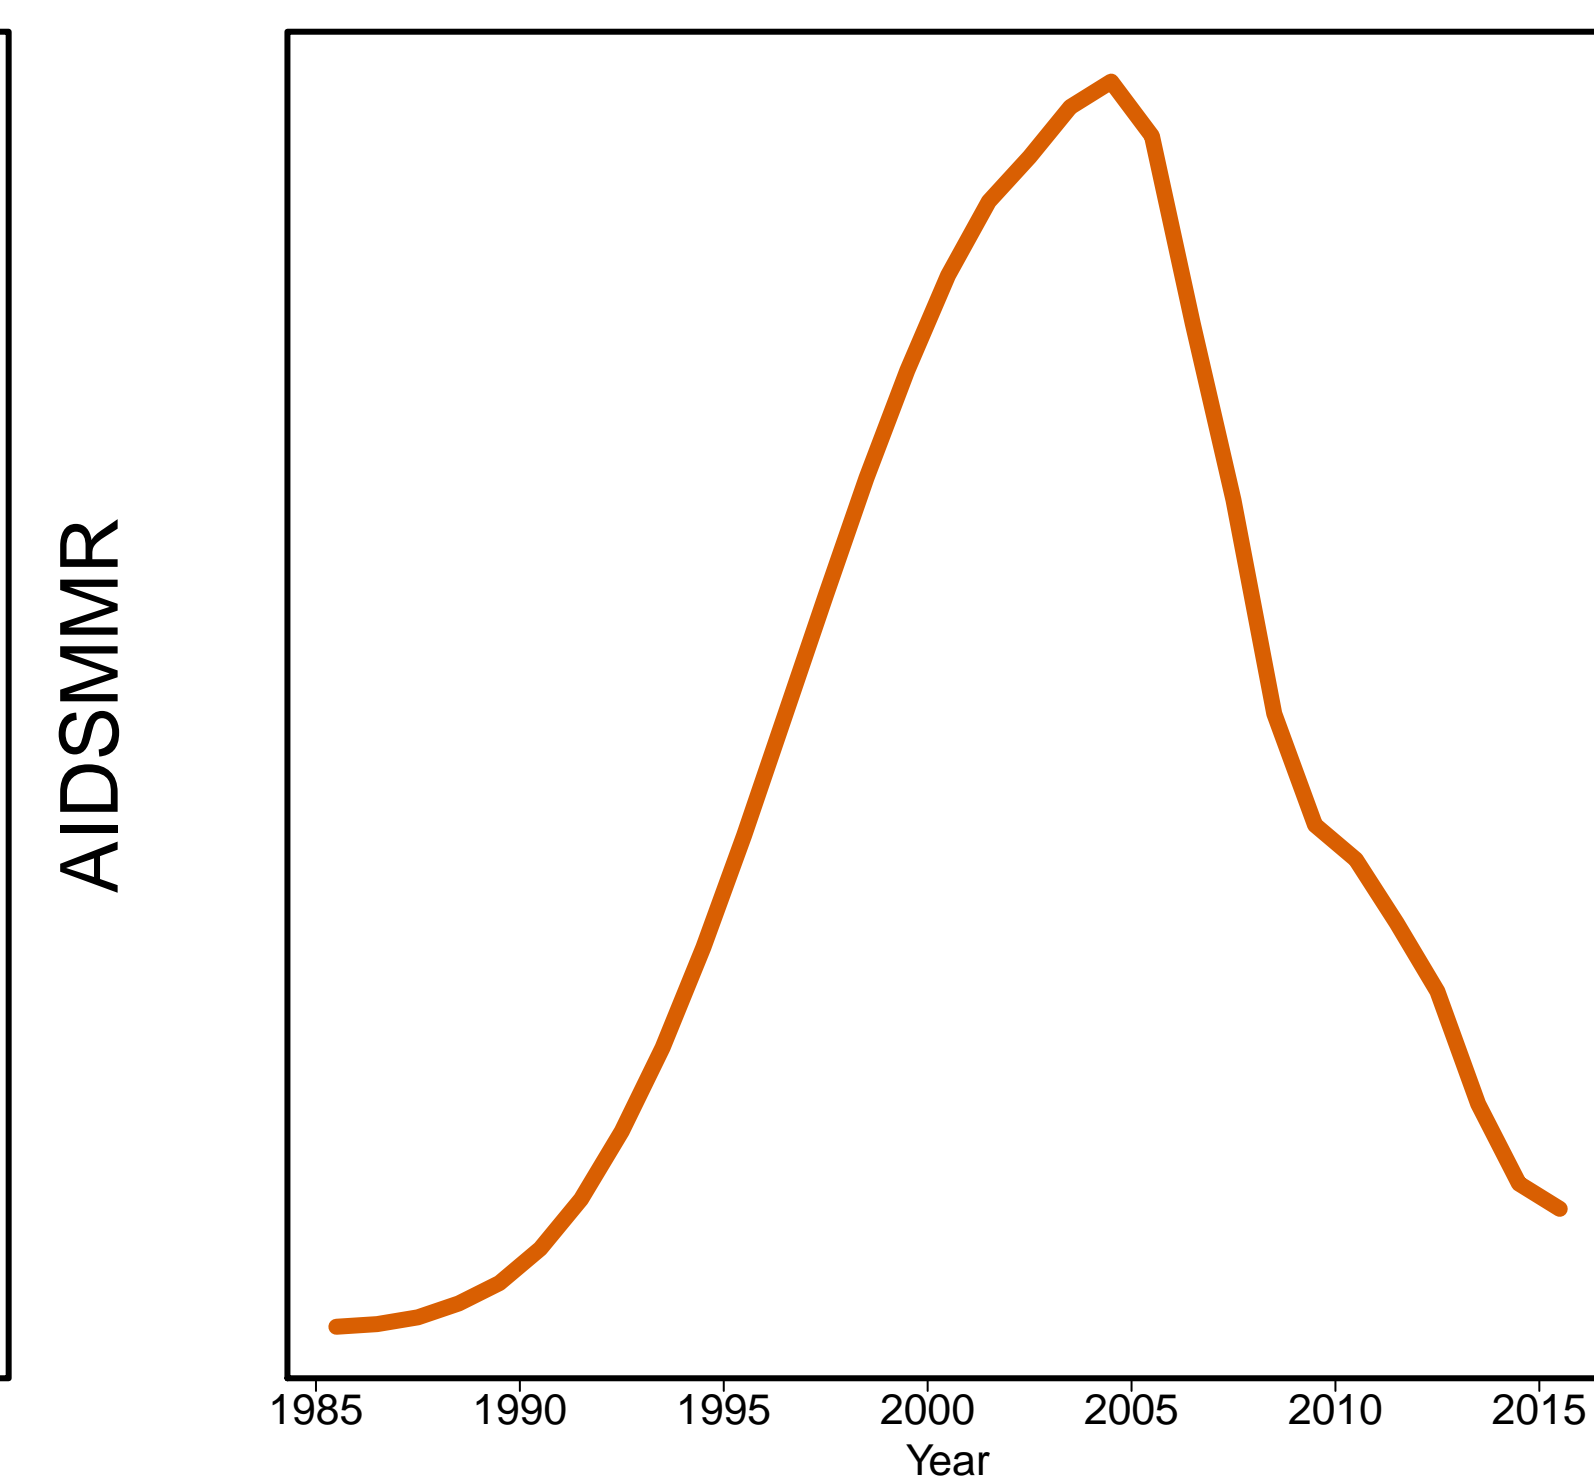



Ecuador [ECU]  
(South America)

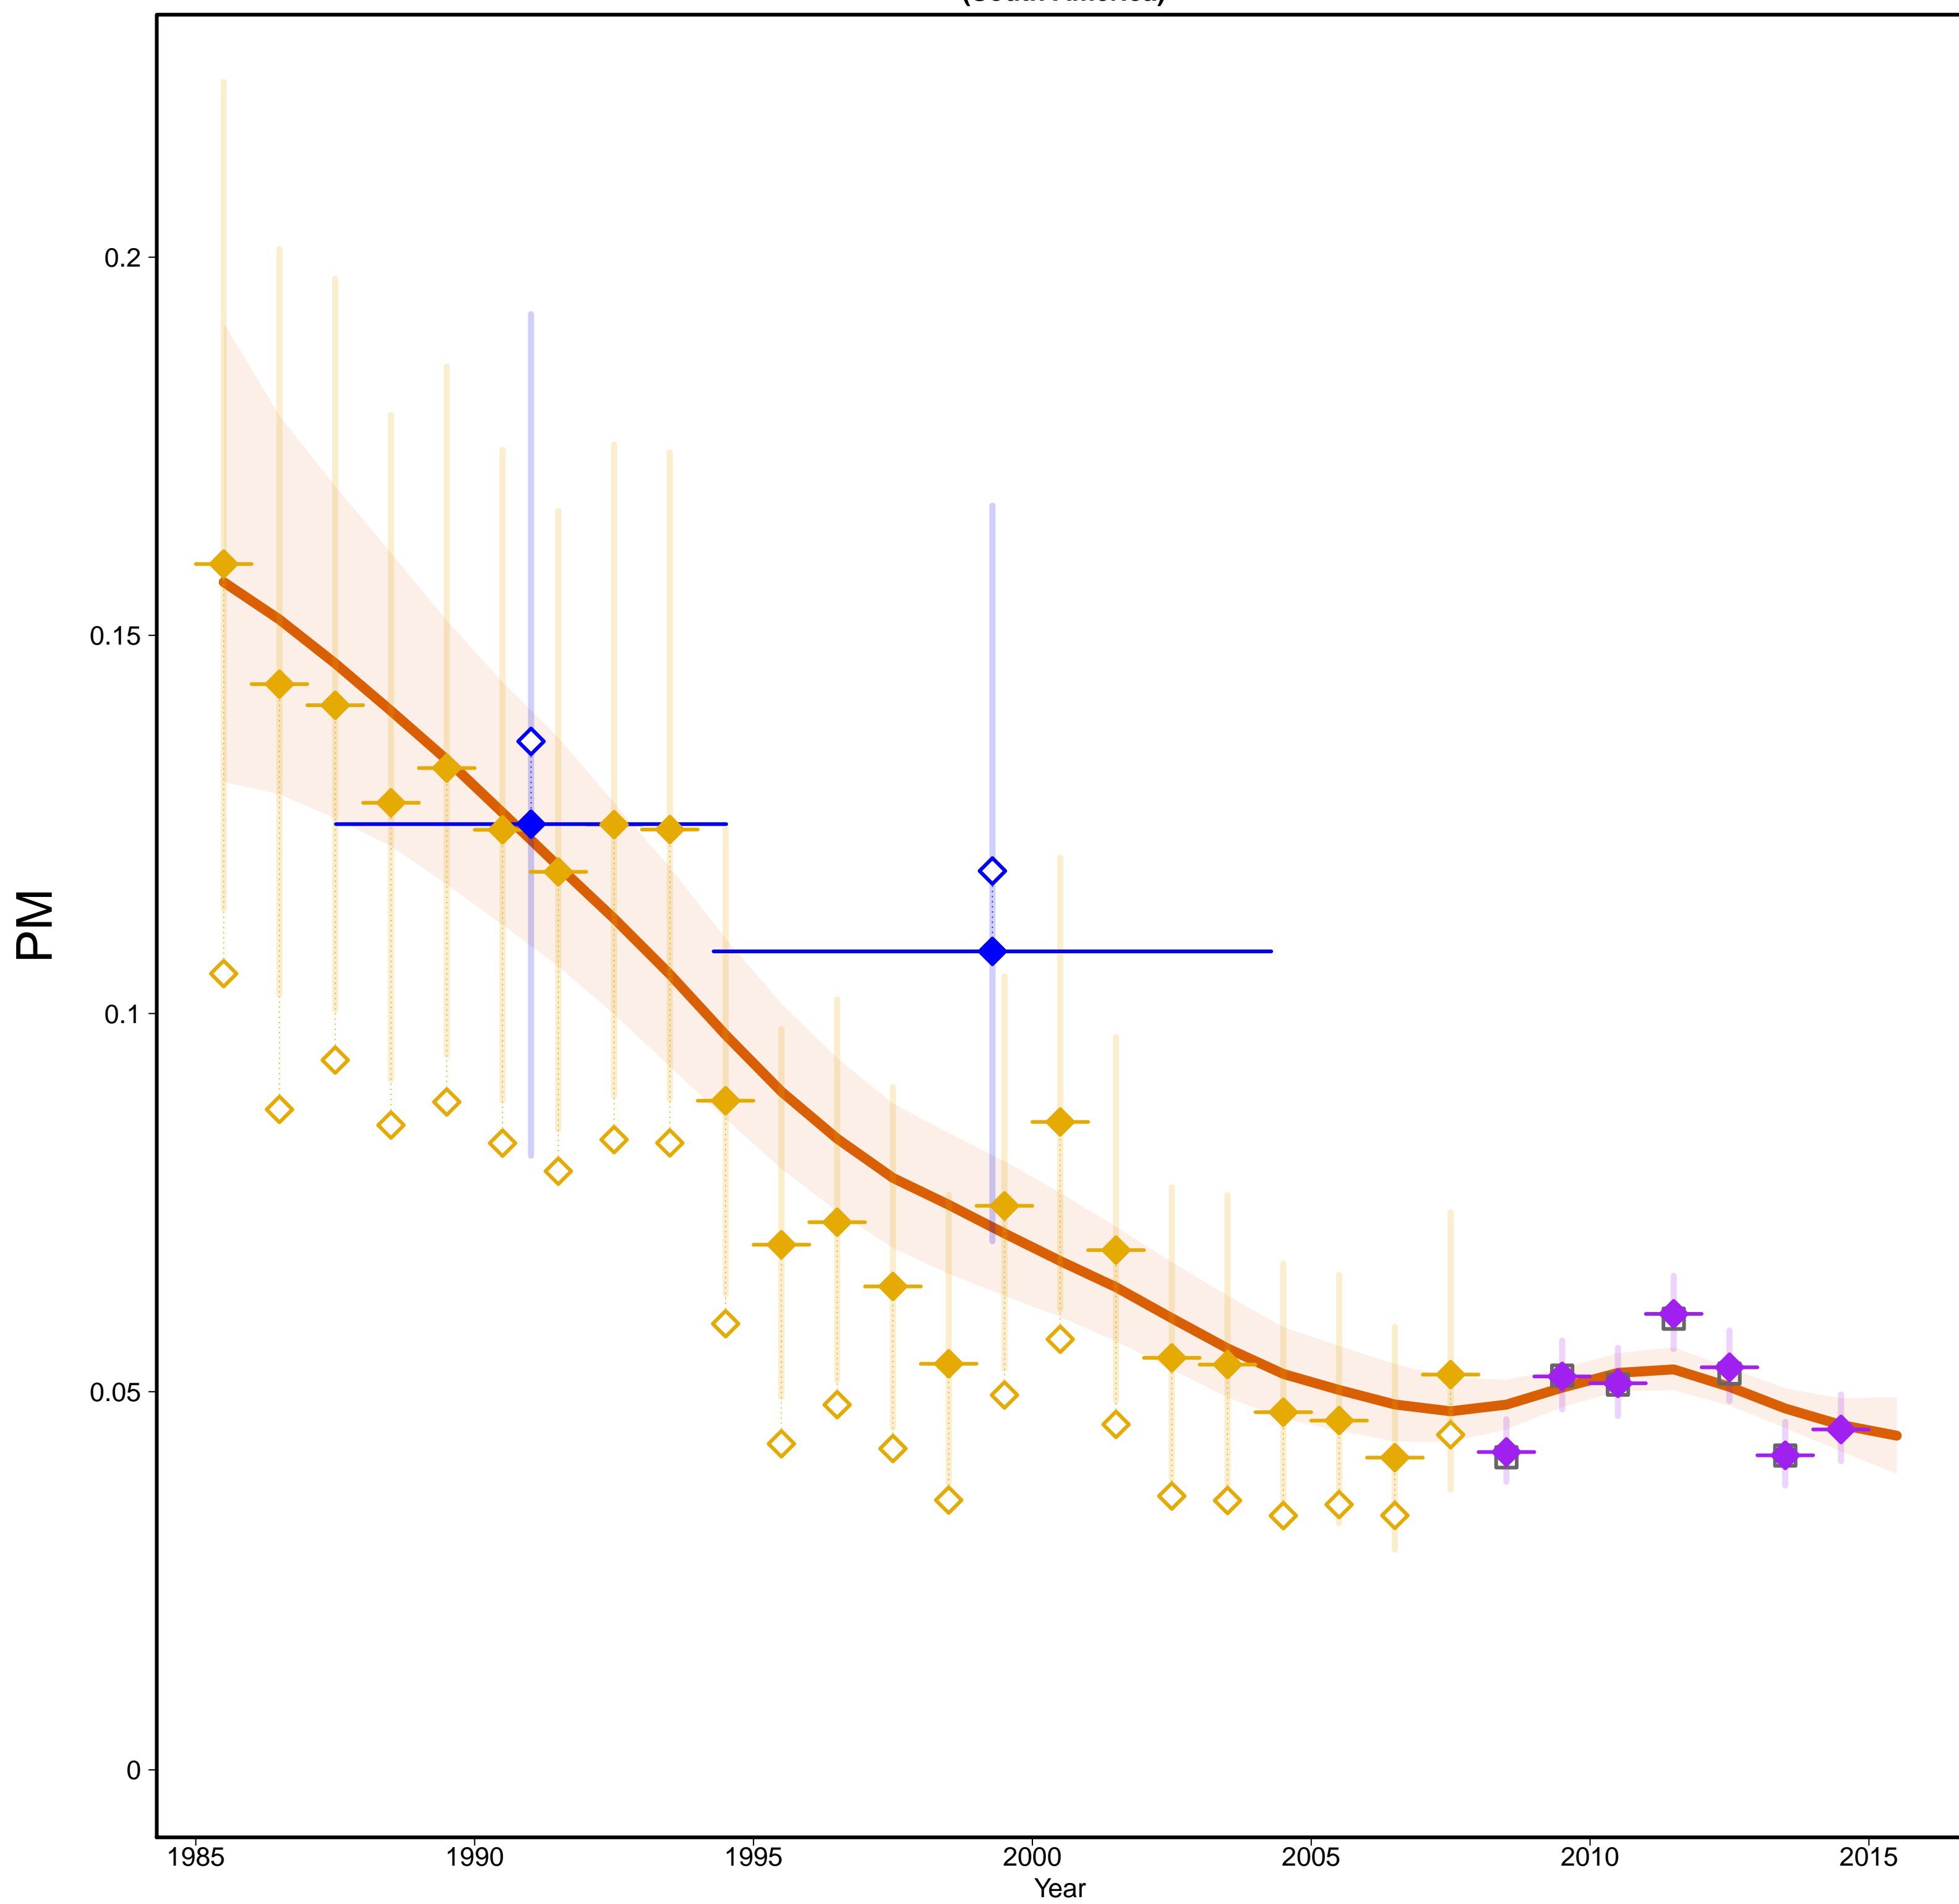

Ecuador [ECU]  
(South America)

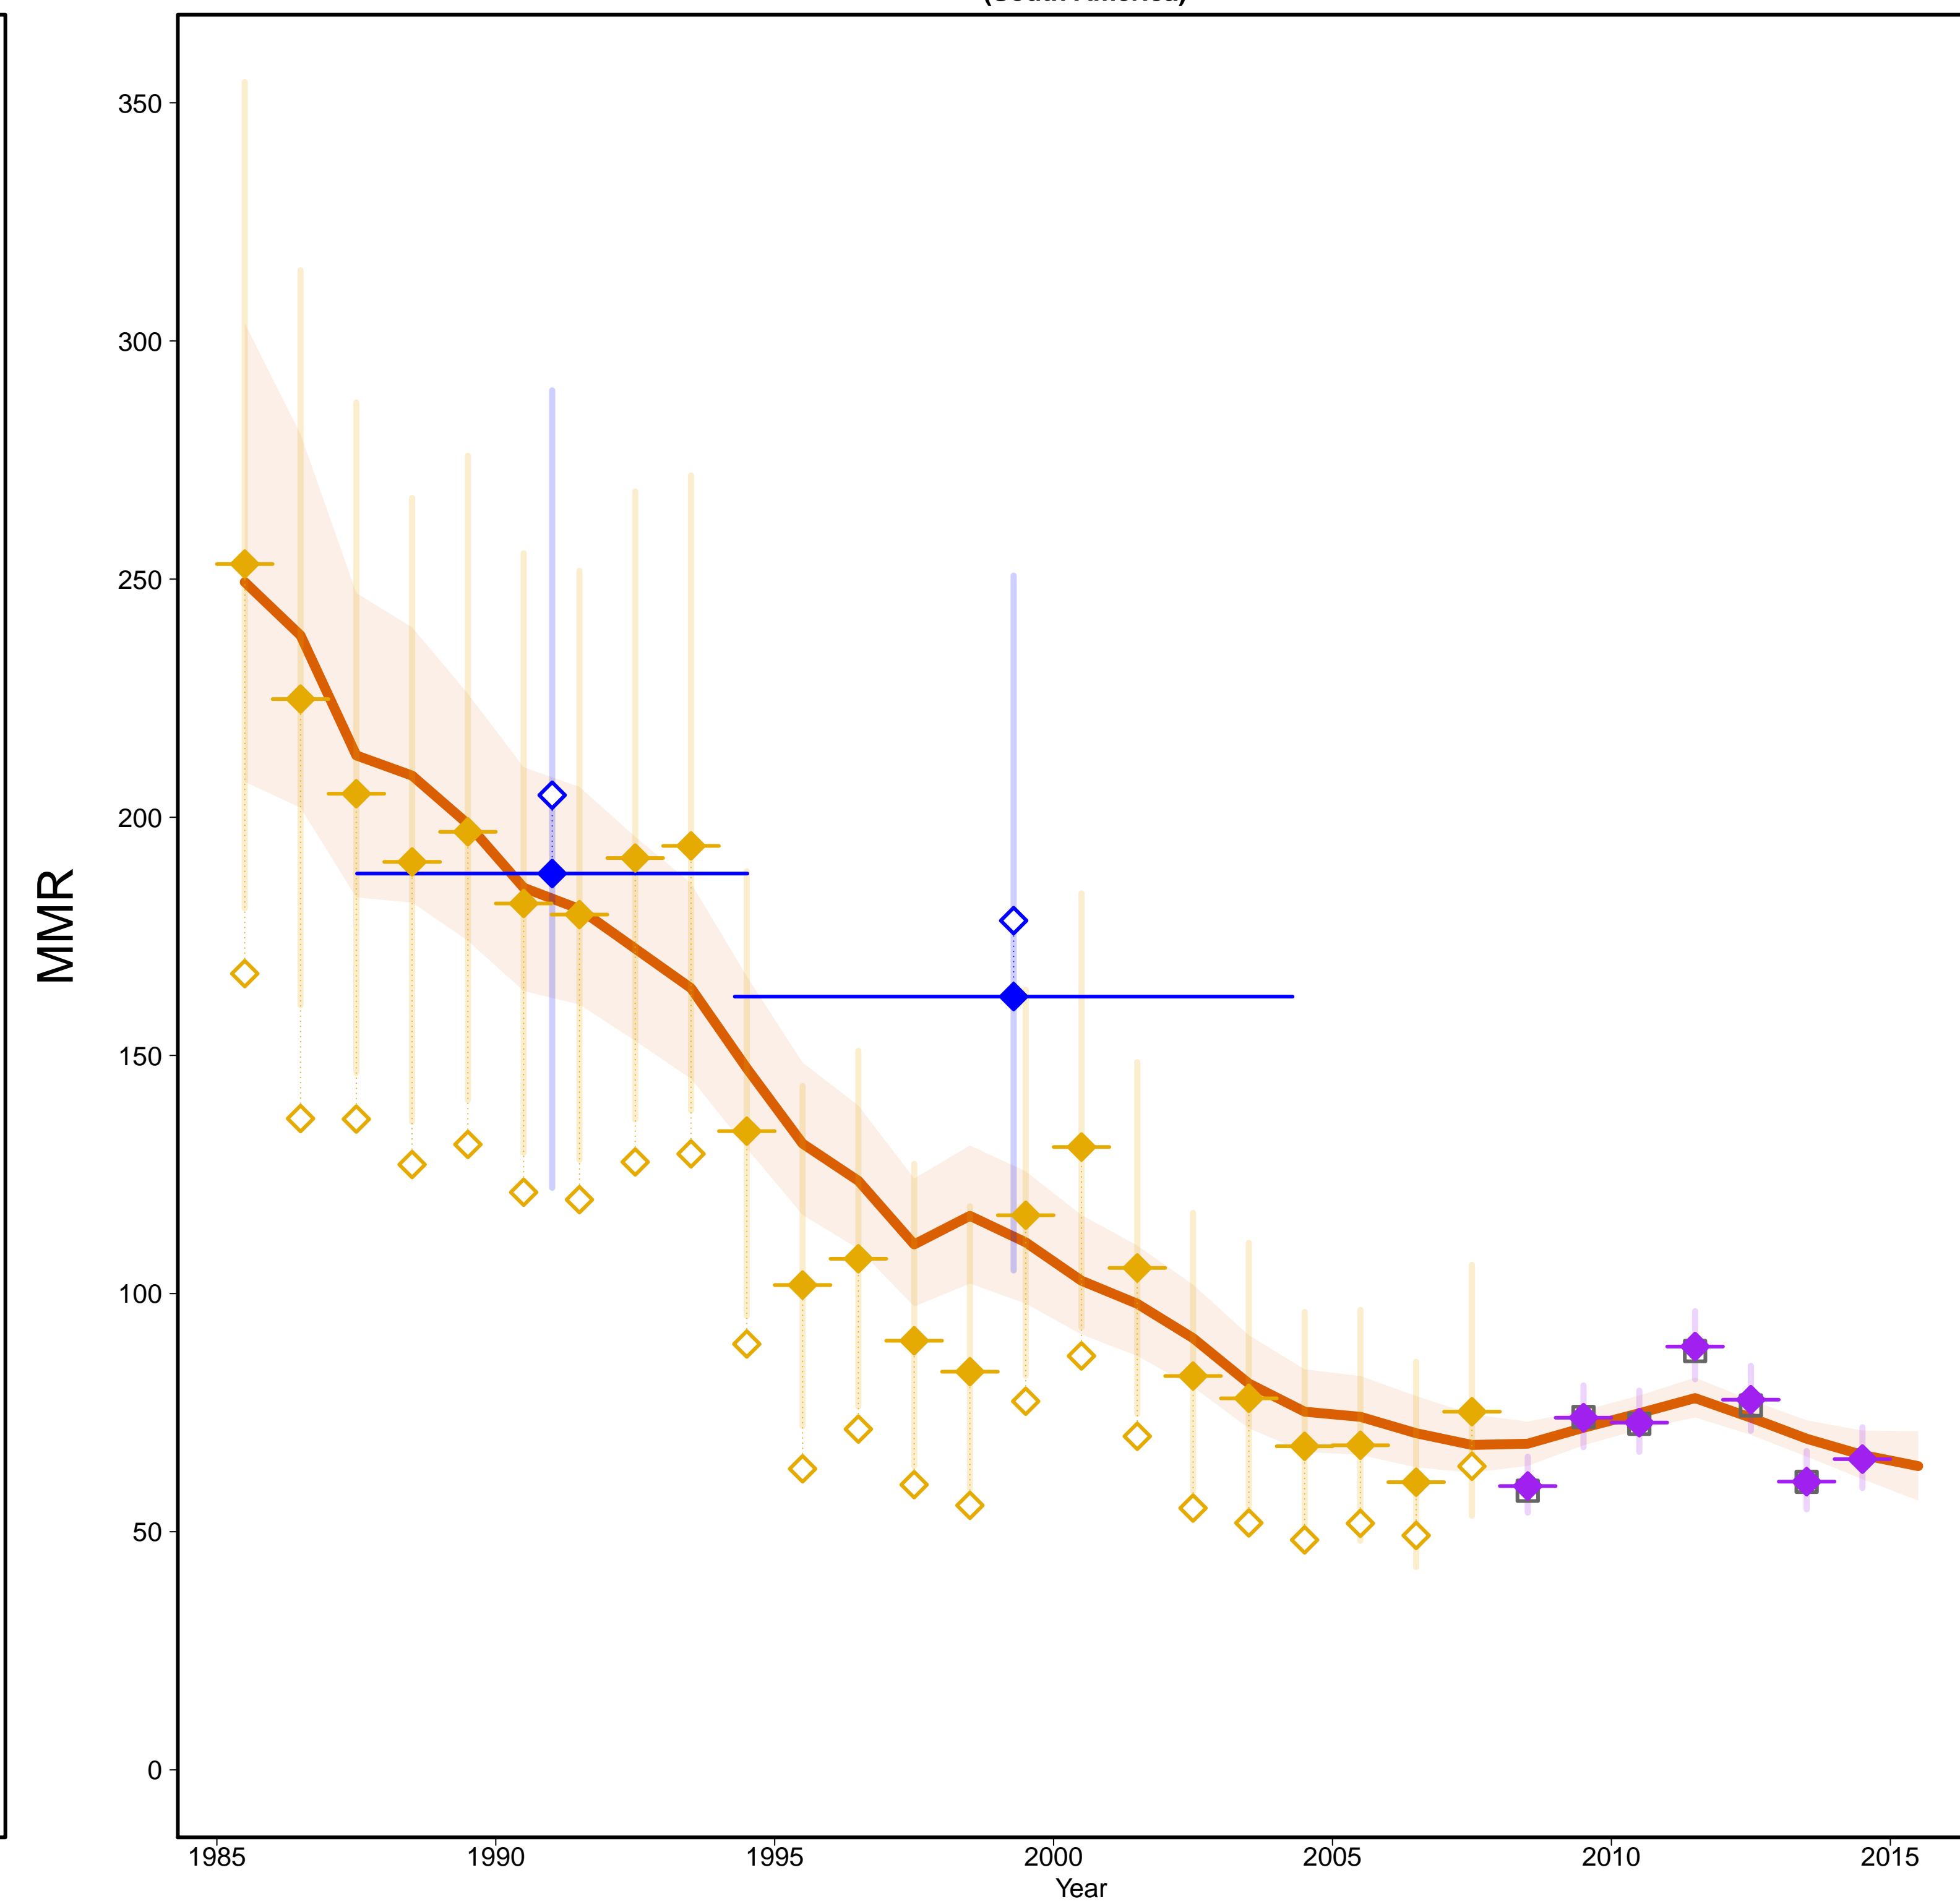

- Estimates –
- Mlate
- MMR Database 2015 –
- ◇ Observed Data
- ◆ Adjusted Data
- Data type –
- ◆ VR
- ◆ Spec. studies
- ◆ DHS
- Excluded VR data  
(overlap with specialized study)

Gross Domestic Product

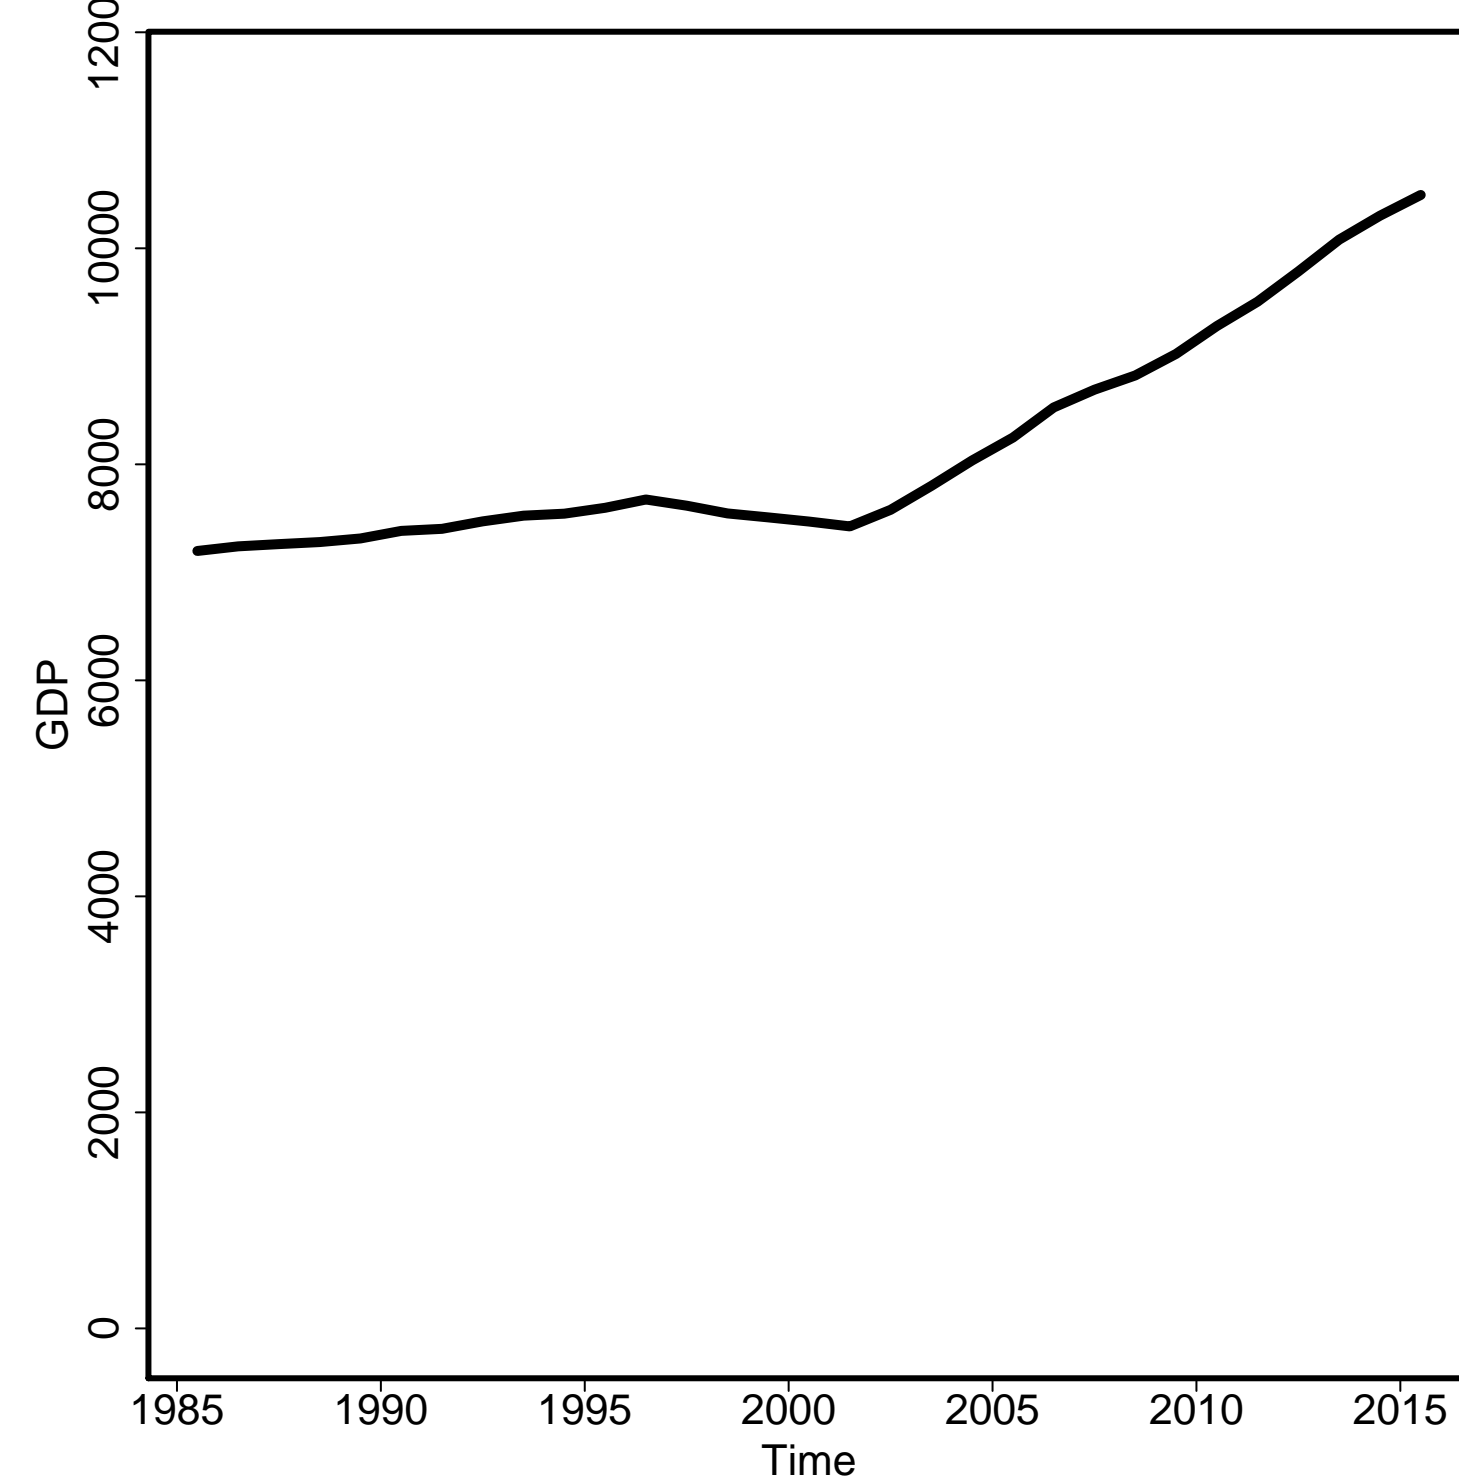

General Fertility Rate

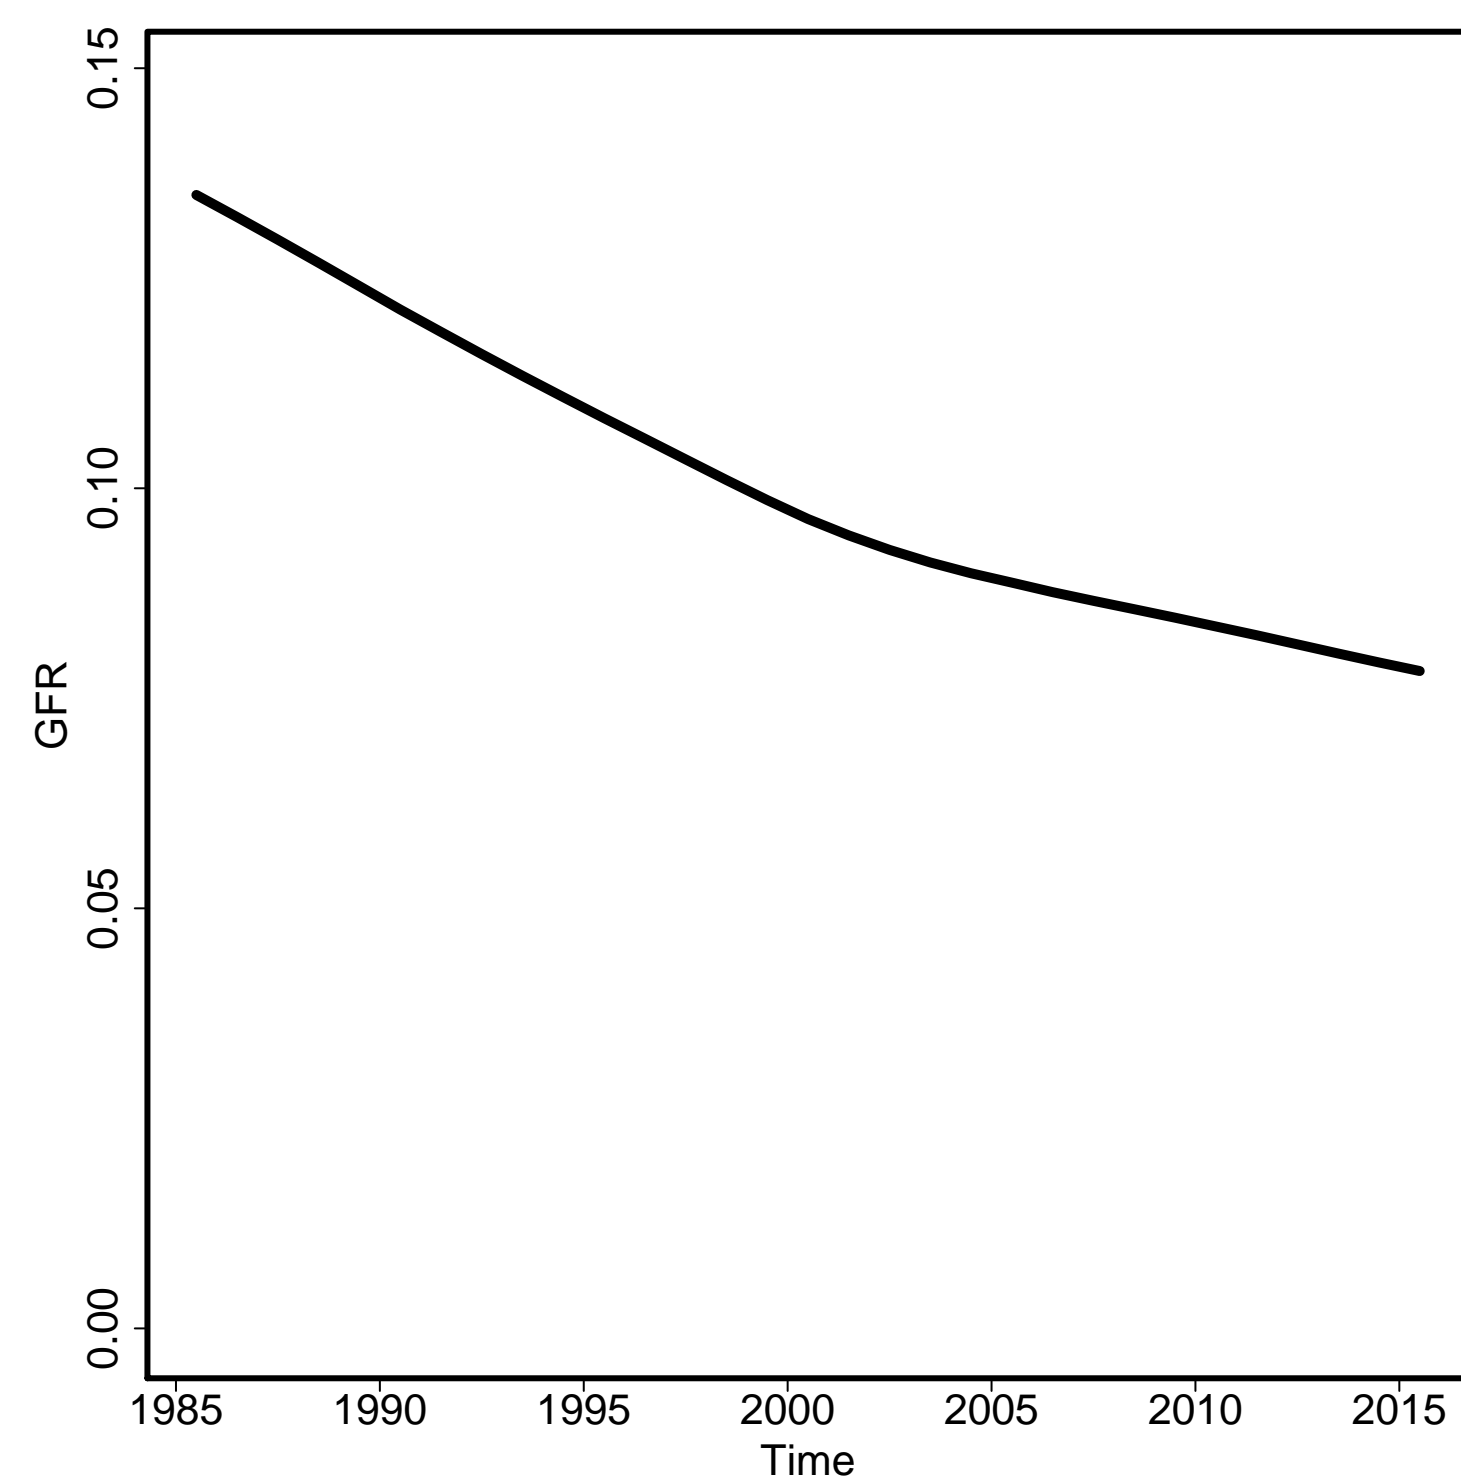

Skilled Attendance to Birth

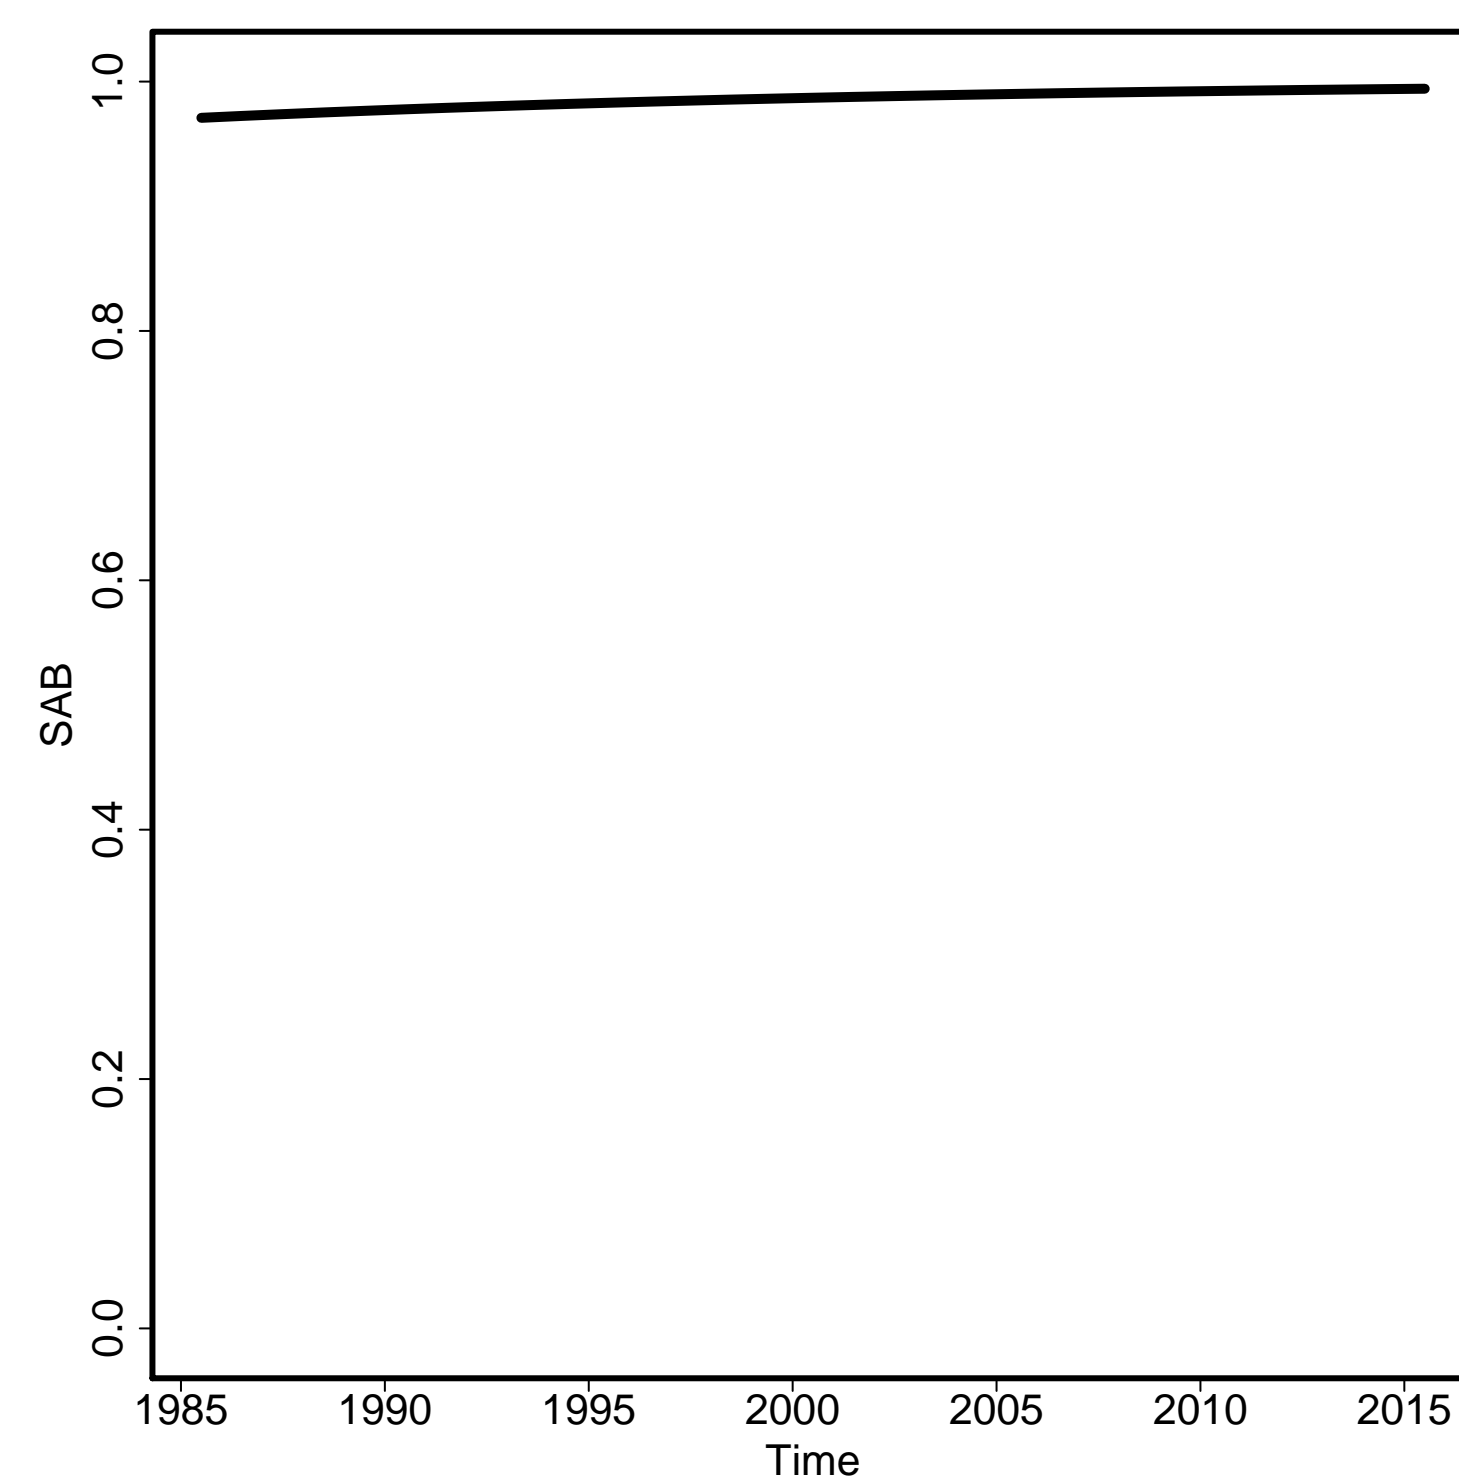

Envelope/Births

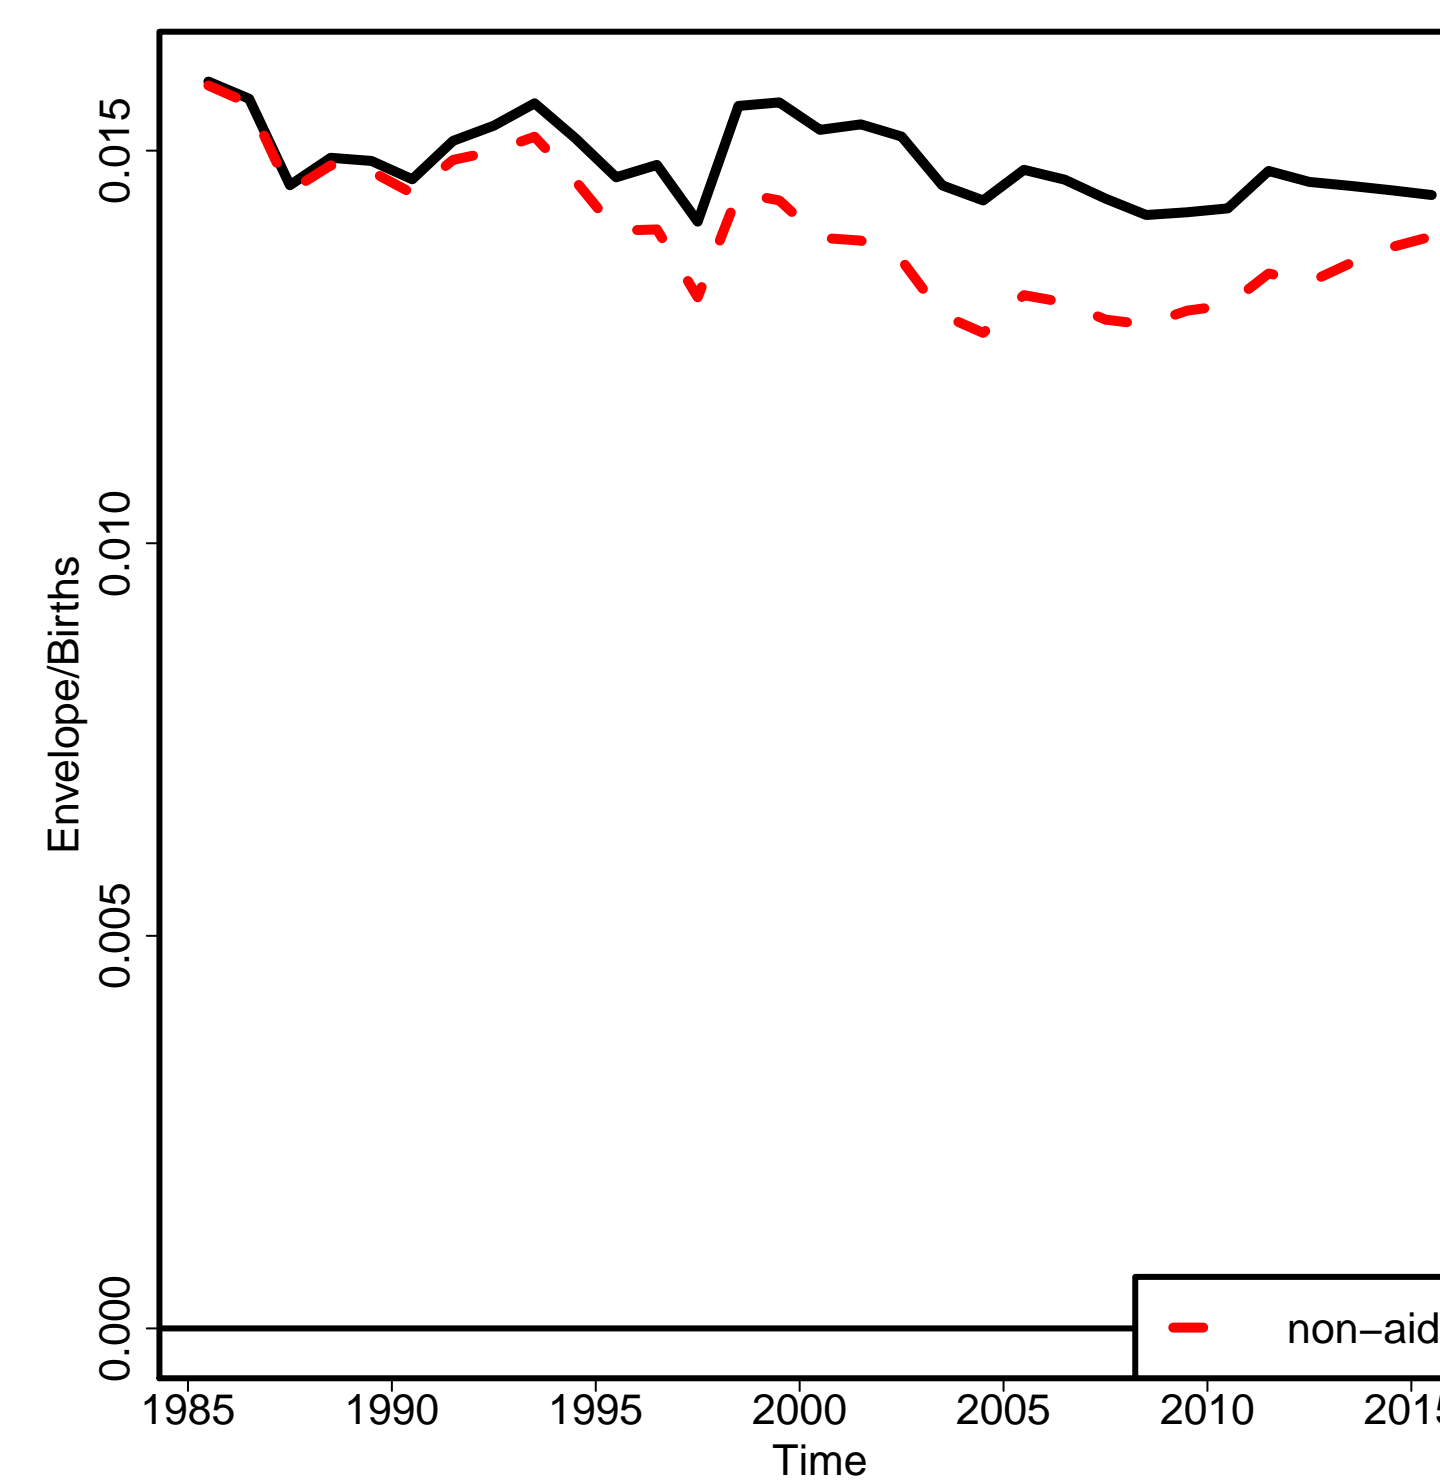

Non-aids MMR

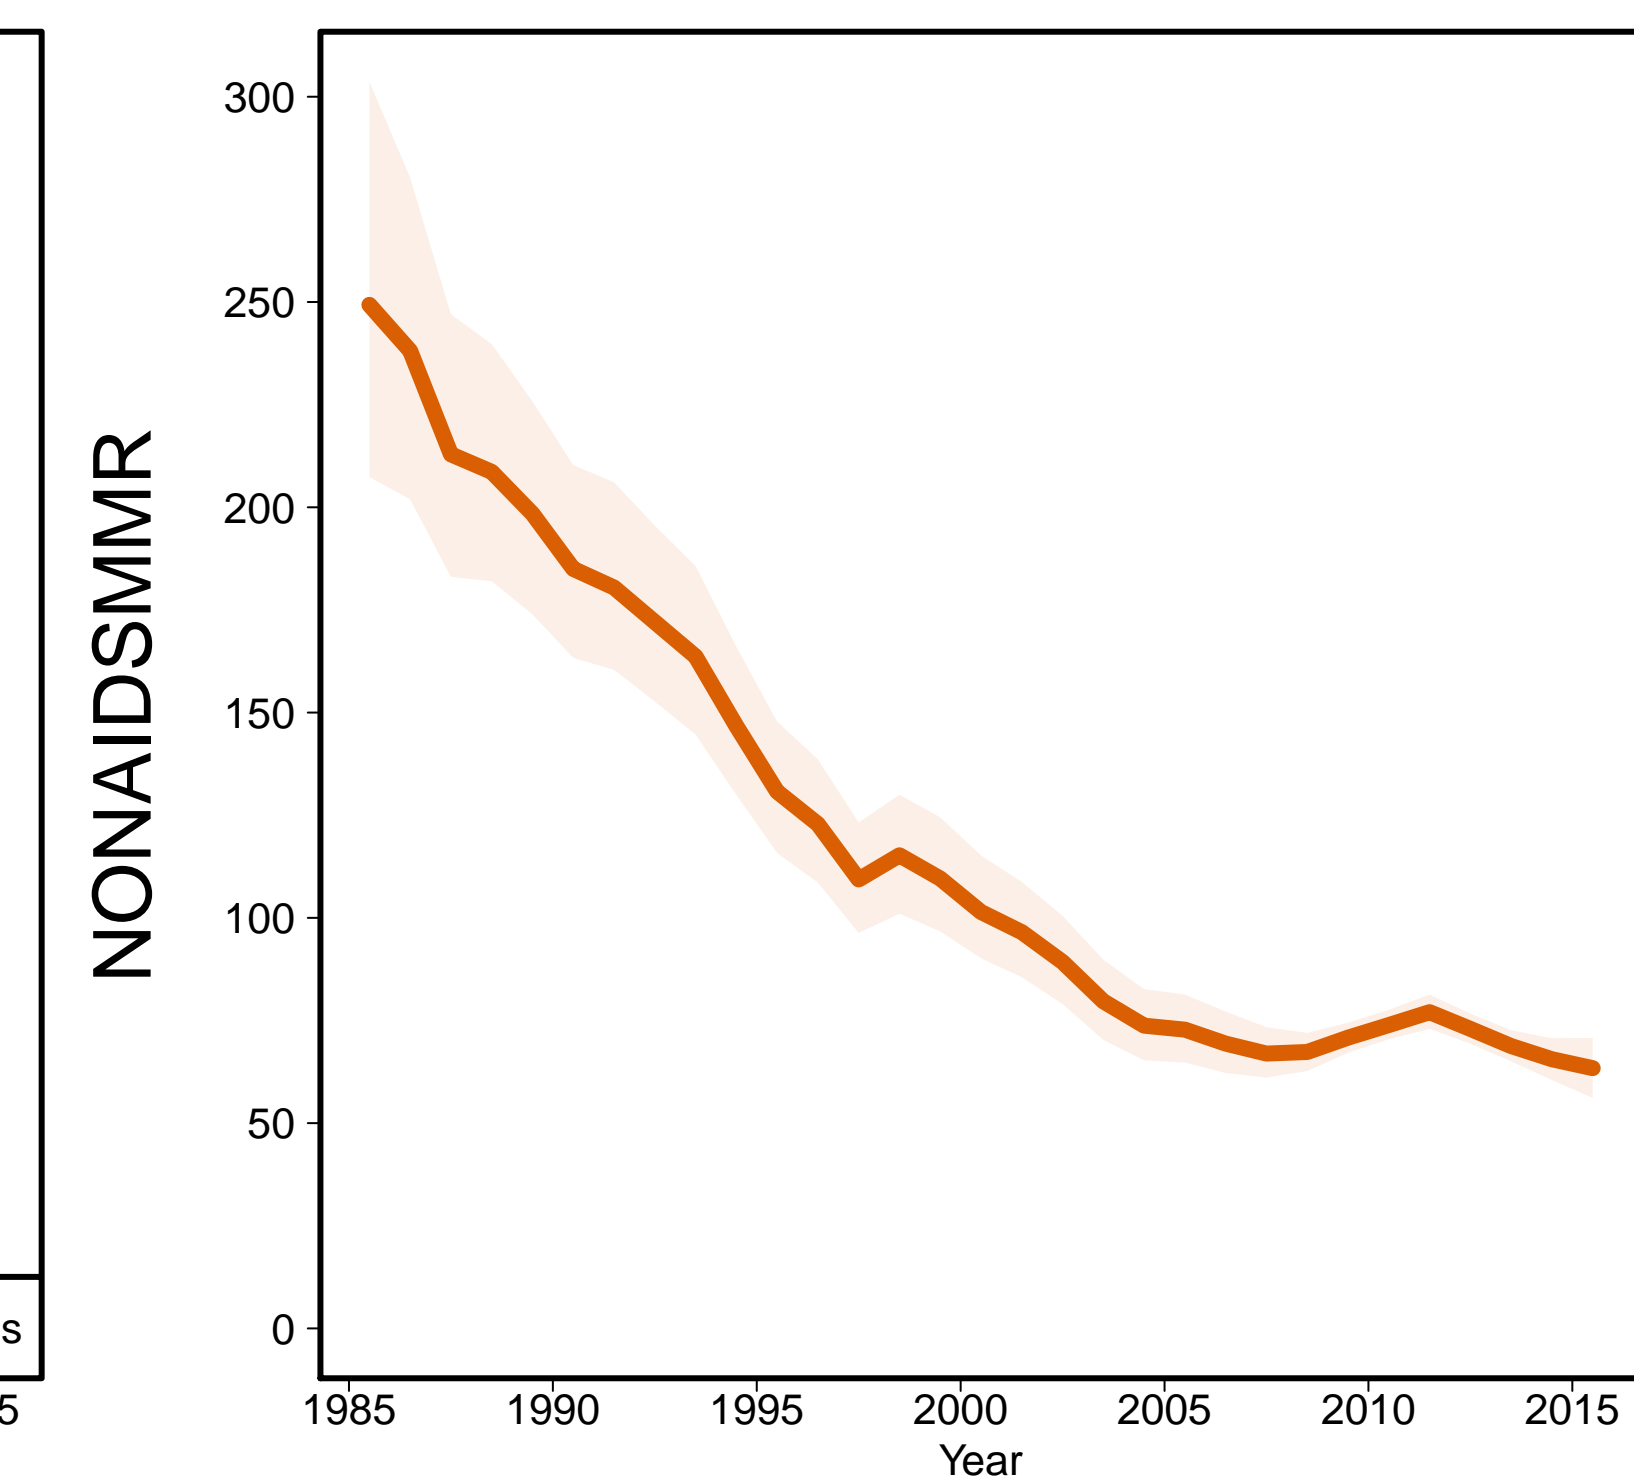

Aids MMR

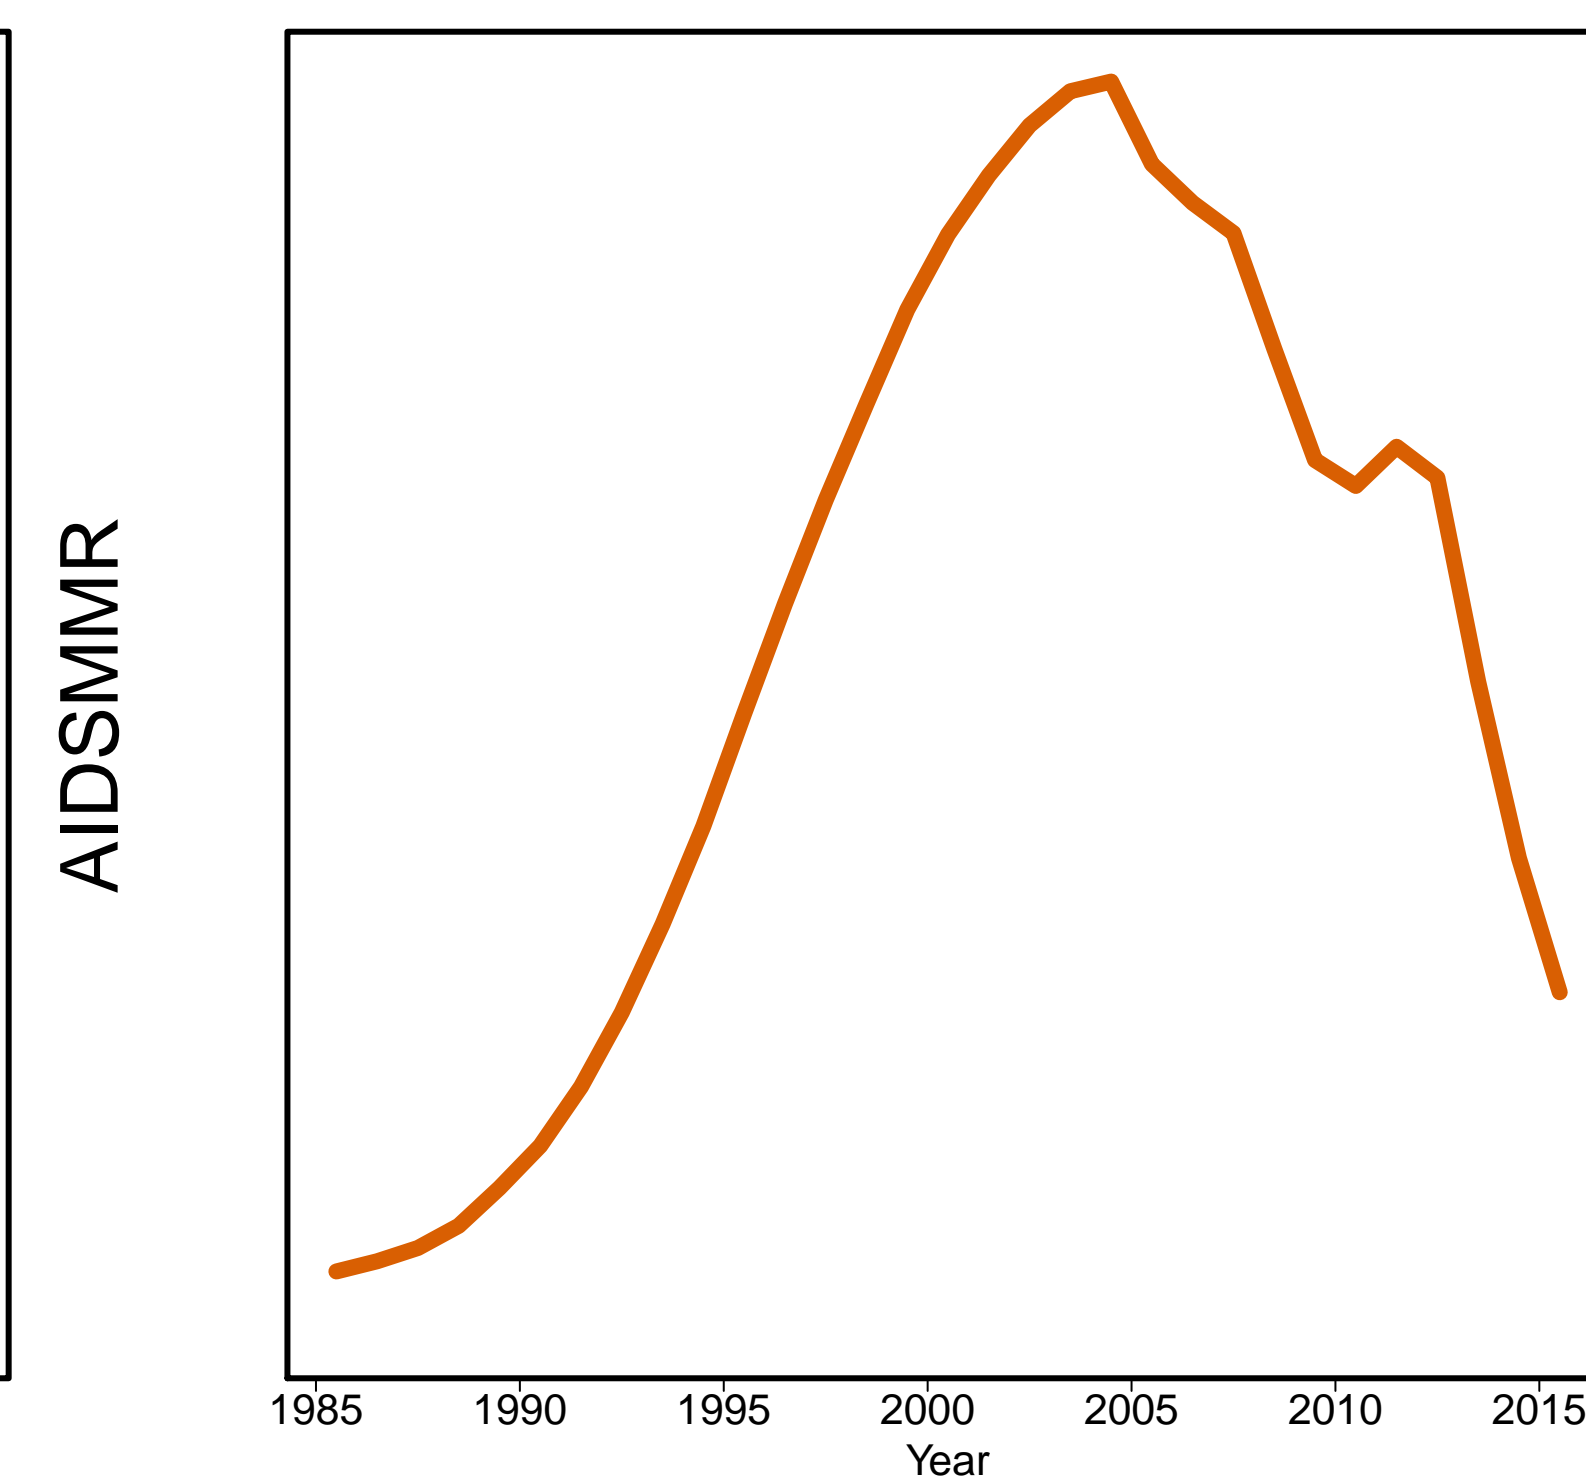

Egypt [EGY]  
(Northern Africa)

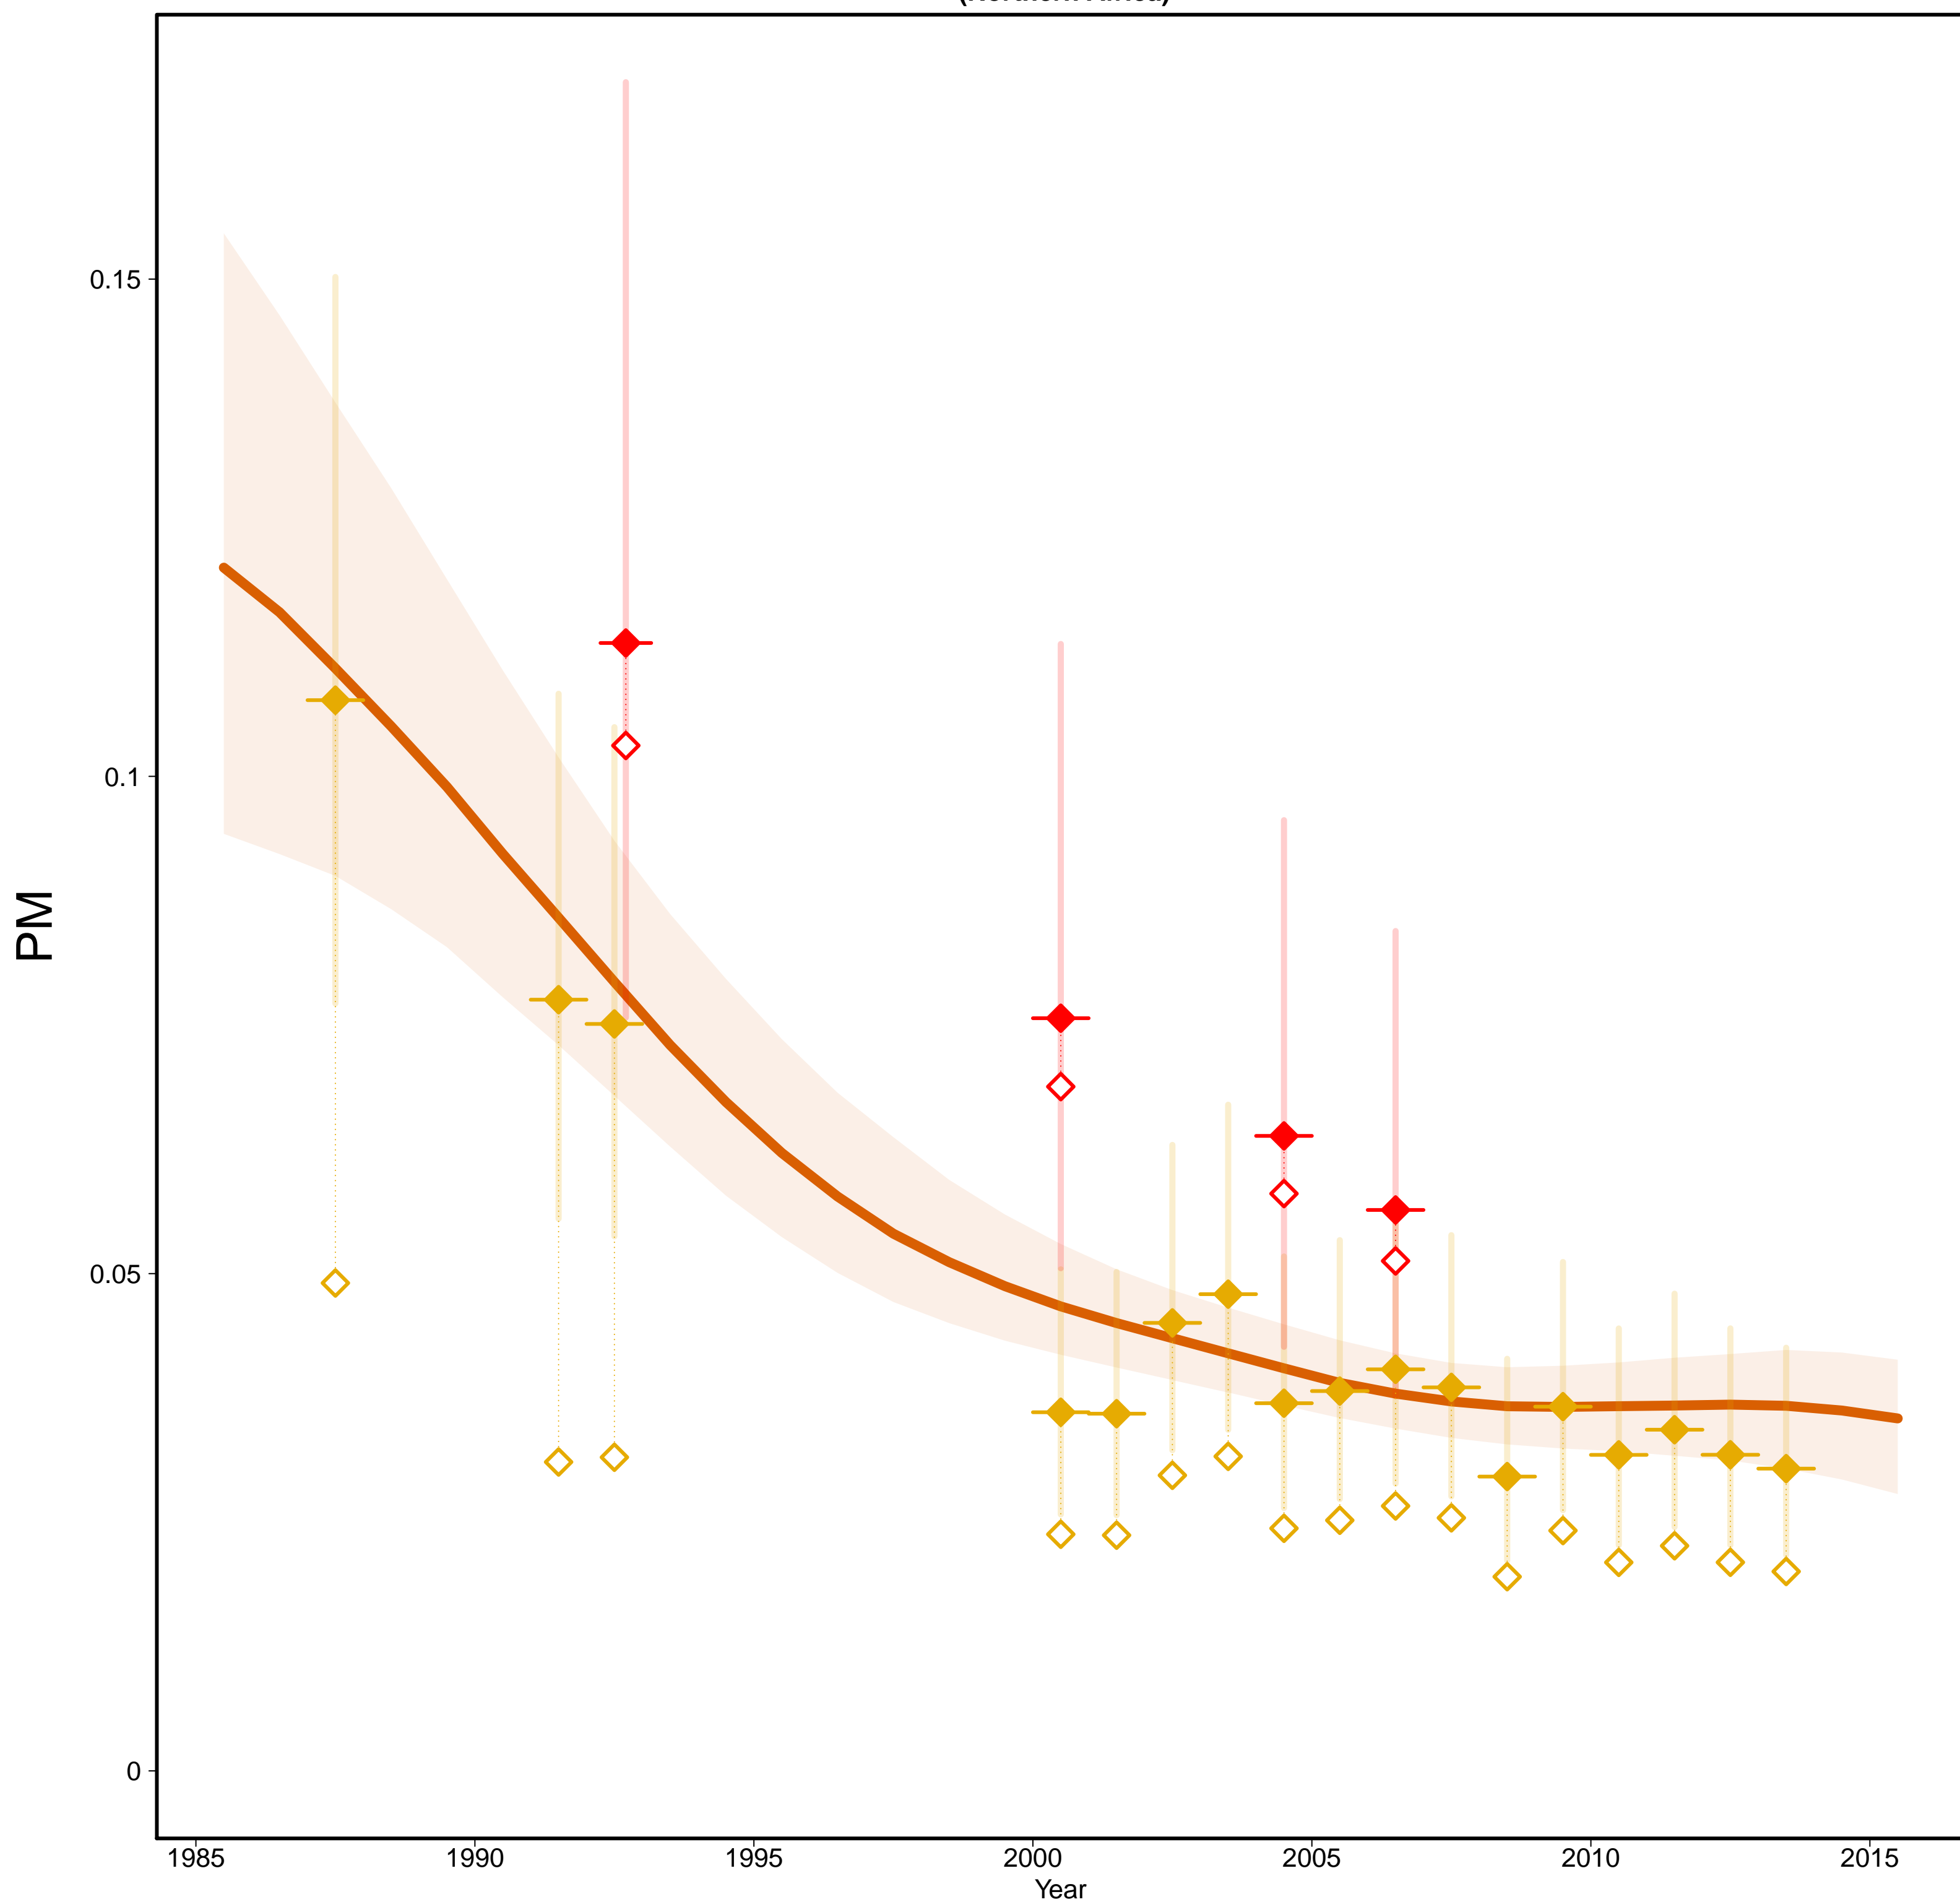

Egypt [EGY]  
(Northern Africa)

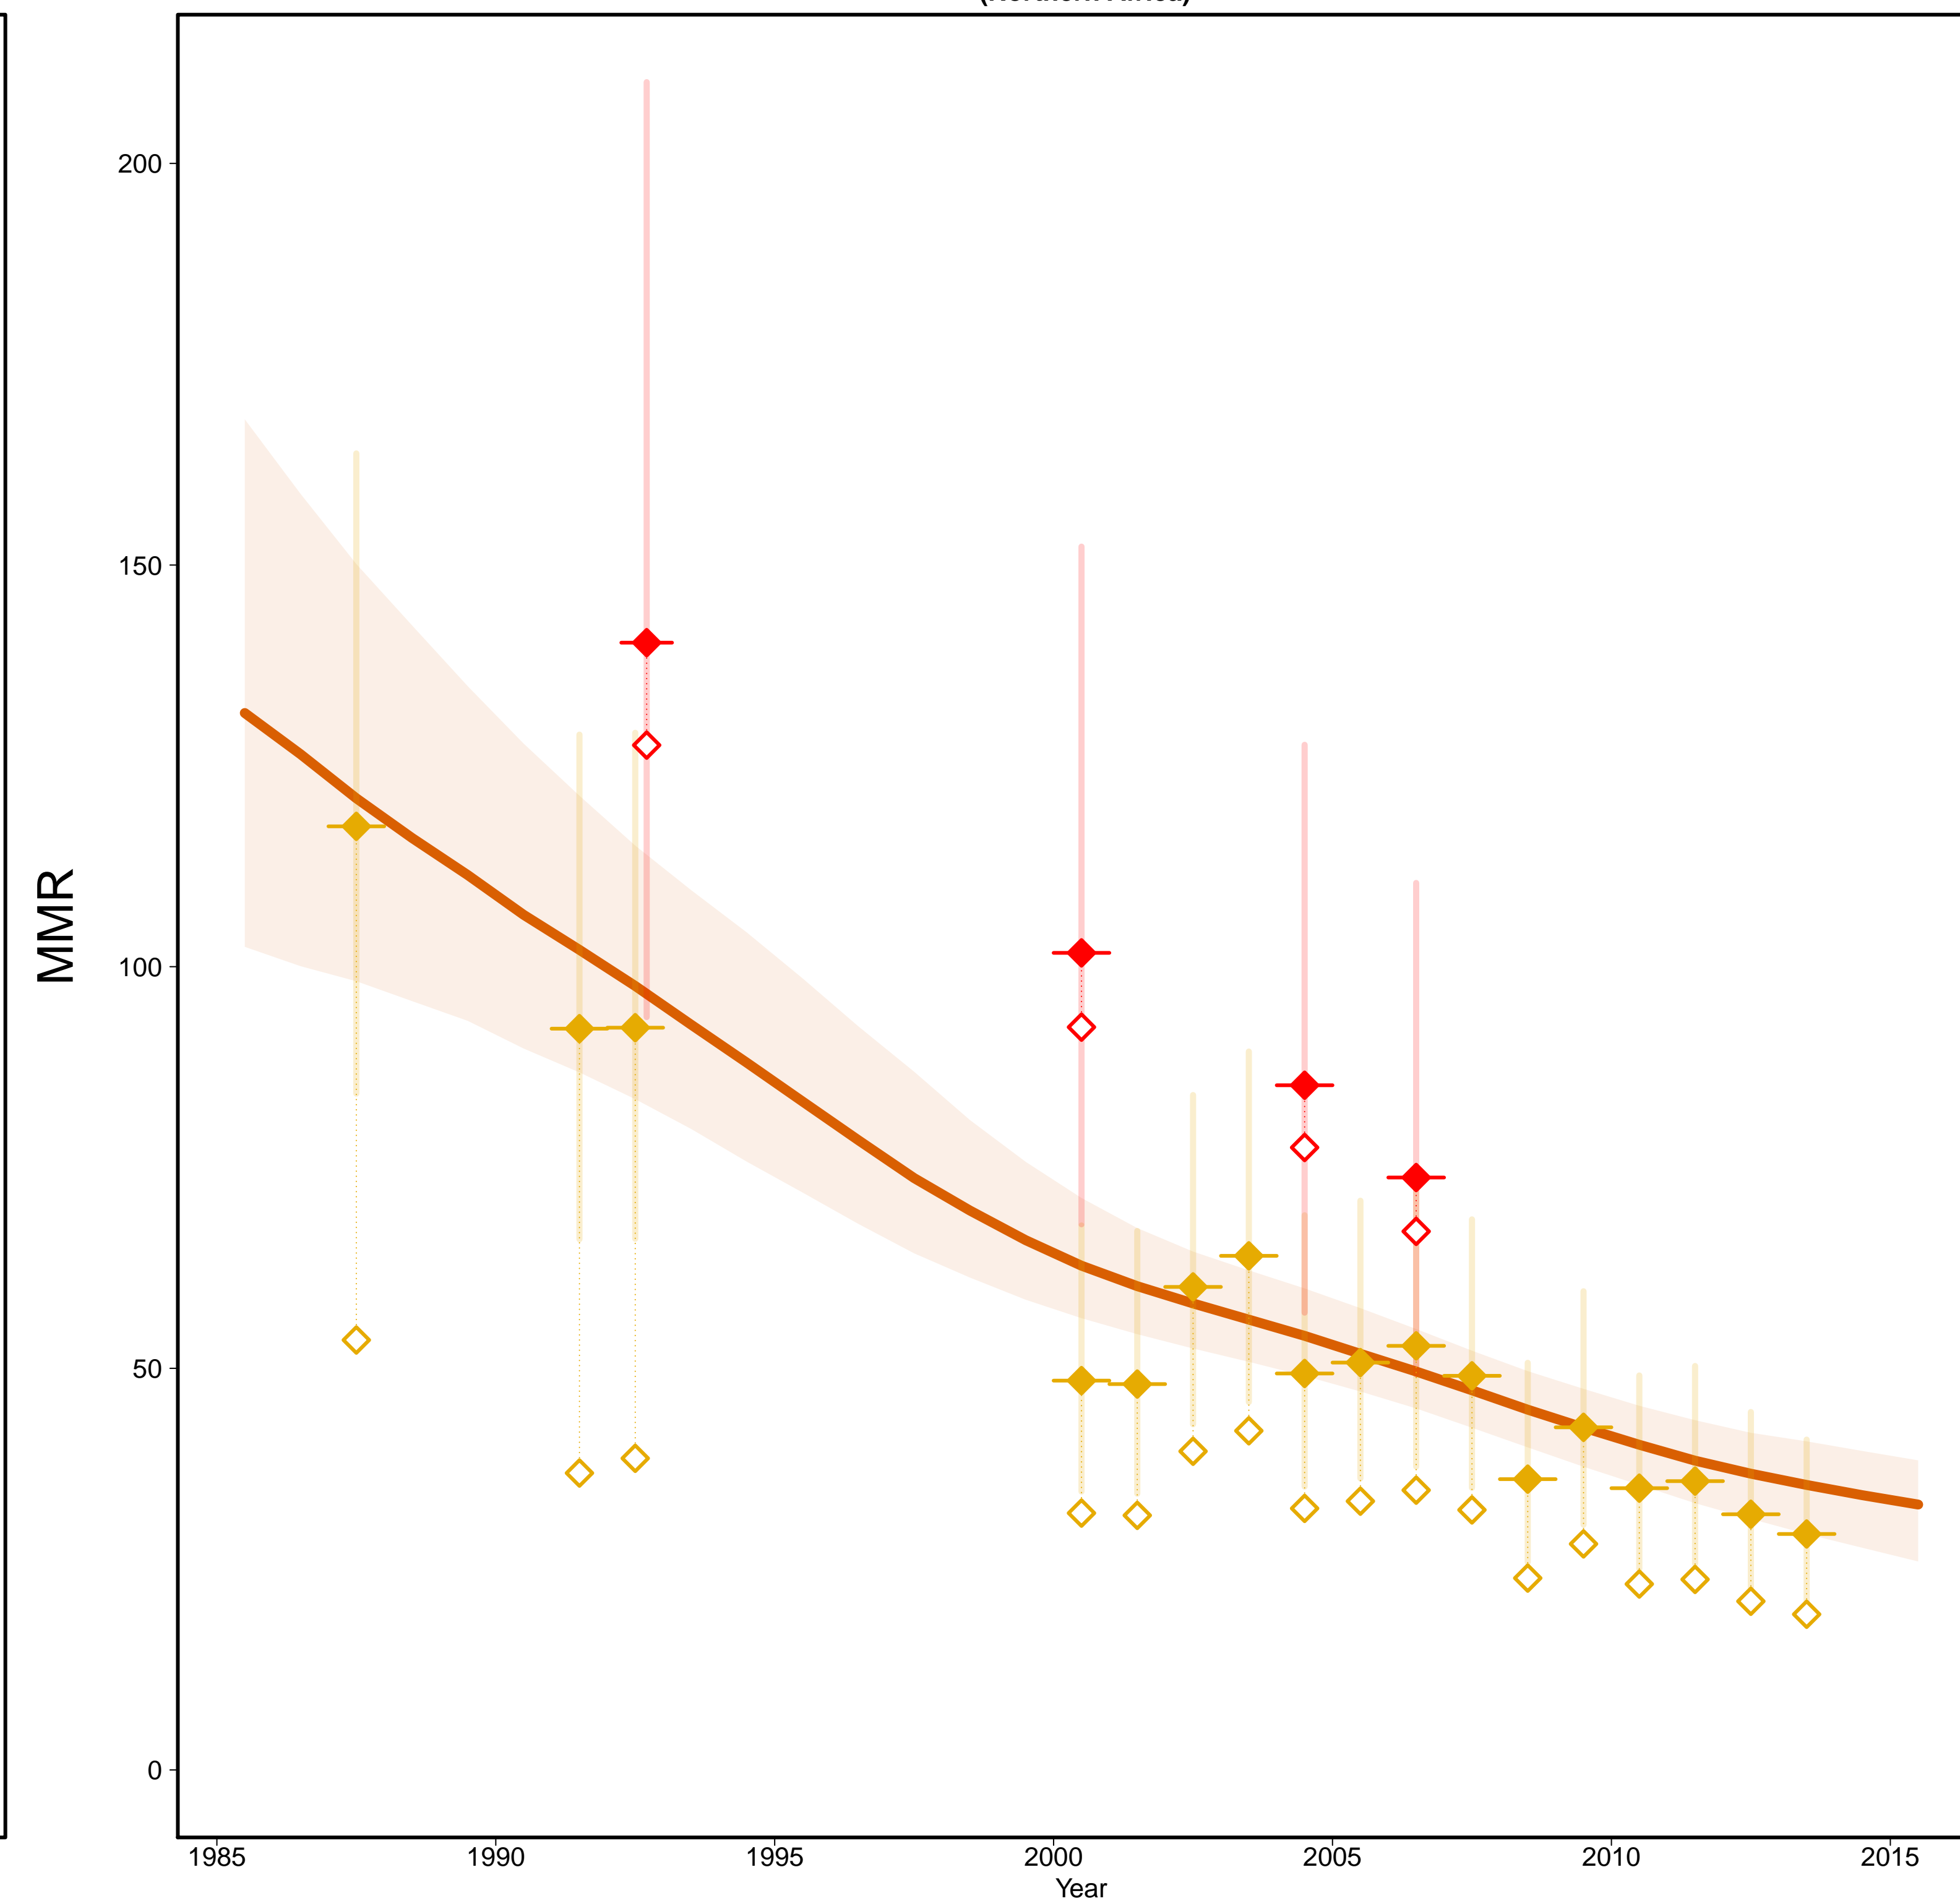

- Estimates —
- MMR Database 2015 —
- ◇ Observed Data
- ◆ Adjusted Data
- Data type —
- ◆ VR
- ◆ Misc. studies

Gross Domestic Product

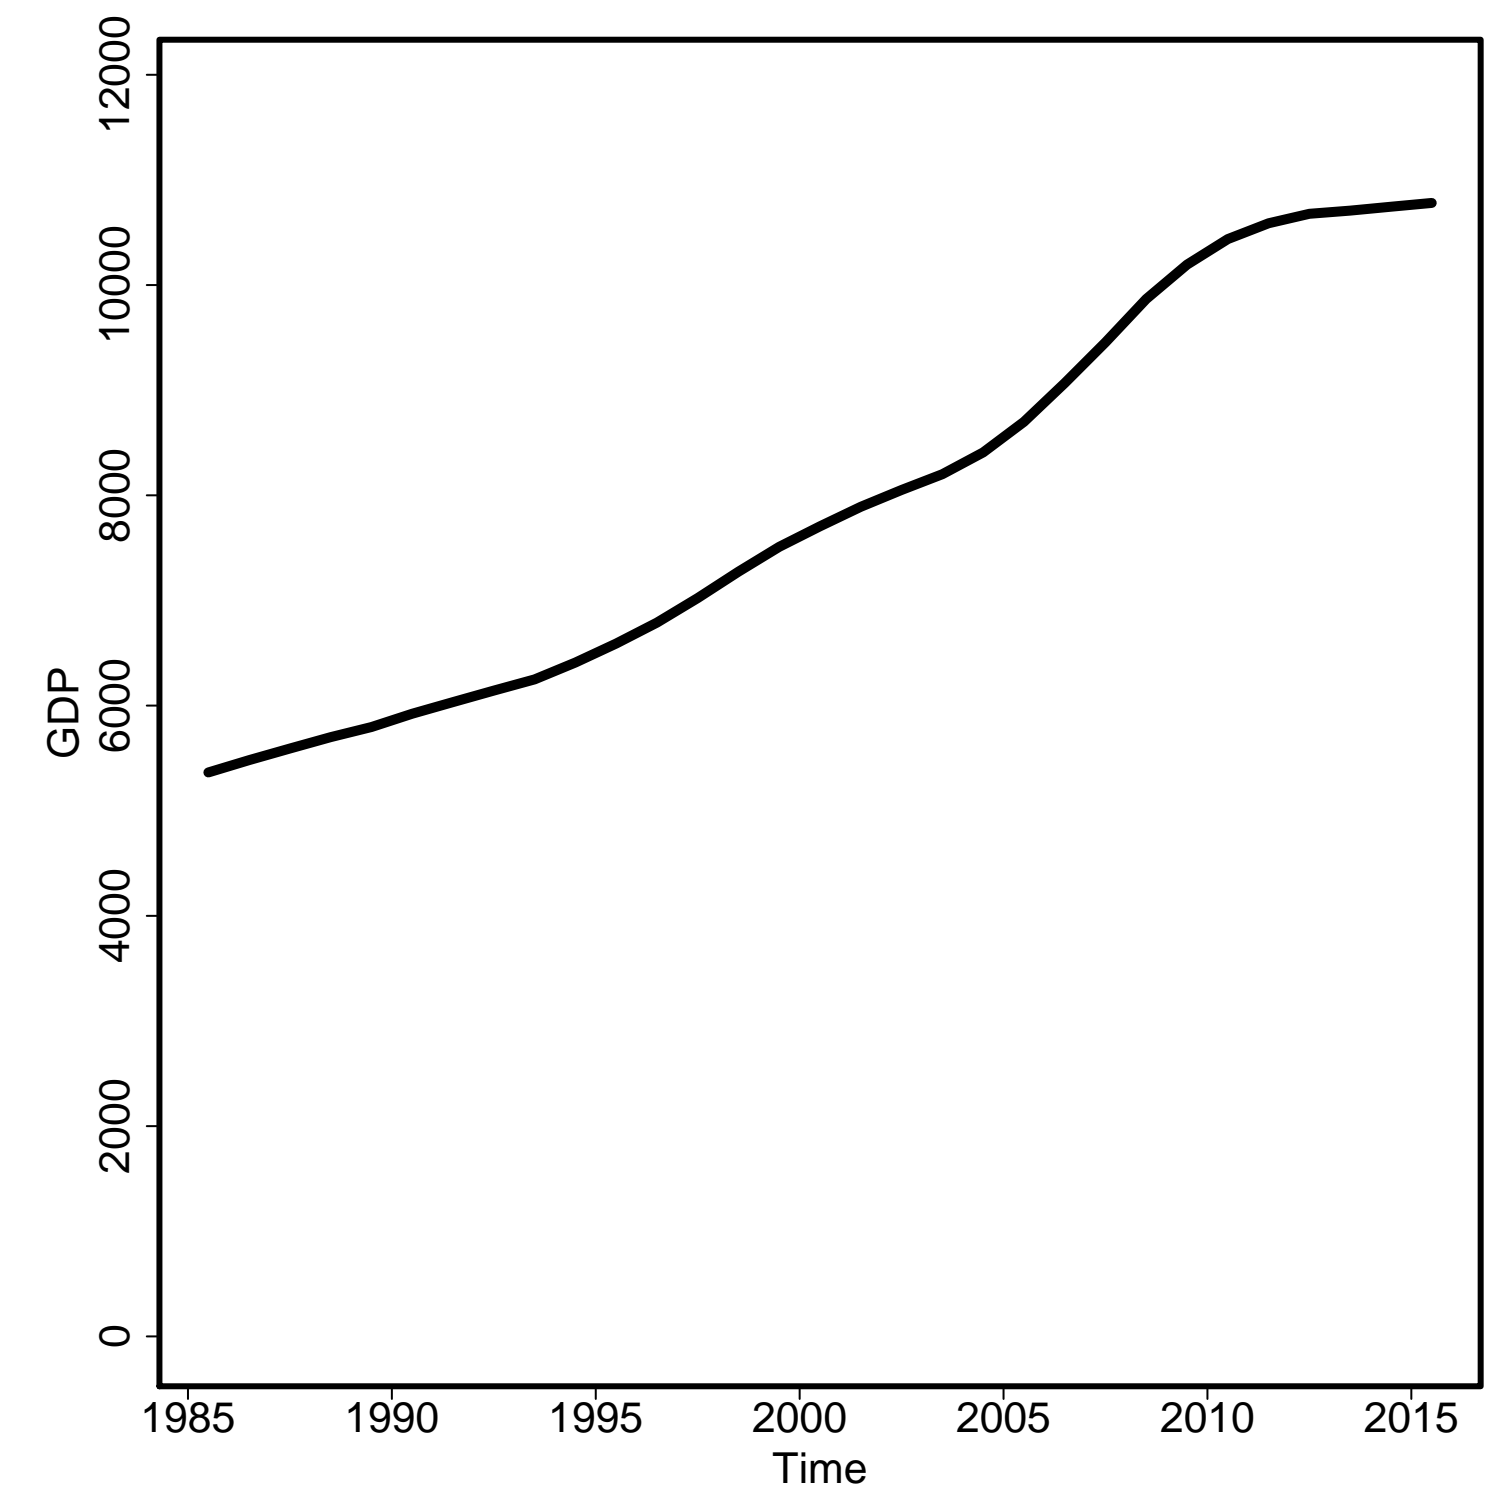

General Fertility Rate

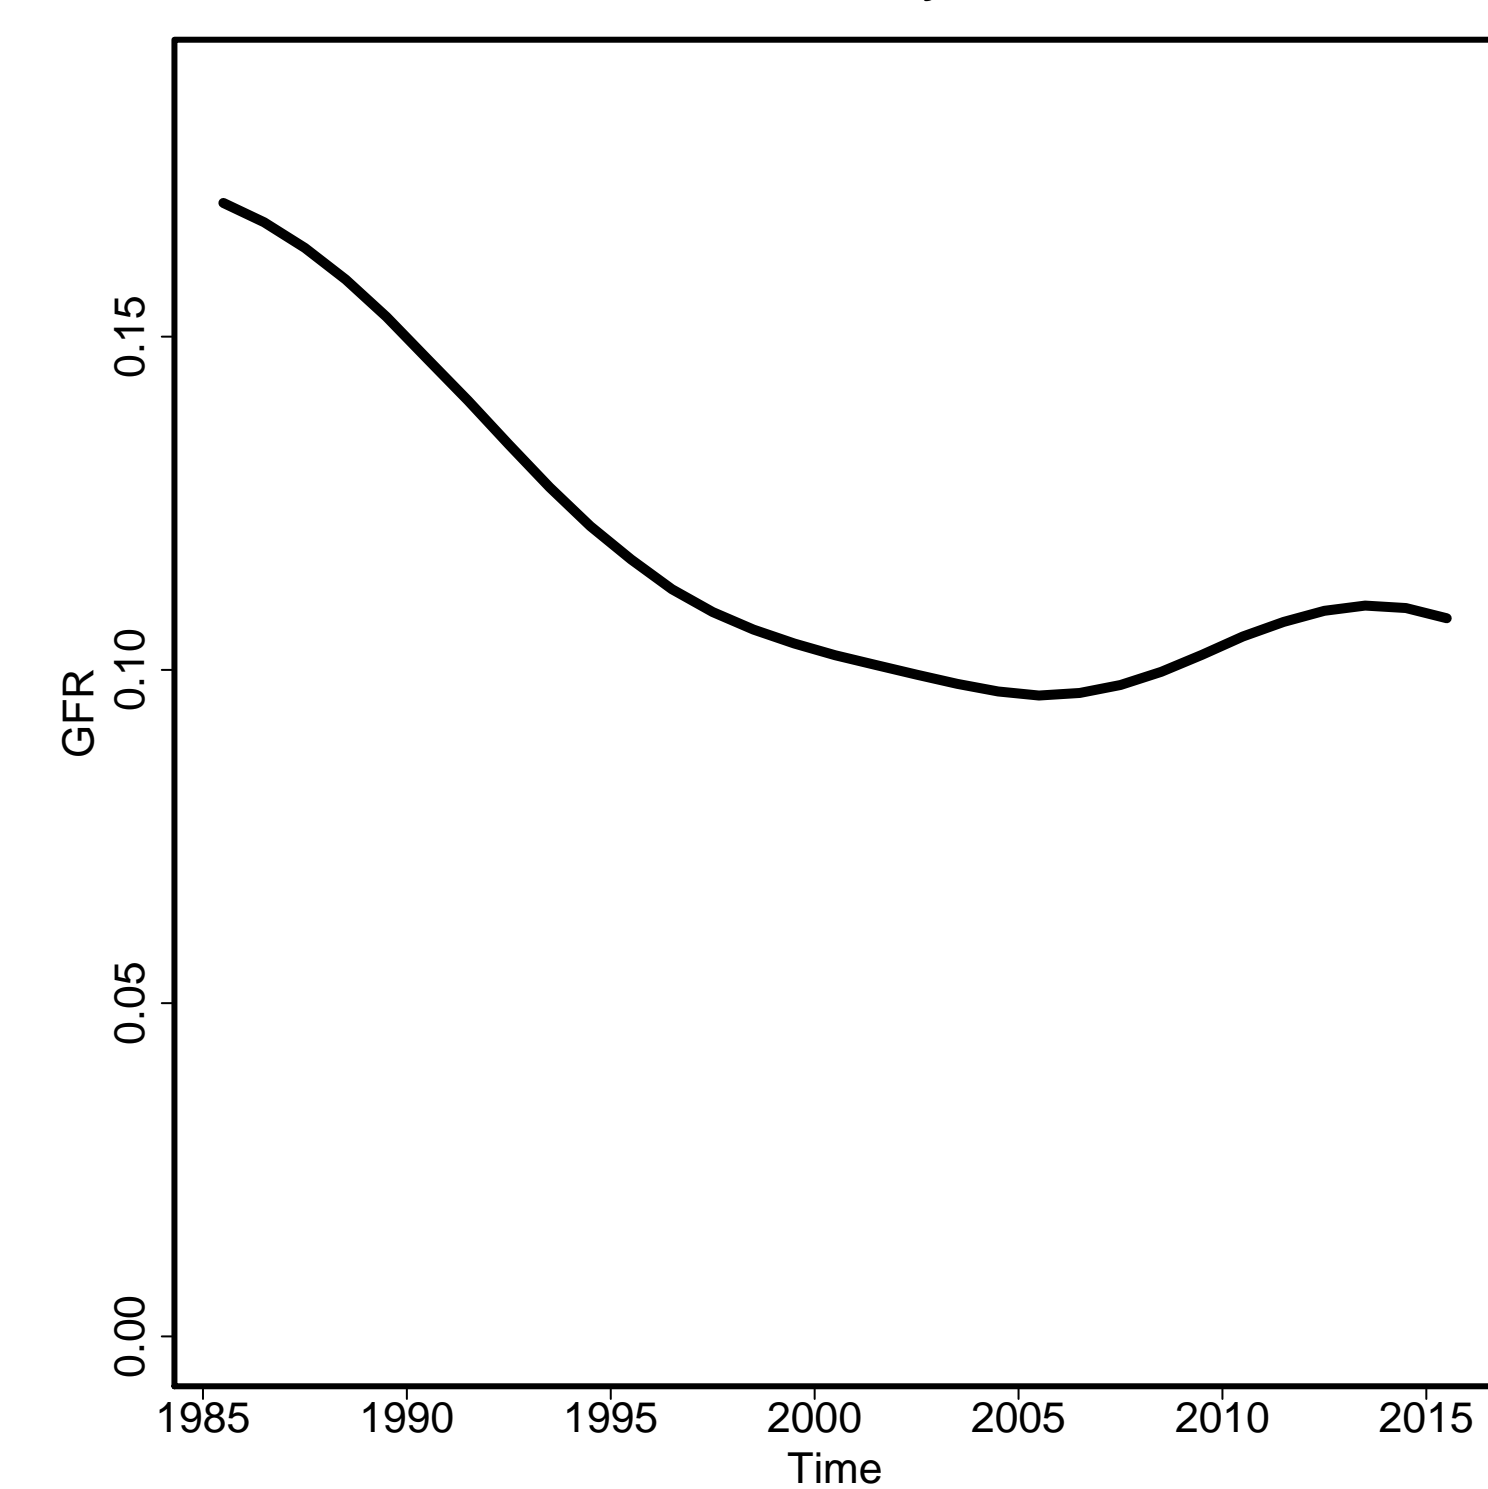

Skilled Attendance to Birth

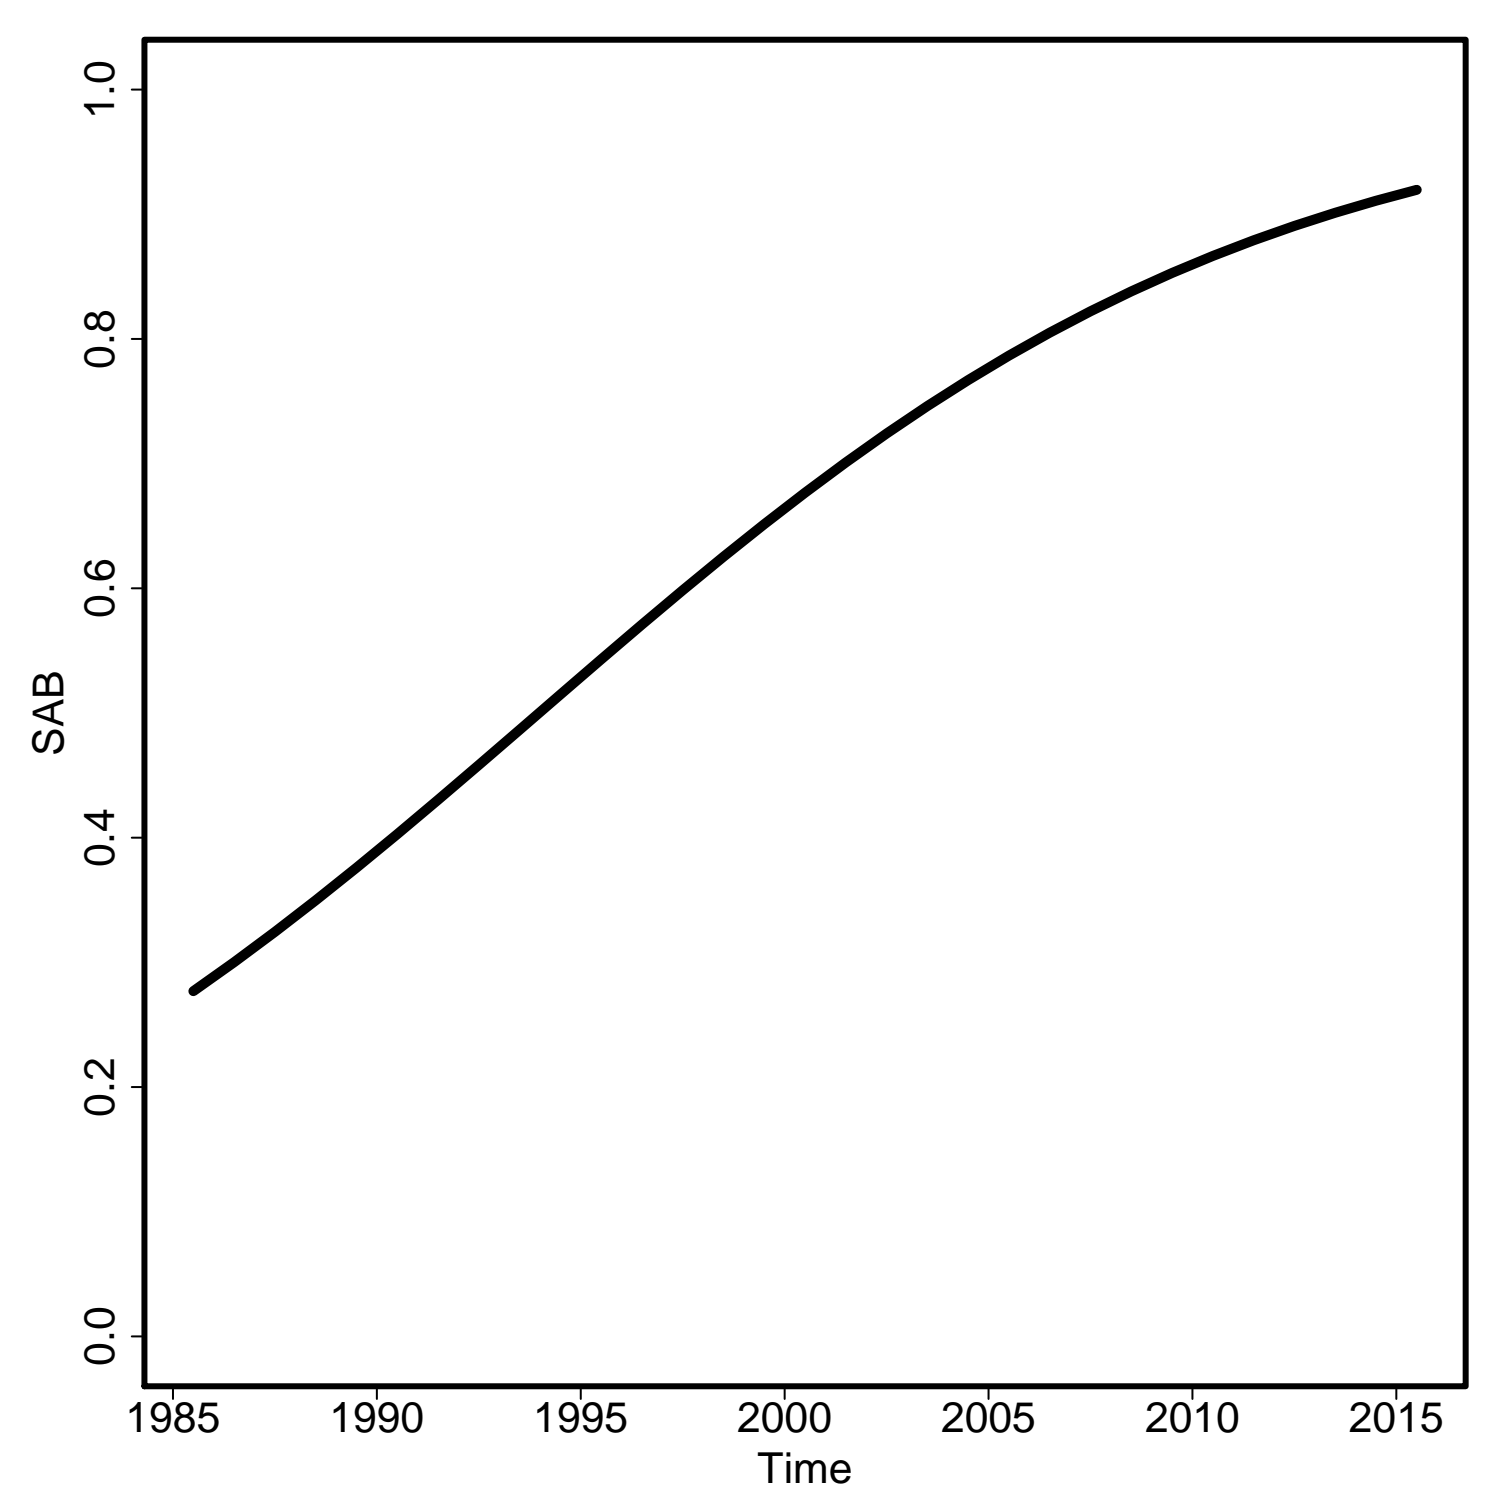

Envelope/Births

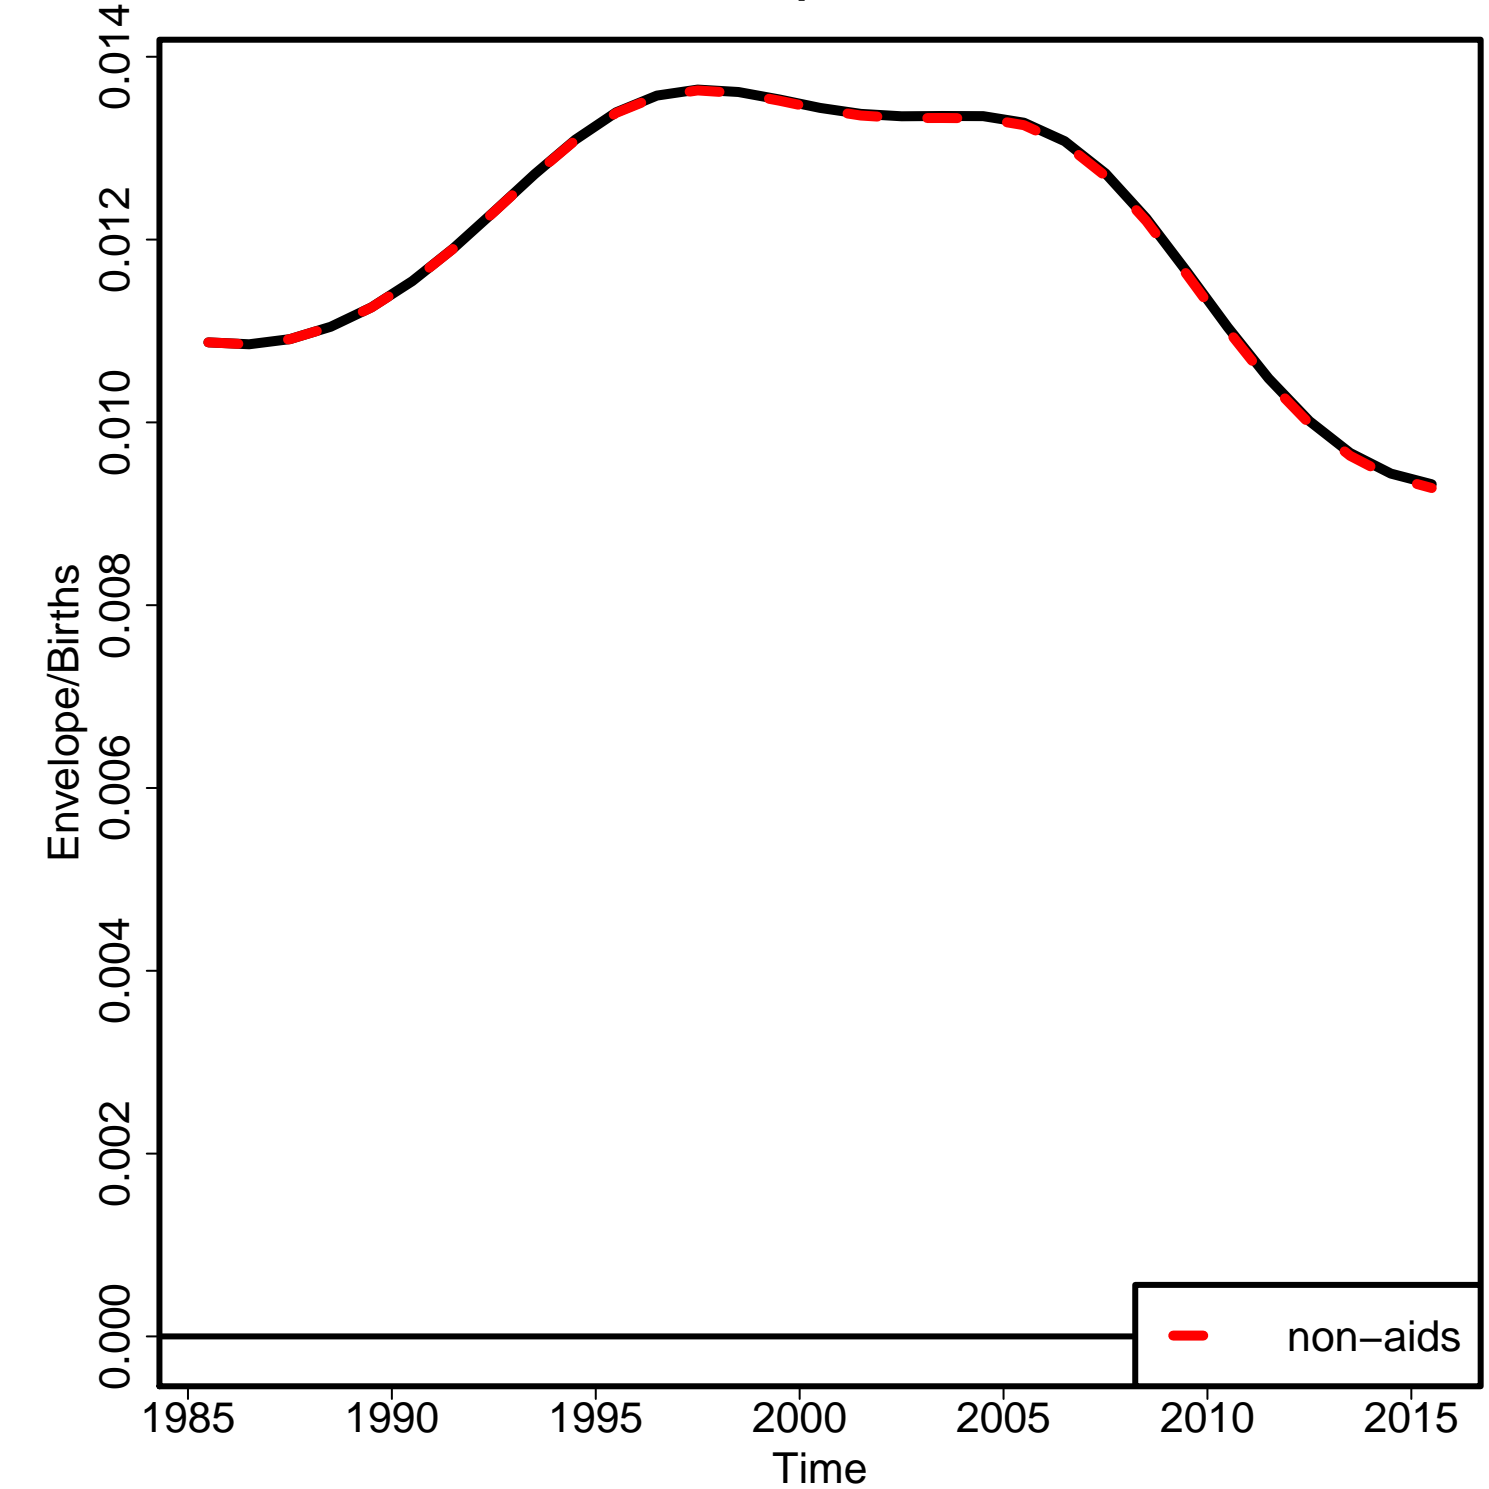

Non-aids MMR

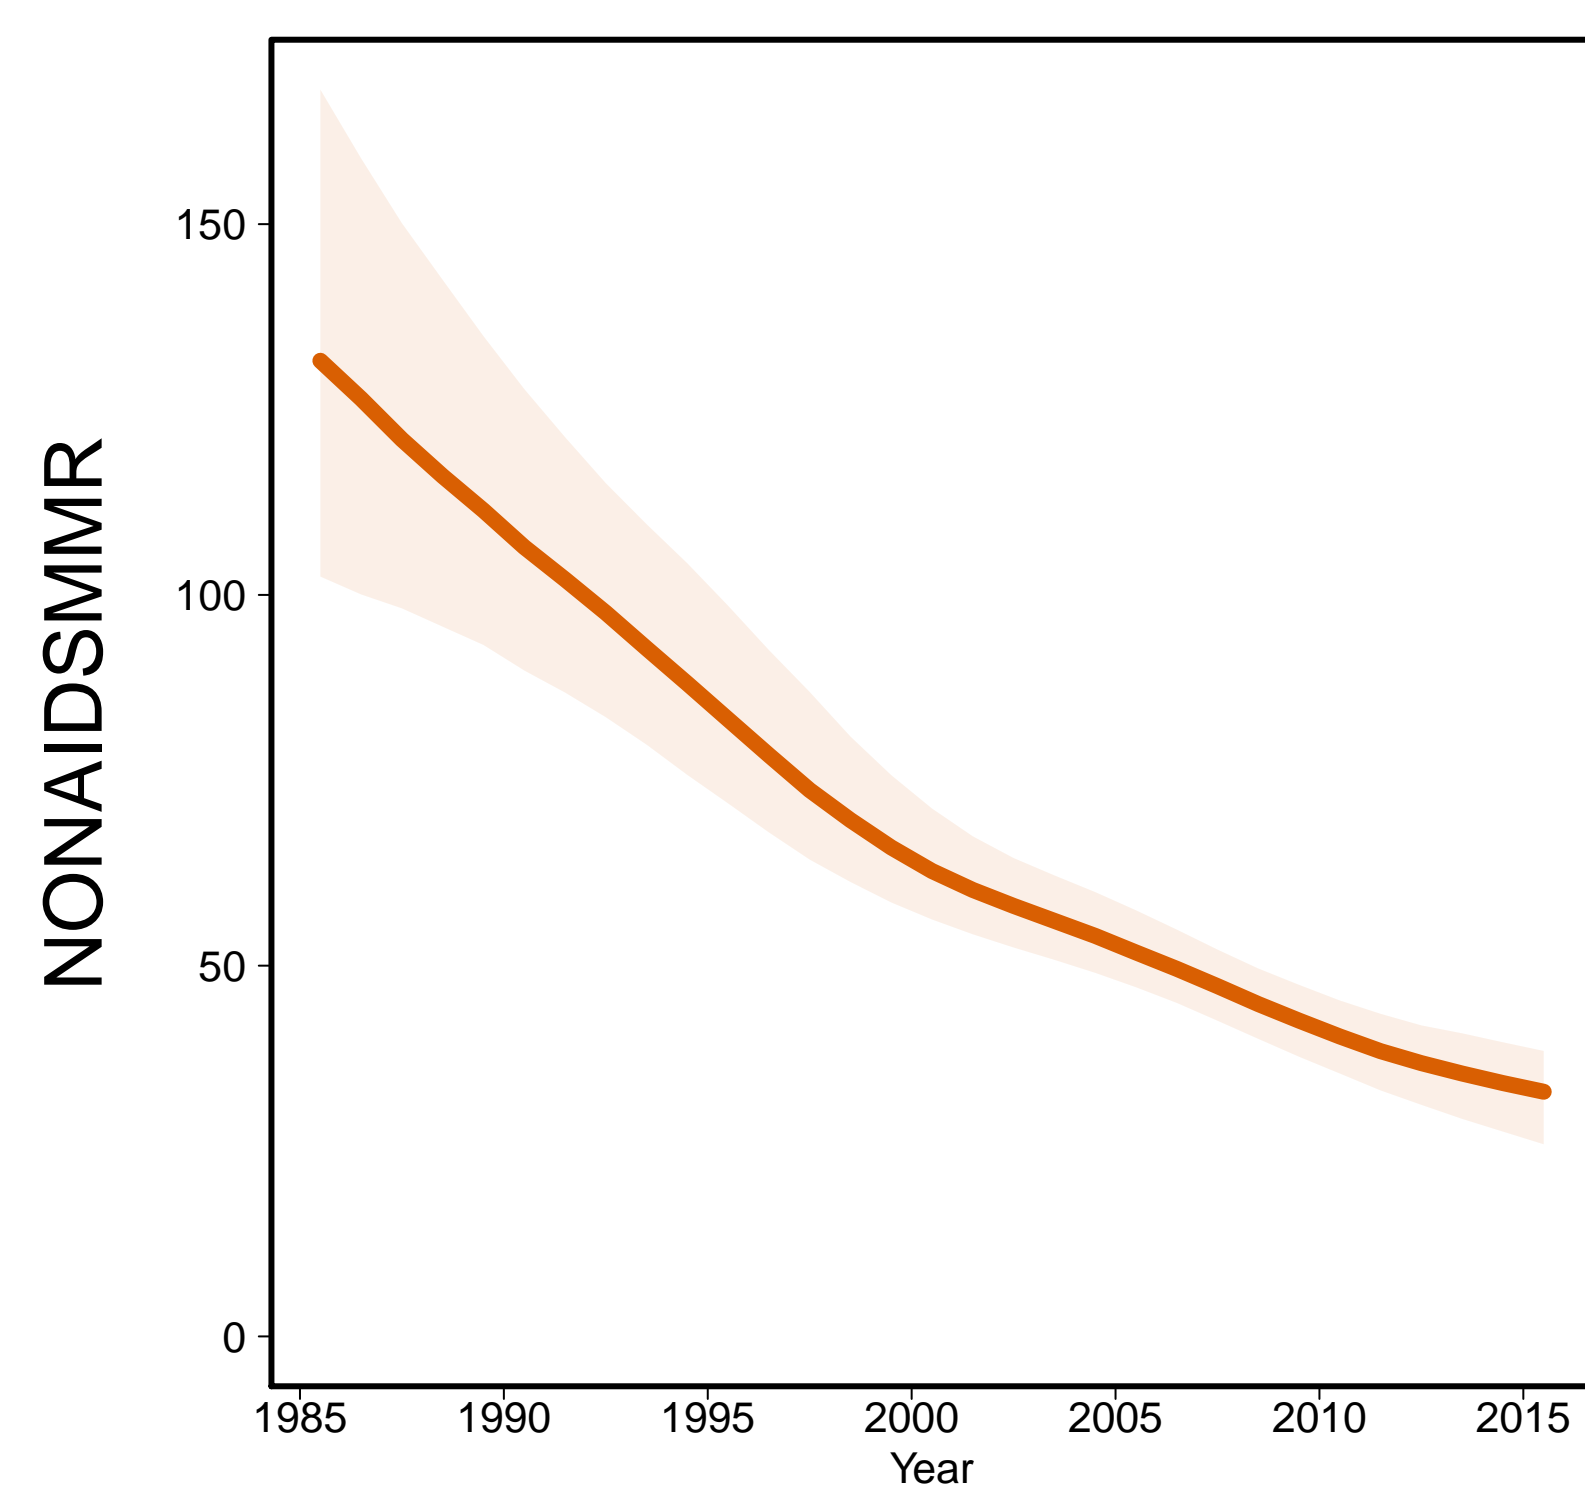

Aids MMR

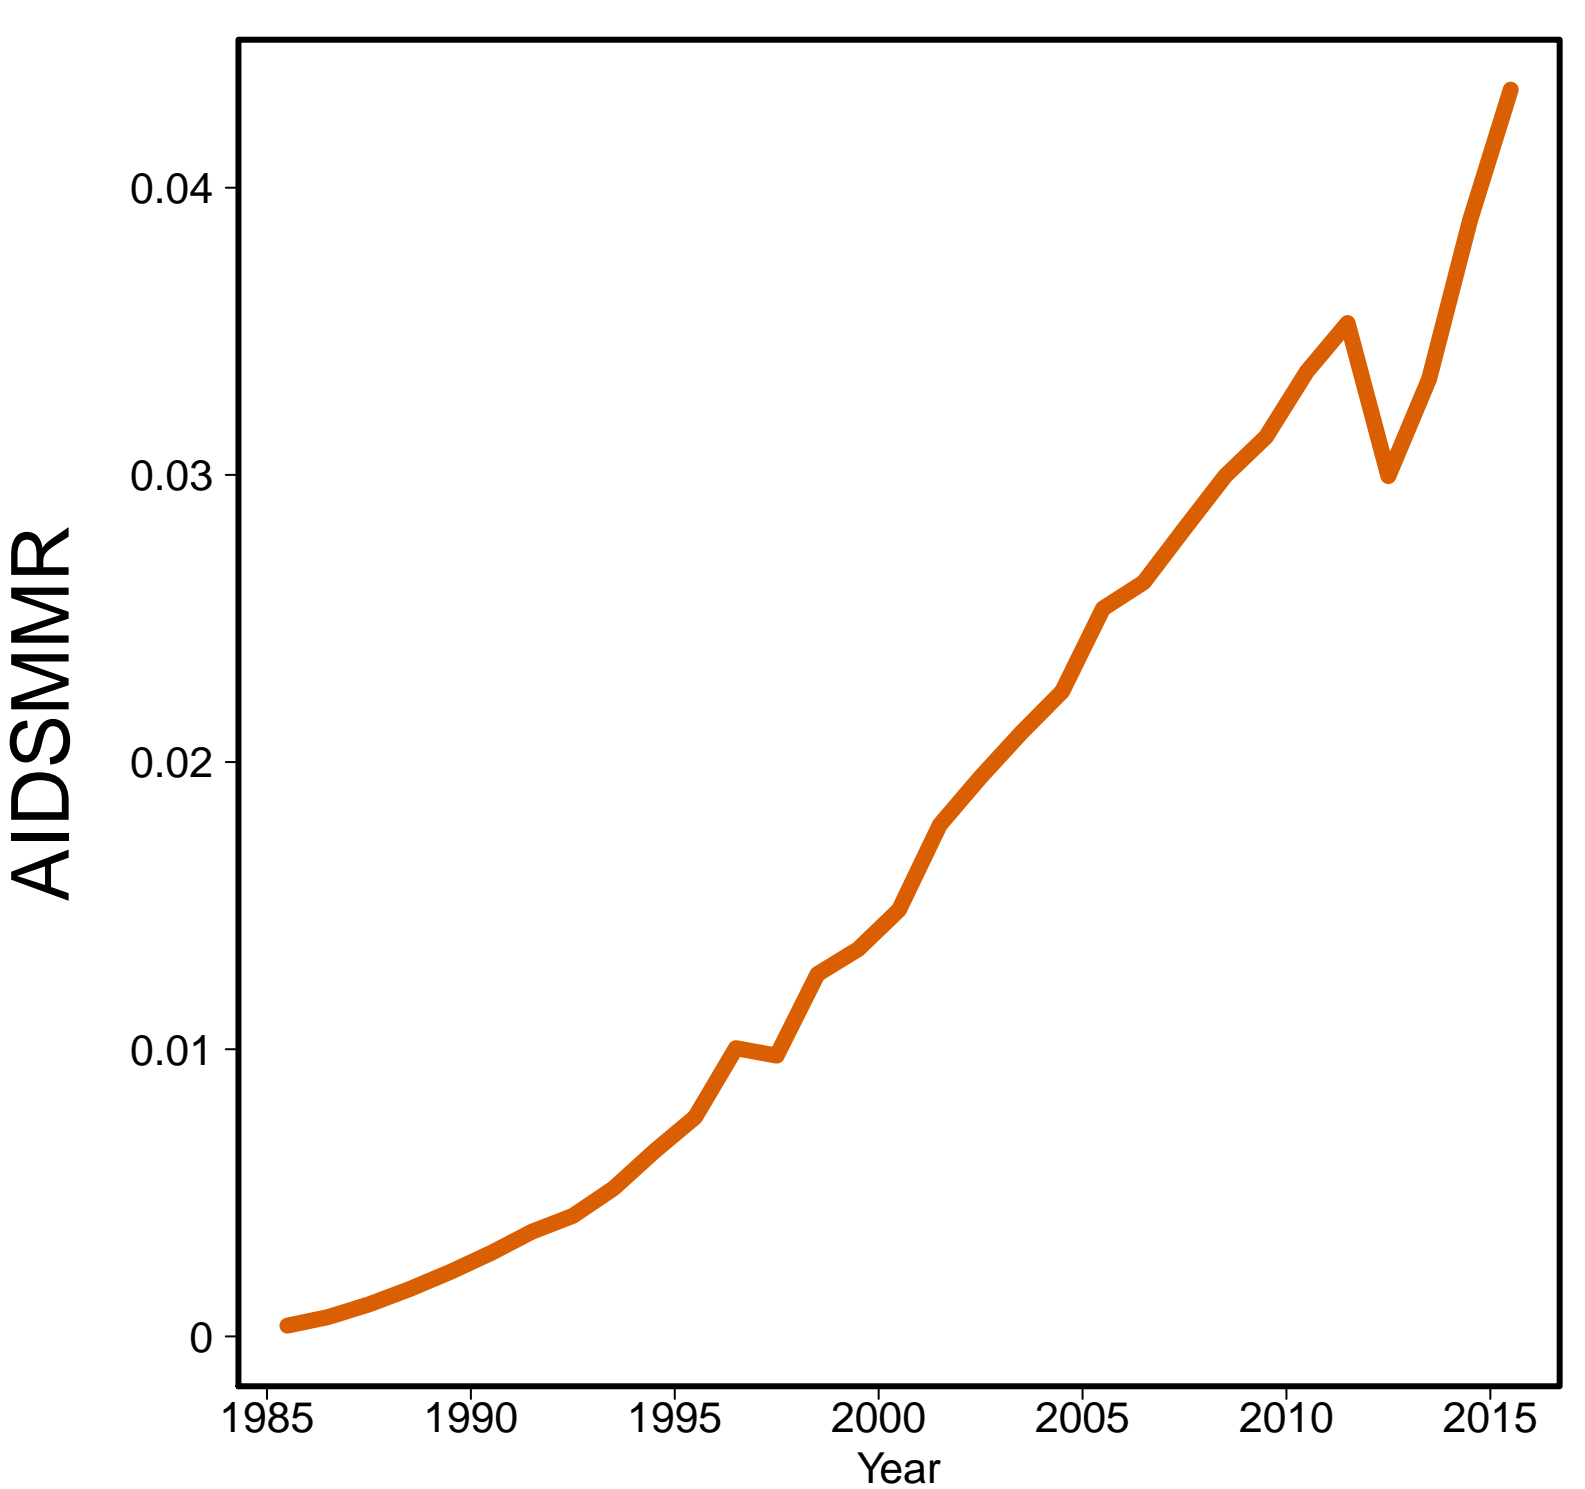

El Salvador [SLV]  
(Central America)

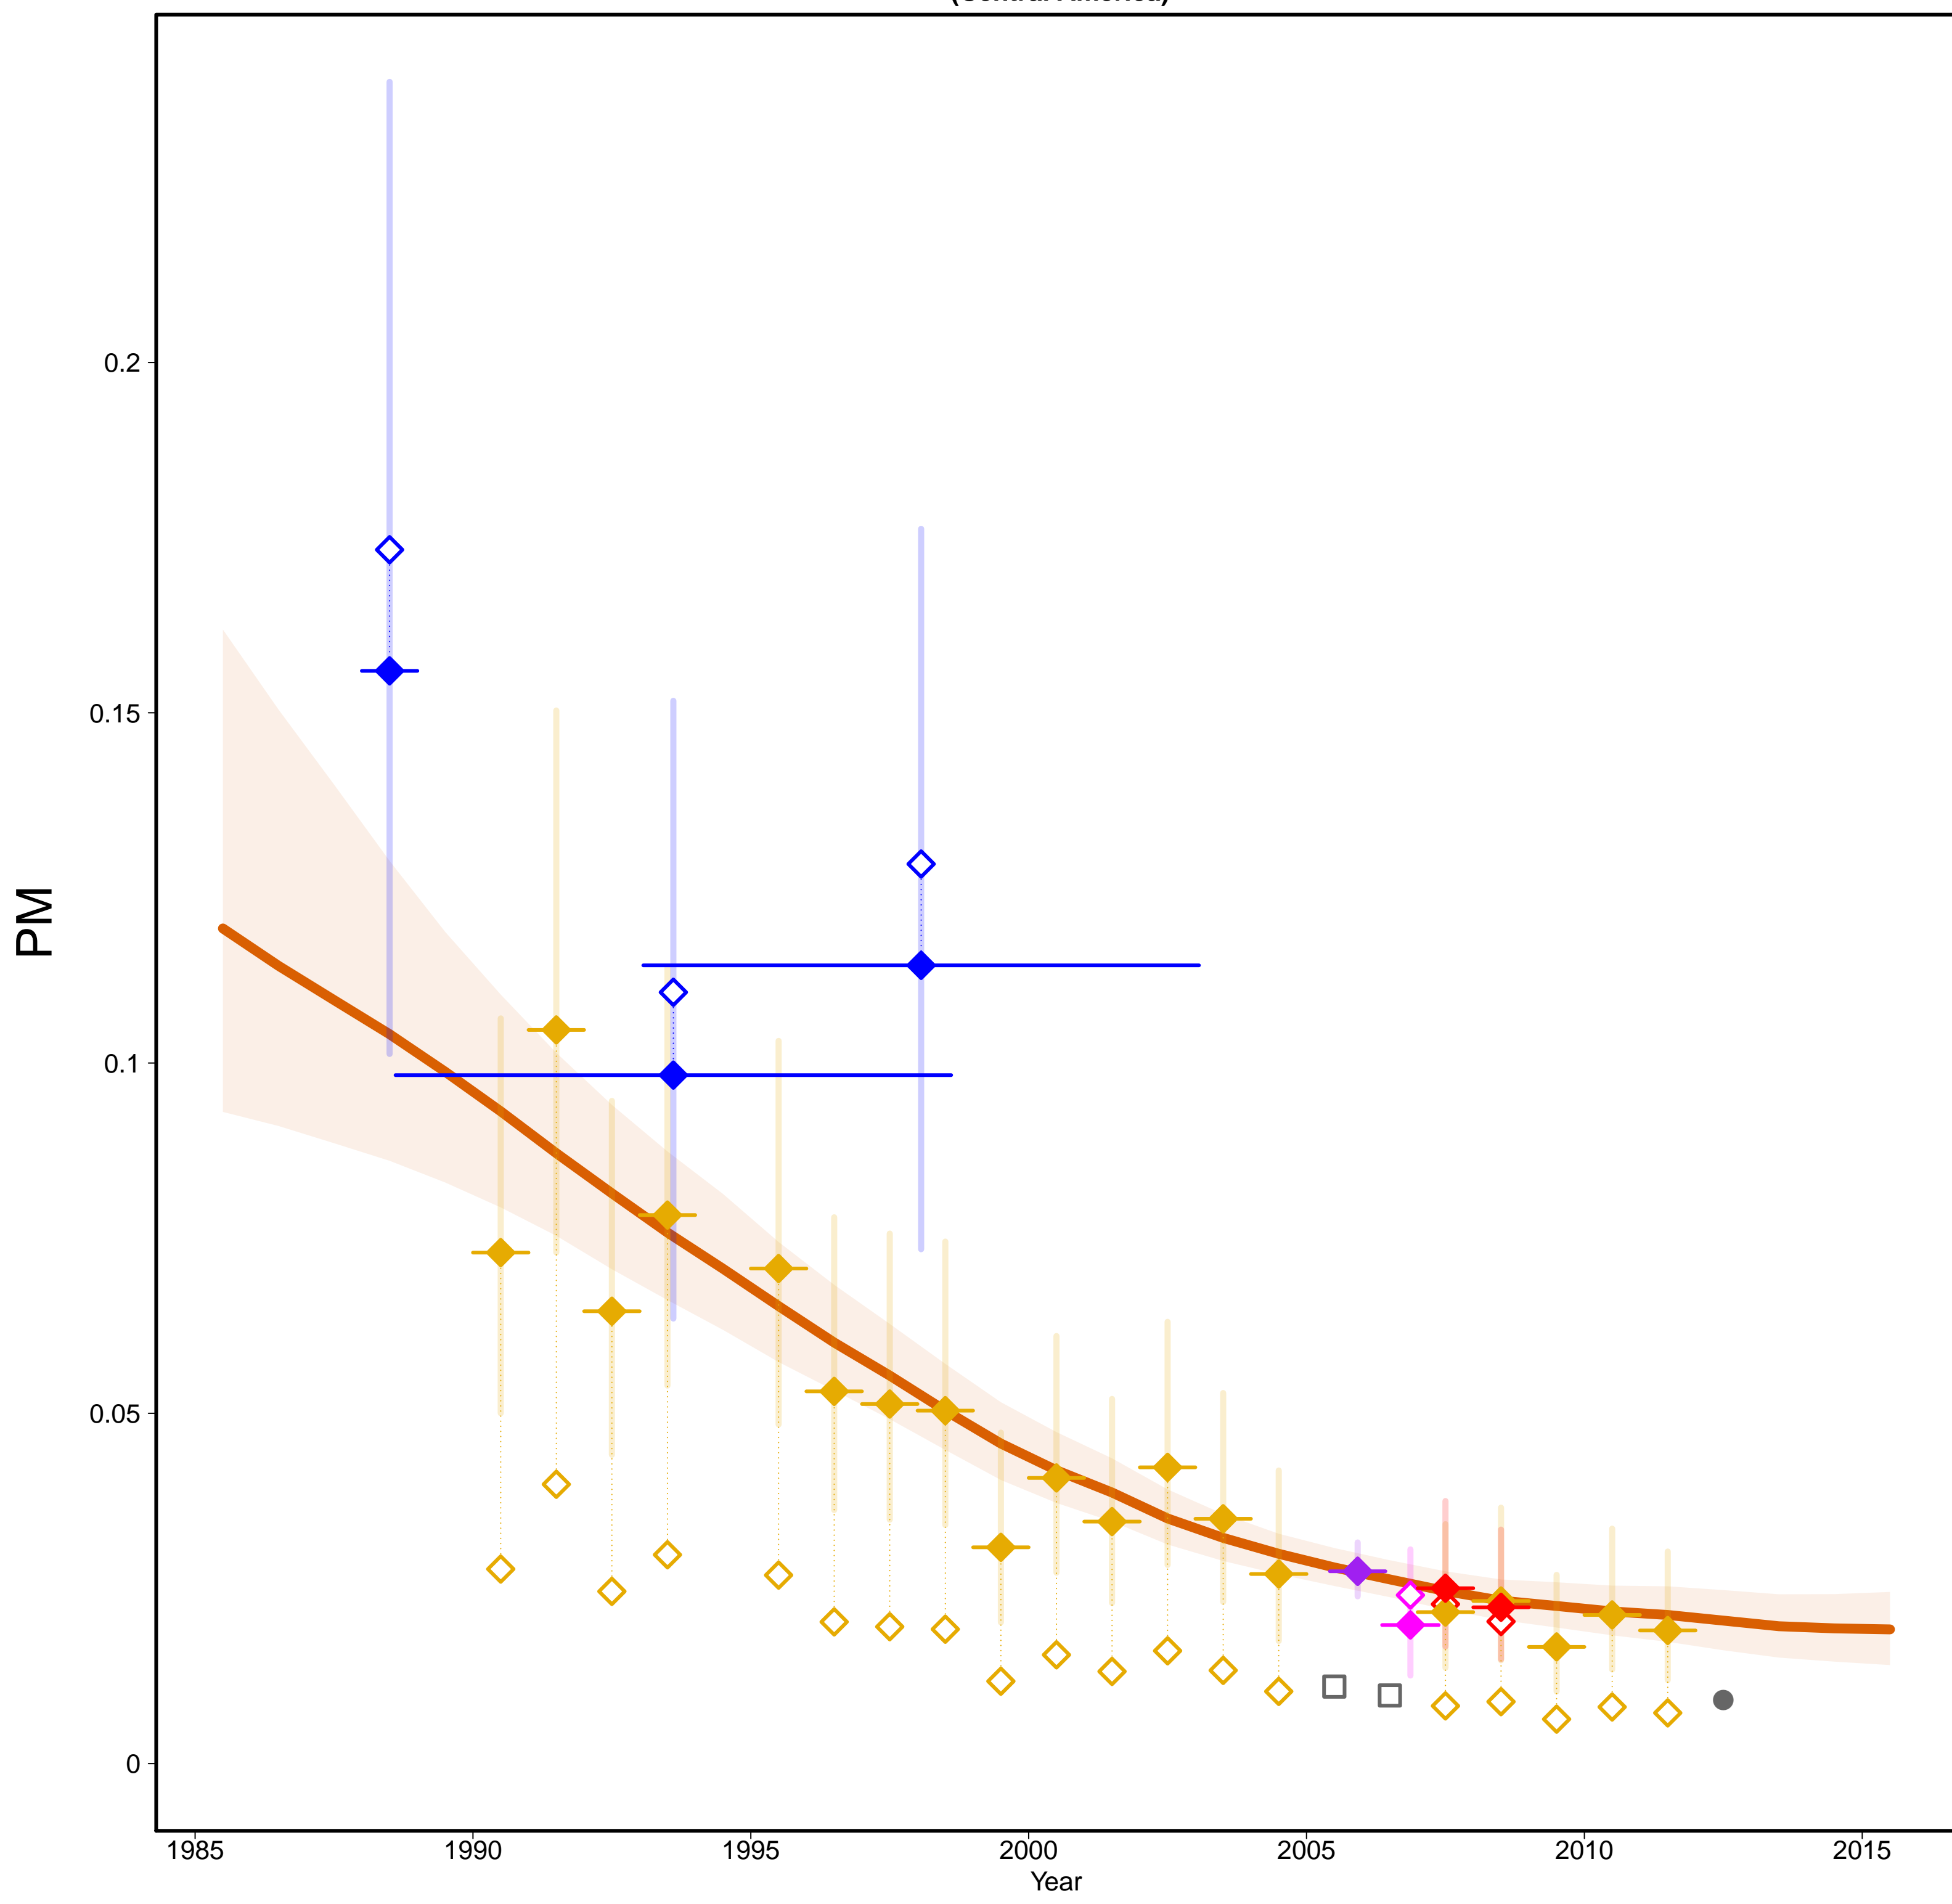

El Salvador [SLV]  
(Central America)

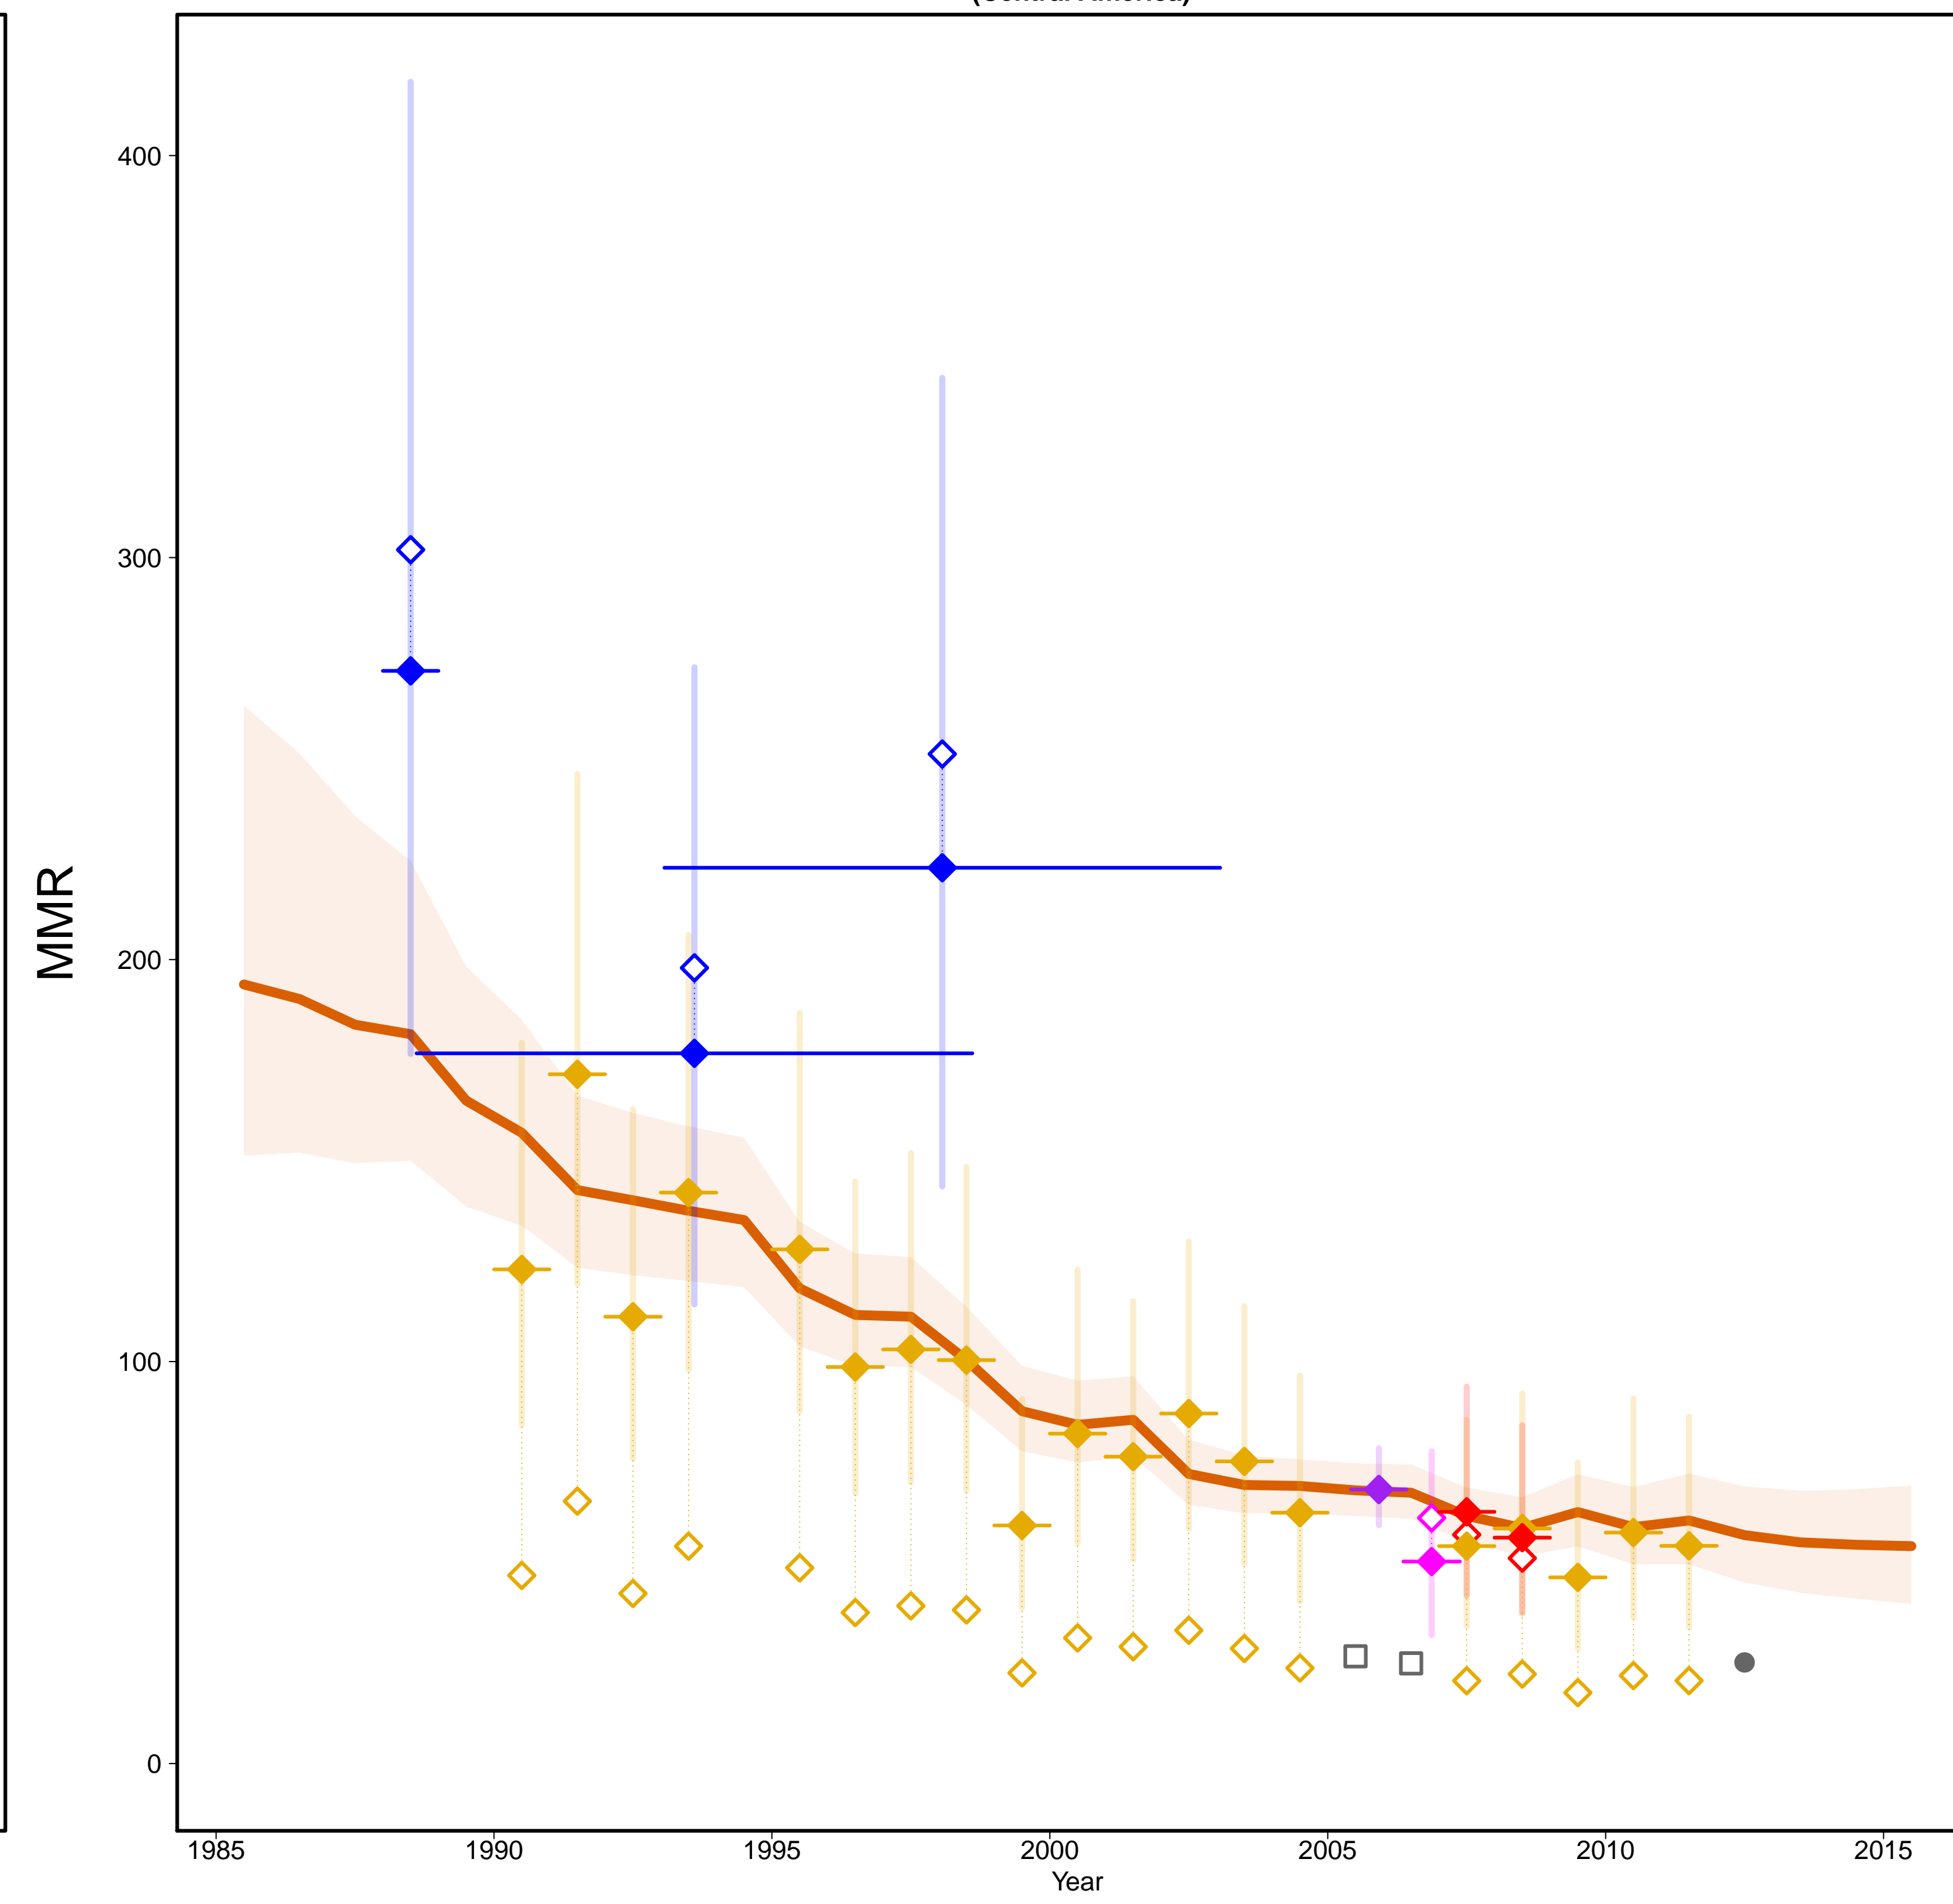

- Estimates –
- Mlate
- MMR Database 2015 –
- ◇ Observed Data
- ◆ Adjusted Data
- Data type –
- ◆ VR
- ◆ Spec. studies
- ◆ DHS
- ◆ Census
- ◆ Misc. studies
- Excluded VR data (data quality issues)
- Excluded VR data (overlap with specialized study)

Gross Domestic Product

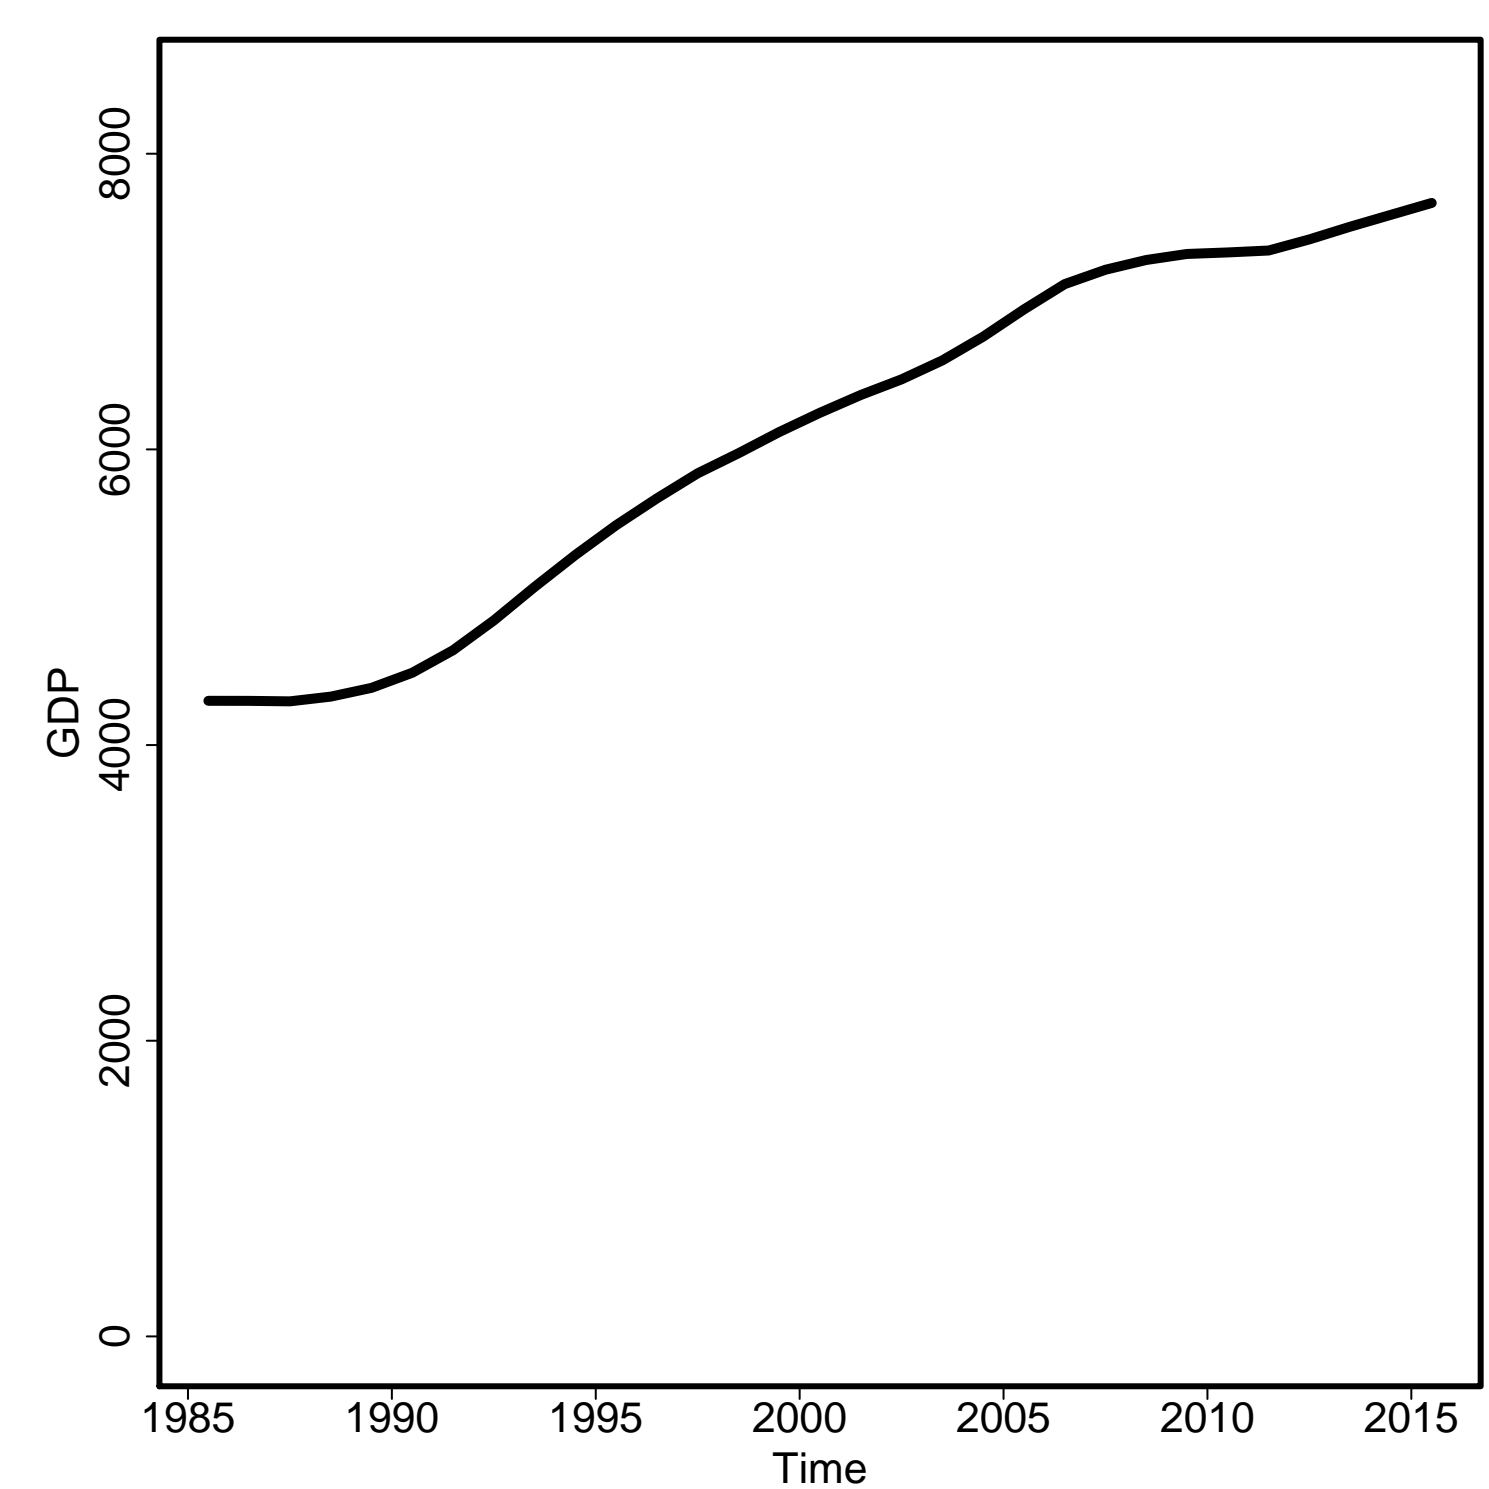

General Fertility Rate

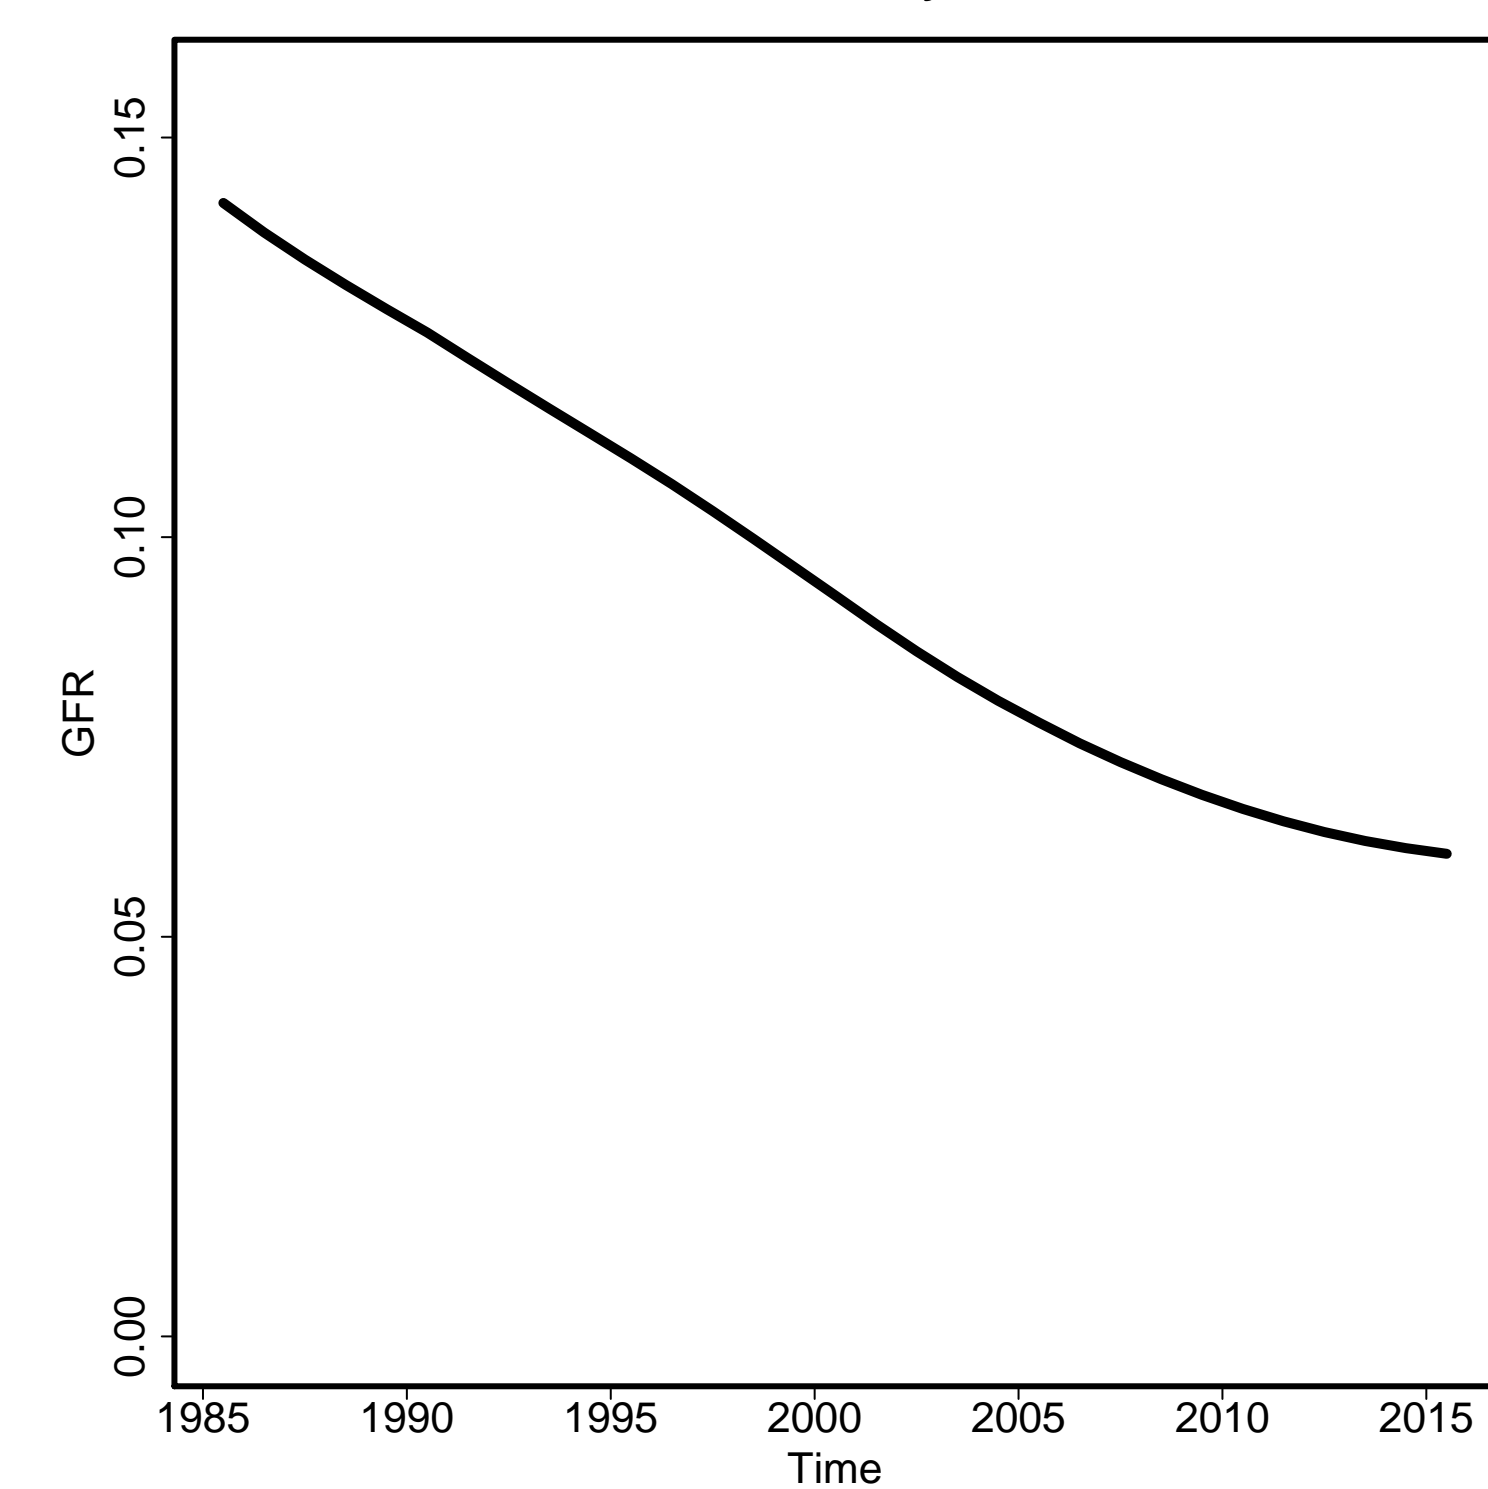

Skilled Attendance to Birth

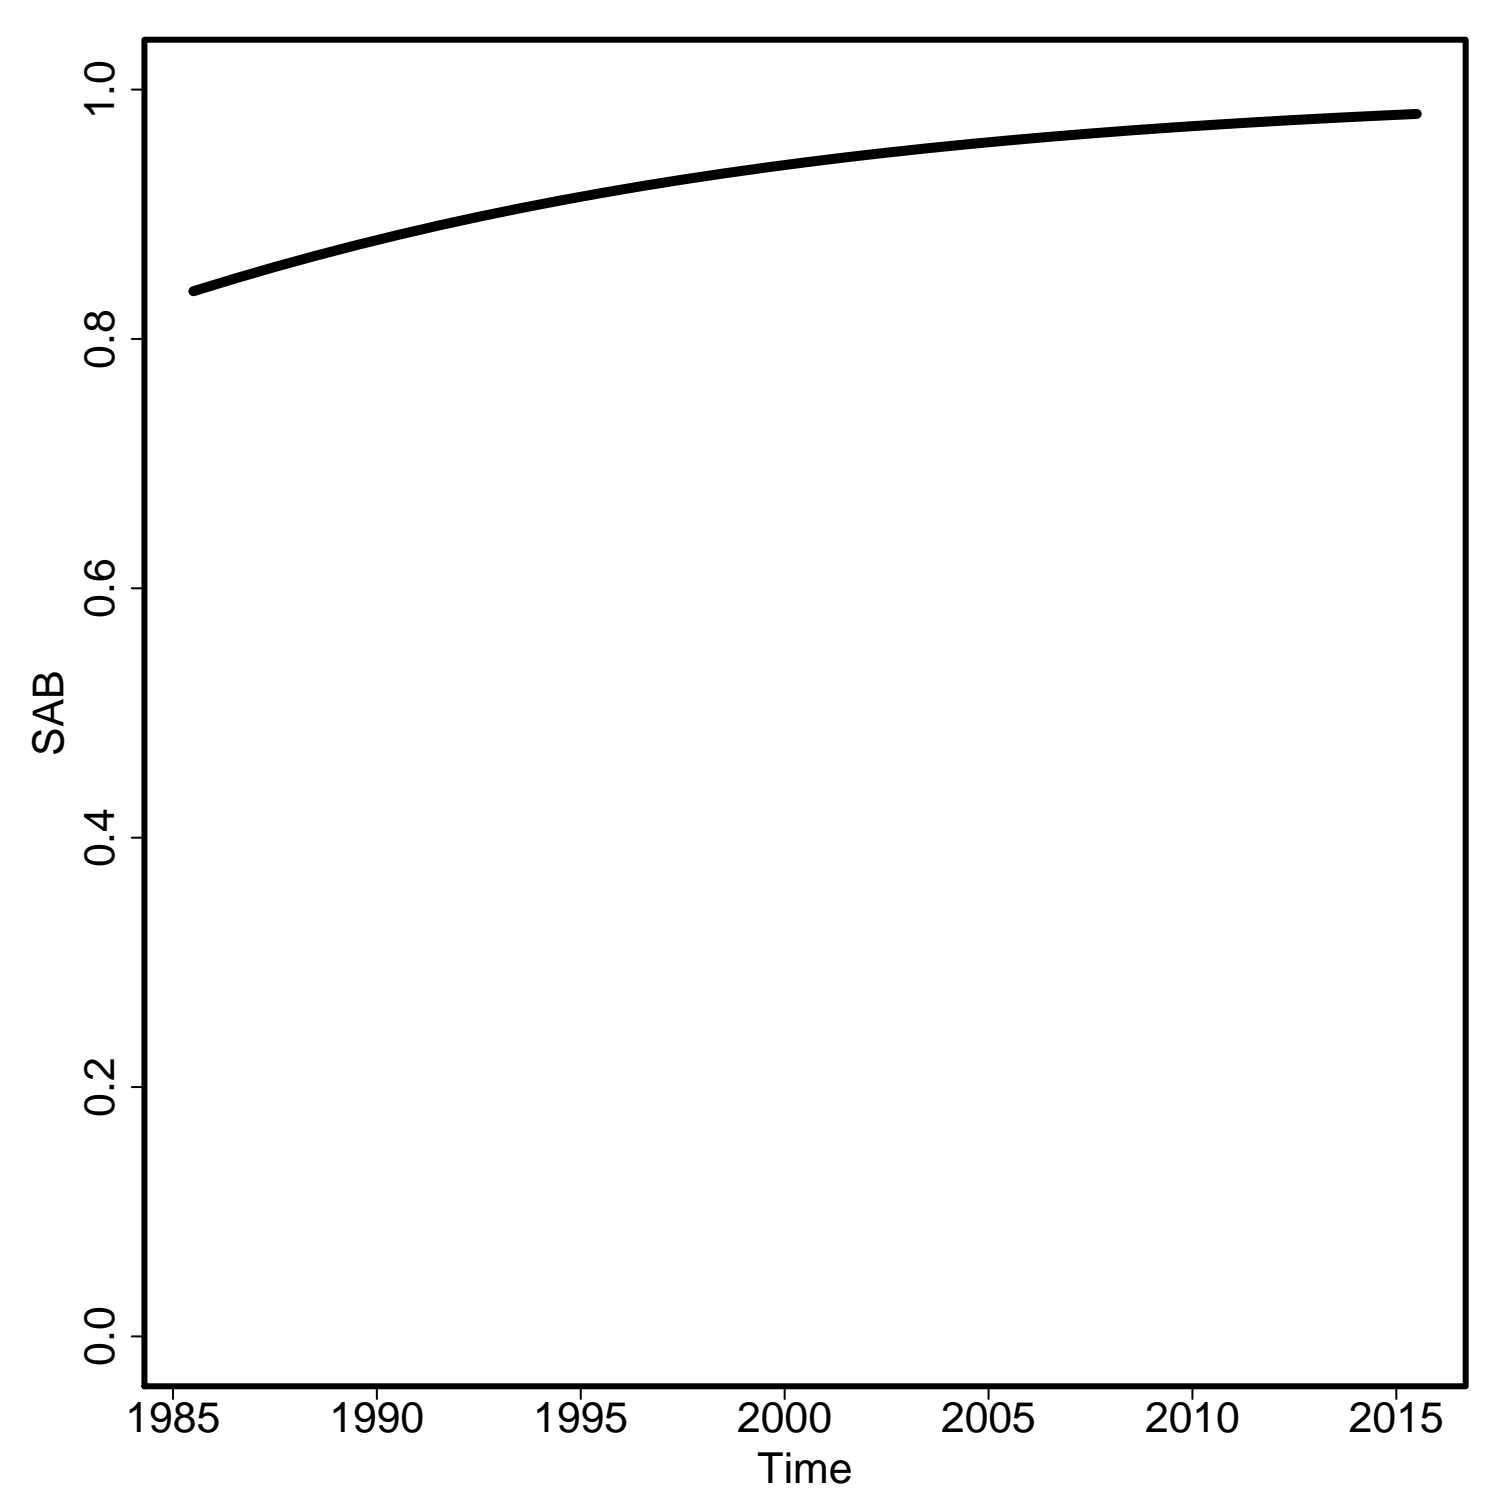

Envelope/Births

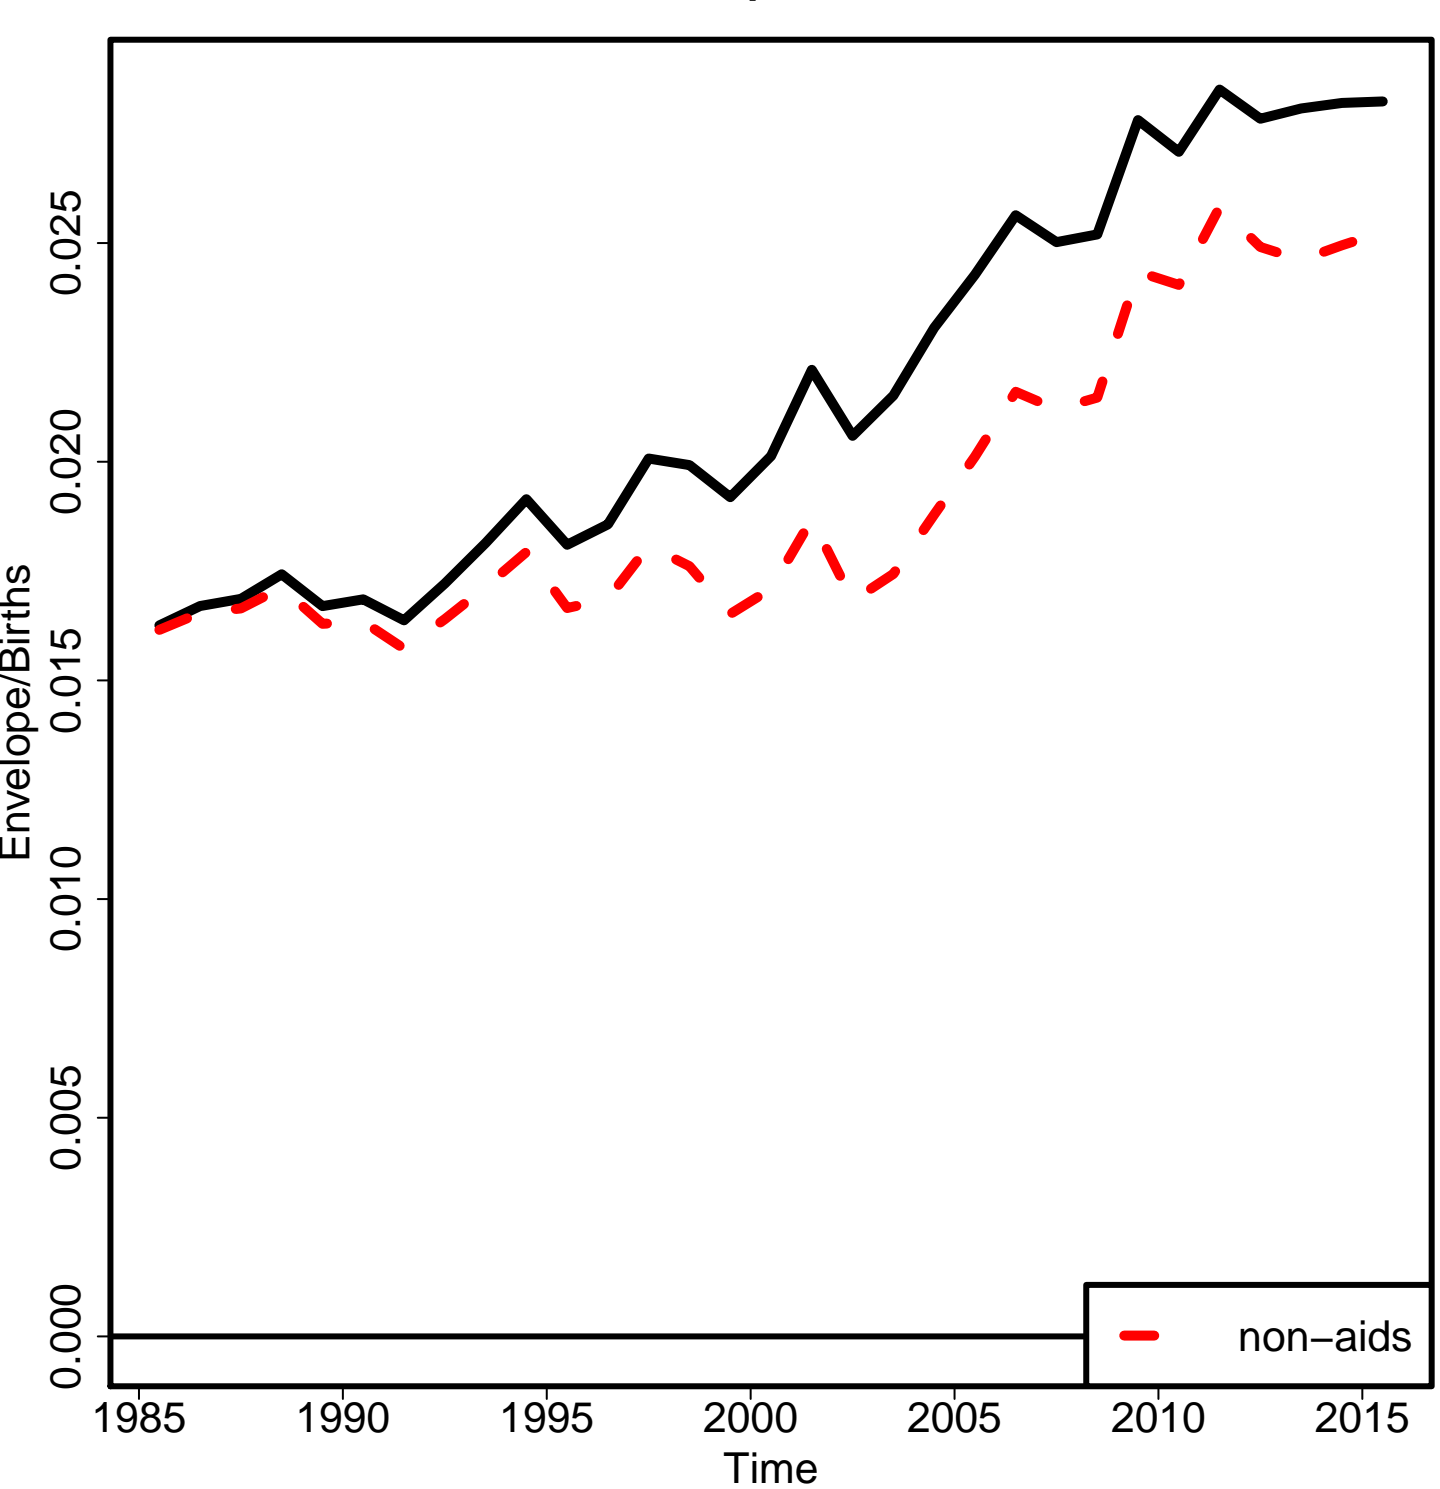

Non-aids MMR

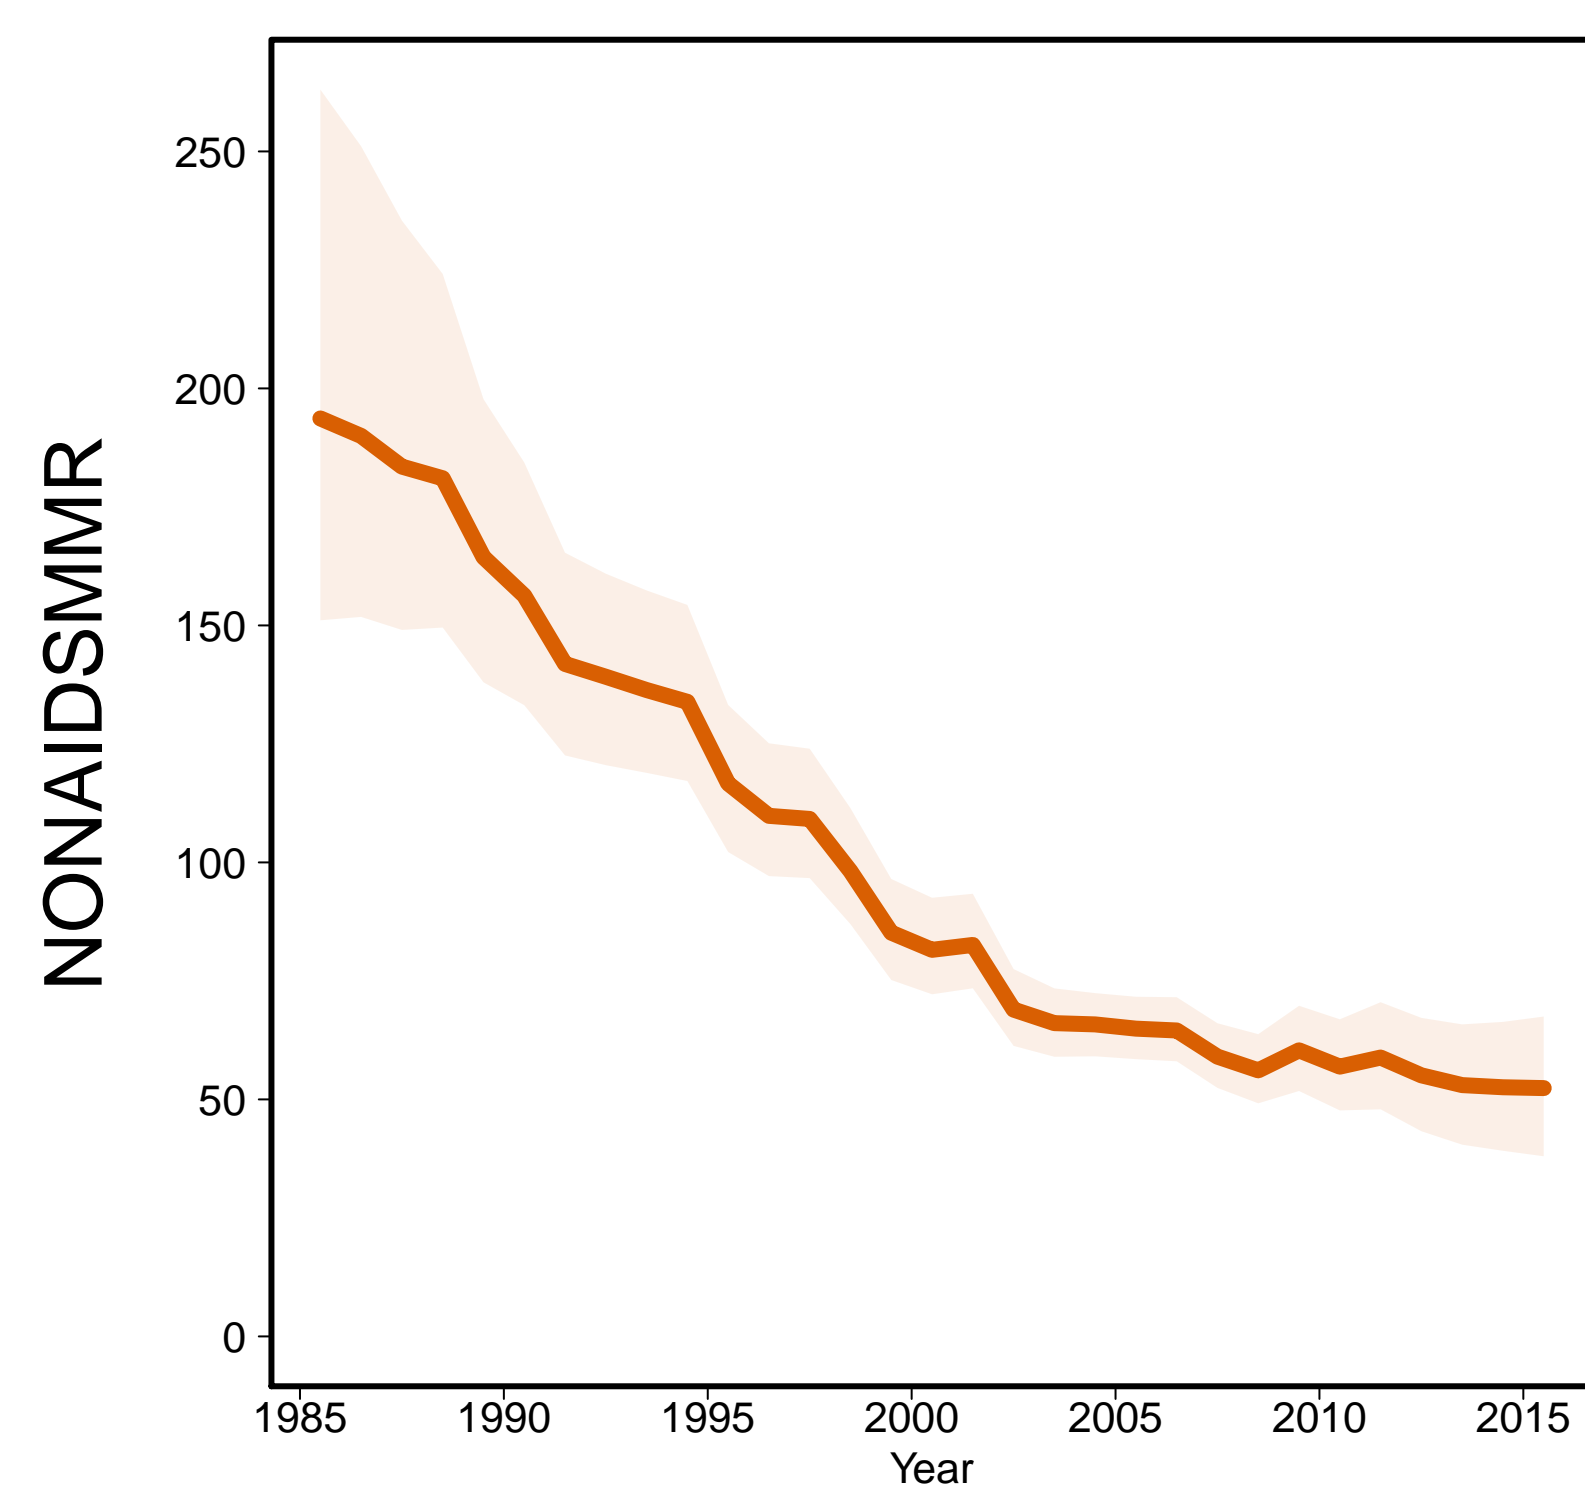

Aids MMR

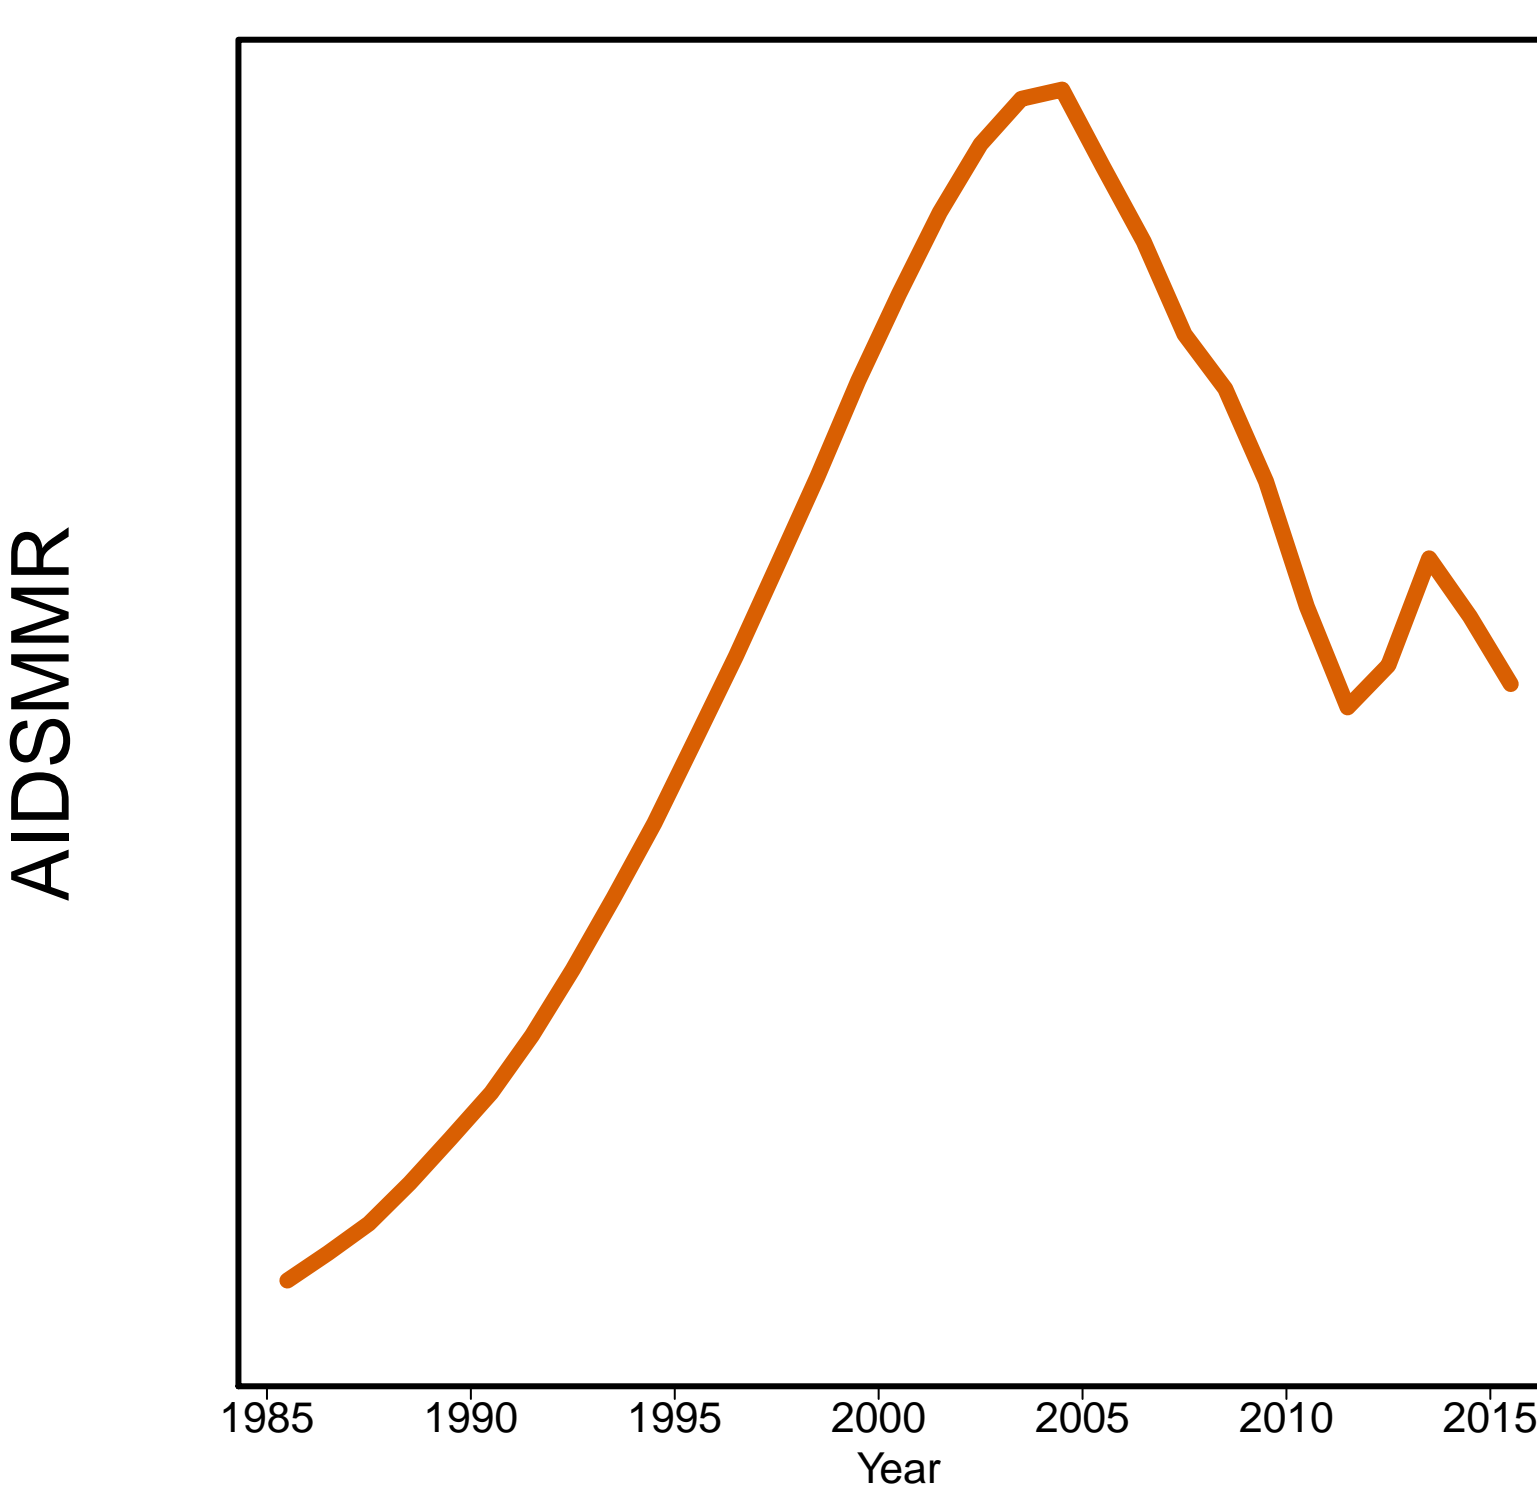

Equatorial Guinea [GNQ]  
(Middle Africa)

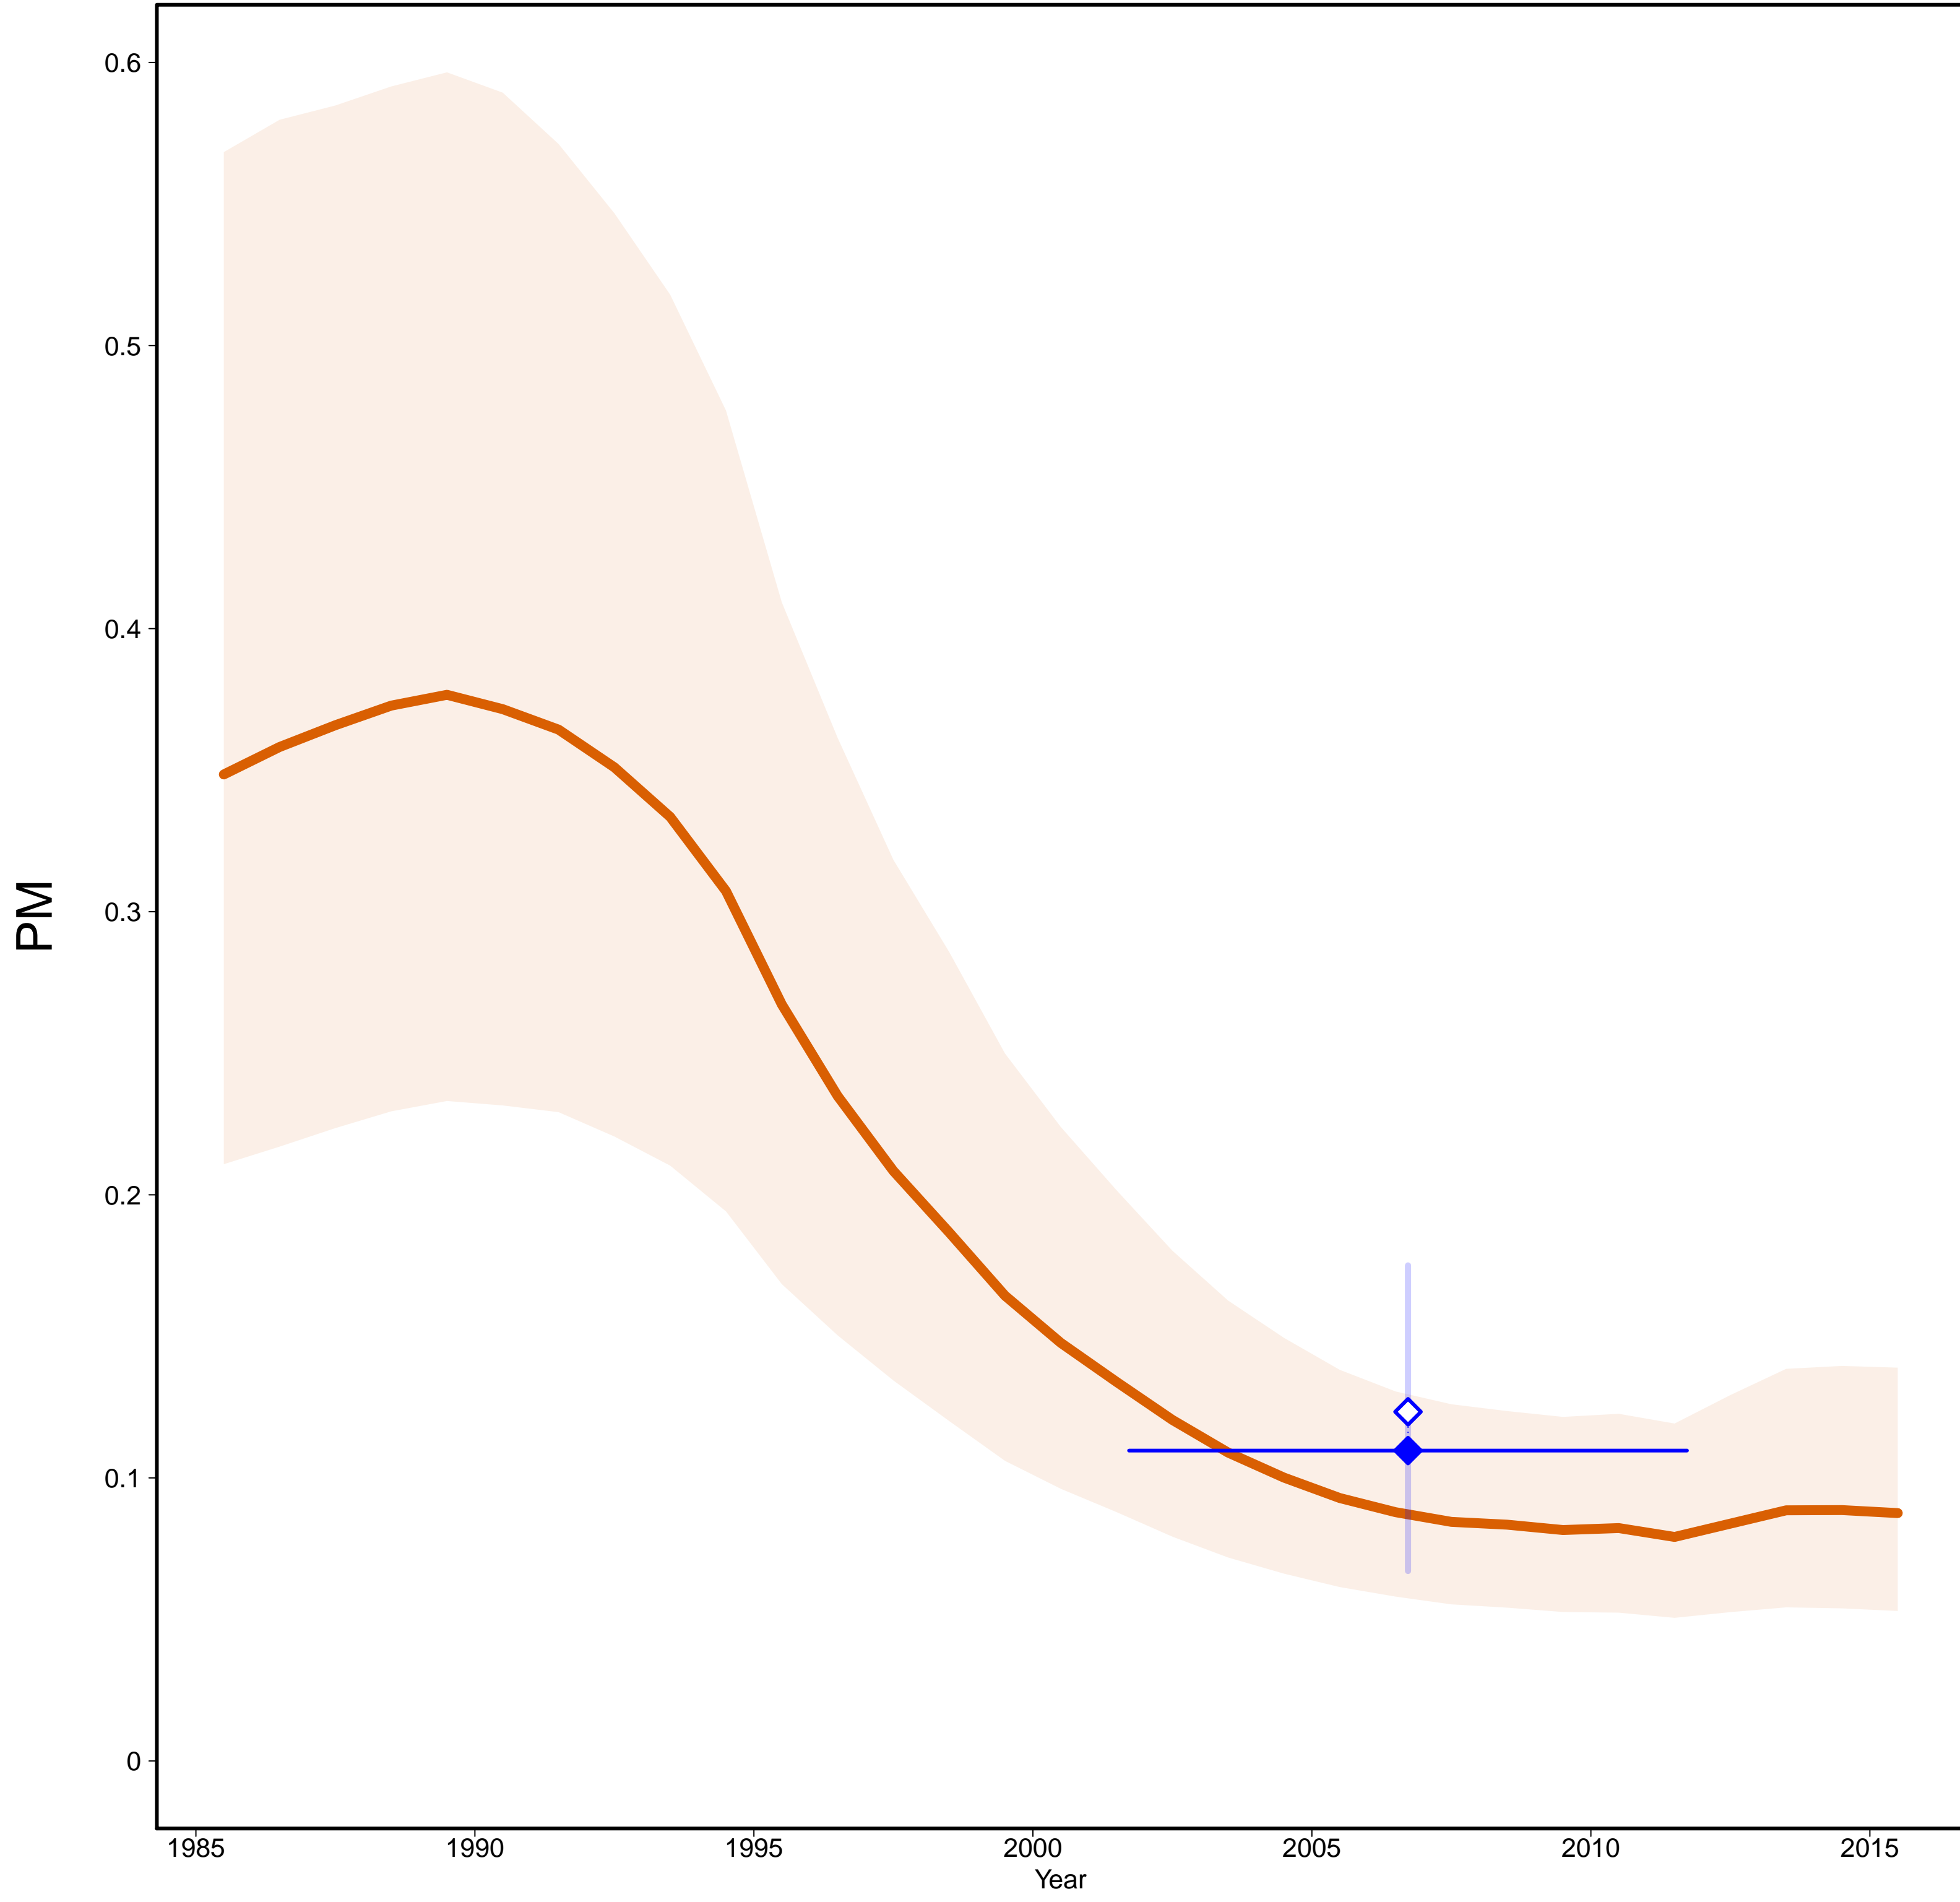

Equatorial Guinea [GNQ]  
(Middle Africa)

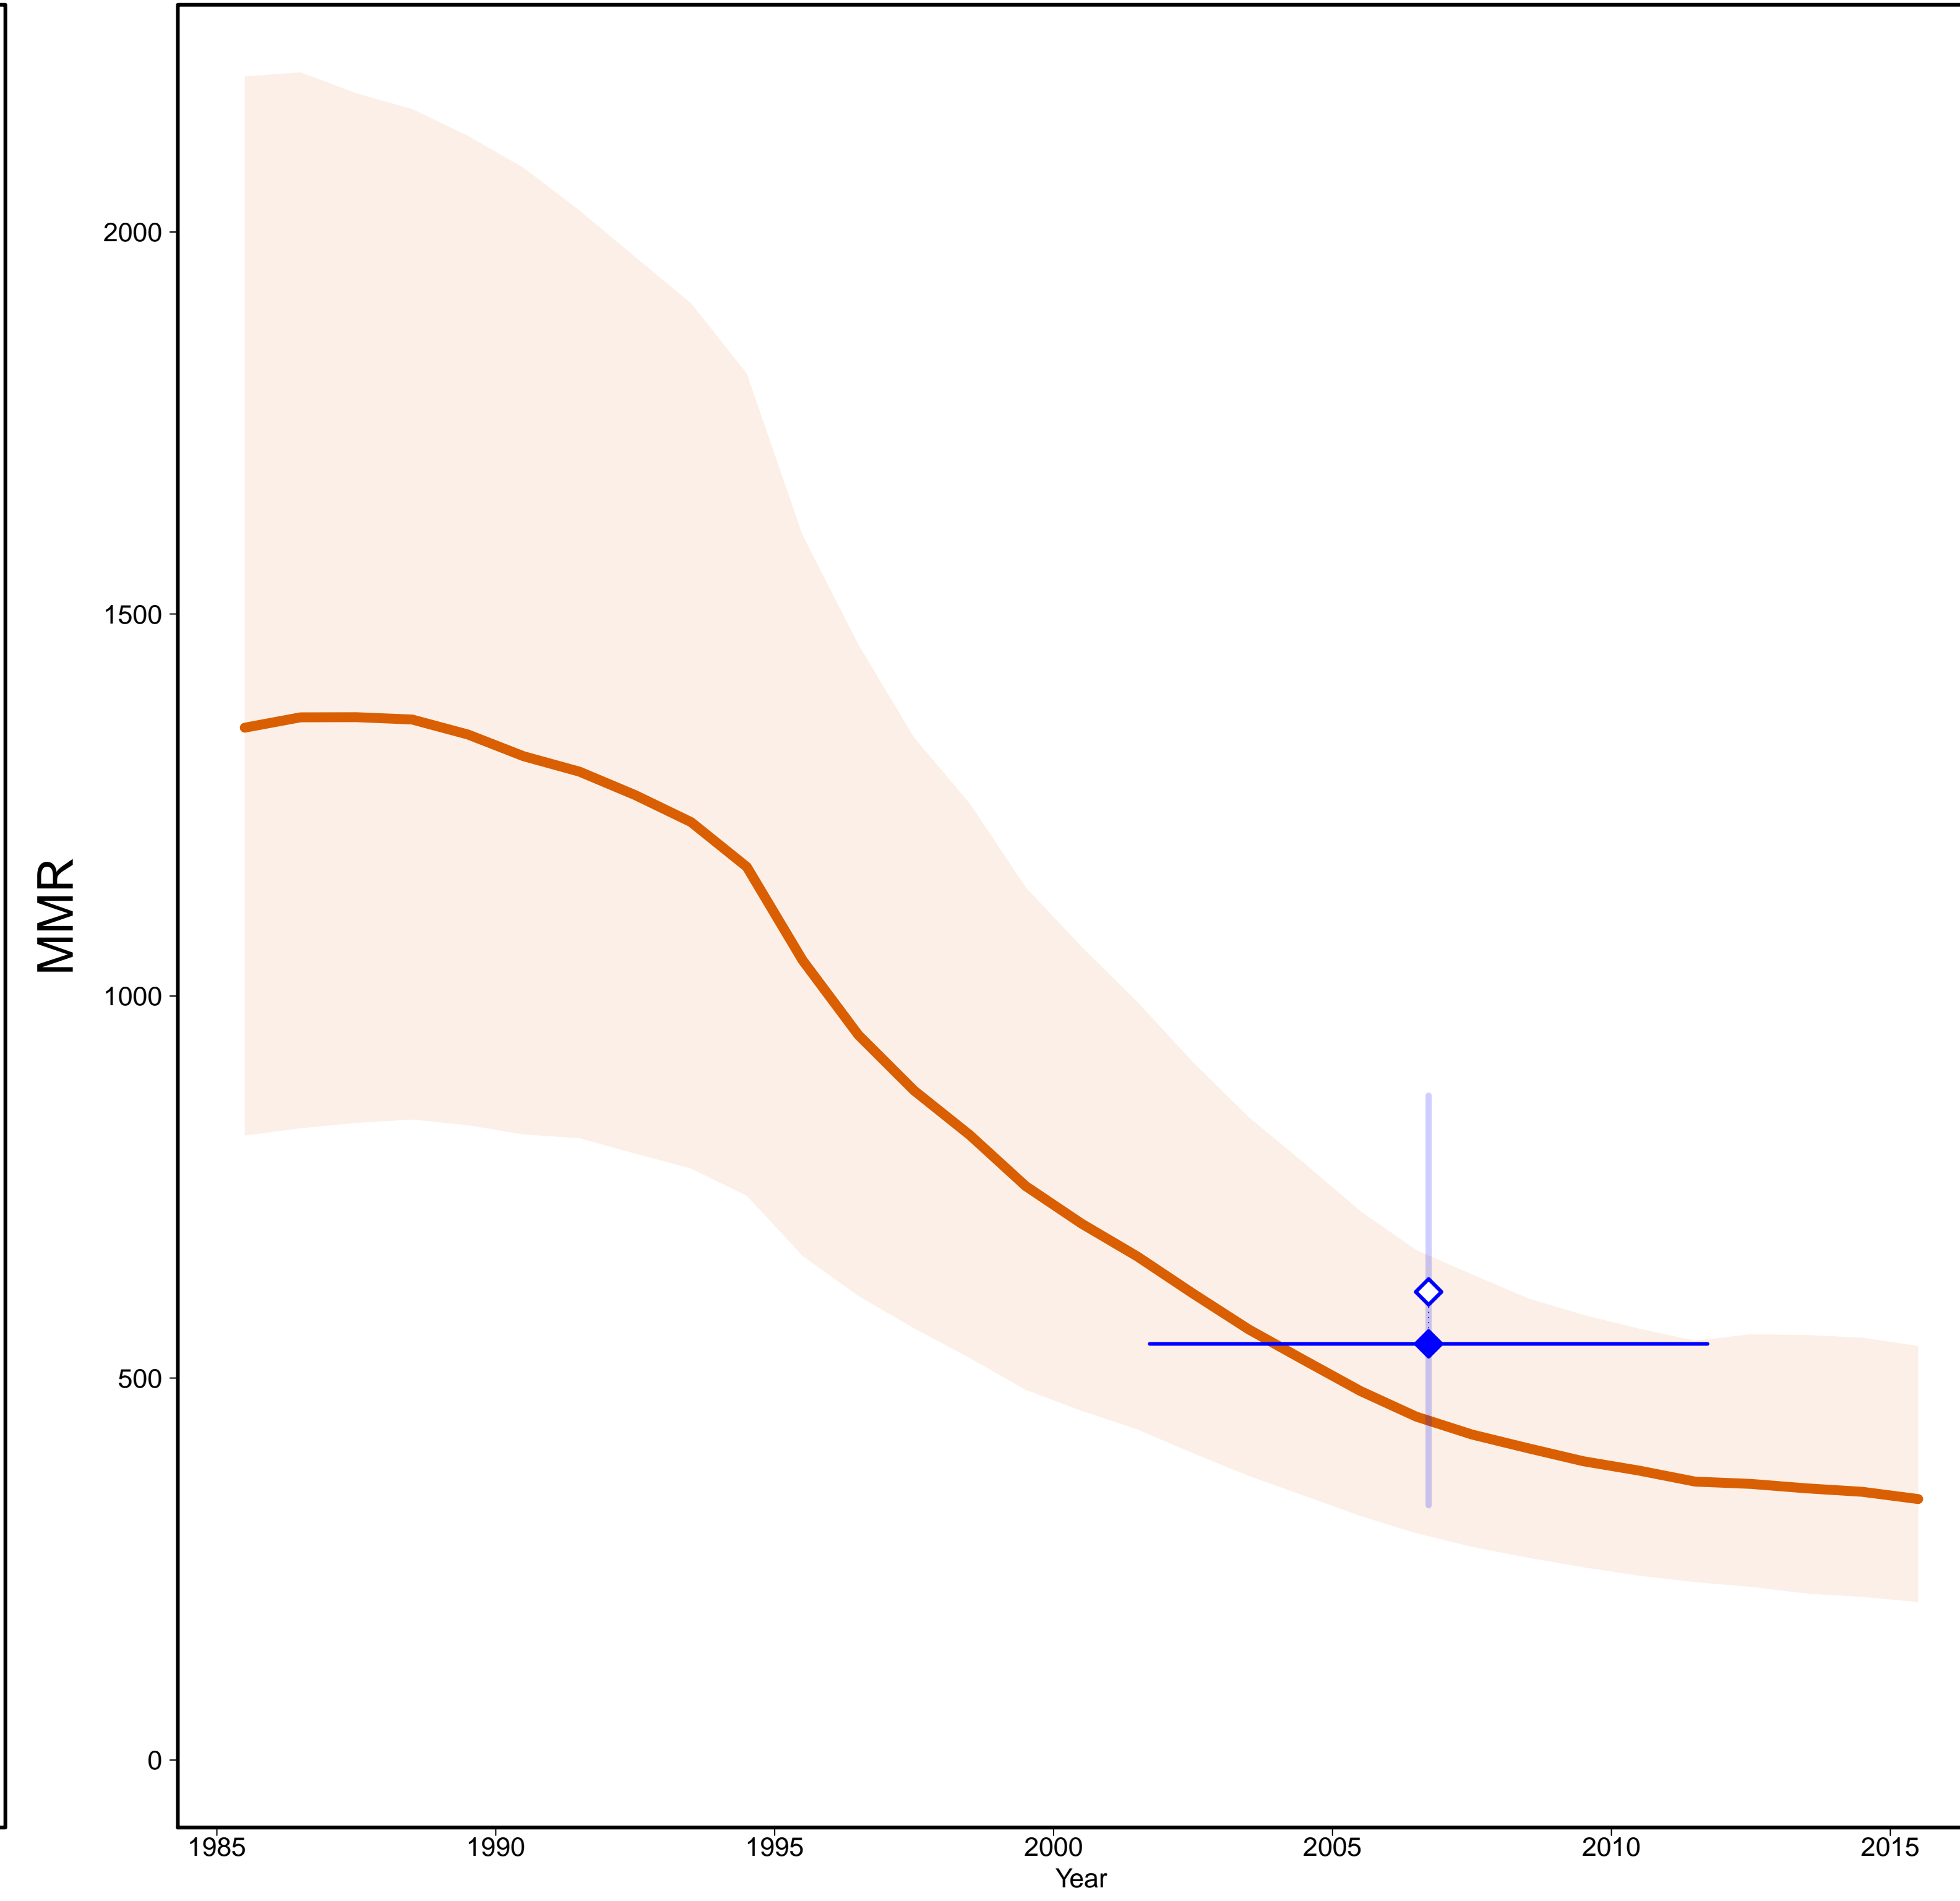

- Estimates —
- MMR Database 2015 —
- ◇ Observed Data
- ◆ Adjusted Data
- Data type —
- ◆ DHS

Gross Domestic Product

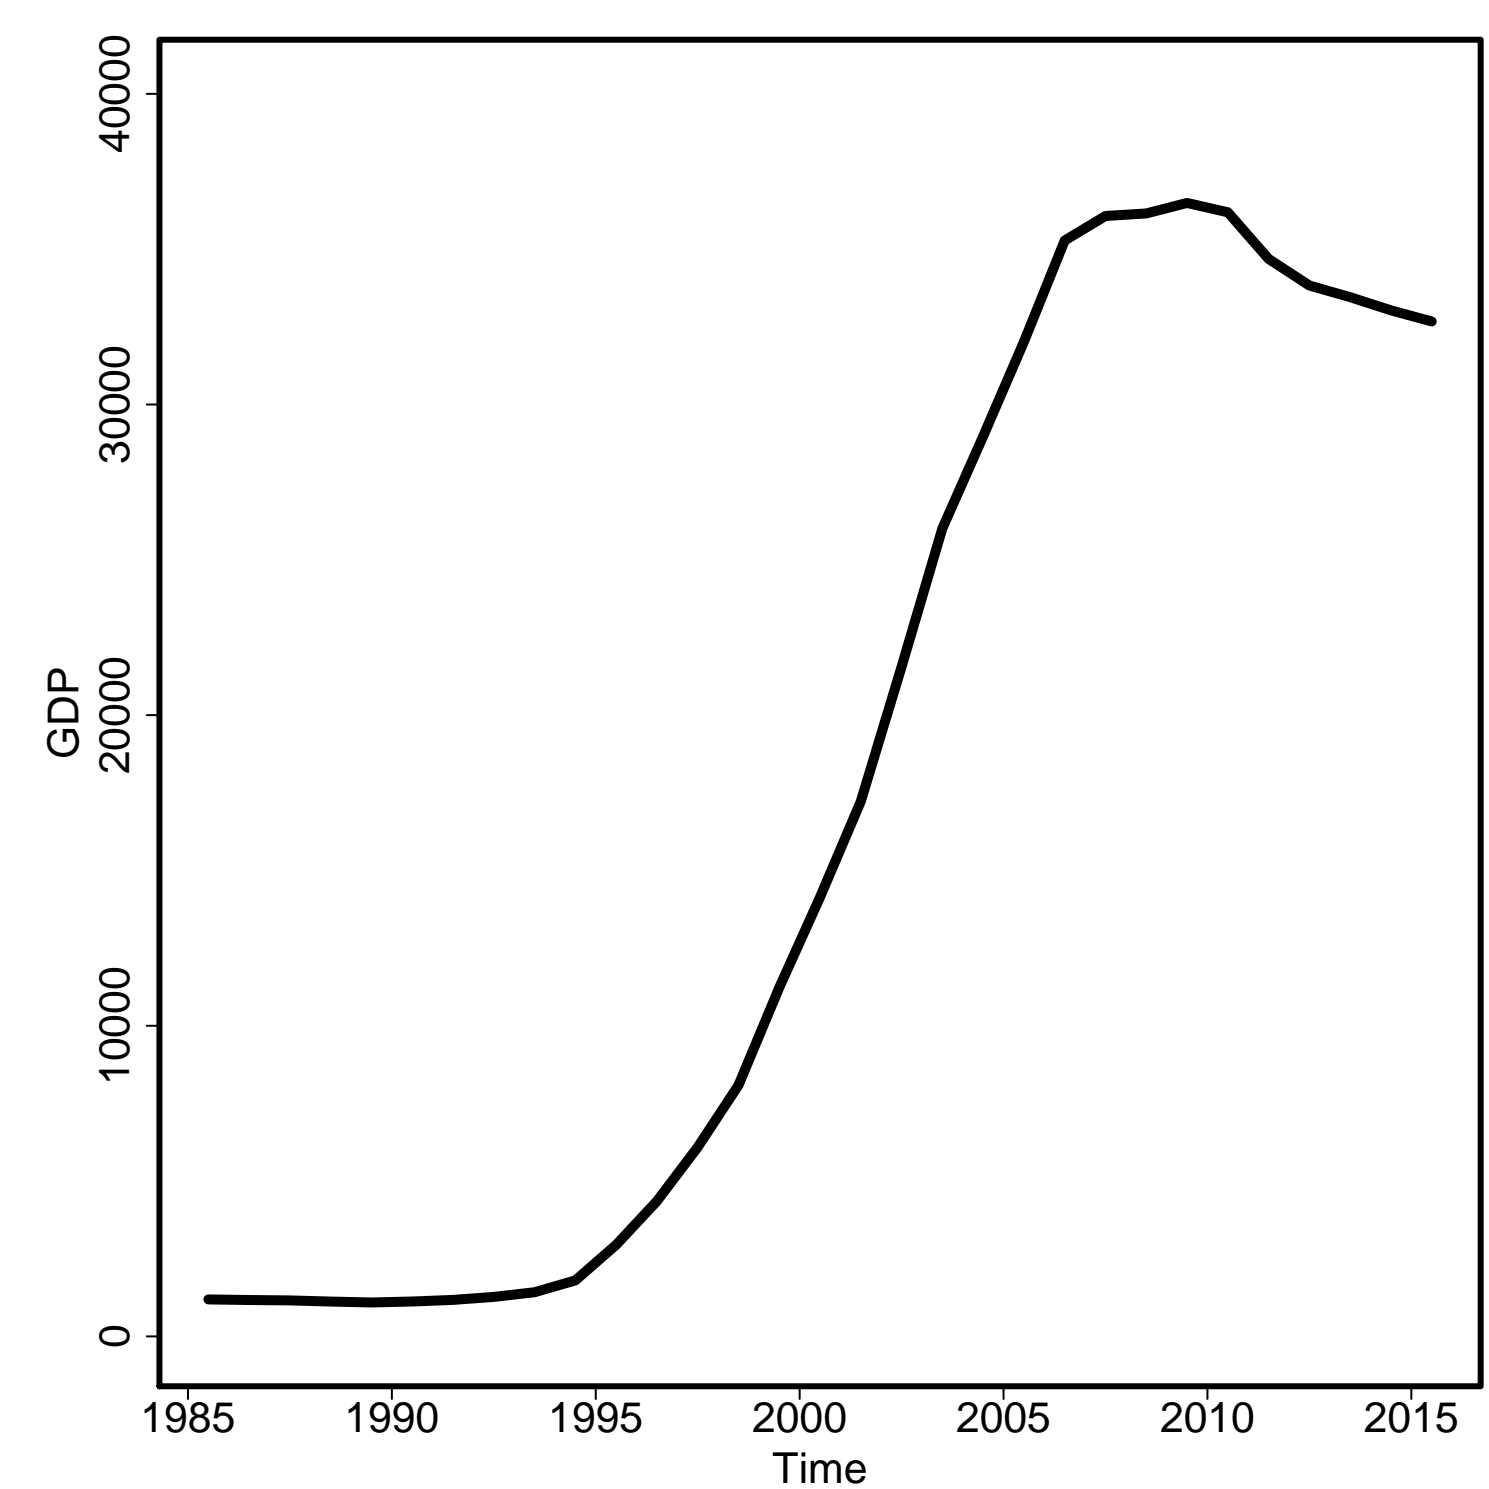

General Fertility Rate

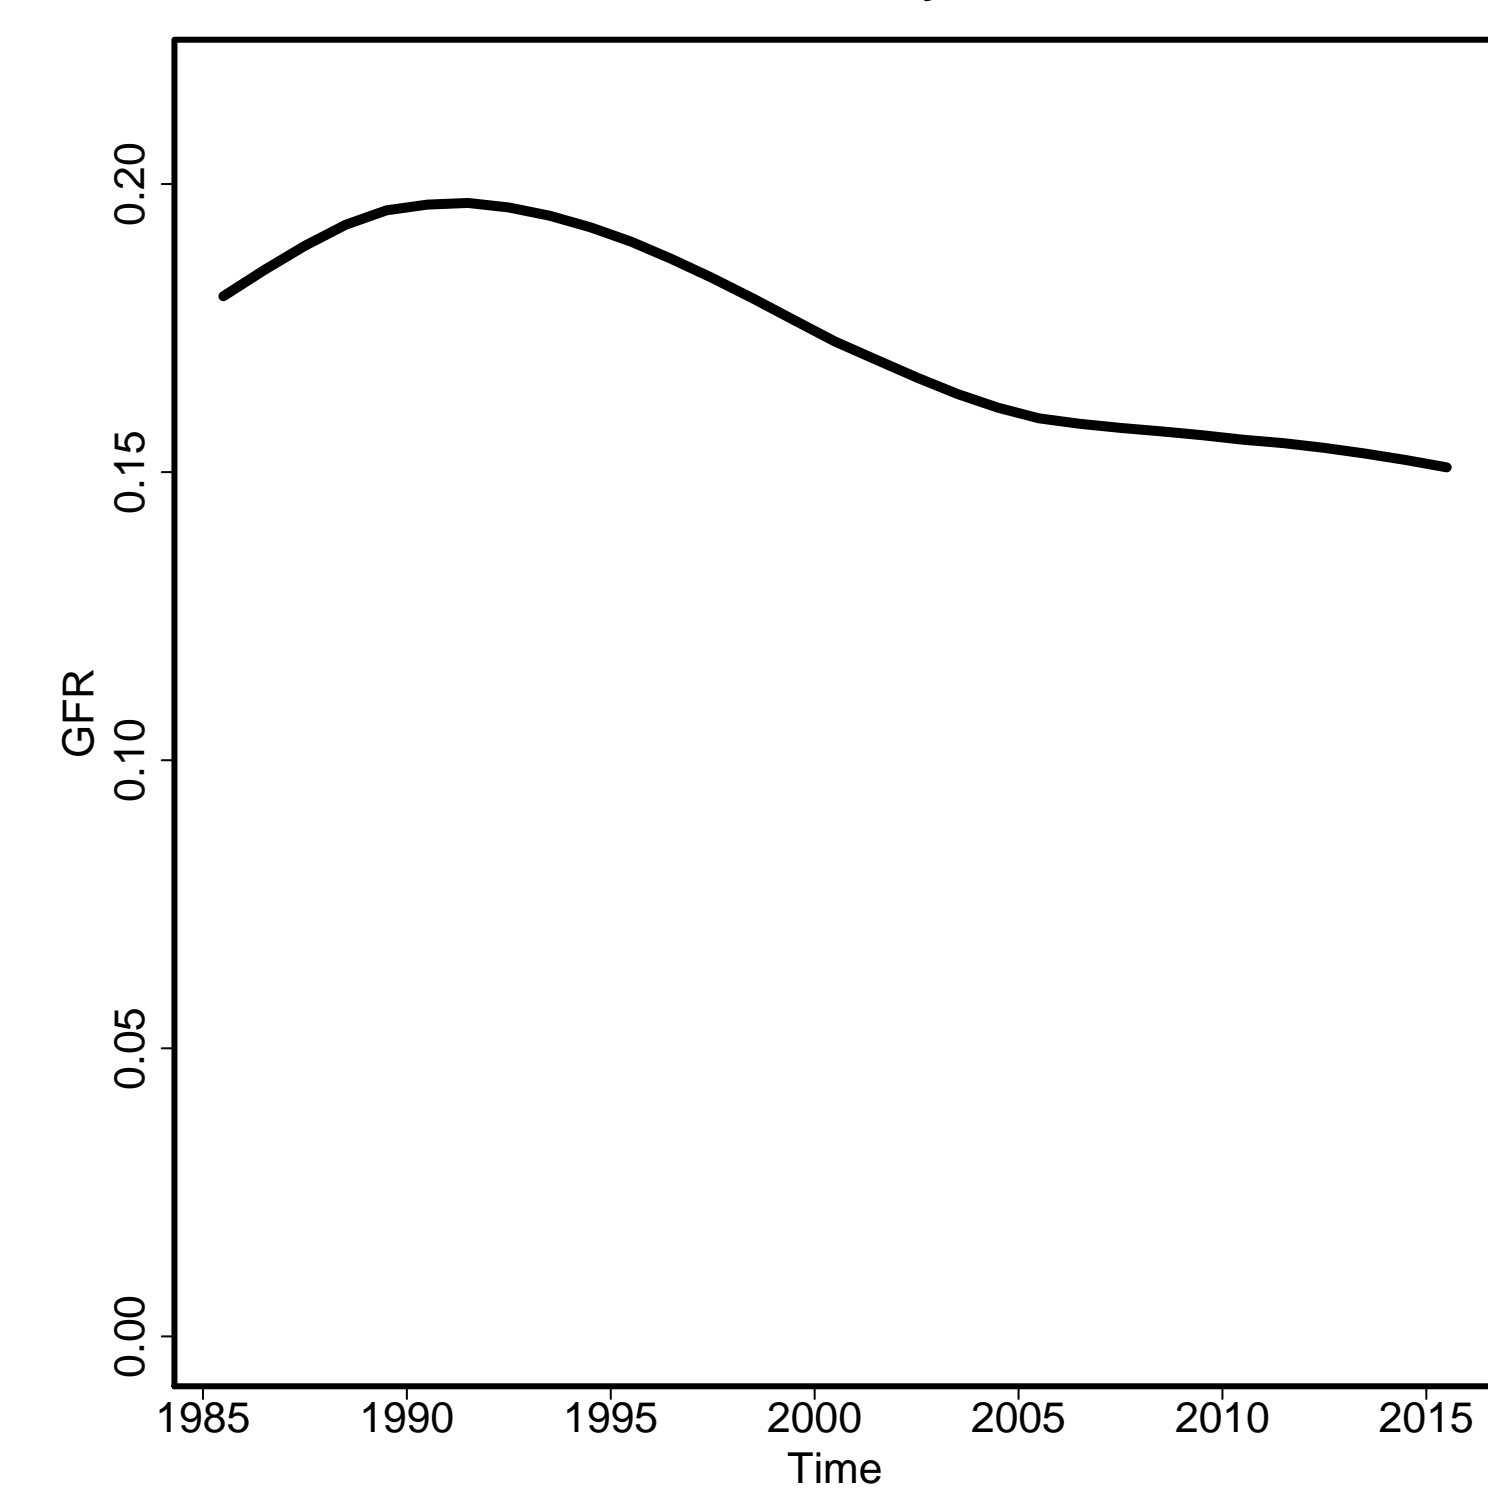

Skilled Attendance to Birth

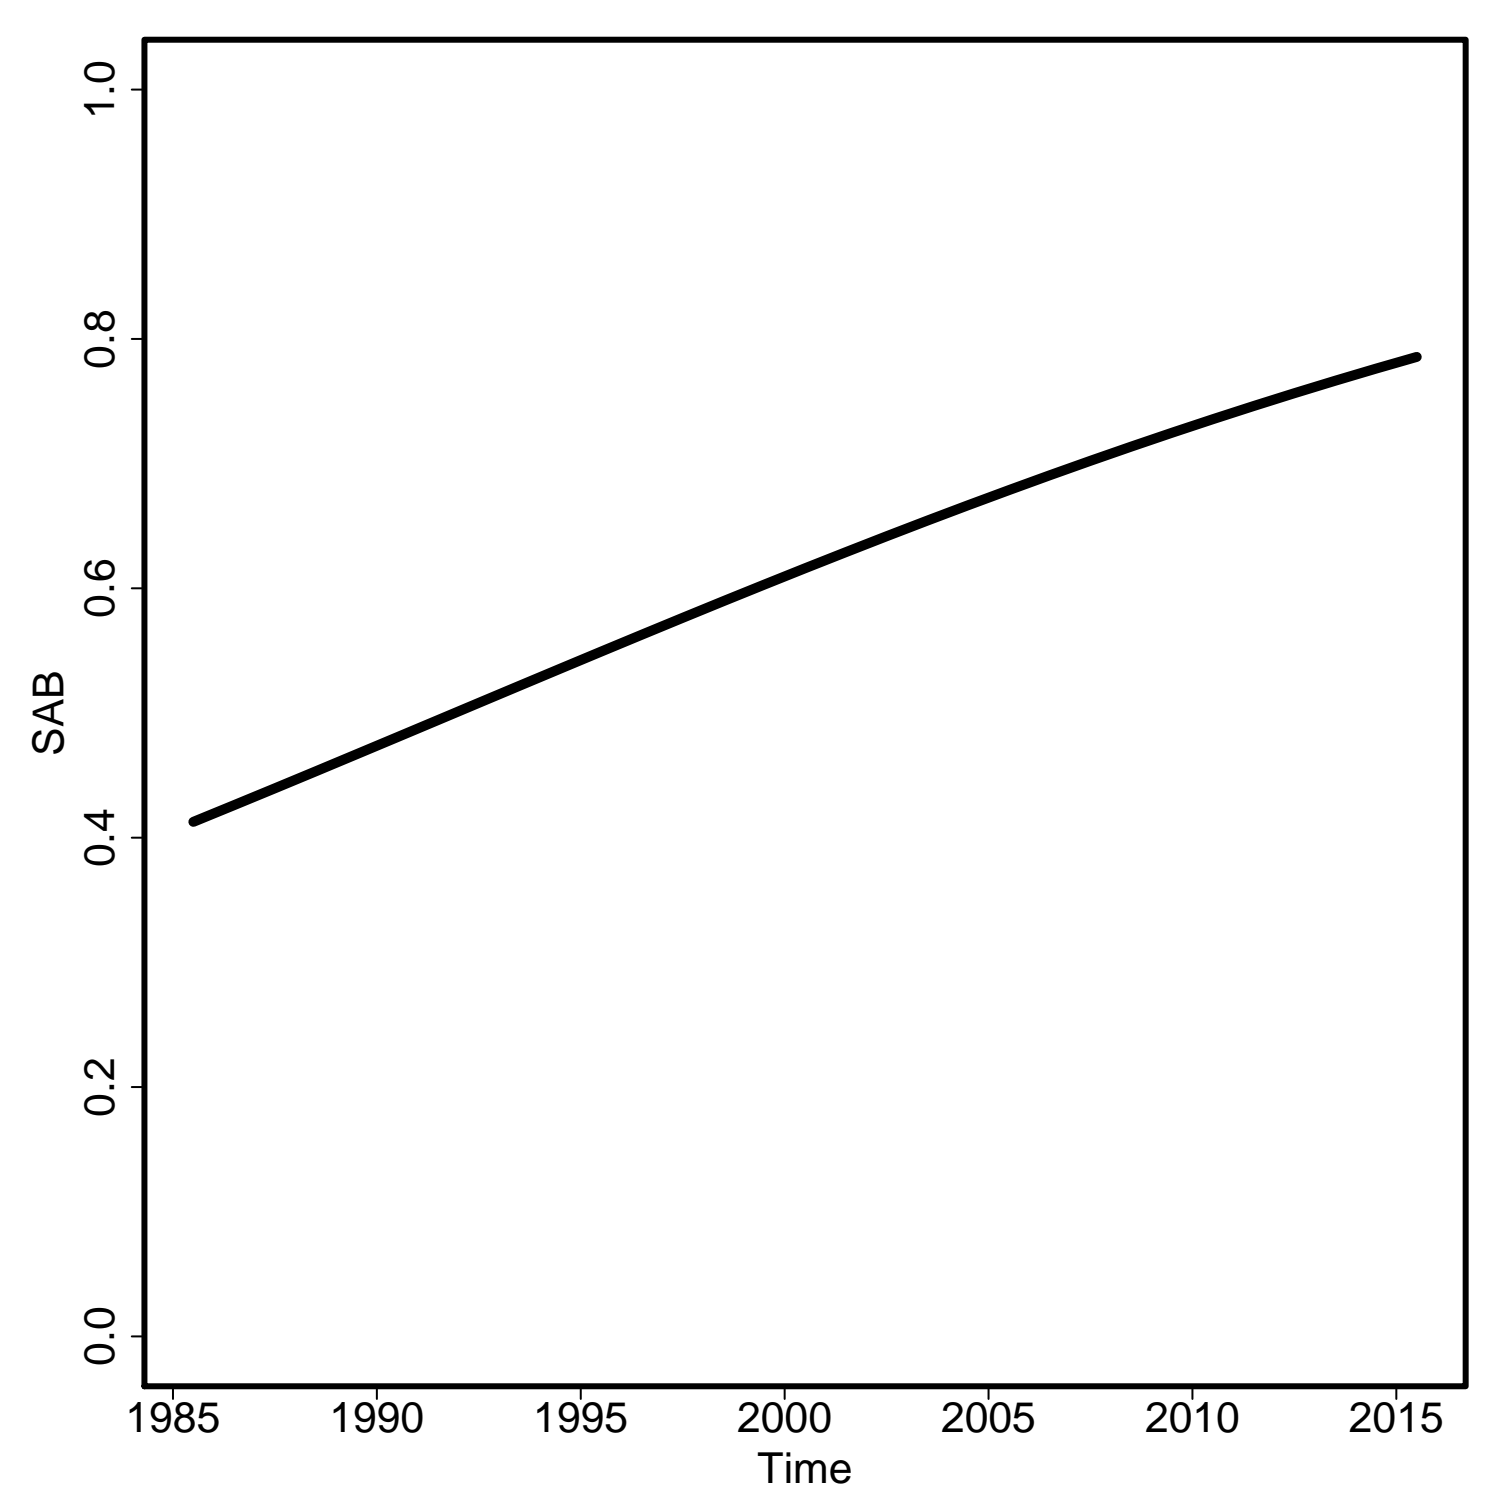

Envelope/Births

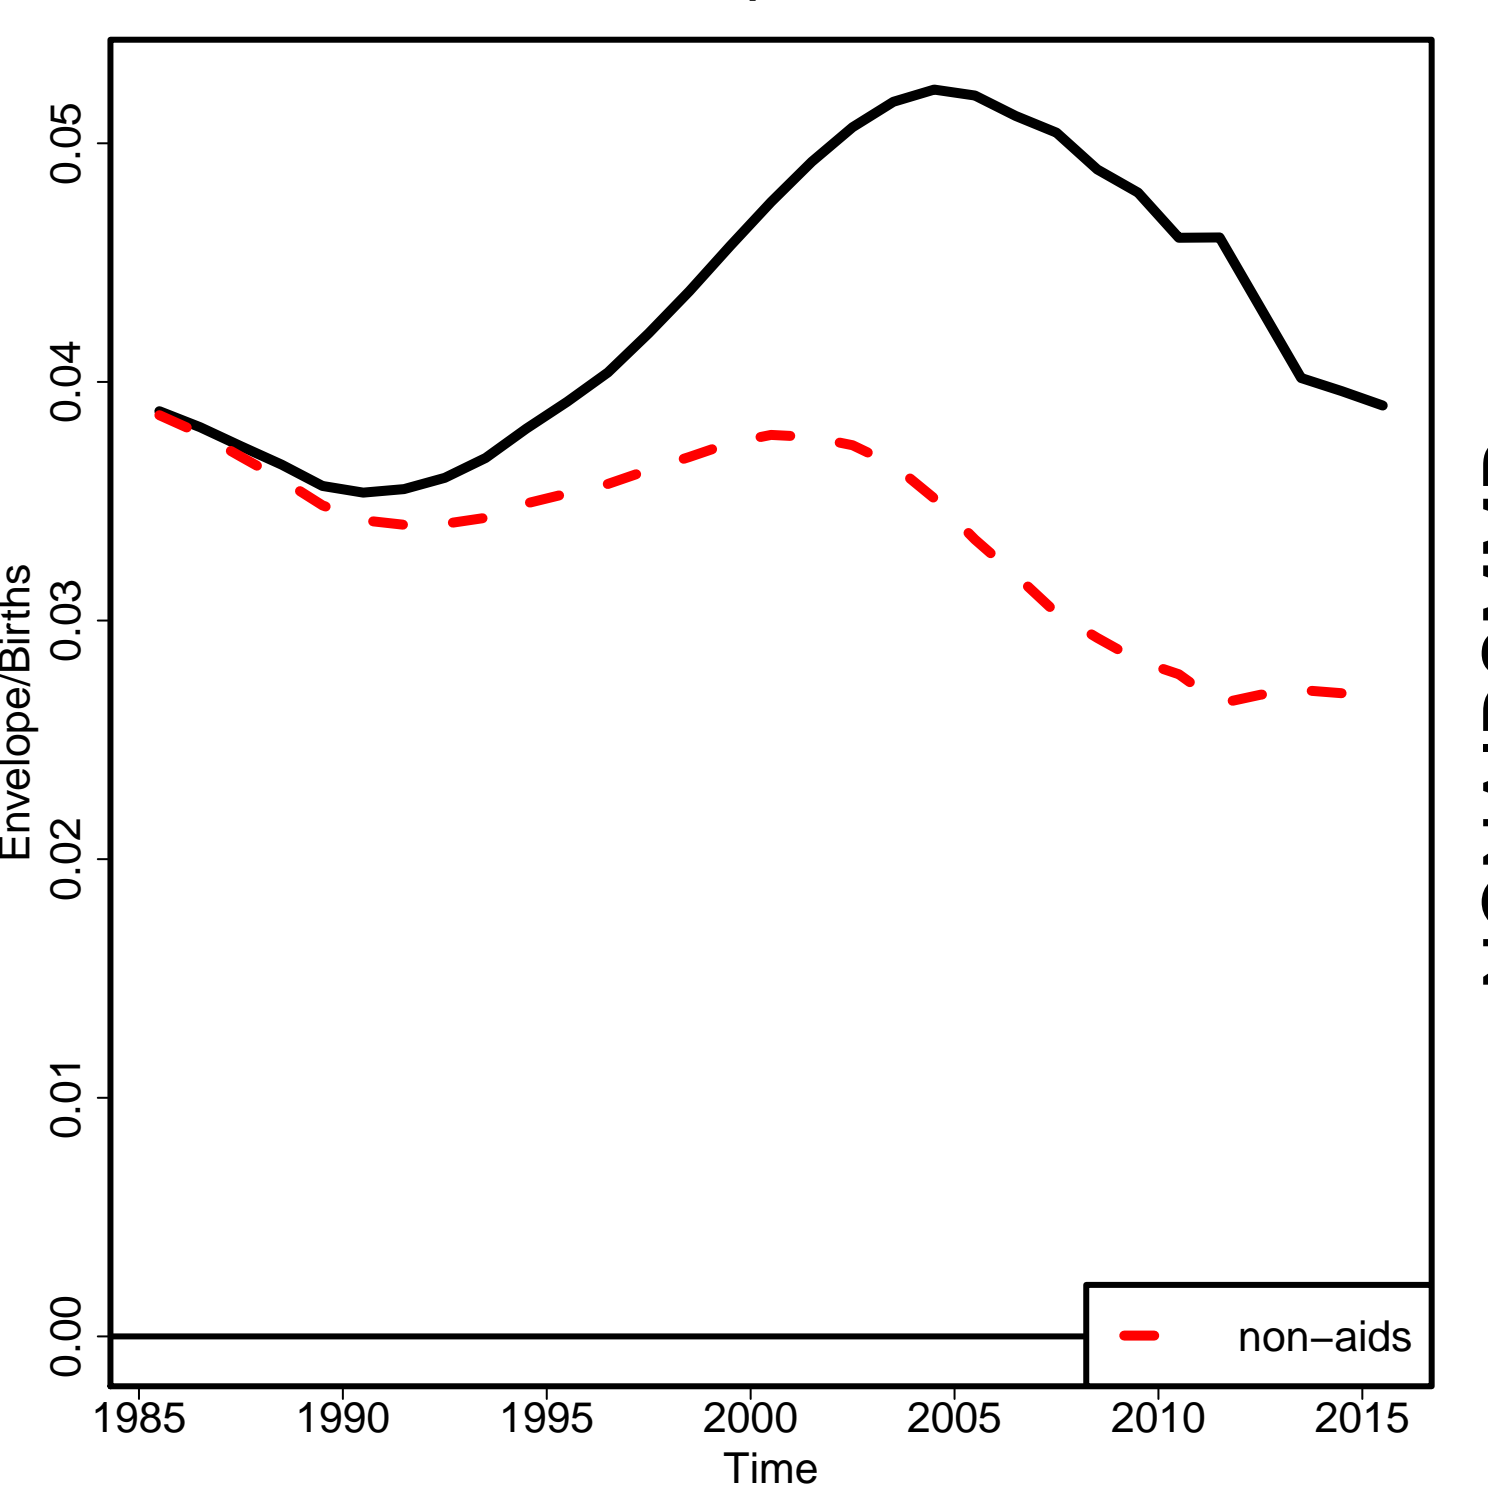

Non-aids MMR

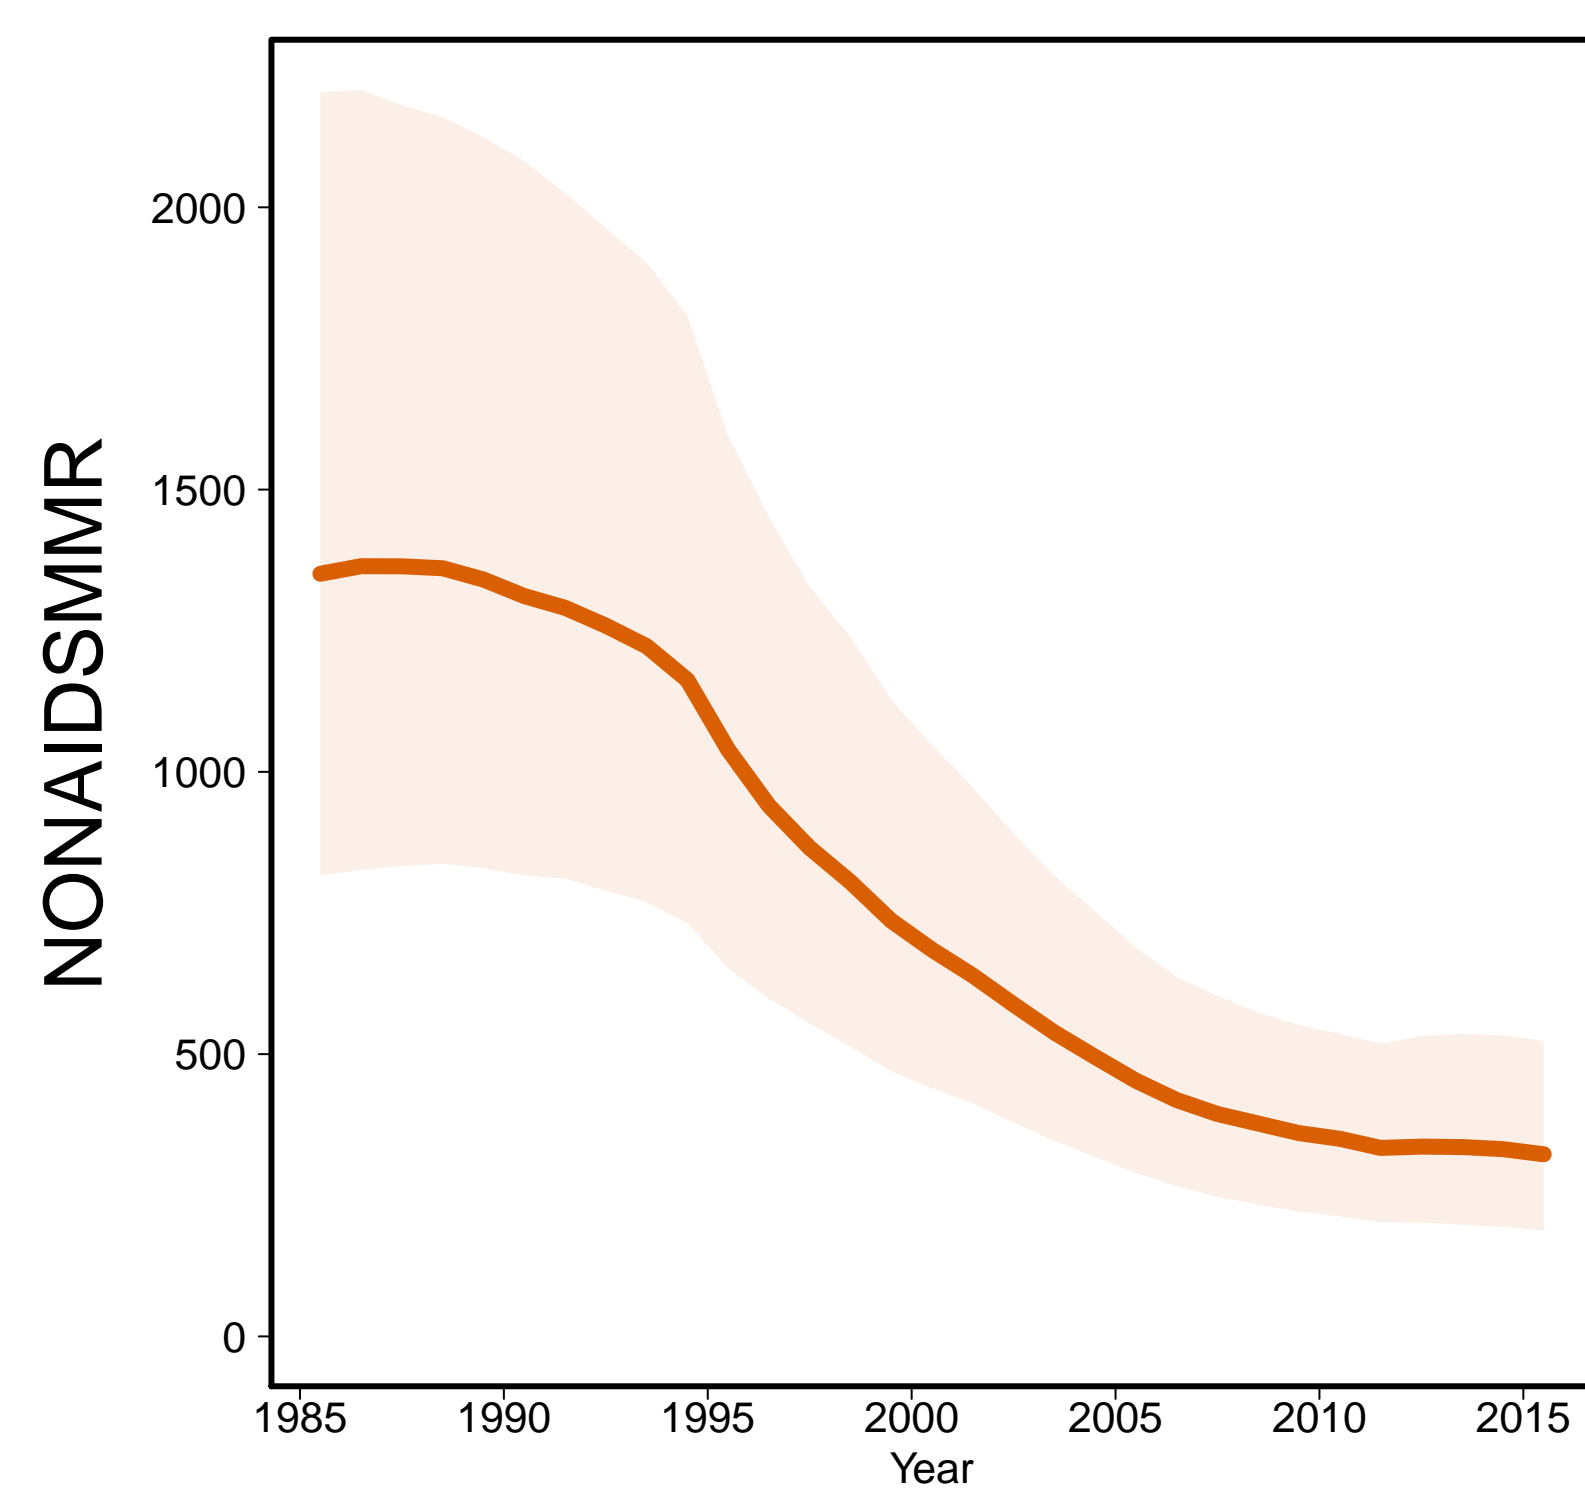

Aids MMR

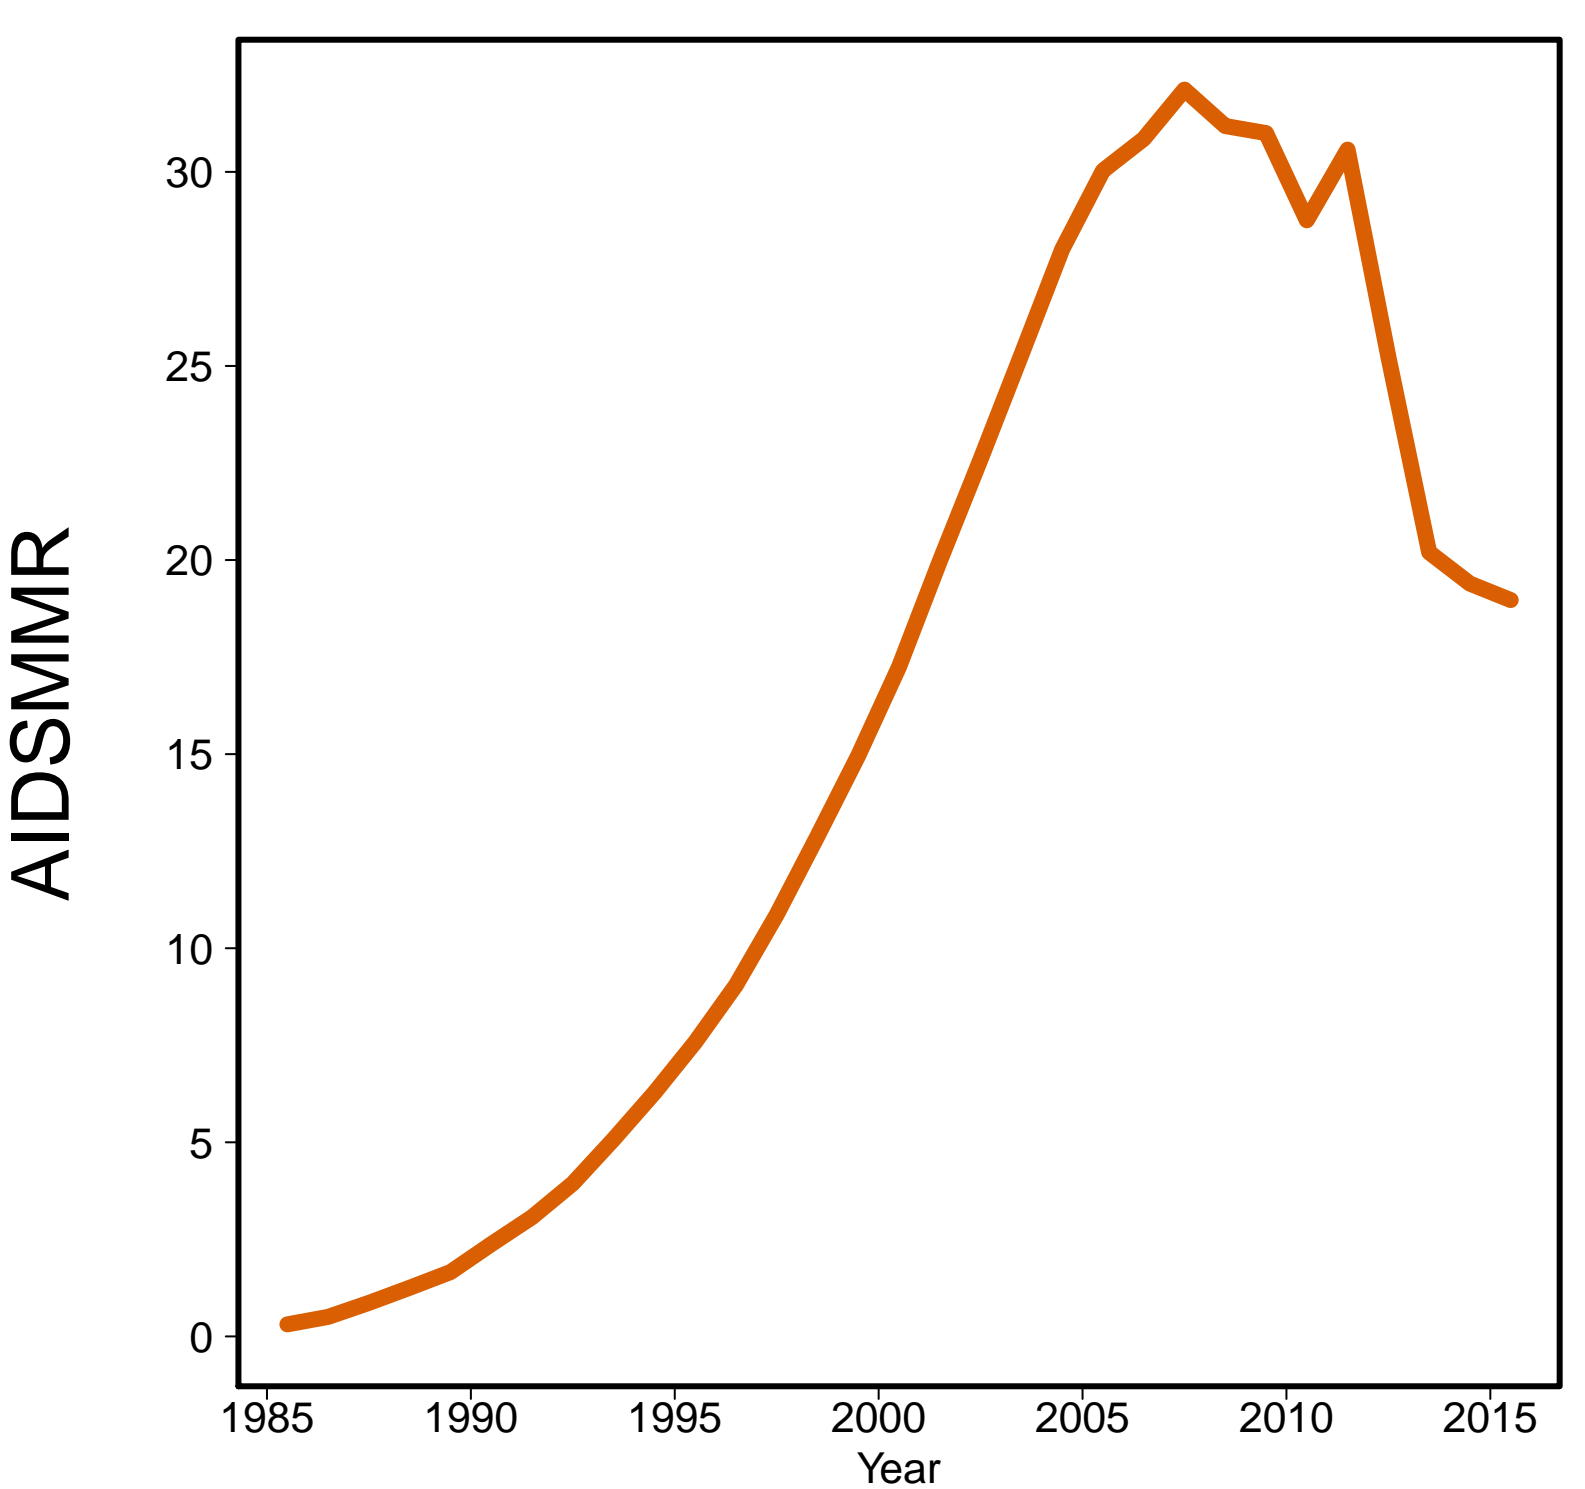

Eritrea [ERI]  
(Eastern Africa)

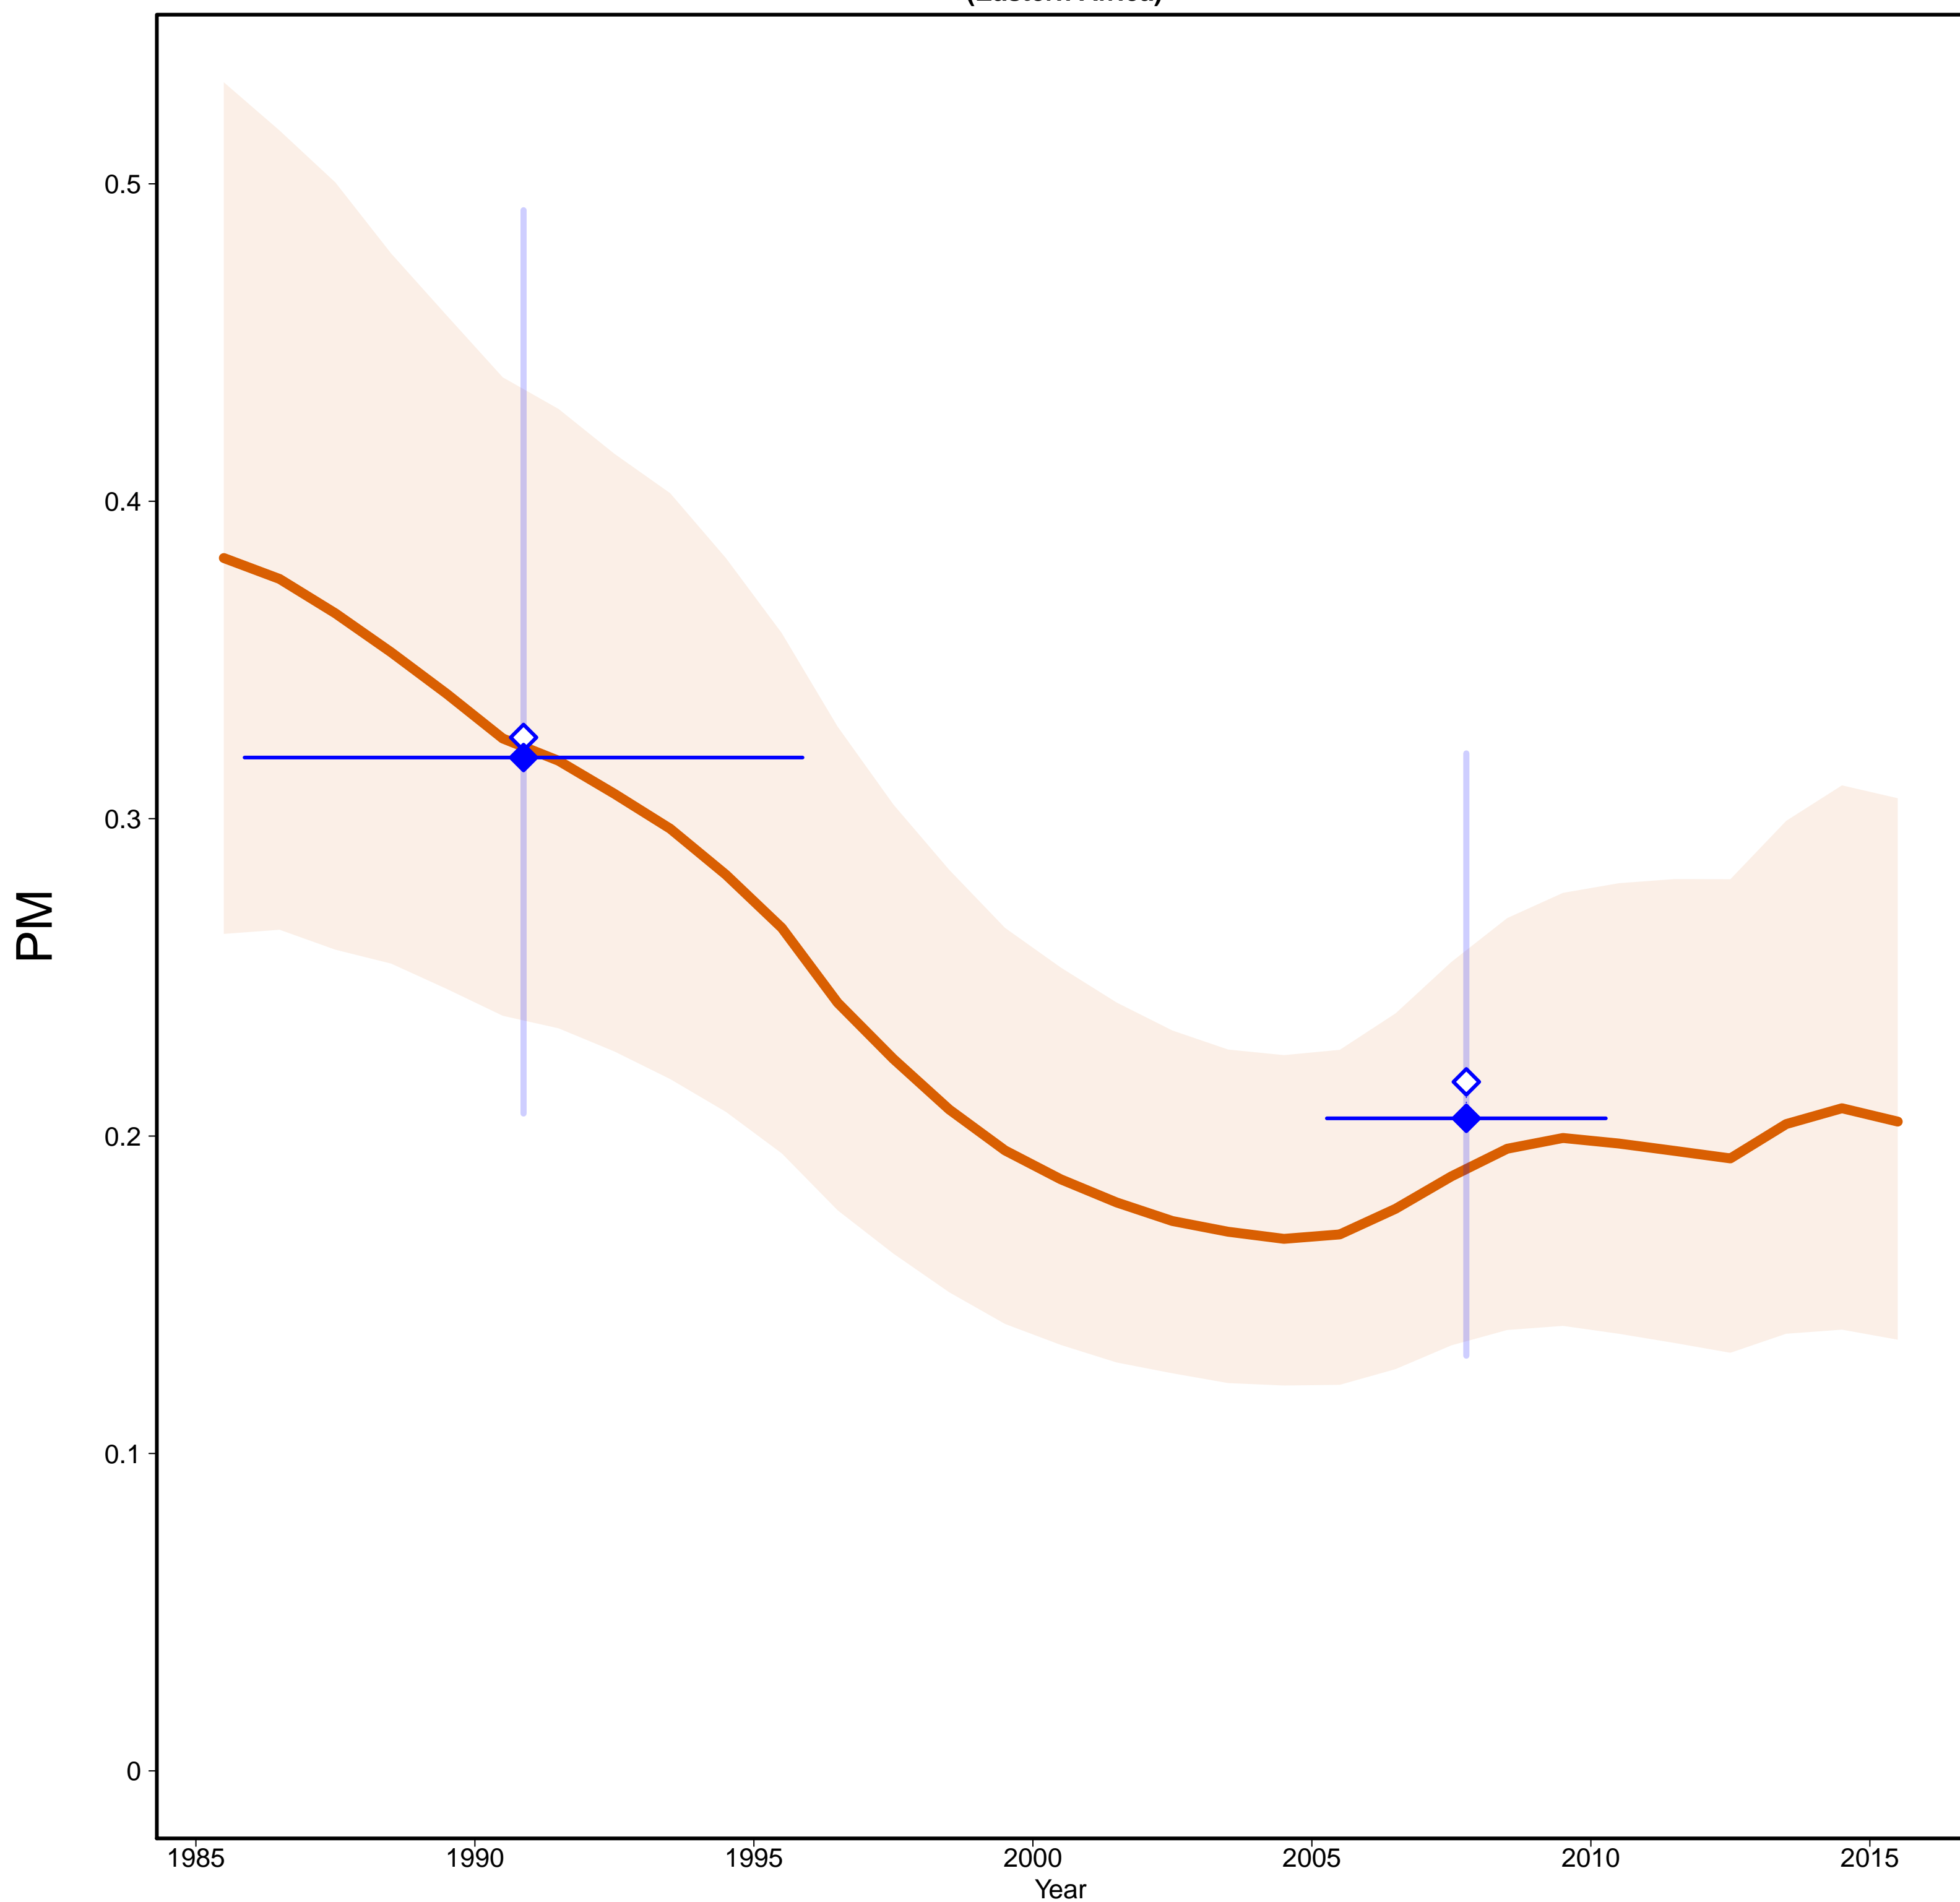

Eritrea [ERI]  
(Eastern Africa)

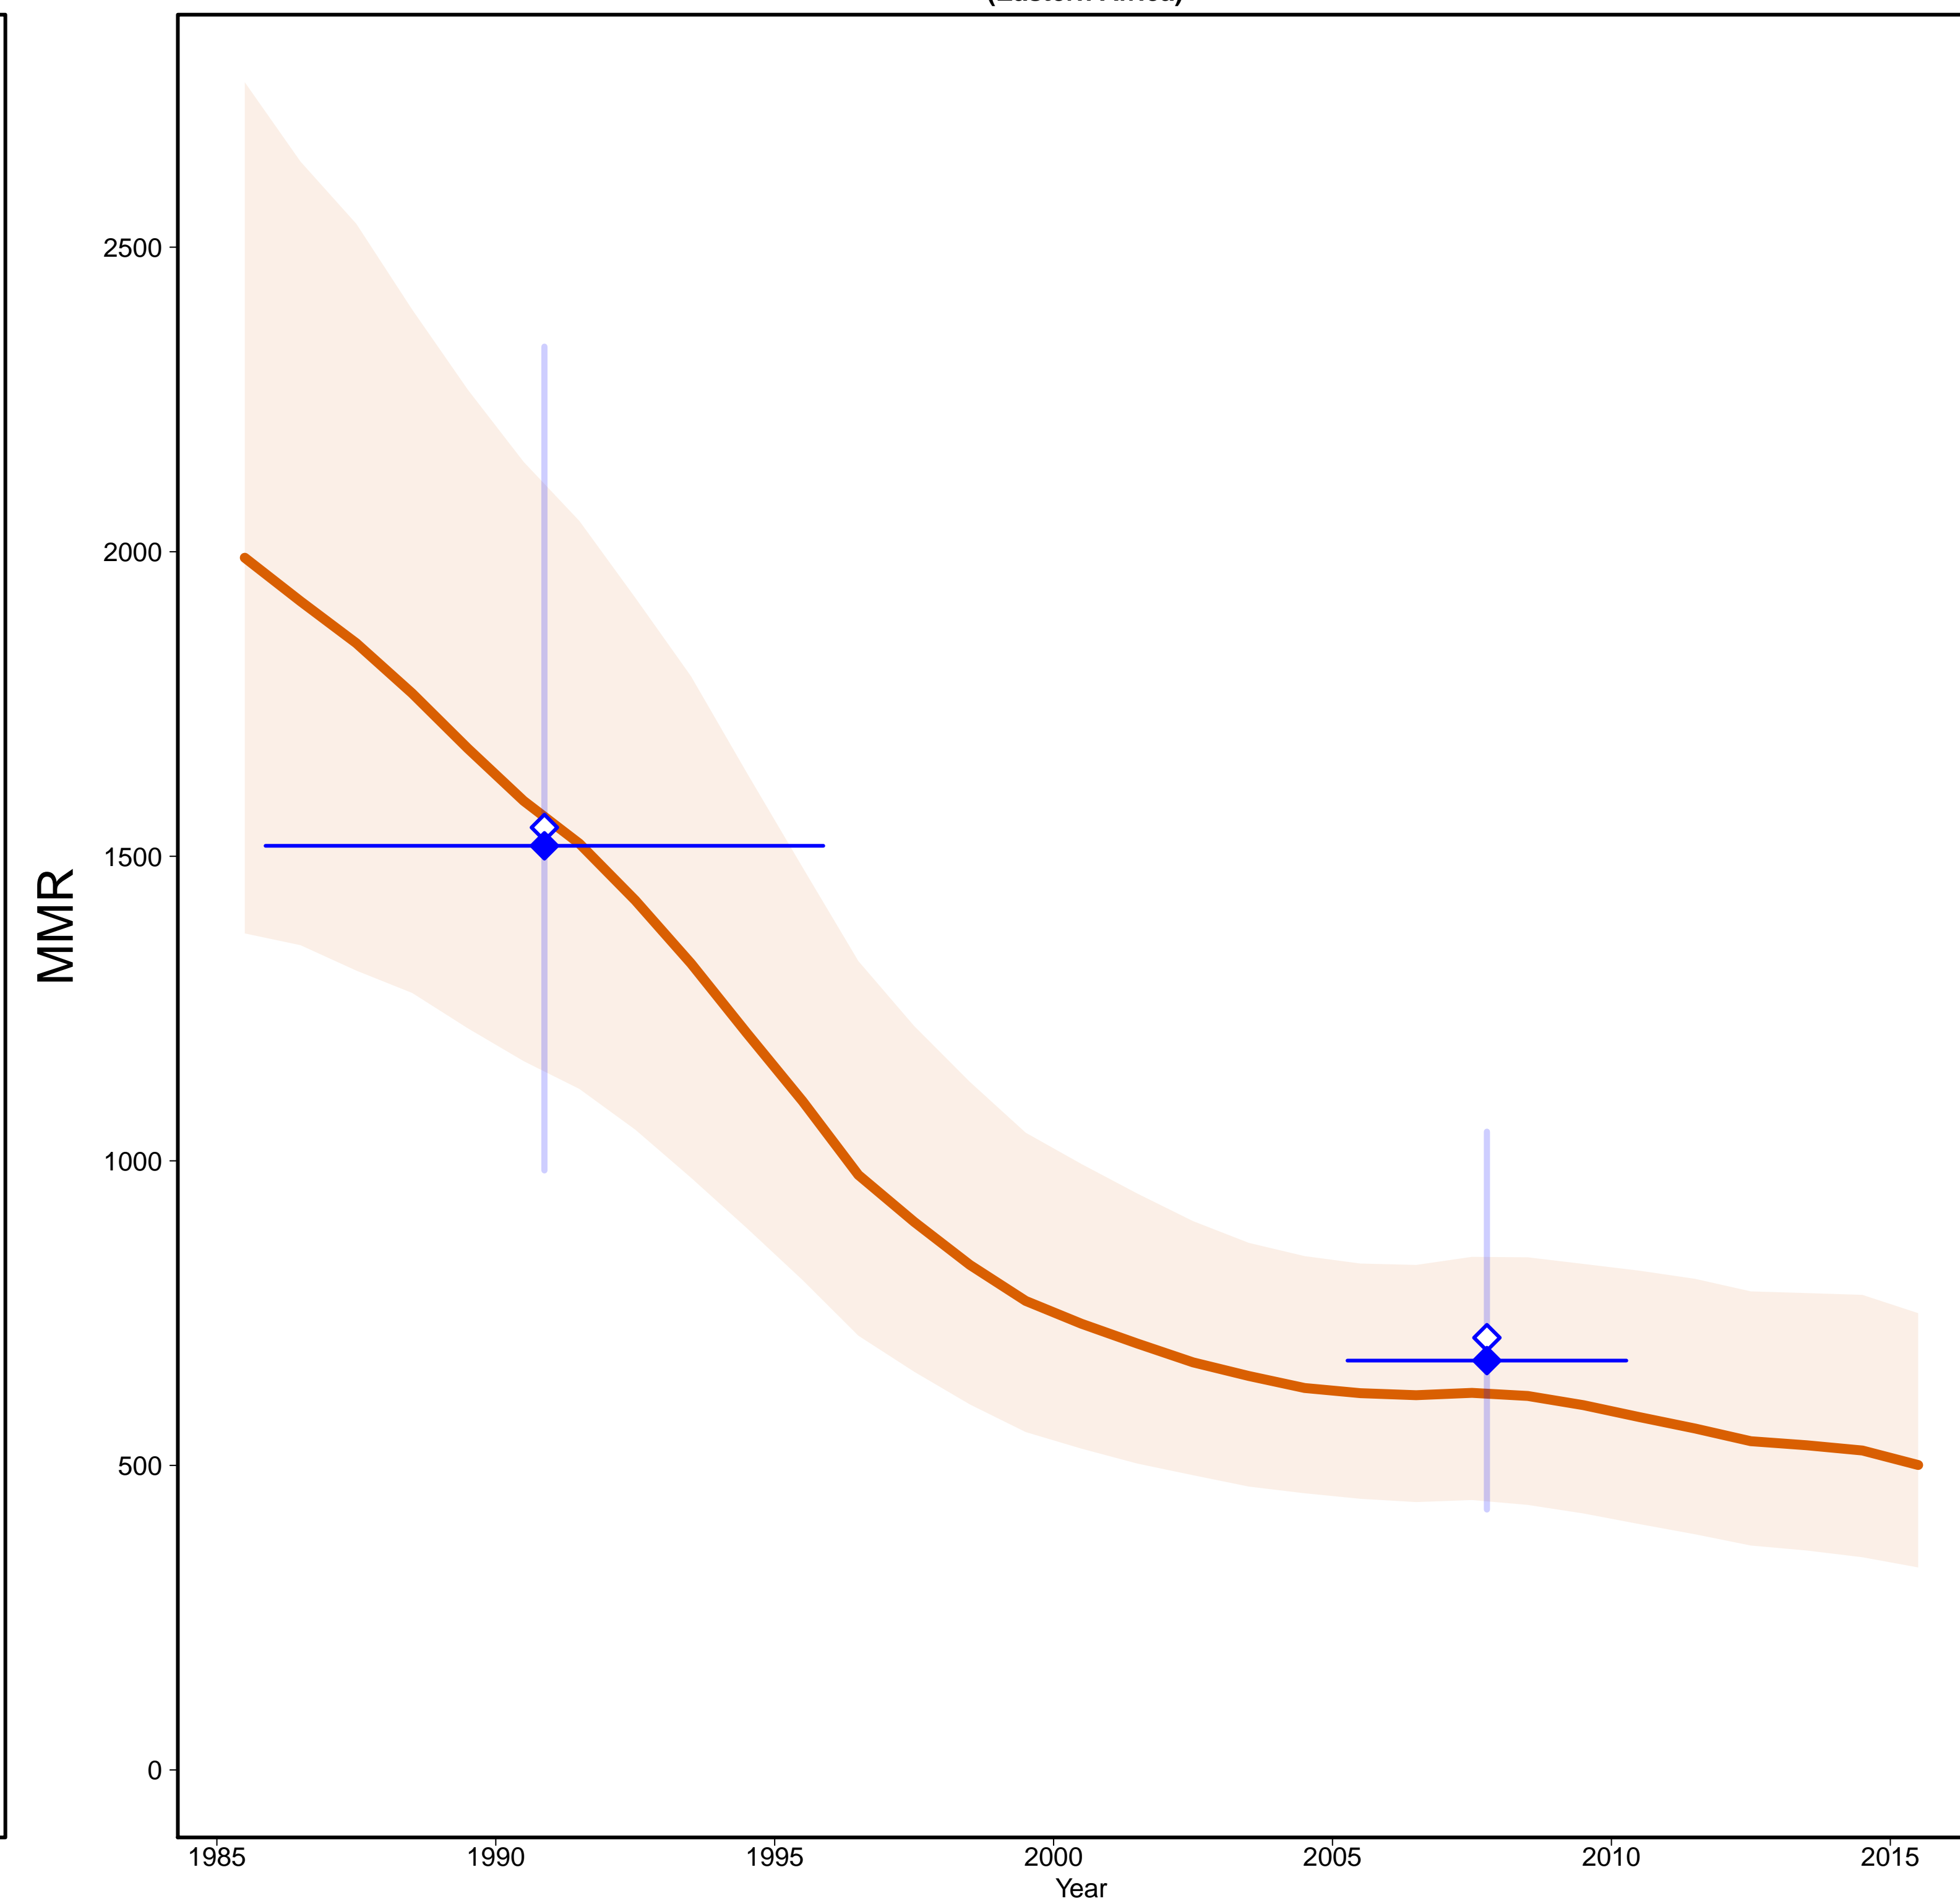

- Estimates —
- MMR Database 2015 —
- ◇ Observed Data
- ◆ Adjusted Data
- Data type —
- ◆ DHS

Gross Domestic Product

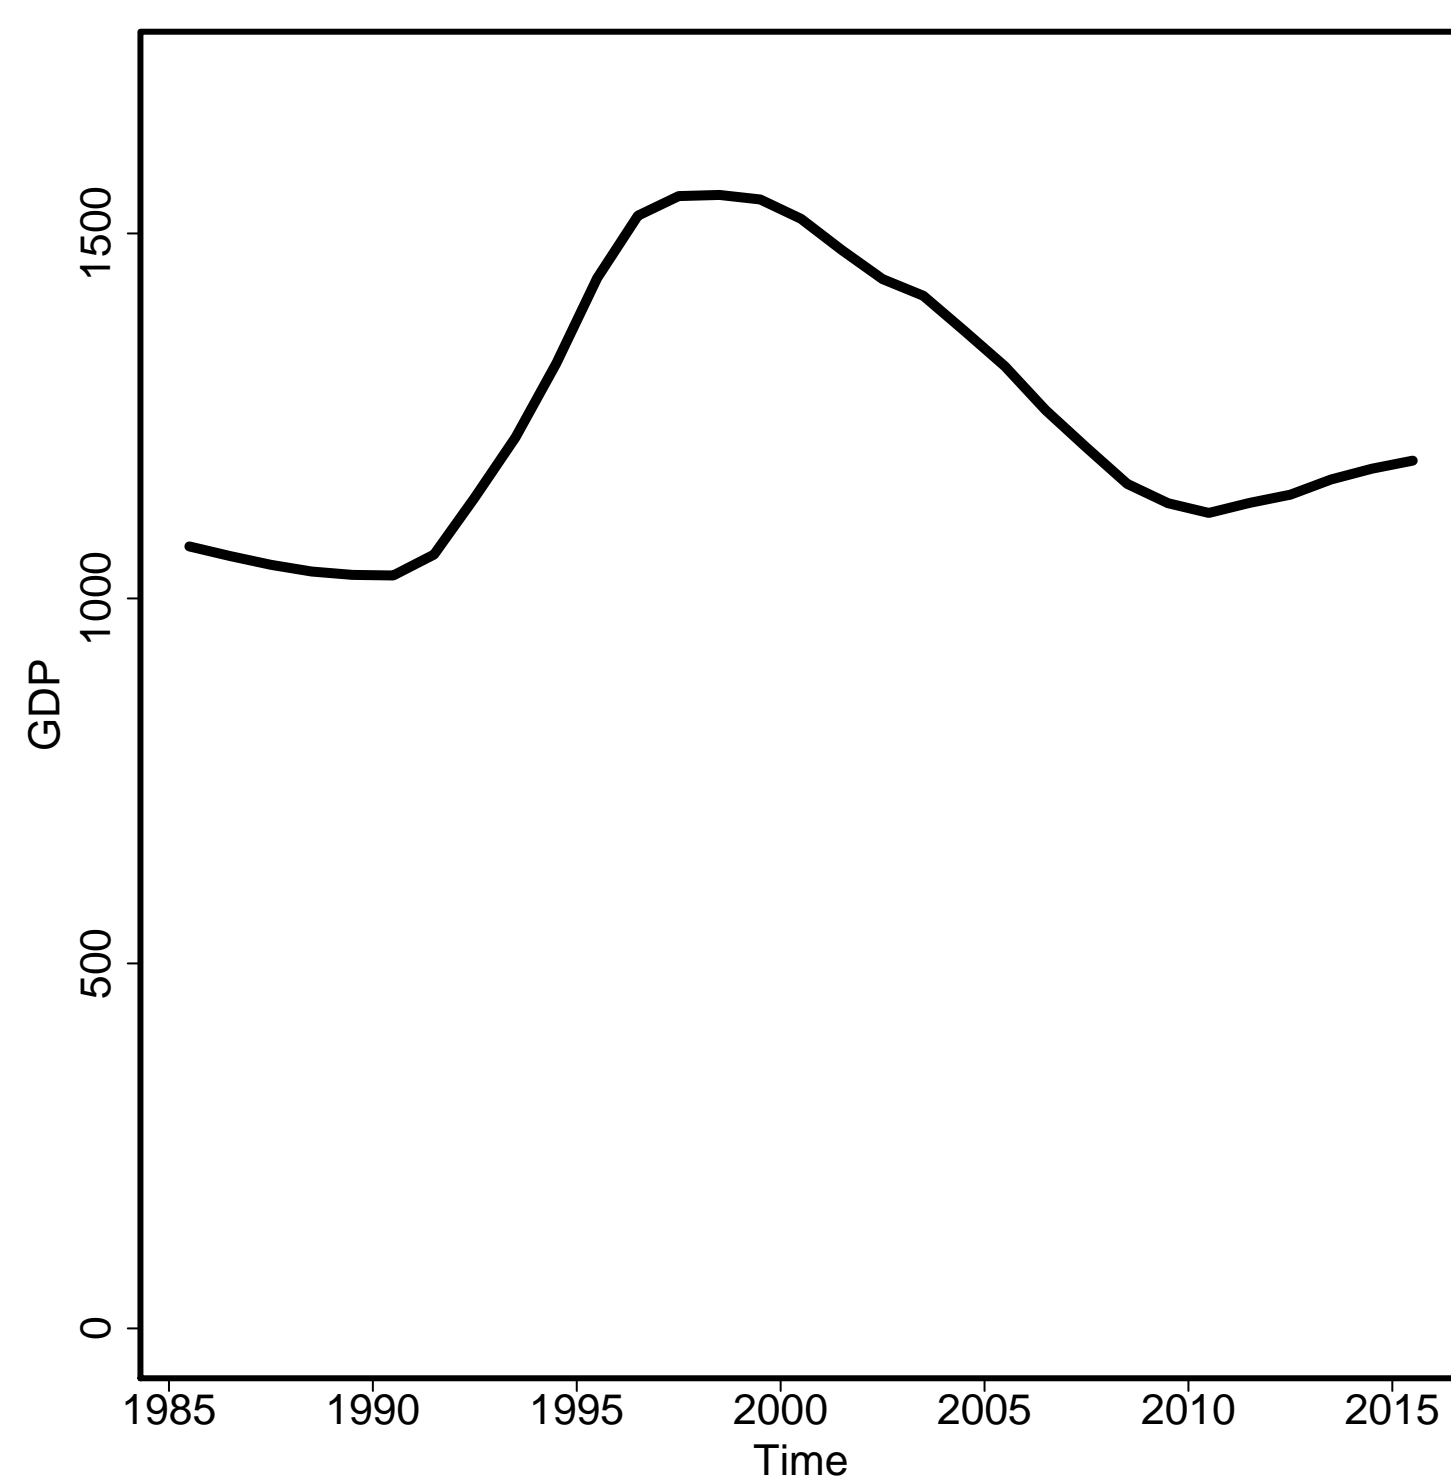

General Fertility Rate

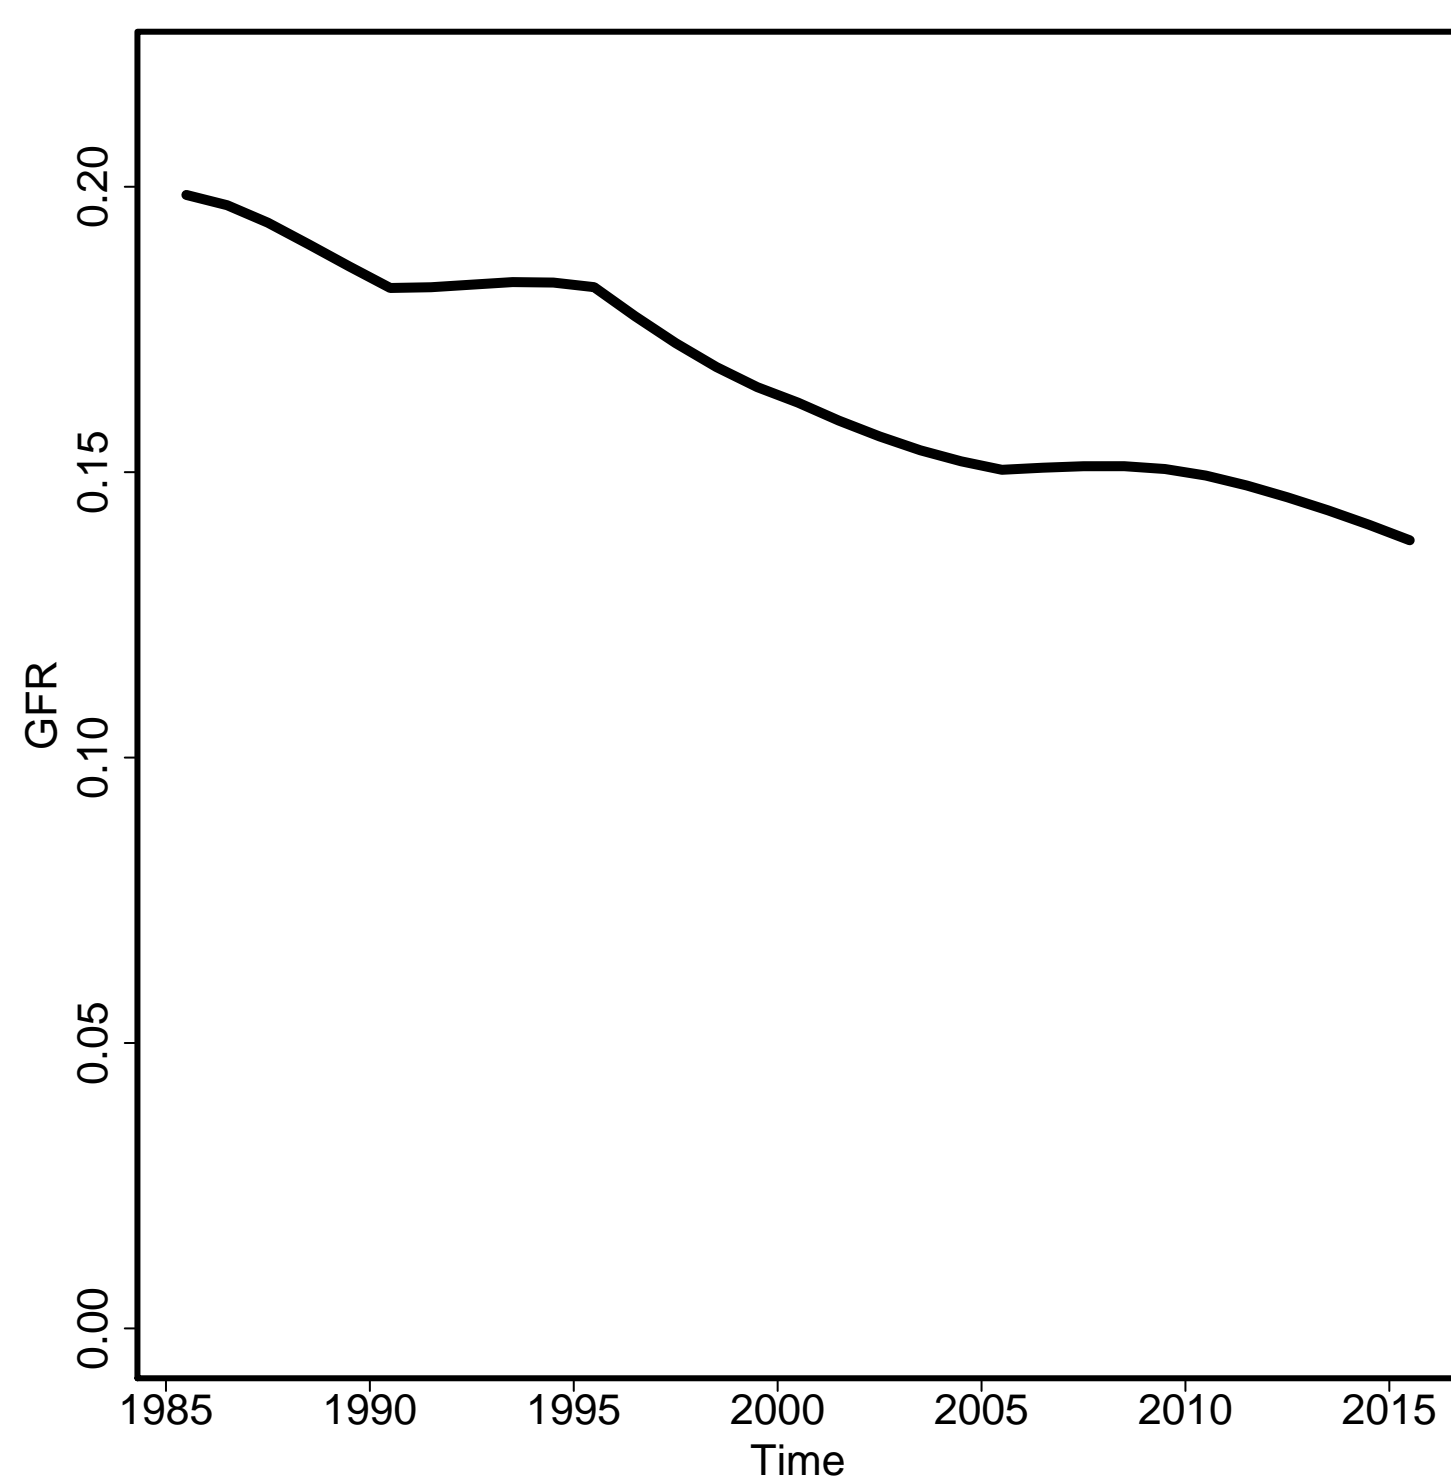

Skilled Attendance to Birth

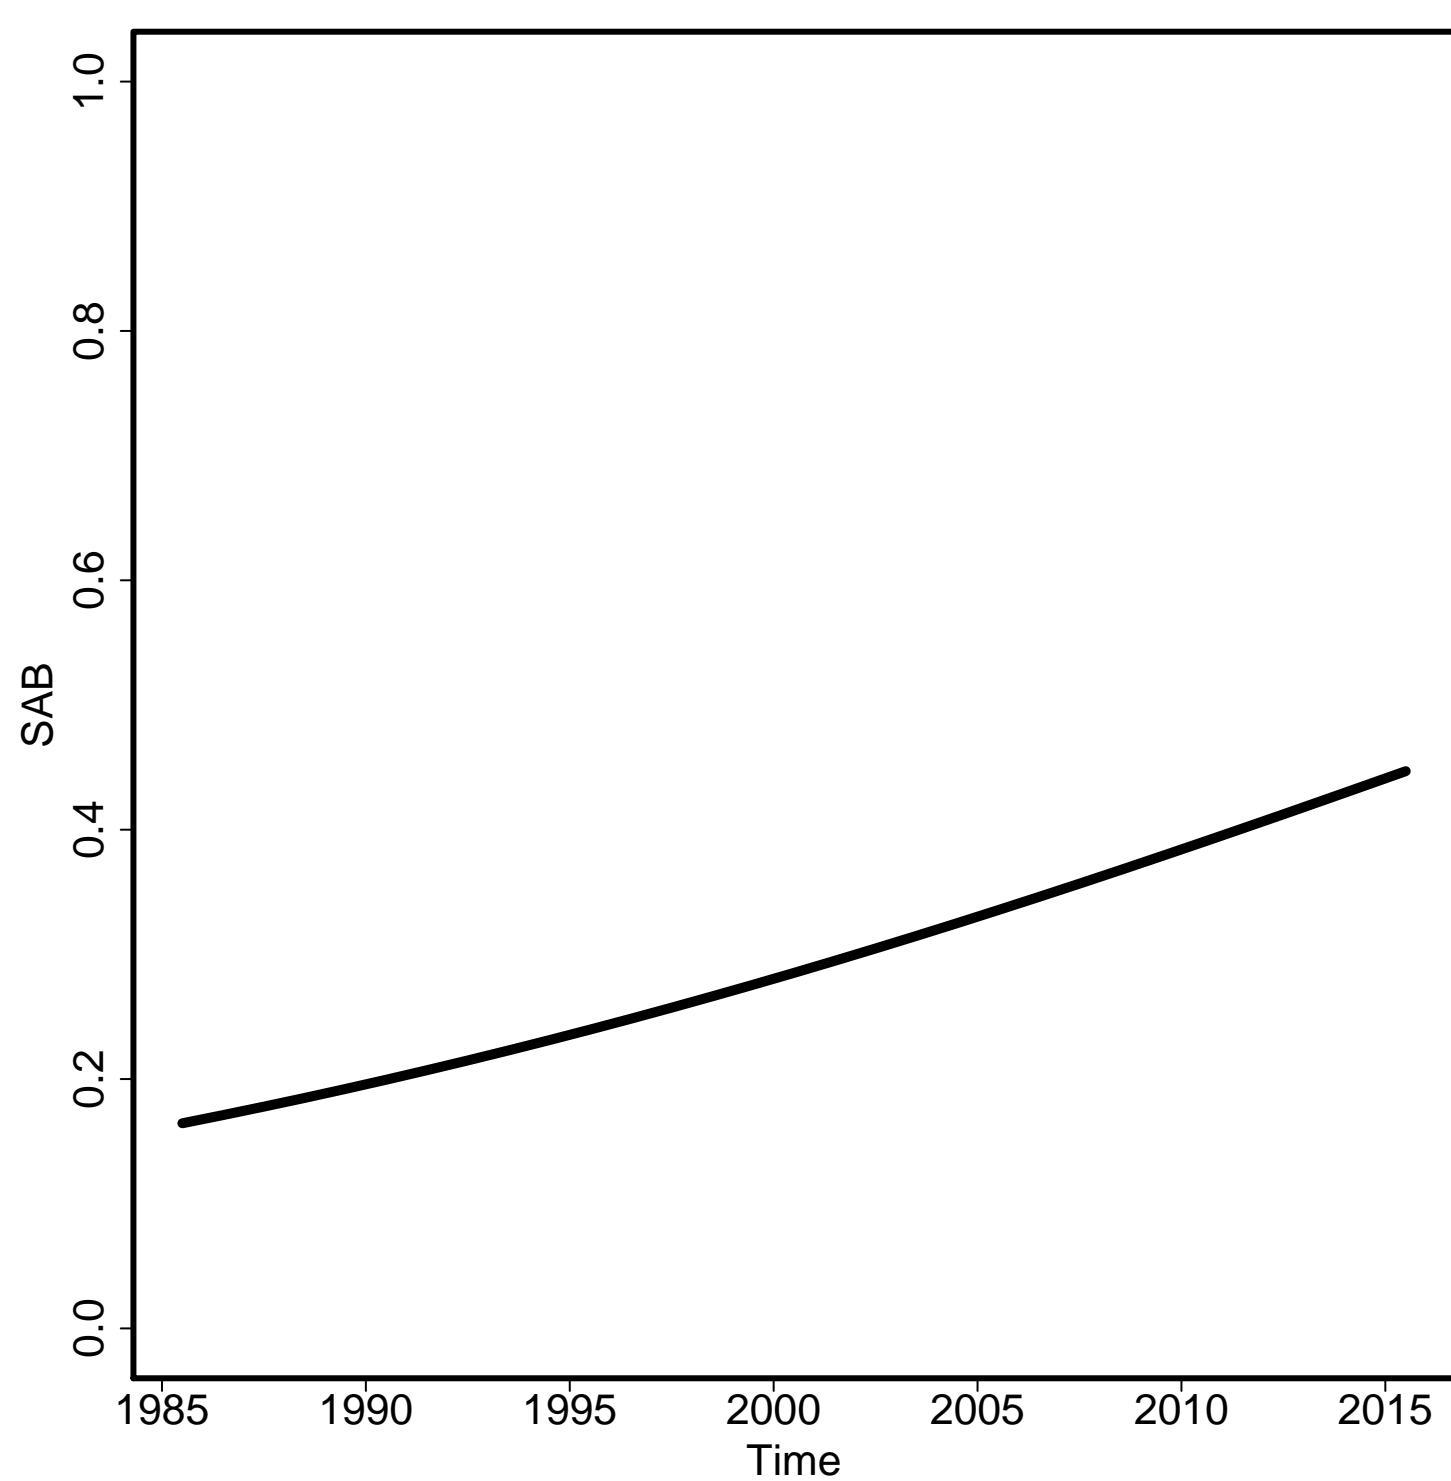

Envelope/Births

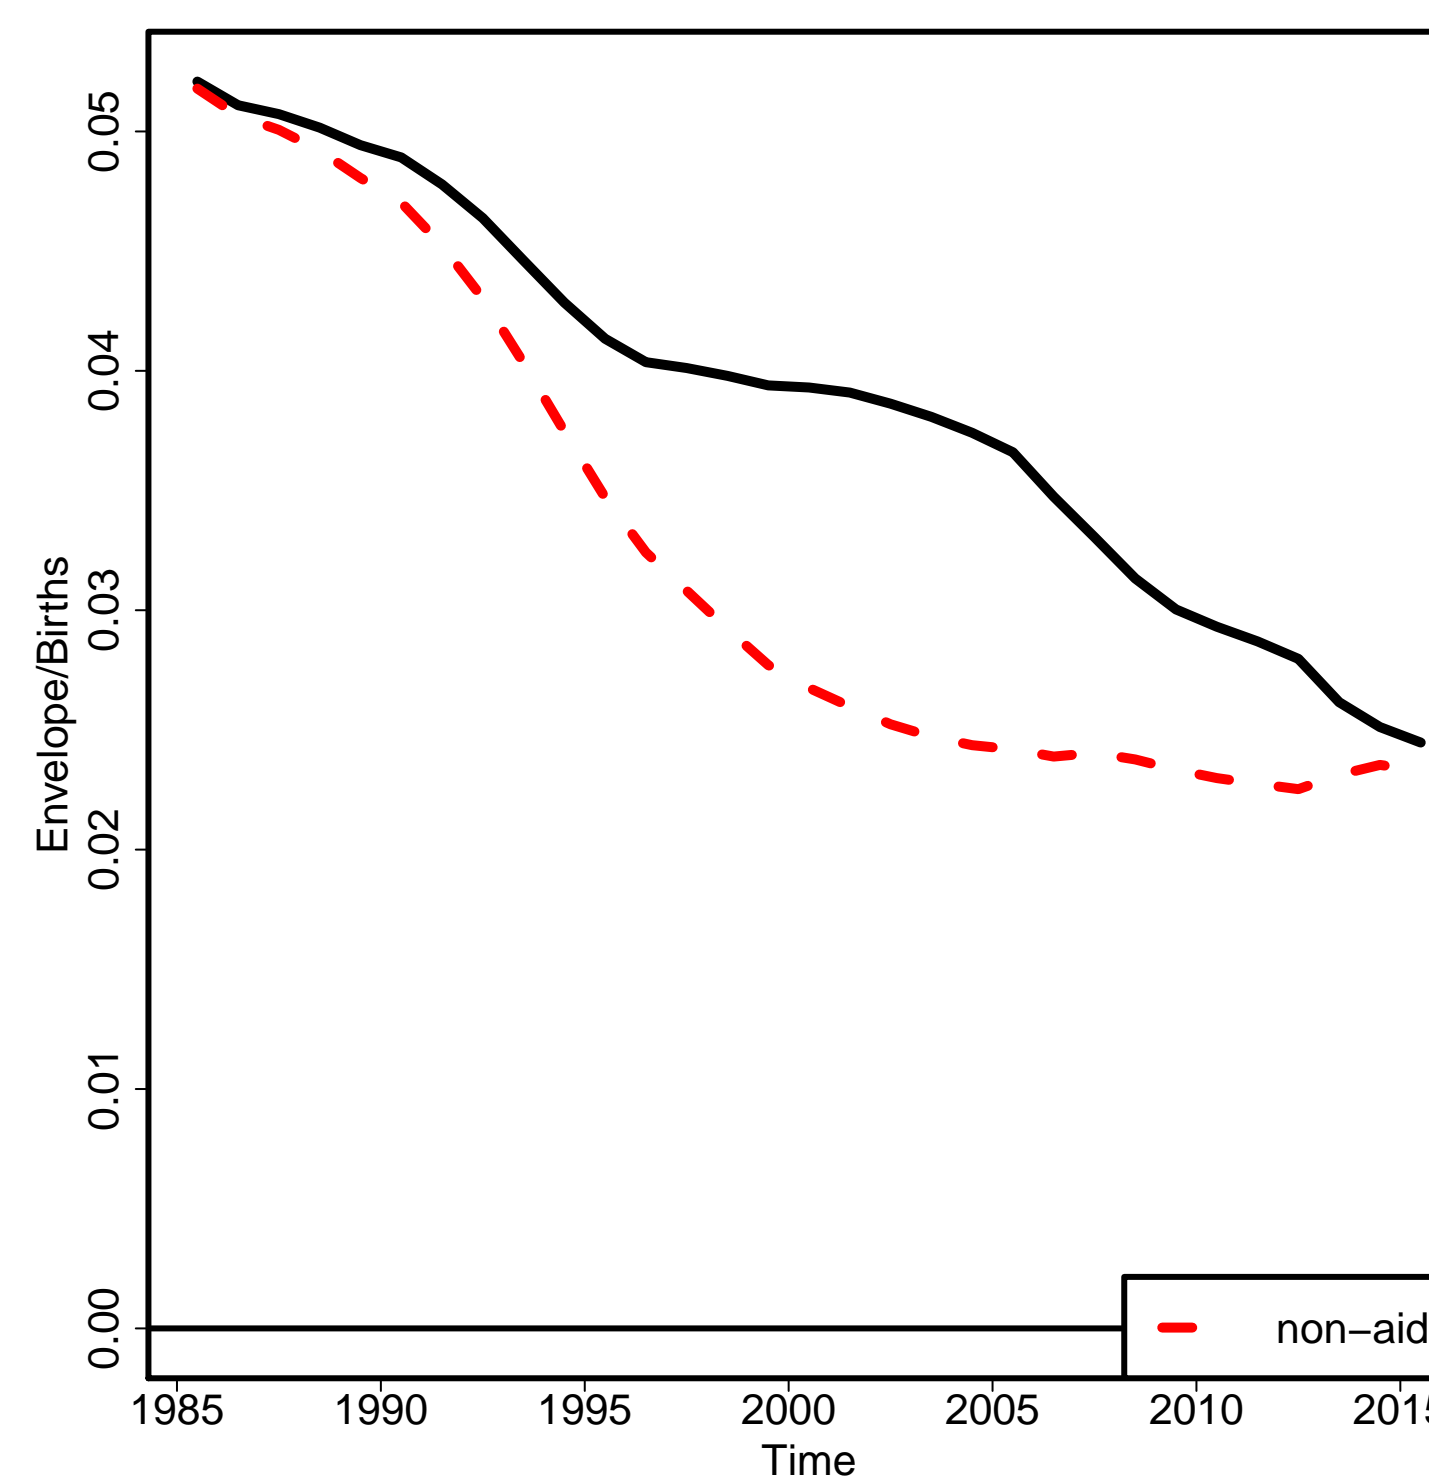

Non-aids MMR

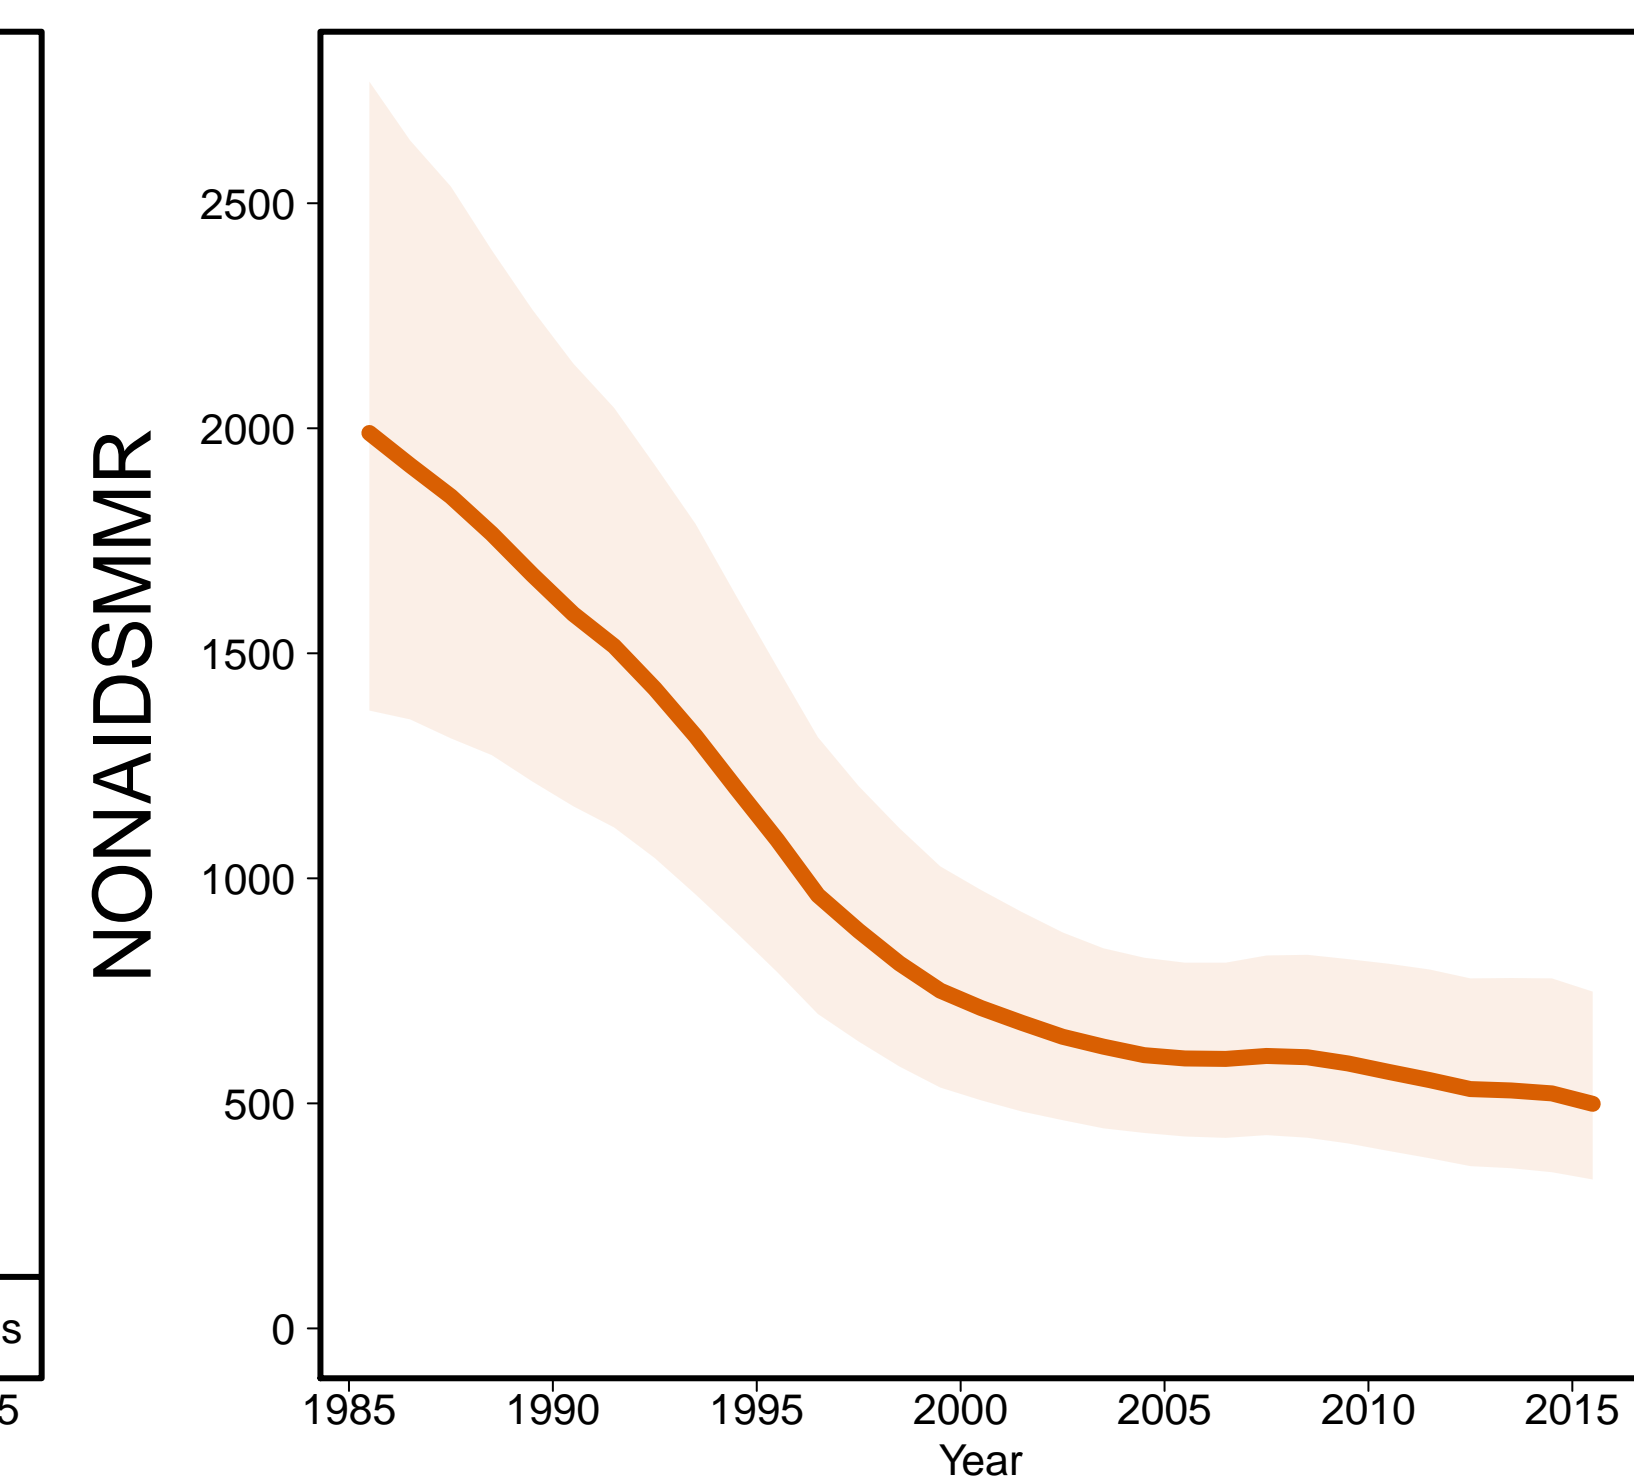

Aids MMR

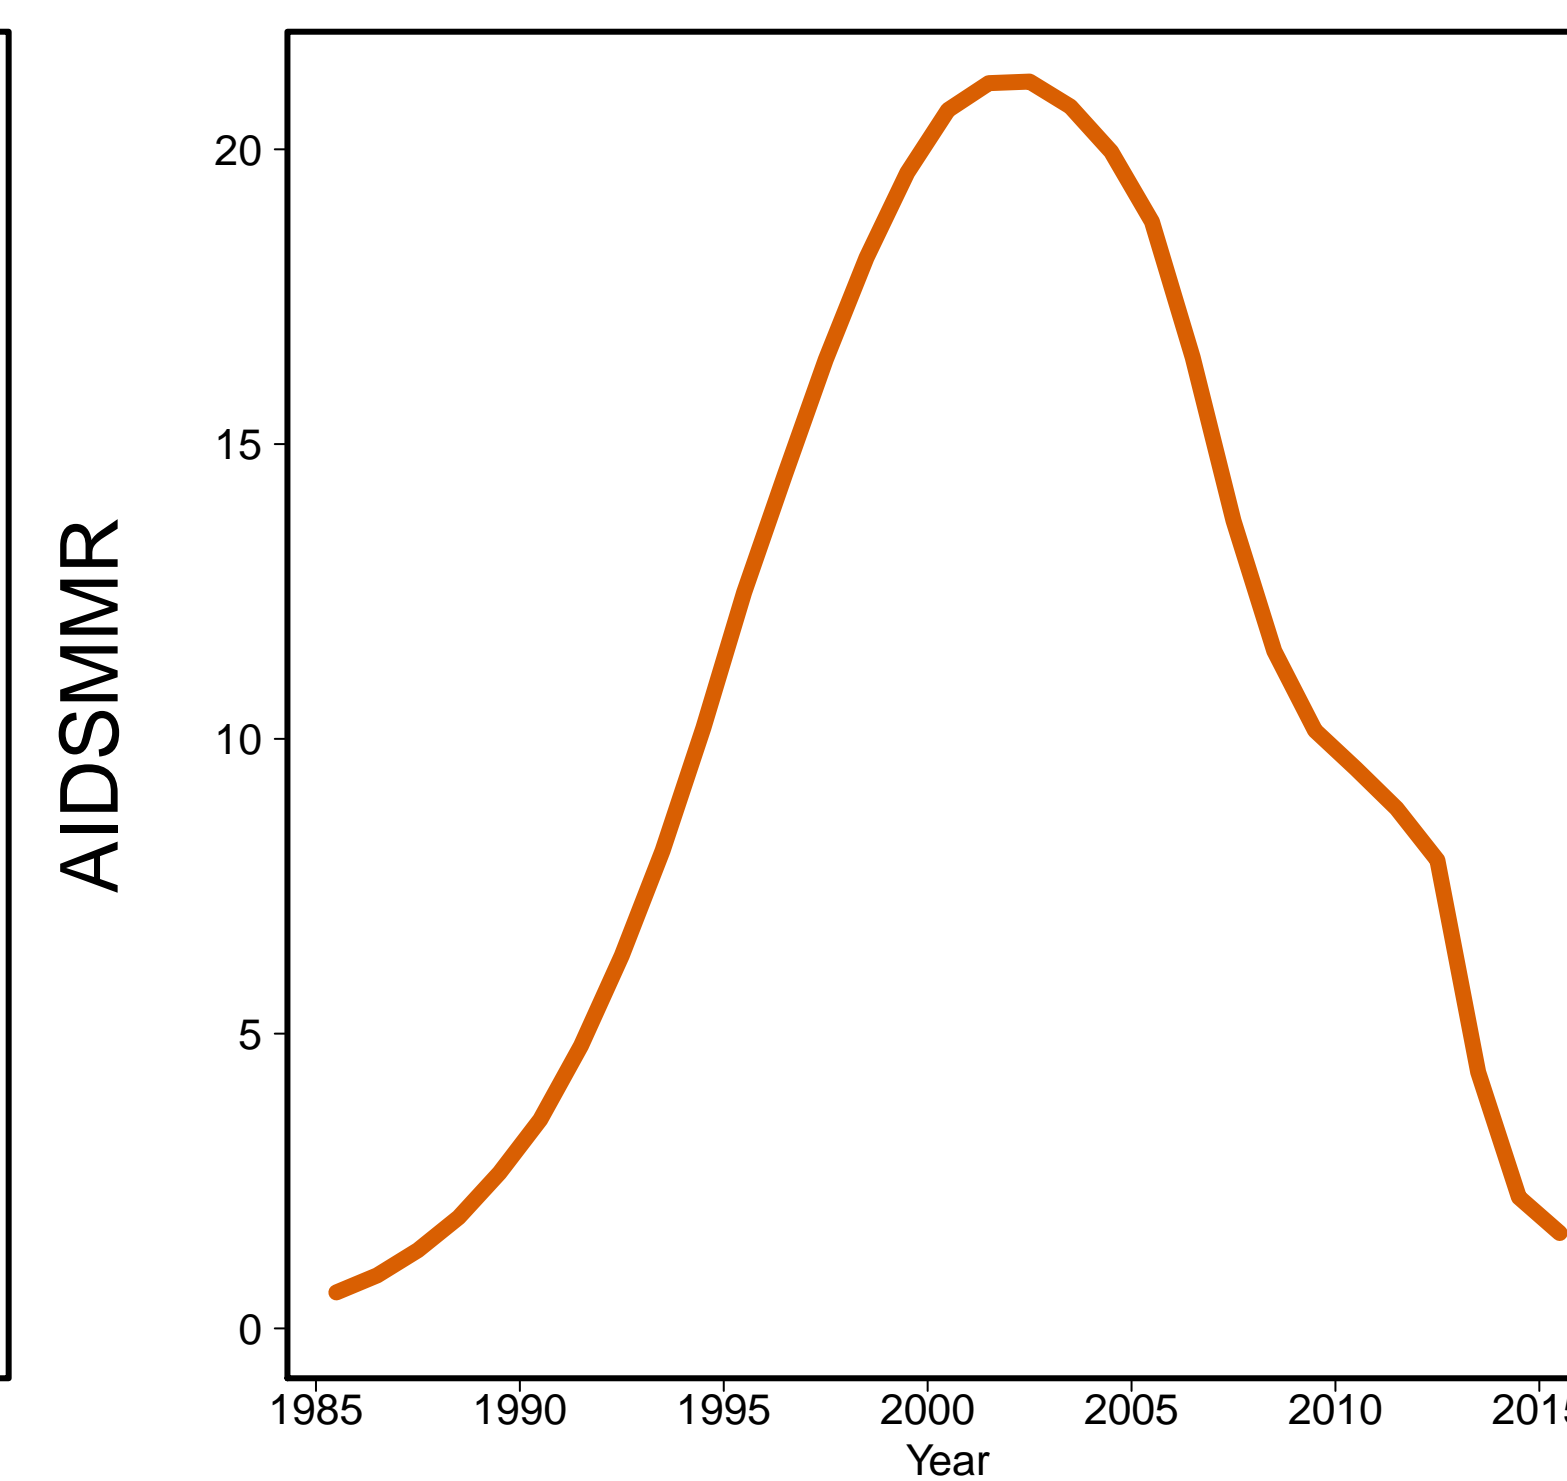

Estonia [EST]  
(Developed regions)

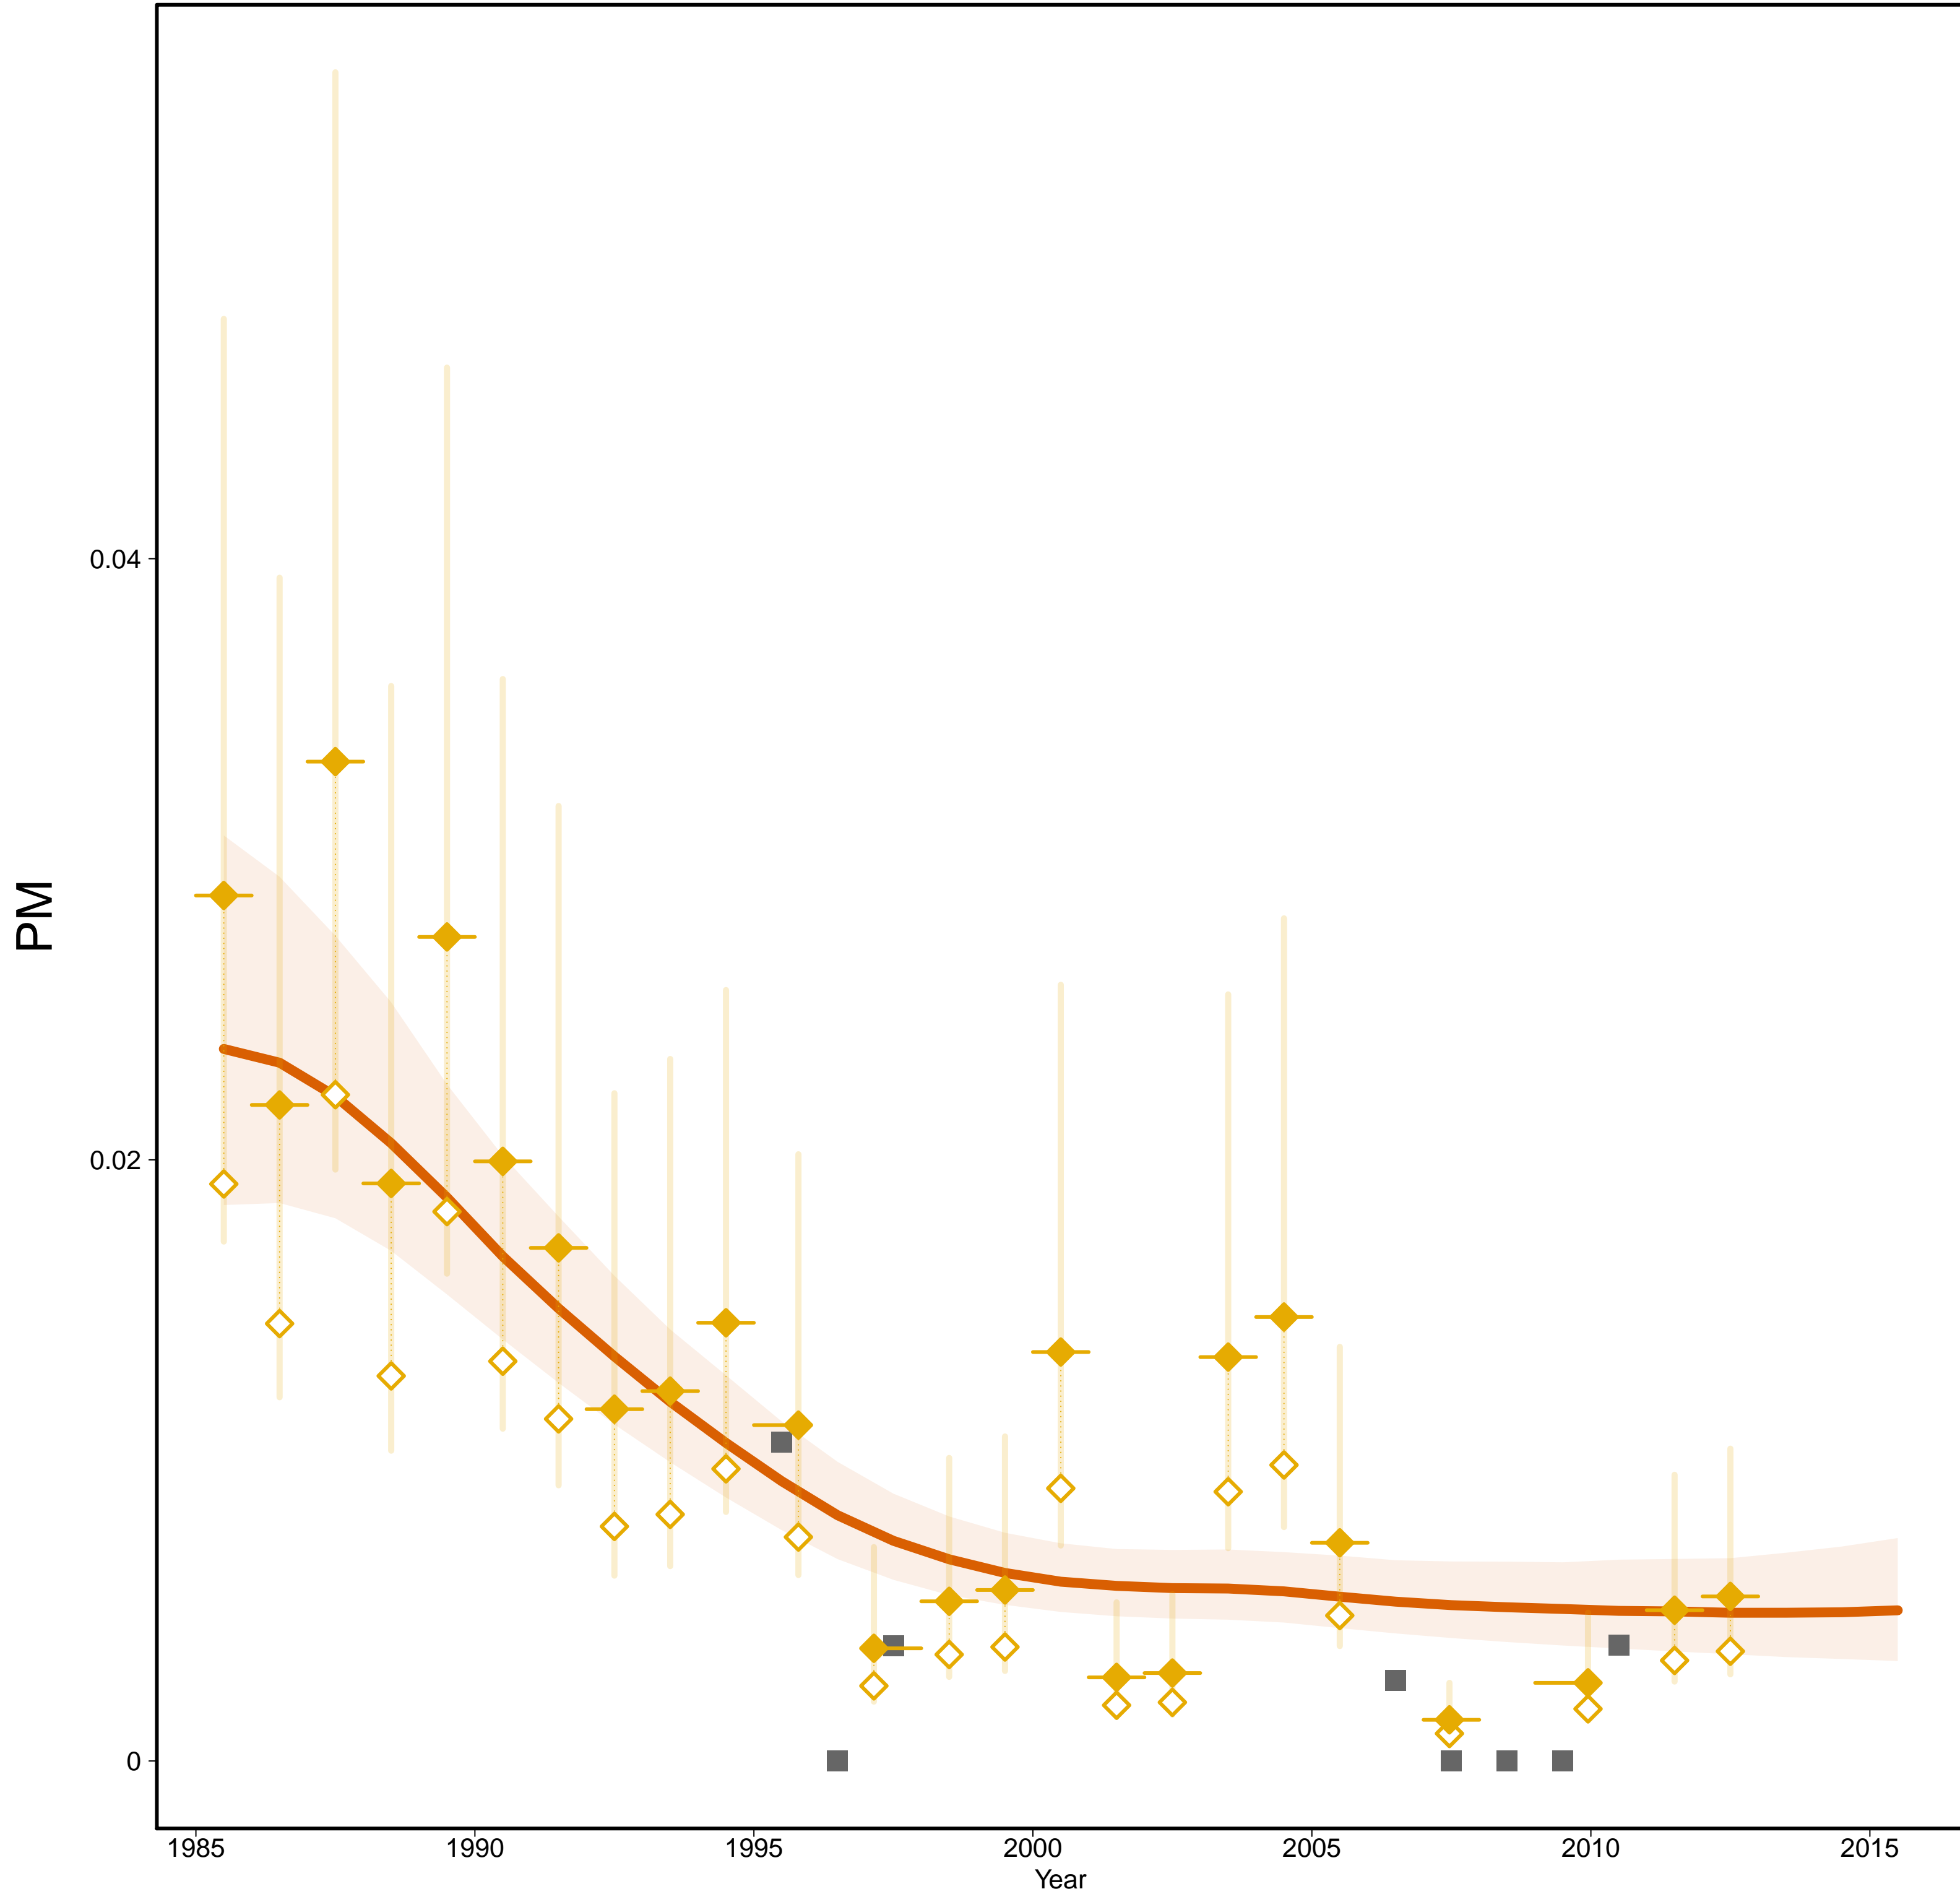

Estonia [EST]  
(Developed regions)

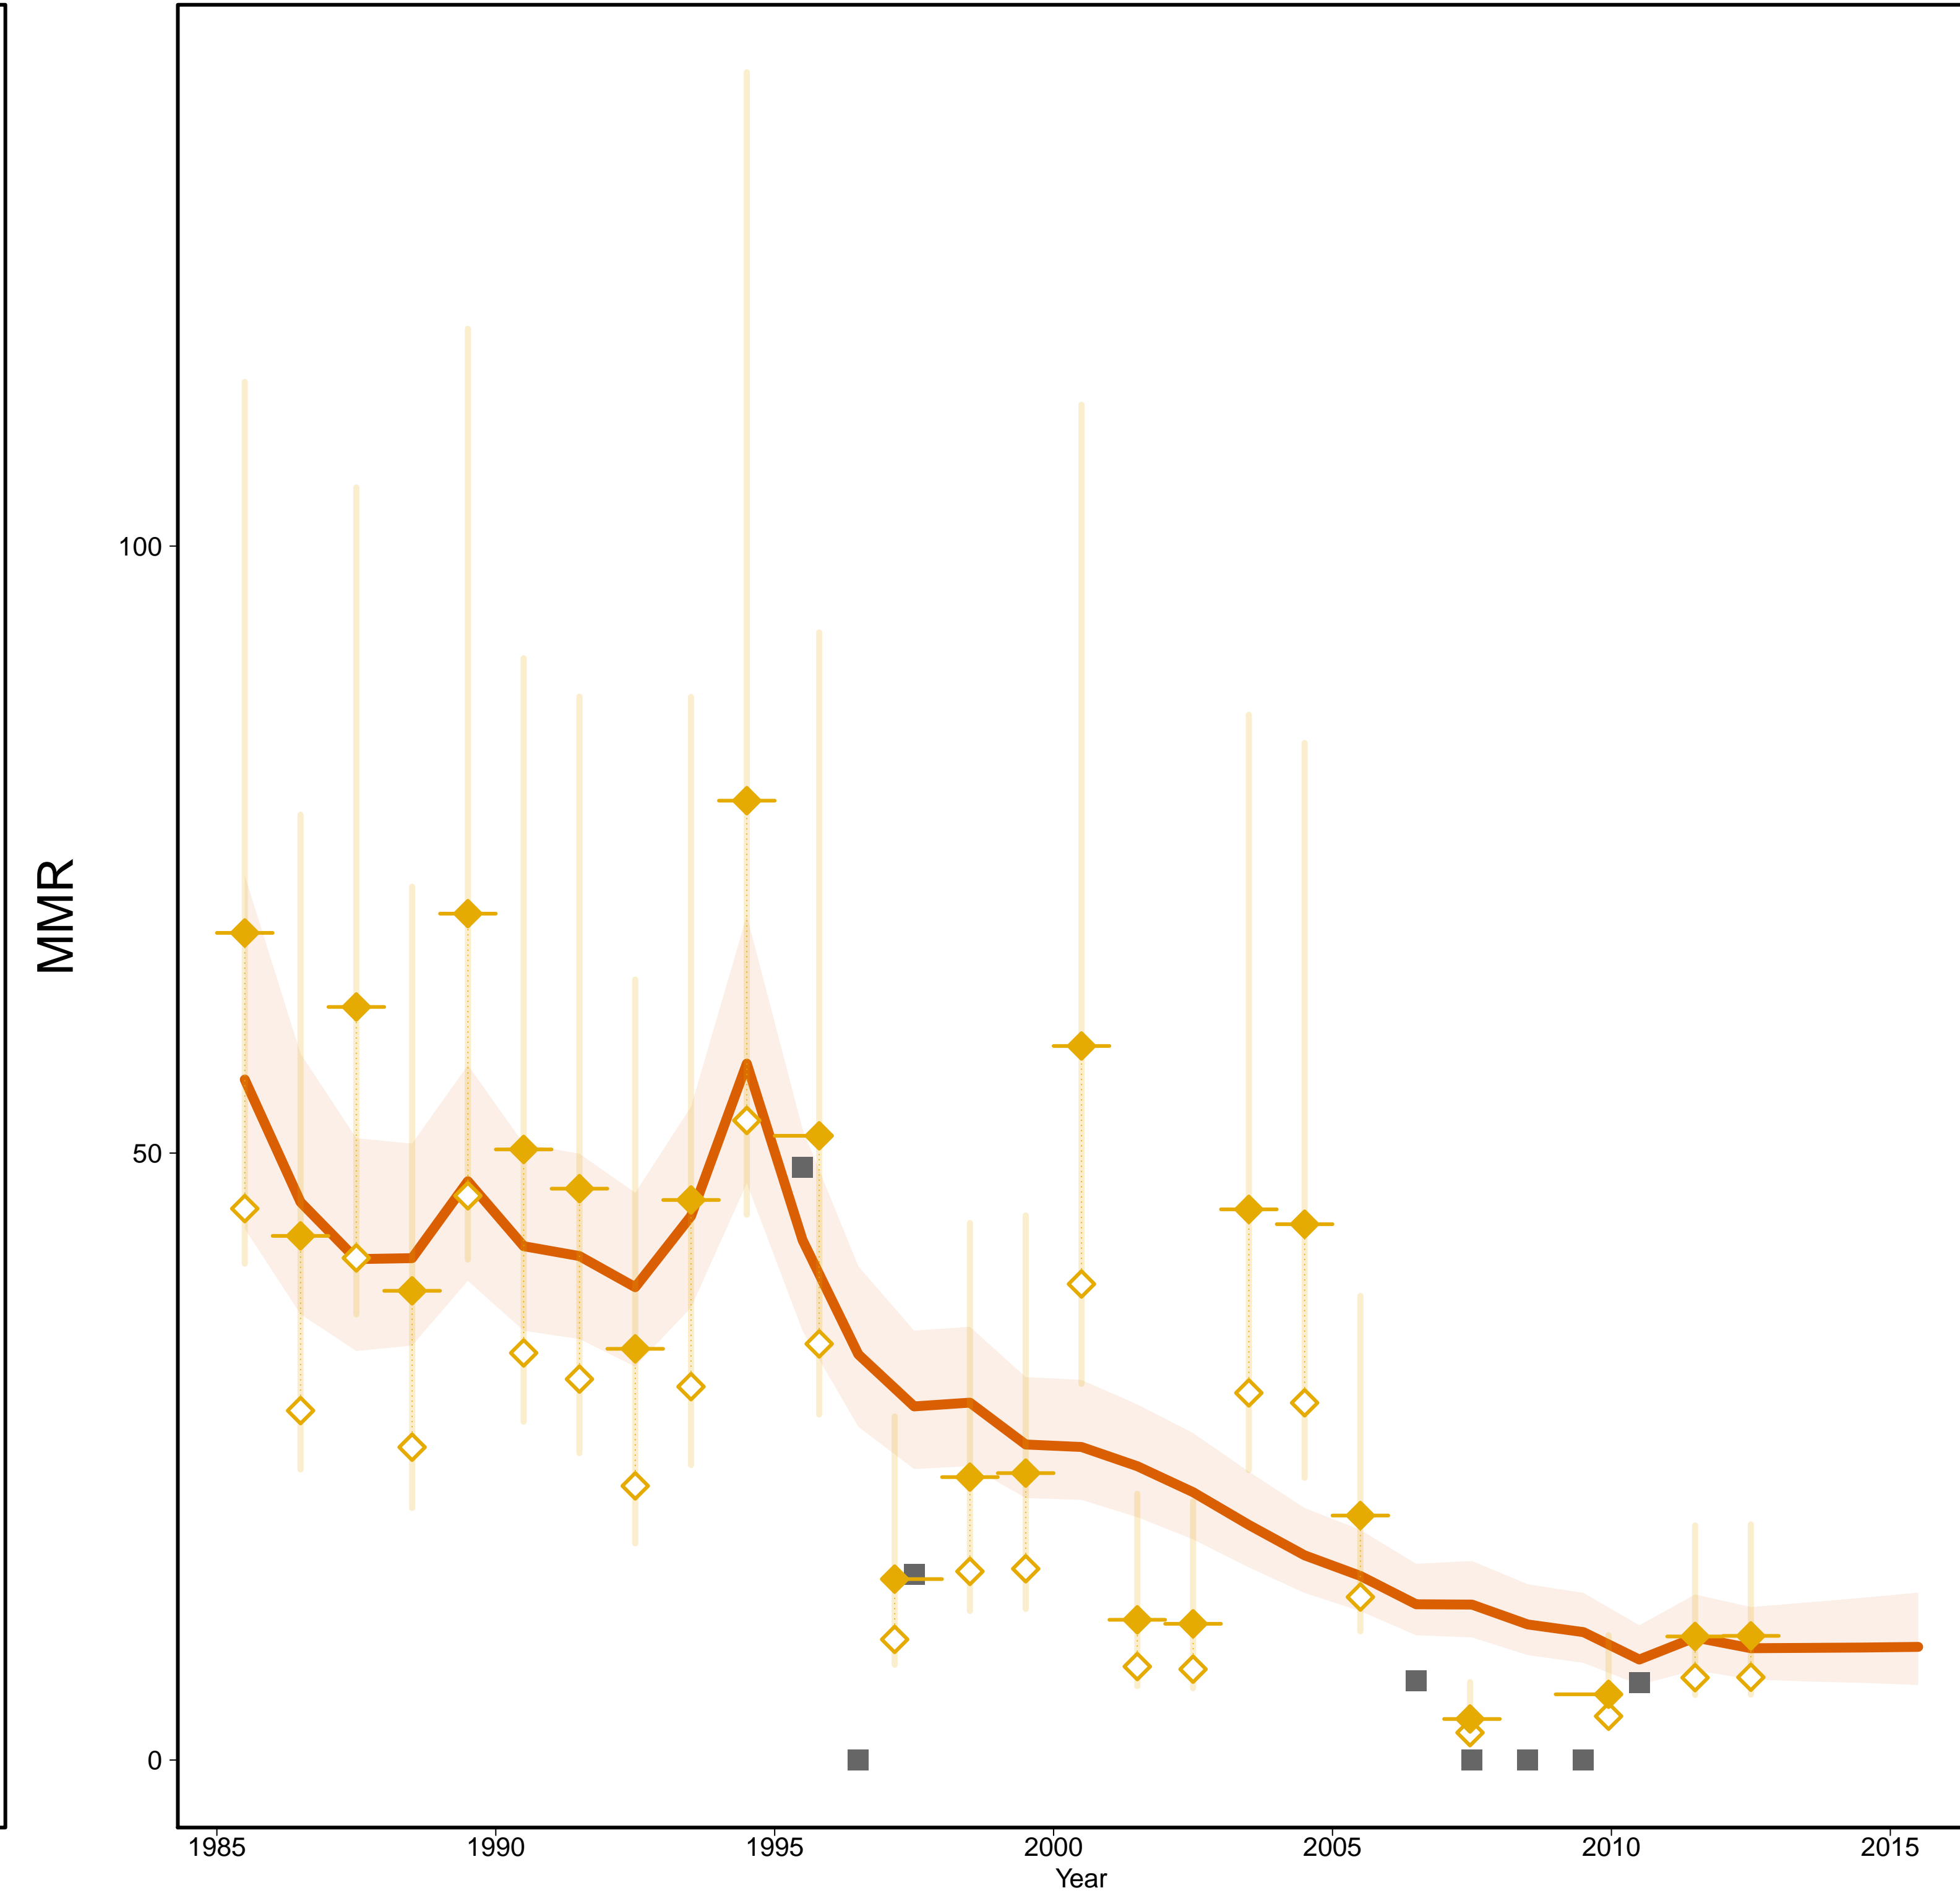

- Estimates —
- MMR Database 2015 —
- ◇ Observed Data
- ◆ Adjusted Data
- Data type —
- ◆ VR
- Reported VR before recalc.  
(related to 0 obs. mat. death)

Gross Domestic Product

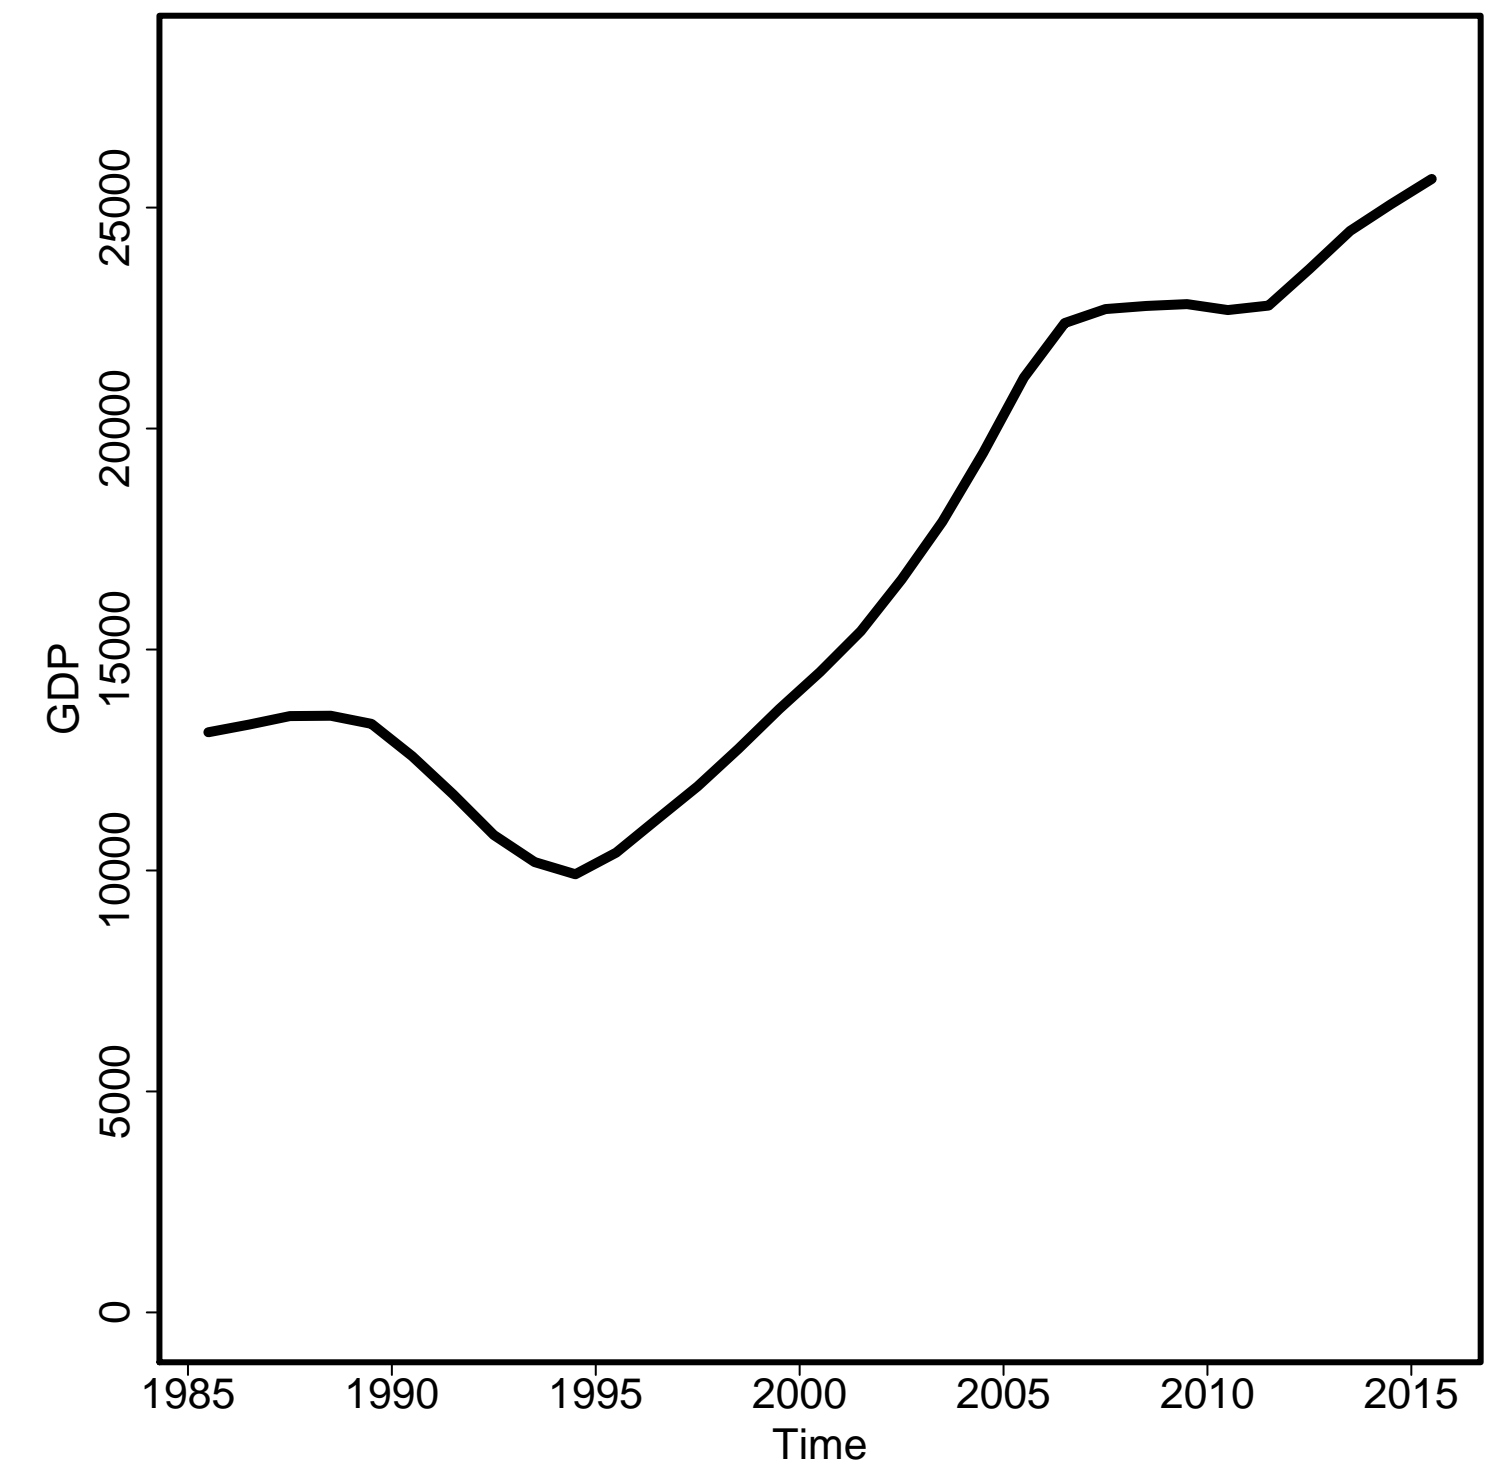

General Fertility Rate

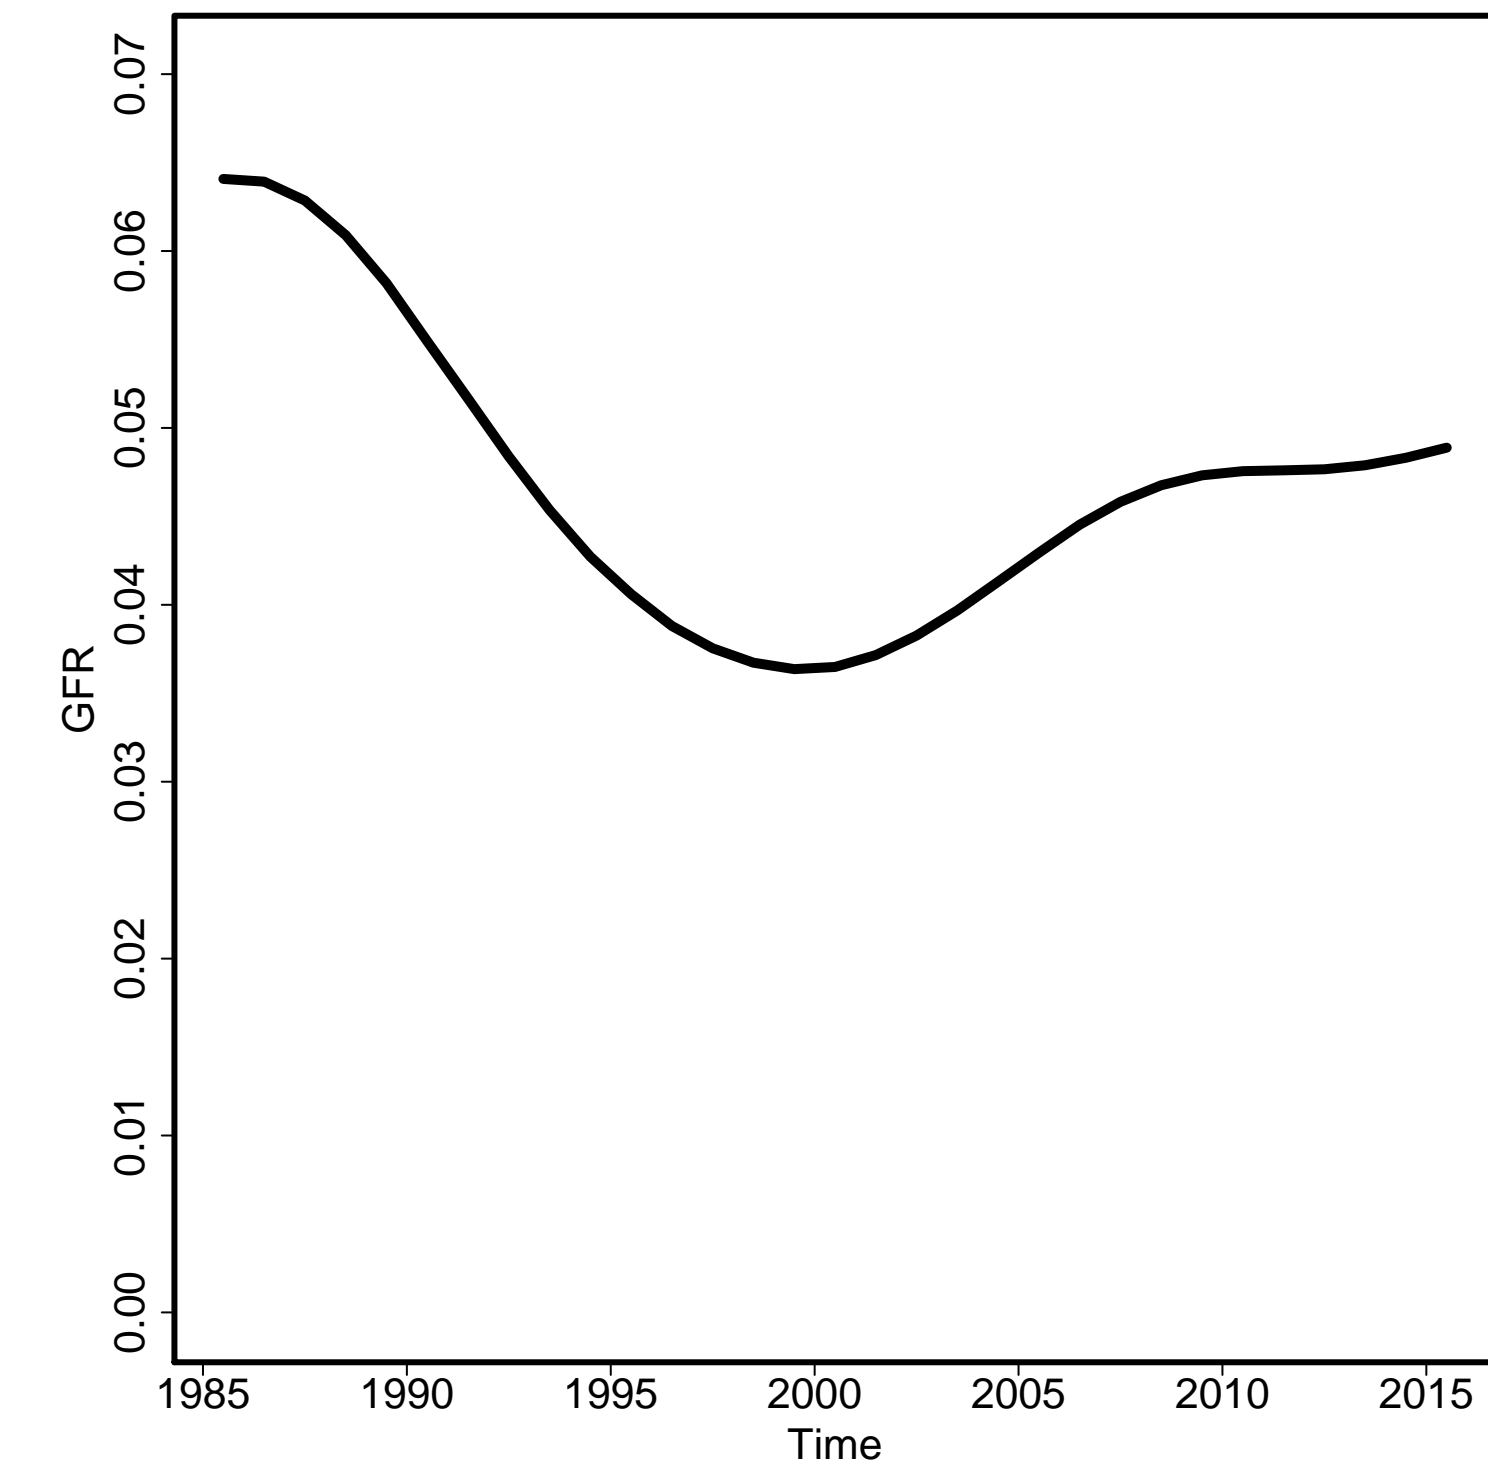

Skilled Attendance to Birth

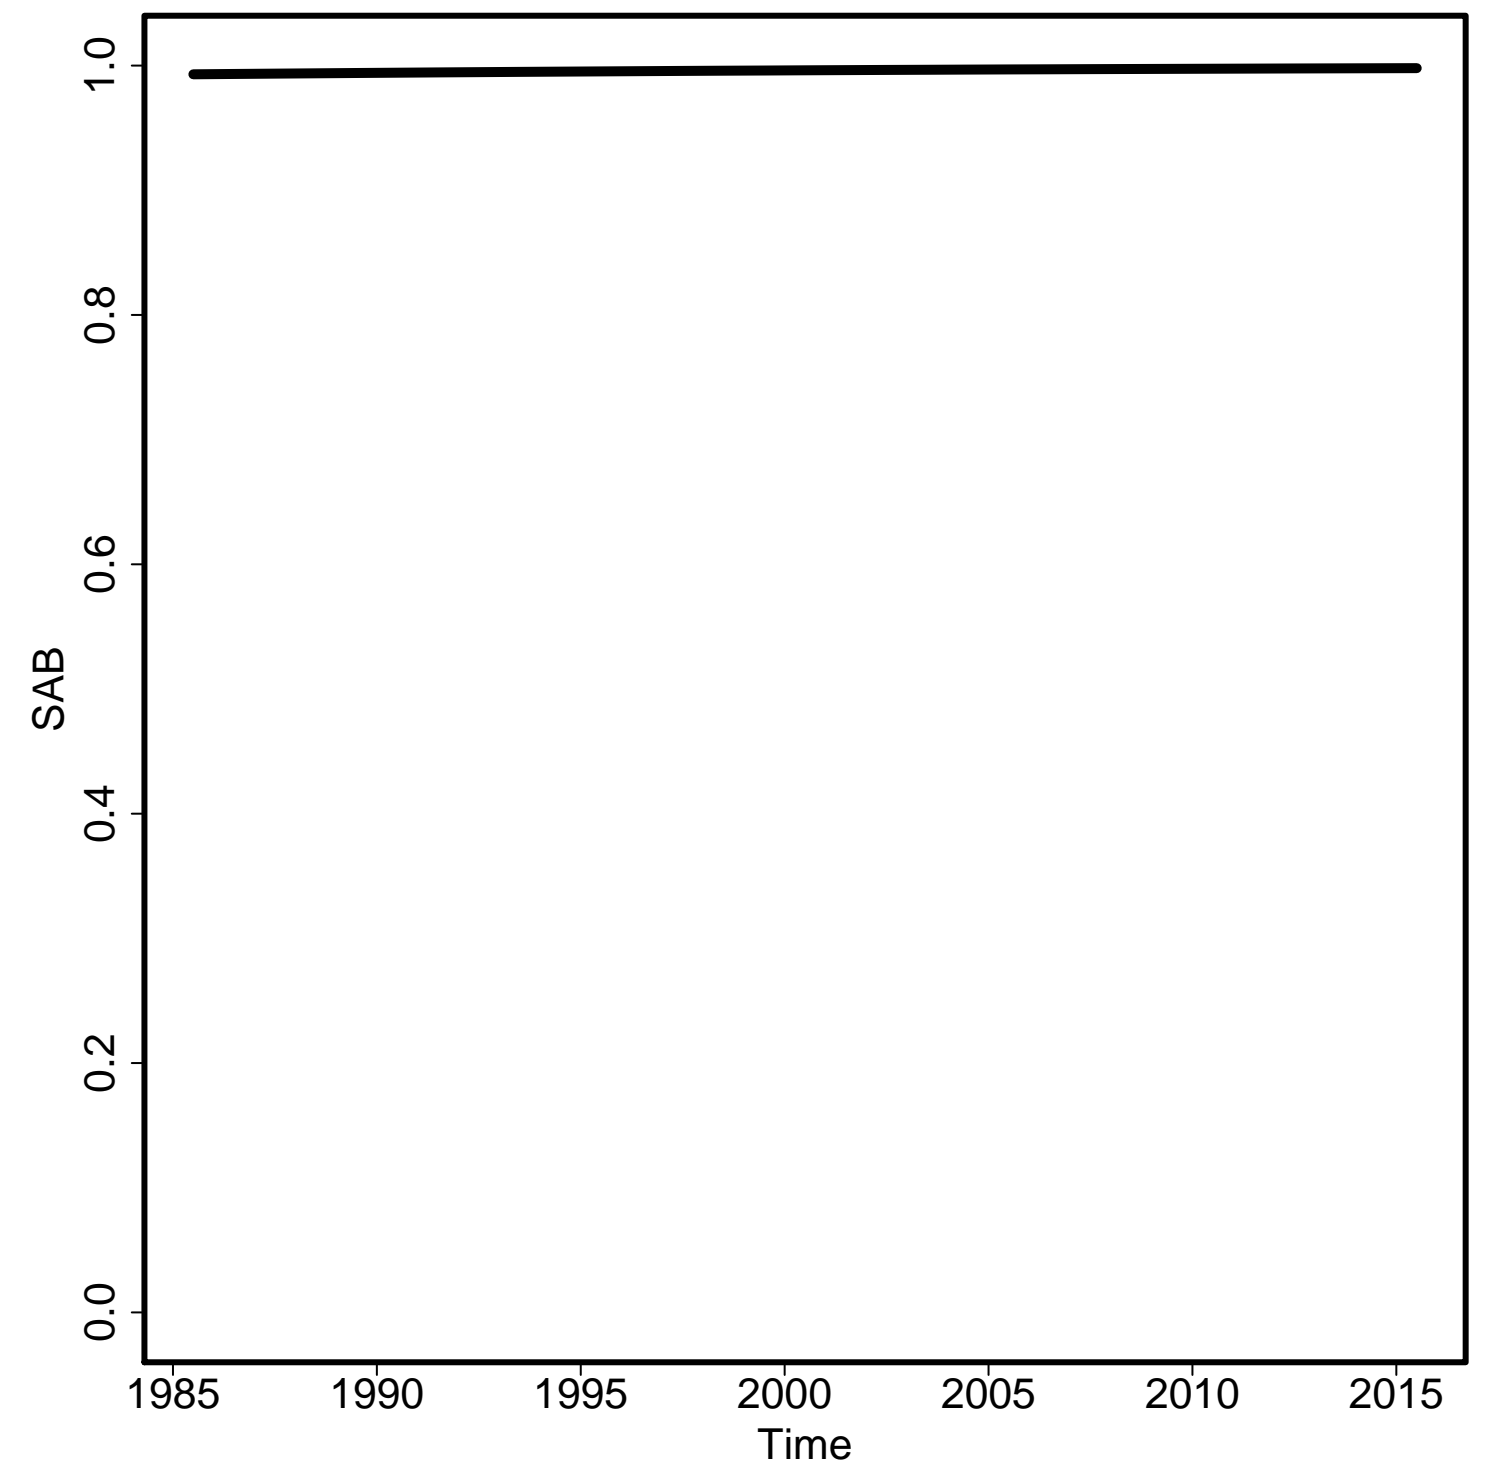

Envelope/Births

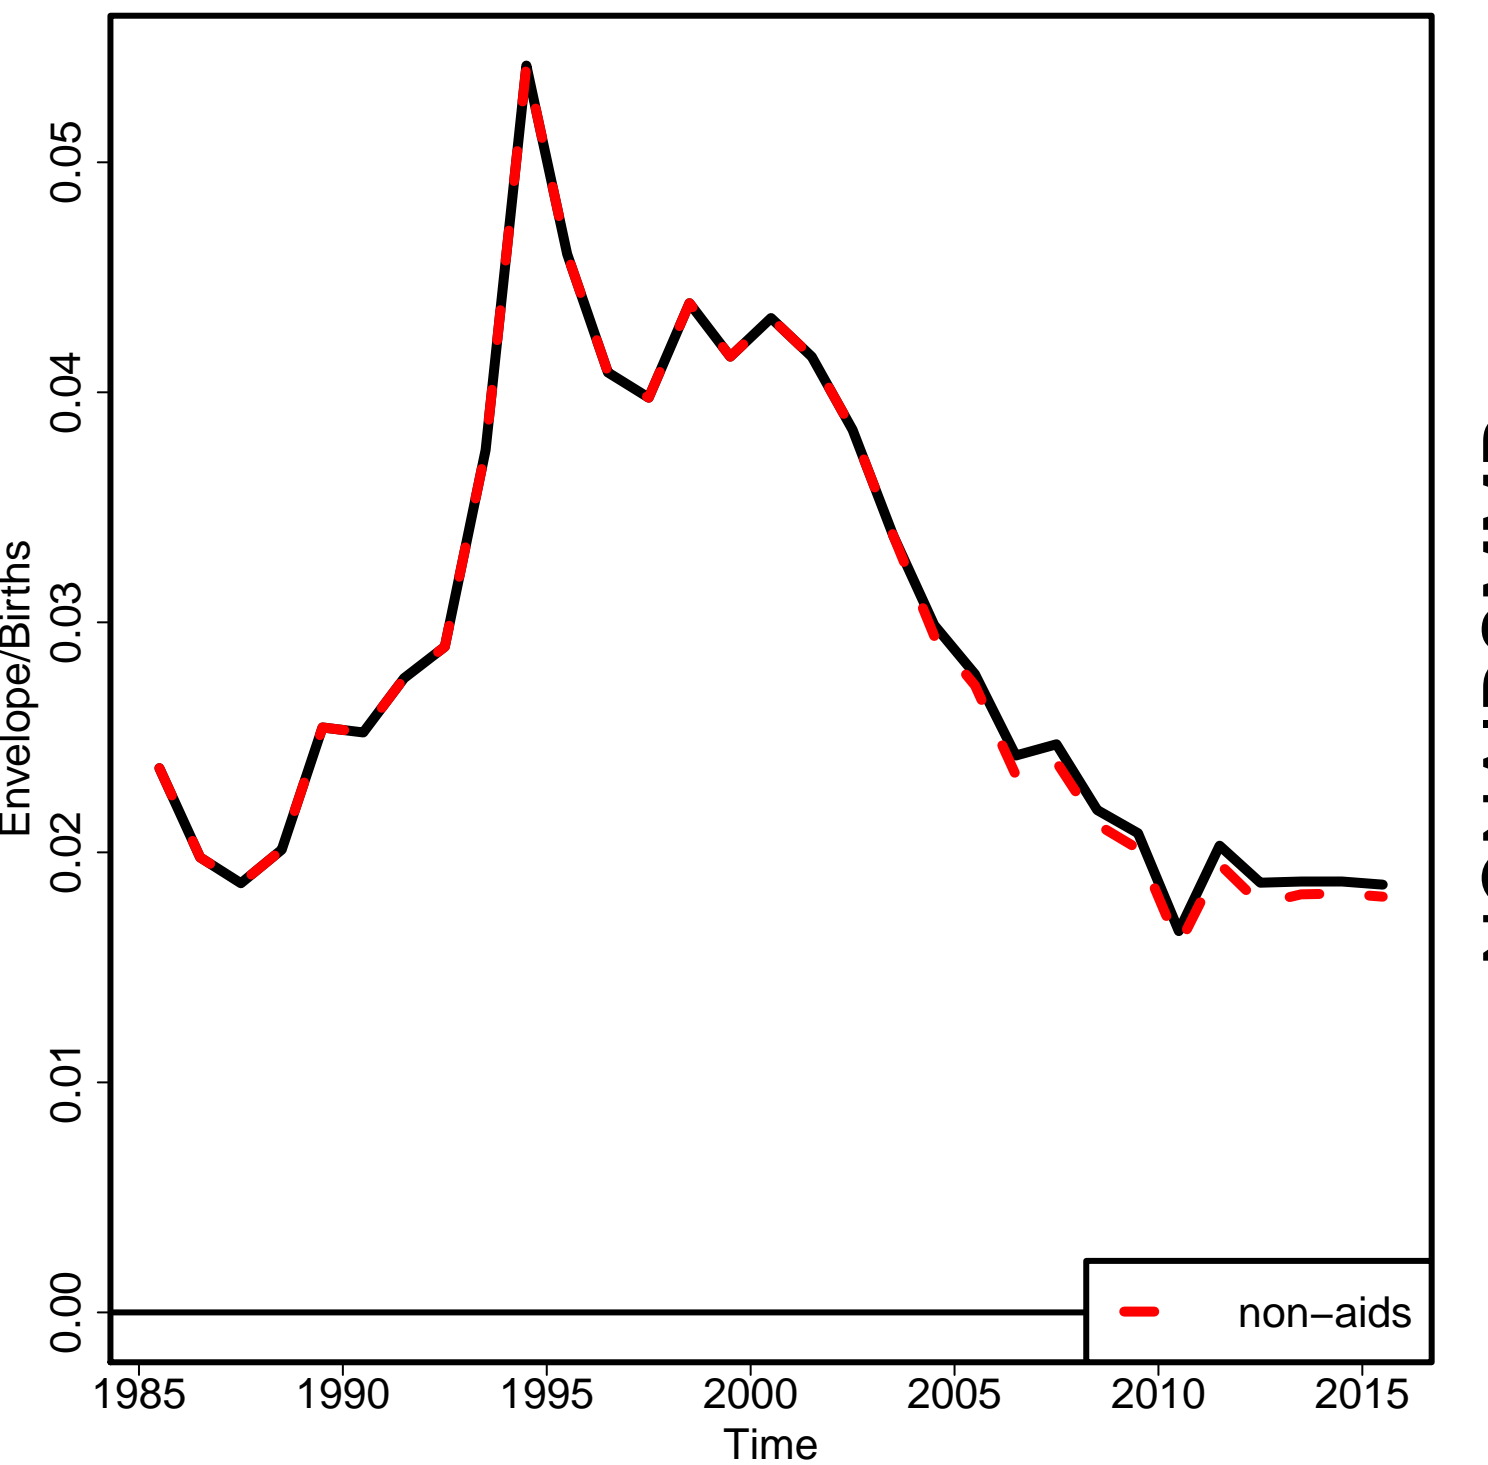

Non-aids MMR

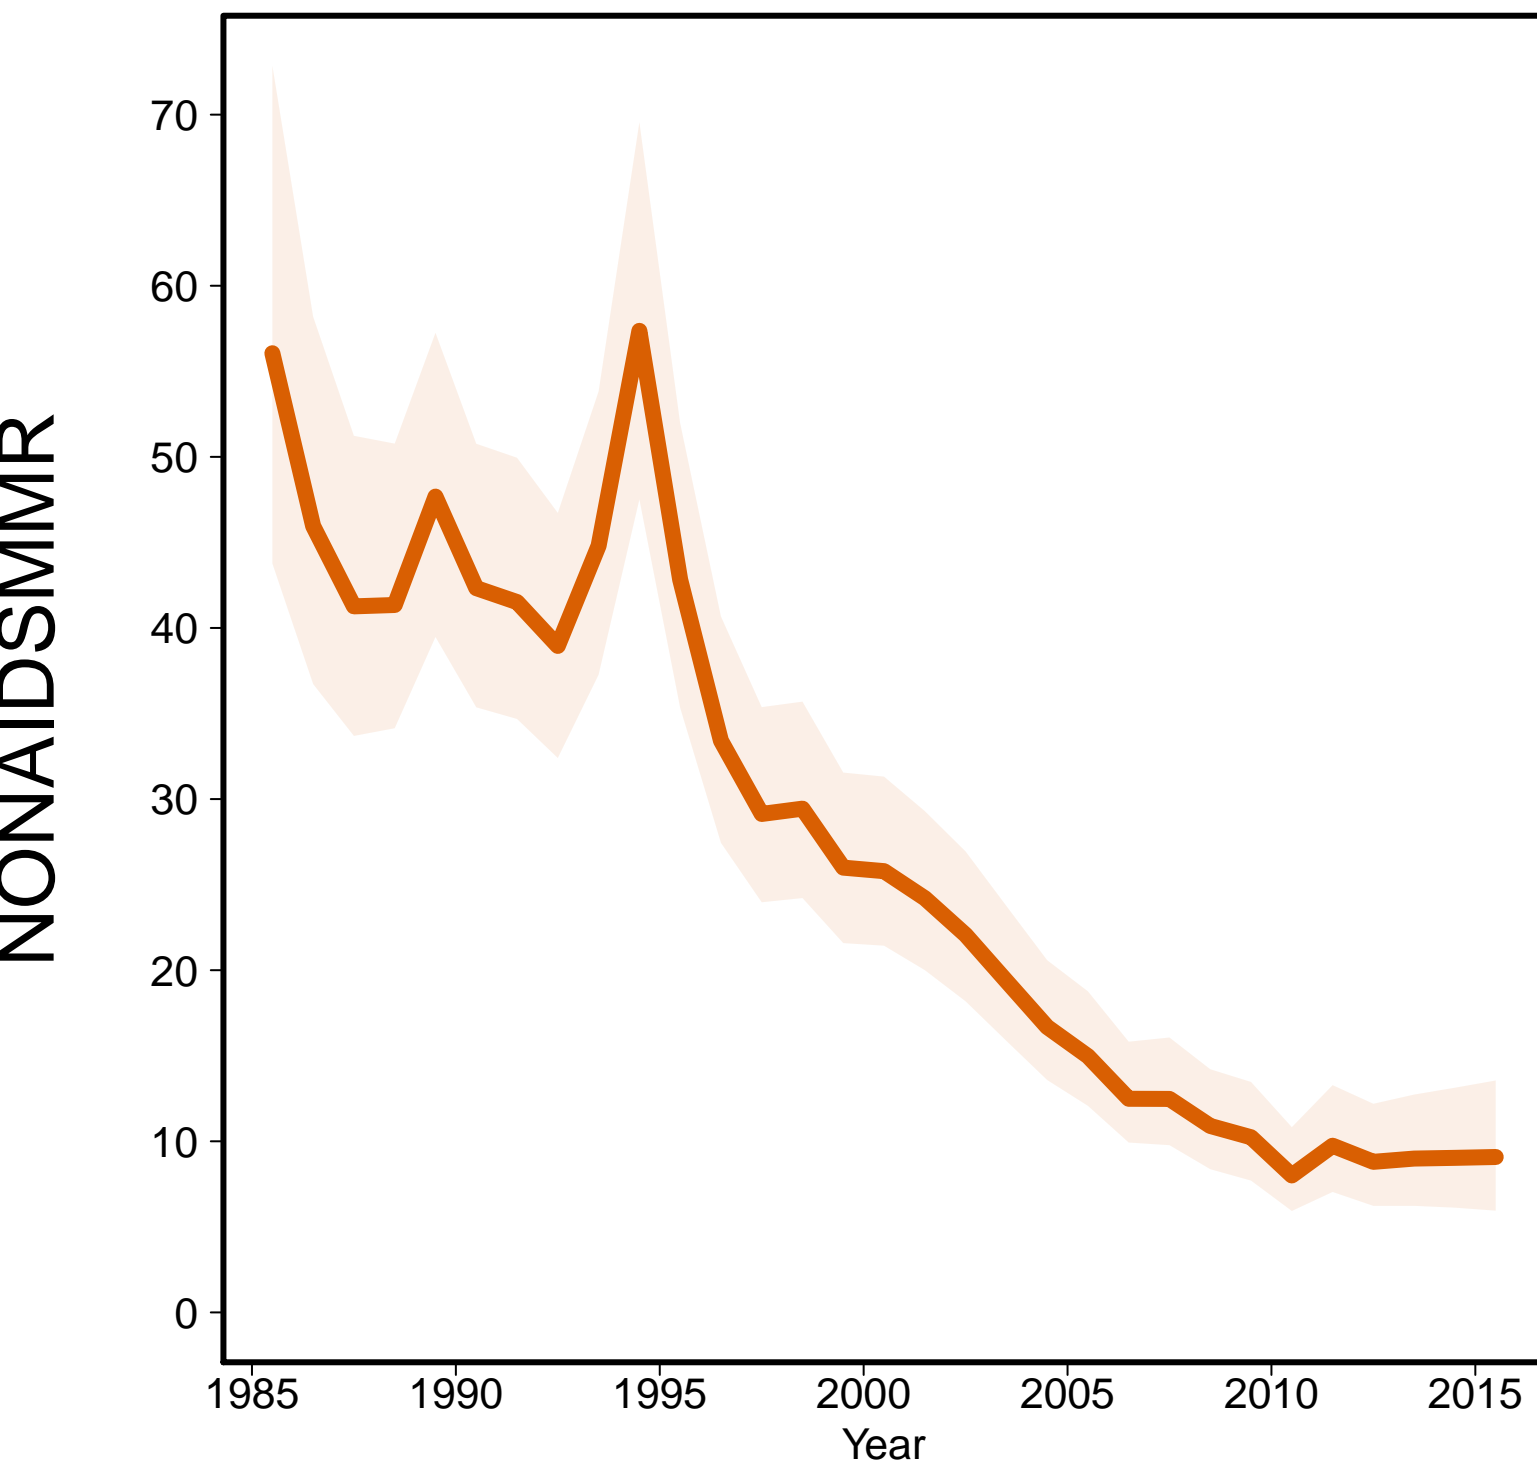

Aids MMR

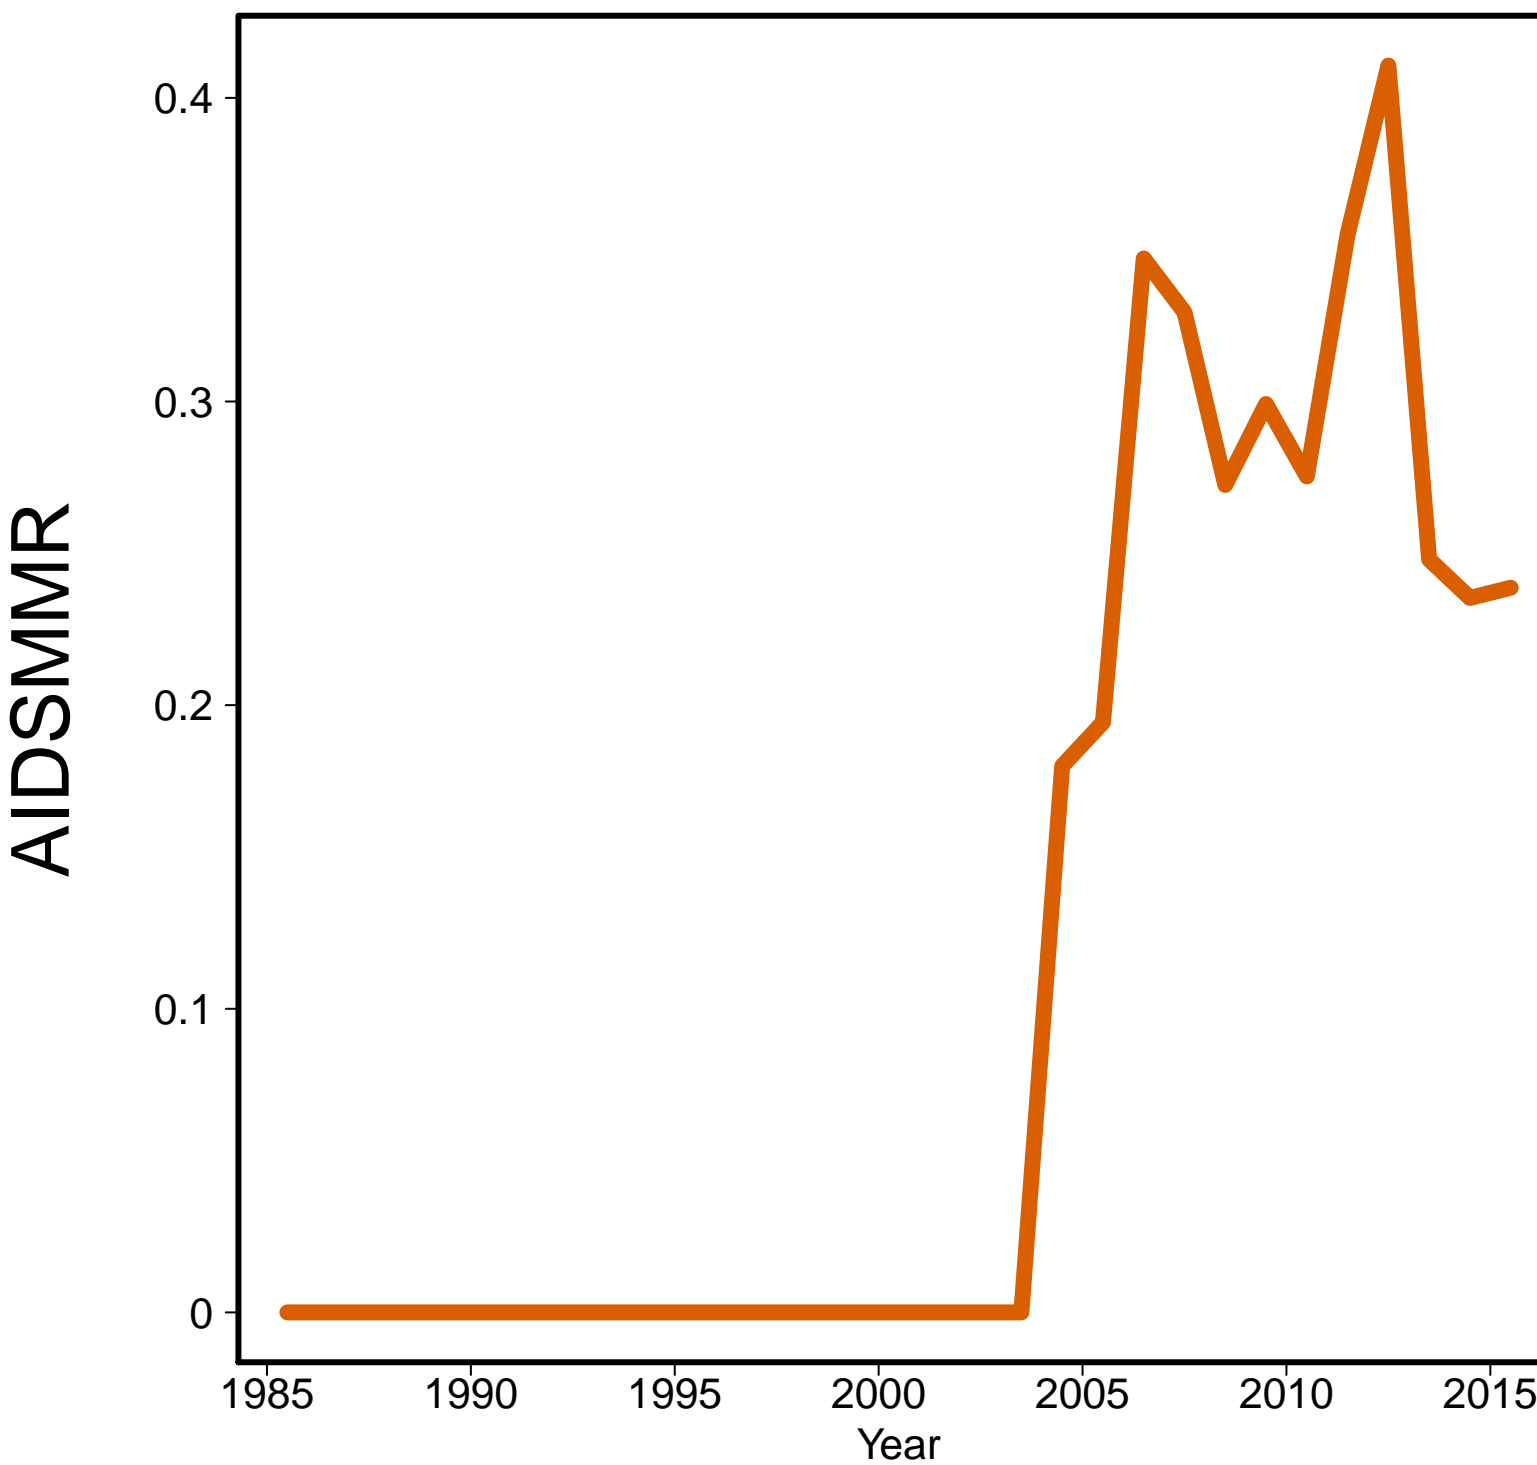

Ethiopia [ETH]  
(Eastern Africa)

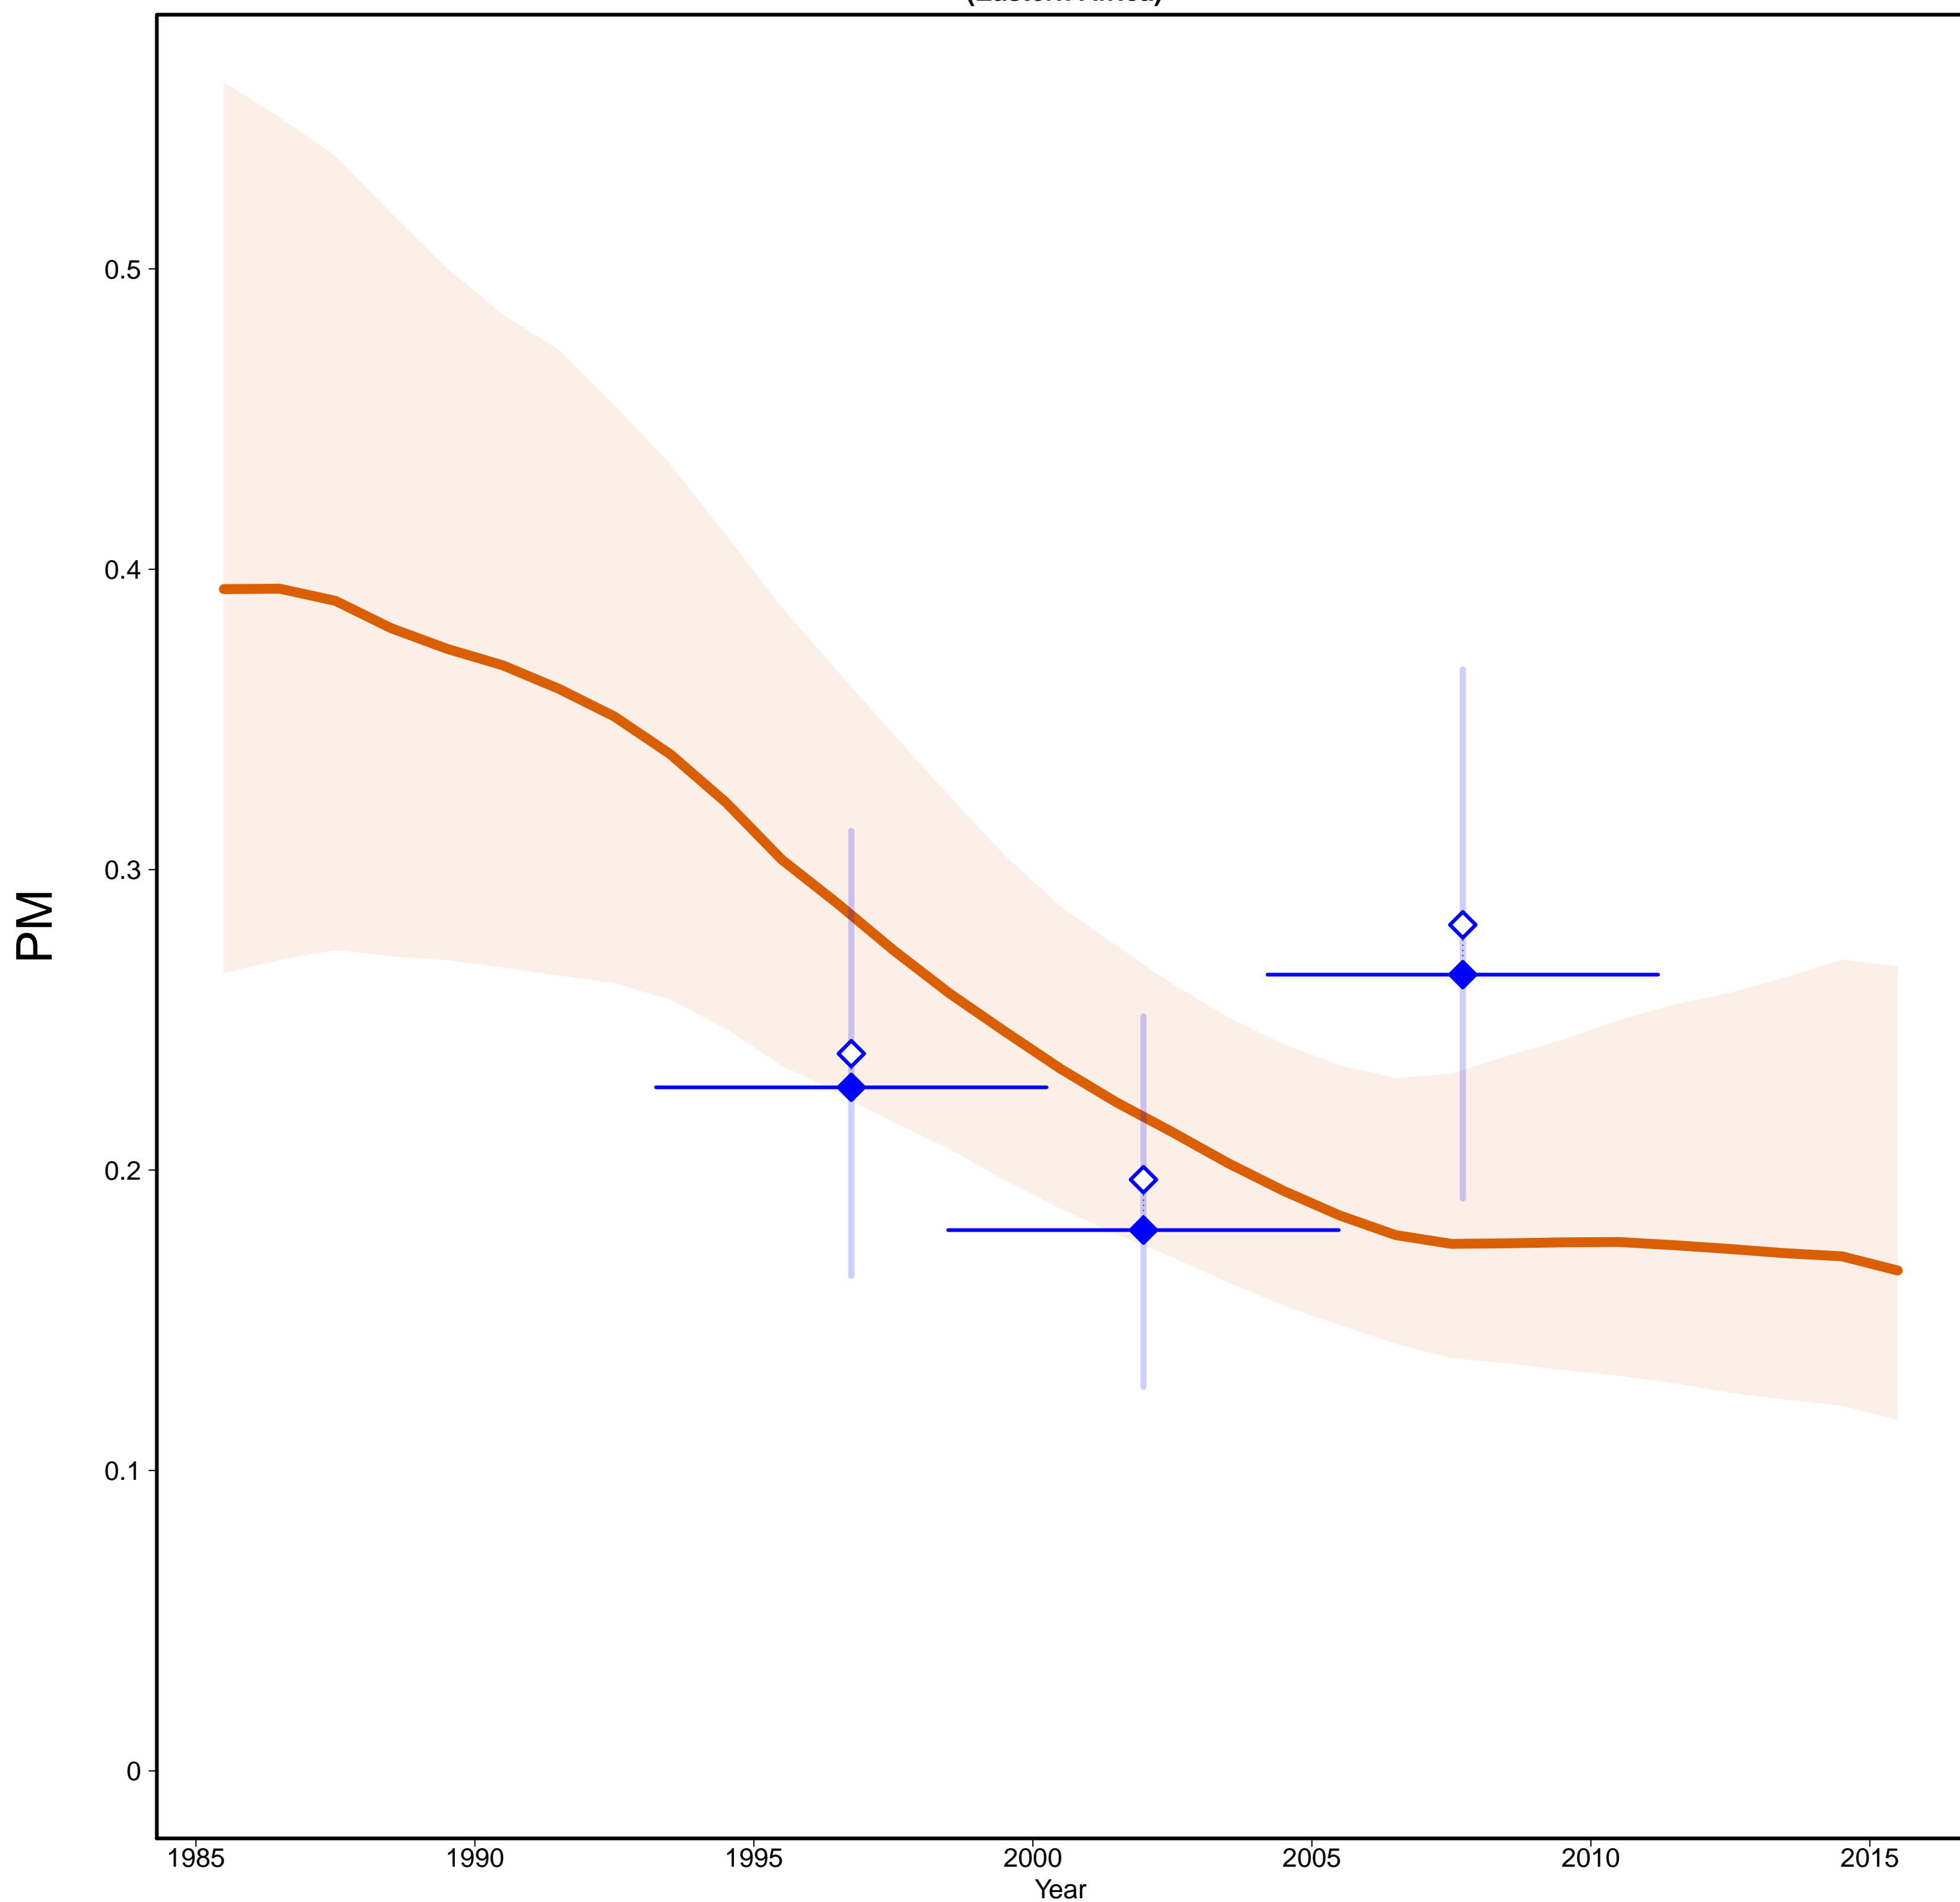

Ethiopia [ETH]  
(Eastern Africa)

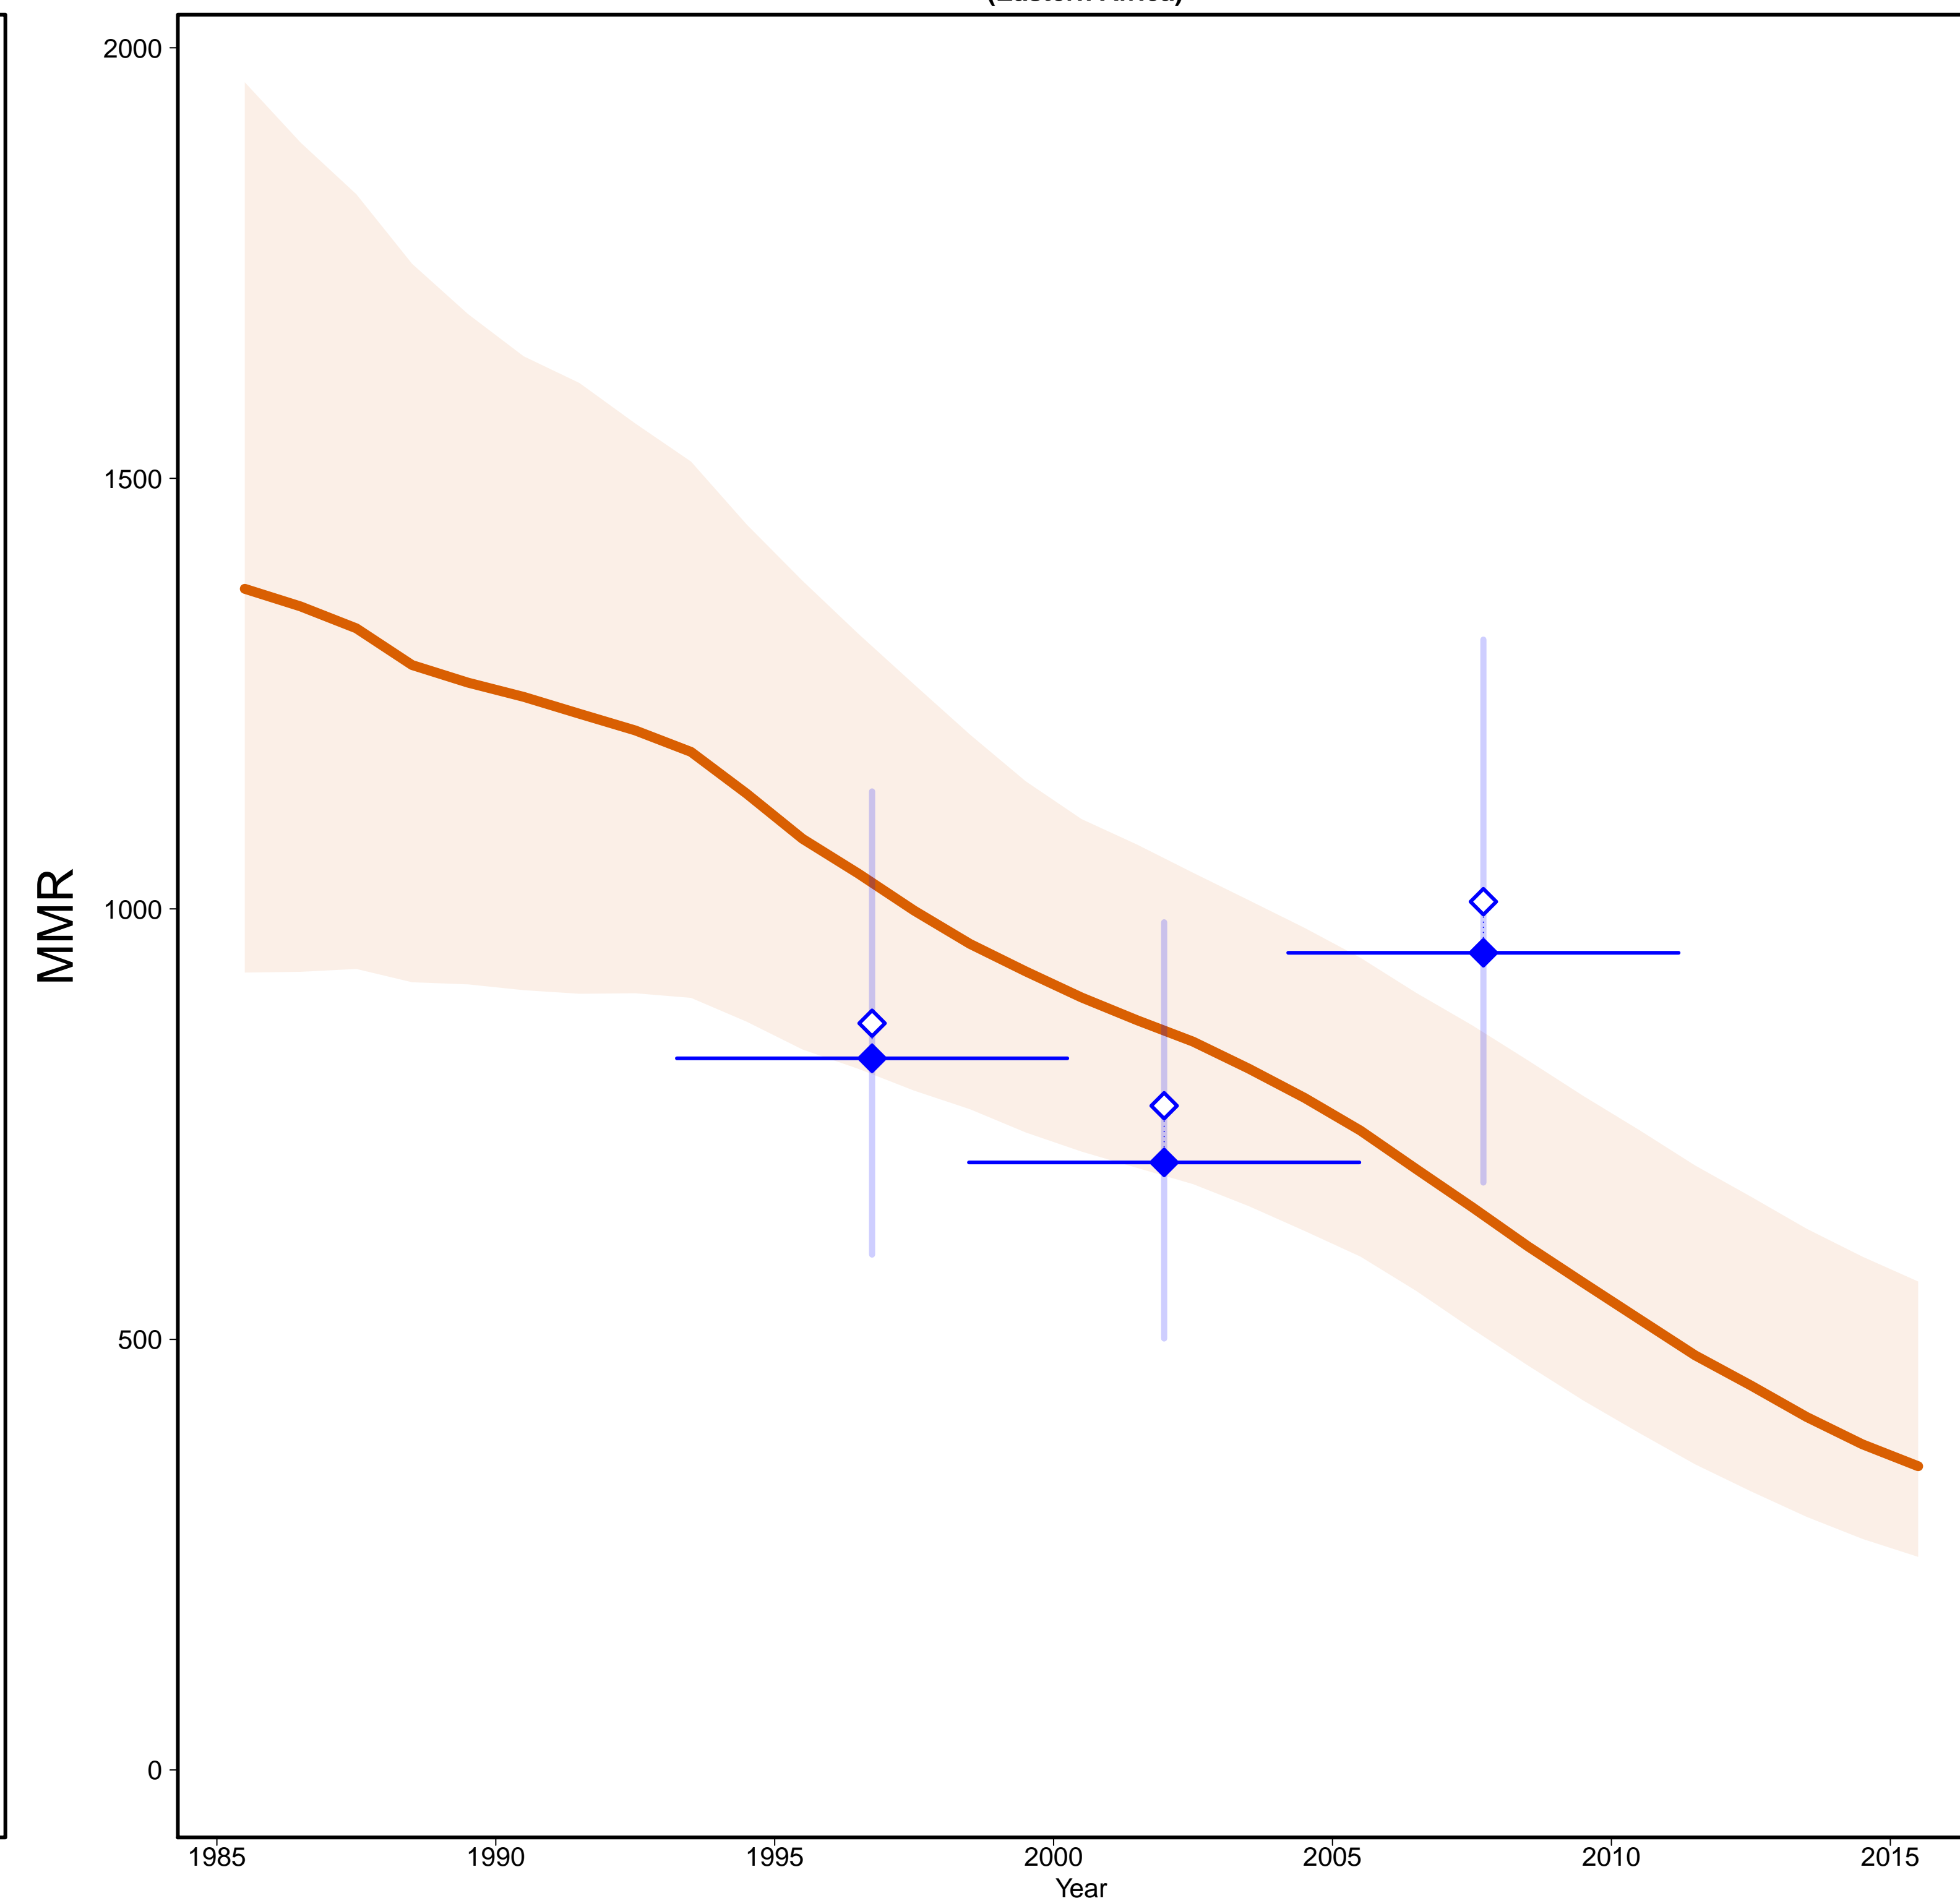

- Estimates —
- MMR Database 2015 —
- ◇ Observed Data
- ◆ Adjusted Data
- Data type —
- ◆ DHS

Gross Domestic Product

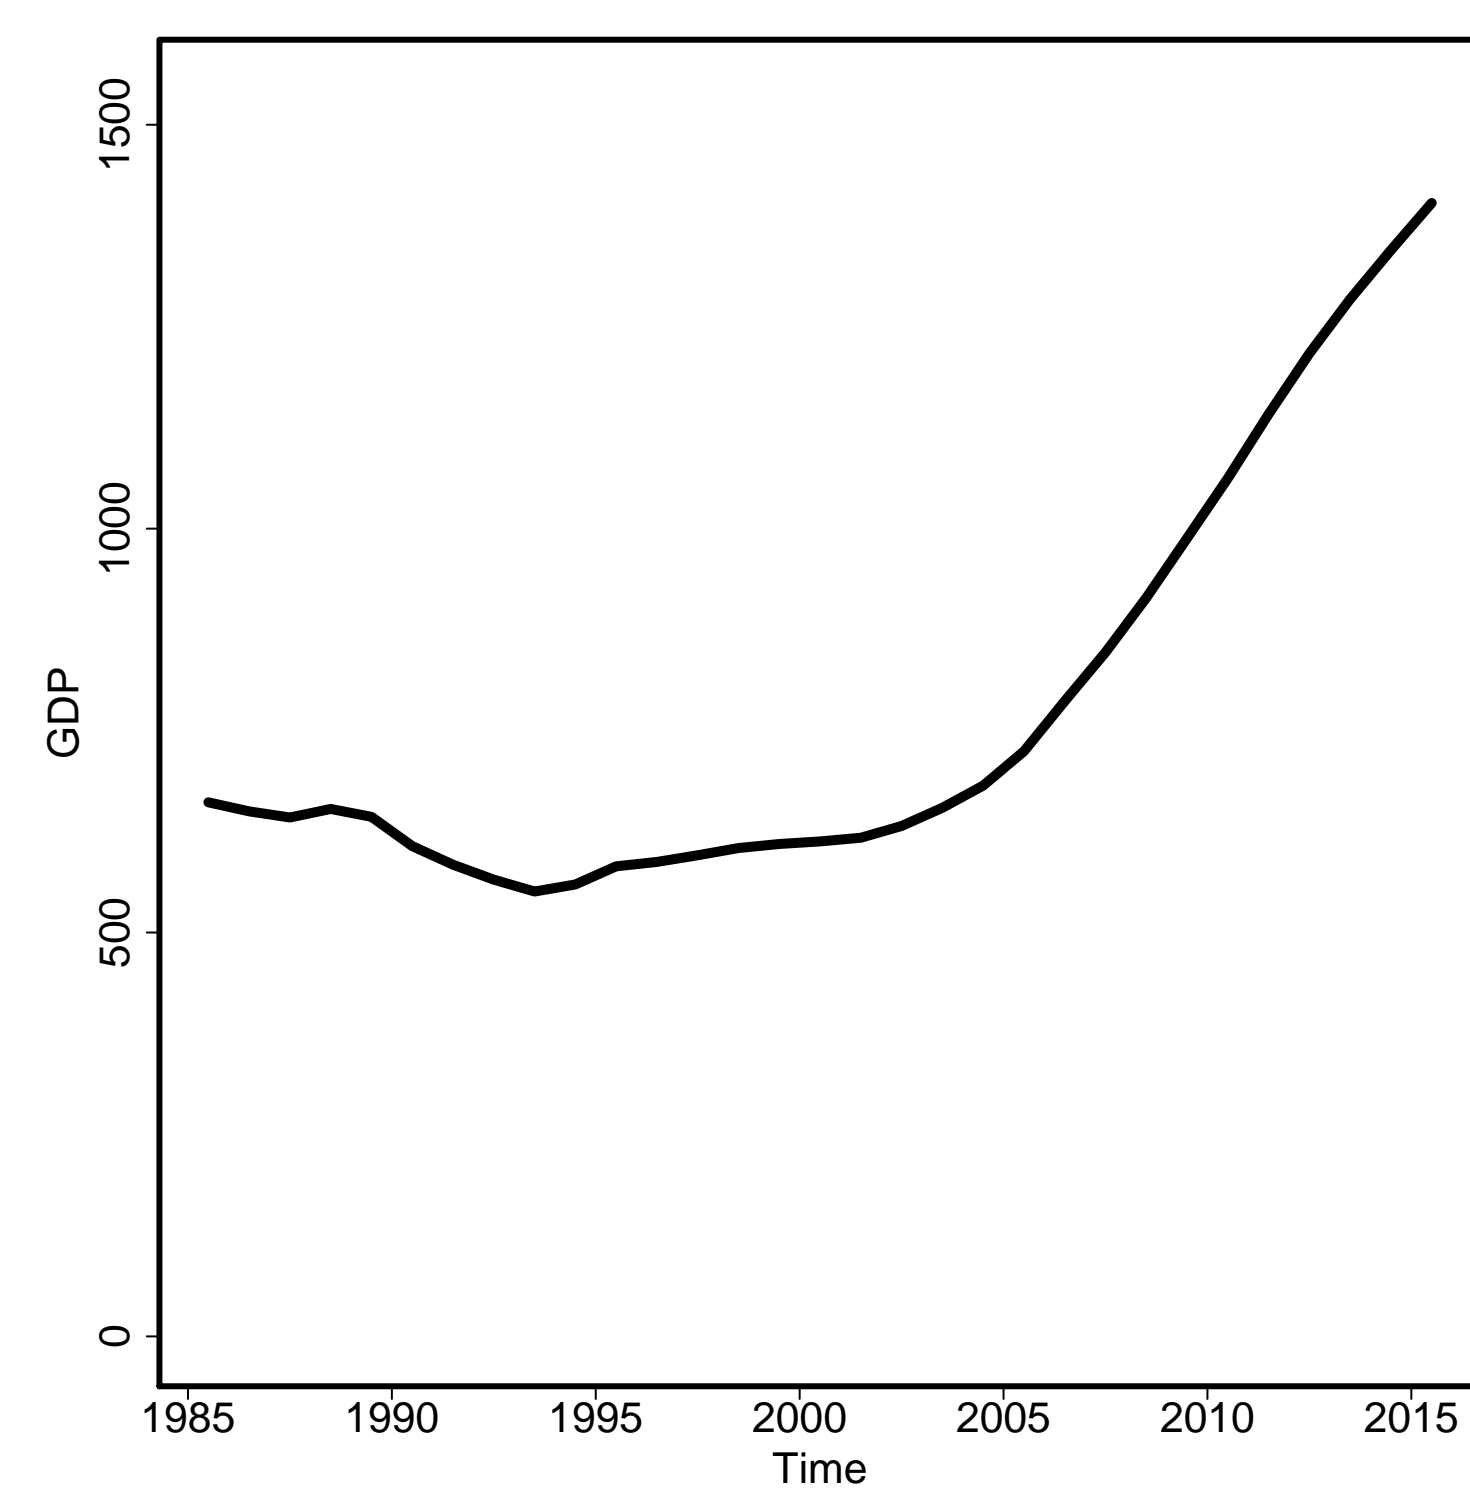

General Fertility Rate

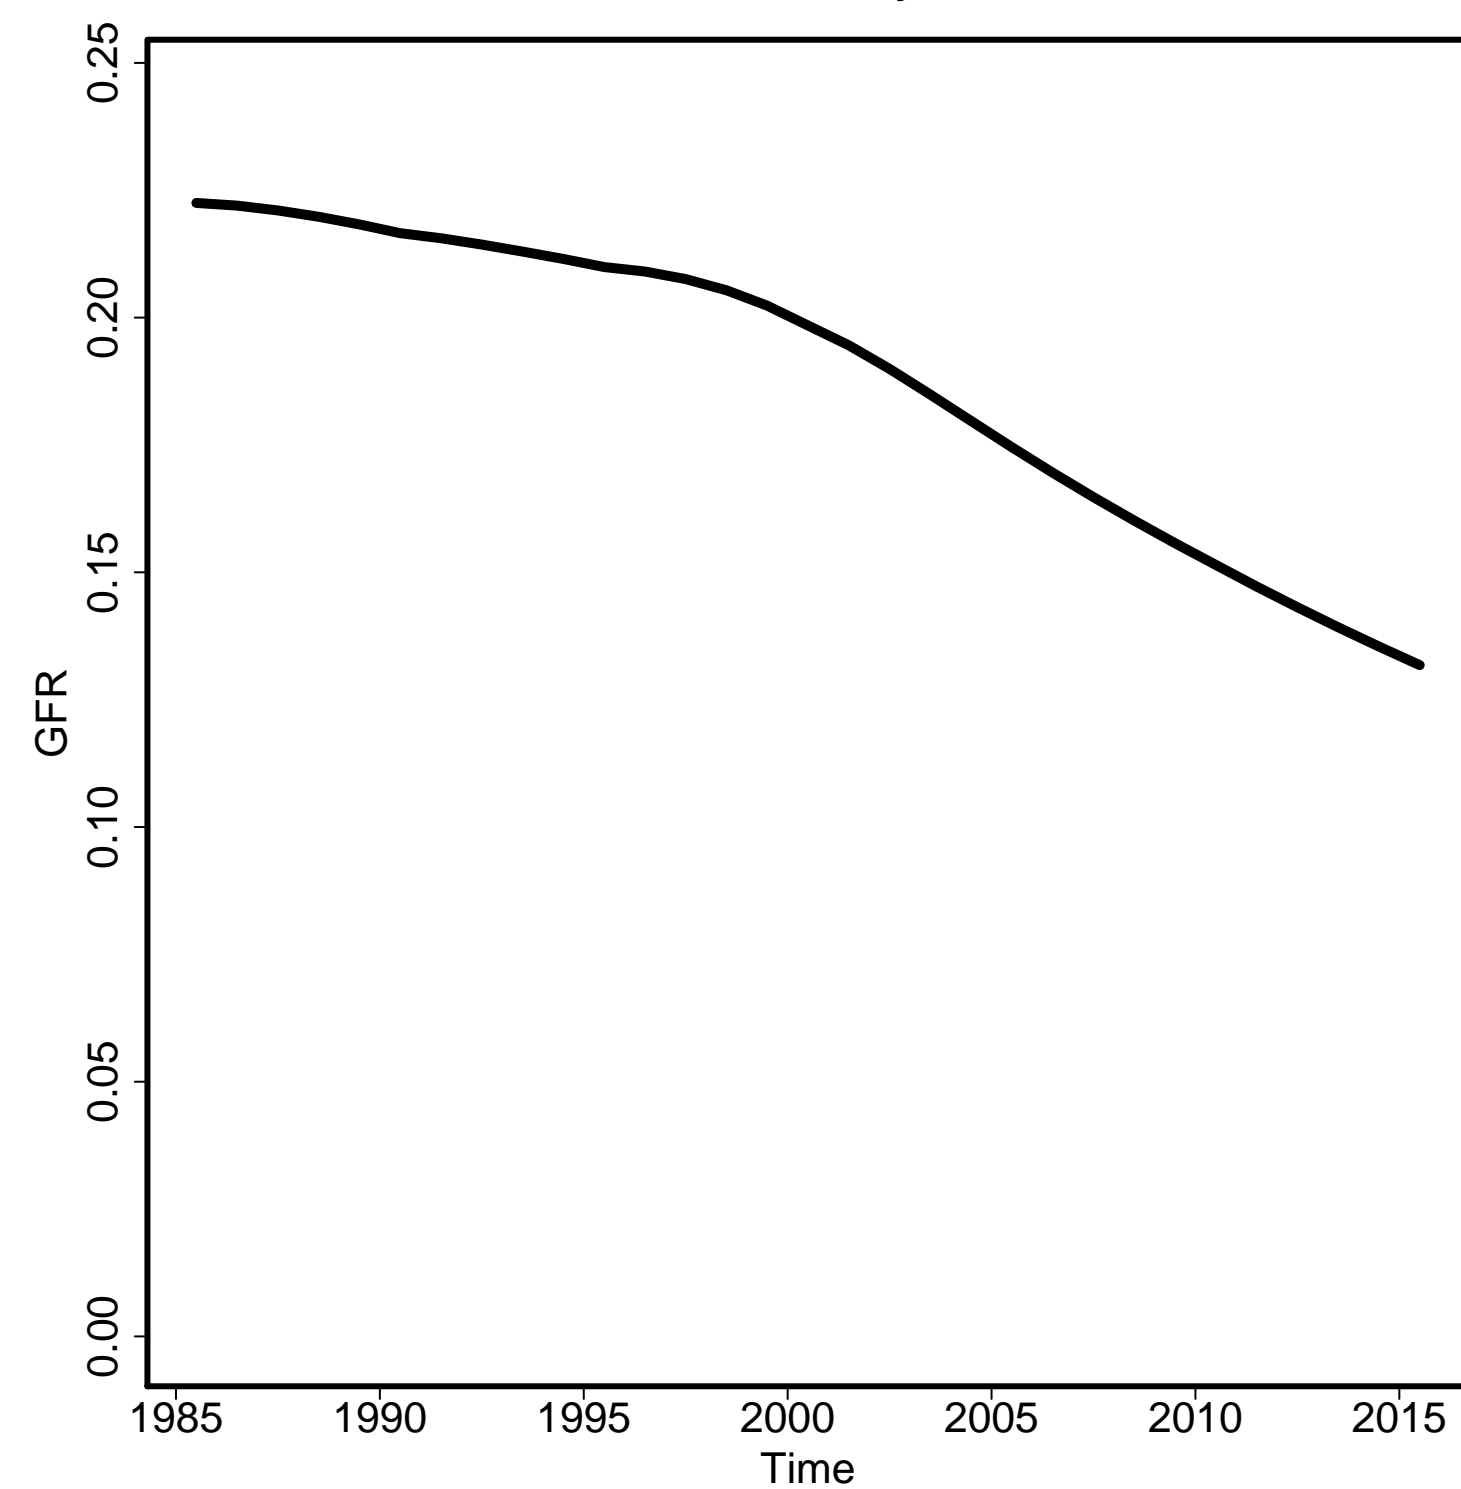

Skilled Attendance to Birth

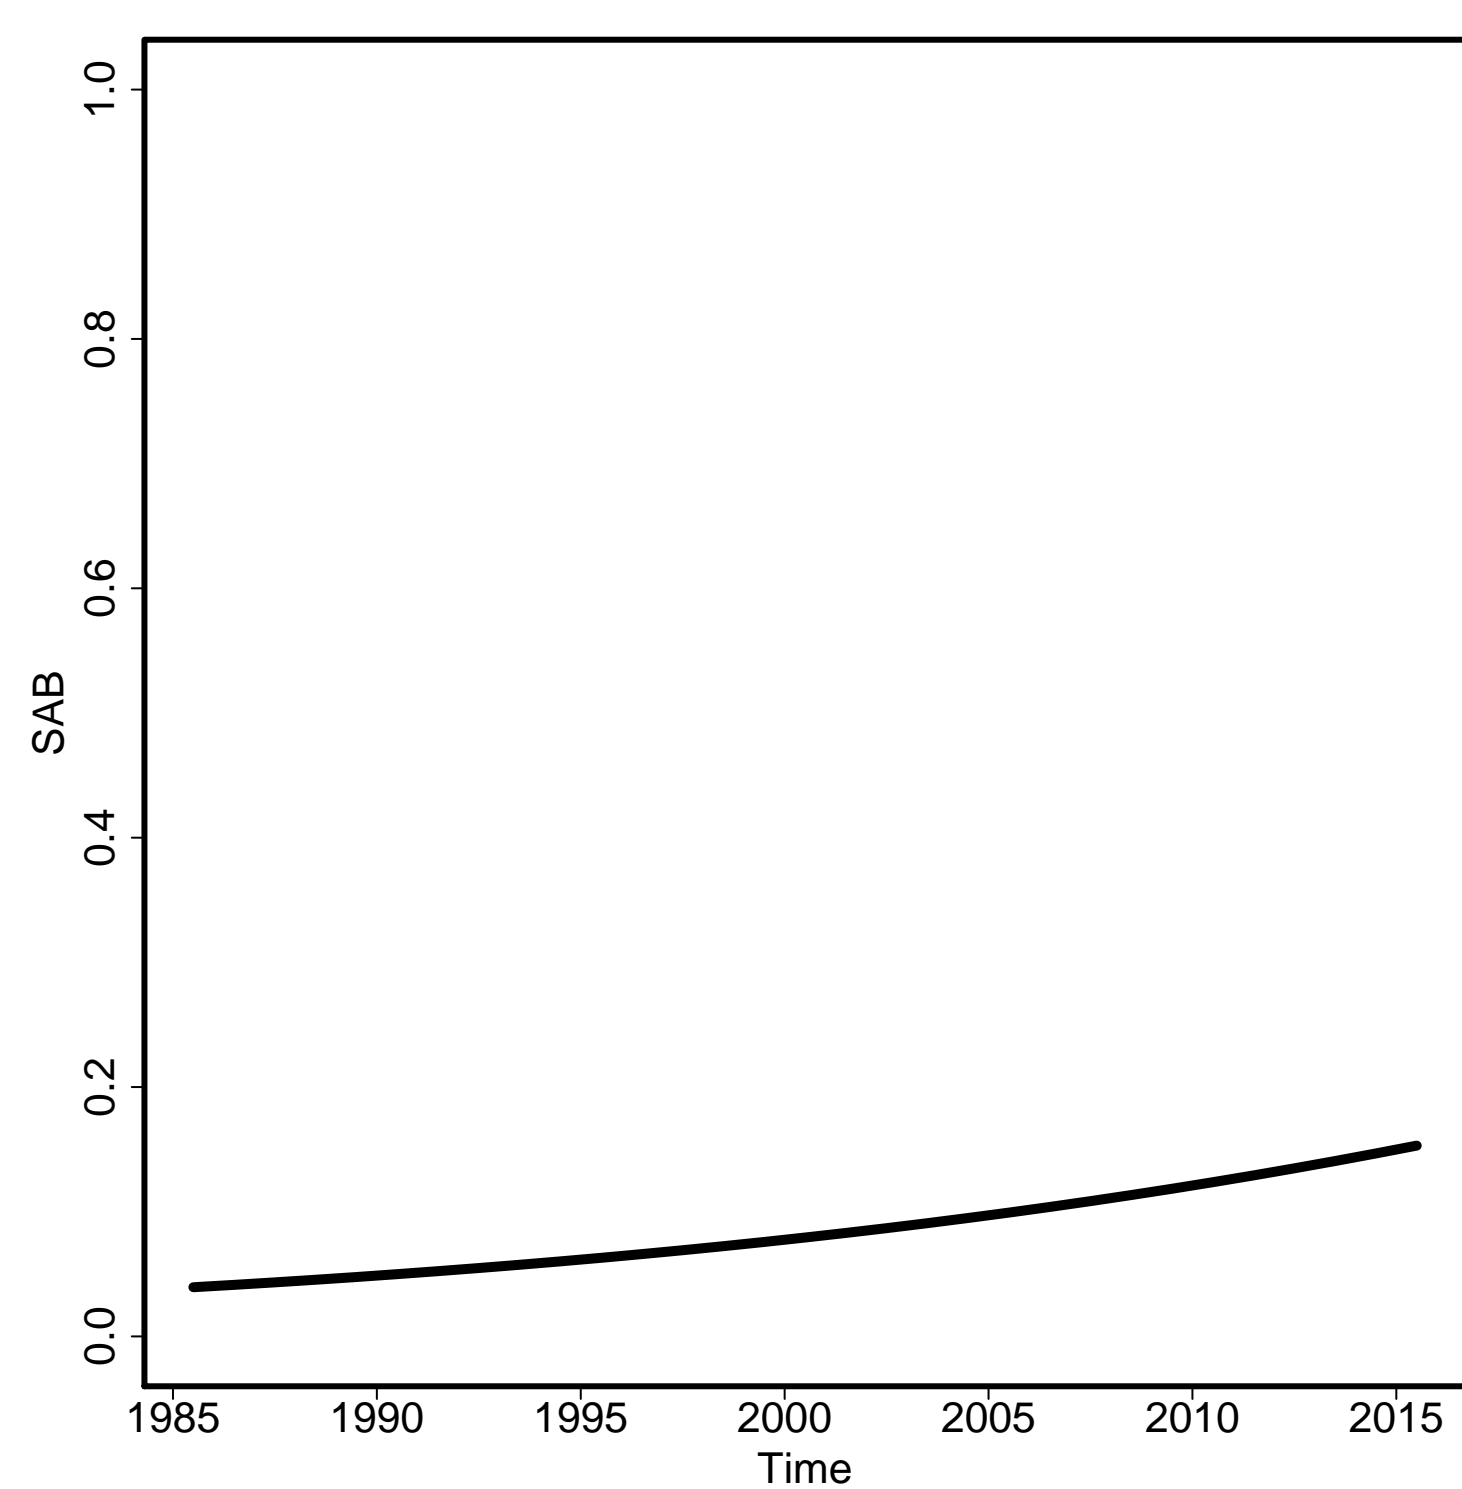

Envelope/Births

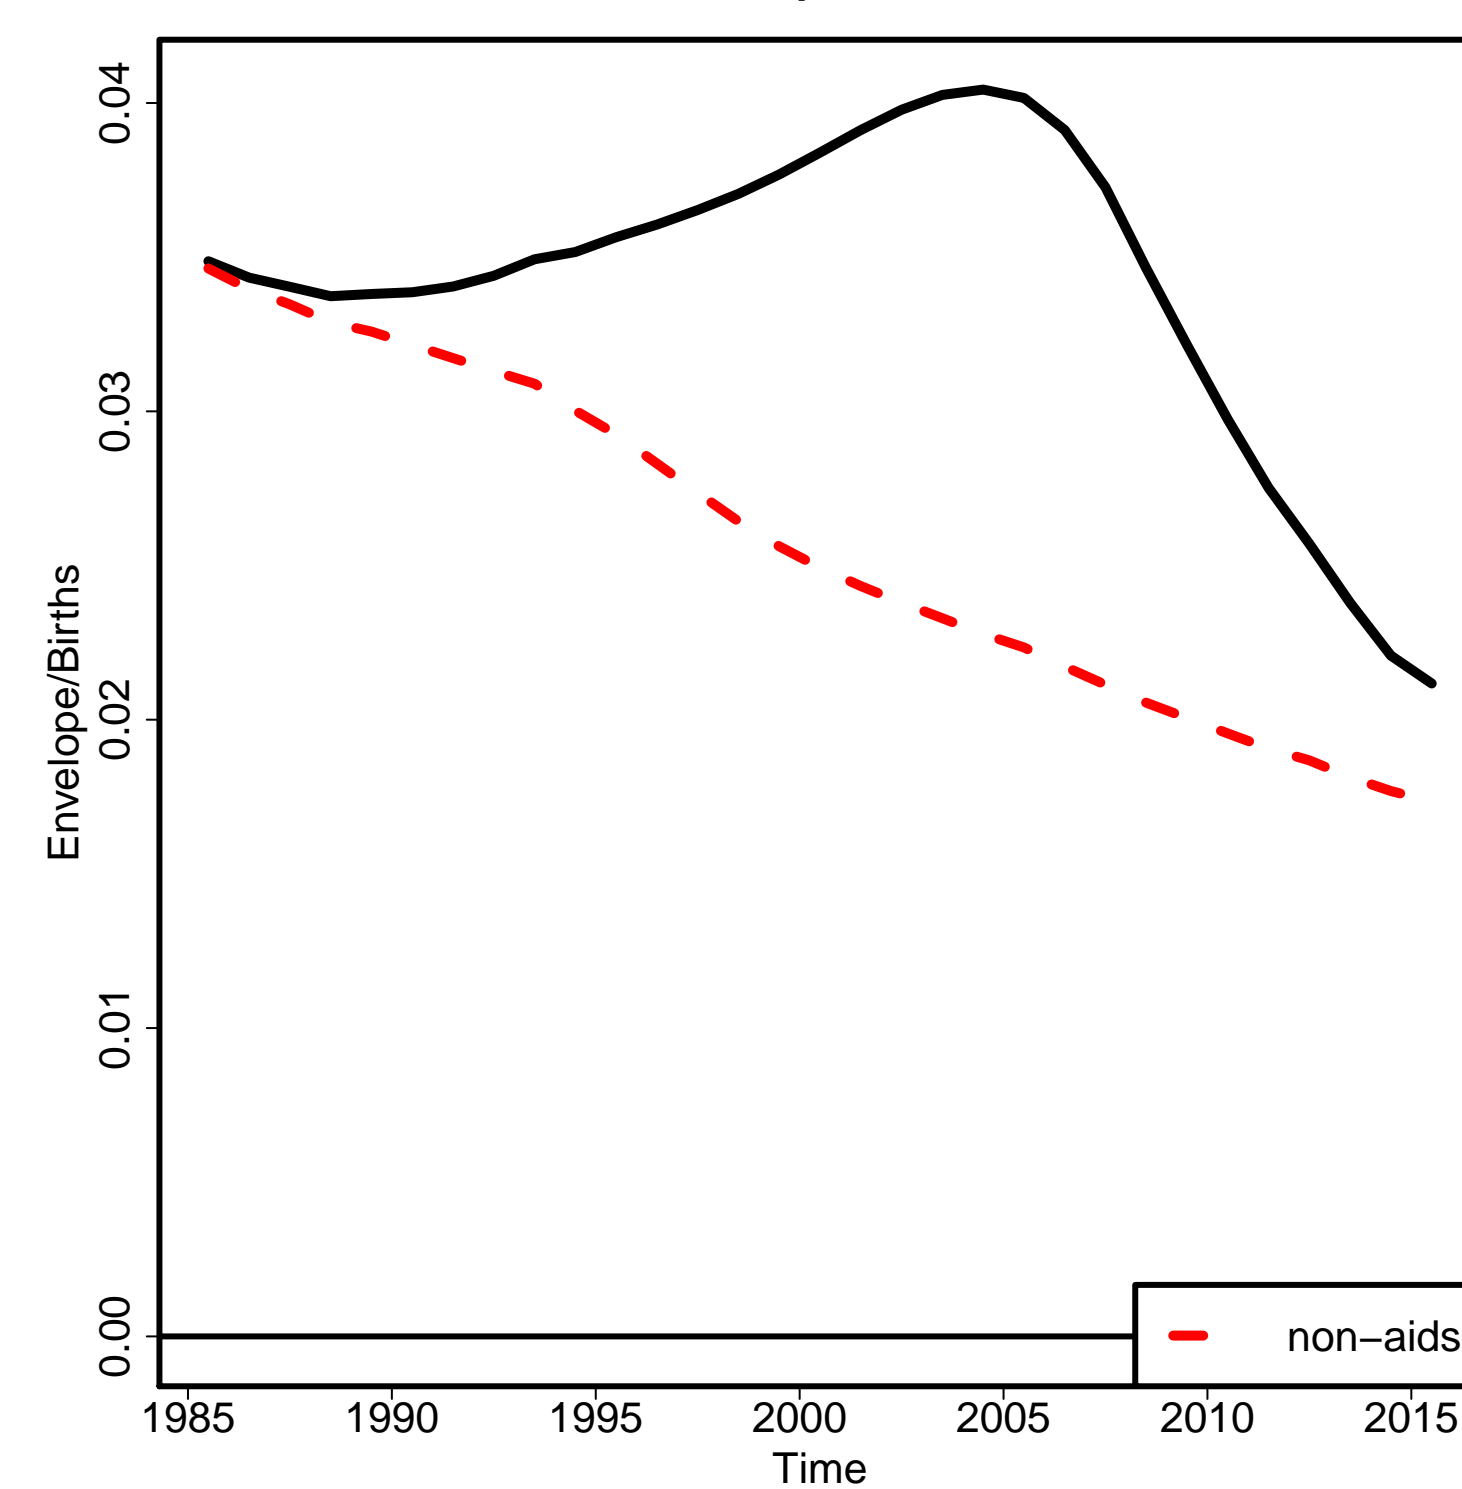

Non-aids MMR

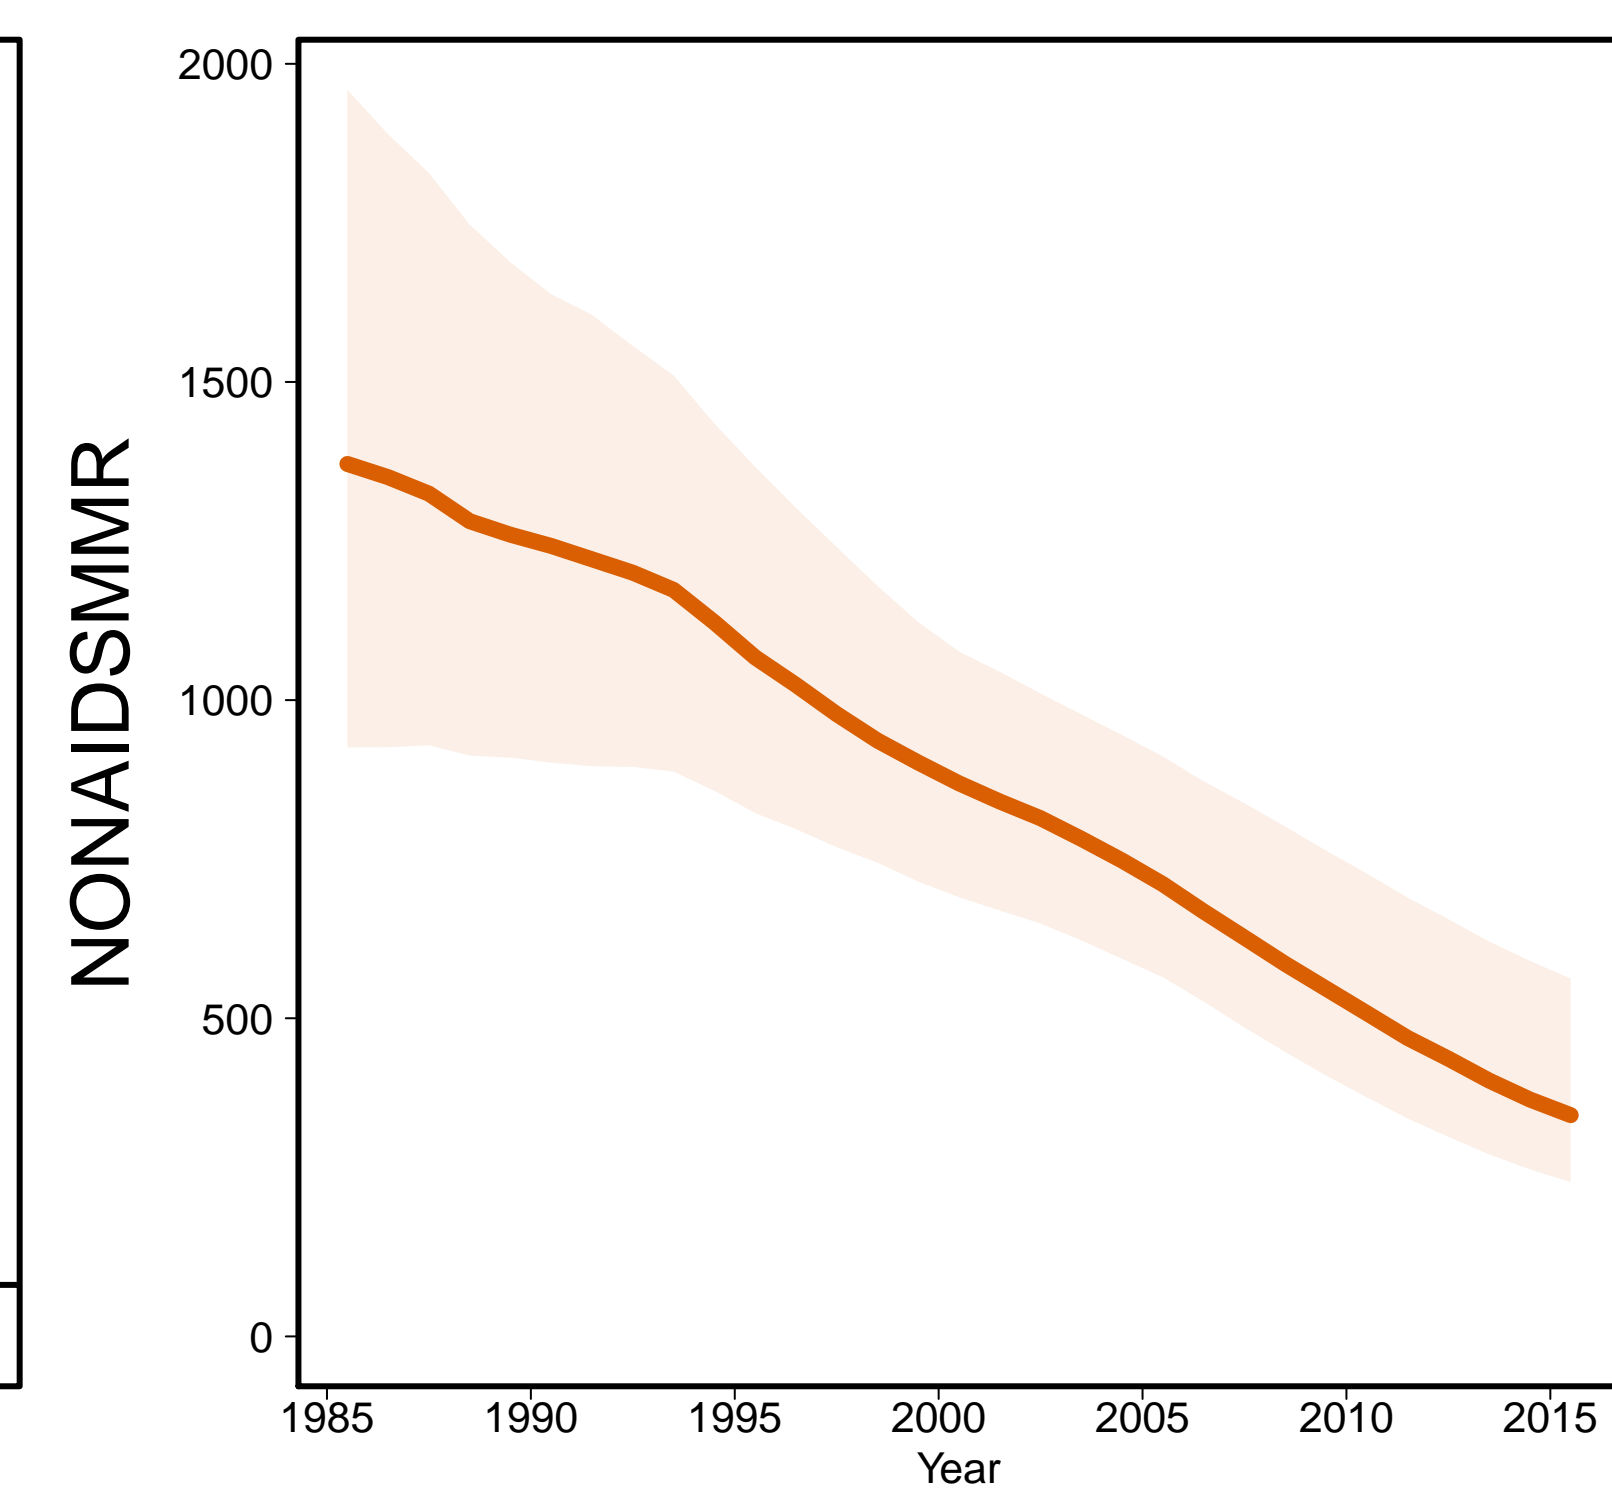

Aids MMR

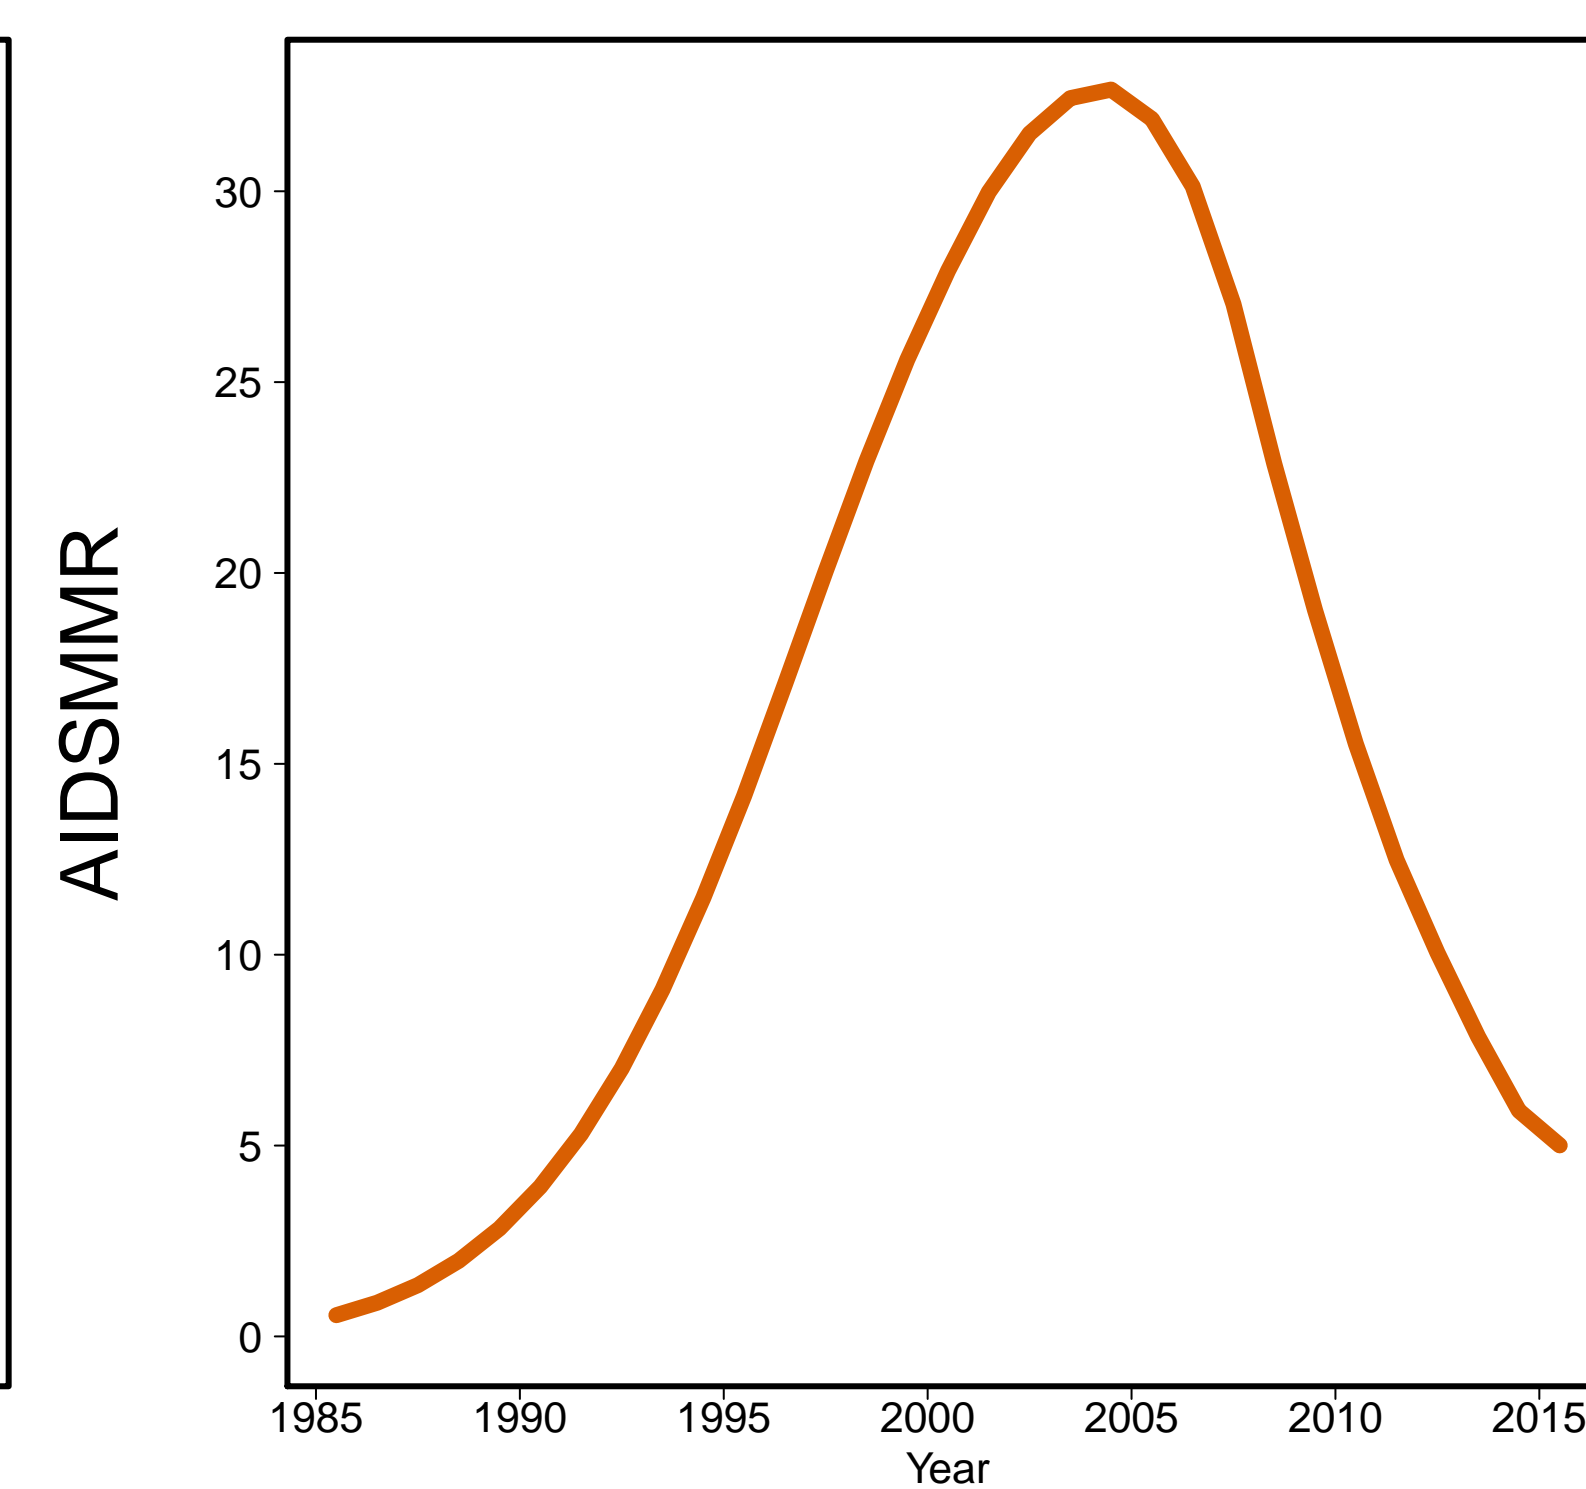

Fiji [FJI]  
(South-Eastern Asia / Oceania)

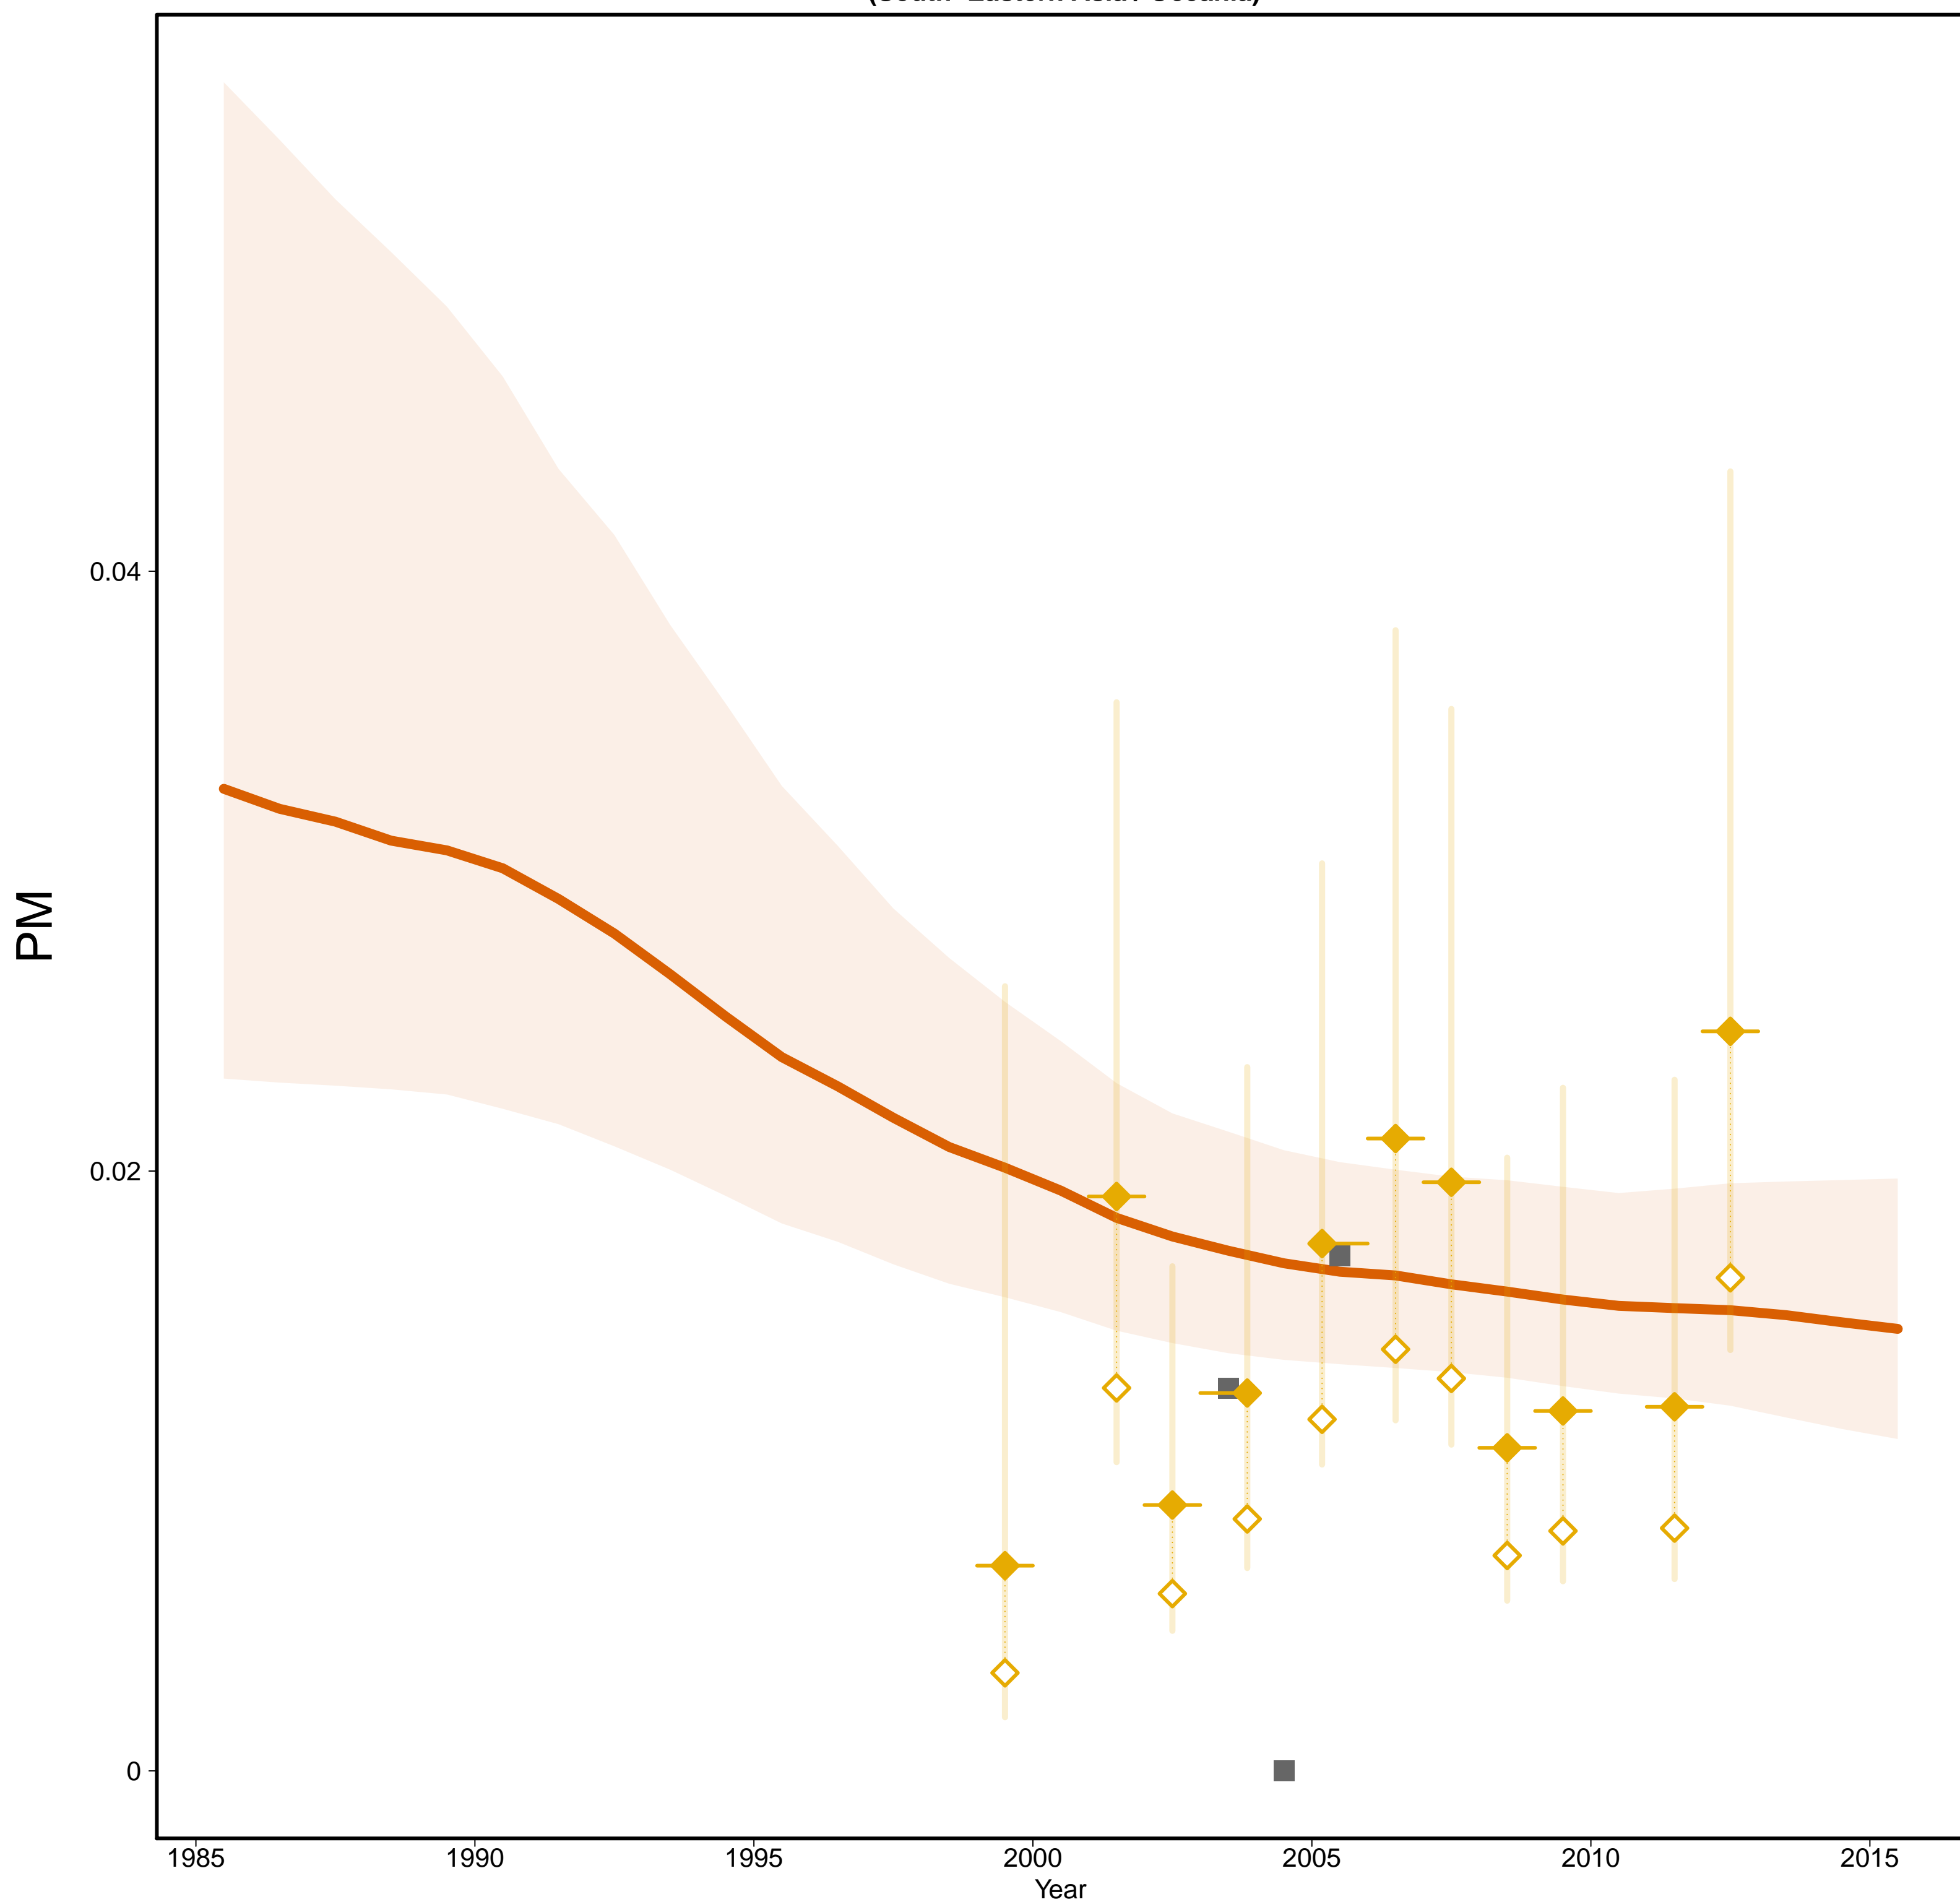

Fiji [FJI]  
(South-Eastern Asia / Oceania)

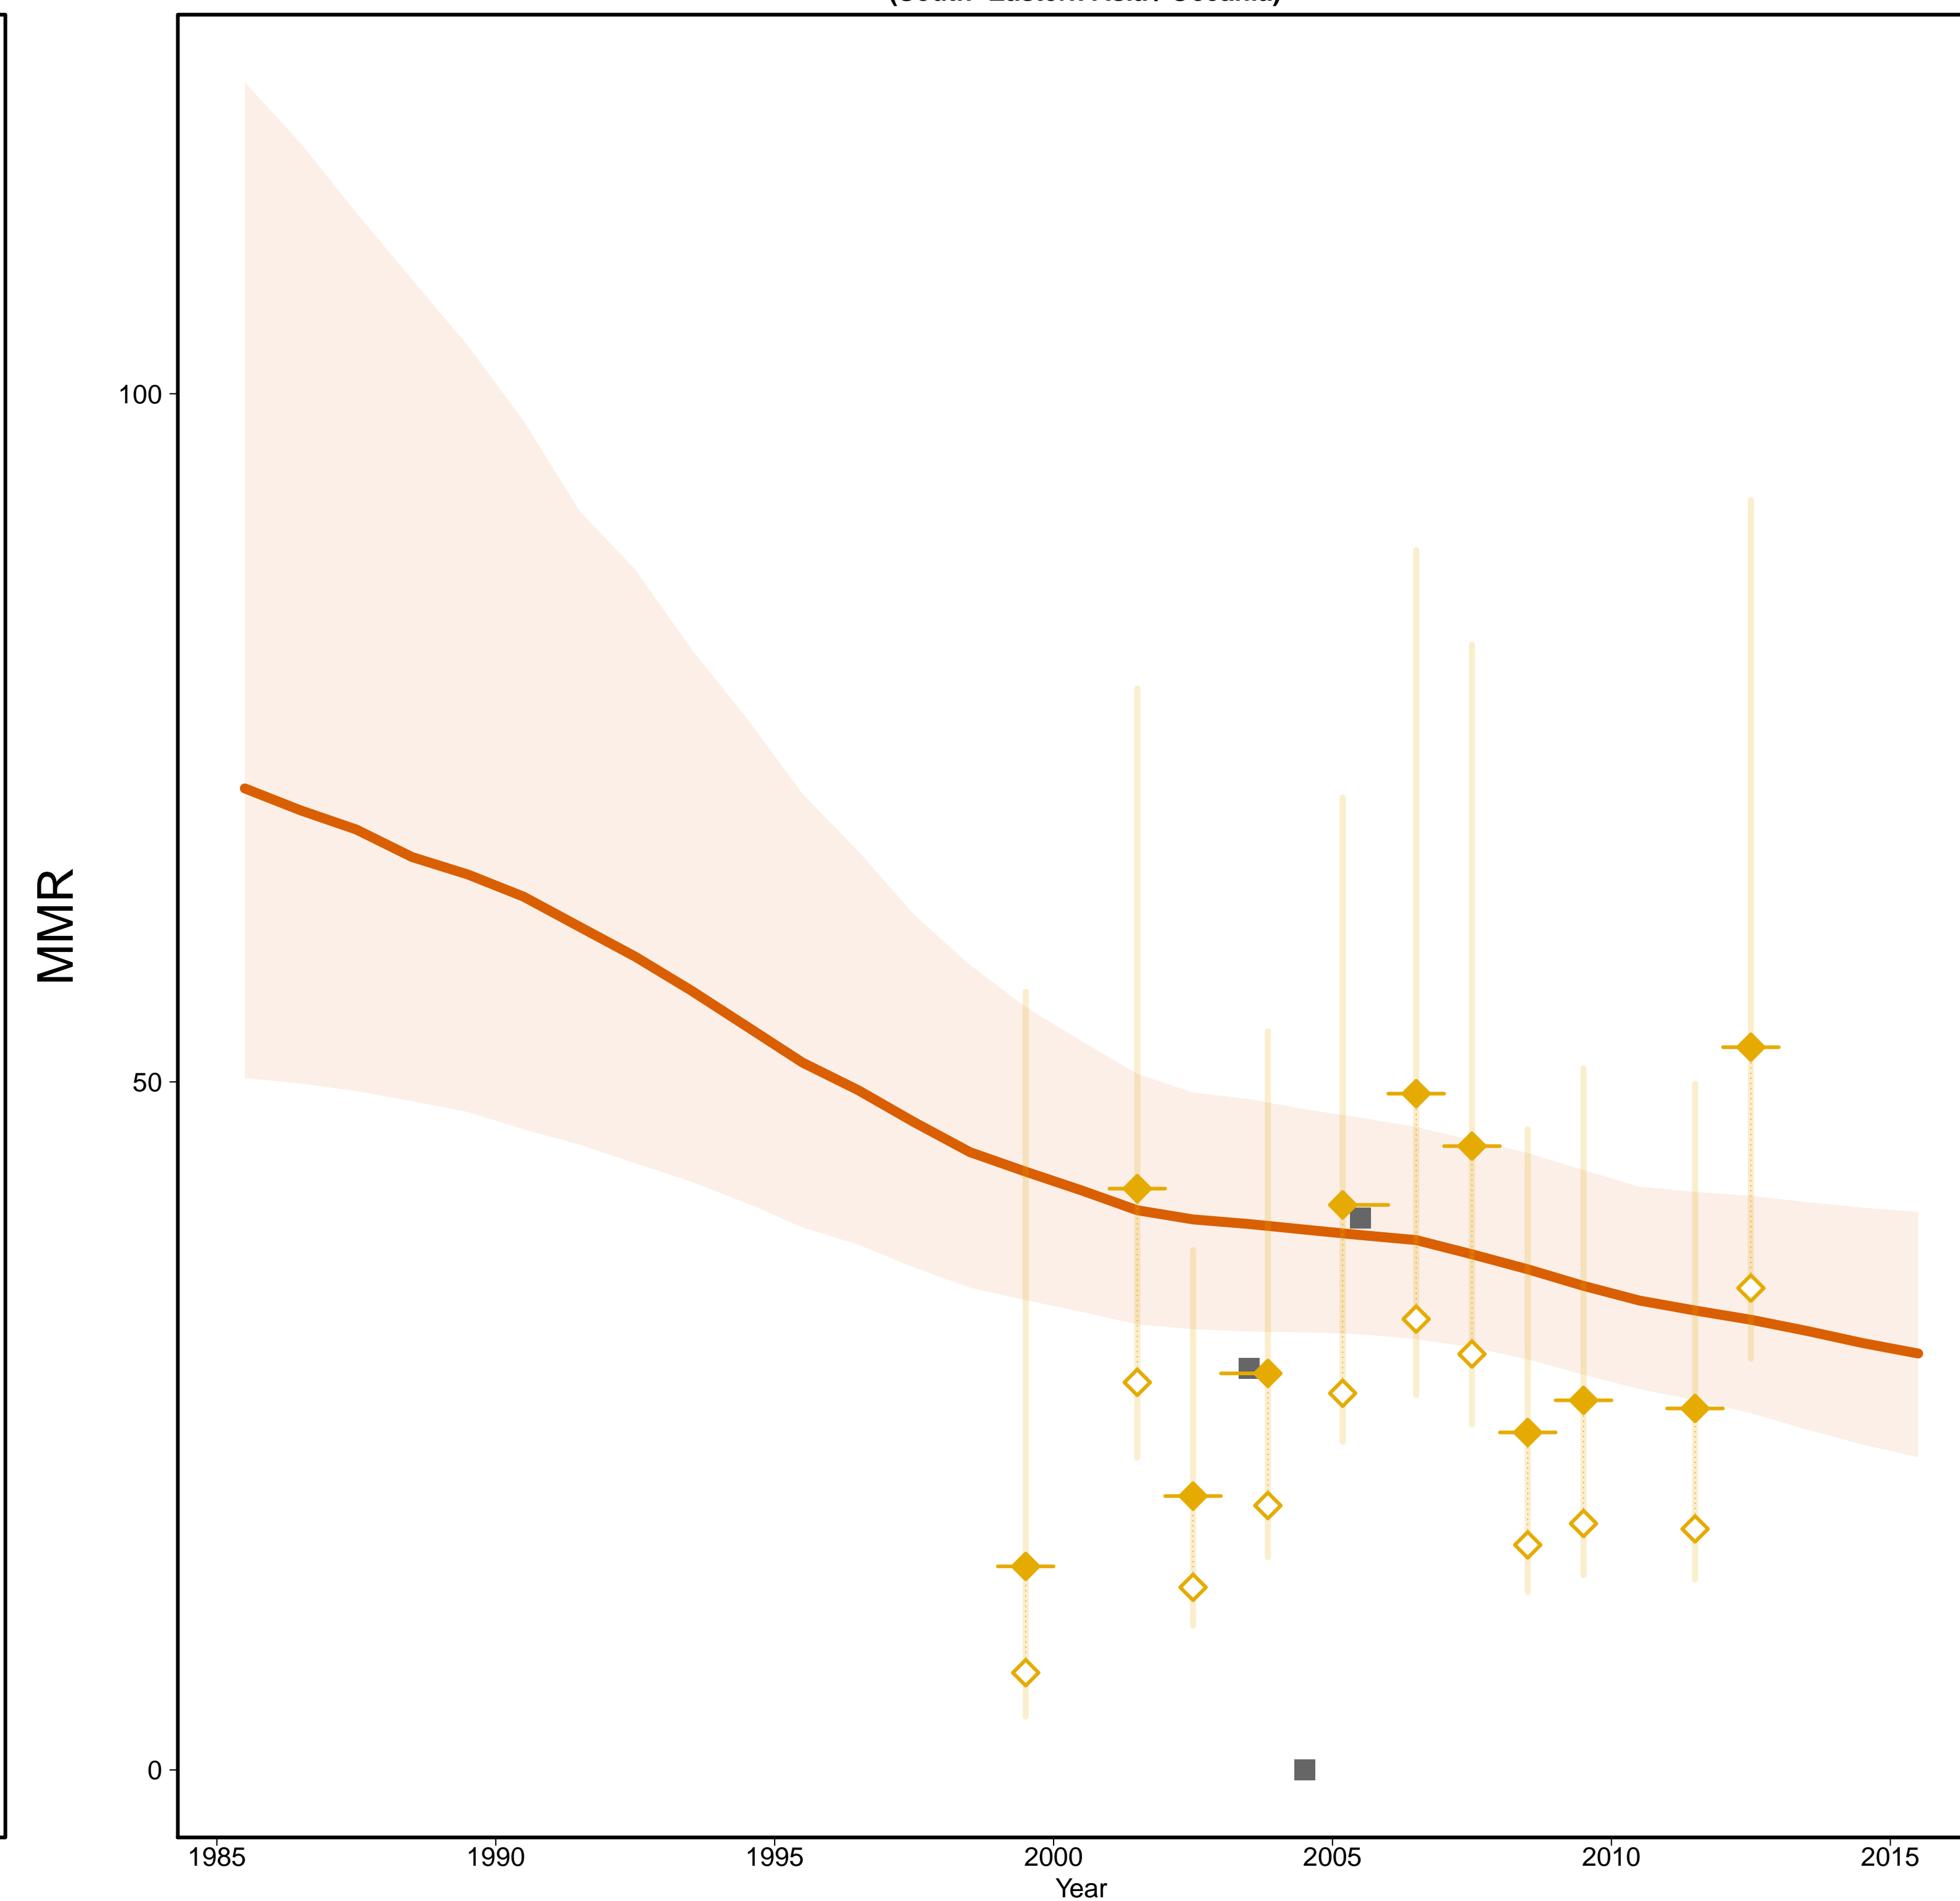

- Estimates –
- Mlate
- MMR Database 2015 –
- ◇ Observed Data
- ◆ Adjusted Data
- Data type –
- ◆ VR
- Reported VR before recalc.  
(related to 0 obs. mat. death)

Gross Domestic Product

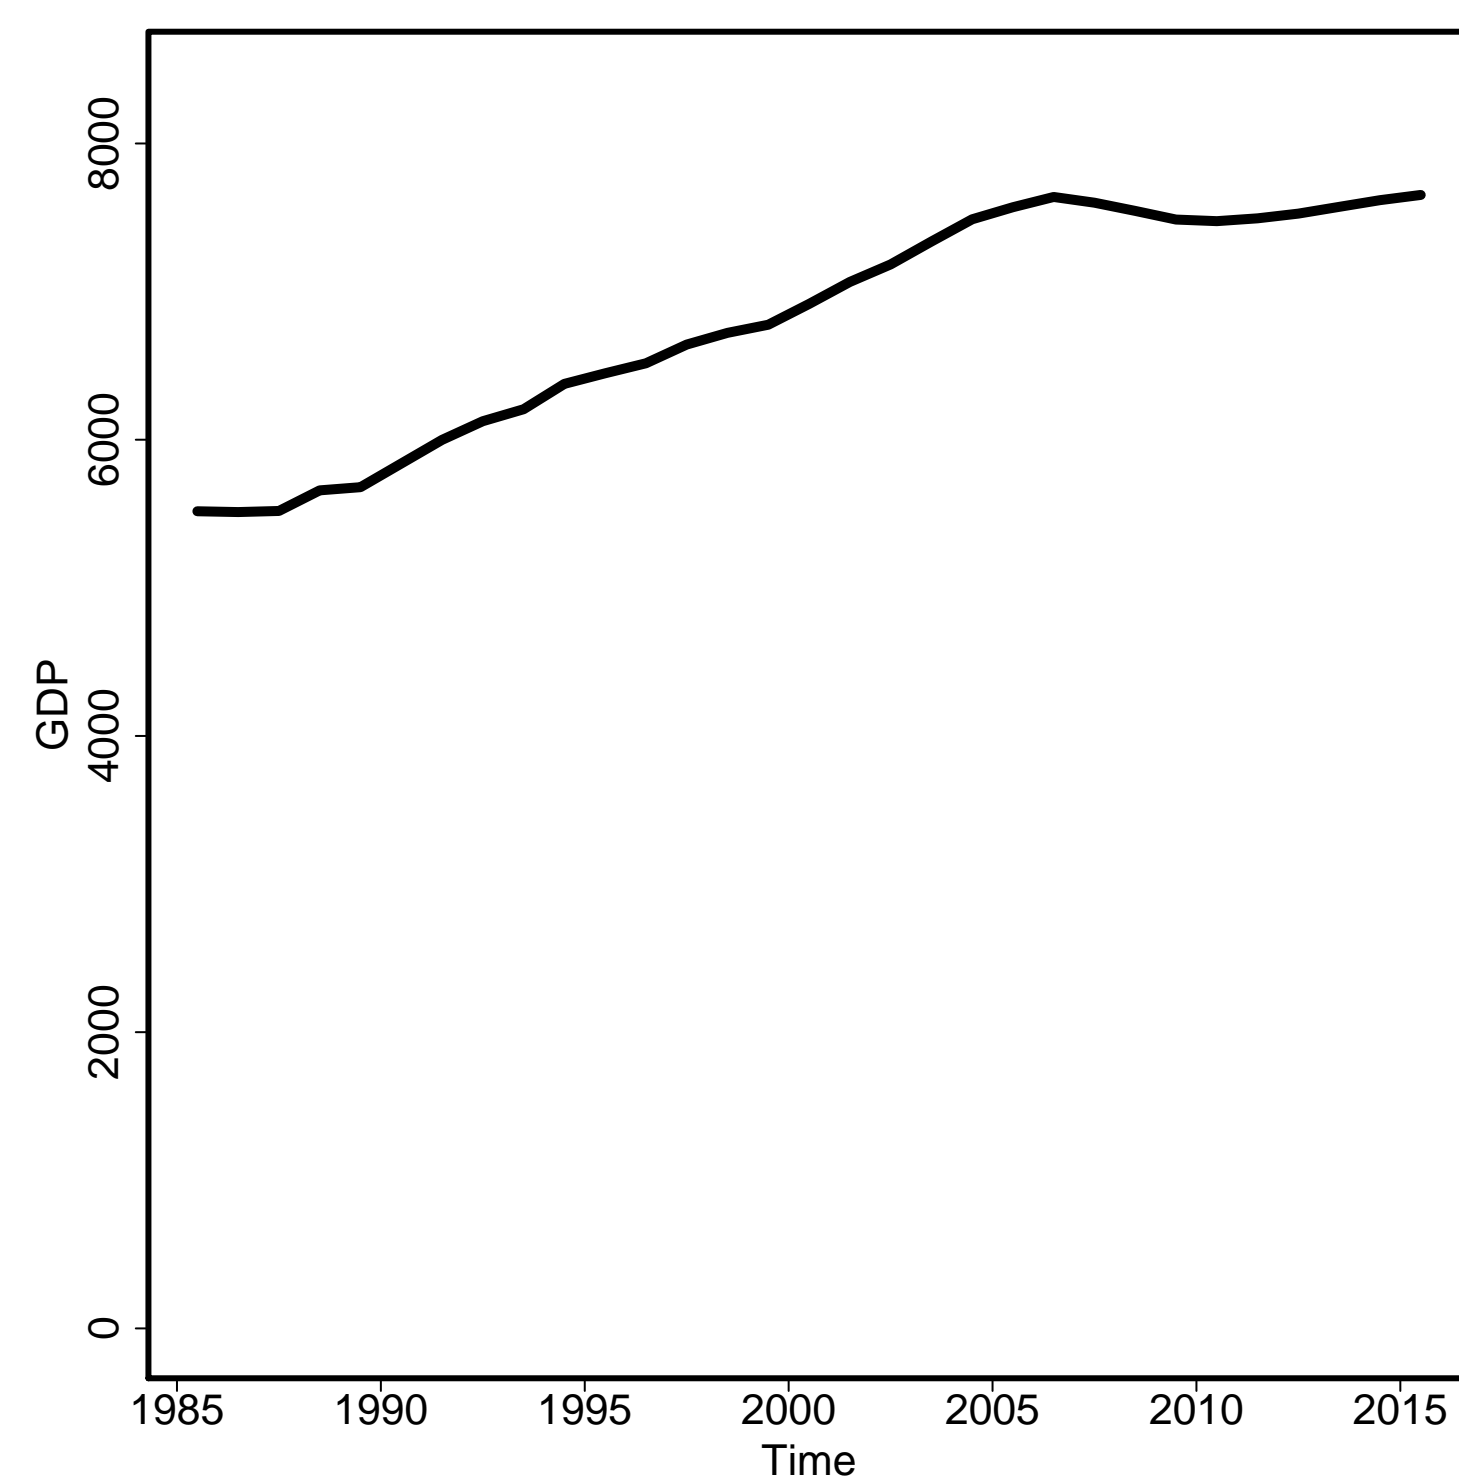

General Fertility Rate

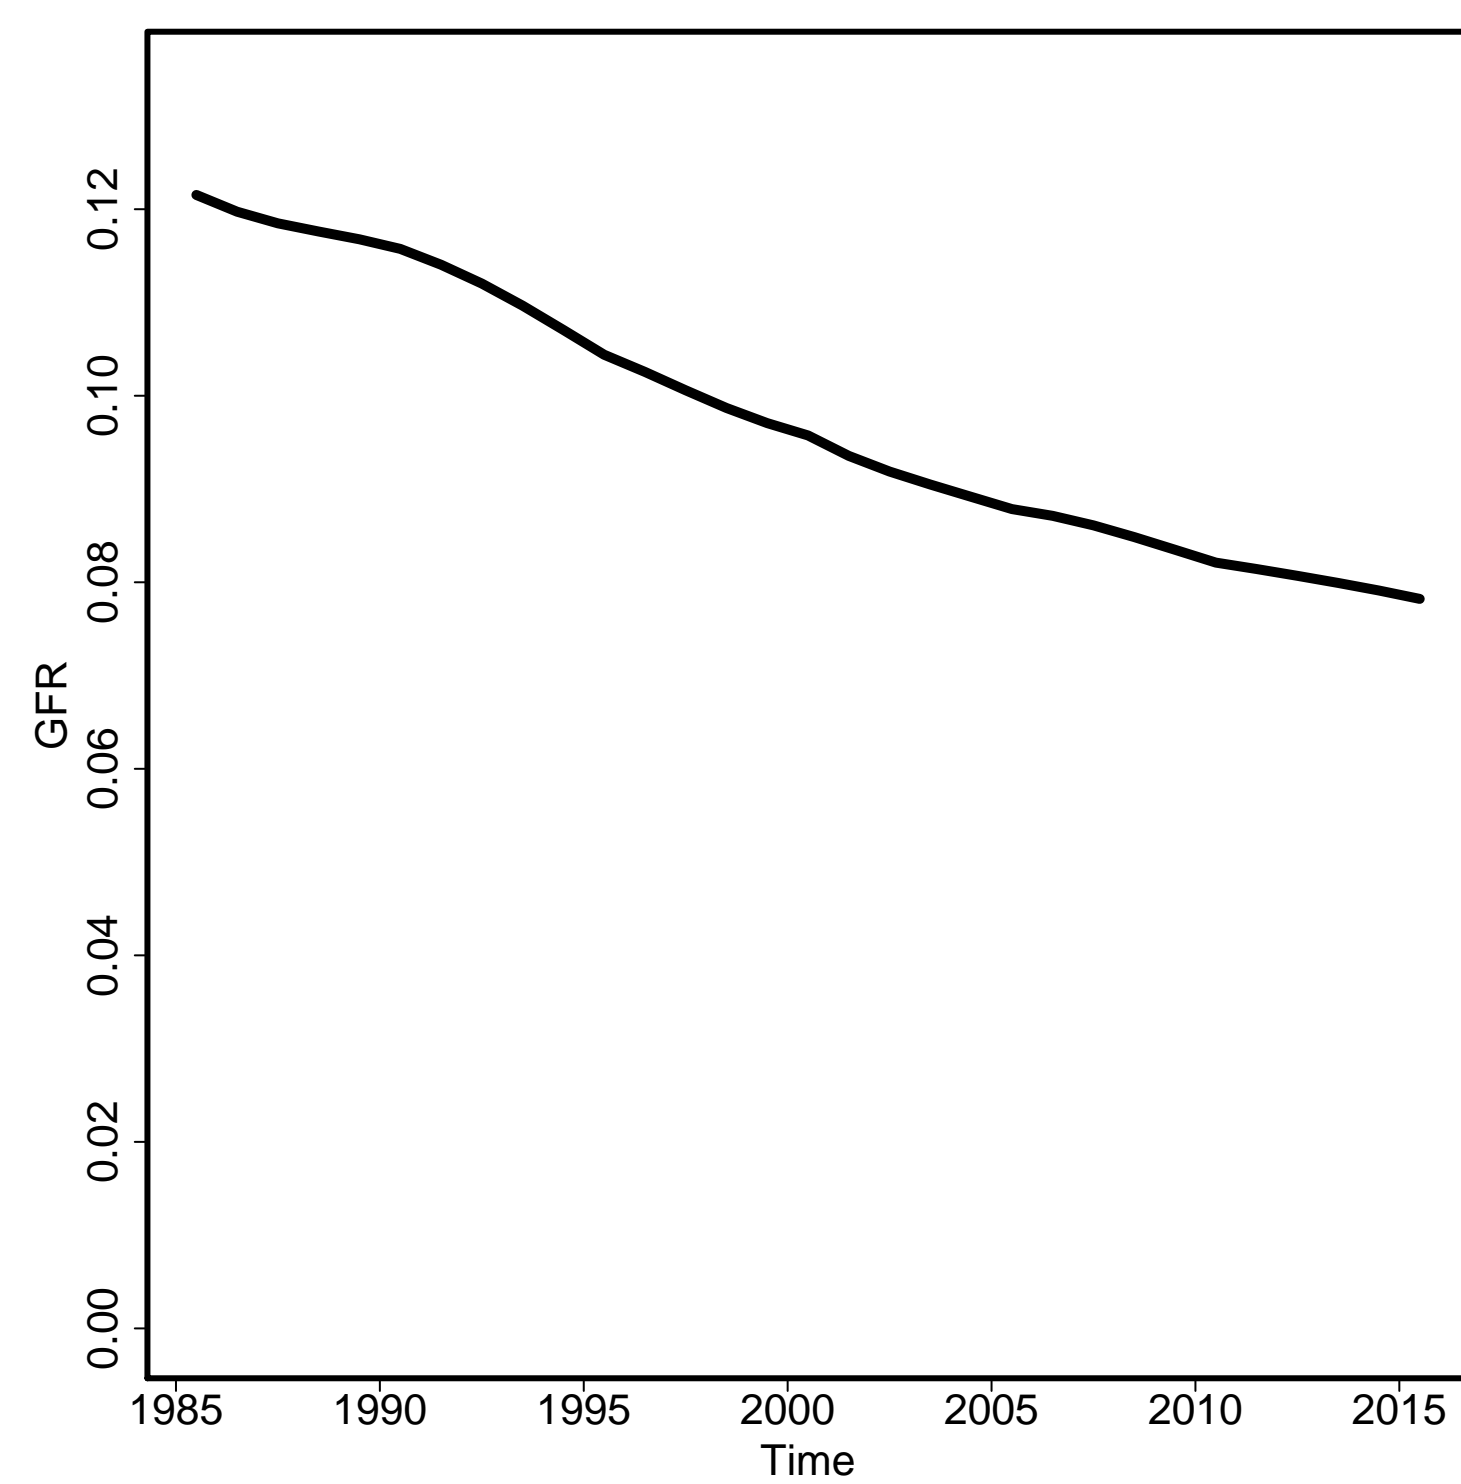

Skilled Attendance to Birth

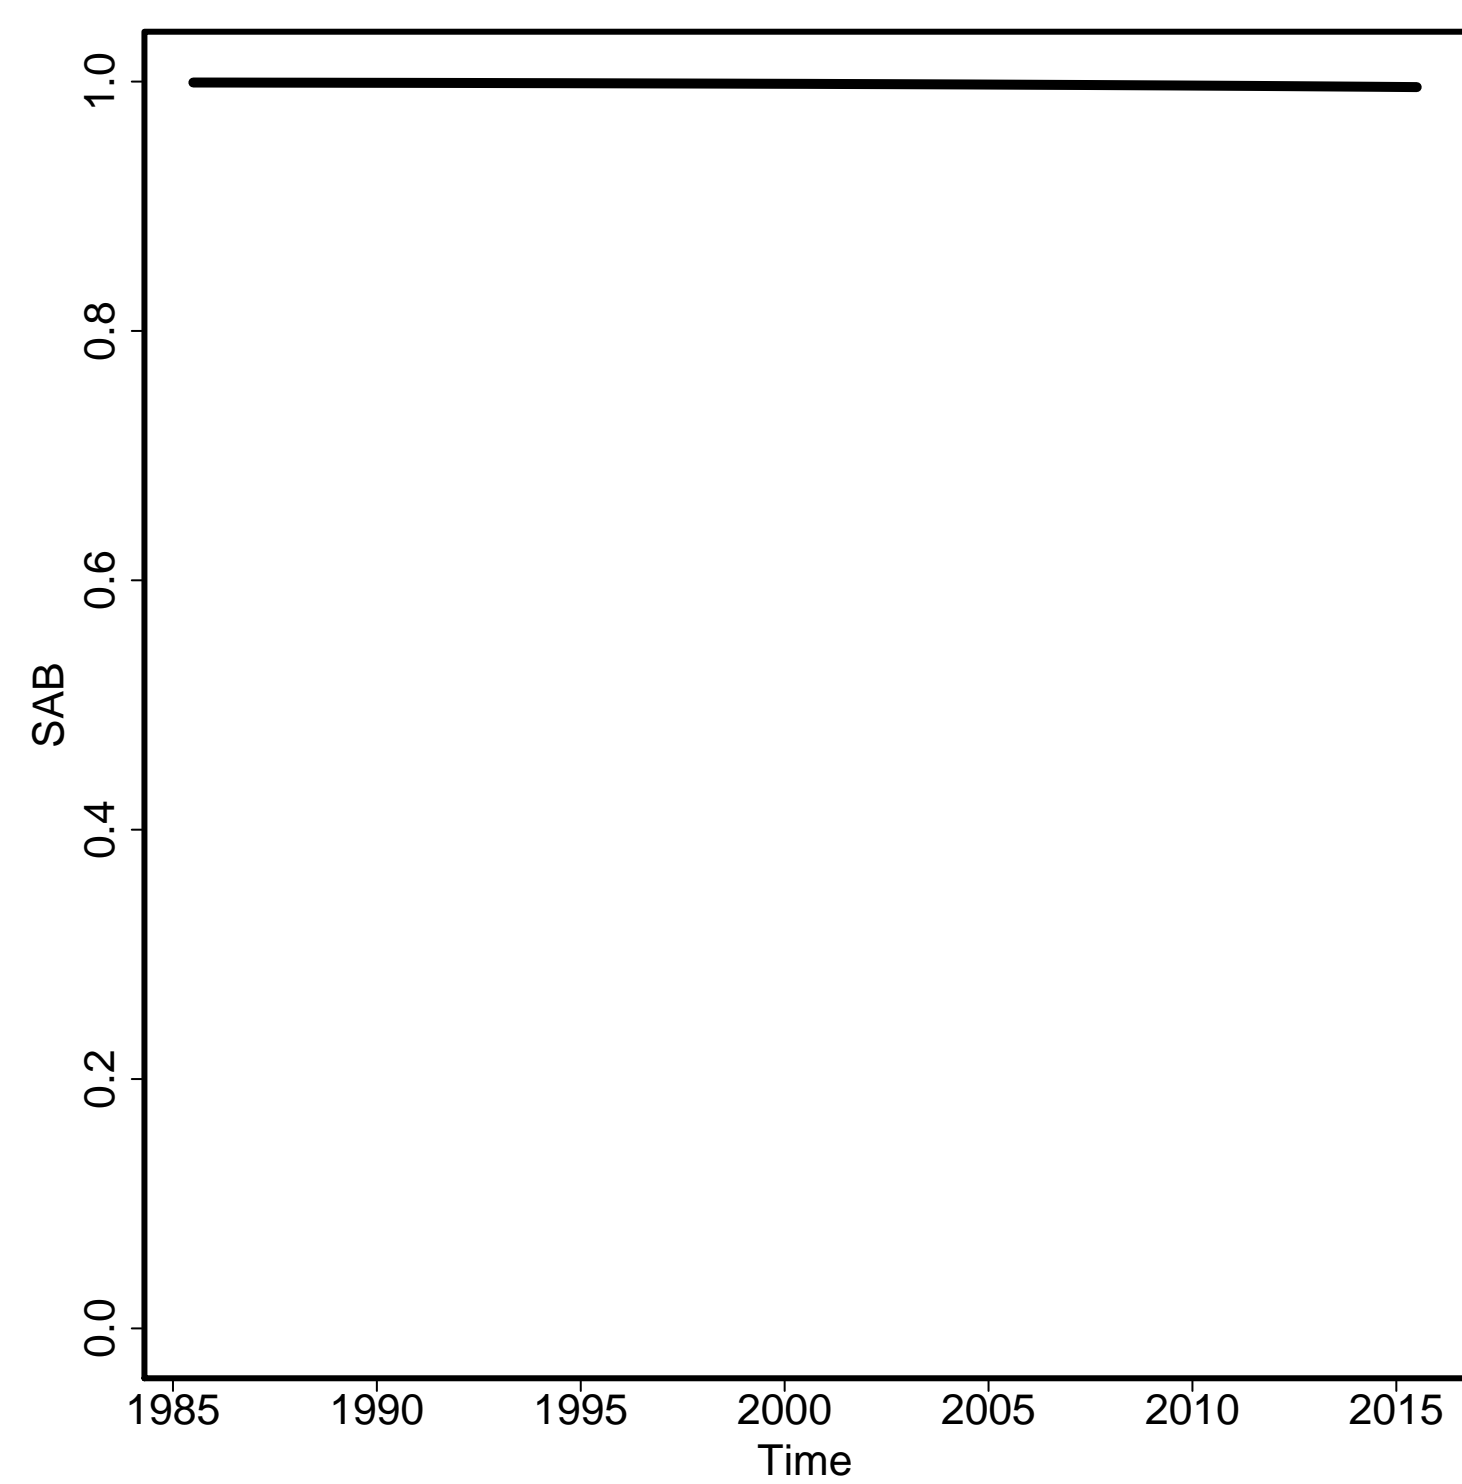

Envelope/Births

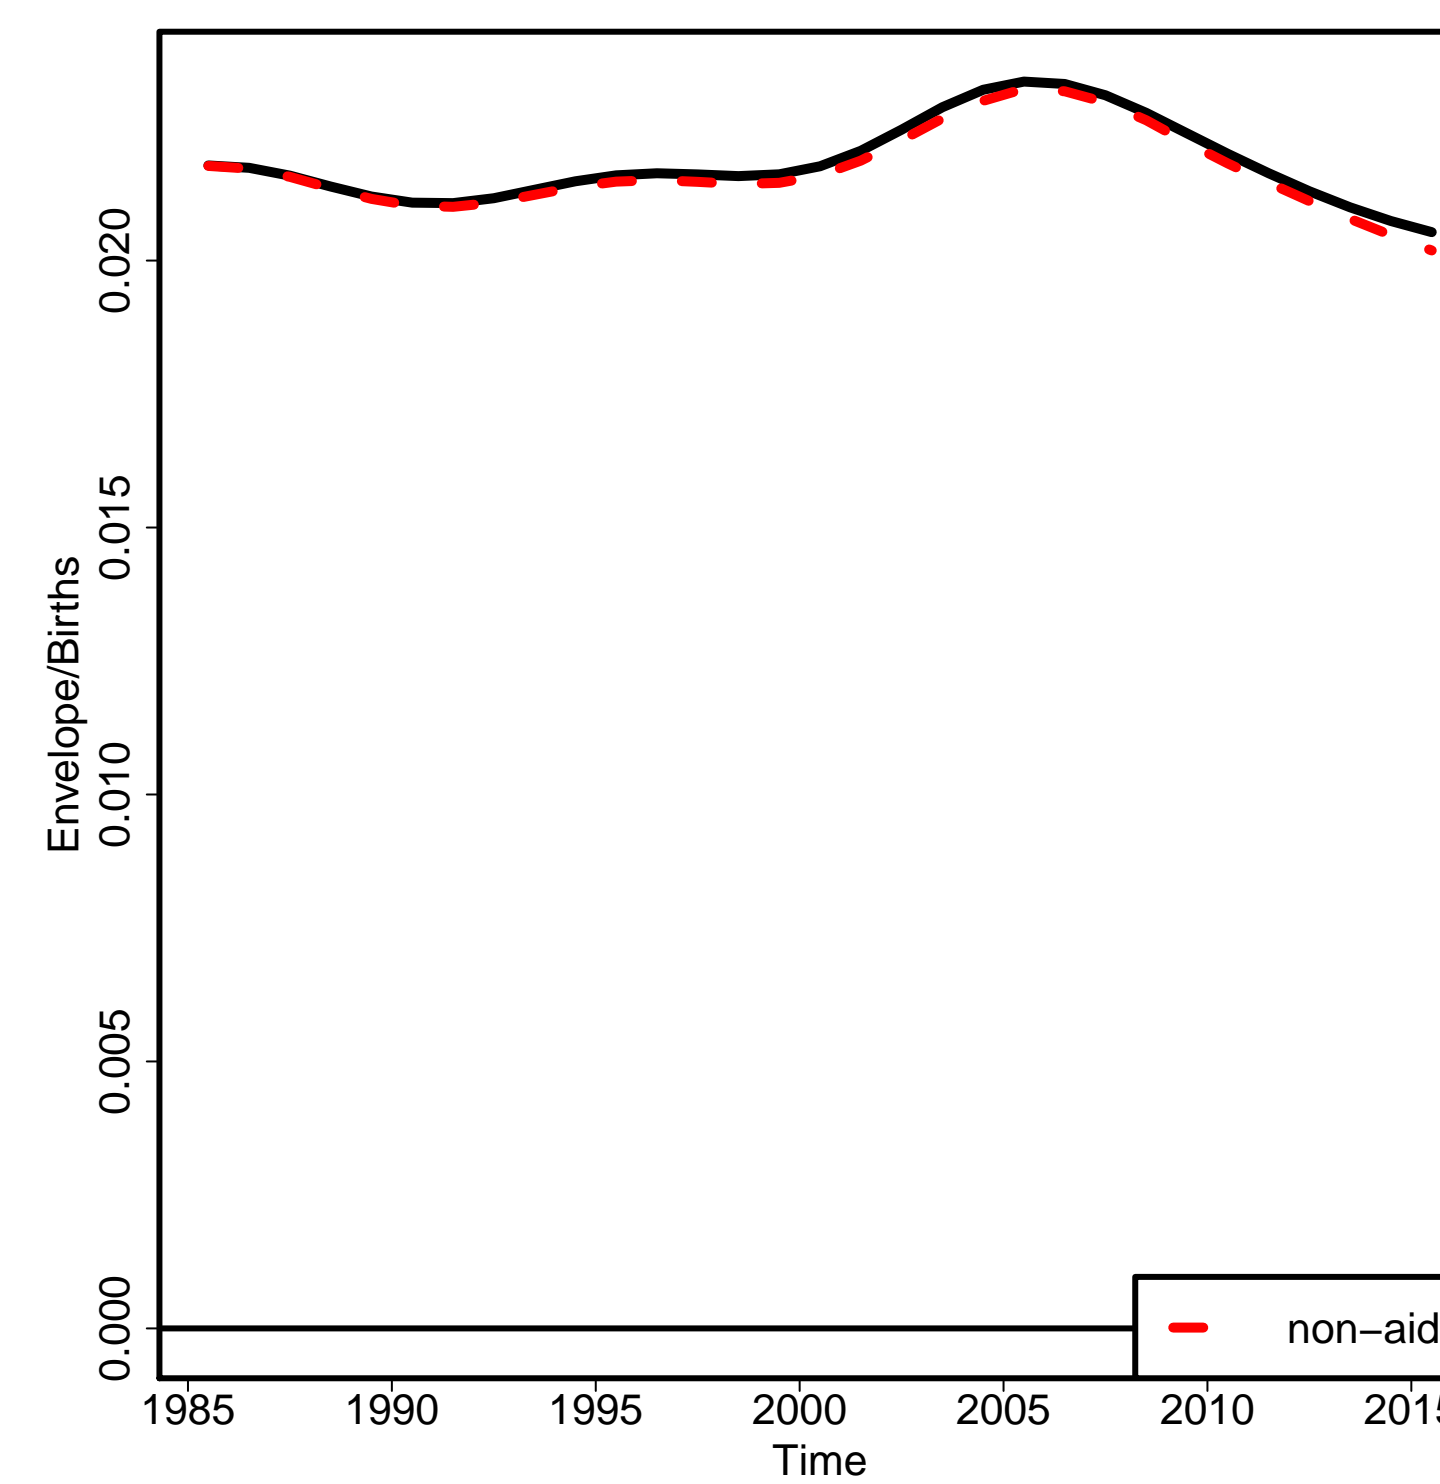

Non-aid MMR

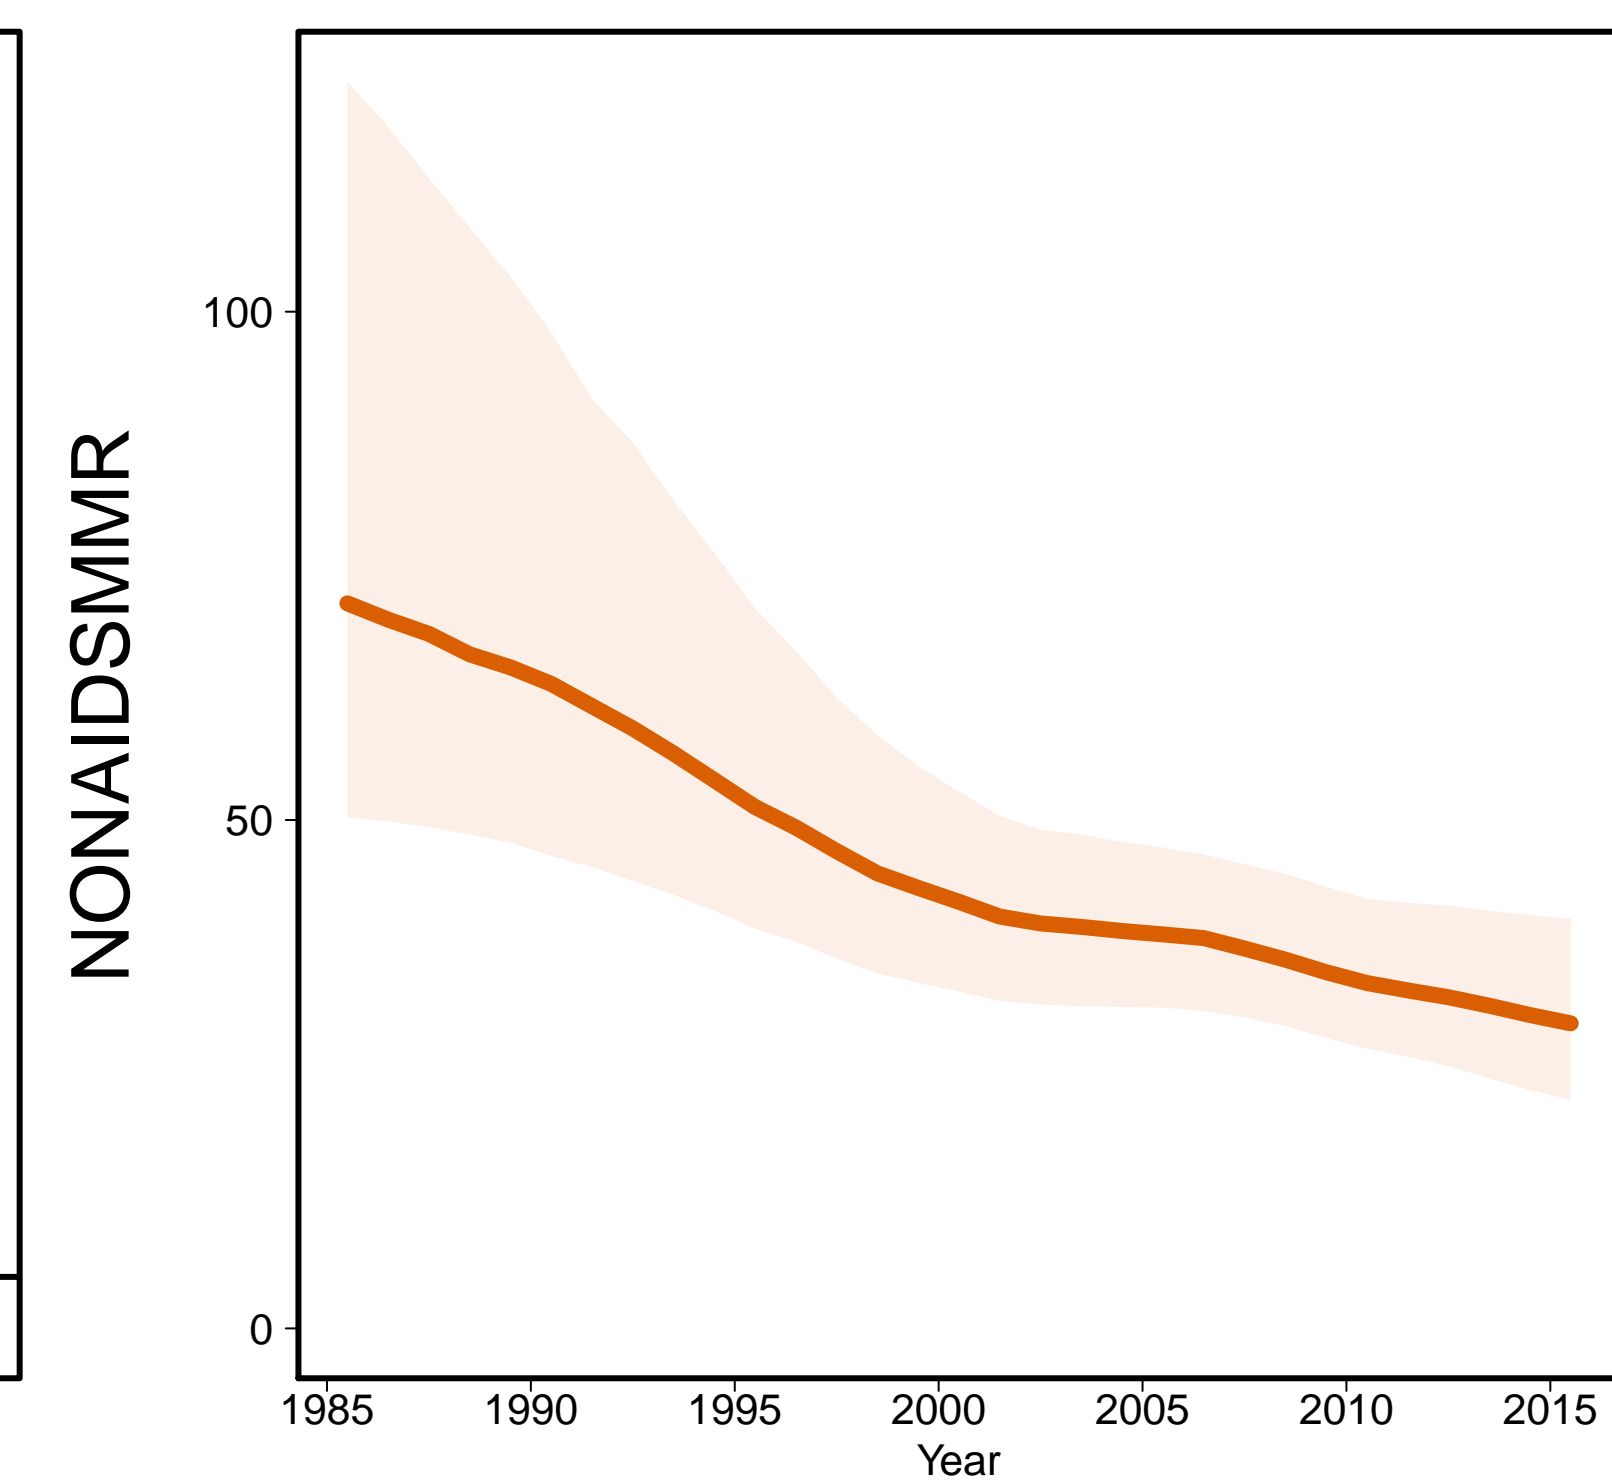

Aids MMR

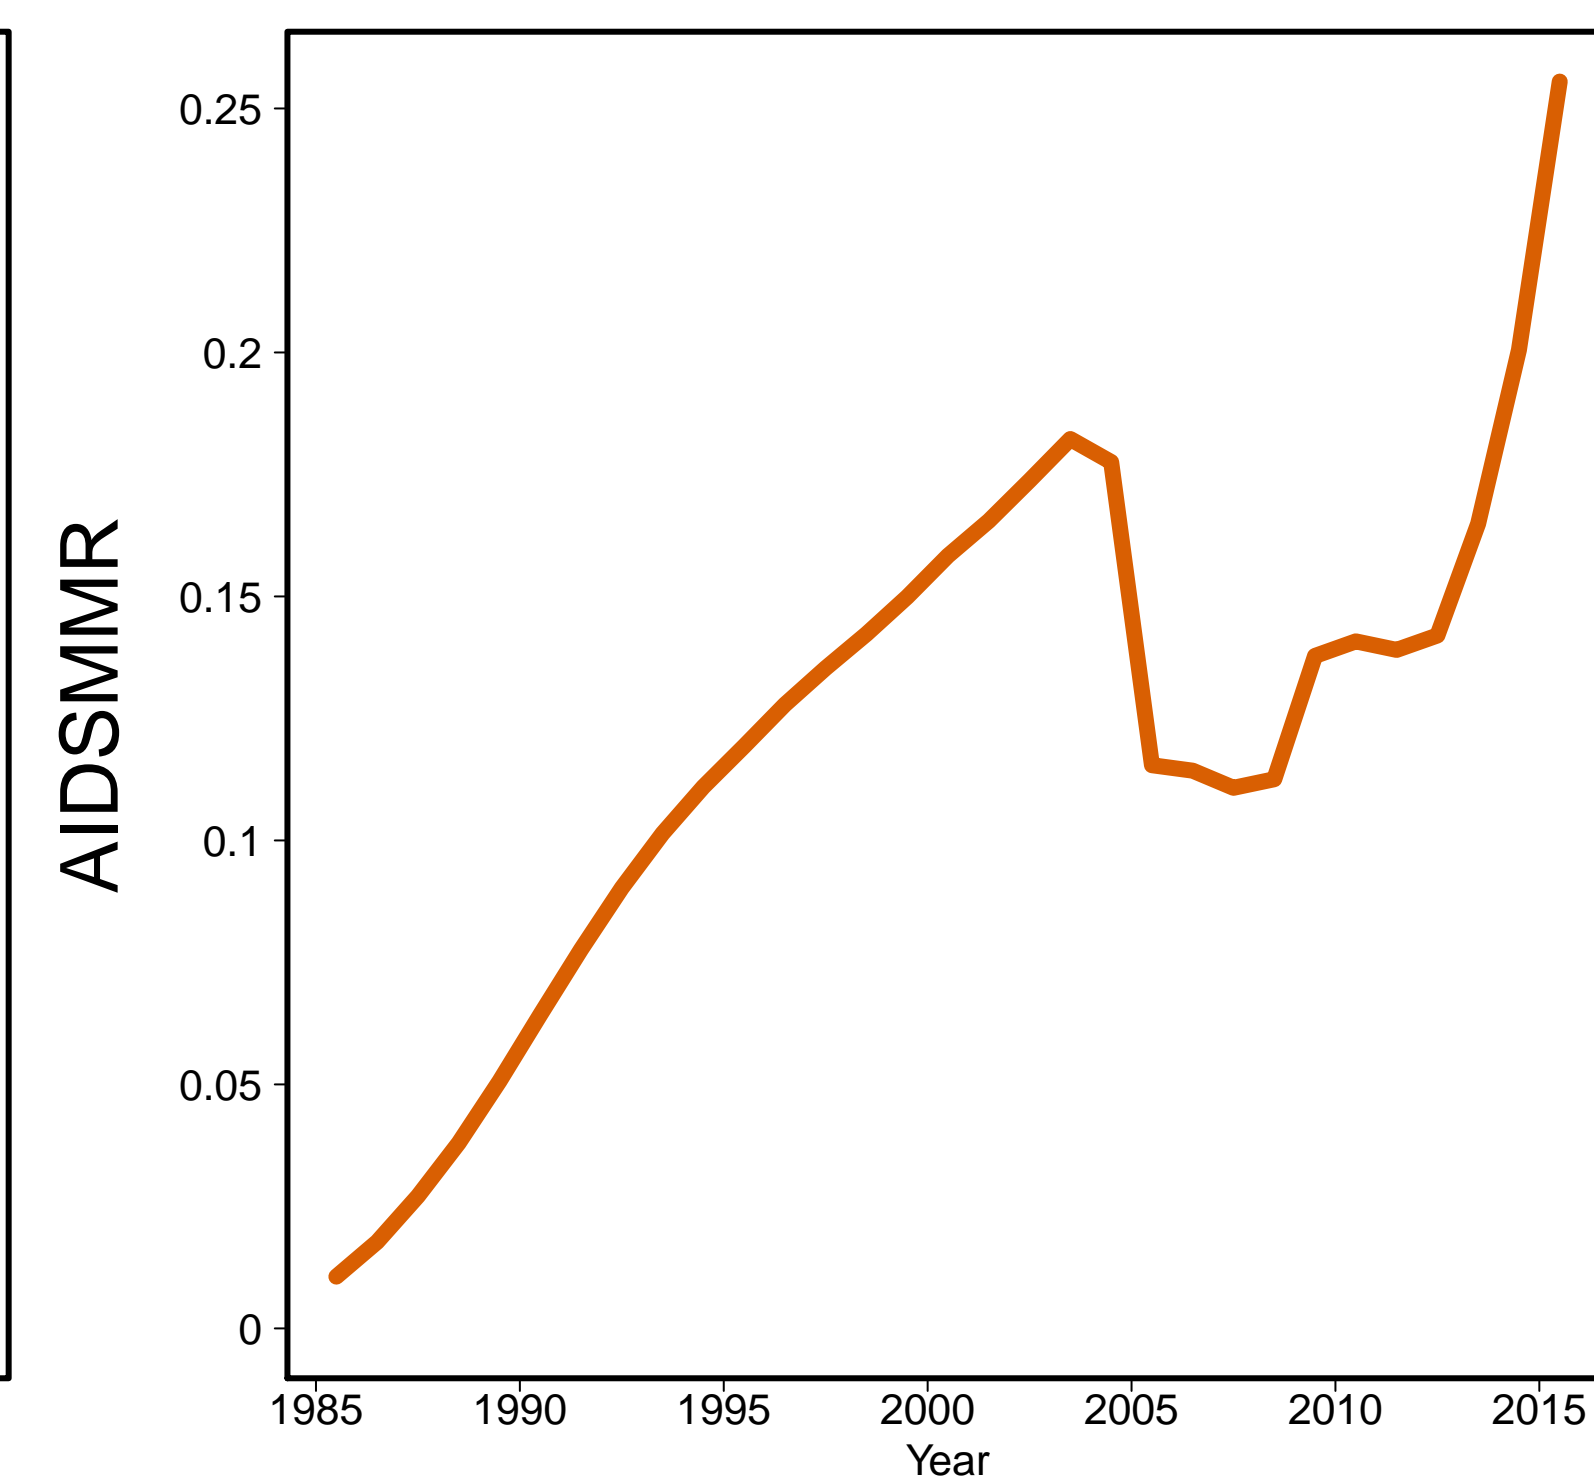



Finland [FIN]  
(Developed regions)

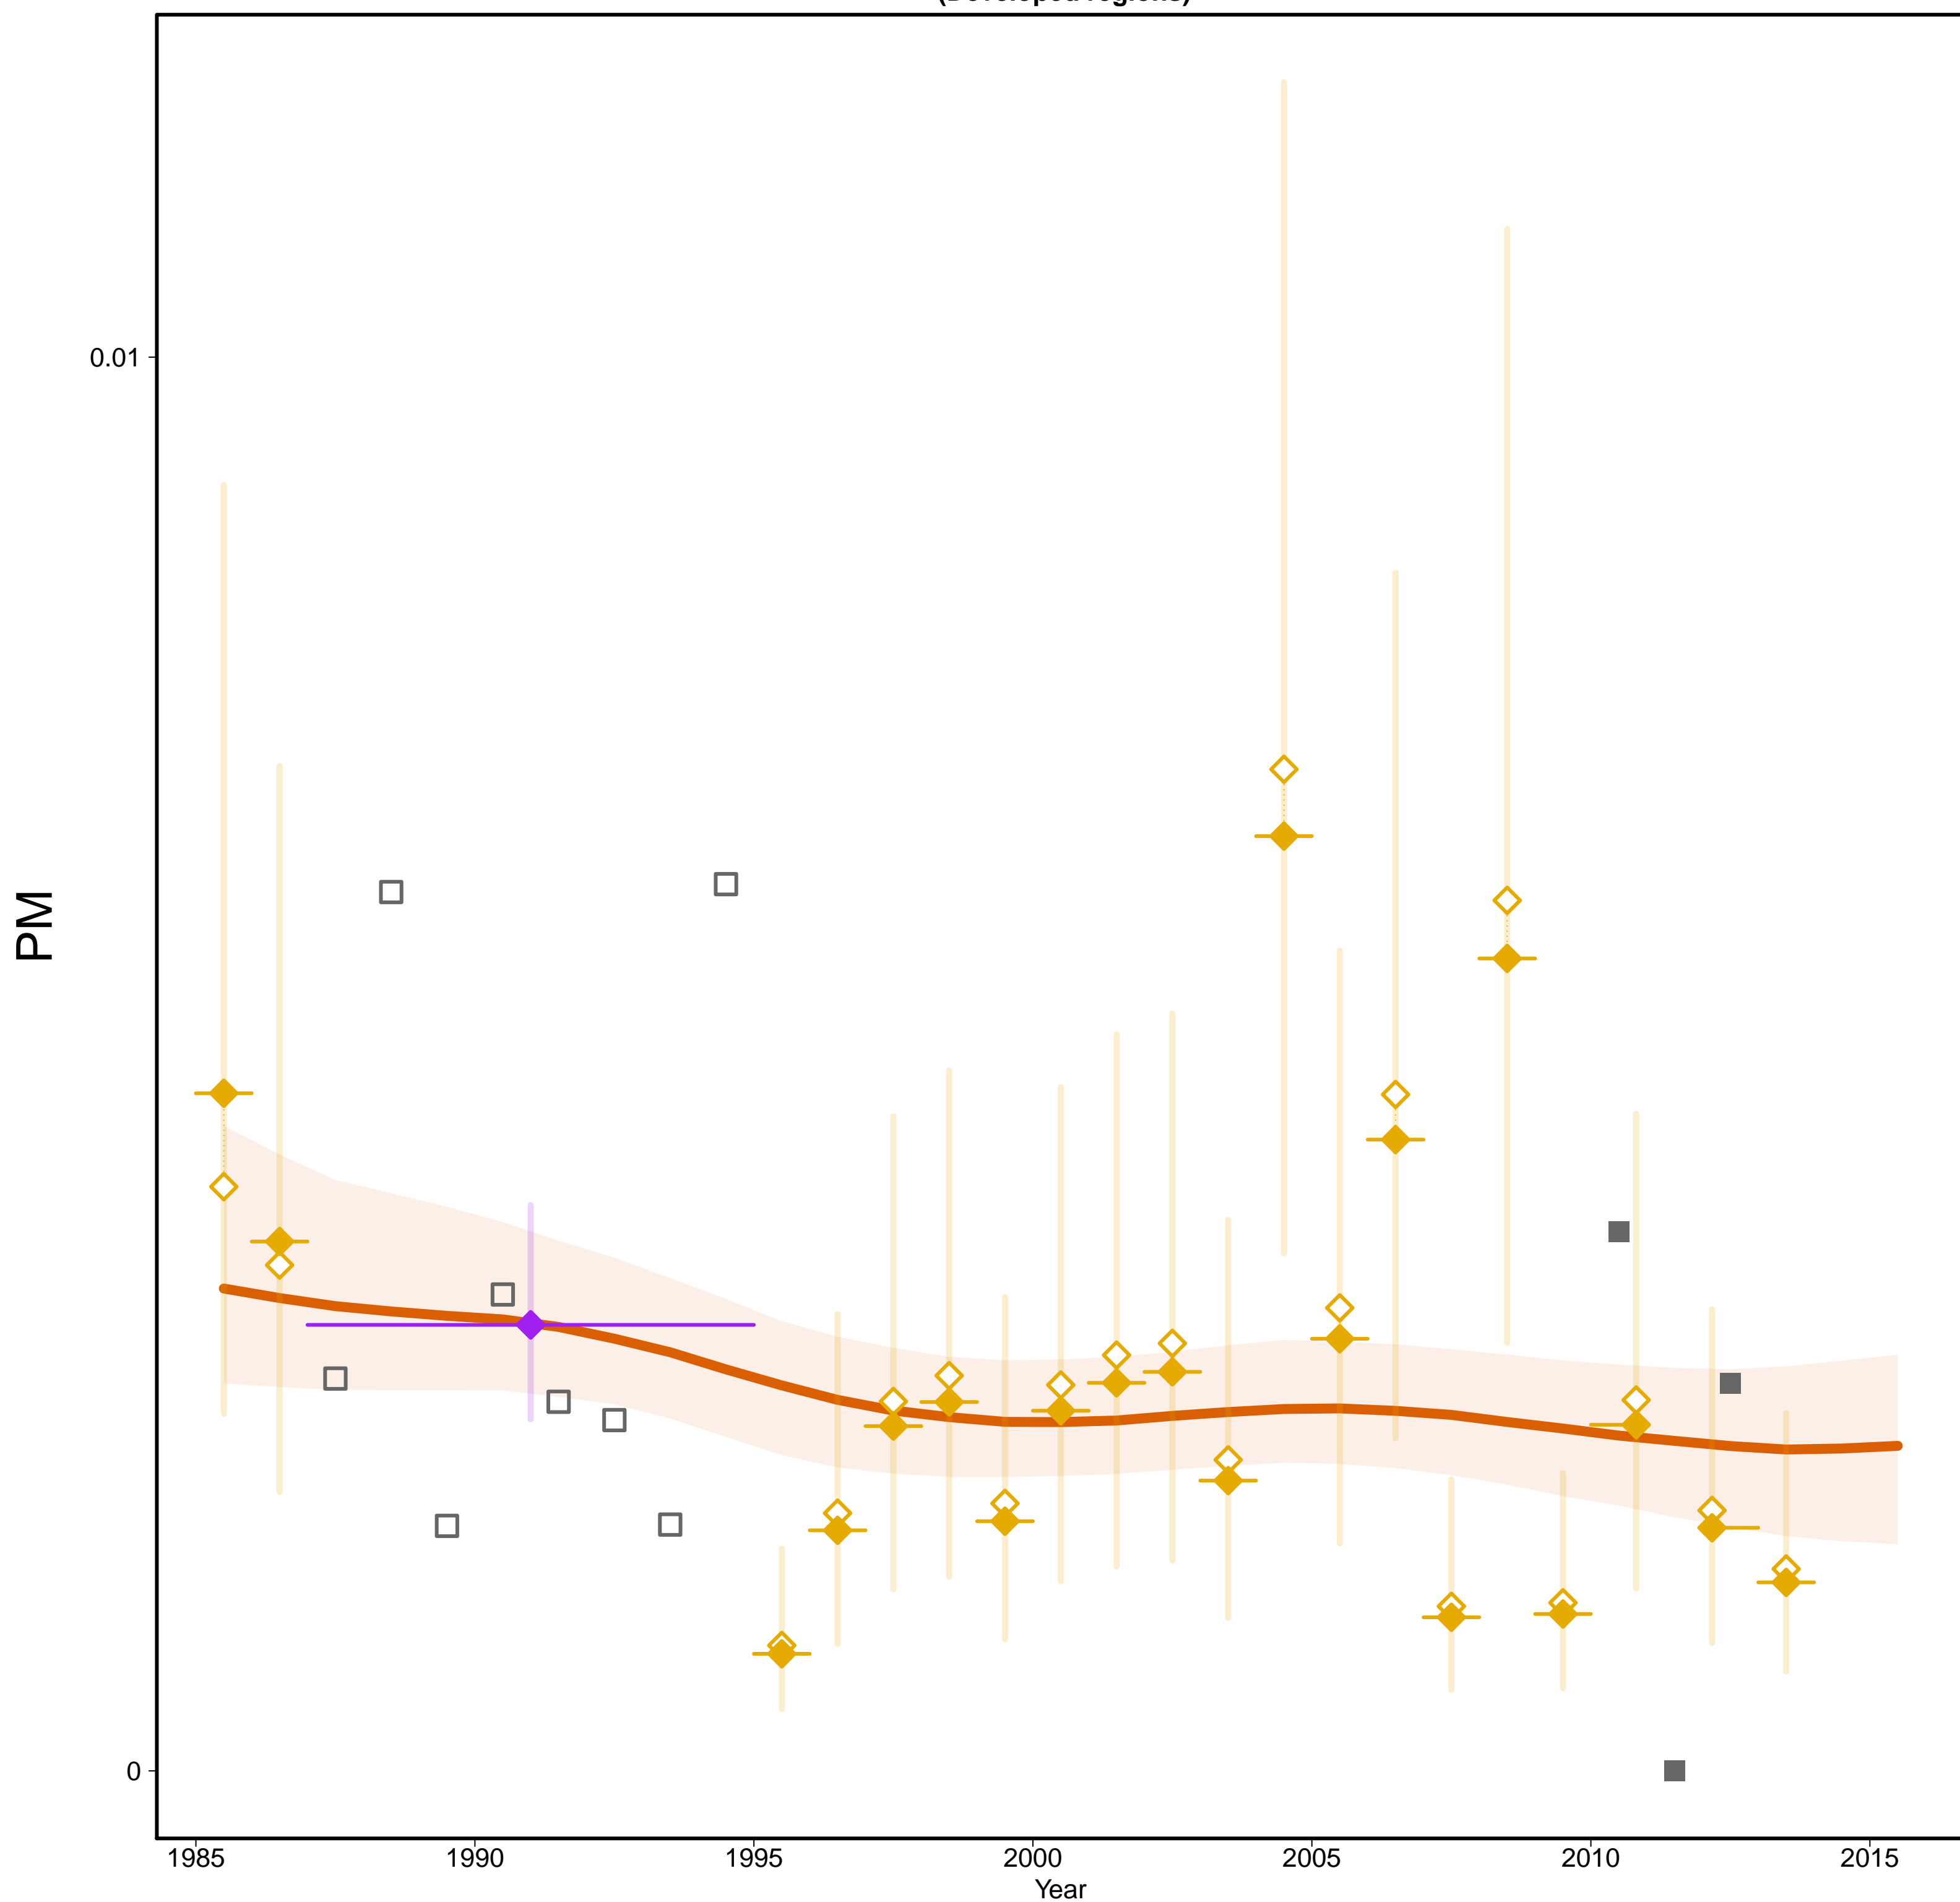

Finland [FIN]  
(Developed regions)

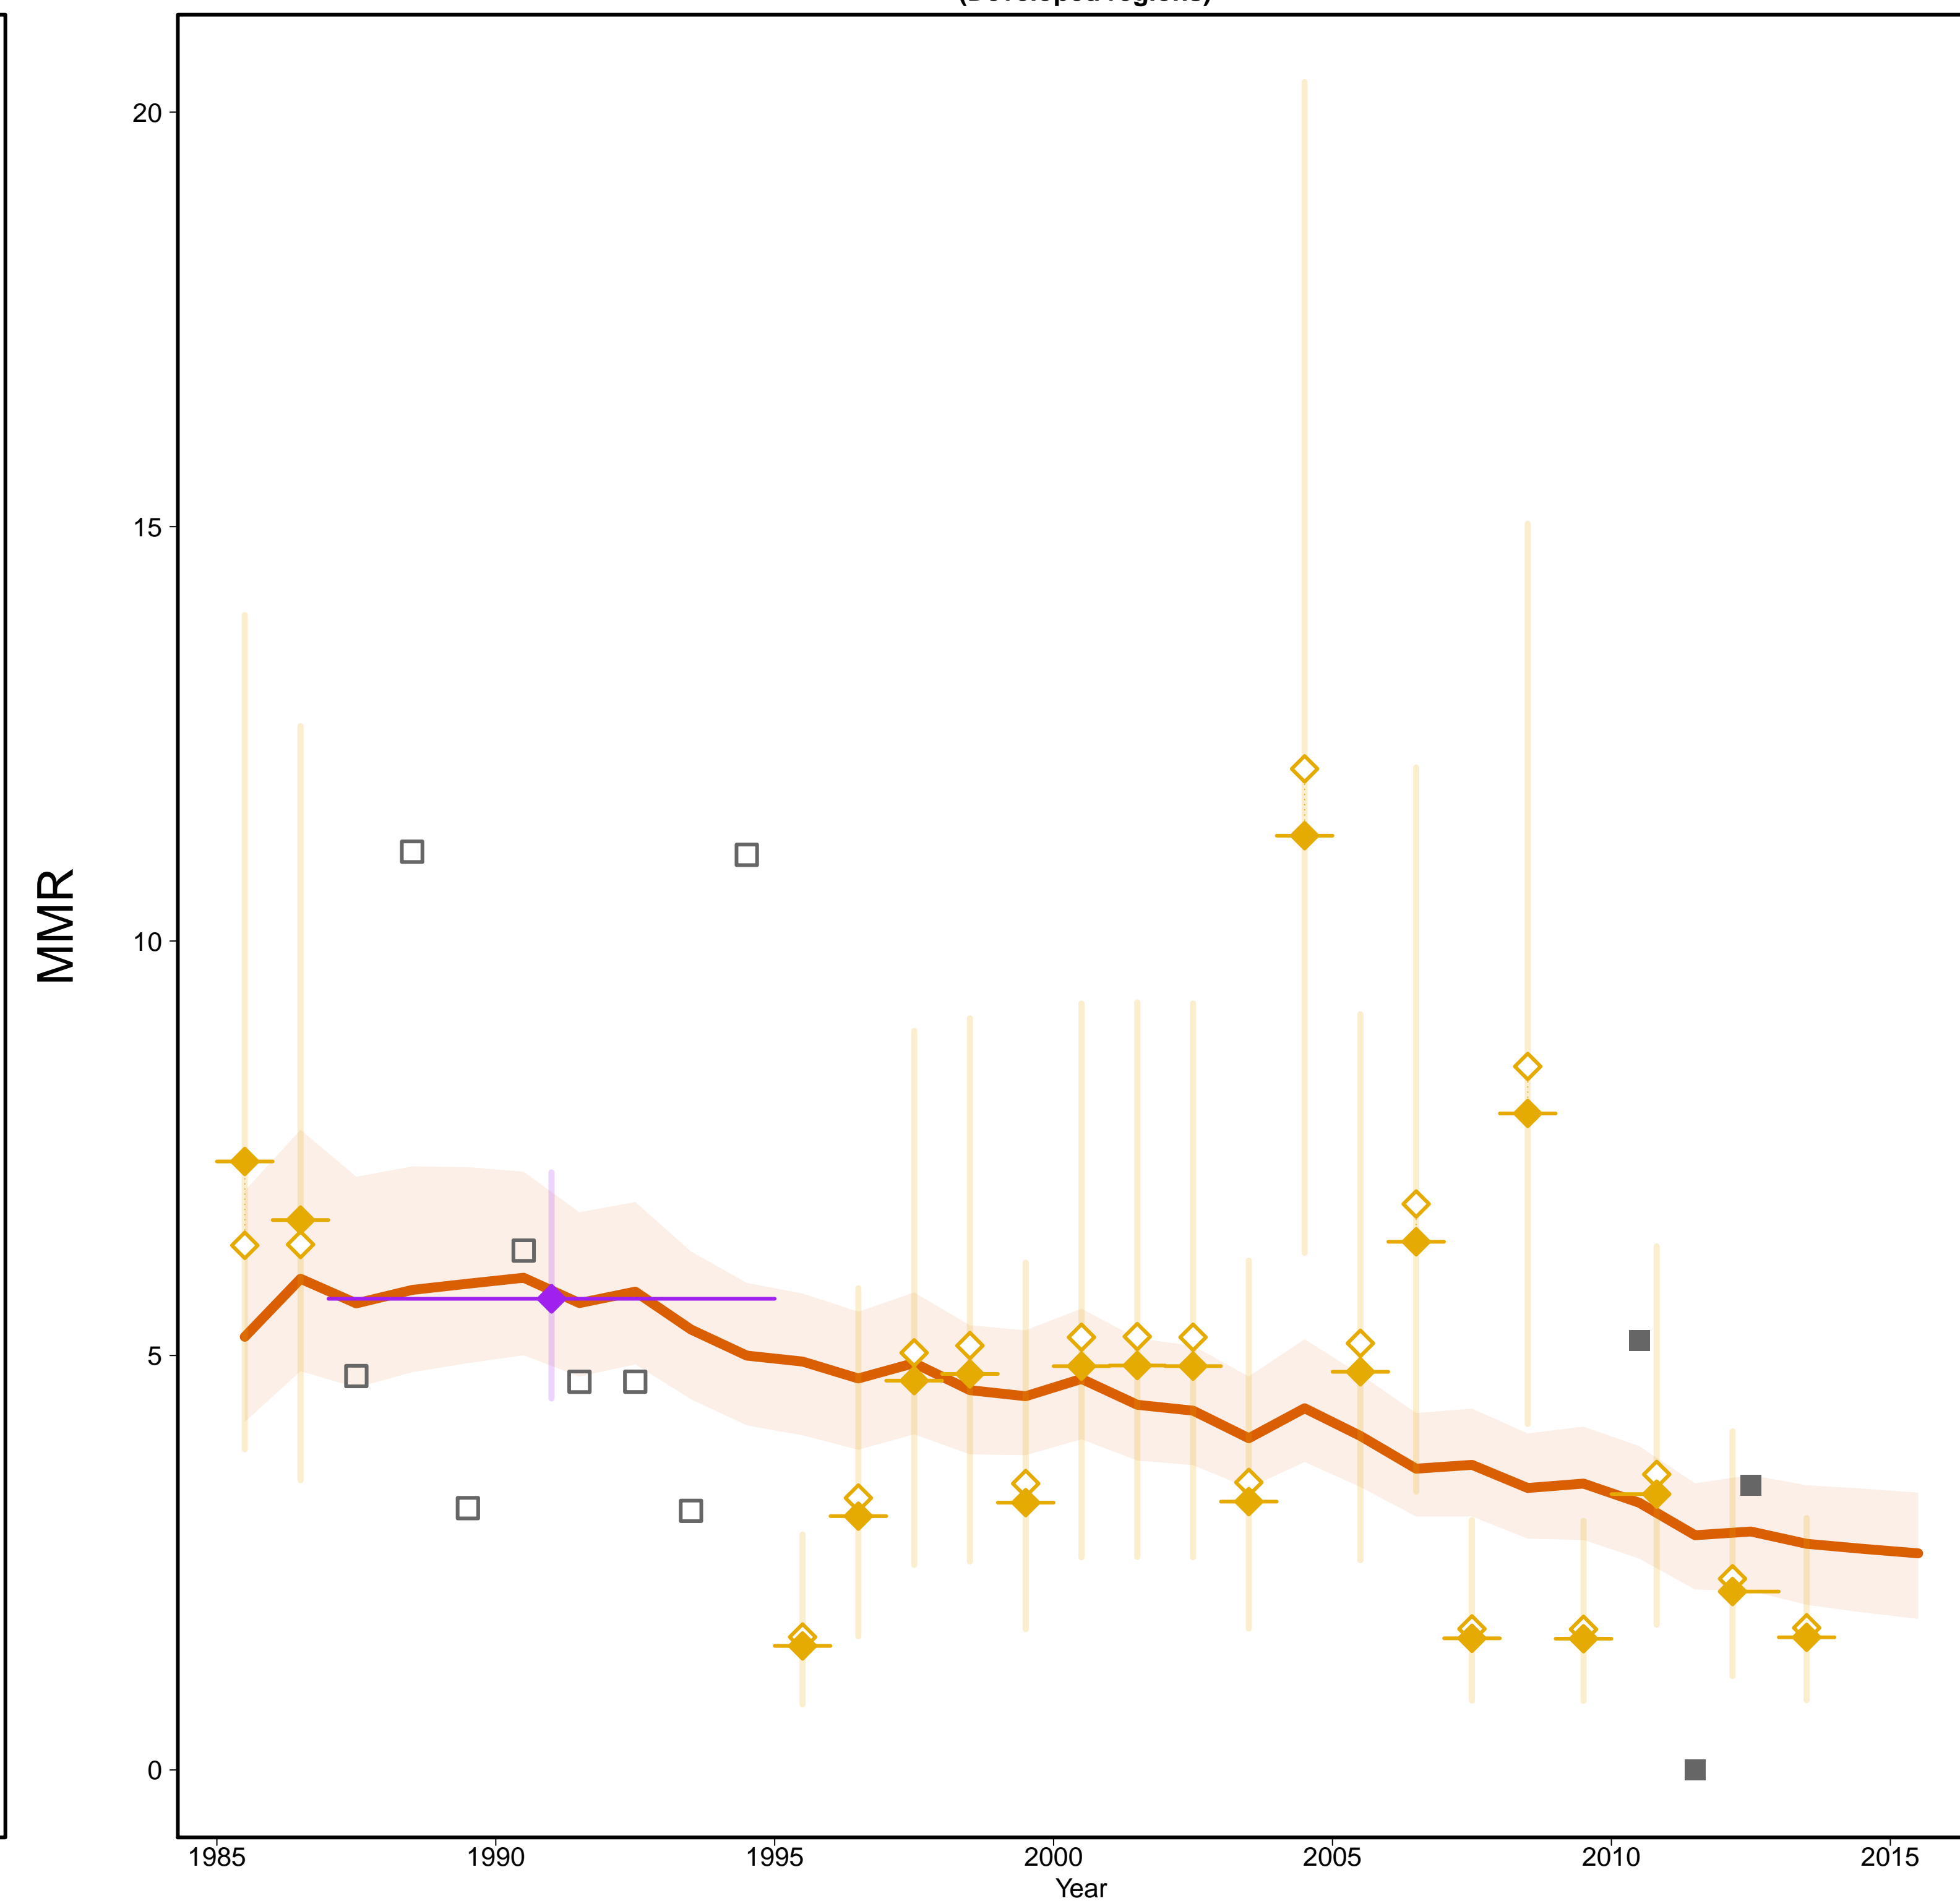

- Estimates –
- Mlate
- MMR Database 2015 –
- ◇ Observed Data
- ◆ Adjusted Data
- Data type –
- ◆ VR
- ◆ Spec. studies
- Reported VR before recalc.  
(related to 0 obs. mat. death)
- Excluded VR data  
(overlap with specialized study)

Gross Domestic Product

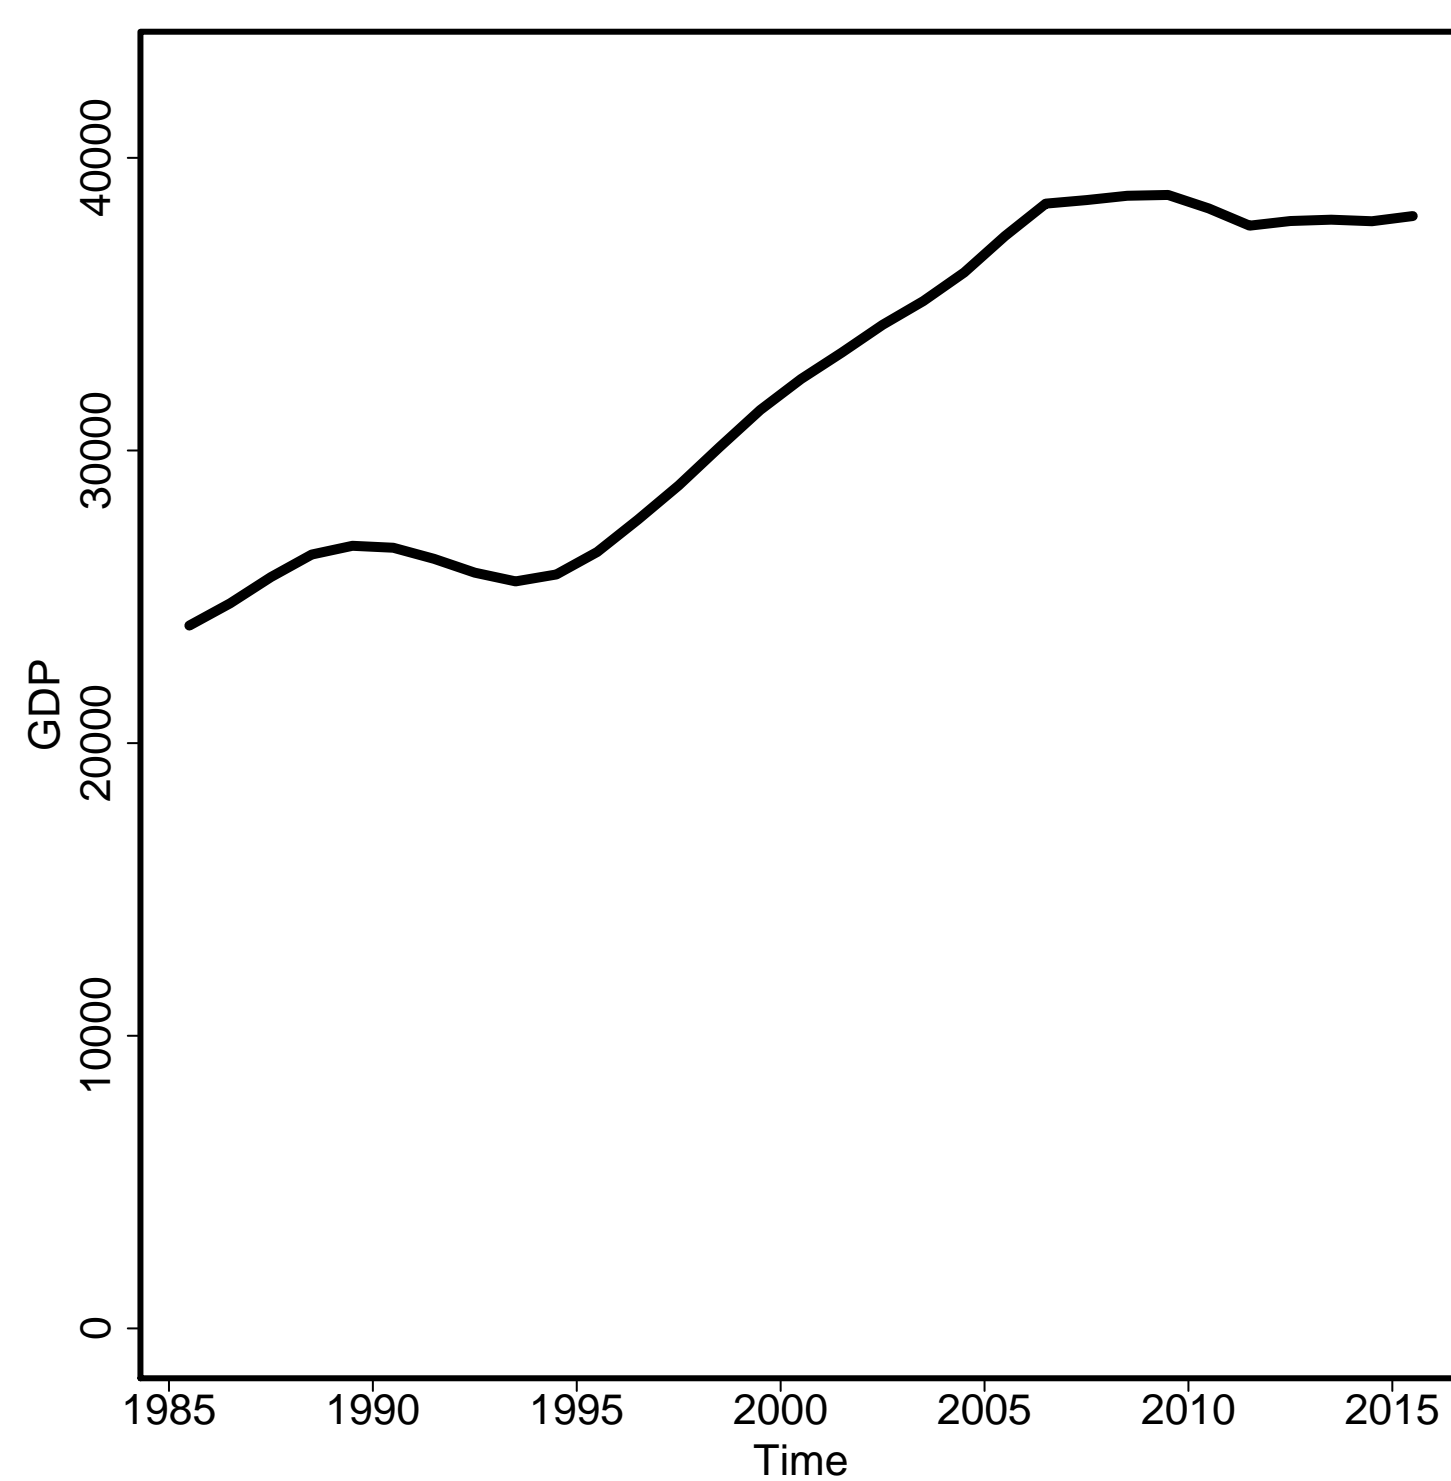

General Fertility Rate

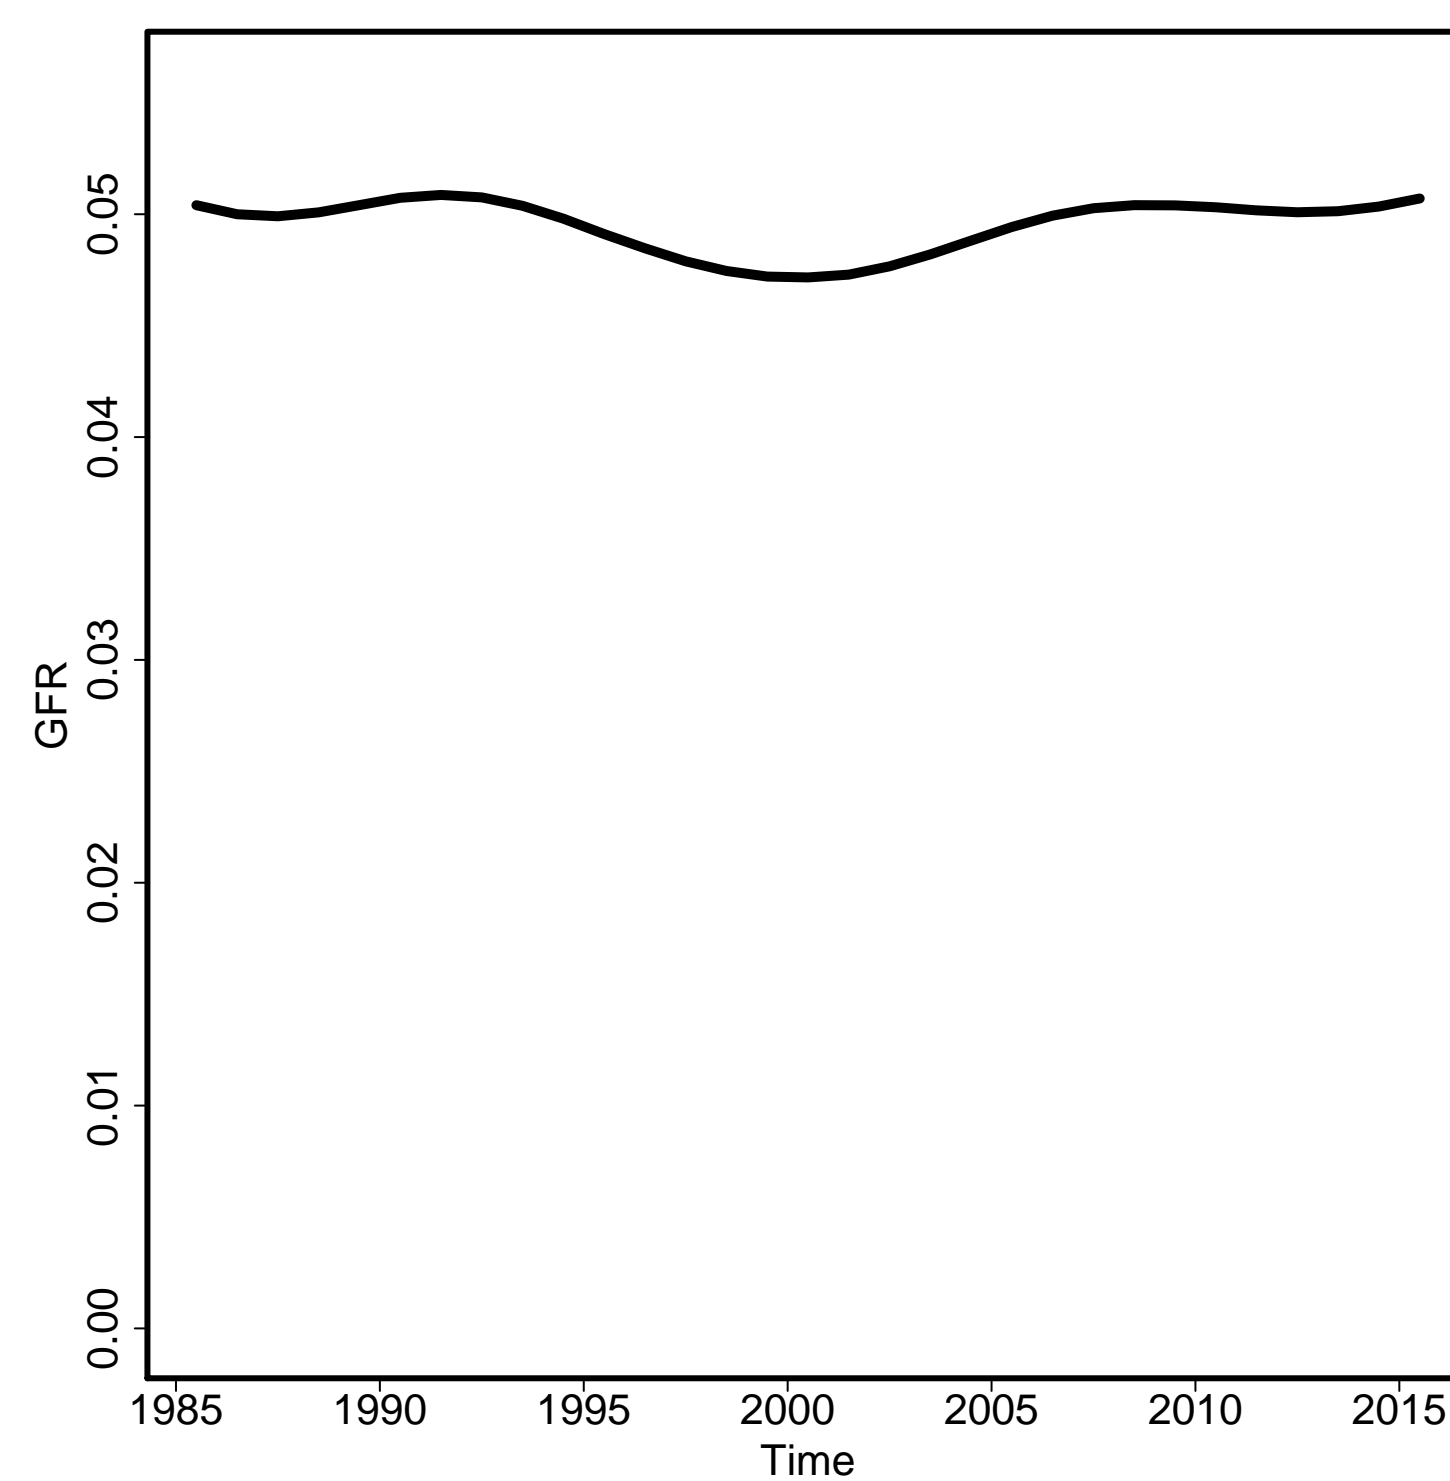

Skilled Attendance to Birth

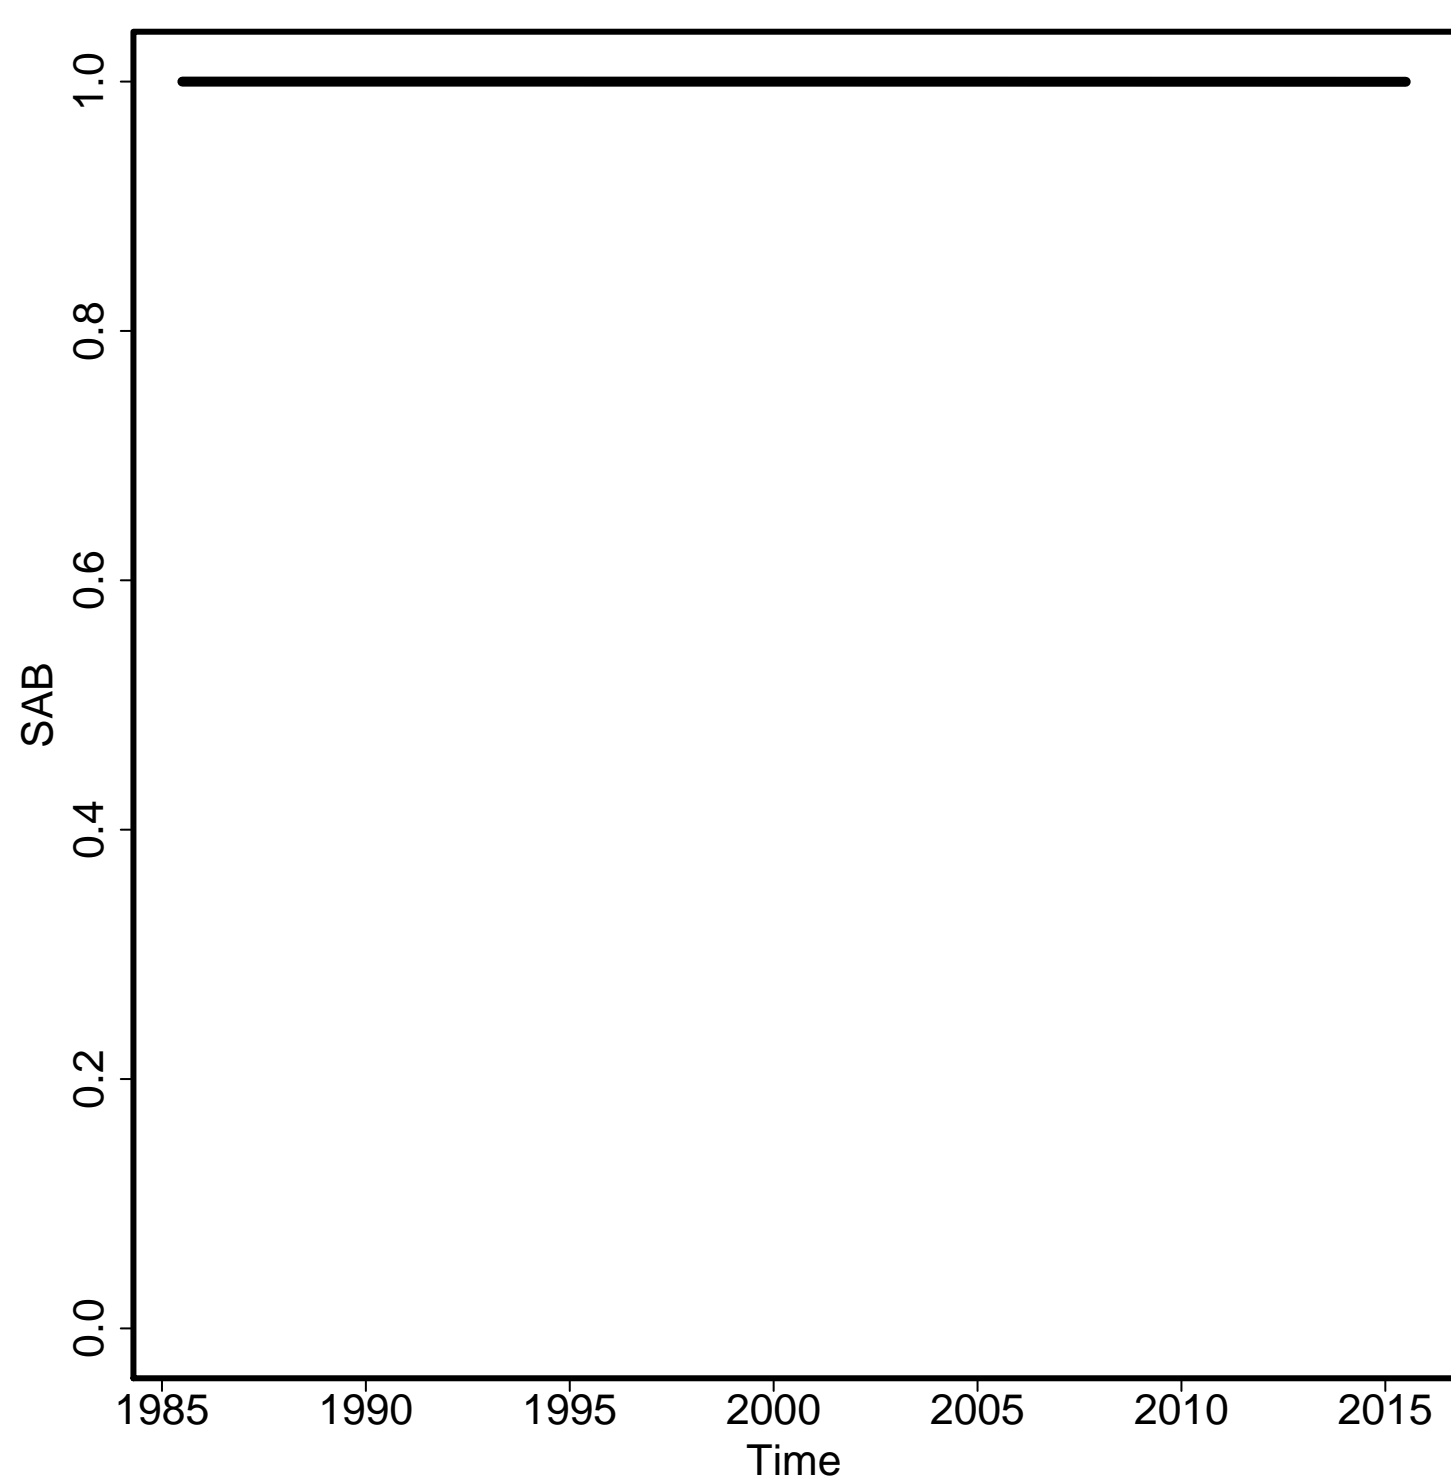

Envelope/Births

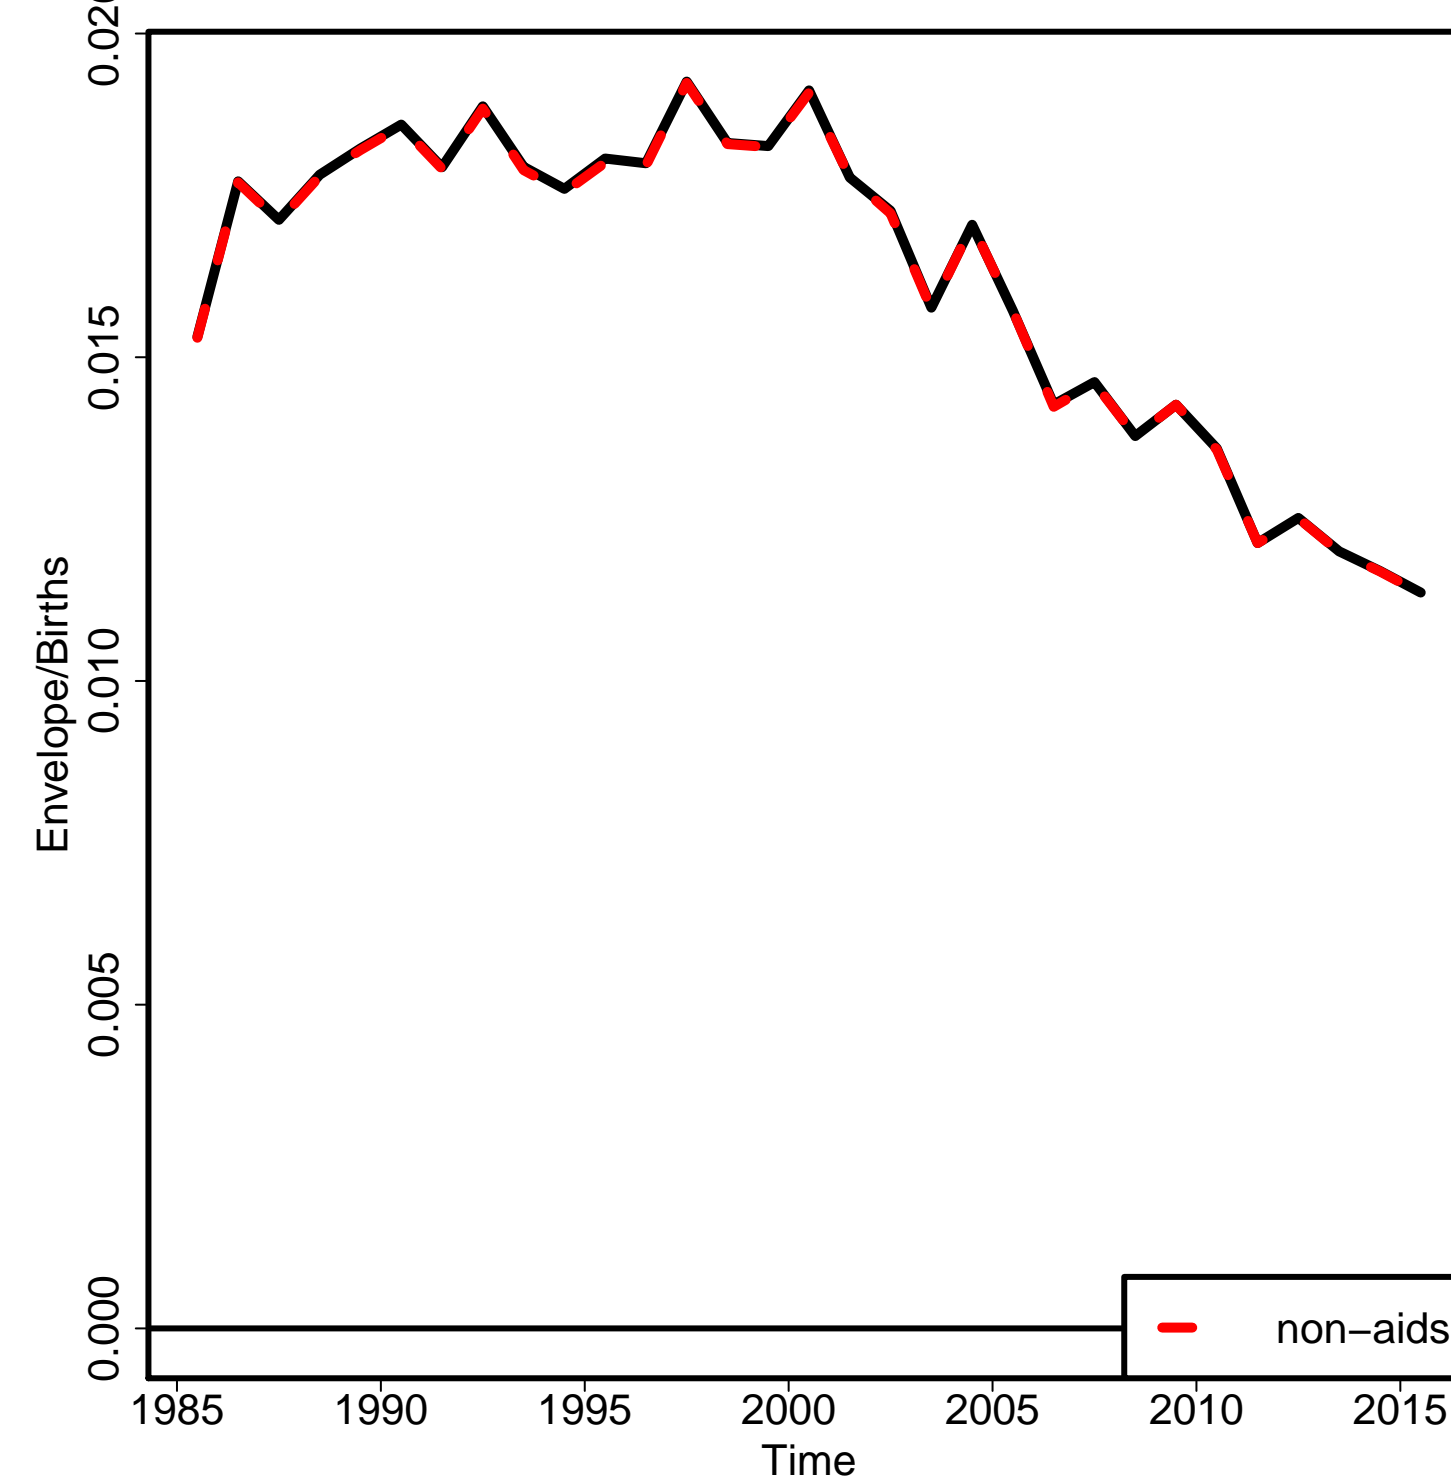

NONAIDSMMR

Non-aid MMR

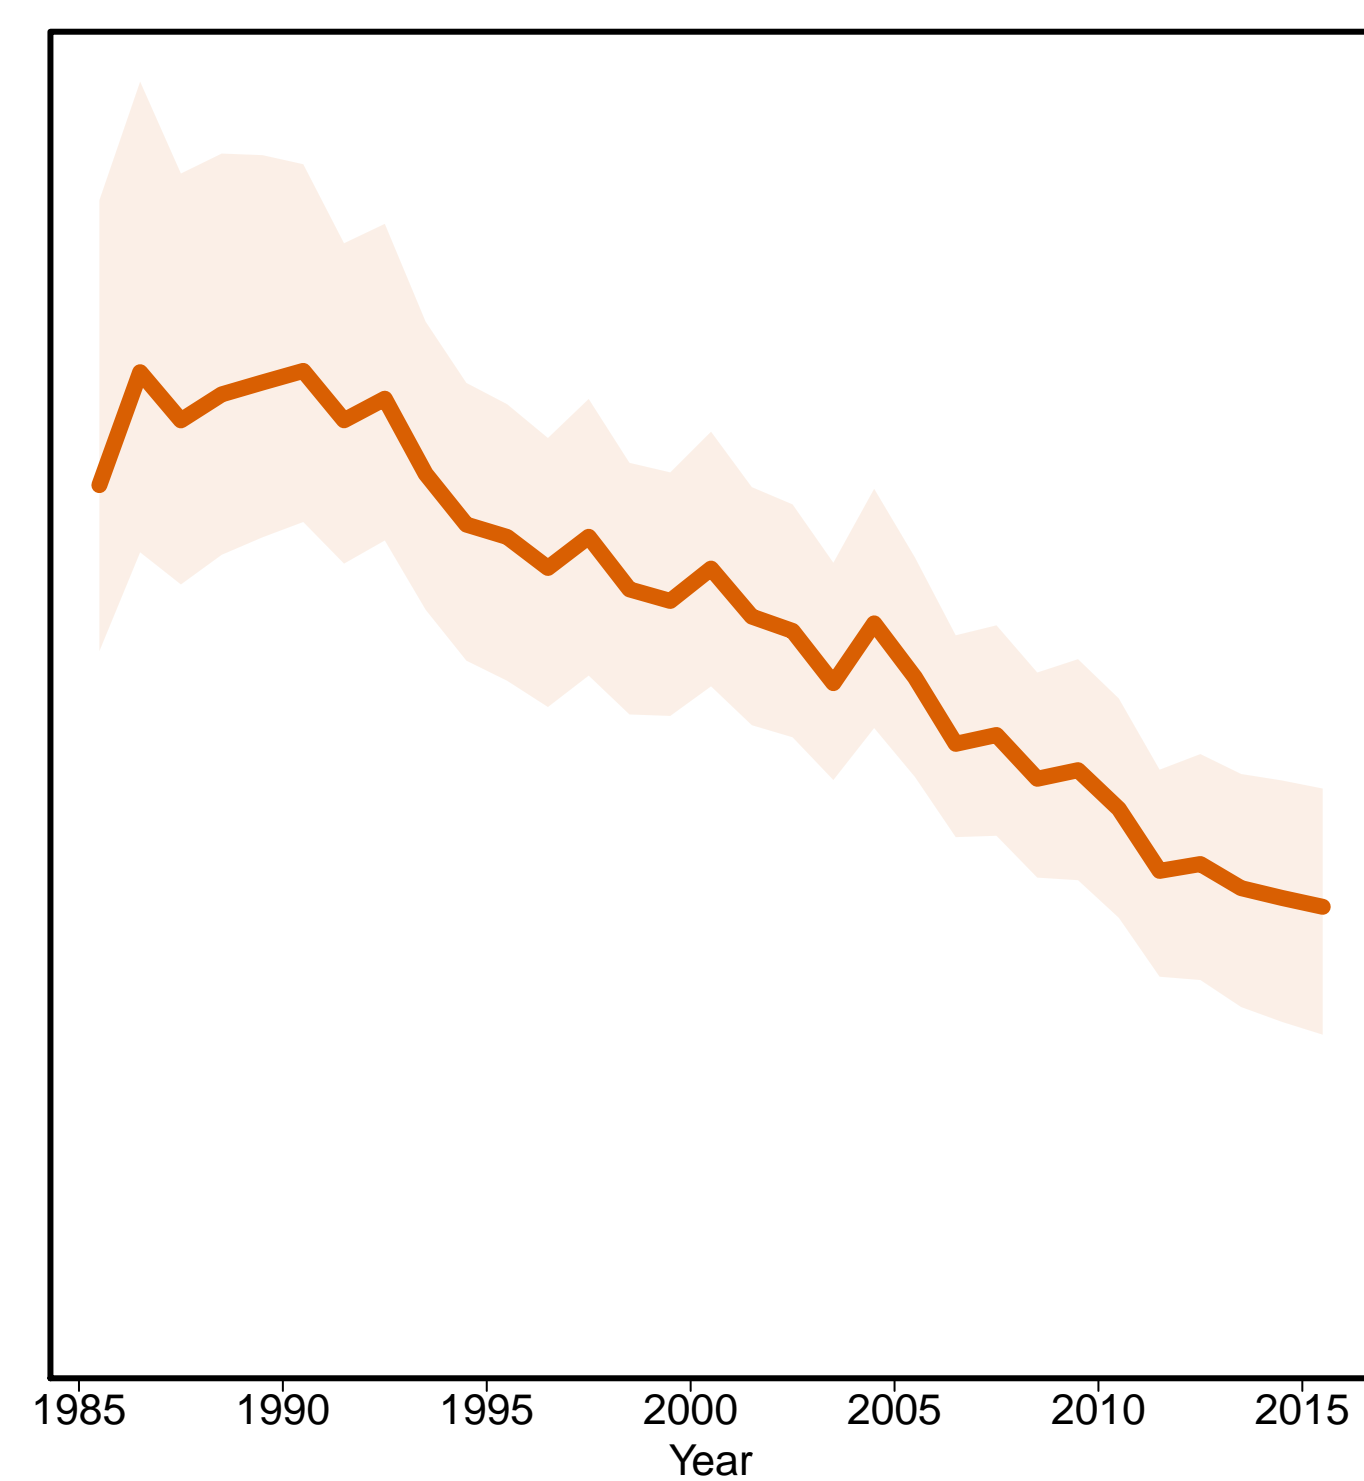

Aids MMR

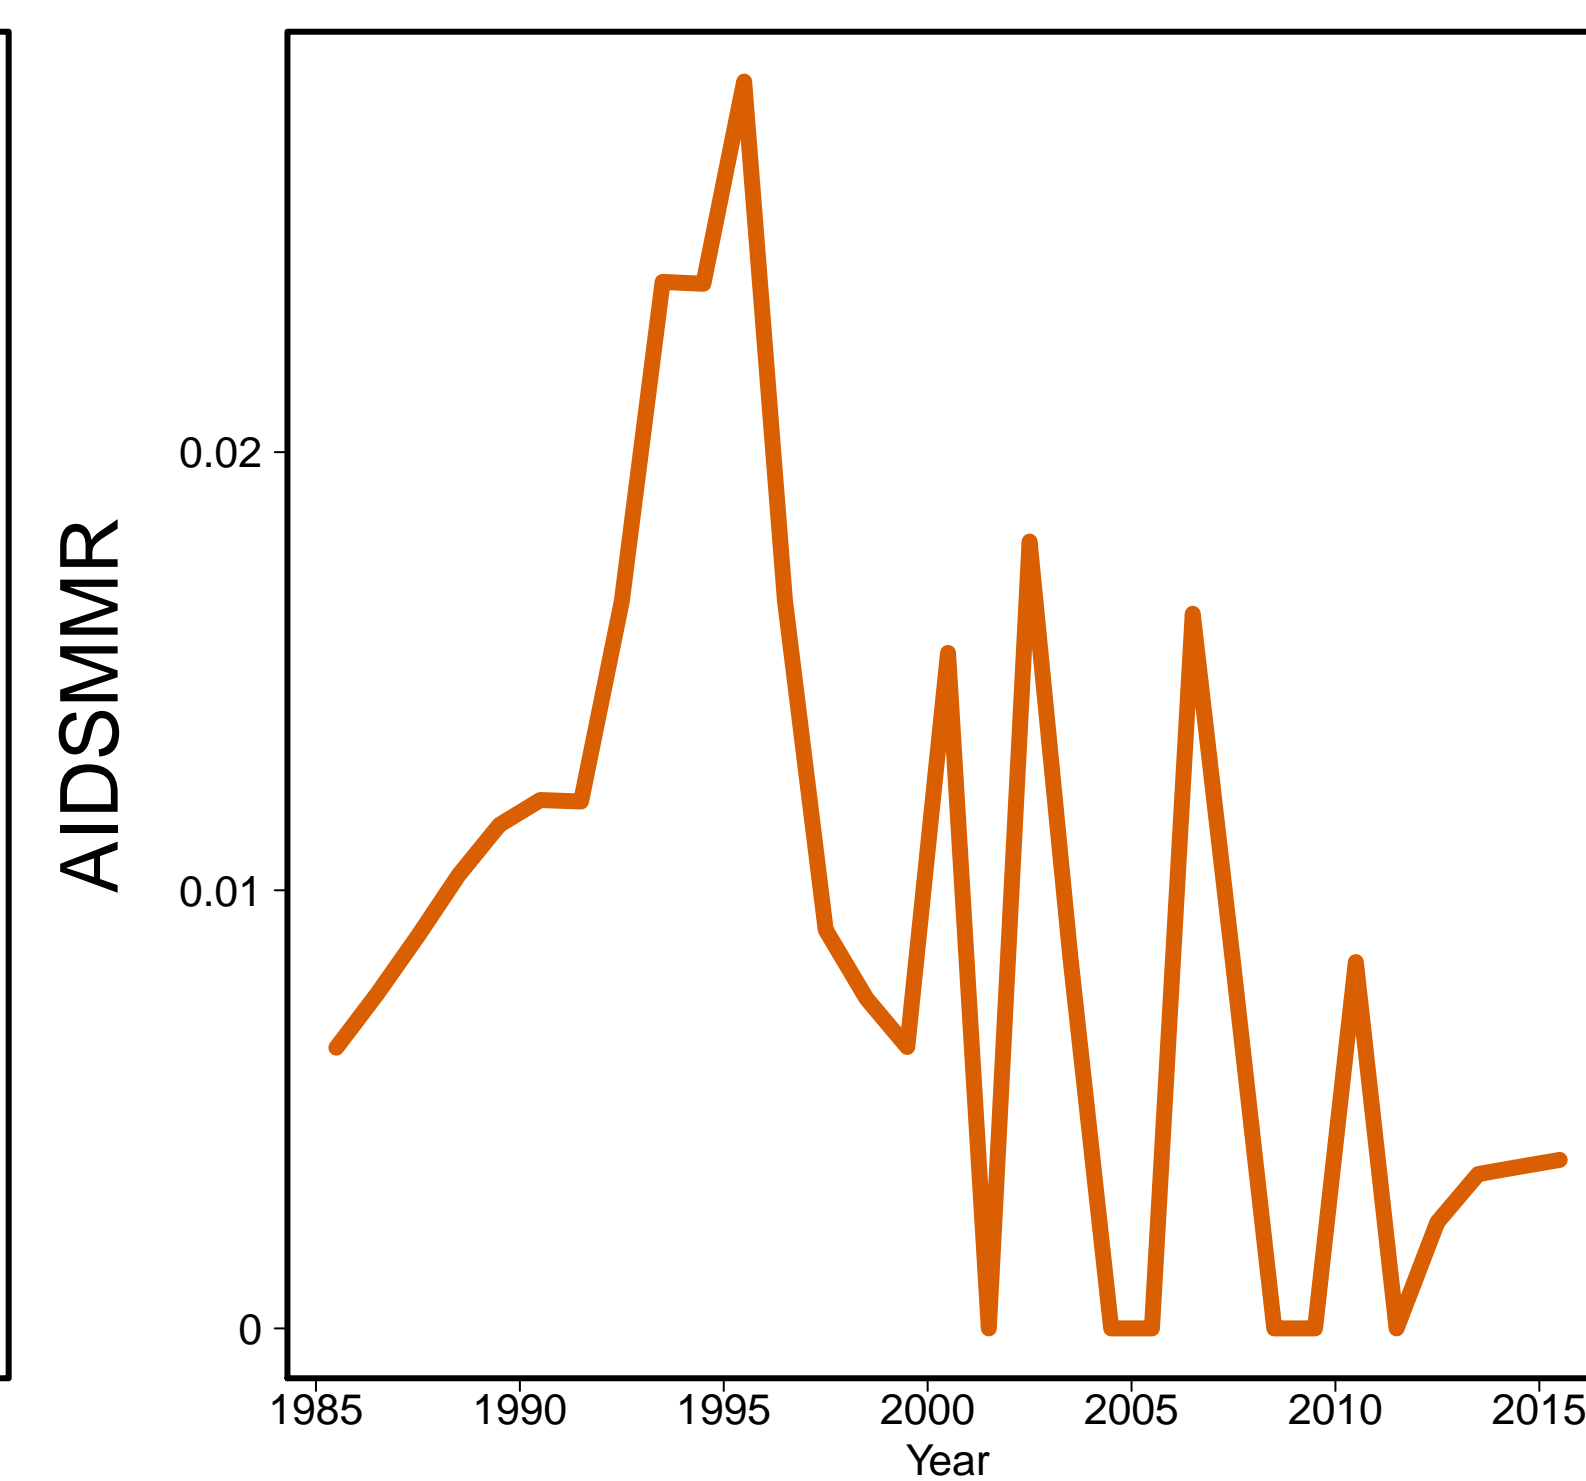

France [FRA]  
(Developed regions)

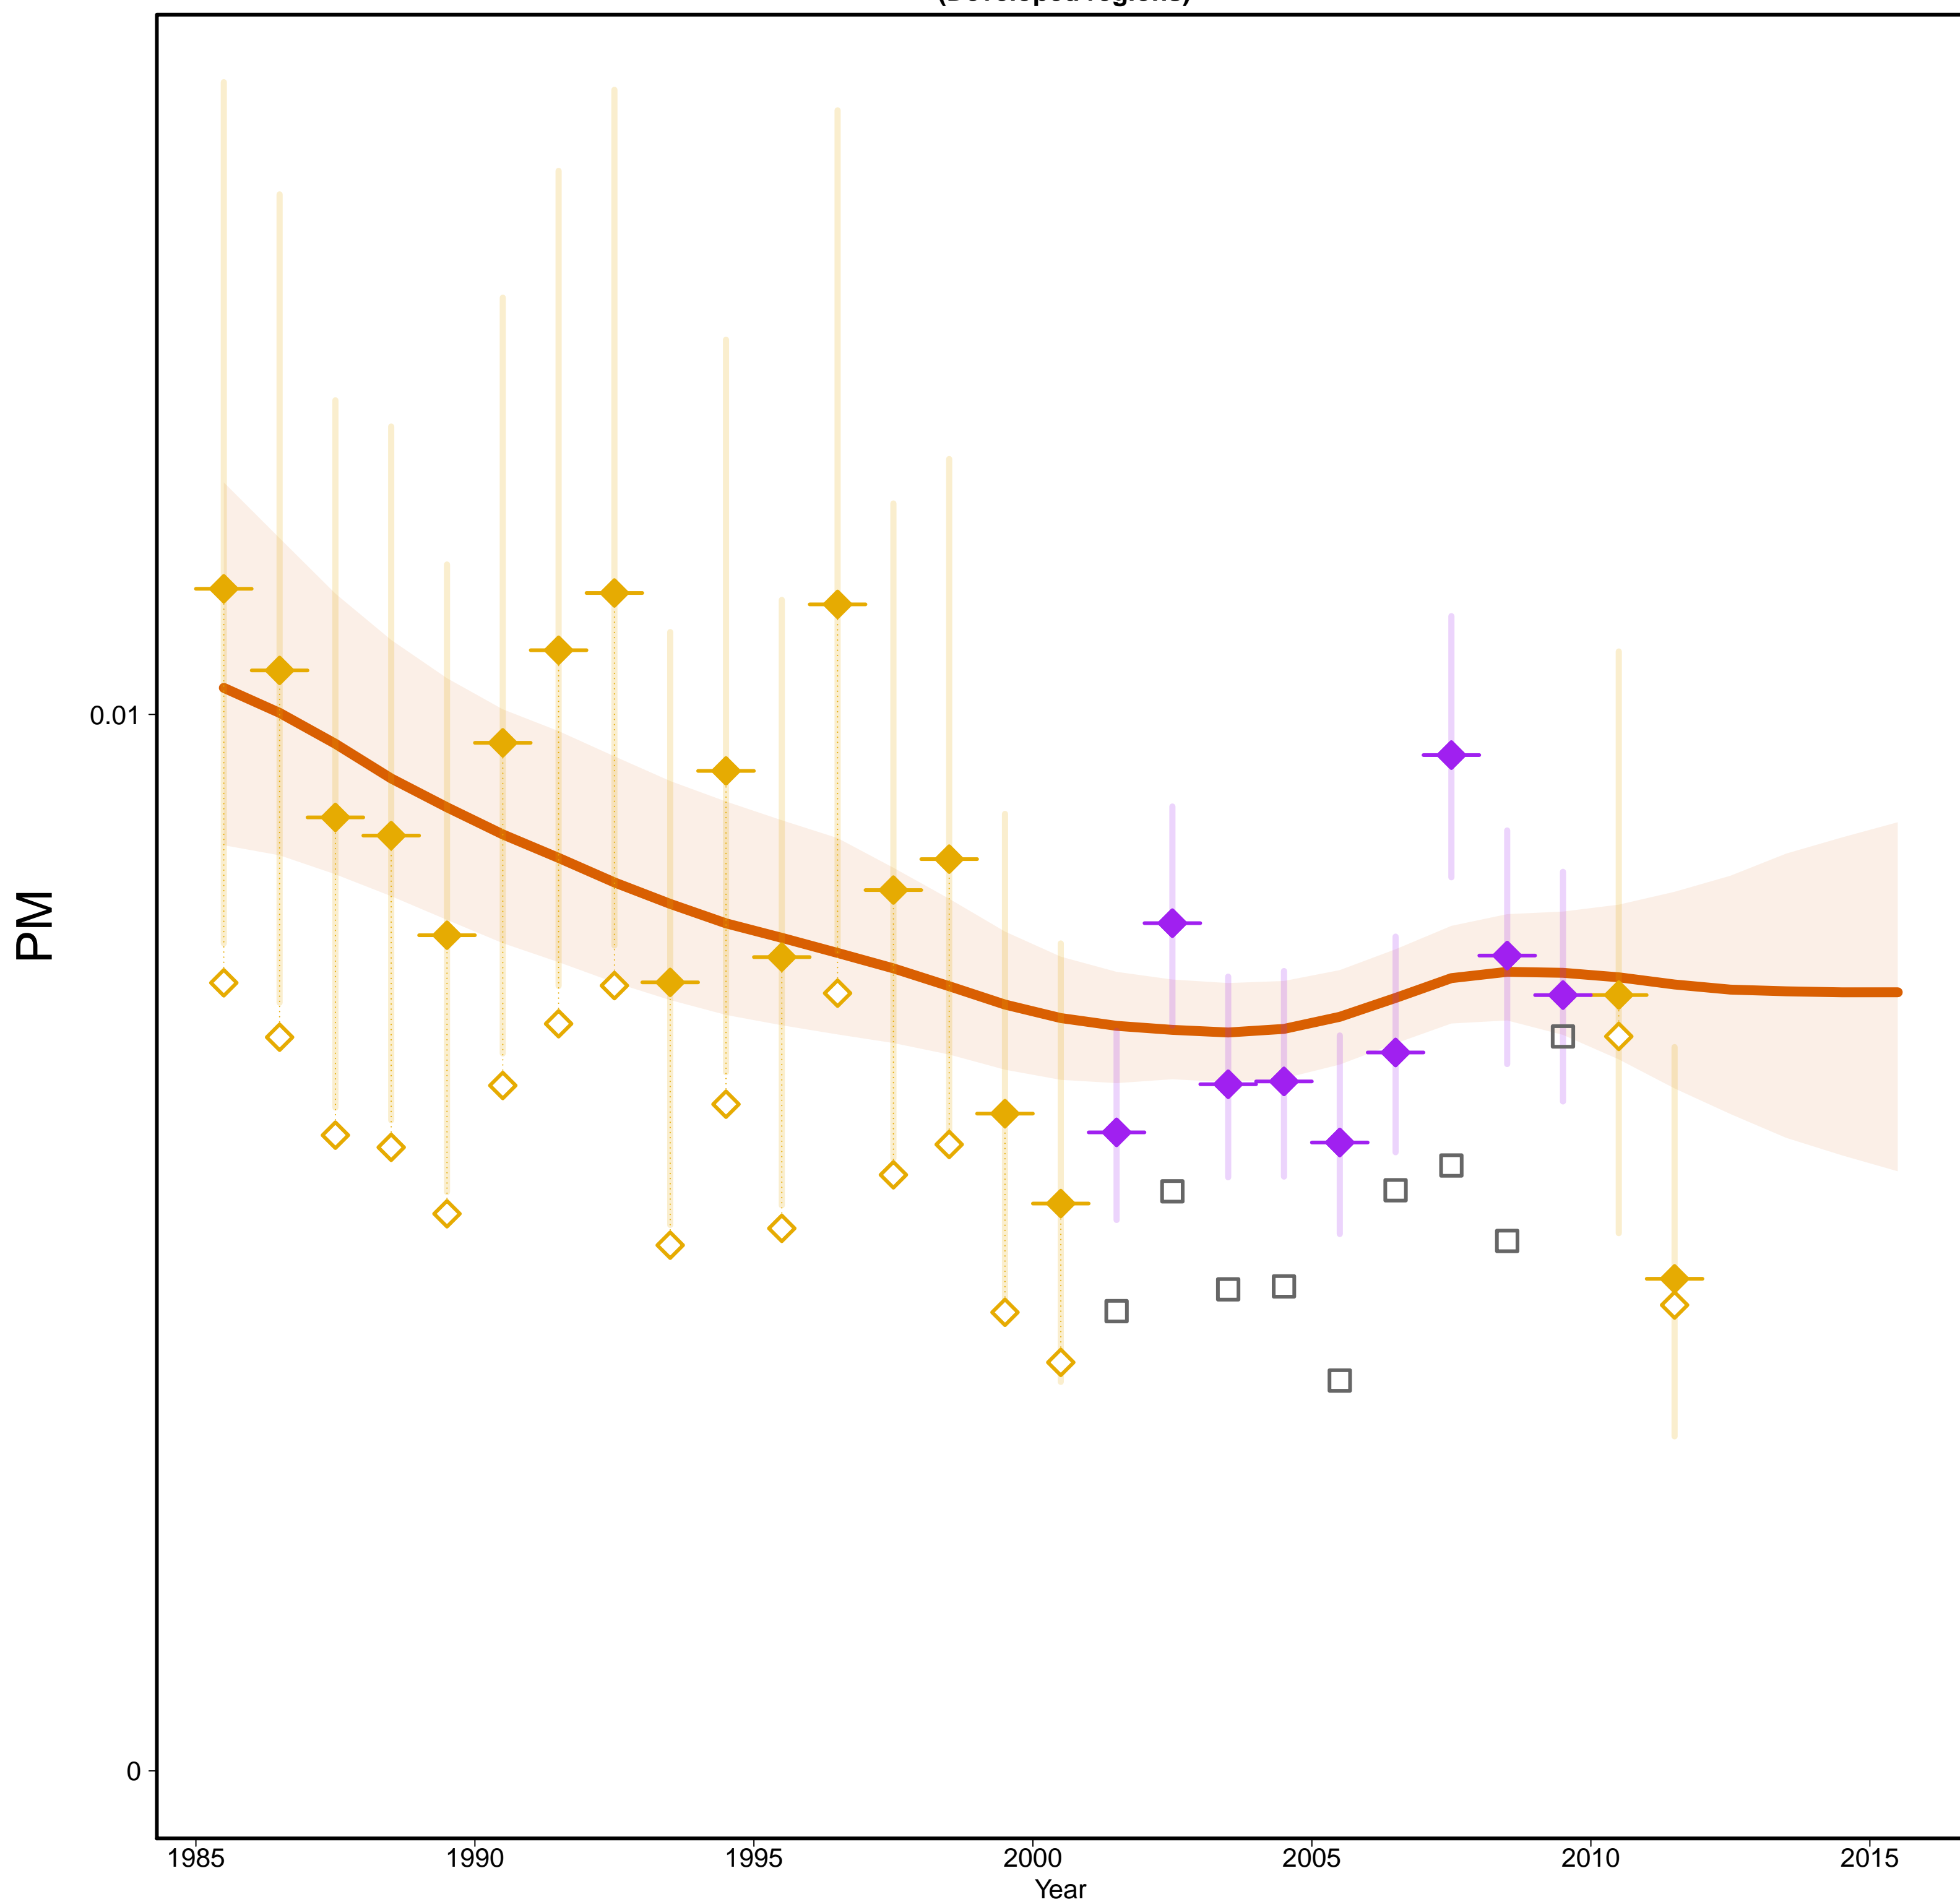

France [FRA]  
(Developed regions)

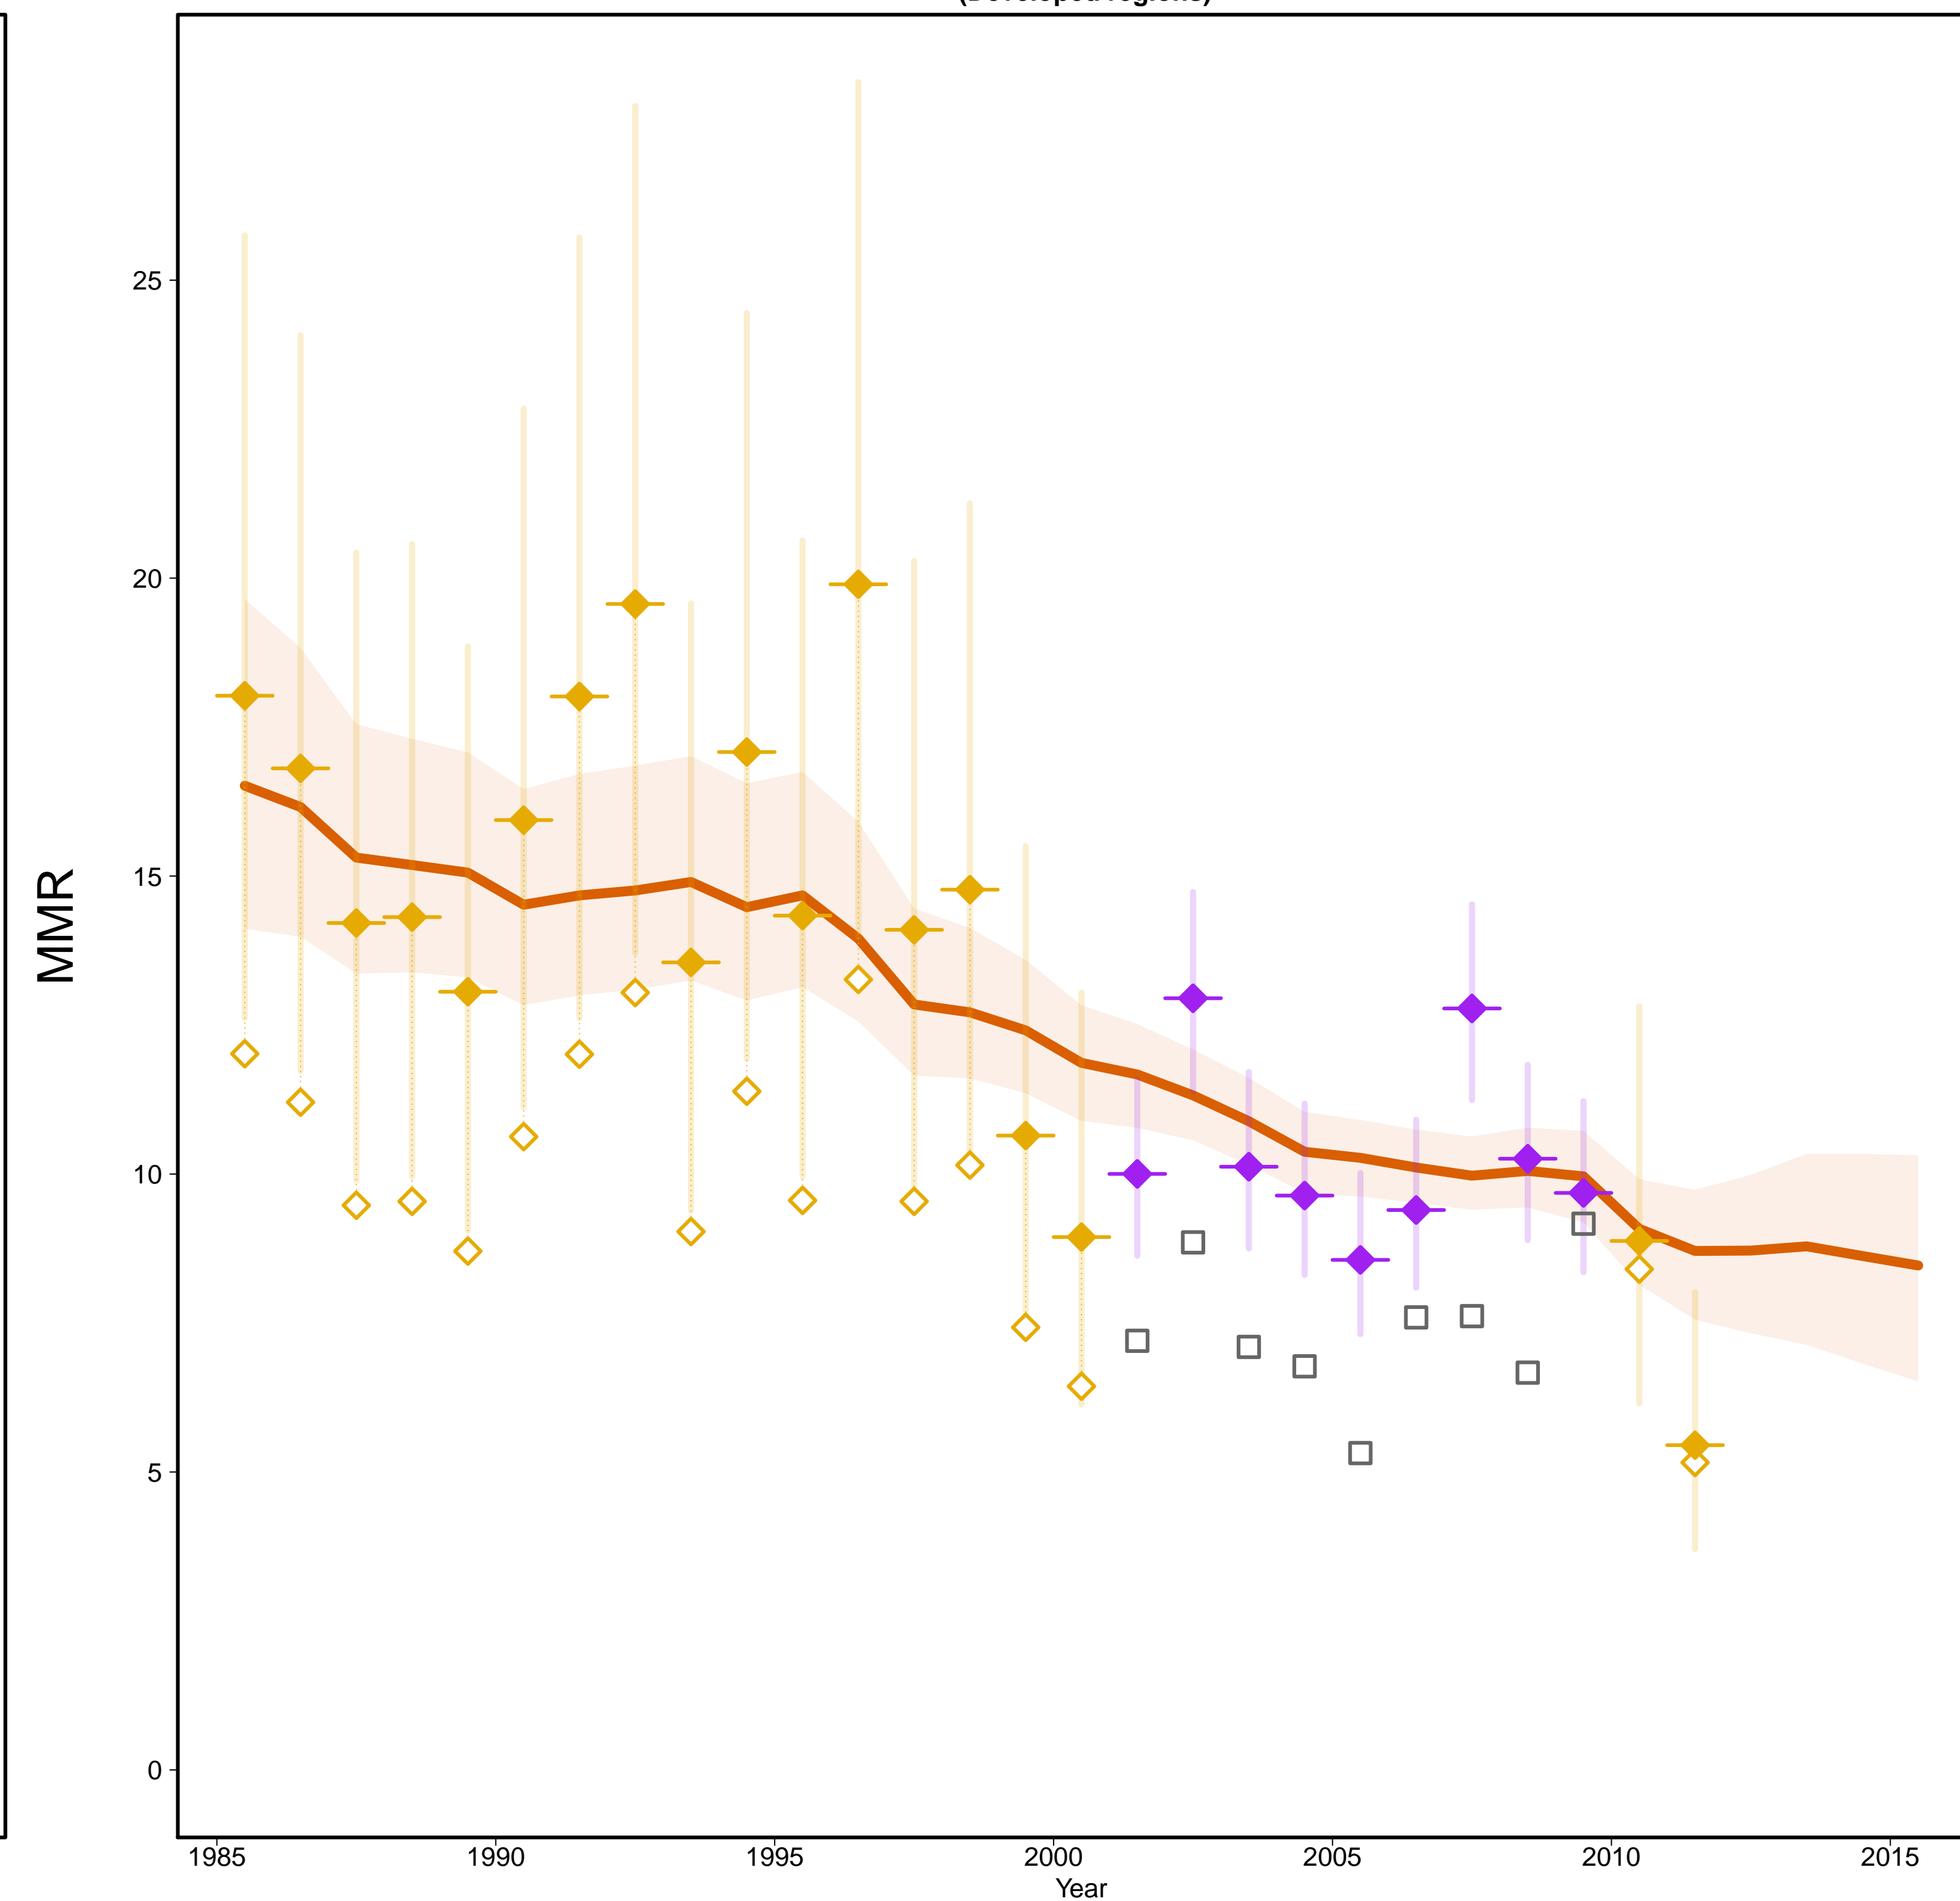

- Estimates —
- MMR Database 2015 —
- ◇ Observed Data
- ◆ Adjusted Data
- Data type —
- ◆ VR
- ◆ Spec. studies
- Excluded VR data  
(overlap with specialized study)

Gross Domestic Product

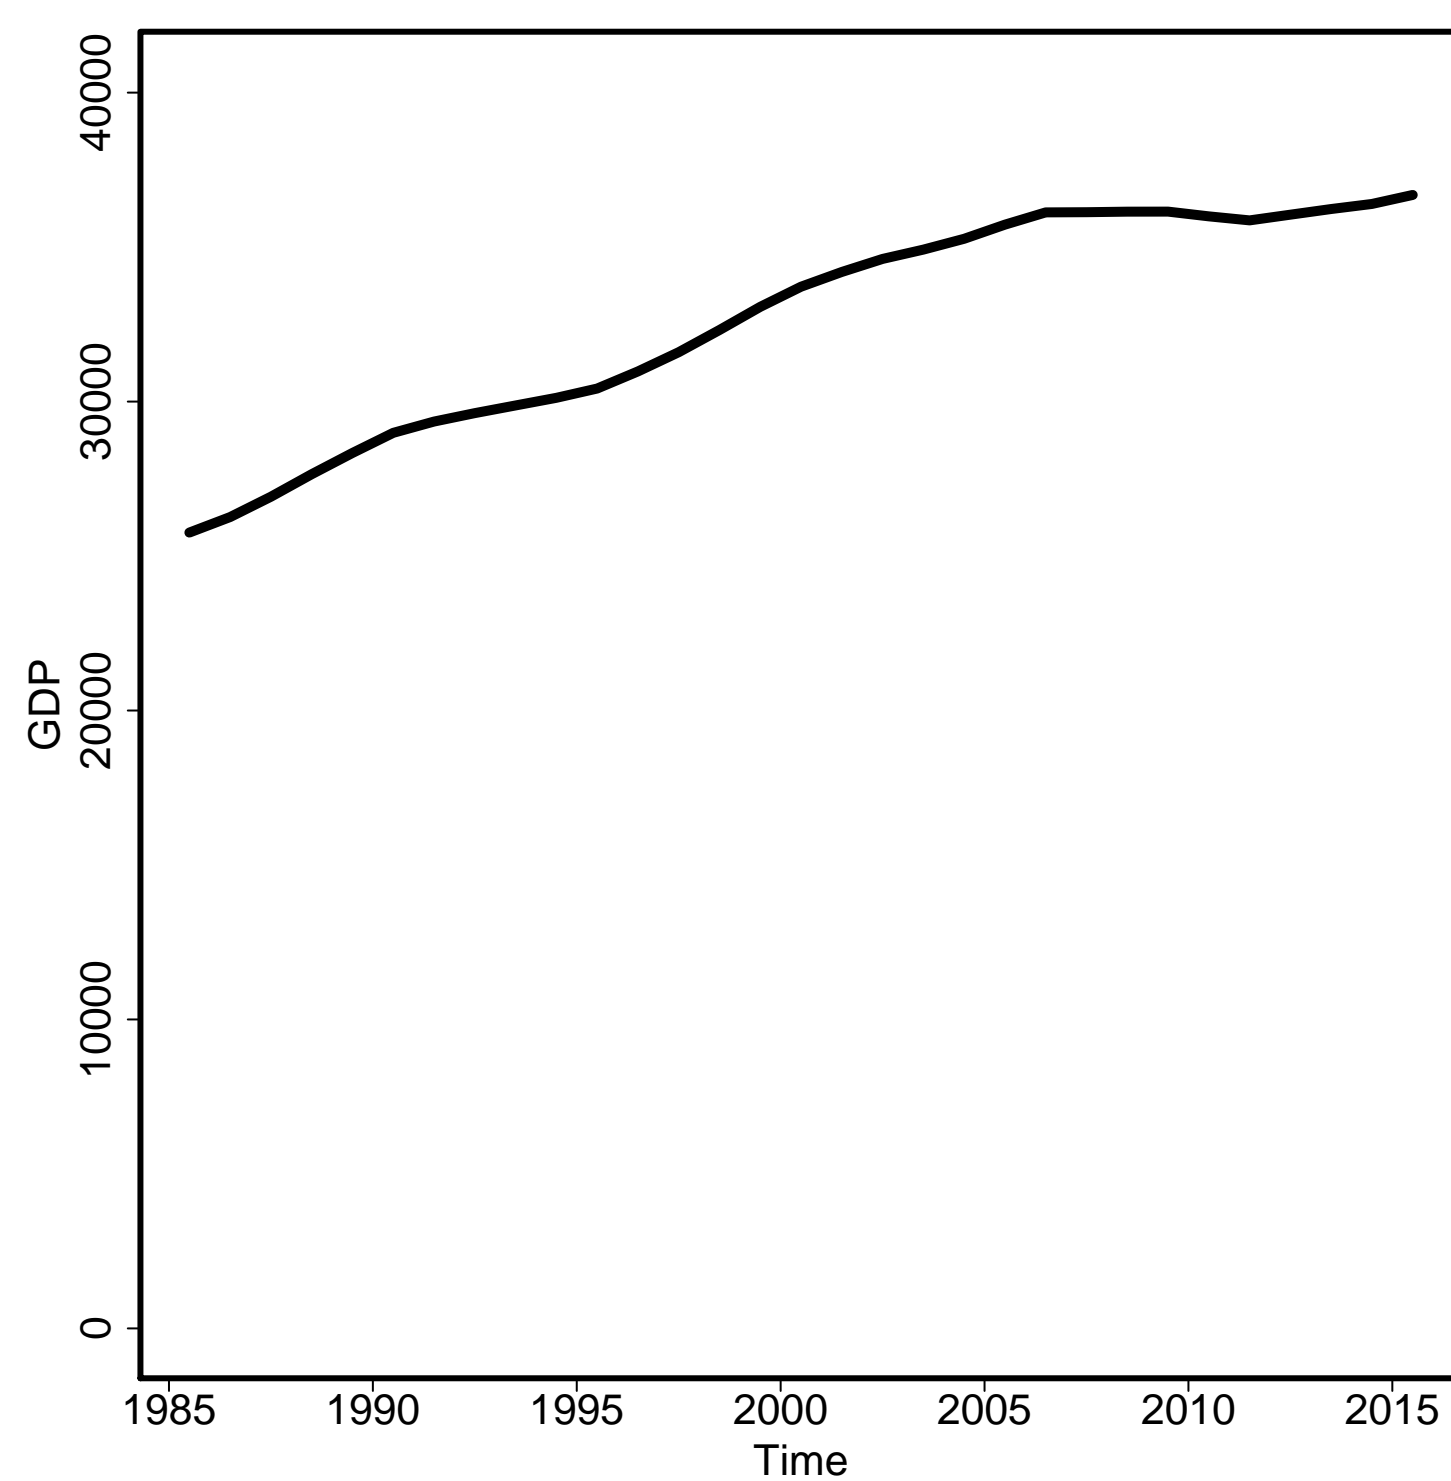

General Fertility Rate

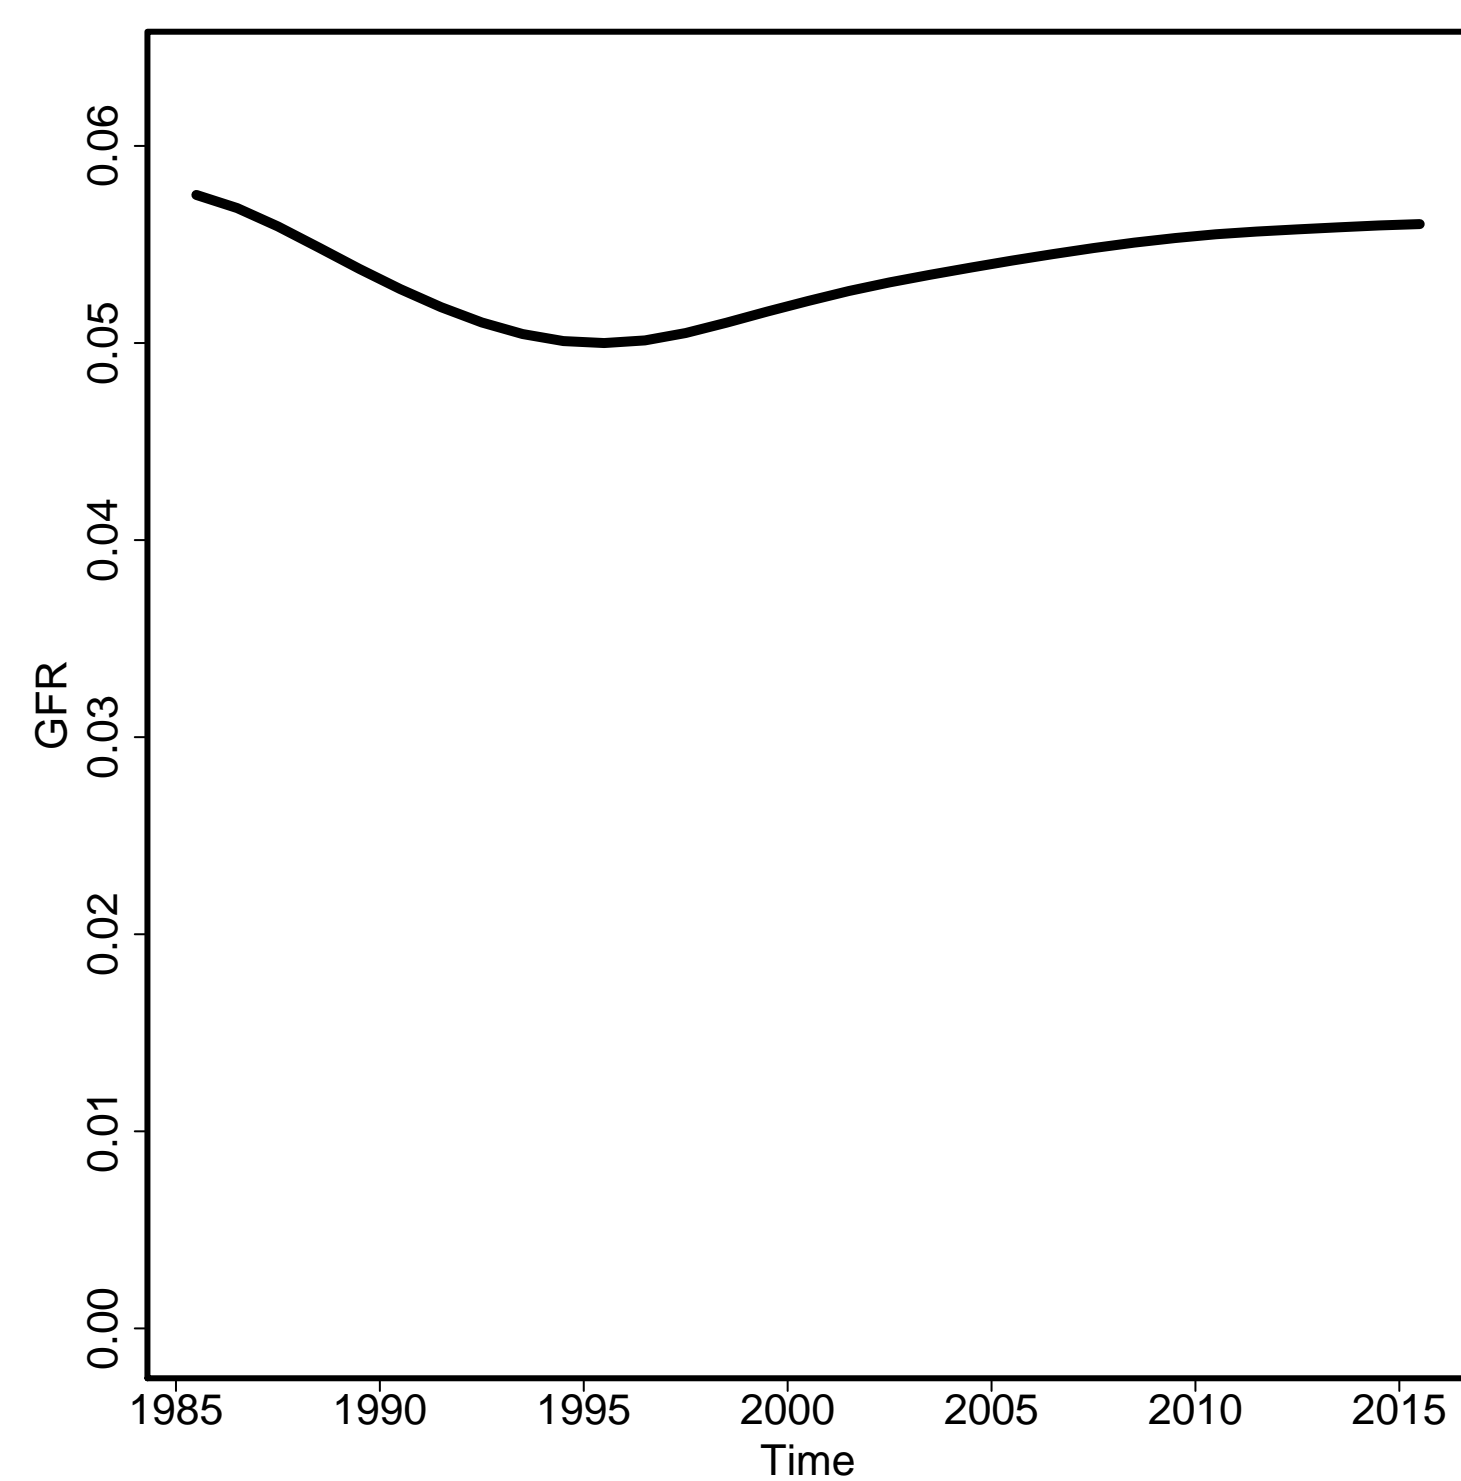

Skilled Attendance to Birth

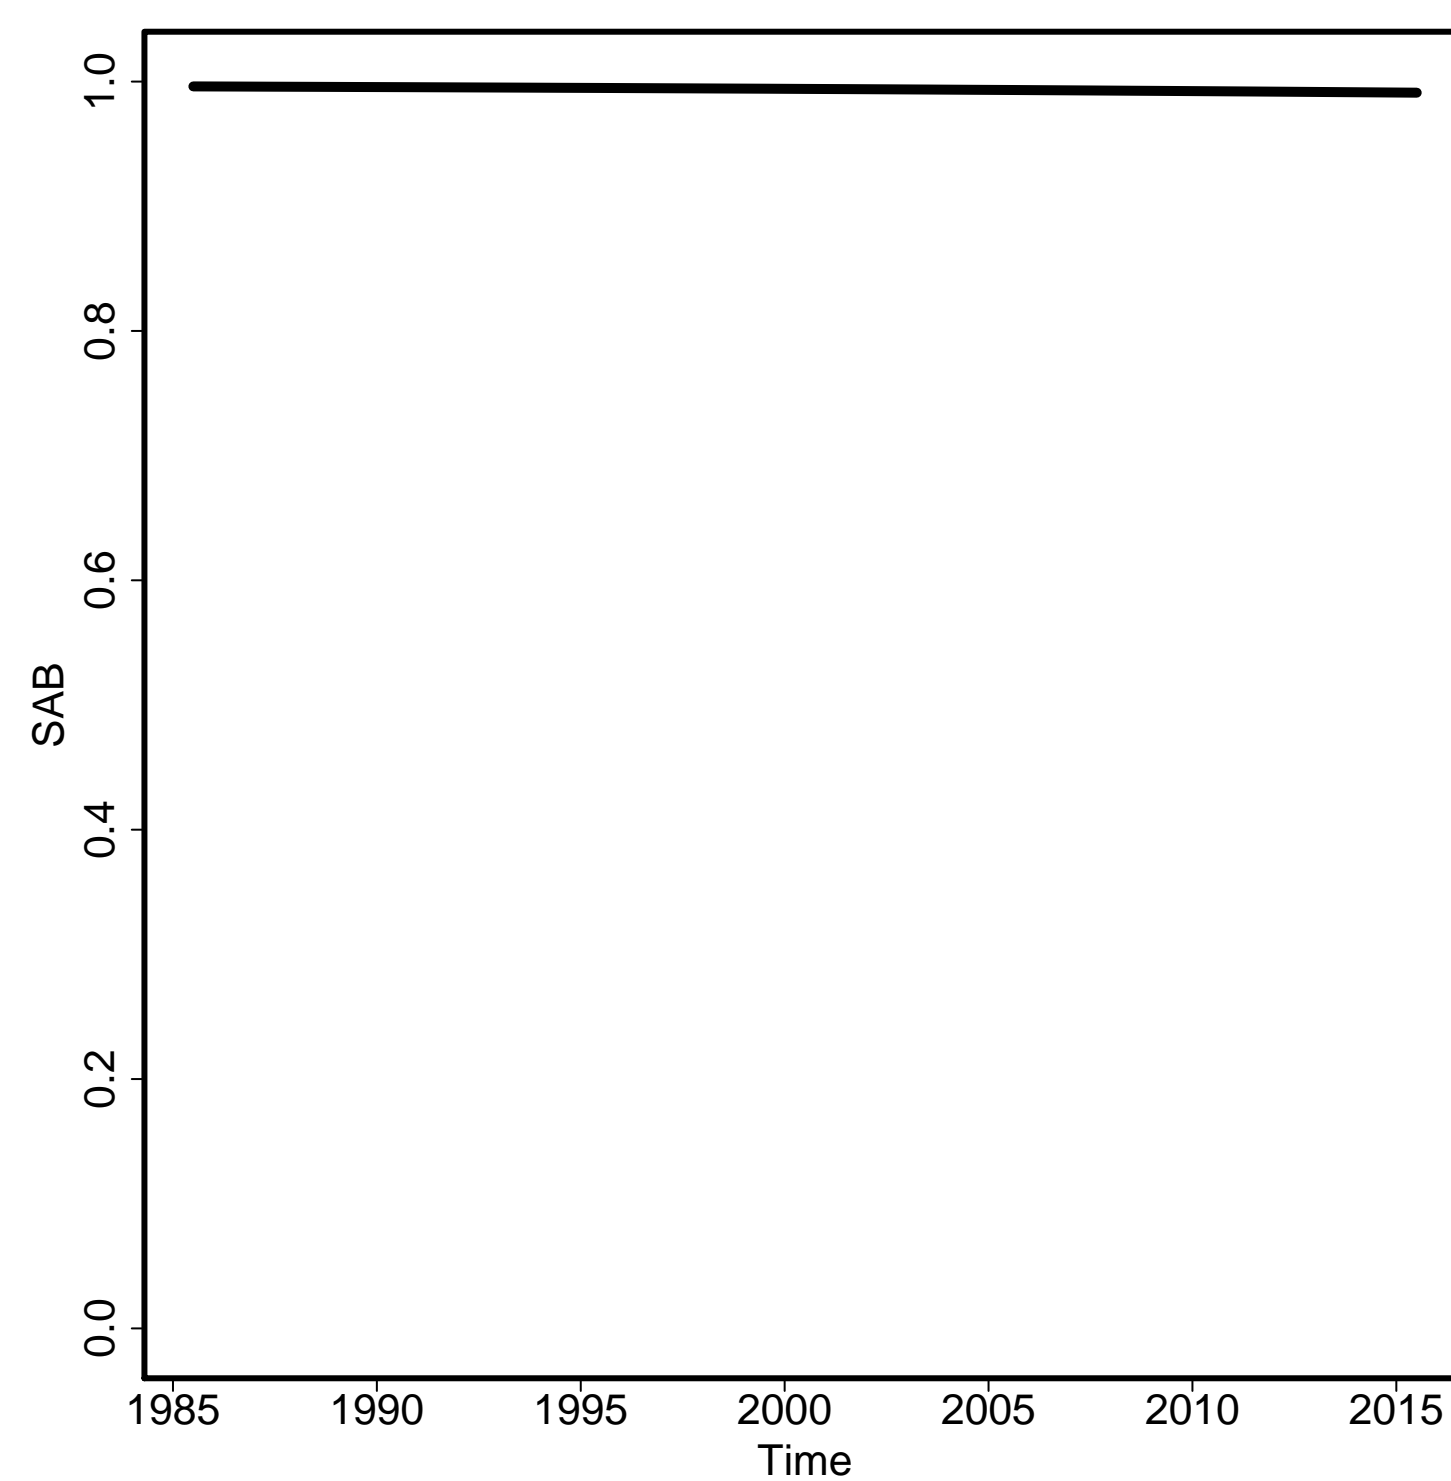

Envelope/Births

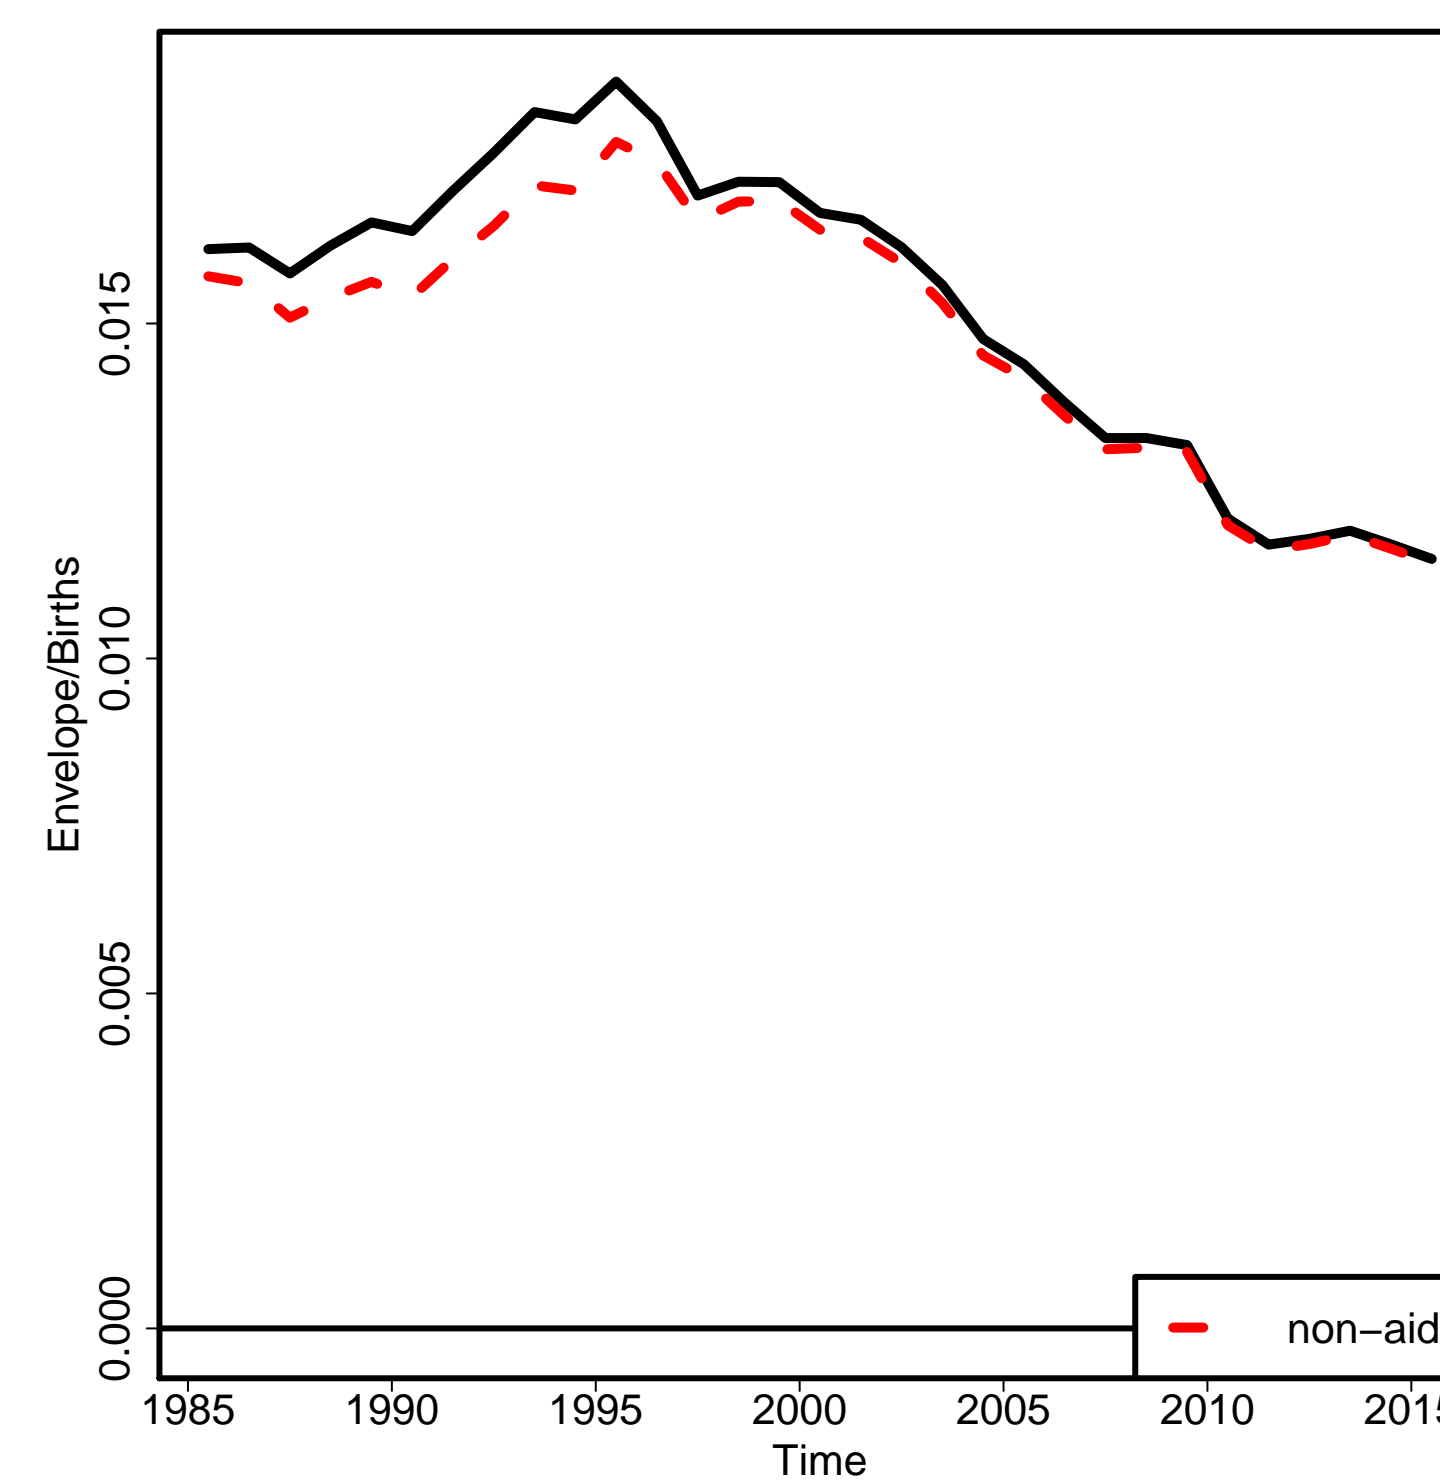

Non-aids MMR

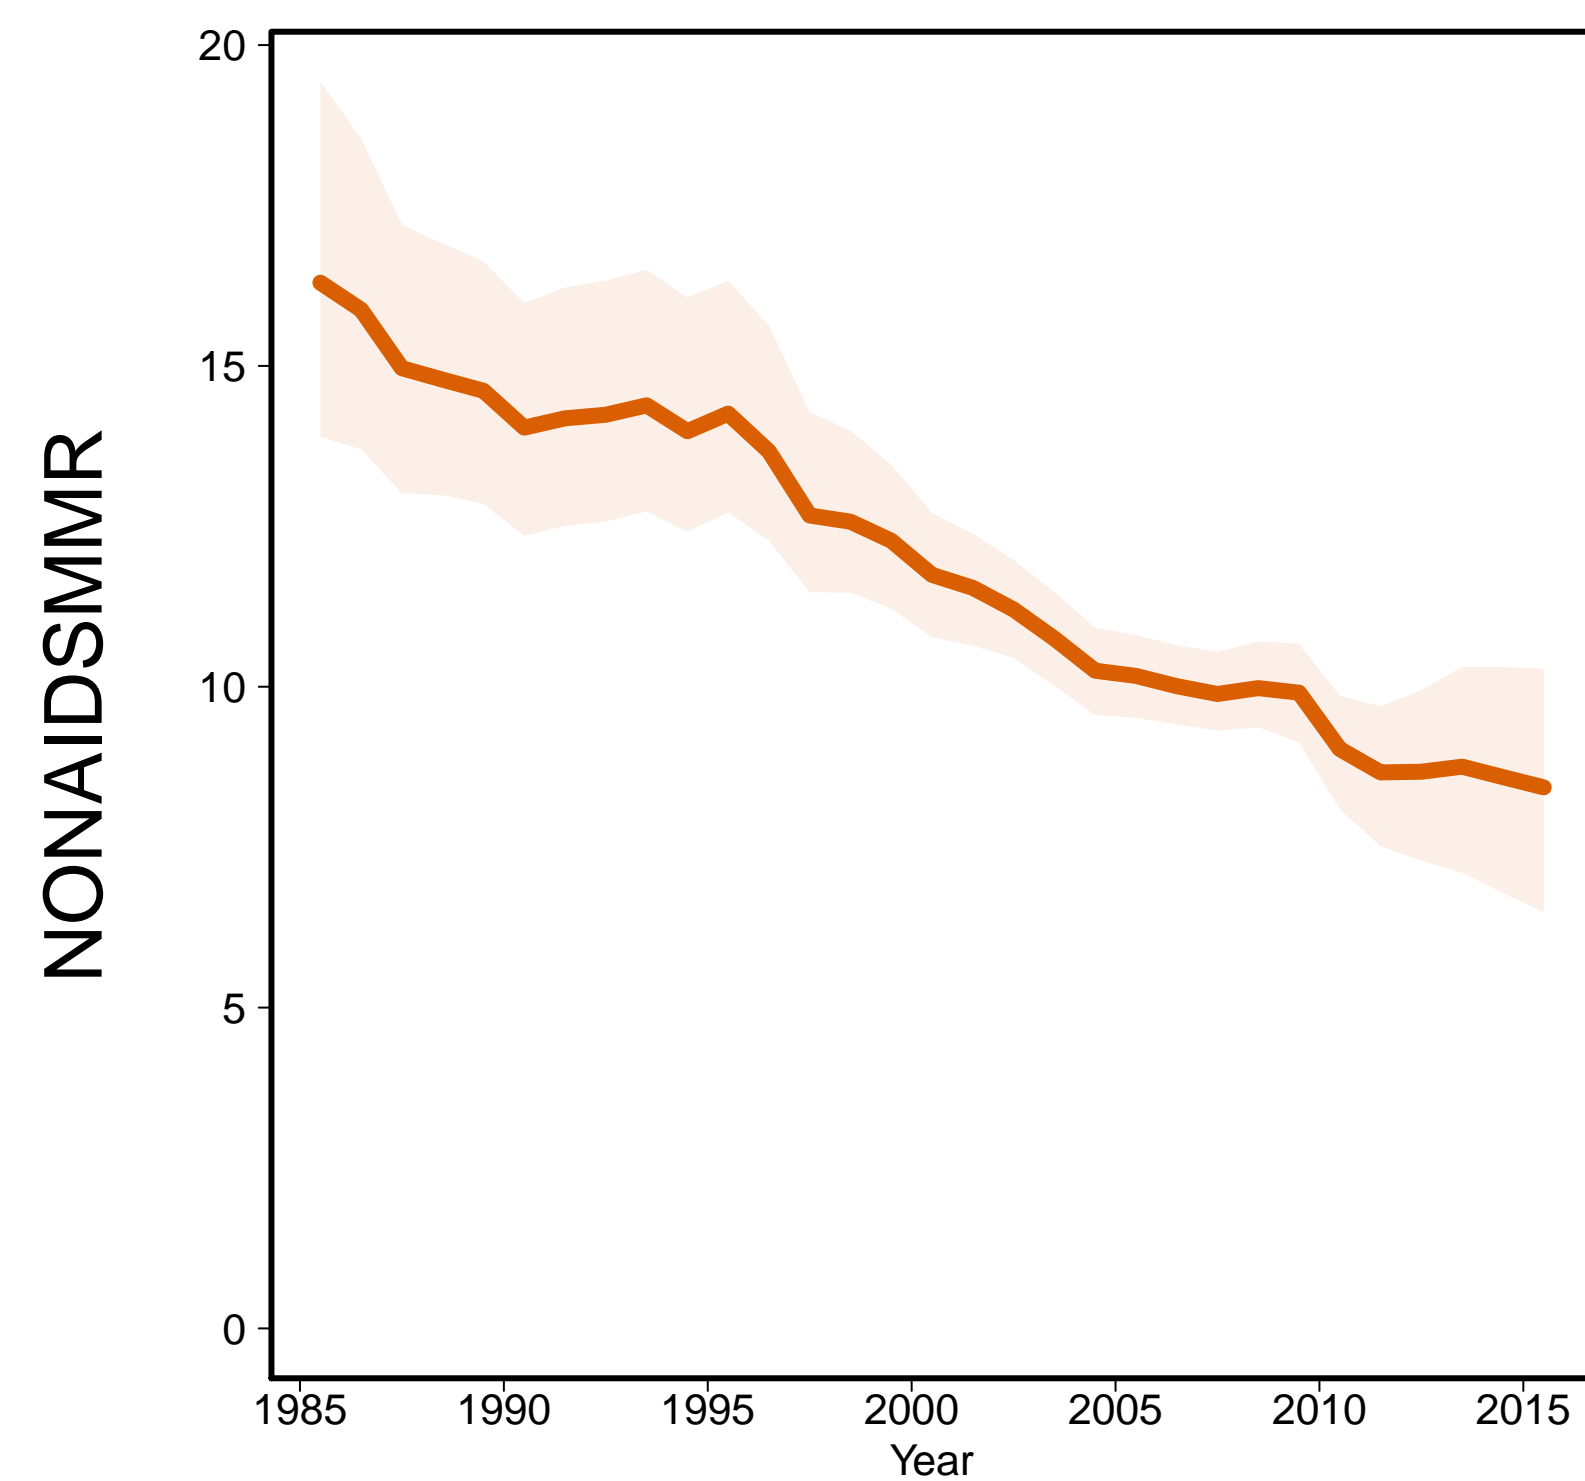

Aids MMR

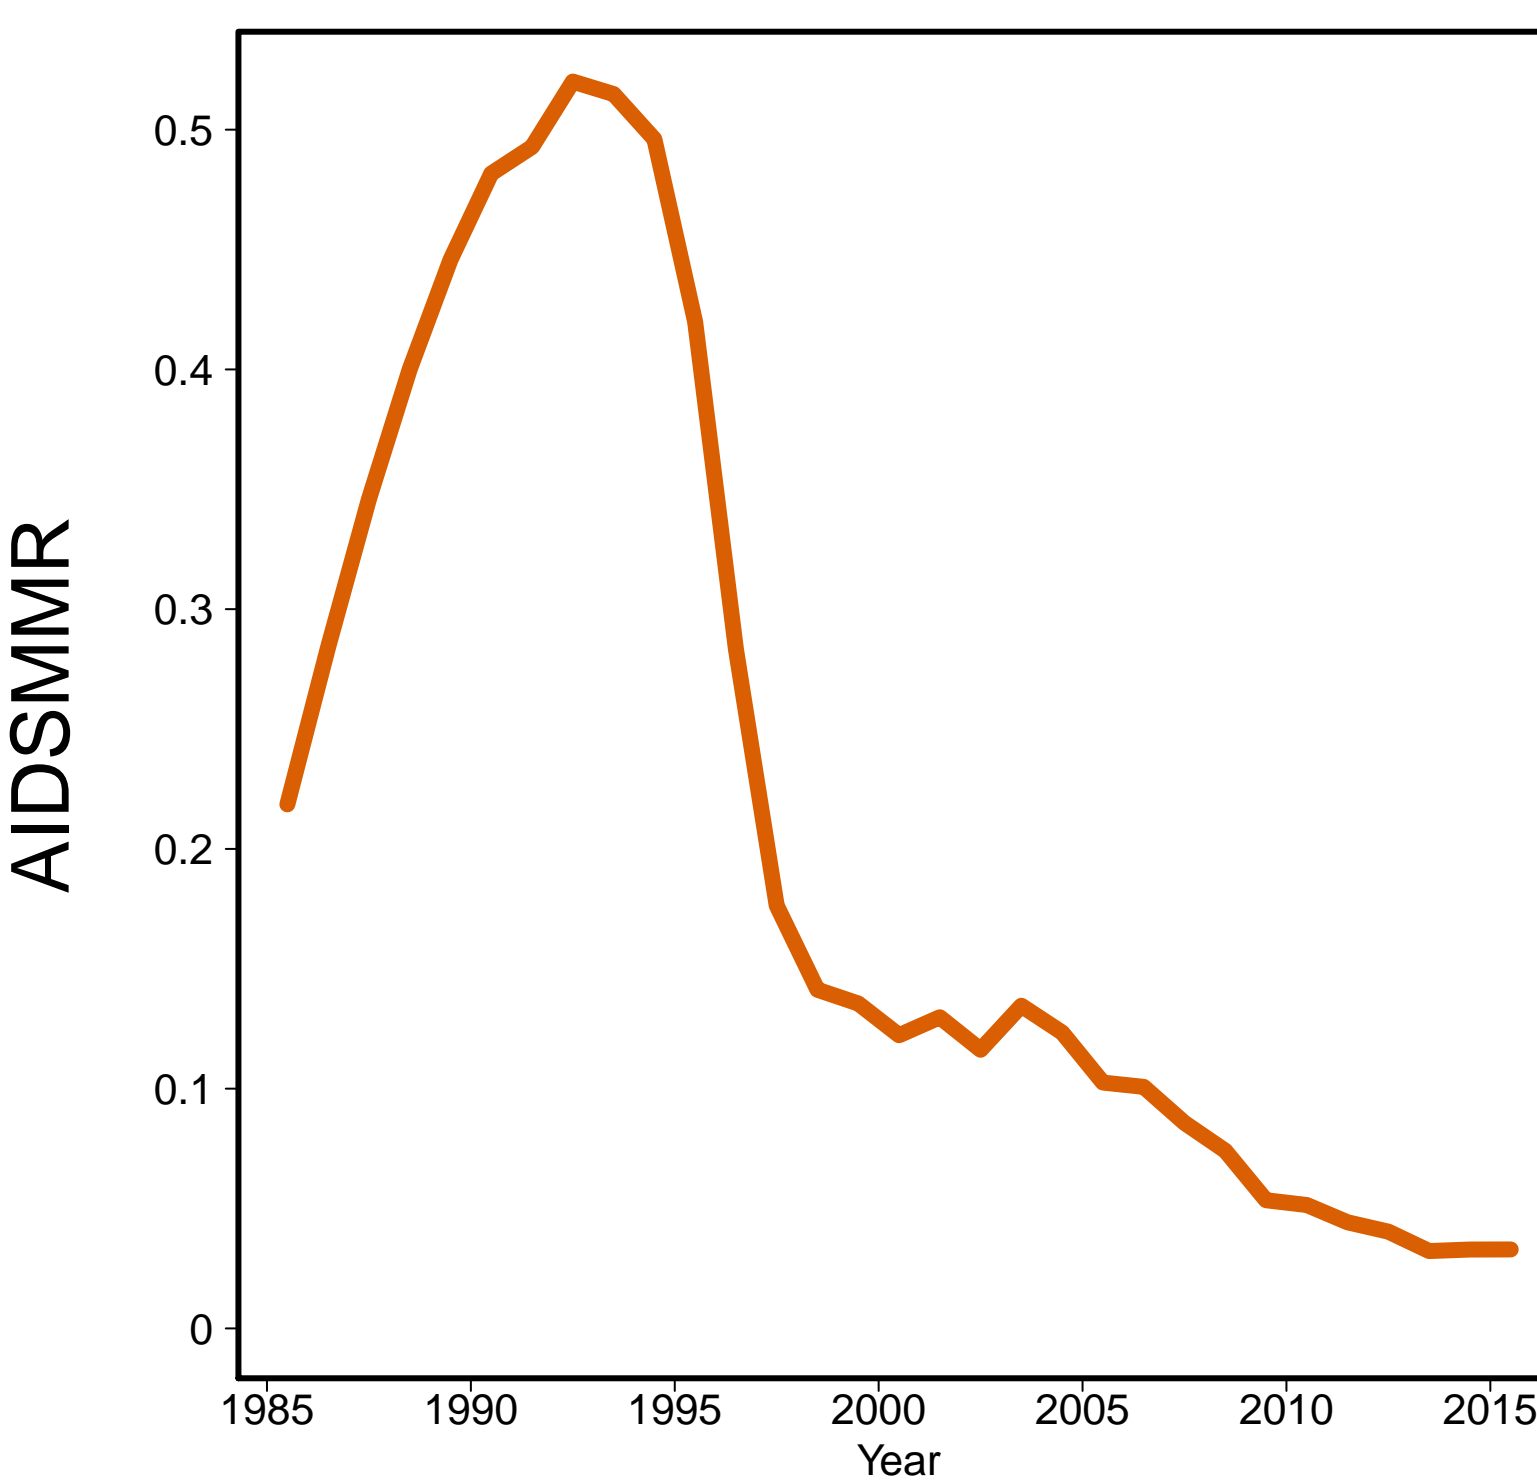

Gabon [GAB]  
(Middle Africa)

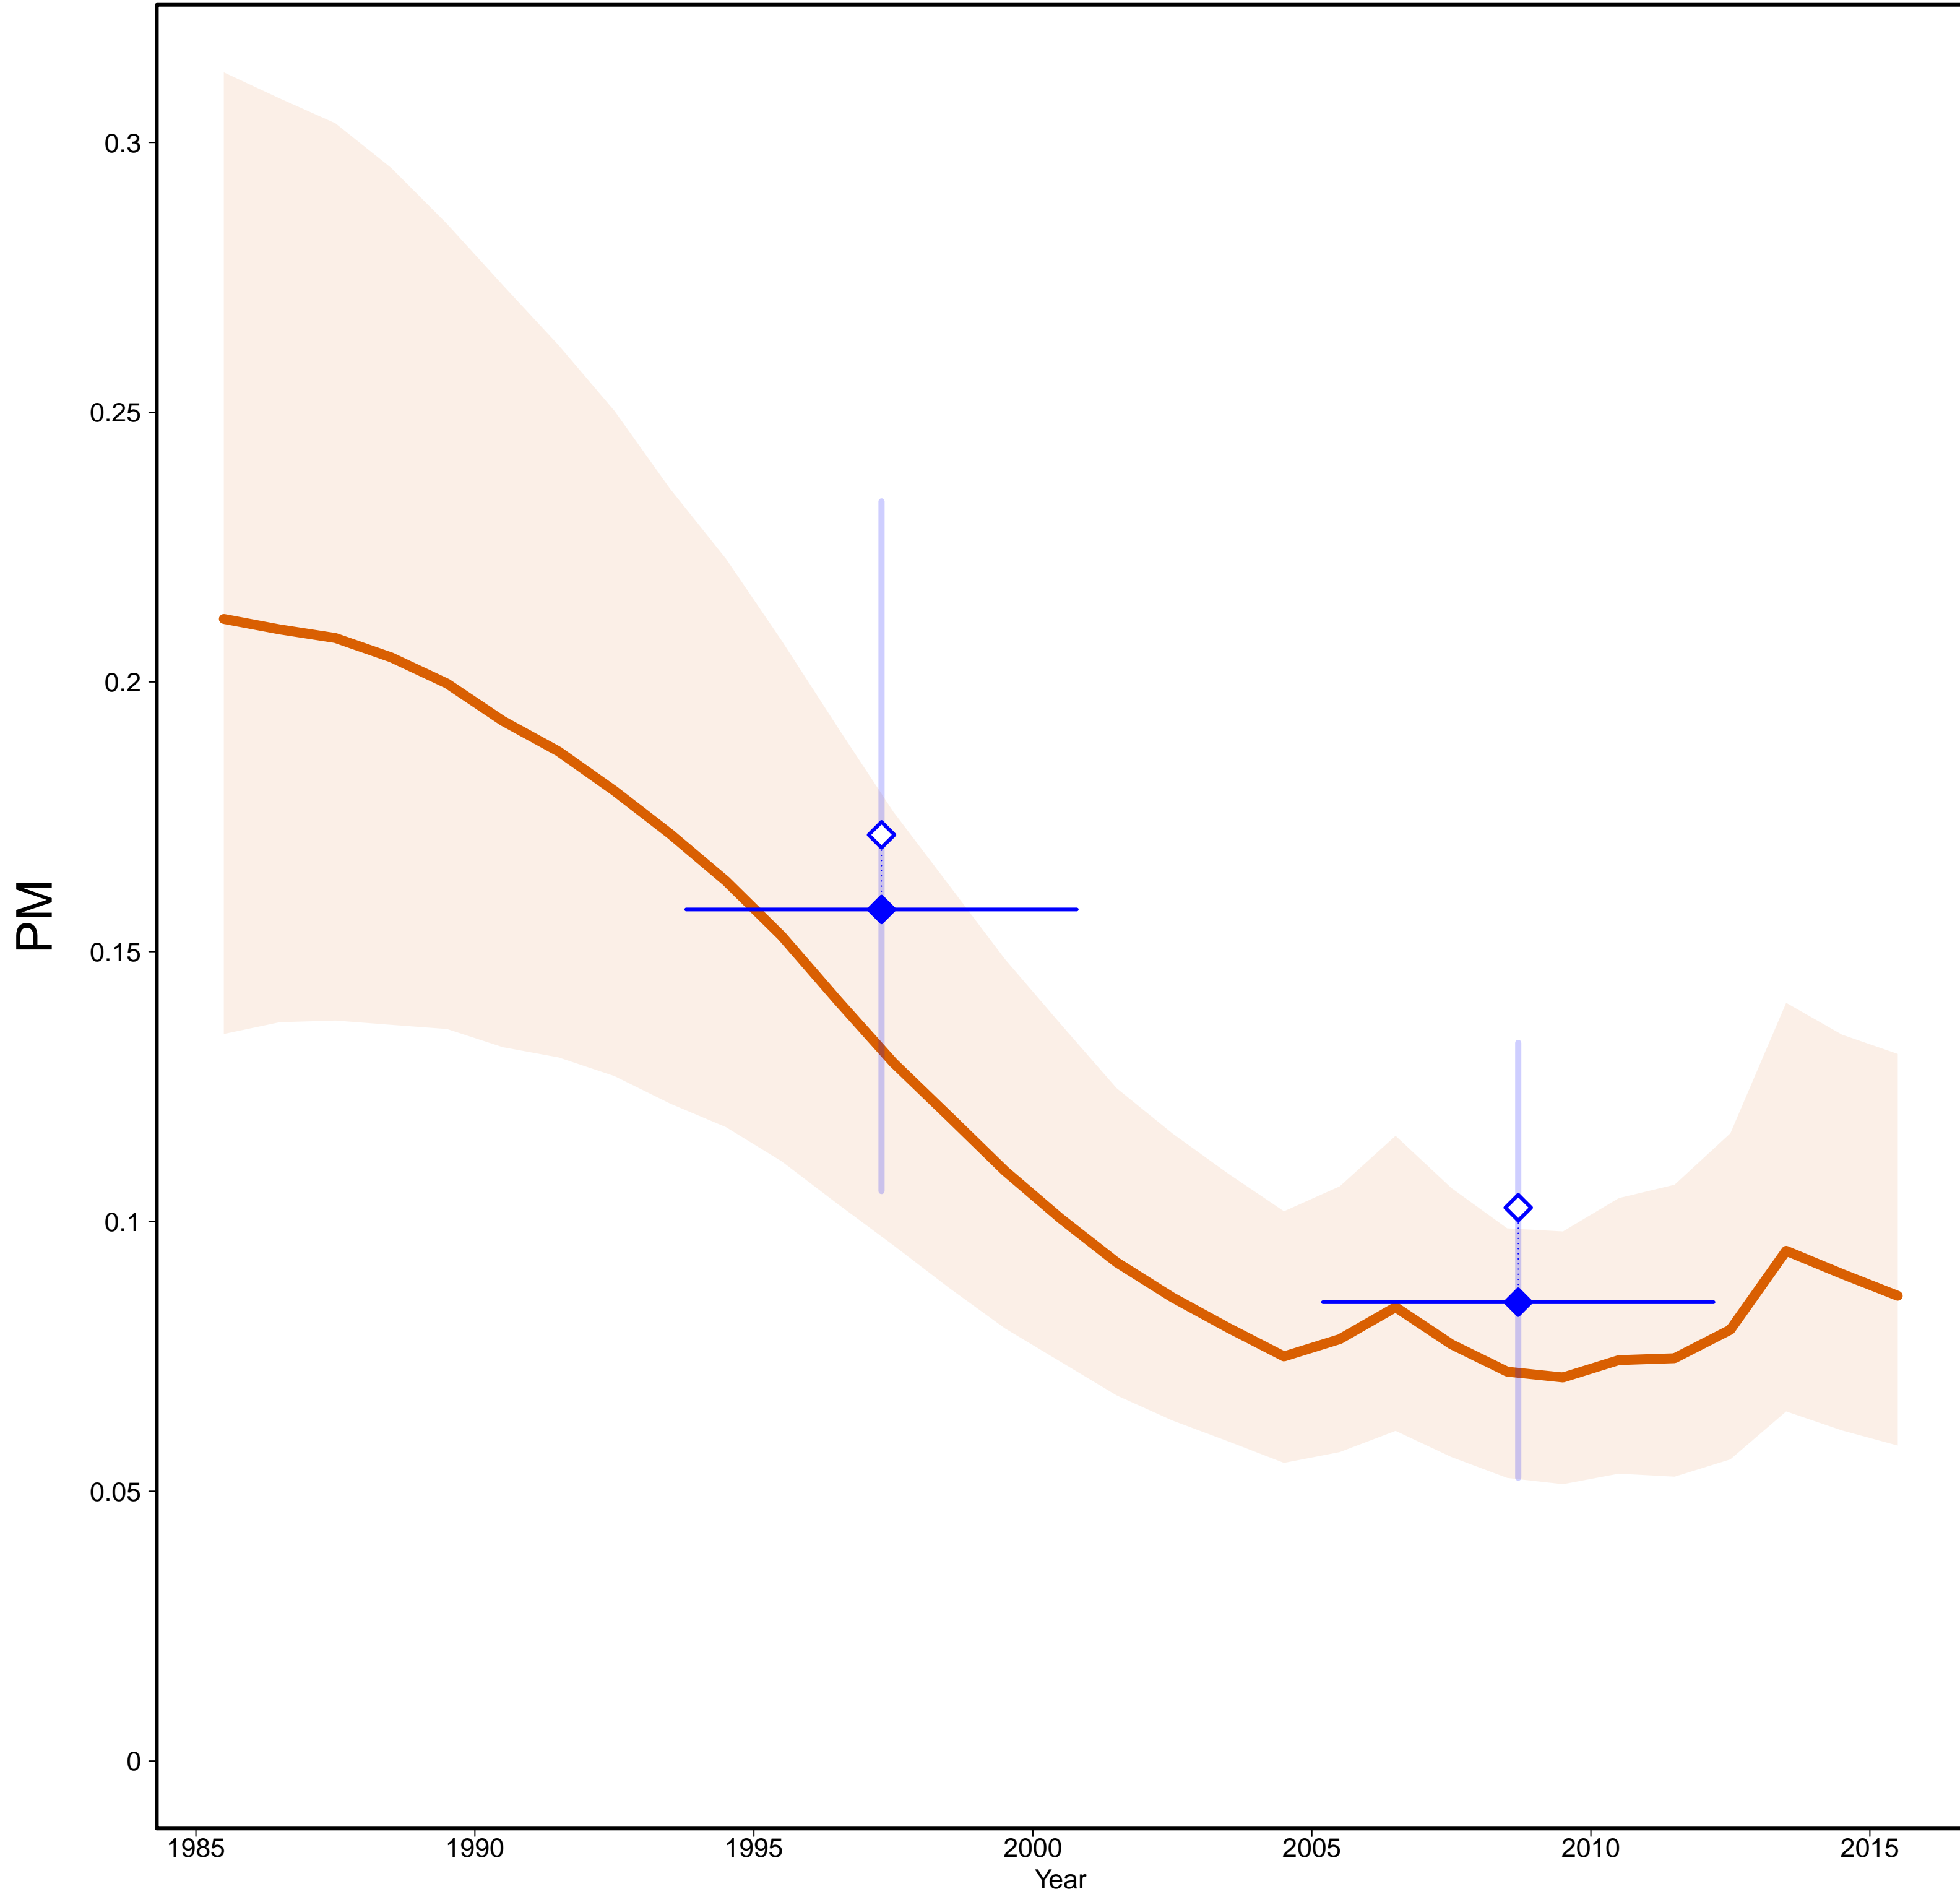

Gabon [GAB]  
(Middle Africa)

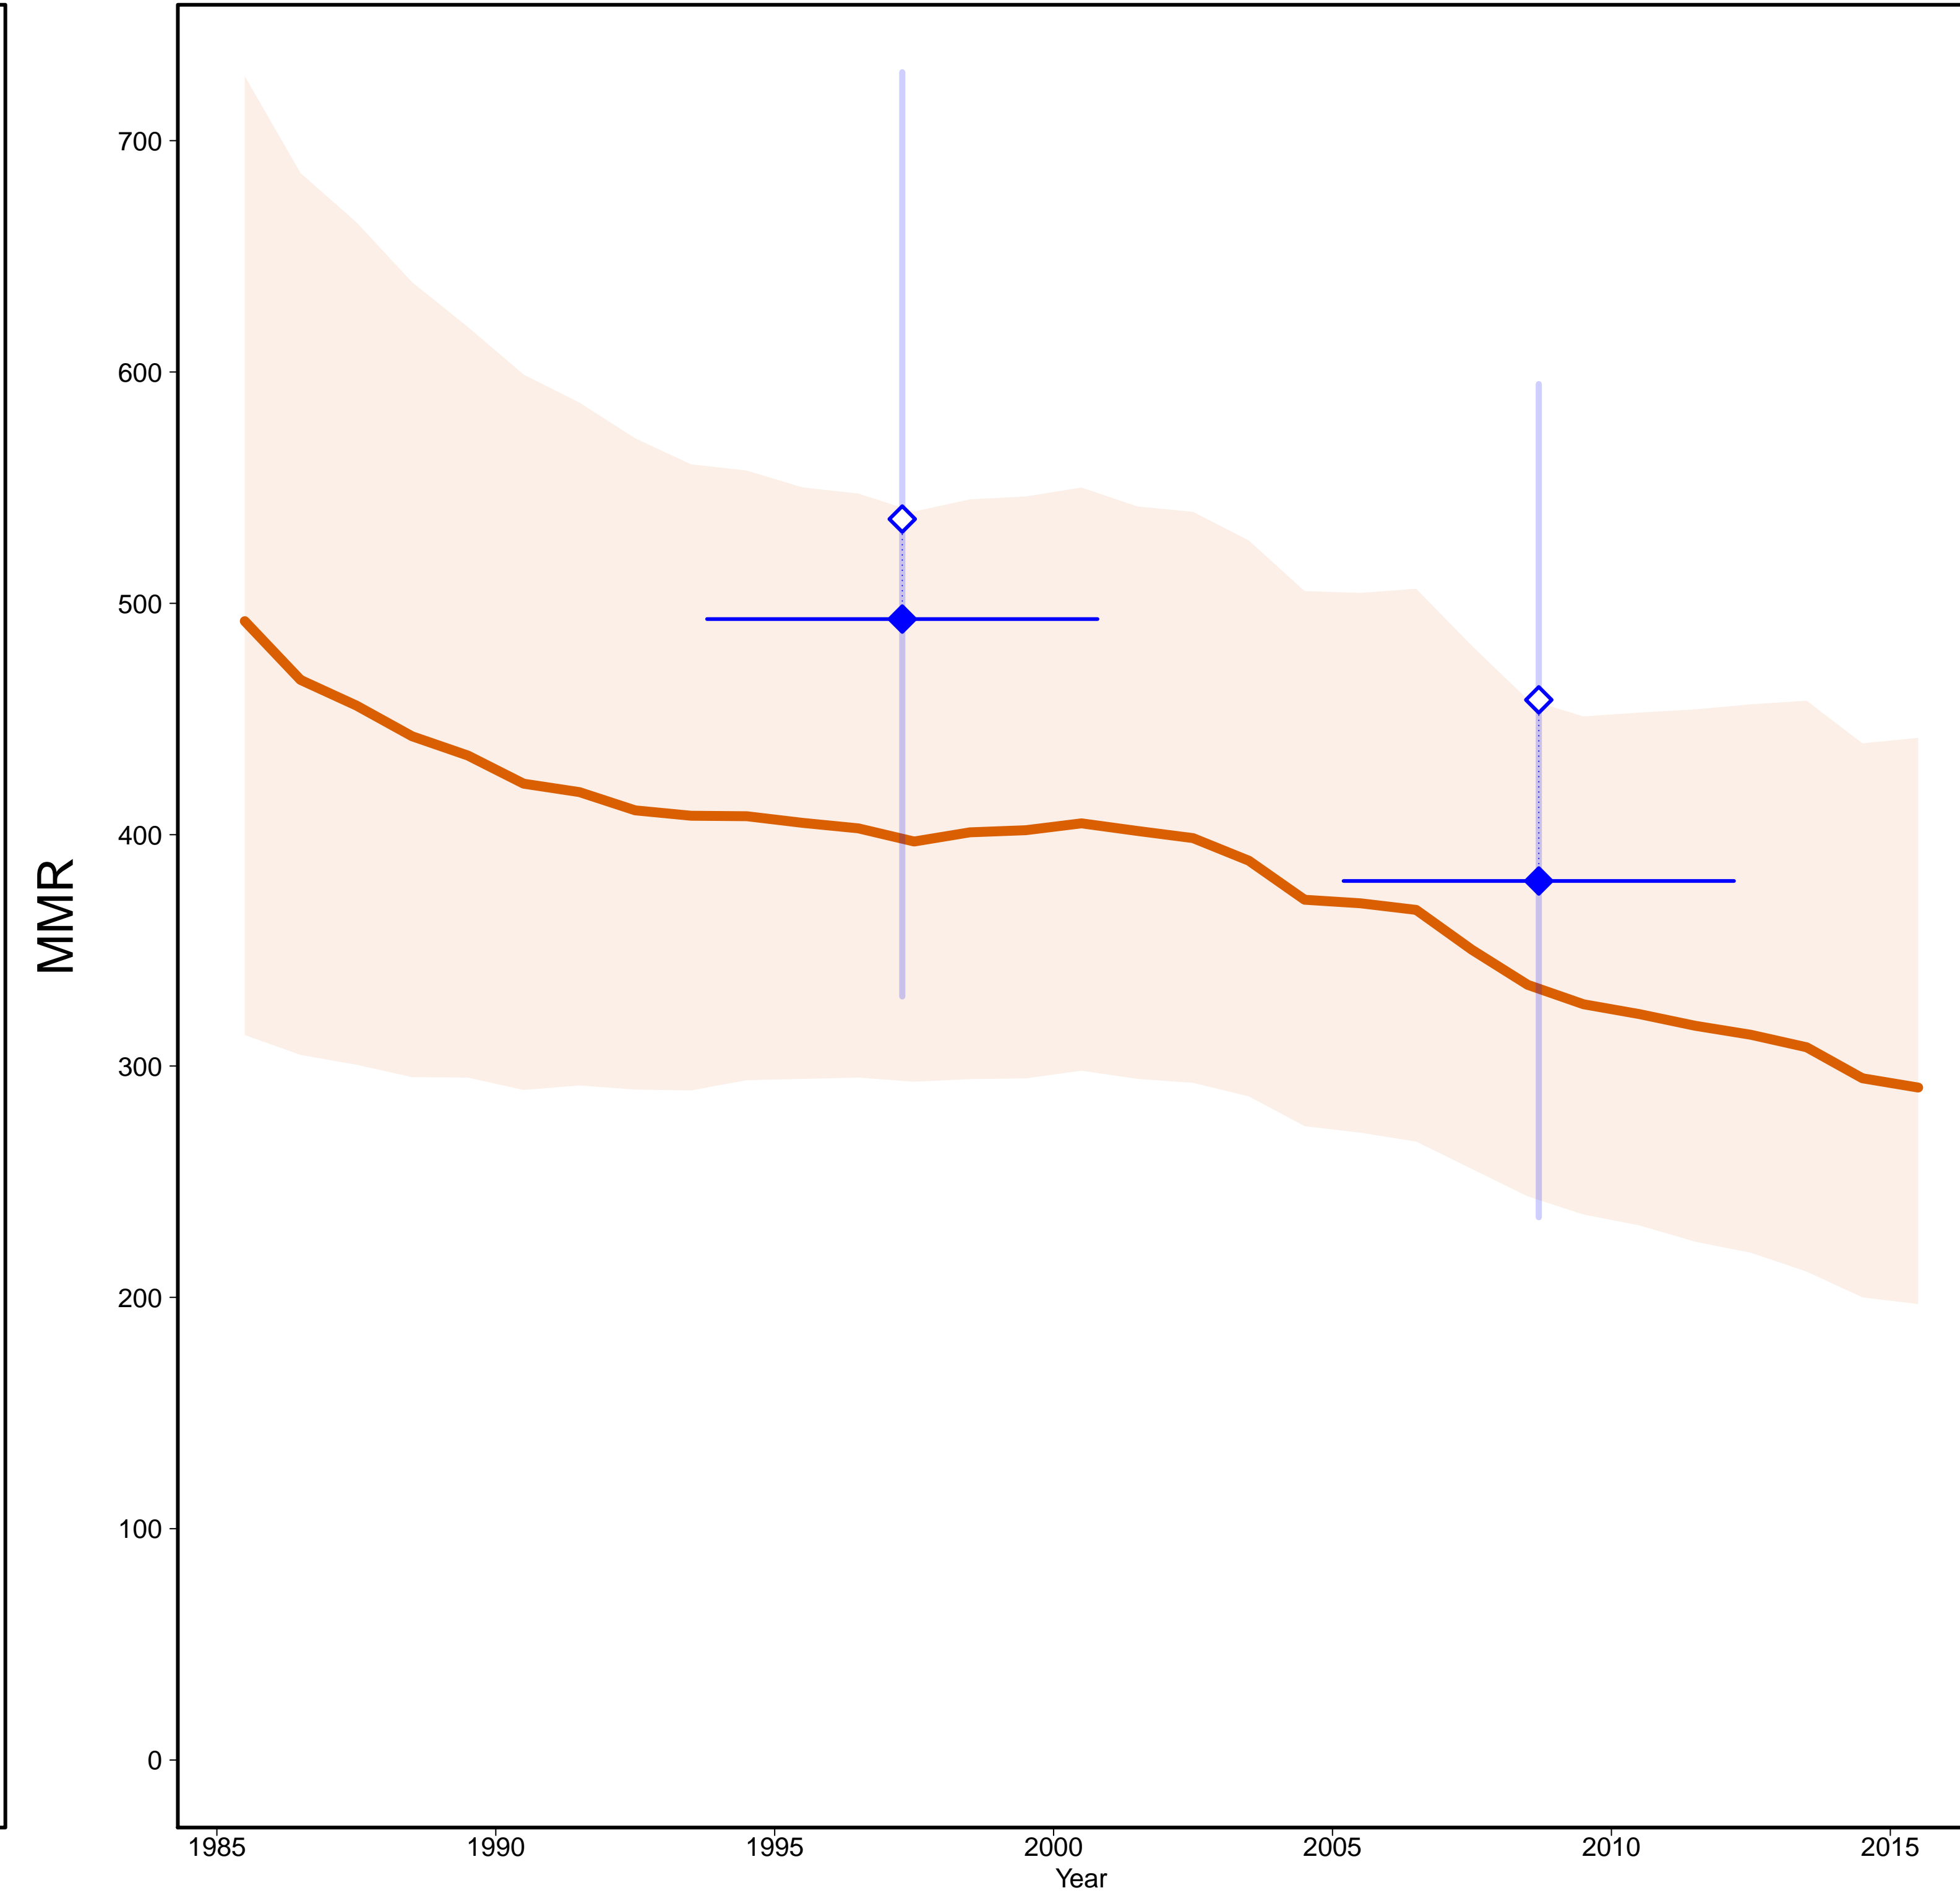

- Estimates —
- MMR Database 2015 —
- ◇ Observed Data
- ◆ Adjusted Data
- Data type —
- ◆ DHS

Gross Domestic Product

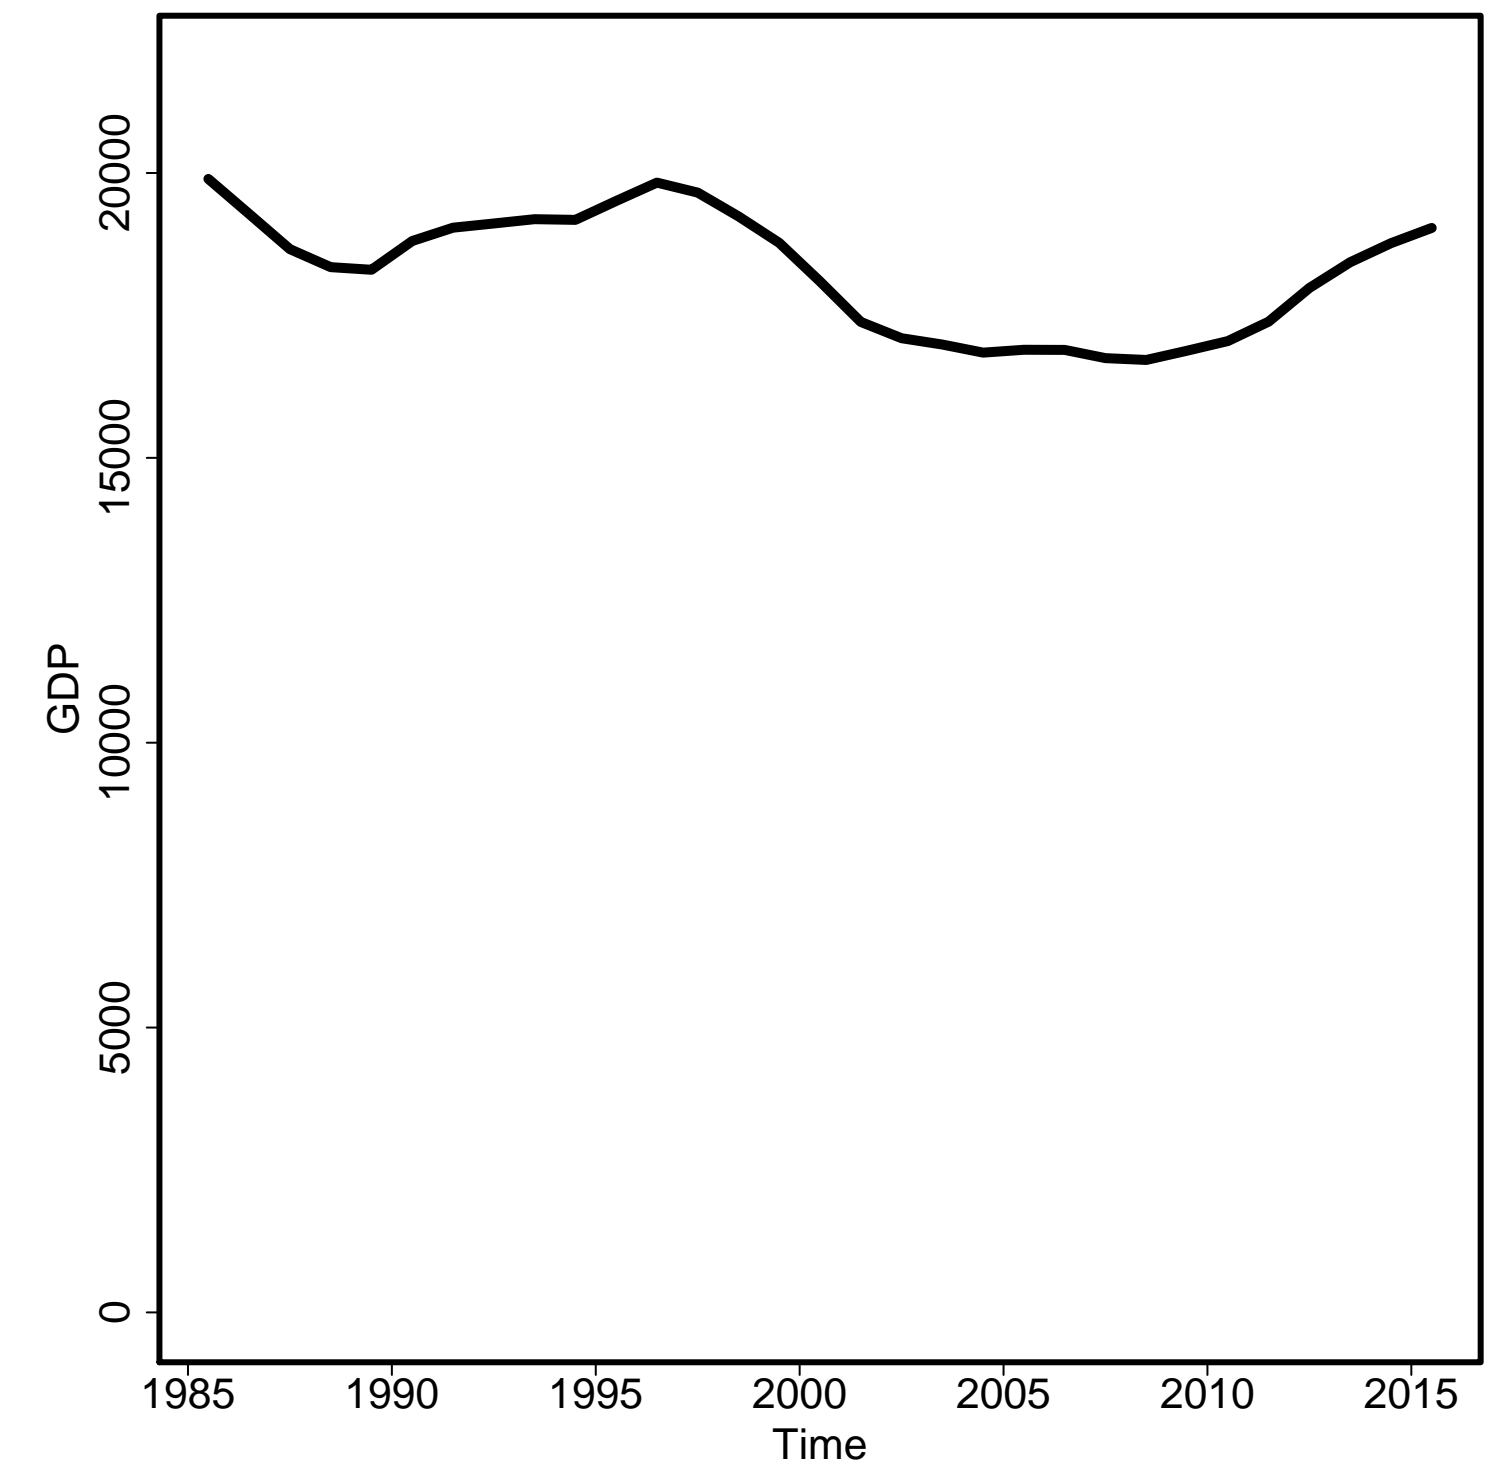

General Fertility Rate

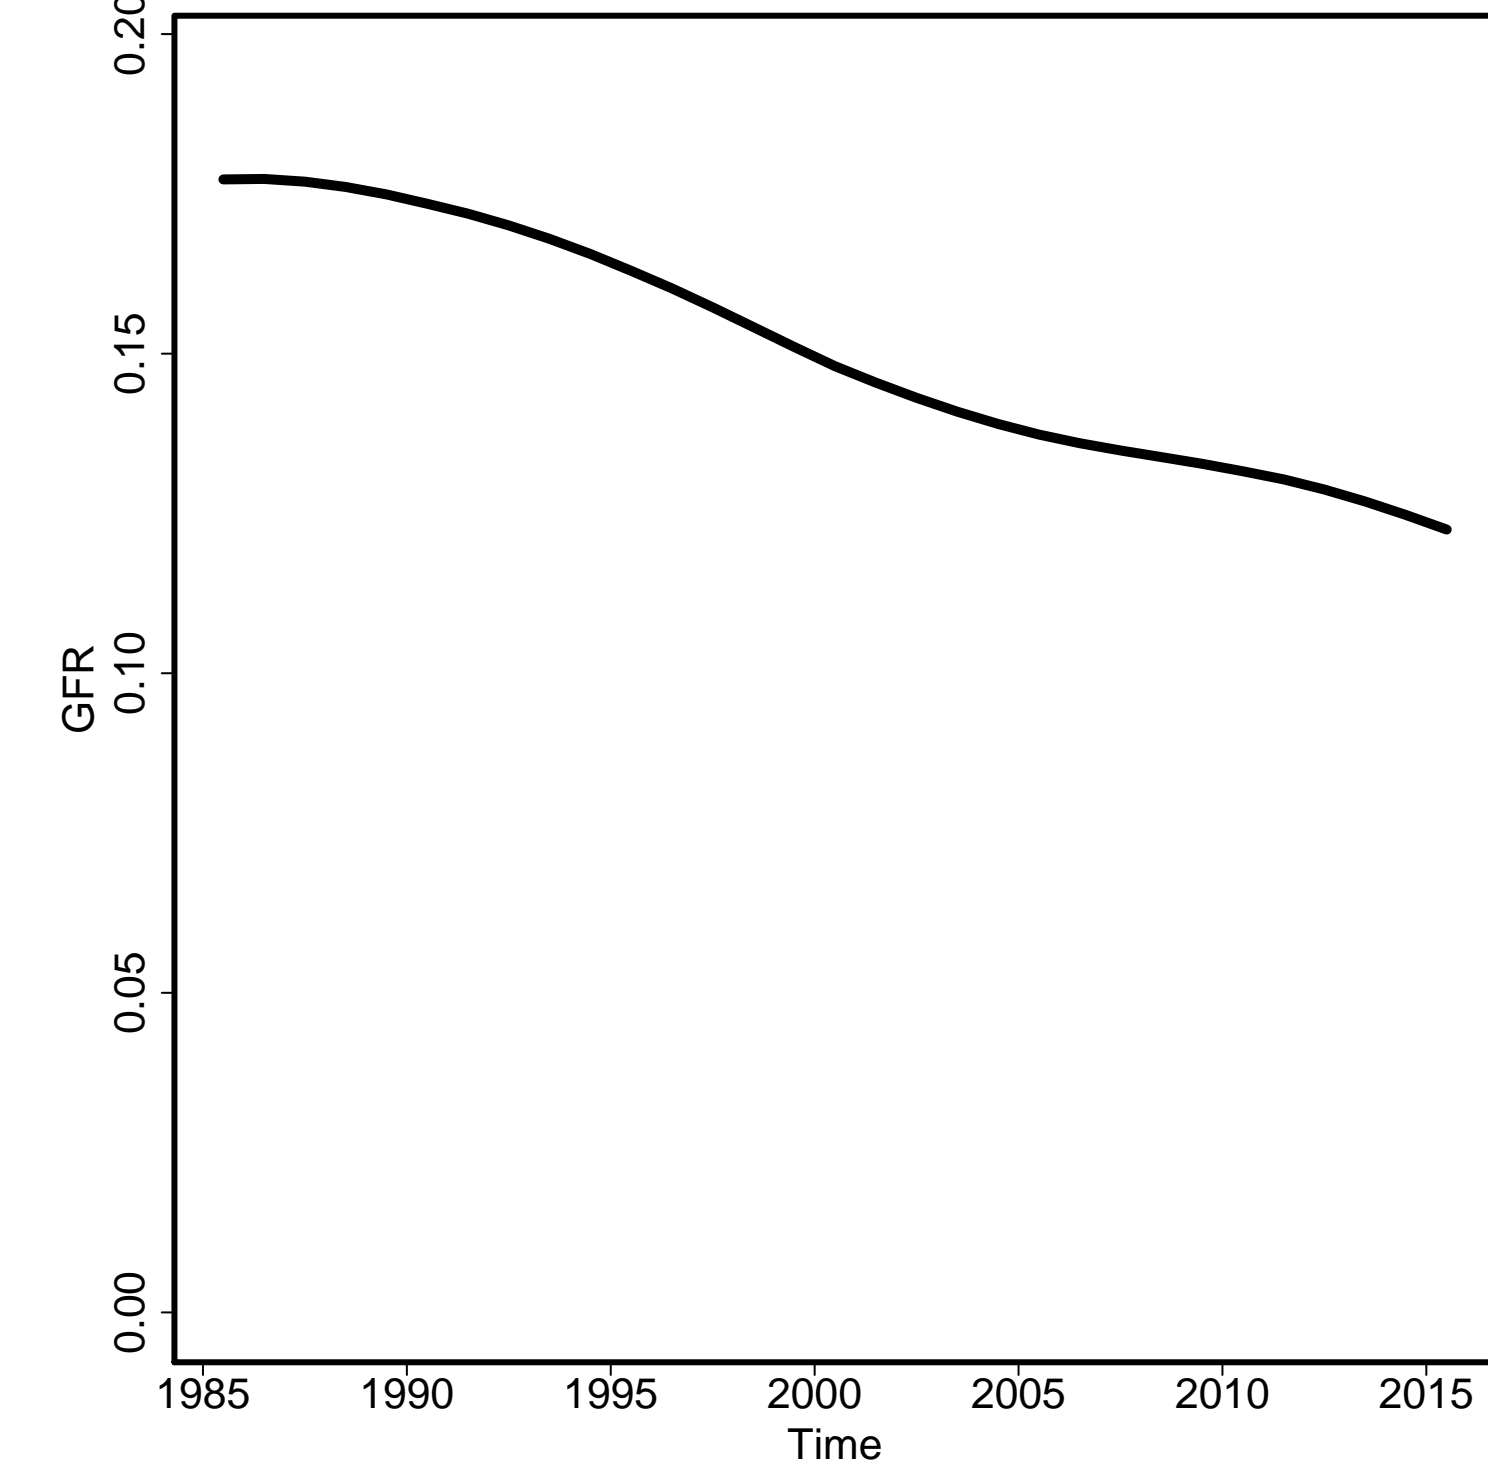

Skilled Attendance to Birth

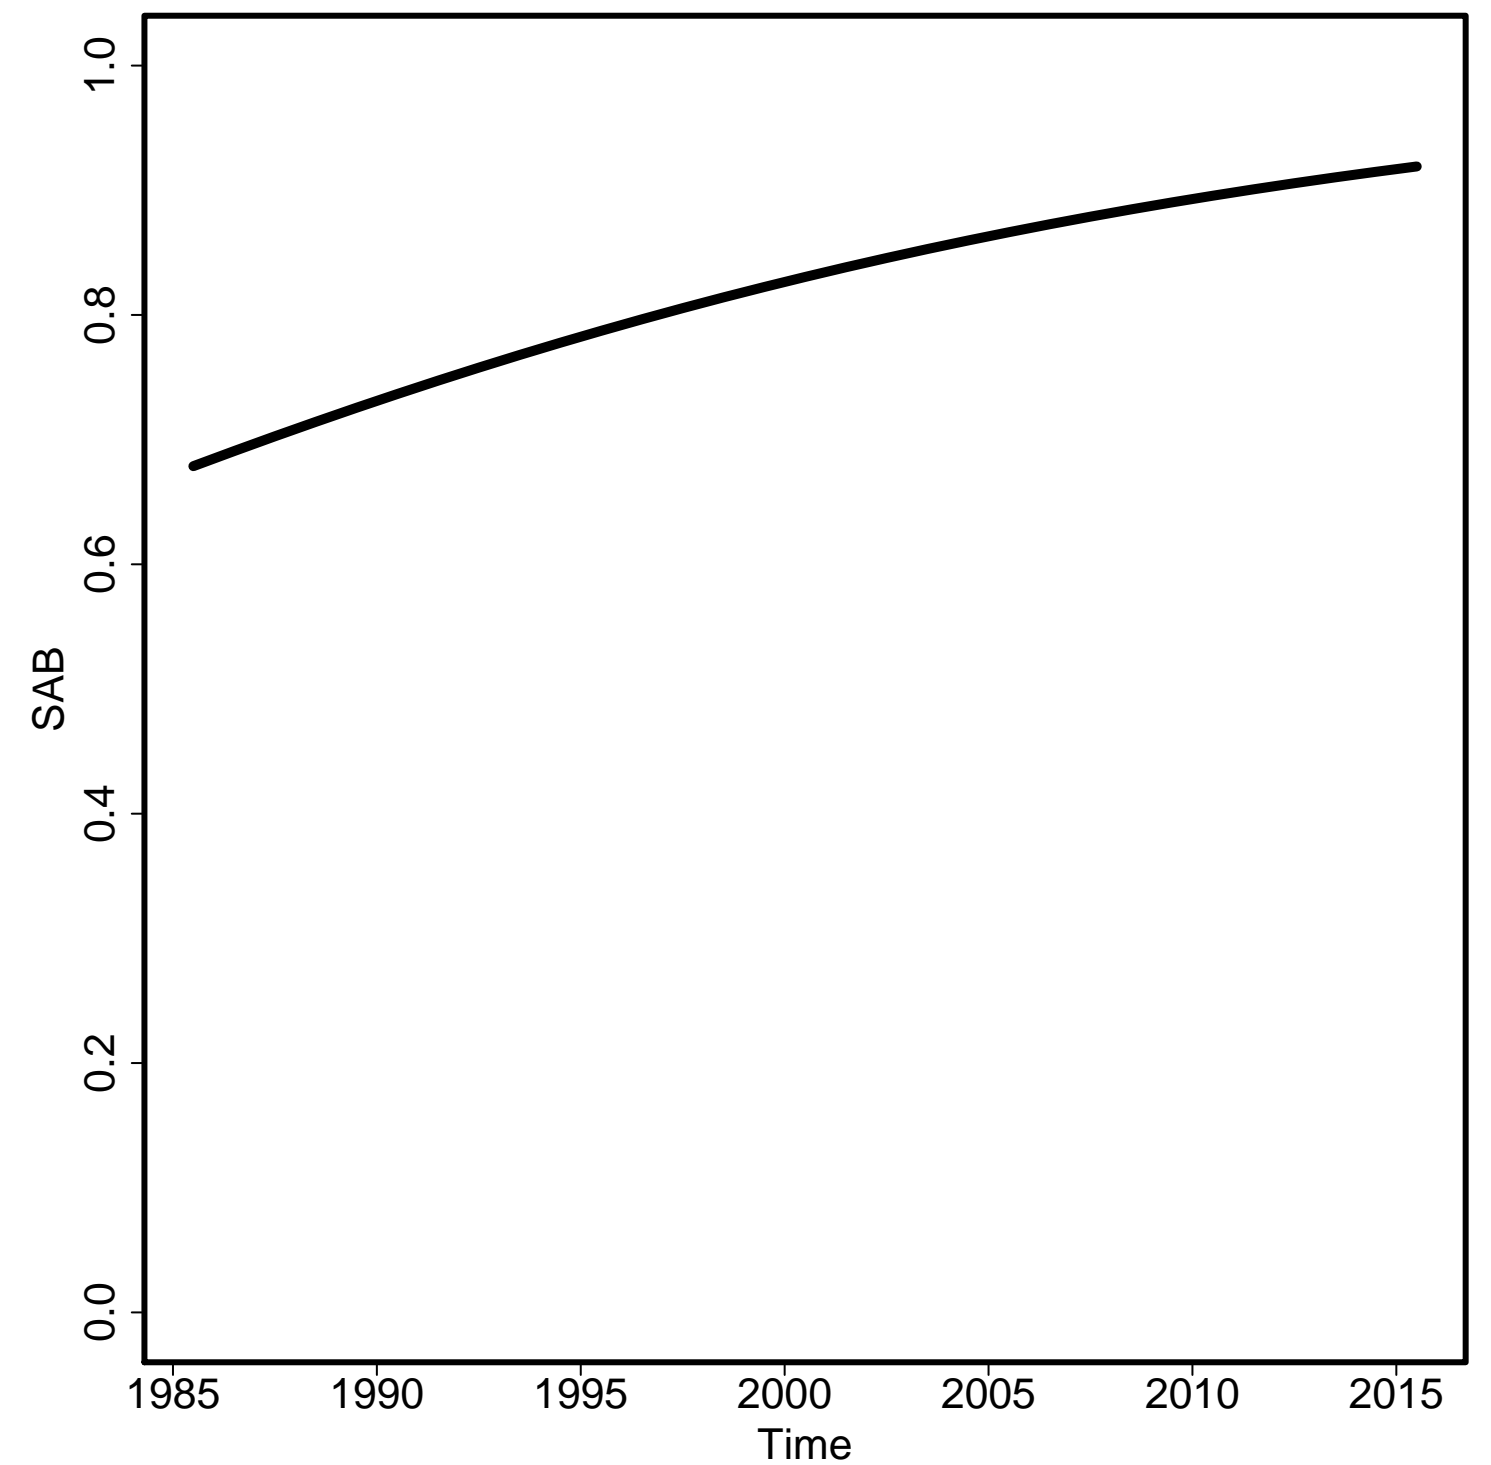

Envelope/Births

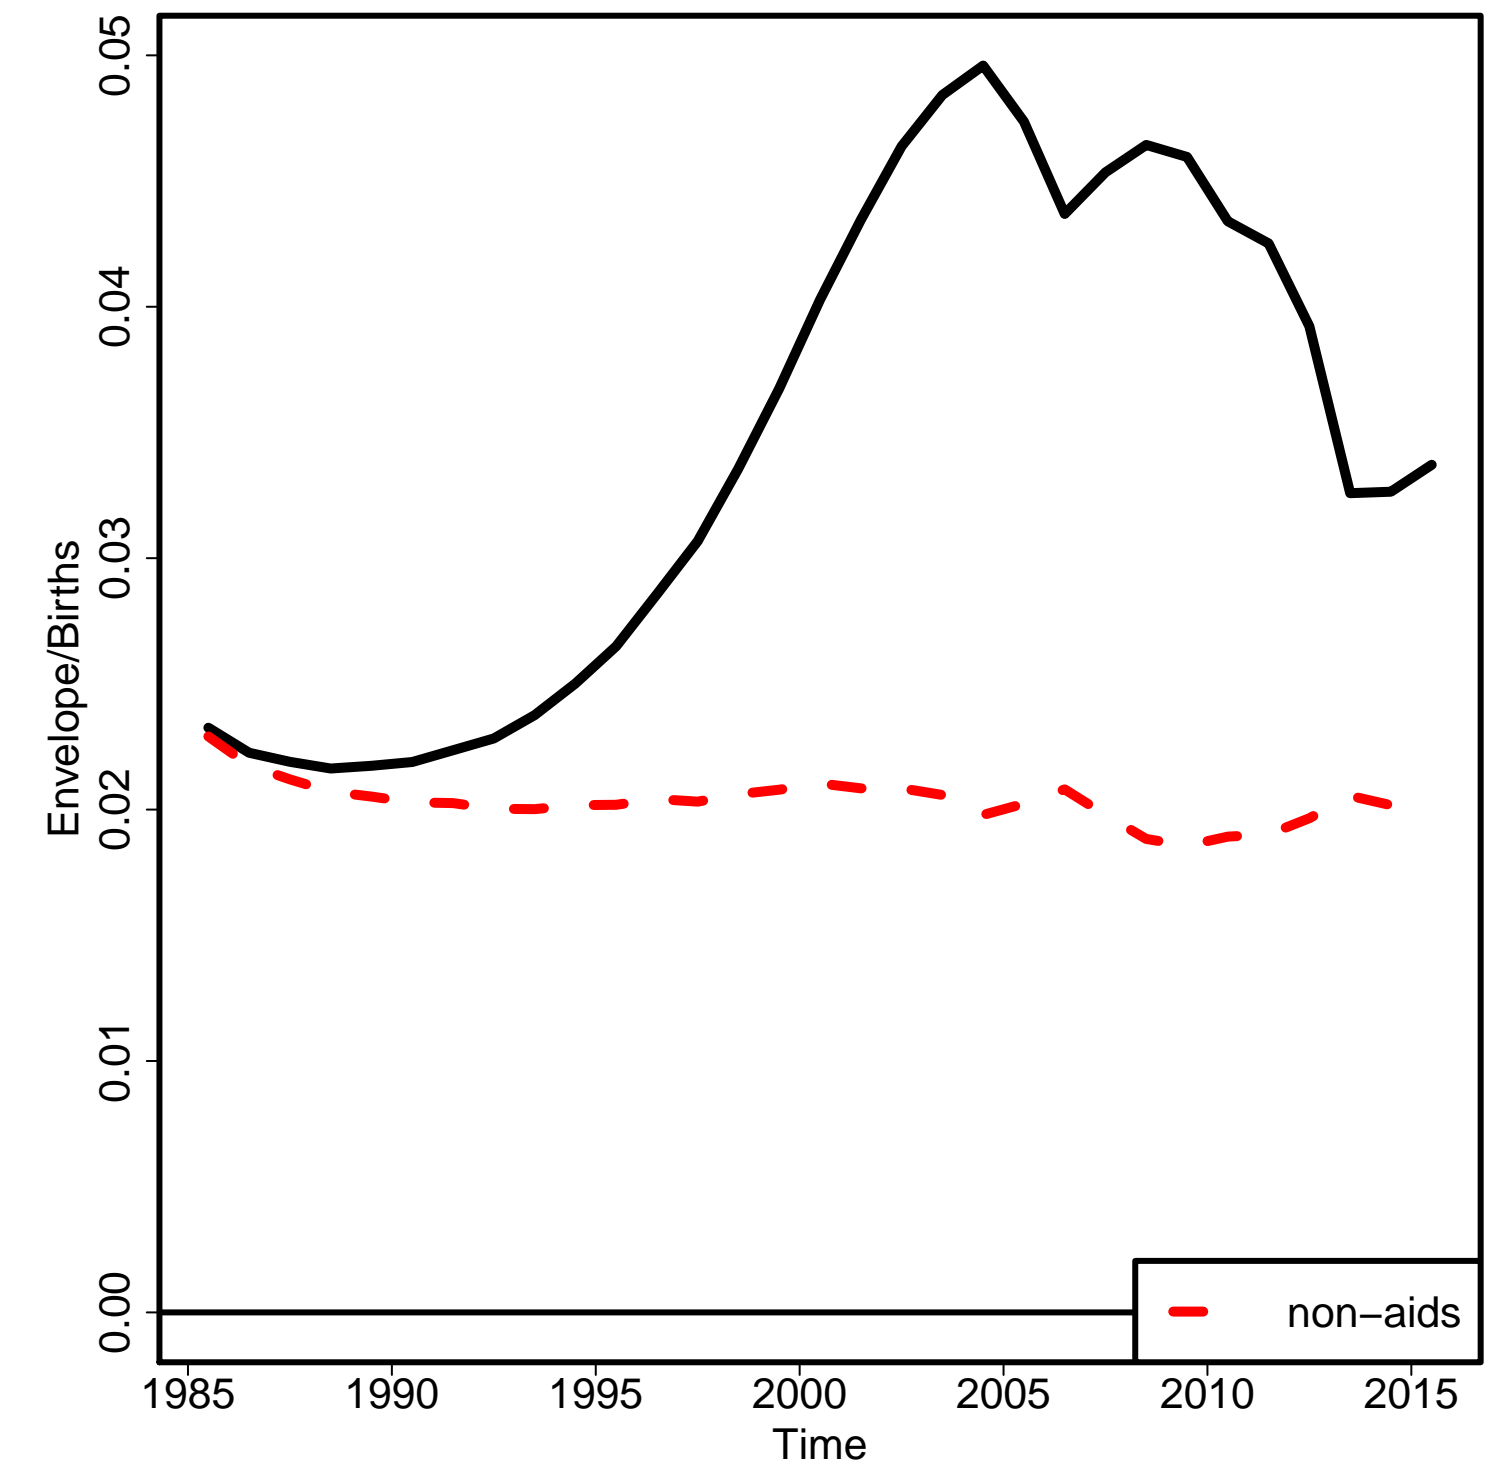

Non-aids MMR

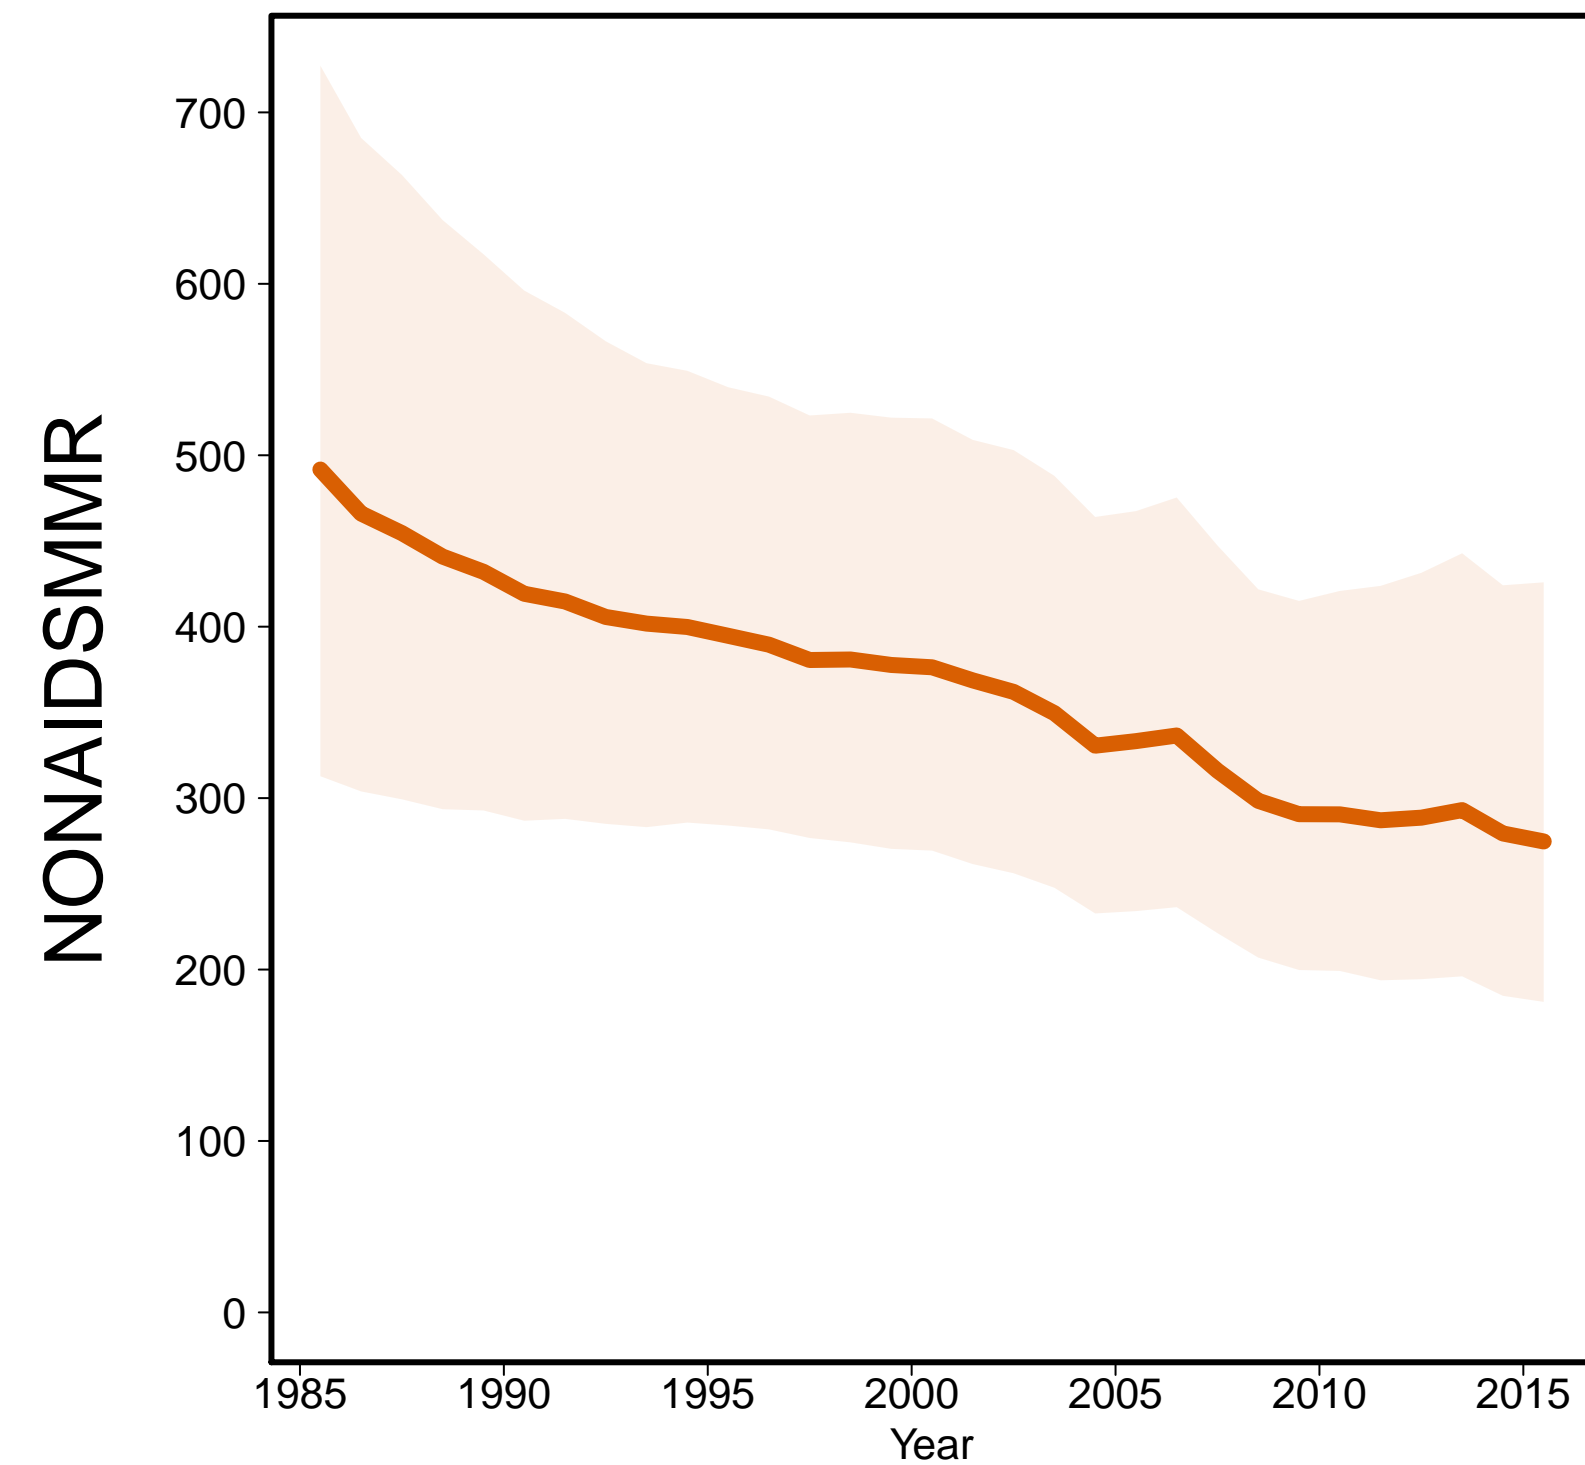

Aids MMR

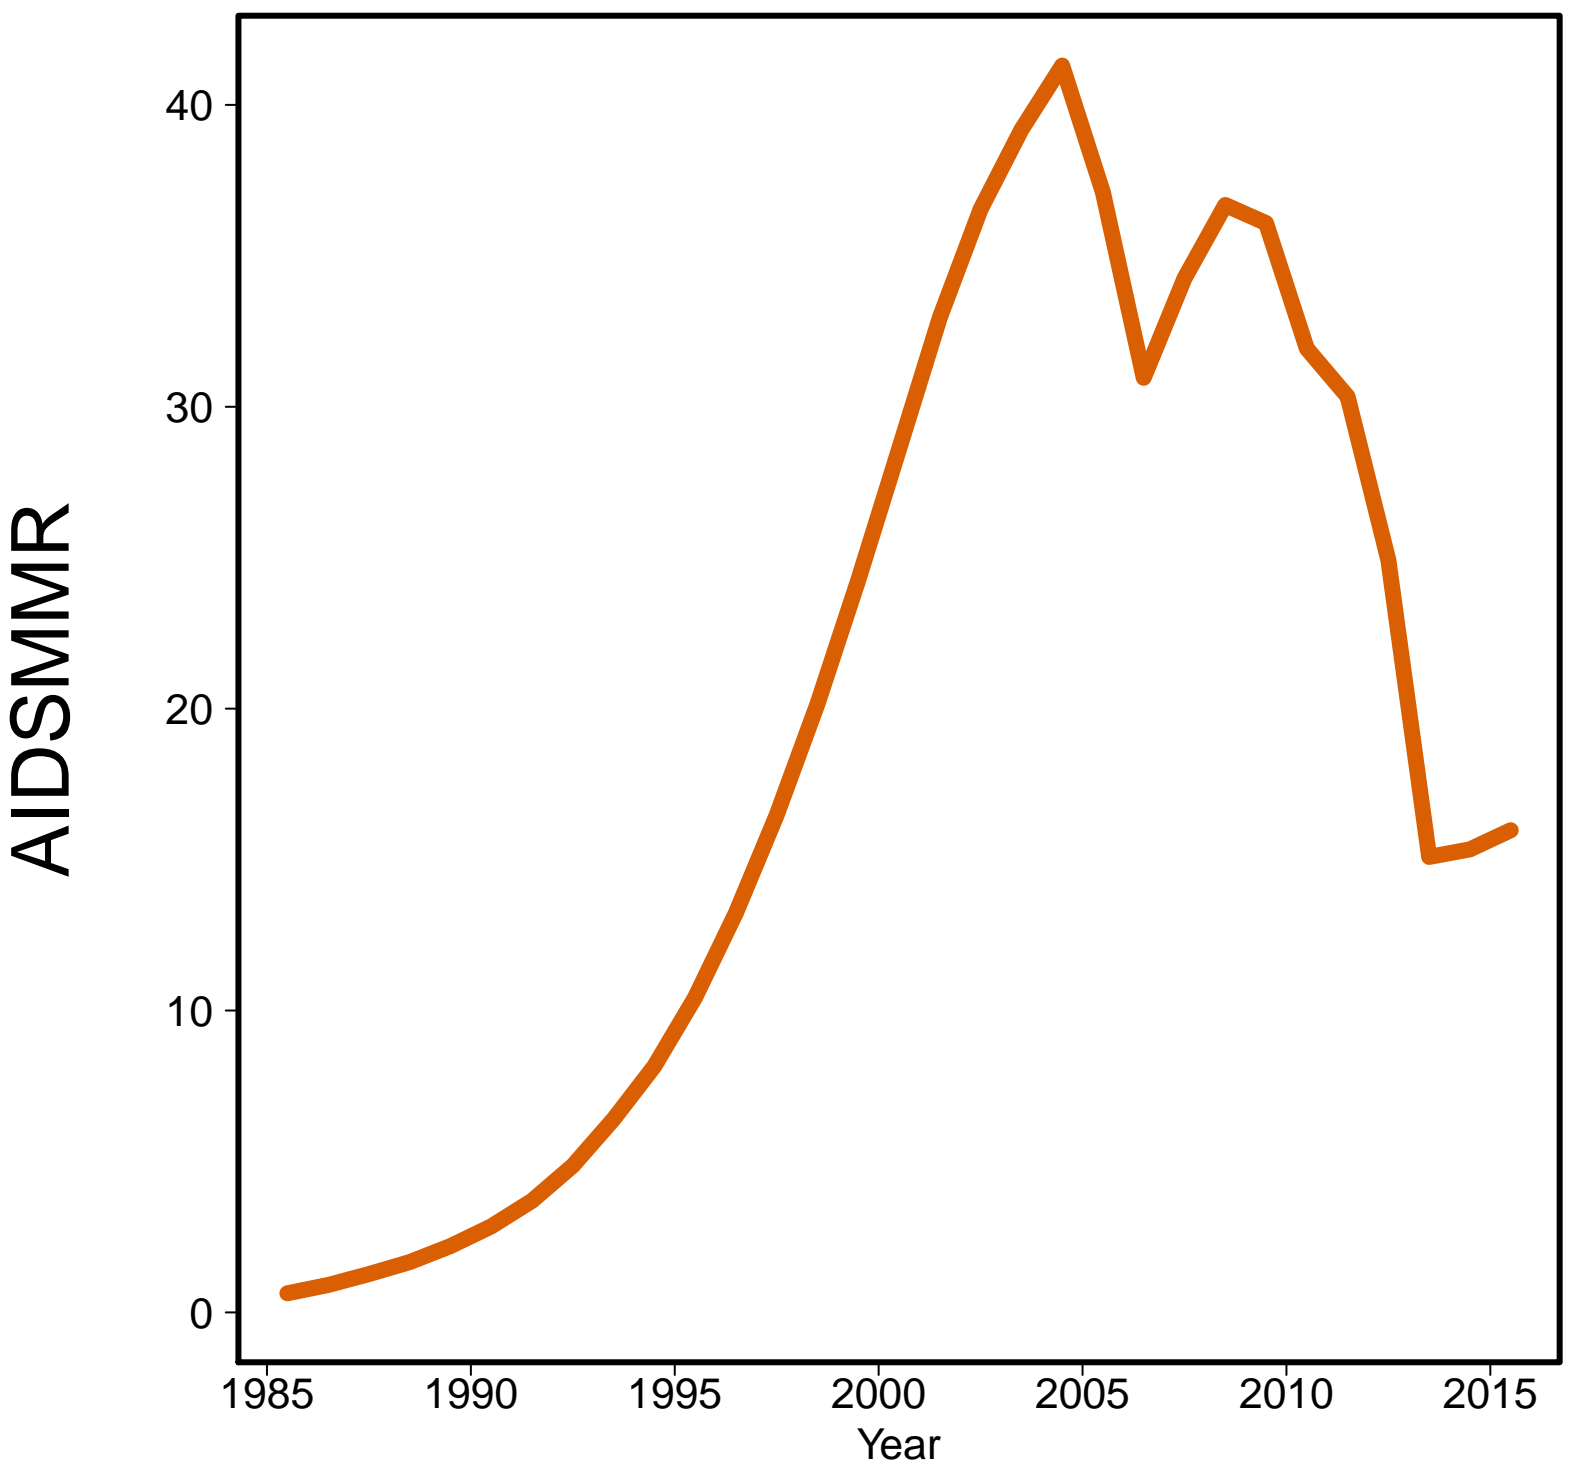

Gambia [GMB]  
(Western Africa)

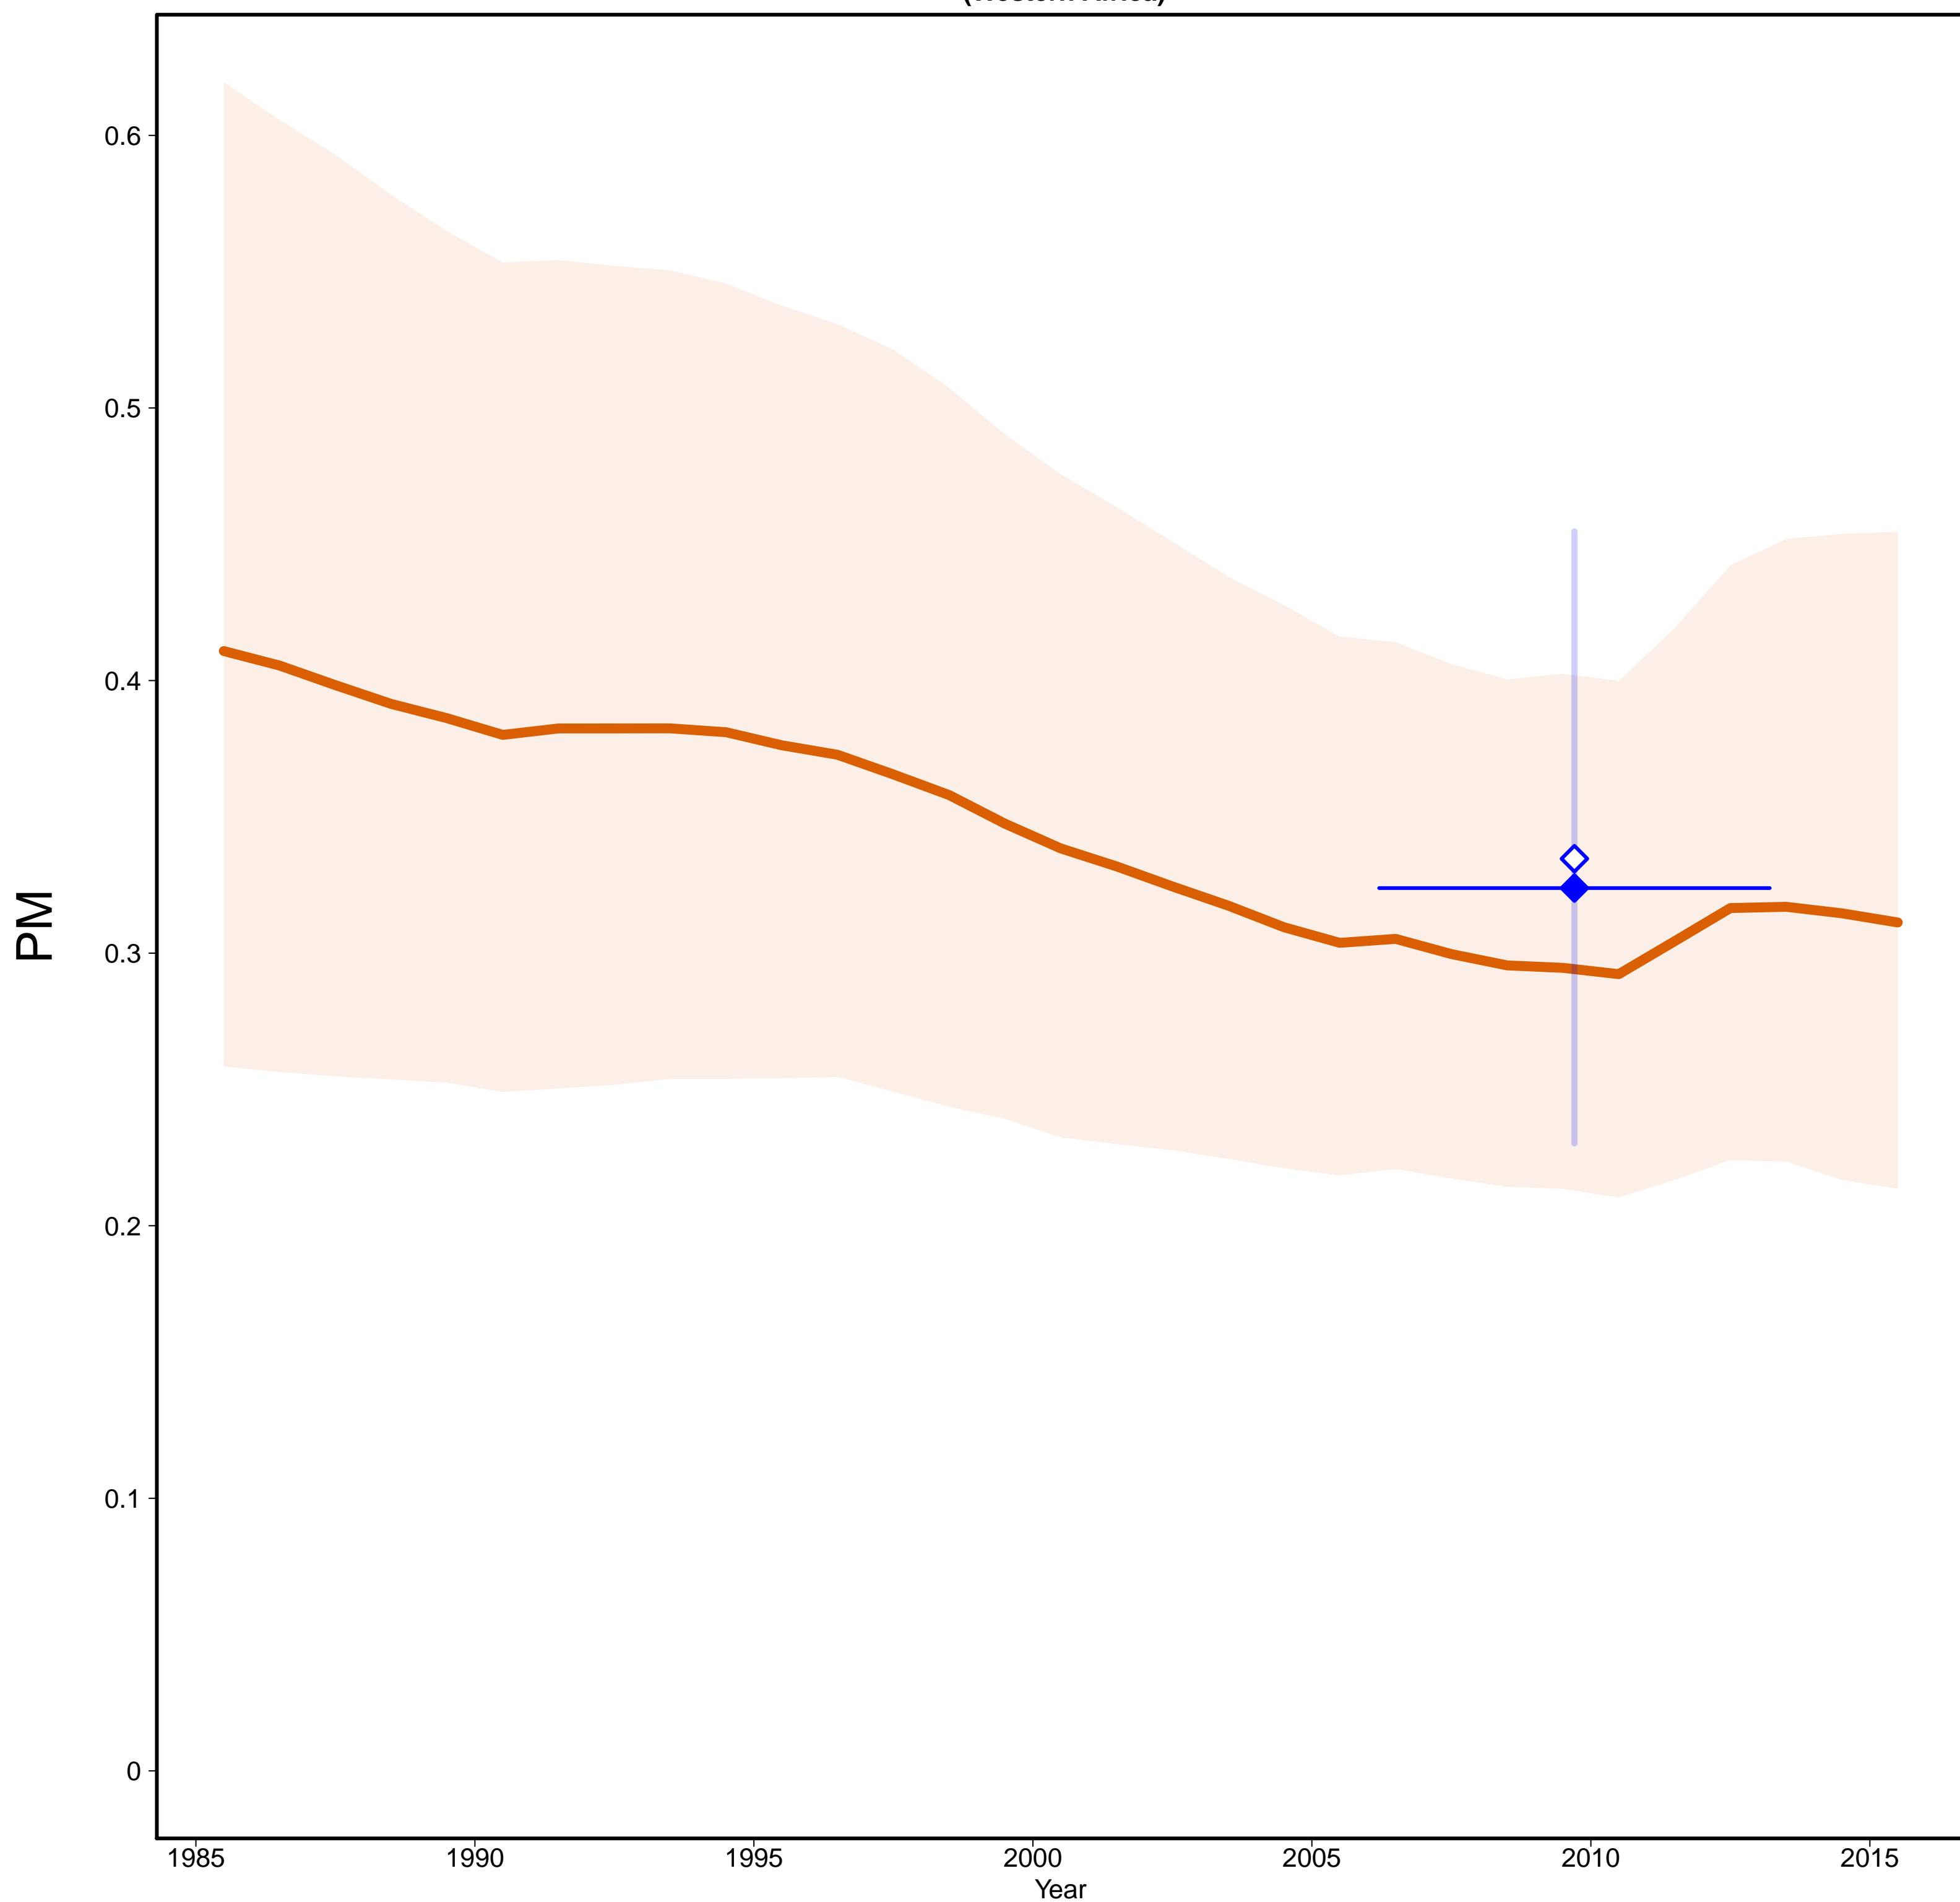

Gambia [GMB]  
(Western Africa)

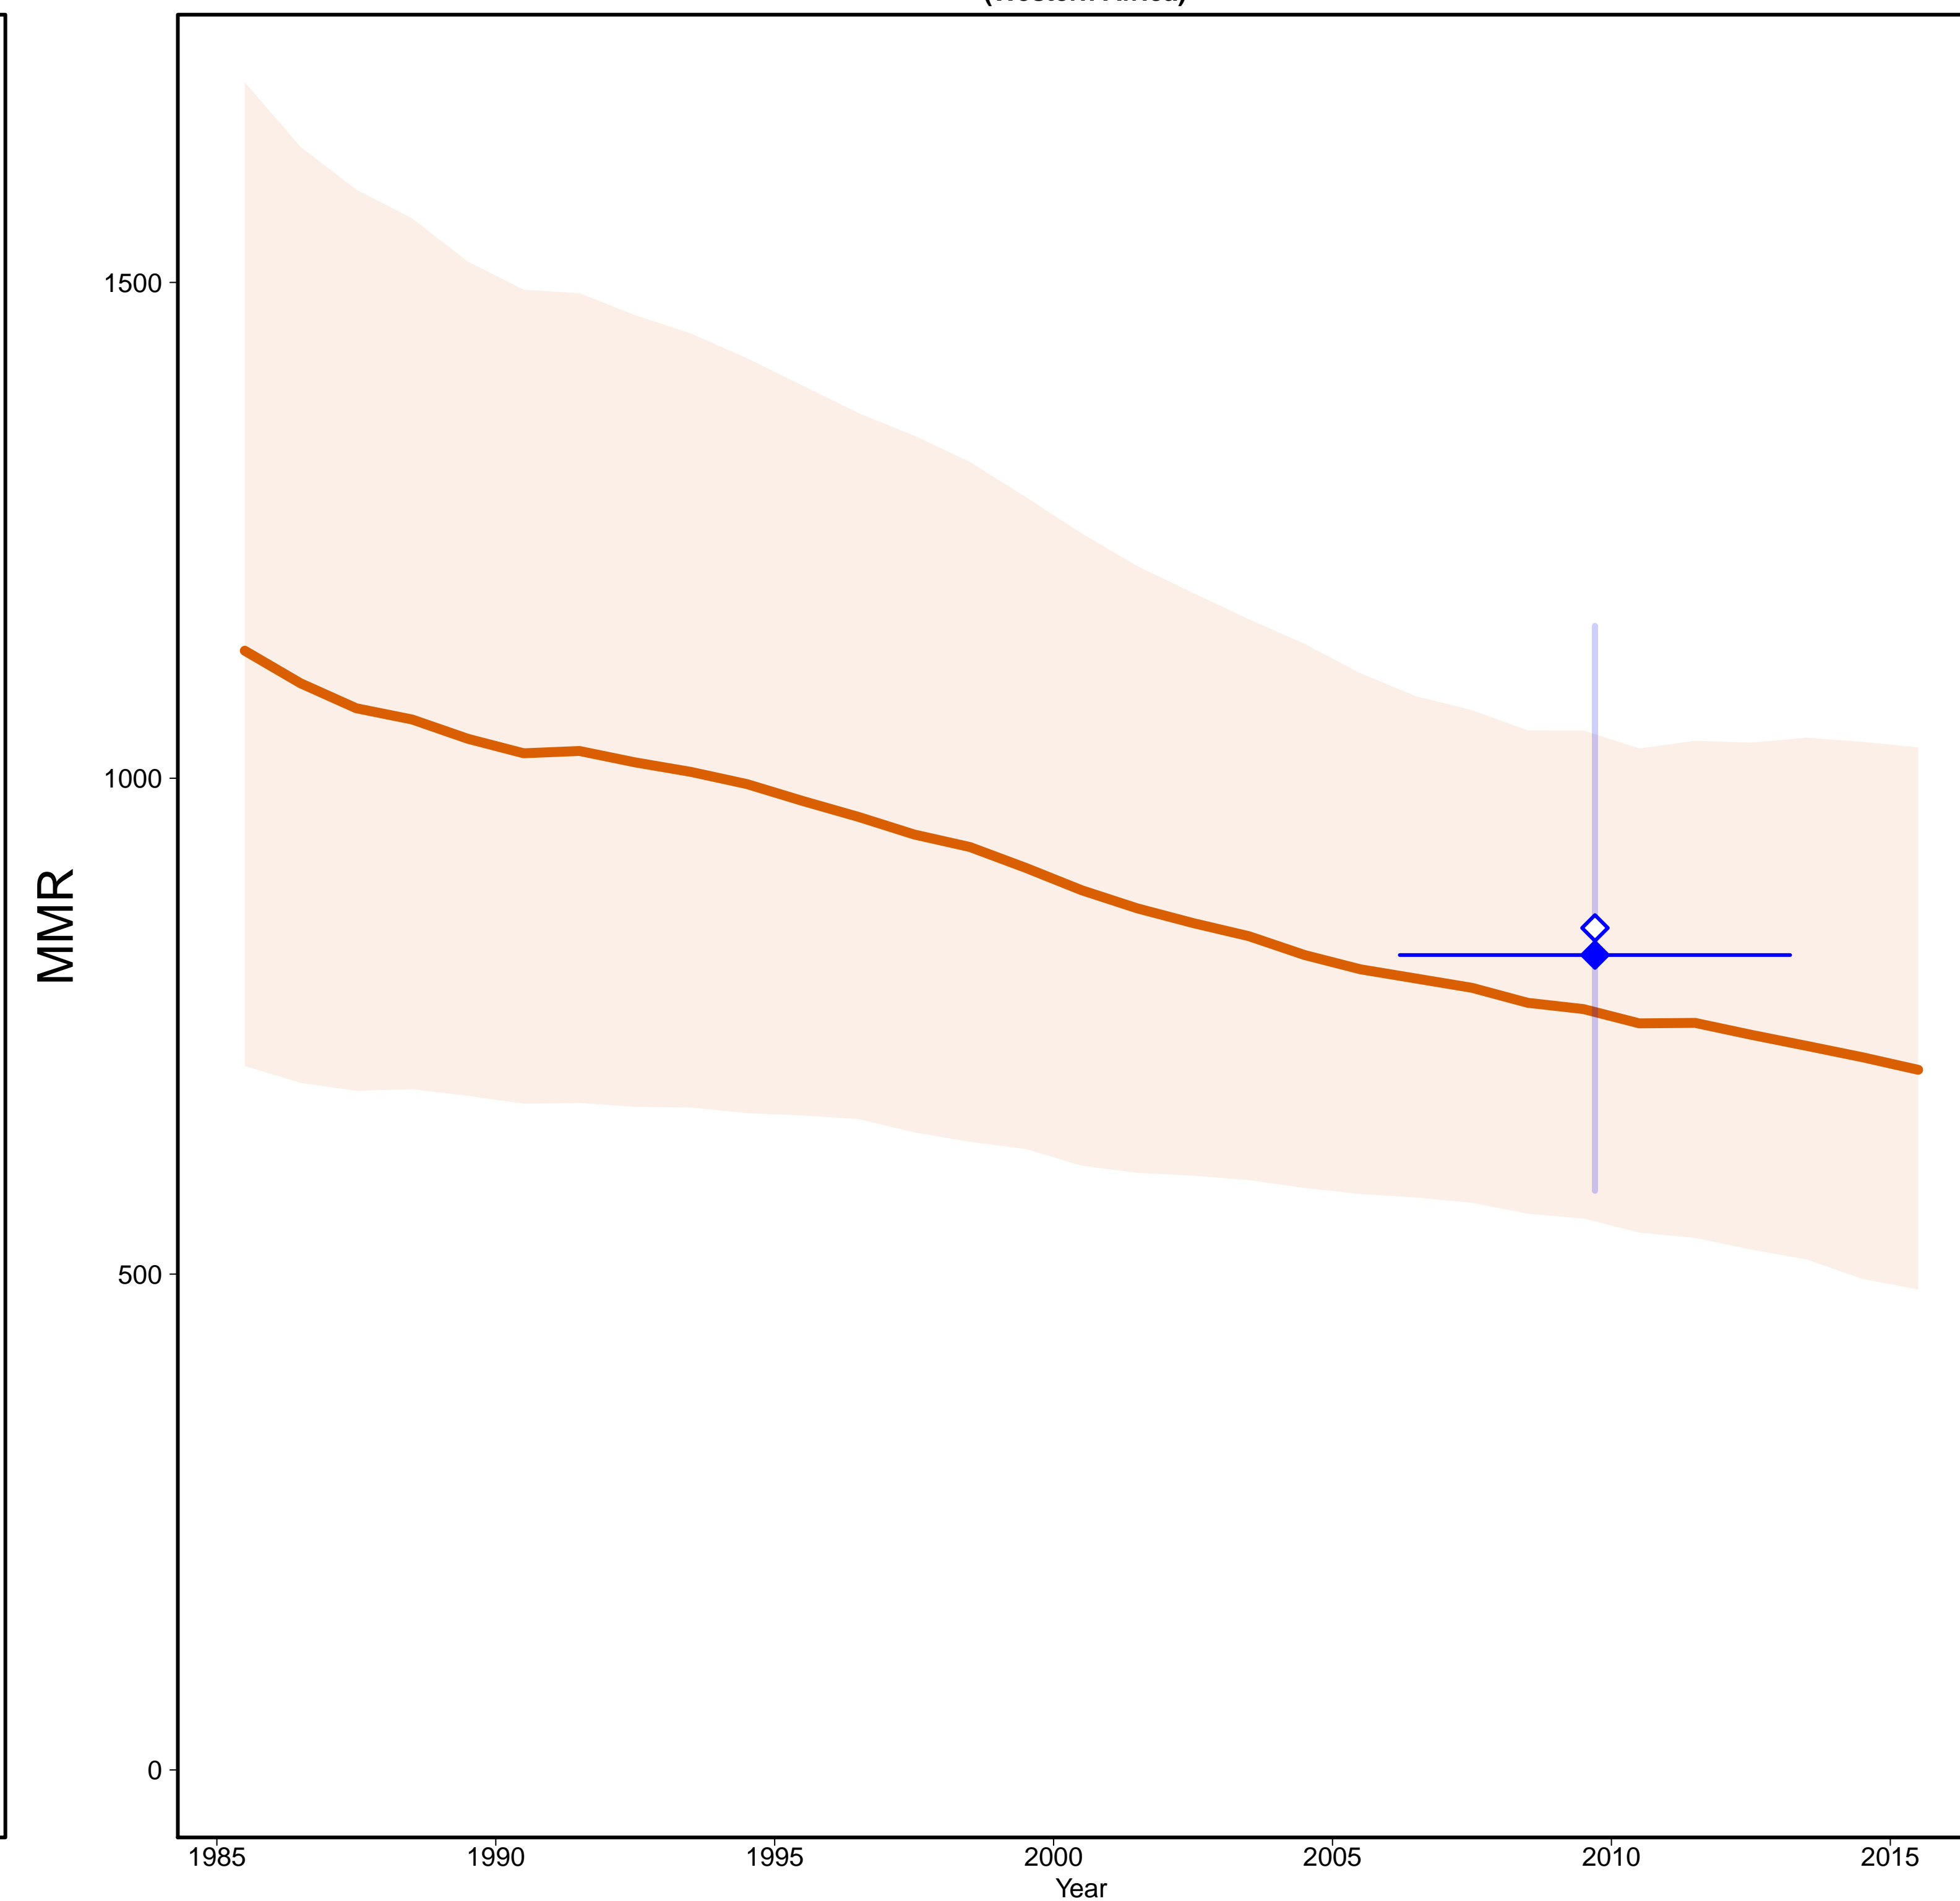

- Estimates —
- MMR Database 2015 —
- ◇ Observed Data
- ◆ Adjusted Data
- Data type —
- ◆ DHS

Gross Domestic Product

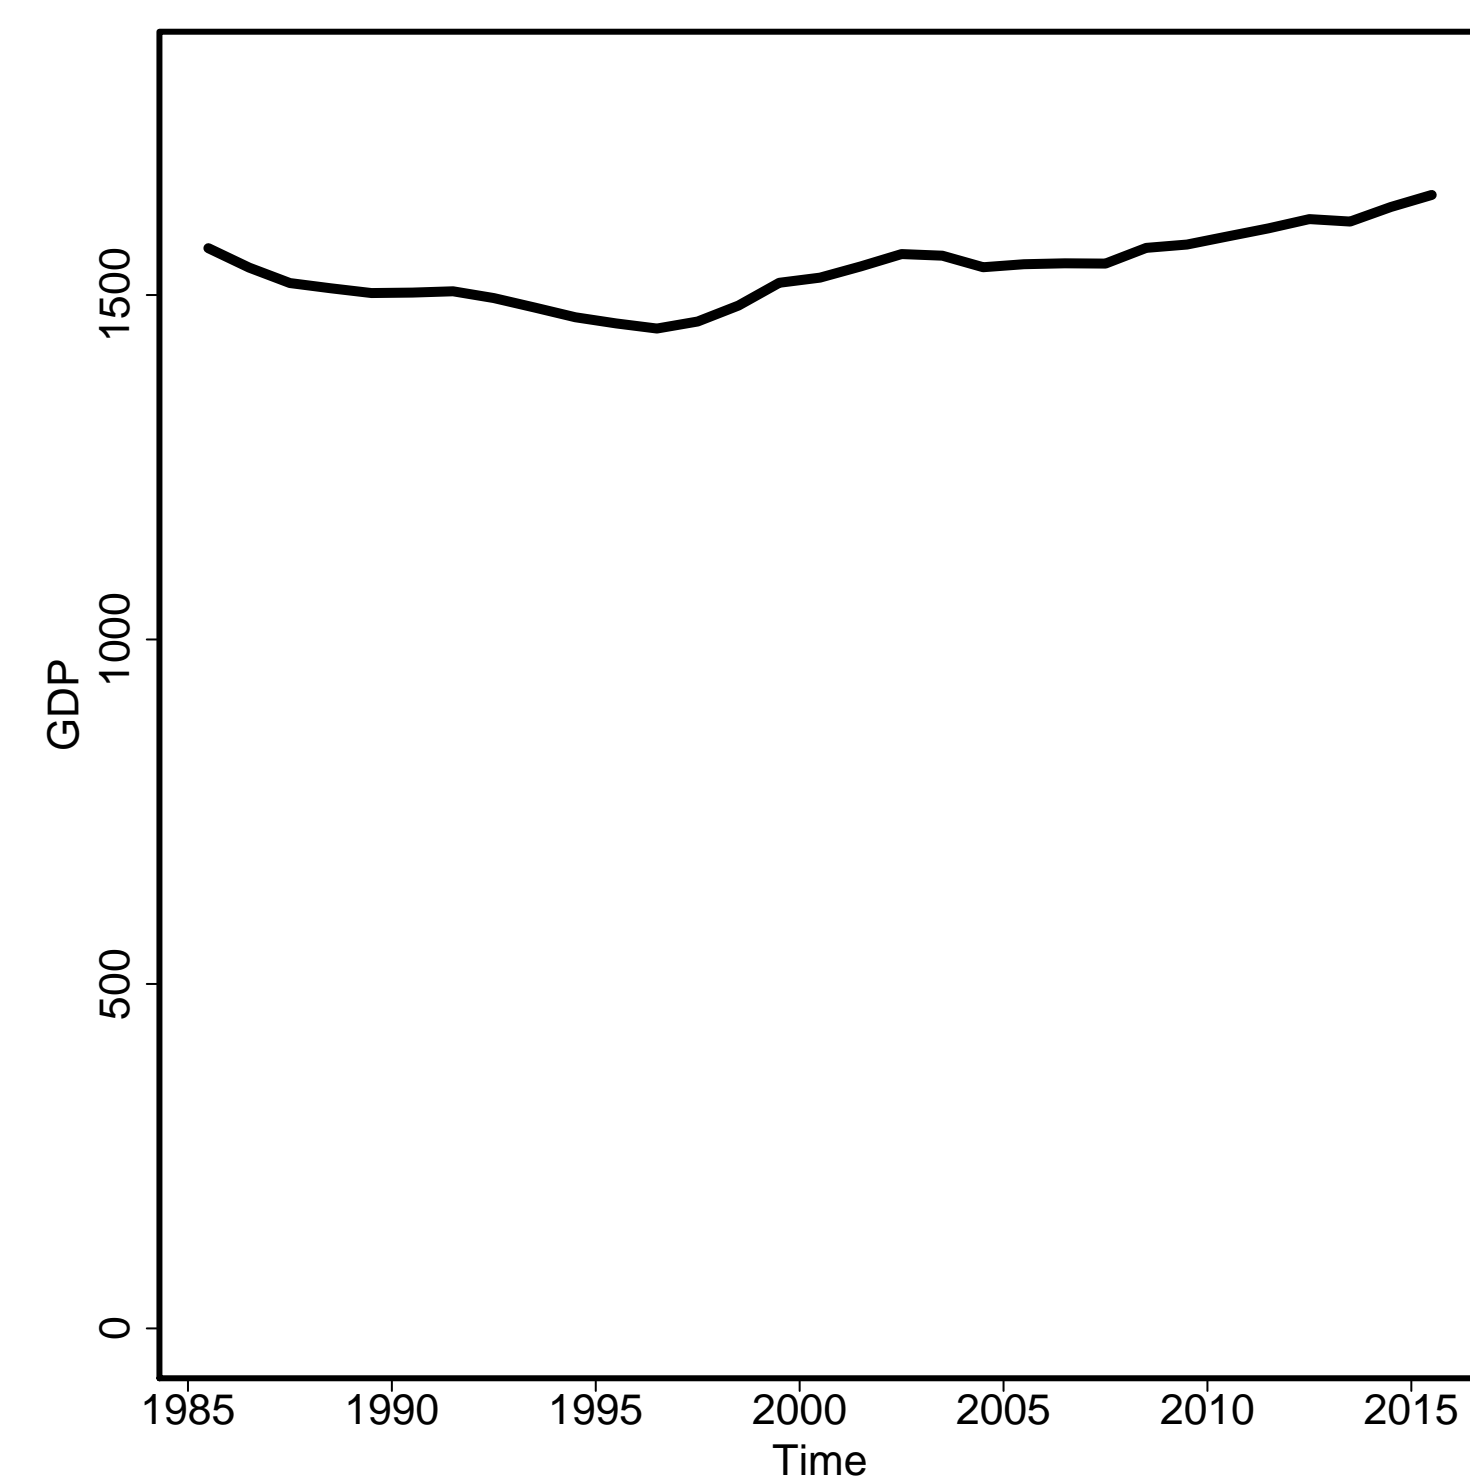

General Fertility Rate

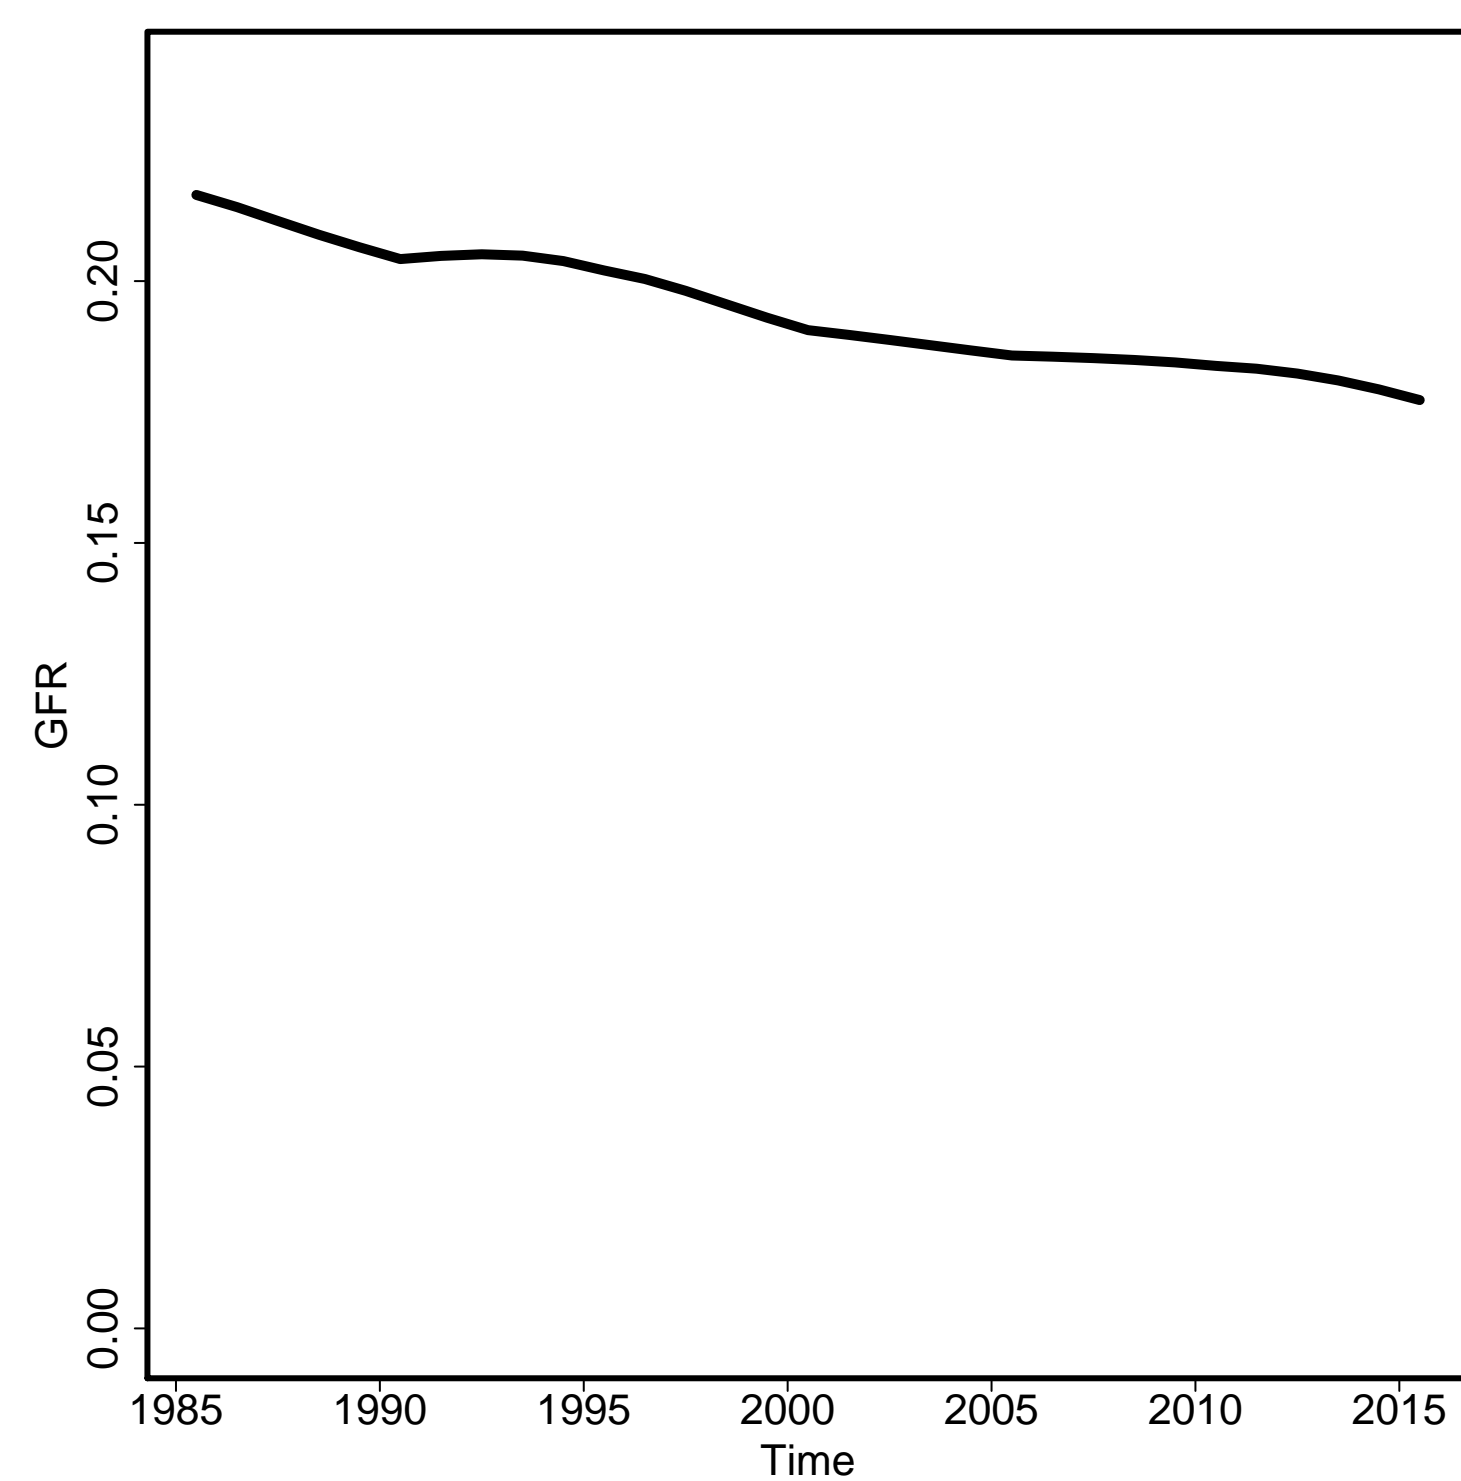

Skilled Attendance to Birth

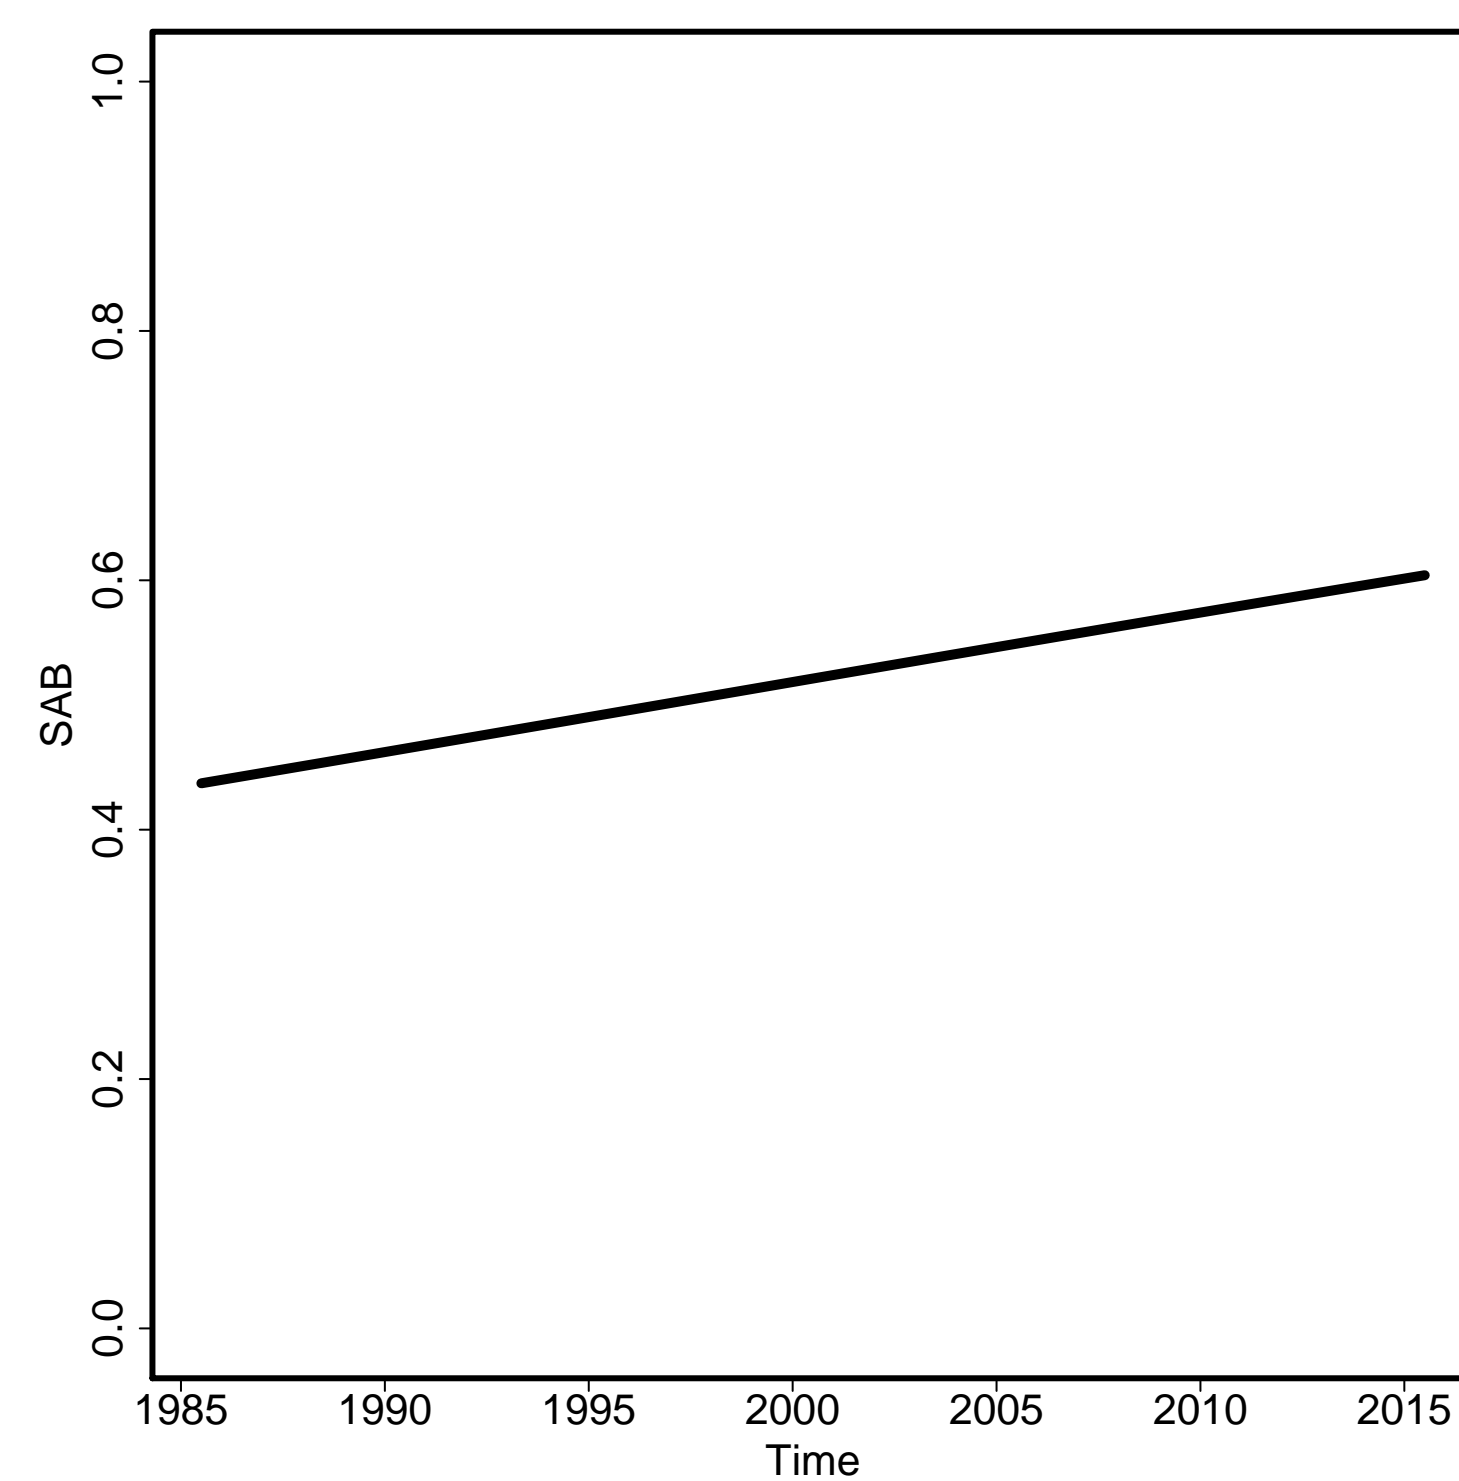

Envelope/Births

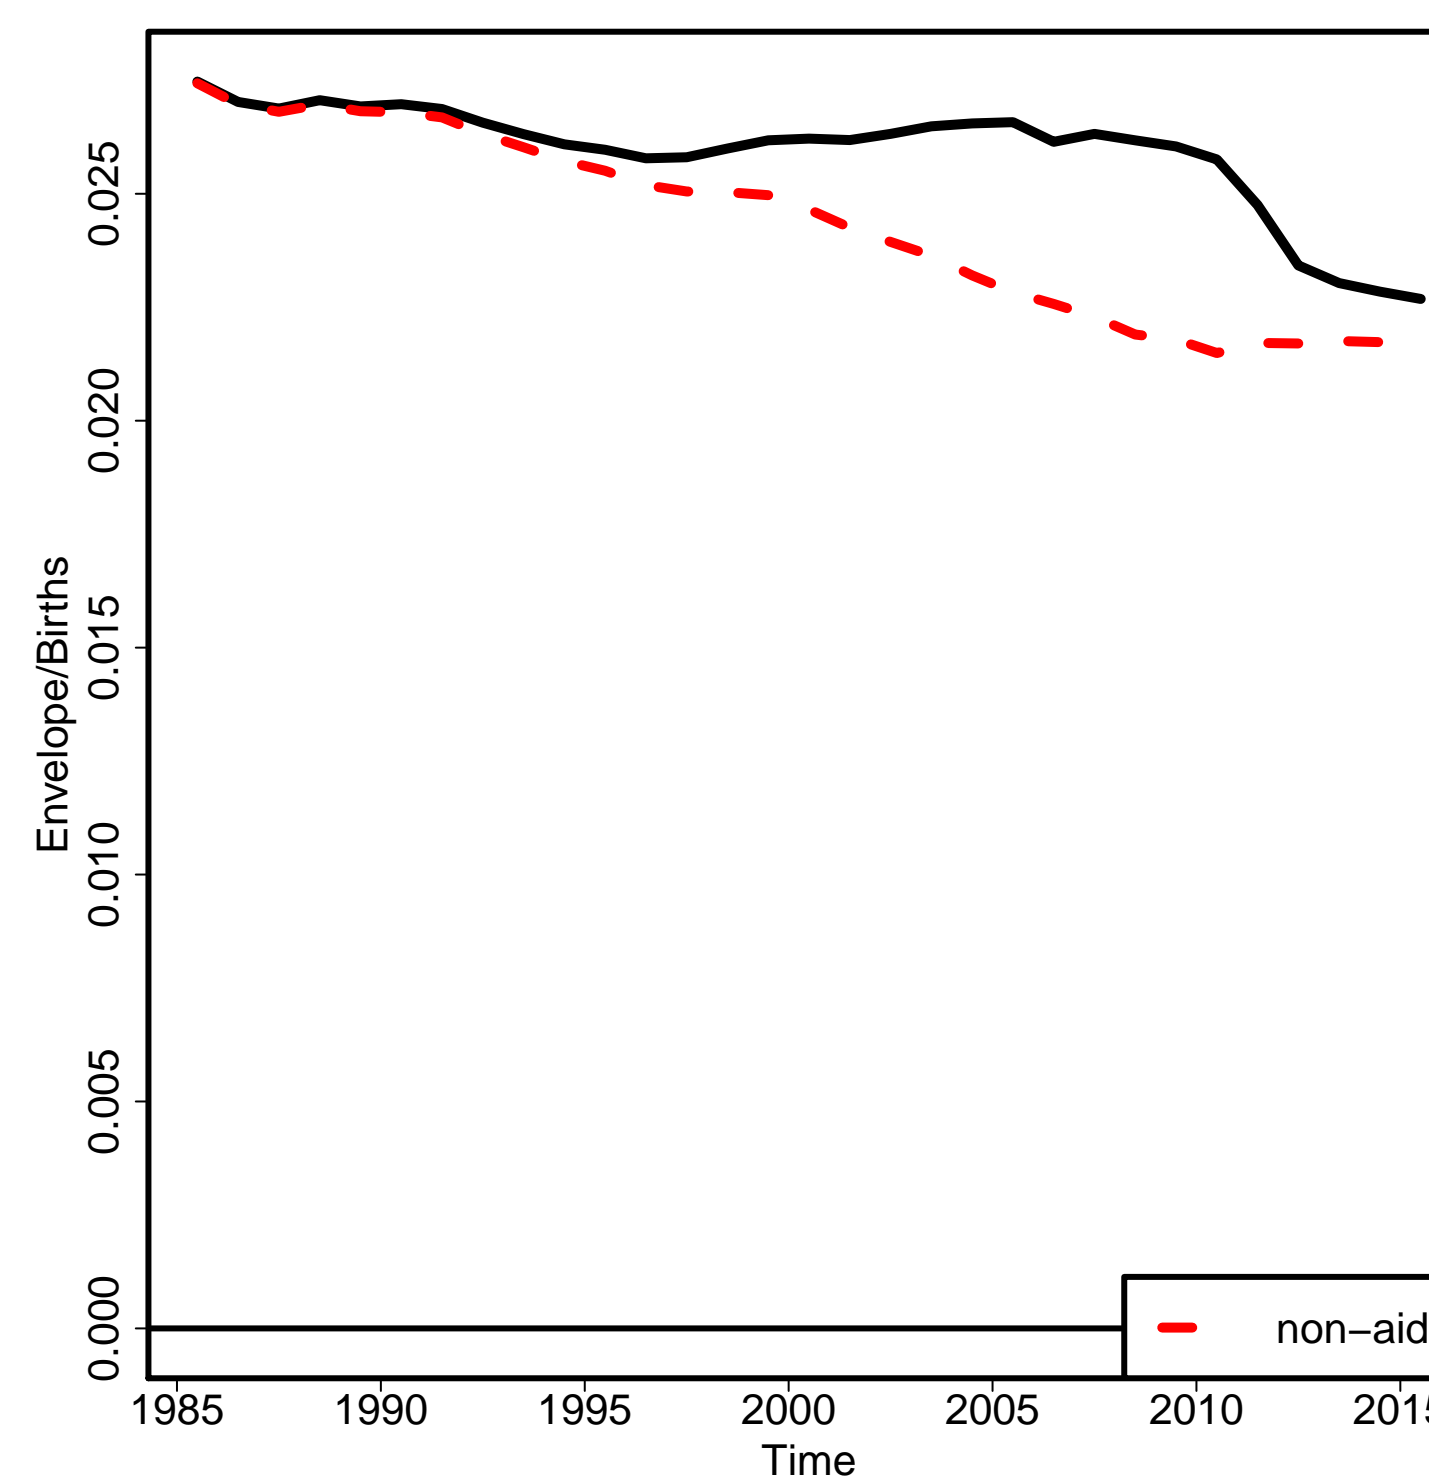

Non-aids MMR

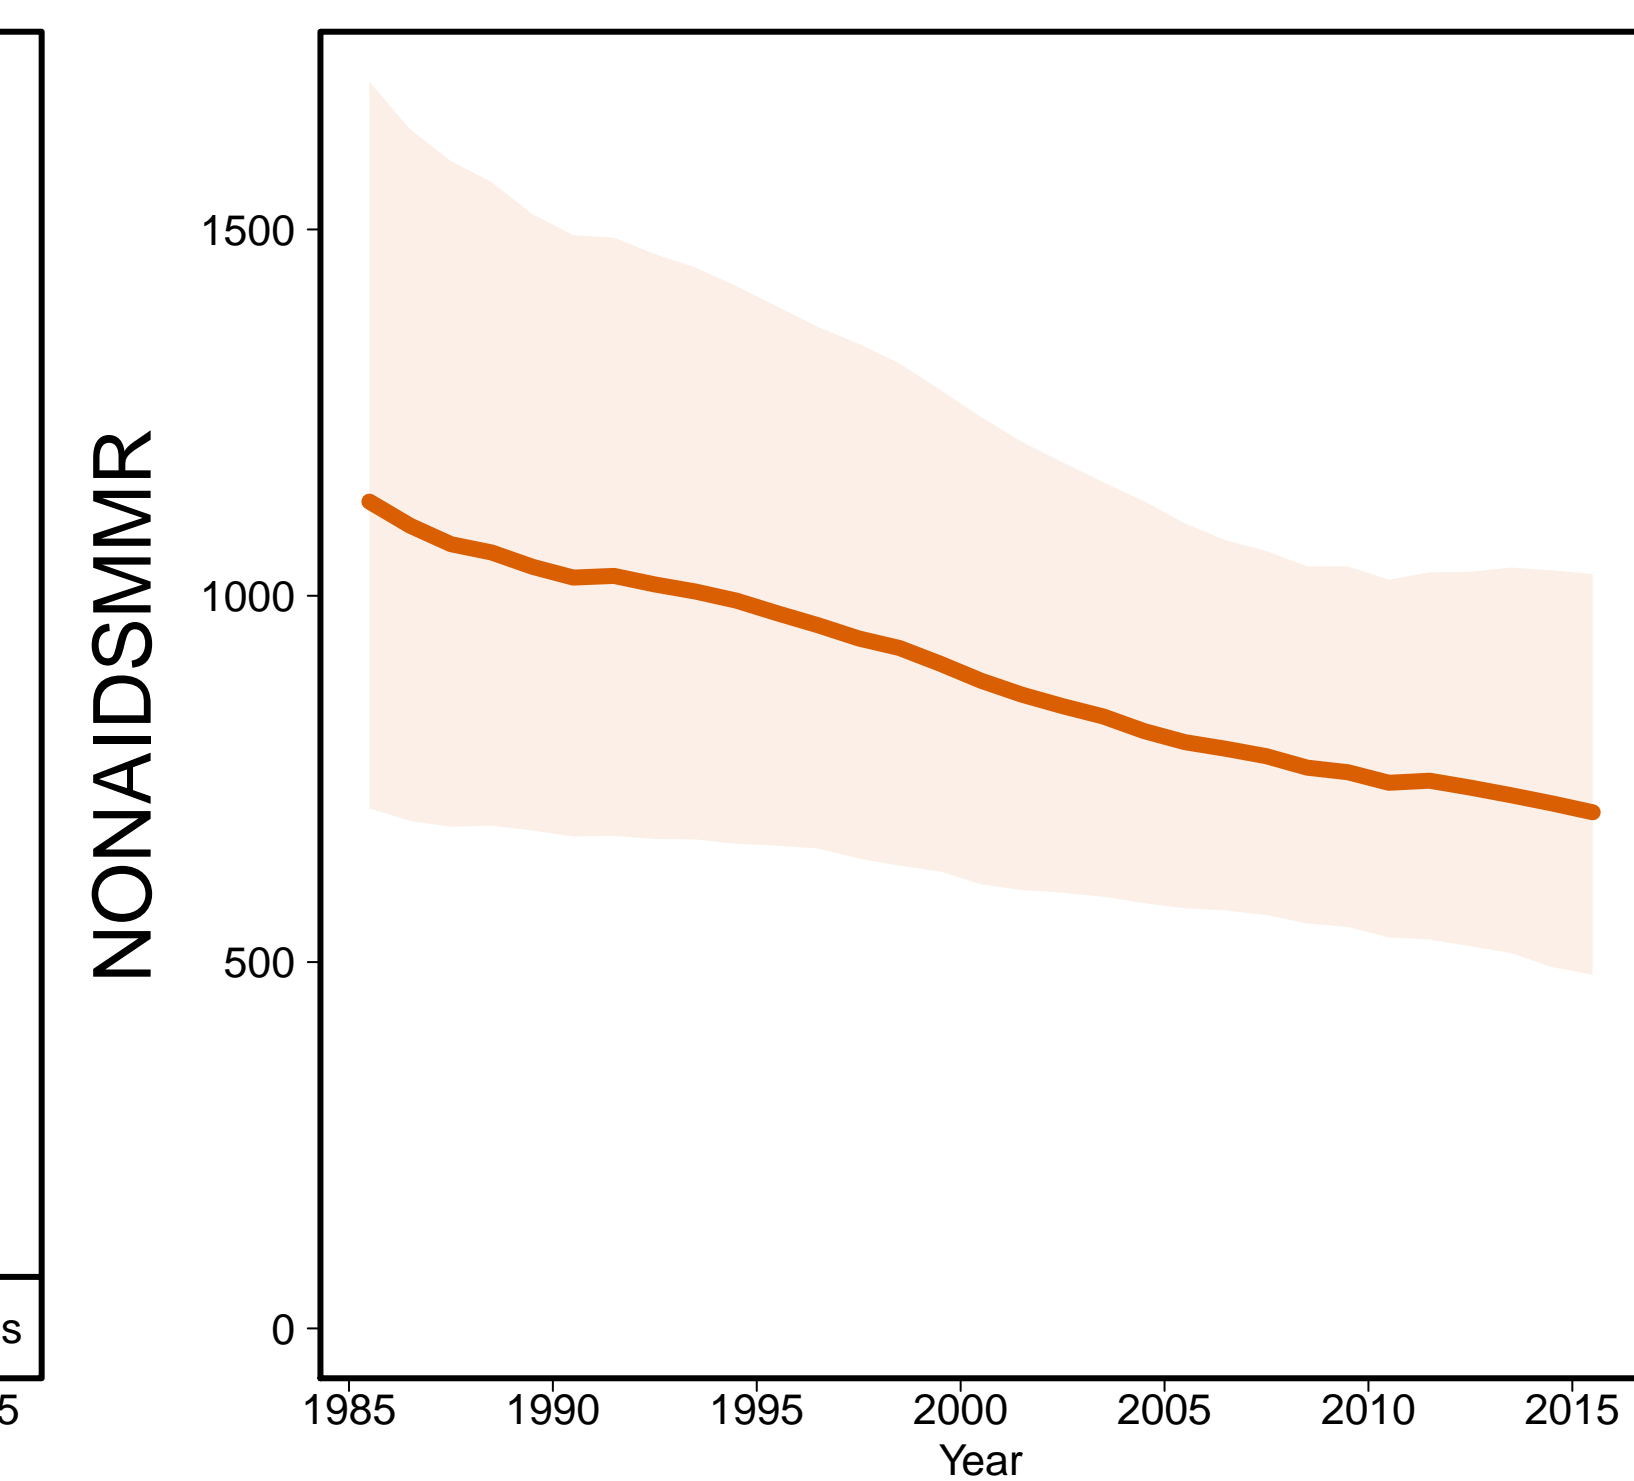

Aids MMR

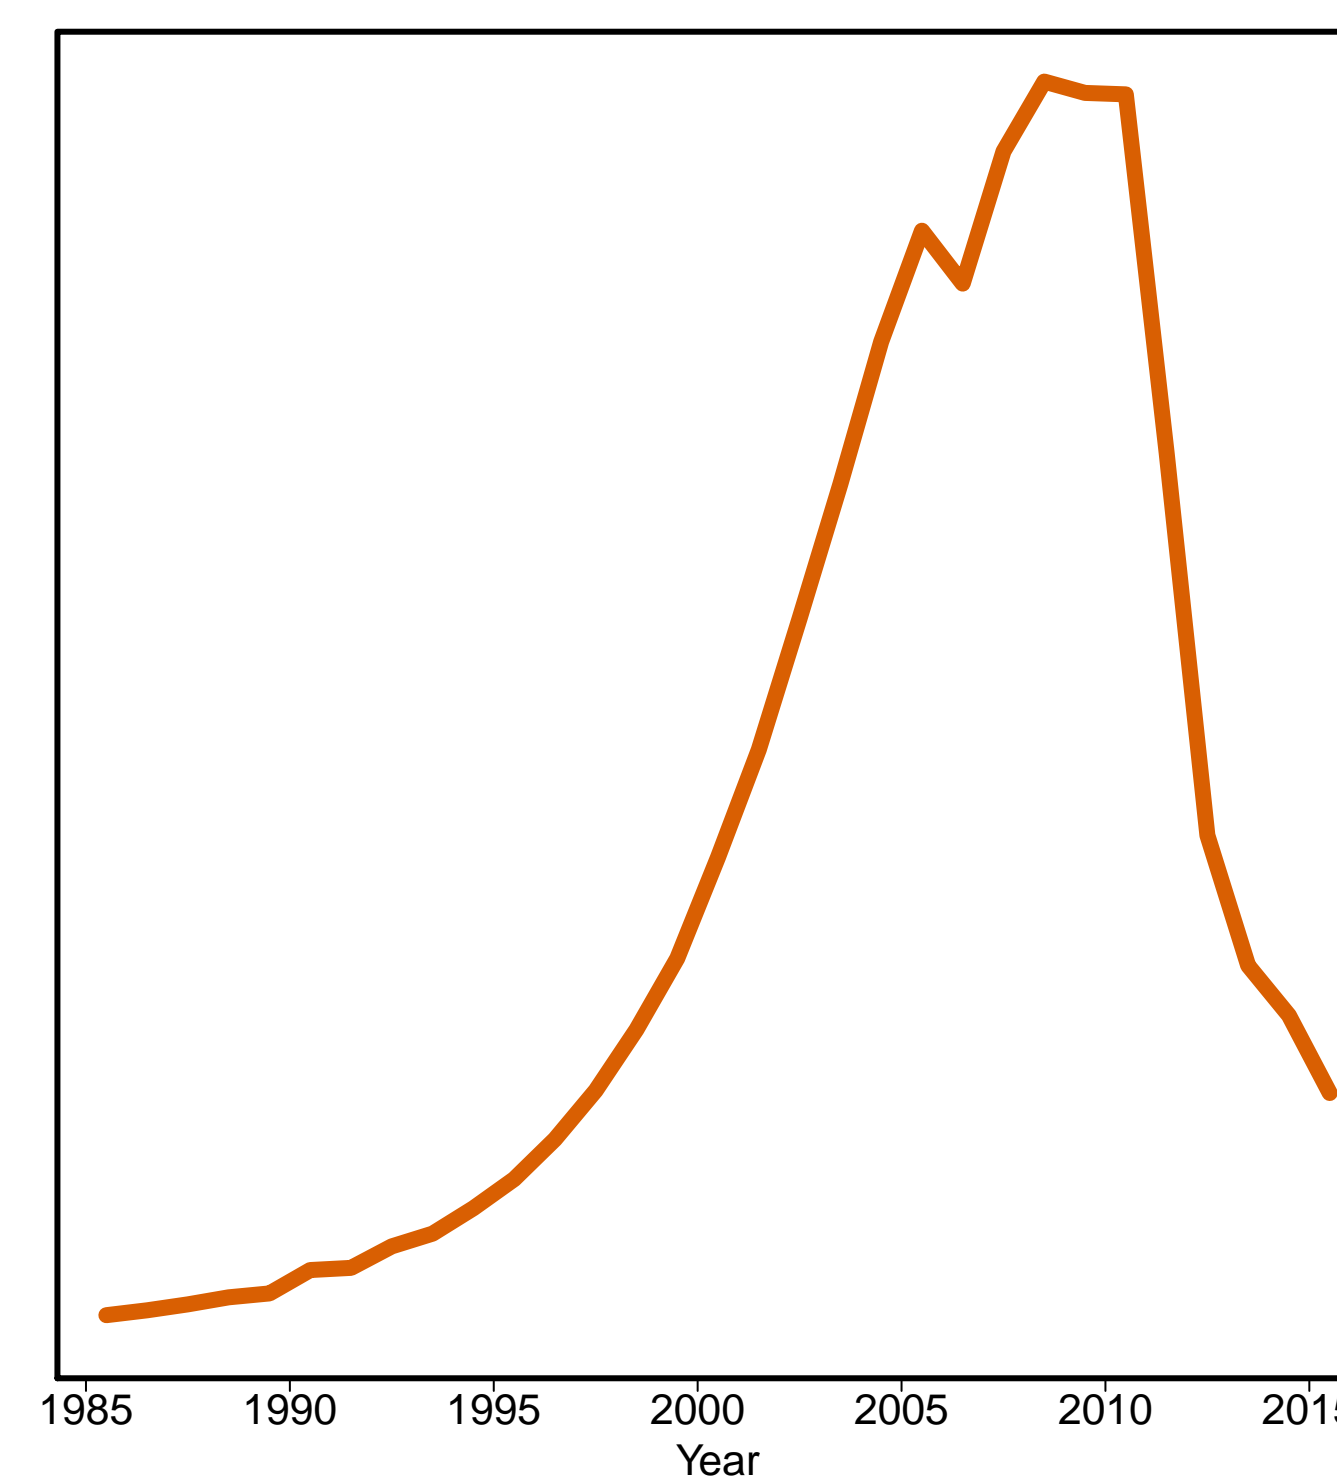

Georgia [GEO]  
(Western Asia)

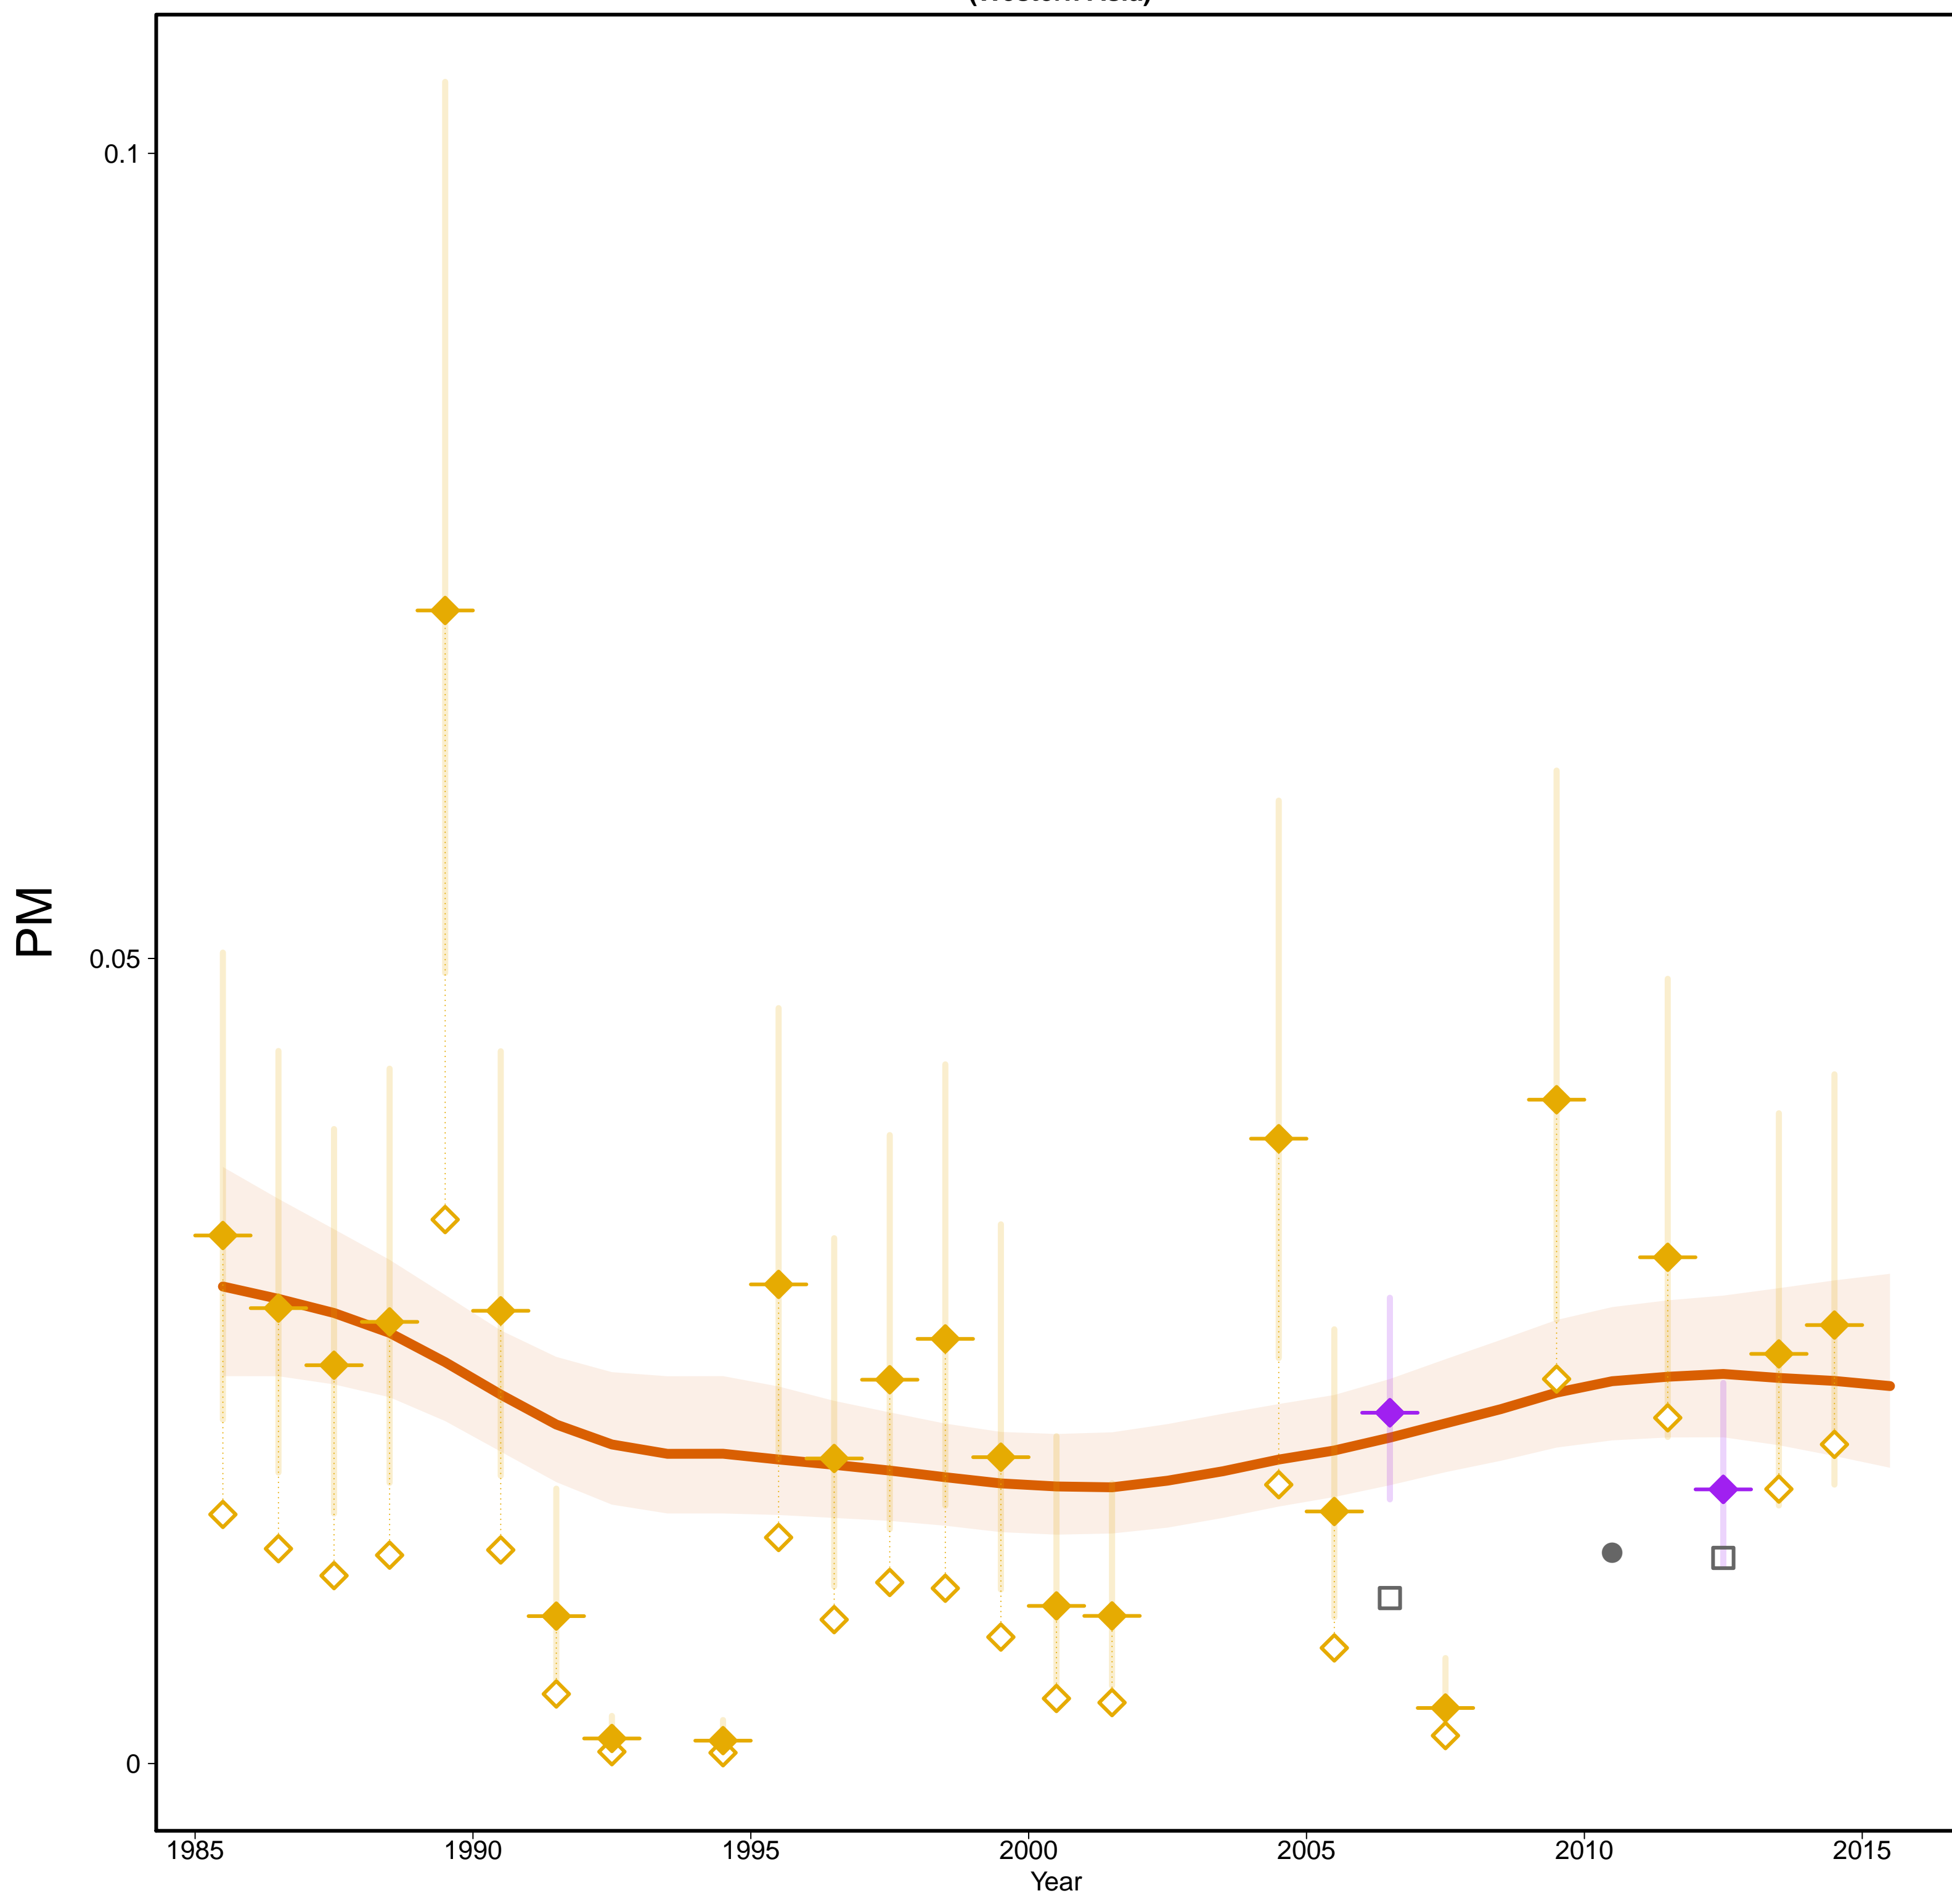

Georgia [GEO]  
(Western Asia)

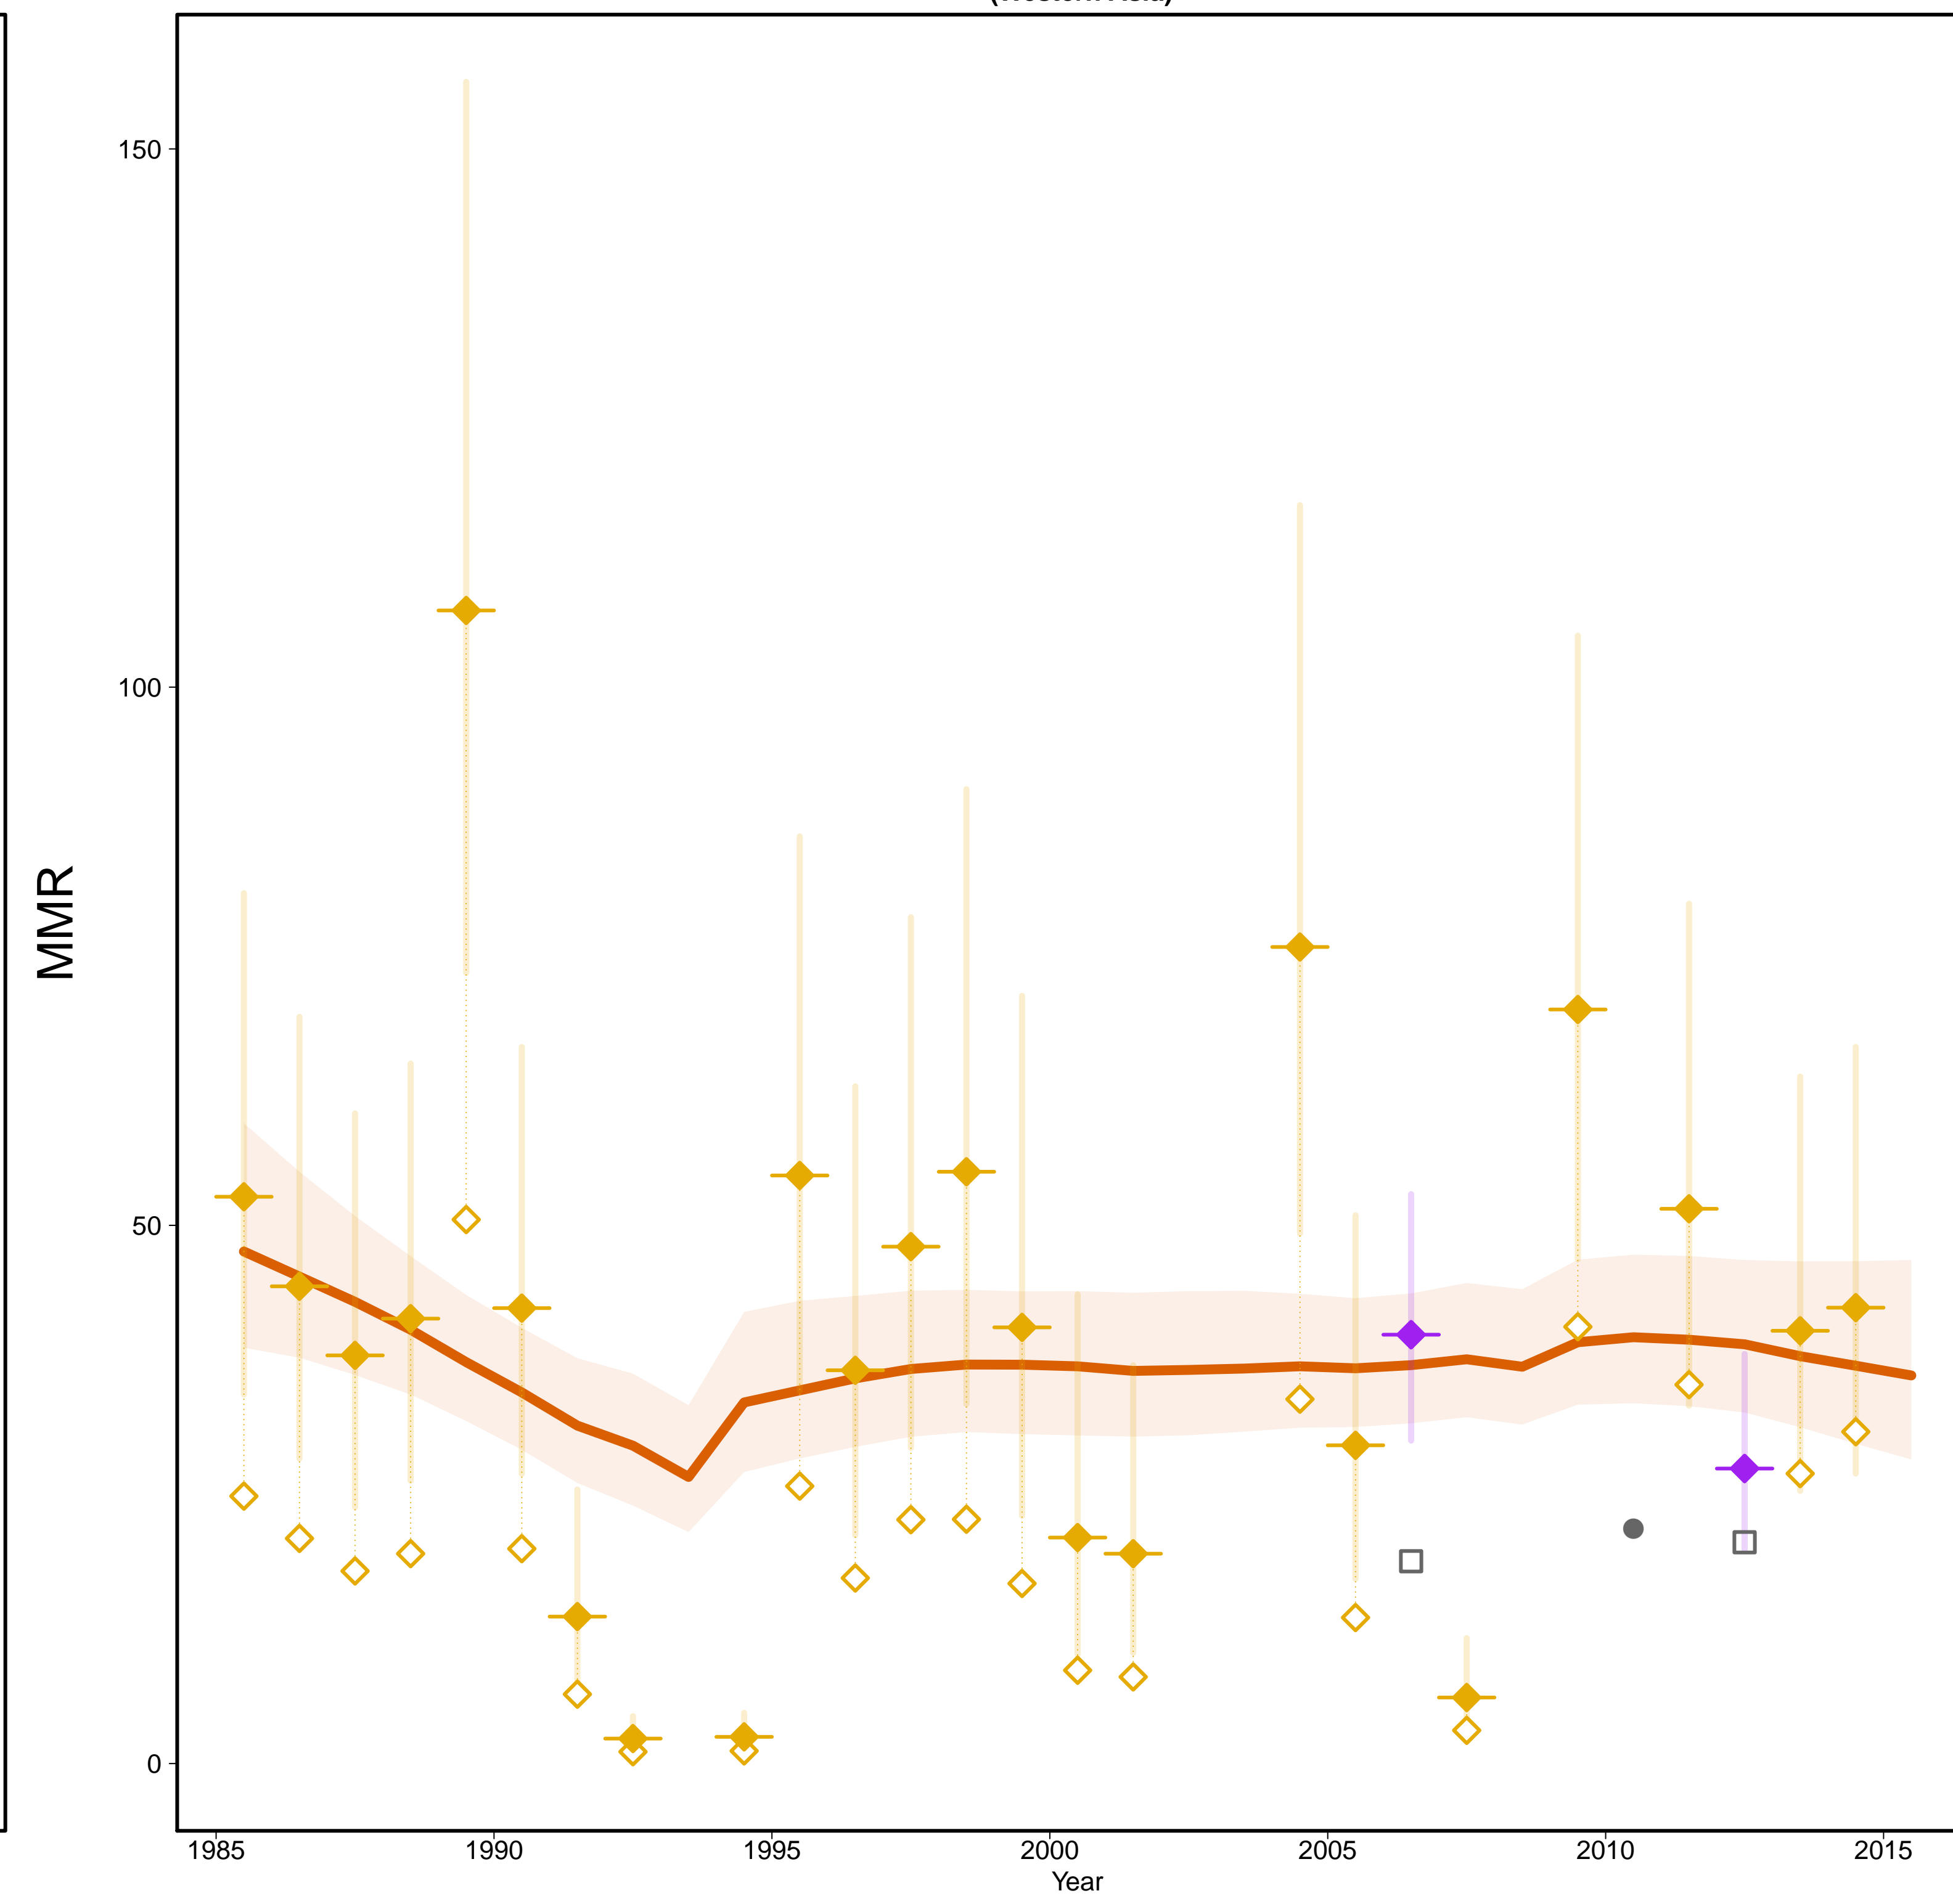

- Estimates –
- Mlate
- MMR Database 2015 –
- ◇ Observed Data
- ◆ Adjusted Data
- Data type –
- ◆ VR
- ◆ Spec. studies
- Excluded VR data (data quality issues)
- Excluded VR data (overlap with specialized study)

Gross Domestic Product

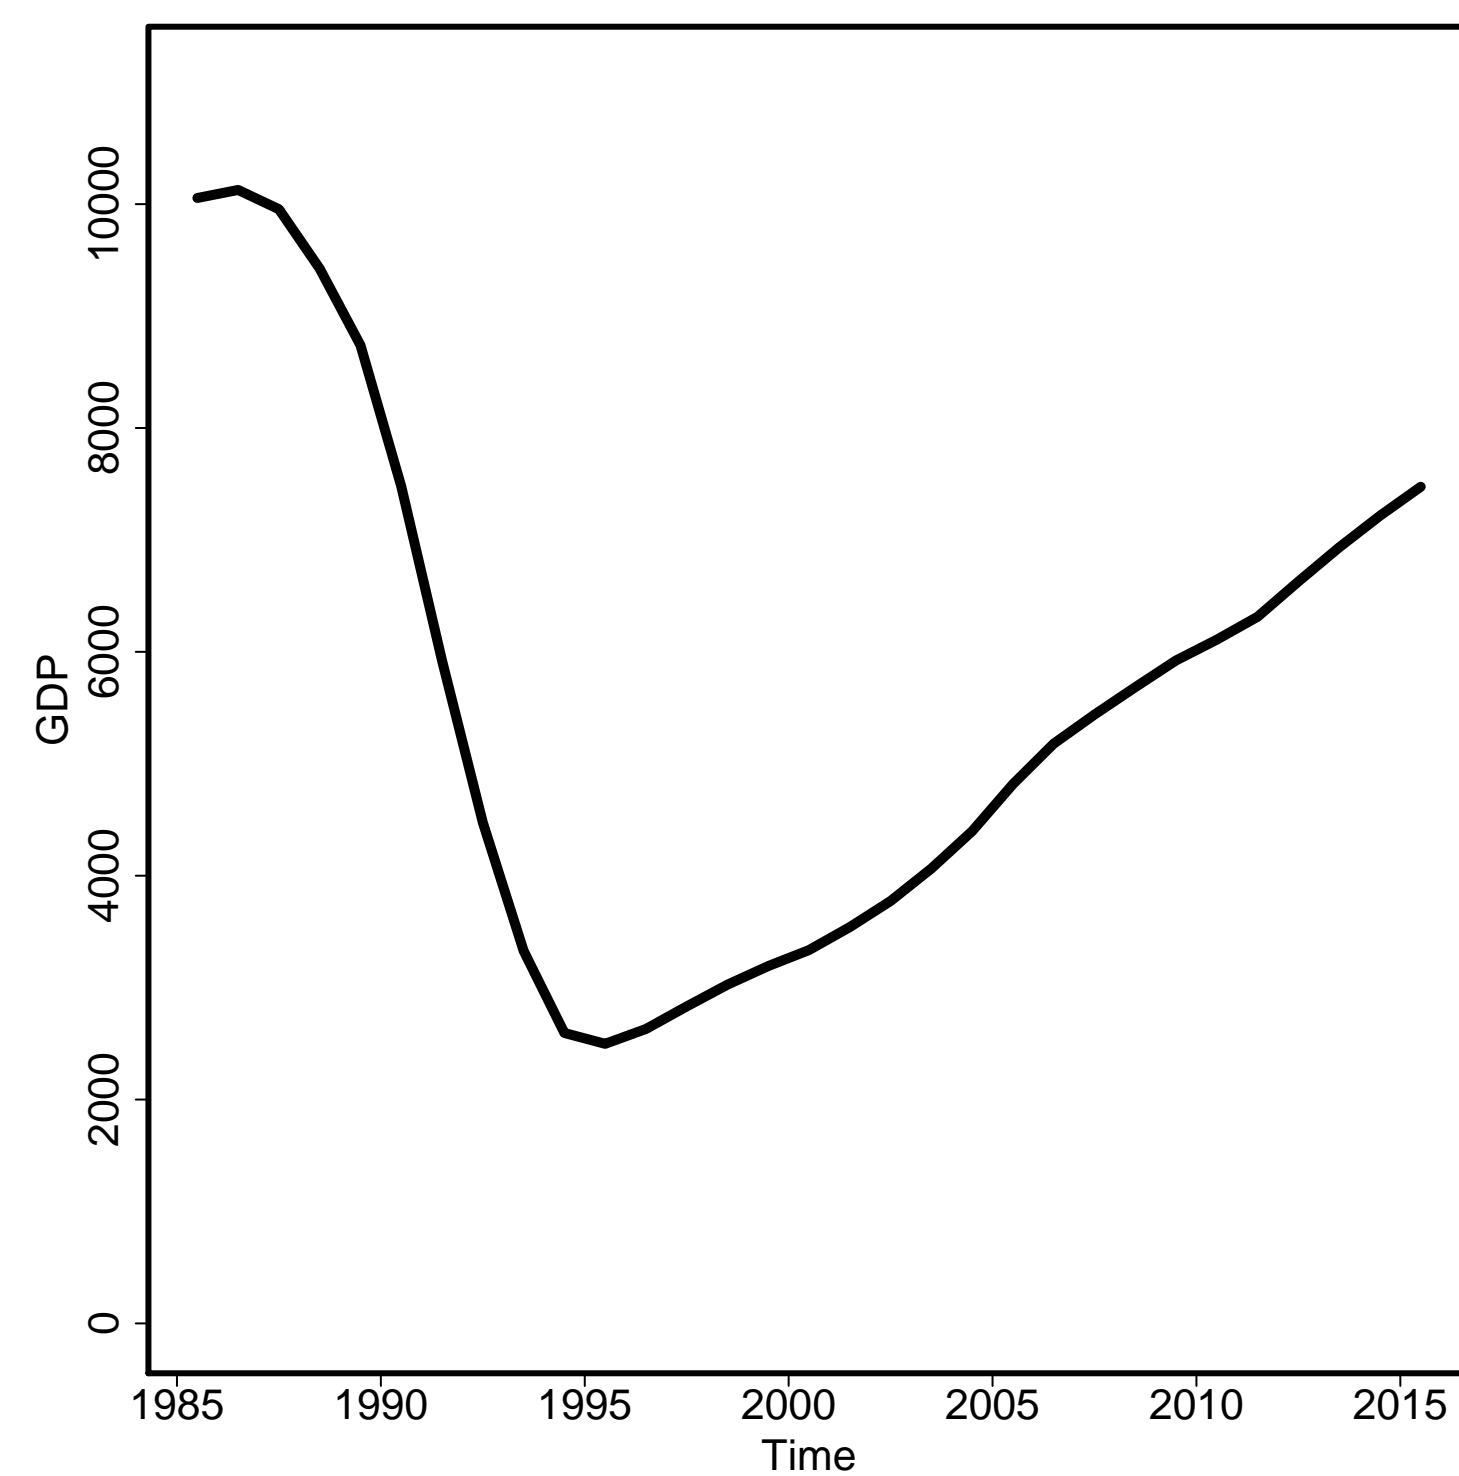

General Fertility Rate

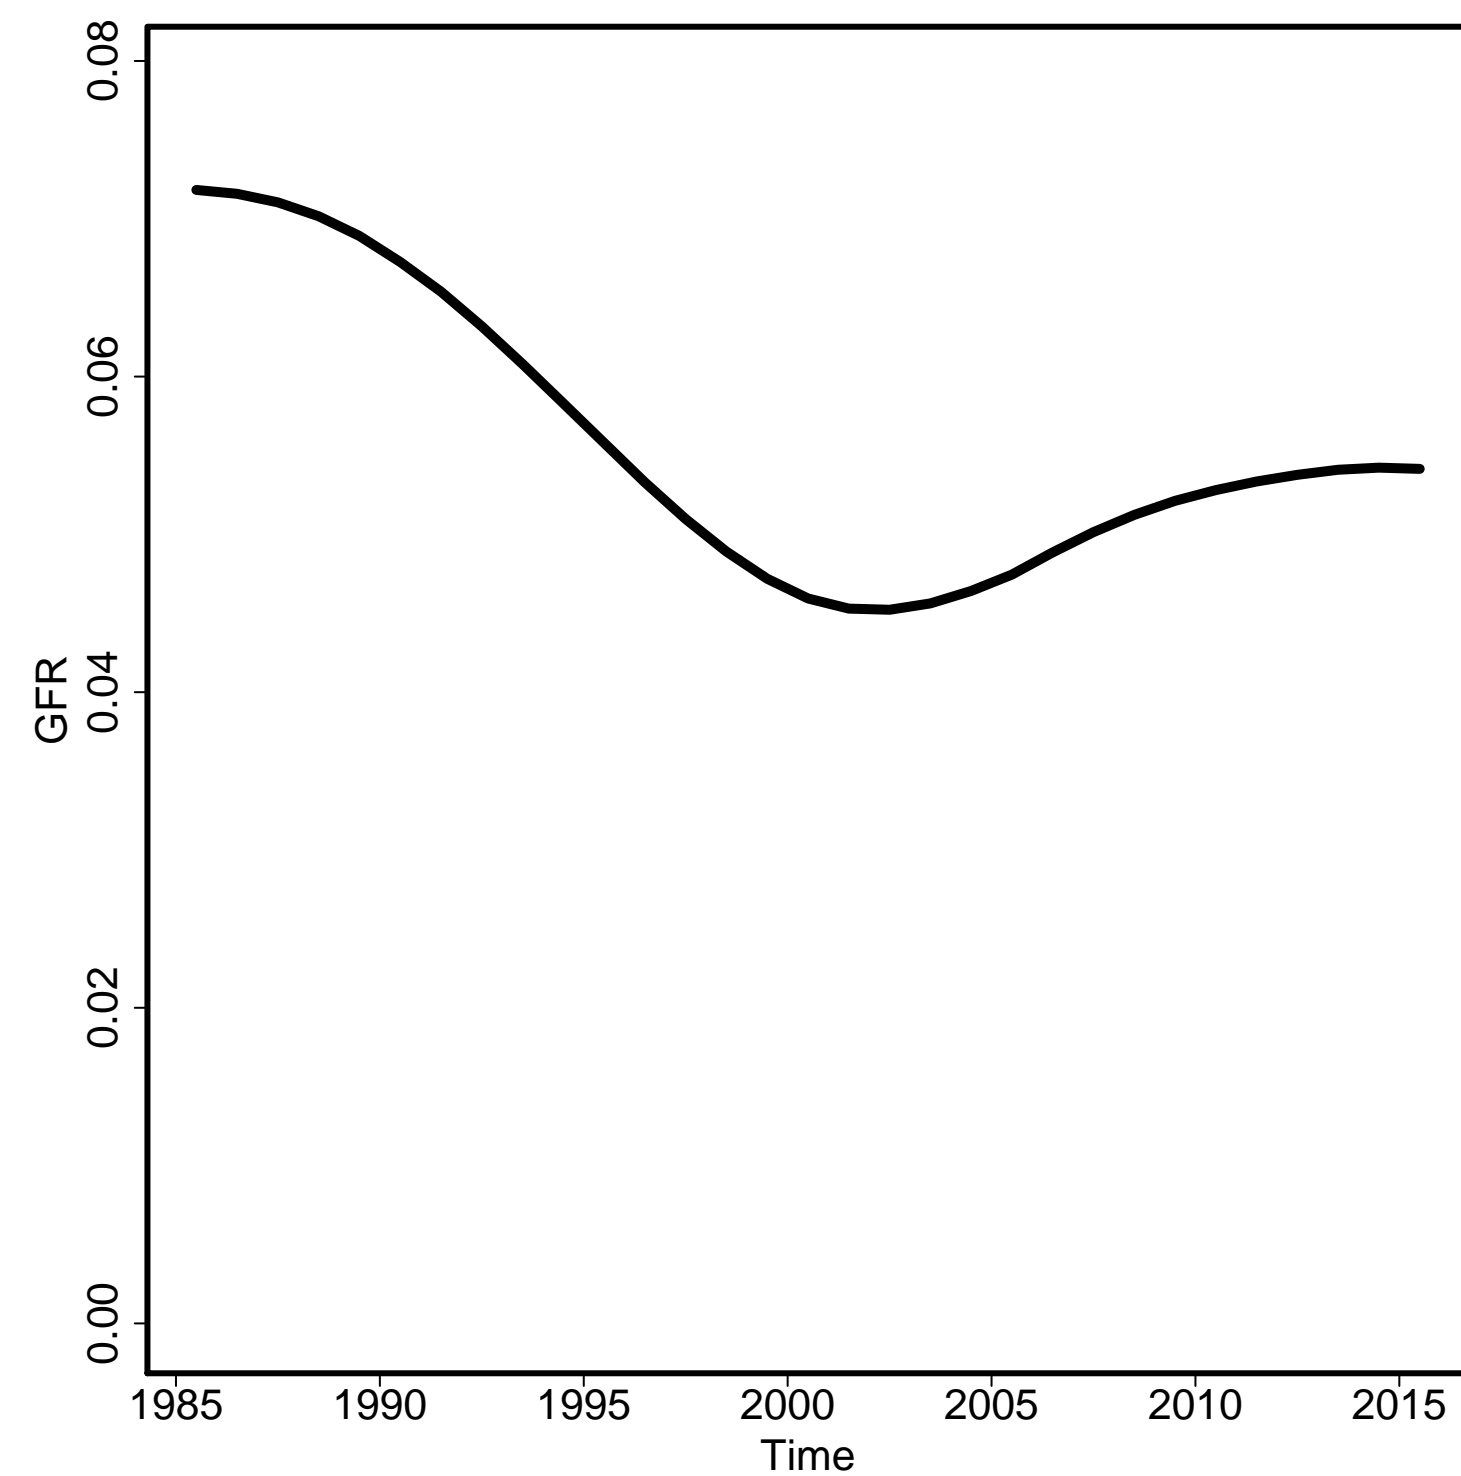

Skilled Attendance to Birth

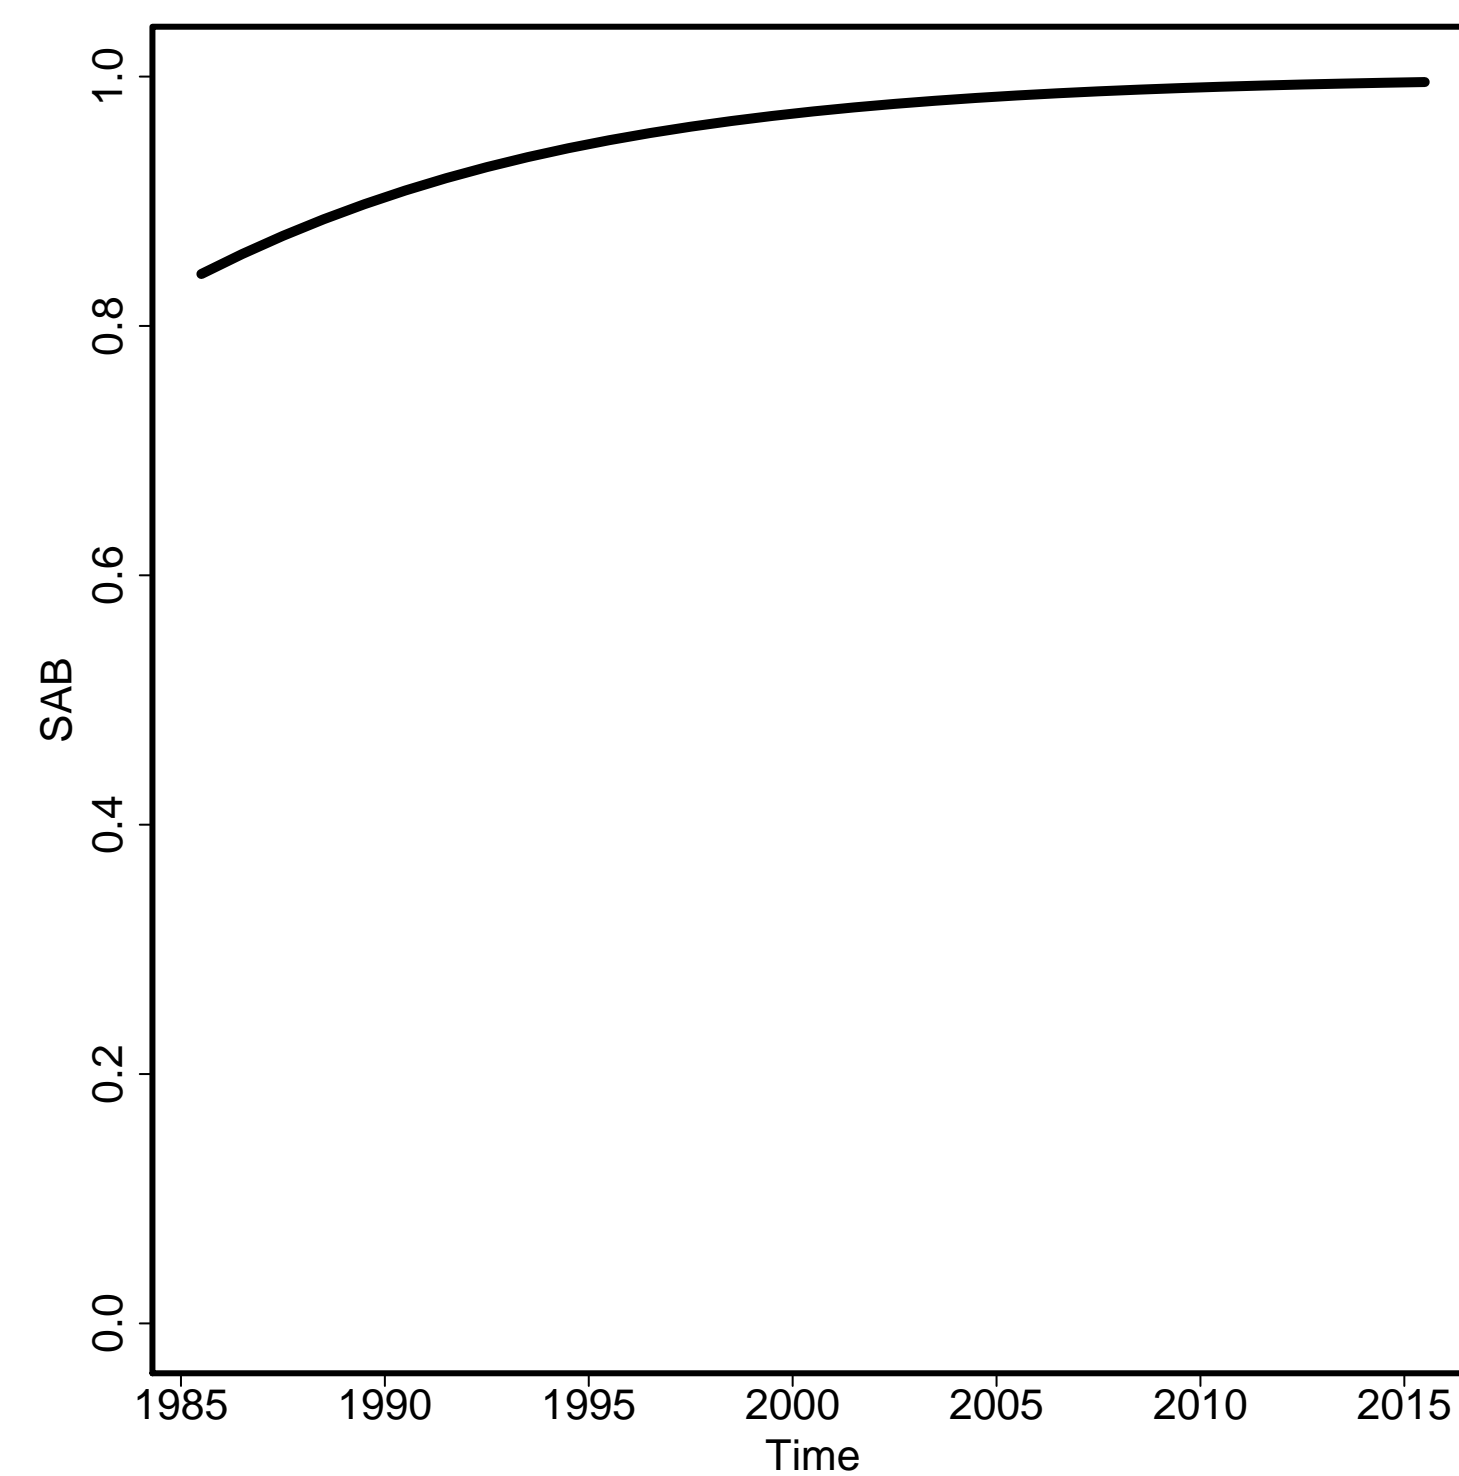

Envelope/Births

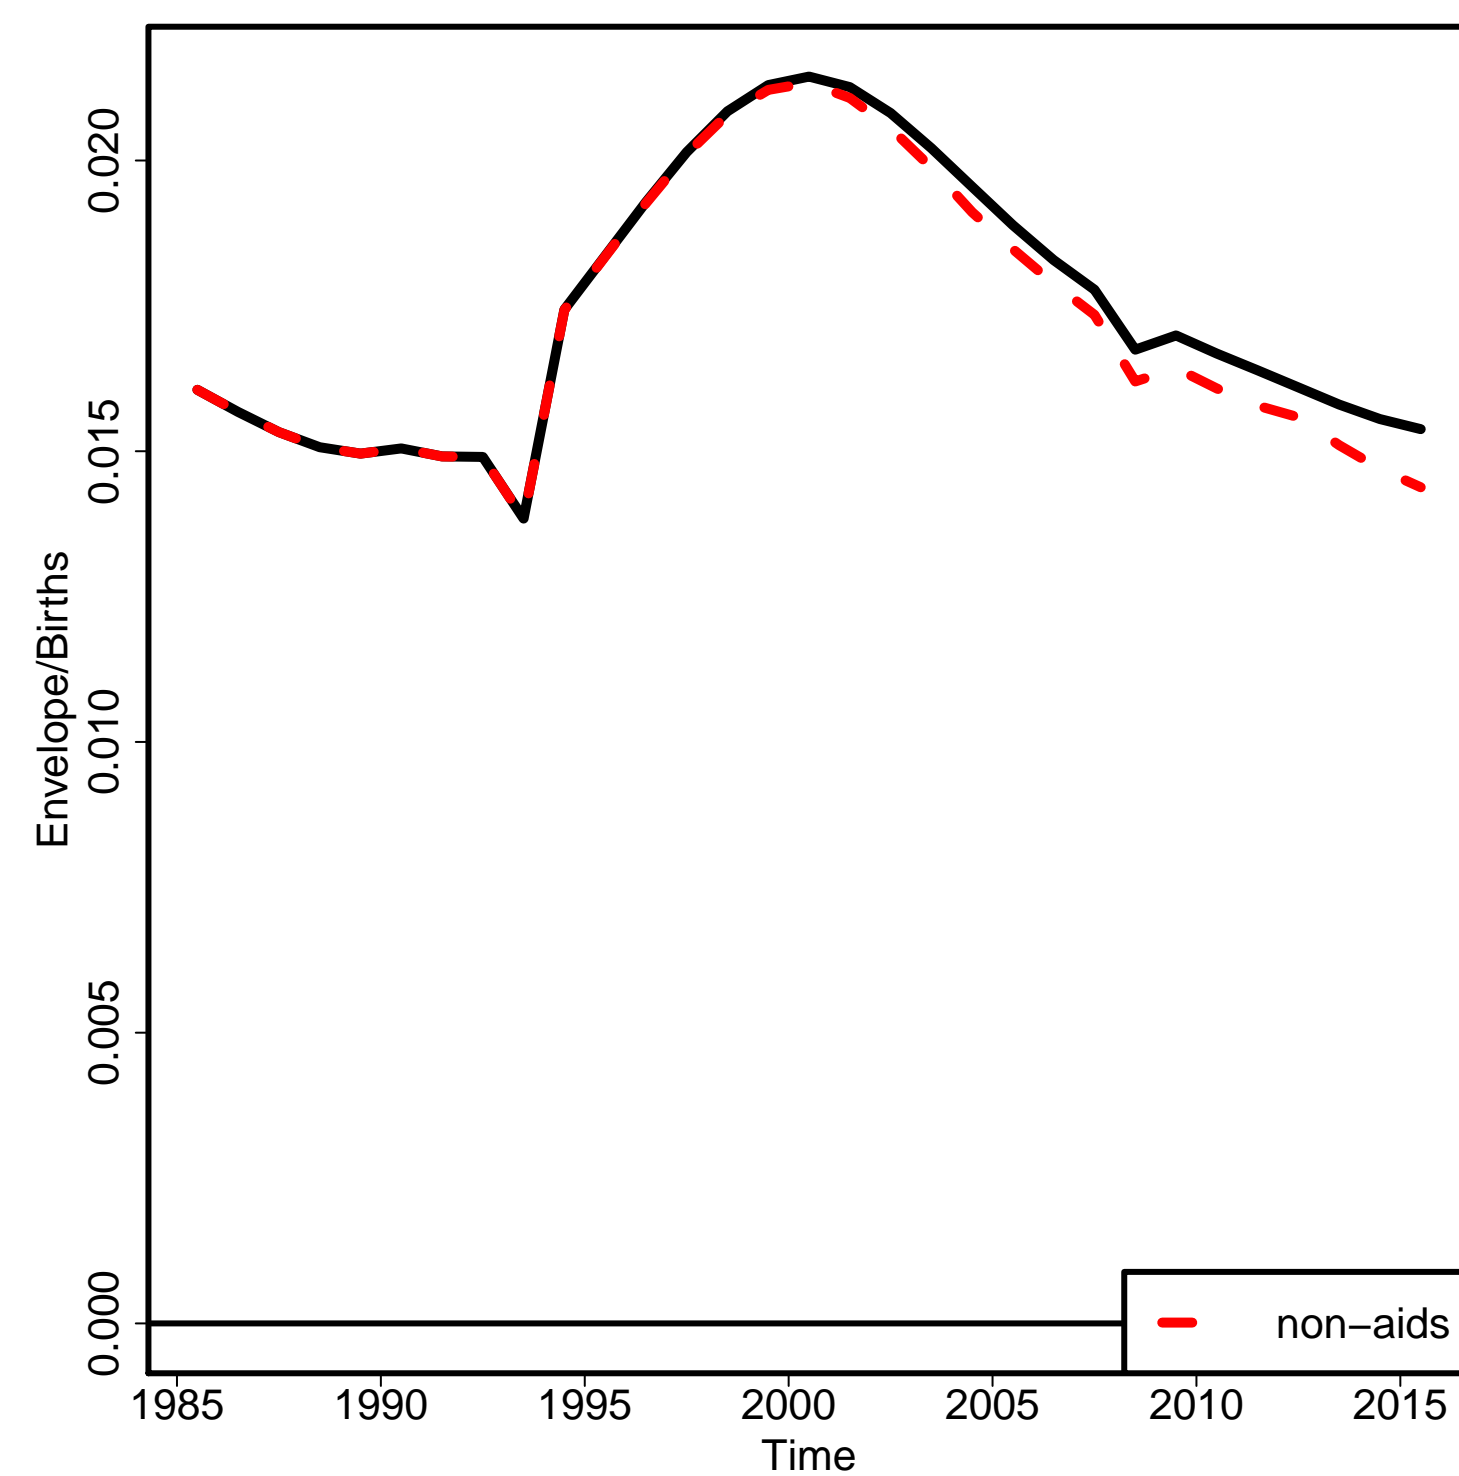

Non-aids MMR

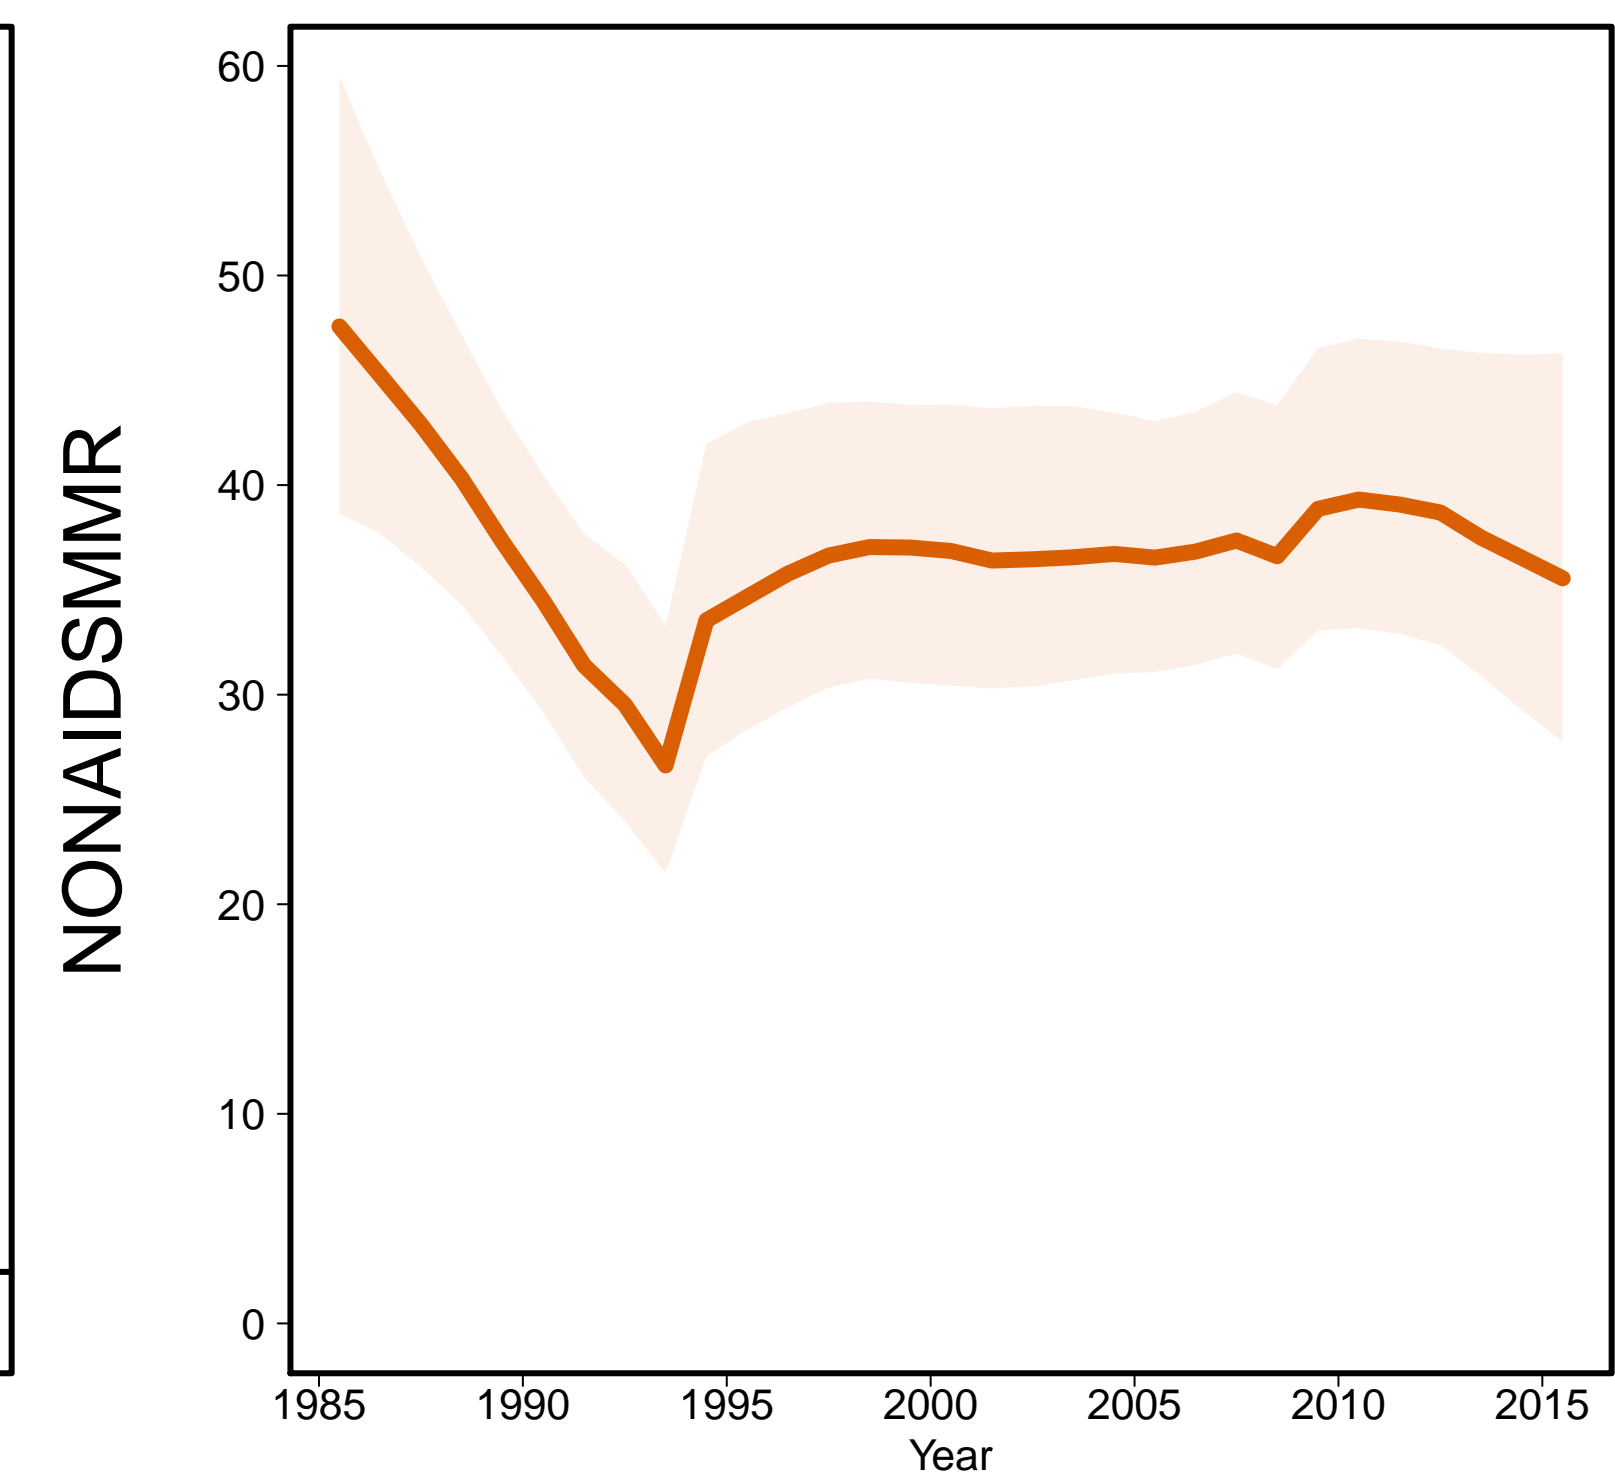

Aids MMR

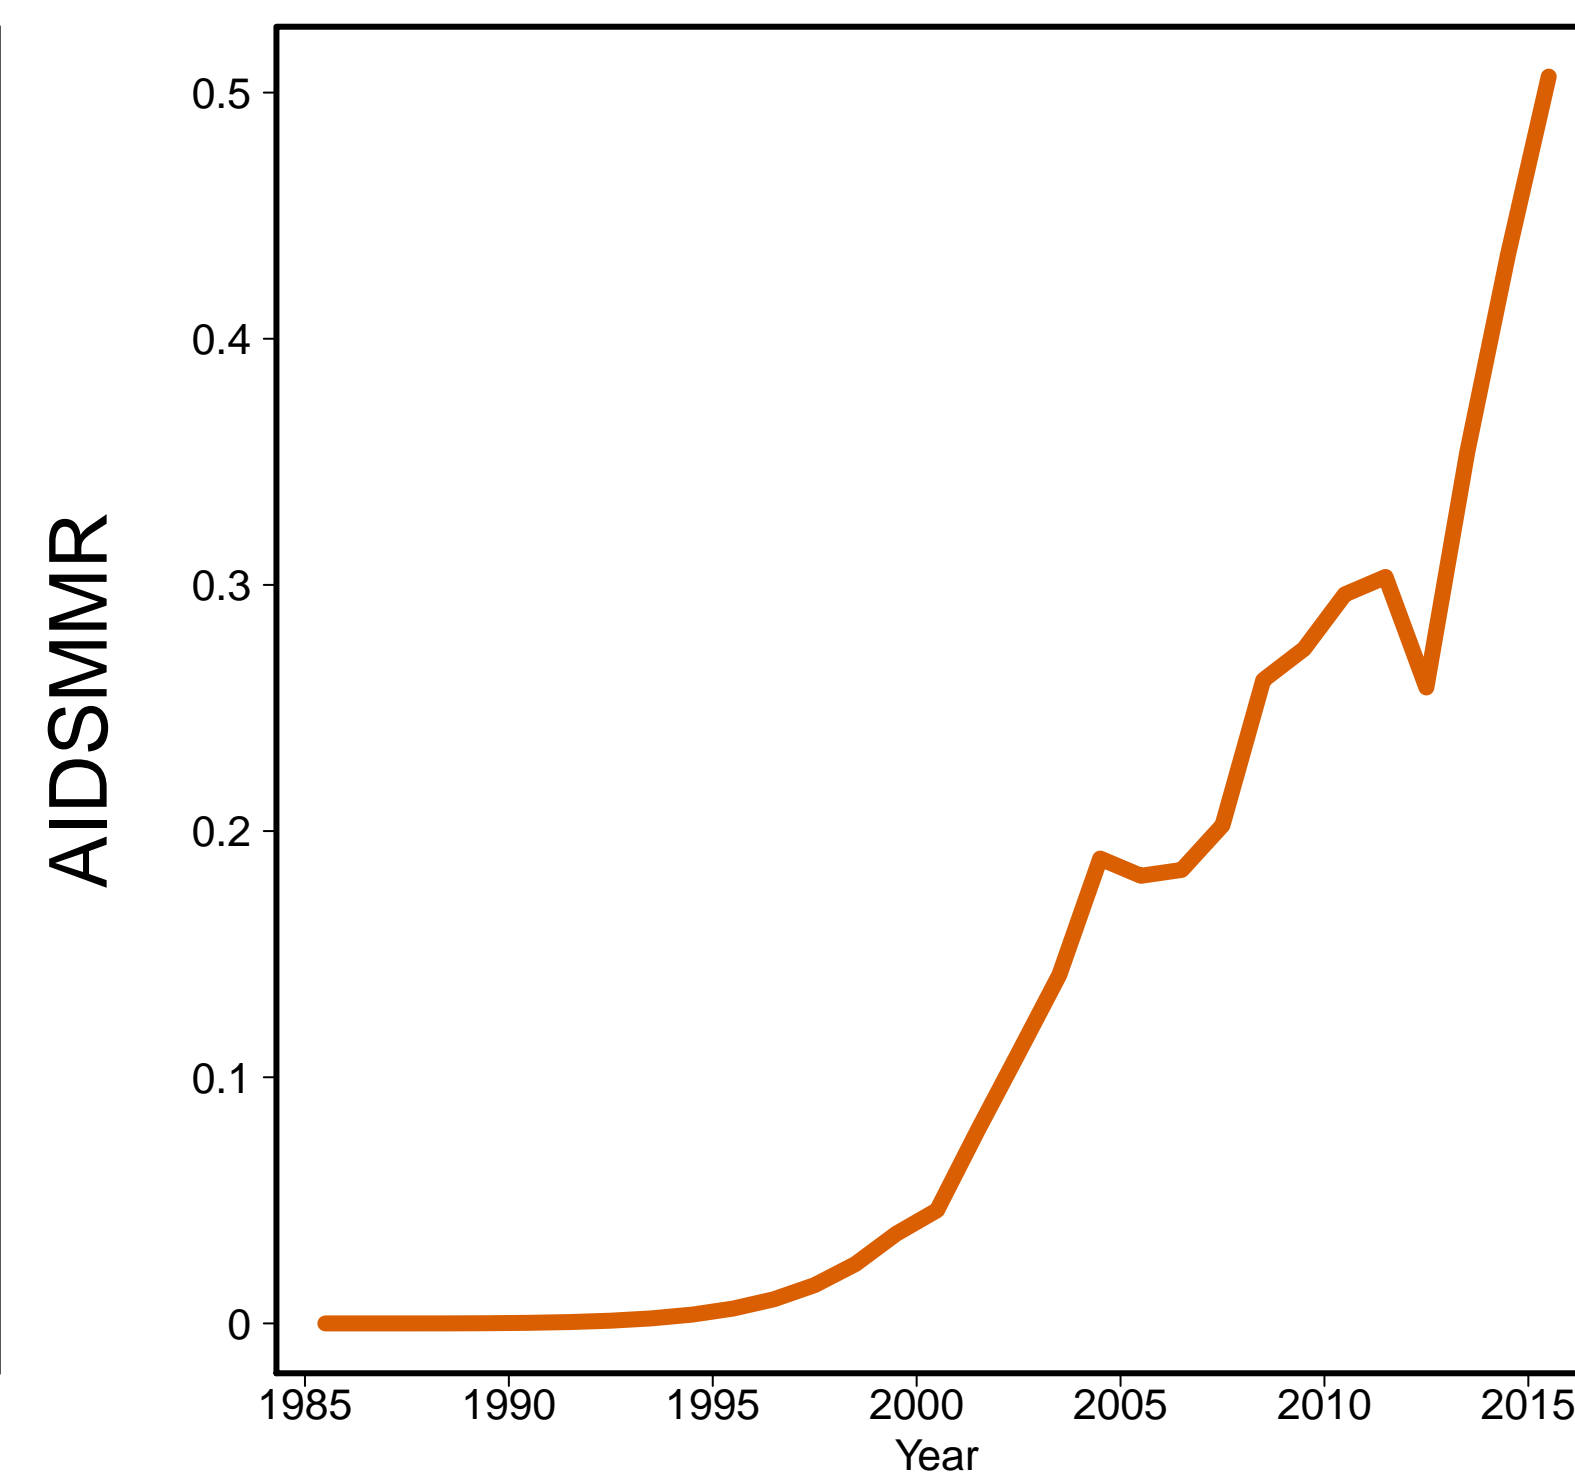

Germany [DEU]  
(Developed regions)

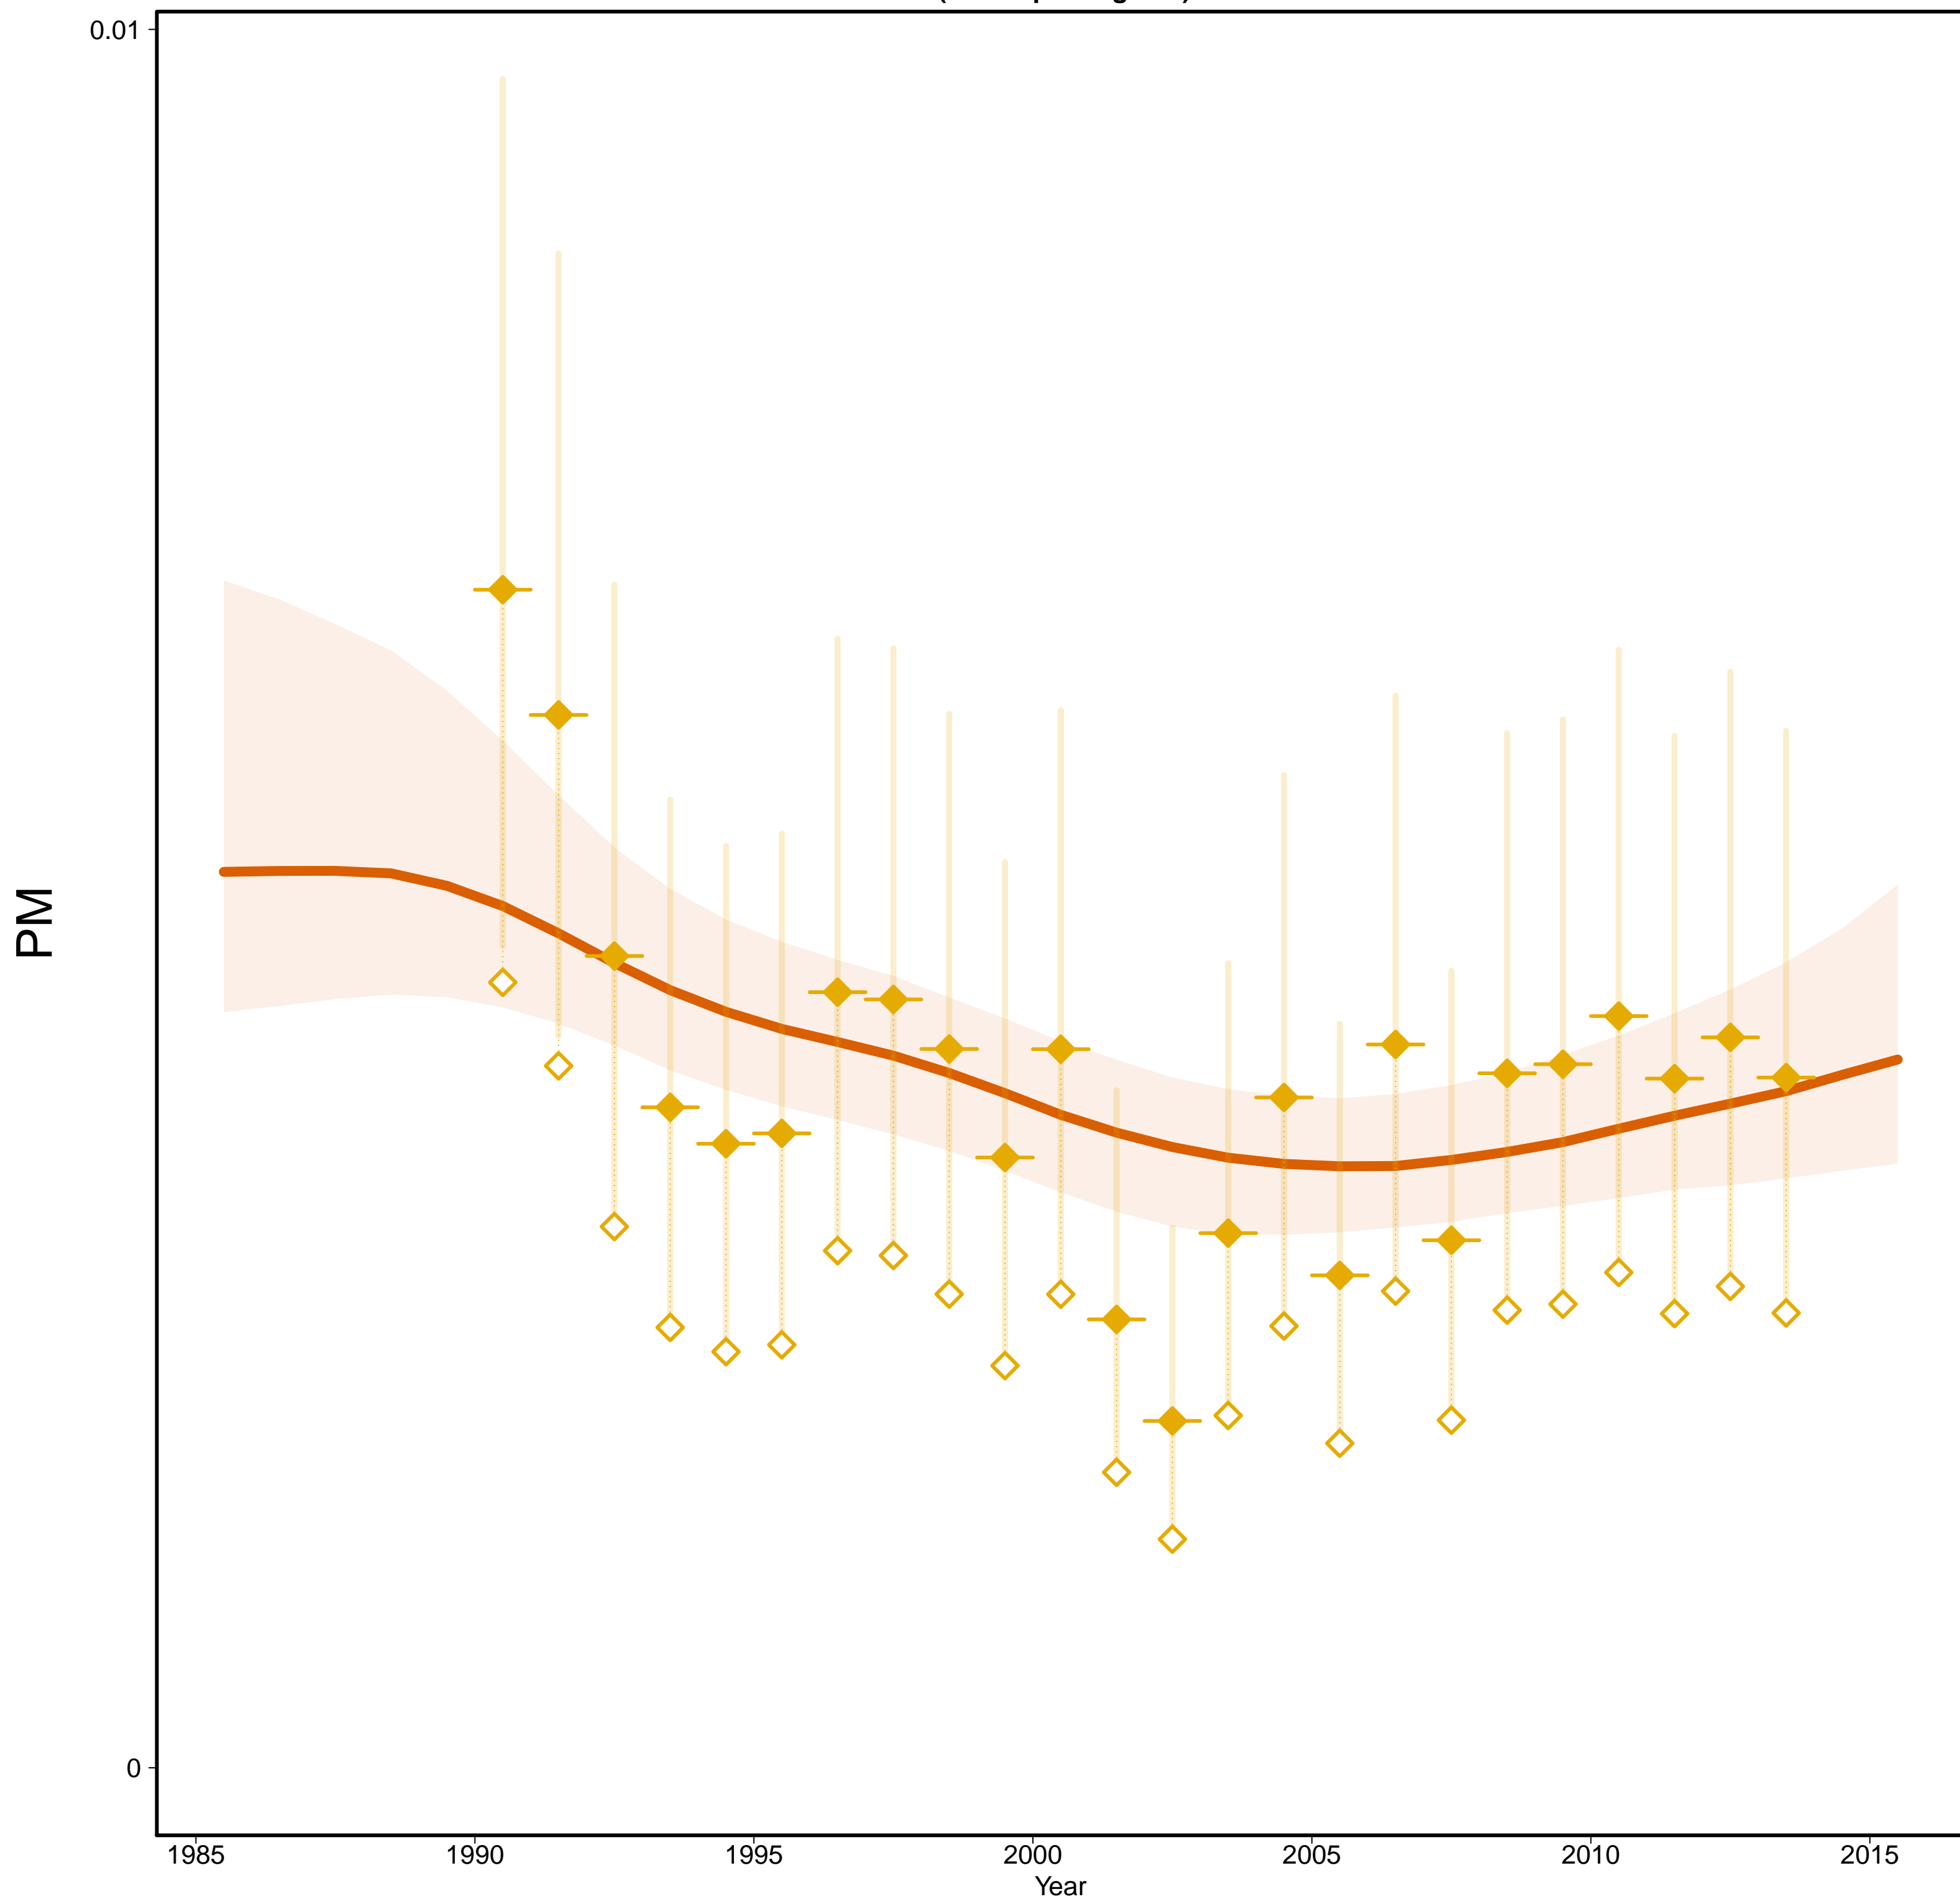

Germany [DEU]  
(Developed regions)

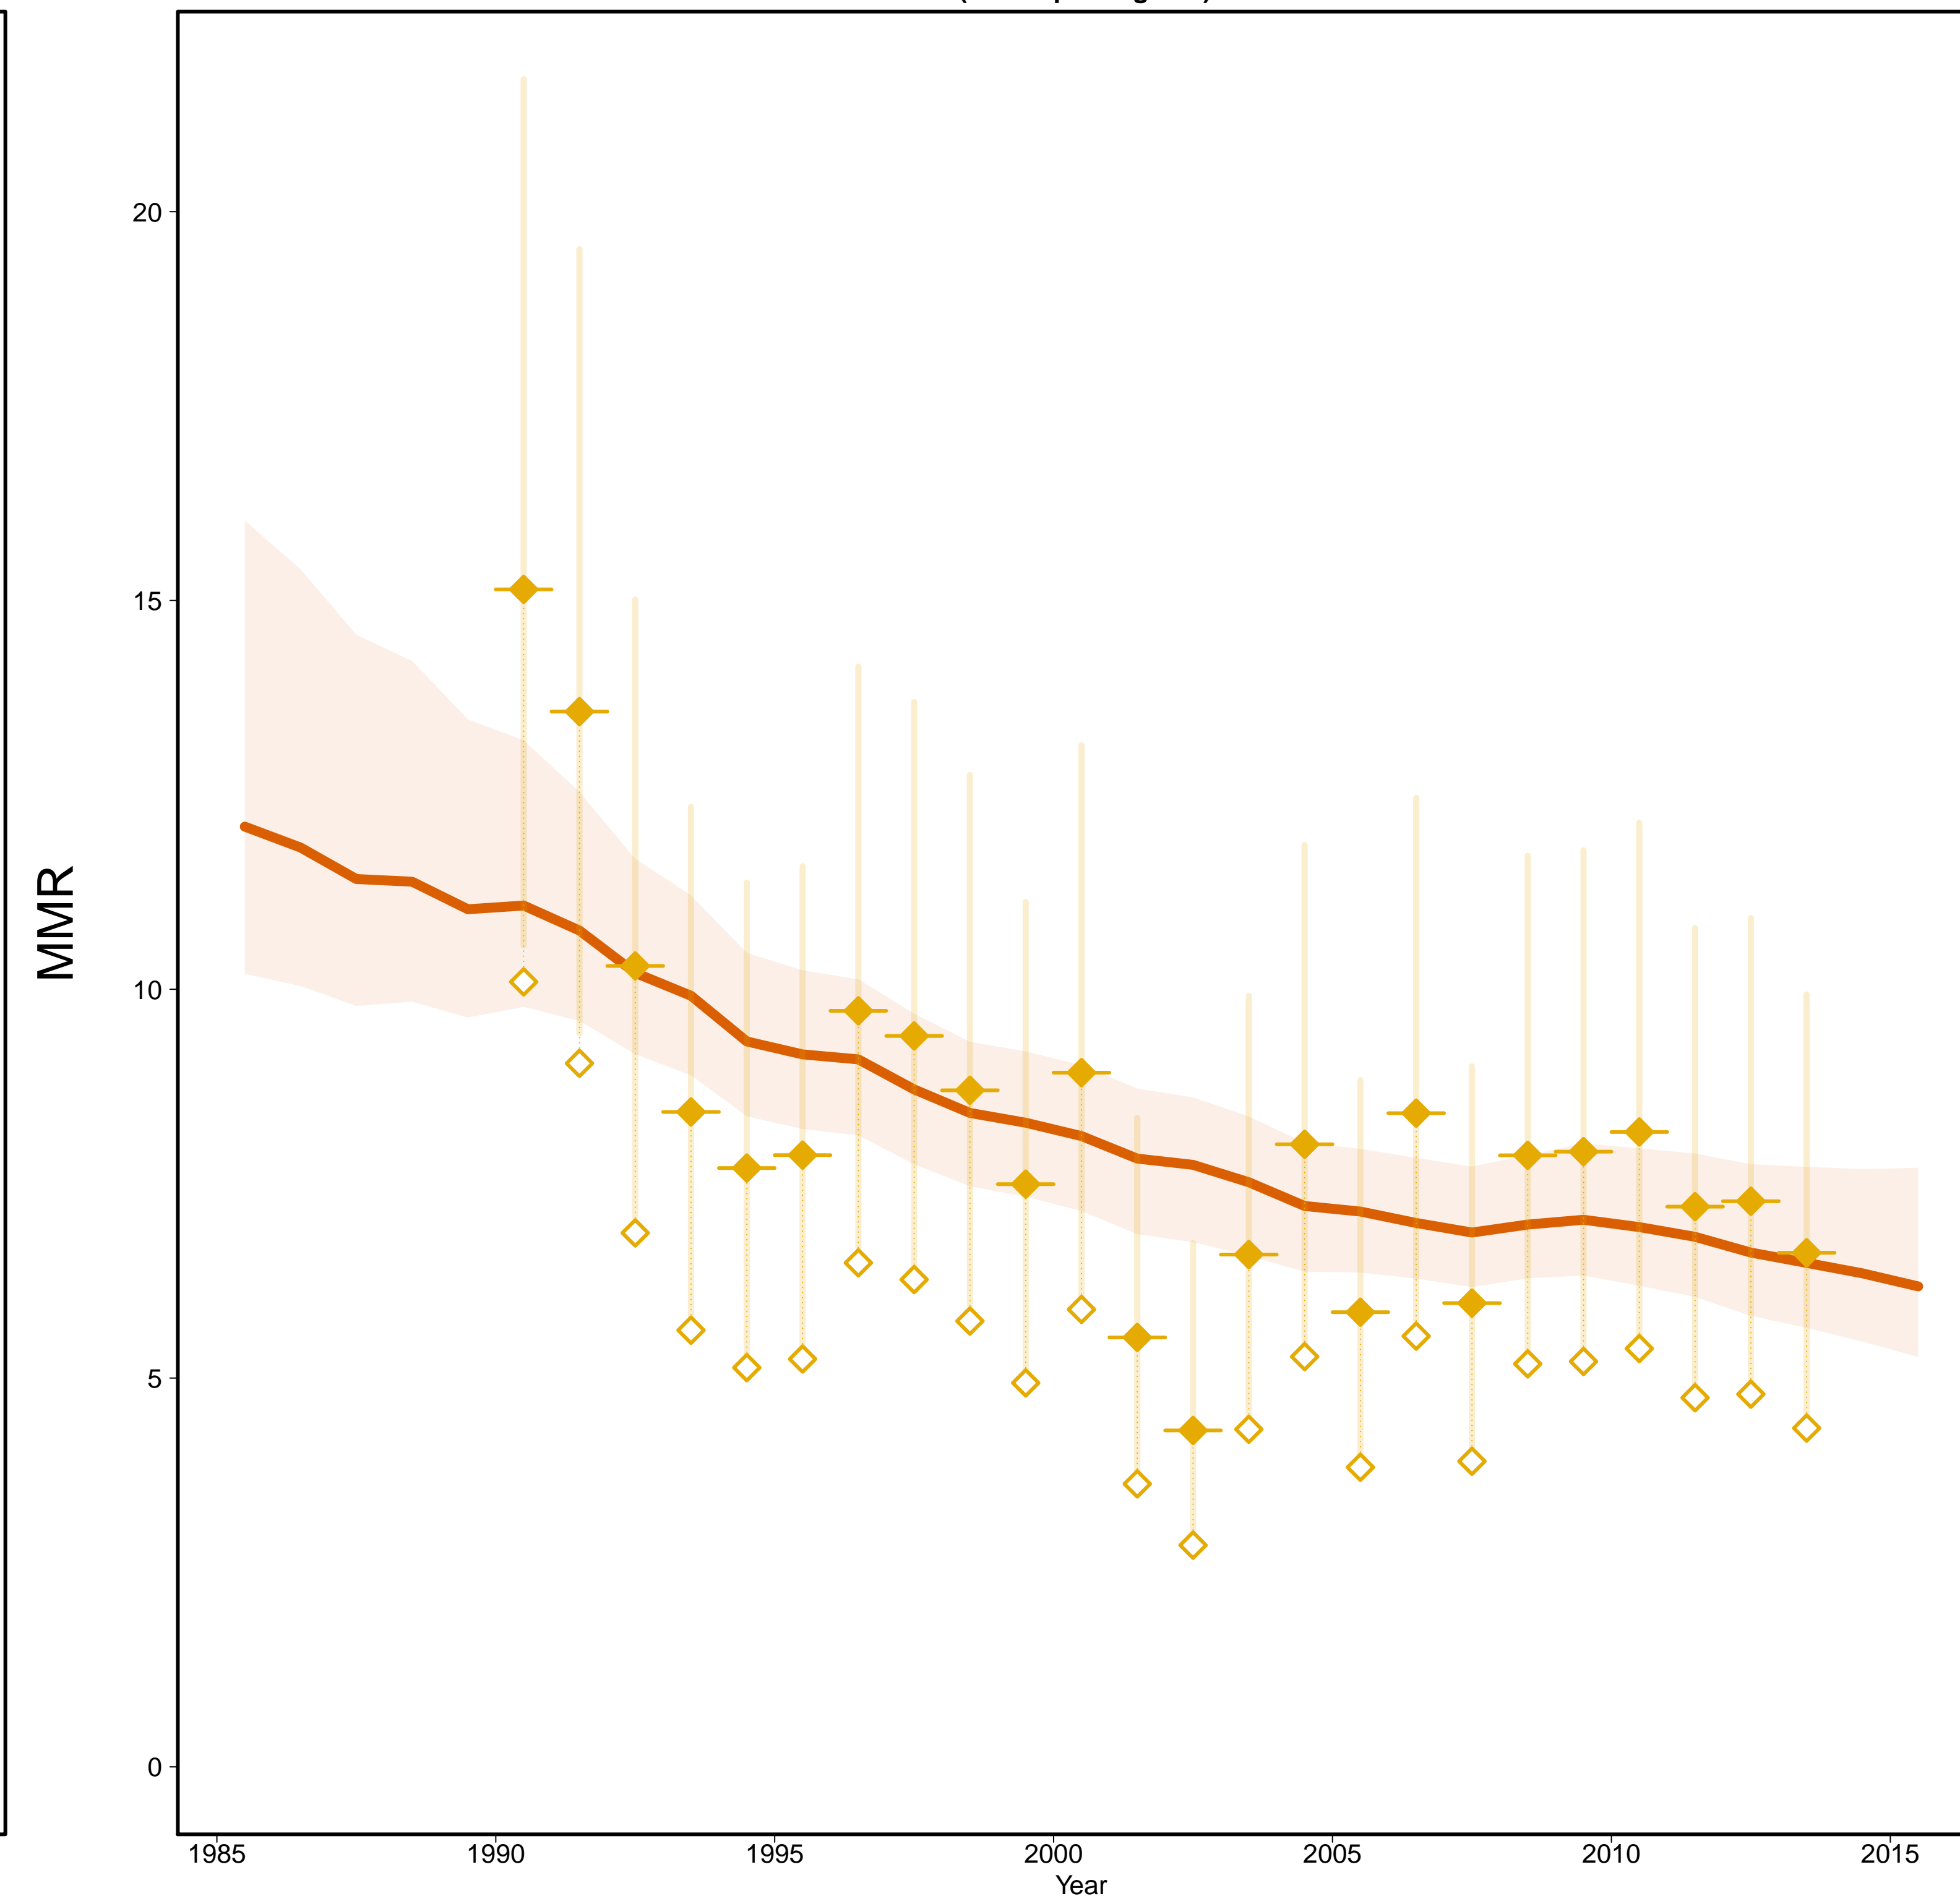

- Estimates —
- MMR Database 2015 —
- ◇ Observed Data
- ◆ Adjusted Data
- Data type —
- ◆ VR

Gross Domestic Product

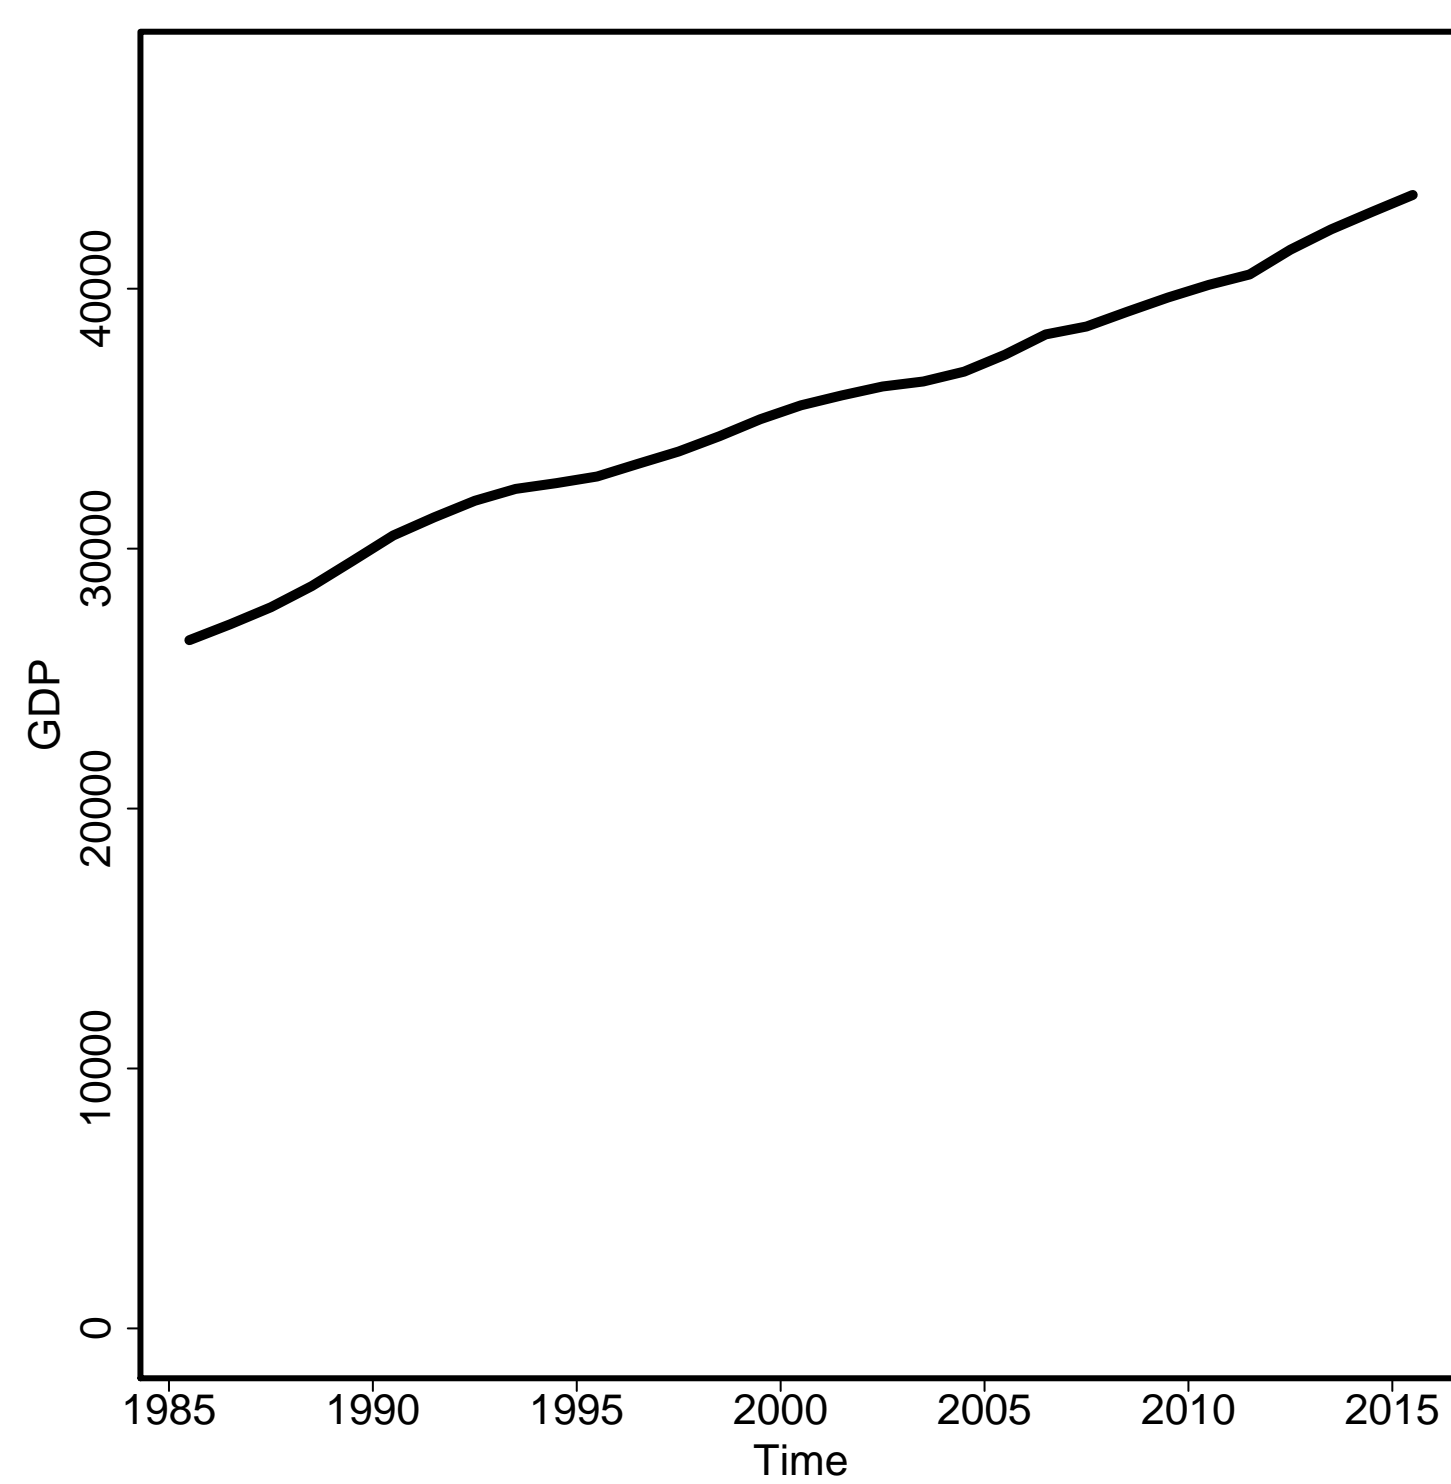

General Fertility Rate

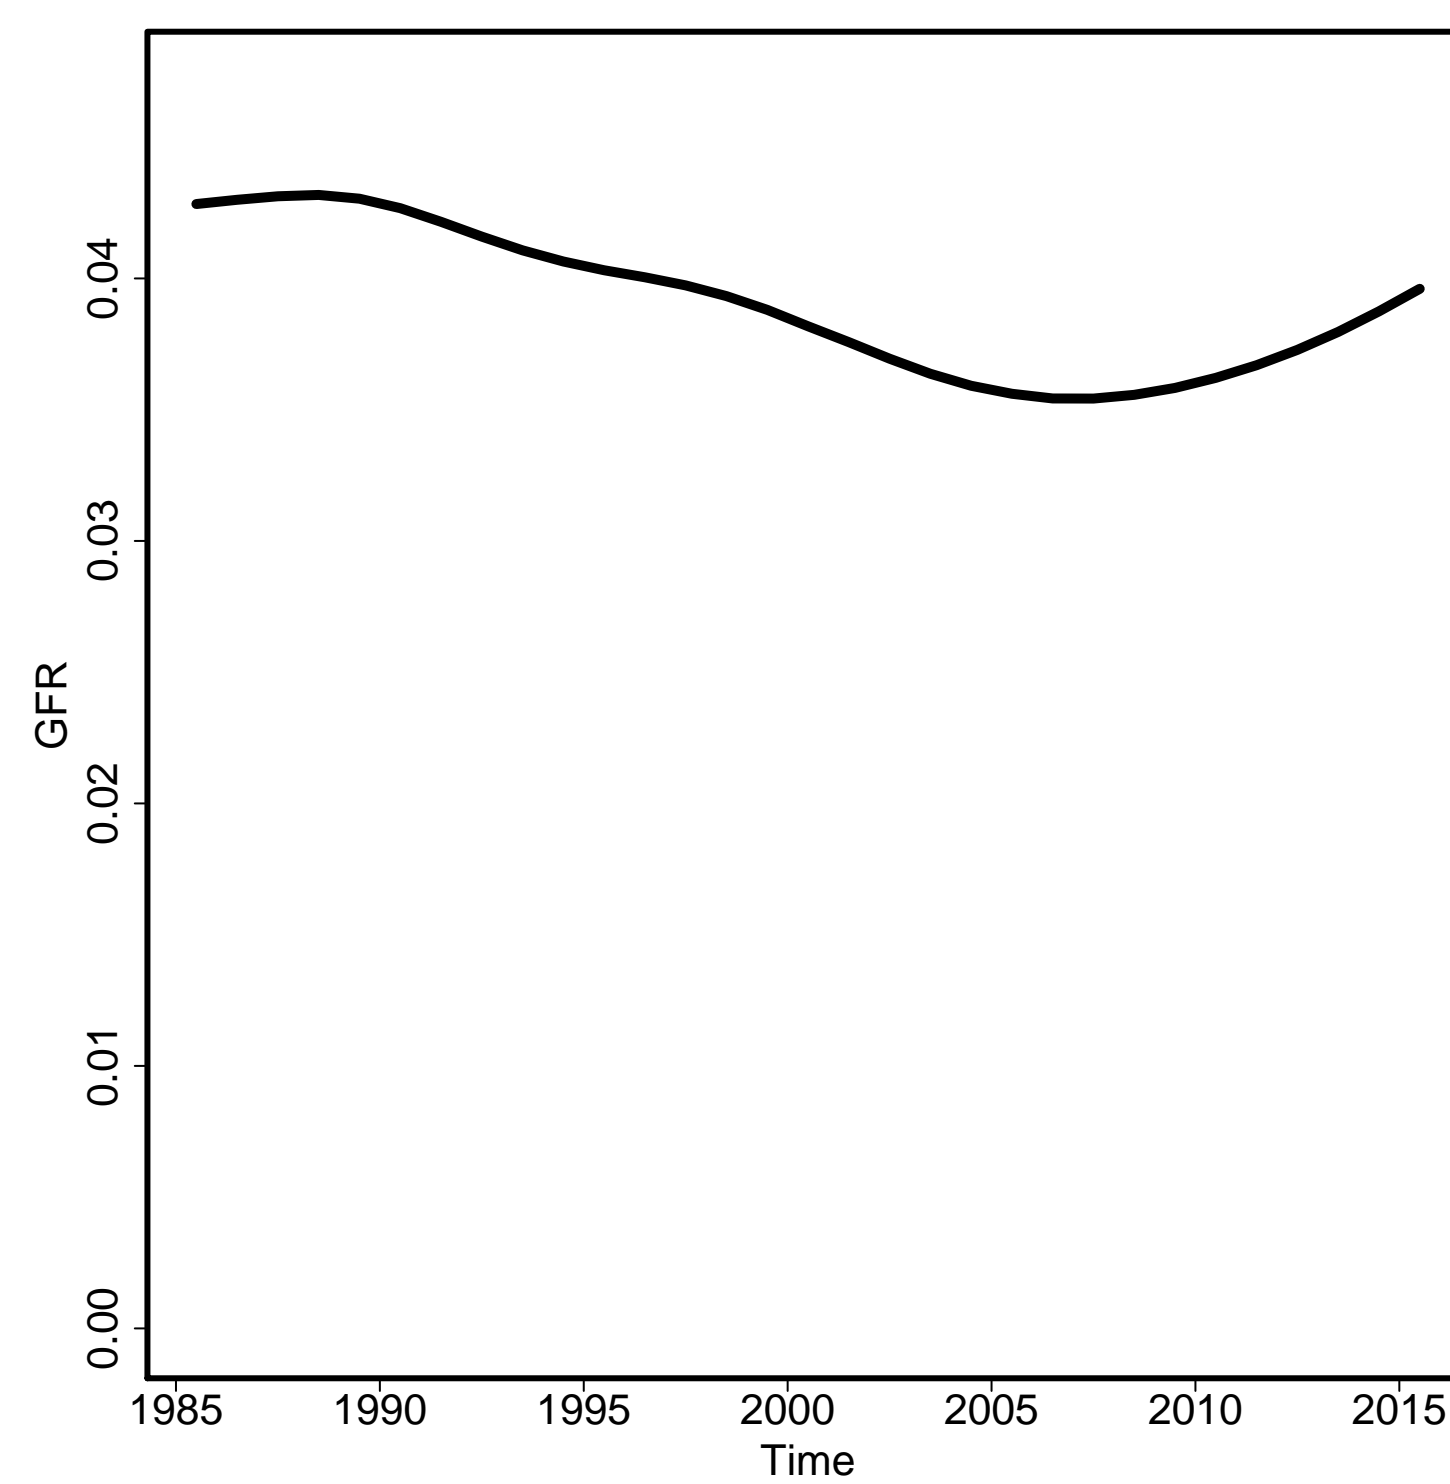

Skilled Attendance to Birth



Envelope/Births

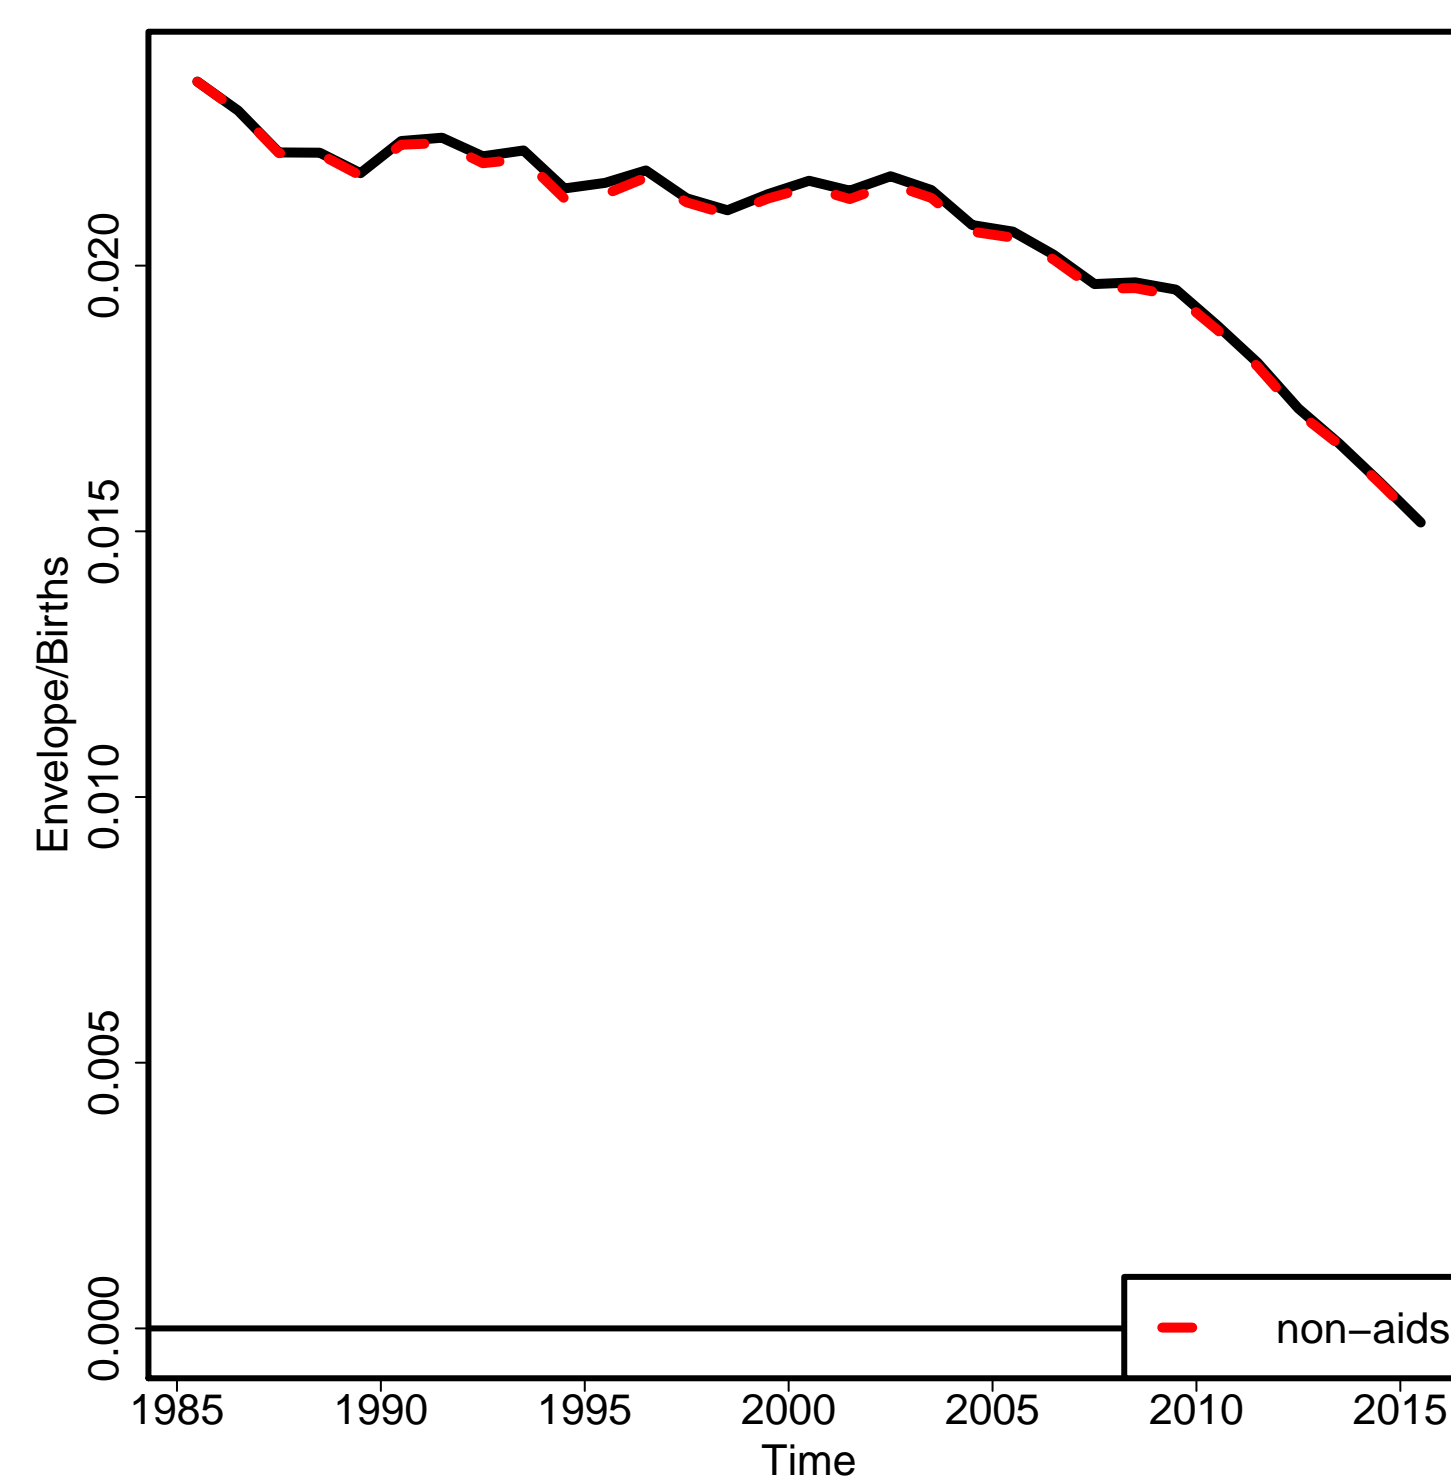

Non-aids MMR

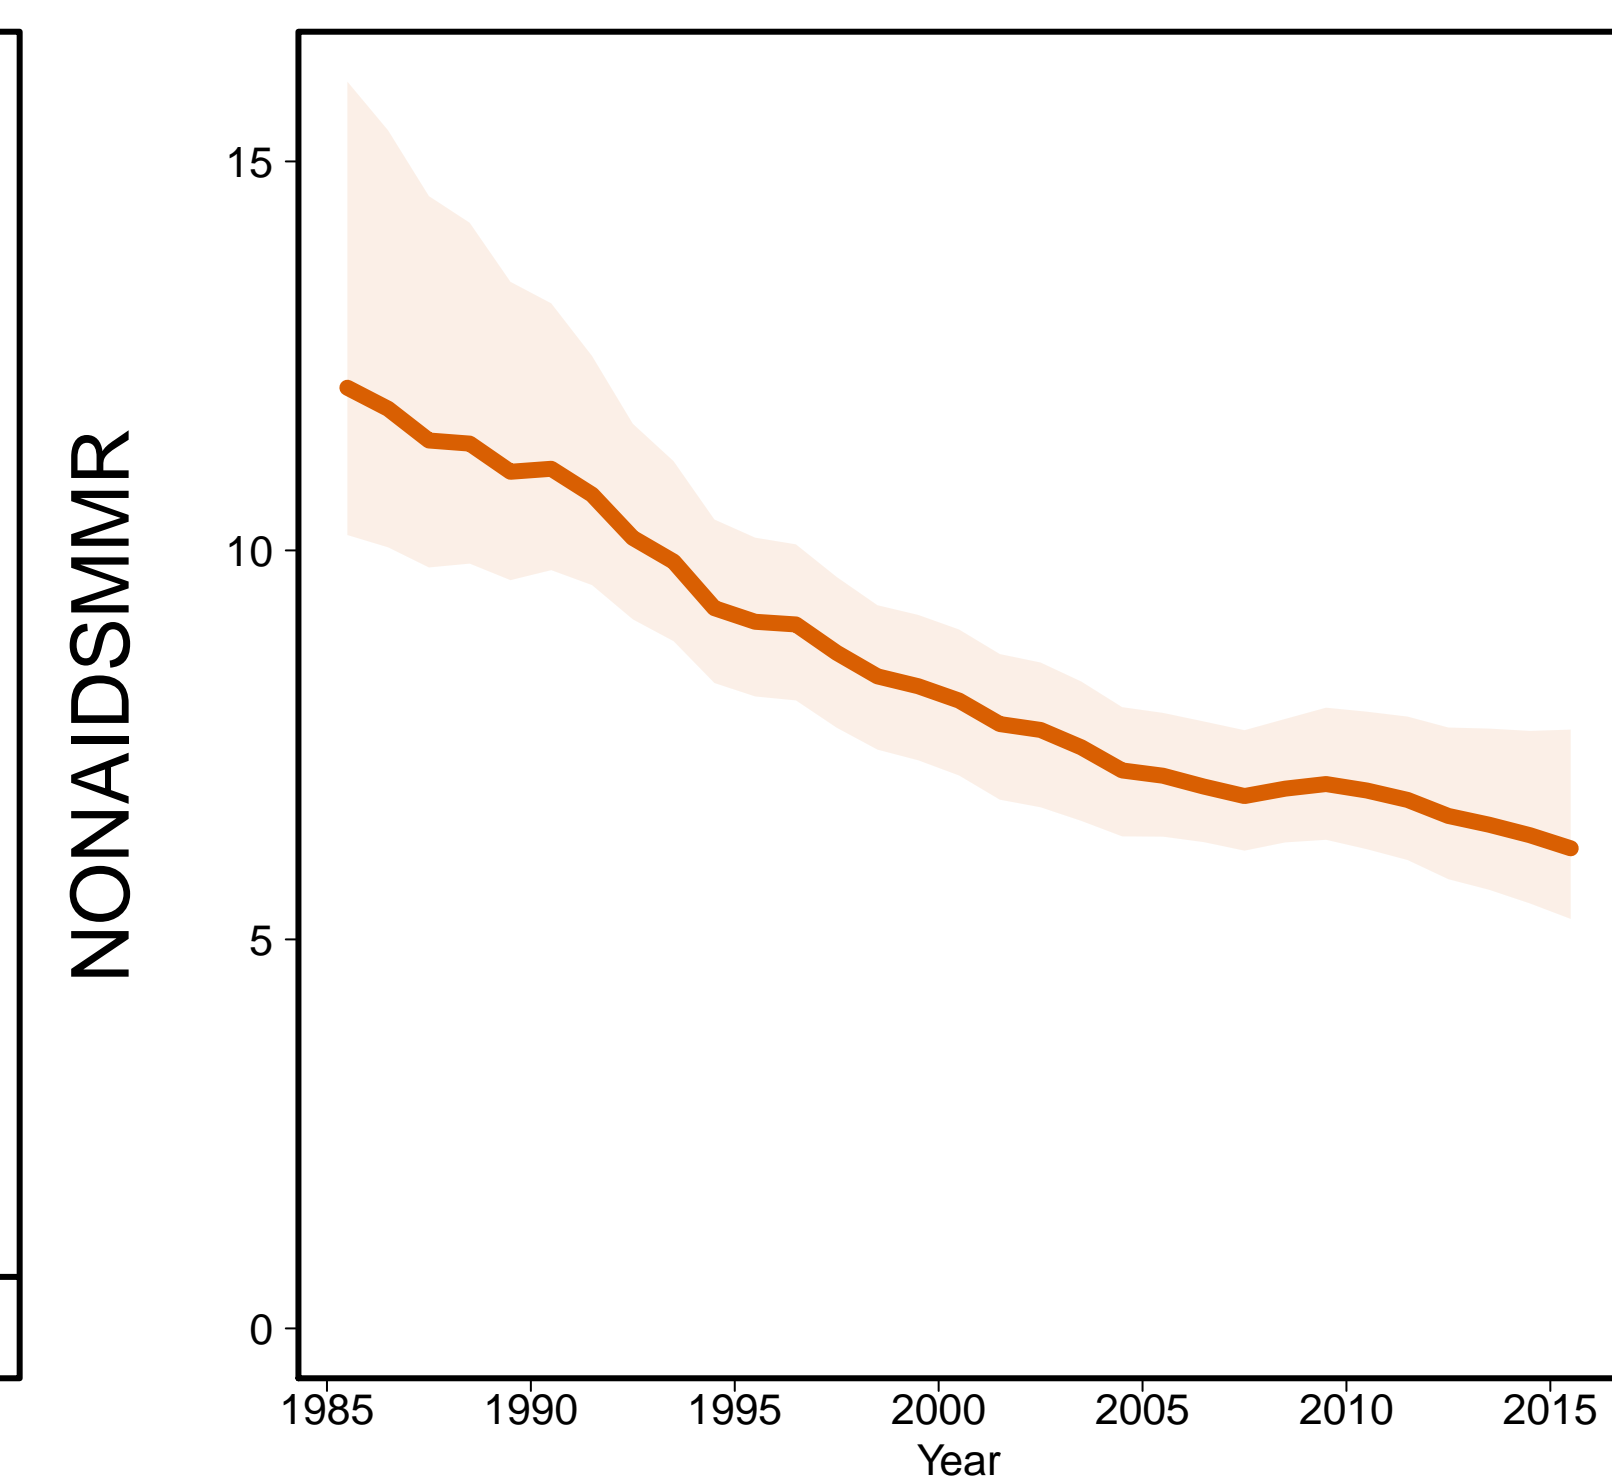

Aids MMR

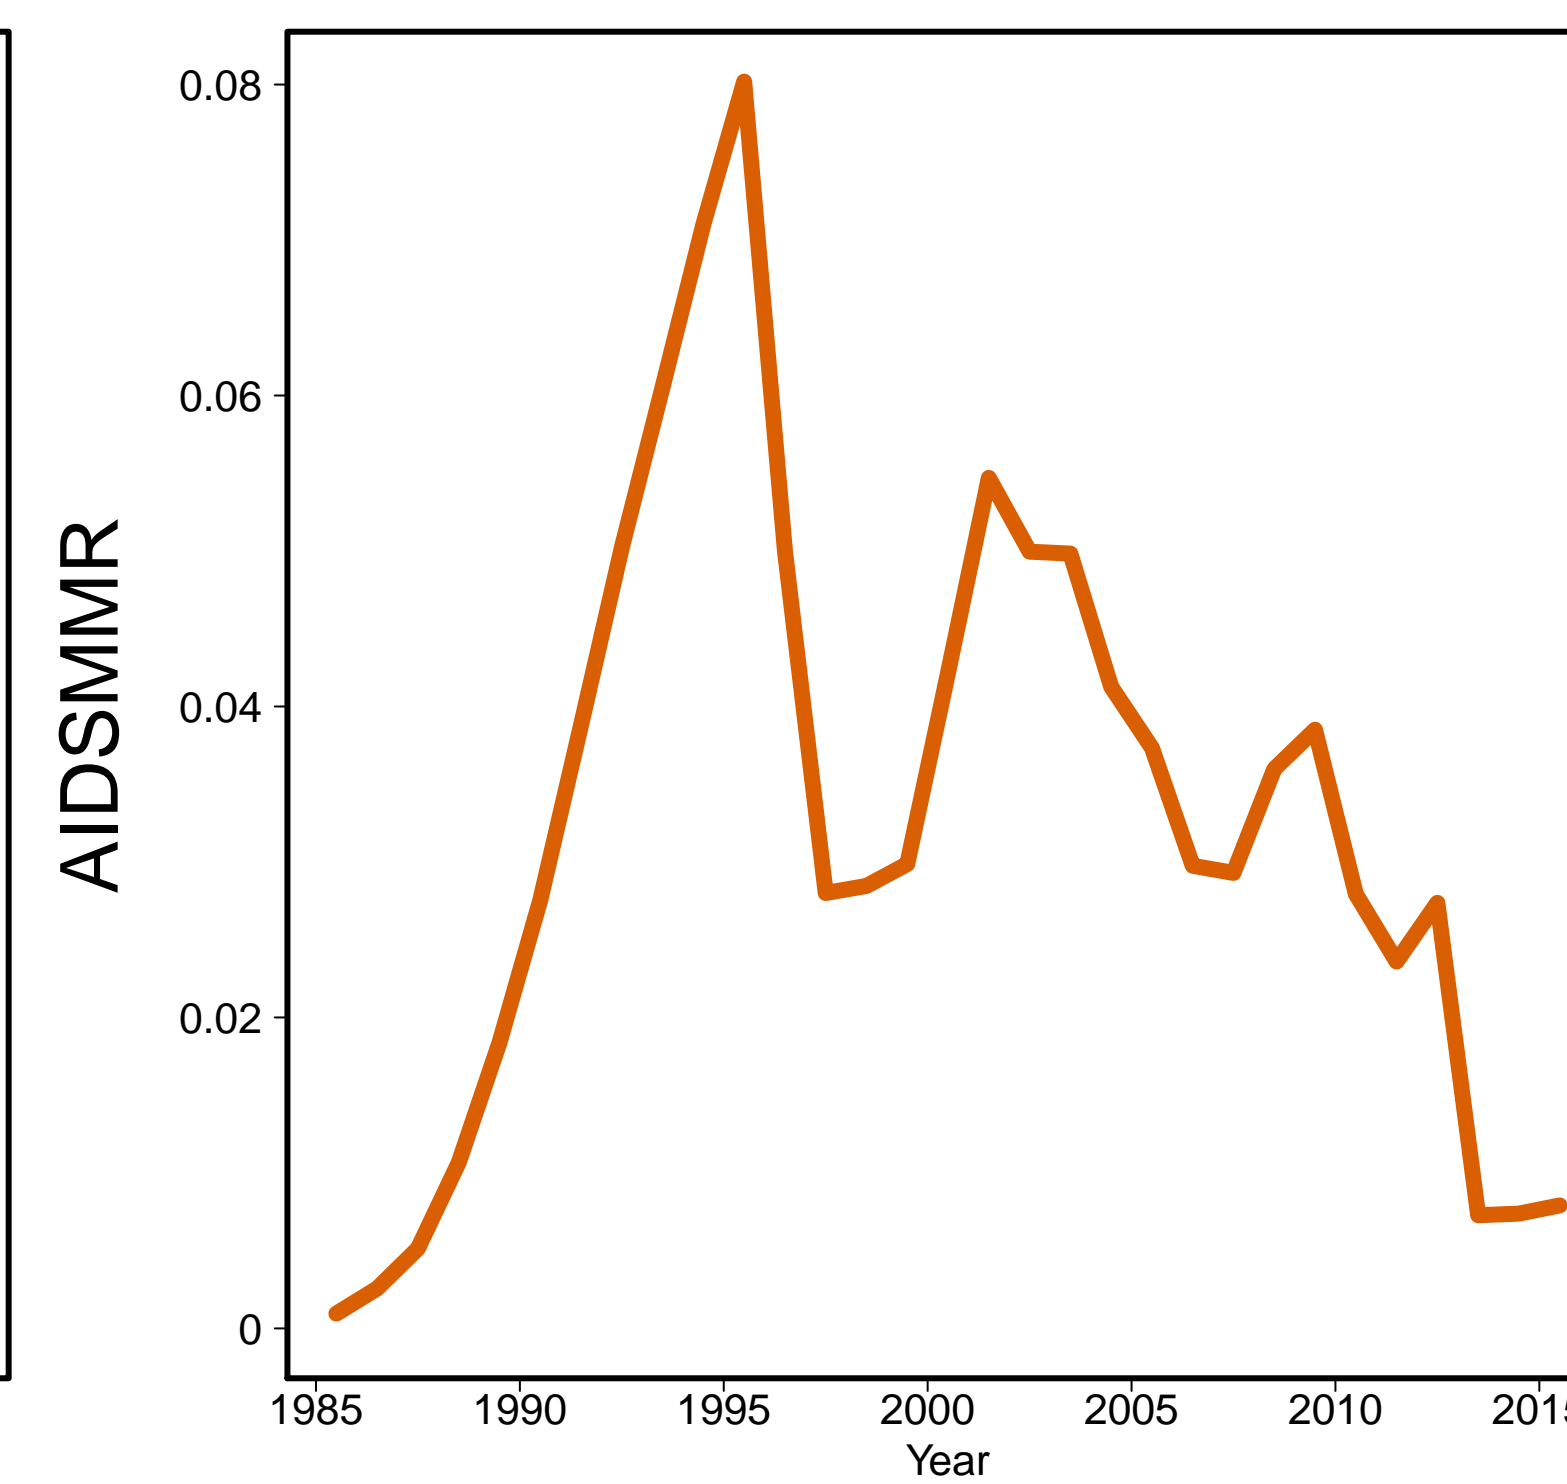

Ghana [GHA]  
(Western Africa)

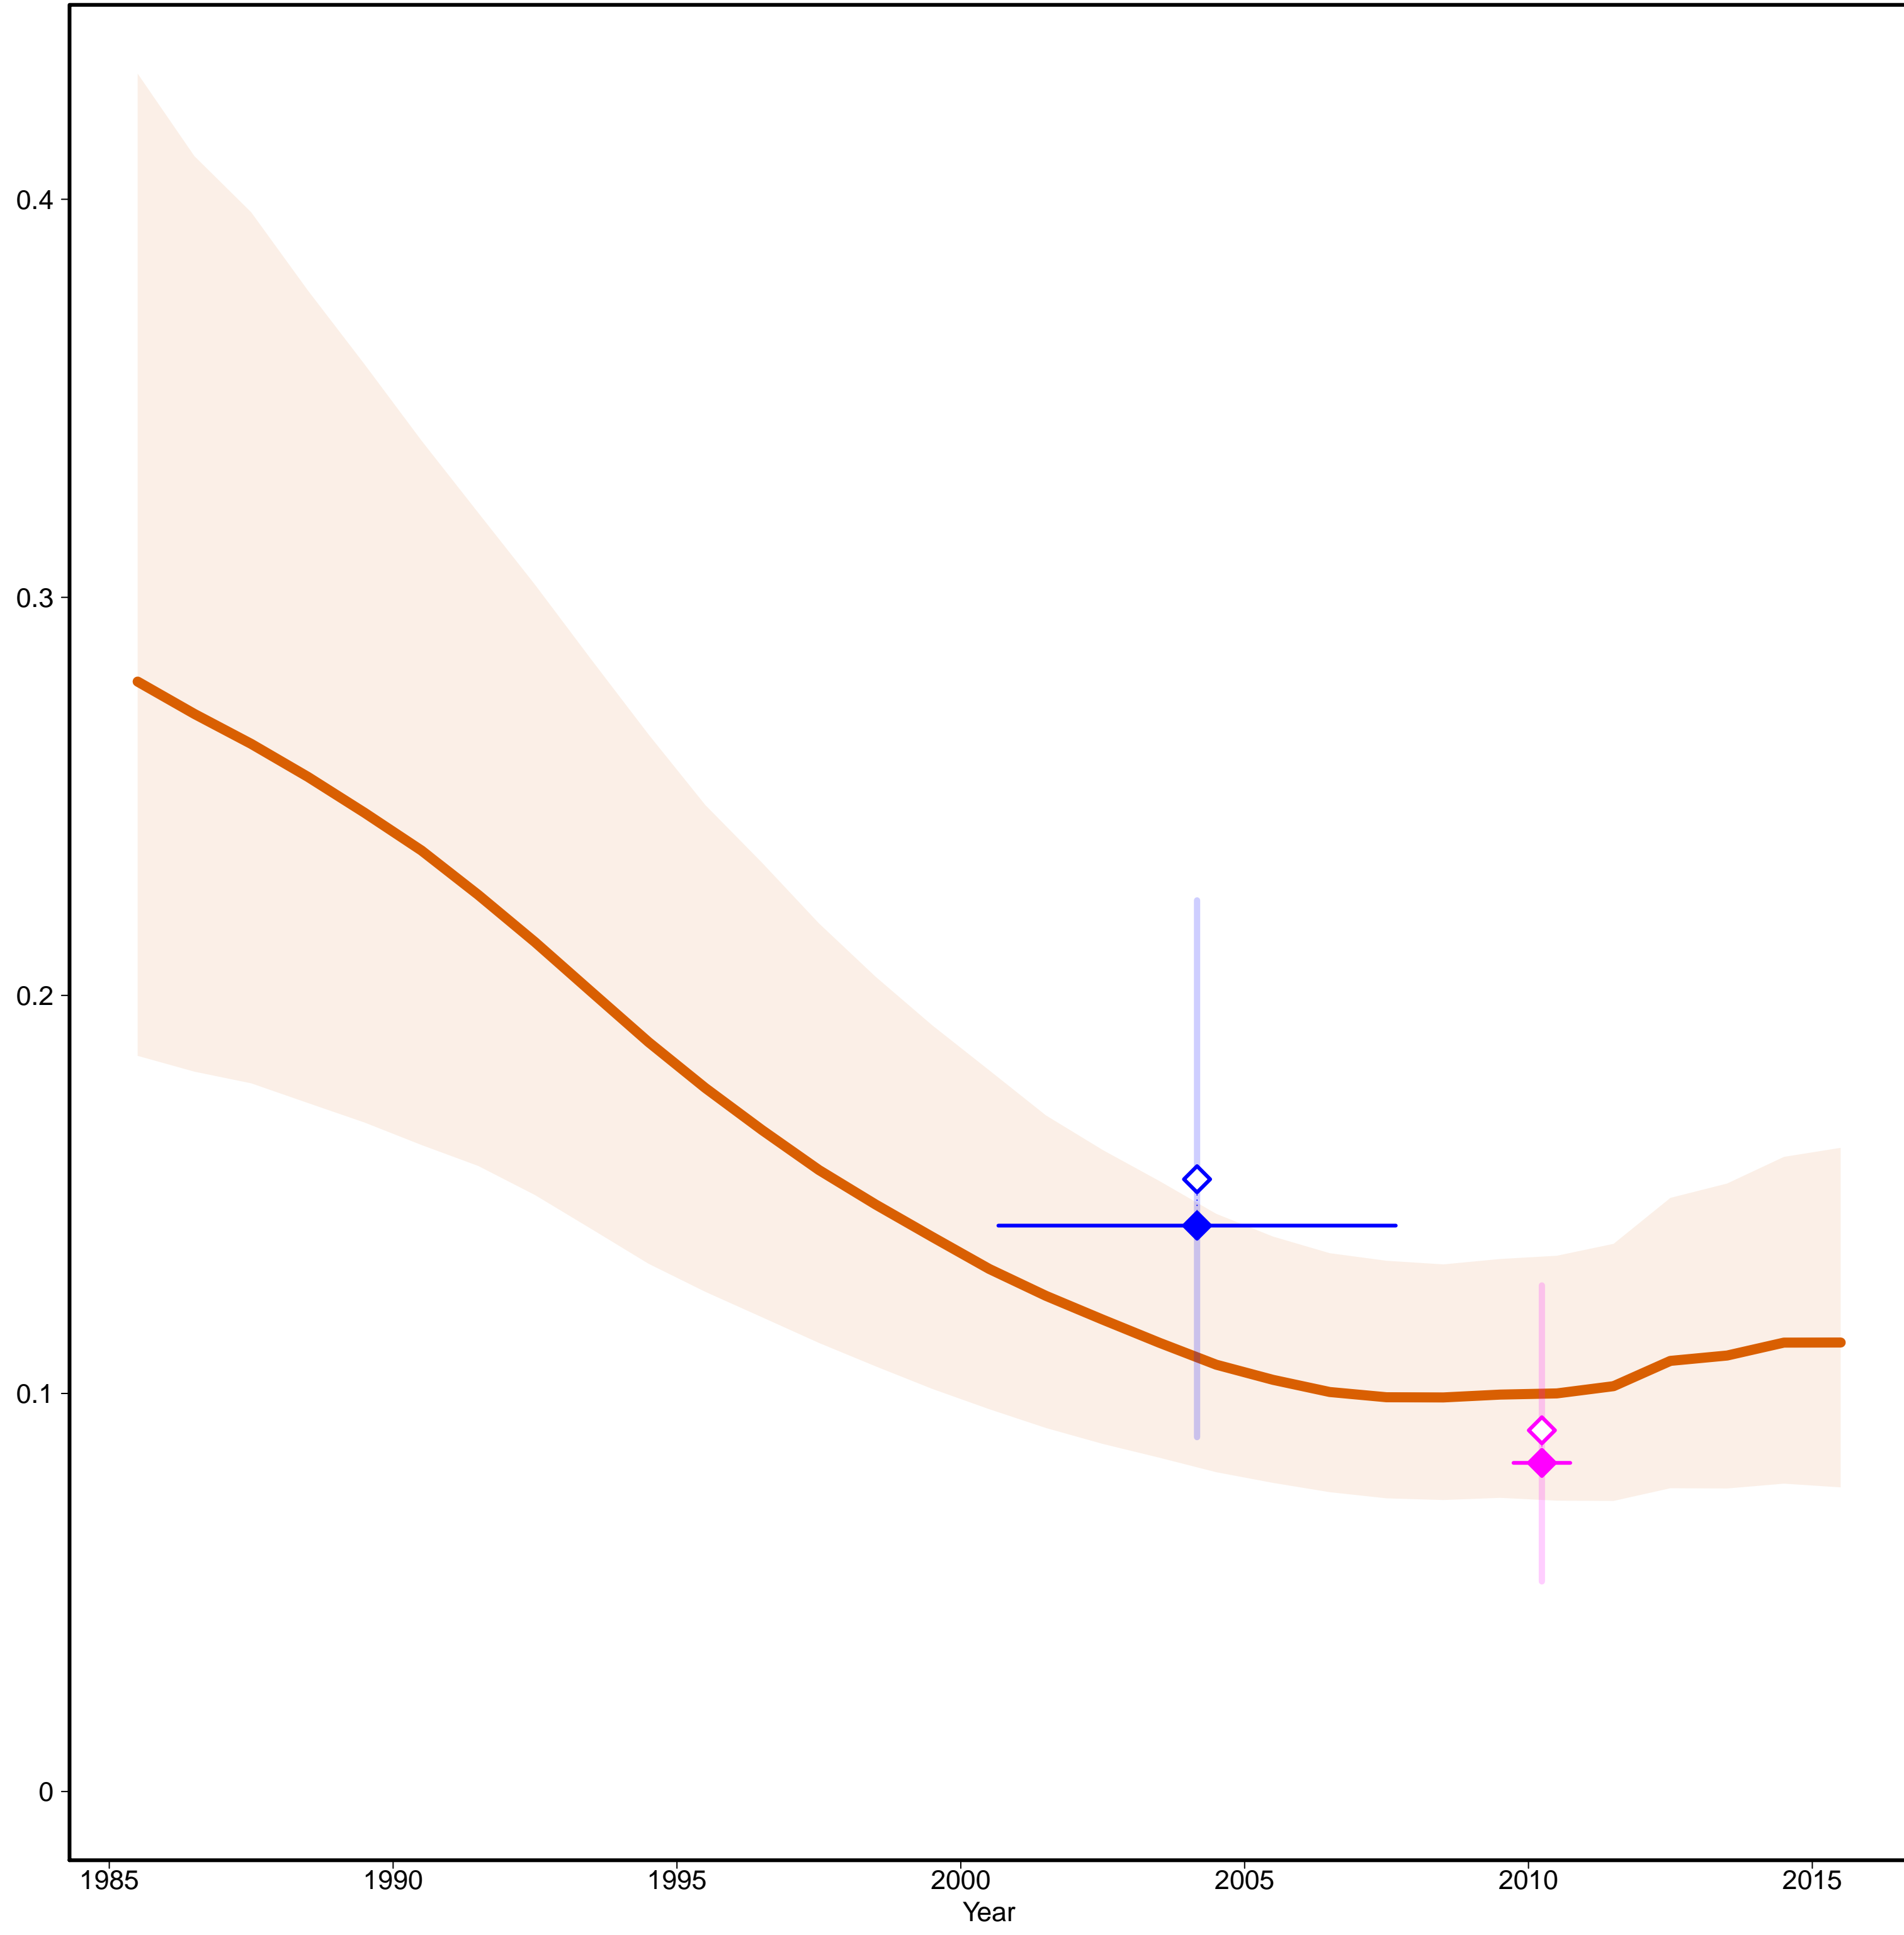

Ghana [GHA]  
(Western Africa)

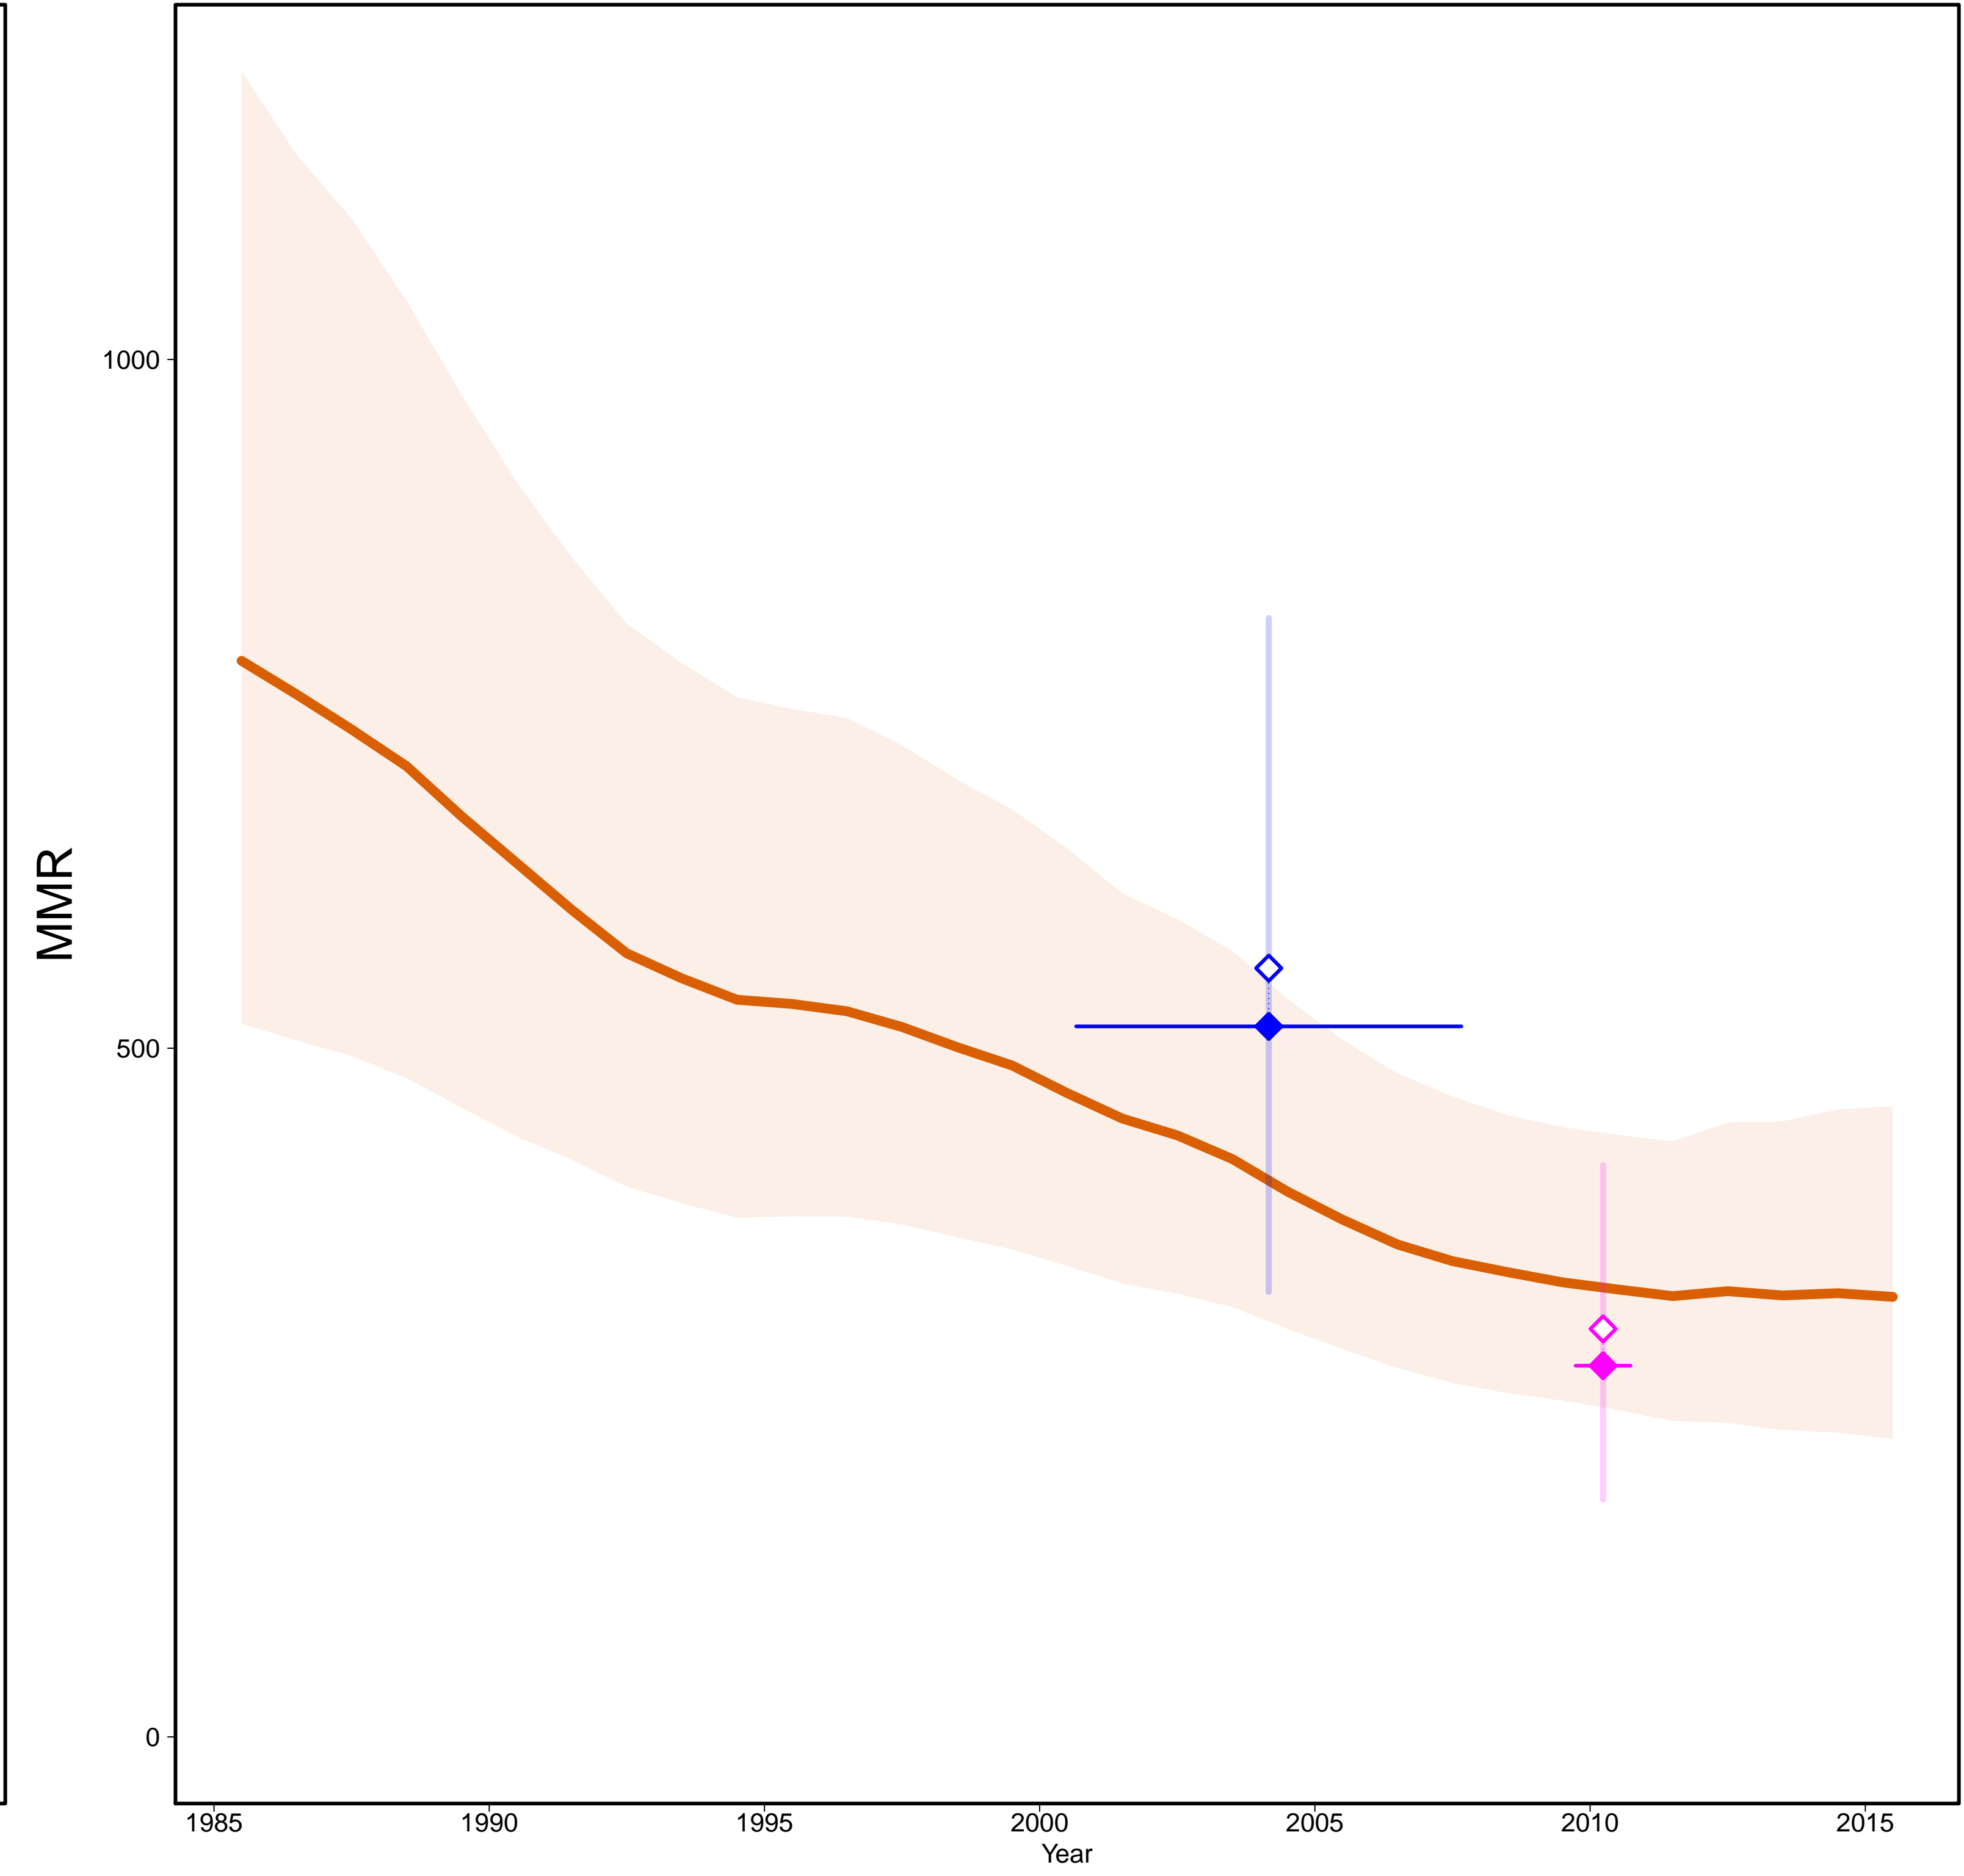

- Estimates —
- MMR Database 2015 —
- ◇ Observed Data
- ◆ Adjusted Data
- Data type —
- ◆ DHS
- ◆ Census

Gross Domestic Product

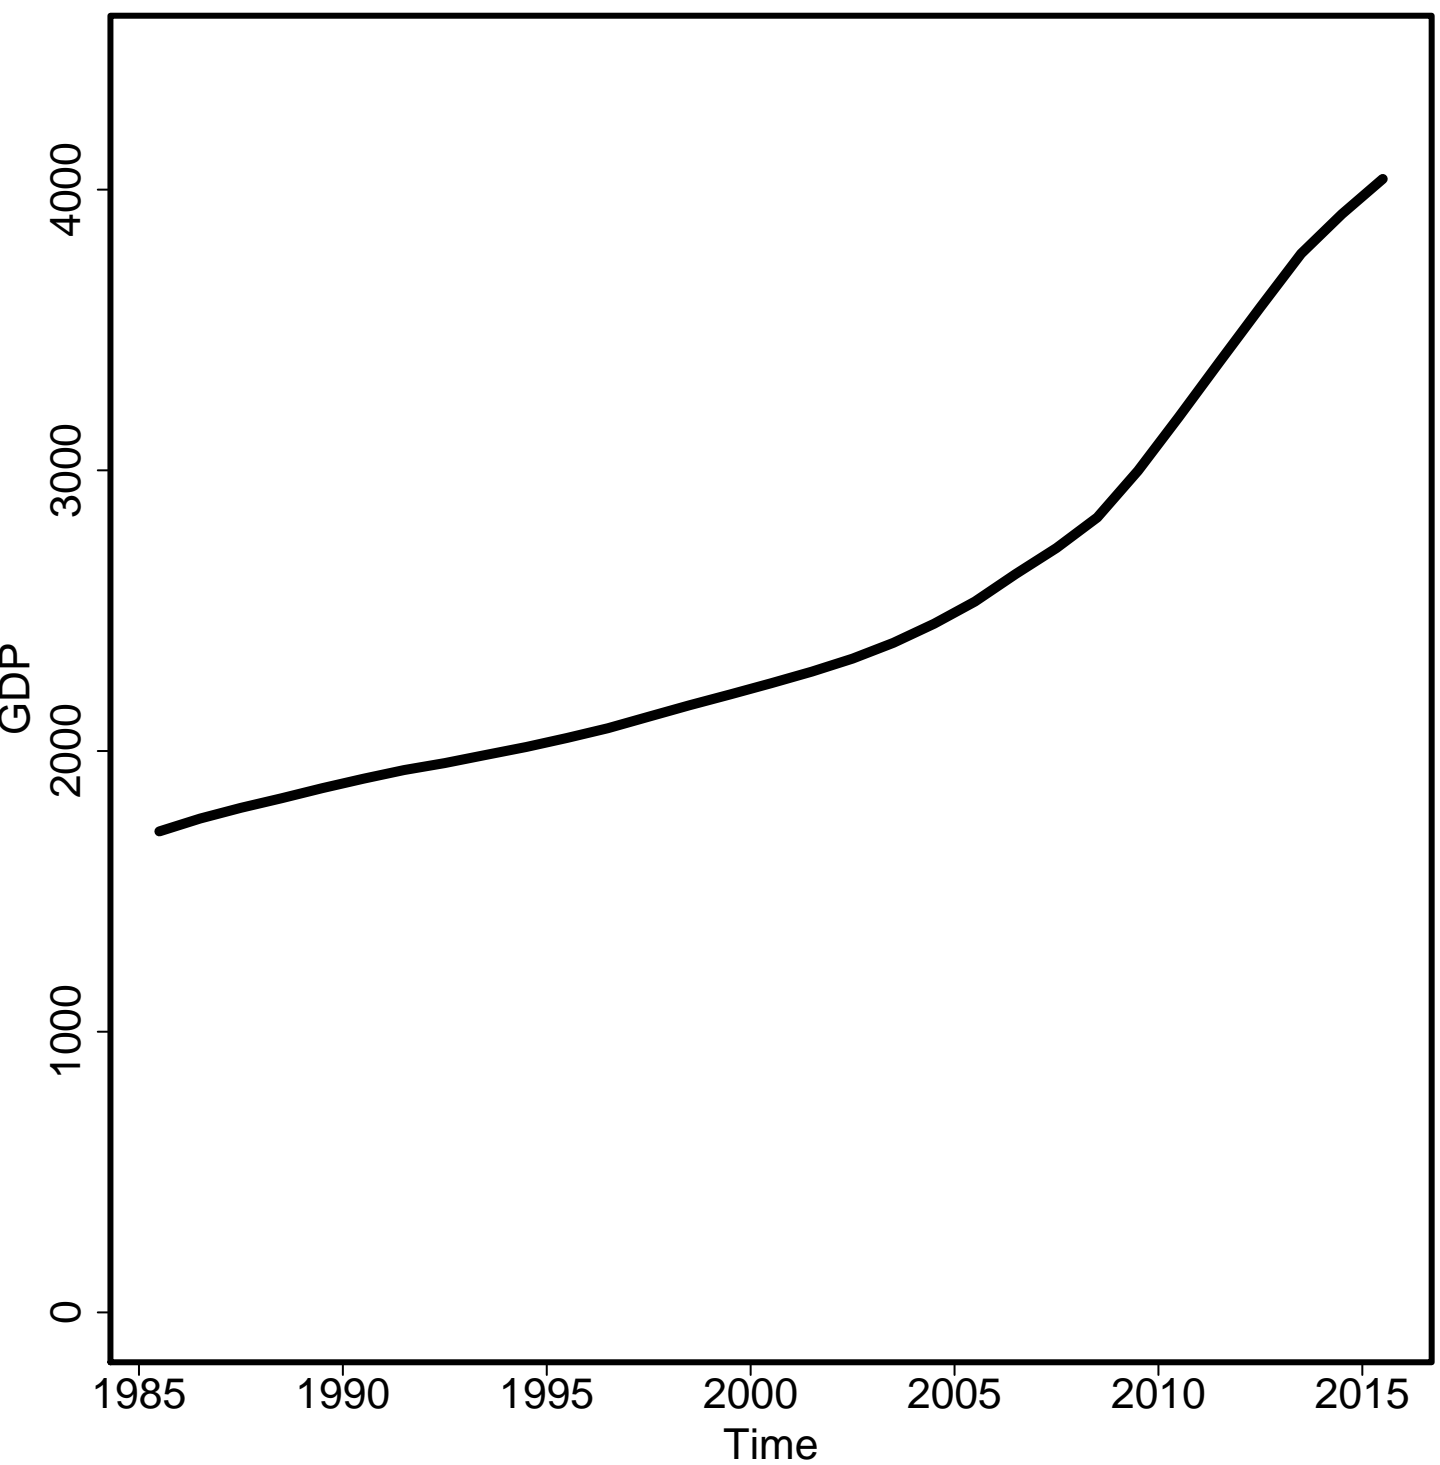

General Fertility Rate

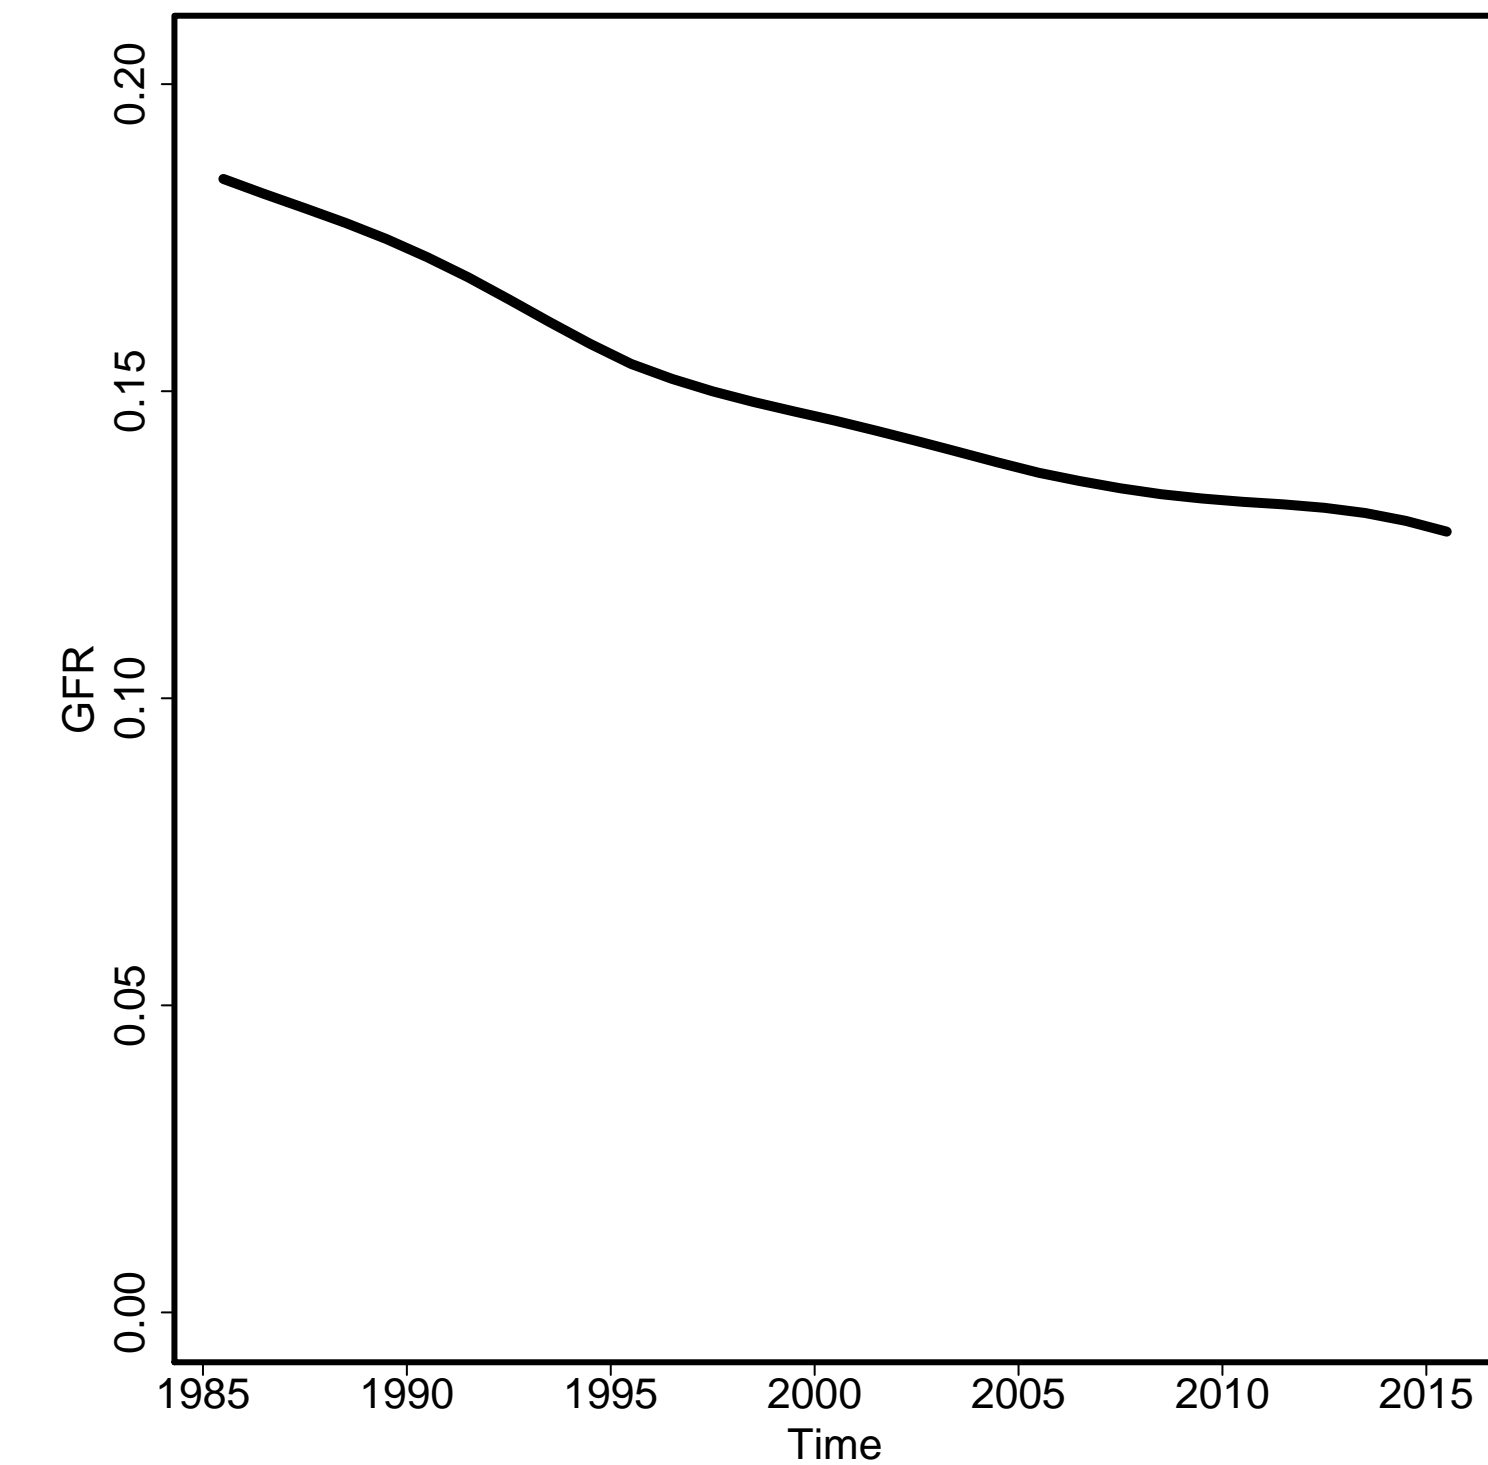

Skilled Attendance to Birth

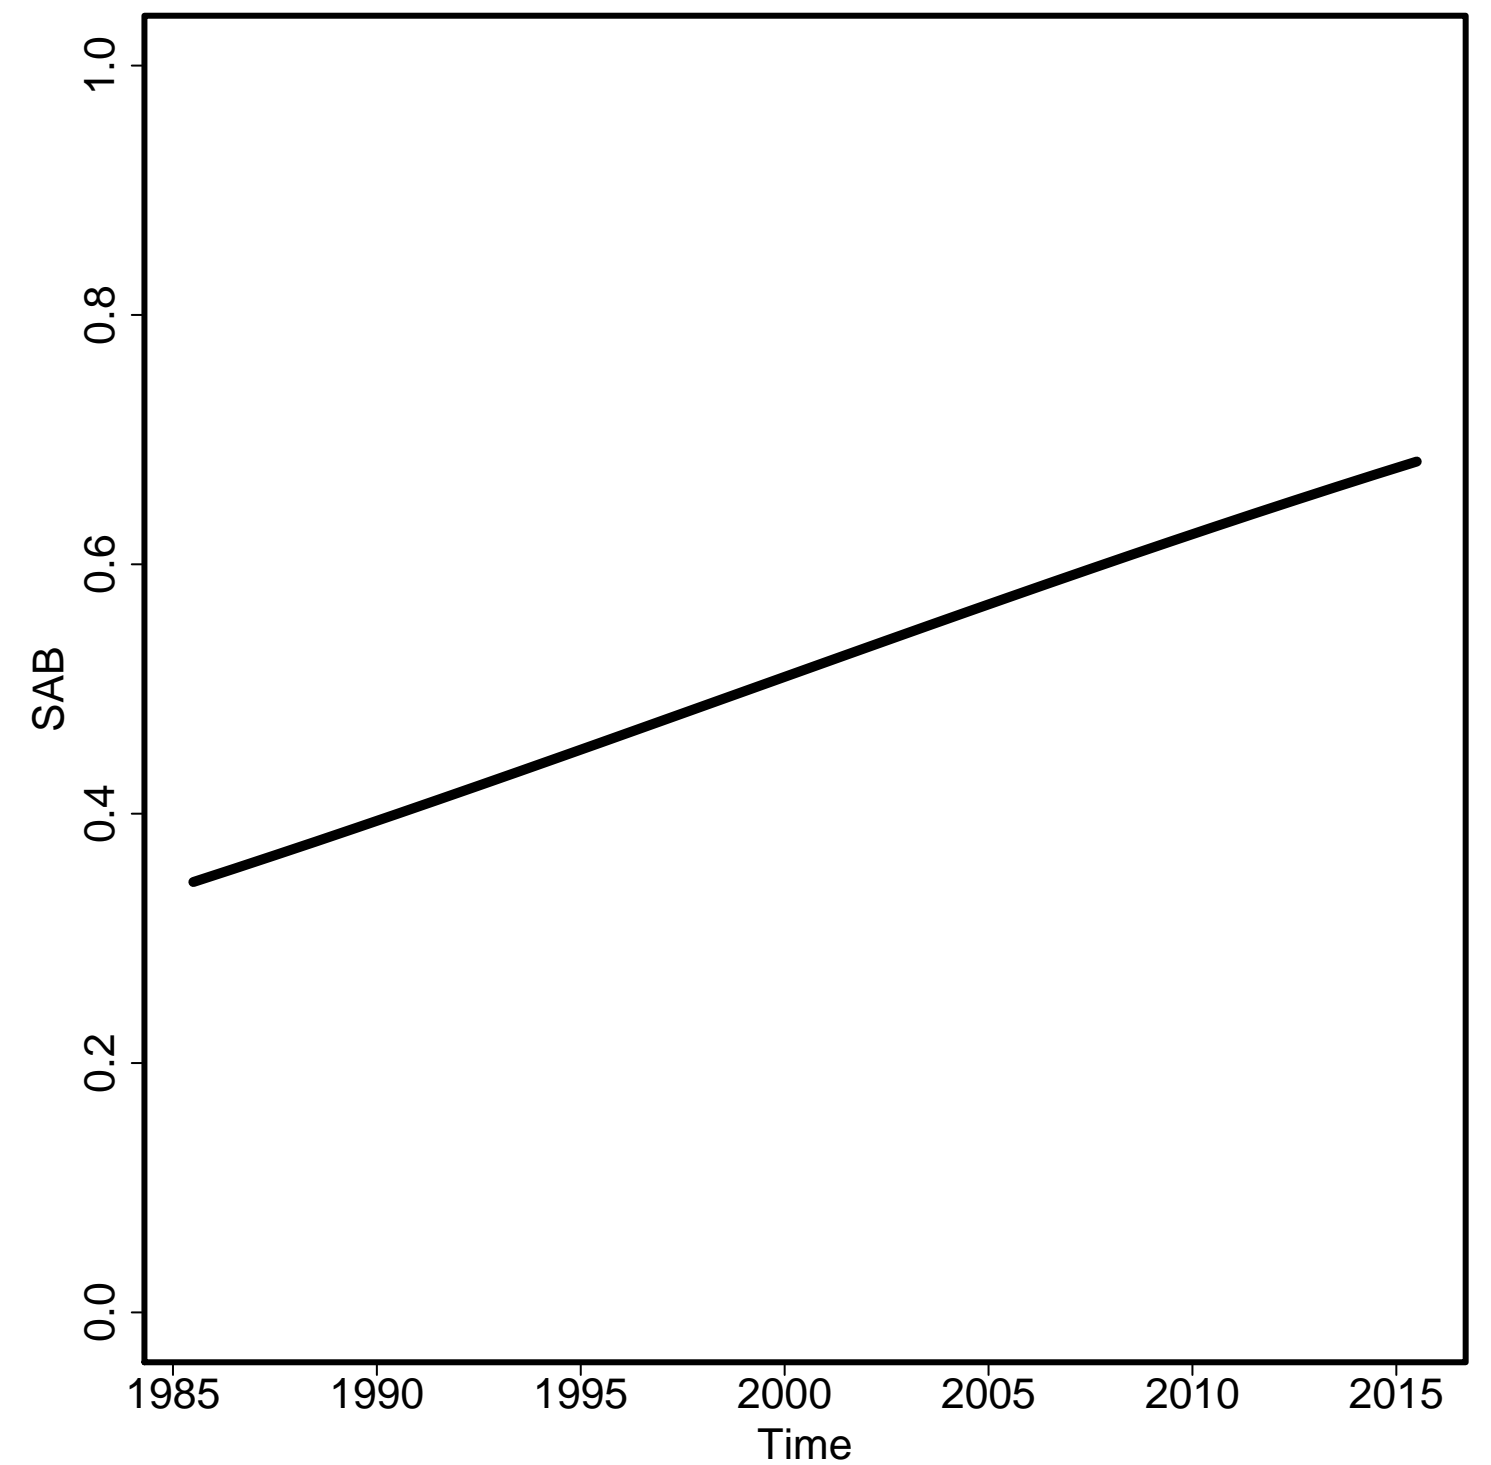

Envelope/Births

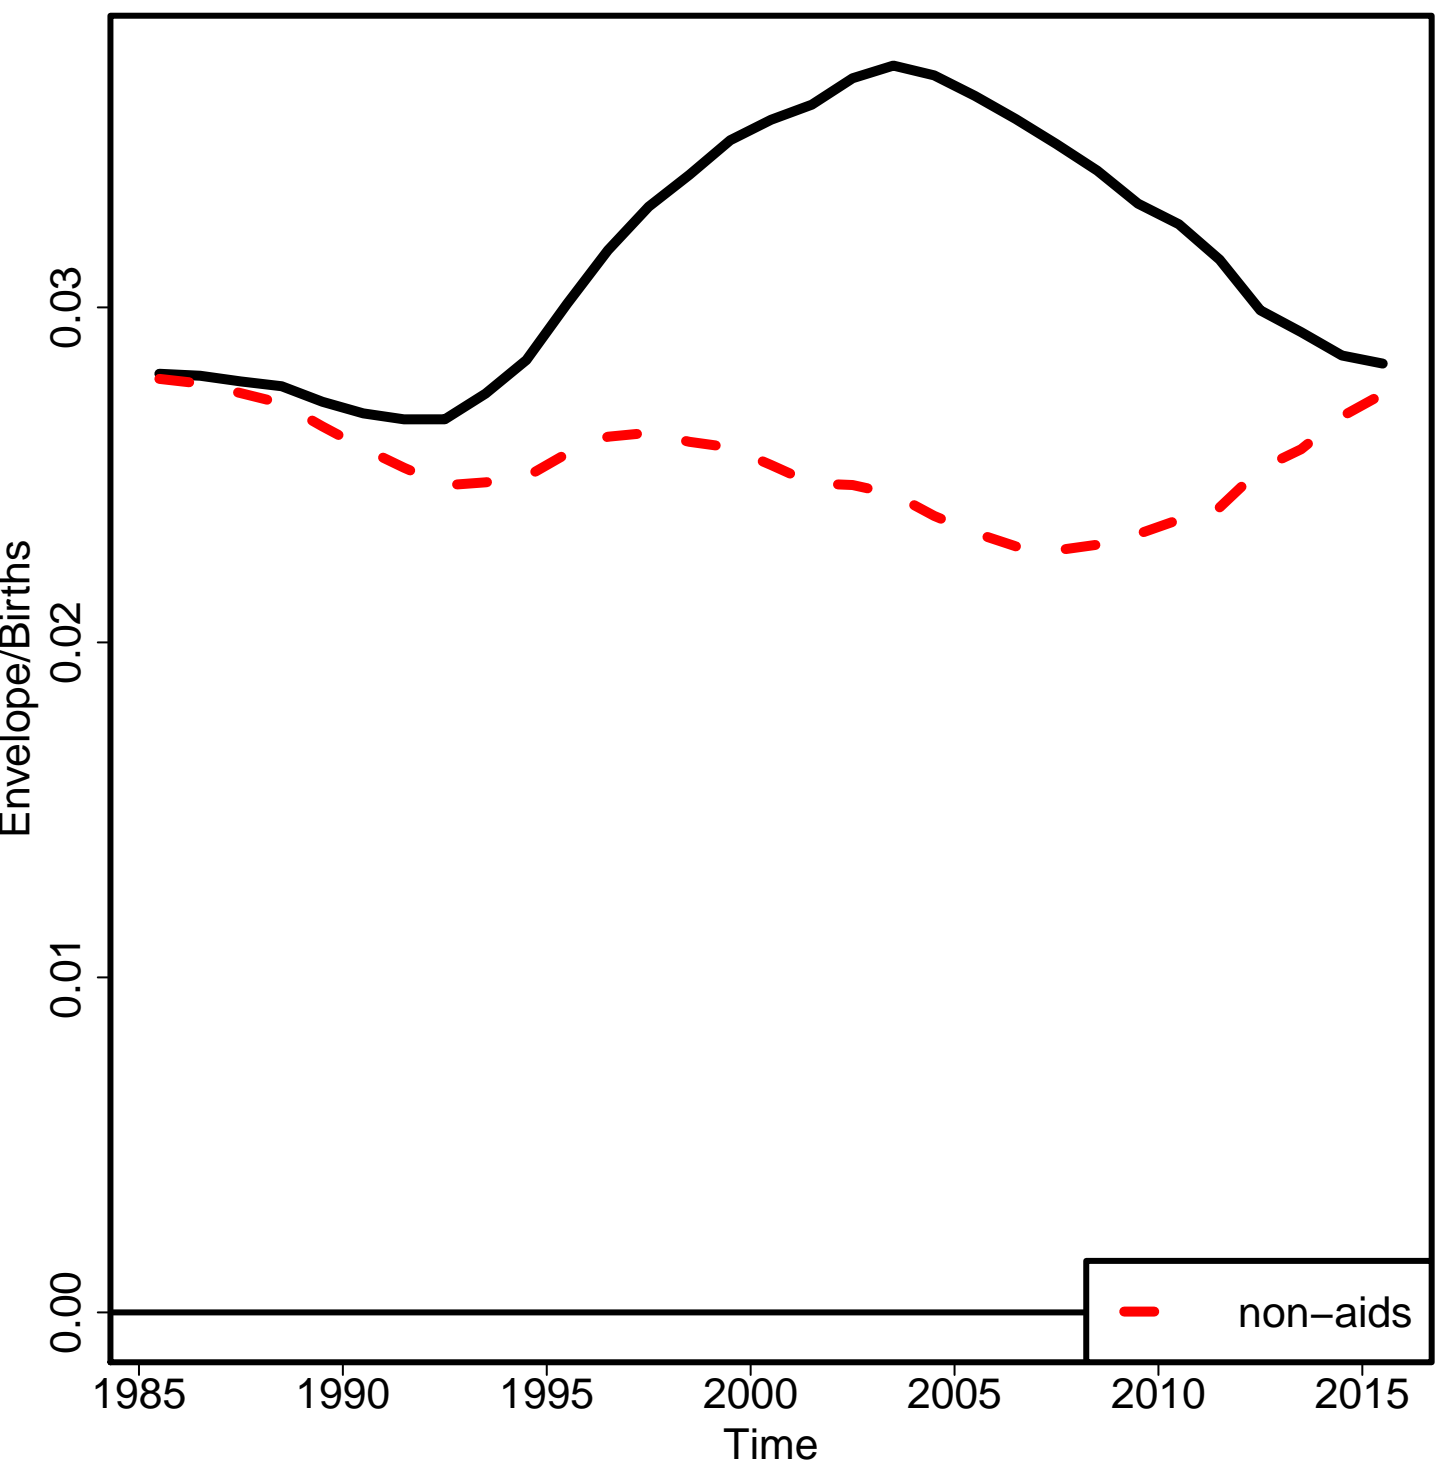

Non-aids MMR

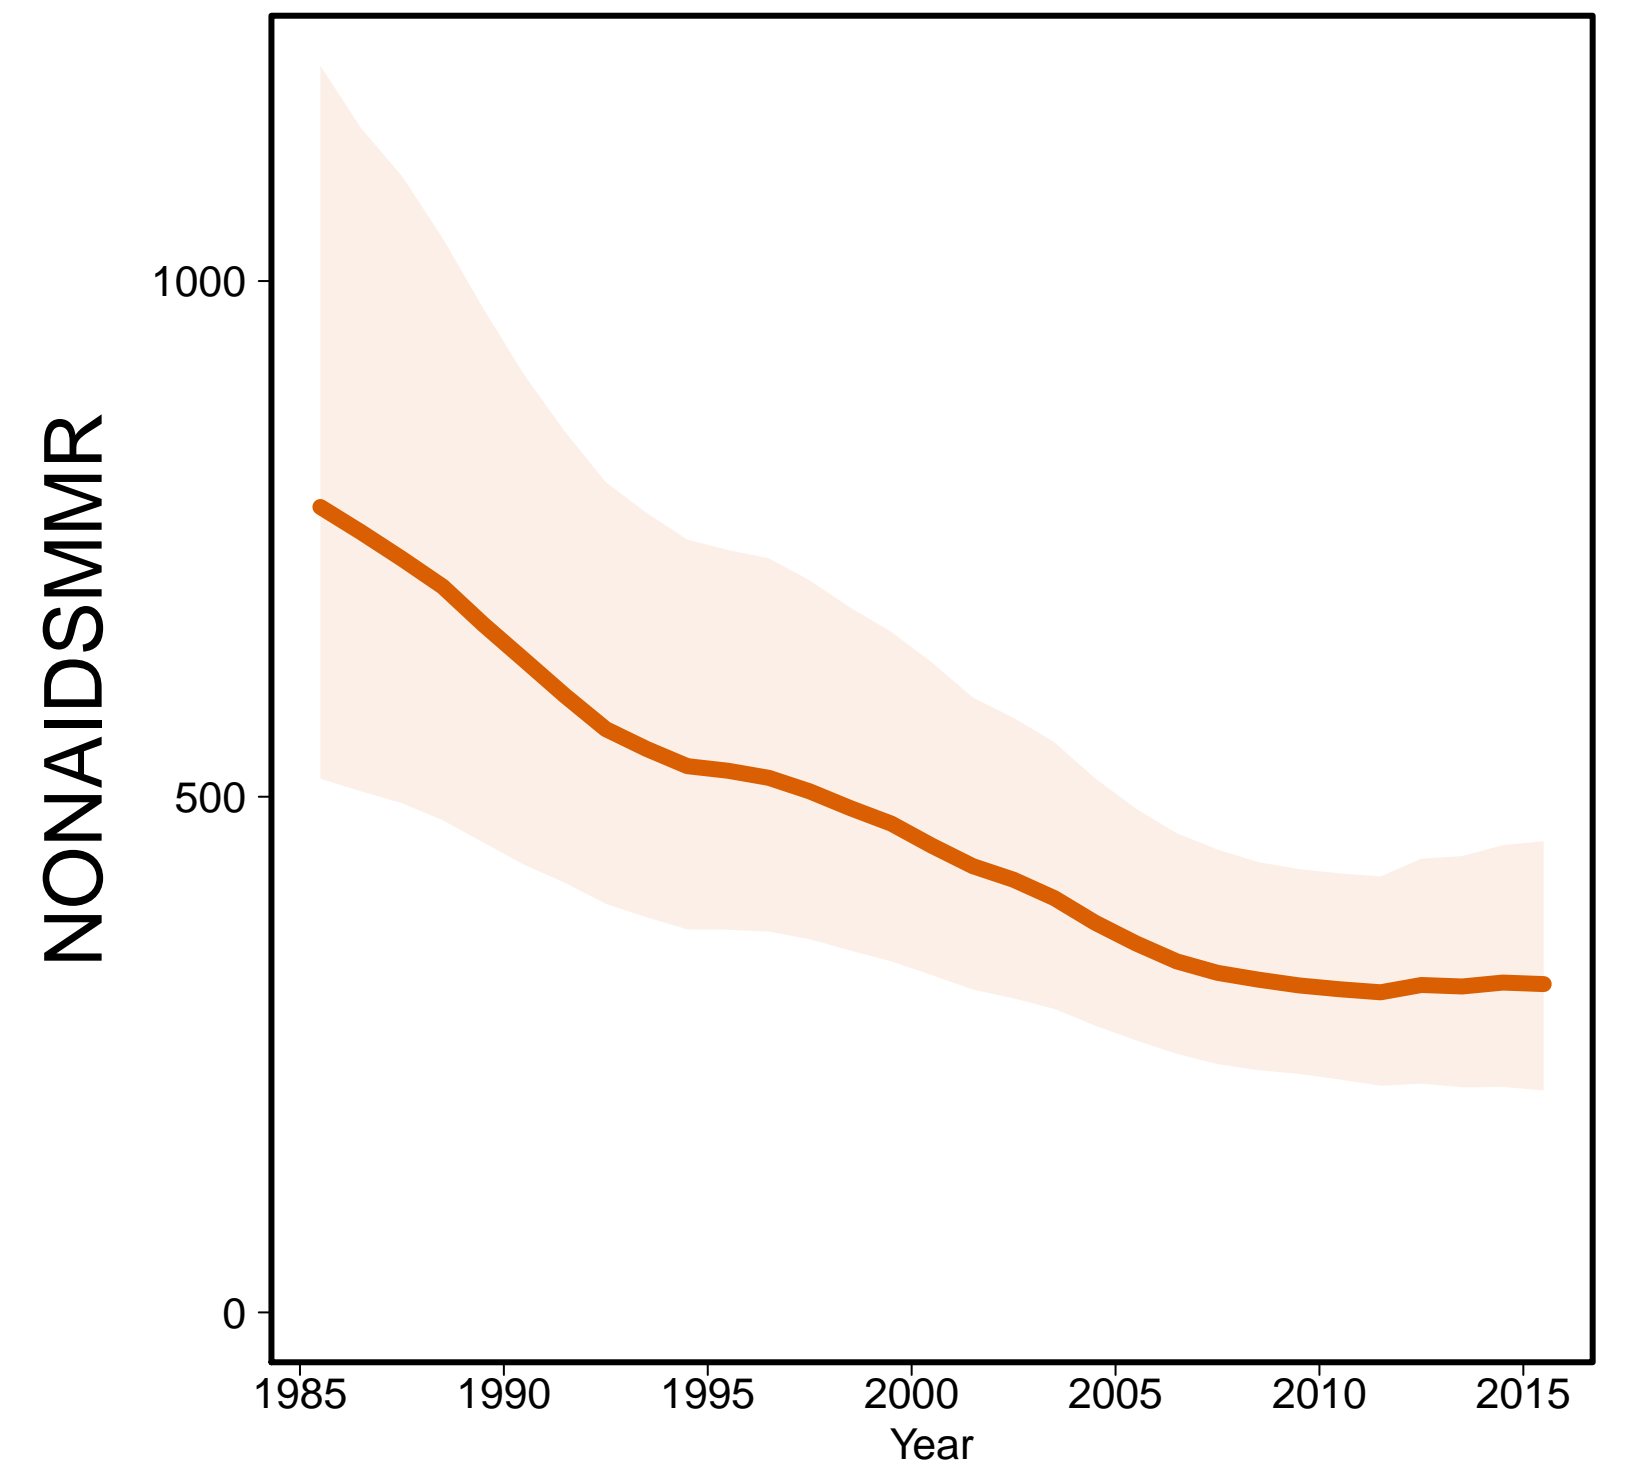

Aids MMR

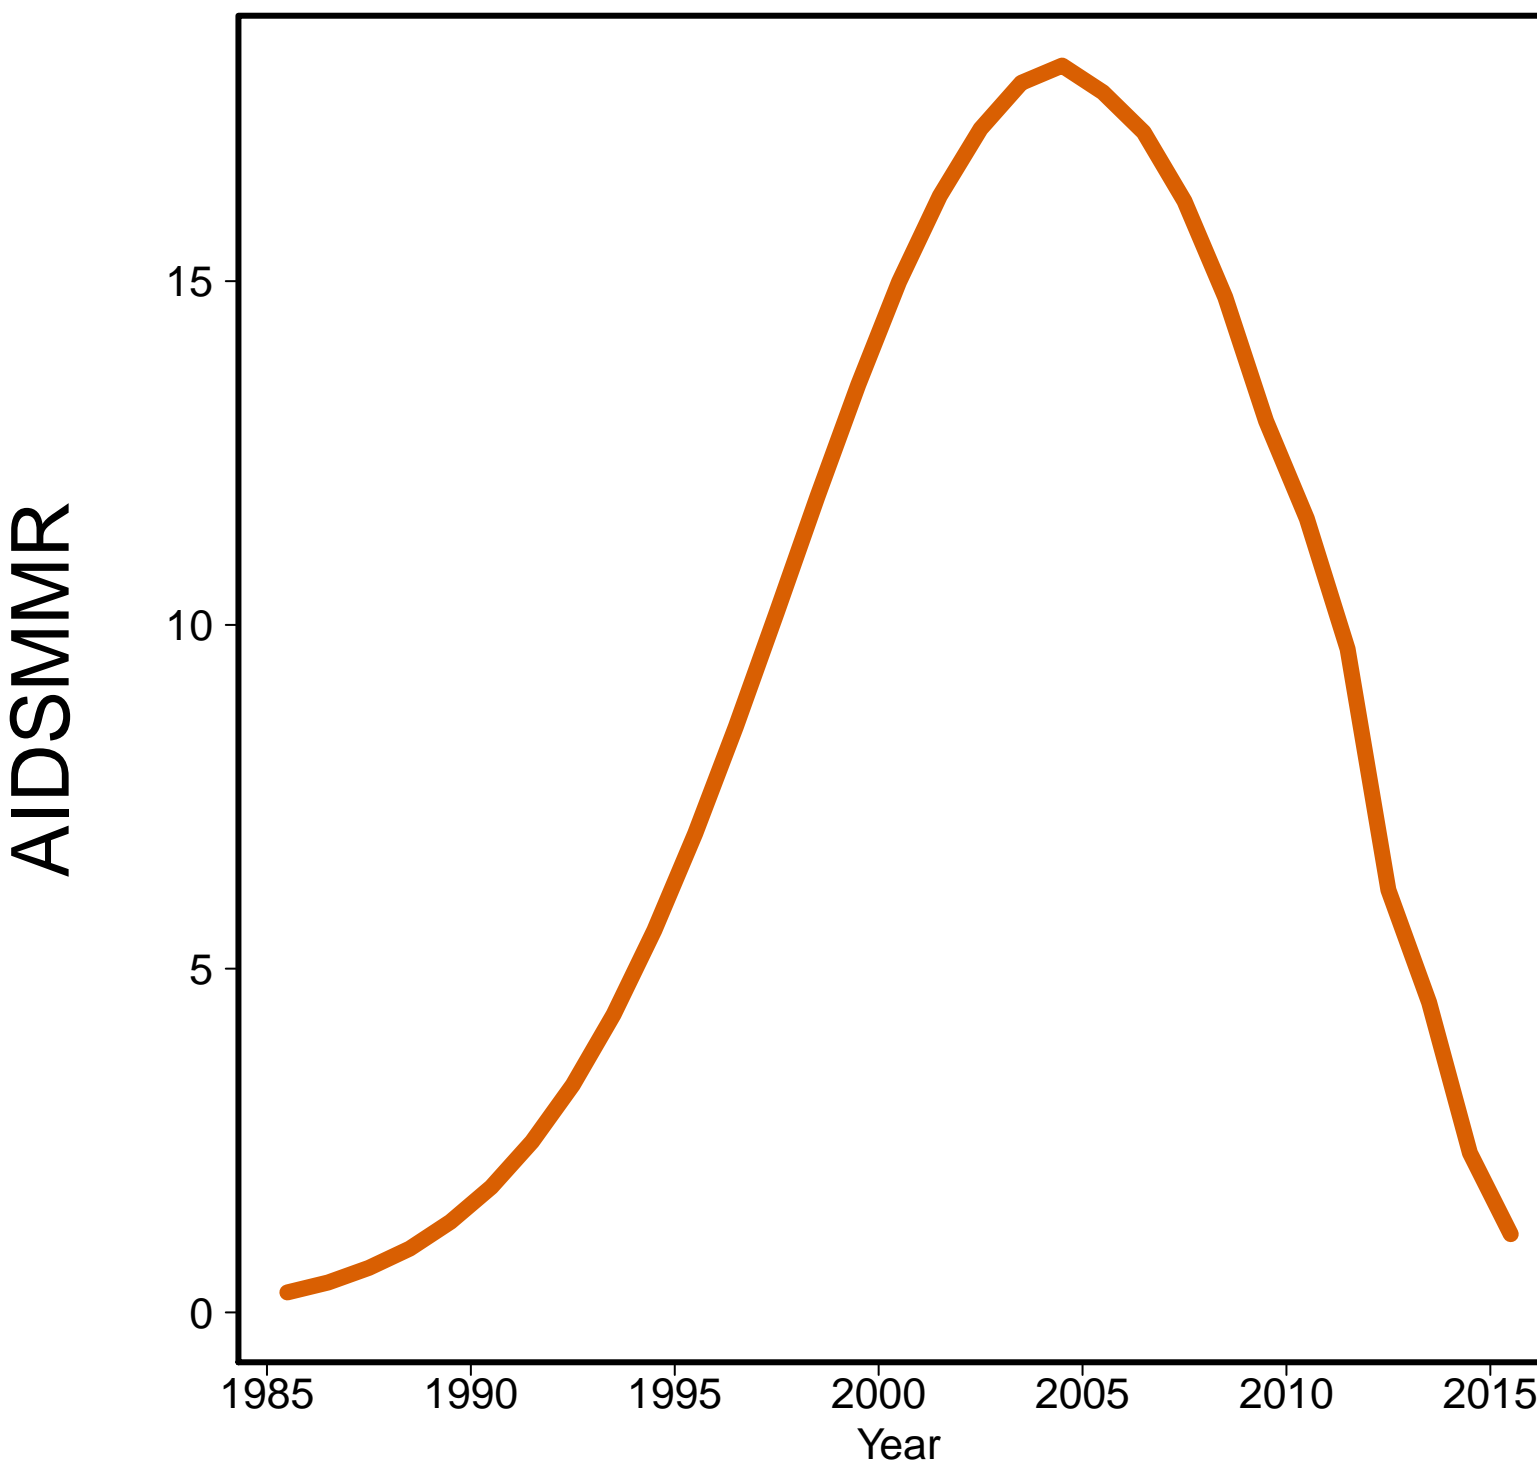

Greece [GRC]  
(Developed regions)

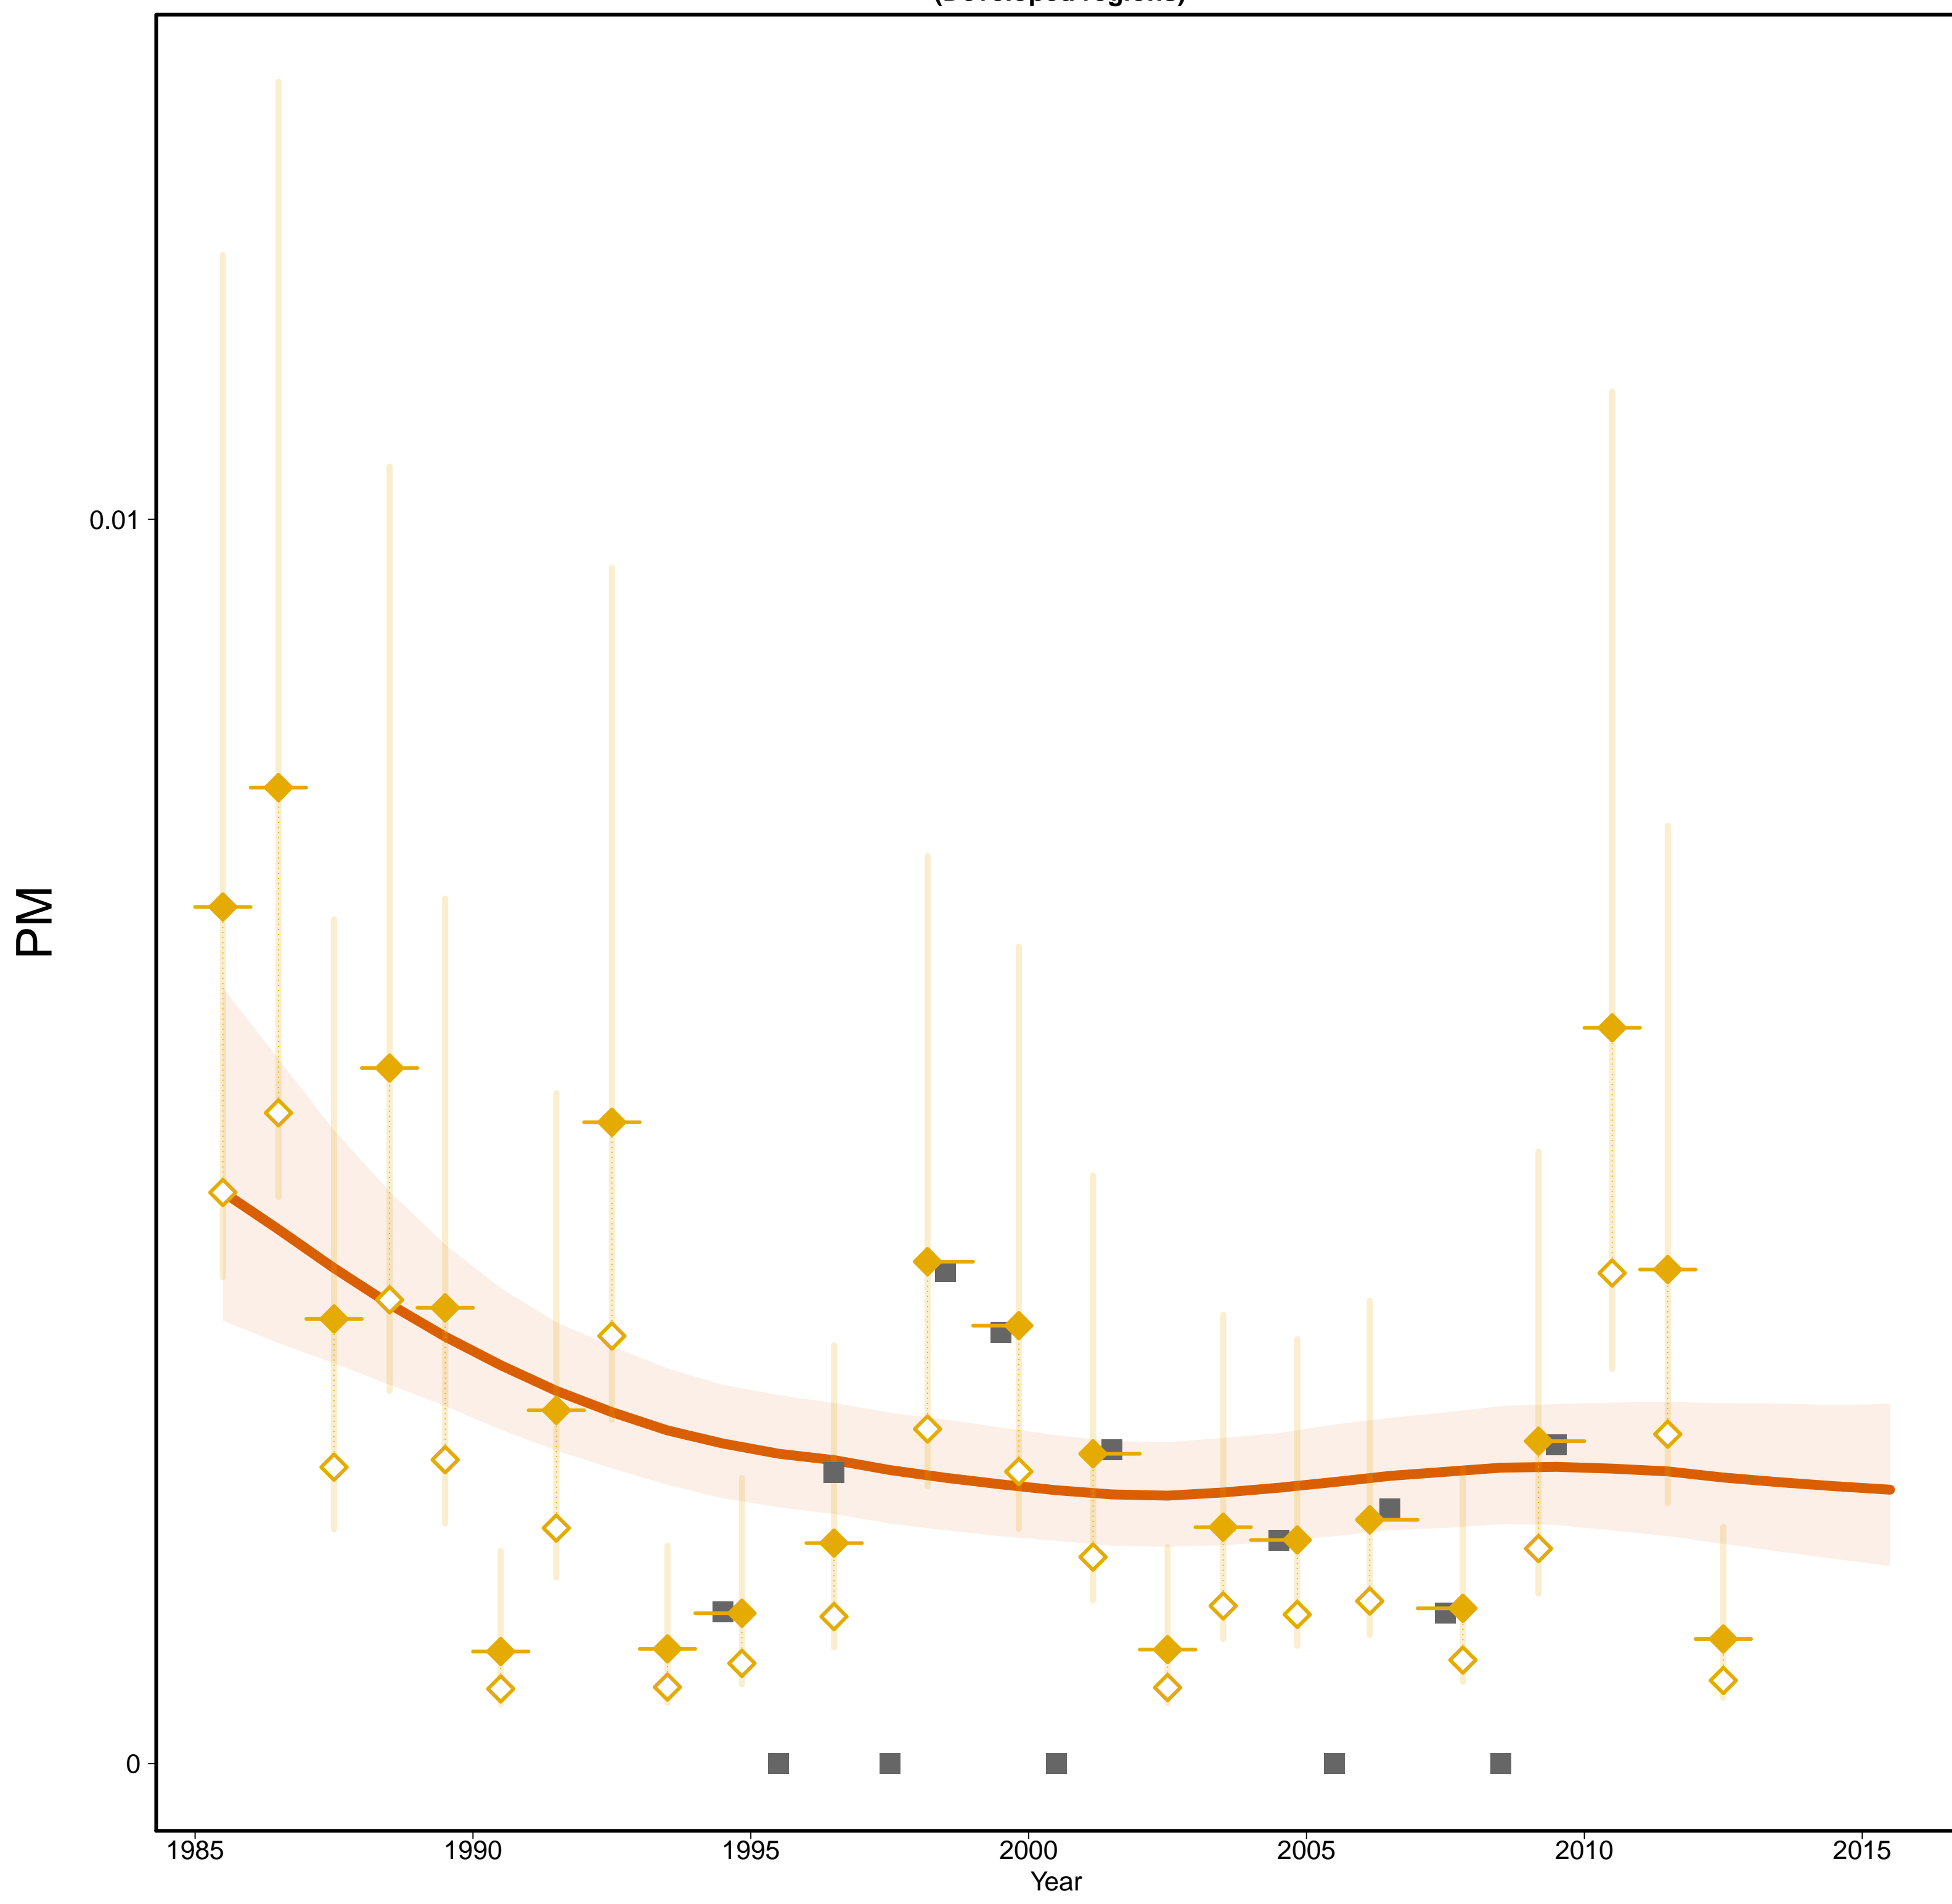

Greece [GRC]  
(Developed regions)

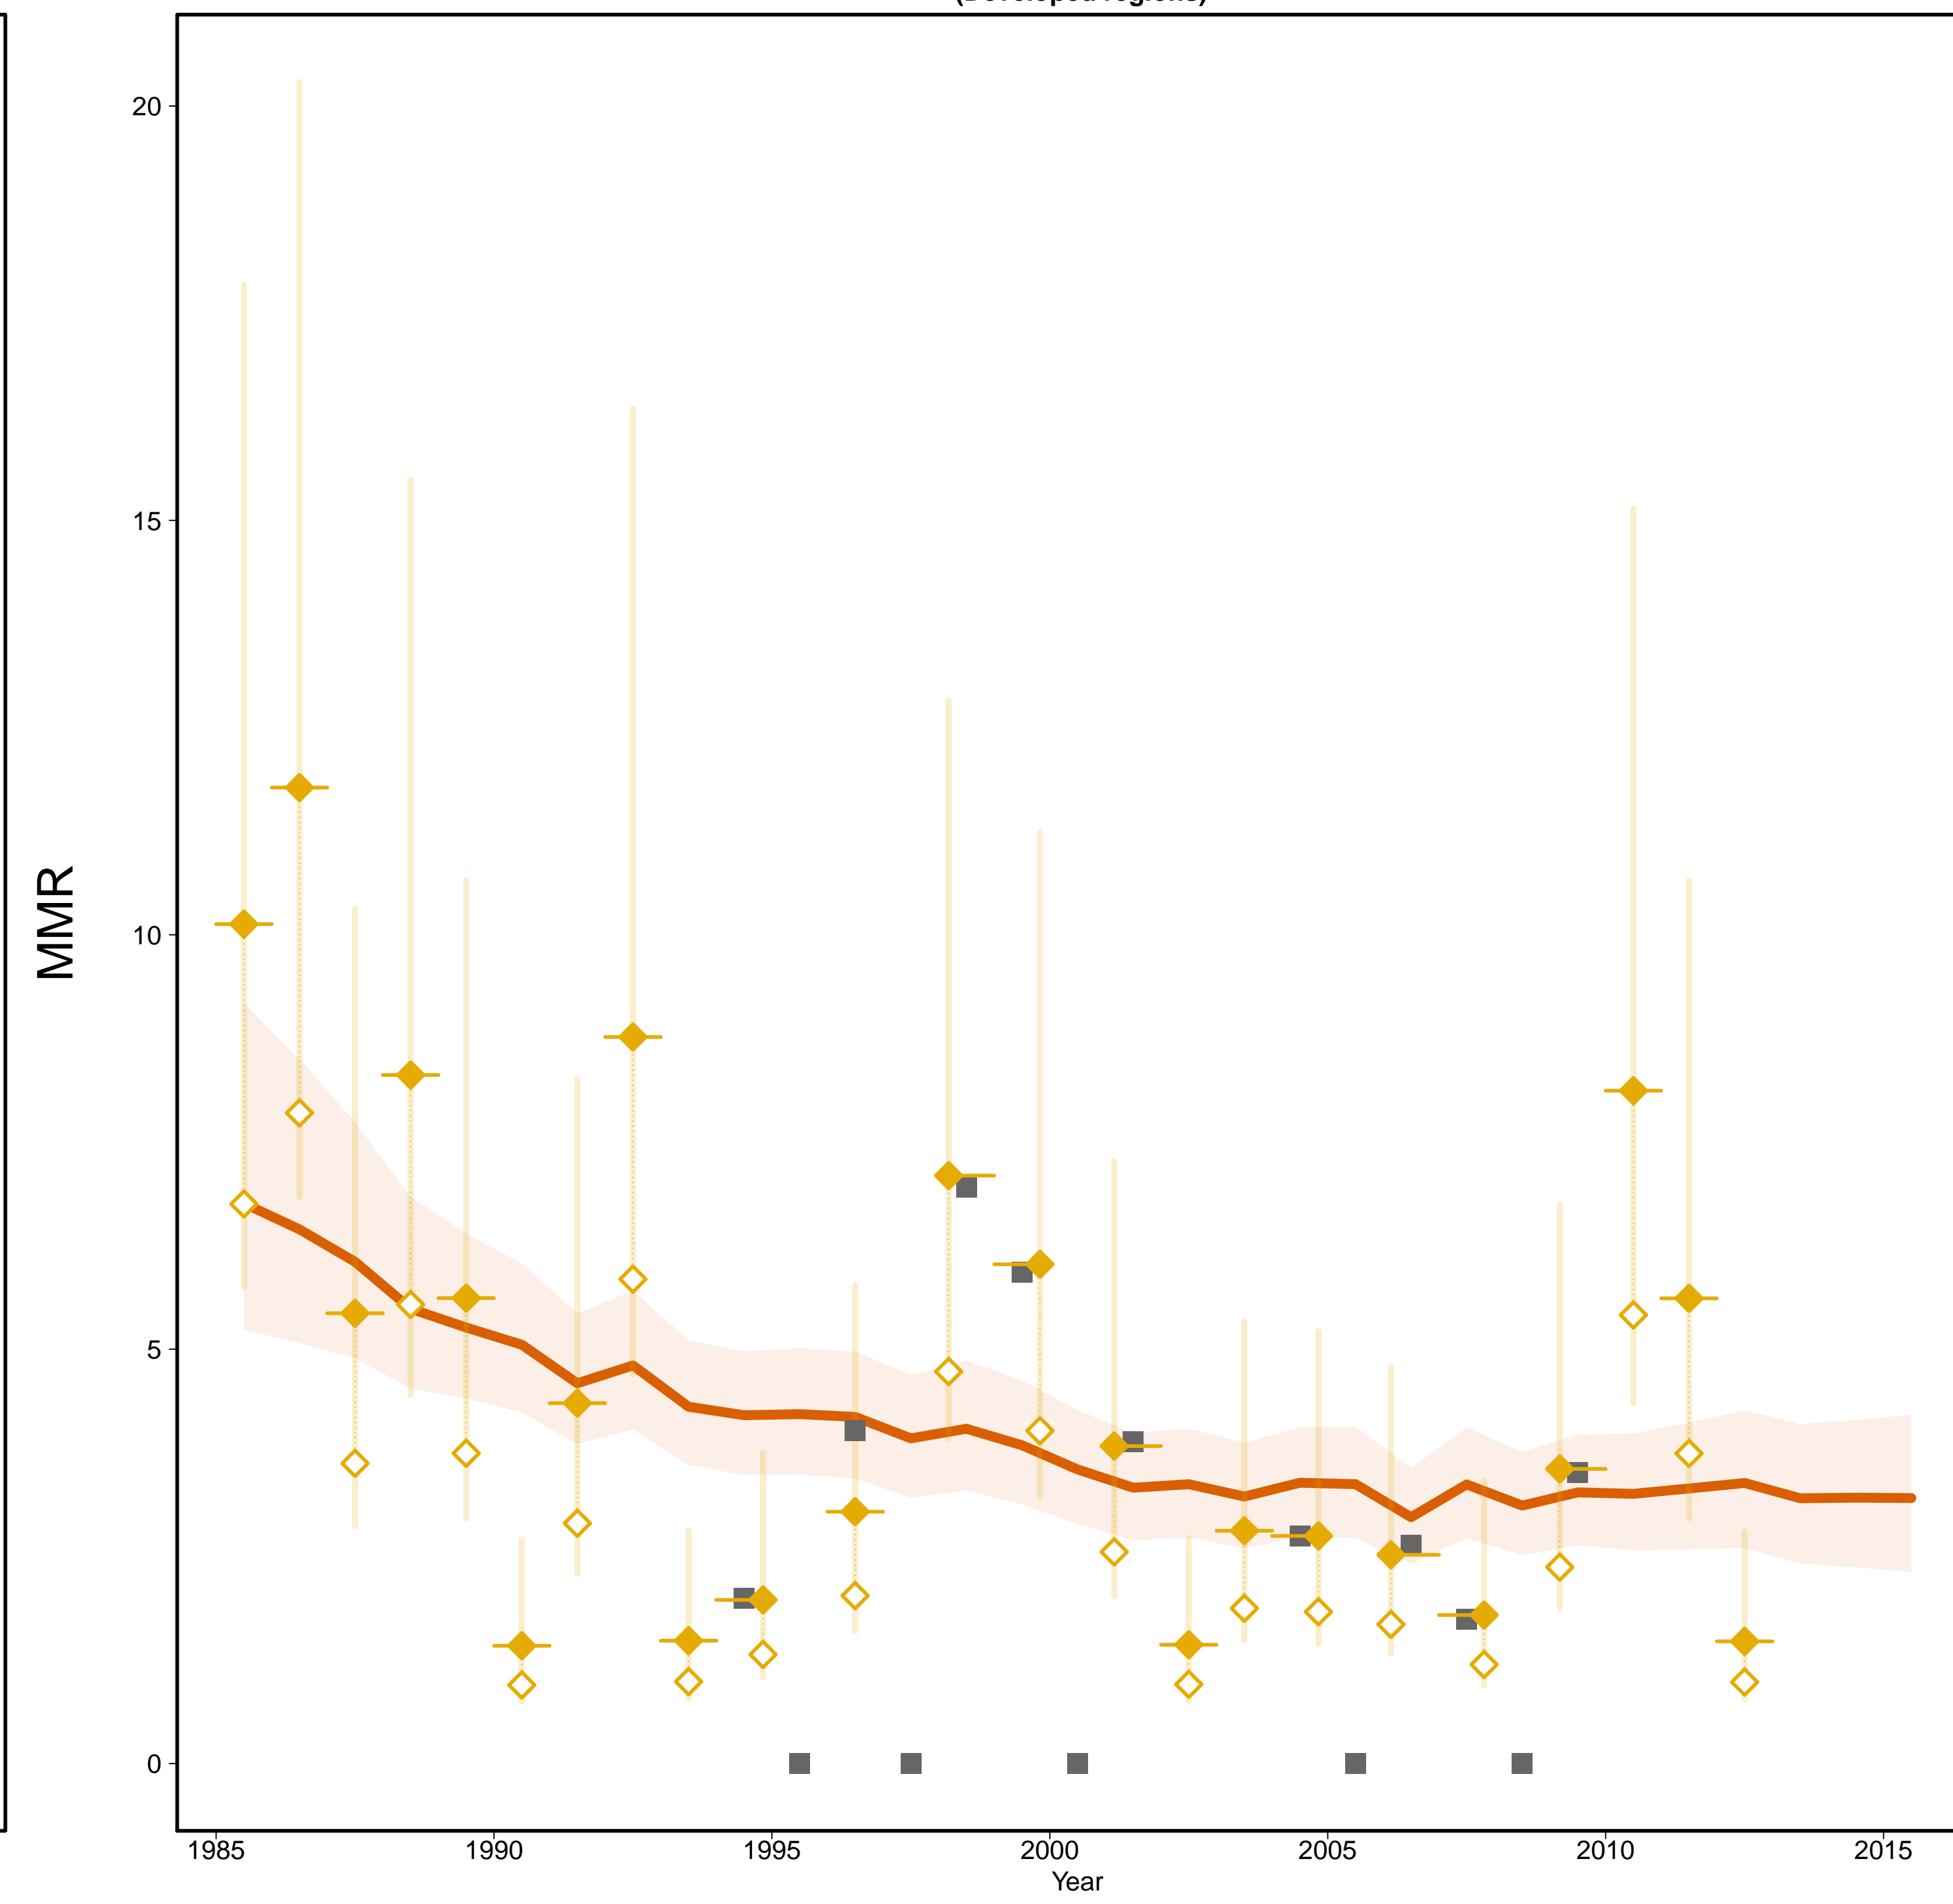

- Estimates –
- Mlate
- MMR Database 2015 –
- ◇ Observed Data
- ◆ Adjusted Data
- Data type –
- ◆ VR
- Reported VR before recalc.  
(related to 0 obs. mat. death)

Gross Domestic Product

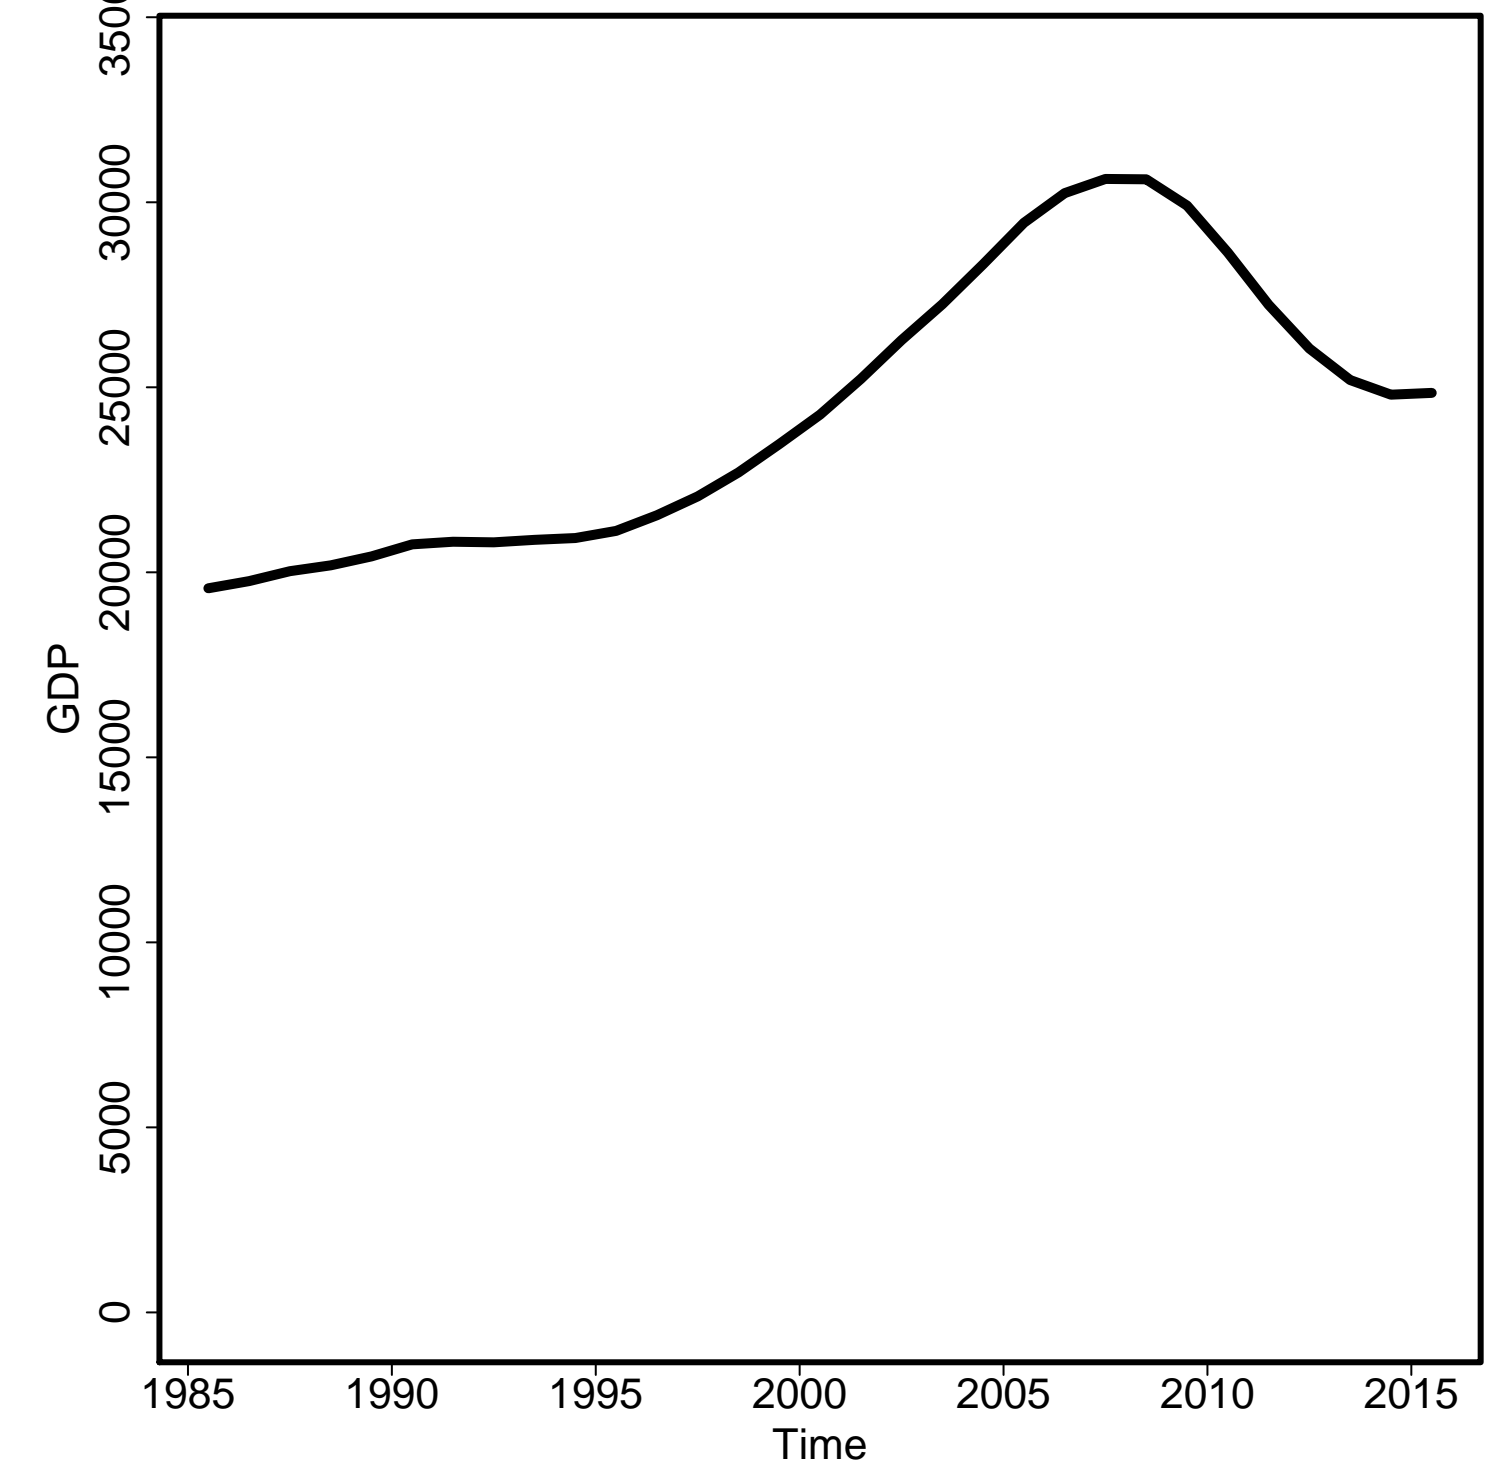

General Fertility Rate

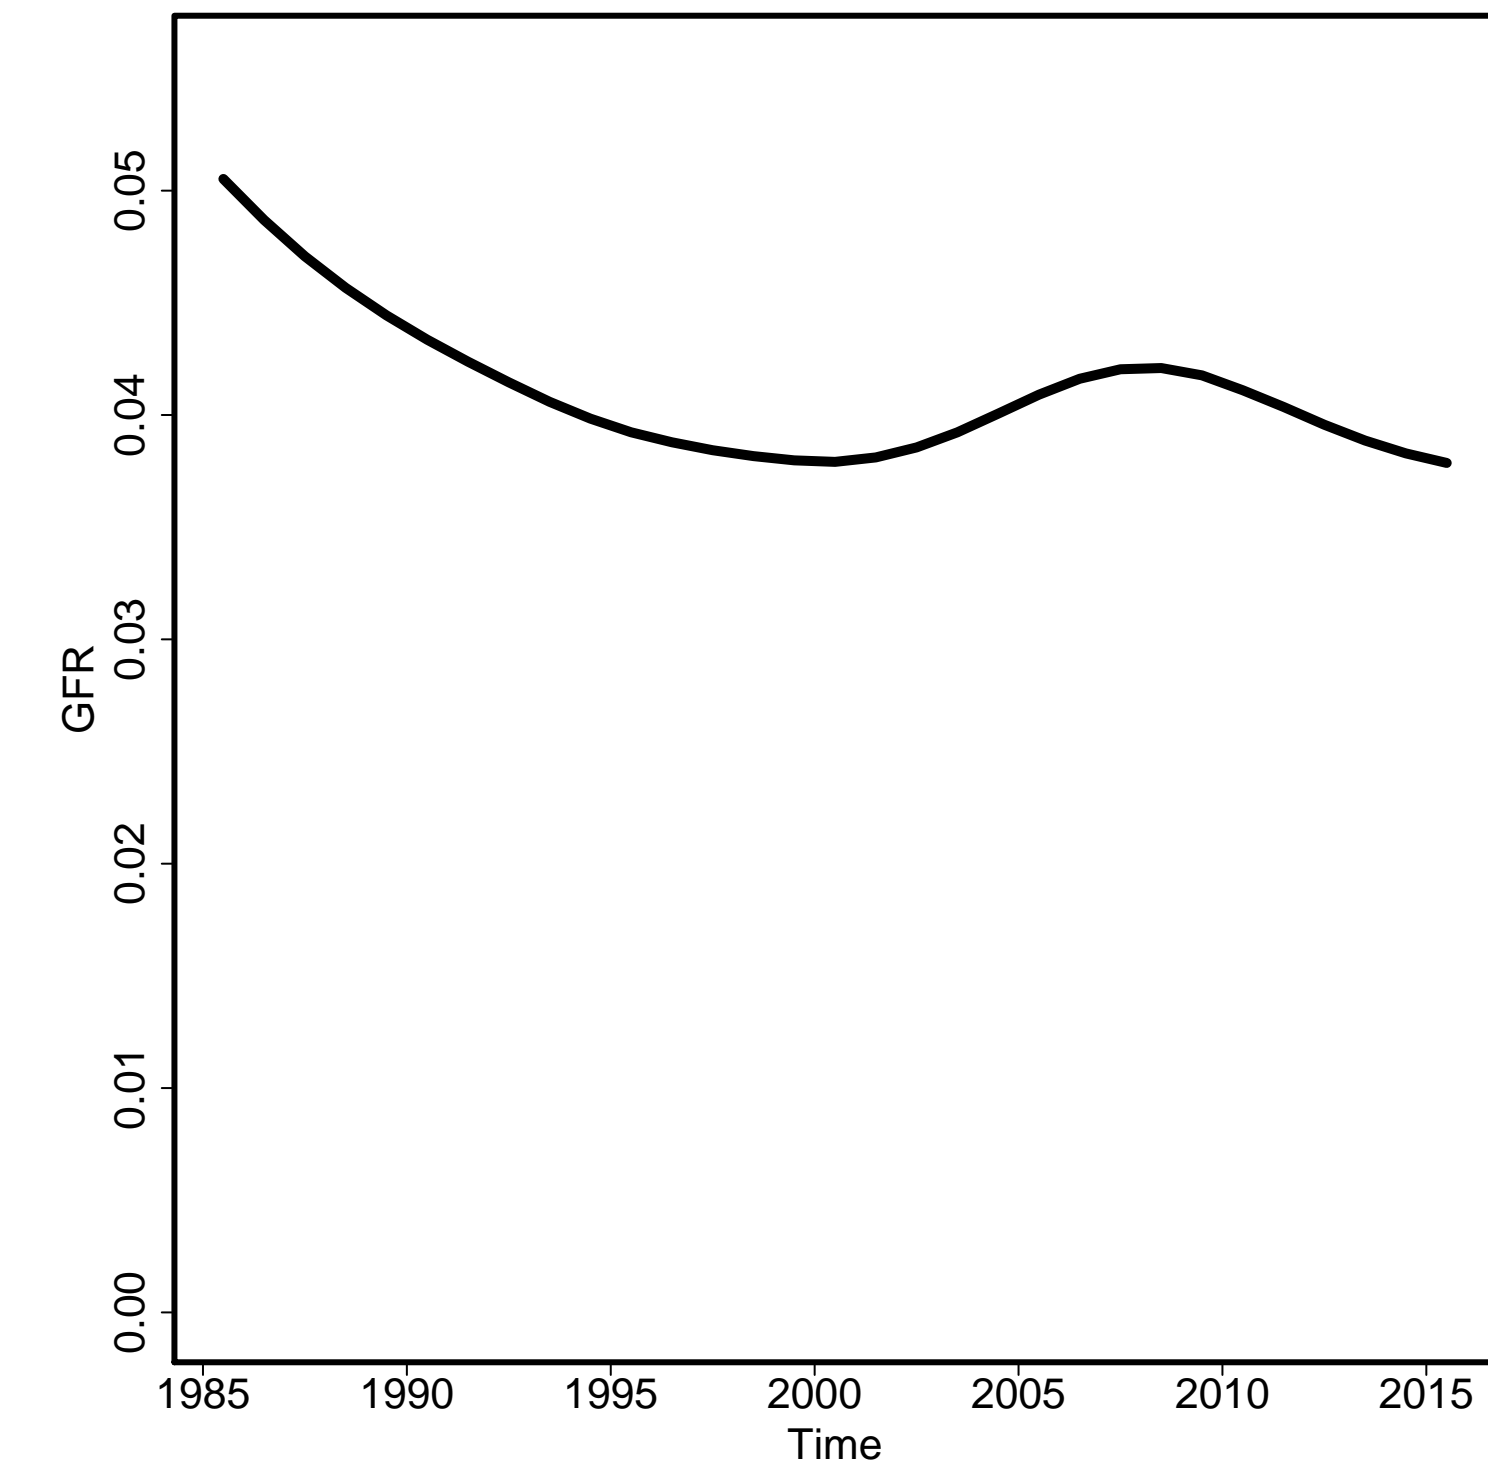

Skilled Attendance to Birth

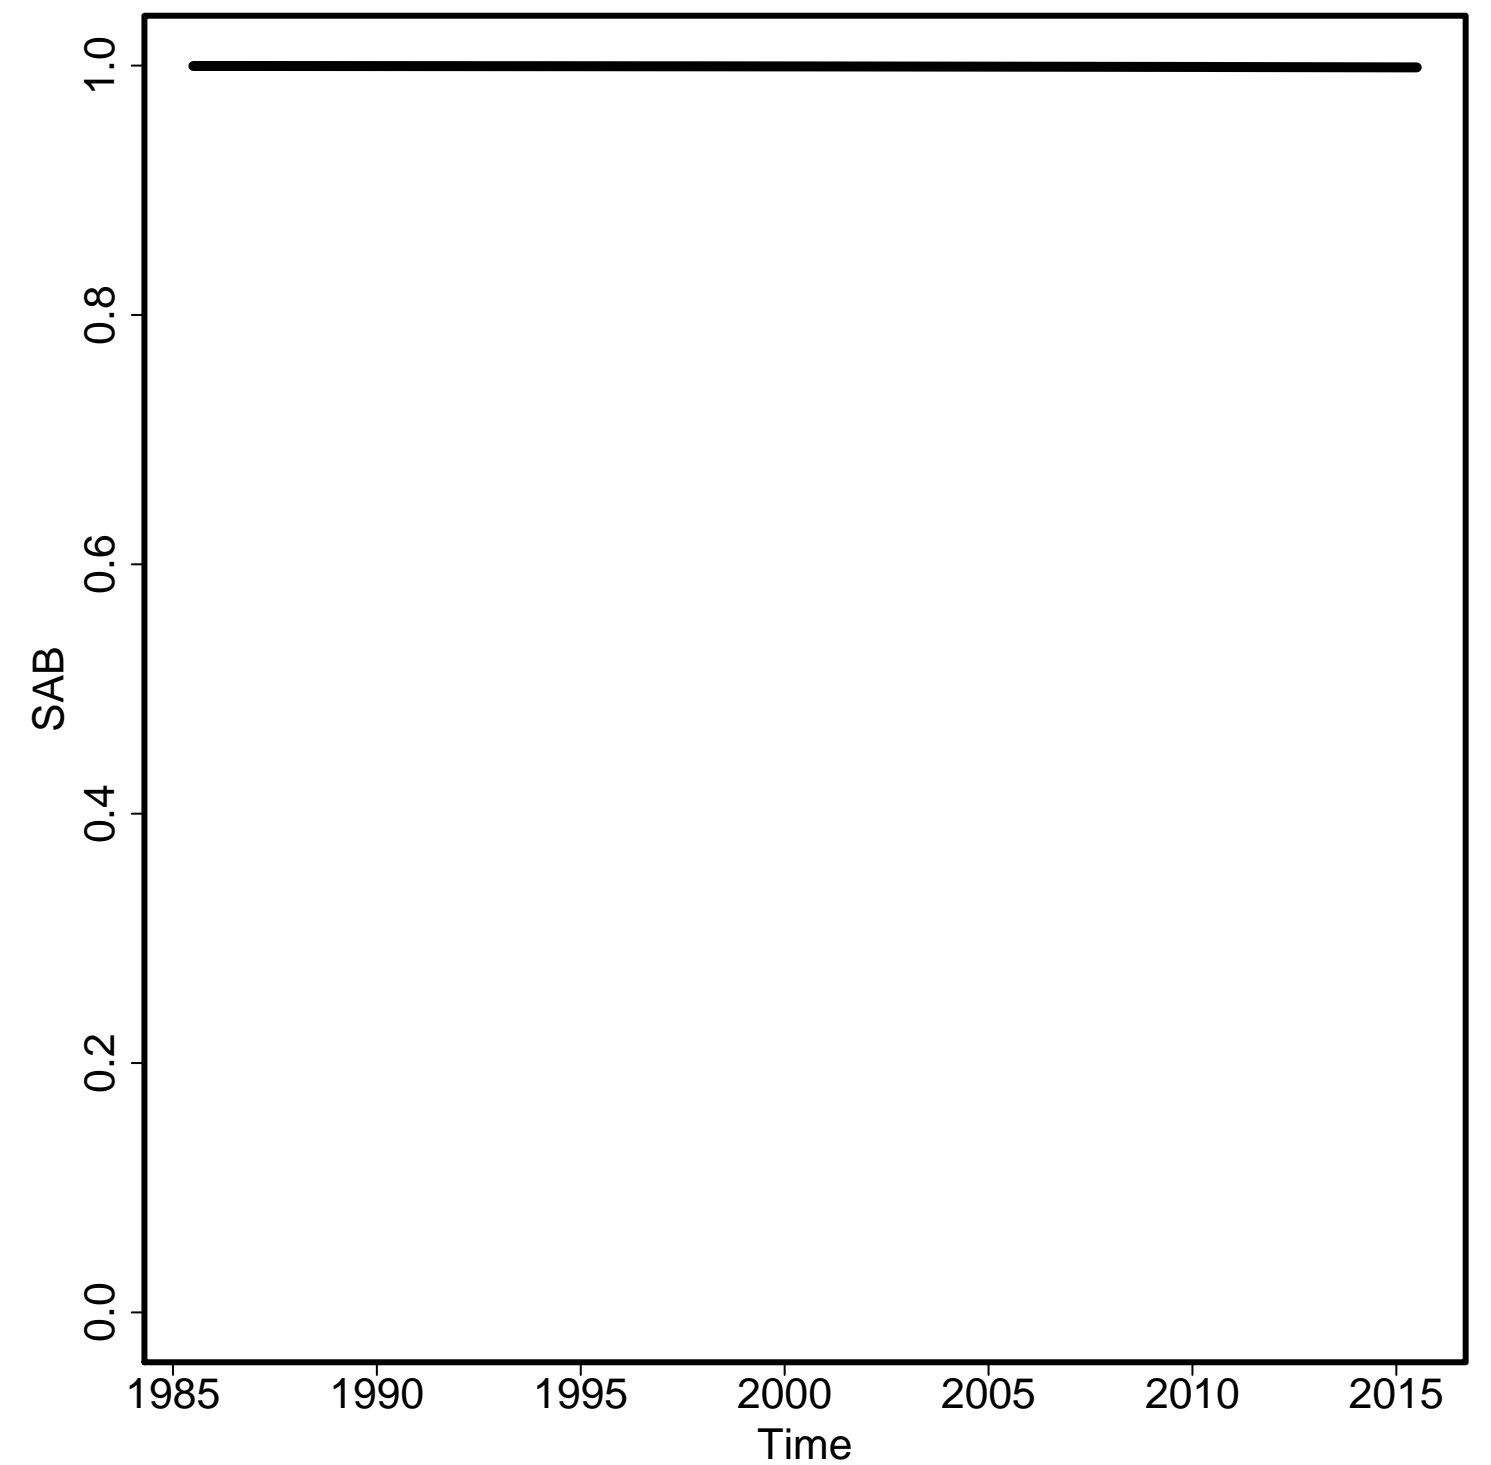

Envelope/Births

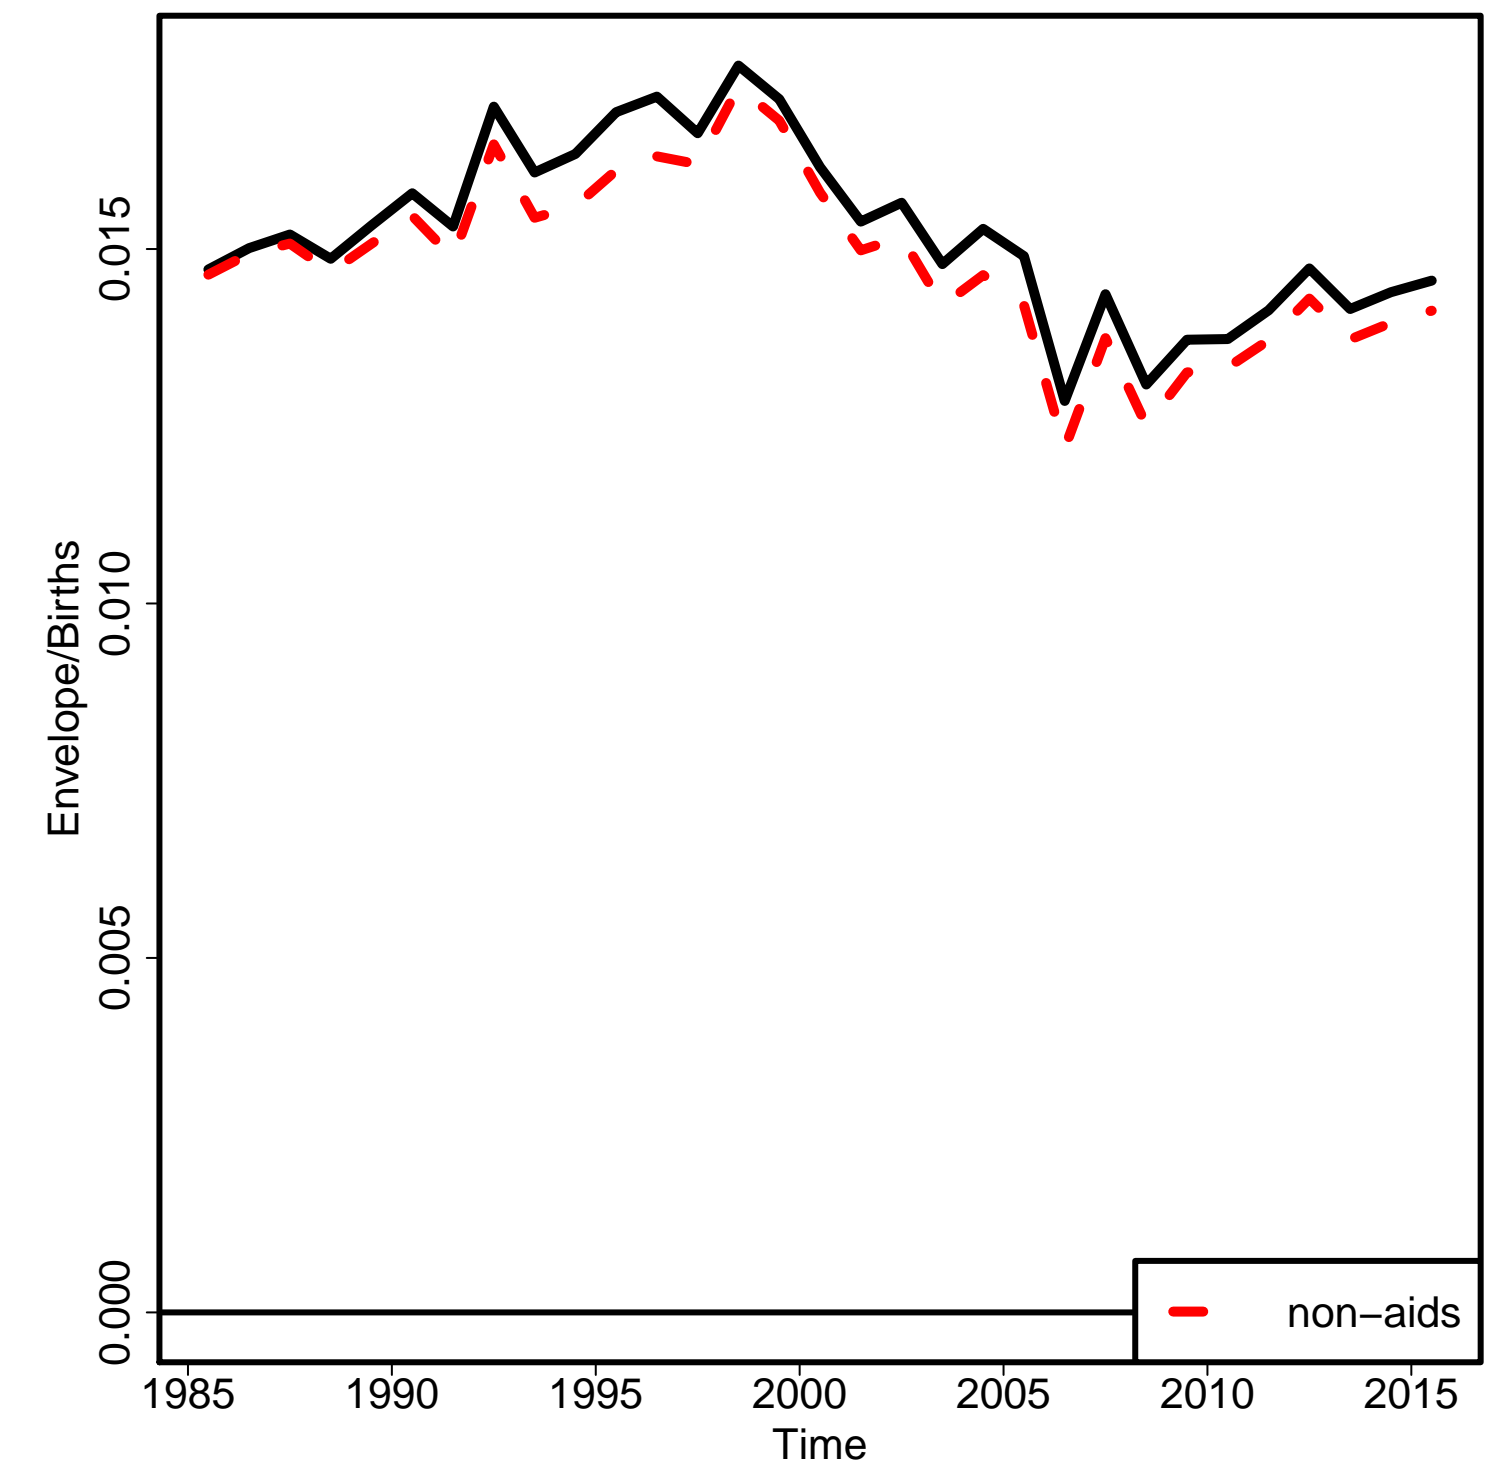

NONAIDSMMR

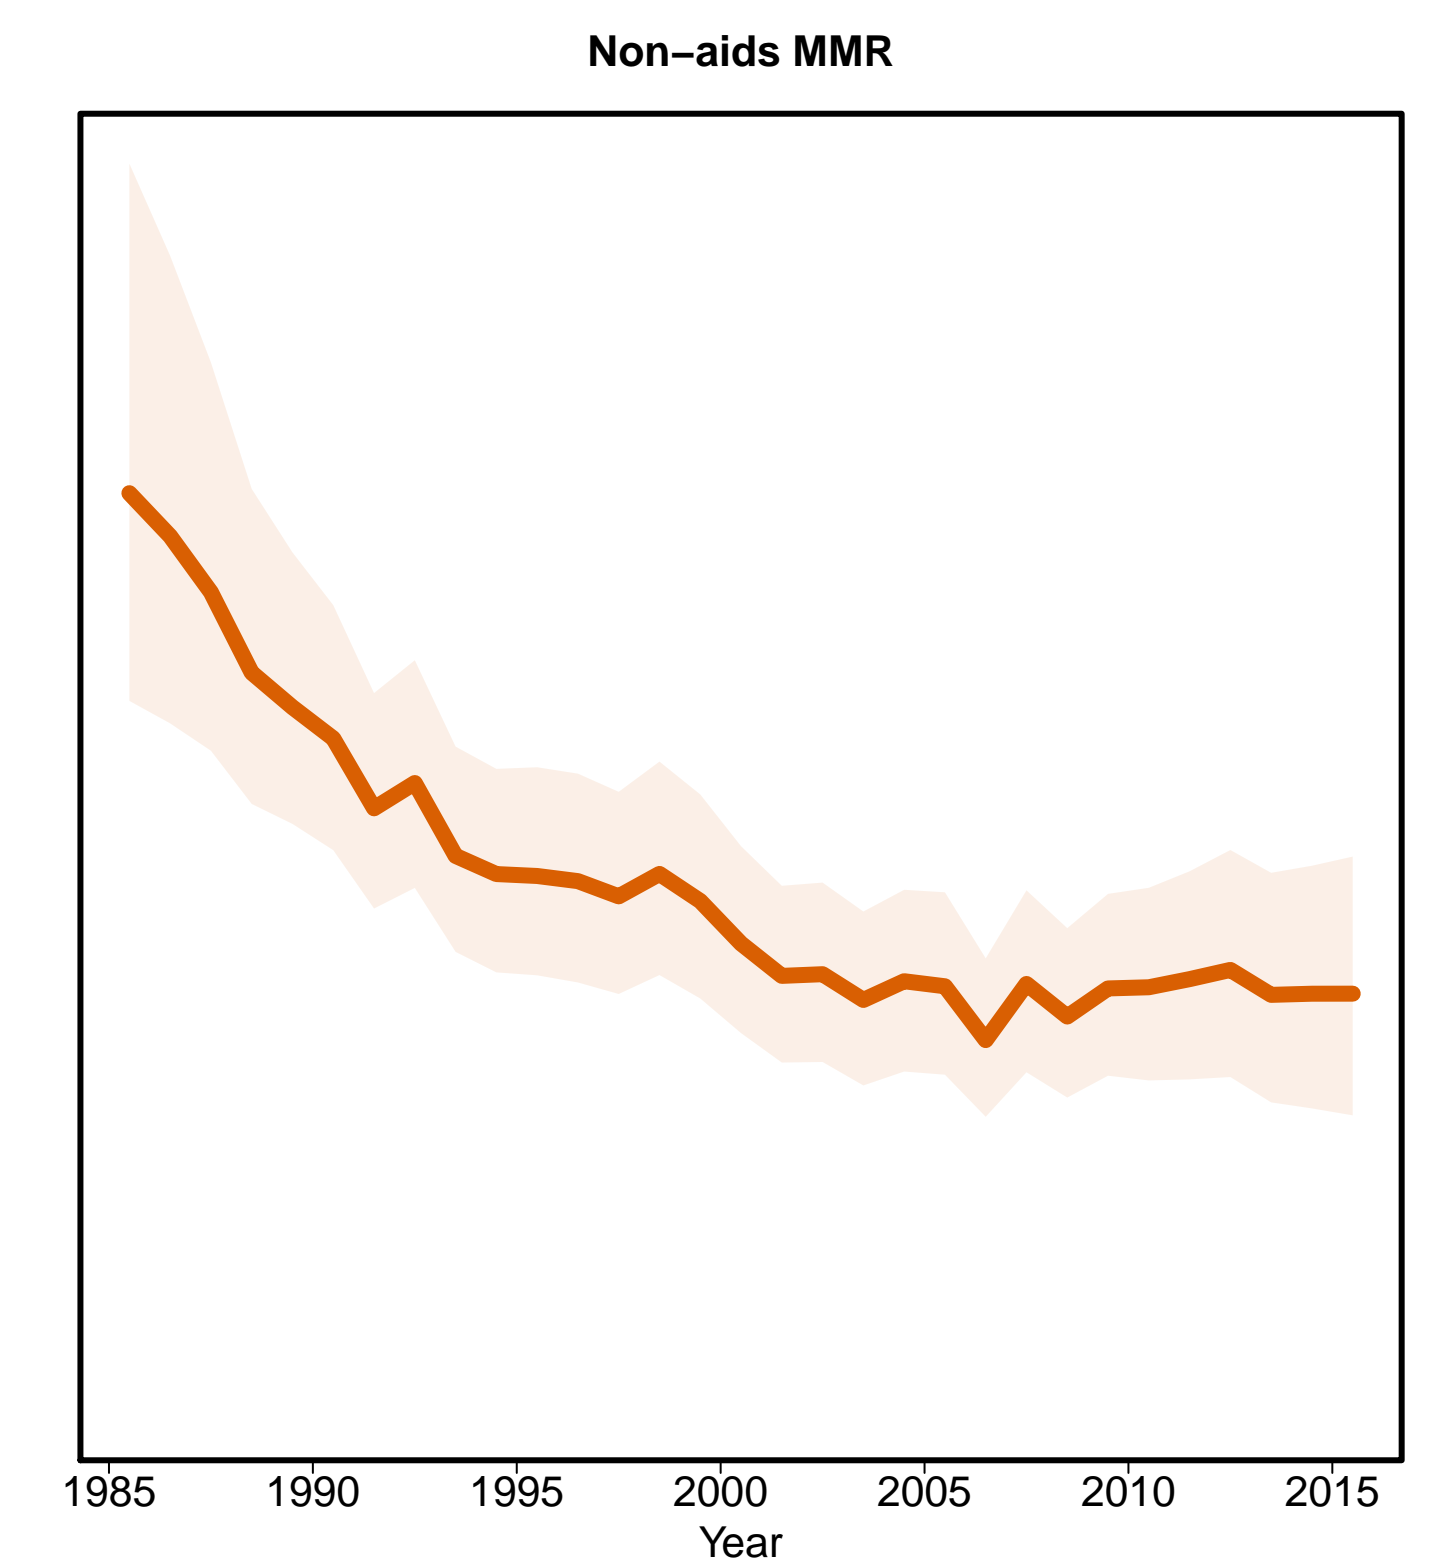

Aids MMR

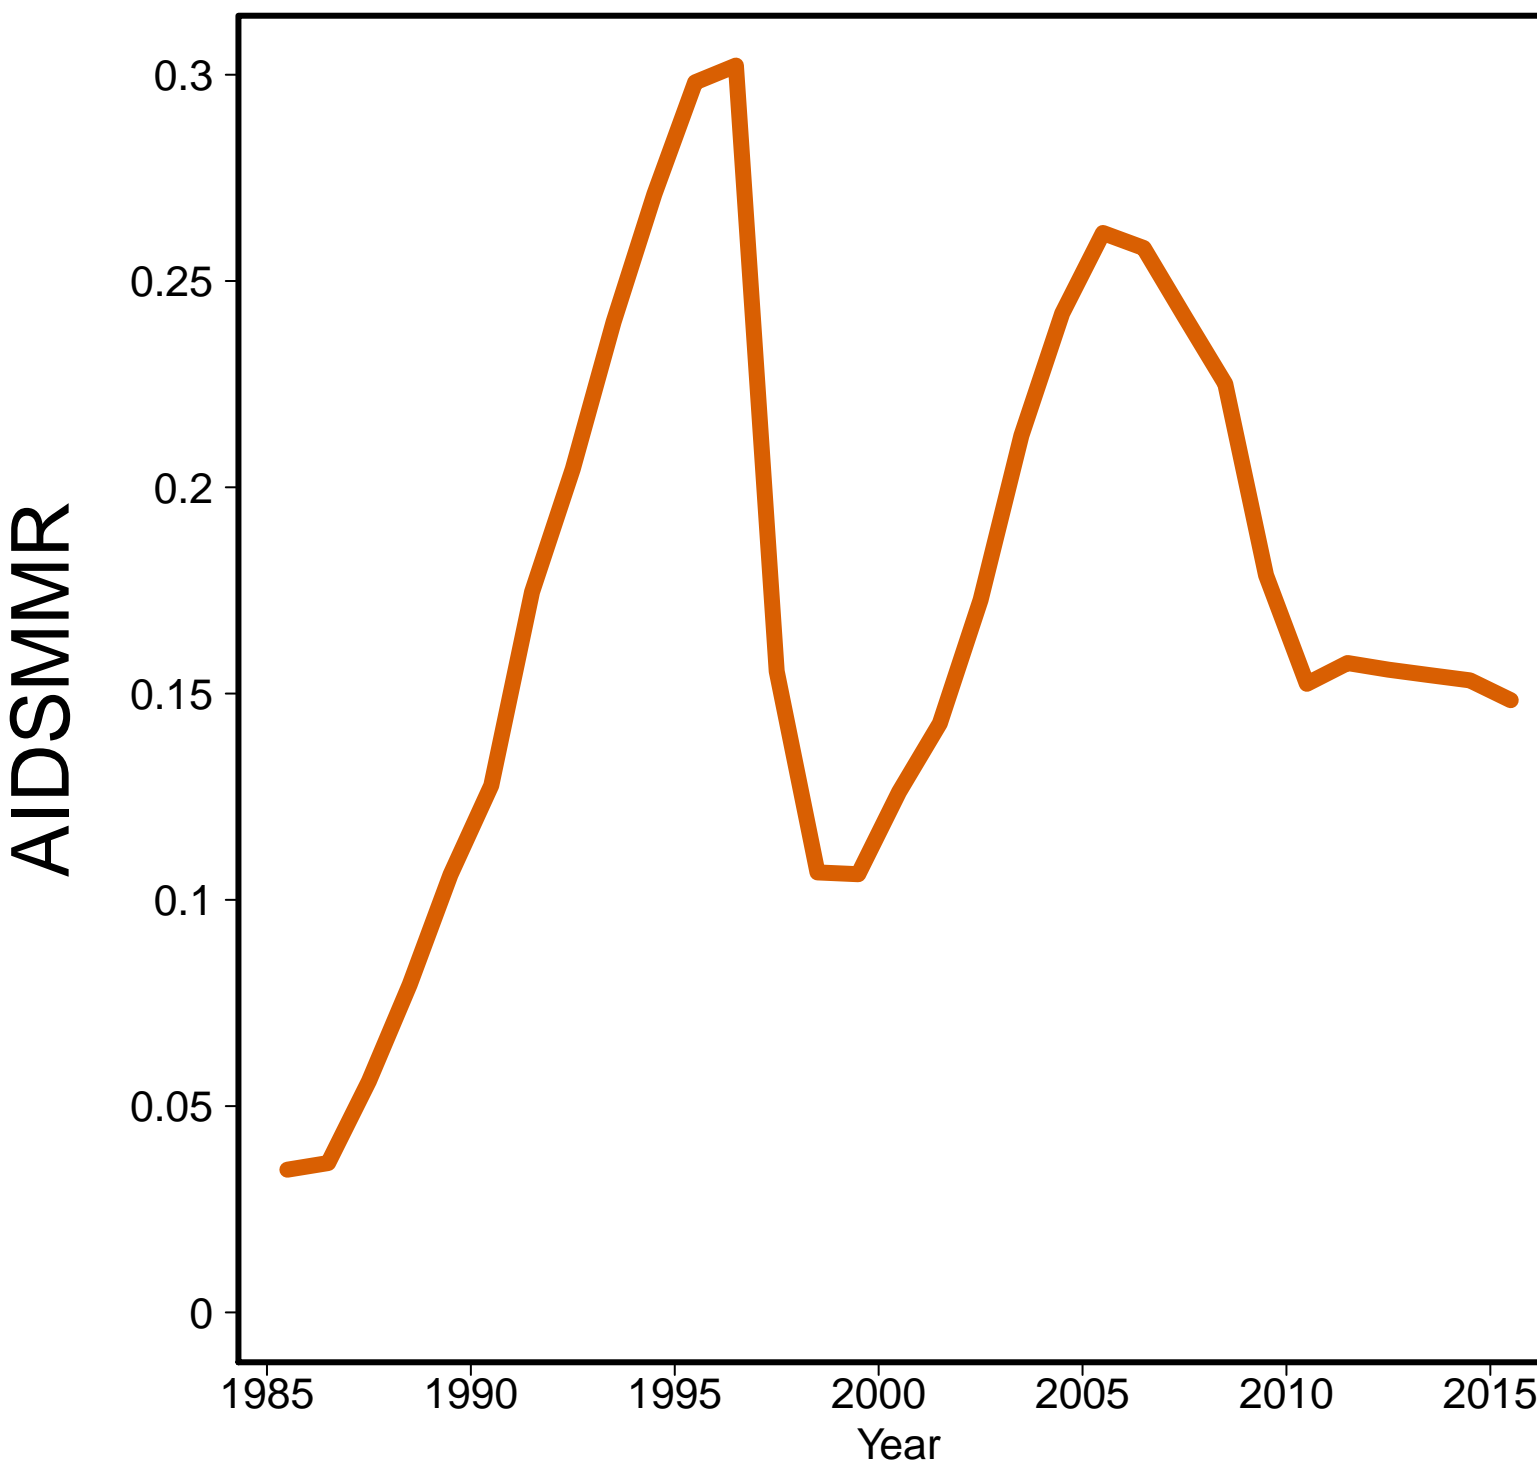



Grenada [GRD]  
(Caribbean)

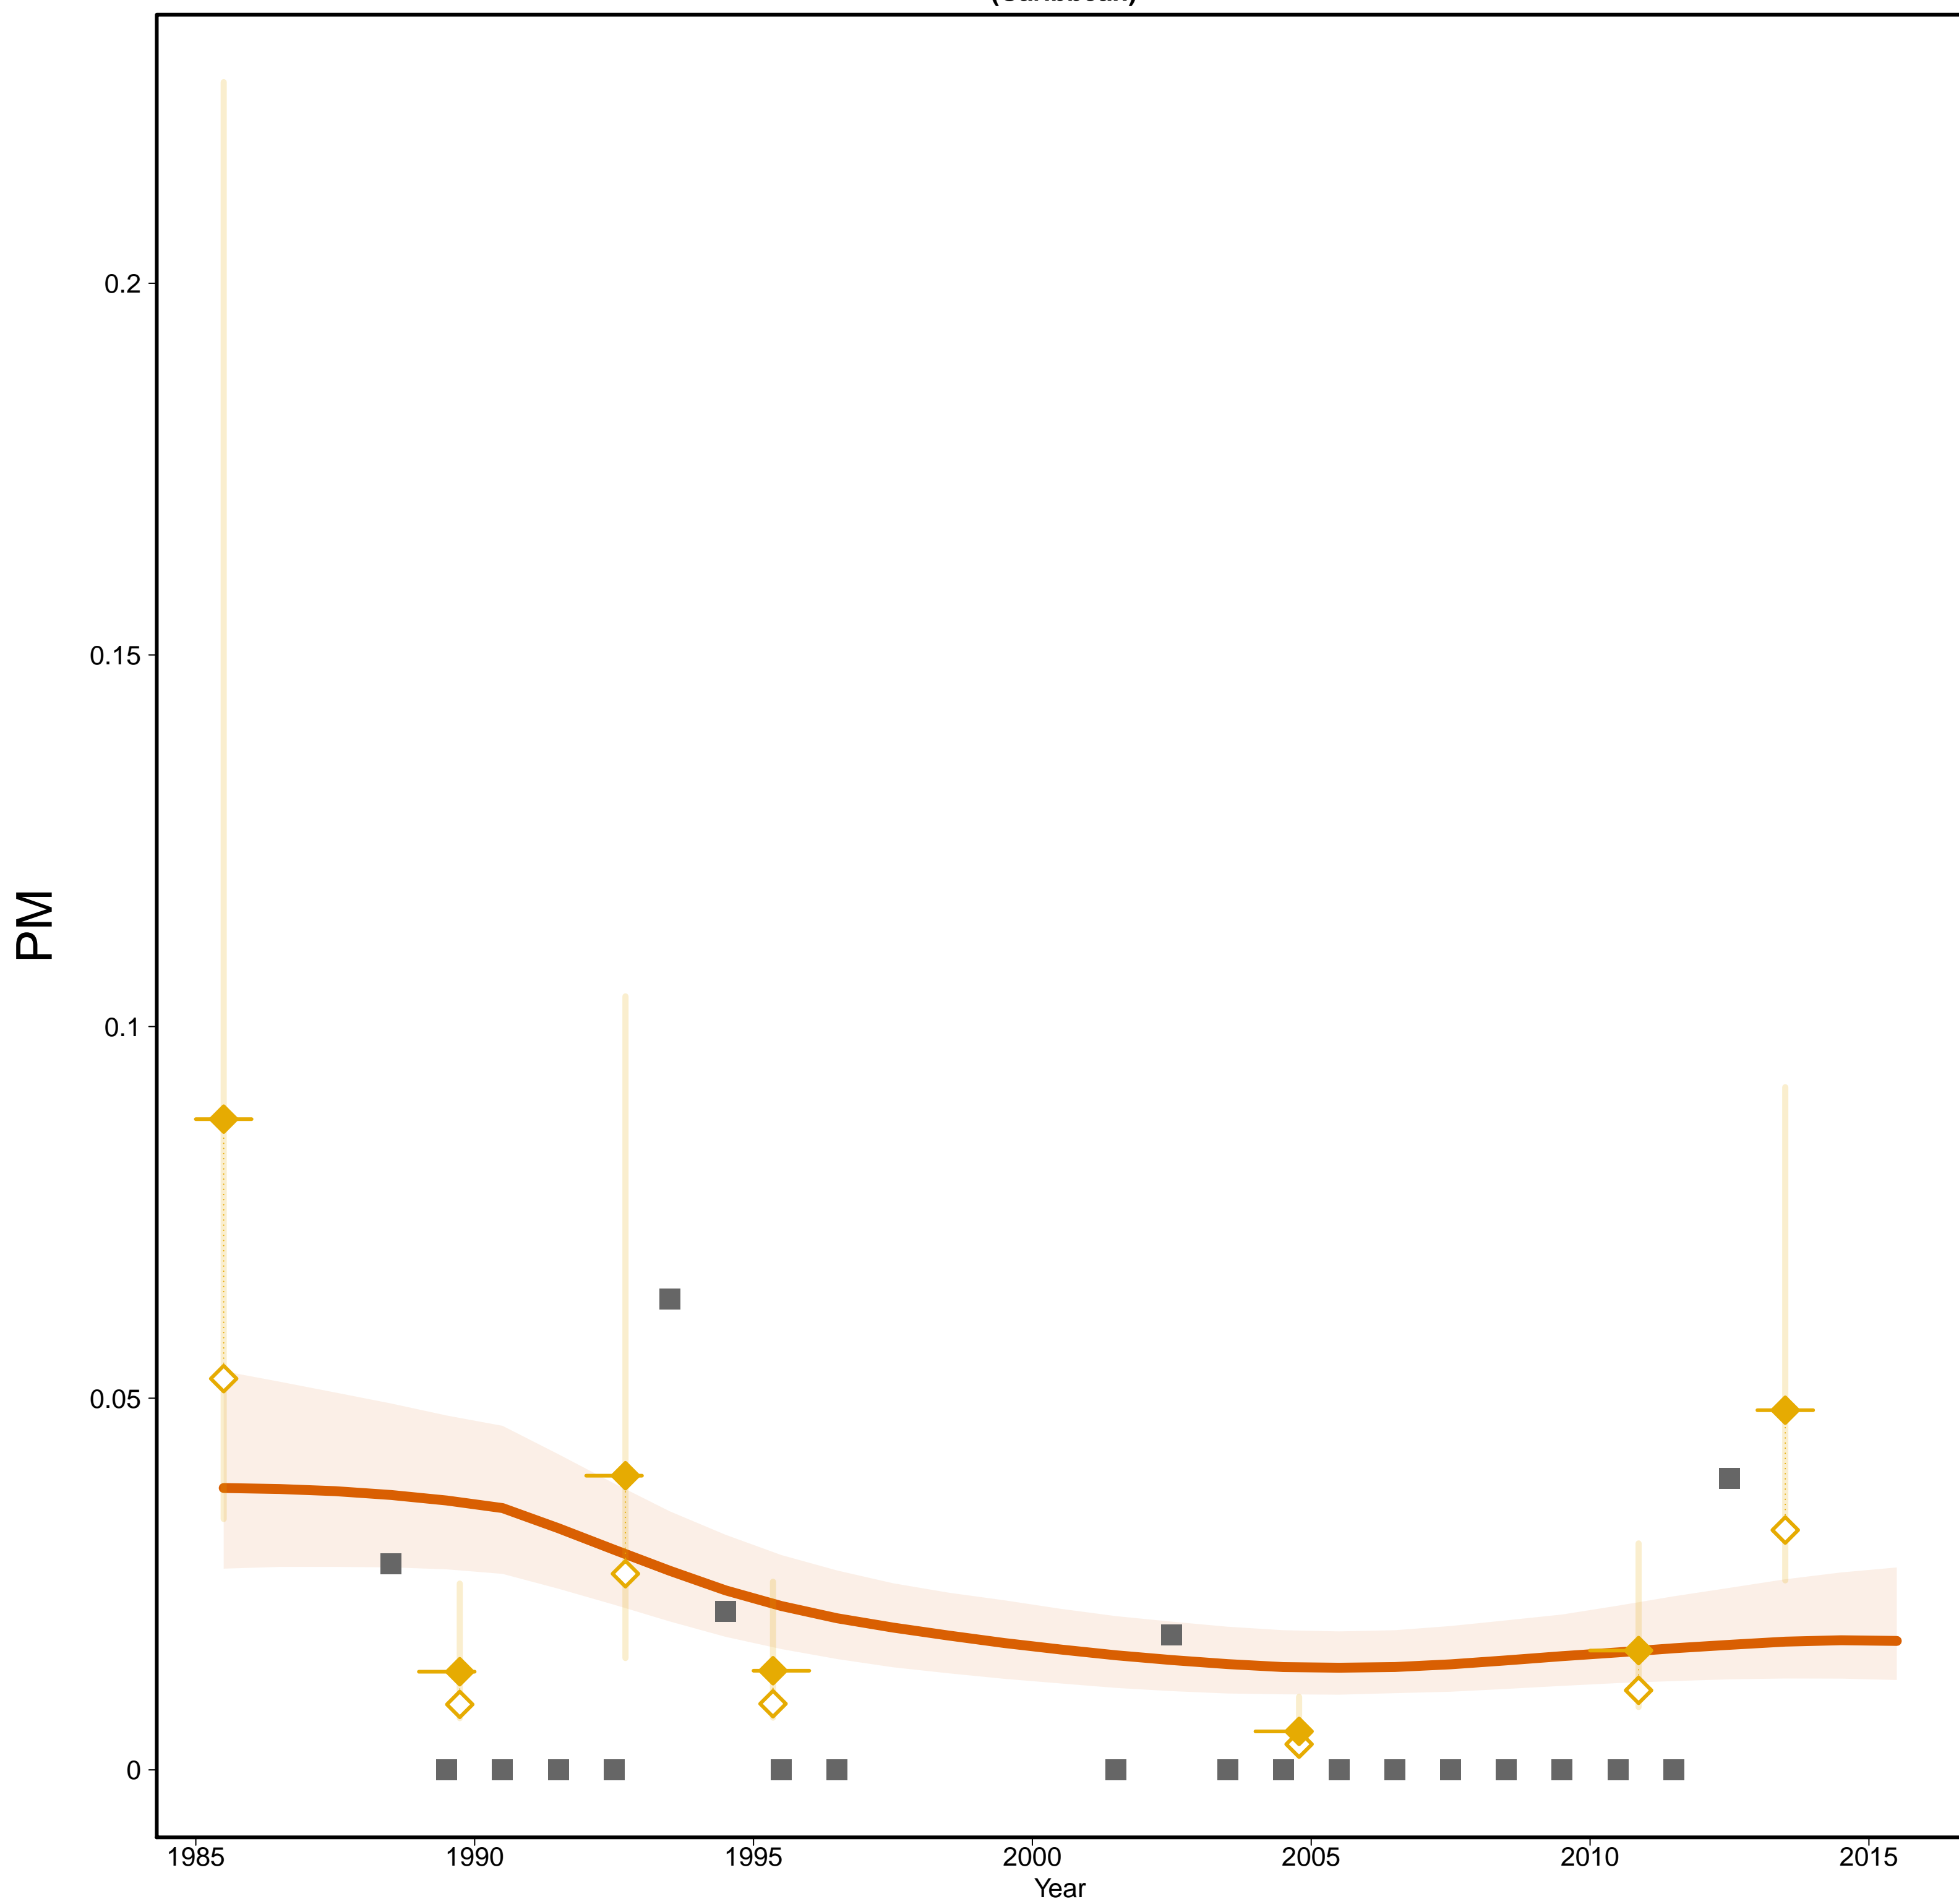

Grenada [GRD]  
(Caribbean)

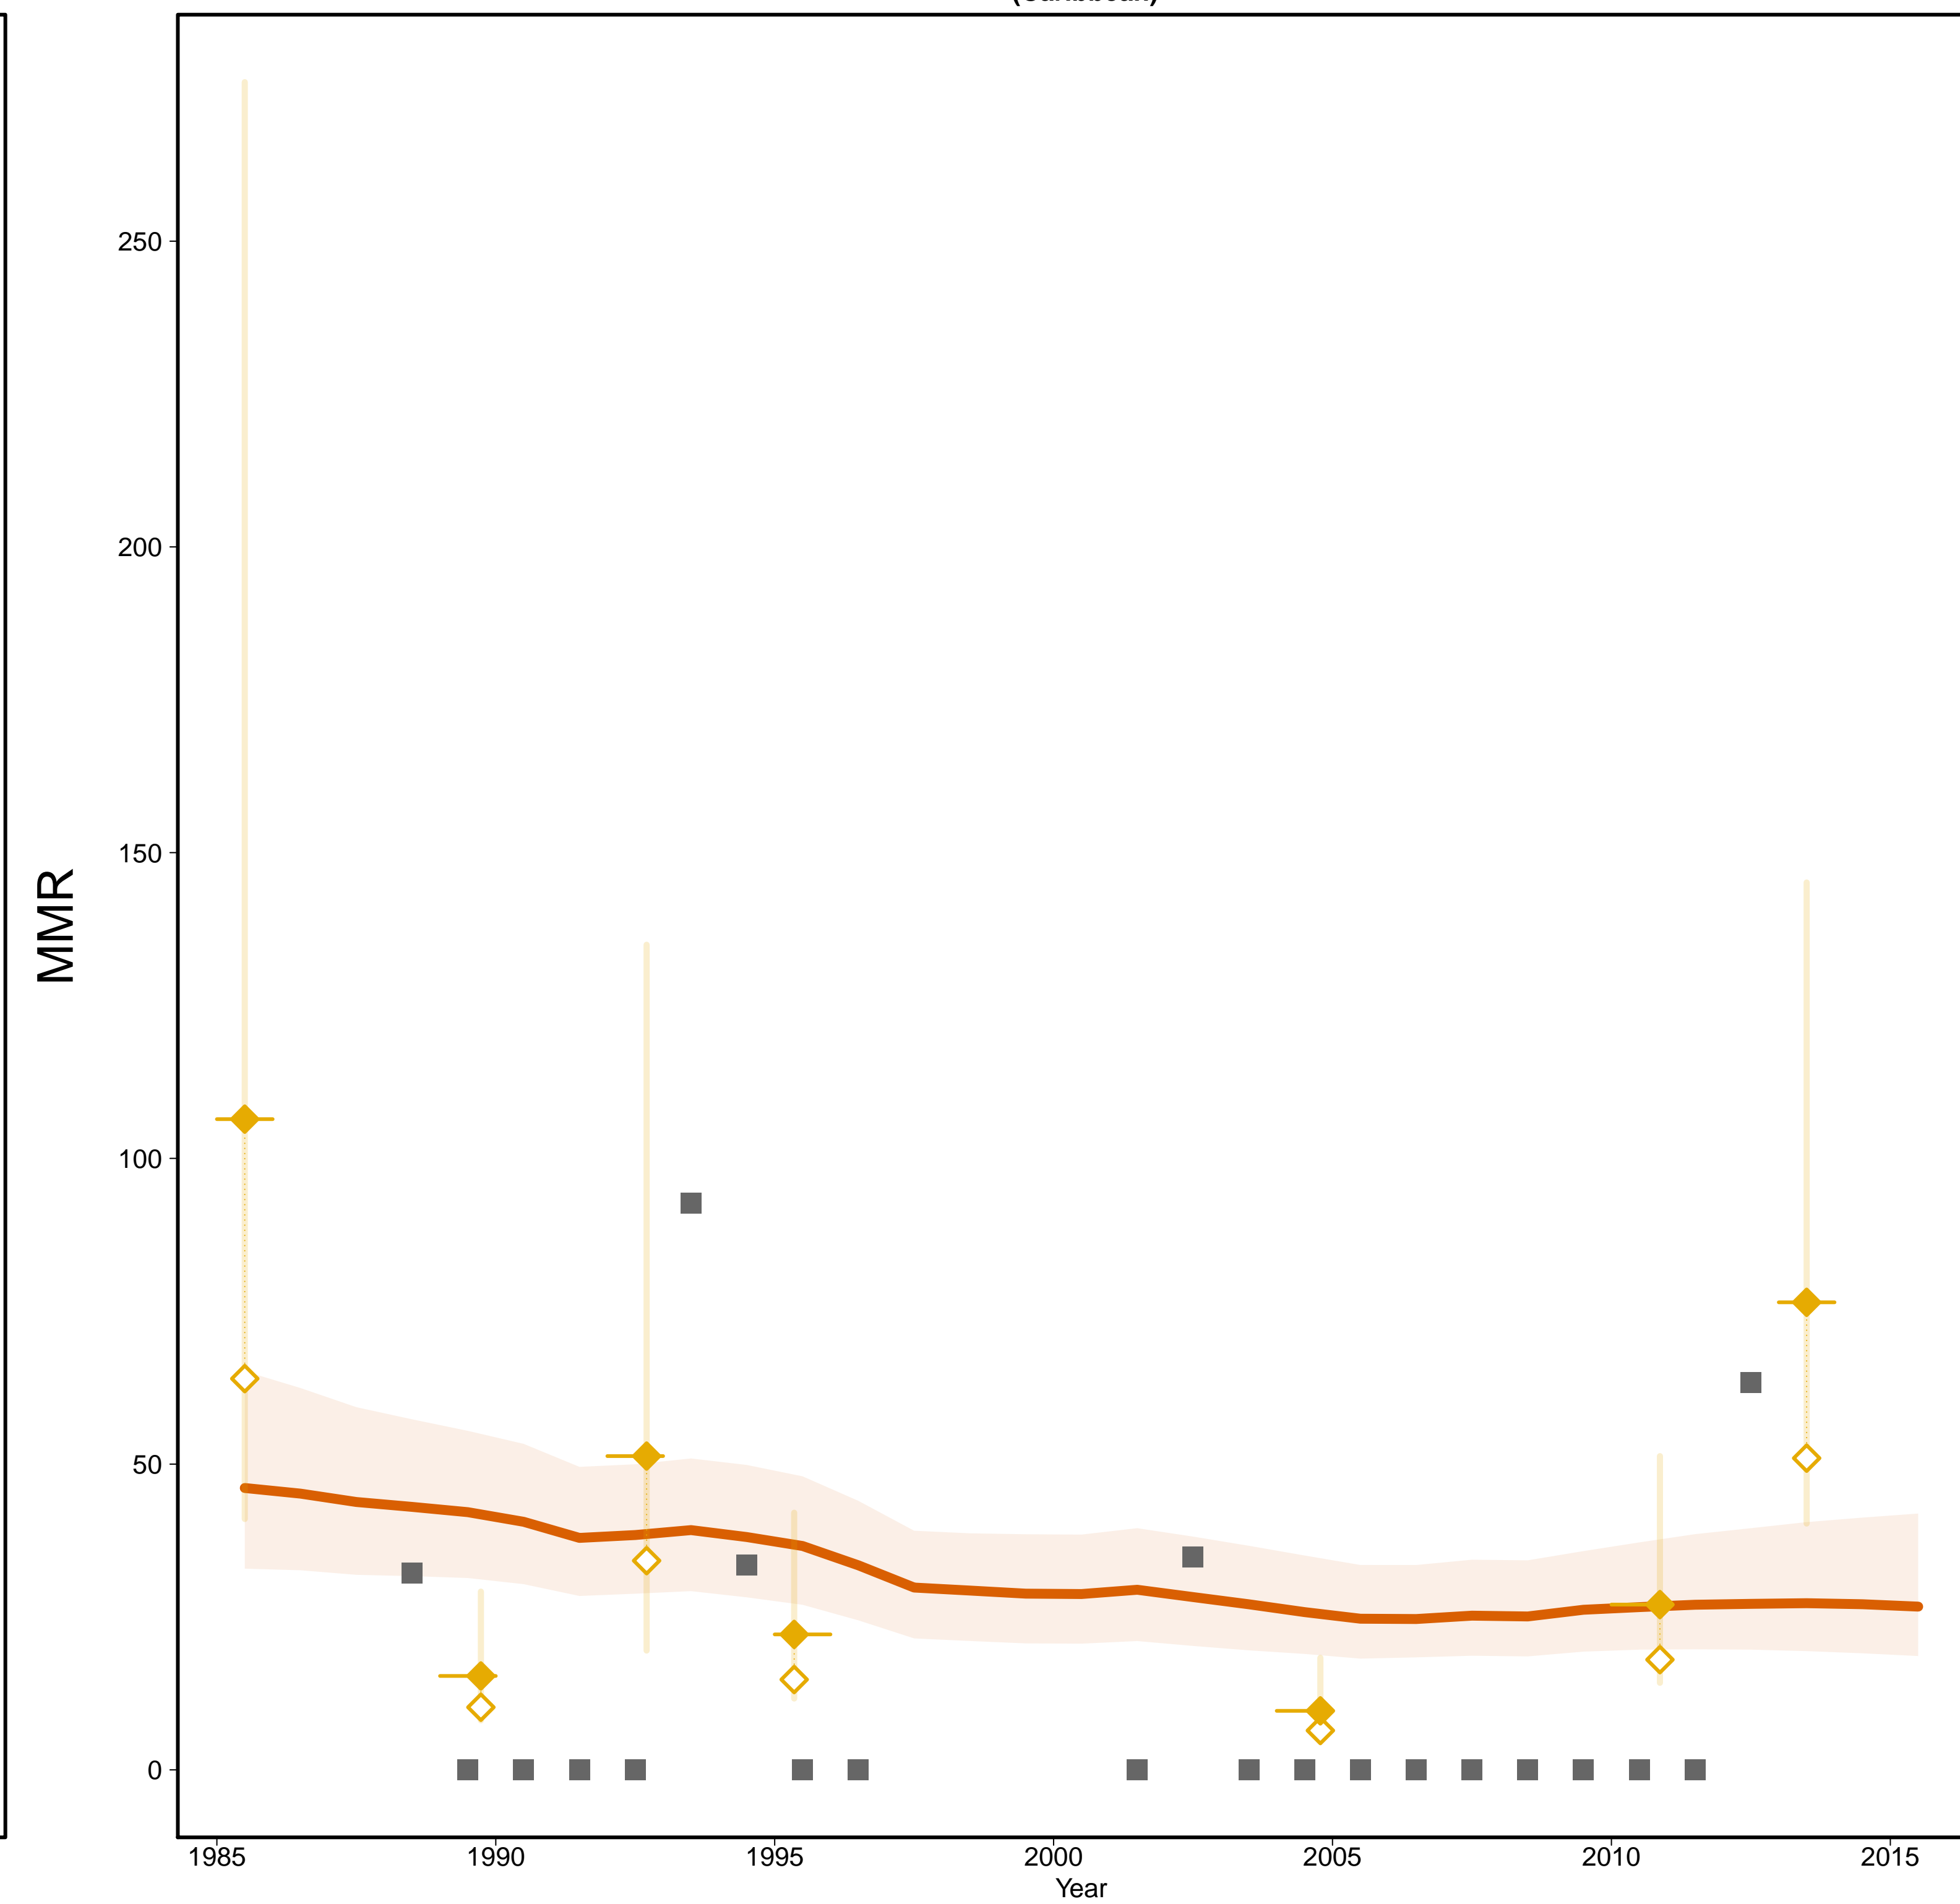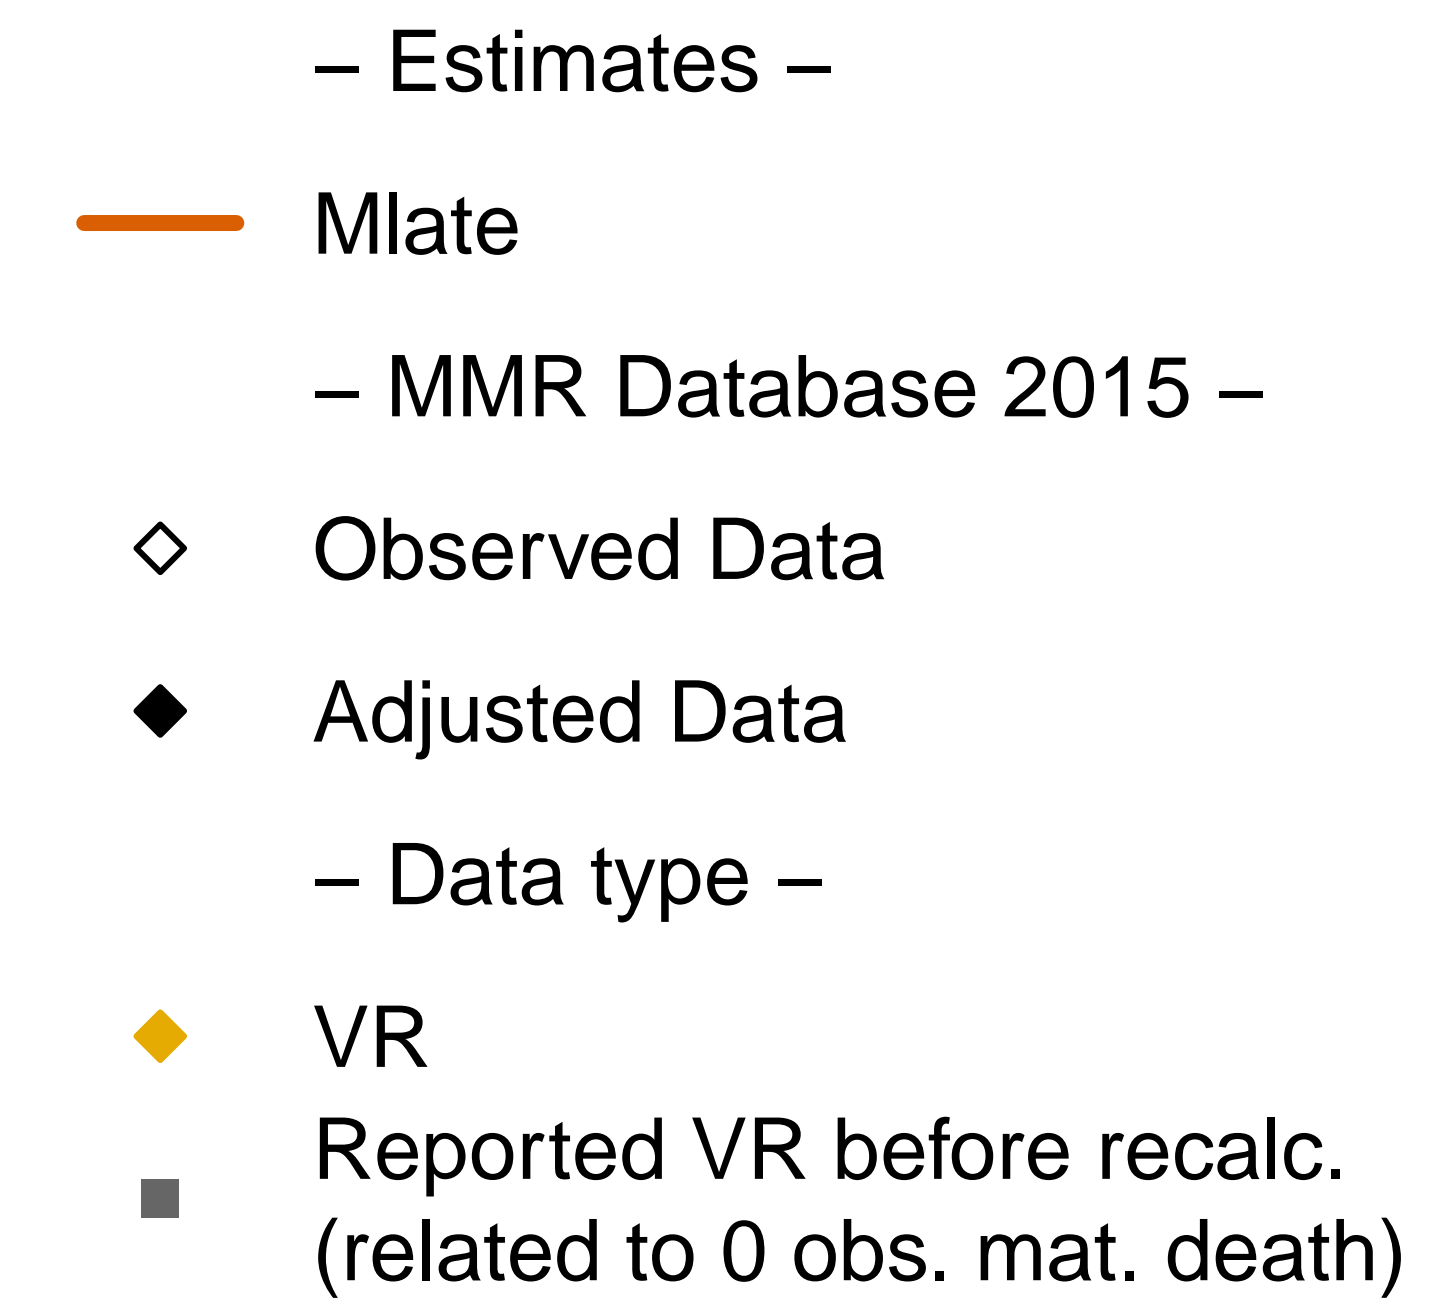

Gross Domestic Product

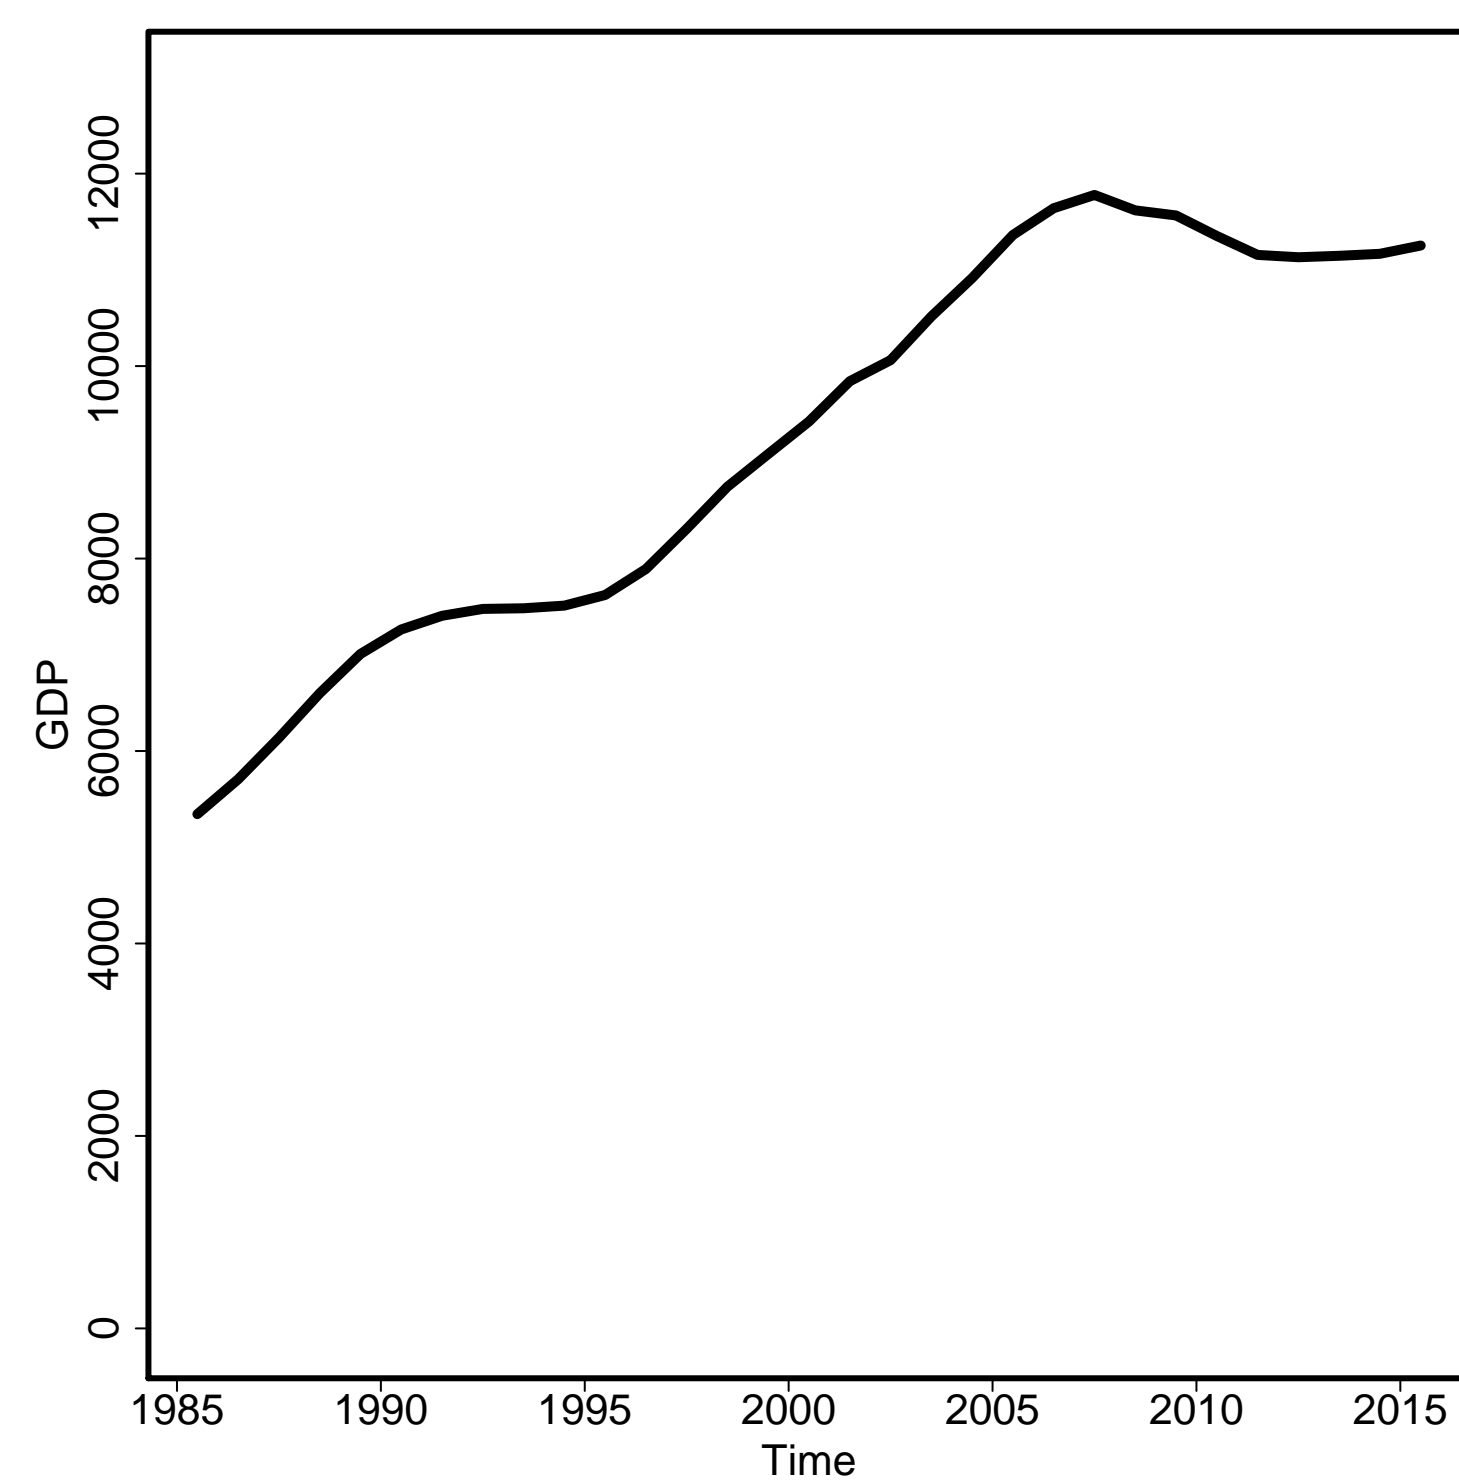

General Fertility Rate

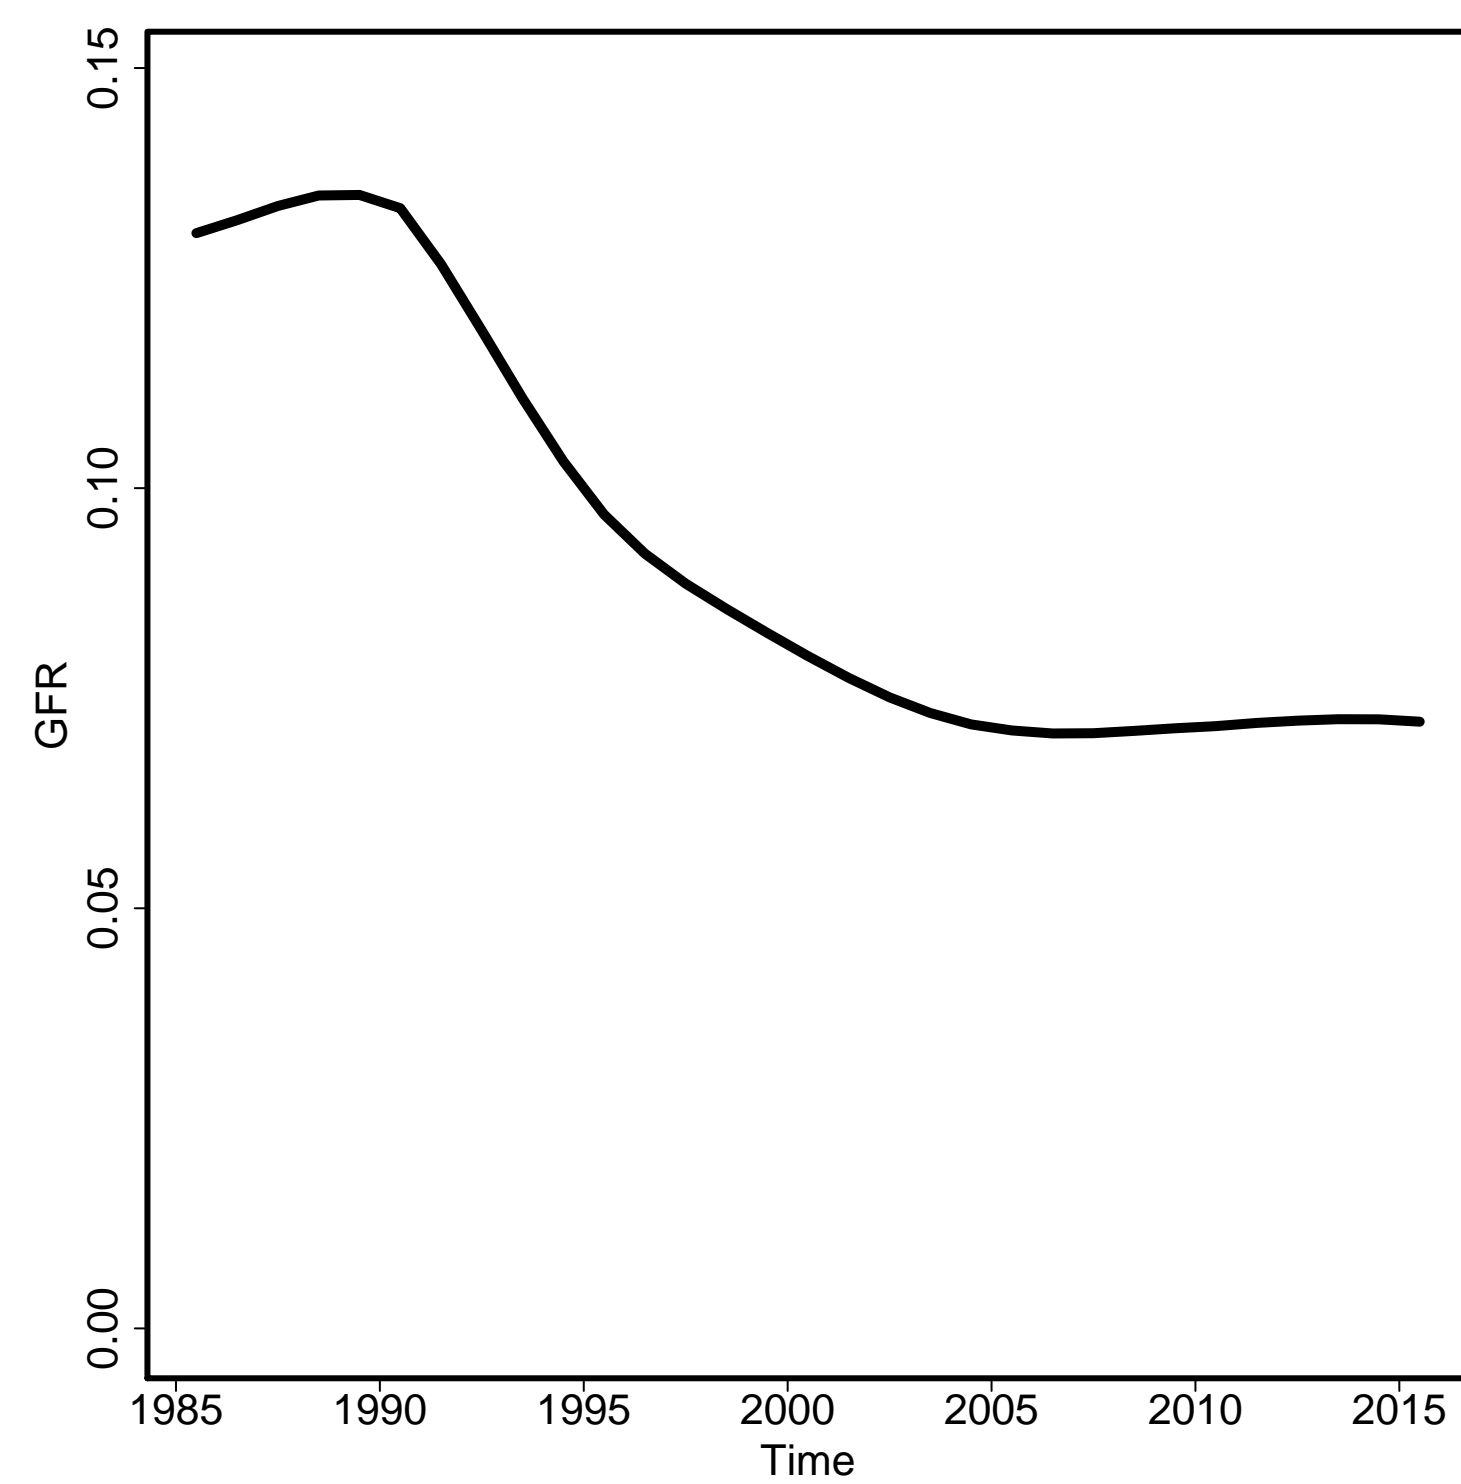

Skilled Attendance to Birth

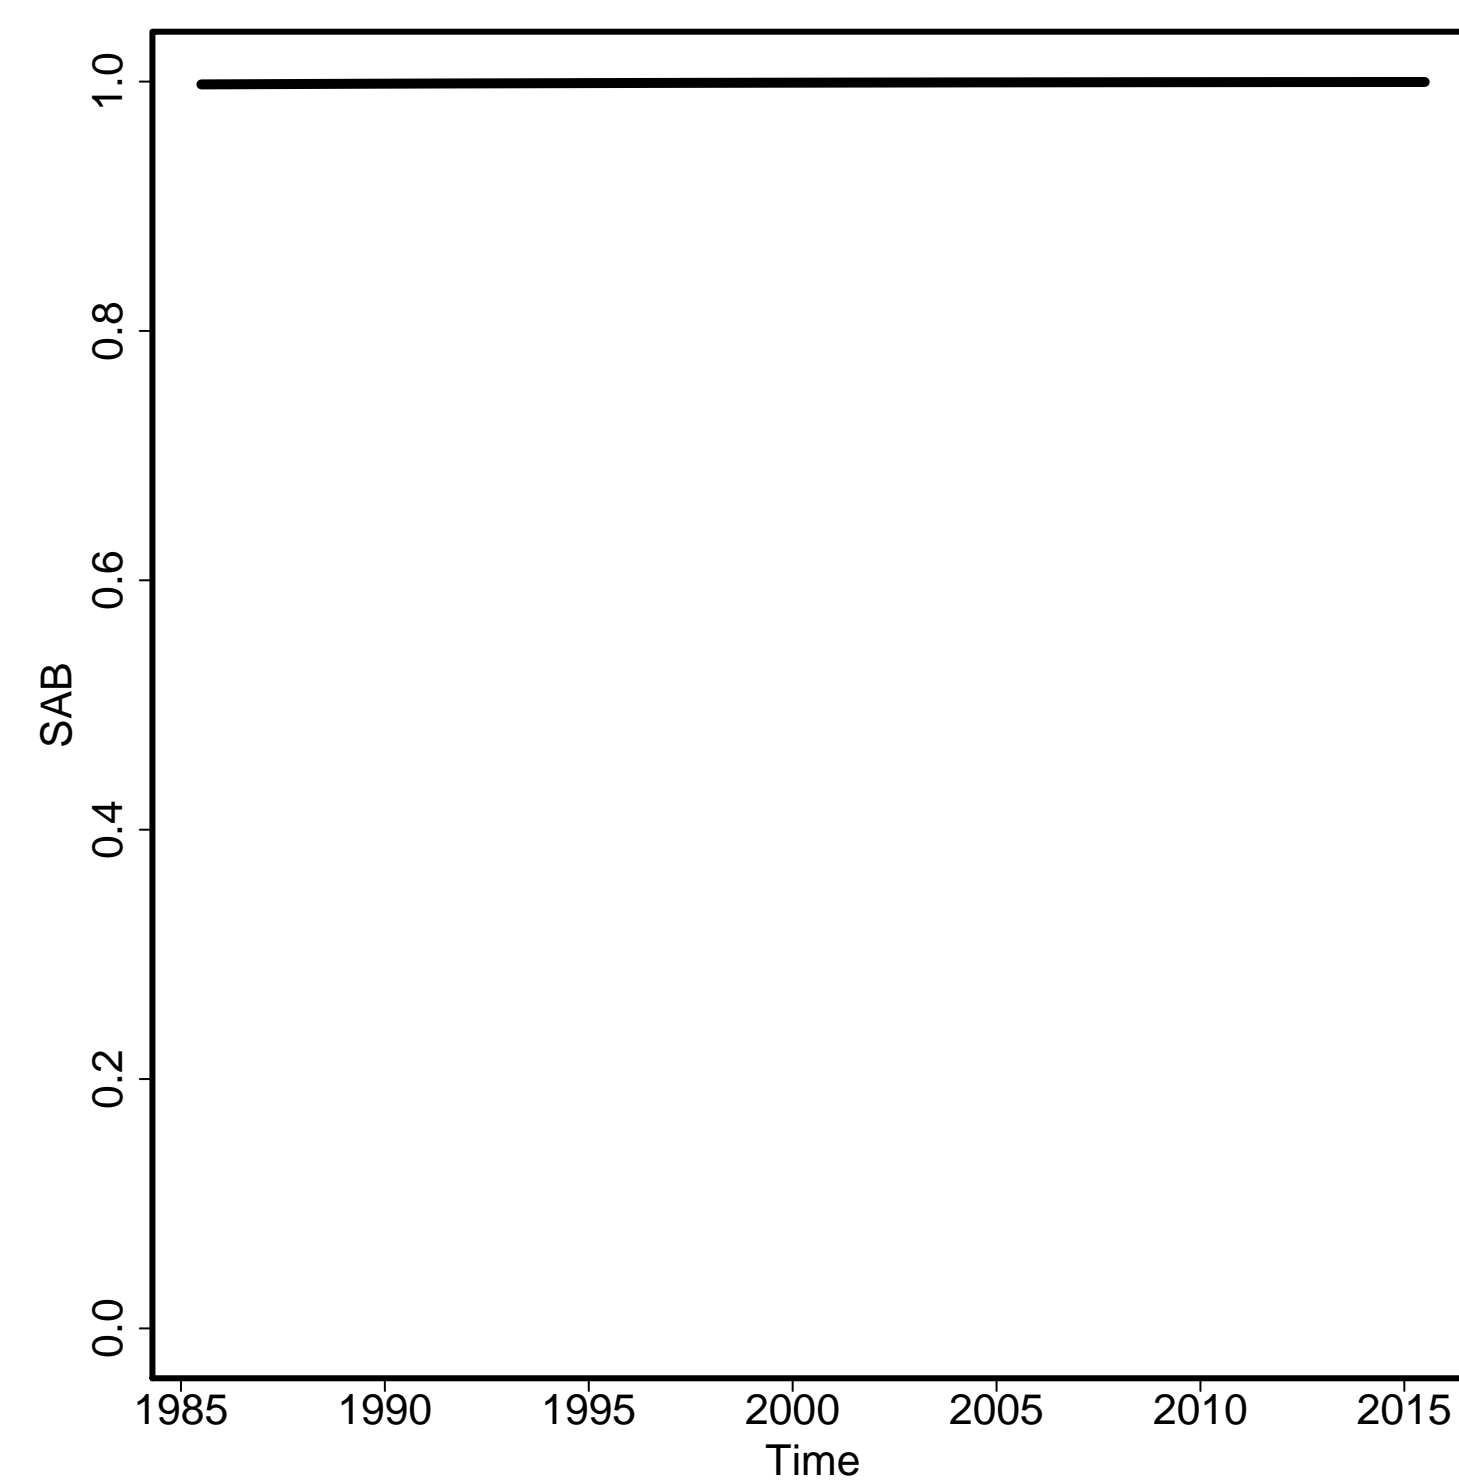

Envelope/Births

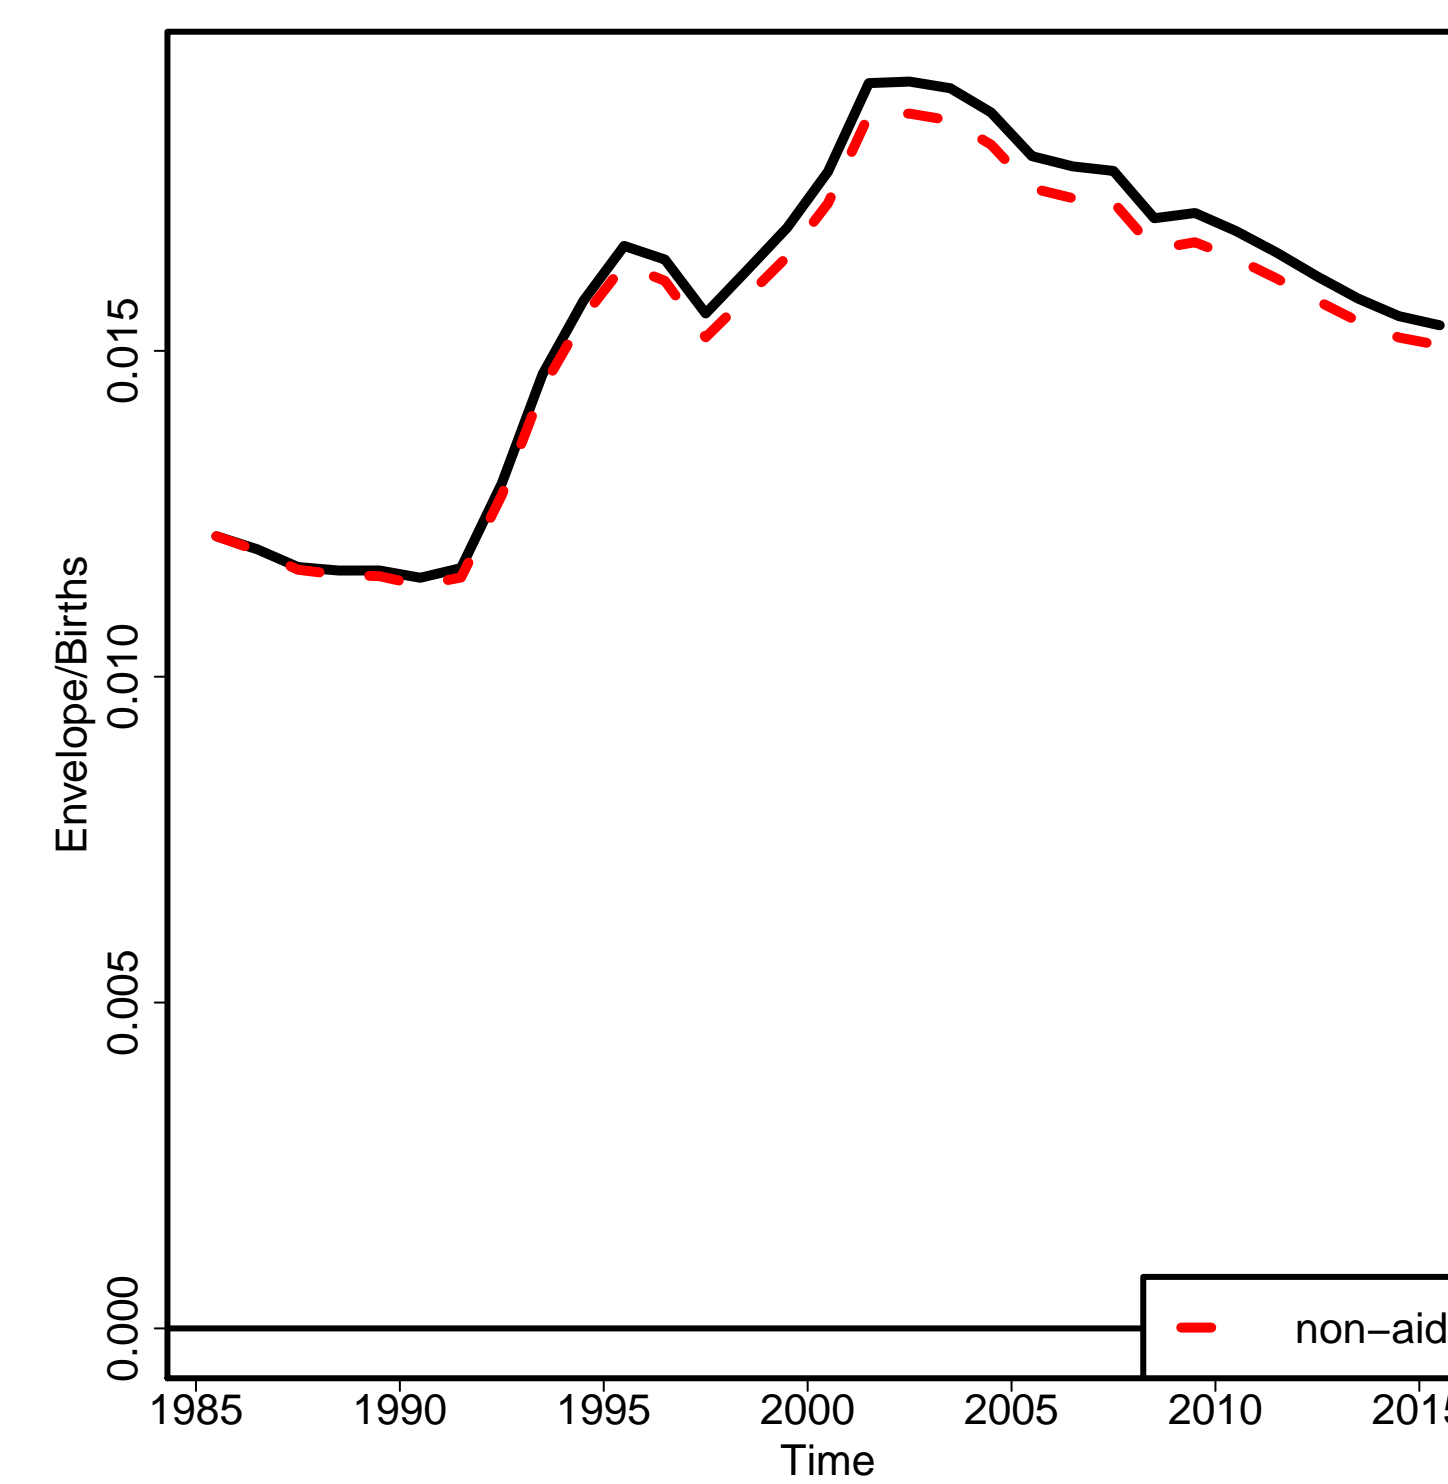

Non-aids MMR

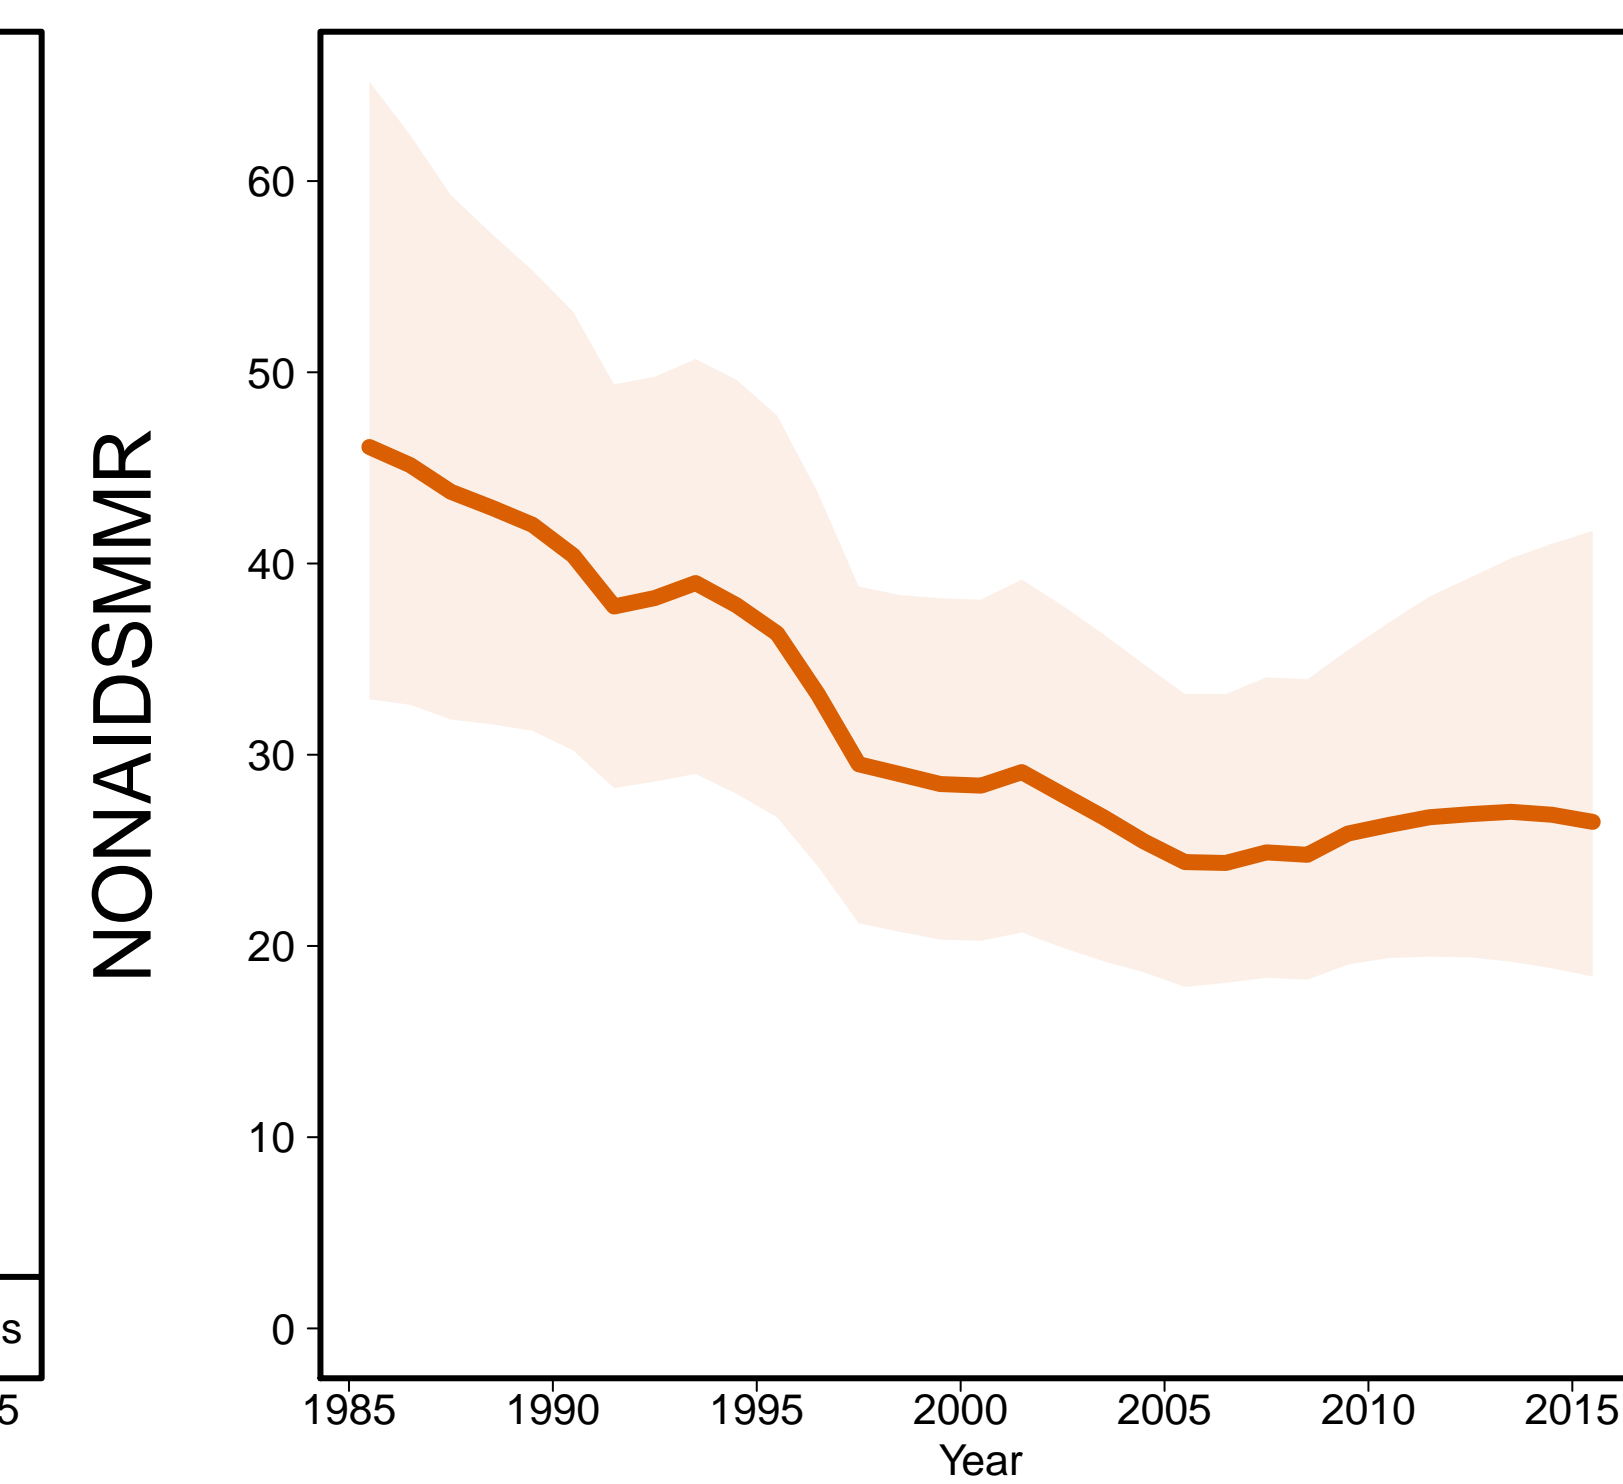

Aids MMR

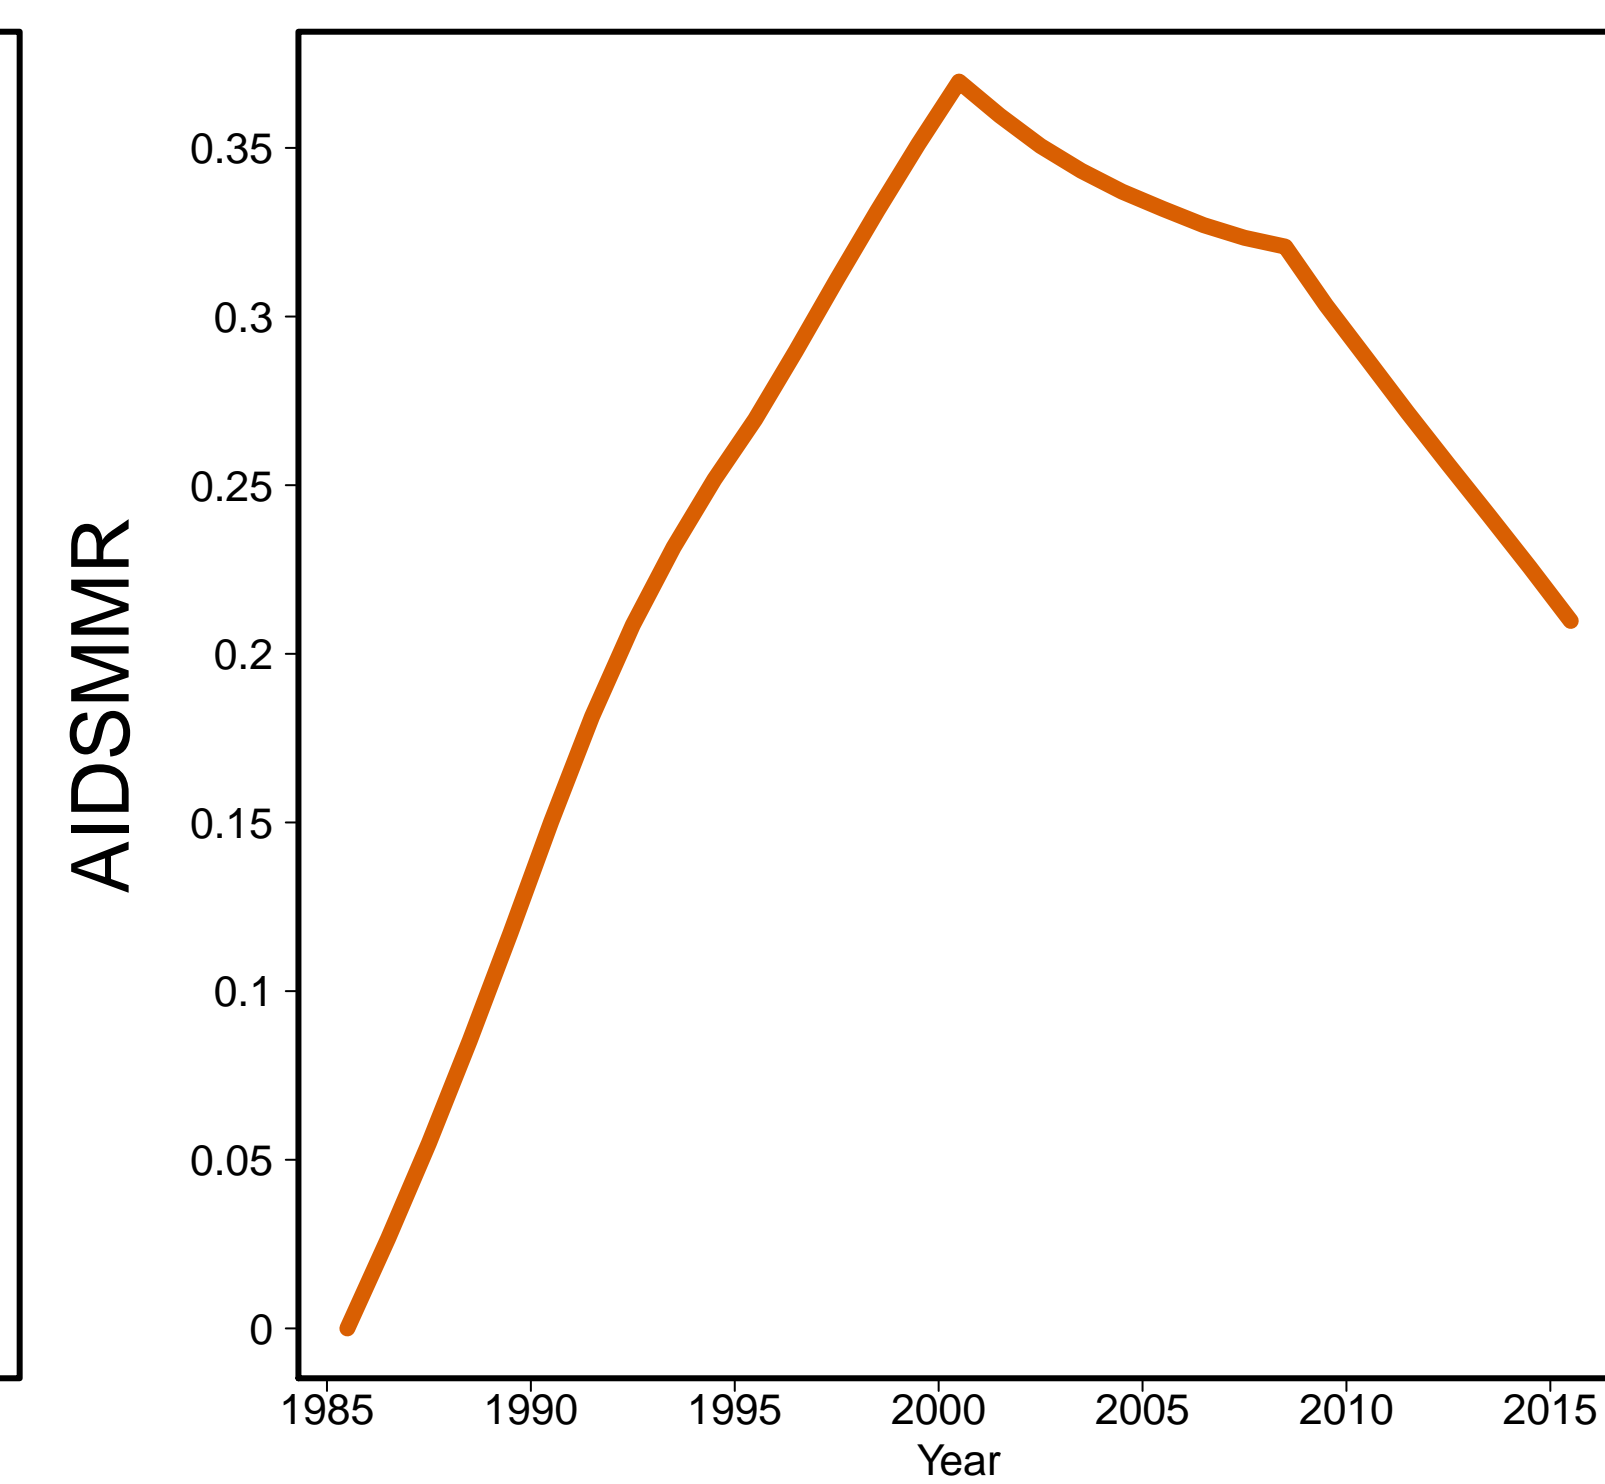

Guatemala [GTM]  
(Central America)

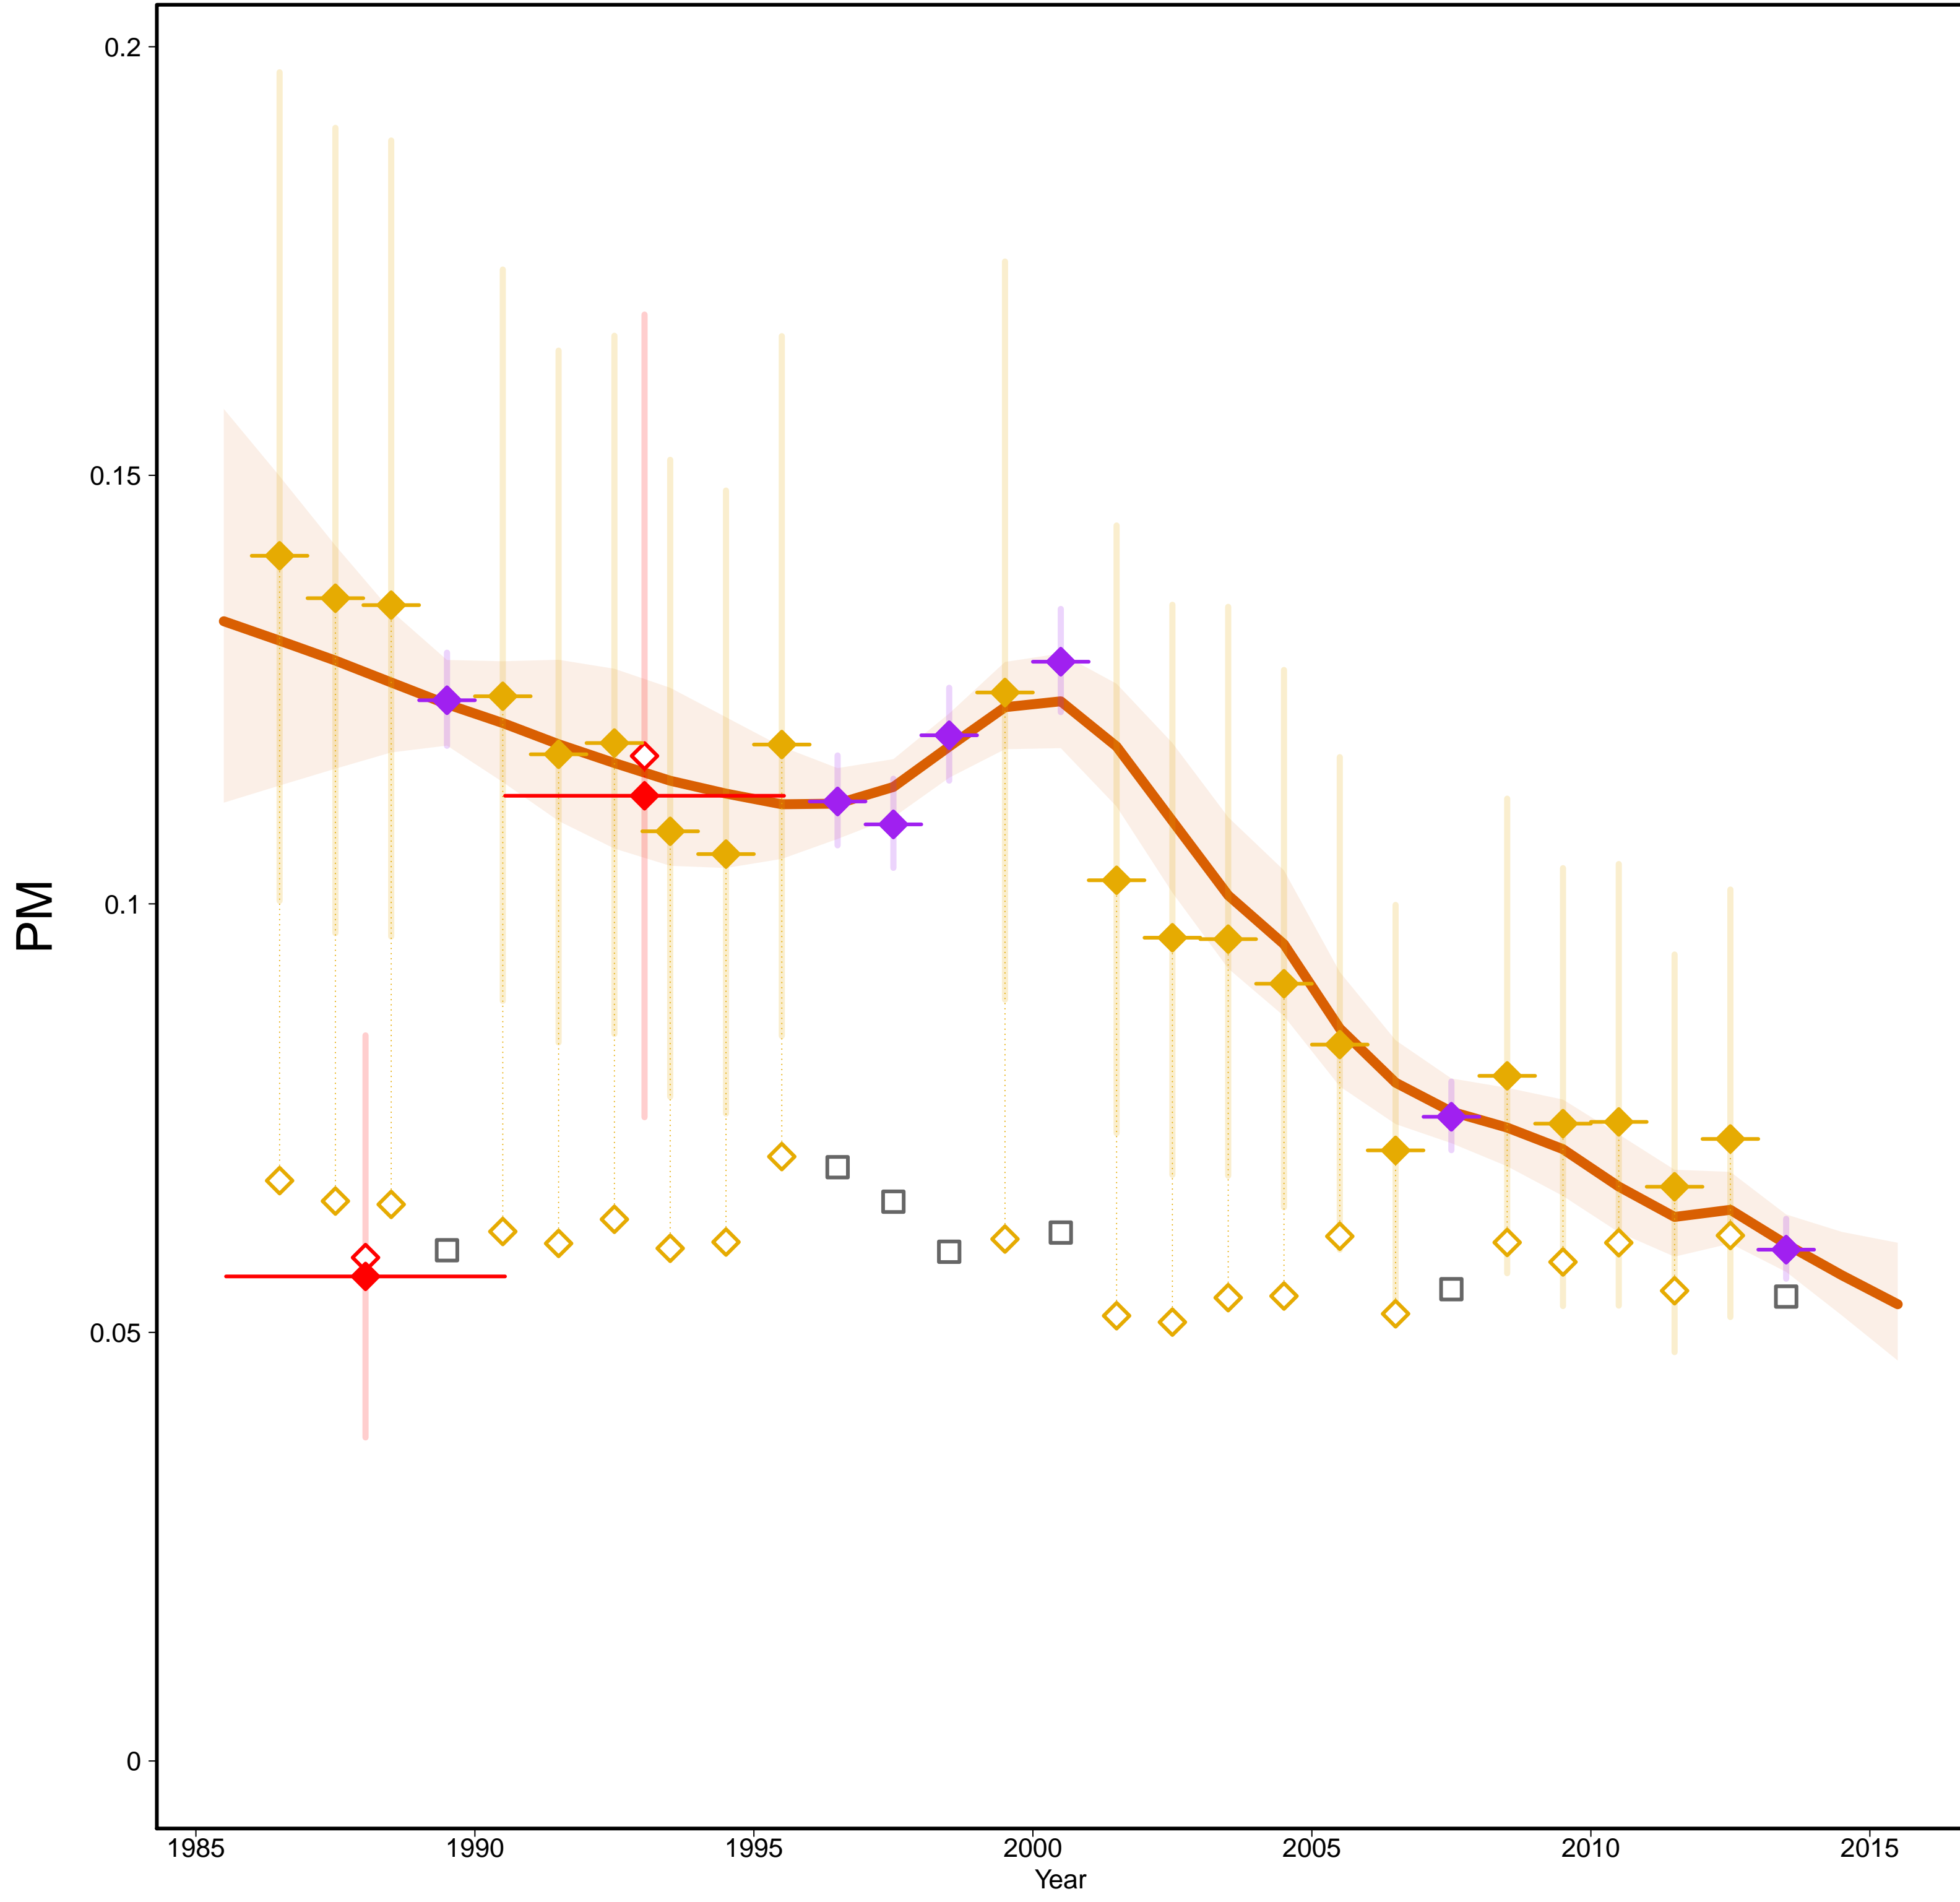

Guatemala [GTM]  
(Central America)

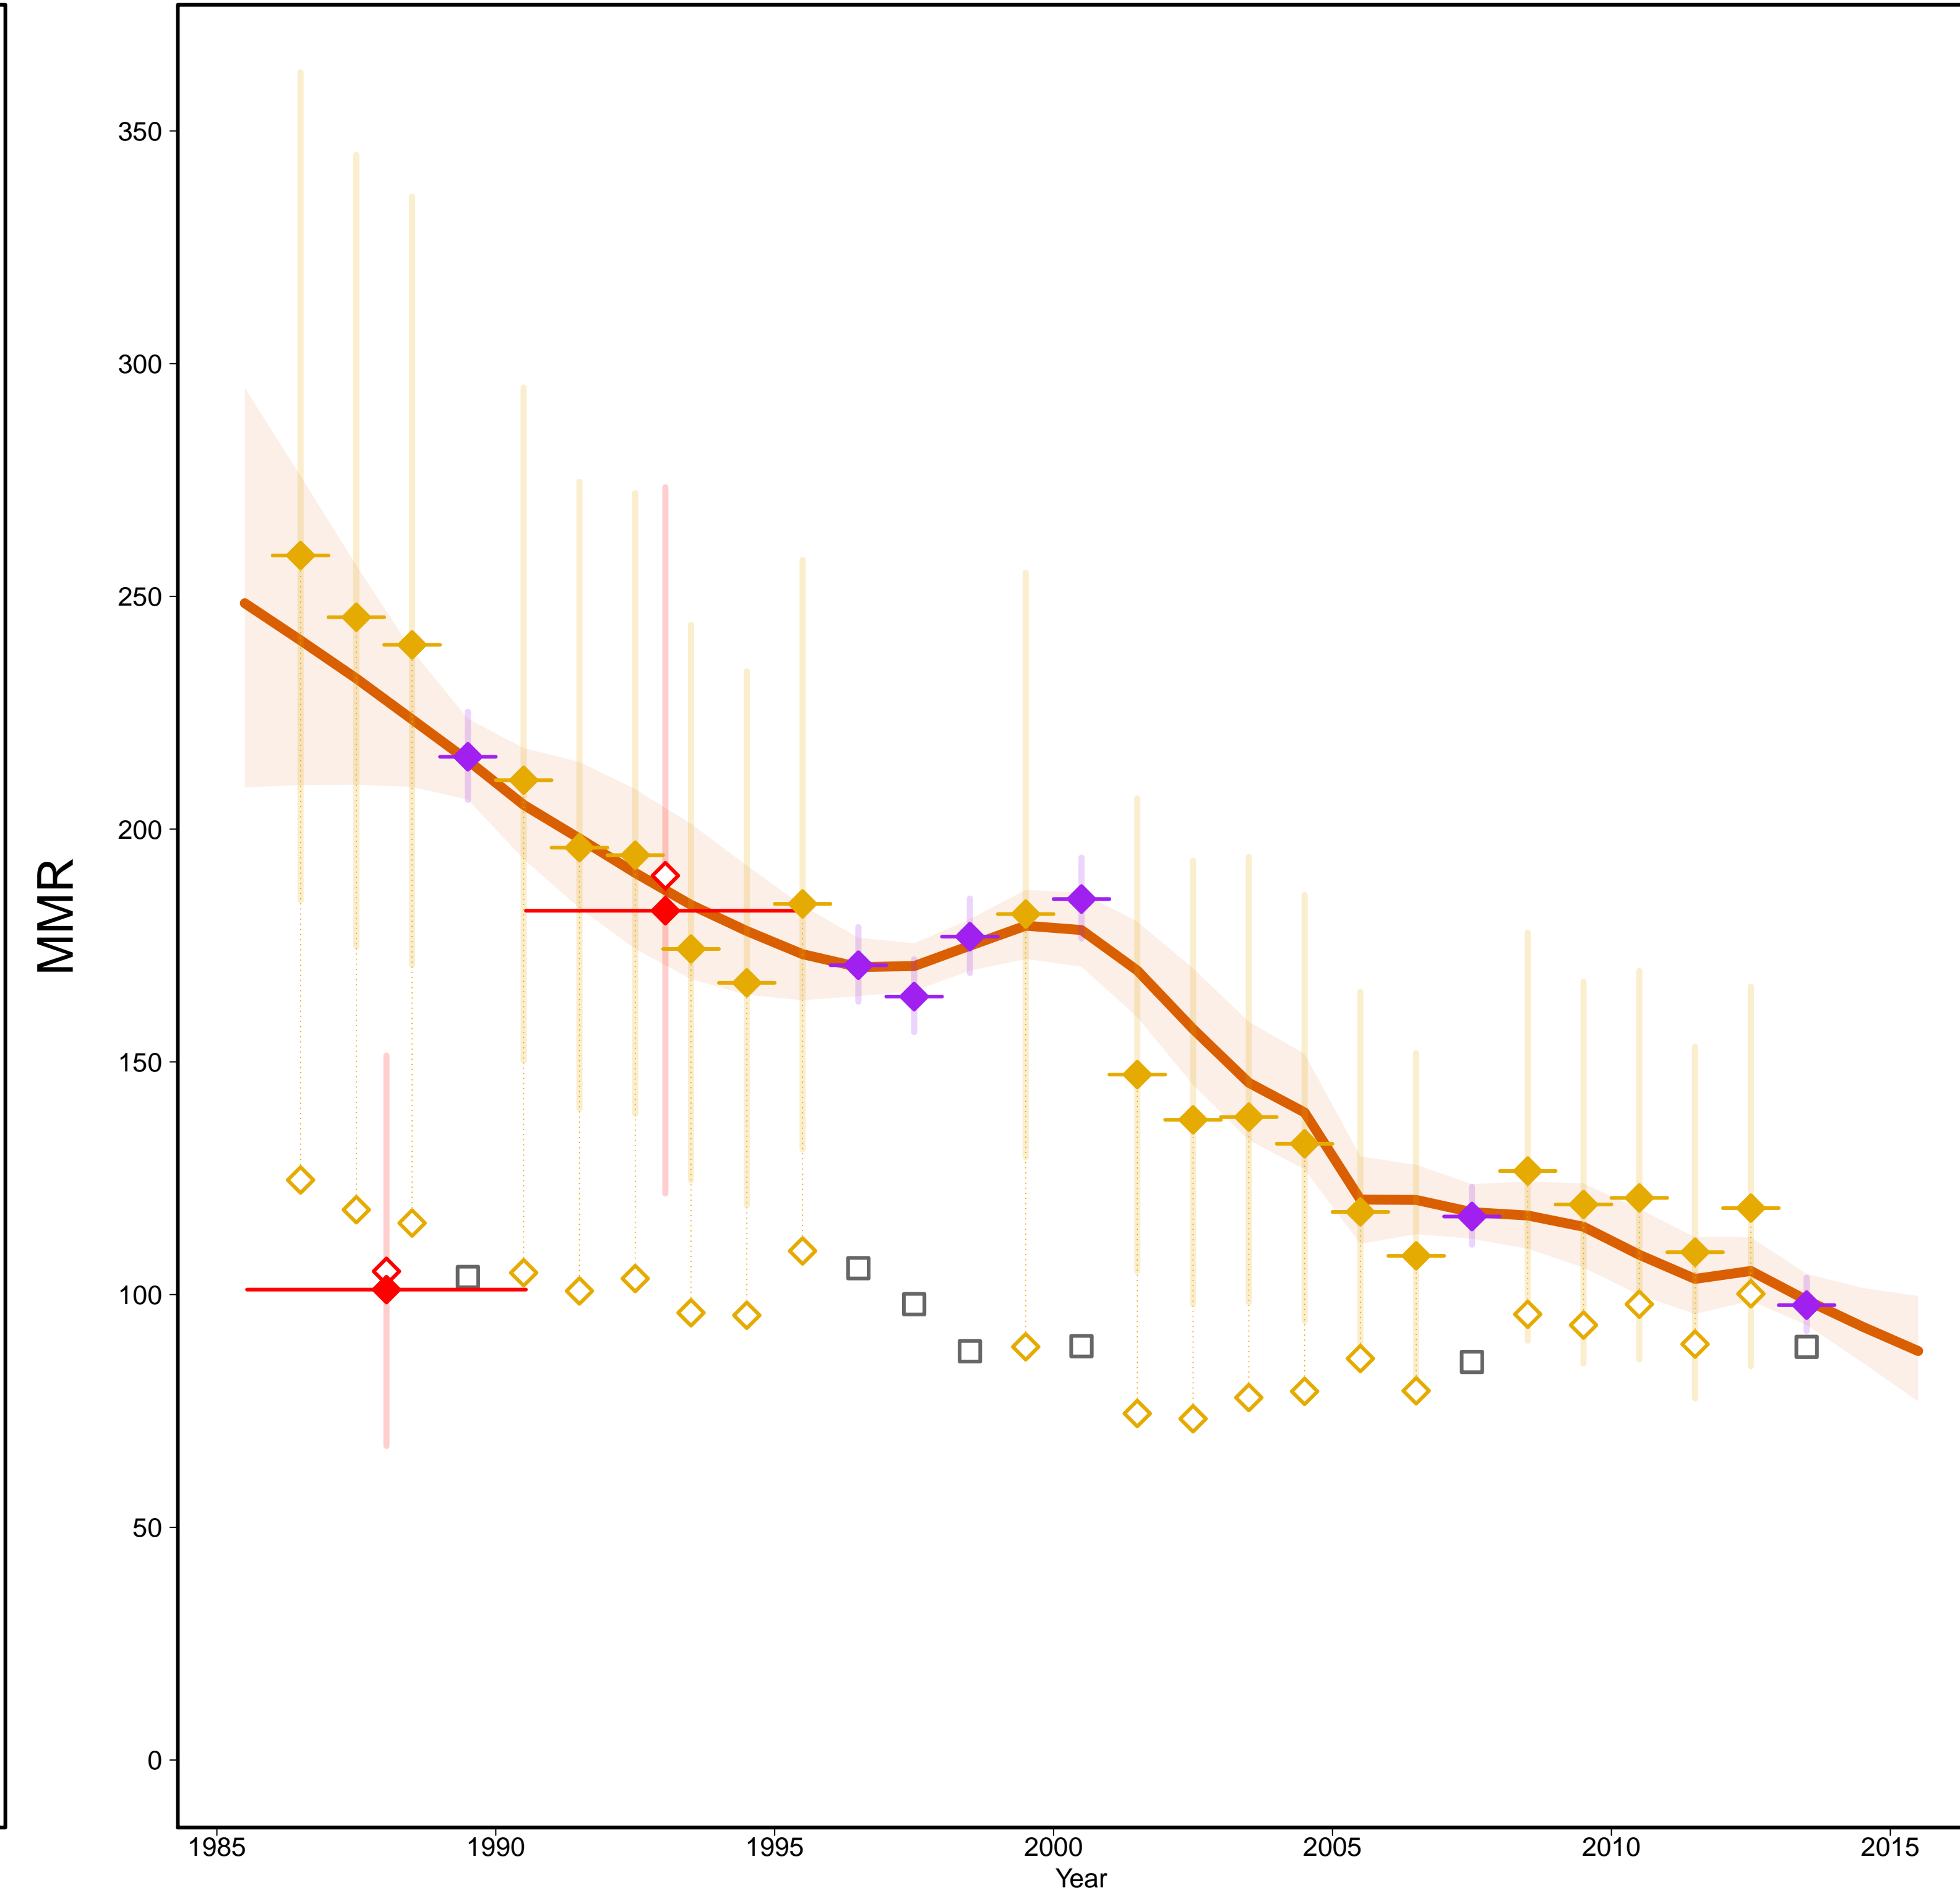

- Estimates —
- MMR Database 2015 —
- ◇ Observed Data
- ◆ Adjusted Data
- Data type —
- ◆ VR
- ◆ Spec. studies
- ◆ Misc. studies
- Excluded VR data  
(overlap with specialized study)

Gross Domestic Product

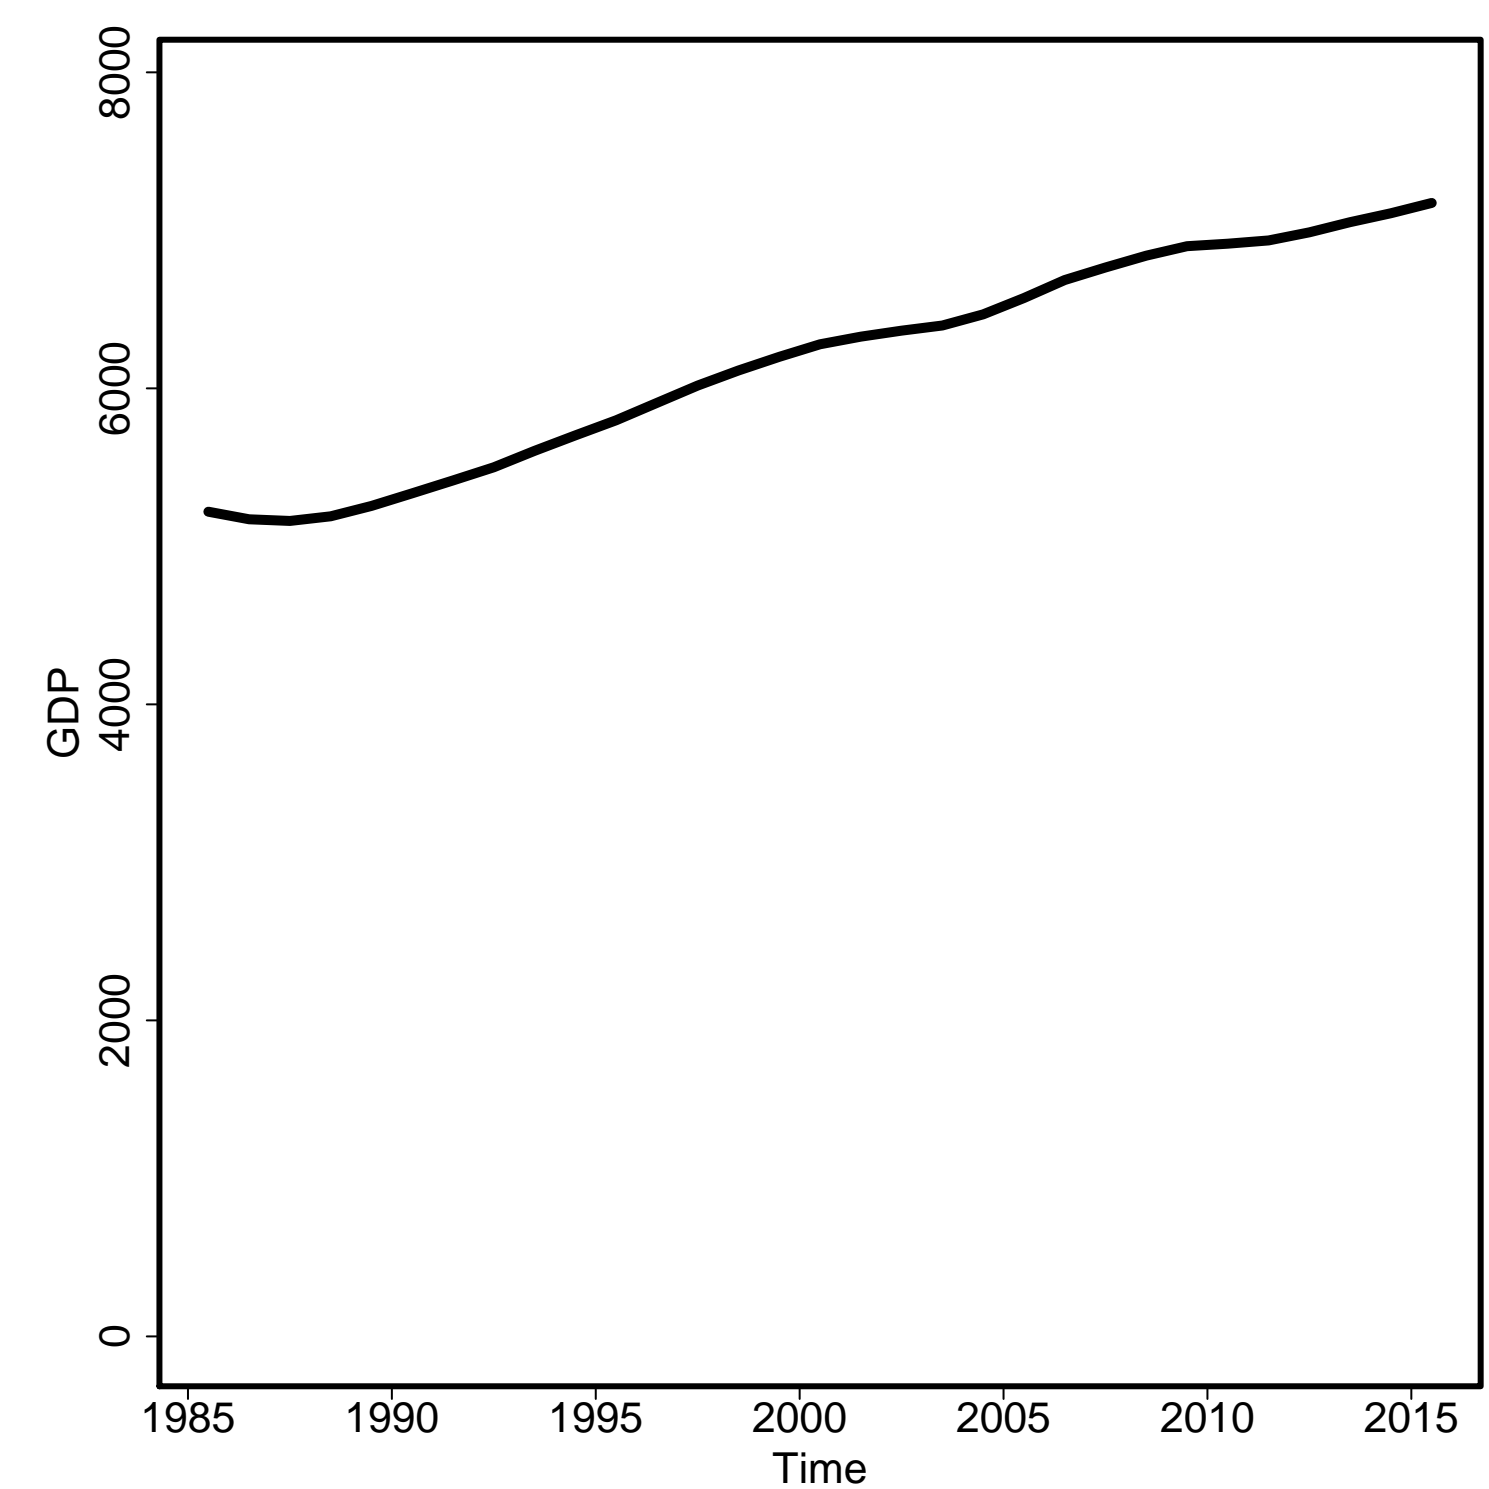

General Fertility Rate

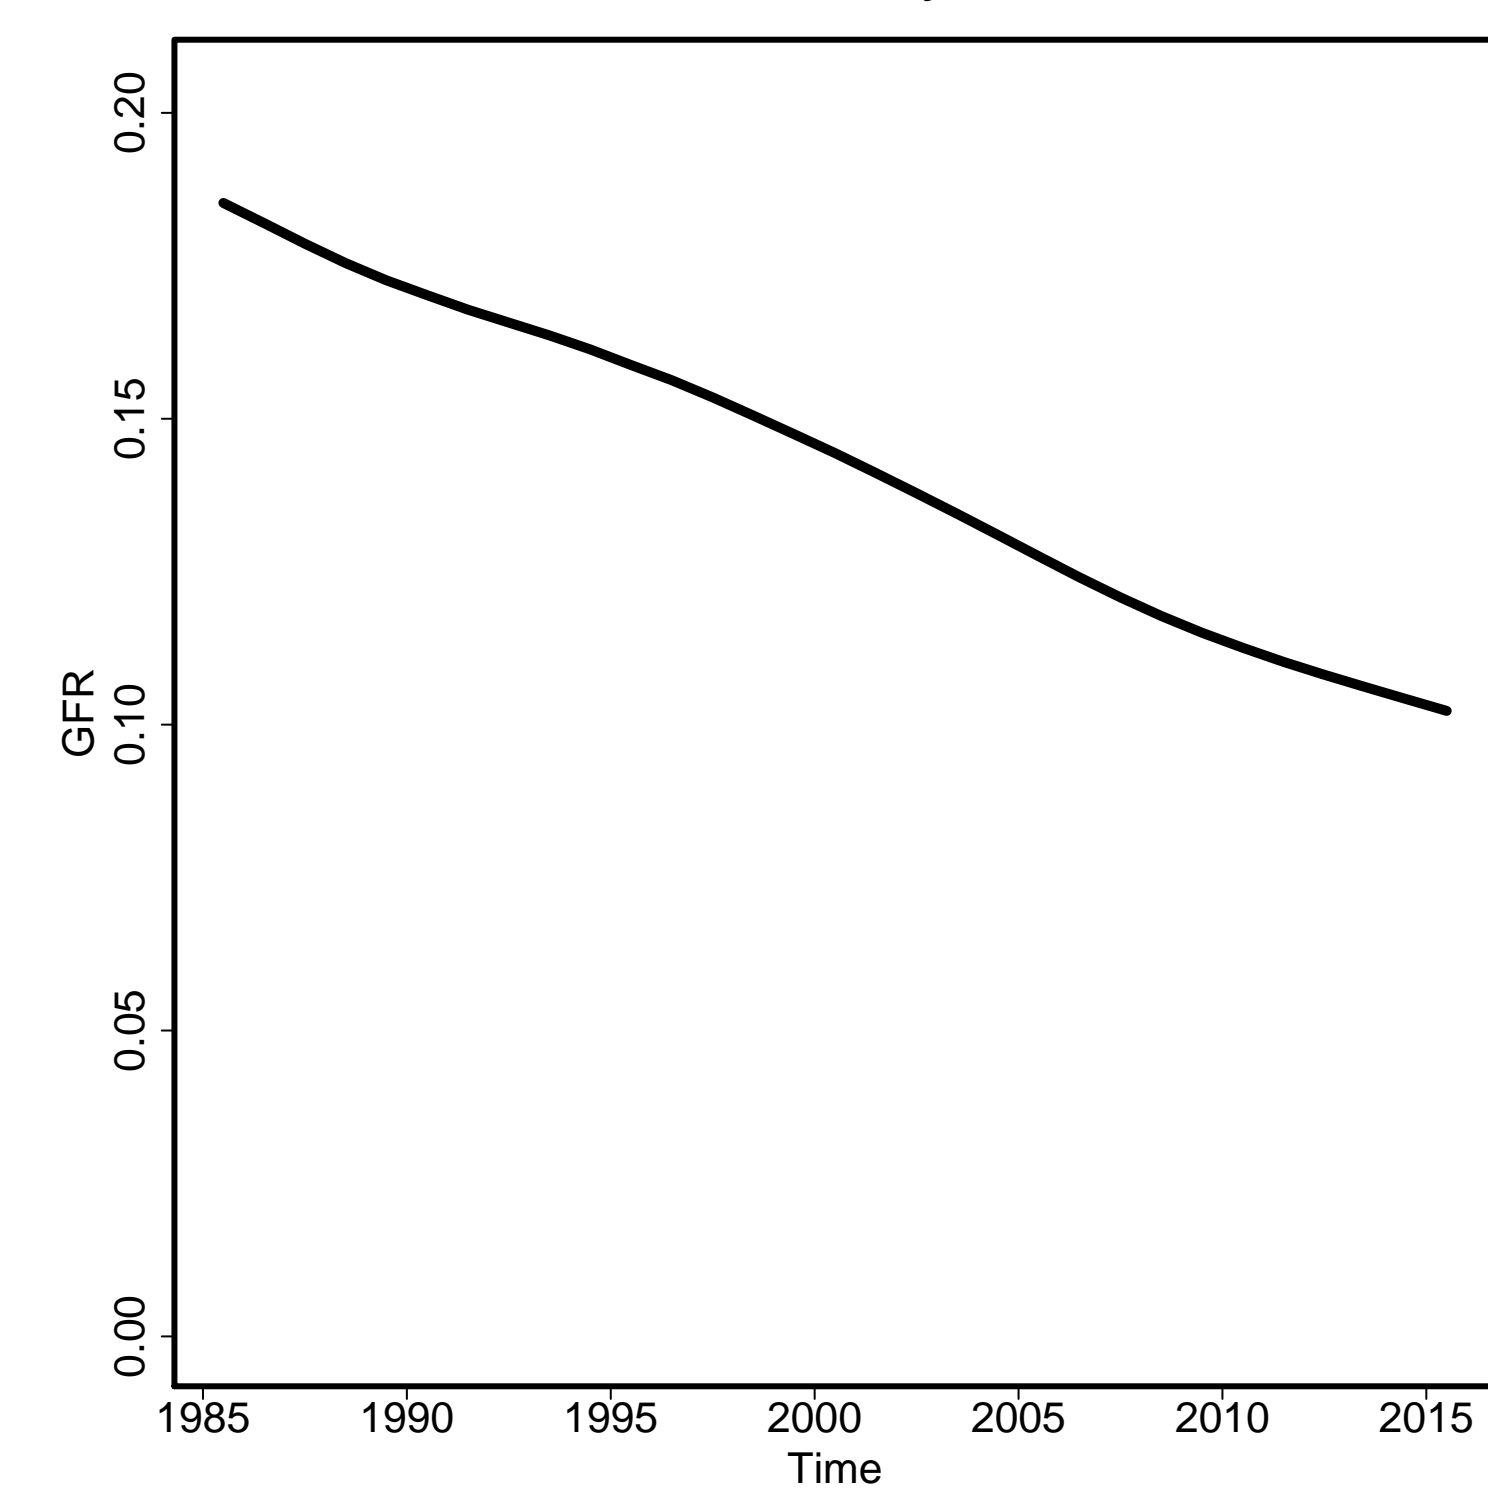

Skilled Attendance to Birth

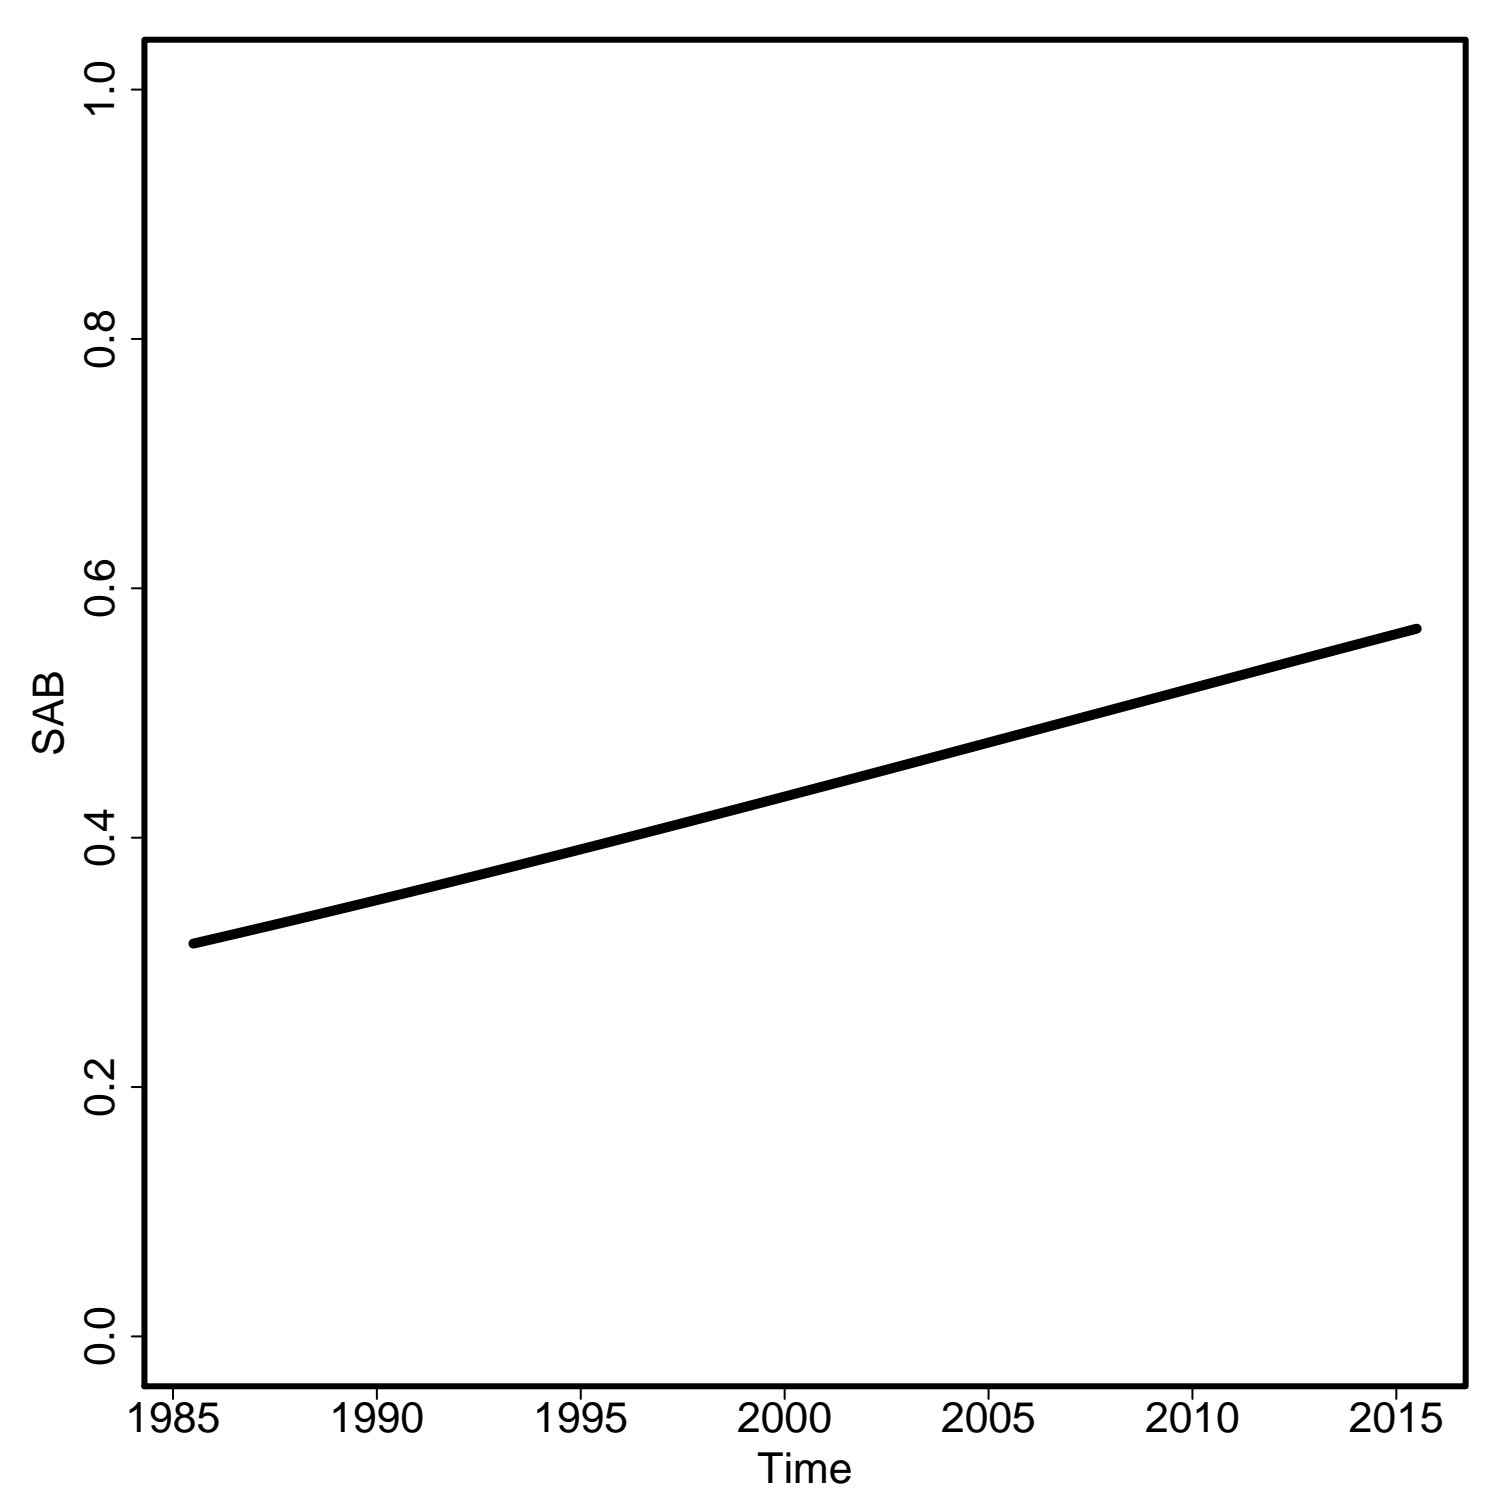

Envelope/Births

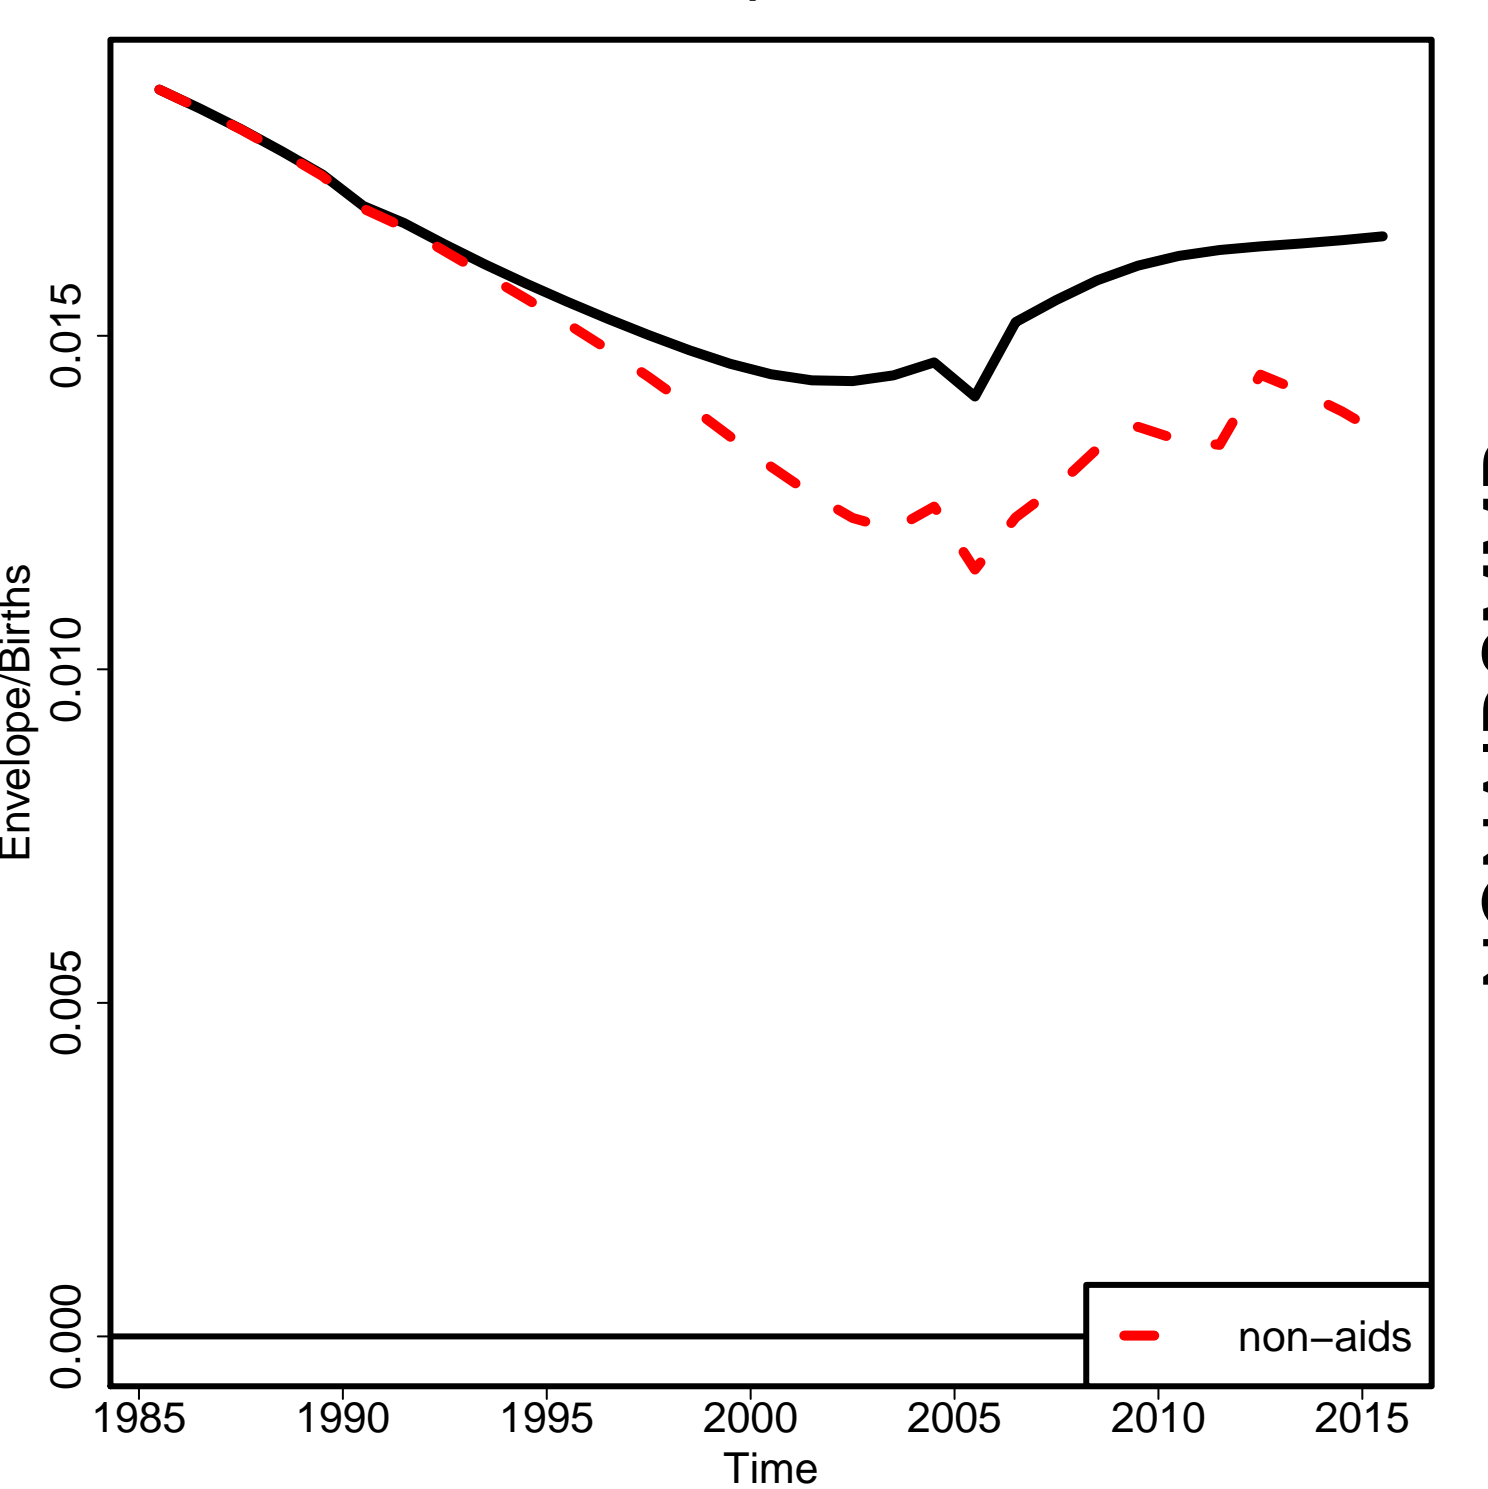

Non-aids MMR

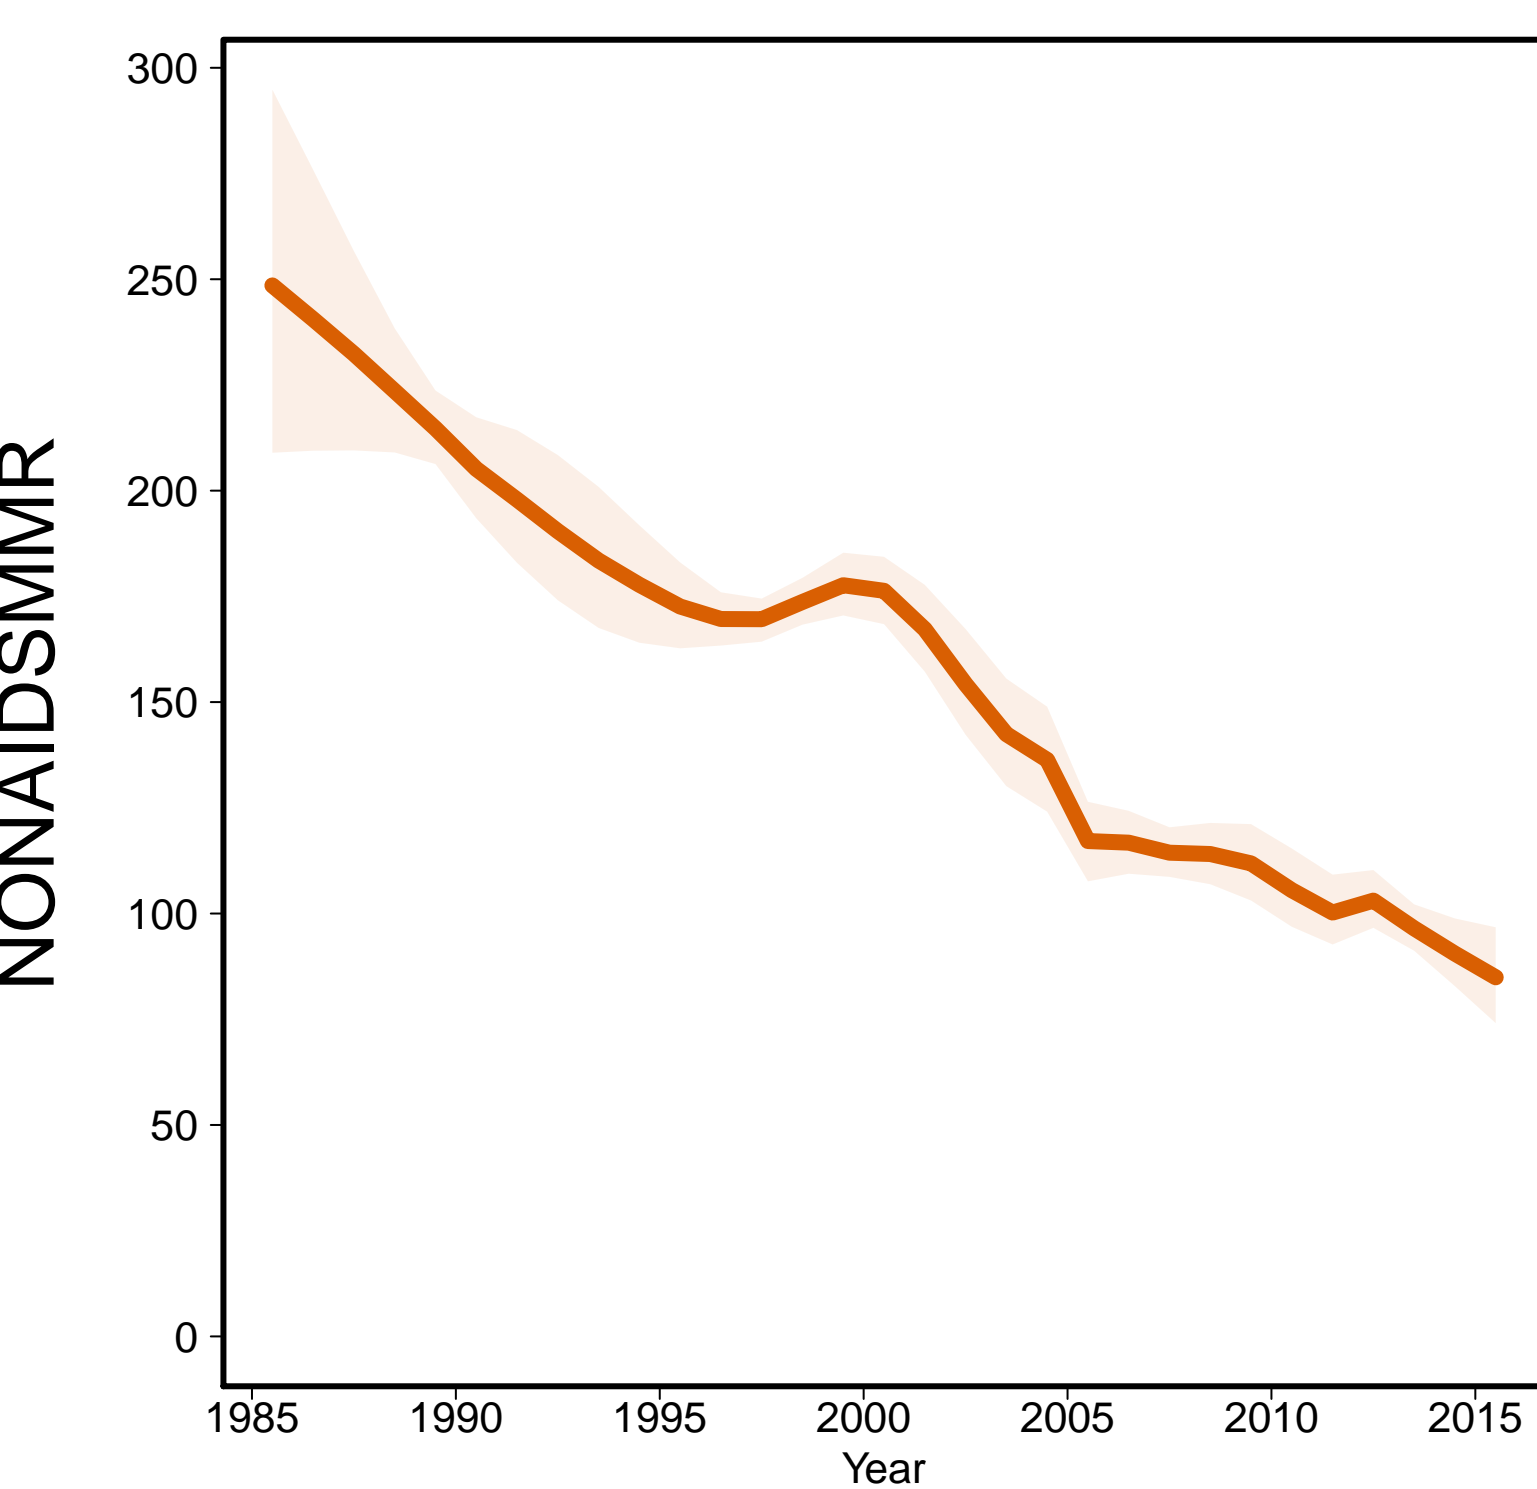

Aids MMR

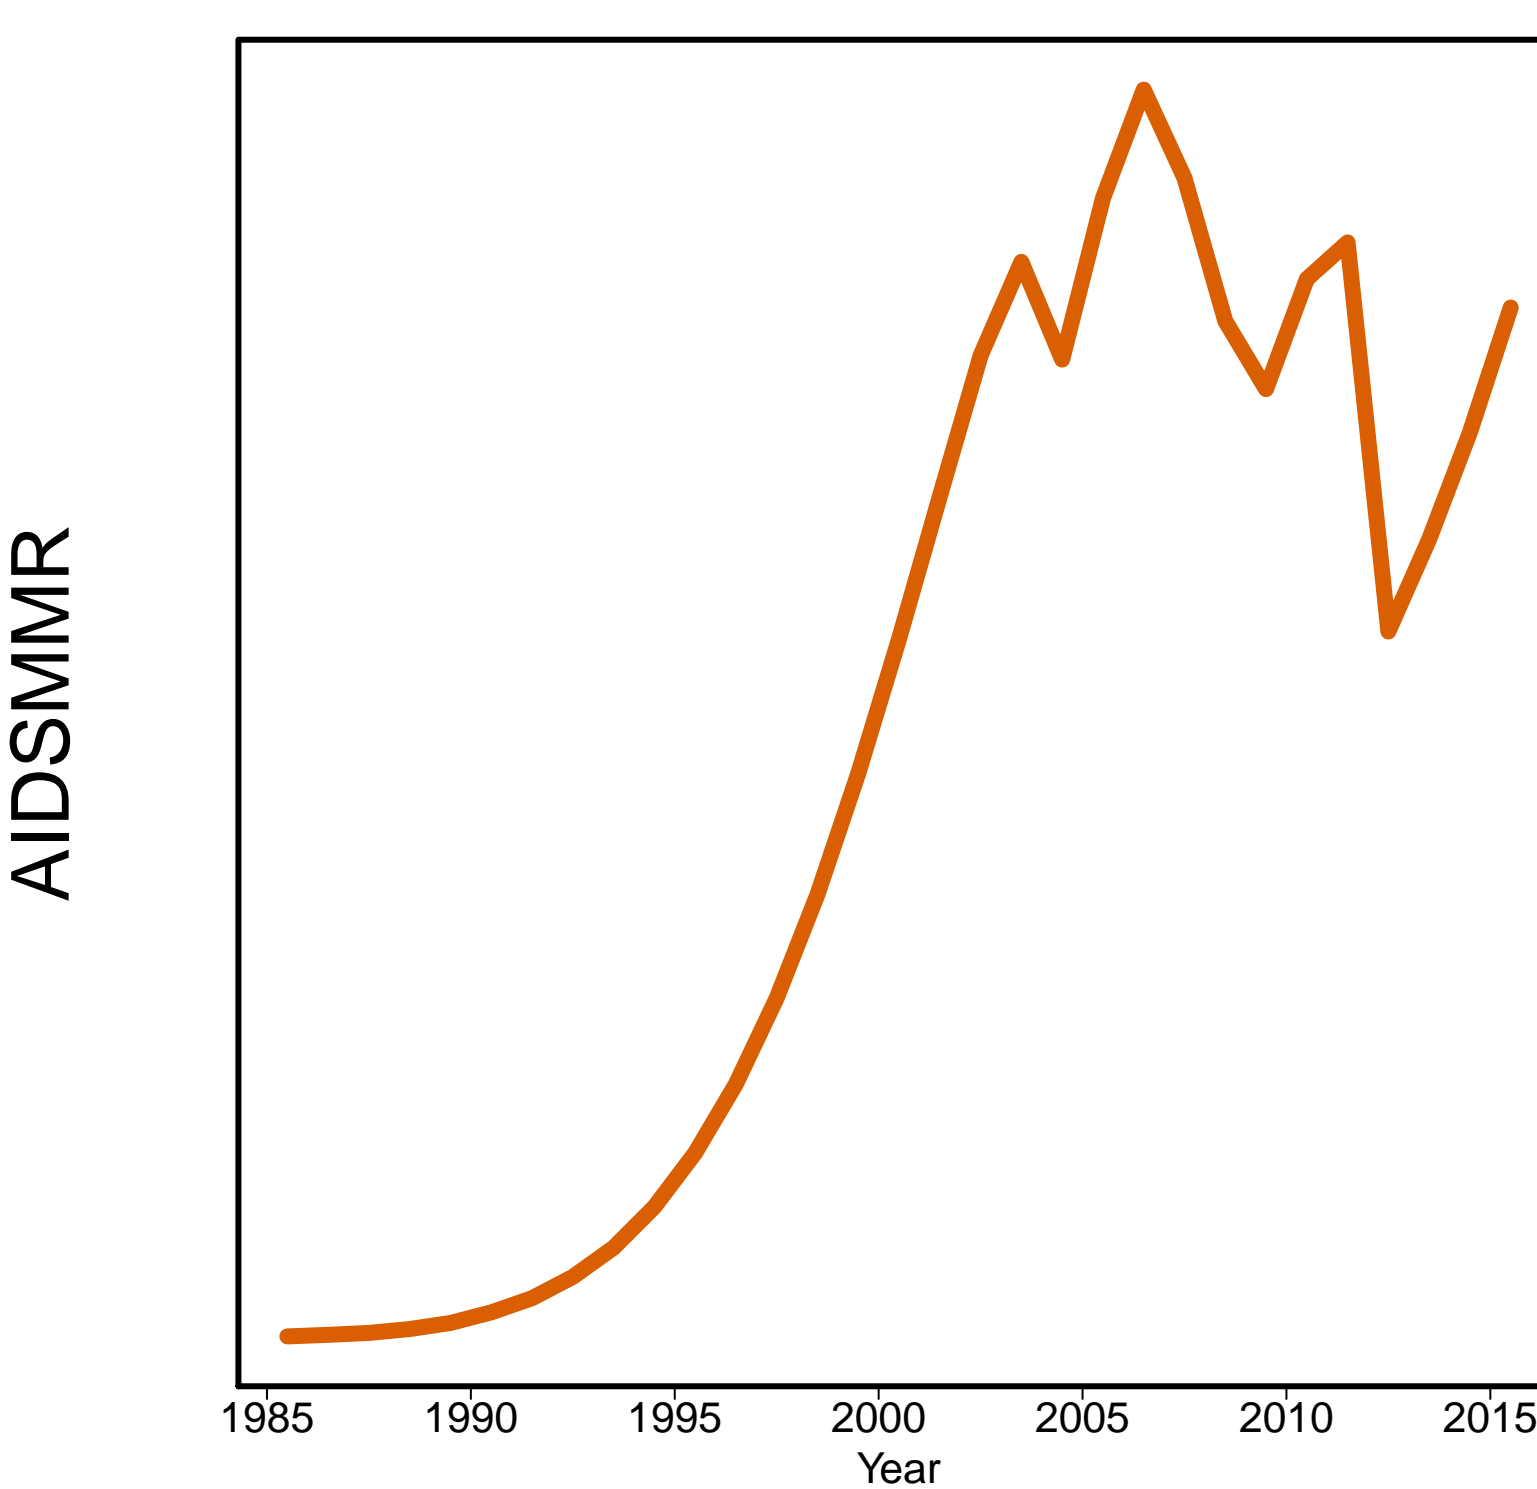

Guinea [GIN]  
(Western Africa)

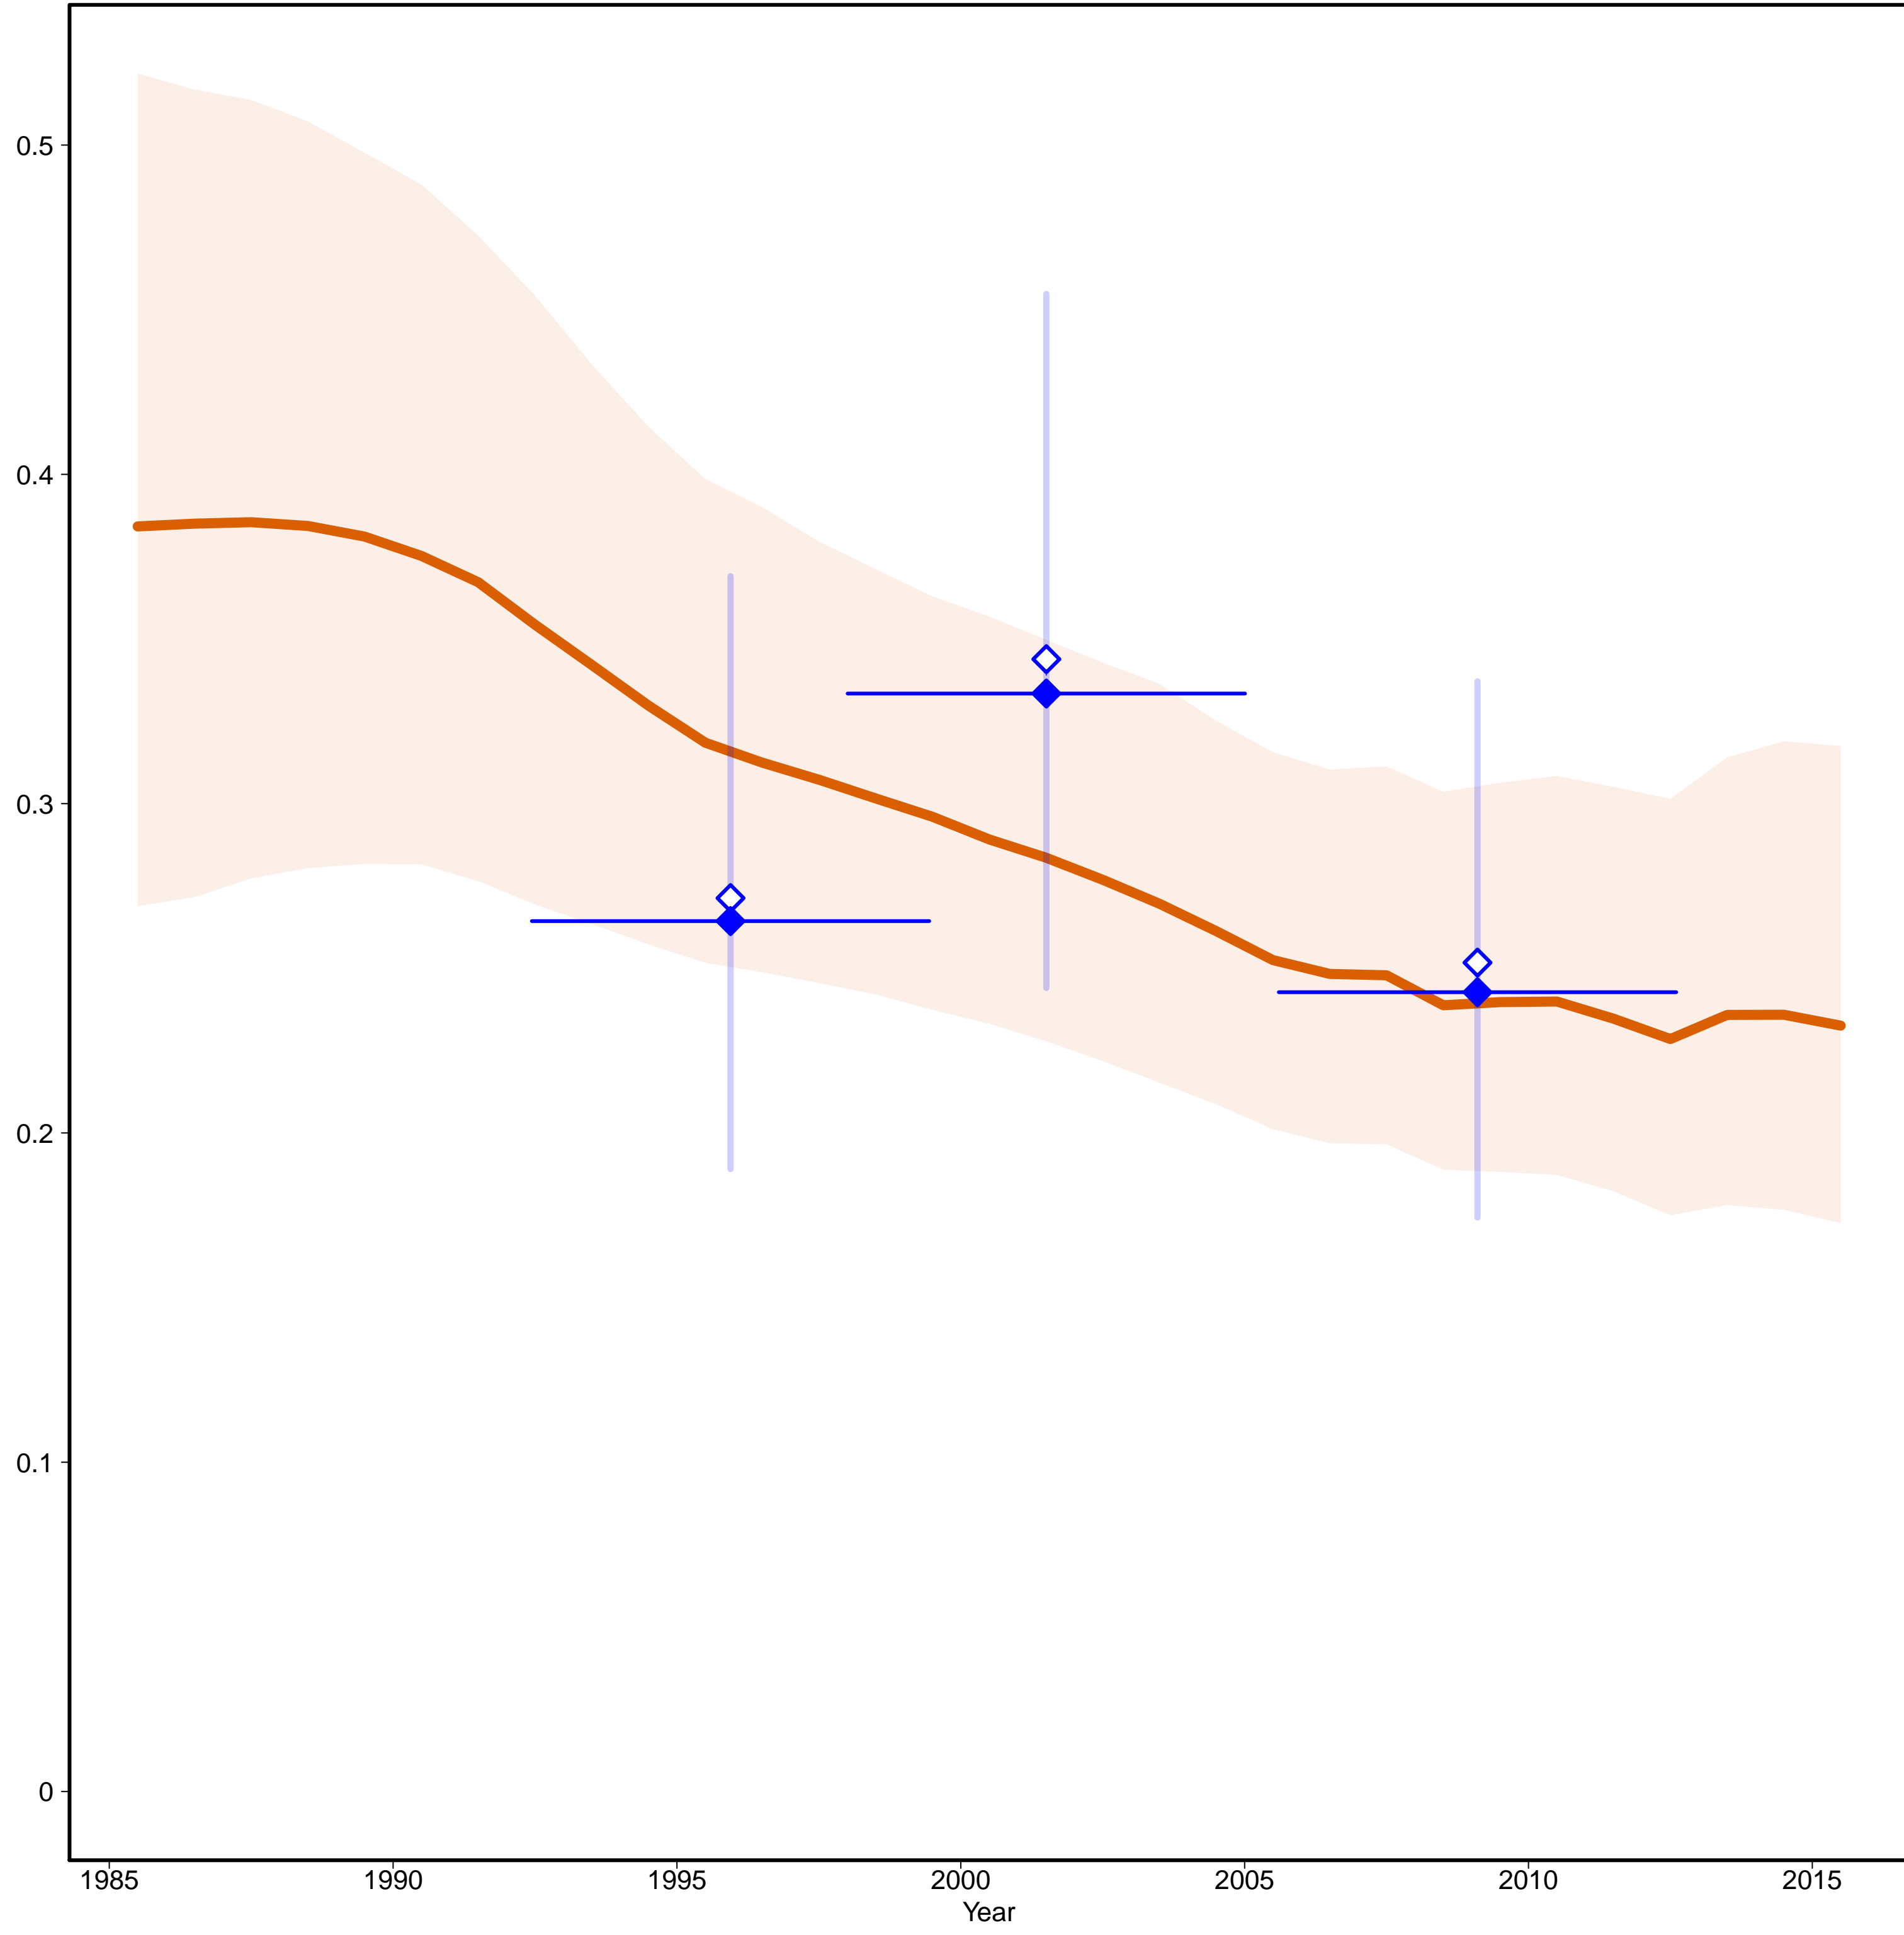

Guinea [GIN]  
(Western Africa)

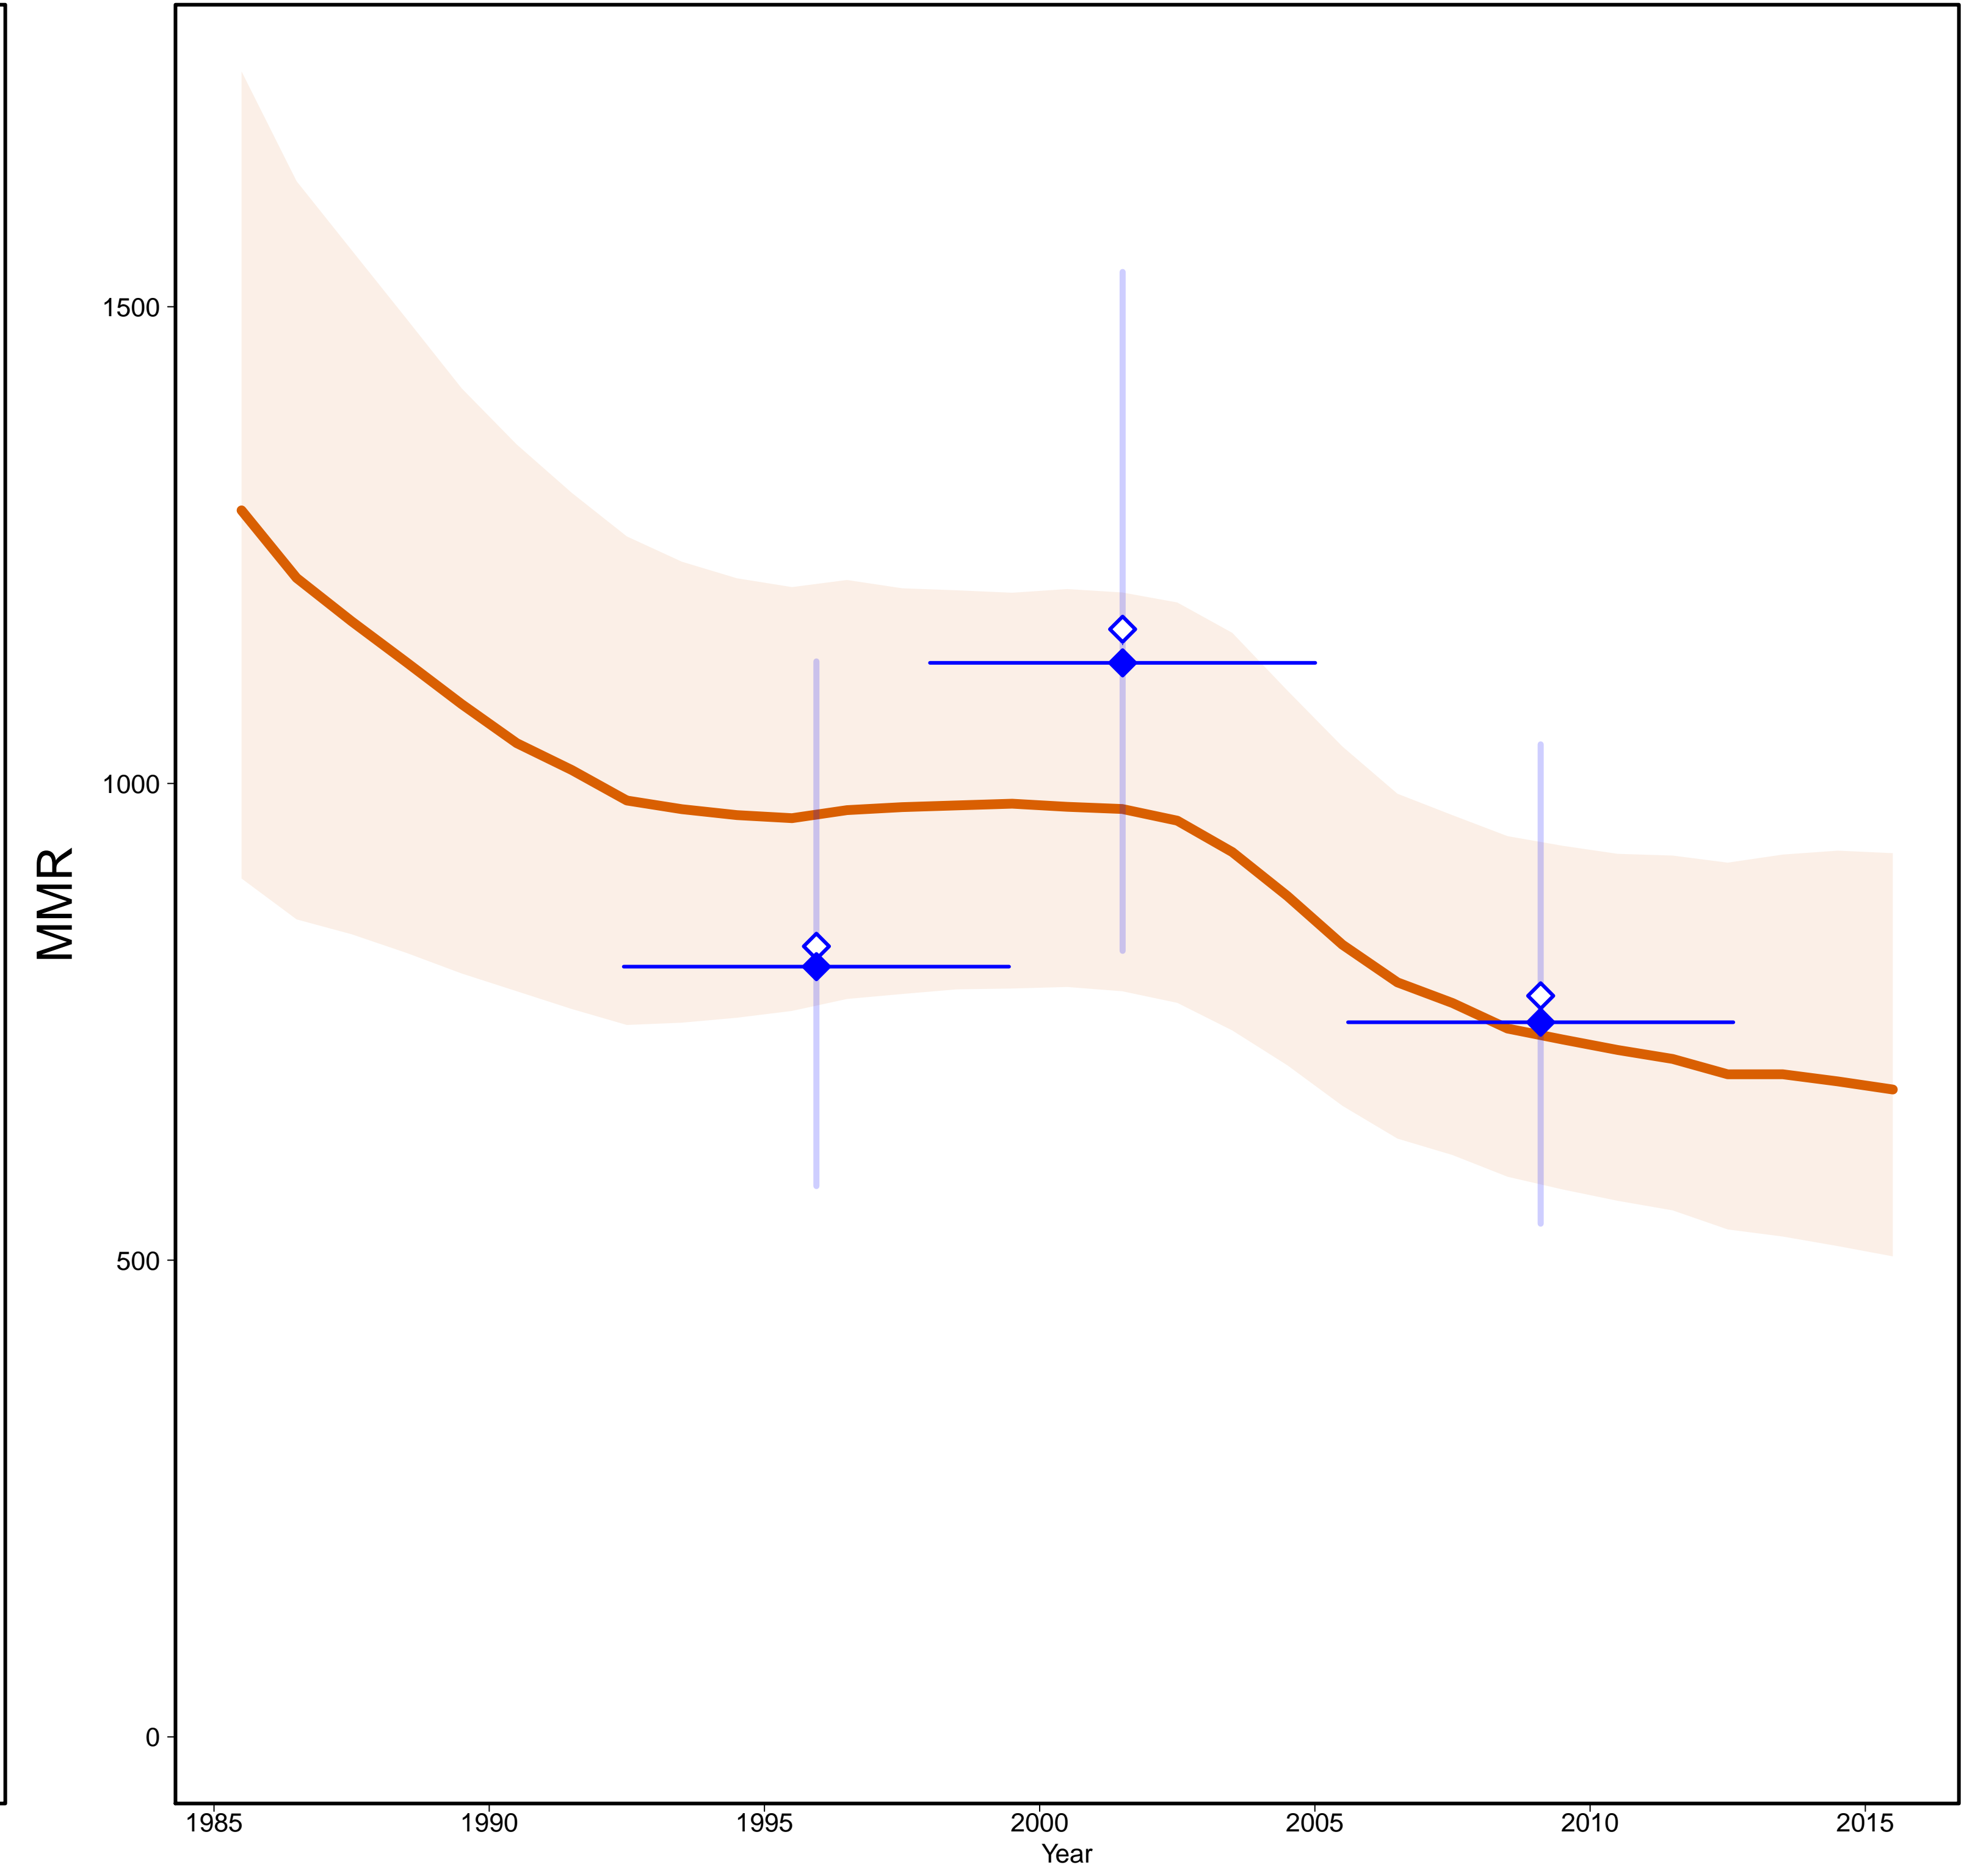

- Estimates —
- MMR Database 2015 —
- ◇ Observed Data
- ◆ Adjusted Data
- Data type —
- ◆ DHS

Gross Domestic Product

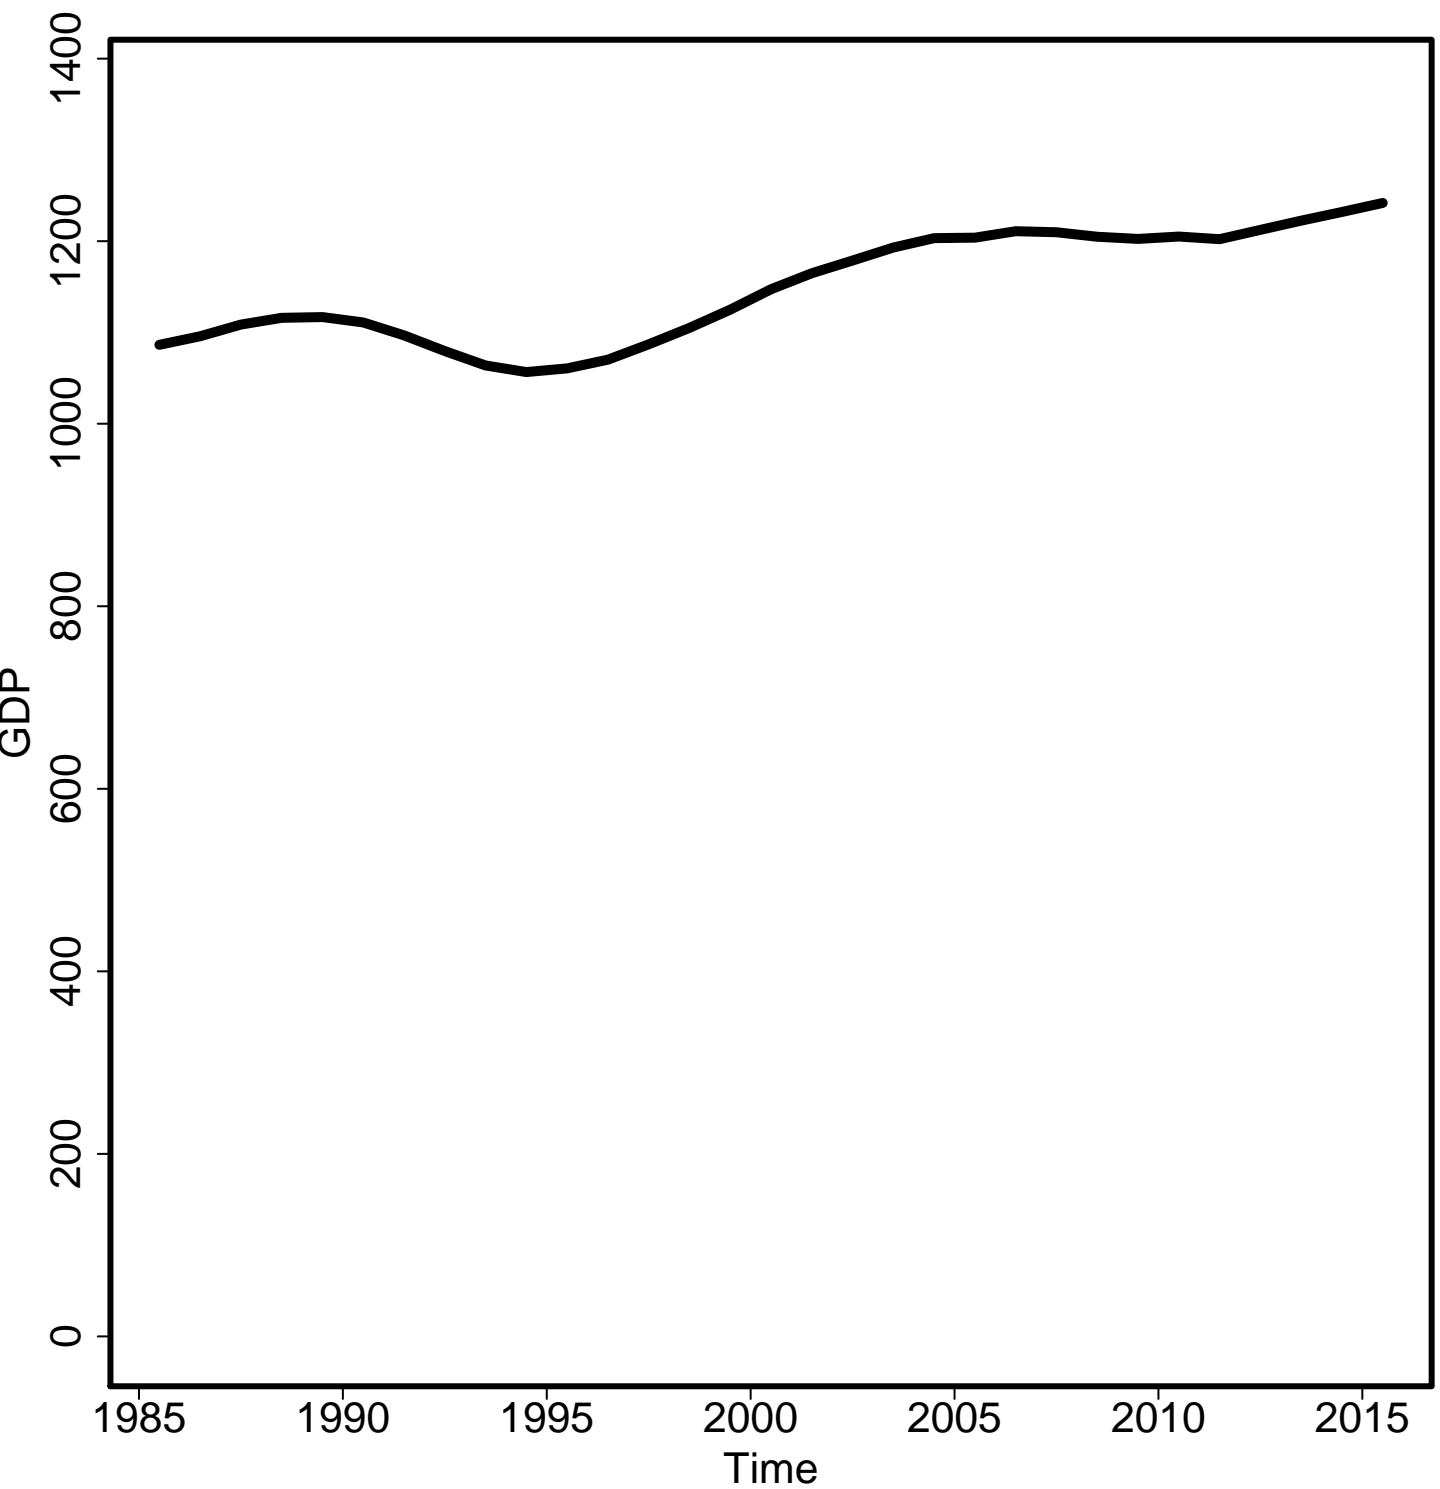

General Fertility Rate

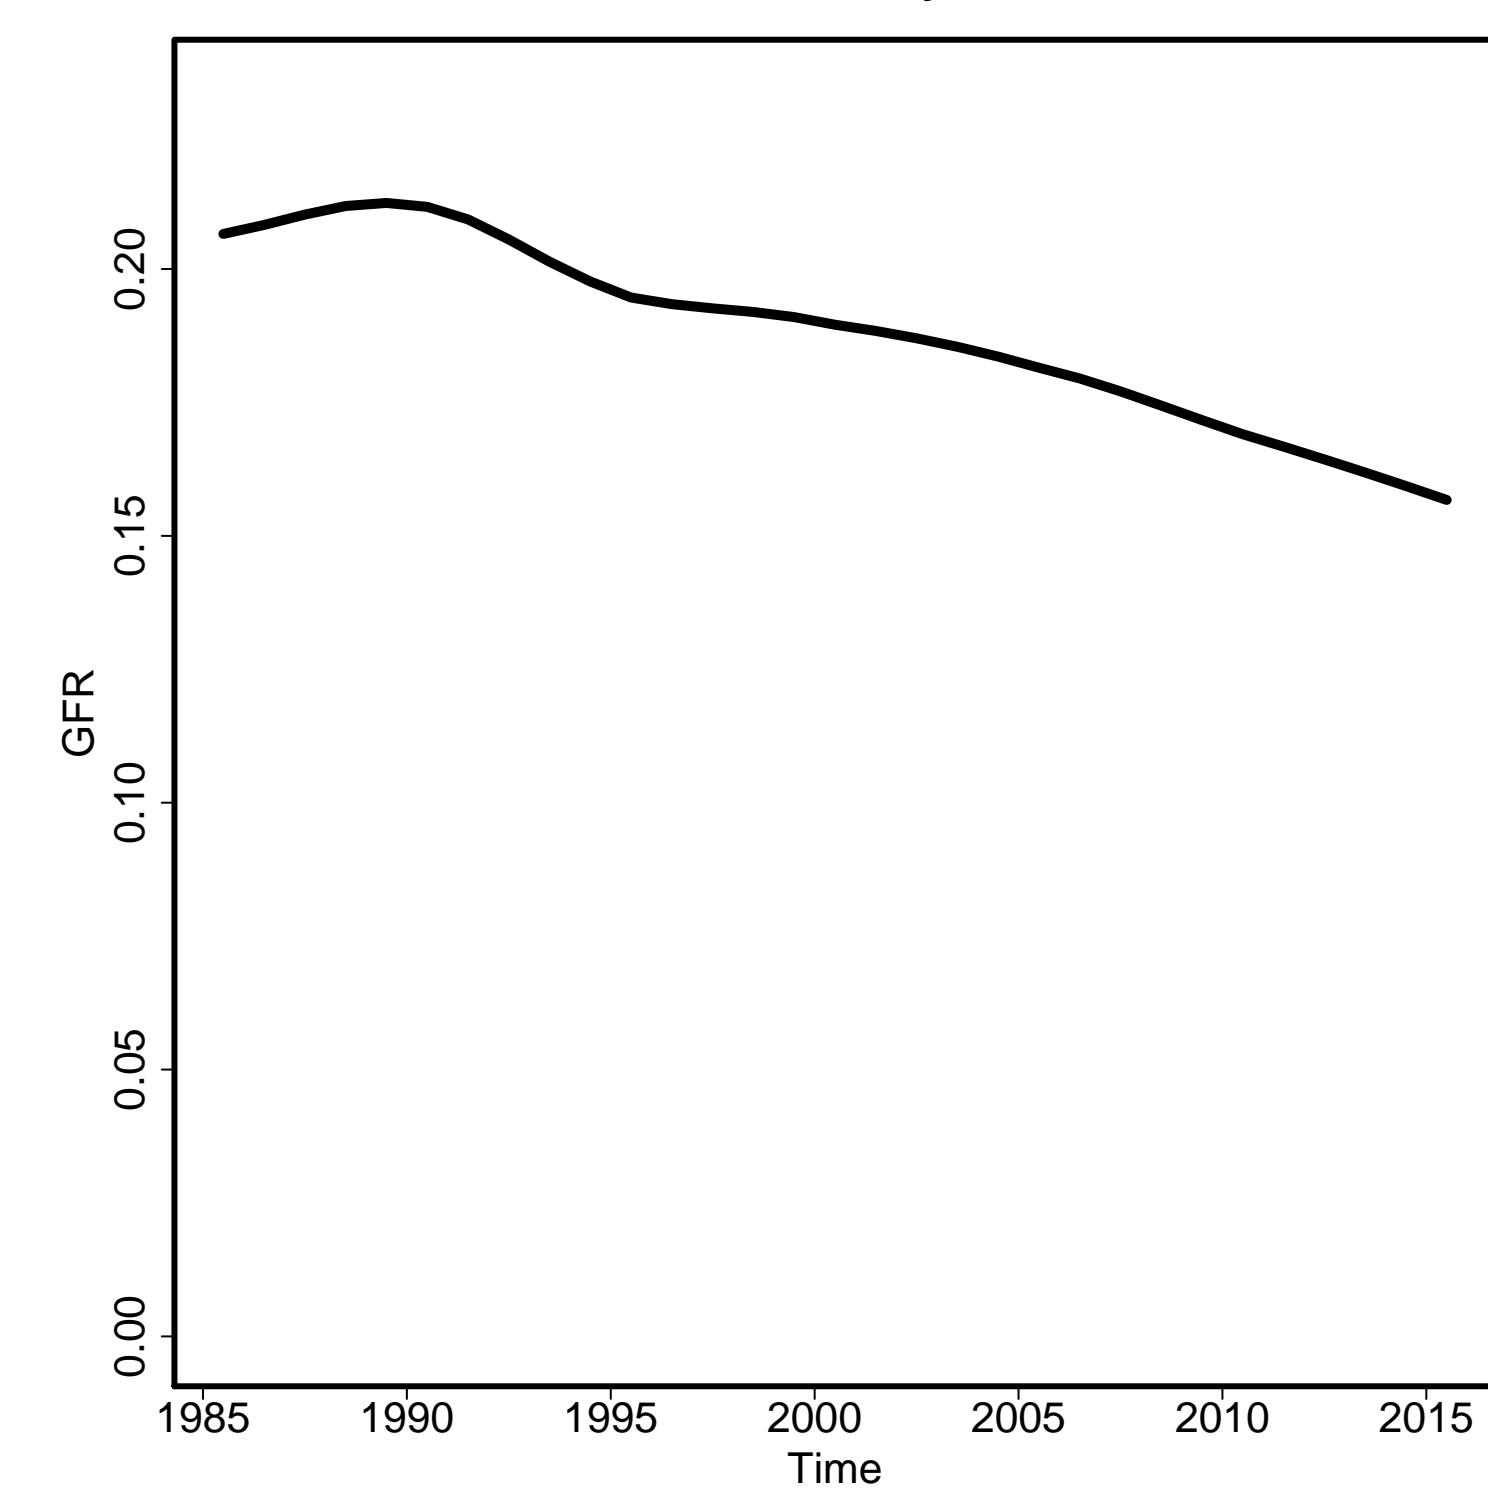

Skilled Attendance to Birth

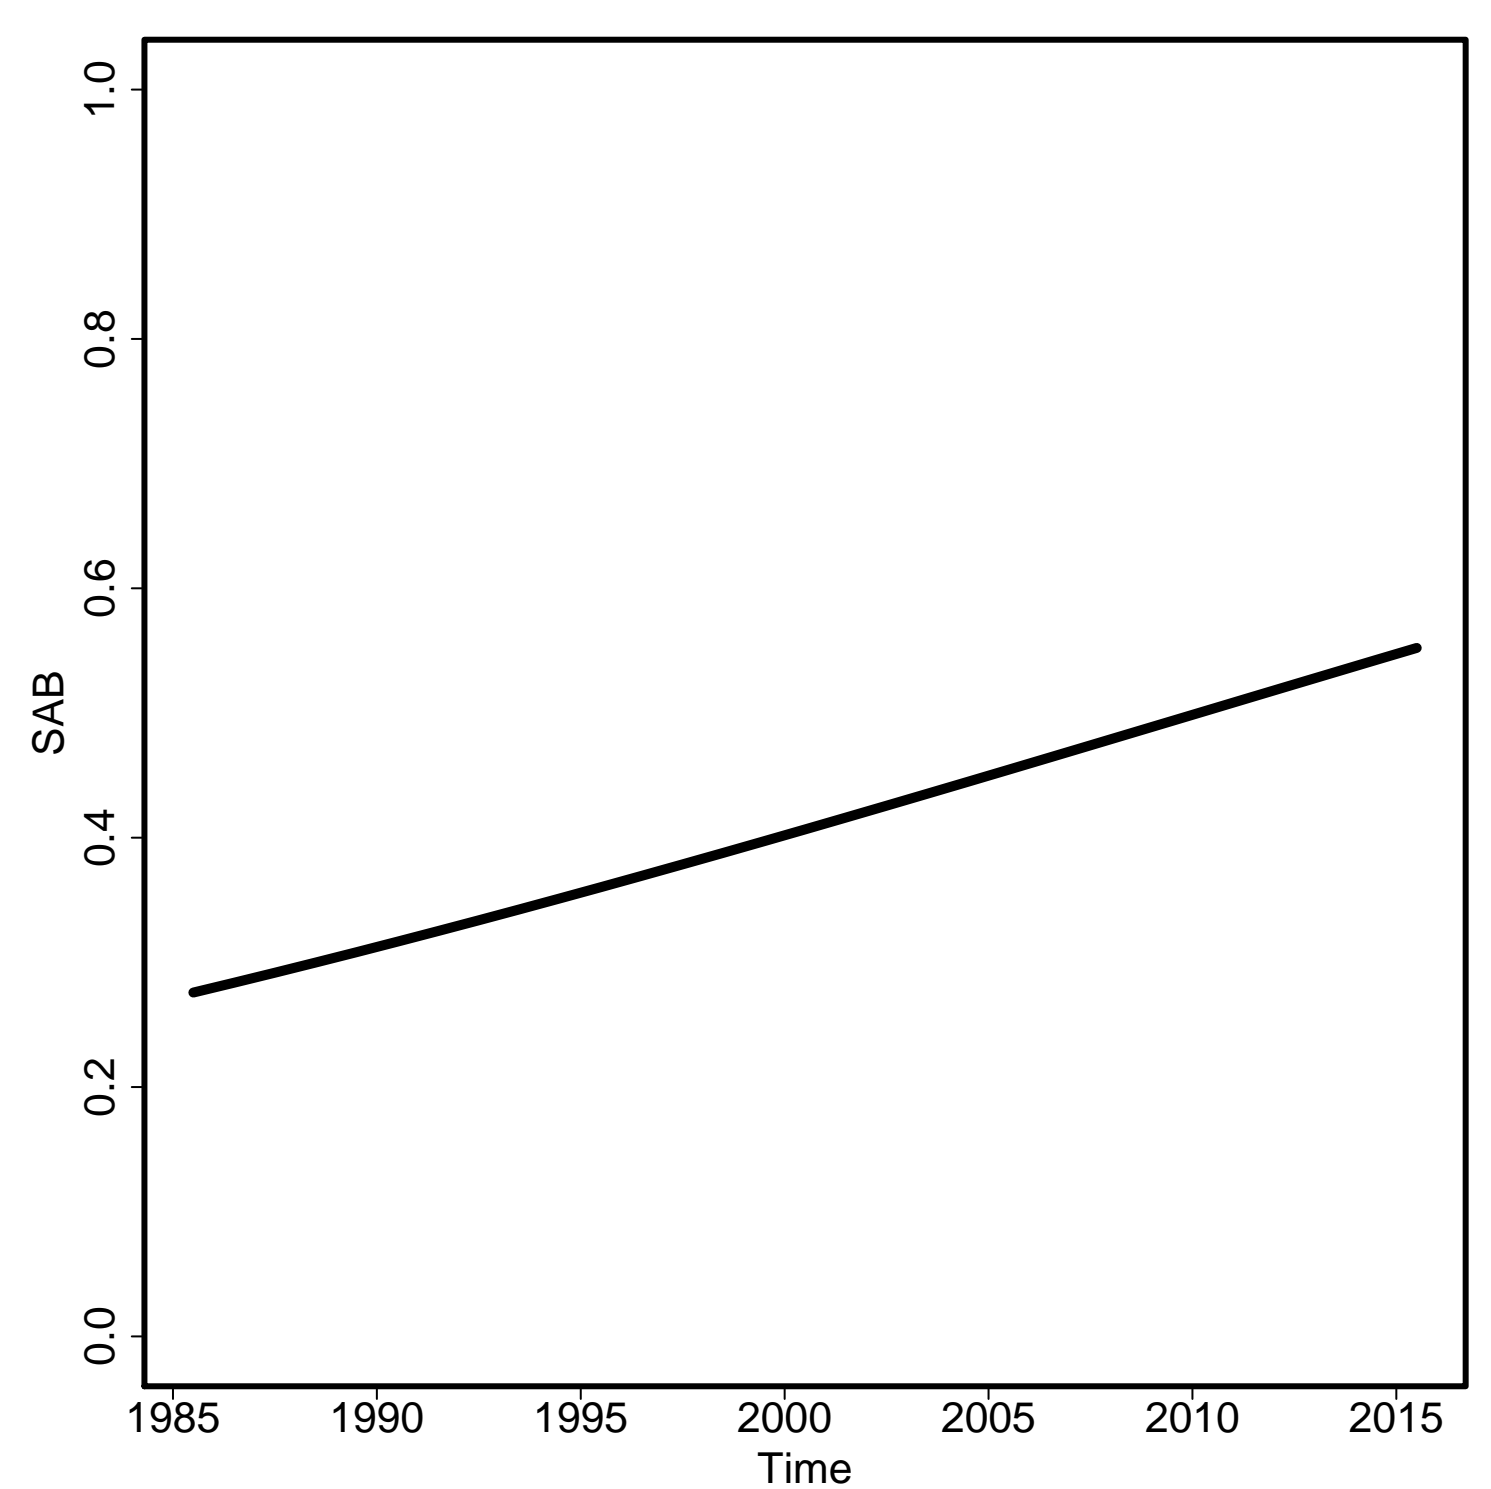

Envelope/Births

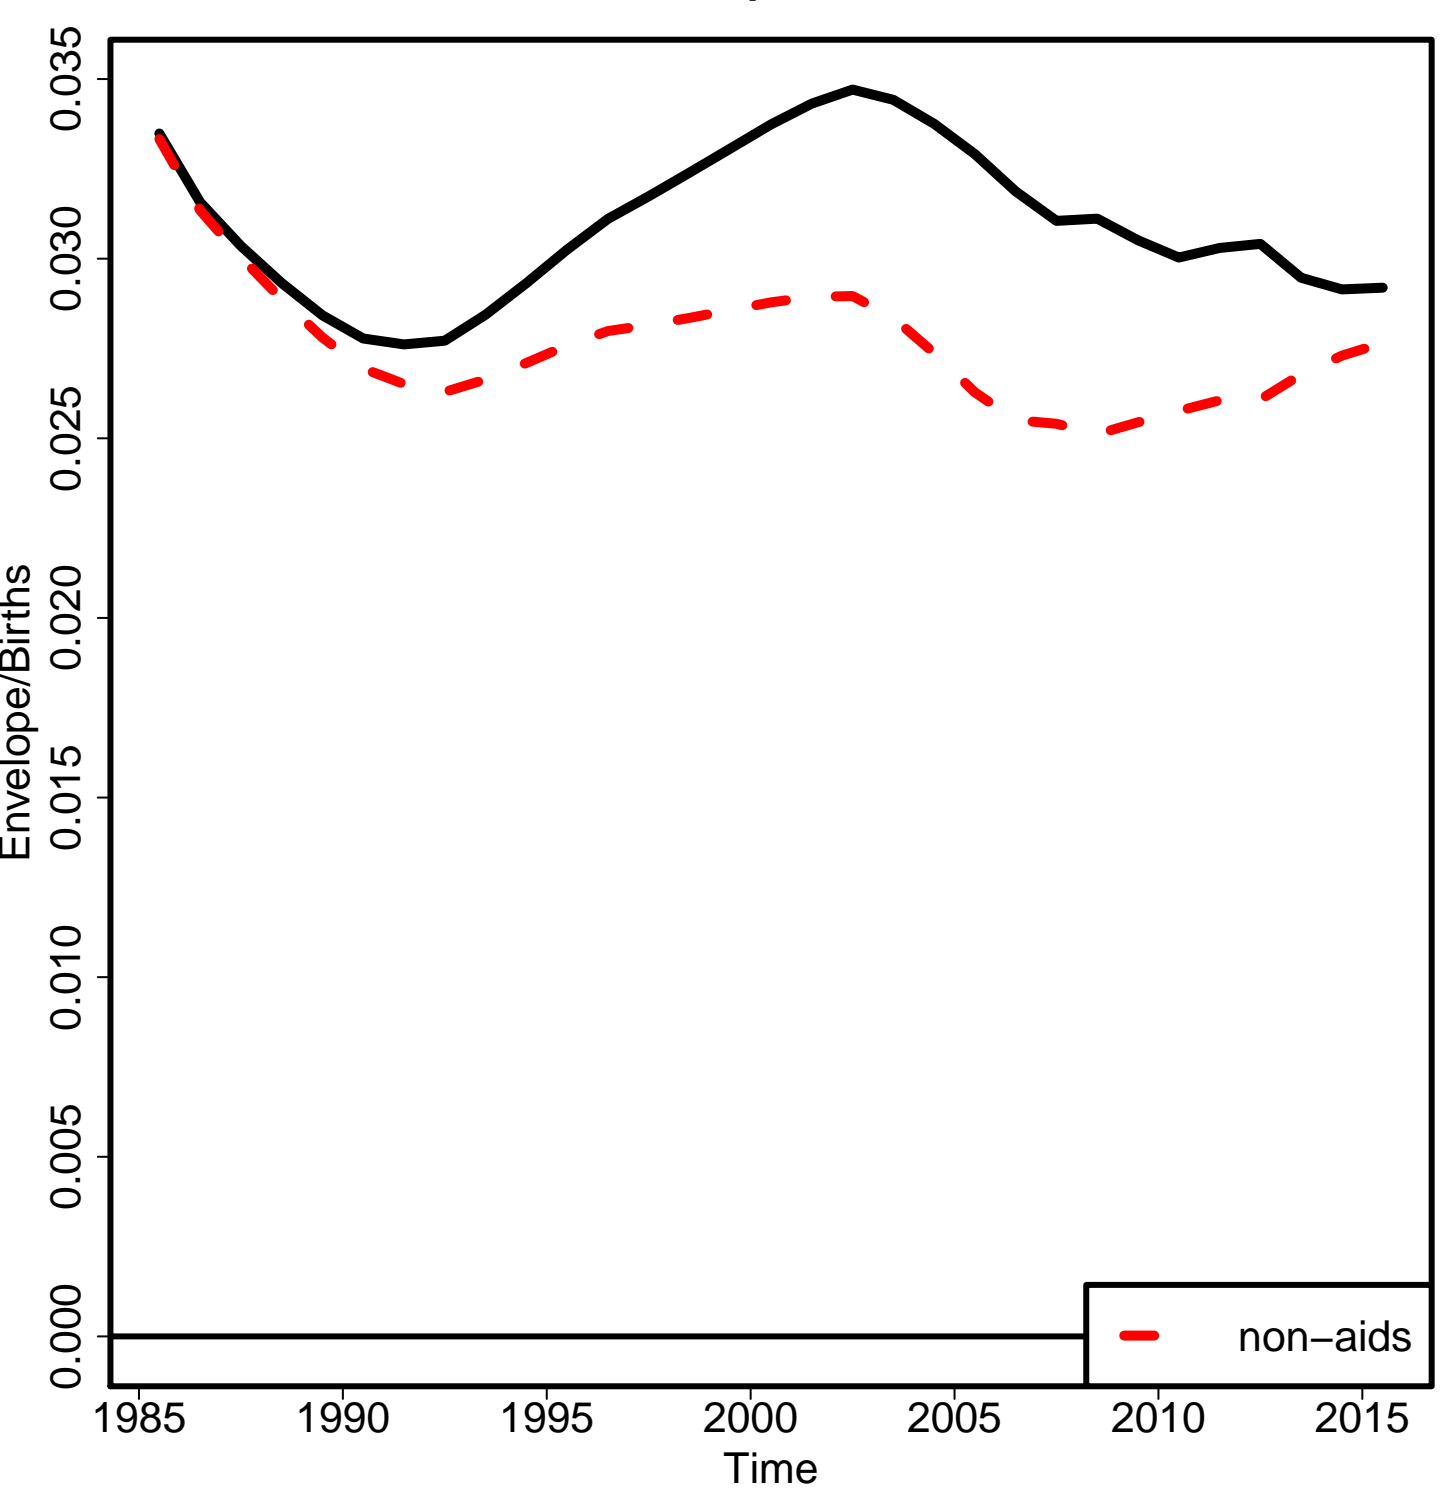

Non-aids MMR

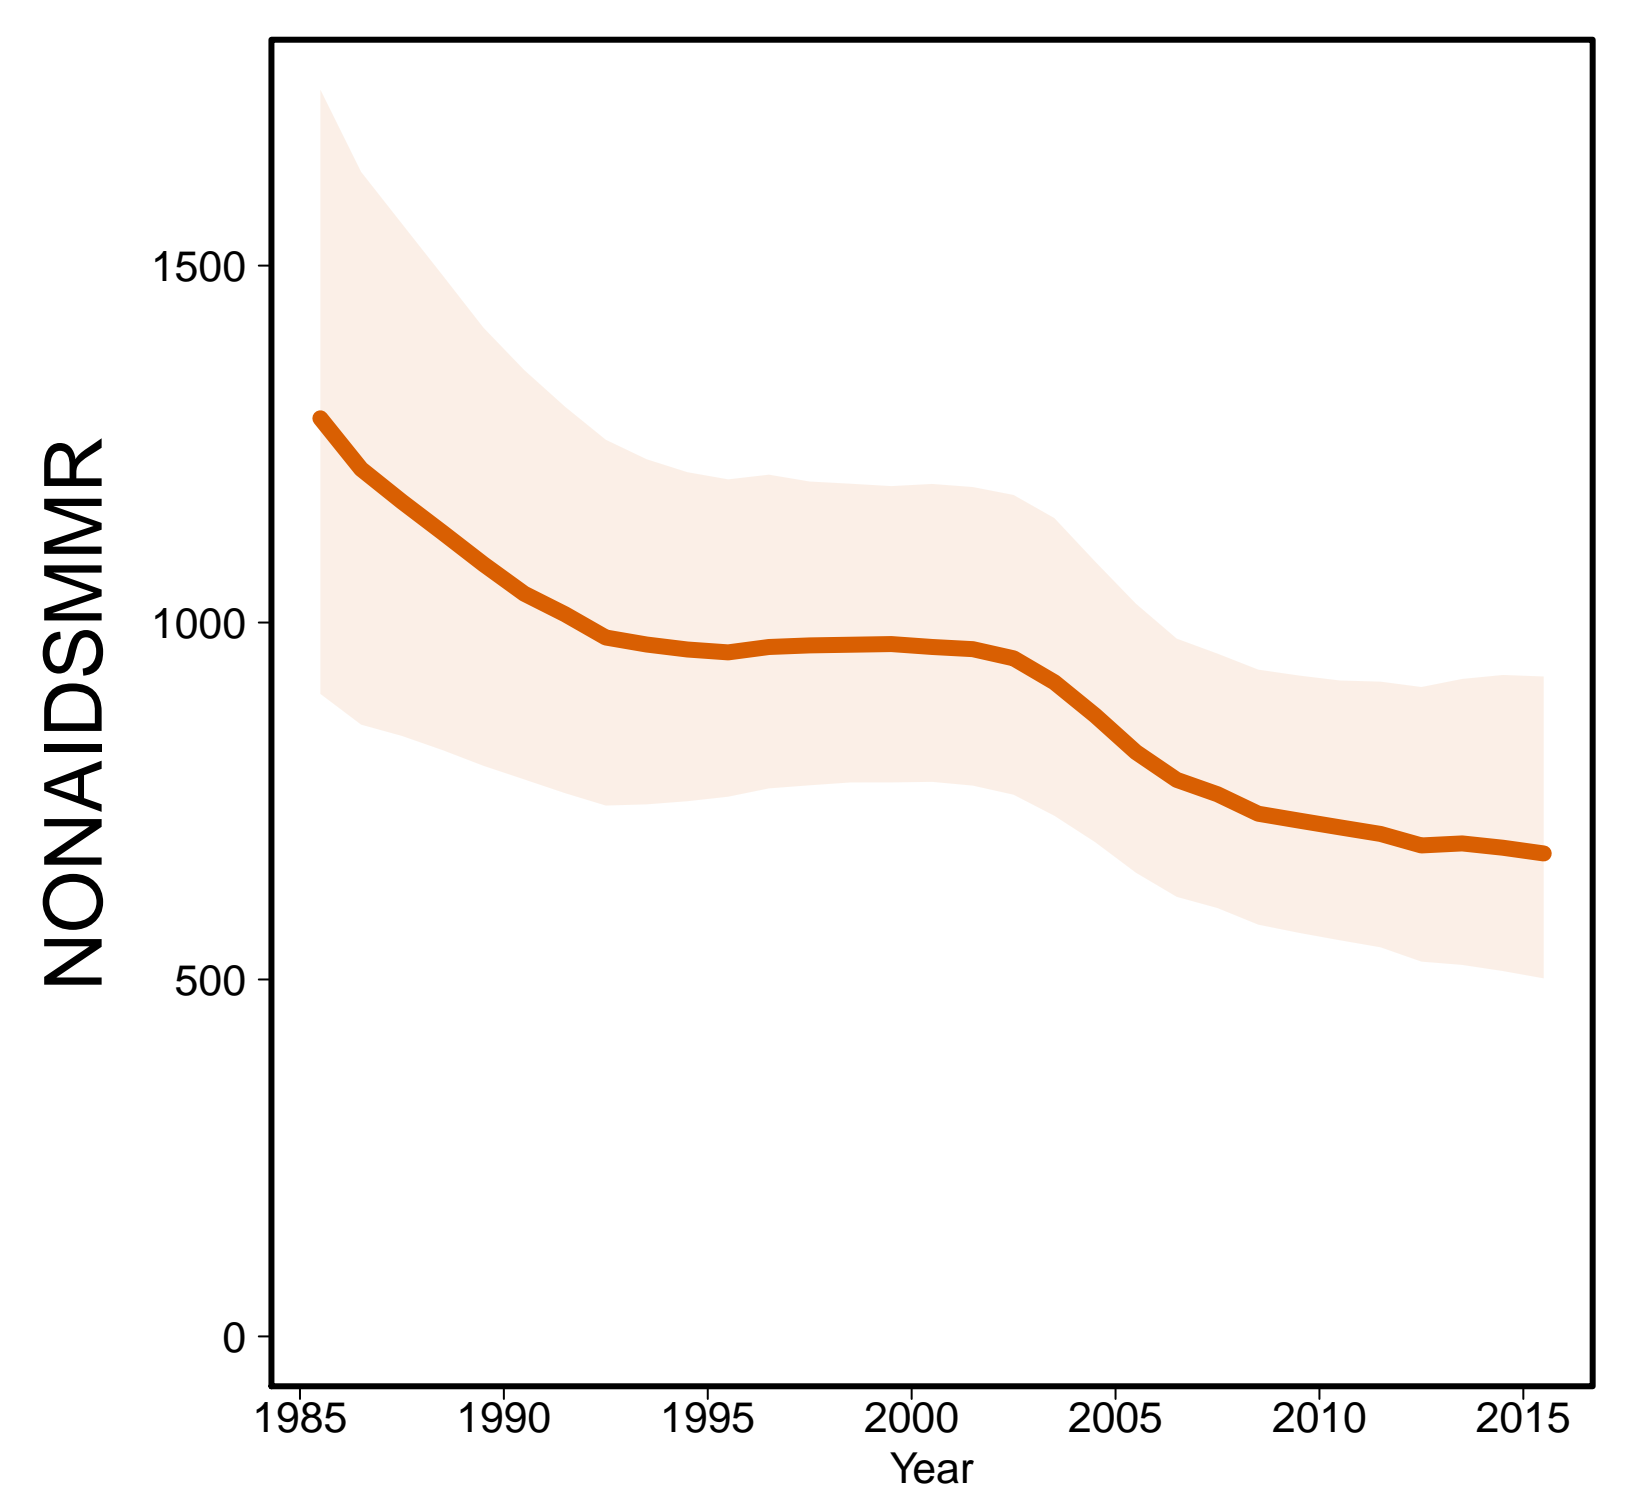

Aids MMR

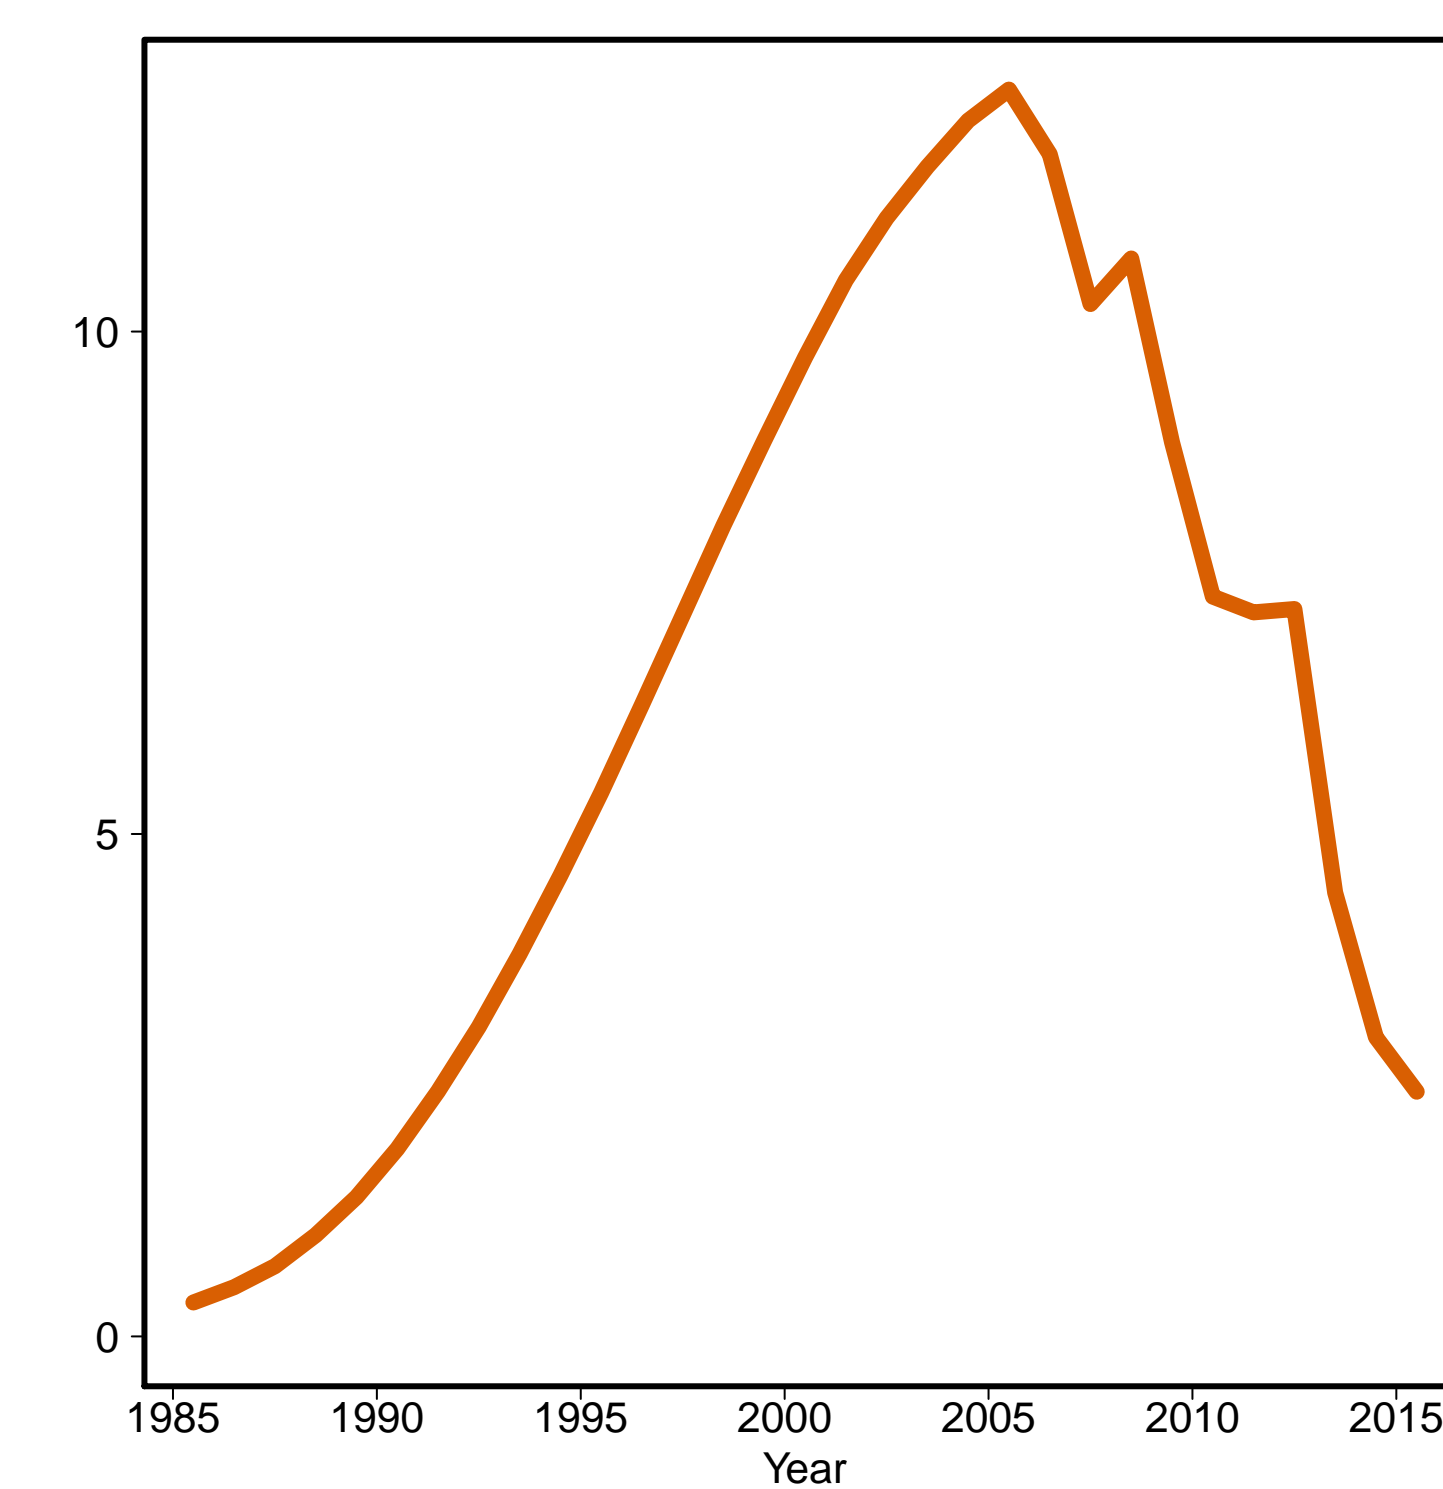

Guinea-Bissau [GNB]  
(Western Africa)

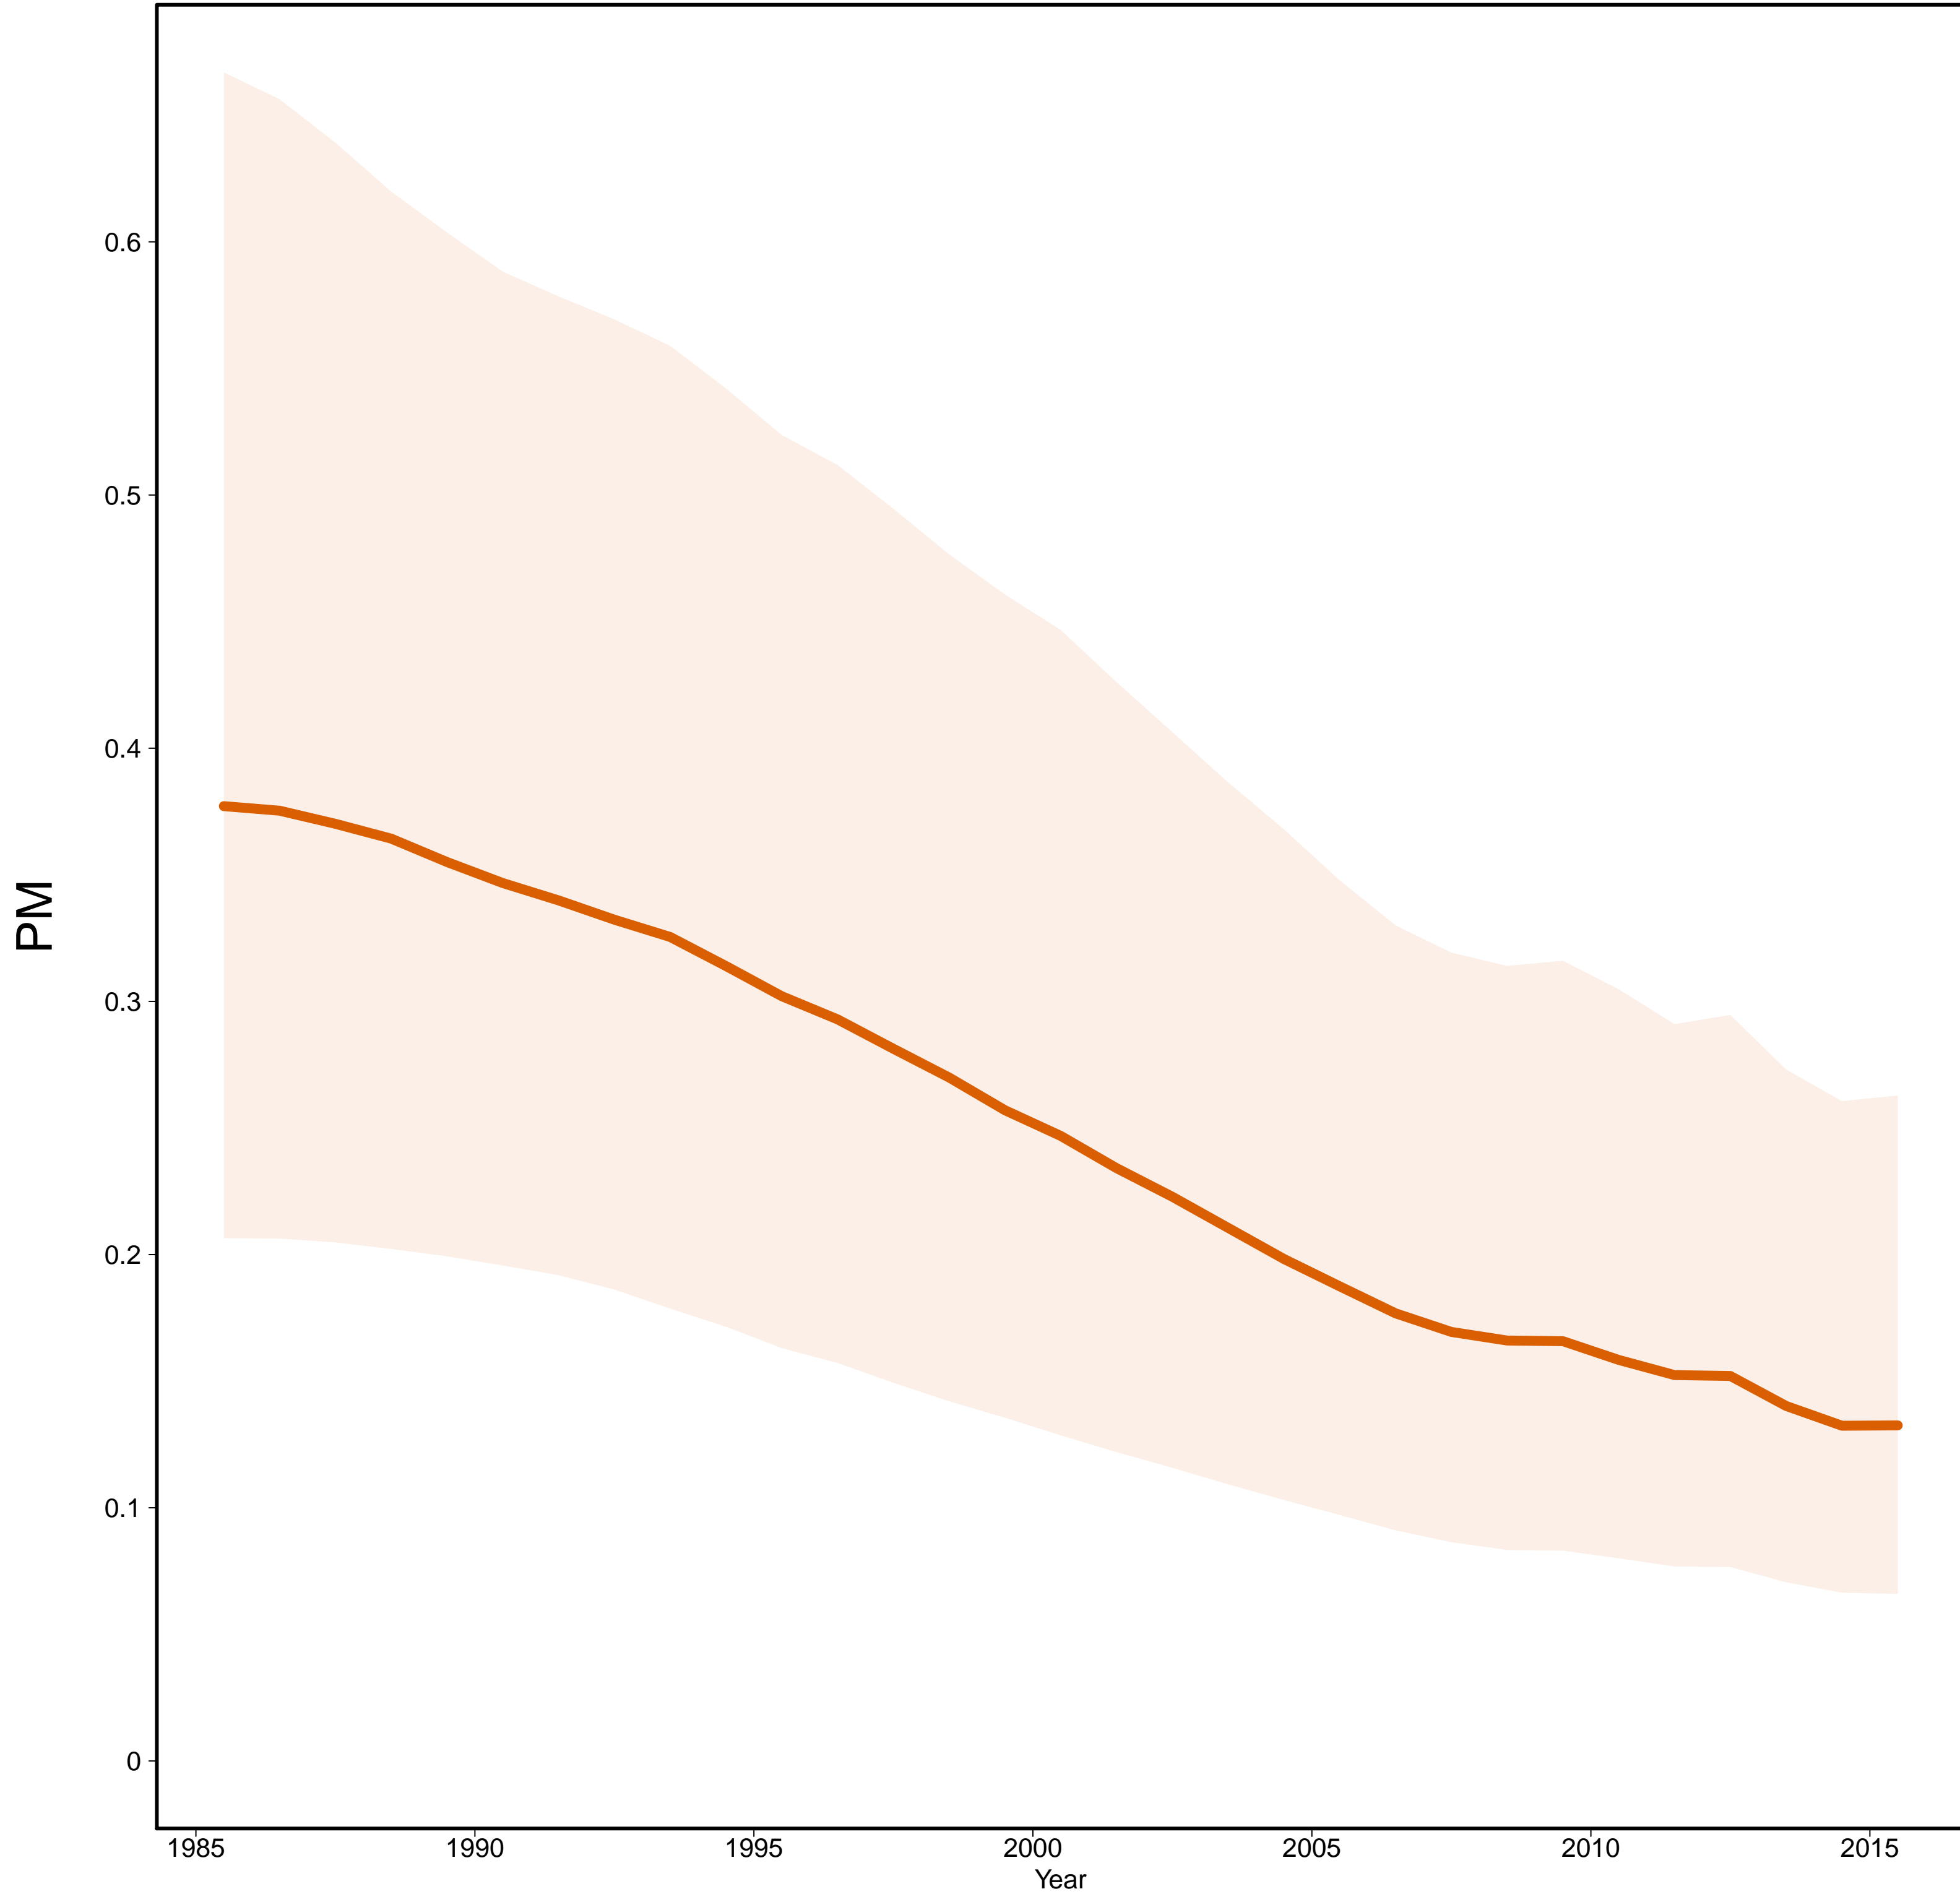

Guinea-Bissau [GNB]  
(Western Africa)

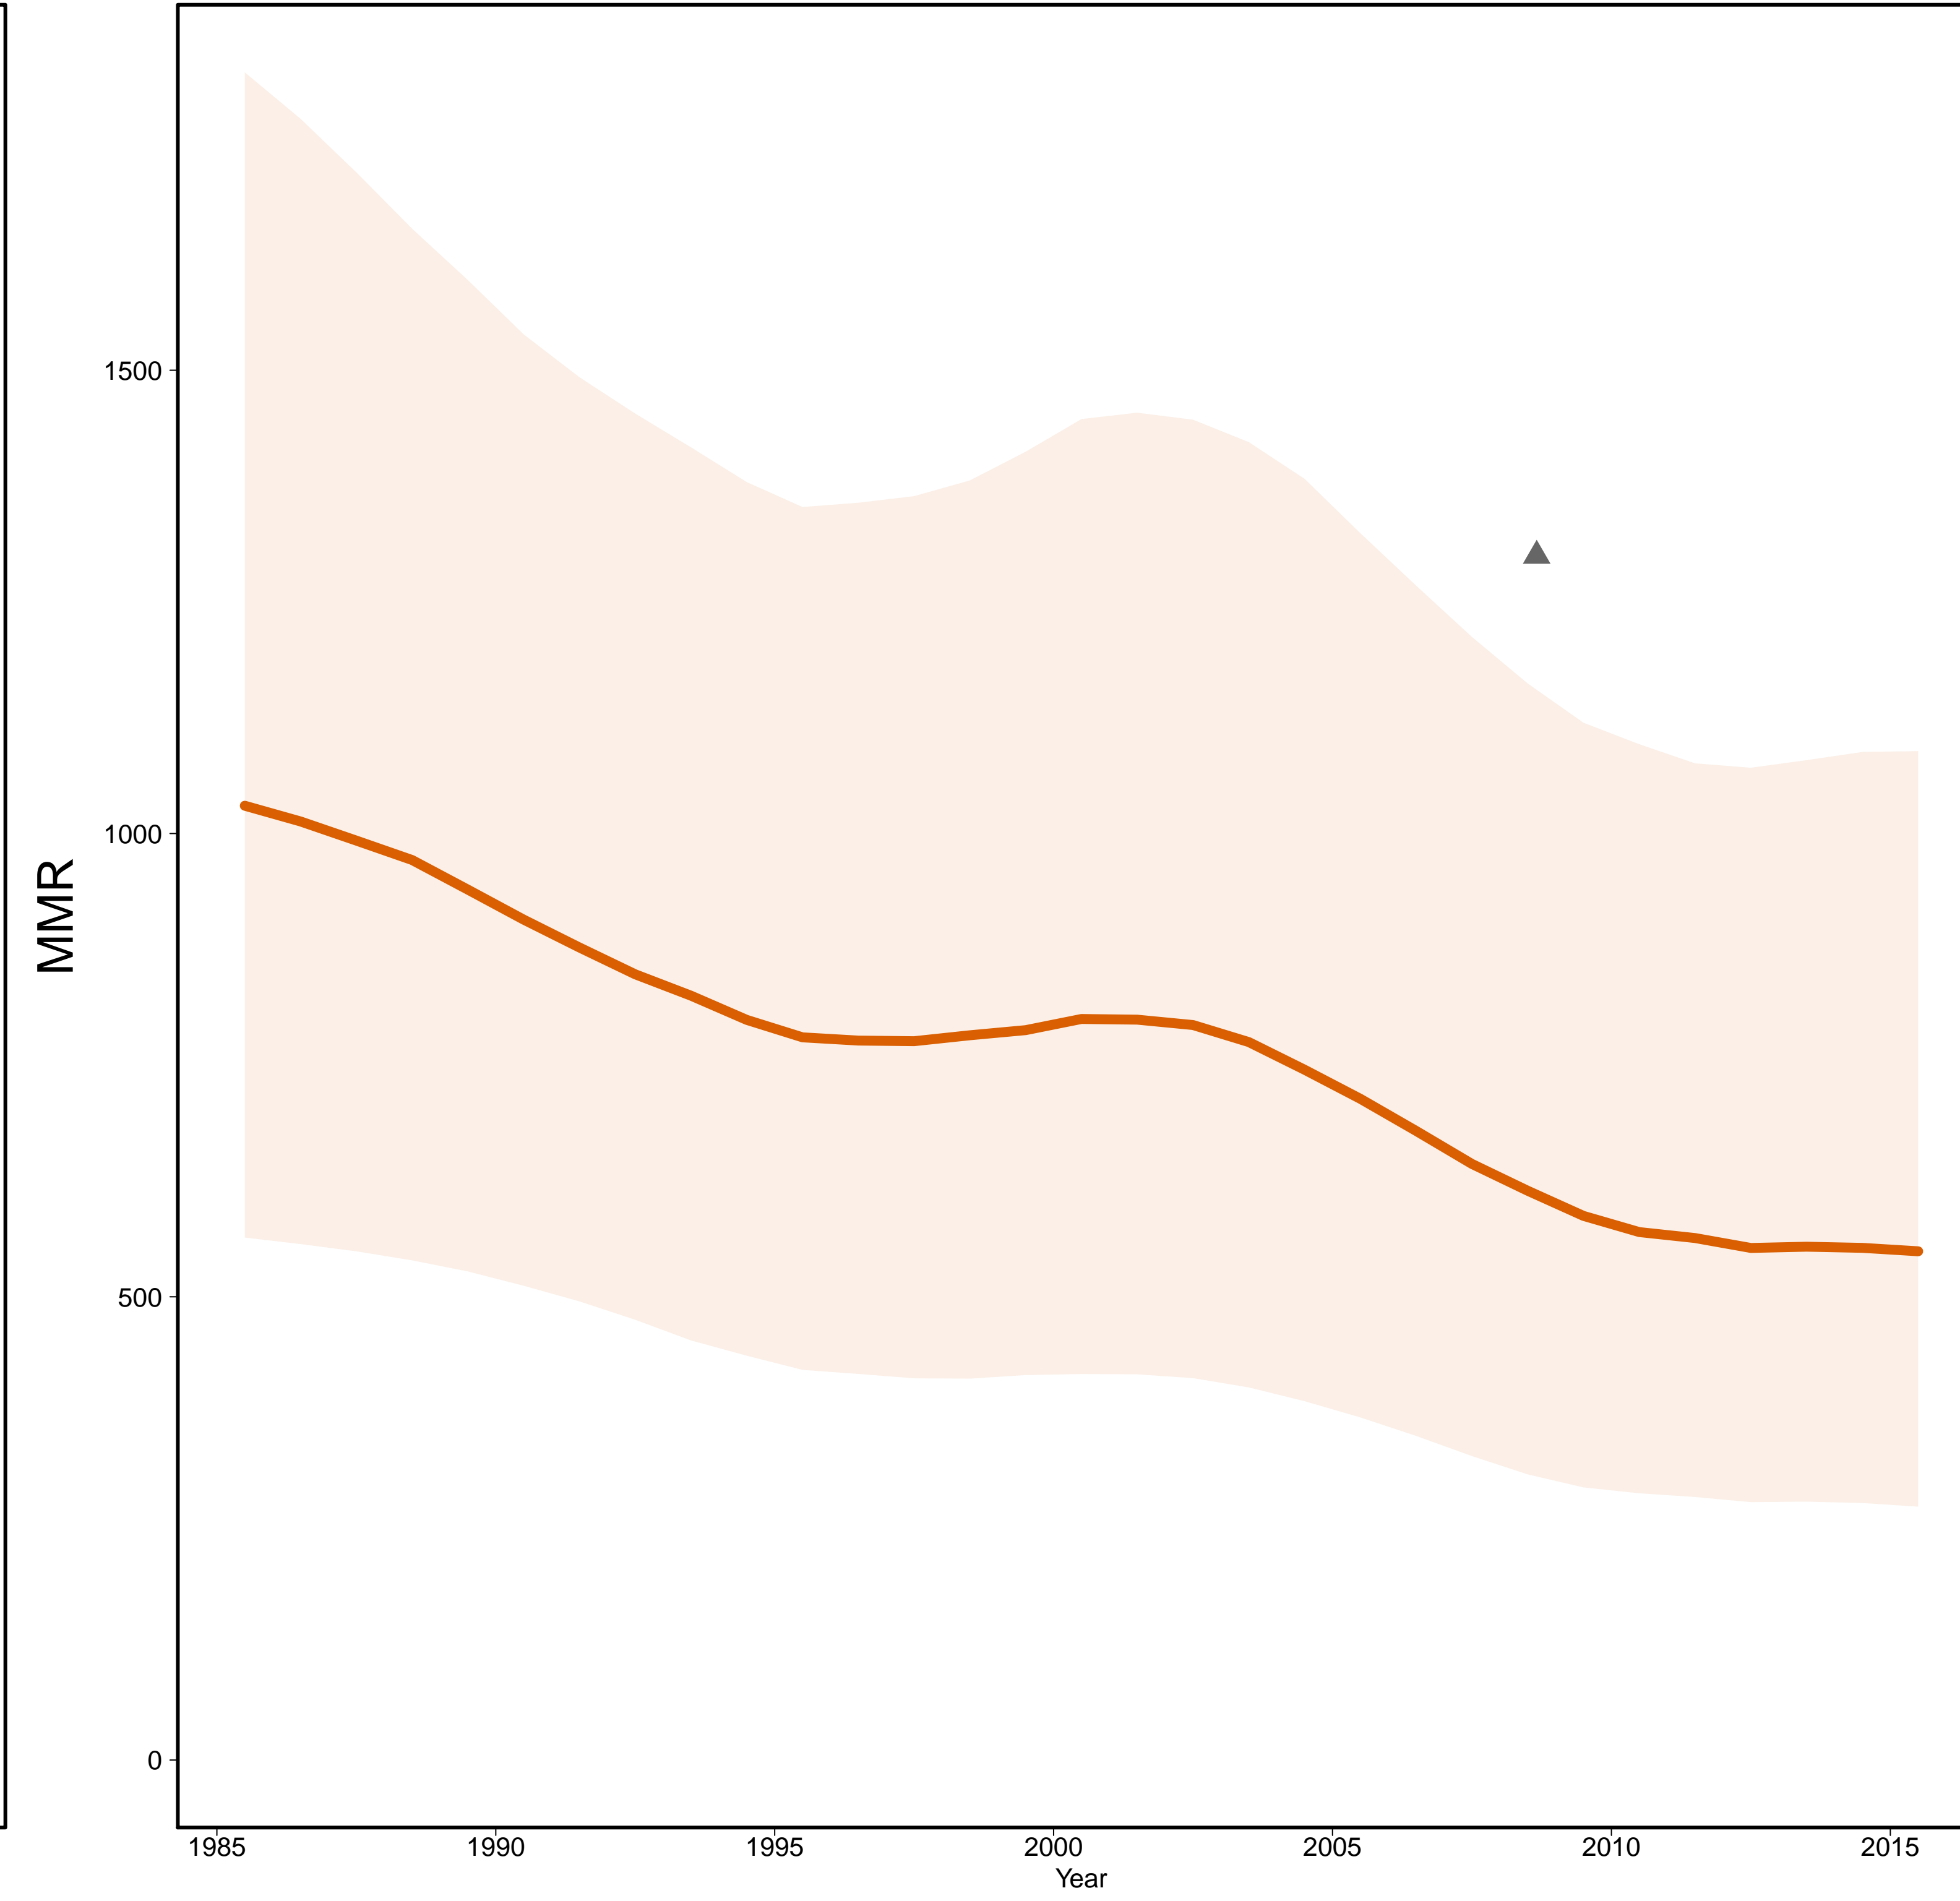

- Estimates —
- MMR Database 2015 —
- ◊ Observed Data
- ◆ Adjusted Data
- Data type —
- ▲ Excluded misc. studies

Gross Domestic Product

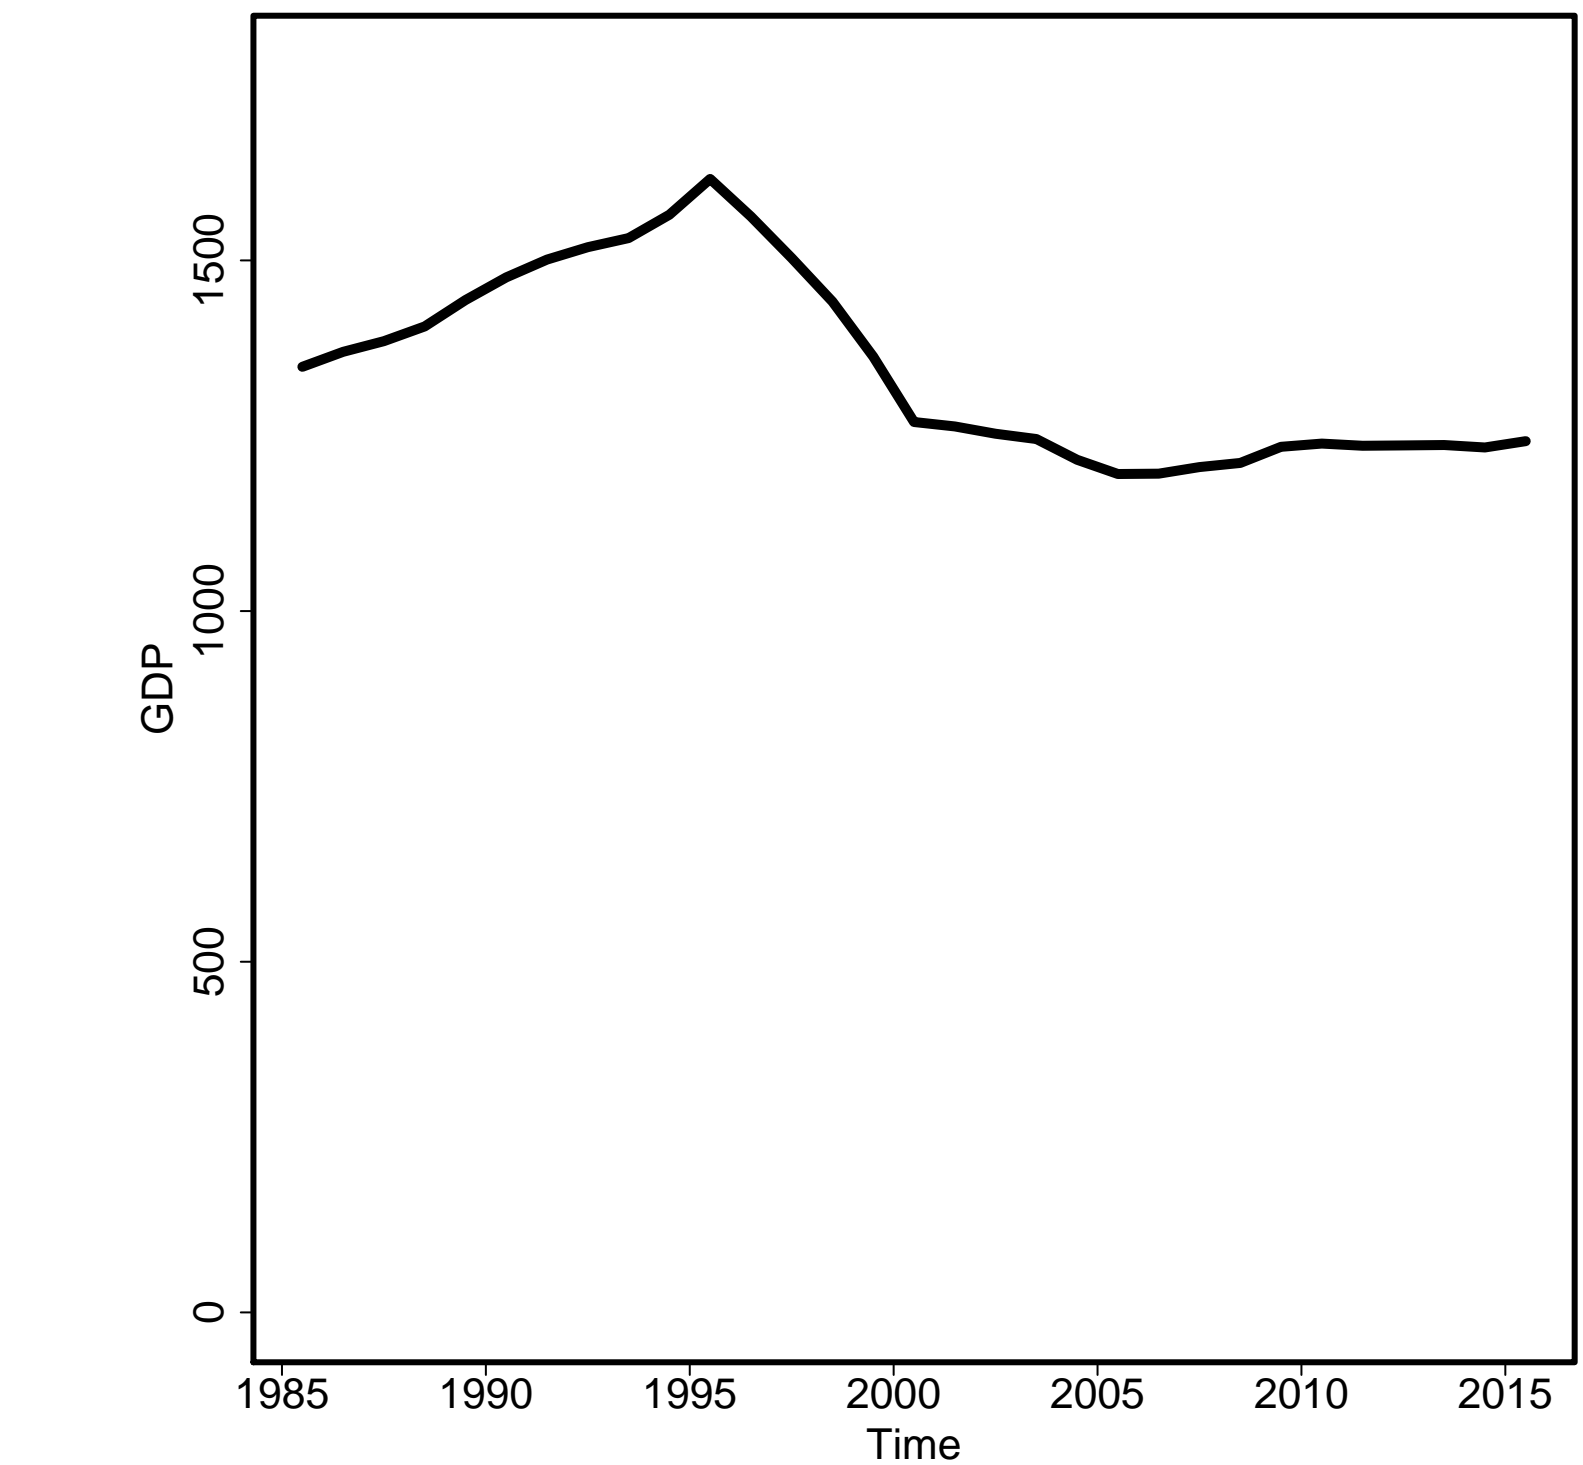

General Fertility Rate

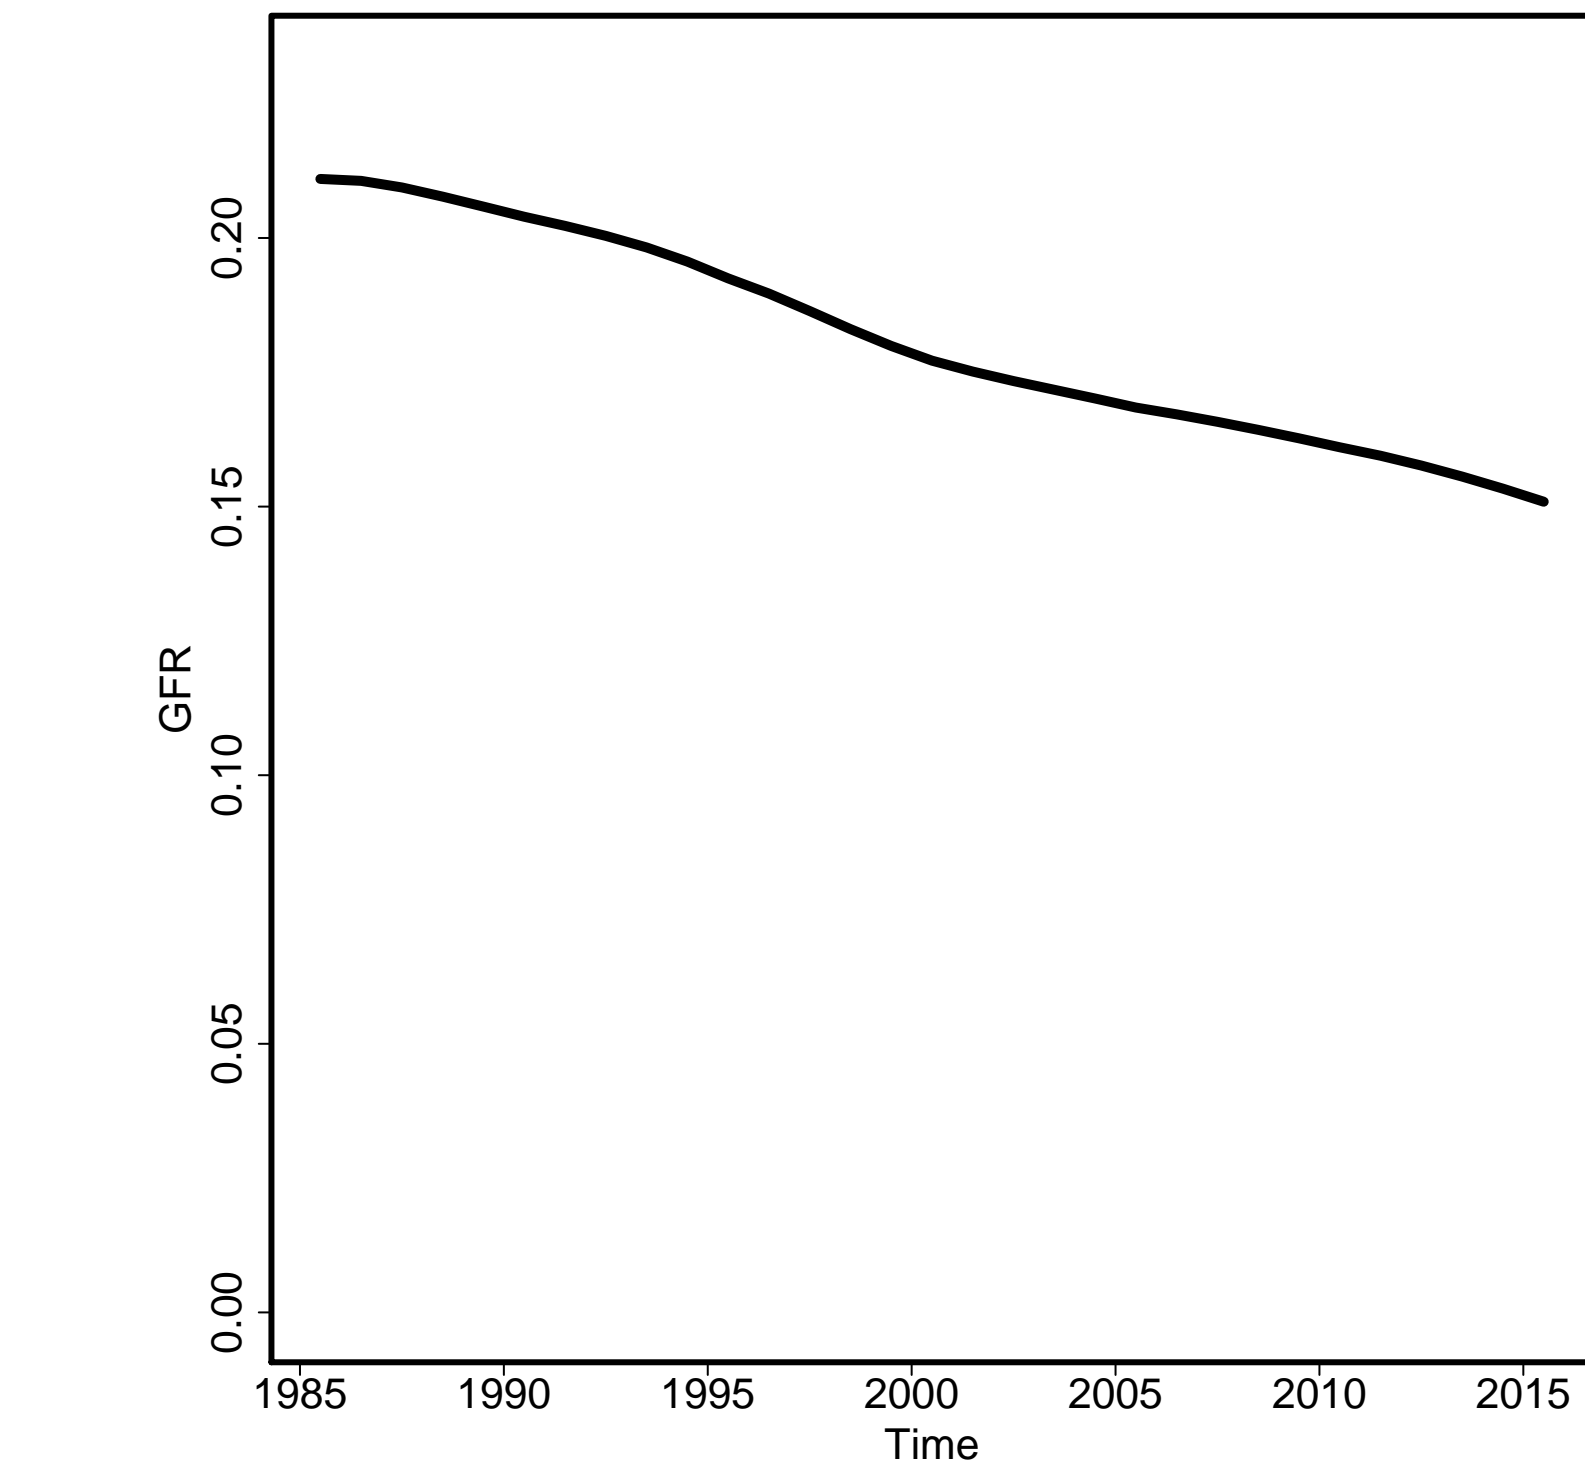

Skilled Attendance to Birth

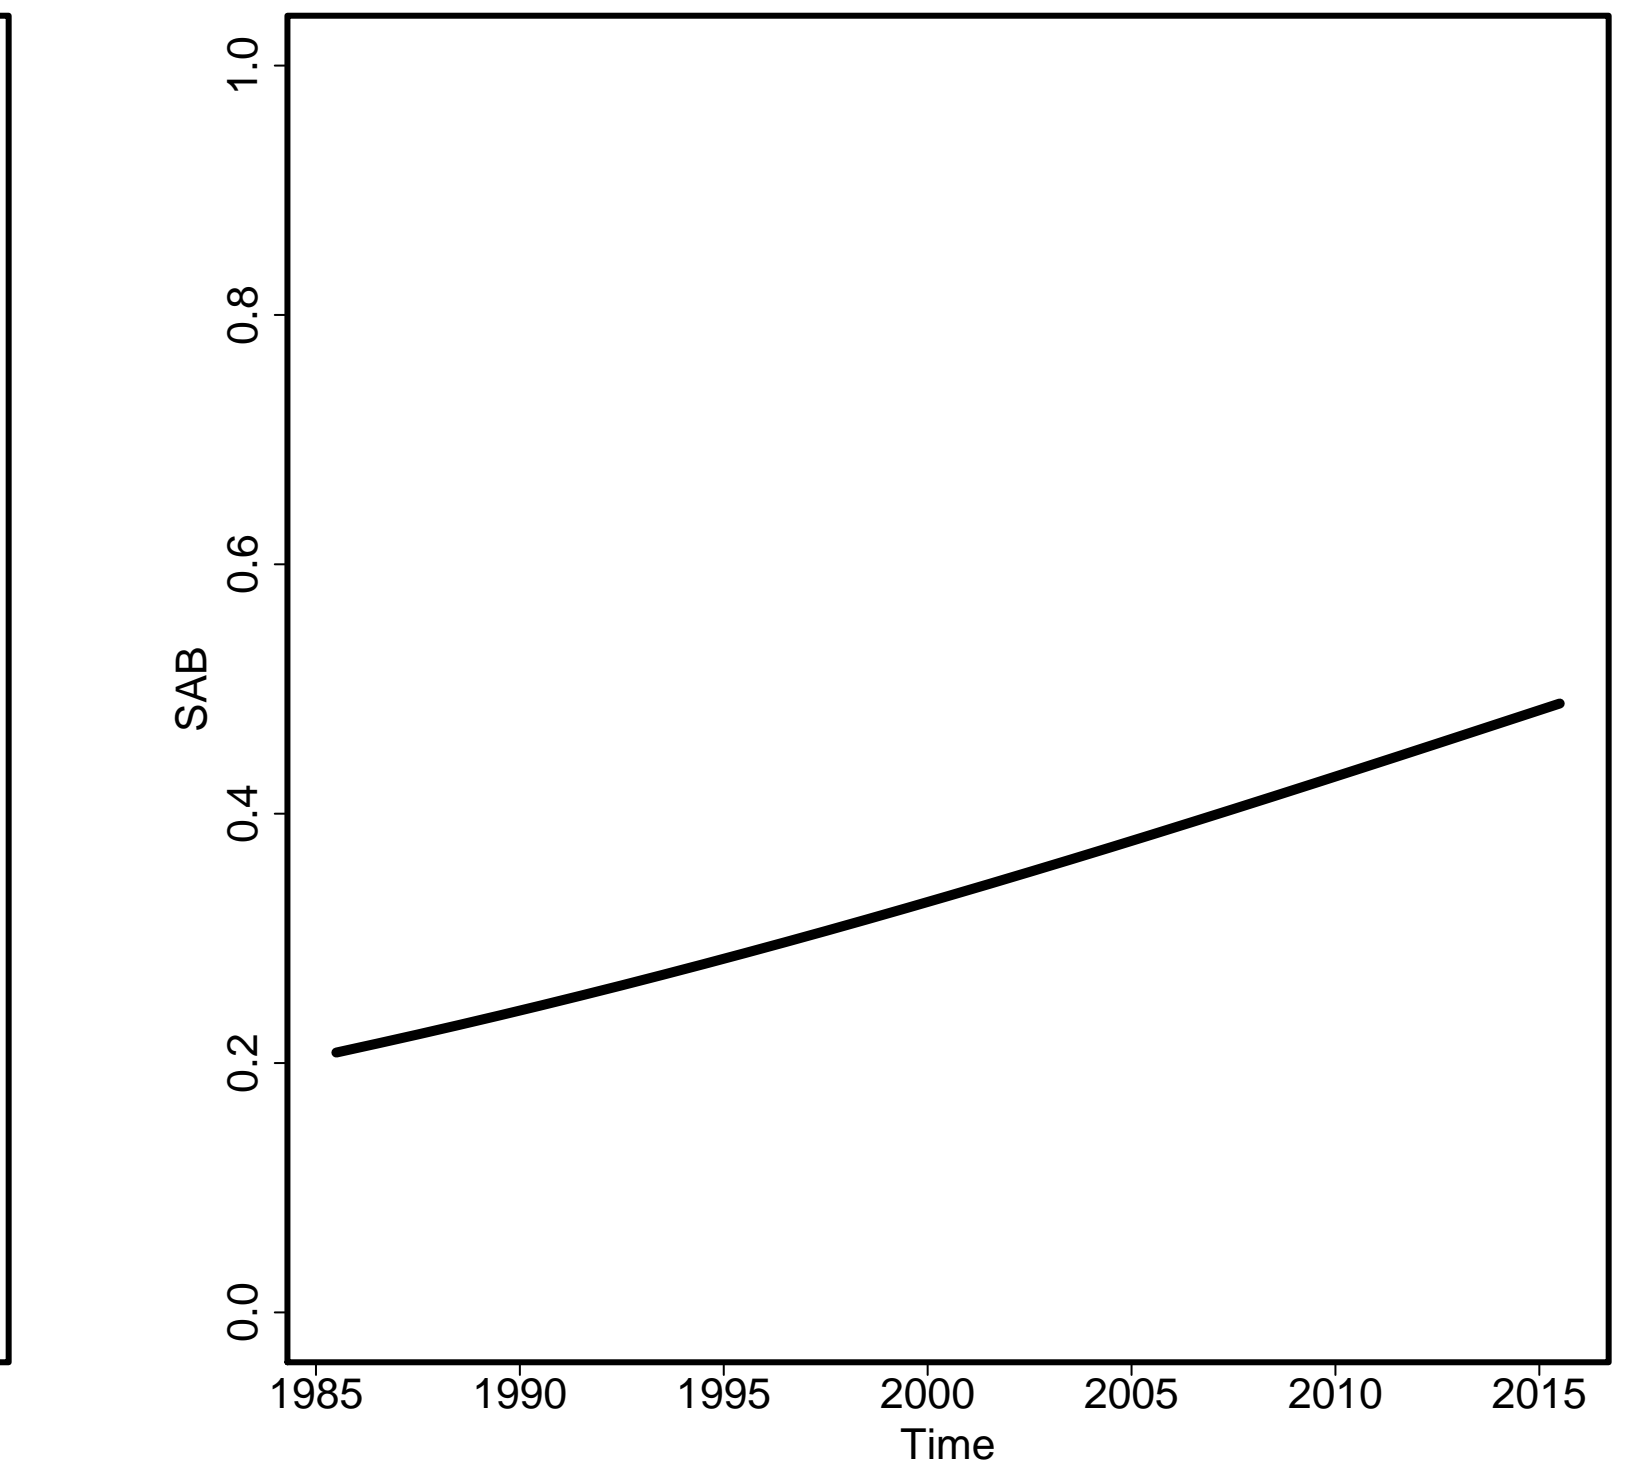

Envelope/Births

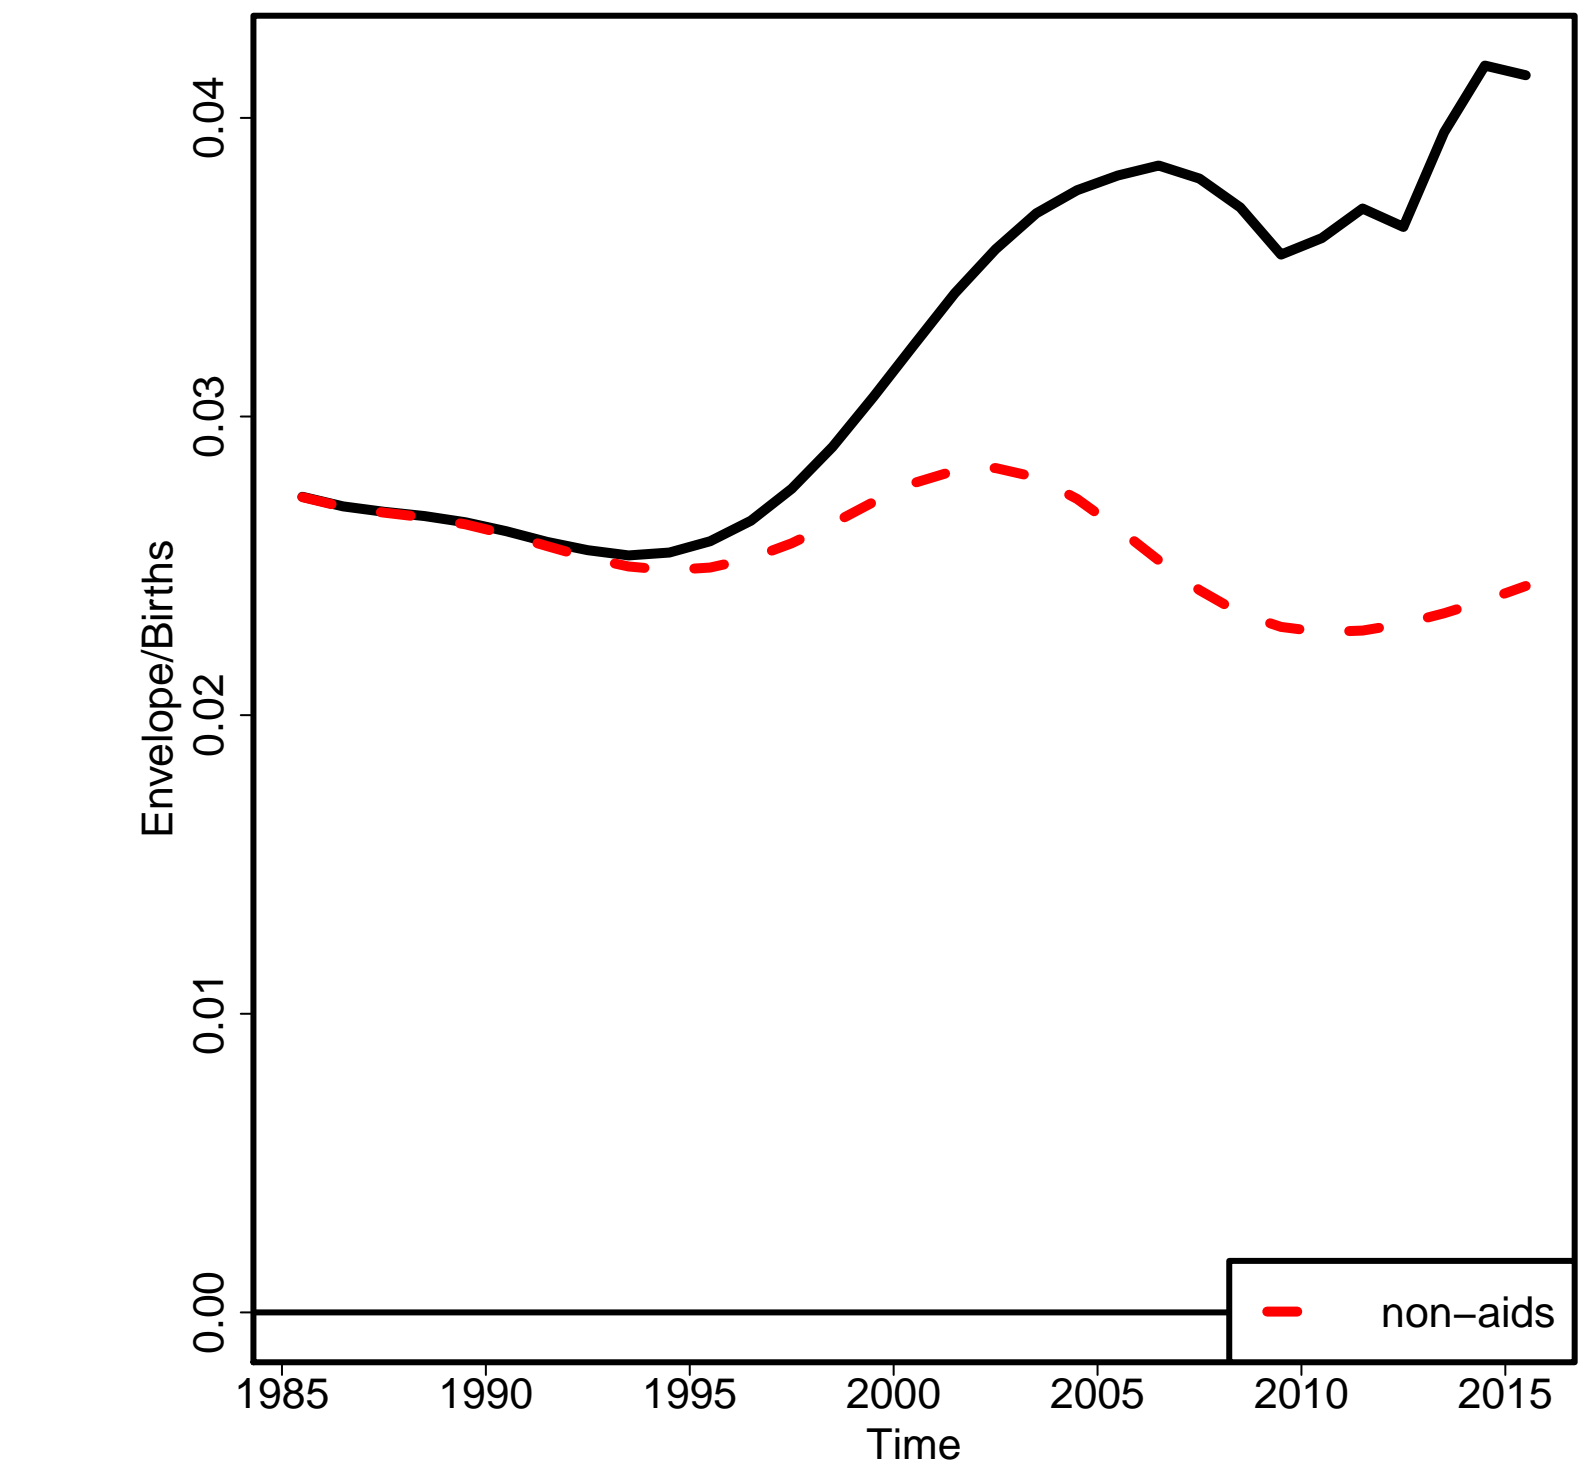

Non-aids MMR

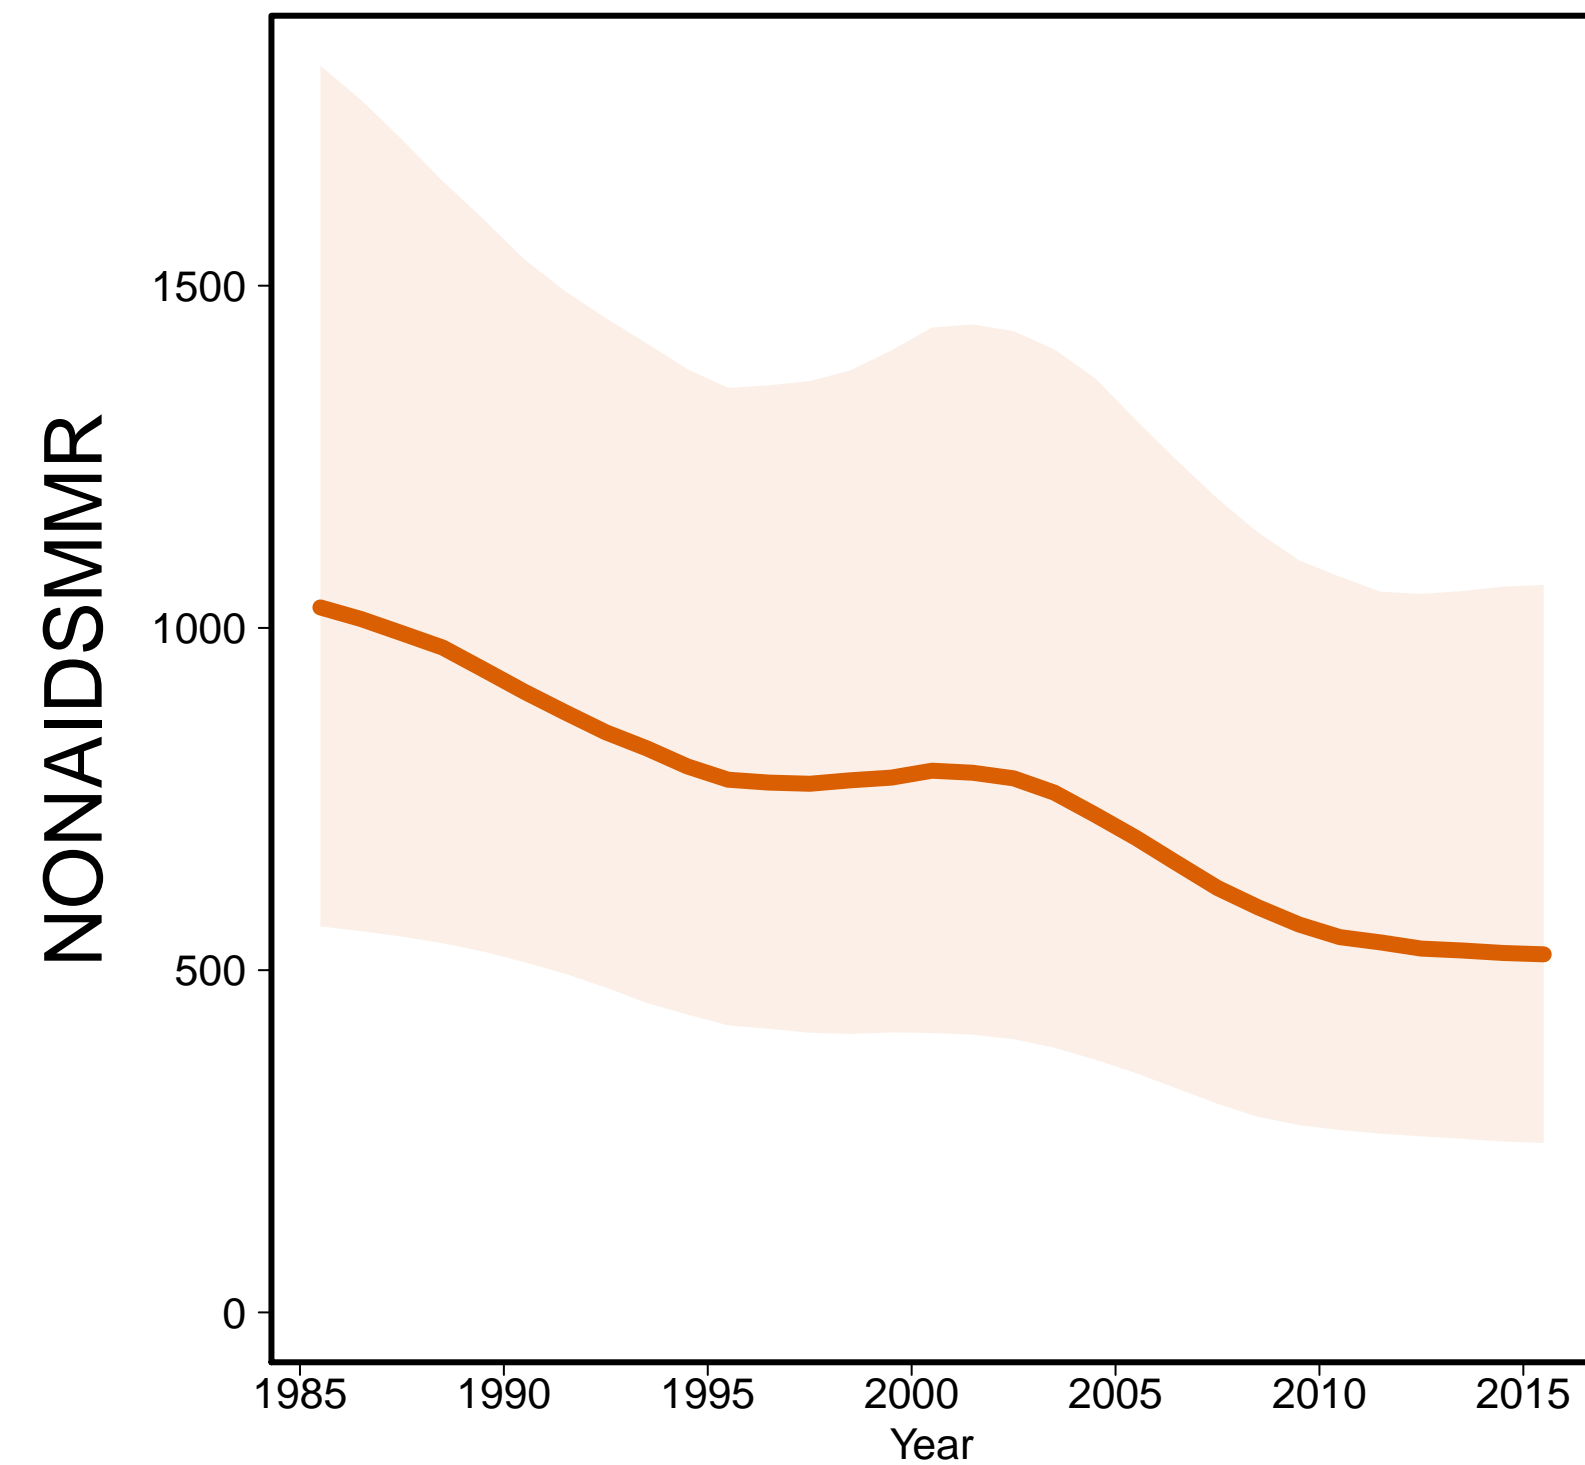

Aids MMR

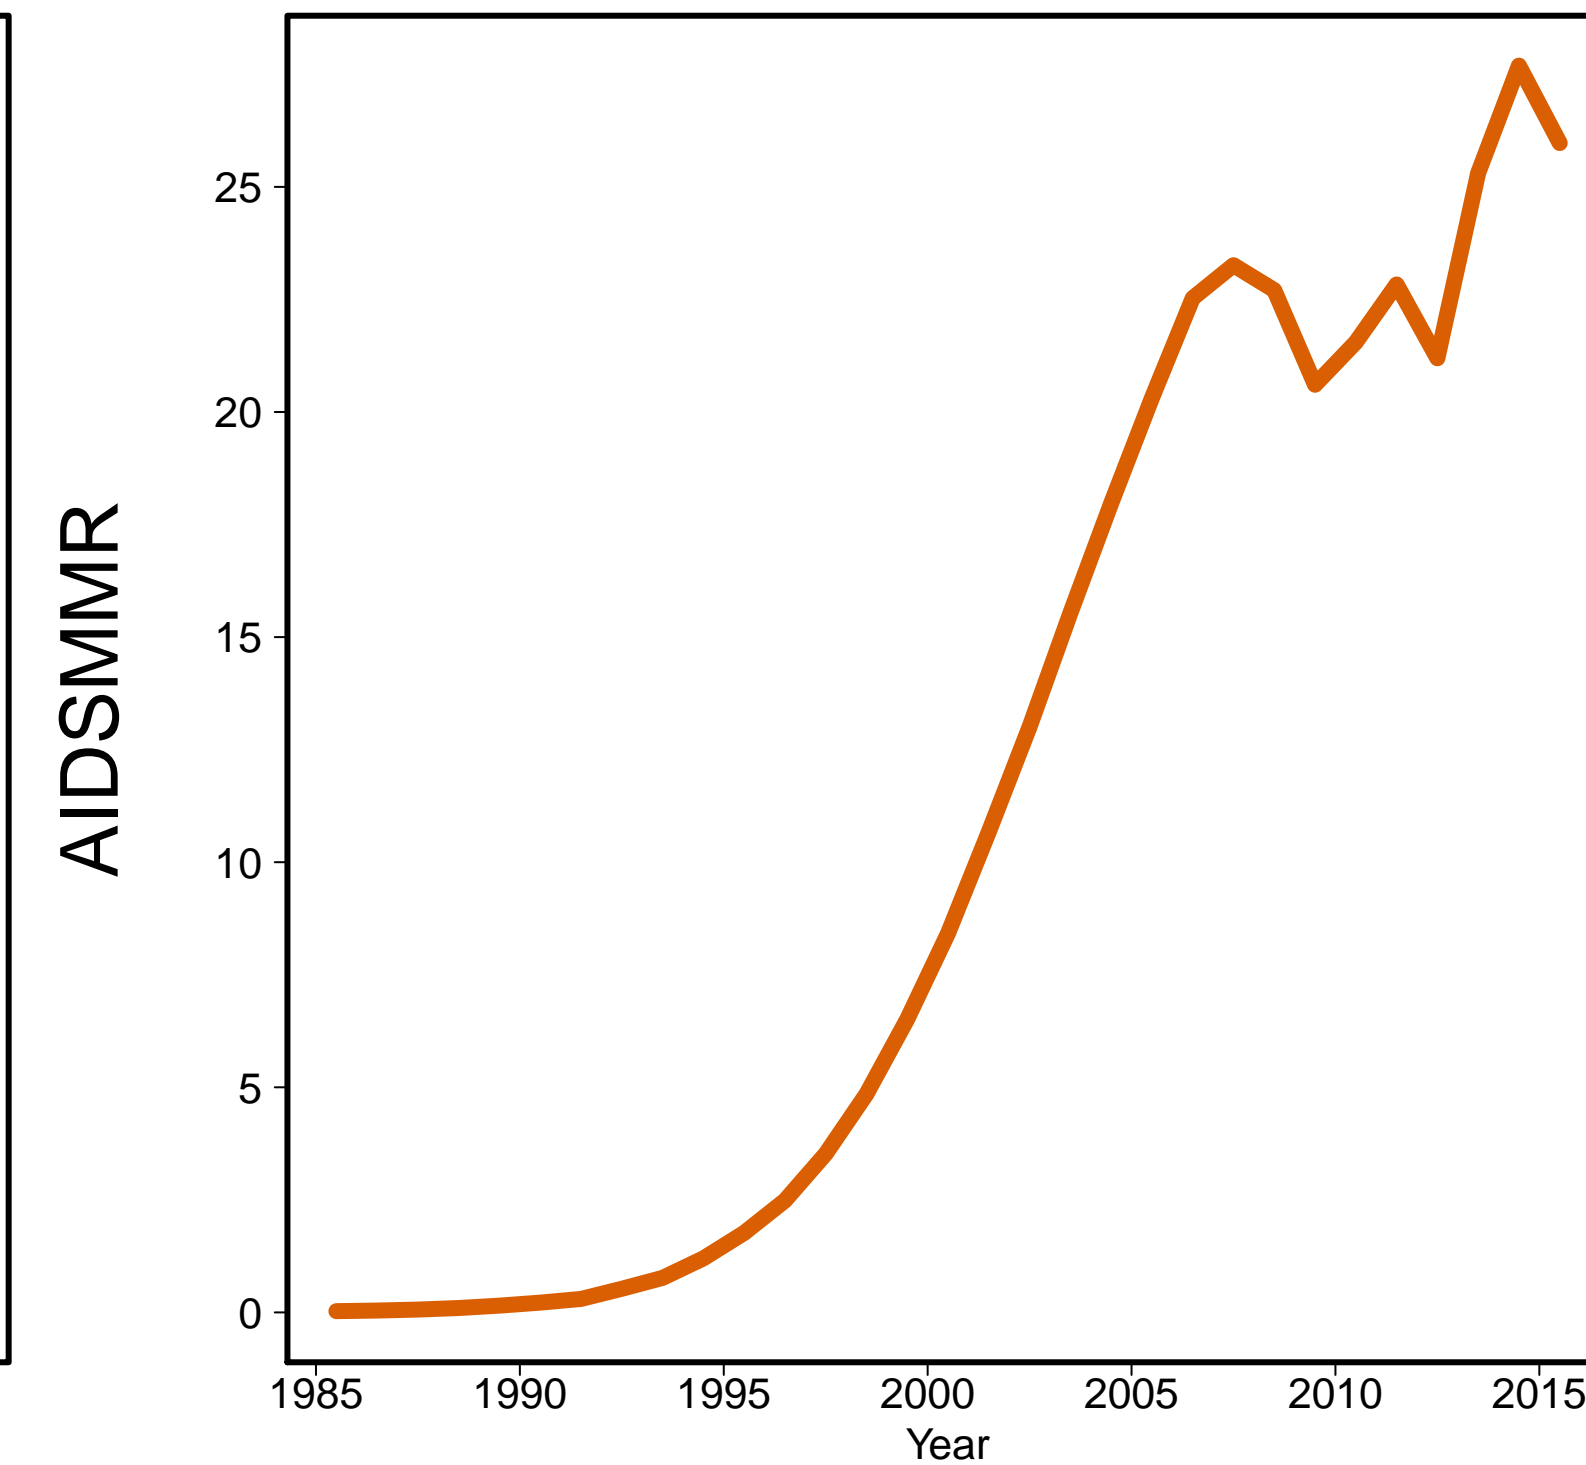

Guyana [GUY]  
(South America)

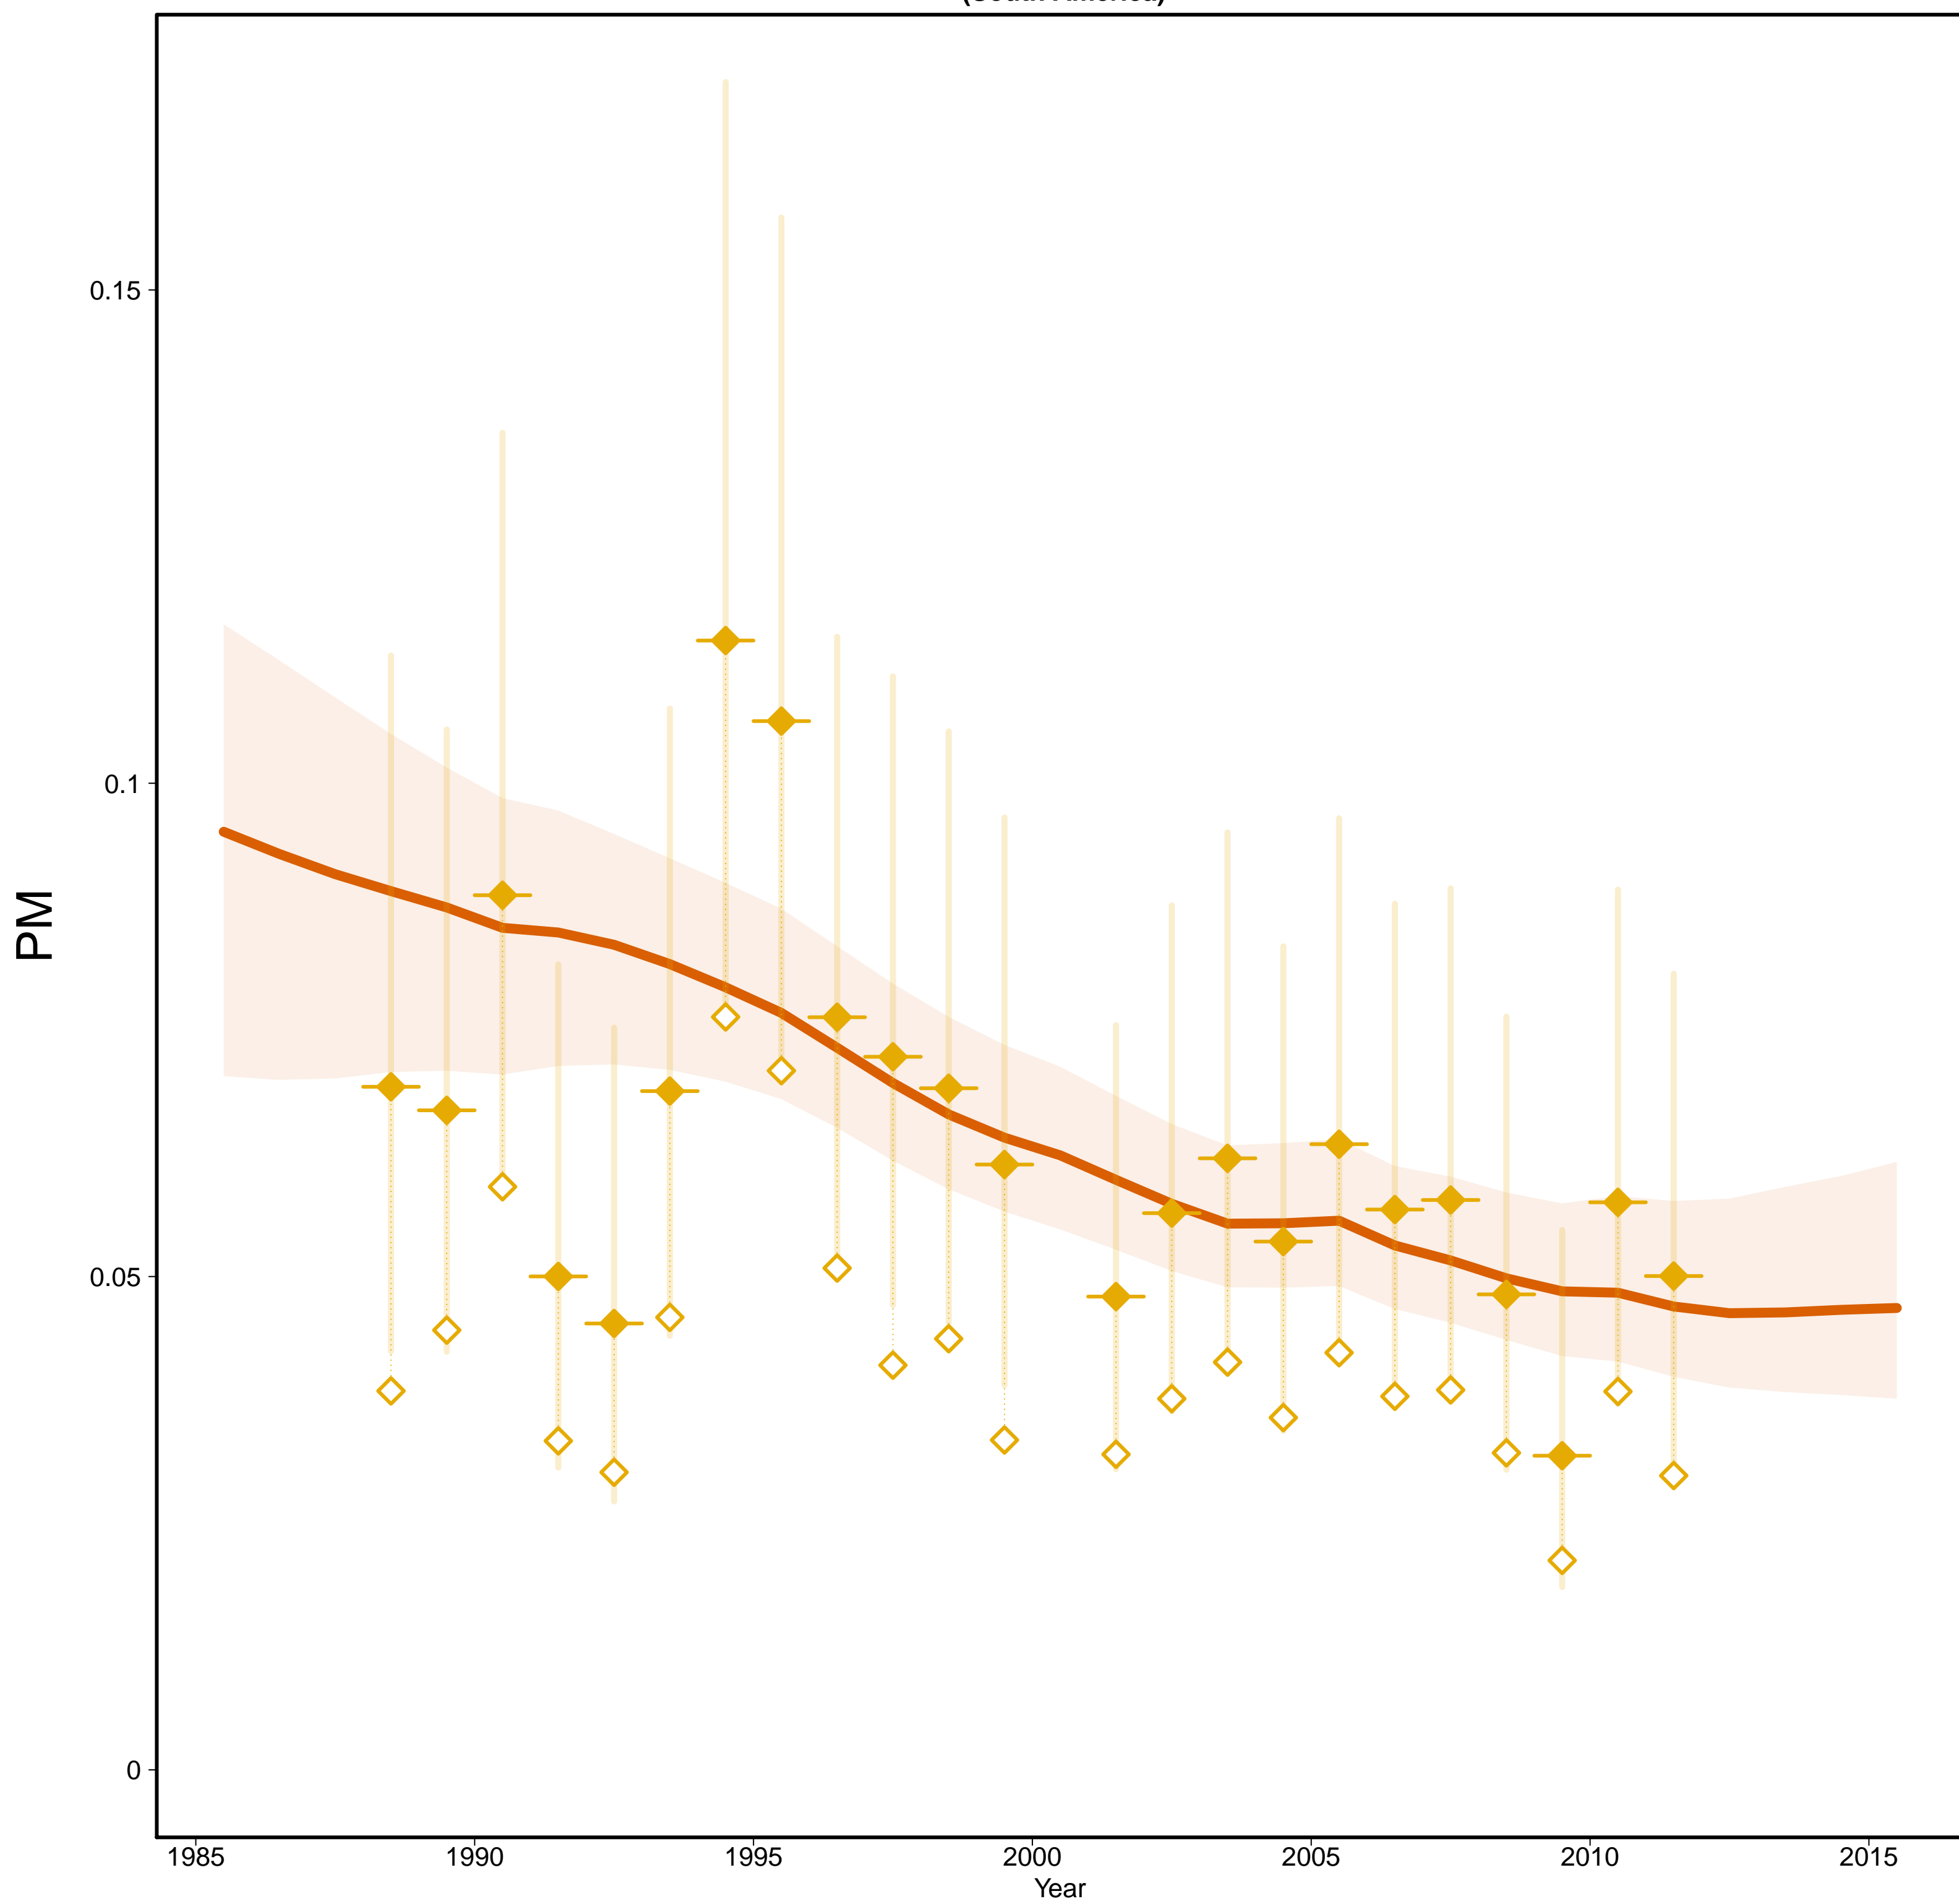

Guyana [GUY]  
(South America)

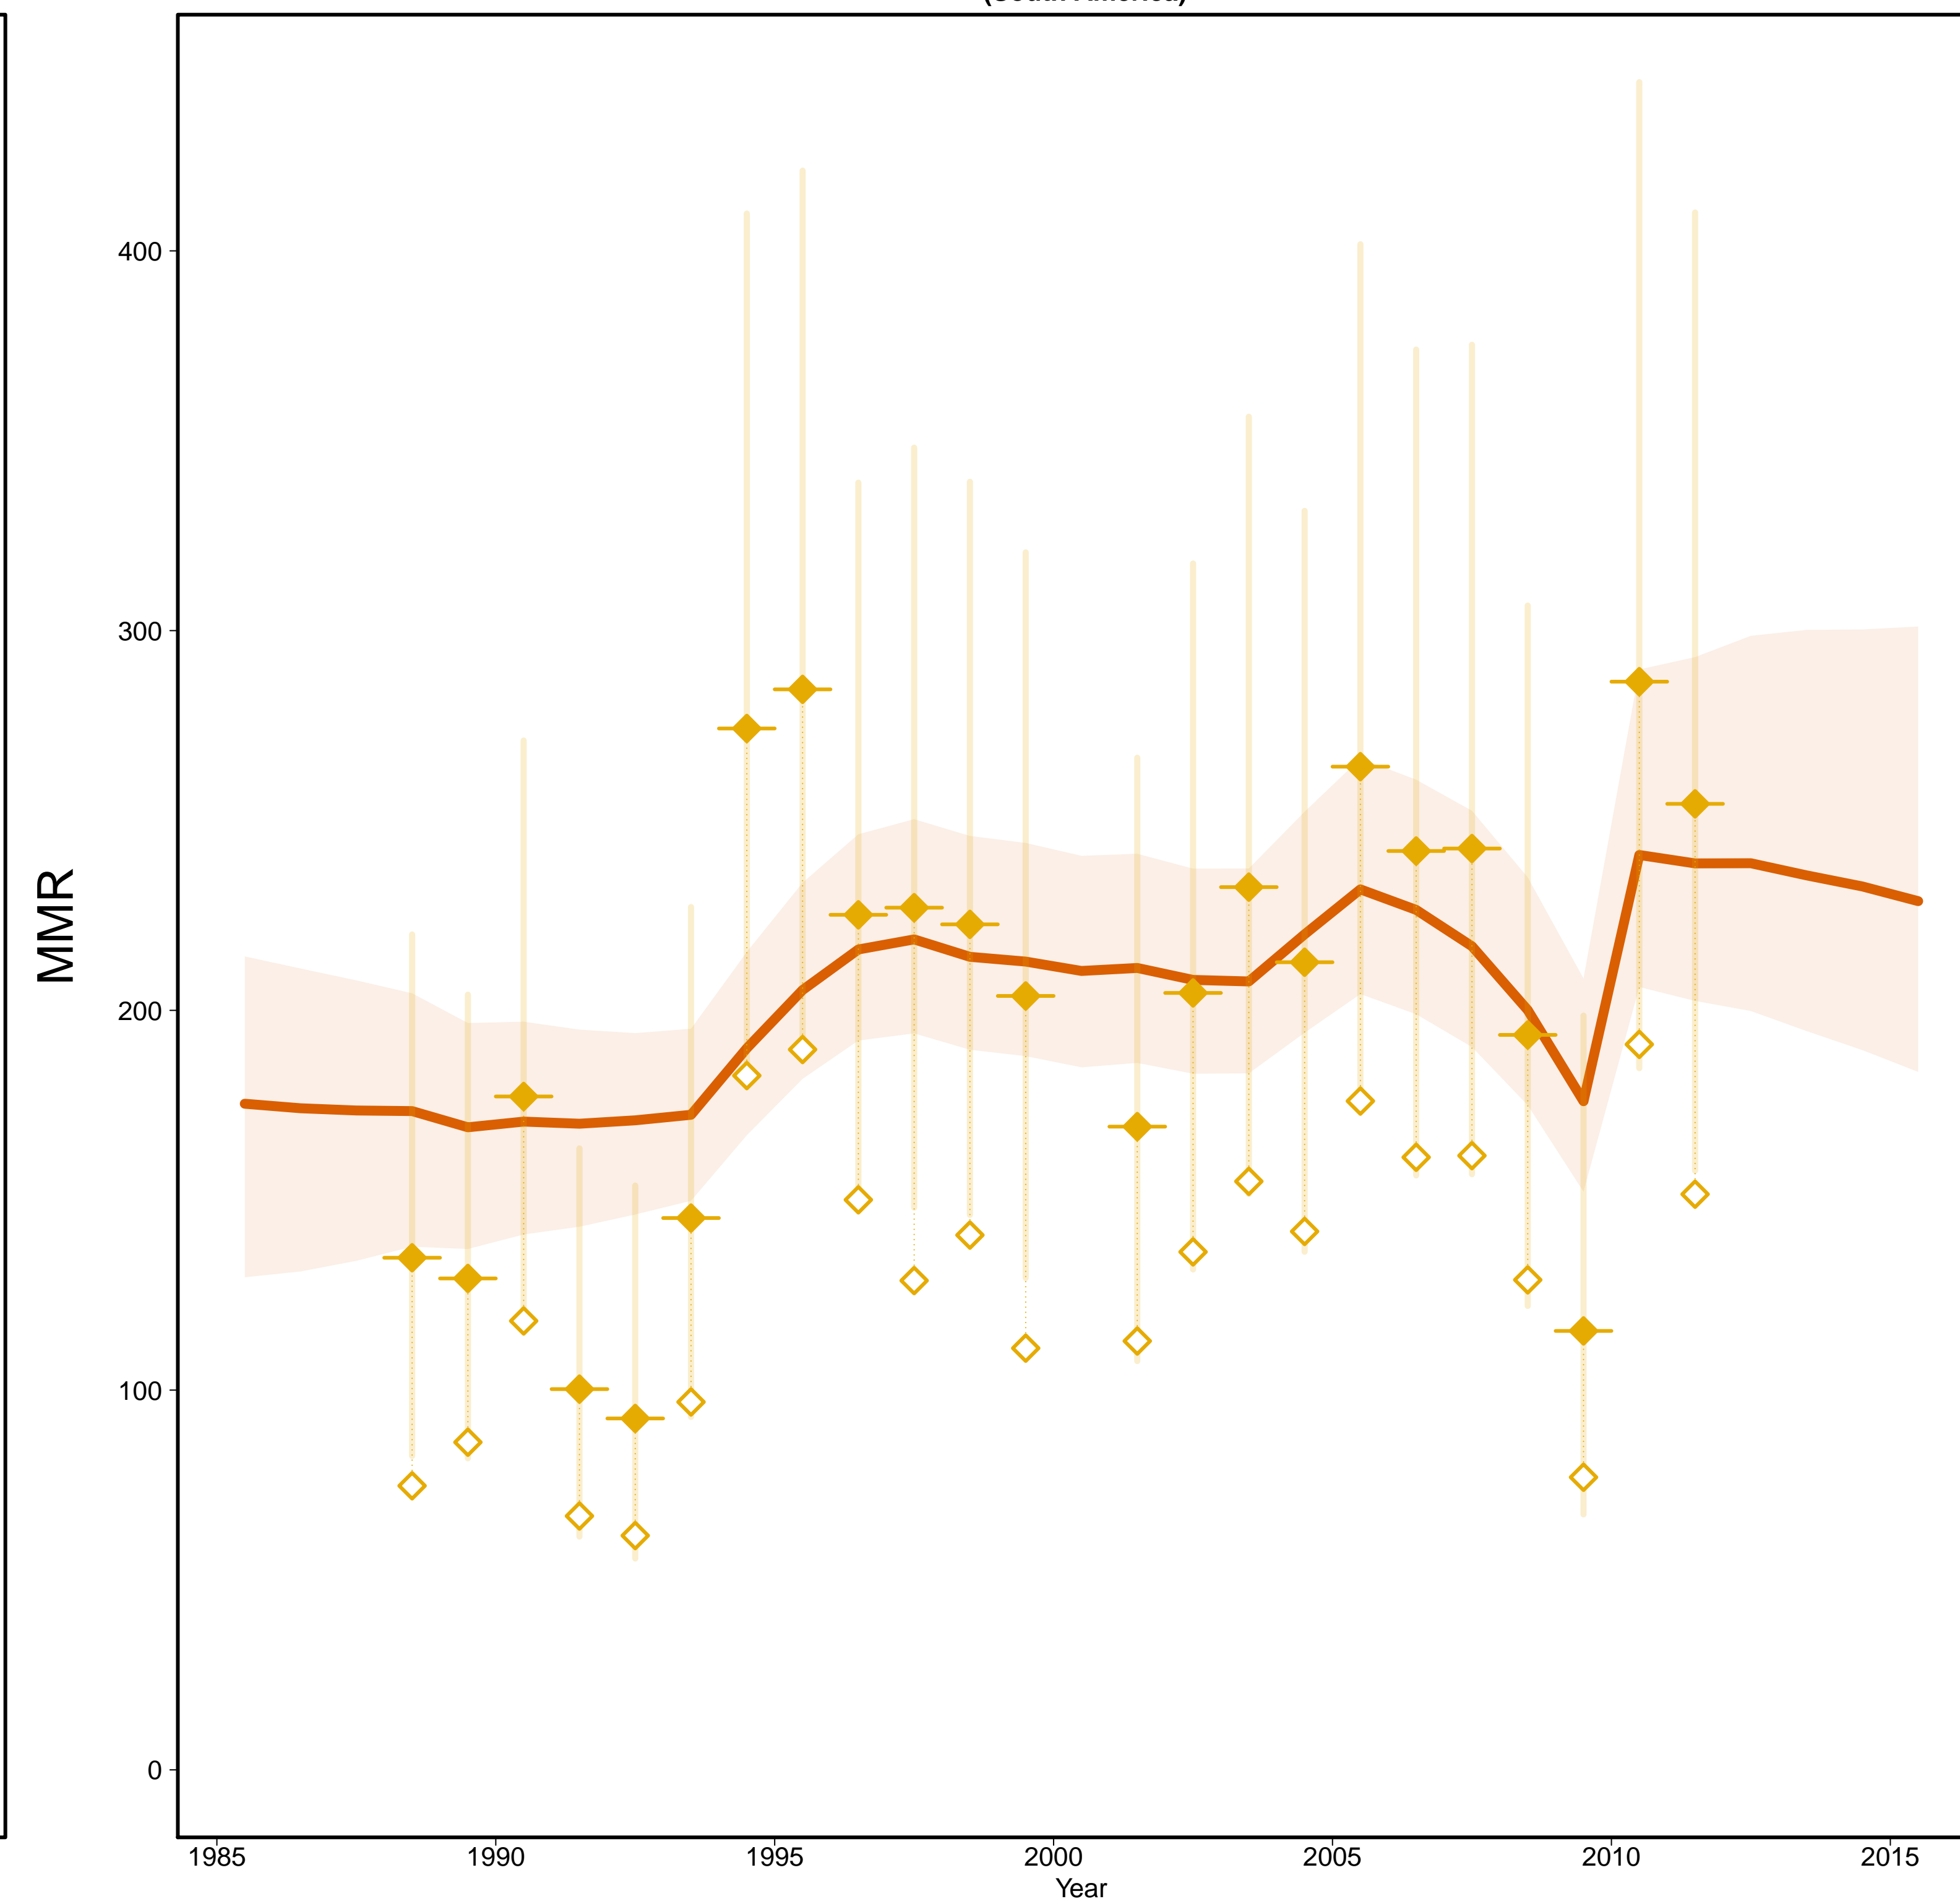

- Estimates —
- MMR Database 2015 —
- ◇ Observed Data
- ◆ Adjusted Data
- Data type —
- ◆ VR

Gross Domestic Product

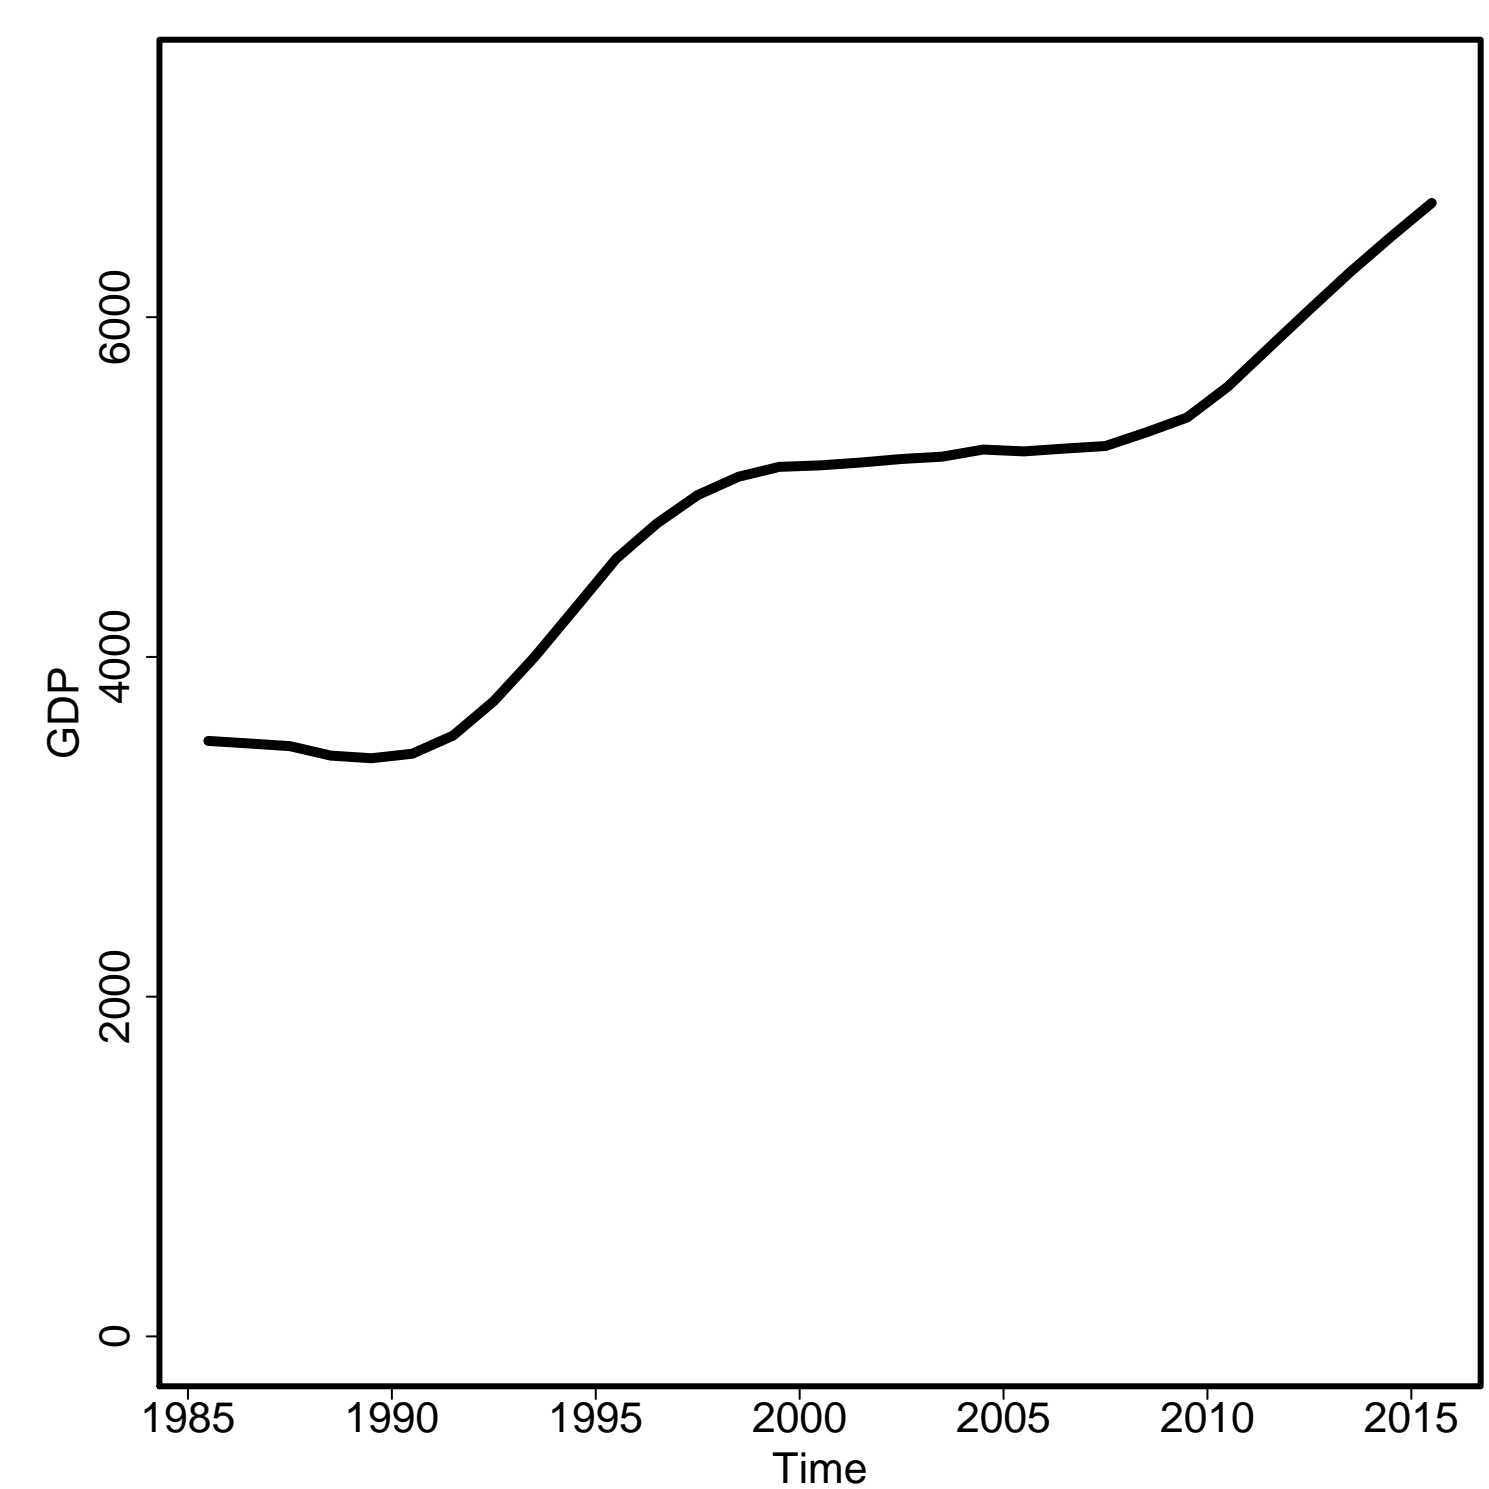

General Fertility Rate

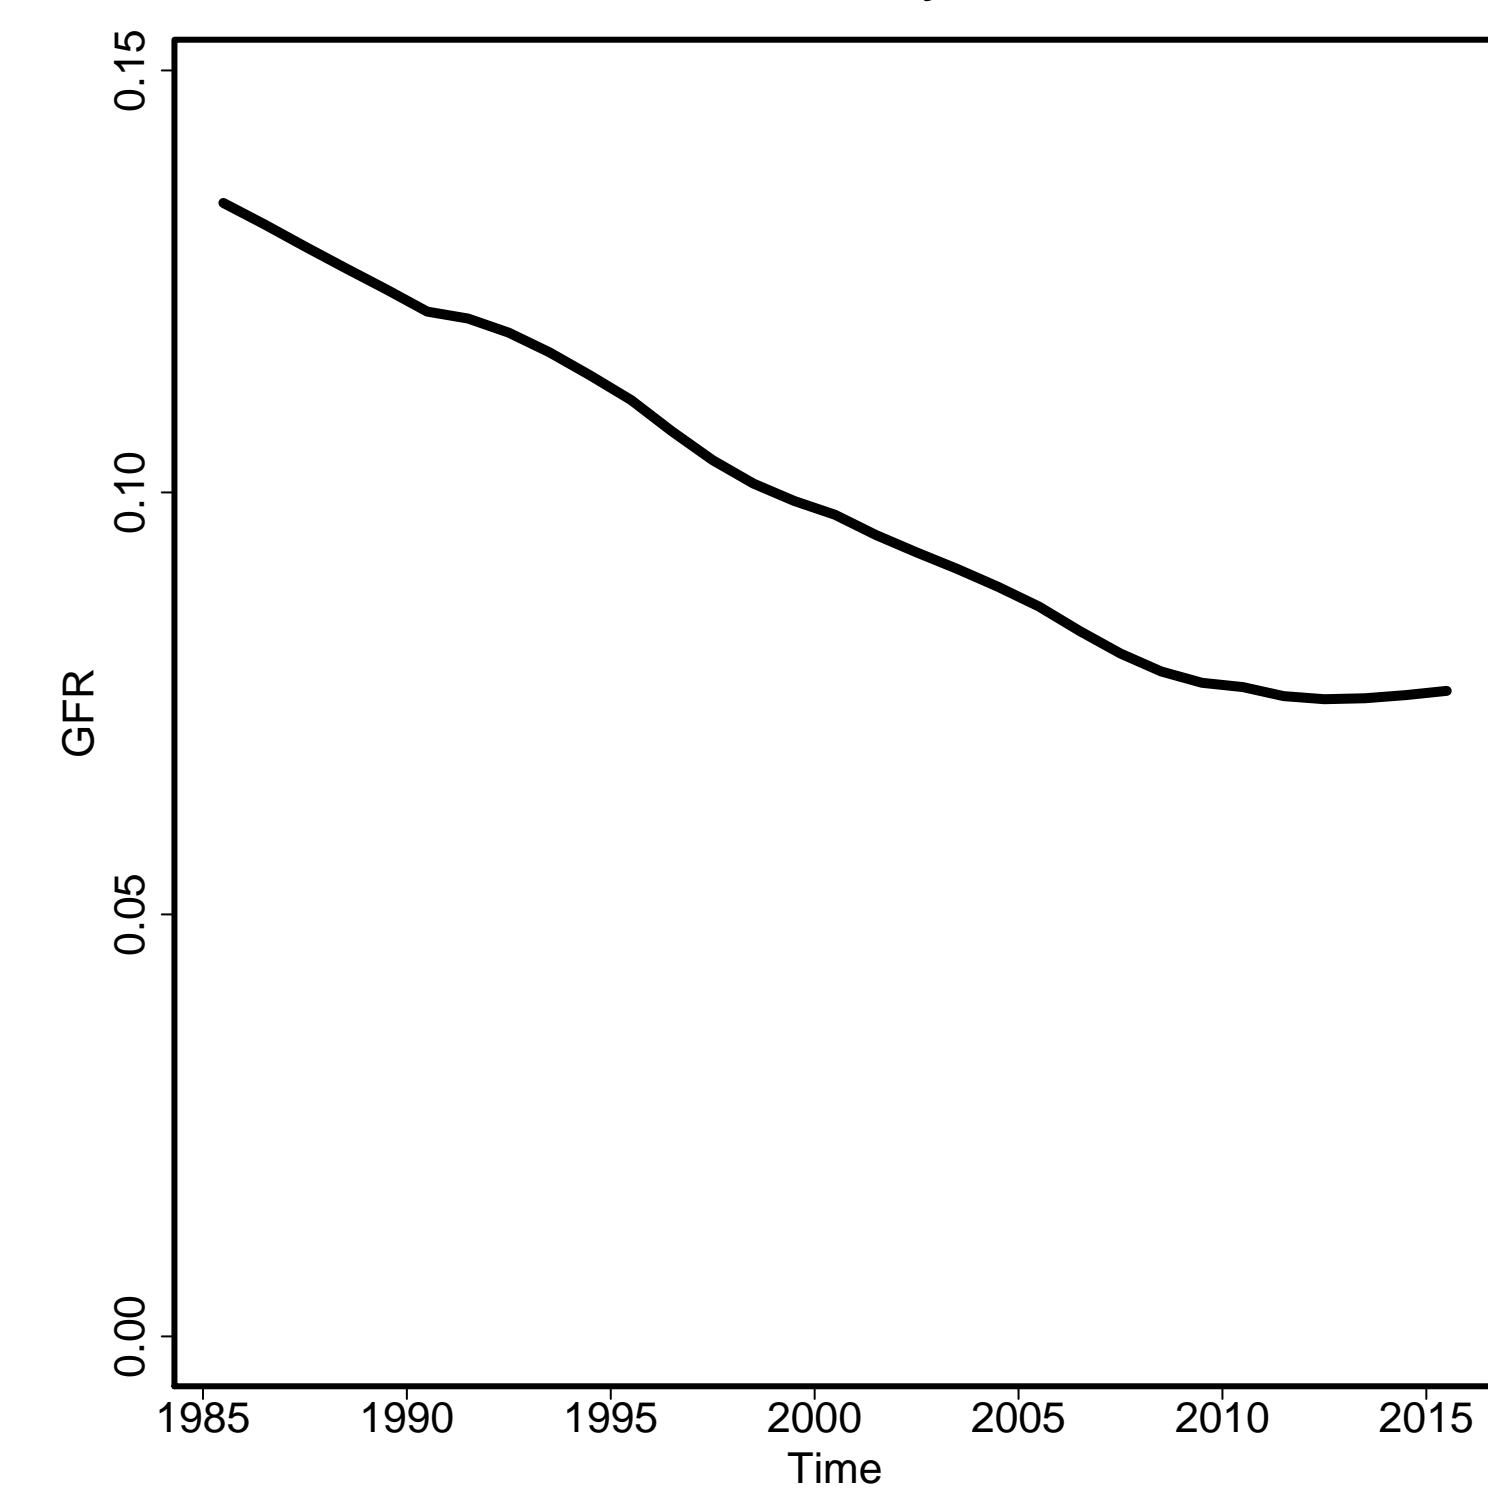

Skilled Attendance to Birth

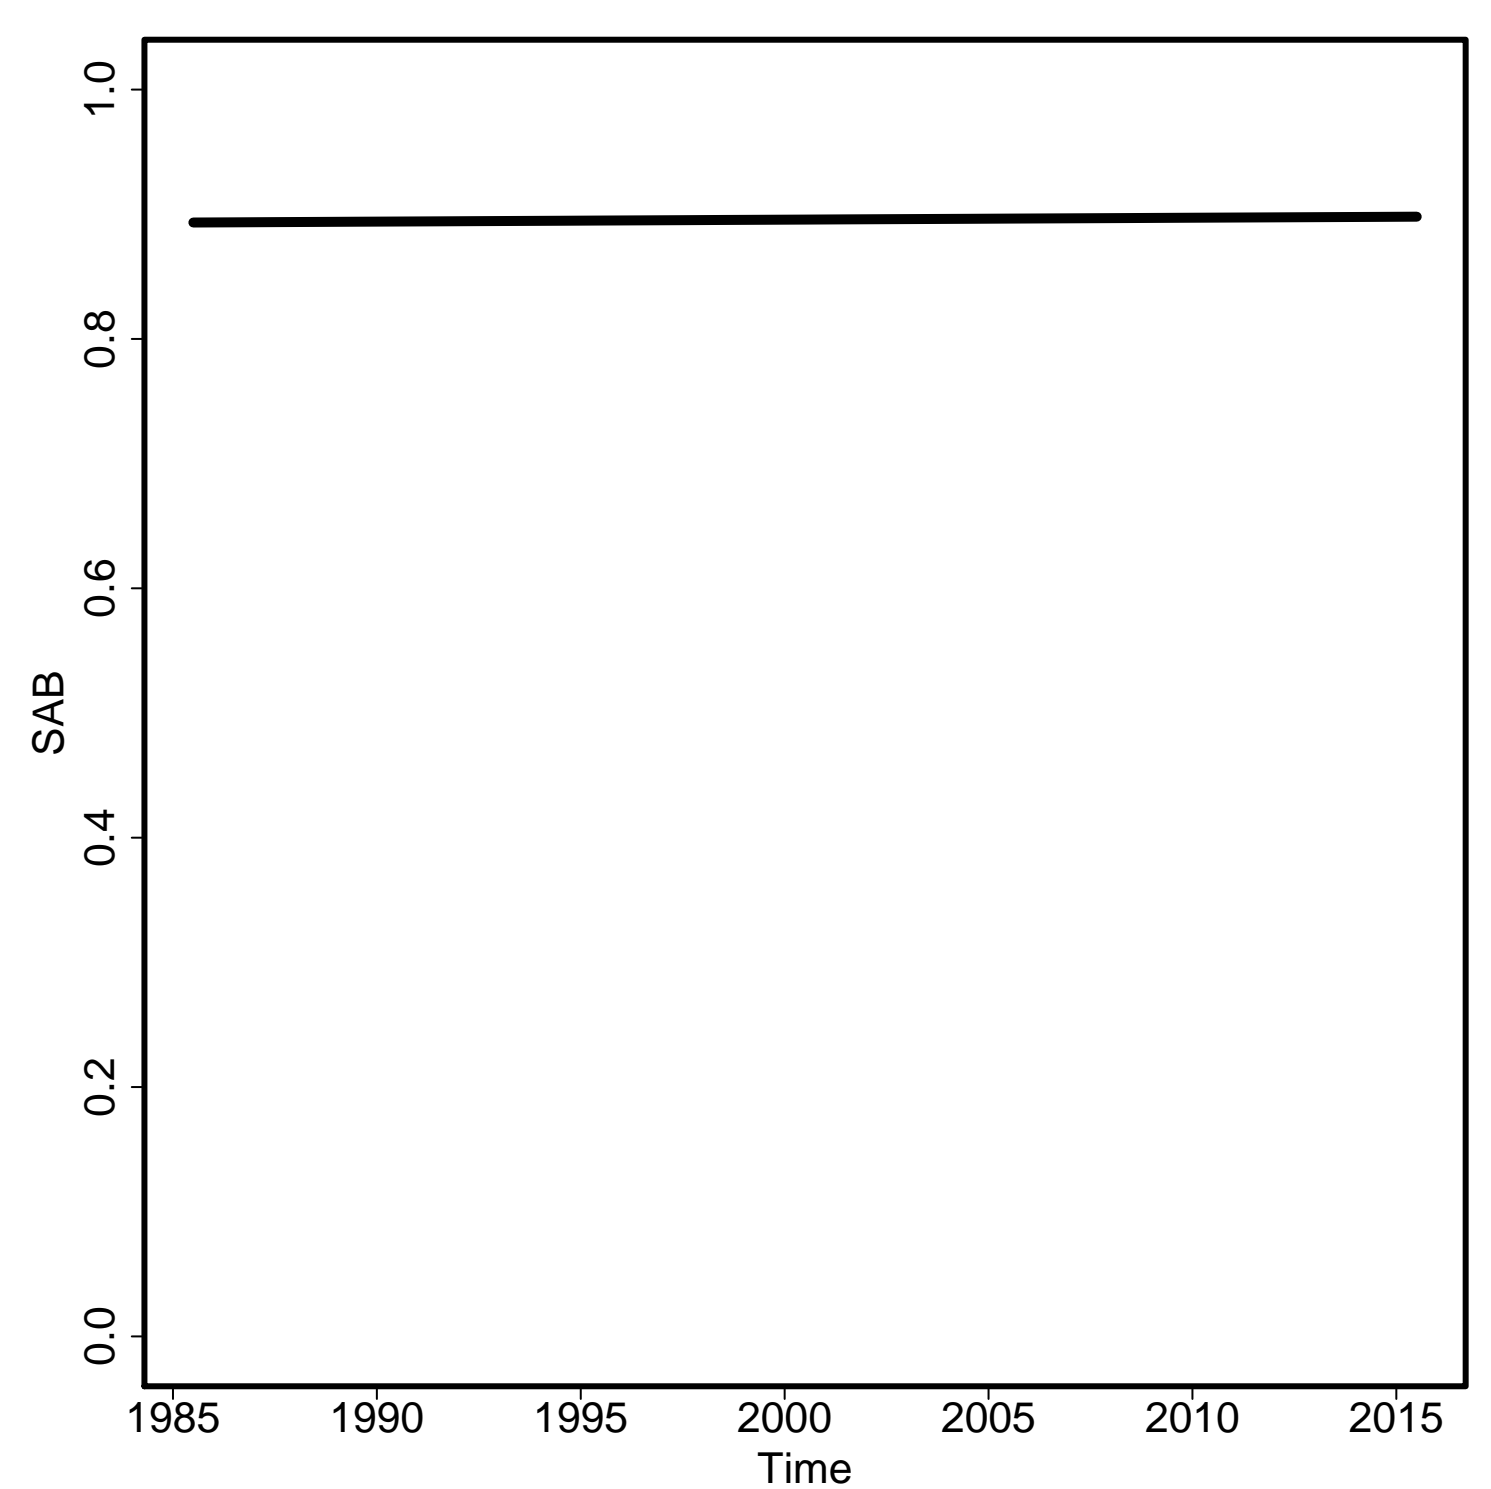

Envelope/Births

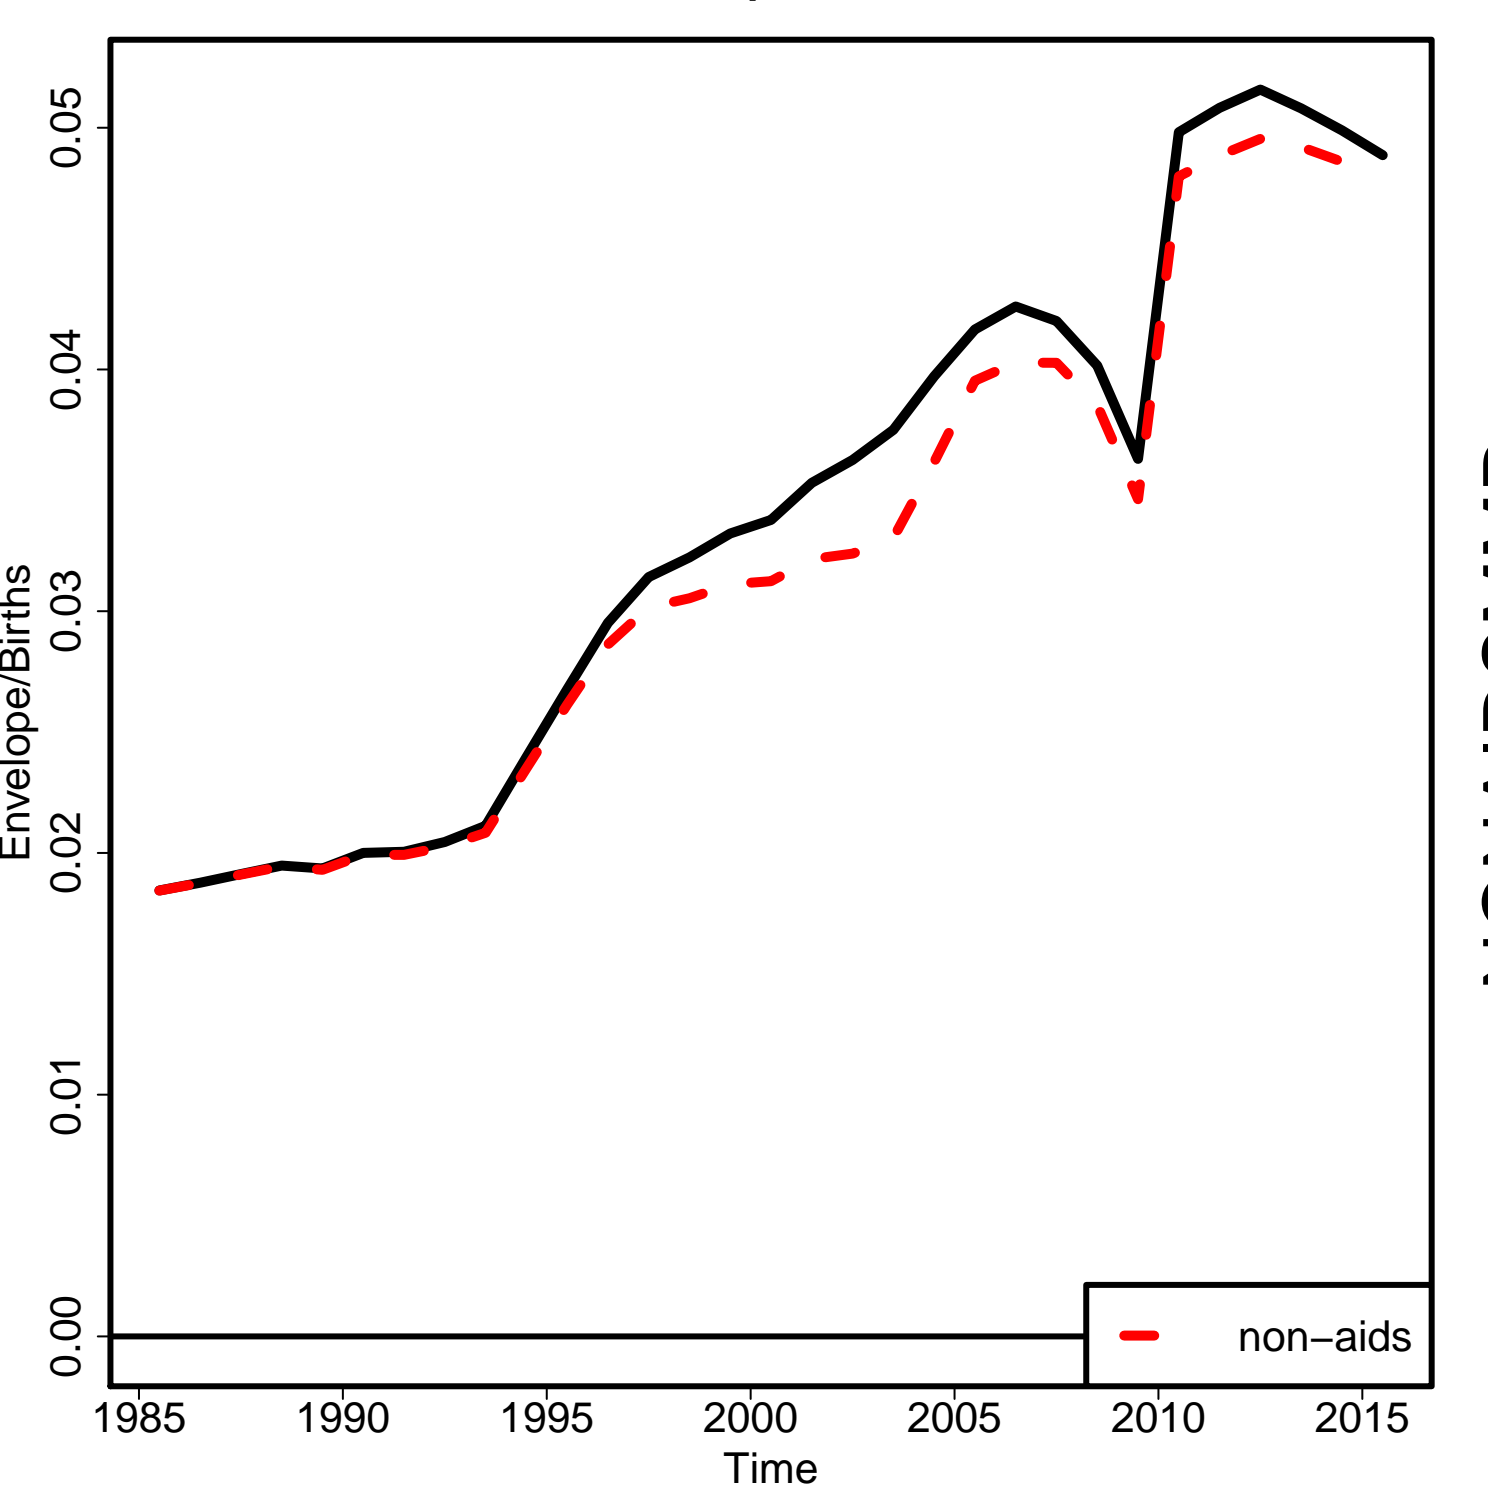

Non-aids MMR

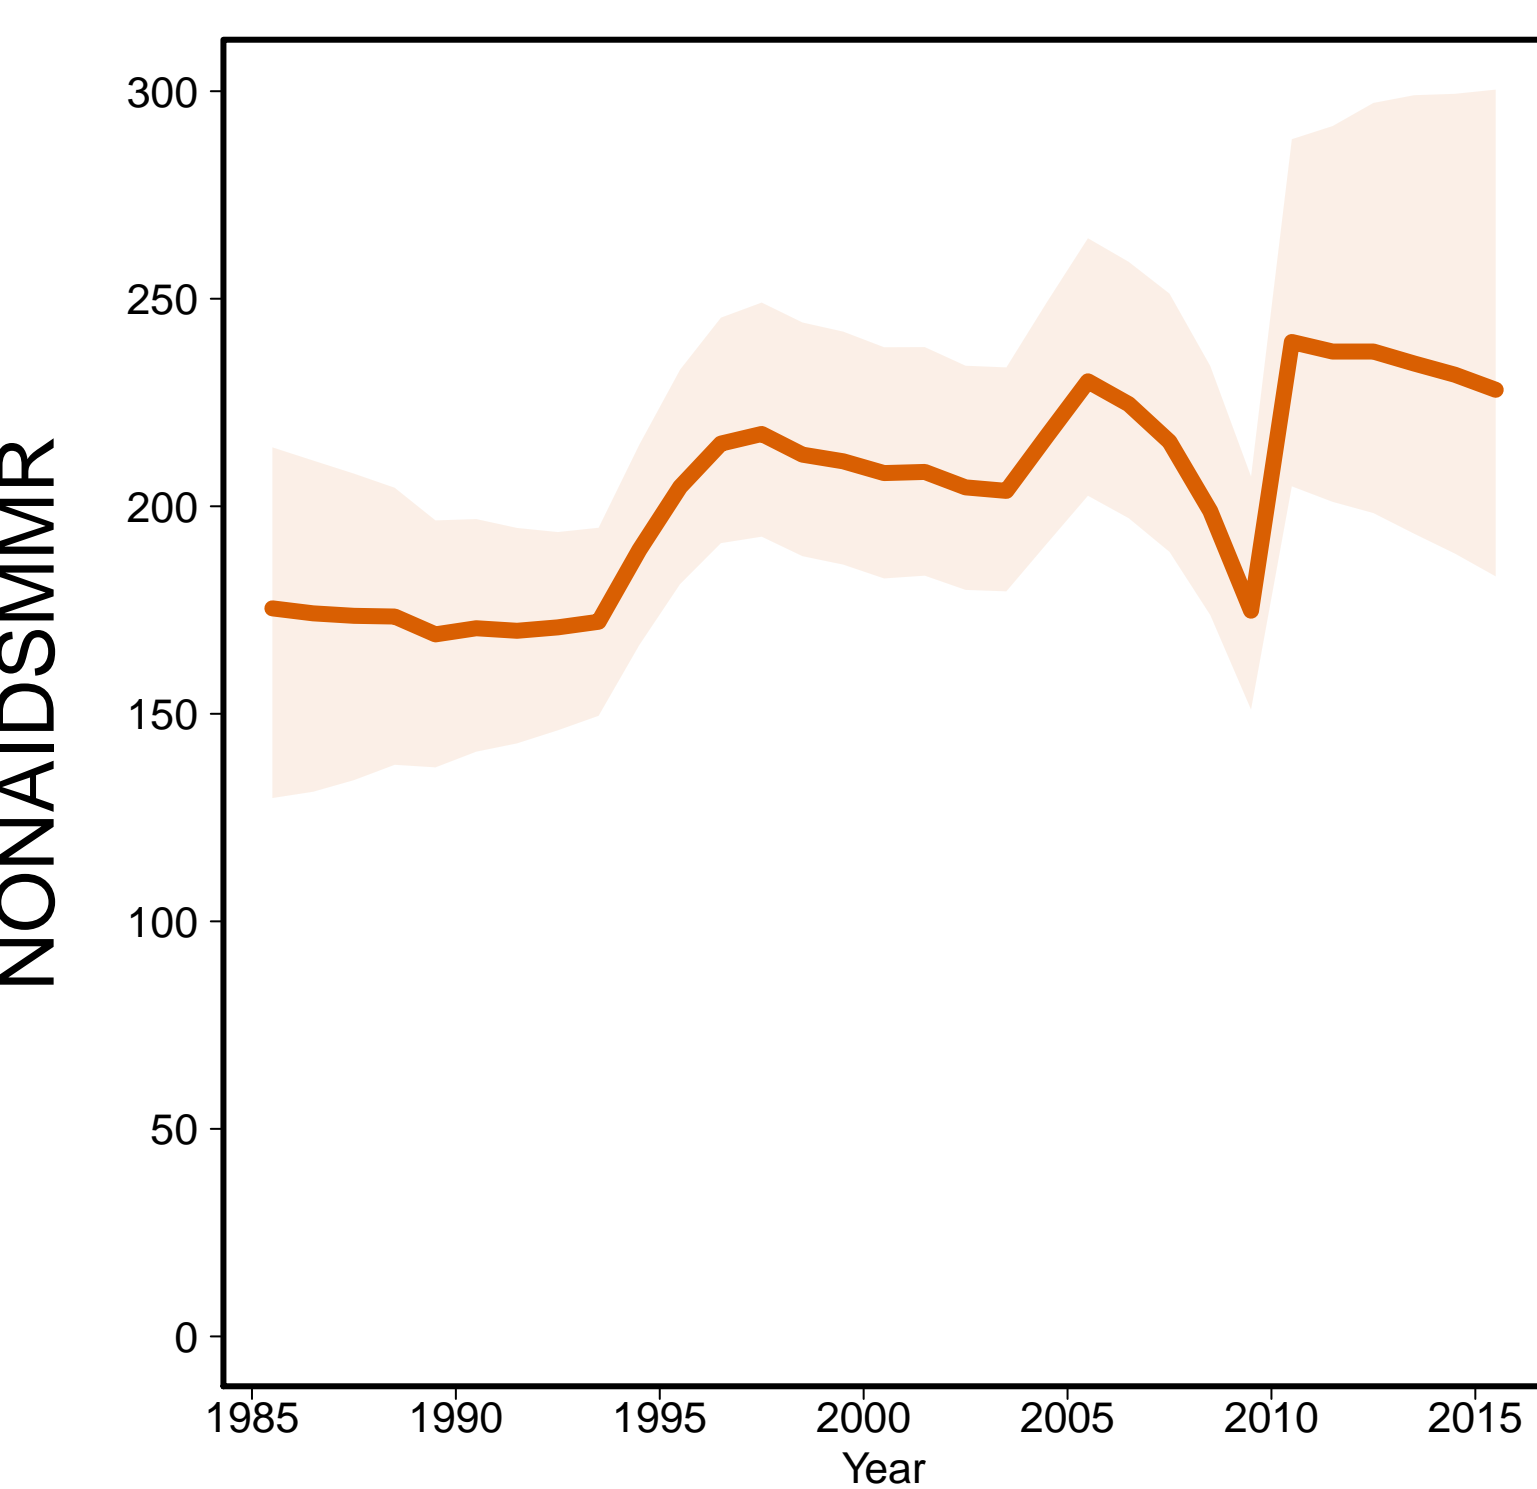

Aids MMR

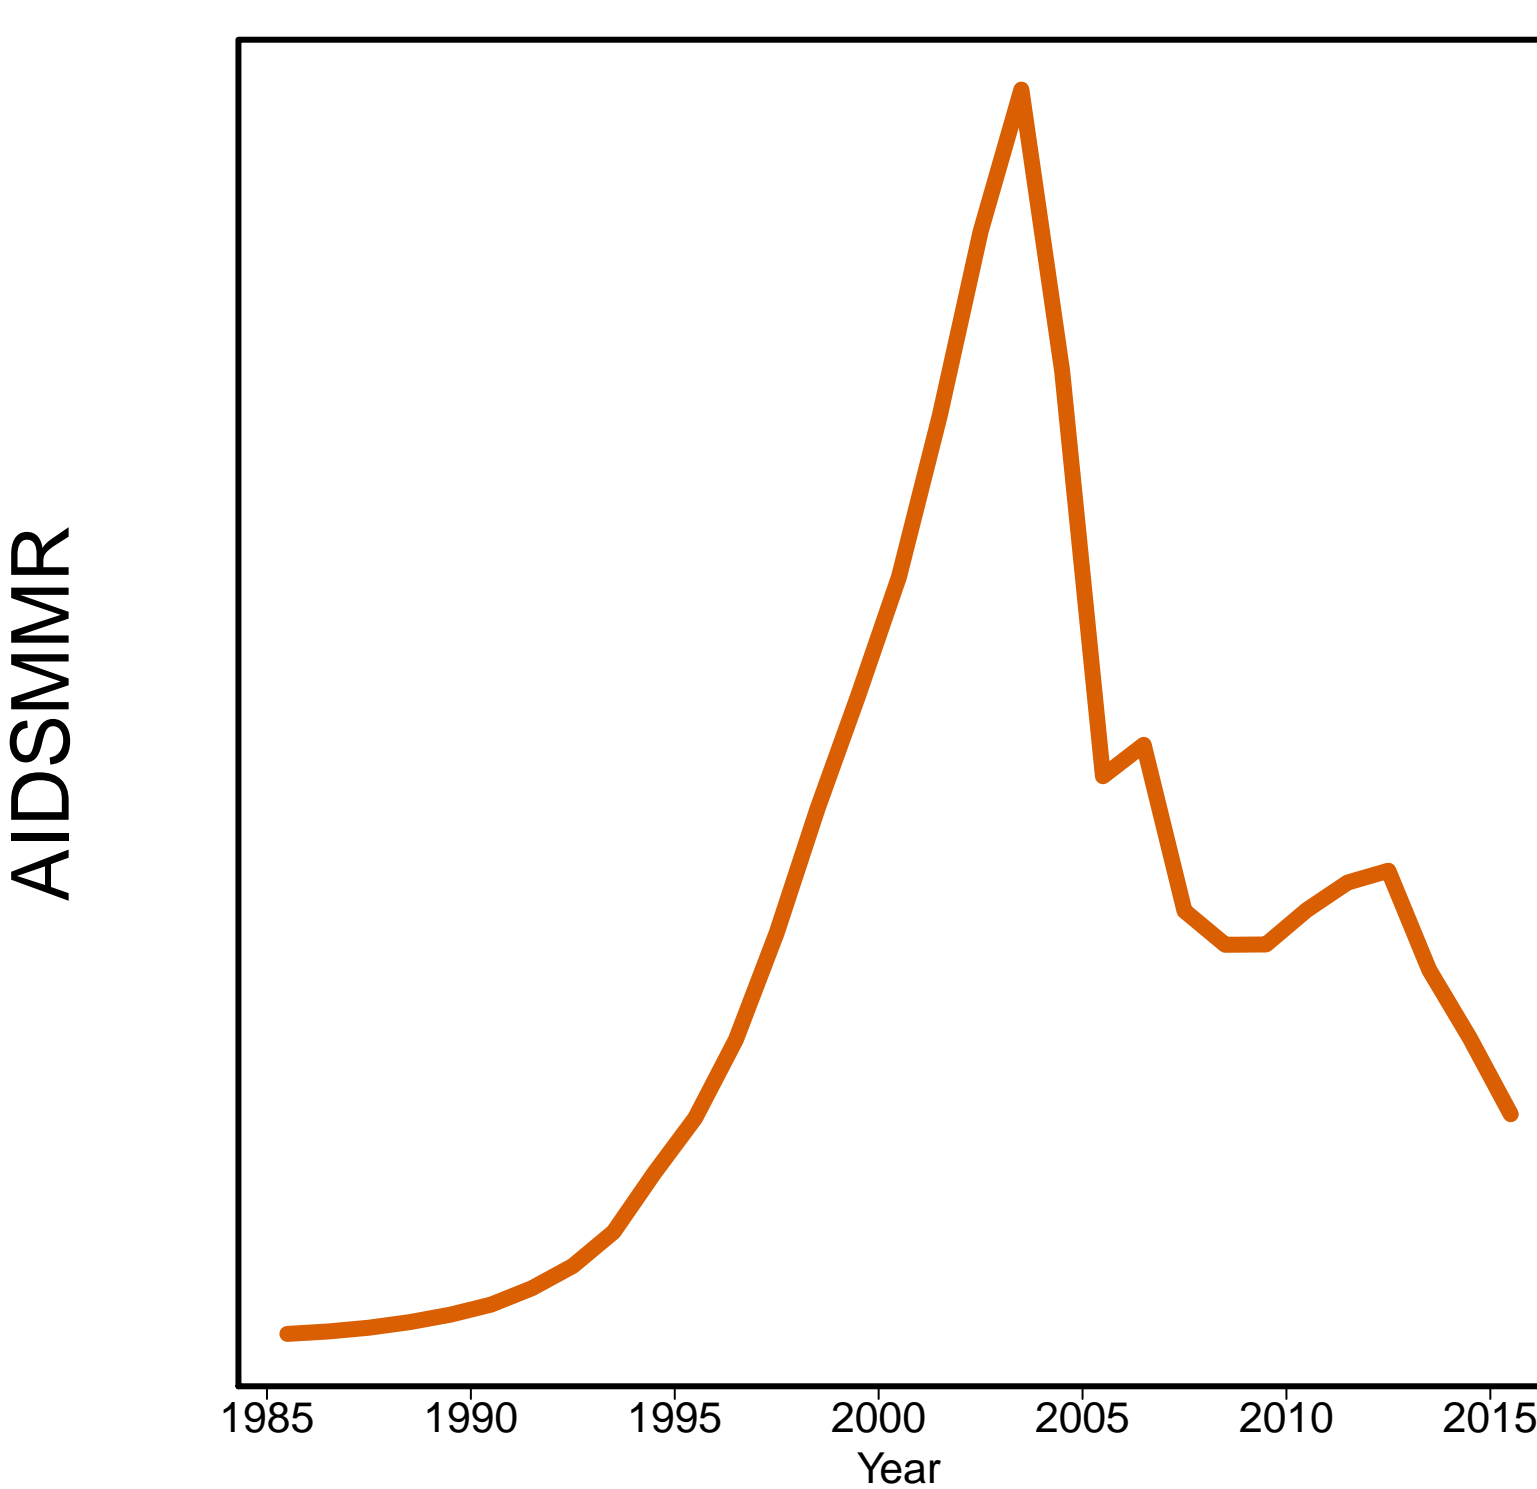

Haiti [HTI]  
(Caribbean)

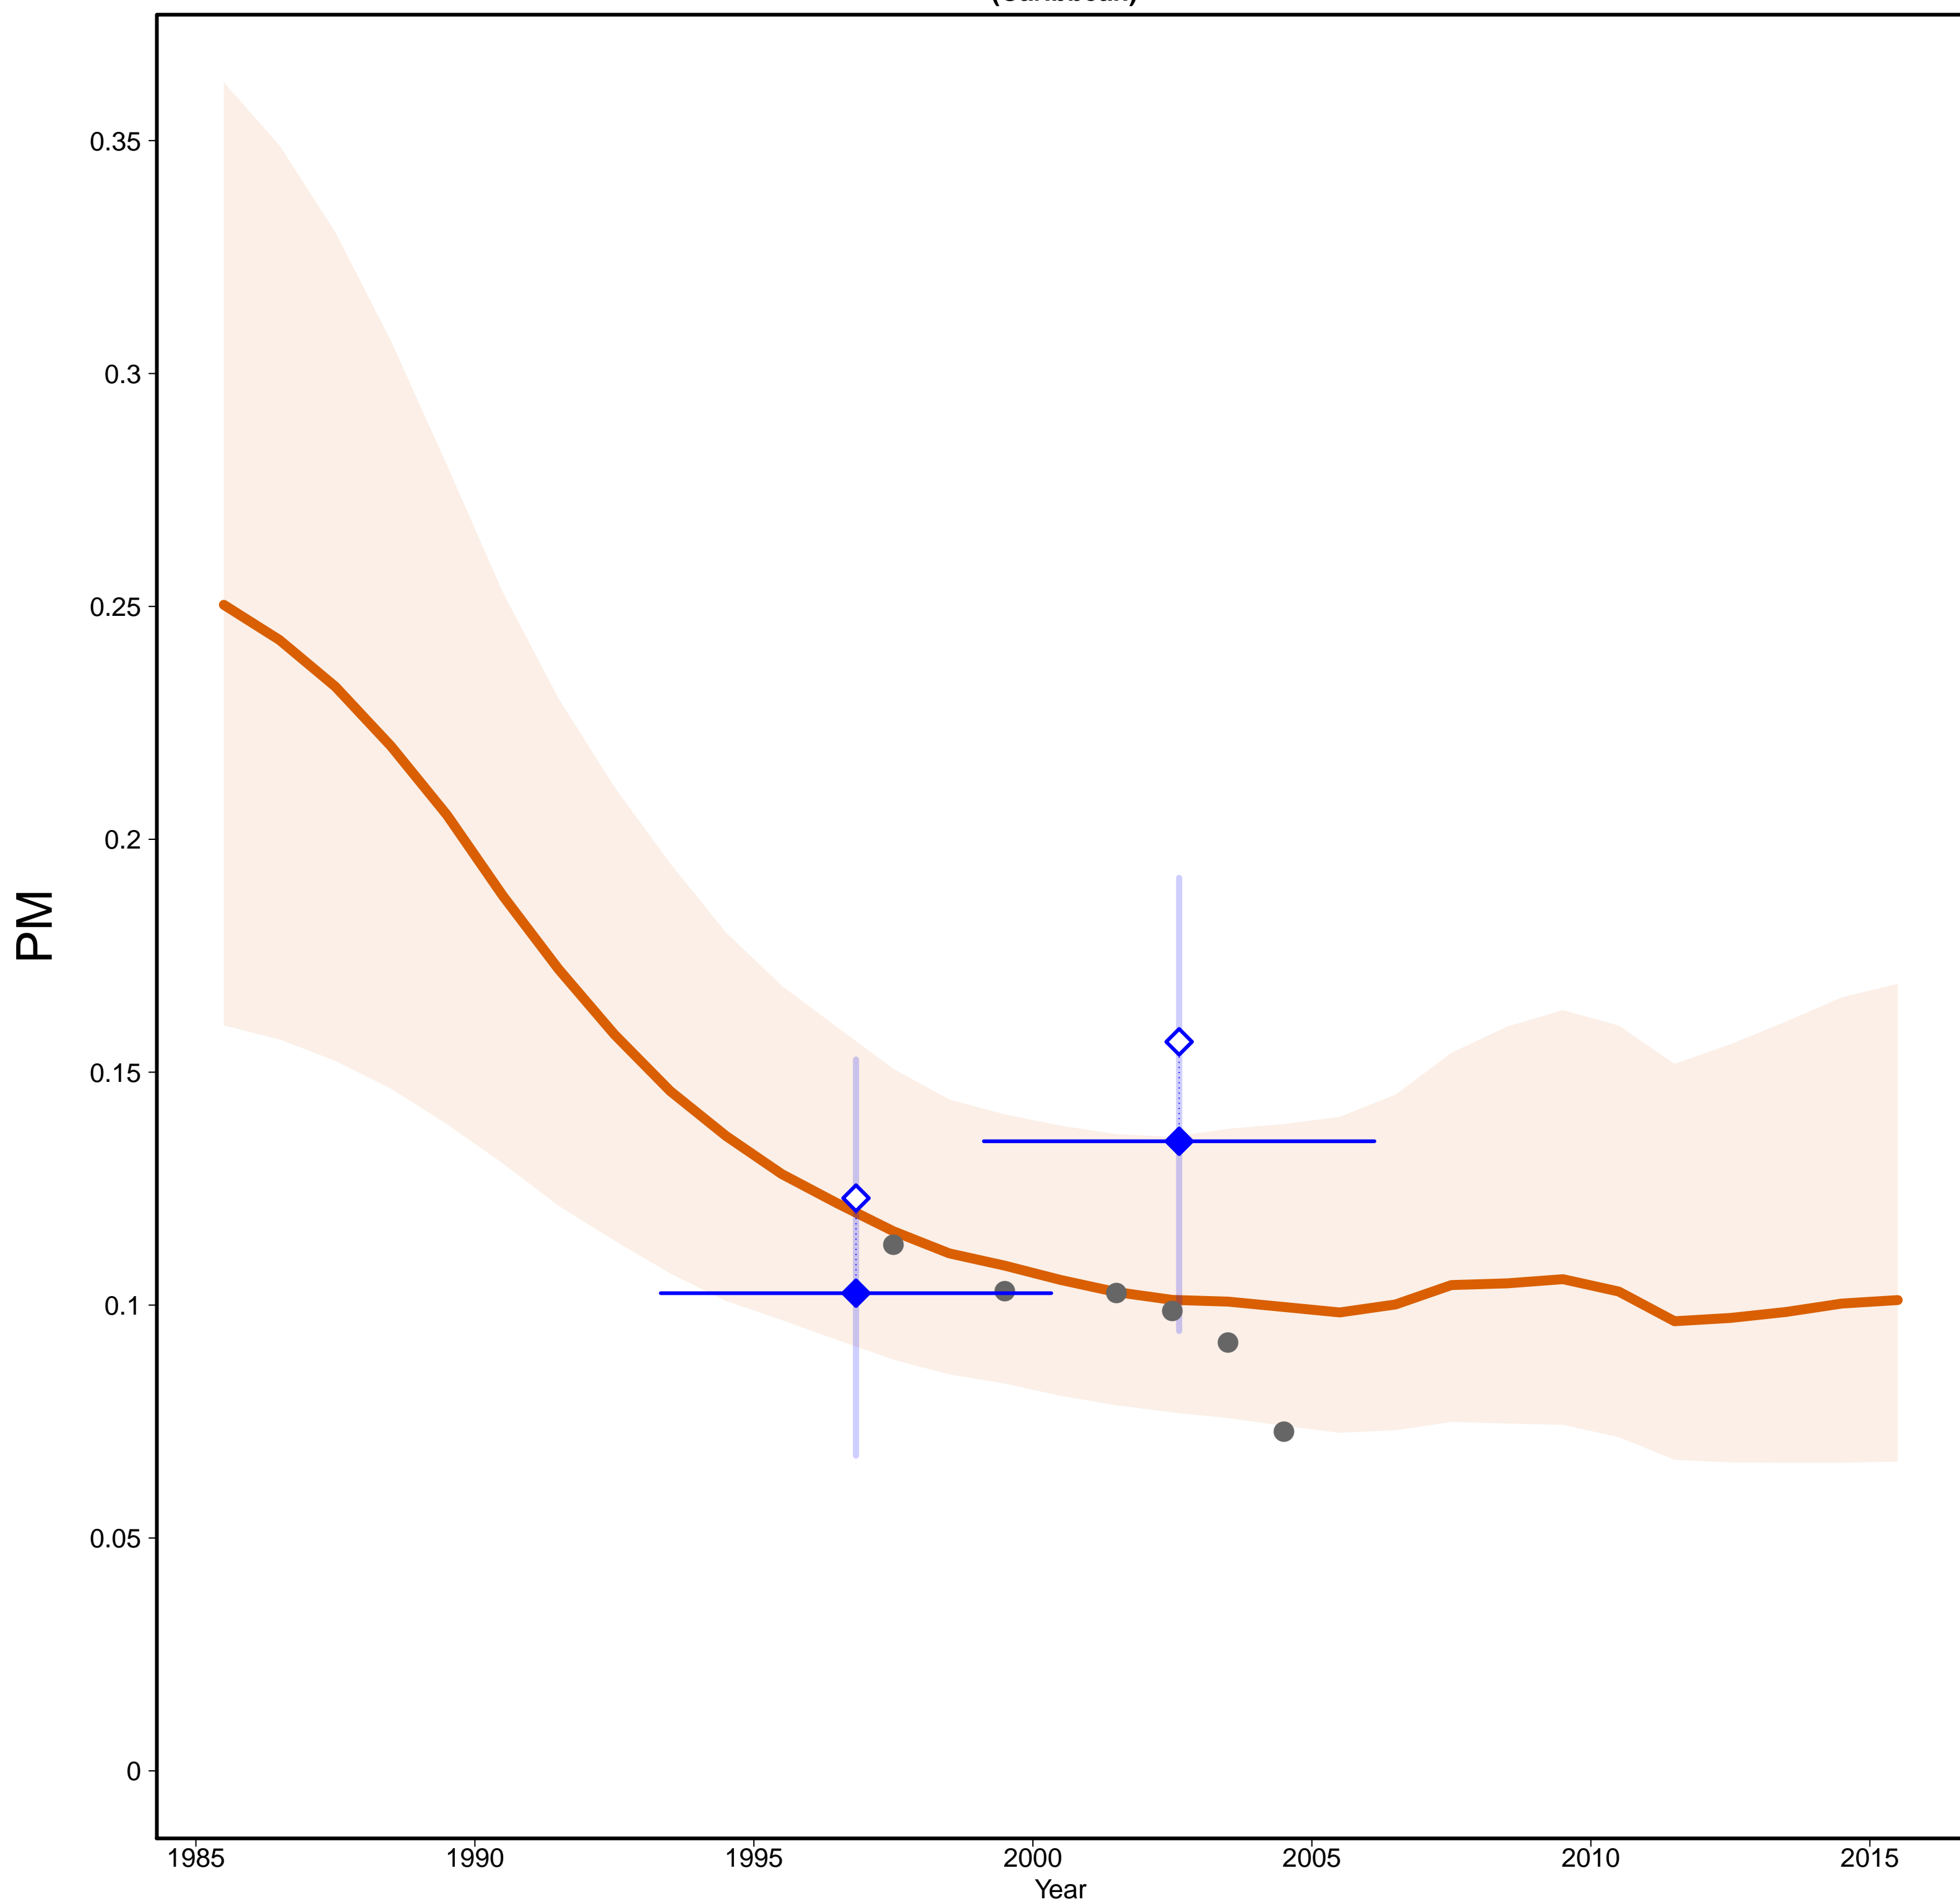

Haiti [HTI]  
(Caribbean)

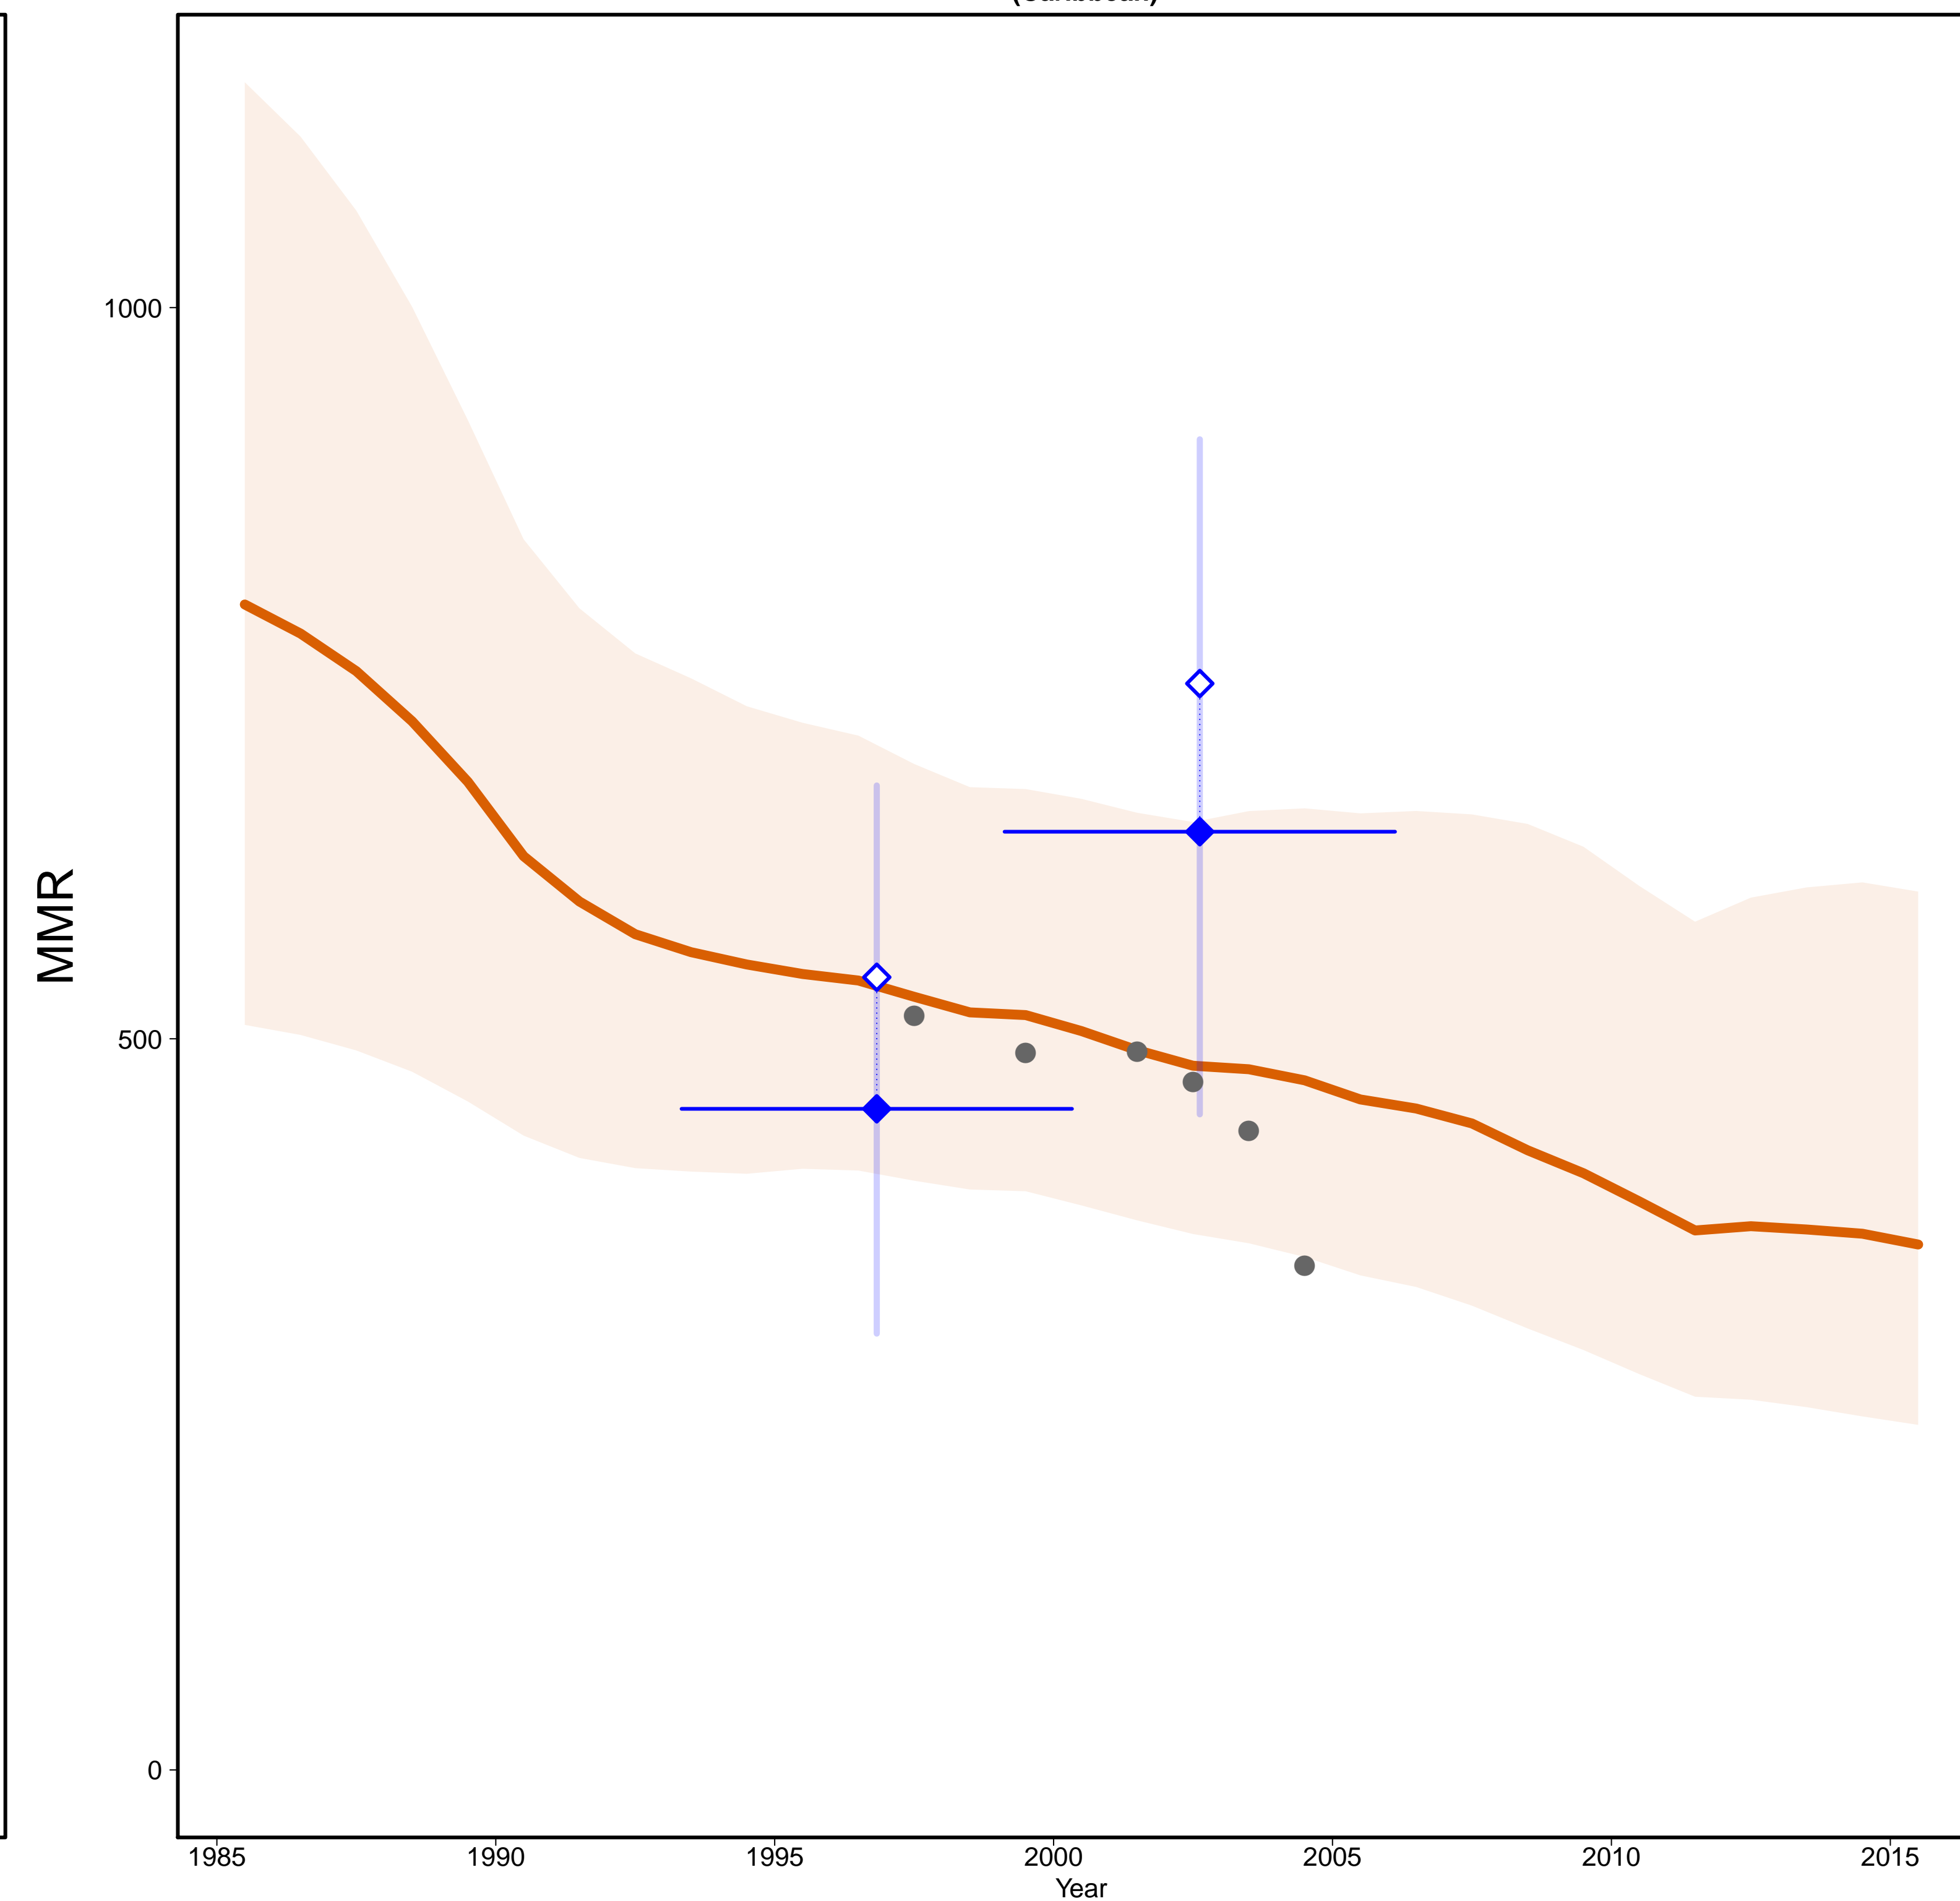

- Estimates –
- Mlate
- MMR Database 2015 –
- ◇ Observed Data
- ◆ Adjusted Data
- Data type –
- ◆ DHS
- Excluded VR data  
(data quality issues)

Gross Domestic Product

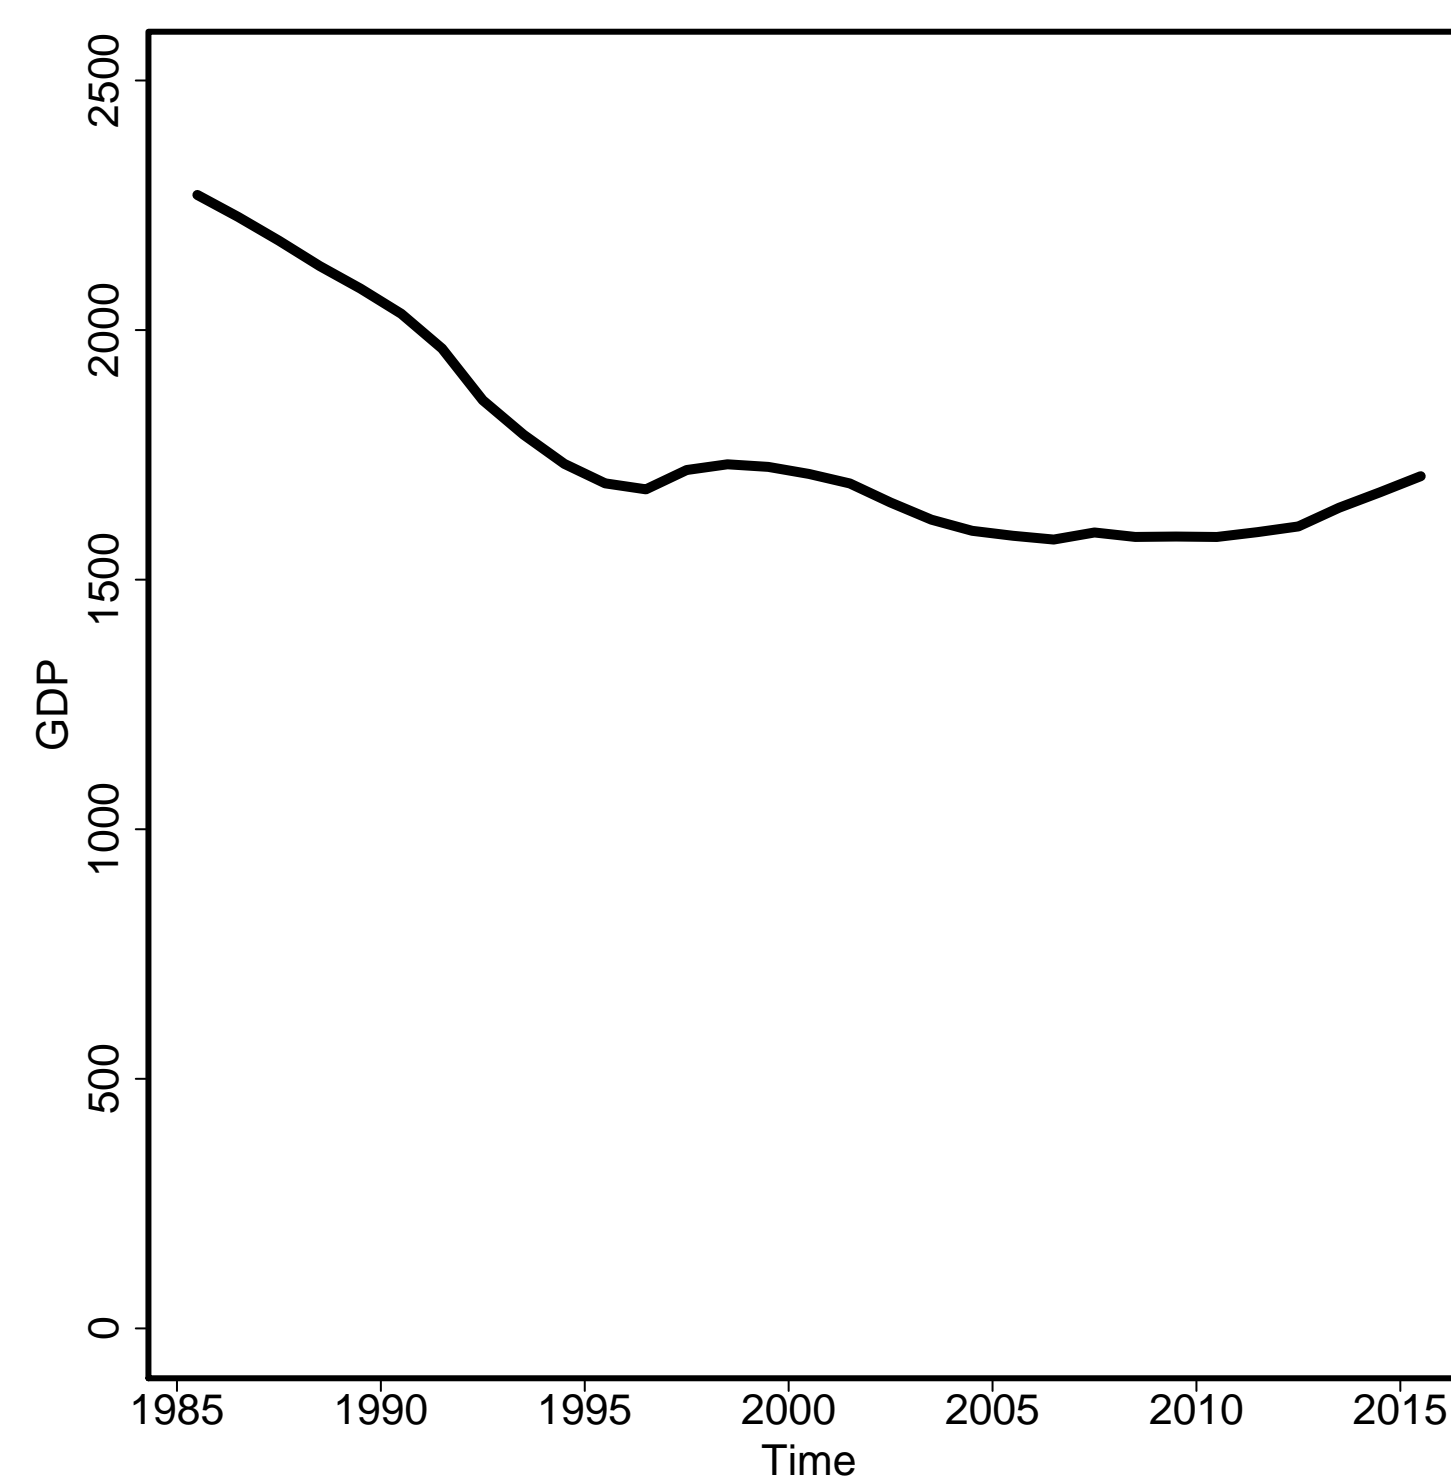

General Fertility Rate

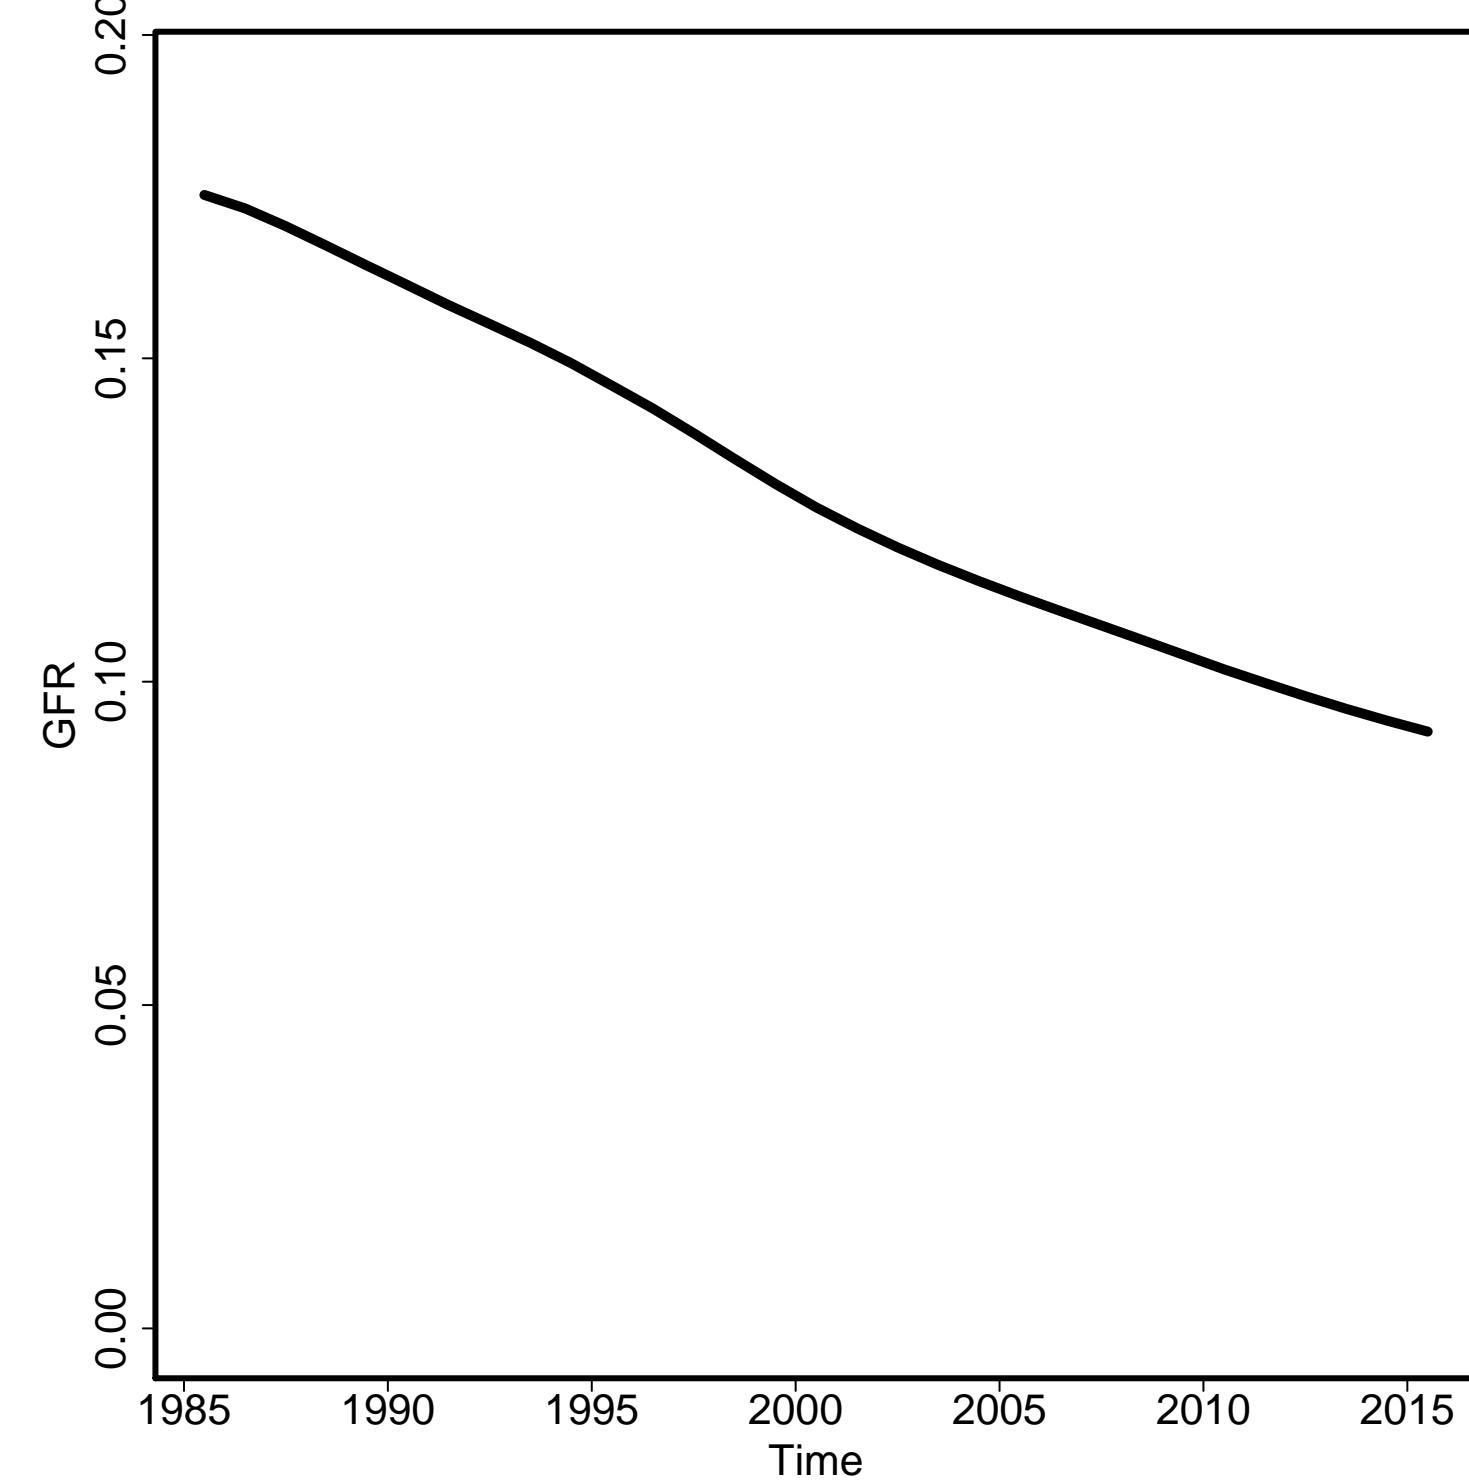

Skilled Attendance to Birth

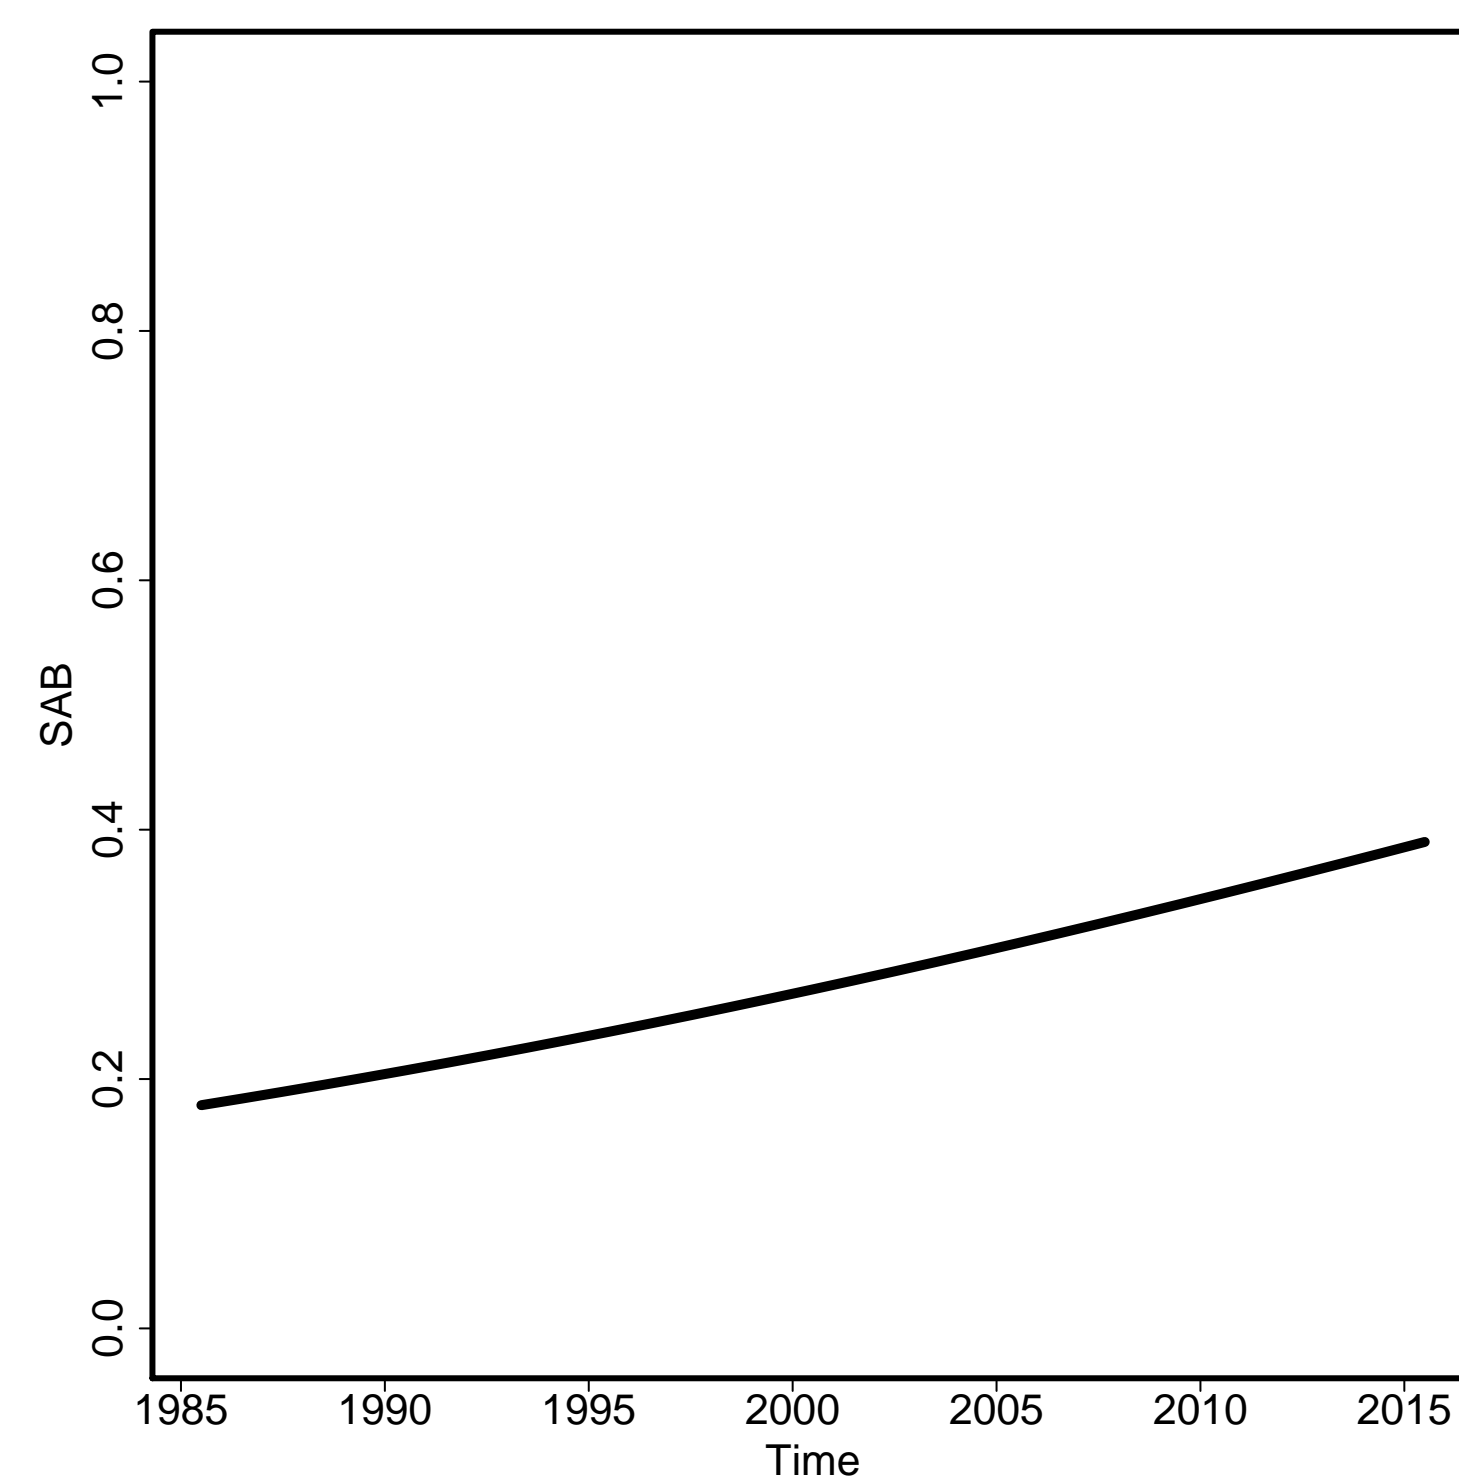

Envelope/Births

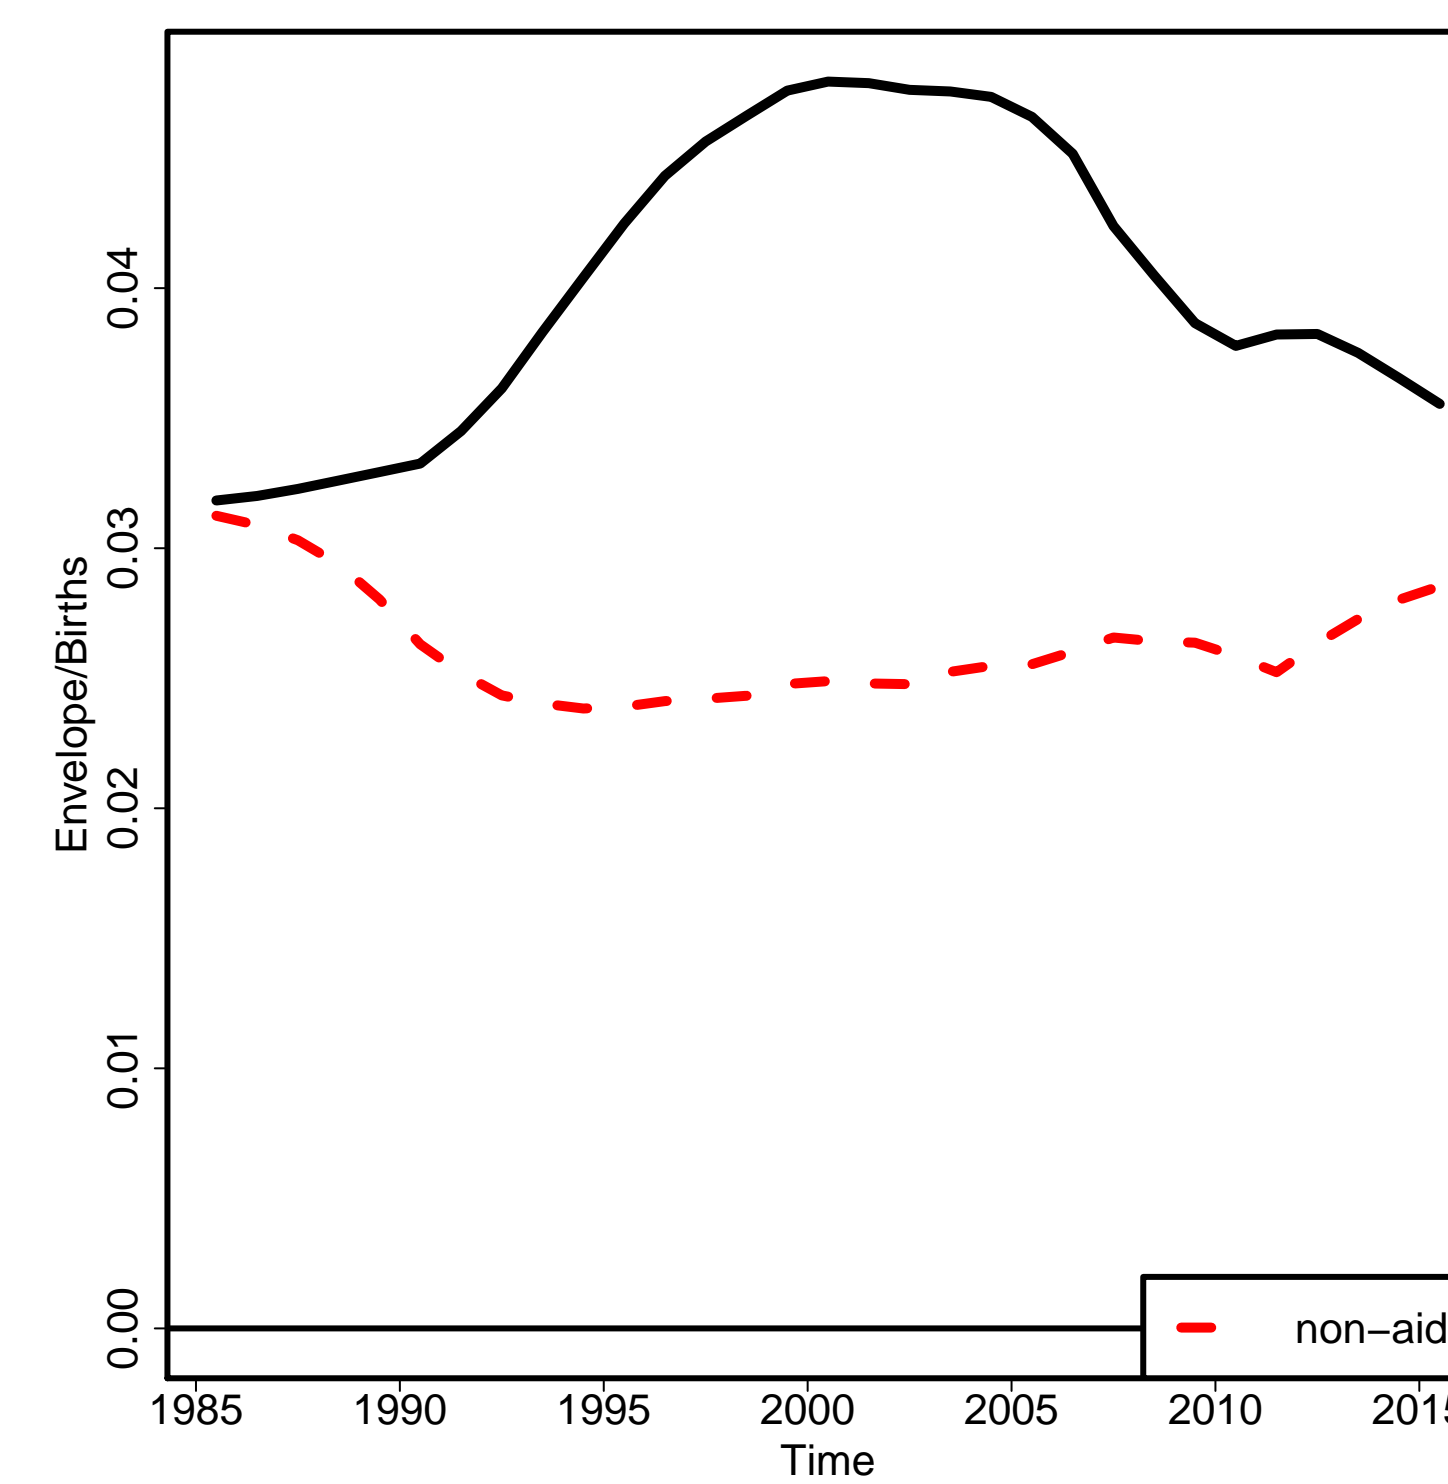

Non-aids MMR

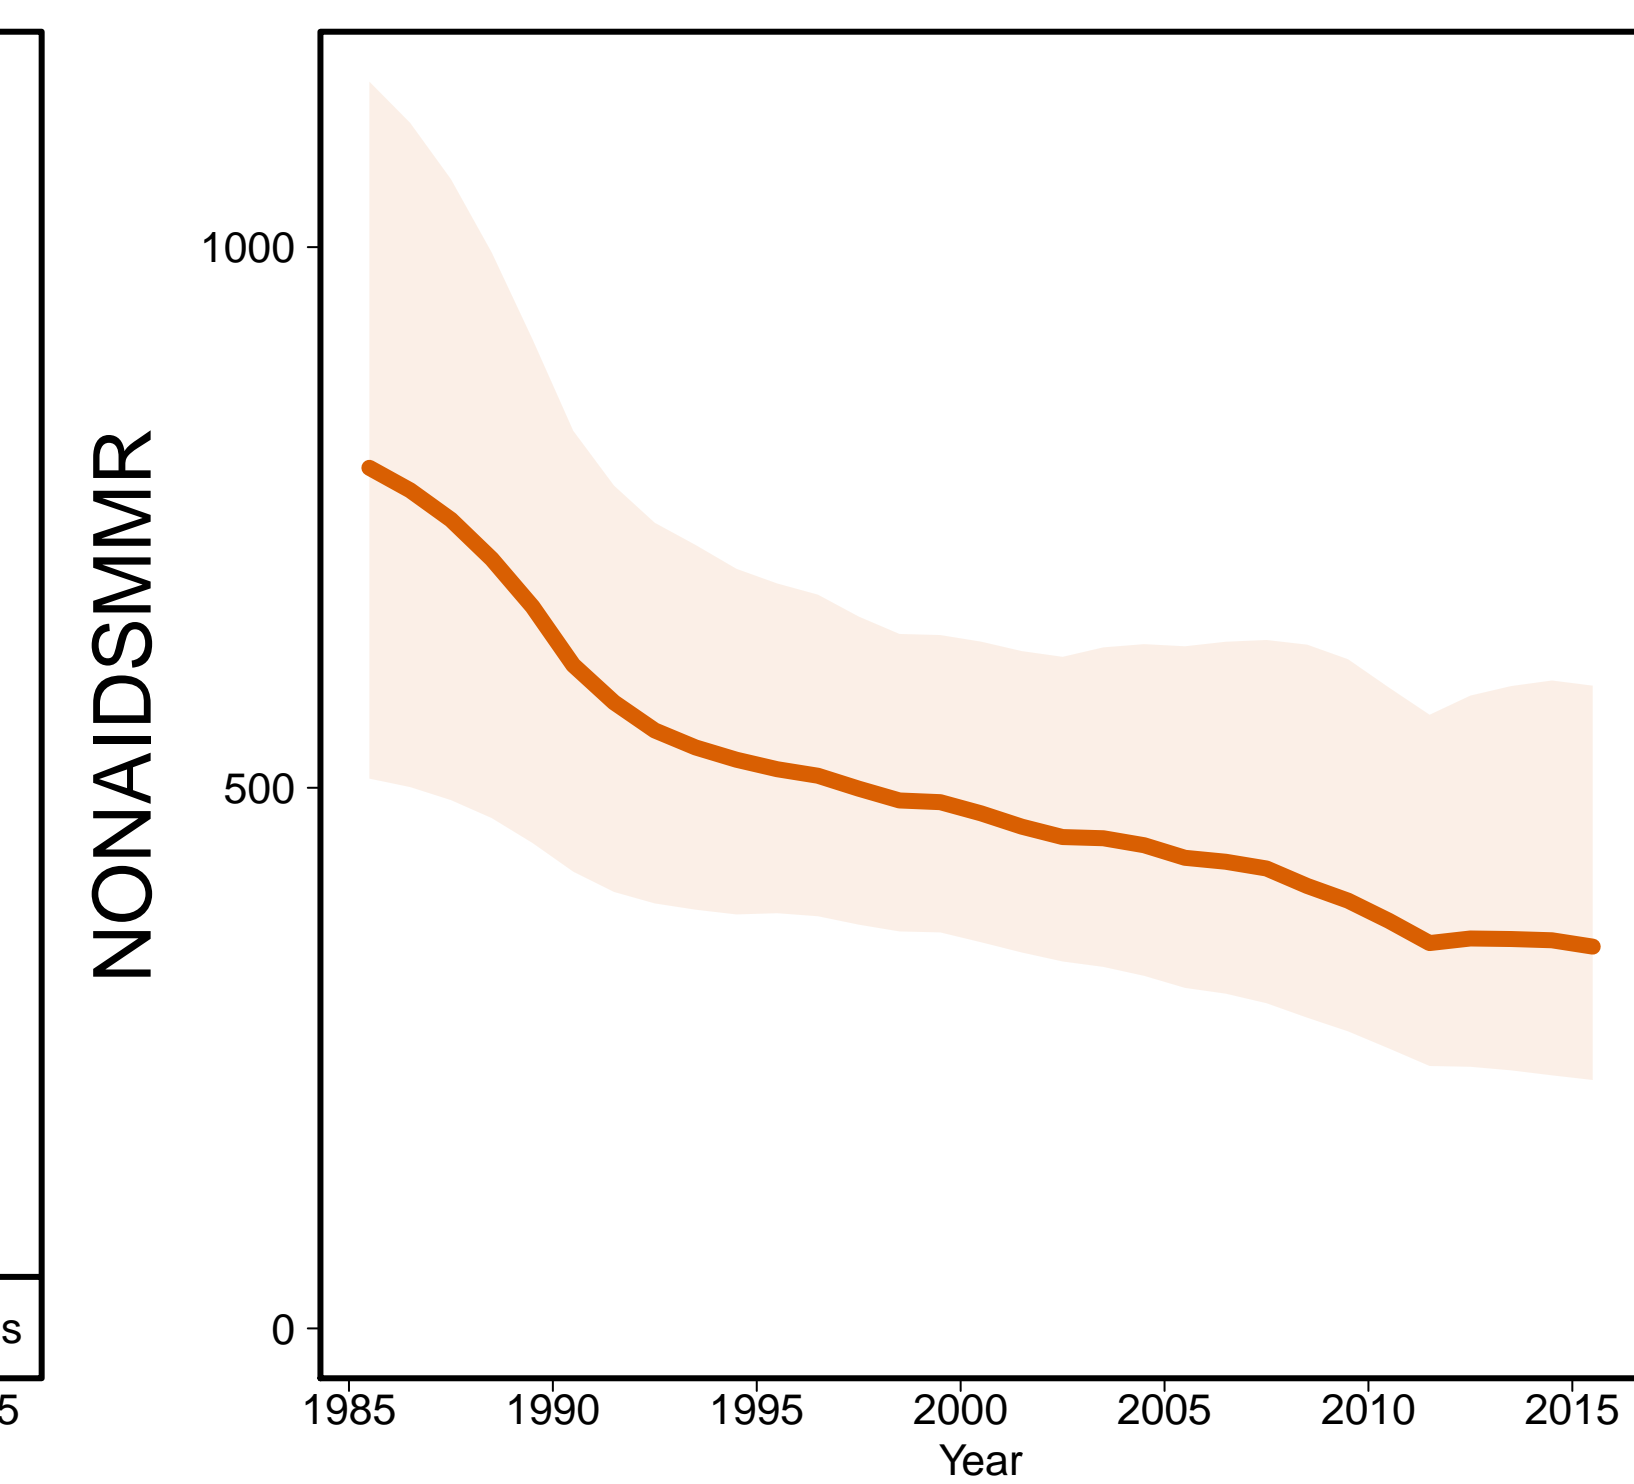

Aids MMR

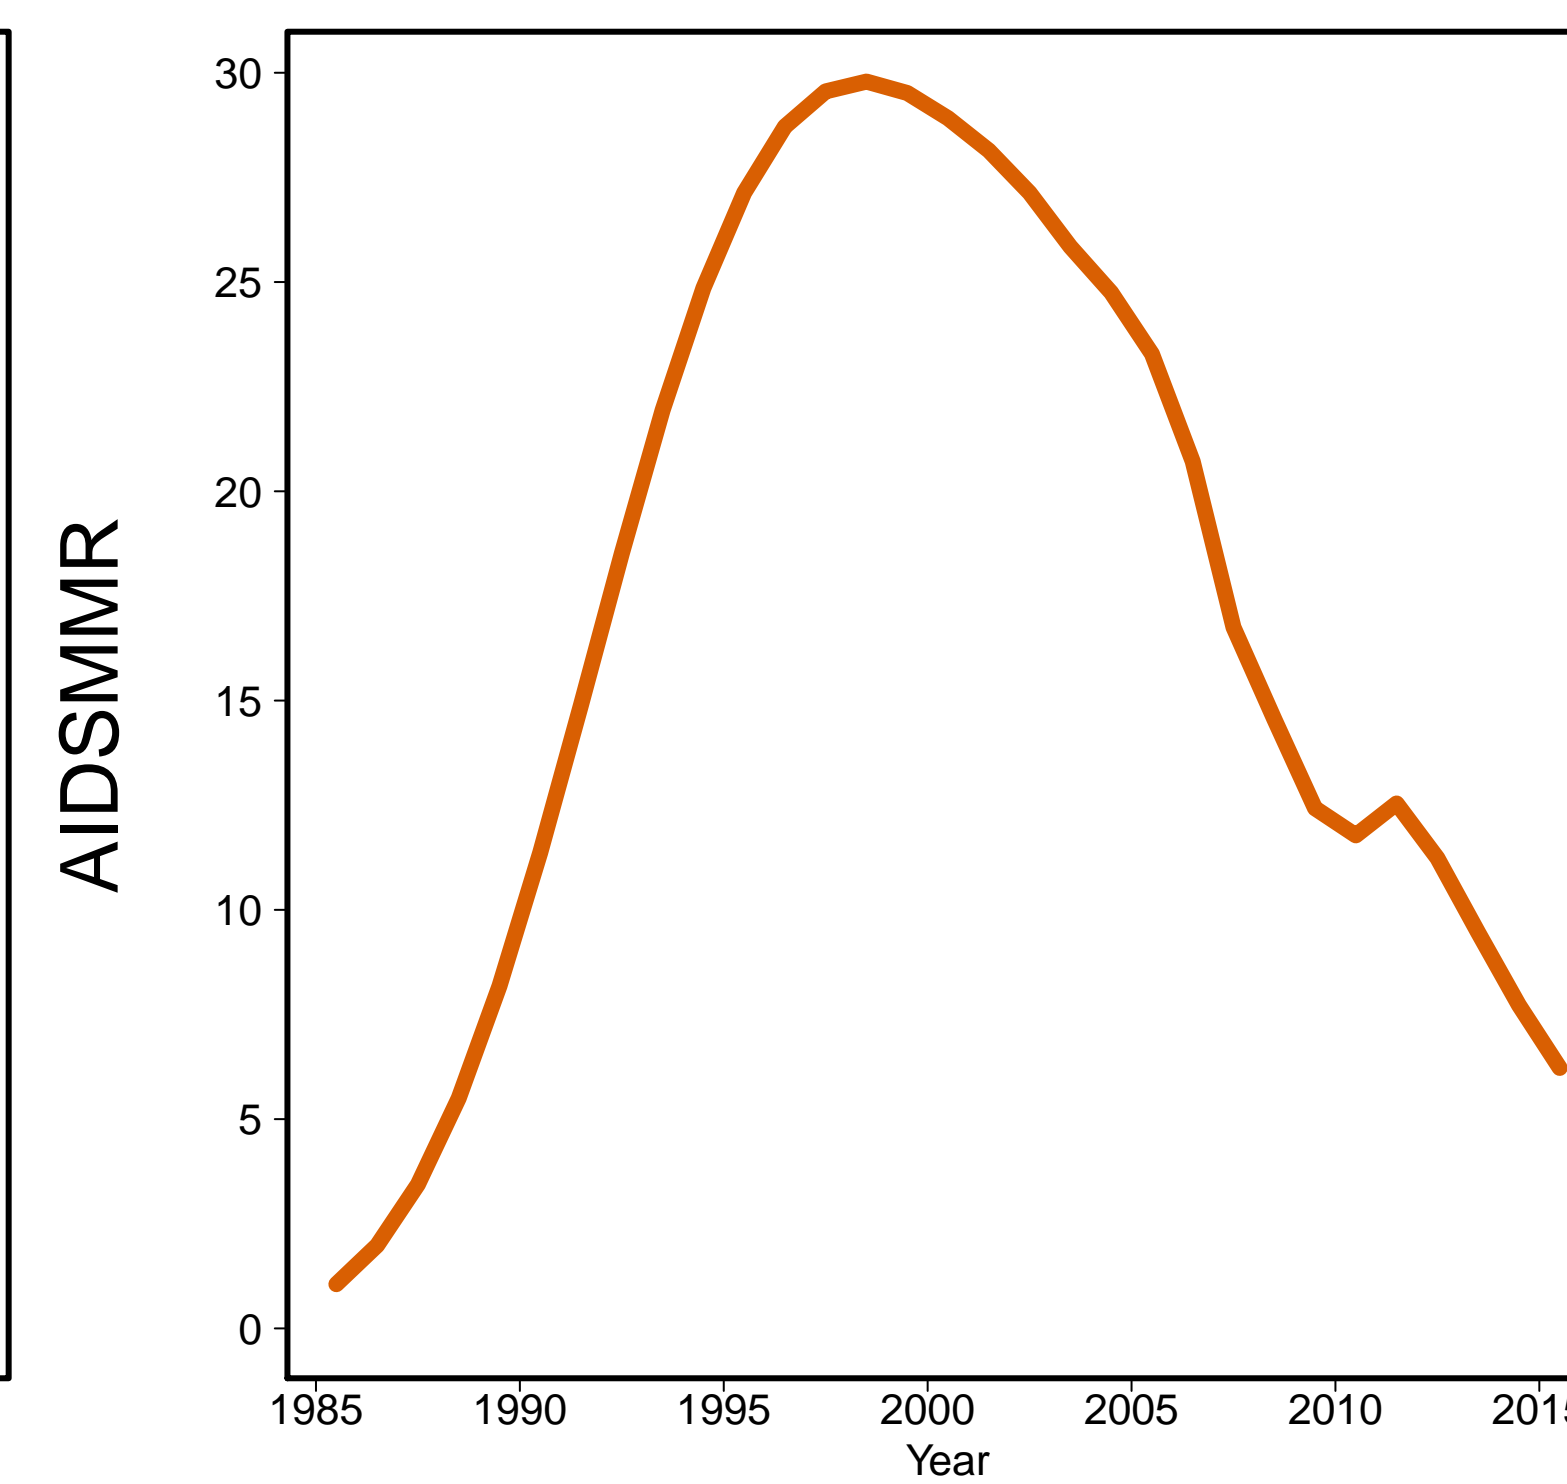

Honduras [HND]  
(Central America)

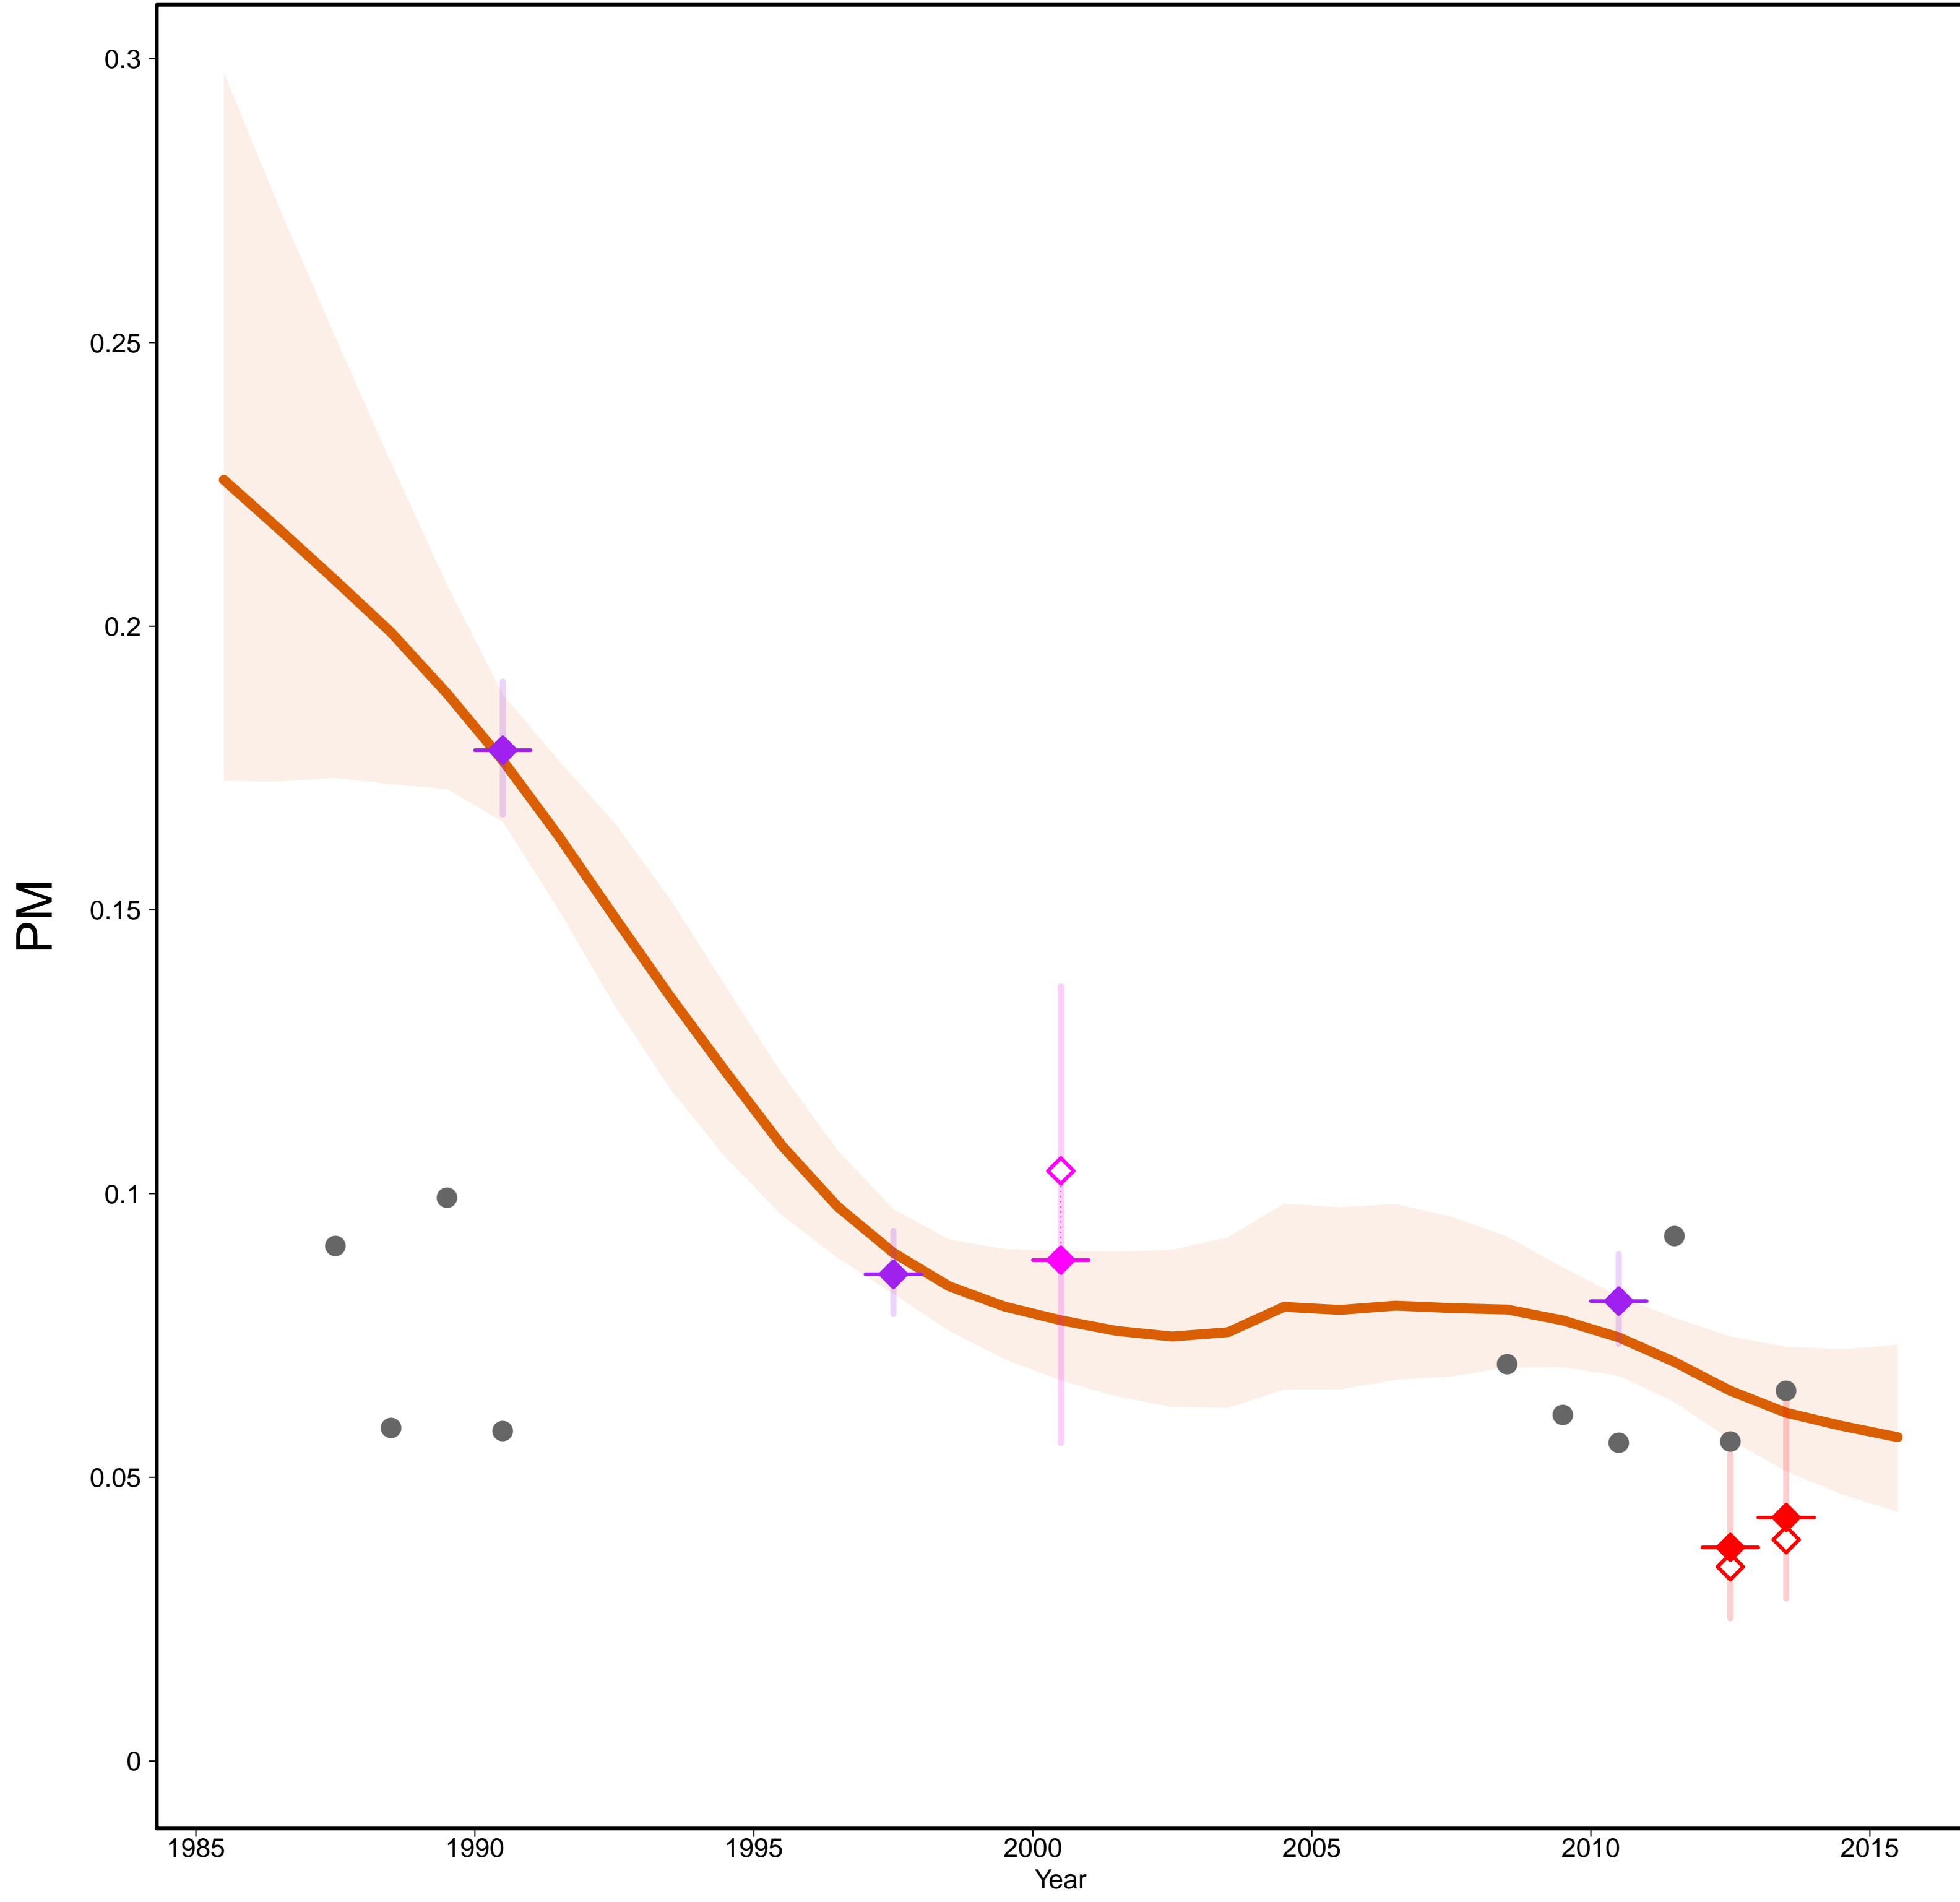

Honduras [HND]  
(Central America)

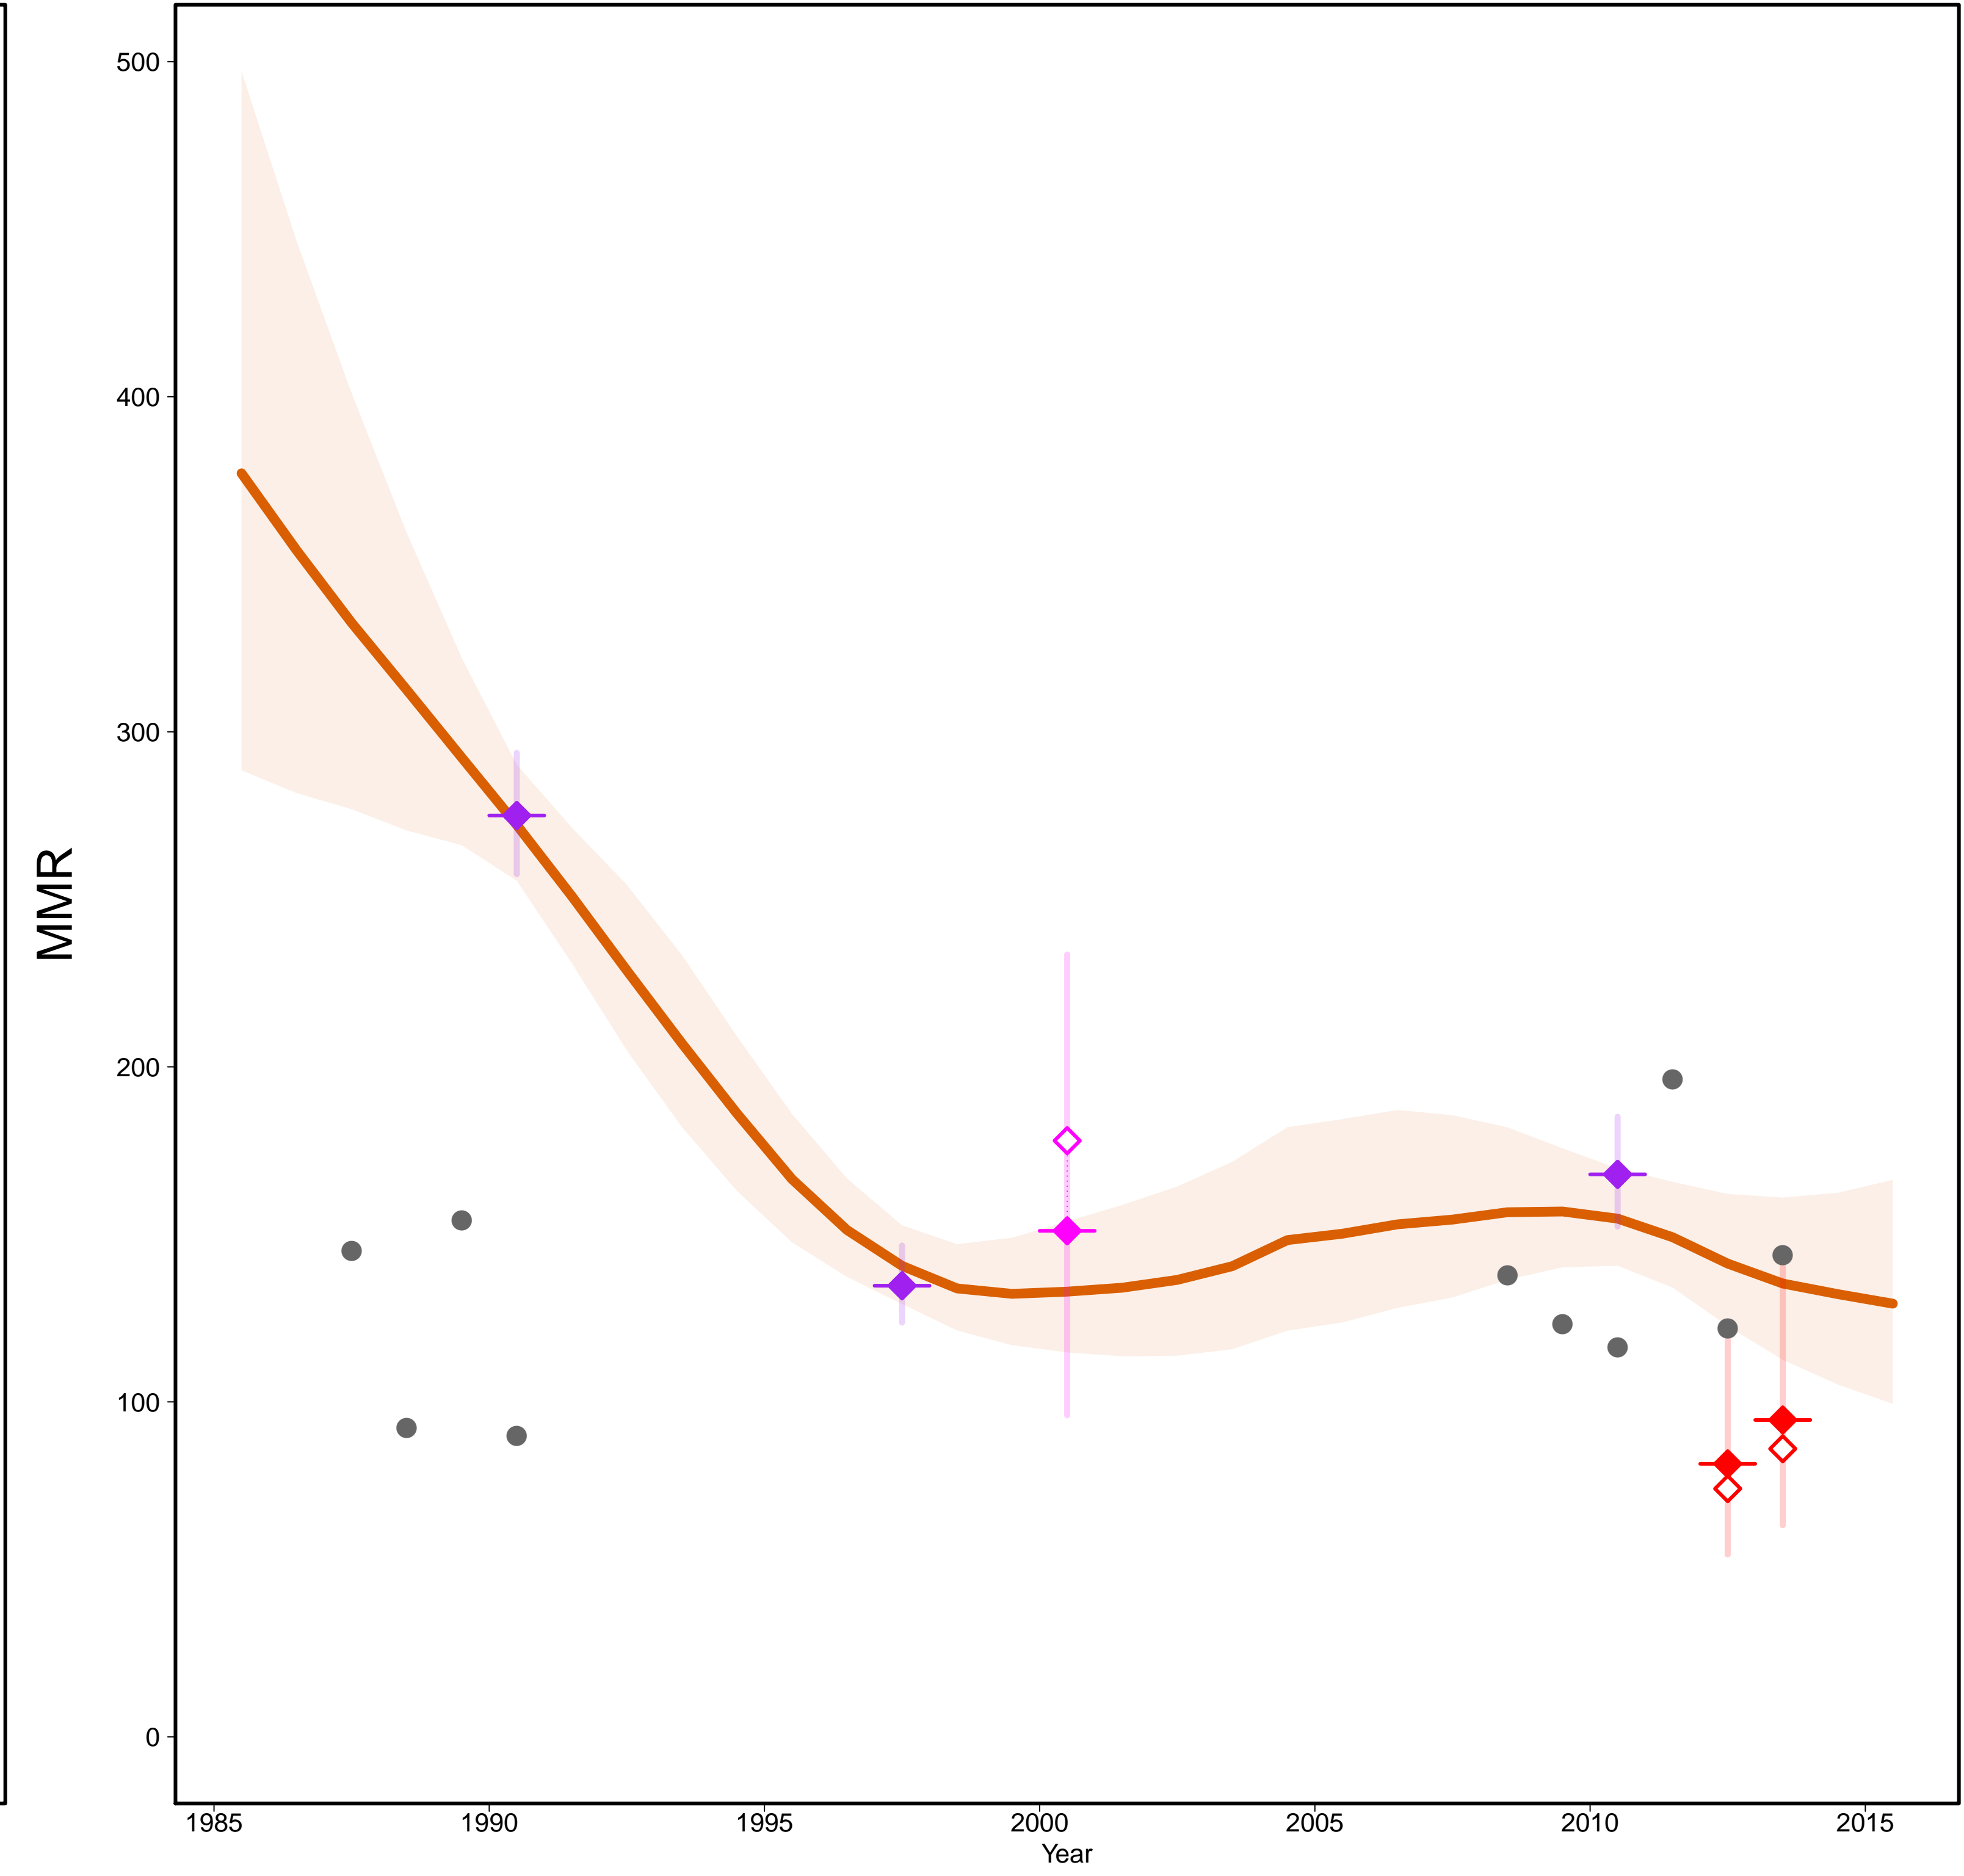

- Estimates —
- MMR Database 2015 —
- ◇ Observed Data
- ◆ Adjusted Data
- Data type —
- ◆ Spec. studies
- ◆ Census
- ◆ Misc. studies
- Excluded VR data  
(data quality issues)

Gross Domestic Product

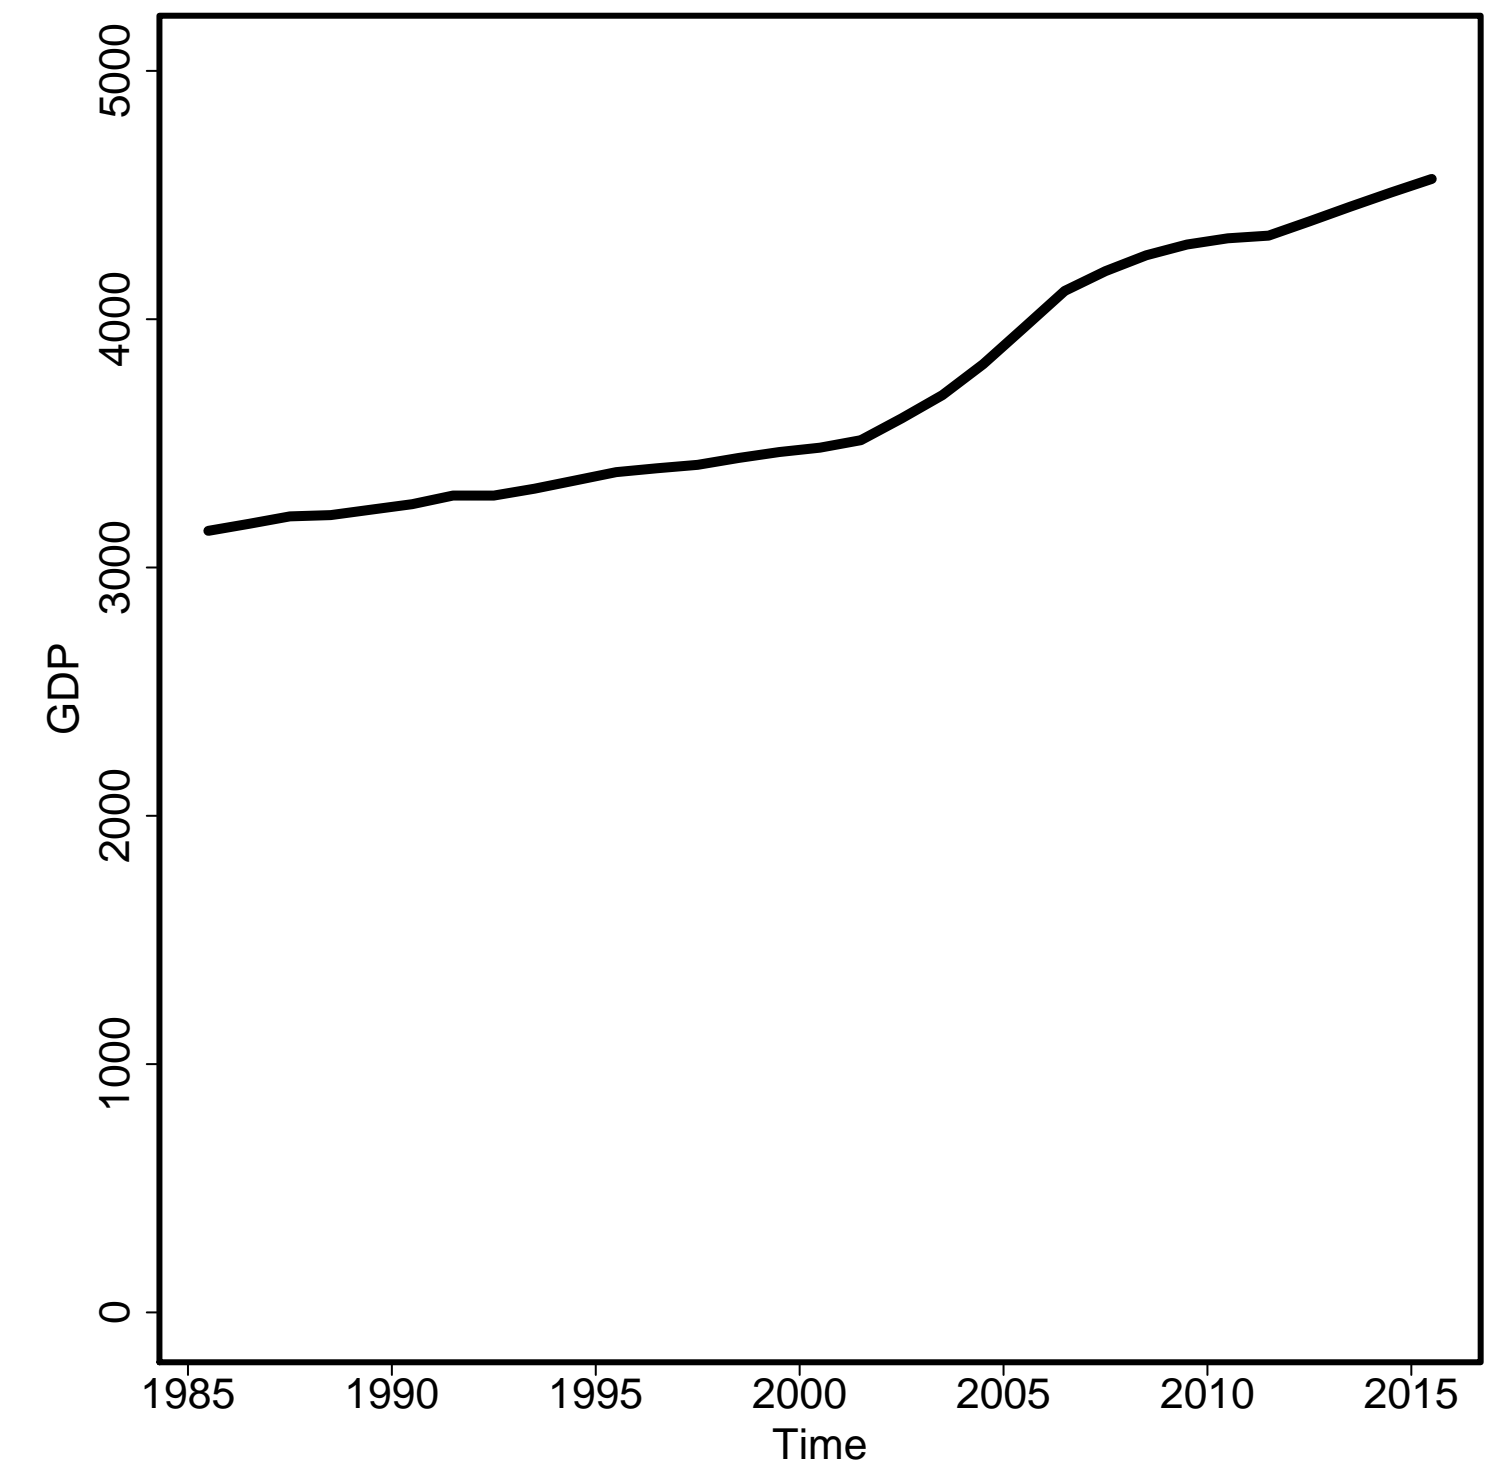

General Fertility Rate

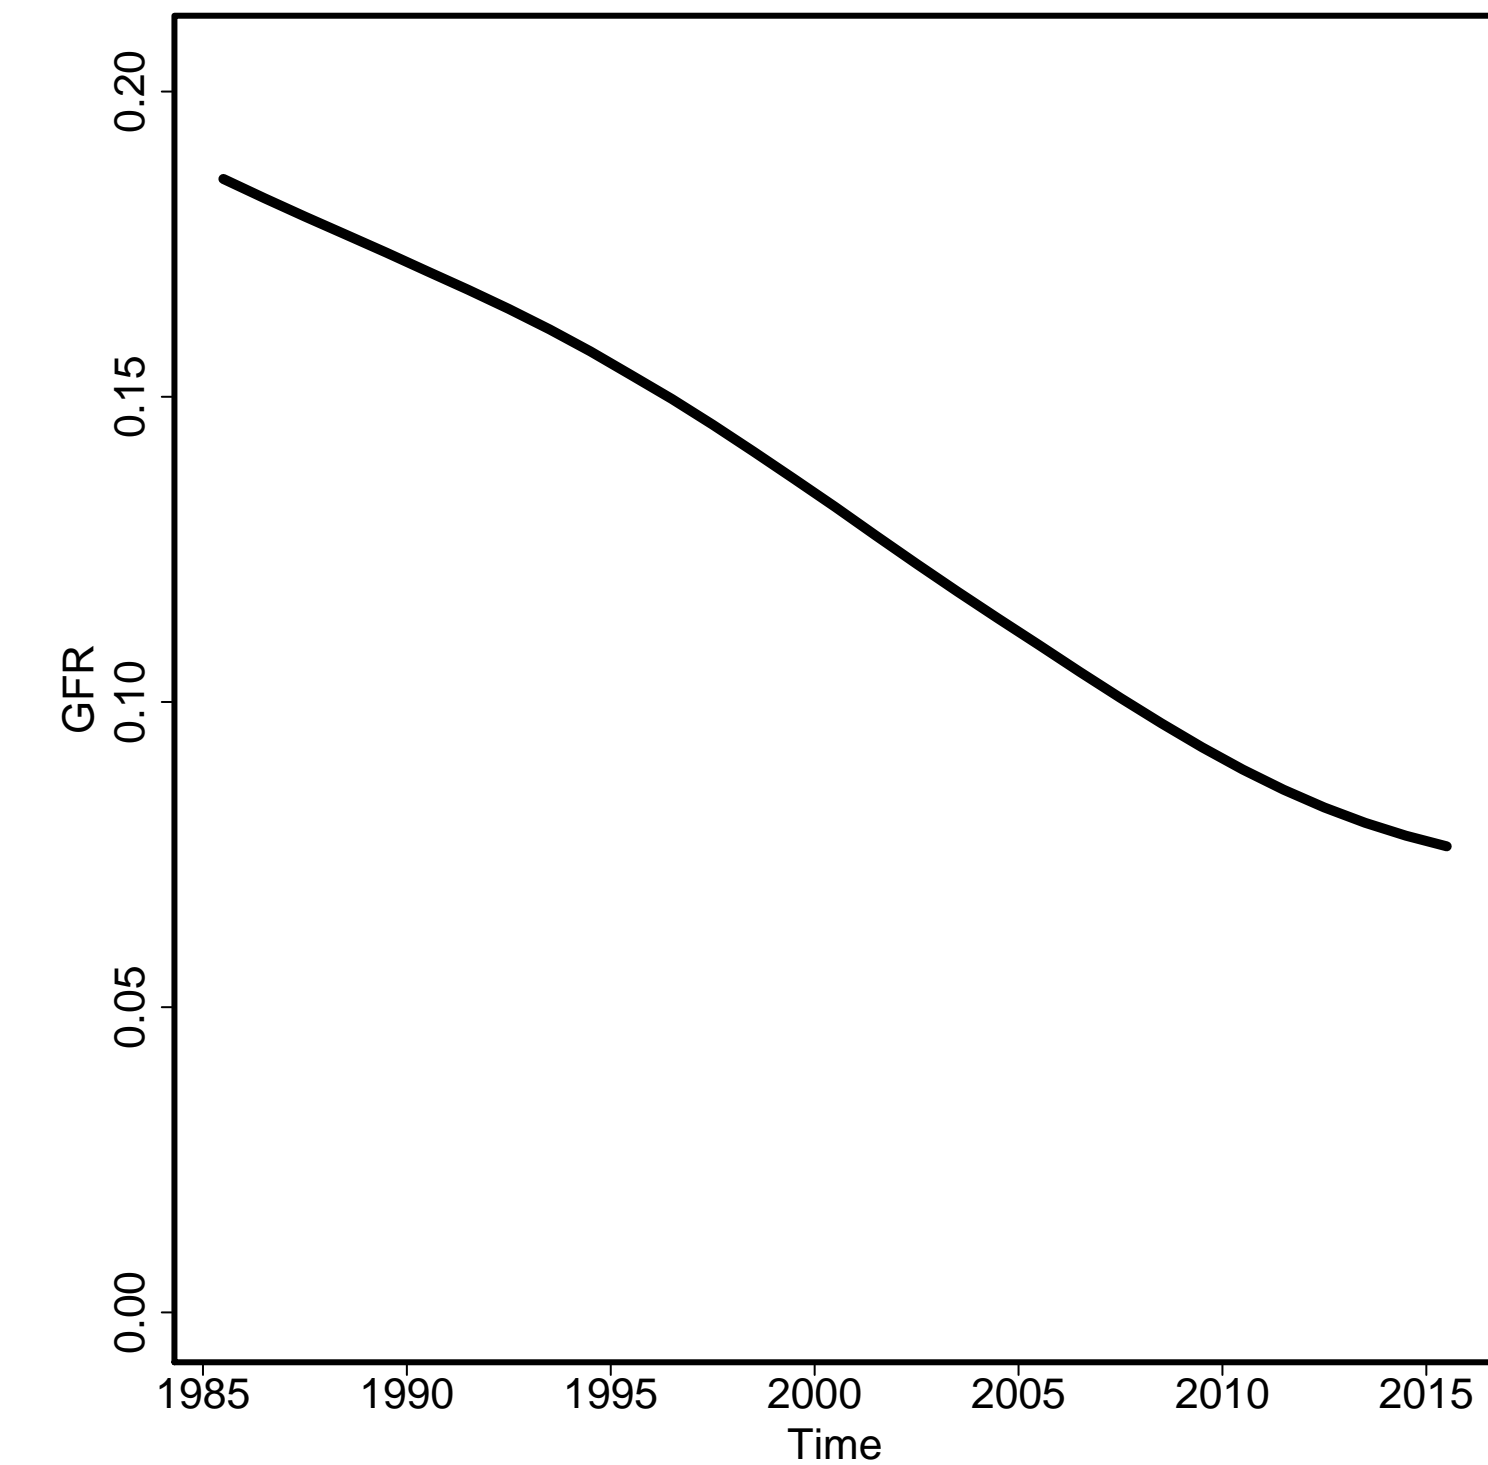

Skilled Attendance to Birth

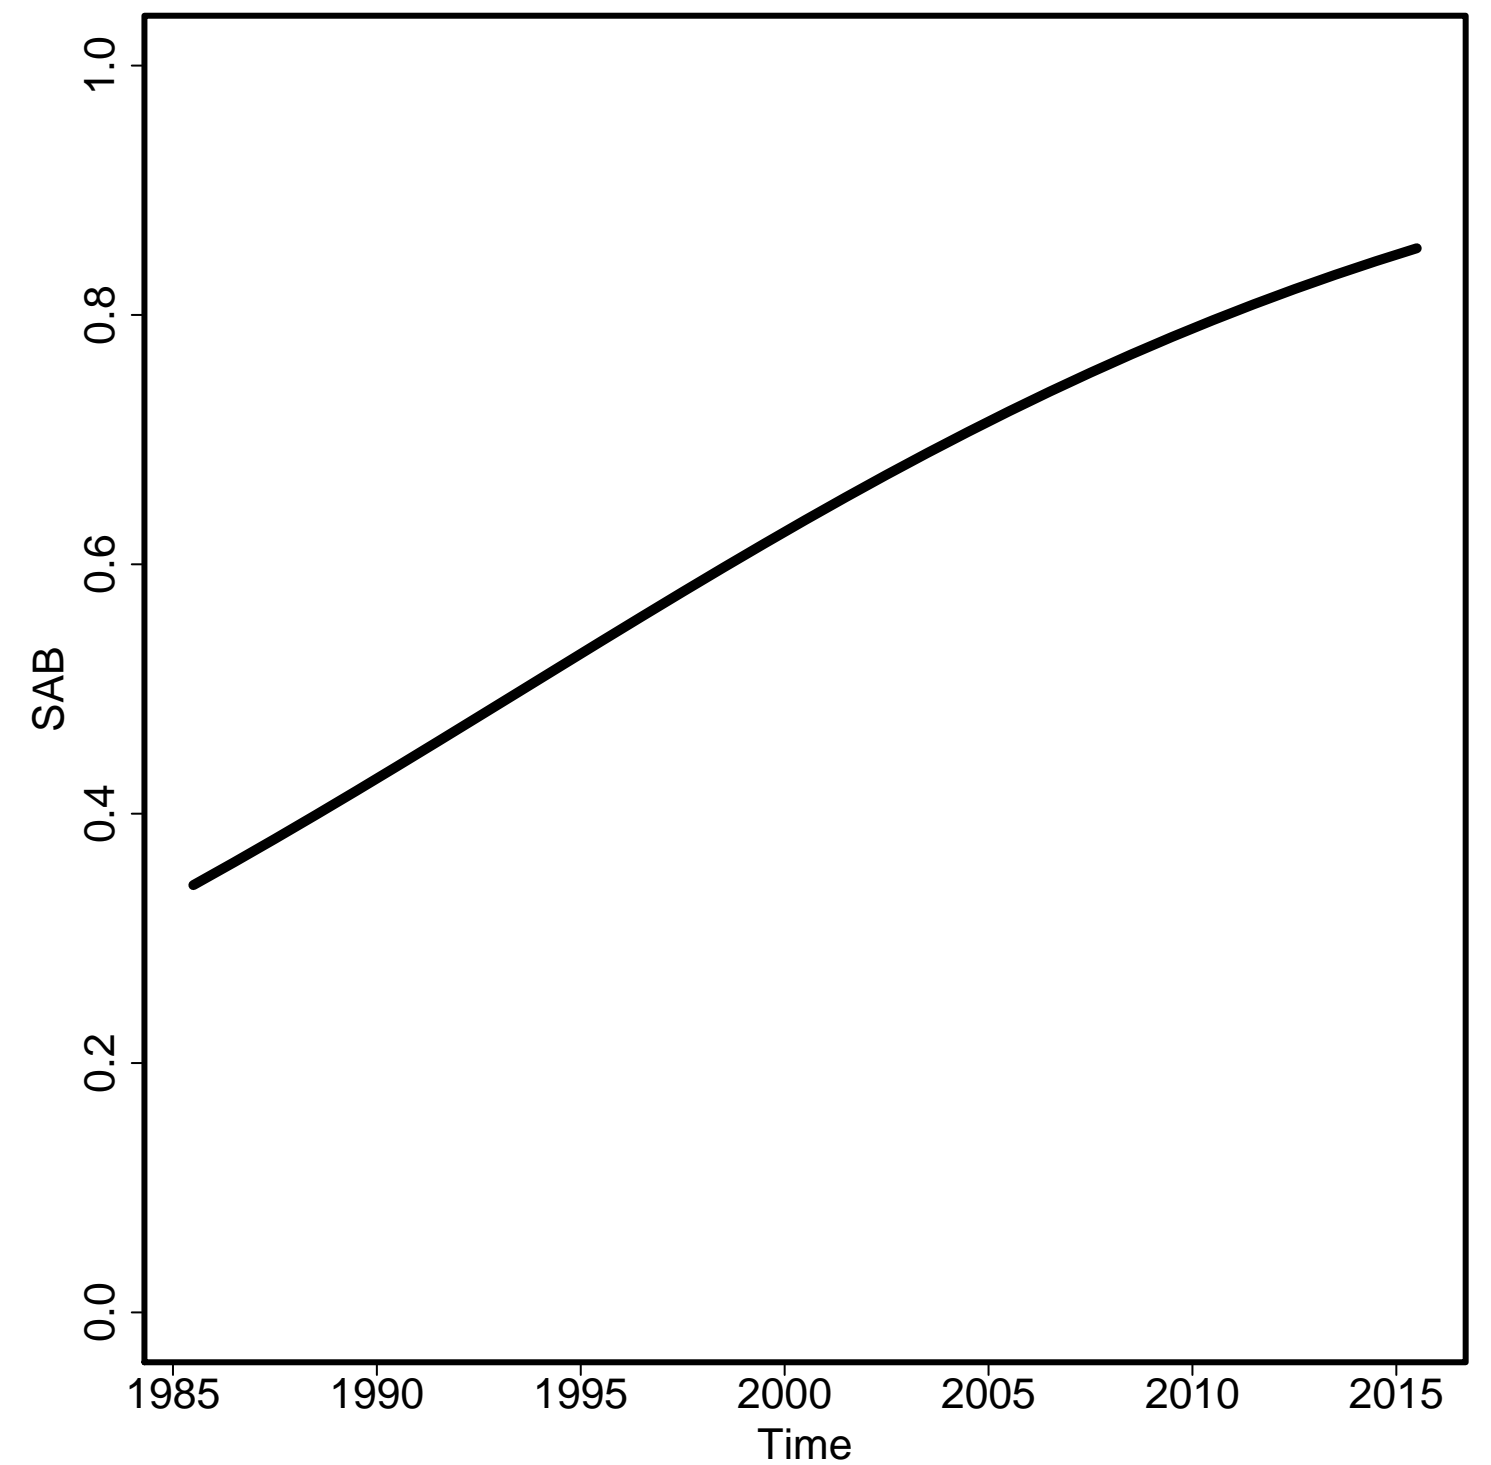

Envelope/Births

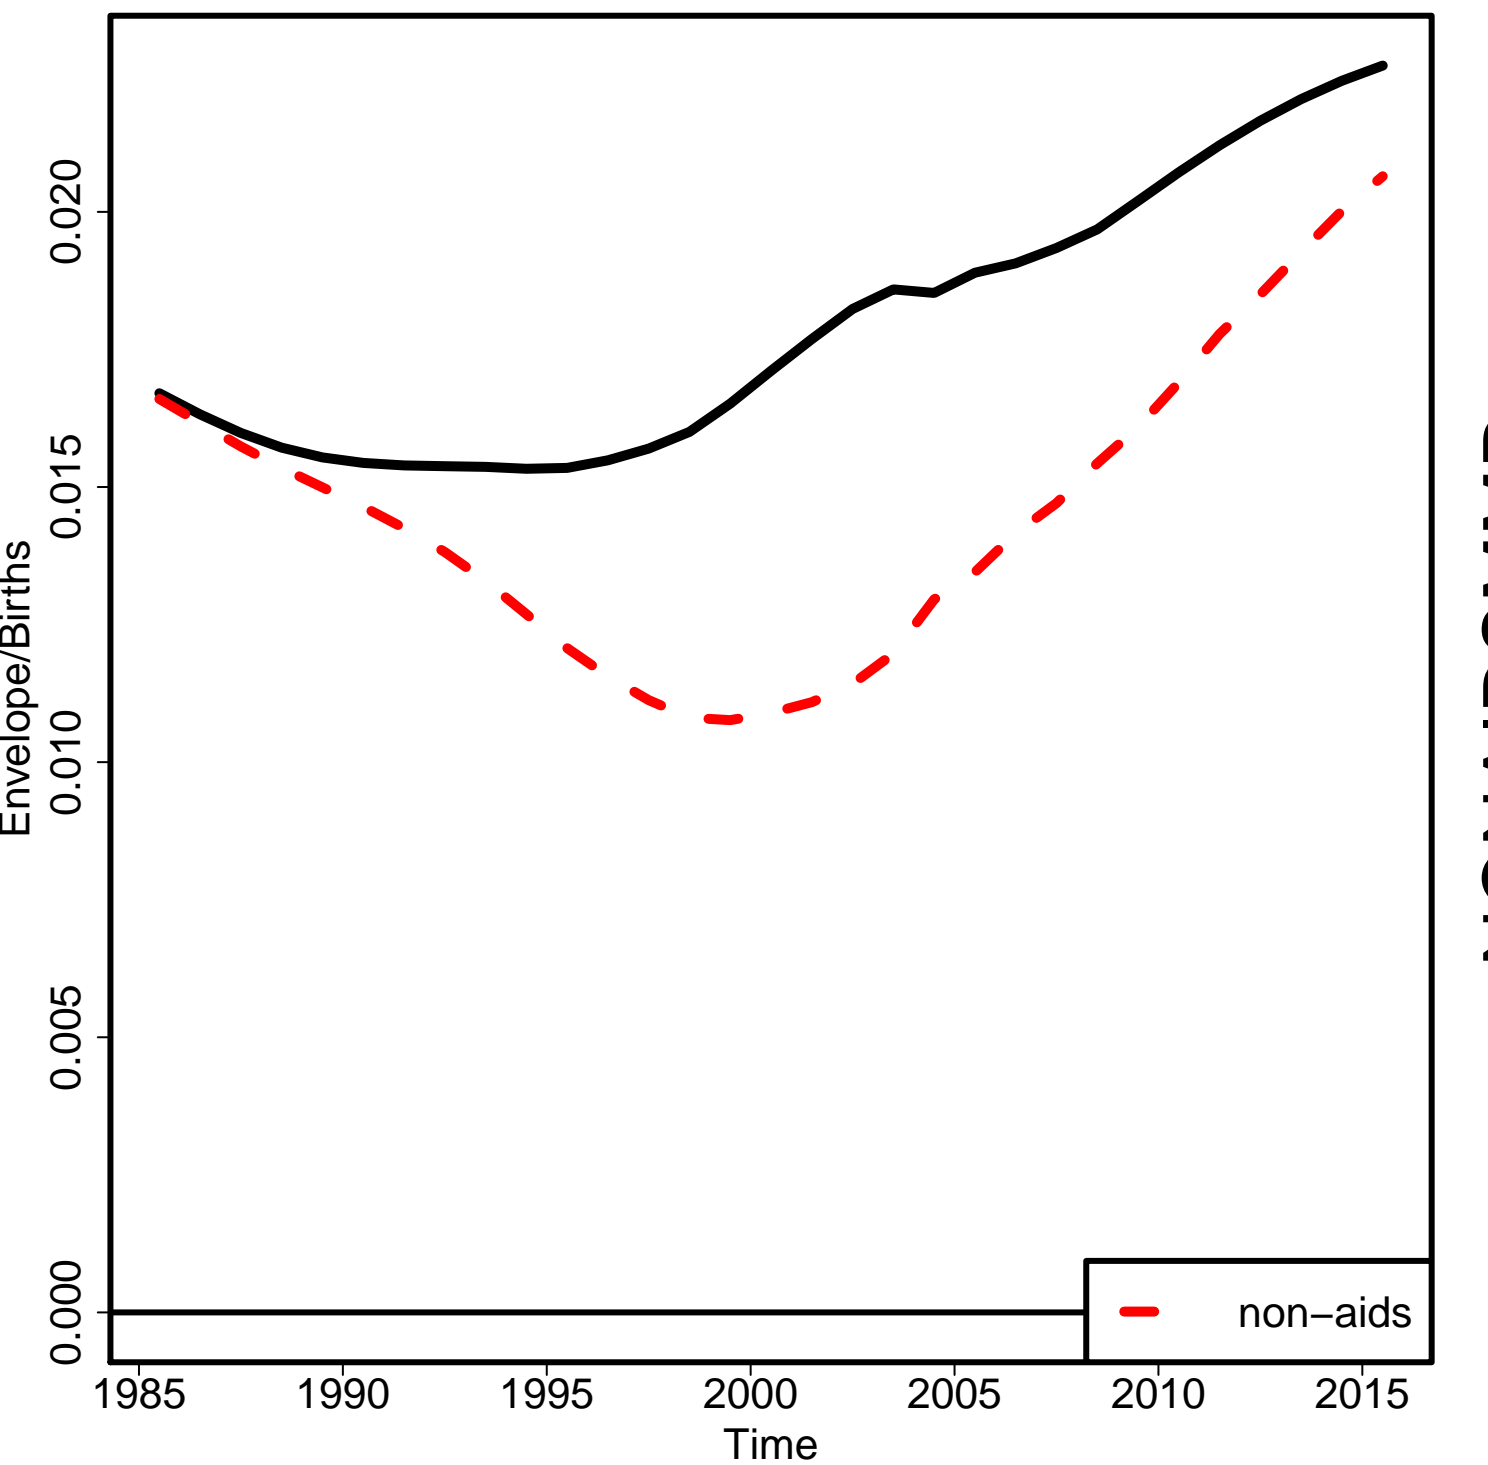

Non-aids MMR

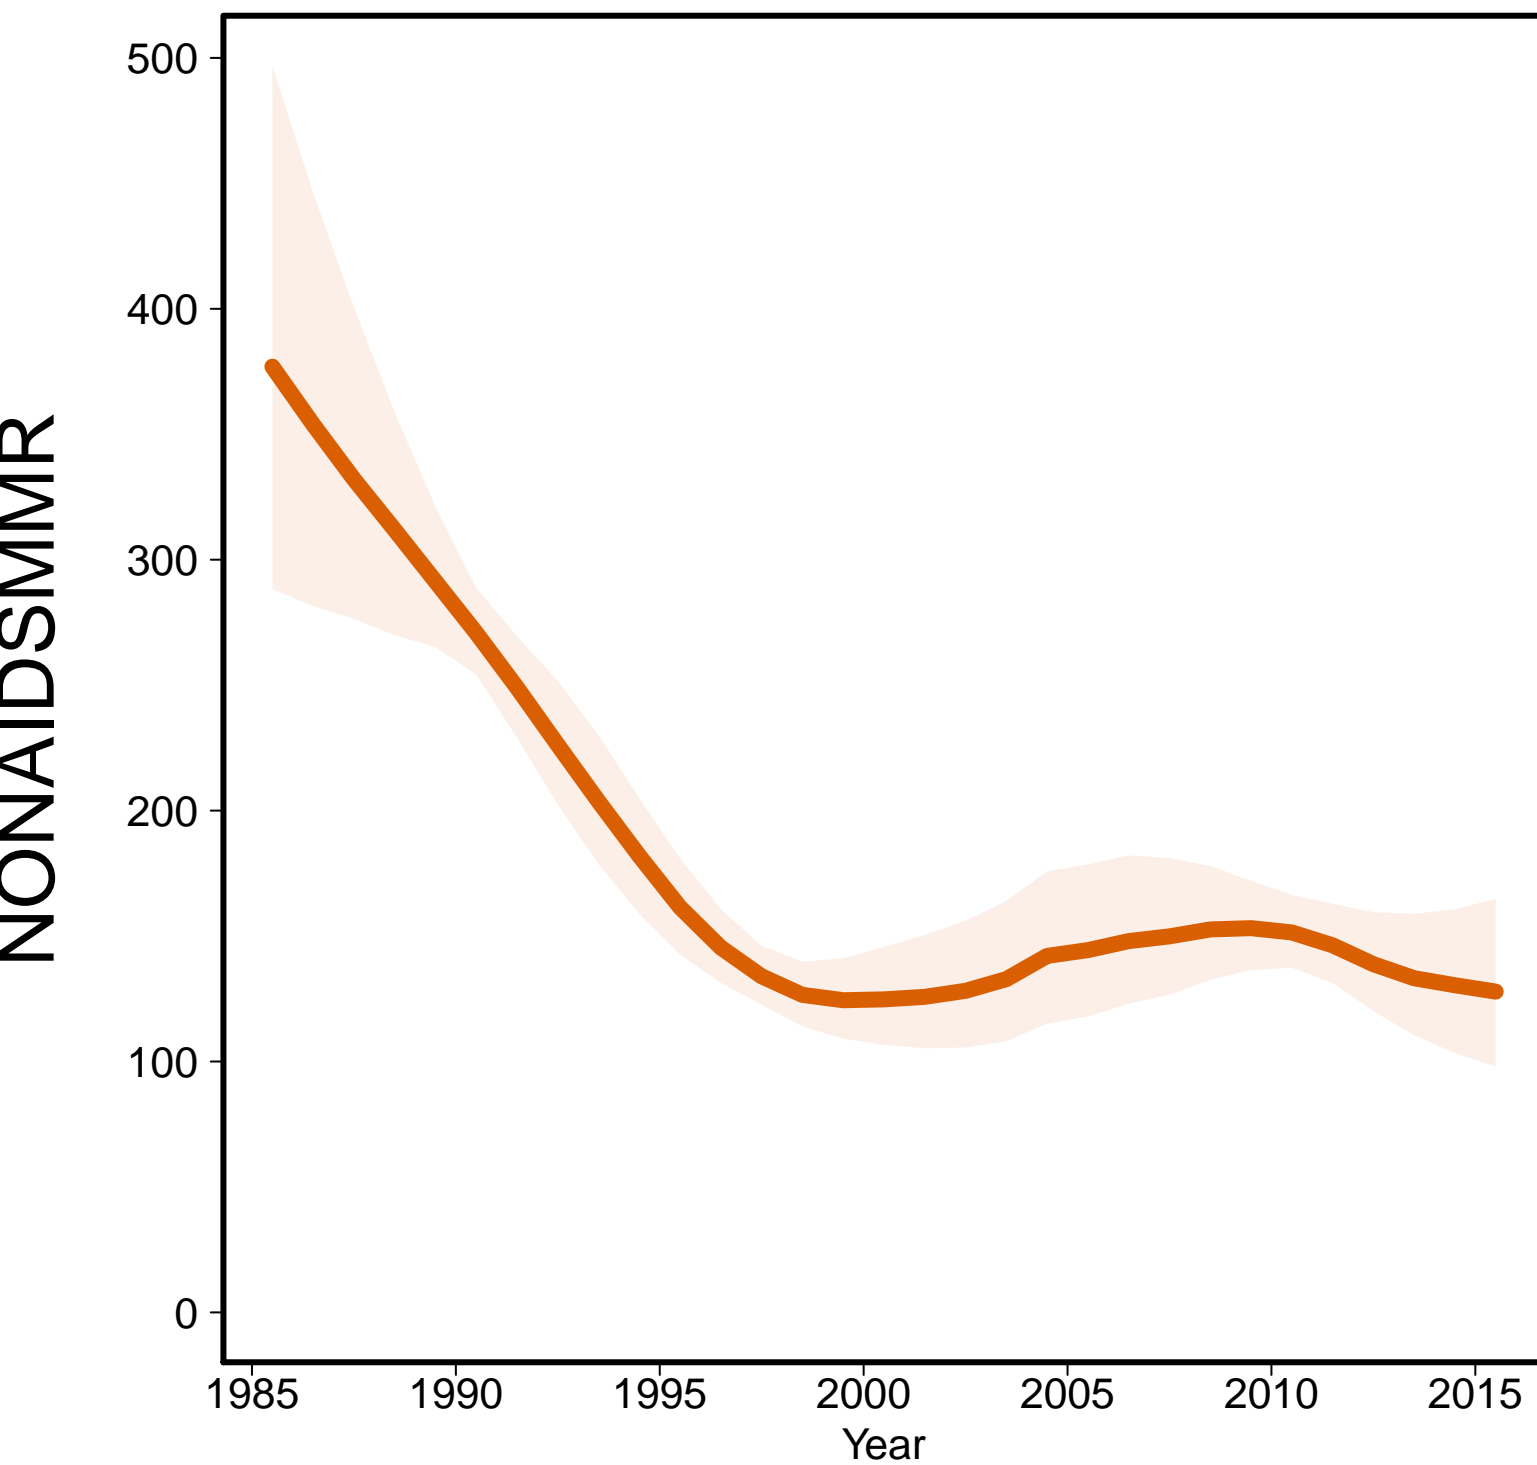

Aids MMR

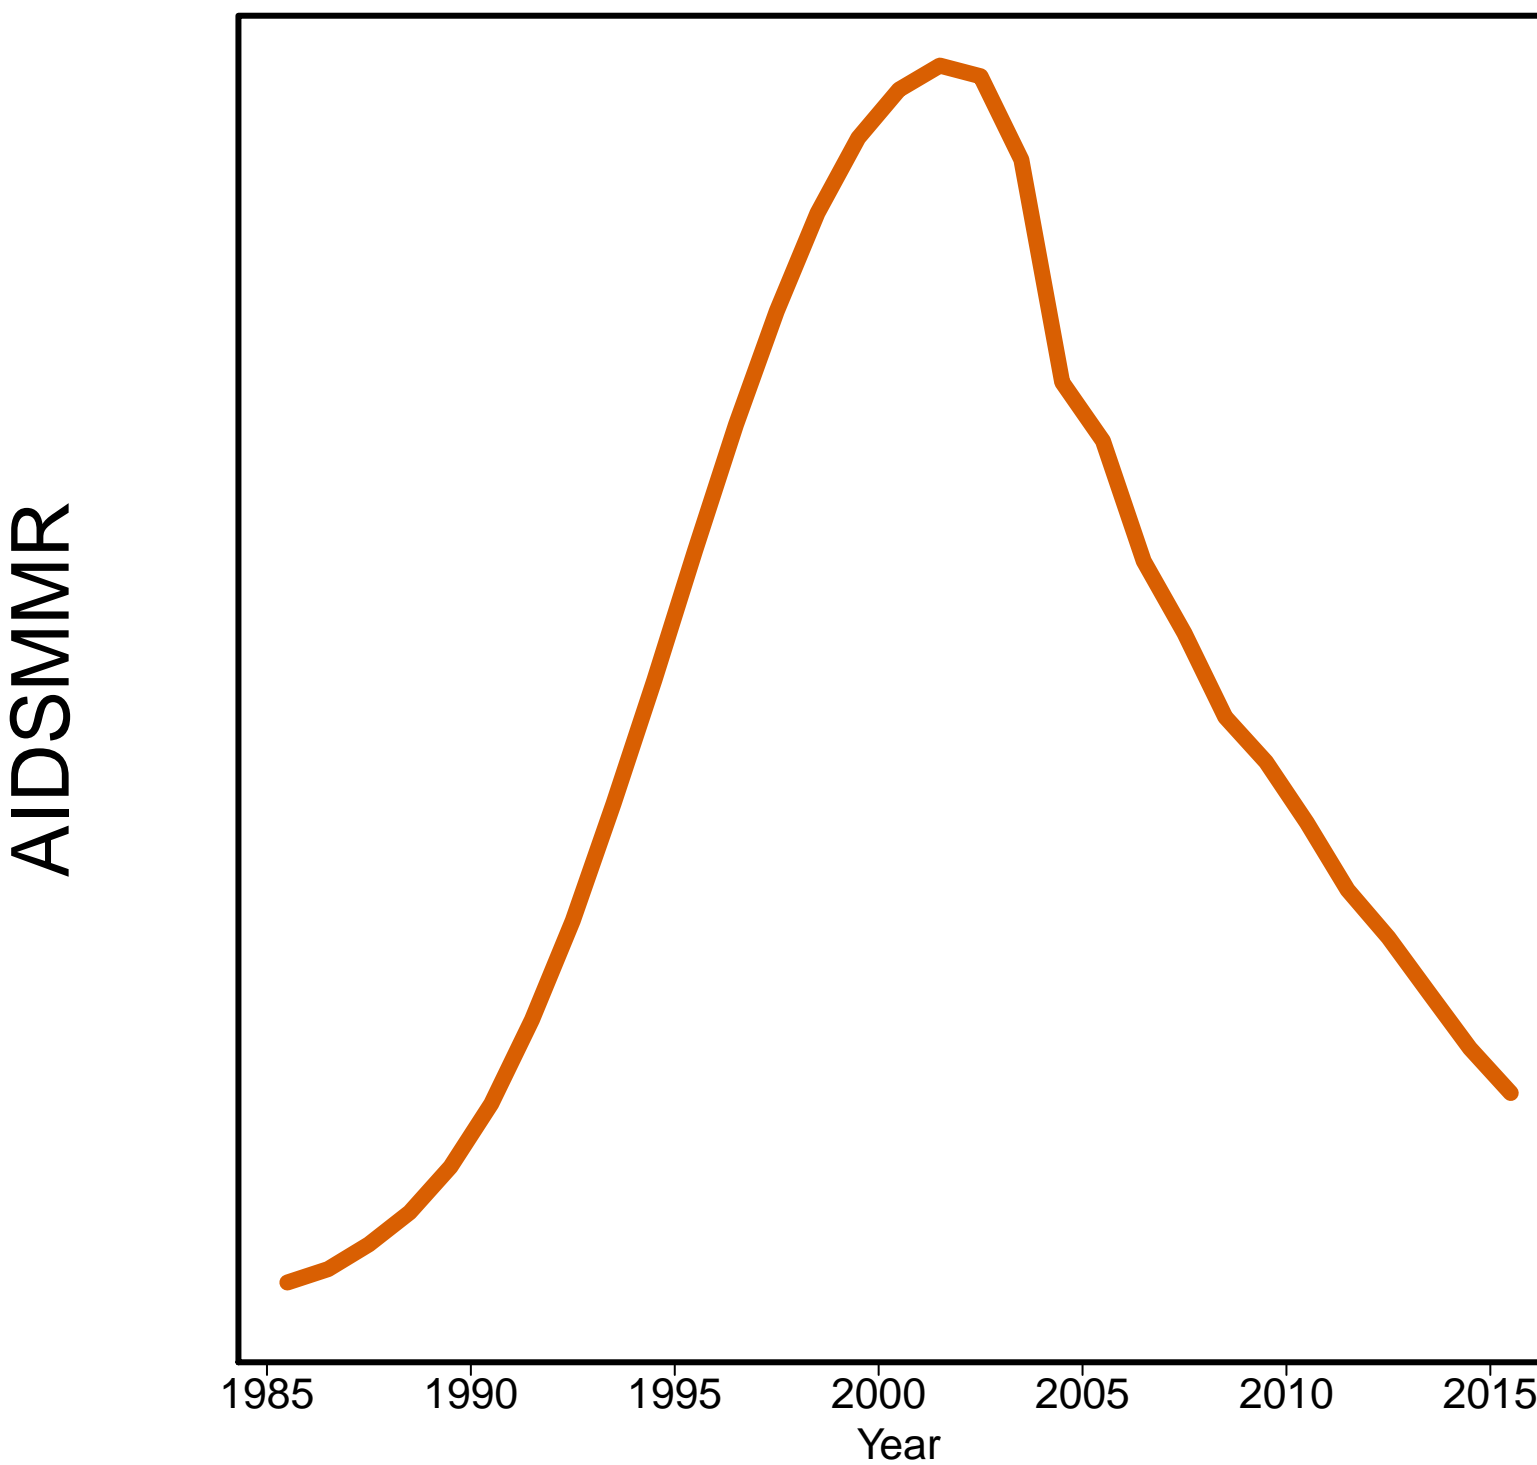

Hungary [HUN]  
(Developed regions)

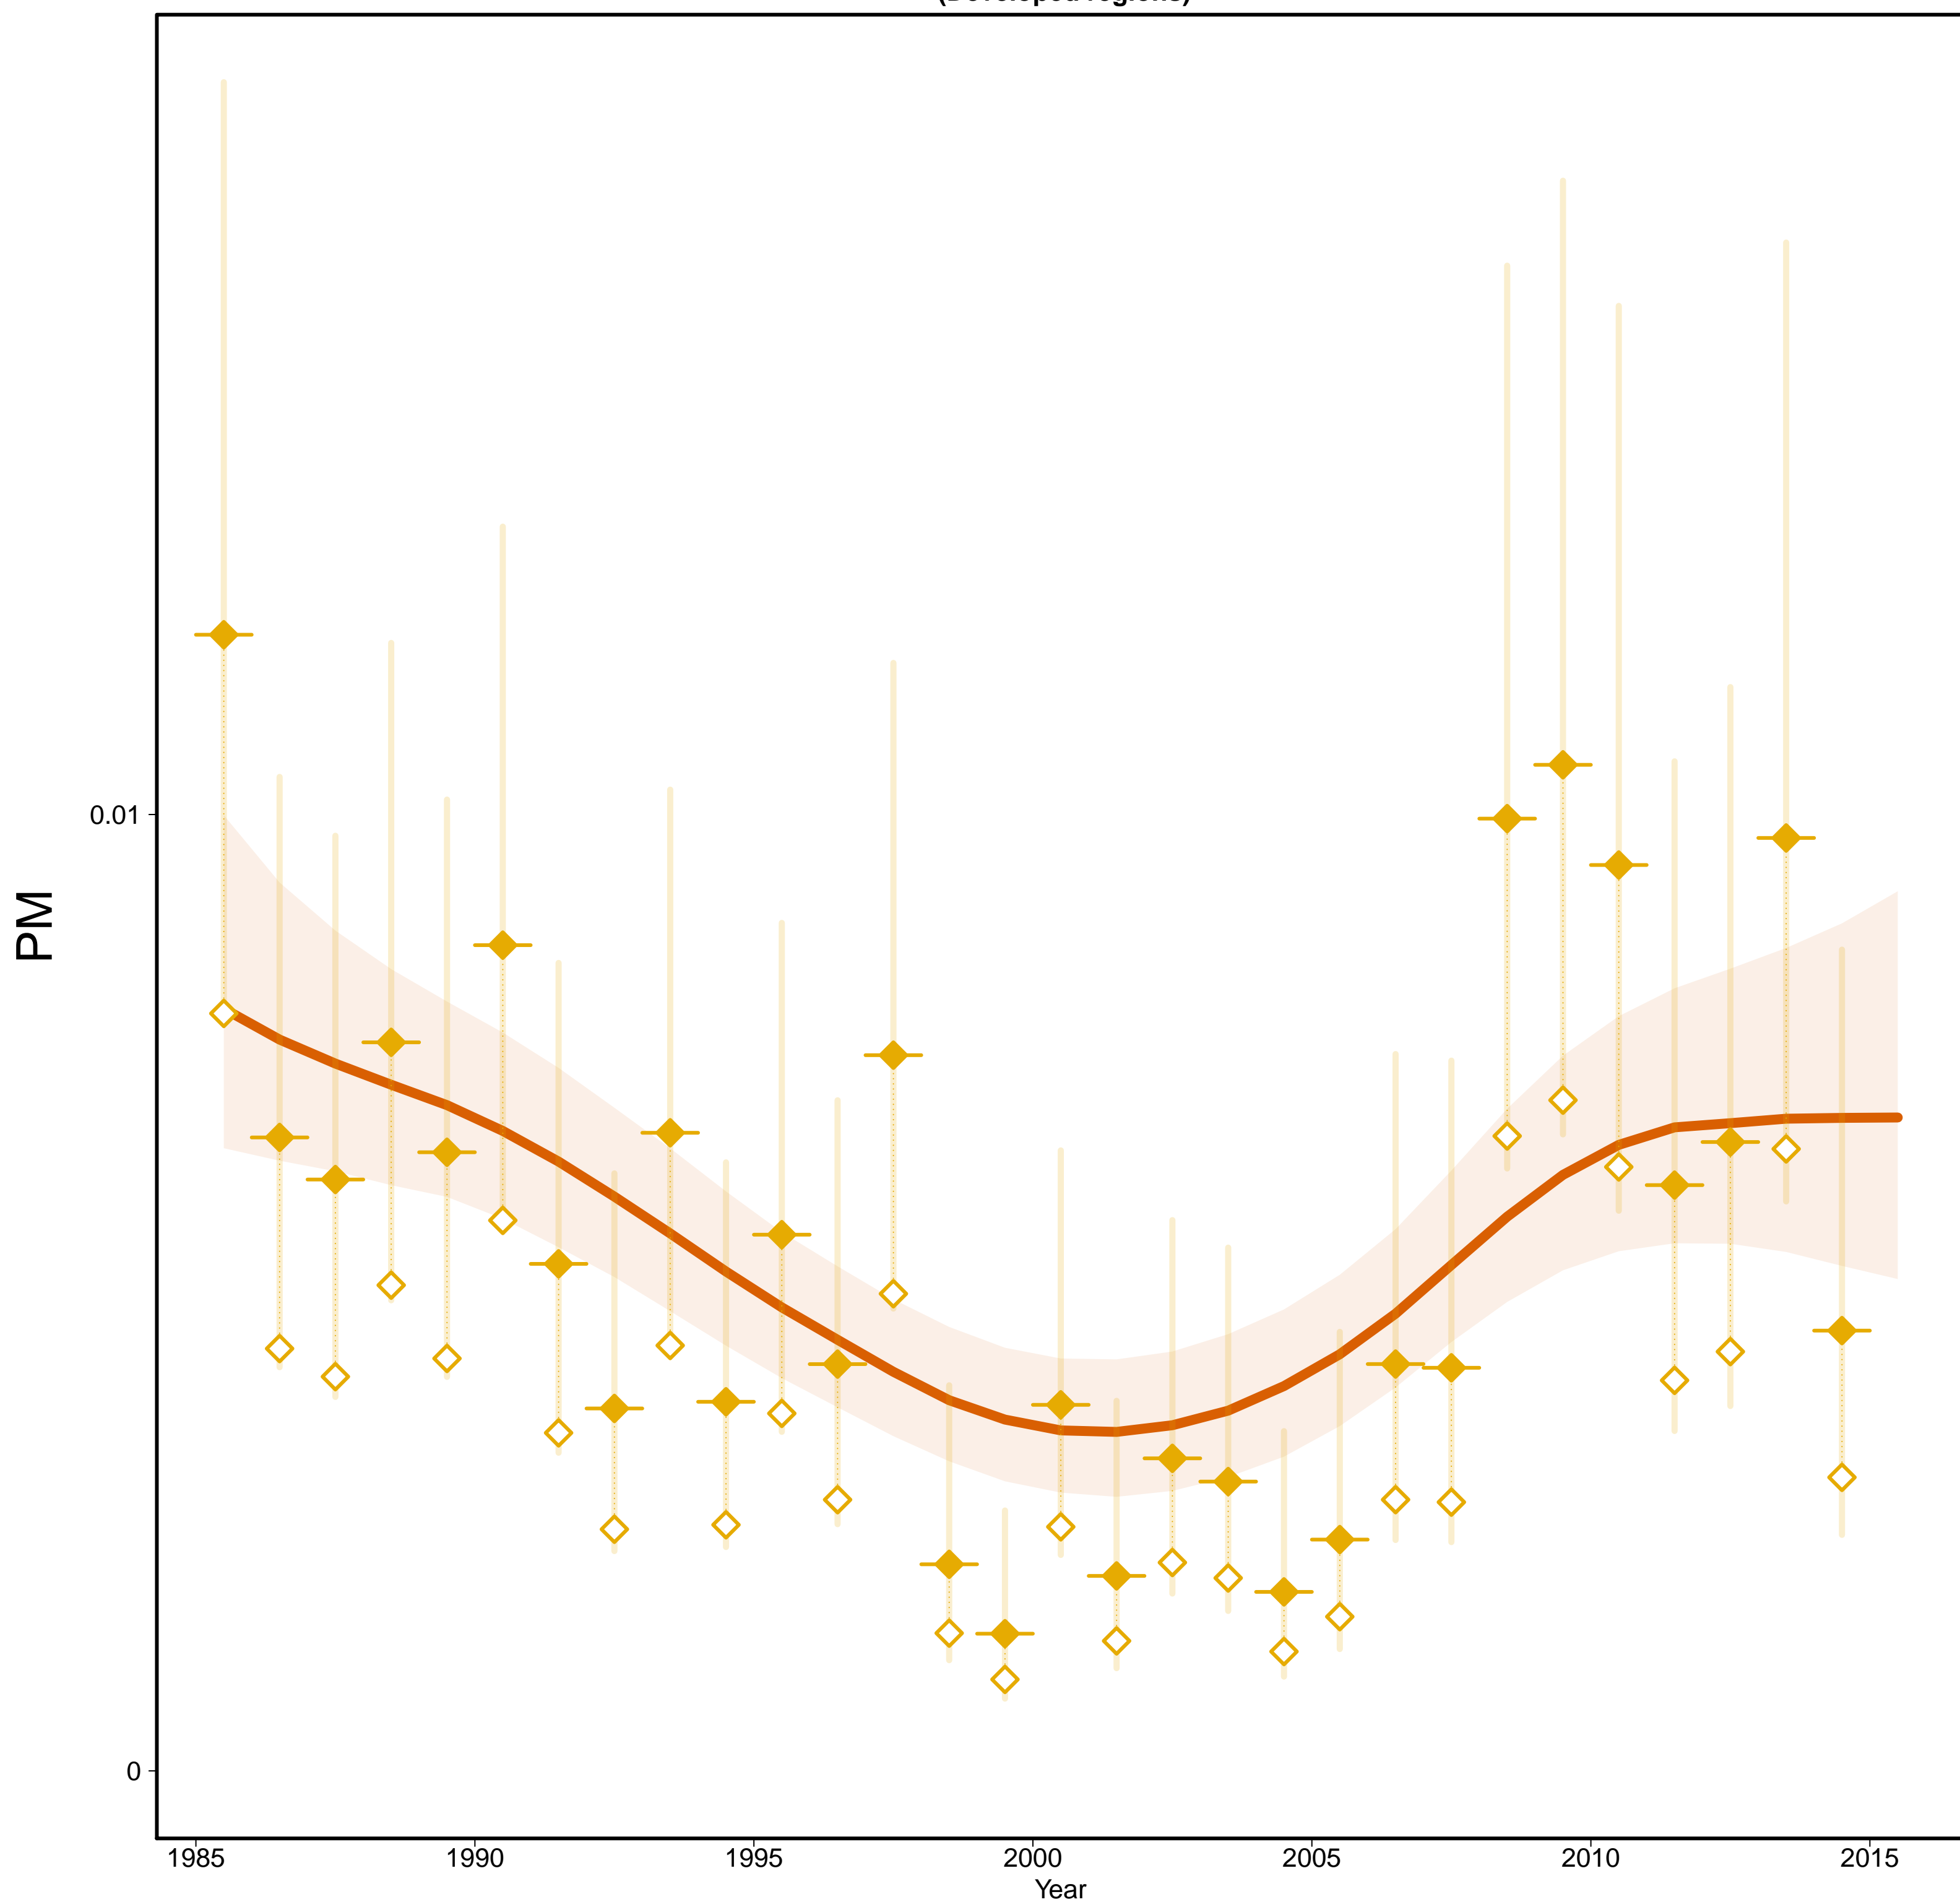

Hungary [HUN]  
(Developed regions)

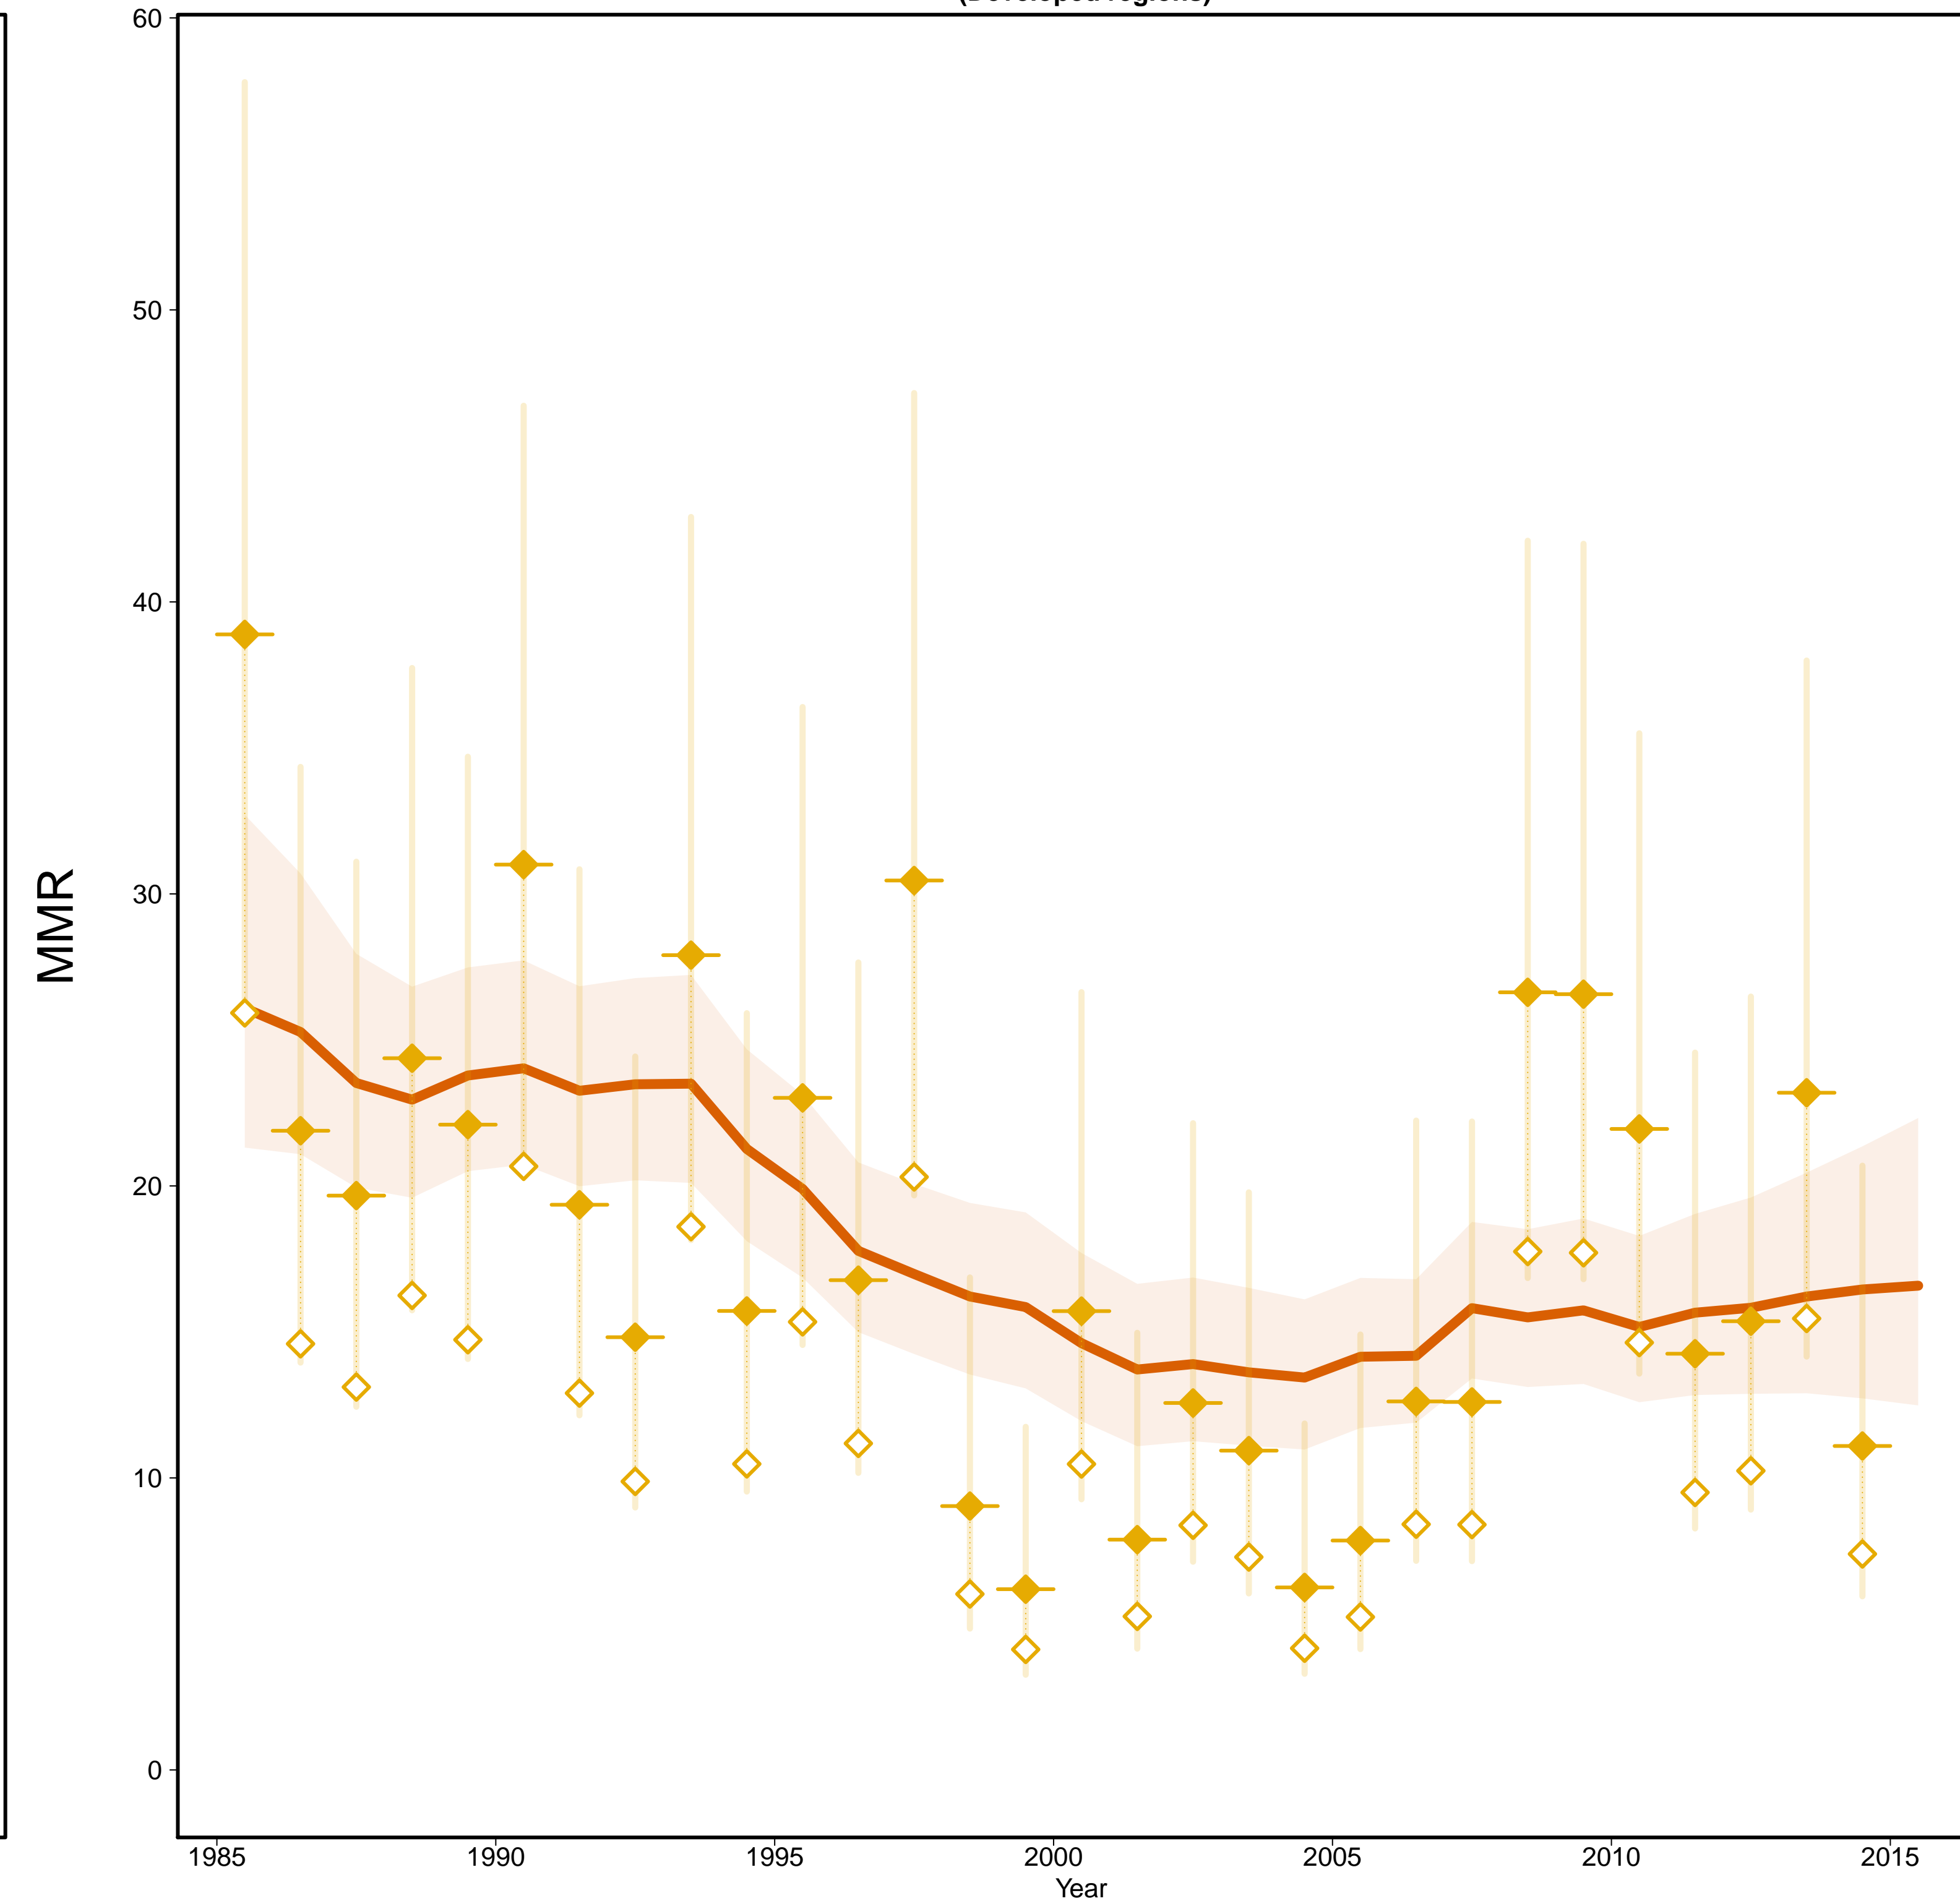

- Estimates —
- MMR Database 2015 —
- ◇ Observed Data
- ◆ Adjusted Data
- Data type —
- ◆ VR

Gross Domestic Product

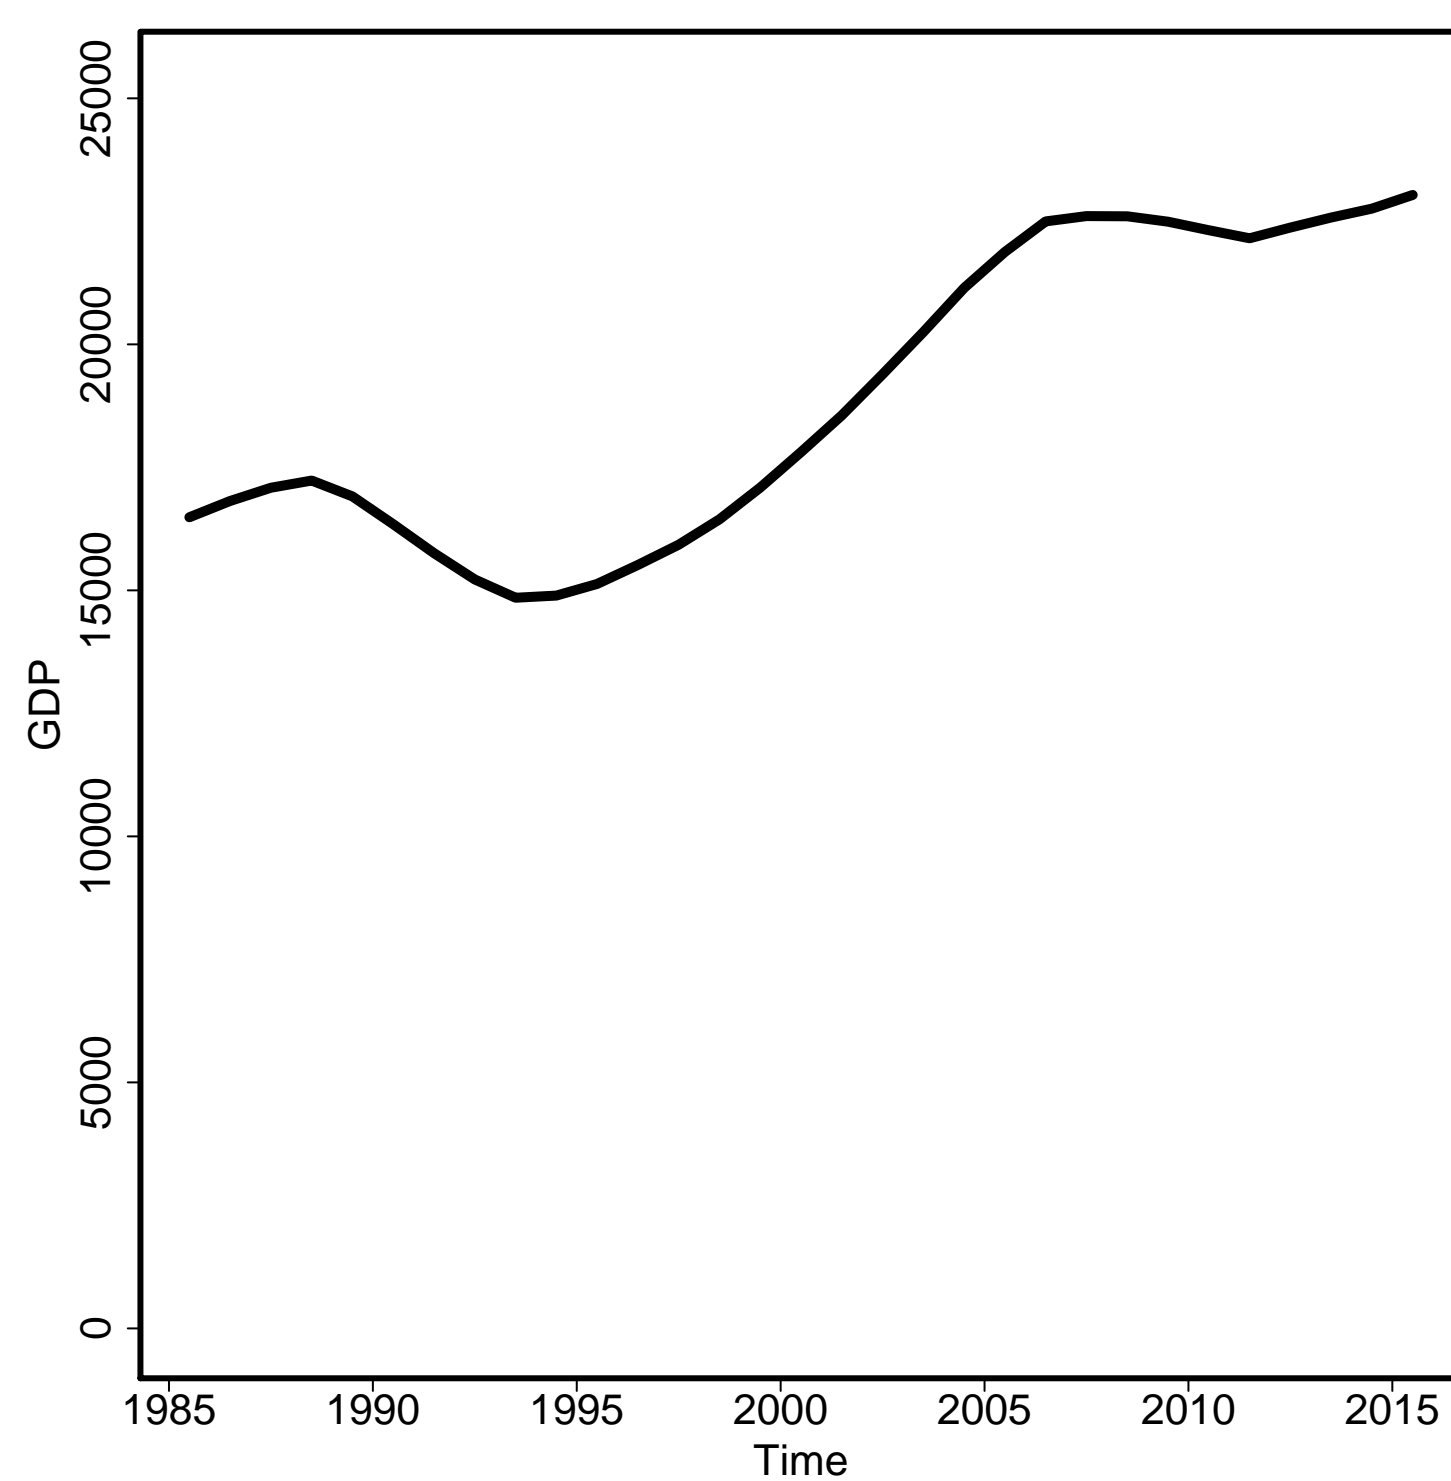

General Fertility Rate

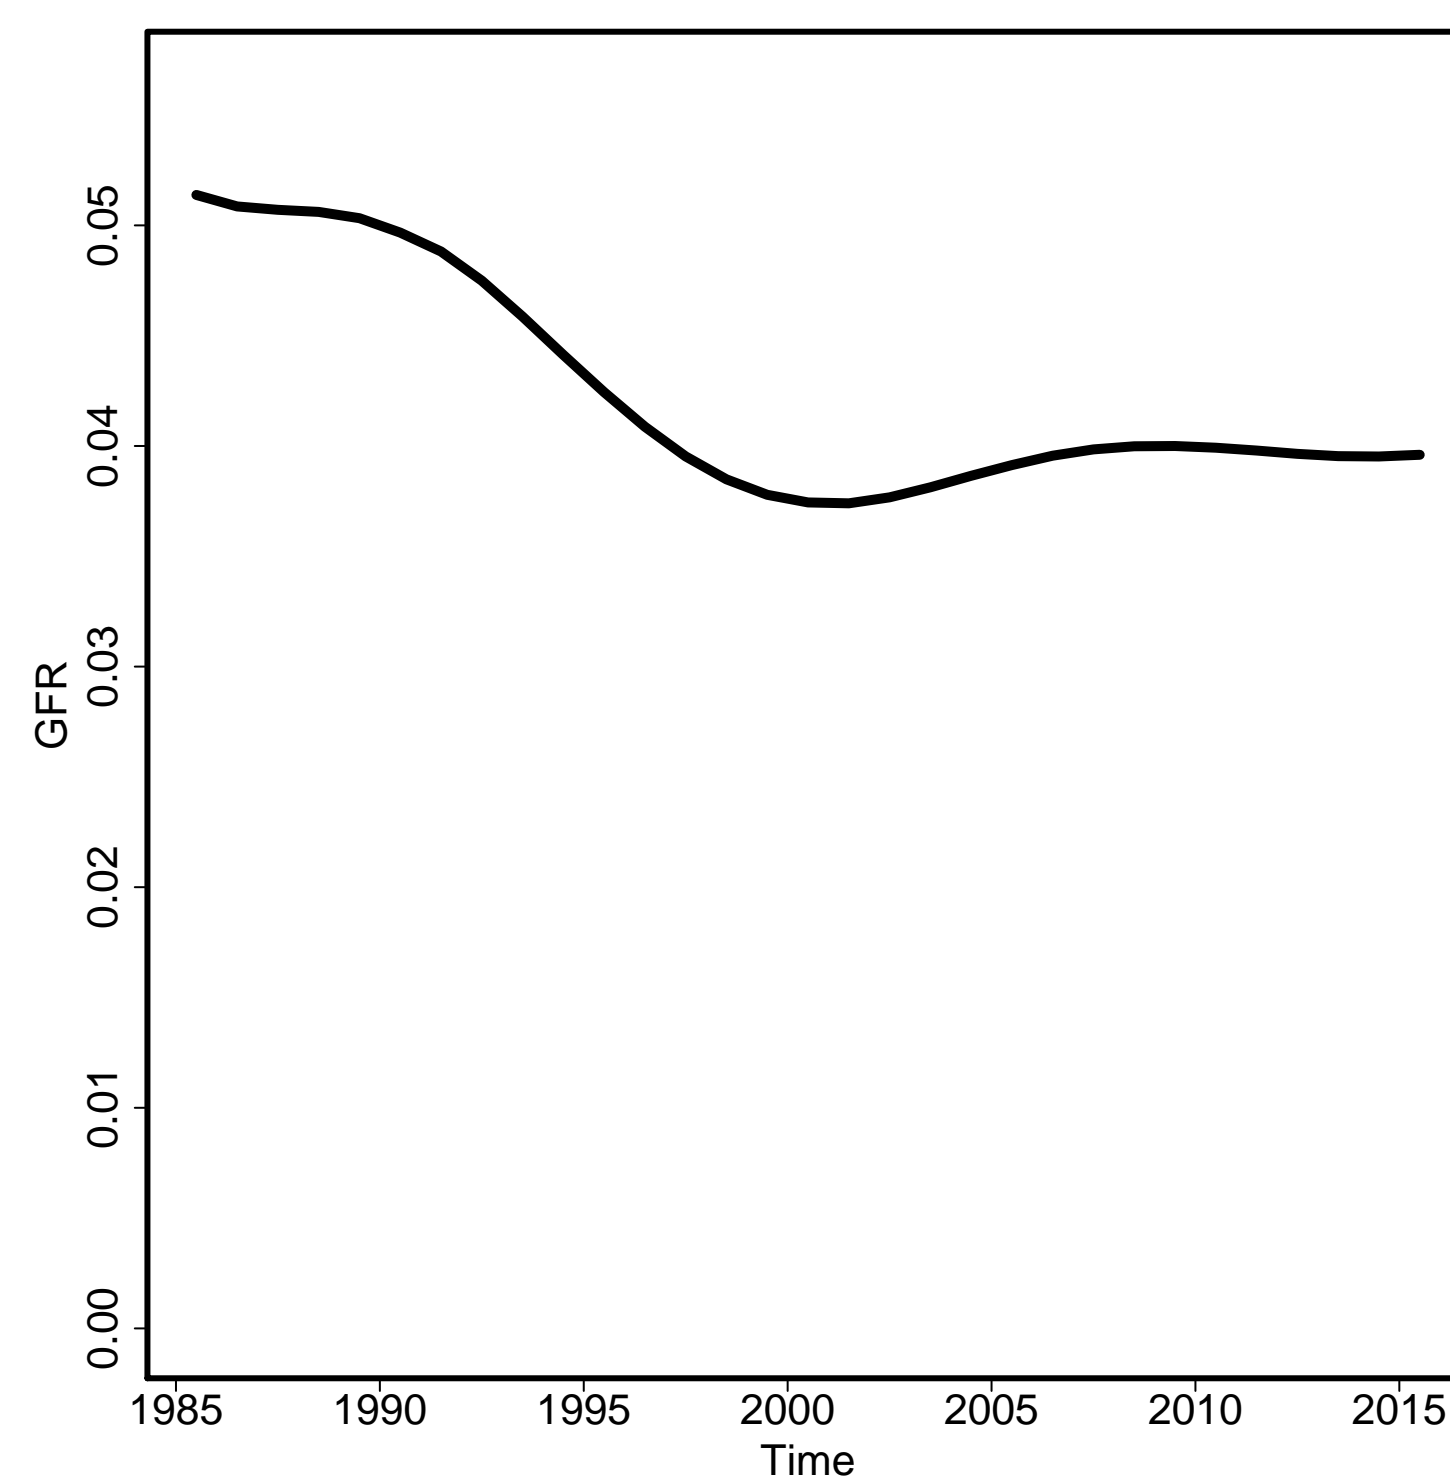

Skilled Attendance to Birth

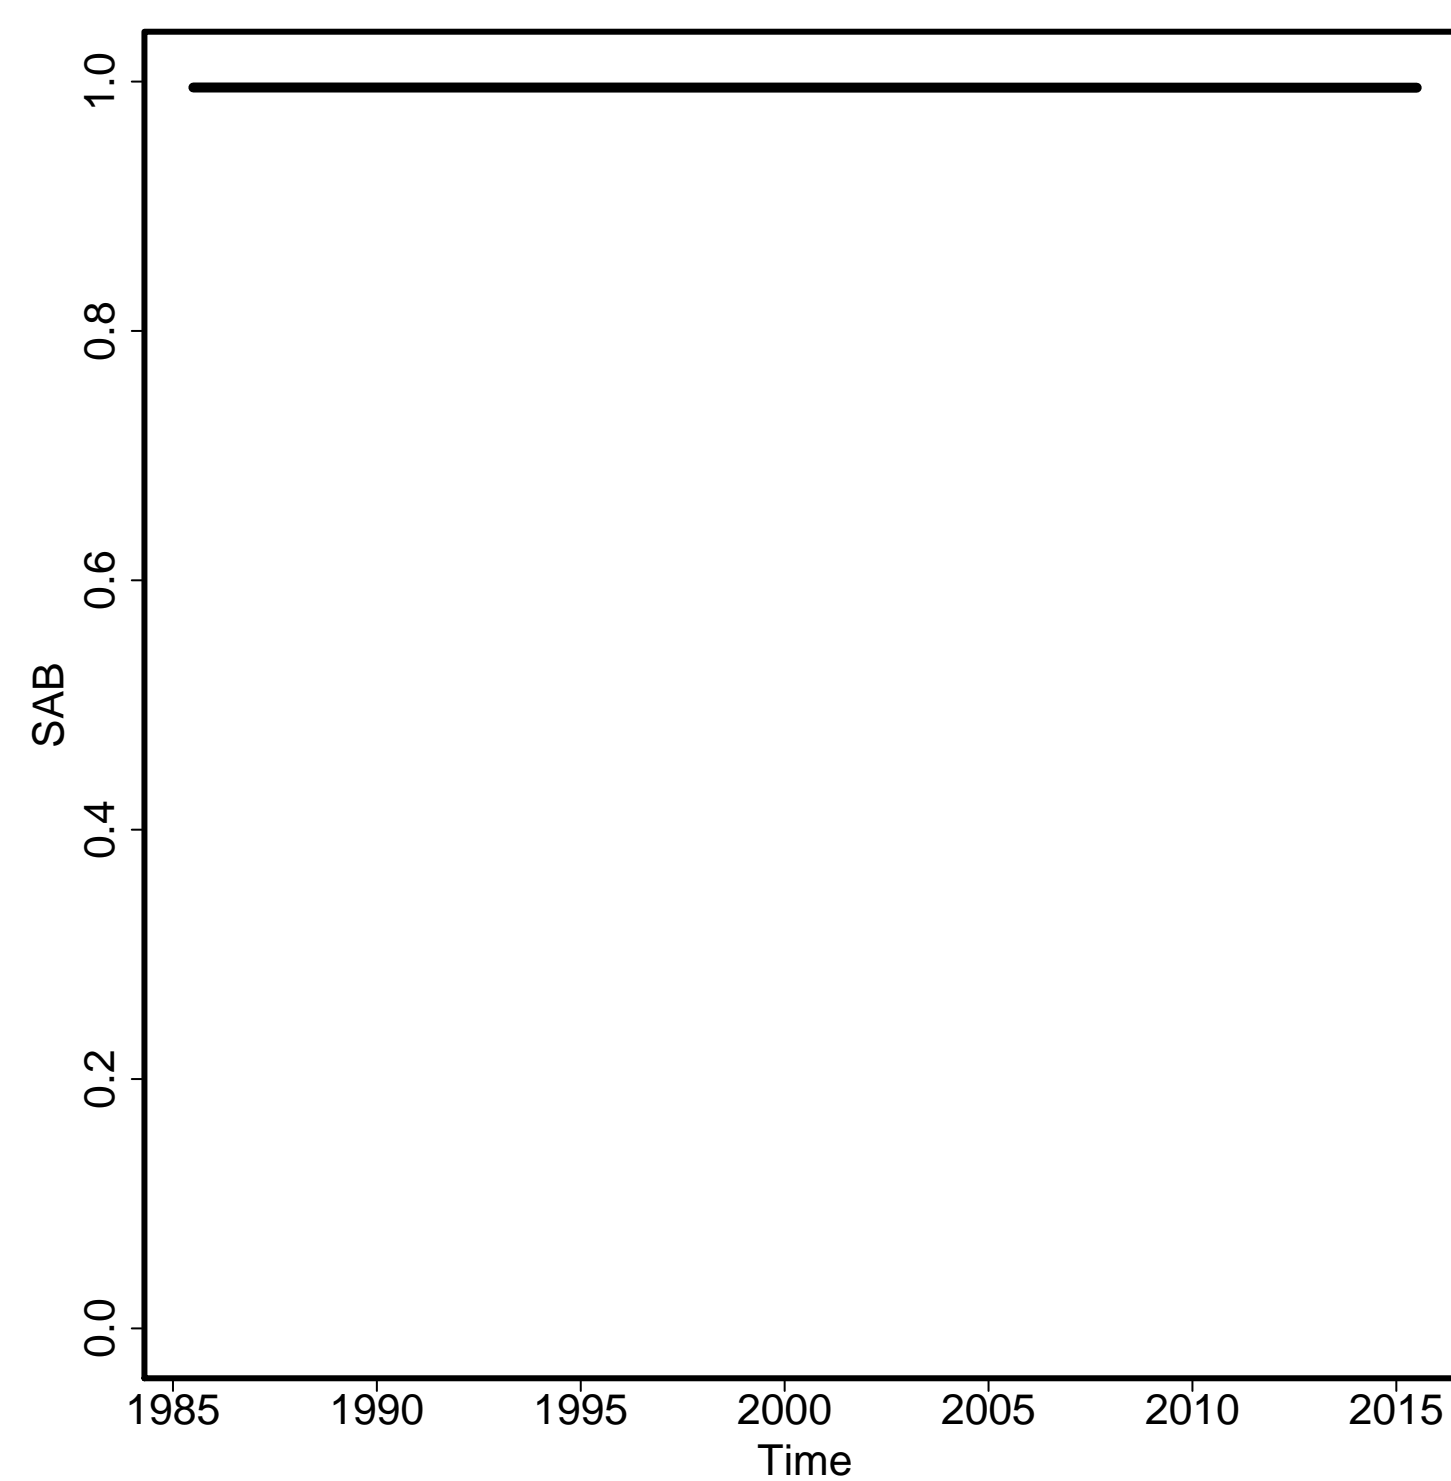

Envelope/Births

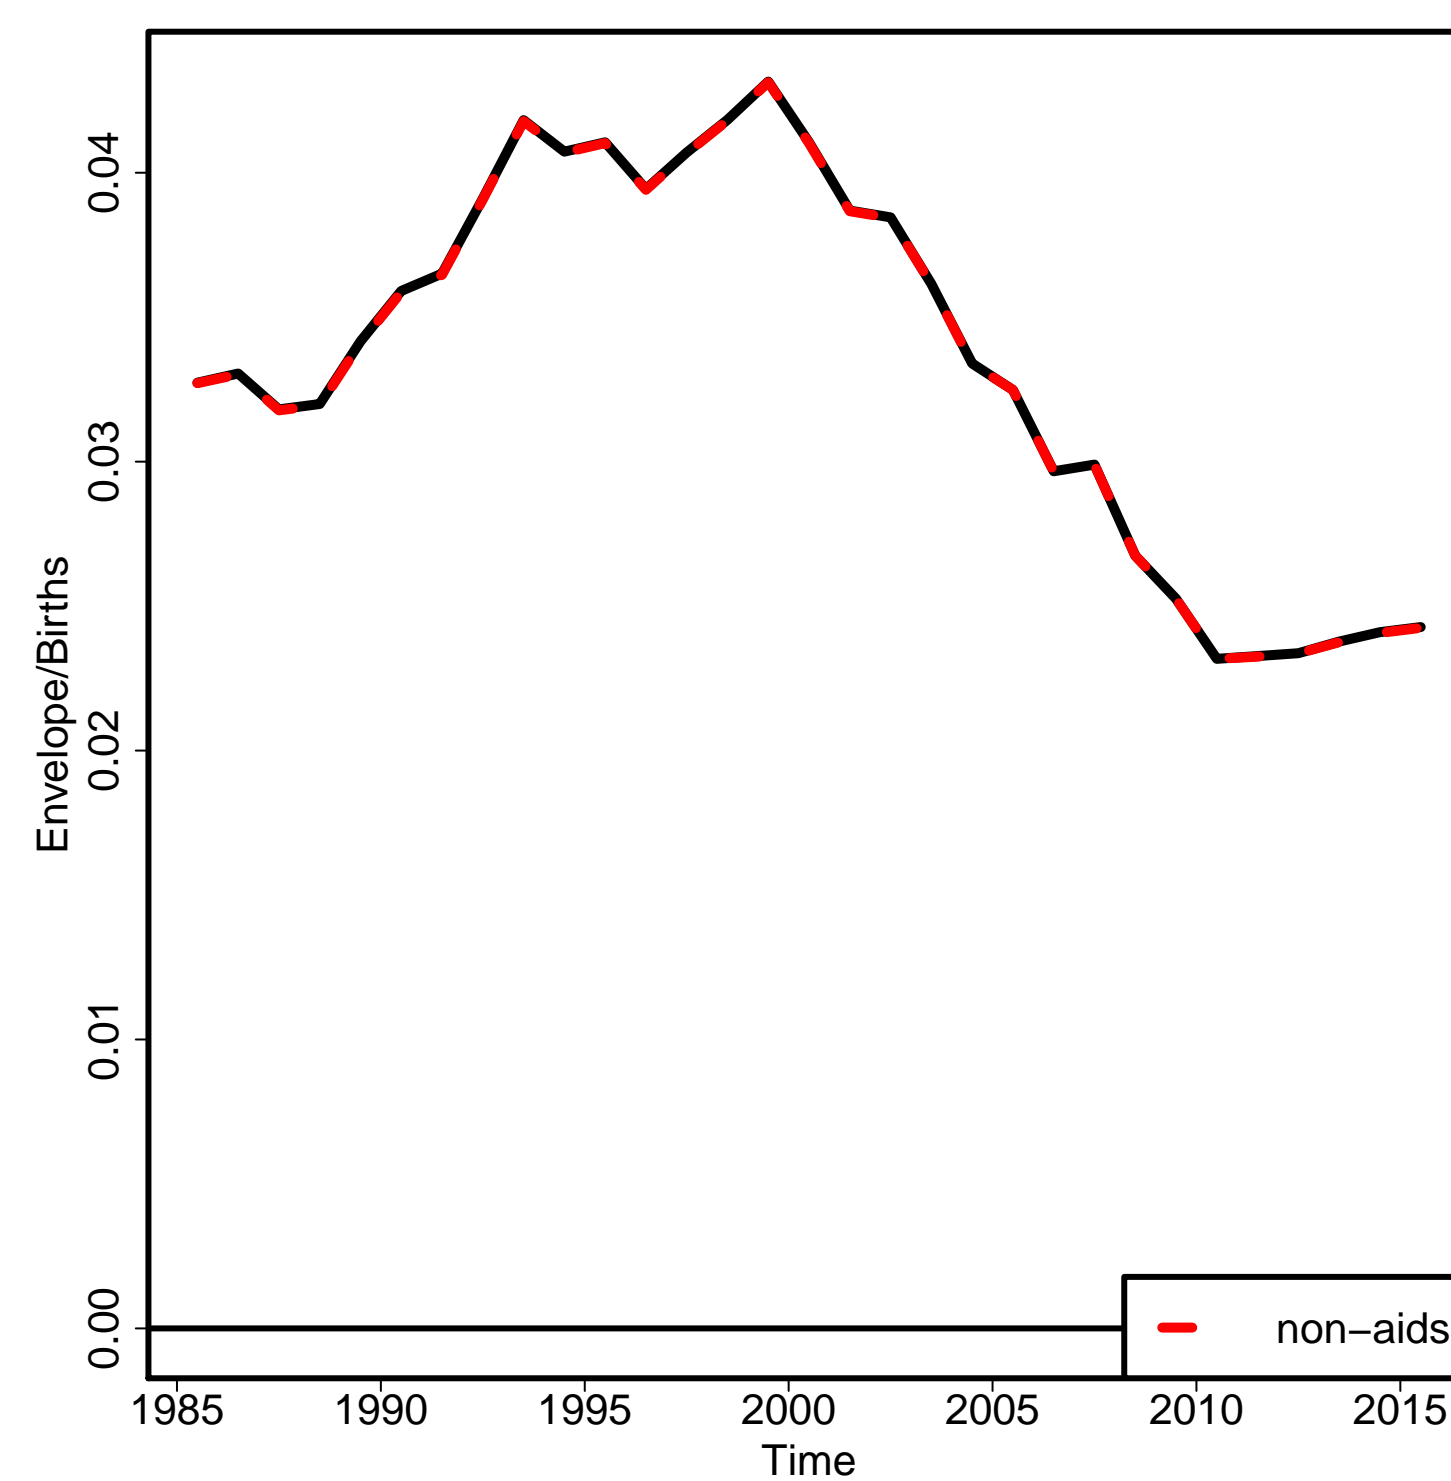

Non-aids MMR

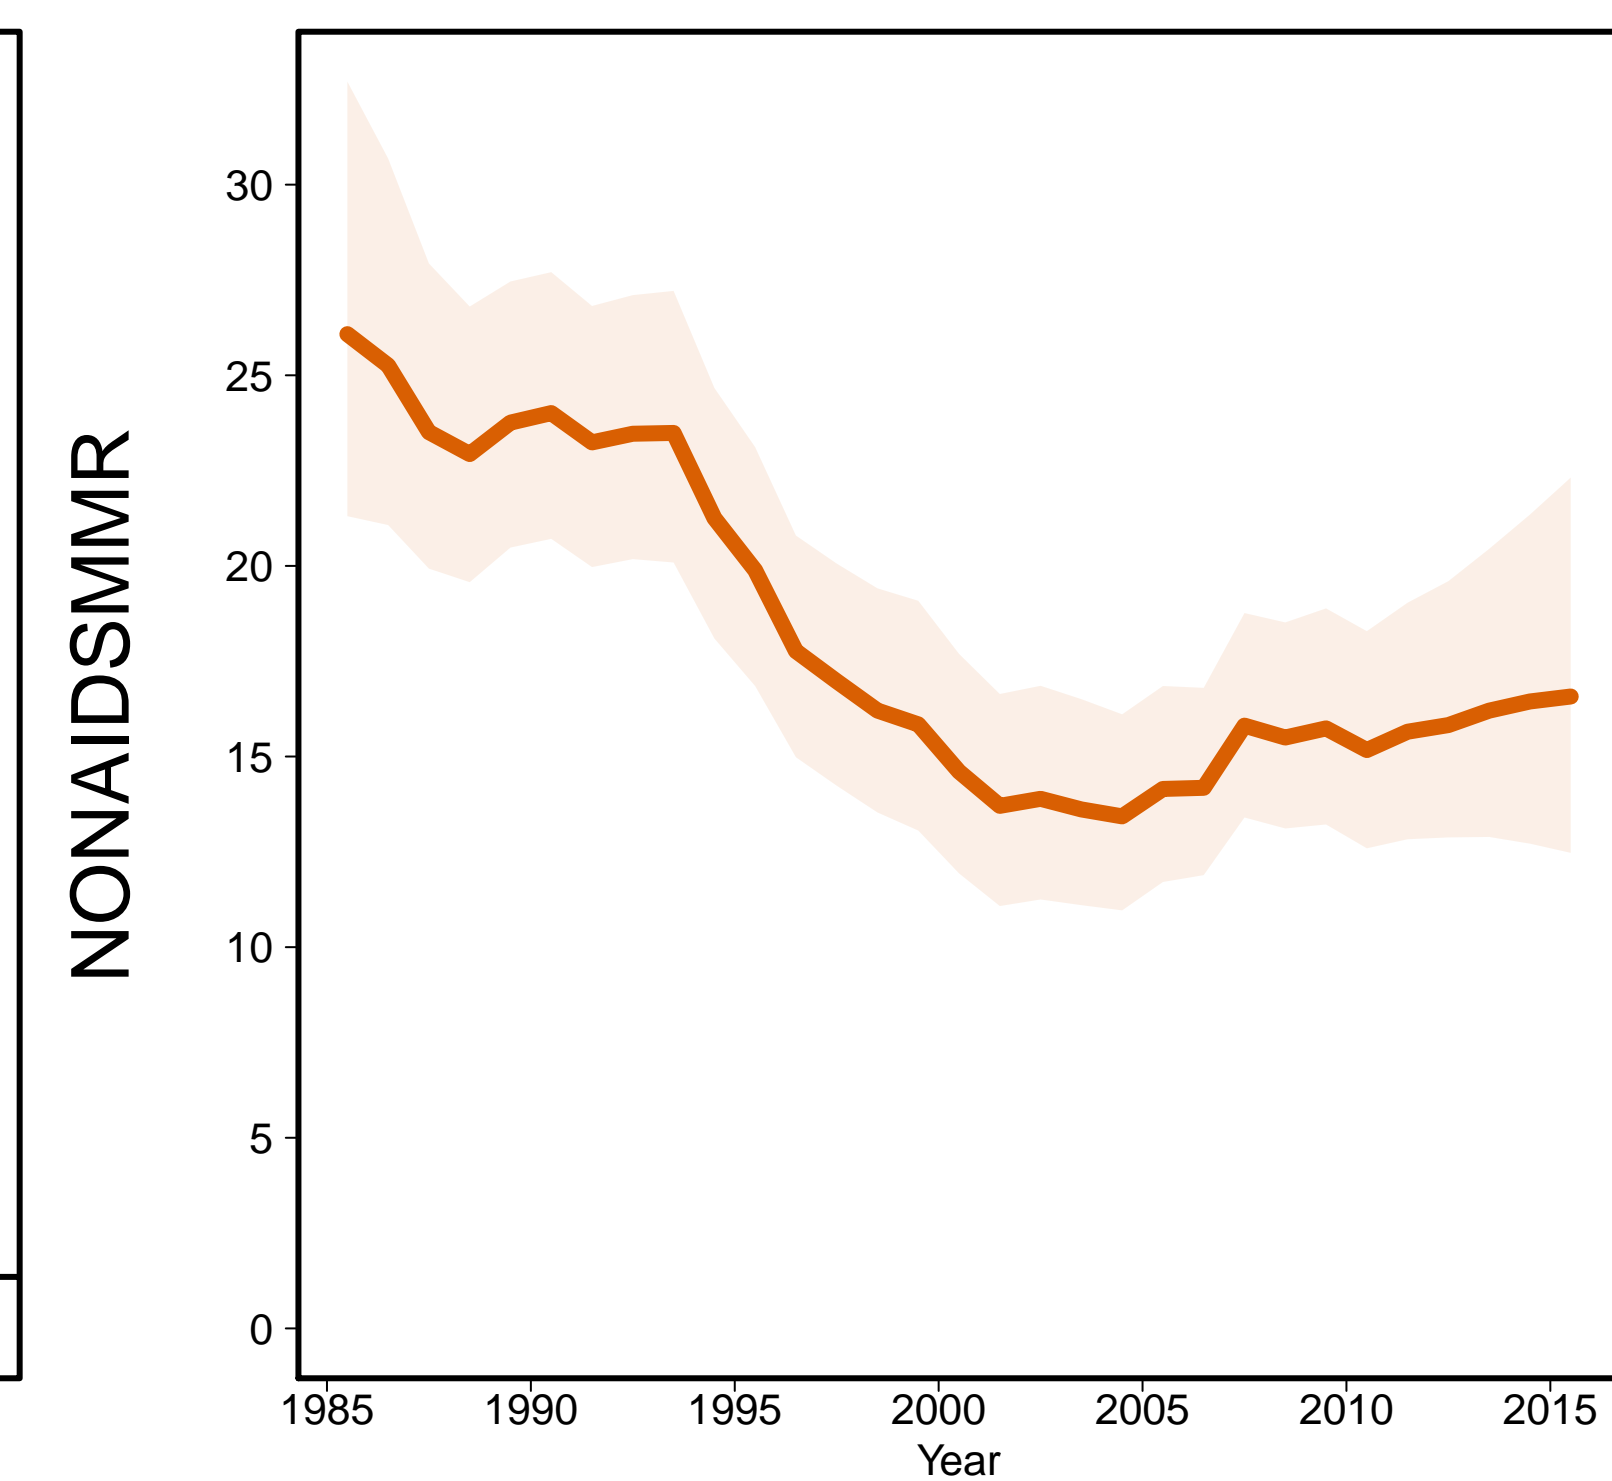

Aids MMR

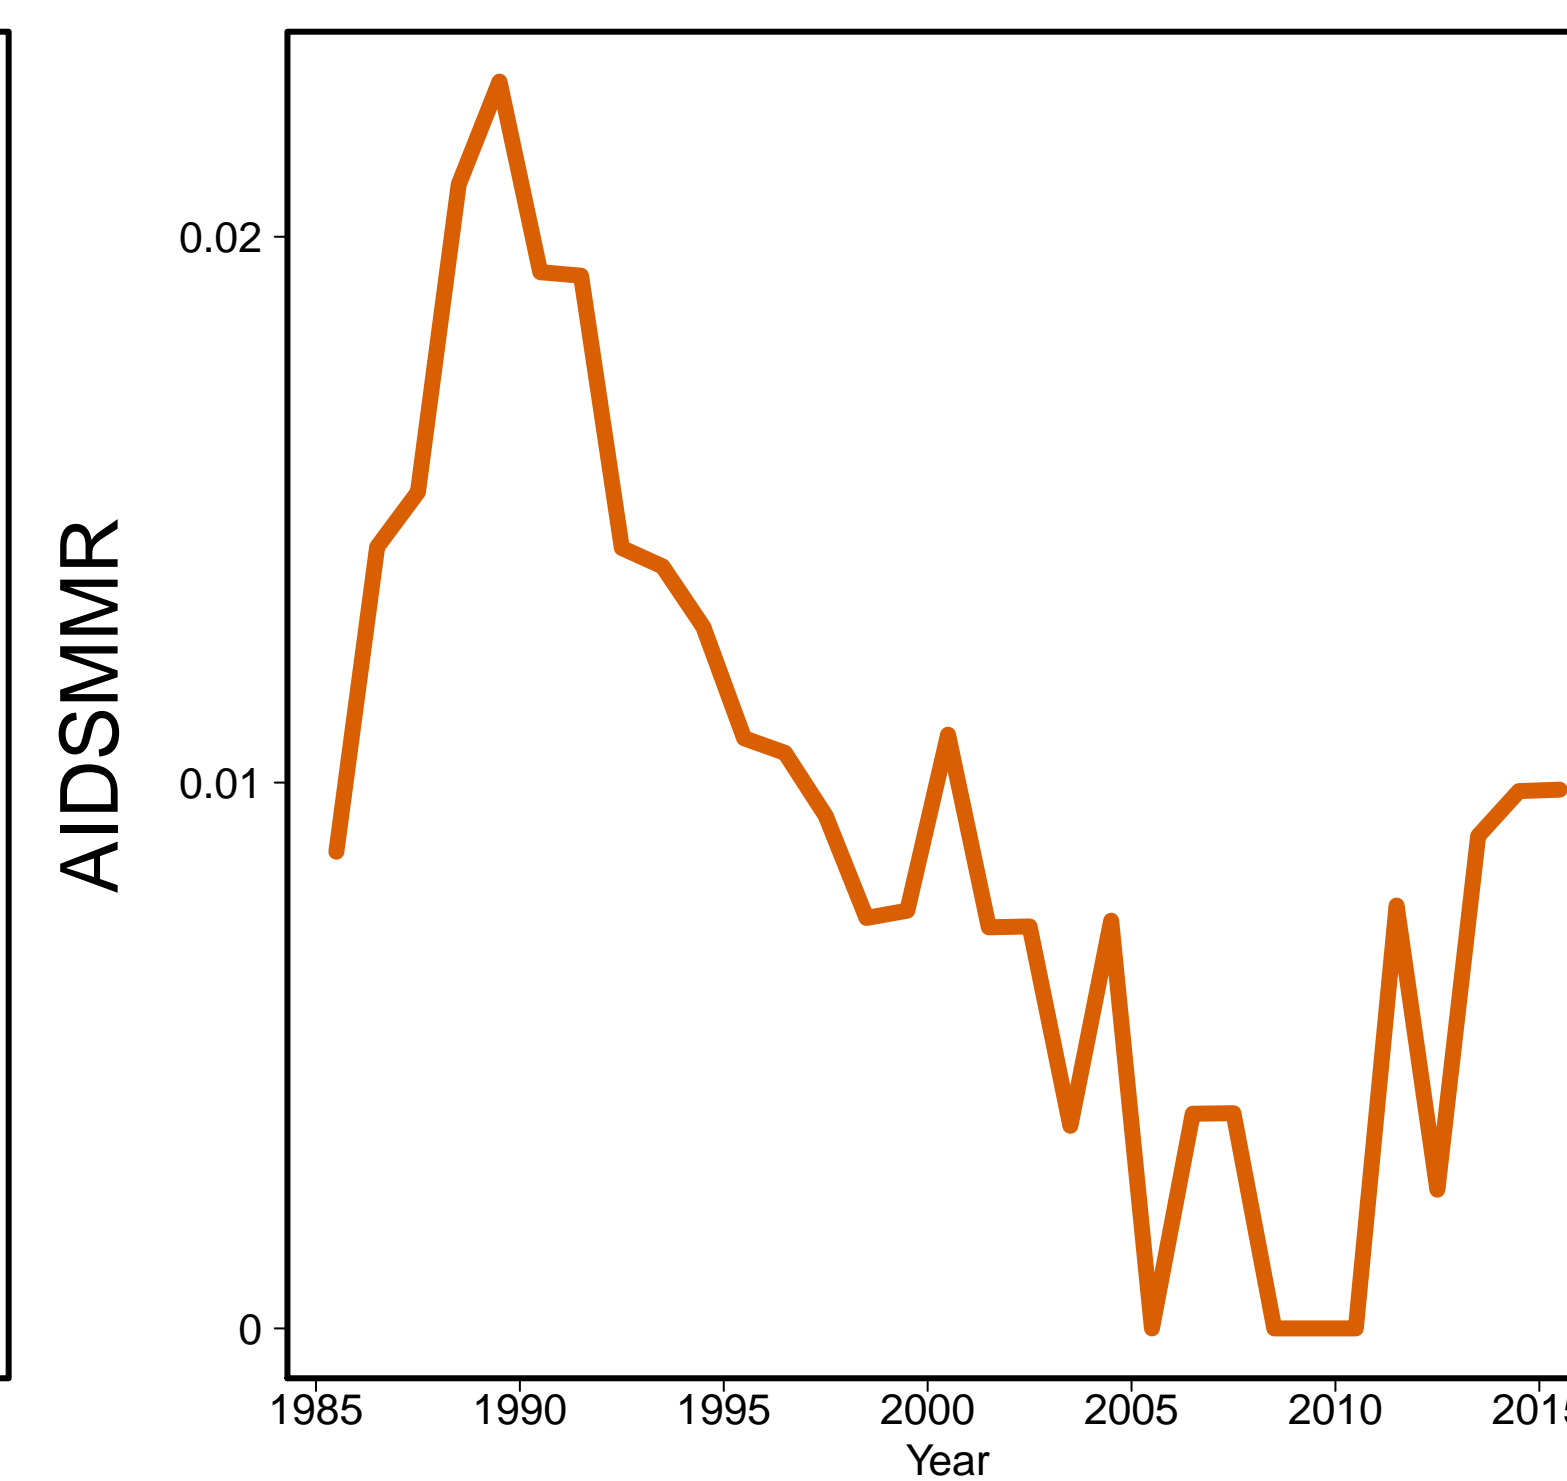



Iceland [ISL]  
(Developed regions)

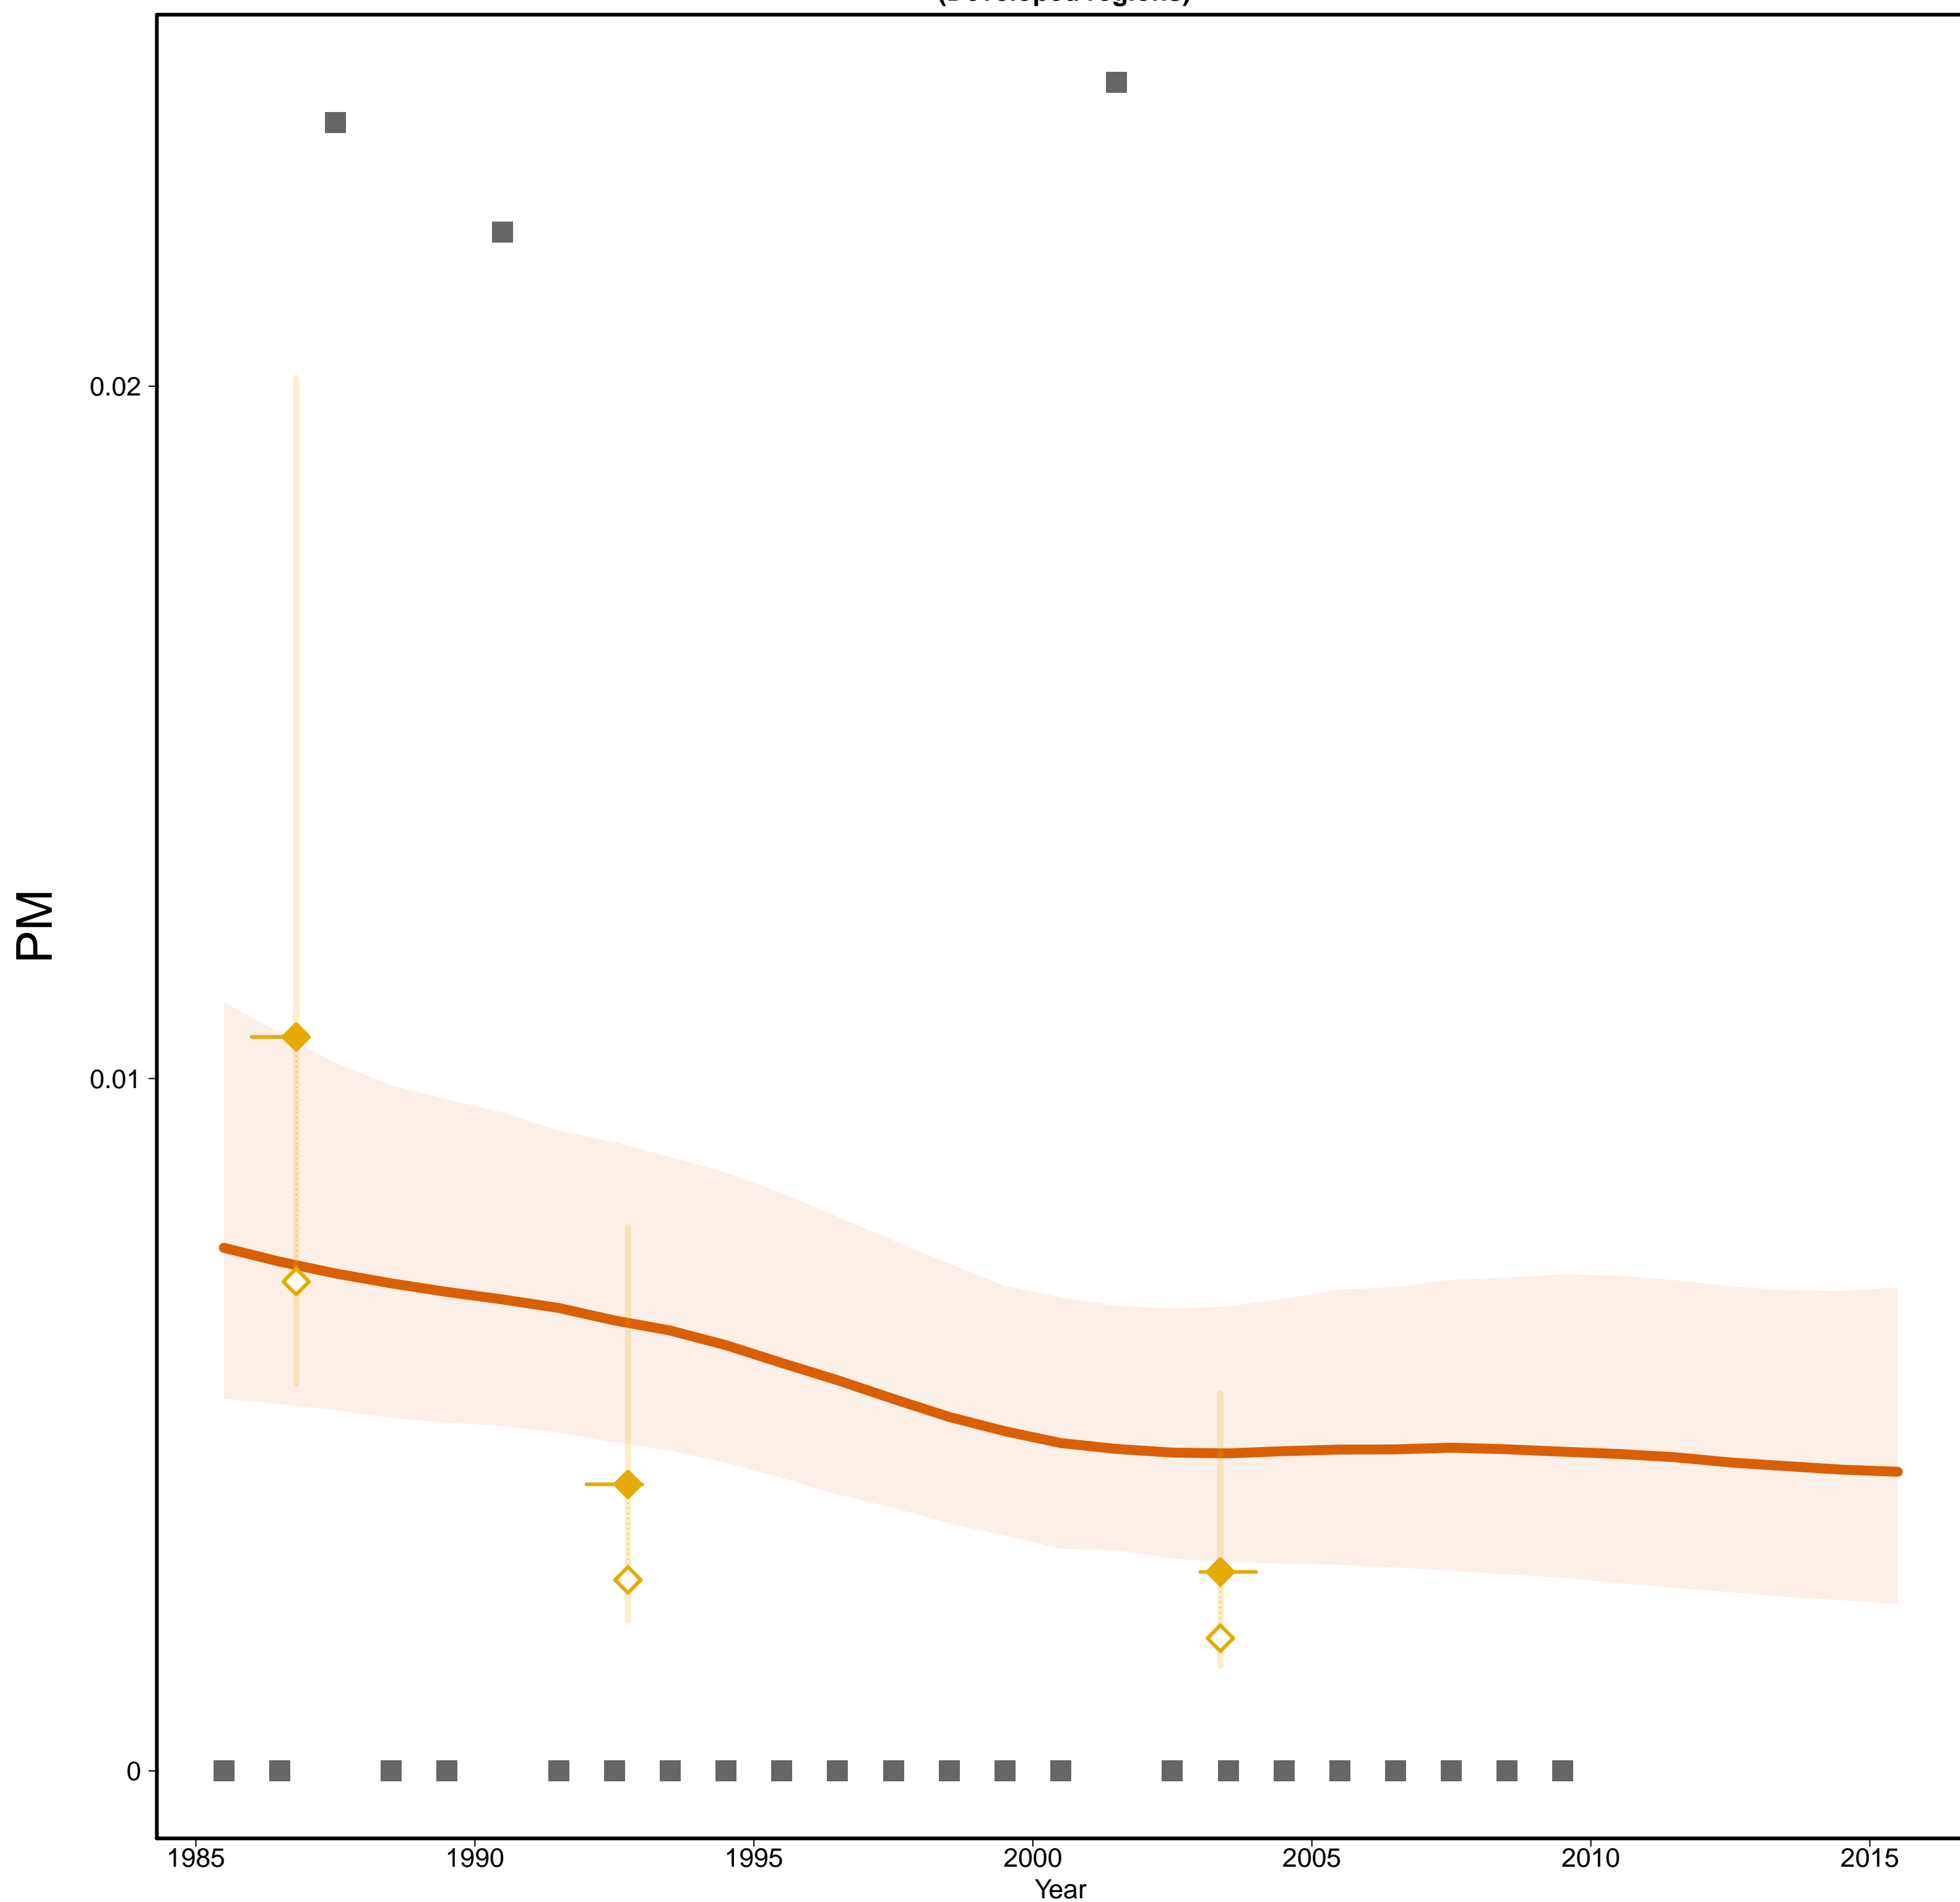

Iceland [ISL]  
(Developed regions)

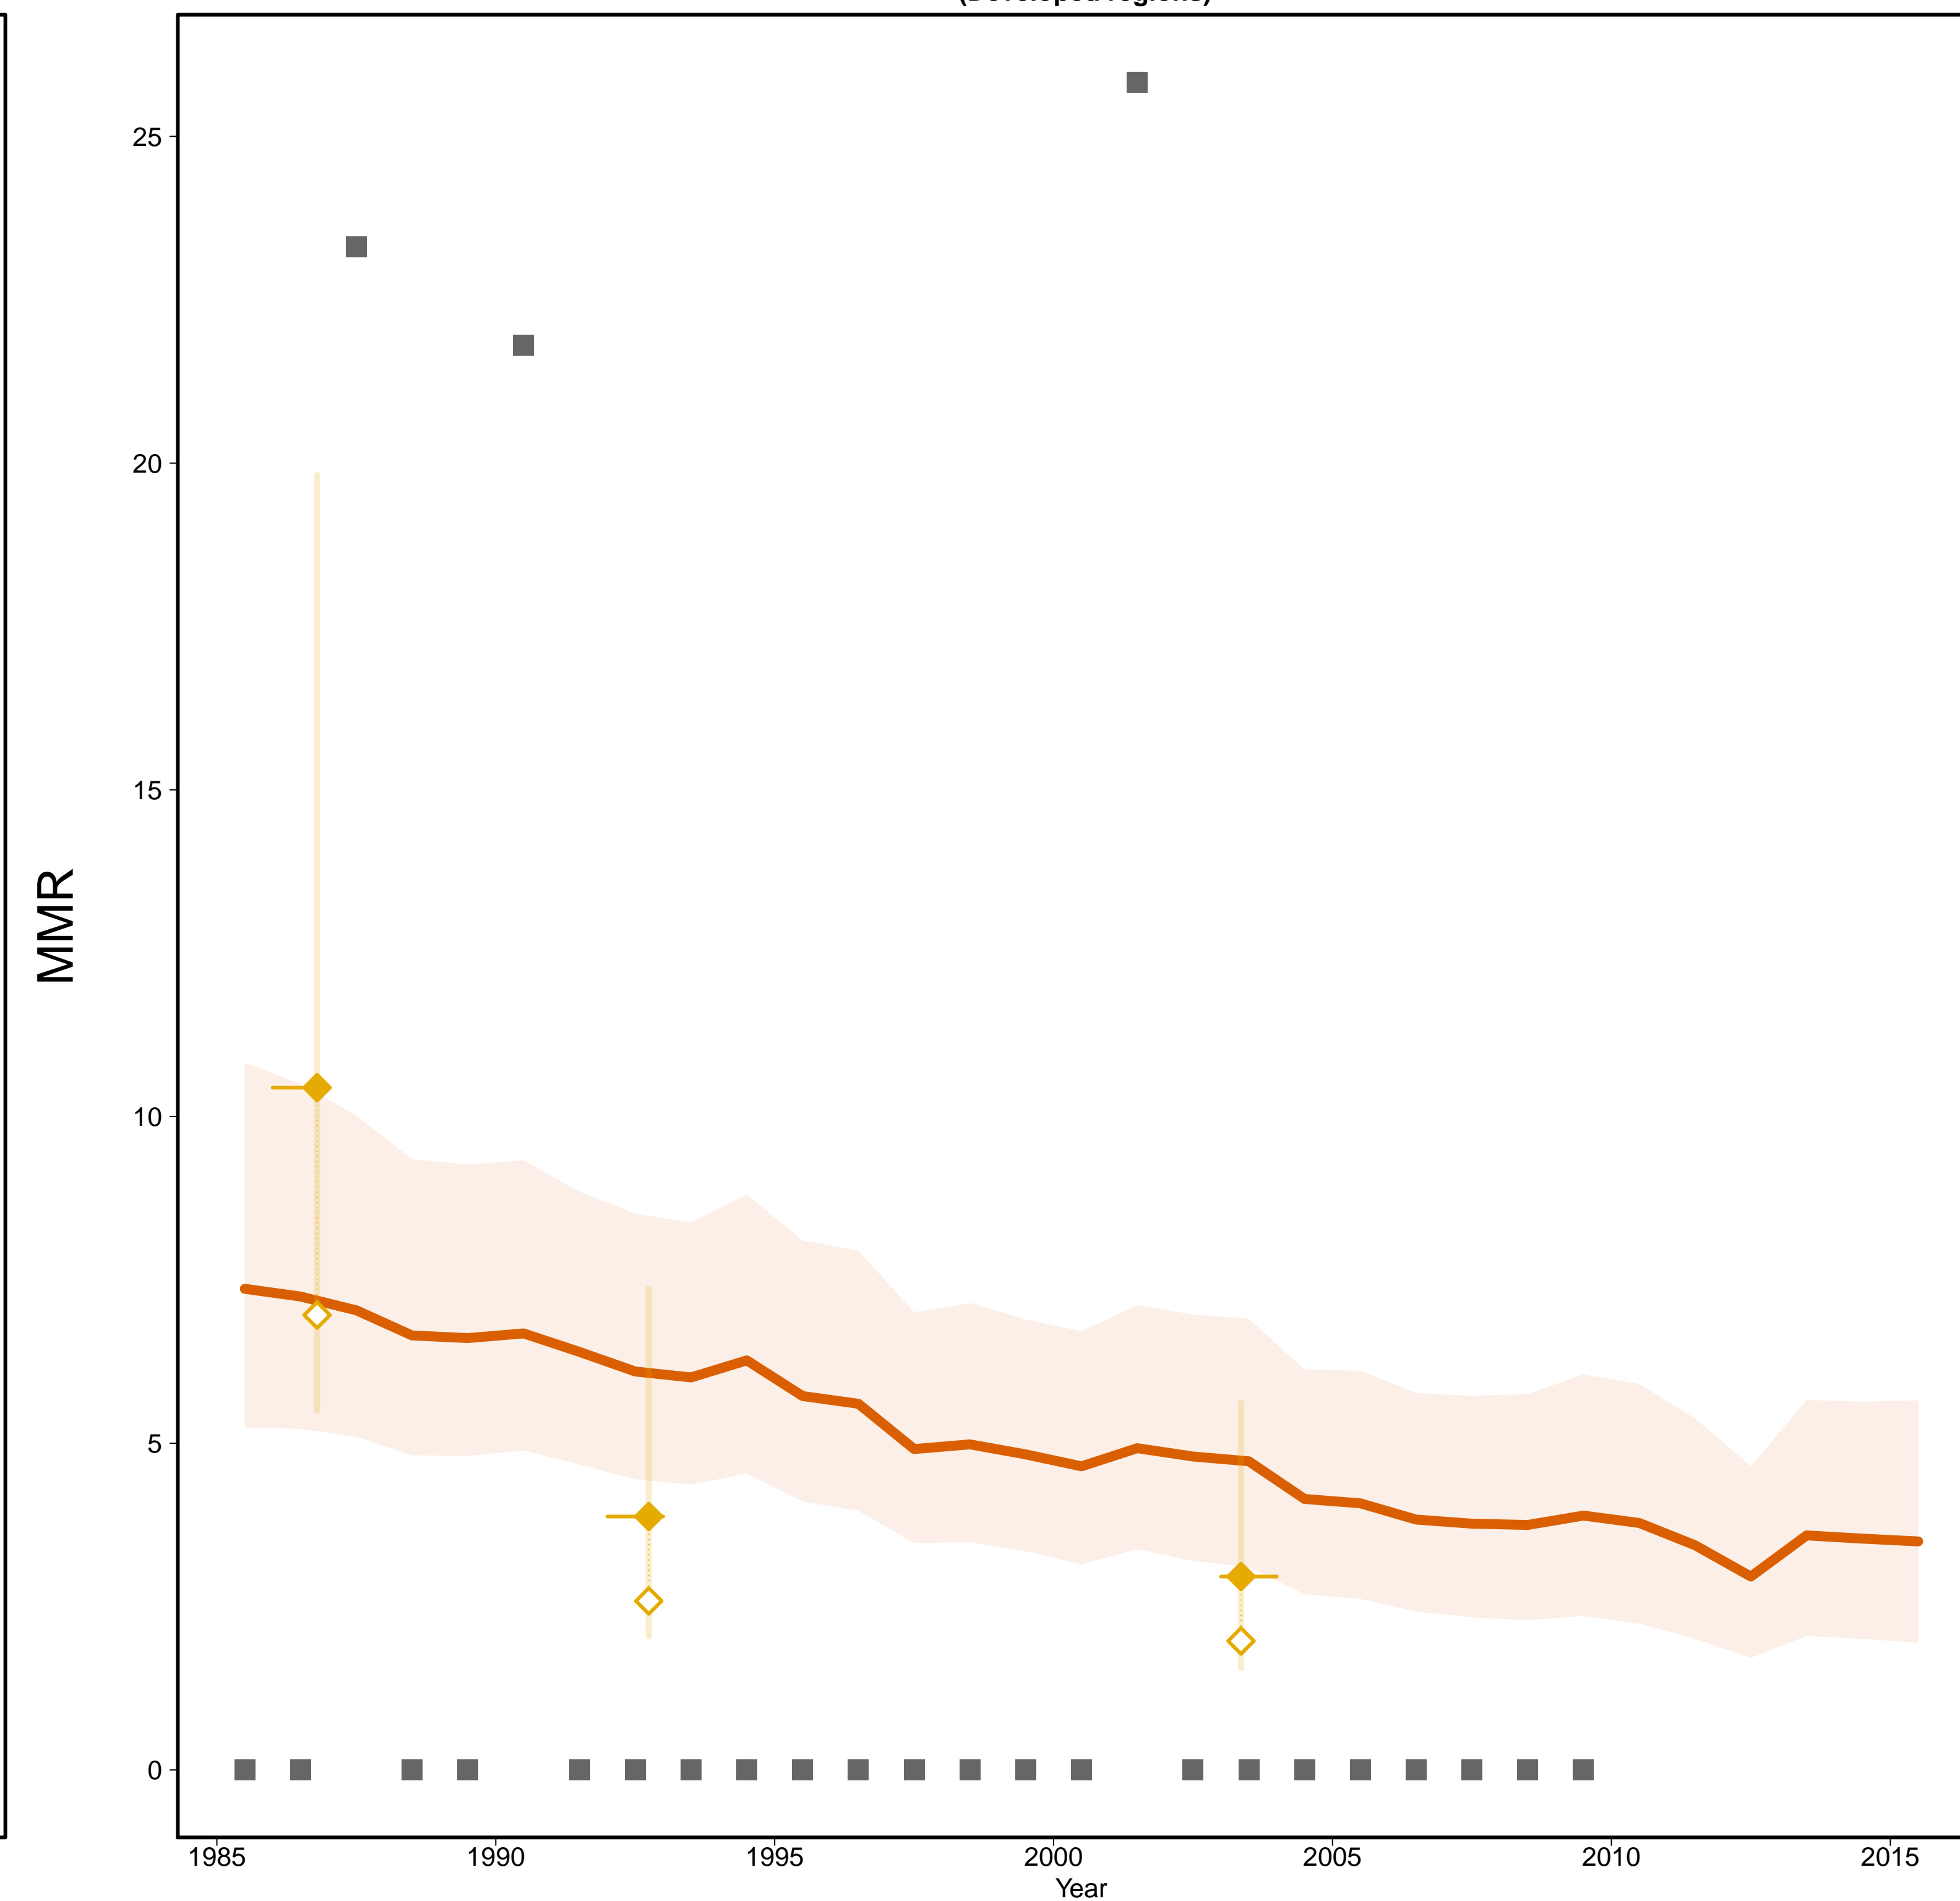

- Estimates –
- Mlate
- MMR Database 2015 –
- ◇ Observed Data
- ◆ Adjusted Data
- Data type –
- ◆ VR
- Reported VR before recalc.  
(related to 0 obs. mat. death)

Gross Domestic Product

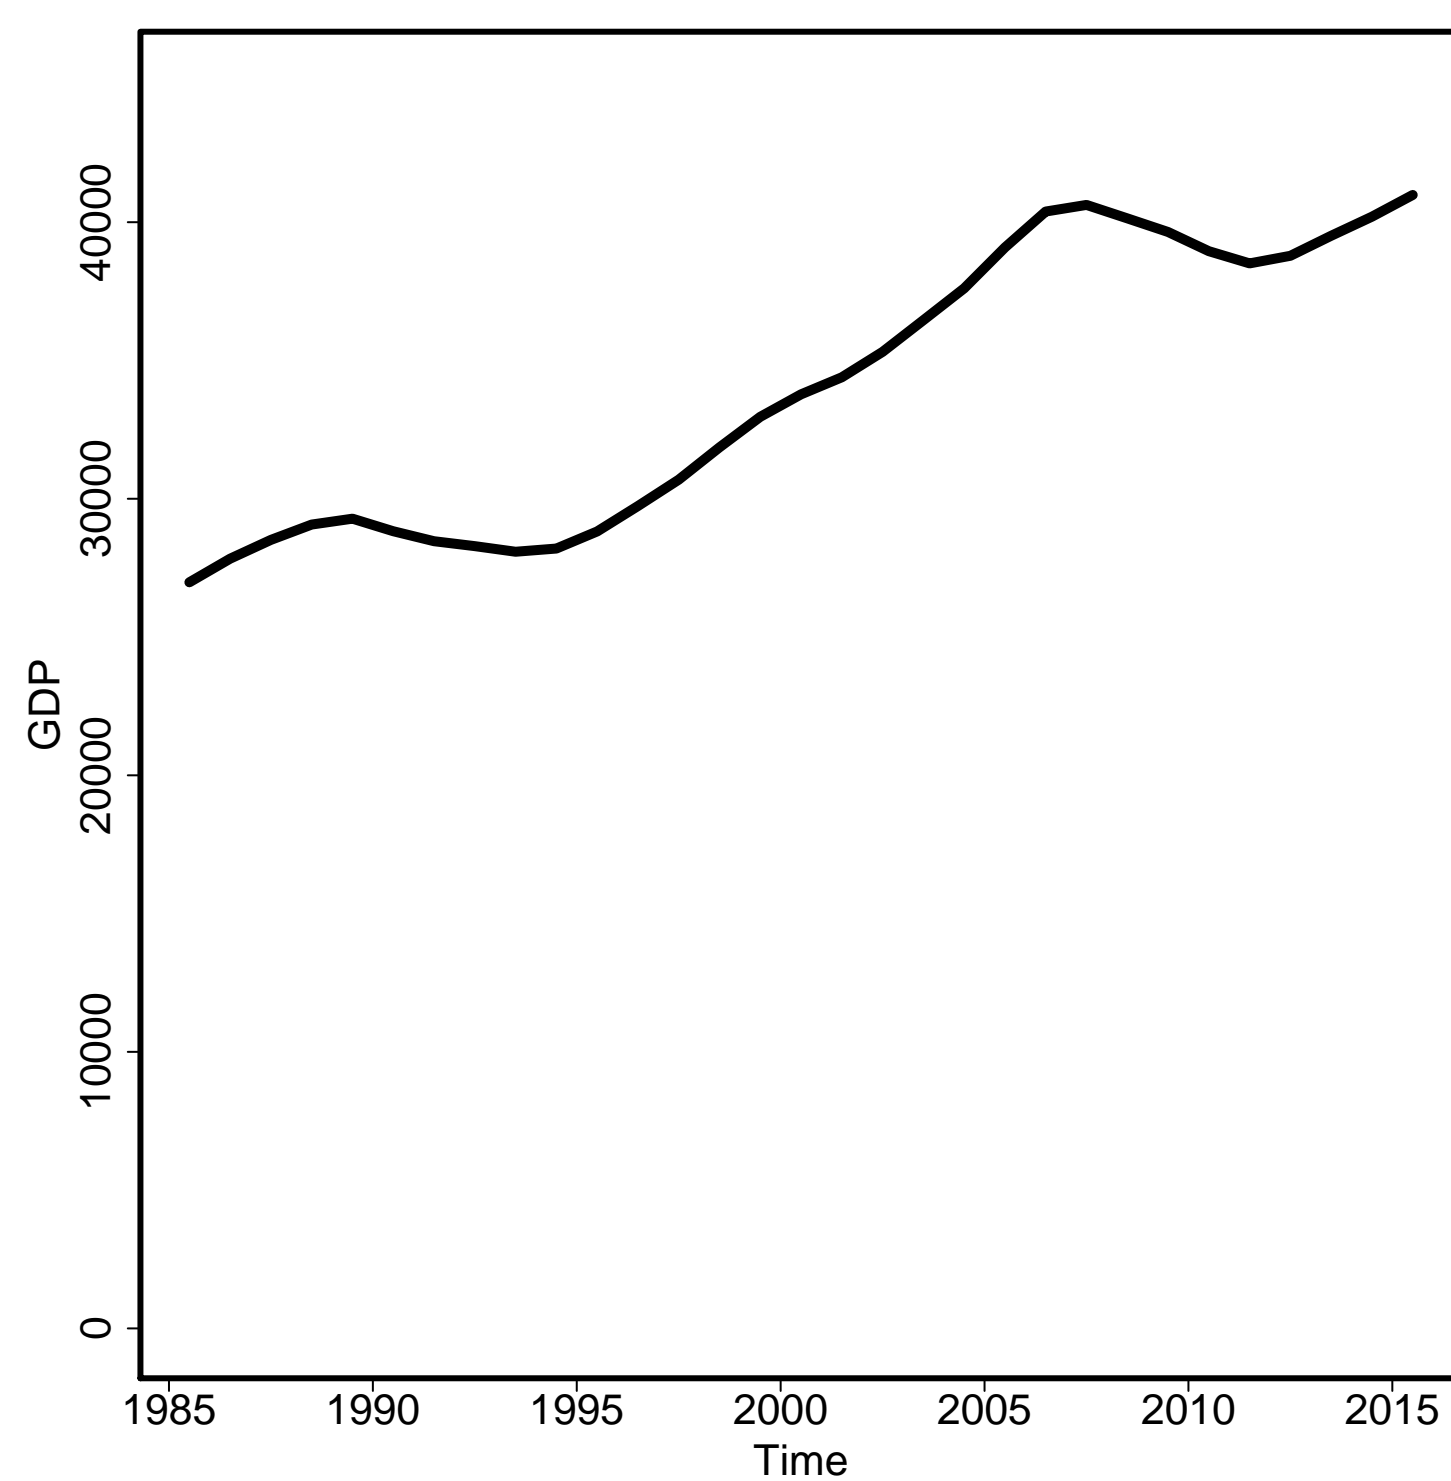

General Fertility Rate

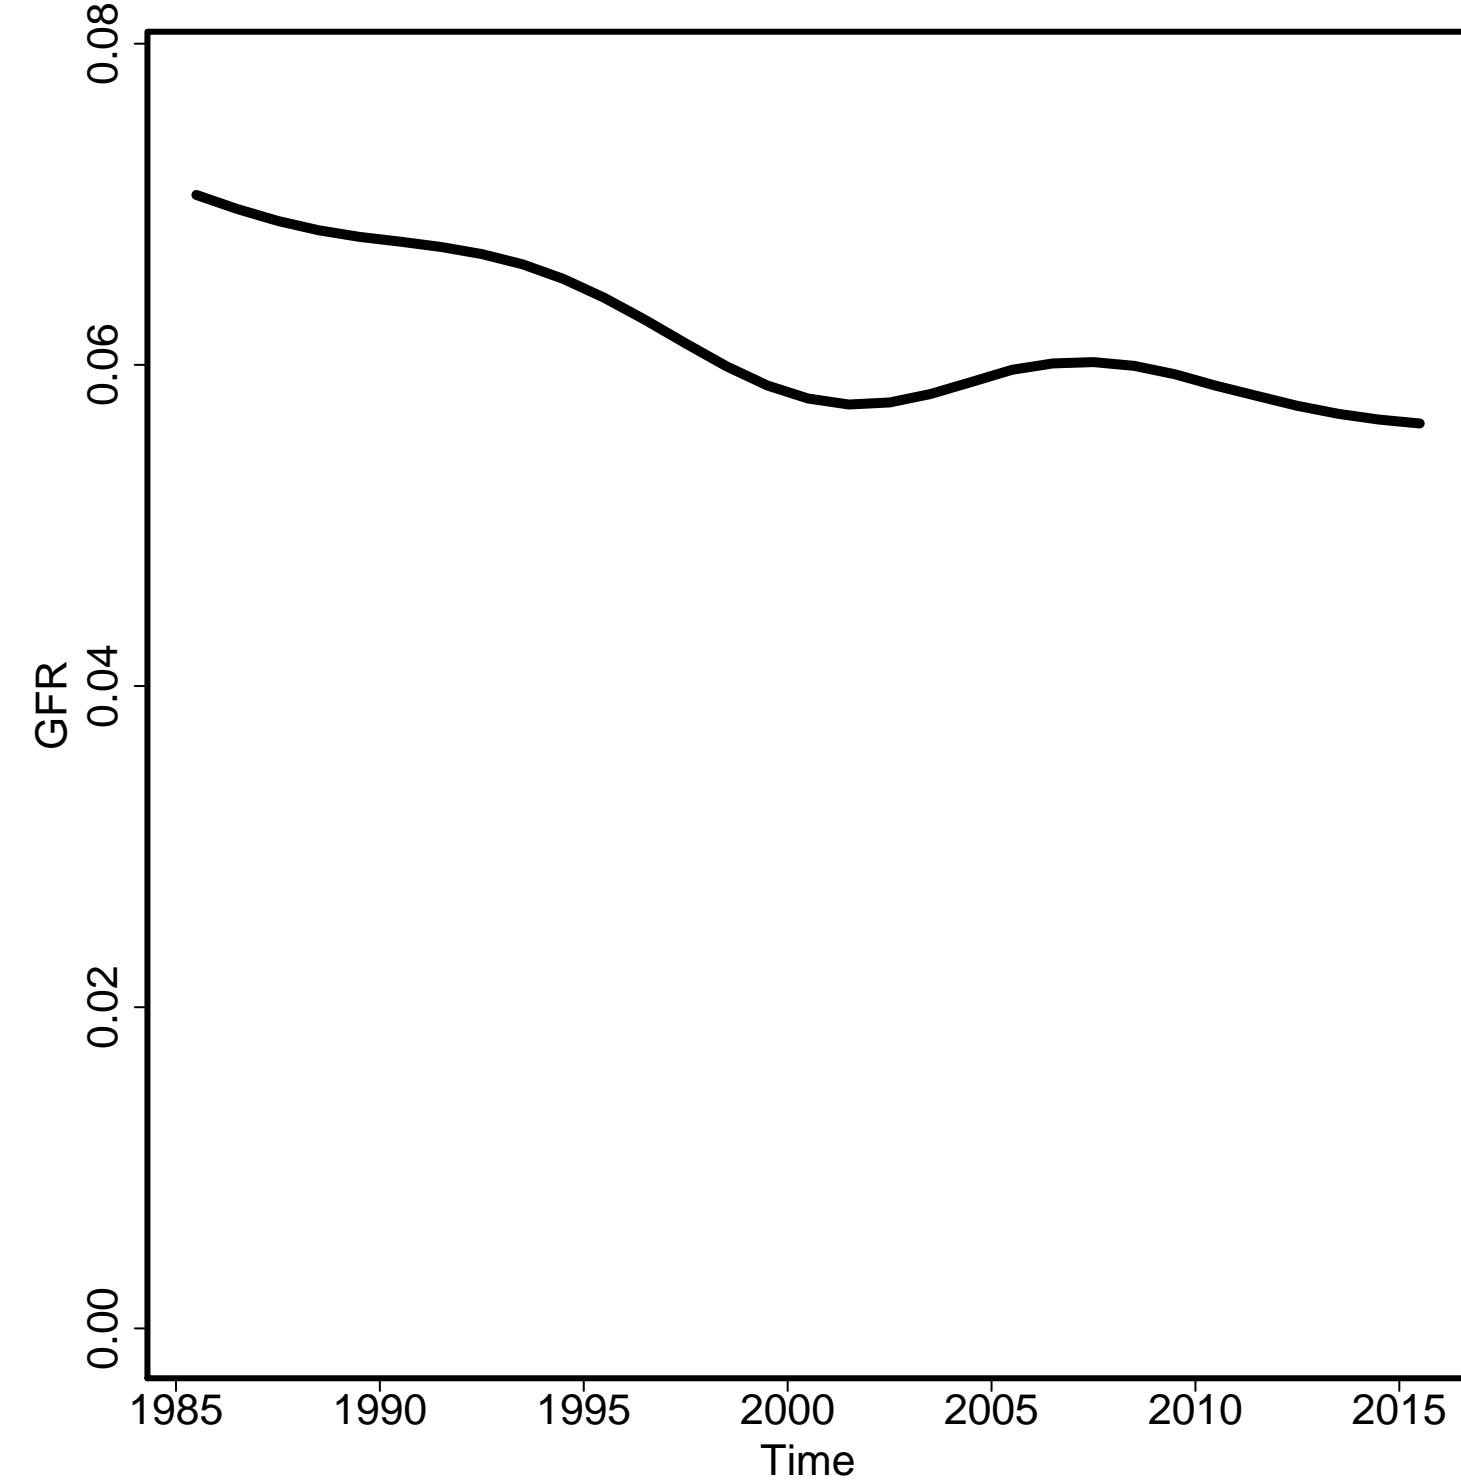

Skilled Attendance to Birth

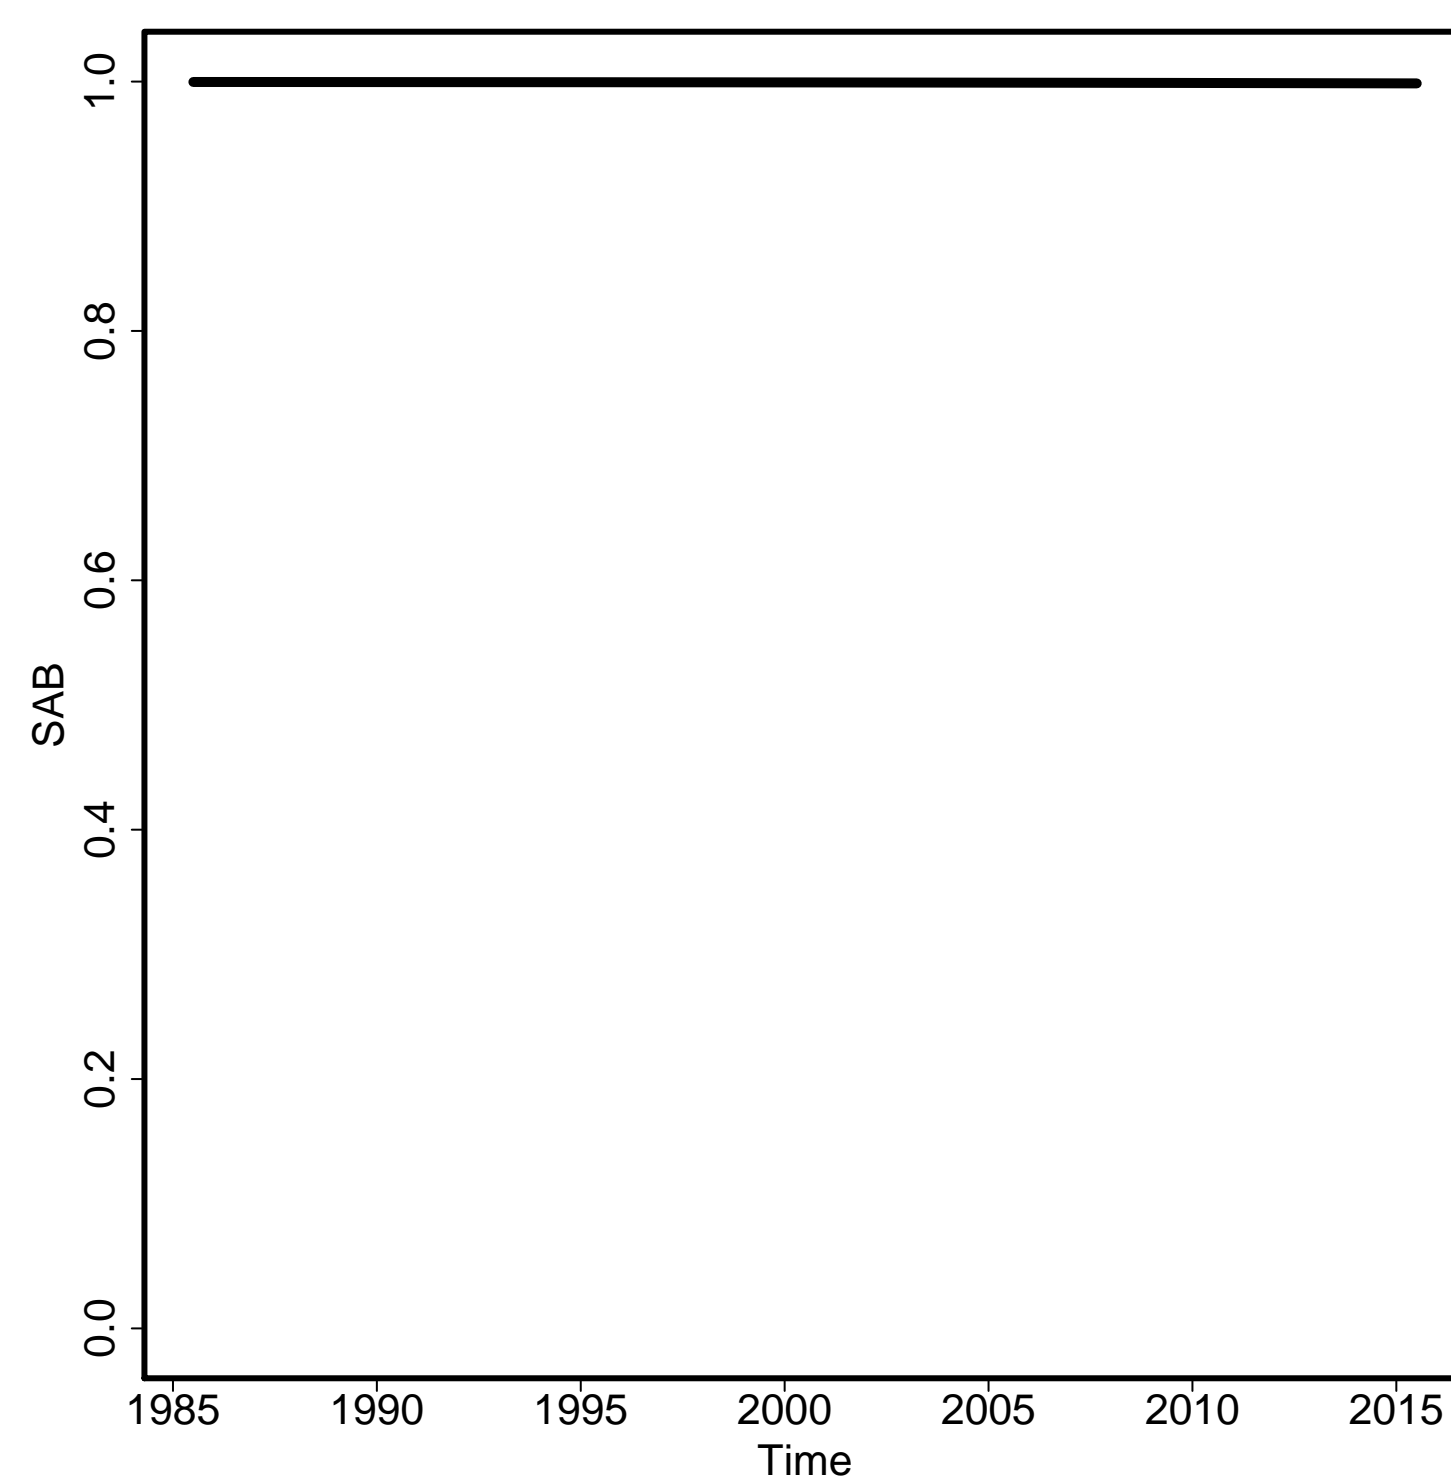

Envelope/Births

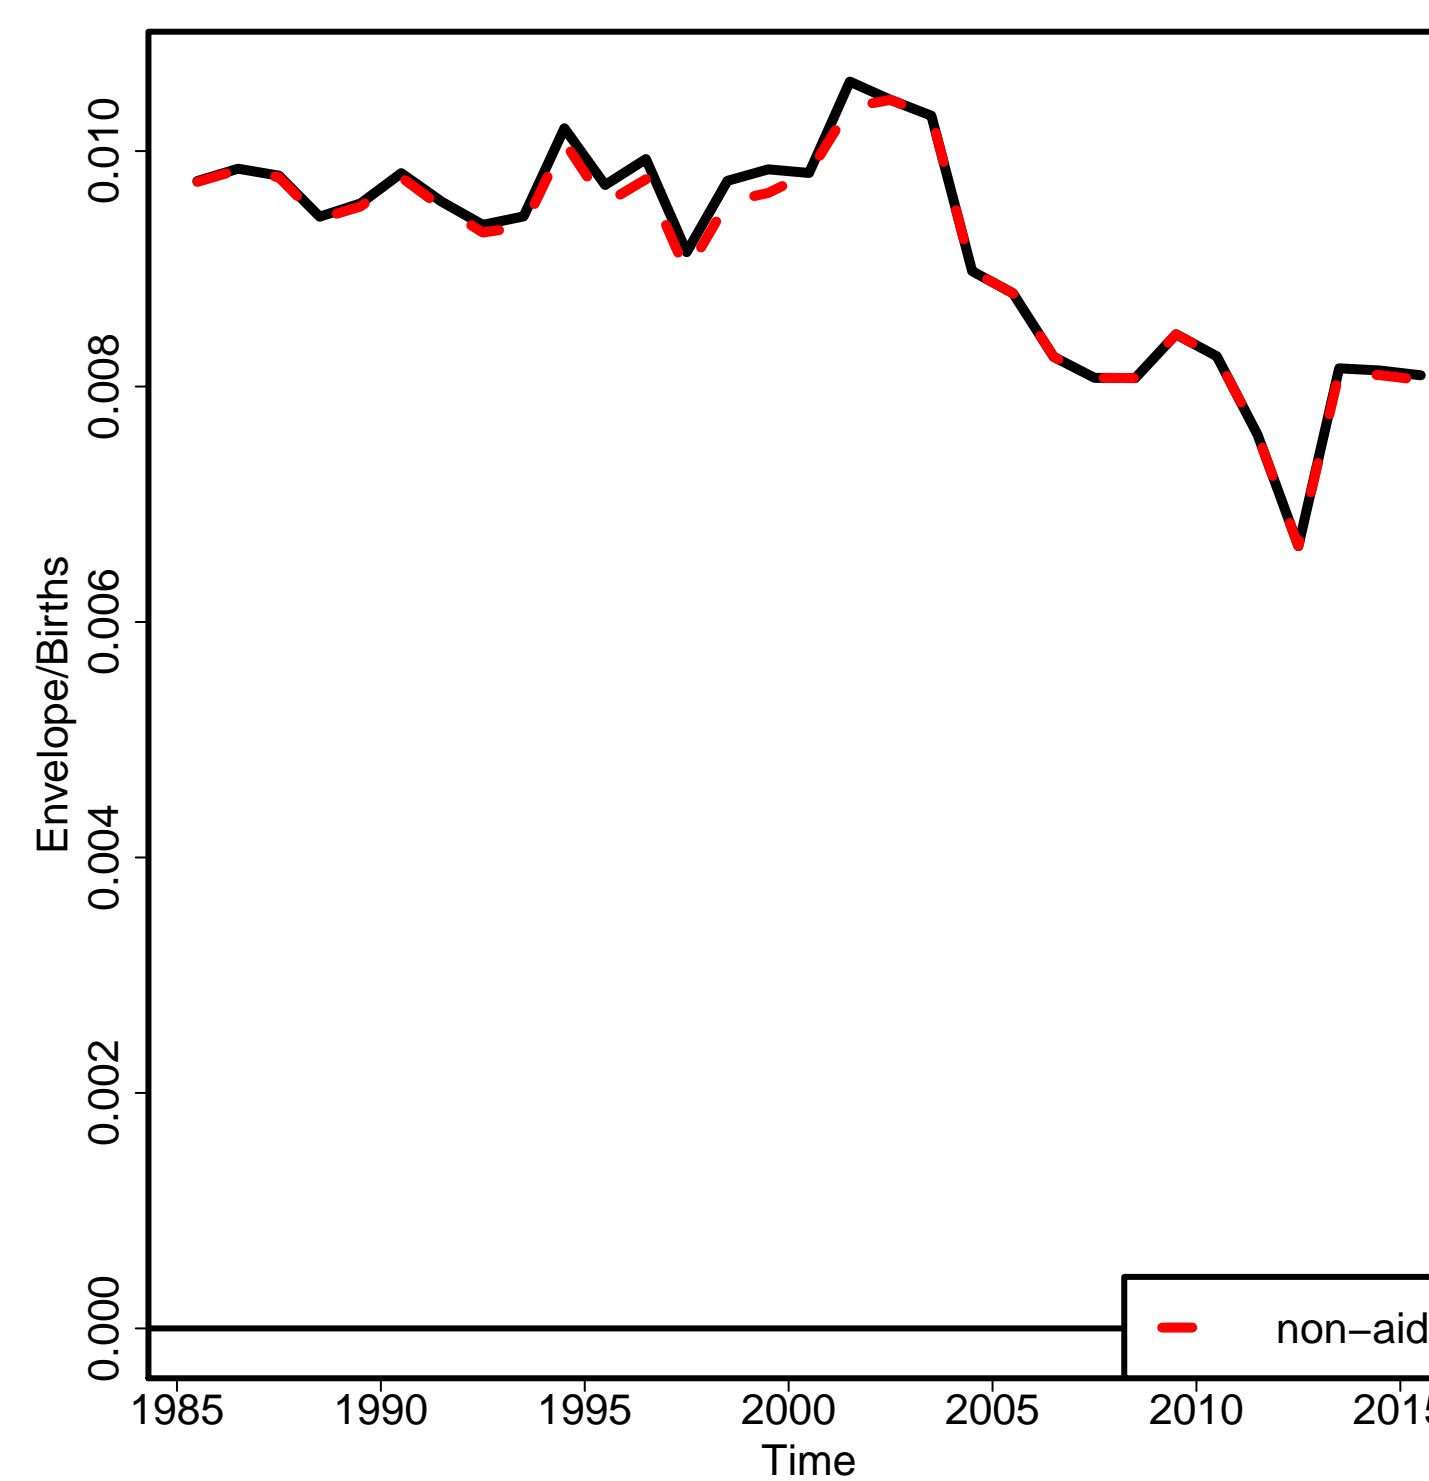

Non-aids MMR

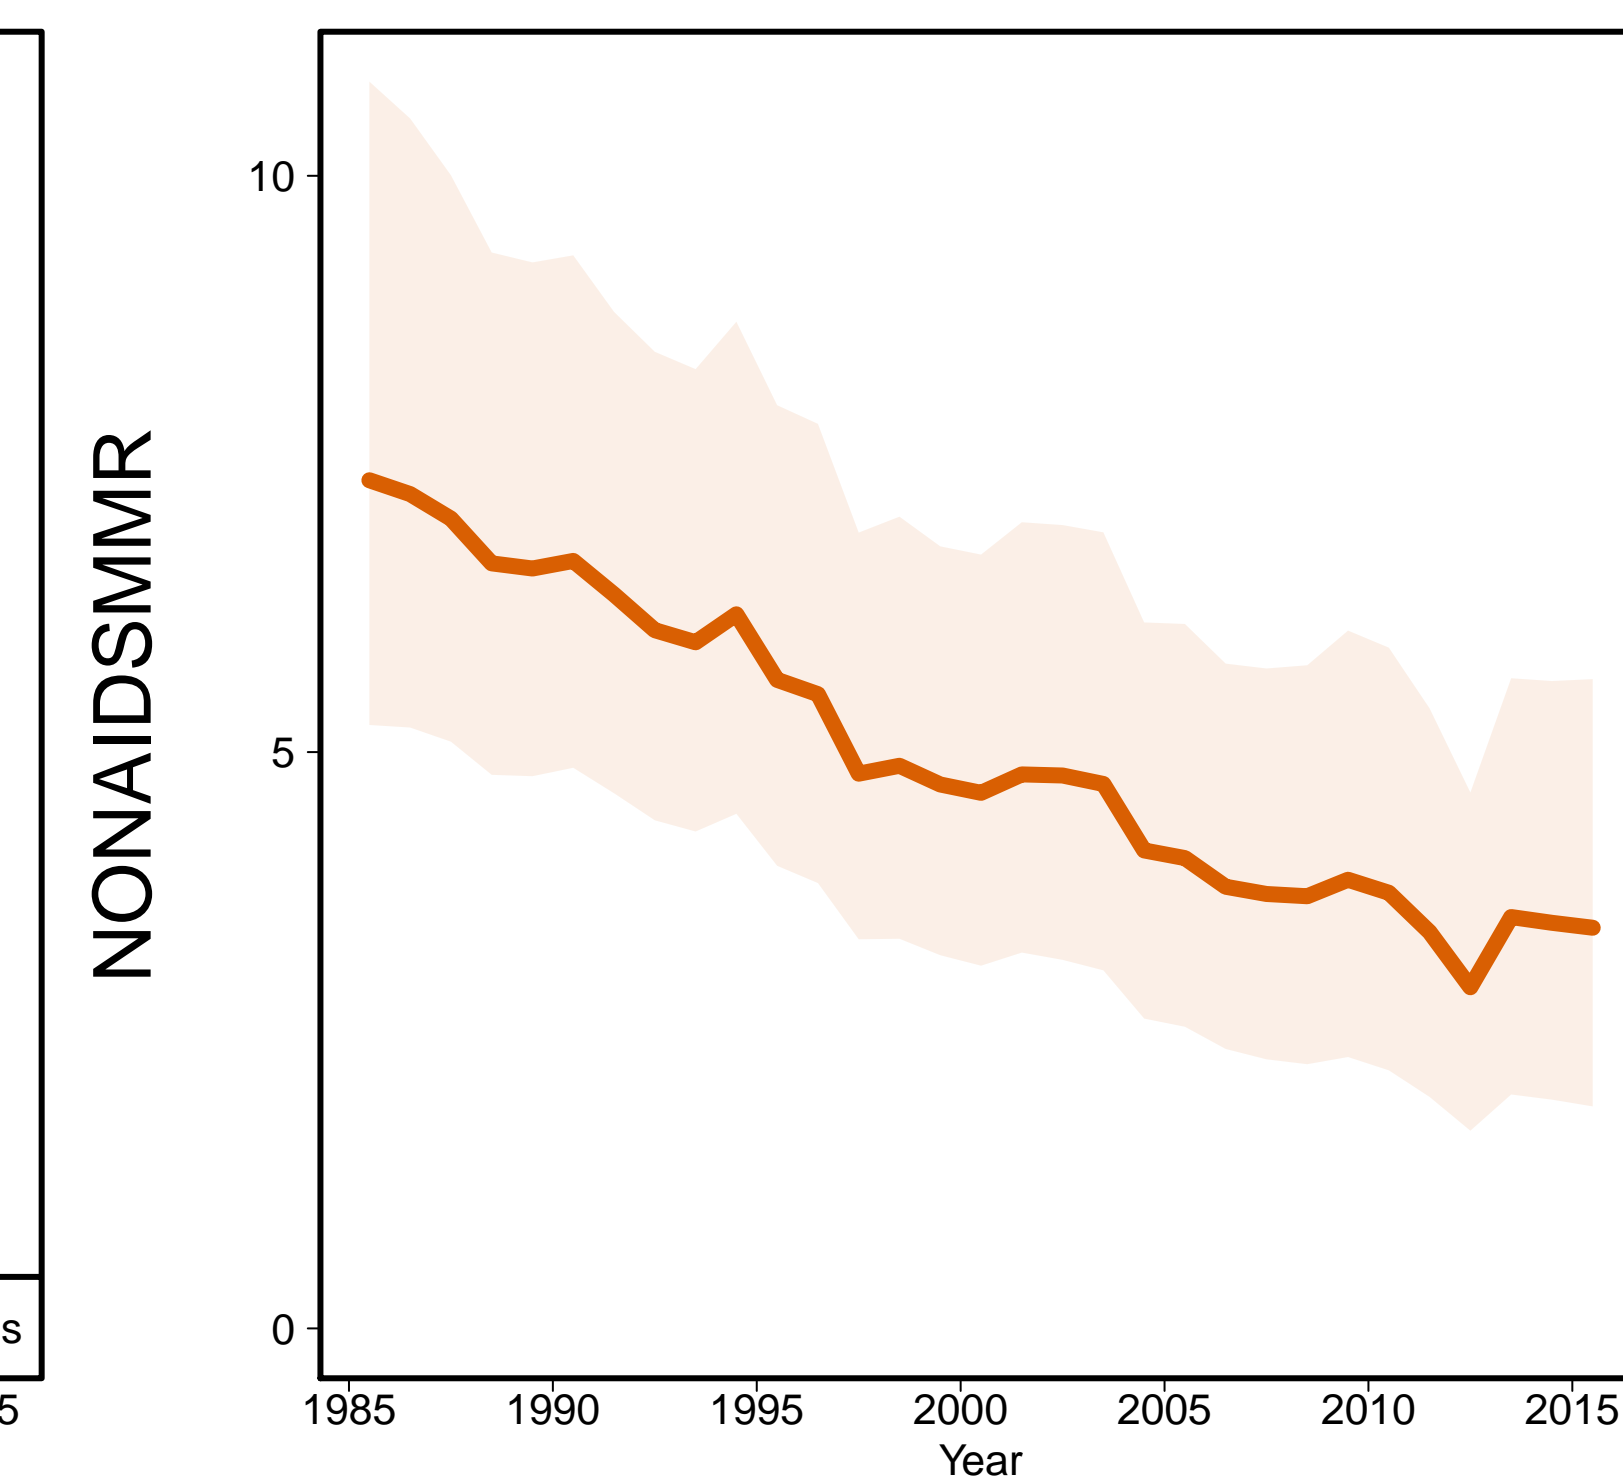

Aids MMR

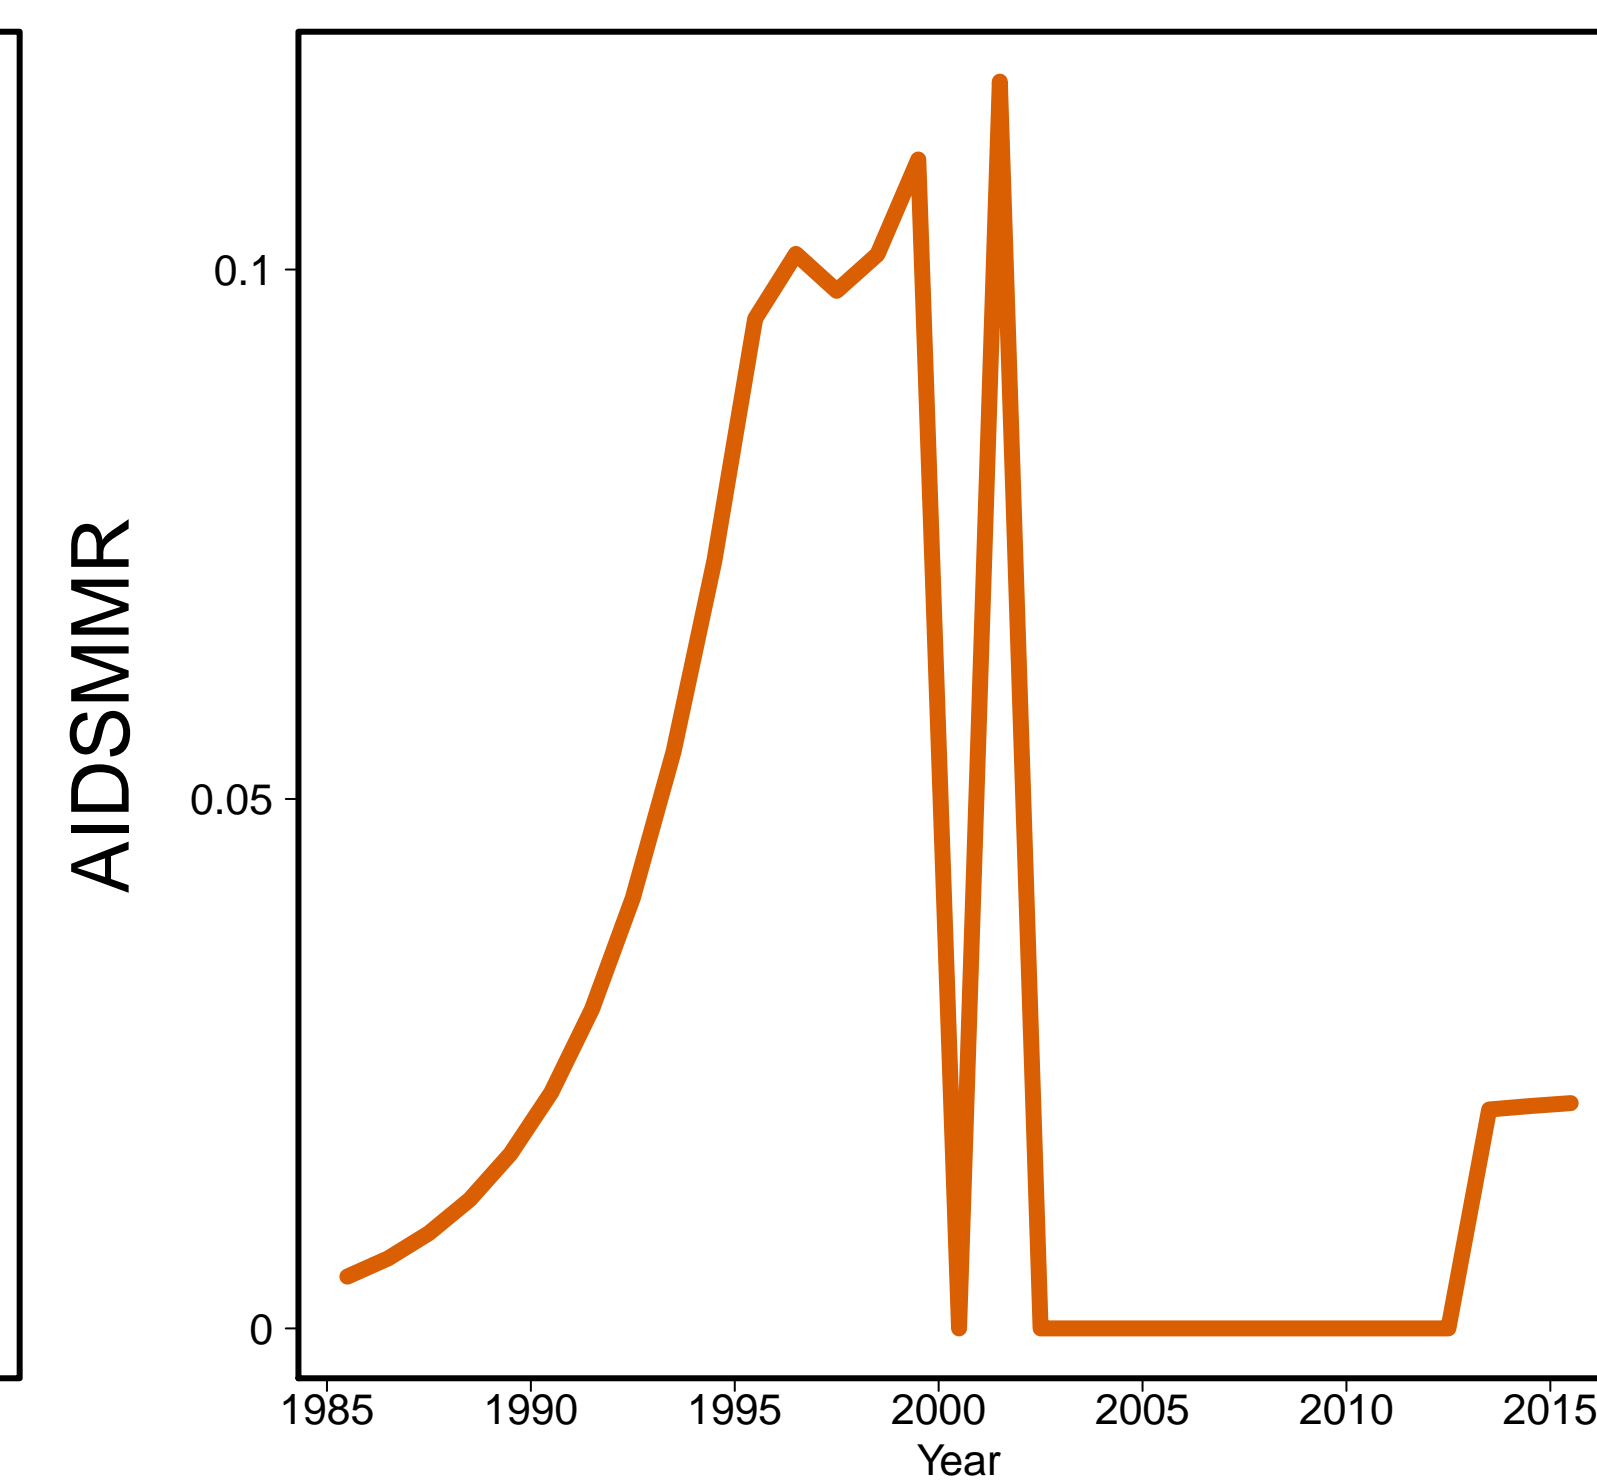

India [IND]  
(Southern Asia)

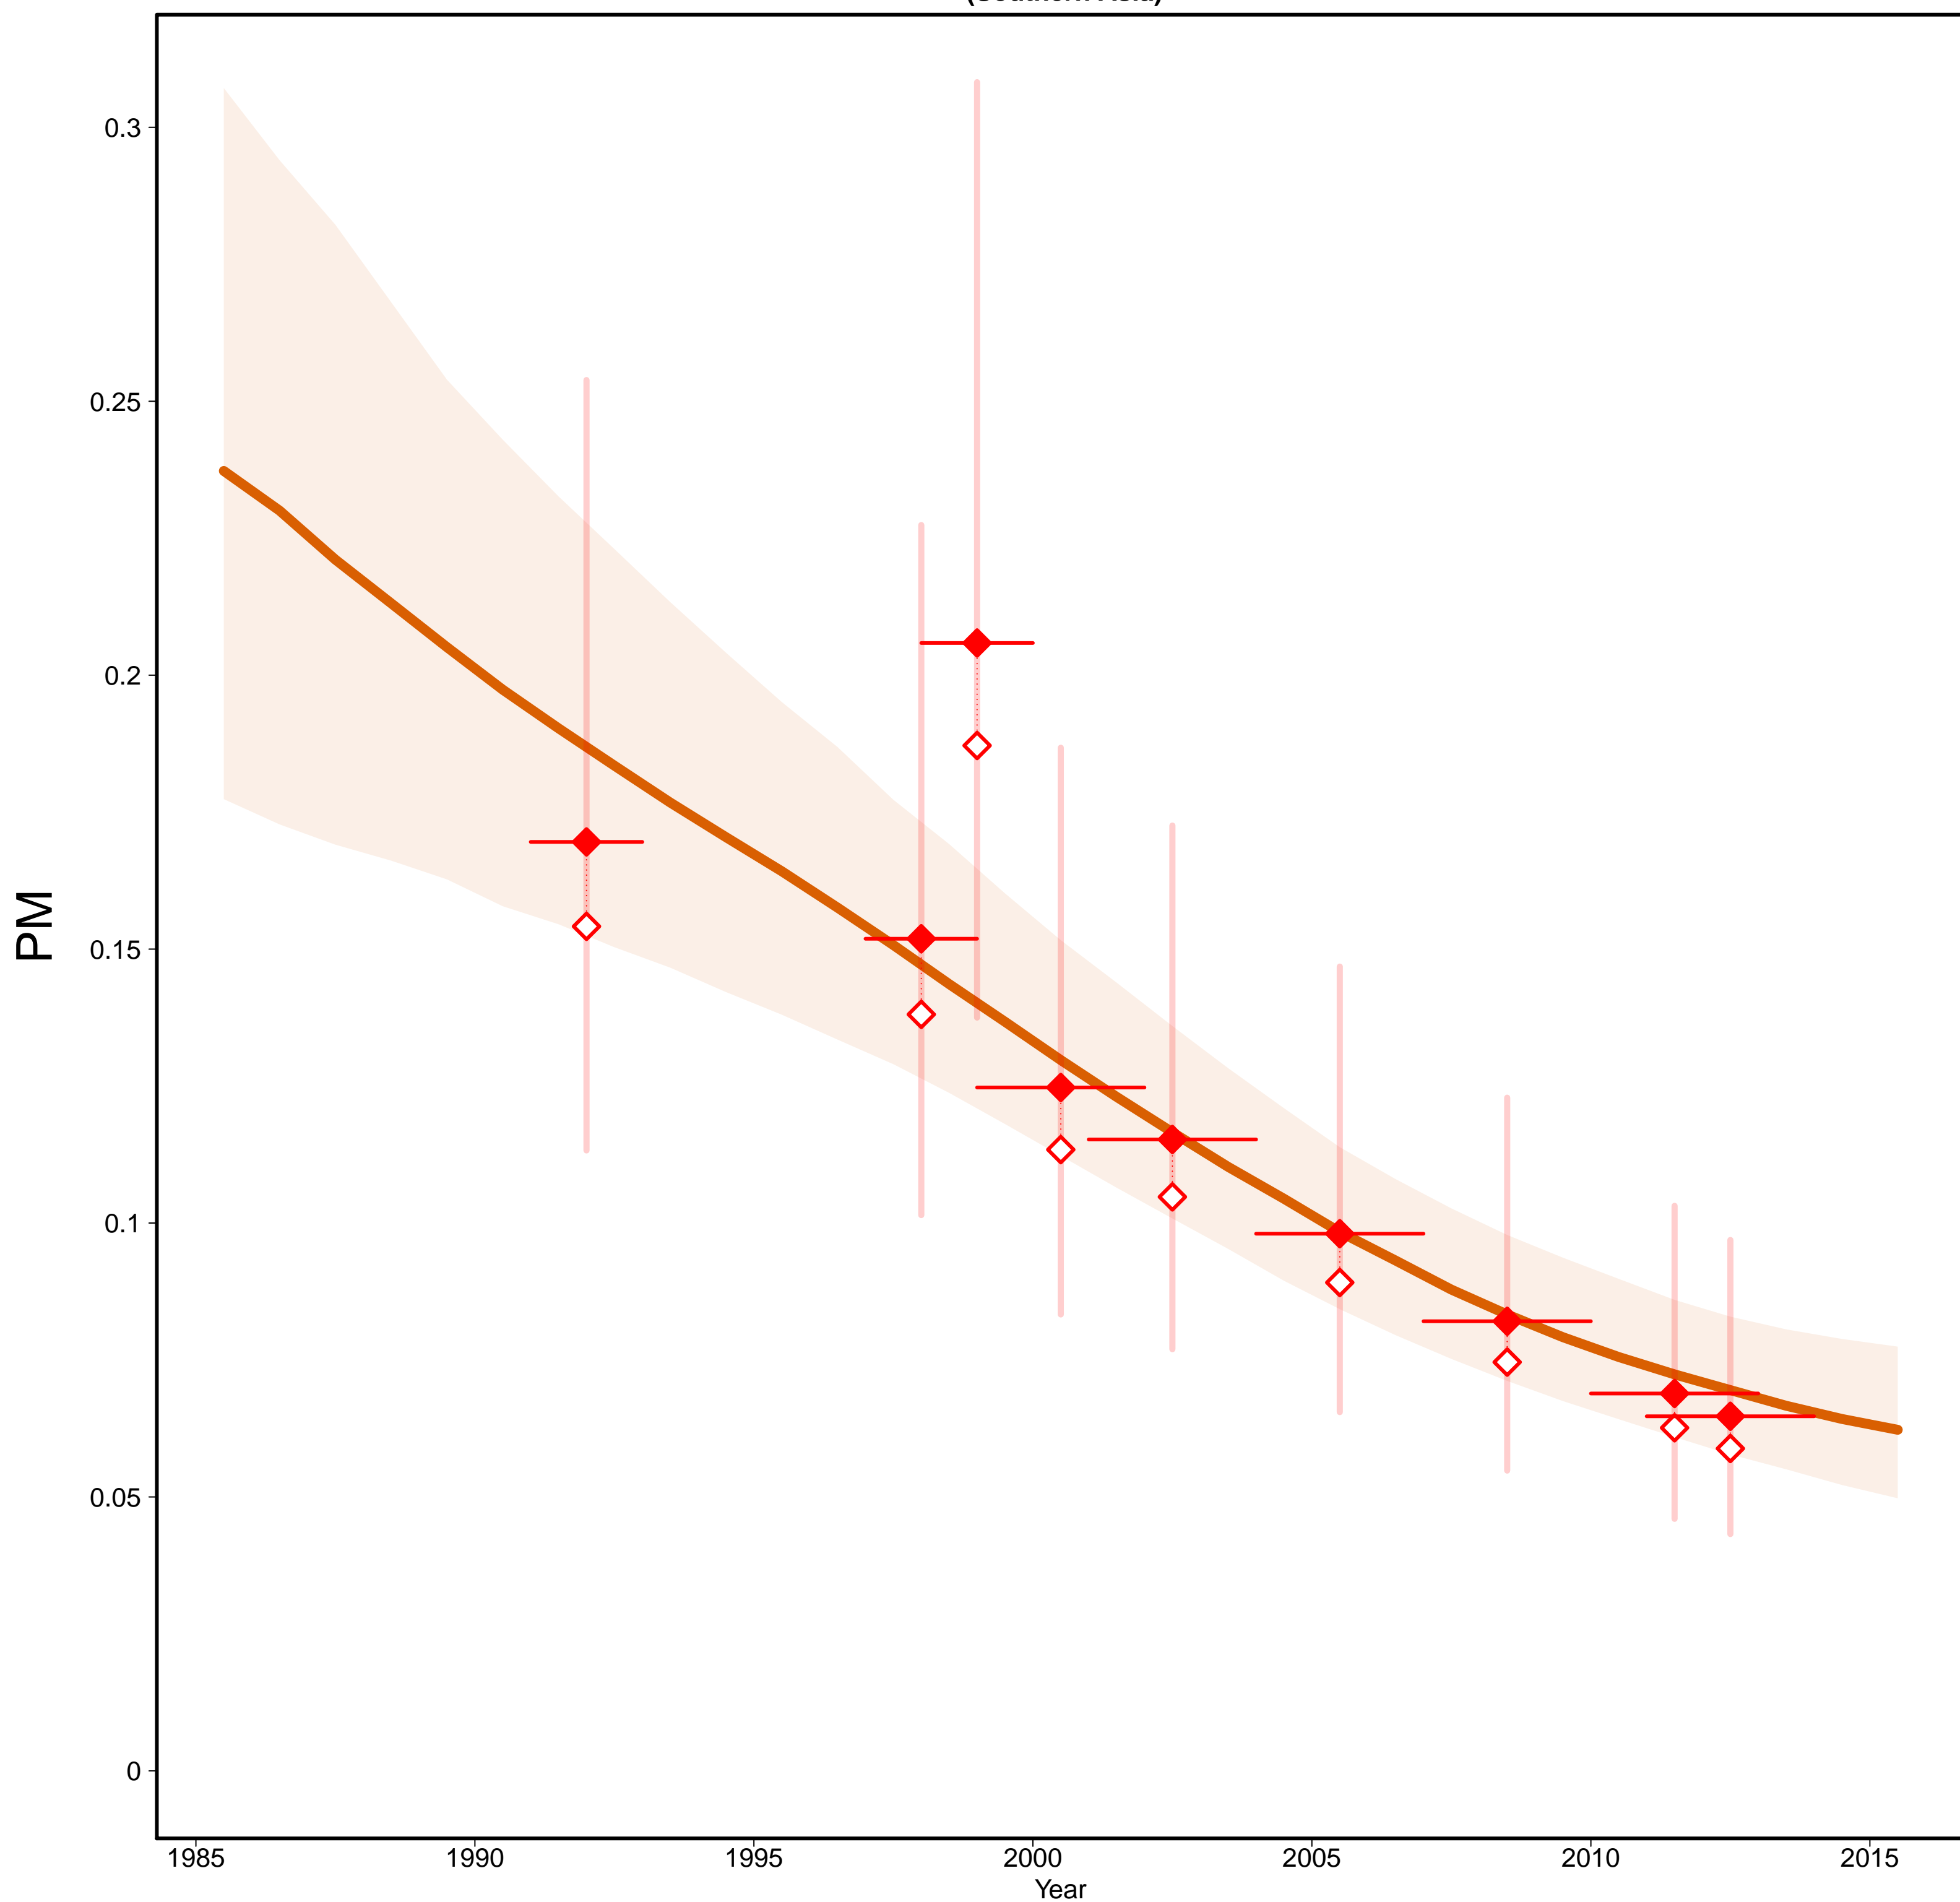

India [IND]  
(Southern Asia)

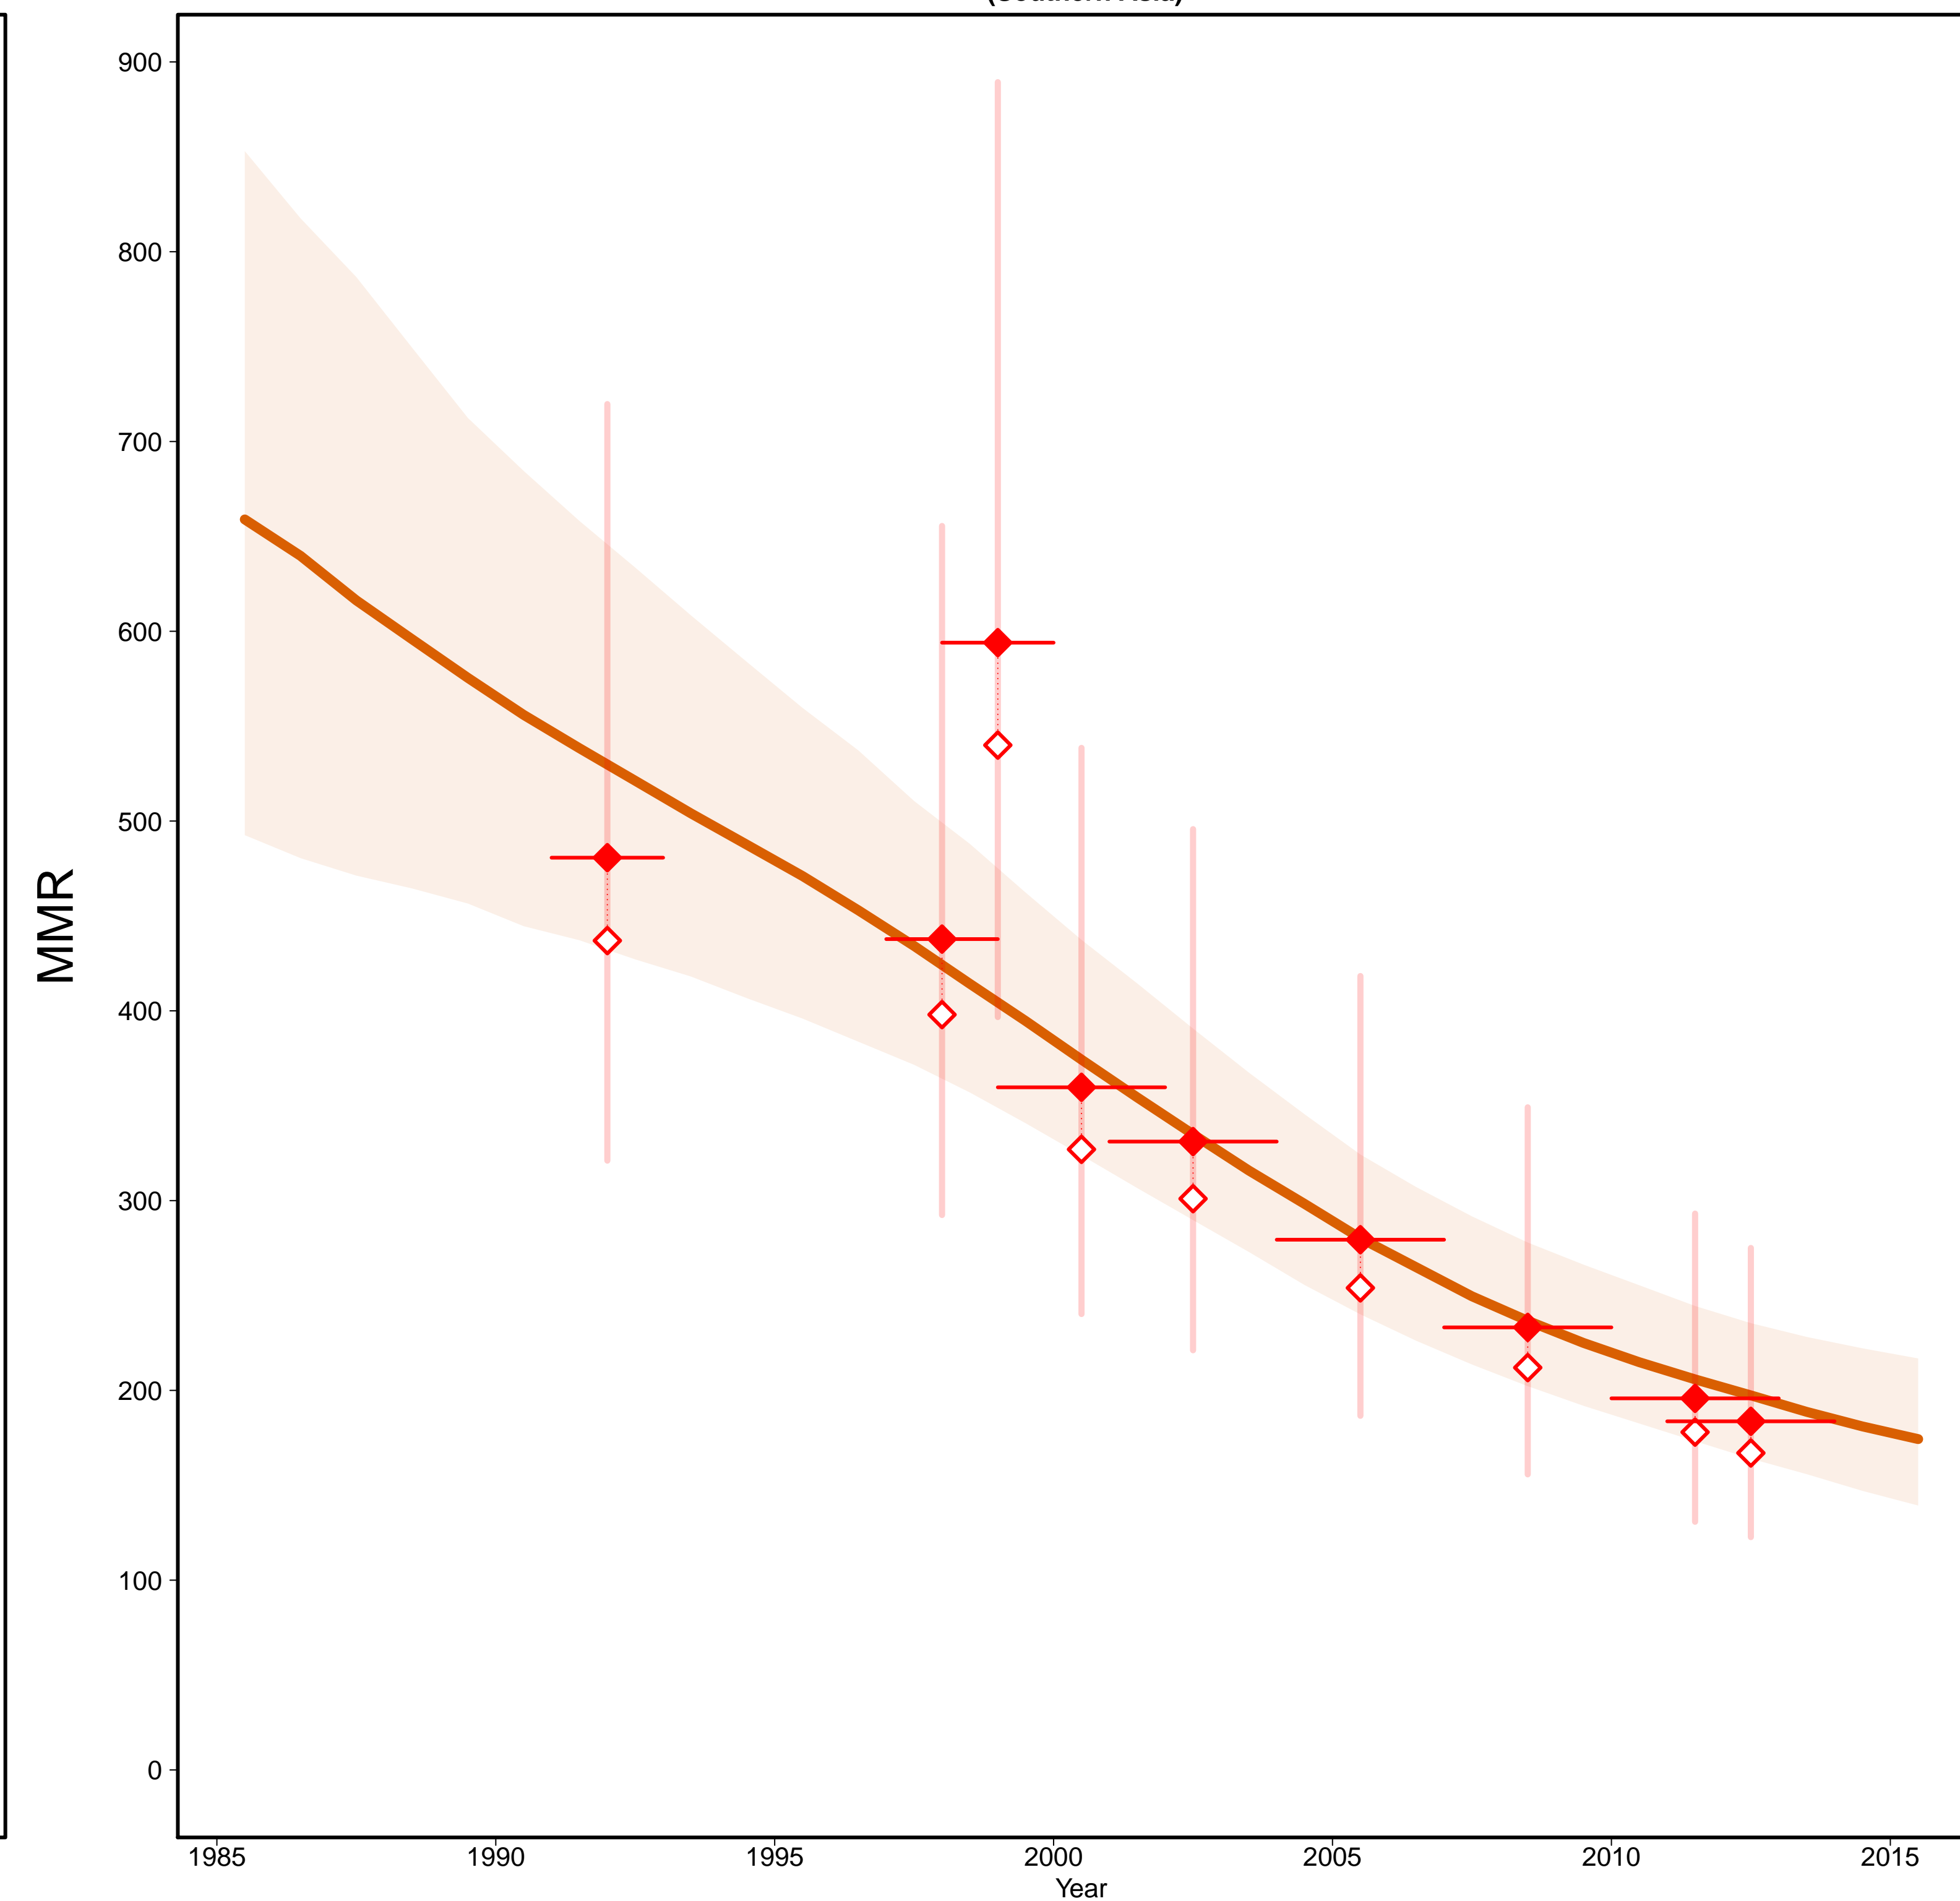

- Estimates —
- MMR Database 2015 —
- ◇ Observed Data
- ◆ Adjusted Data
- Data type —
- ◆ Misc. studies

Gross Domestic Product

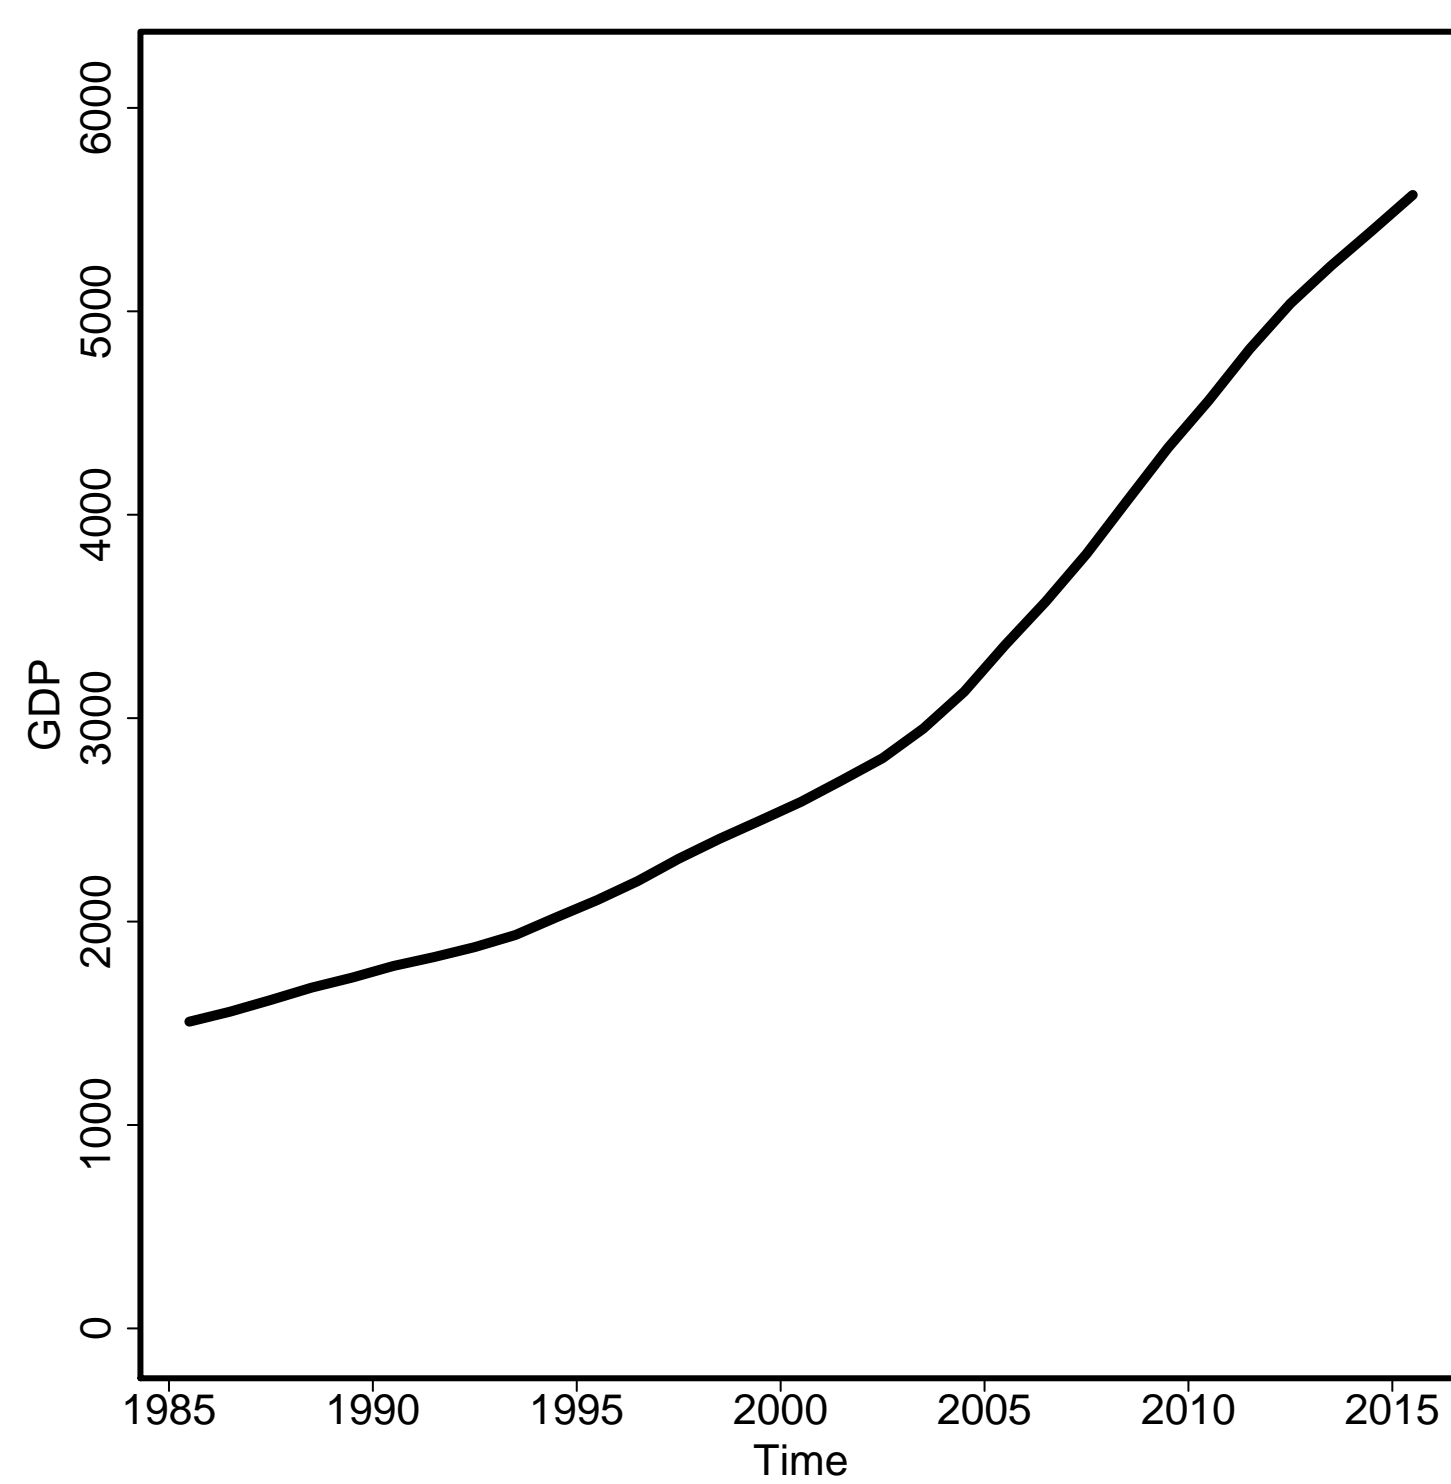

General Fertility Rate

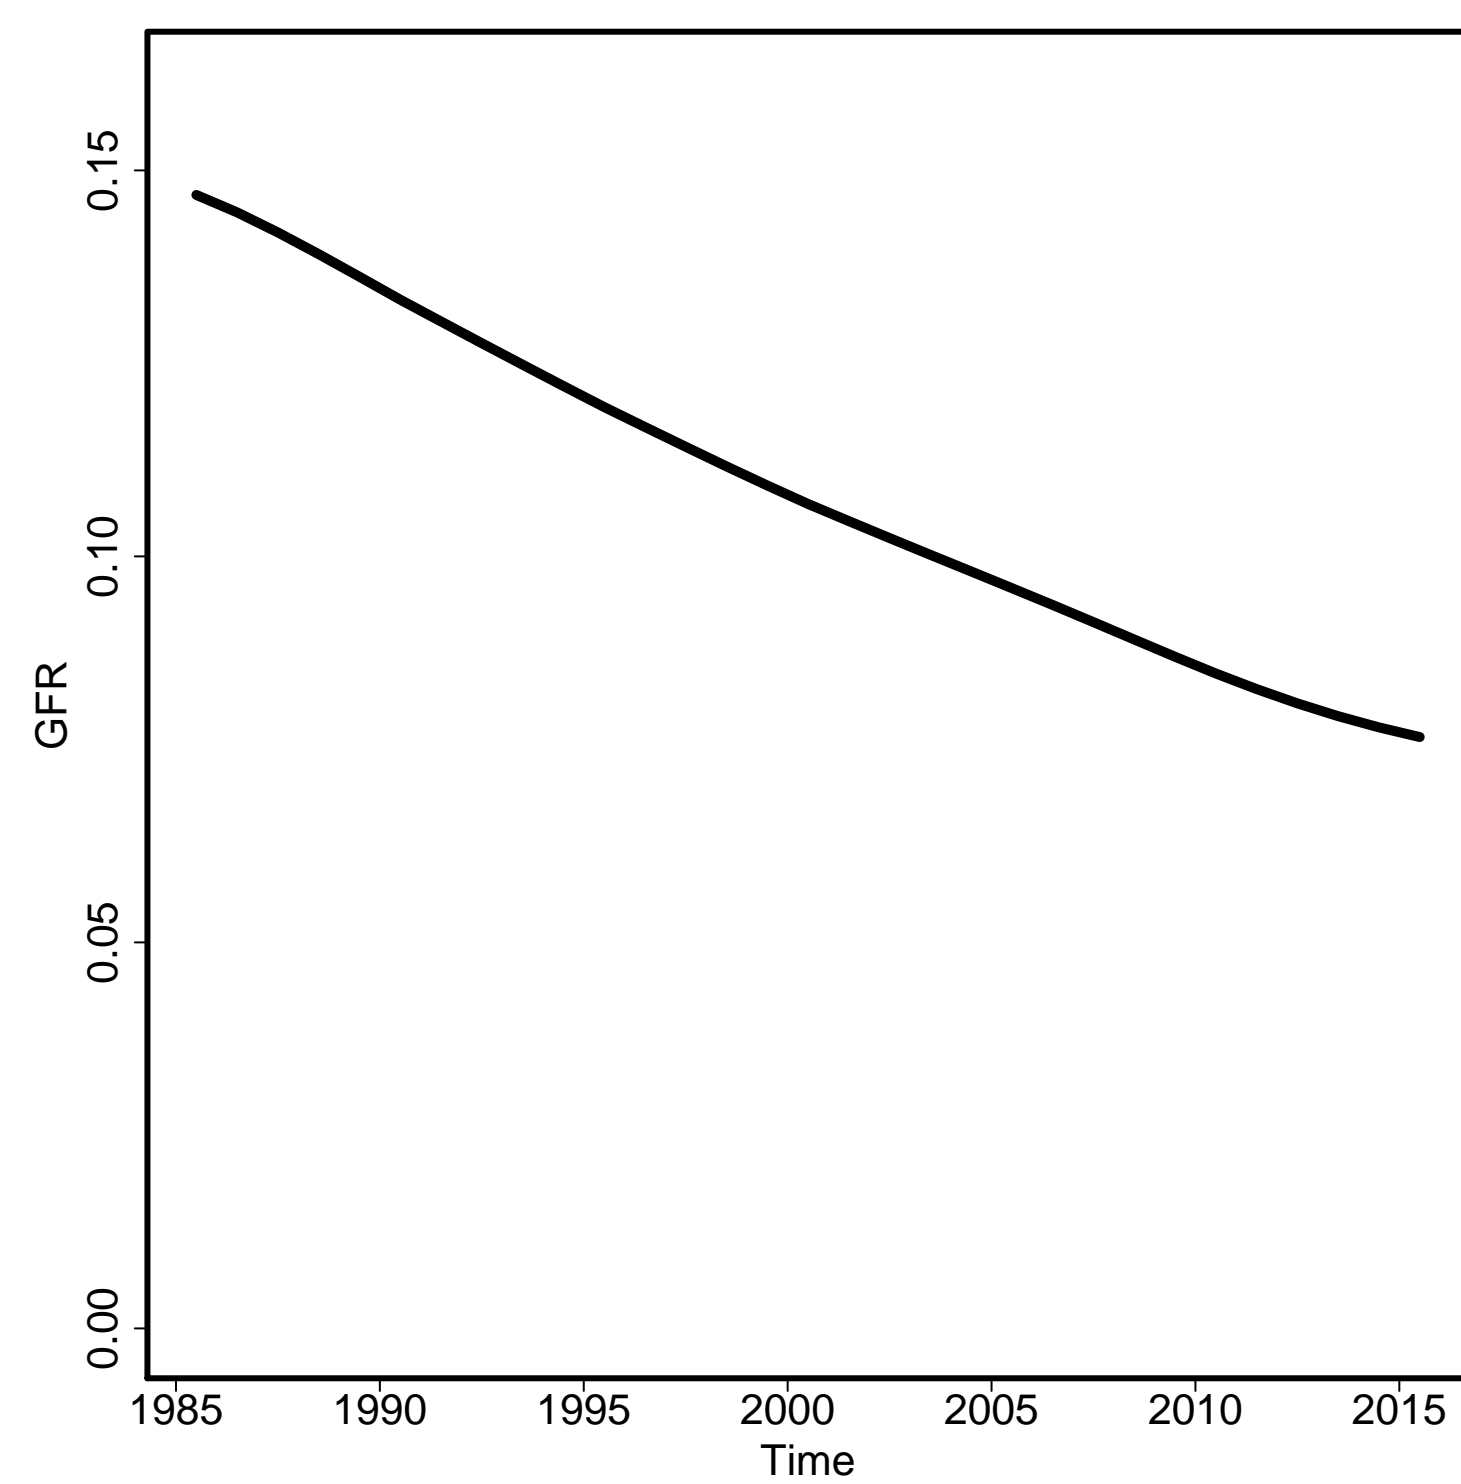

Skilled Attendance to Birth

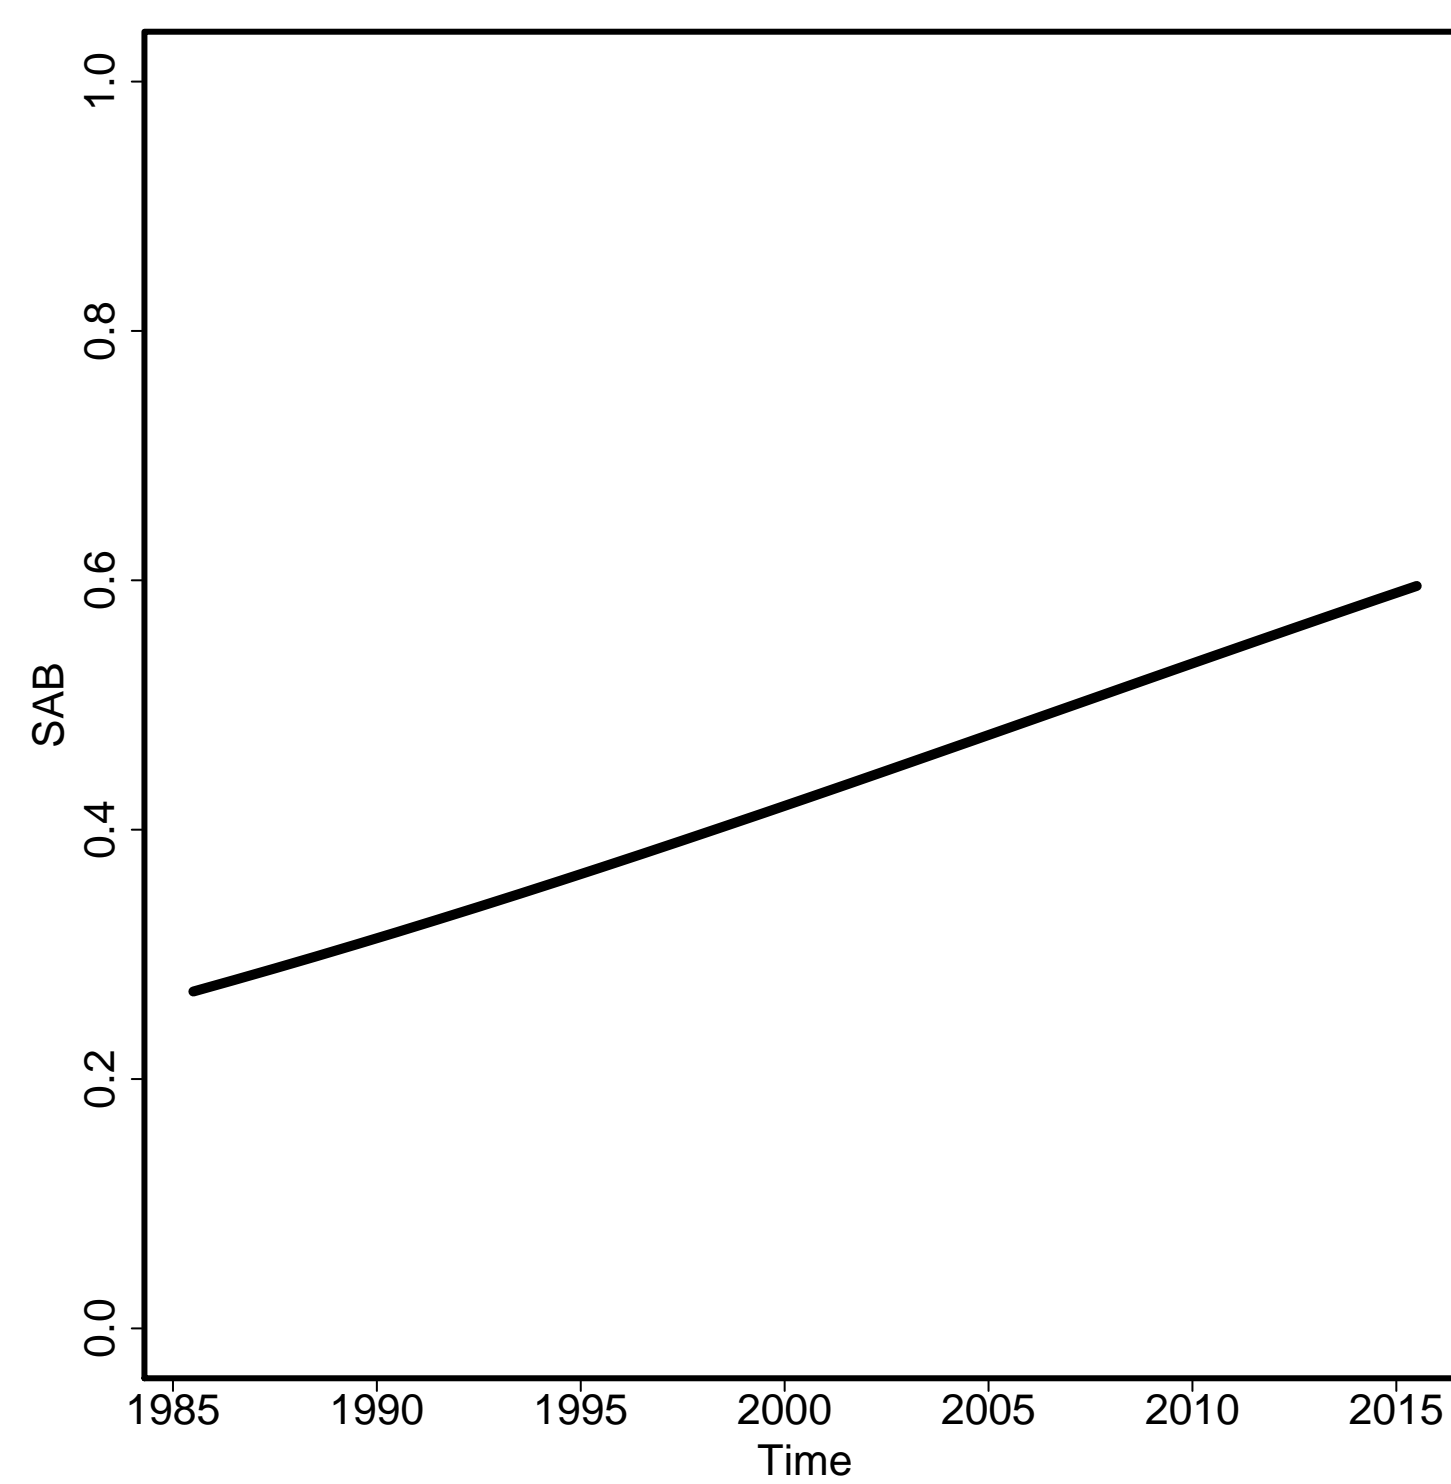

Envelope/Births

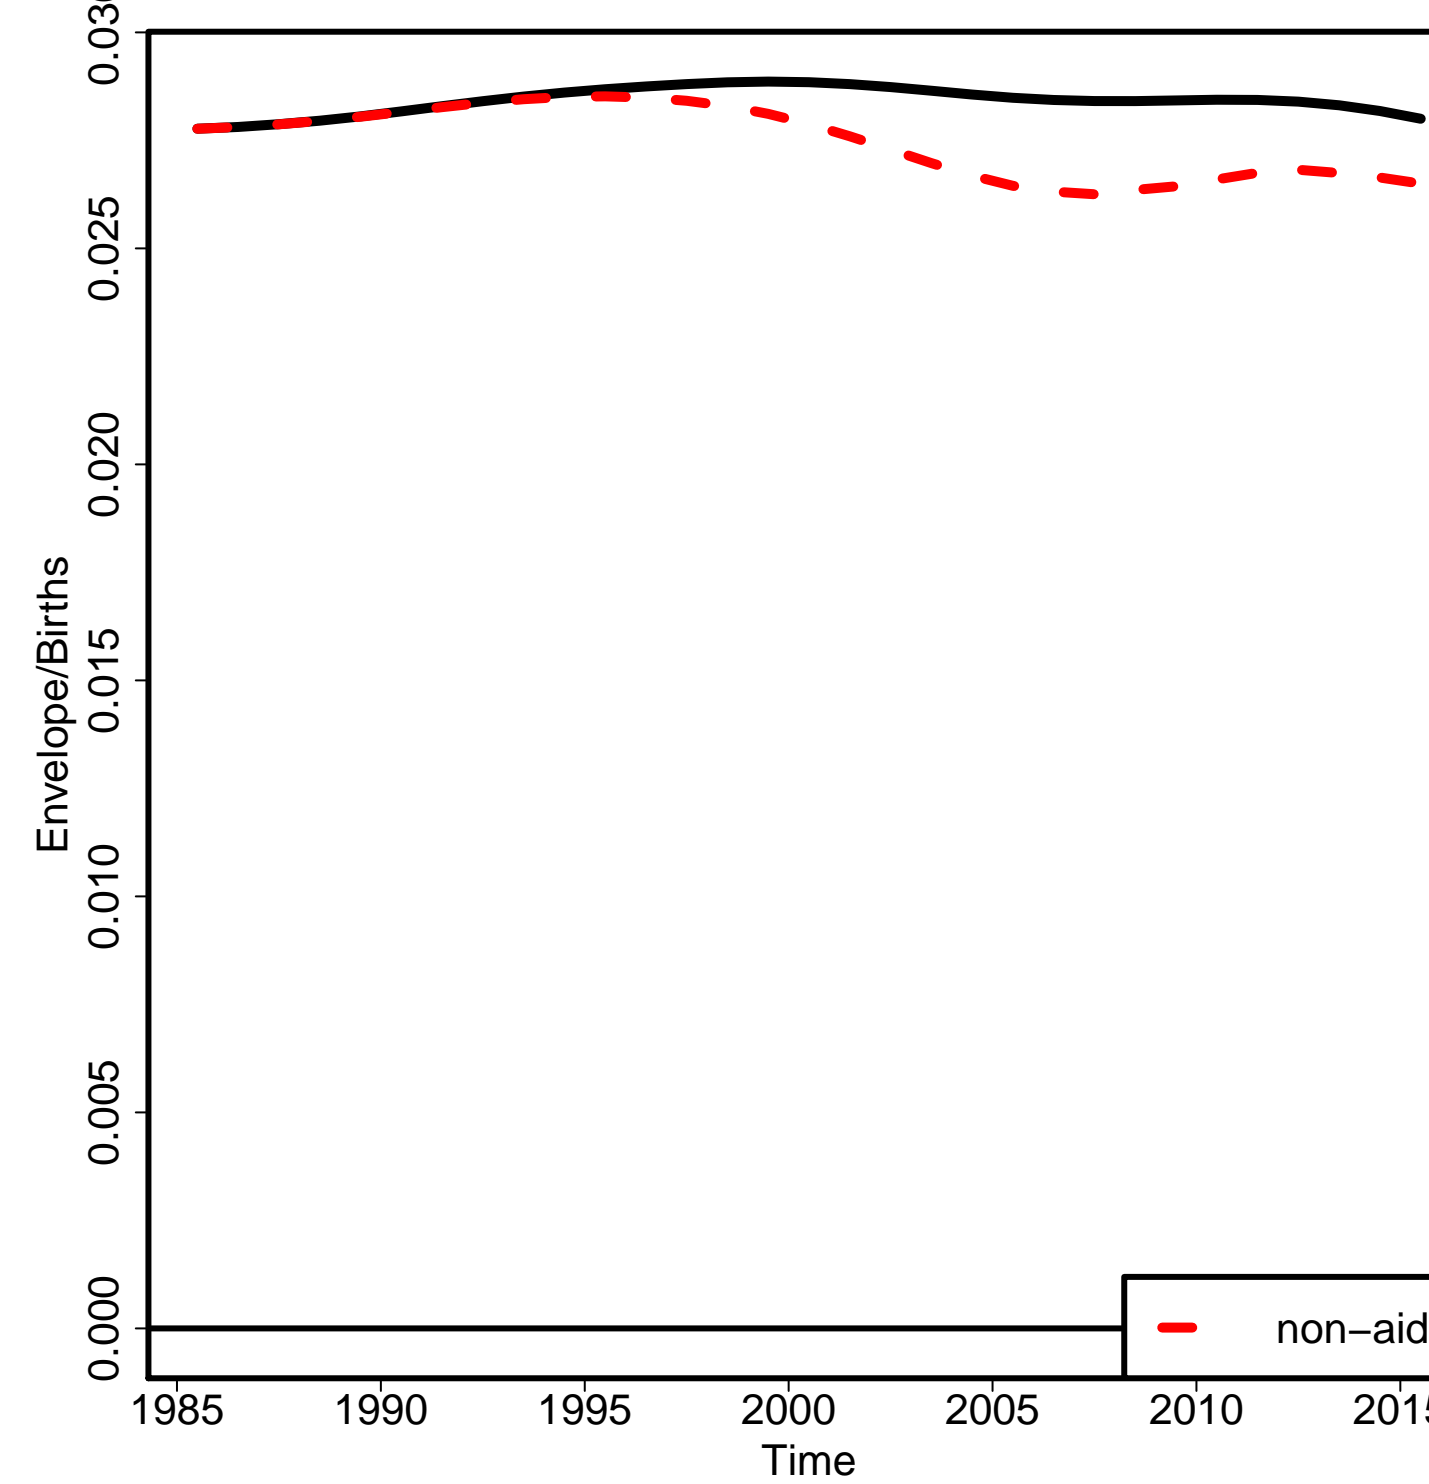

Non-aids MMR

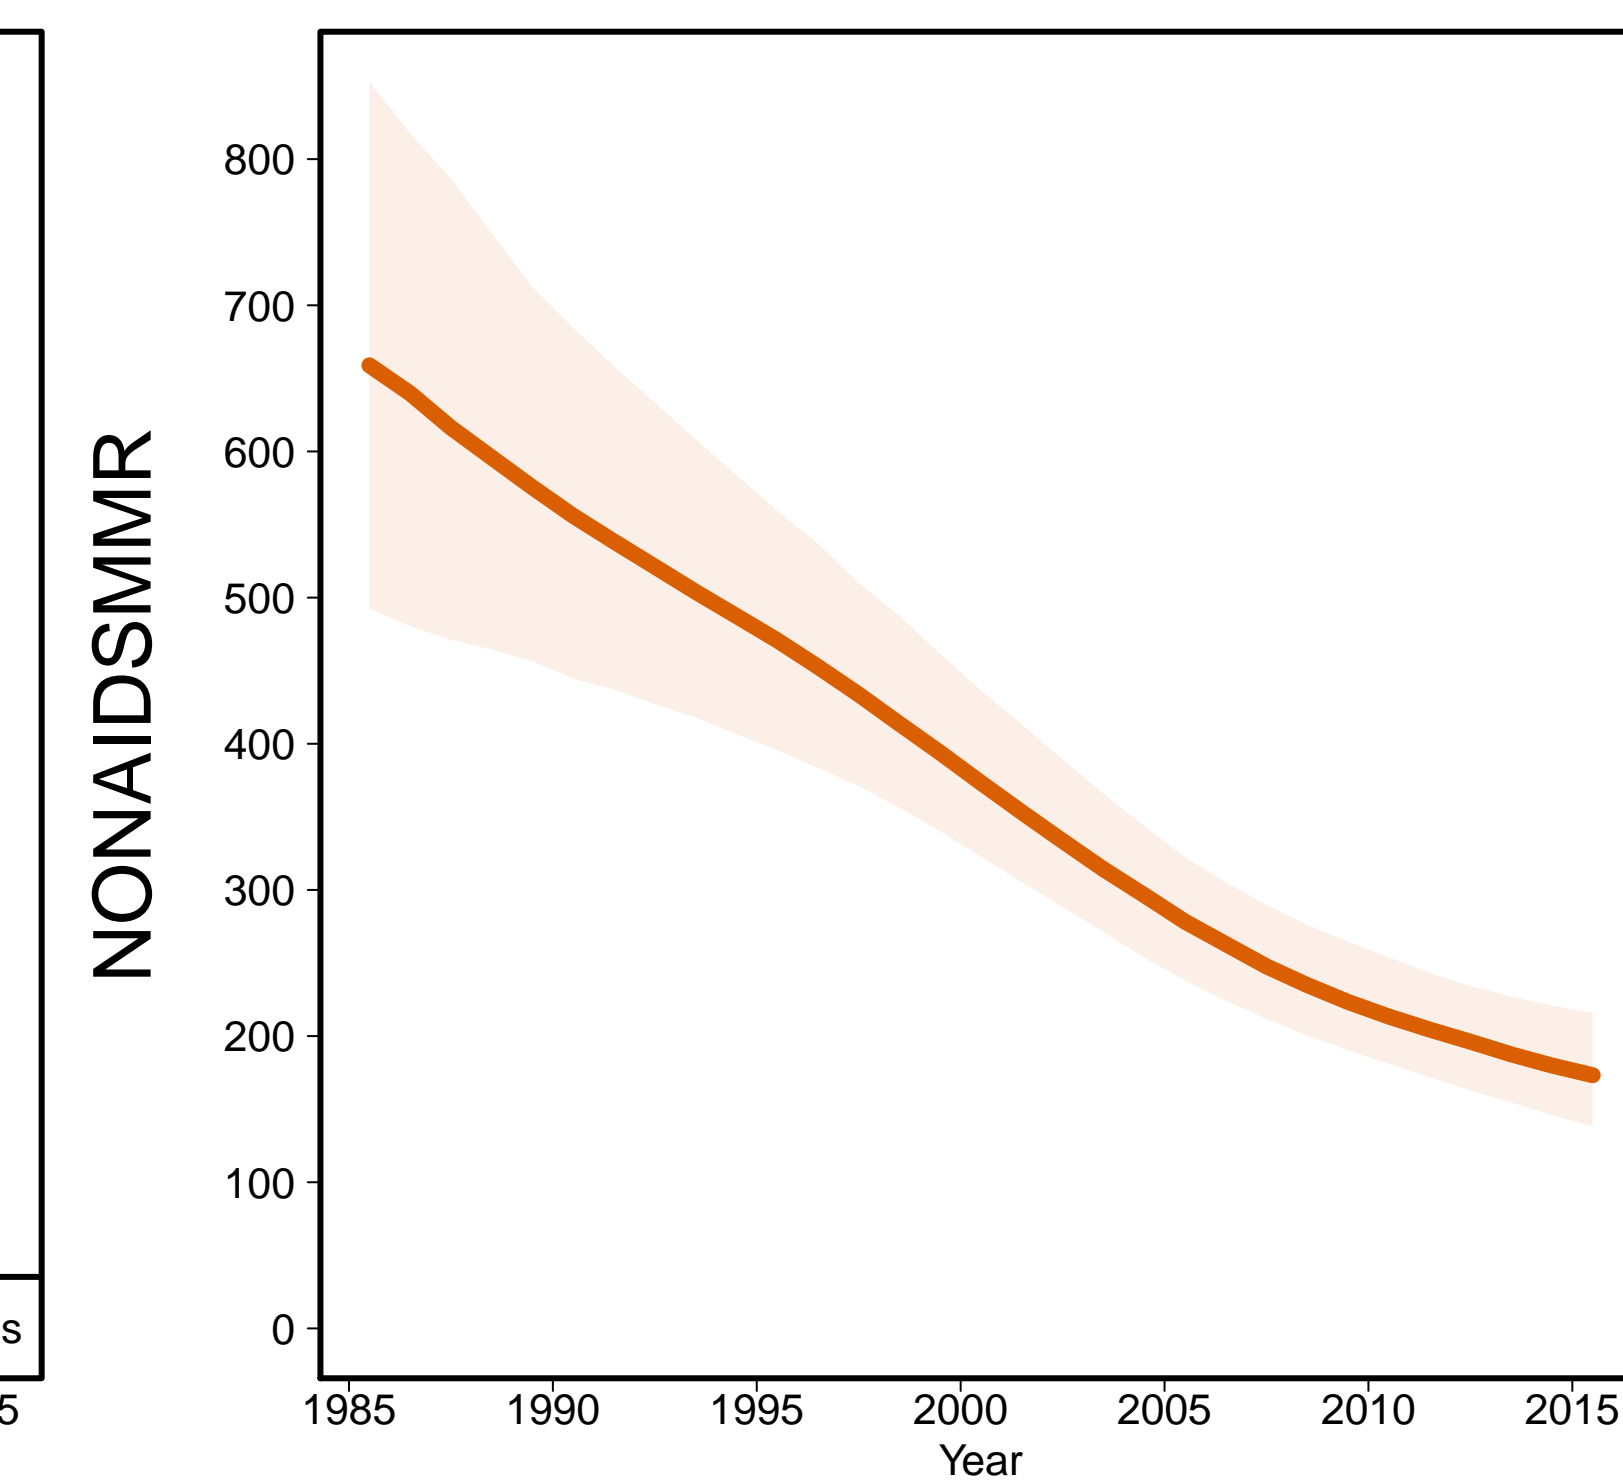

AIDSMMR

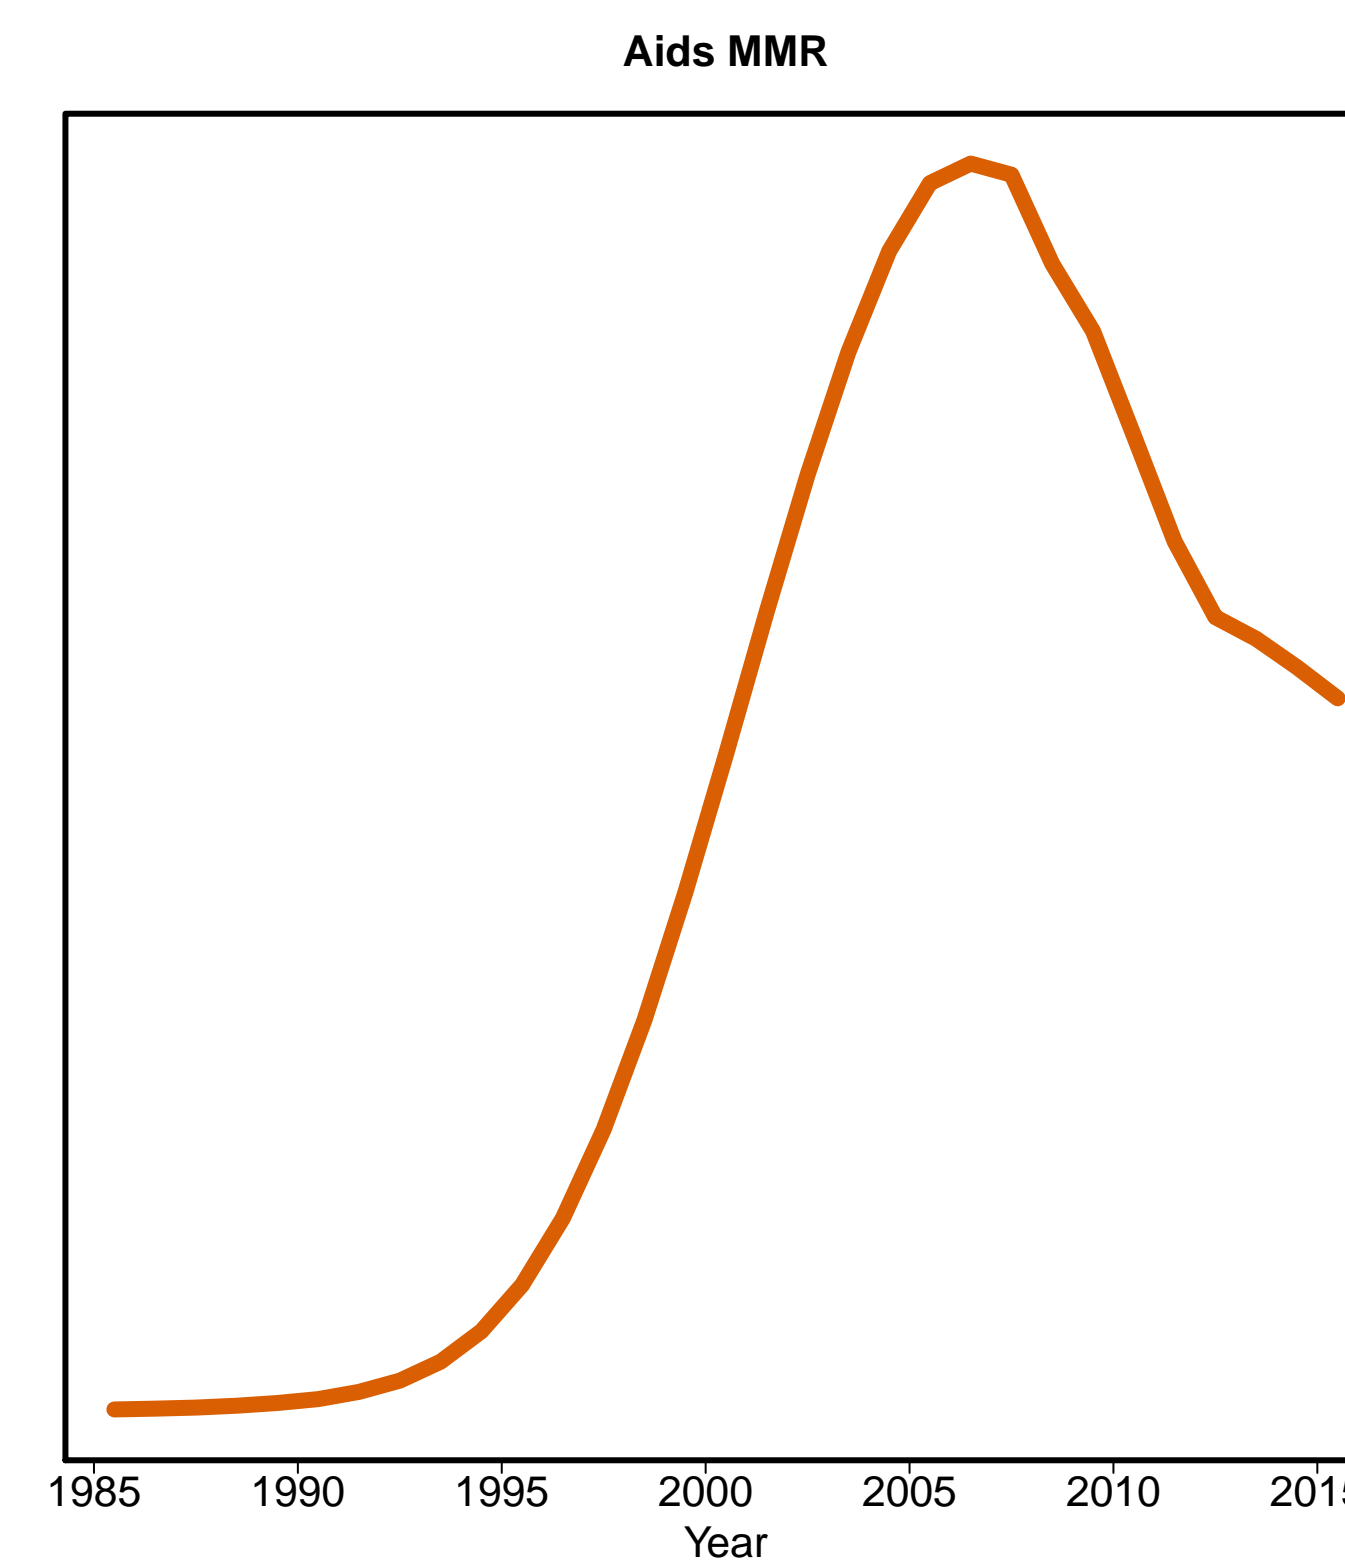

Indonesia [IDN]  
(South-Eastern Asia / Oceania)

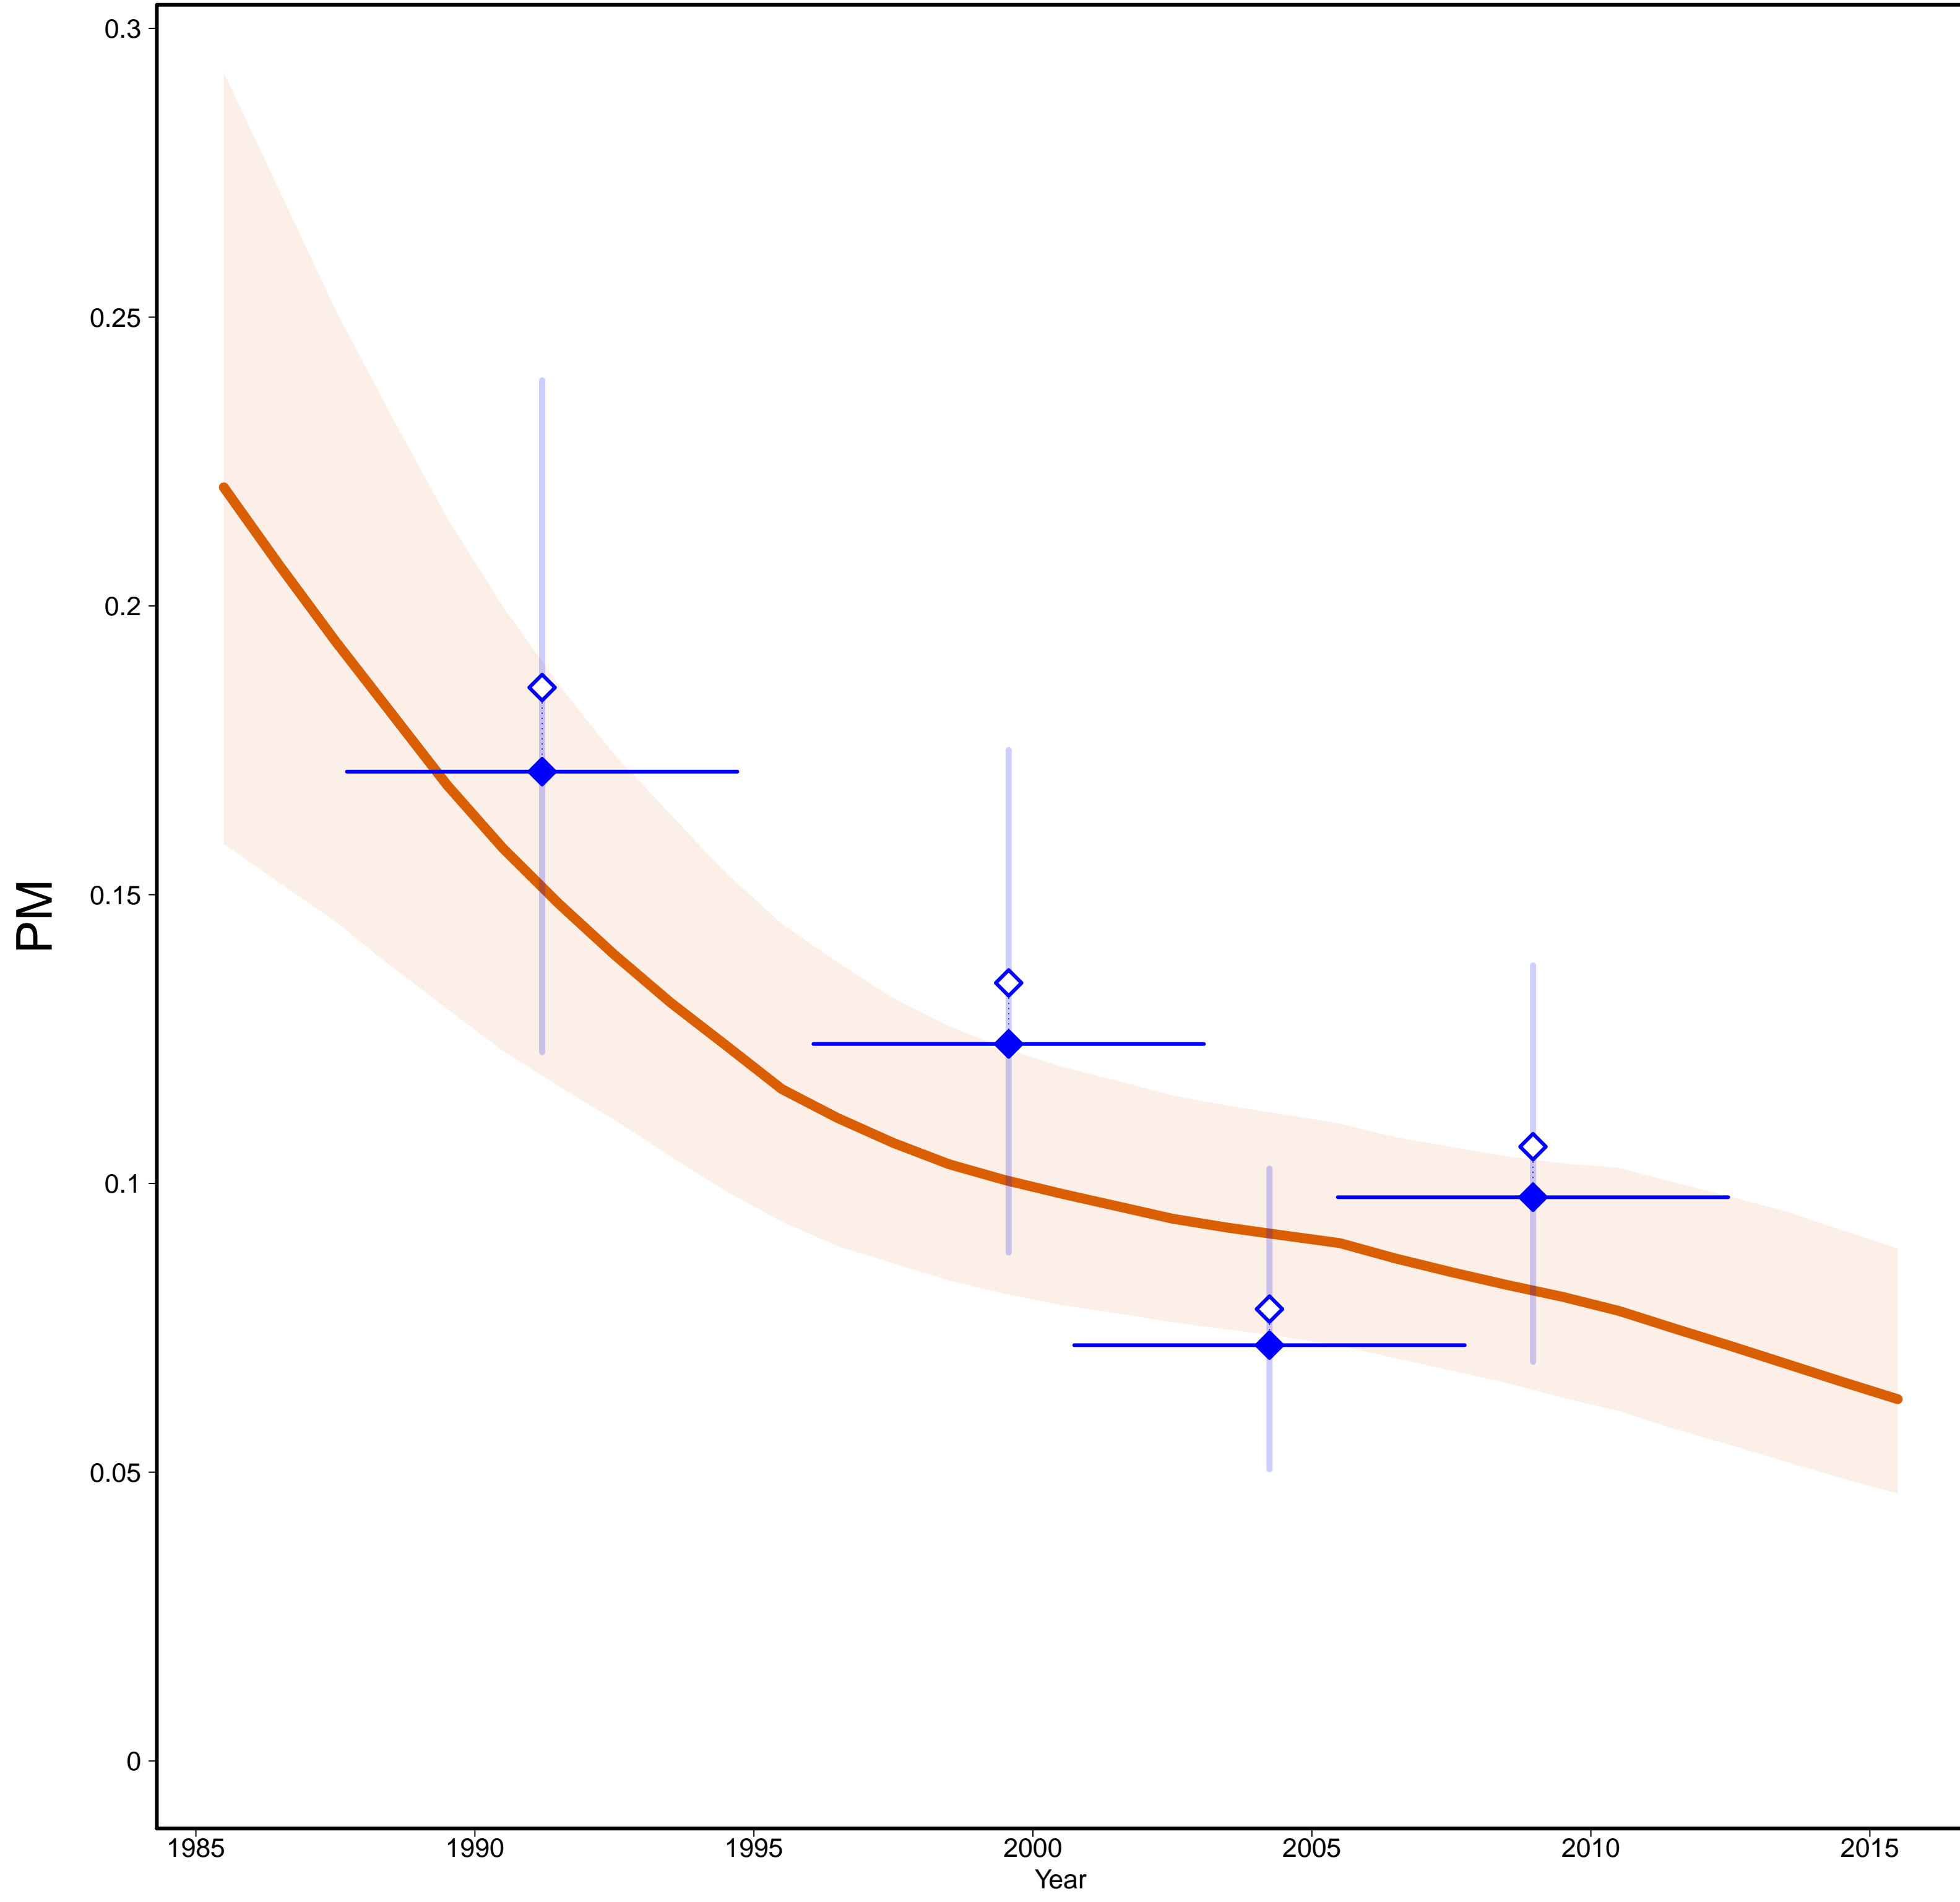

Indonesia [IDN]  
(South-Eastern Asia / Oceania)

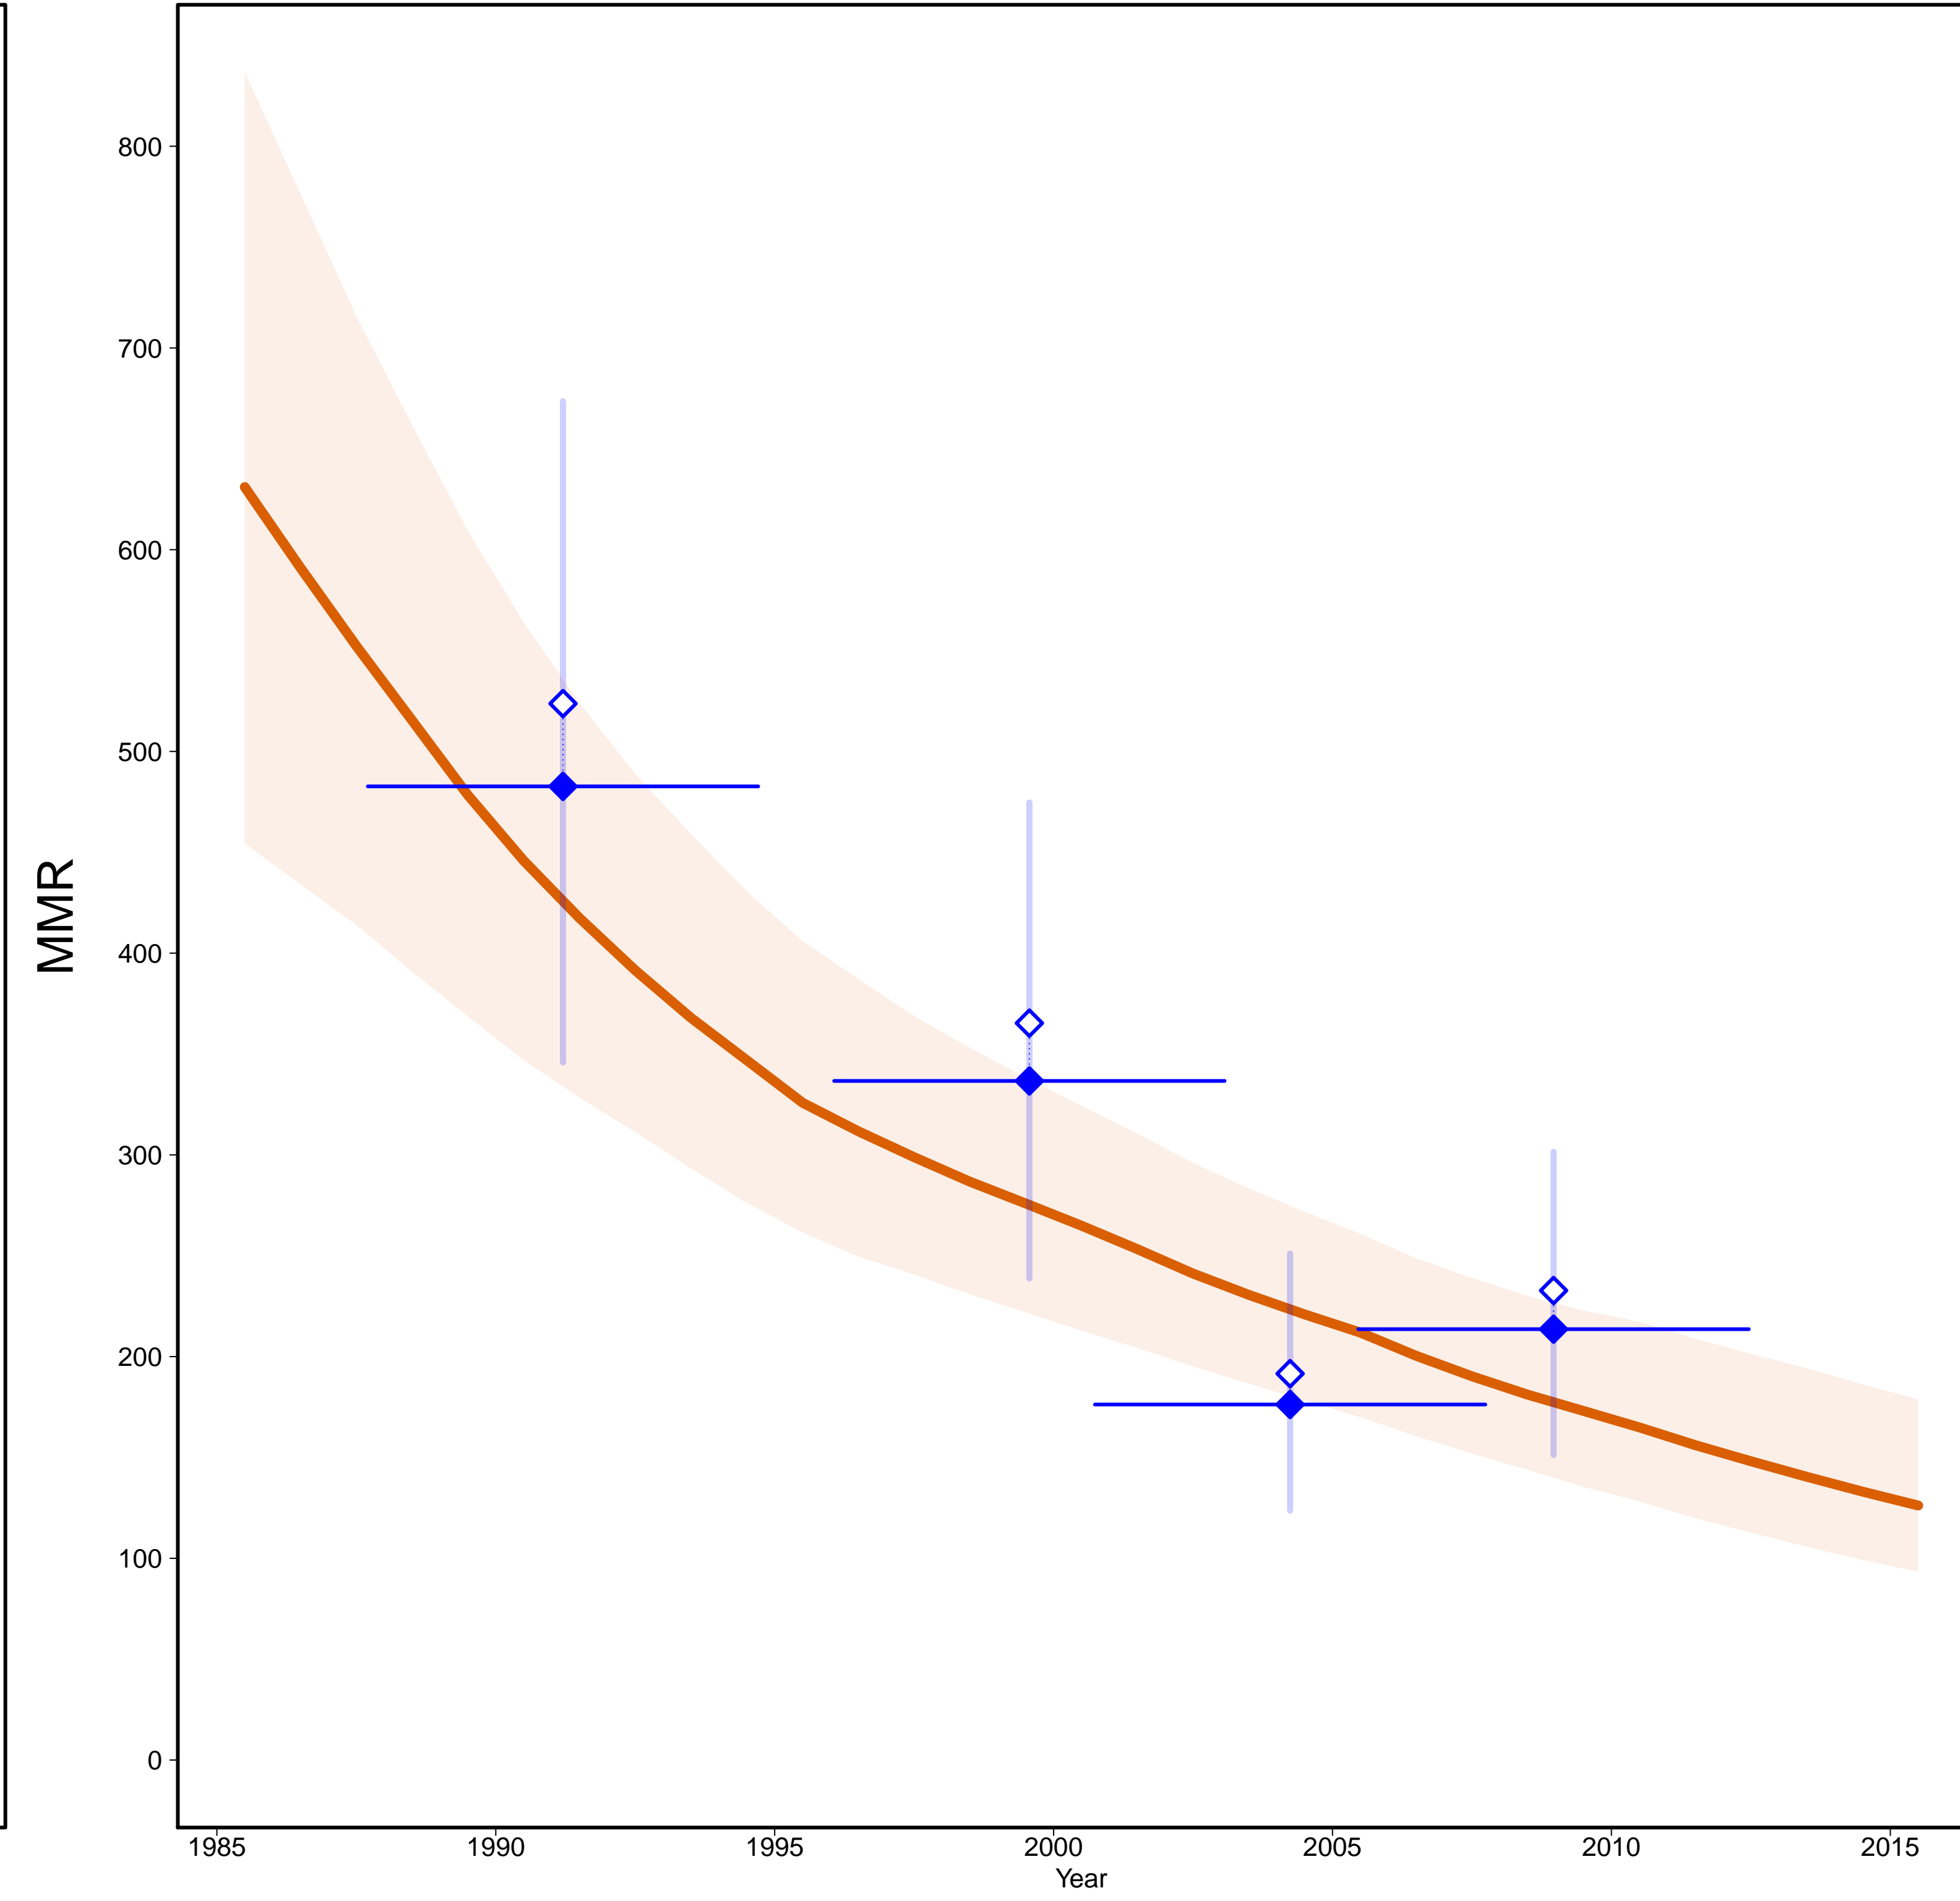

- Estimates —
- MMR Database 2015 —
- ◇ Observed Data
- ◆ Adjusted Data
- Data type —
- ◆ DHS

Gross Domestic Product

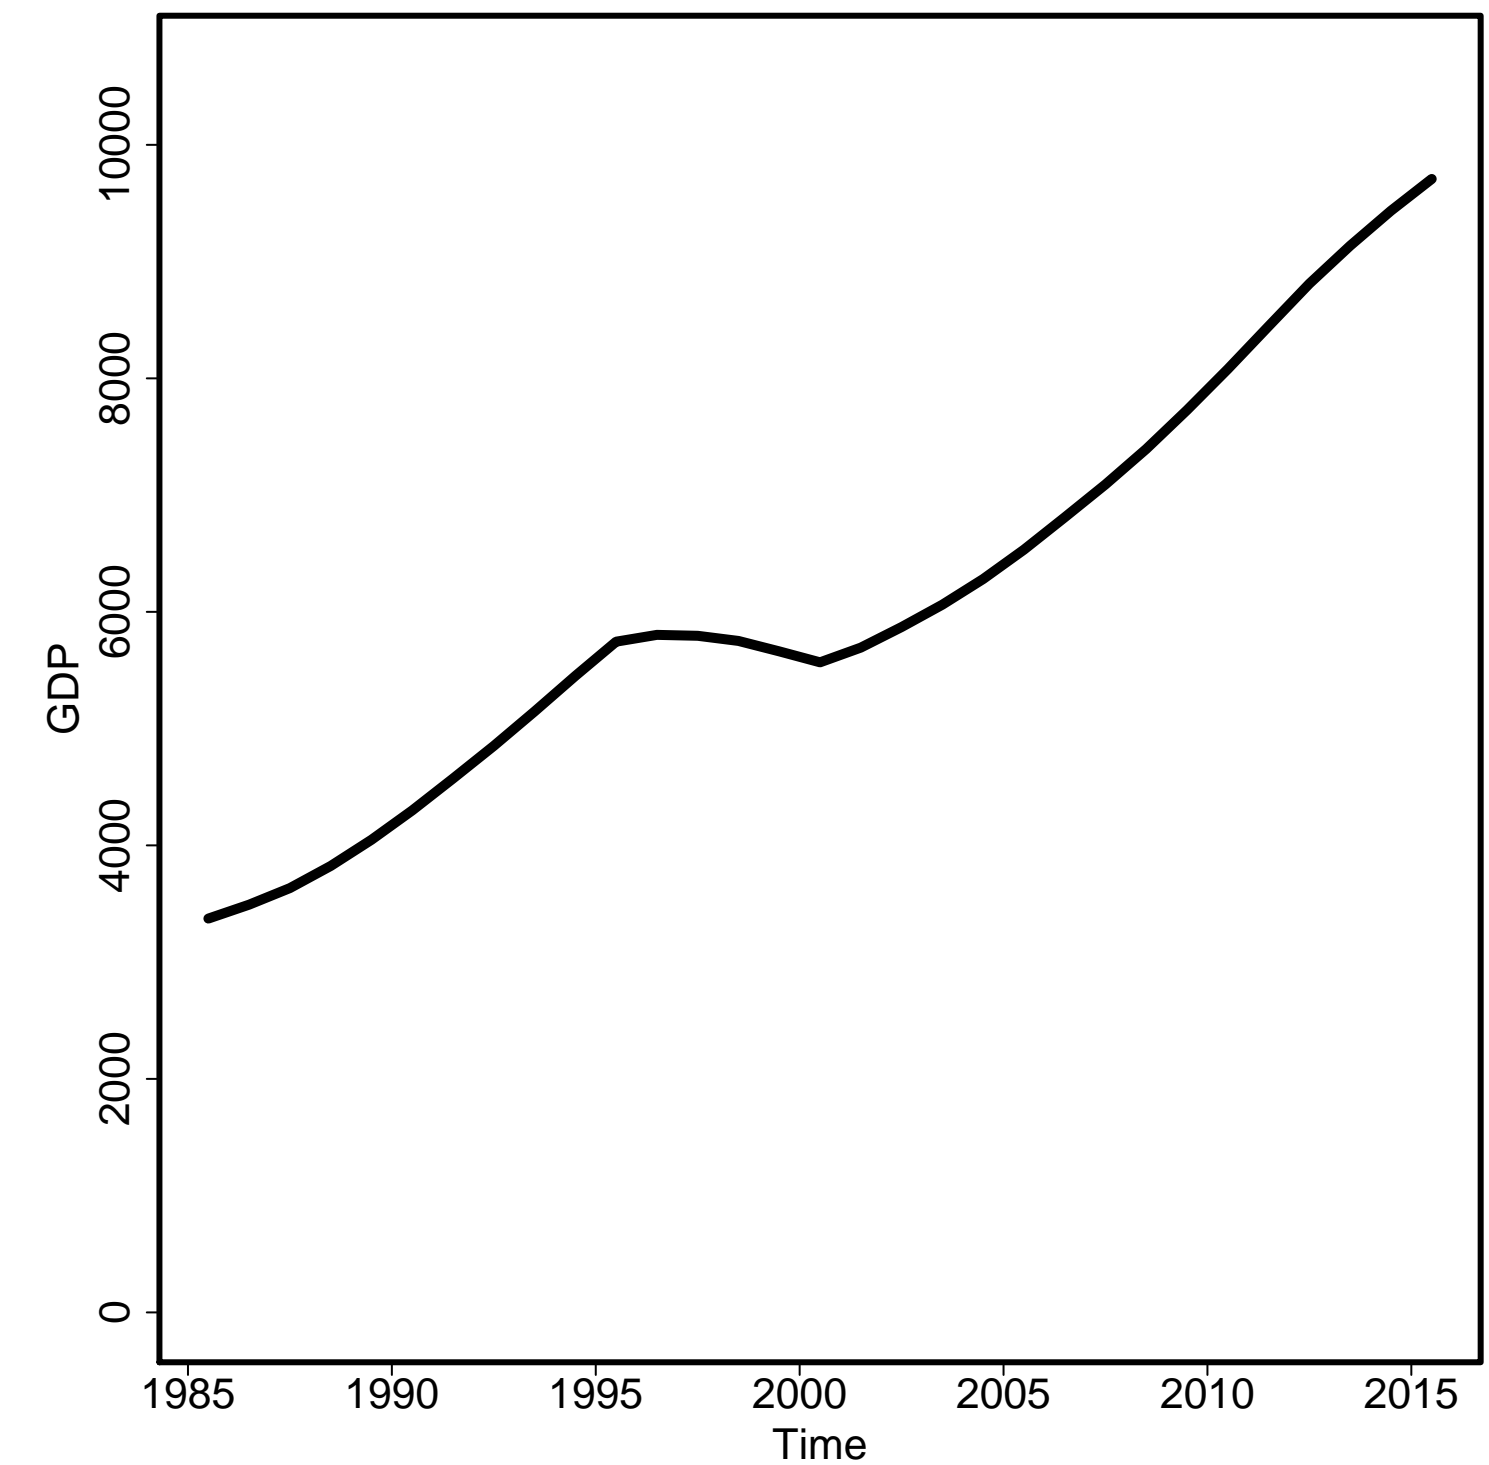

General Fertility Rate

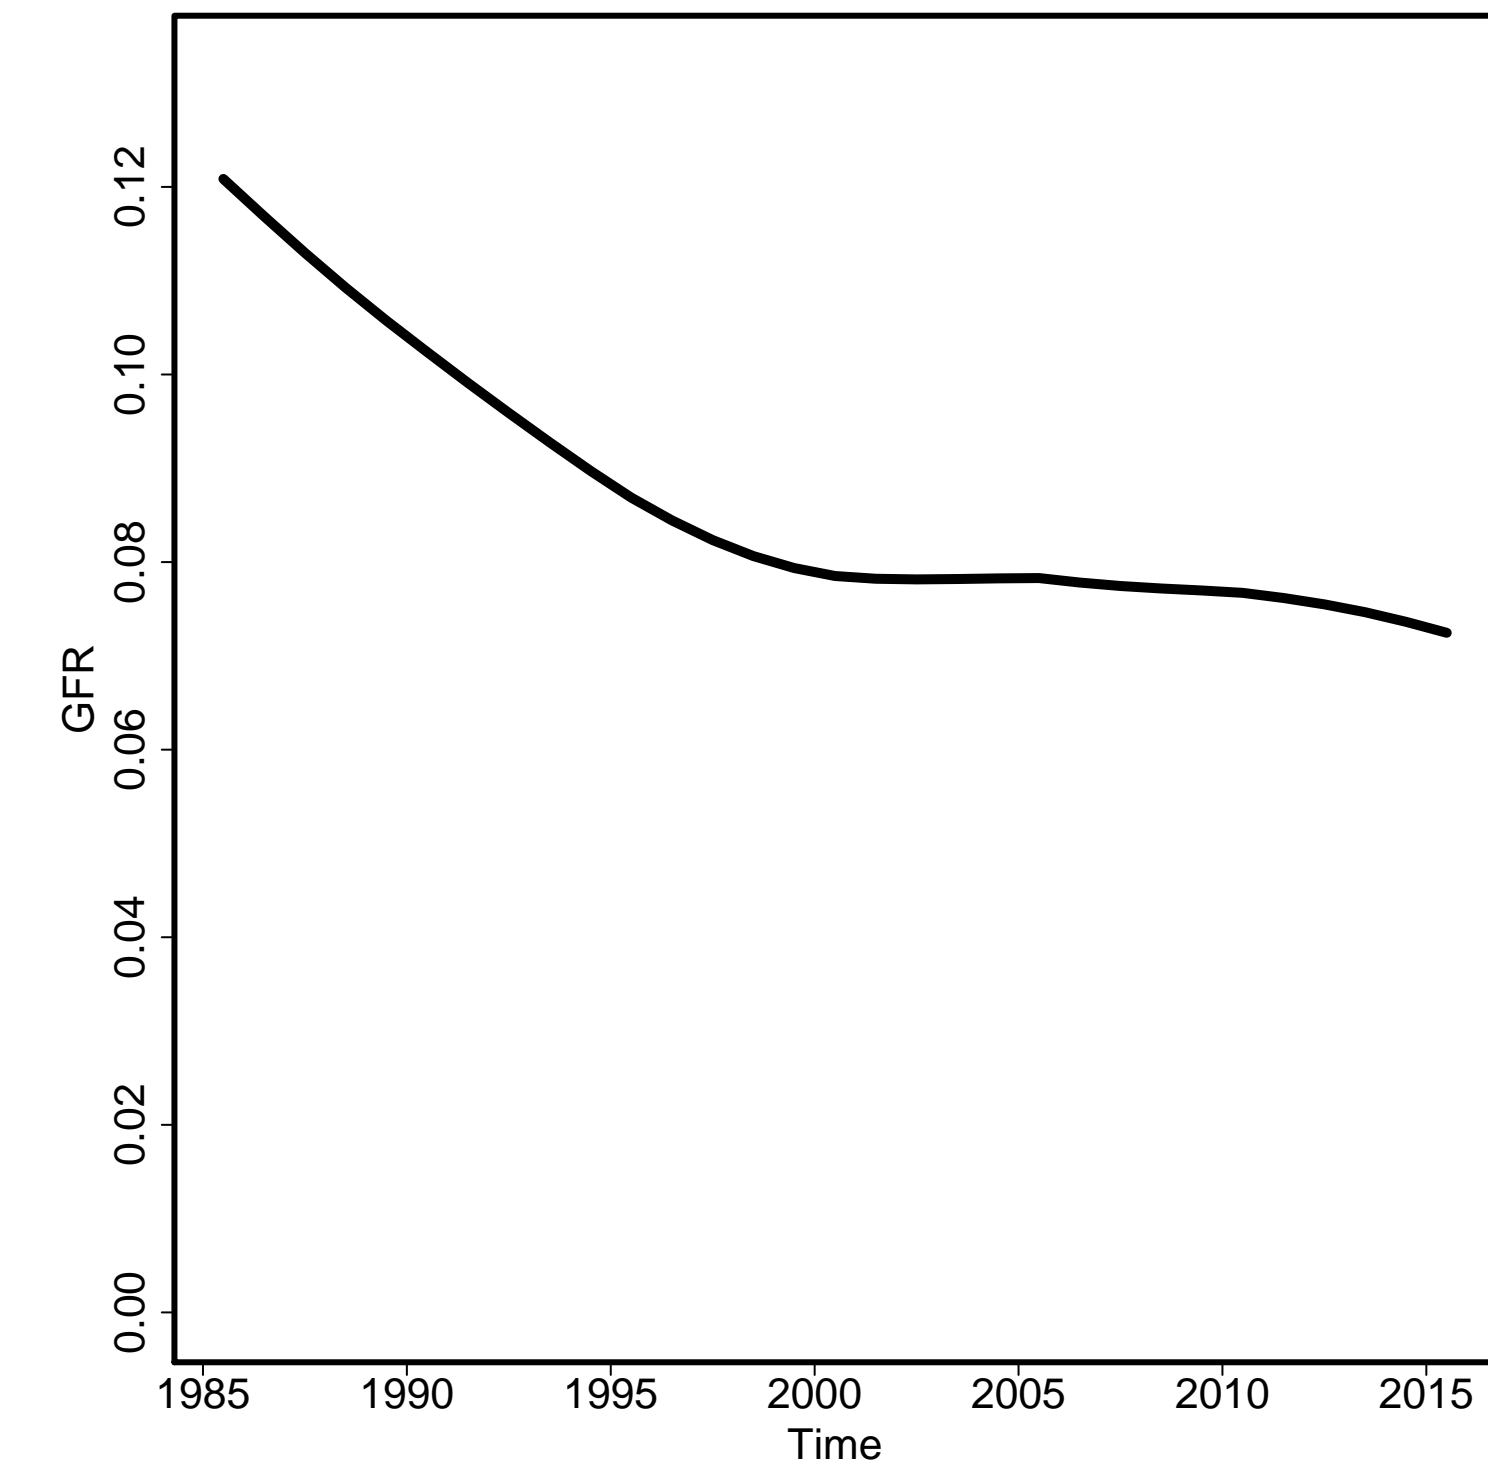

Skilled Attendance to Birth

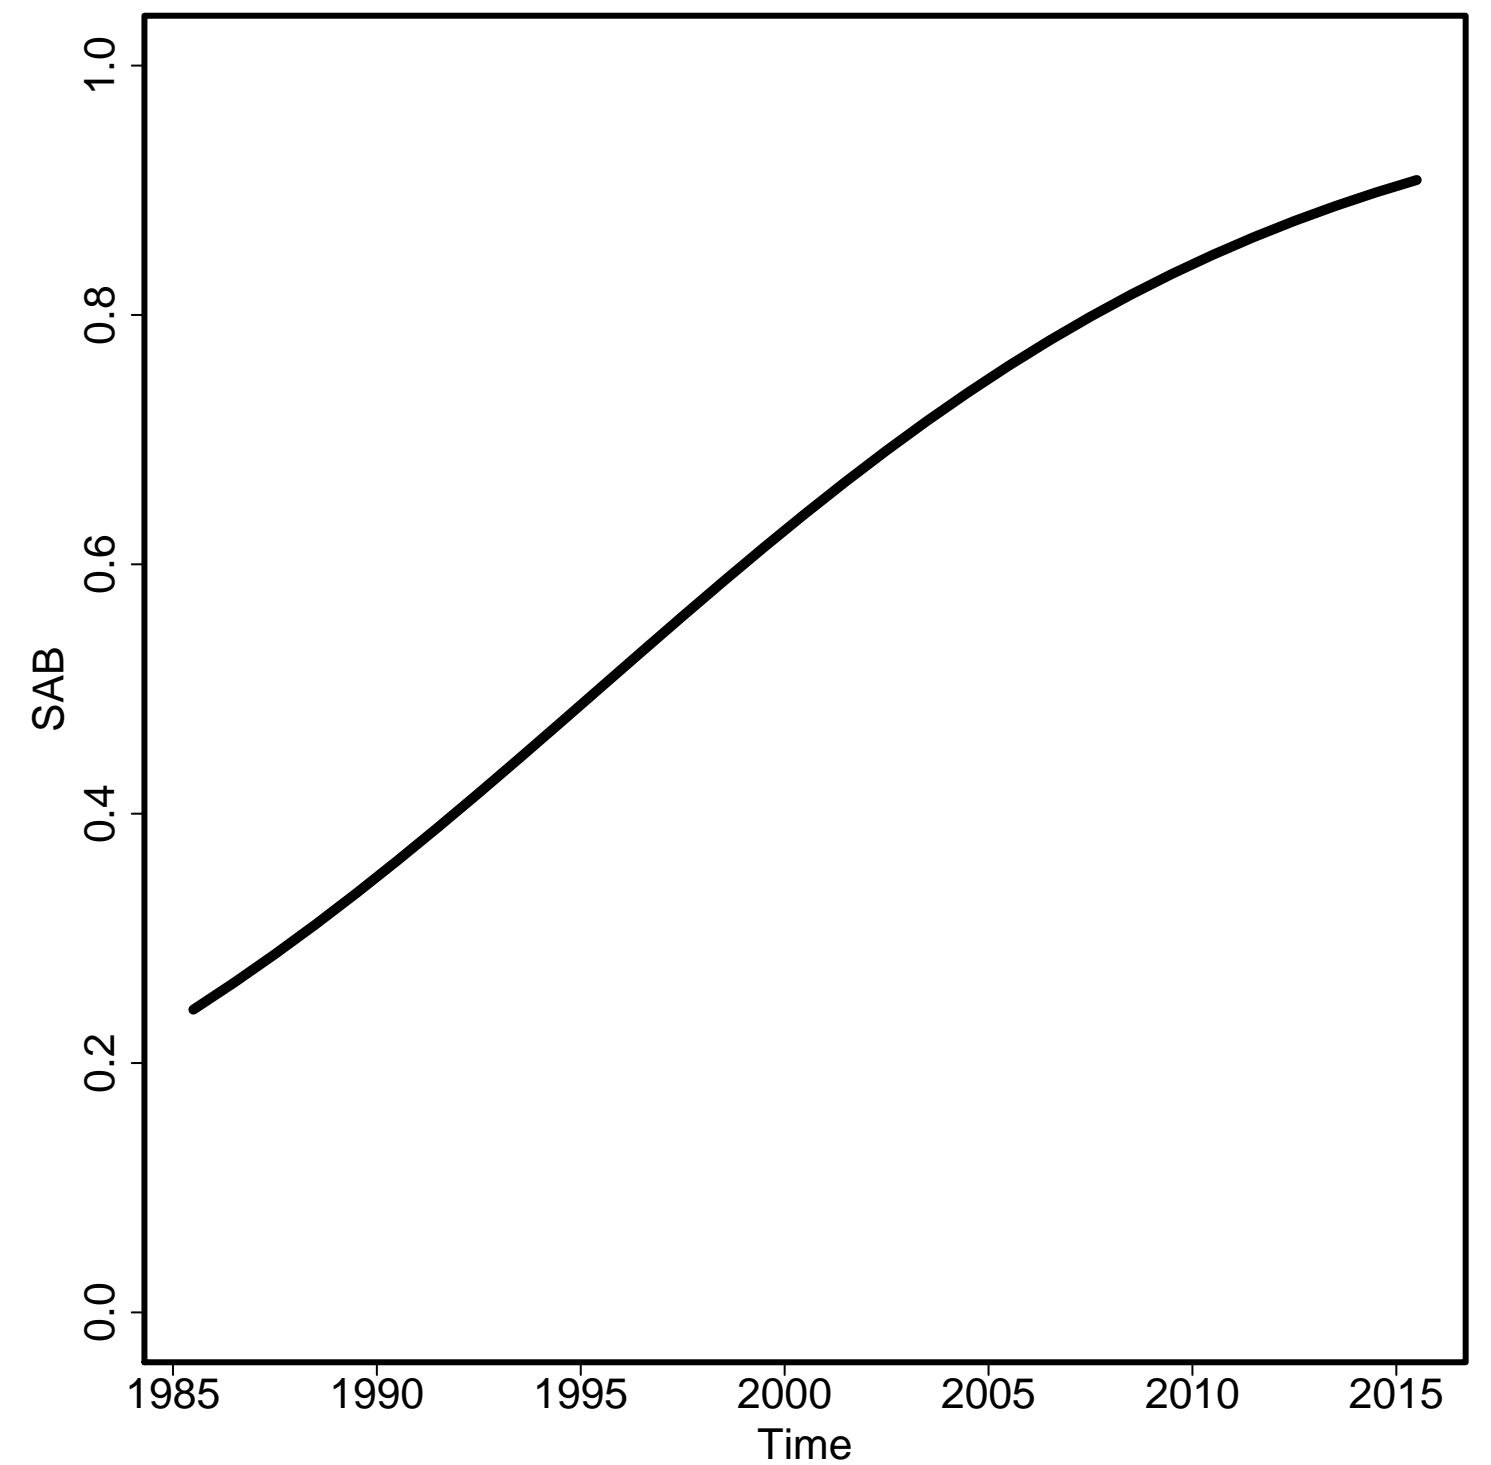

Envelope/Births

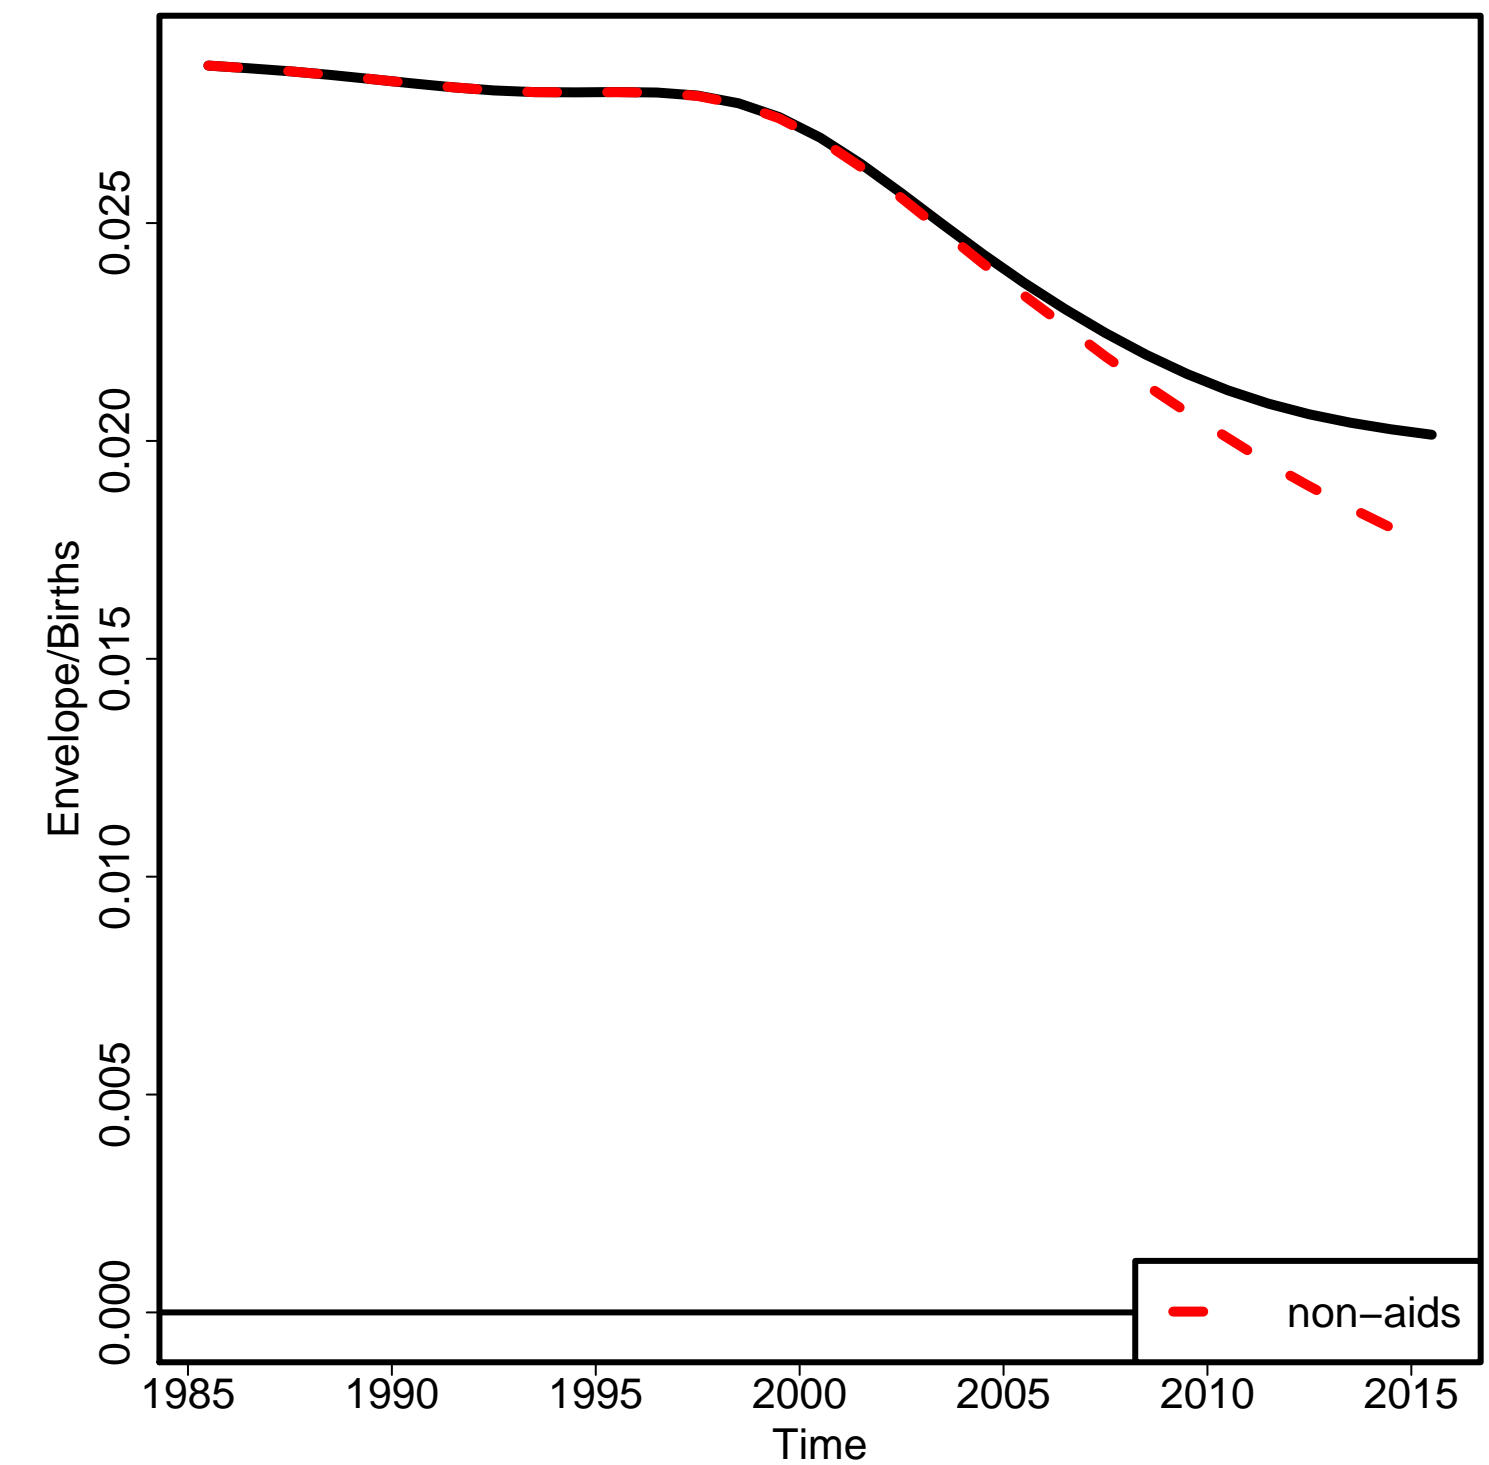

Non-aids MMR

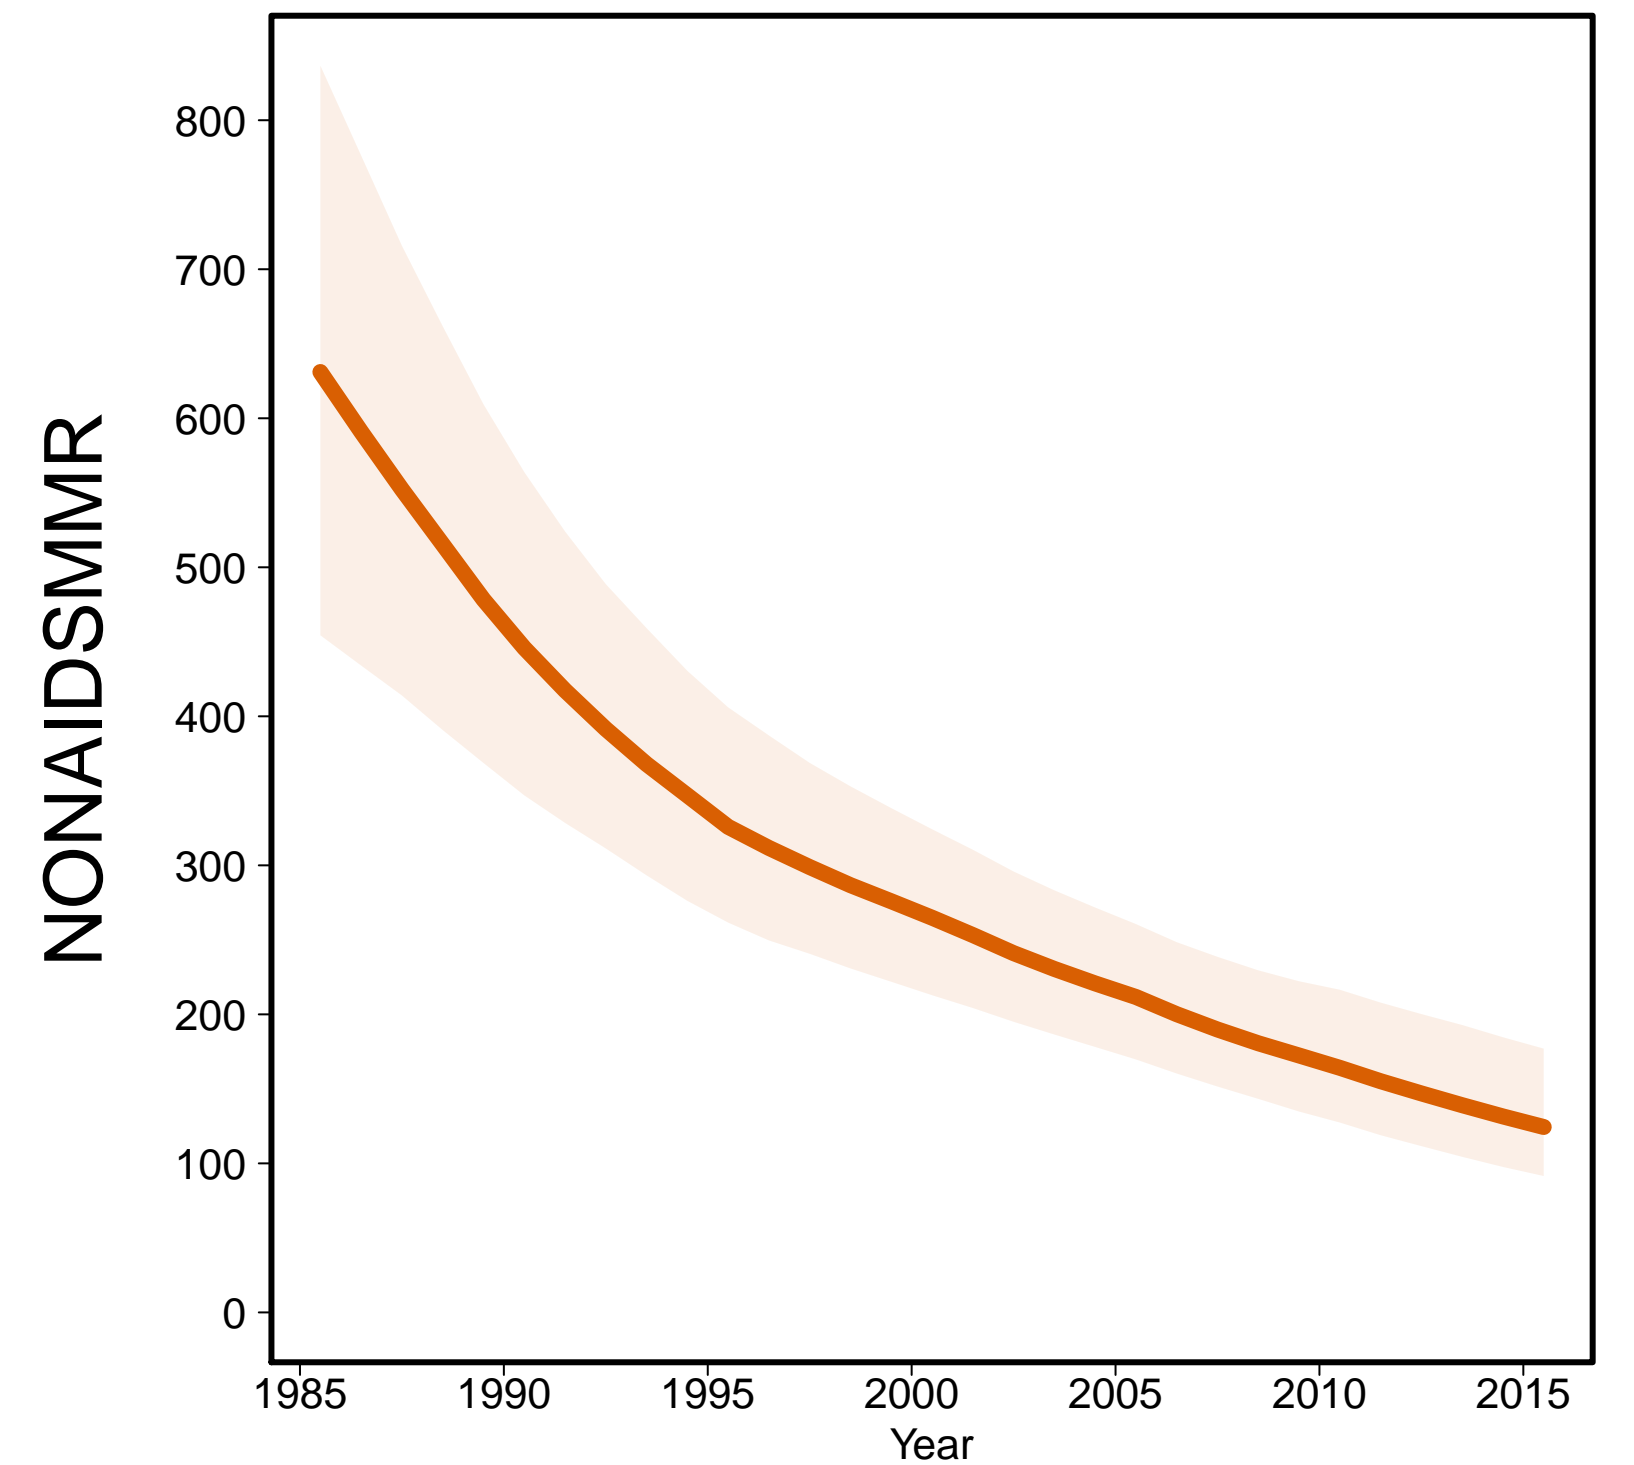

Aids MMR

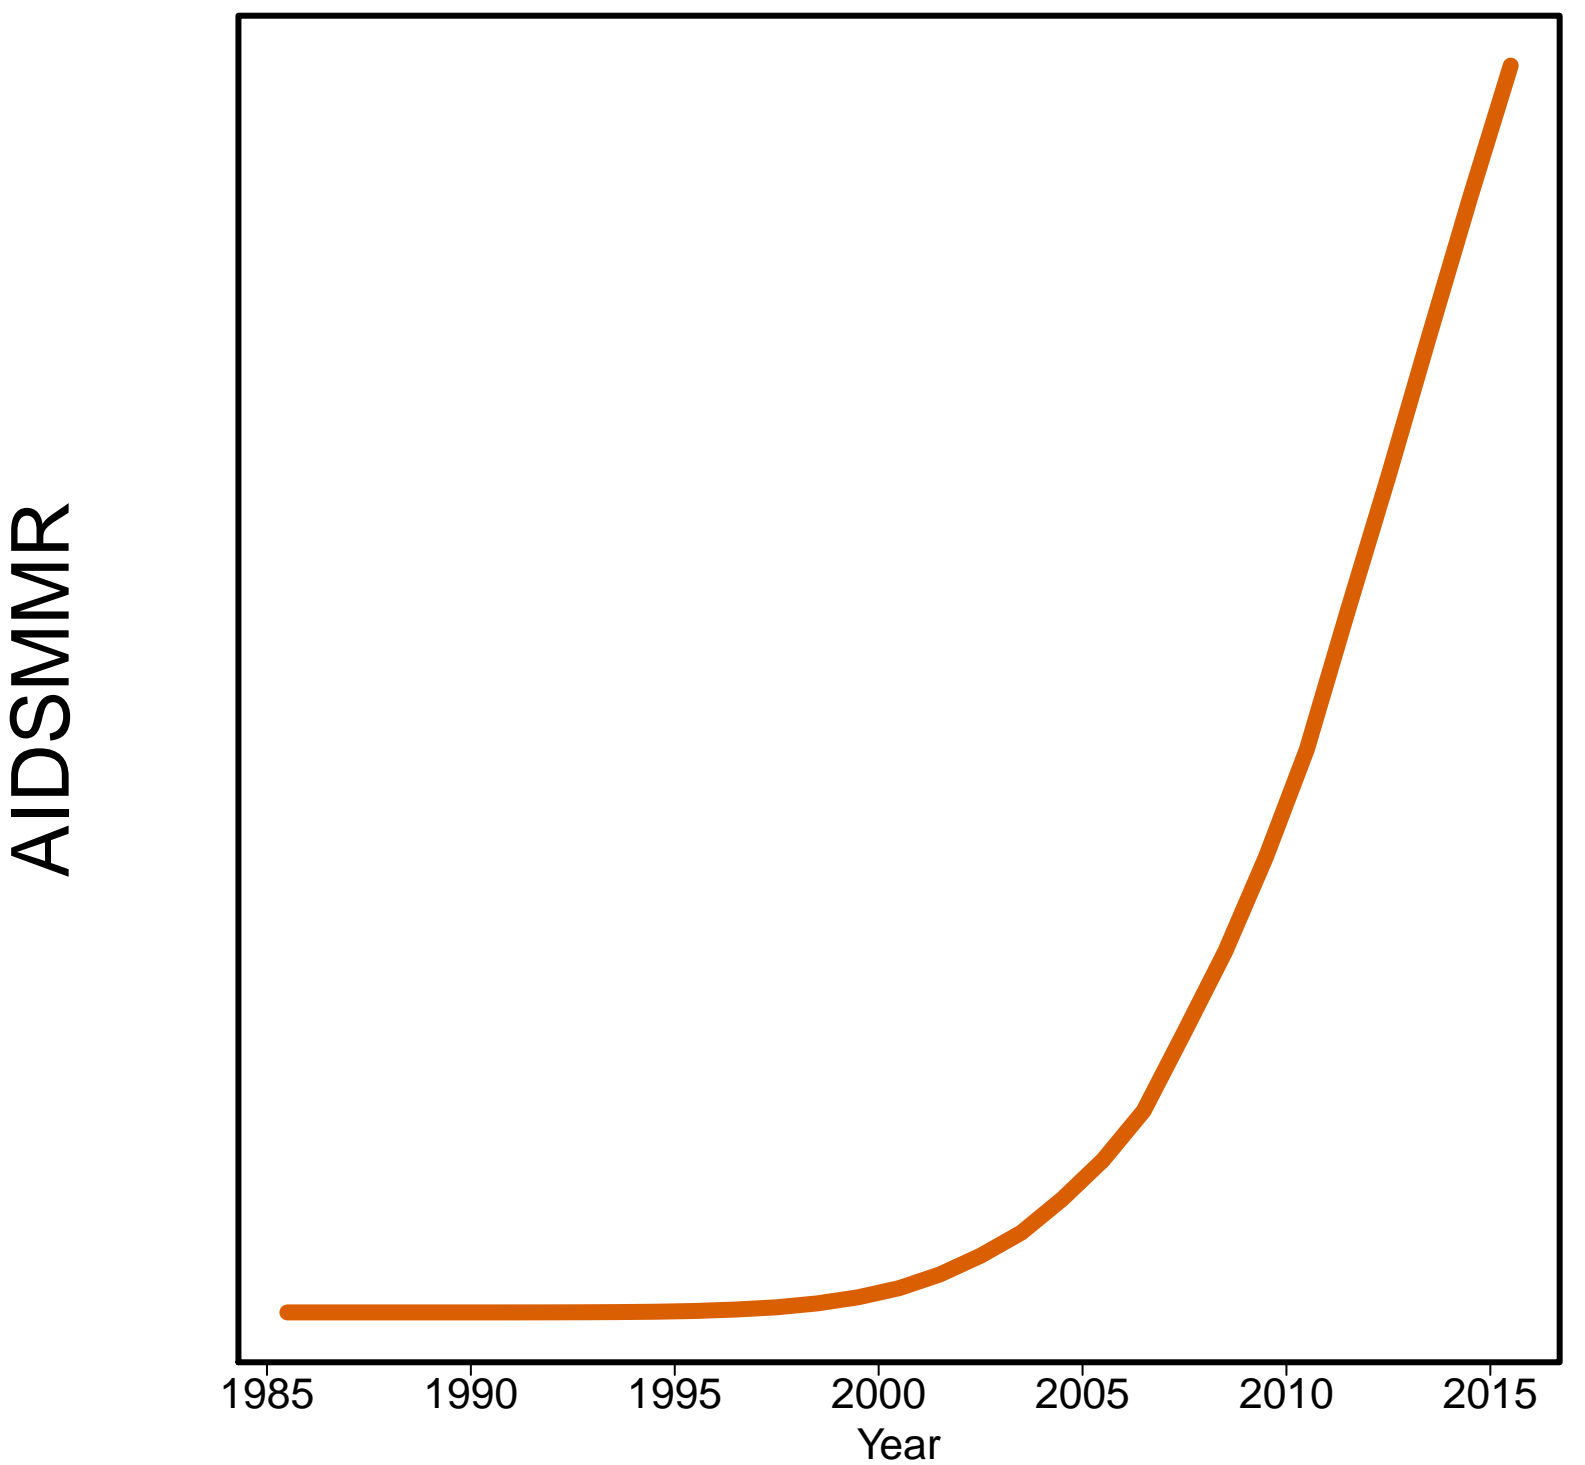

Iran [IRN]  
(Southern Asia)

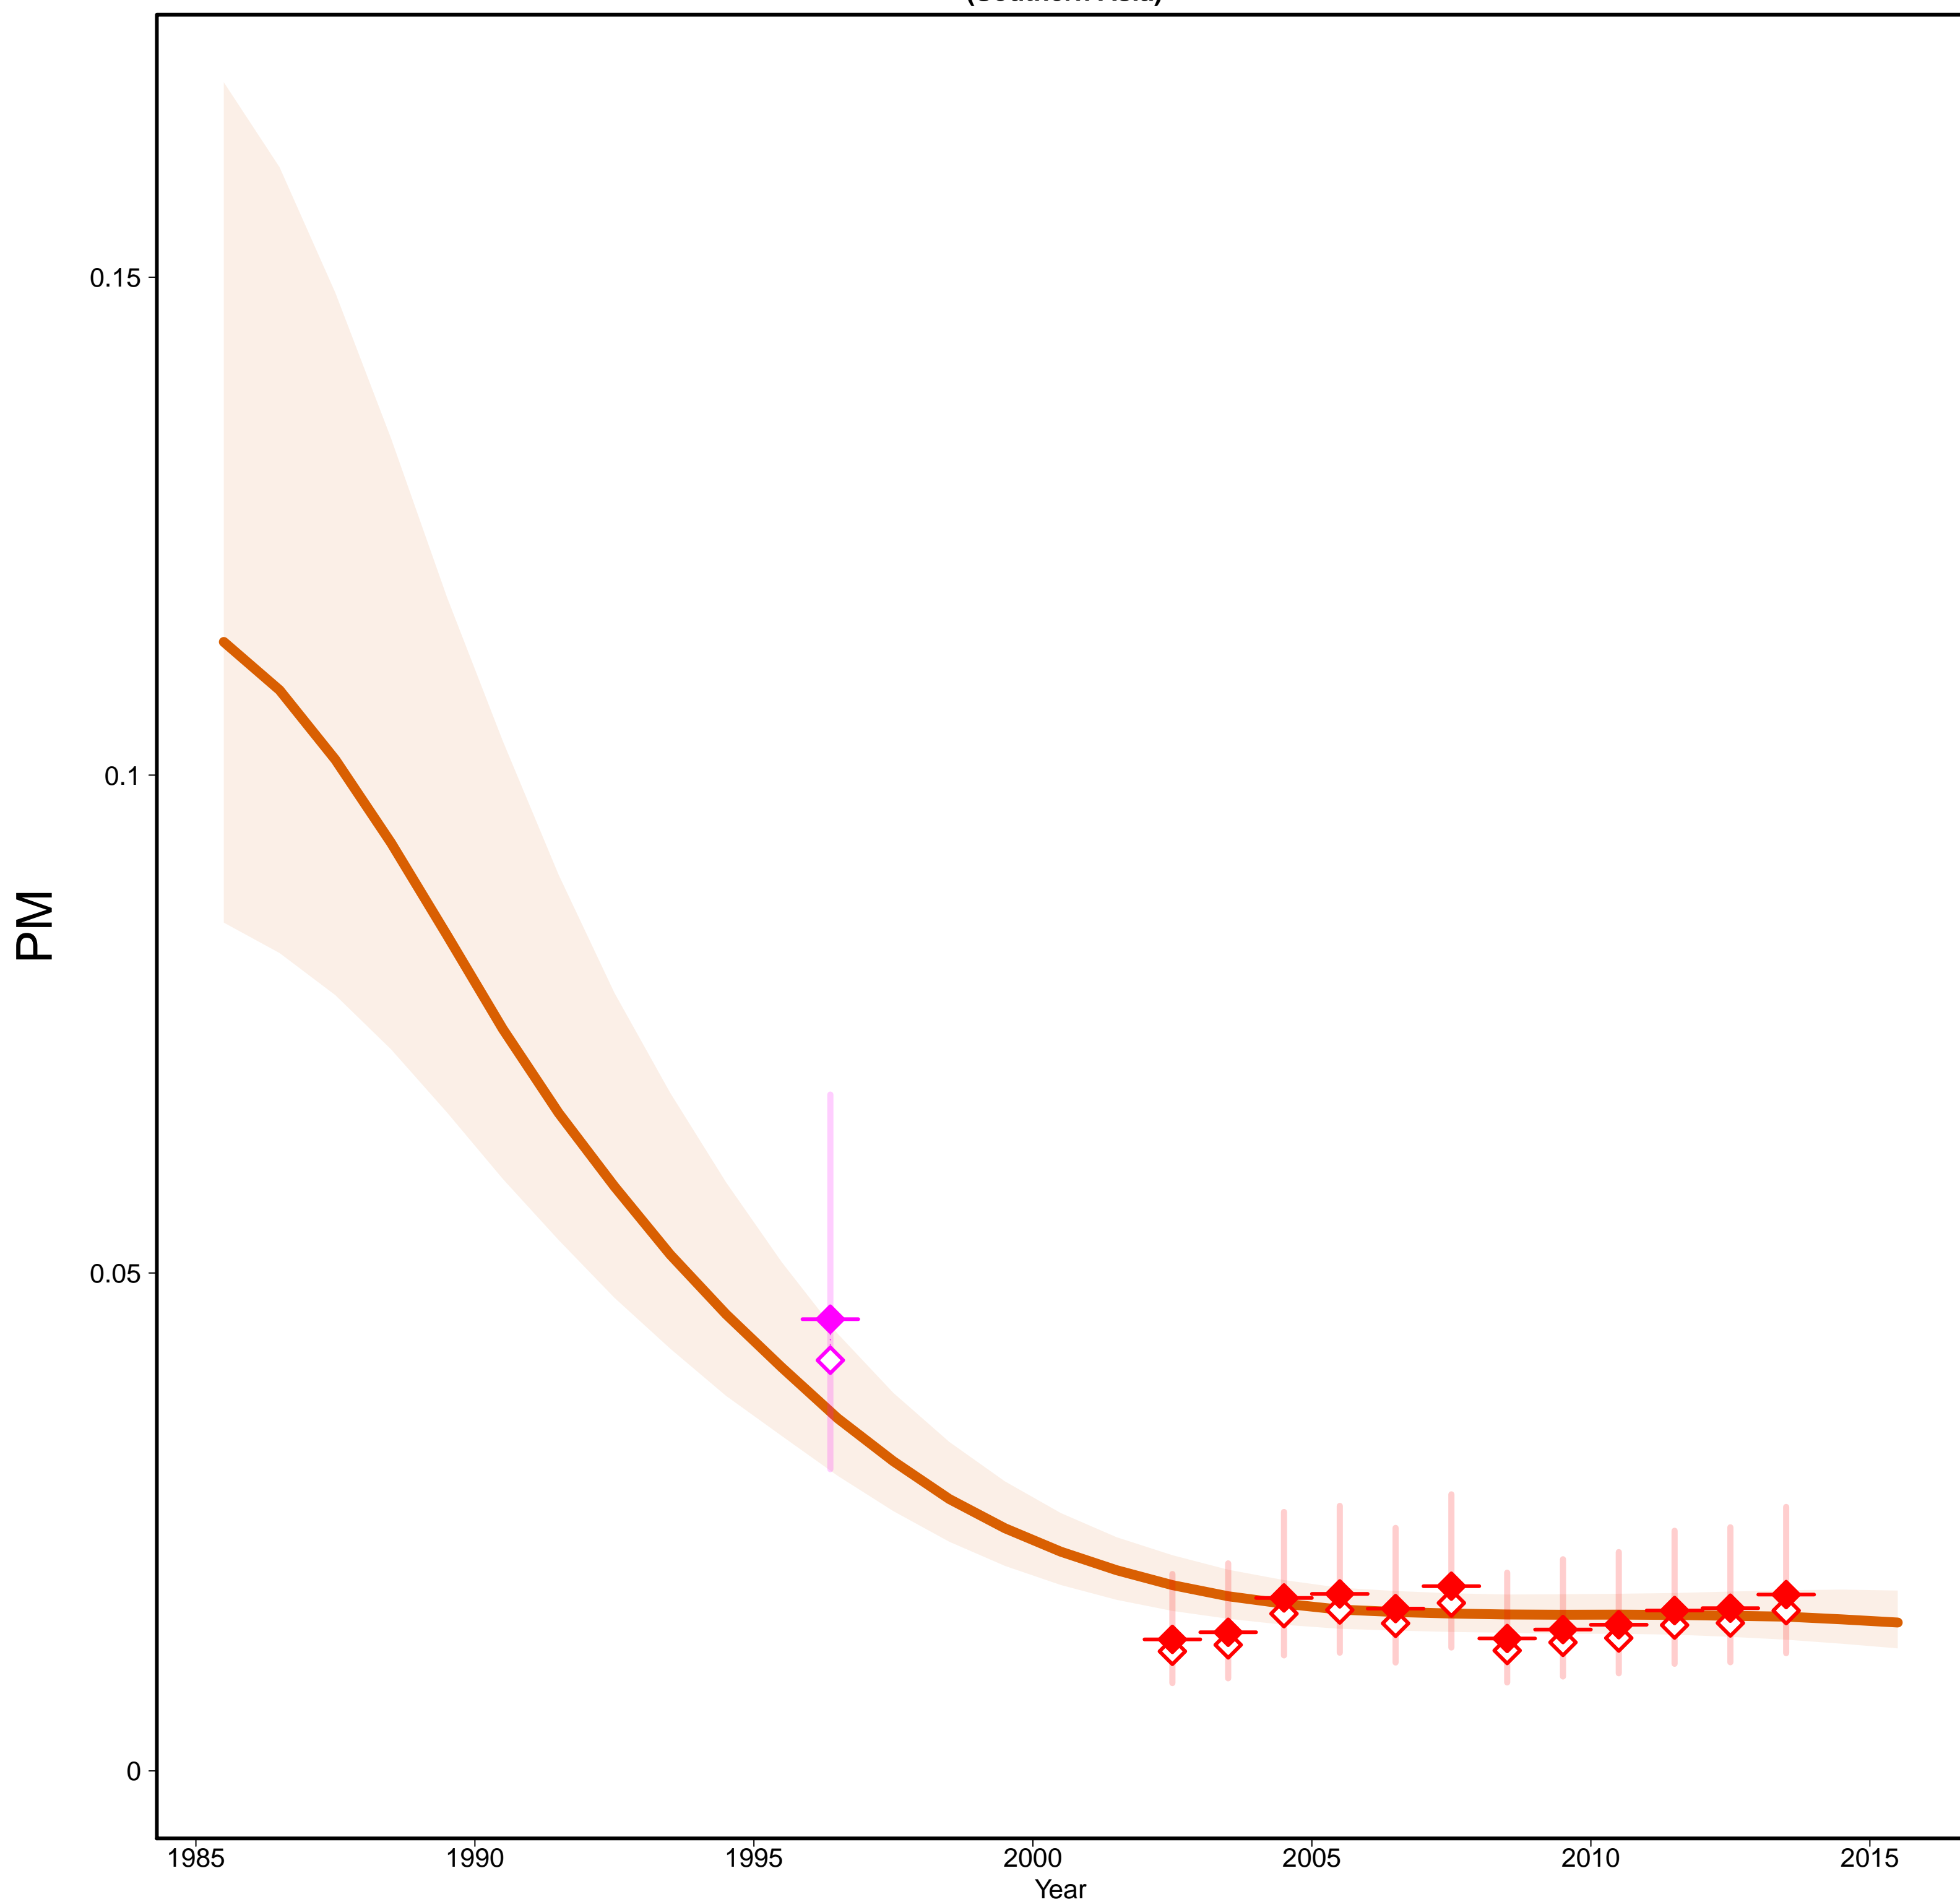

Iran [IRN]  
(Southern Asia)

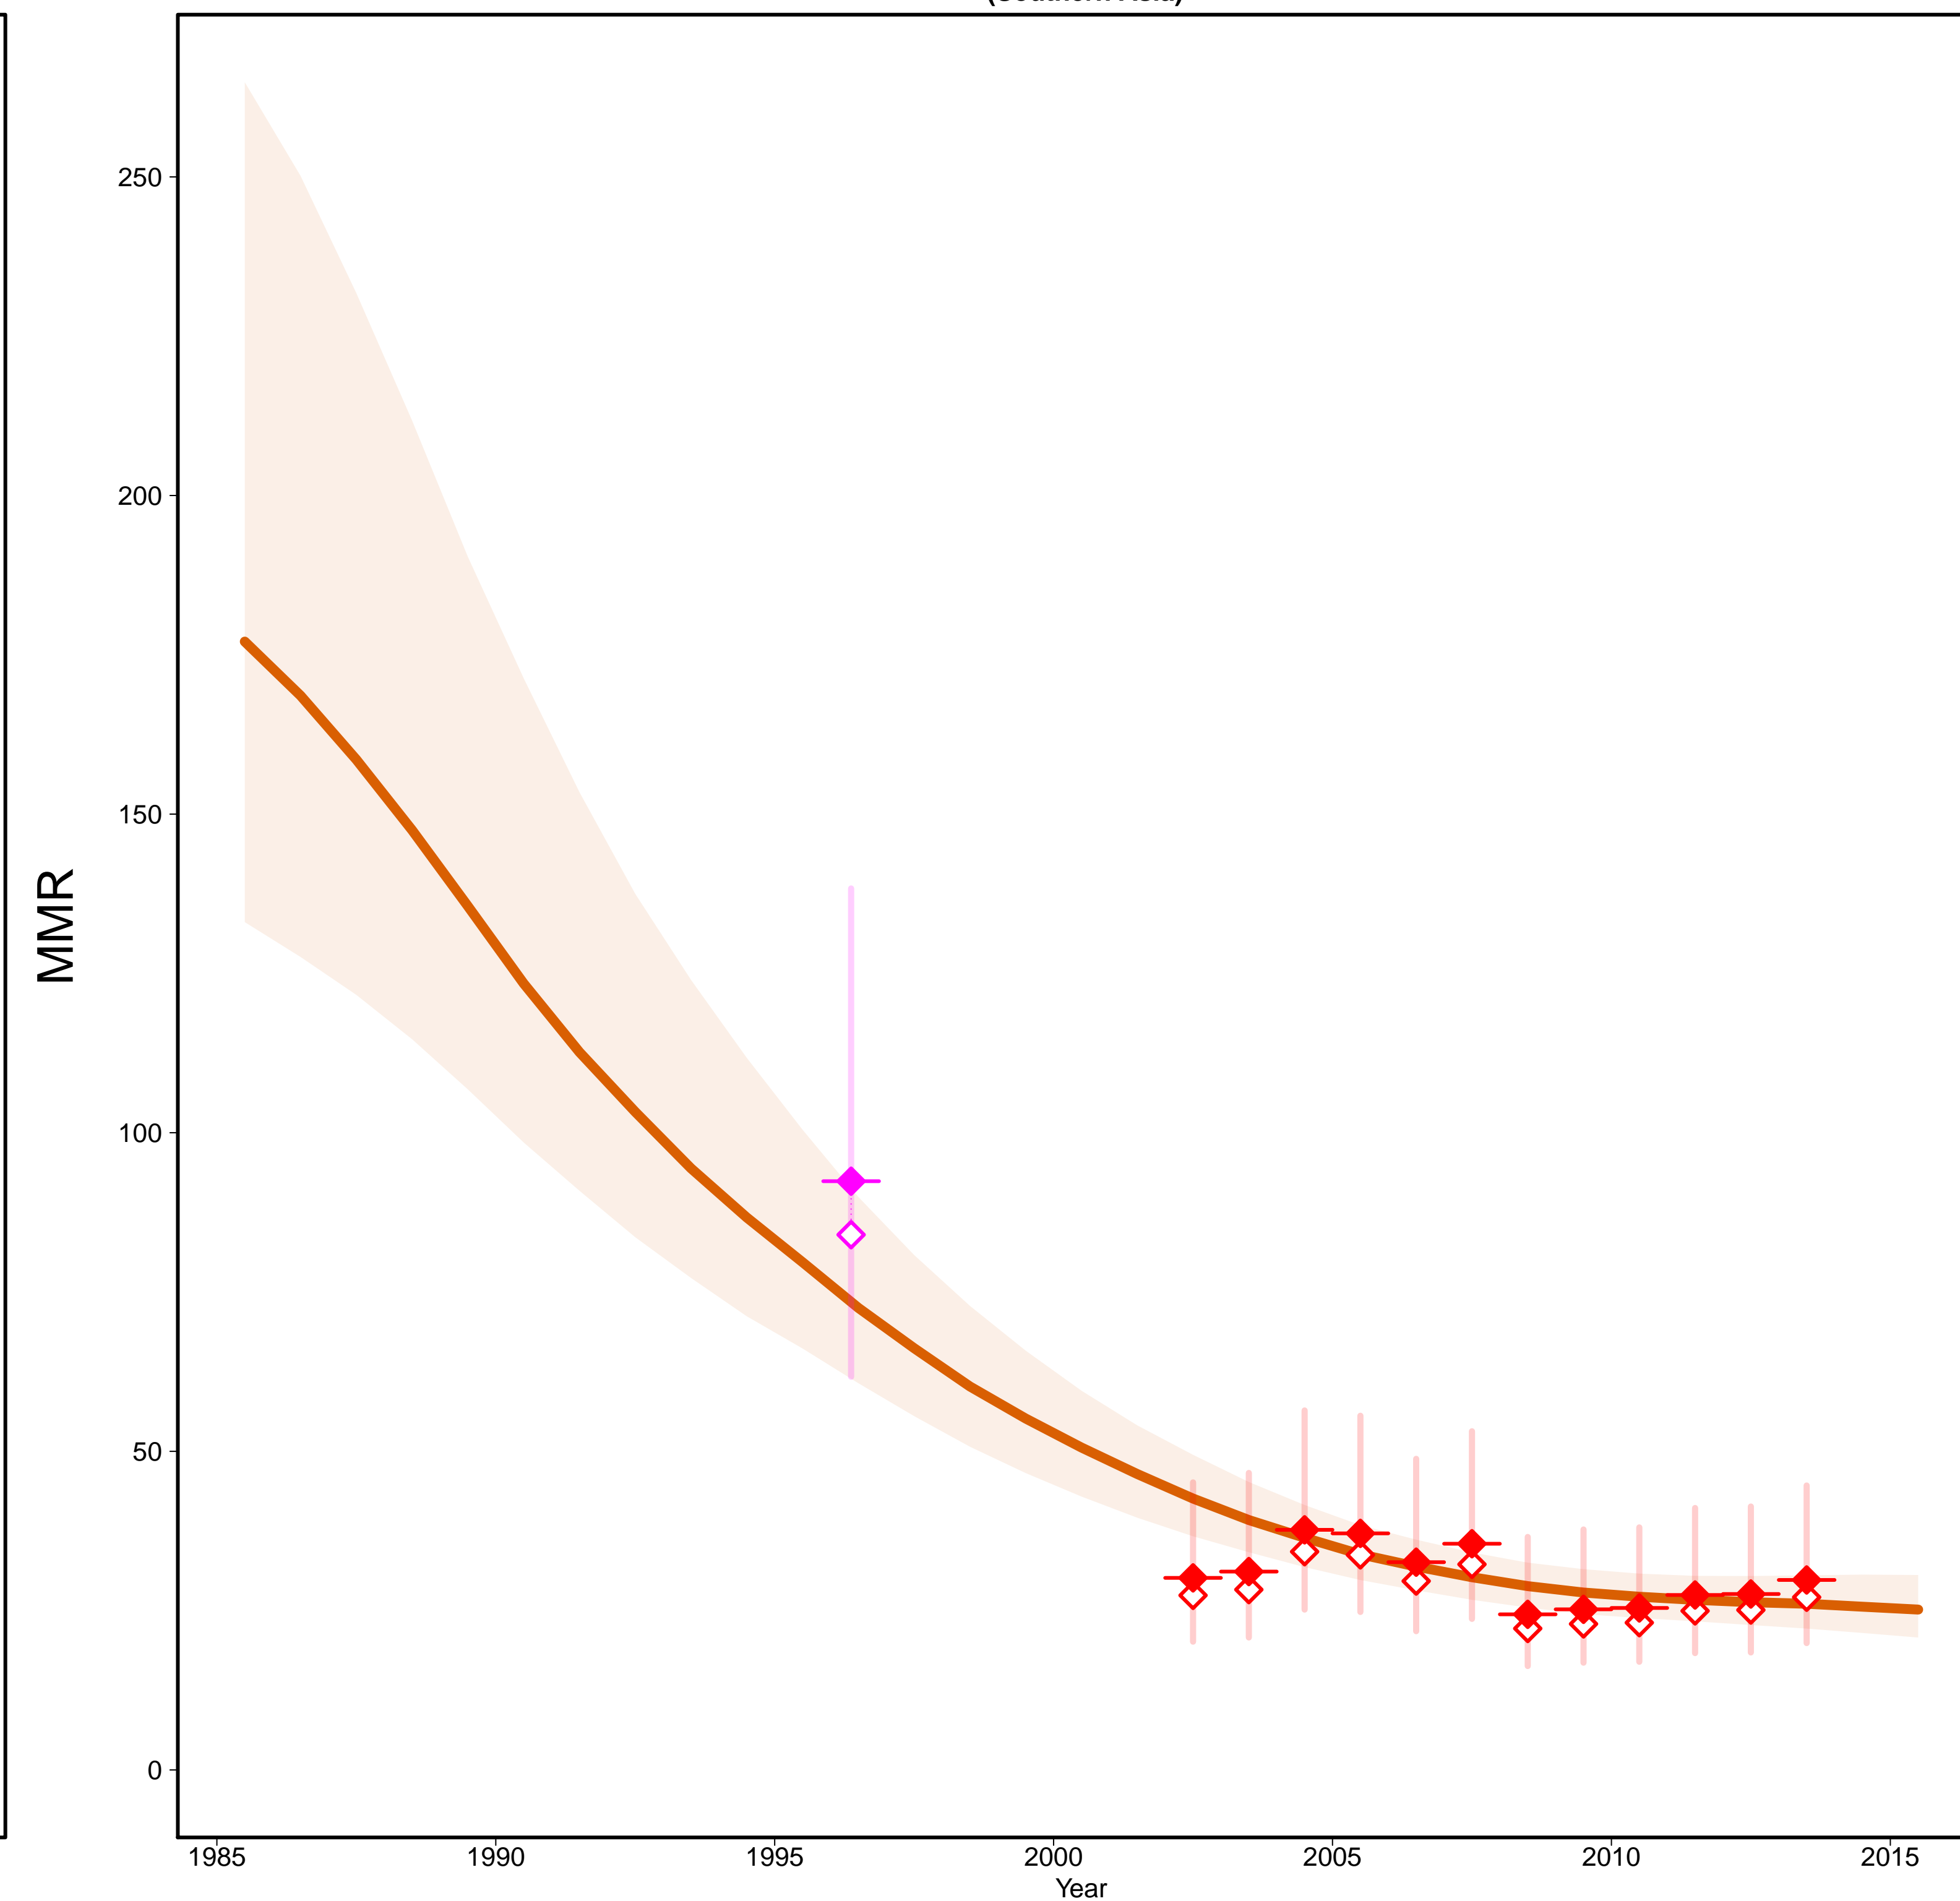

- Estimates —
- MMR Database 2015 —
- ◇ Observed Data
- ◆ Adjusted Data
- Data type —
- ◆ Census
- ◆ Misc. studies

Gross Domestic Product

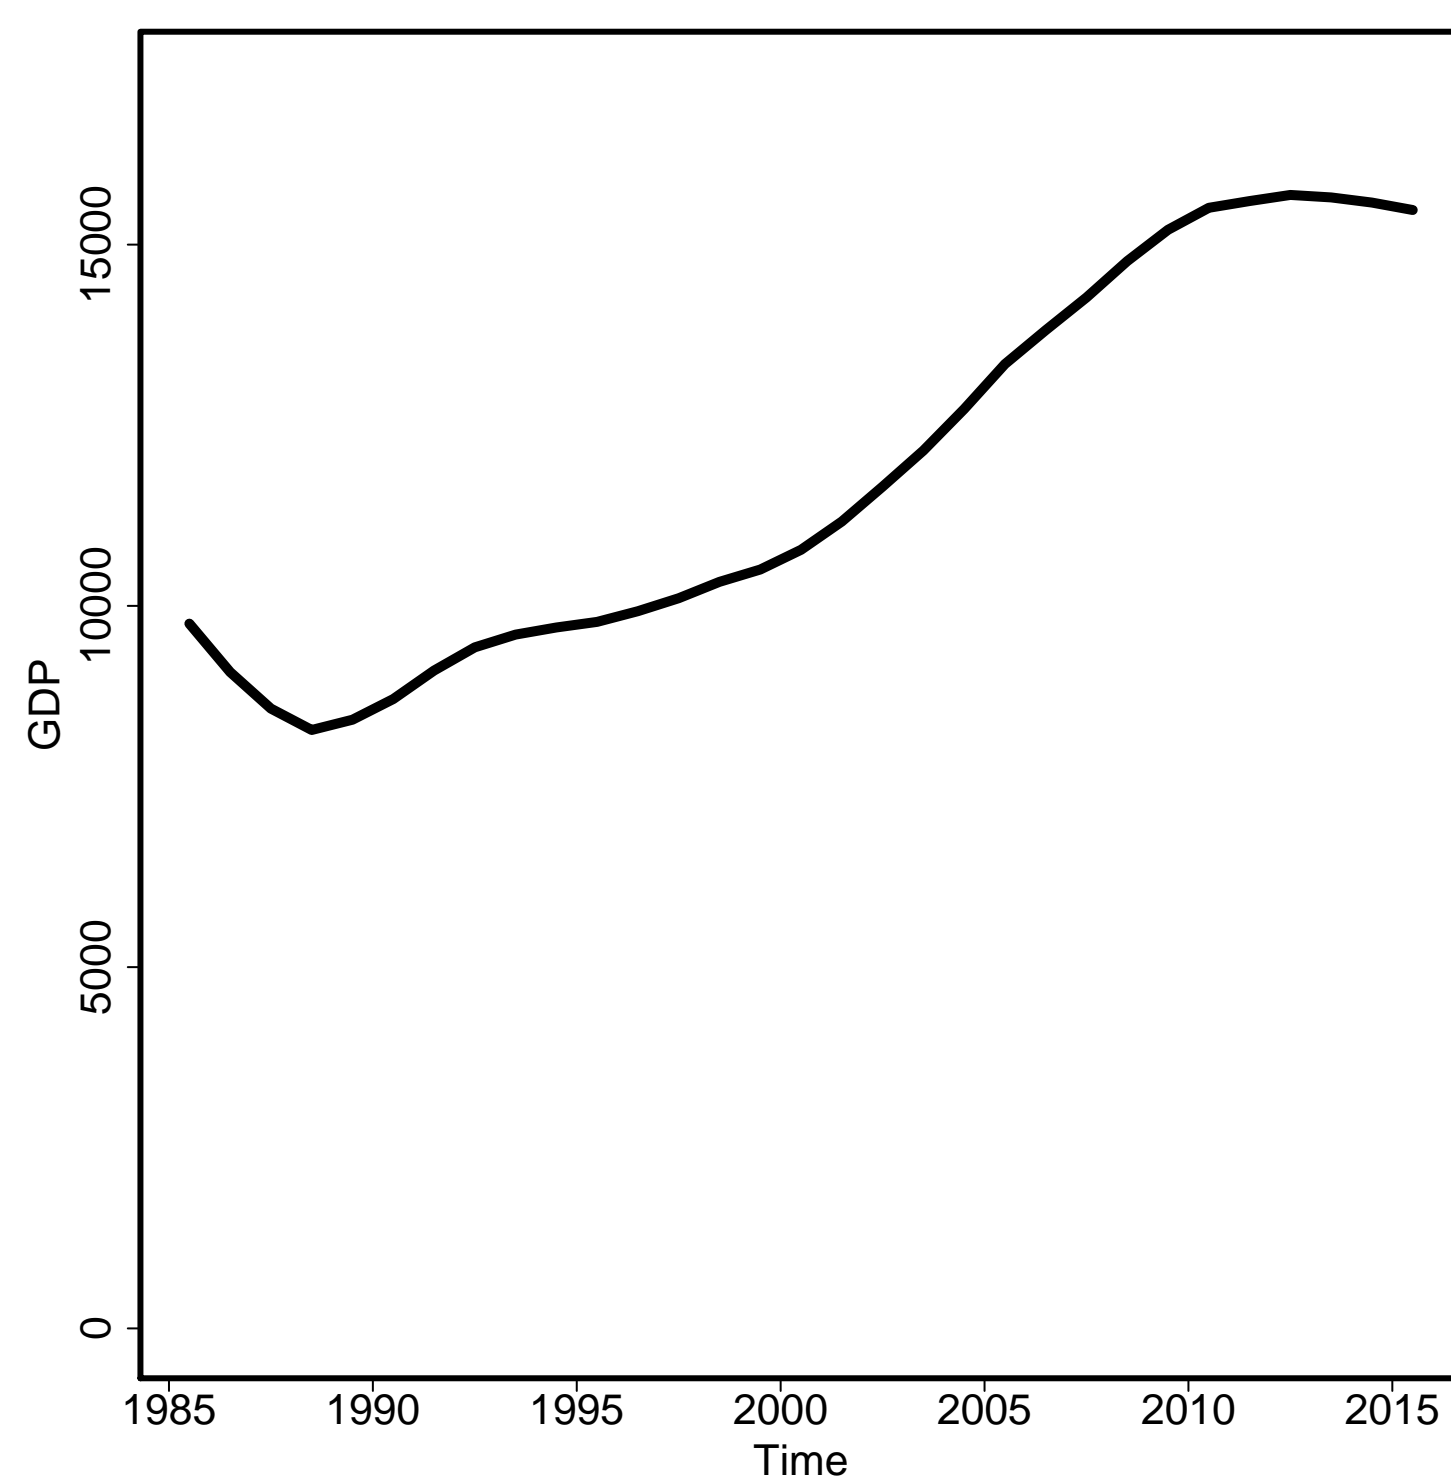

General Fertility Rate

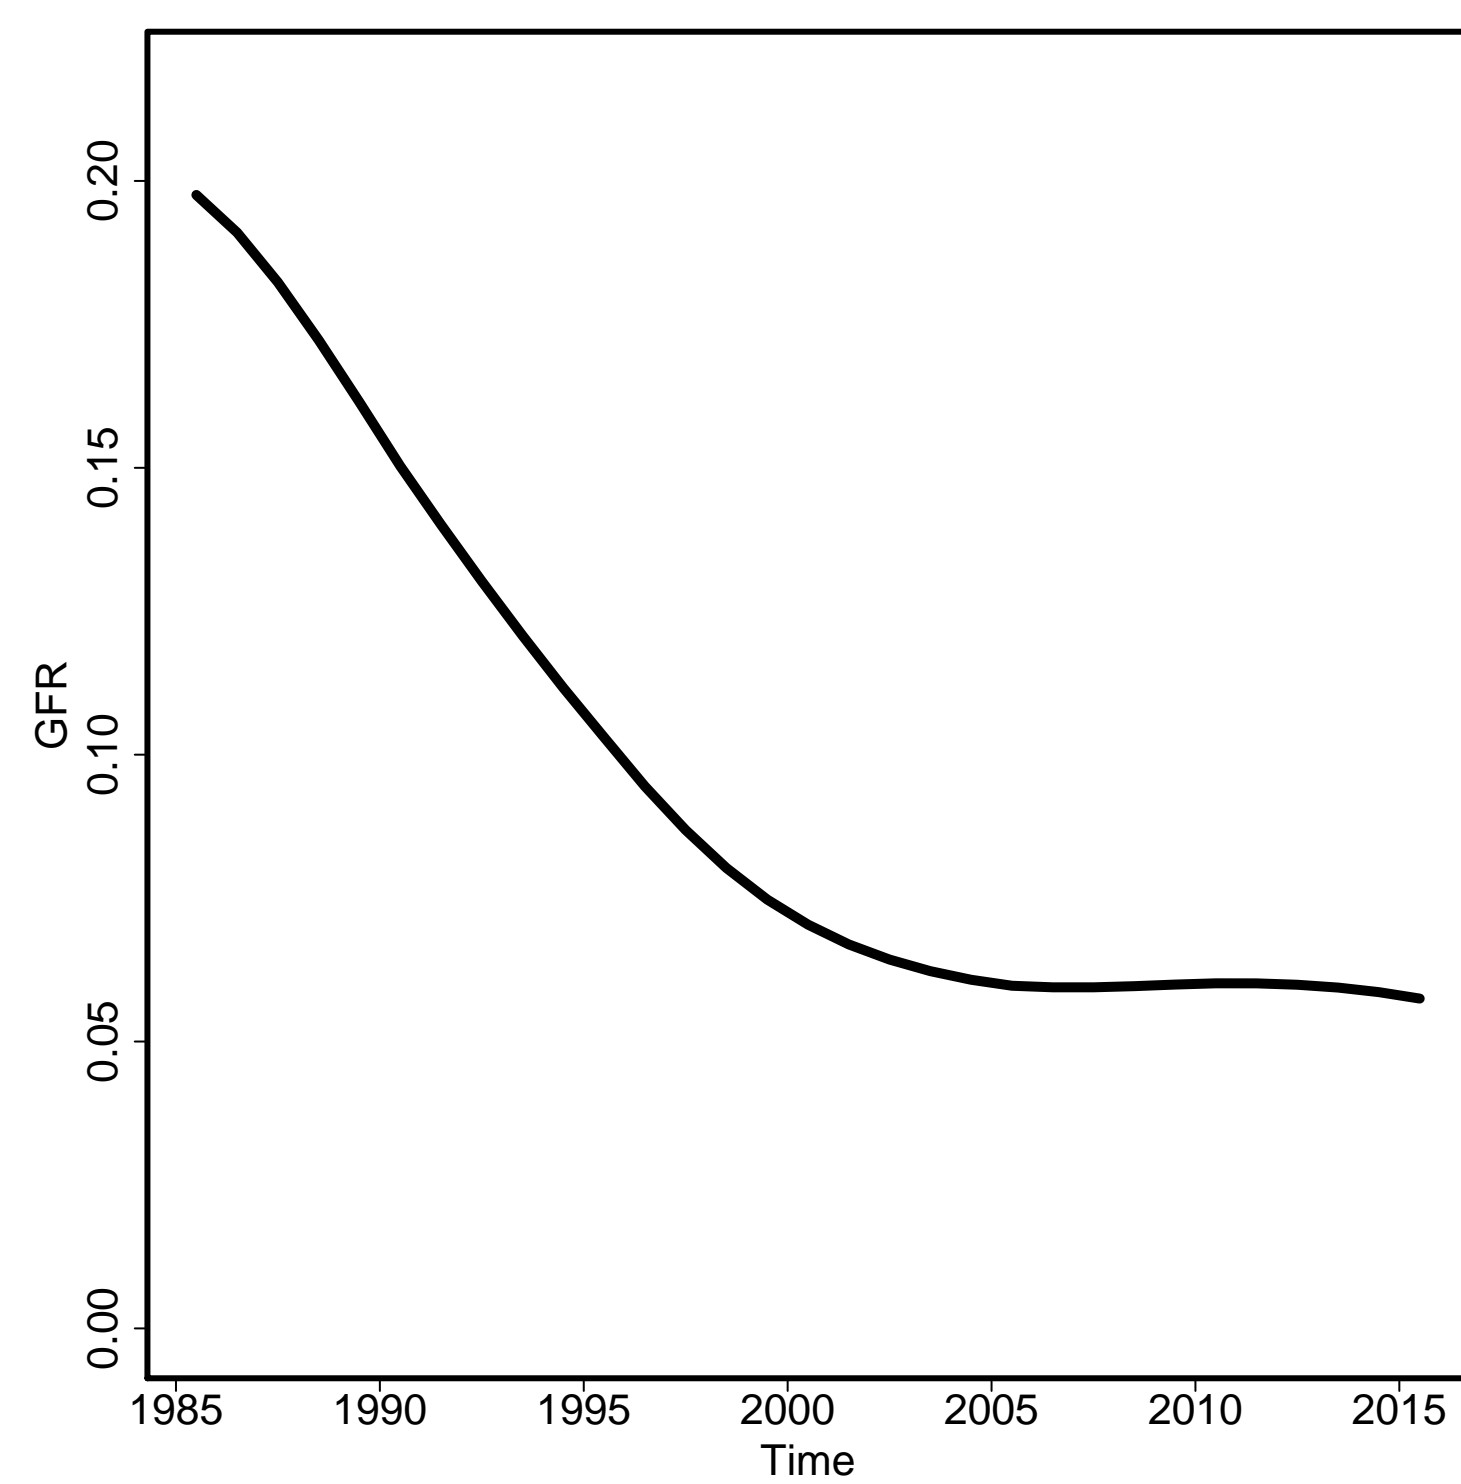

Skilled Attendance to Birth

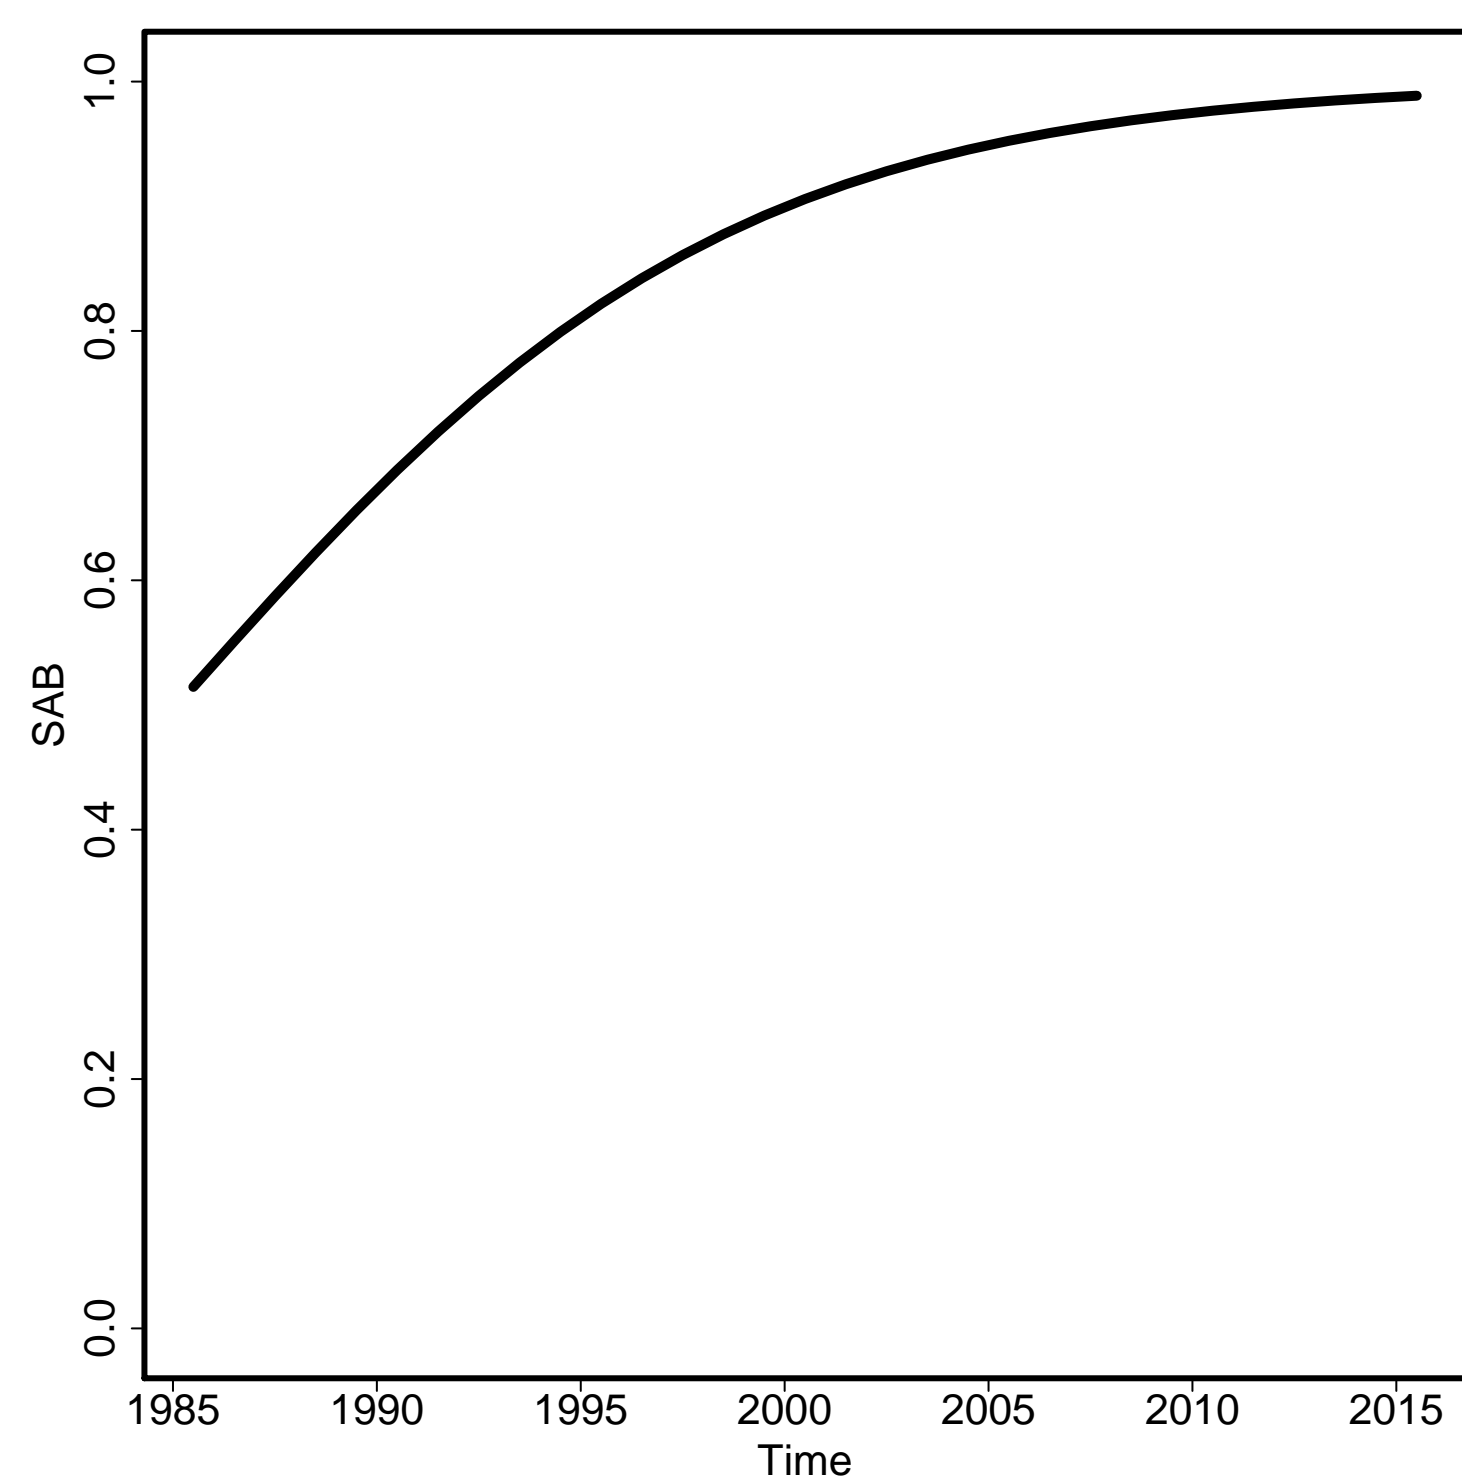

Envelope/Births

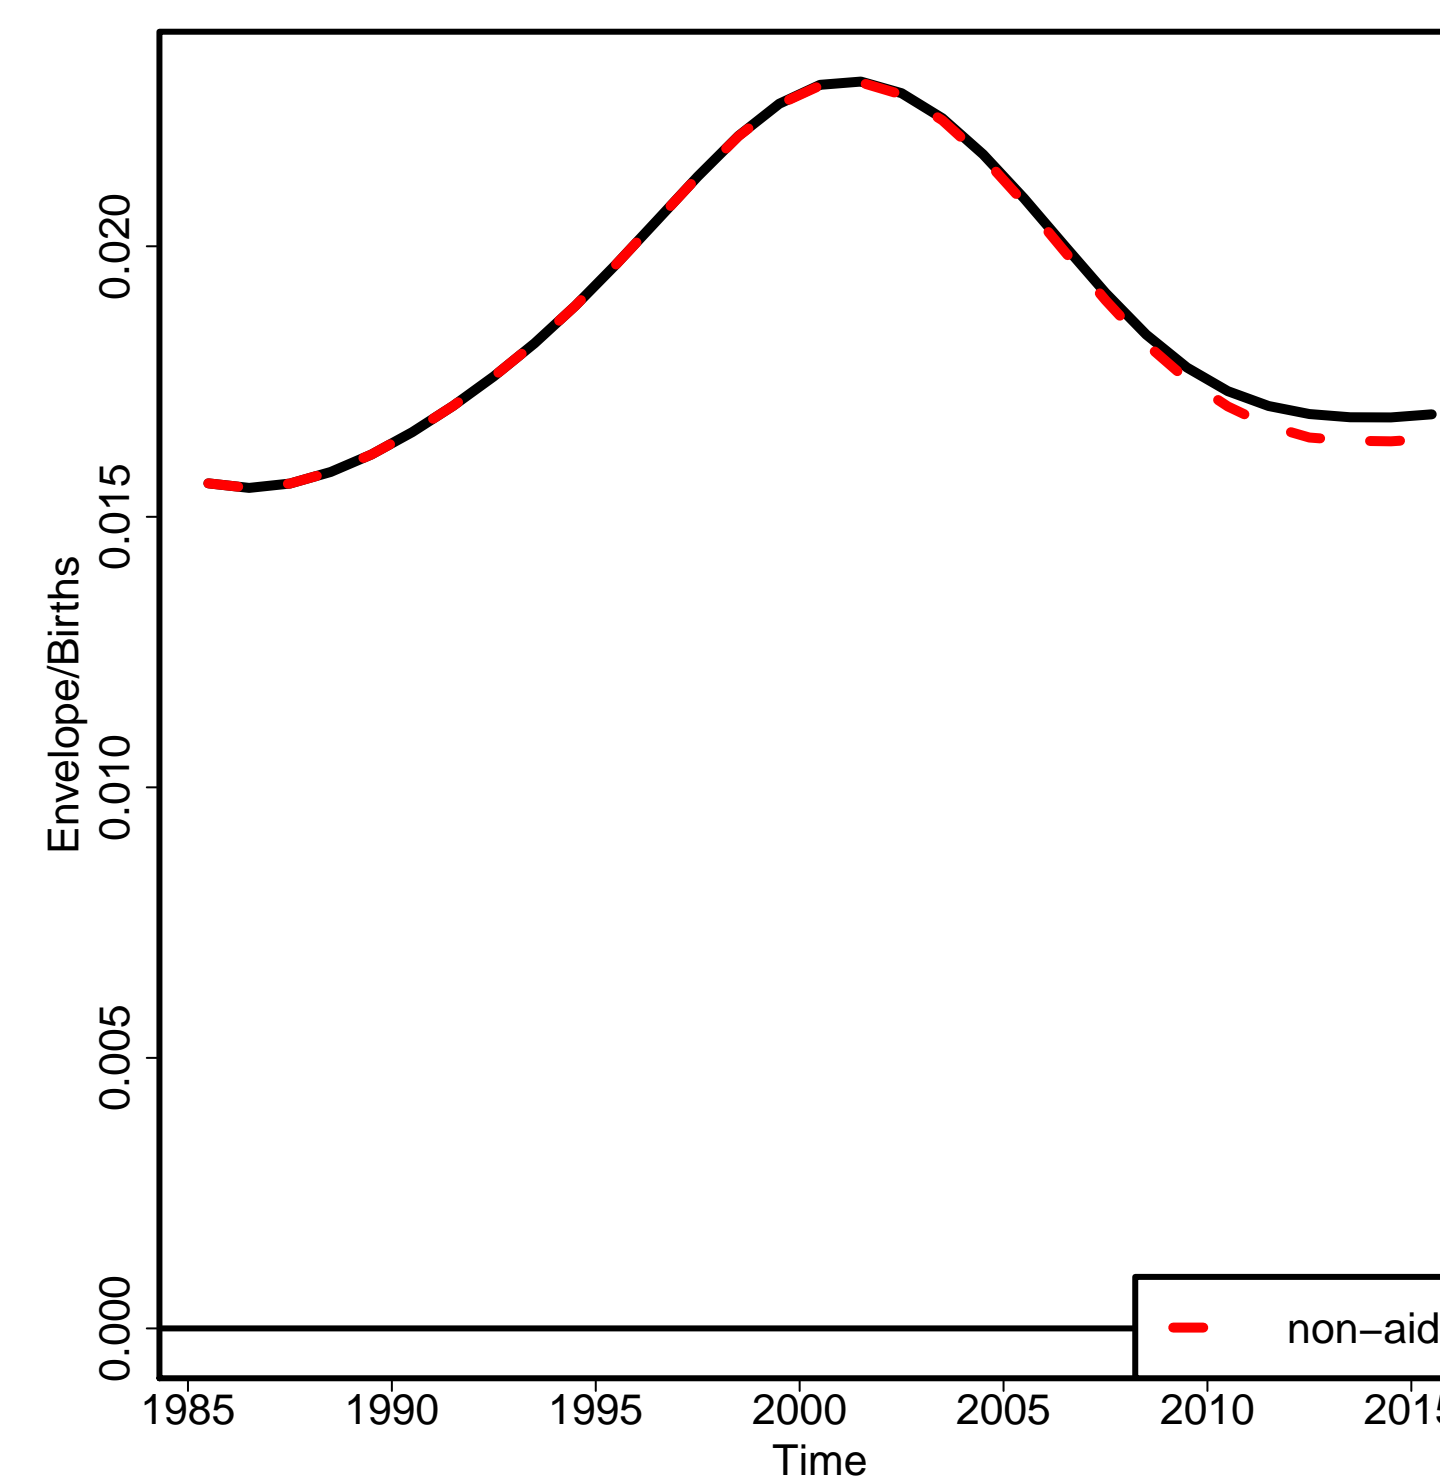

Non-aids MMR

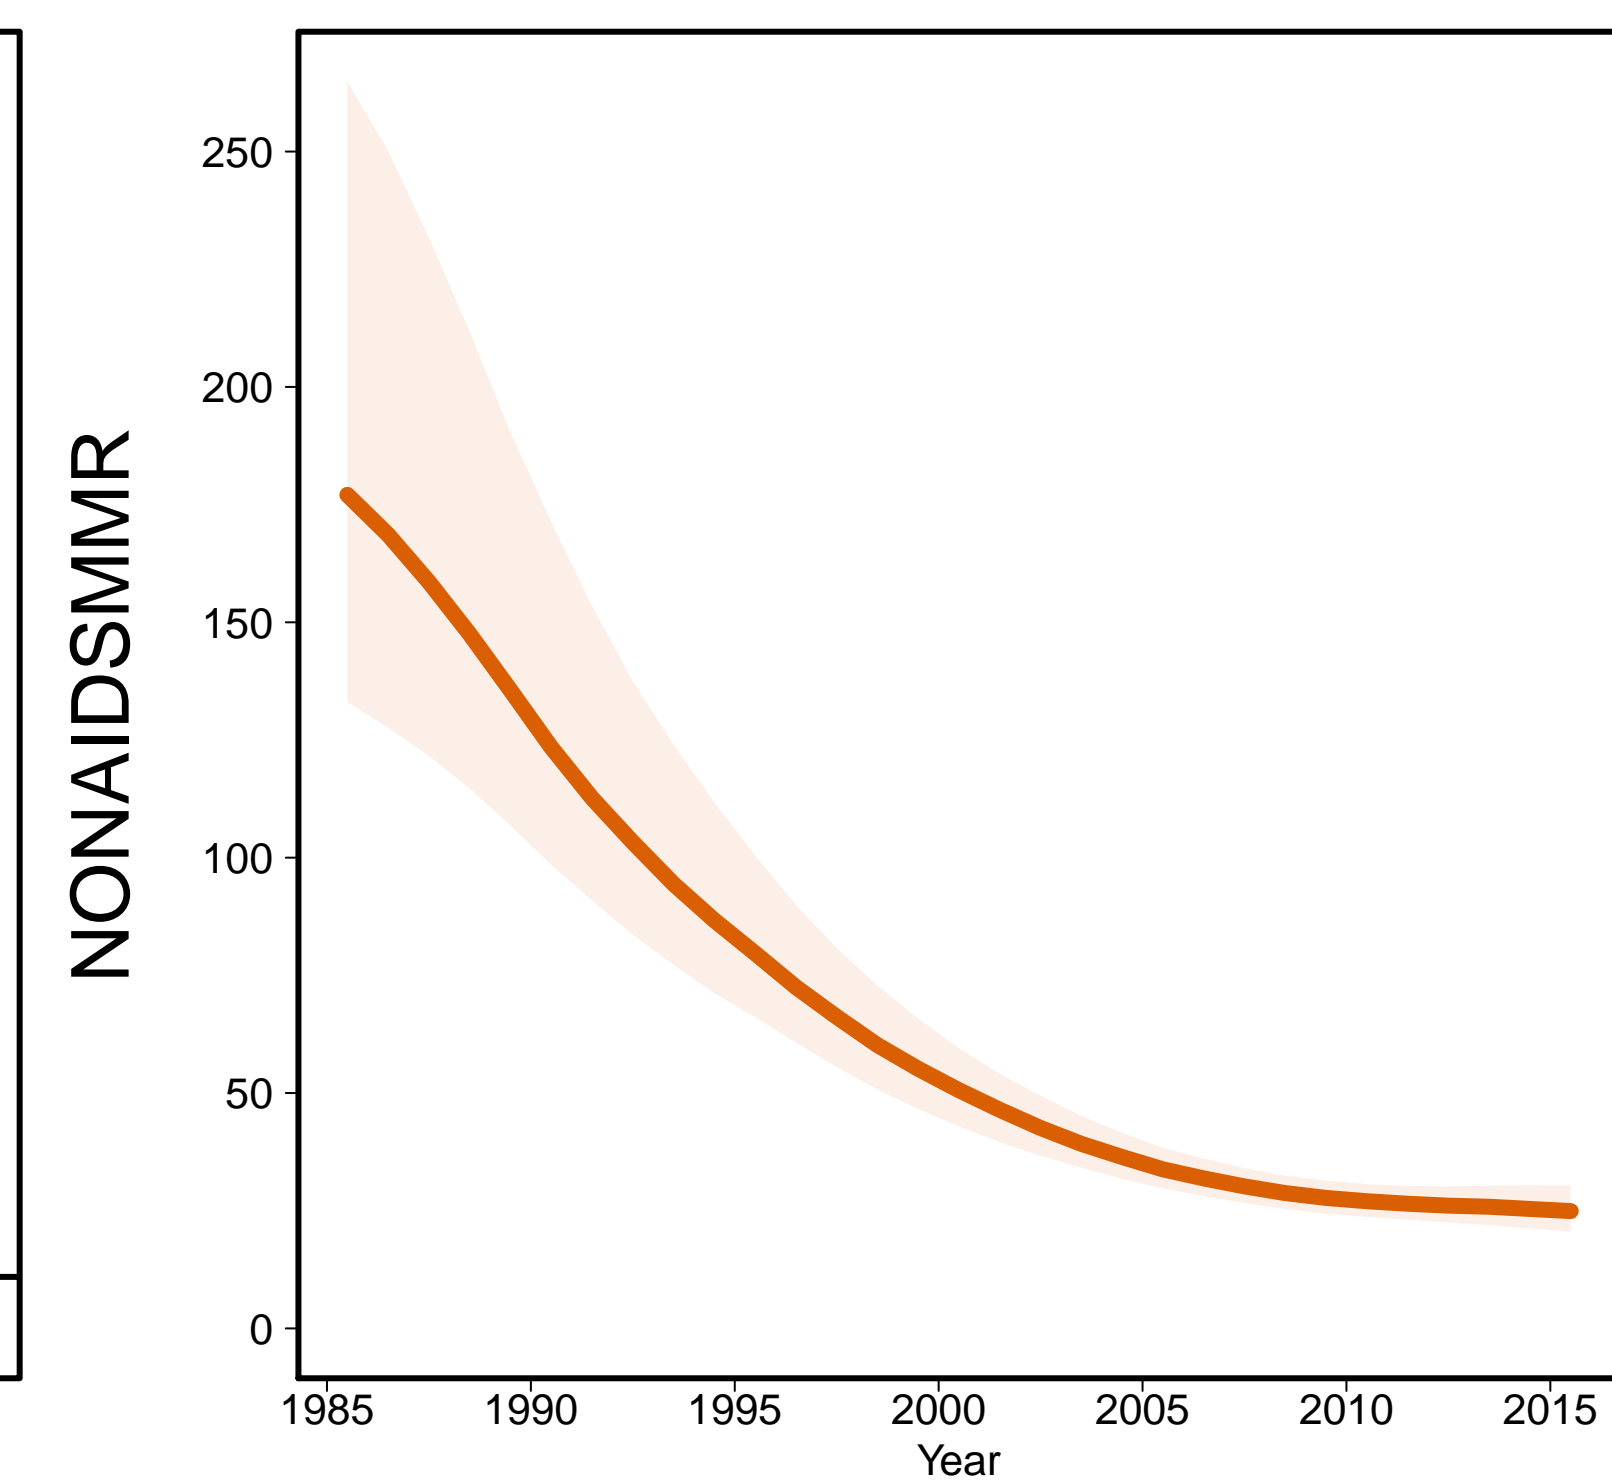

Aids MMR

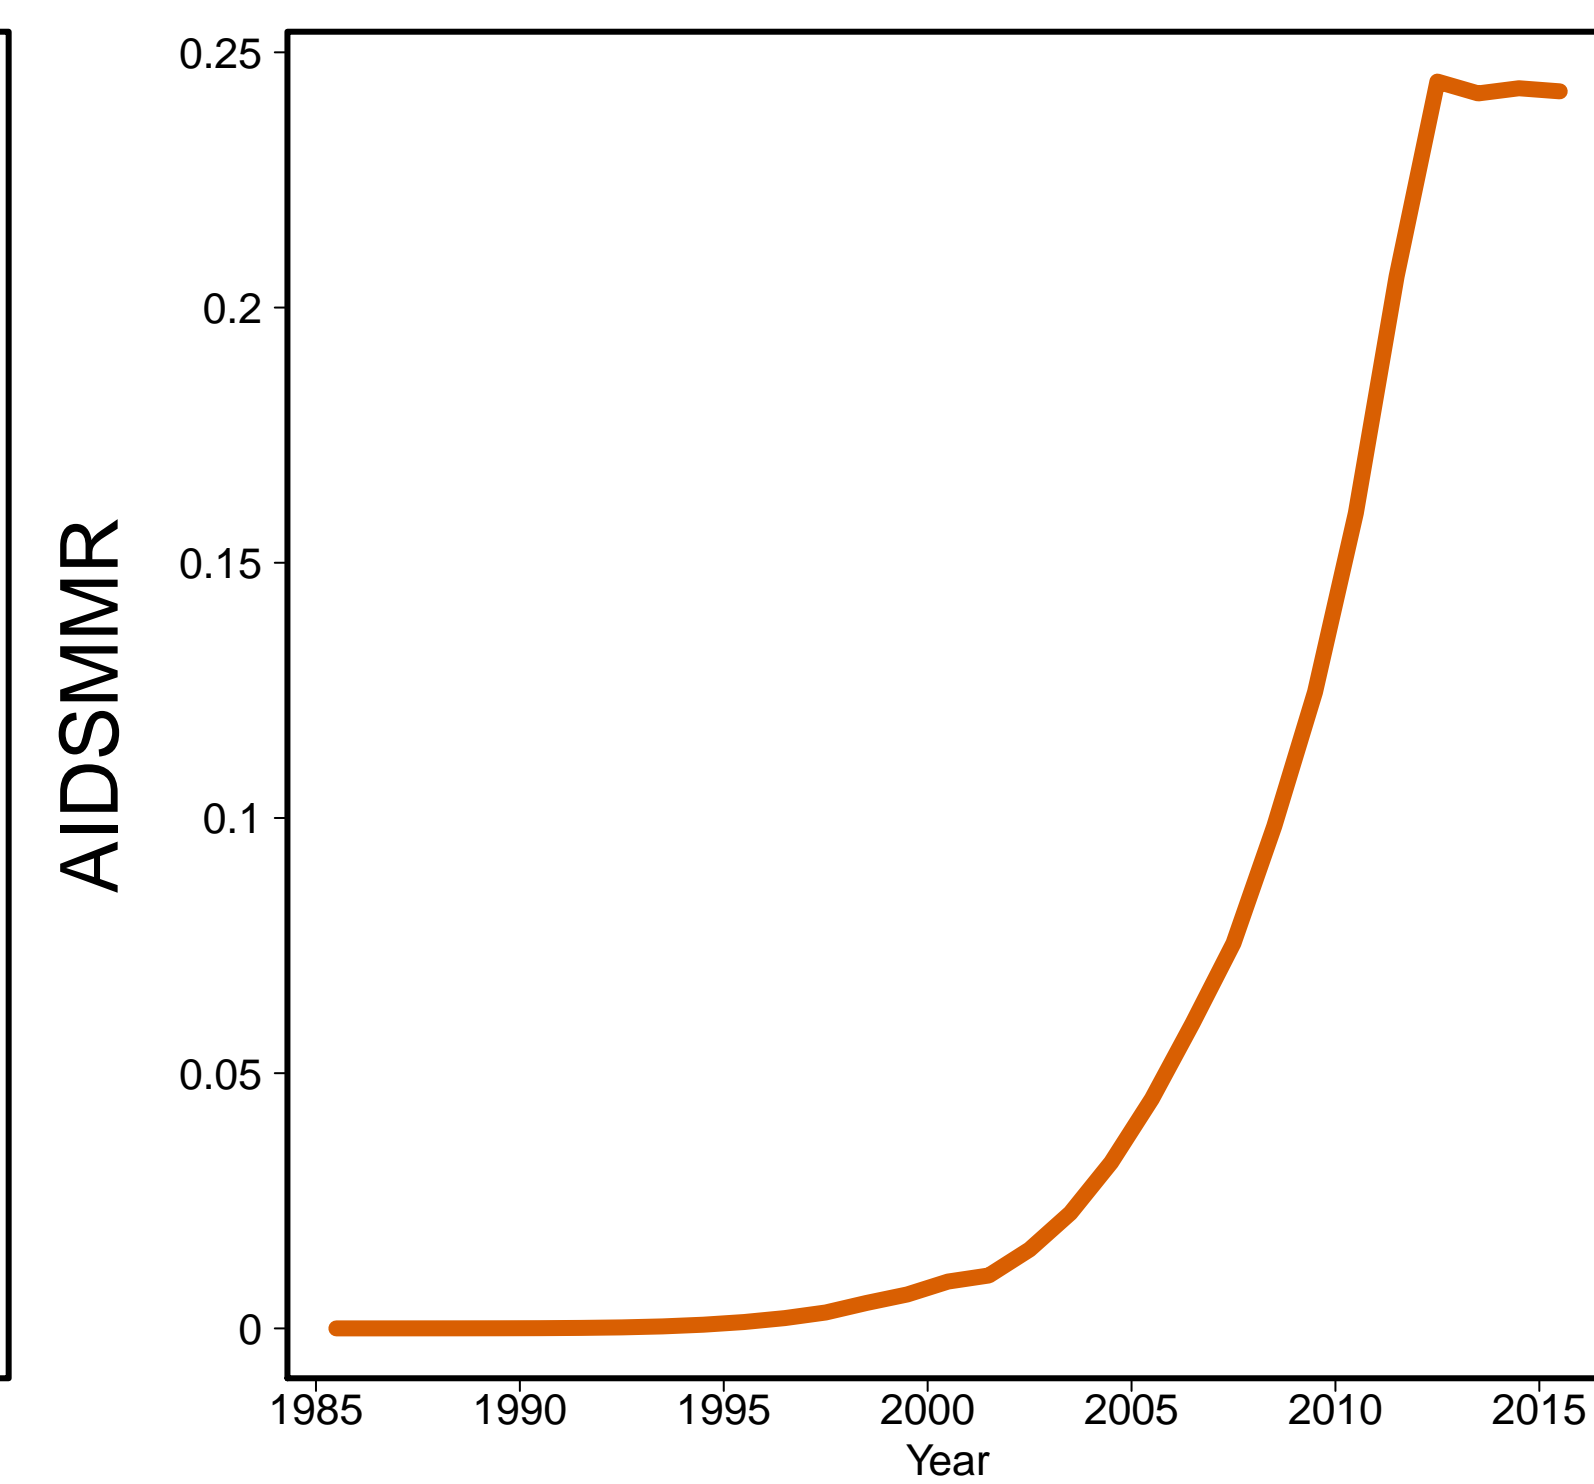

Iraq [IRQ]  
(Western Asia)

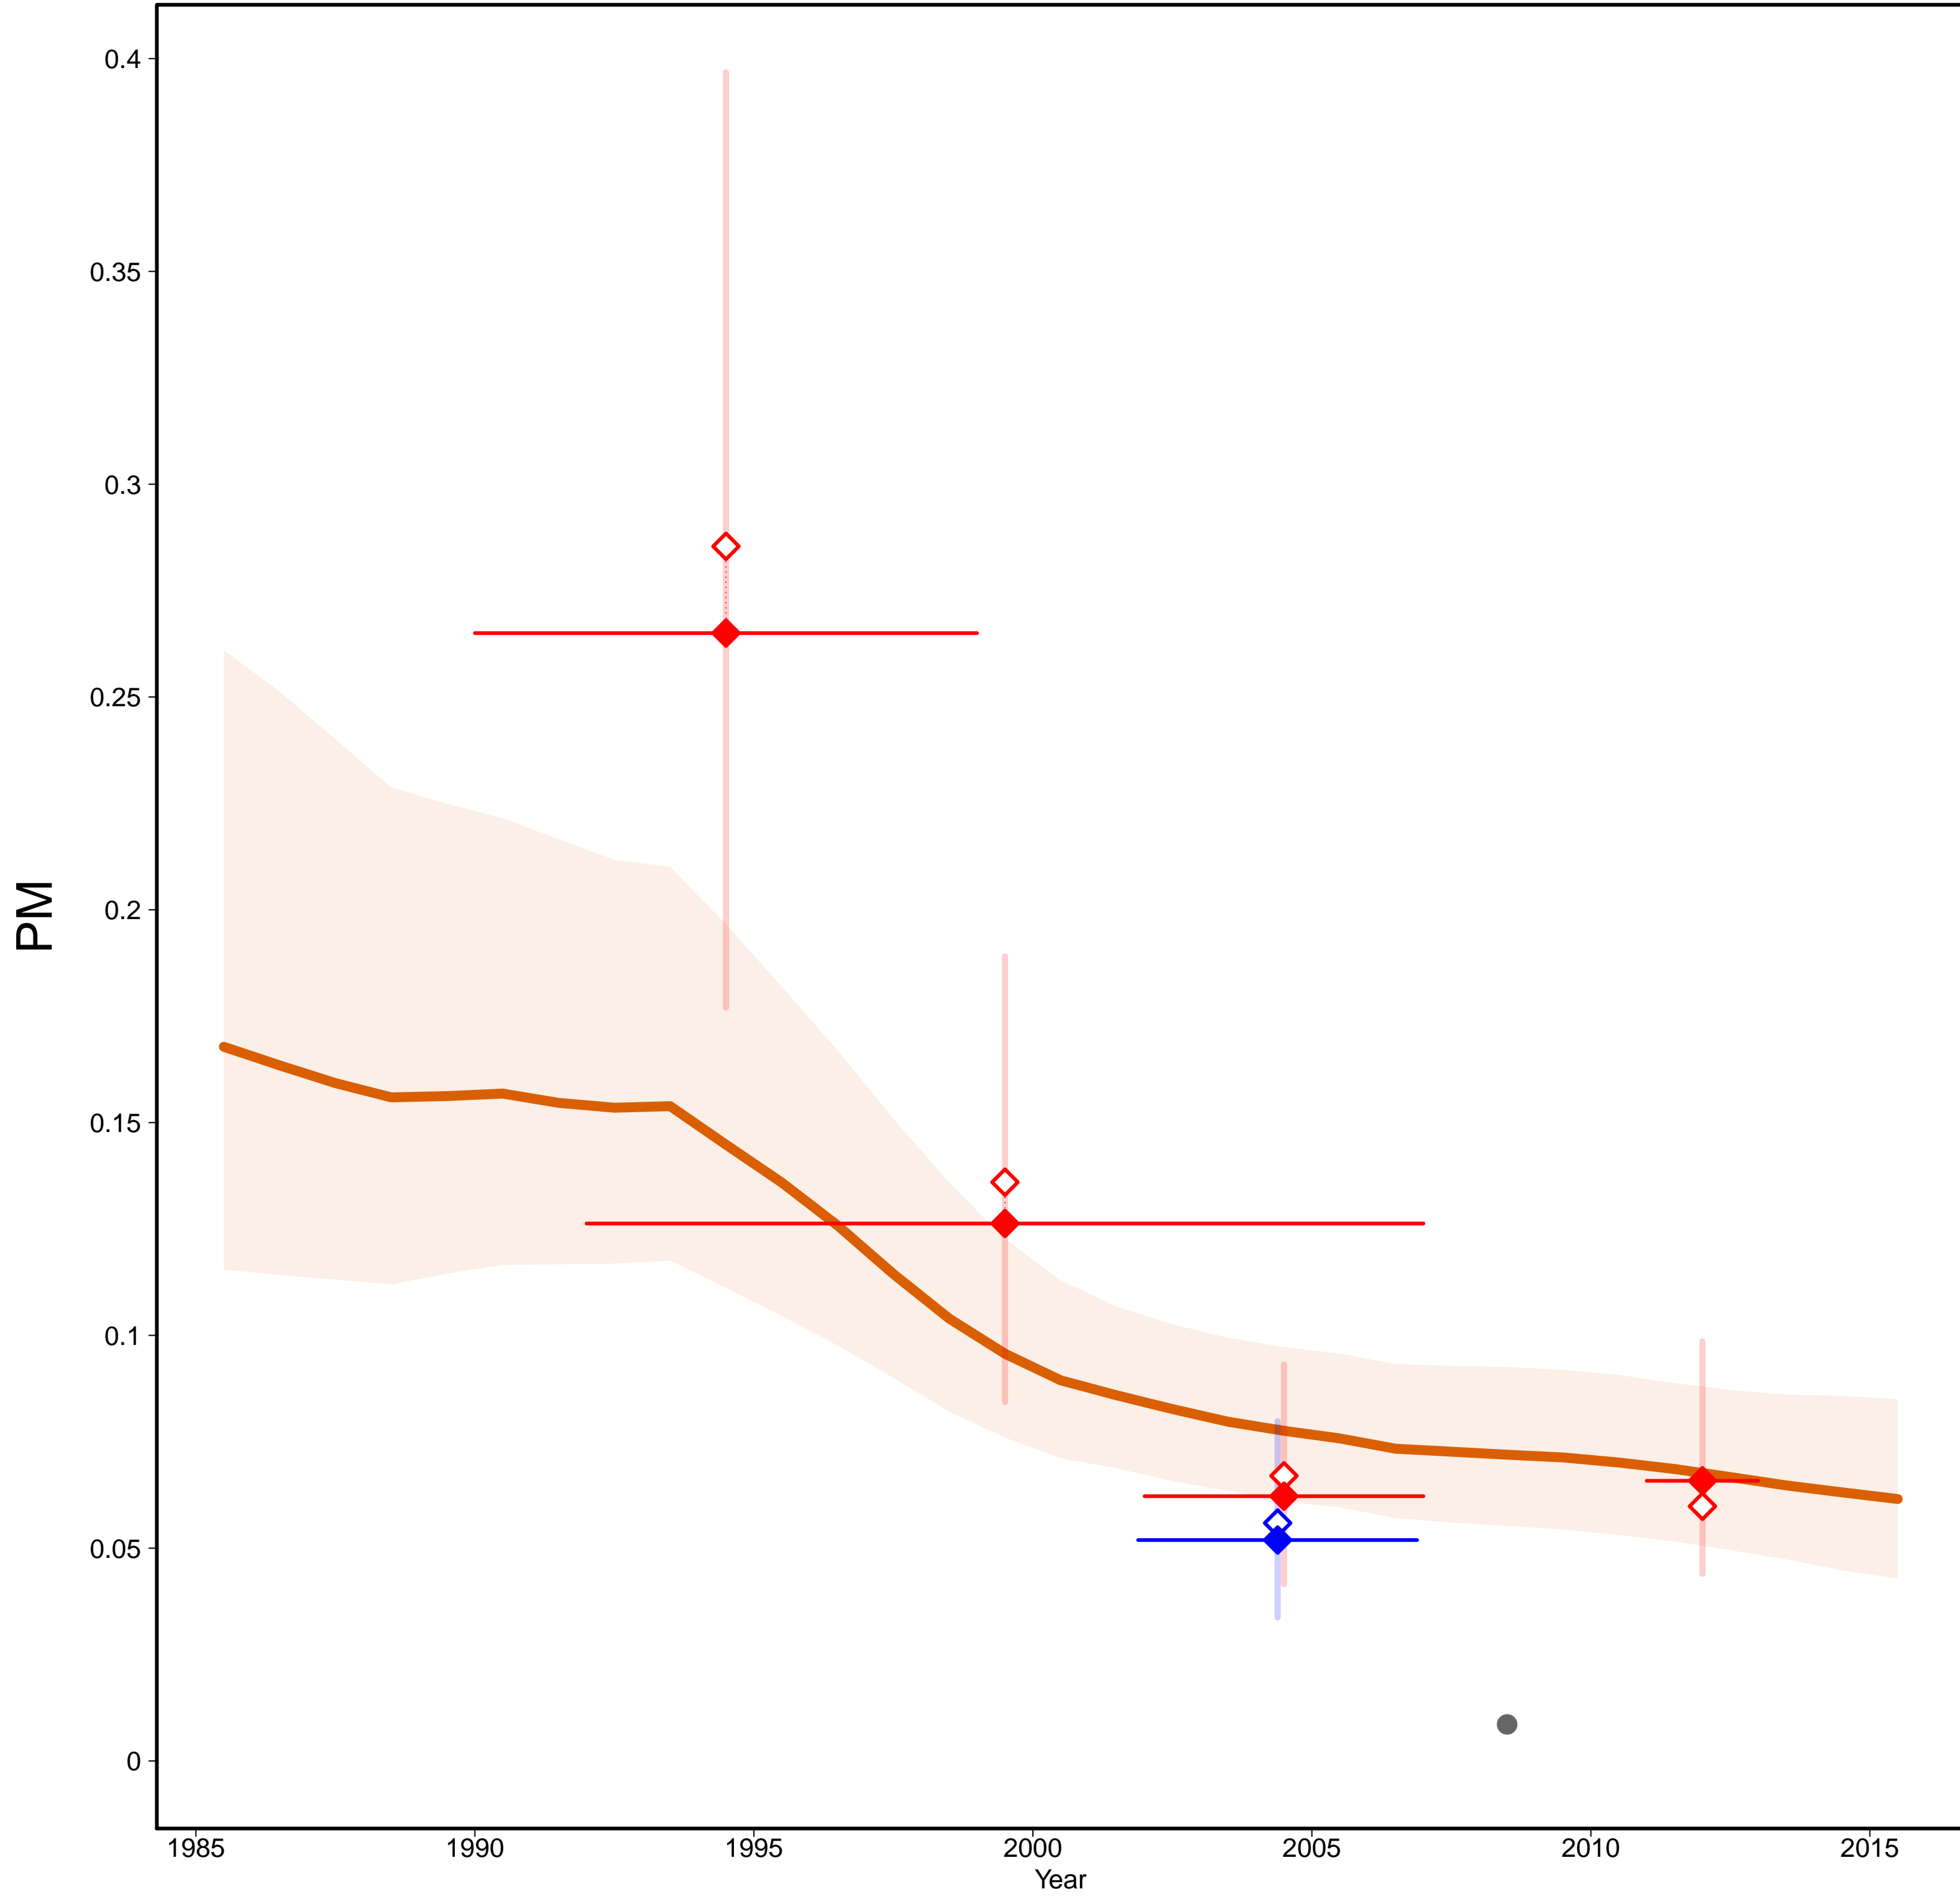

Iraq [IRQ]  
(Western Asia)

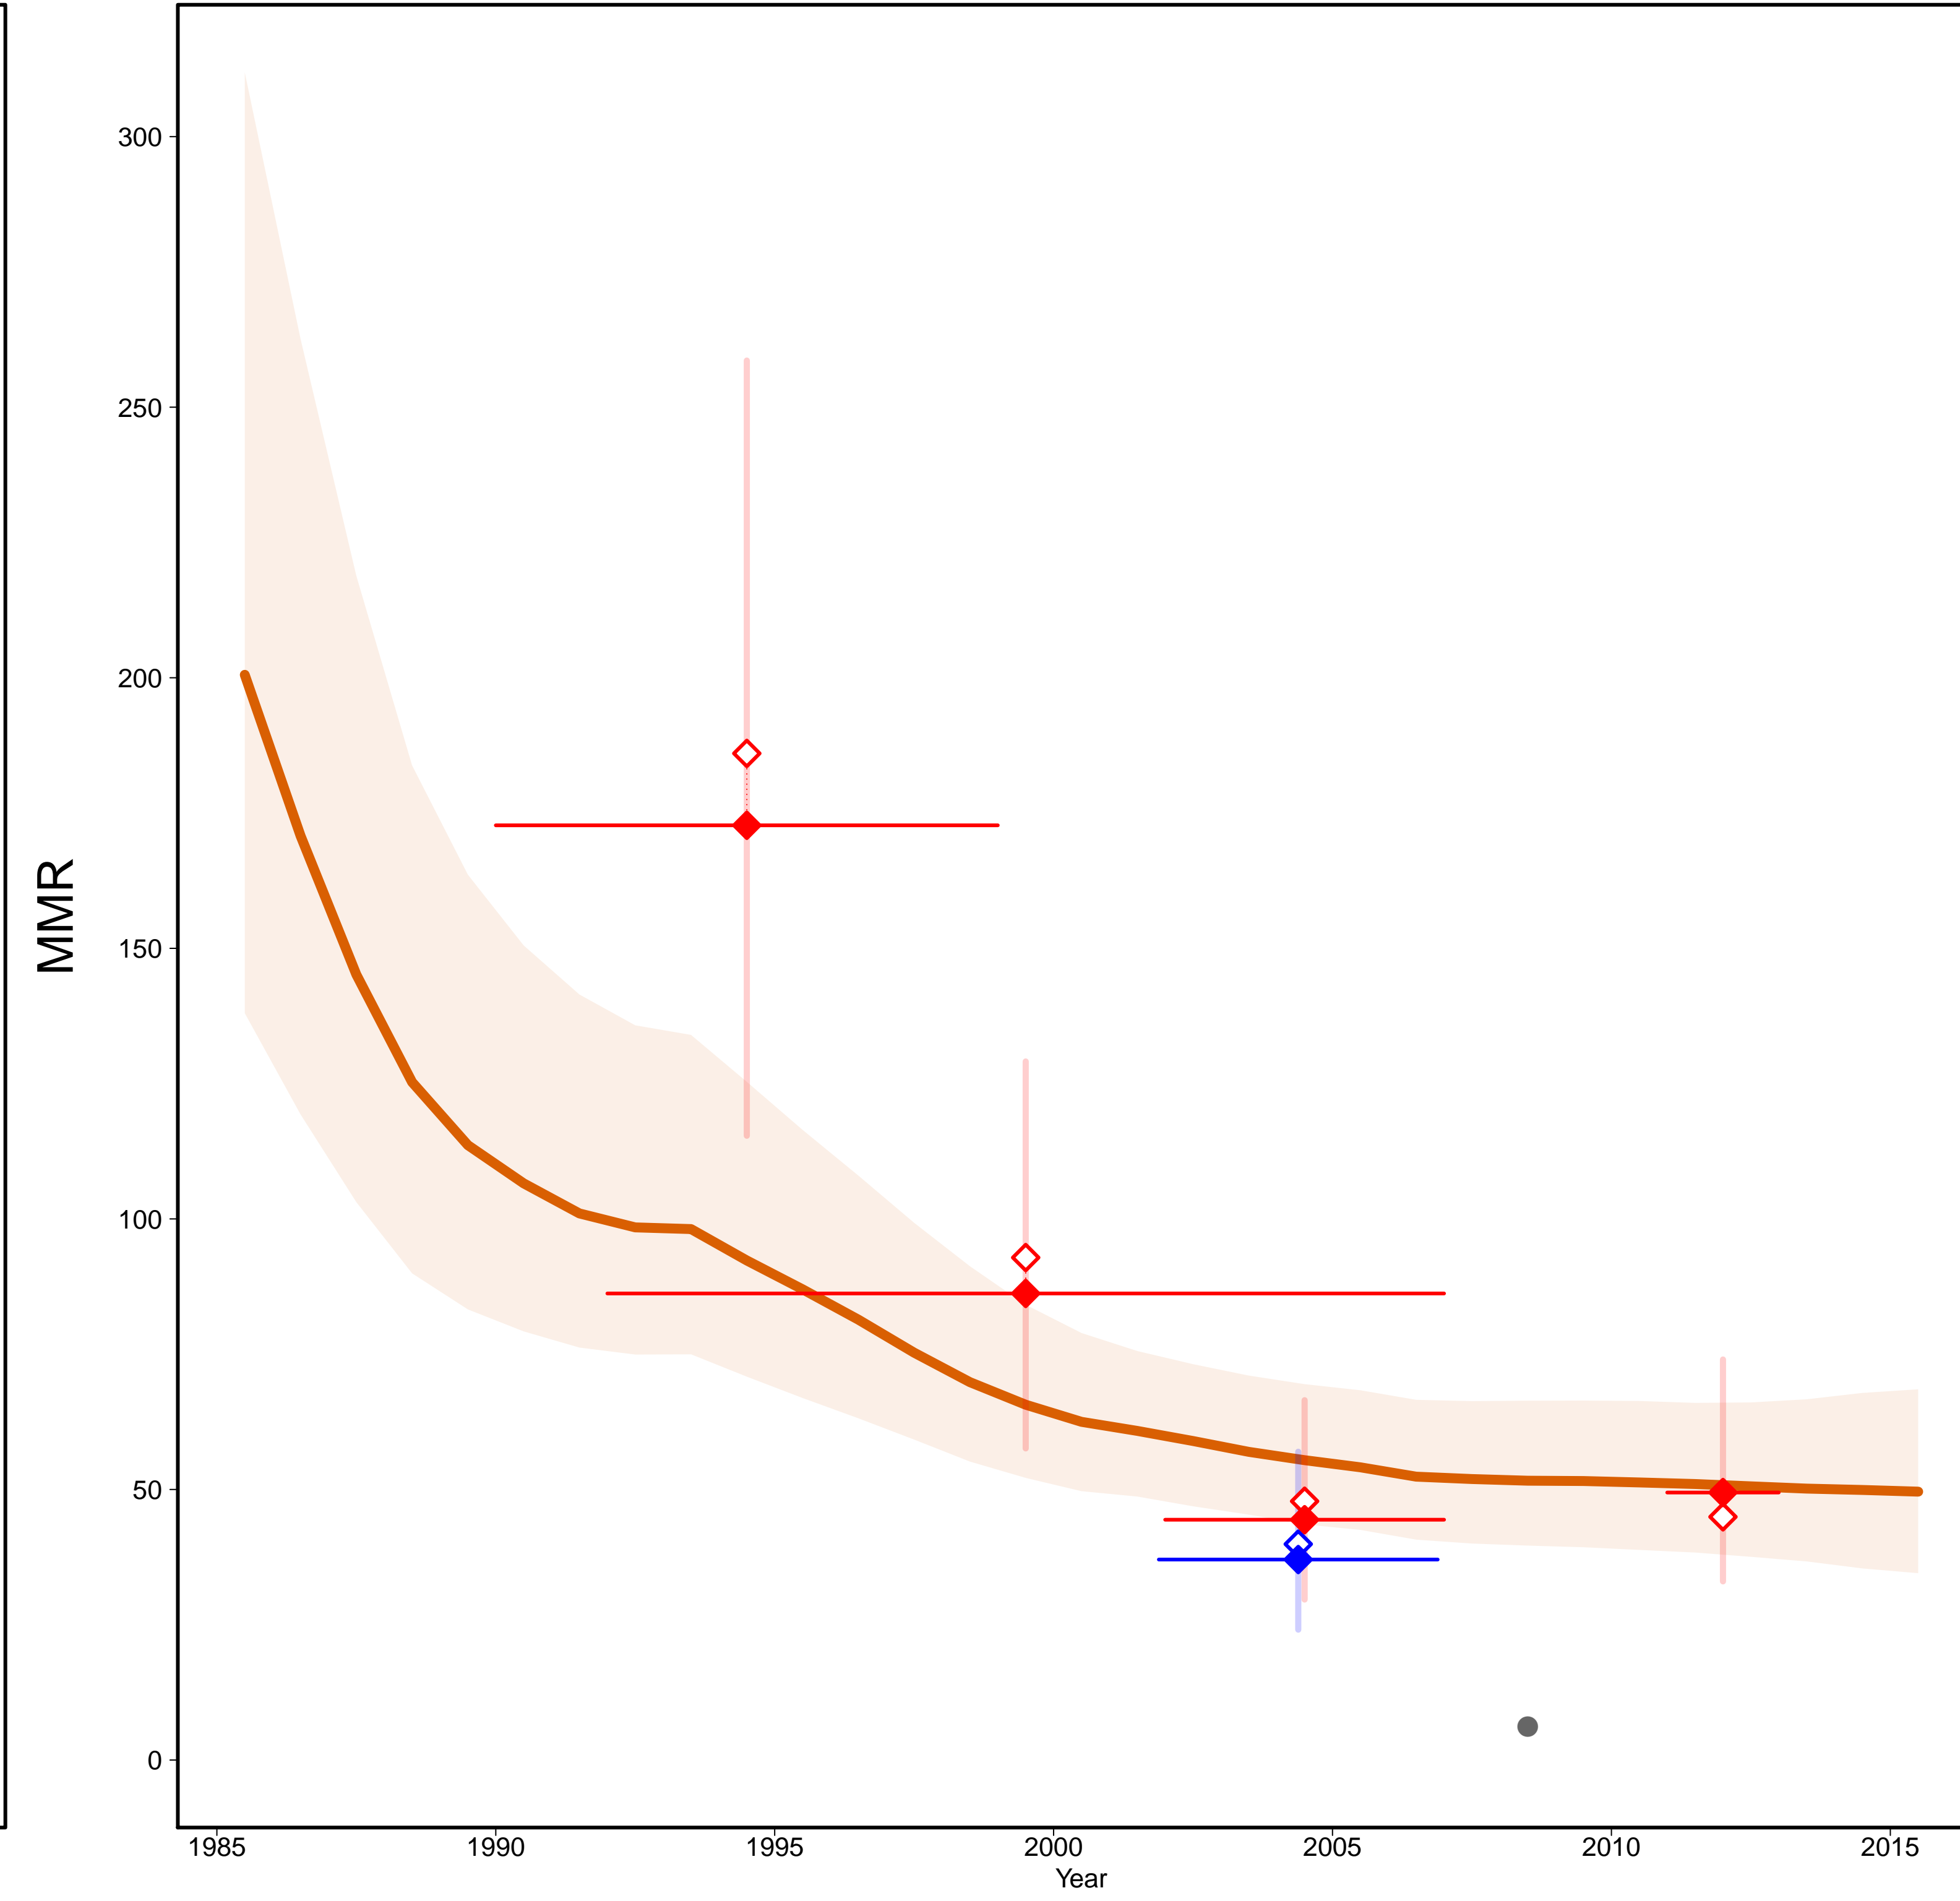

- Estimates –
- Mlate
- MMR Database 2015 –
- ◇ Observed Data
- ◆ Adjusted Data
- Data type –
- ◆ DHS
- ◆ Misc. studies
- Excluded VR data  
(data quality issues)

Gross Domestic Product

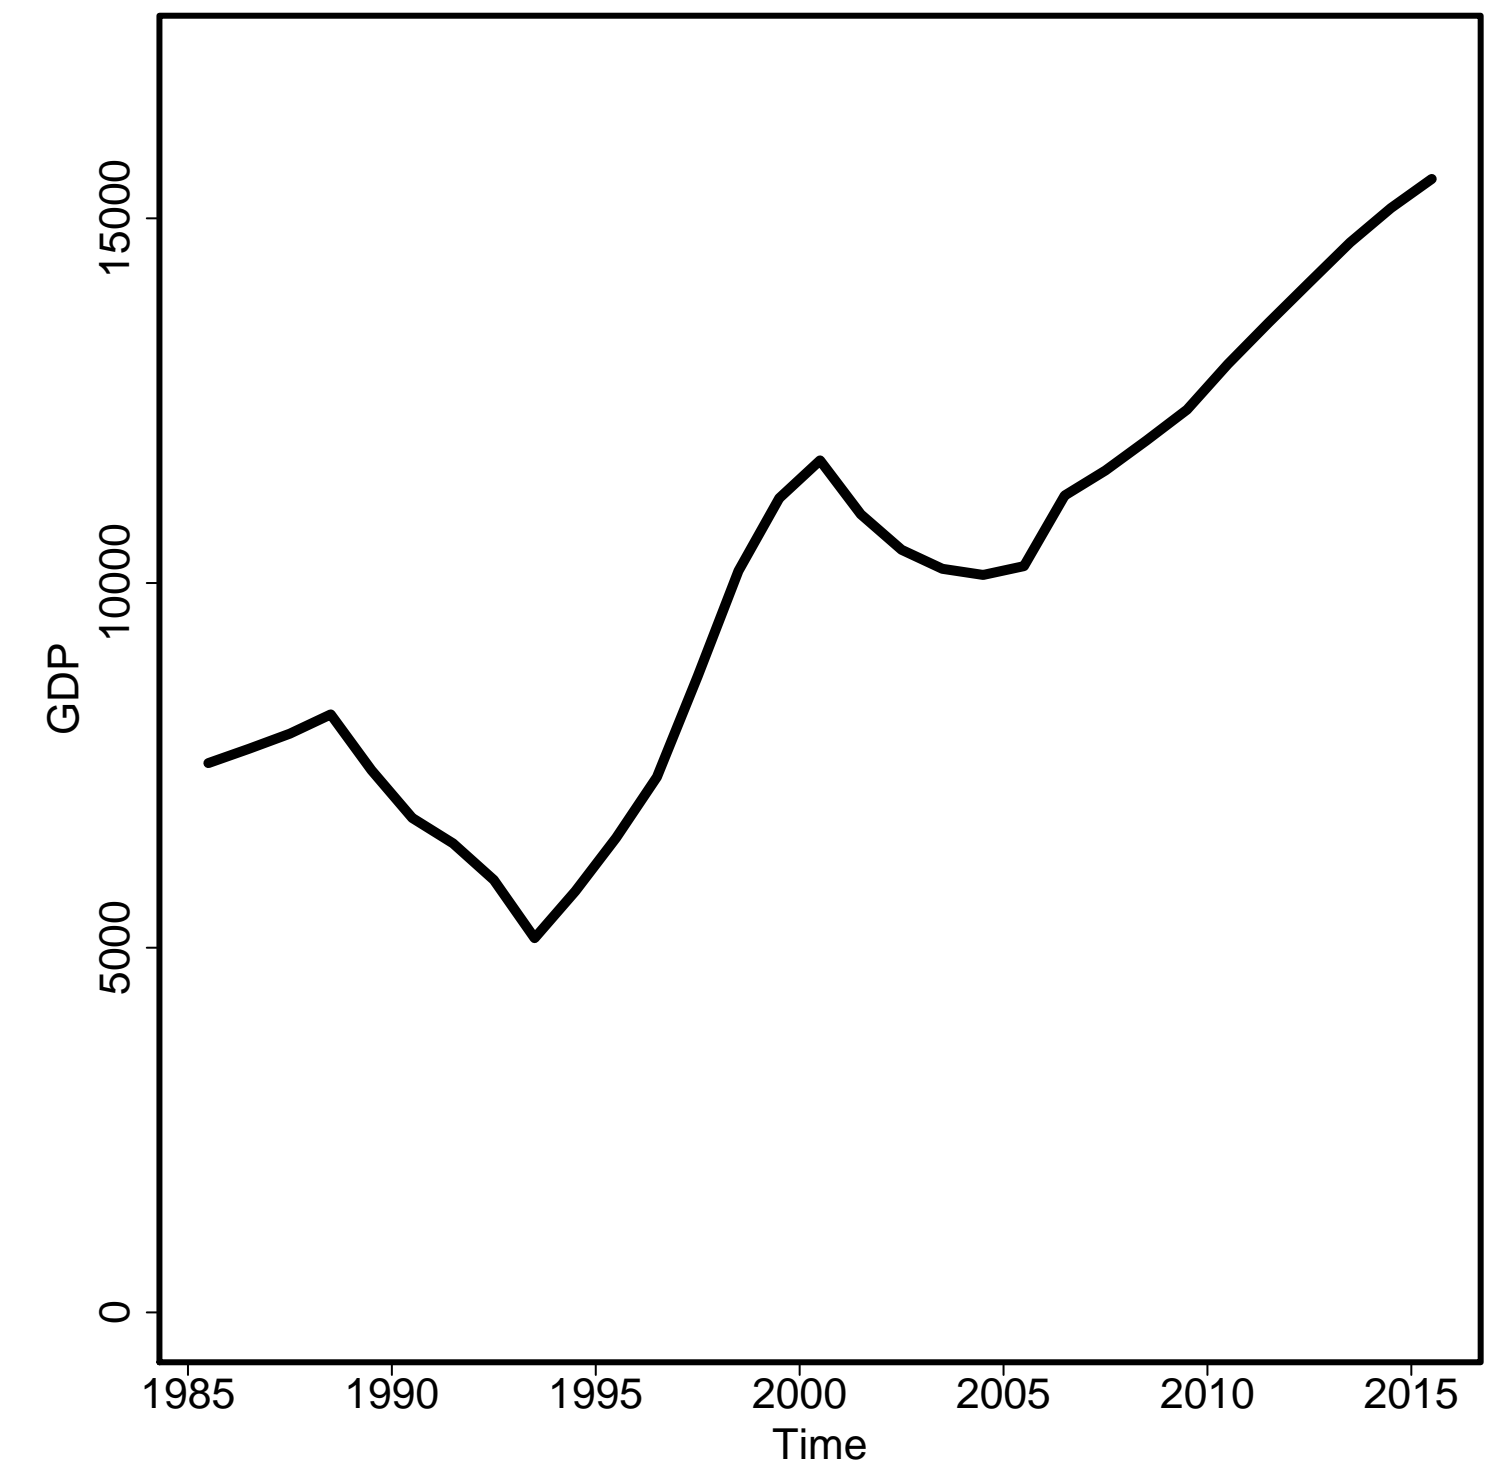

General Fertility Rate

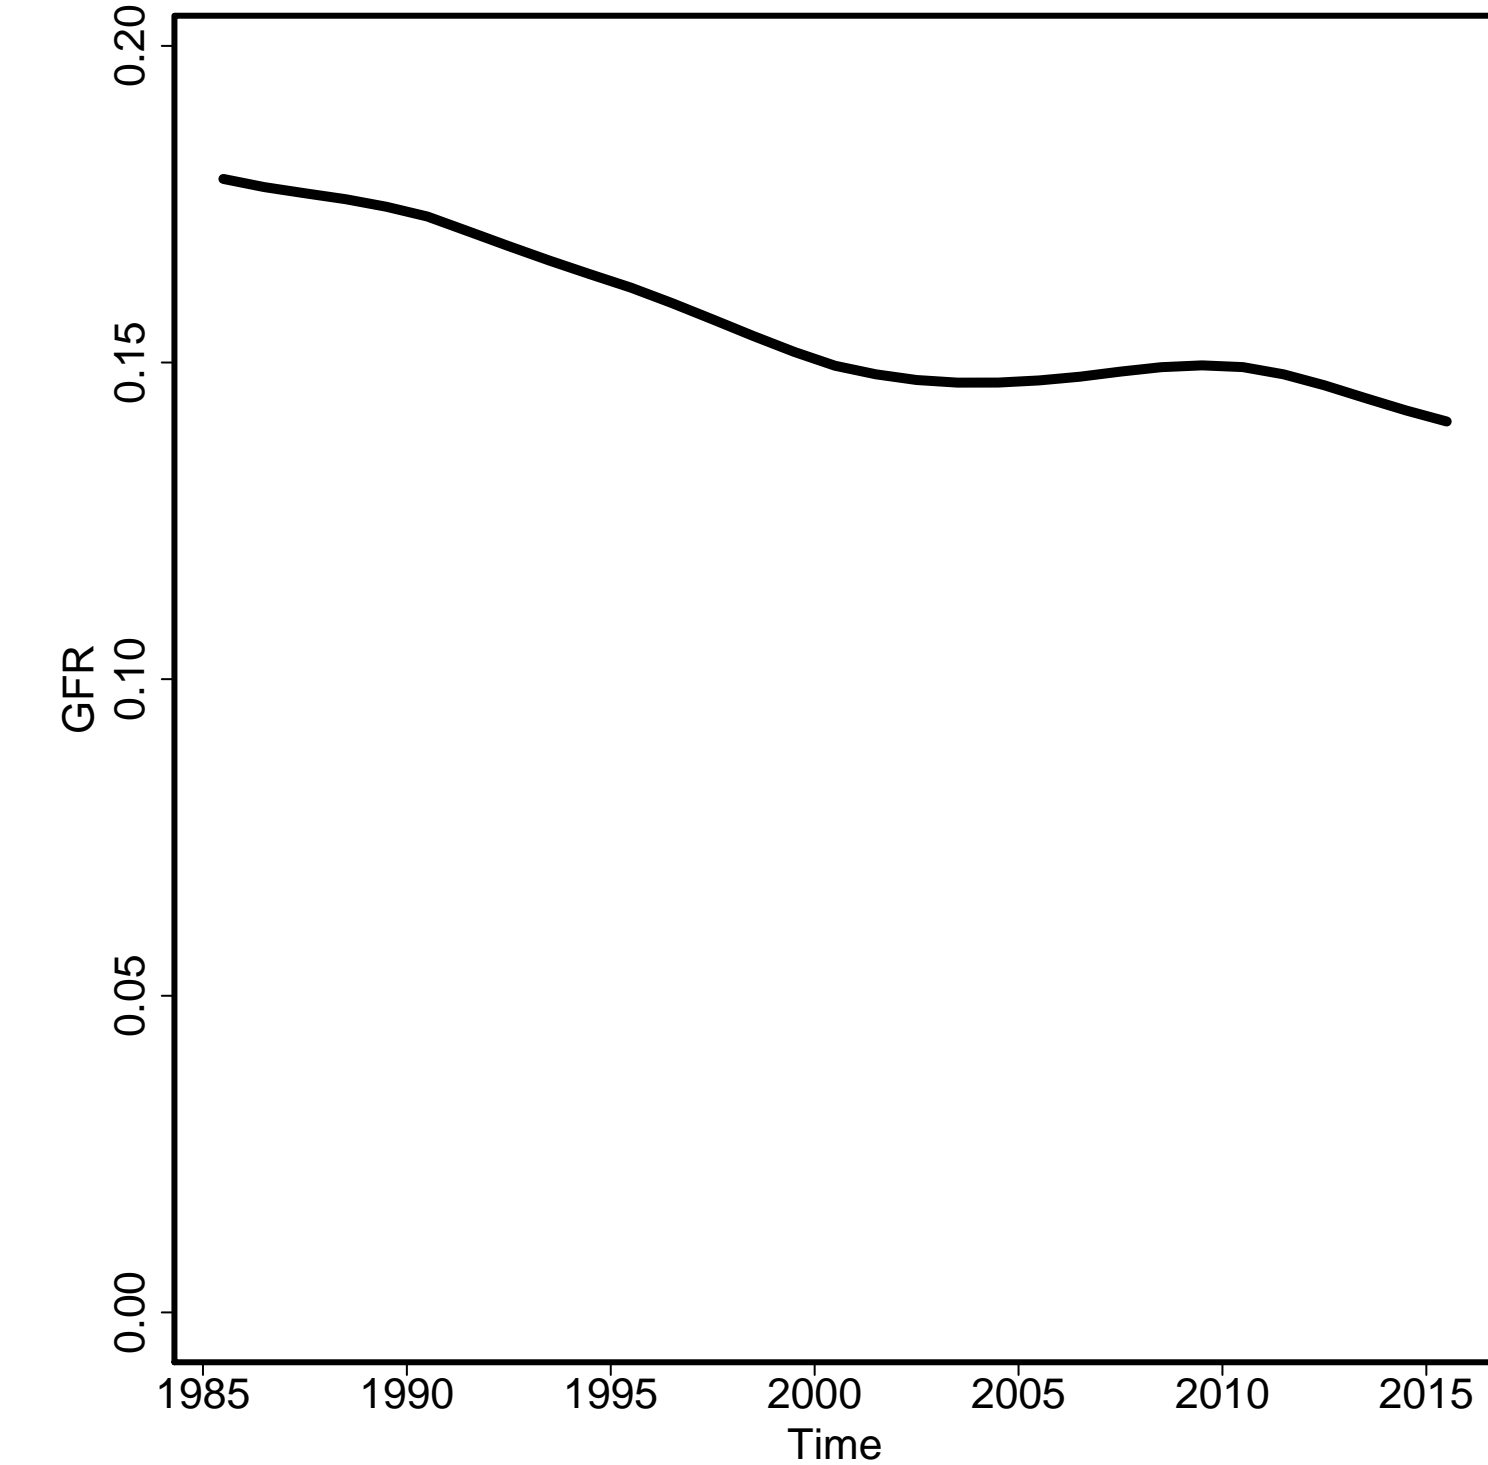

Skilled Attendance to Birth

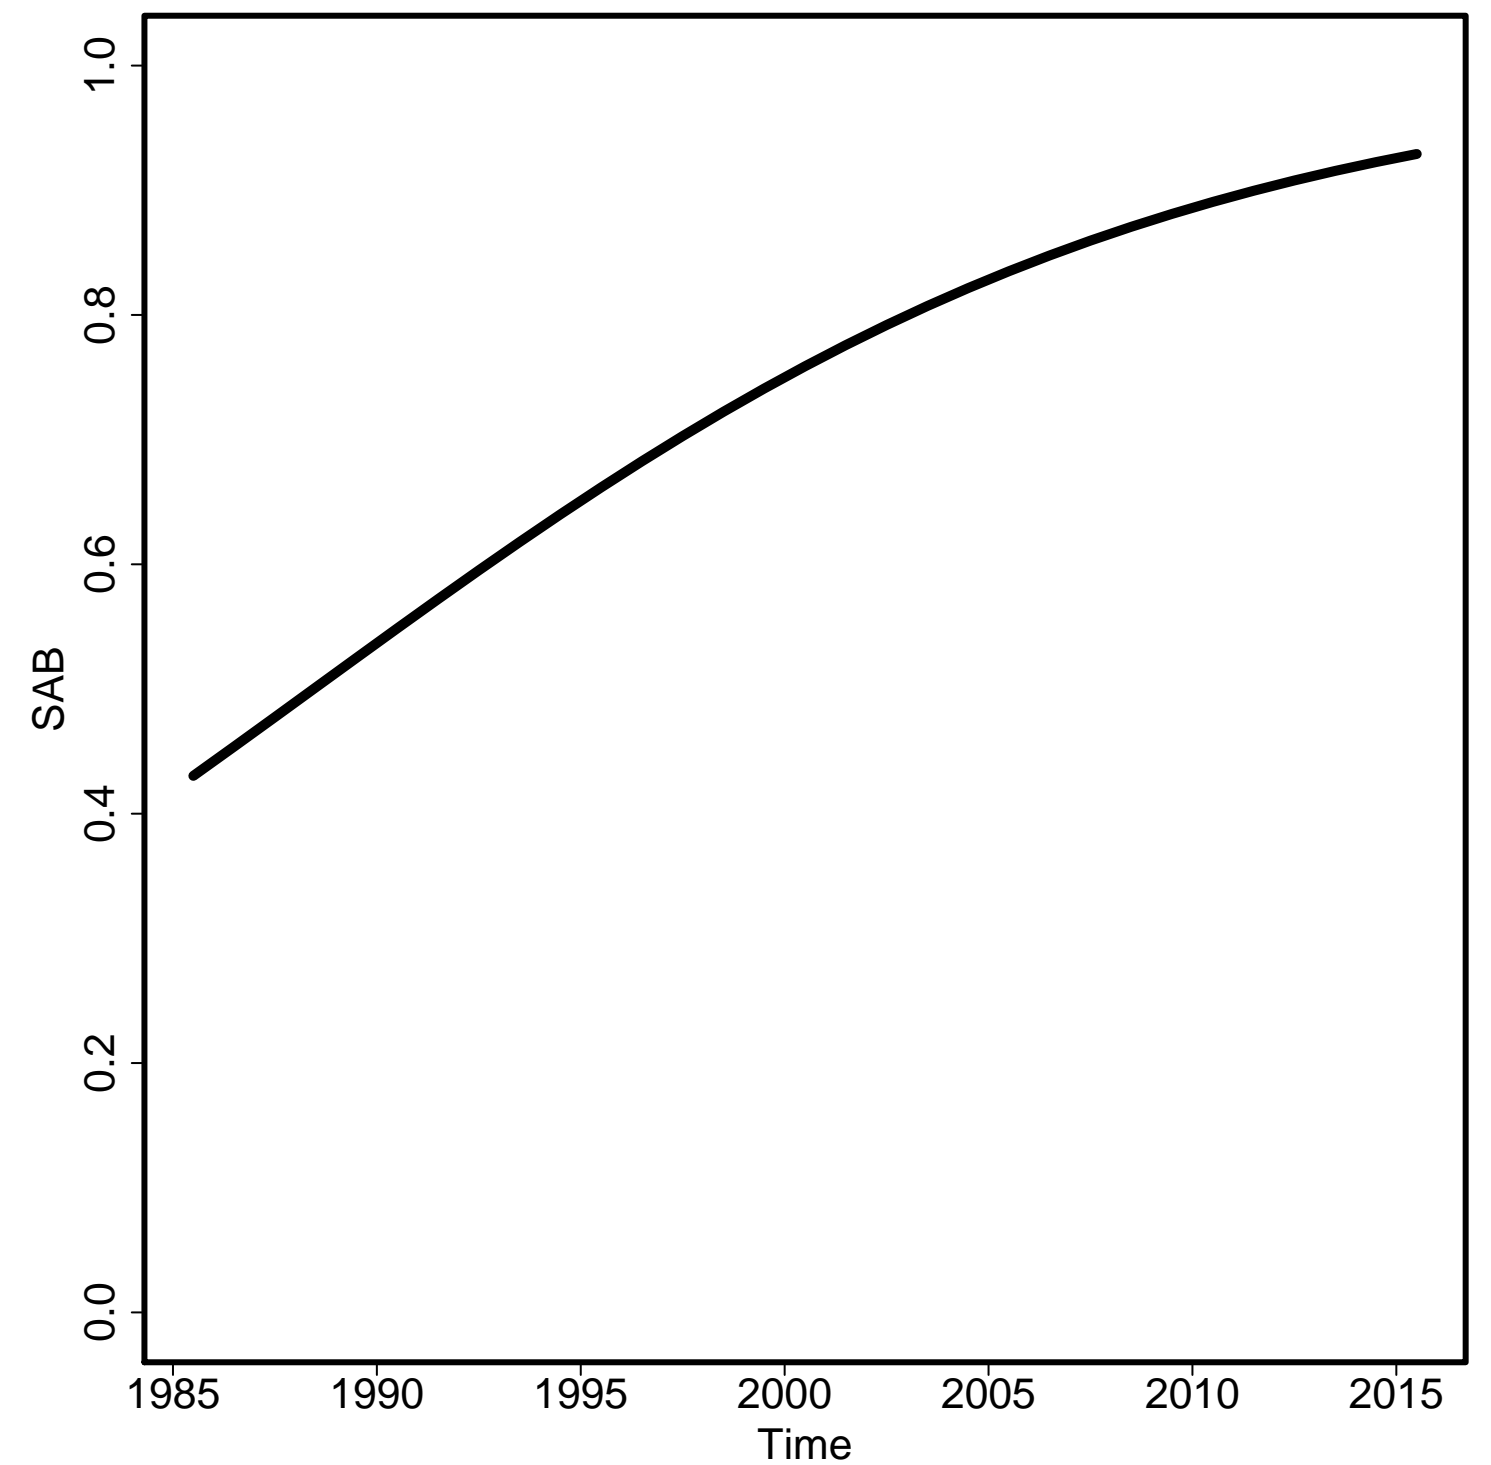

Envelope/Births

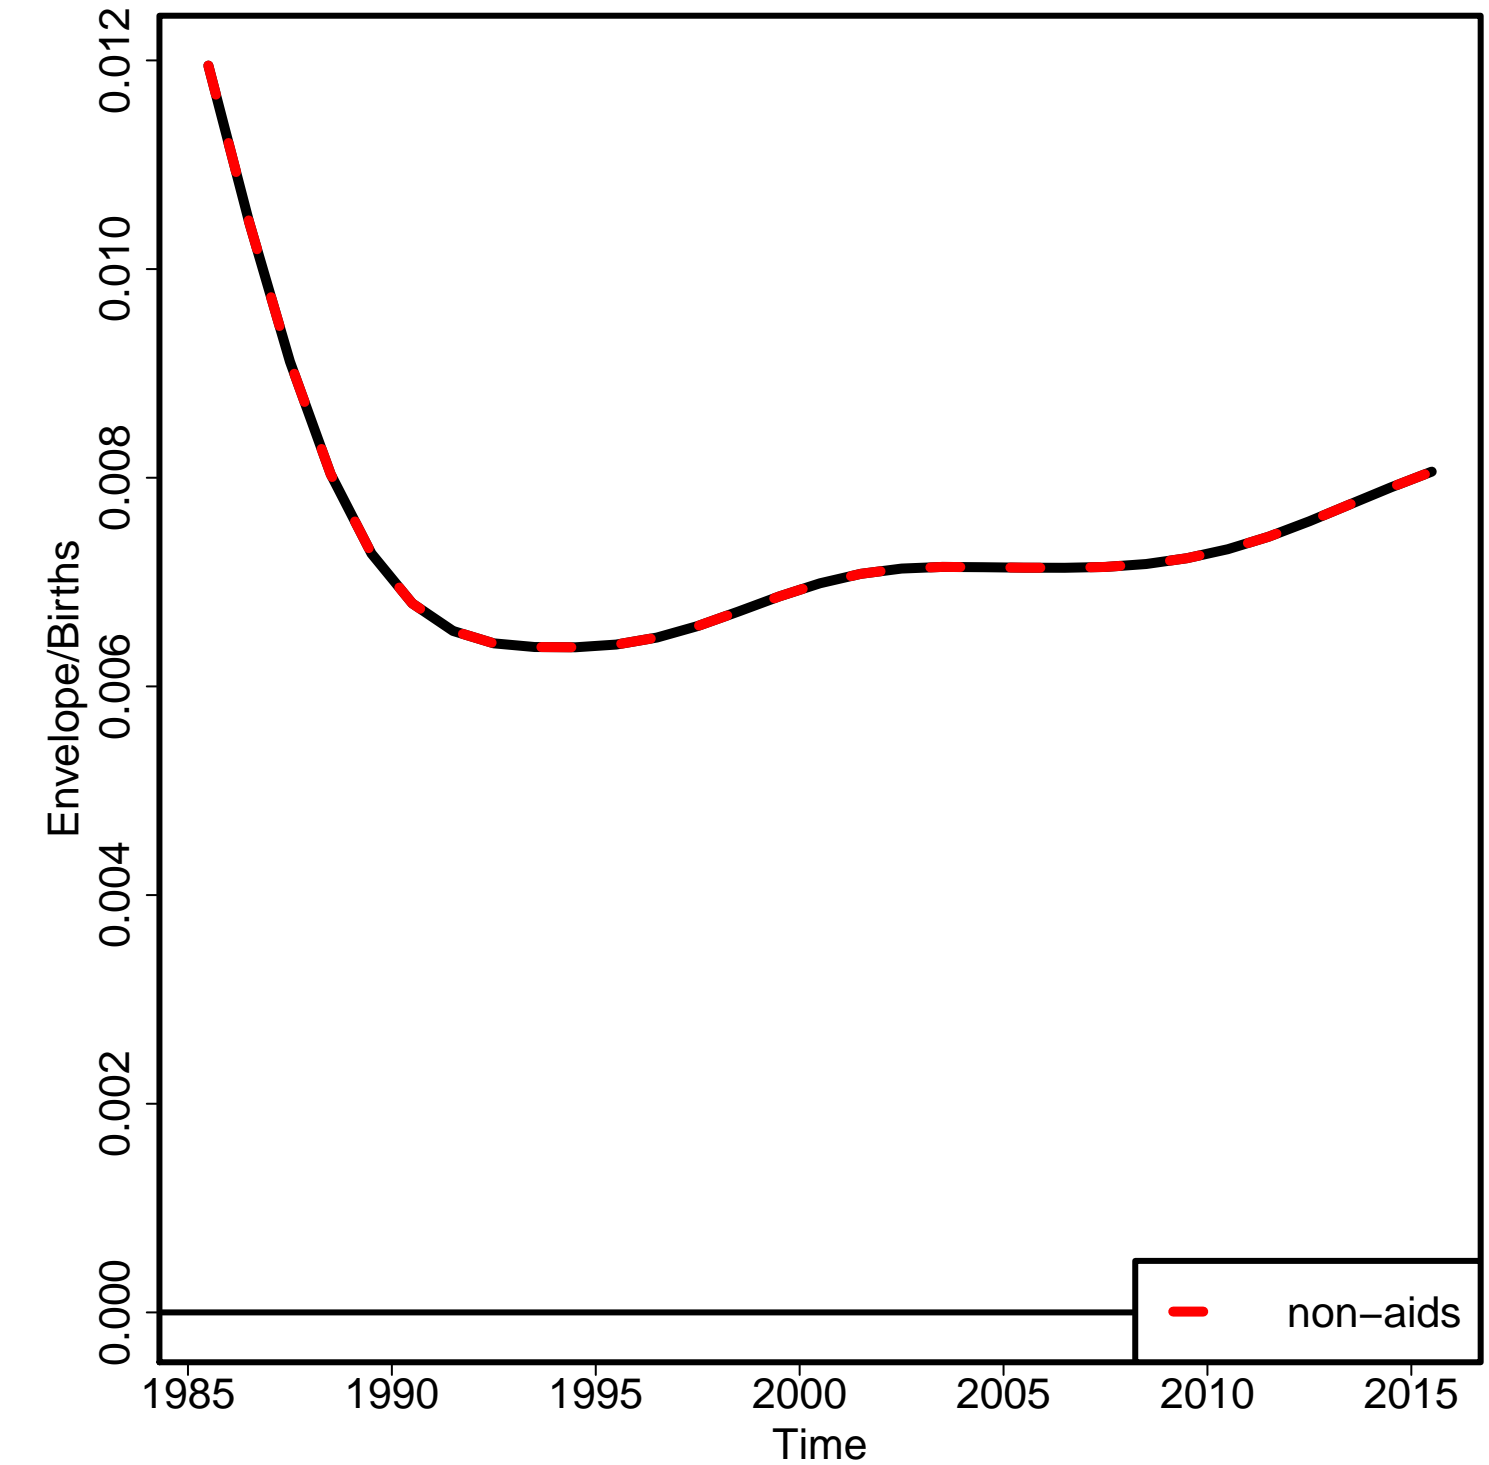

Non-aids MMR

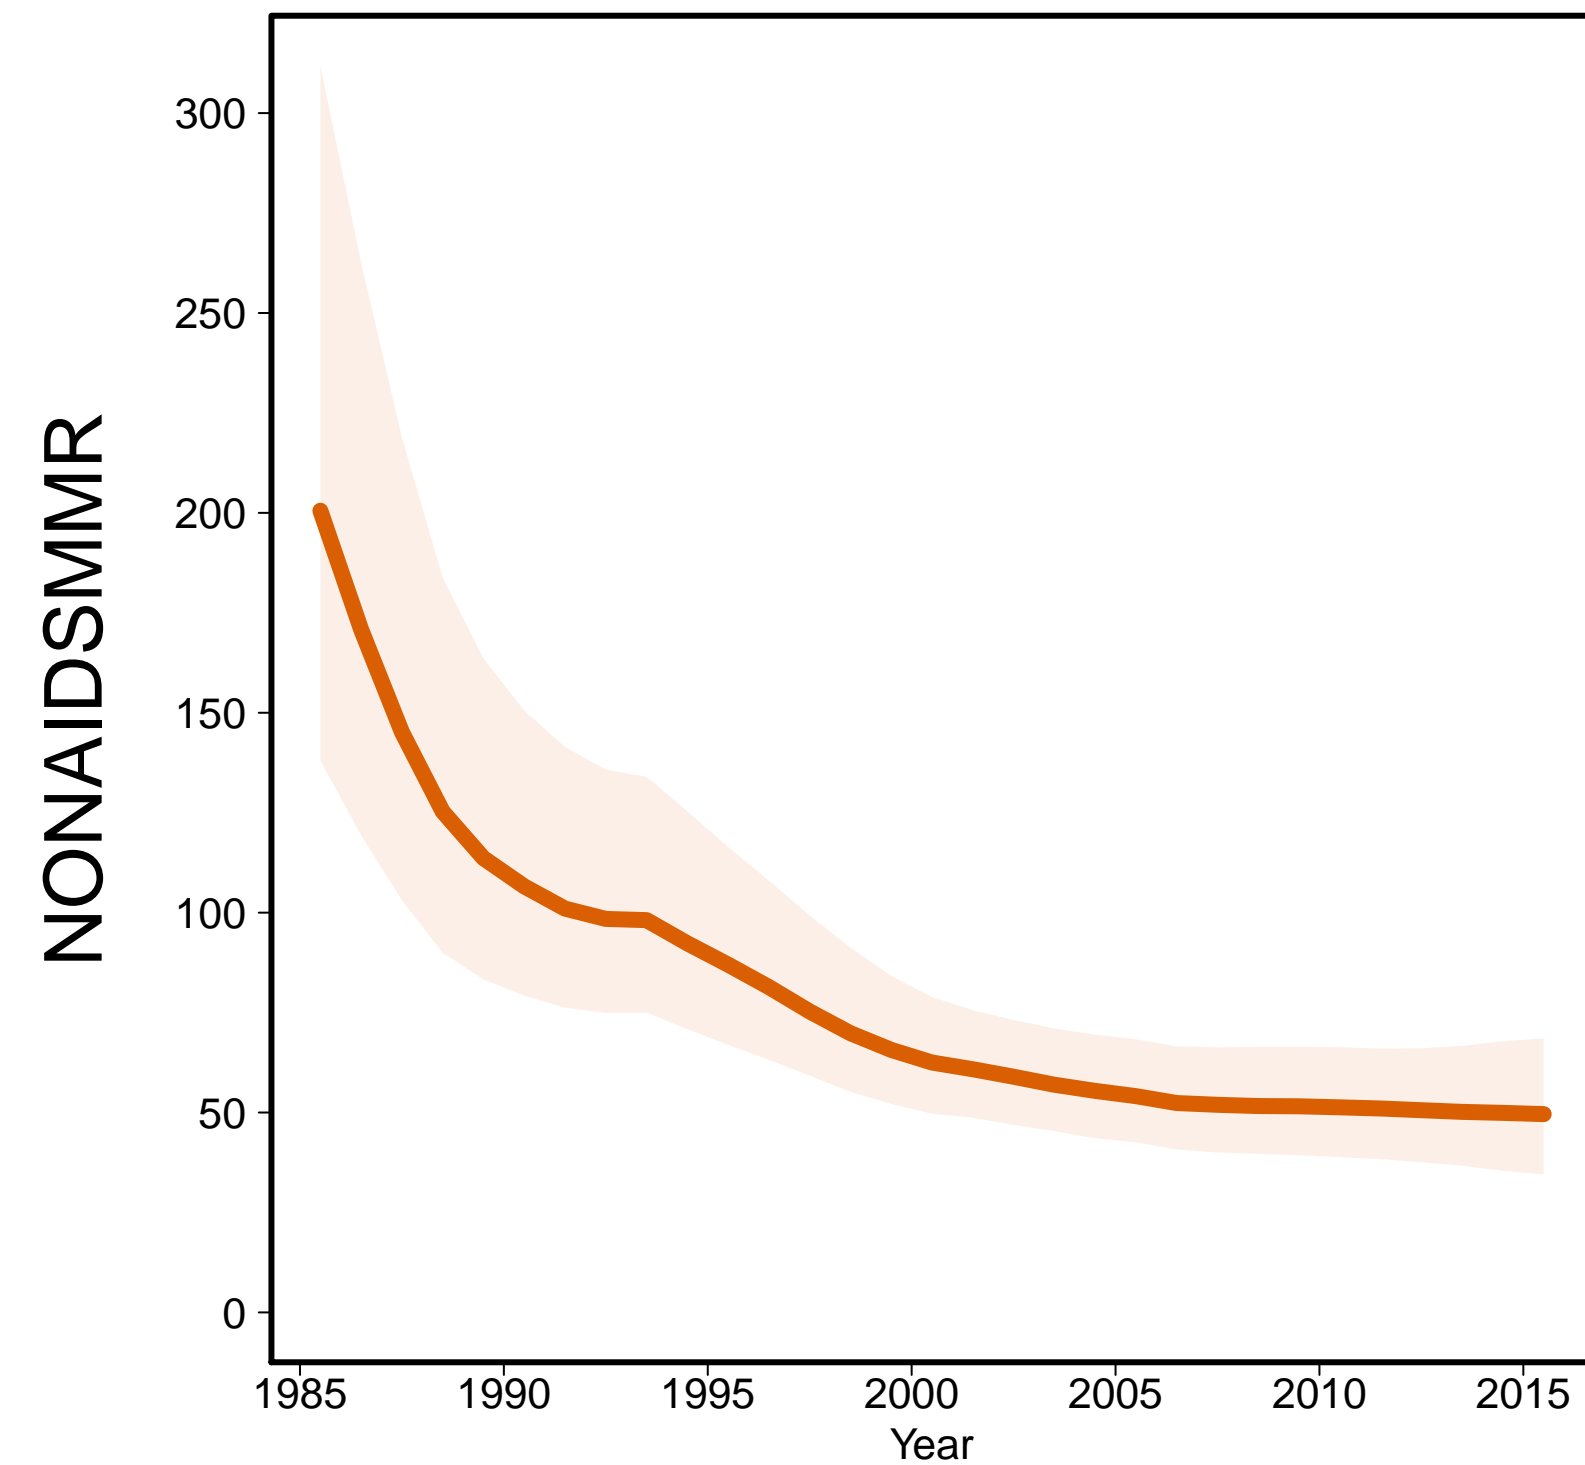

Aids MMR



Ireland [IRL]  
(Developed regions)

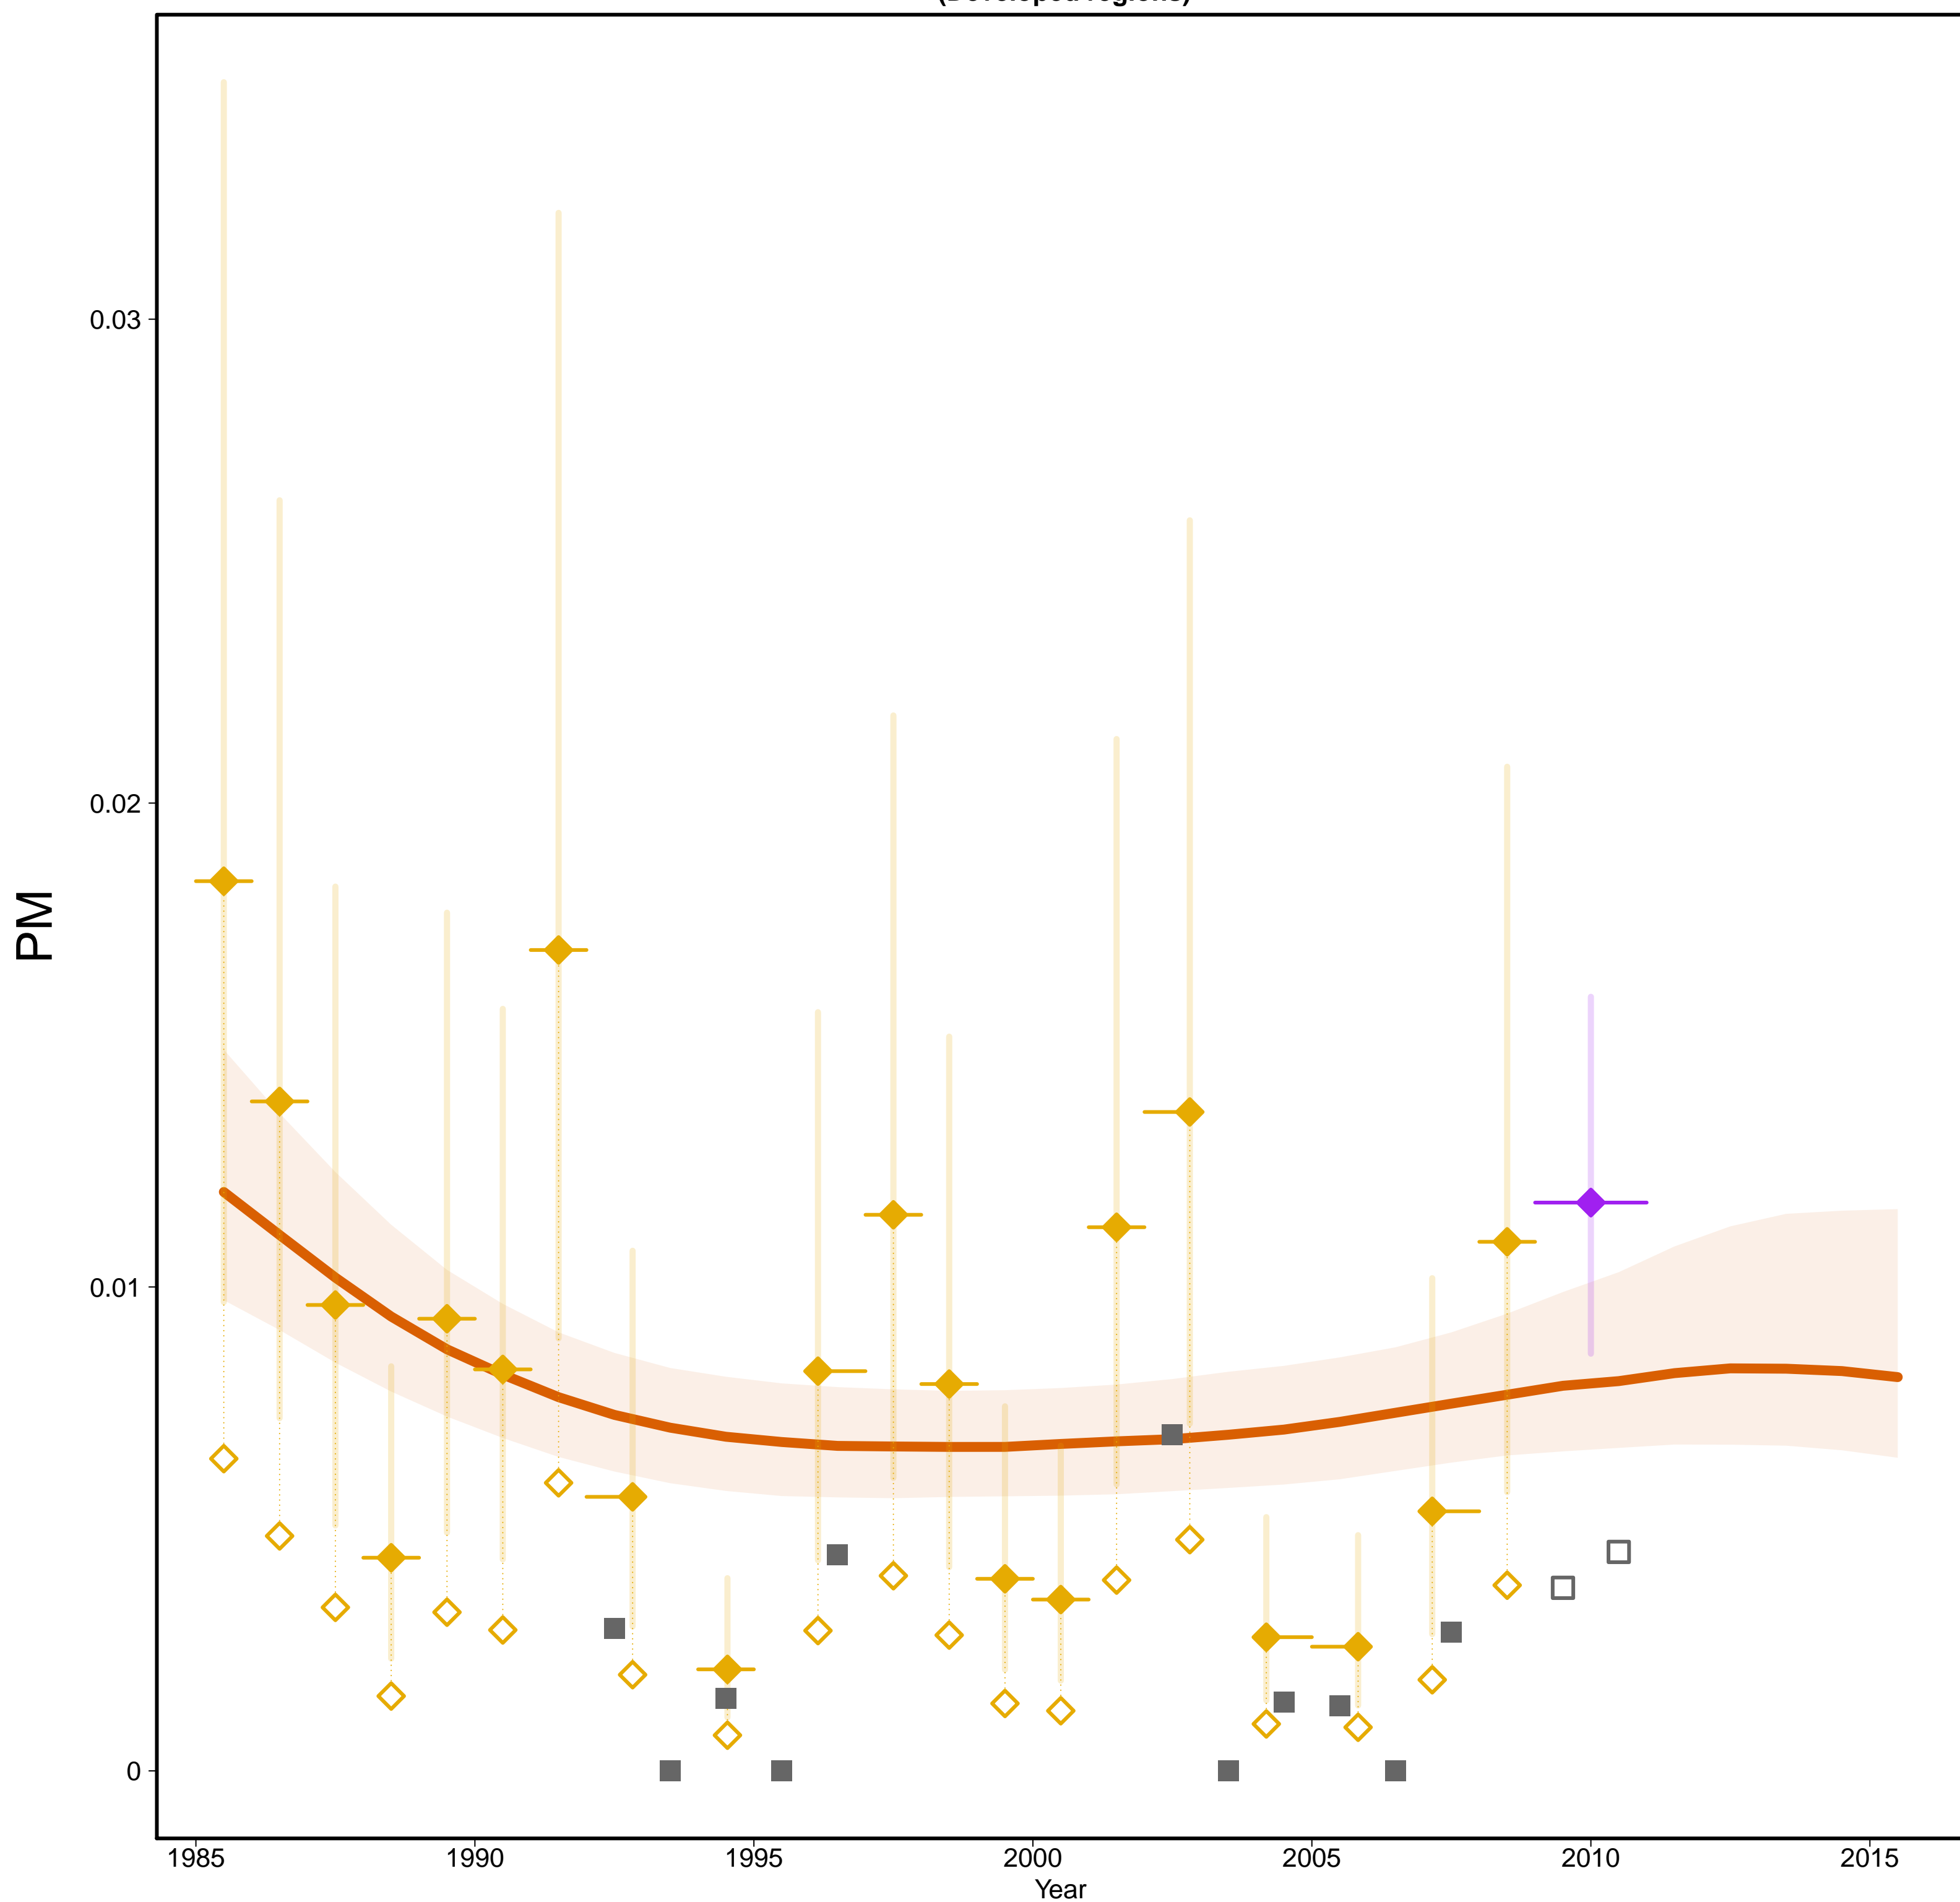

Ireland [IRL]  
(Developed regions)

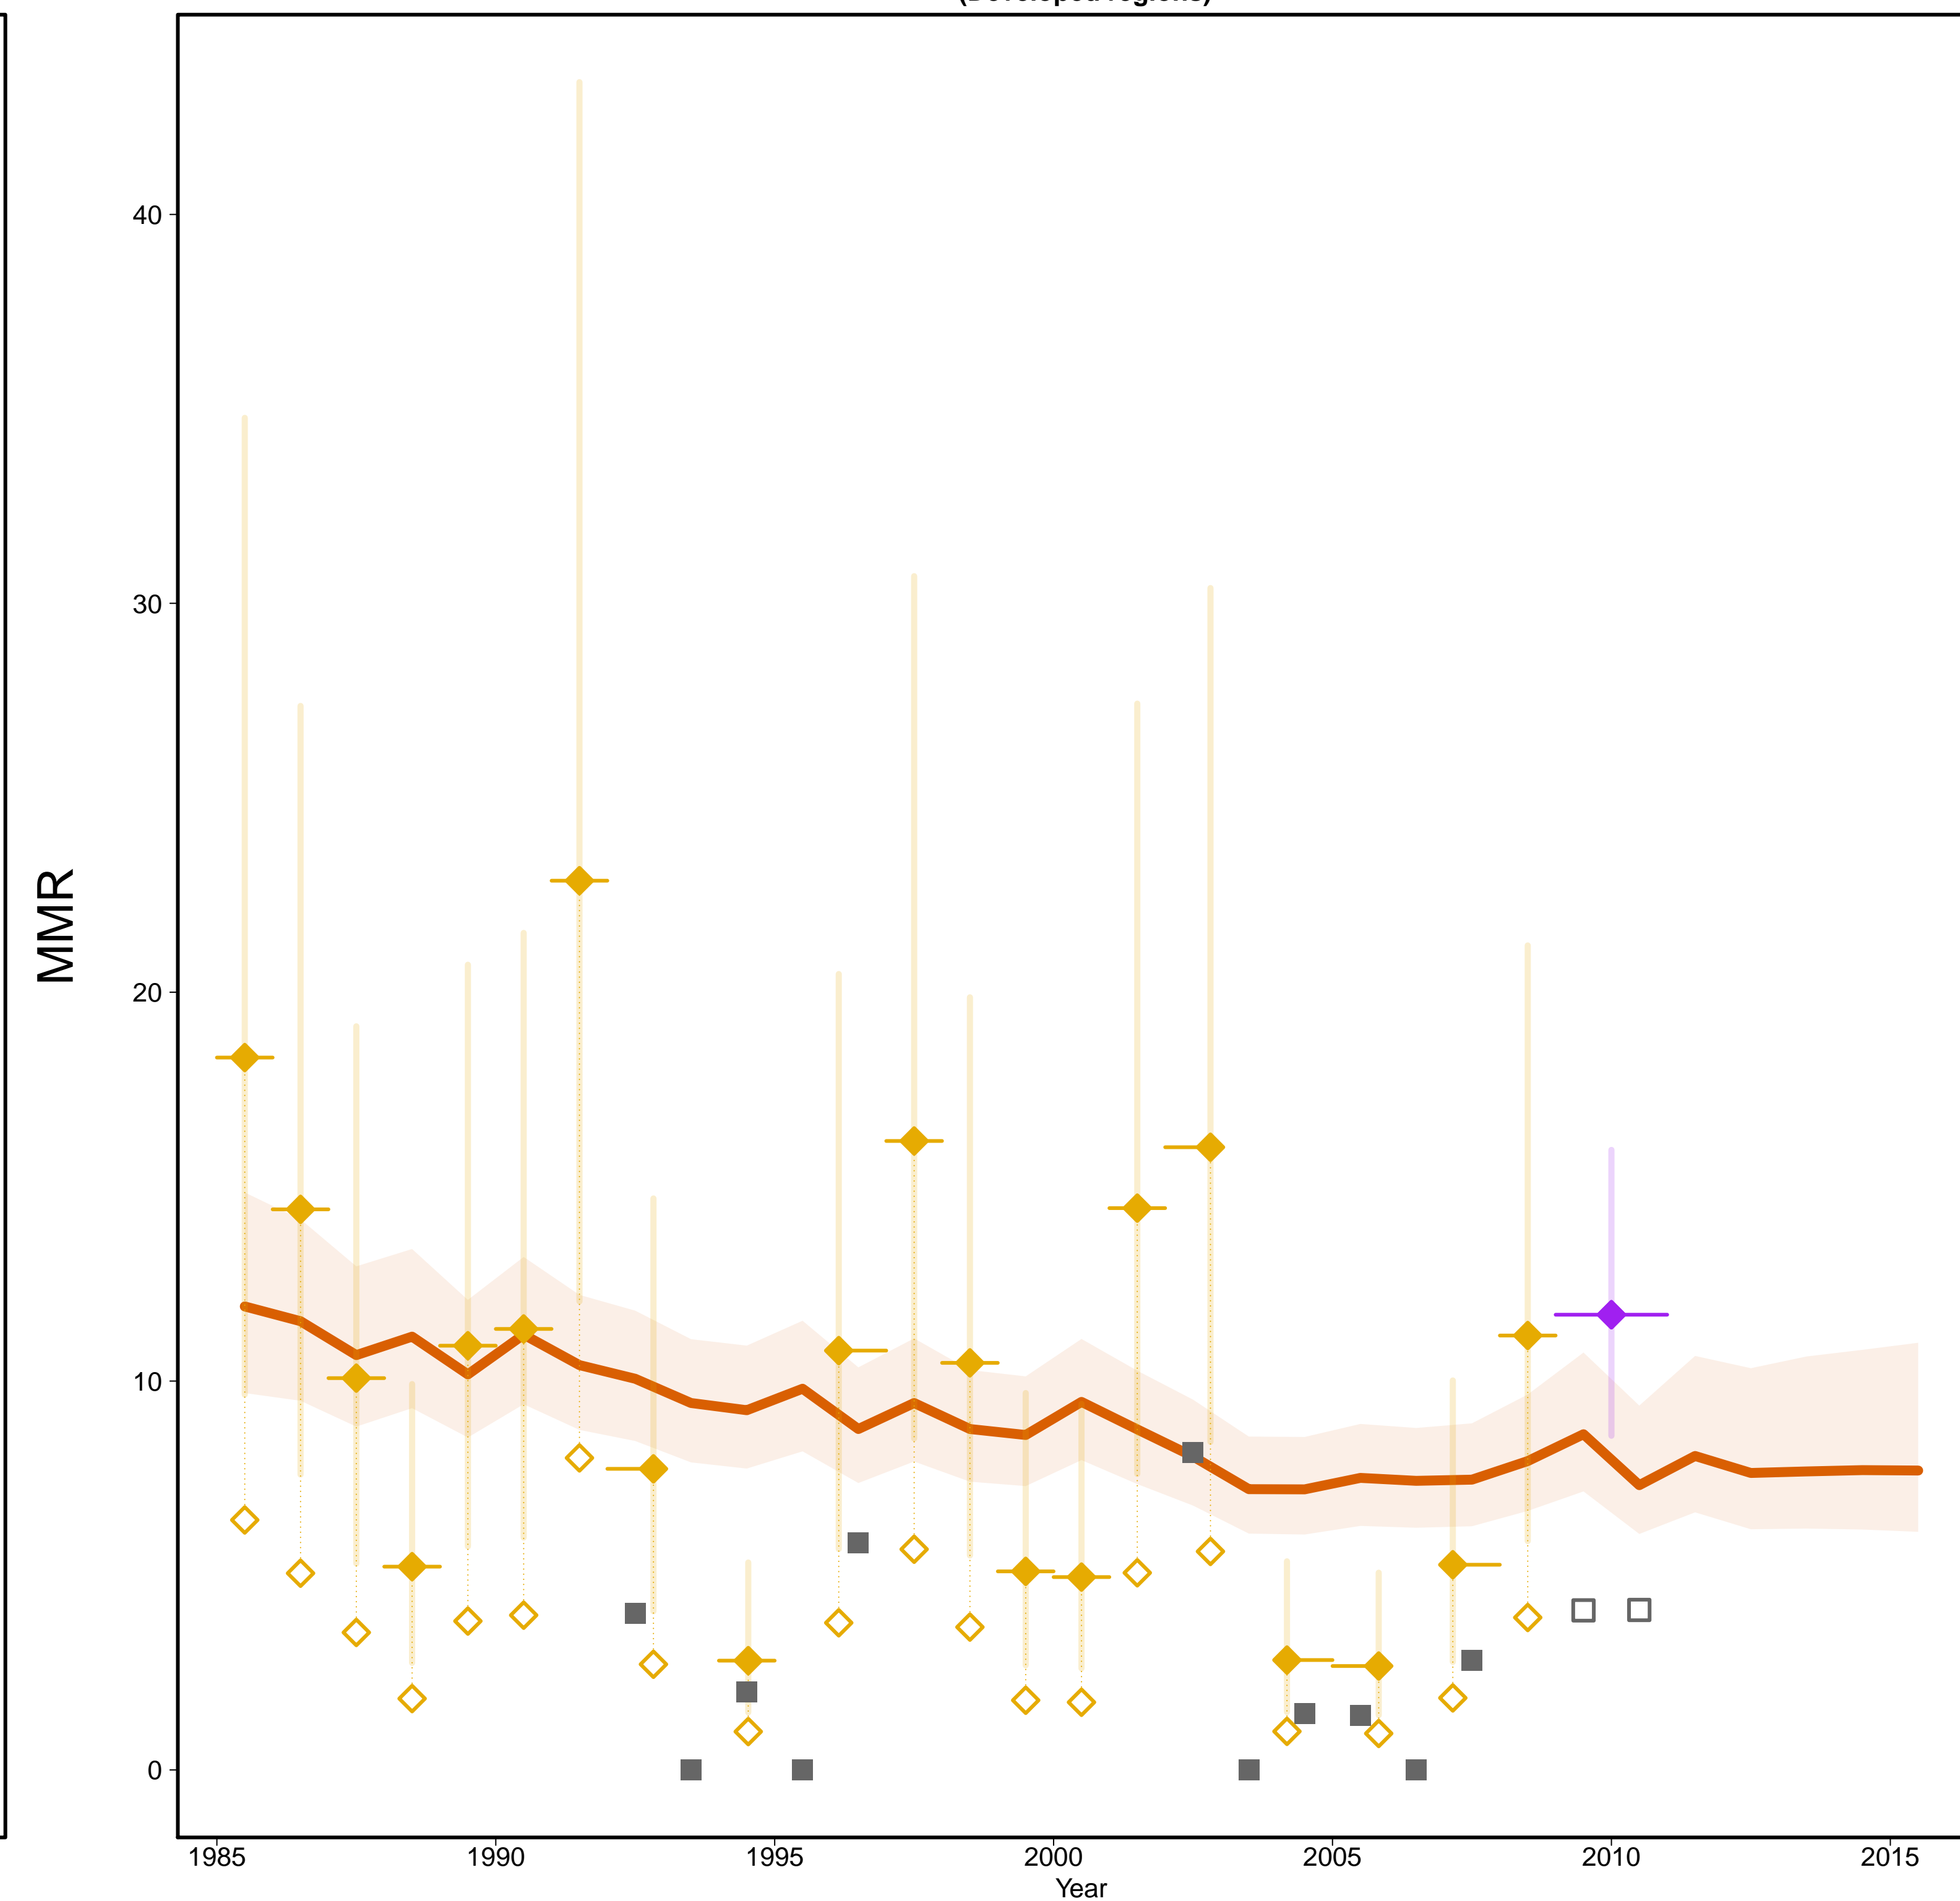

- Estimates —
- MMR Database 2015 —
- ◇ Observed Data
- ◆ Adjusted Data
- Data type —
- ◆ VR
- ◆ Spec. studies
- Reported VR before recalc.  
(related to 0 obs. mat. death)
- Excluded VR data  
(overlap with specialized study)

Gross Domestic Product

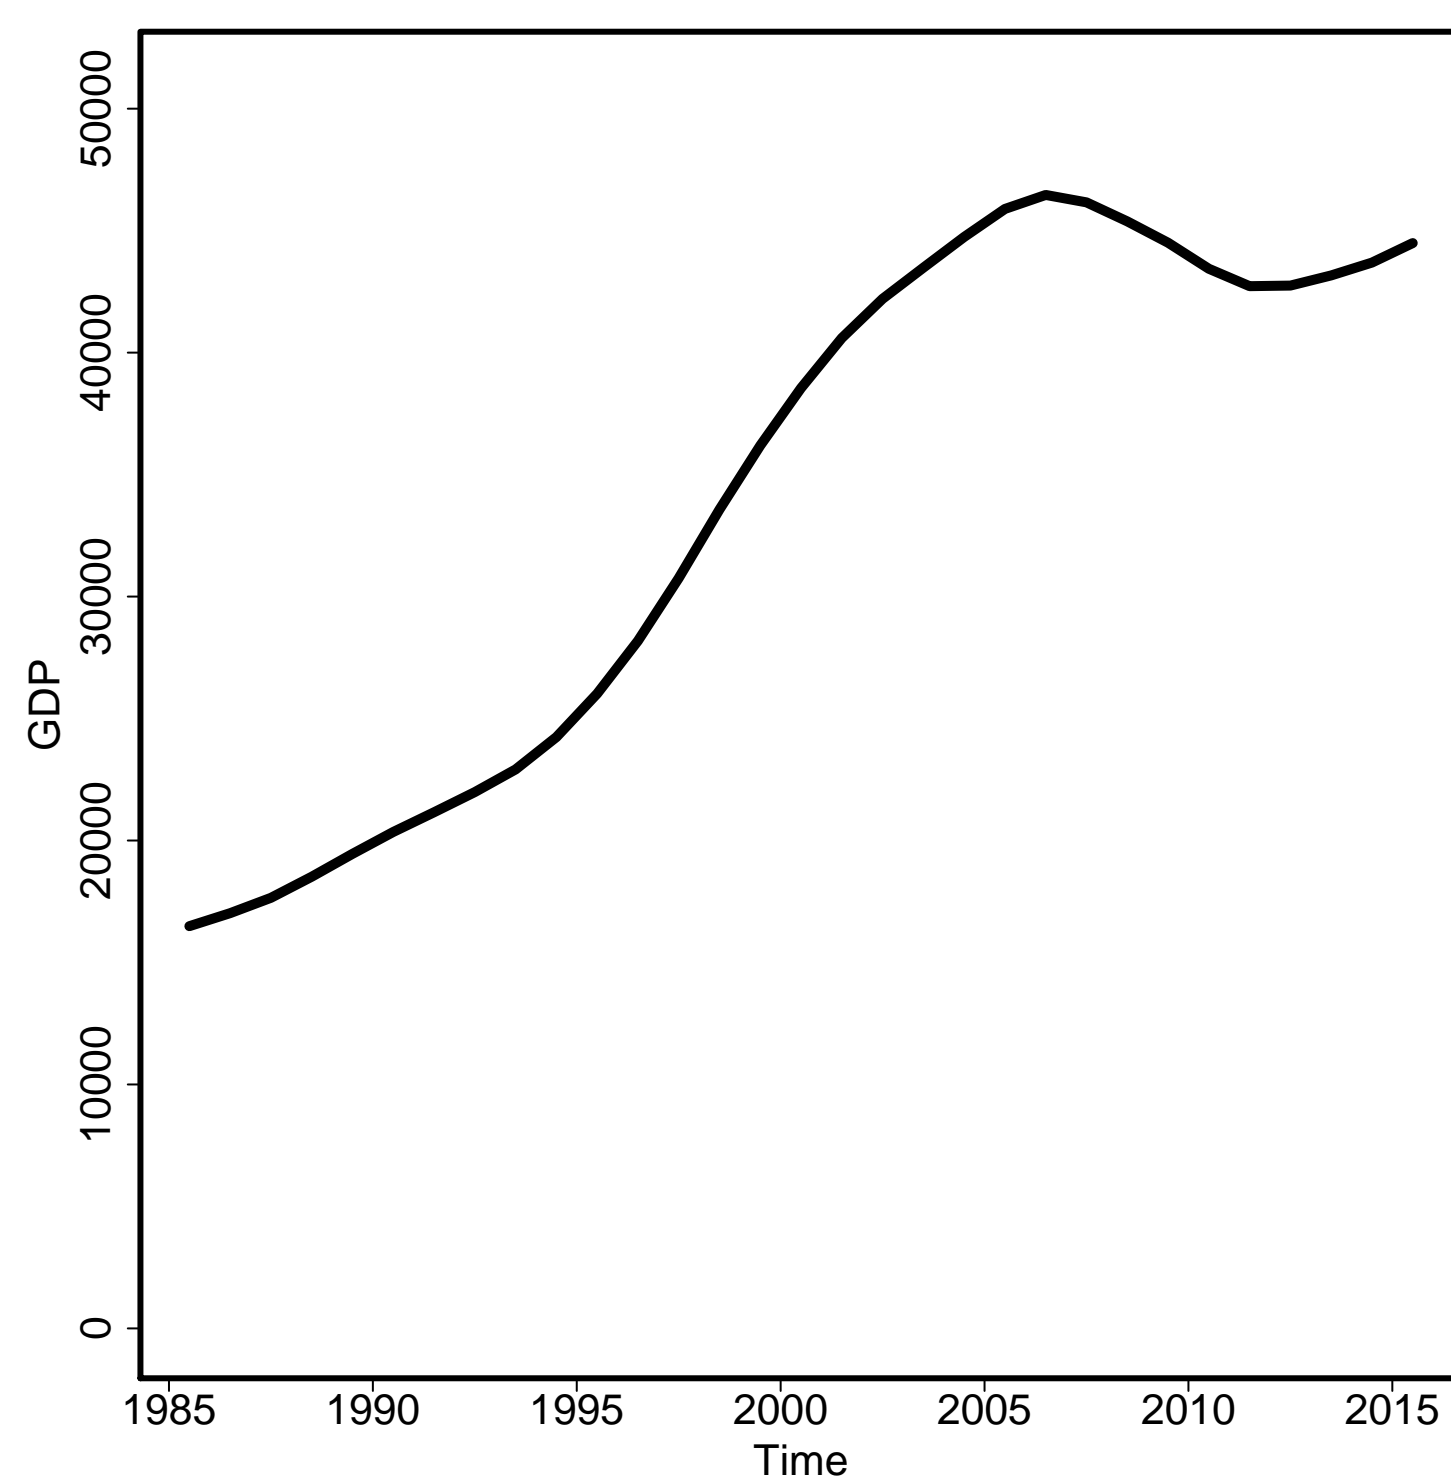

General Fertility Rate

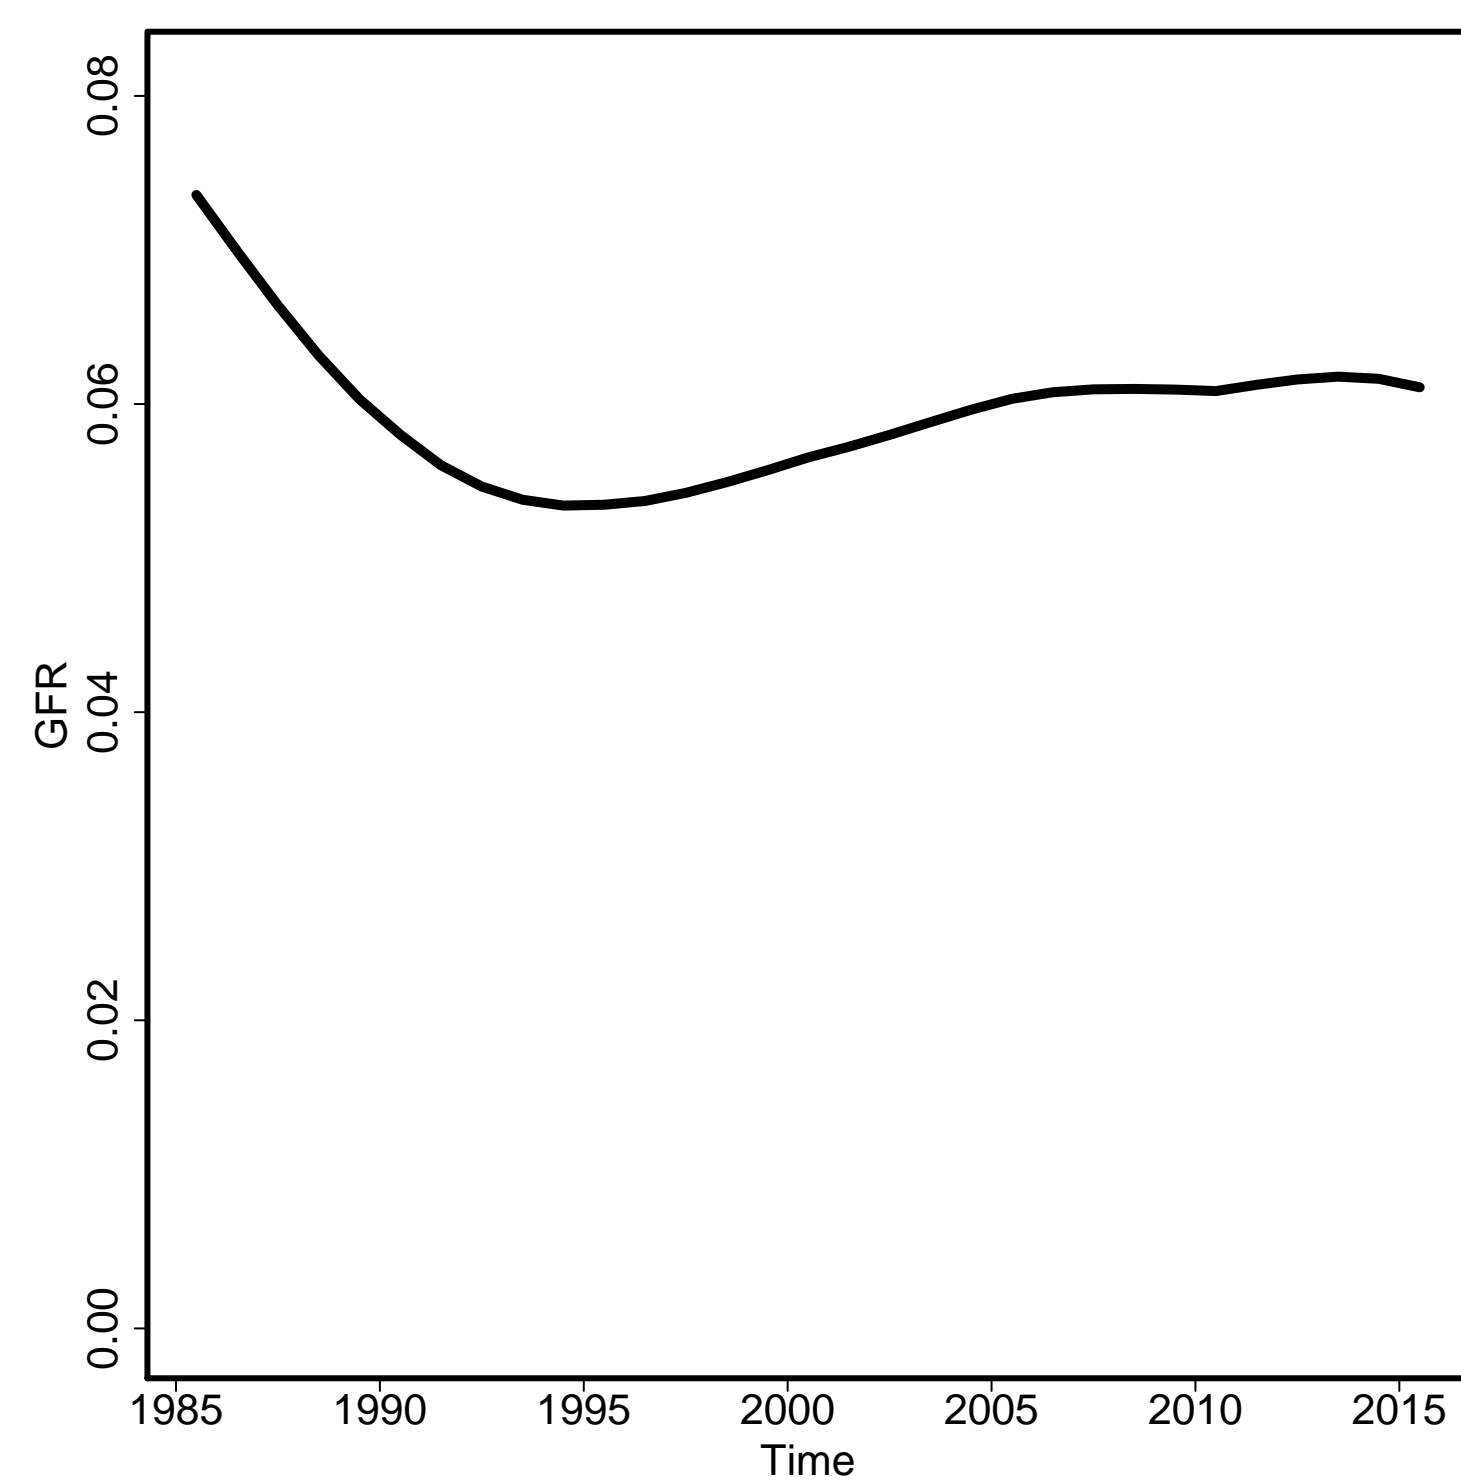

Skilled Attendance to Birth

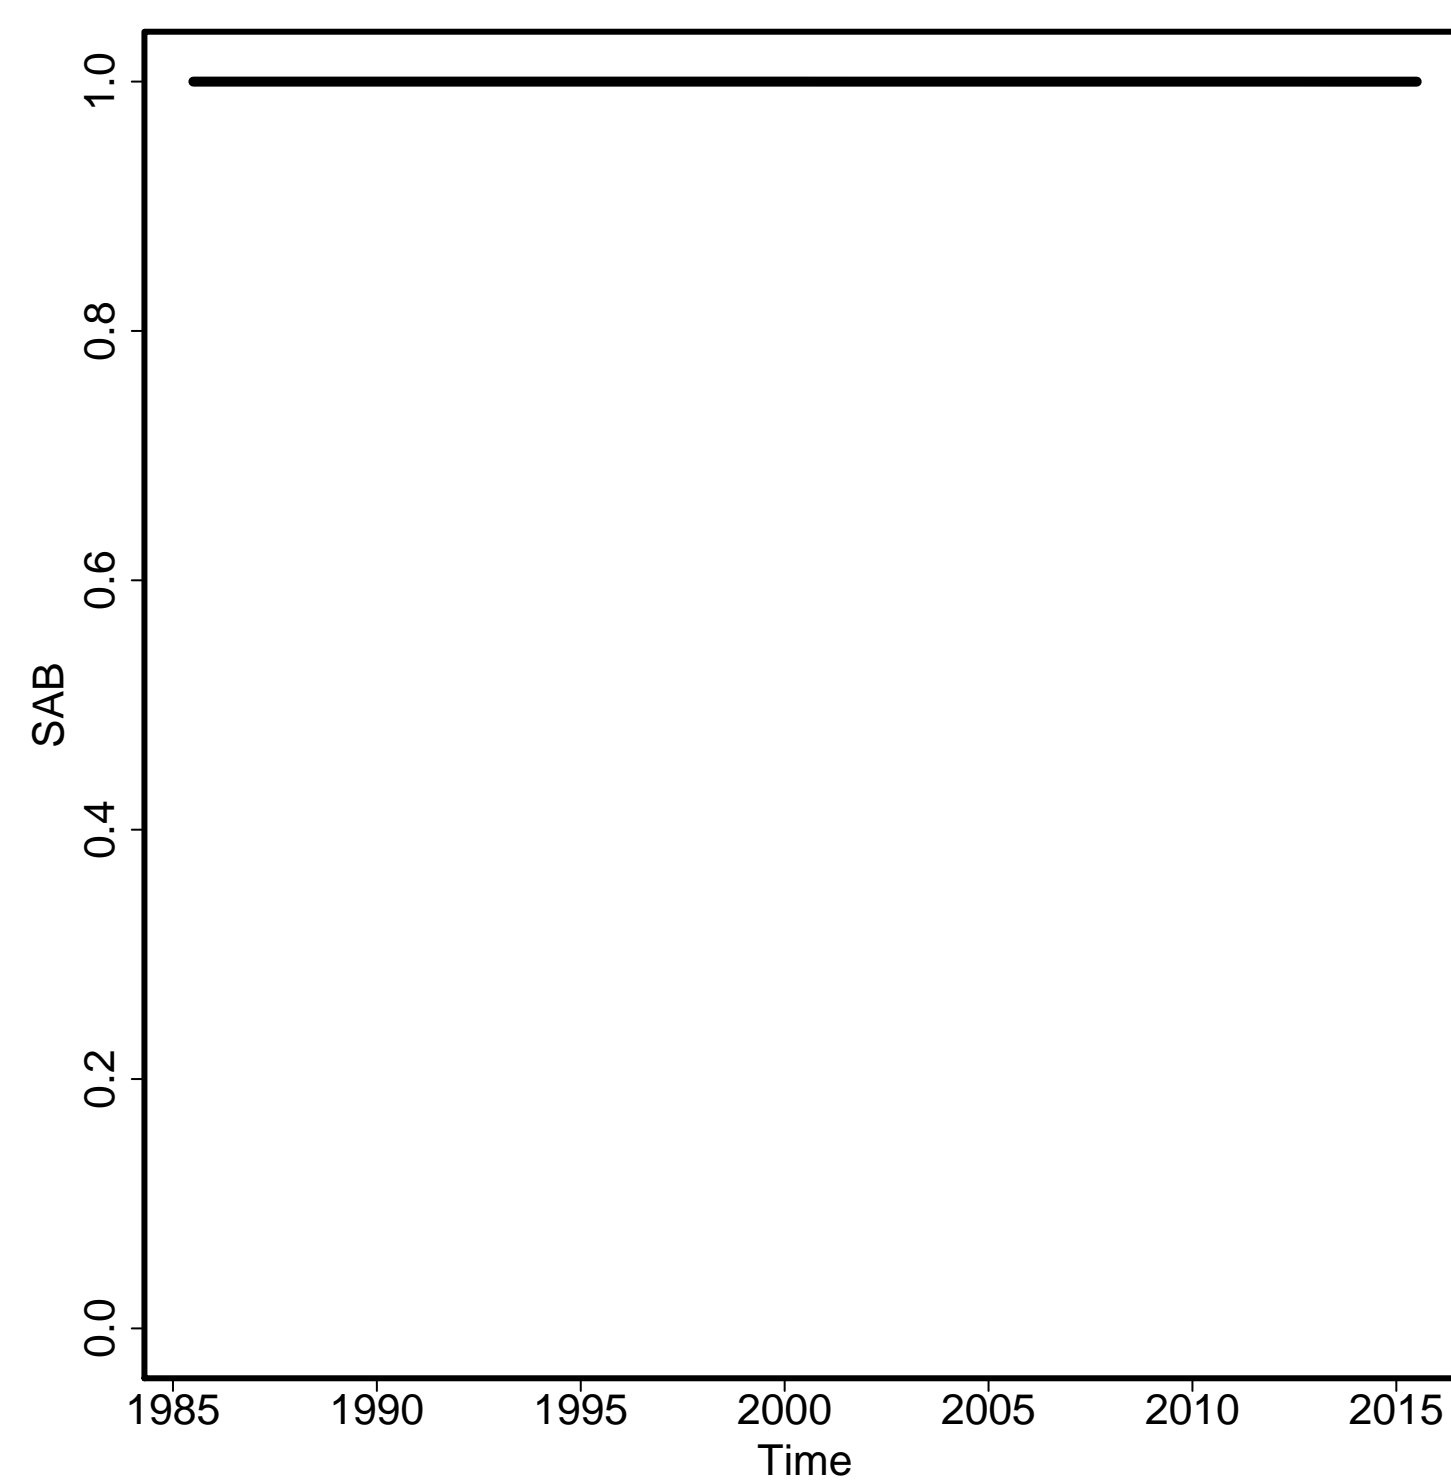

Envelope/Births

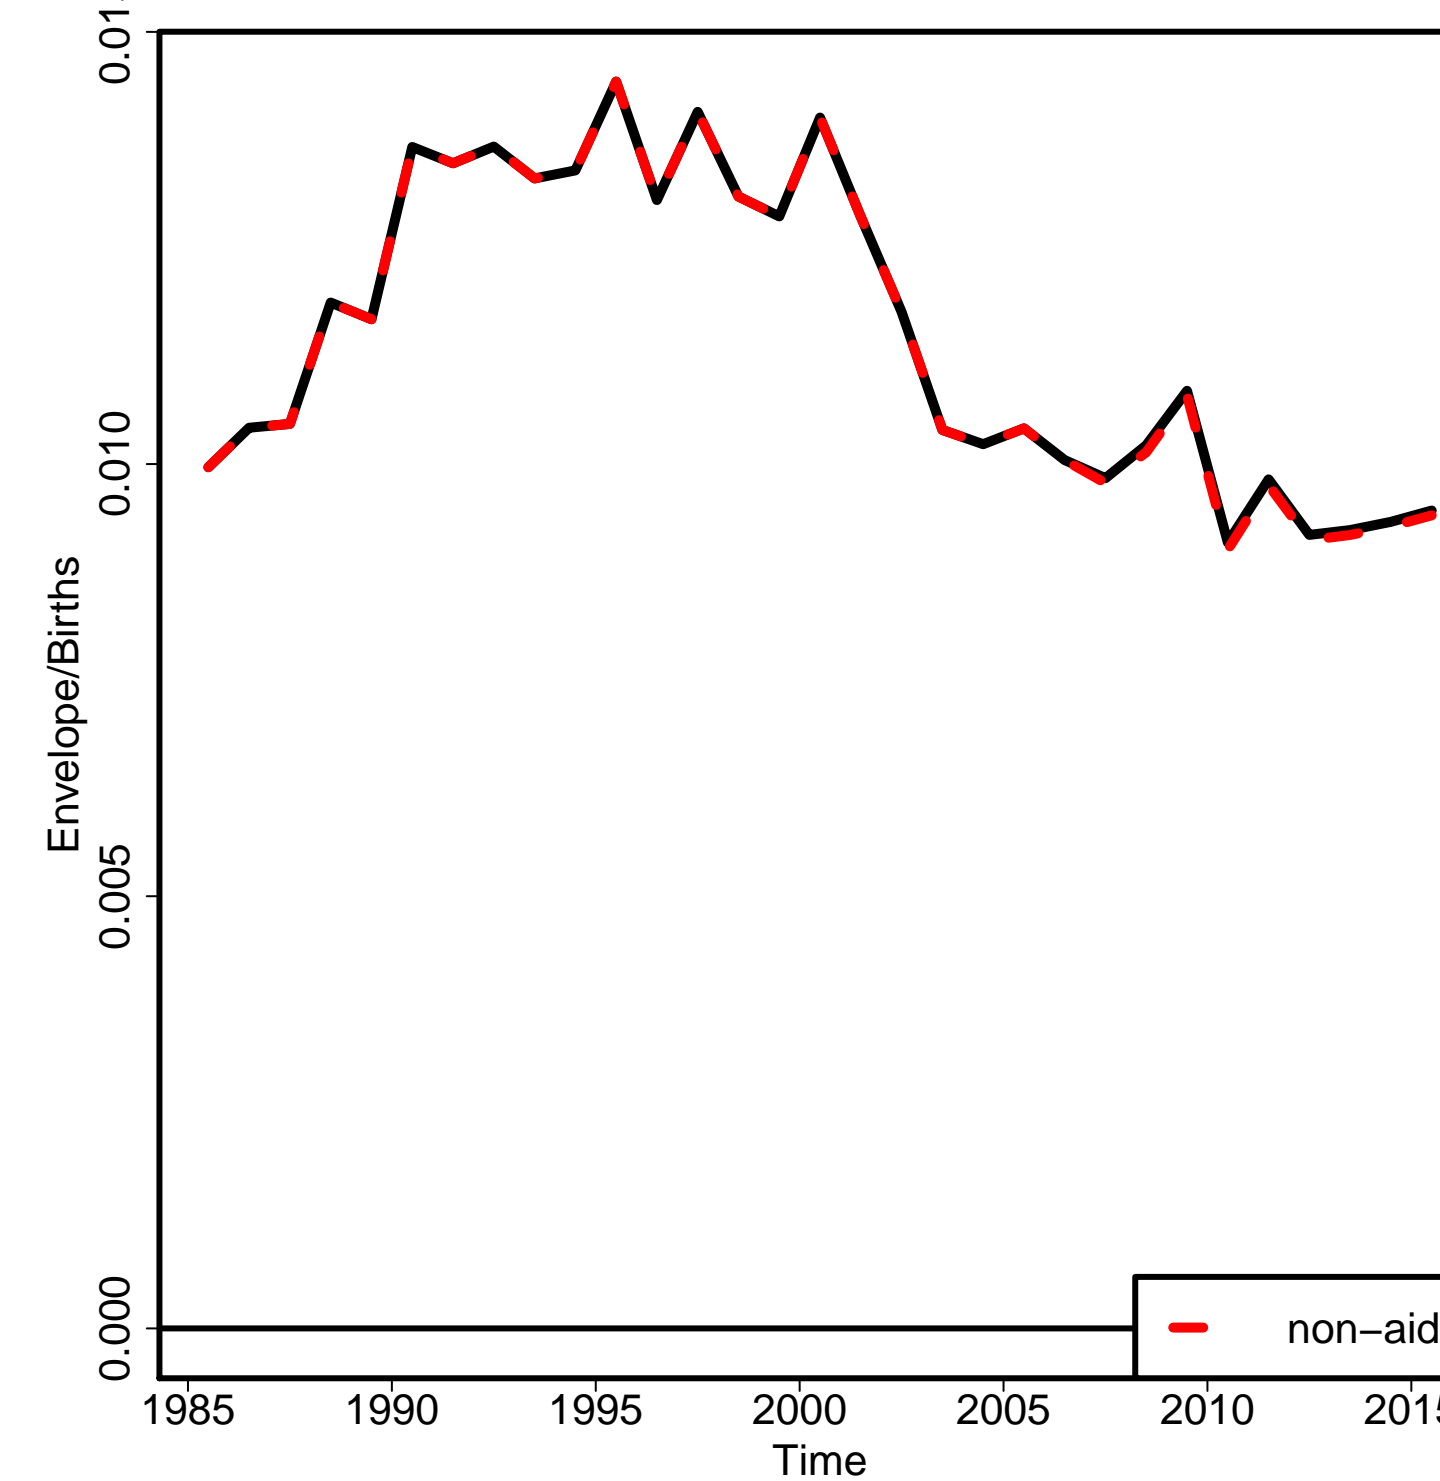

Non-aids MMR

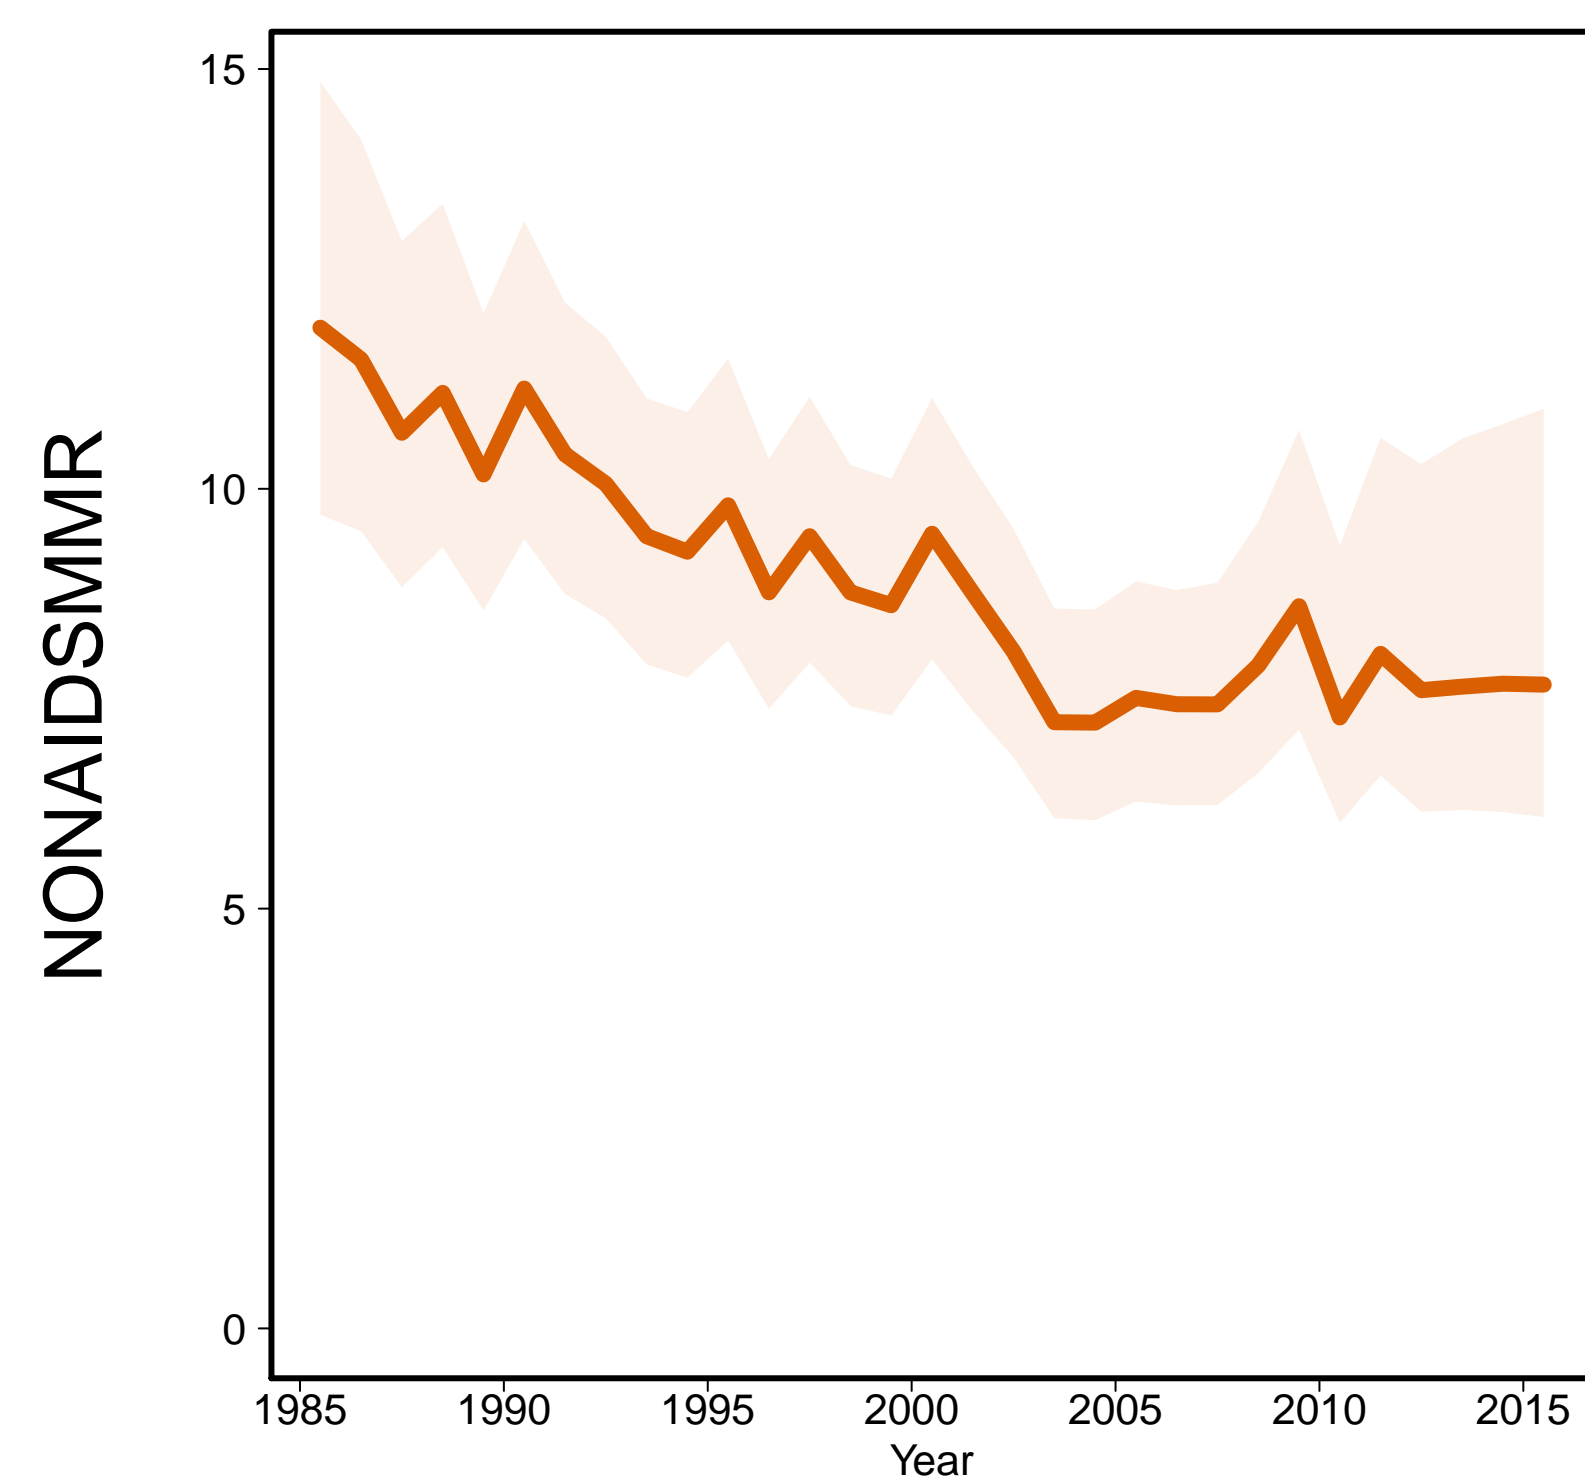

Aids MMR

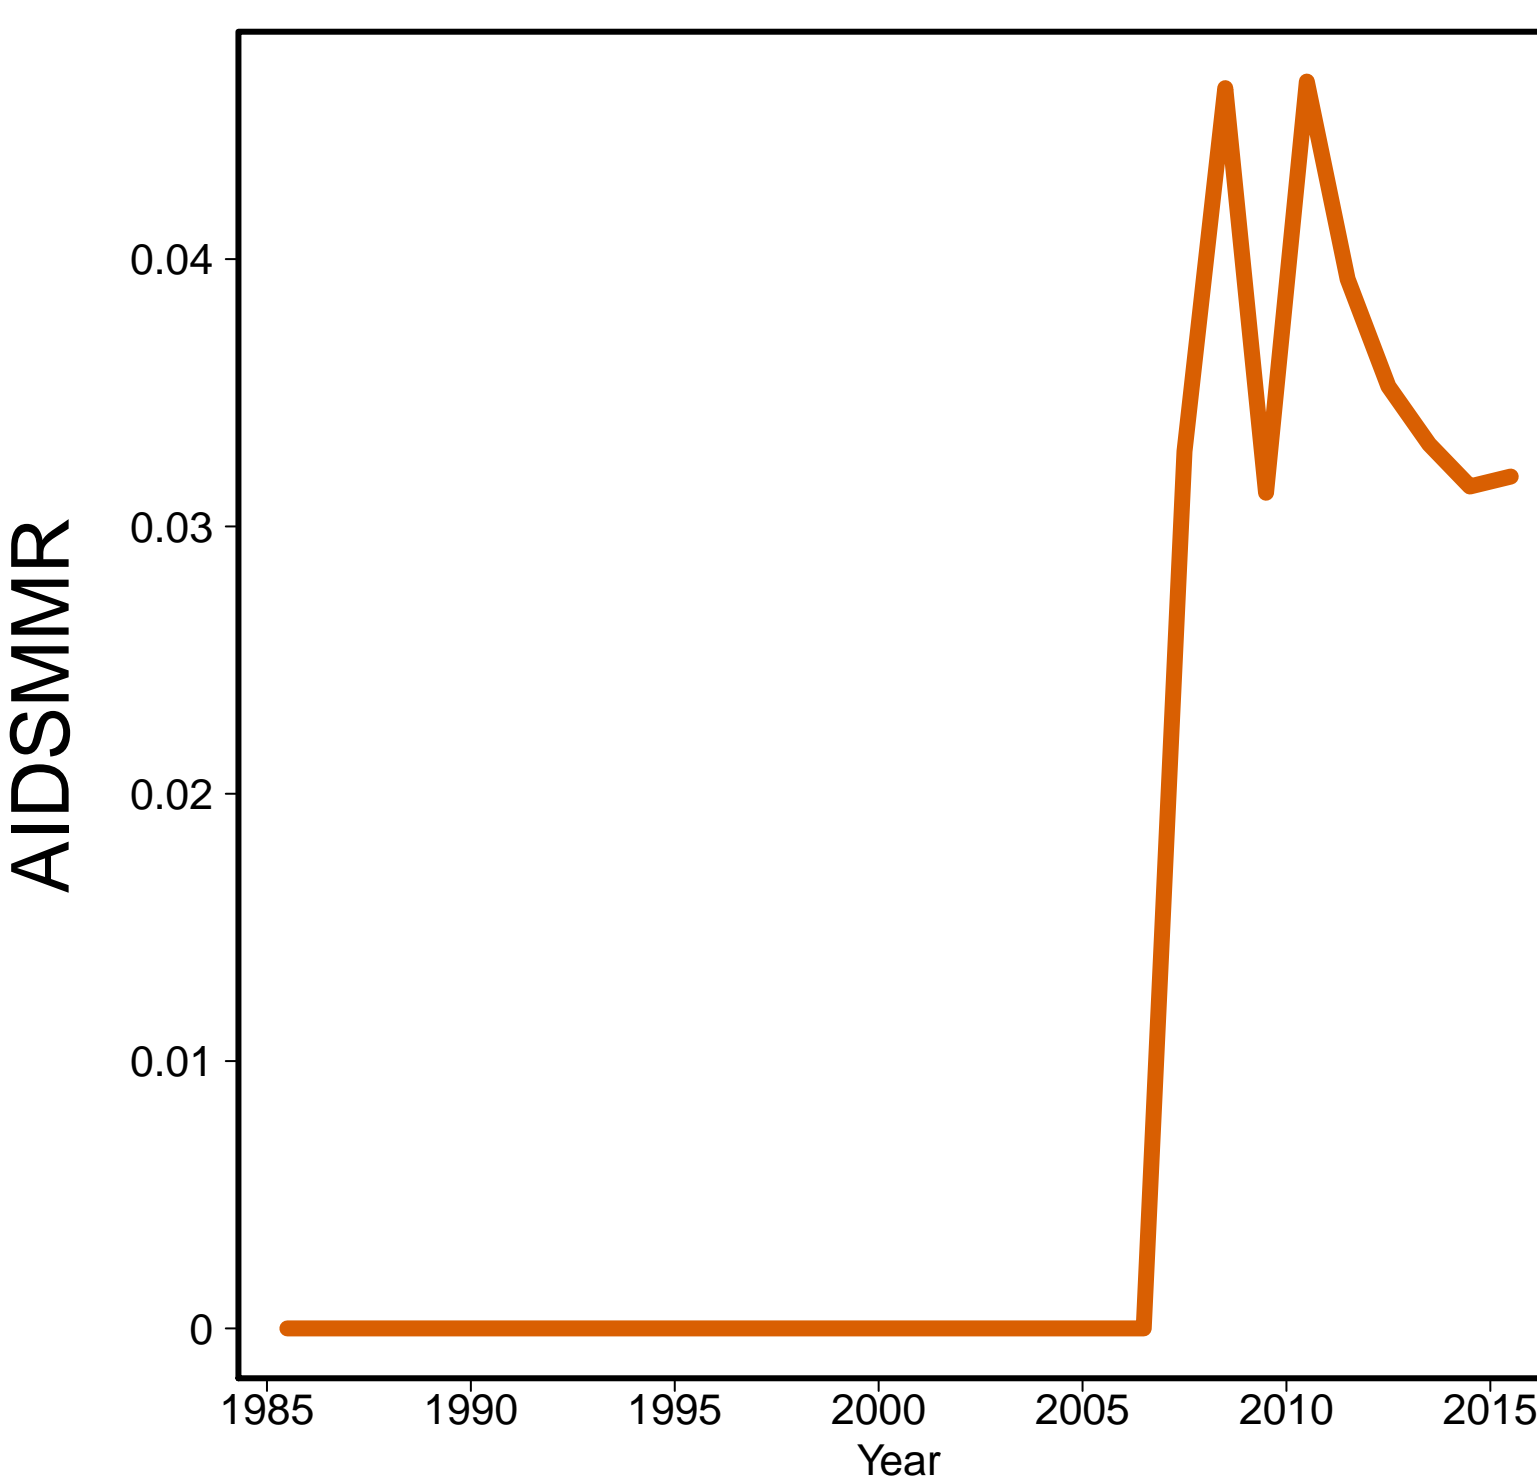

Israel [ISR]  
(Western Asia)

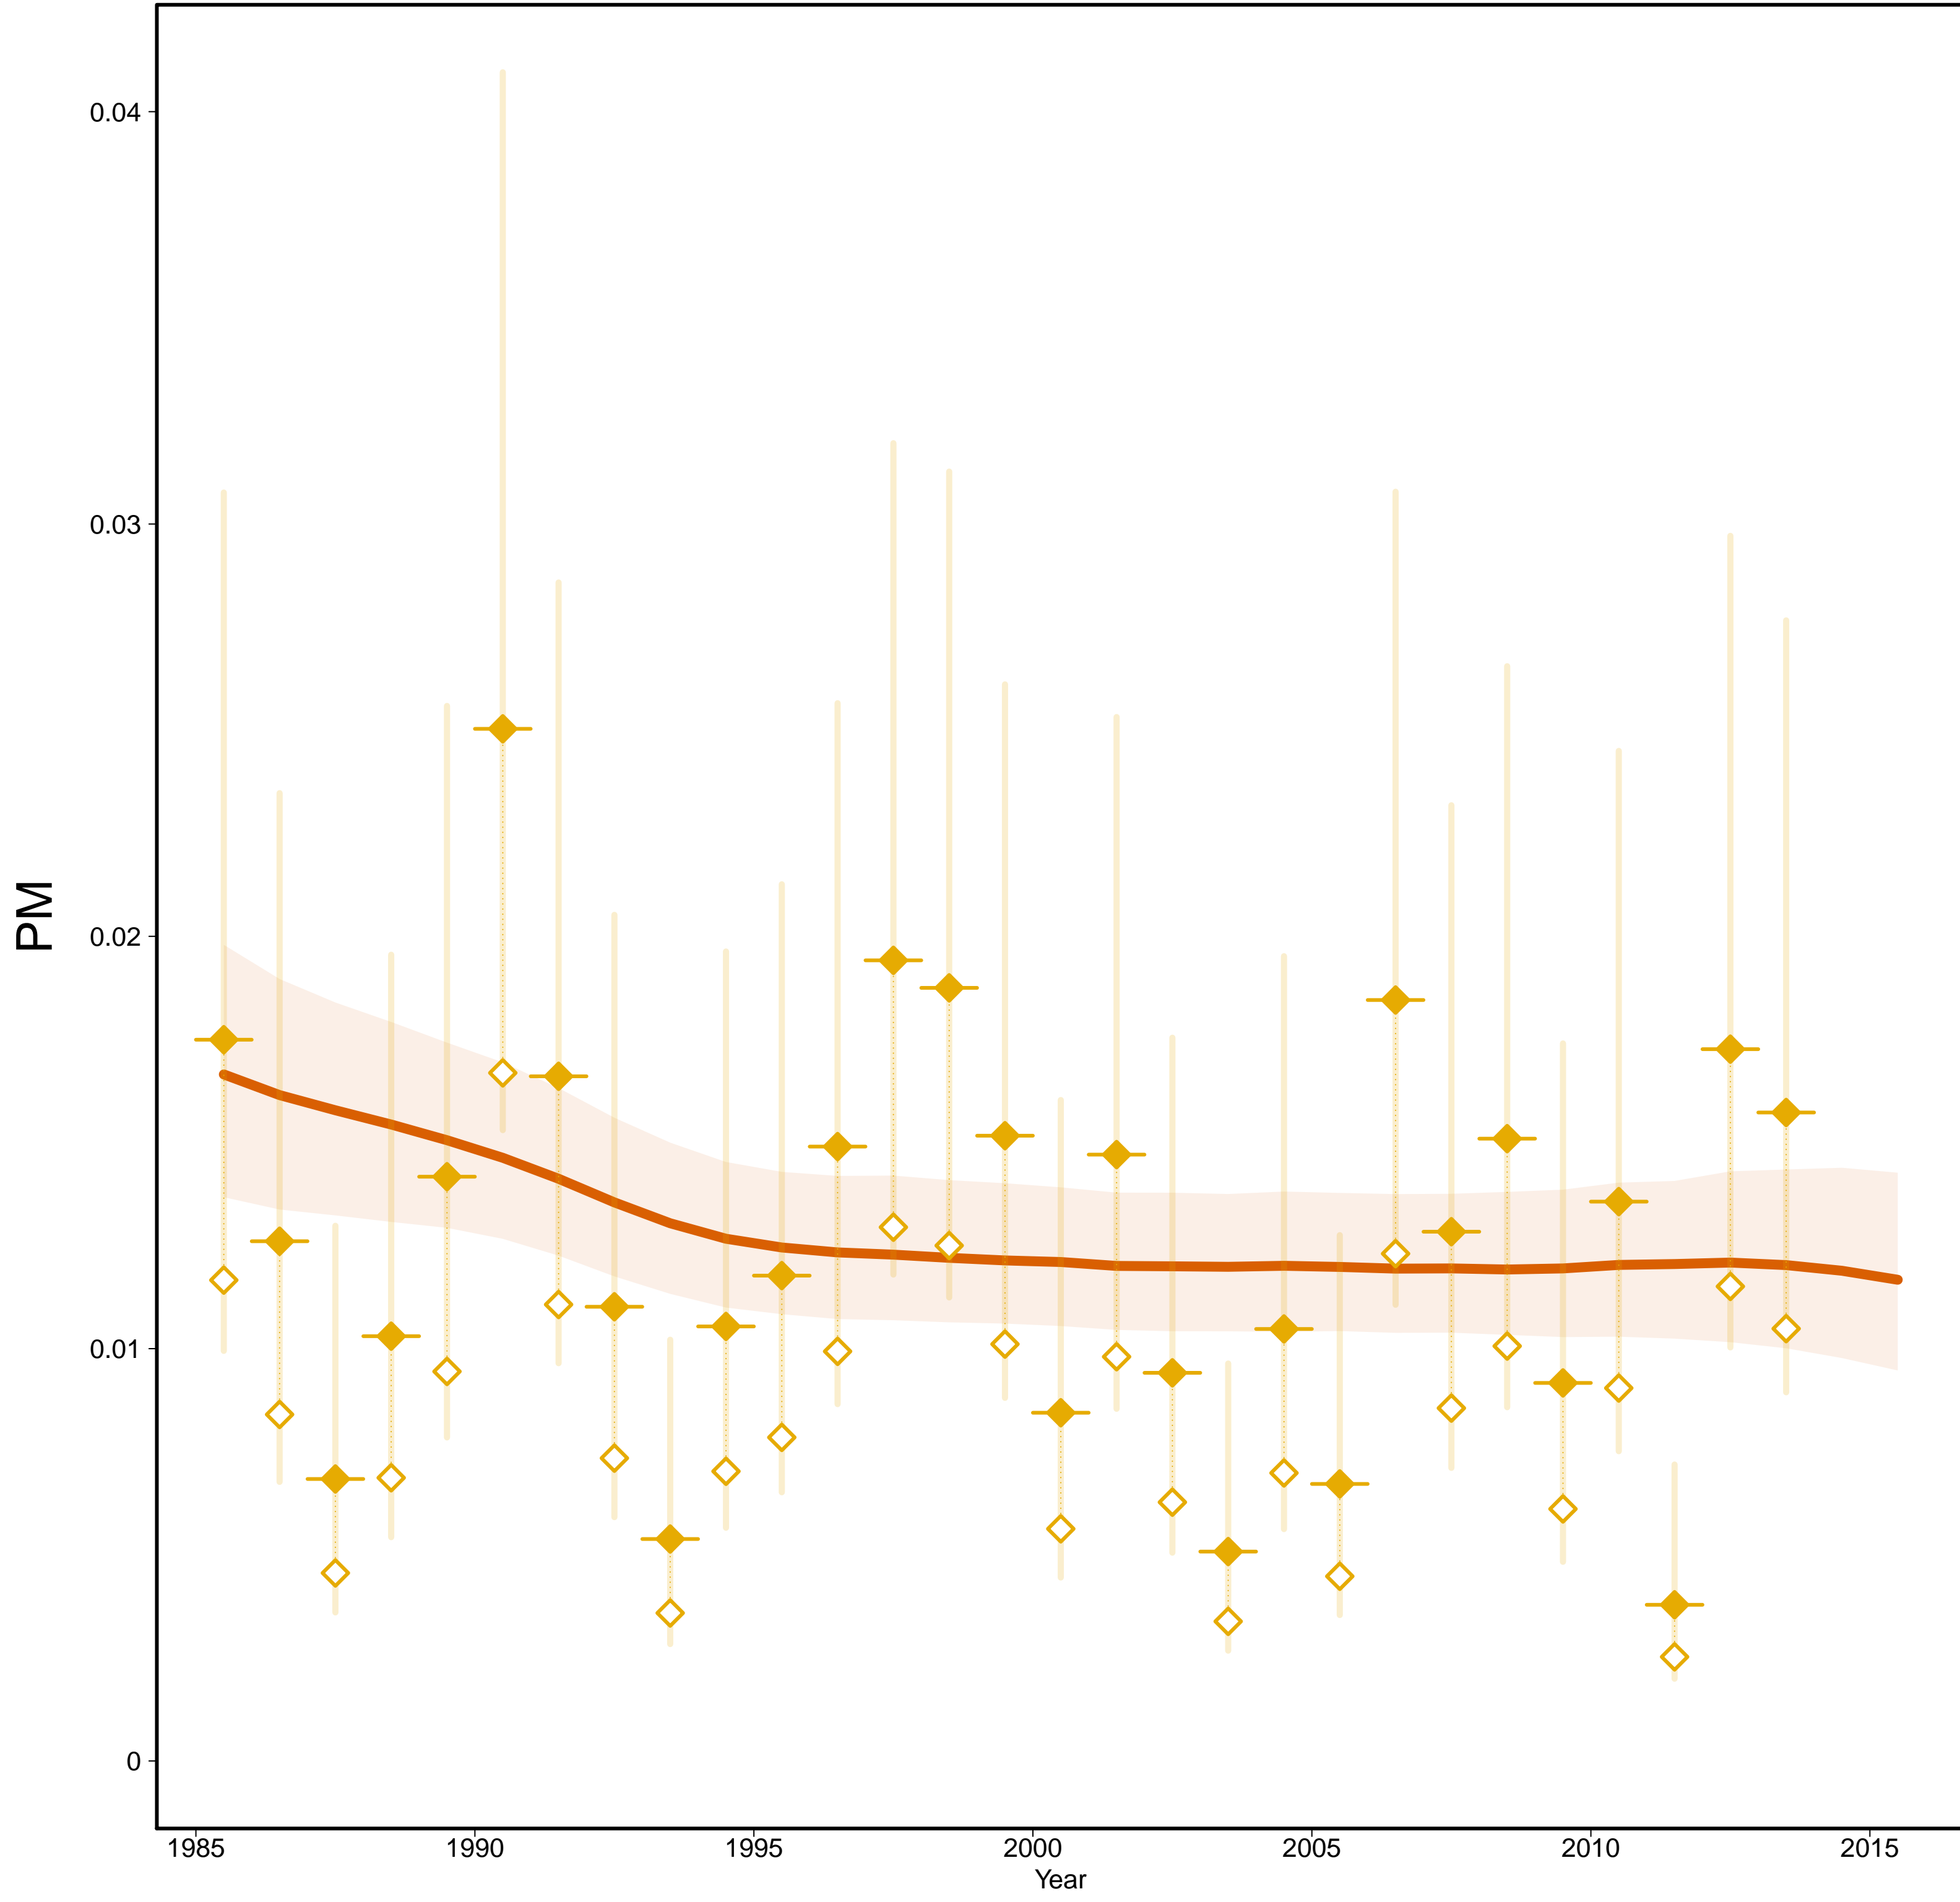

Israel [ISR]  
(Western Asia)

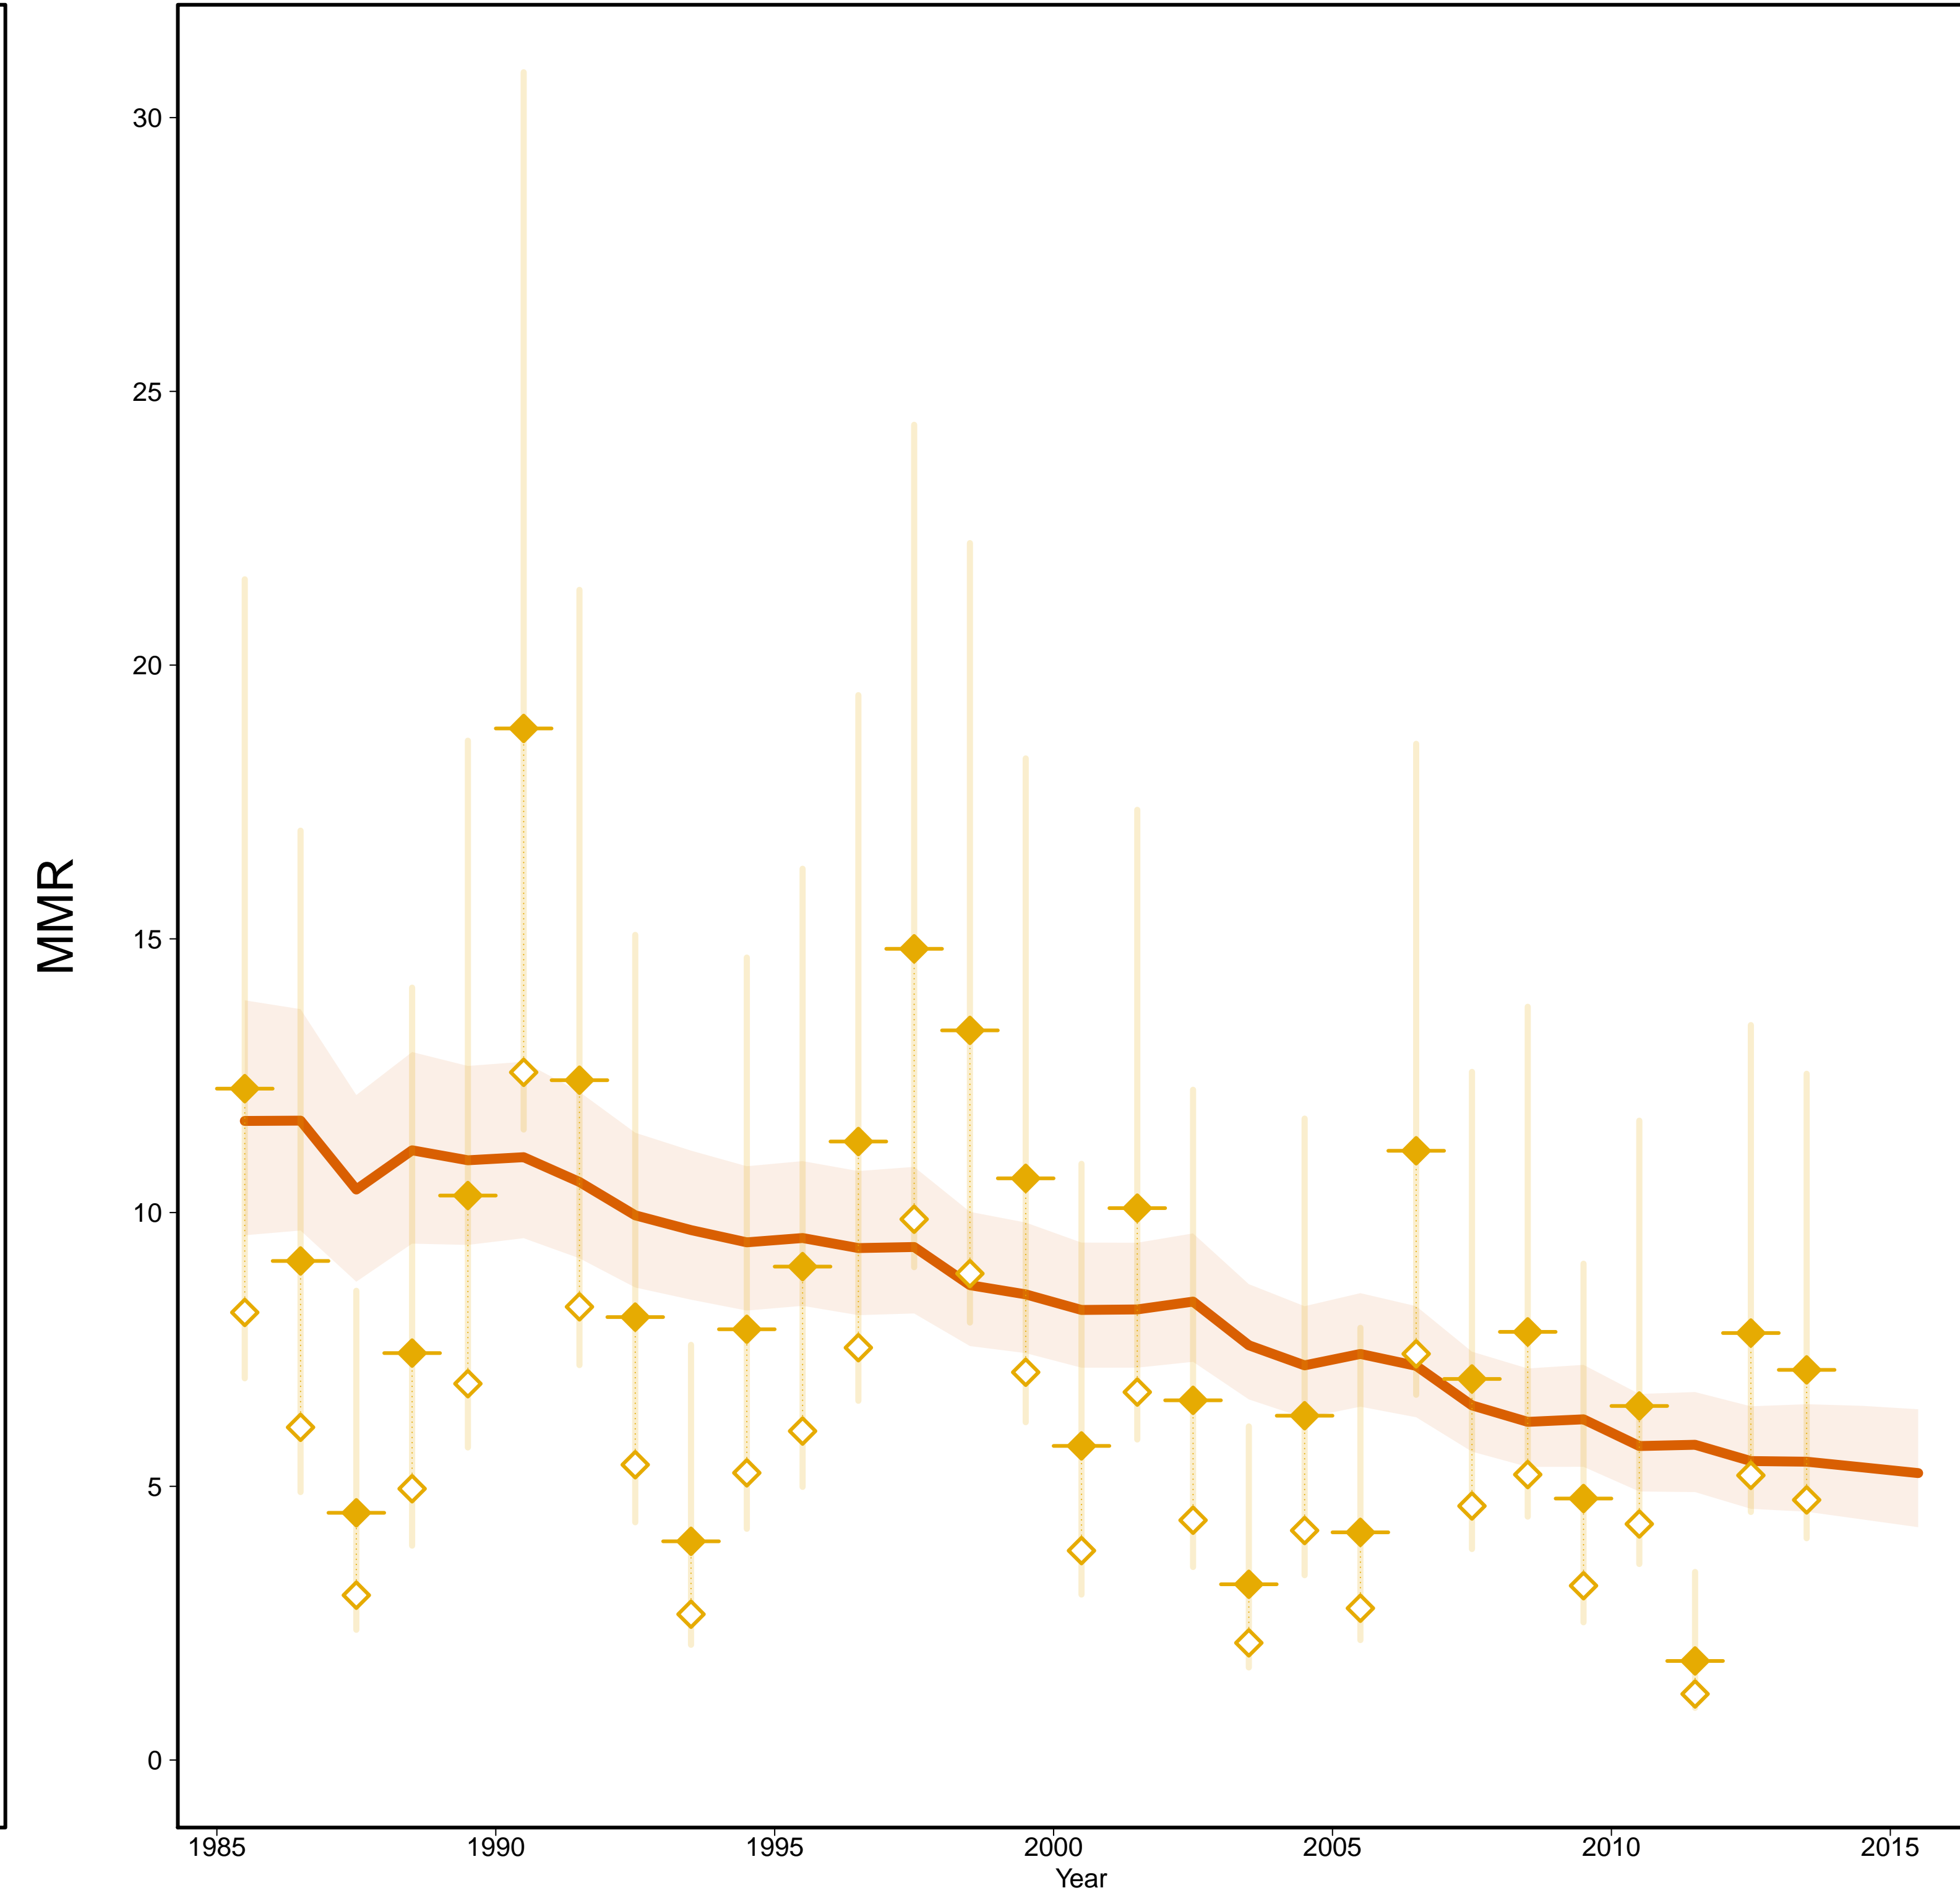

- Estimates —
- MMR Database 2015 —
- ◇ Observed Data
- ◆ Adjusted Data
- Data type —
- ◆ VR

Gross Domestic Product

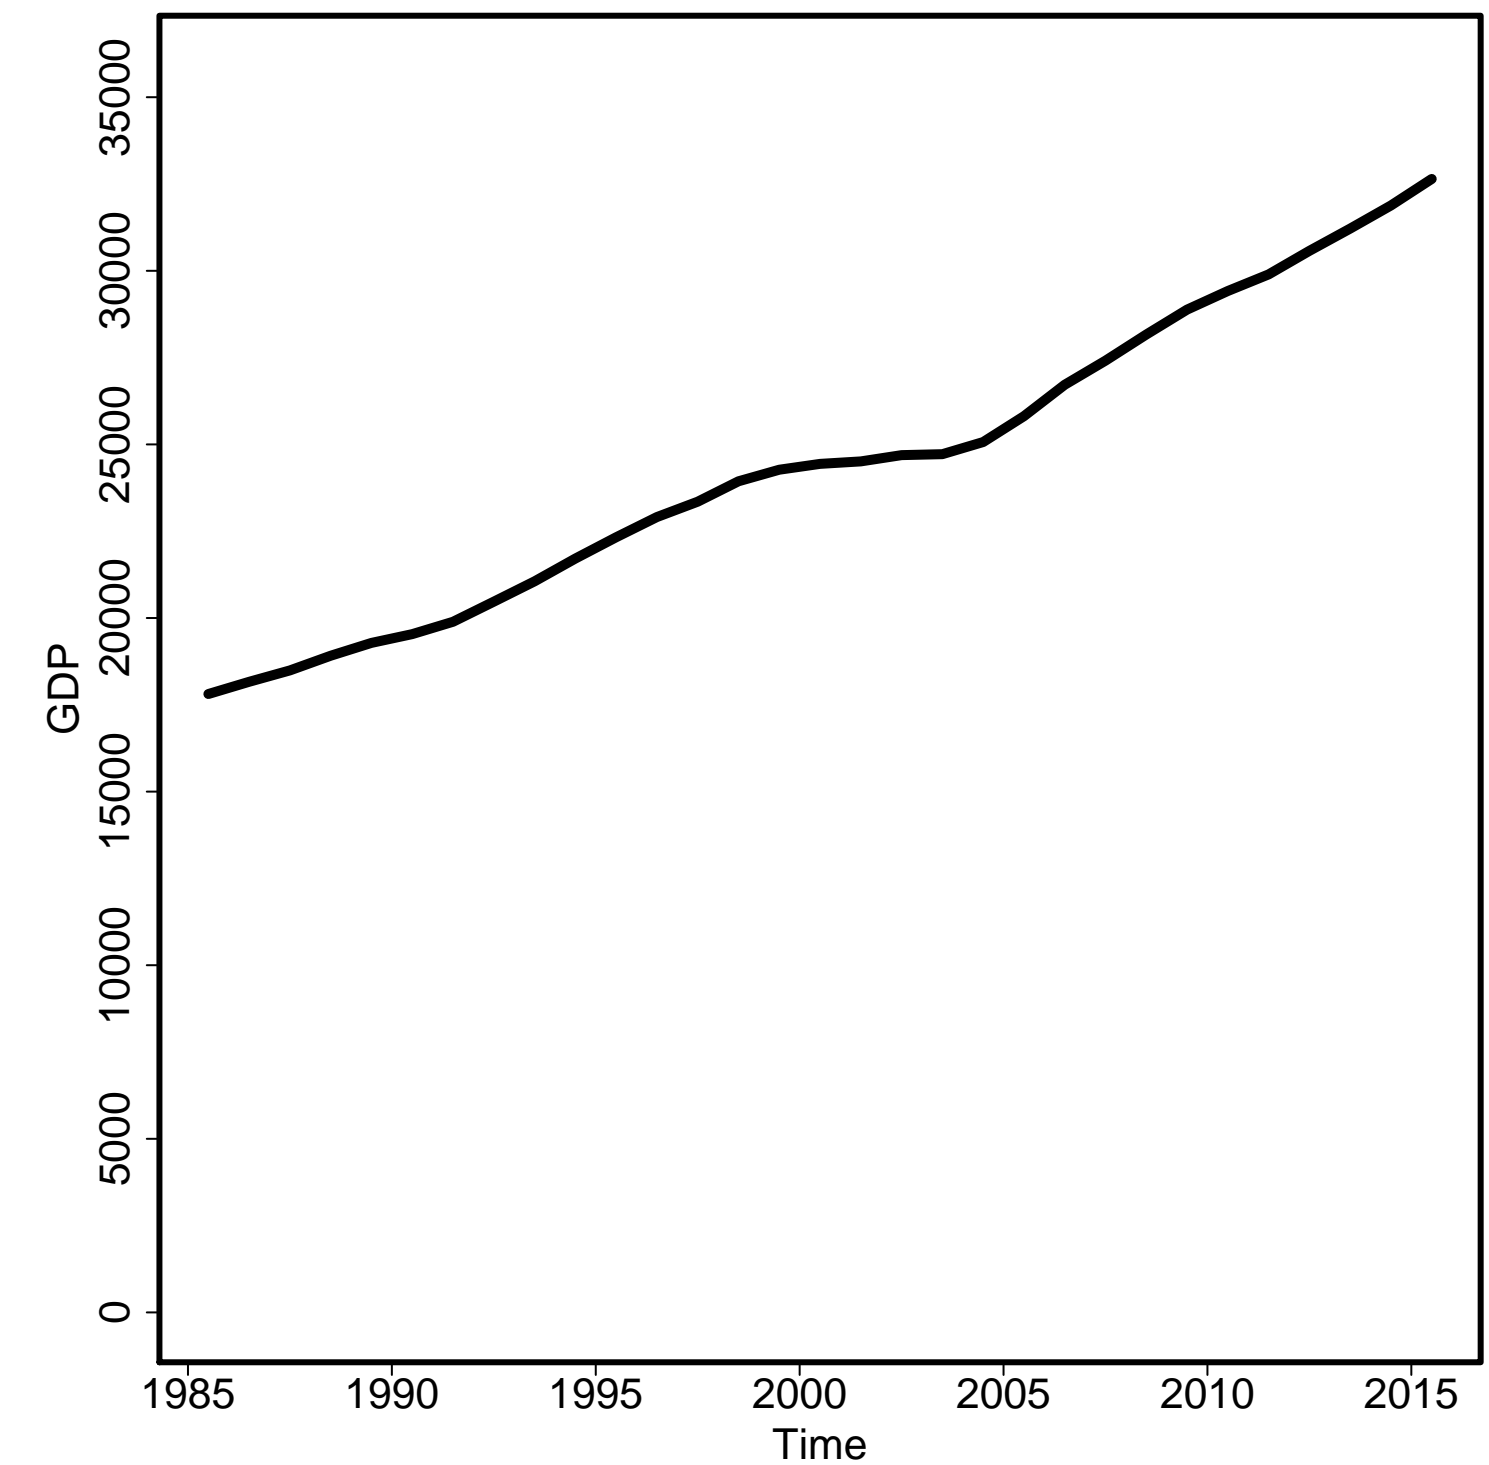

General Fertility Rate

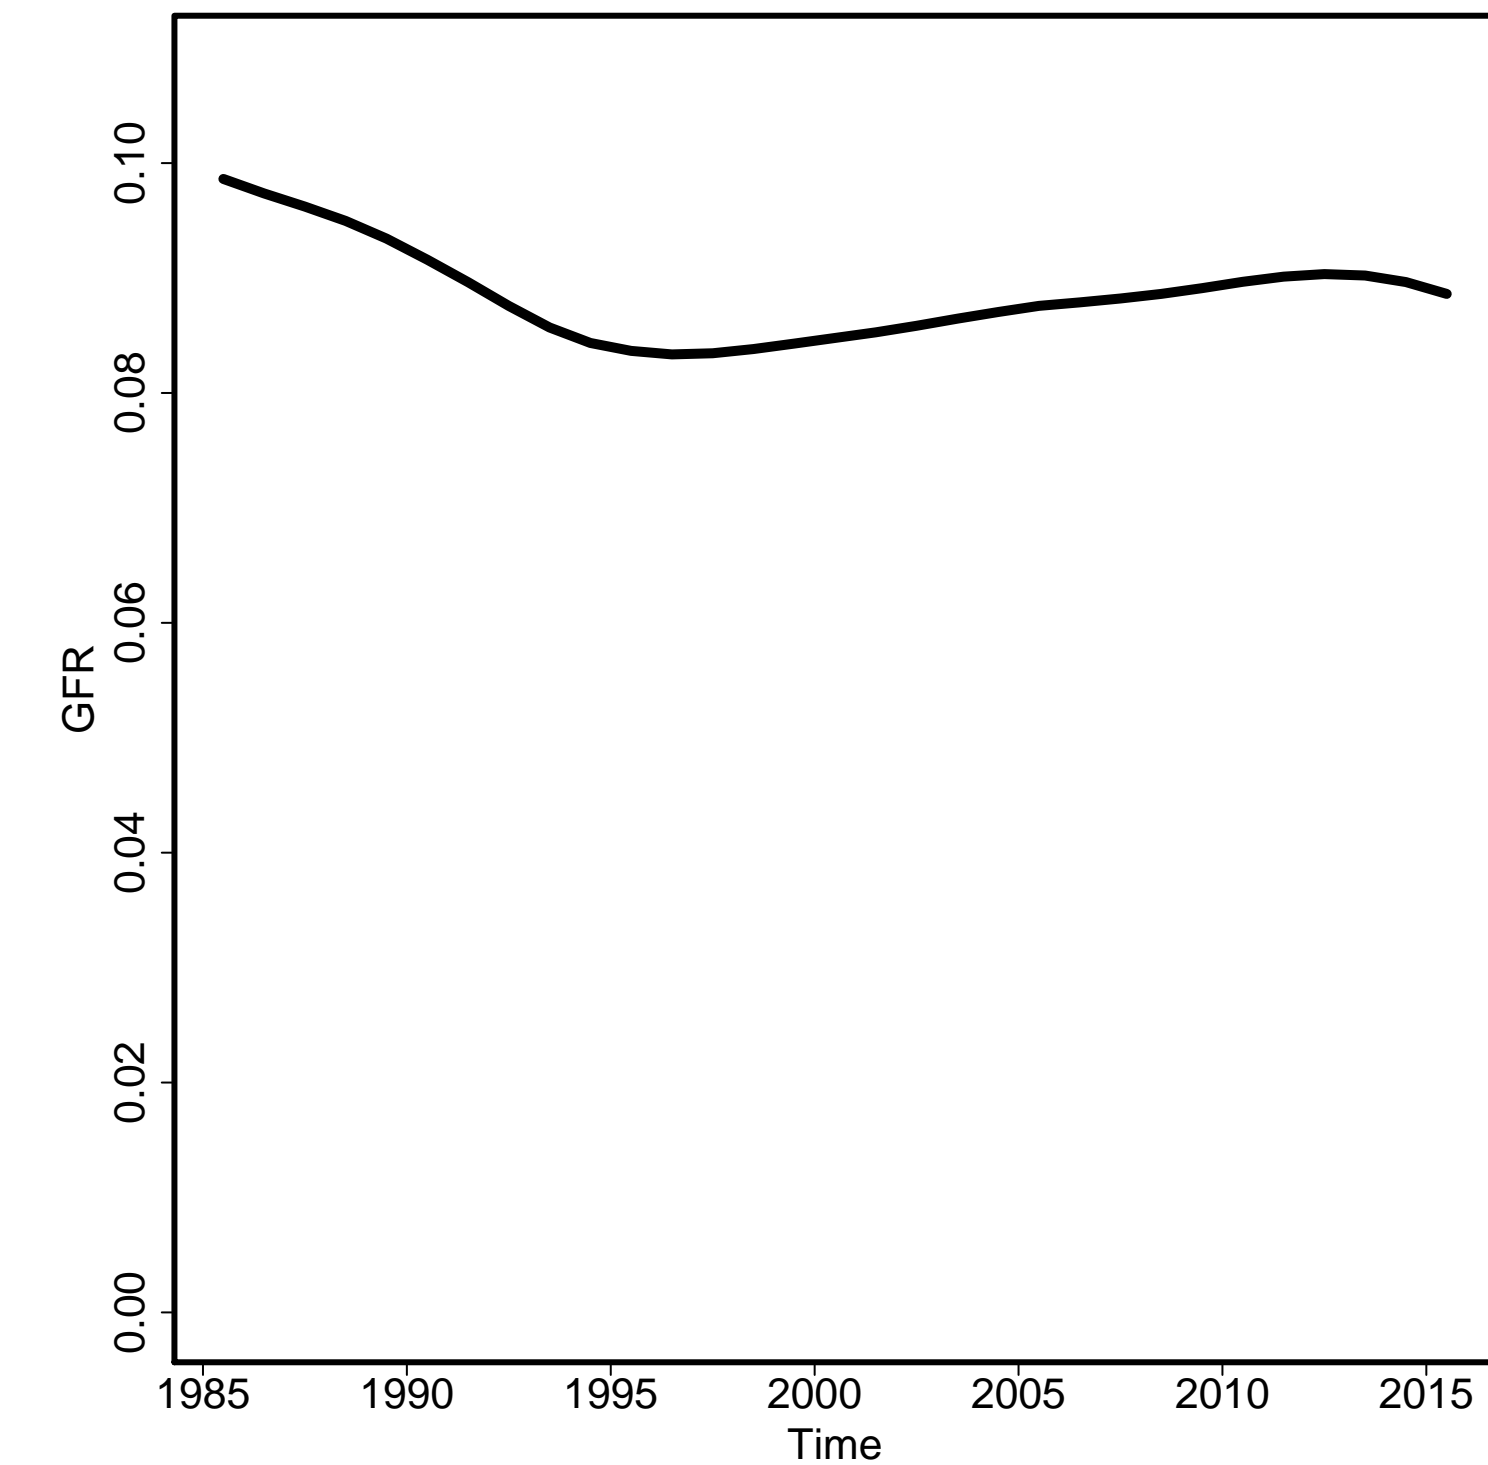

Skilled Attendance to Birth



Envelope/Births

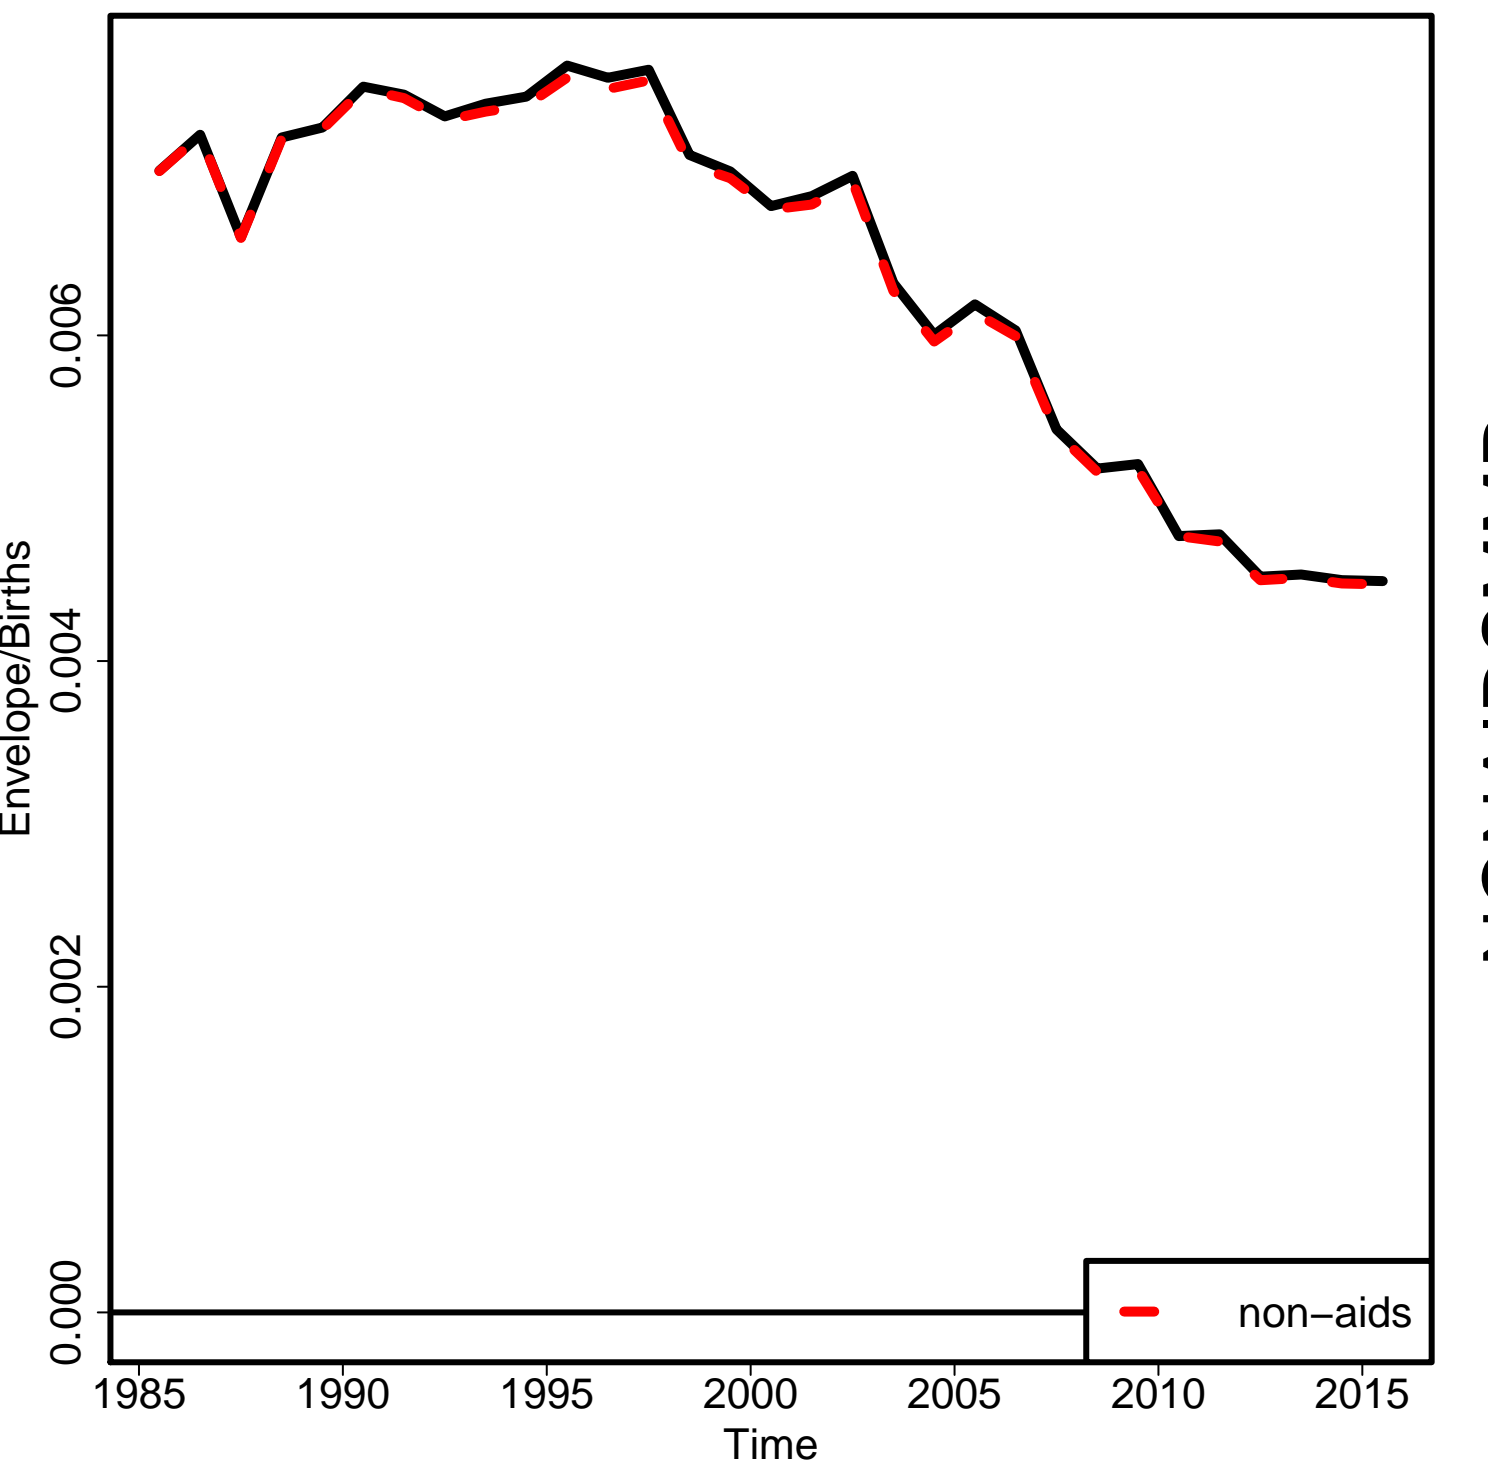

Non-aids MMR

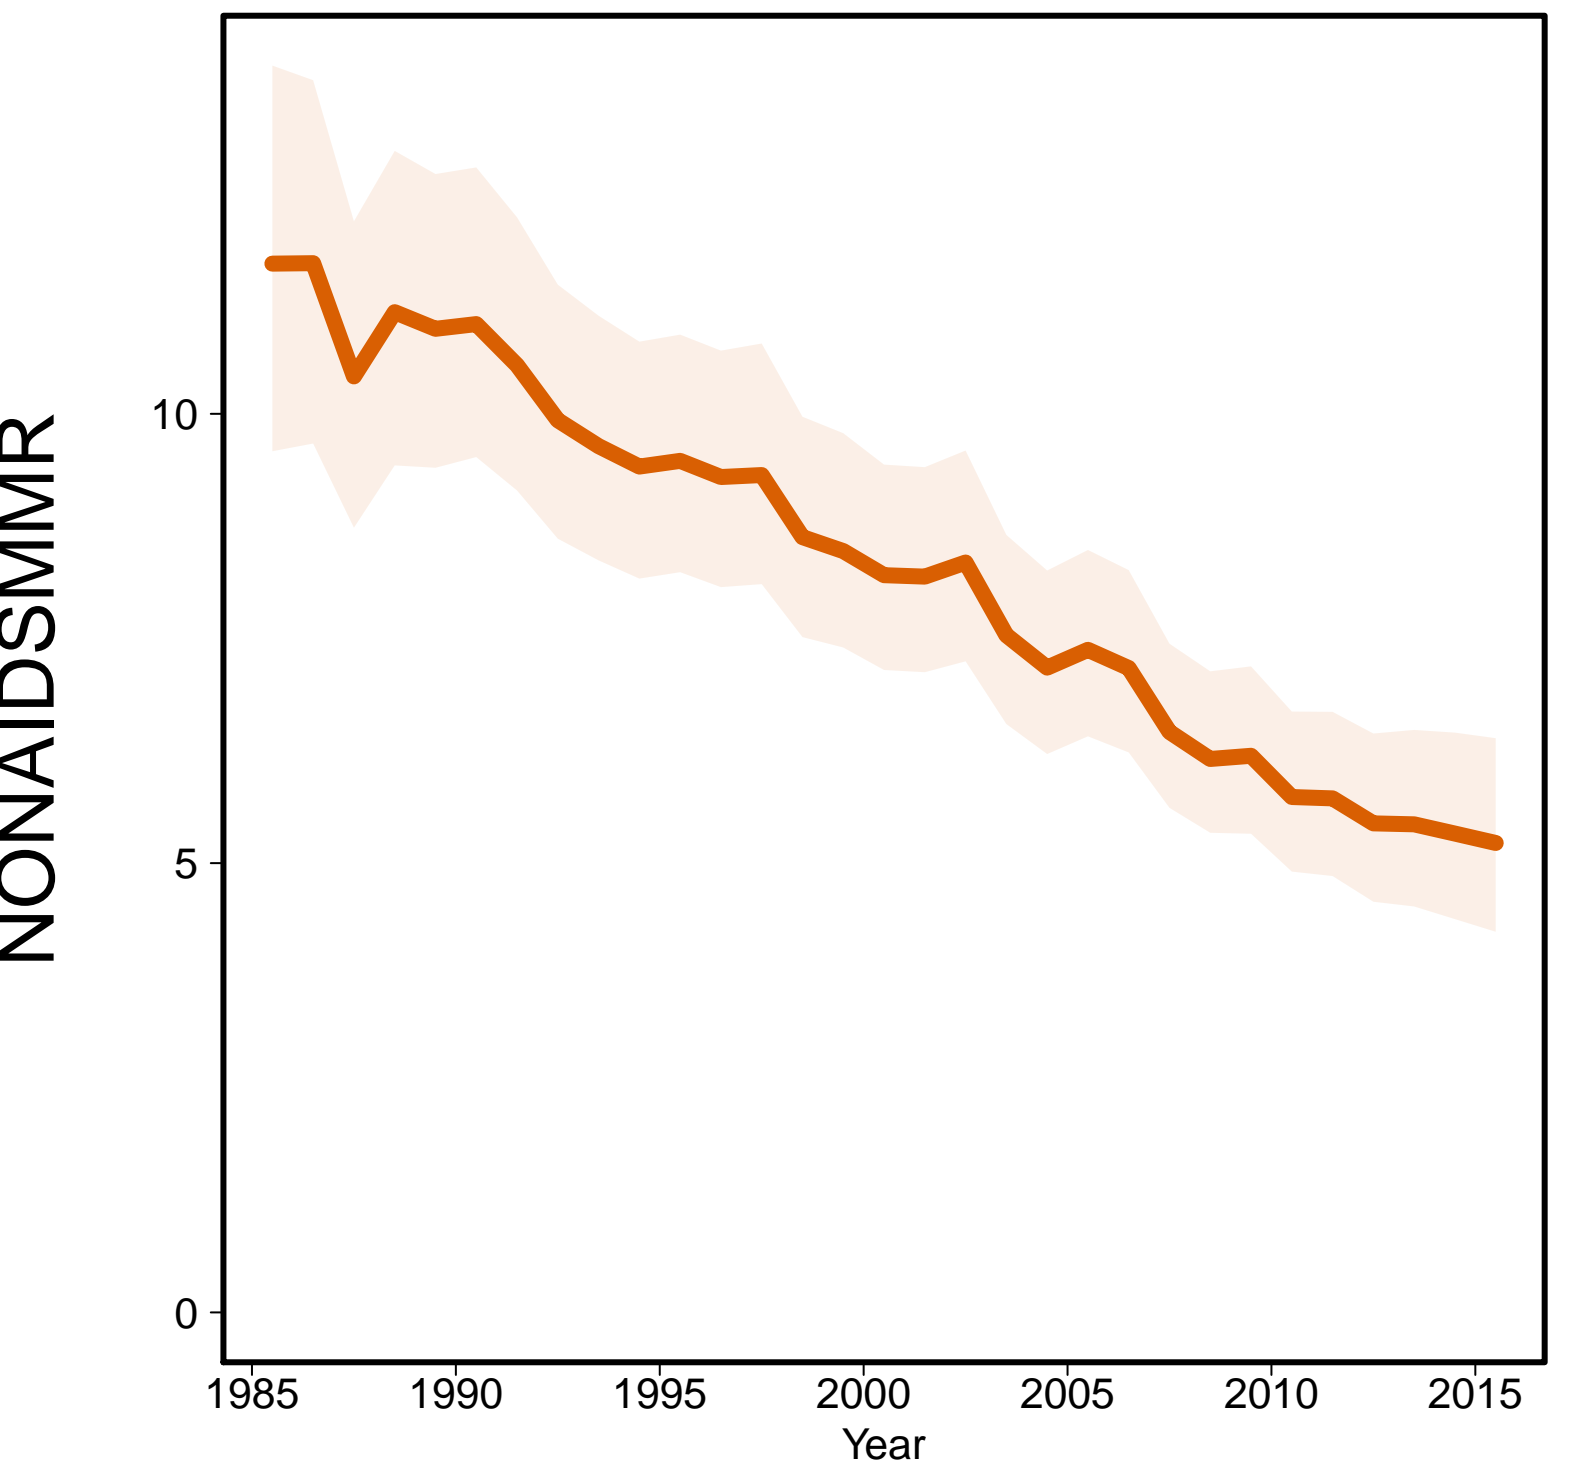

Aids MMR

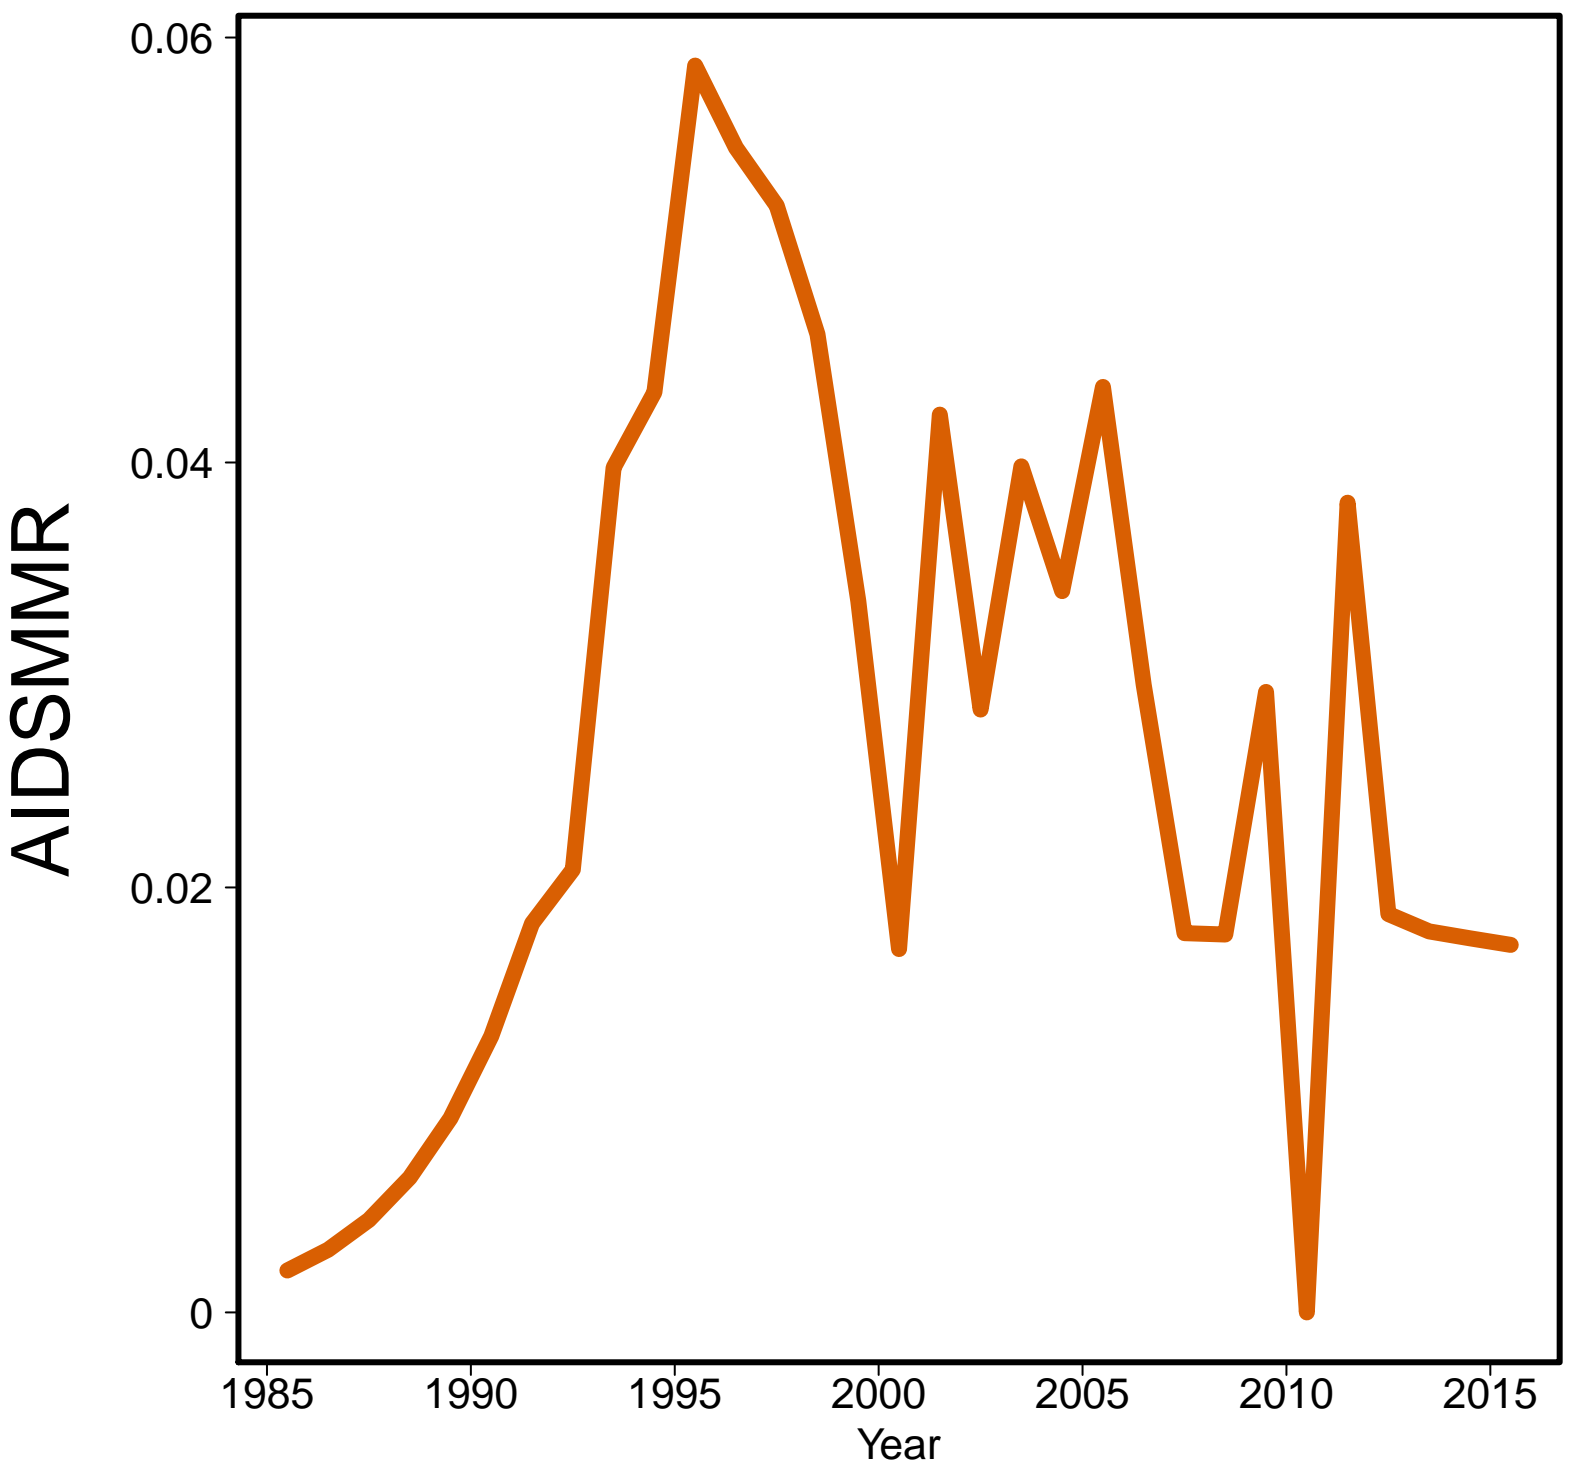

Italy [ITA]  
(Developed regions)

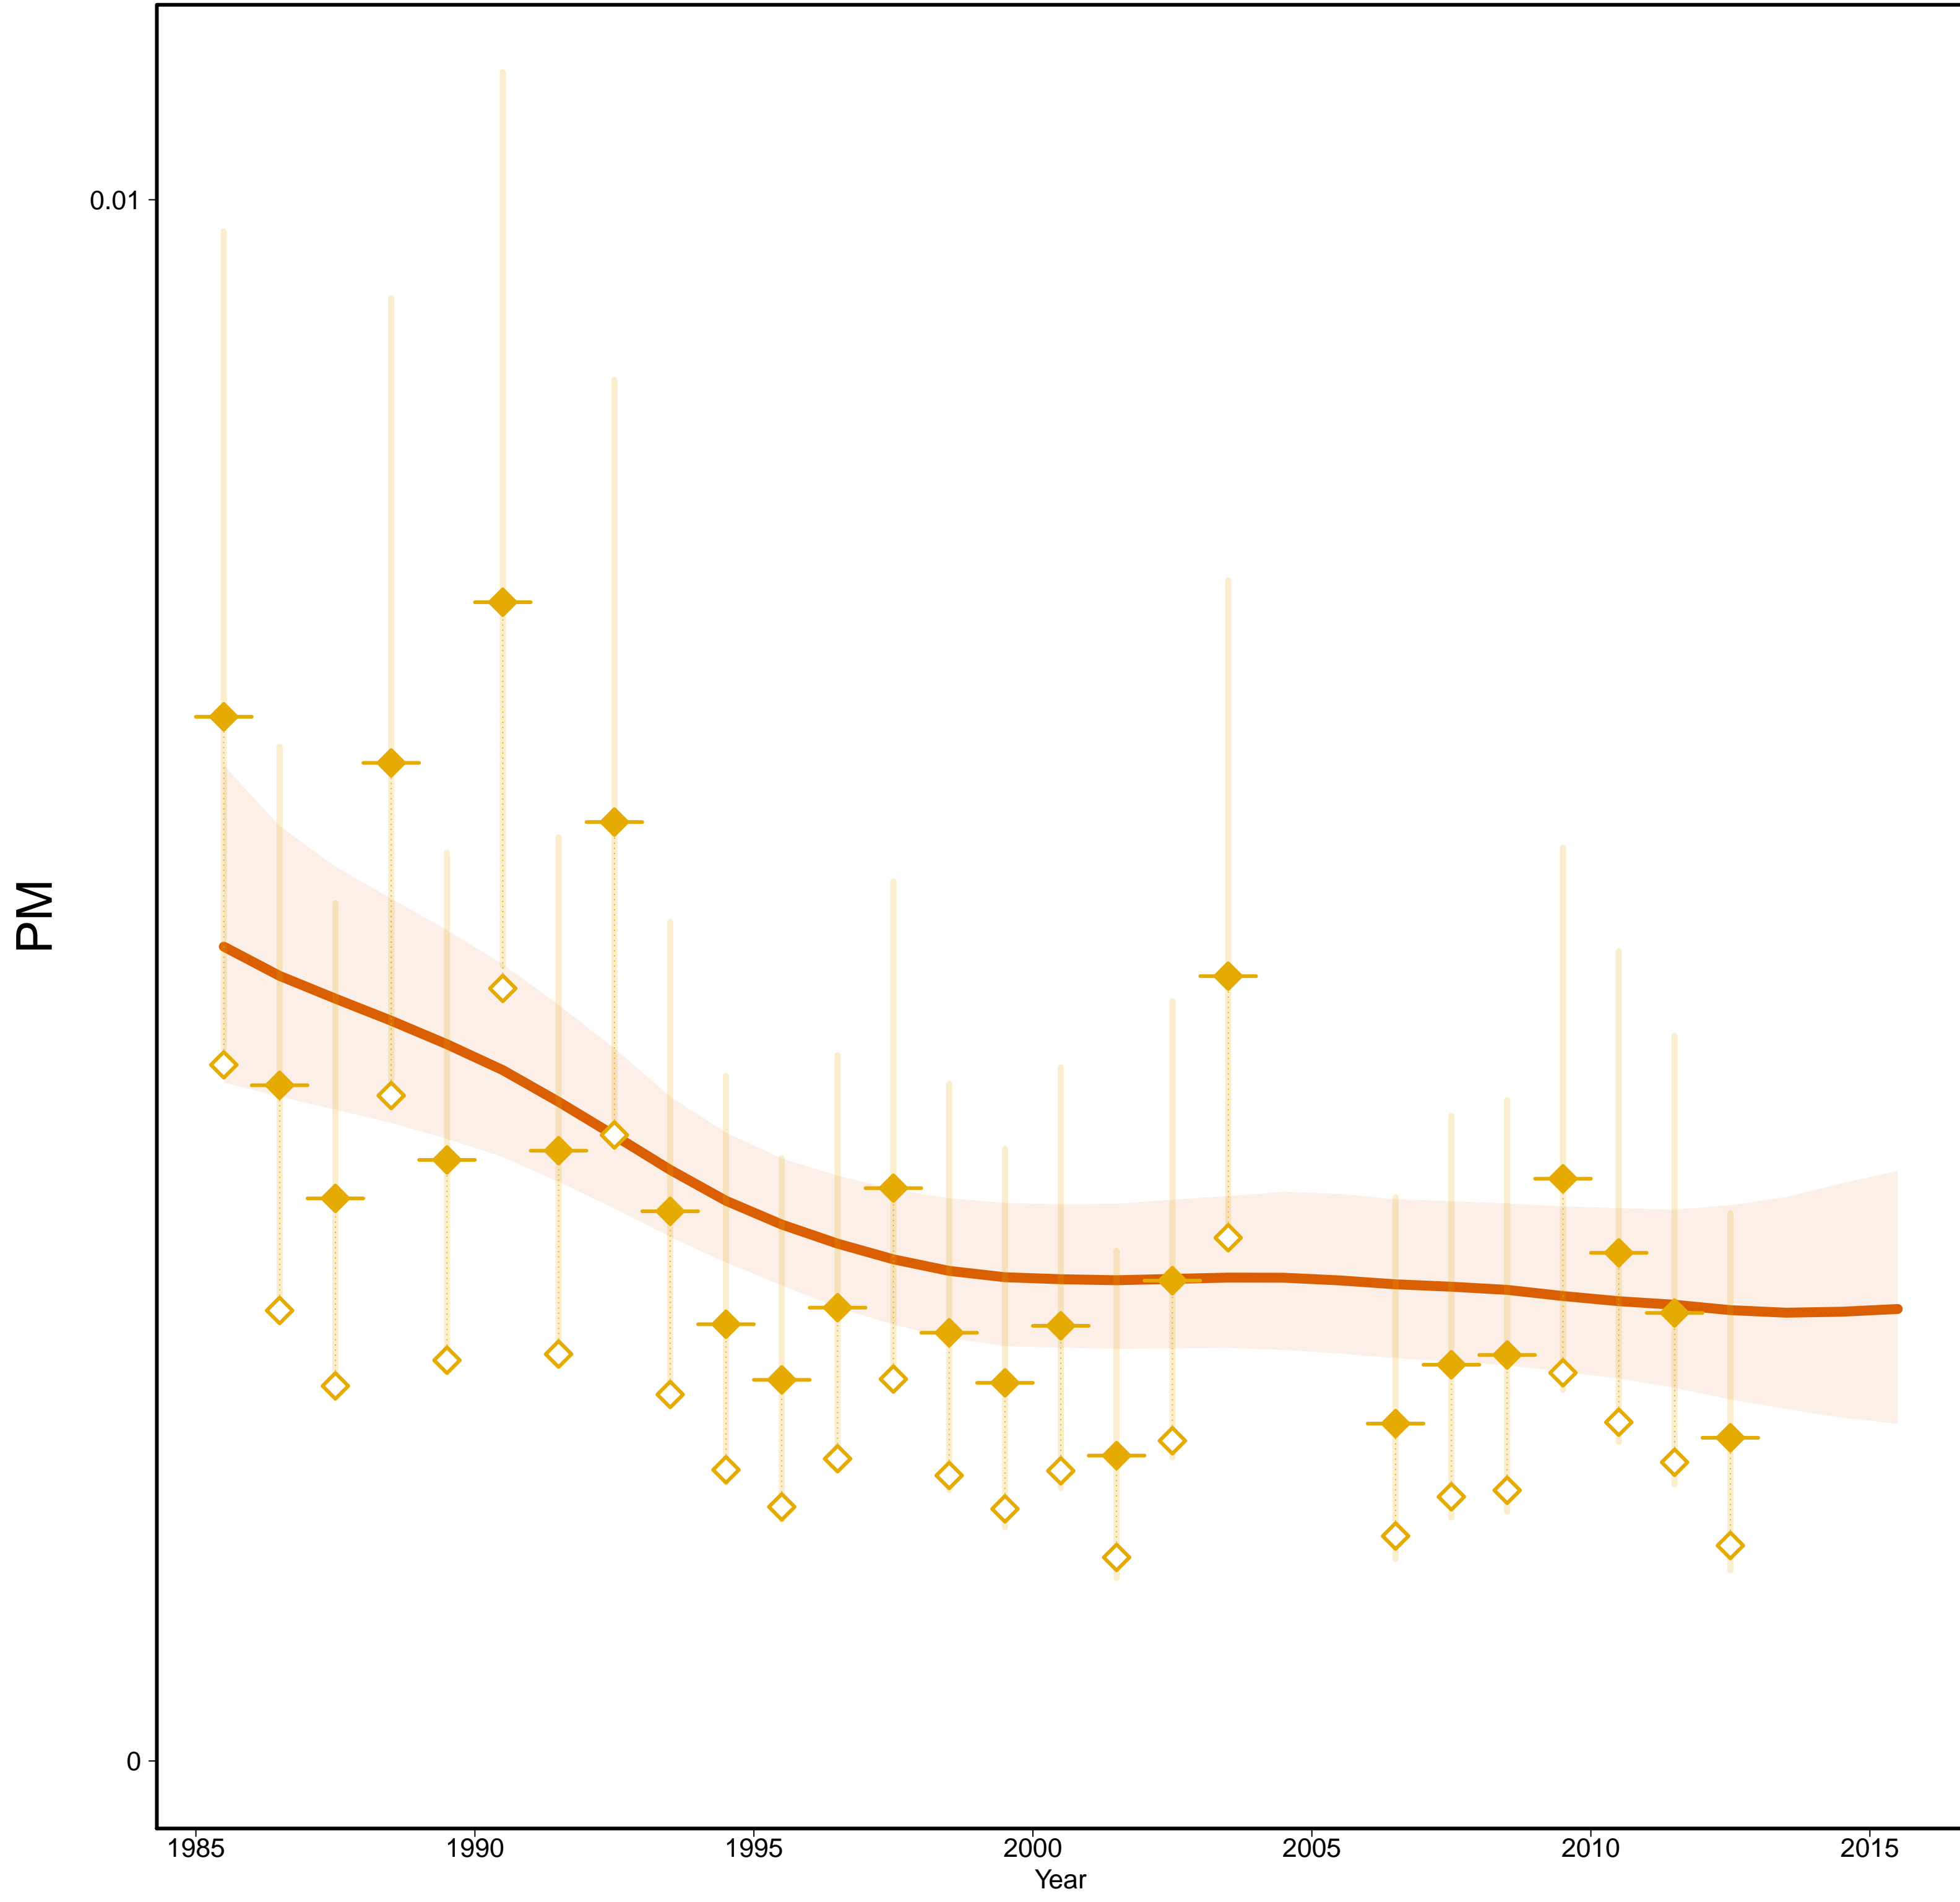

Italy [ITA]  
(Developed regions)

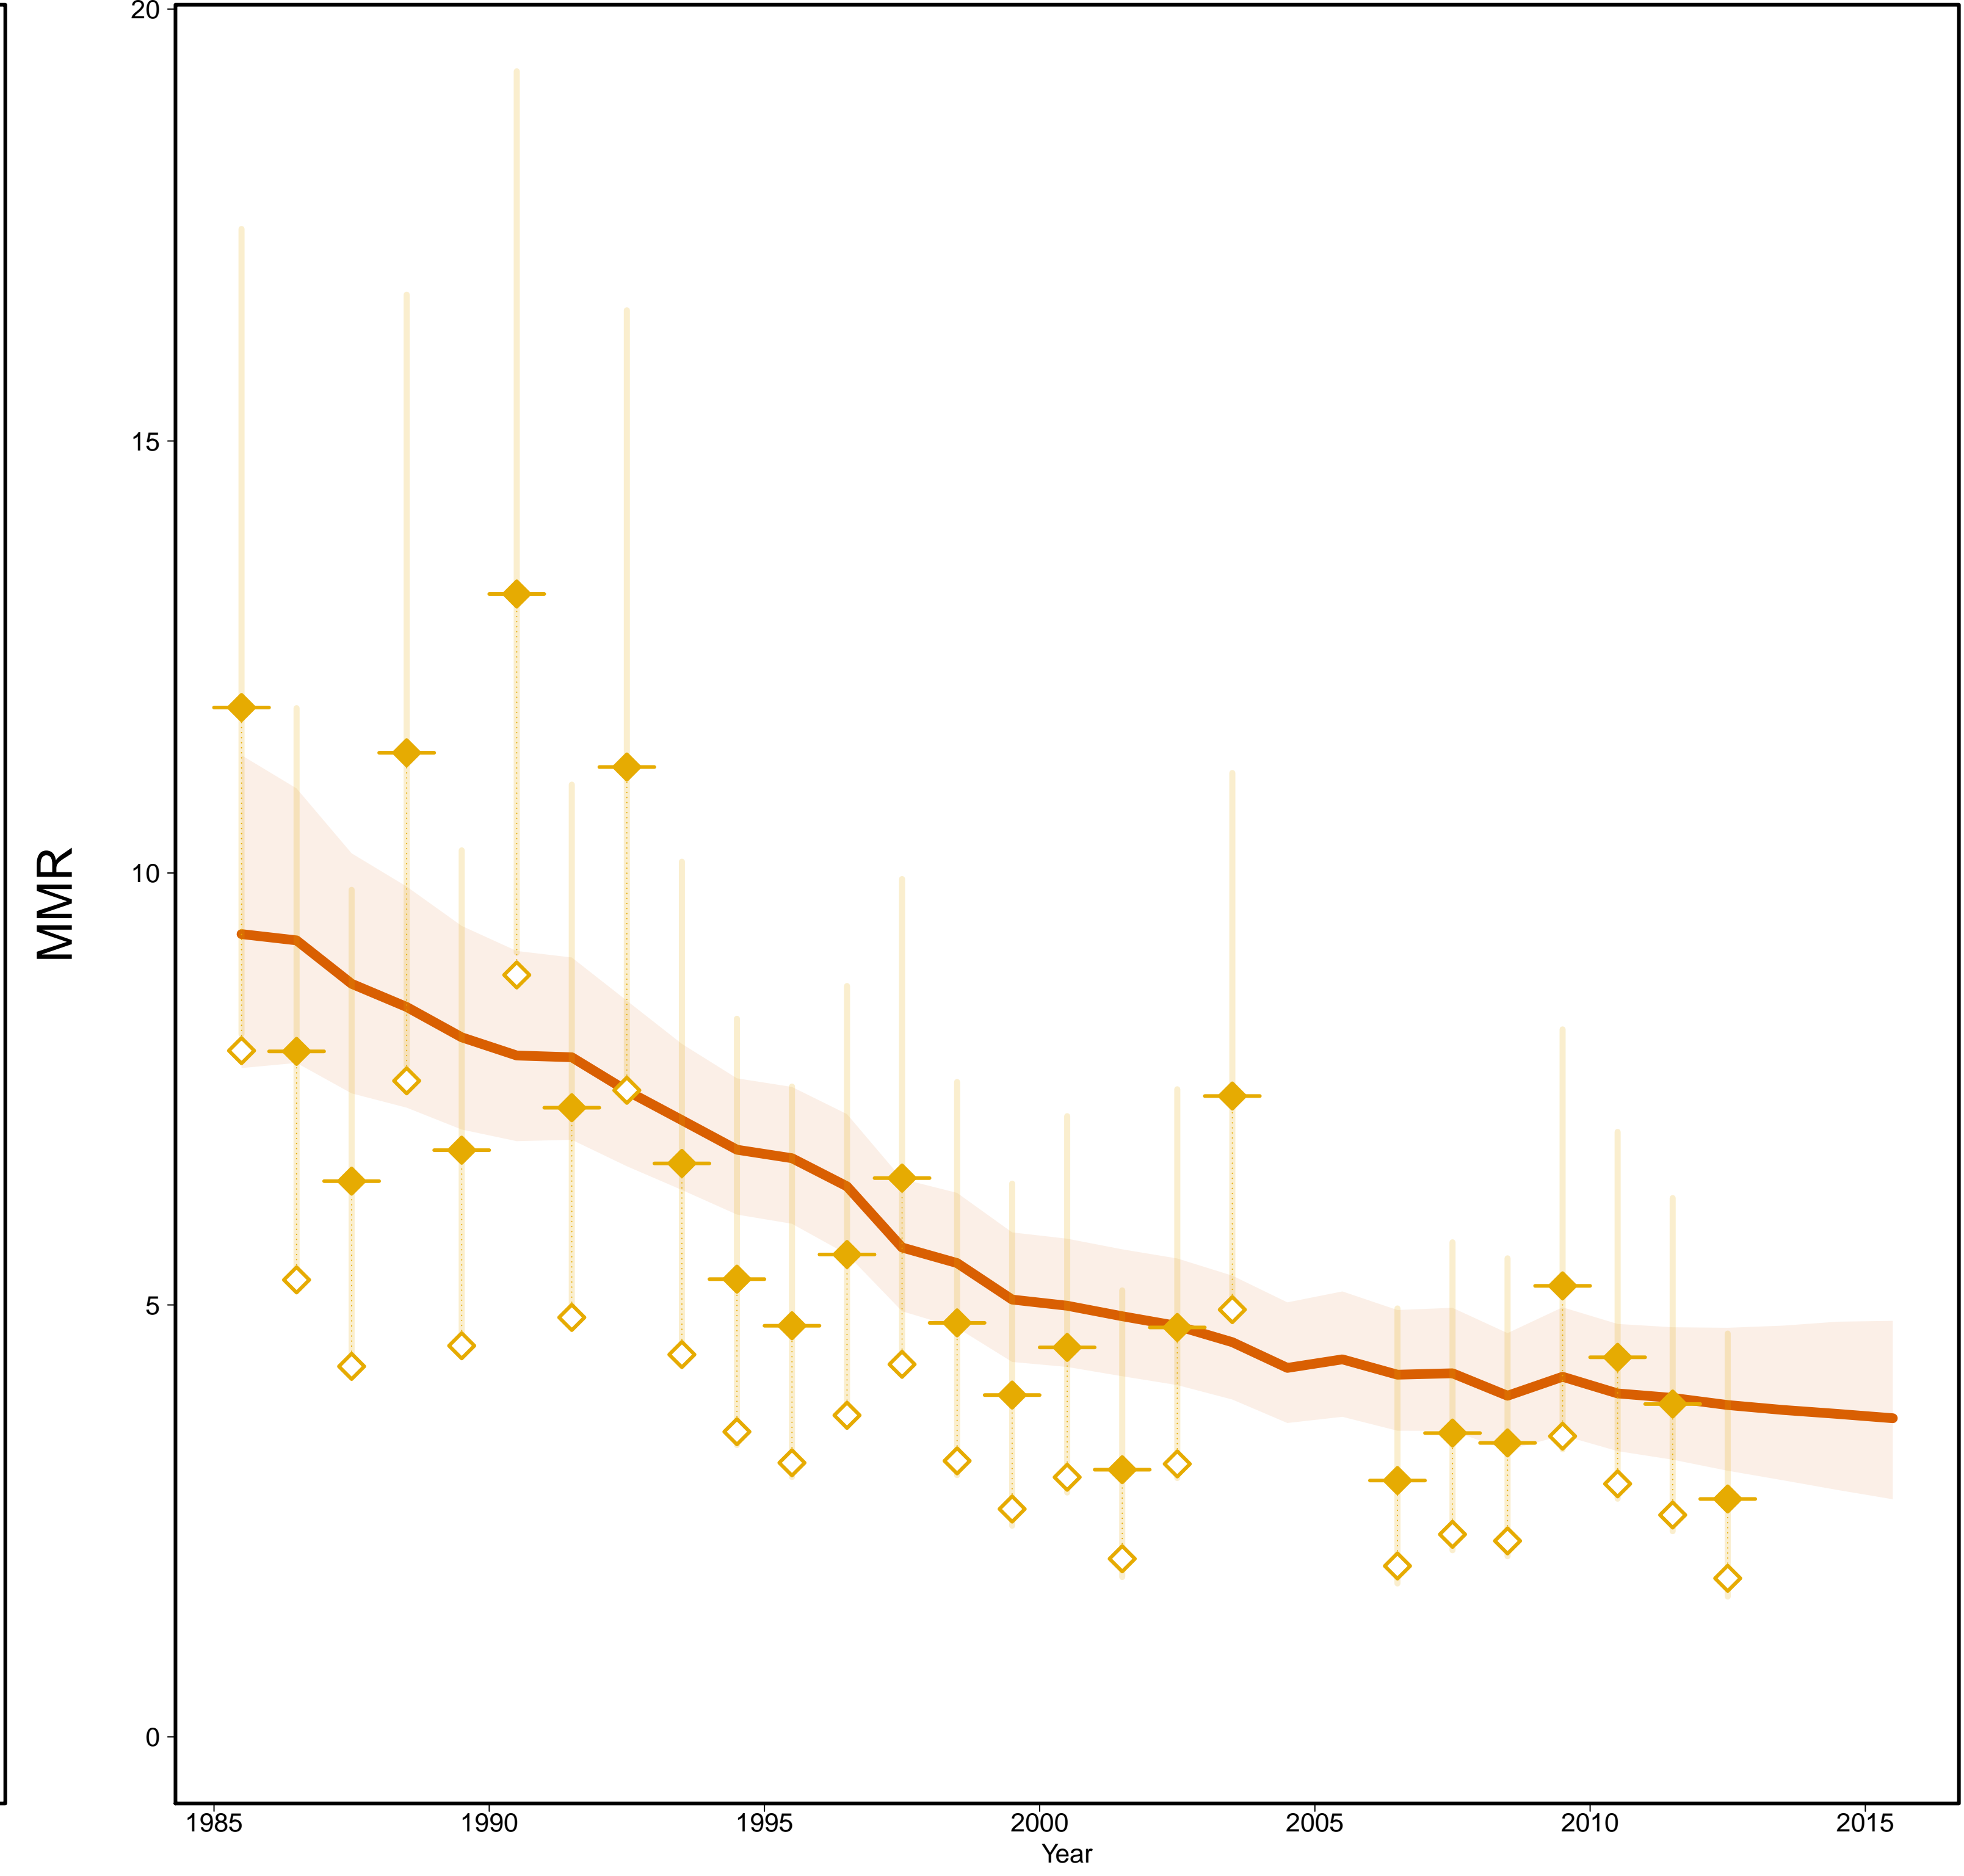

- Estimates —
- MMR Database 2015 —
- ◇ Observed Data
- ◆ Adjusted Data
- Data type —
- ◆ VR

Gross Domestic Product

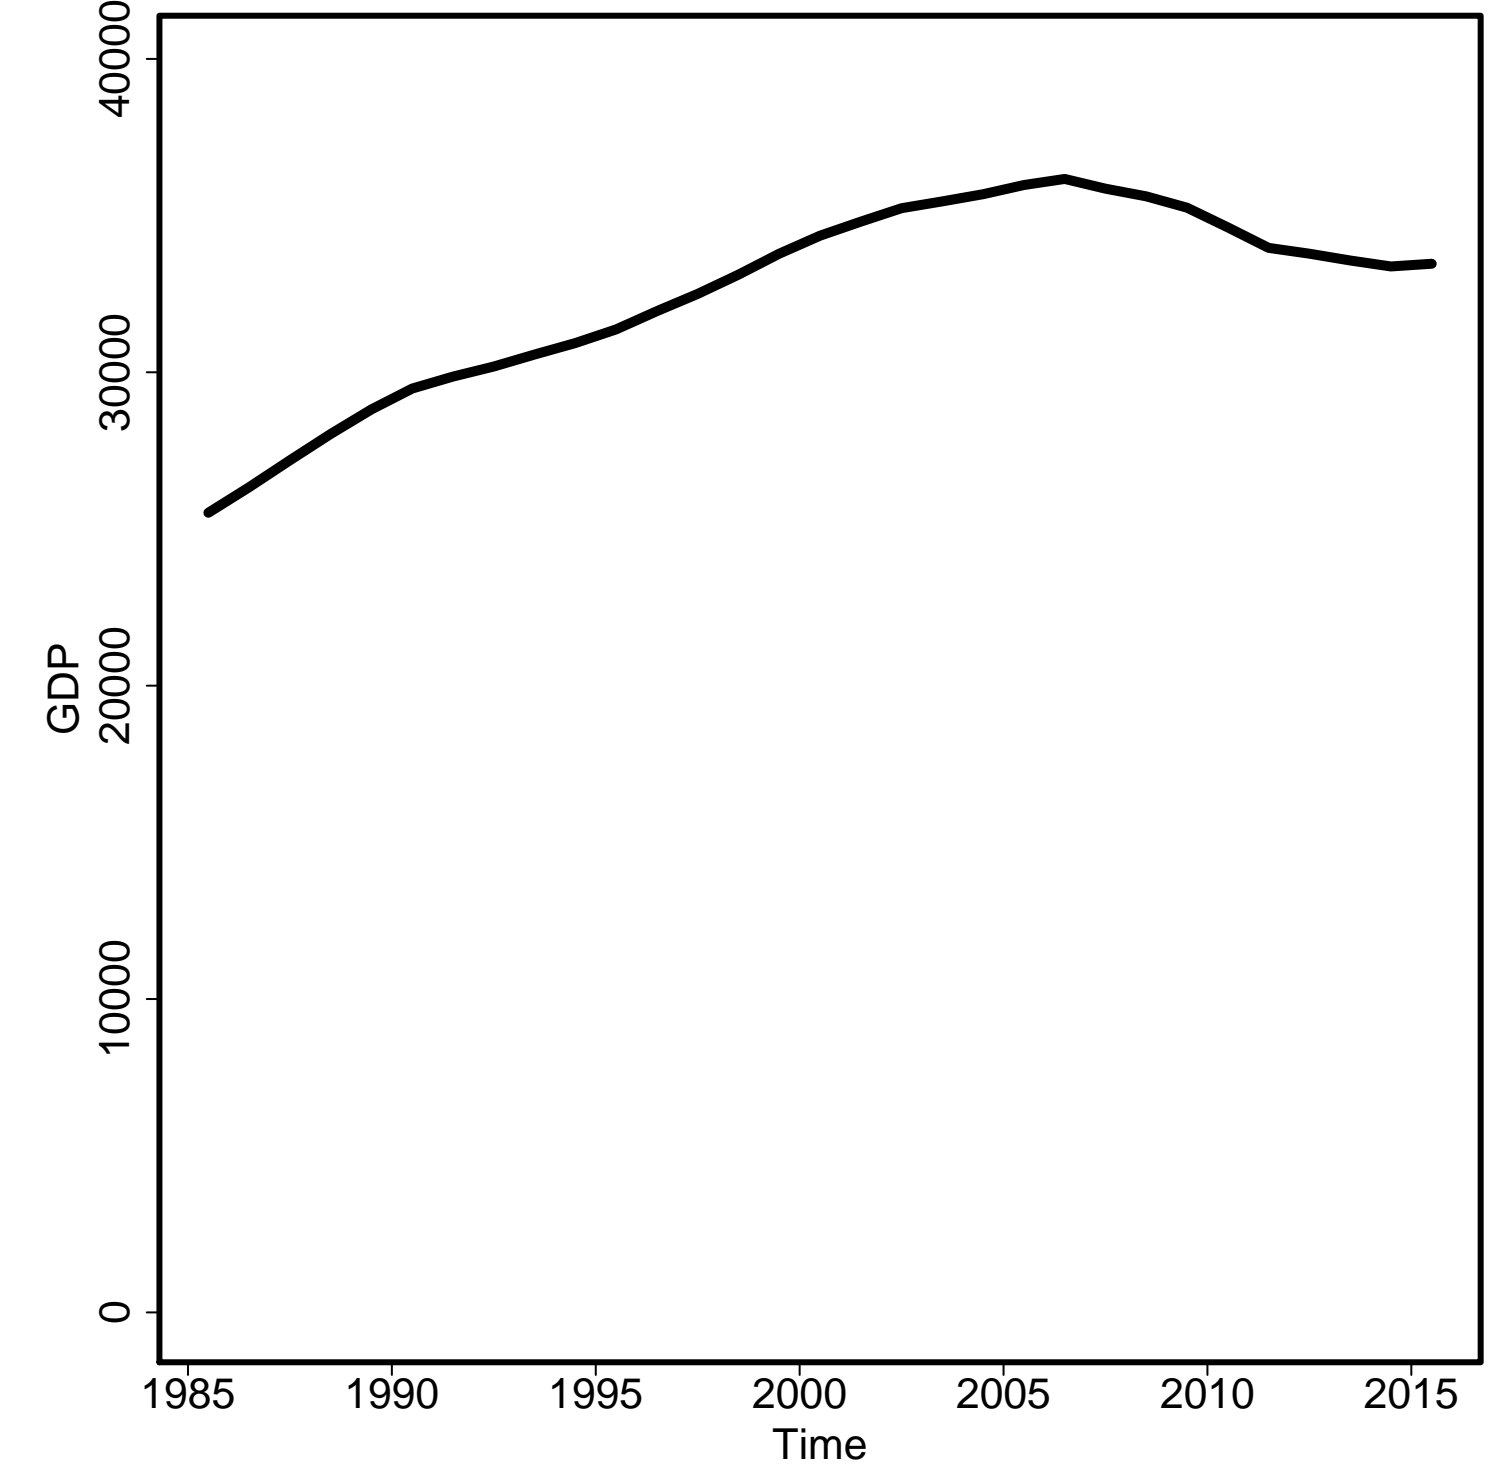

General Fertility Rate

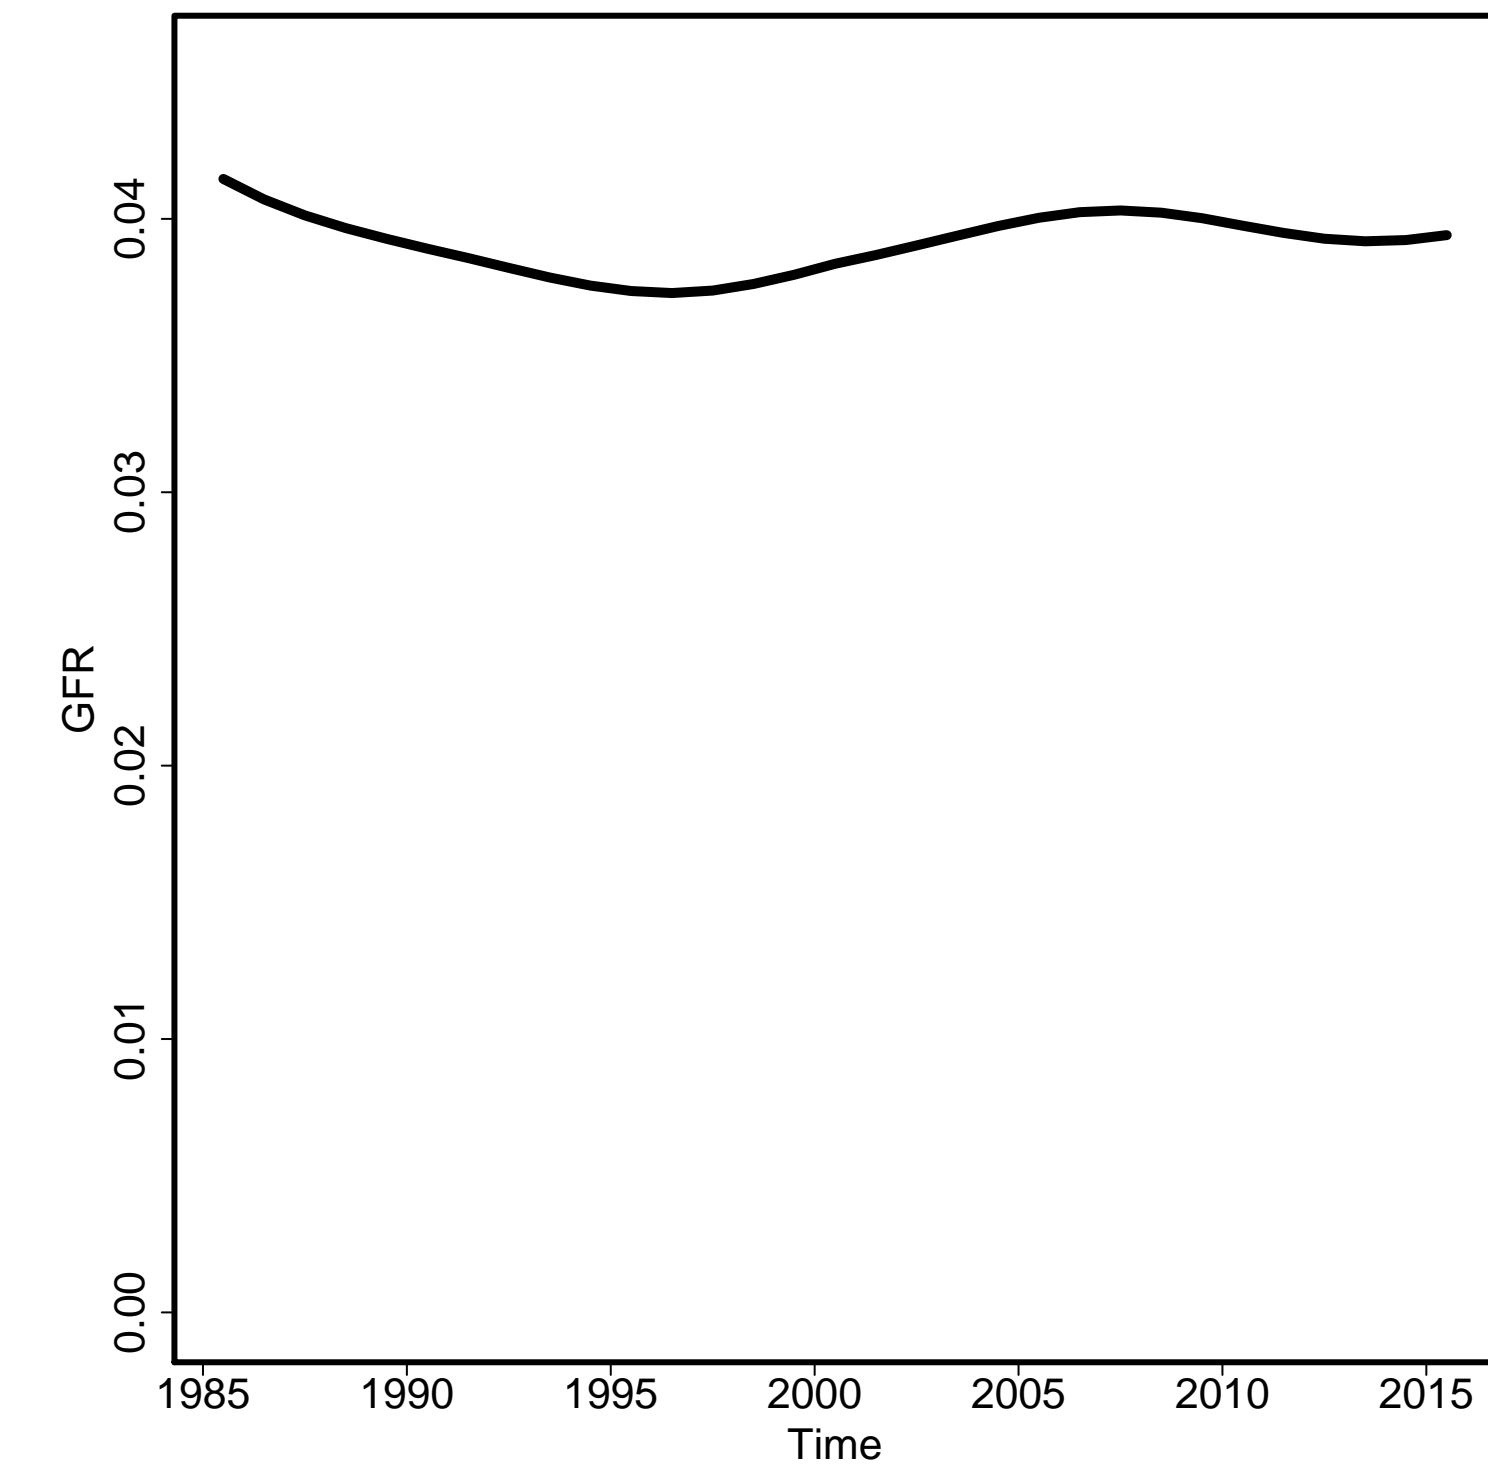

Skilled Attendance to Birth



Envelope/Births

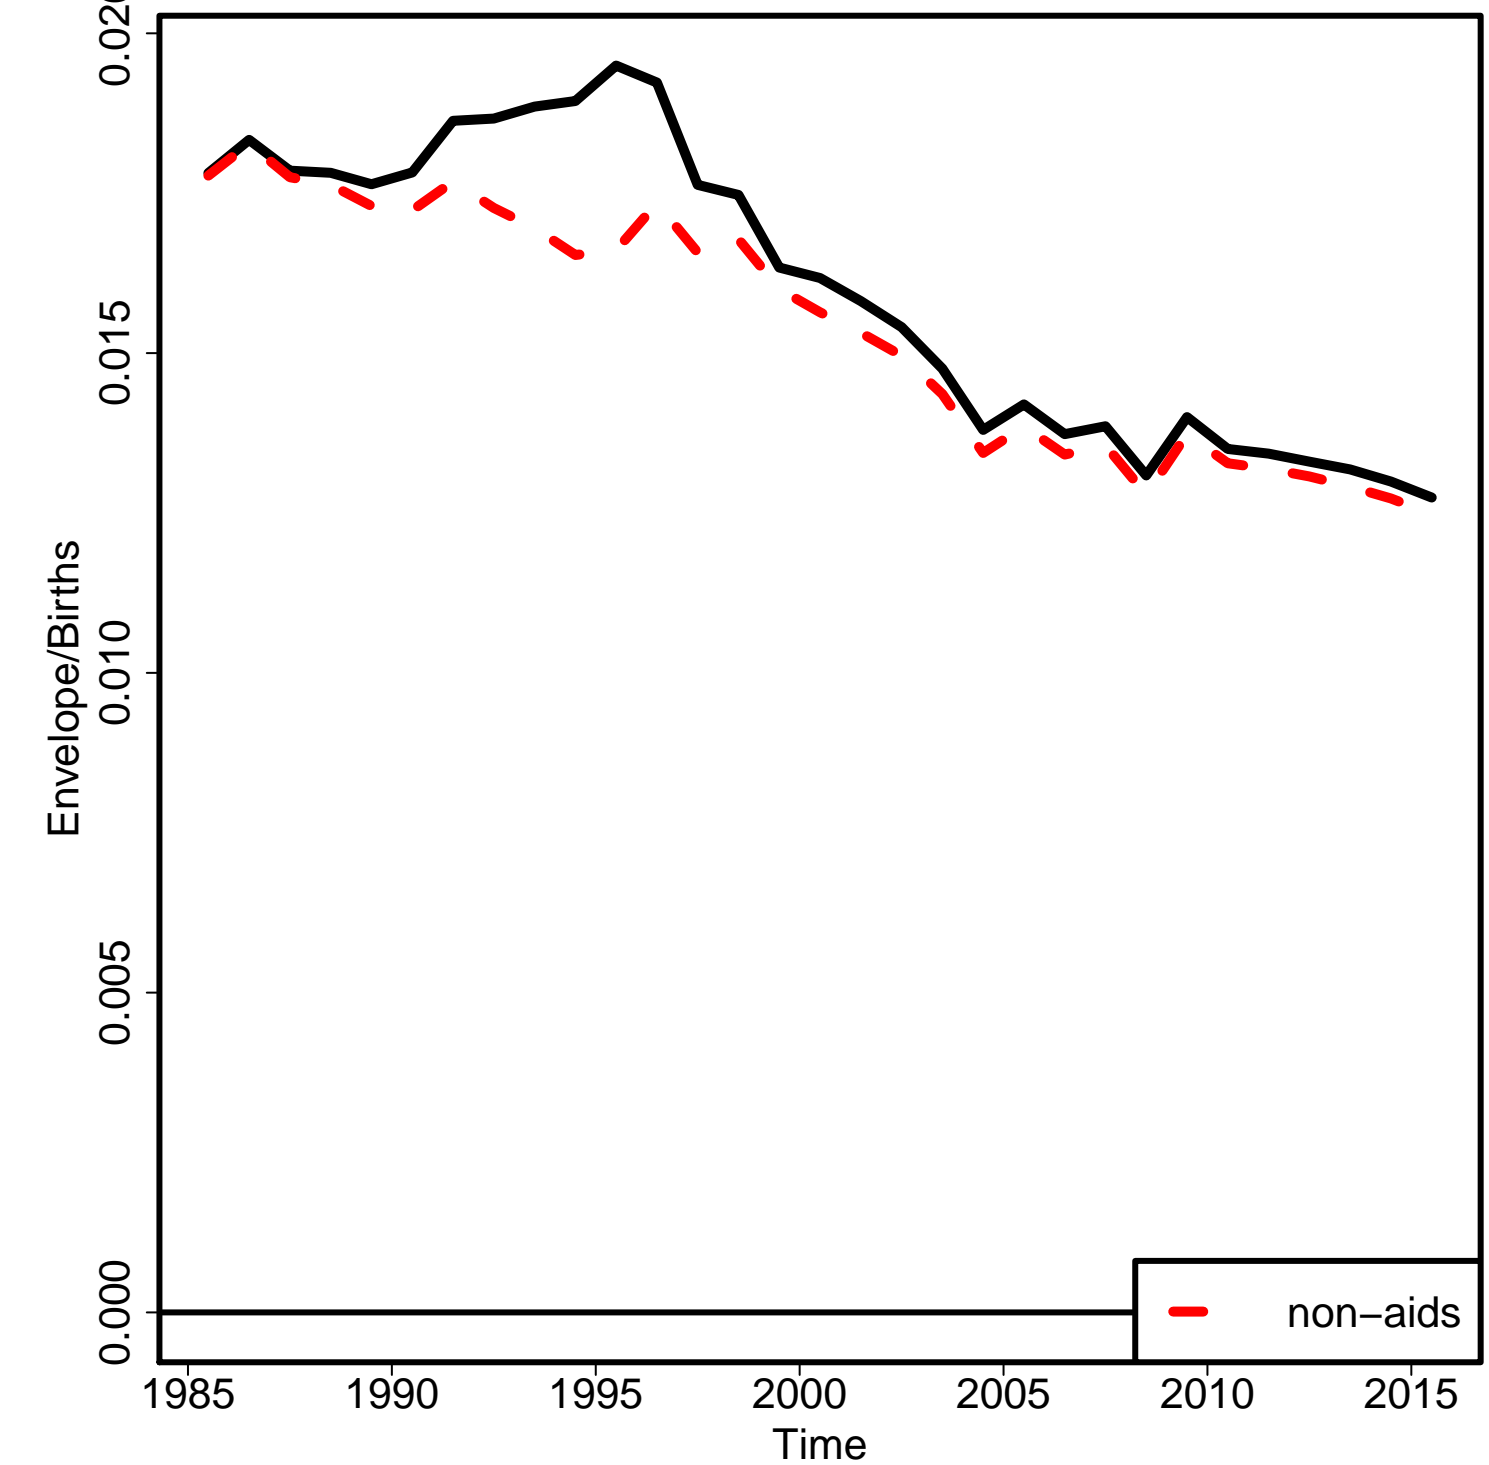

Non-aids MMR

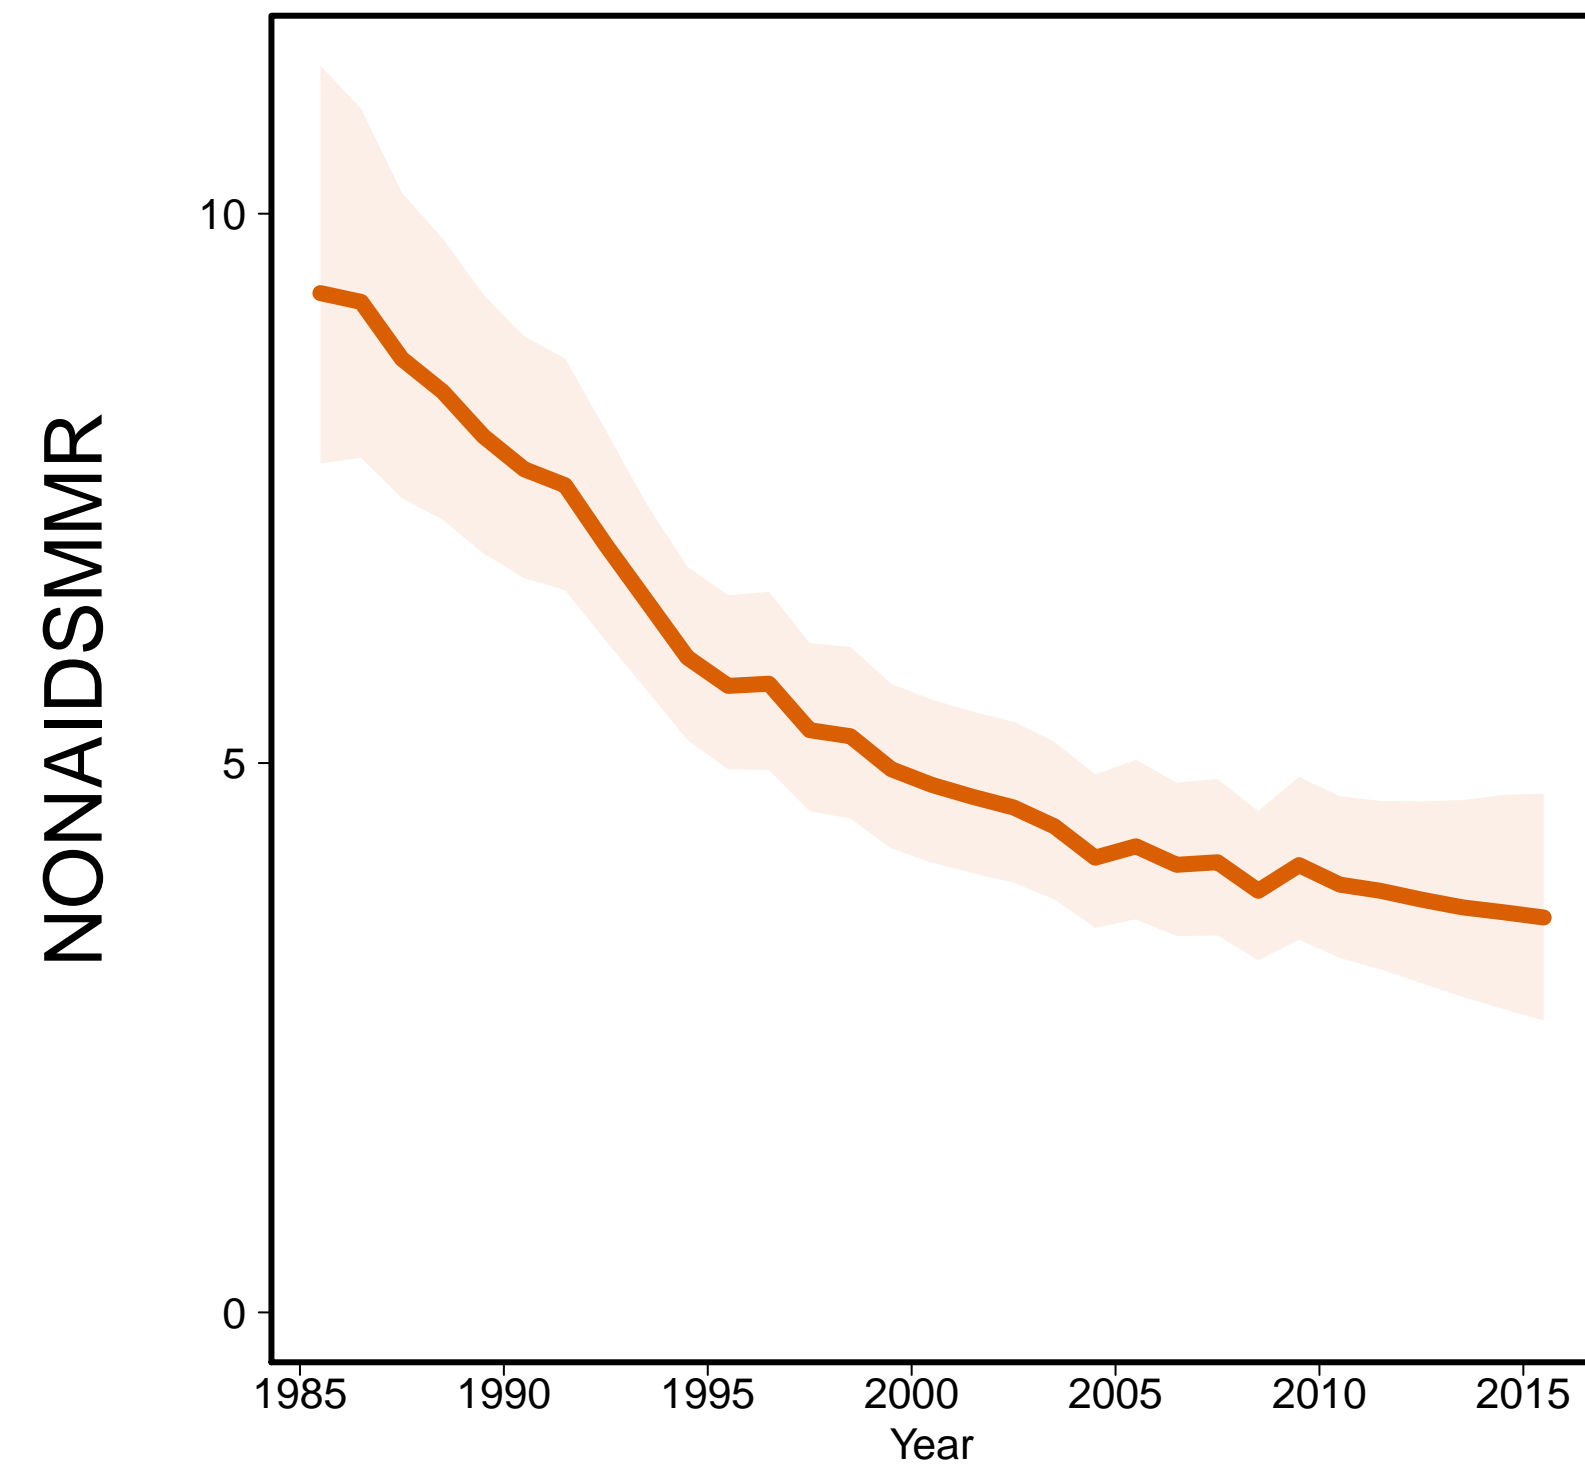

Aids MMR

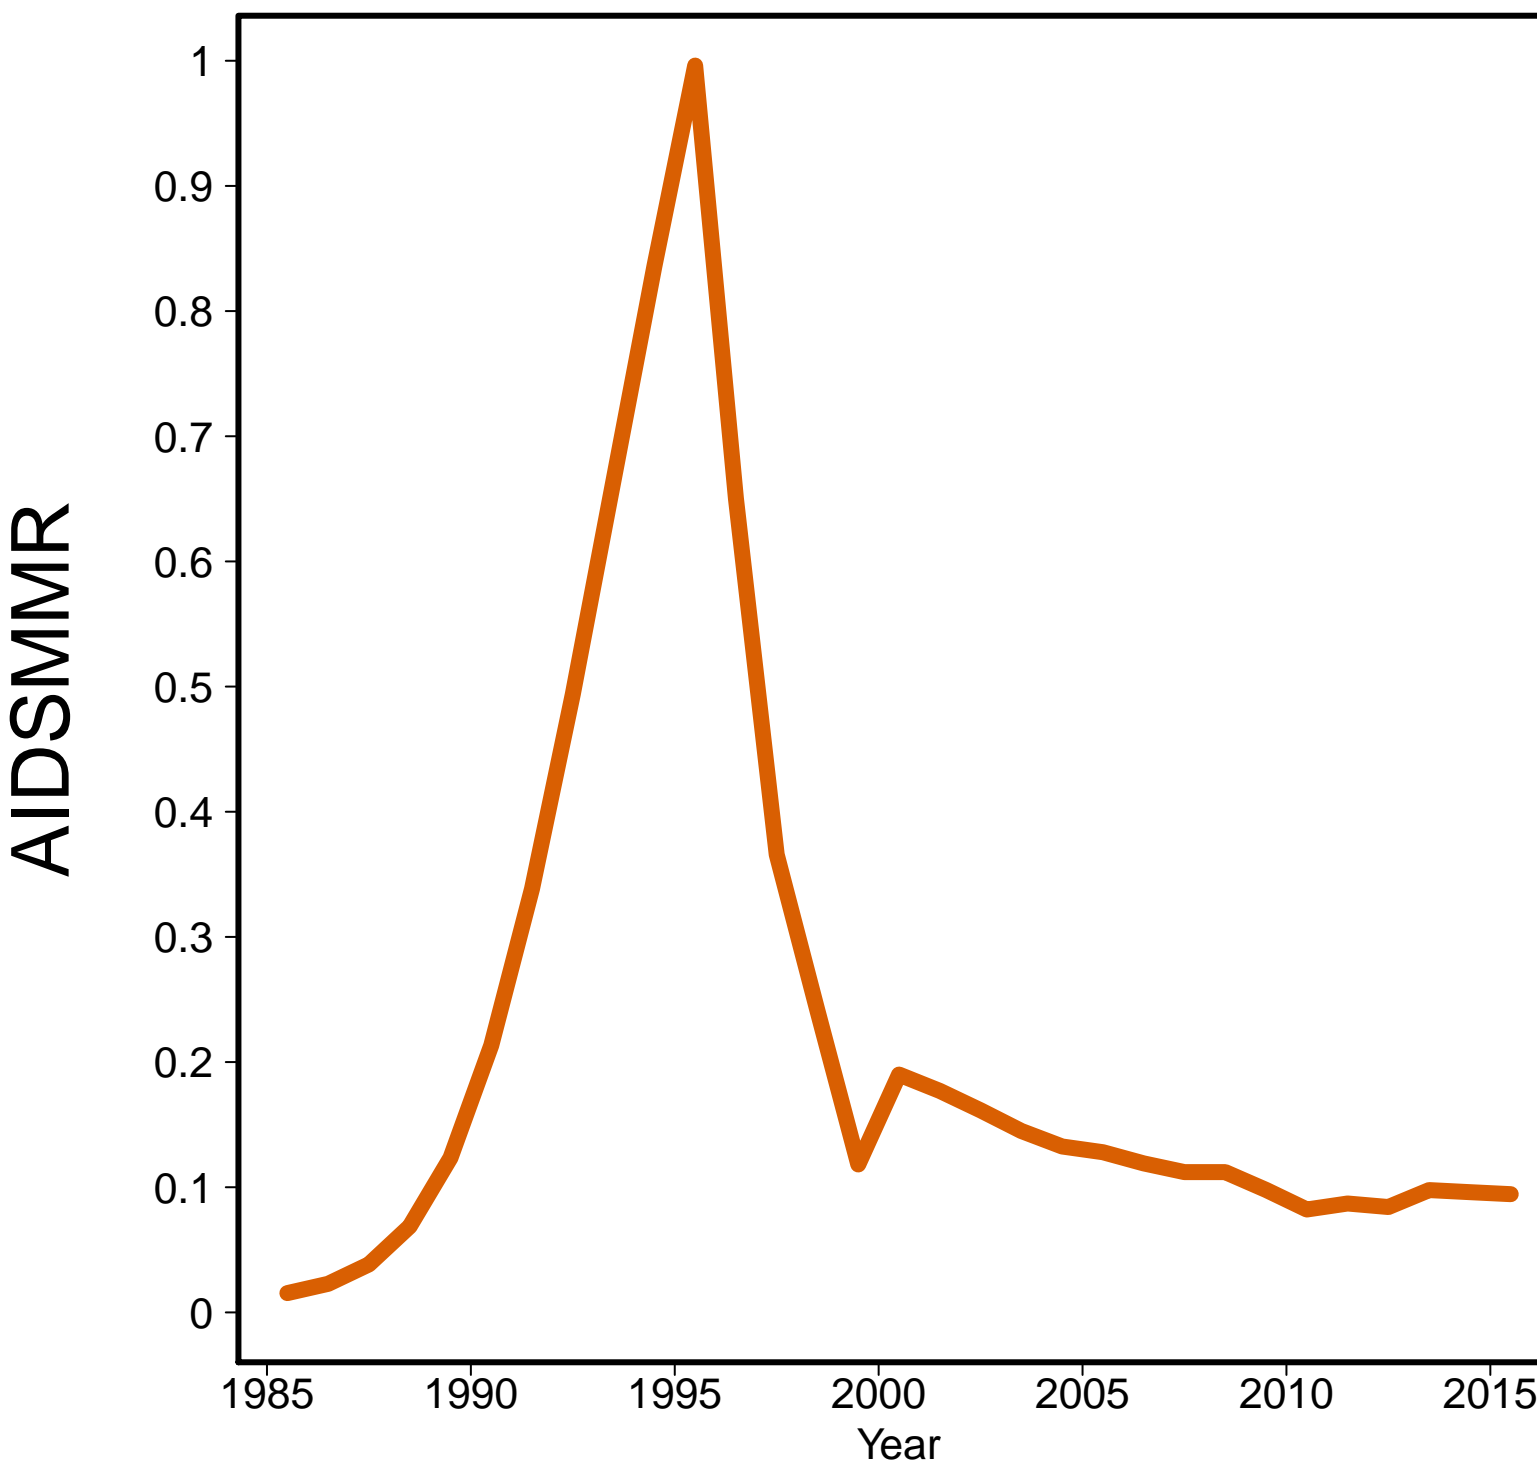



Jamaica [JAM]  
(Caribbean)

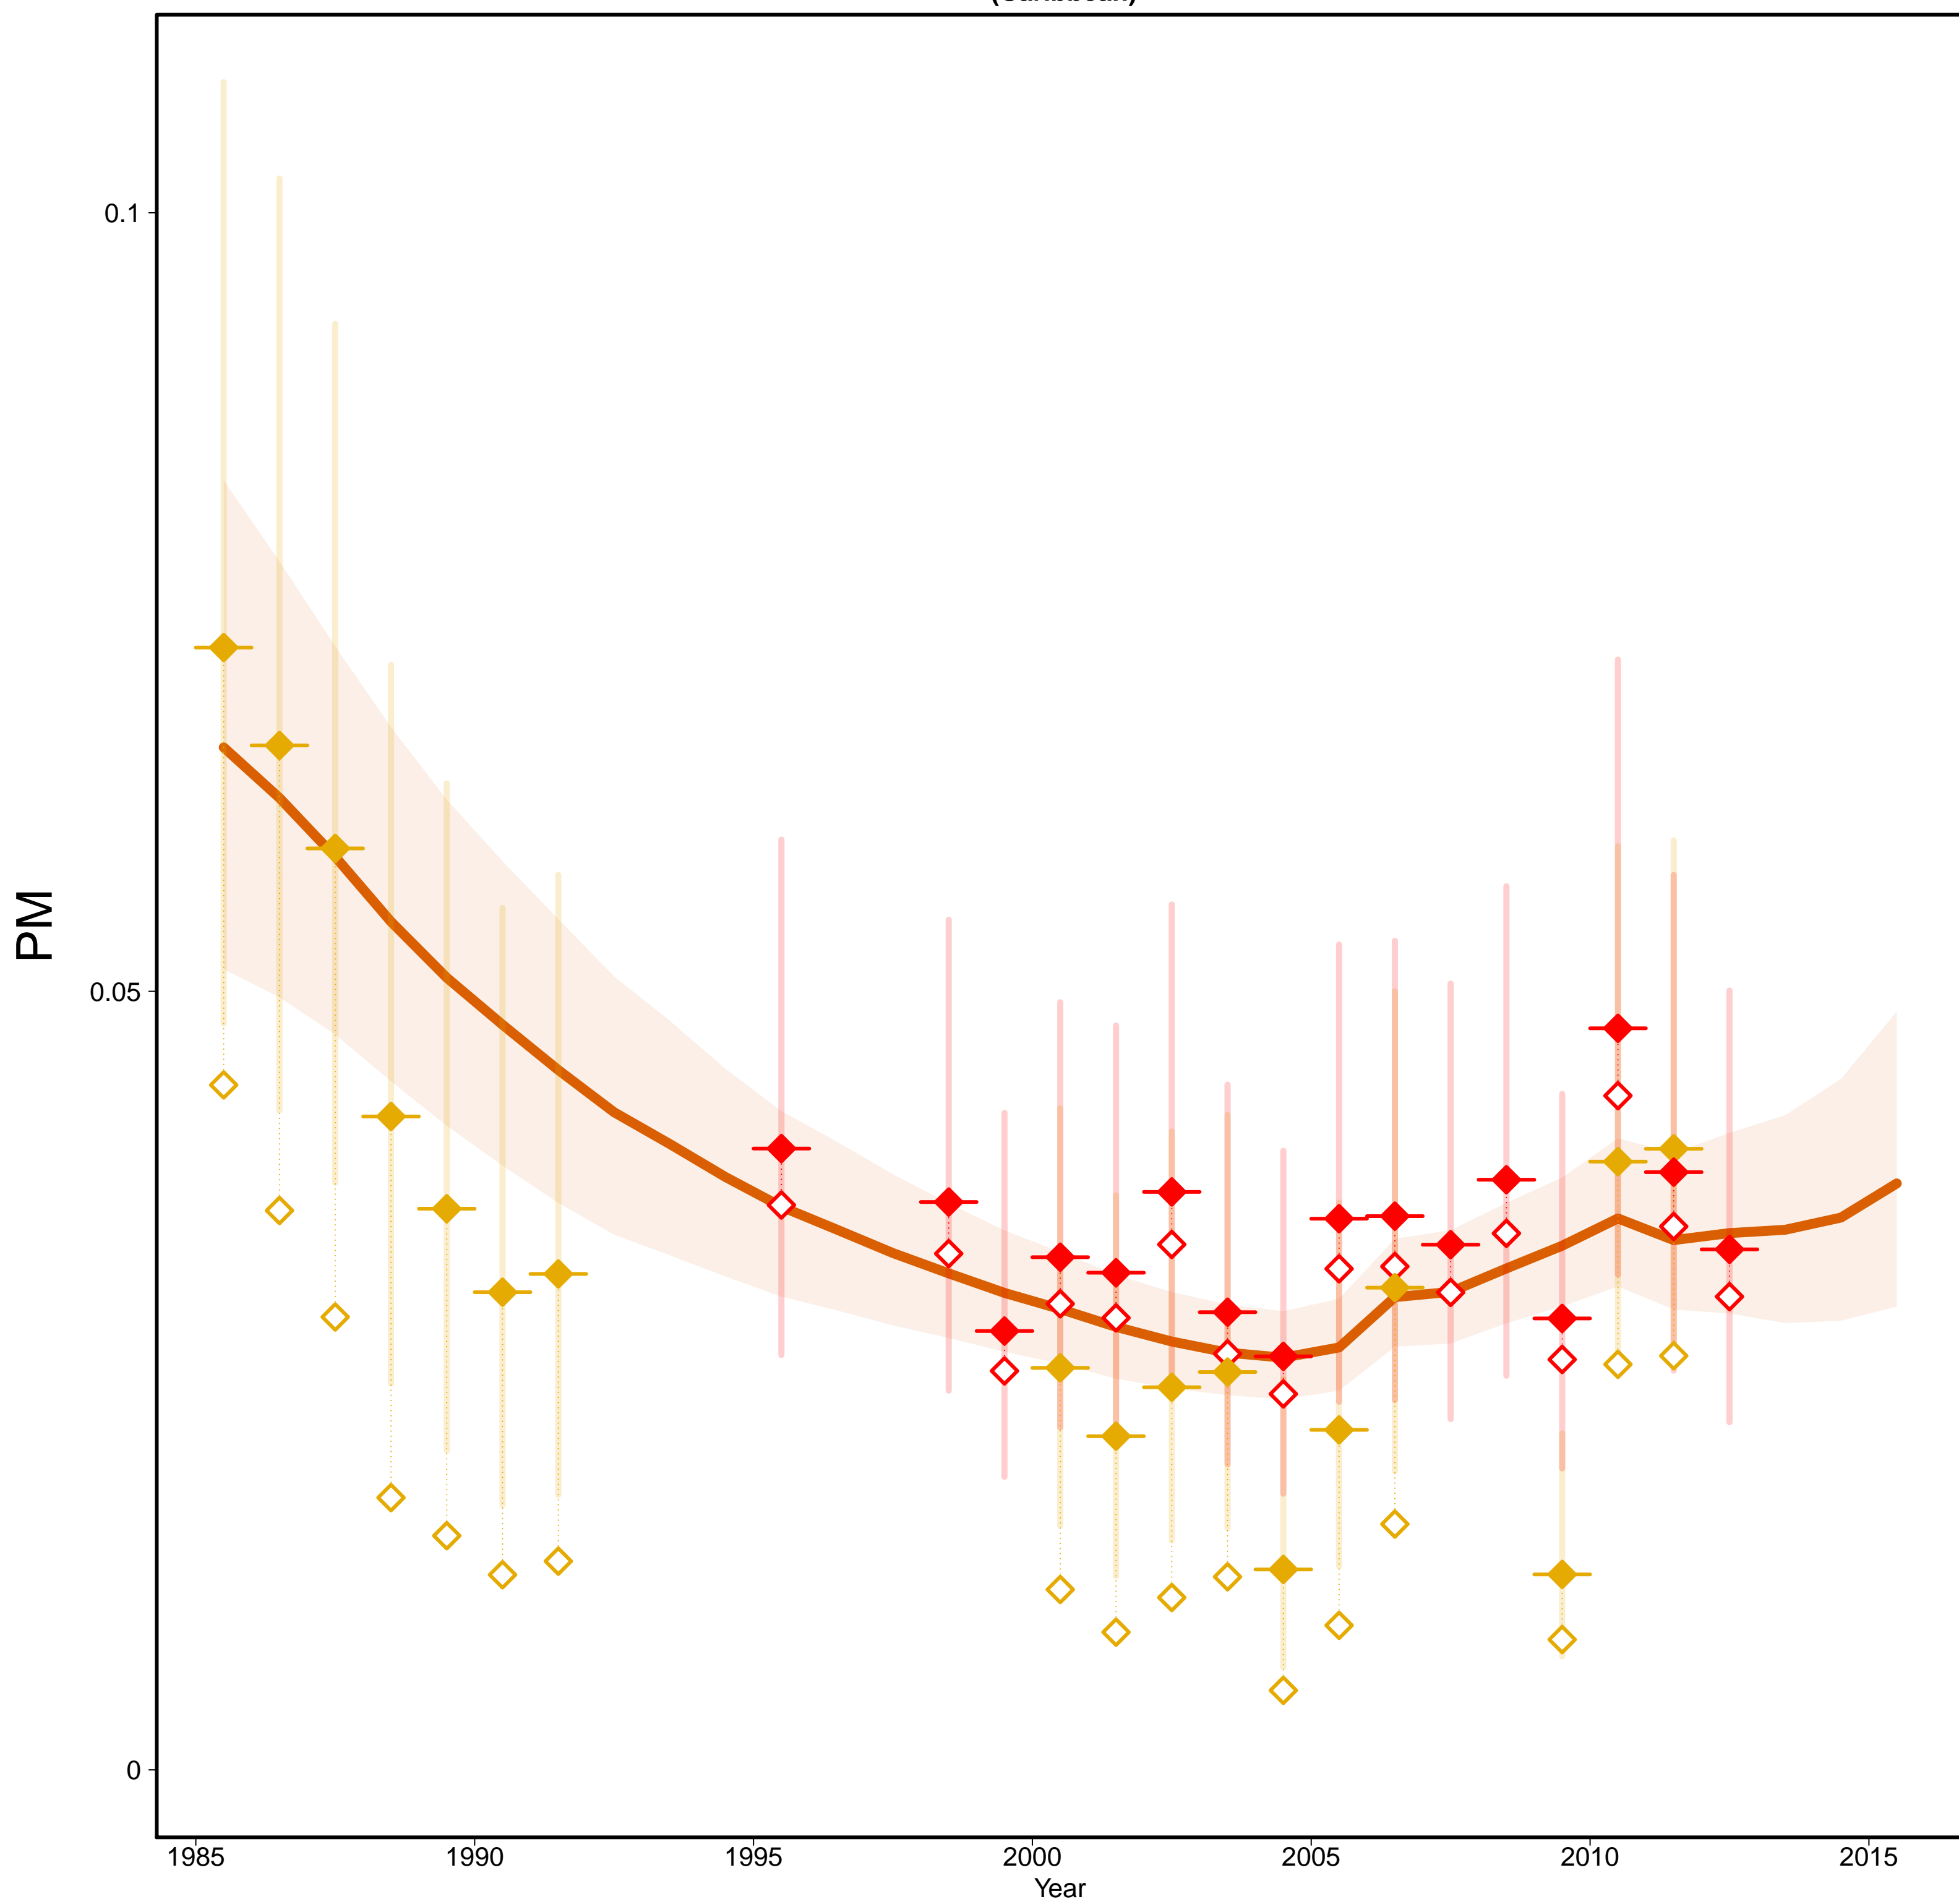

Jamaica [JAM]  
(Caribbean)

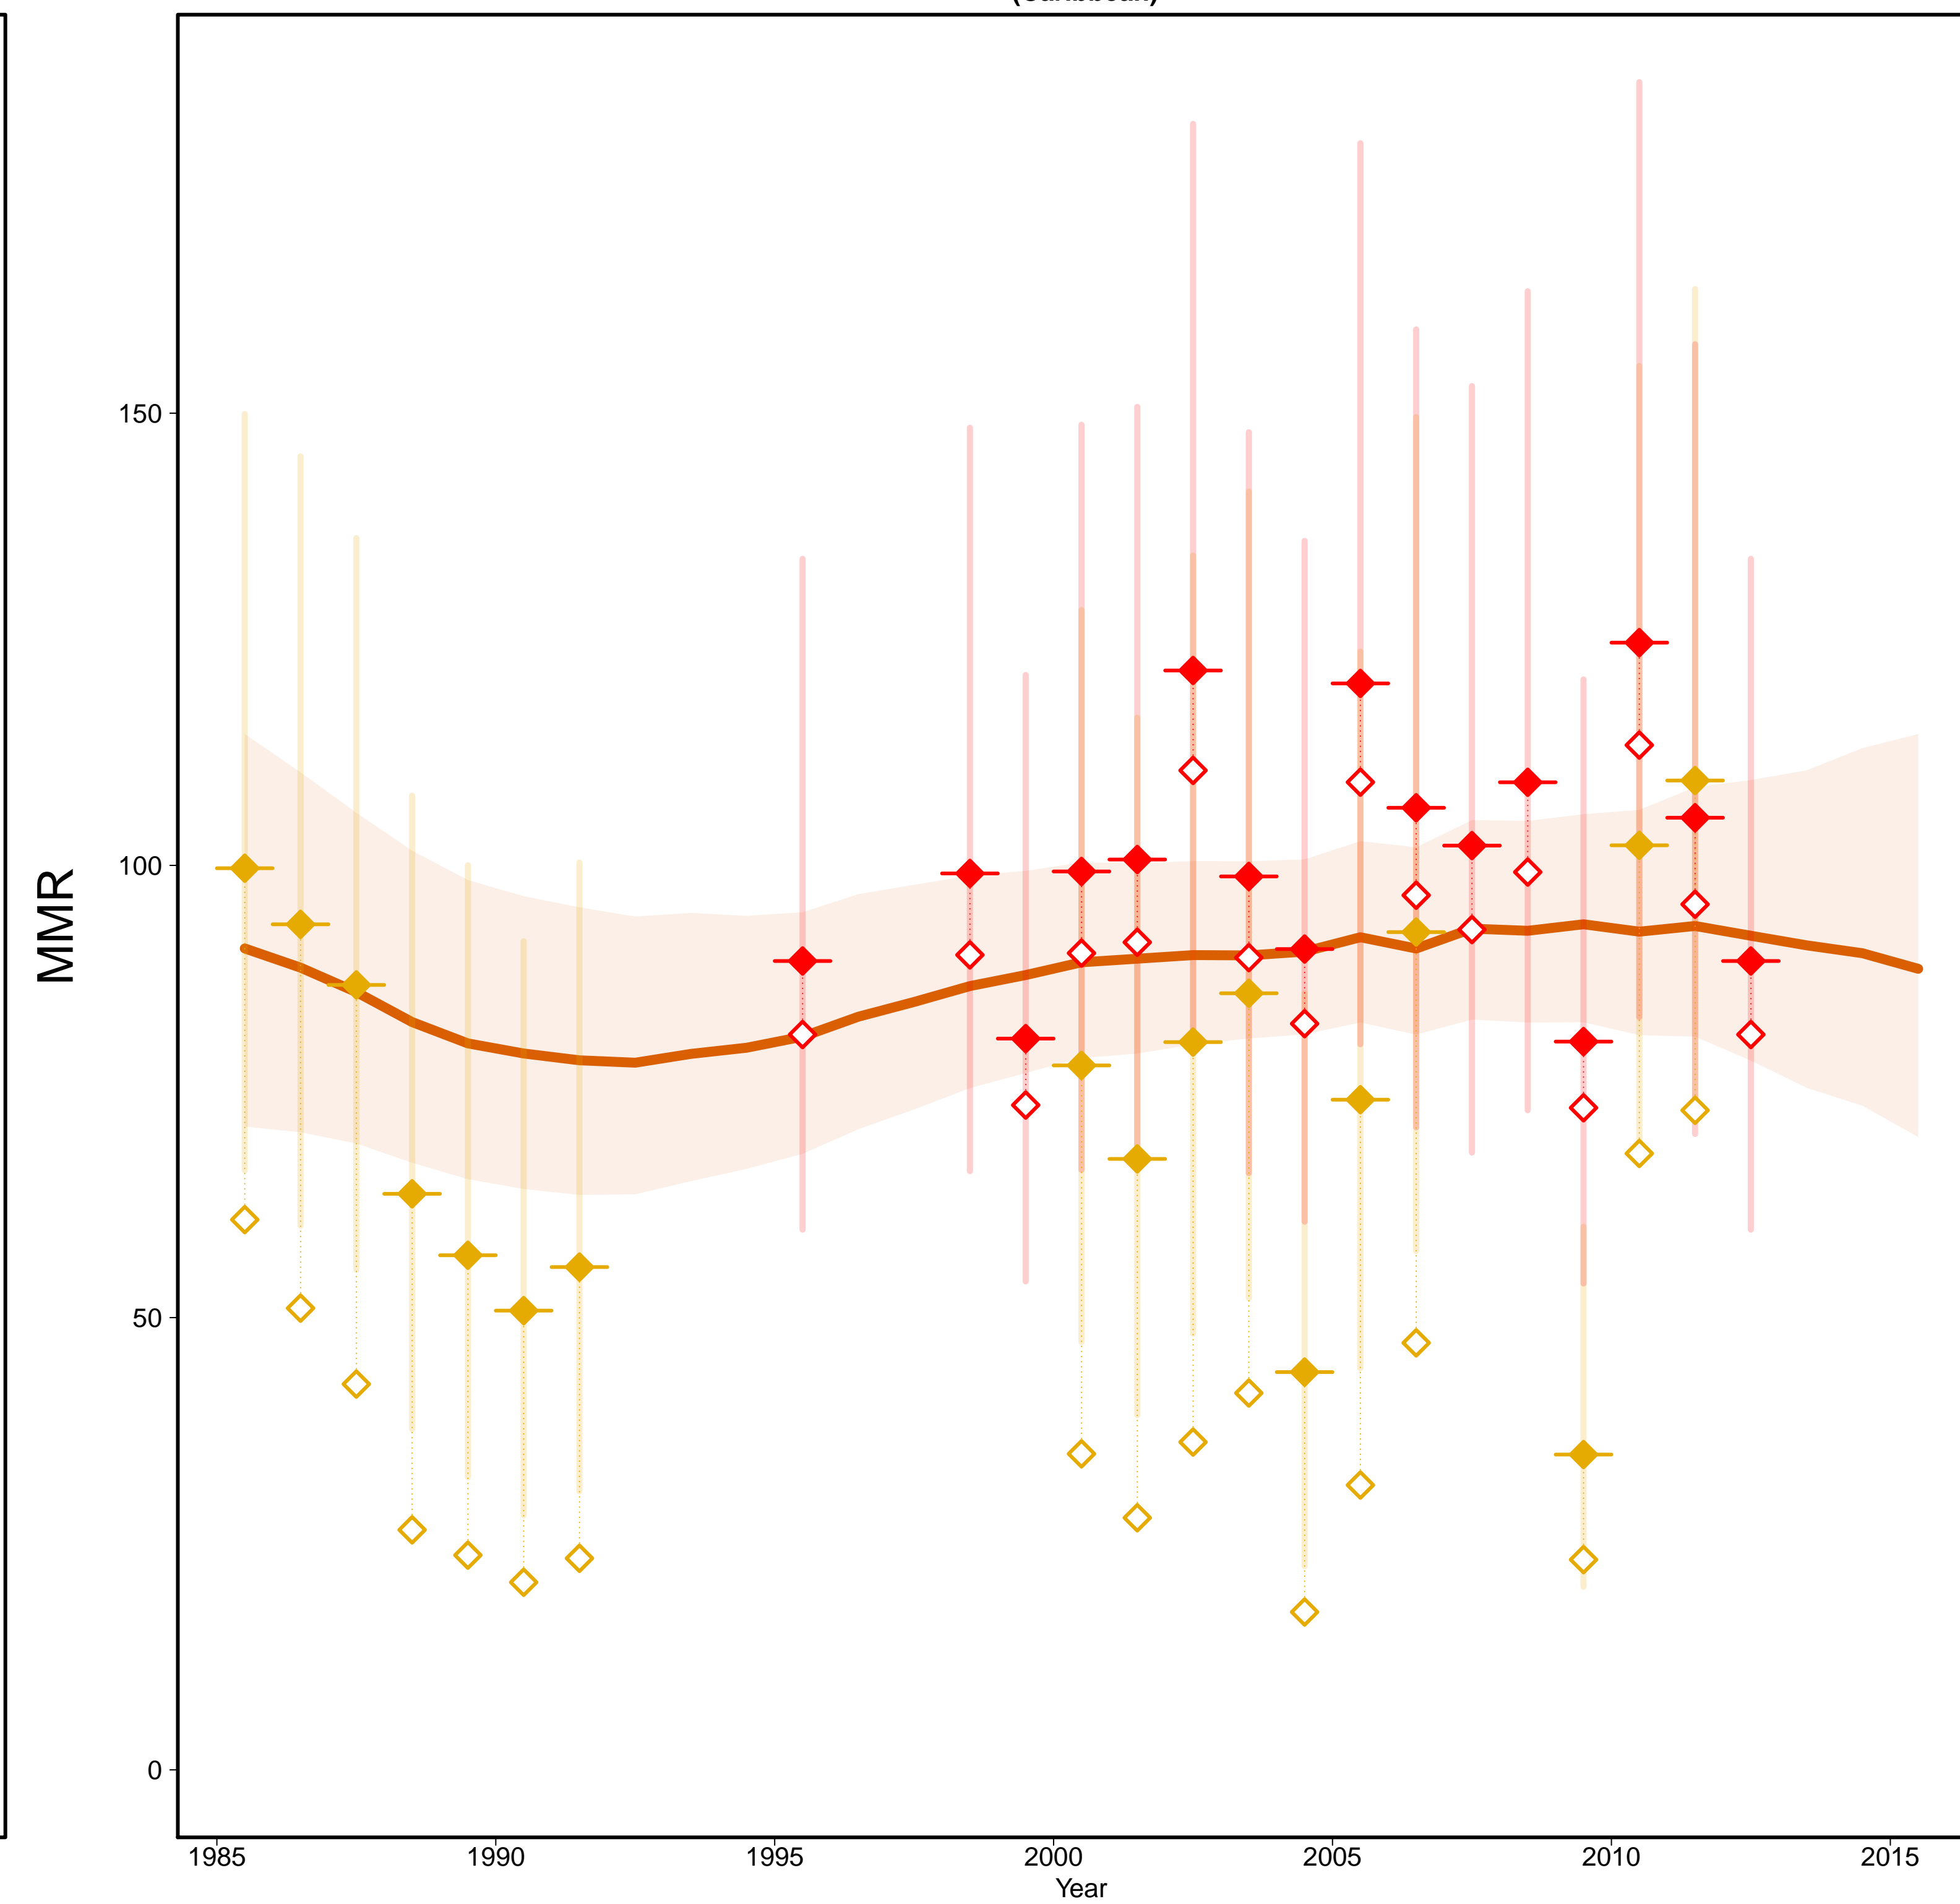

- Estimates —
- MMR Database 2015 —
- ◇ Observed Data
- ◆ Adjusted Data
- Data type —
- ◆ VR
- ◆ Misc. studies

Gross Domestic Product

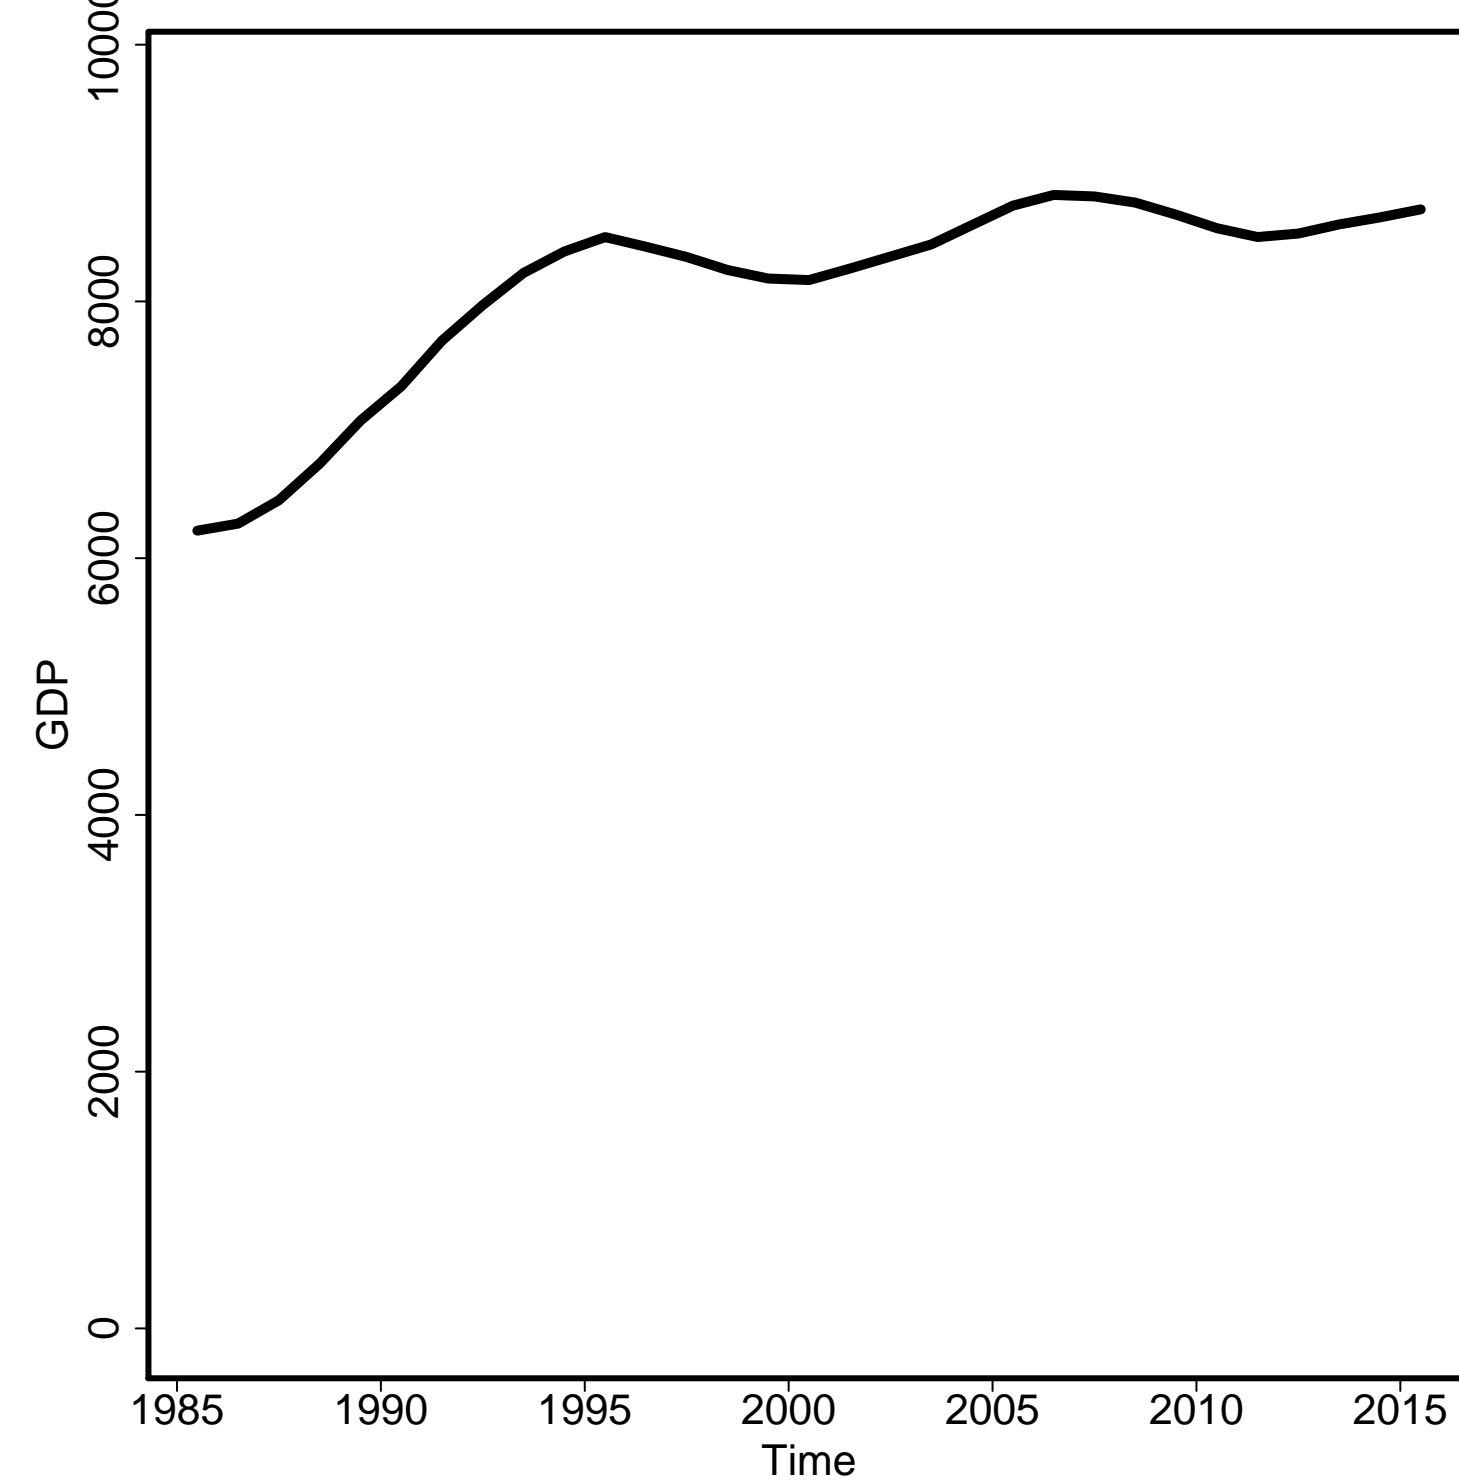

General Fertility Rate

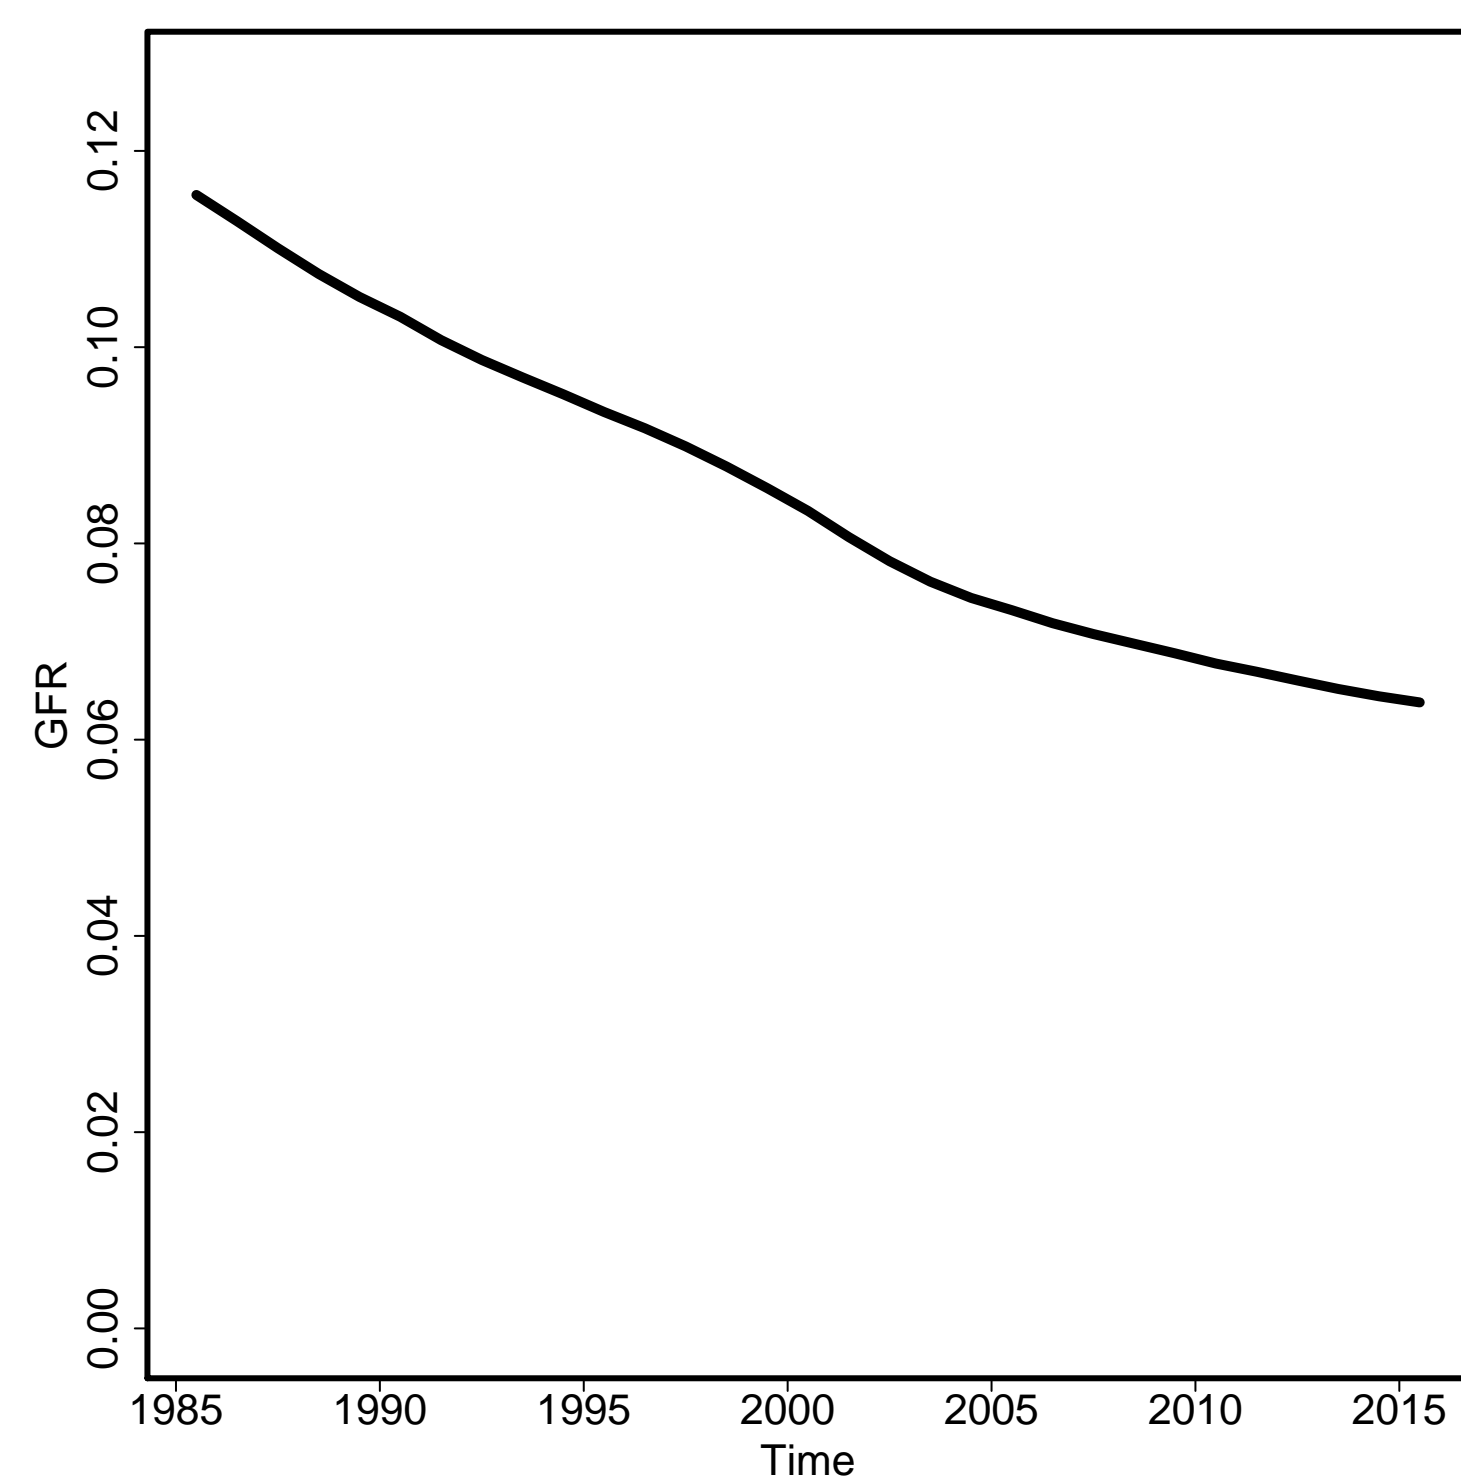

Skilled Attendance to Birth

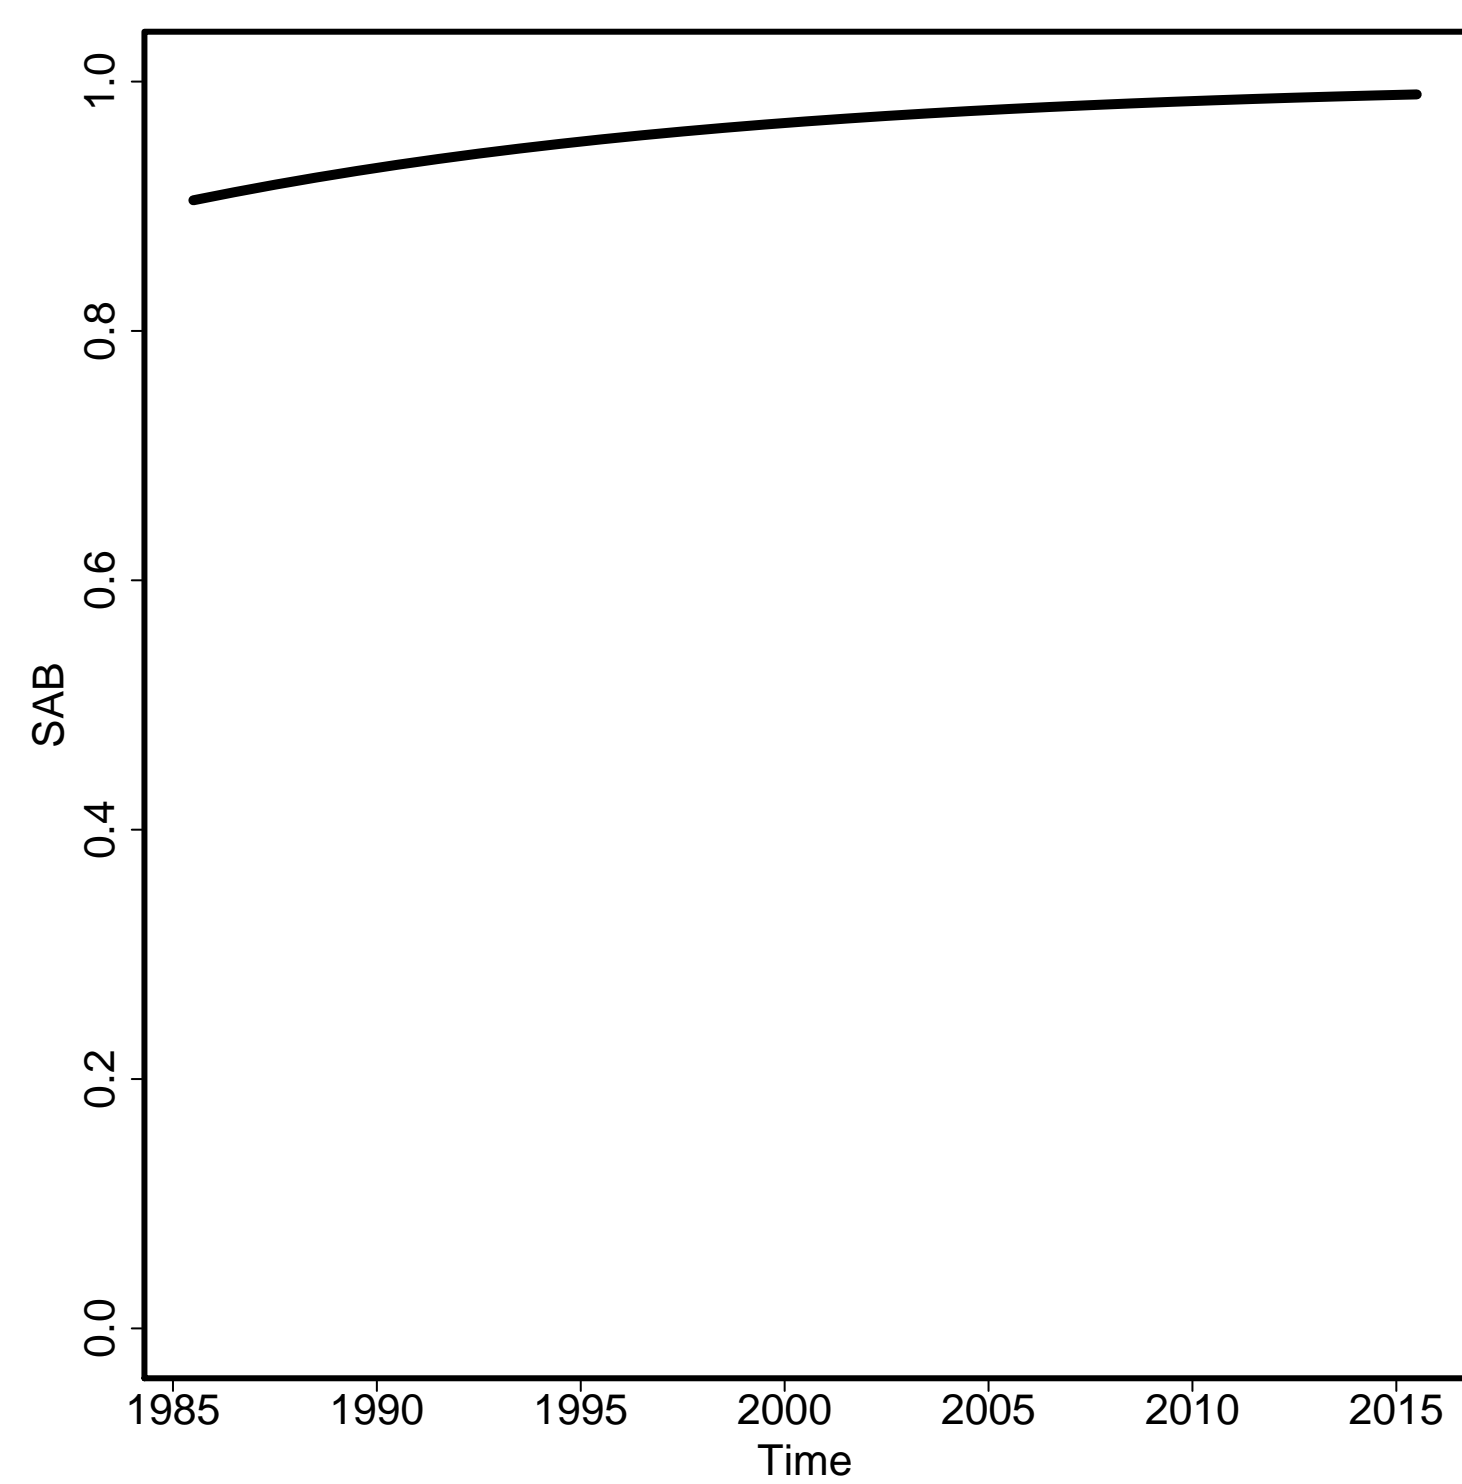

Envelope/Births

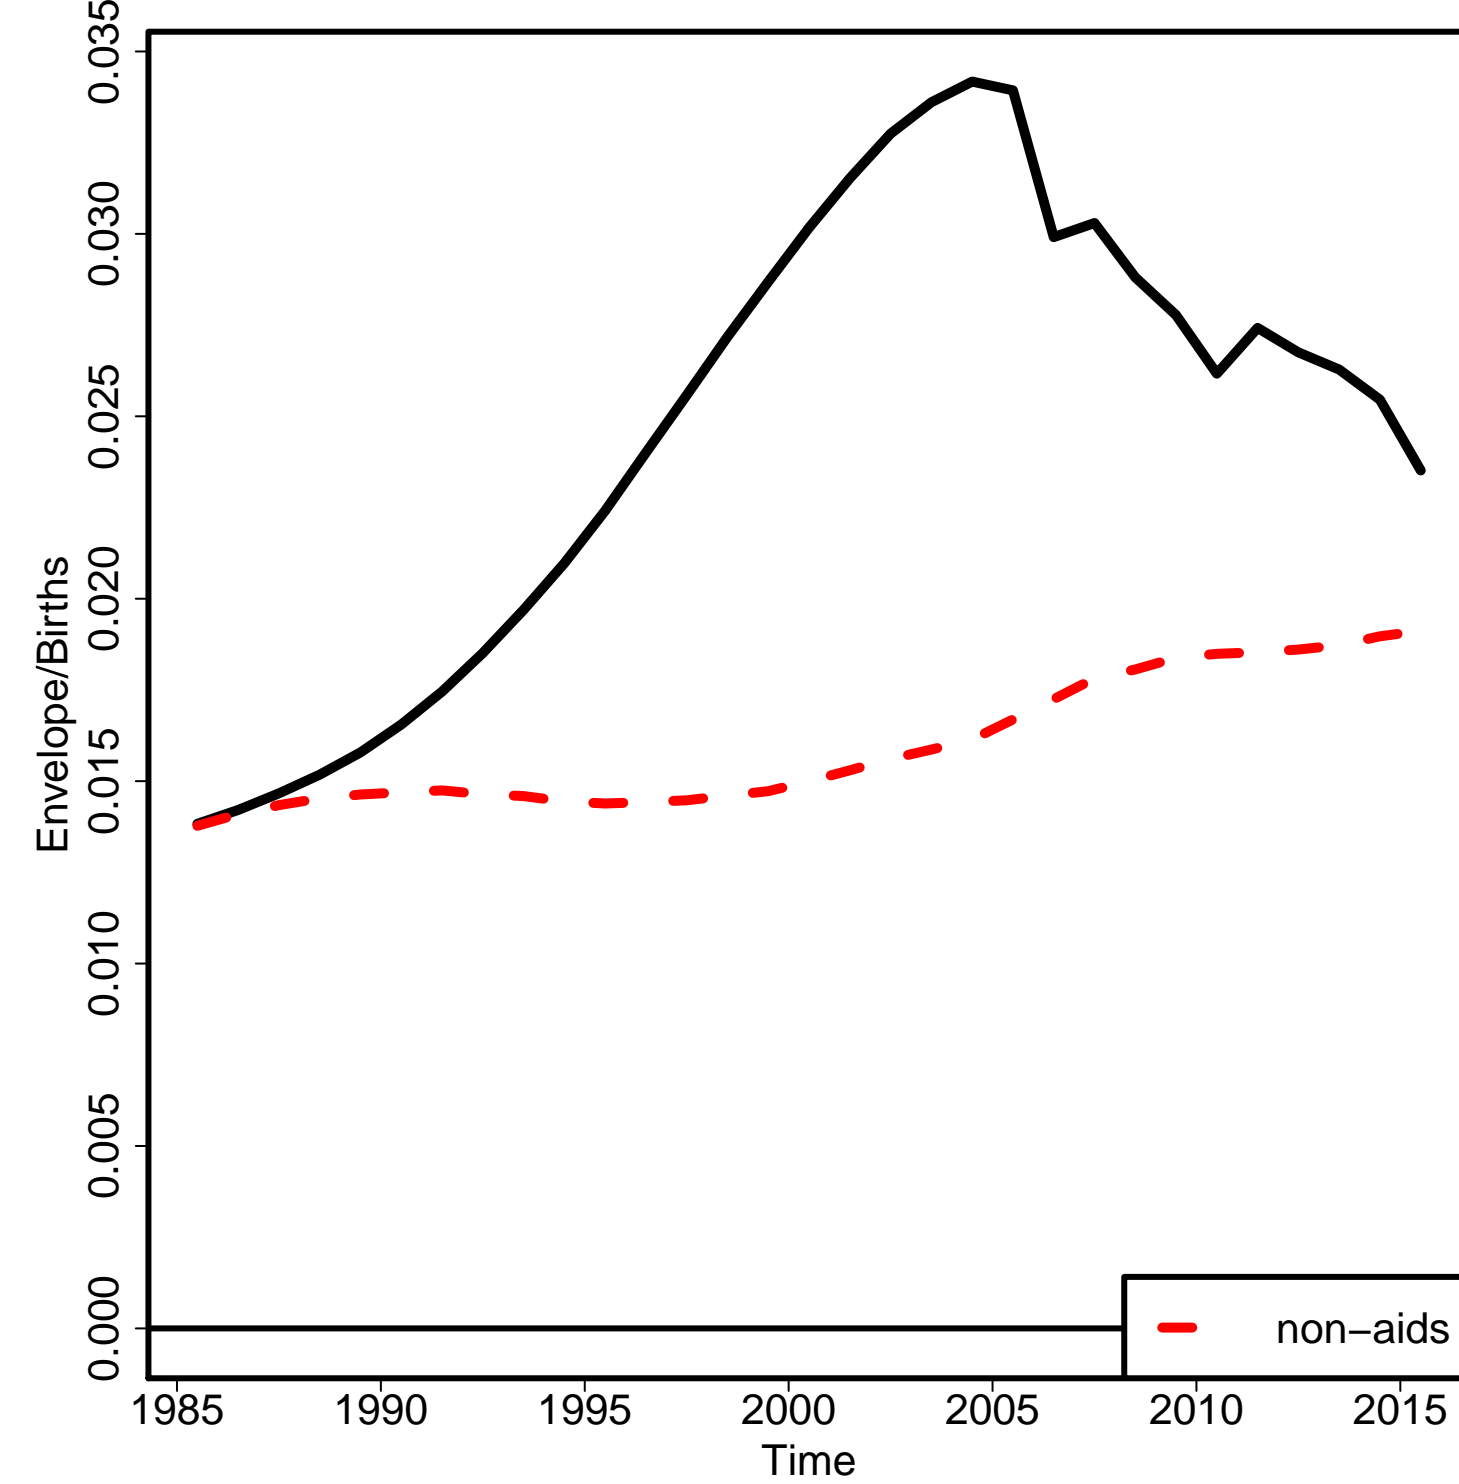

Non-aids MMR

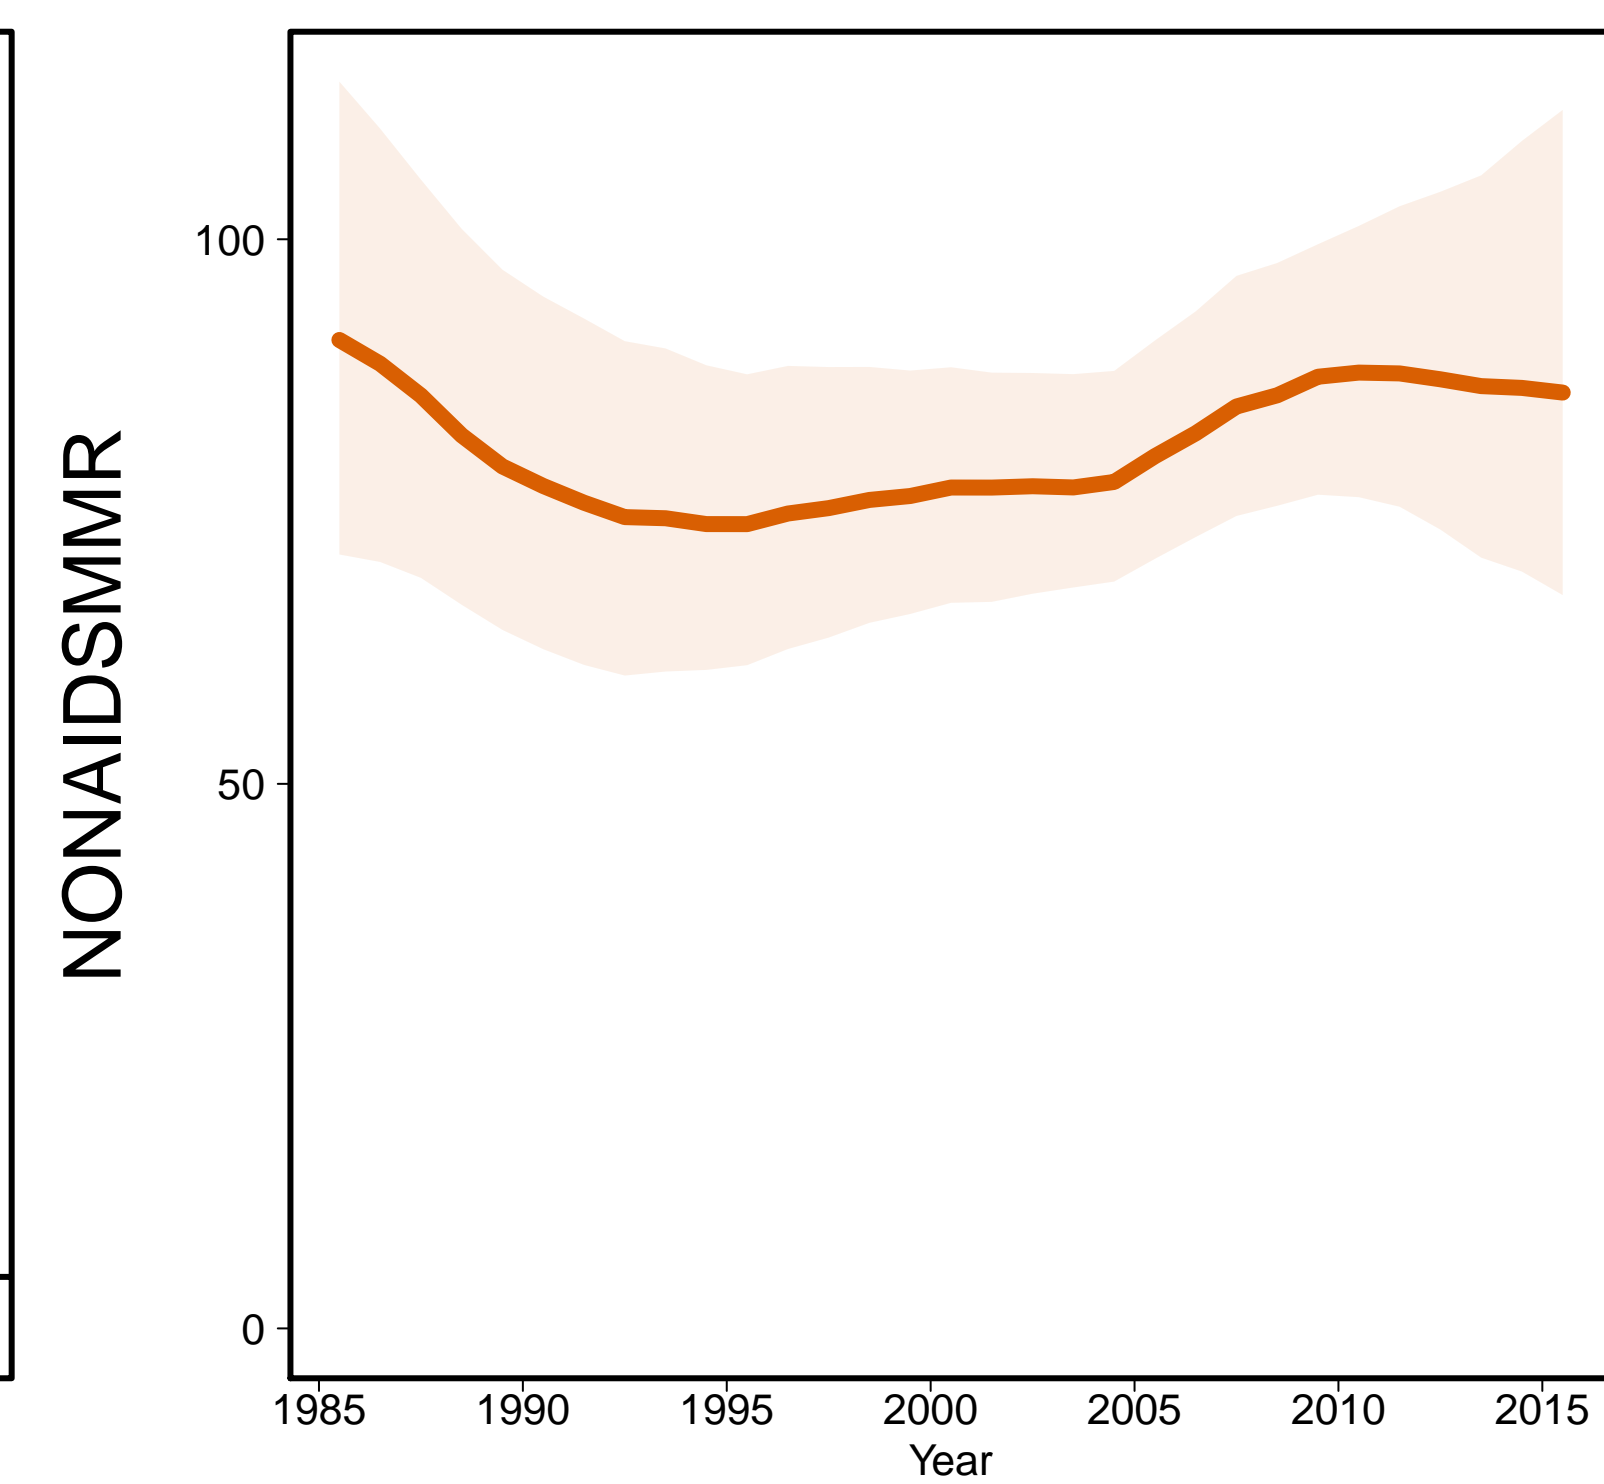

Aids MMR

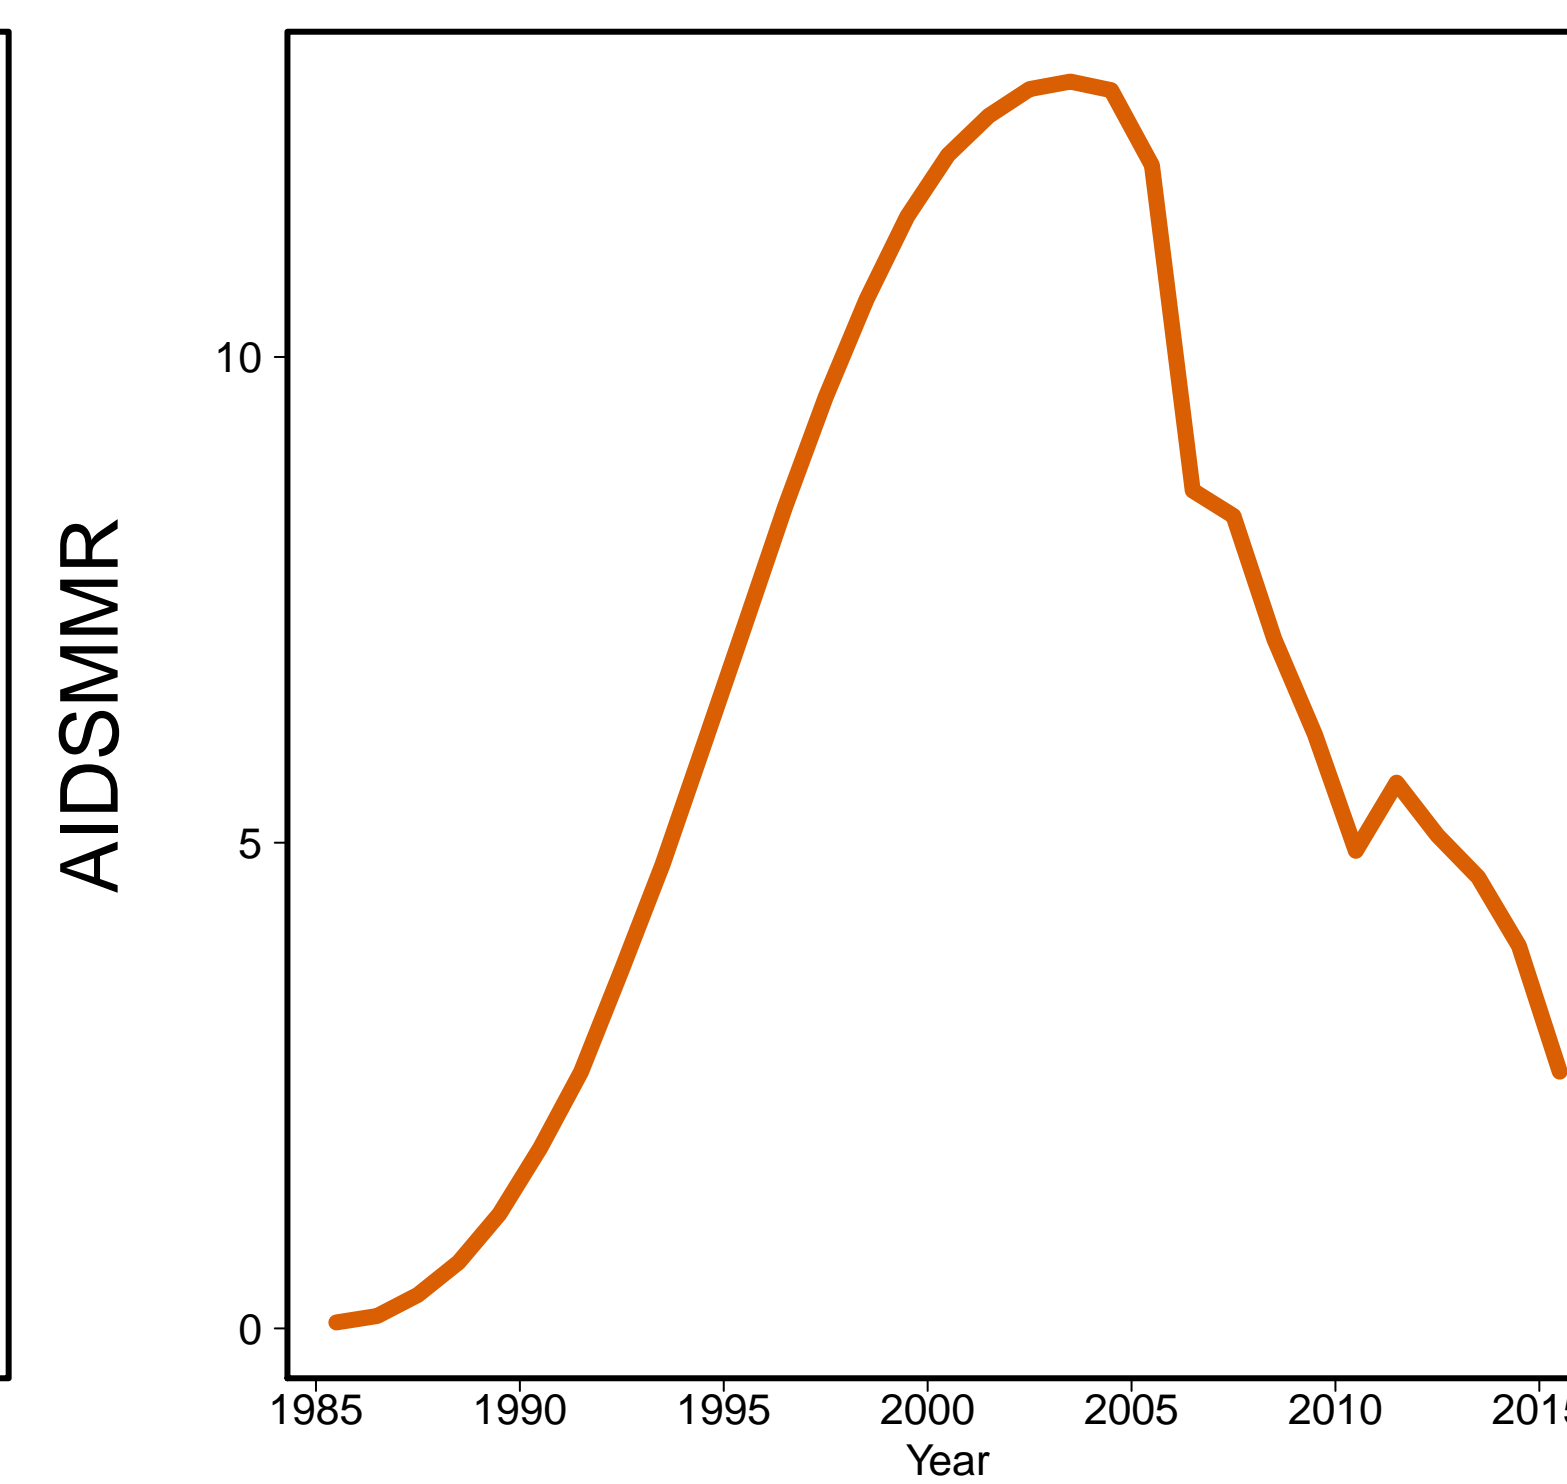

Japan [JPN]  
(Developed regions)

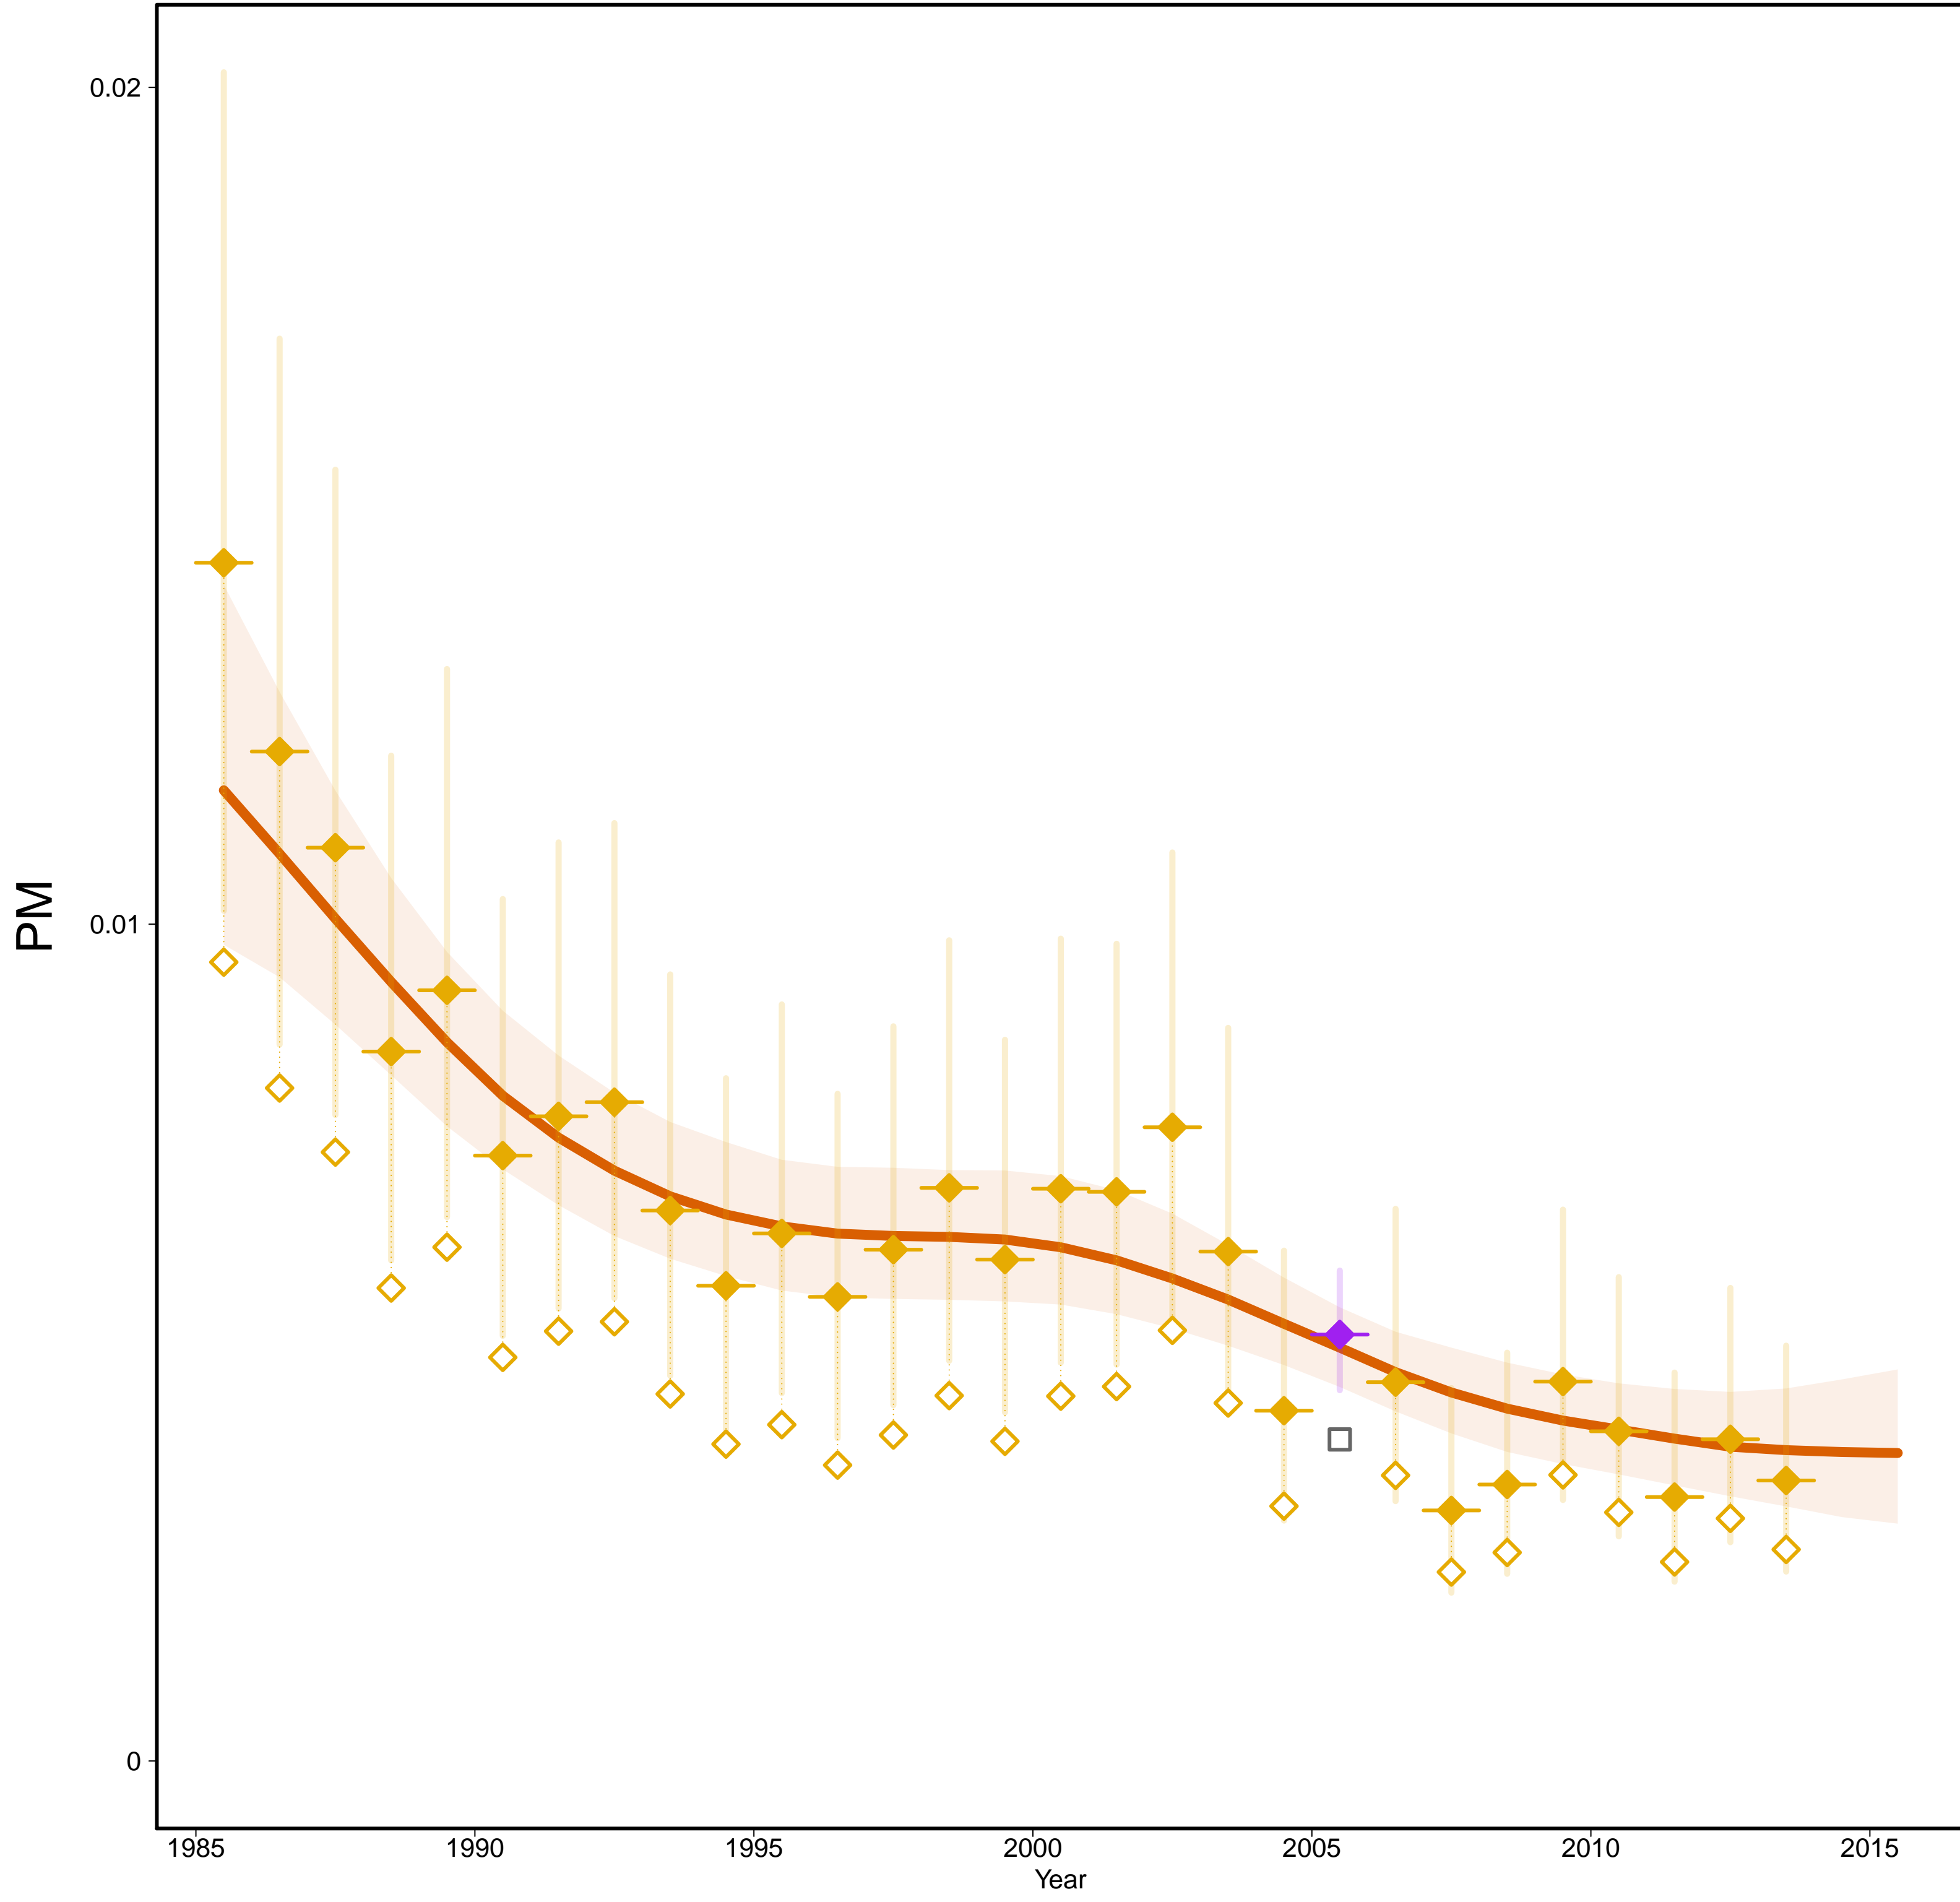

Japan [JPN]  
(Developed regions)

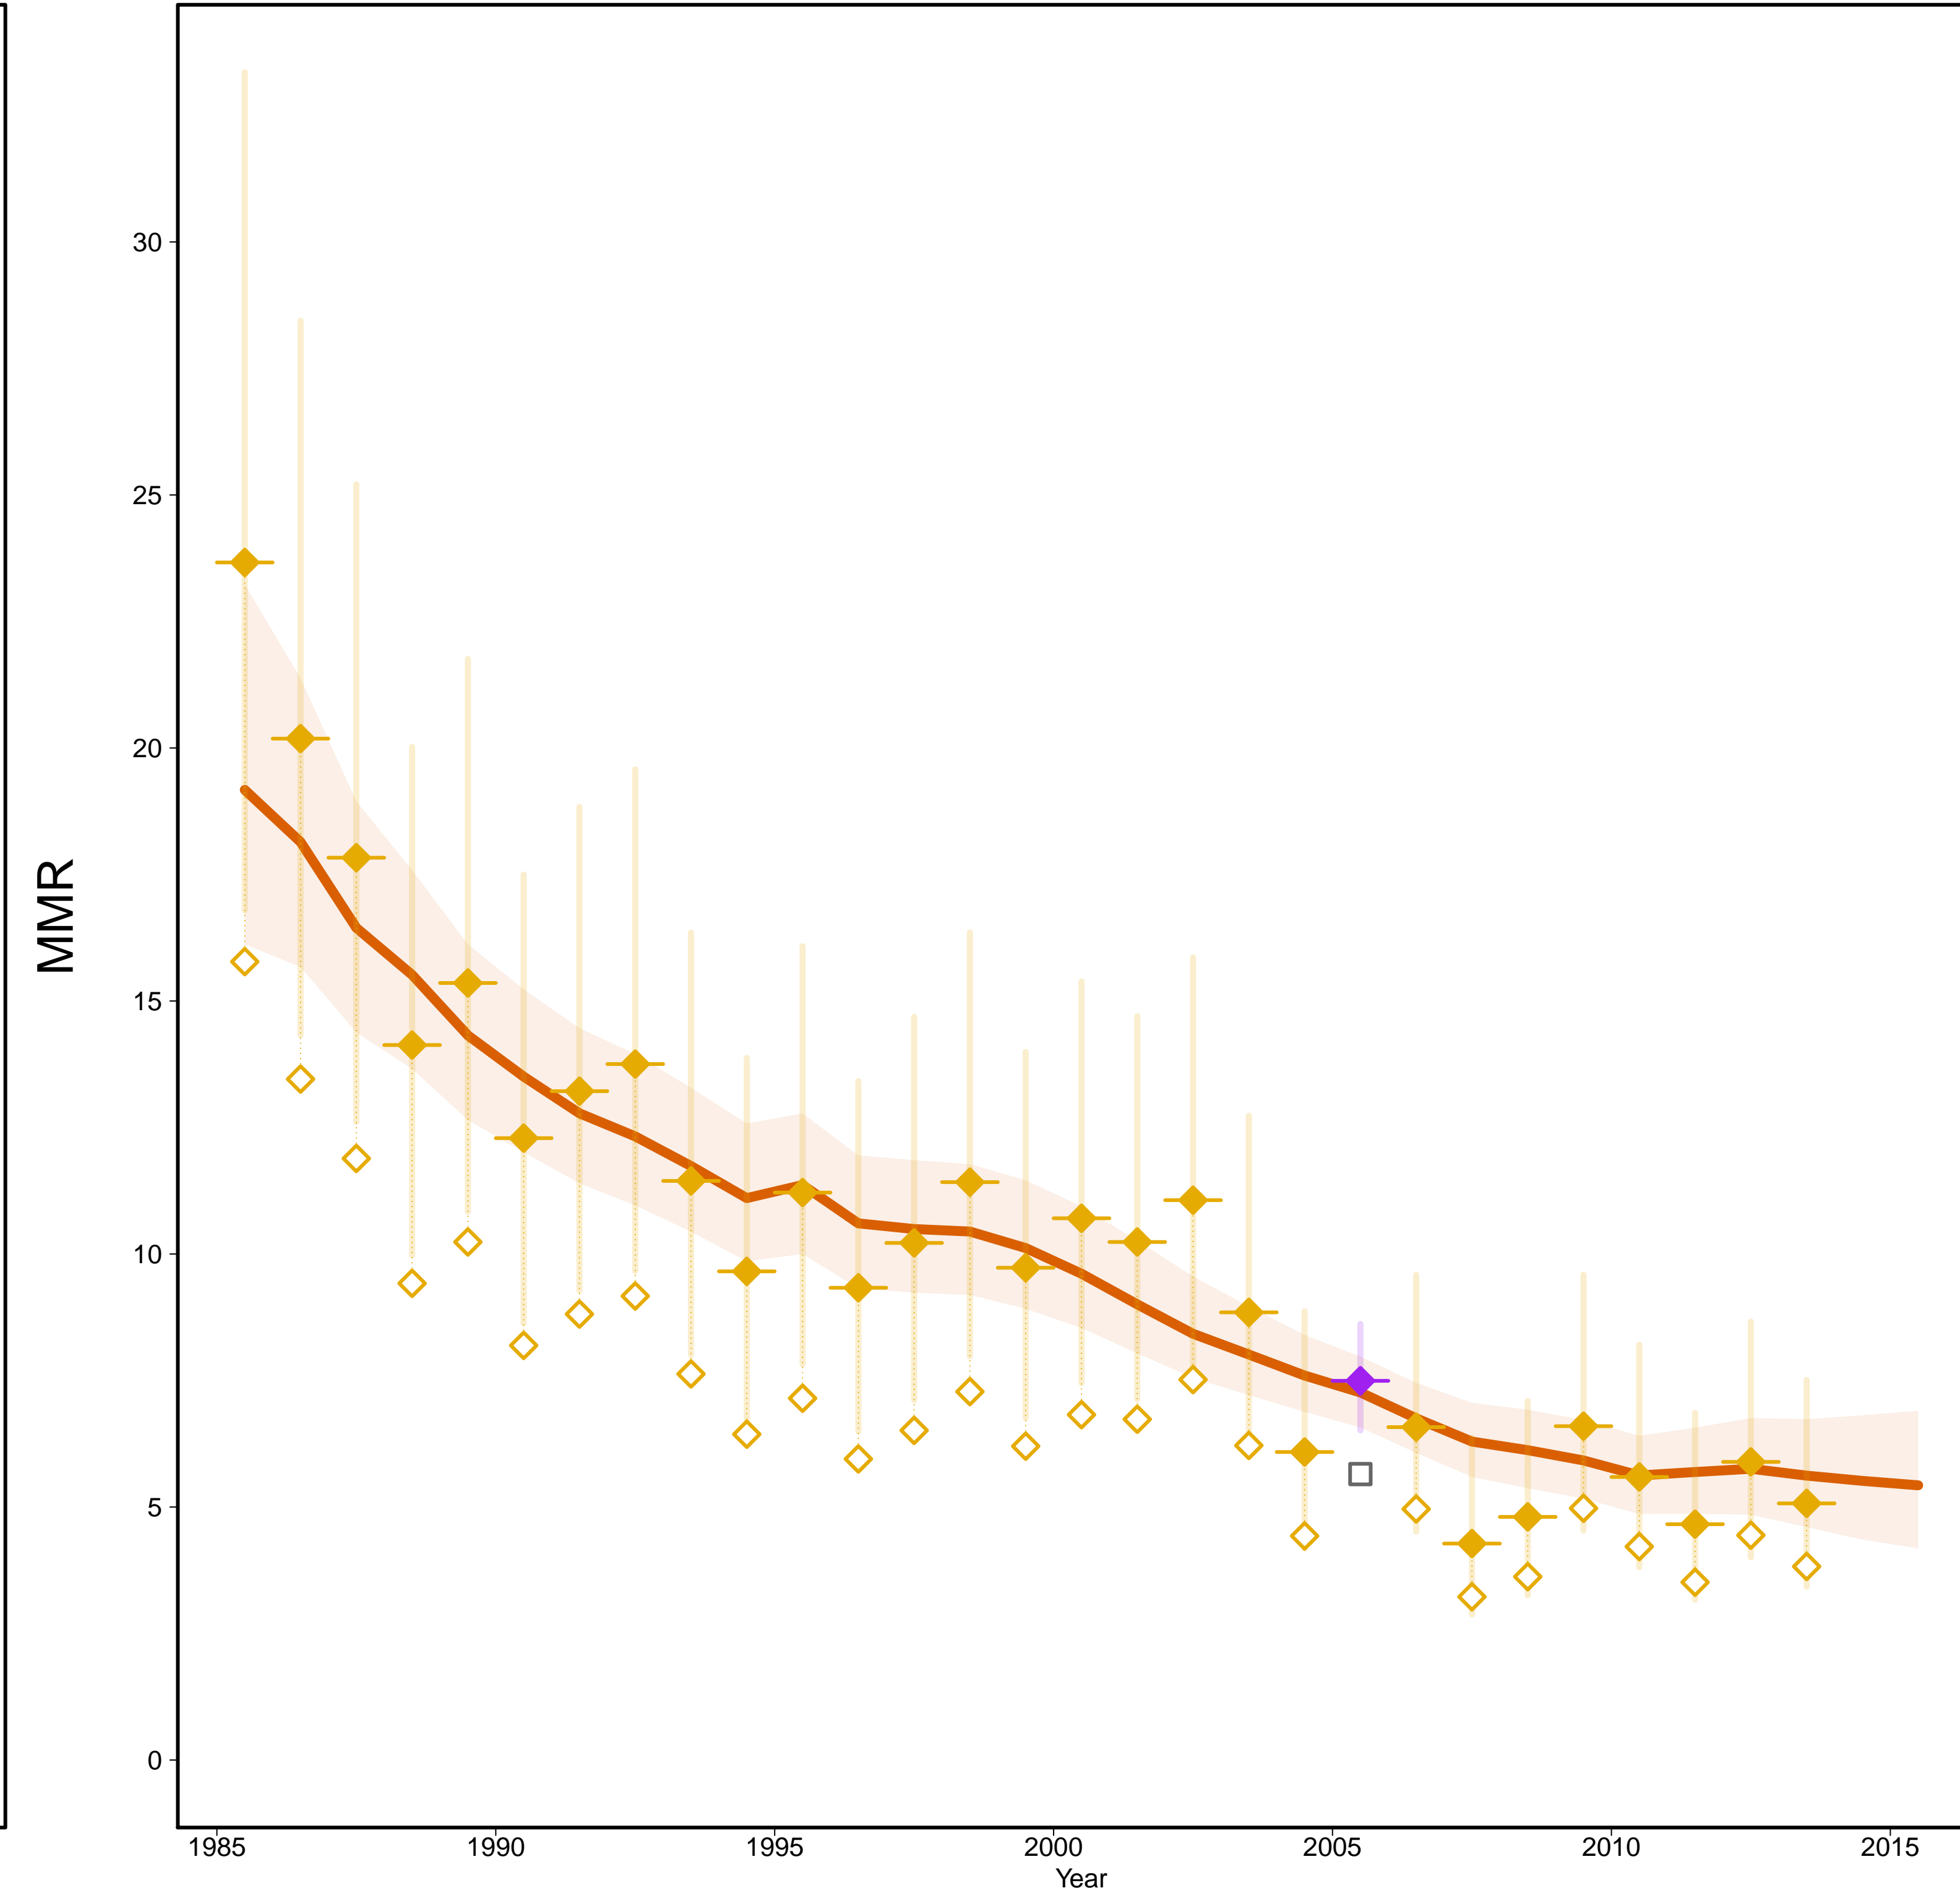

- Estimates -
- Mlate
- MMR Database 2015 -
- ◇ Observed Data
- ◆ Adjusted Data
- Data type -
- ◆ VR
- ◆ Spec. studies
- Excluded VR data  
(overlap with specialized study)

Gross Domestic Product

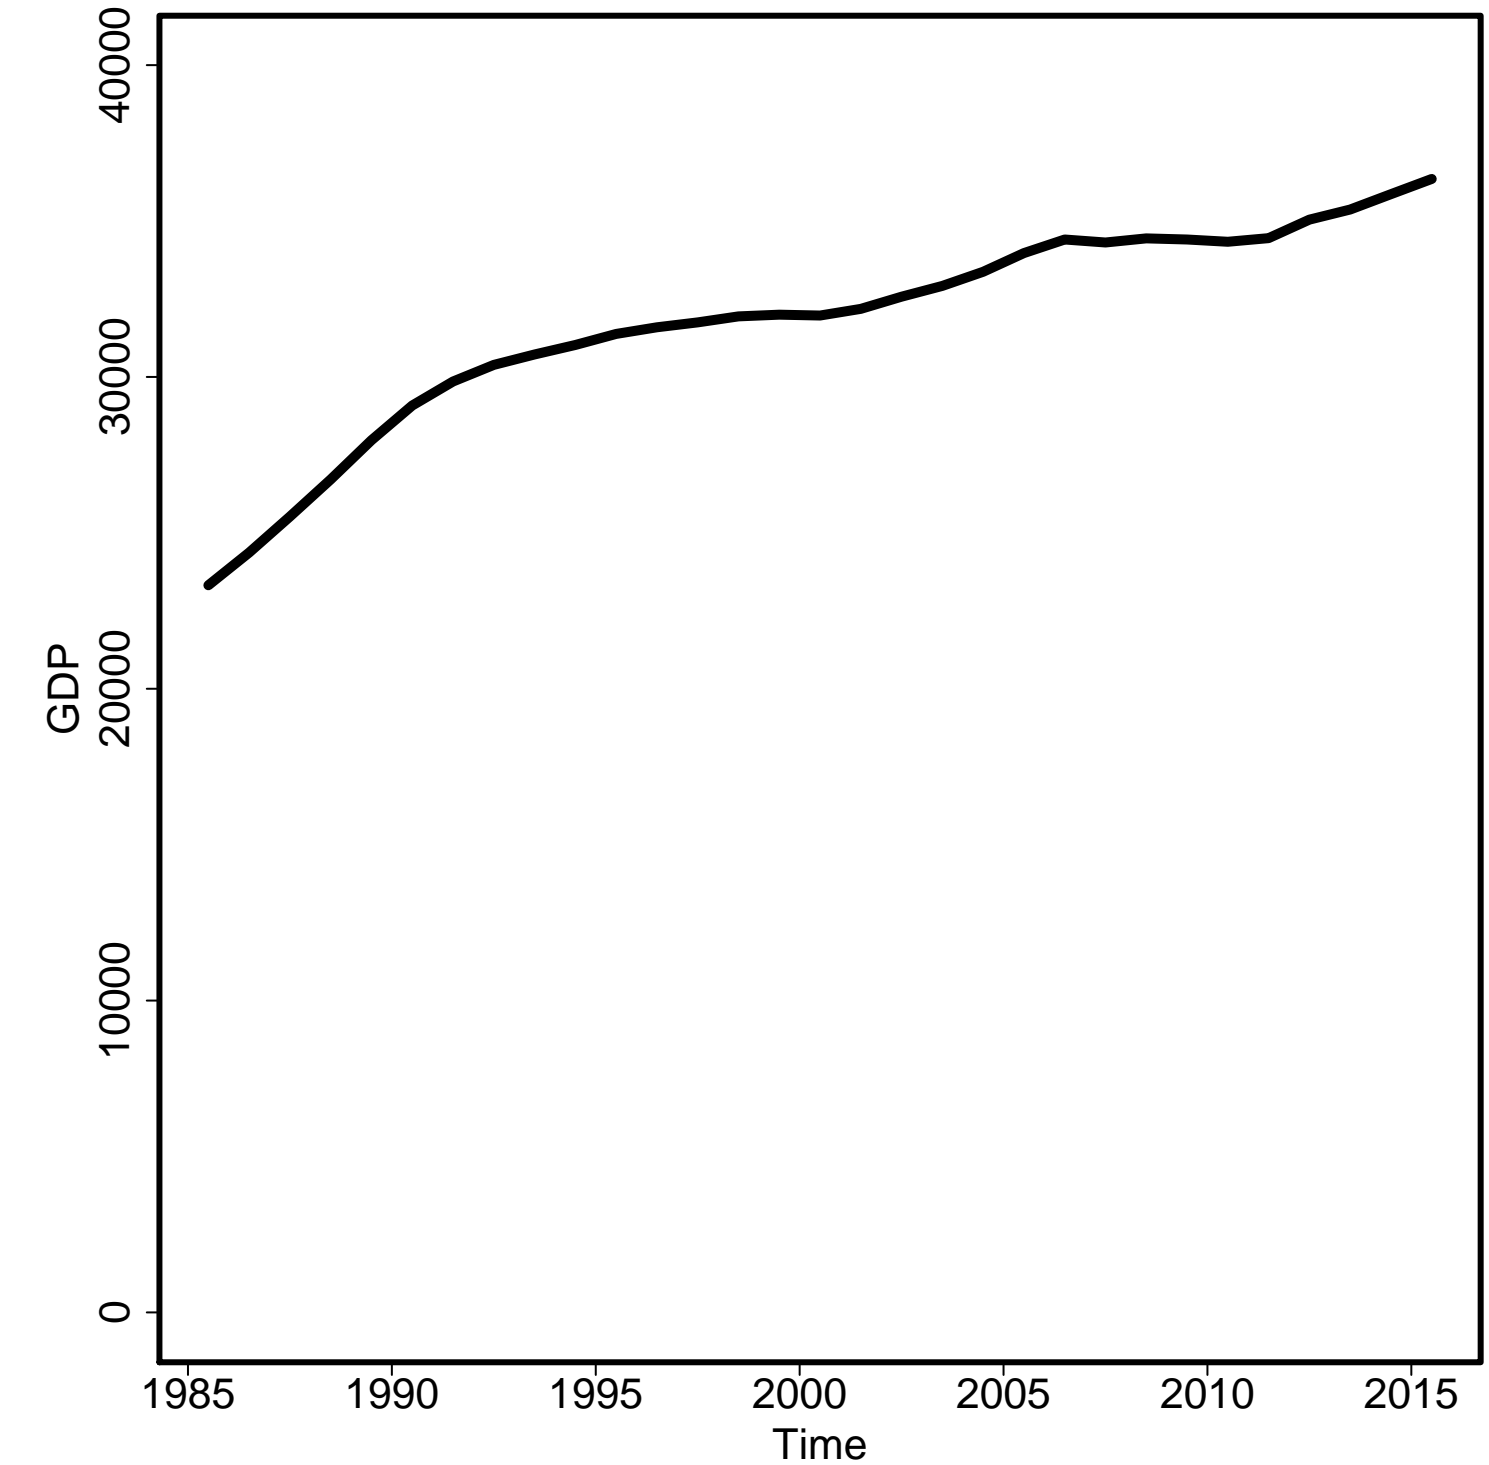

General Fertility Rate

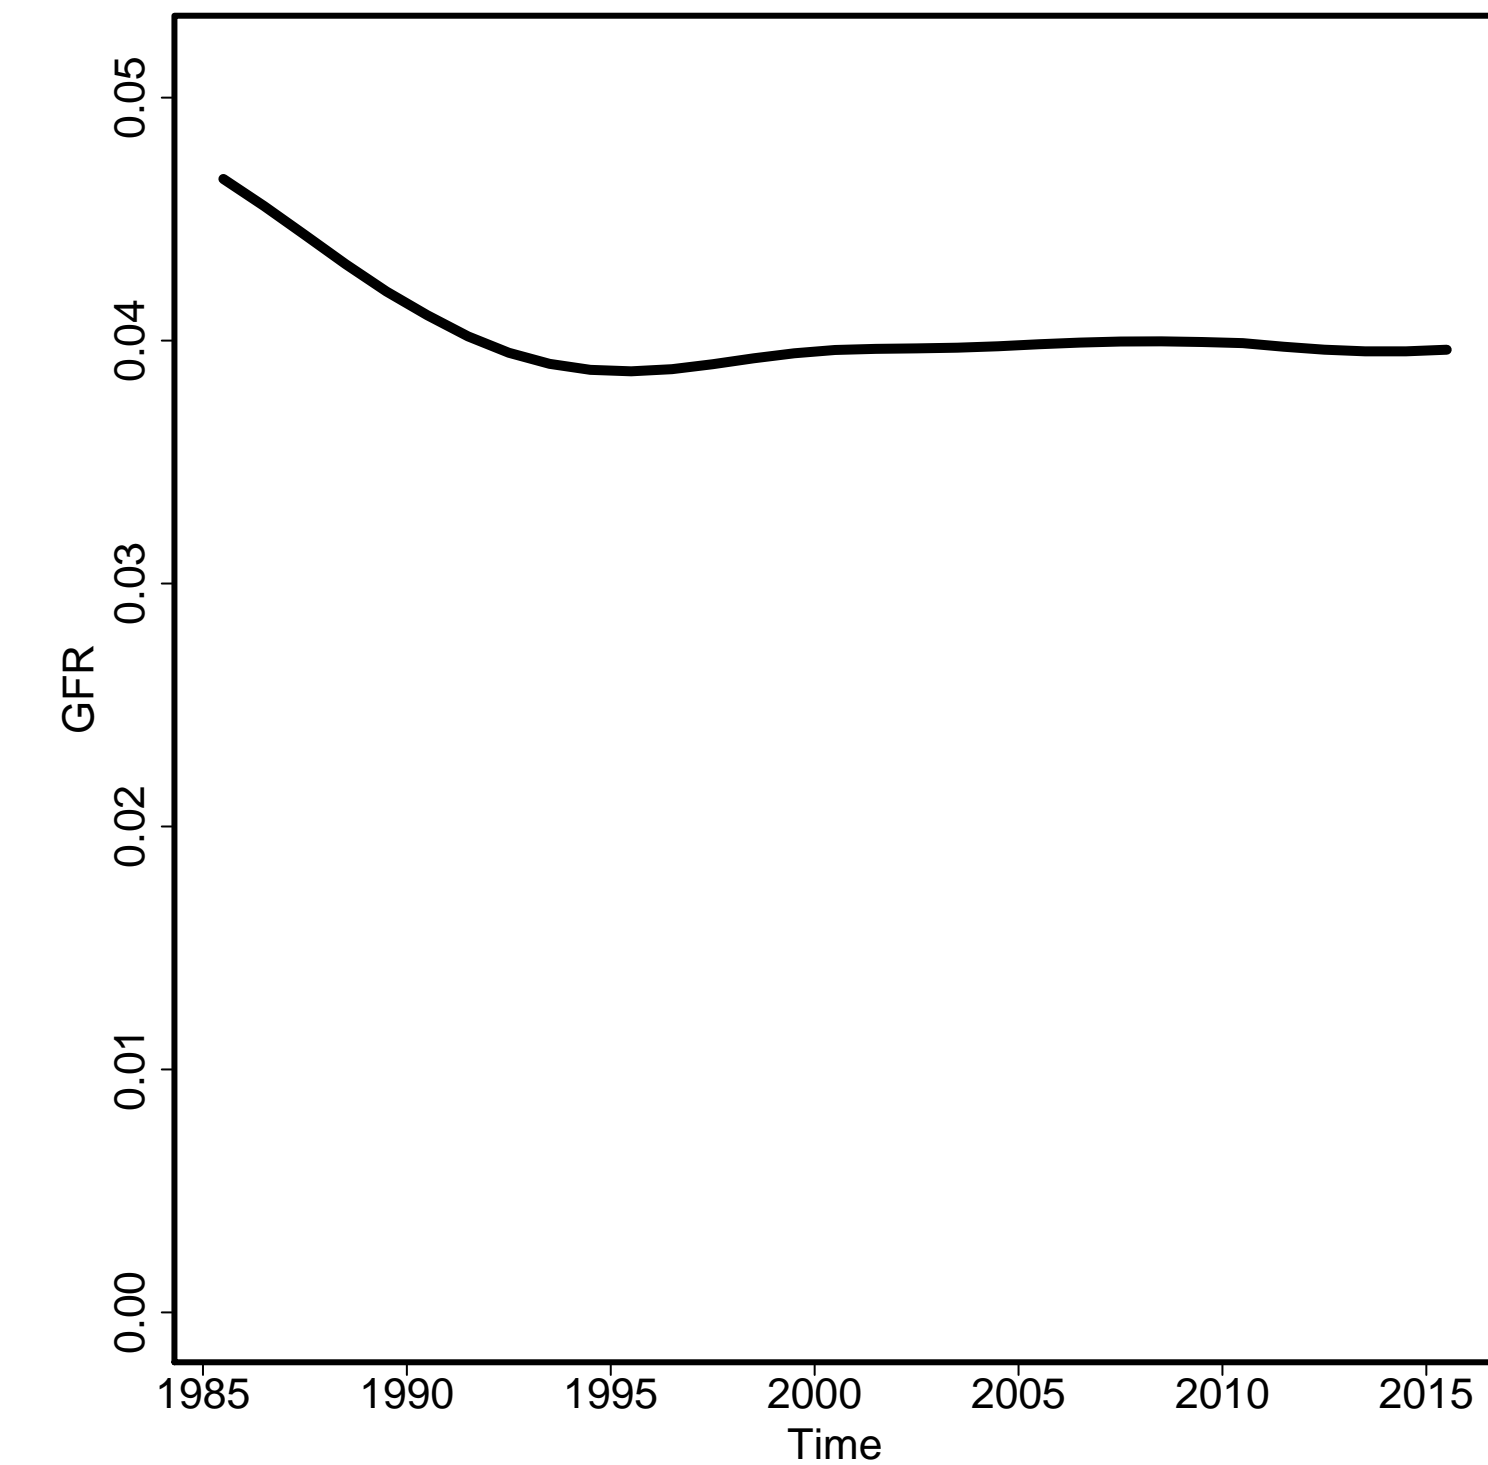

Skilled Attendance to Birth

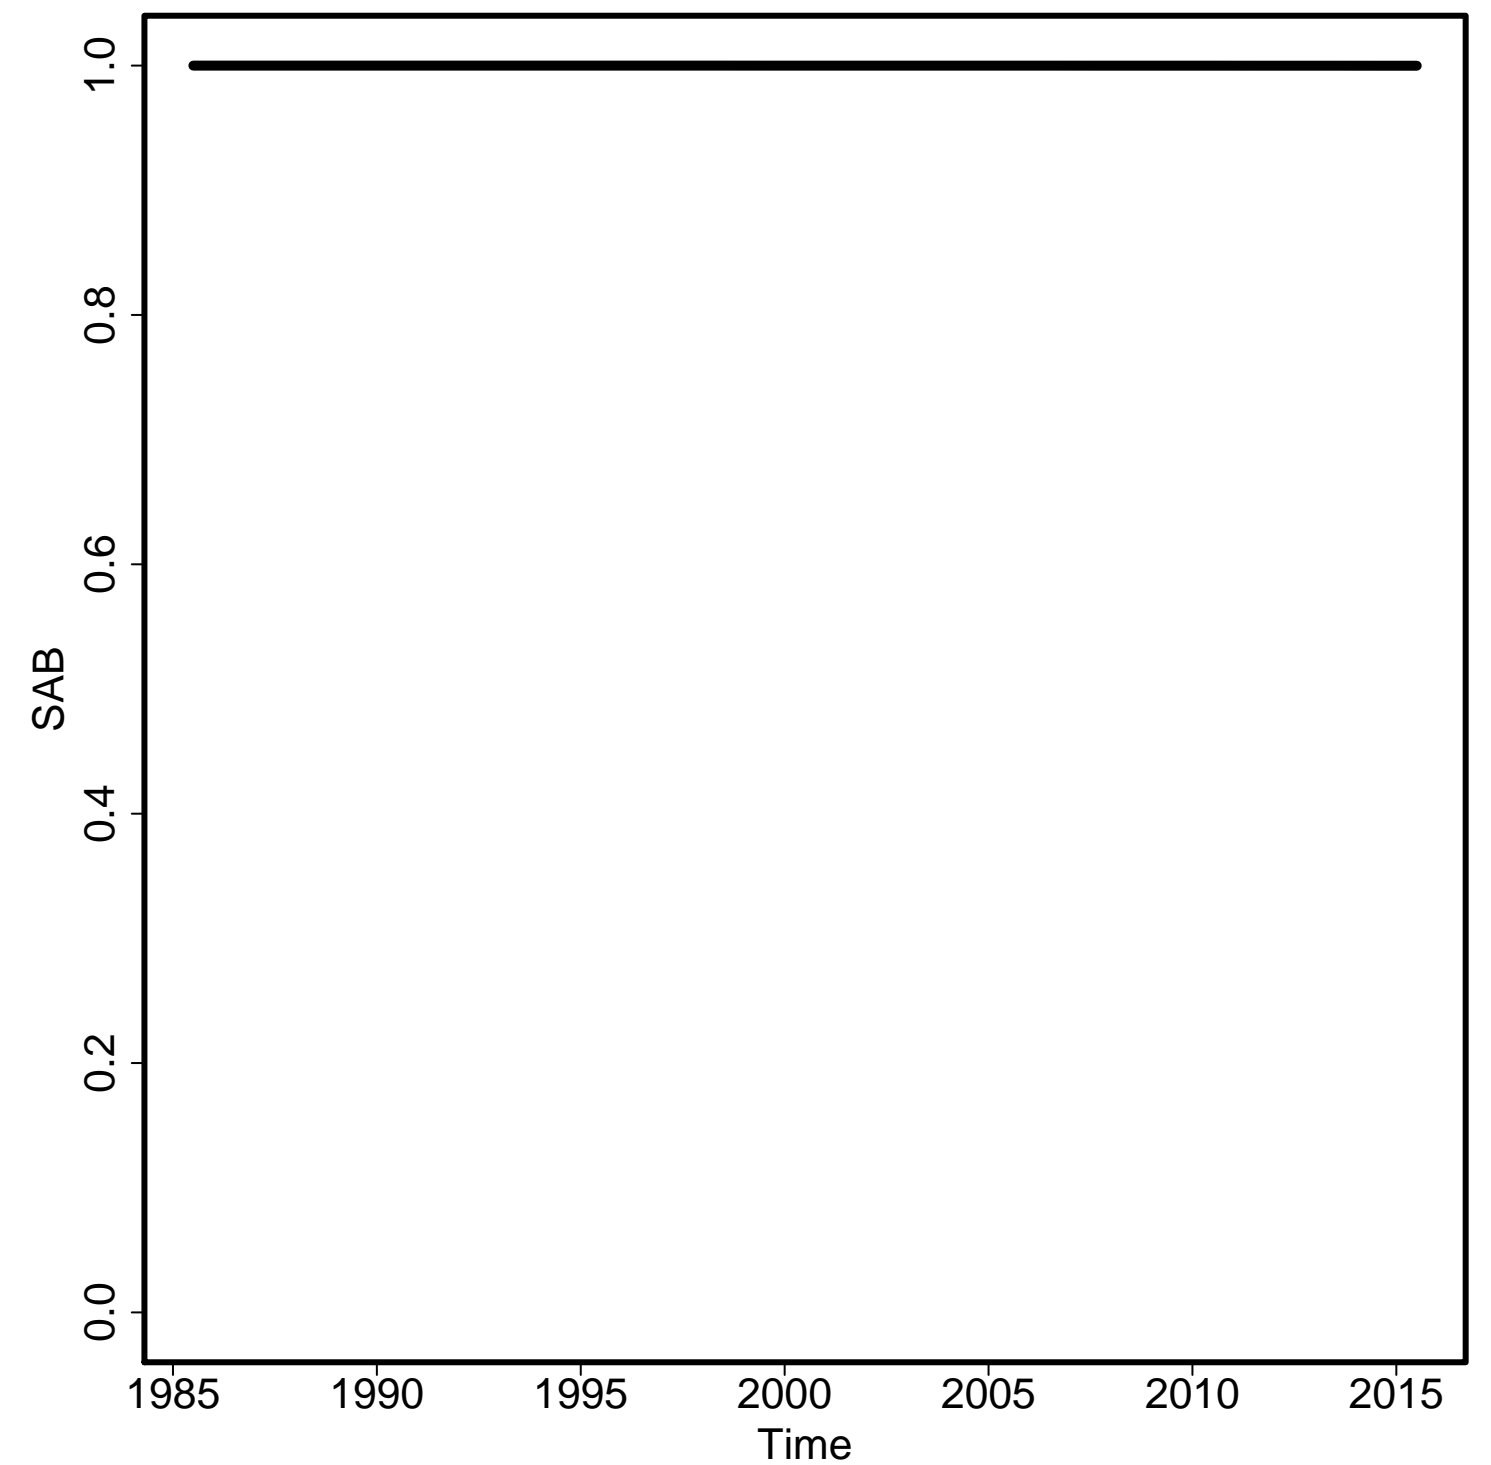

Envelope/Births

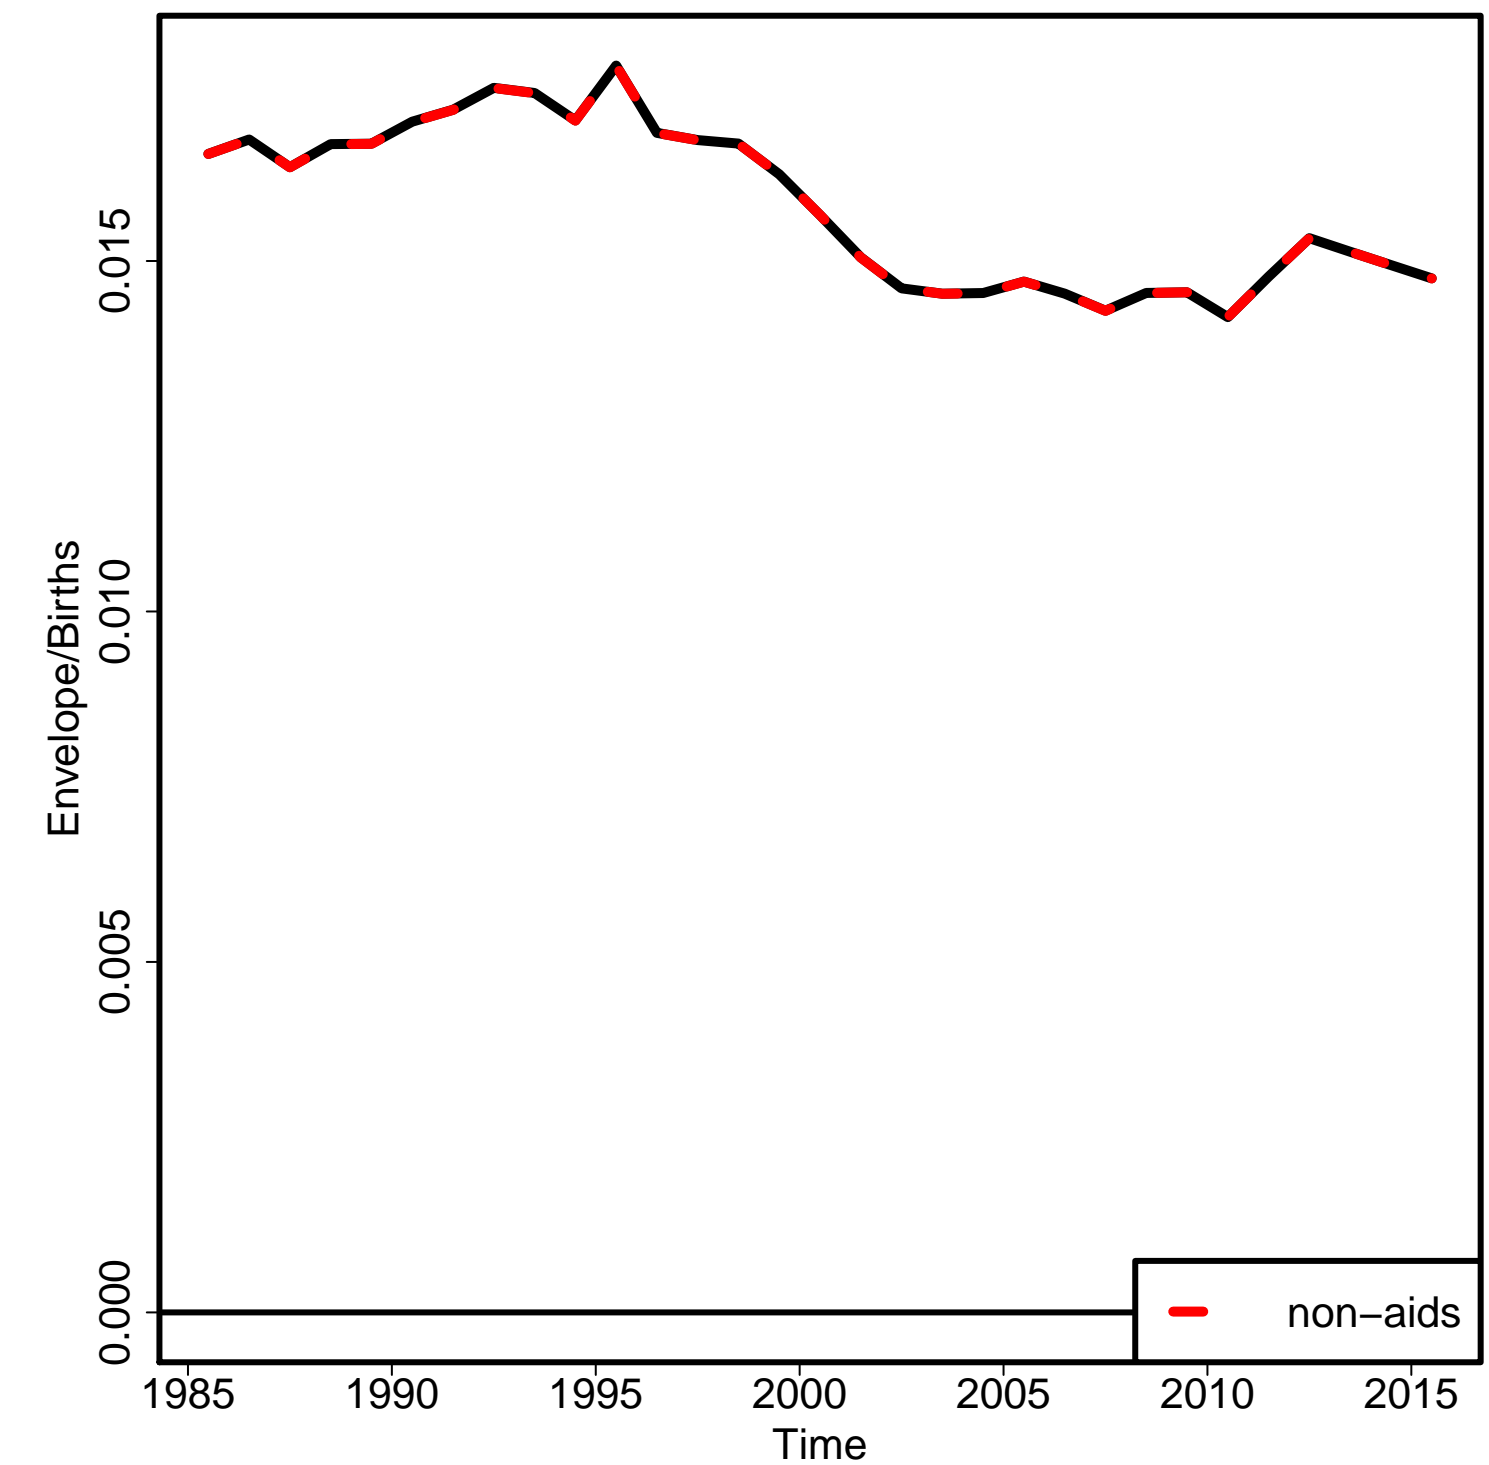

Non-aids MMR

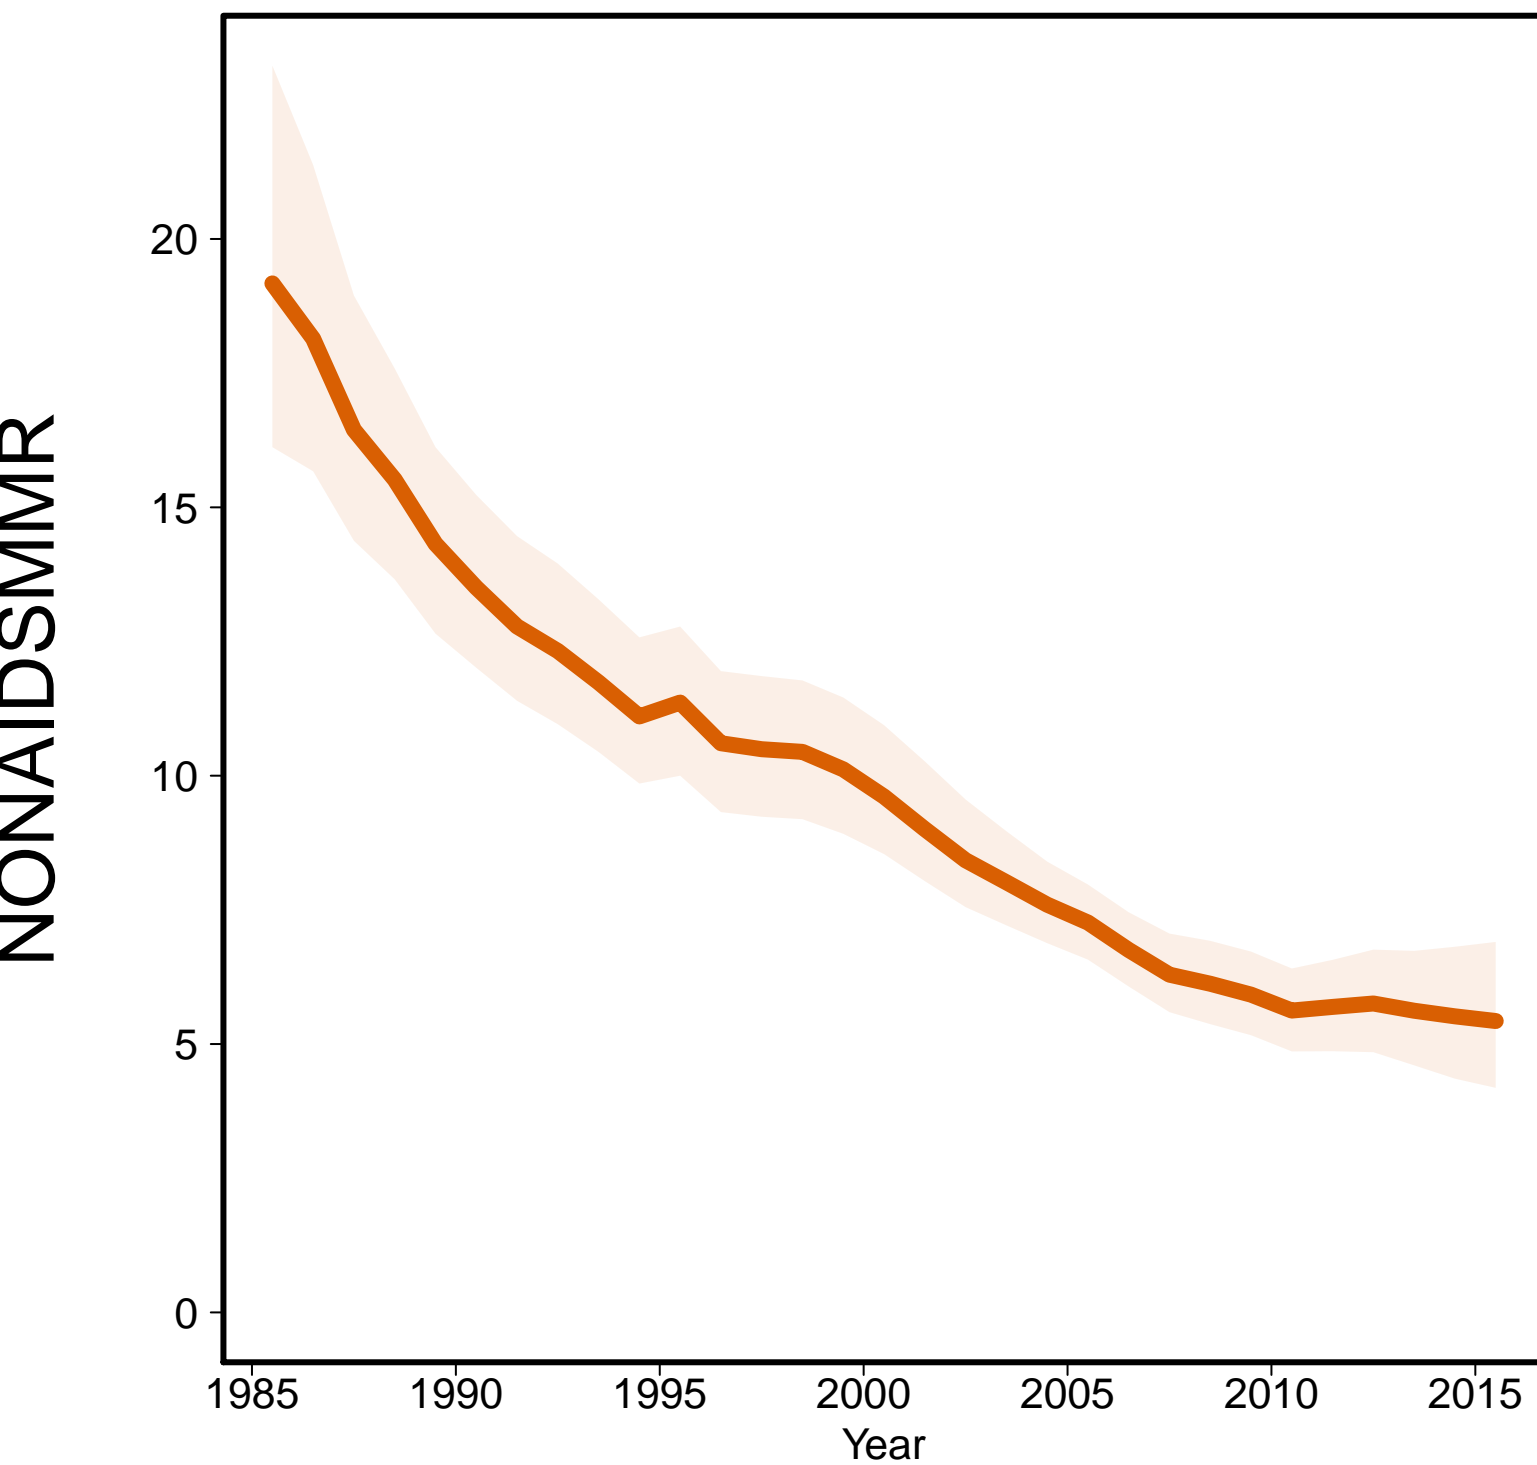

Aids MMR

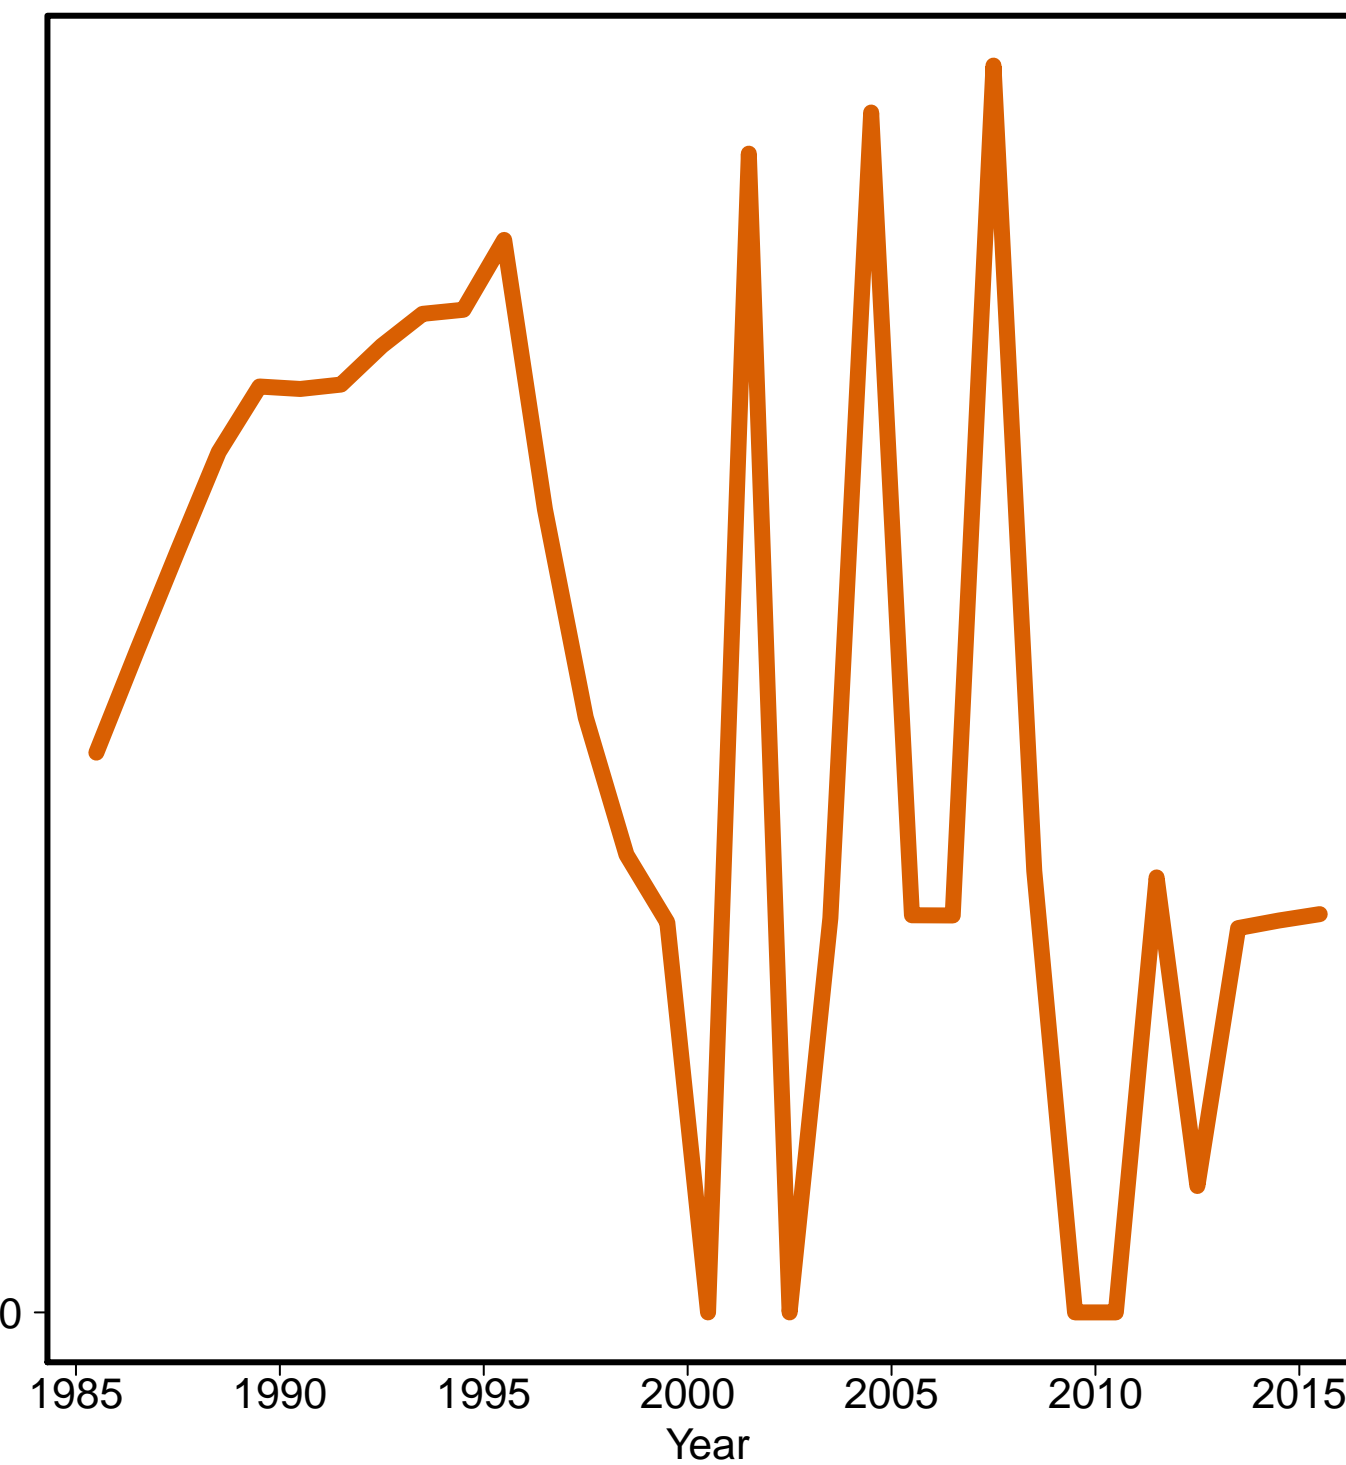

Jordan [JOR]  
(Western Asia)

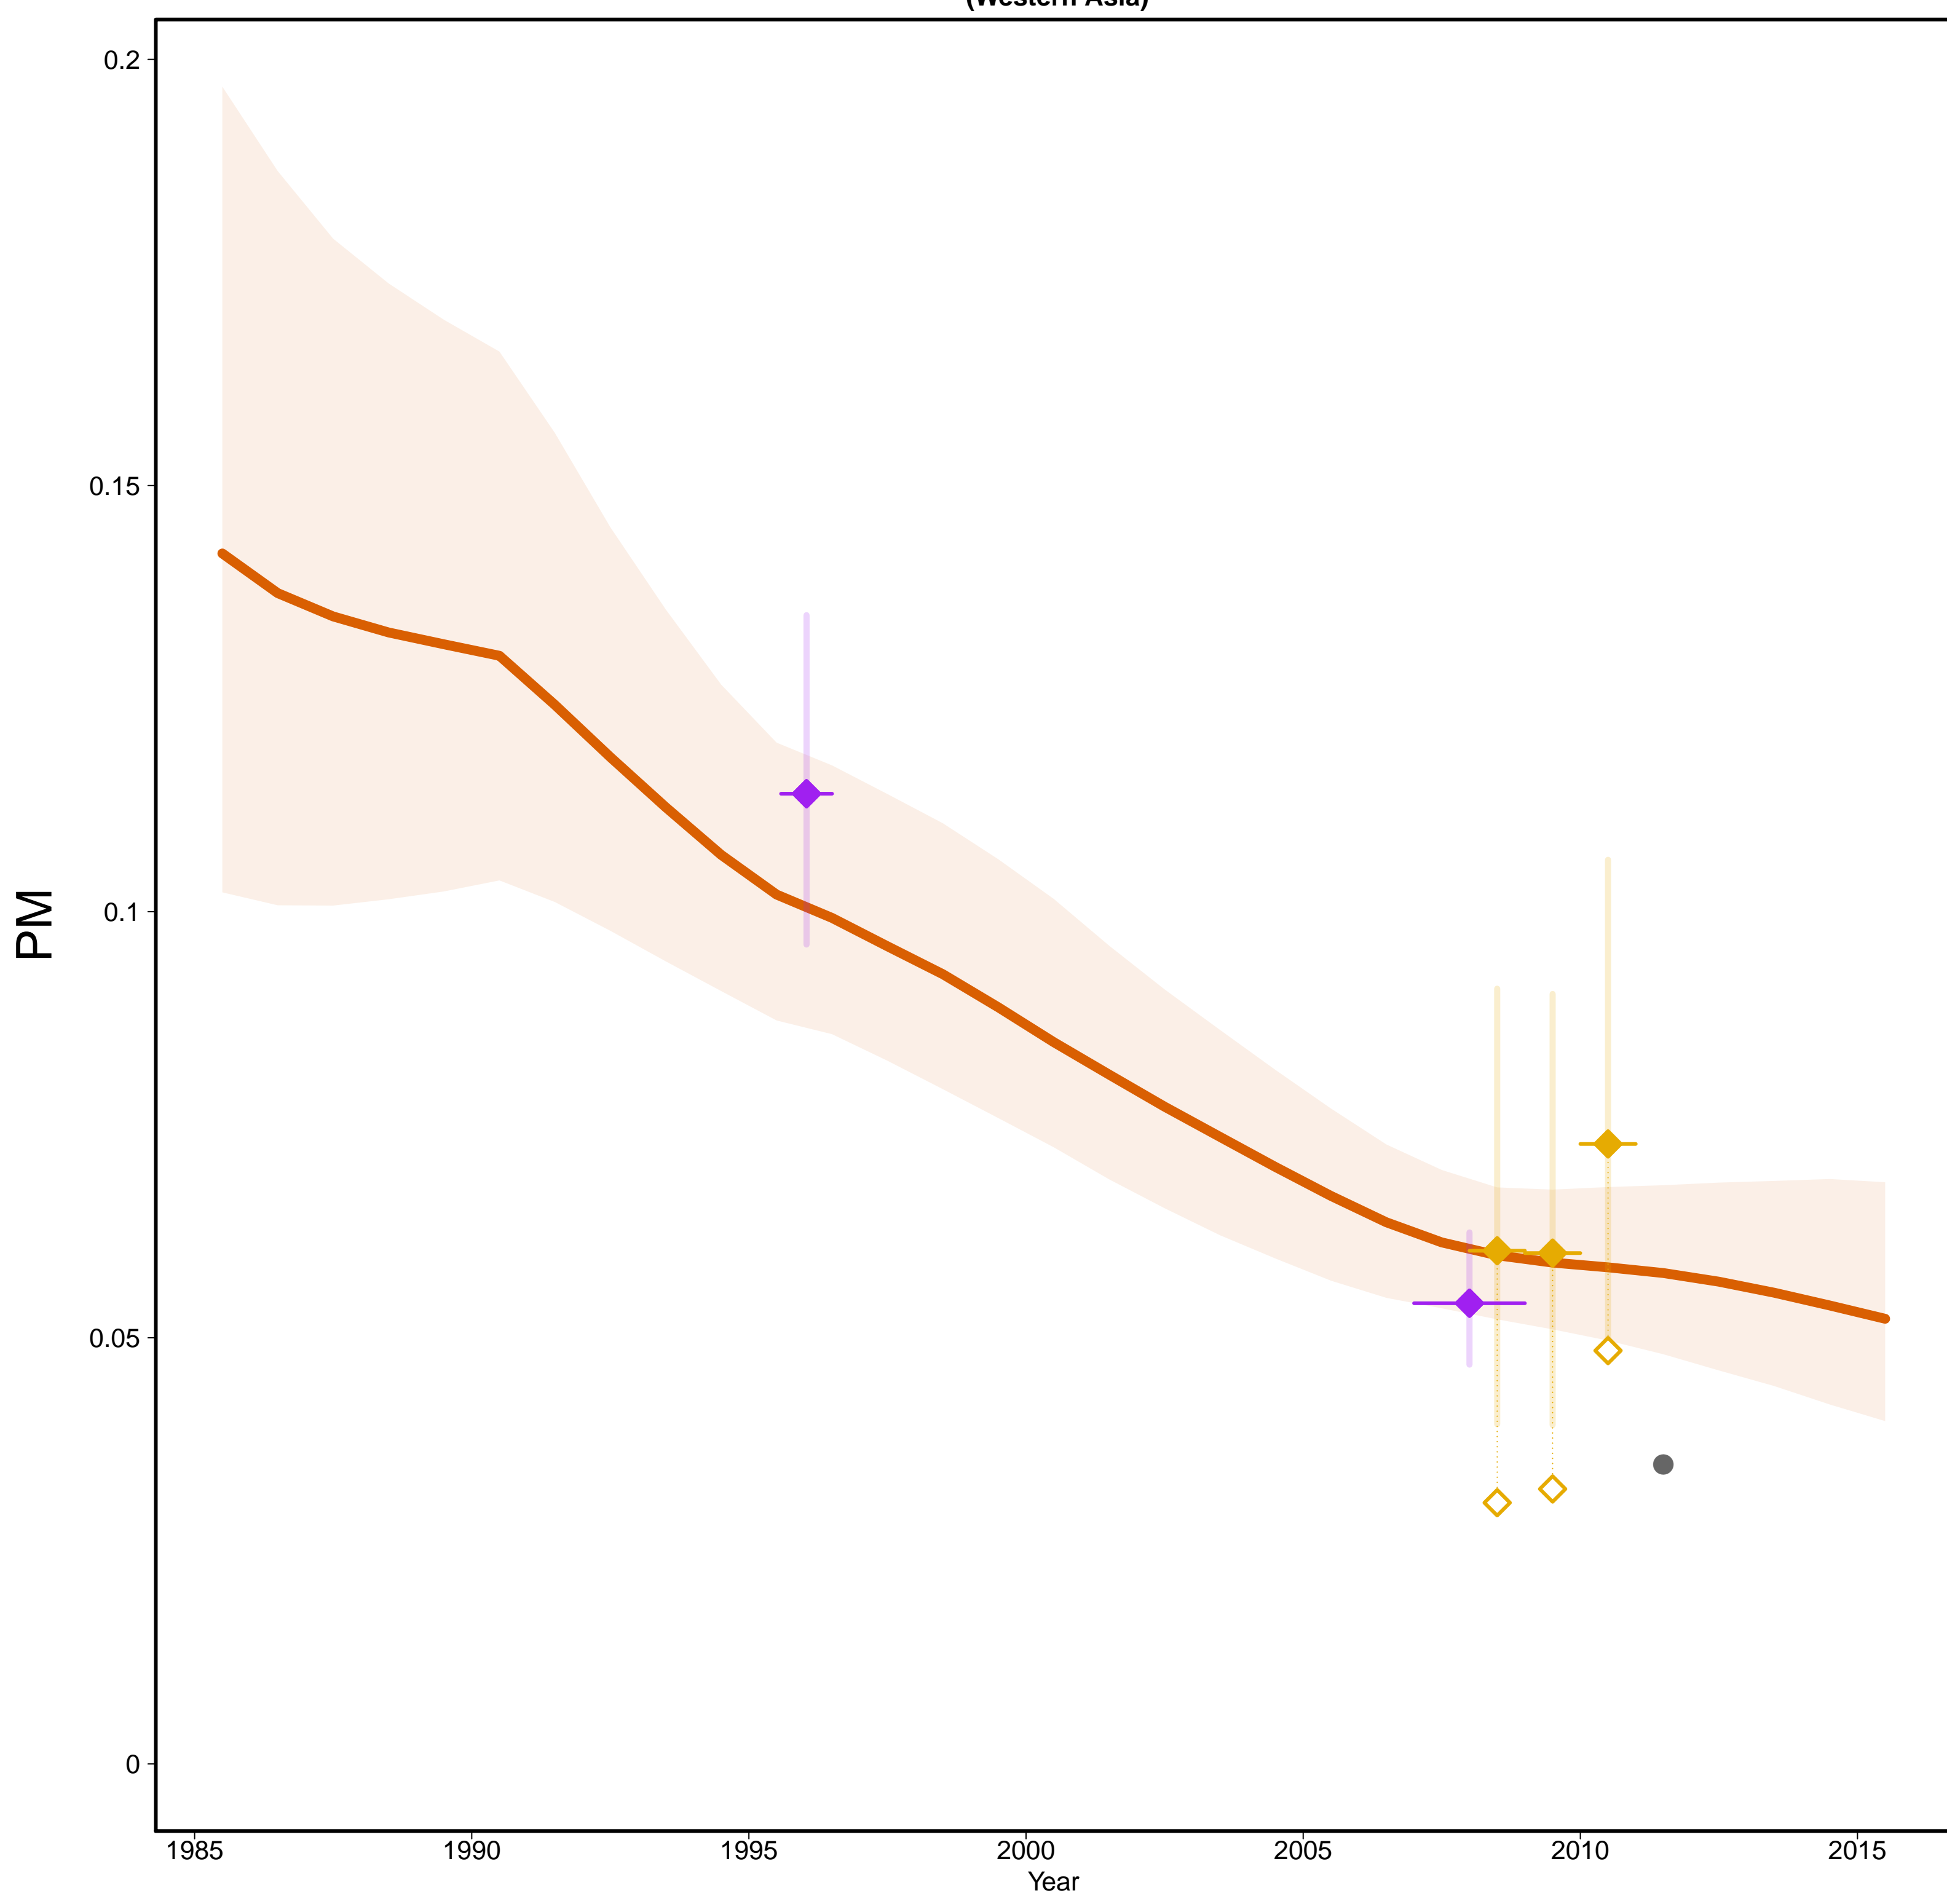

Jordan [JOR]  
(Western Asia)

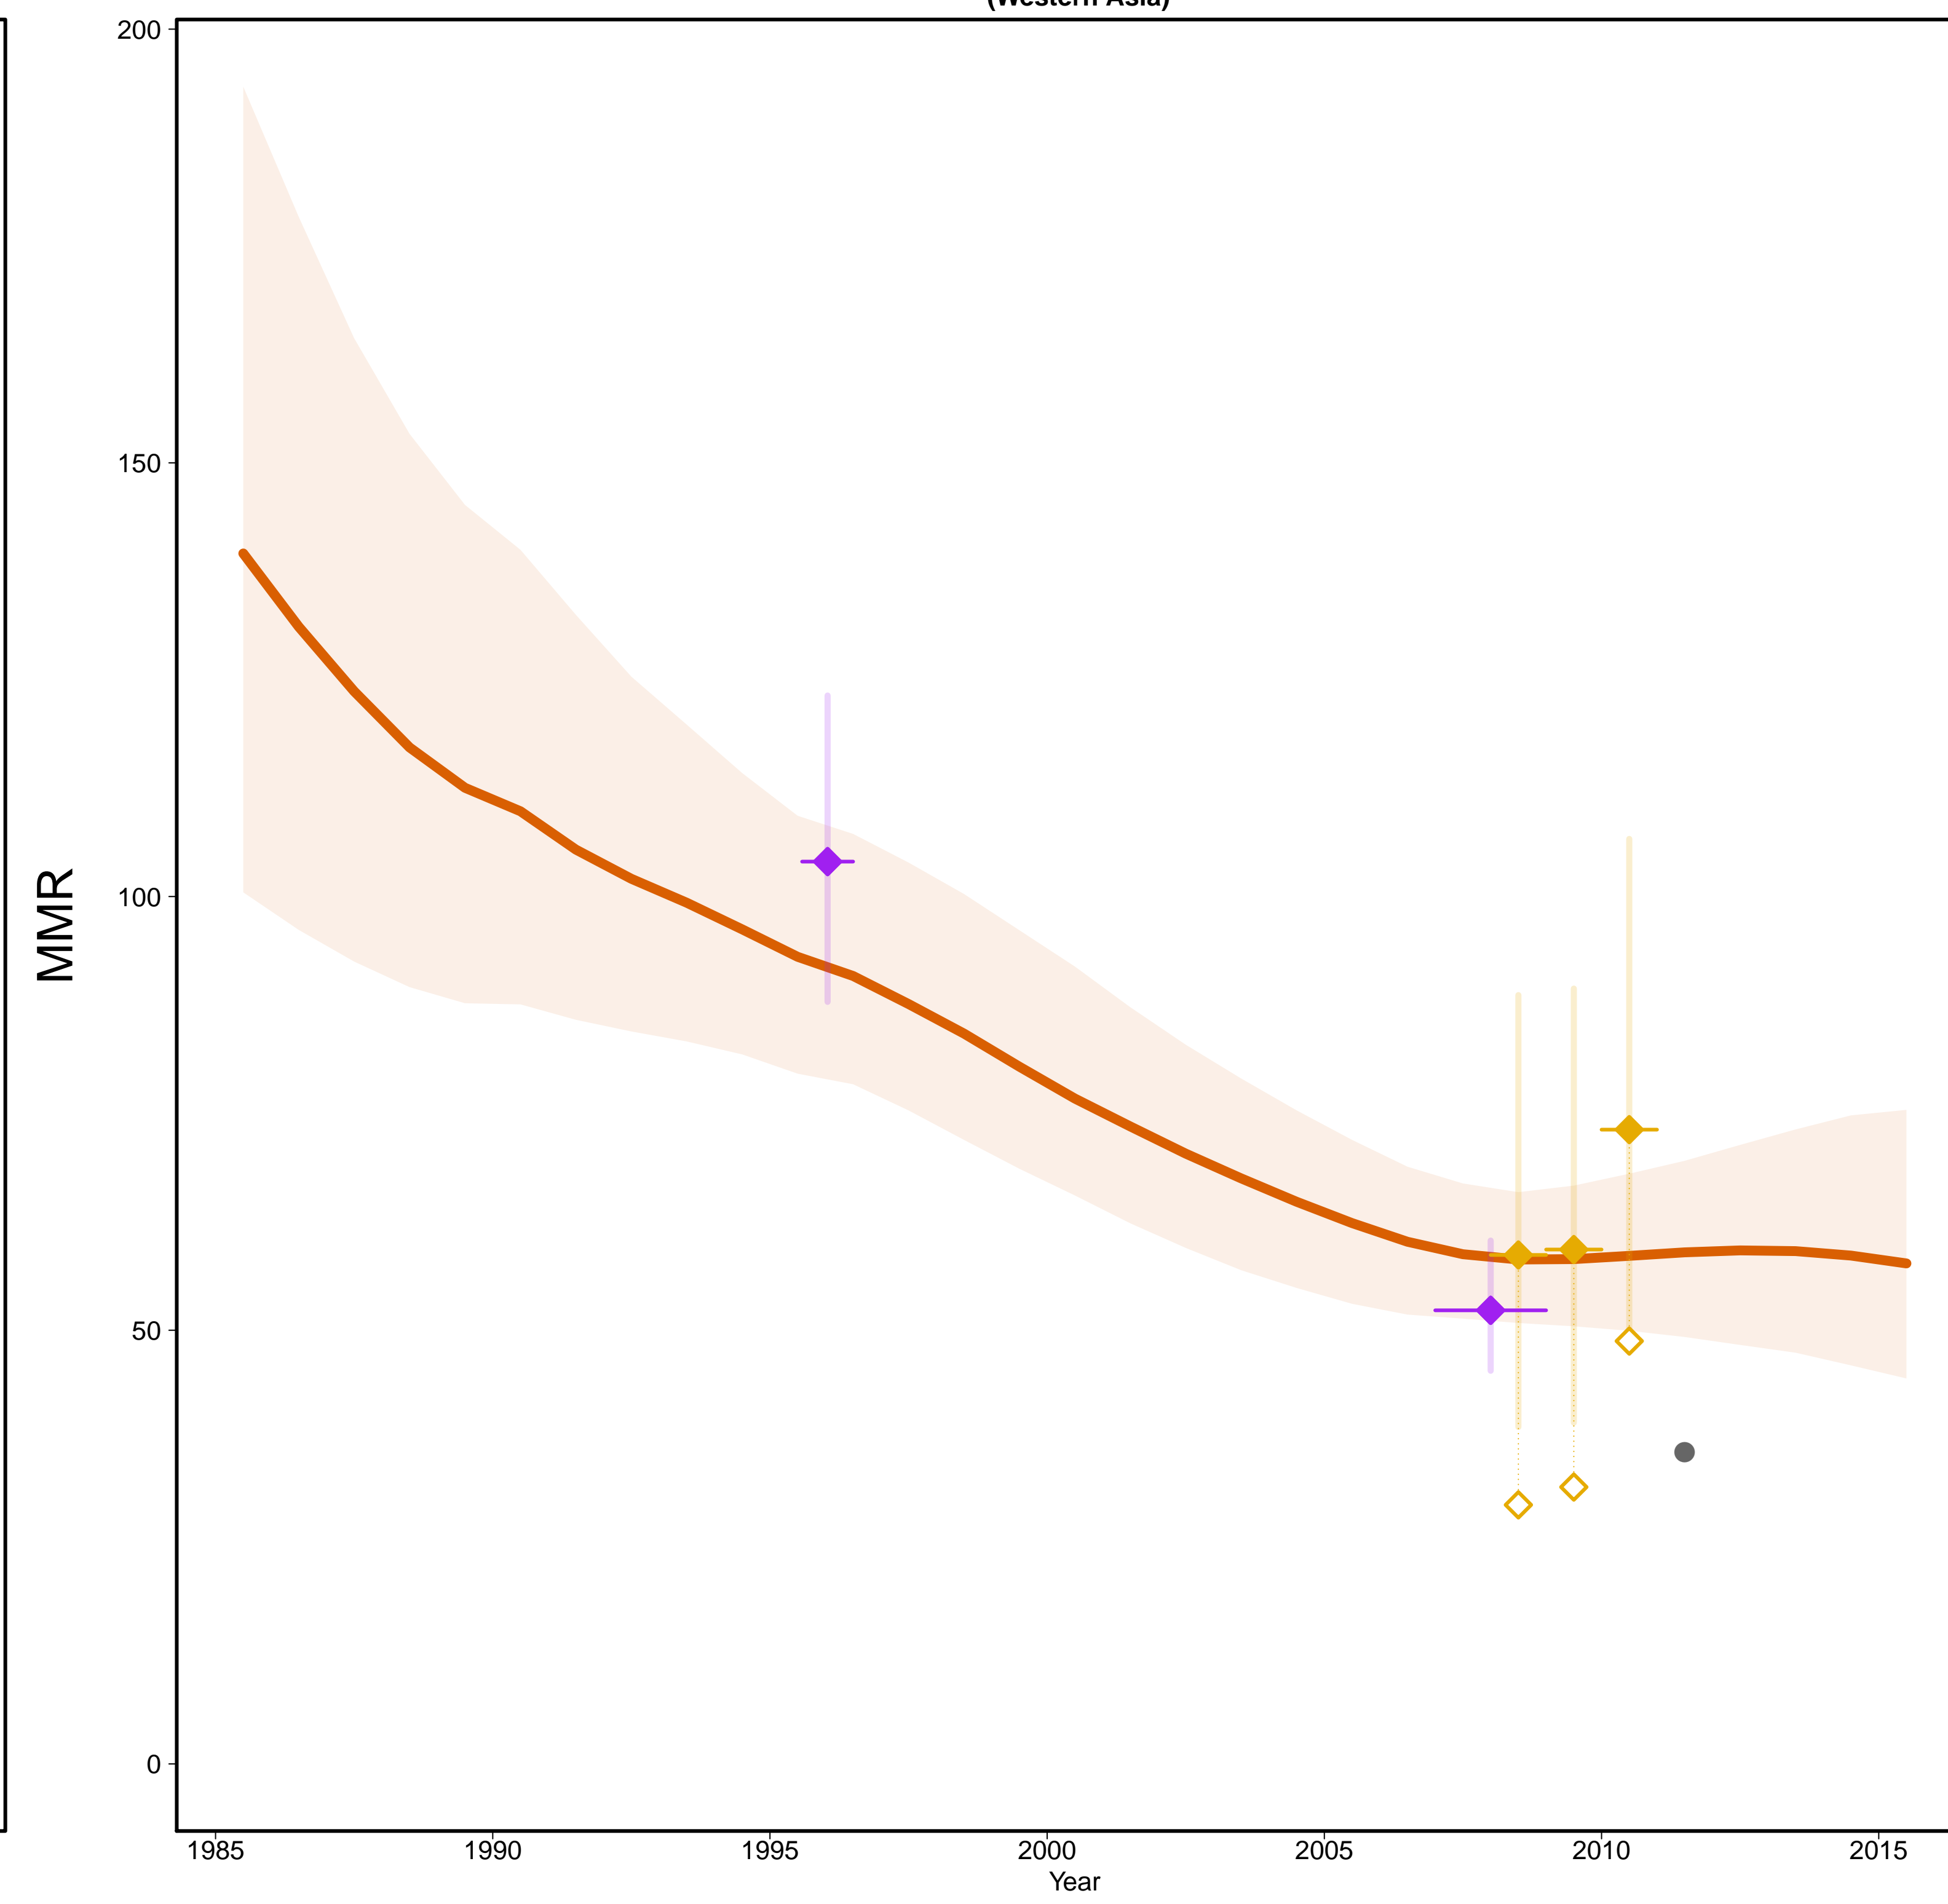

- Estimates –
- Mlate
- MMR Database 2015 –
- ◇ Observed Data
- ◆ Adjusted Data
- Data type –
- ◆ VR
- ◆ Spec. studies
- Excluded VR data (data quality issues)

Gross Domestic Product

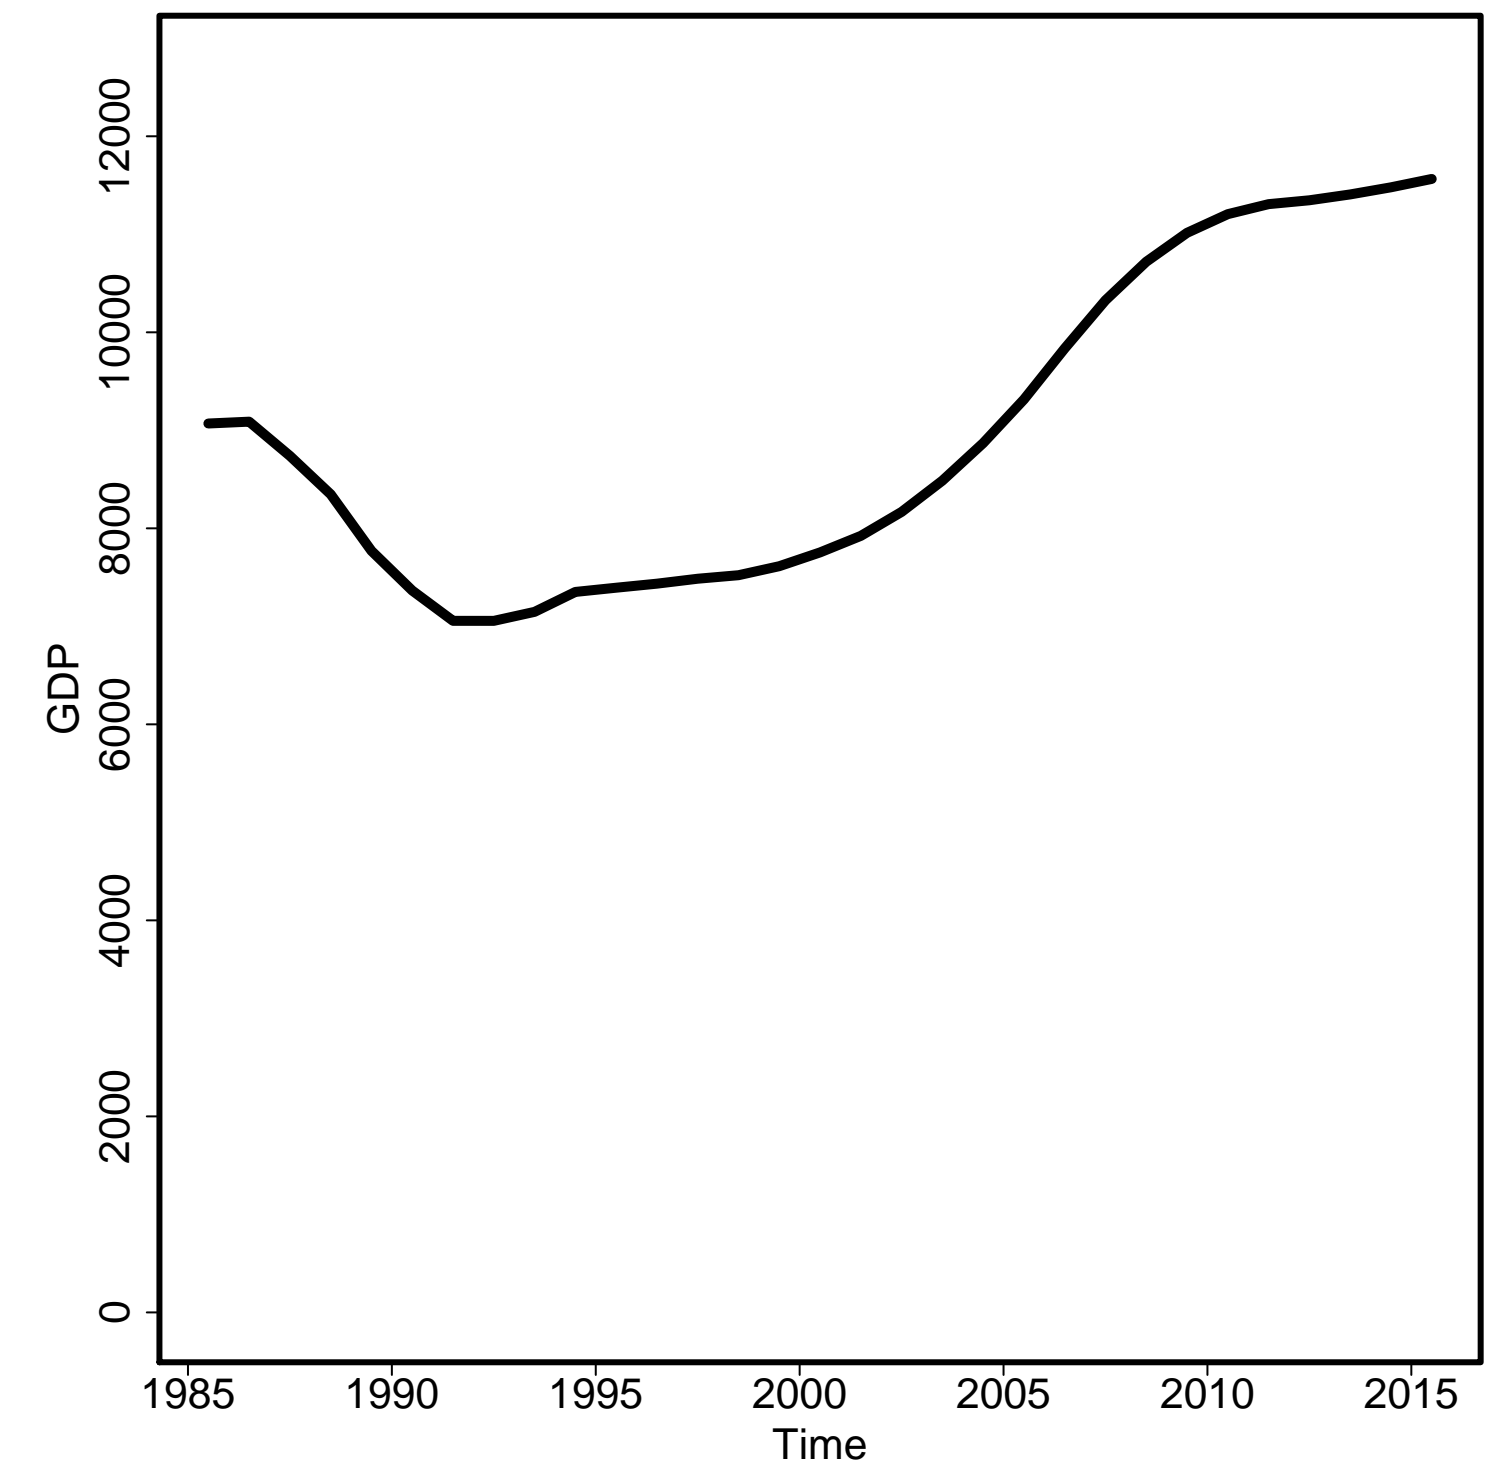

General Fertility Rate

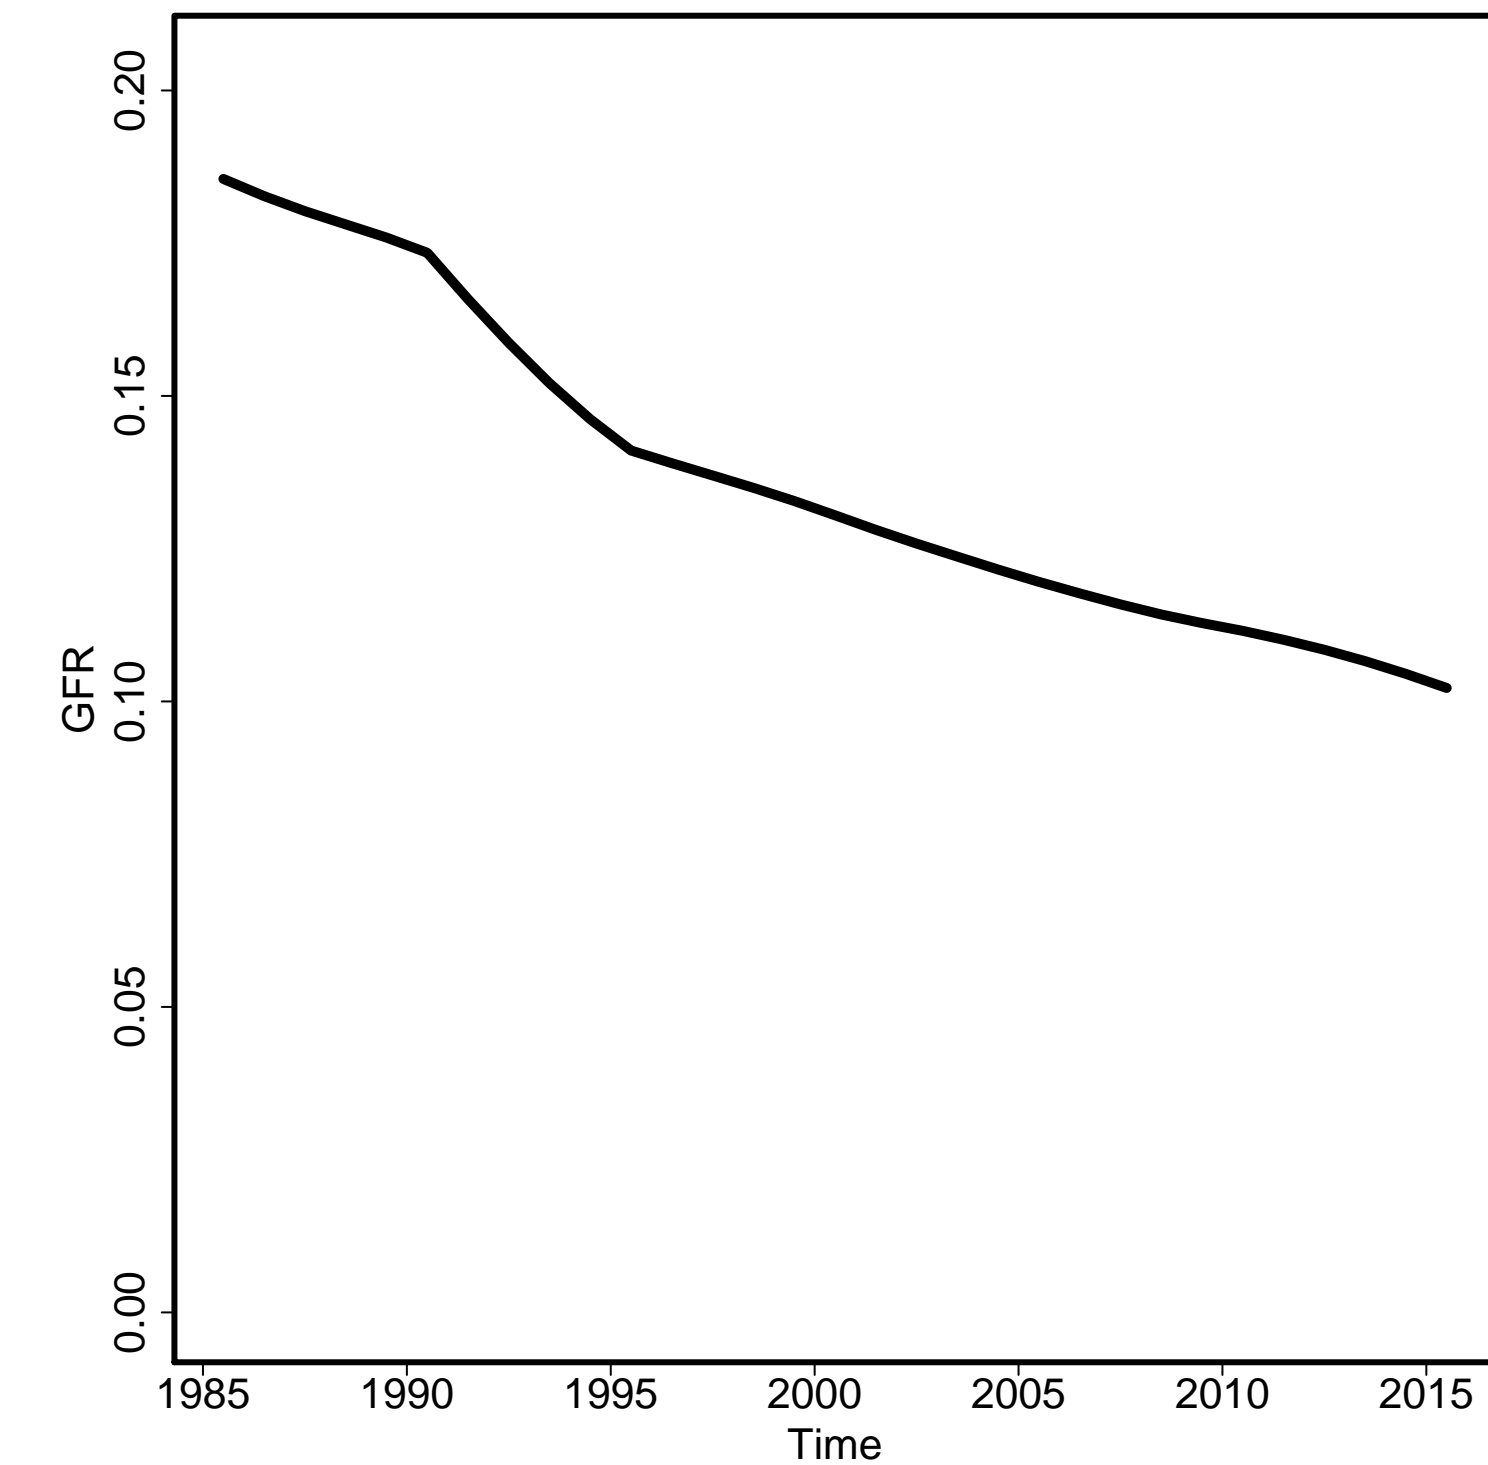

Skilled Attendance to Birth

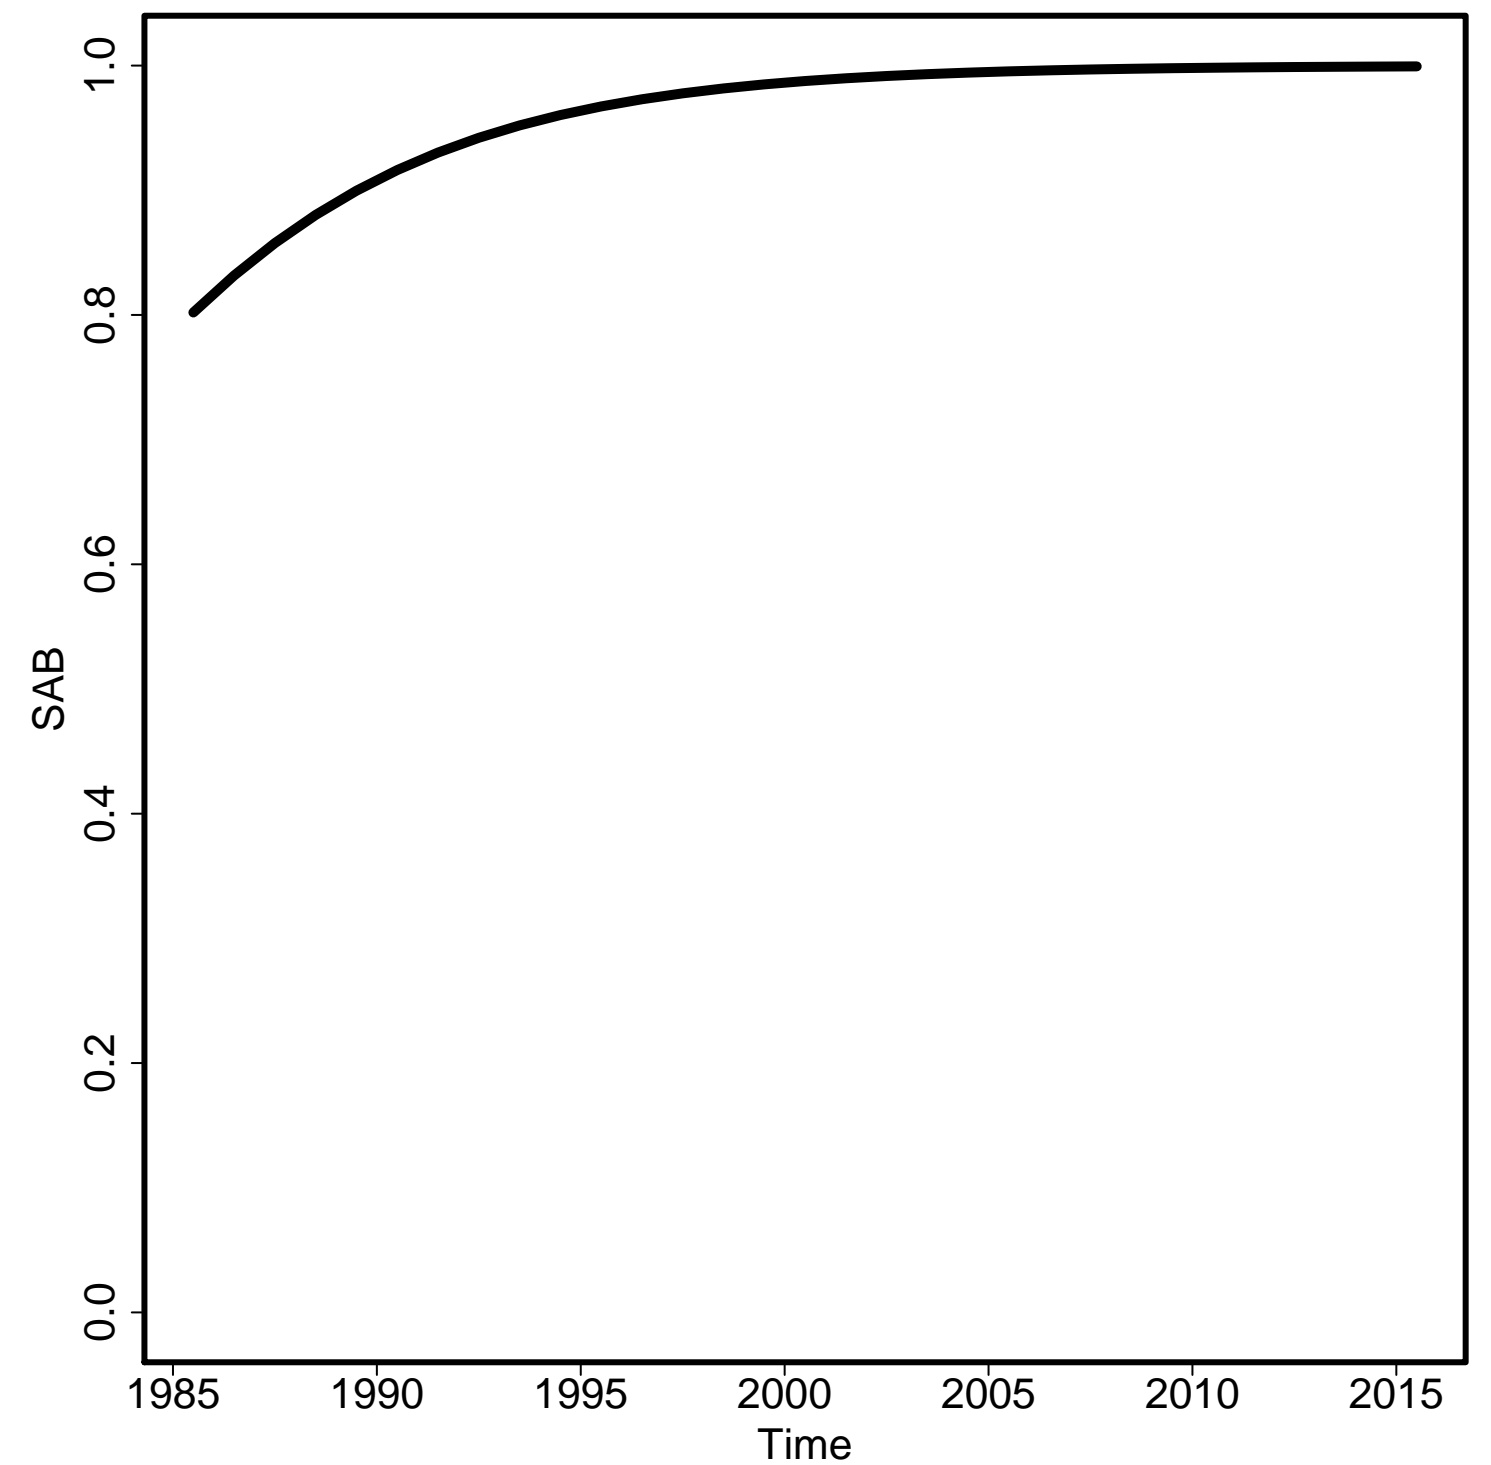

Envelope/Births

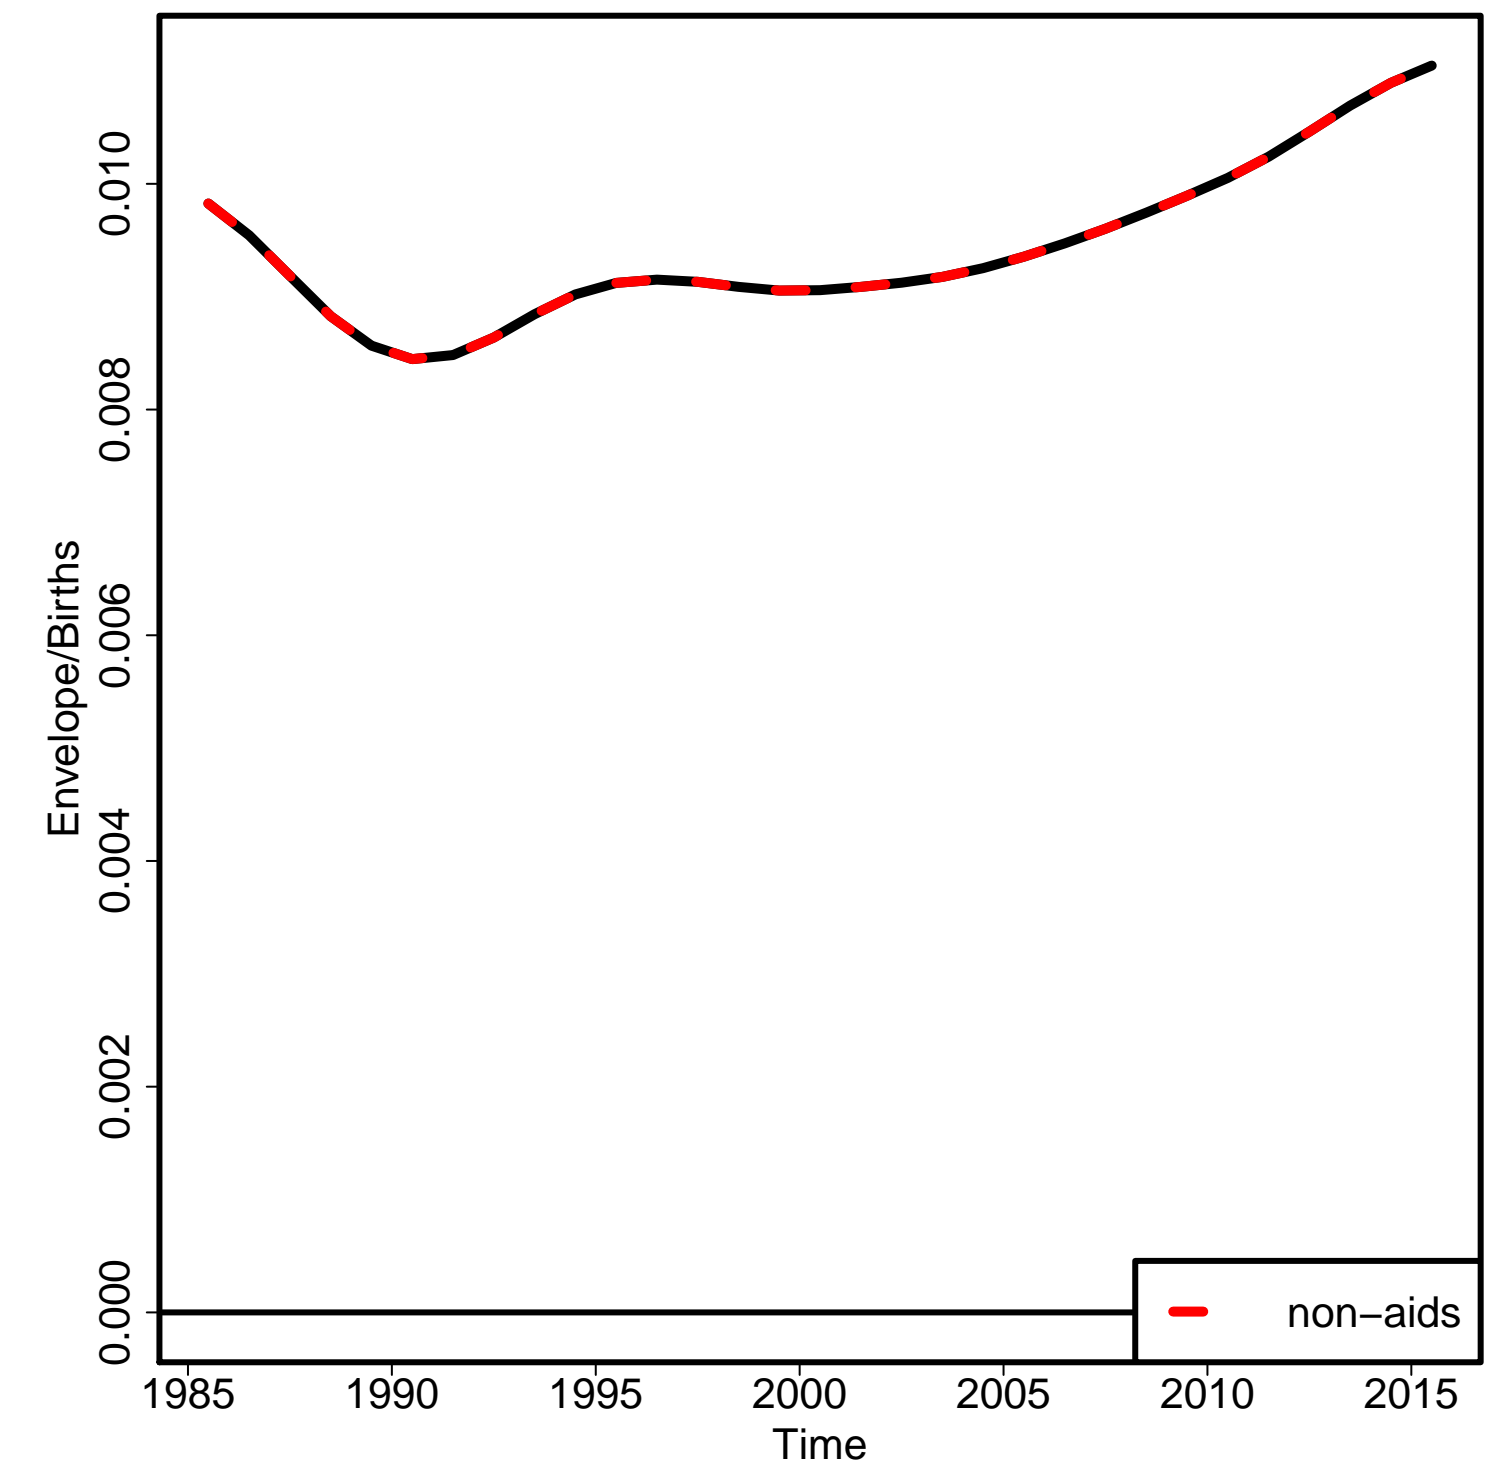

Non-aids MMR

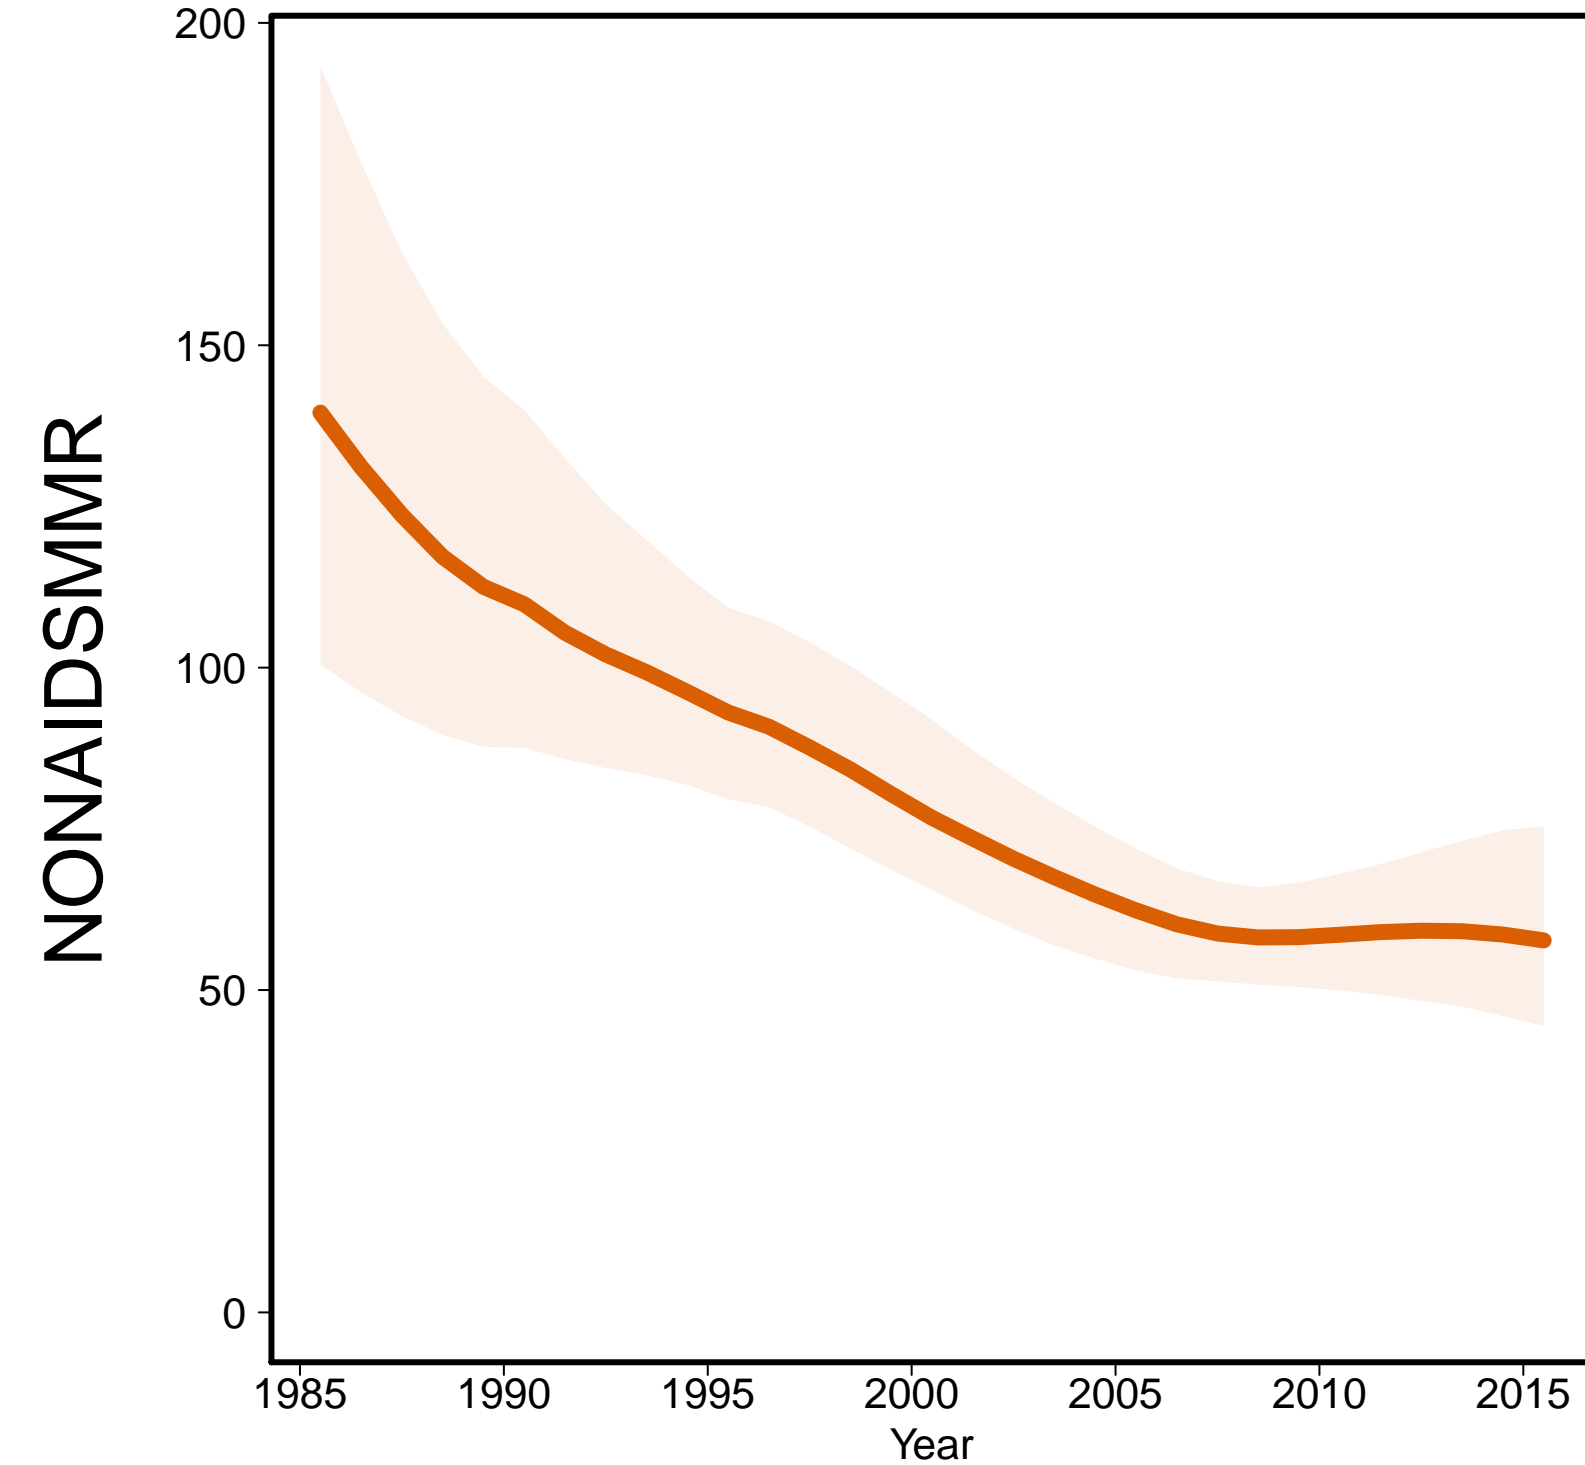

Aids MMR



Kazakhstan [KAZ]  
(Central Asia)

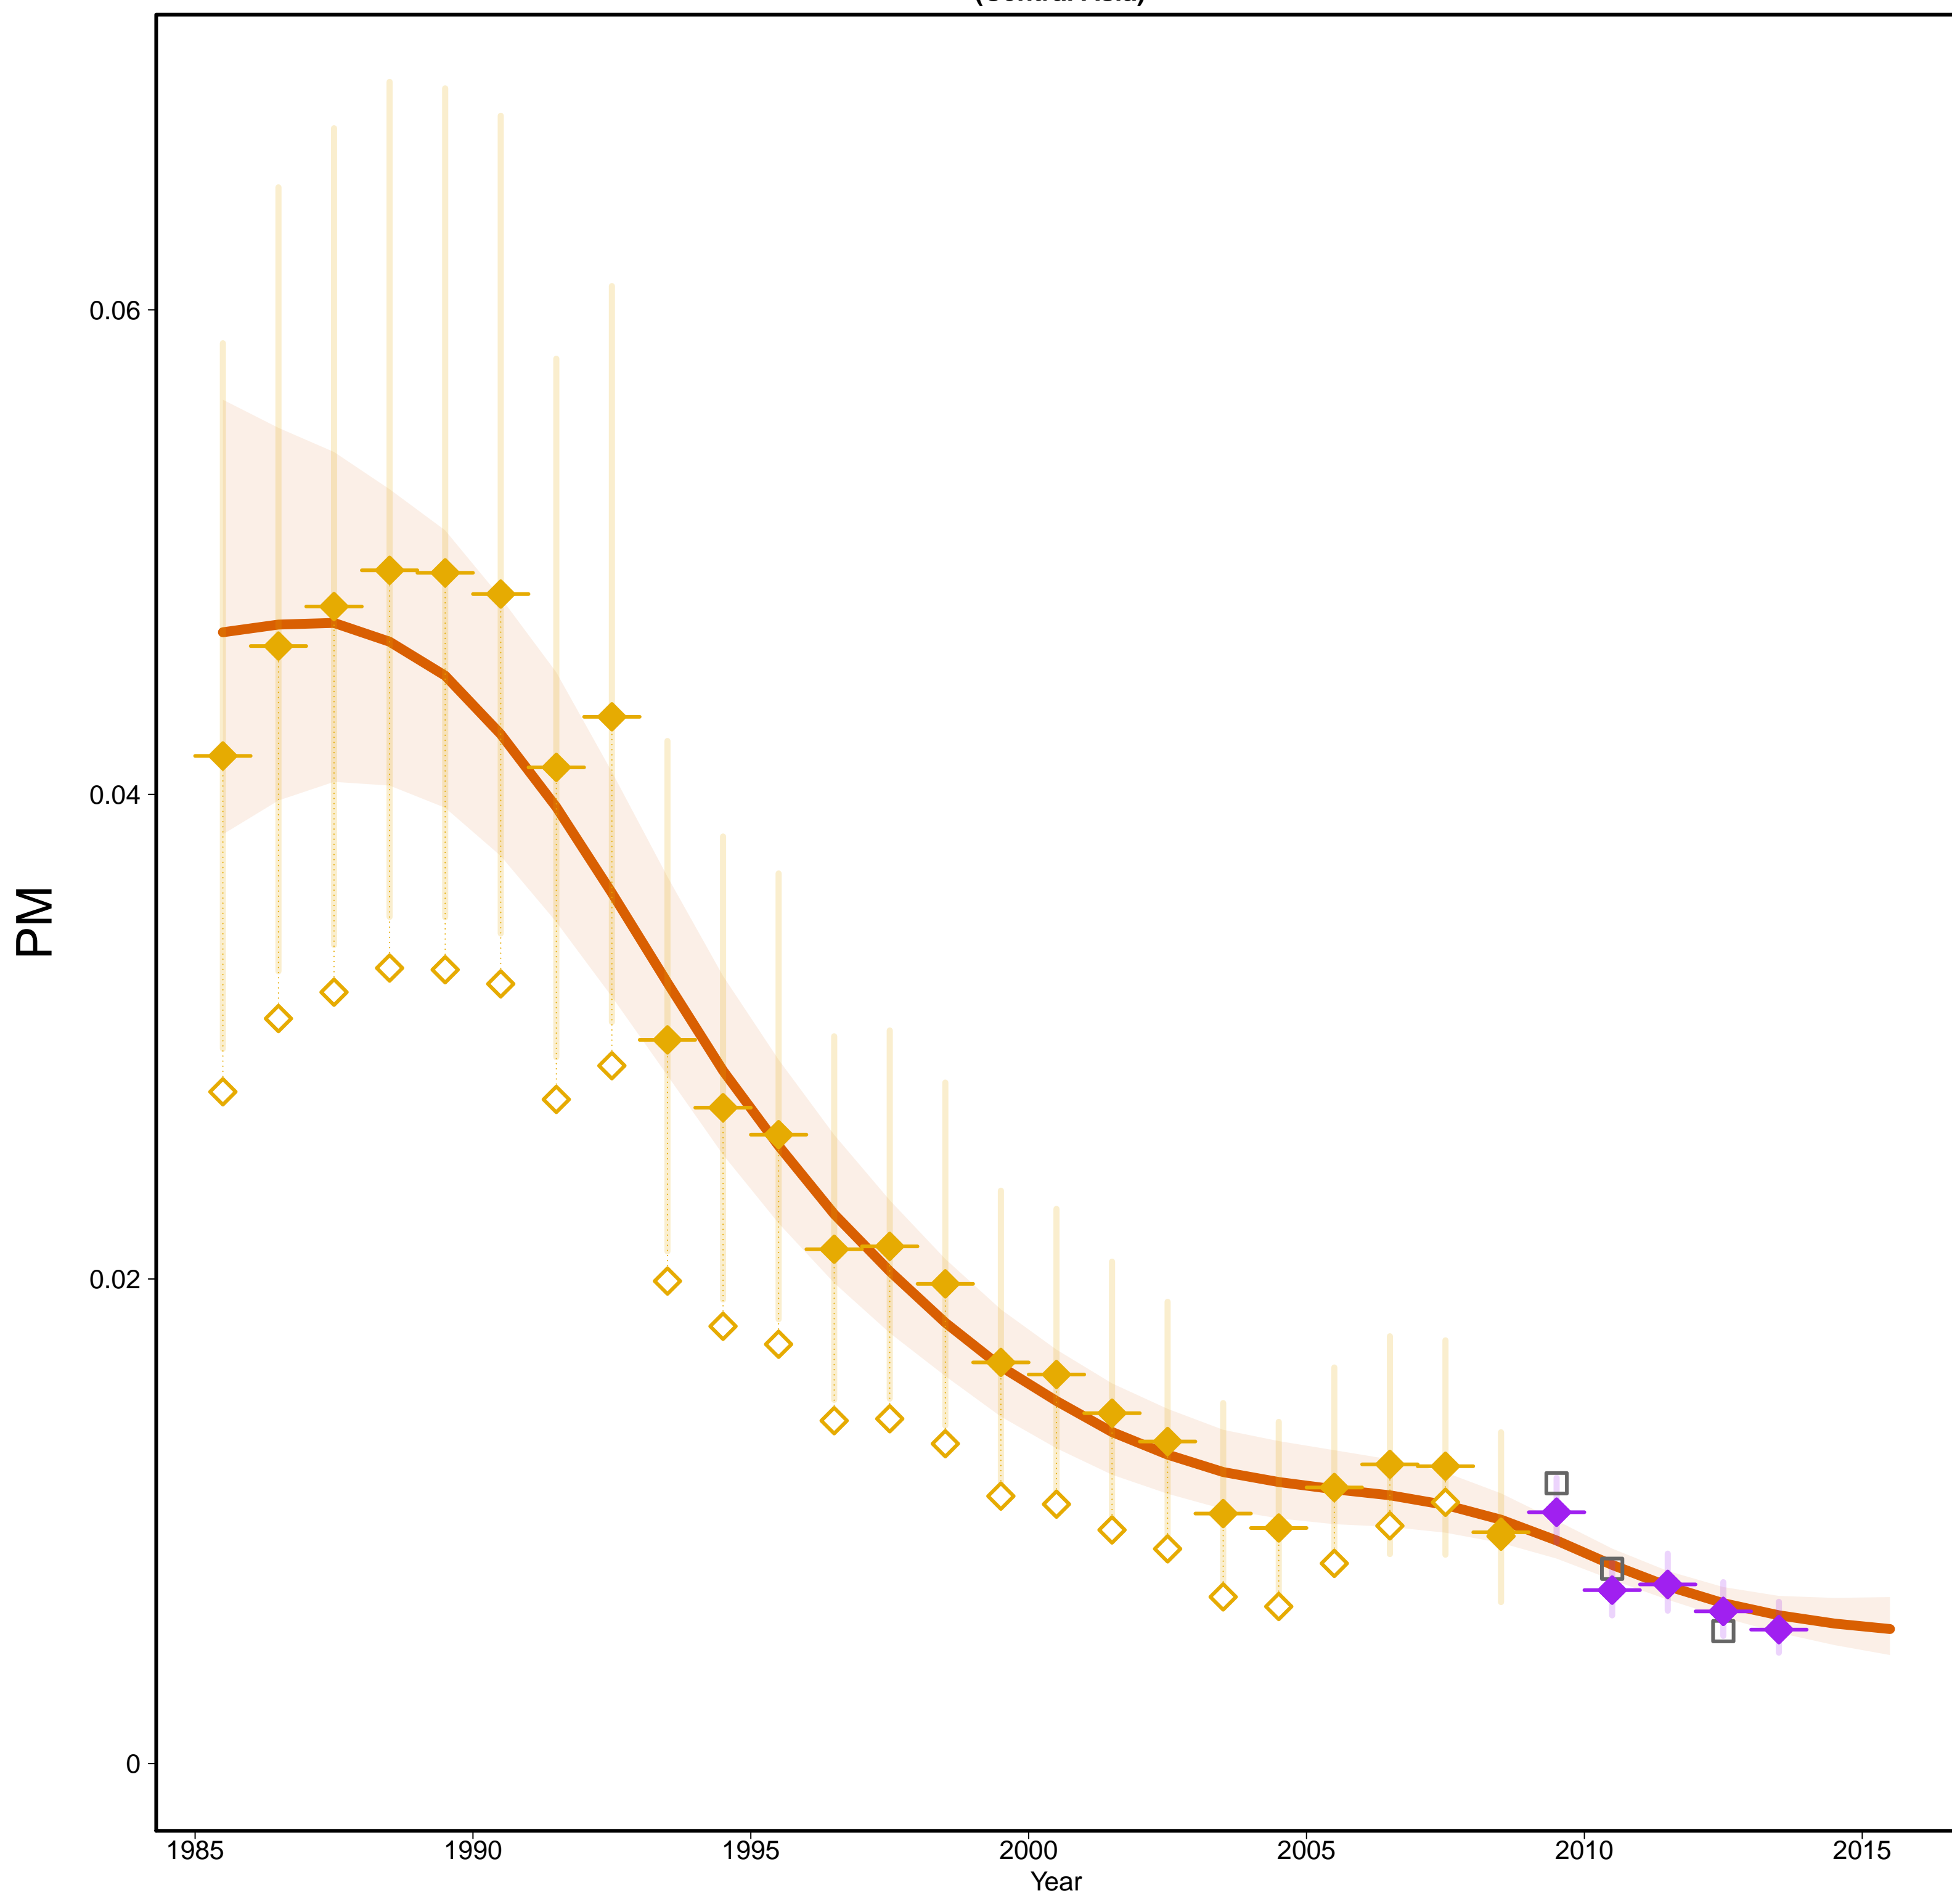

Kazakhstan [KAZ]  
(Central Asia)

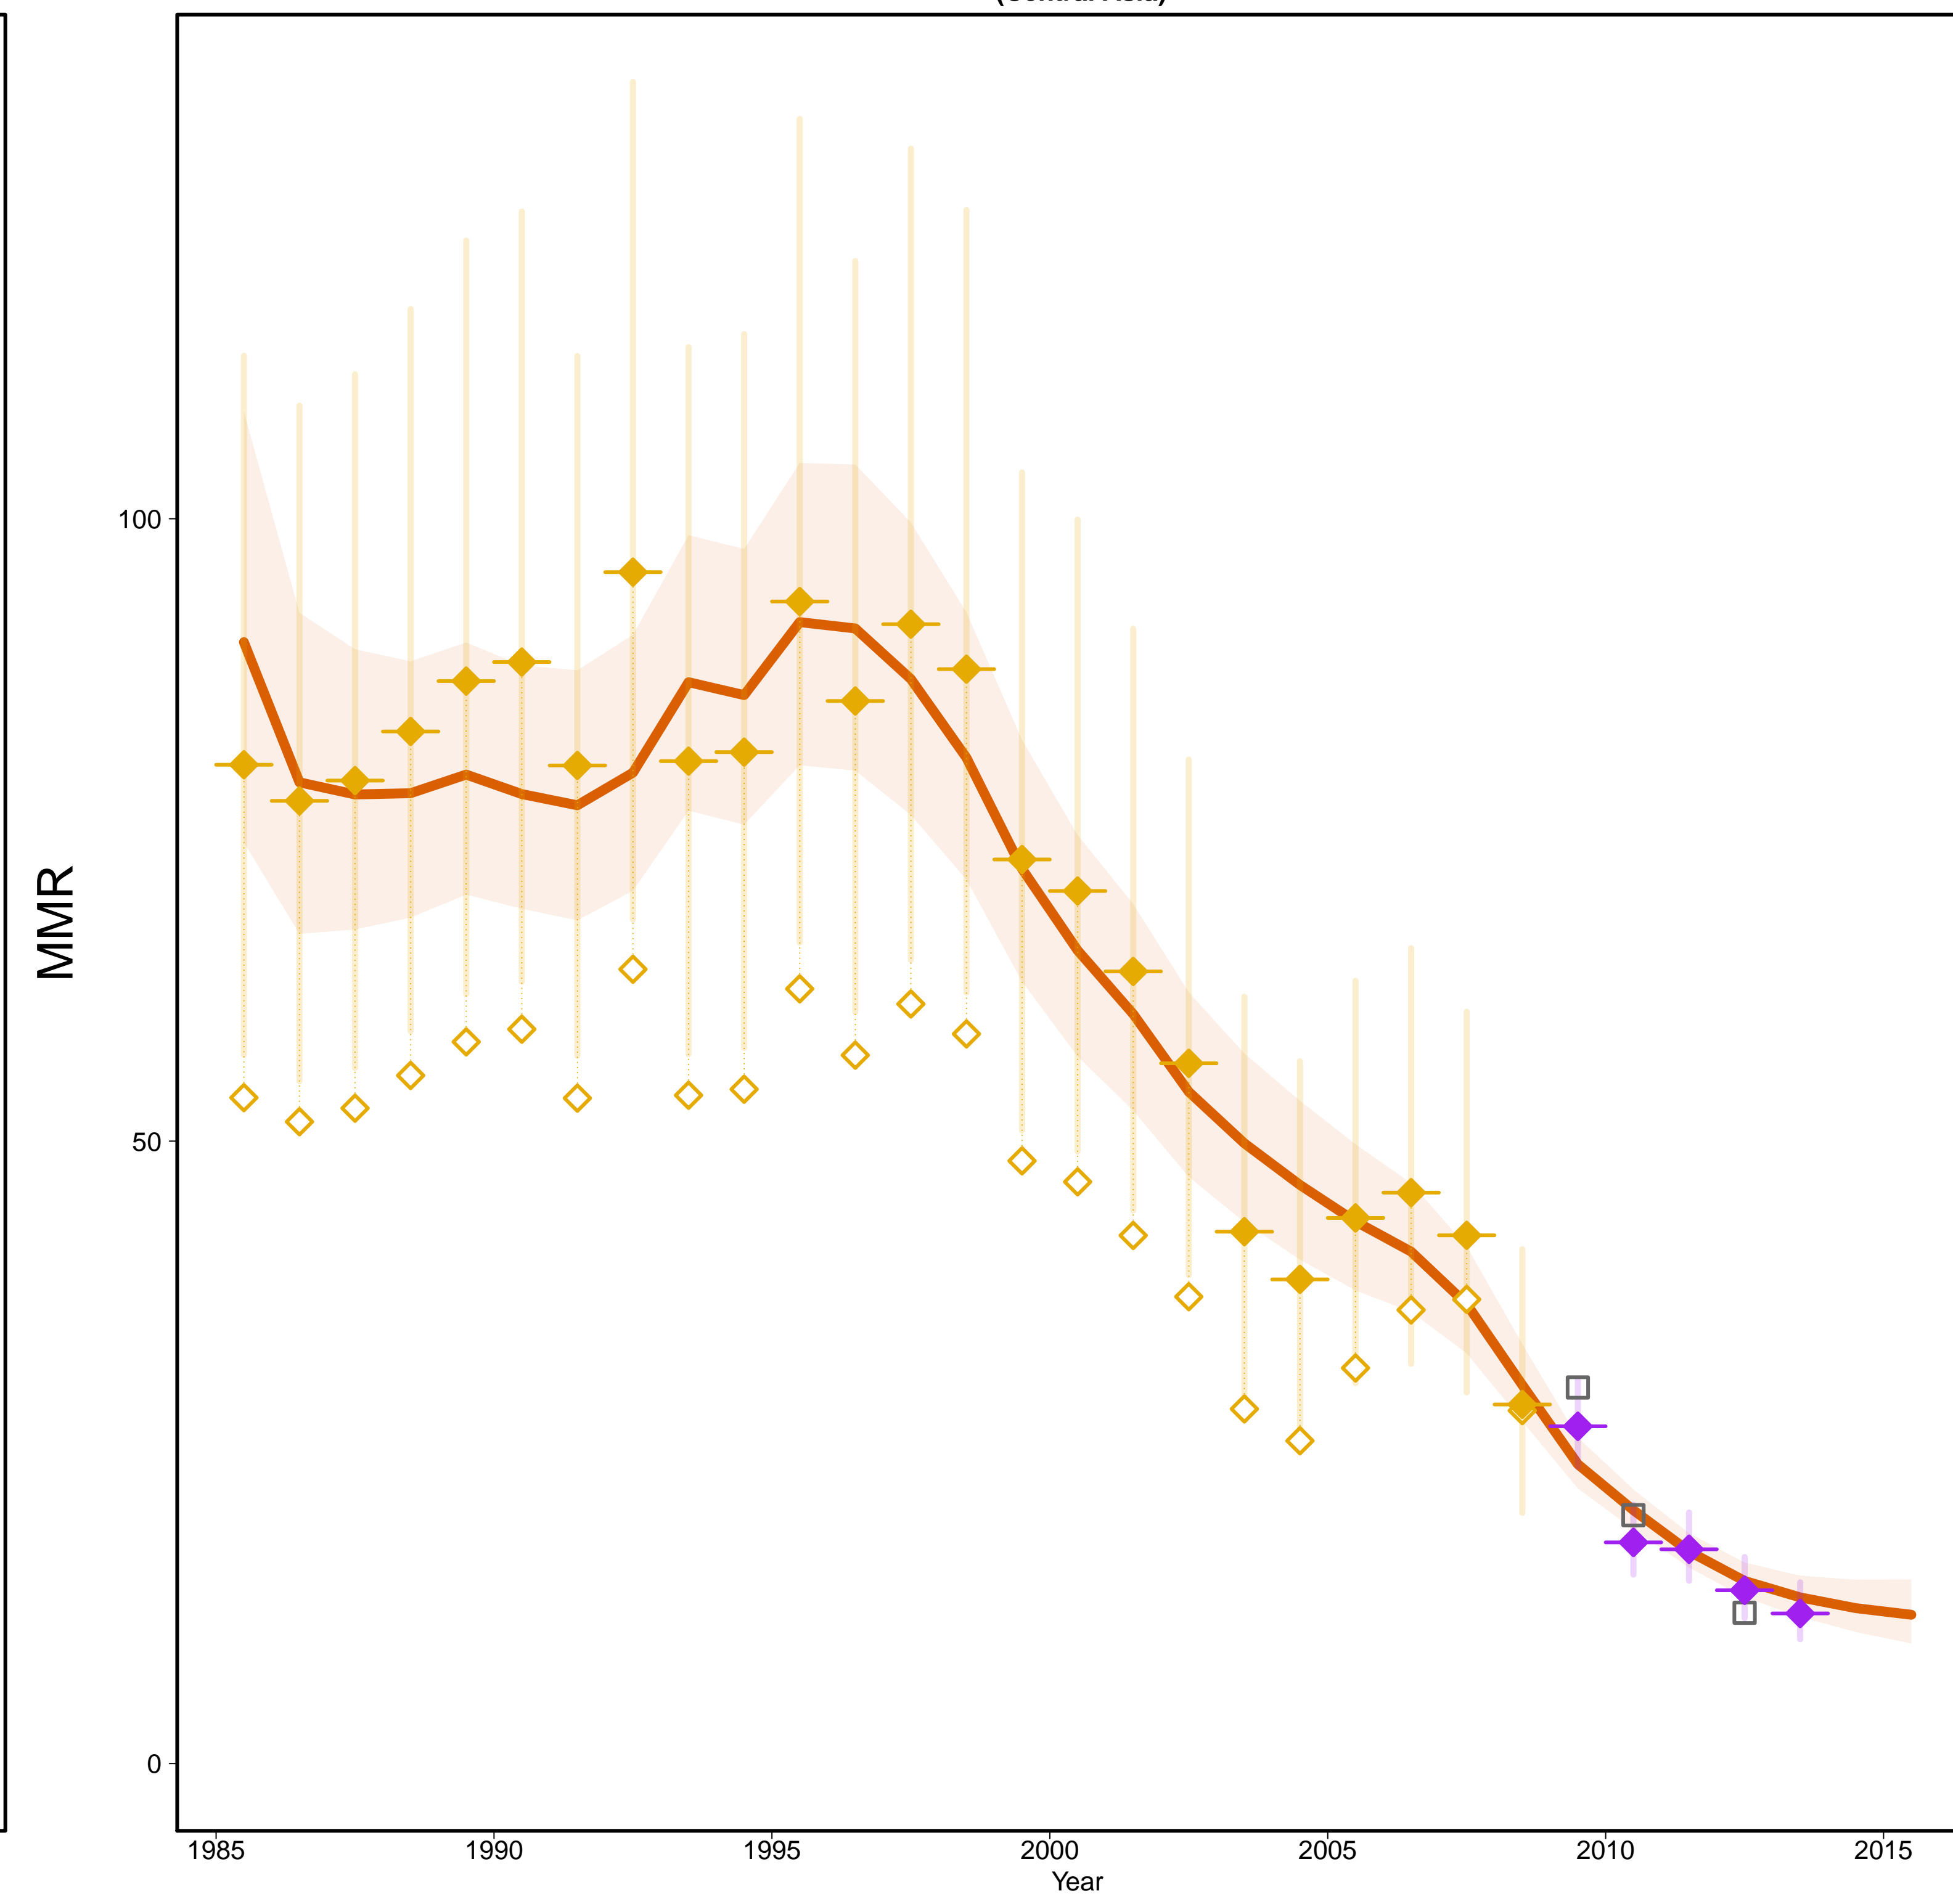

- Estimates —
- MMR Database 2015 —
- ◇ Observed Data
- ◆ Adjusted Data
- Data type —
- ◆ VR
- ◆ Spec. studies
- Excluded VR data  
(overlap with specialized study)

Gross Domestic Product

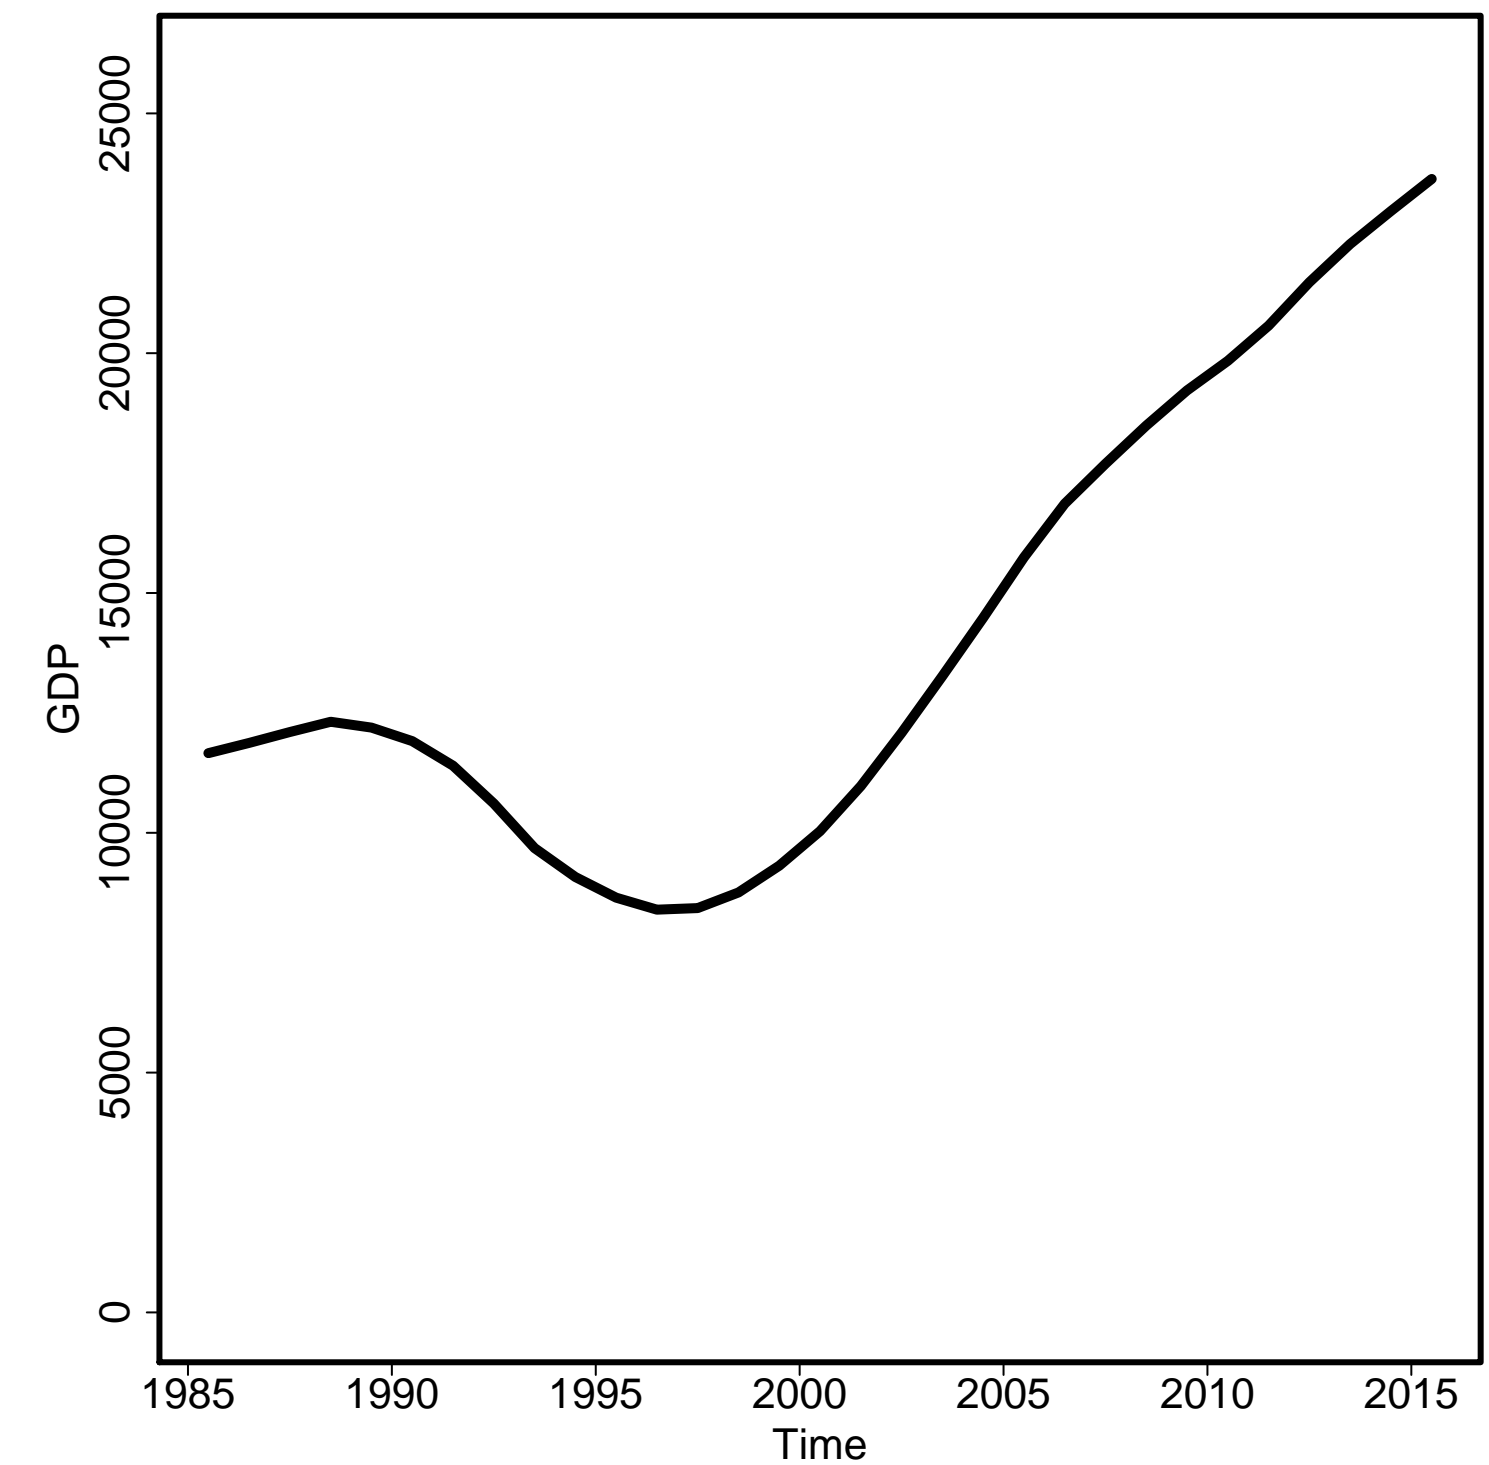

General Fertility Rate

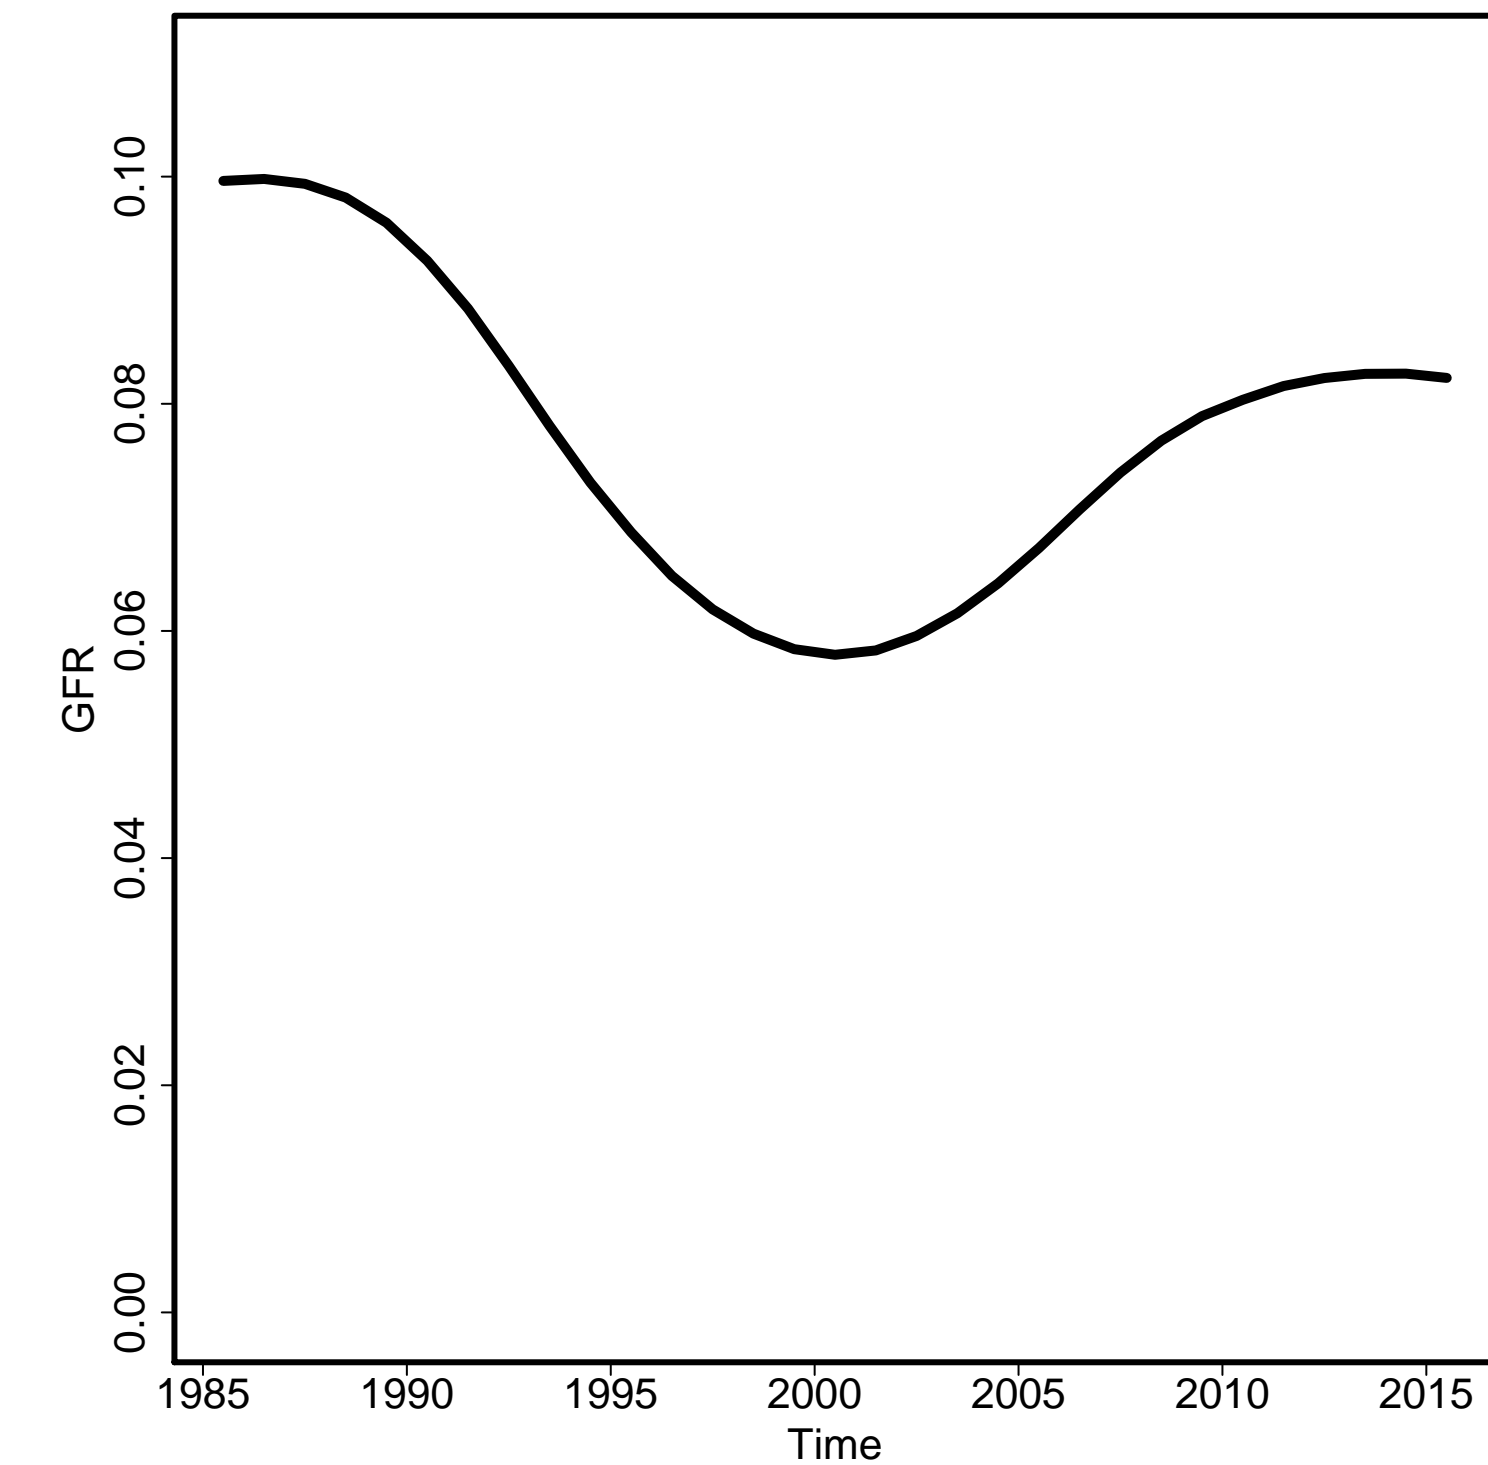

Skilled Attendance to Birth

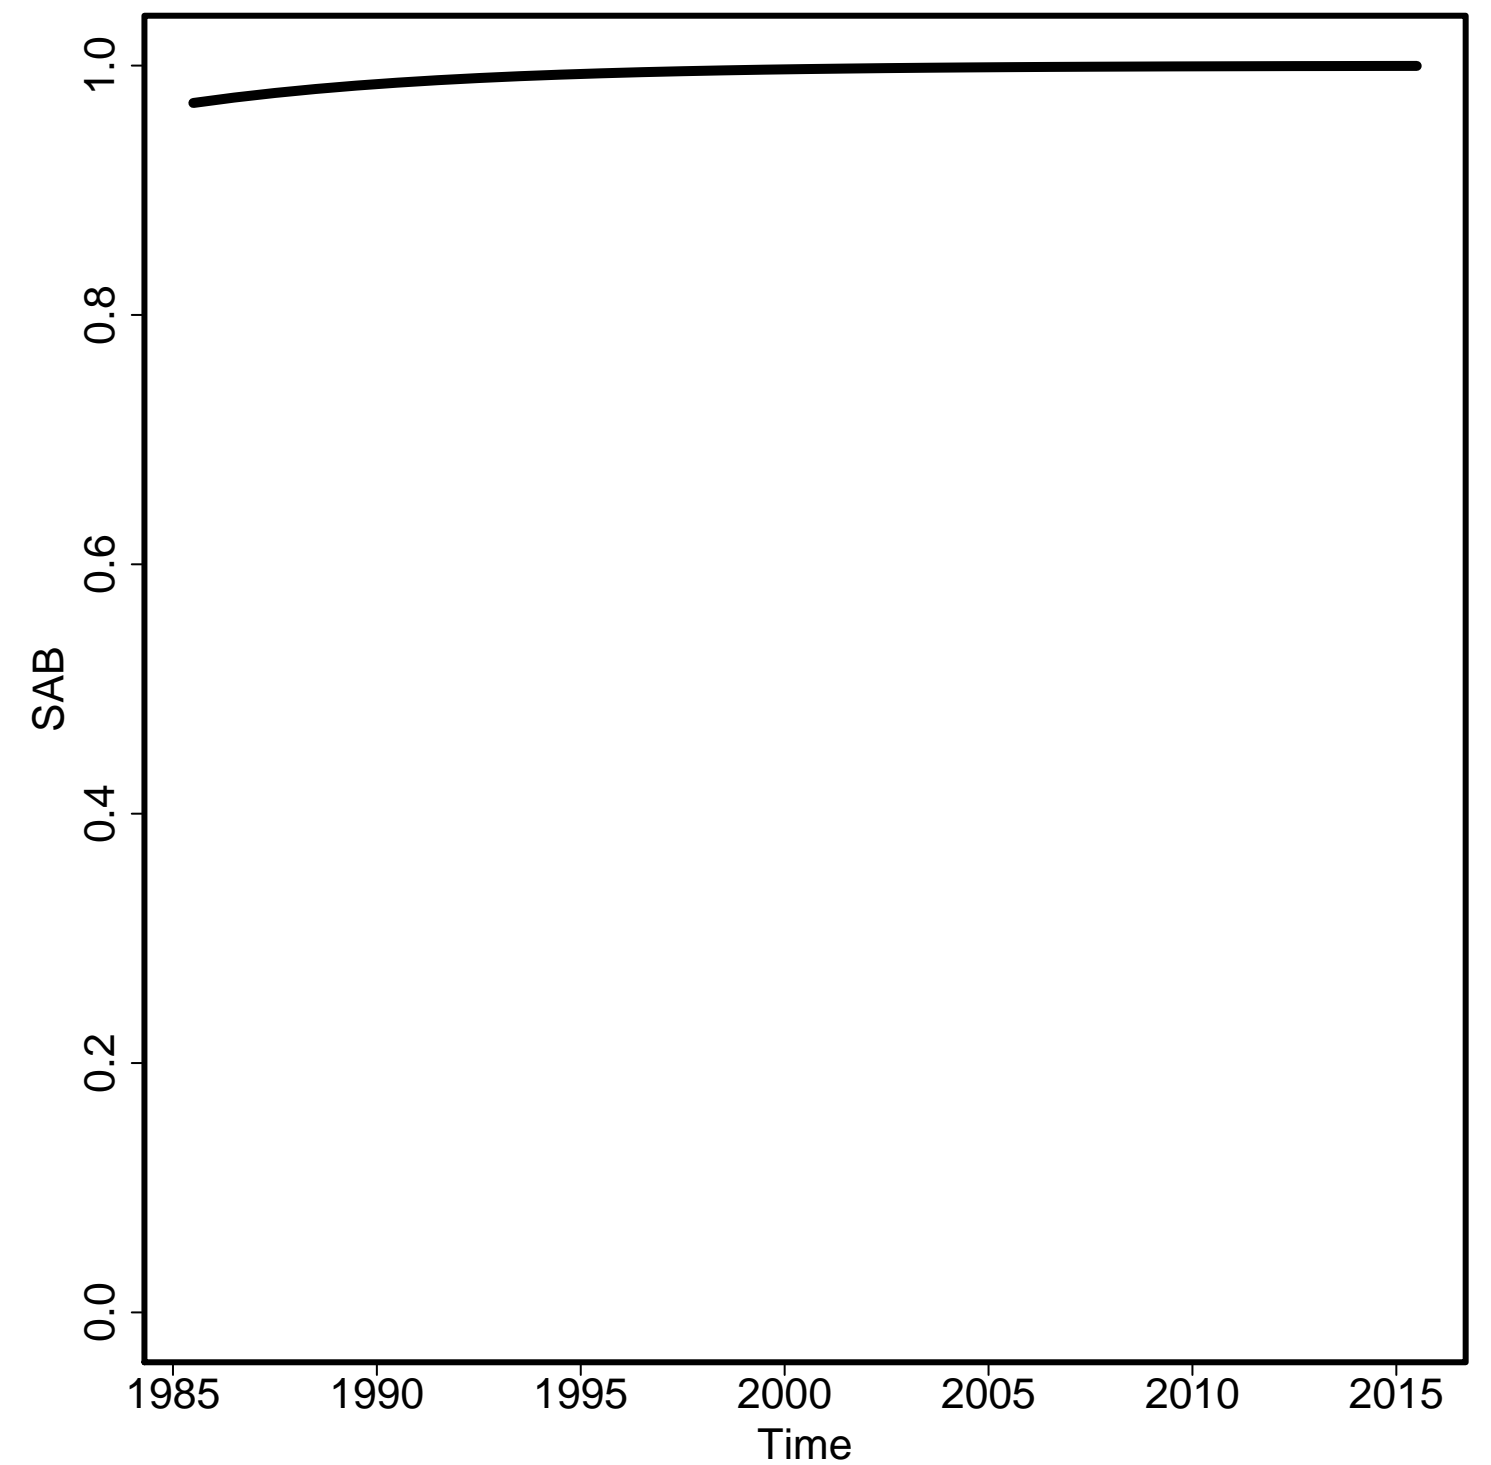

Envelope/Births

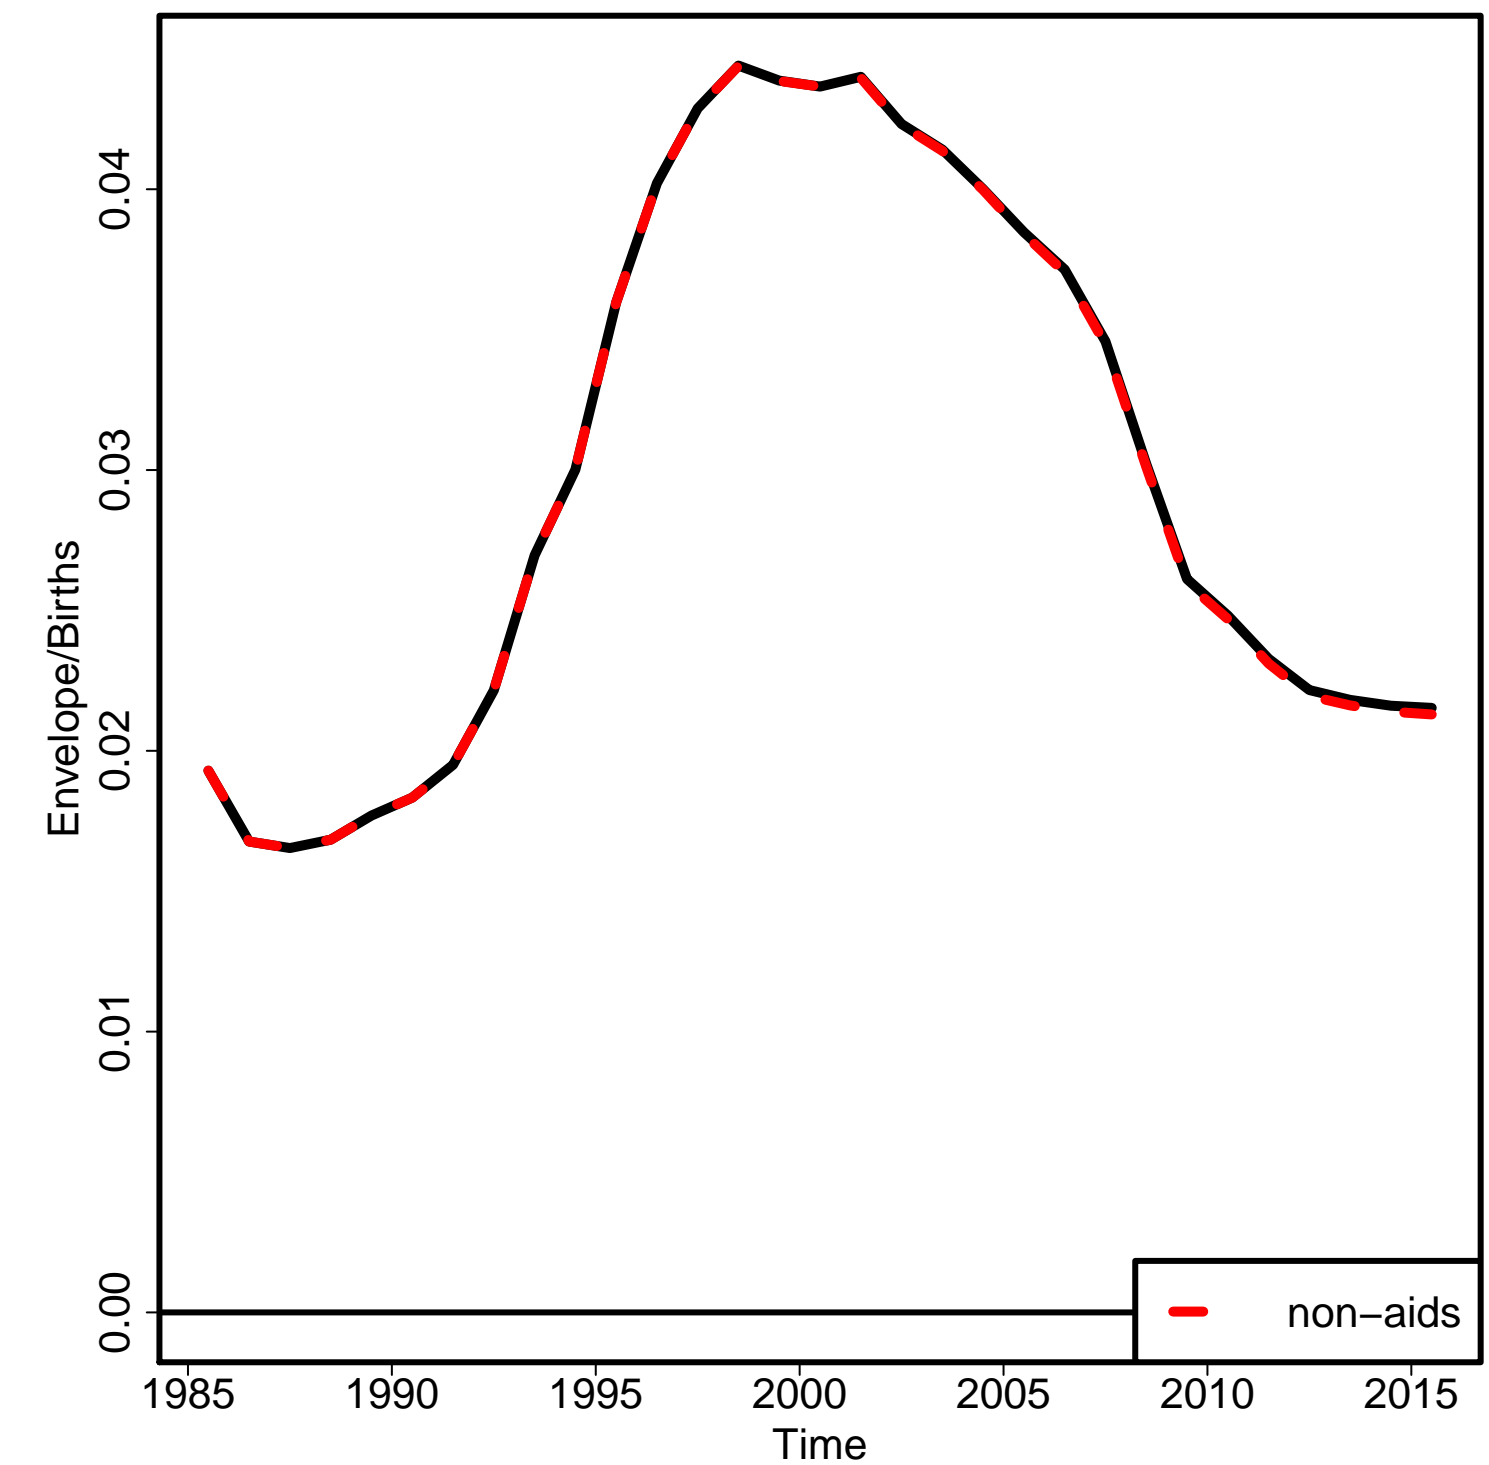

Non-aids MMR

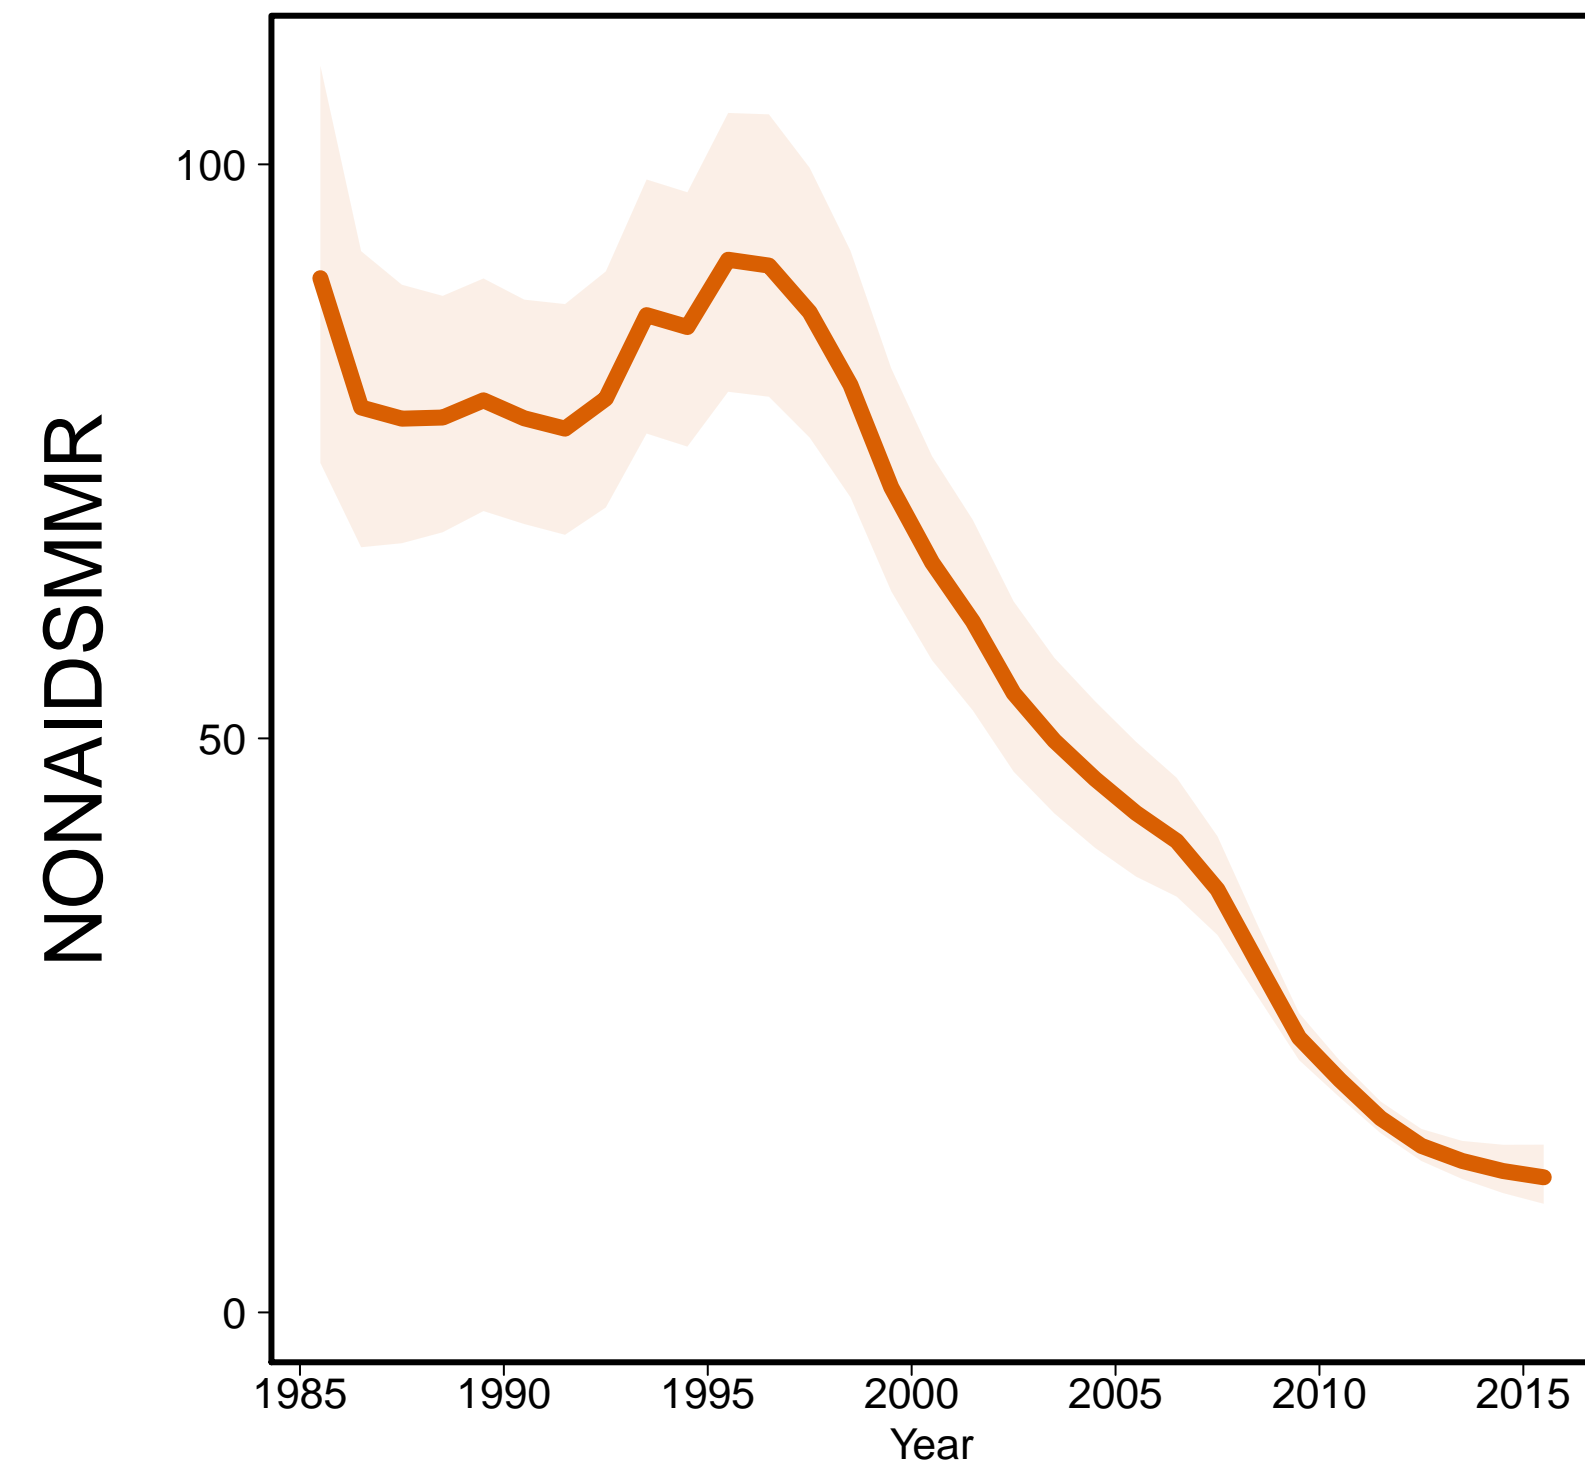

Aids MMR

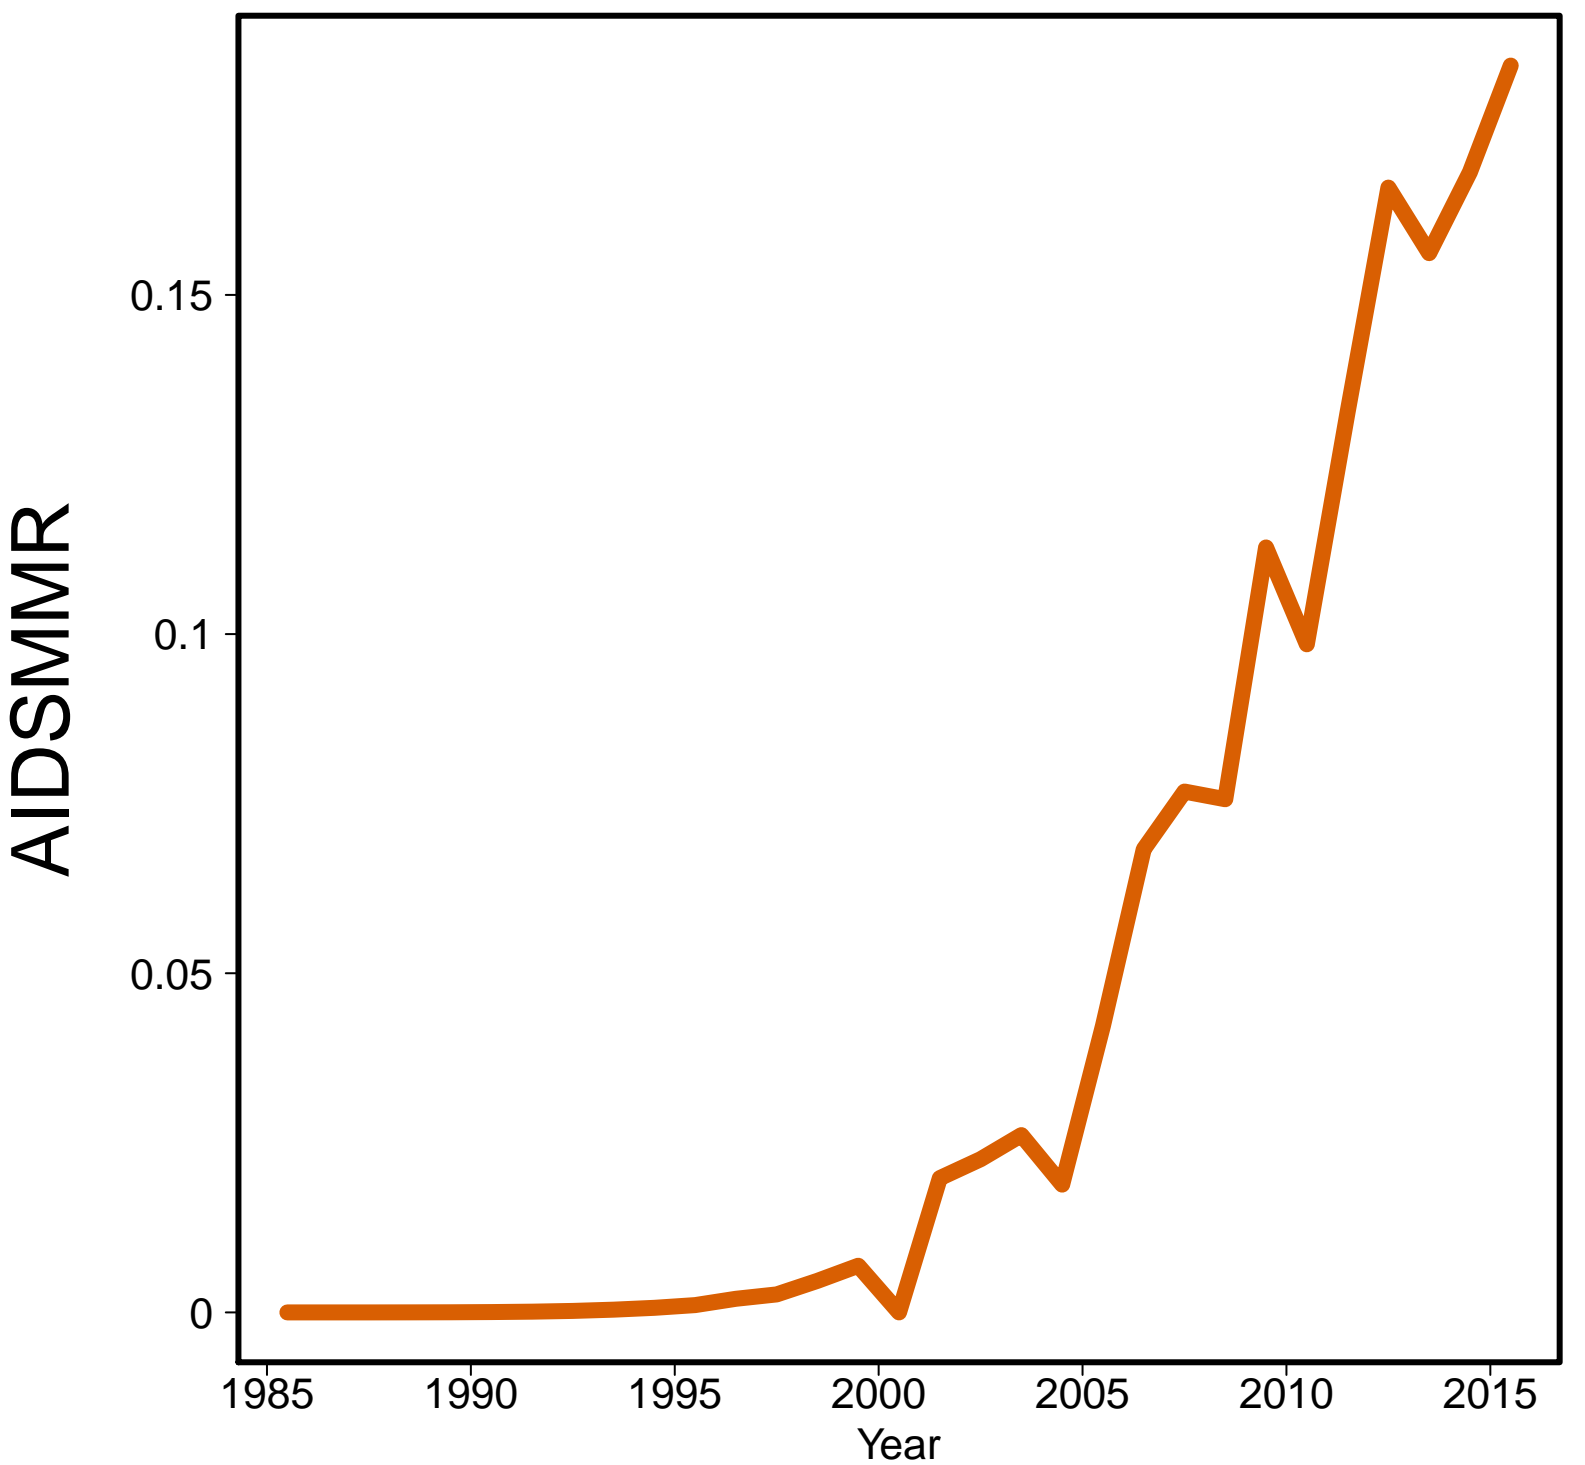

Kenya [KEN]  
(Eastern Africa)

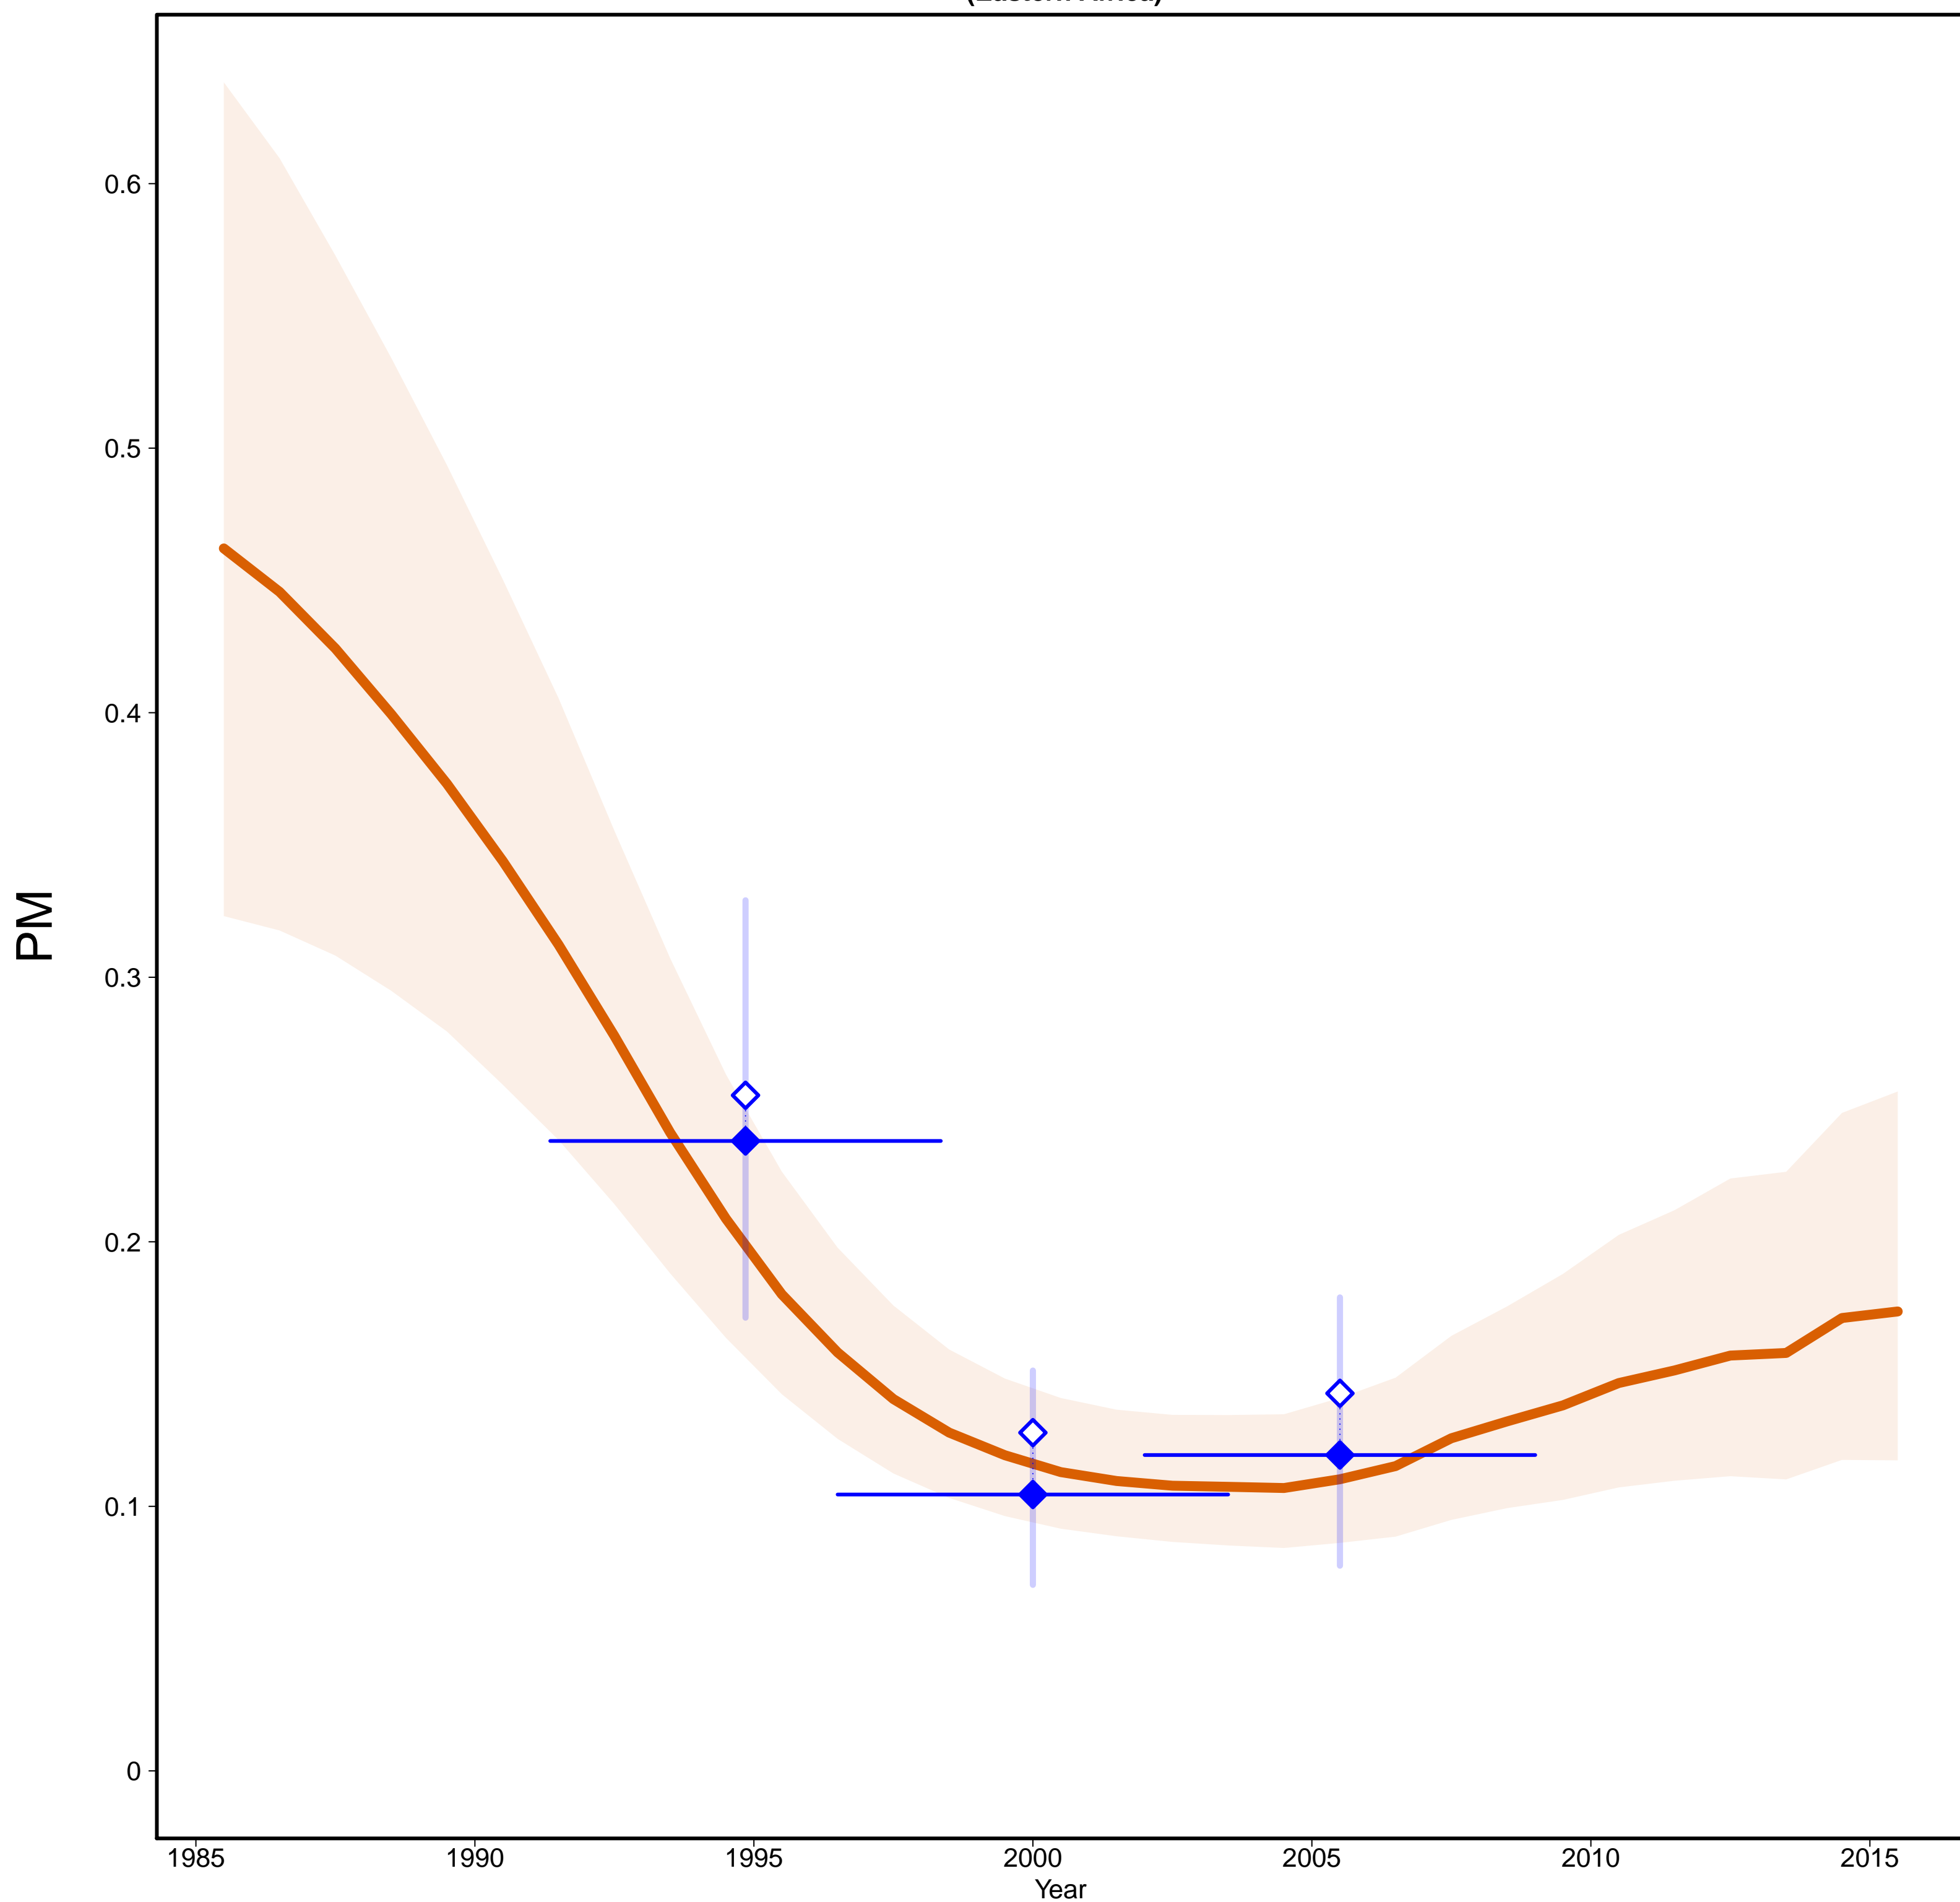

Kenya [KEN]  
(Eastern Africa)

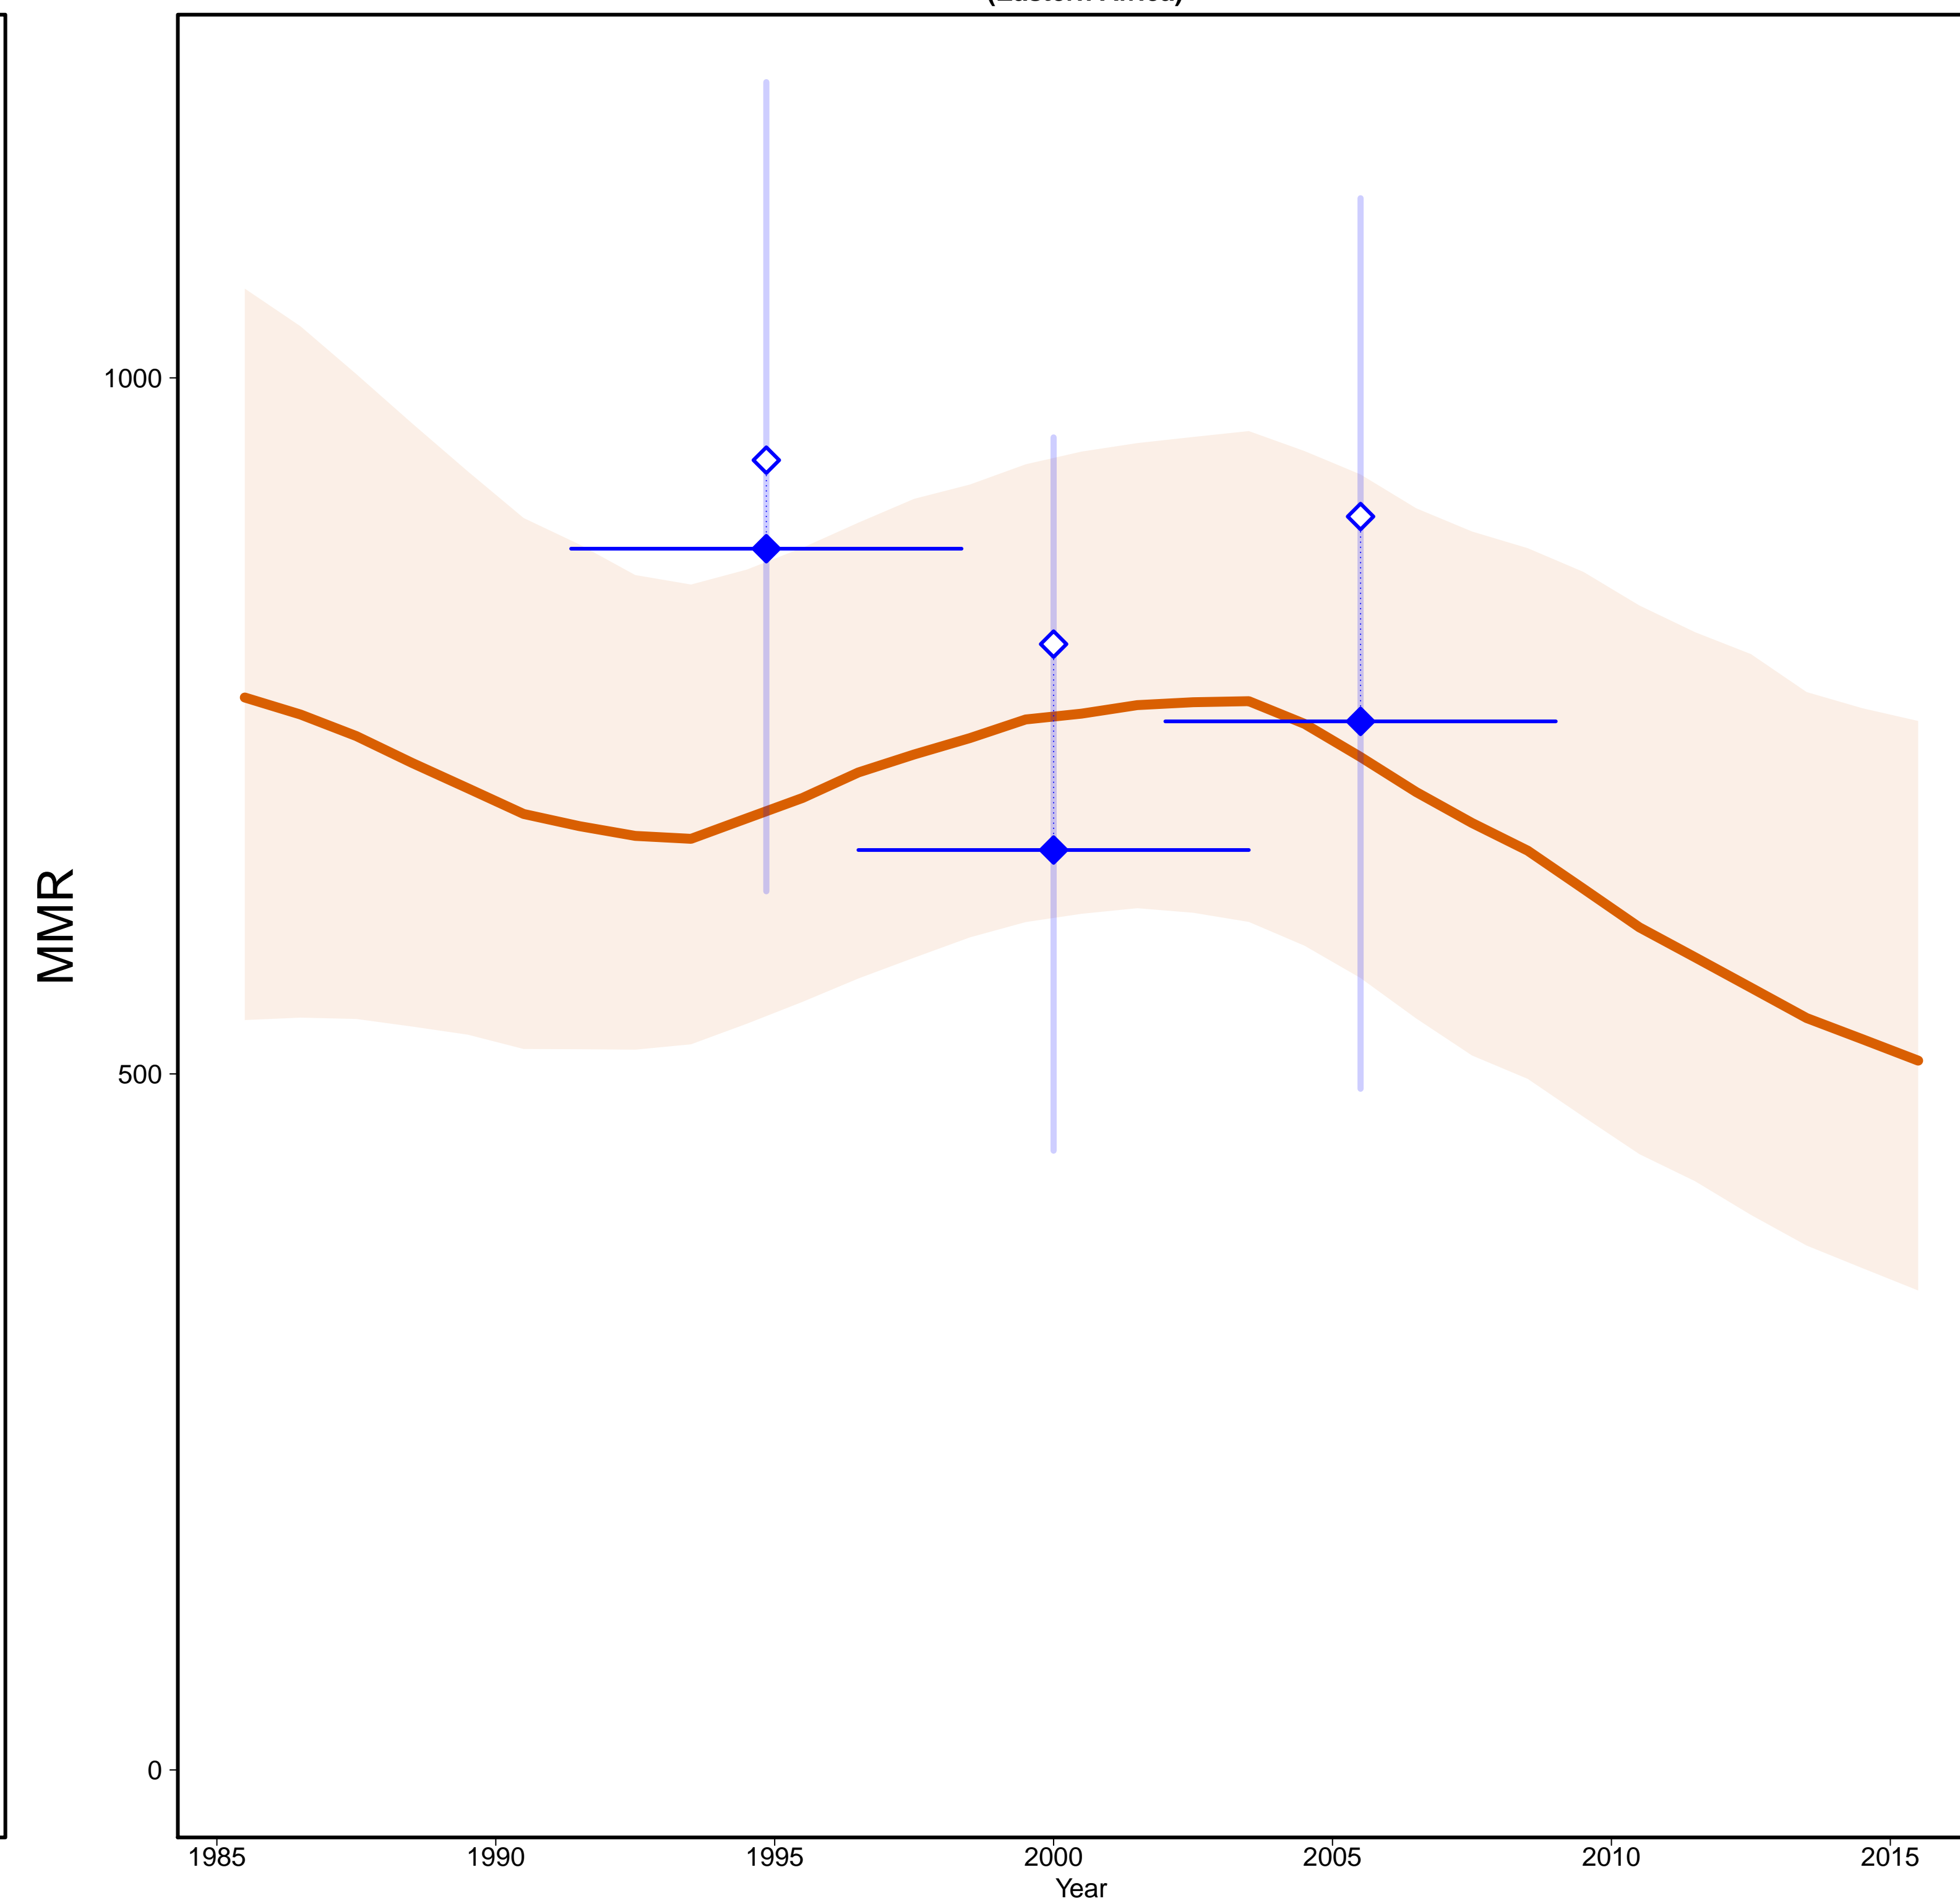

- Estimates —
- MMR Database 2015 —
- ◇ Observed Data
- ◆ Adjusted Data
- Data type —
- ◆ DHS

Gross Domestic Product

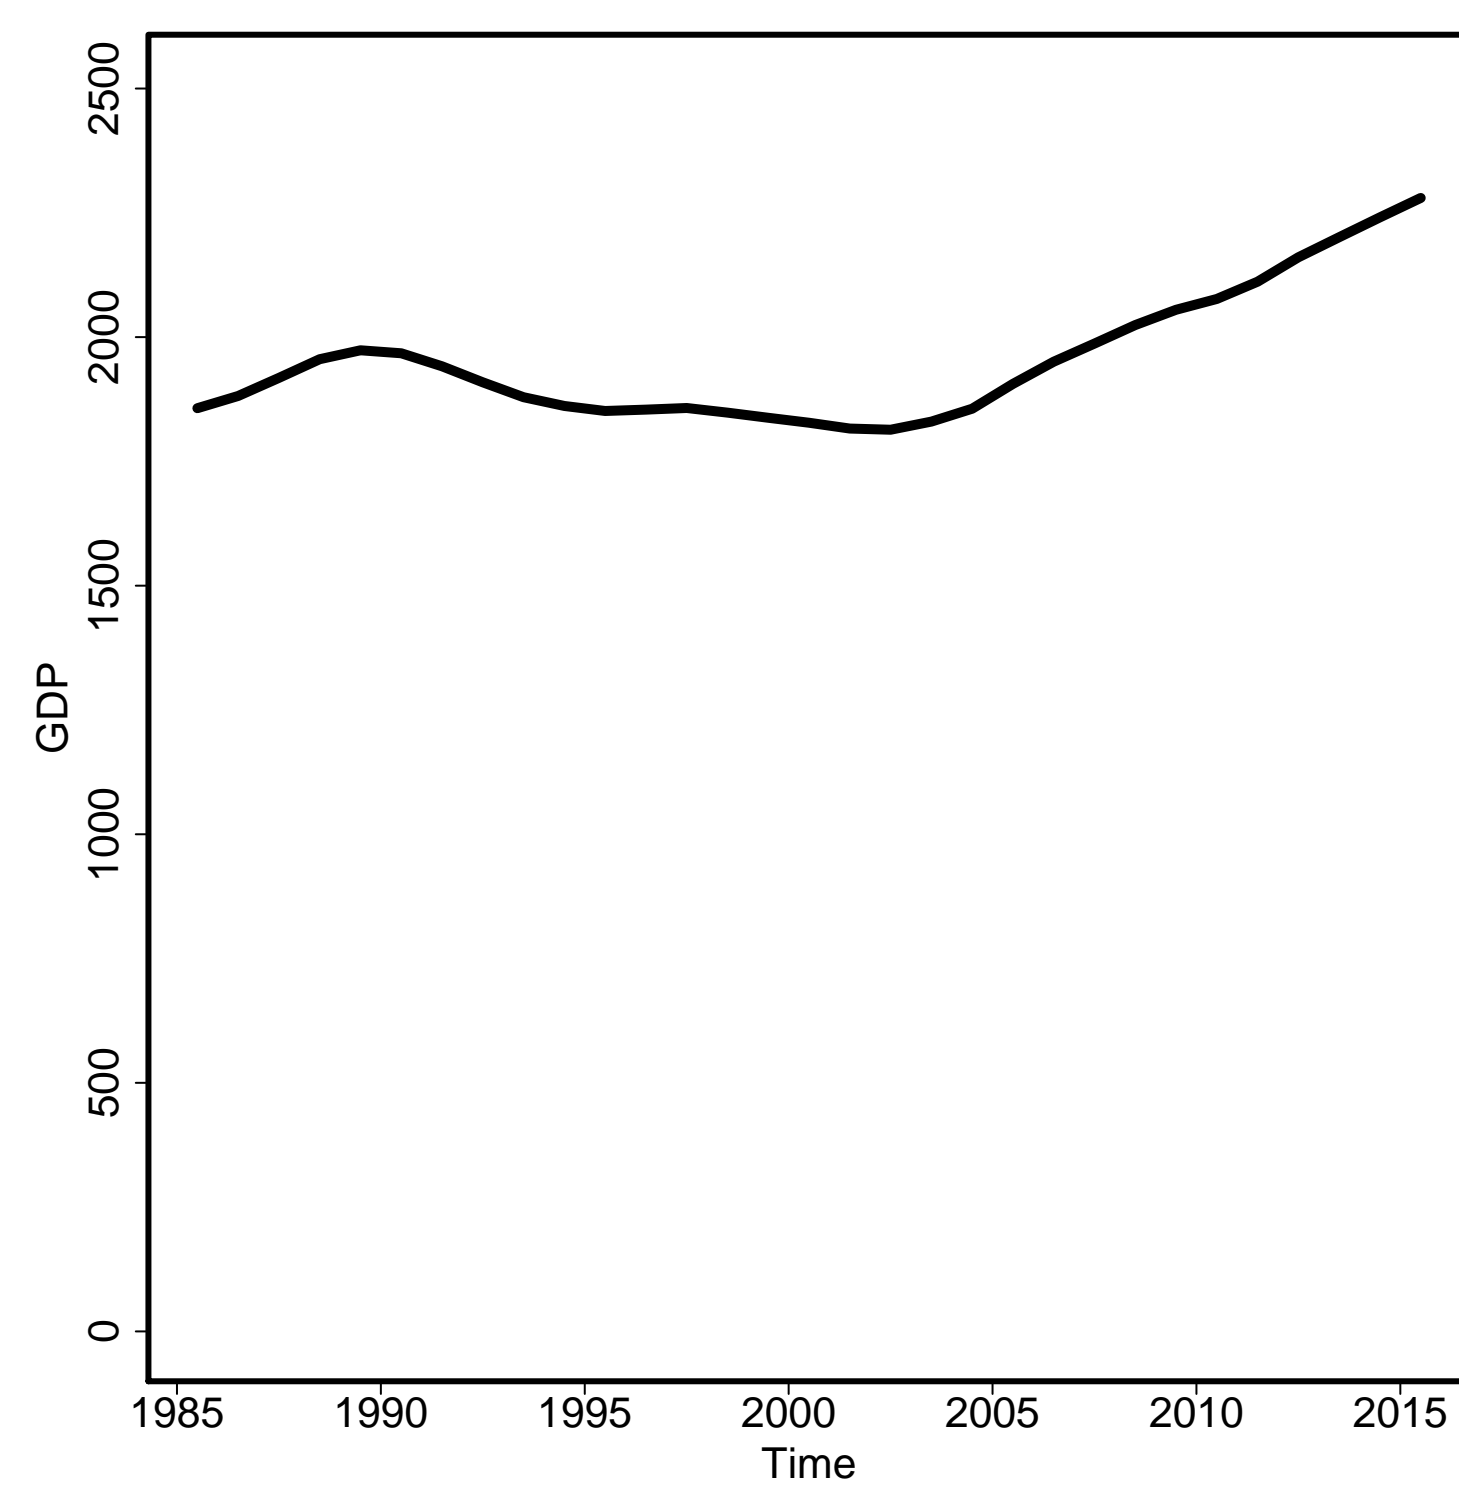

General Fertility Rate

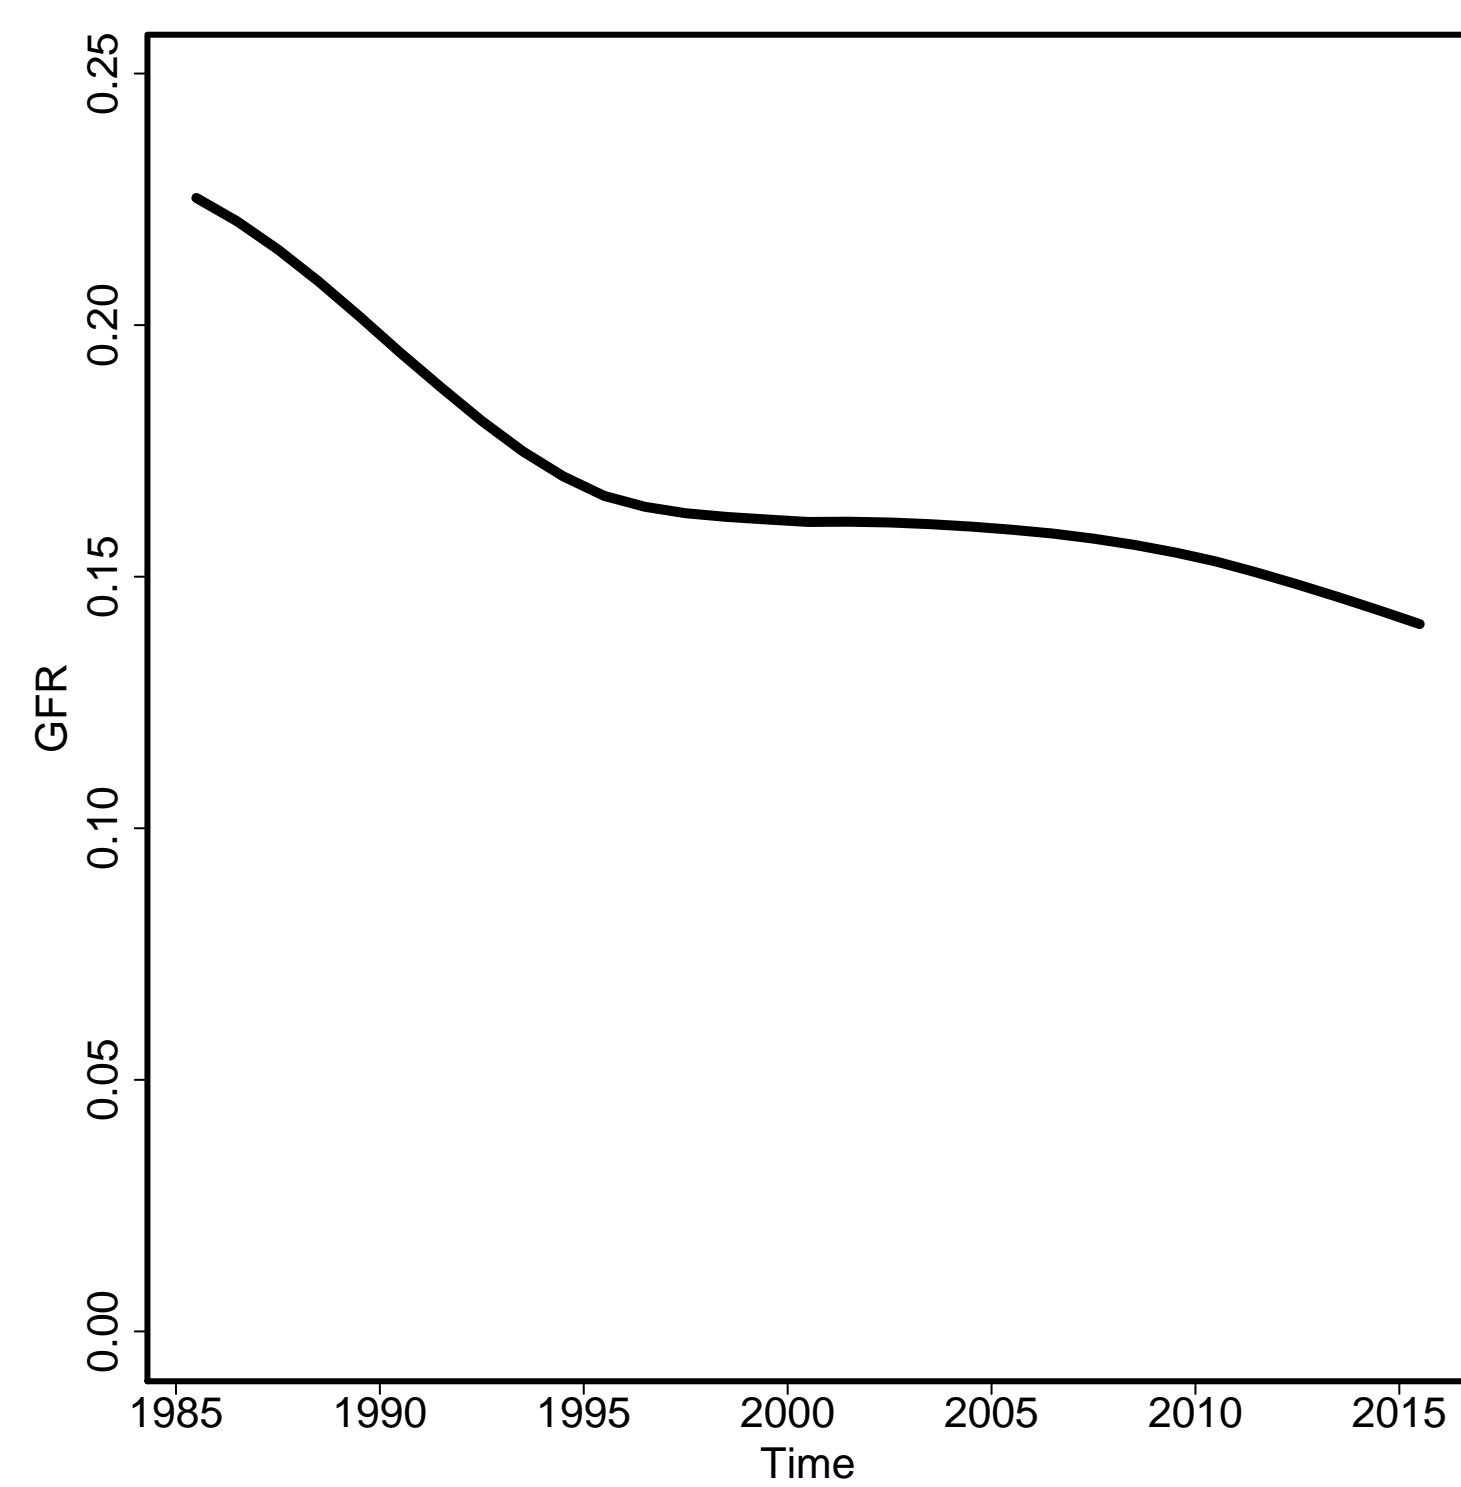

Skilled Attendance to Birth

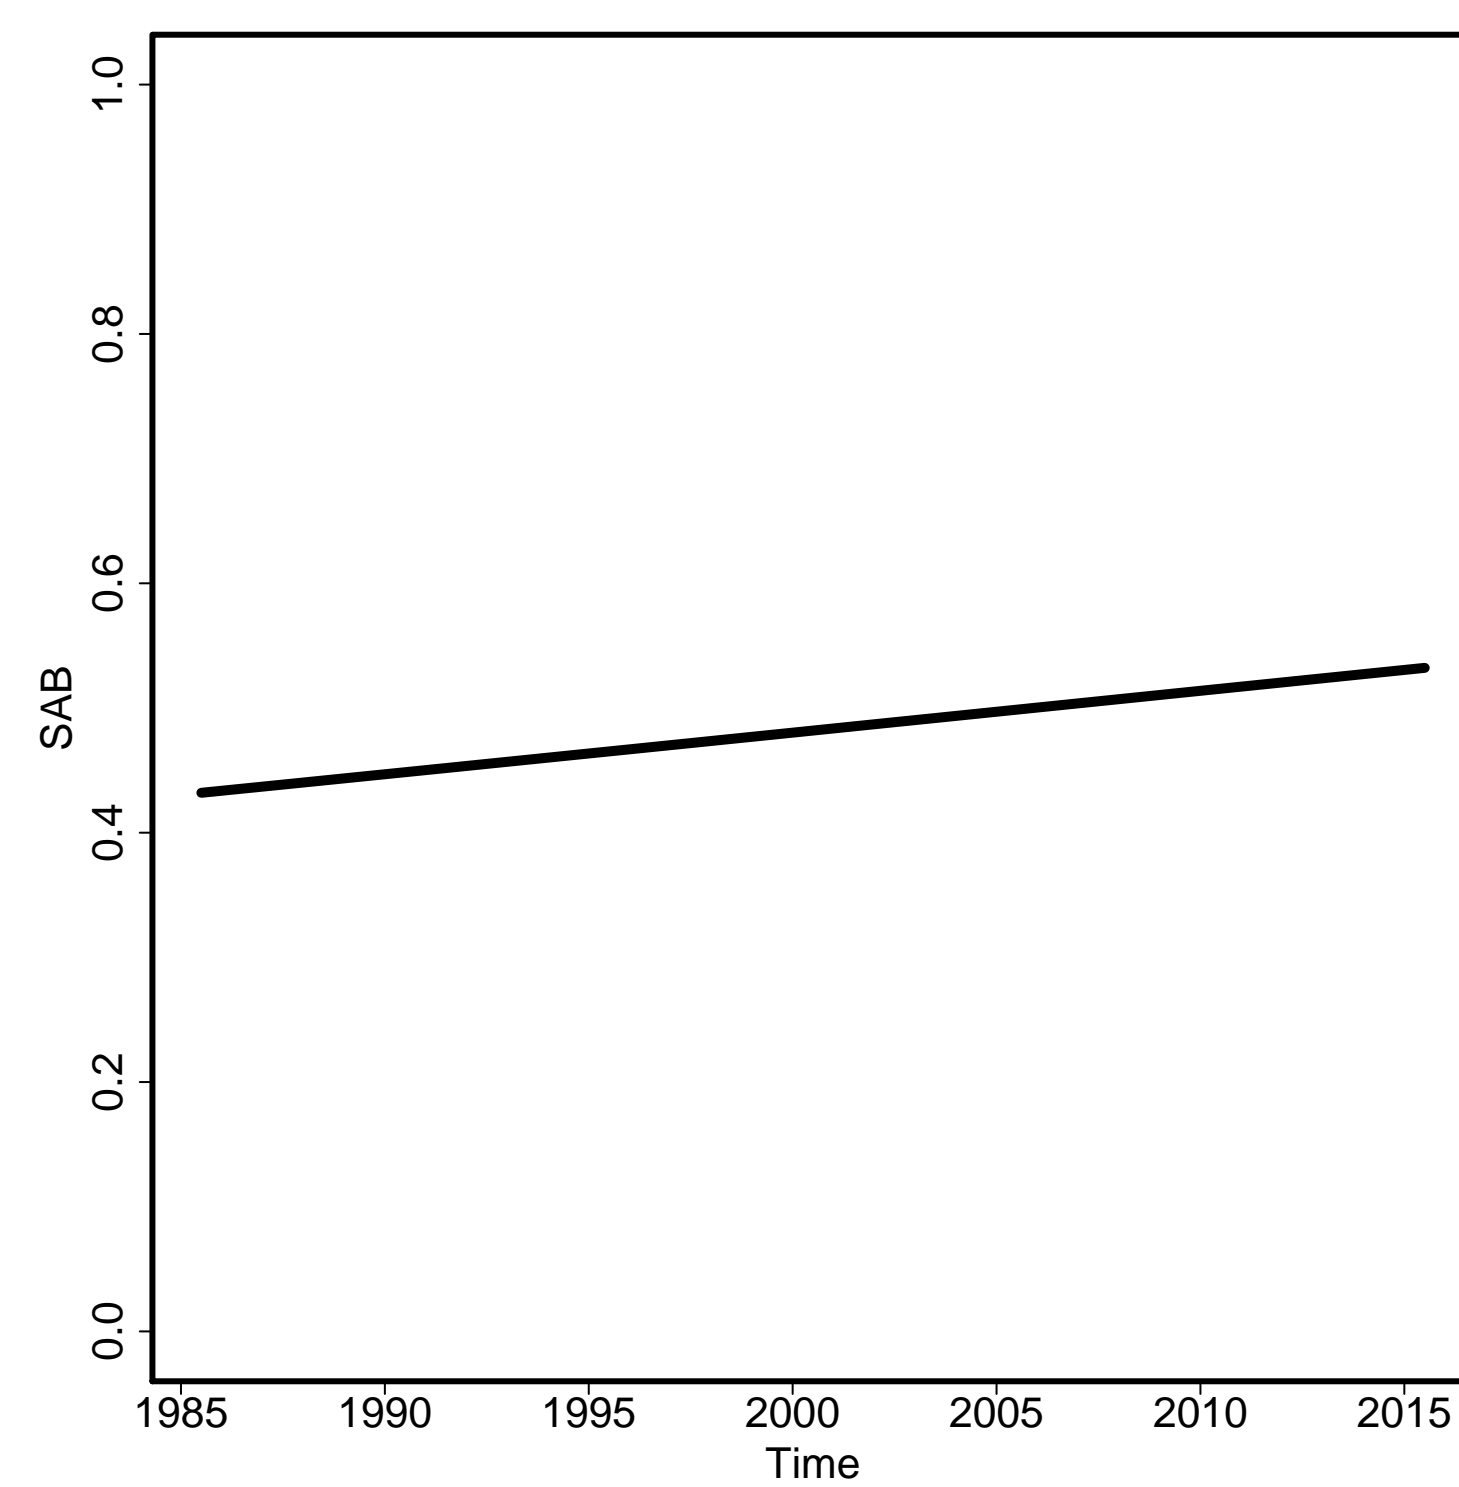

Envelope/Births

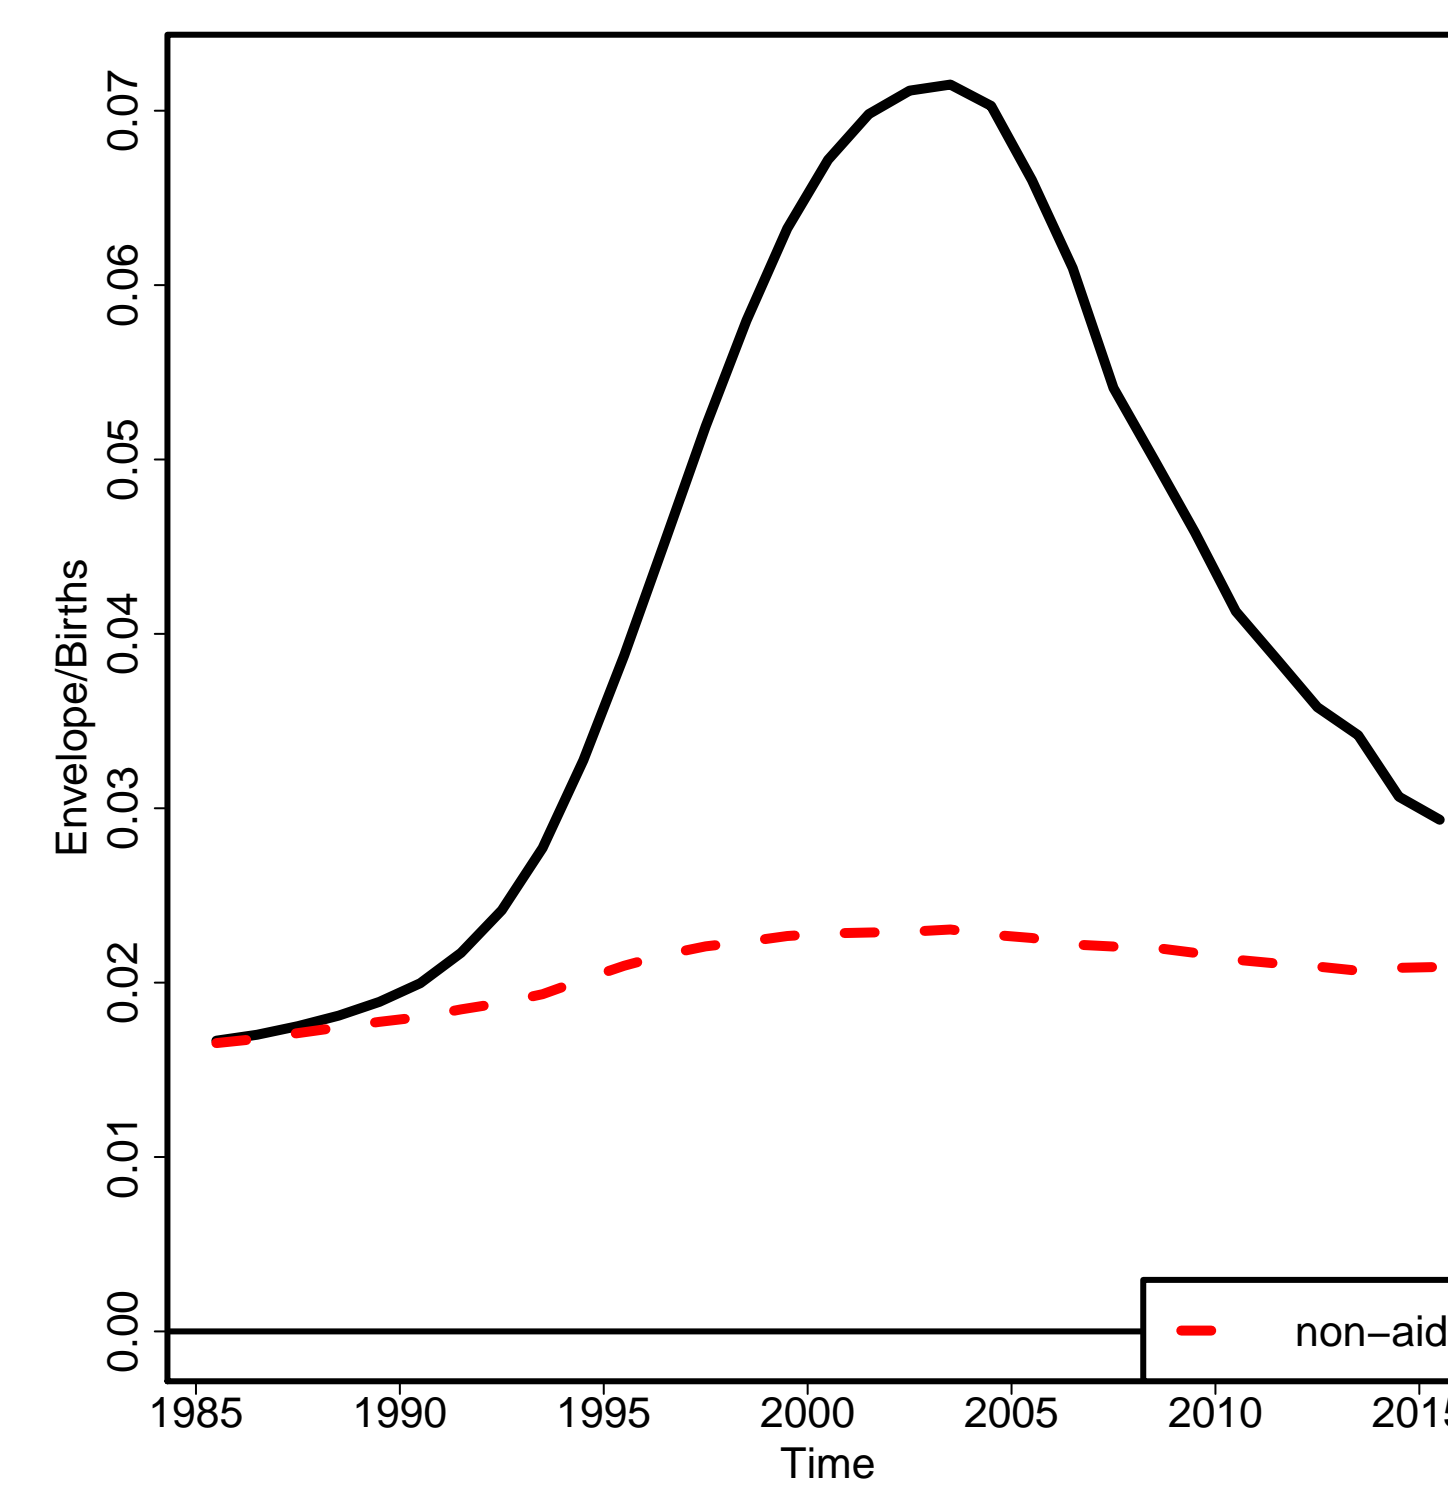

Non-aids MMR

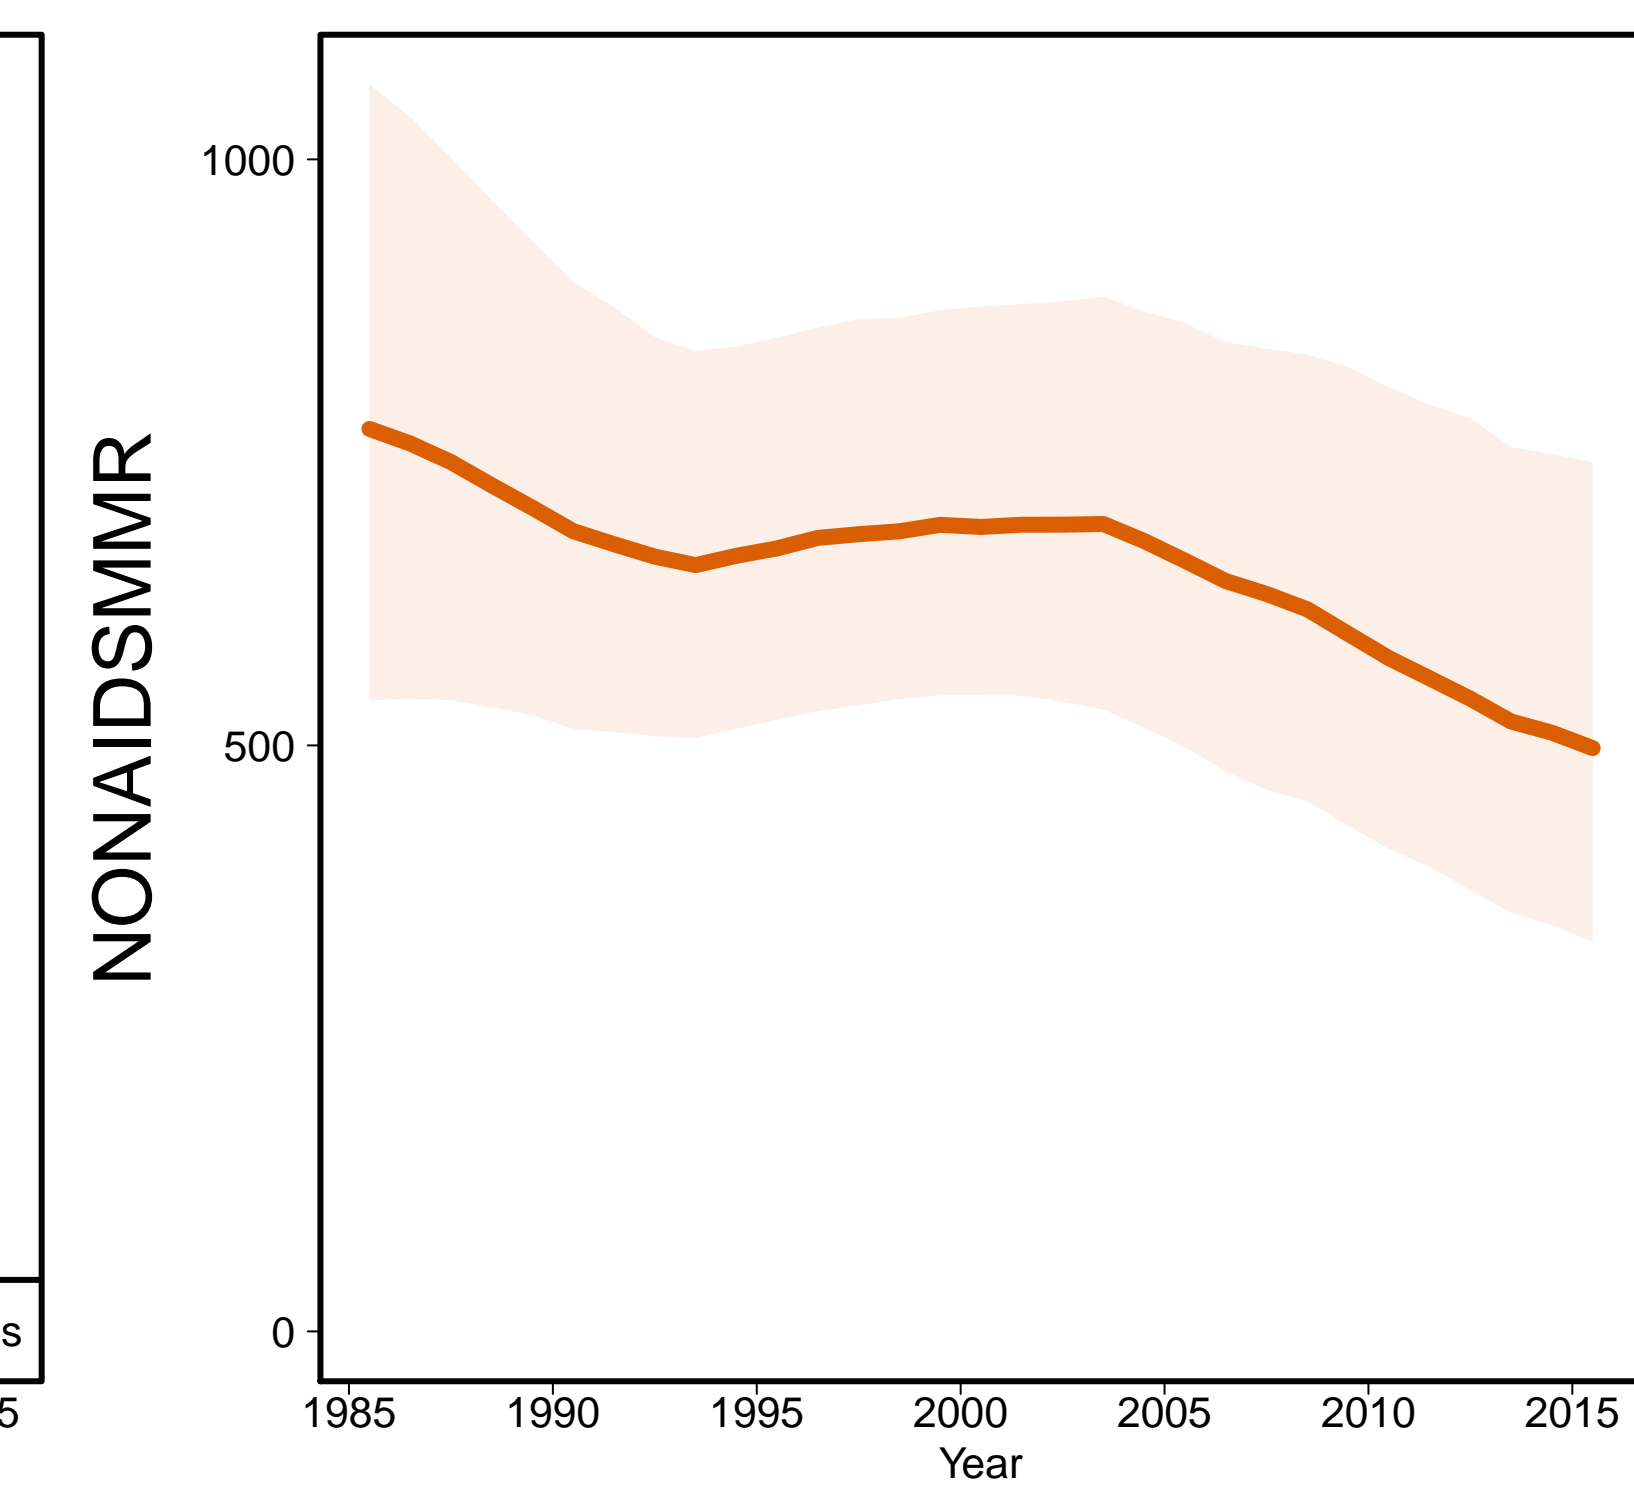

Aids MMR

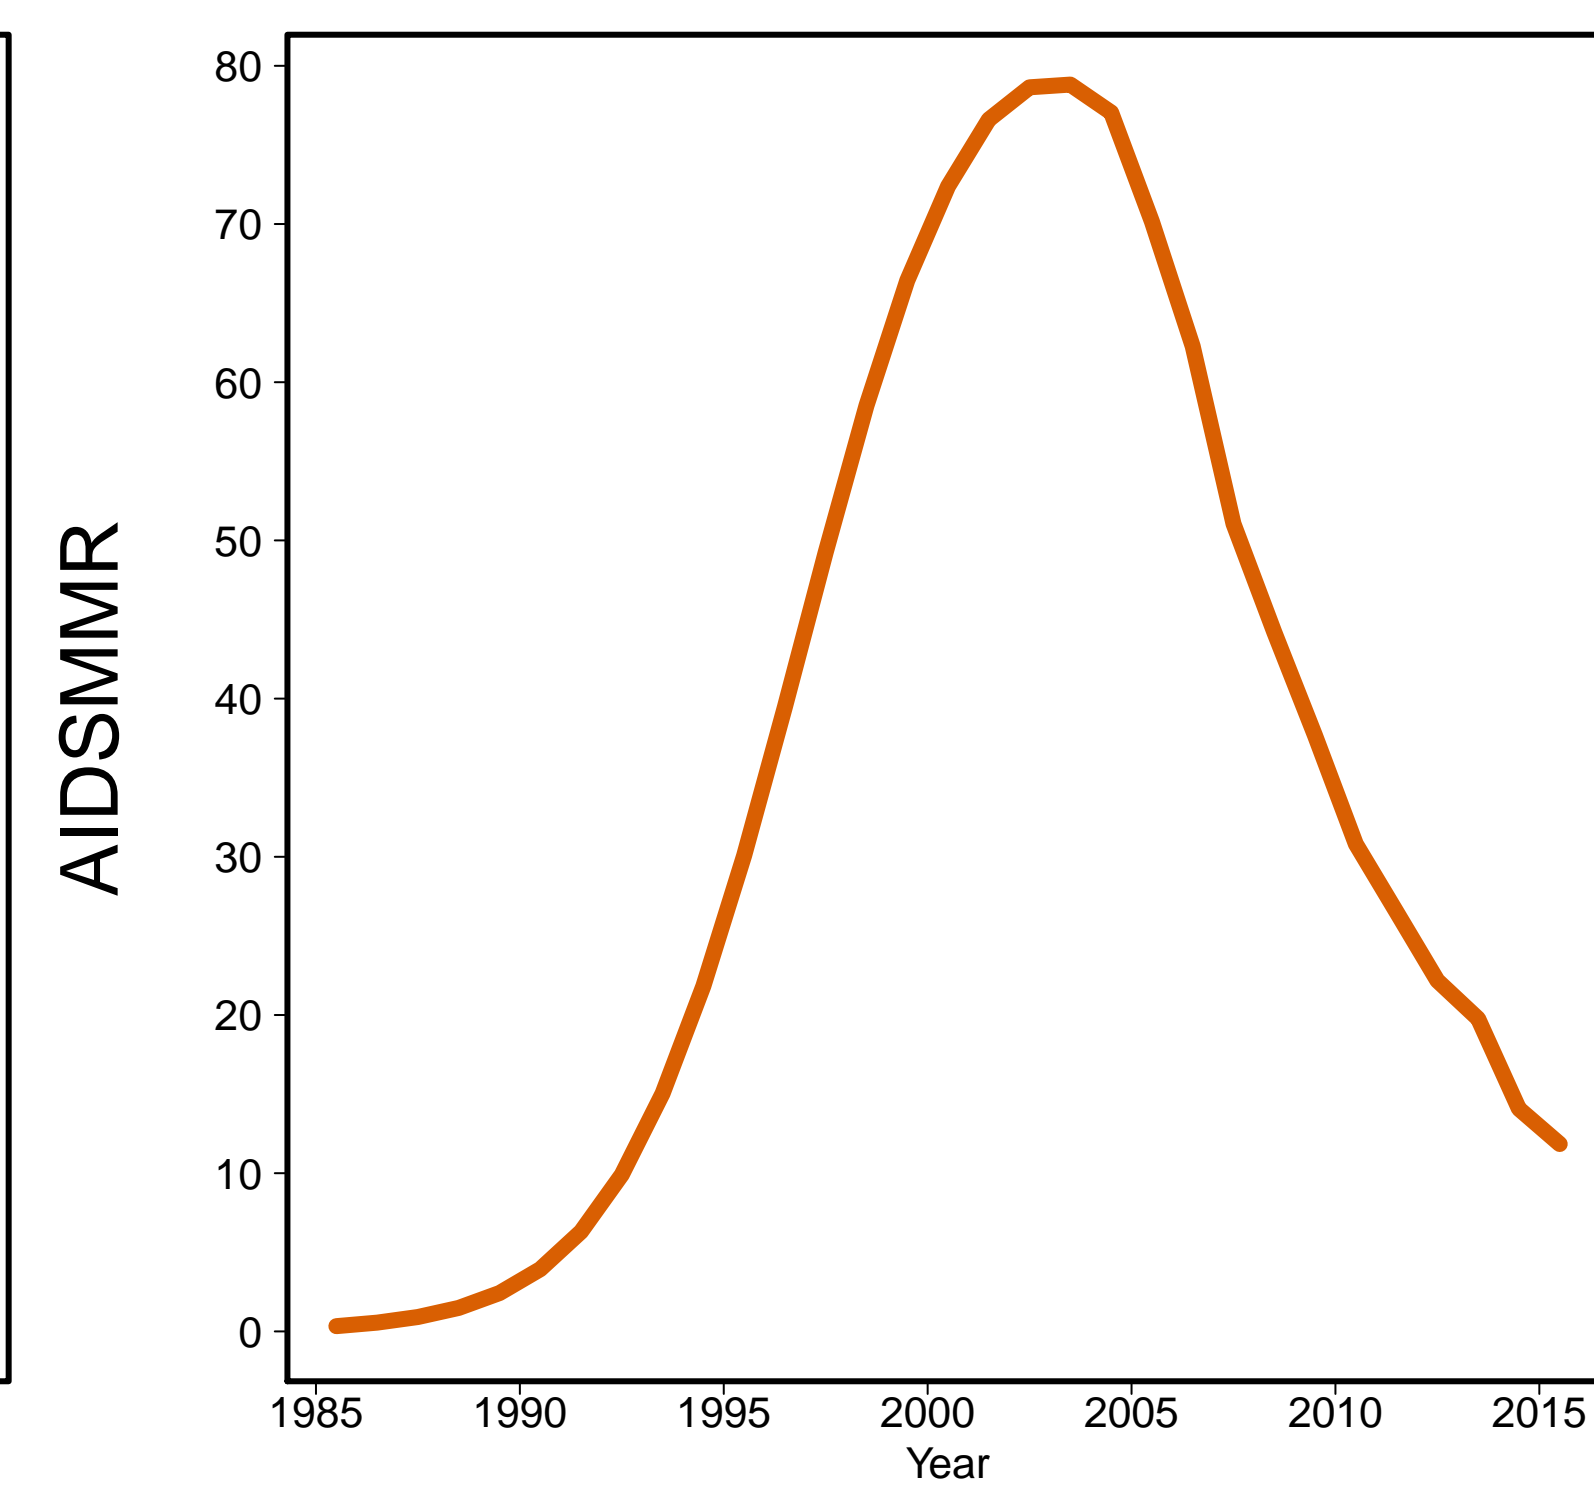

Kiribati [KIR]  
(South-Eastern Asia / Oceania)

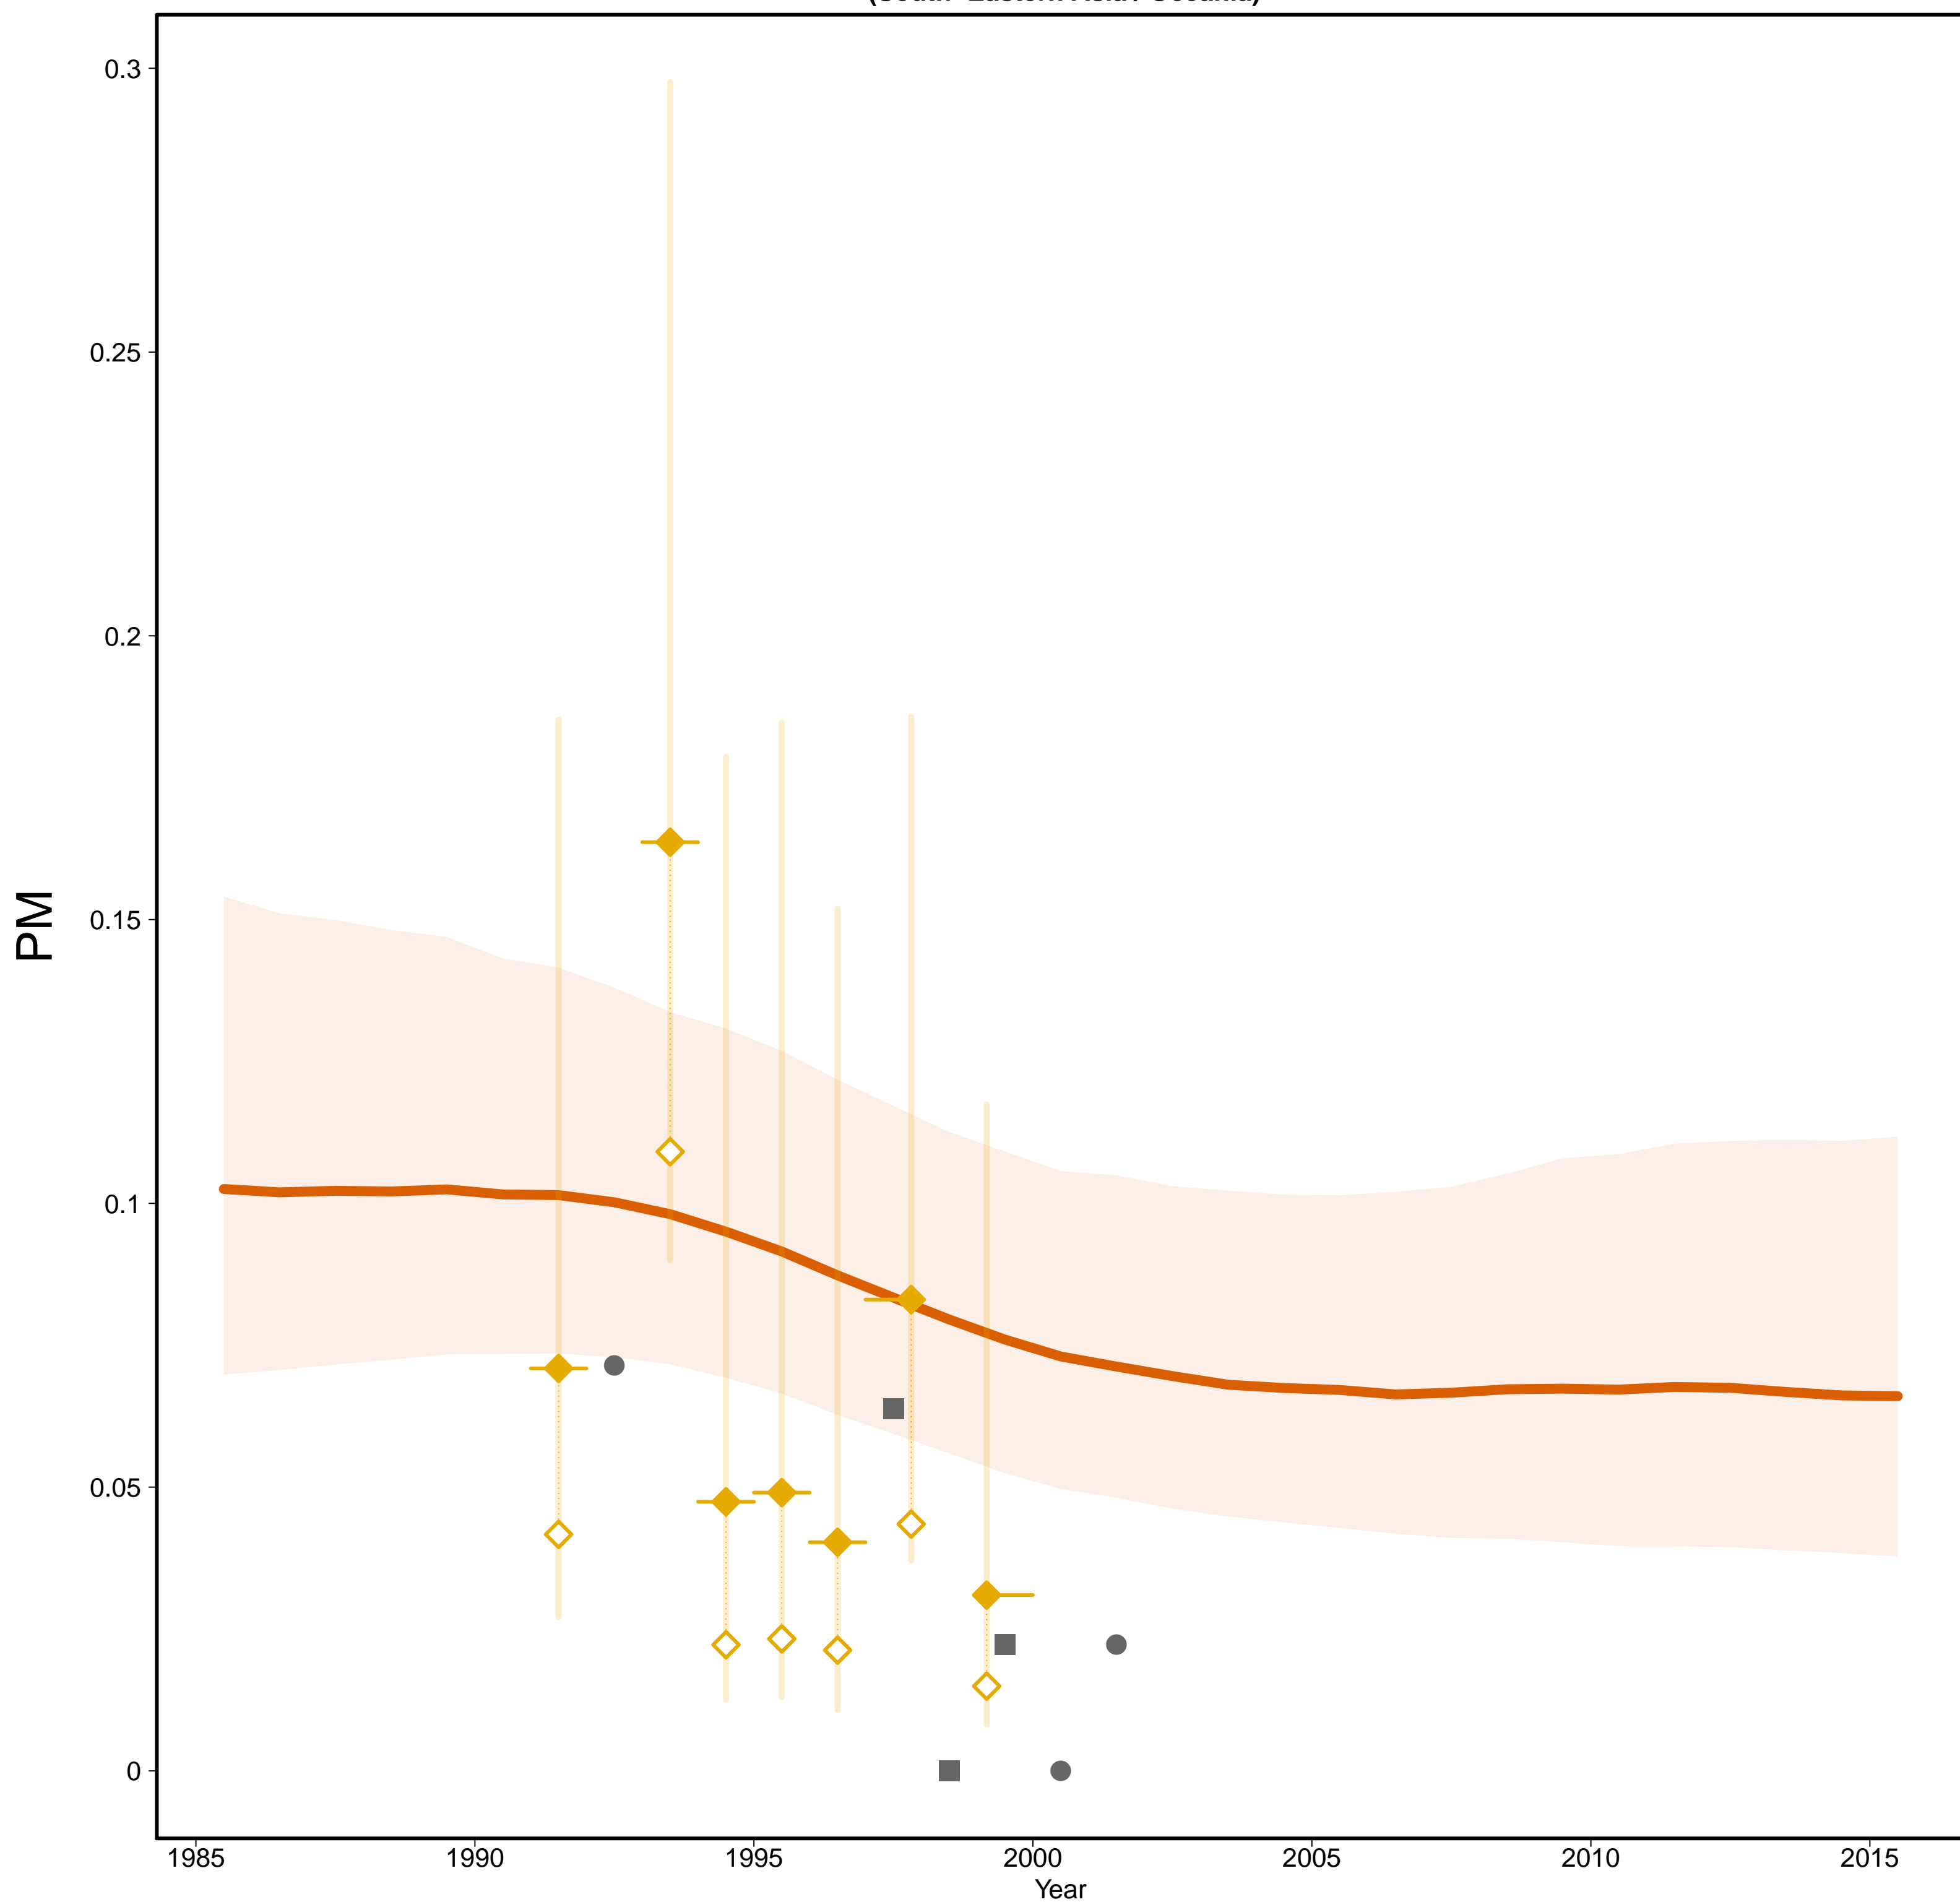

Kiribati [KIR]  
(South-Eastern Asia / Oceania)

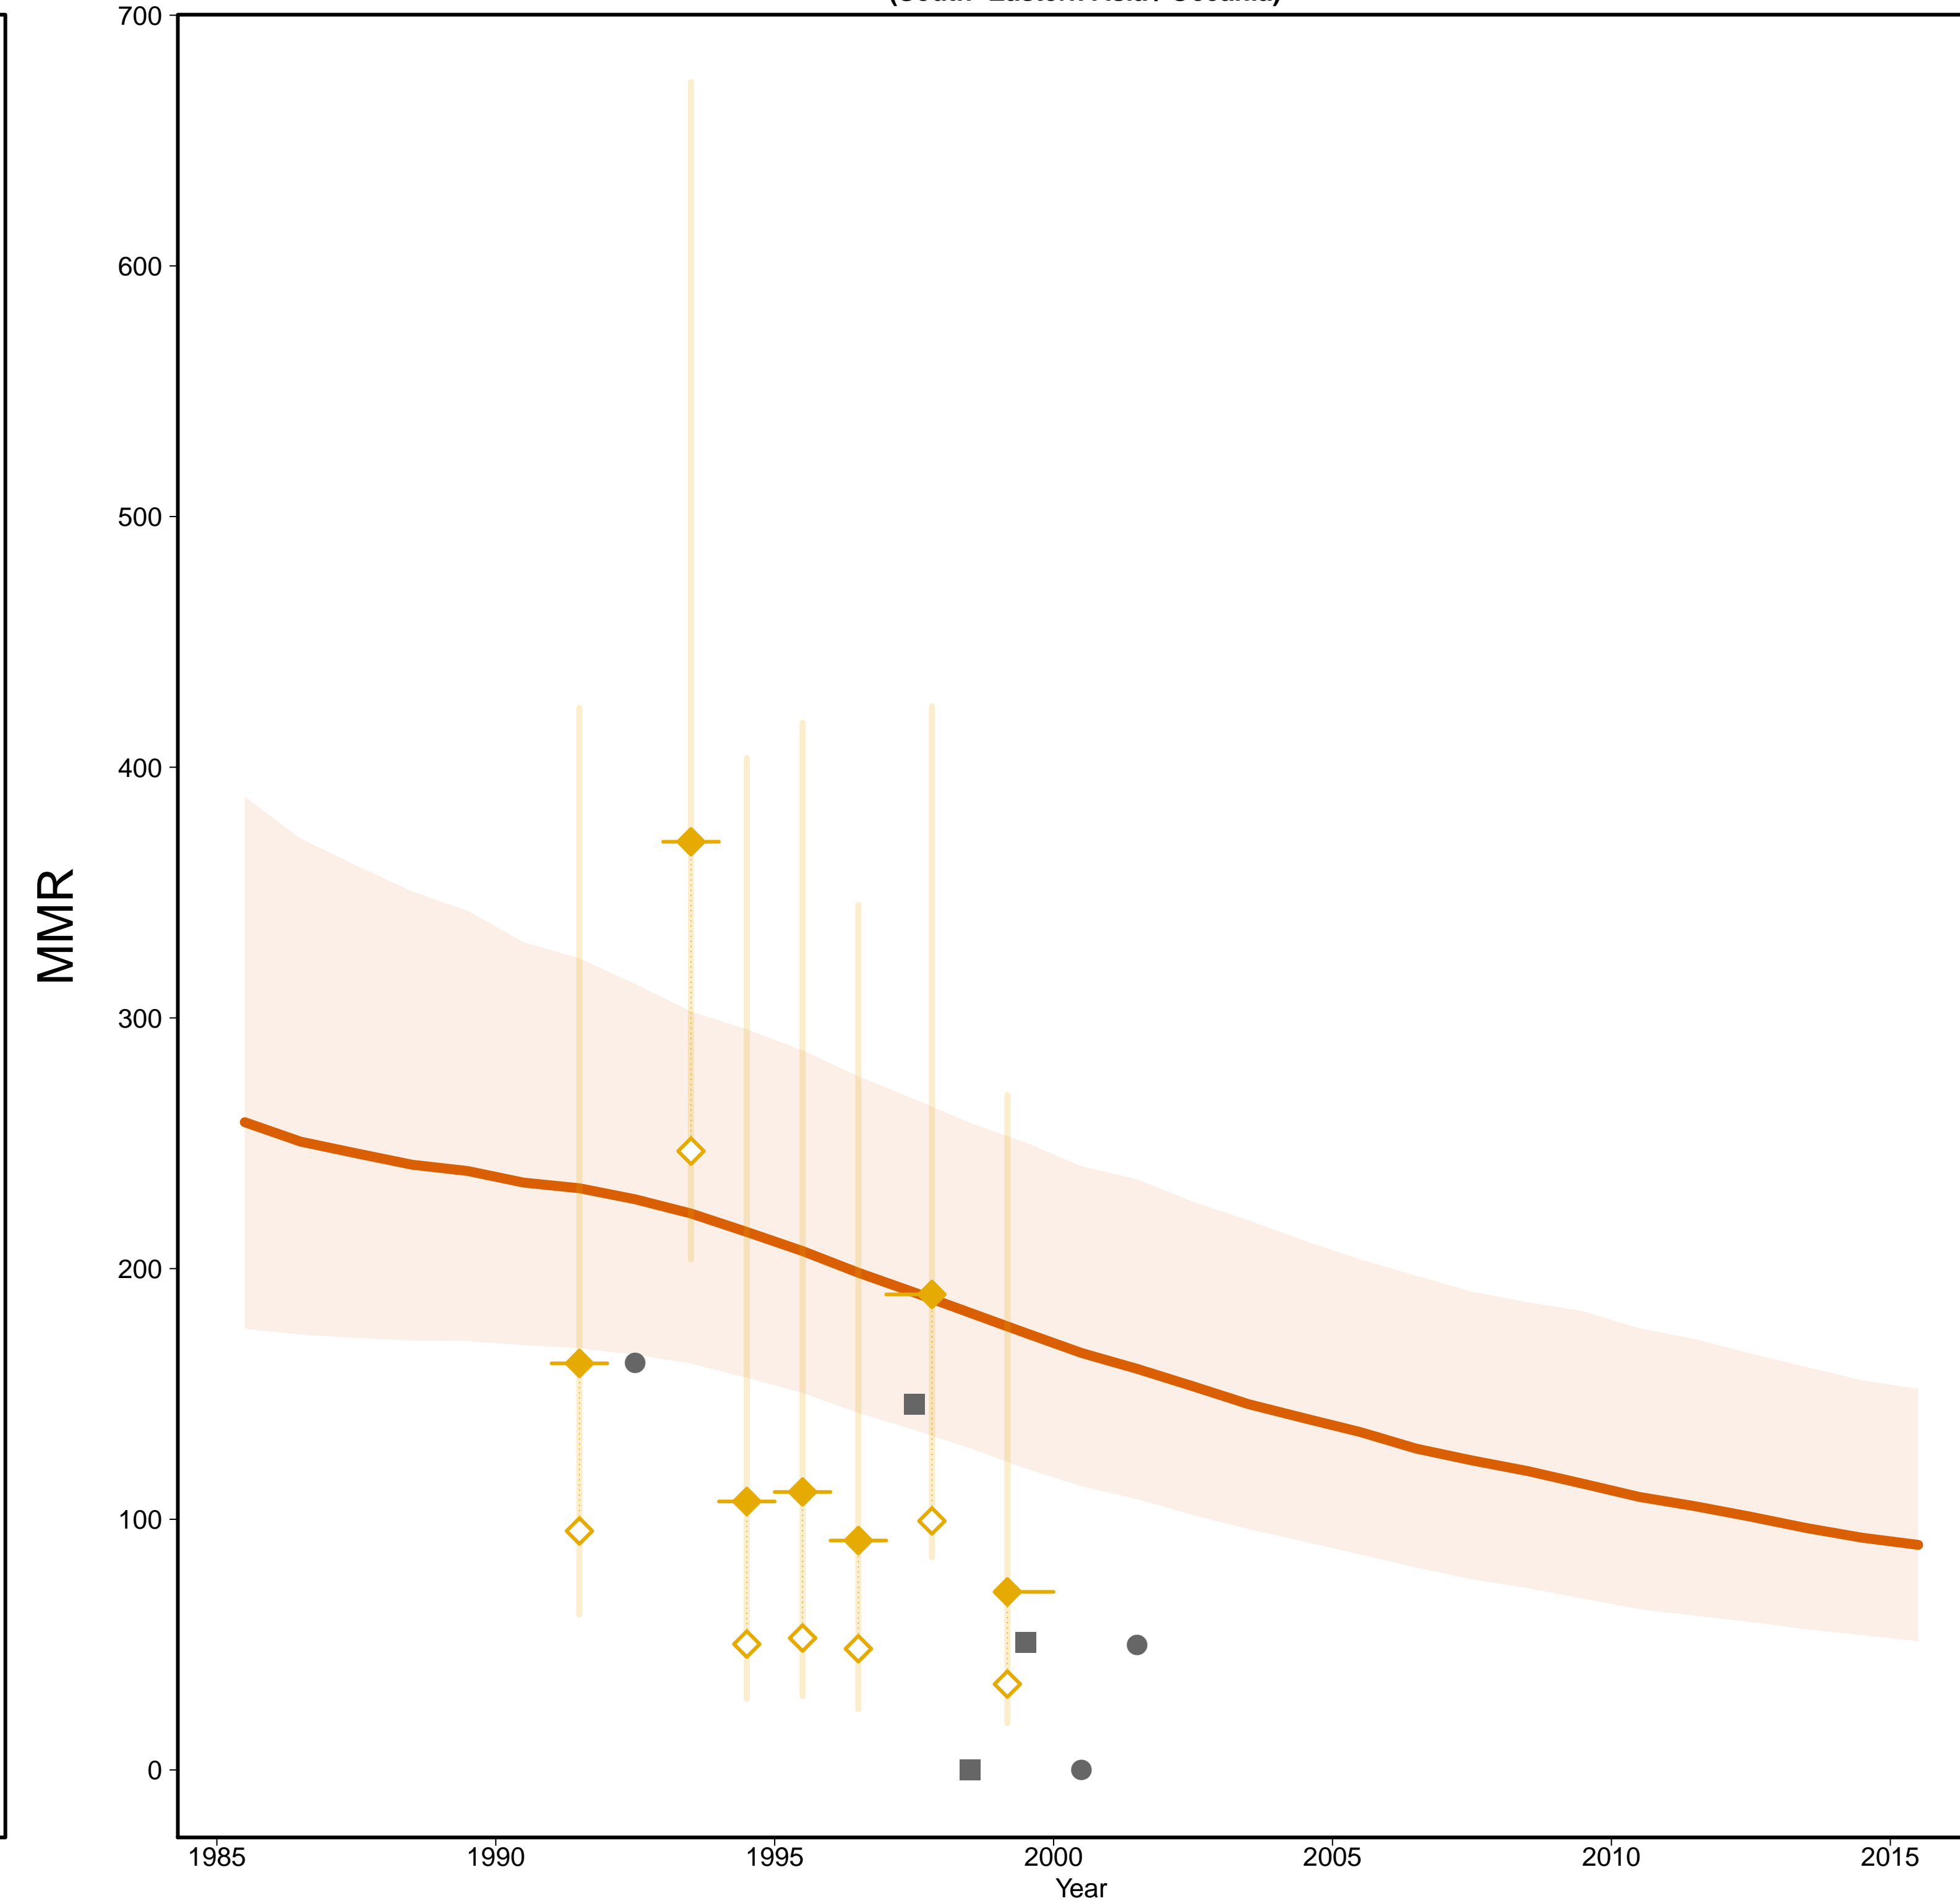

- Estimates —
- MMR Database 2015 —
- ◇ Observed Data
- ◆ Adjusted Data
- Data type —
- ◆ VR
- Reported VR before recal.  
(related to 0 obs. mat. death)
- Excluded VR data  
(data quality issues)

Gross Domestic Product

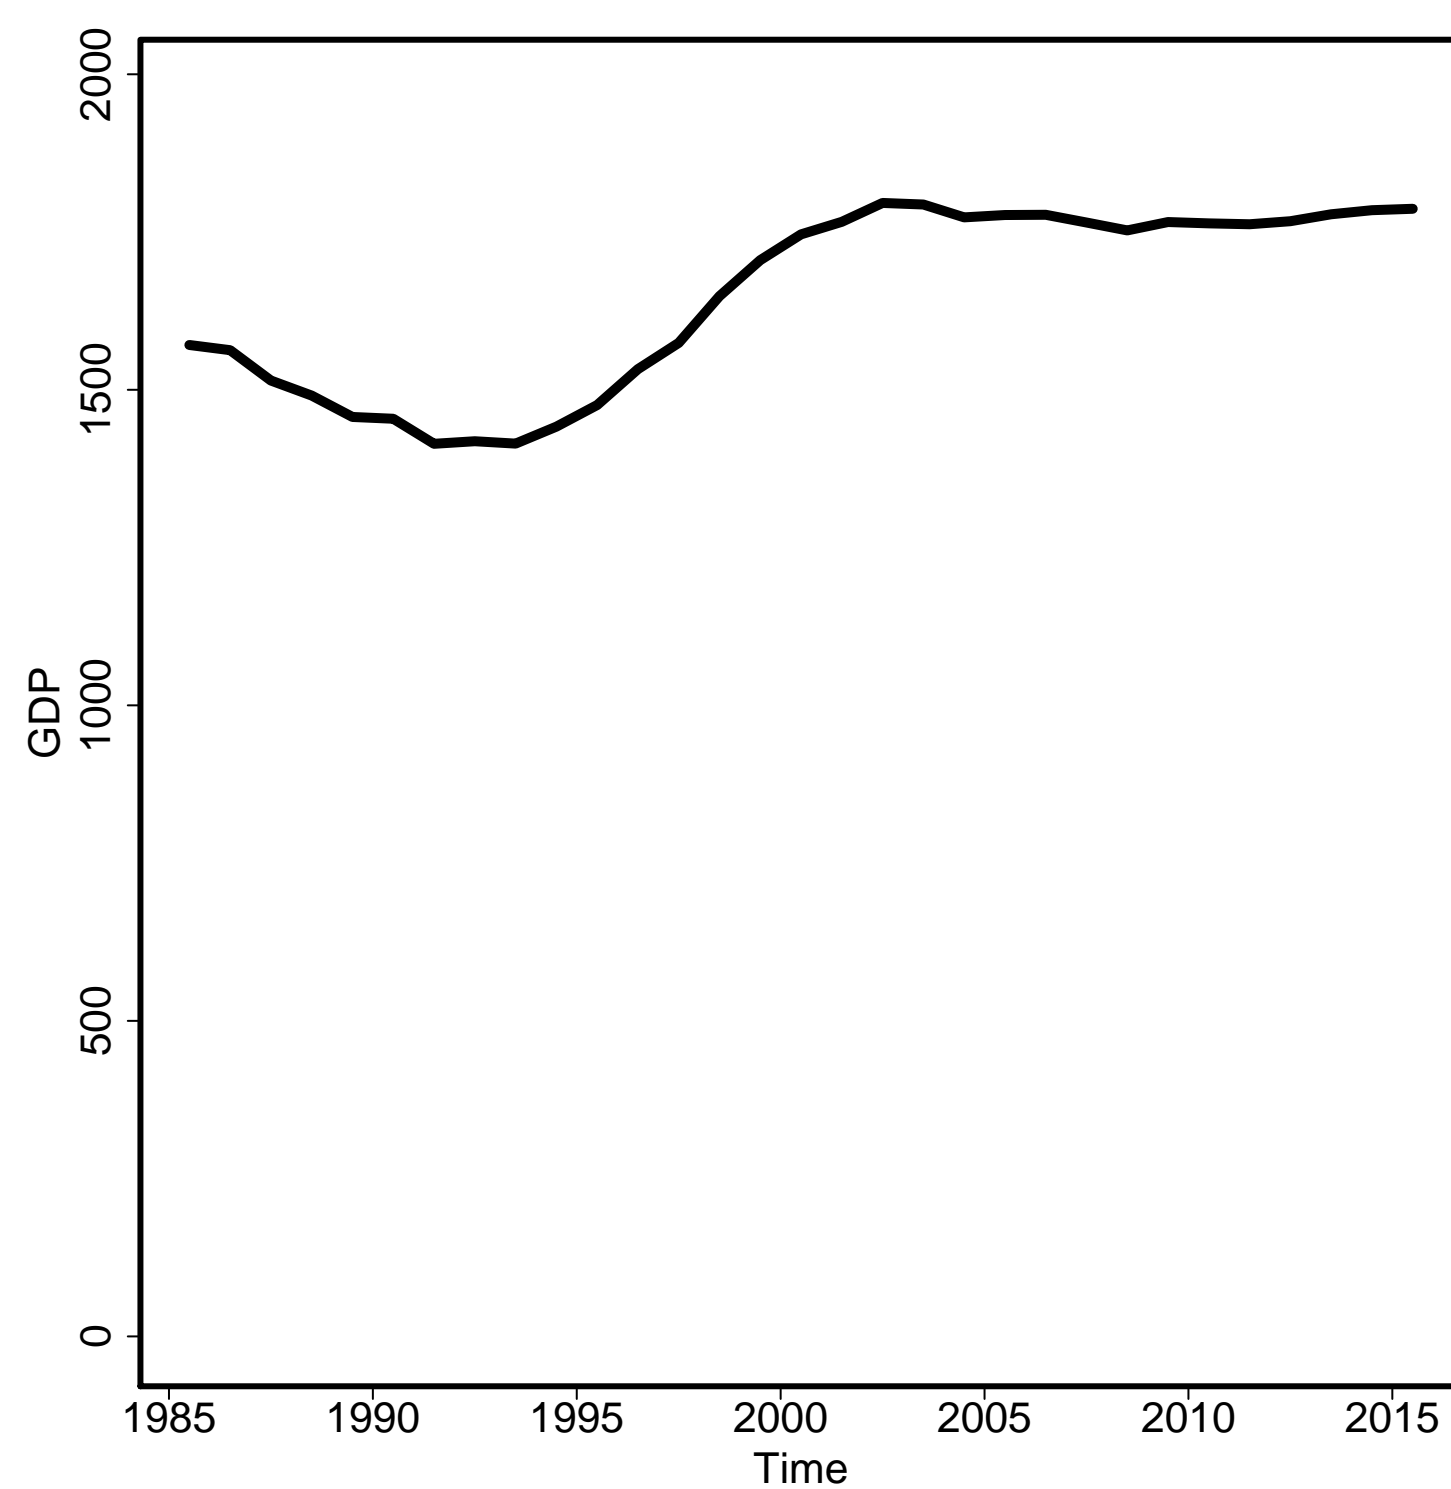

General Fertility Rate

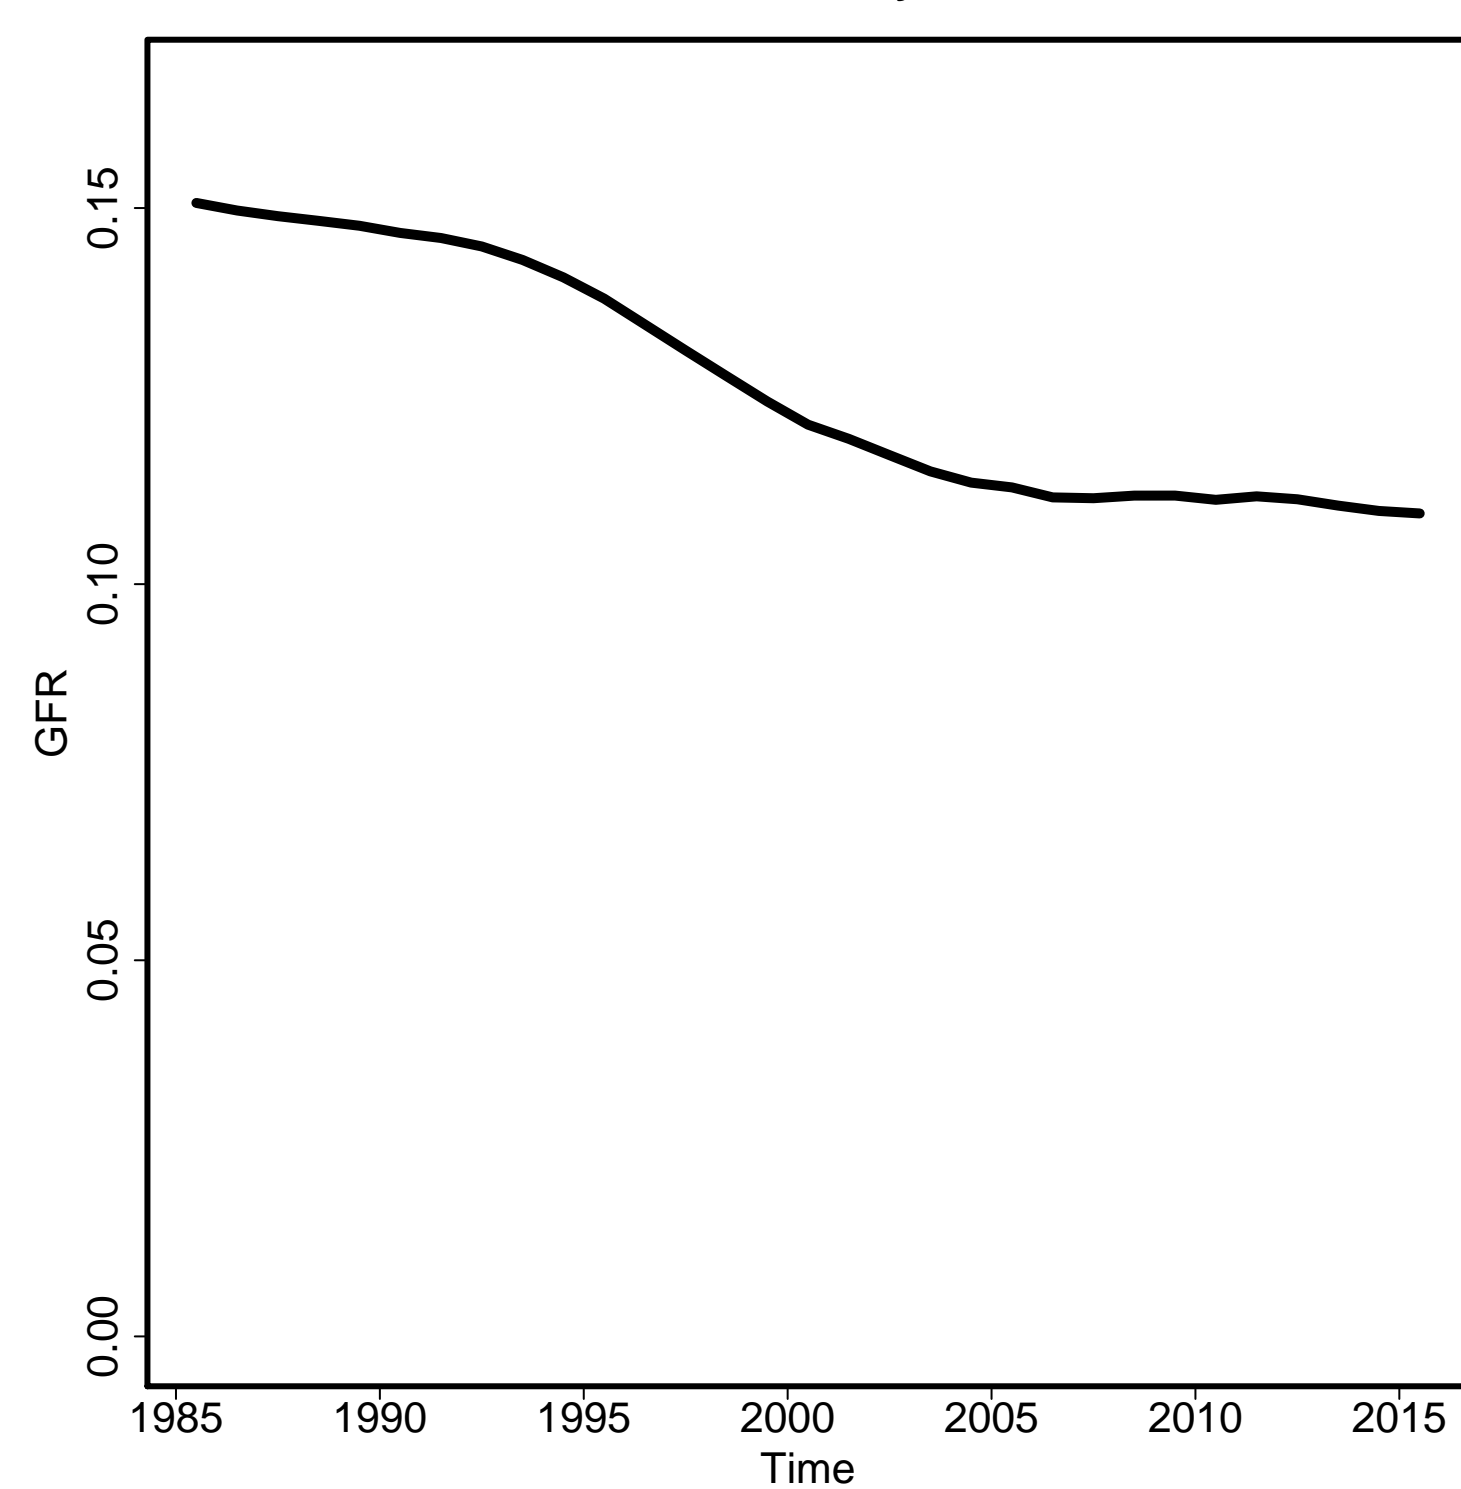

Skilled Attendance to Birth

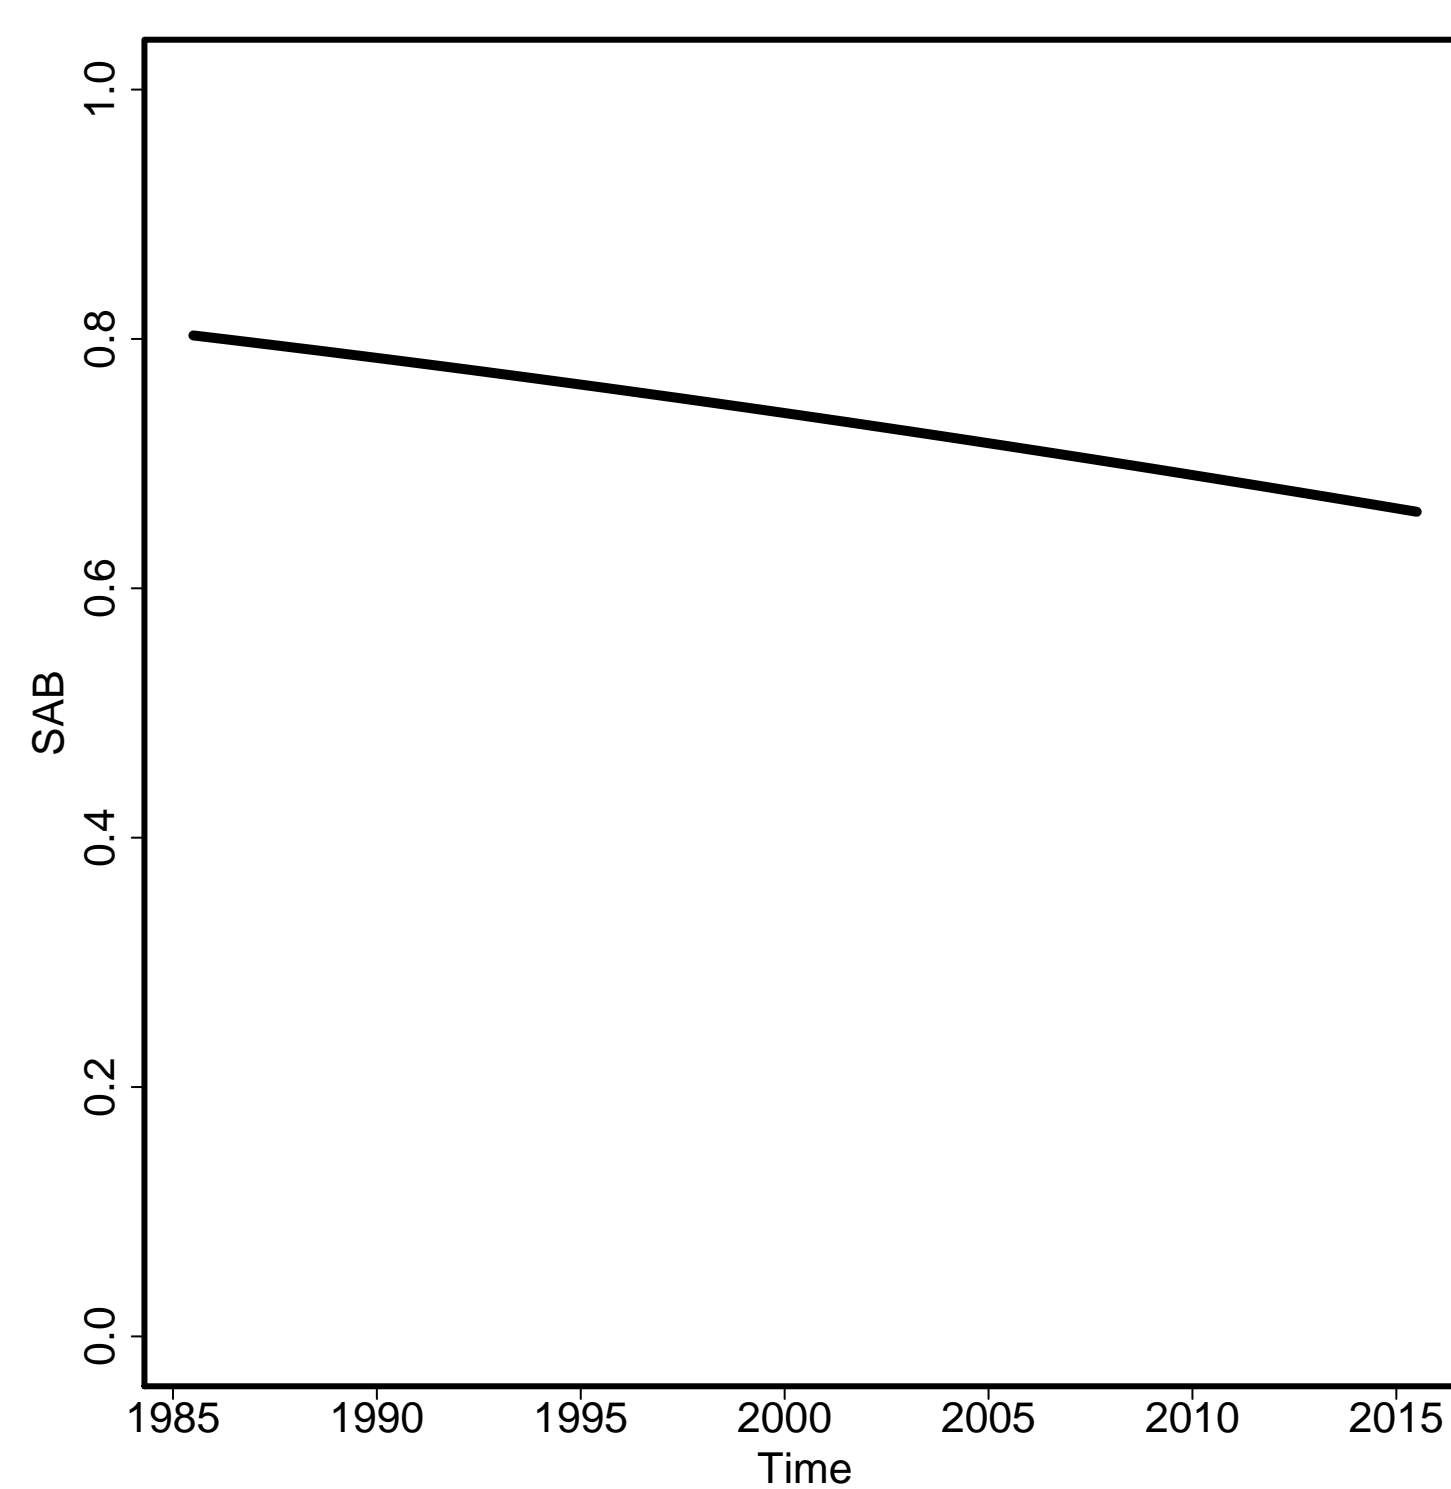

Envelope/Births

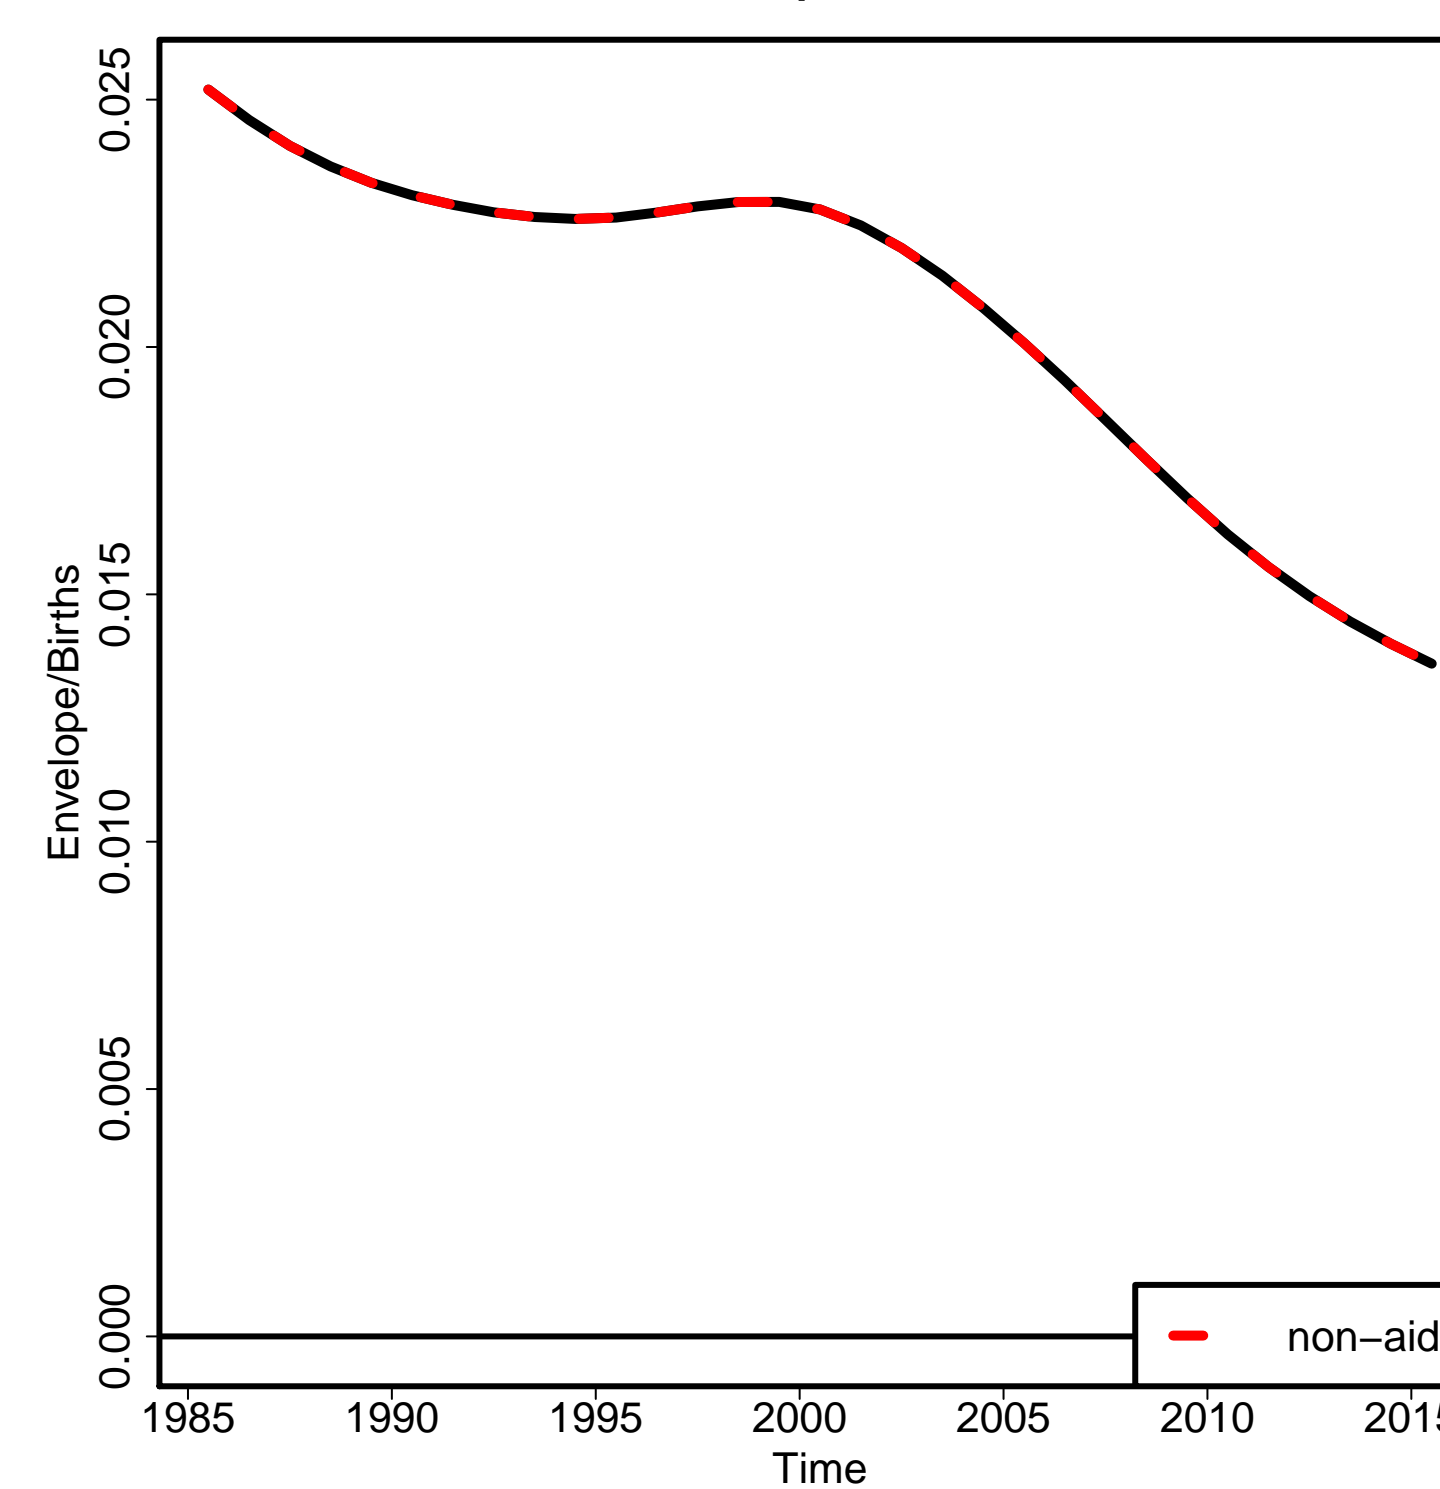

Non-aids MMR

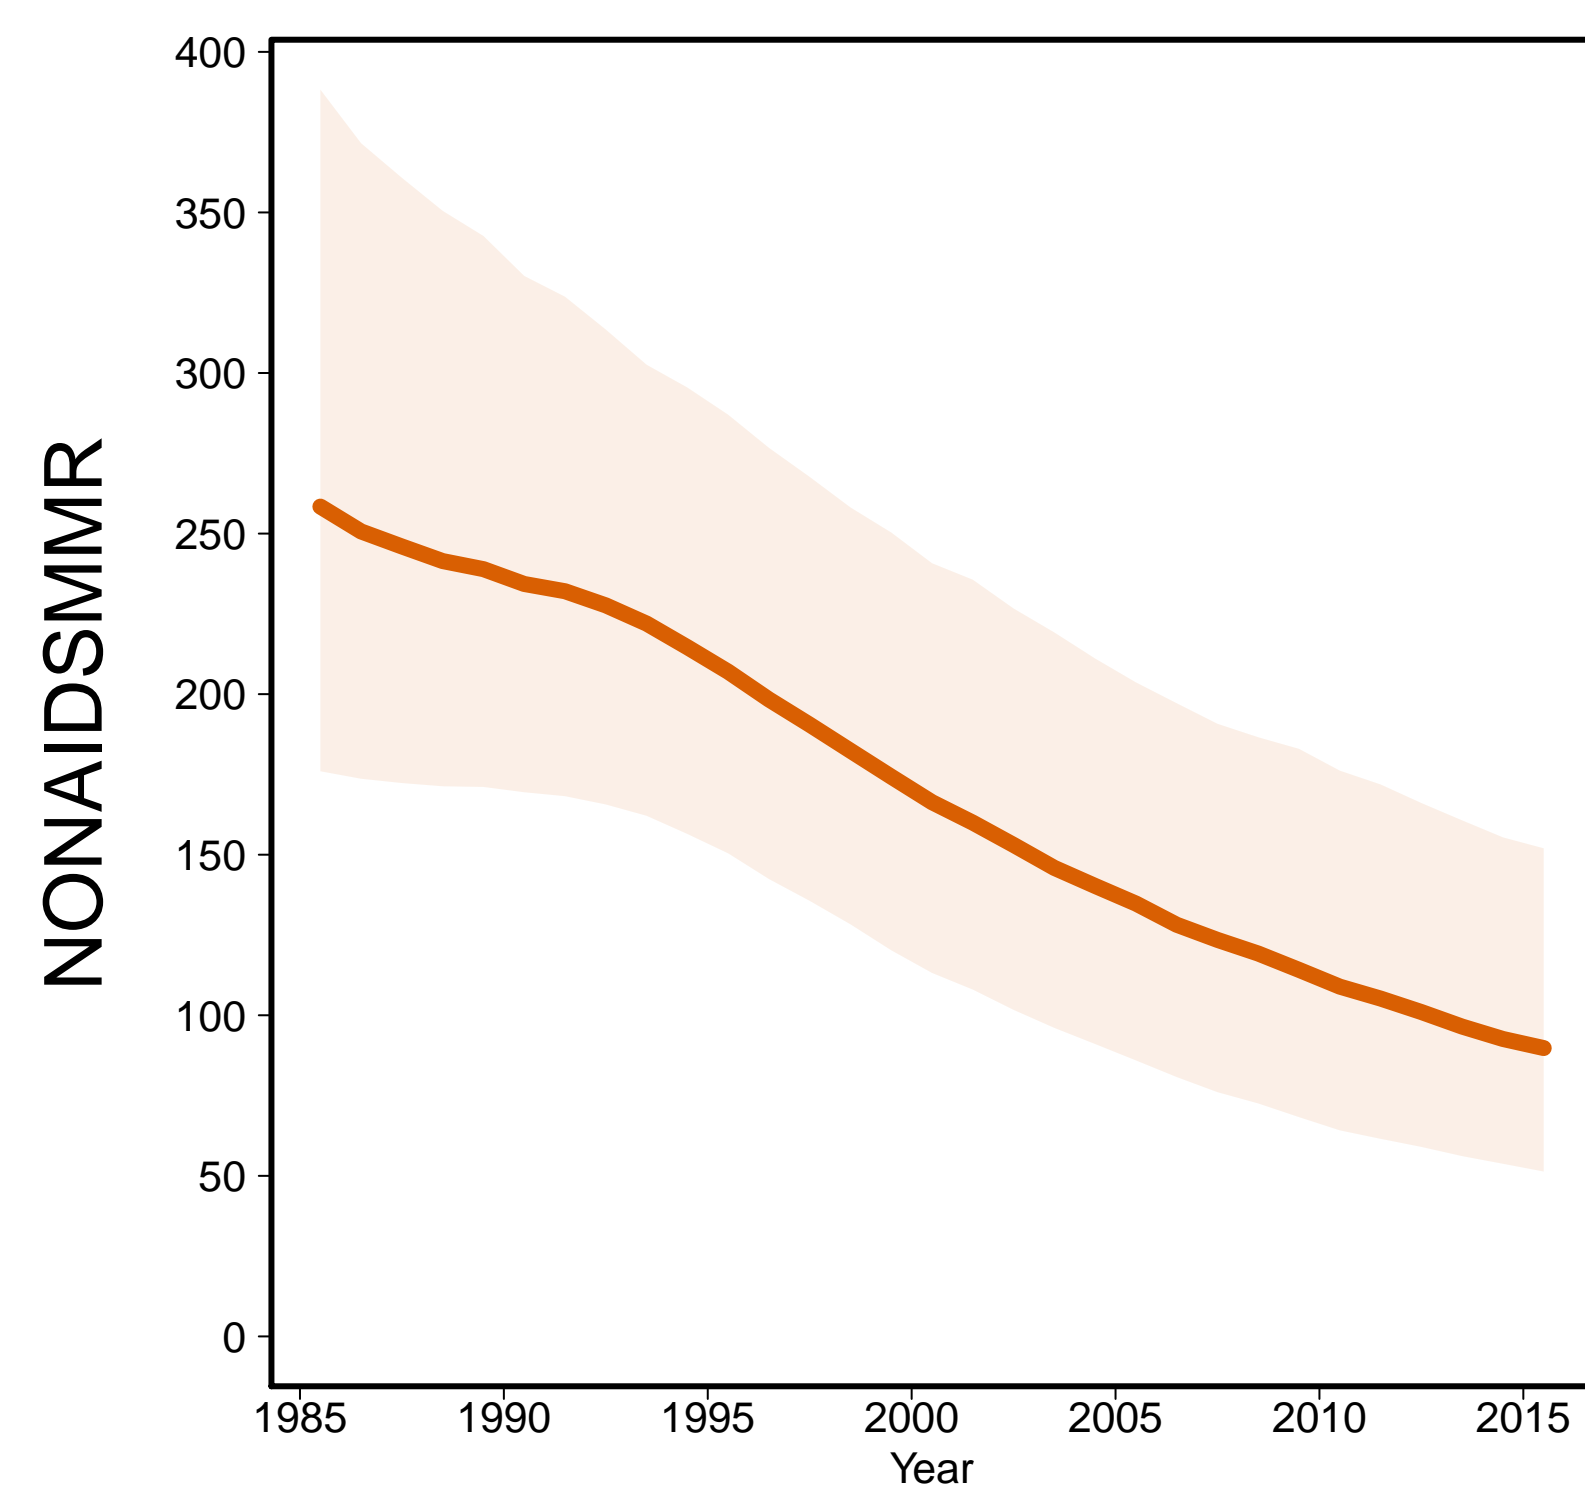

Aids MMR



Kuwait [KWT]  
(Western Asia)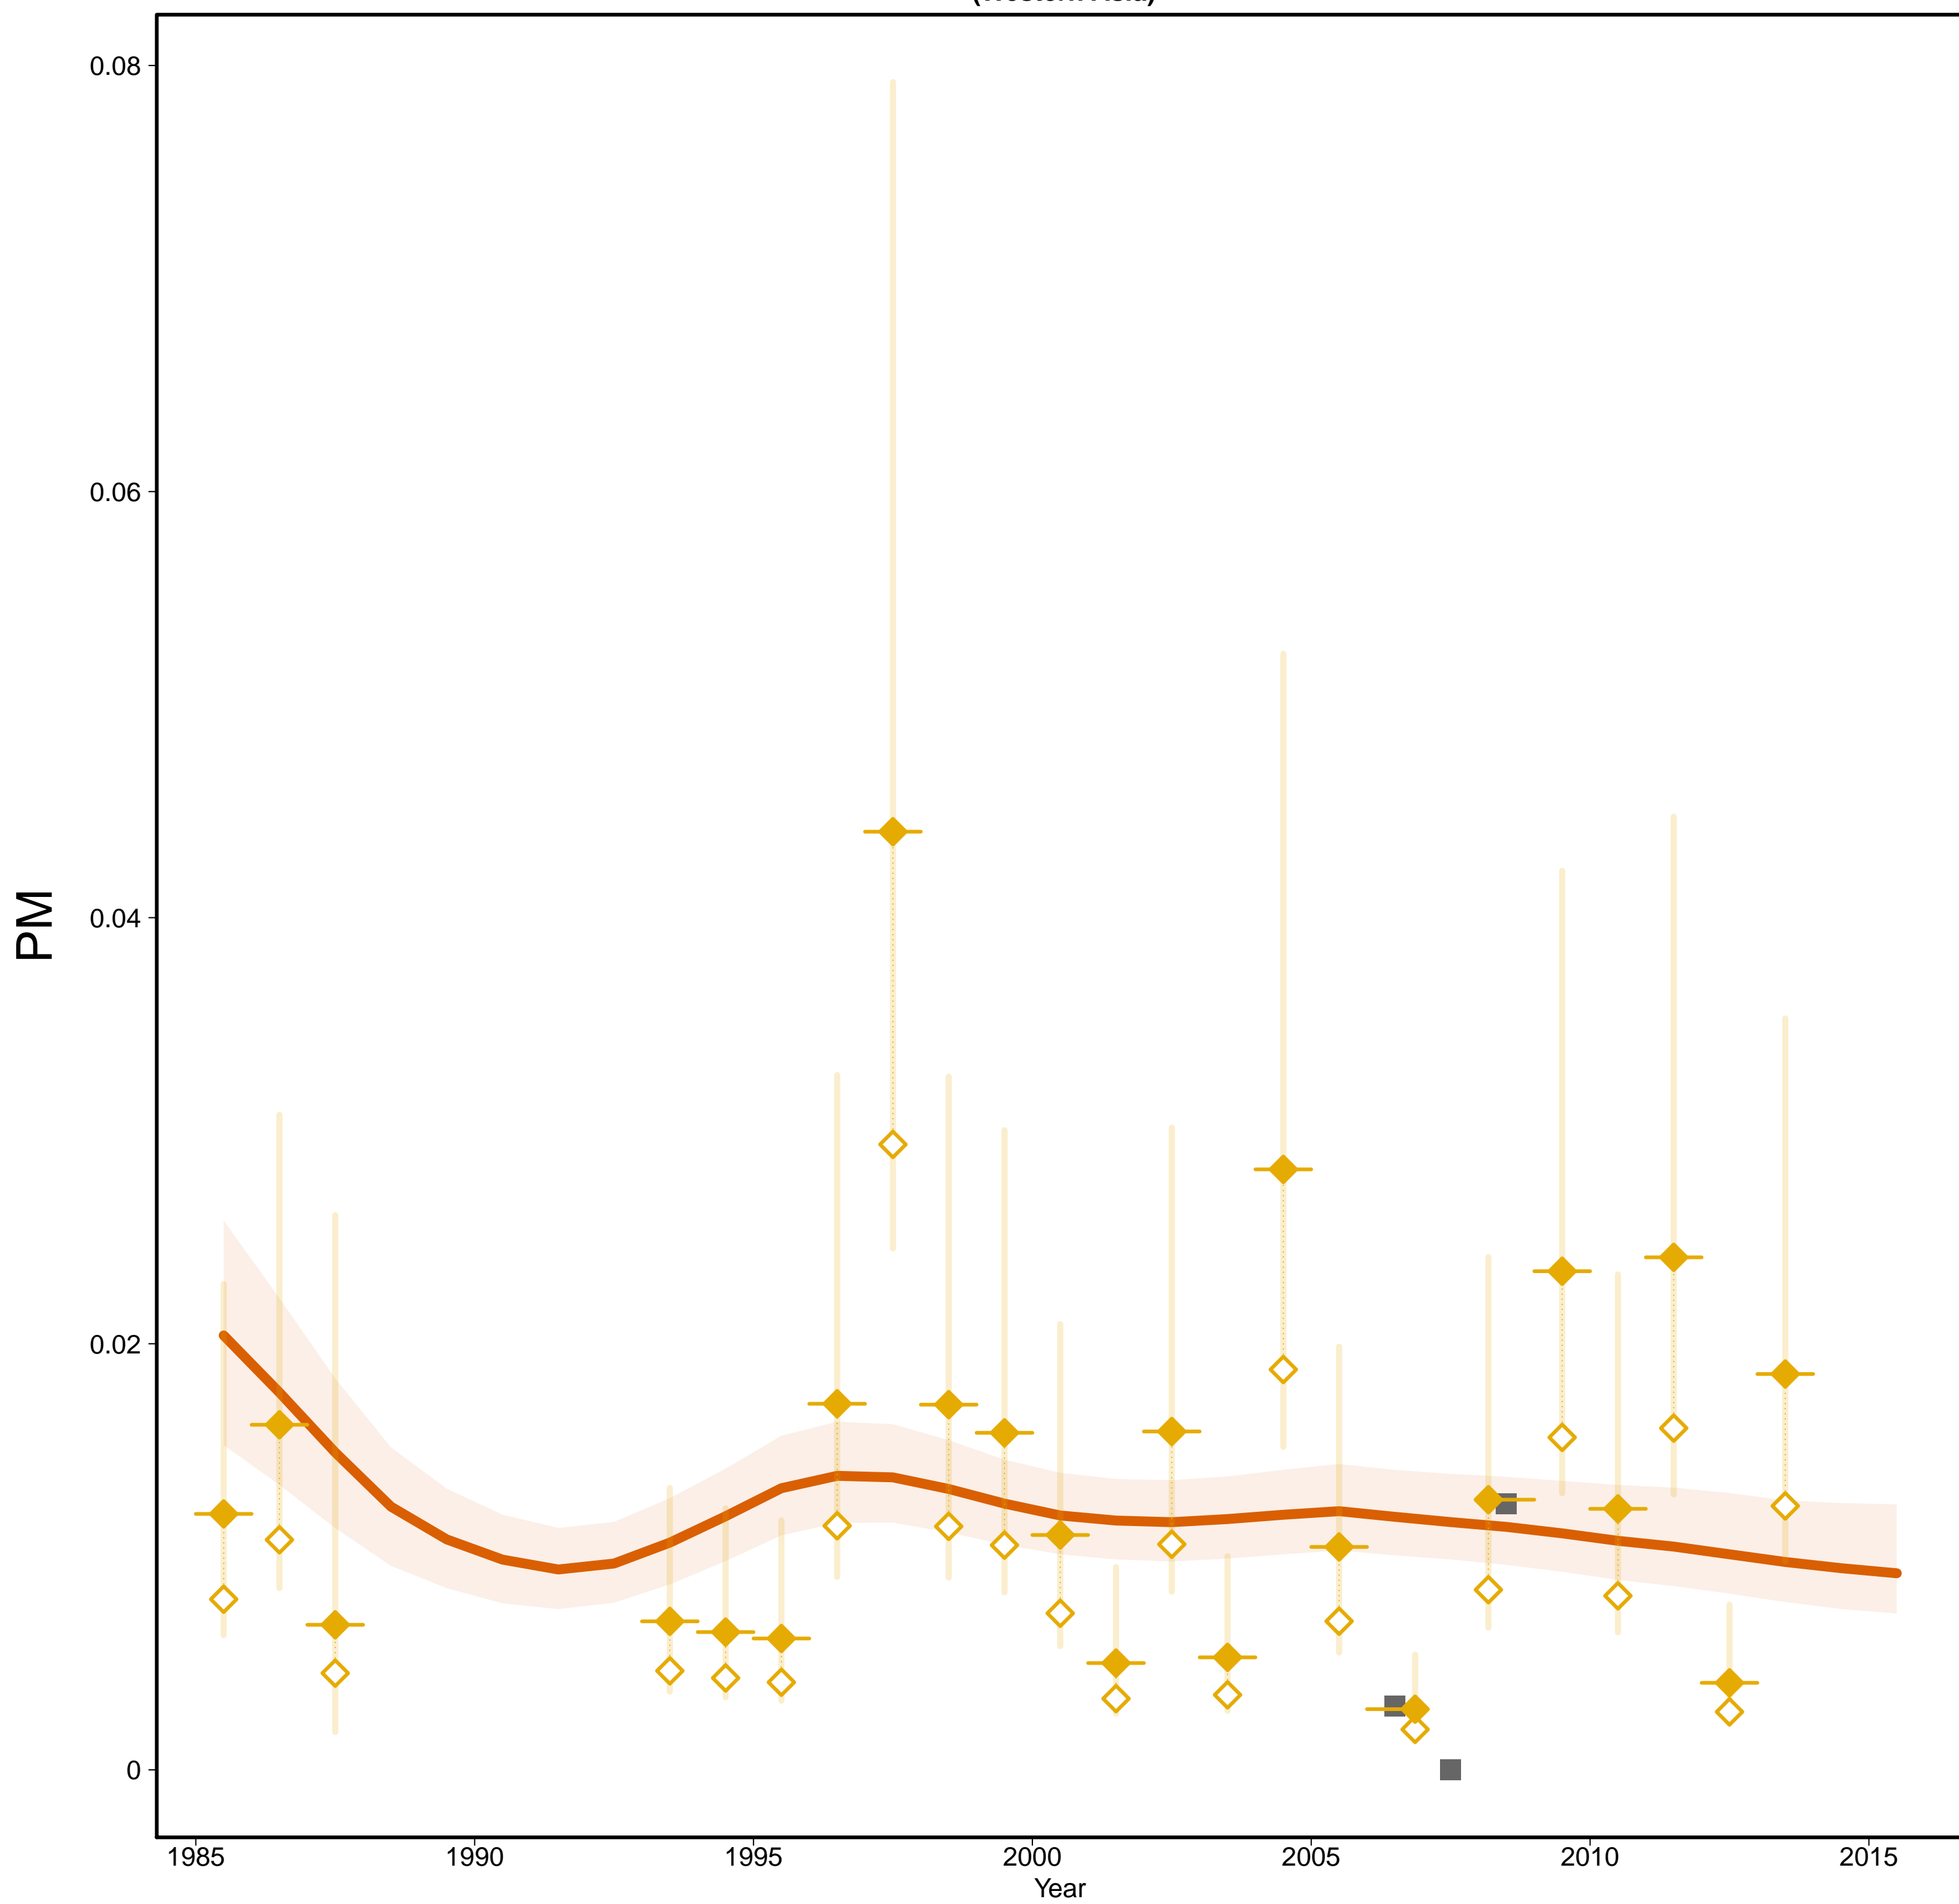Kuwait [KWT]  
(Western Asia)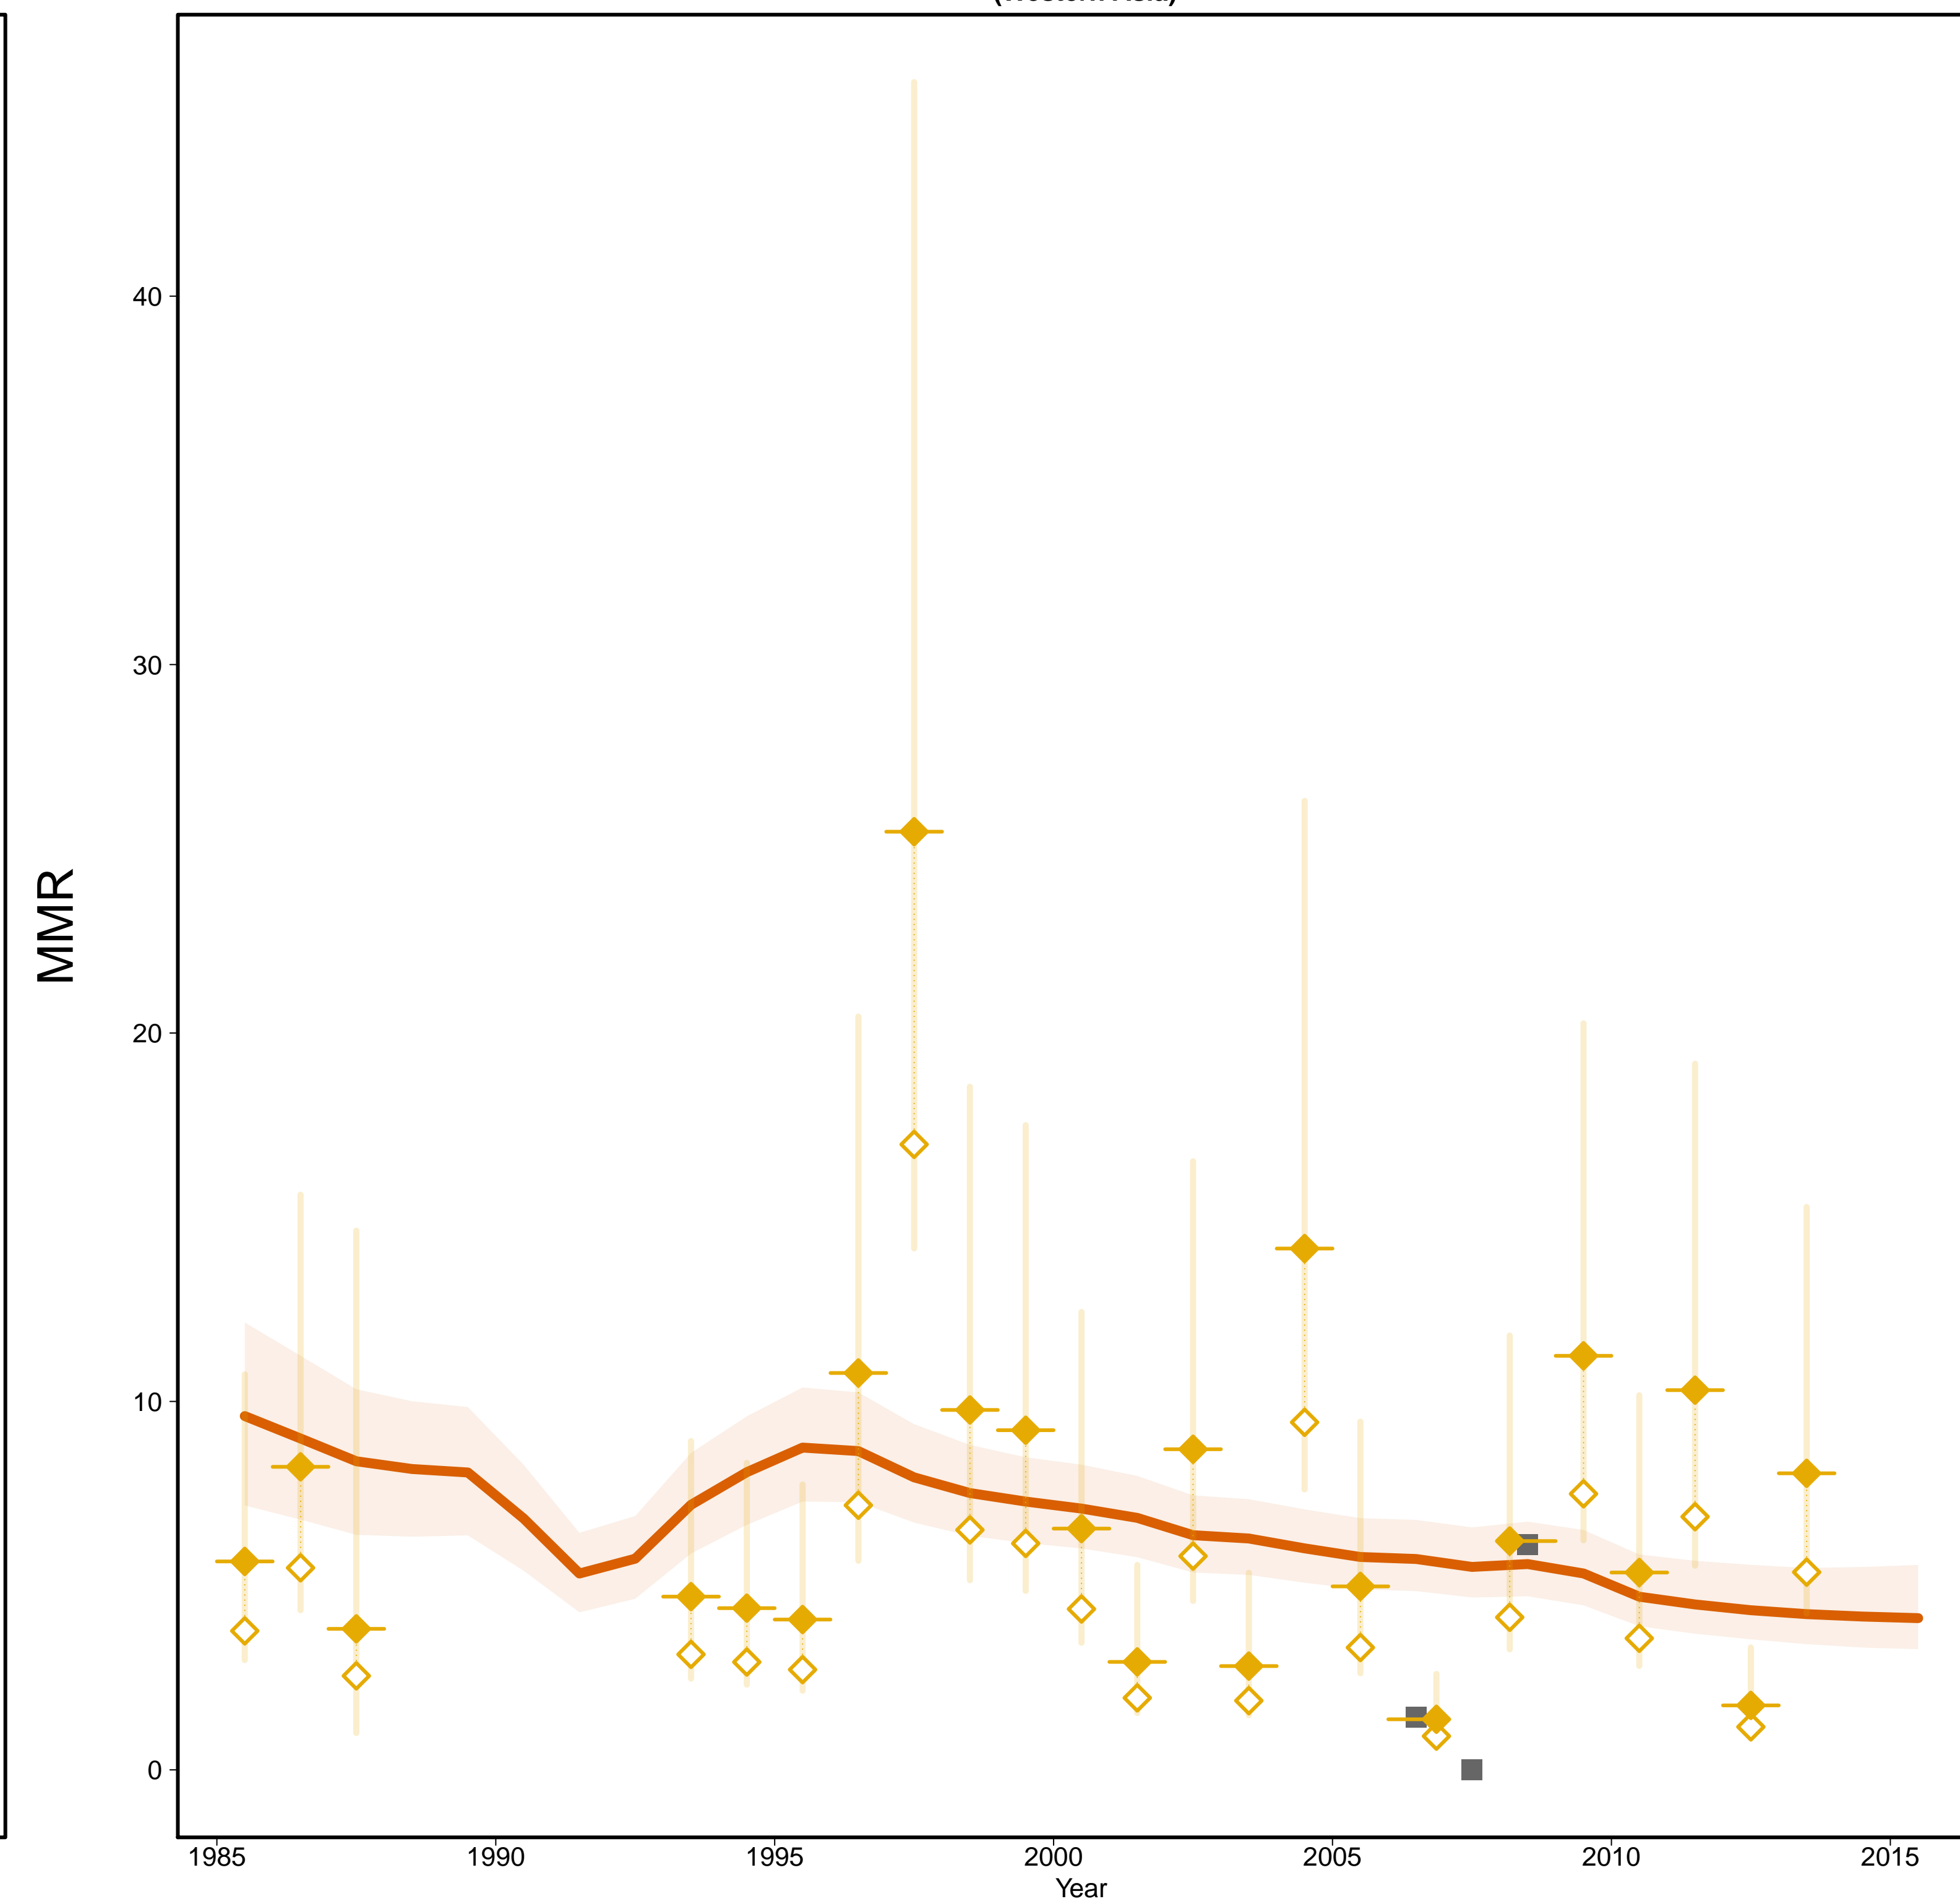

- Estimates –
- Mlate
- MMR Database 2015 –
- ◇ Observed Data
- ◆ Adjusted Data
- Data type –
- ◆ VR
- Reported VR before recalc.  
(related to 0 obs. mat. death)

Gross Domestic Product

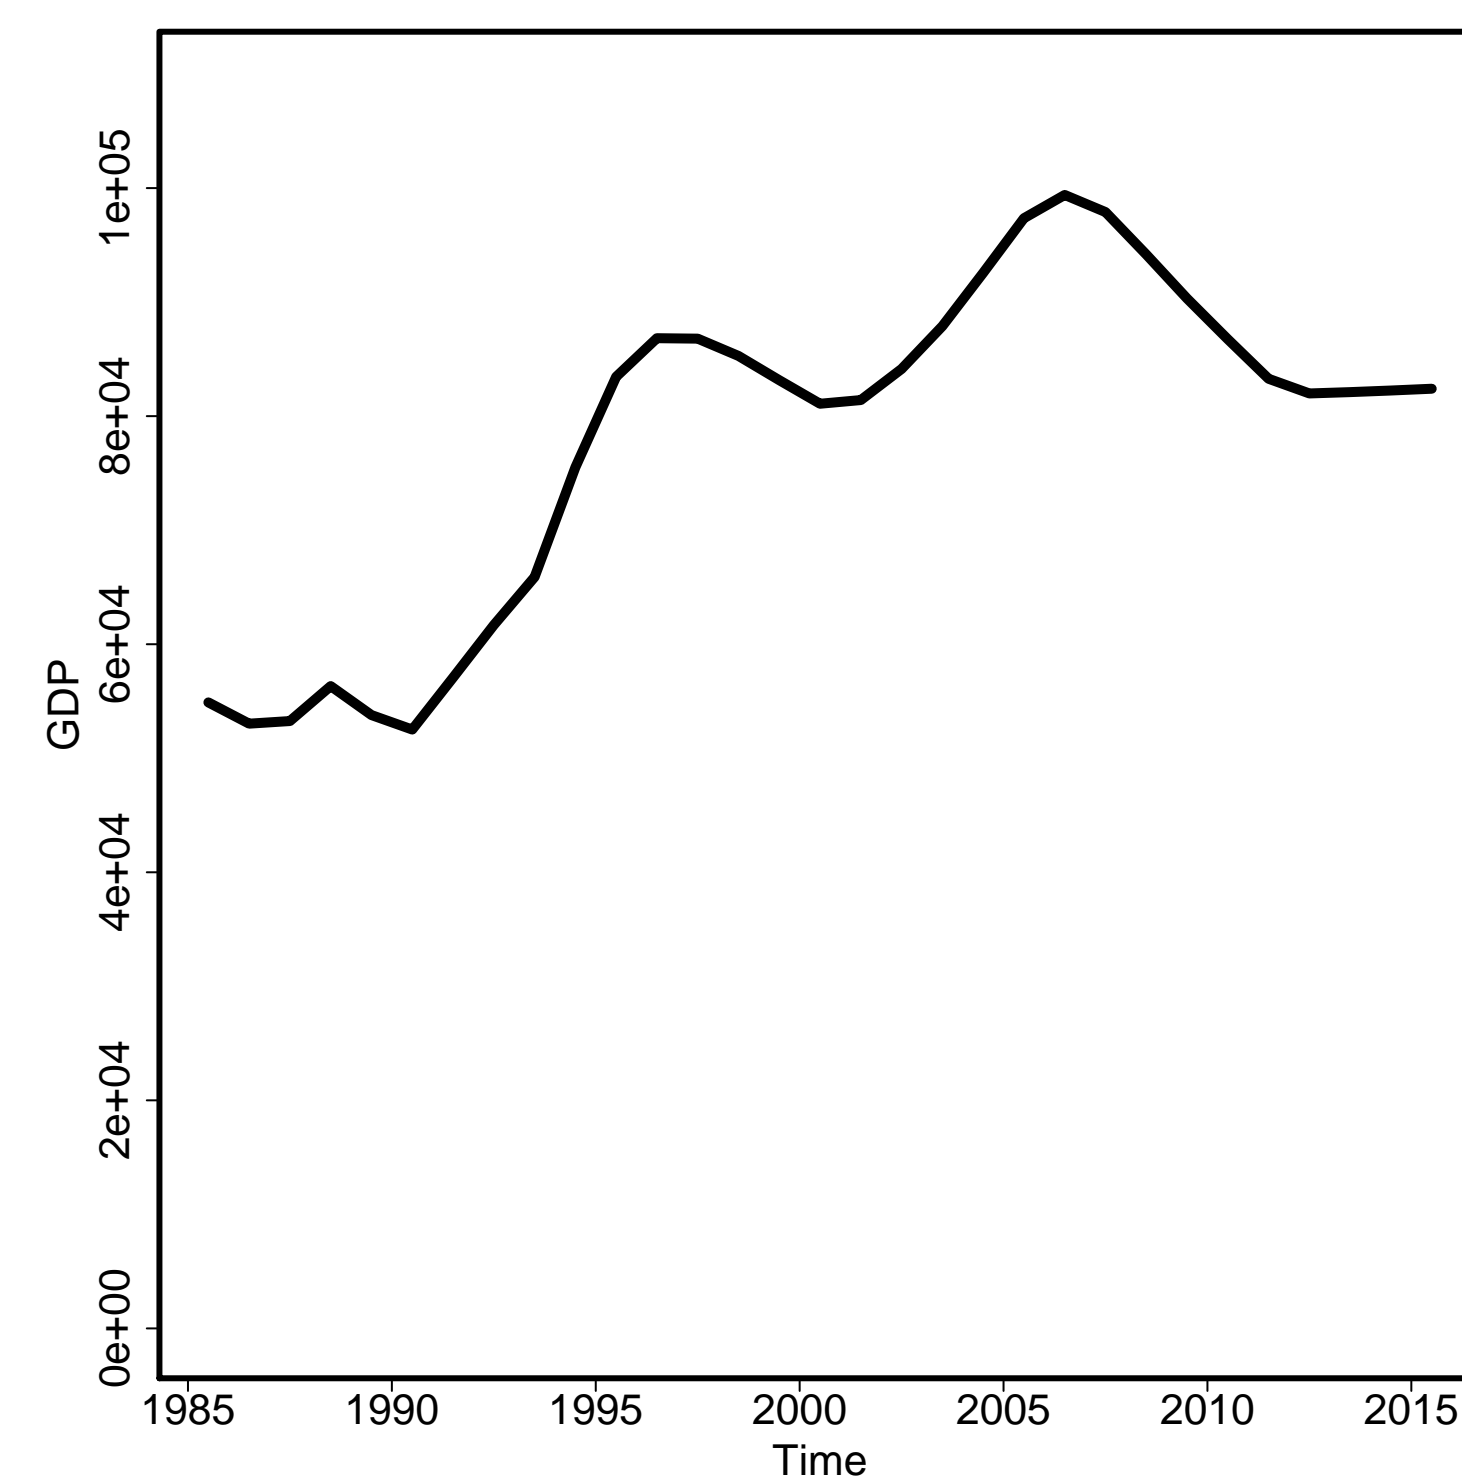

General Fertility Rate

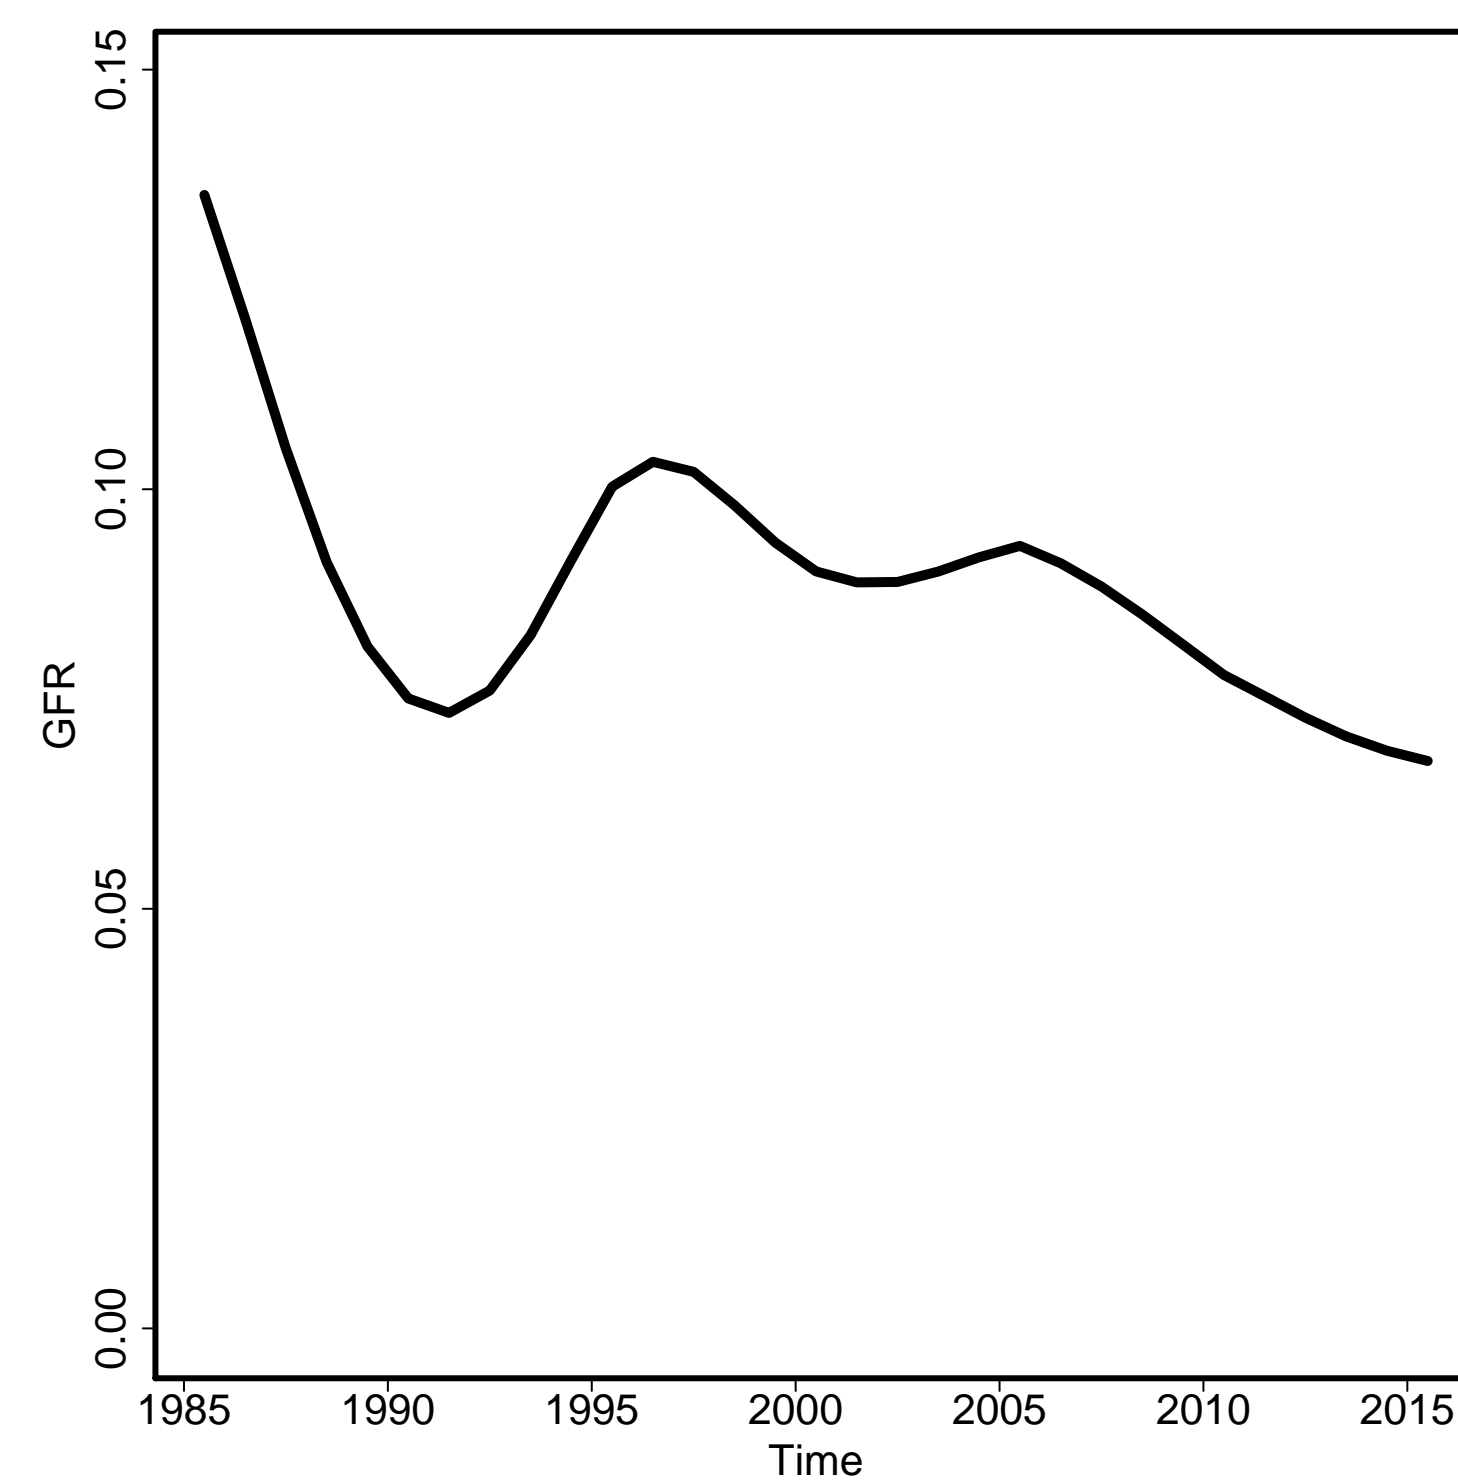

Skilled Attendance to Birth

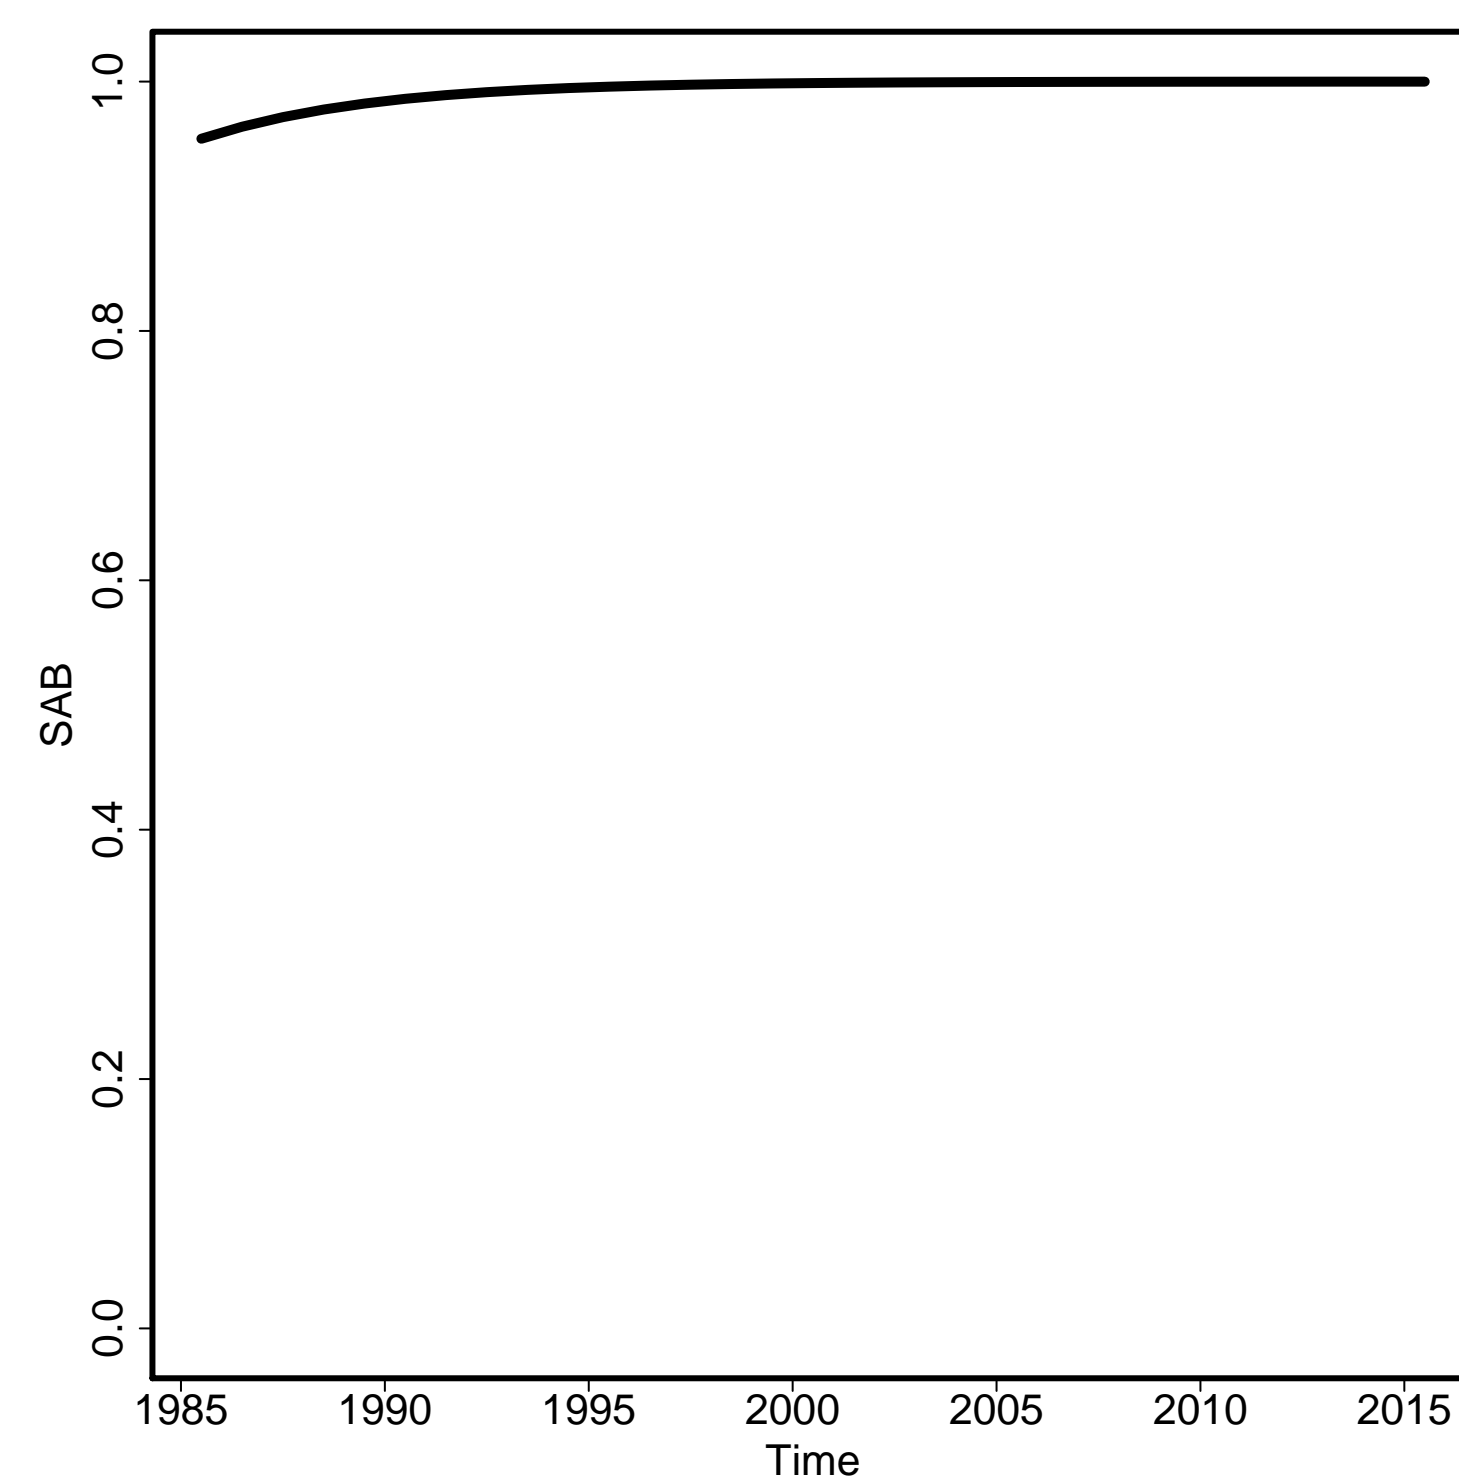

Envelope/Births

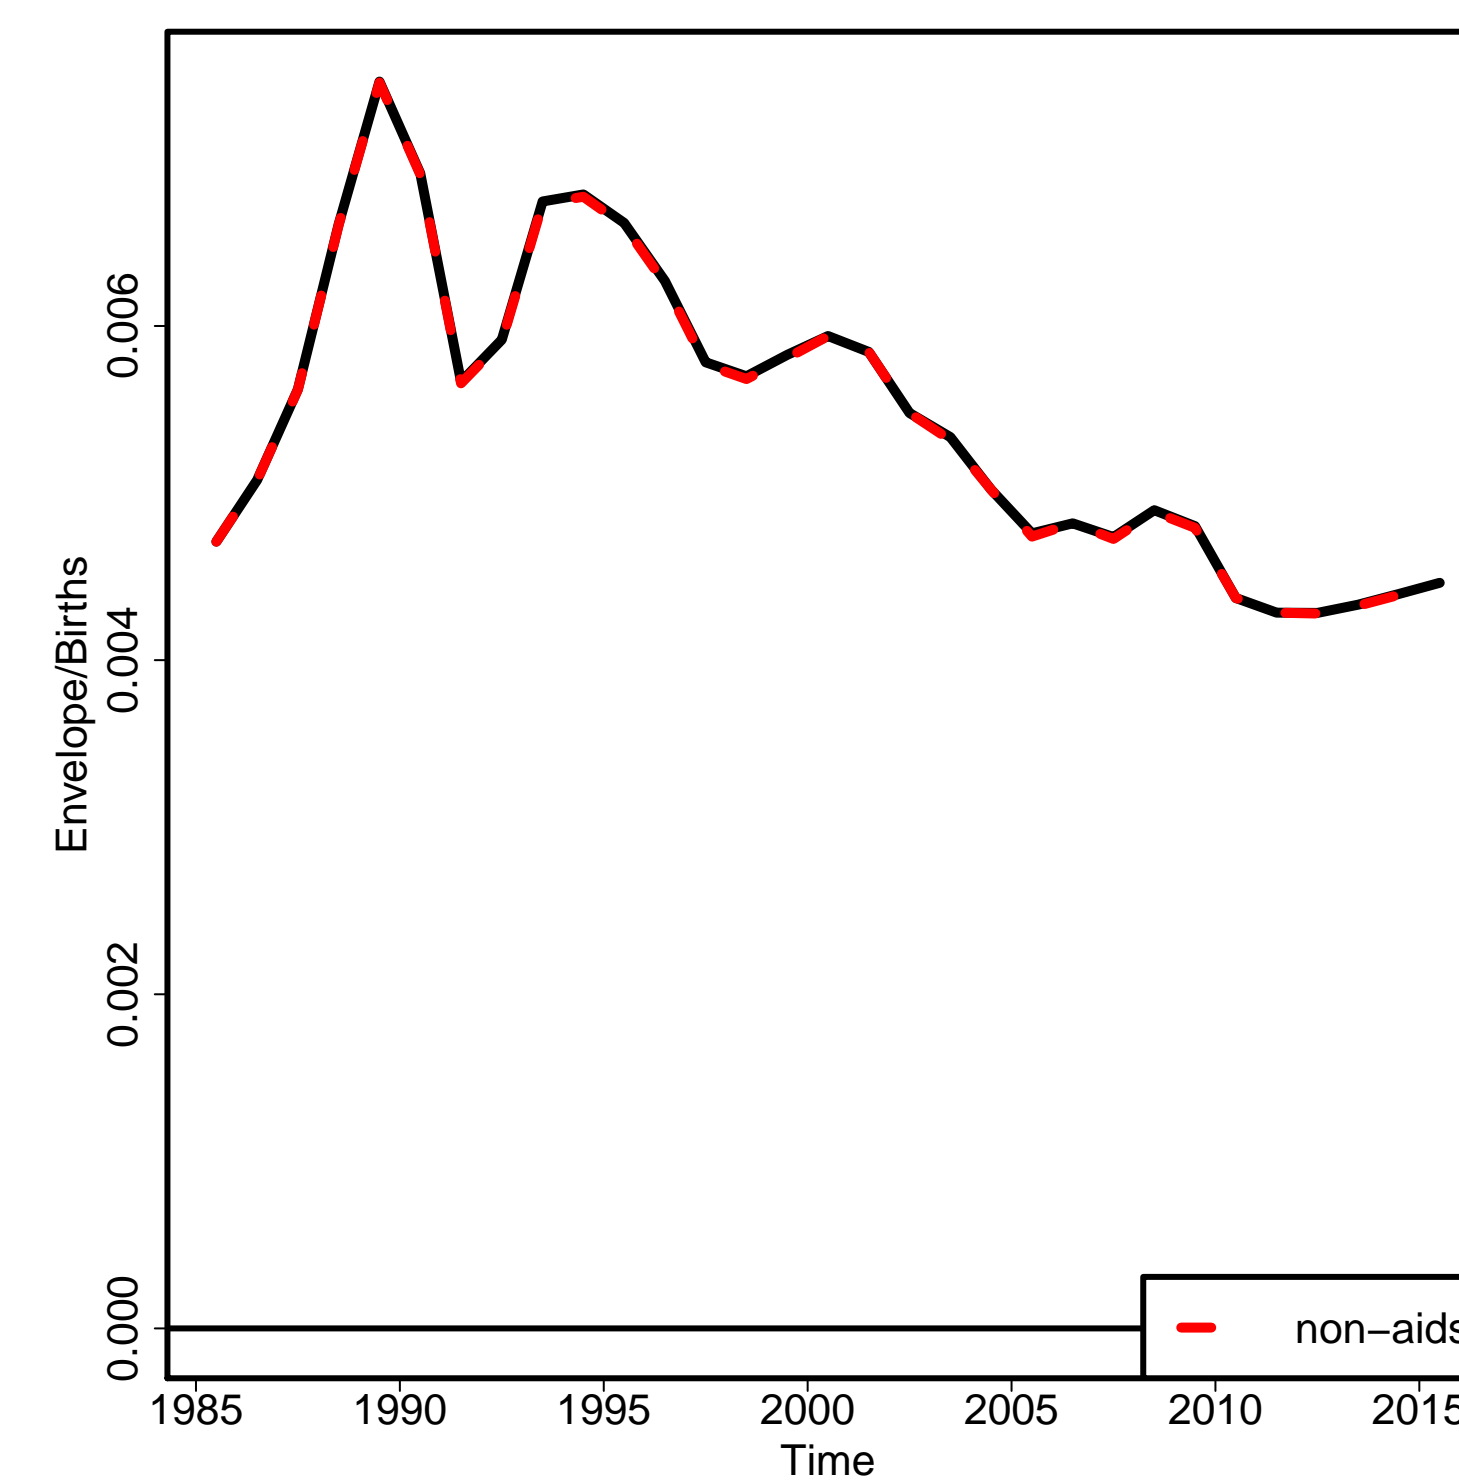

Non-aids MMR

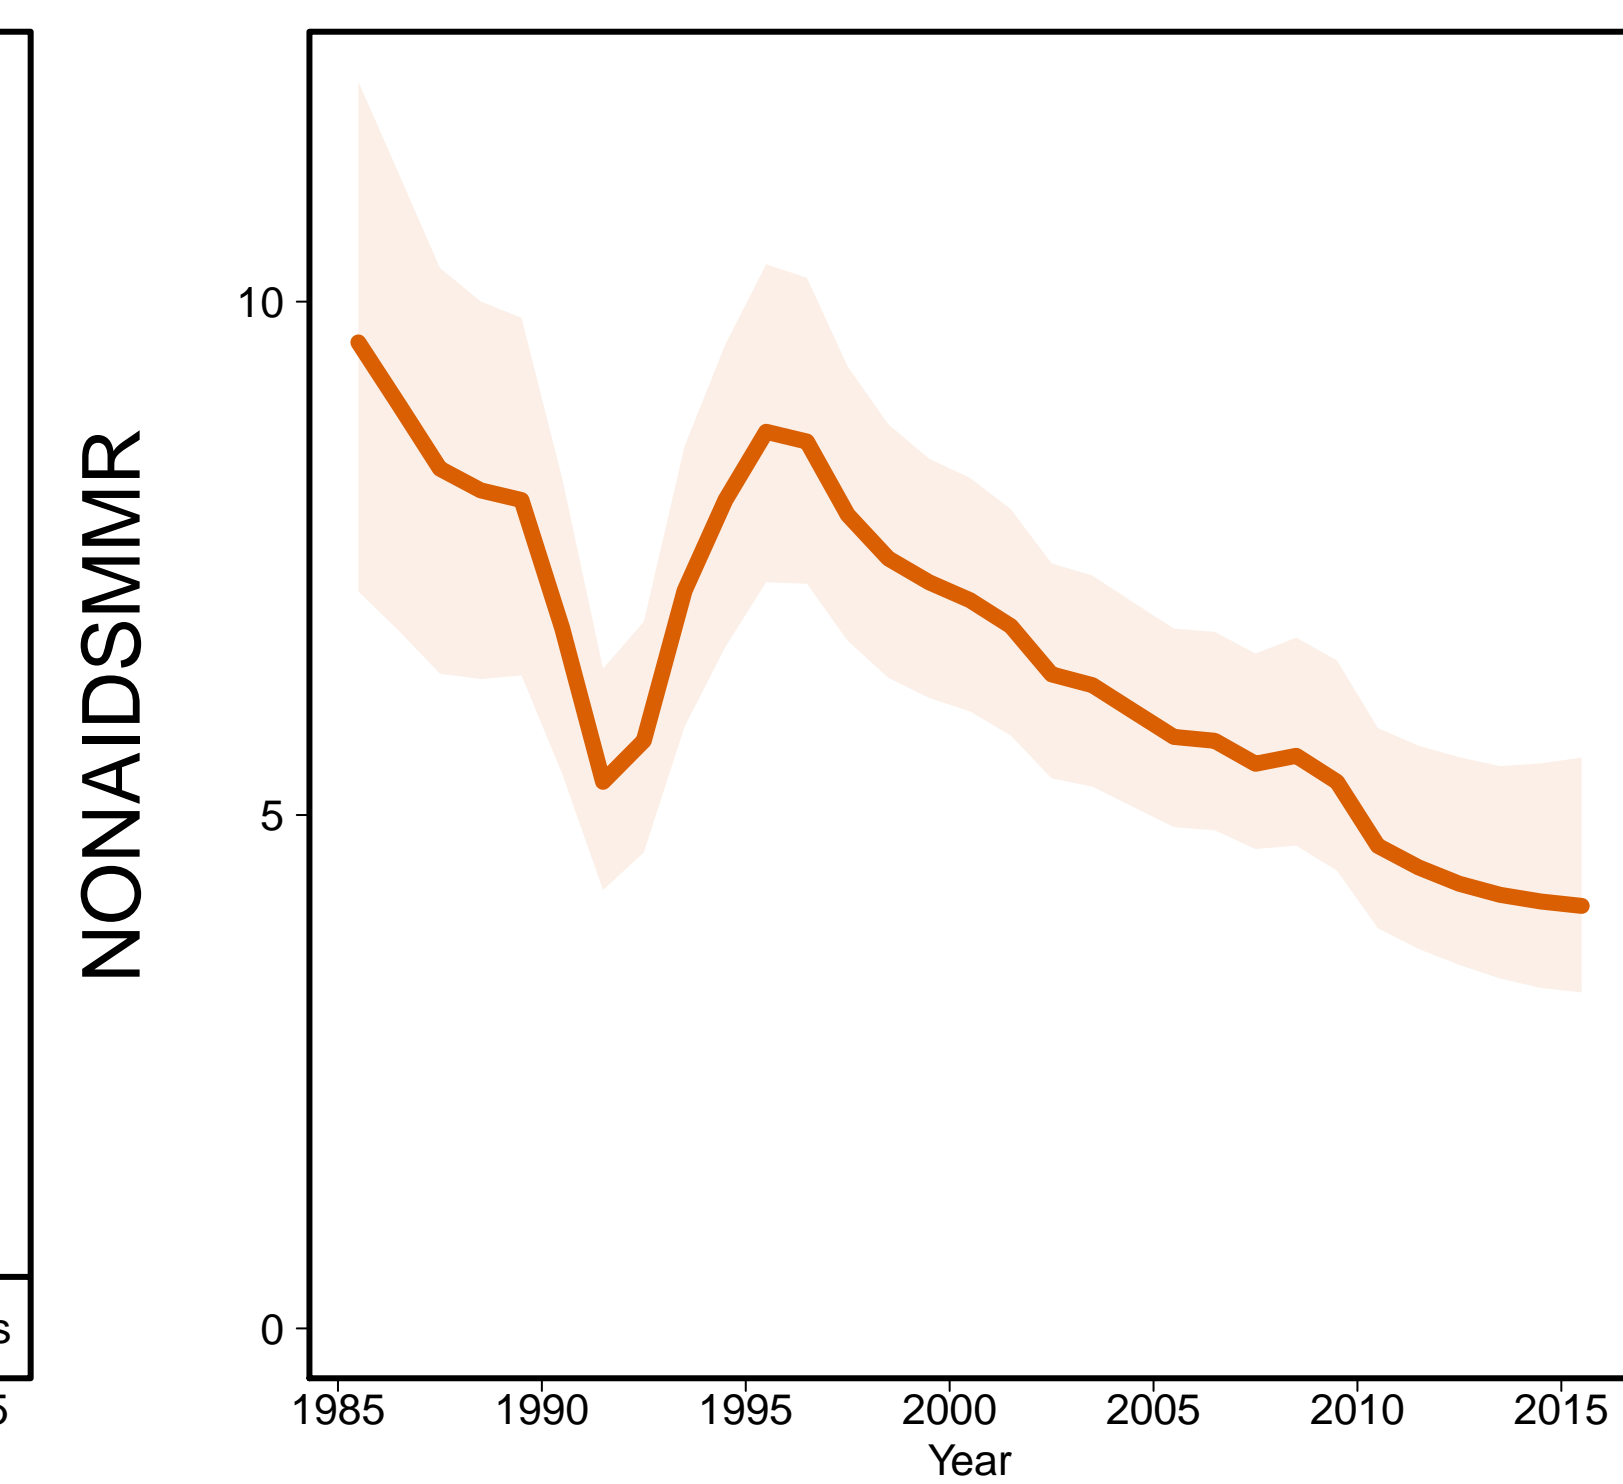

Aids MMR

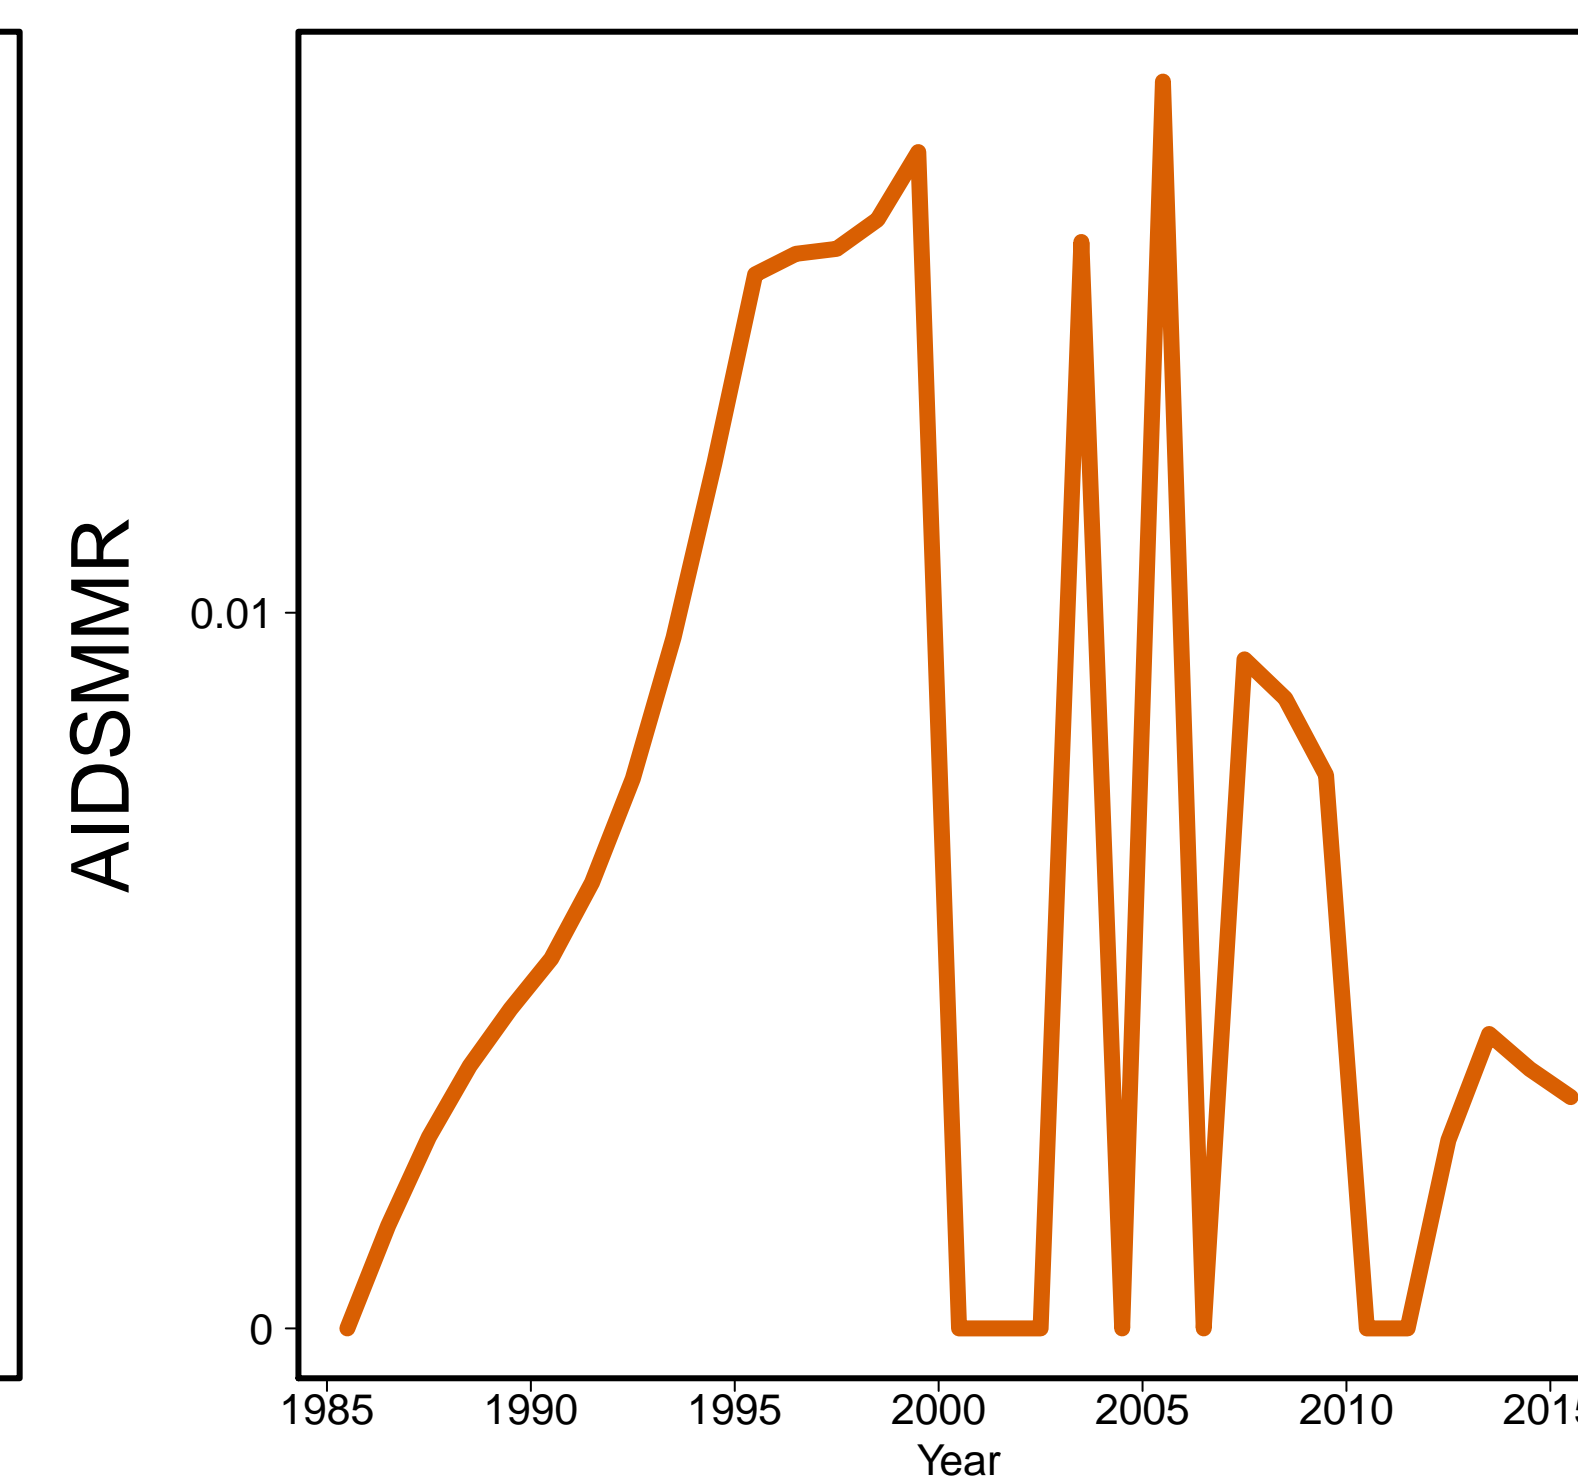

Kyrgyzstan [KGZ]  
(Central Asia)

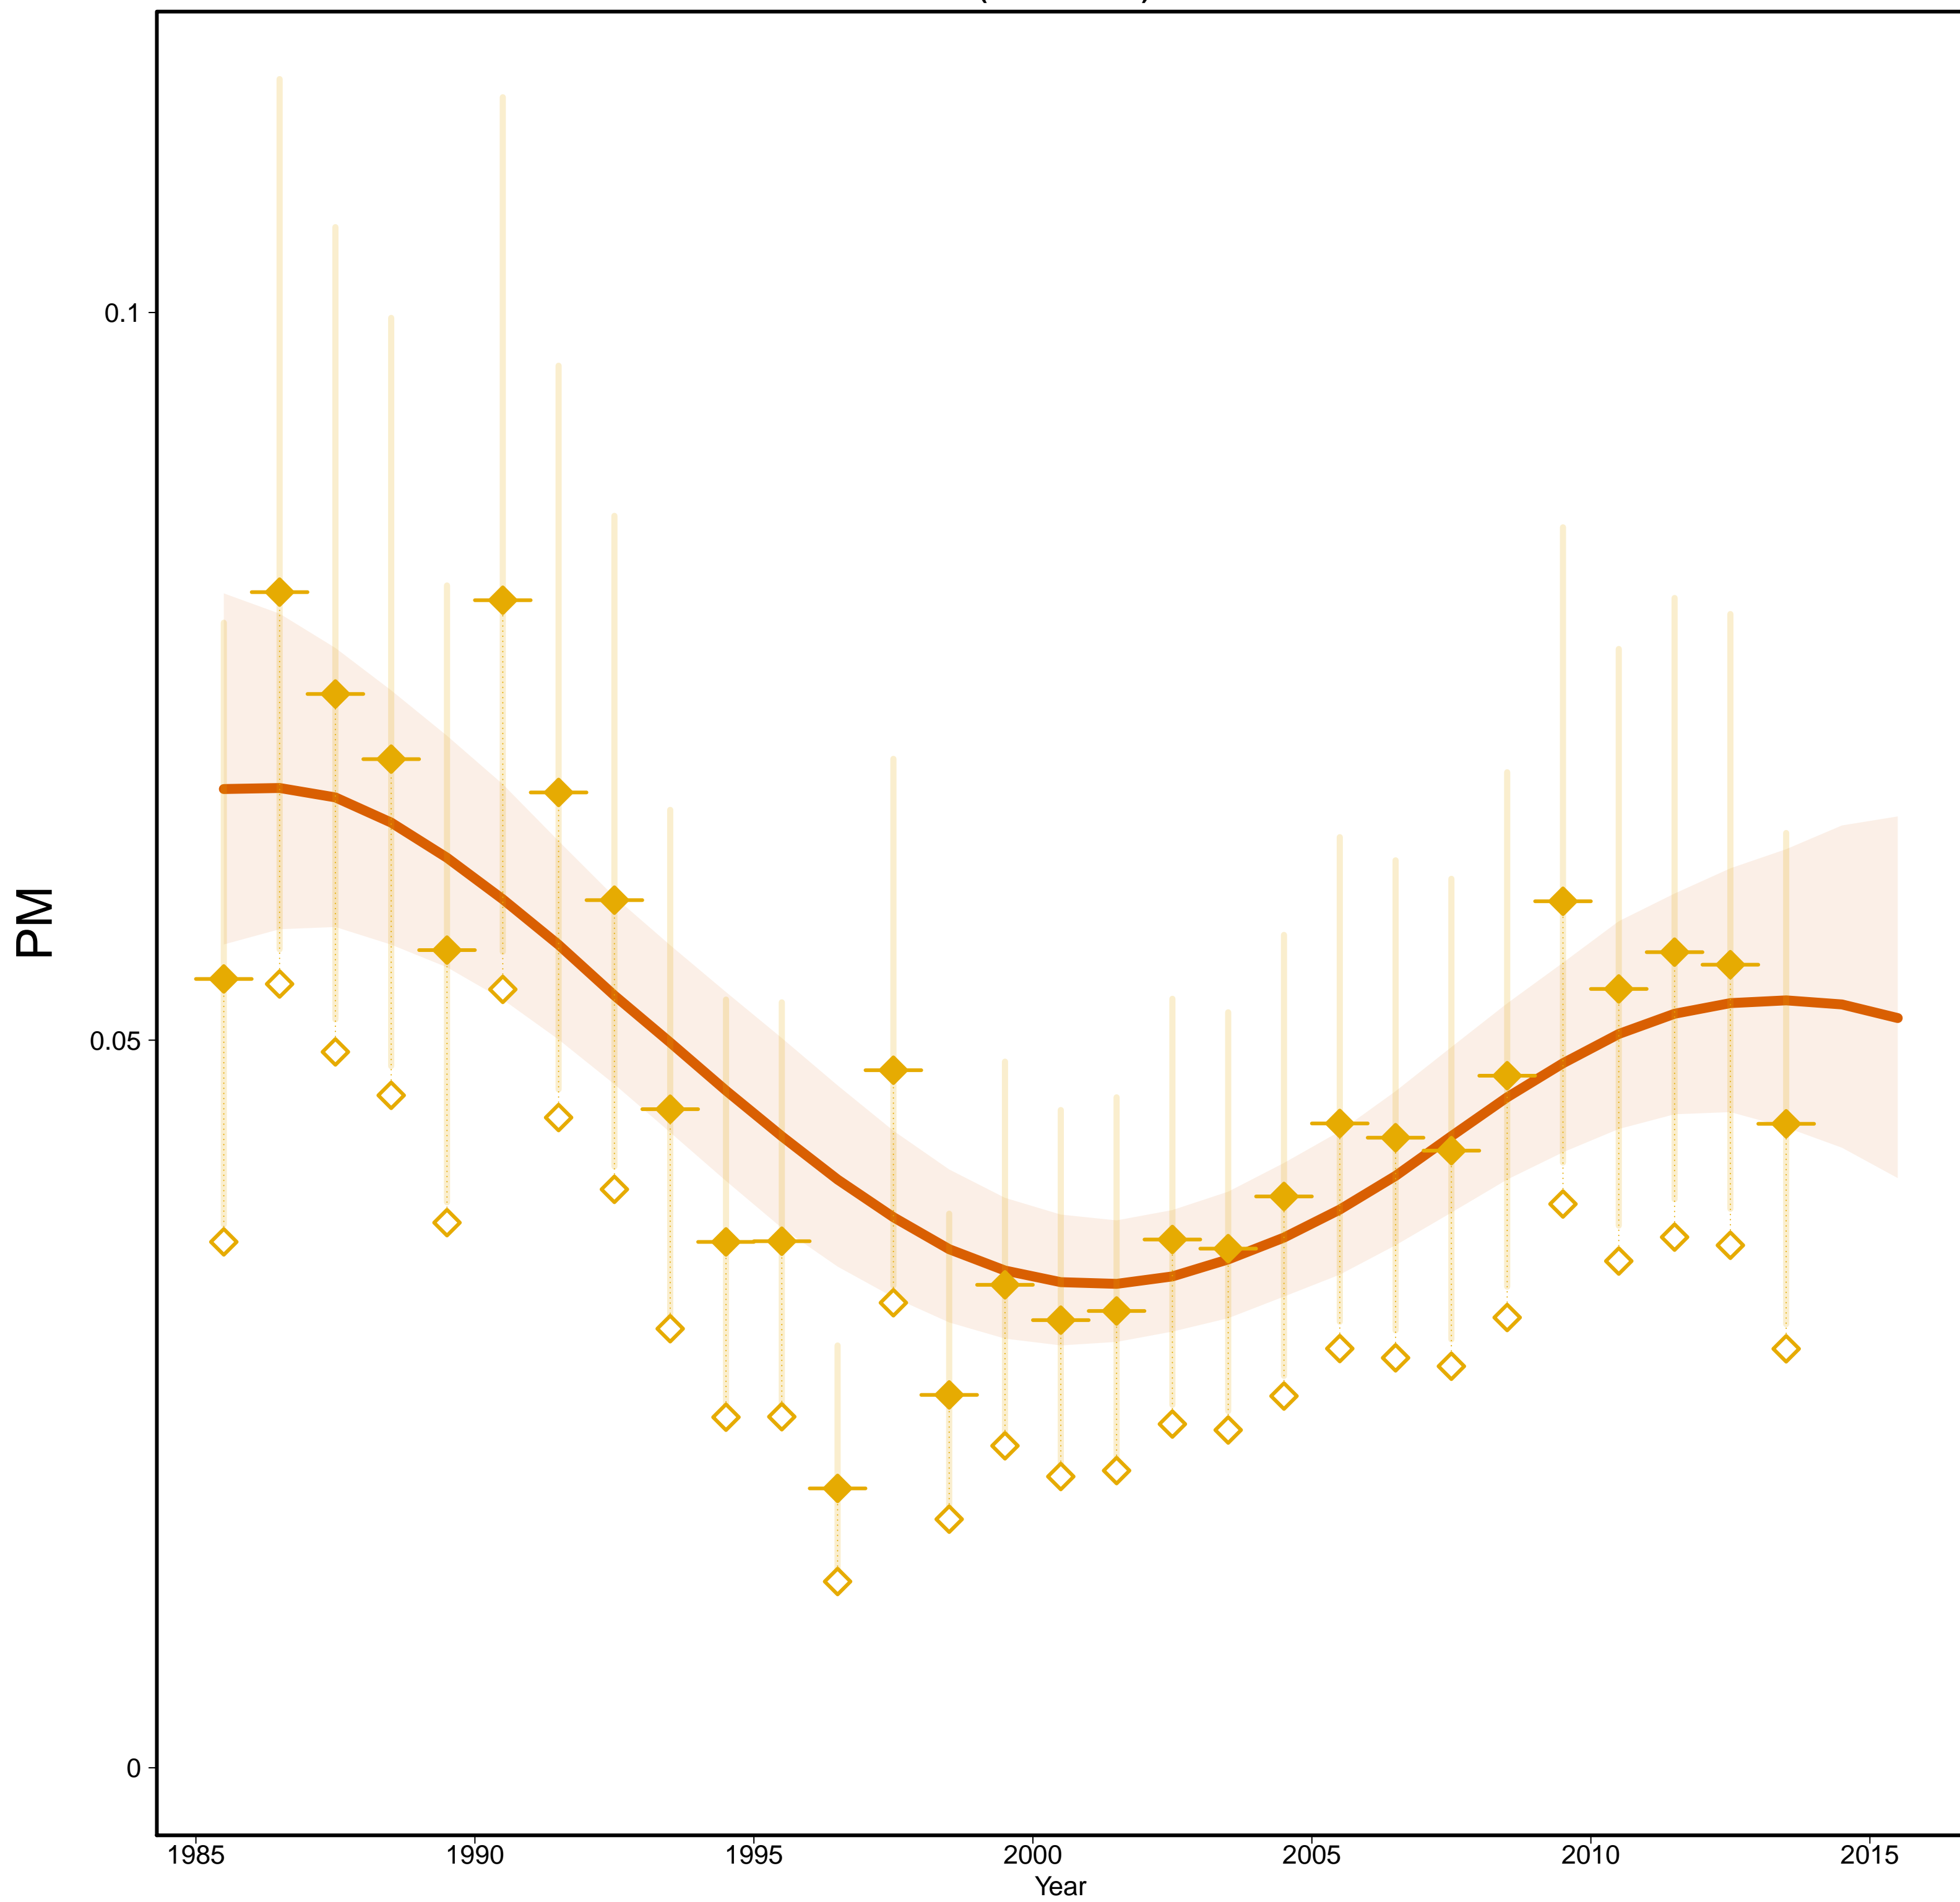

Kyrgyzstan [KGZ]  
(Central Asia)

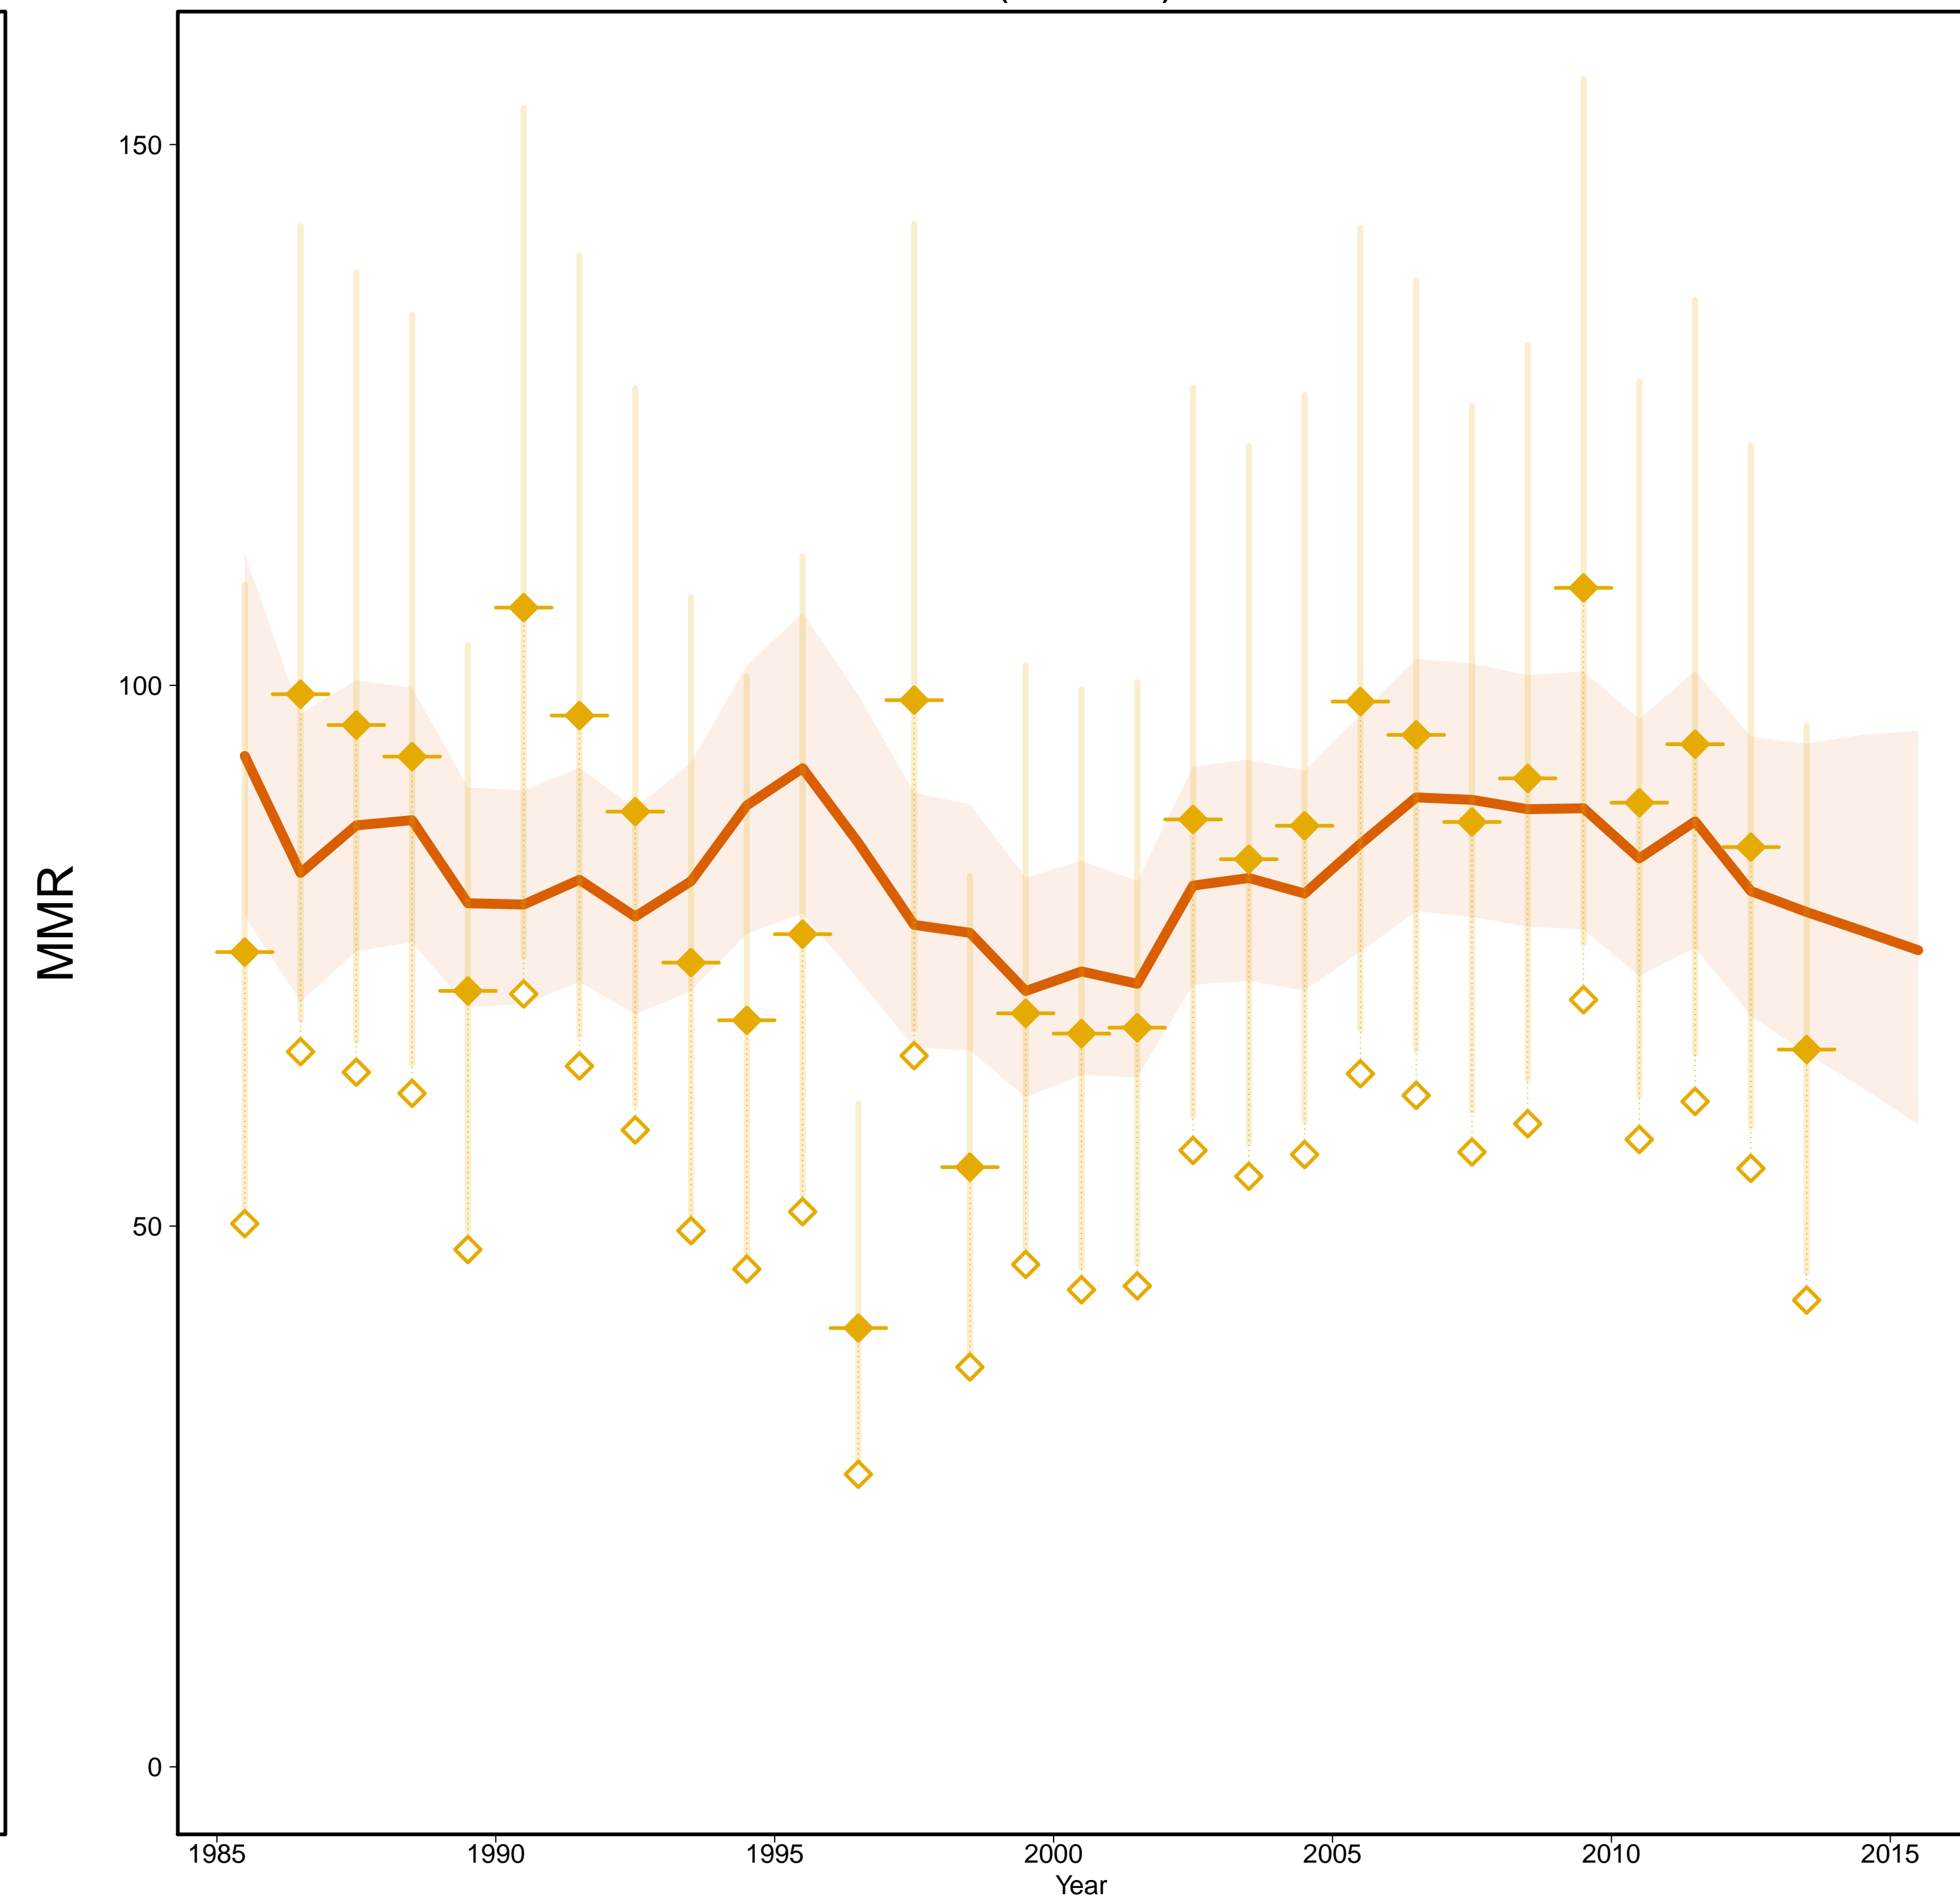

- Estimates —
- MMR Database 2015 —
- ◇ Observed Data
- ◆ Adjusted Data
- Data type —
- ◆ VR

Gross Domestic Product

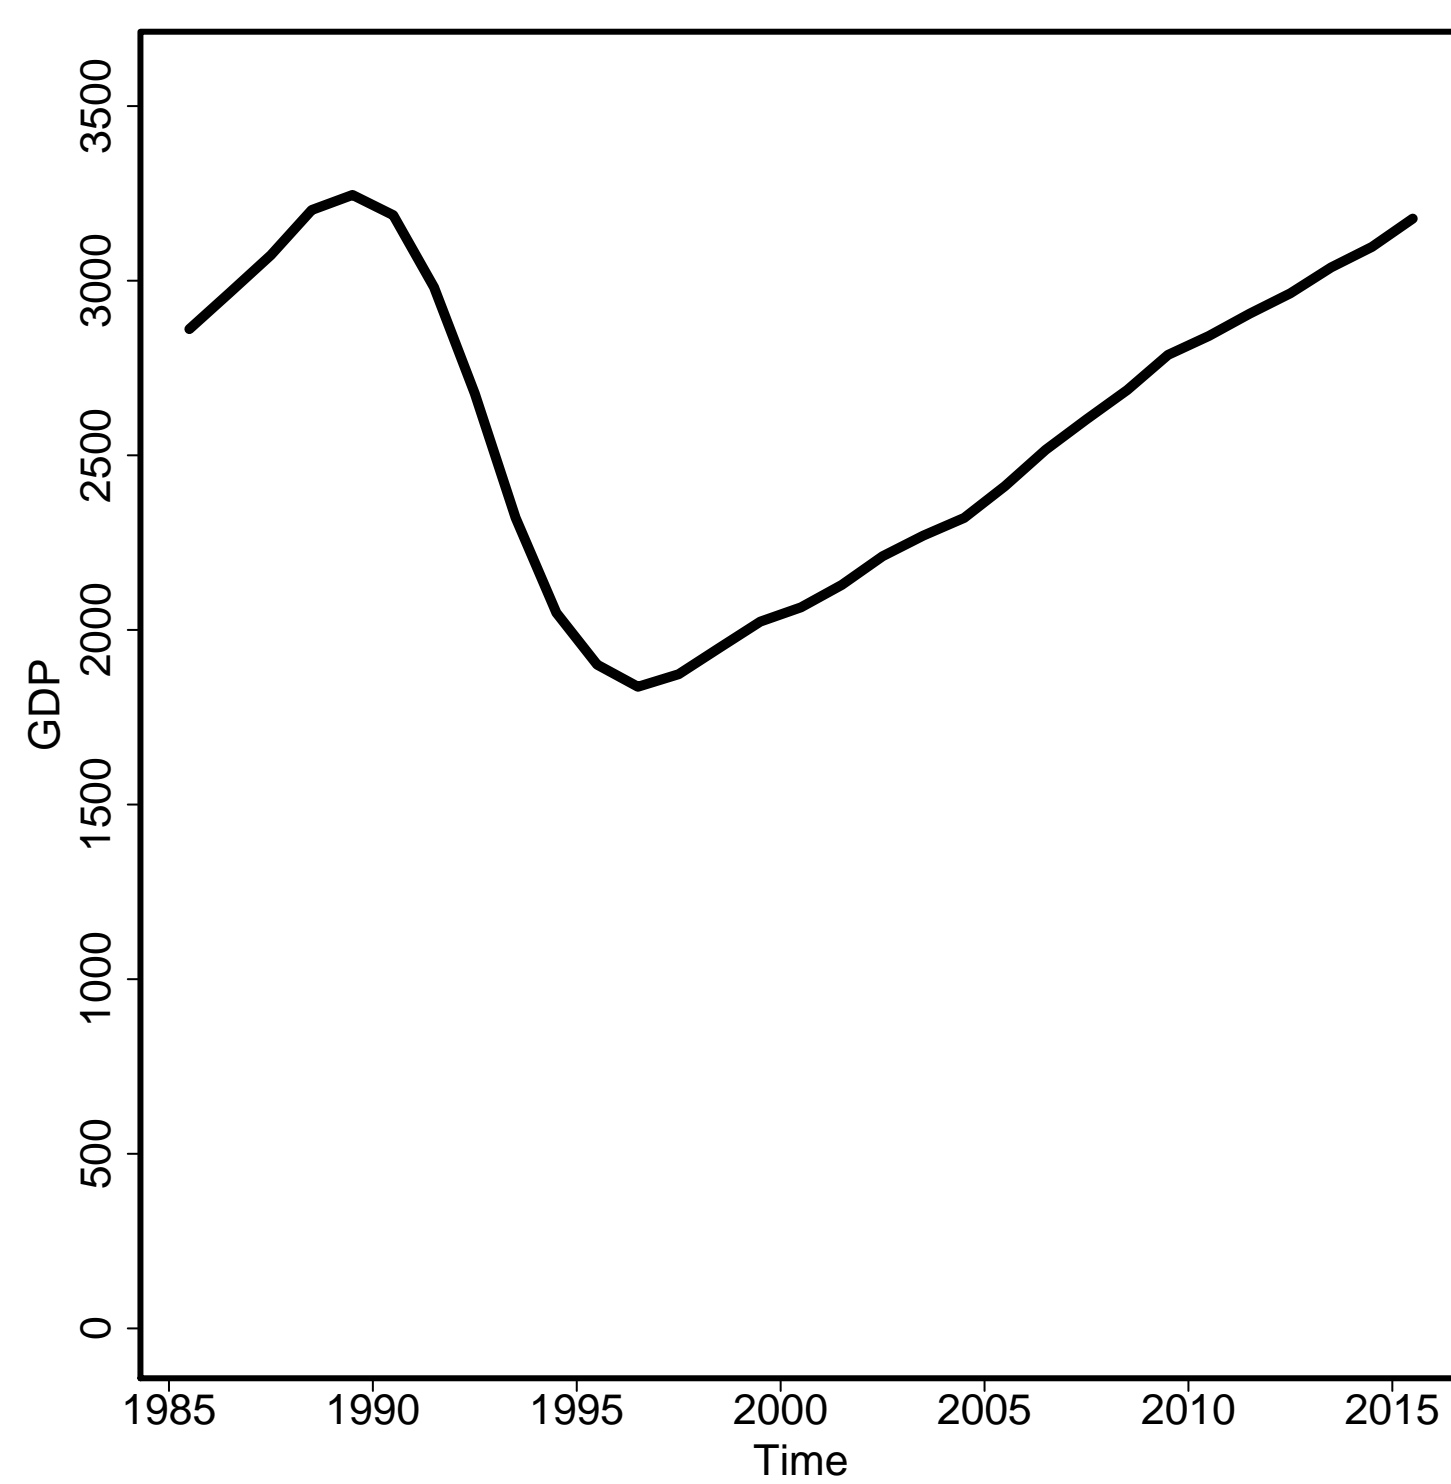

General Fertility Rate

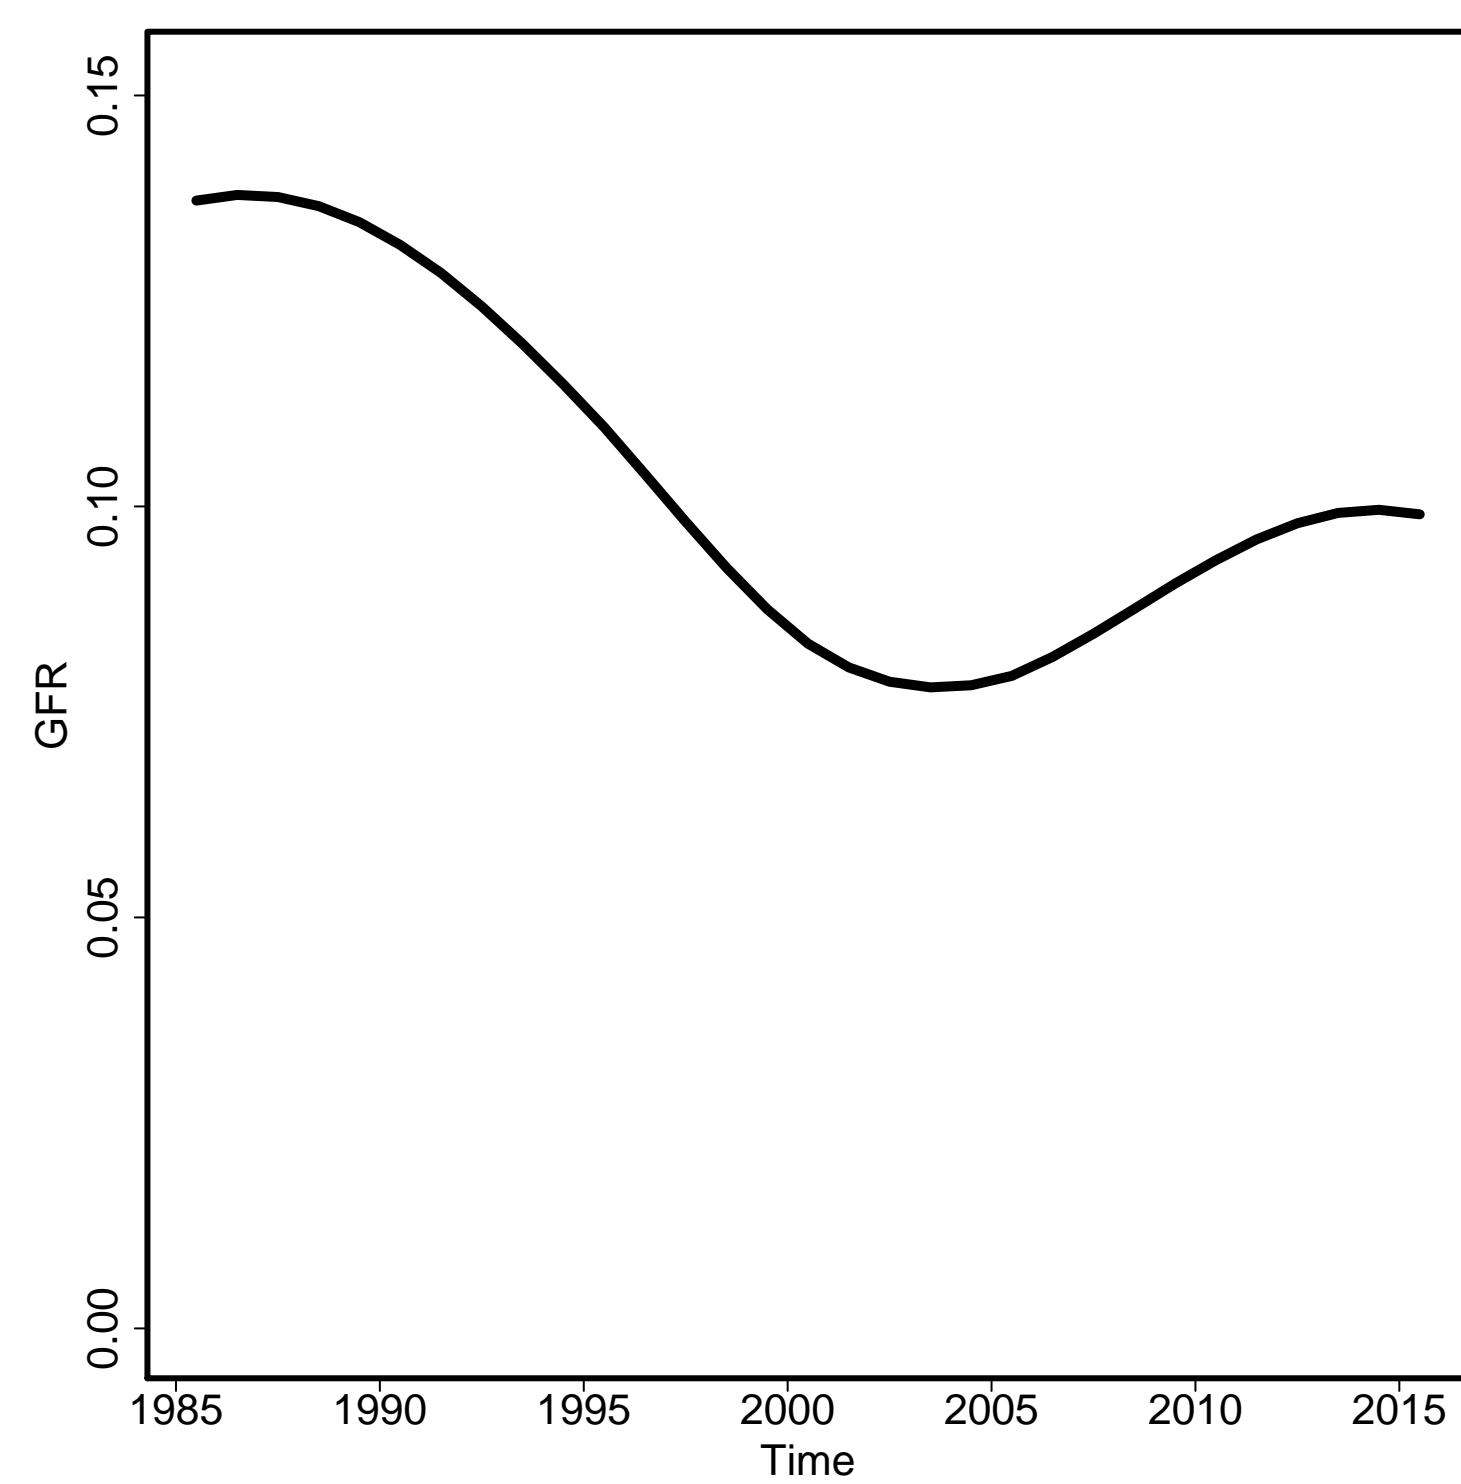

Skilled Attendance to Birth

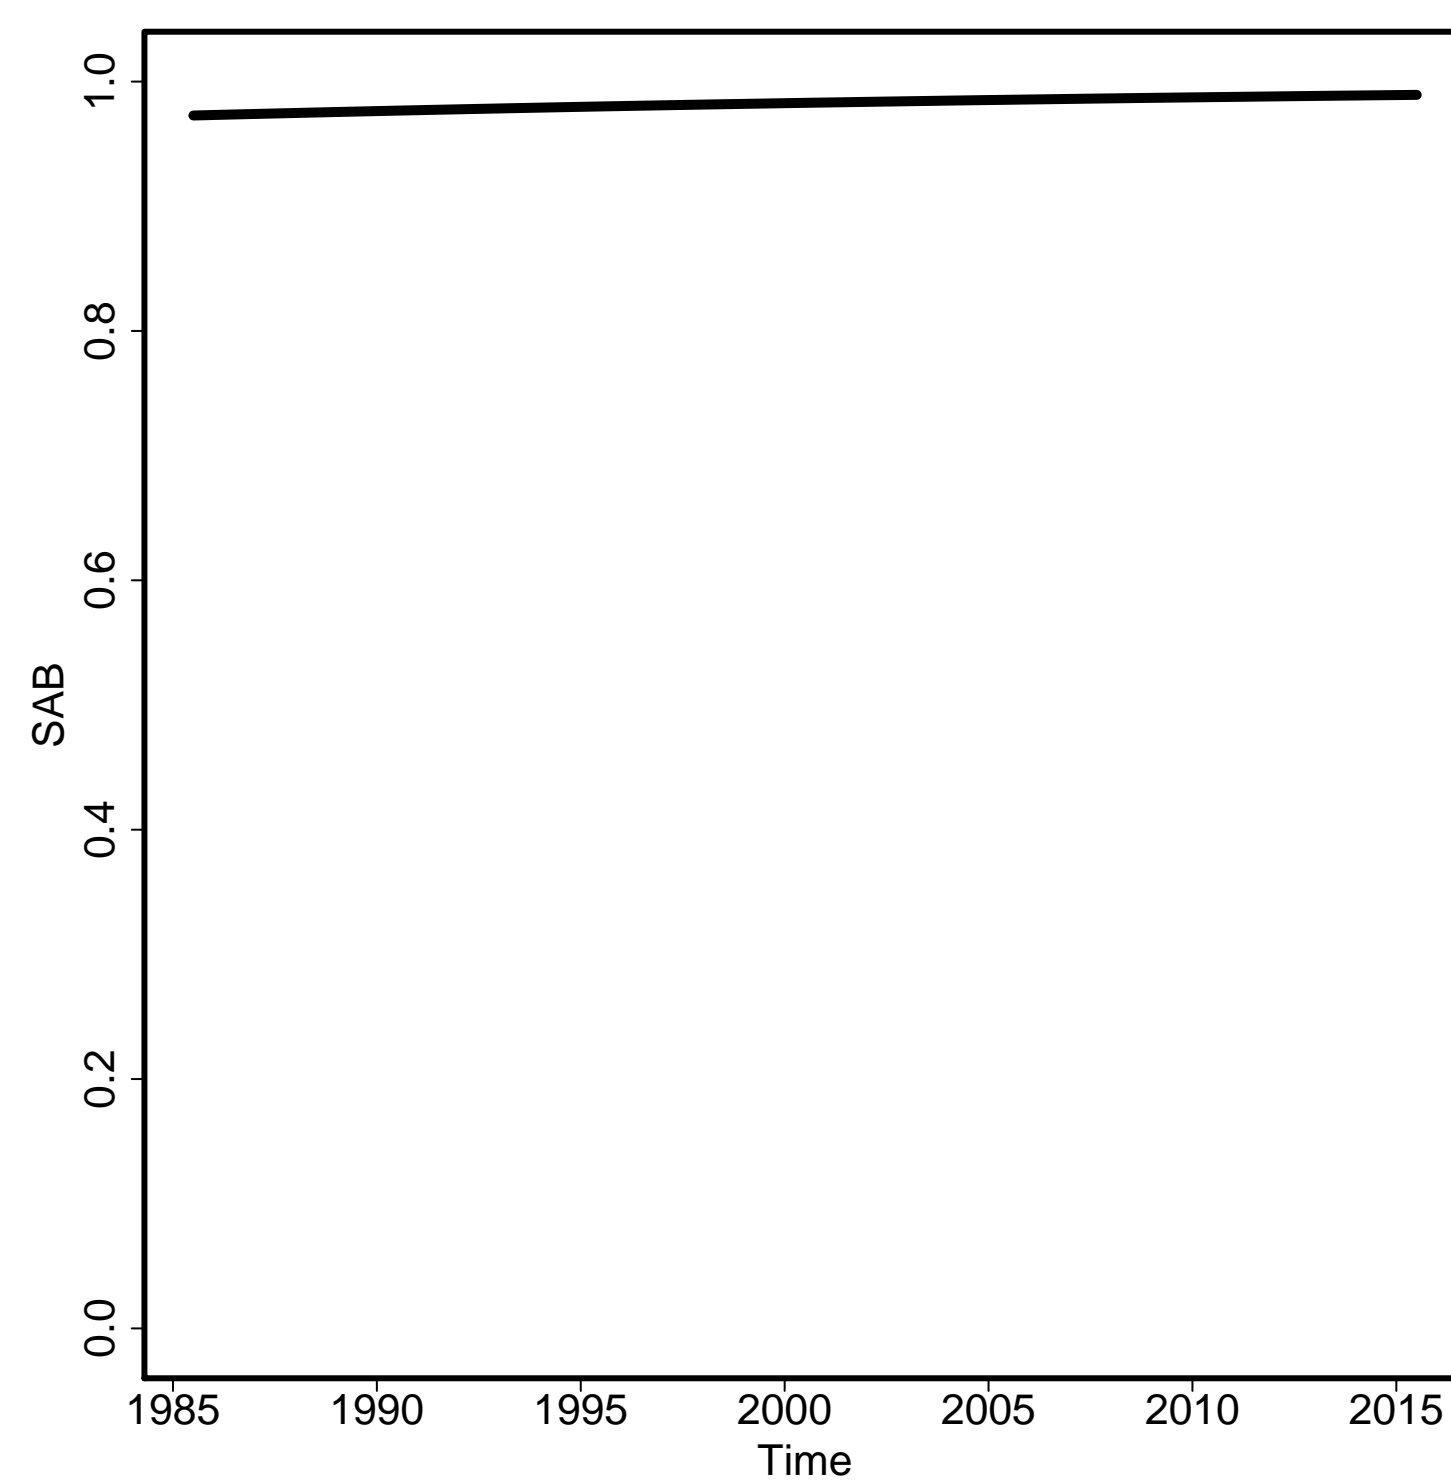

Envelope/Births

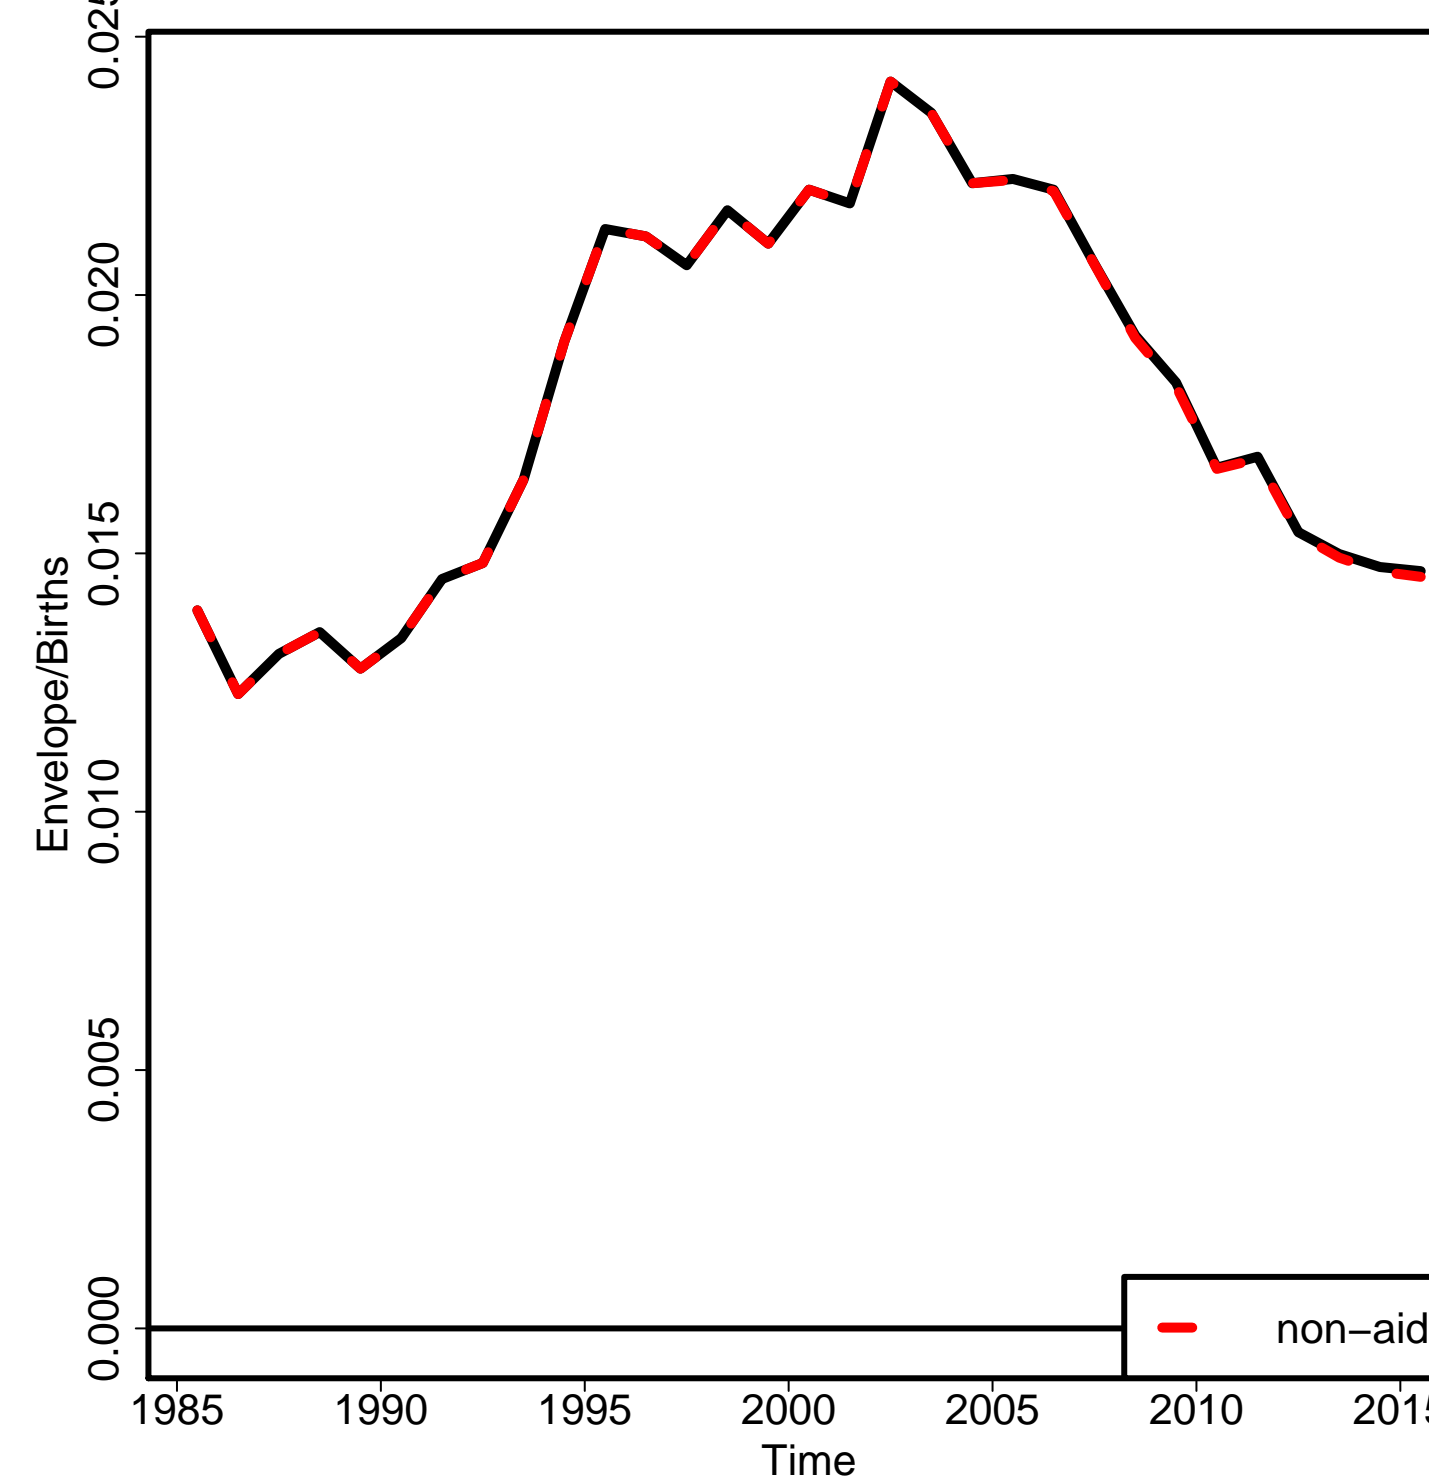

Non-aids MMR

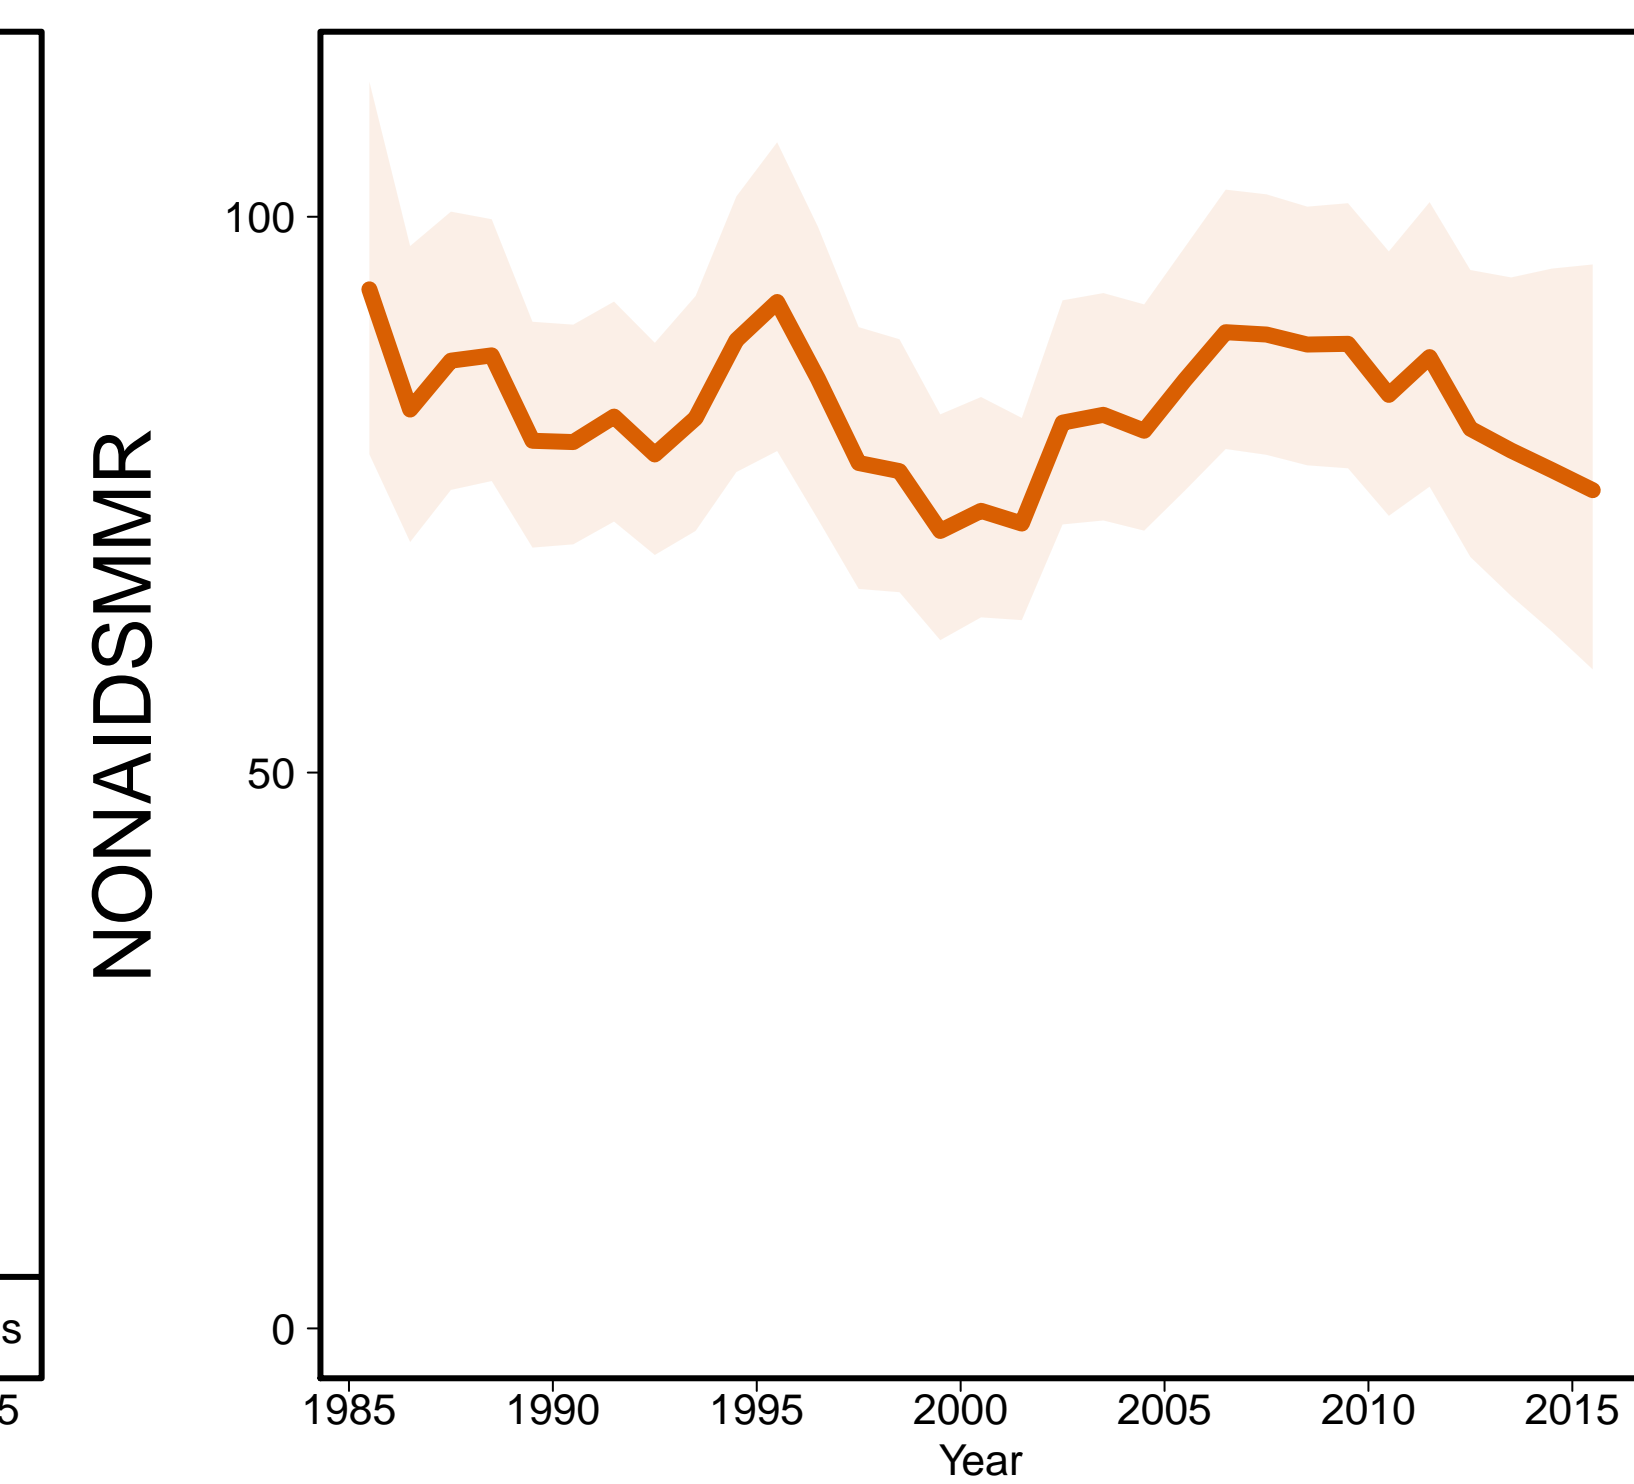

Aids MMR

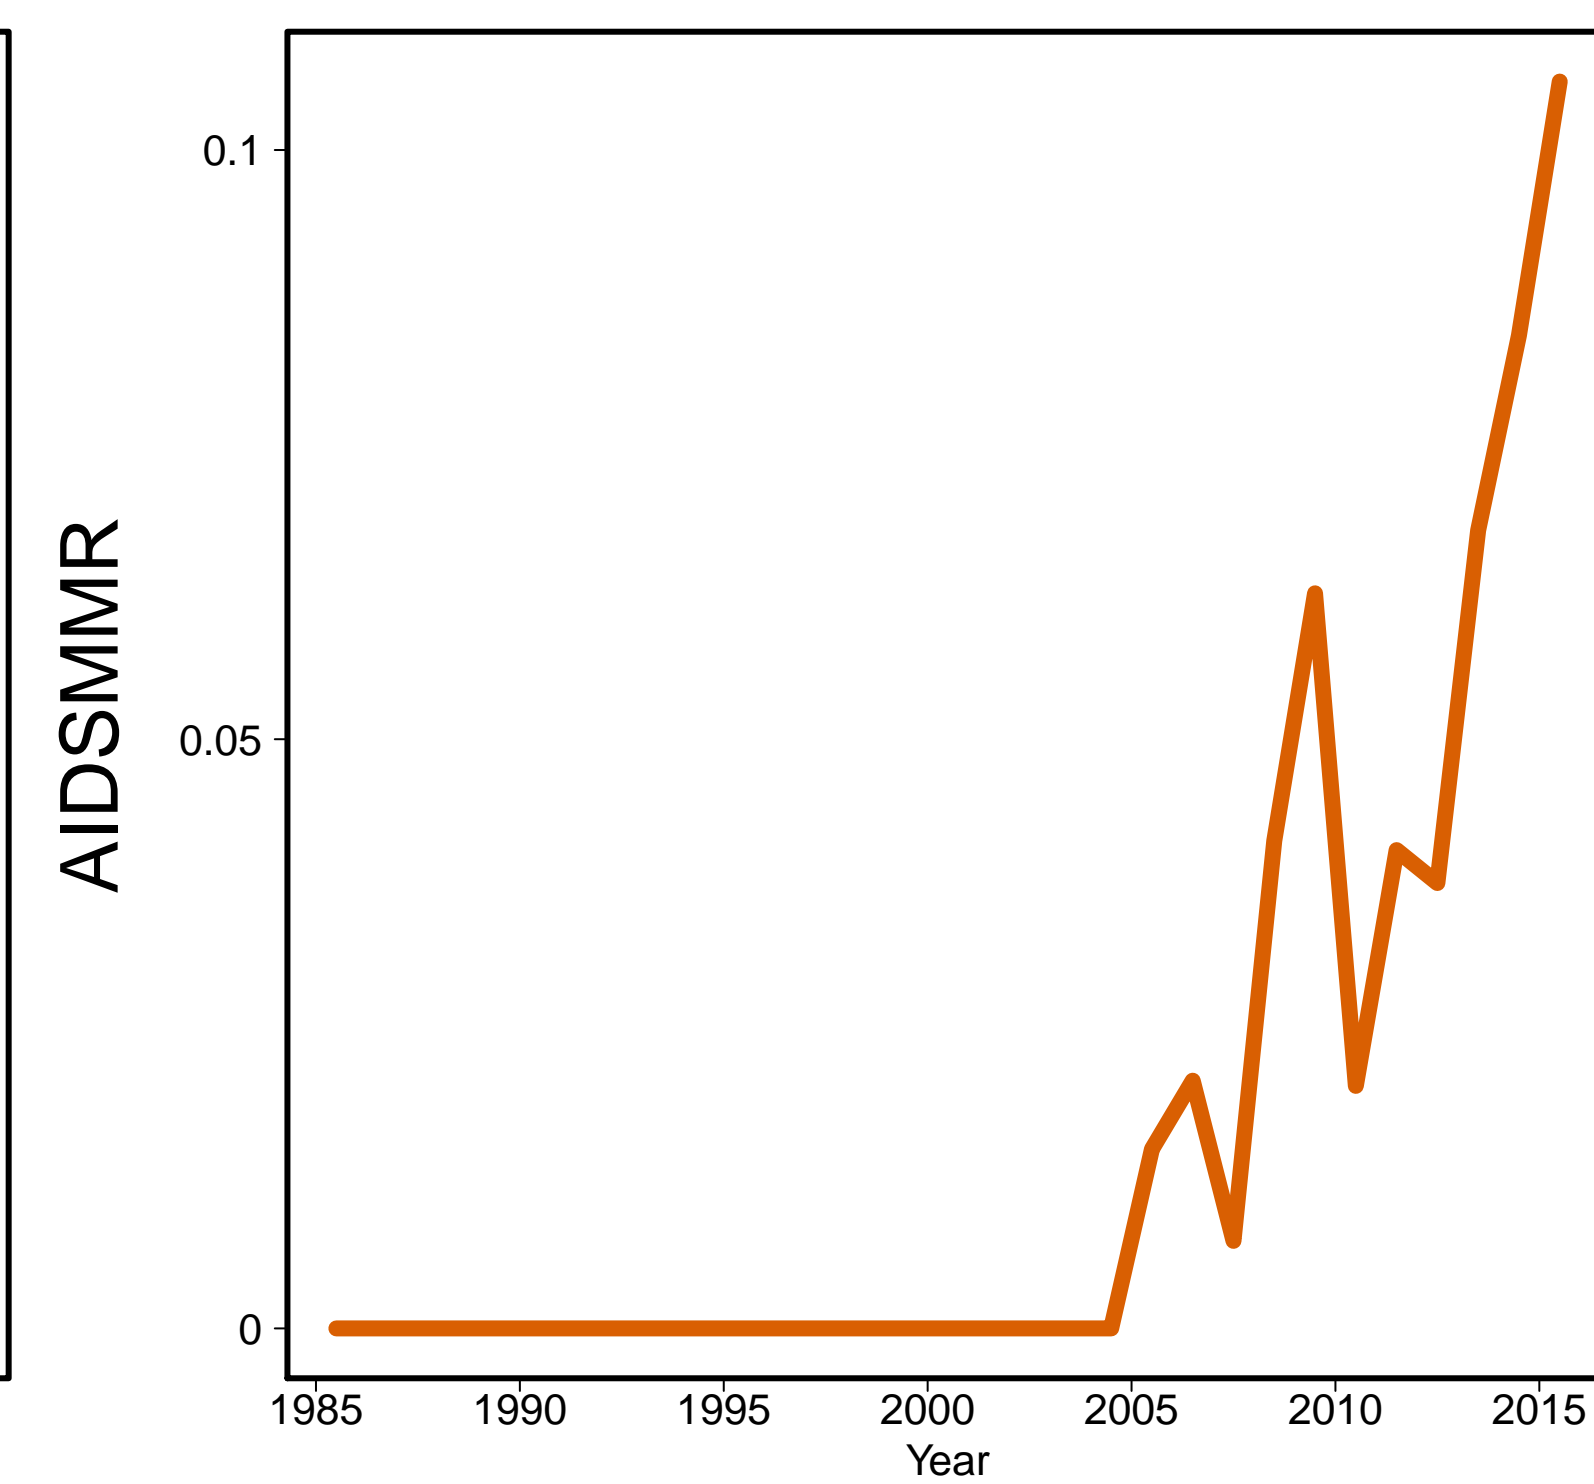



Lao [LAO]  
(South-Eastern Asia / Oceania)

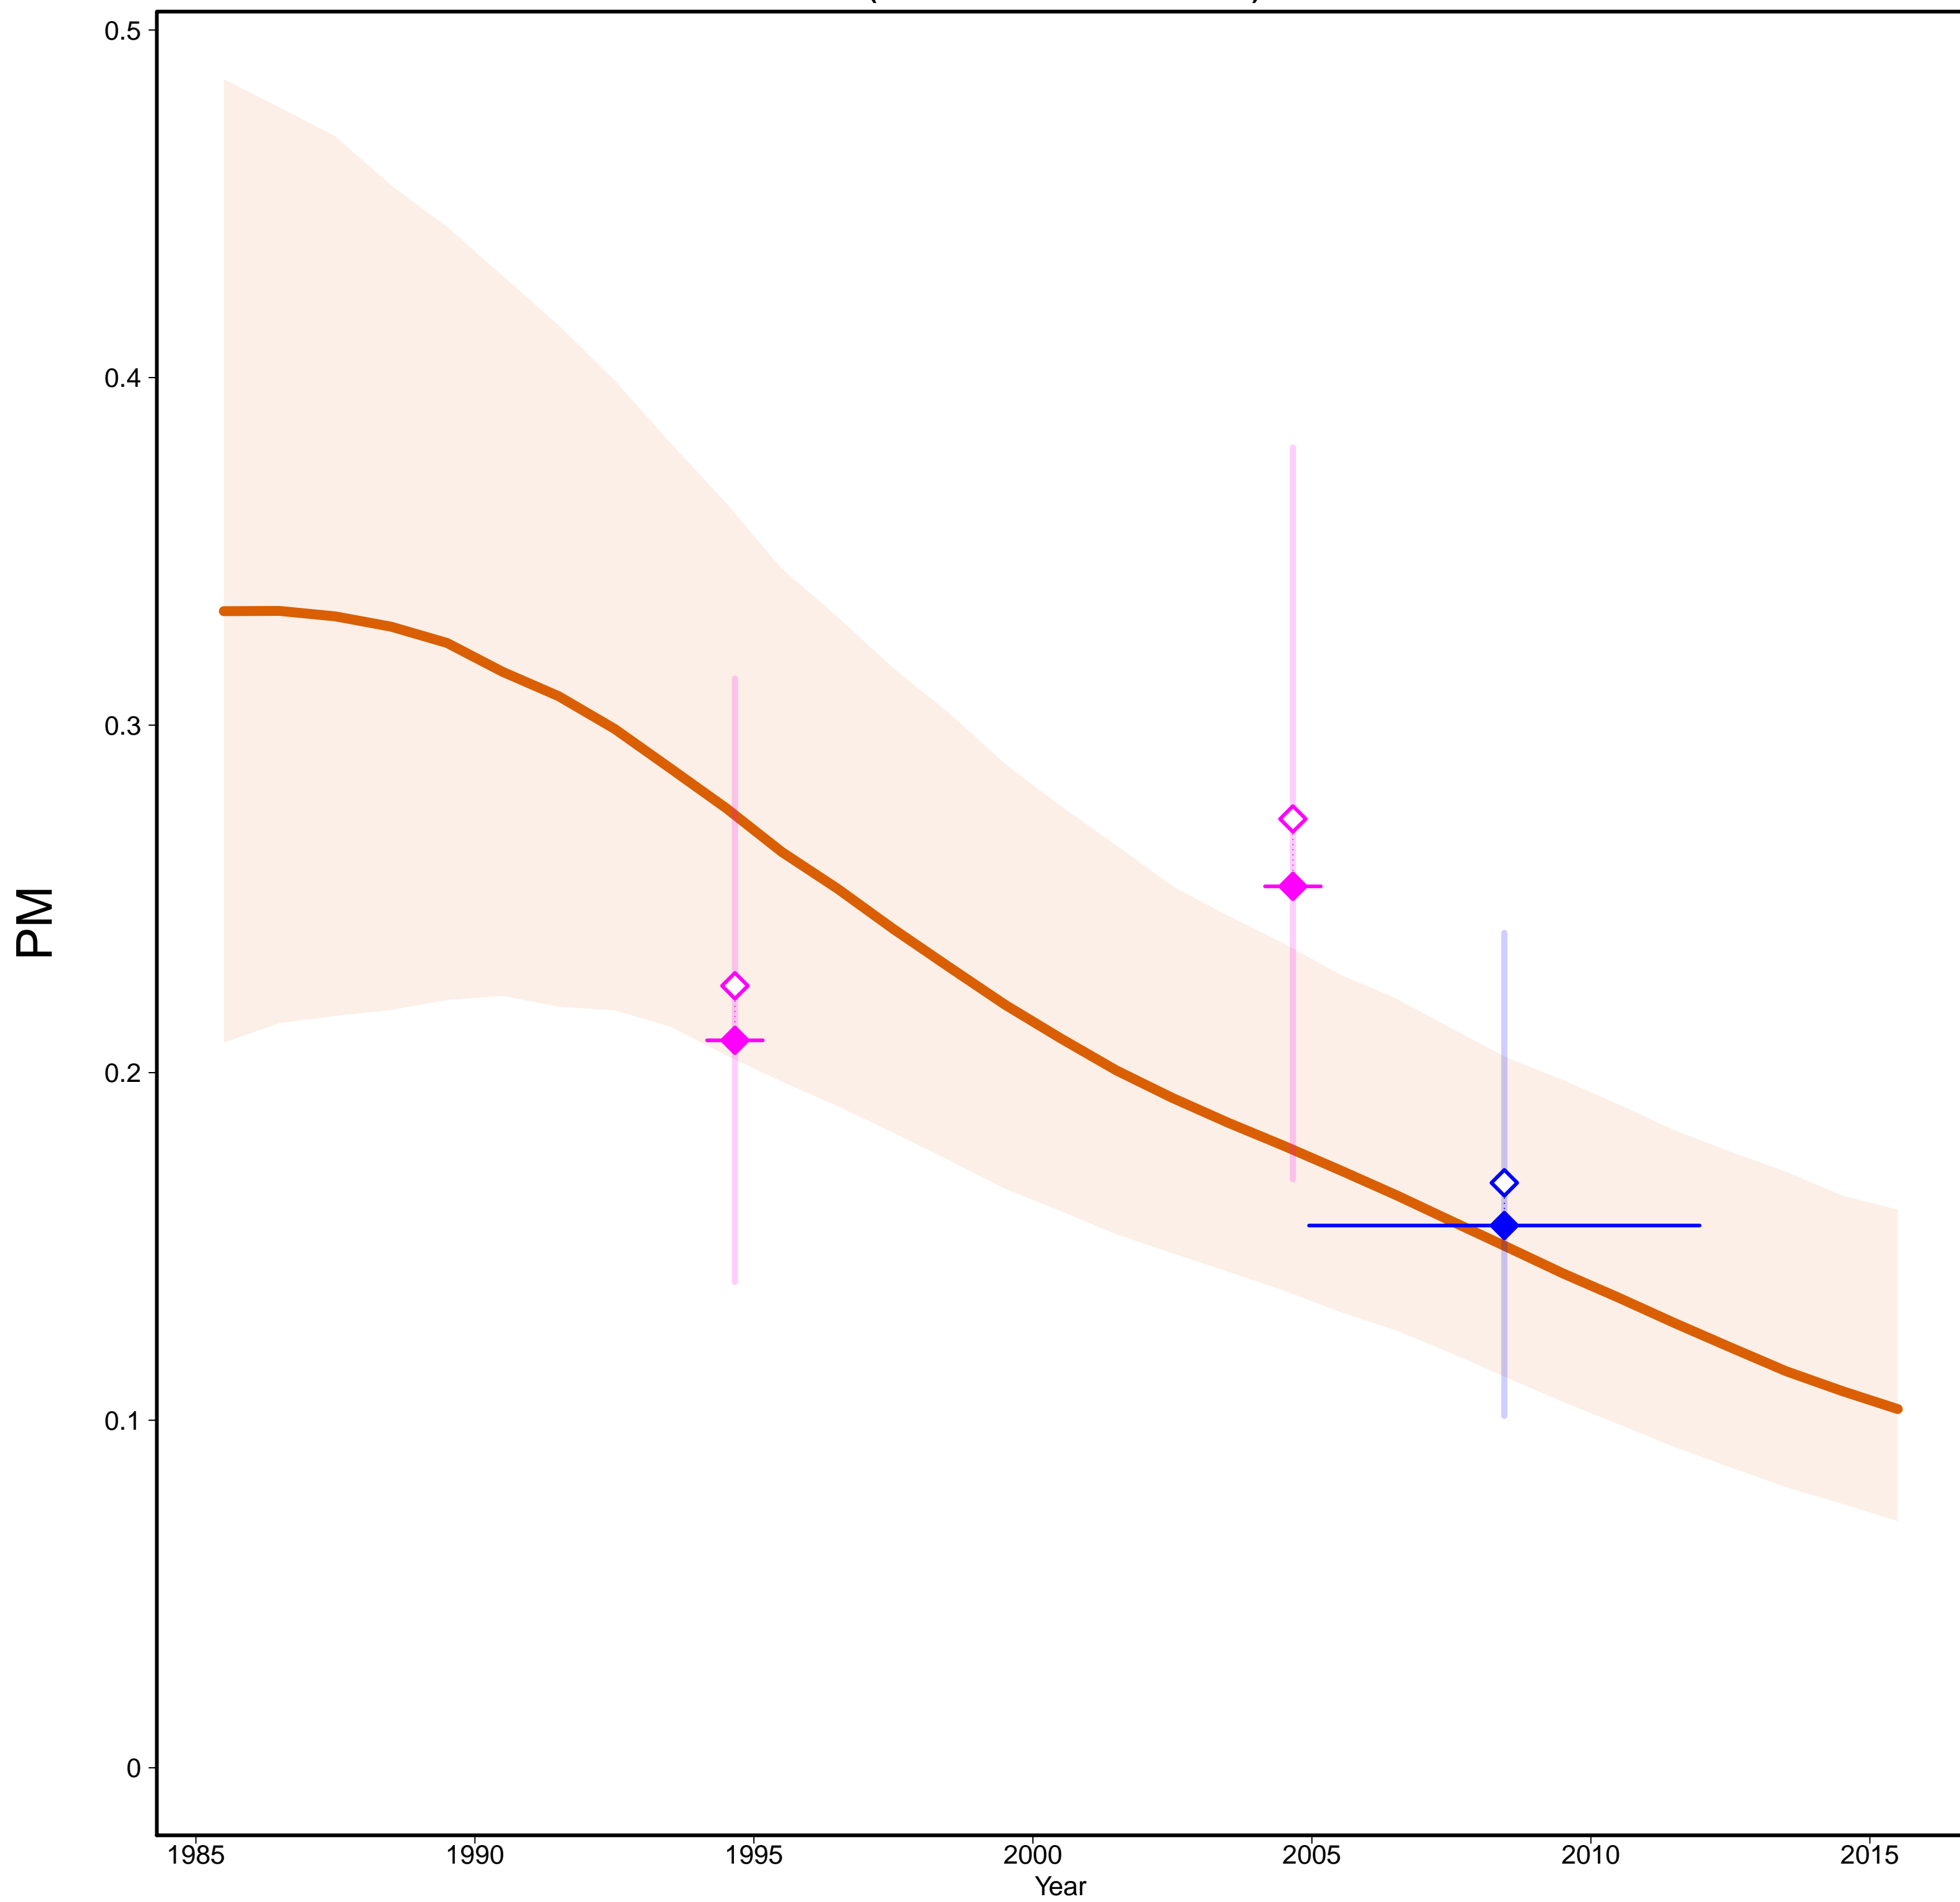

Lao [LAO]  
(South-Eastern Asia / Oceania)

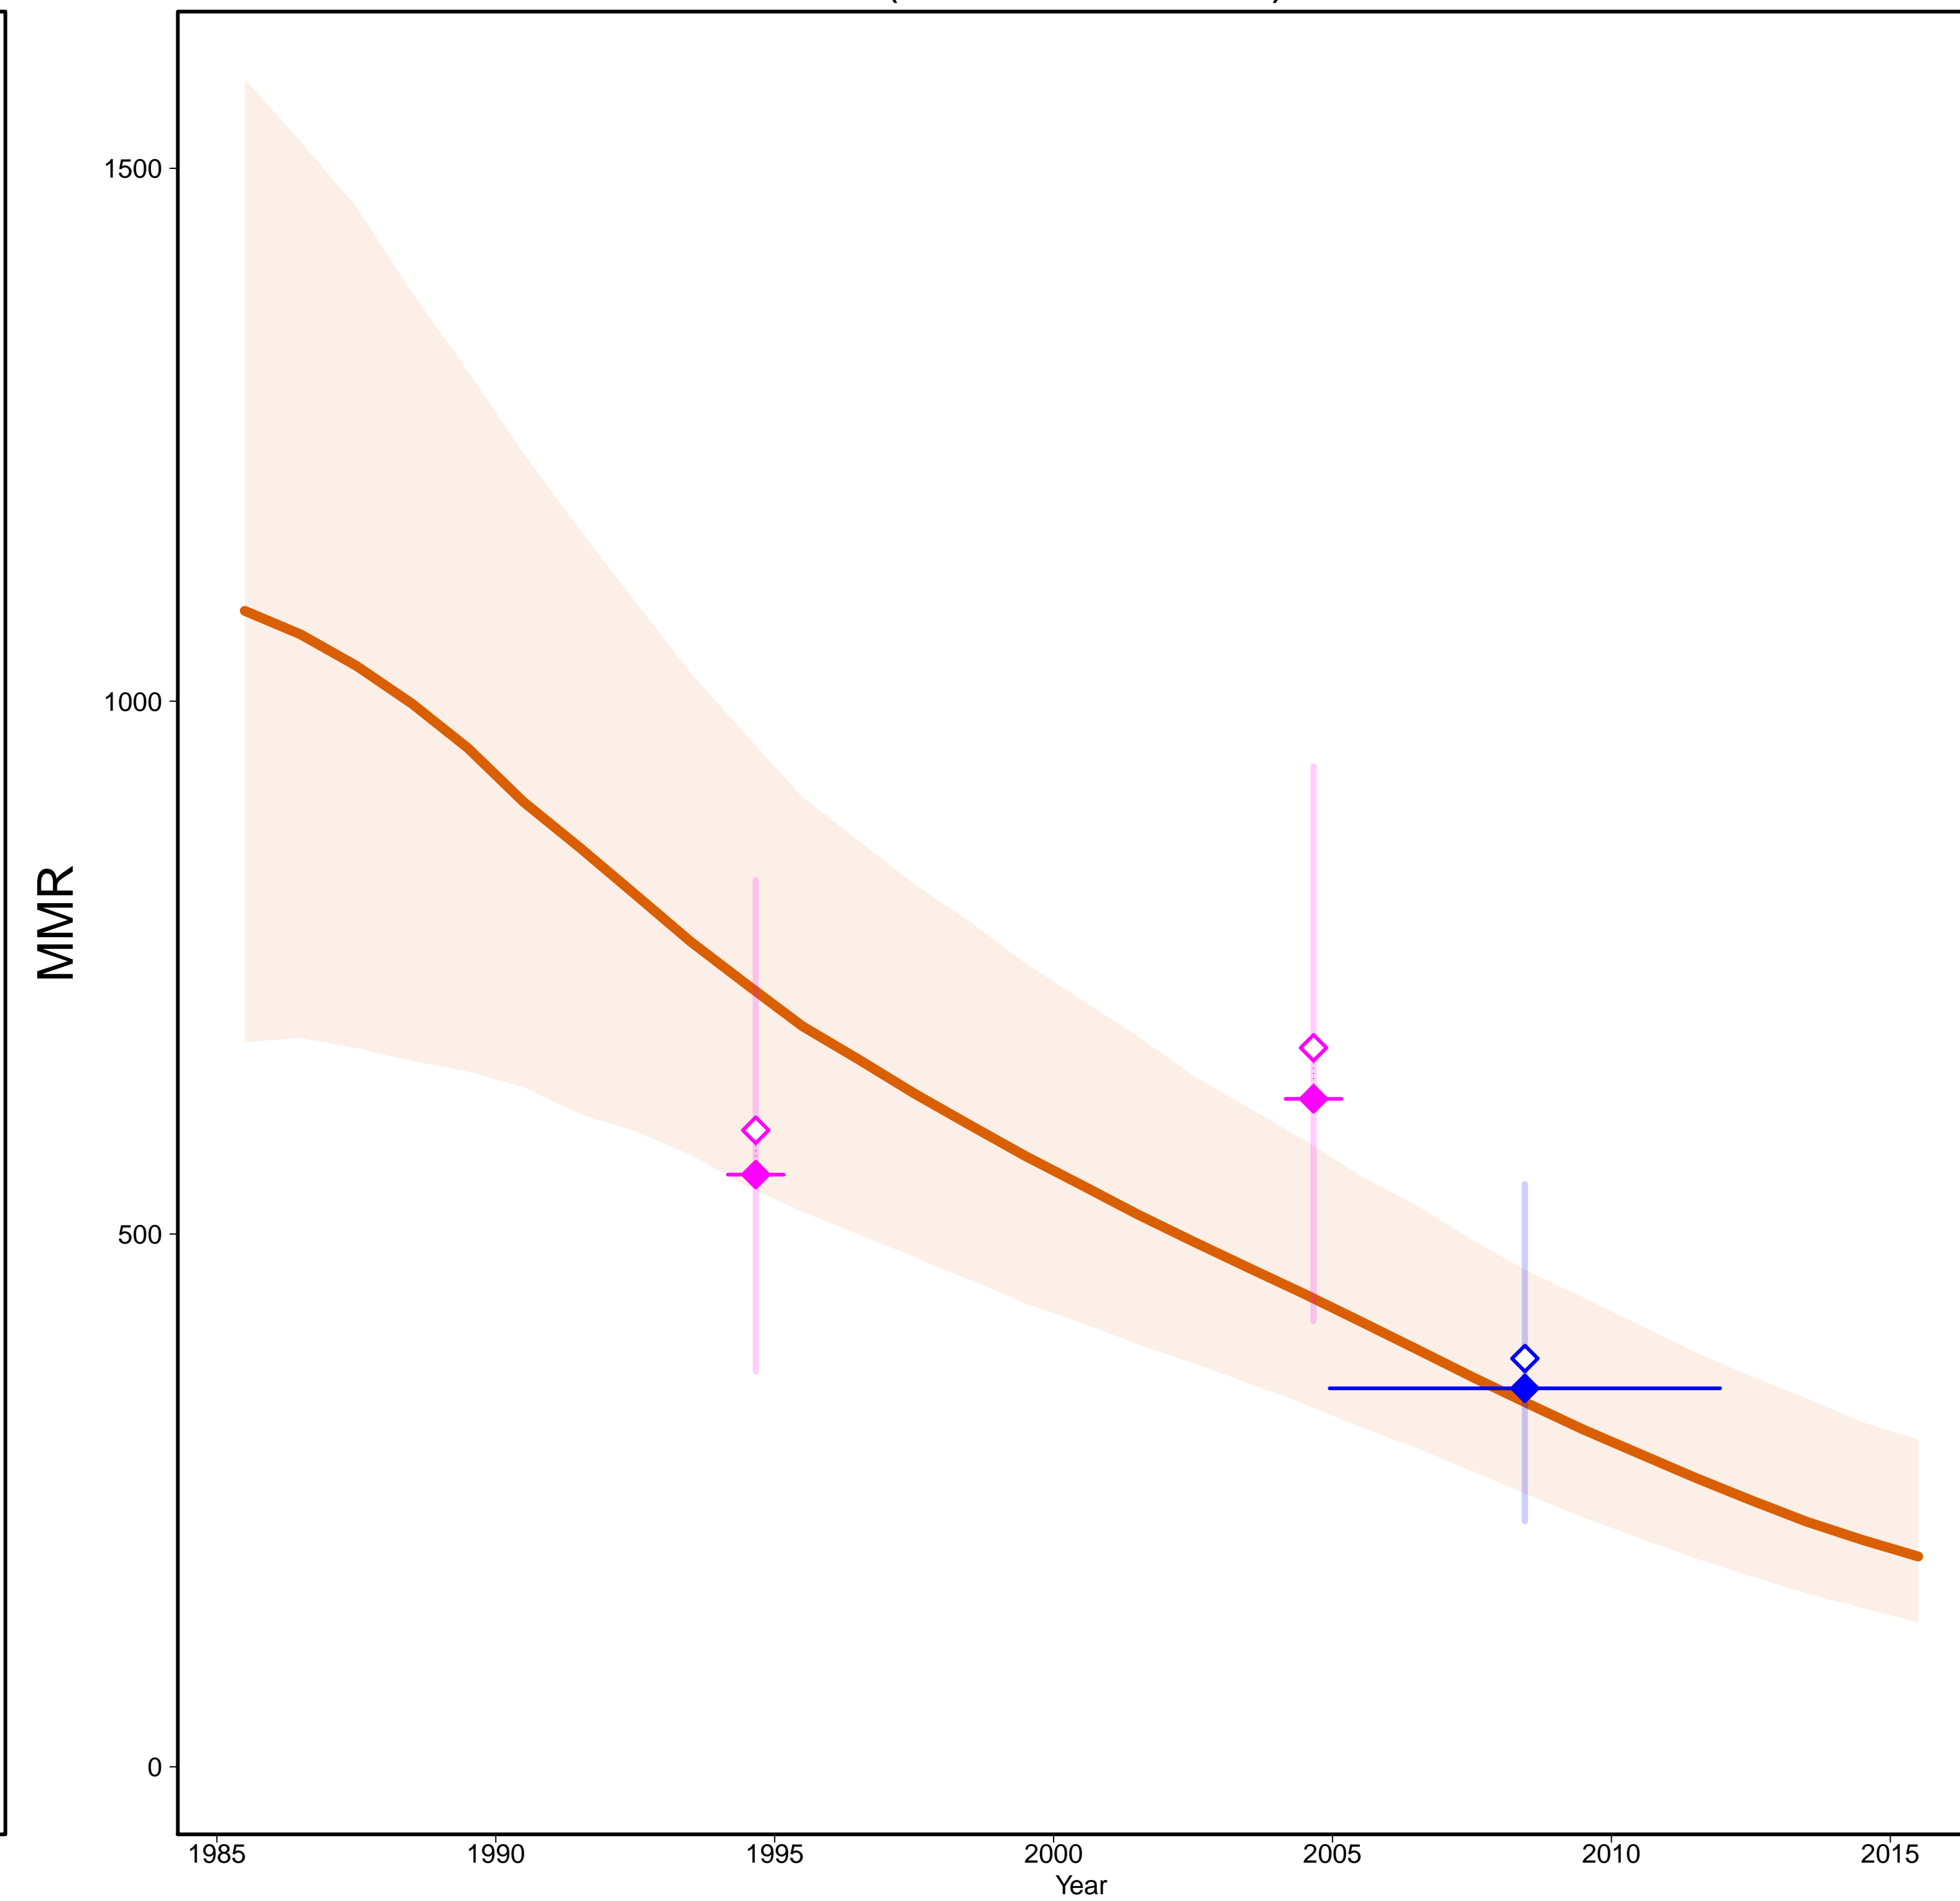

- Estimates —
- MMR Database 2015 —
- ◇ Observed Data
- ◆ Adjusted Data
- Data type —
- ◆ DHS
- ◆ Census

Gross Domestic Product

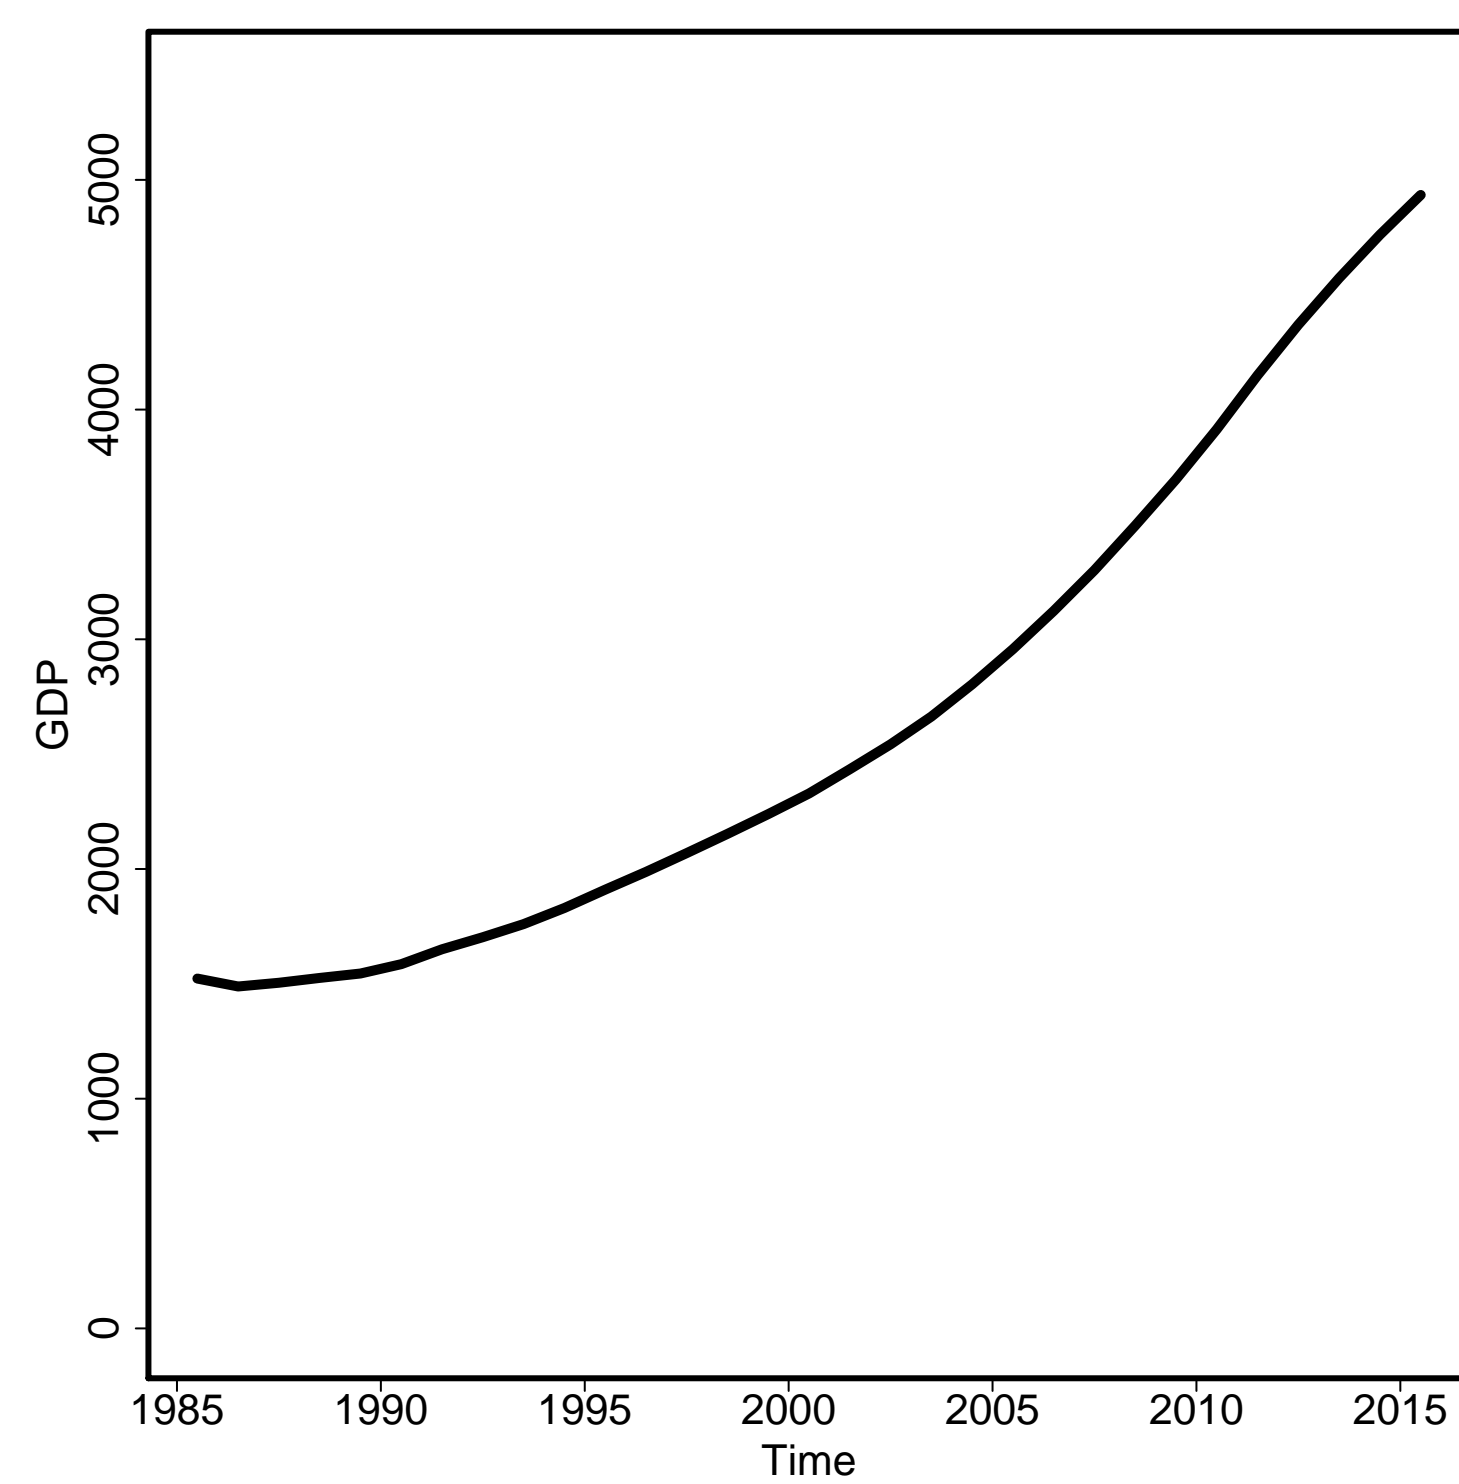

General Fertility Rate

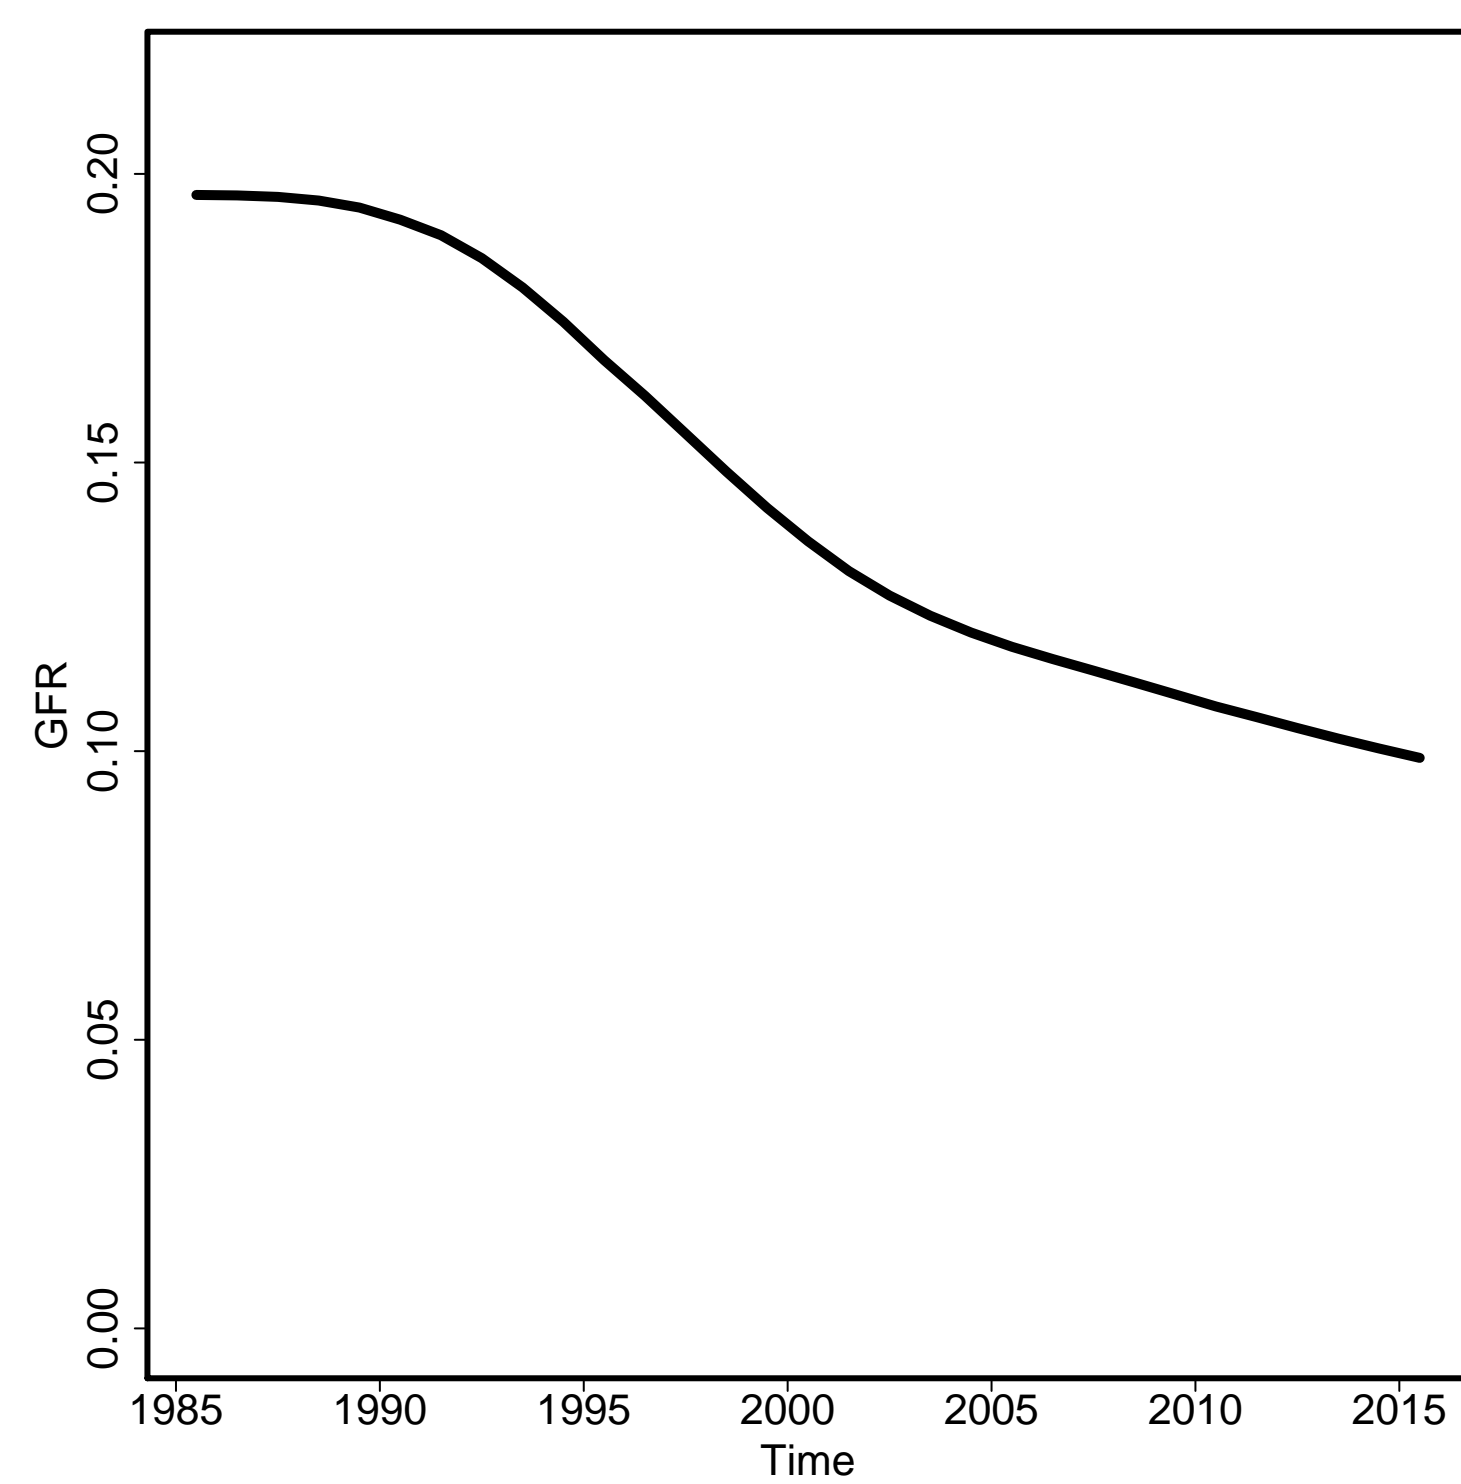

Skilled Attendance to Birth

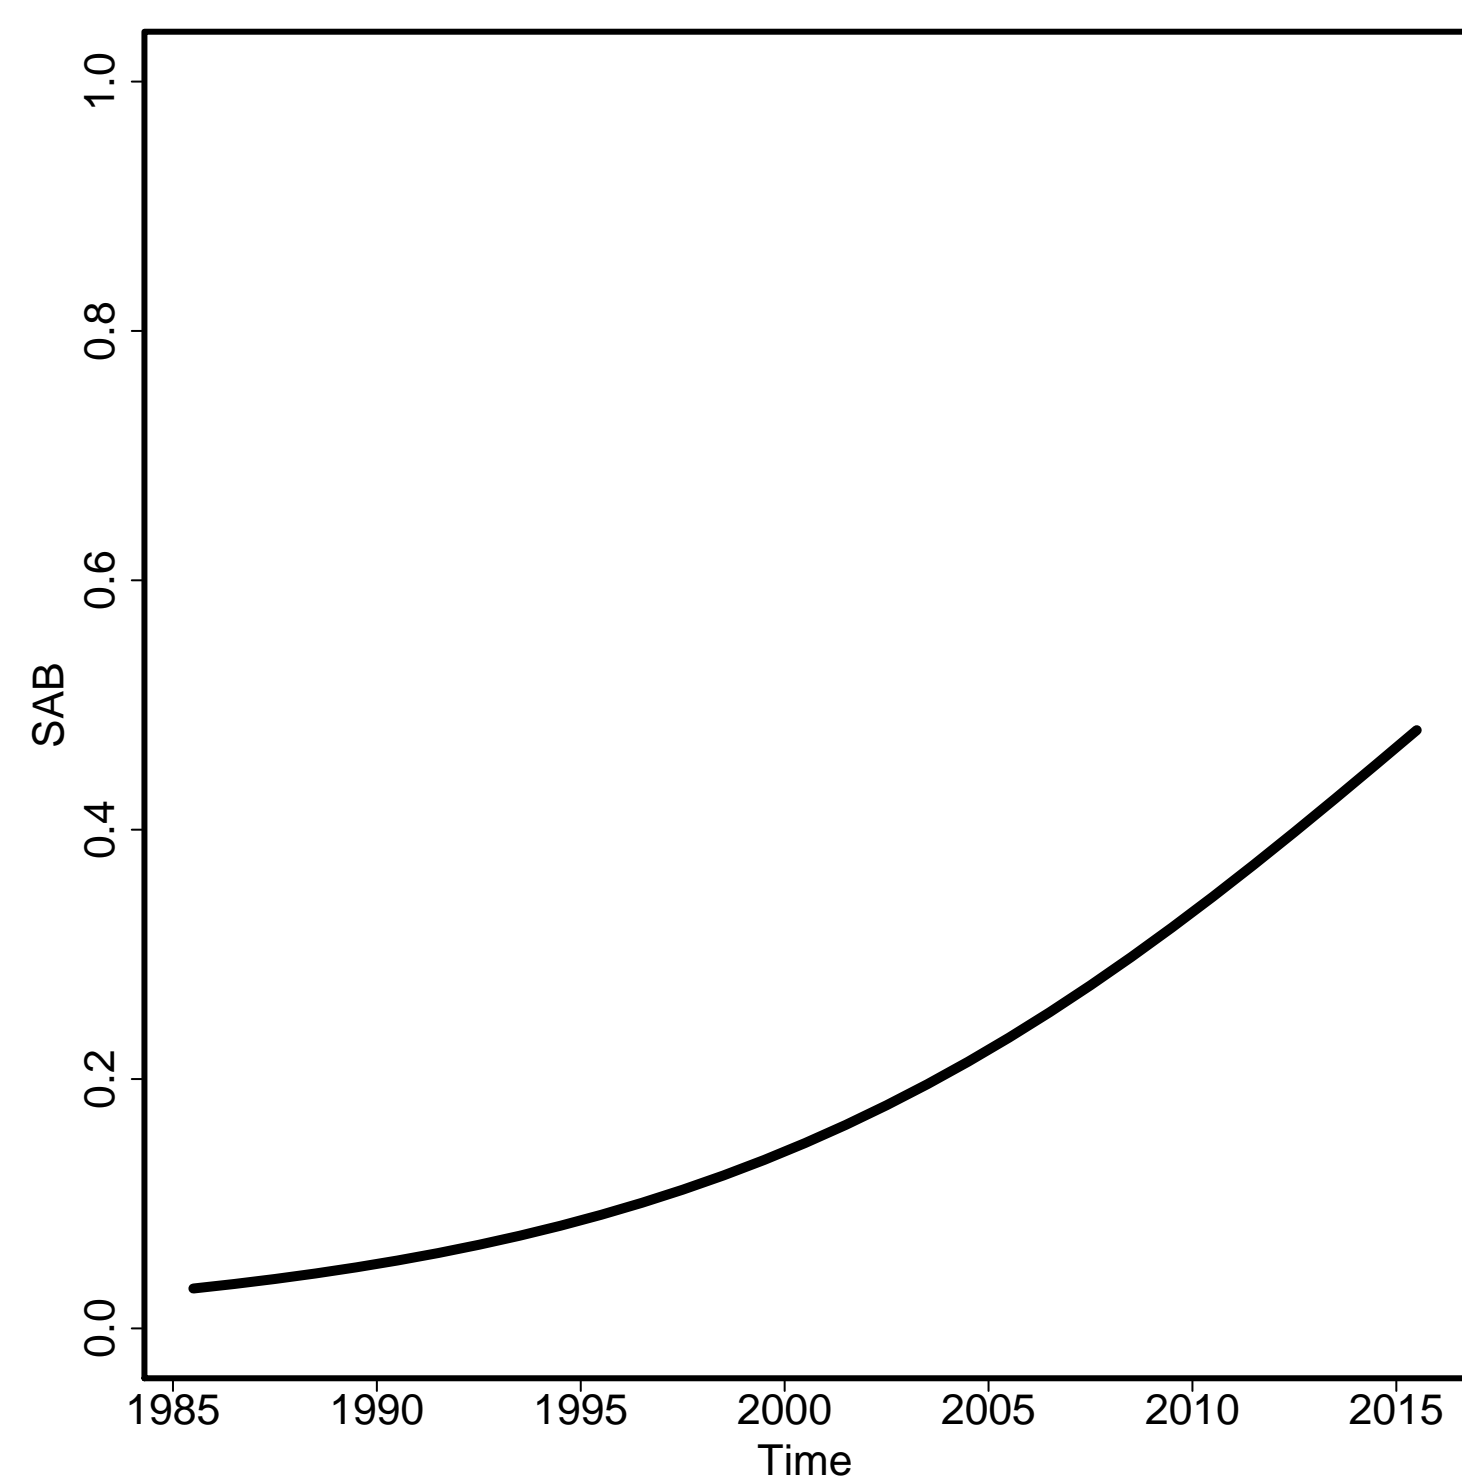

Envelope/Births

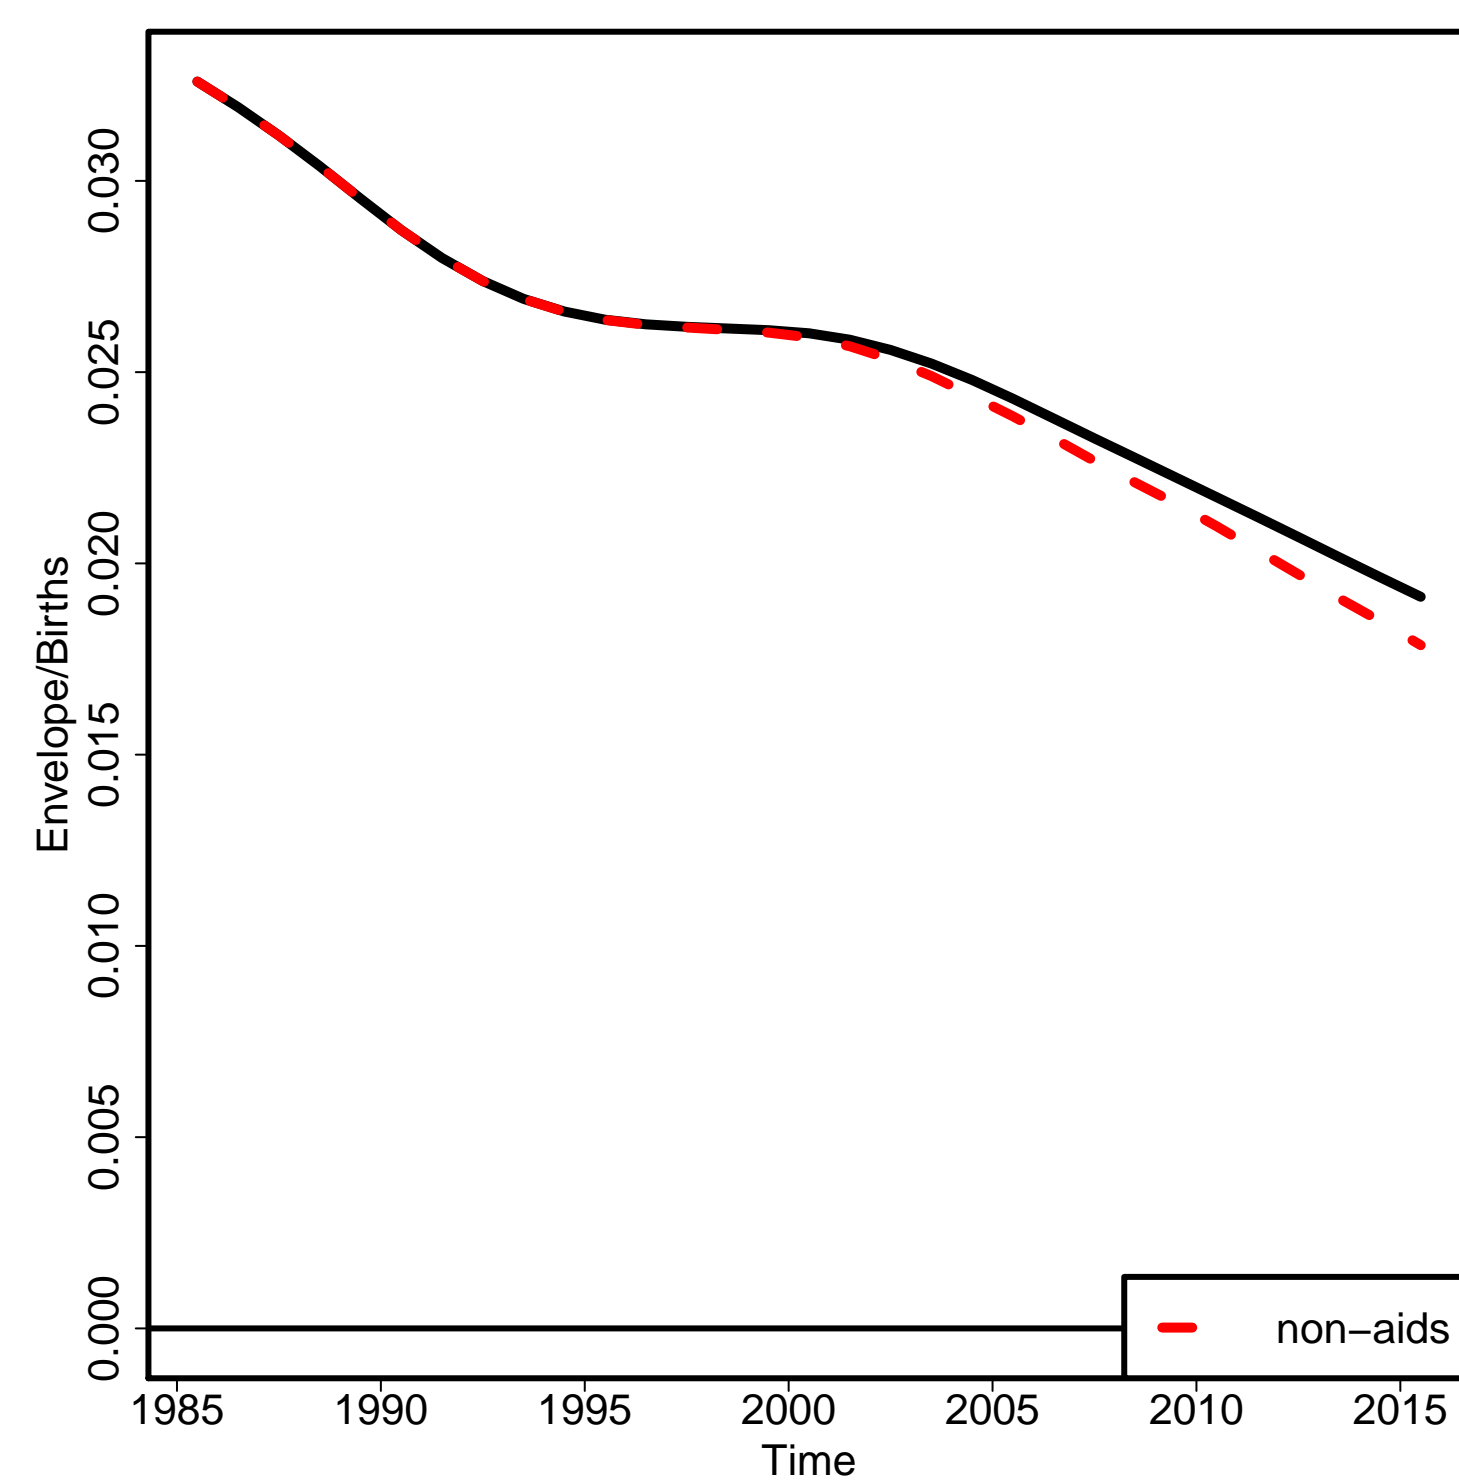

Non-aids MMR

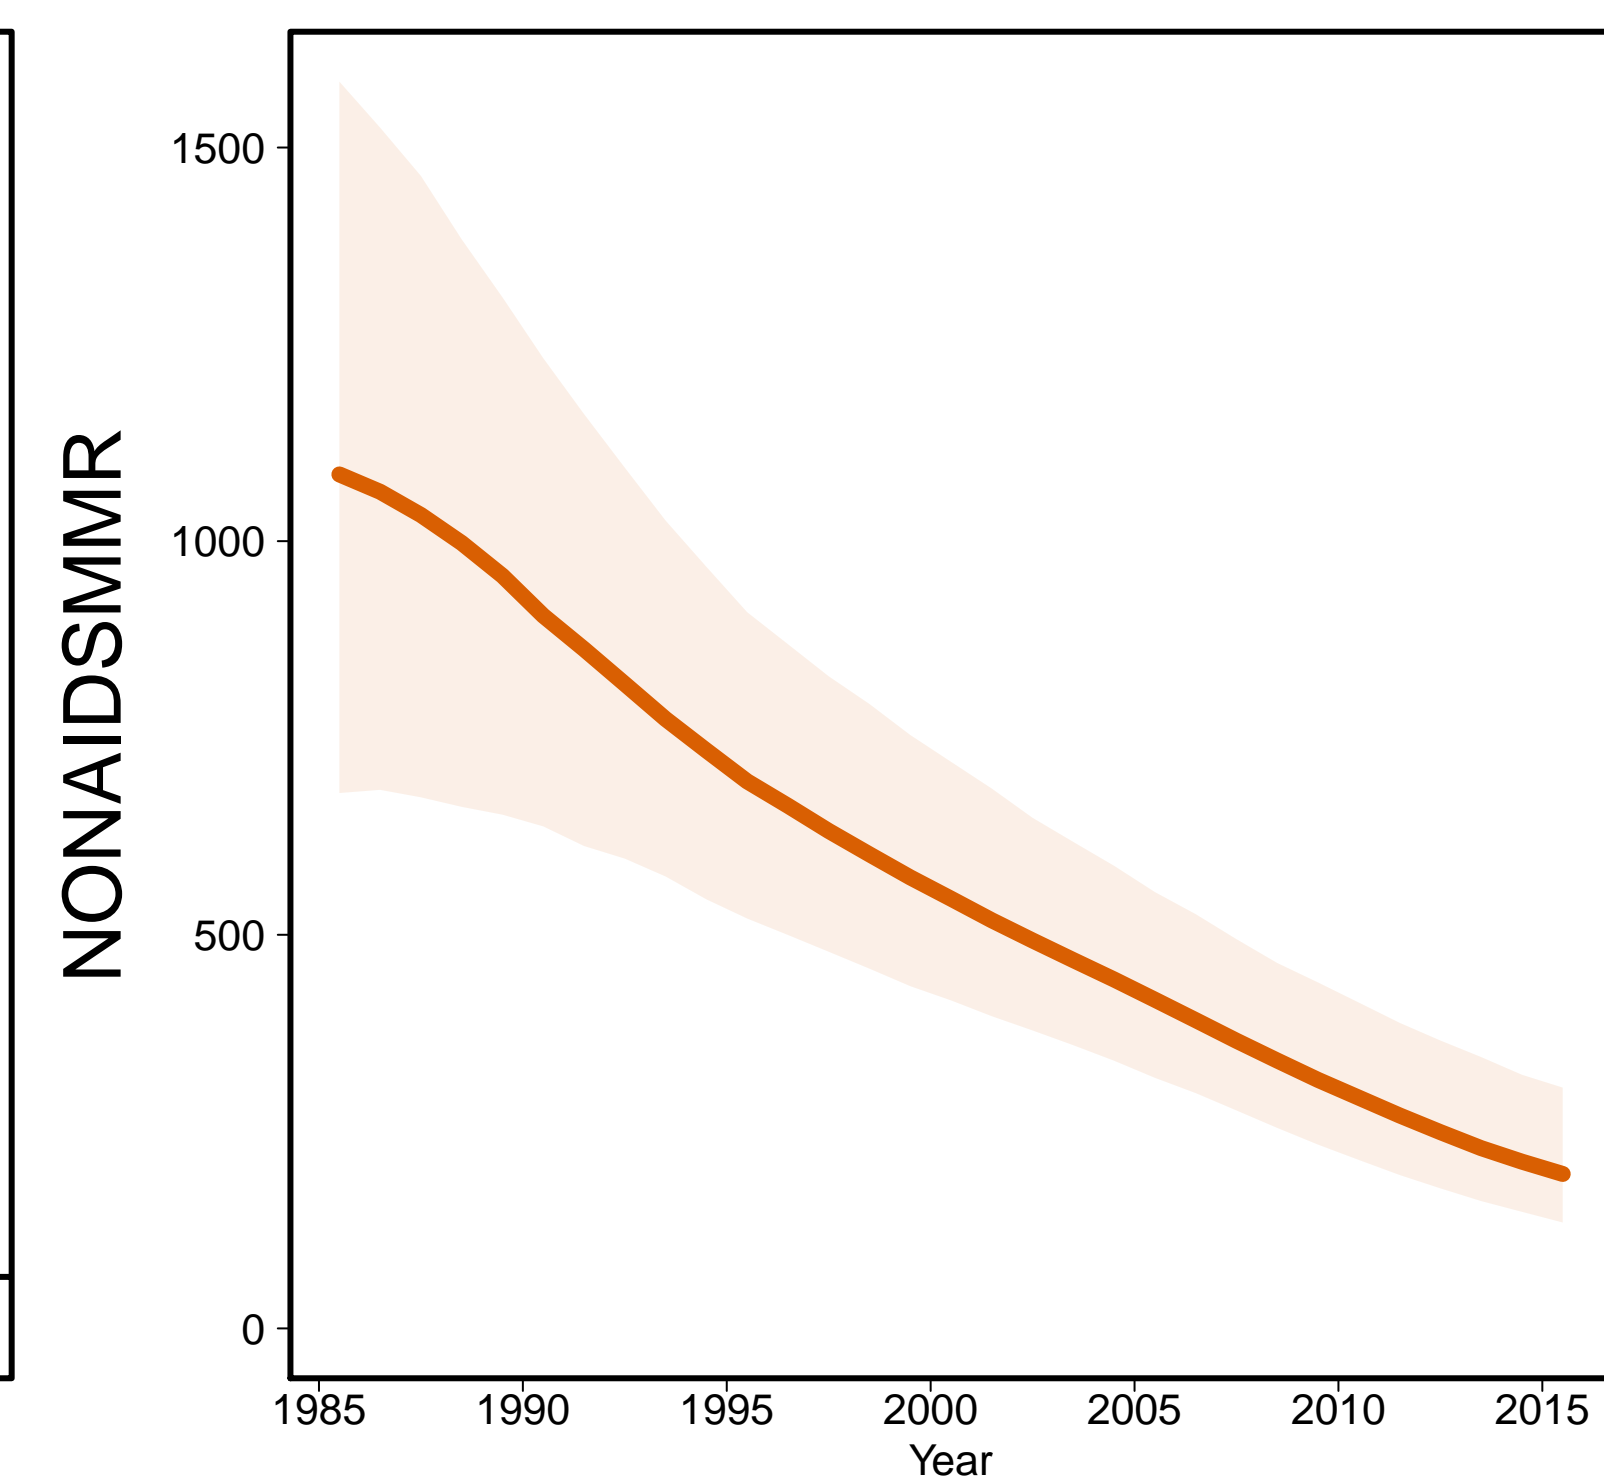

Aids MMR

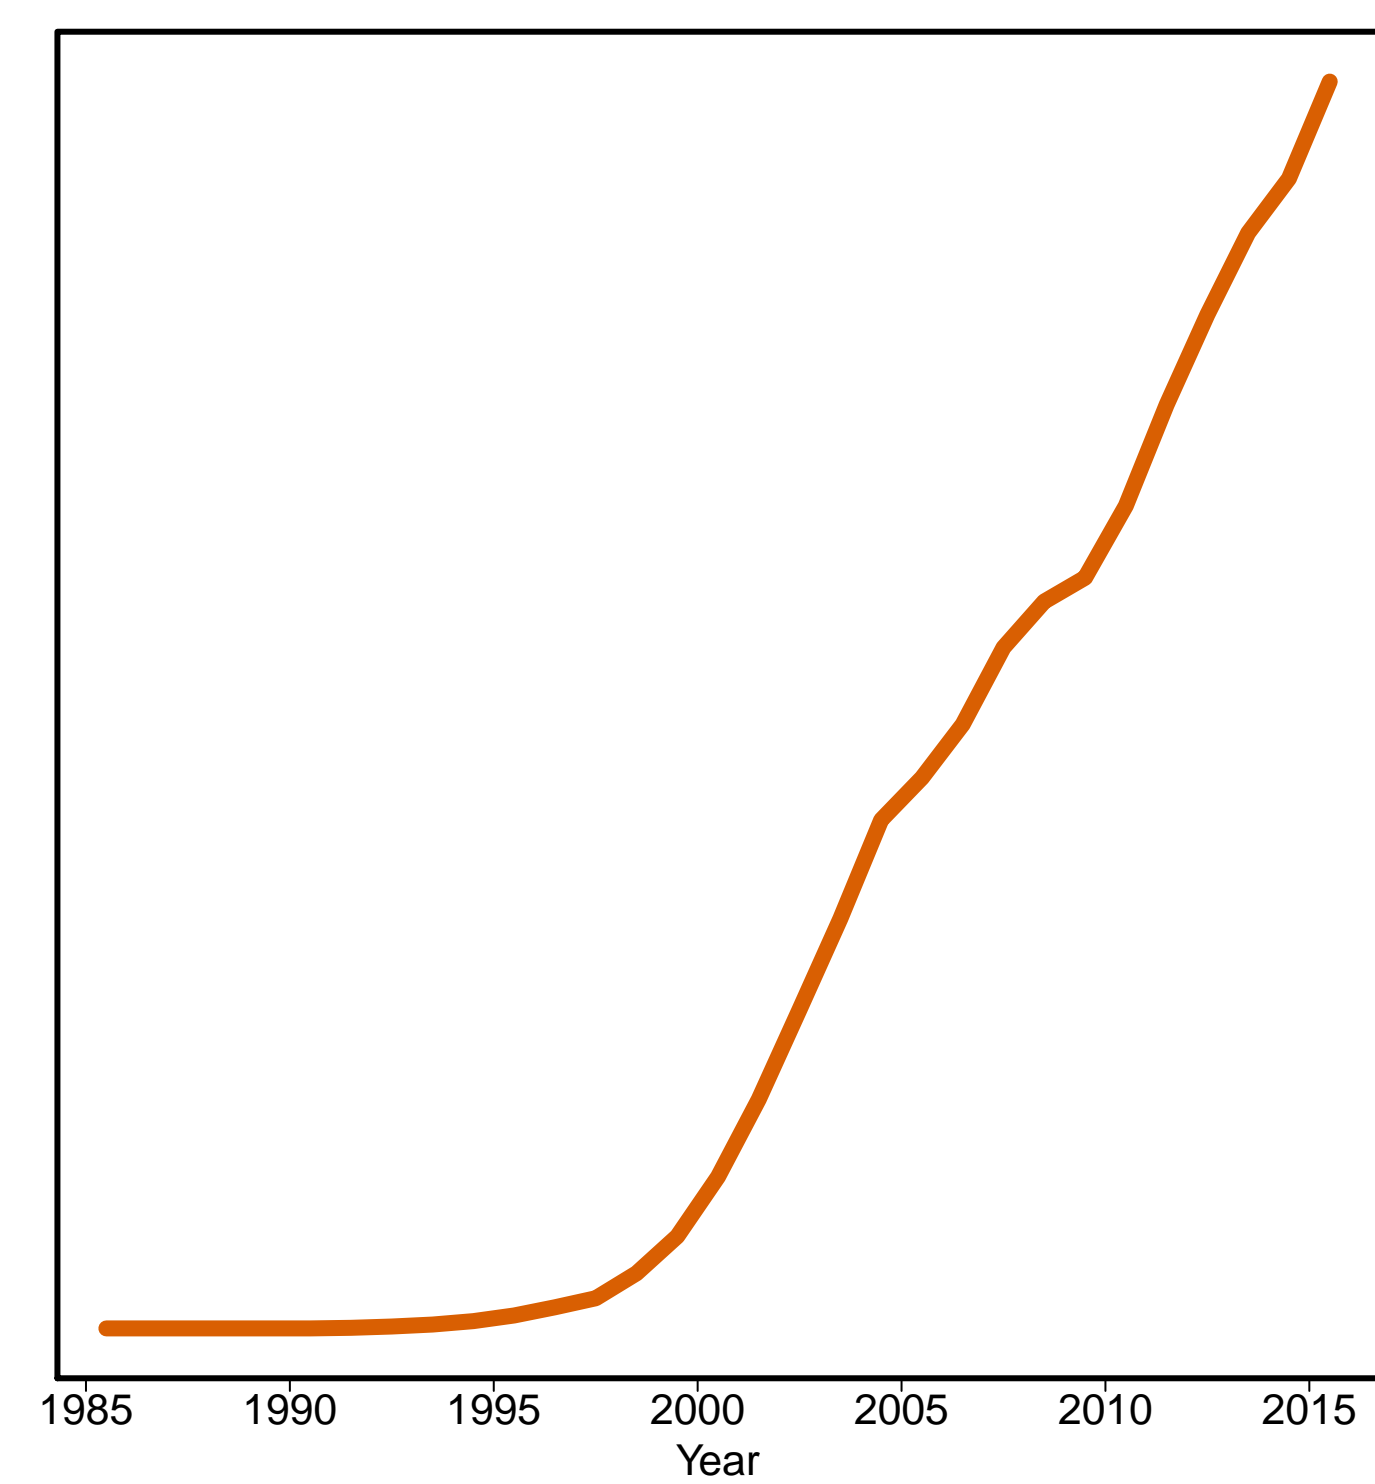

Latvia [LVA]  
(Developed regions)

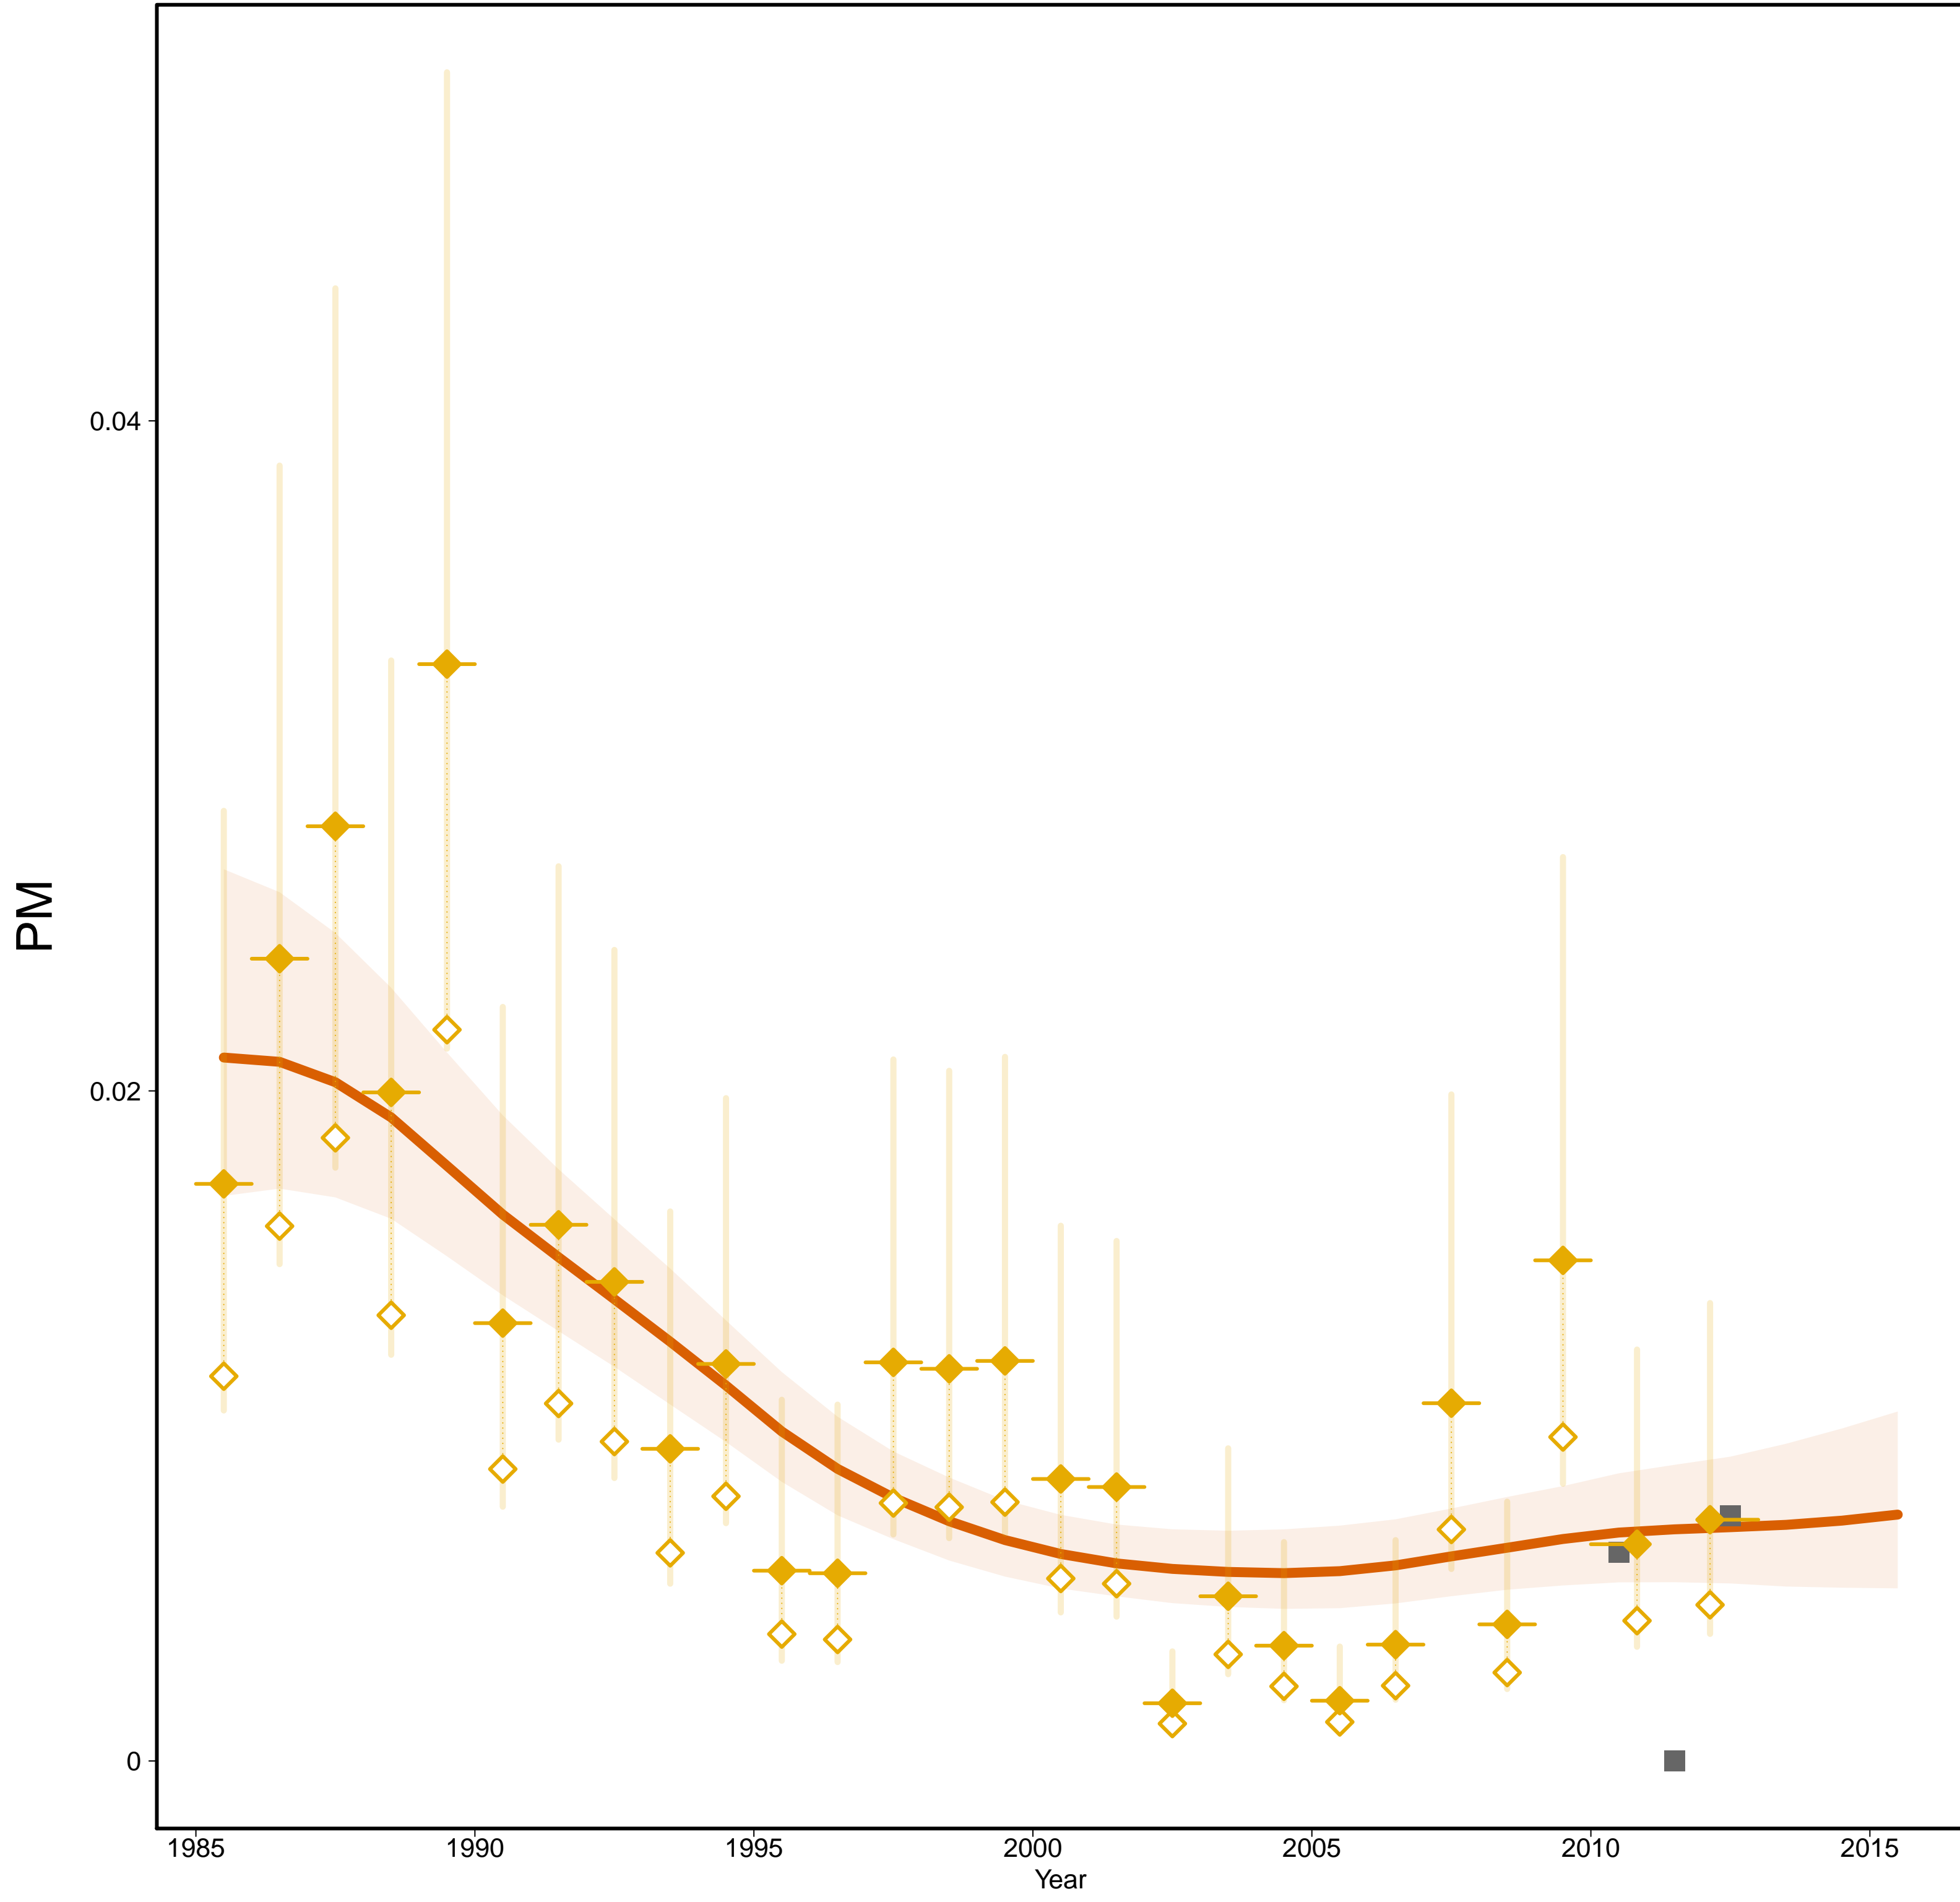

Latvia [LVA]  
(Developed regions)

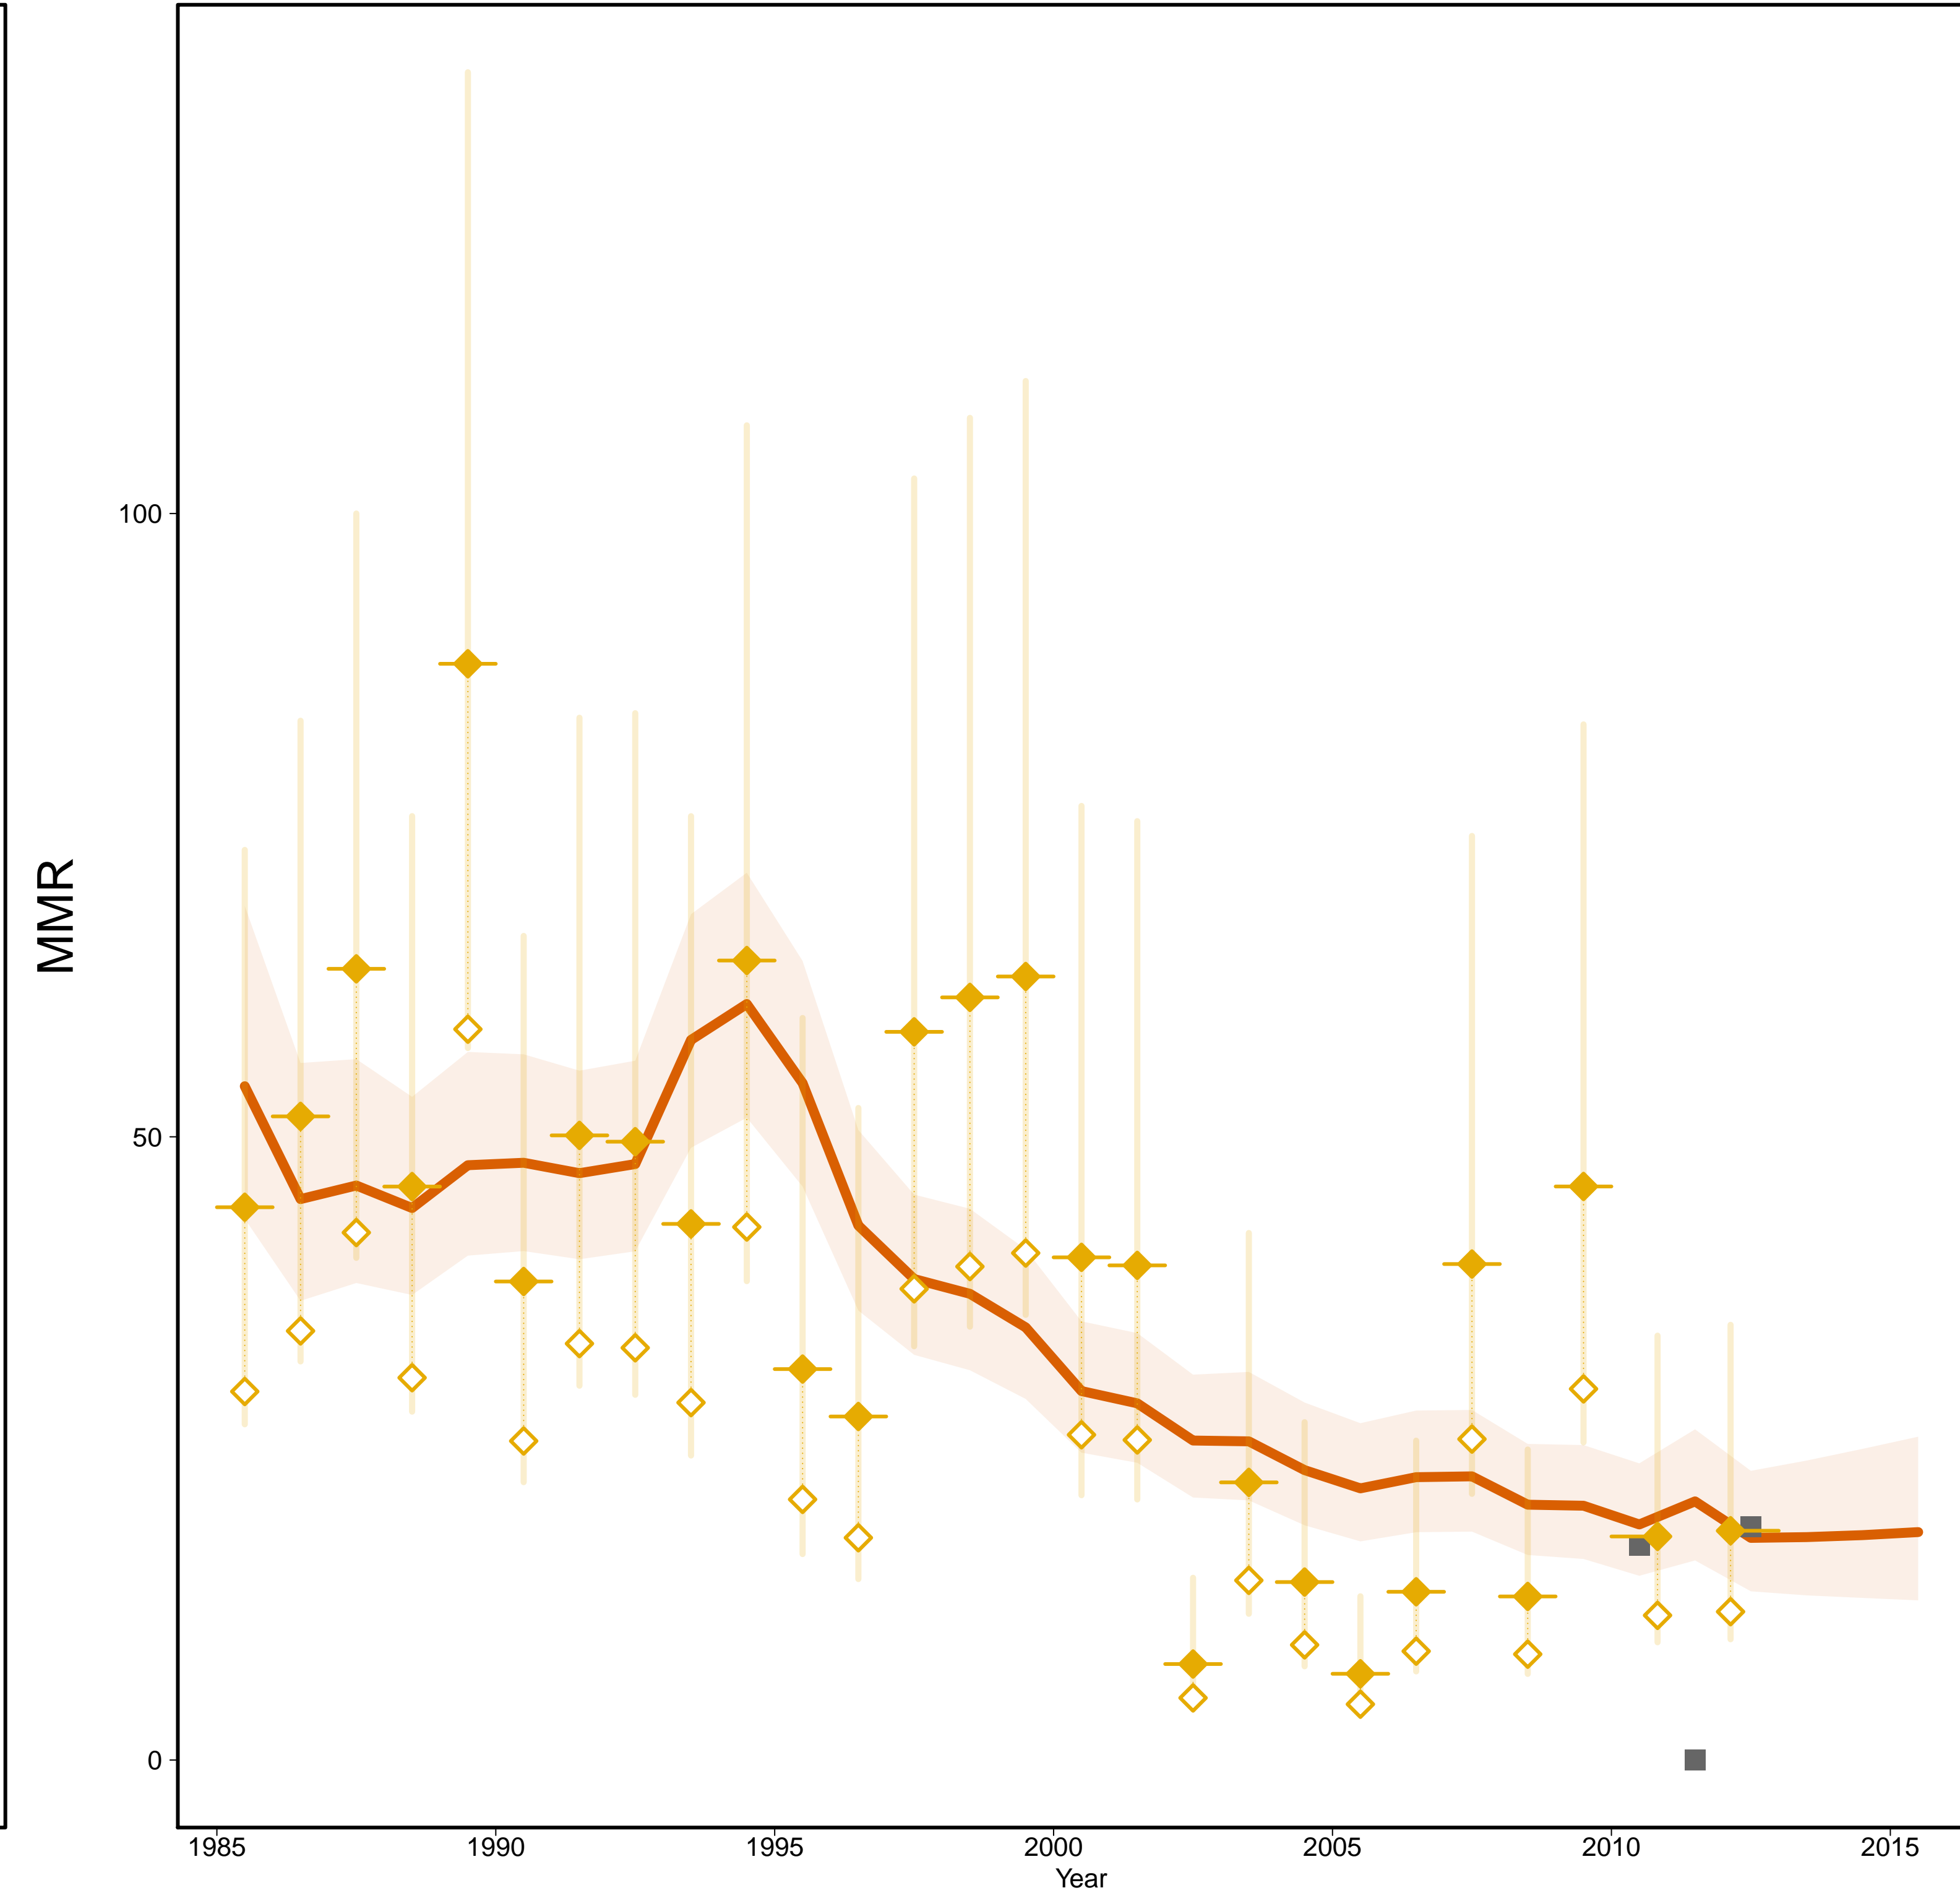

- Estimates –
- Mlate
- MMR Database 2015 –
- ◇ Observed Data
- ◆ Adjusted Data
- Data type –
- ◆ VR
- Reported VR before recalc.  
(related to 0 obs. mat. death)

Gross Domestic Product

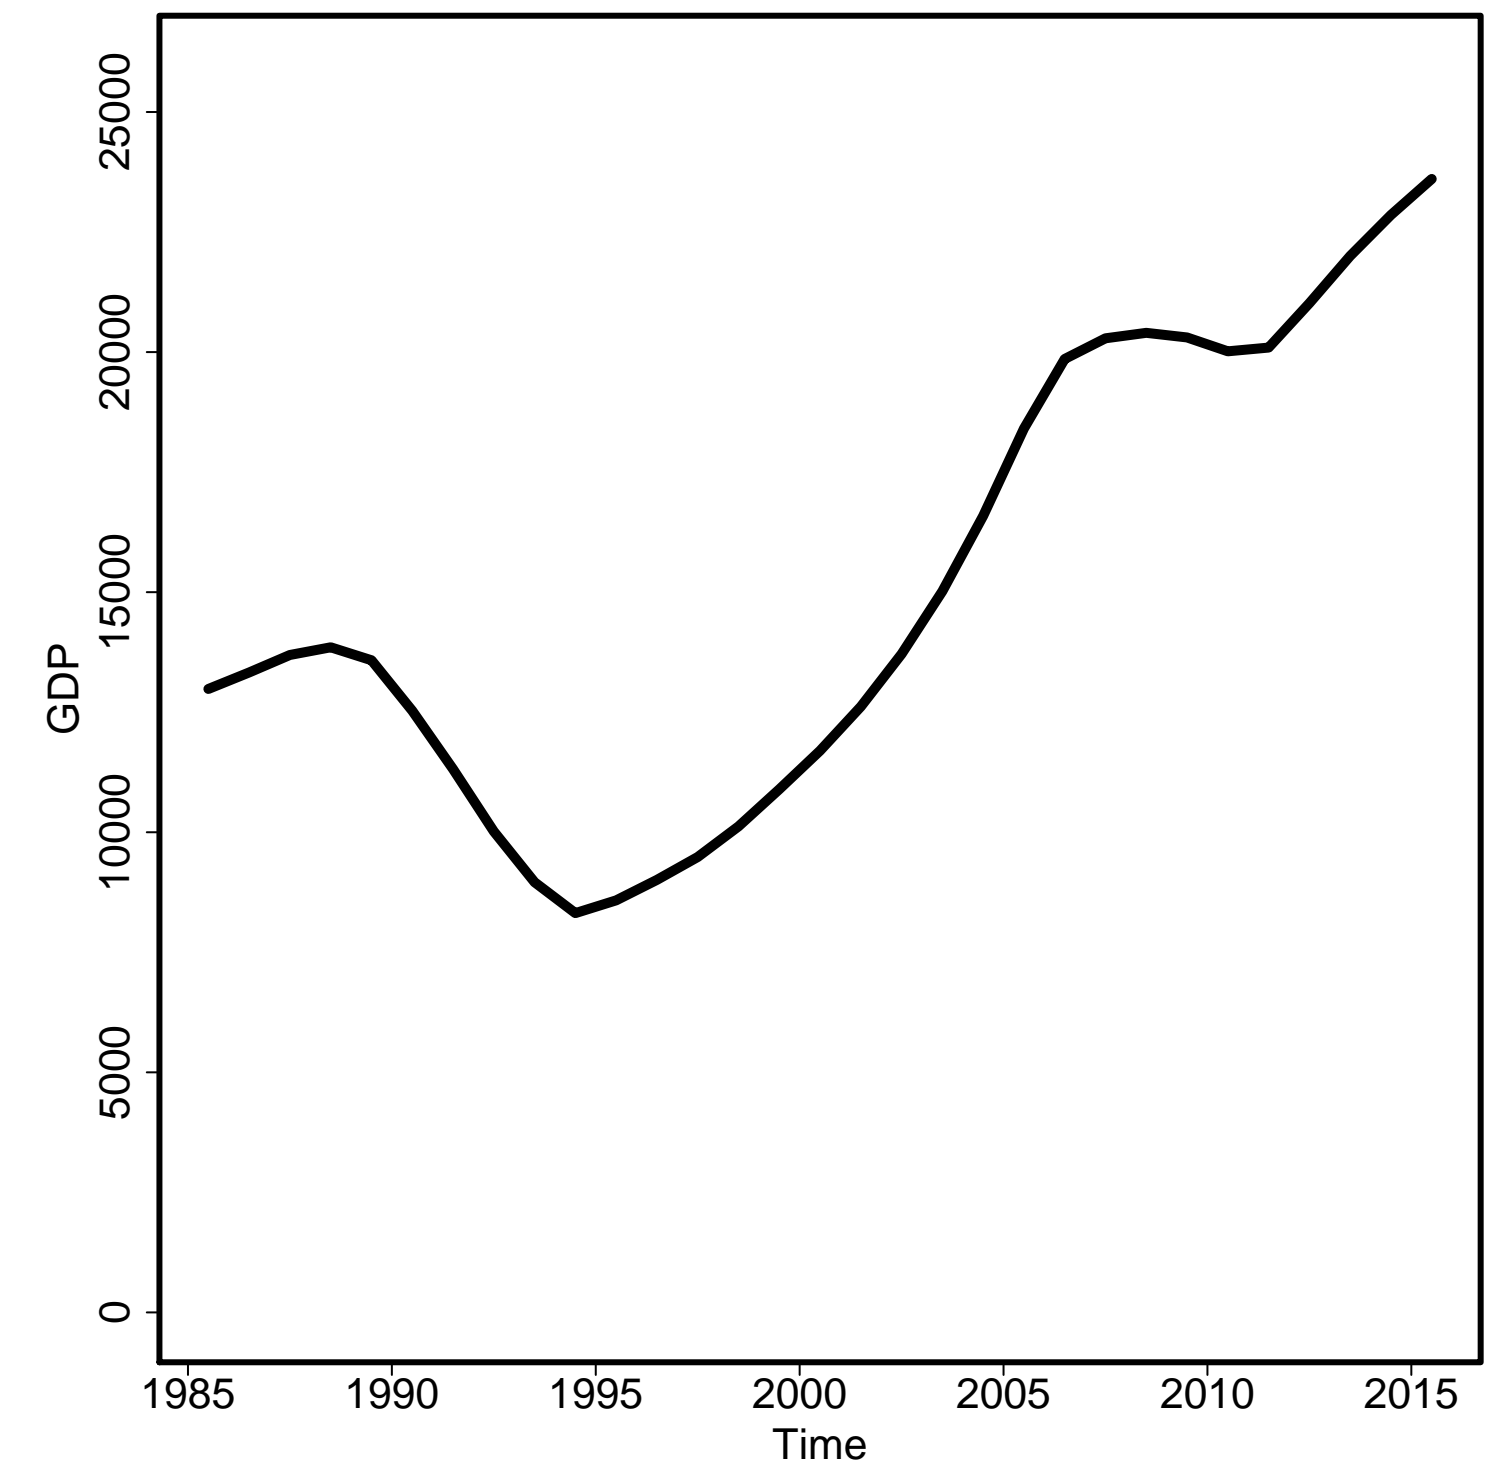

General Fertility Rate

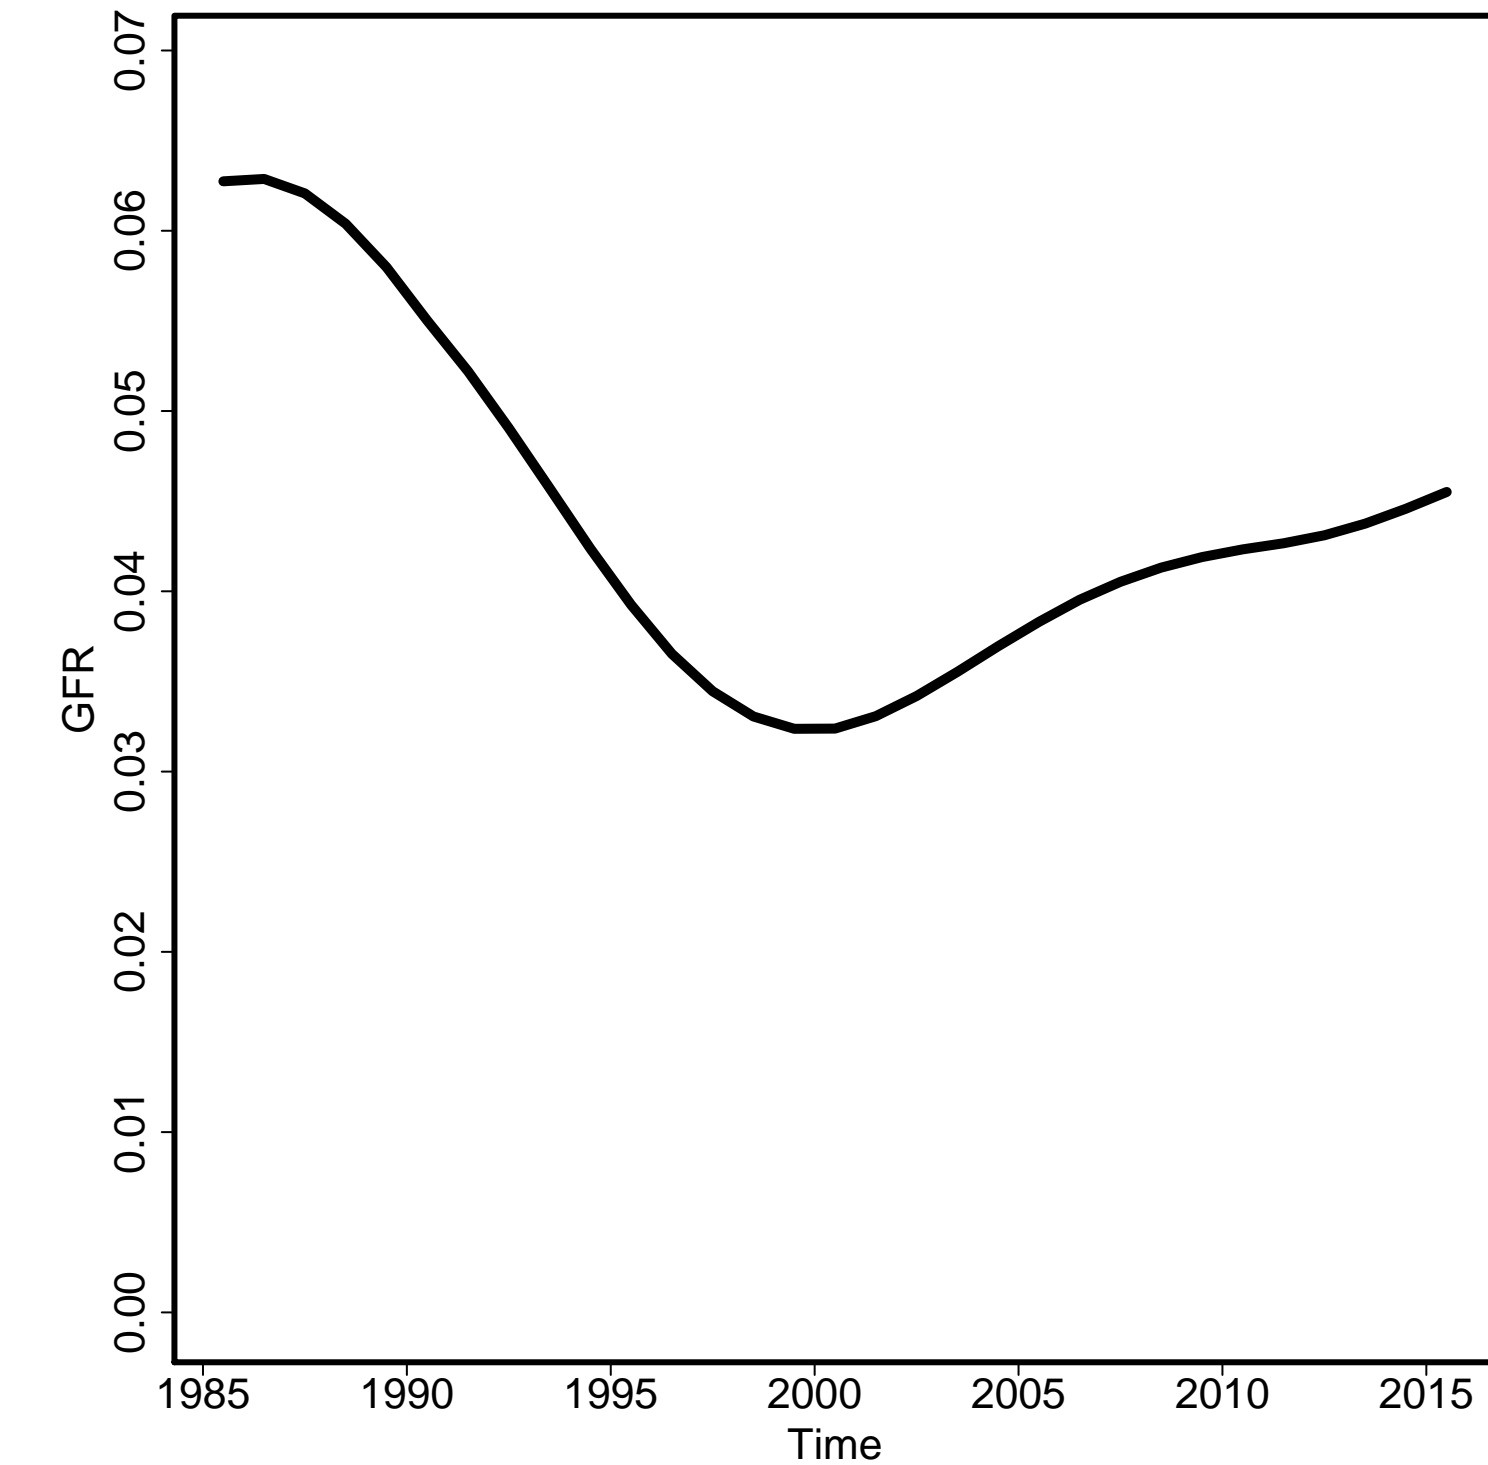

Skilled Attendance to Birth

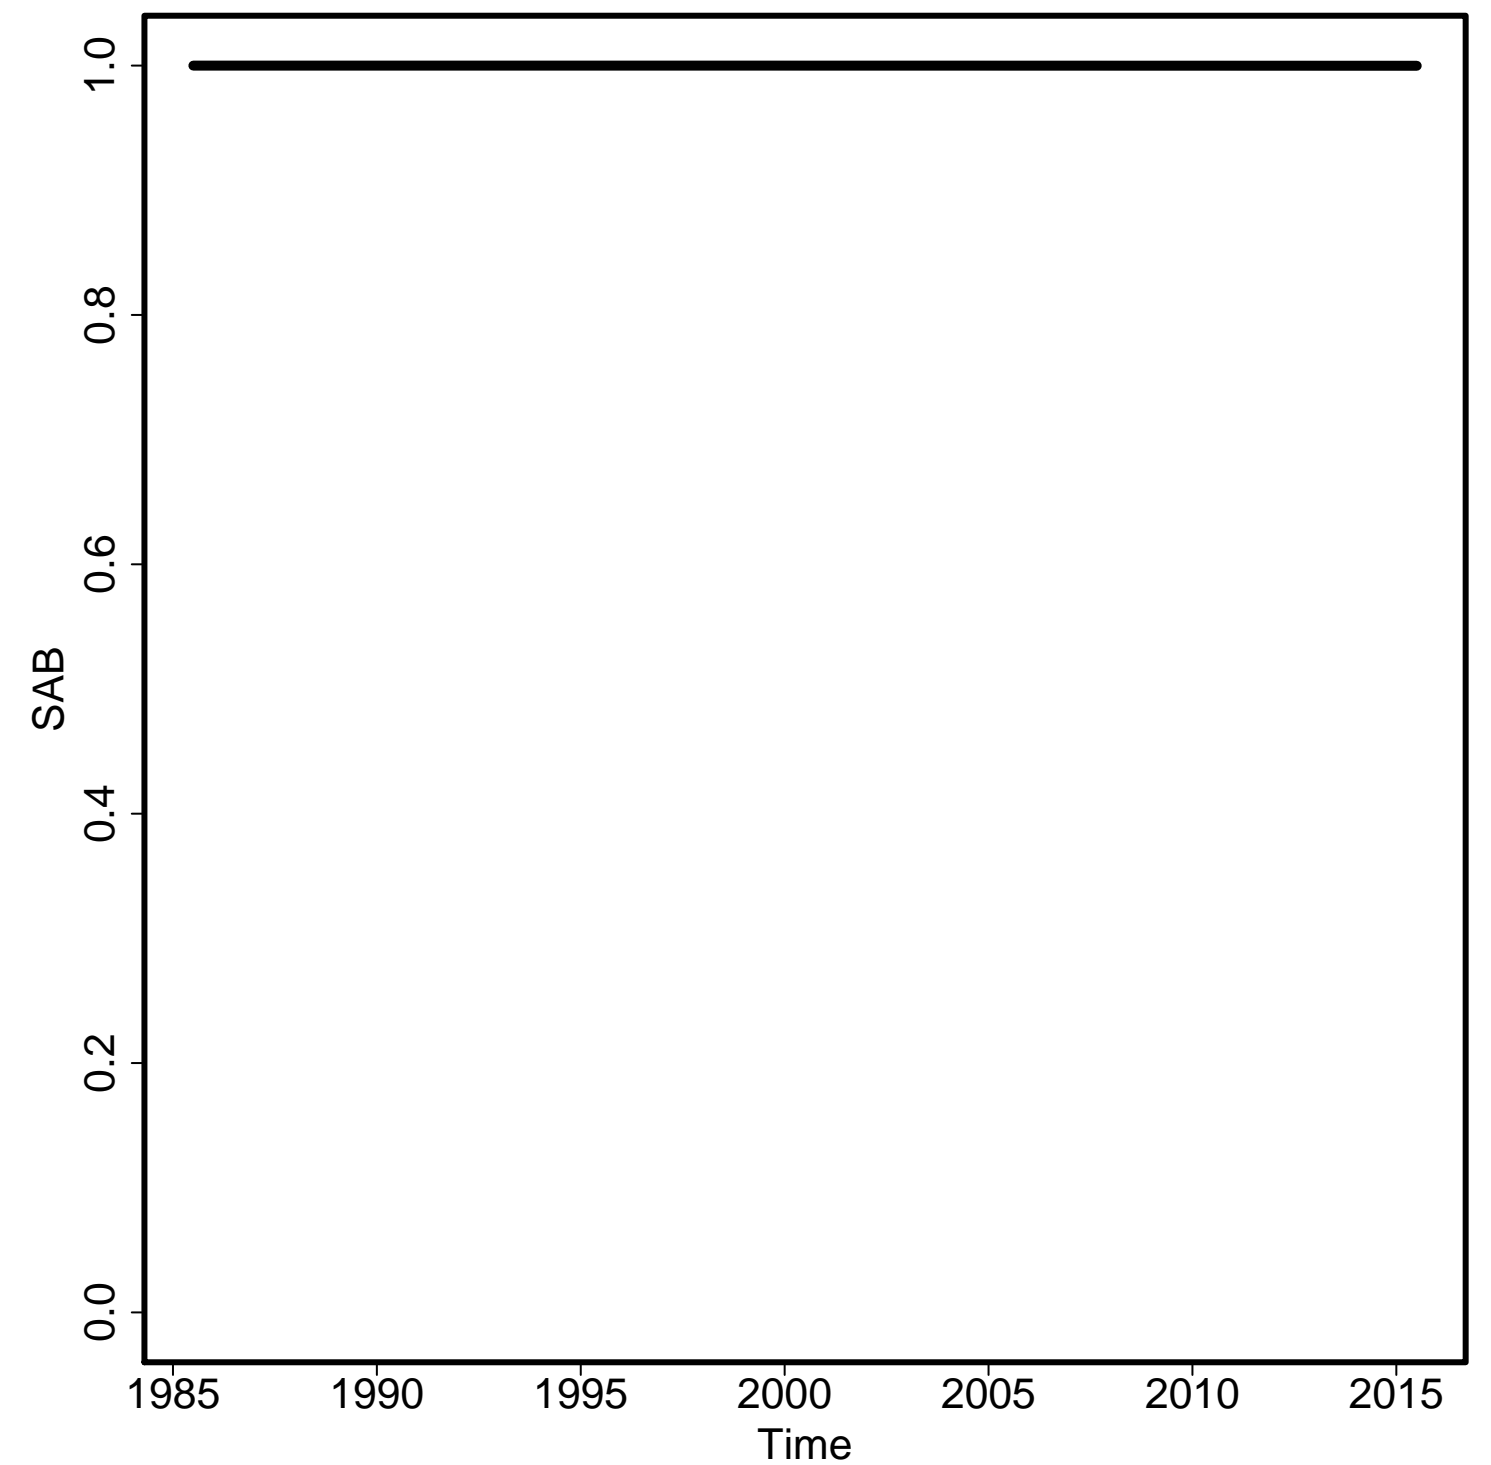

Envelope/Births

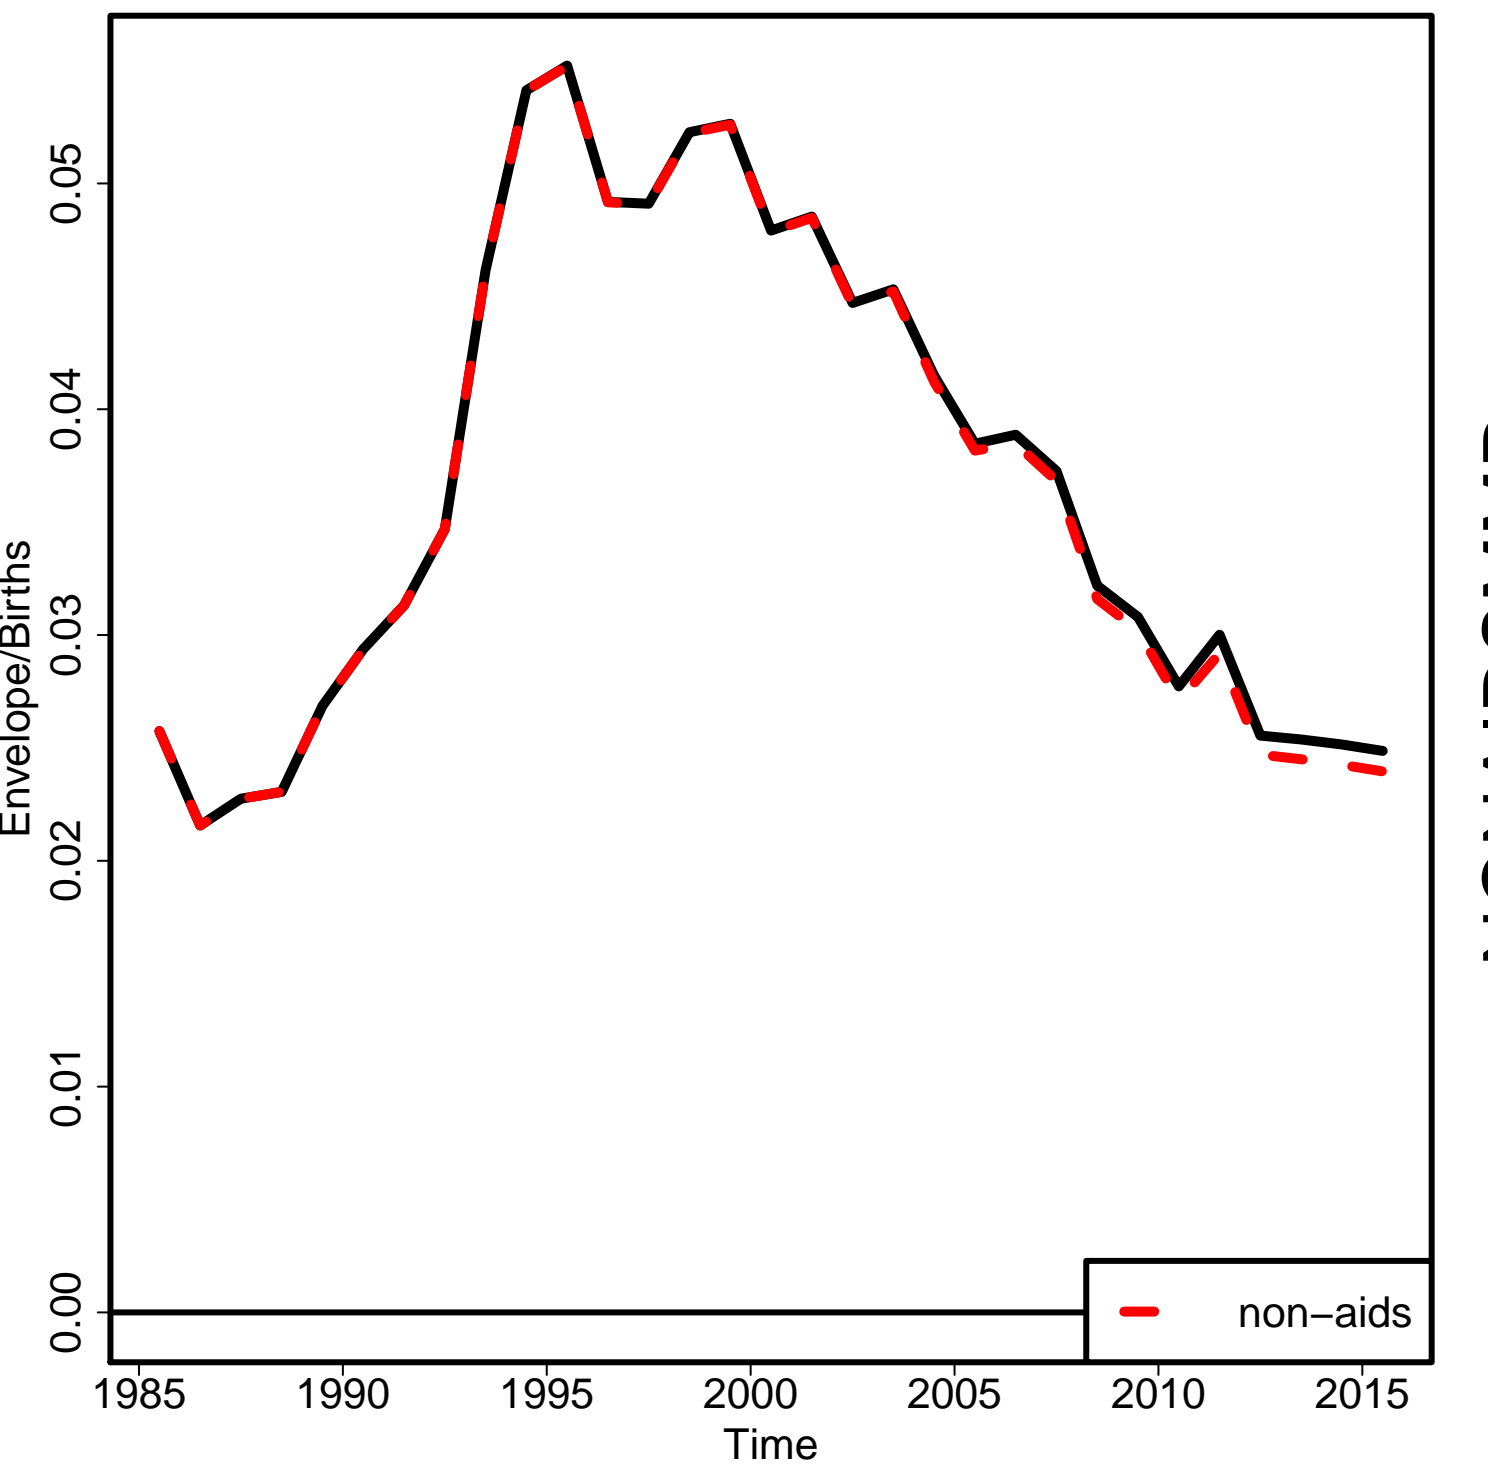

Non-aids MMR

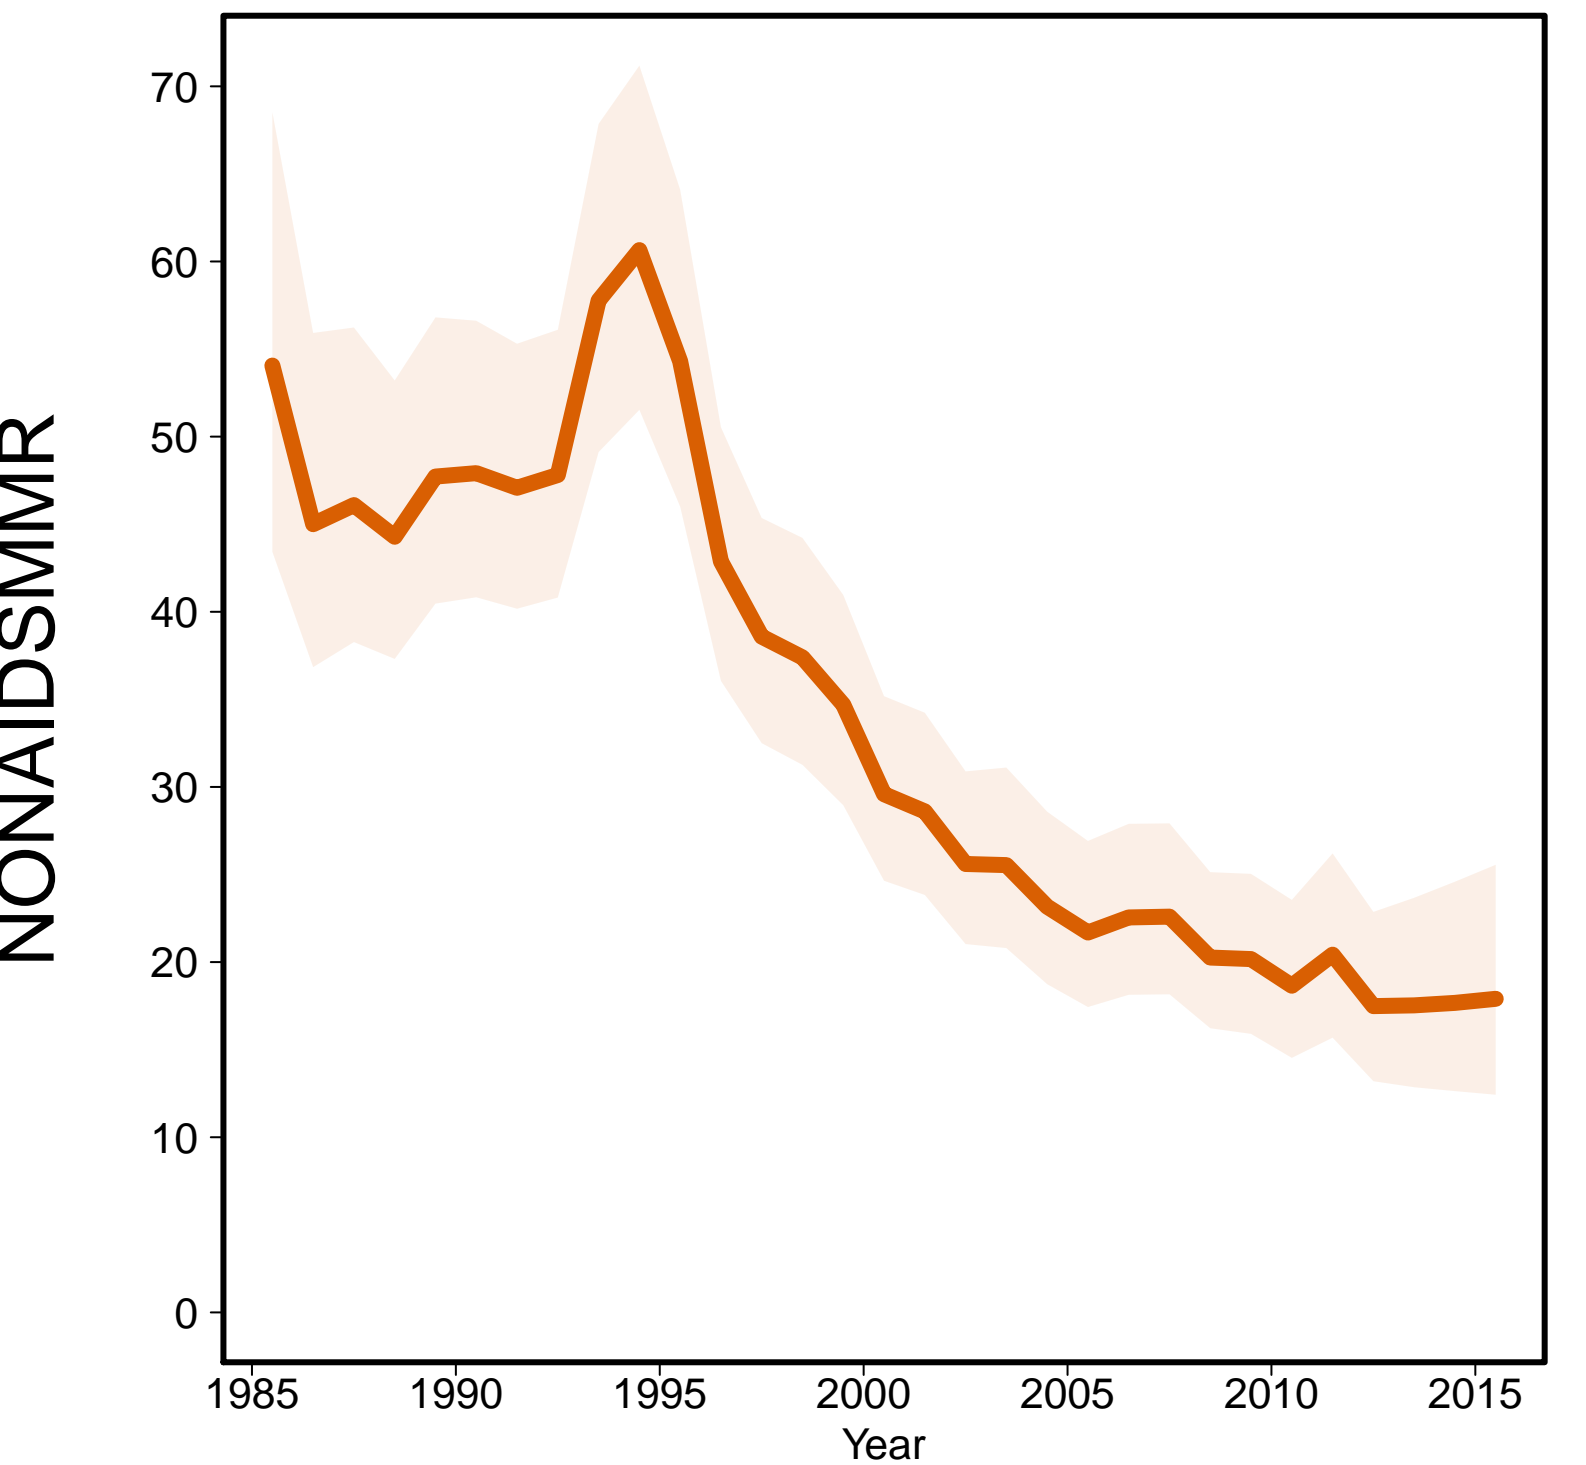

Aids MMR

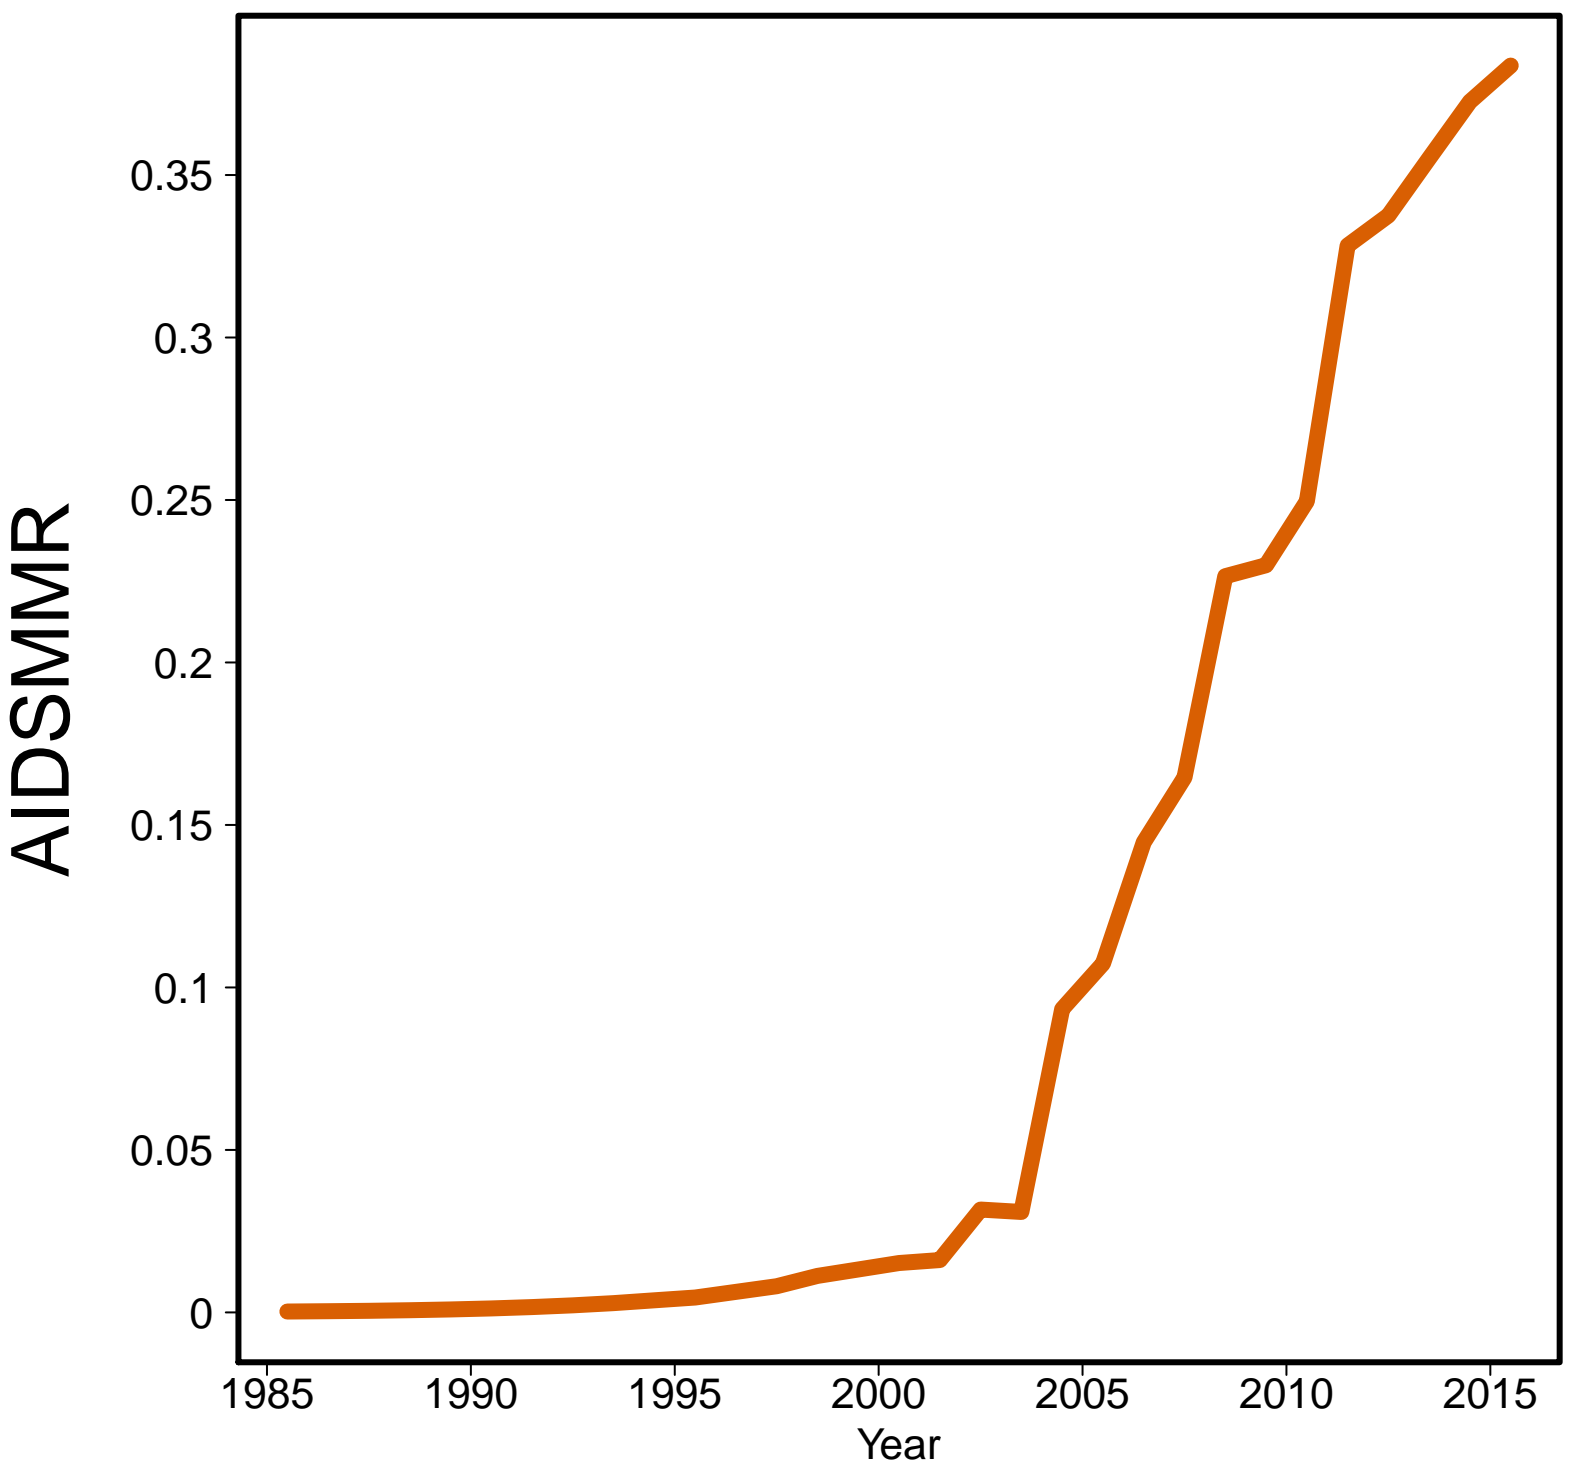

Lebanon [LBN]  
(Western Asia)

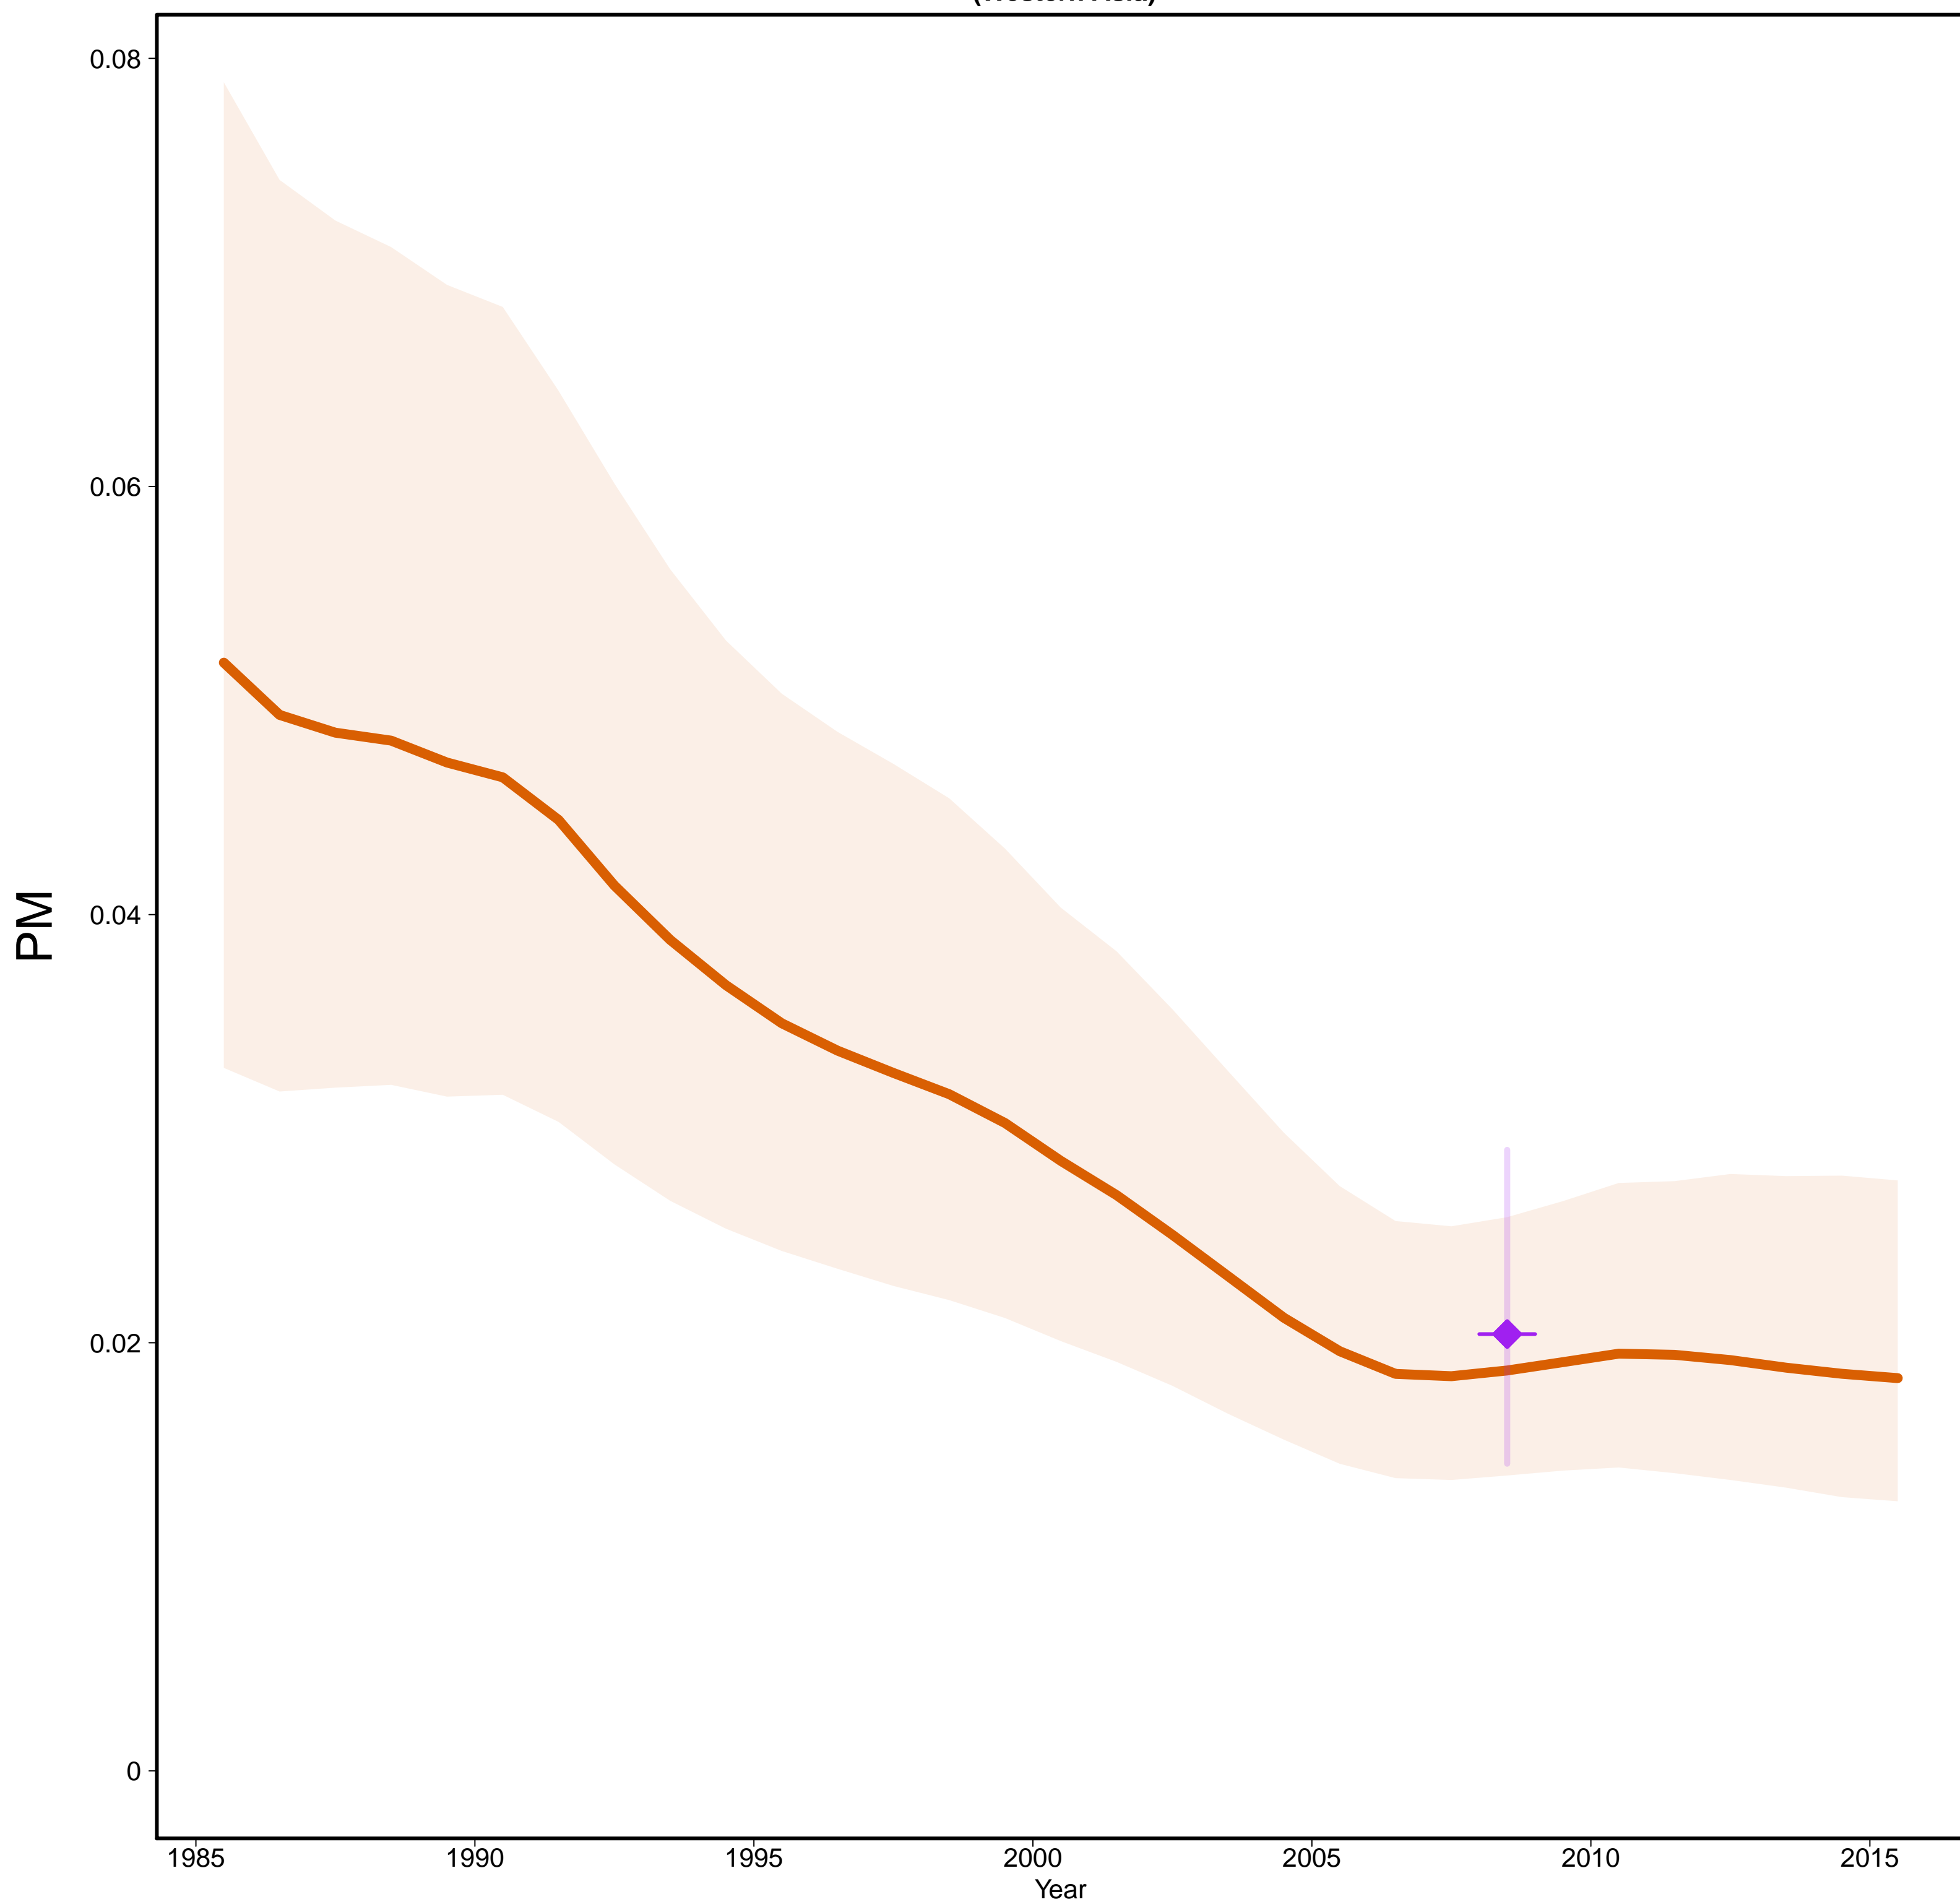

Lebanon [LBN]  
(Western Asia)

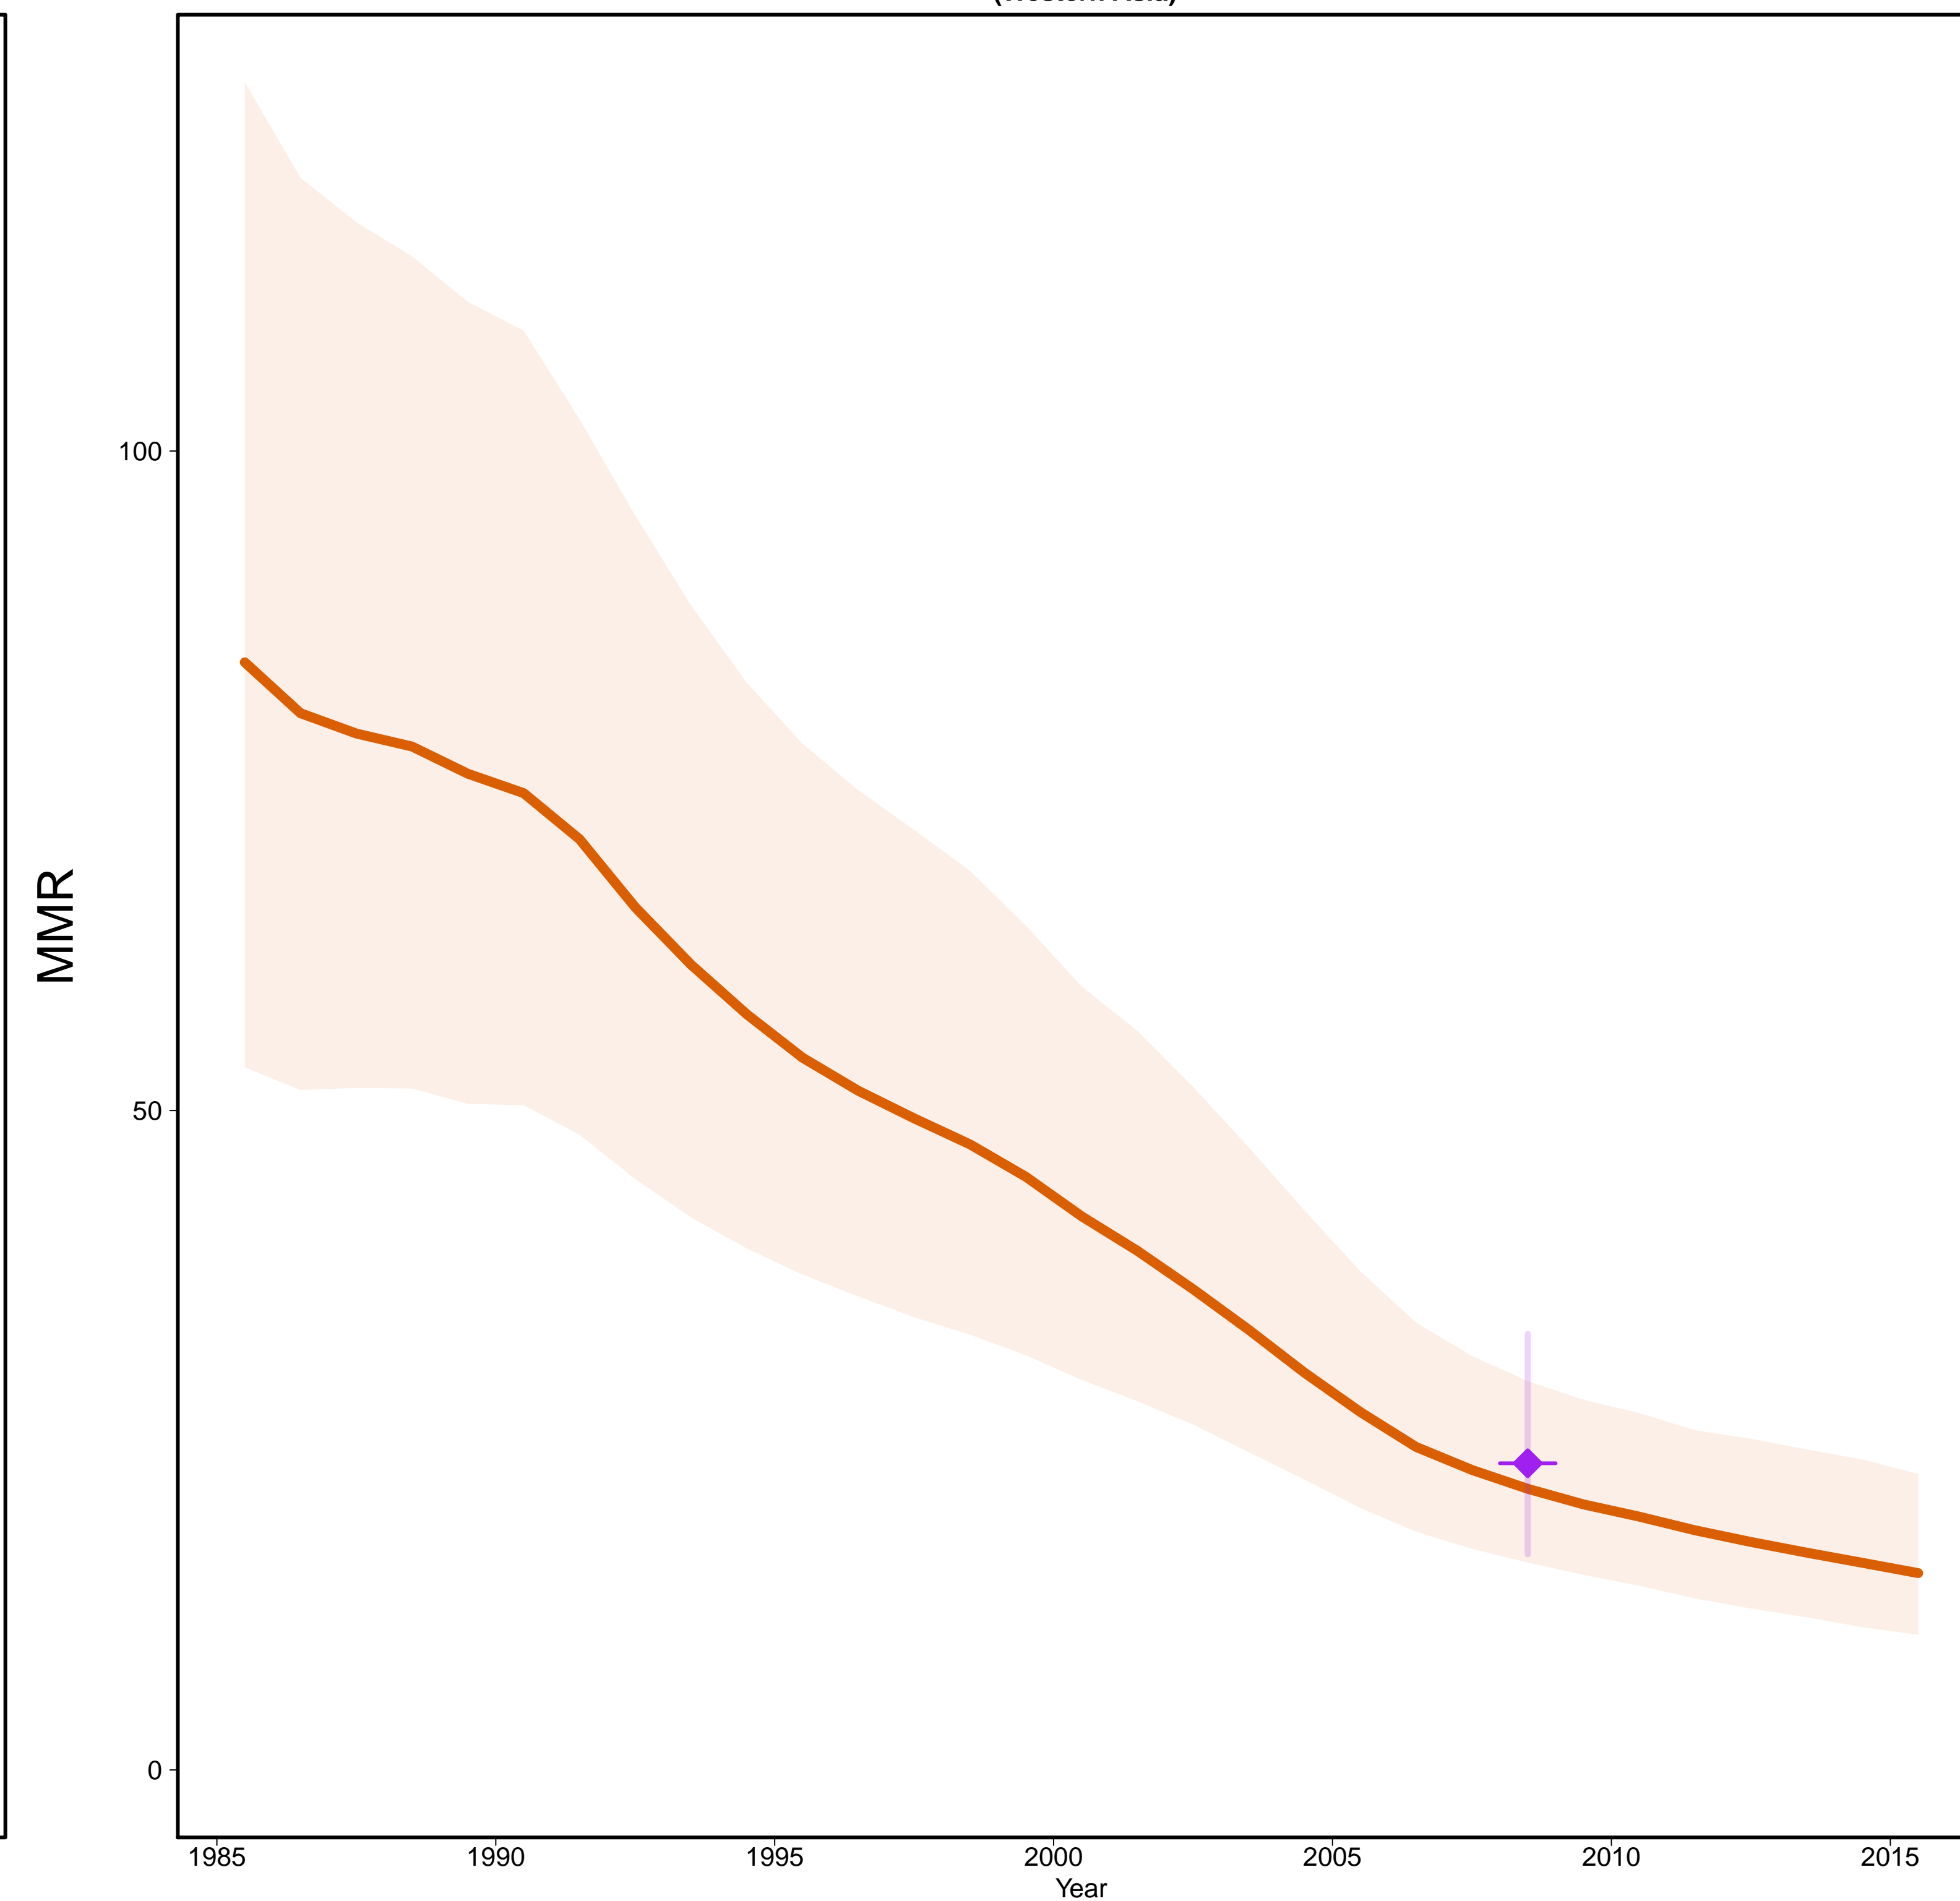

- Estimates —
- MMR Database 2015 —
- ◊ Observed Data
- ◆ Adjusted Data
- Data type —
- ◆ Spec. studies

Gross Domestic Product

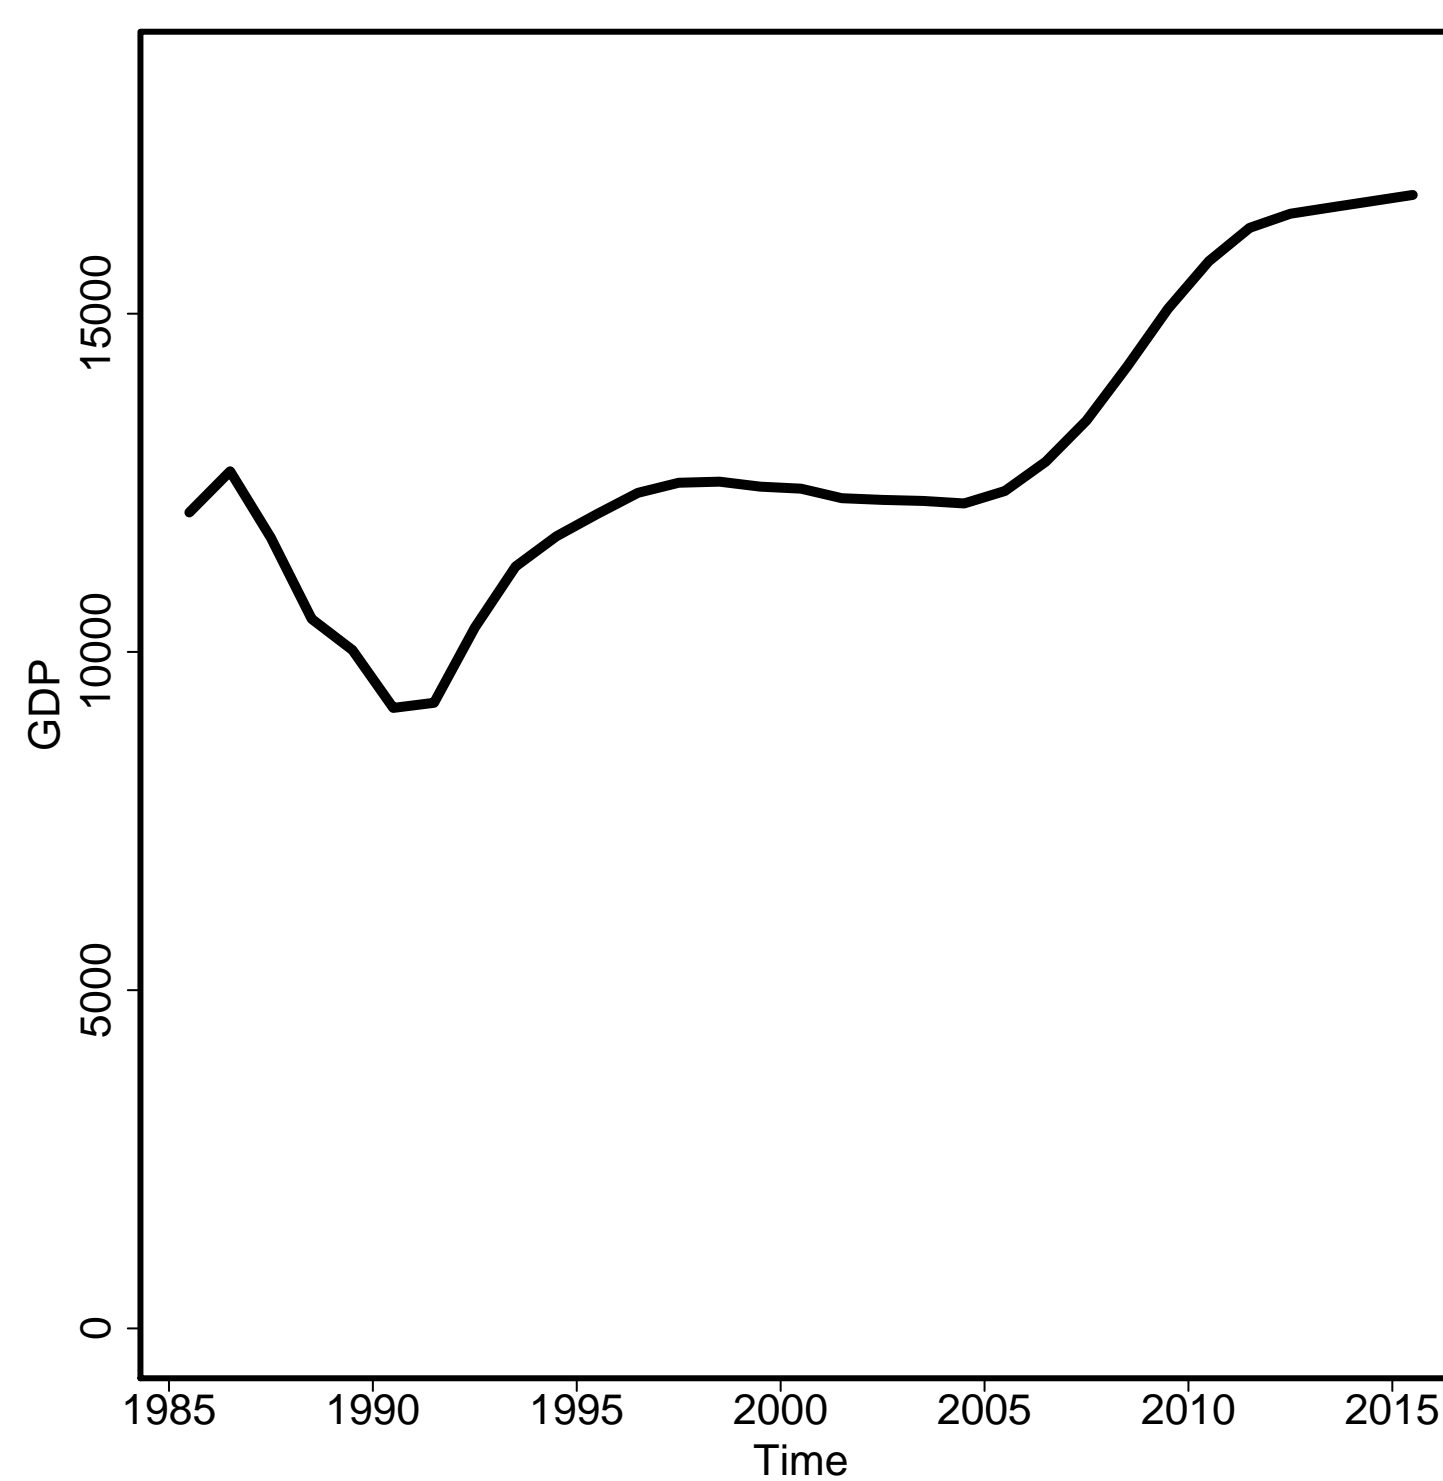

General Fertility Rate

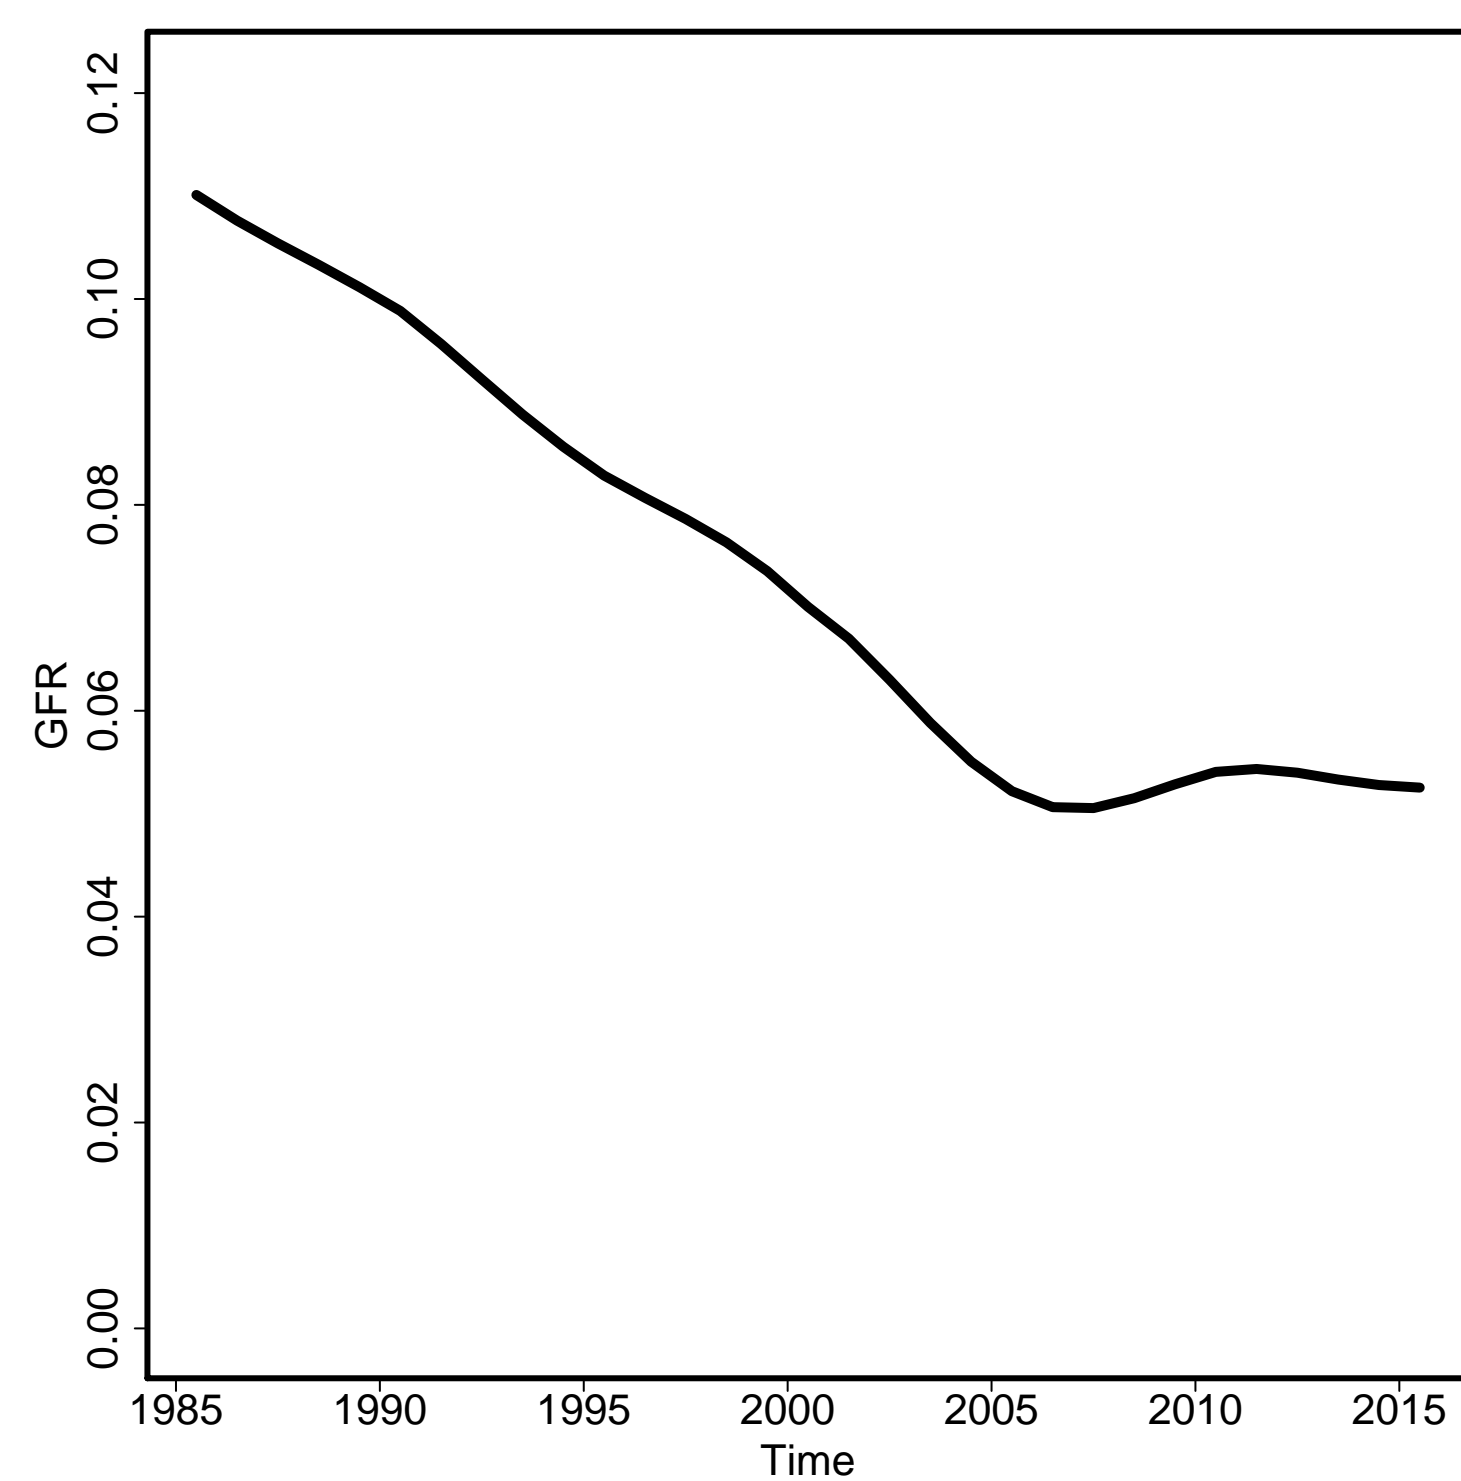

Skilled Attendance to Birth

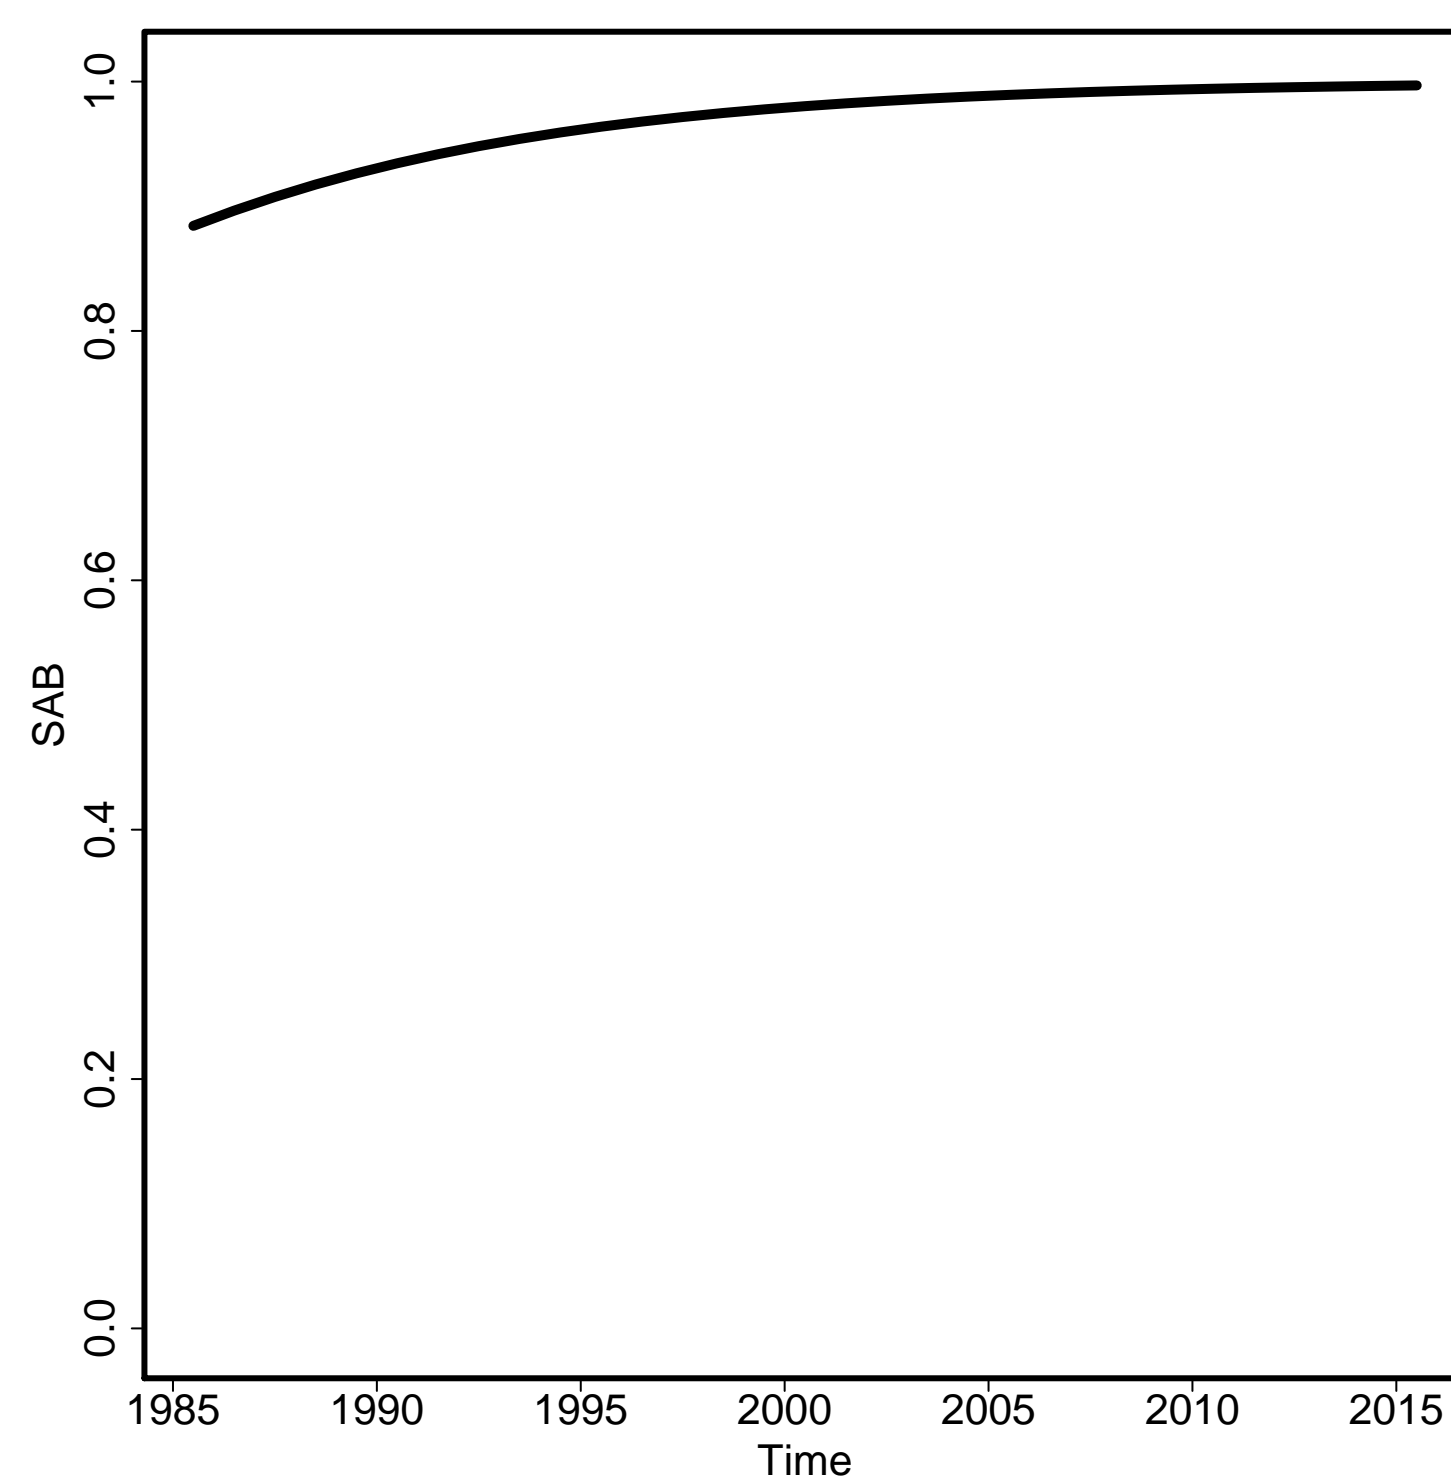

Envelope/Births

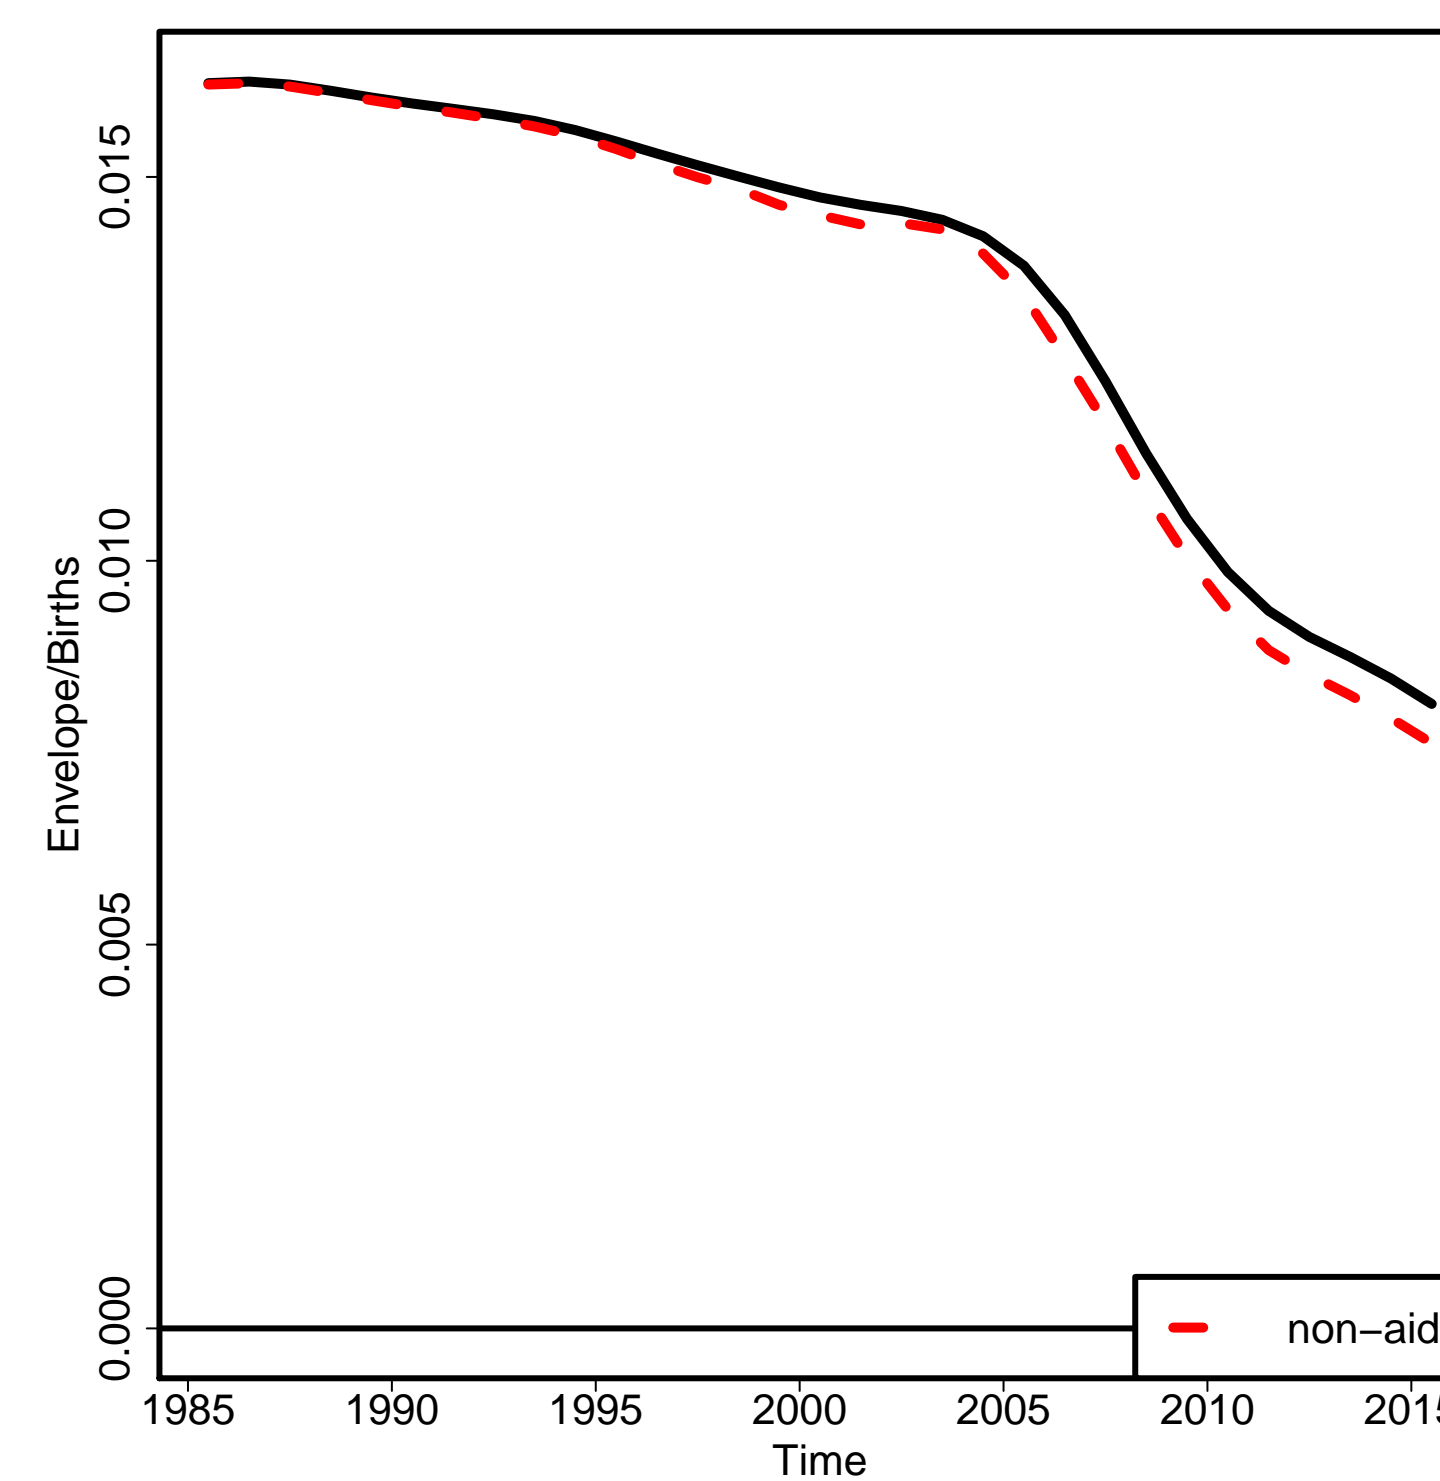

Non-aids MMR

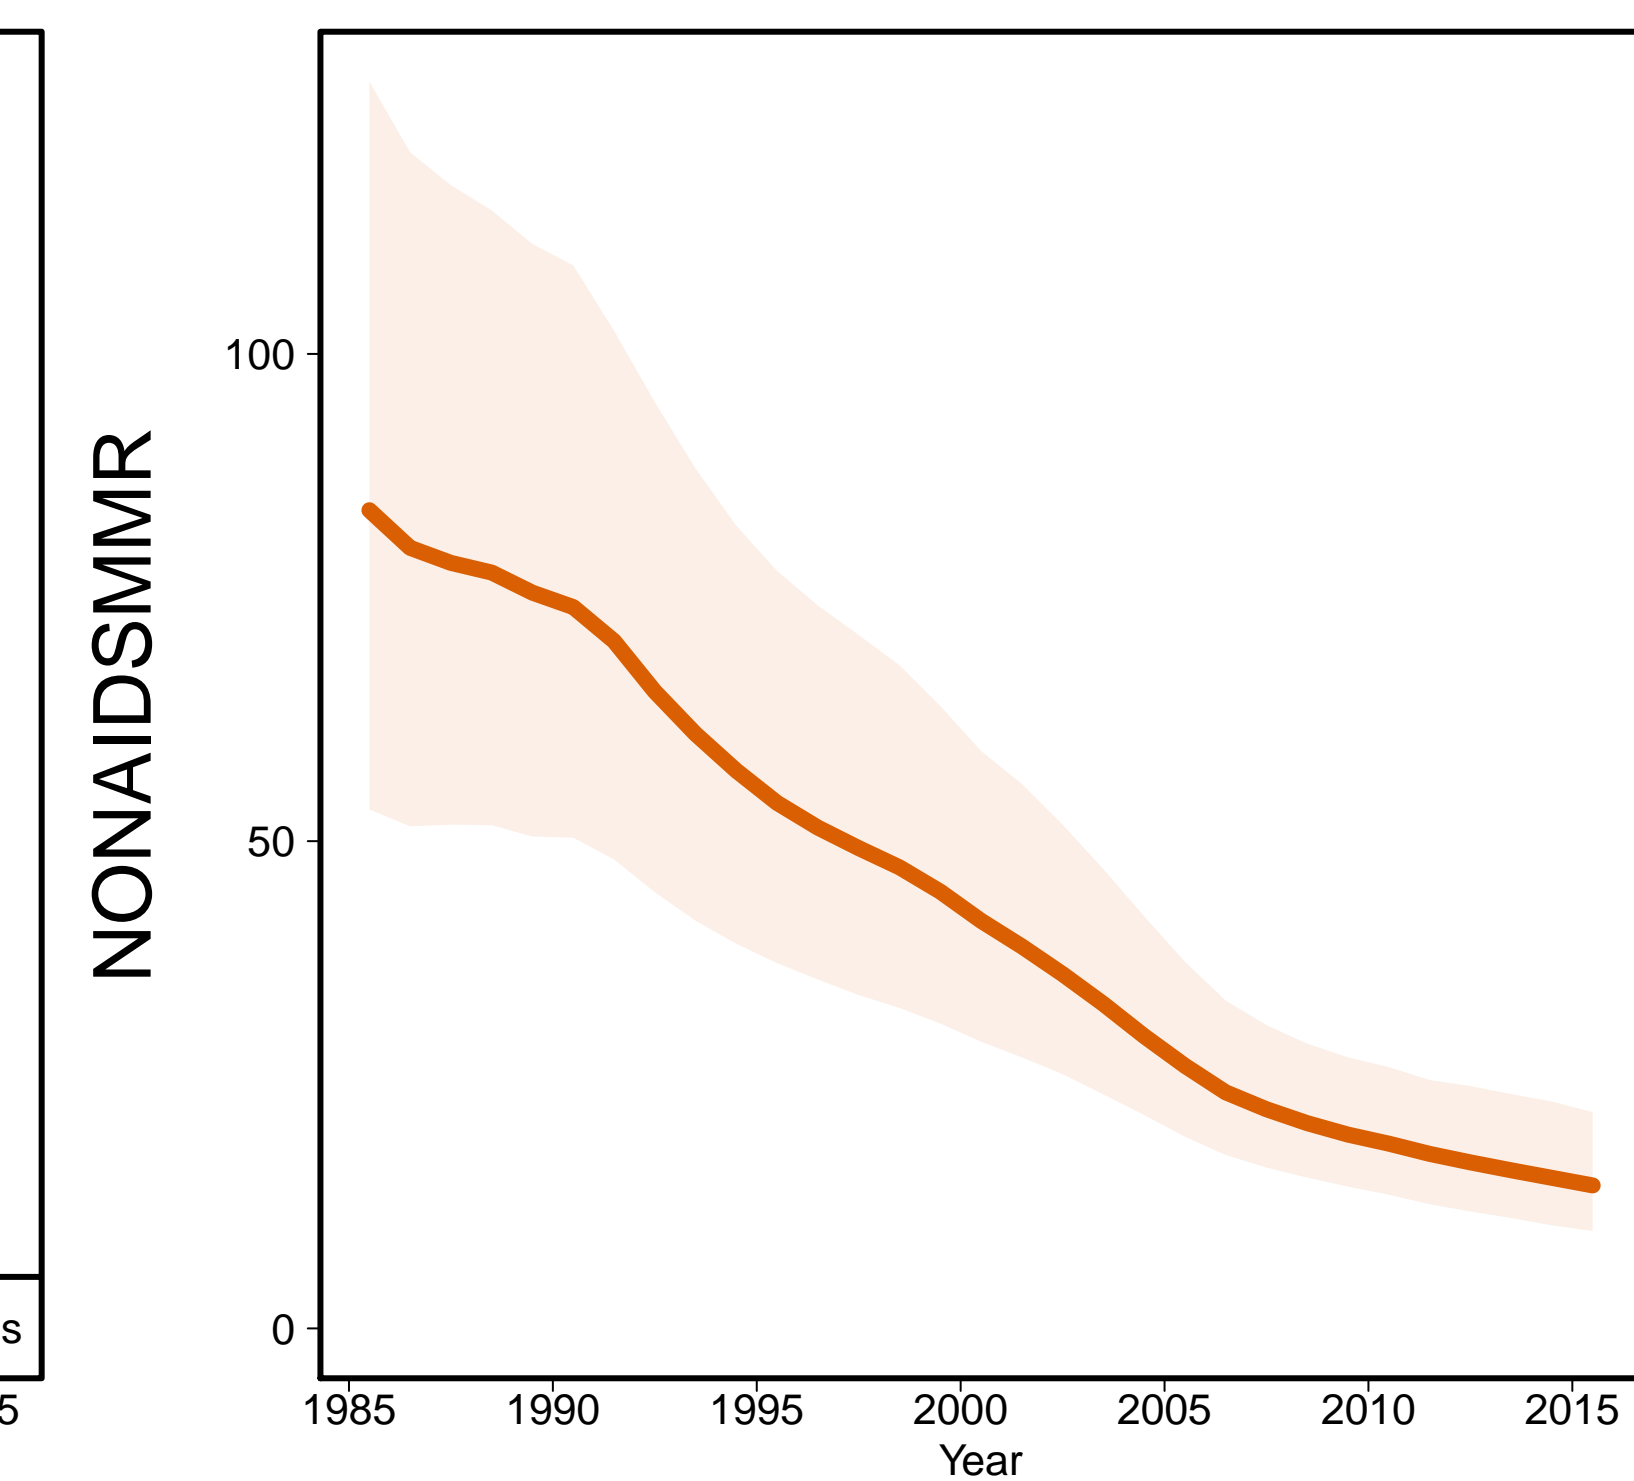

Aids MMR

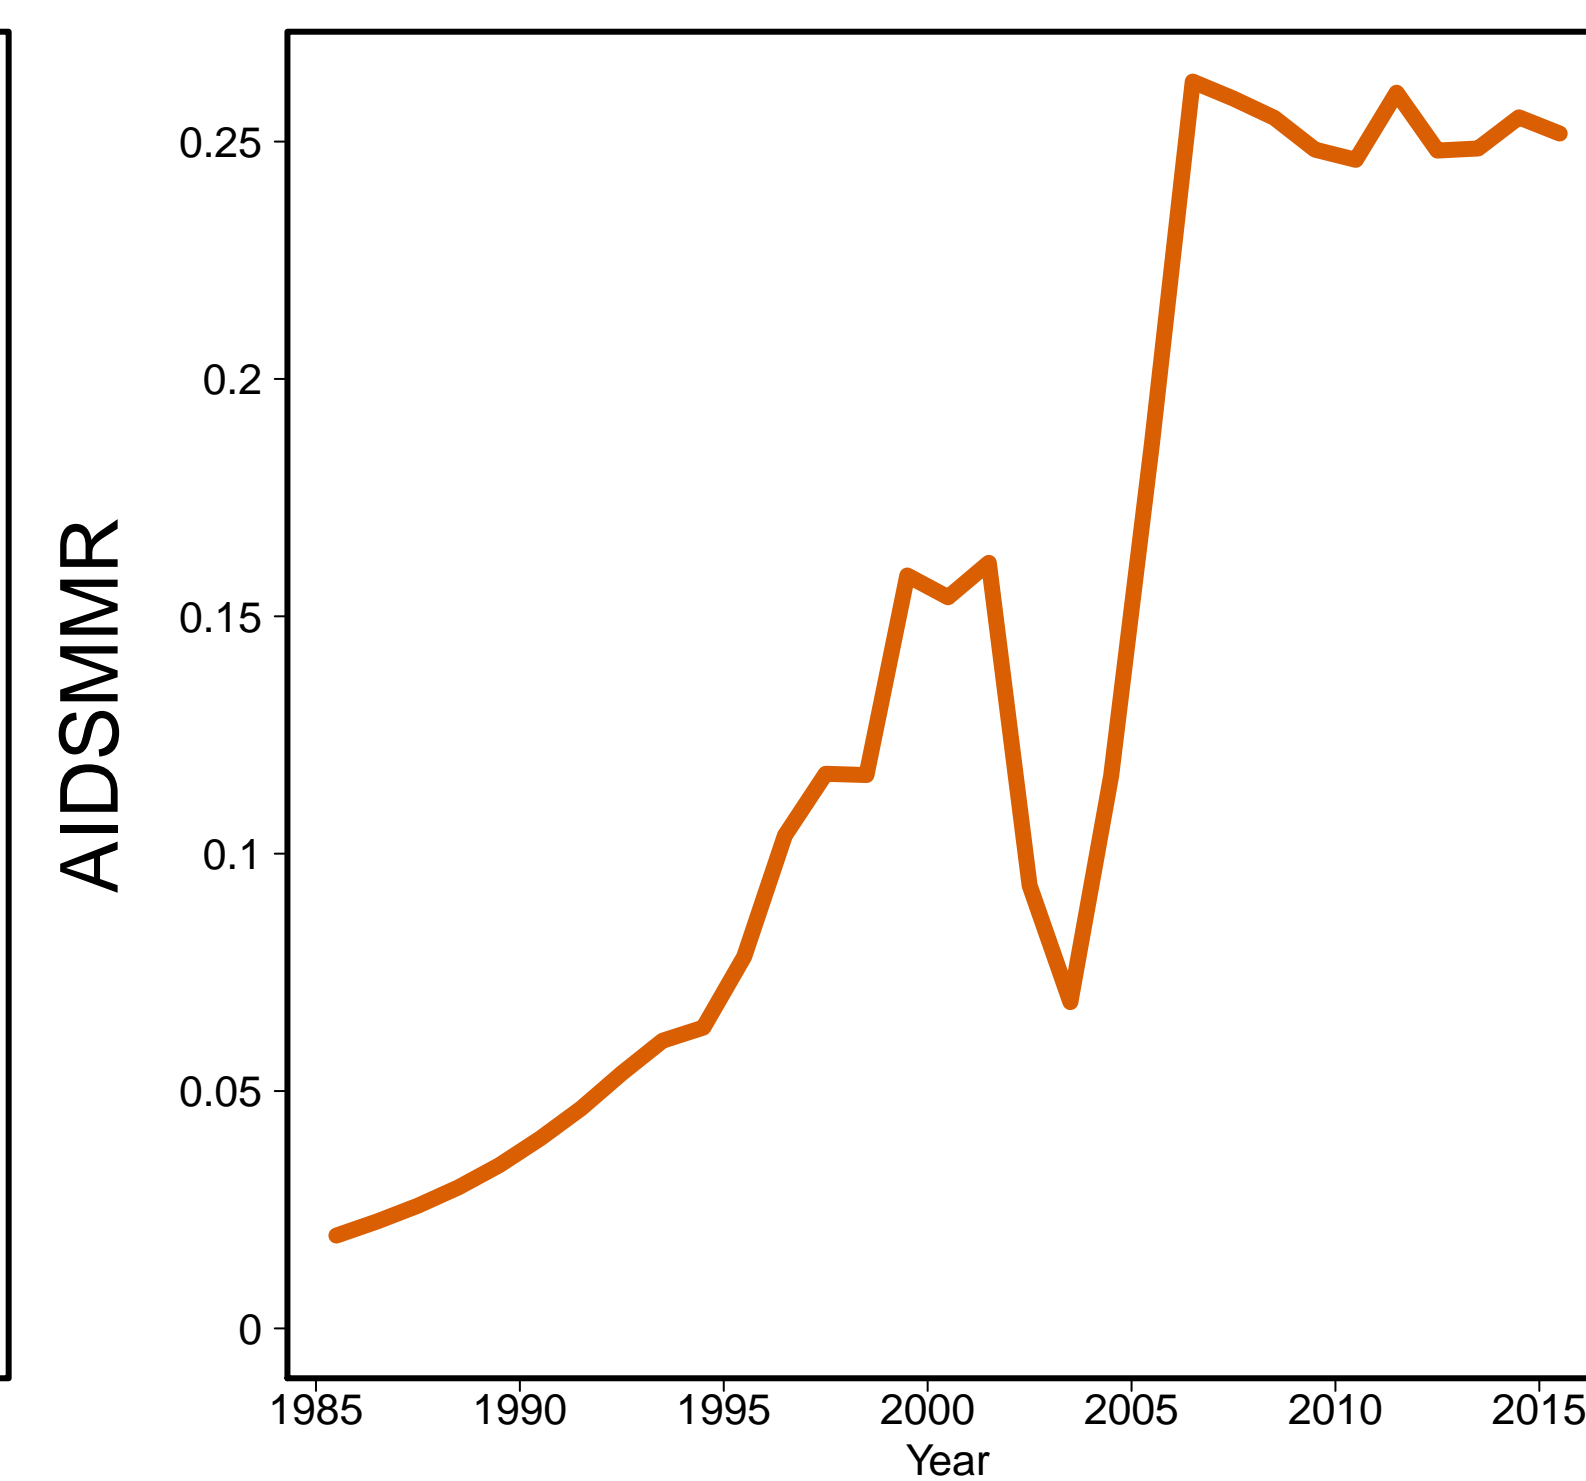

Lesotho [LSO]  
(Southern Africa)

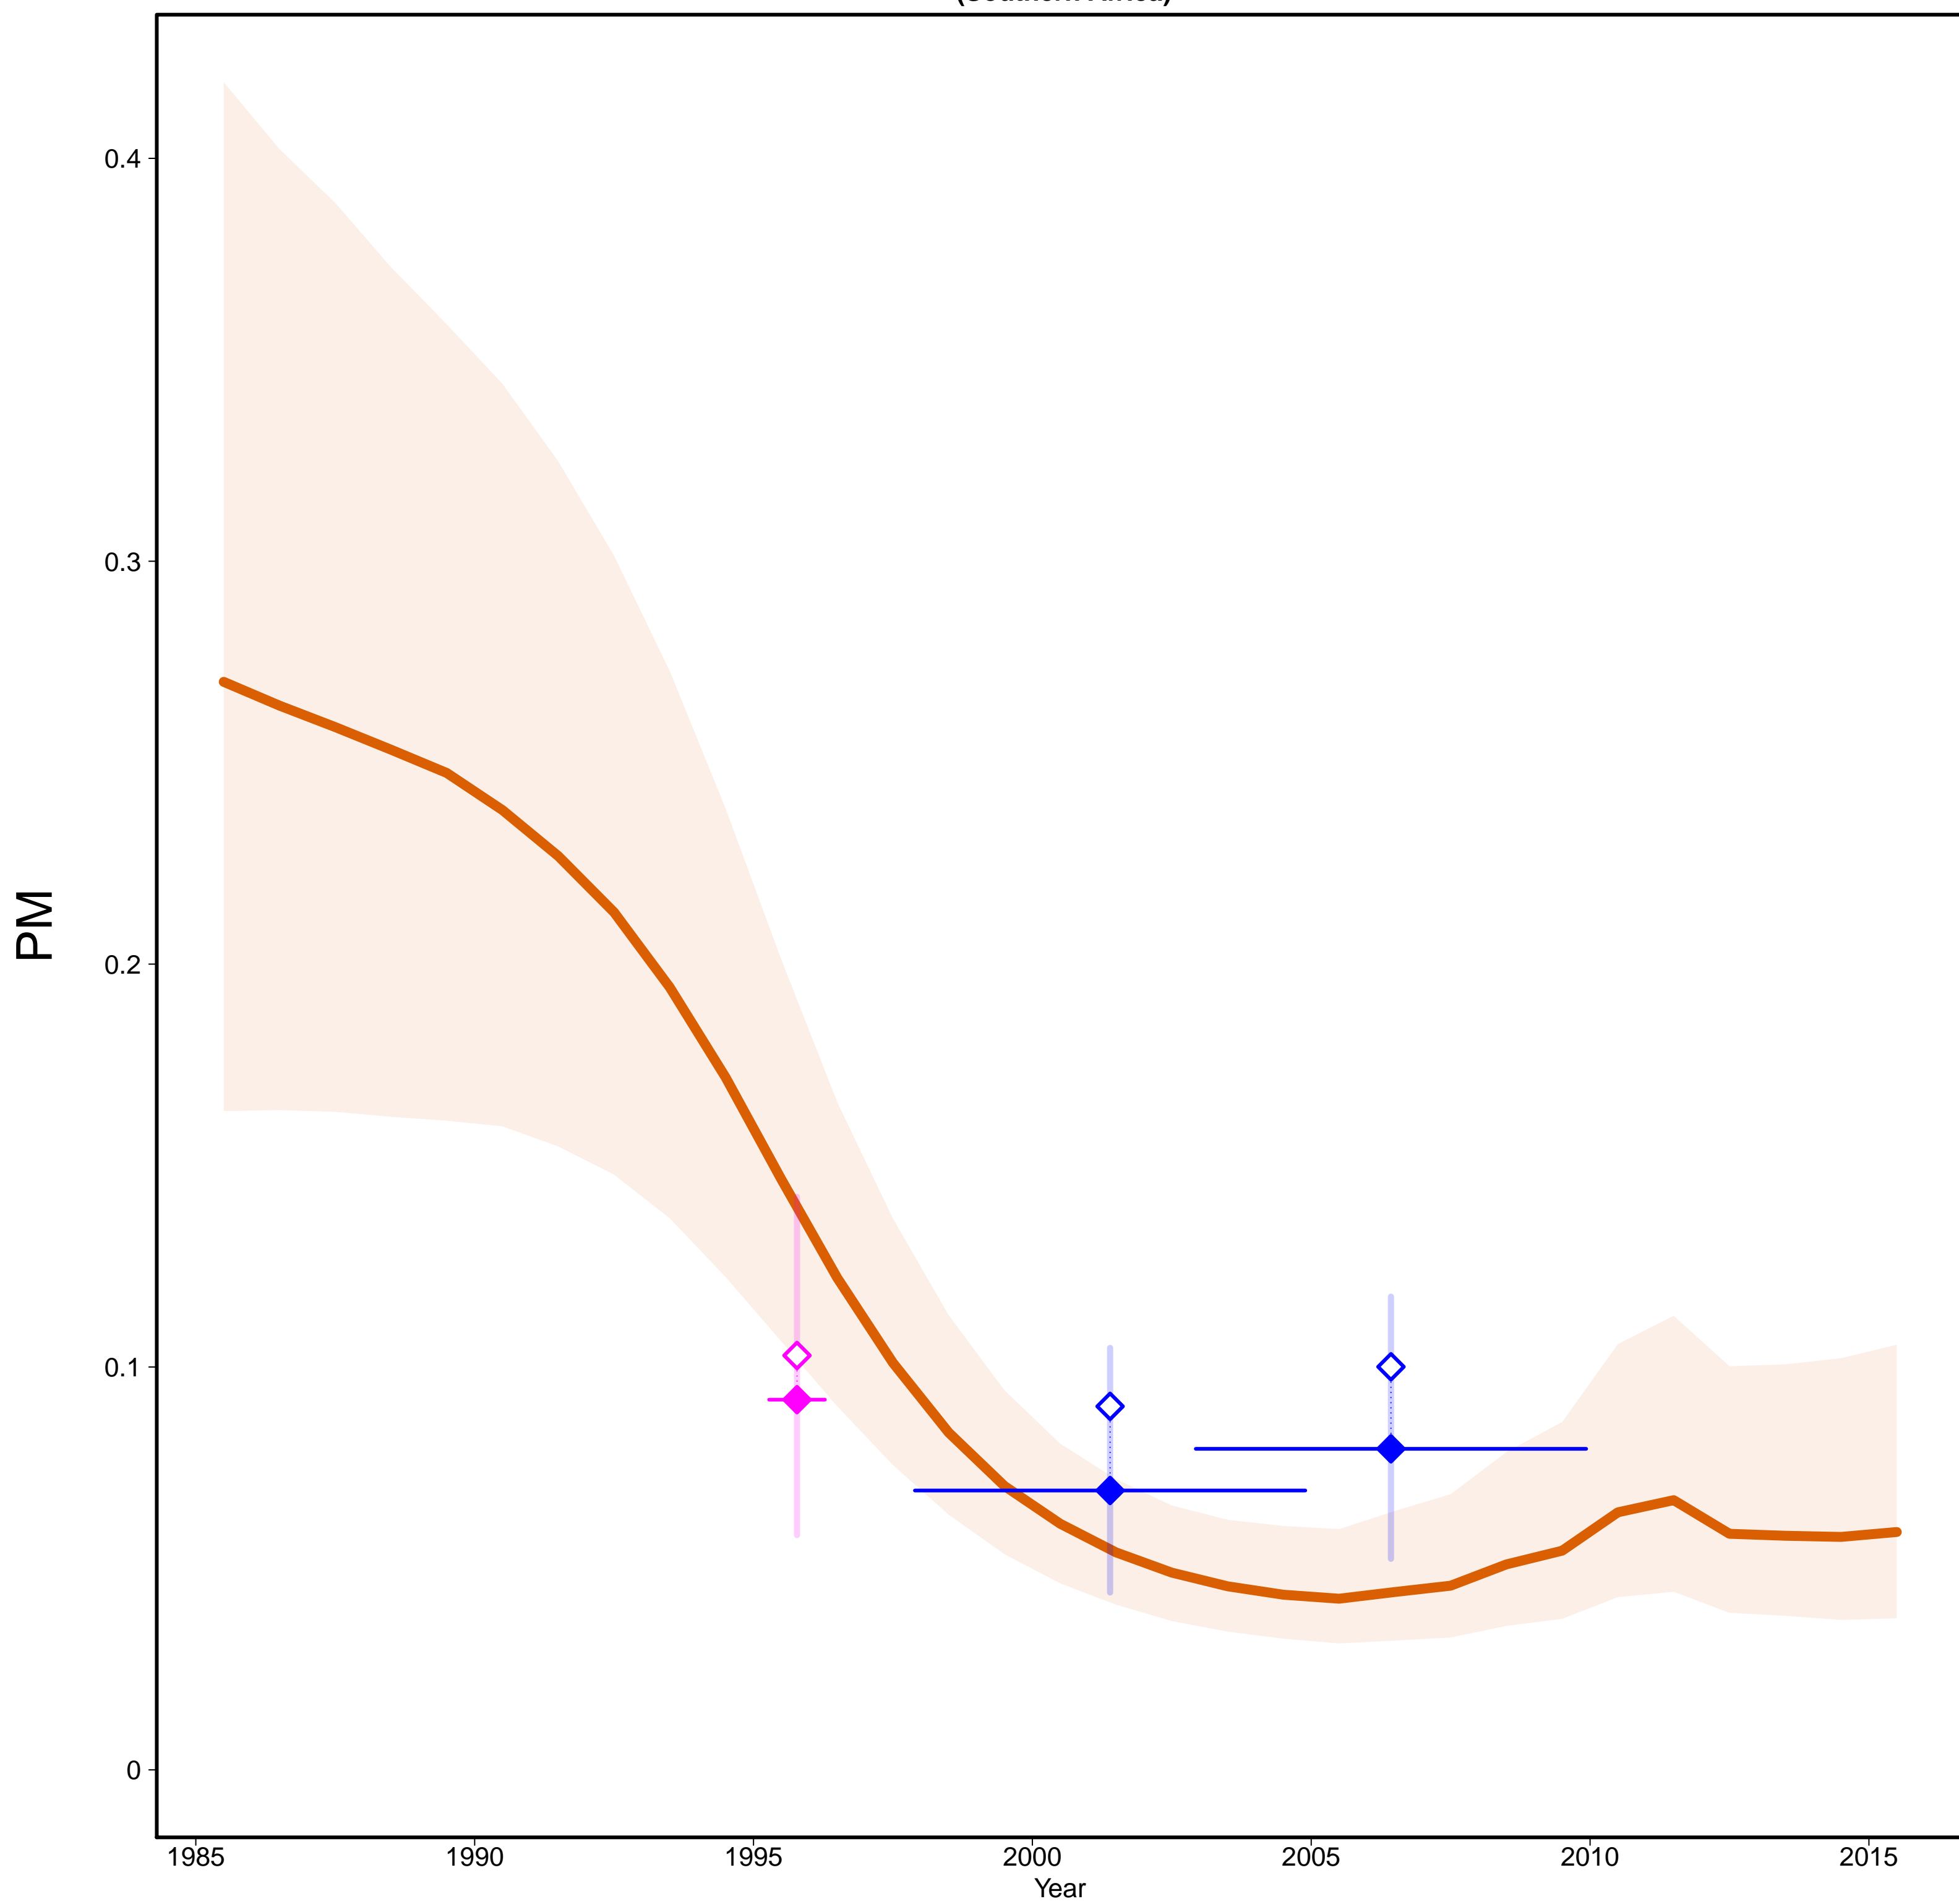

Lesotho [LSO]  
(Southern Africa)

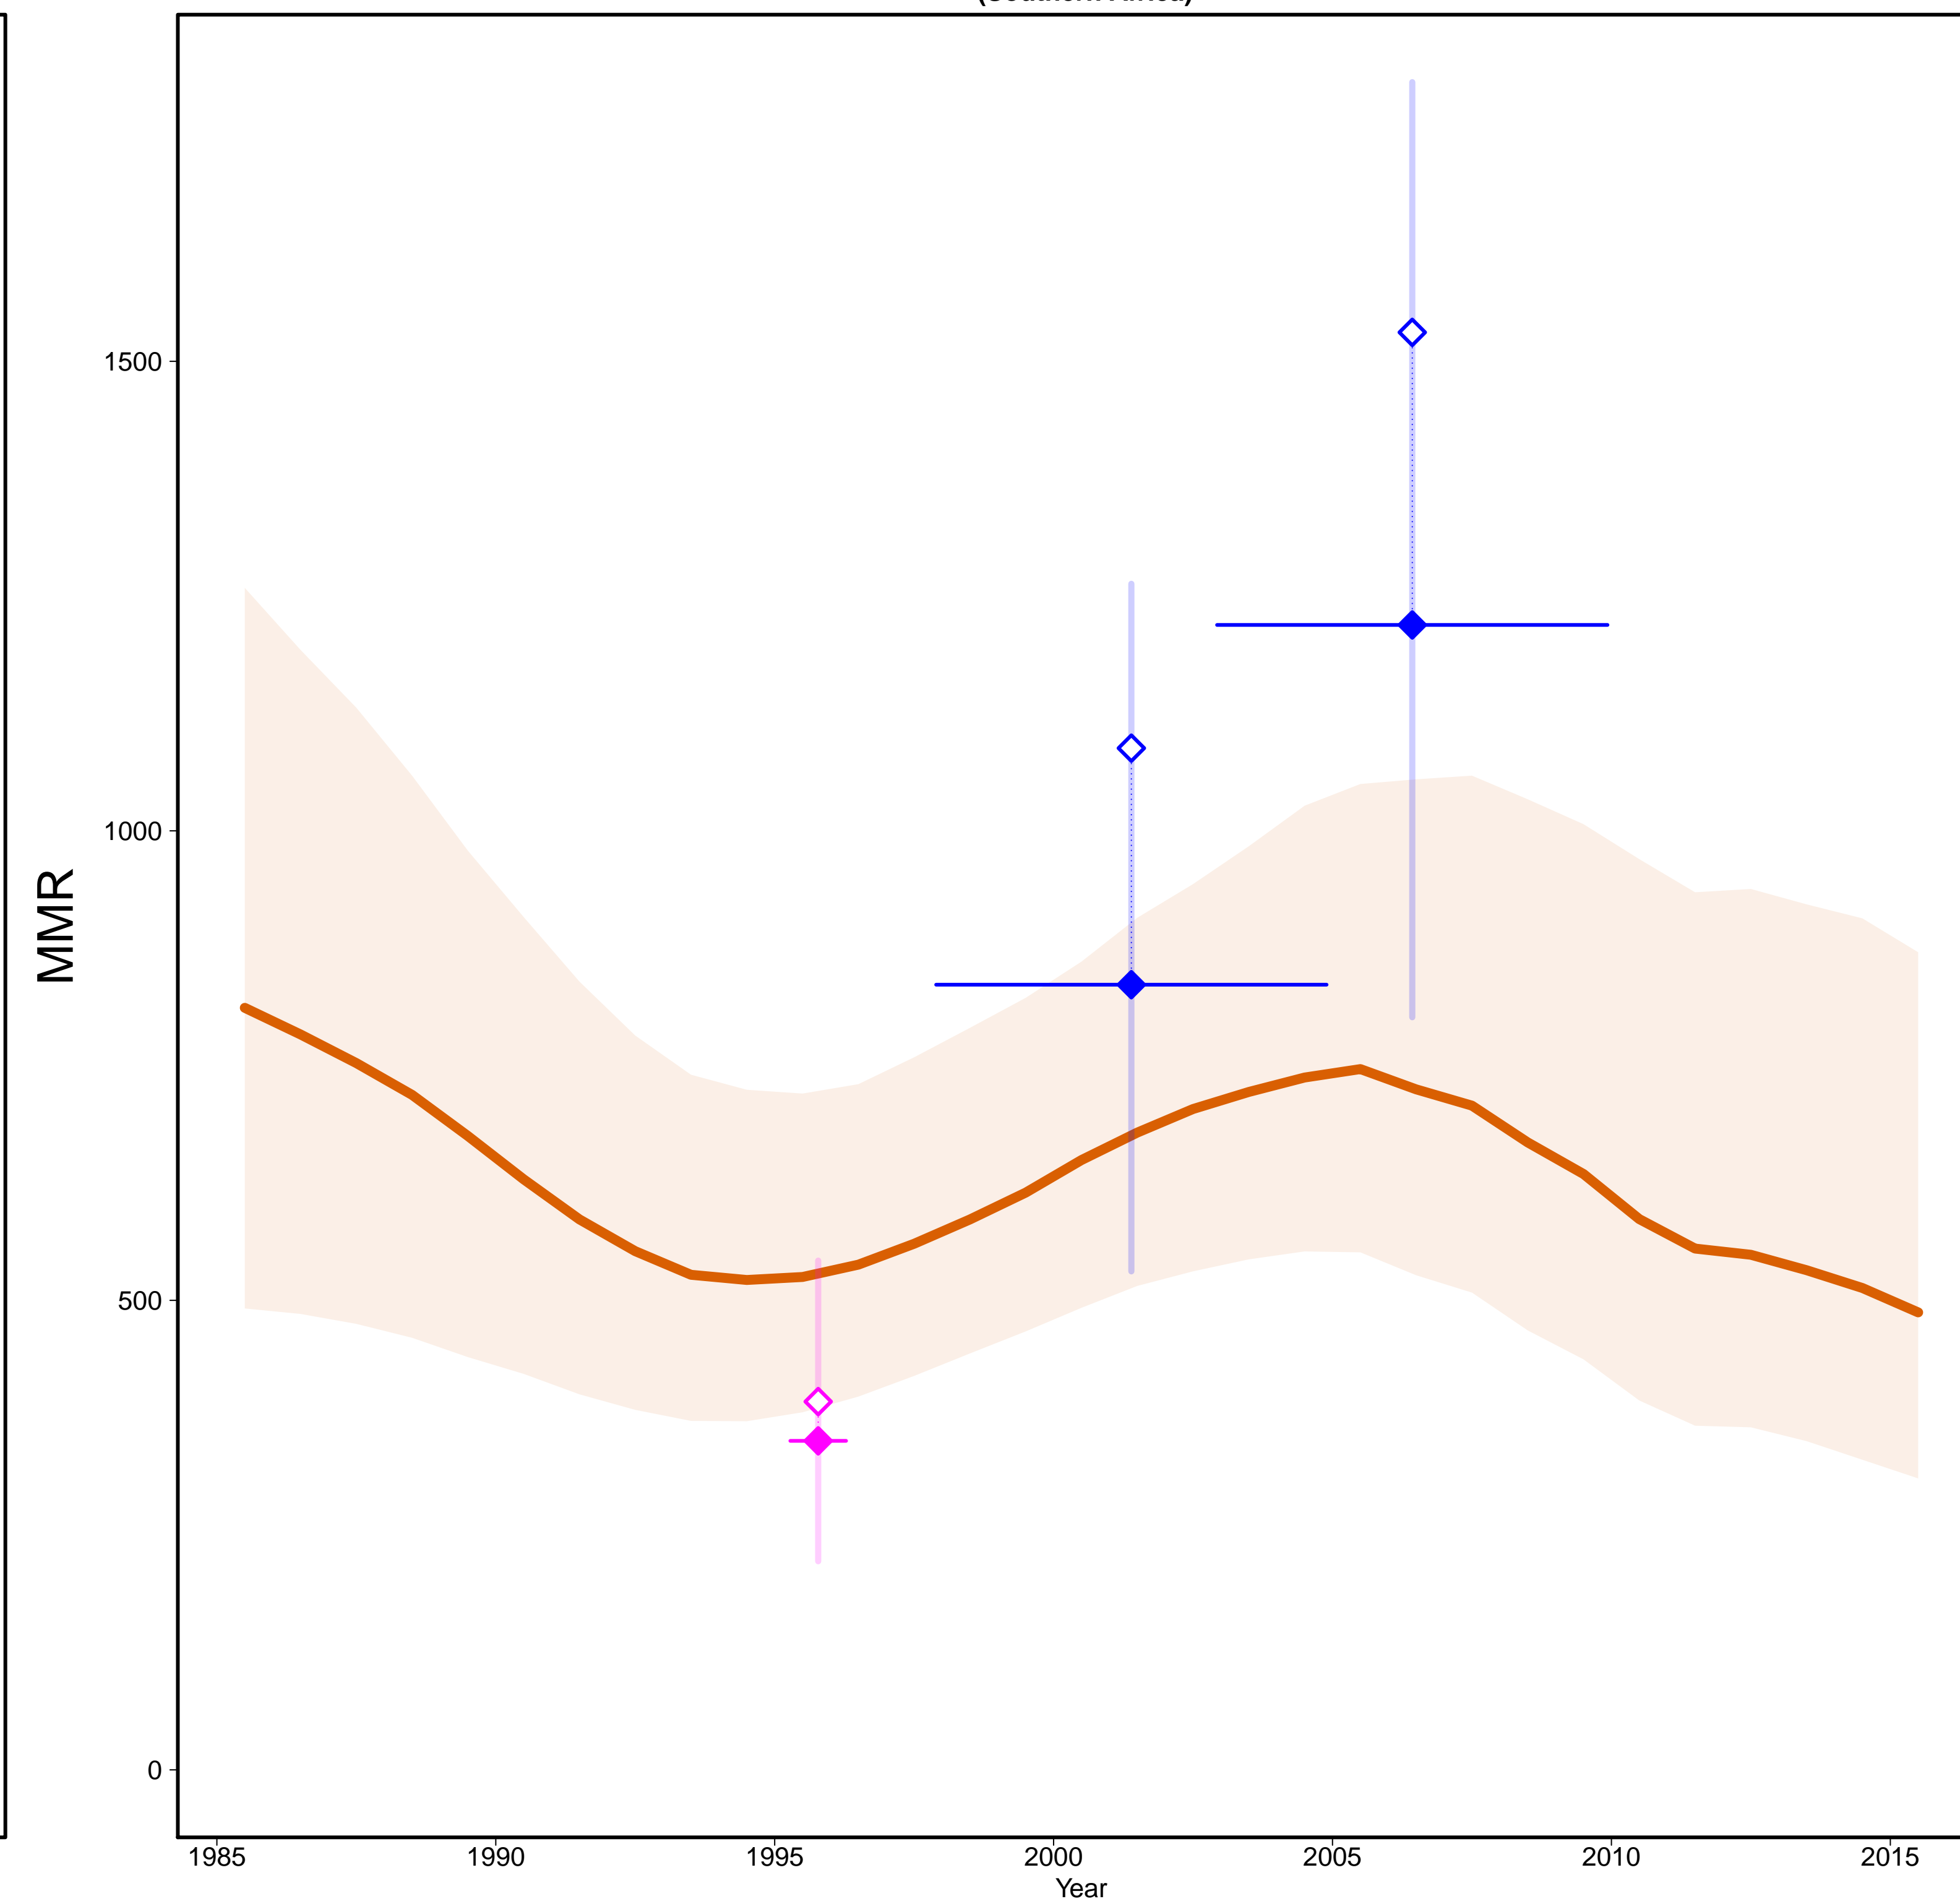

- Estimates –
- MMR Database 2015 –
- ◇ Observed Data
- ◆ Adjusted Data
- Data type –
- ◆ DHS
- ◆ Census

Gross Domestic Product

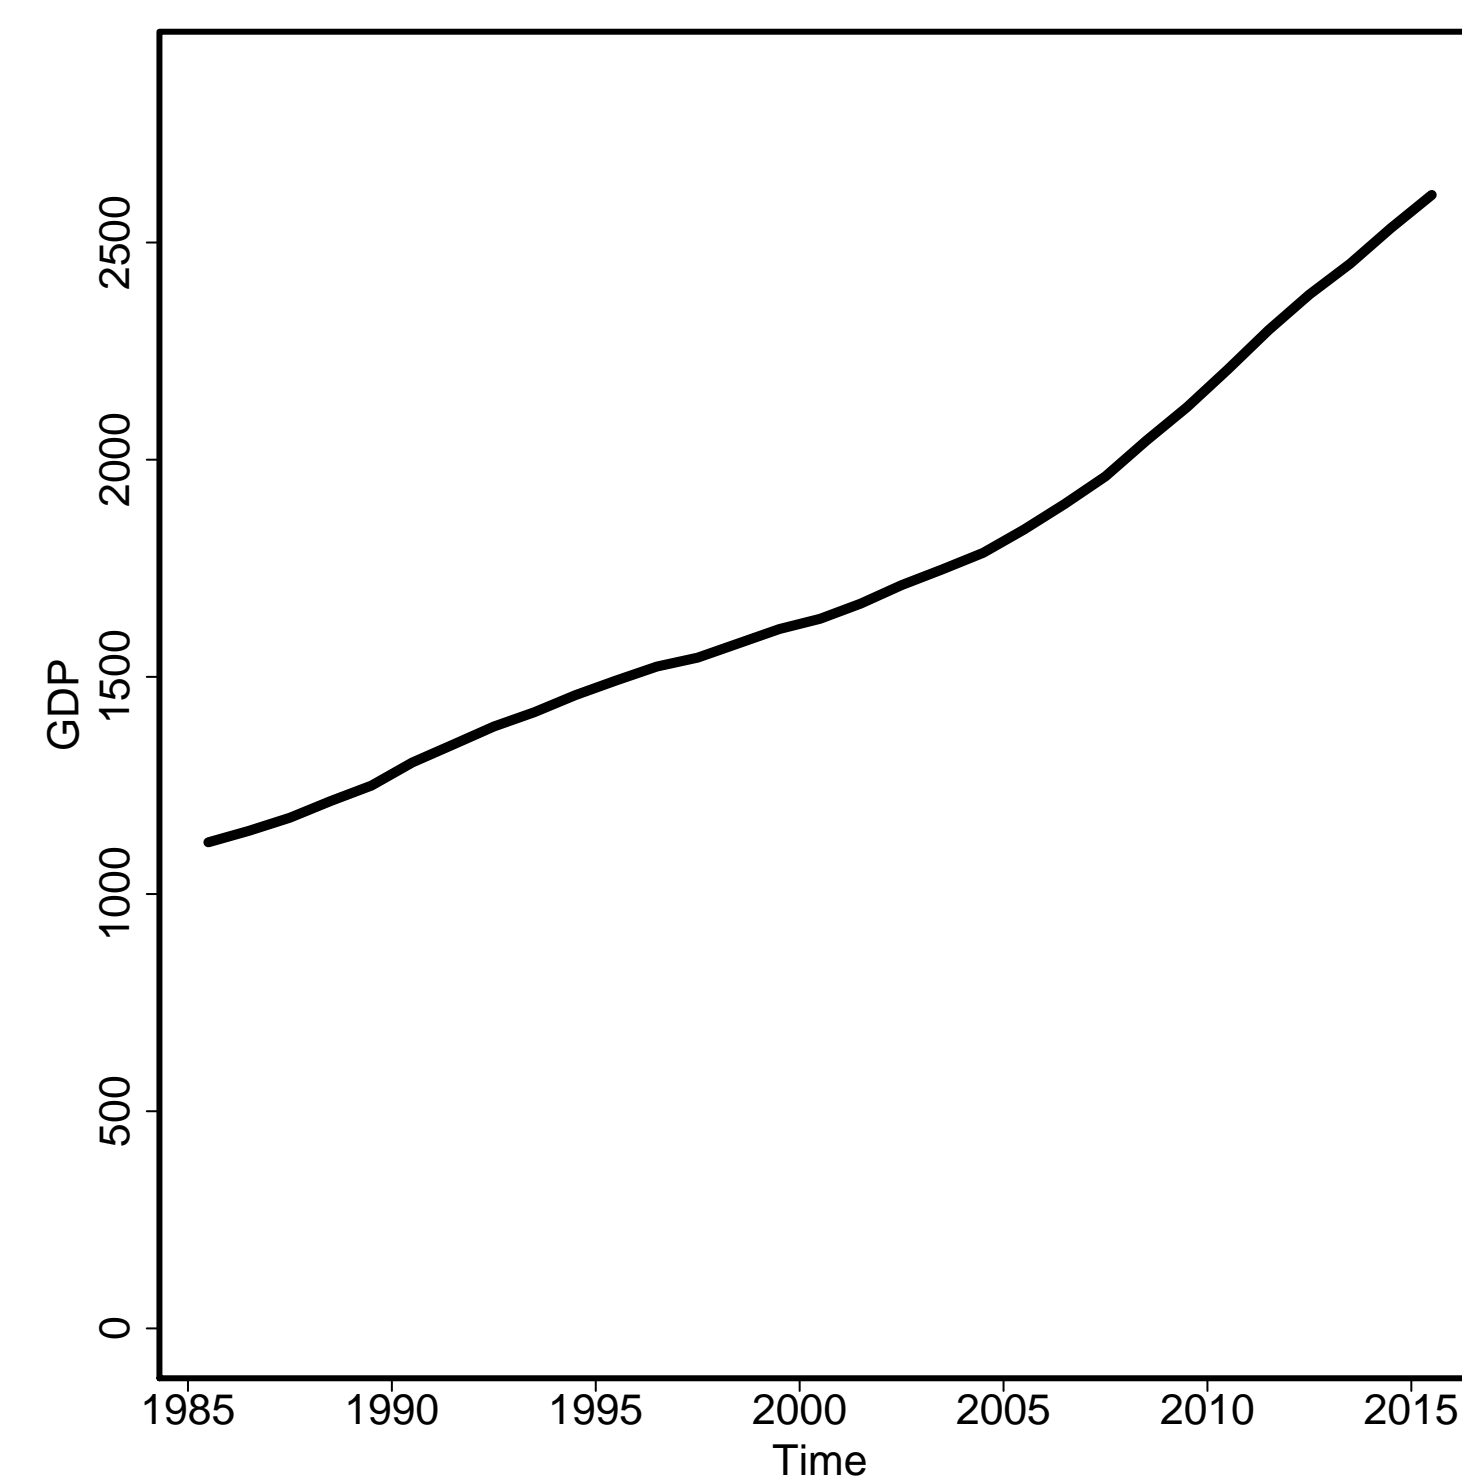

General Fertility Rate

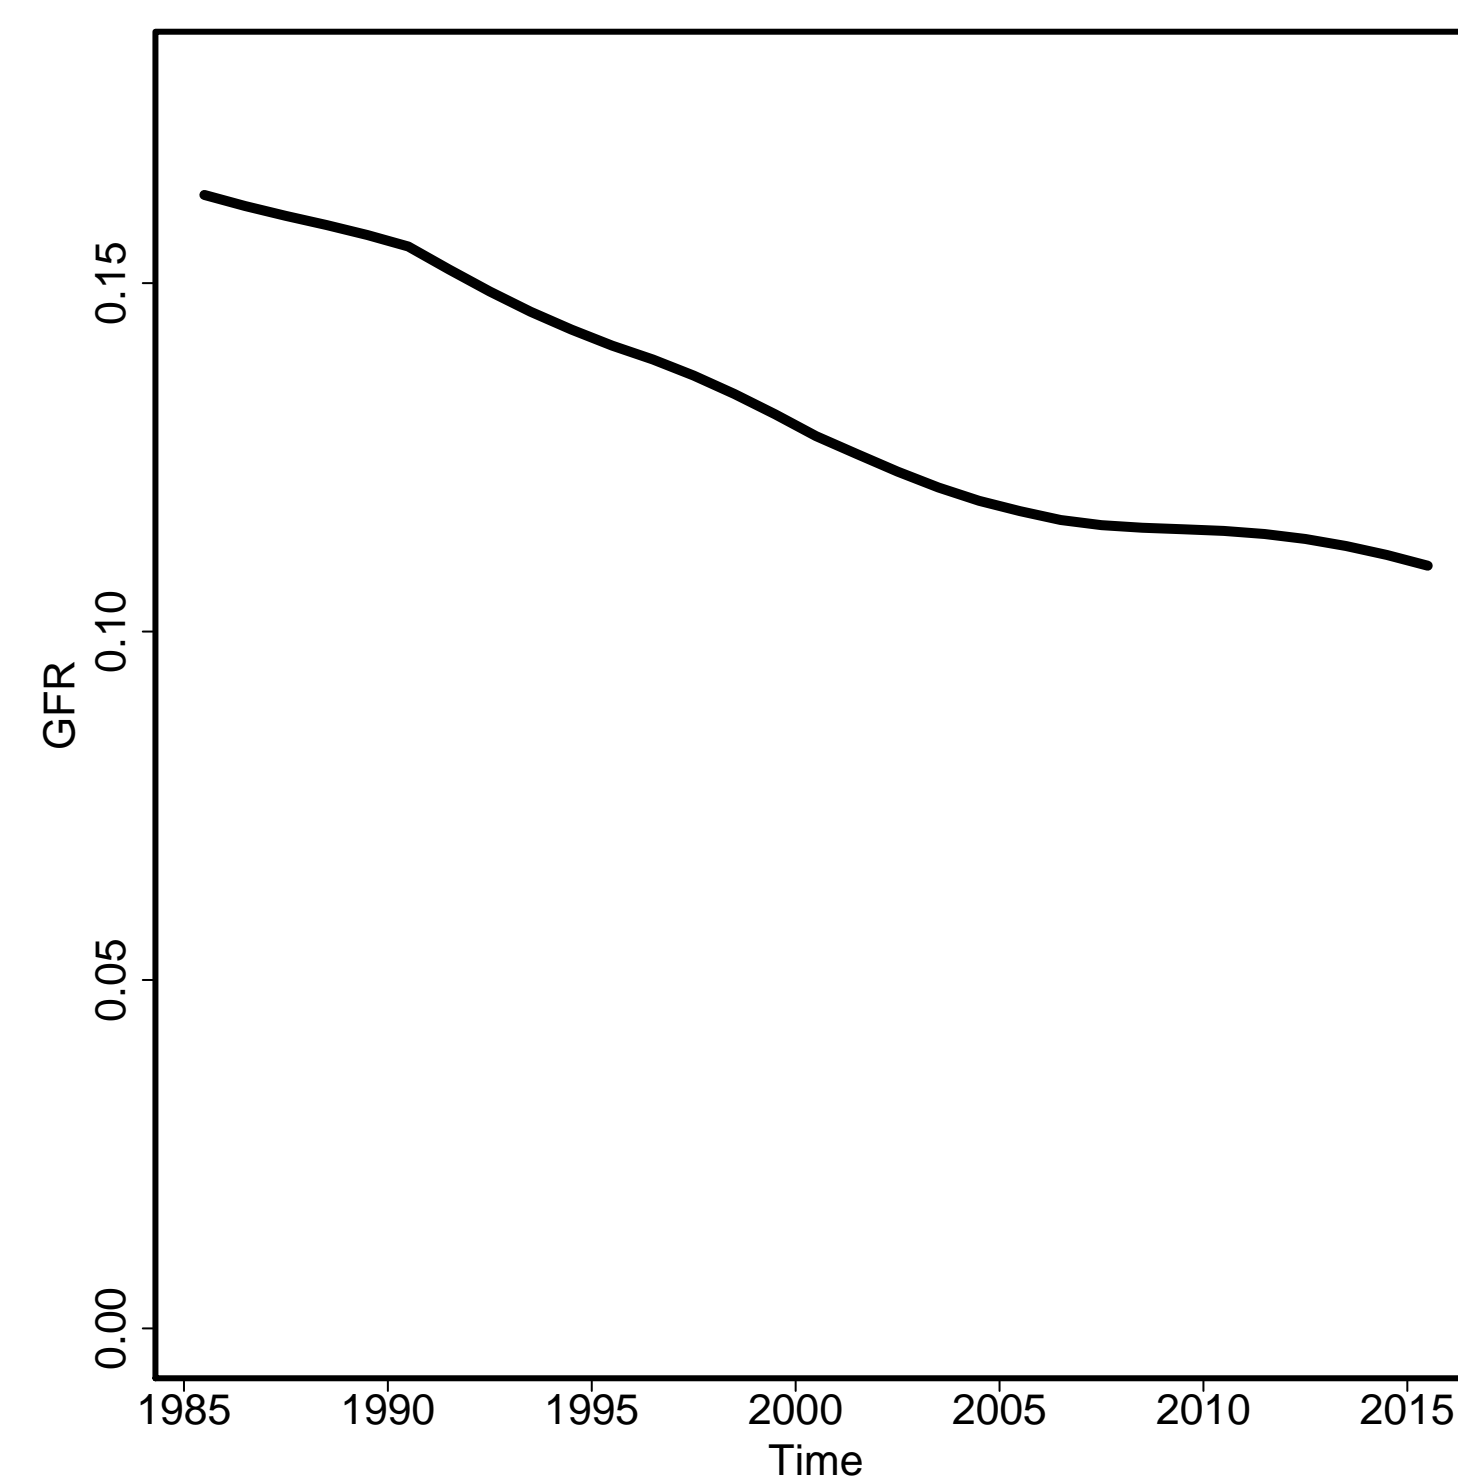

Skilled Attendance to Birth

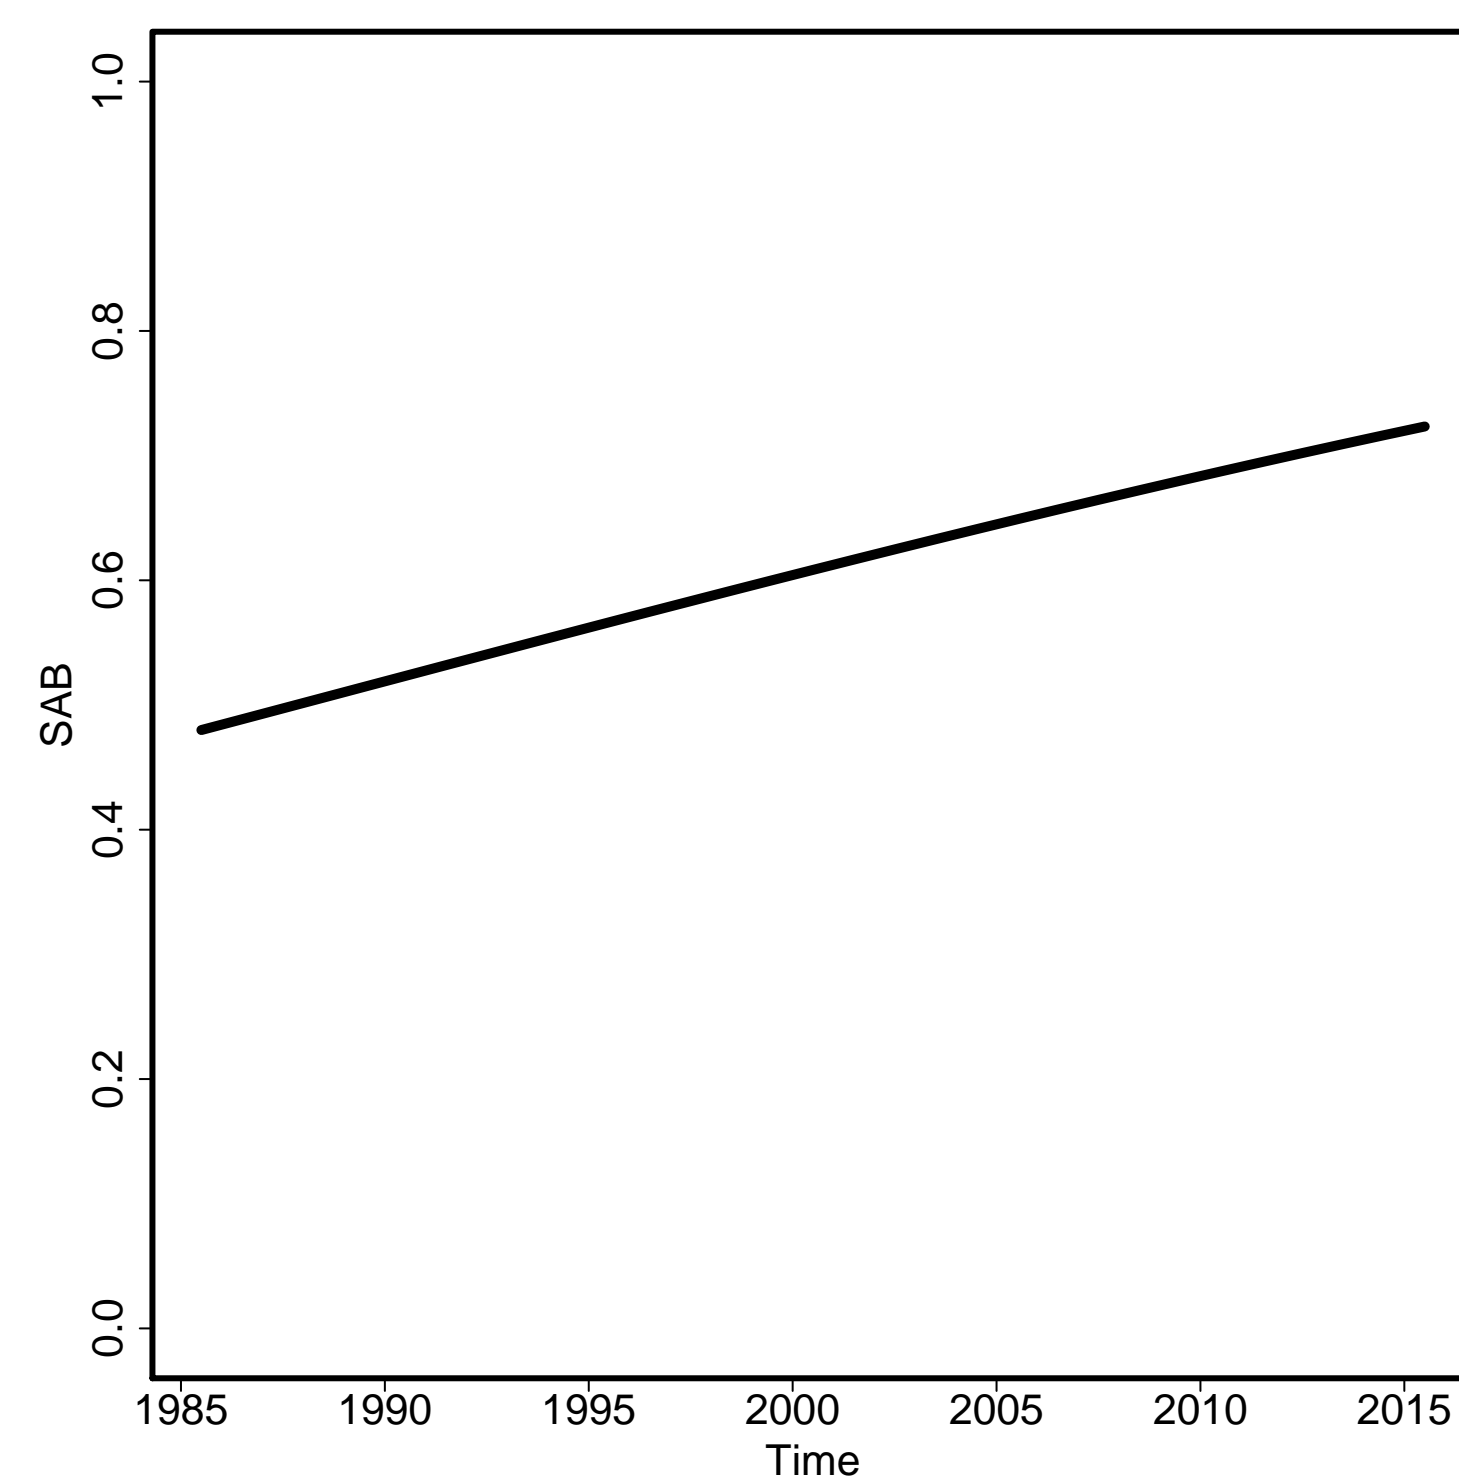

Envelope/Births

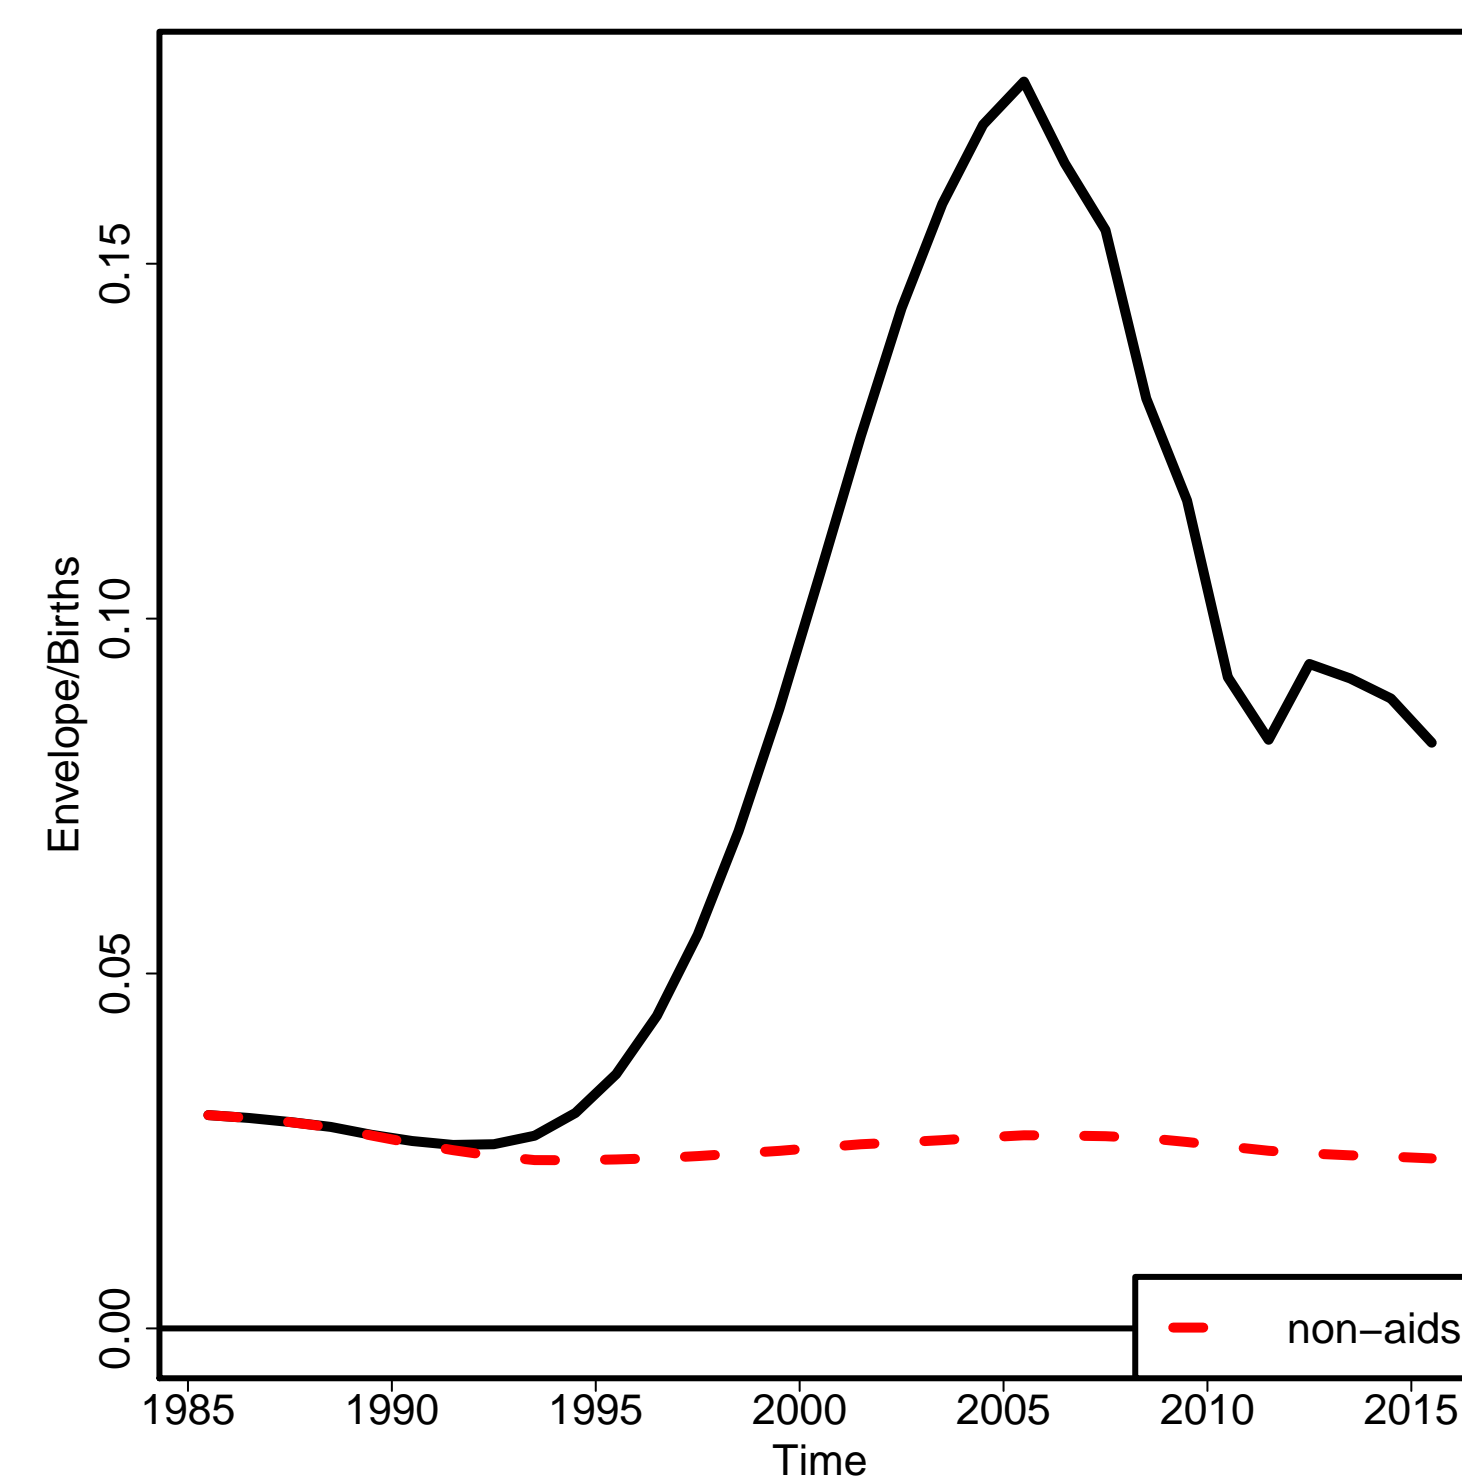

Non-aids MMR

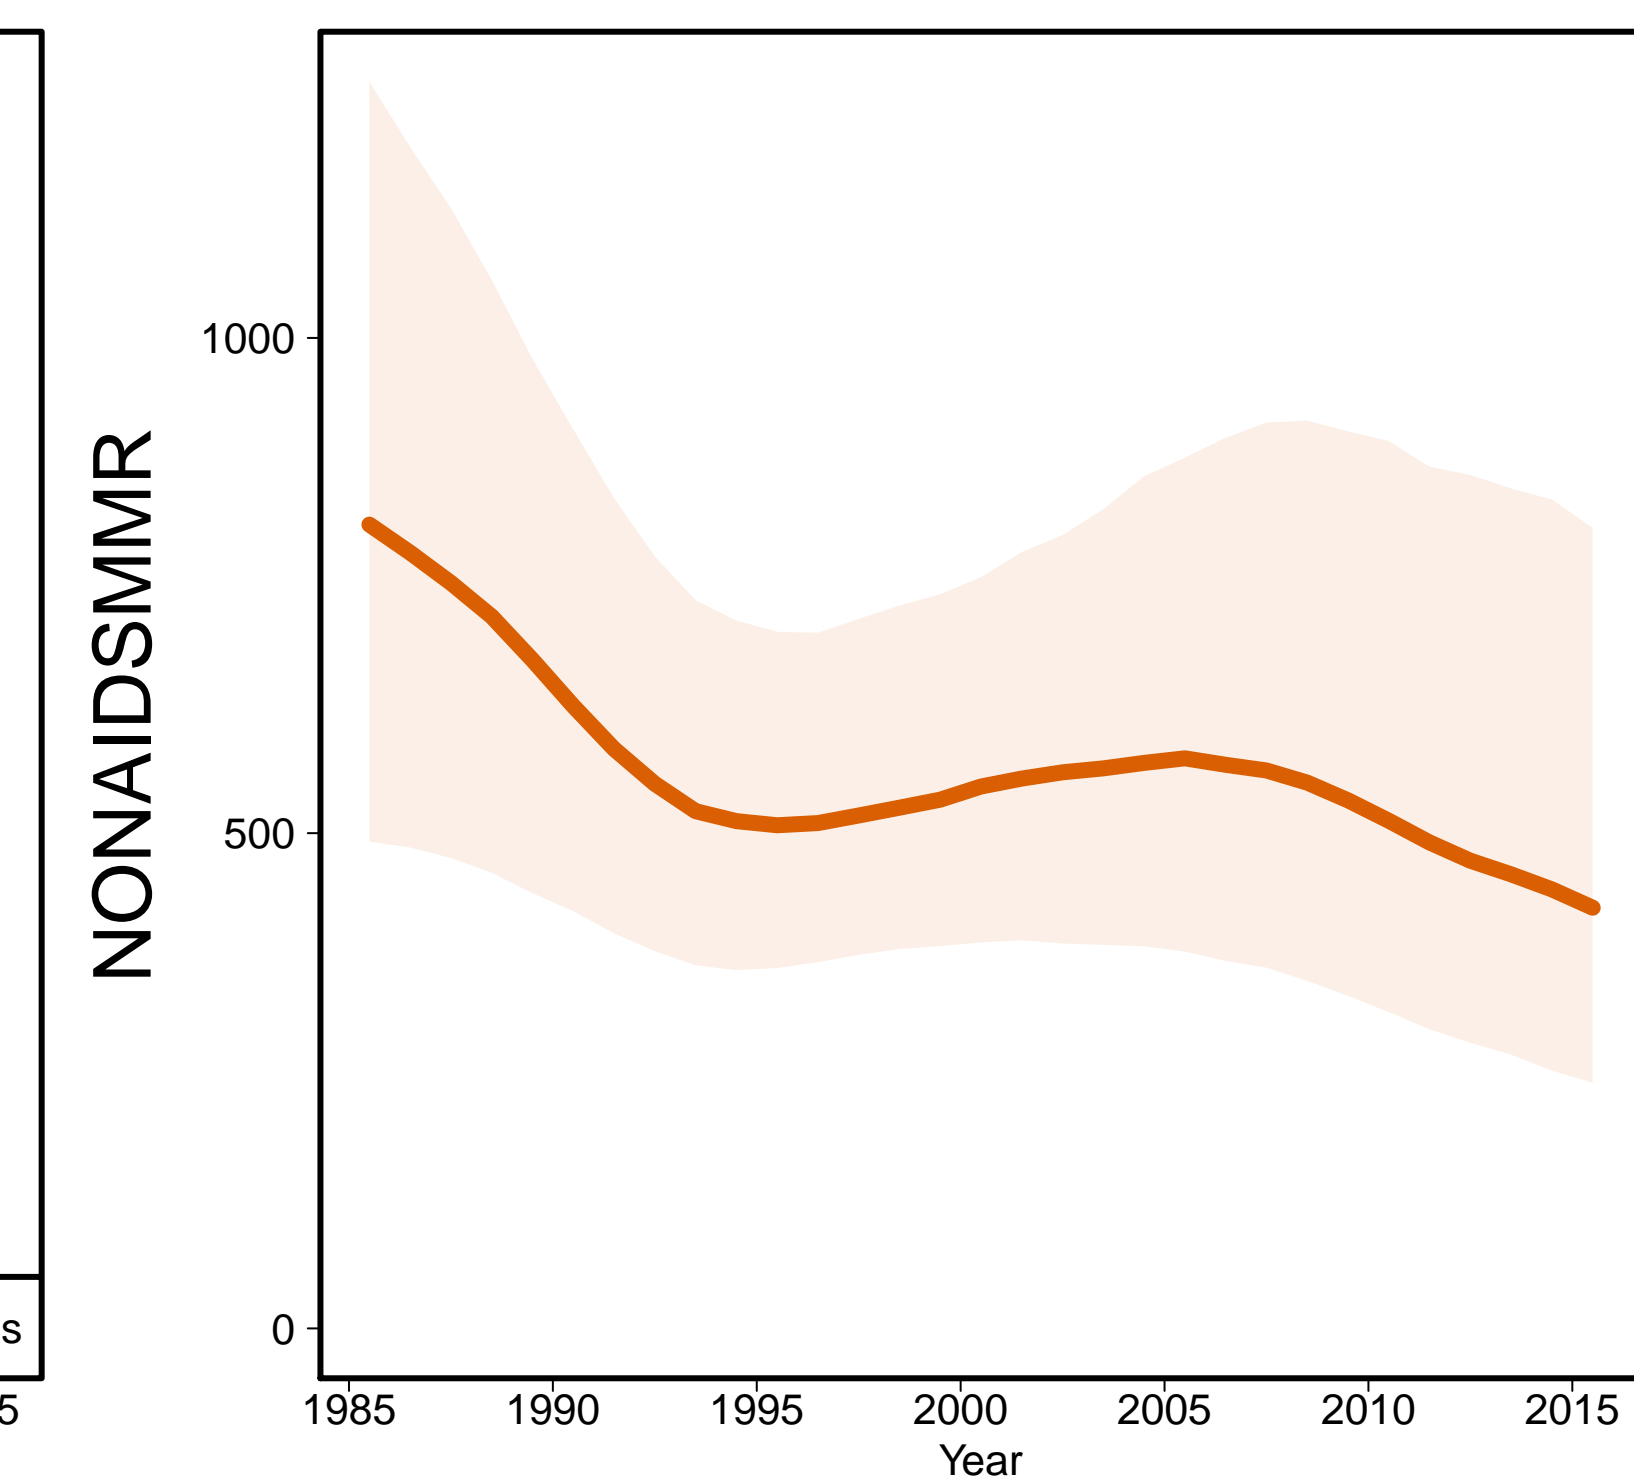

Aids MMR

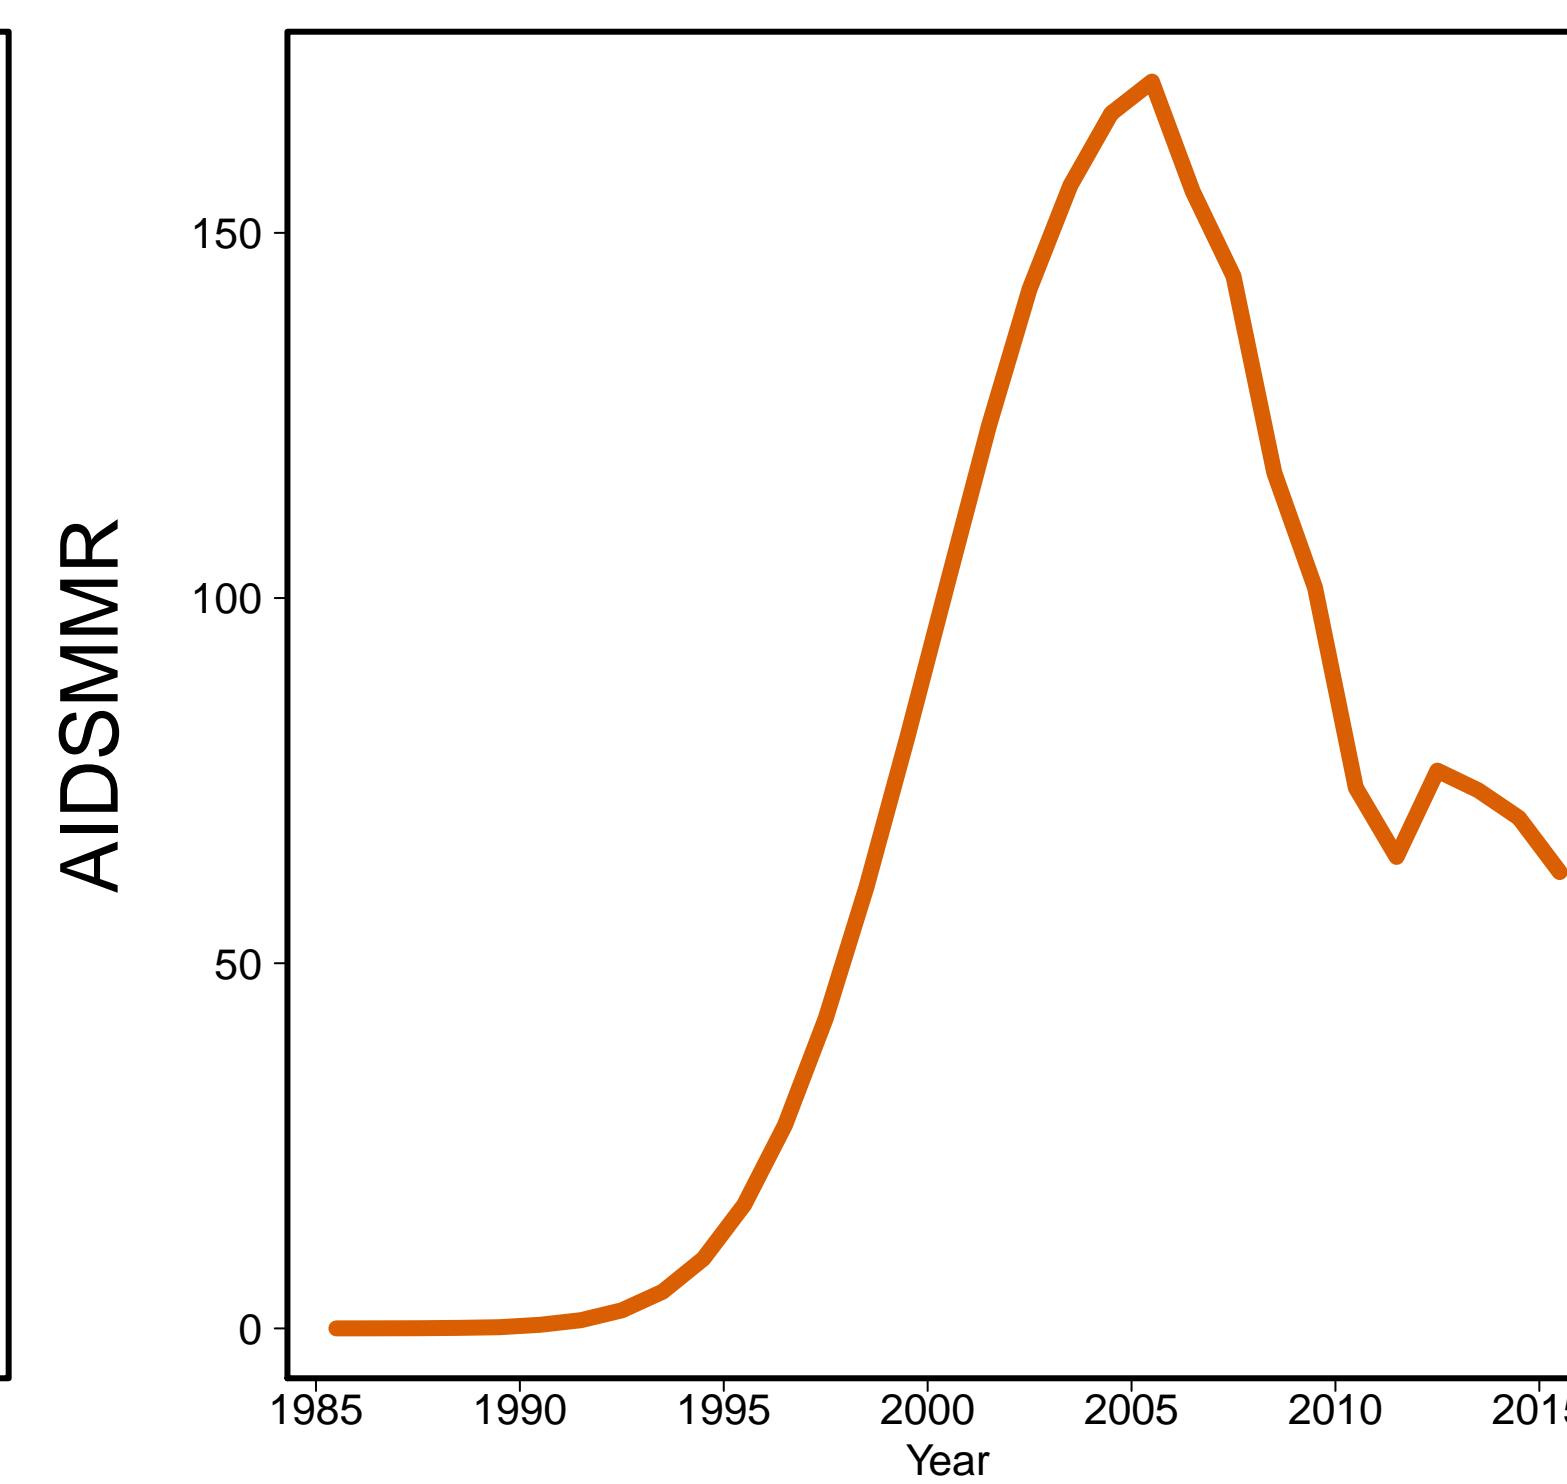

Liberia [LBR]  
(Western Africa)

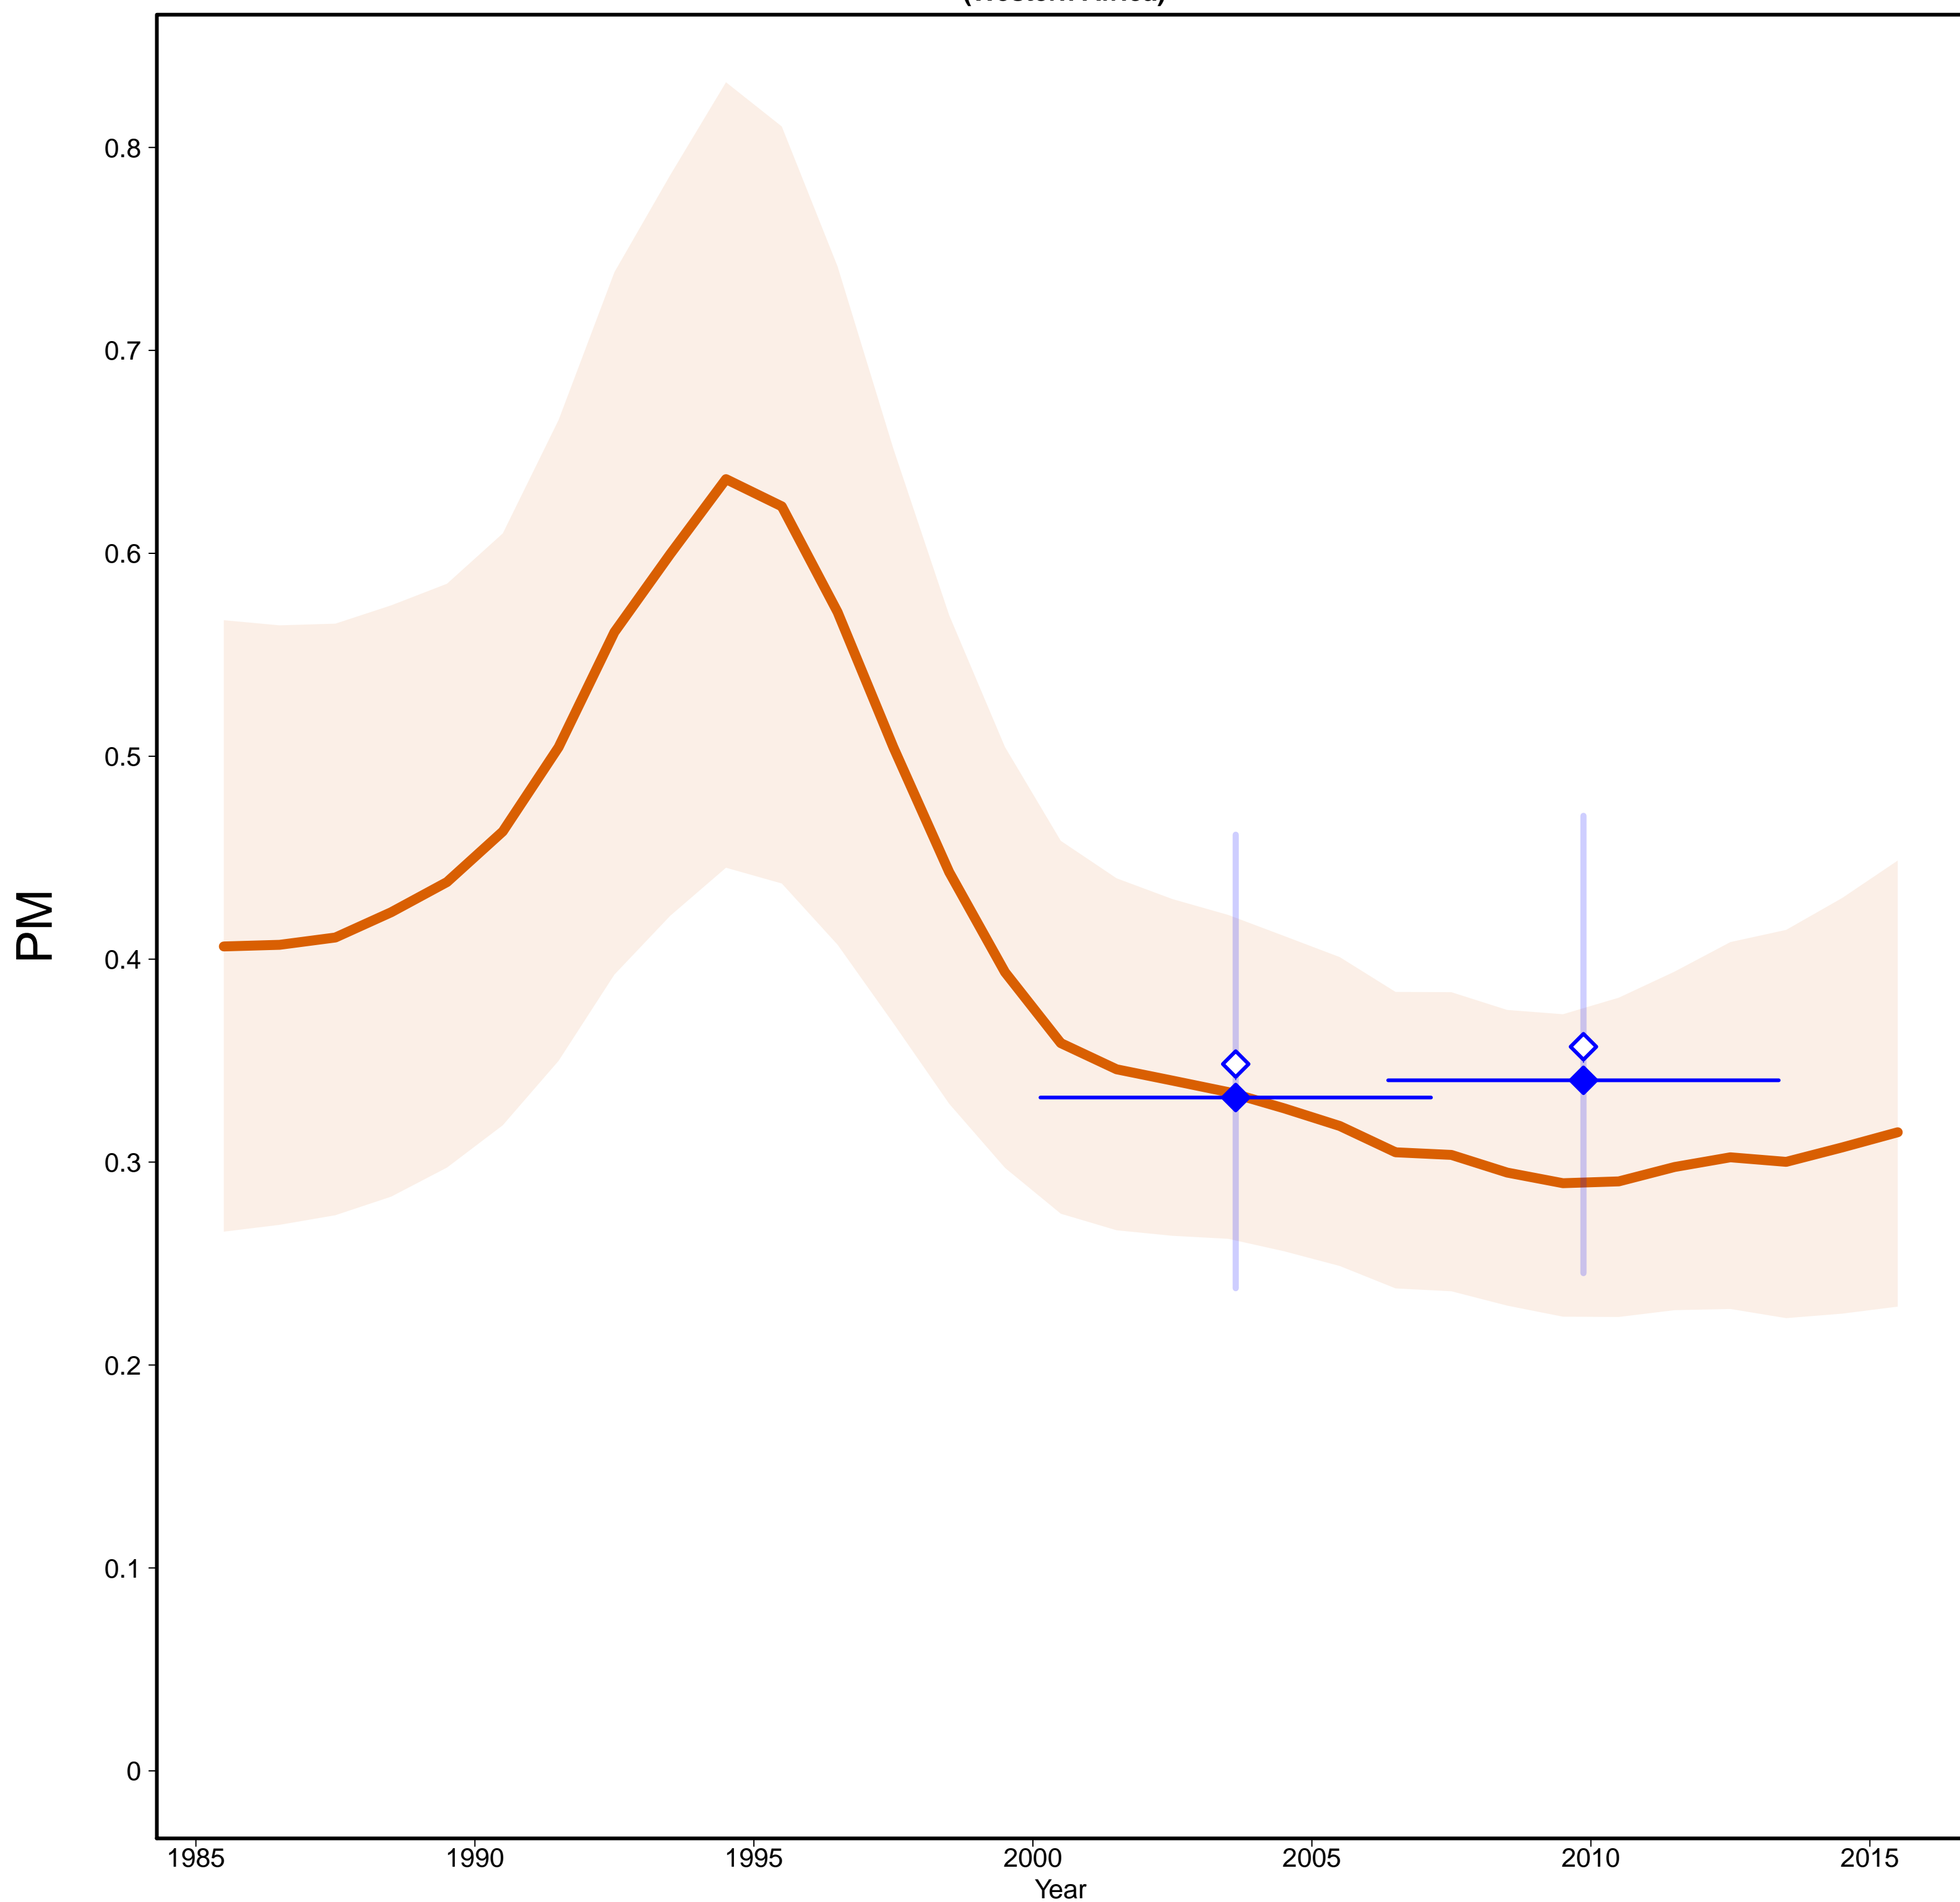

Liberia [LBR]  
(Western Africa)

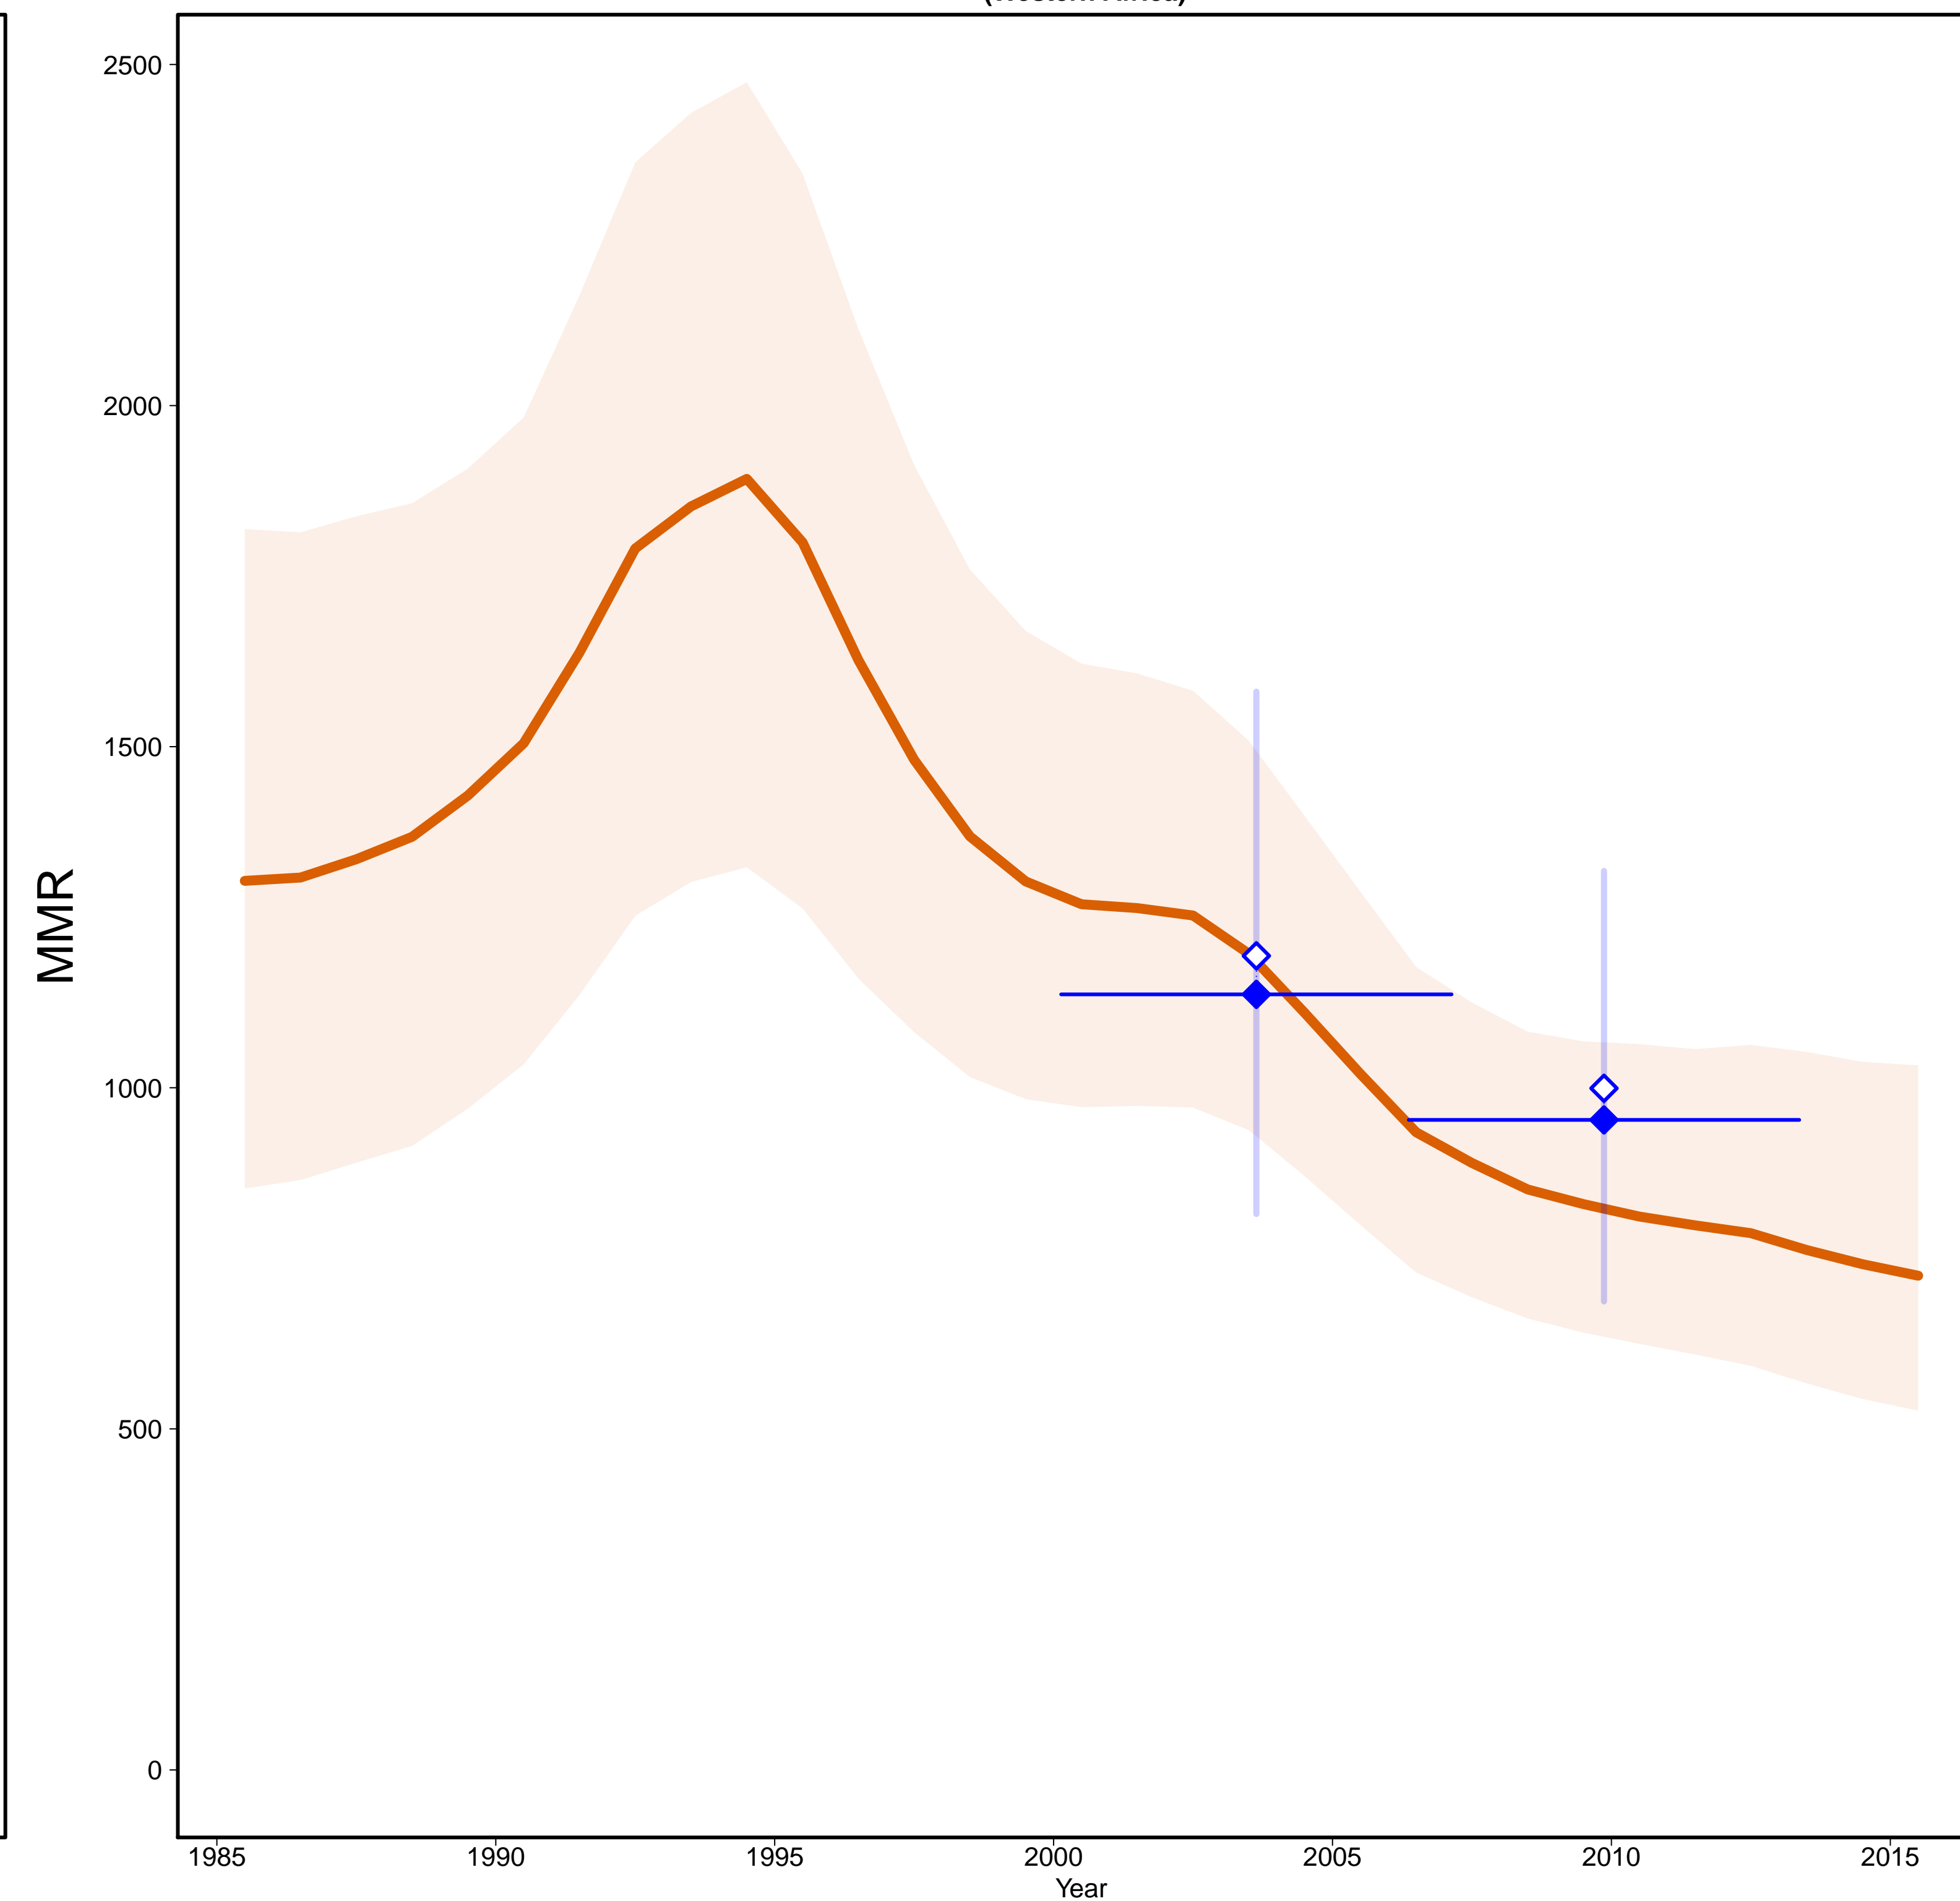

- Estimates —
- MMR Database 2015 —
- ◇ Observed Data
- ◆ Adjusted Data
- Data type —
- ◆ DHS

Gross Domestic Product

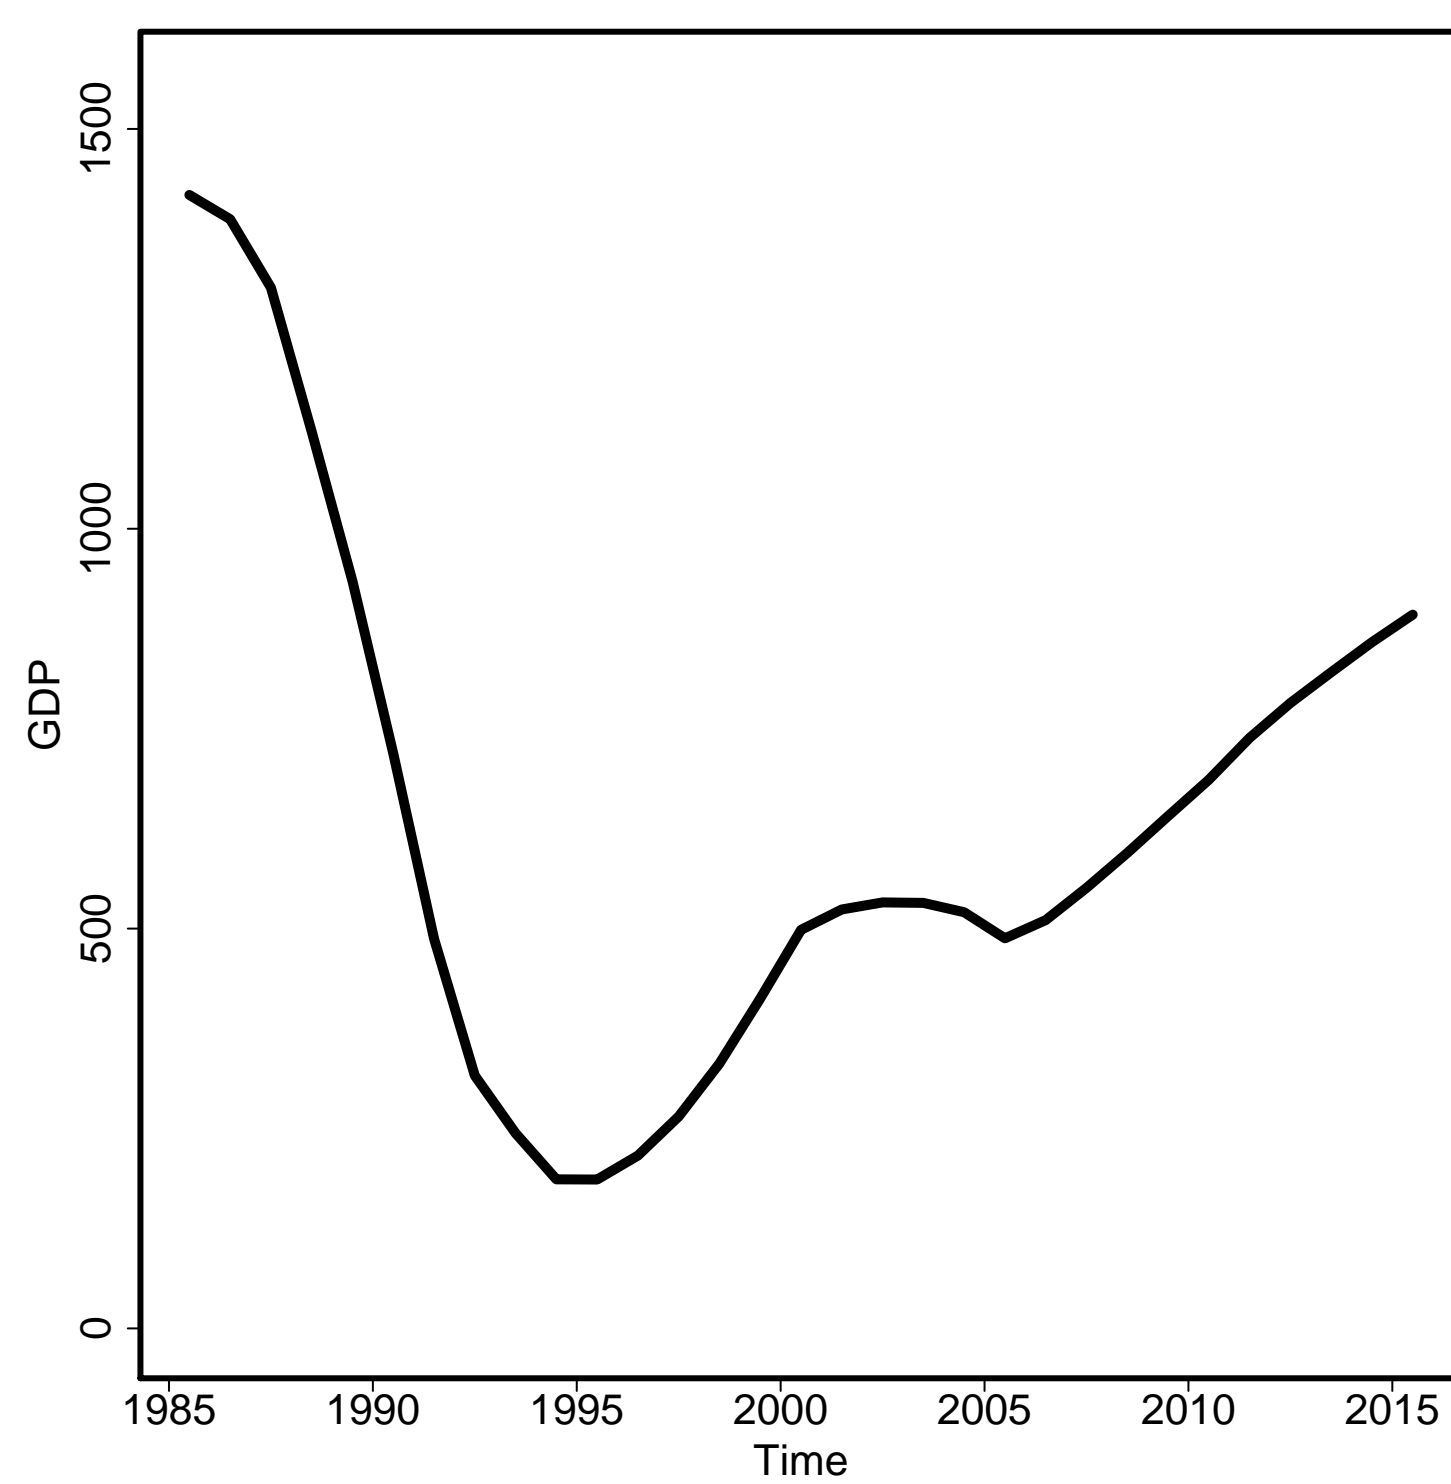

General Fertility Rate

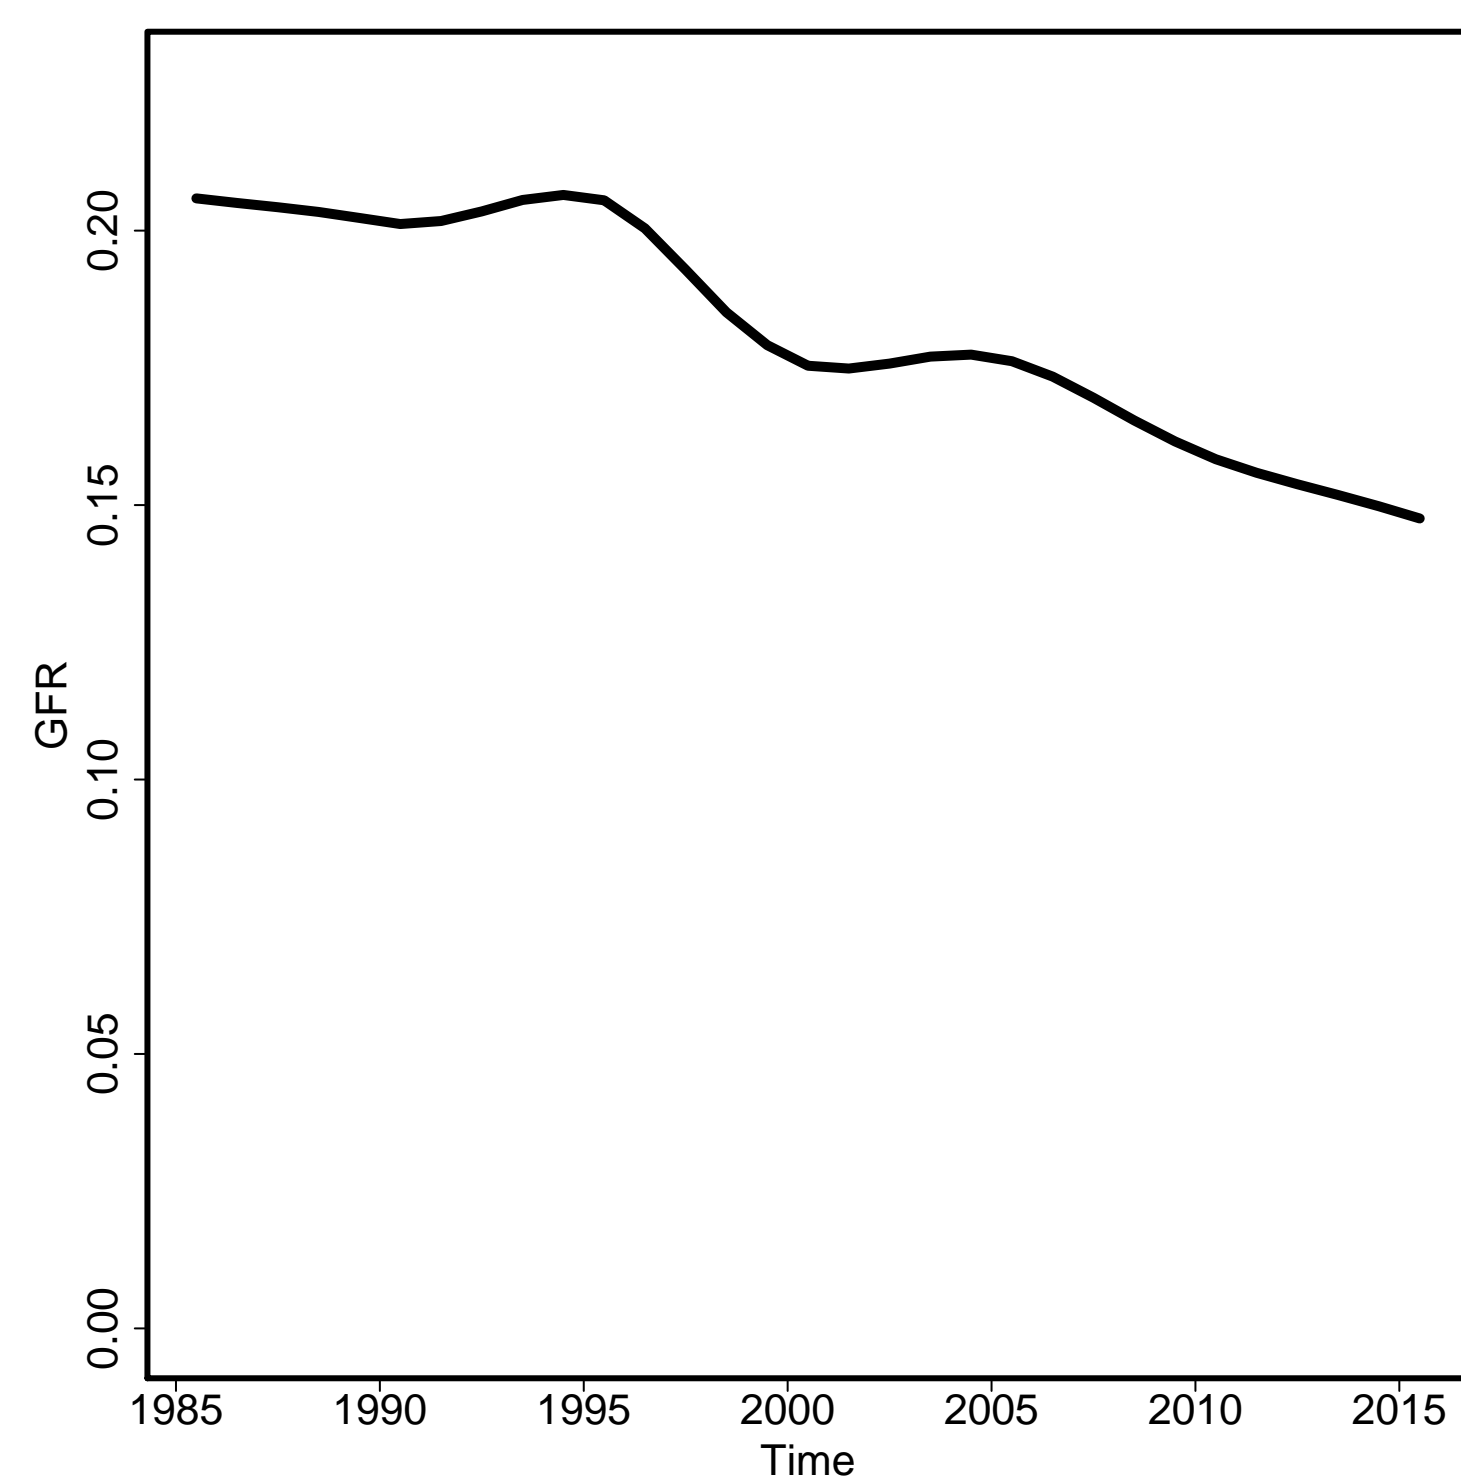

Skilled Attendance to Birth

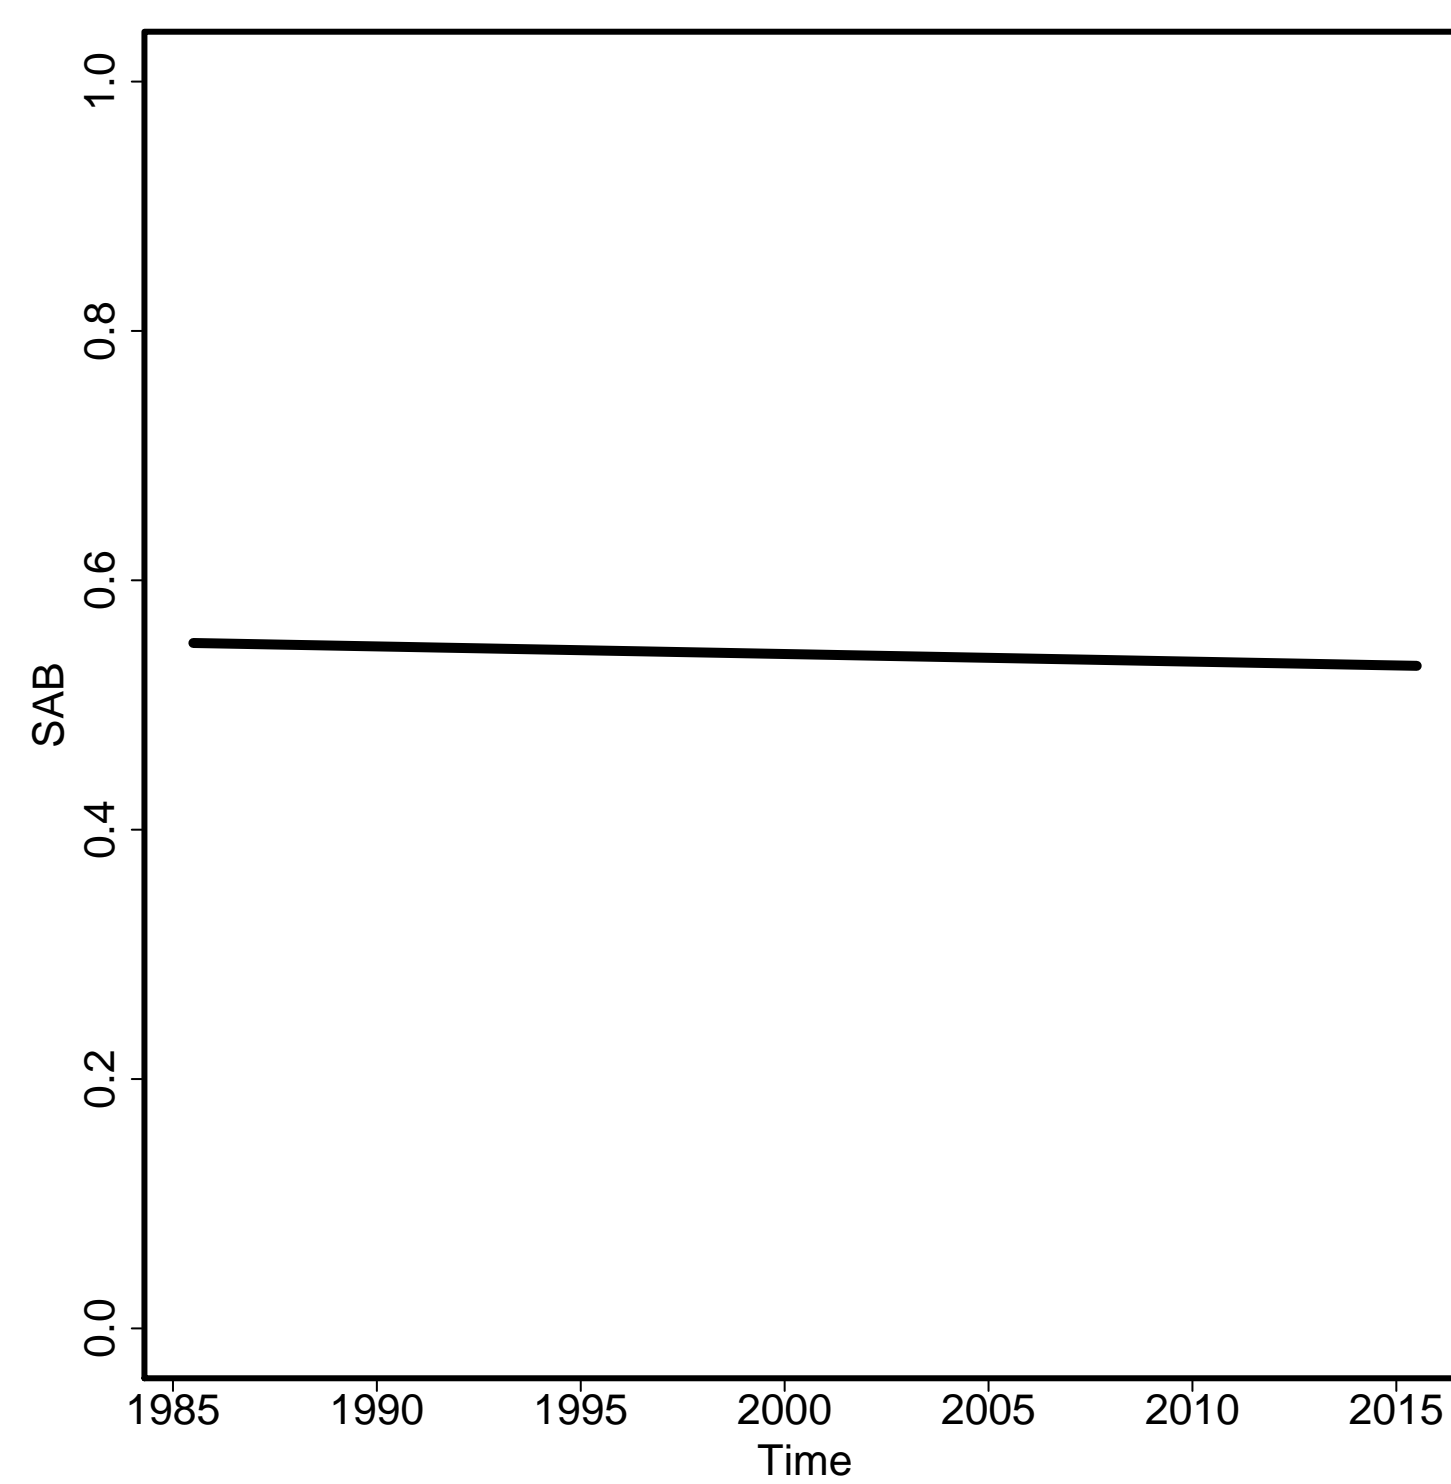

Envelope/Births

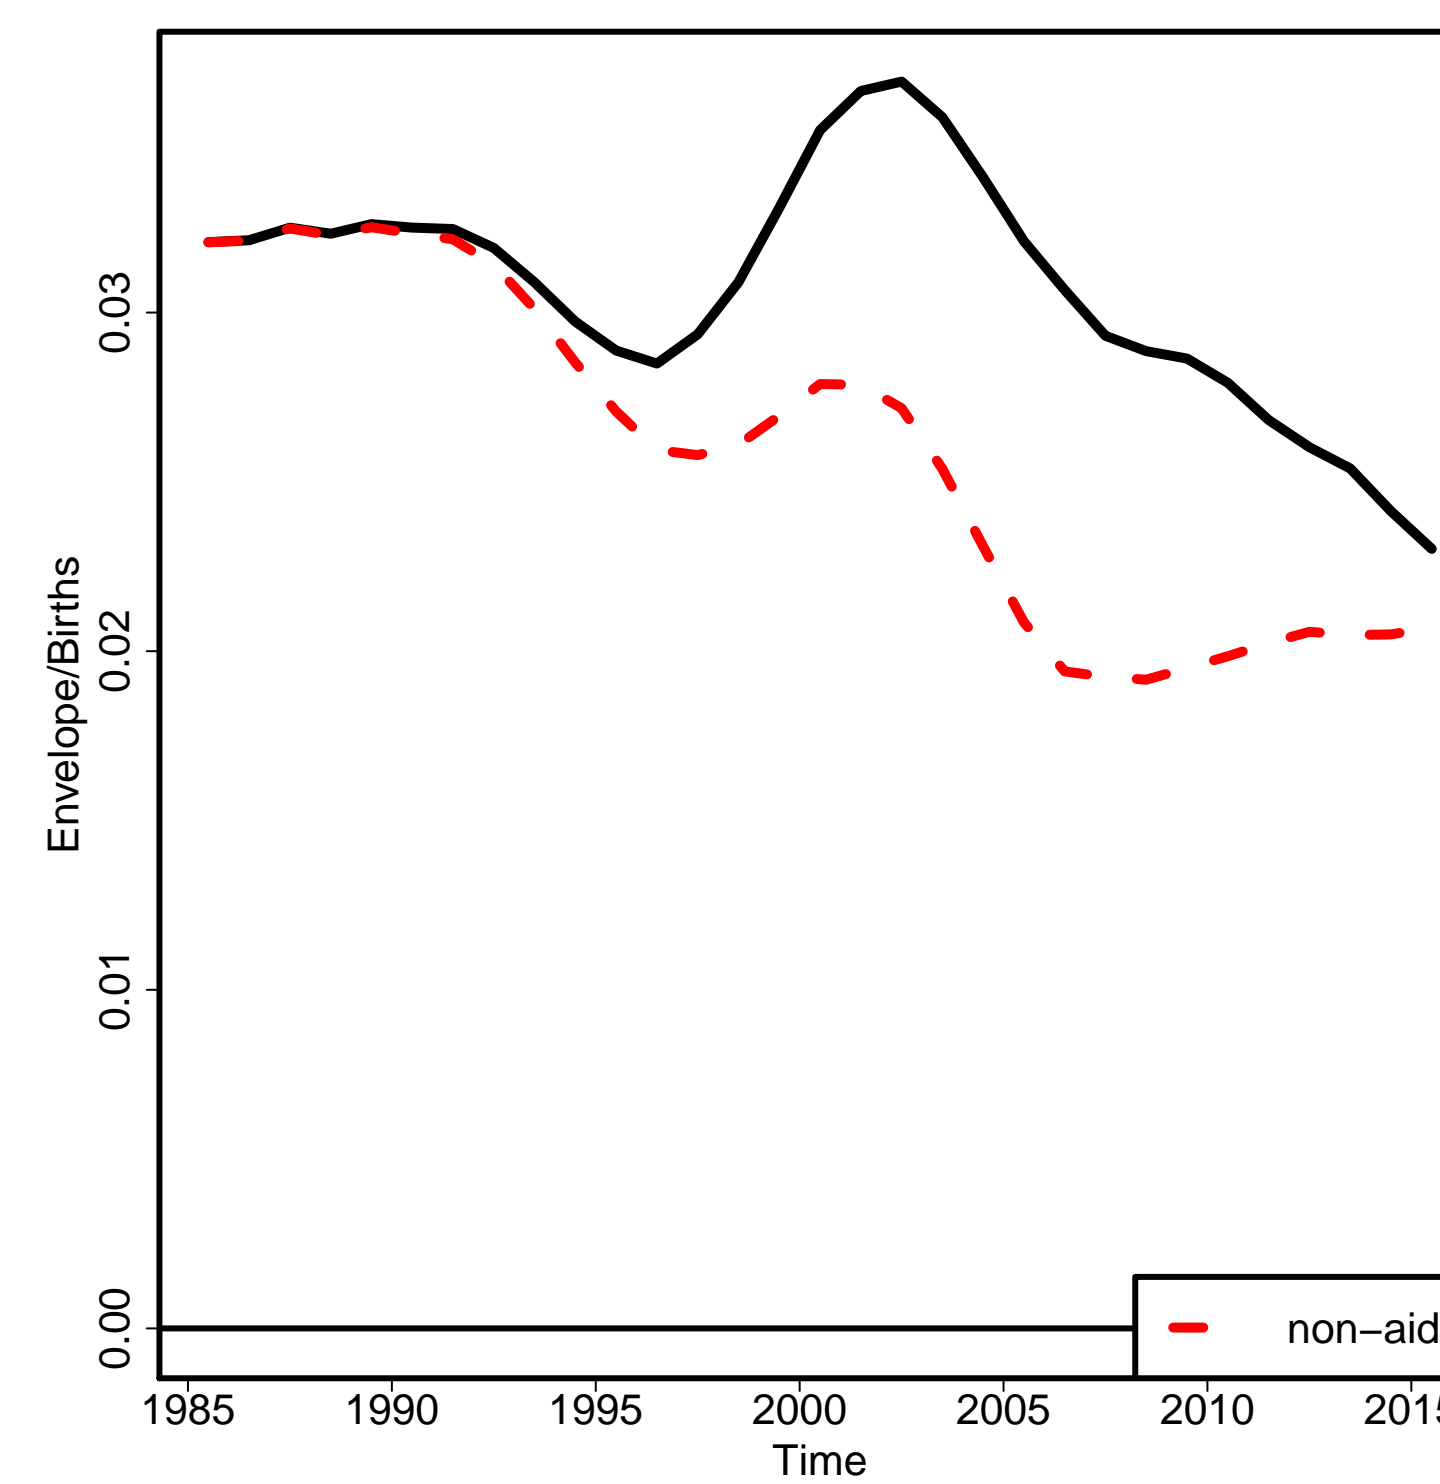

Non-aids MMR

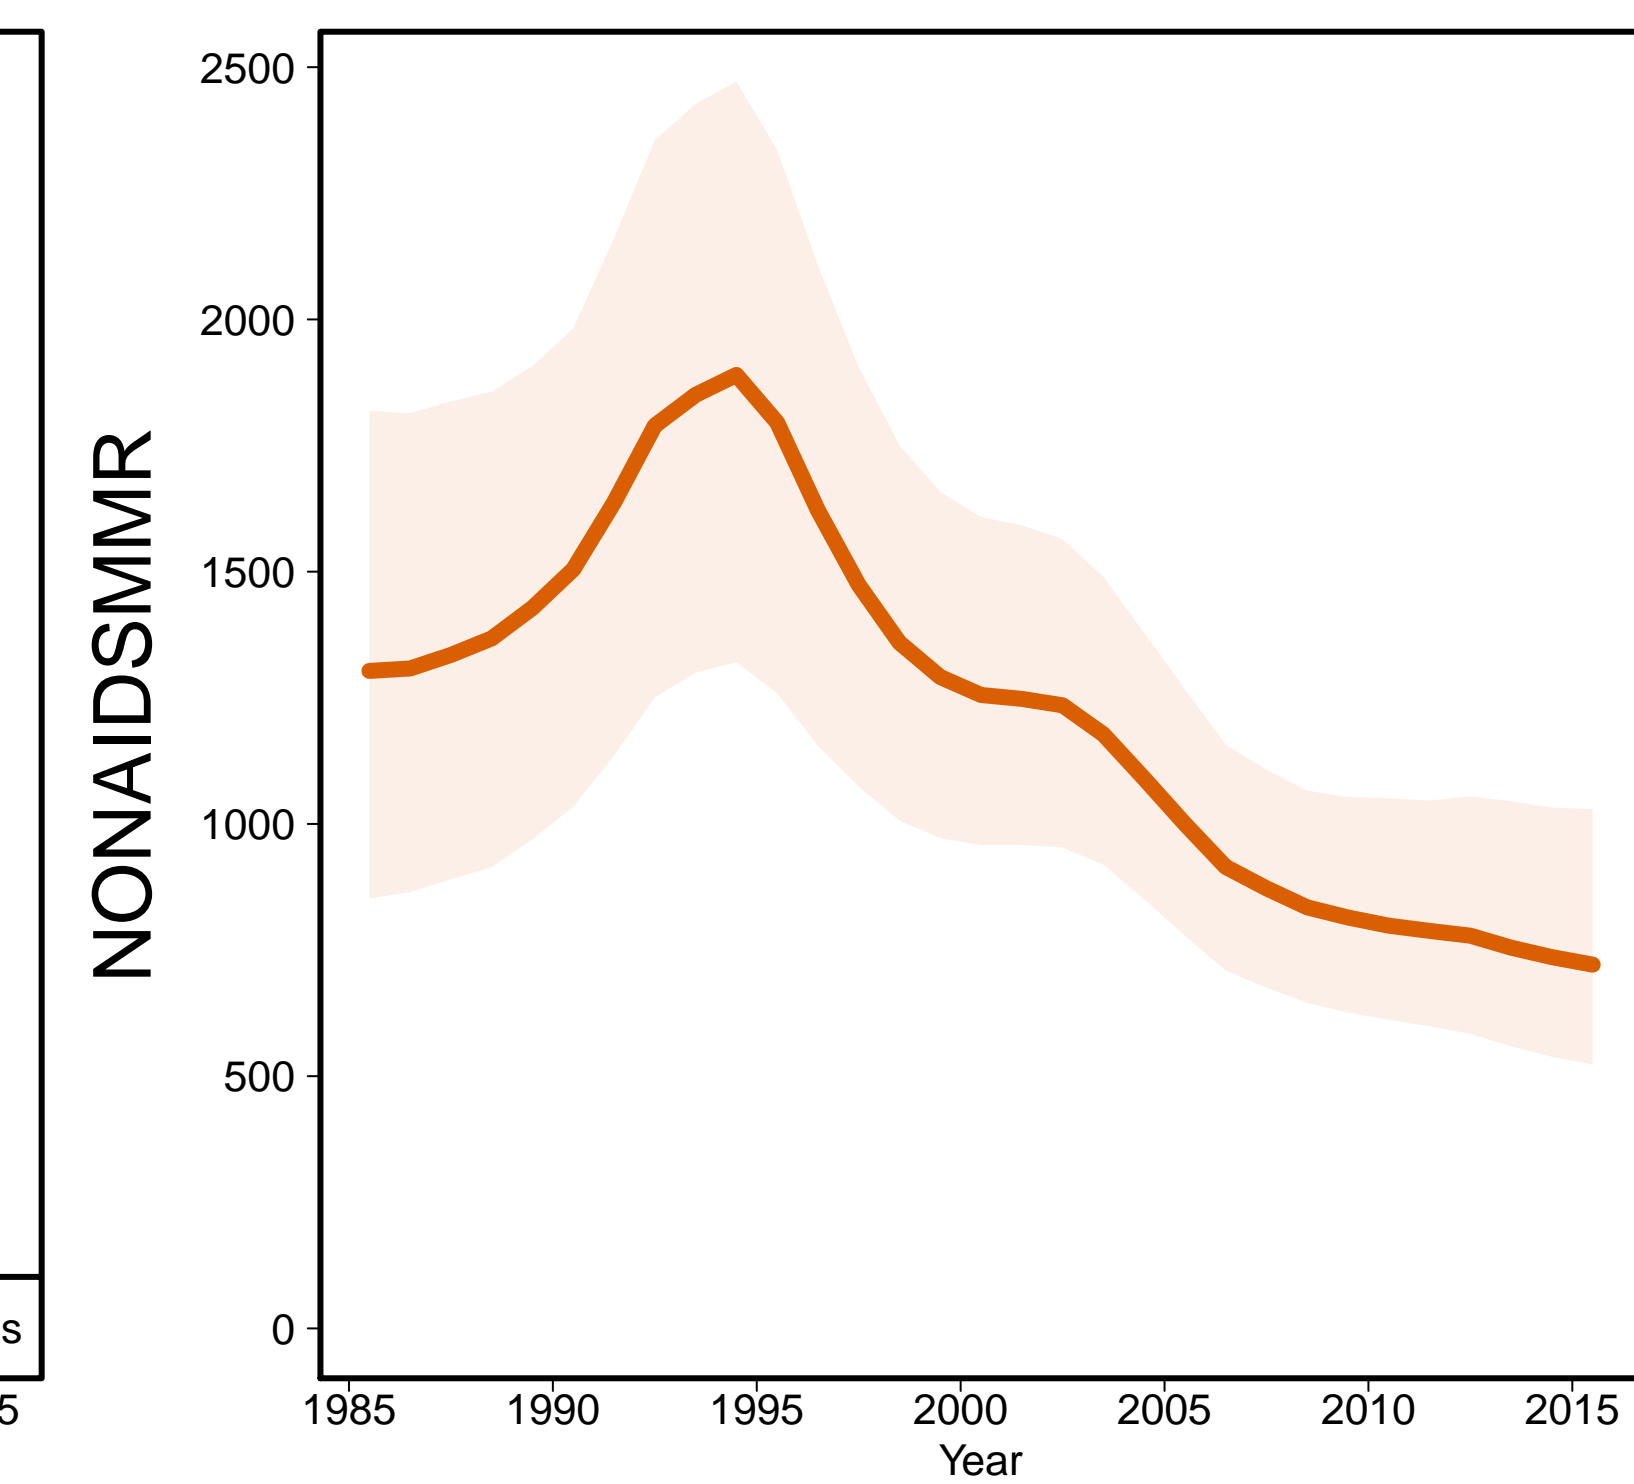

Aids MMR

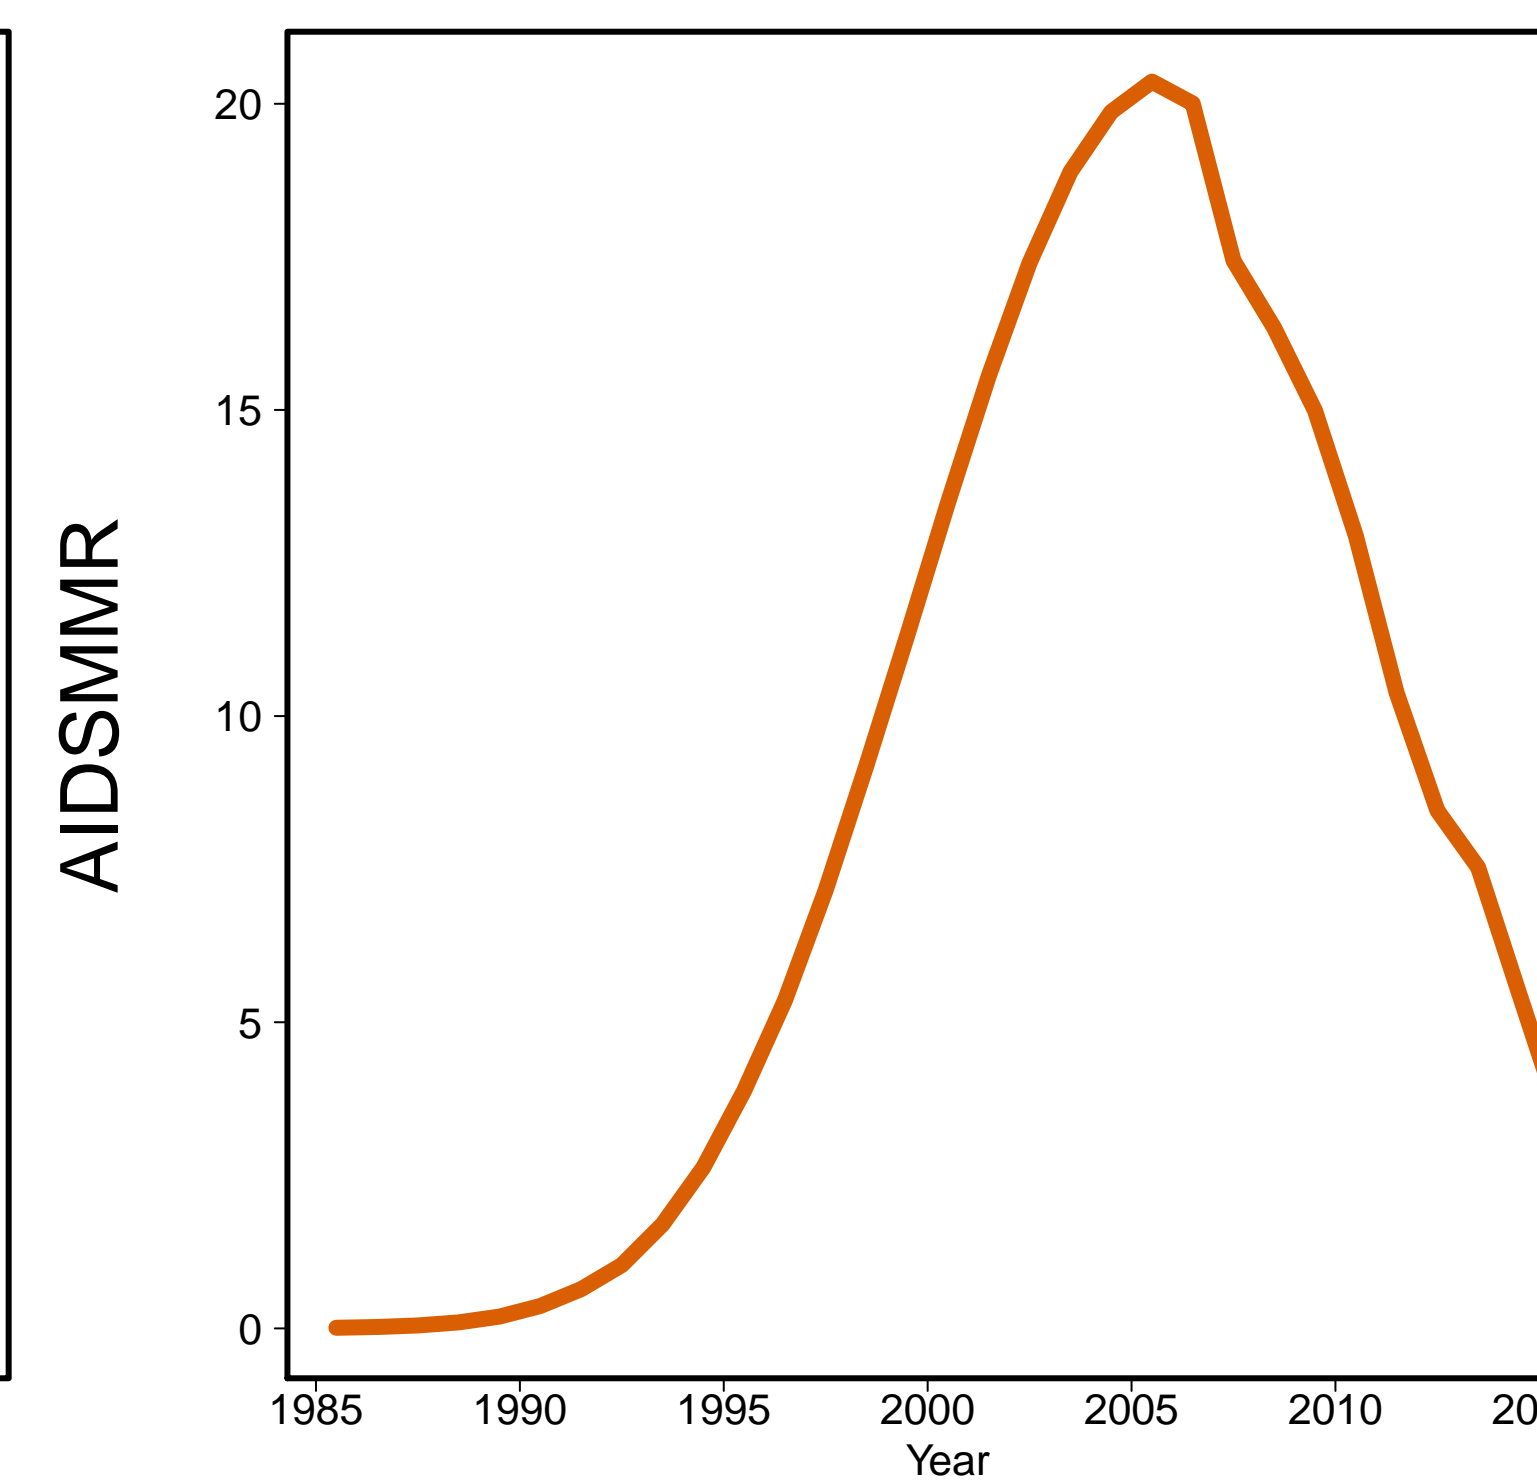

Libya [LBY]  
(Northern Africa)

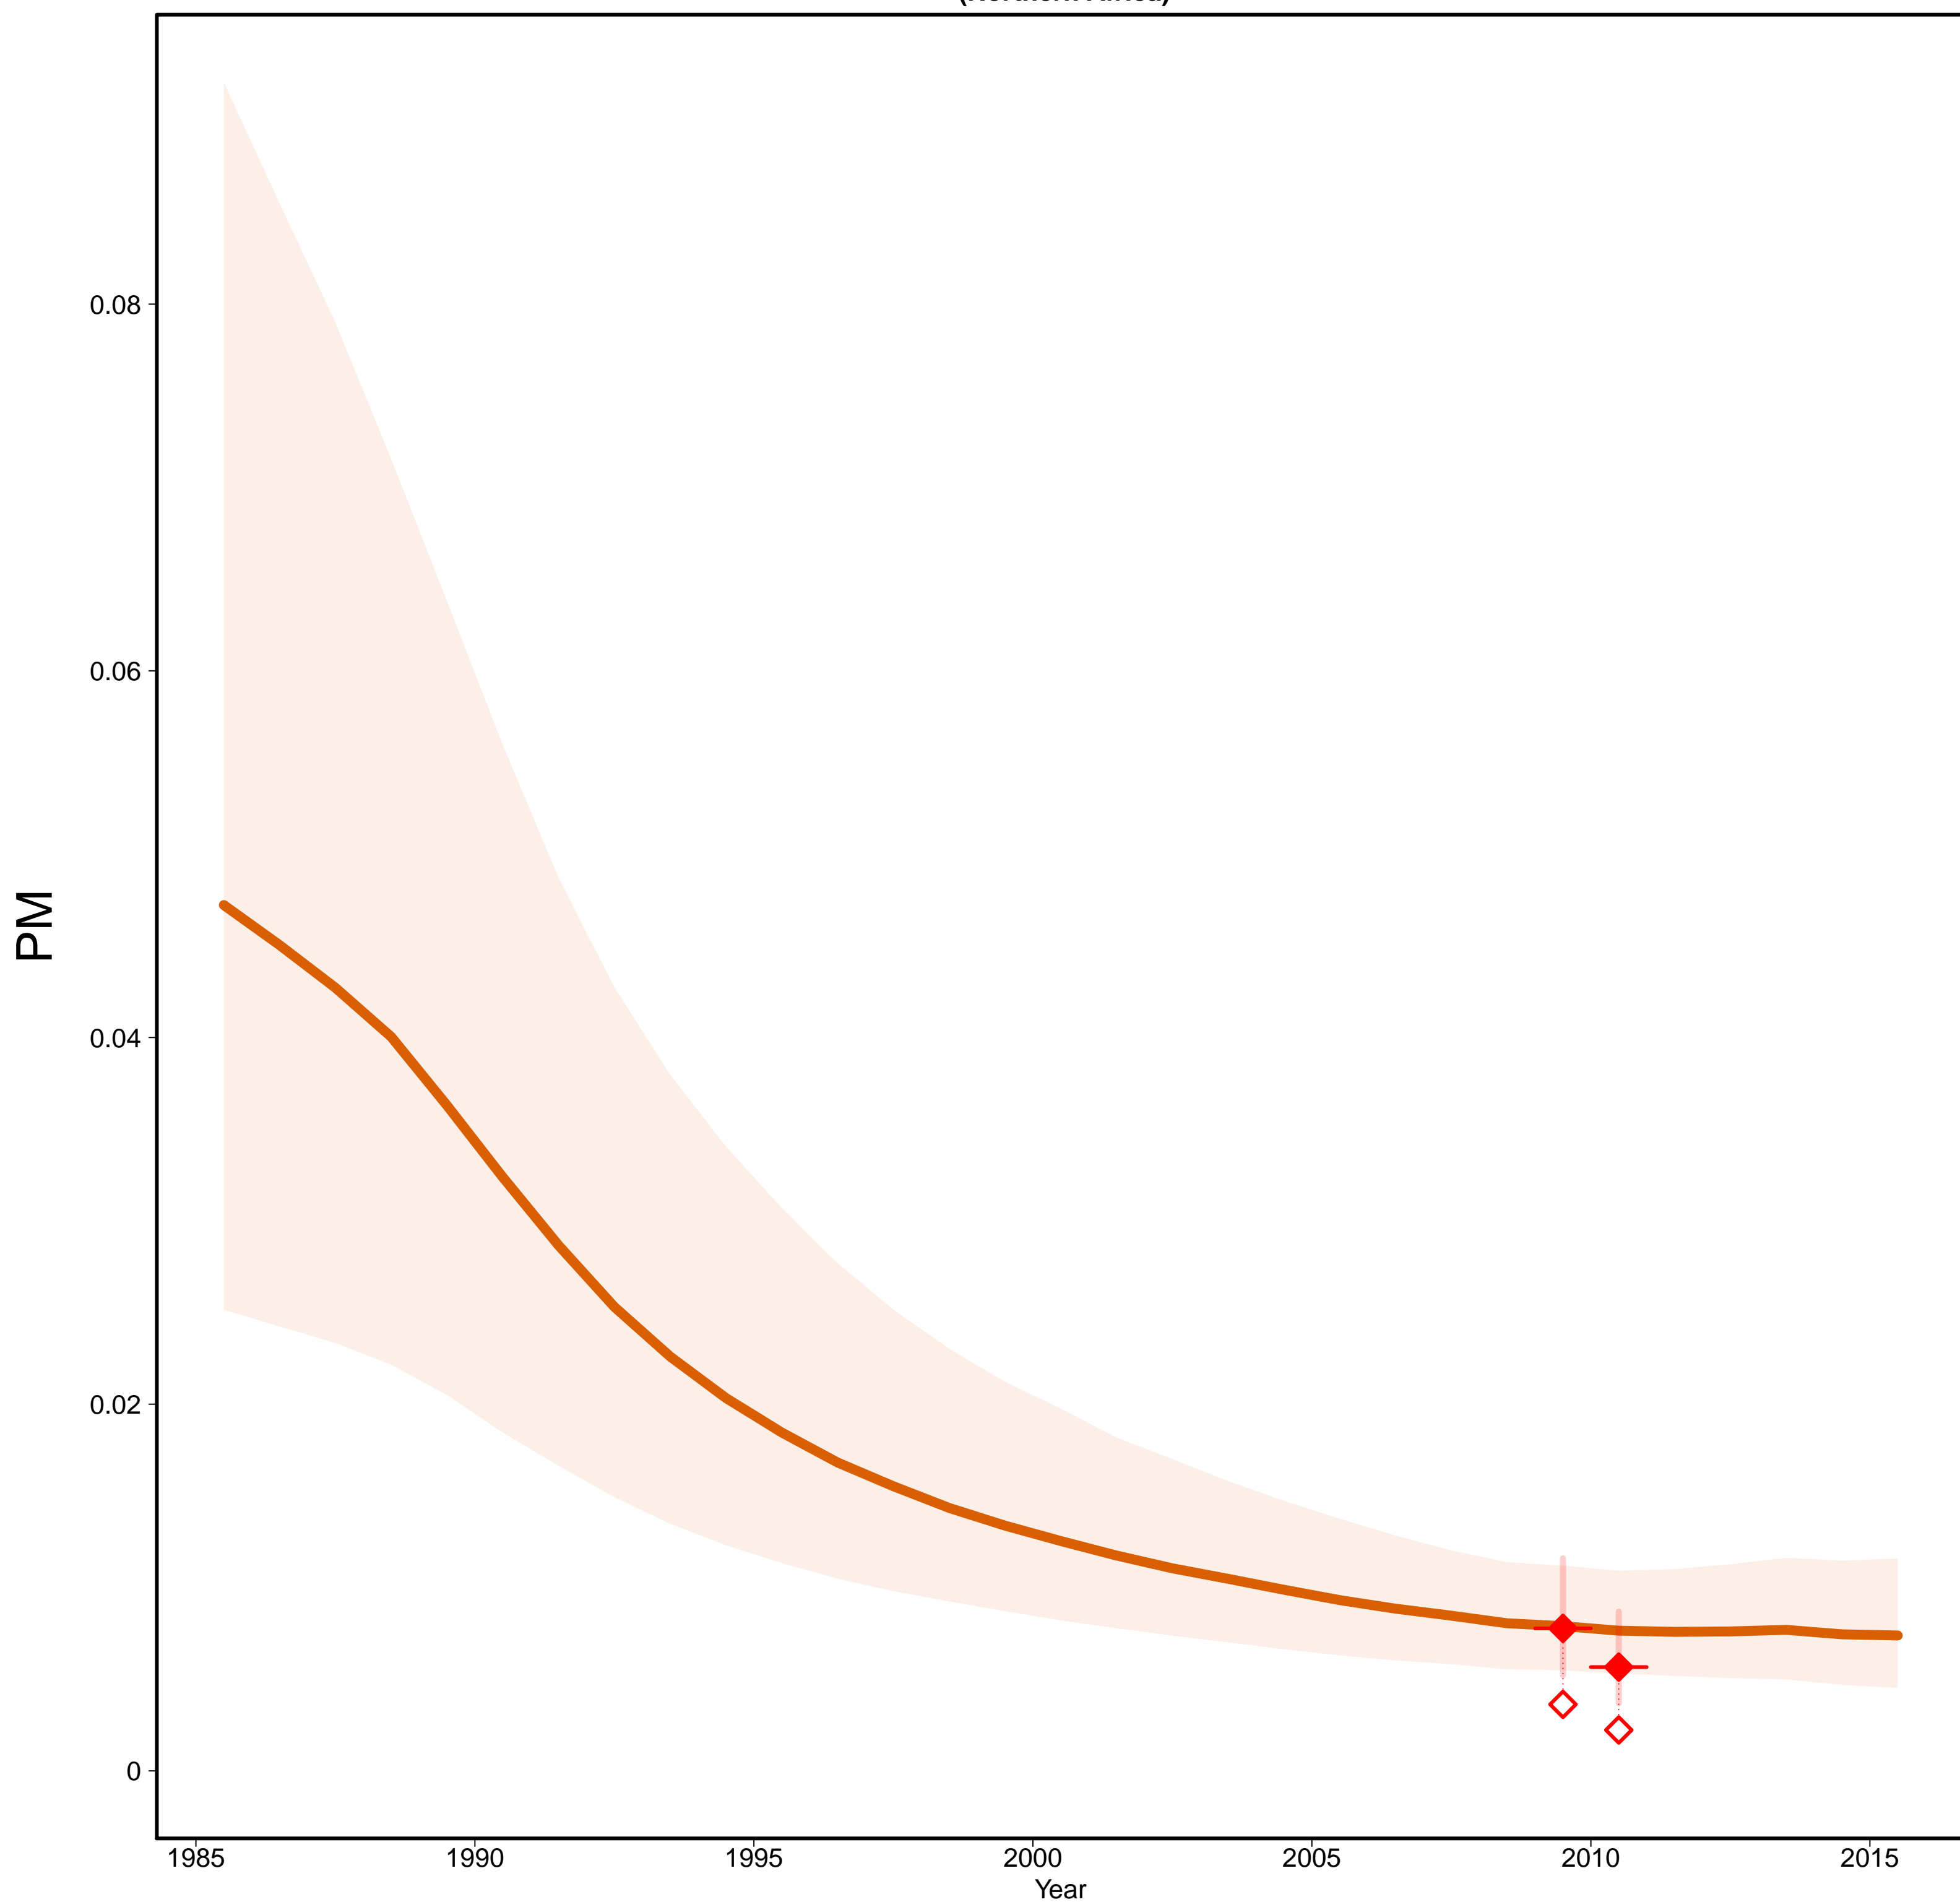

Libya [LBY]  
(Northern Africa)

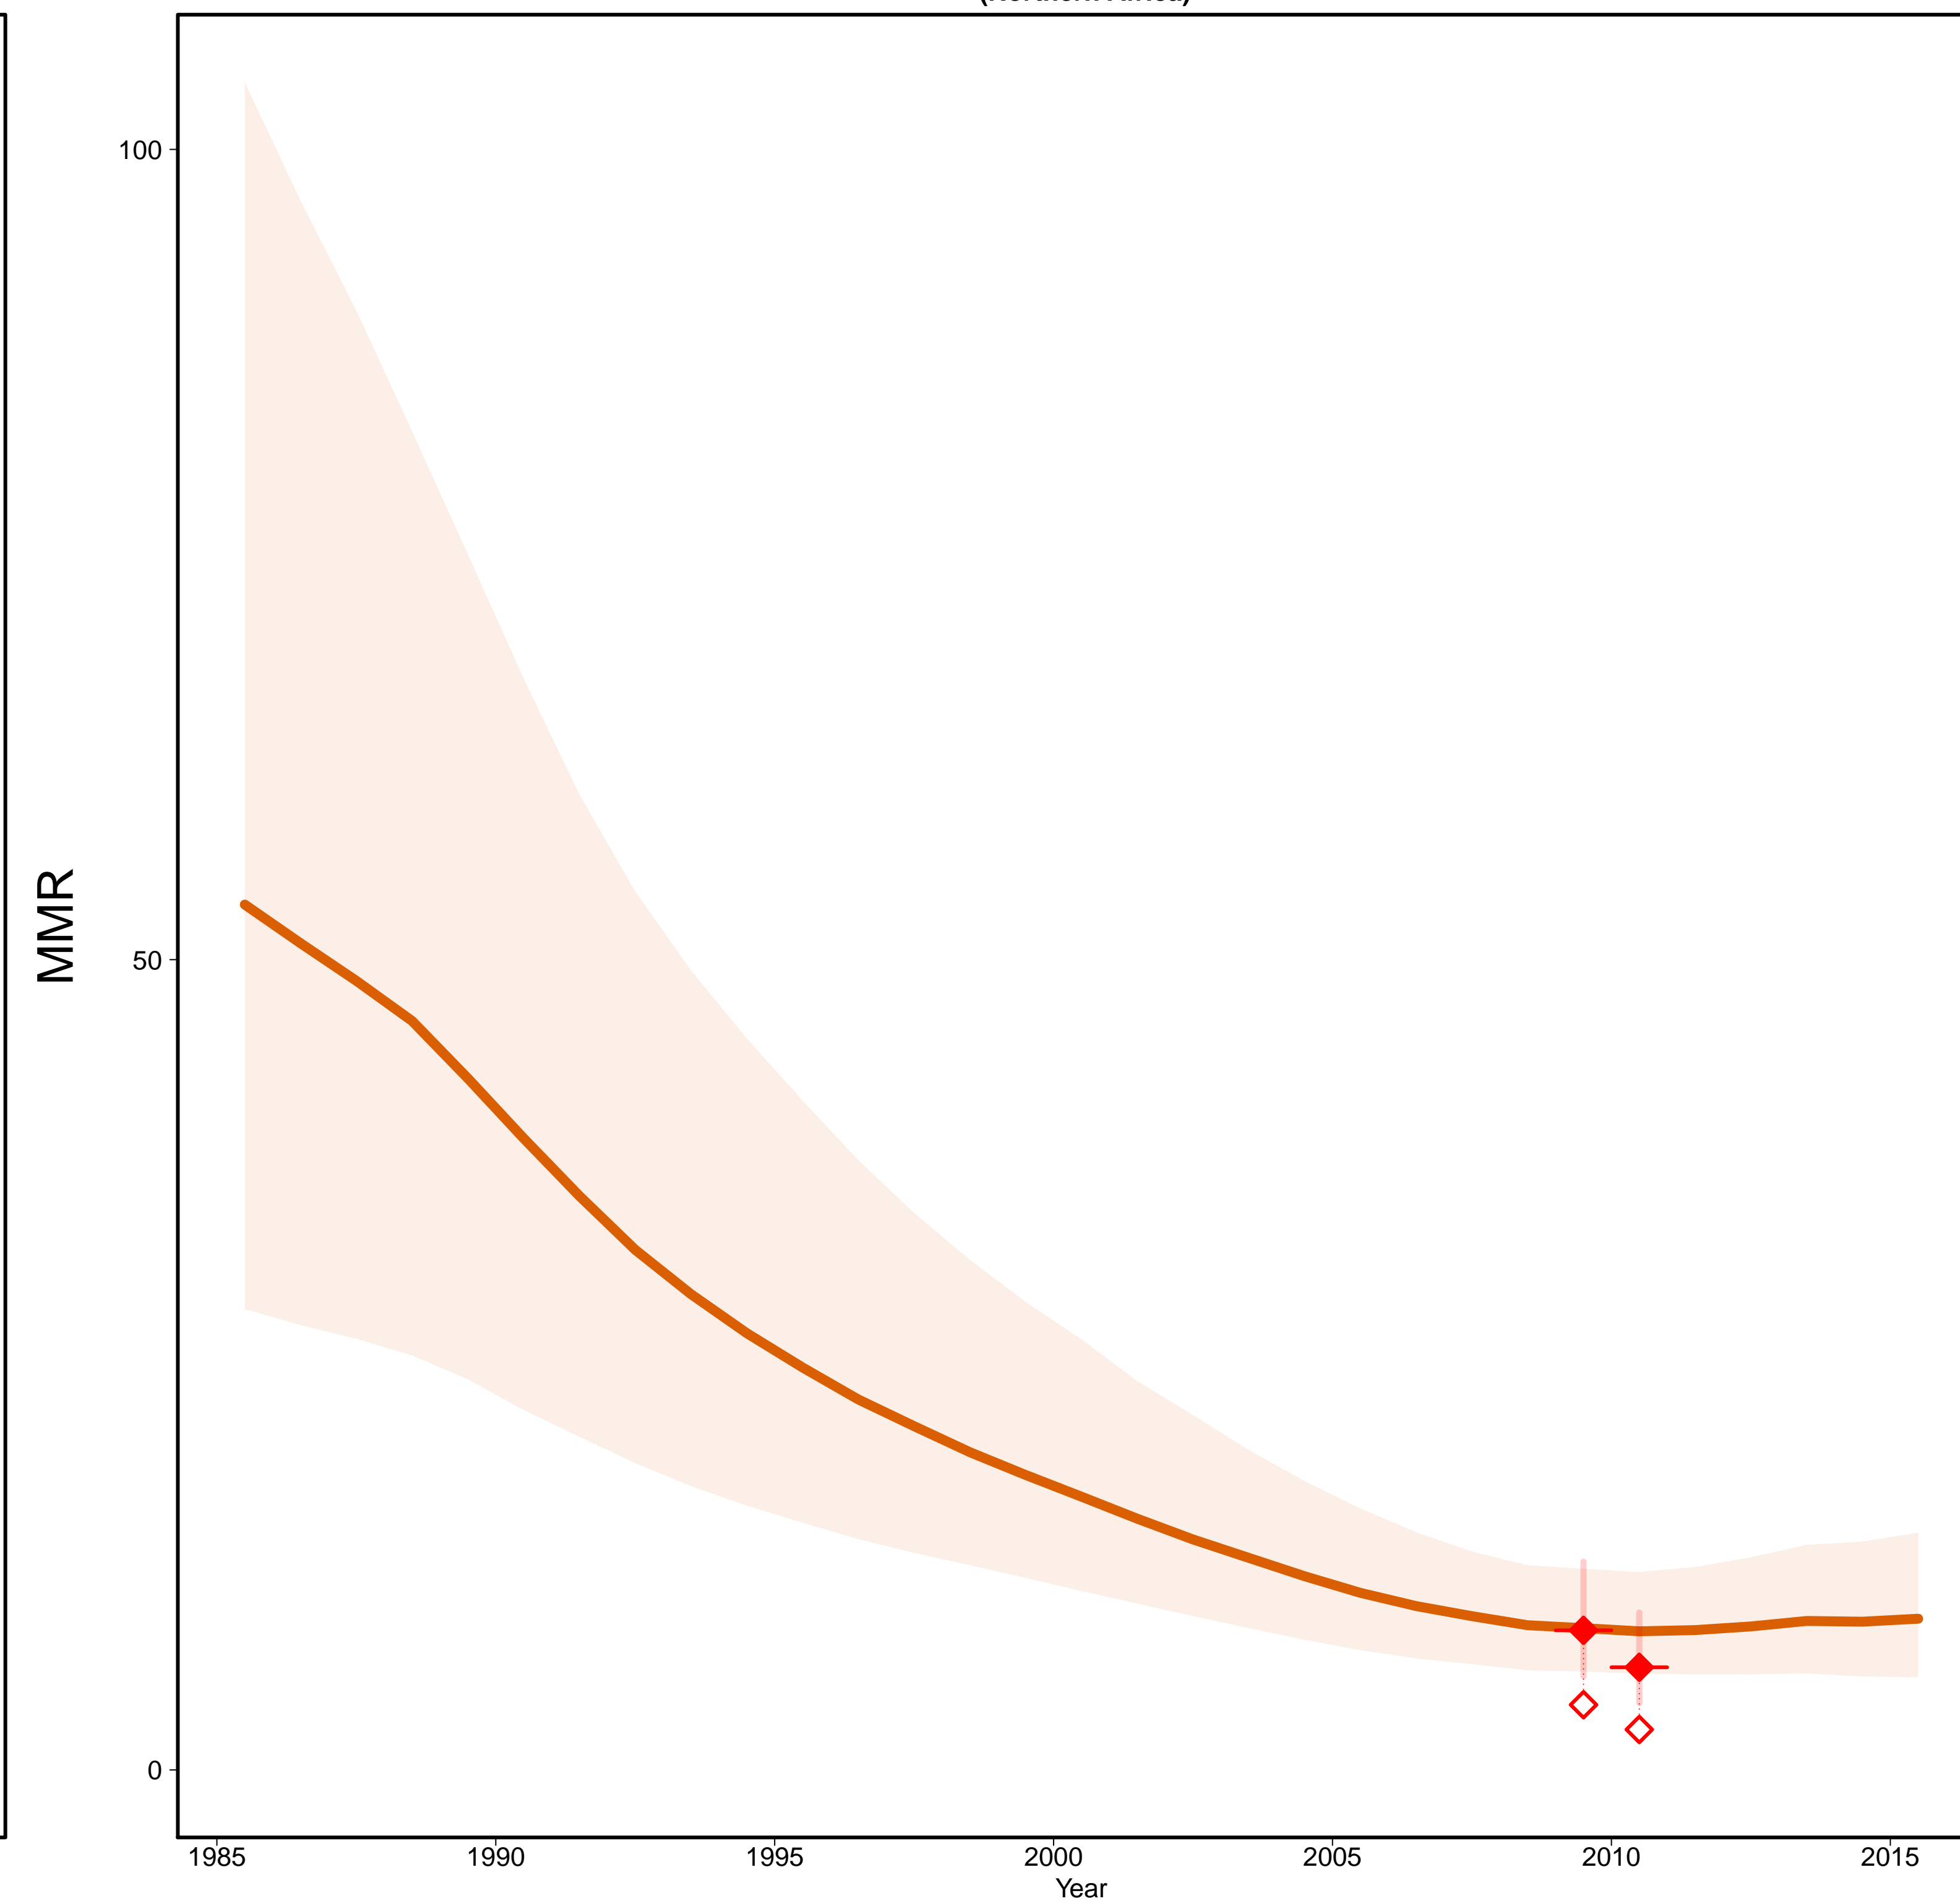

- Estimates —
- MMR Database 2015 —
- ◊ Observed Data
- ◆ Adjusted Data
- Data type —
- ◆ Misc. studies

Gross Domestic Product

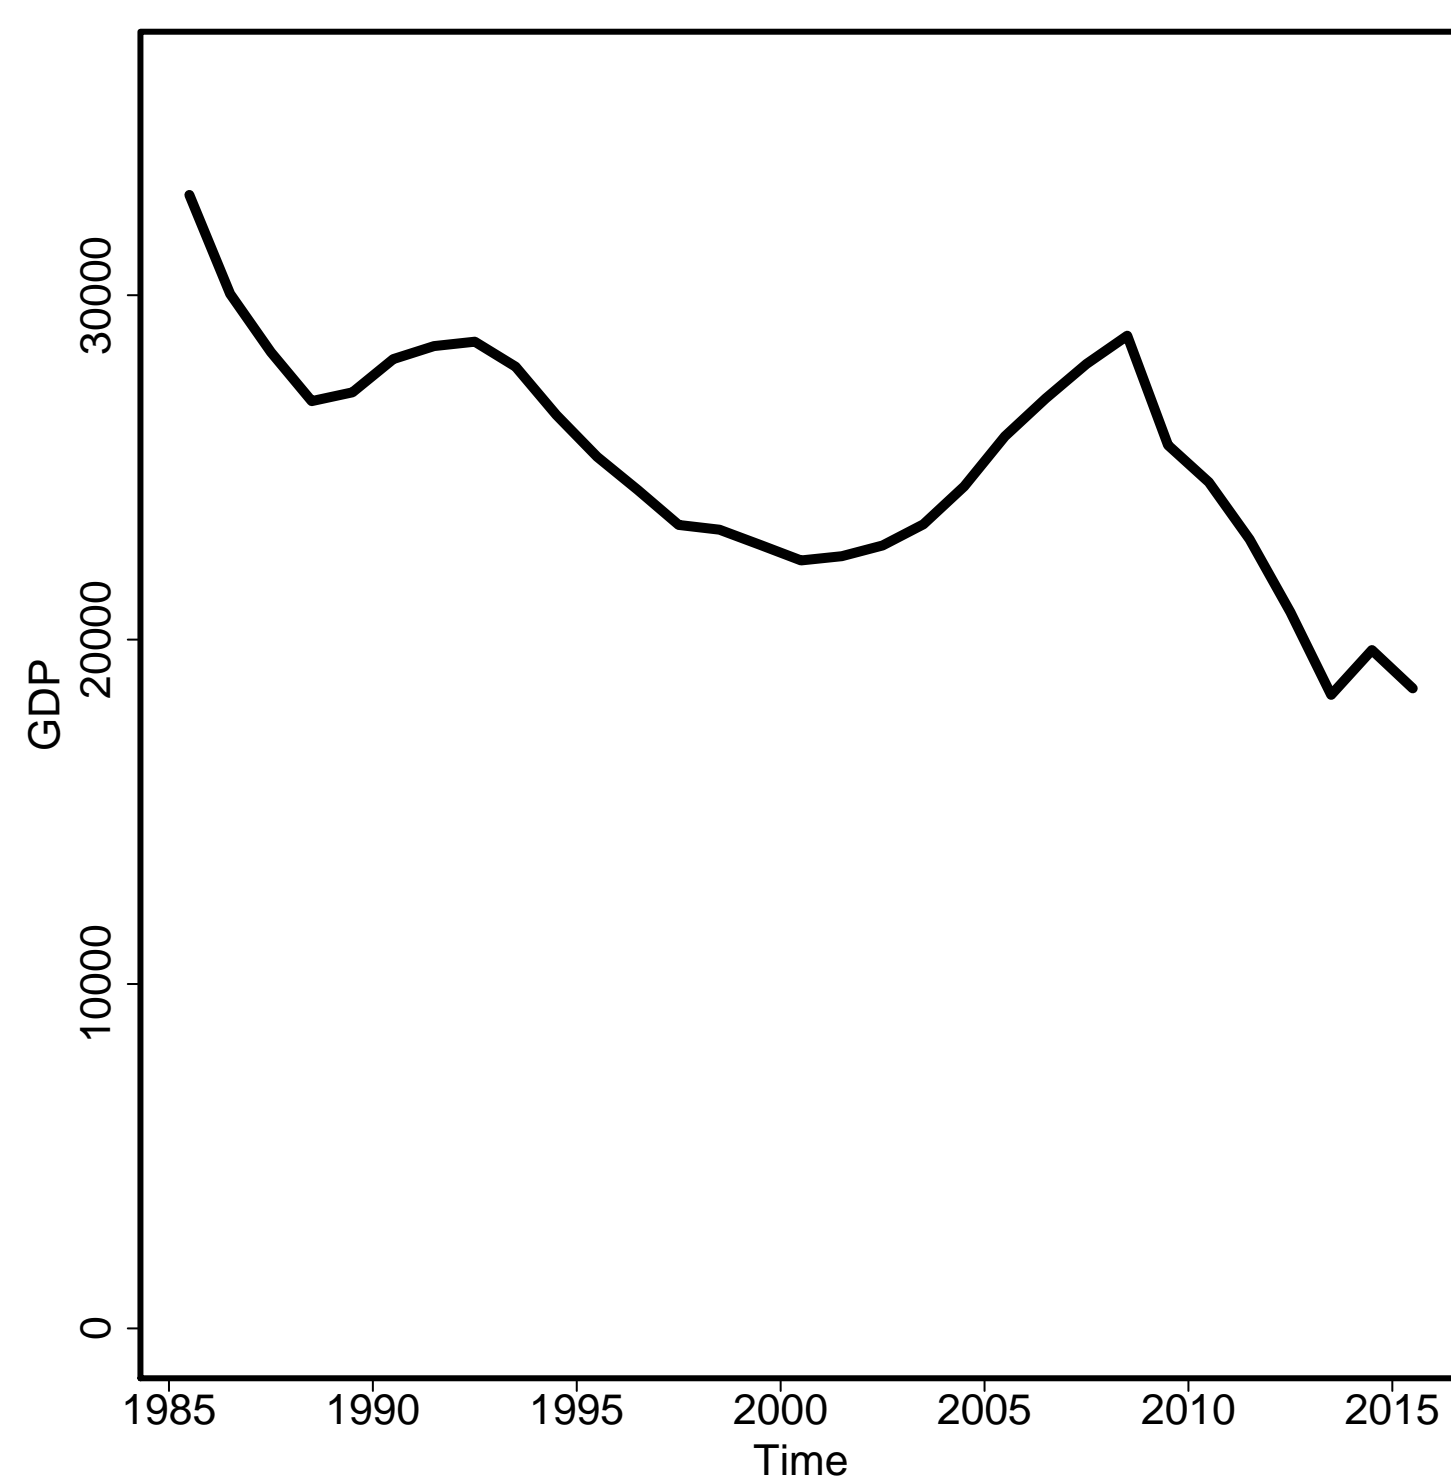

General Fertility Rate

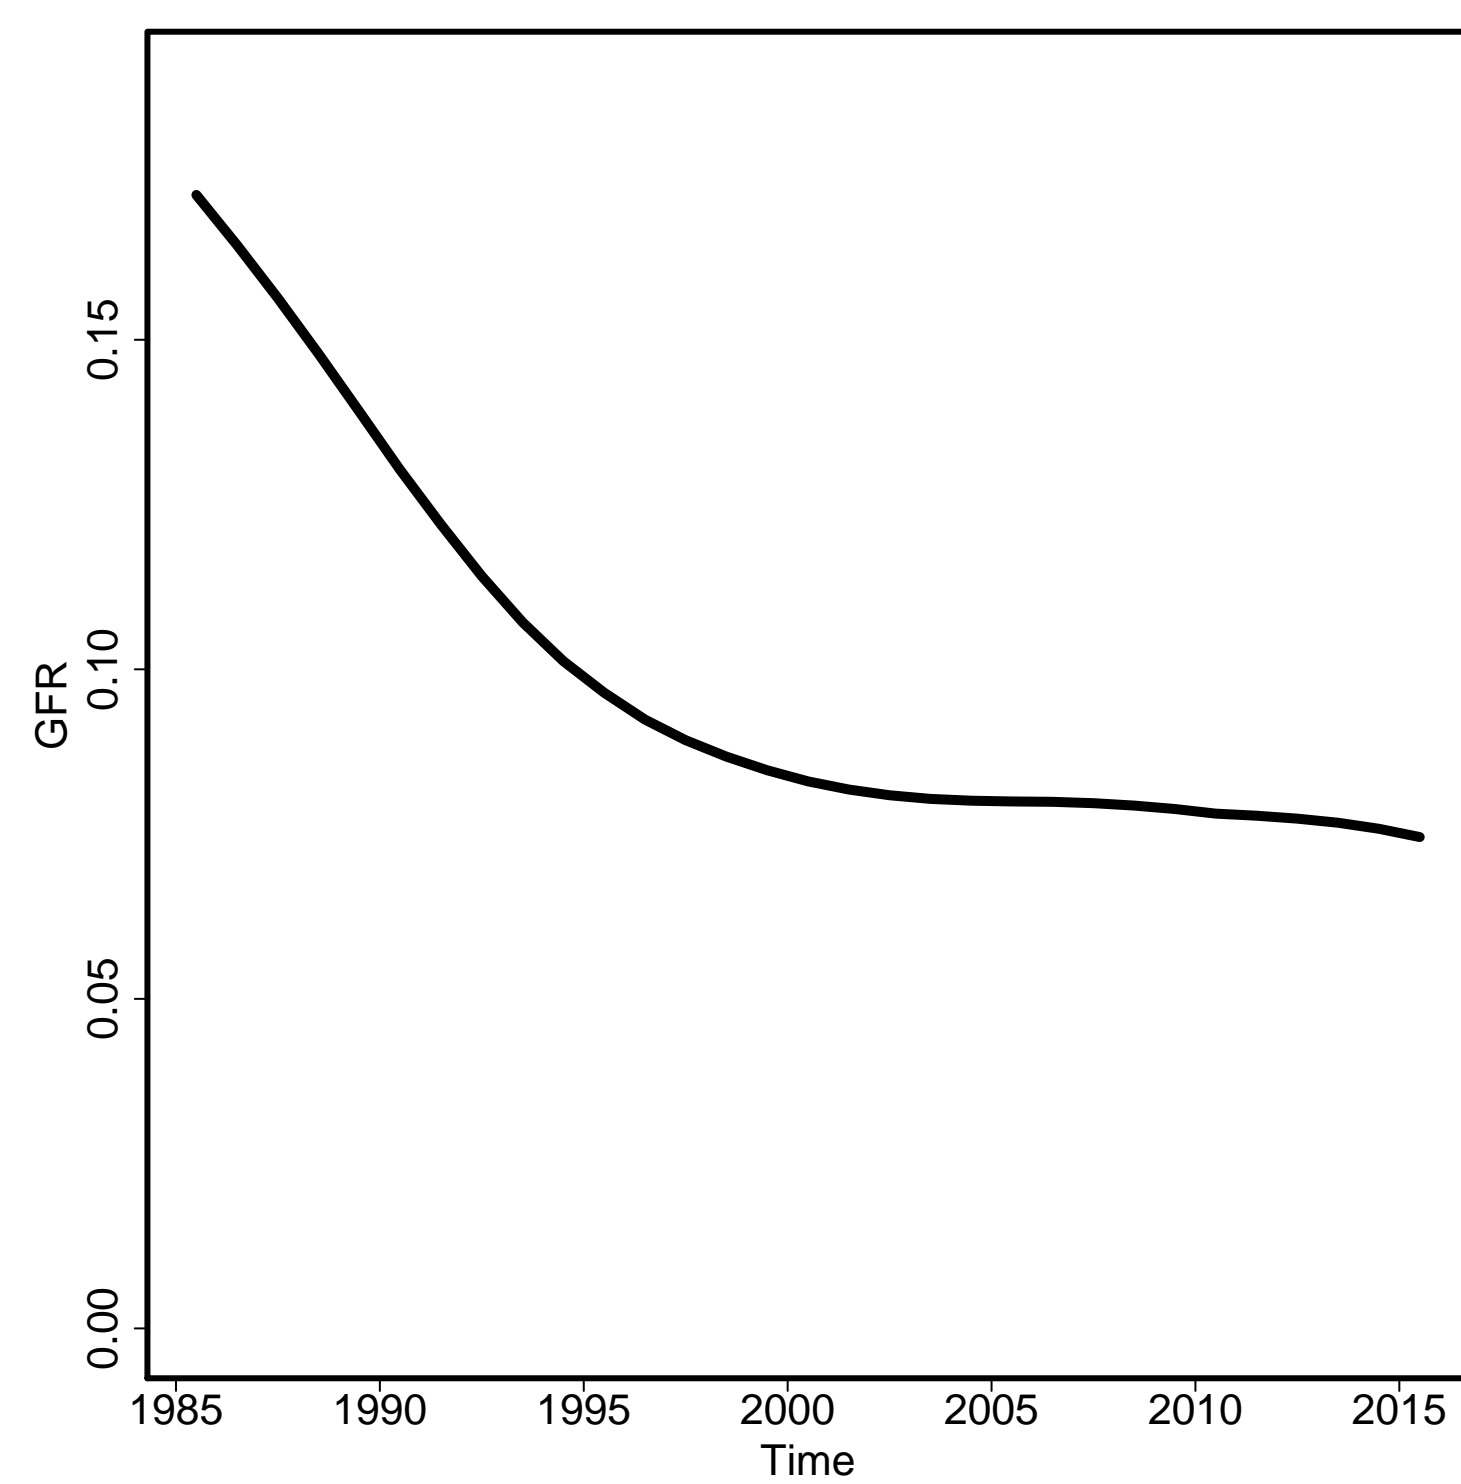

Skilled Attendance to Birth

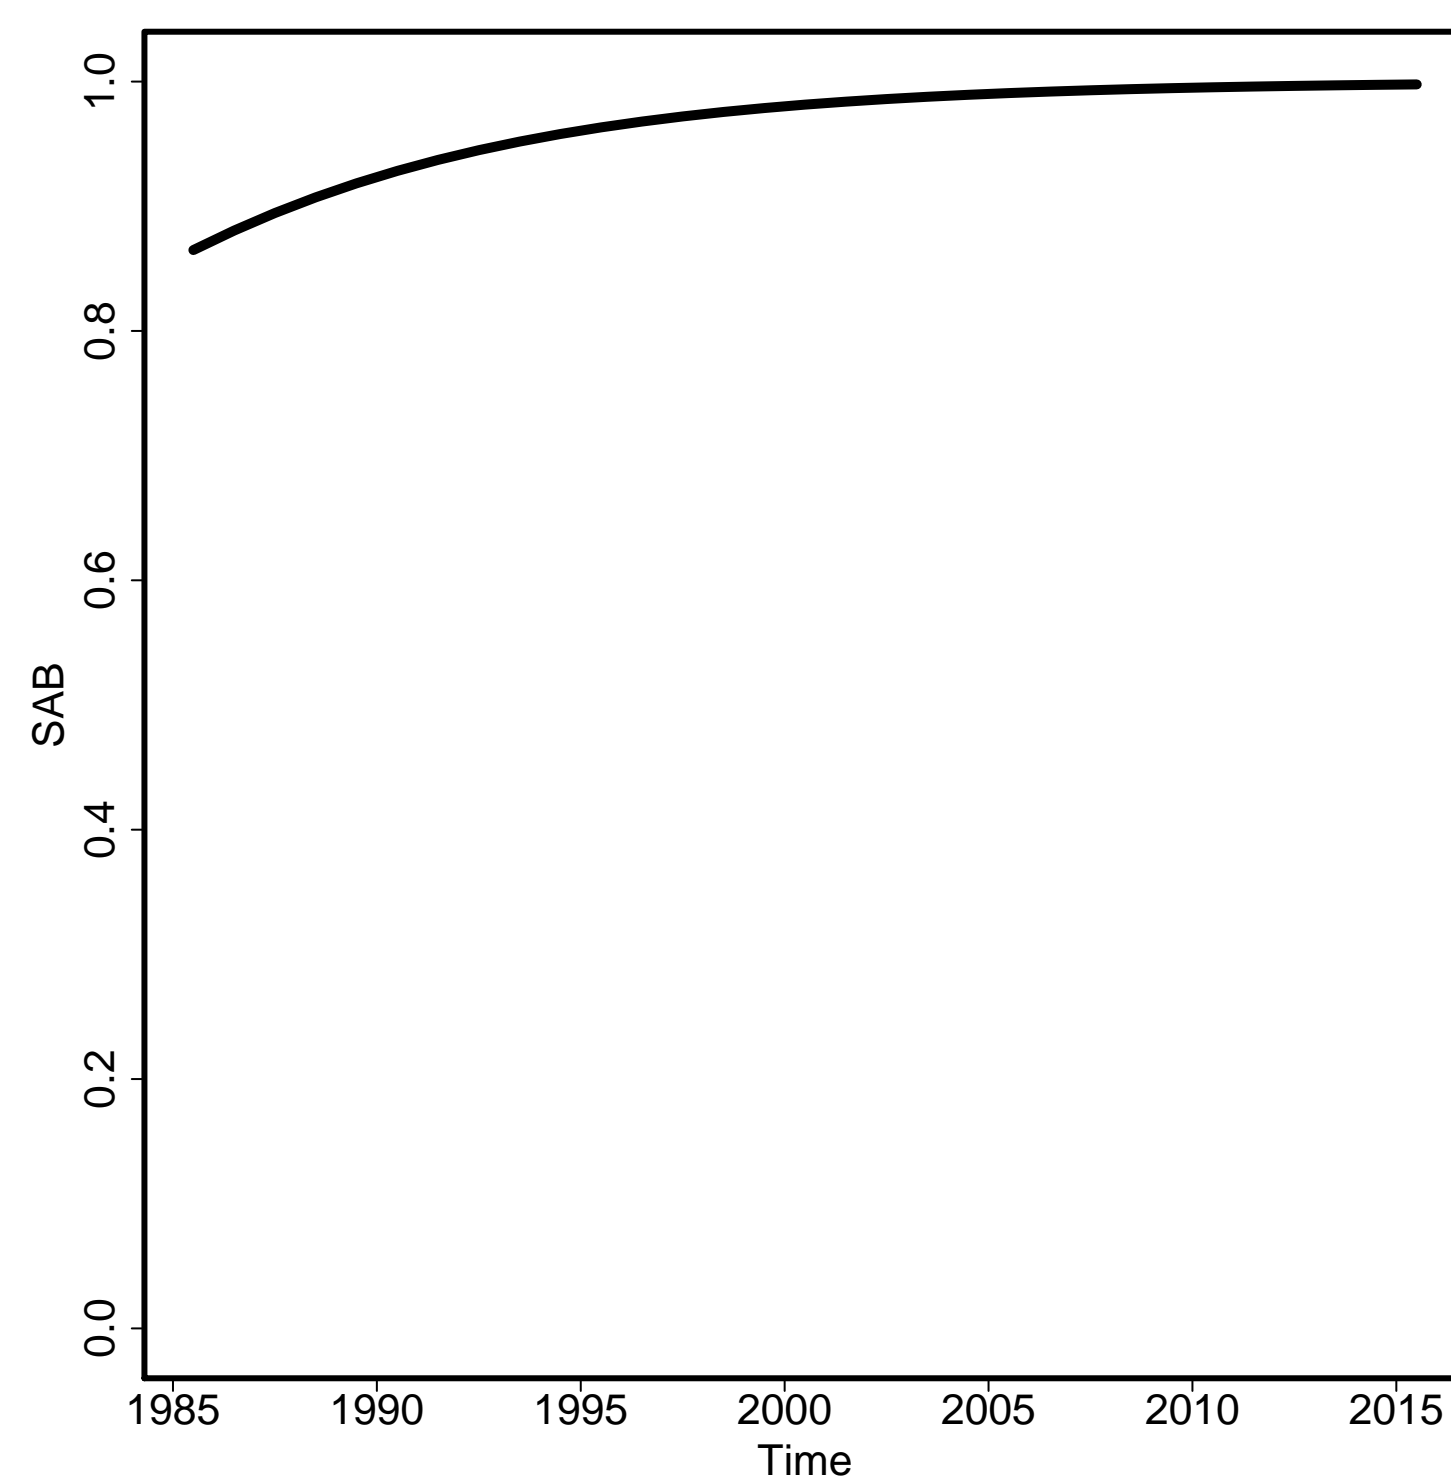

Envelope/Births

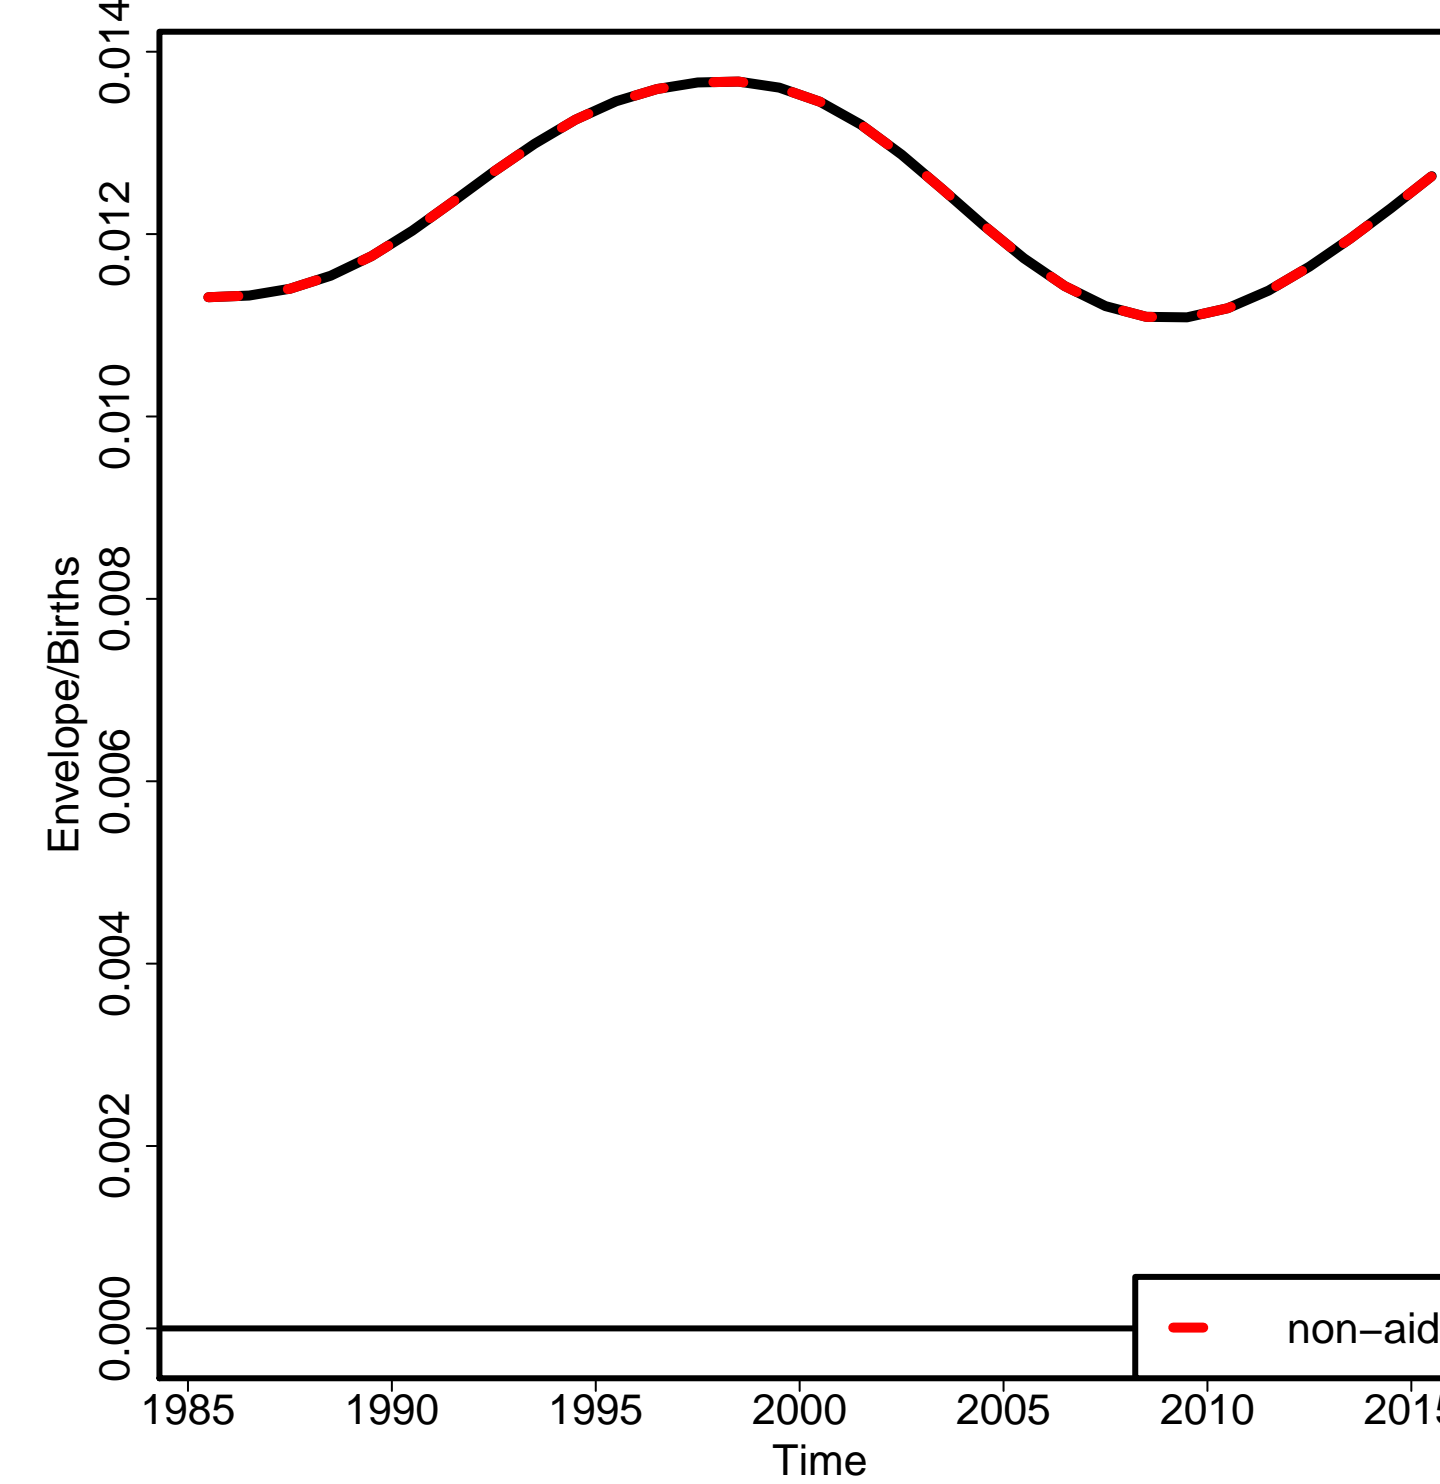

Non-aids MMR

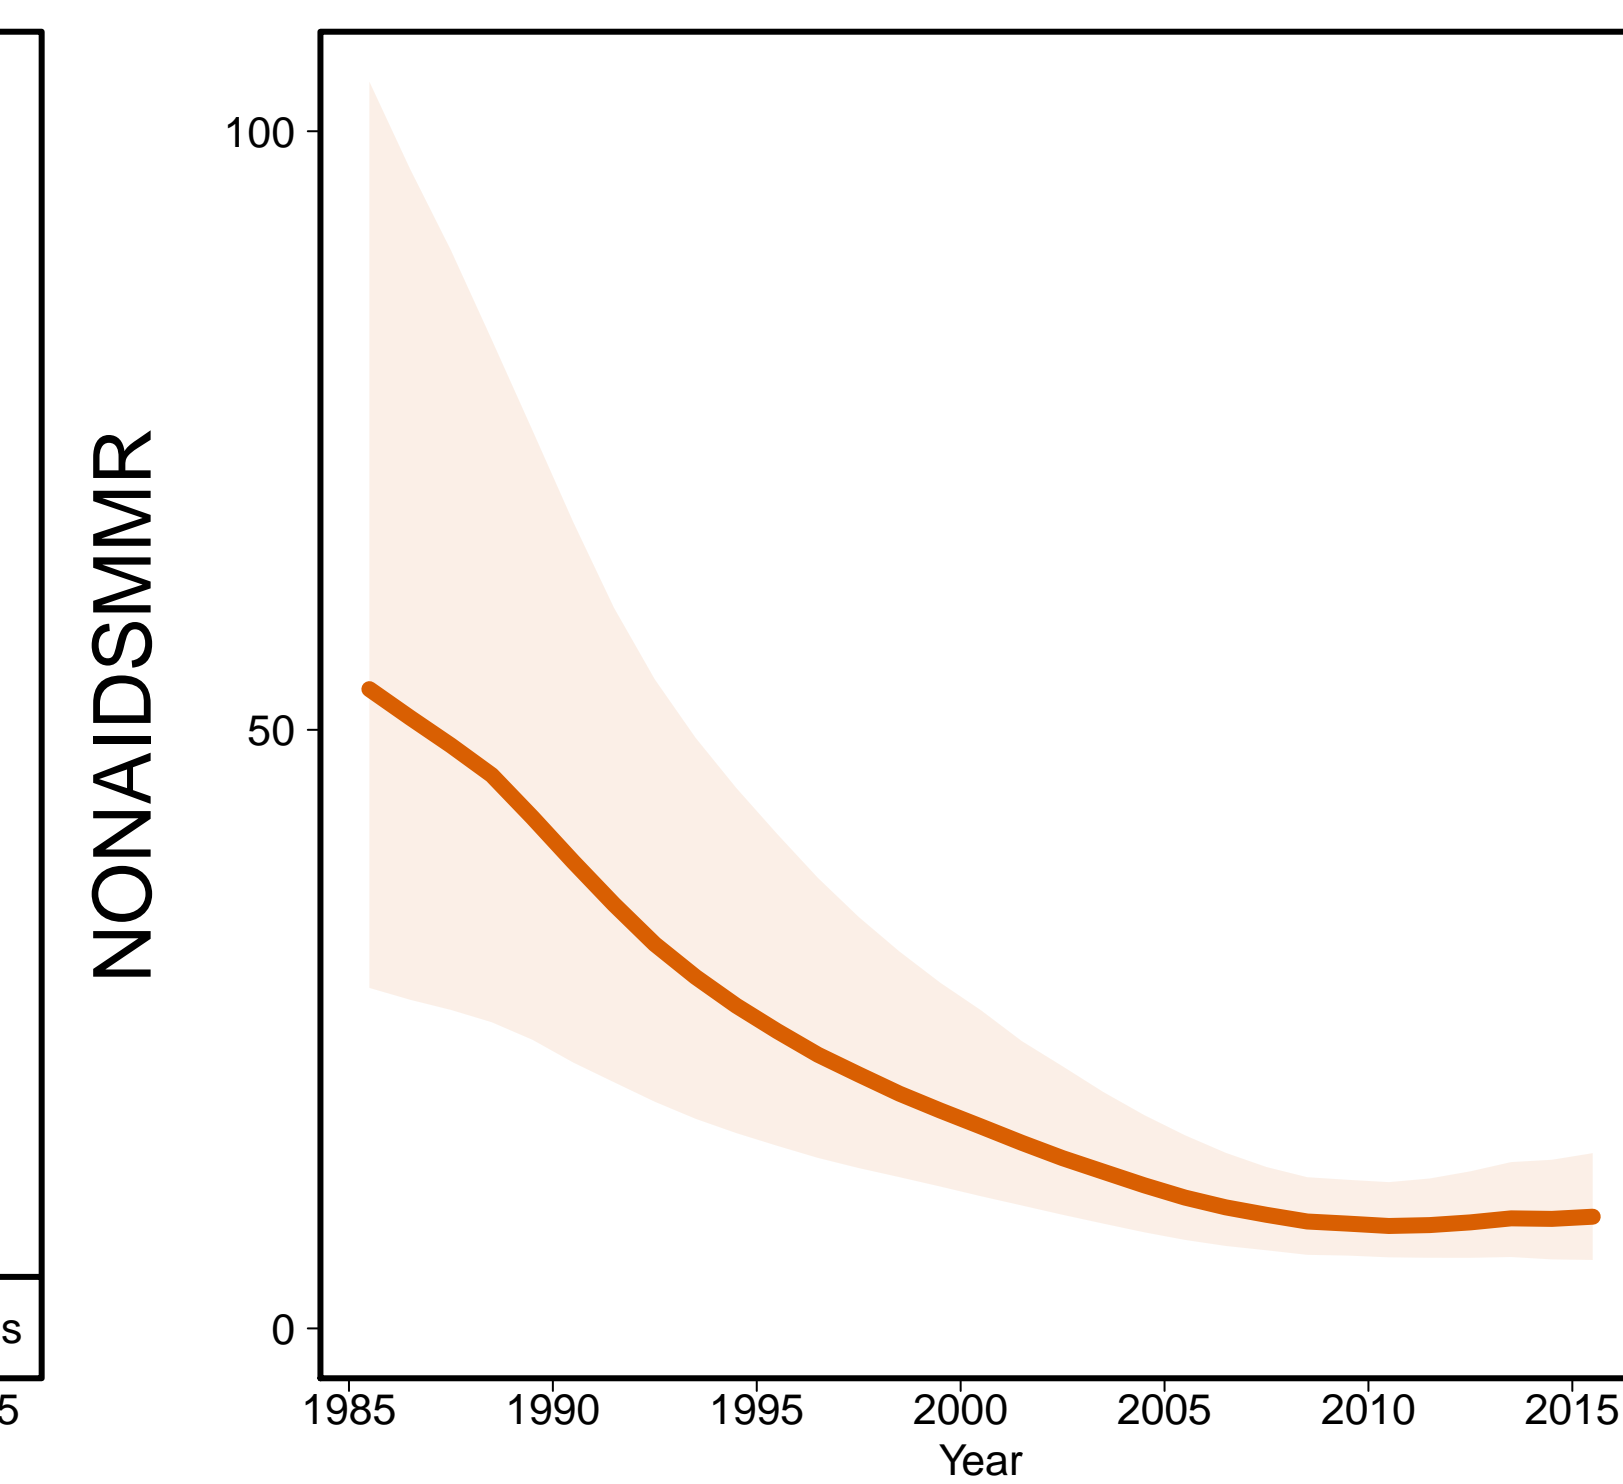

Aids MMR

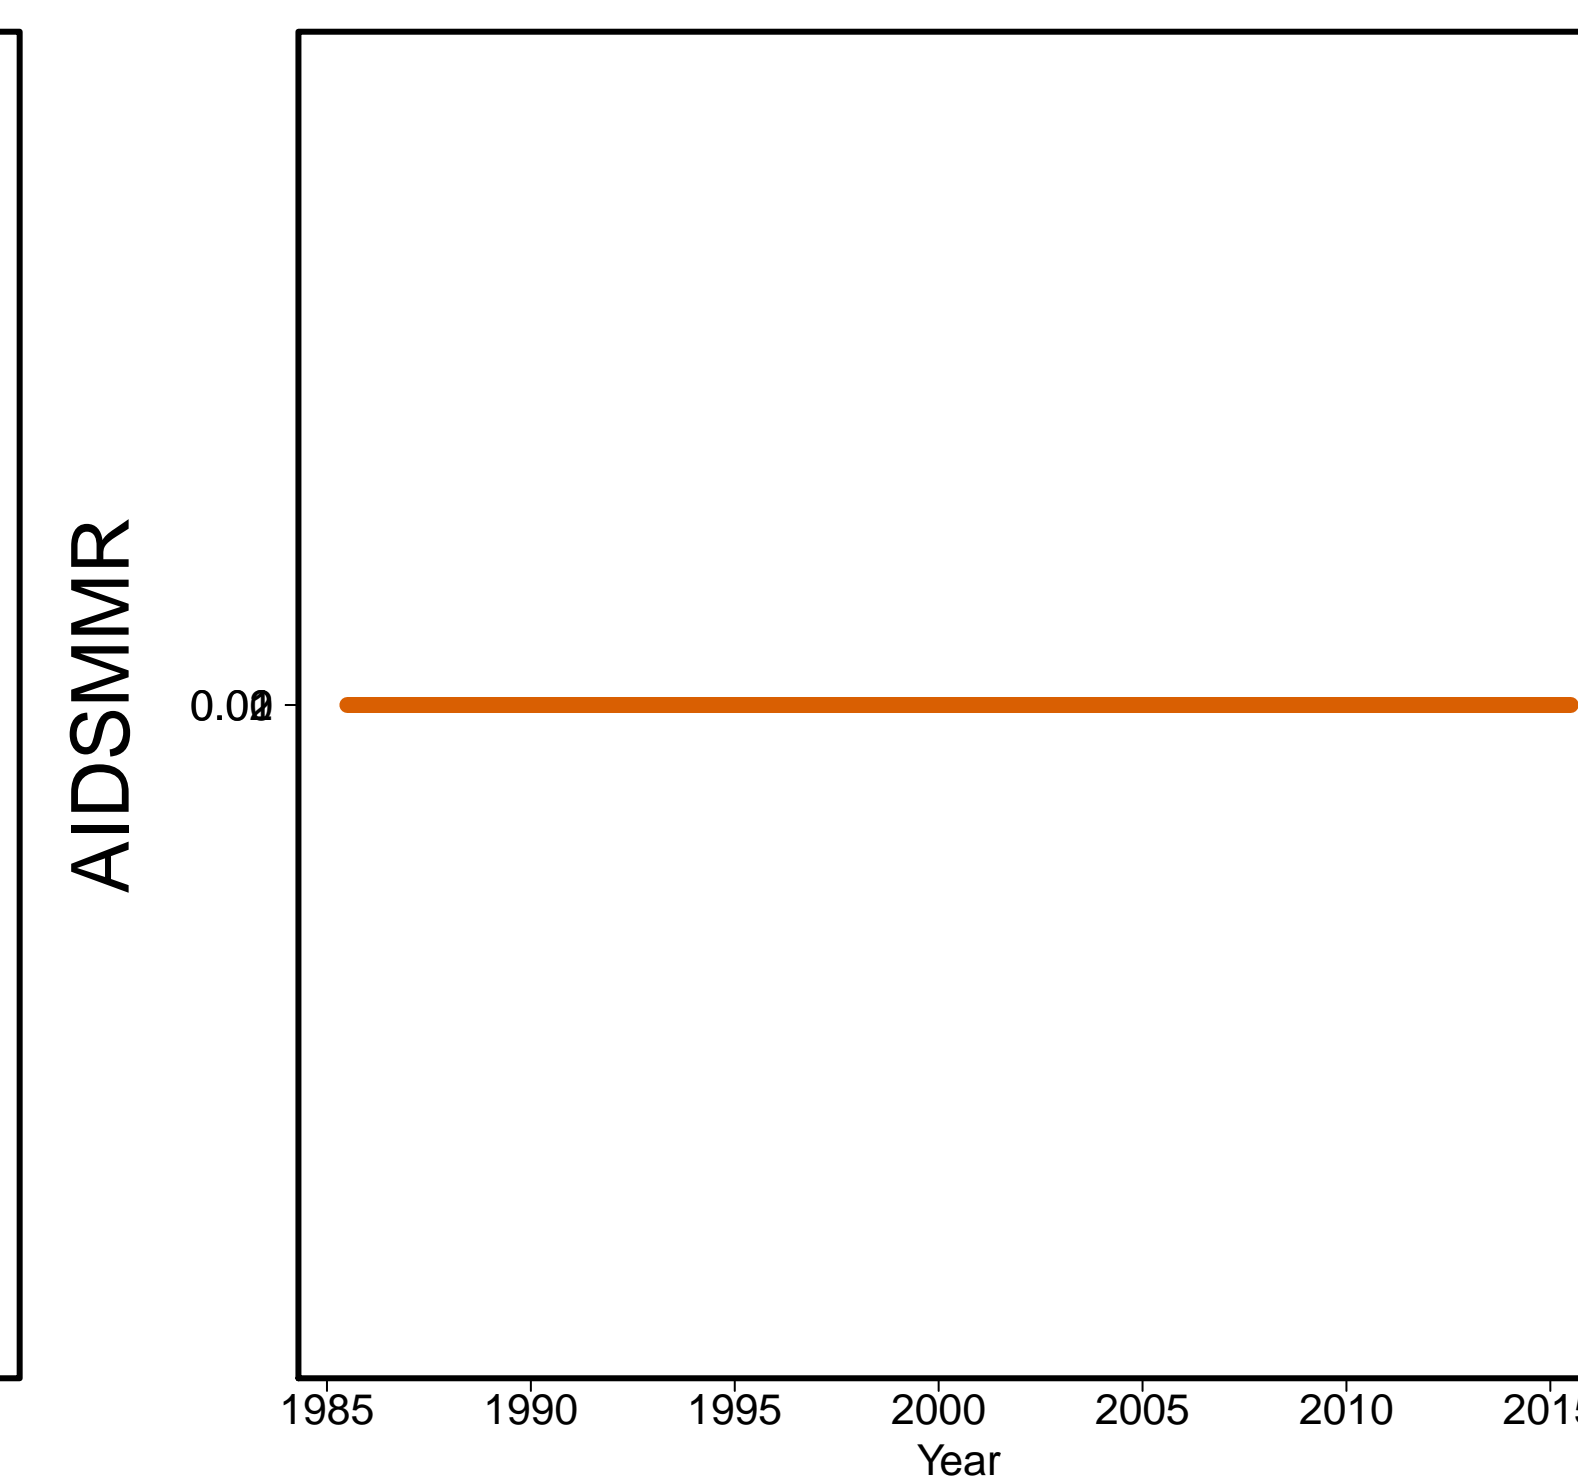

Lithuania [LTU]  
(Developed regions)

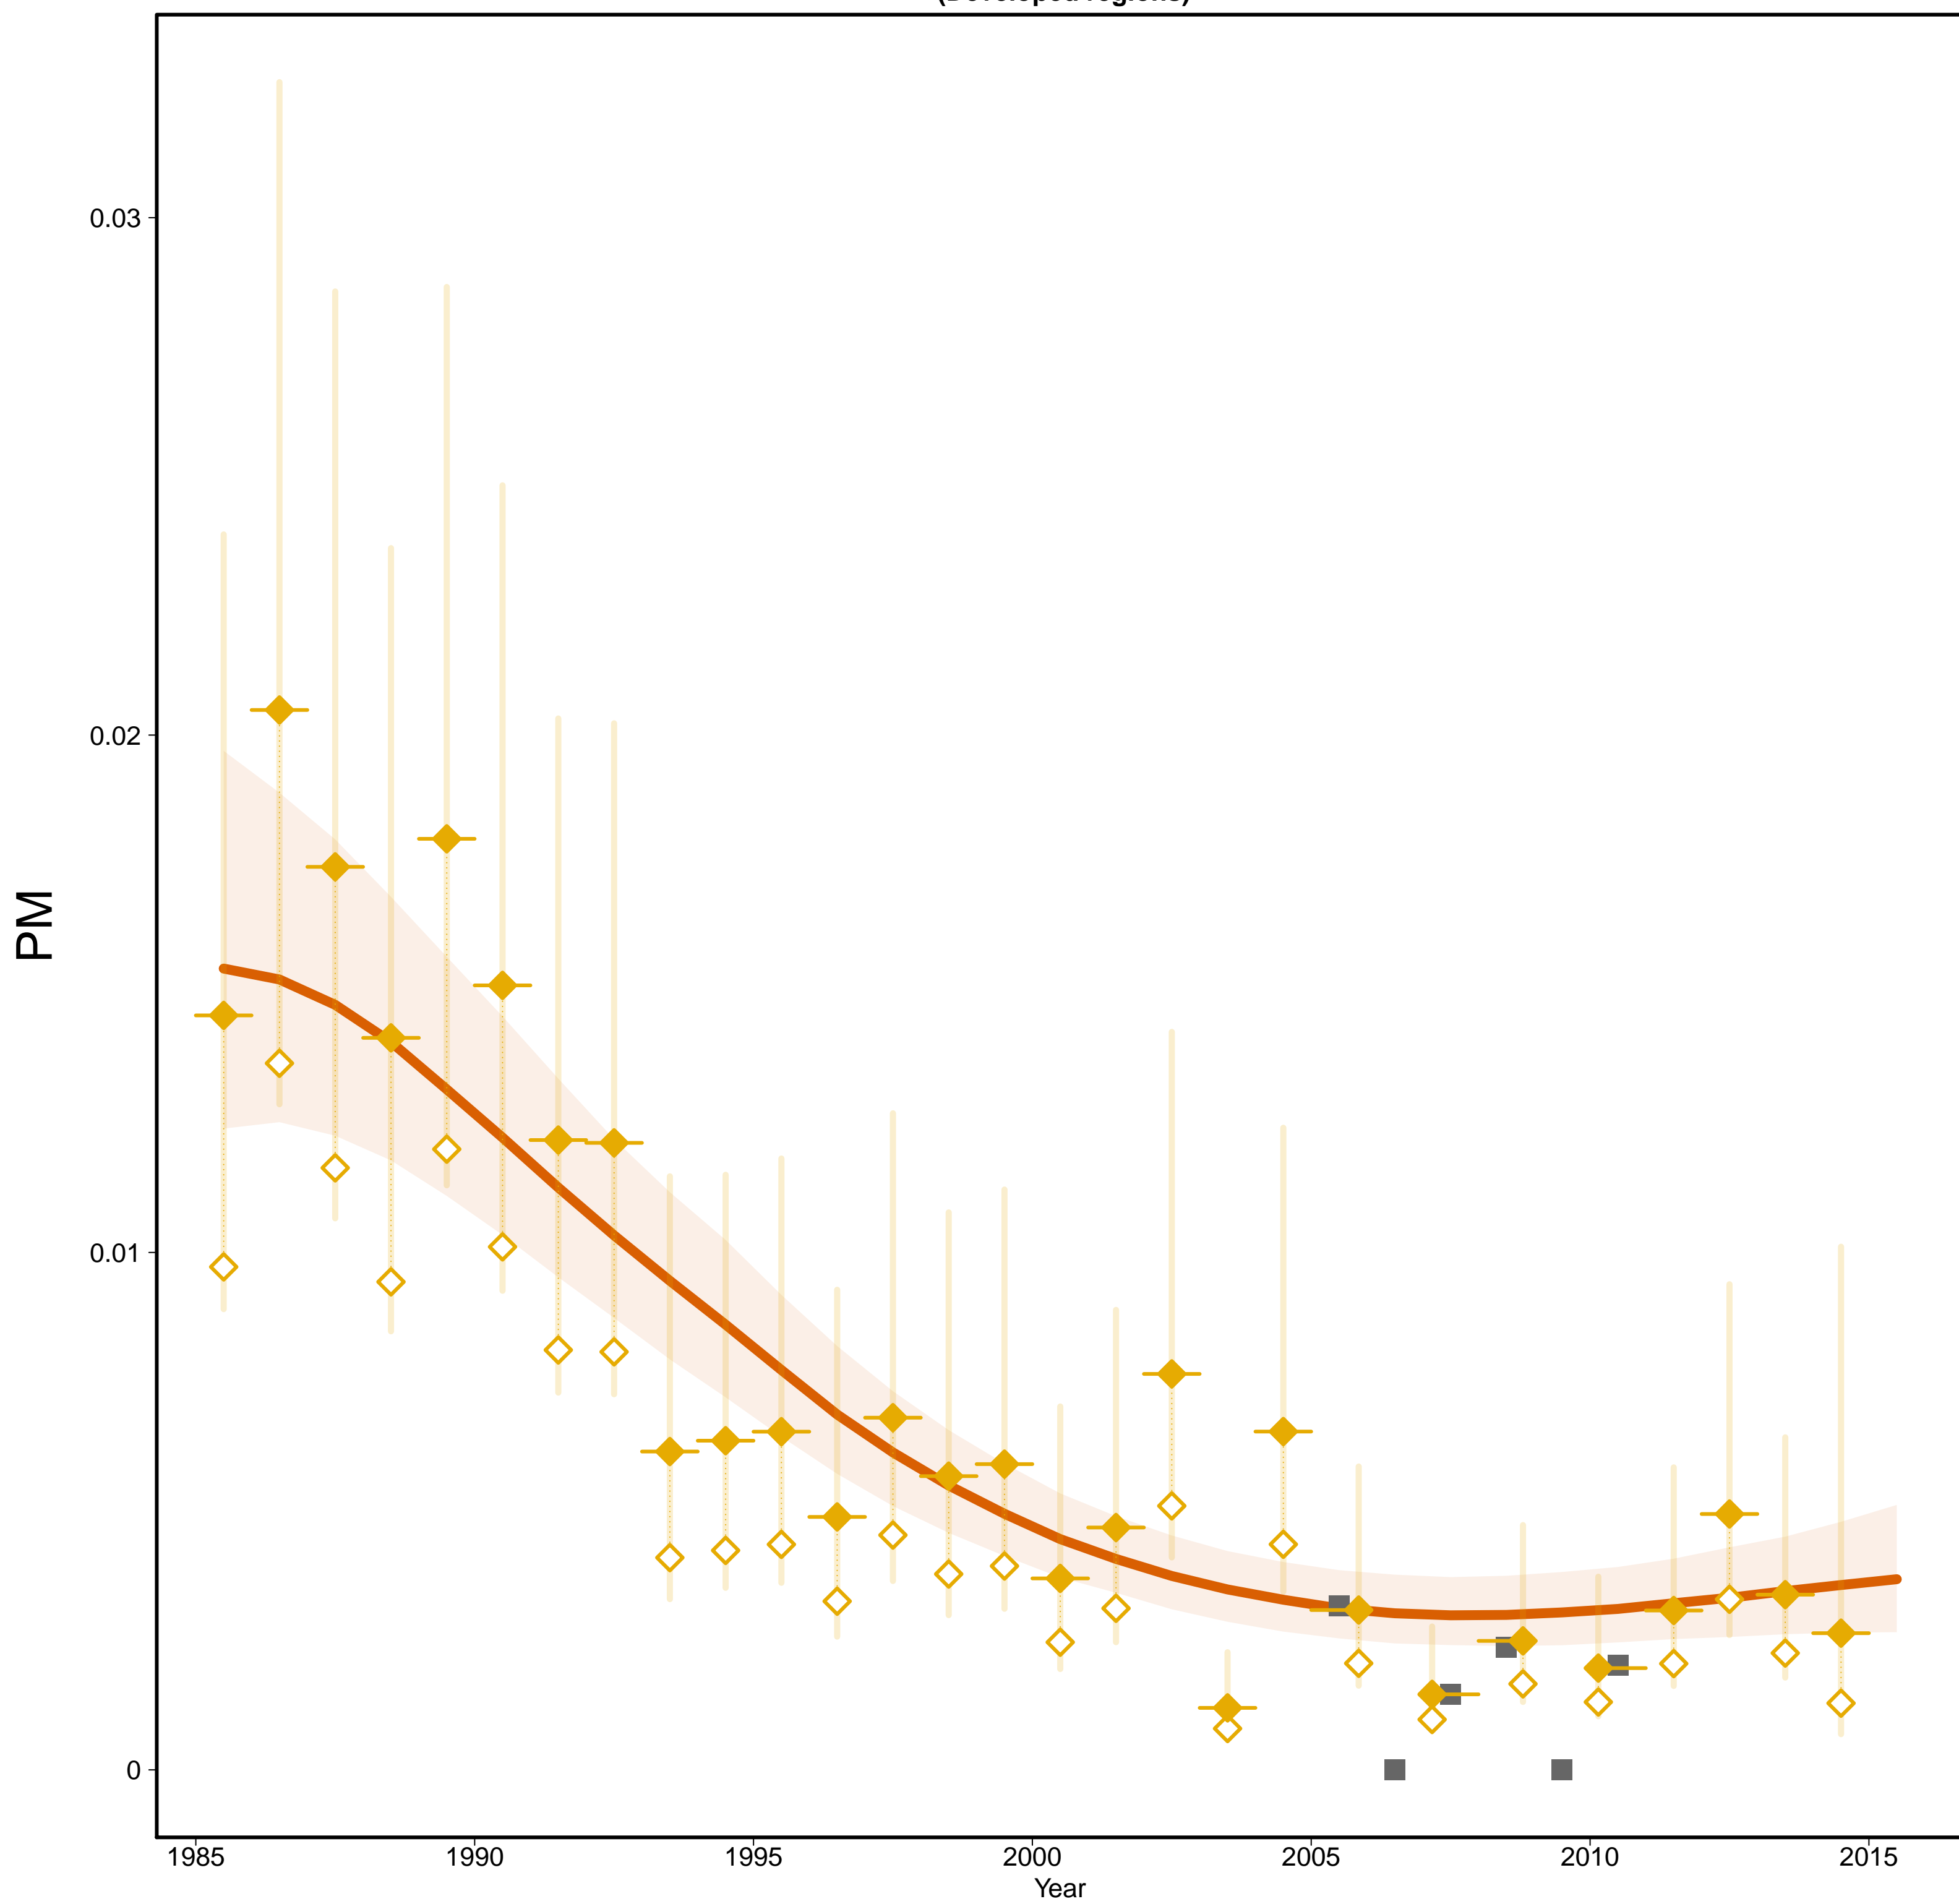

Lithuania [LTU]  
(Developed regions)

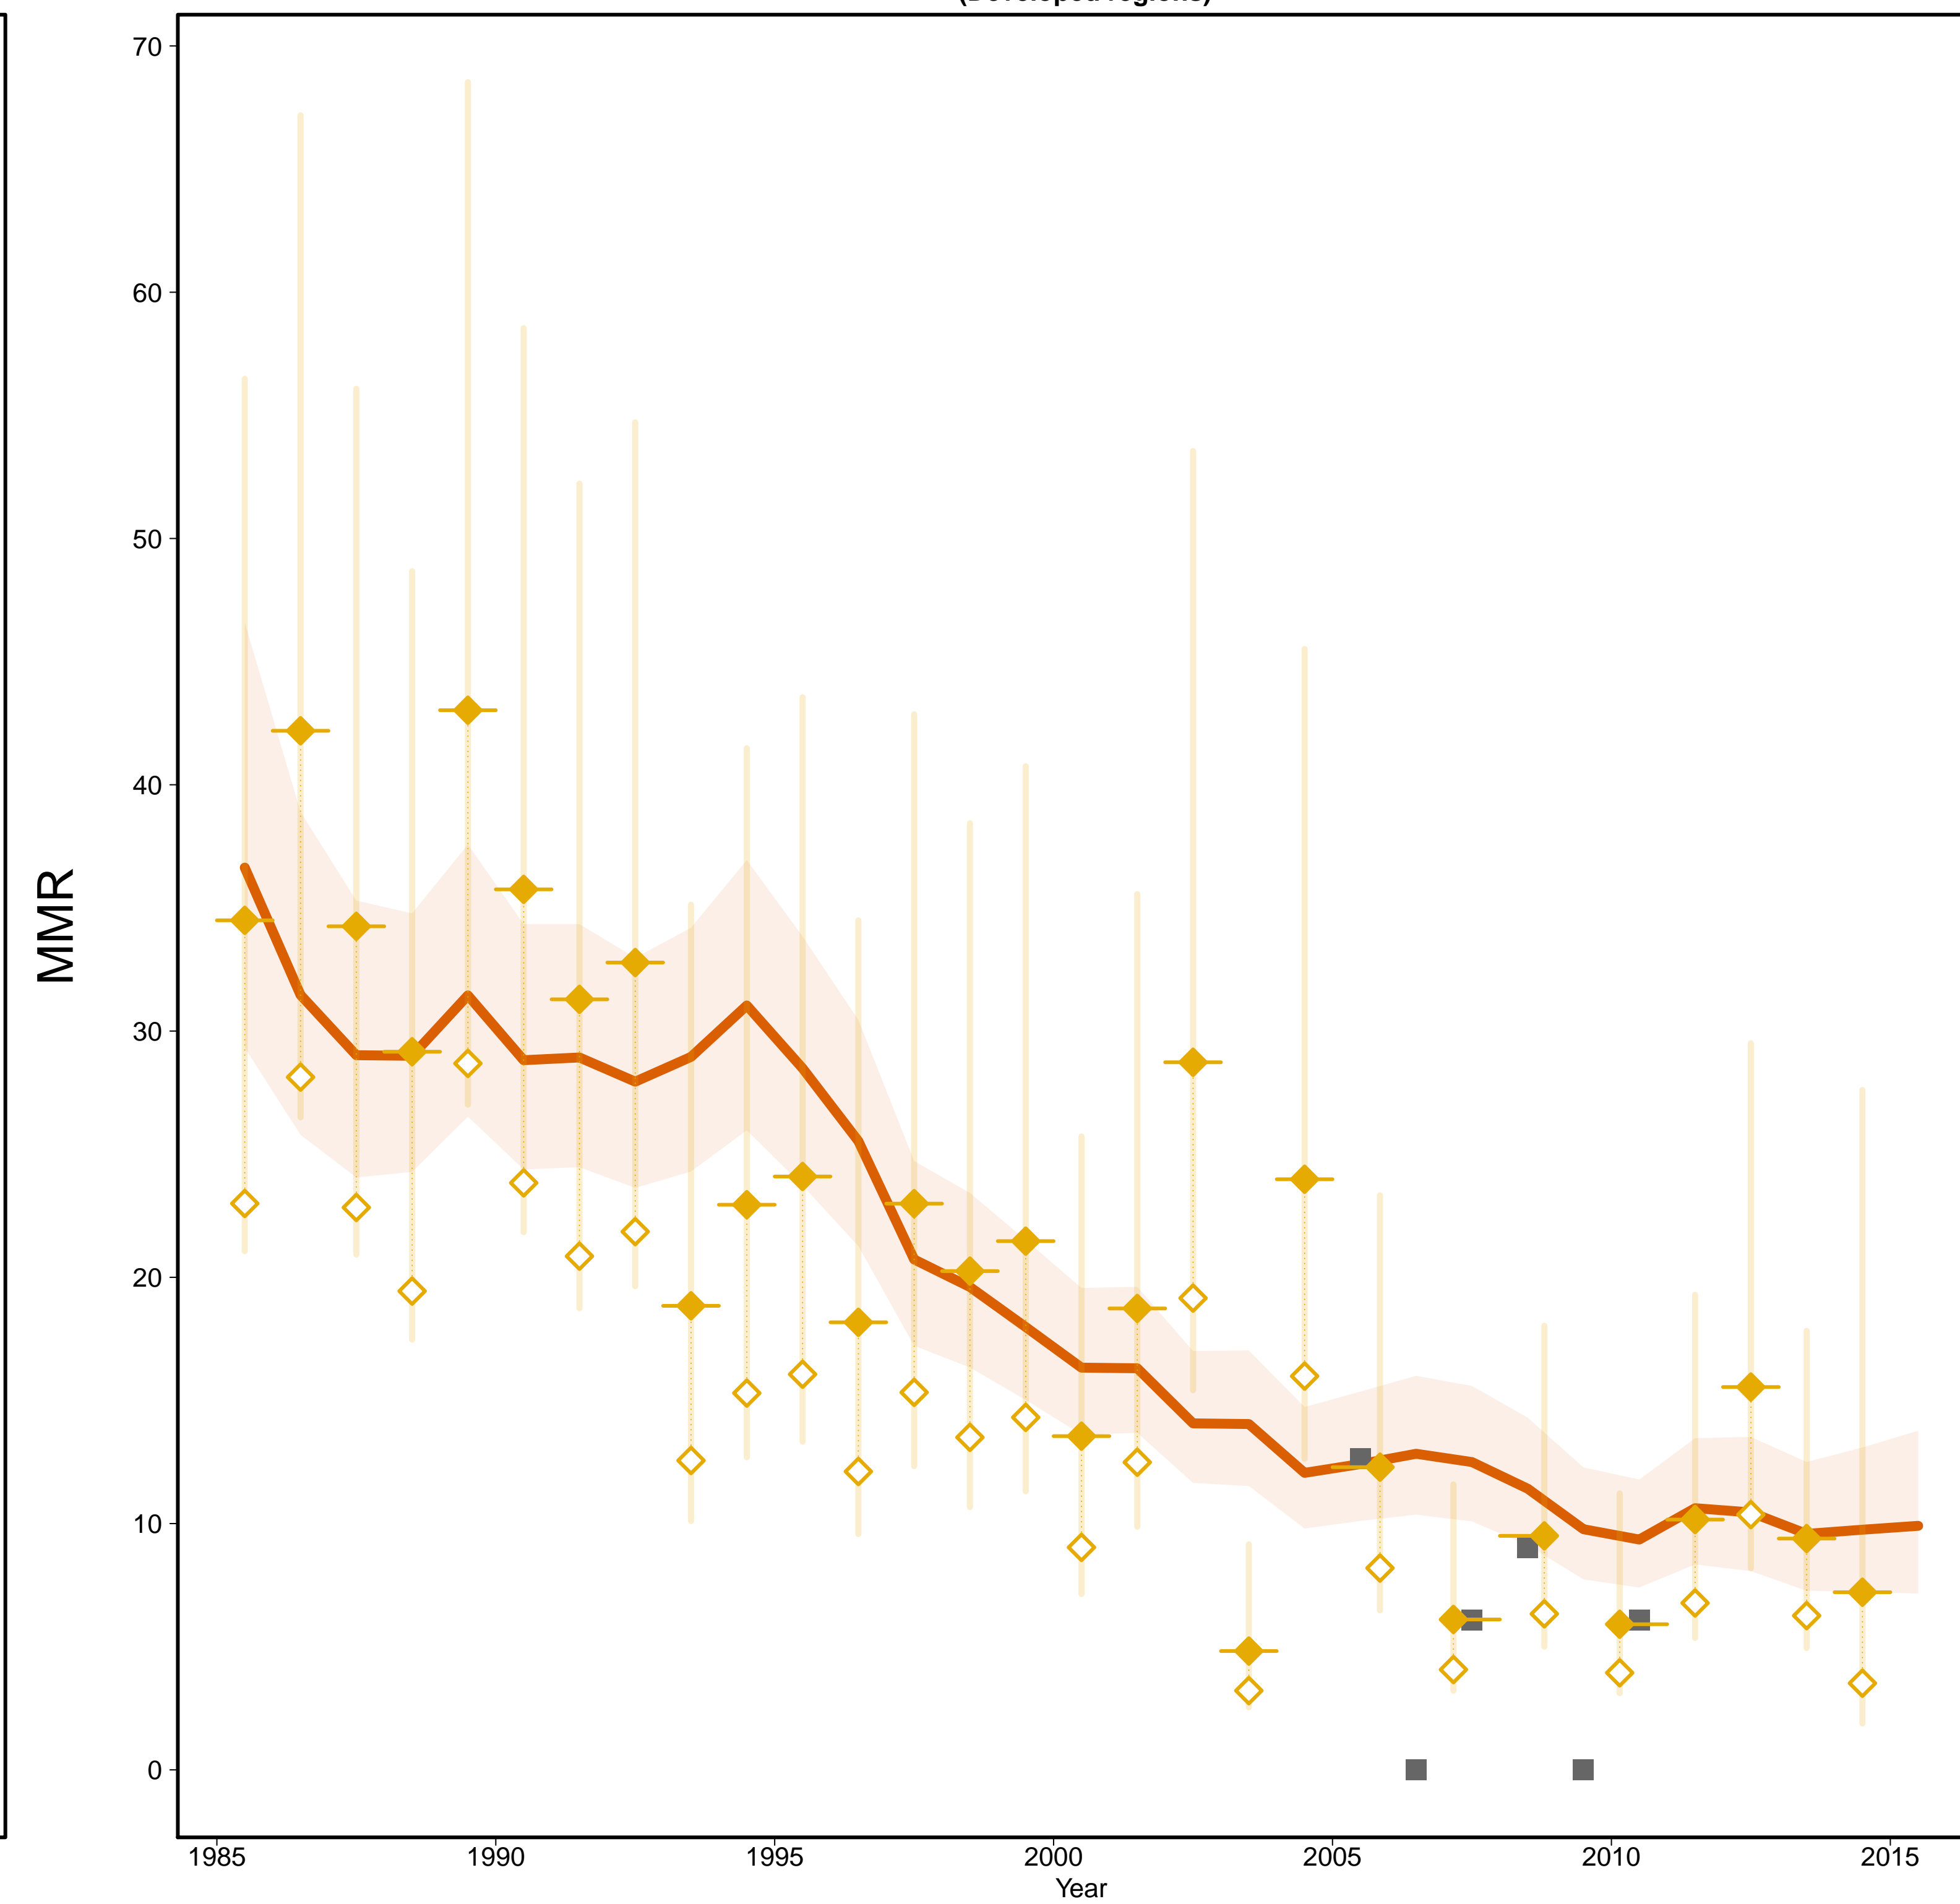

- Estimates —
- MMR Database 2015 —
- ◇ Observed Data
- ◆ Adjusted Data
- Data type —
- ◆ VR
- Reported VR before recalc.  
(related to 0 obs. mat. death)

Gross Domestic Product

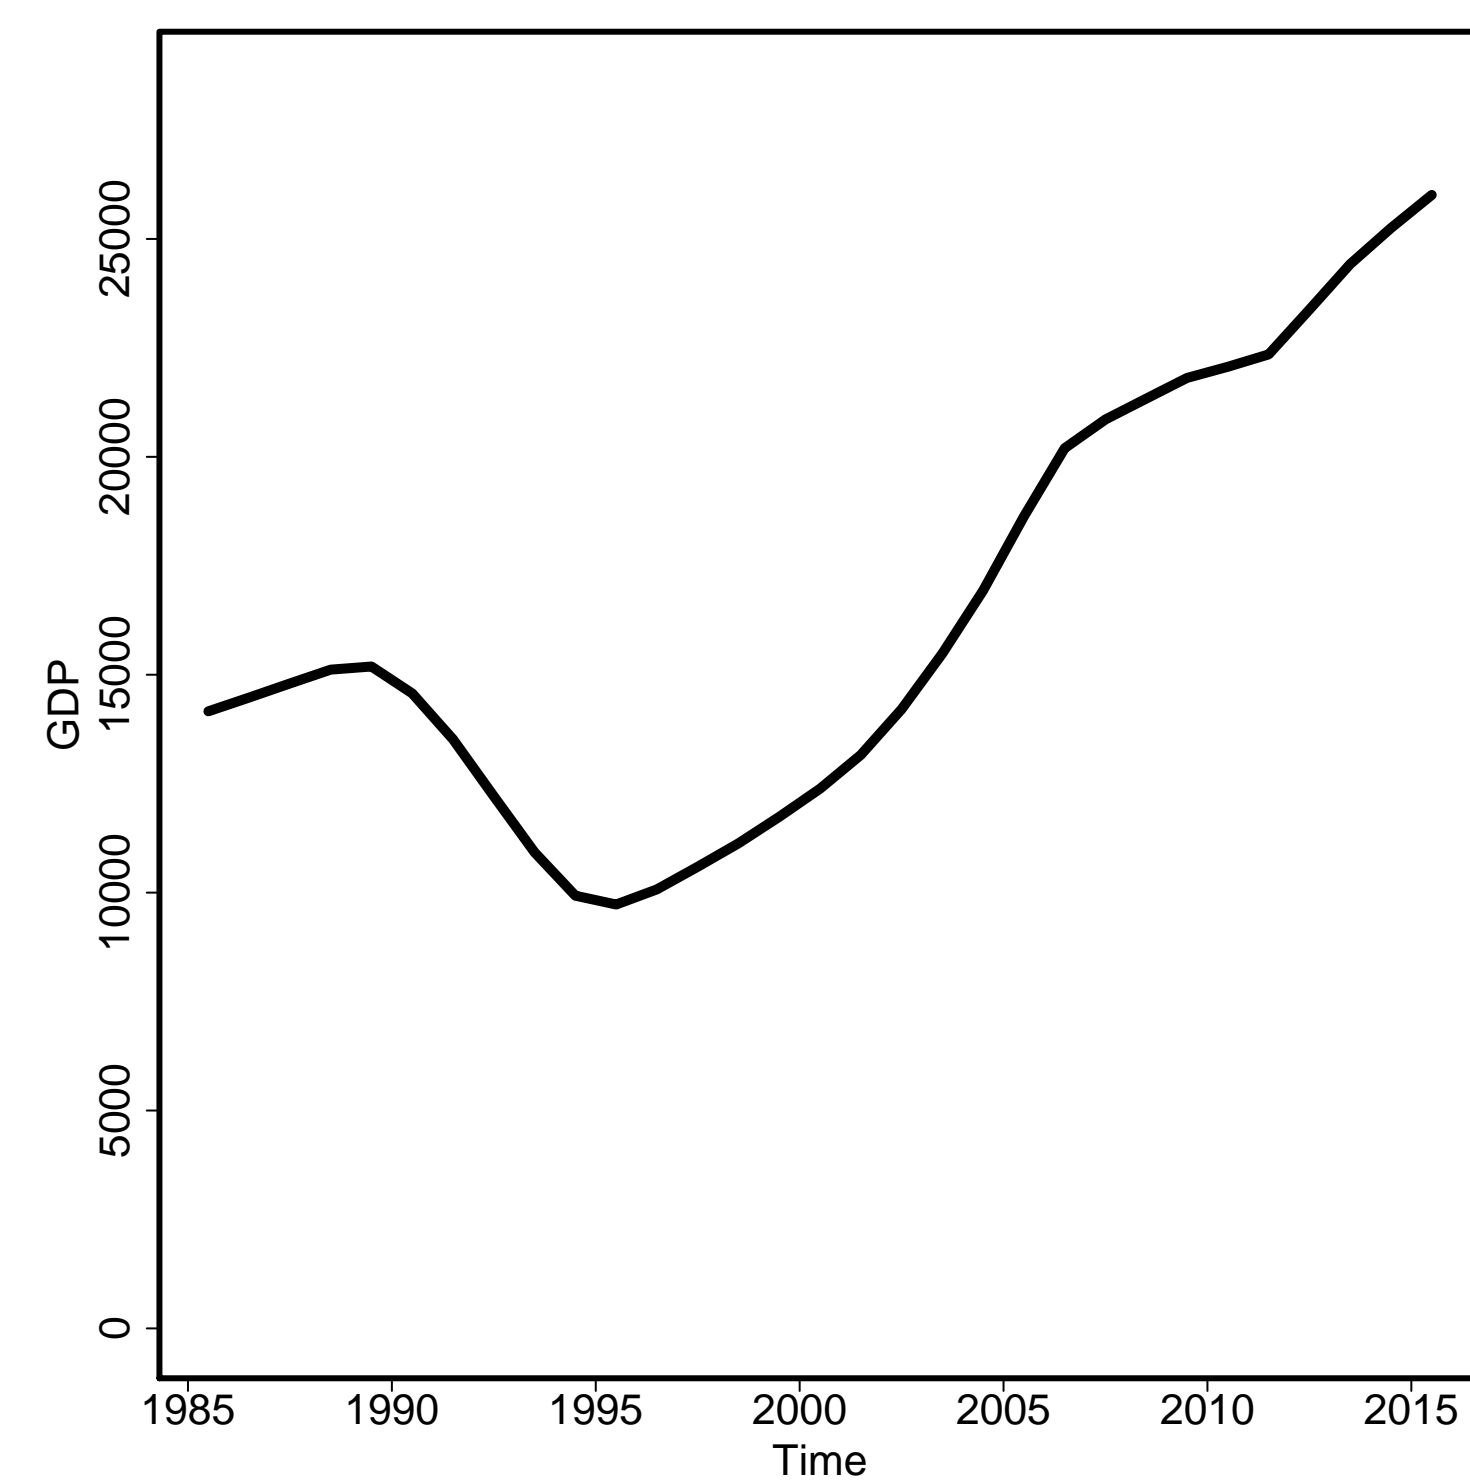

General Fertility Rate

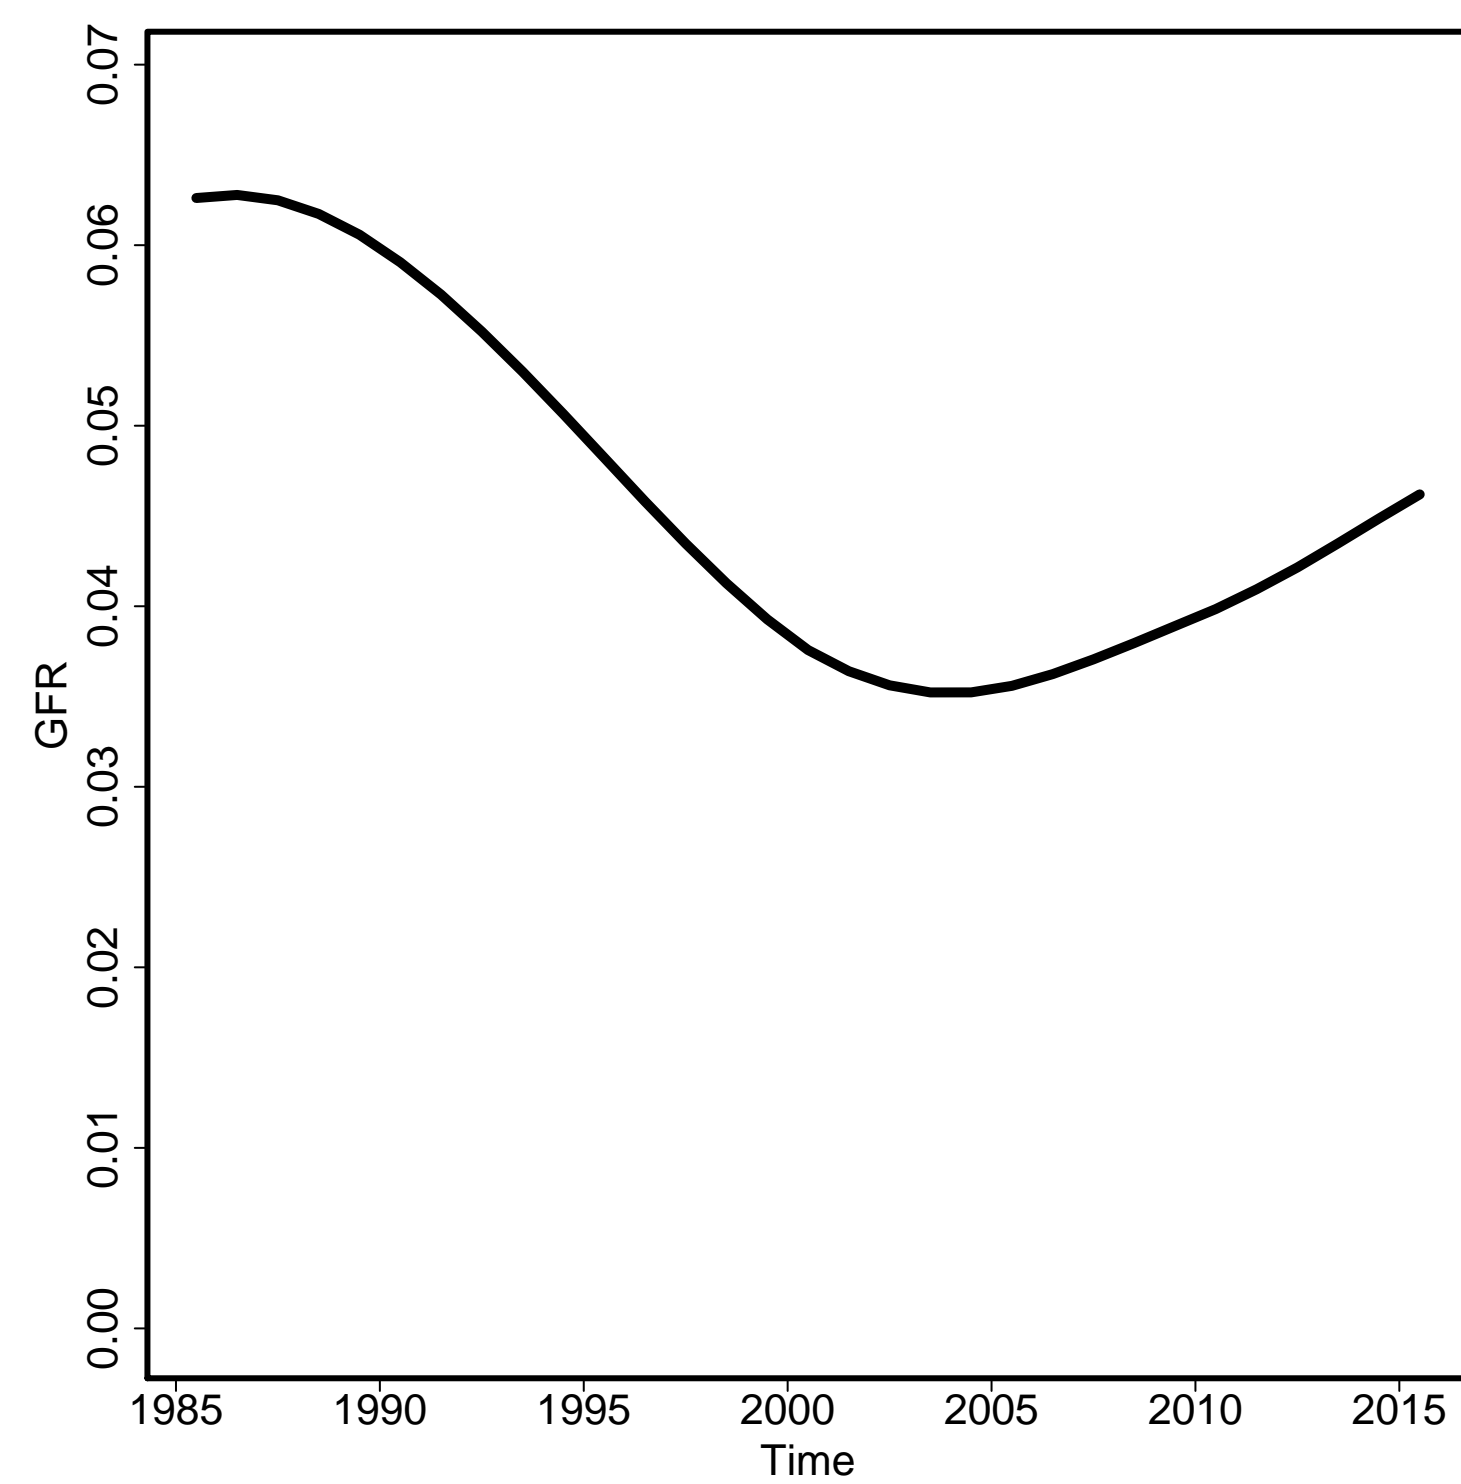

Skilled Attendance to Birth

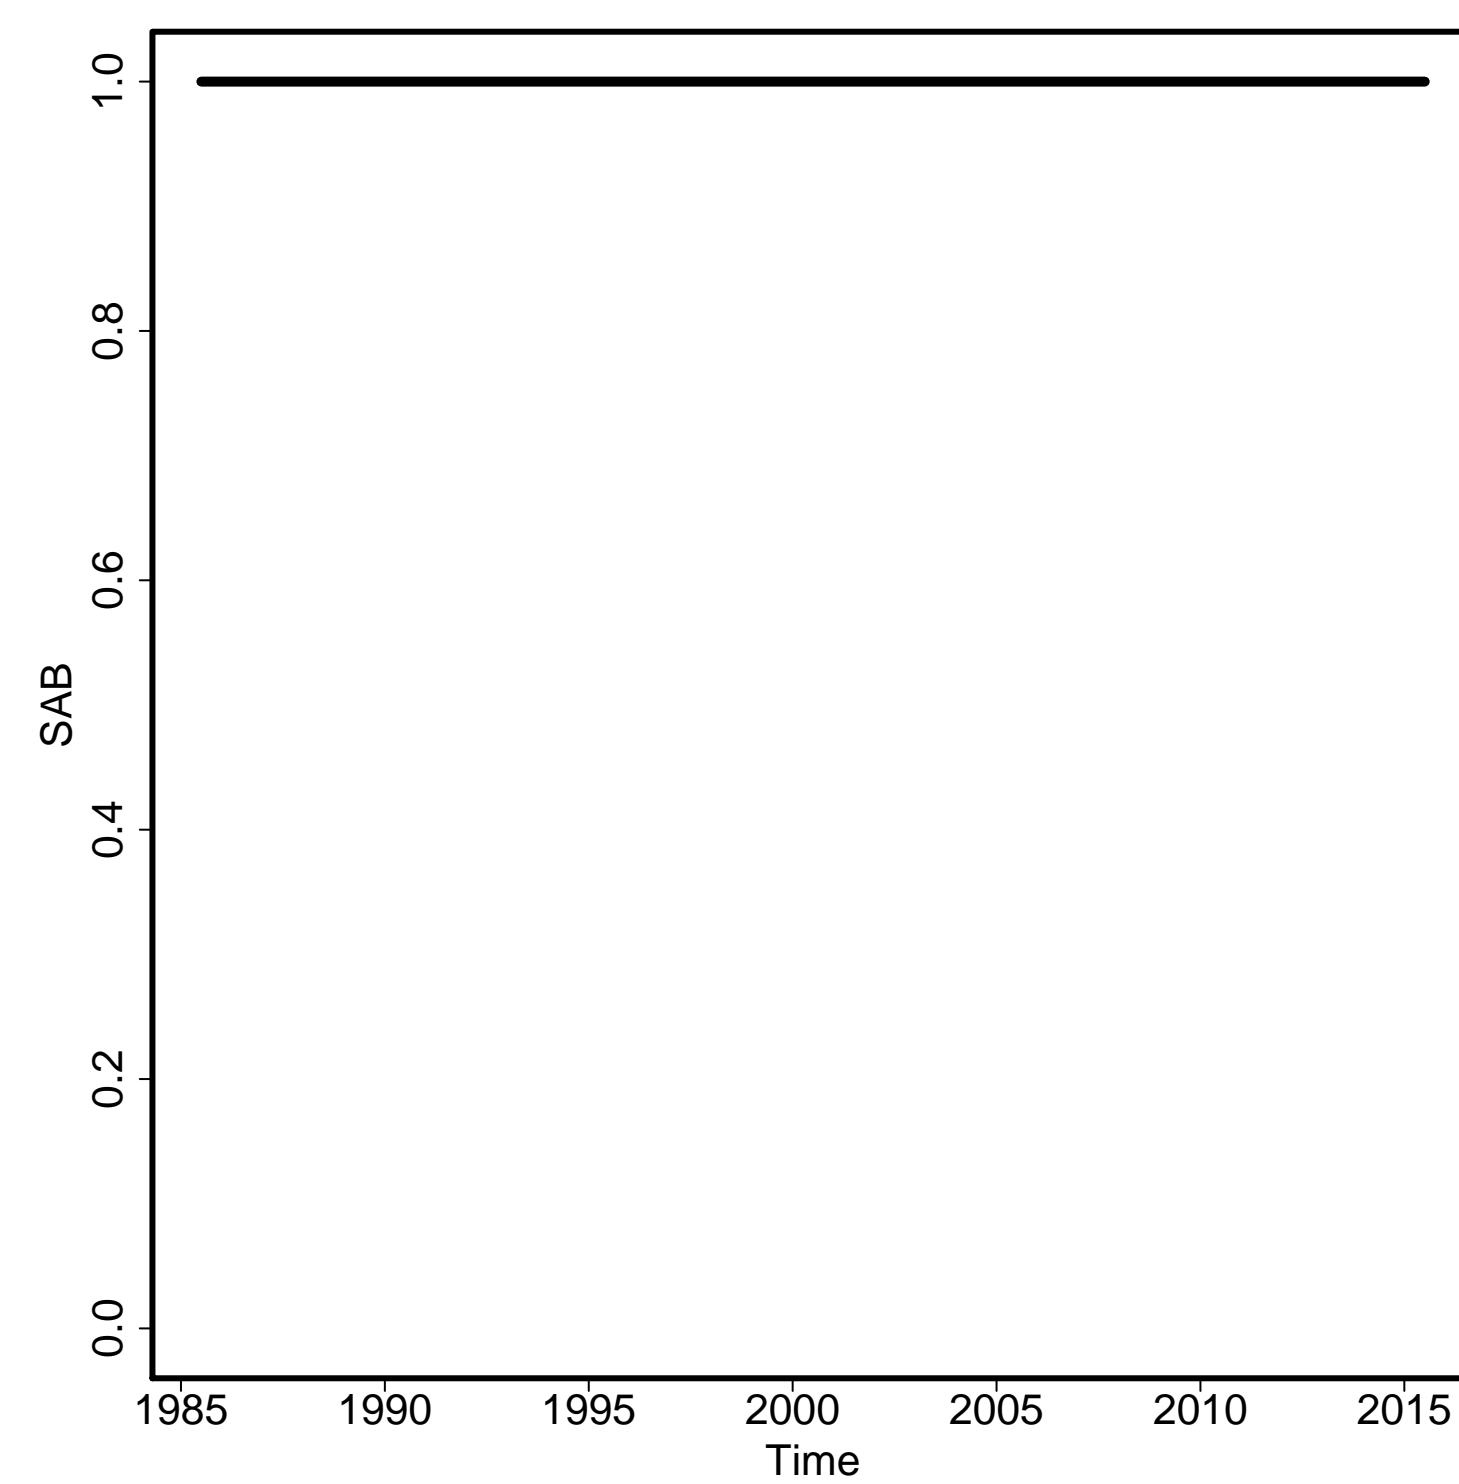

Envelope/Births

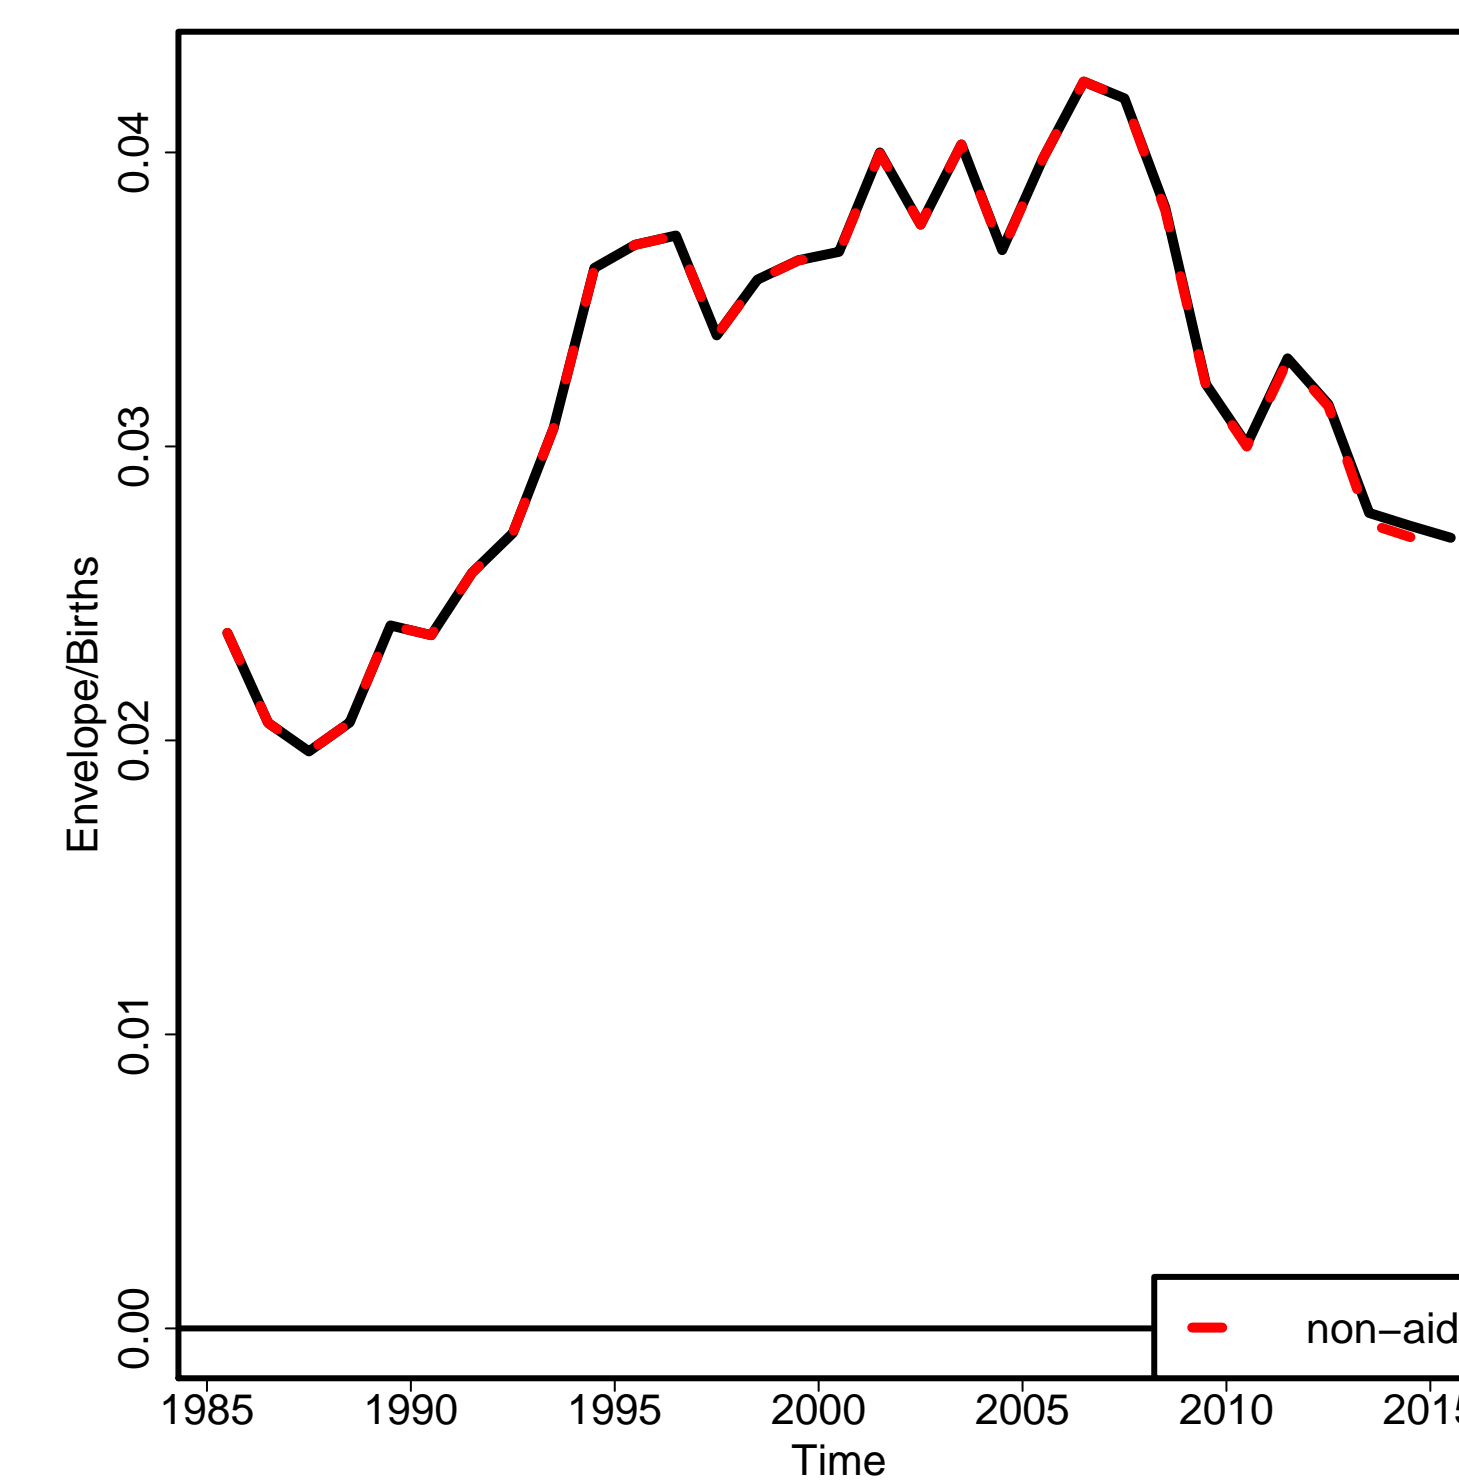

Non-aids MMR

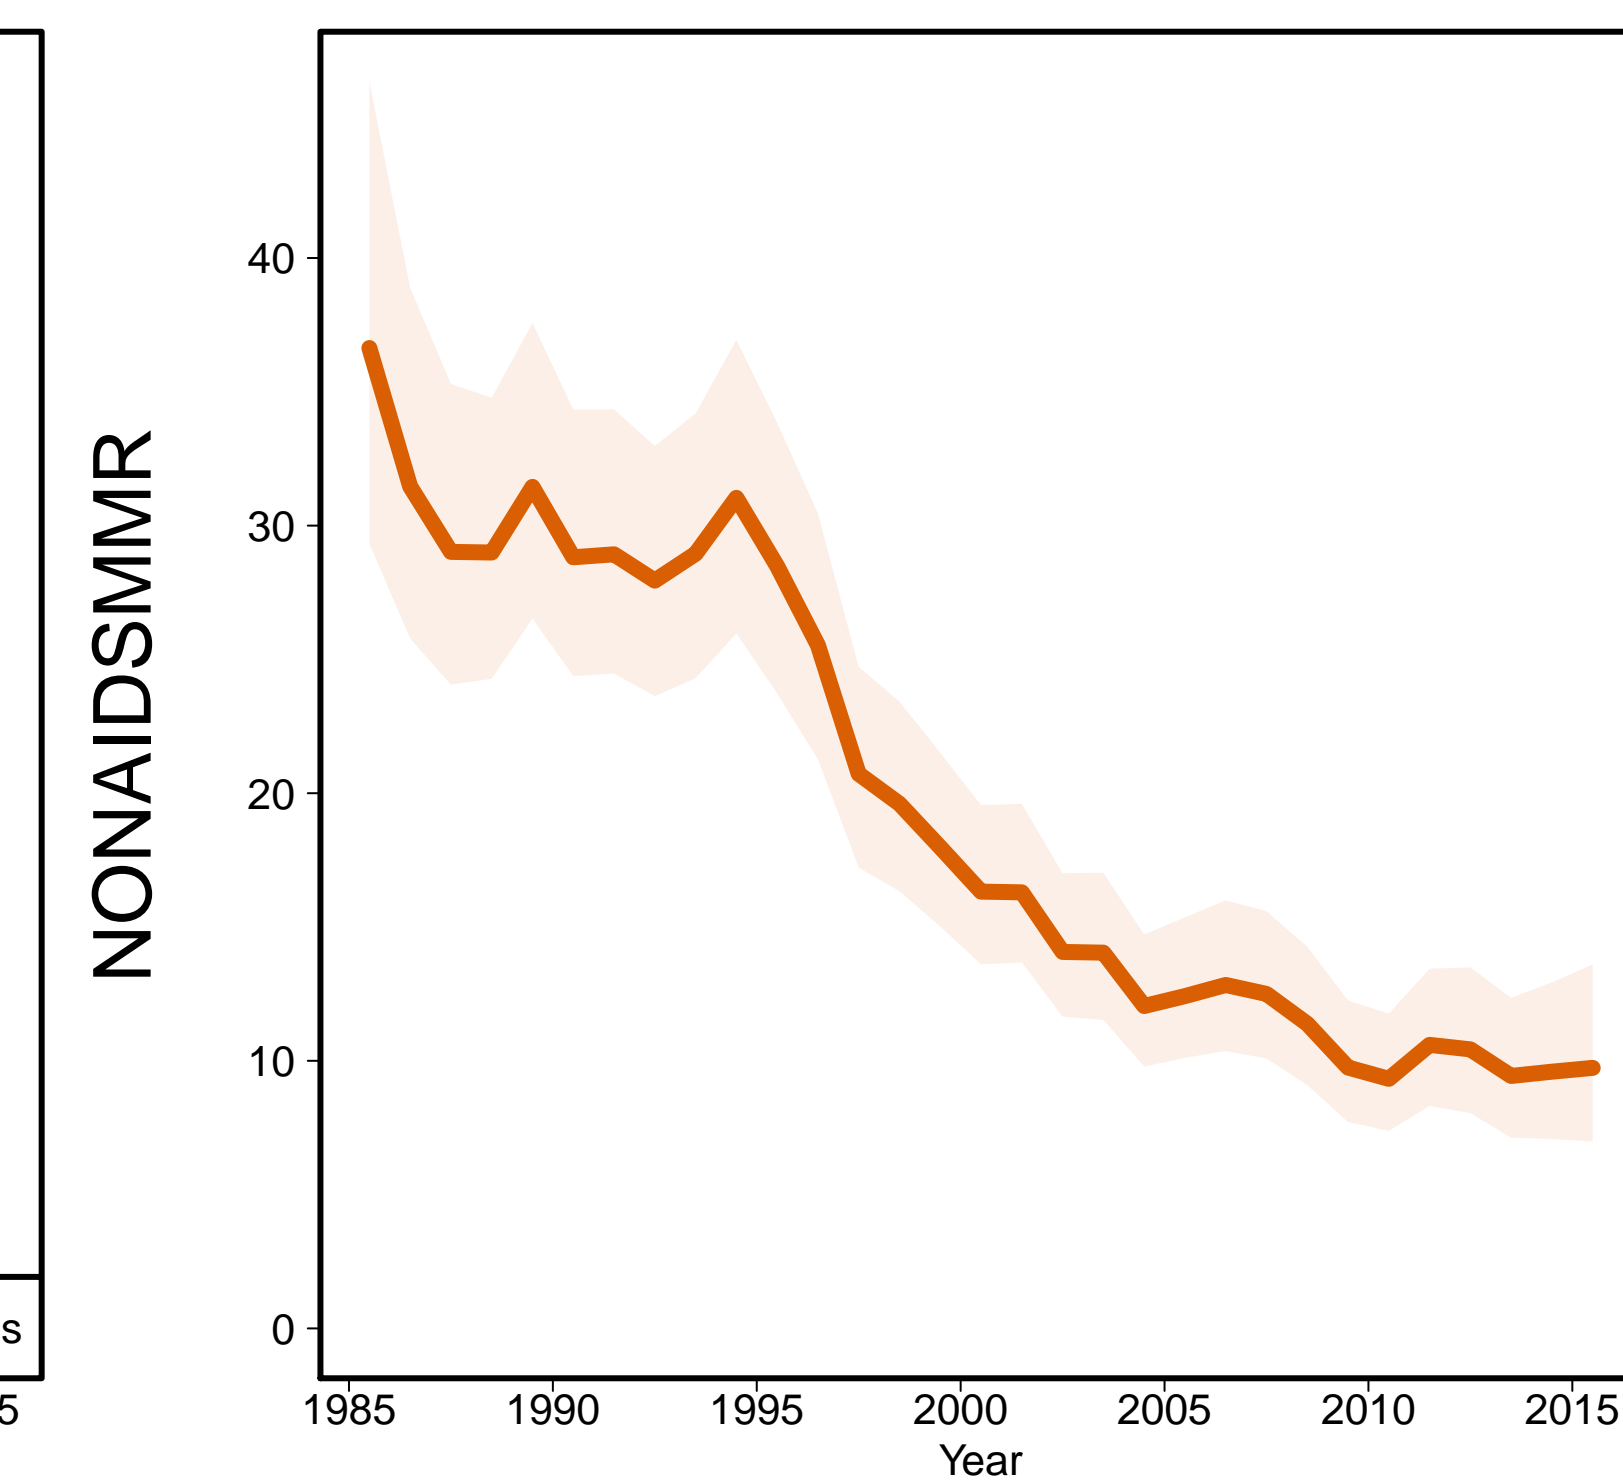

Aids MMR

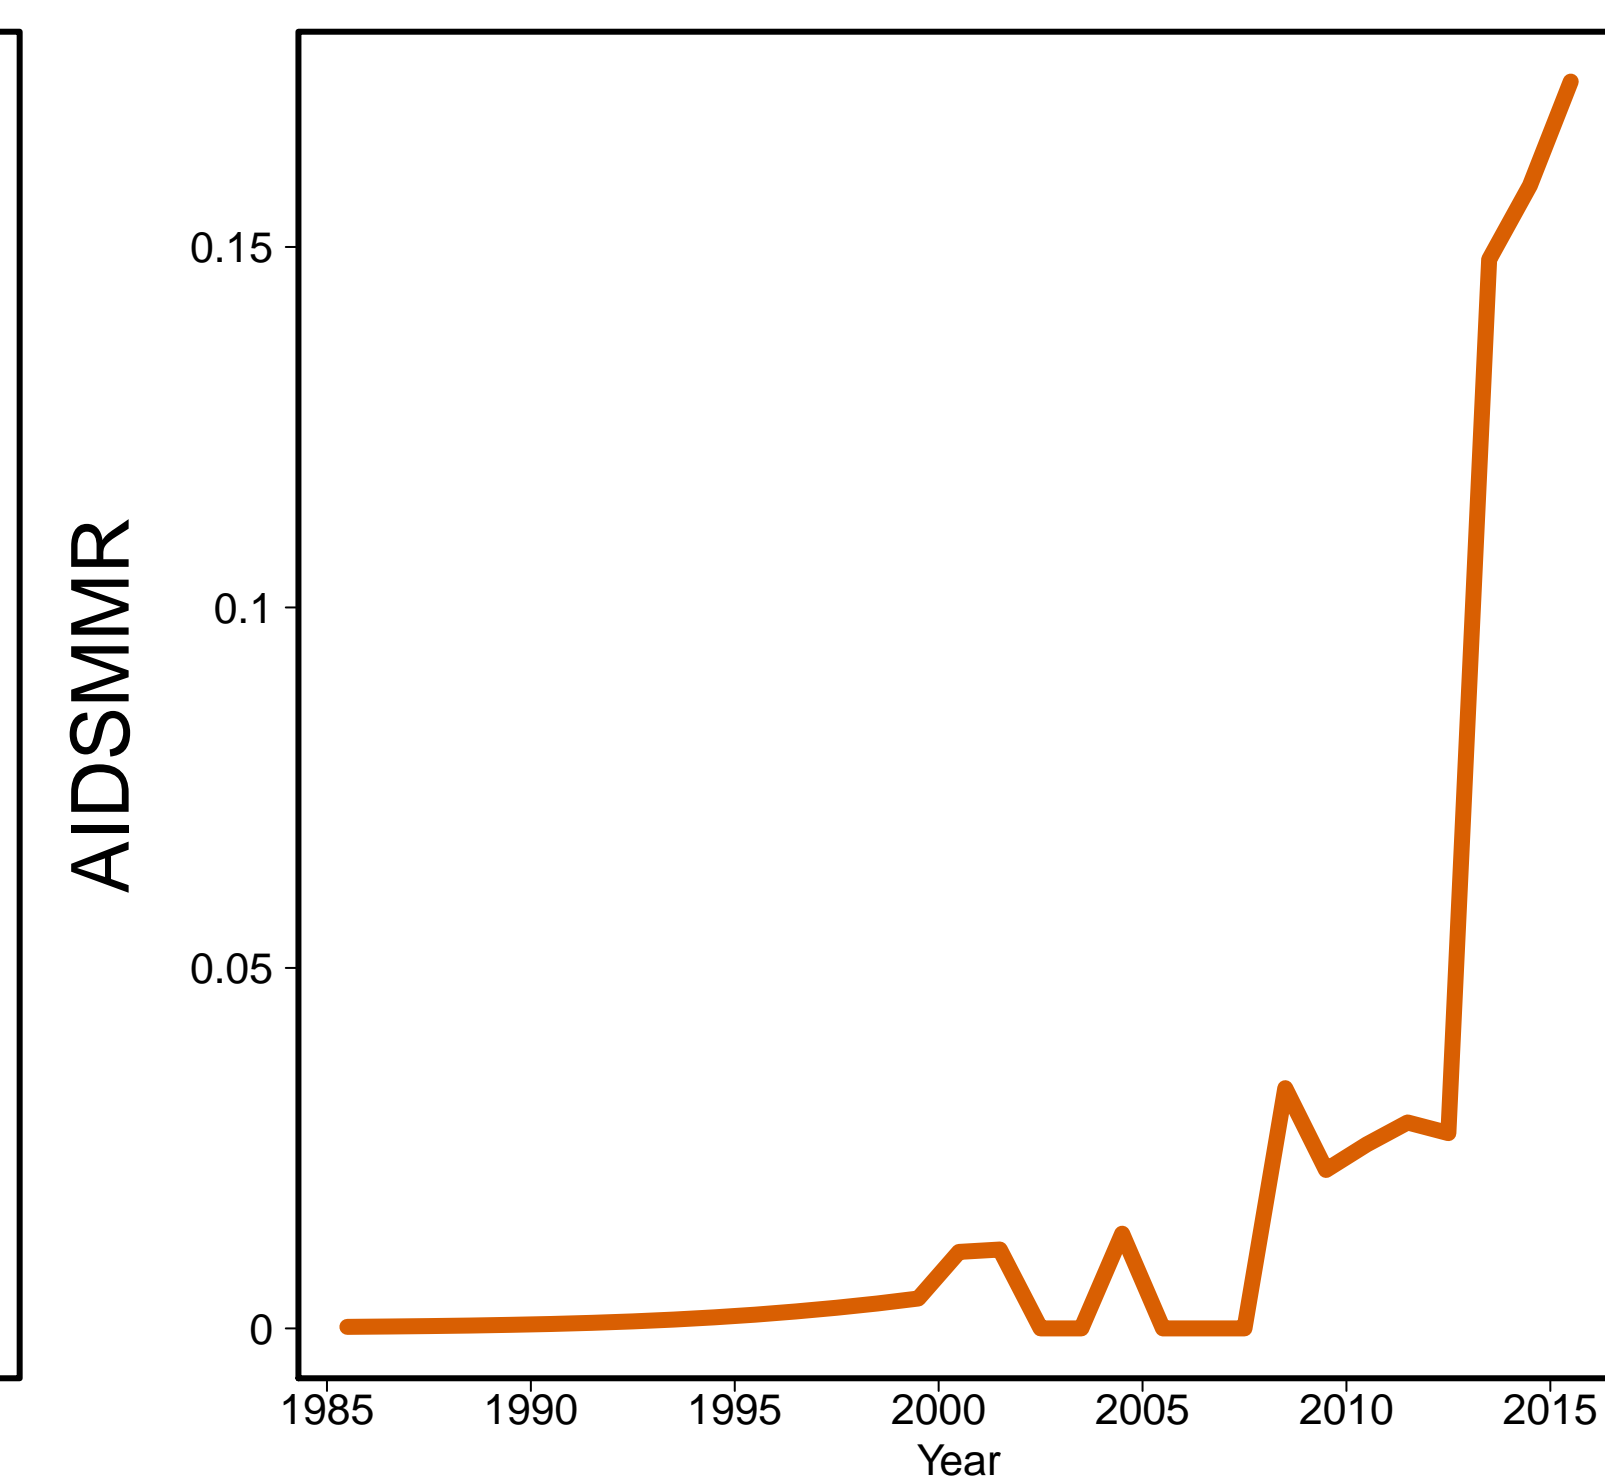

Luxembourg [LUX]  
(Developed regions)

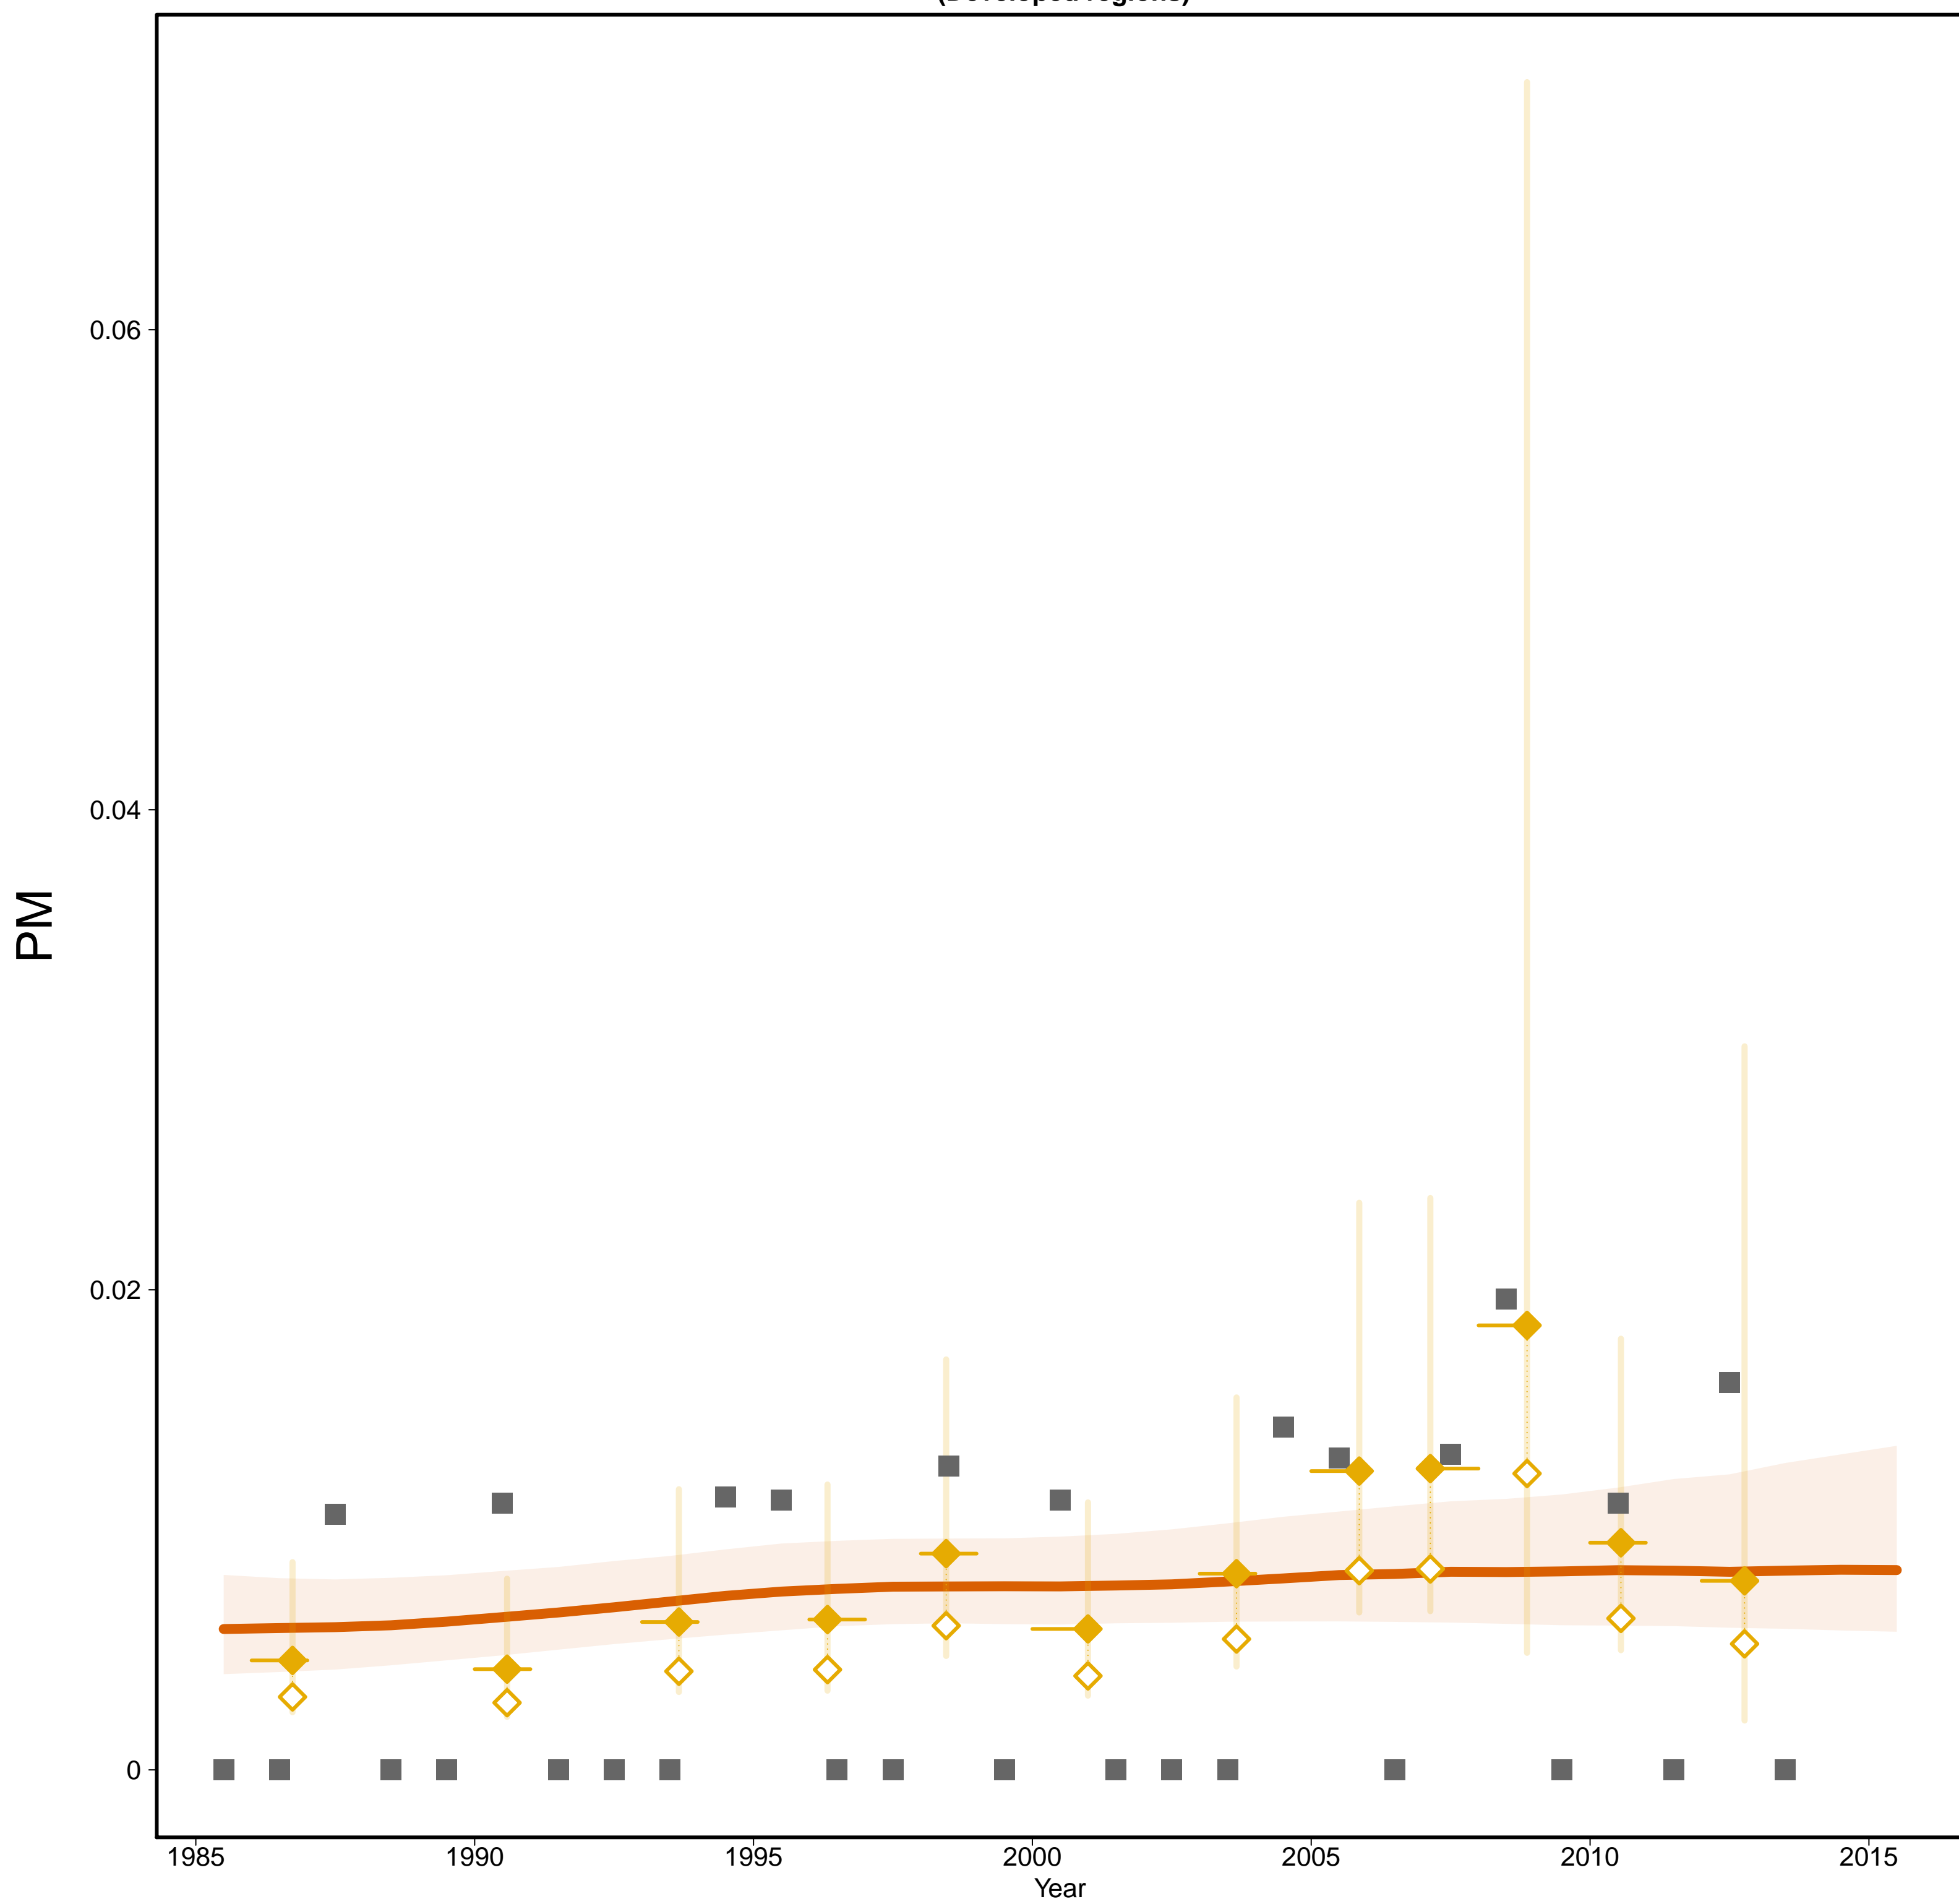

Luxembourg [LUX]  
(Developed regions)

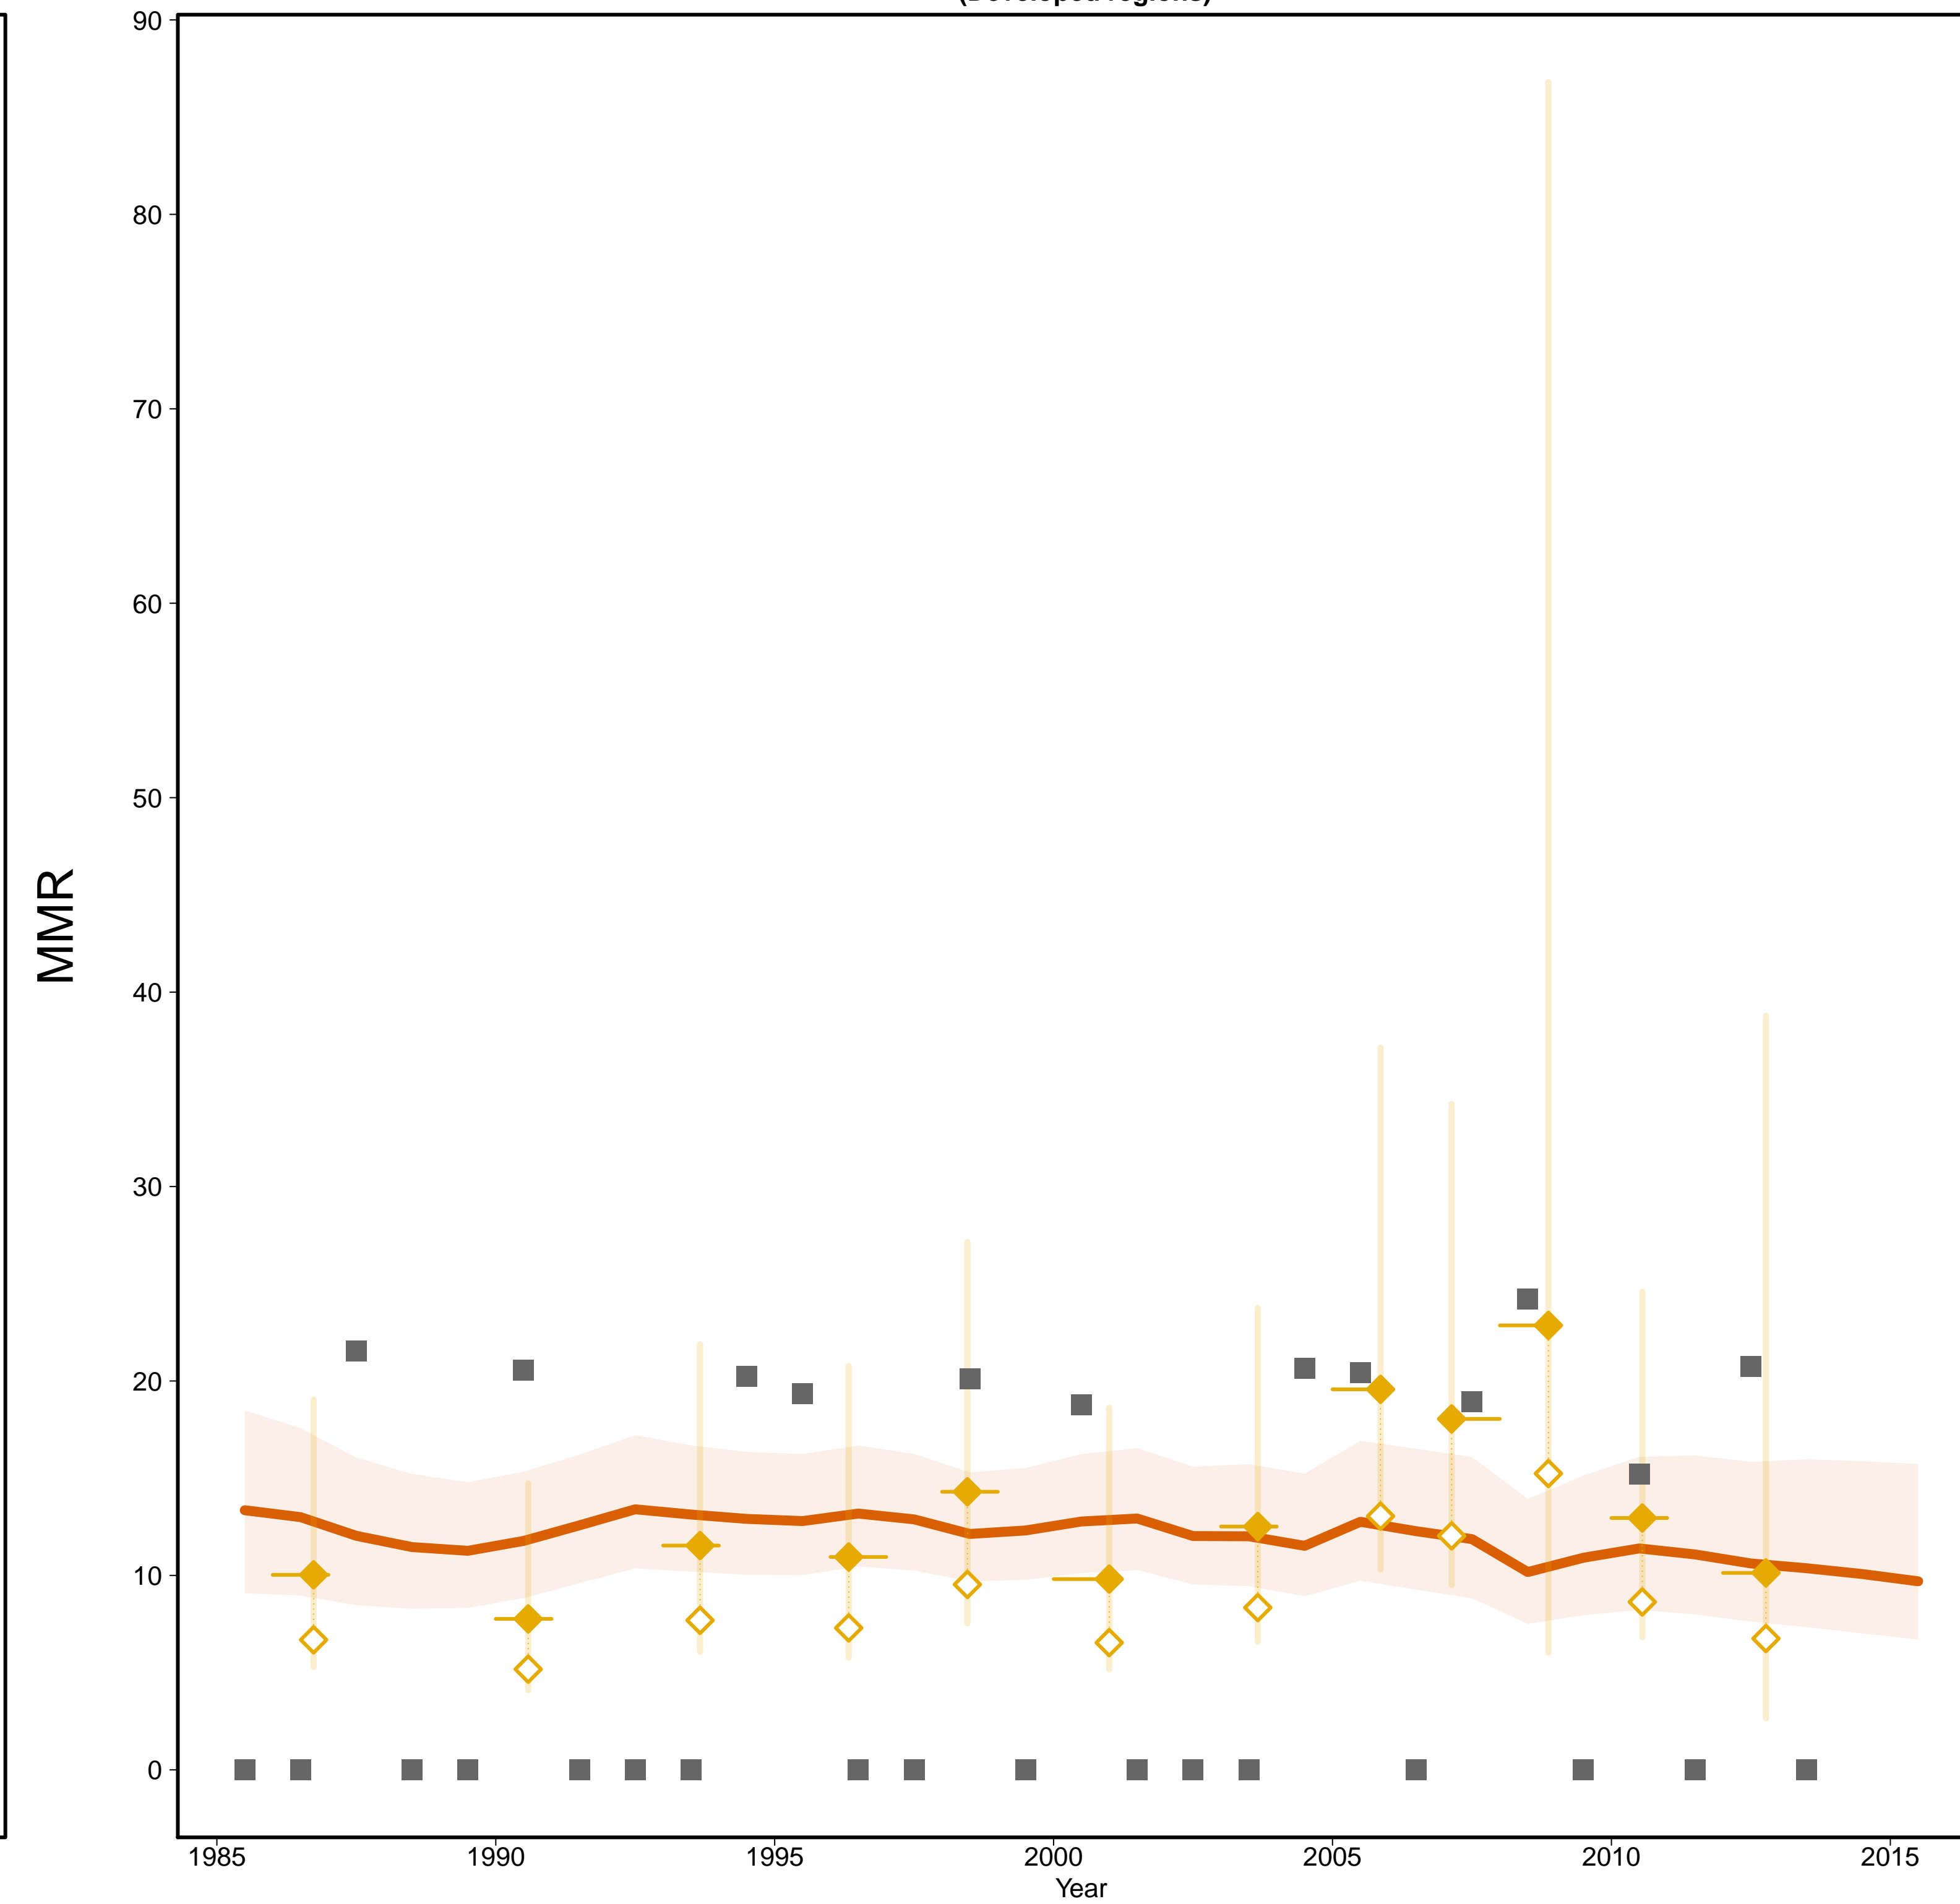

- Estimates –
- Mlate
- MMR Database 2015 –
- ◇ Observed Data
- ◆ Adjusted Data
- Data type –
- ◆ VR
- Reported VR before recalc.  
(related to 0 obs. mat. death)

Gross Domestic Product

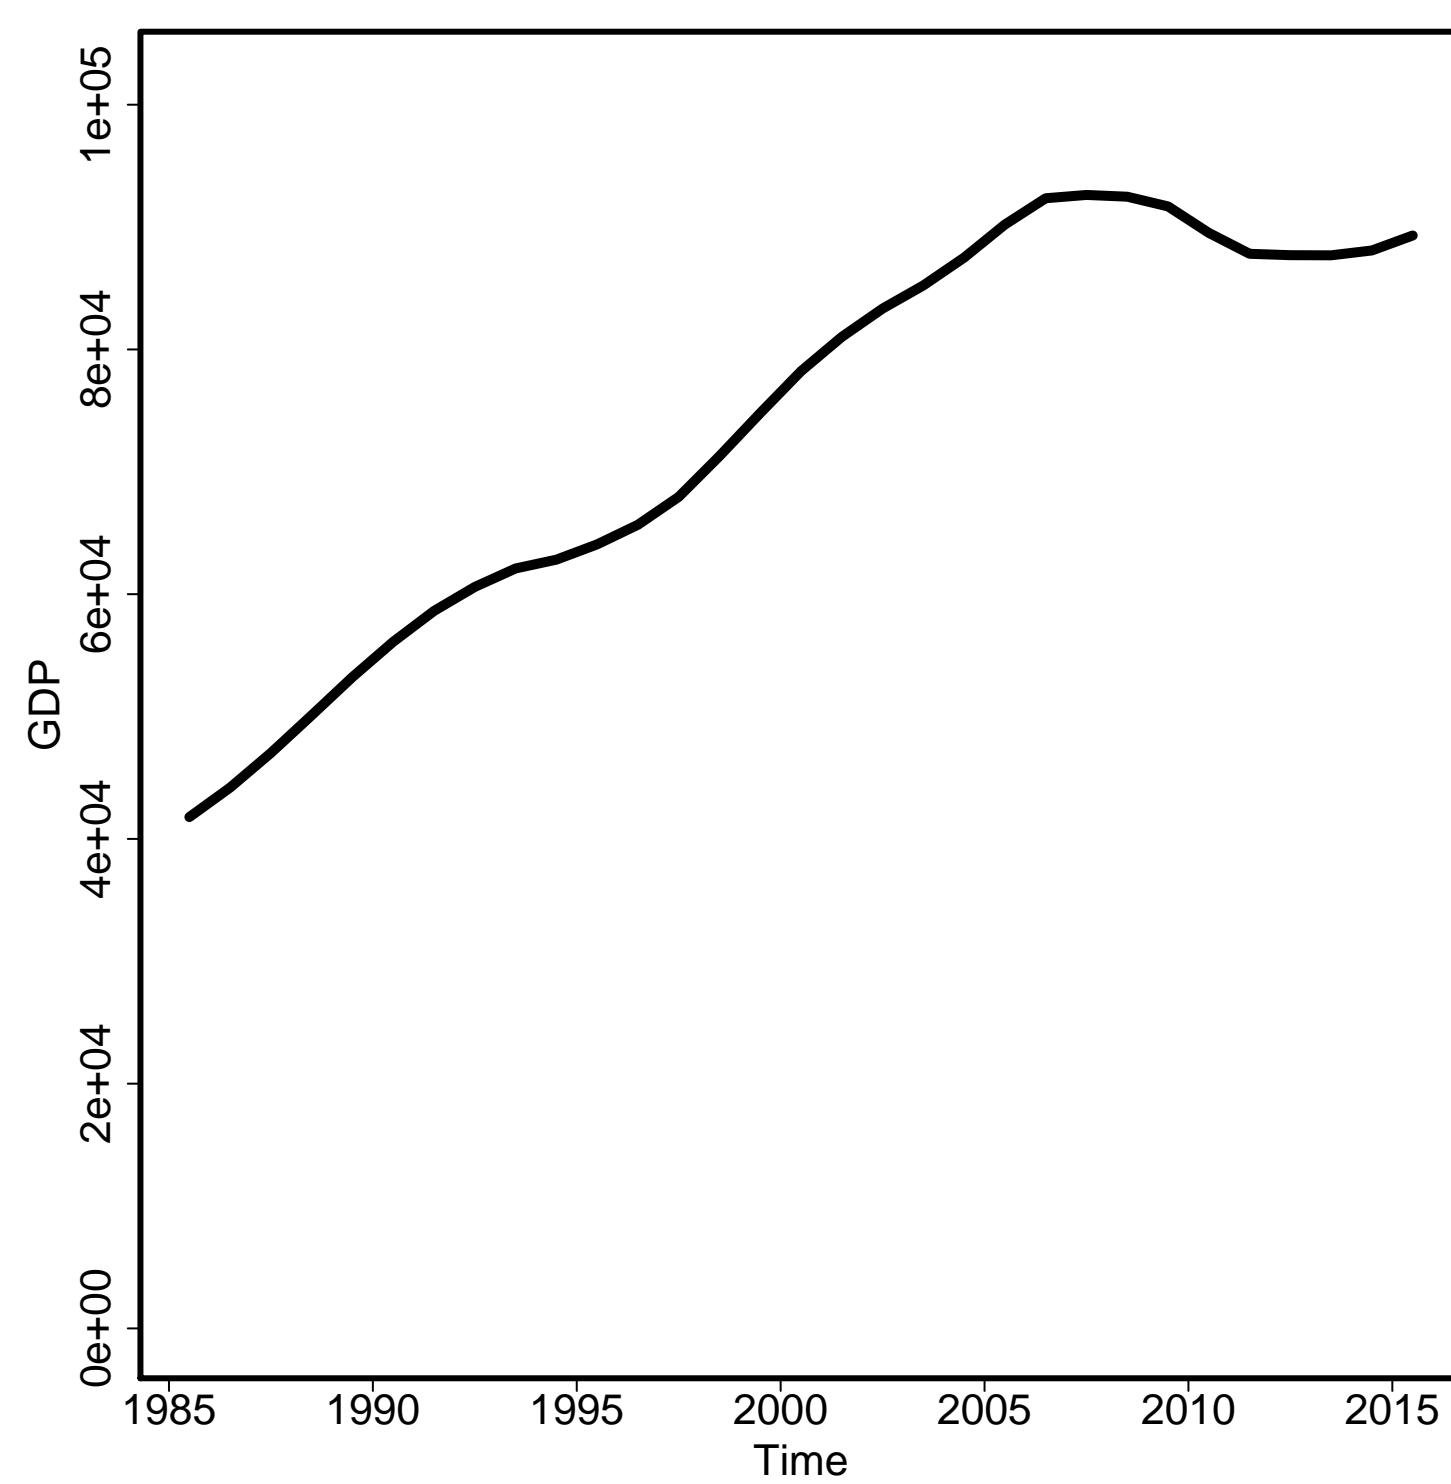

General Fertility Rate

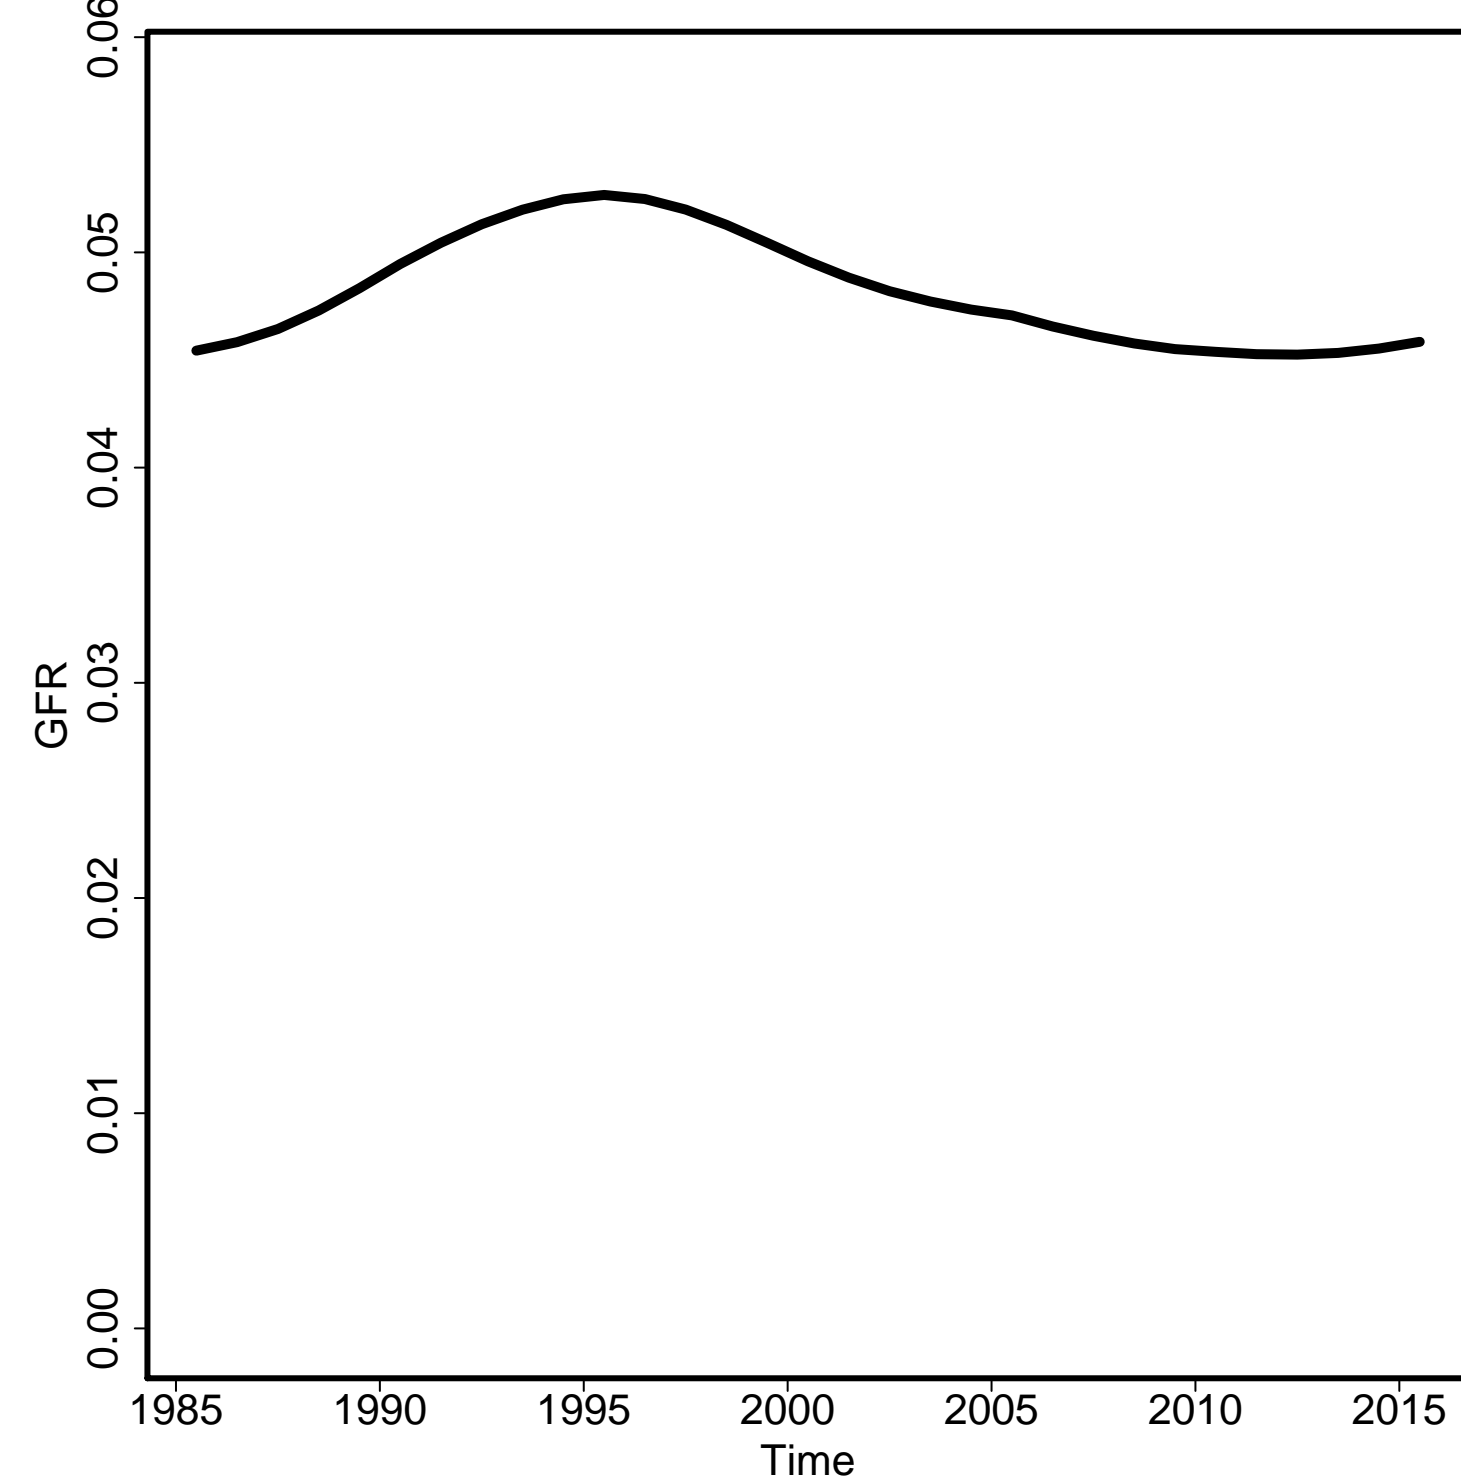

Skilled Attendance to Birth

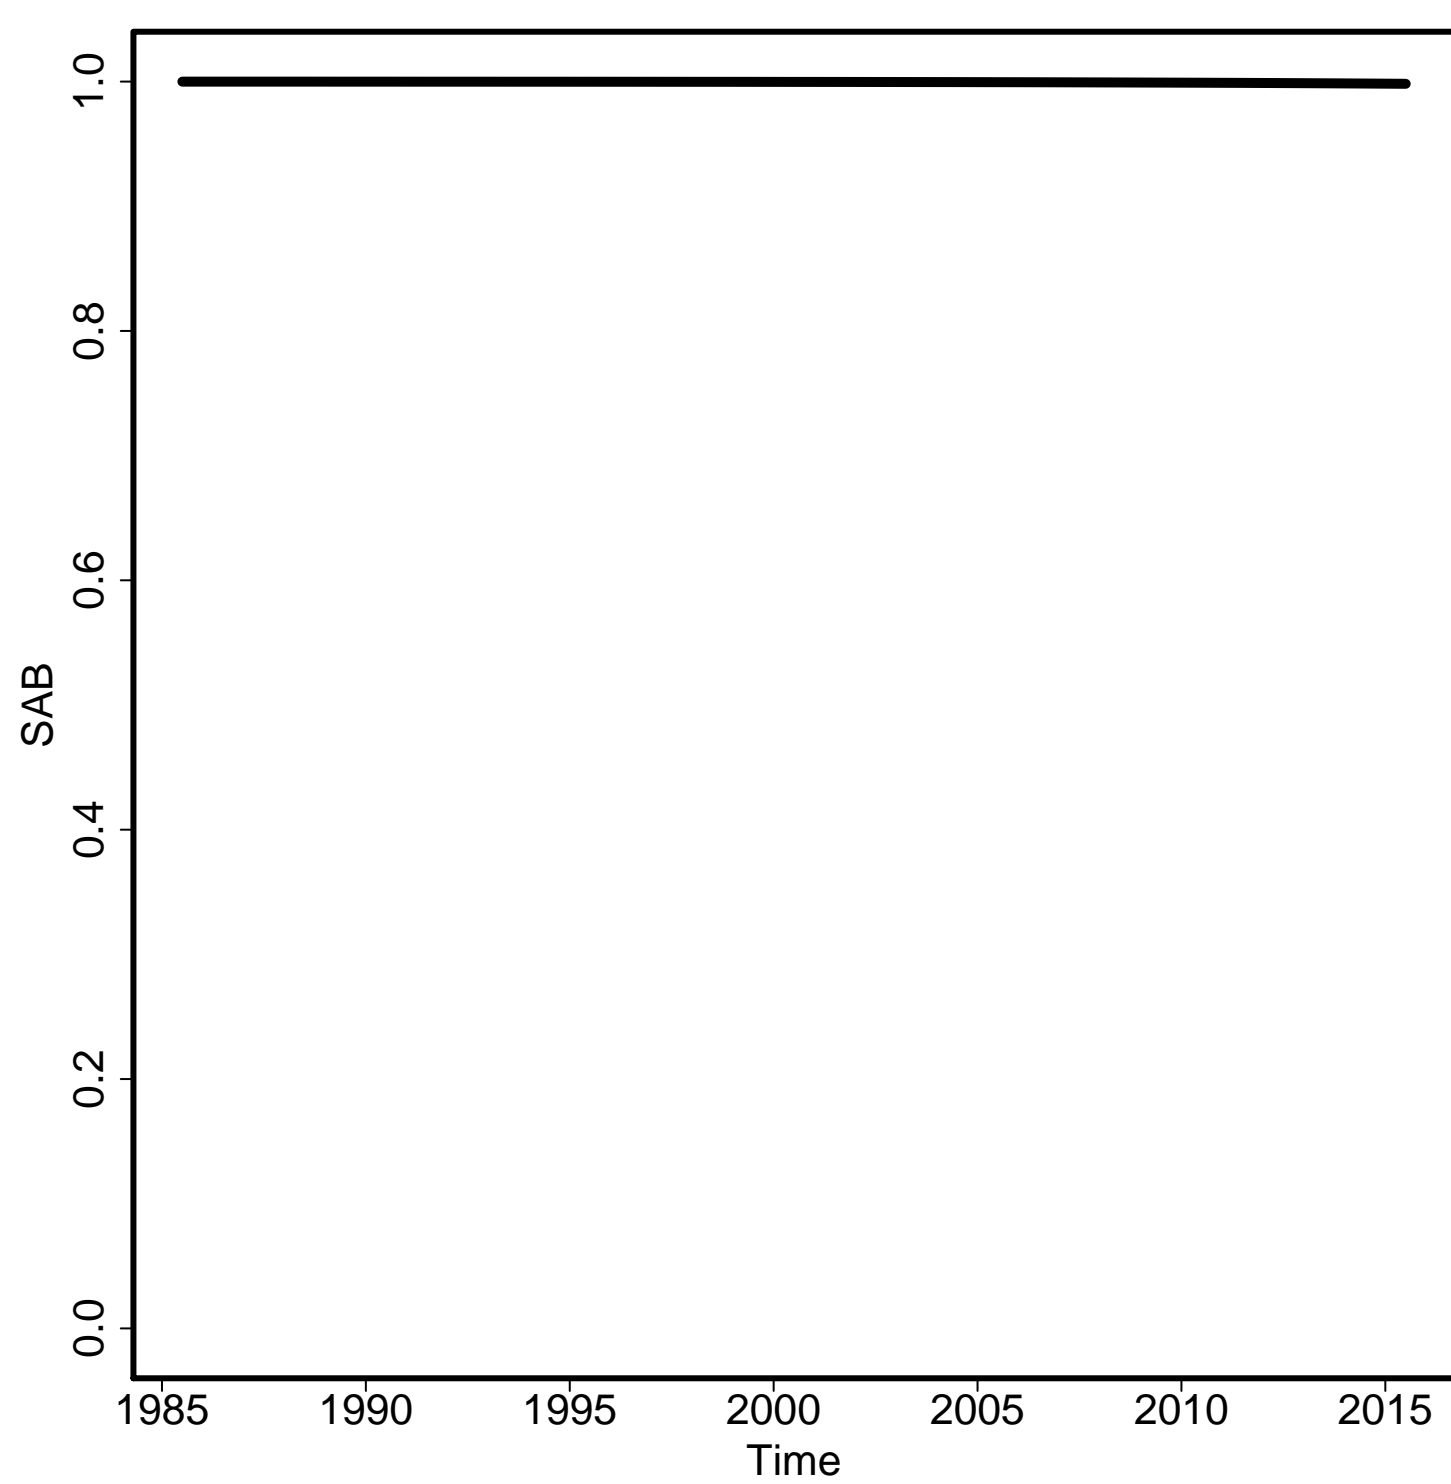

Envelope/Births

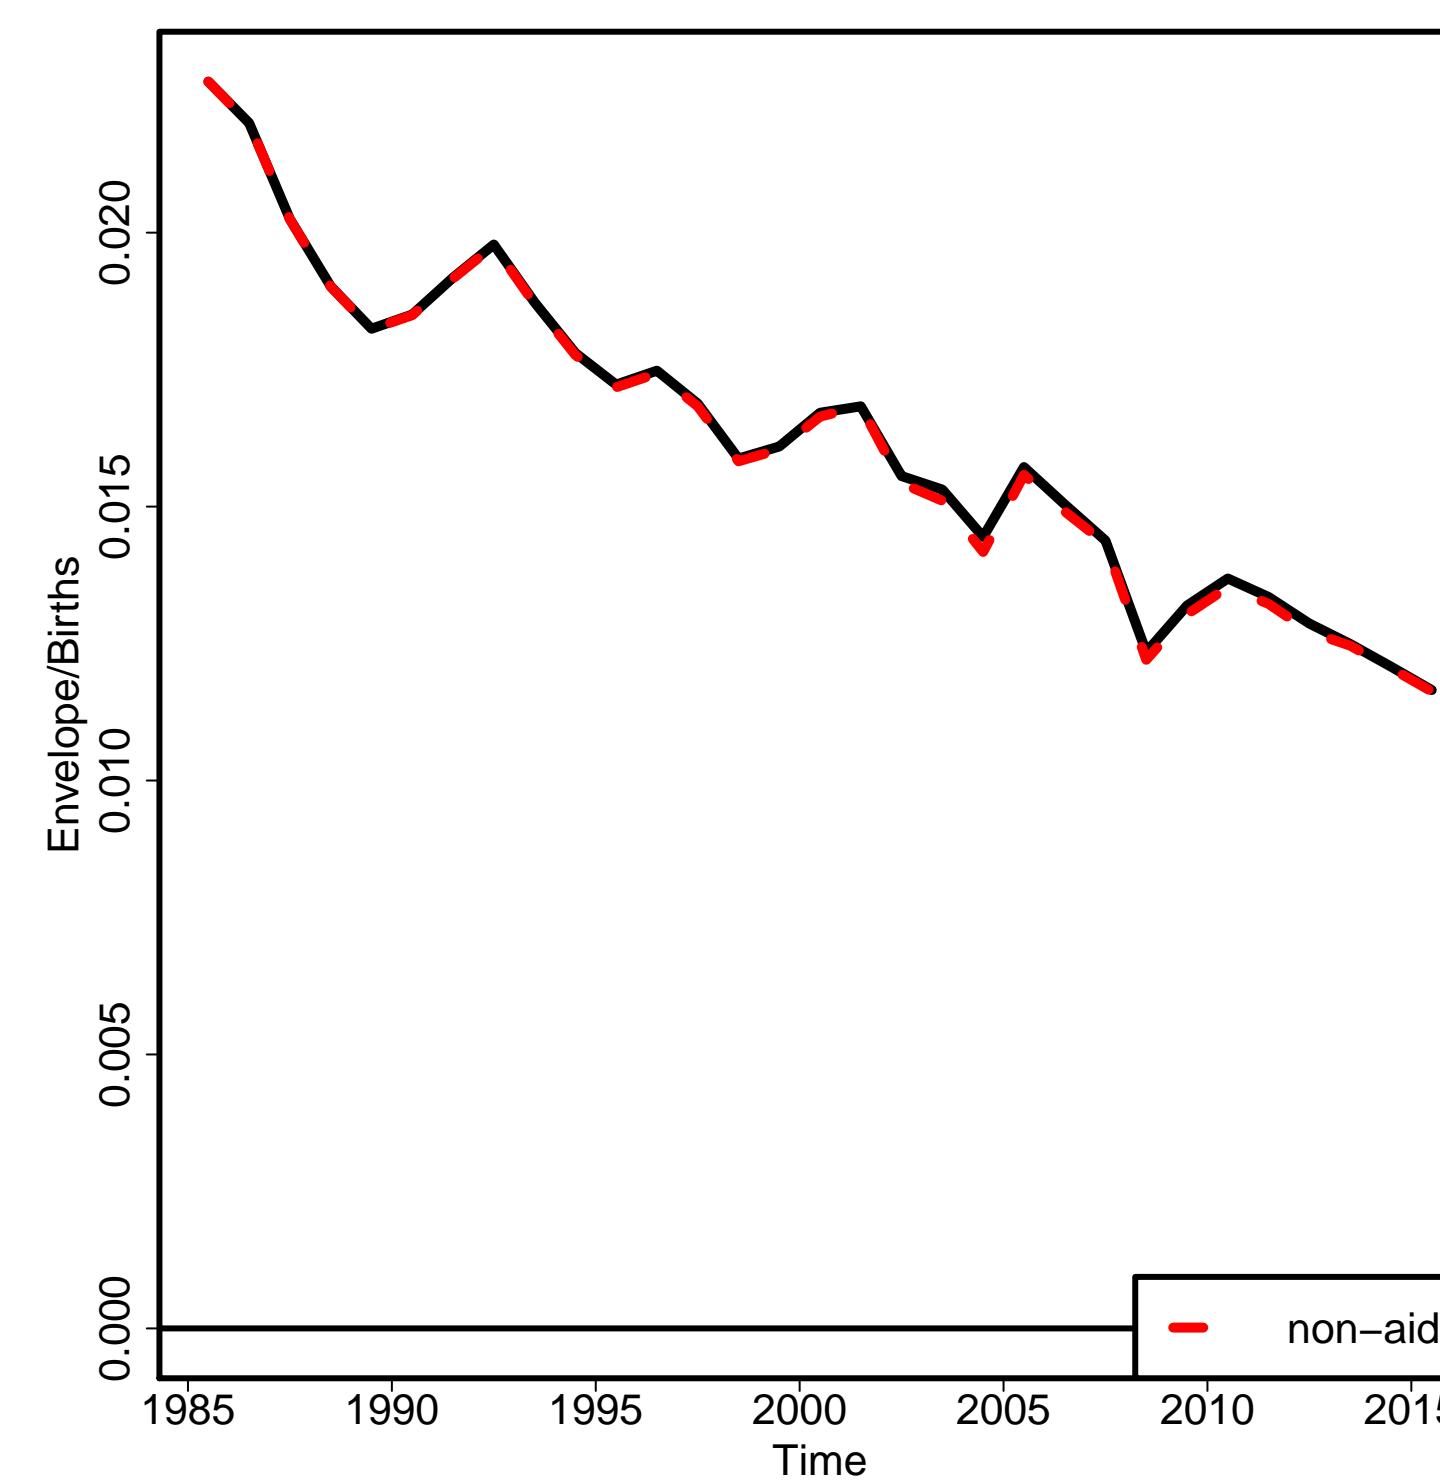

Non-aids MMR

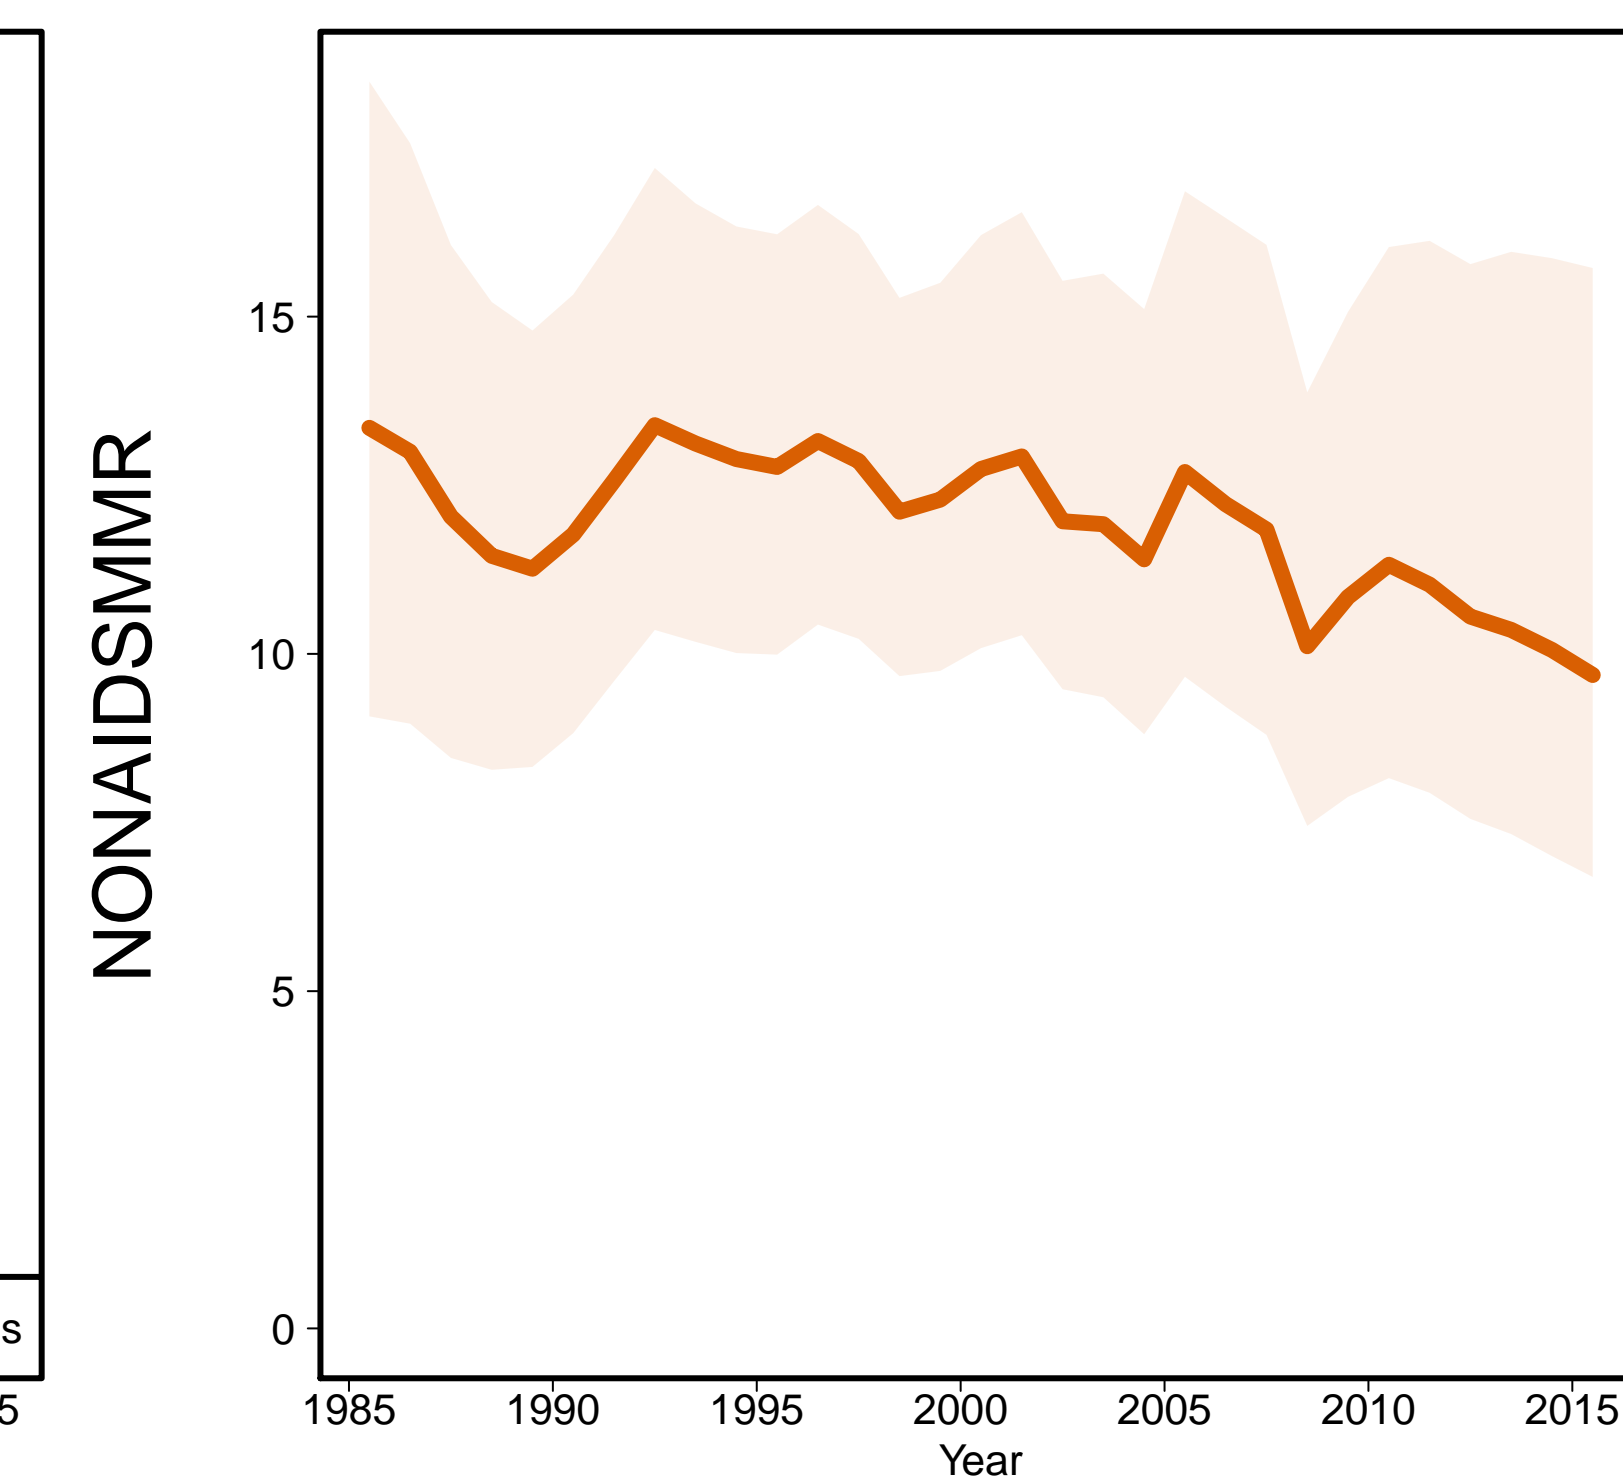

Aids MMR

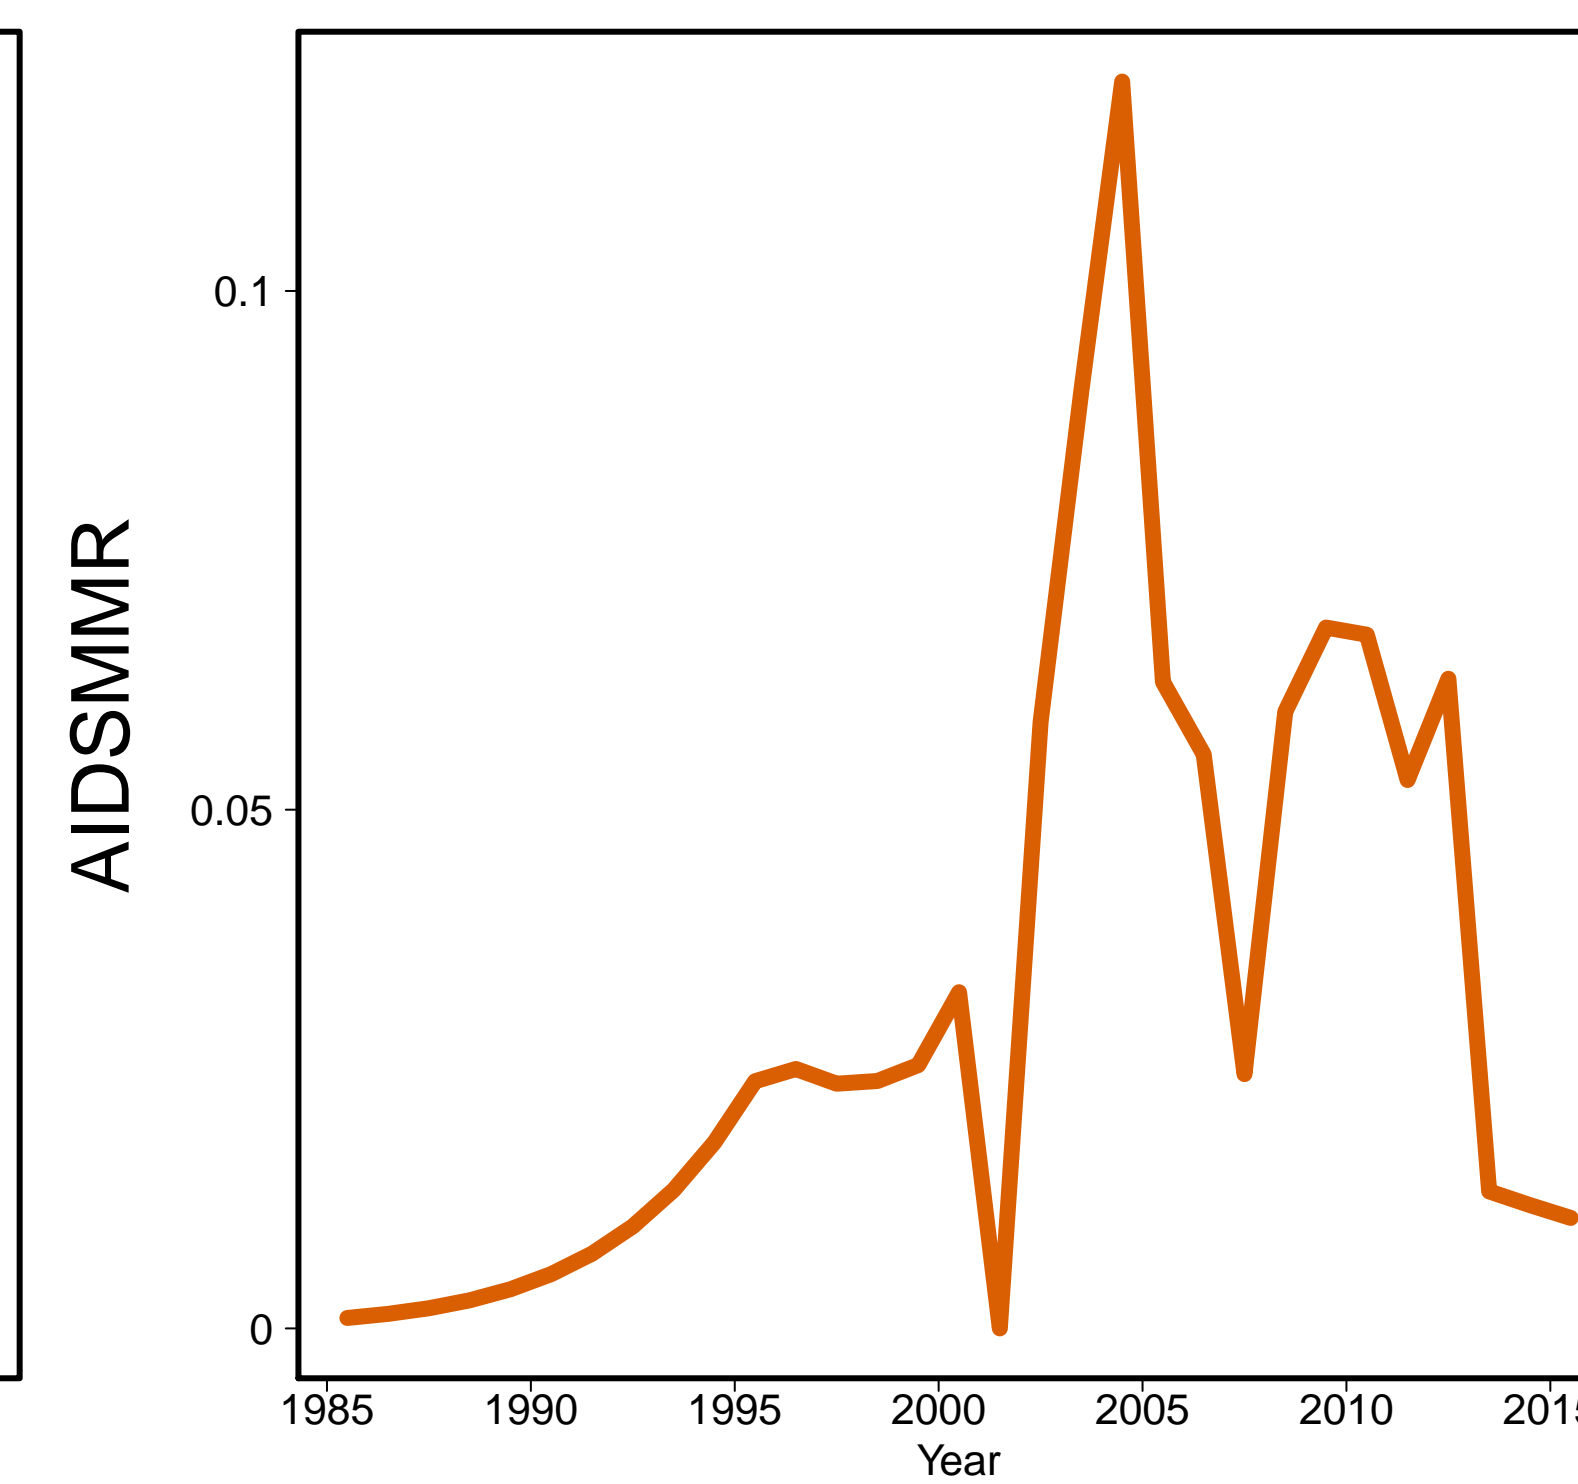



Madagascar [MDG]  
(Eastern Africa)

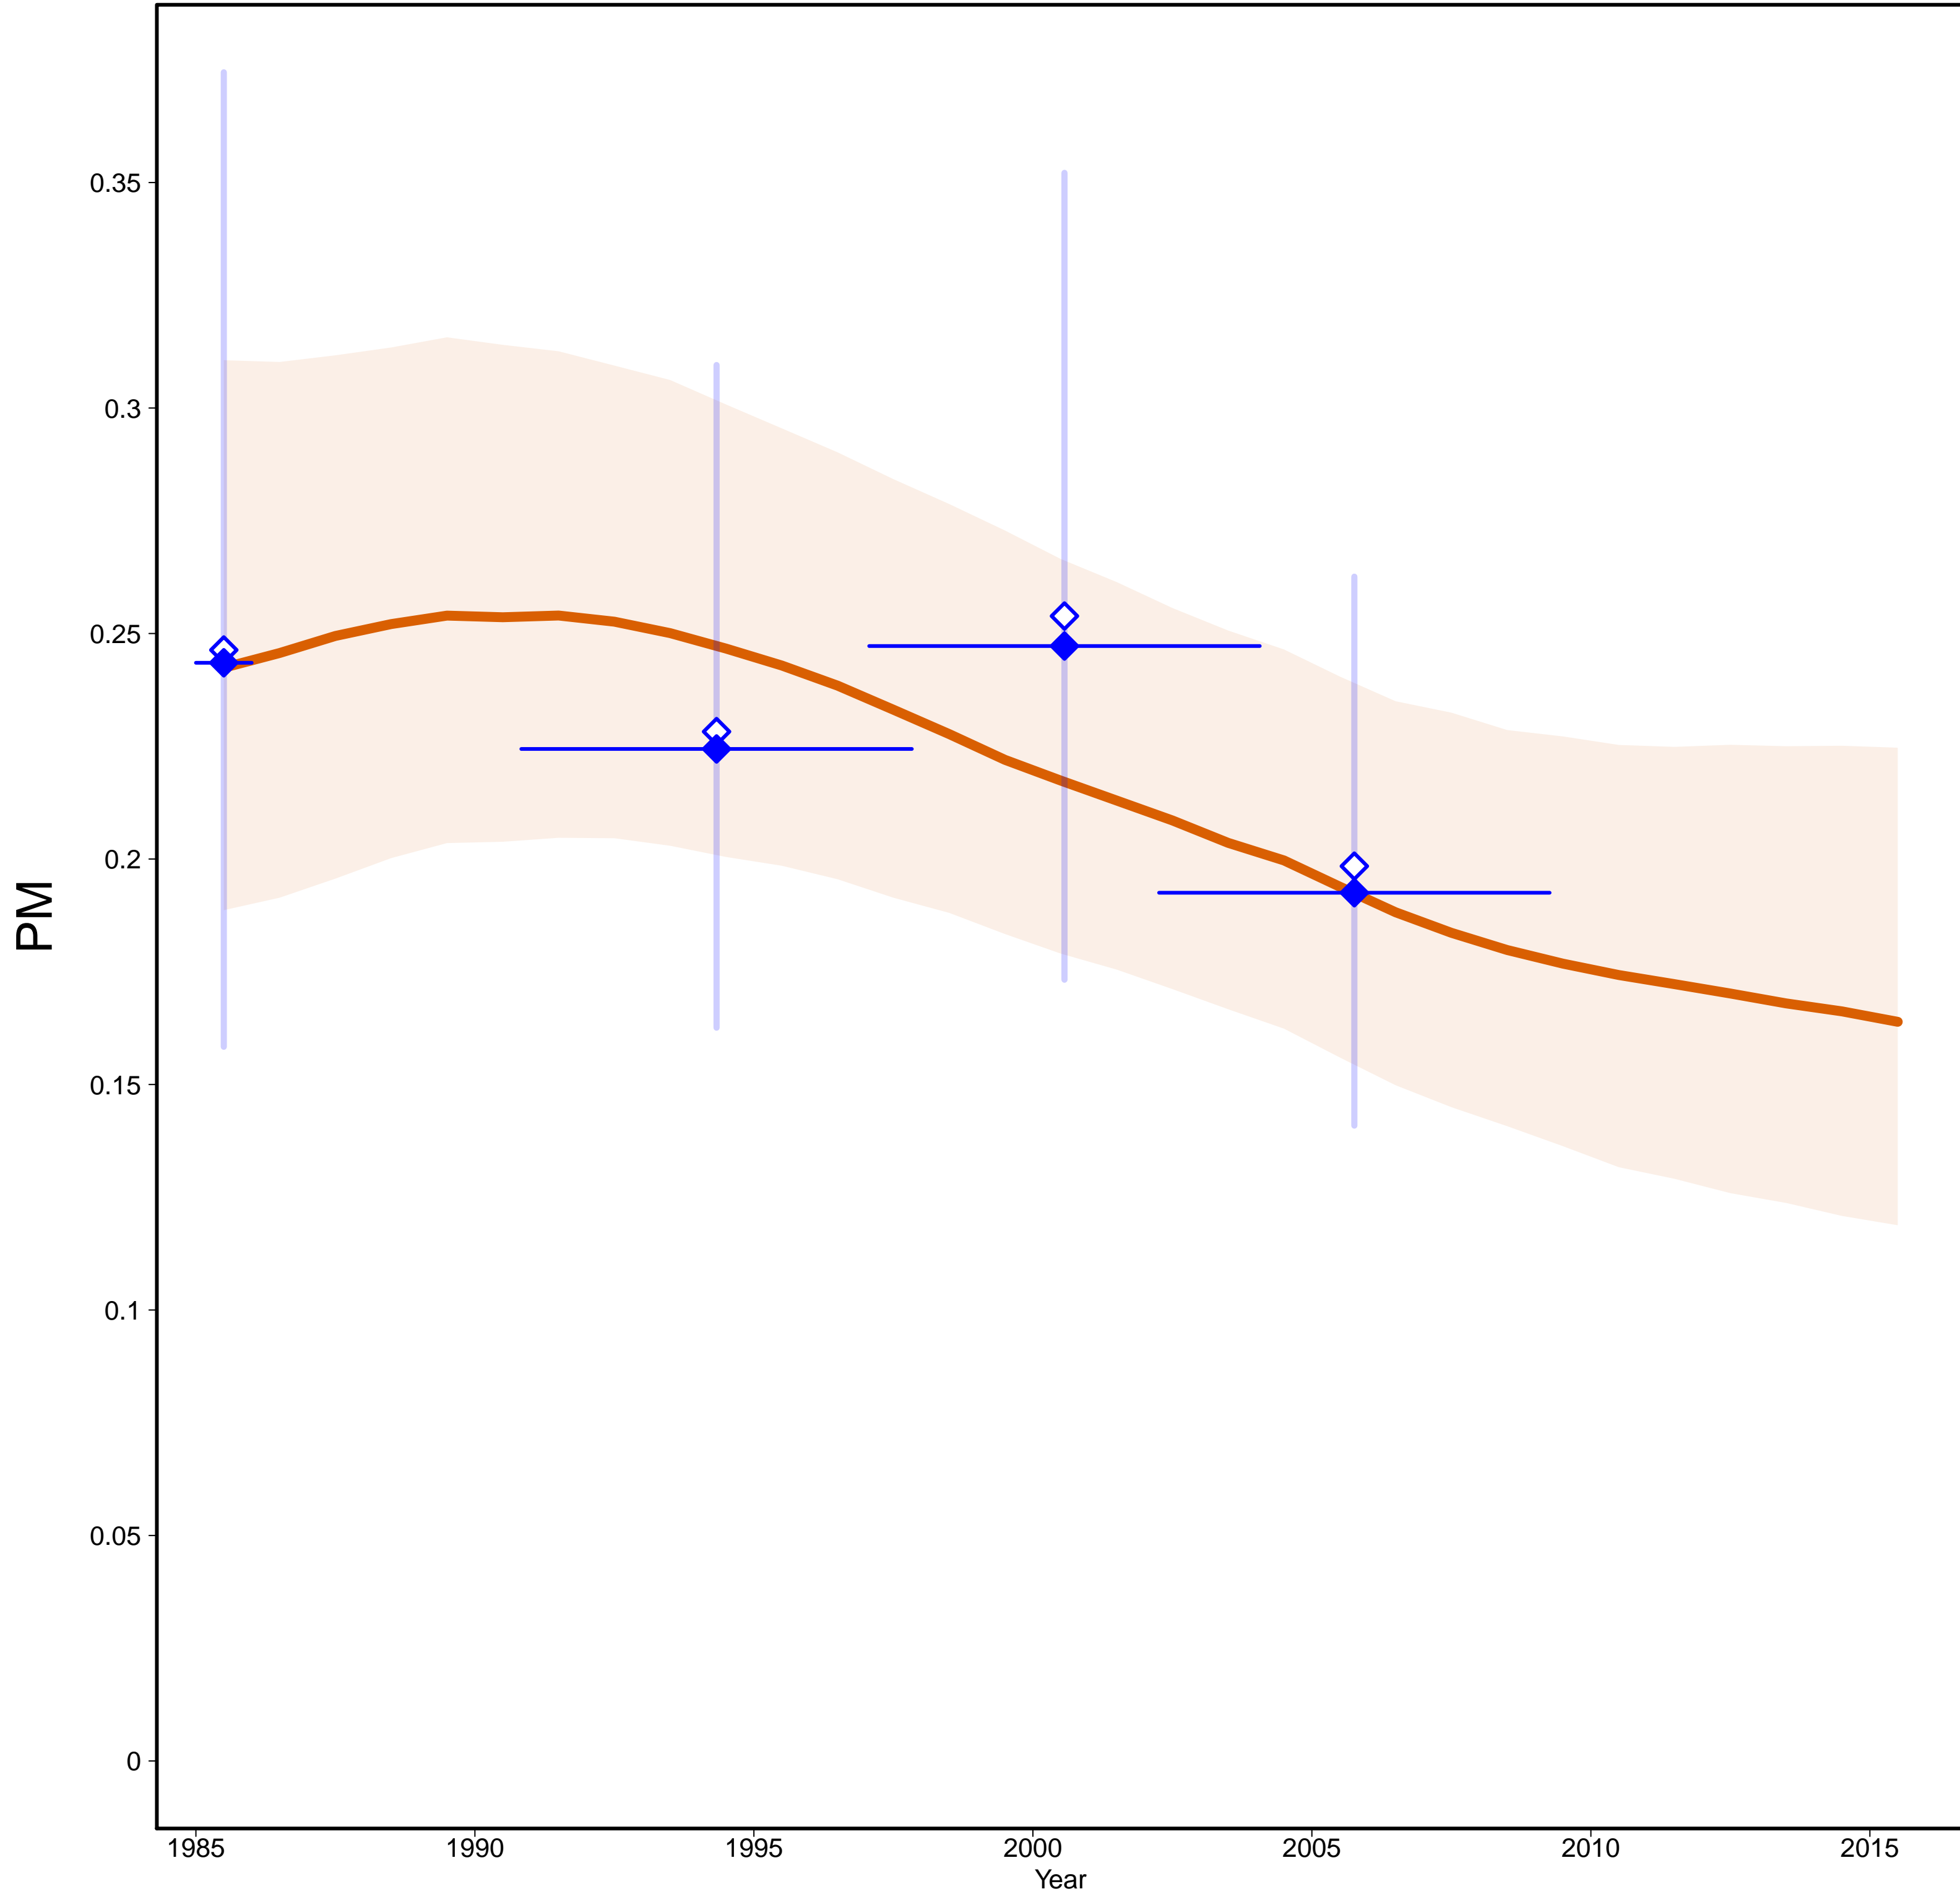

Madagascar [MDG]  
(Eastern Africa)

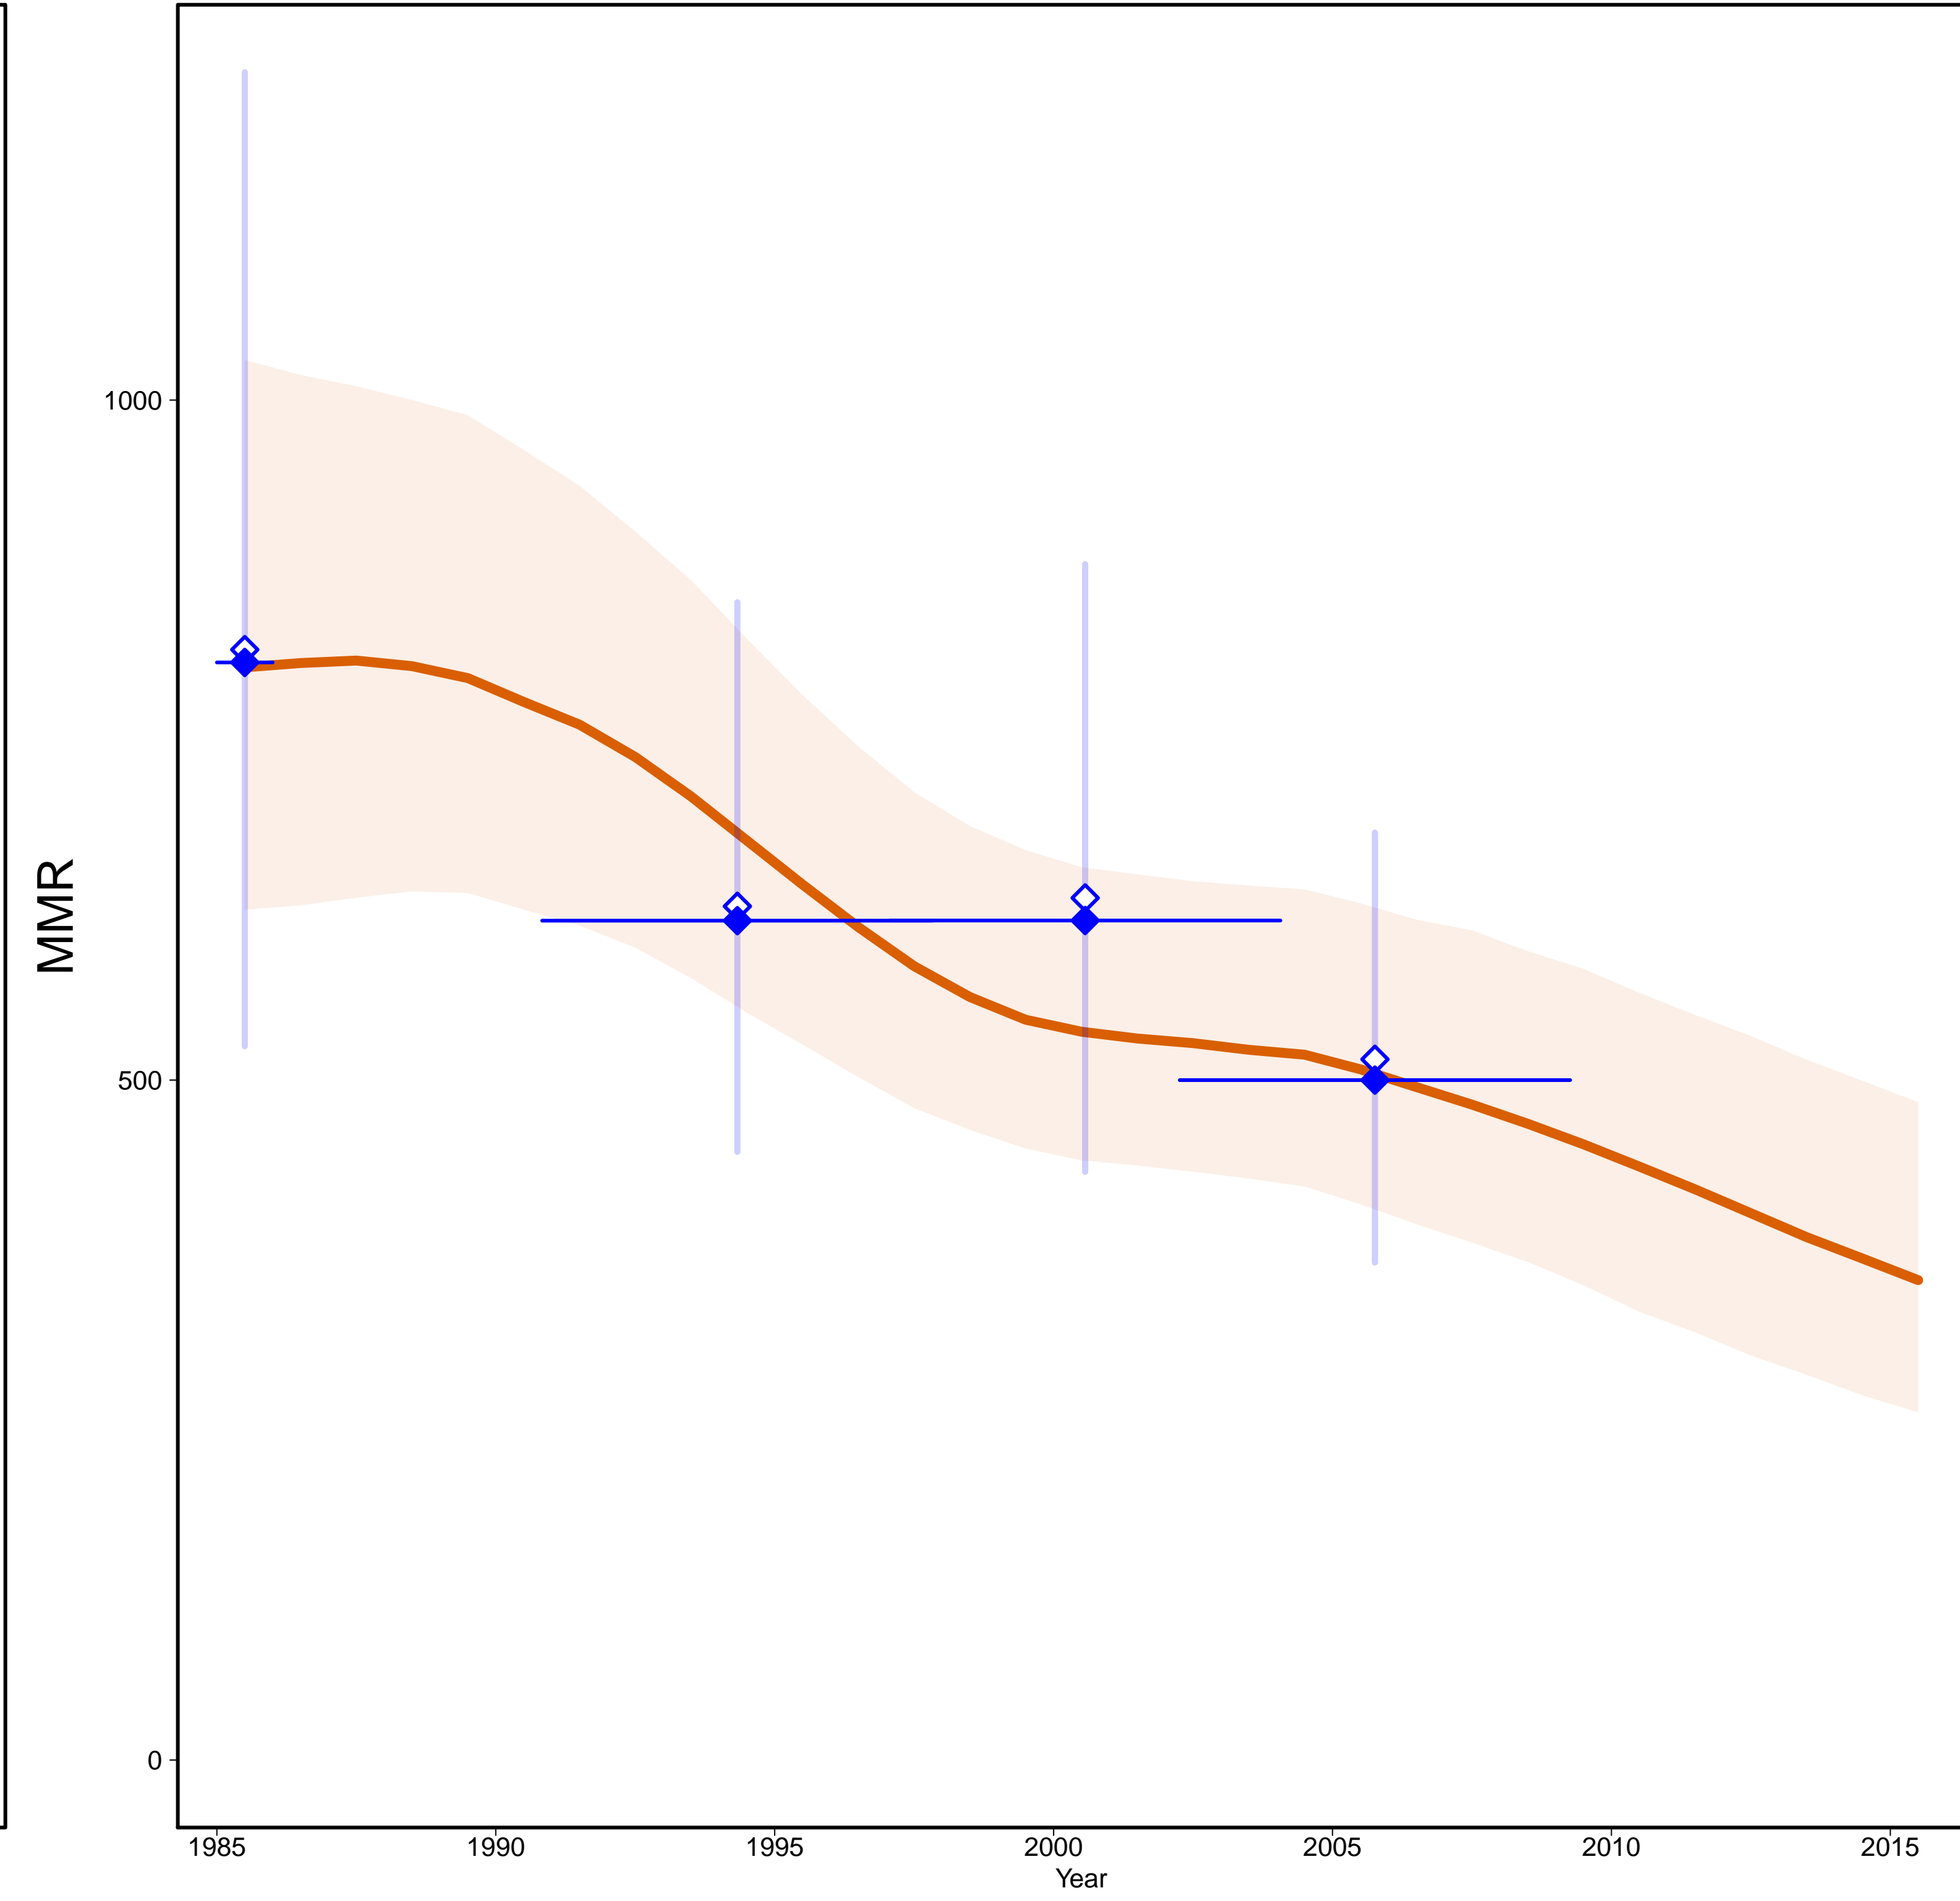

- Estimates —
- MMR Database 2015 —
- ◇ Observed Data
- ◆ Adjusted Data
- Data type —
- ◆ DHS

Gross Domestic Product

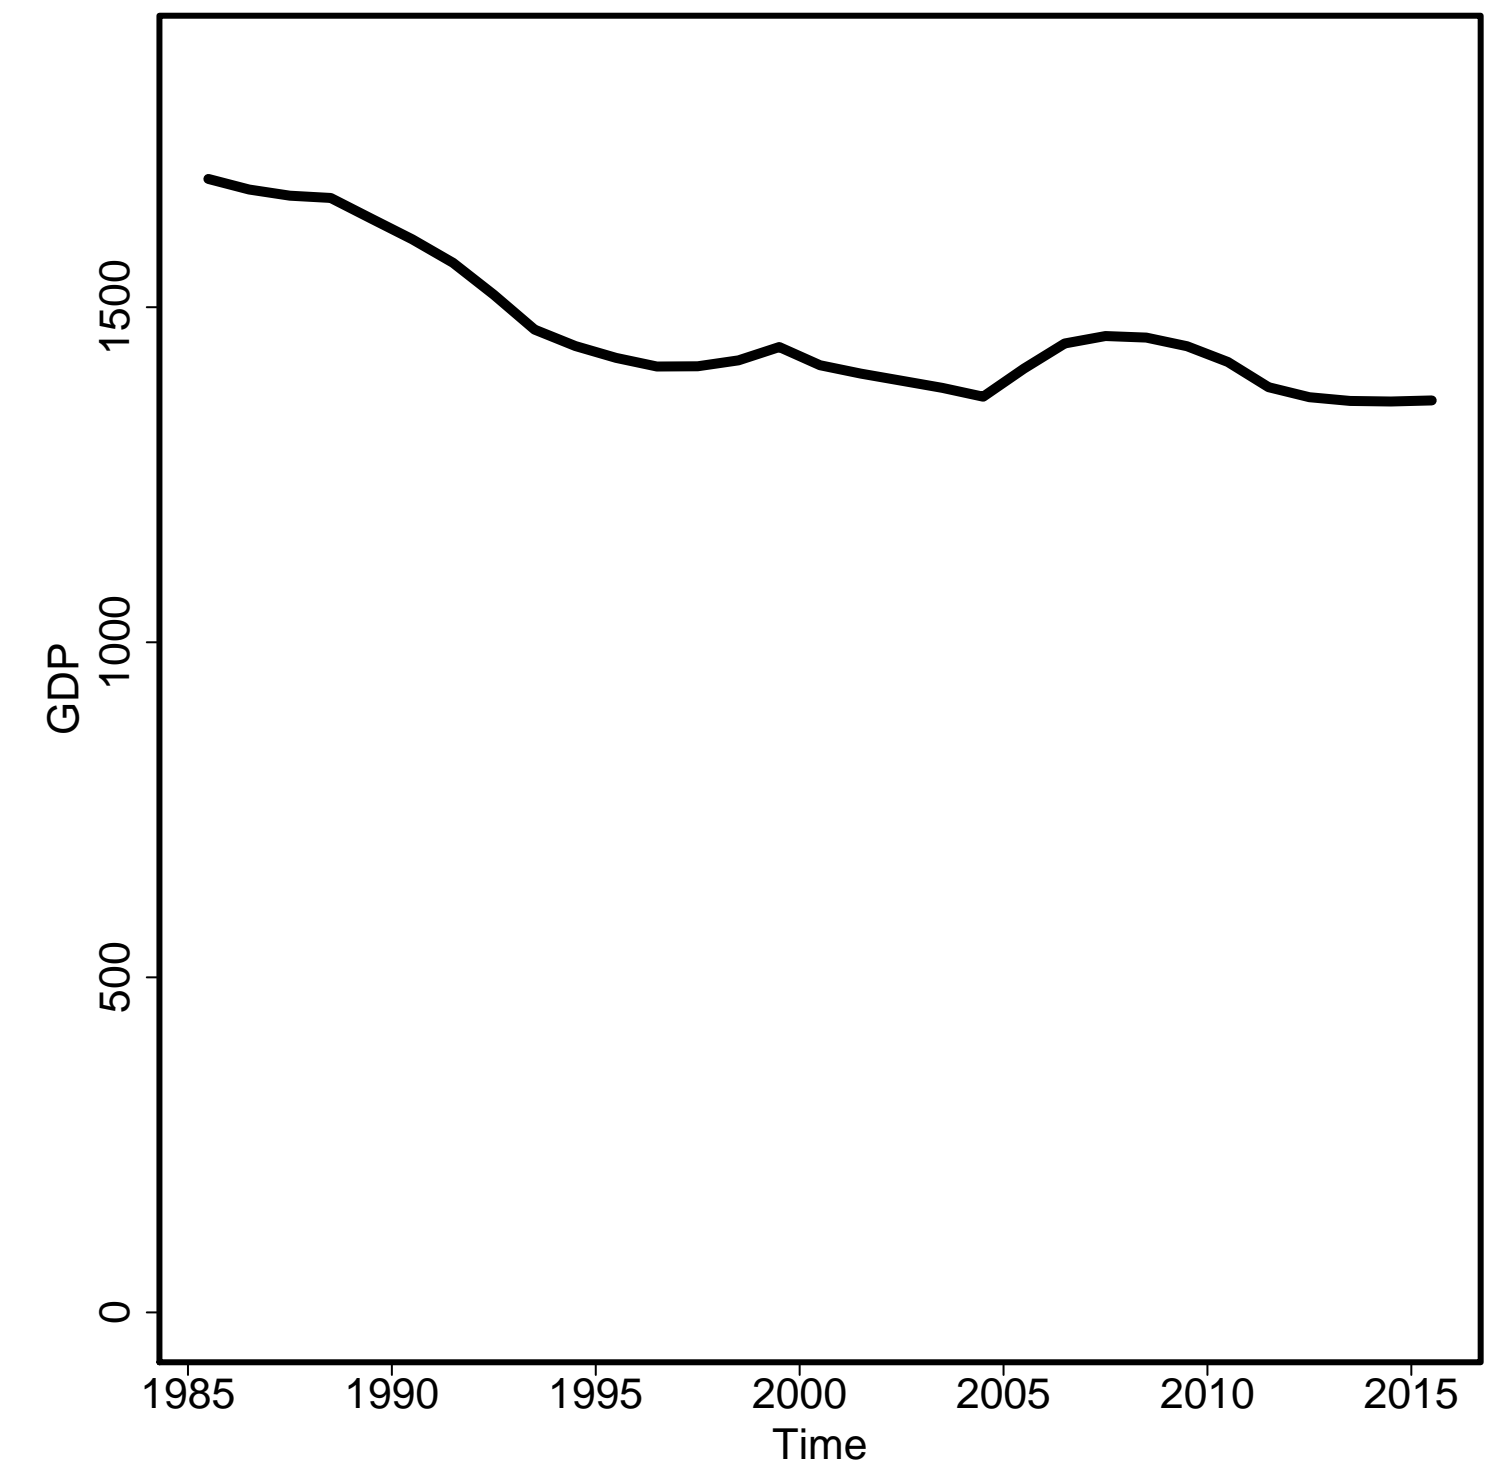

General Fertility Rate

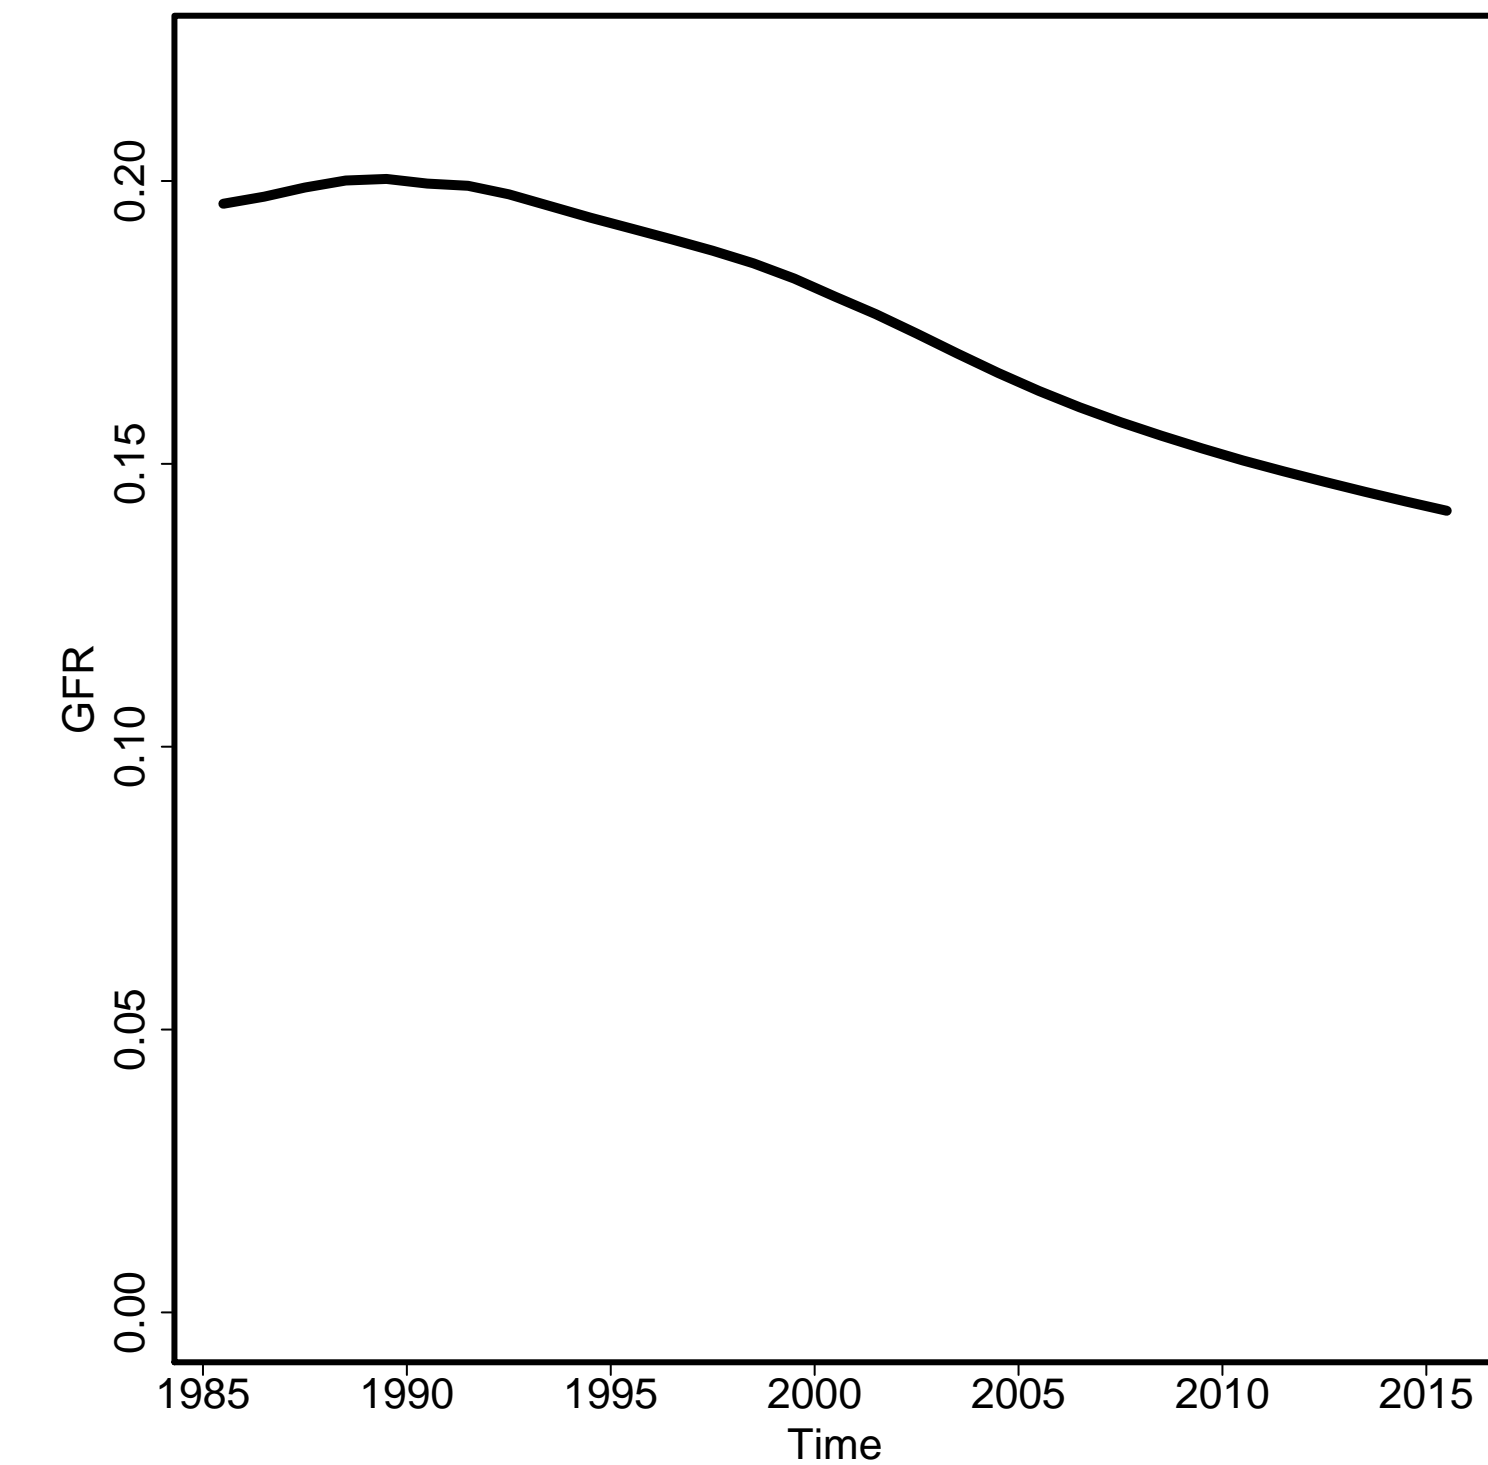

Skilled Attendance to Birth

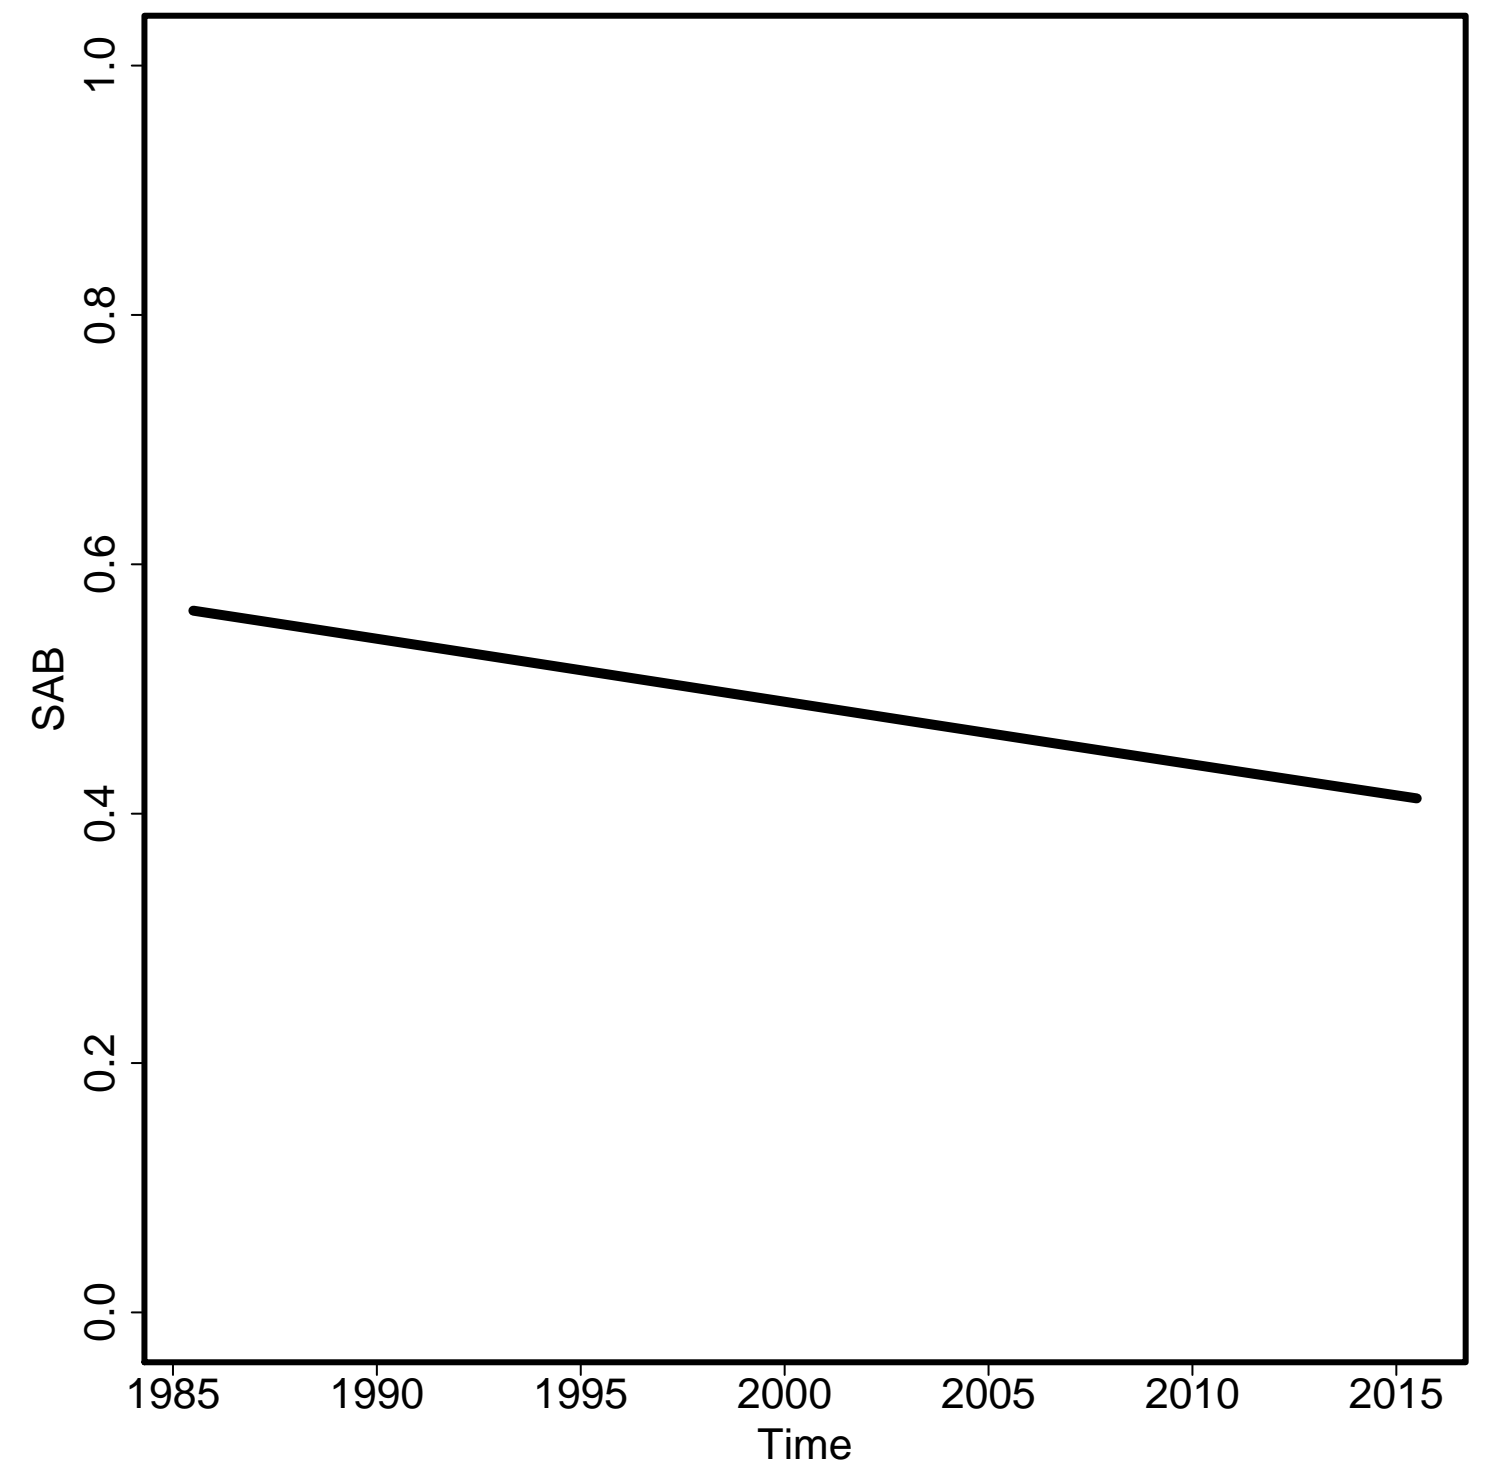

Envelope/Births

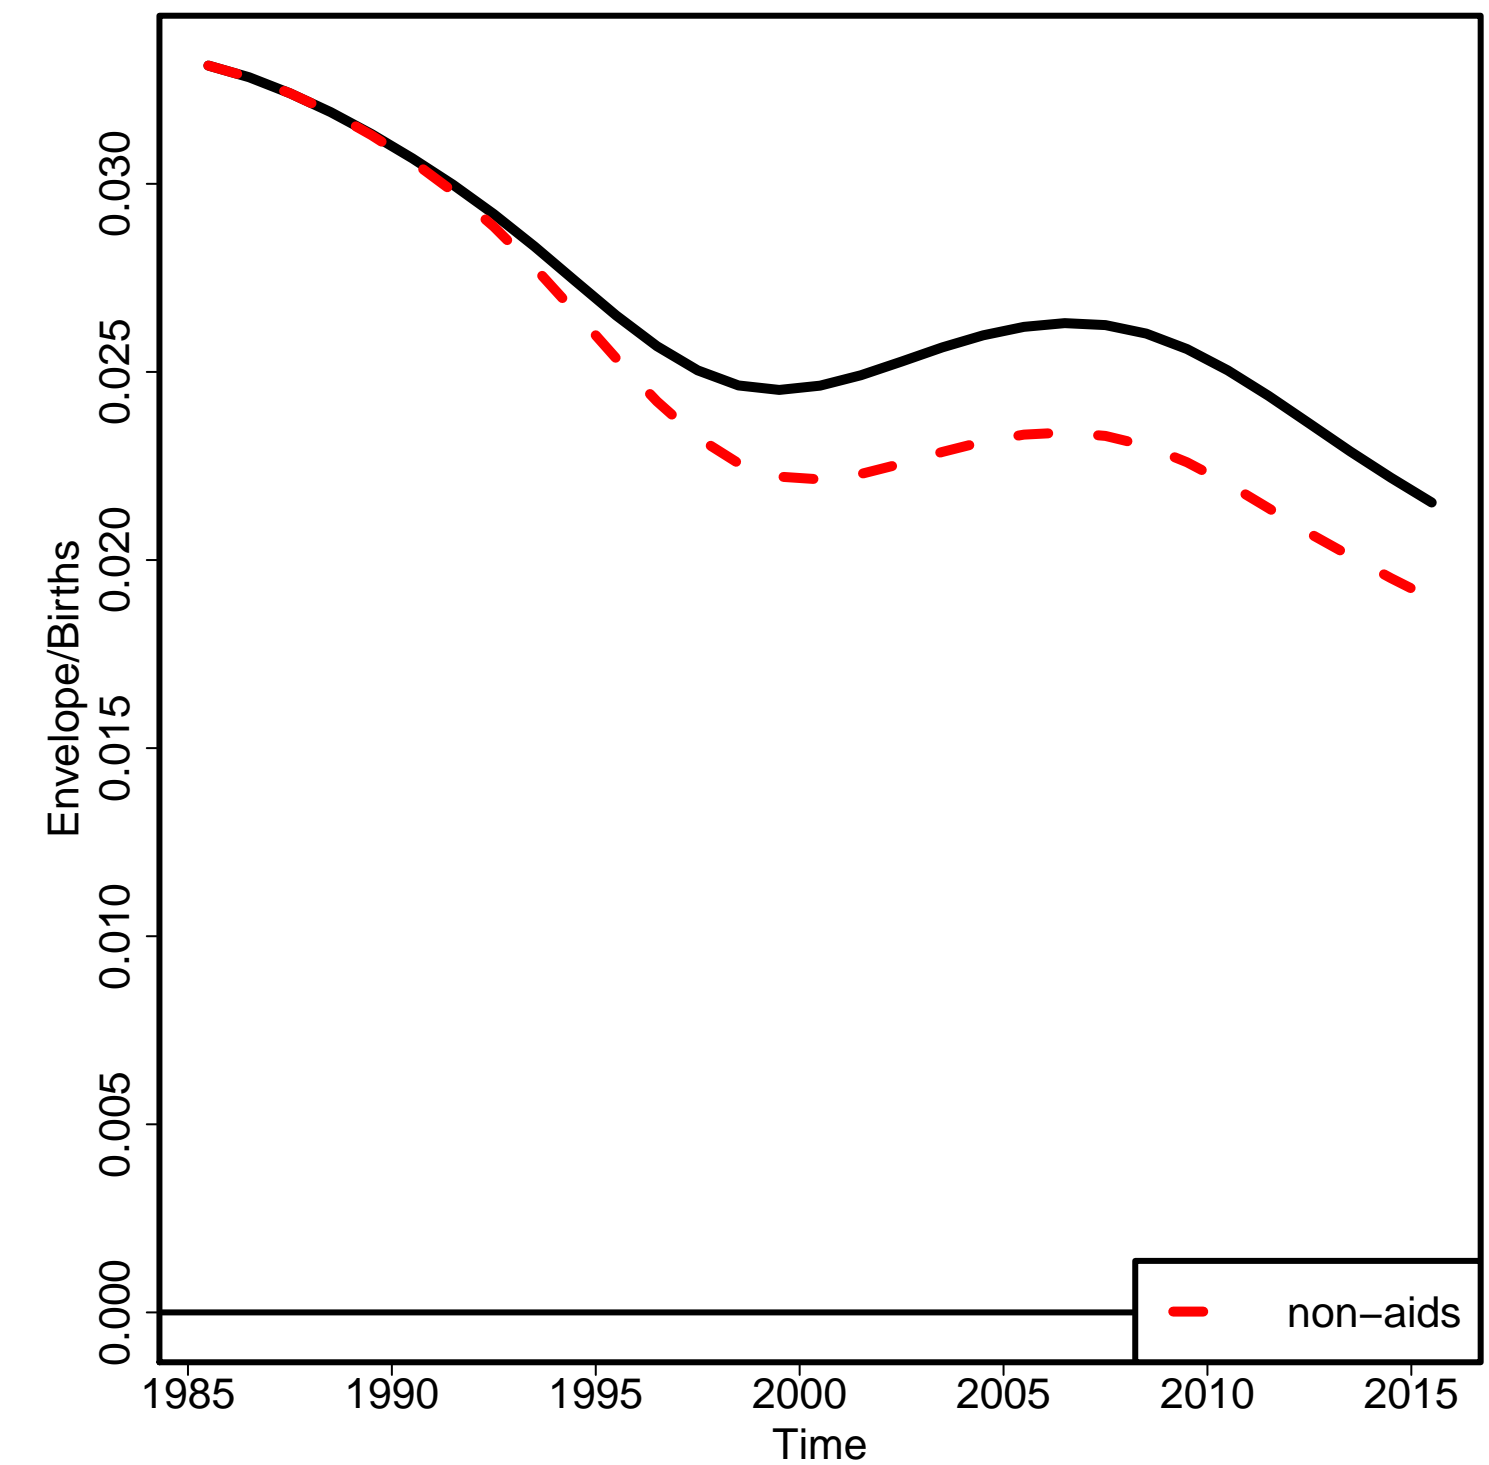

Non-aids MMR

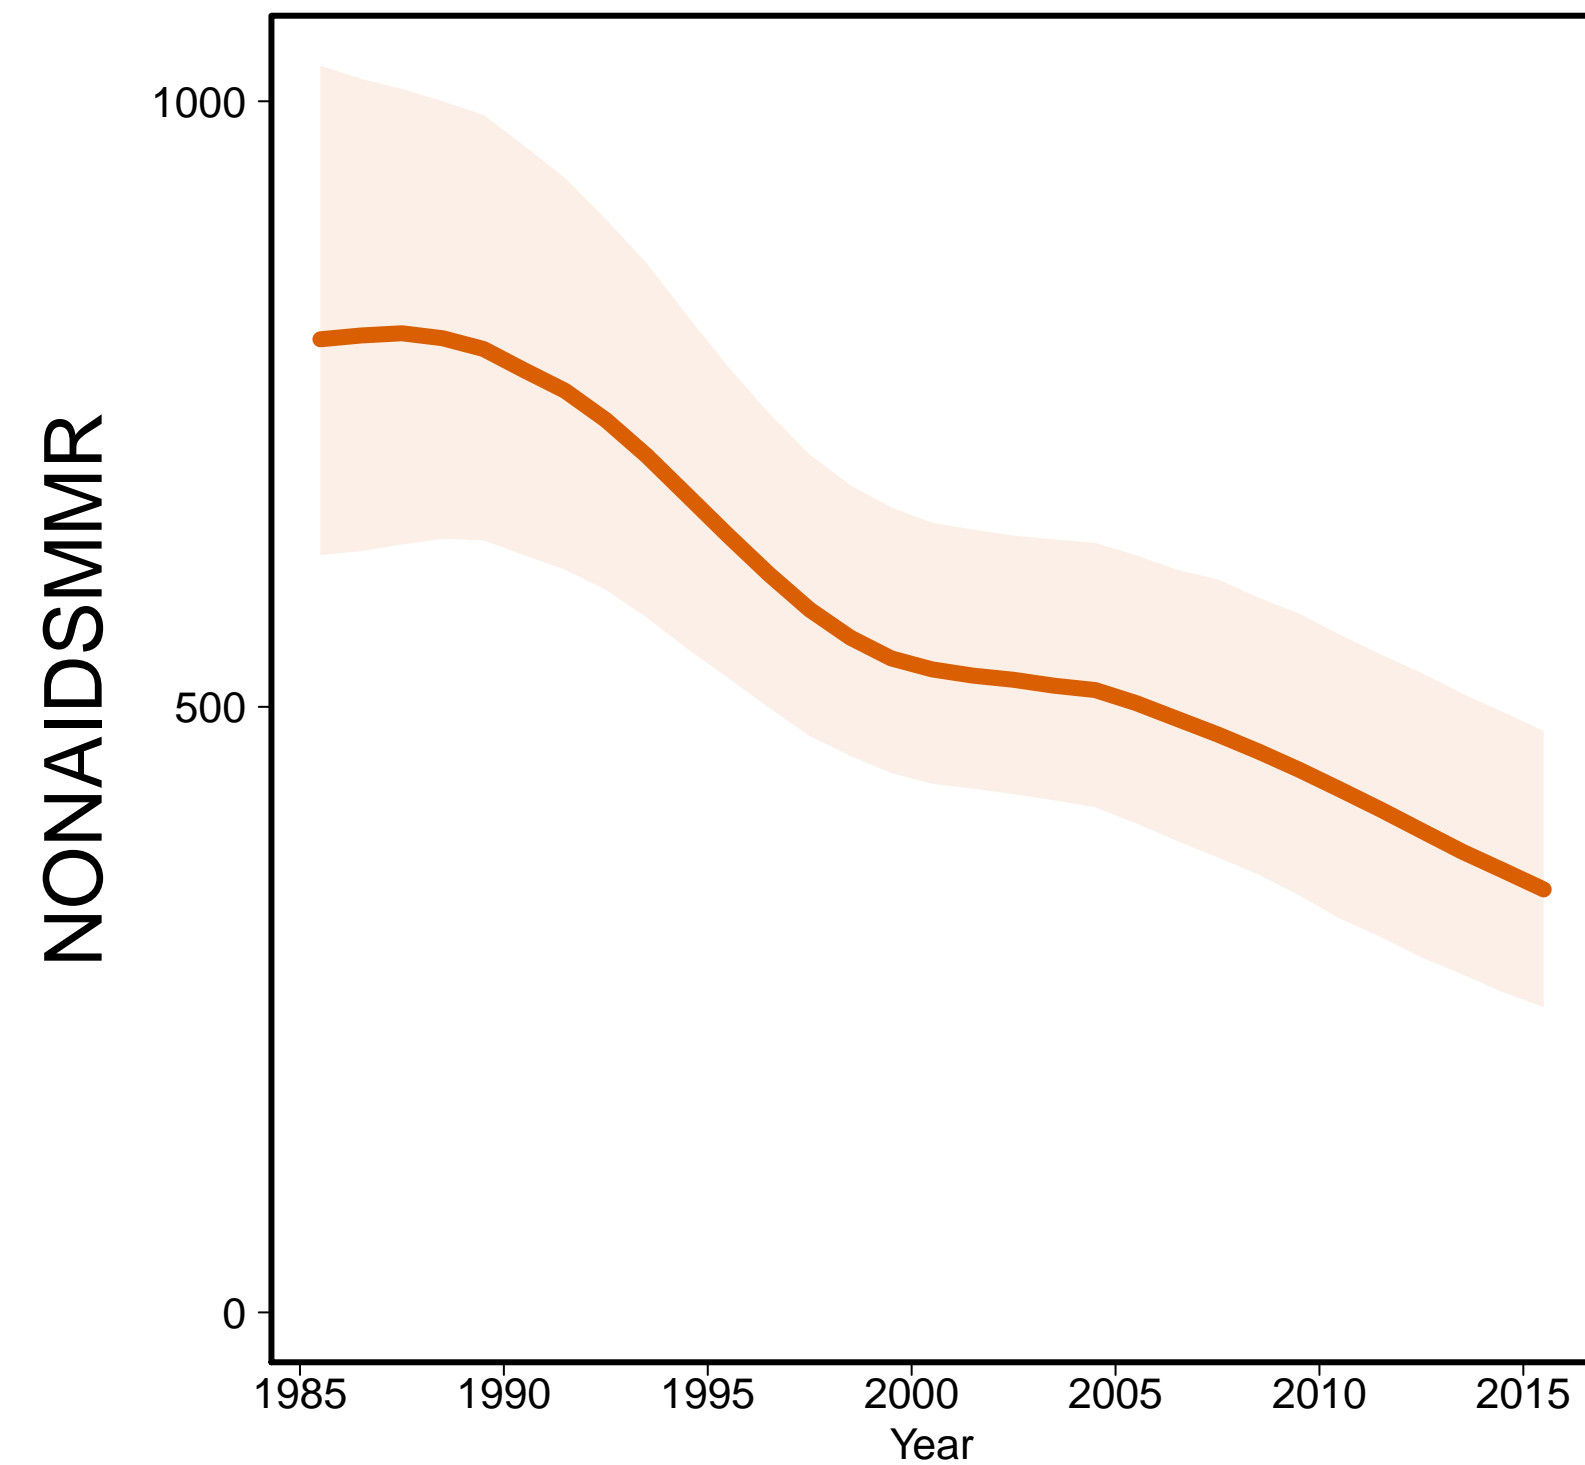

Aids MMR

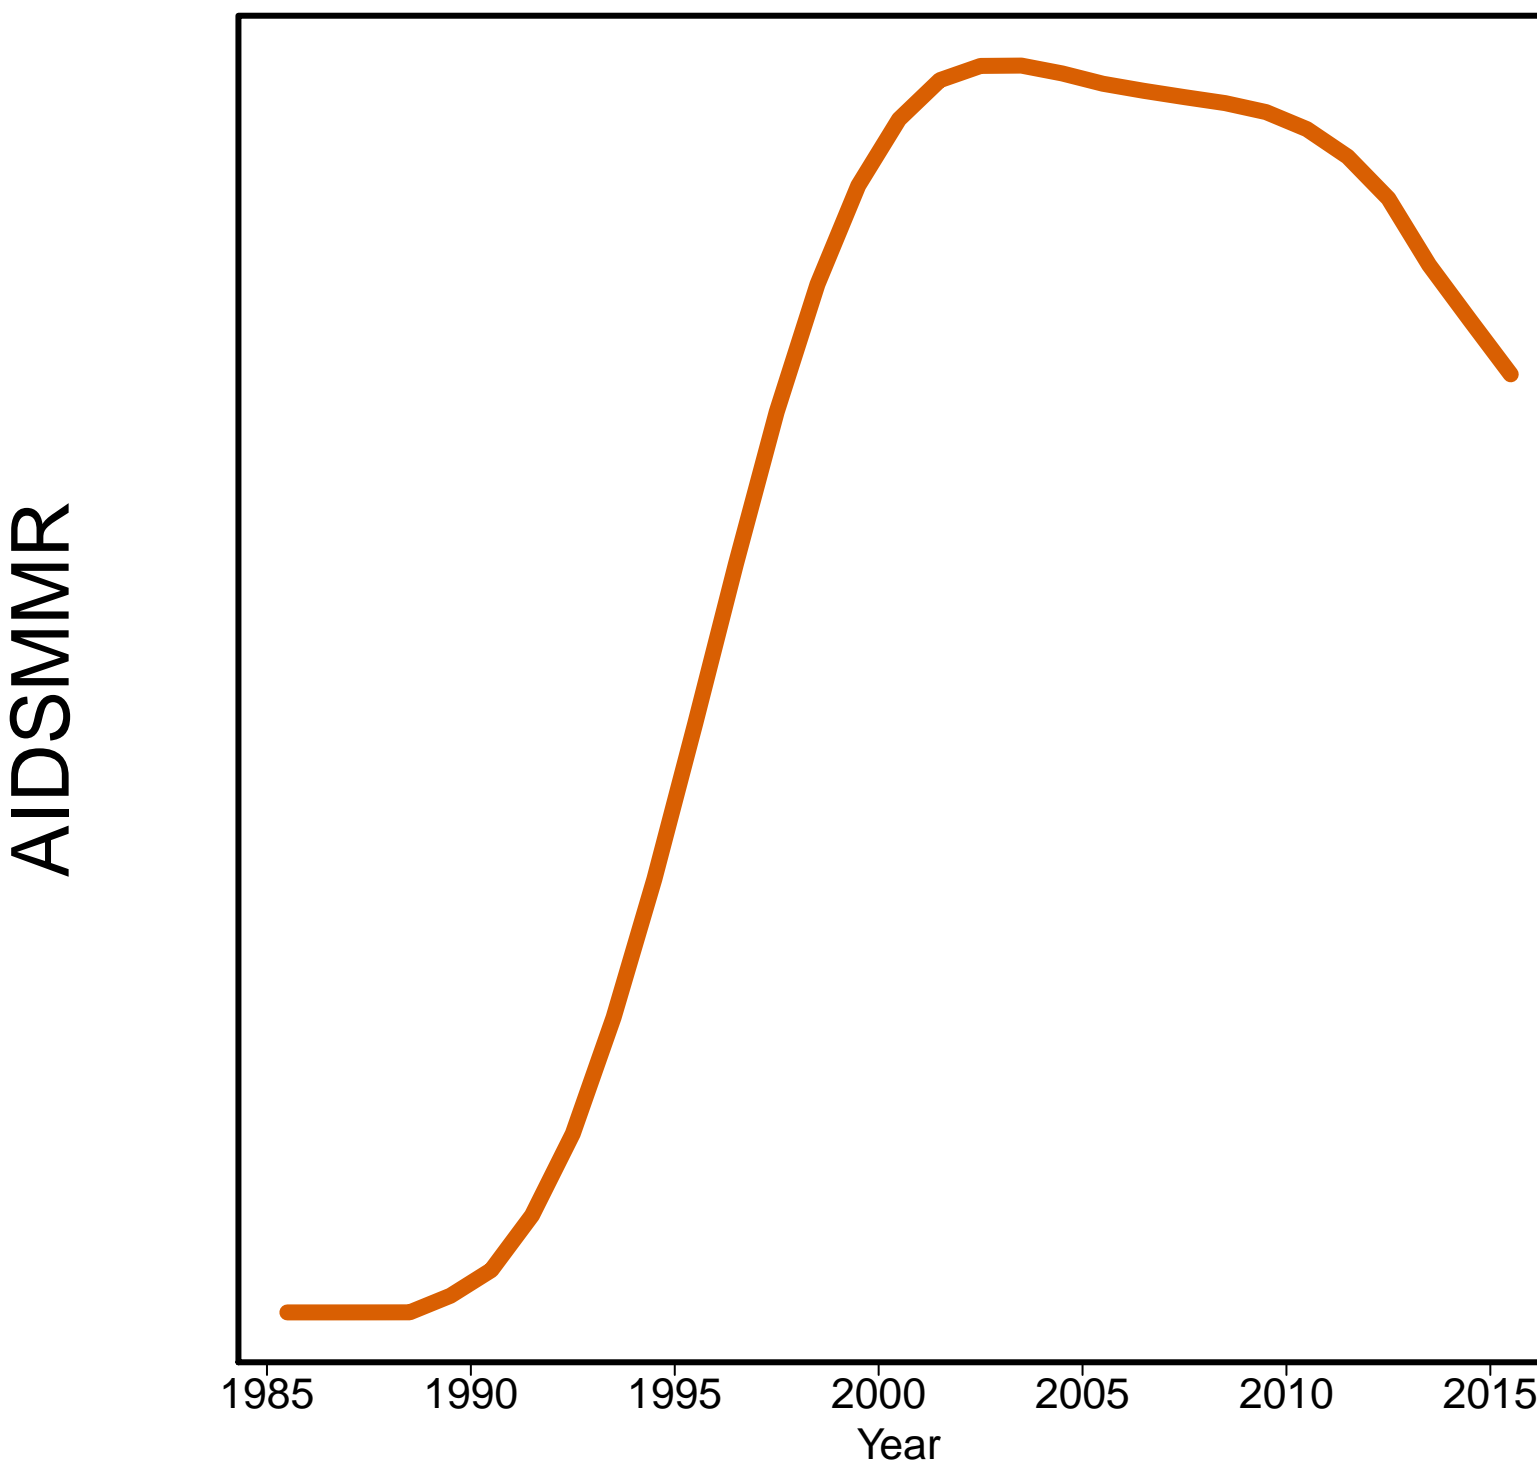

Malawi [MWI]  
(Eastern Africa)

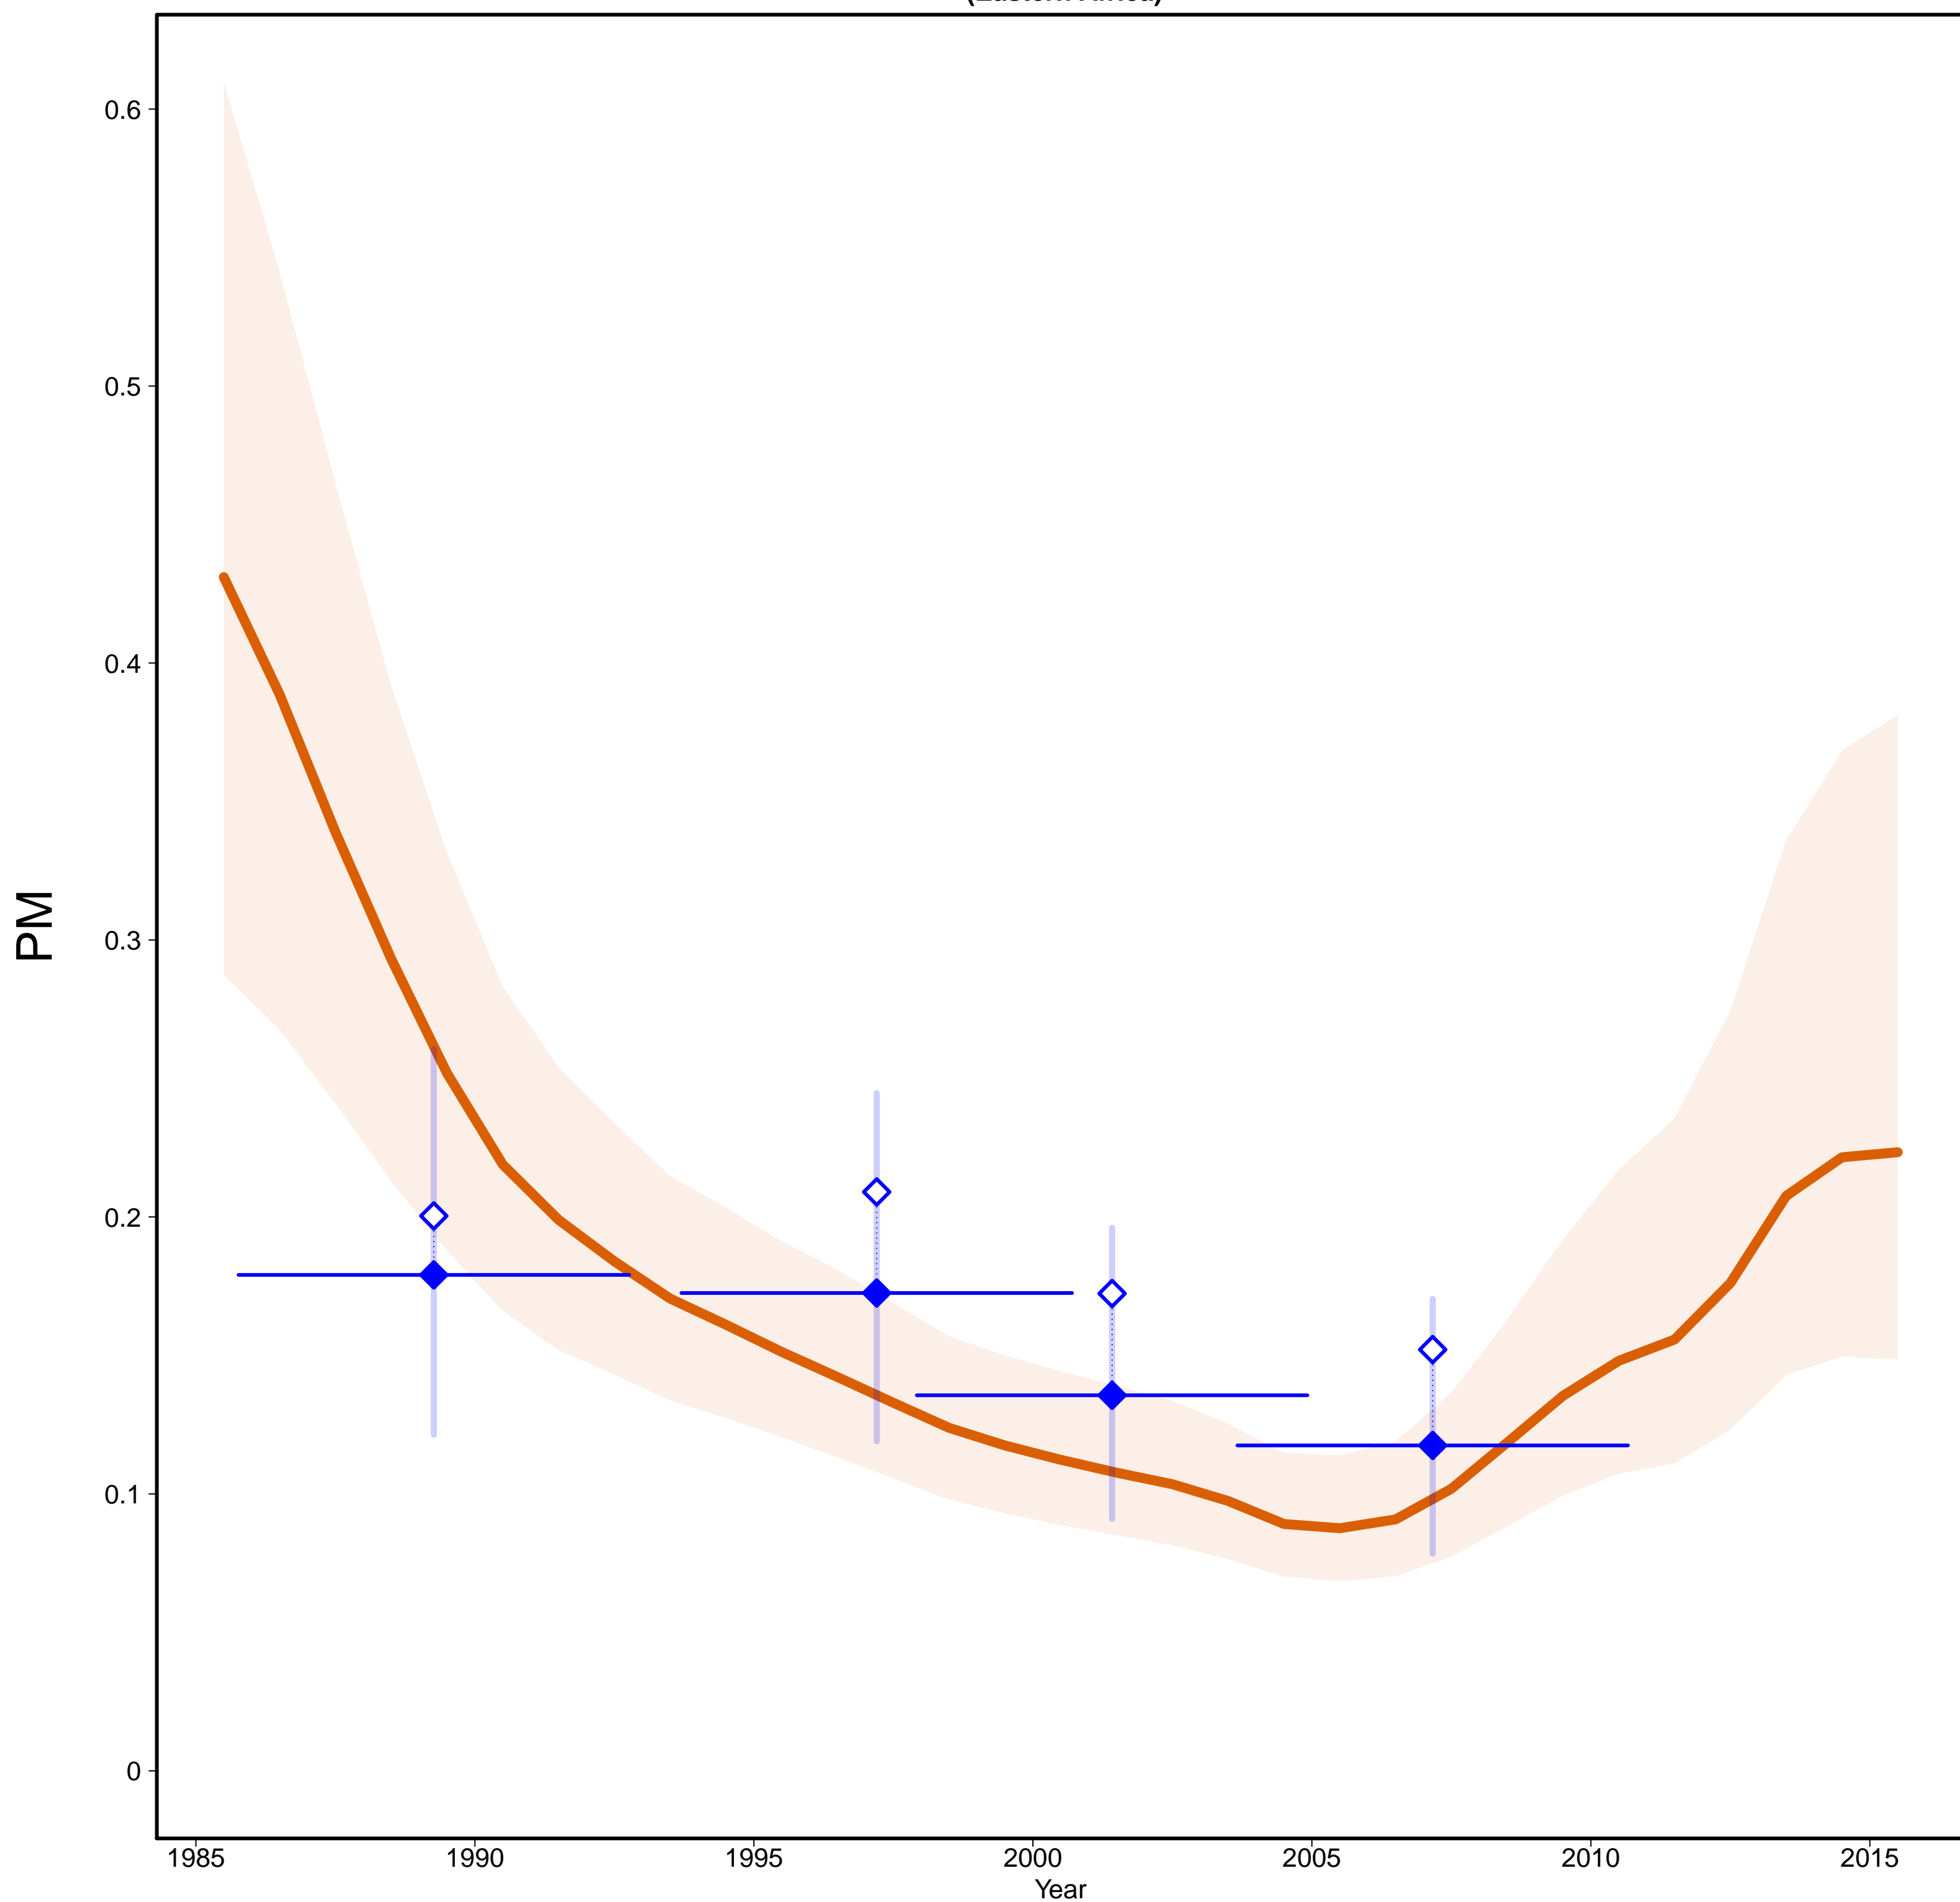

Malawi [MWI]  
(Eastern Africa)

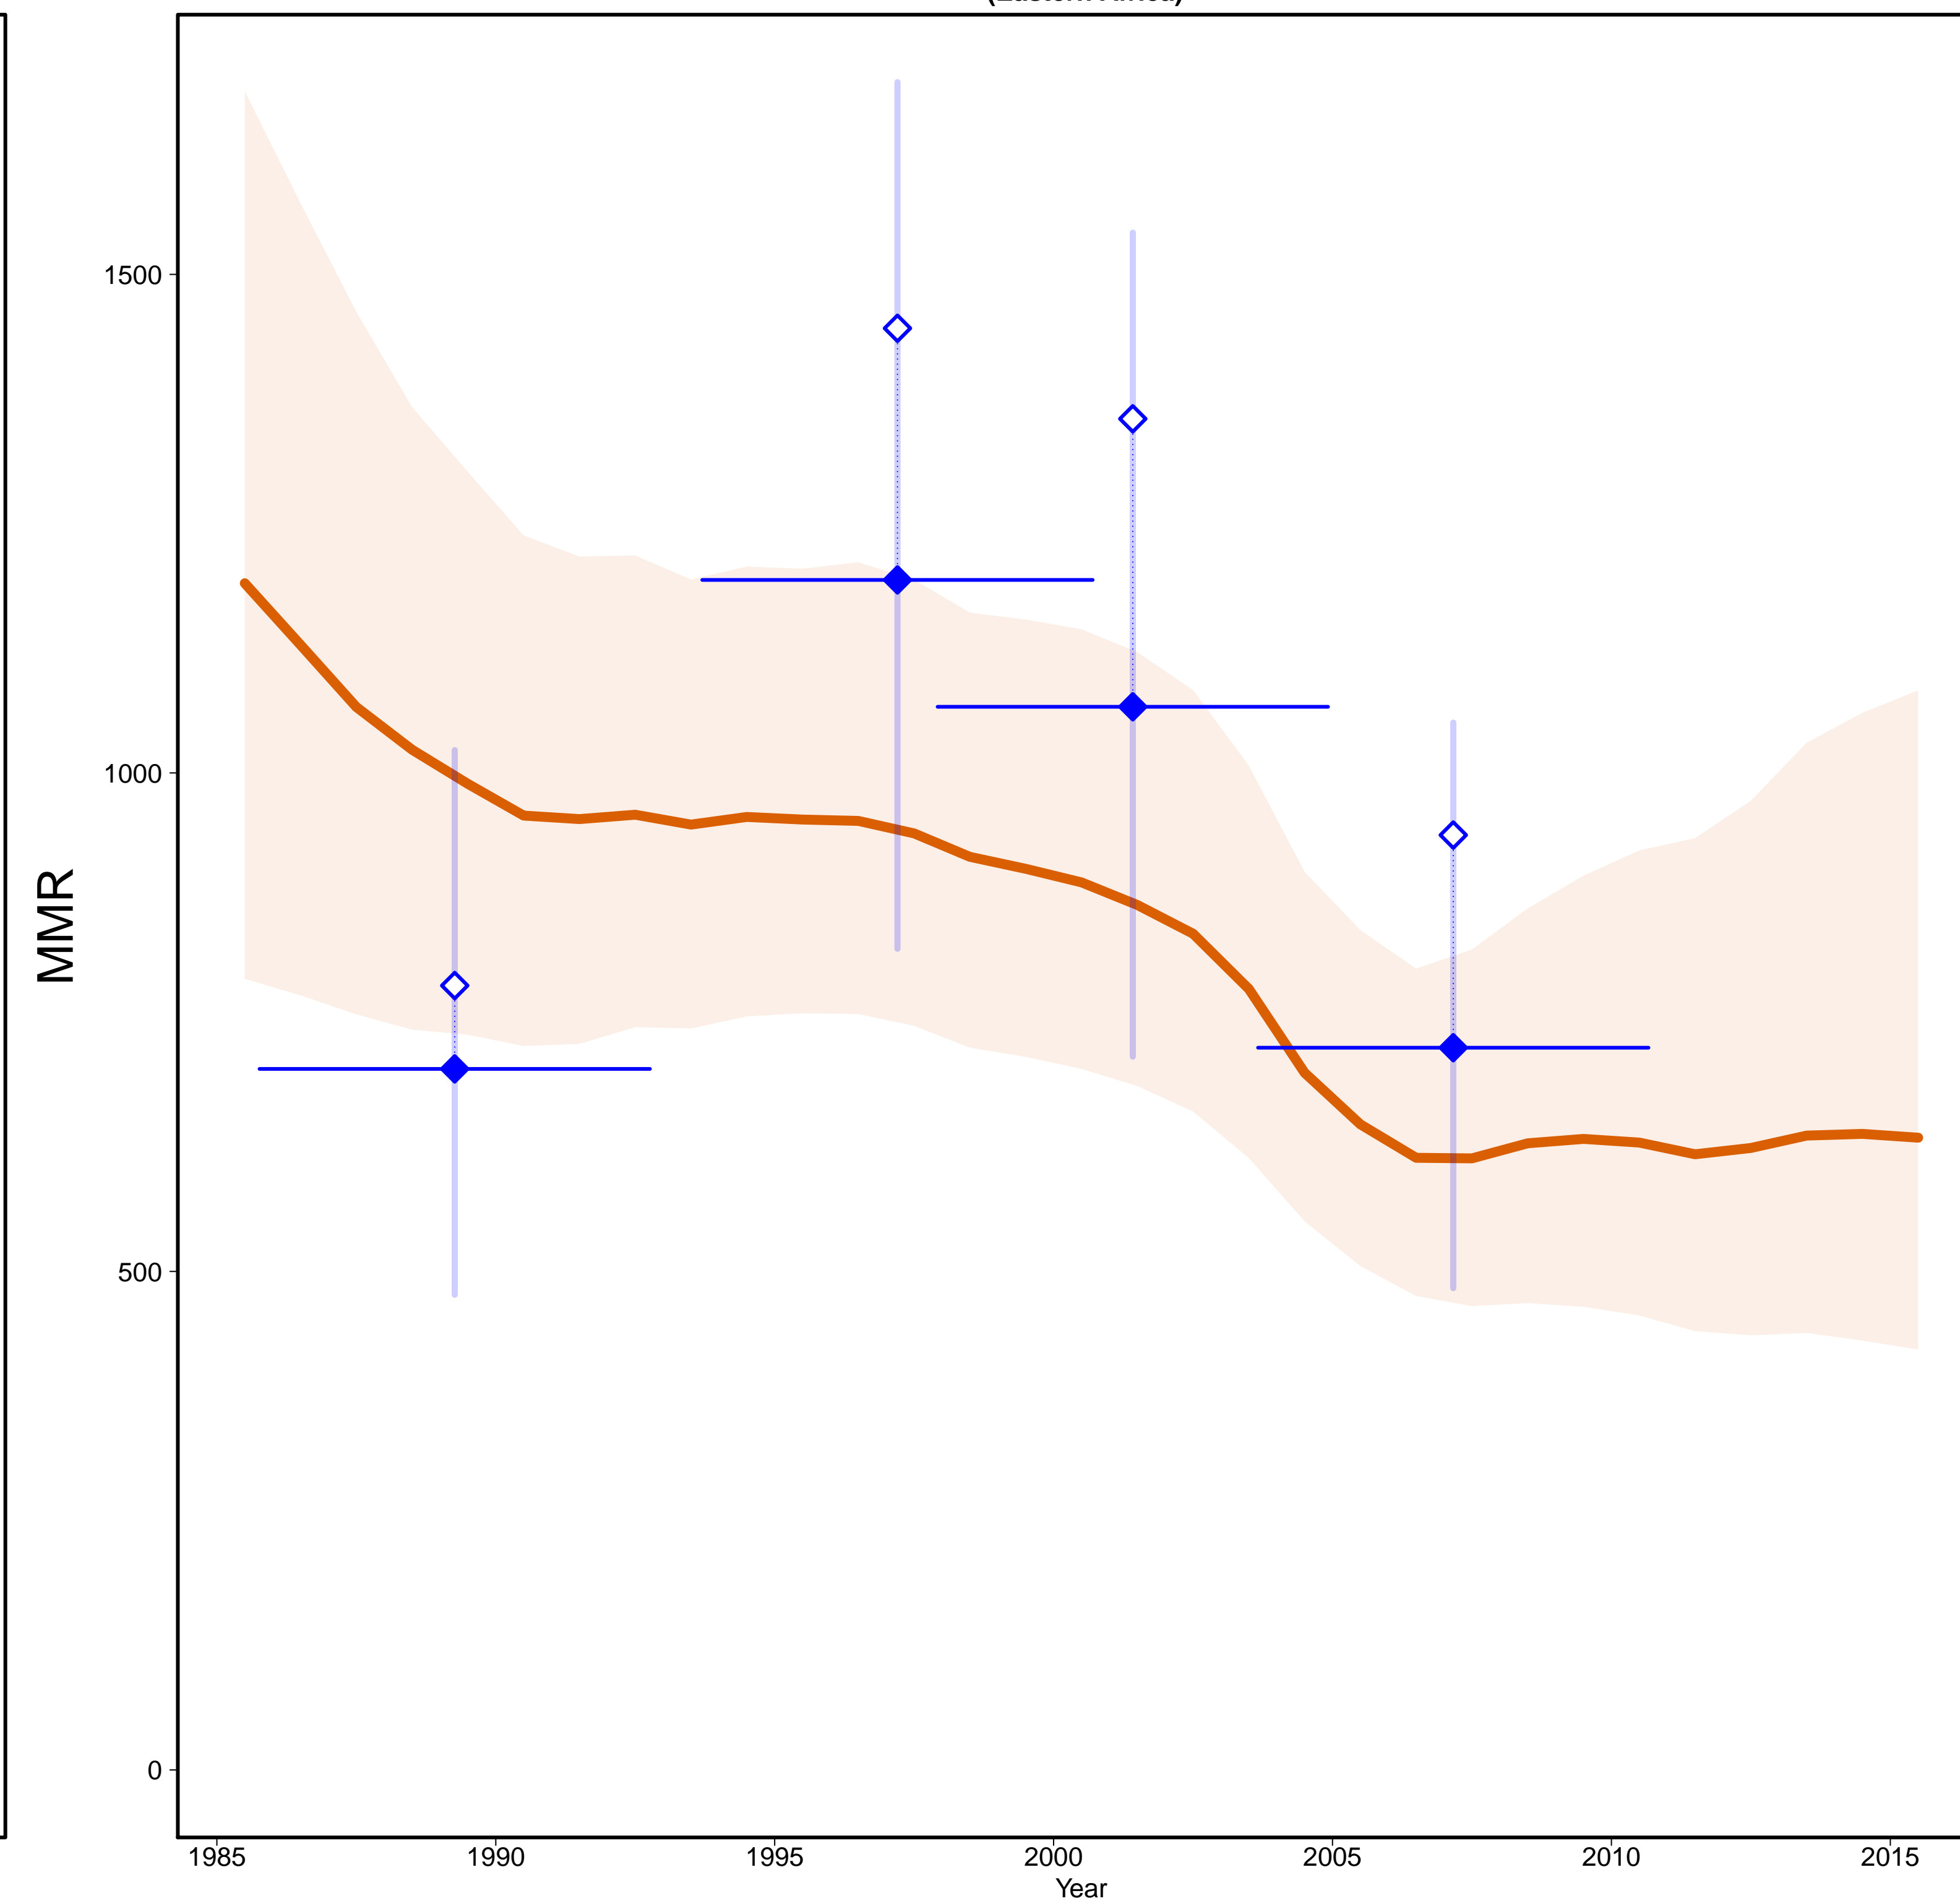

- Estimates —
- MMR Database 2015 —
- ◇ Observed Data
- ◆ Adjusted Data
- Data type —
- ◆ DHS

Gross Domestic Product

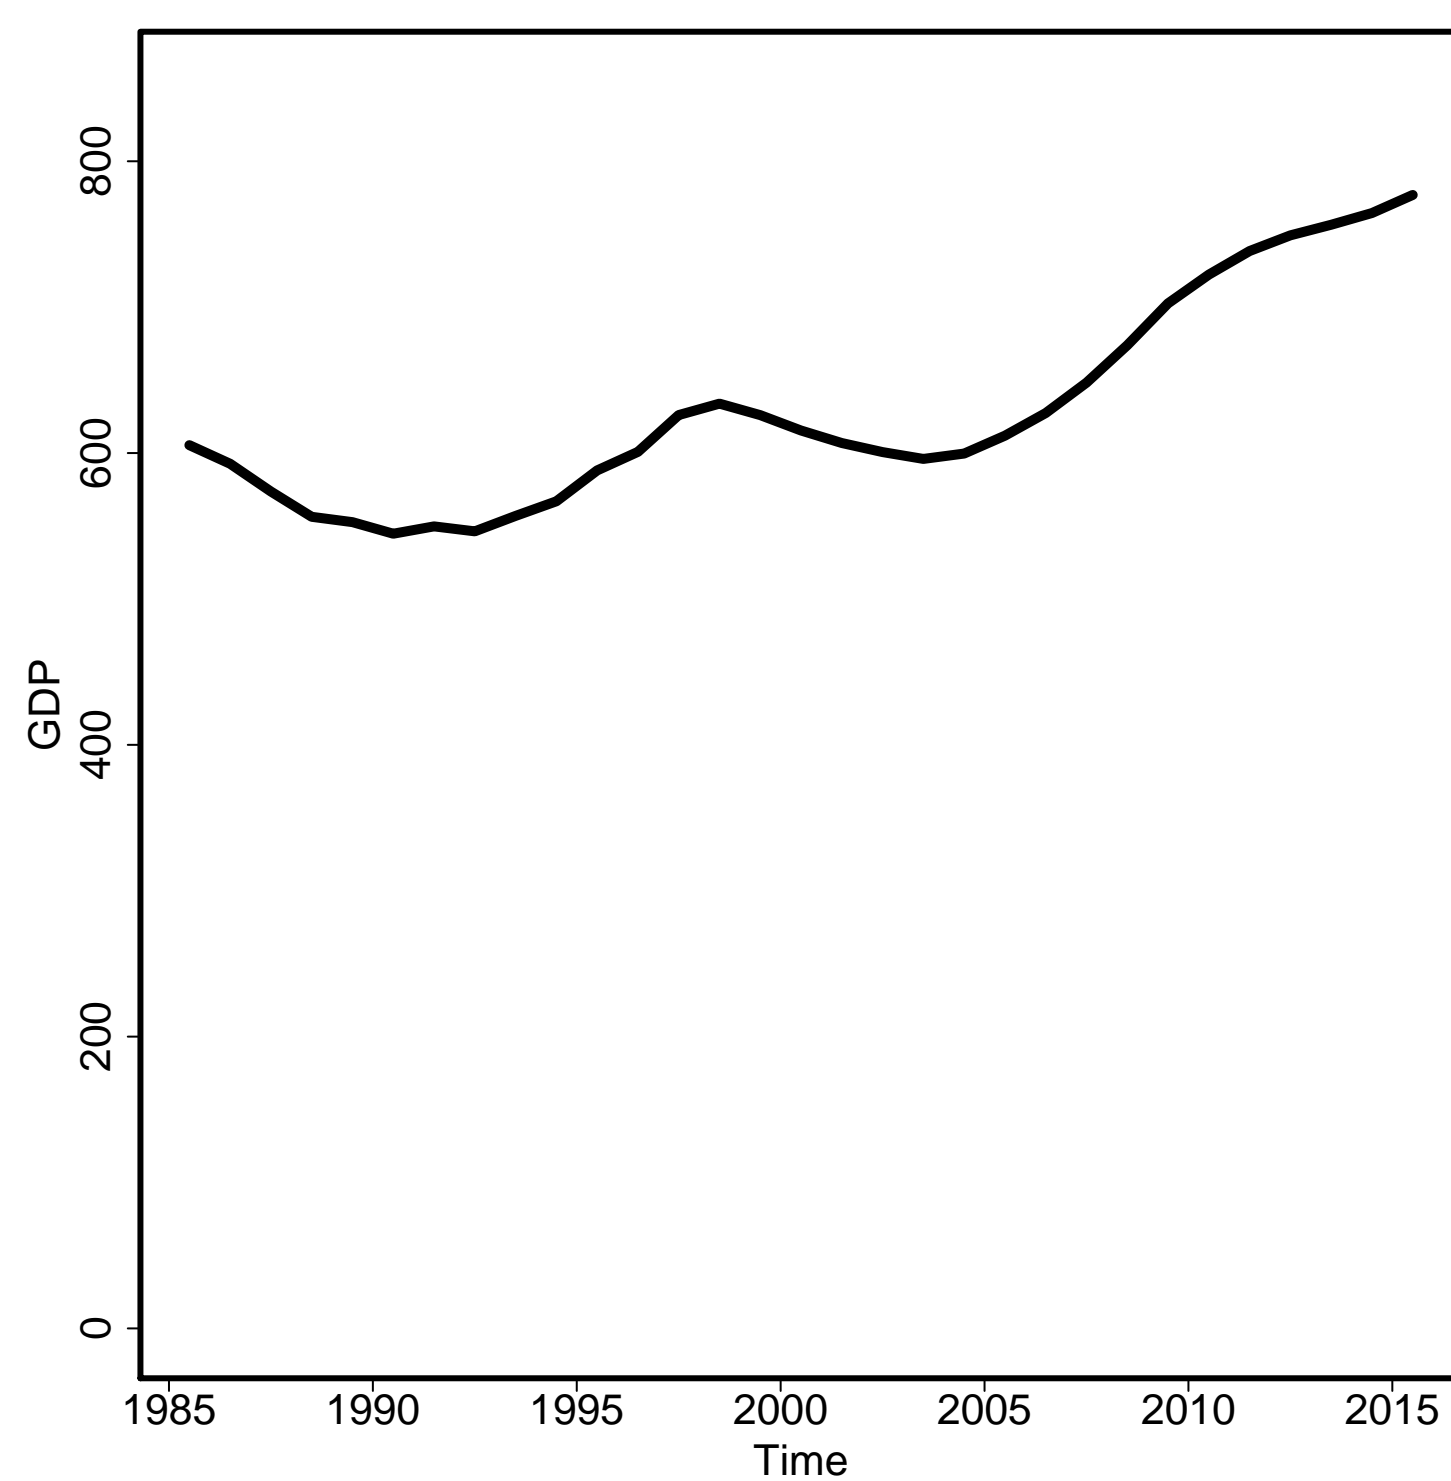

General Fertility Rate

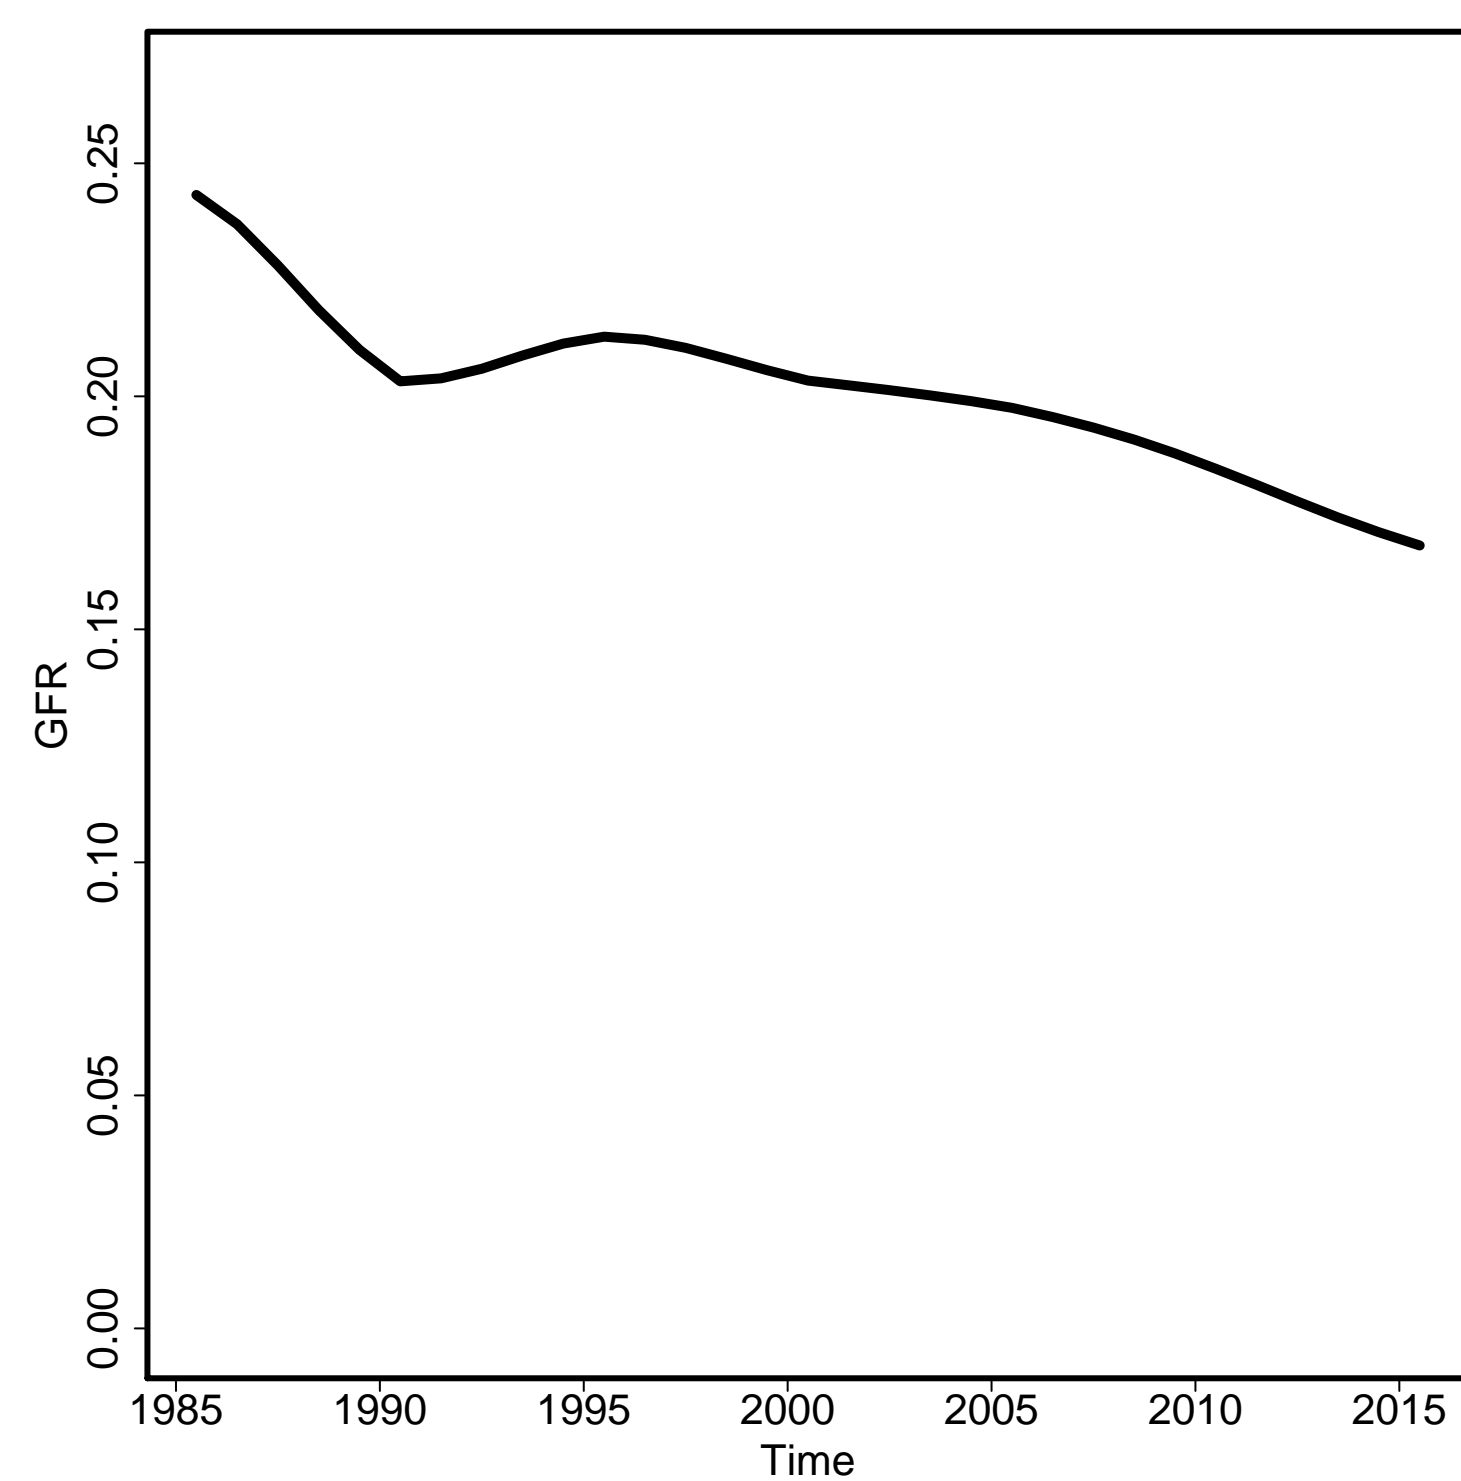

Skilled Attendance to Birth

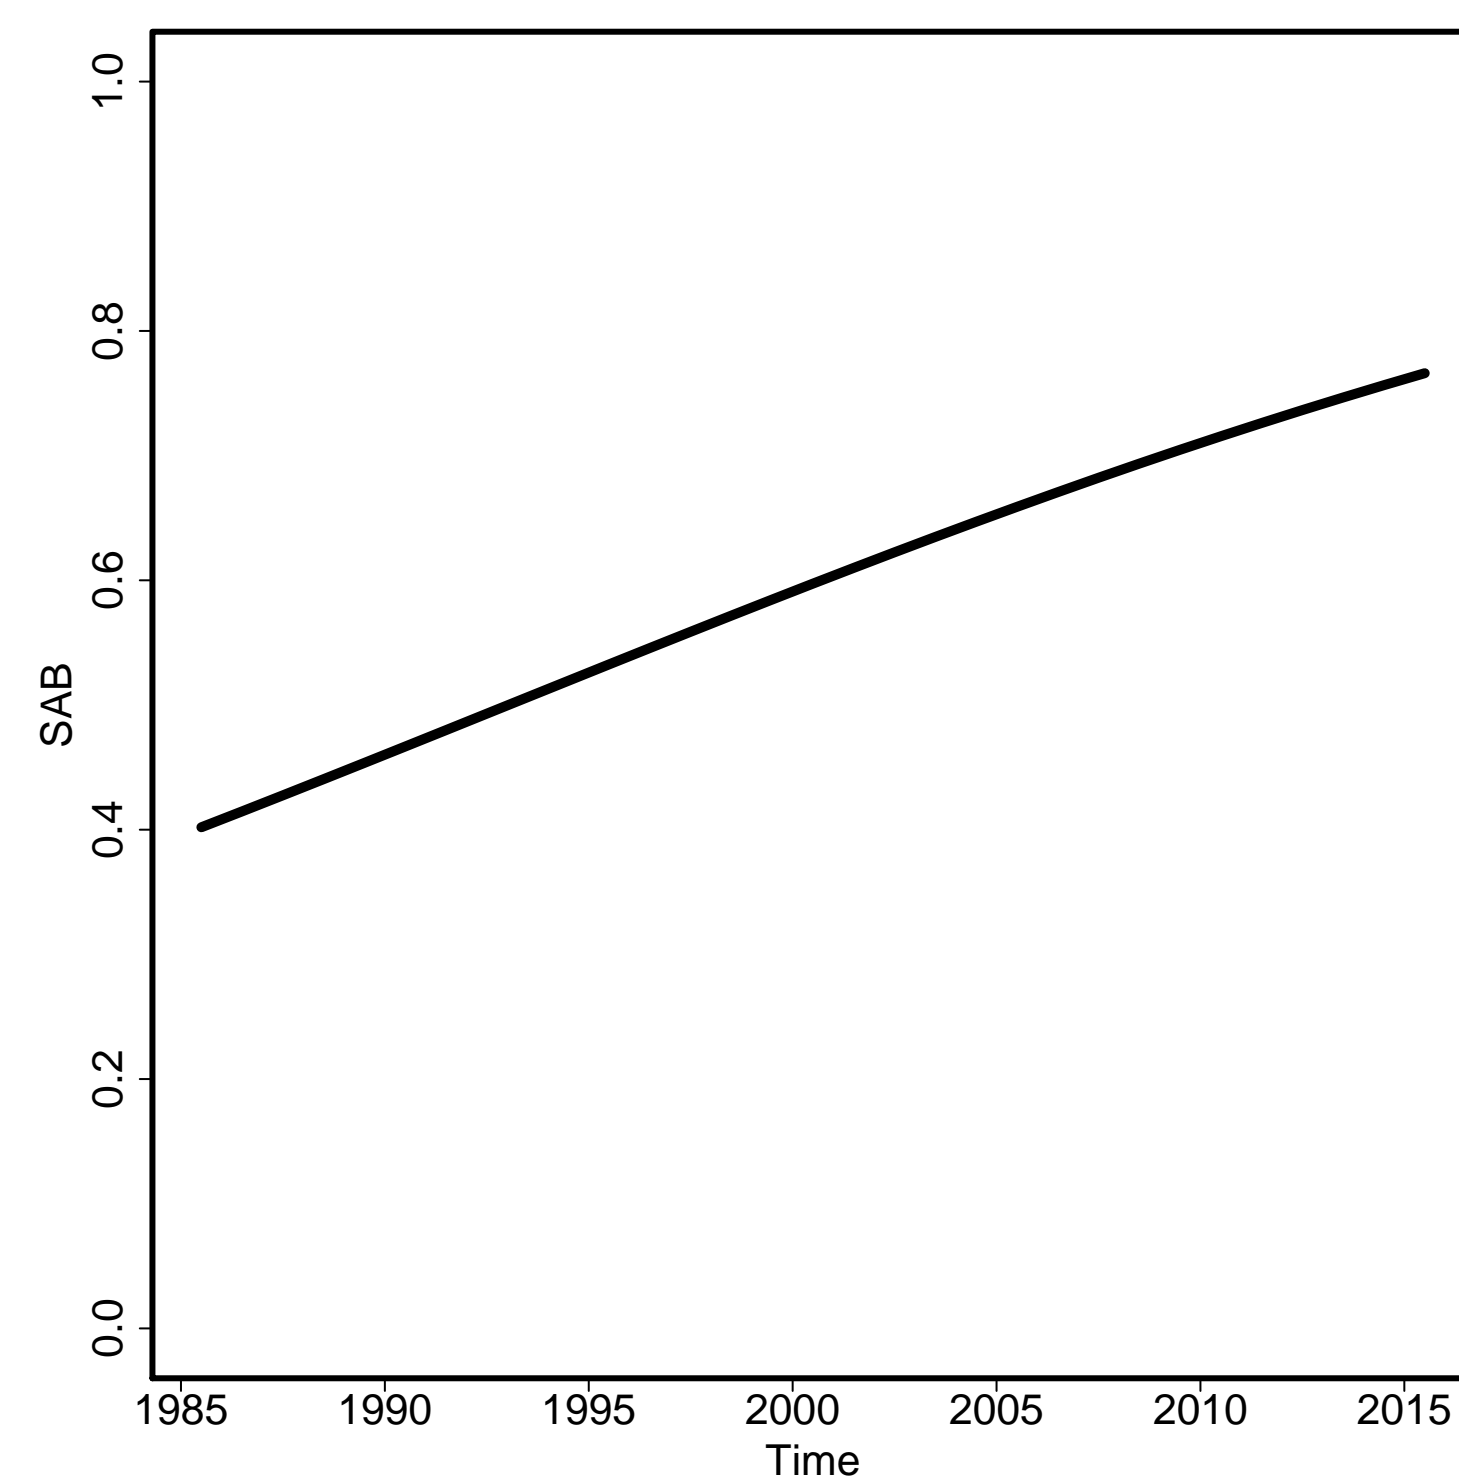

Envelope/Births

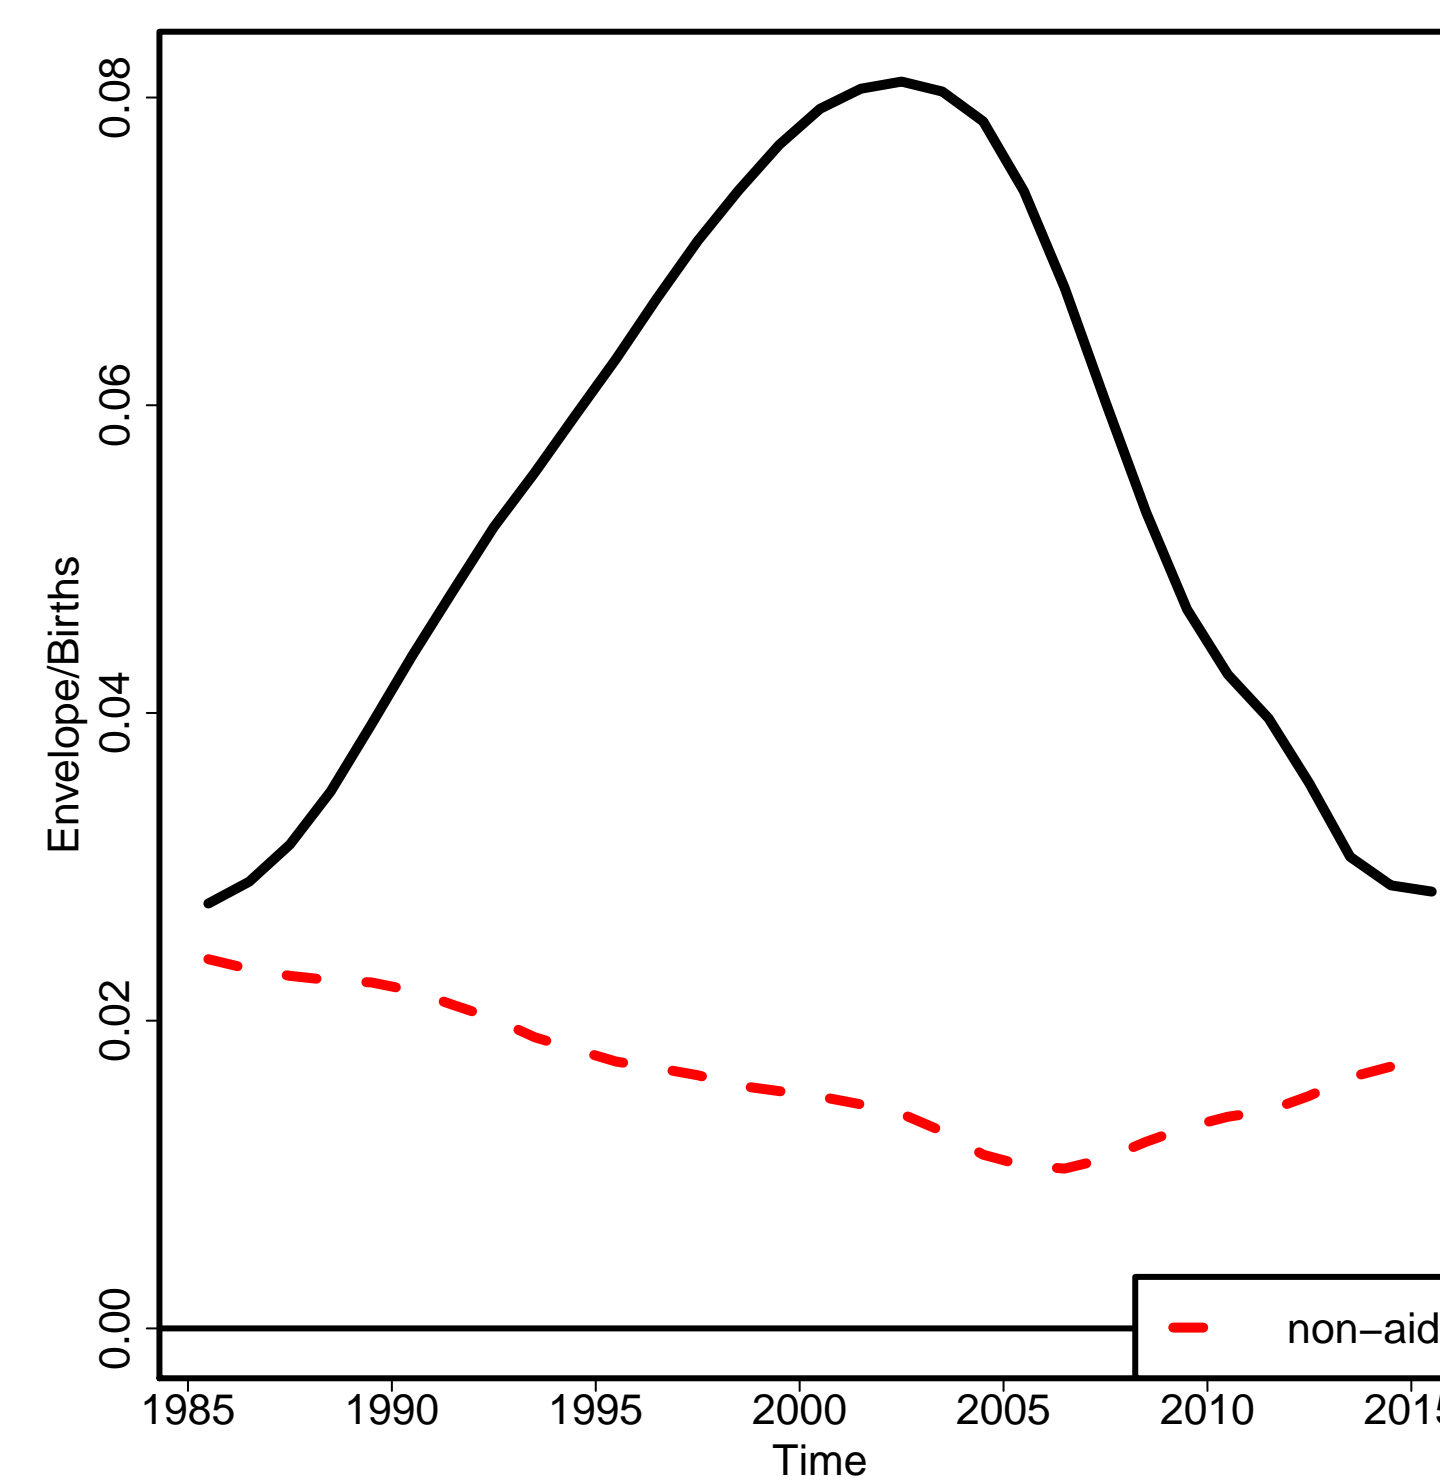

Non-aids MMR

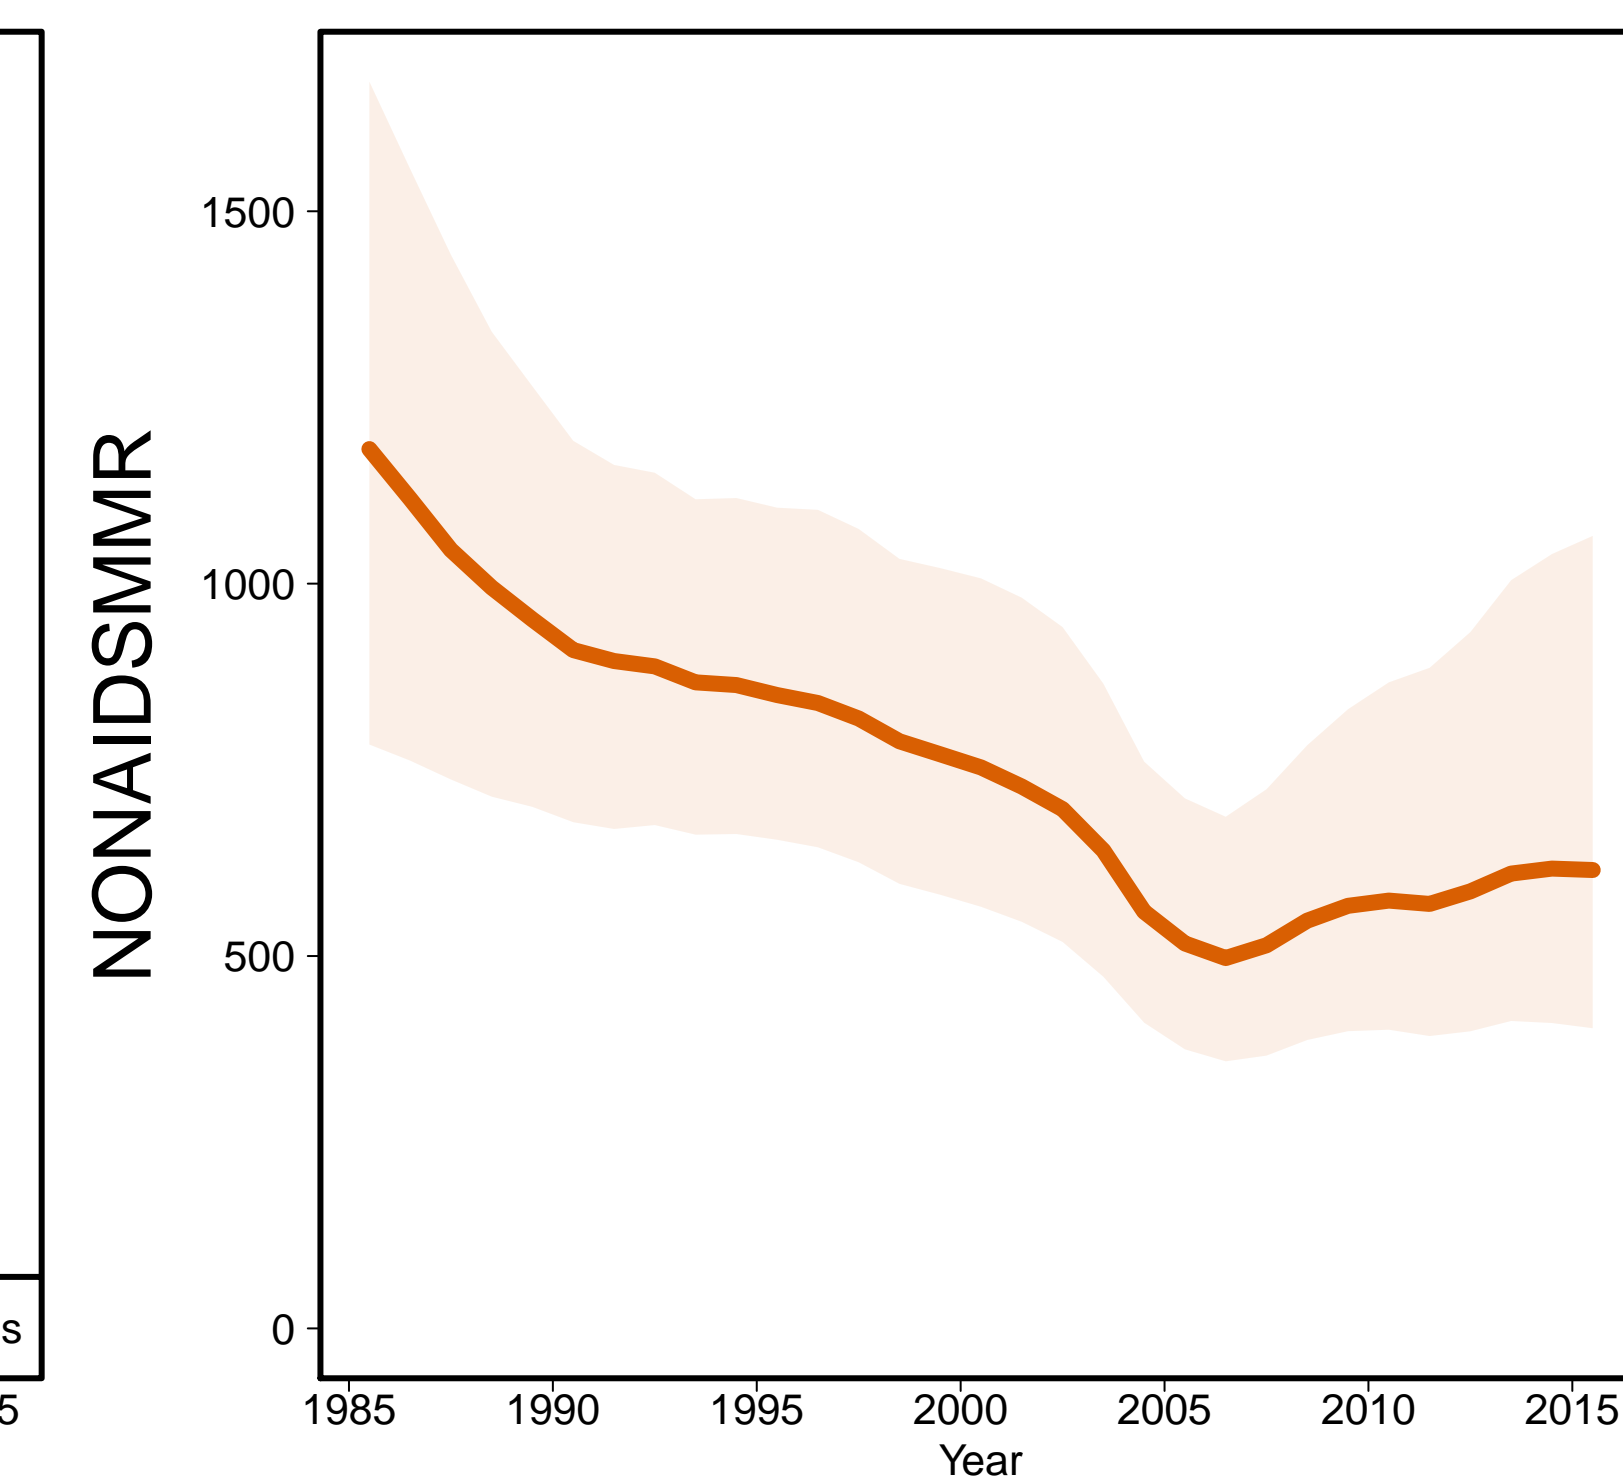

Aids MMR

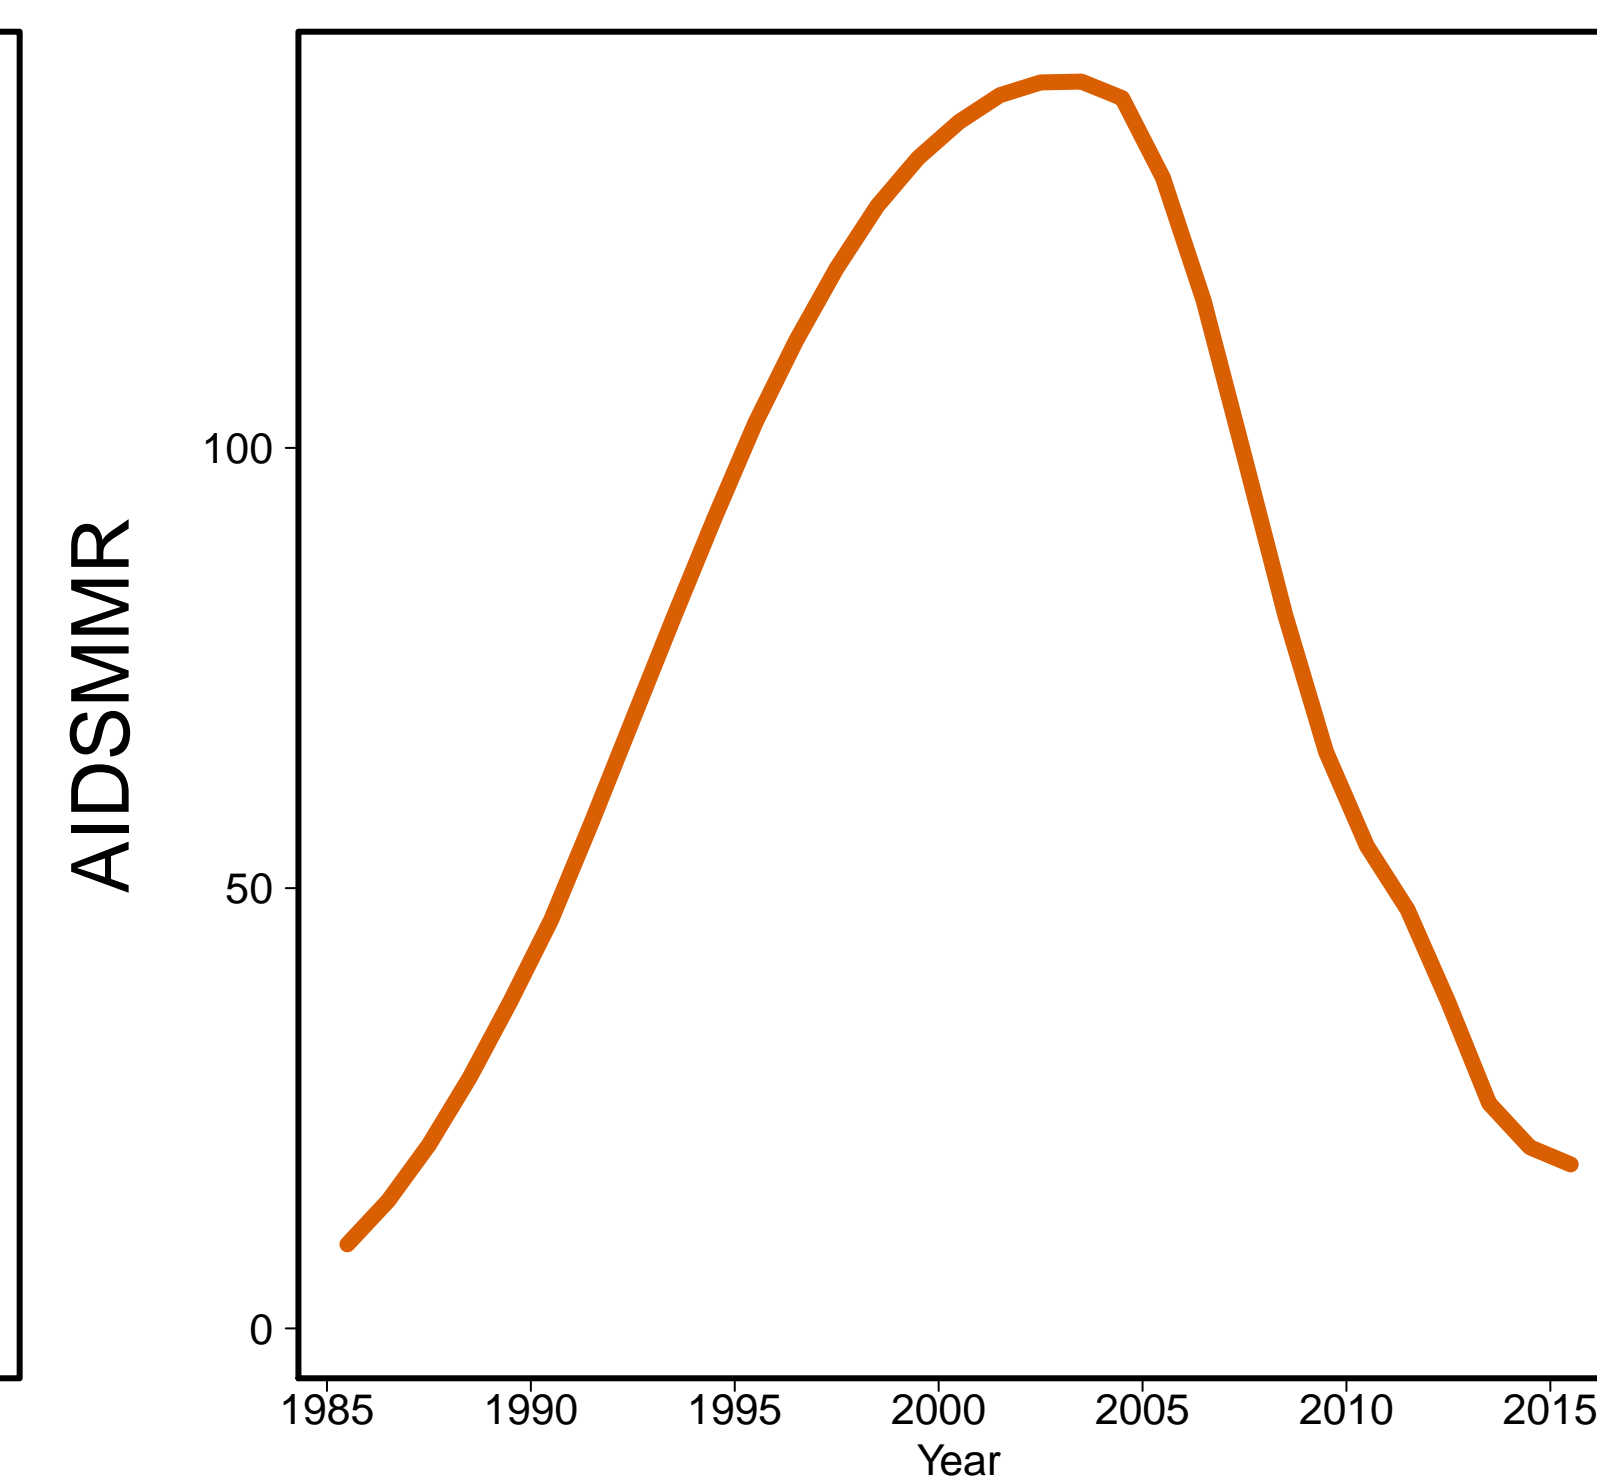

Malaysia [MYS]  
(South-Eastern Asia / Oceania)

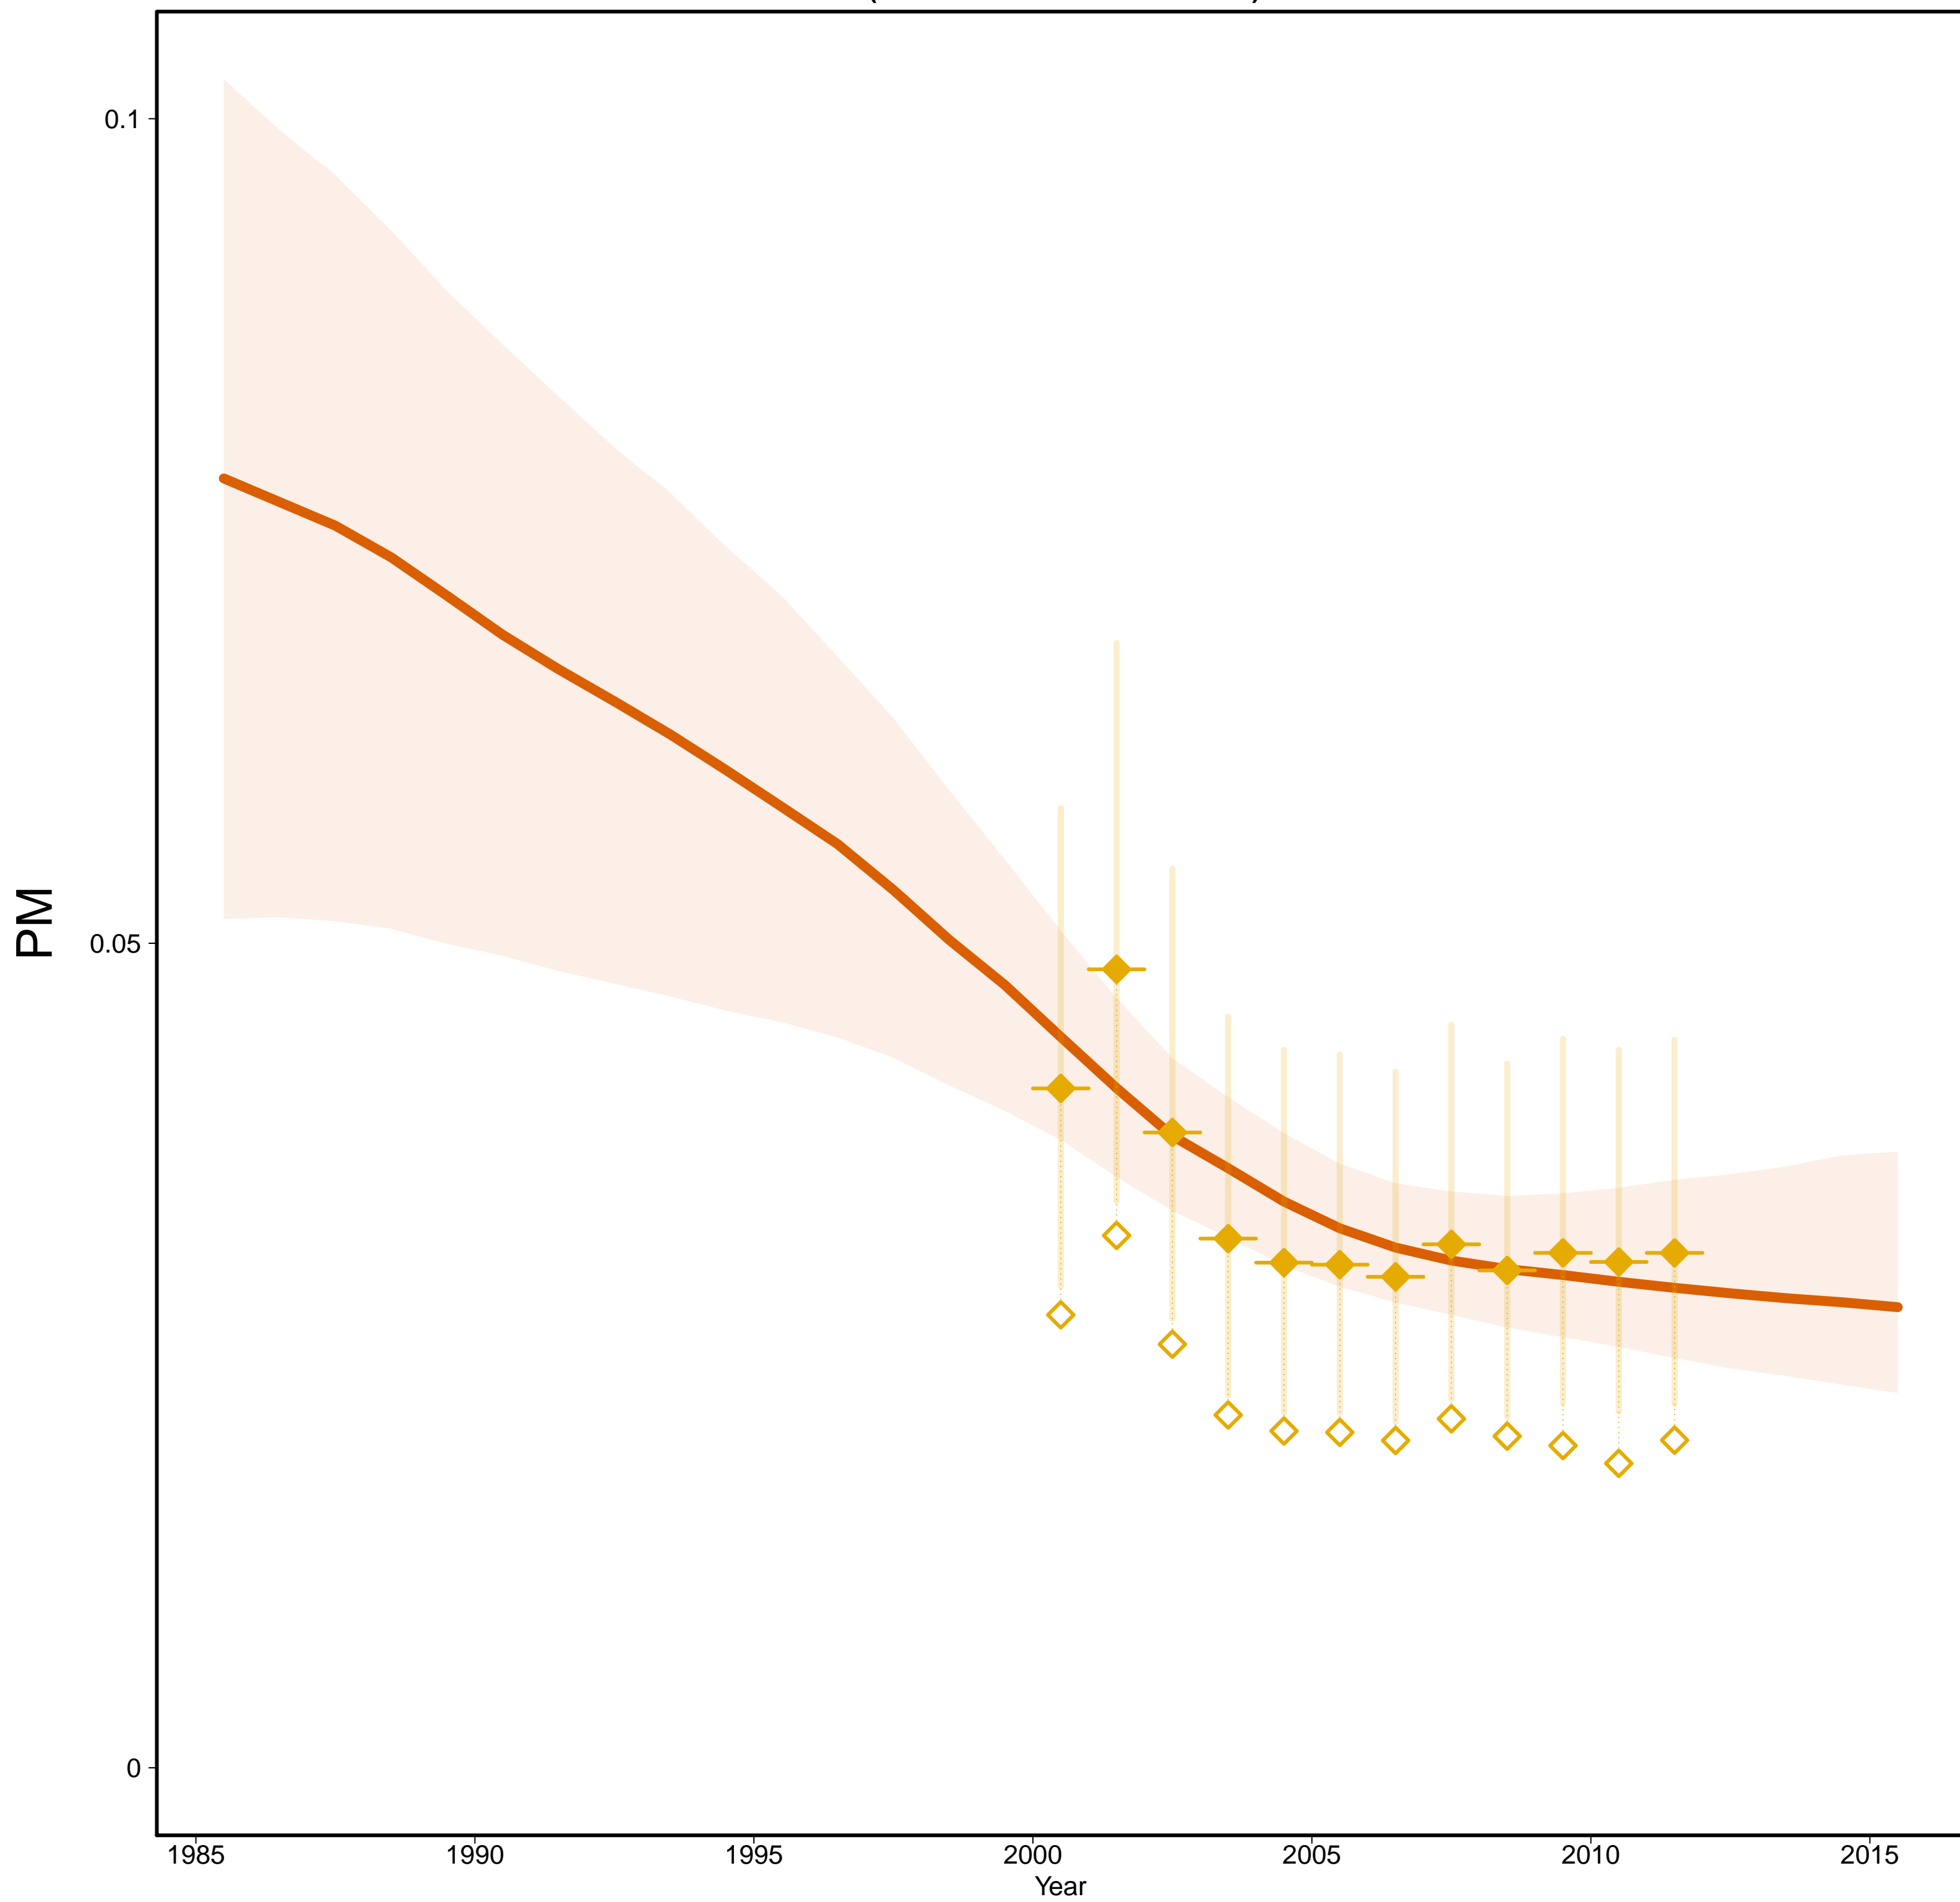

Malaysia [MYS]  
(South-Eastern Asia / Oceania)

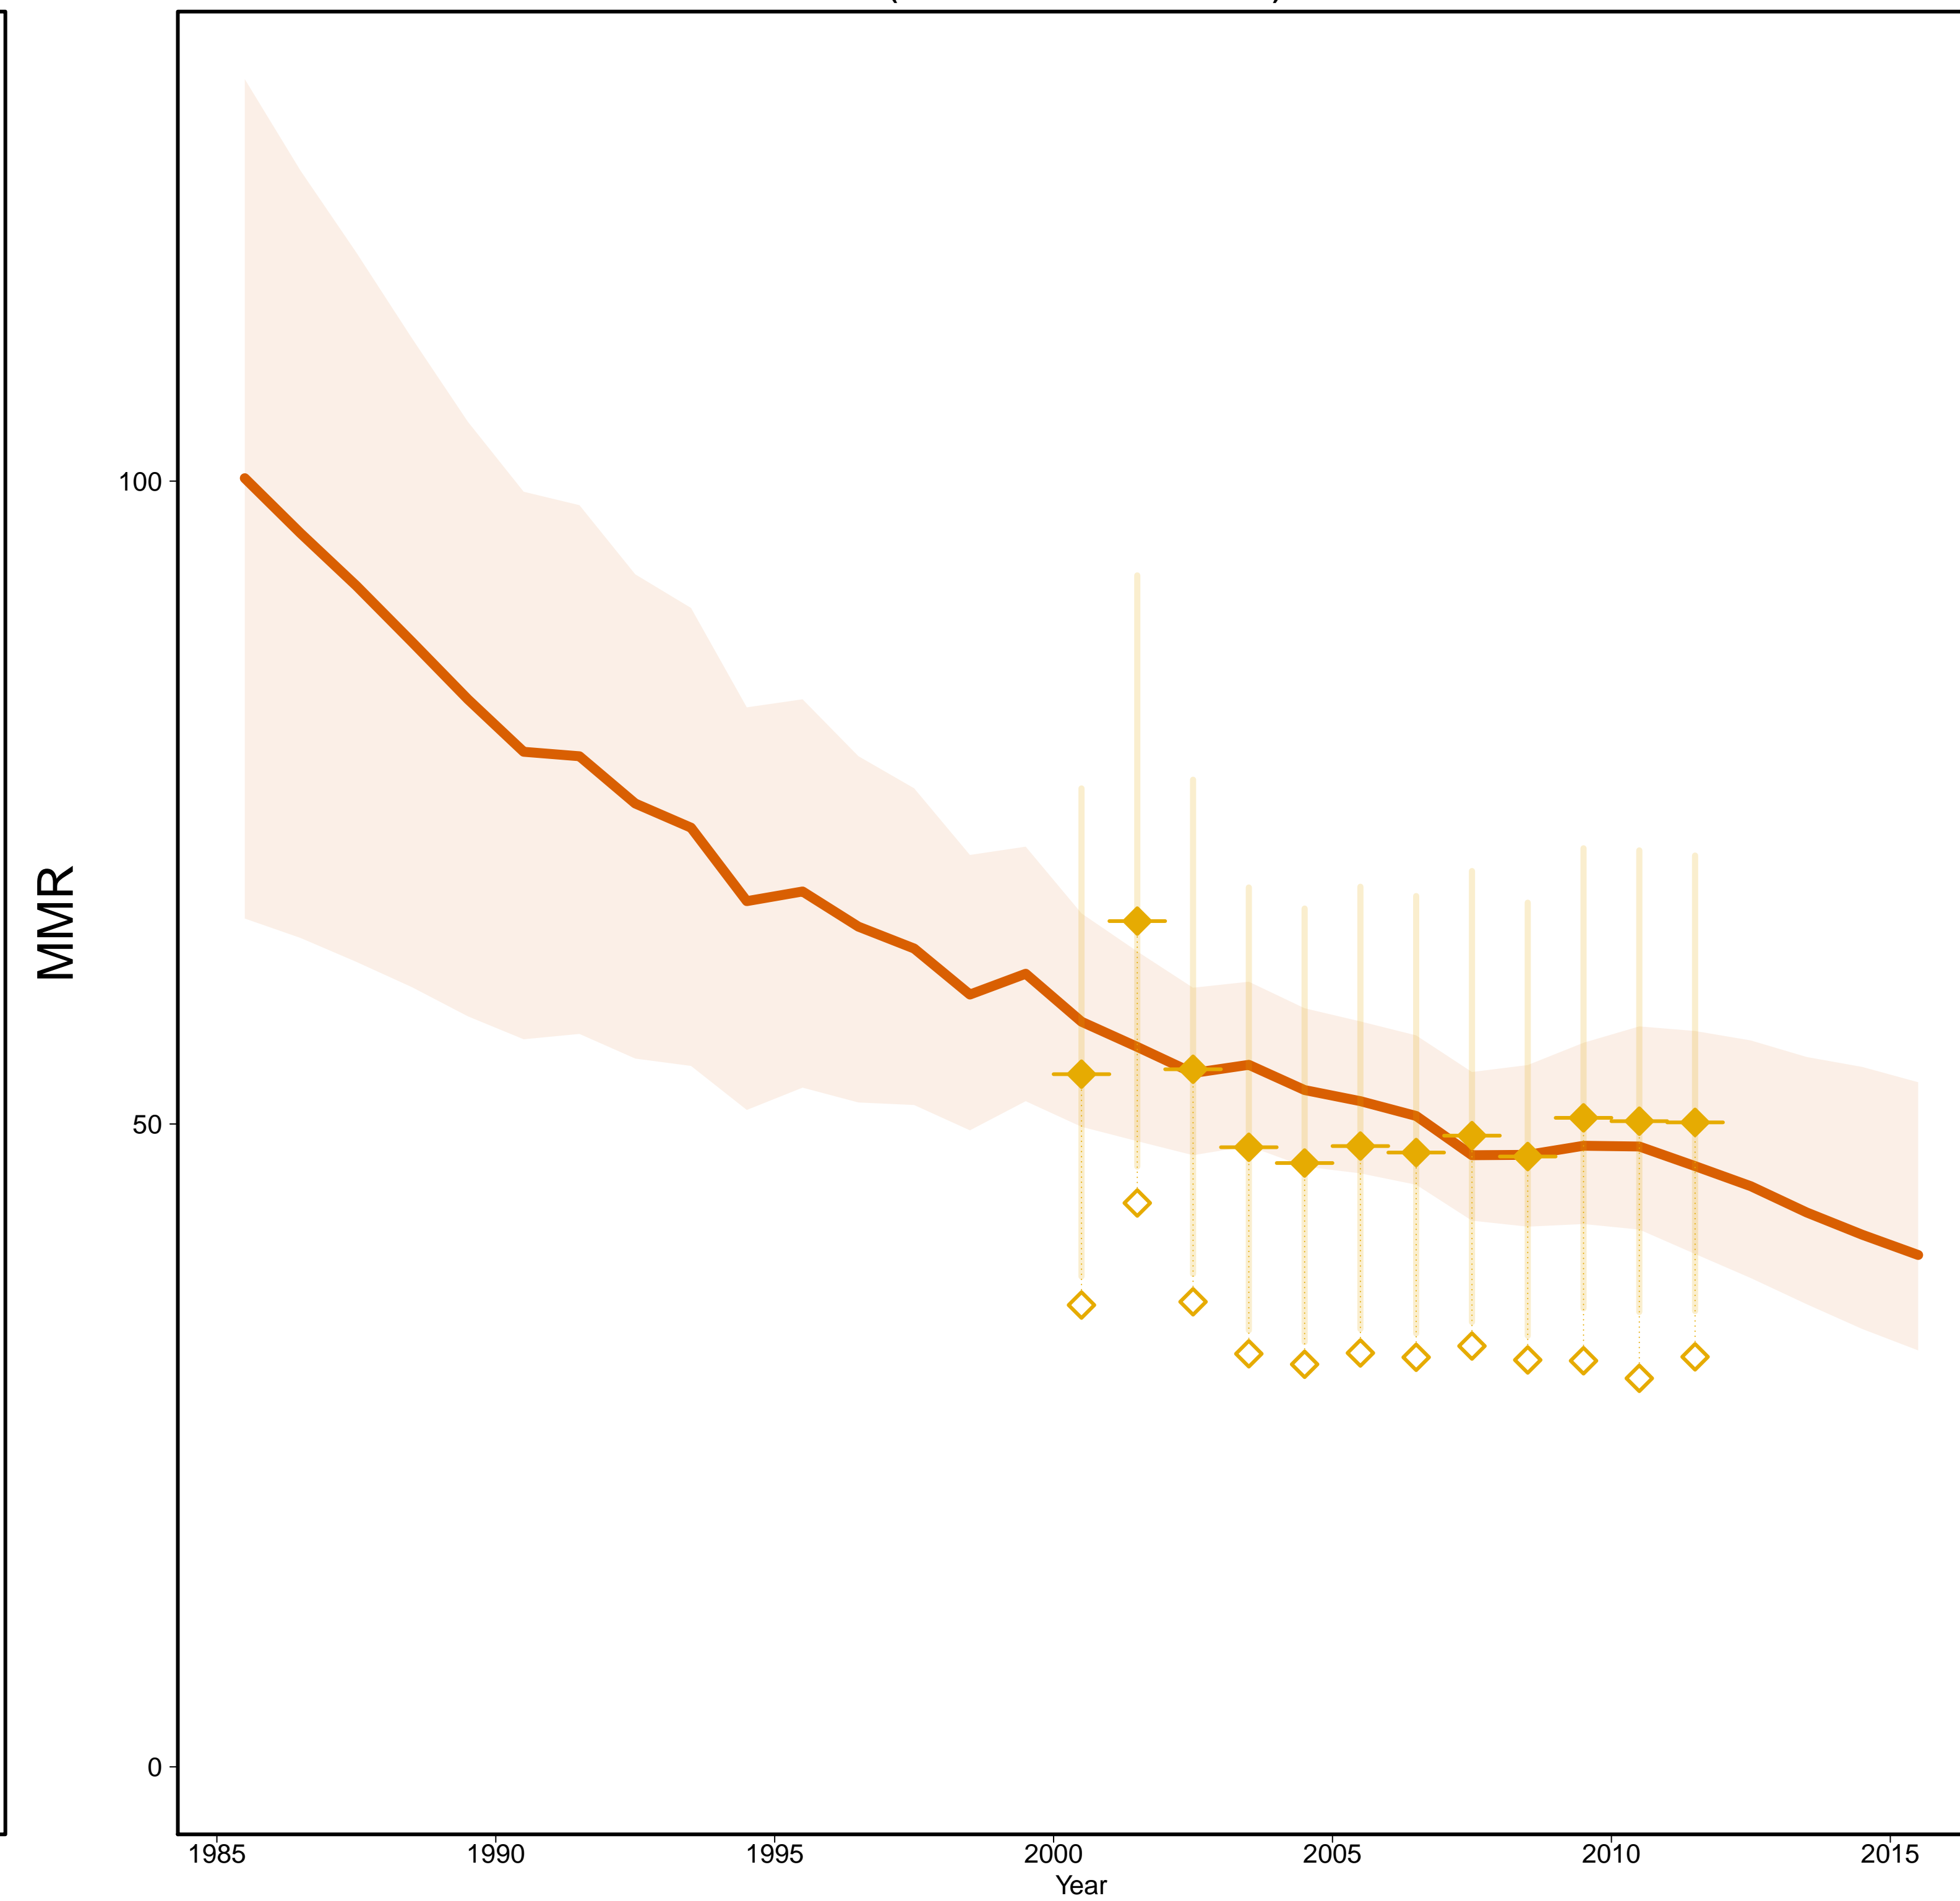

- Estimates —
- MMR Database 2015 —
- ◇ Observed Data
- ◆ Adjusted Data
- Data type —
- ◆ VR

Gross Domestic Product

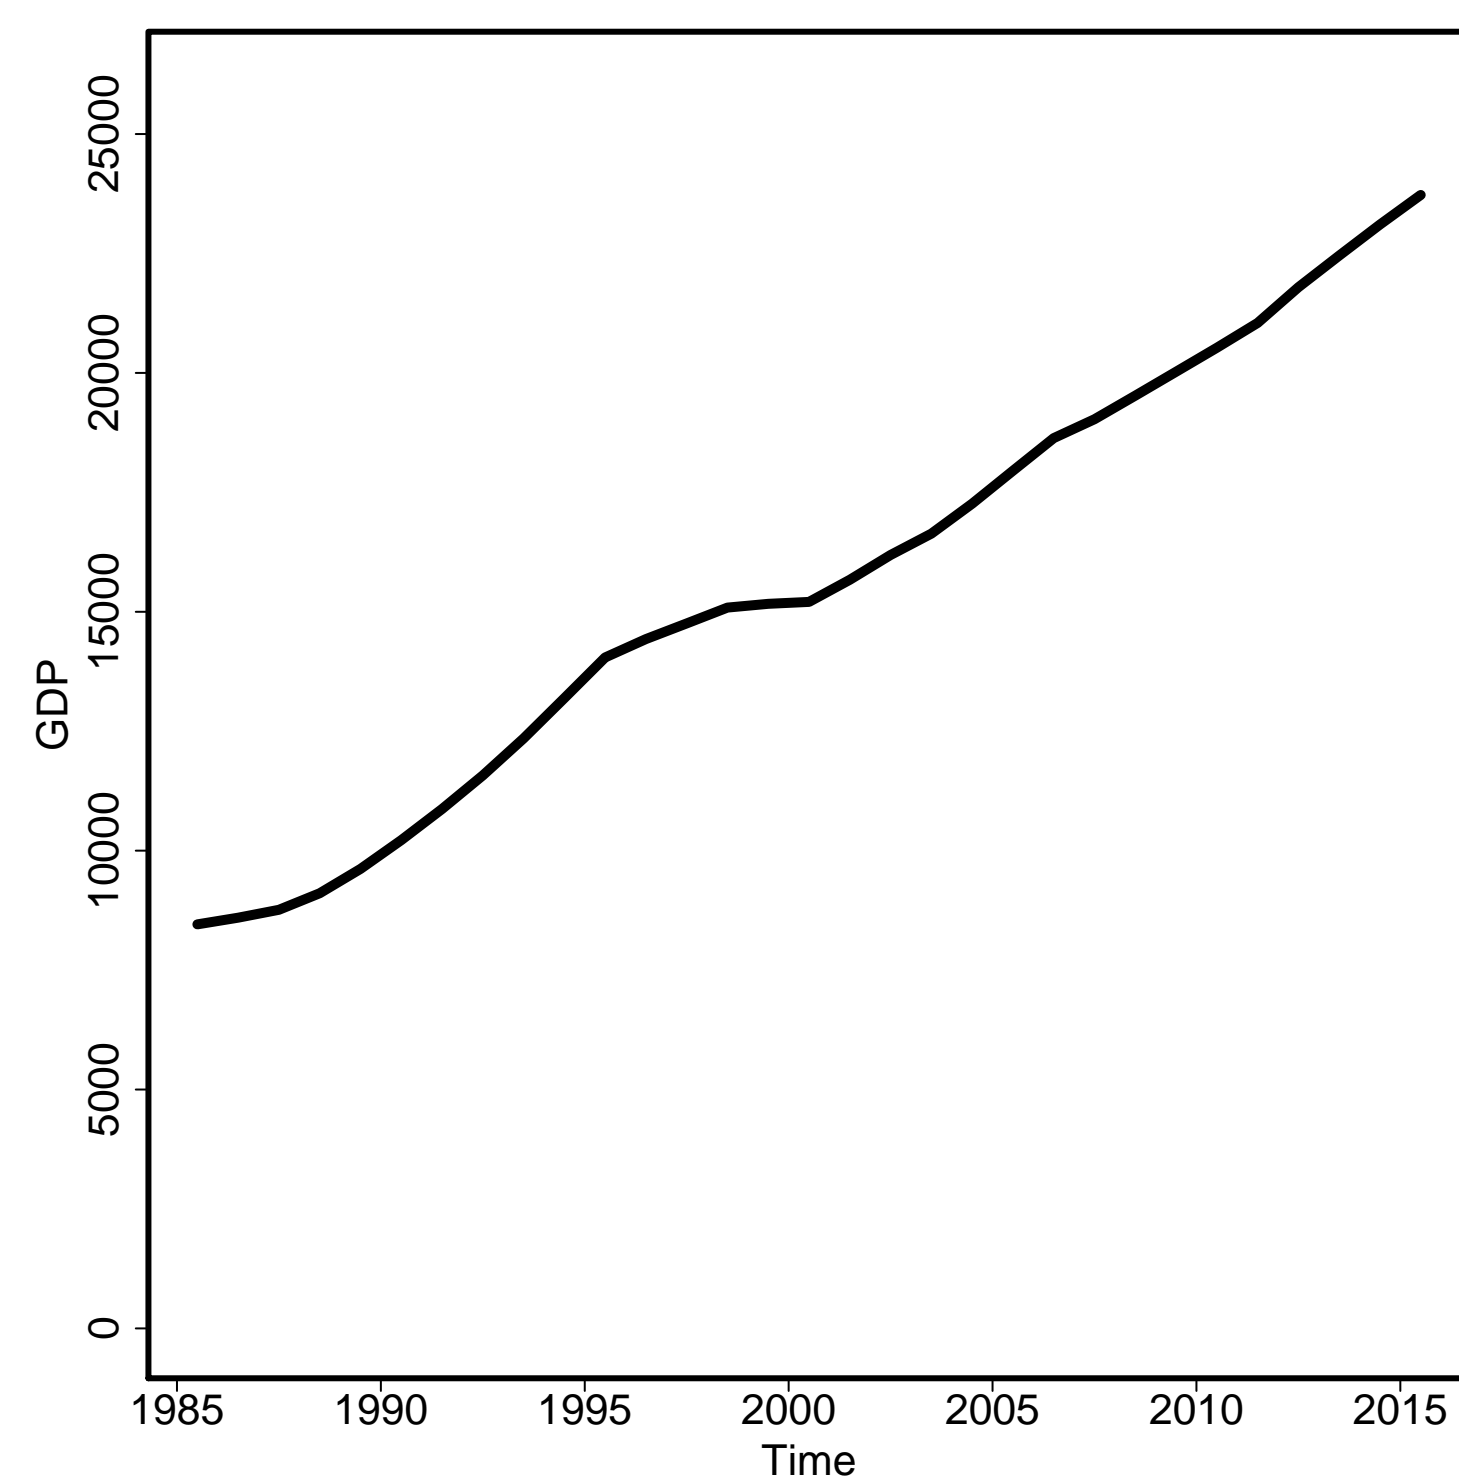

General Fertility Rate

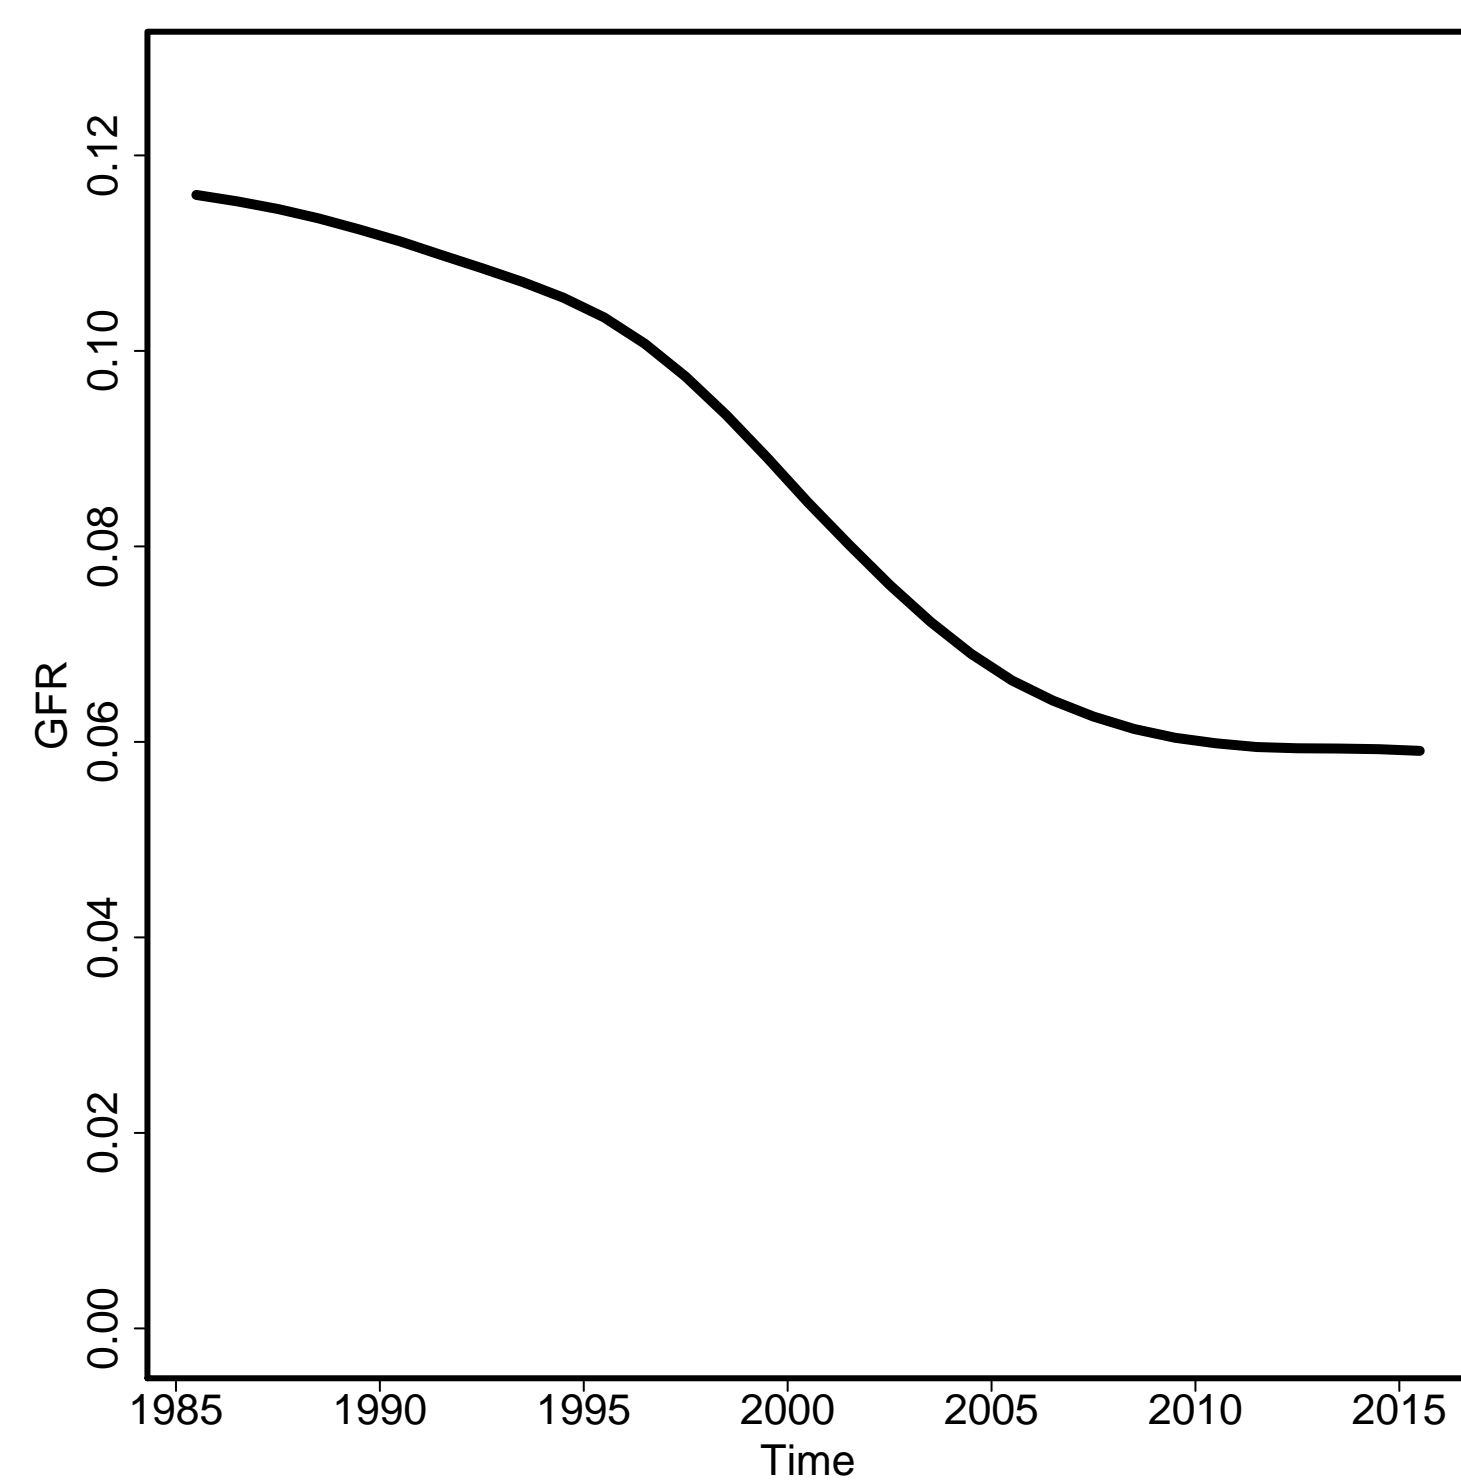

Skilled Attendance to Birth

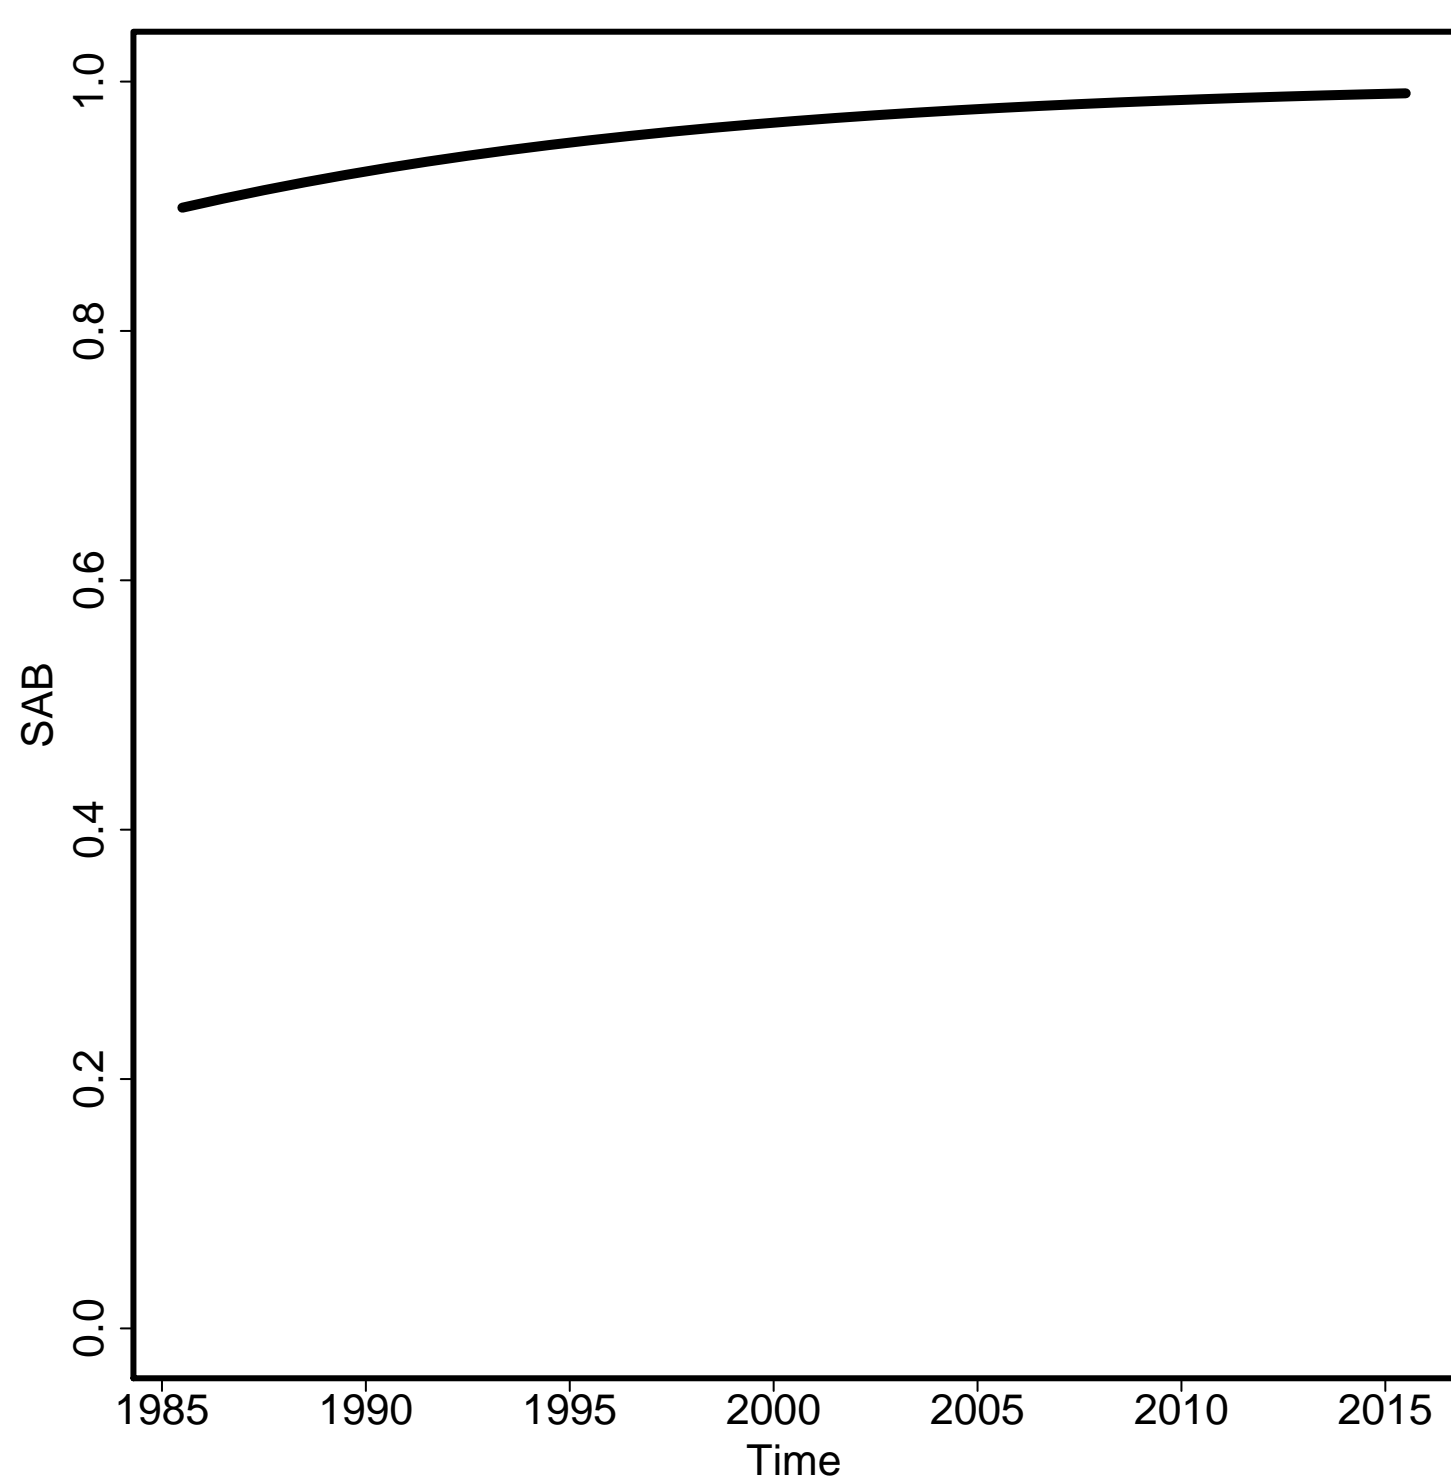

Envelope/Births

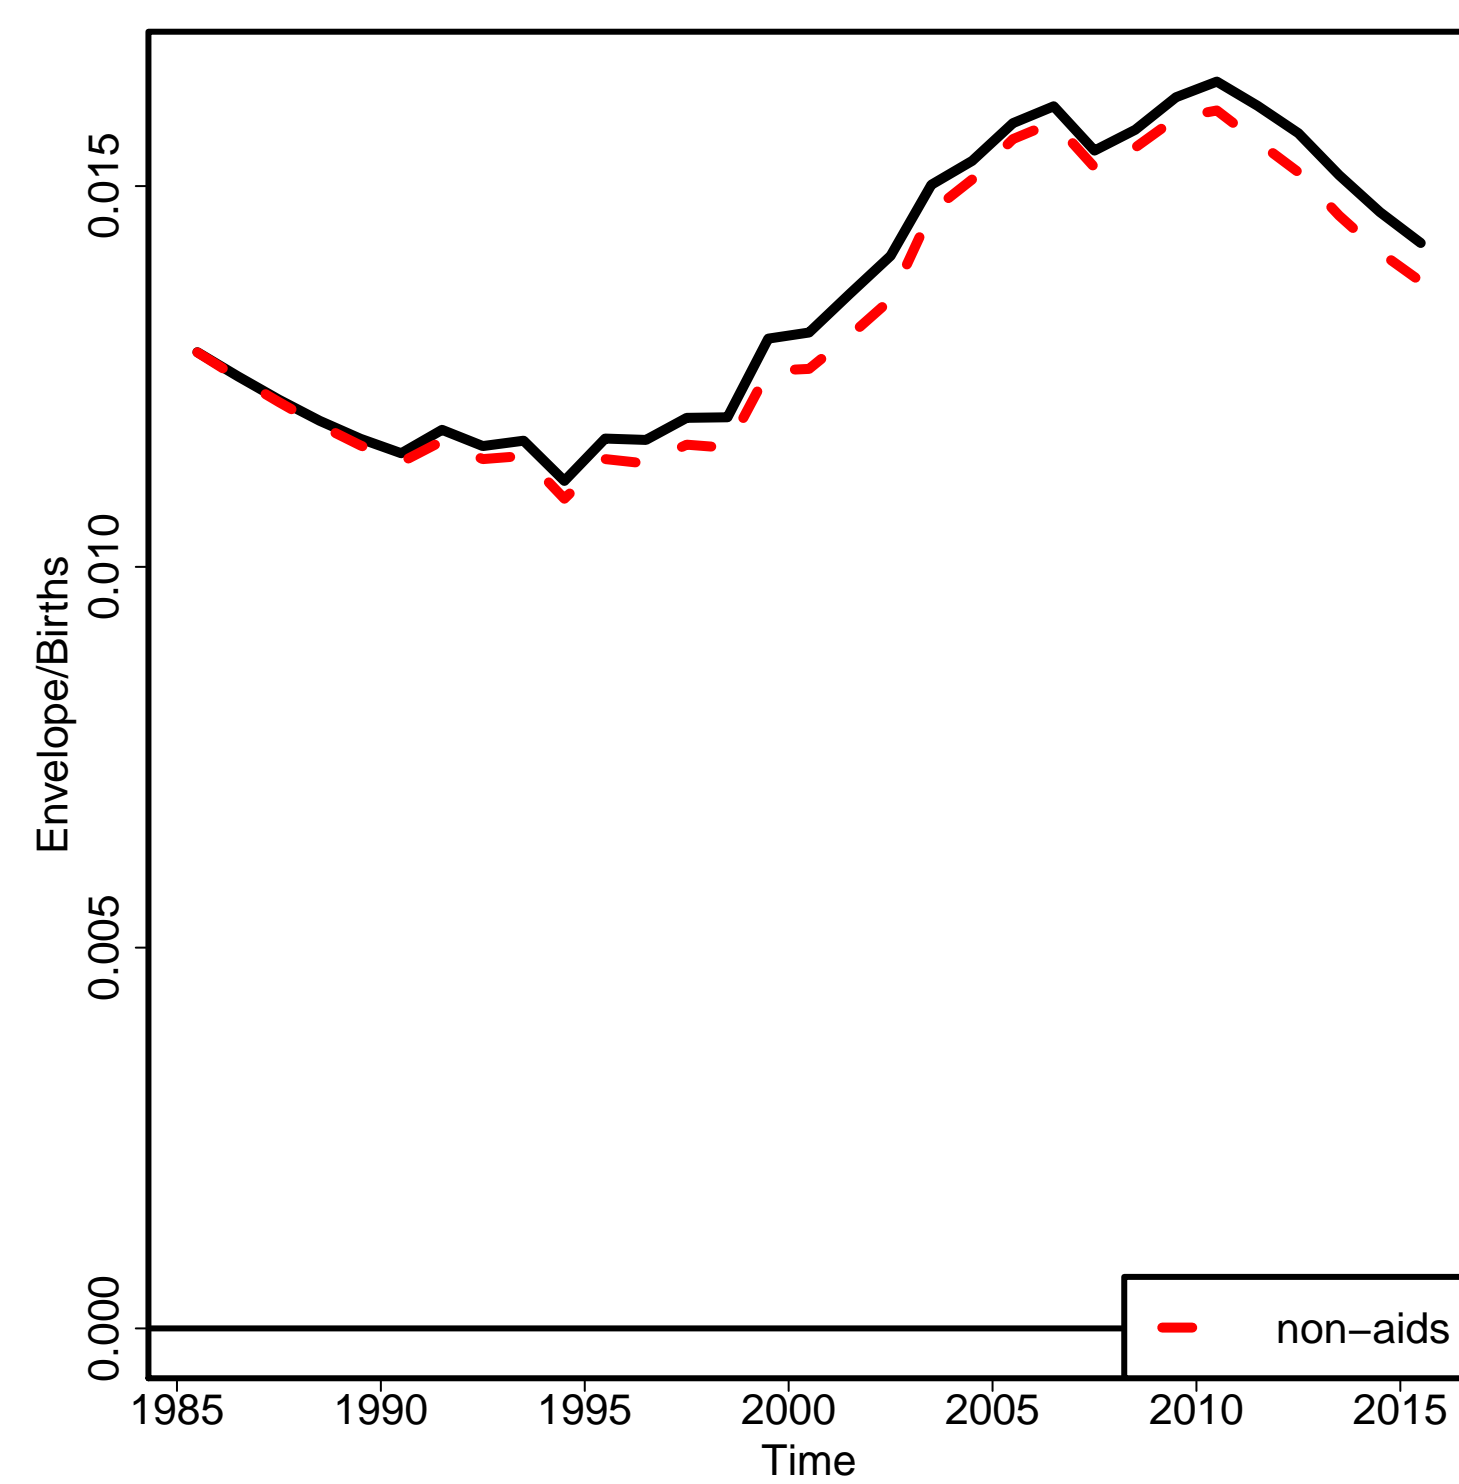

Non-aids MMR

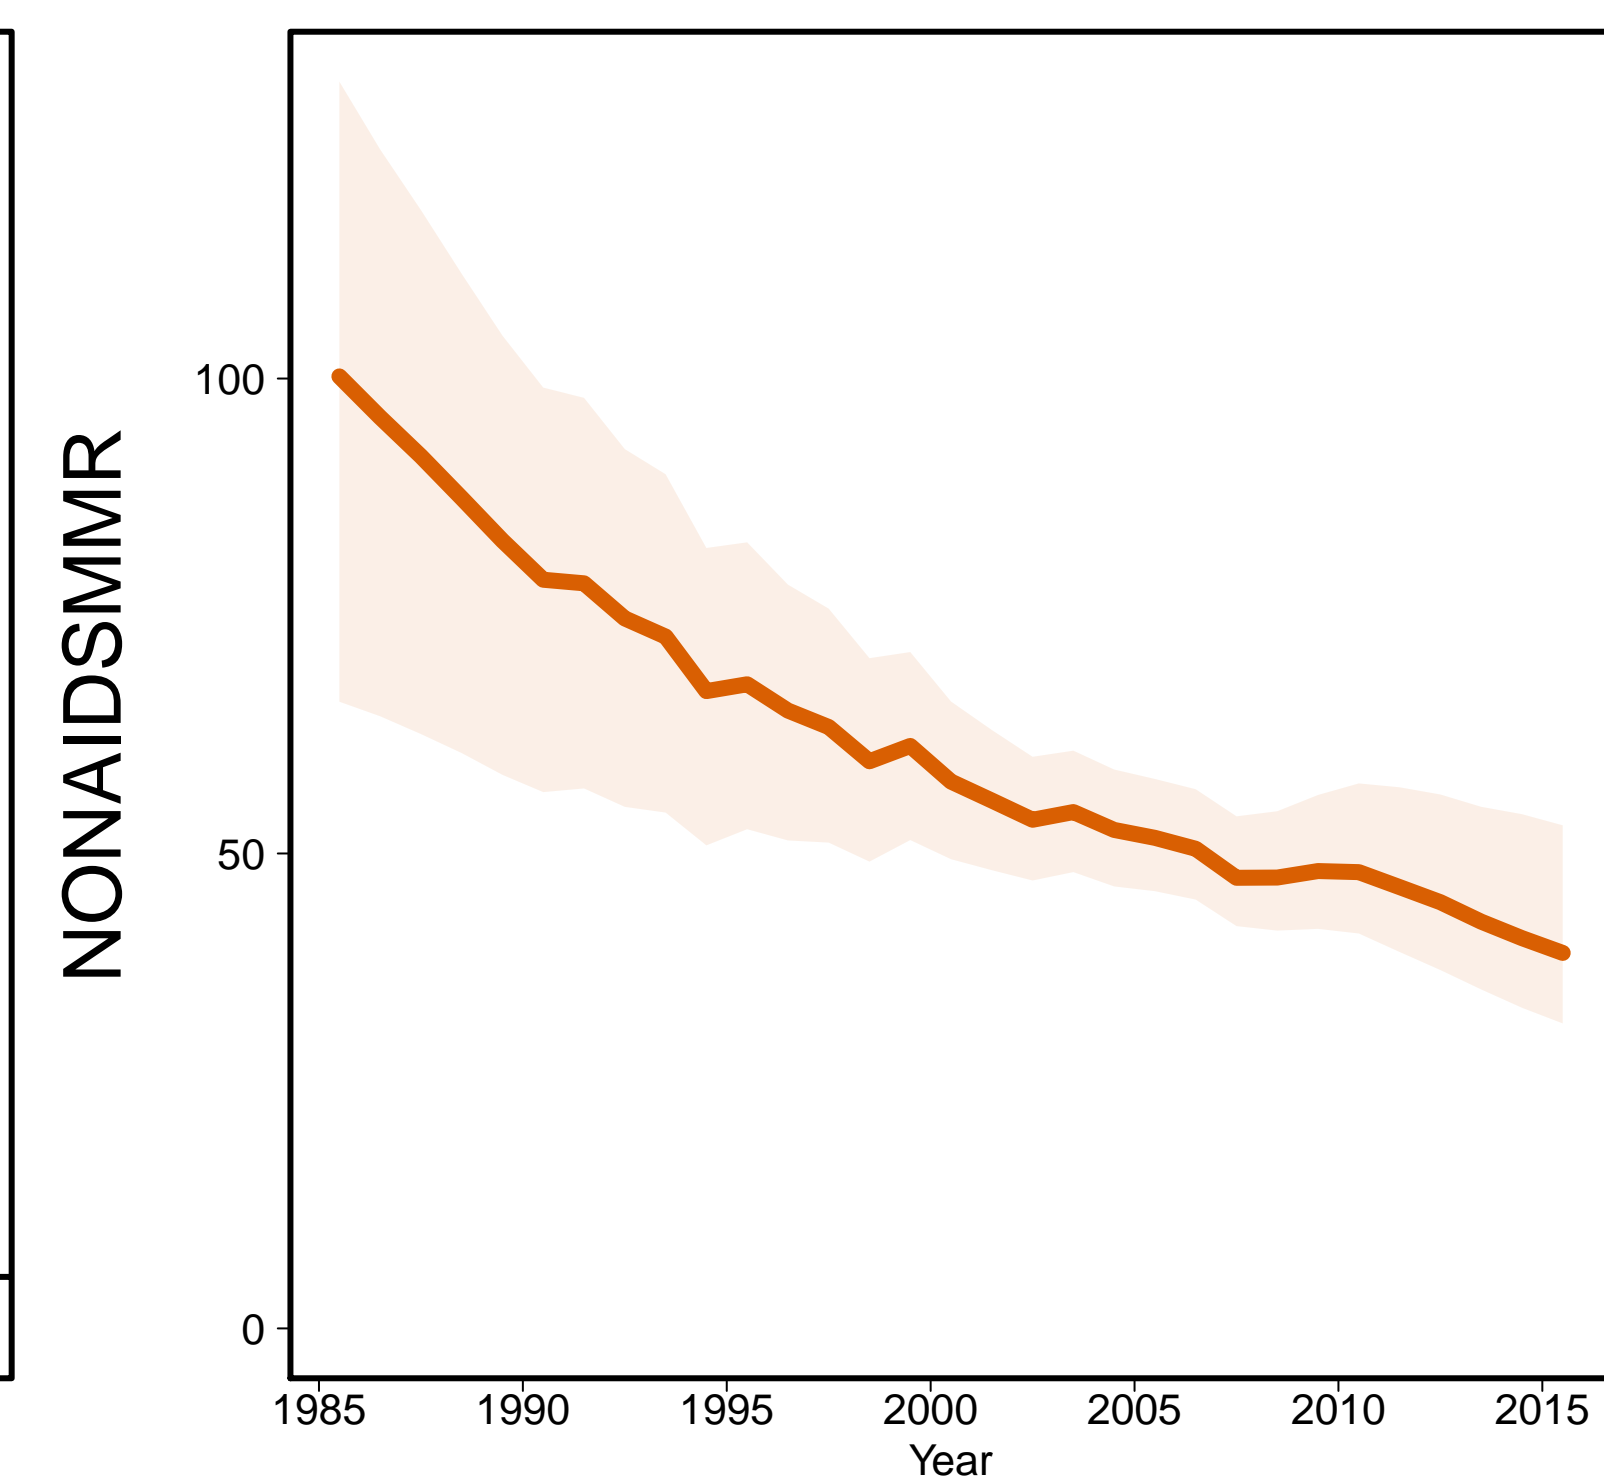

Aids MMR

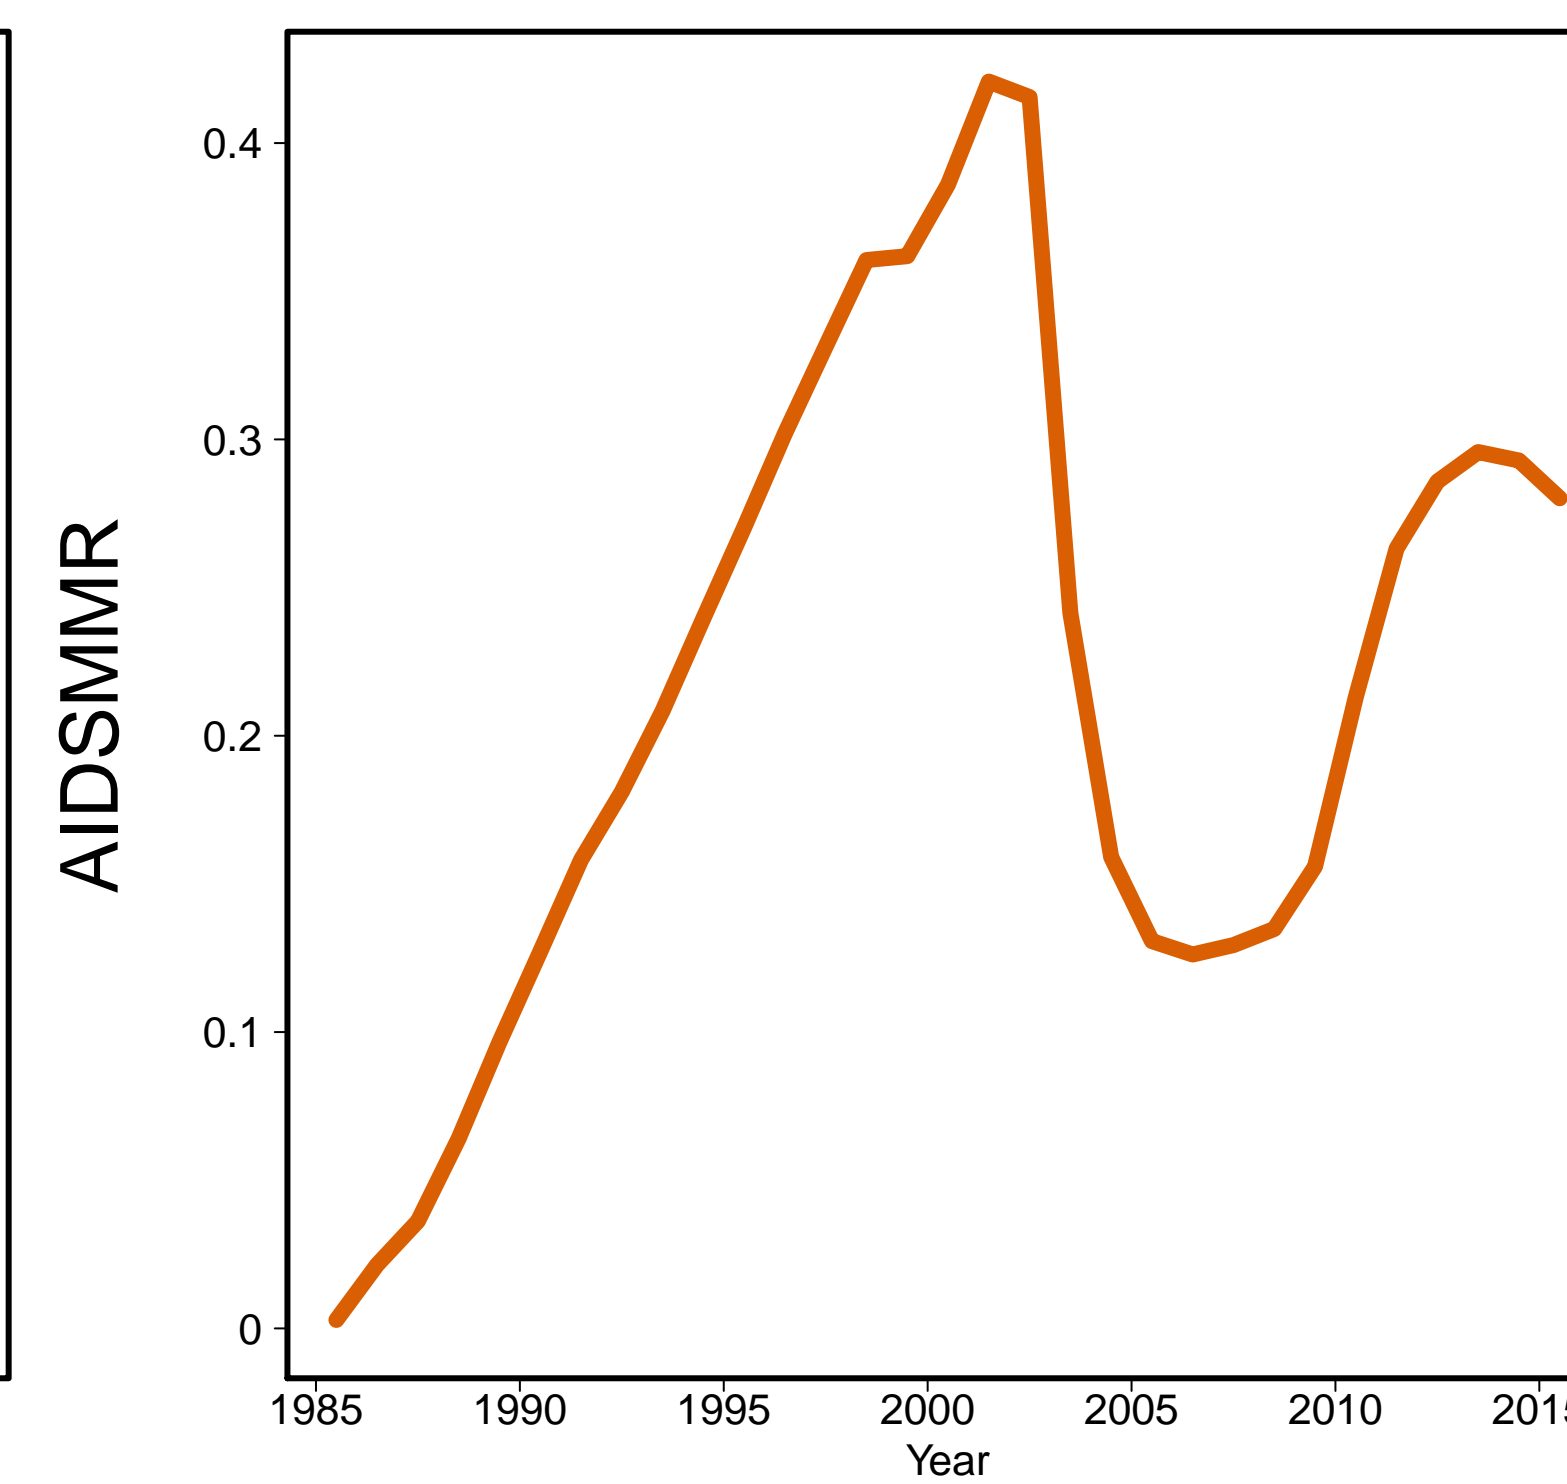

Maldives [MDV]  
(Southern Asia)

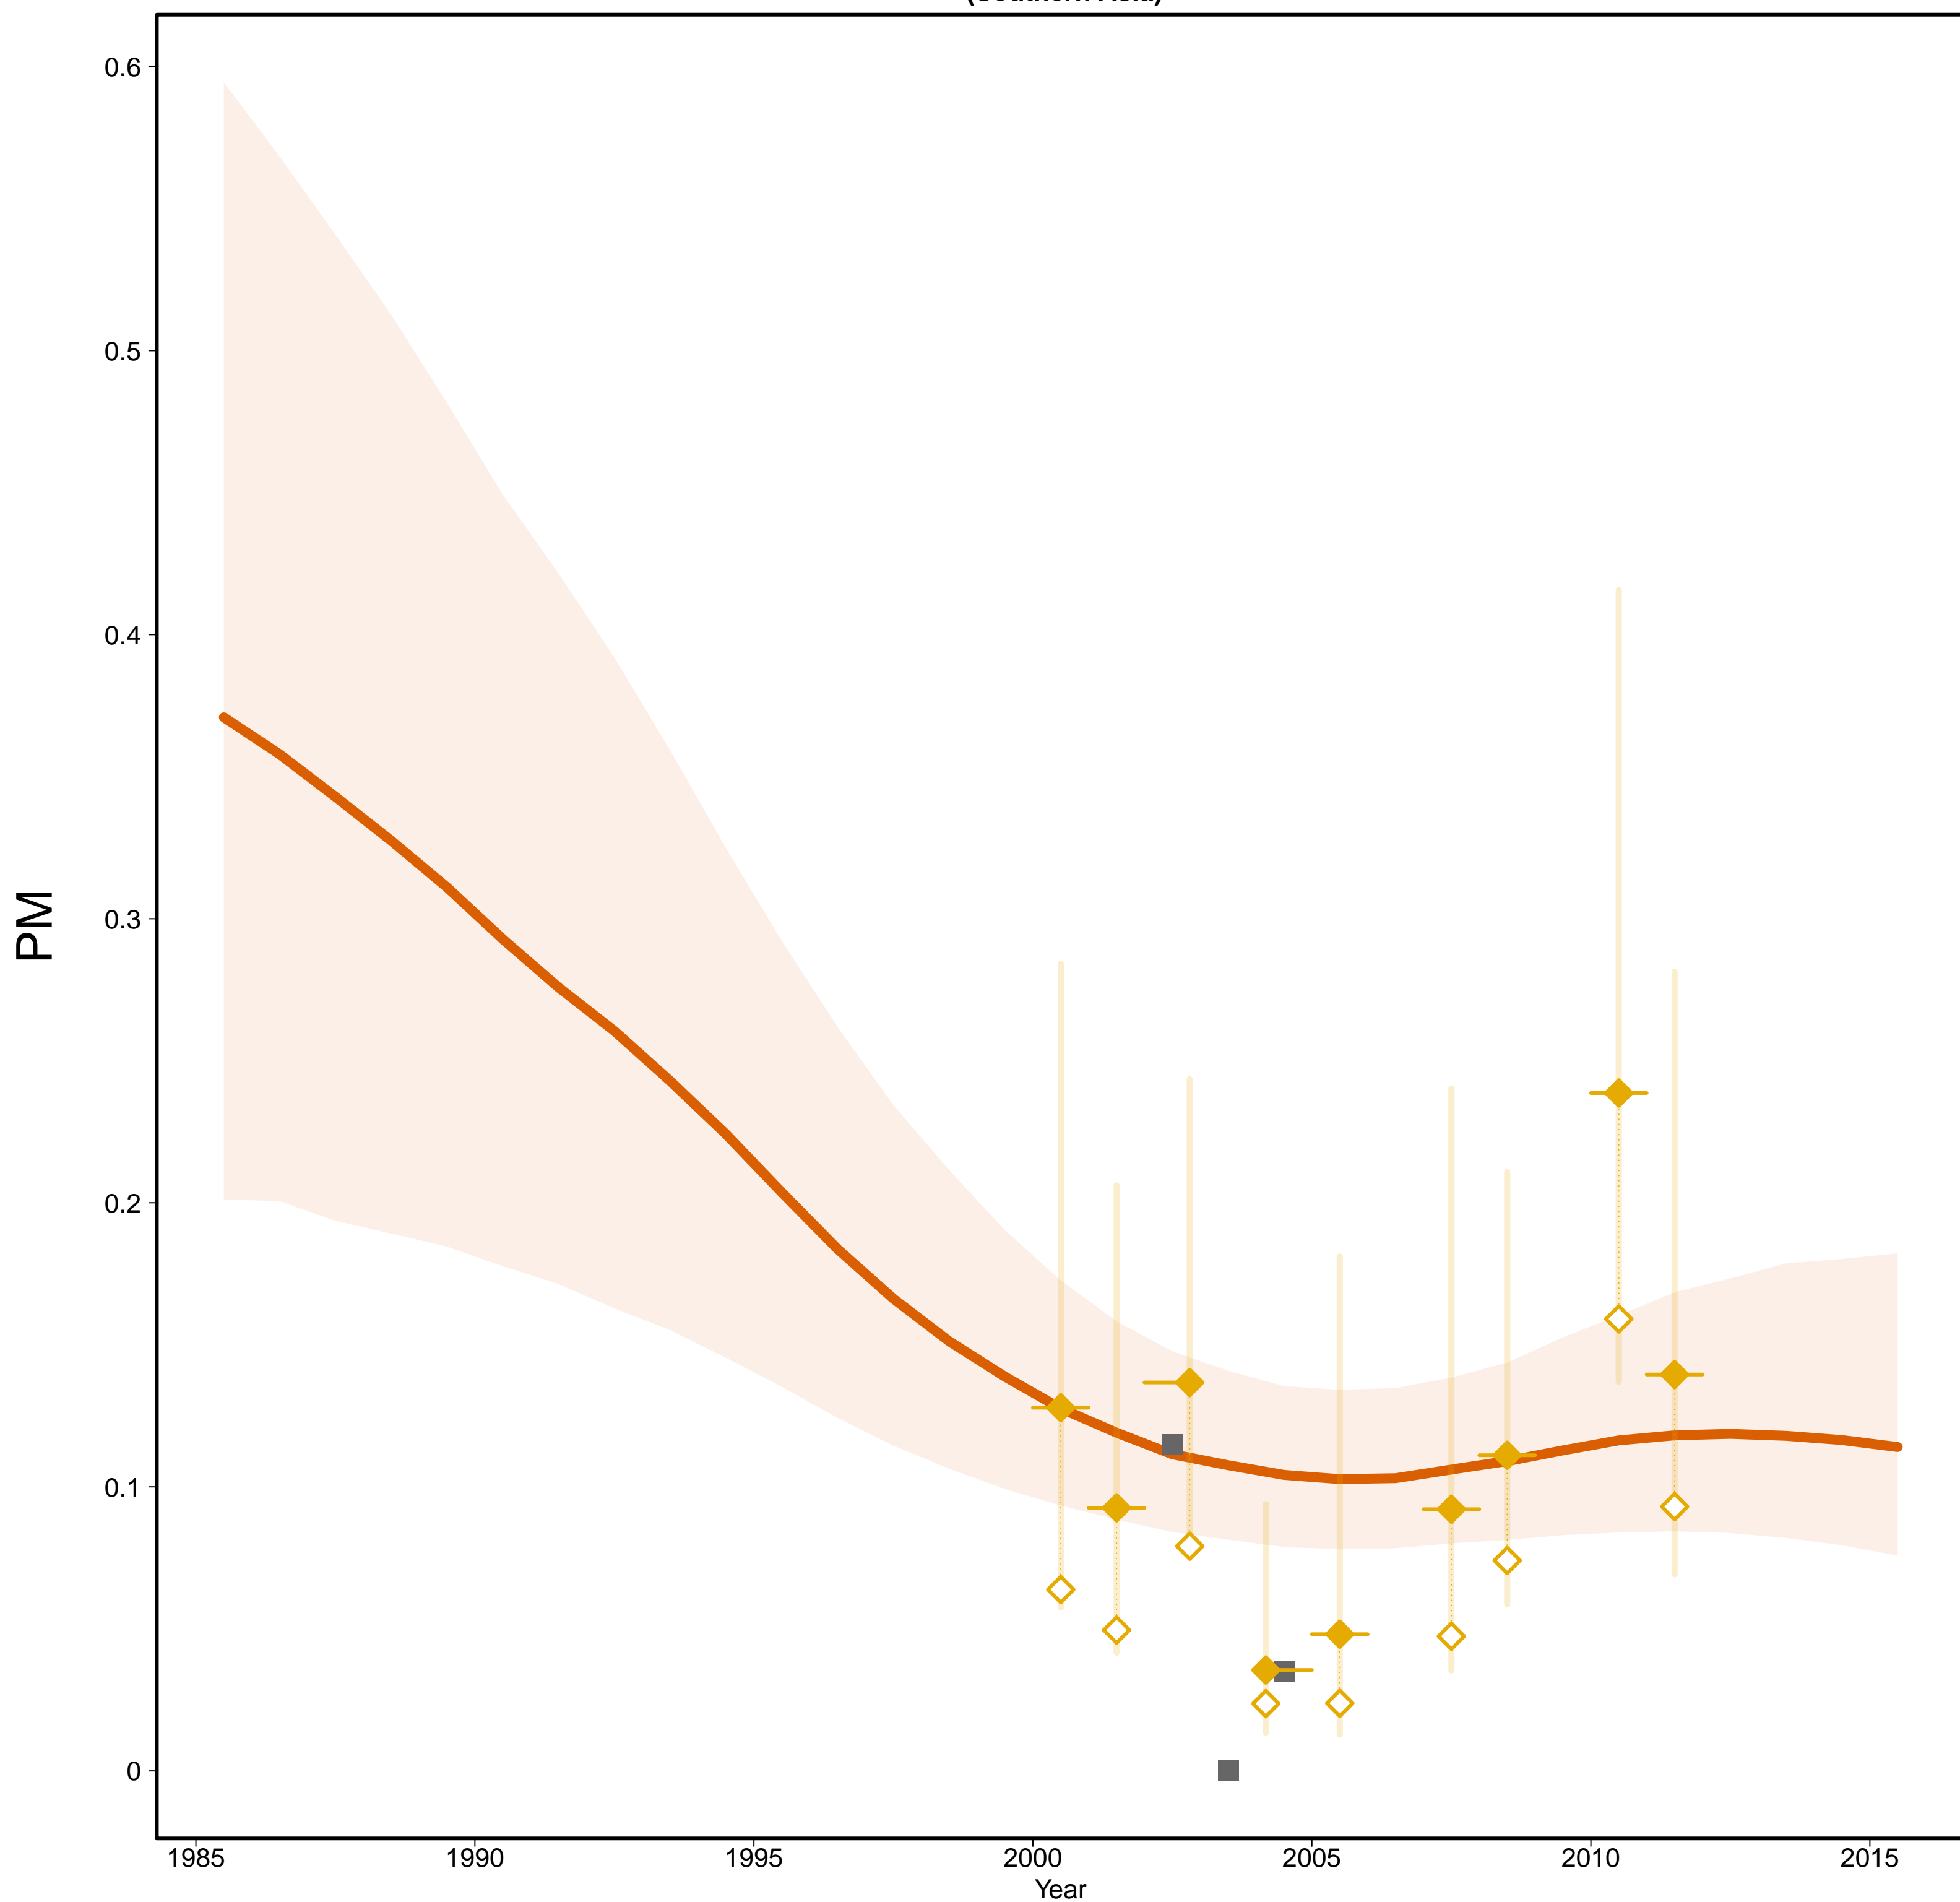

Maldives [MDV]  
(Southern Asia)

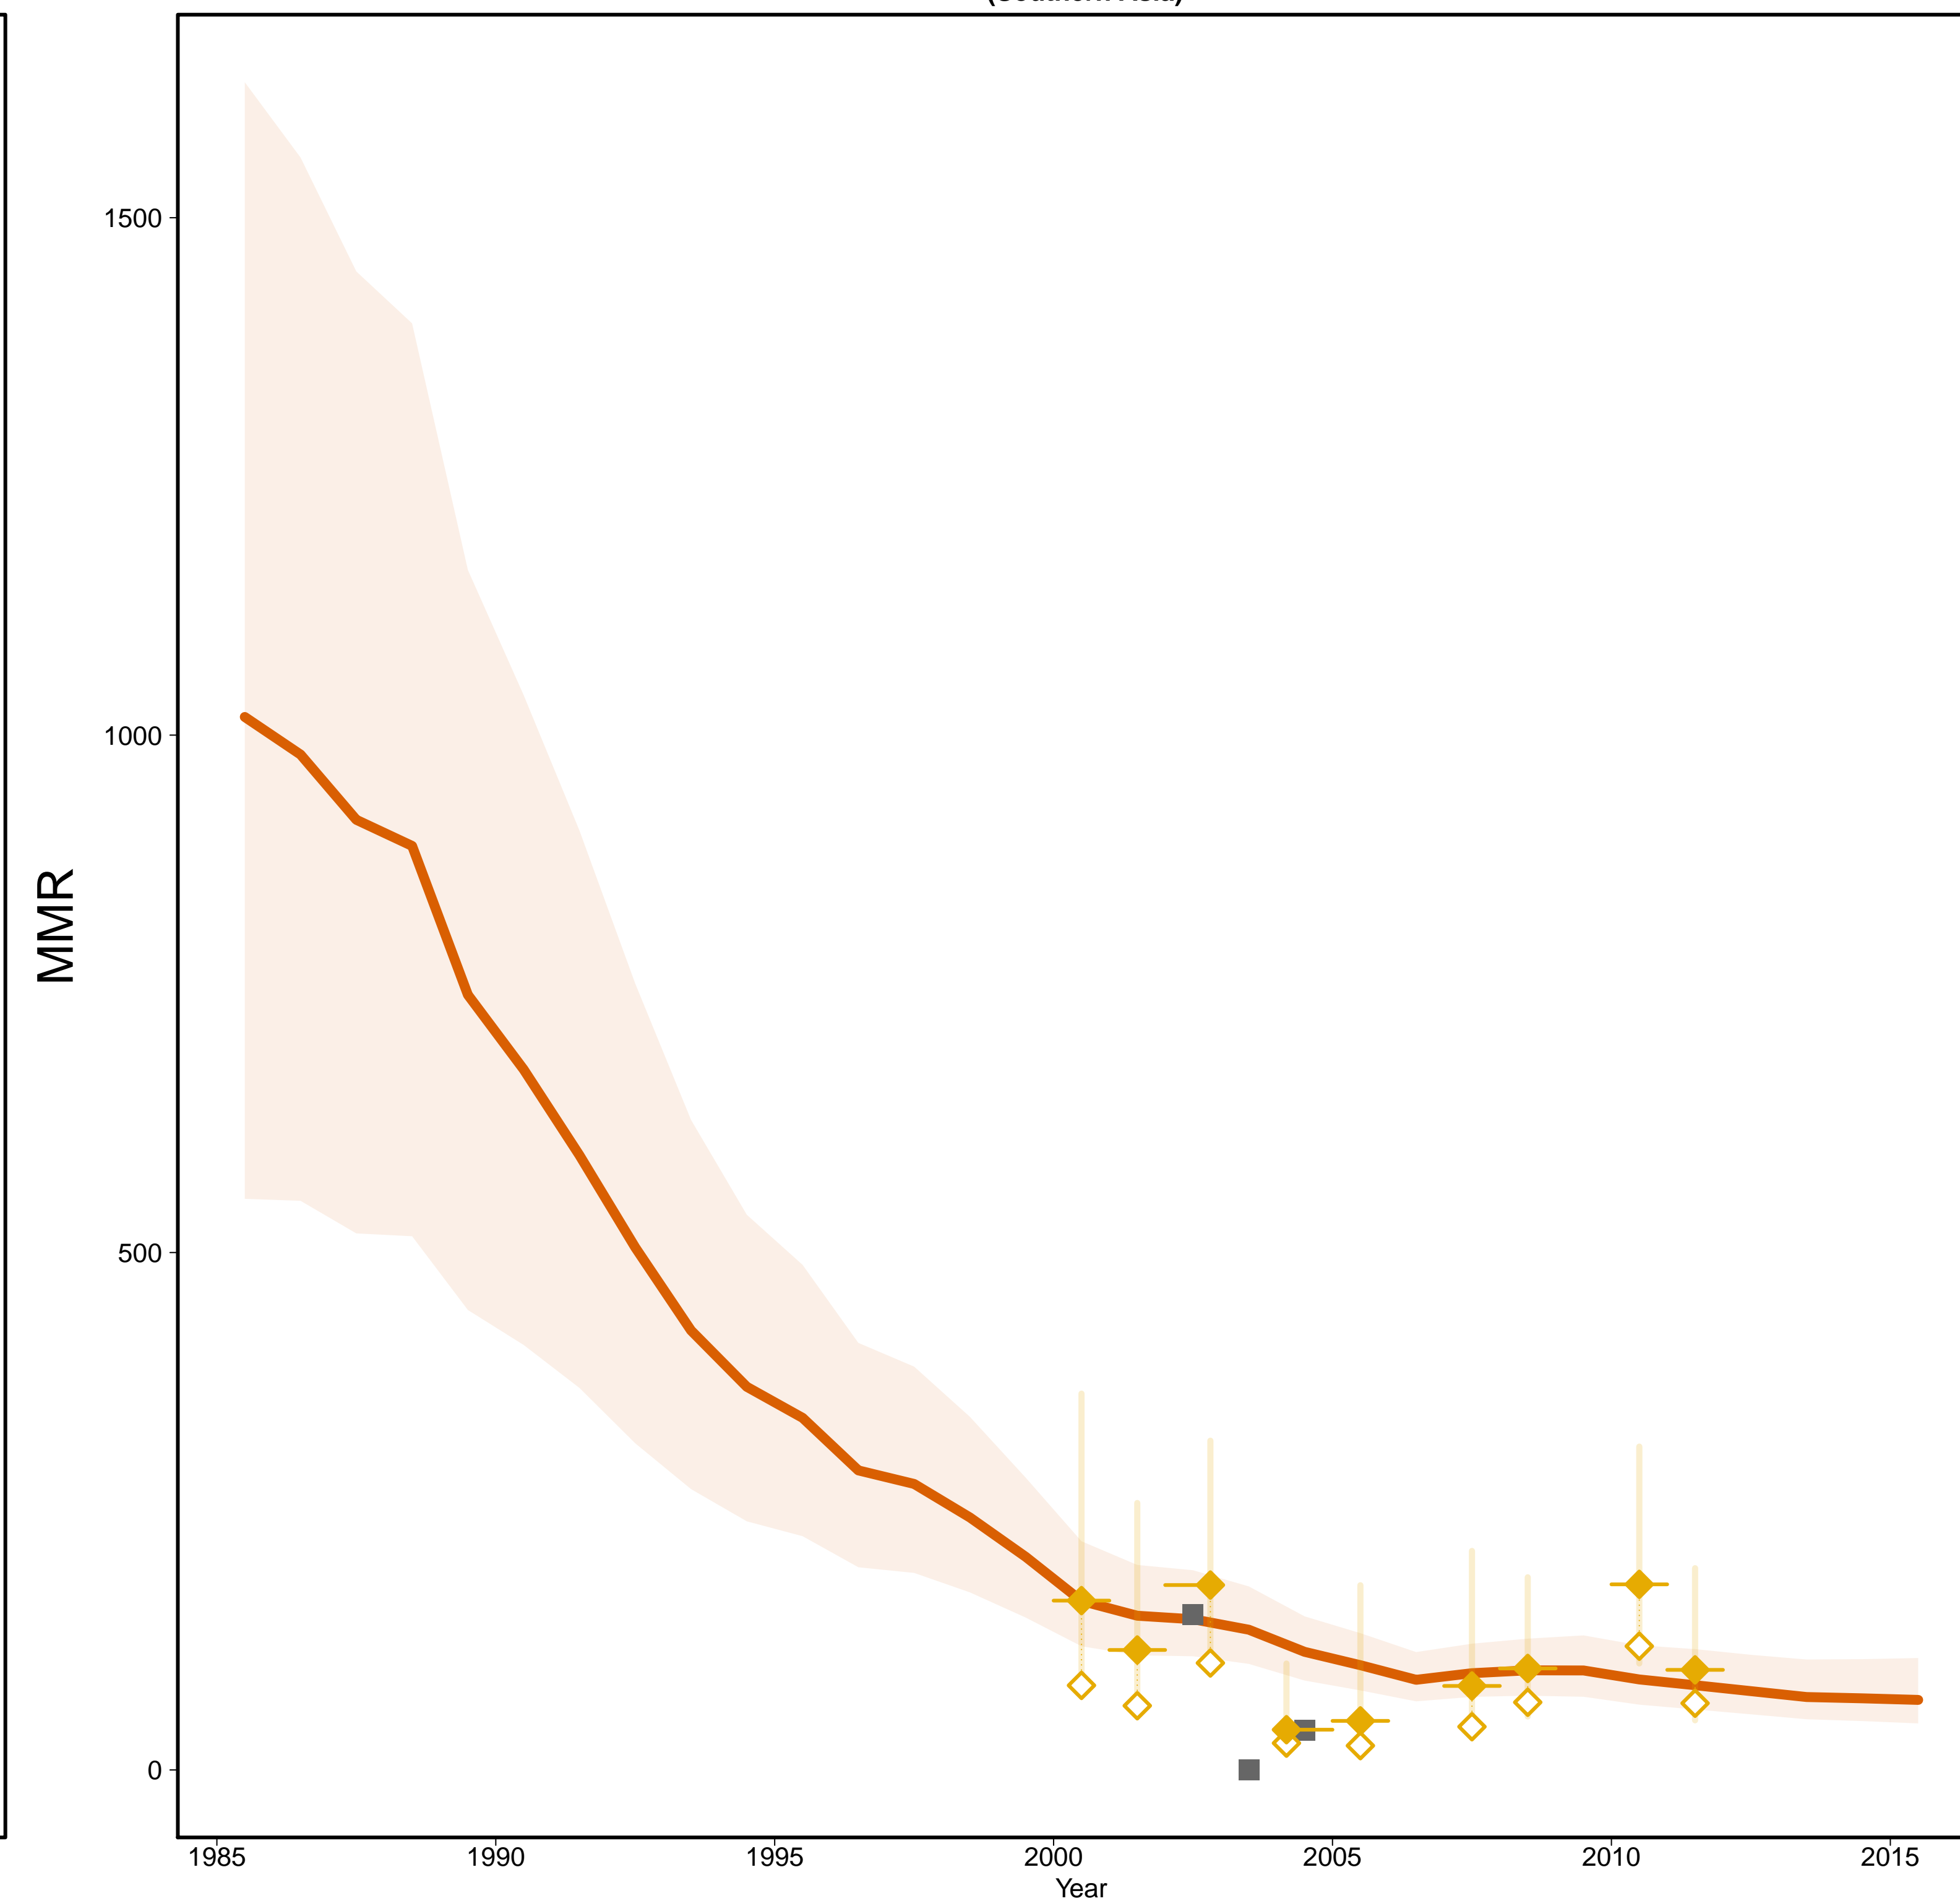

- Estimates –
- Mlate
- MMR Database 2015 –
- ◇ Observed Data
- ◆ Adjusted Data
- Data type –
- ◆ VR
- Reported VR before recalc.  
(related to 0 obs. mat. death)

Gross Domestic Product

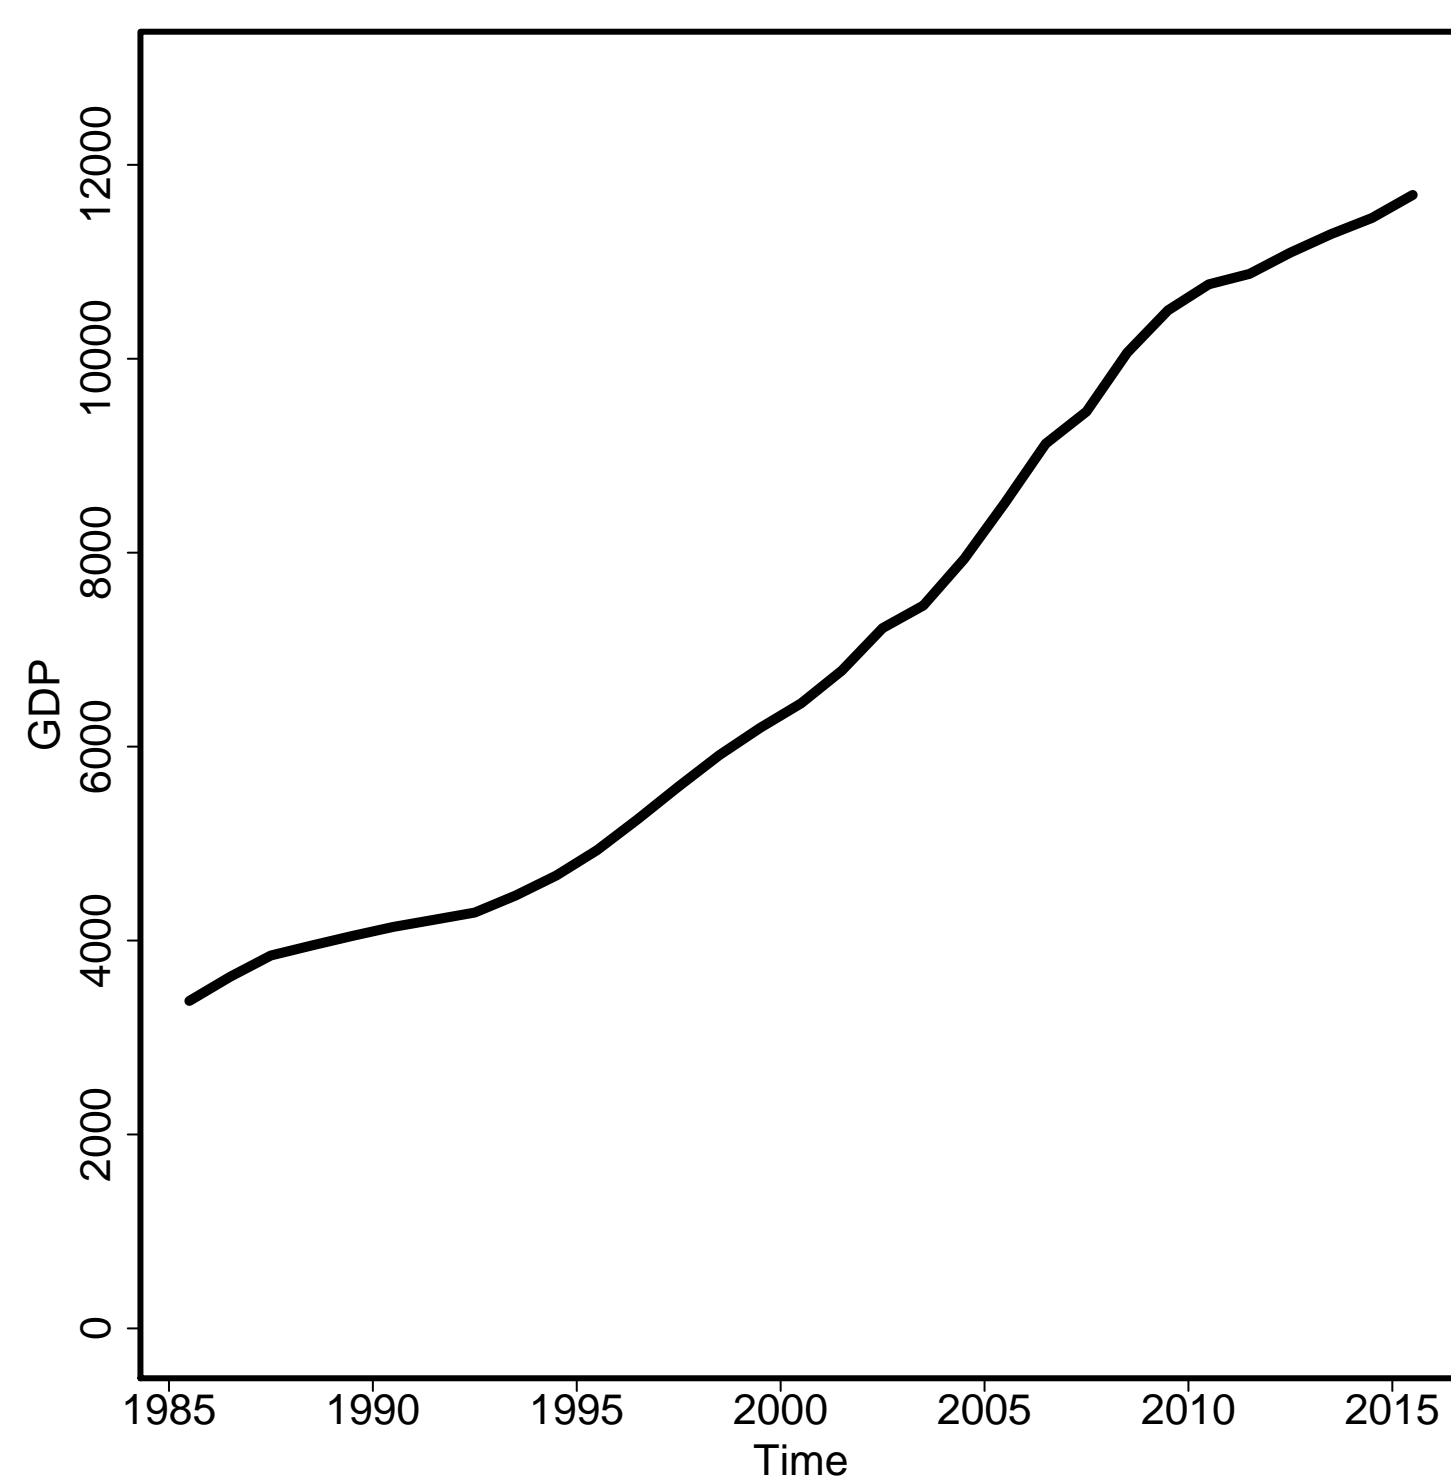

General Fertility Rate

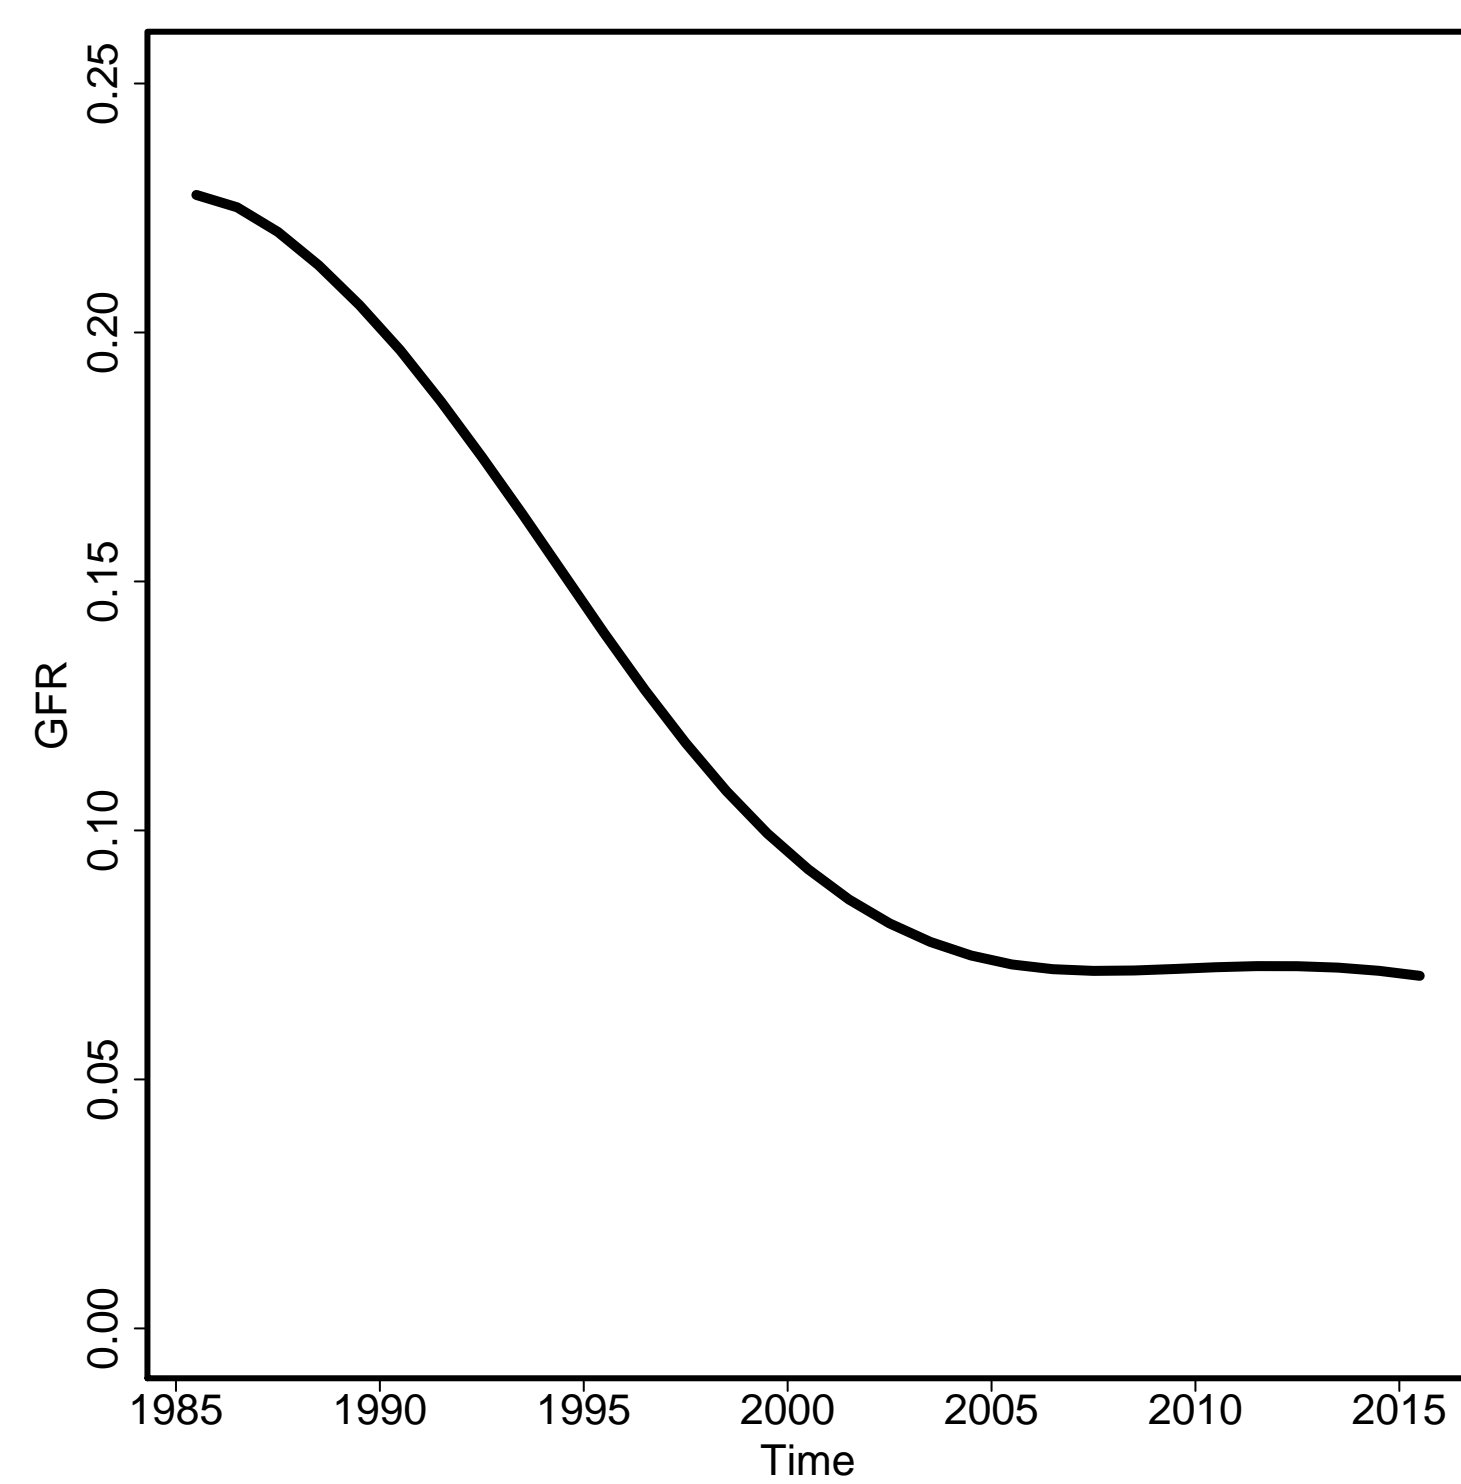

Skilled Attendance to Birth

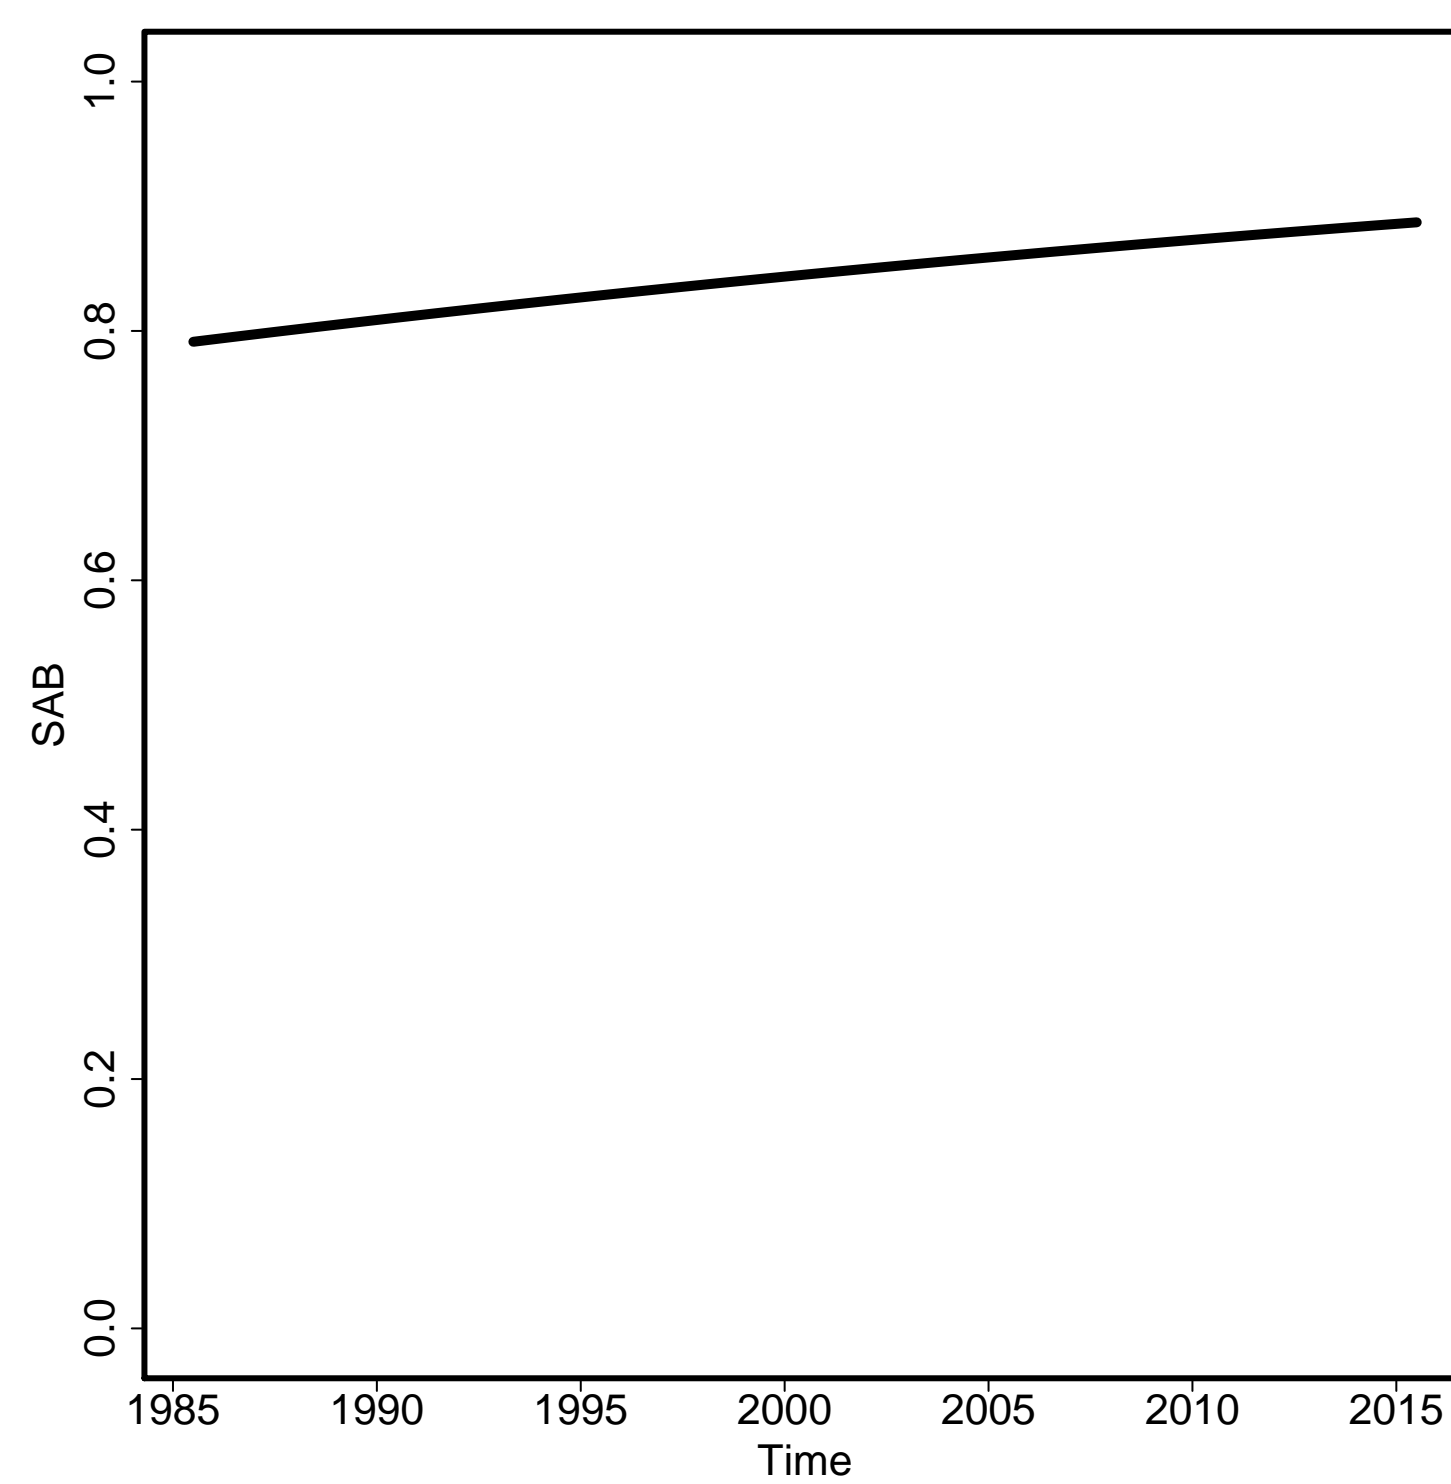

Envelope/Births

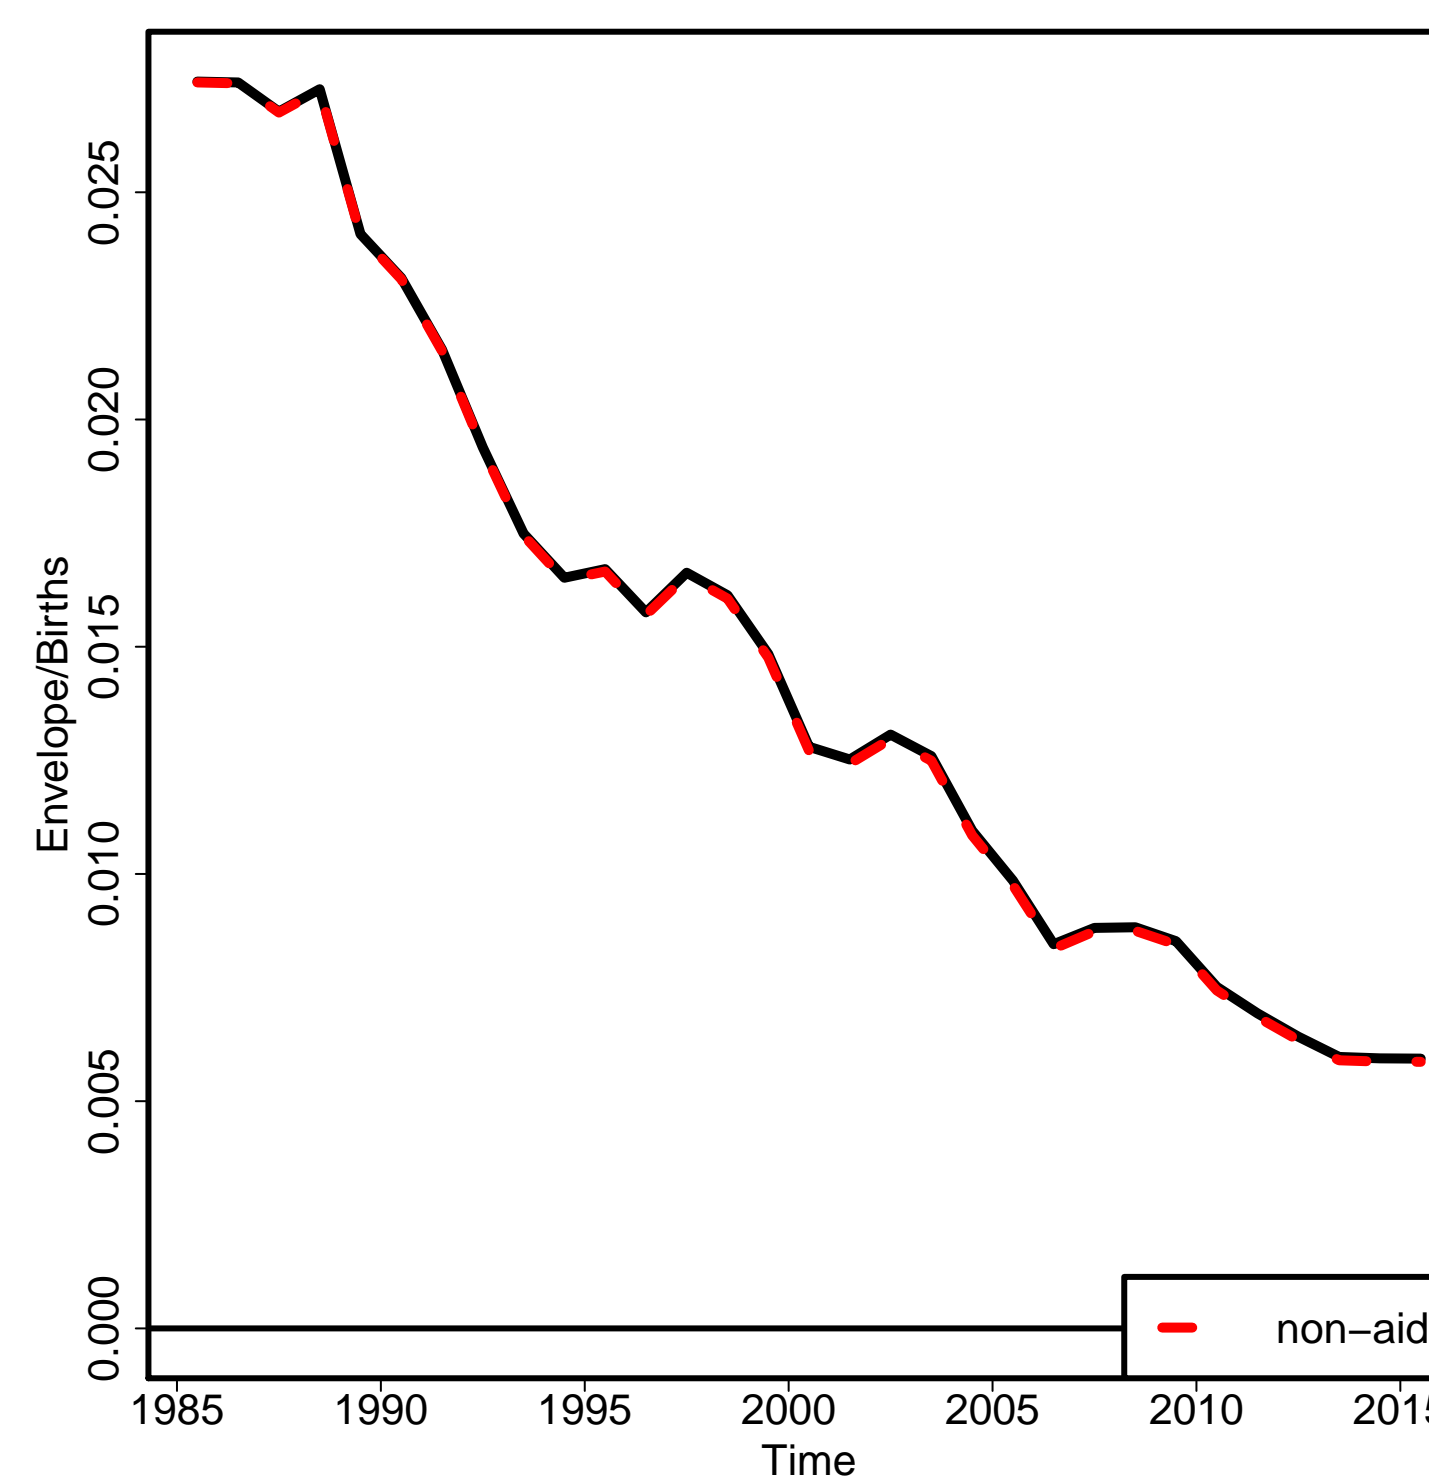

Non-aids MMR

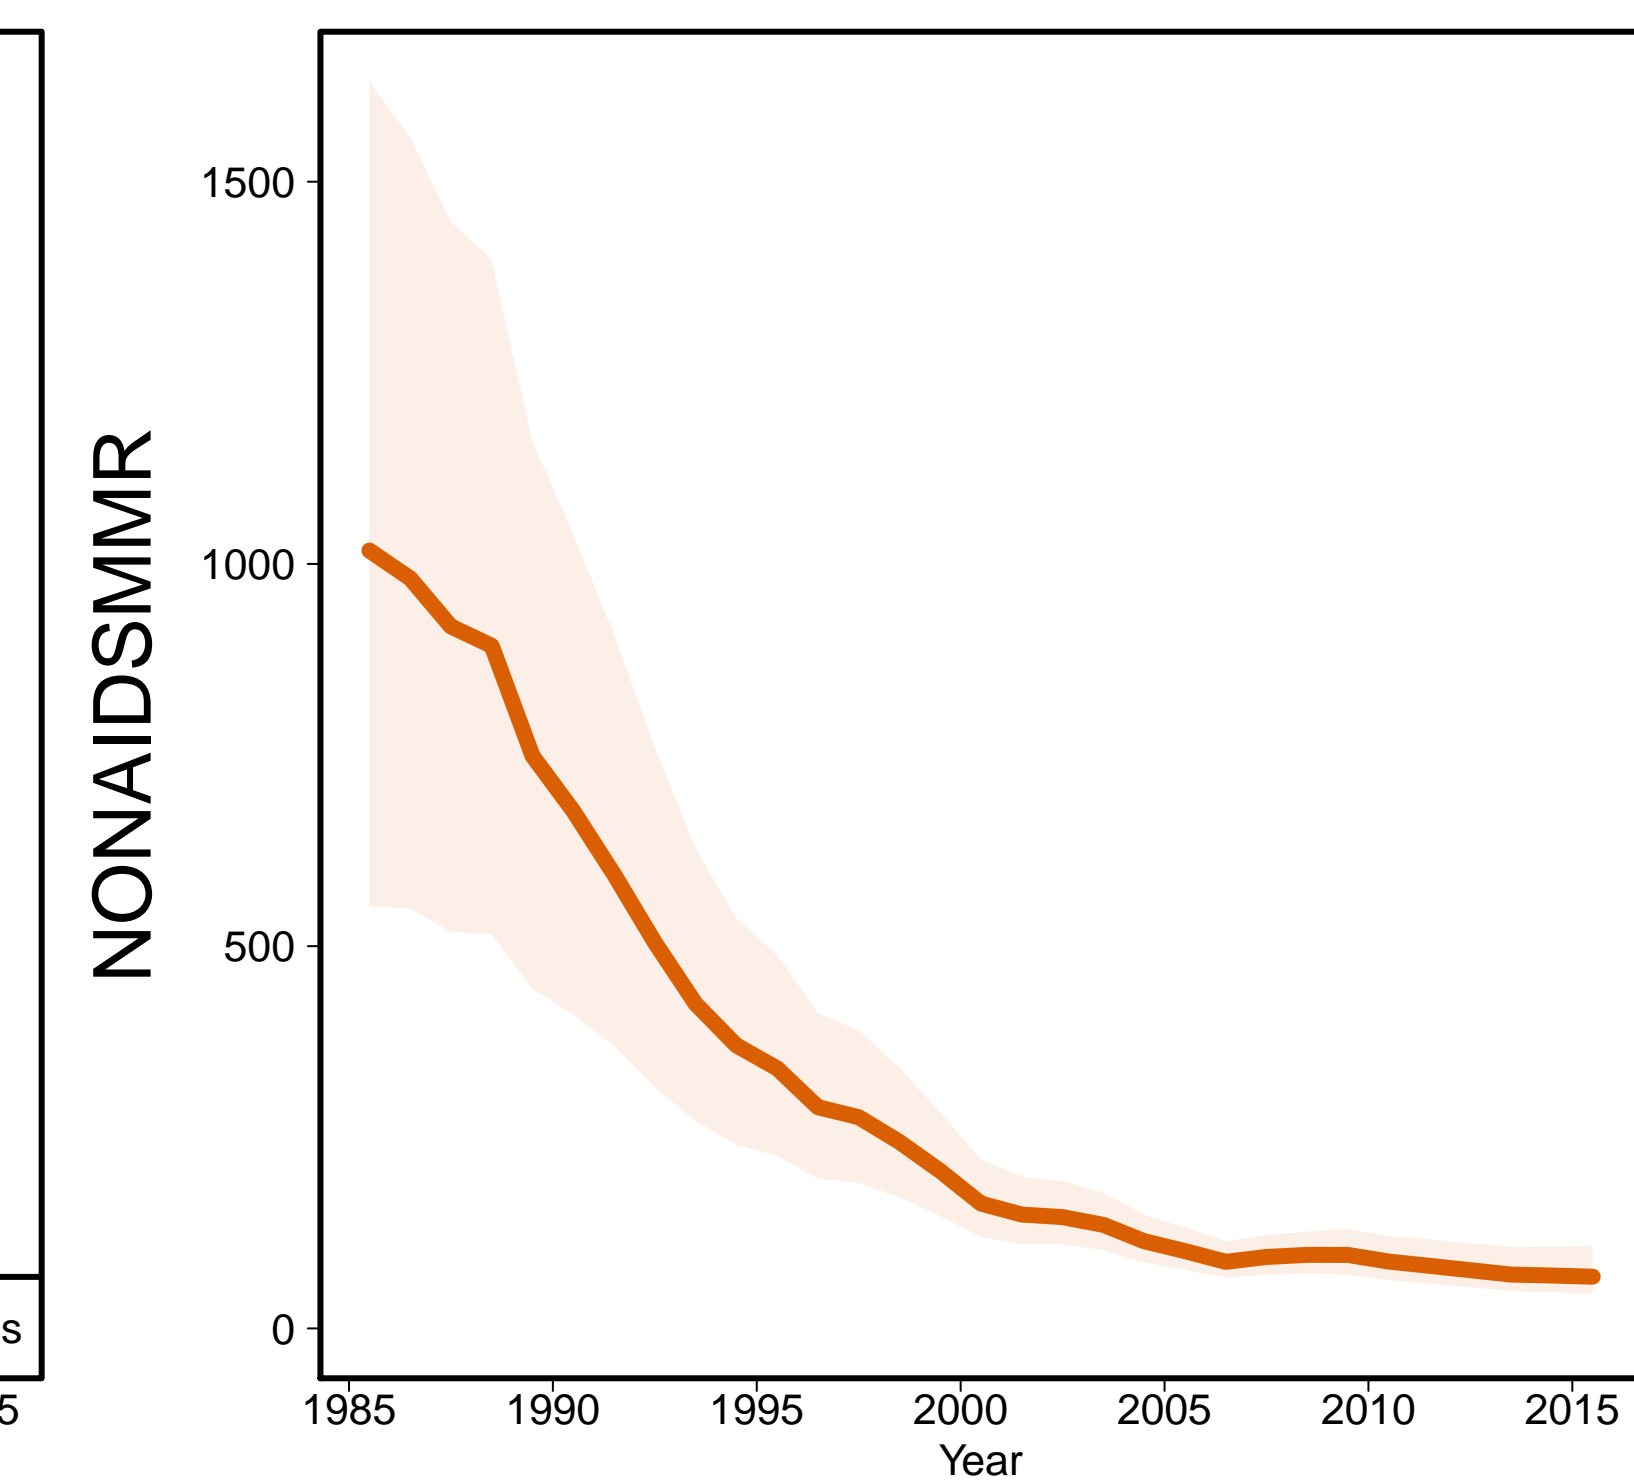

Aids MMR

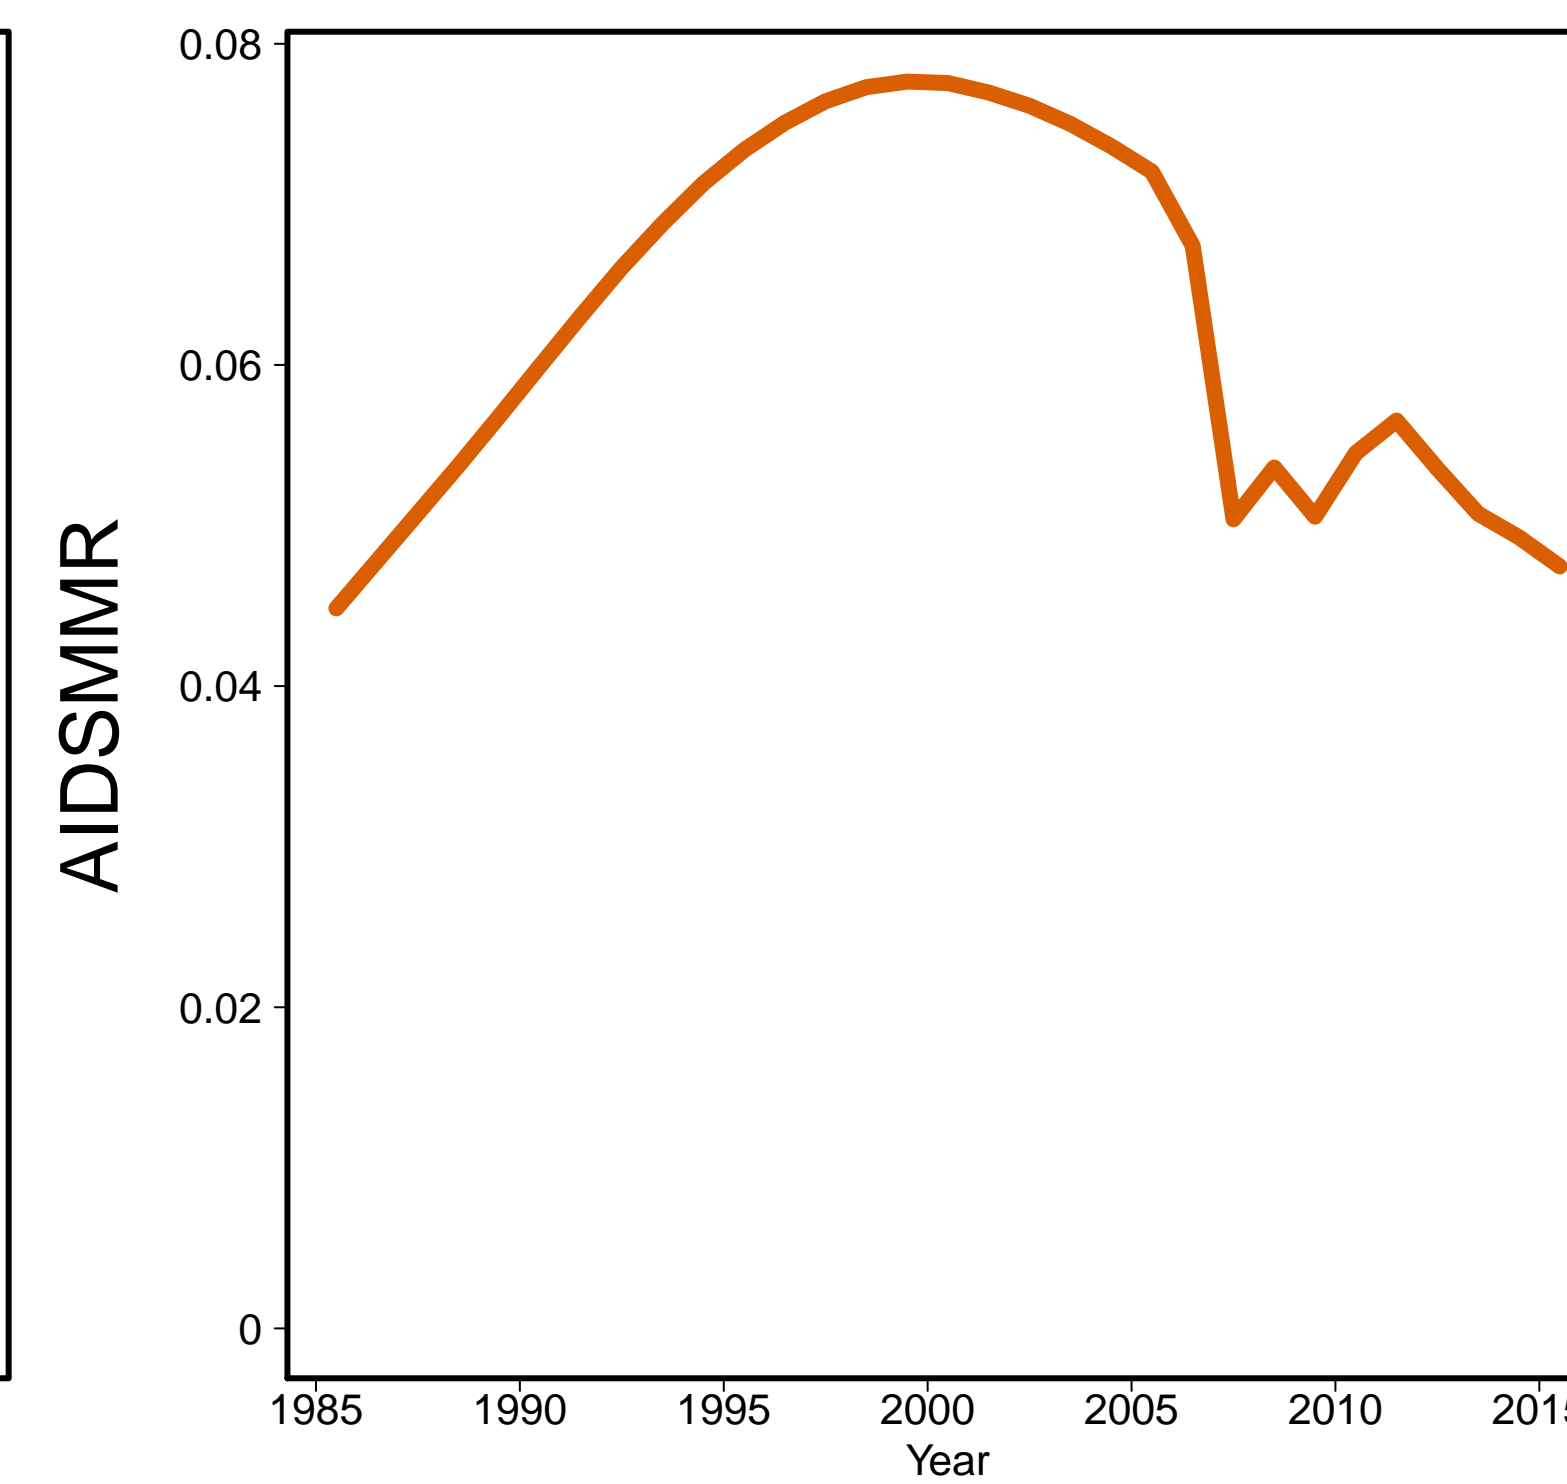

Mali [MLI]  
(Western Africa)

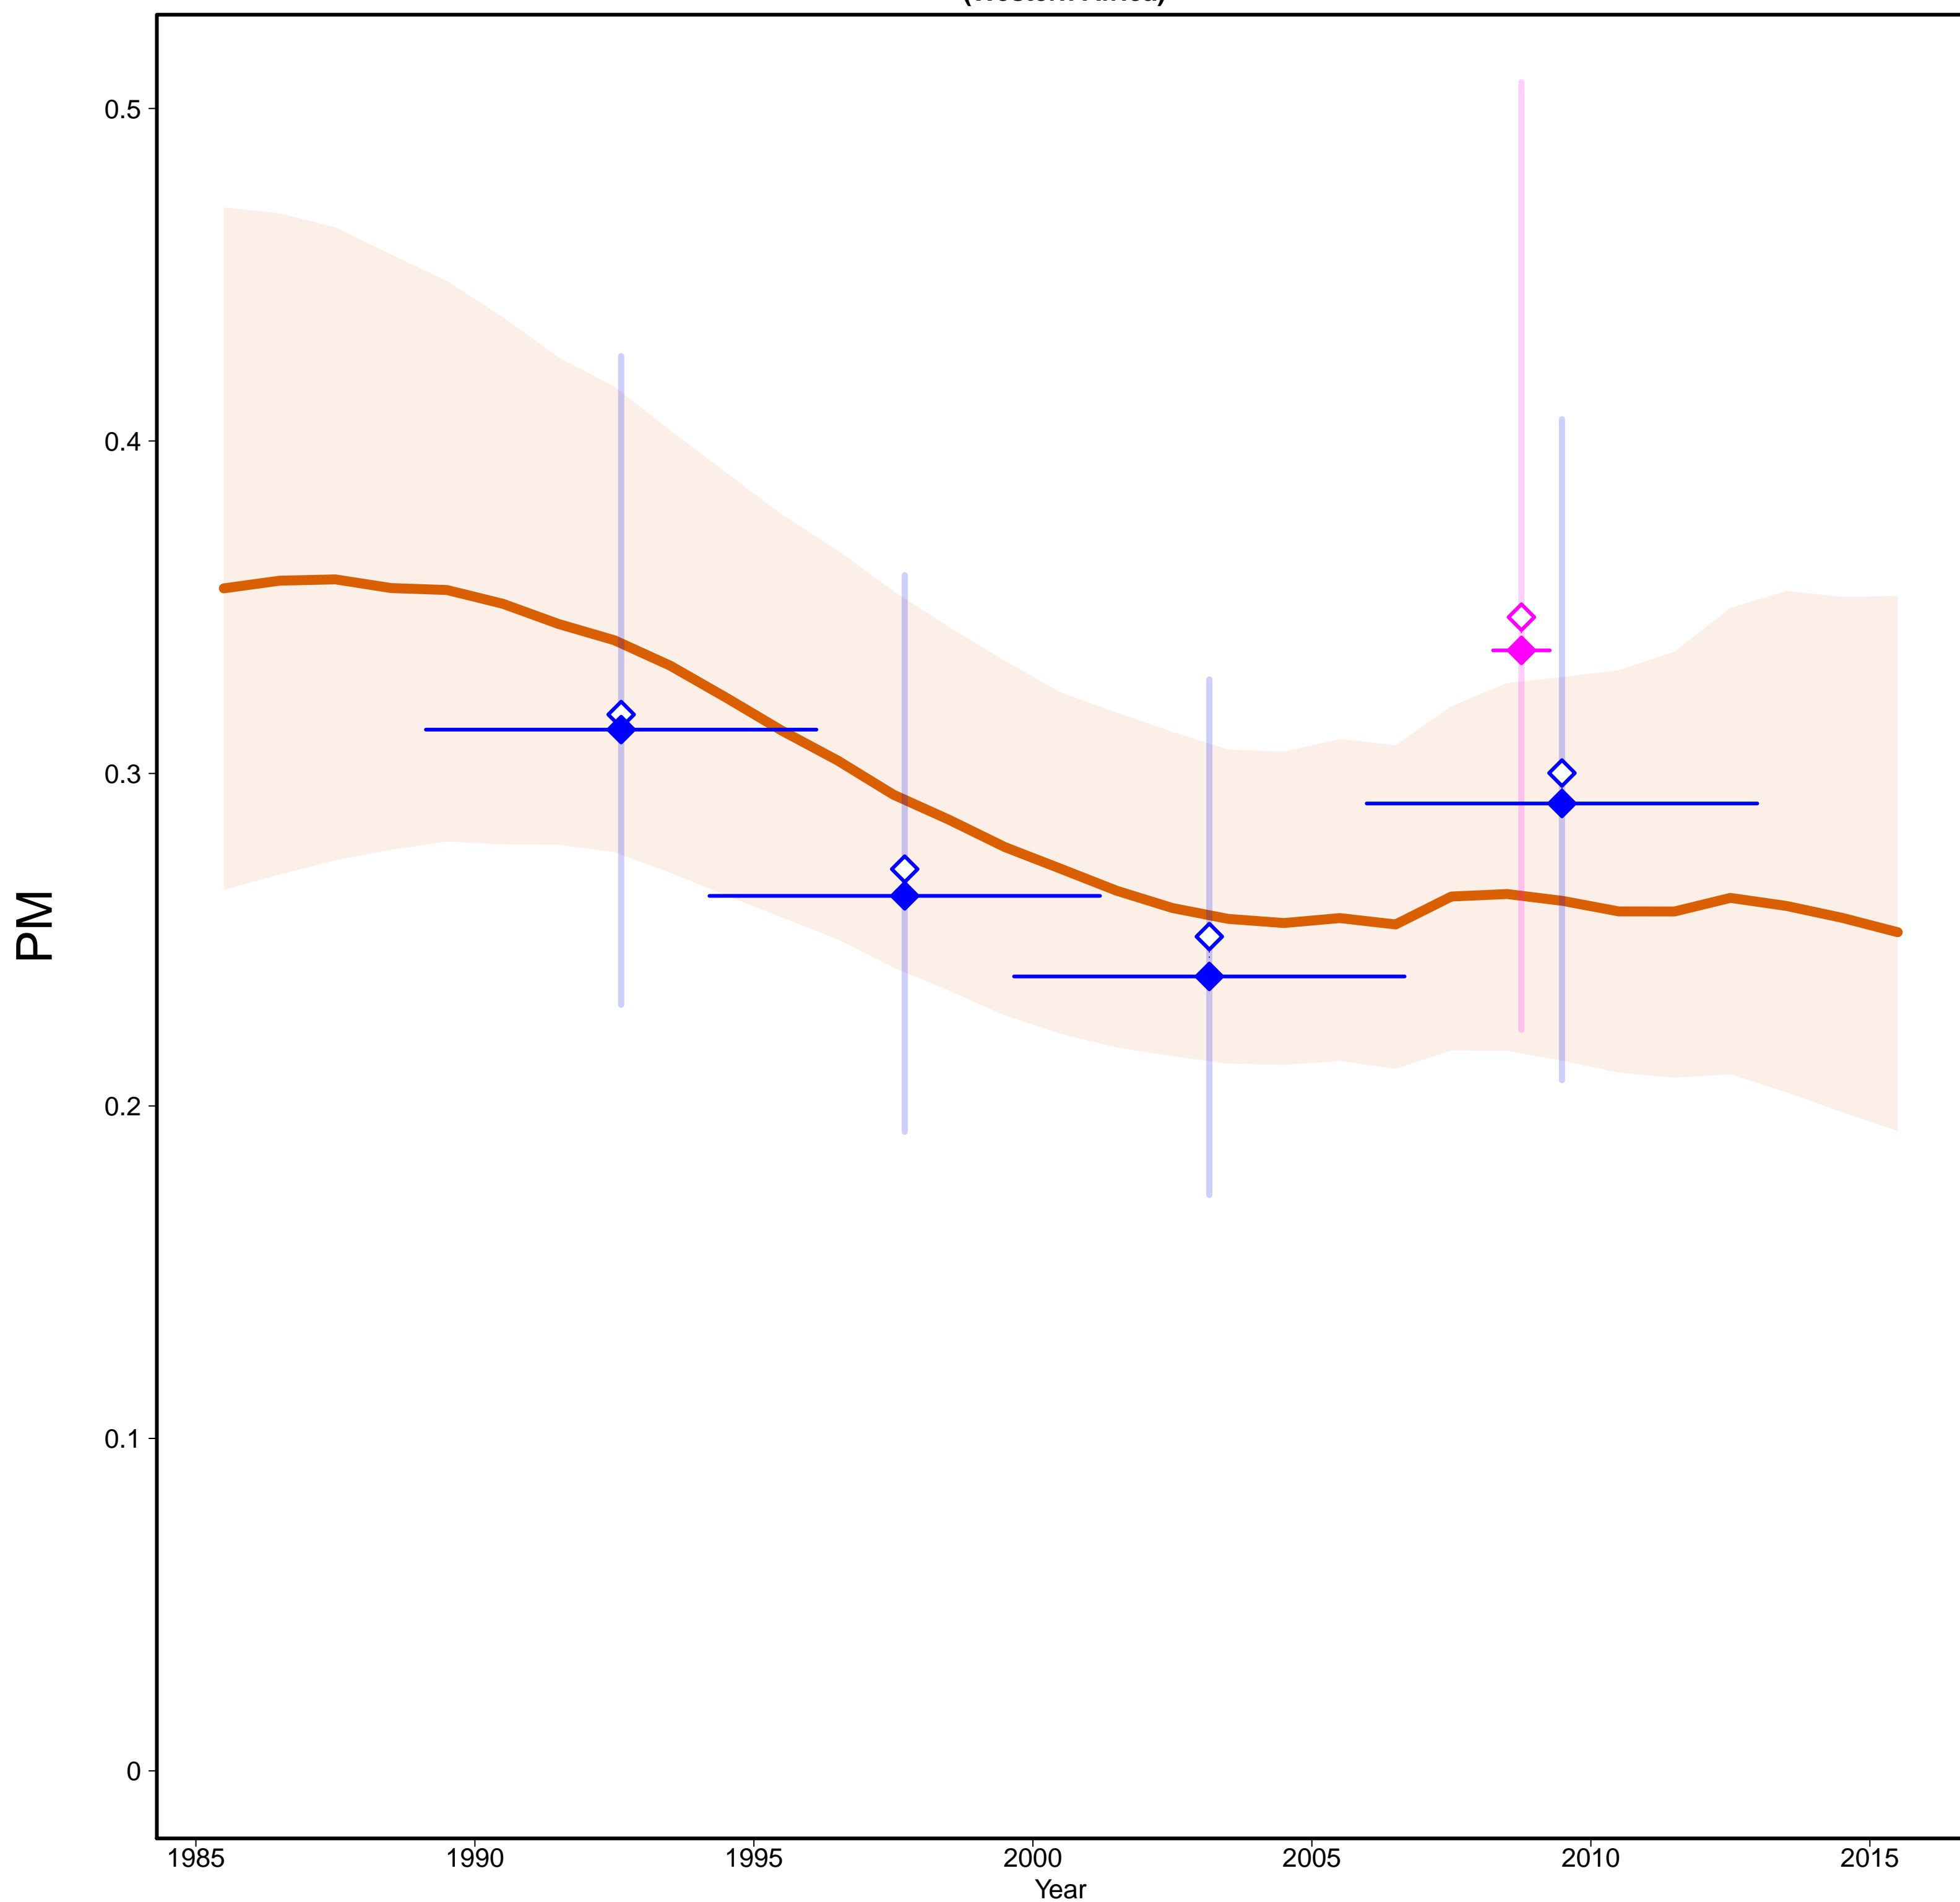

Mali [MLI]  
(Western Africa)

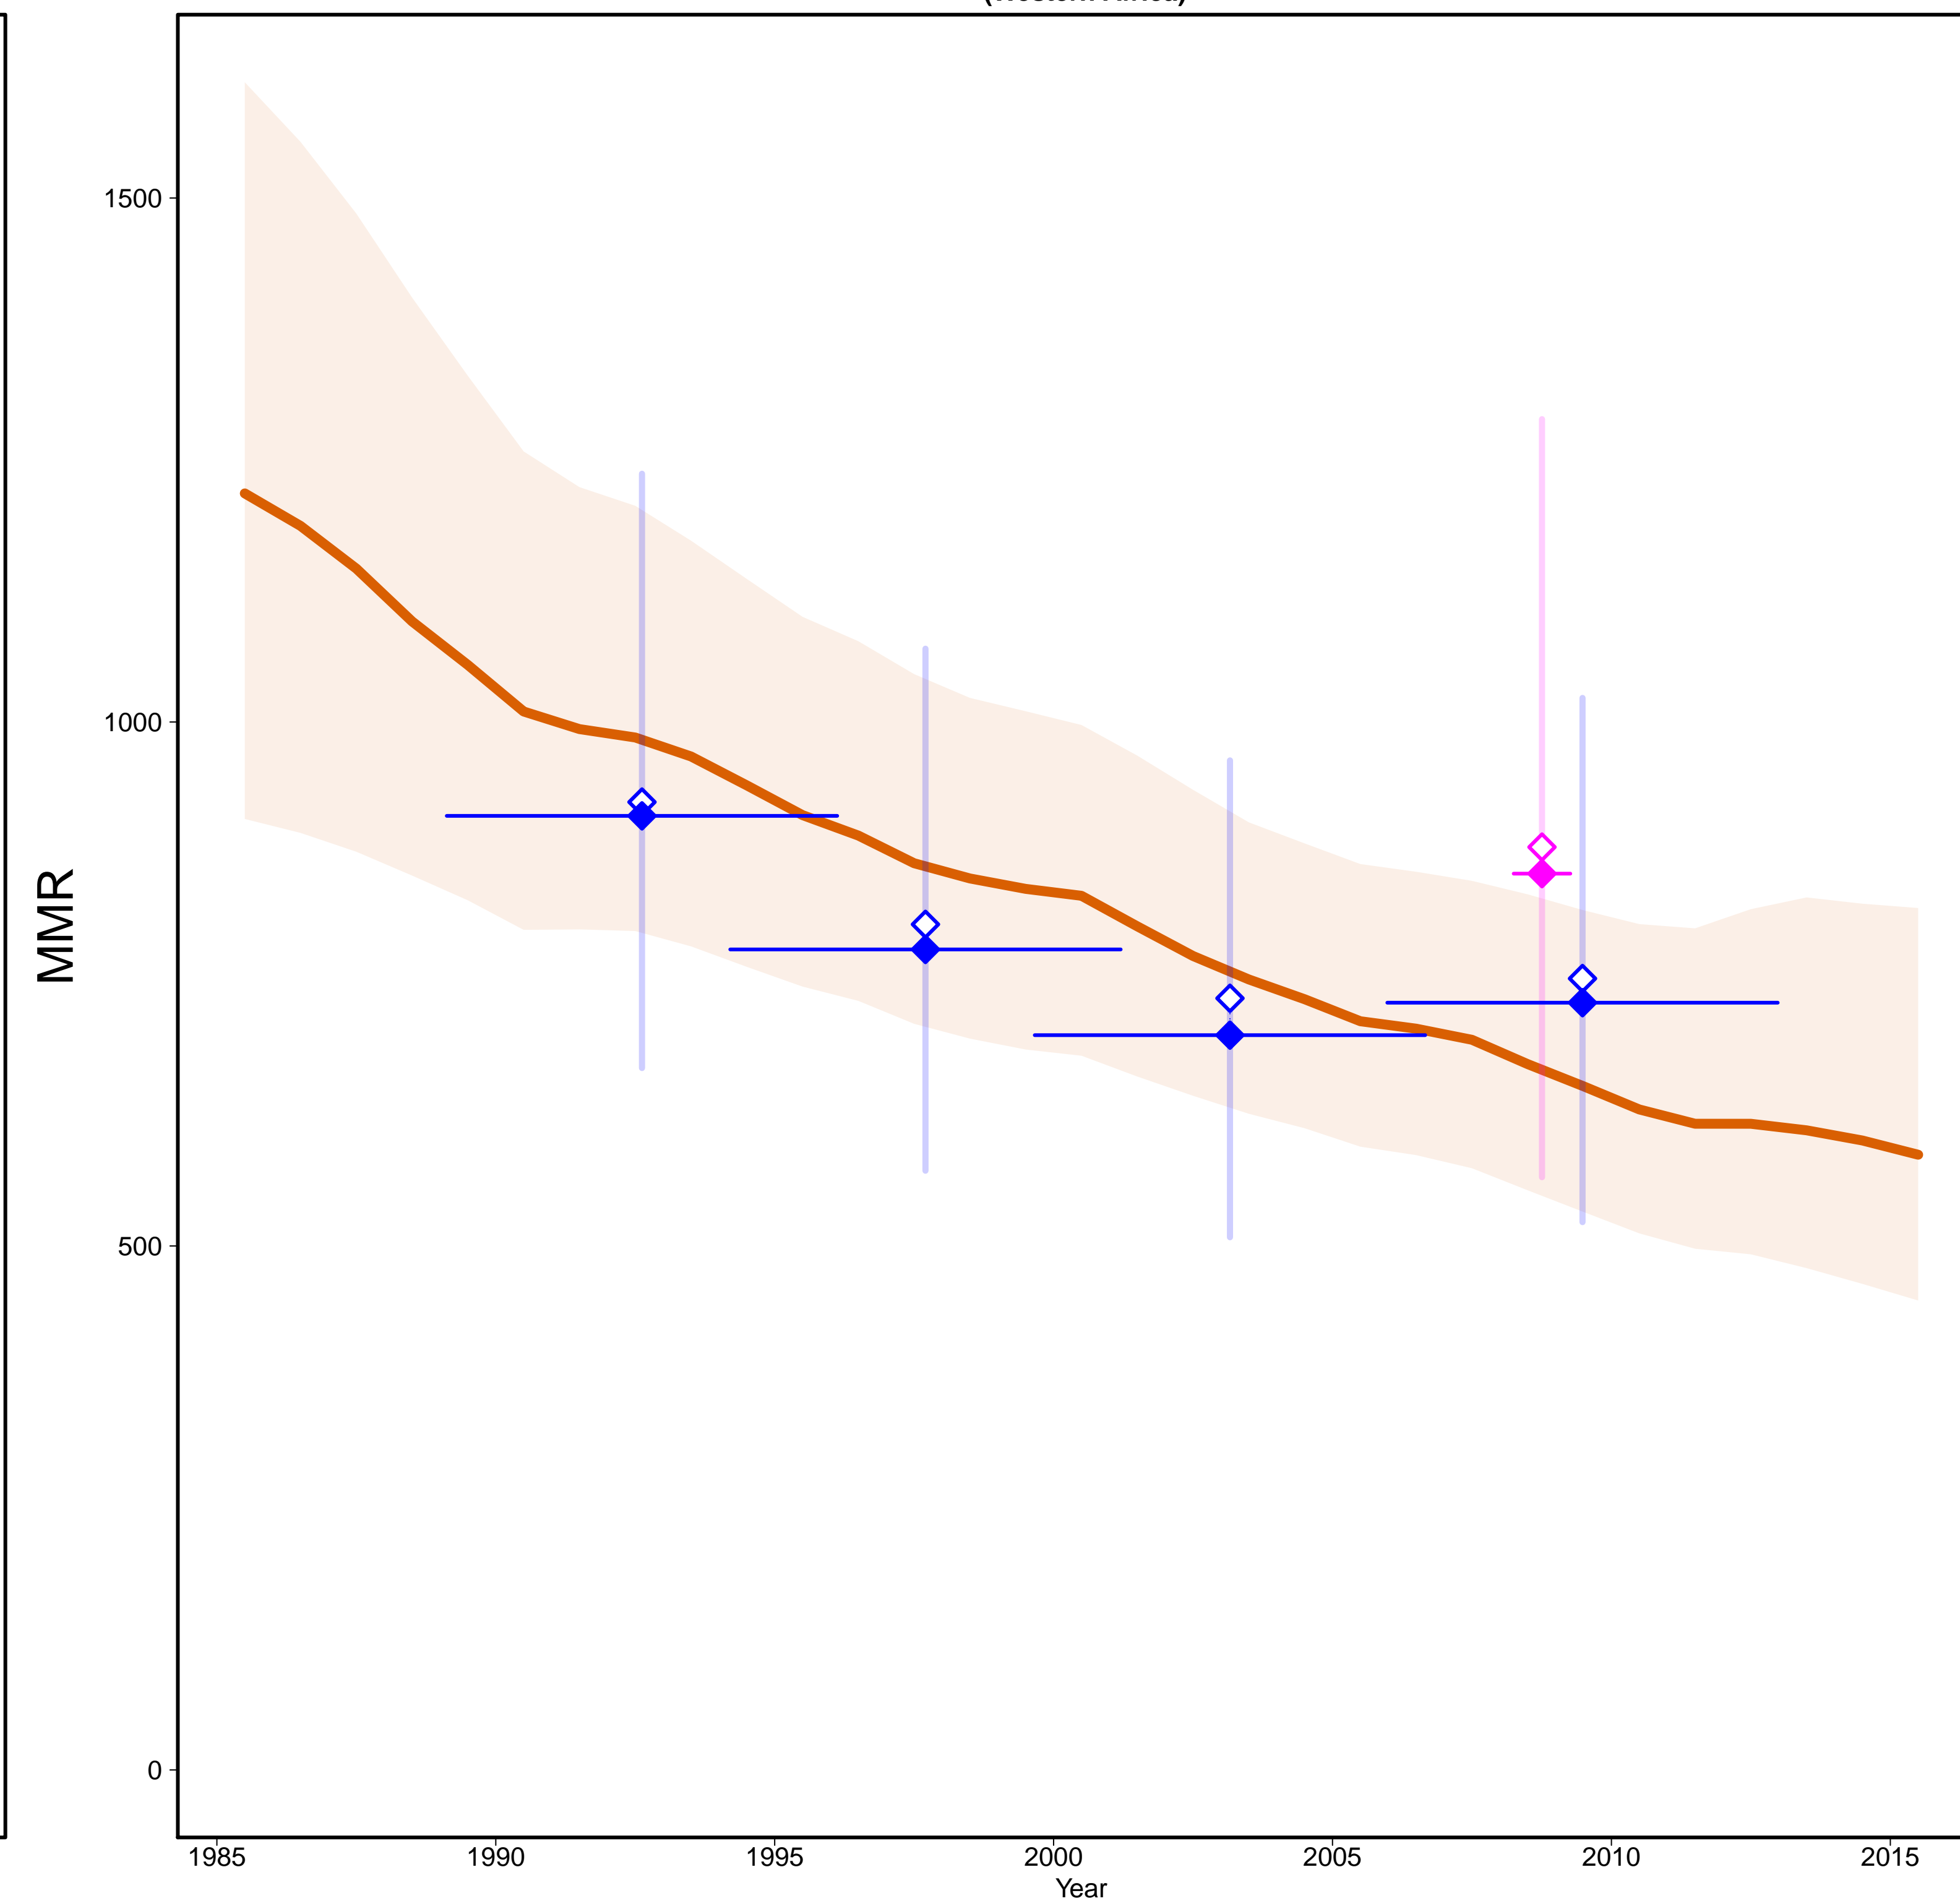

- Estimates —
- MMR Database 2015 —
- ◇ Observed Data
- ◆ Adjusted Data
- Data type —
- ◆ DHS
- ◆ Census

Gross Domestic Product

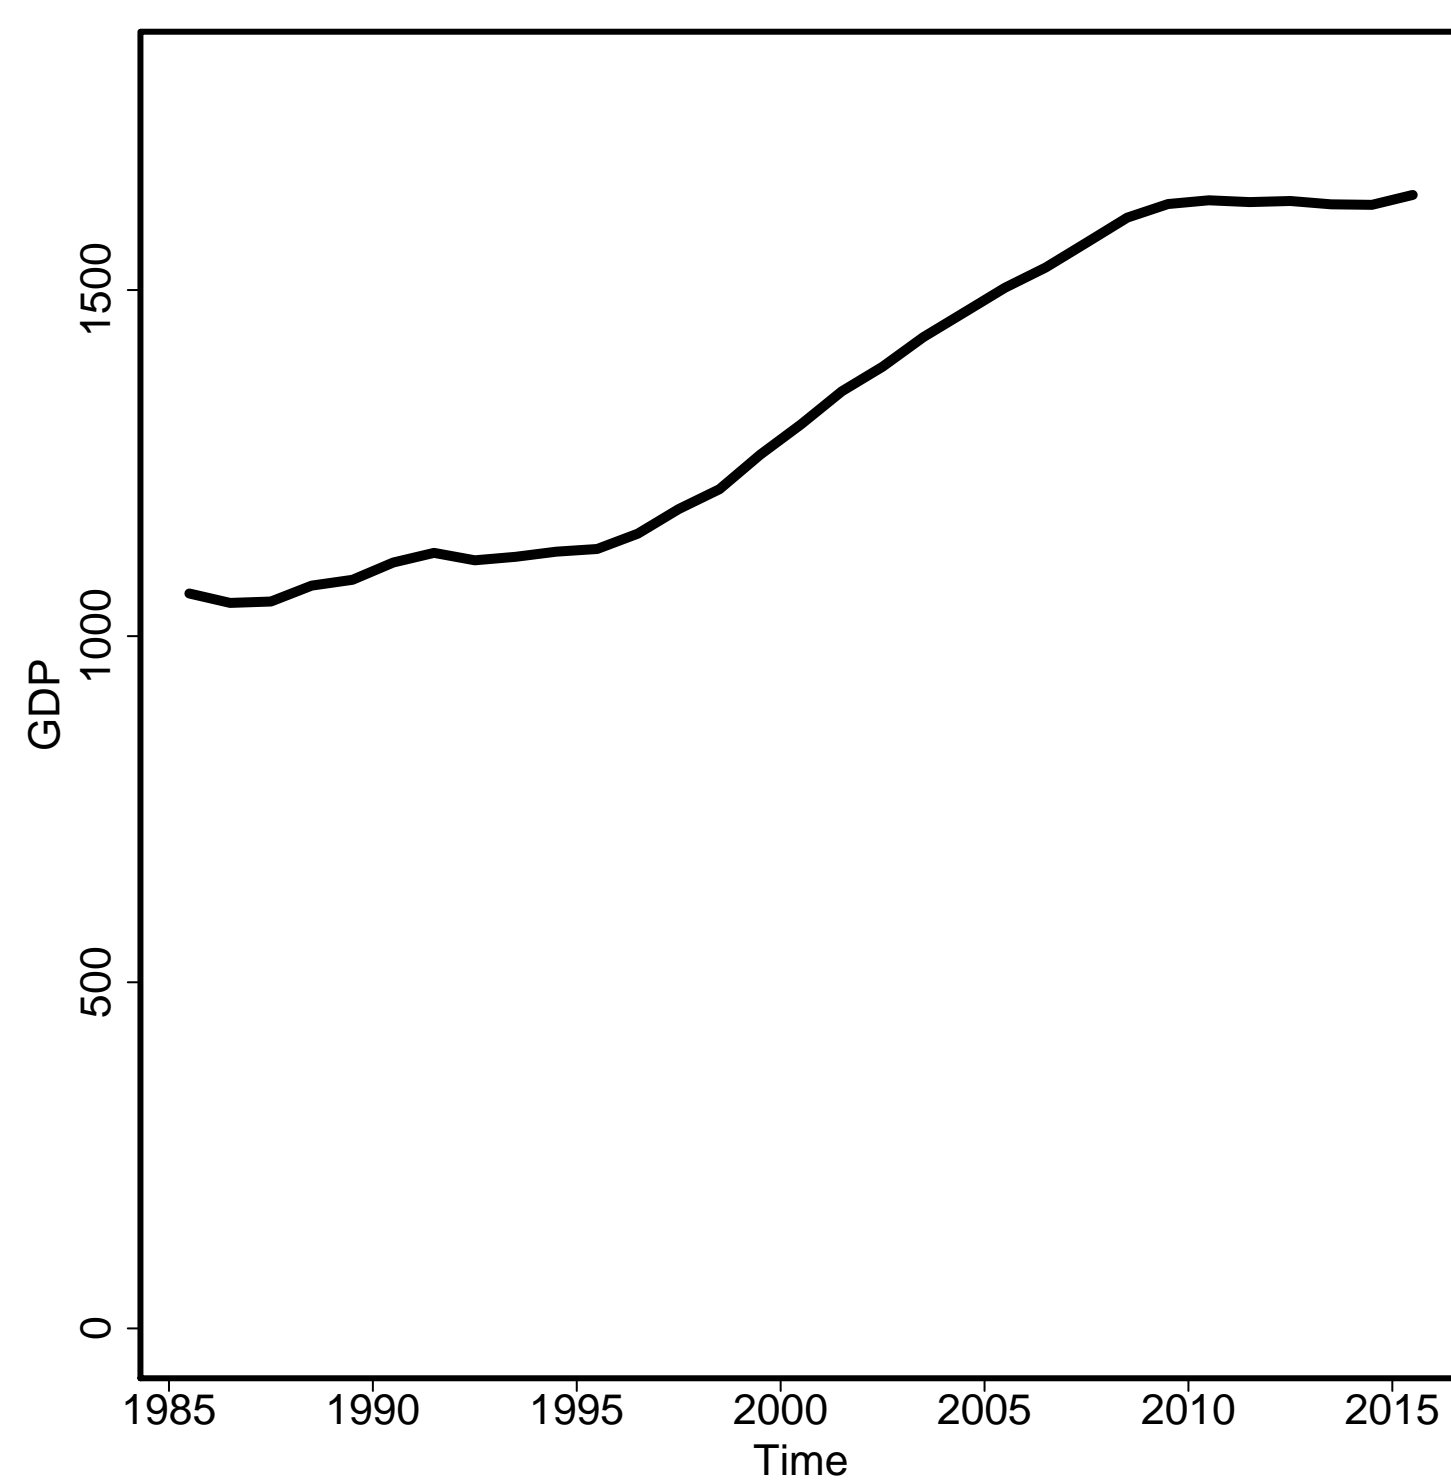

General Fertility Rate

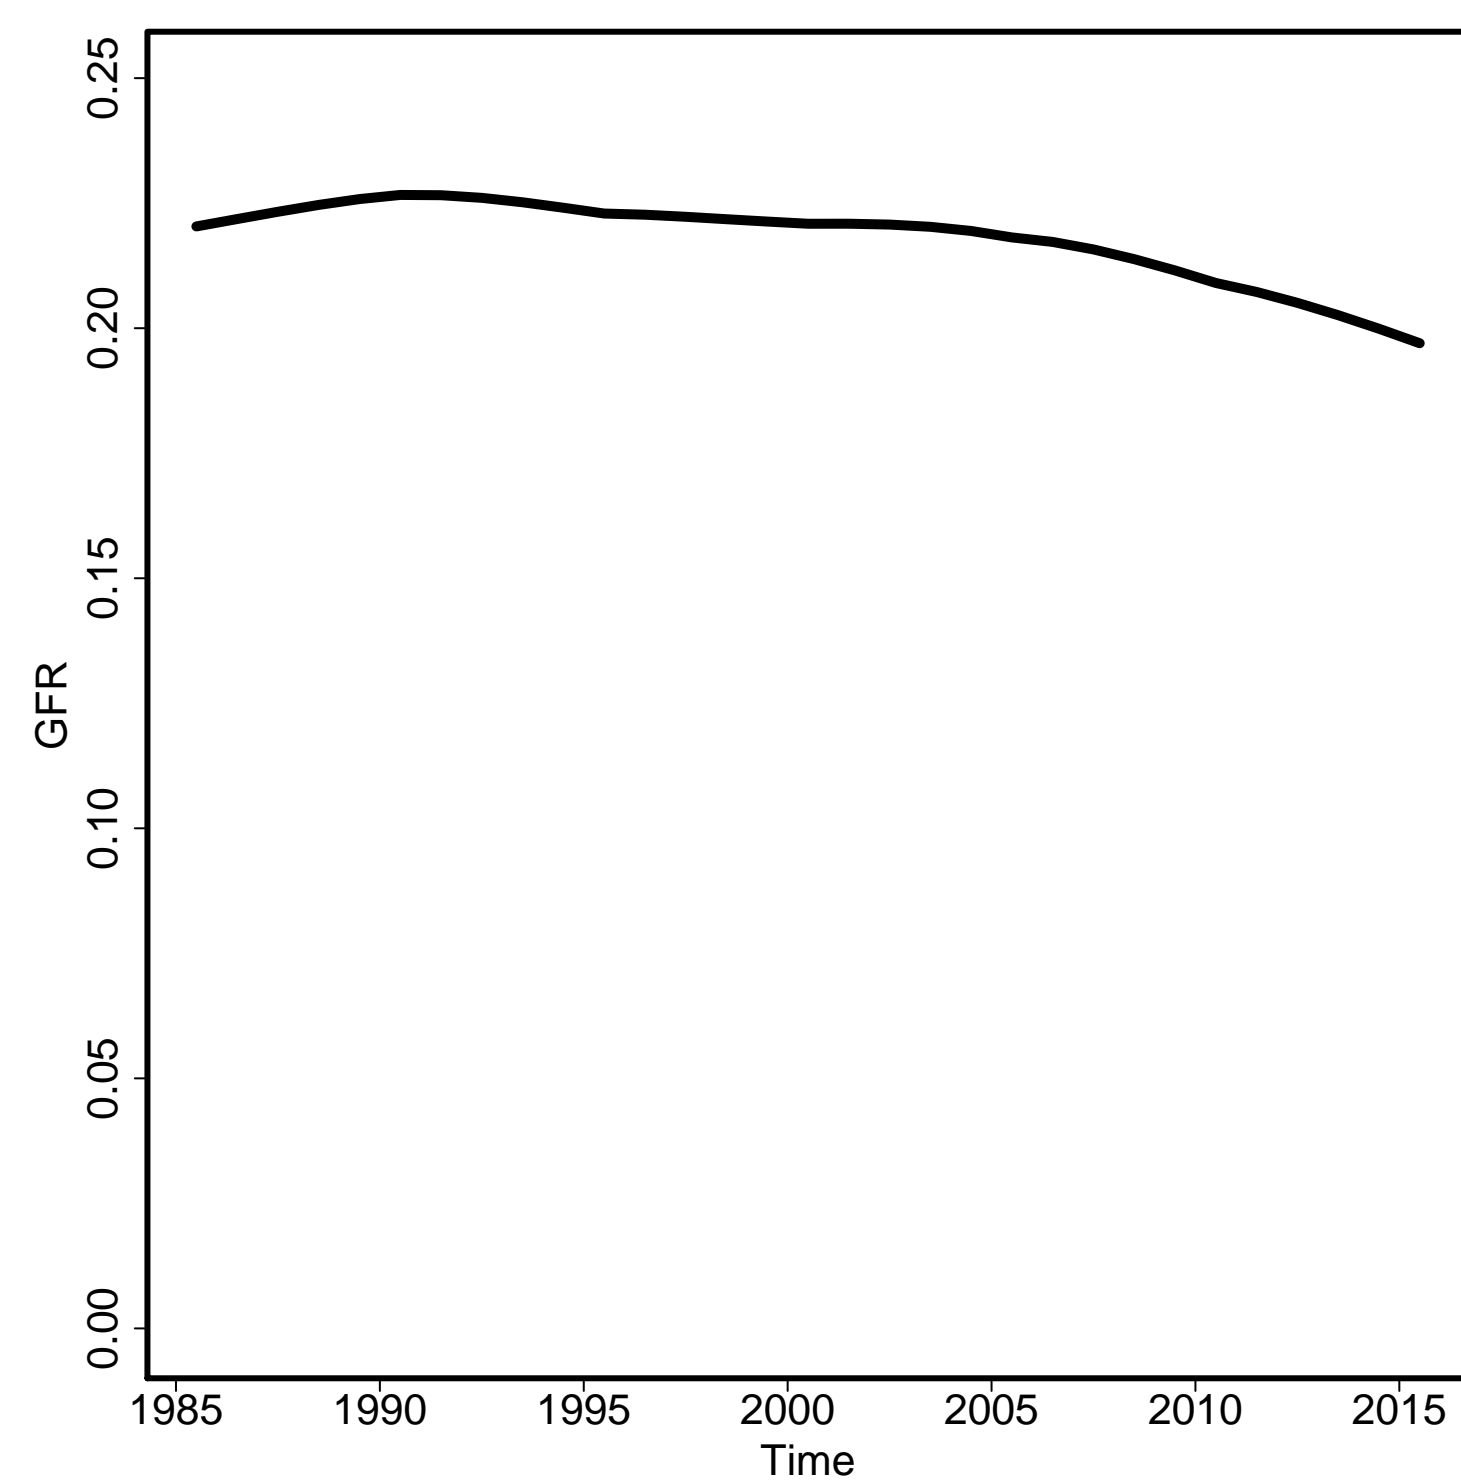

Skilled Attendance to Birth

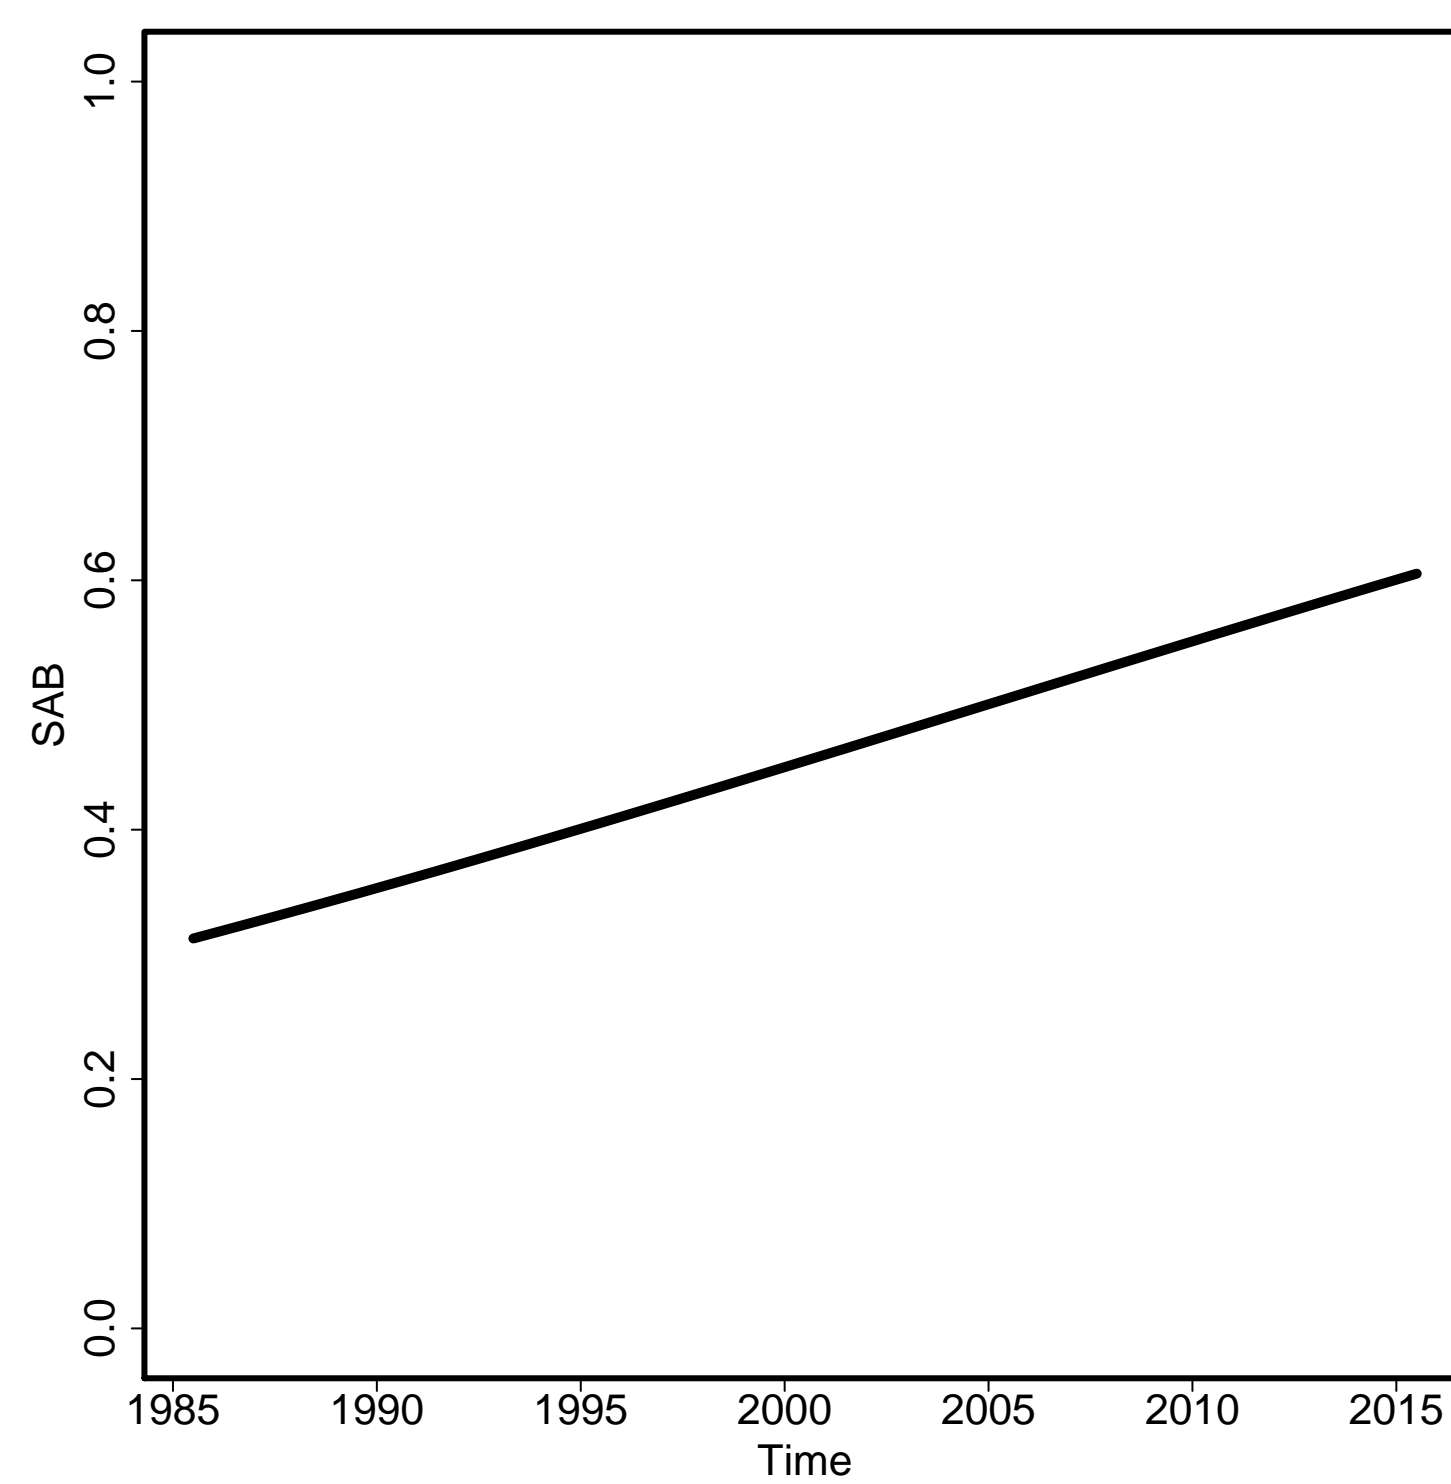

Envelope/Births

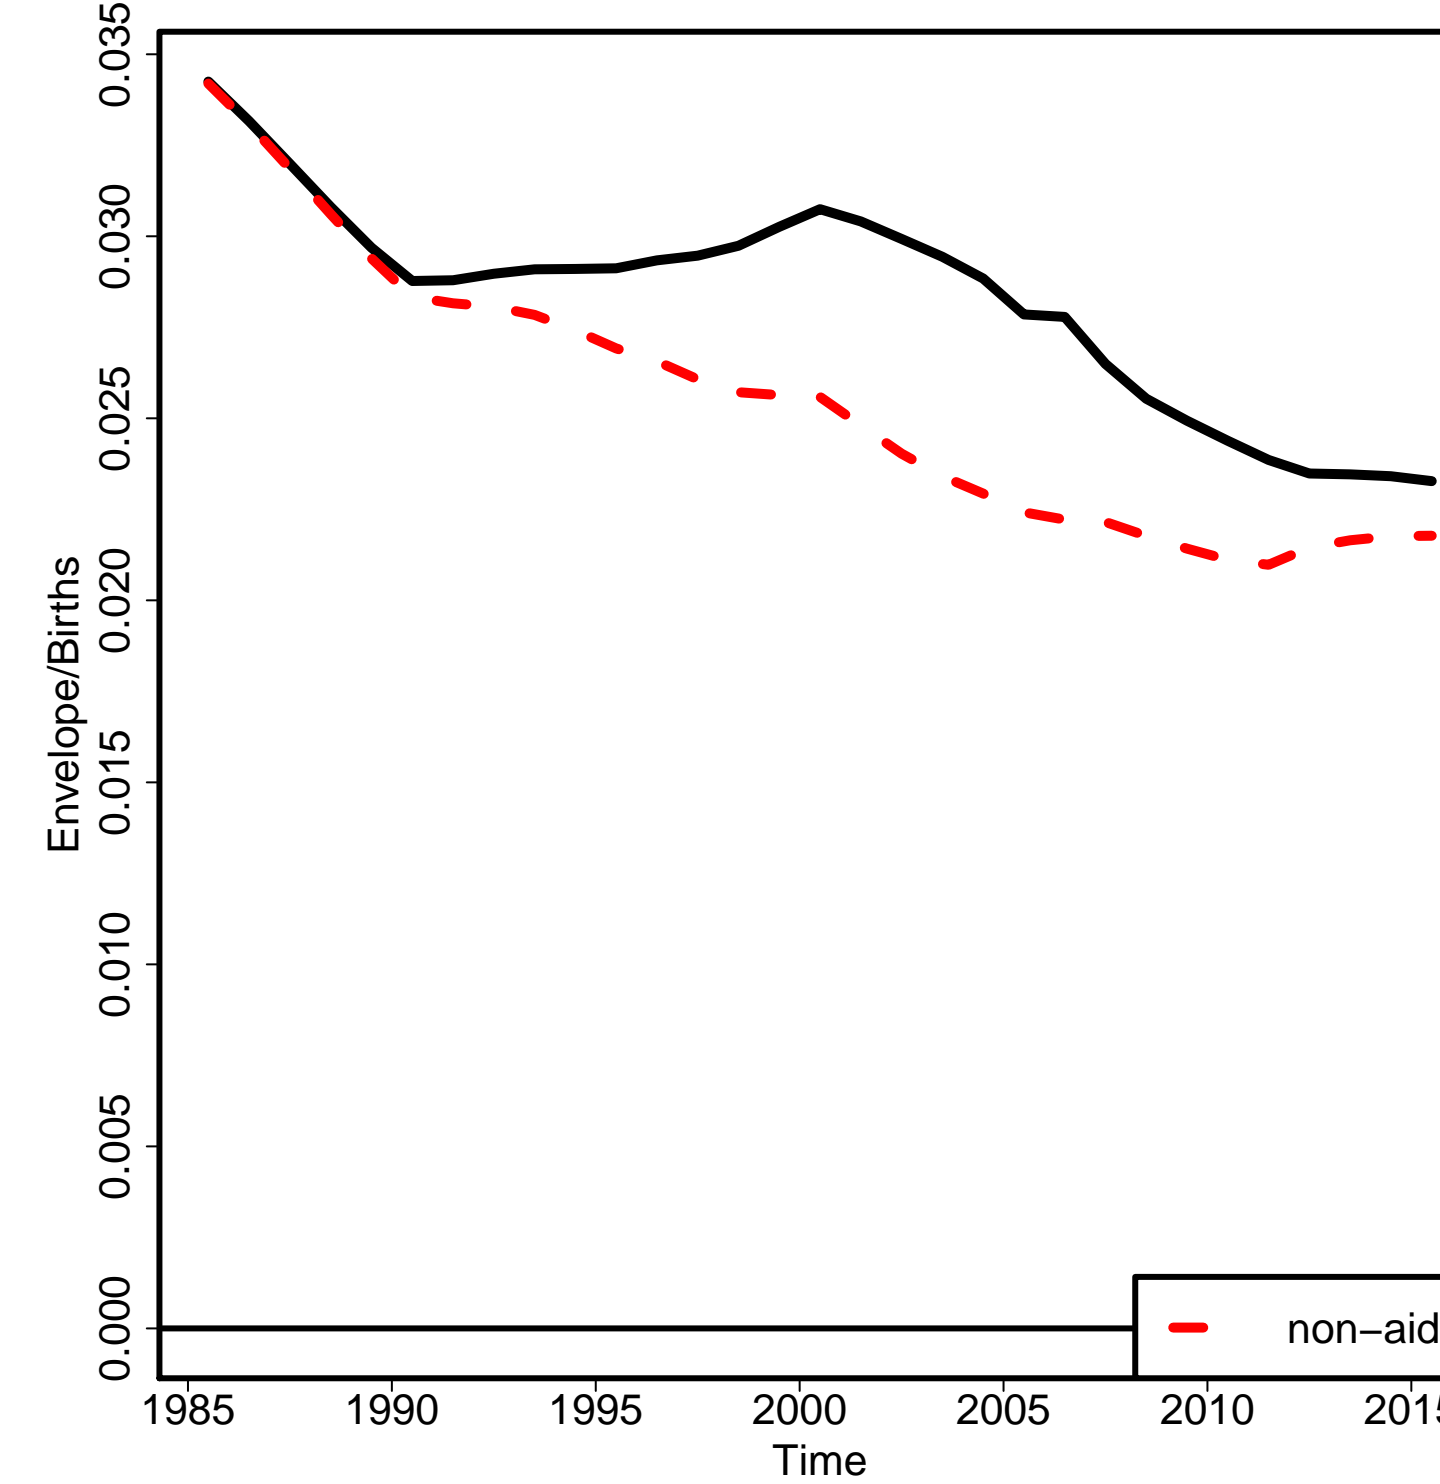

Non-aids MMR

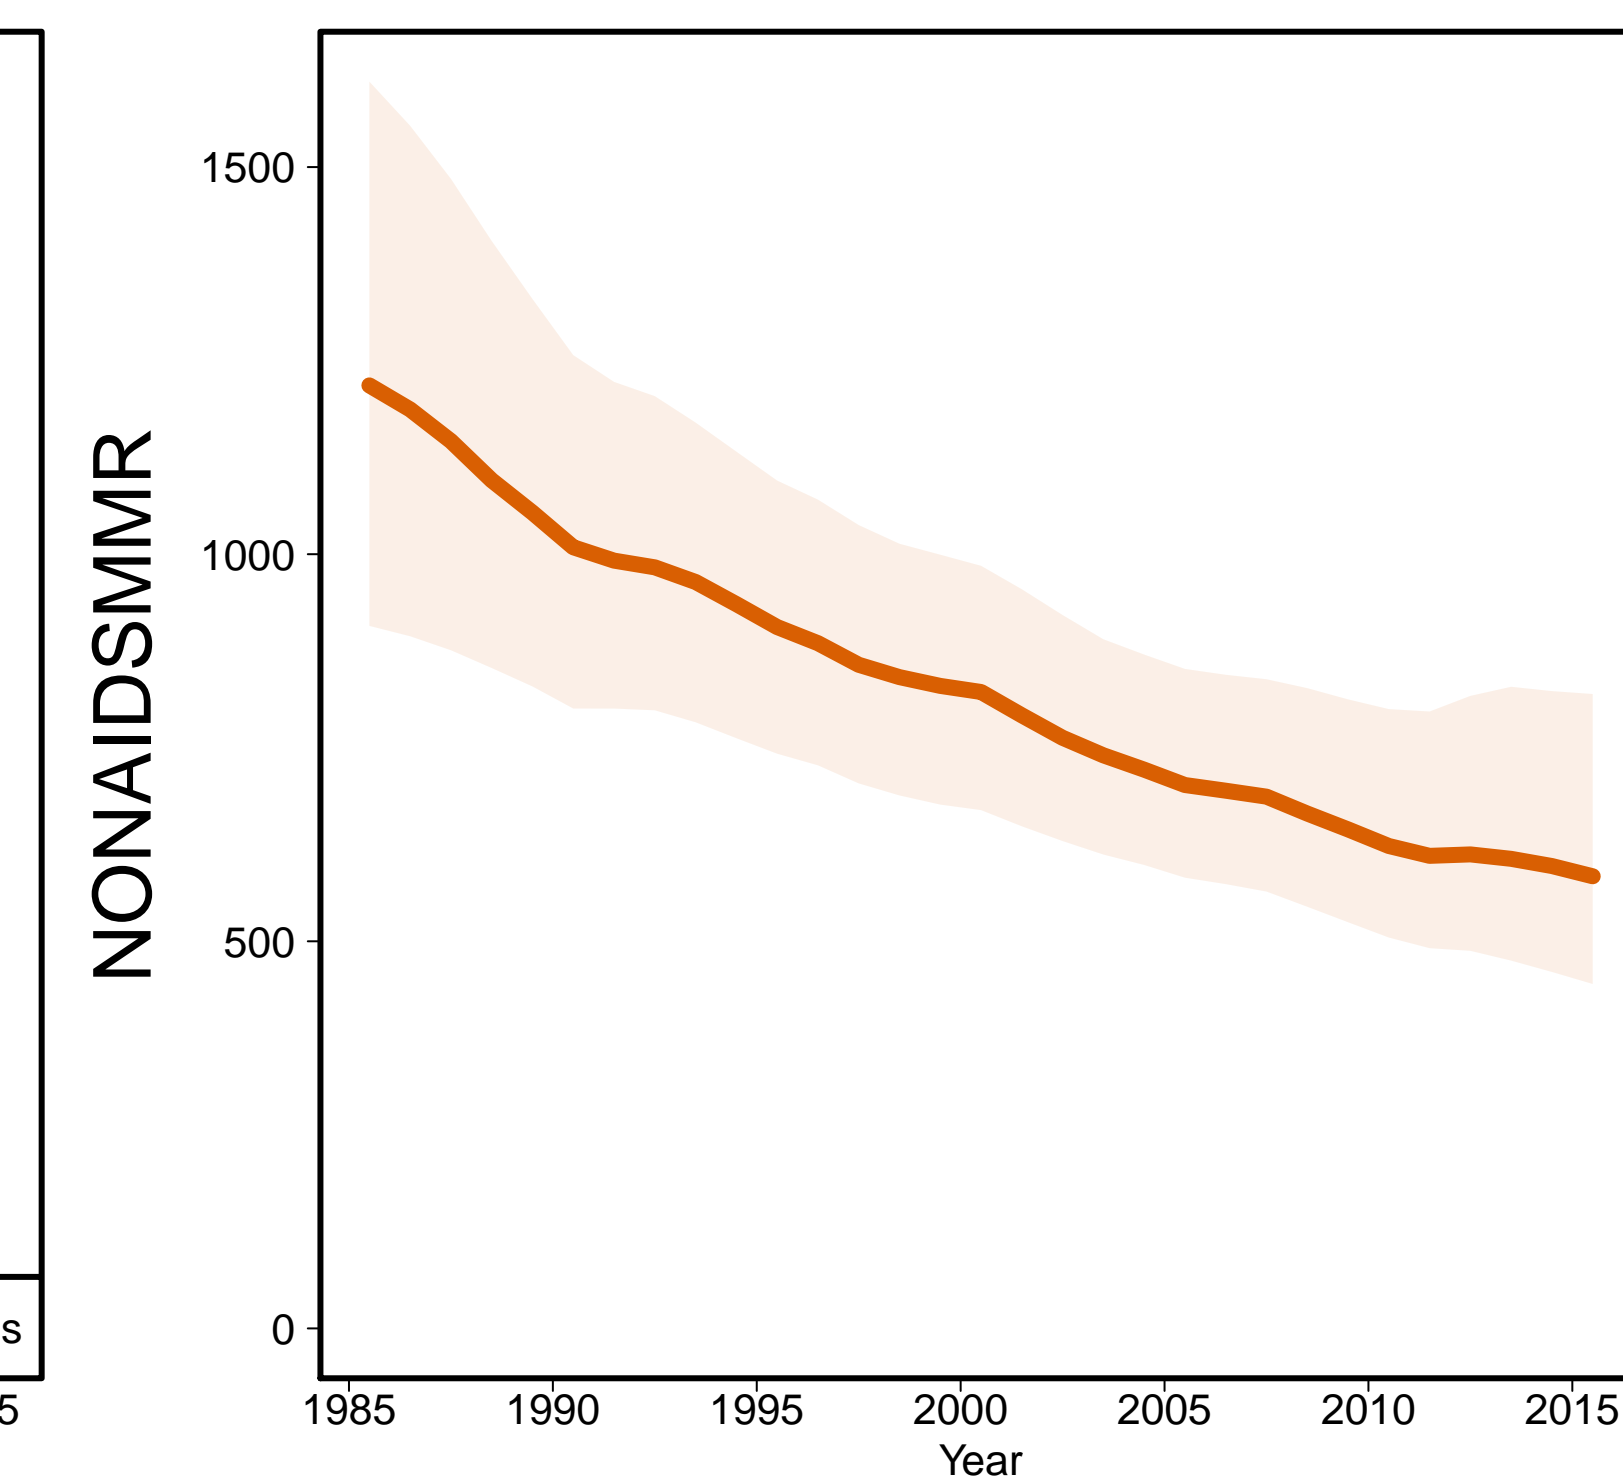

Aids MMR

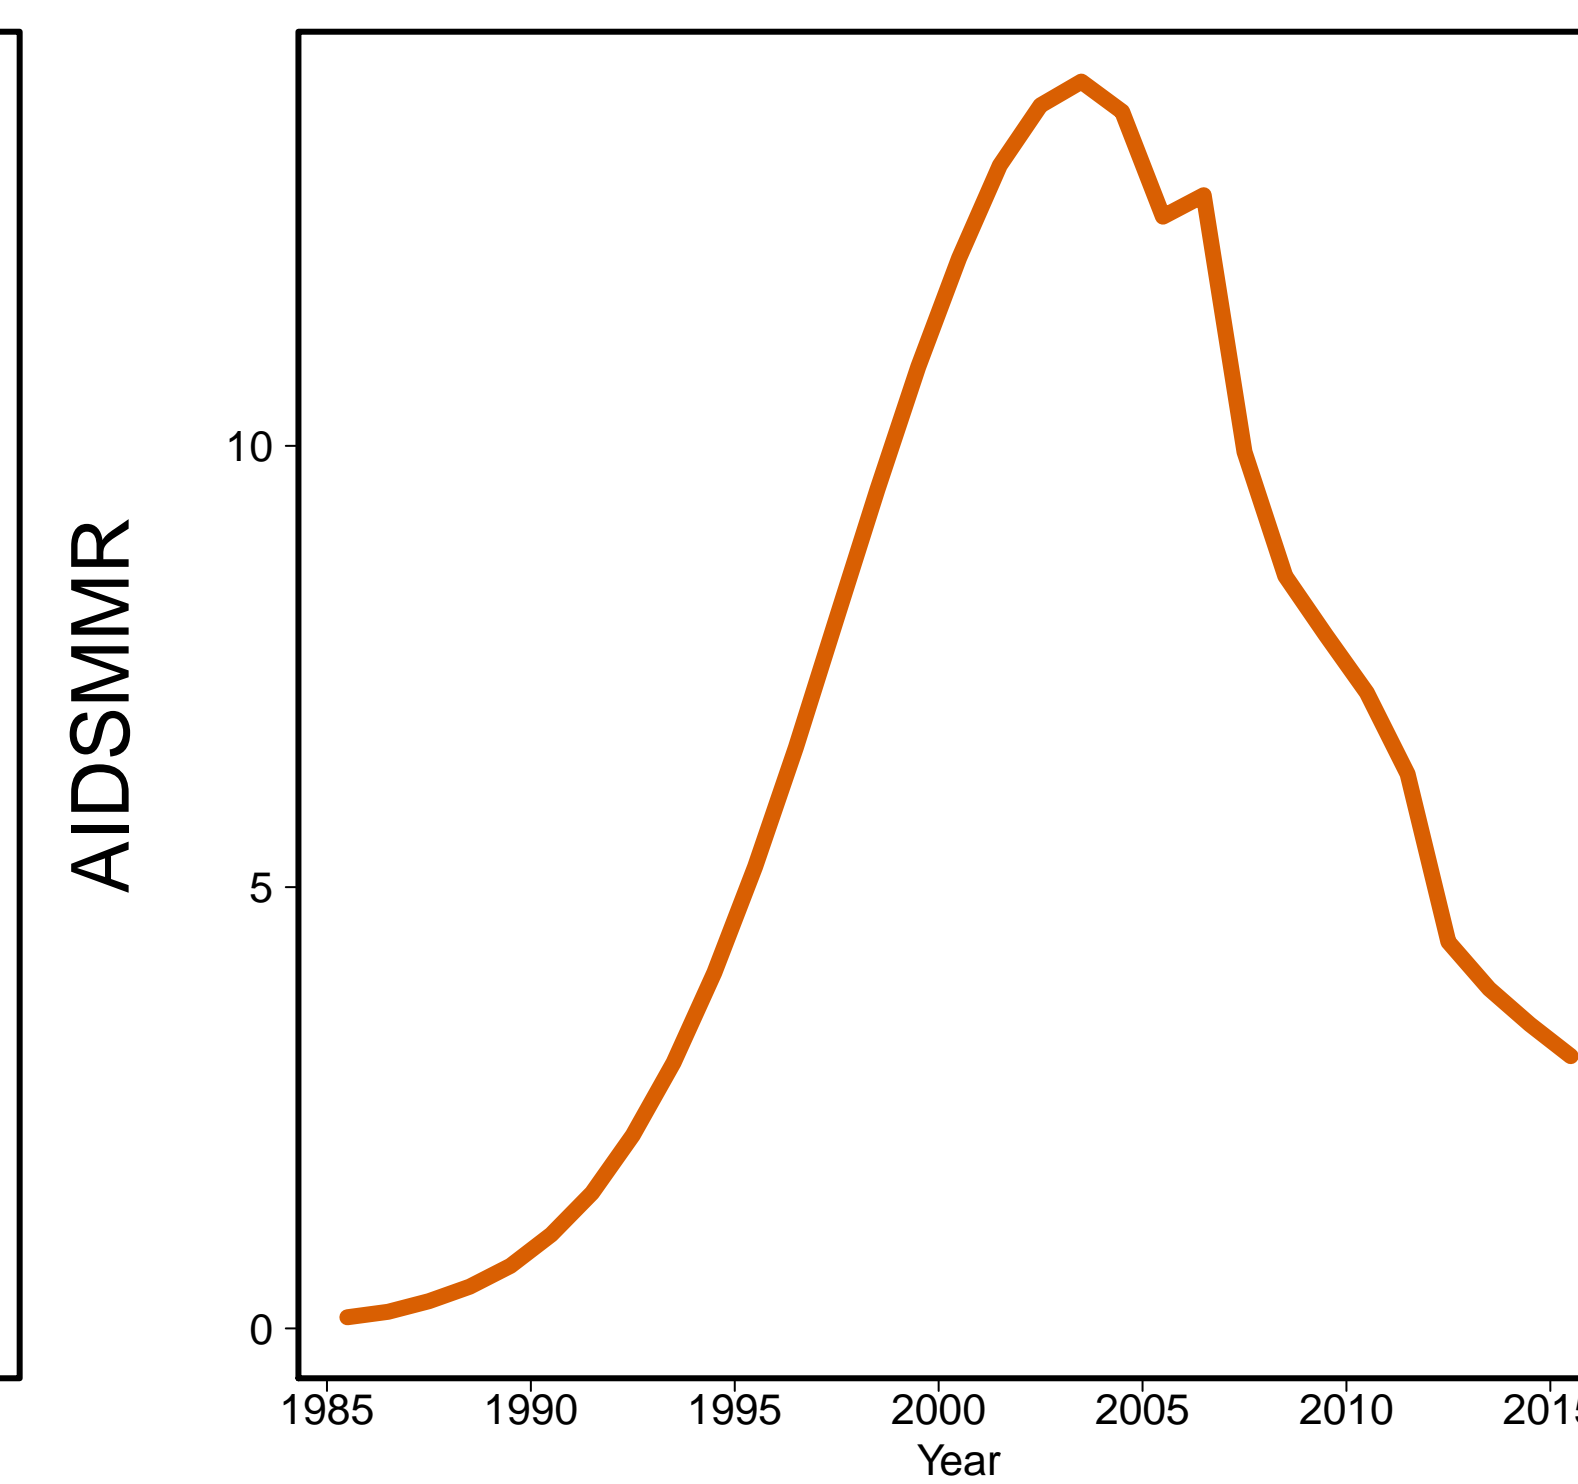

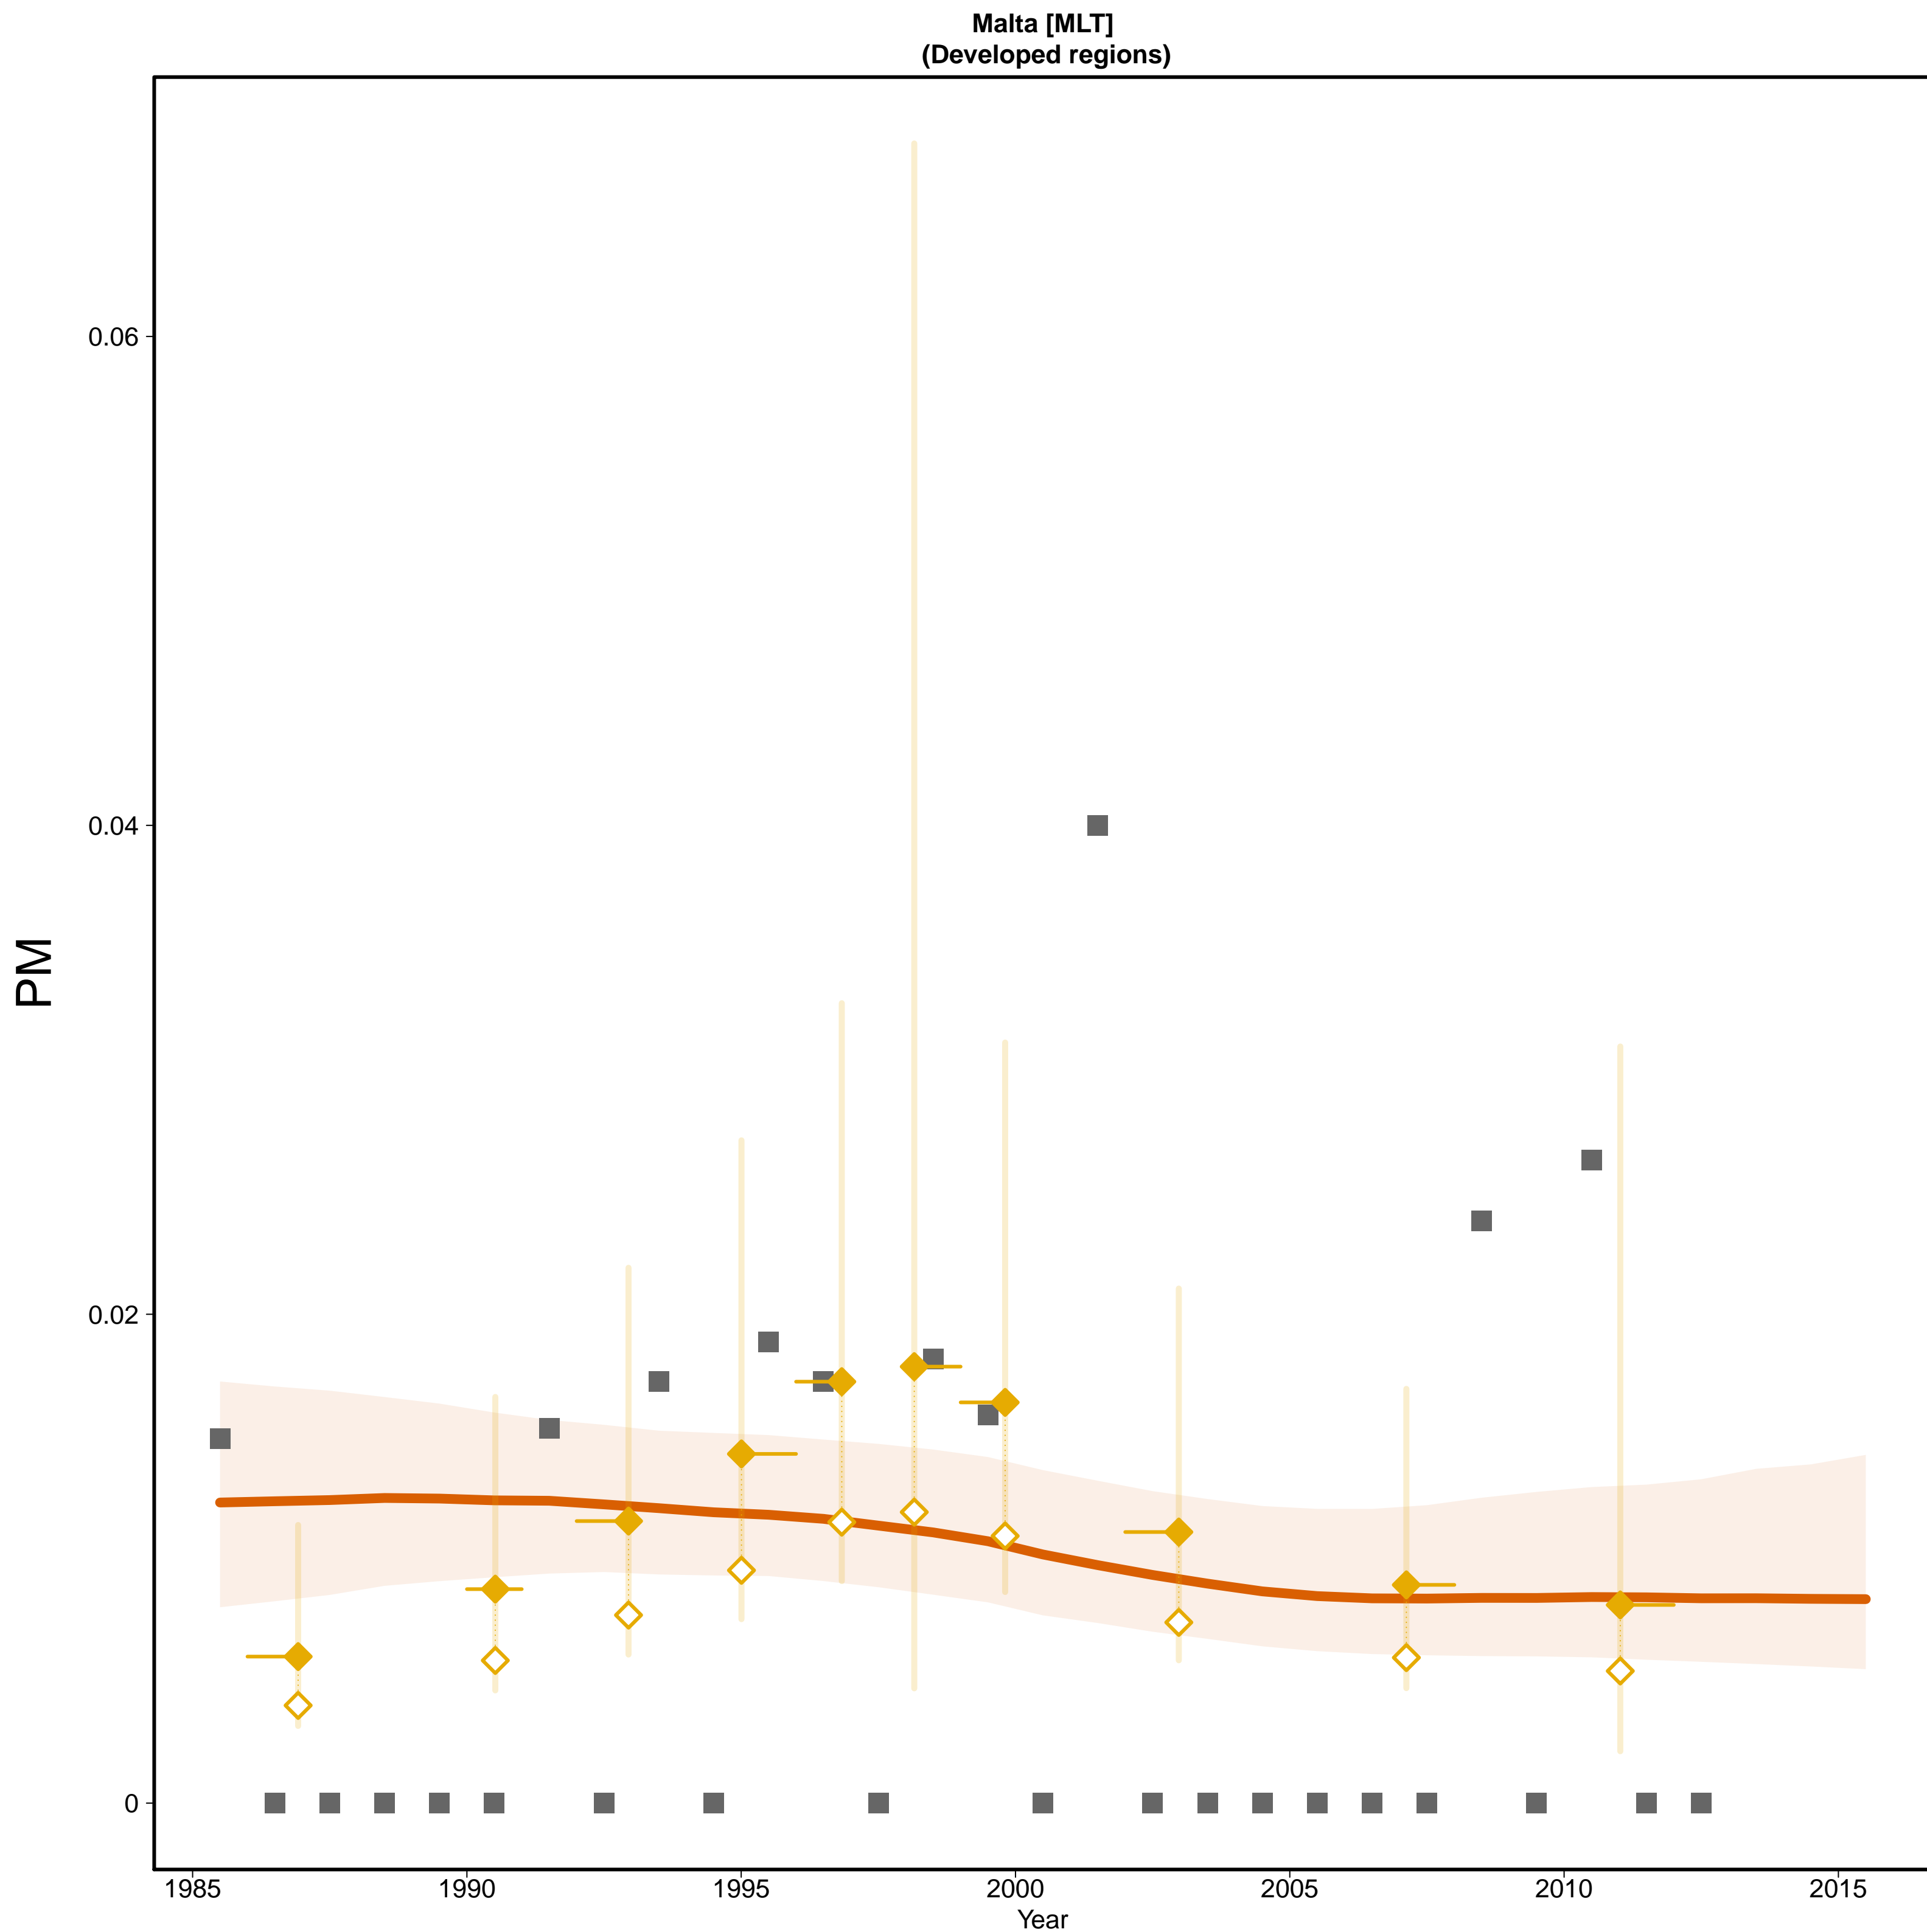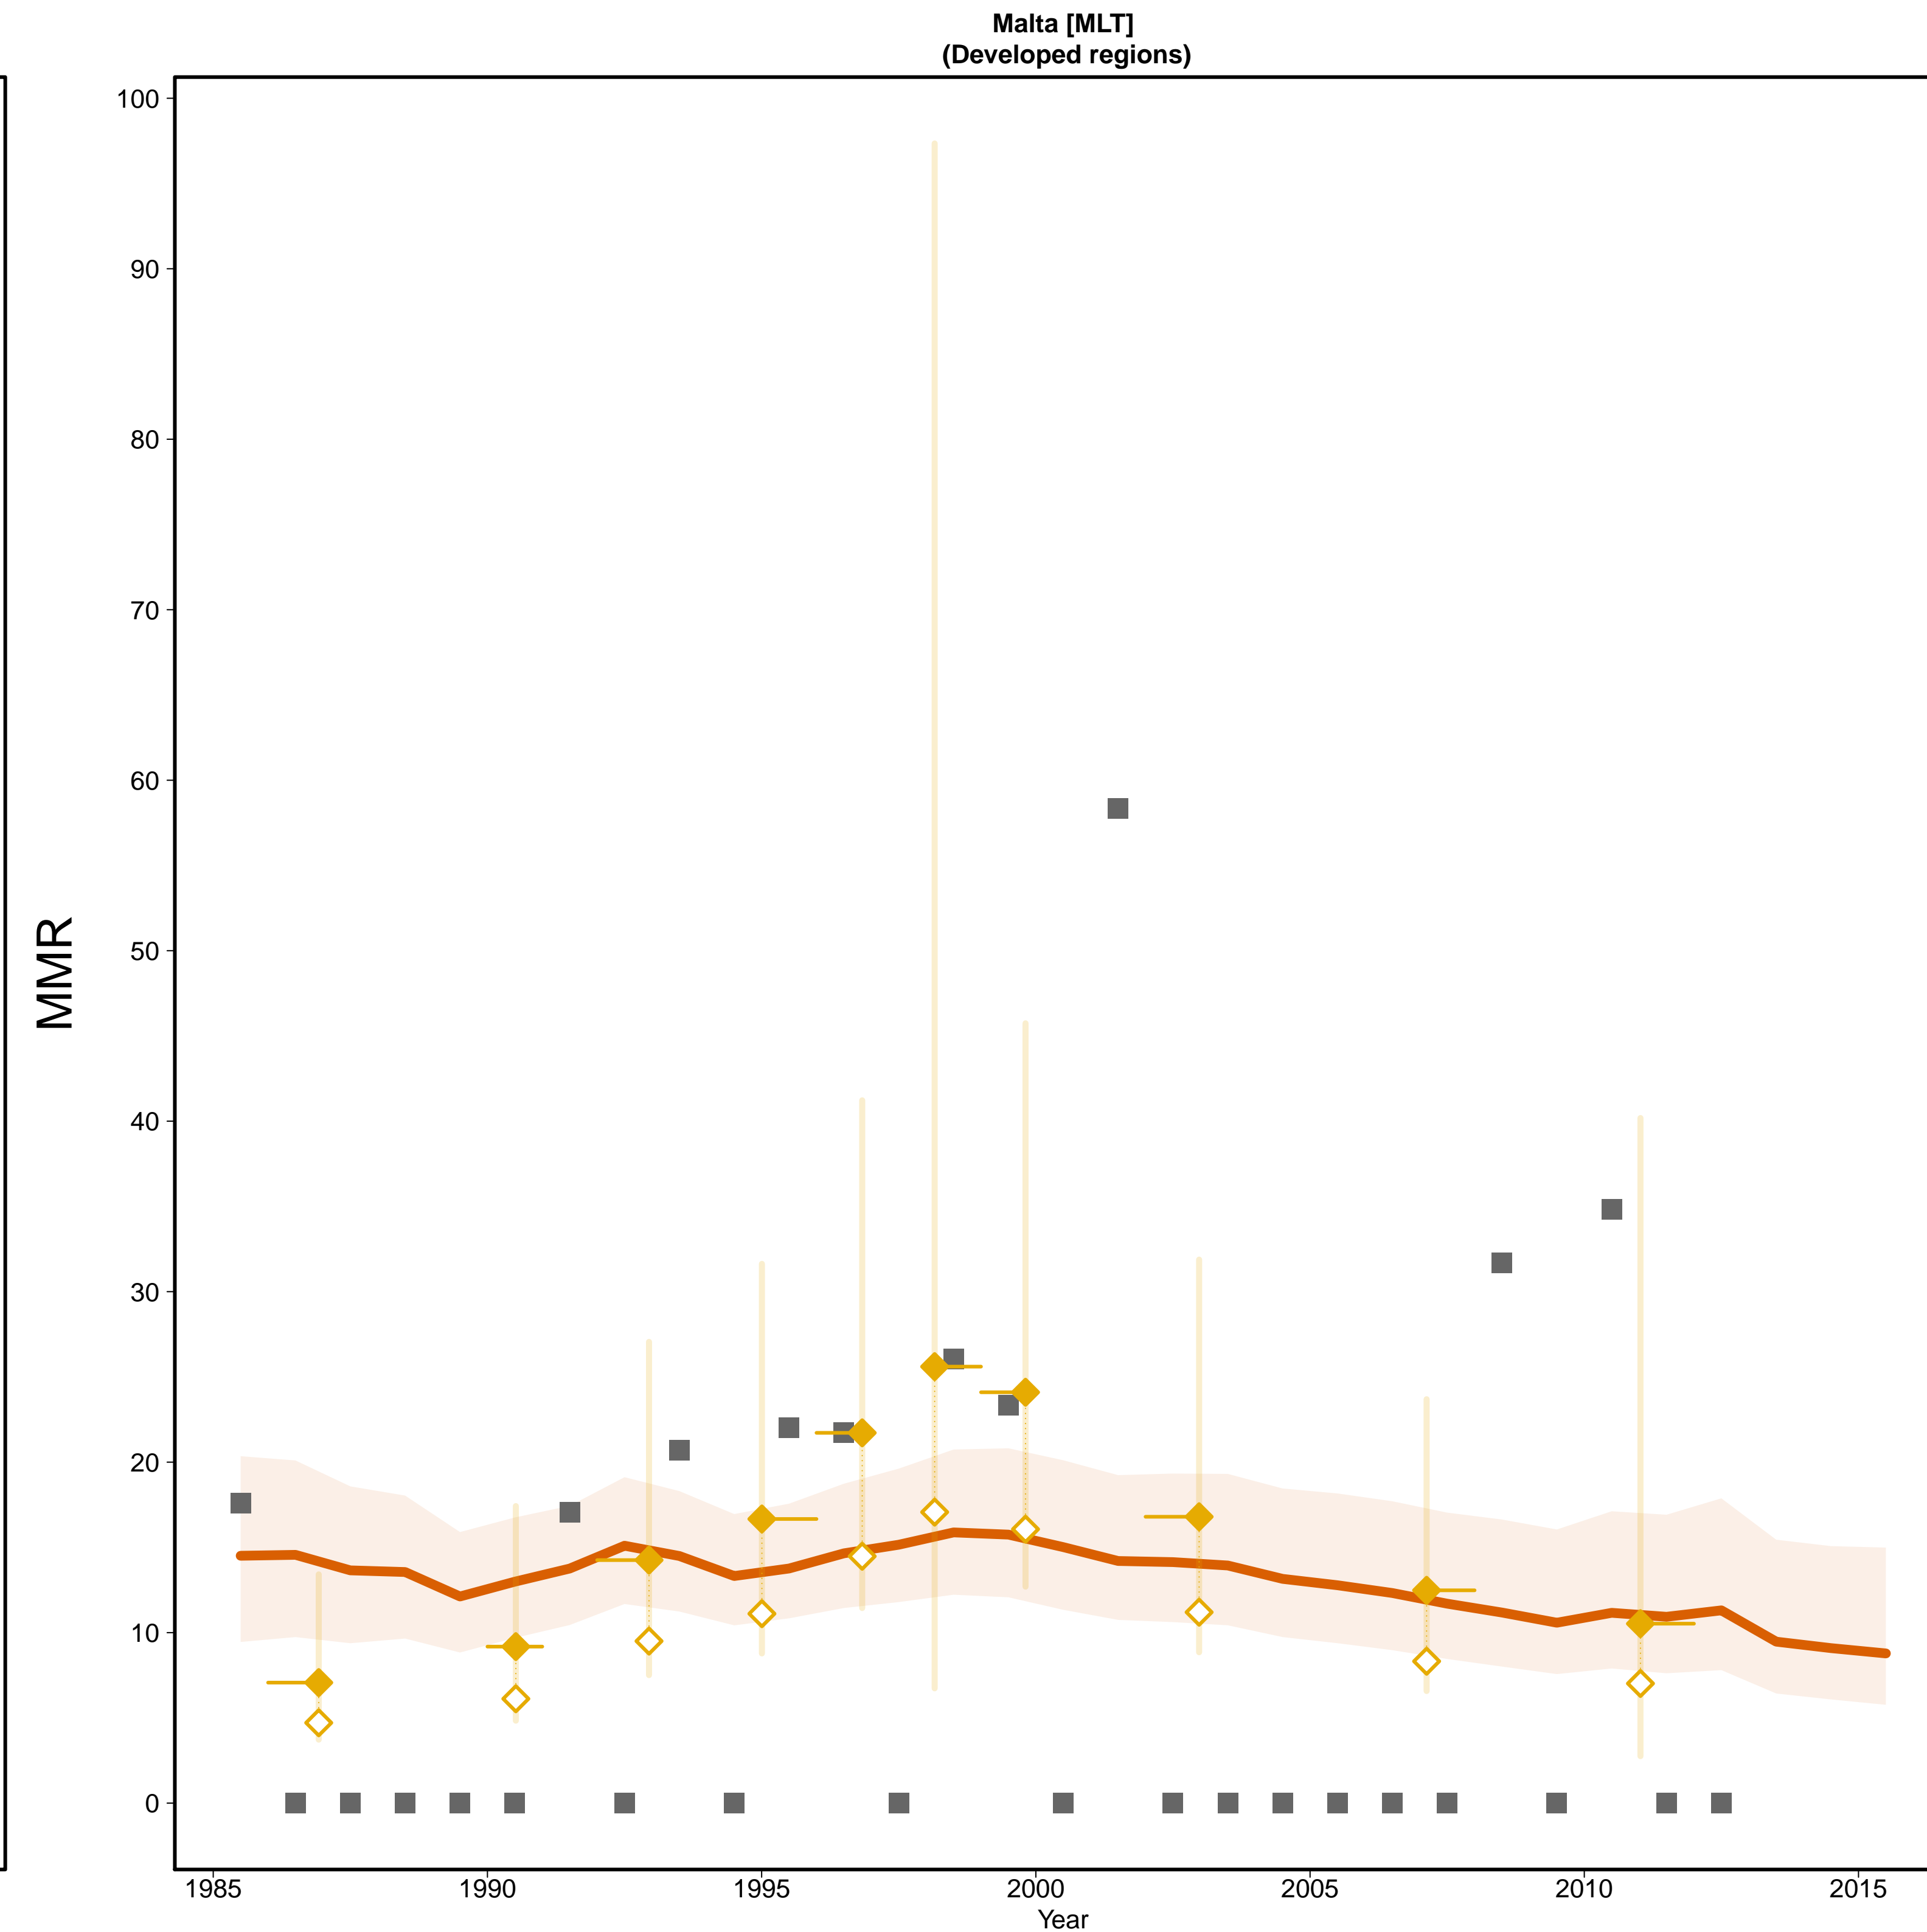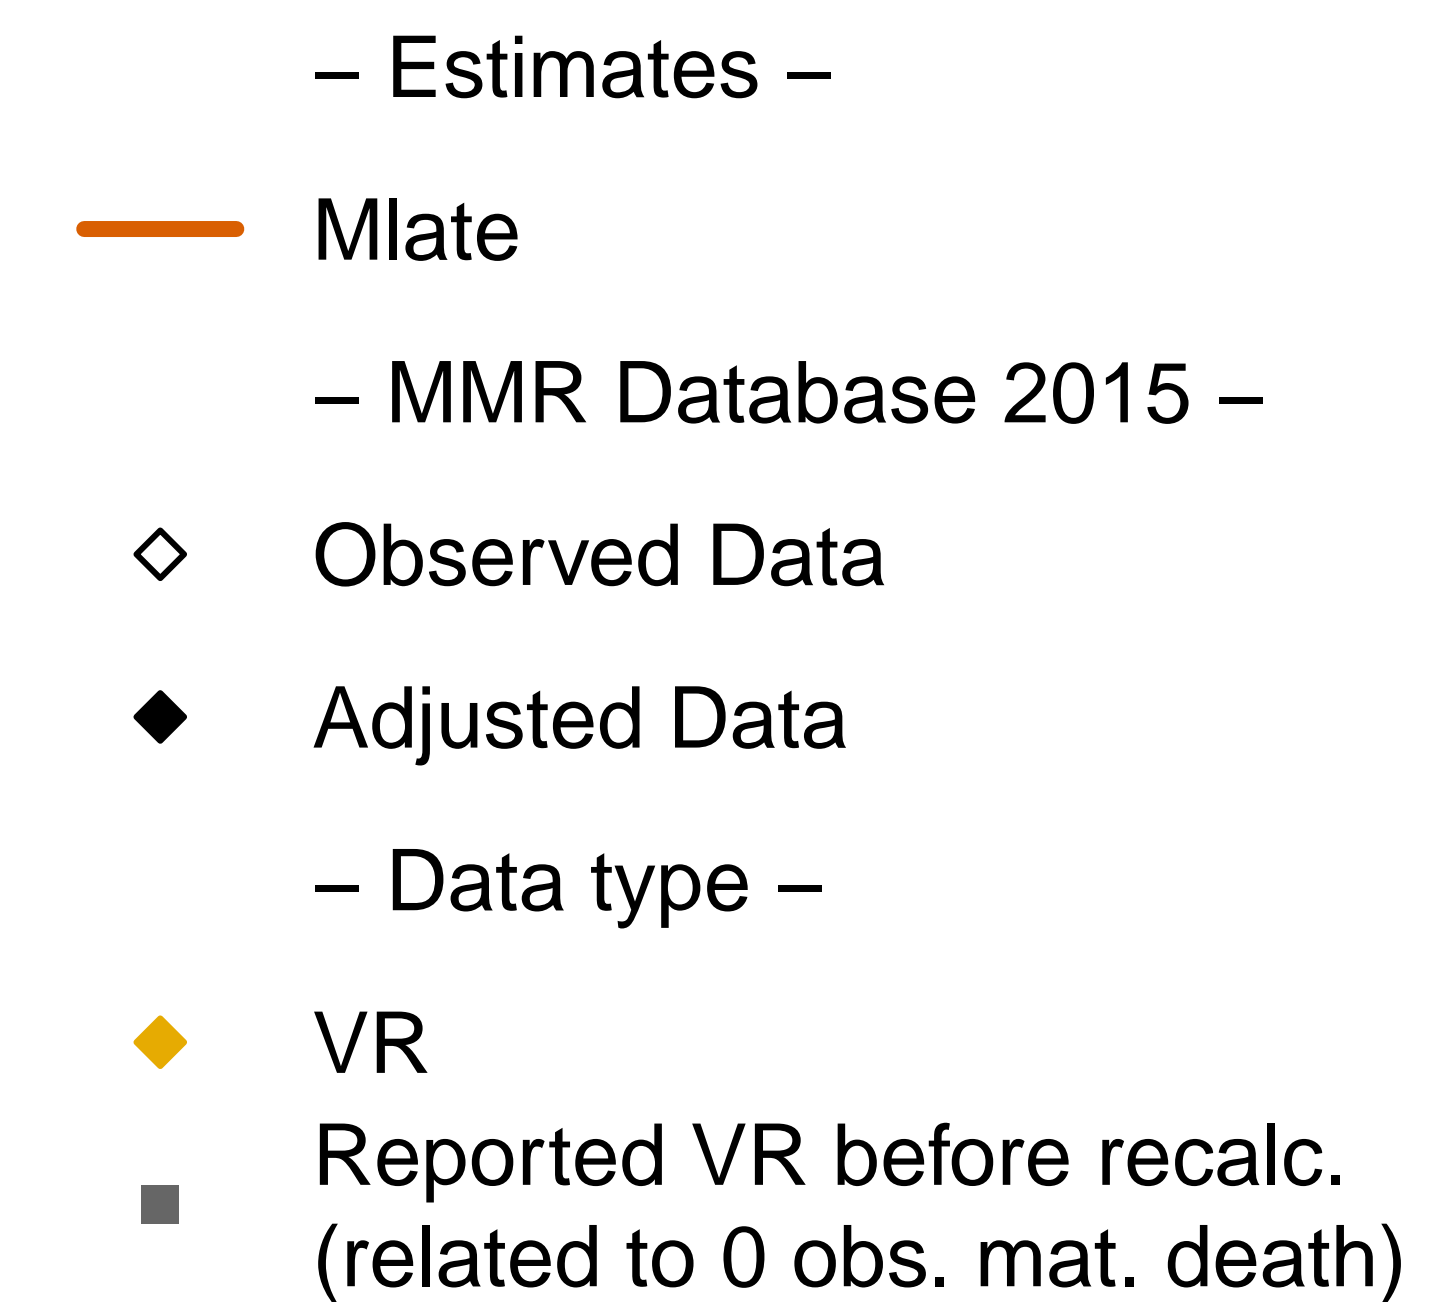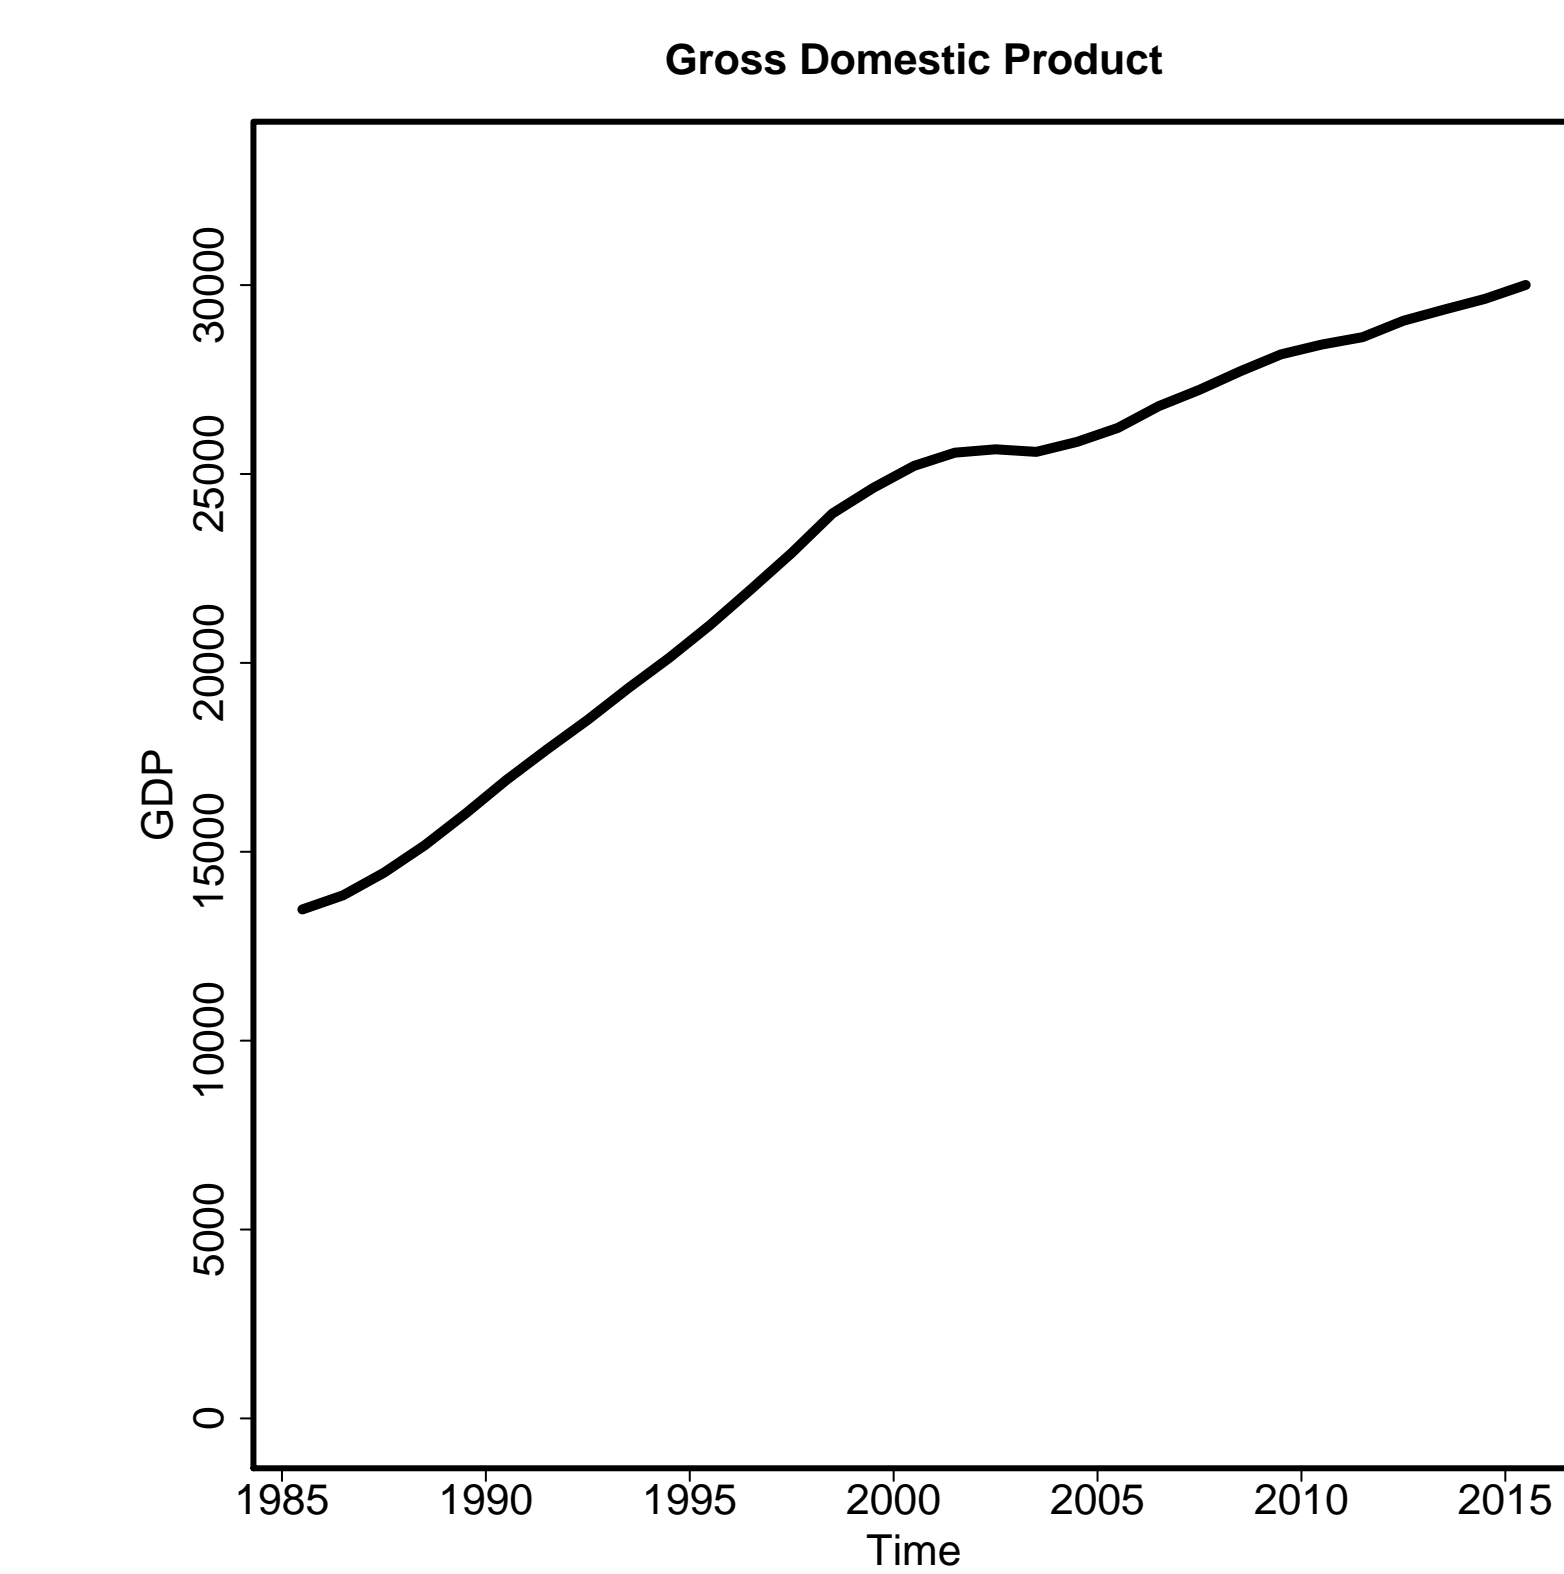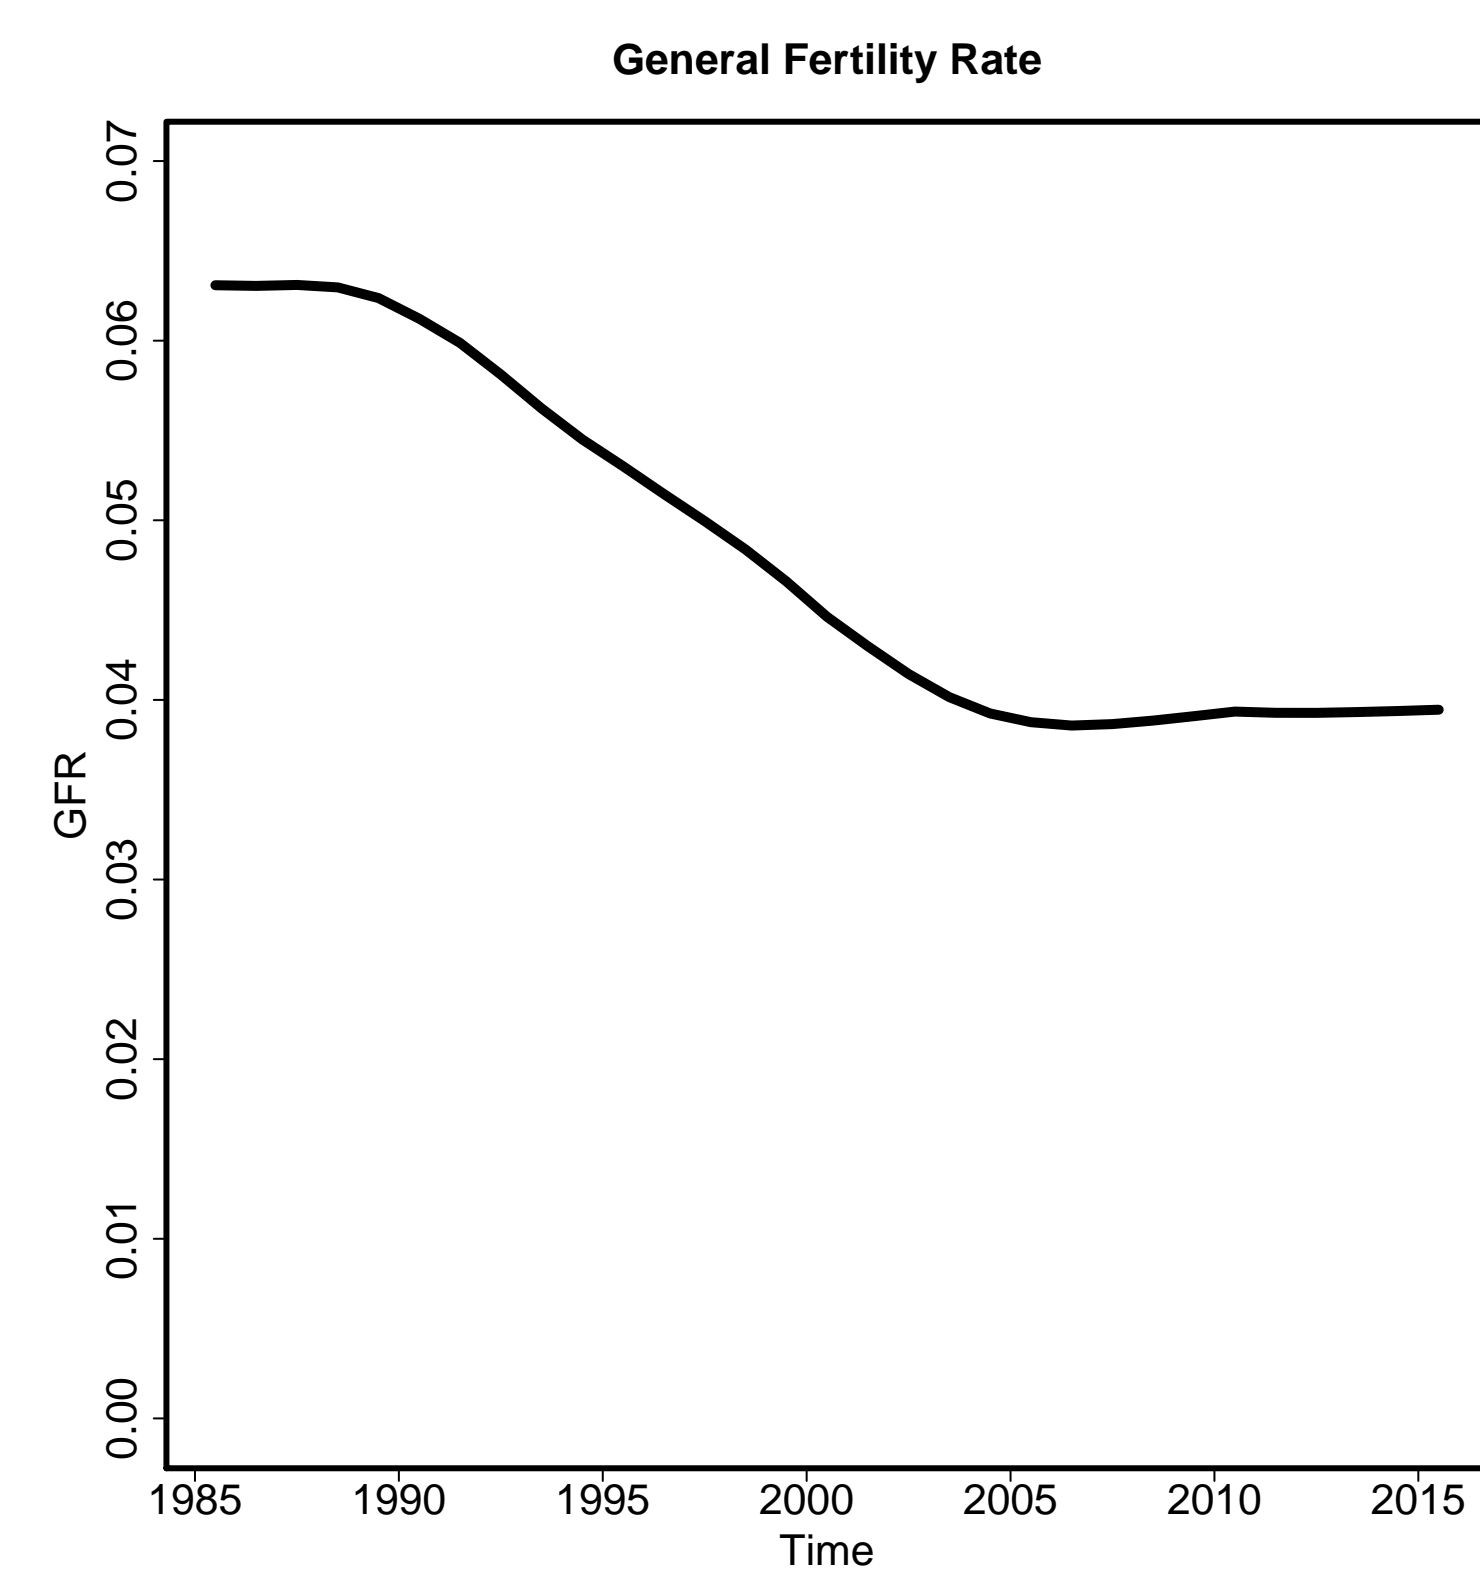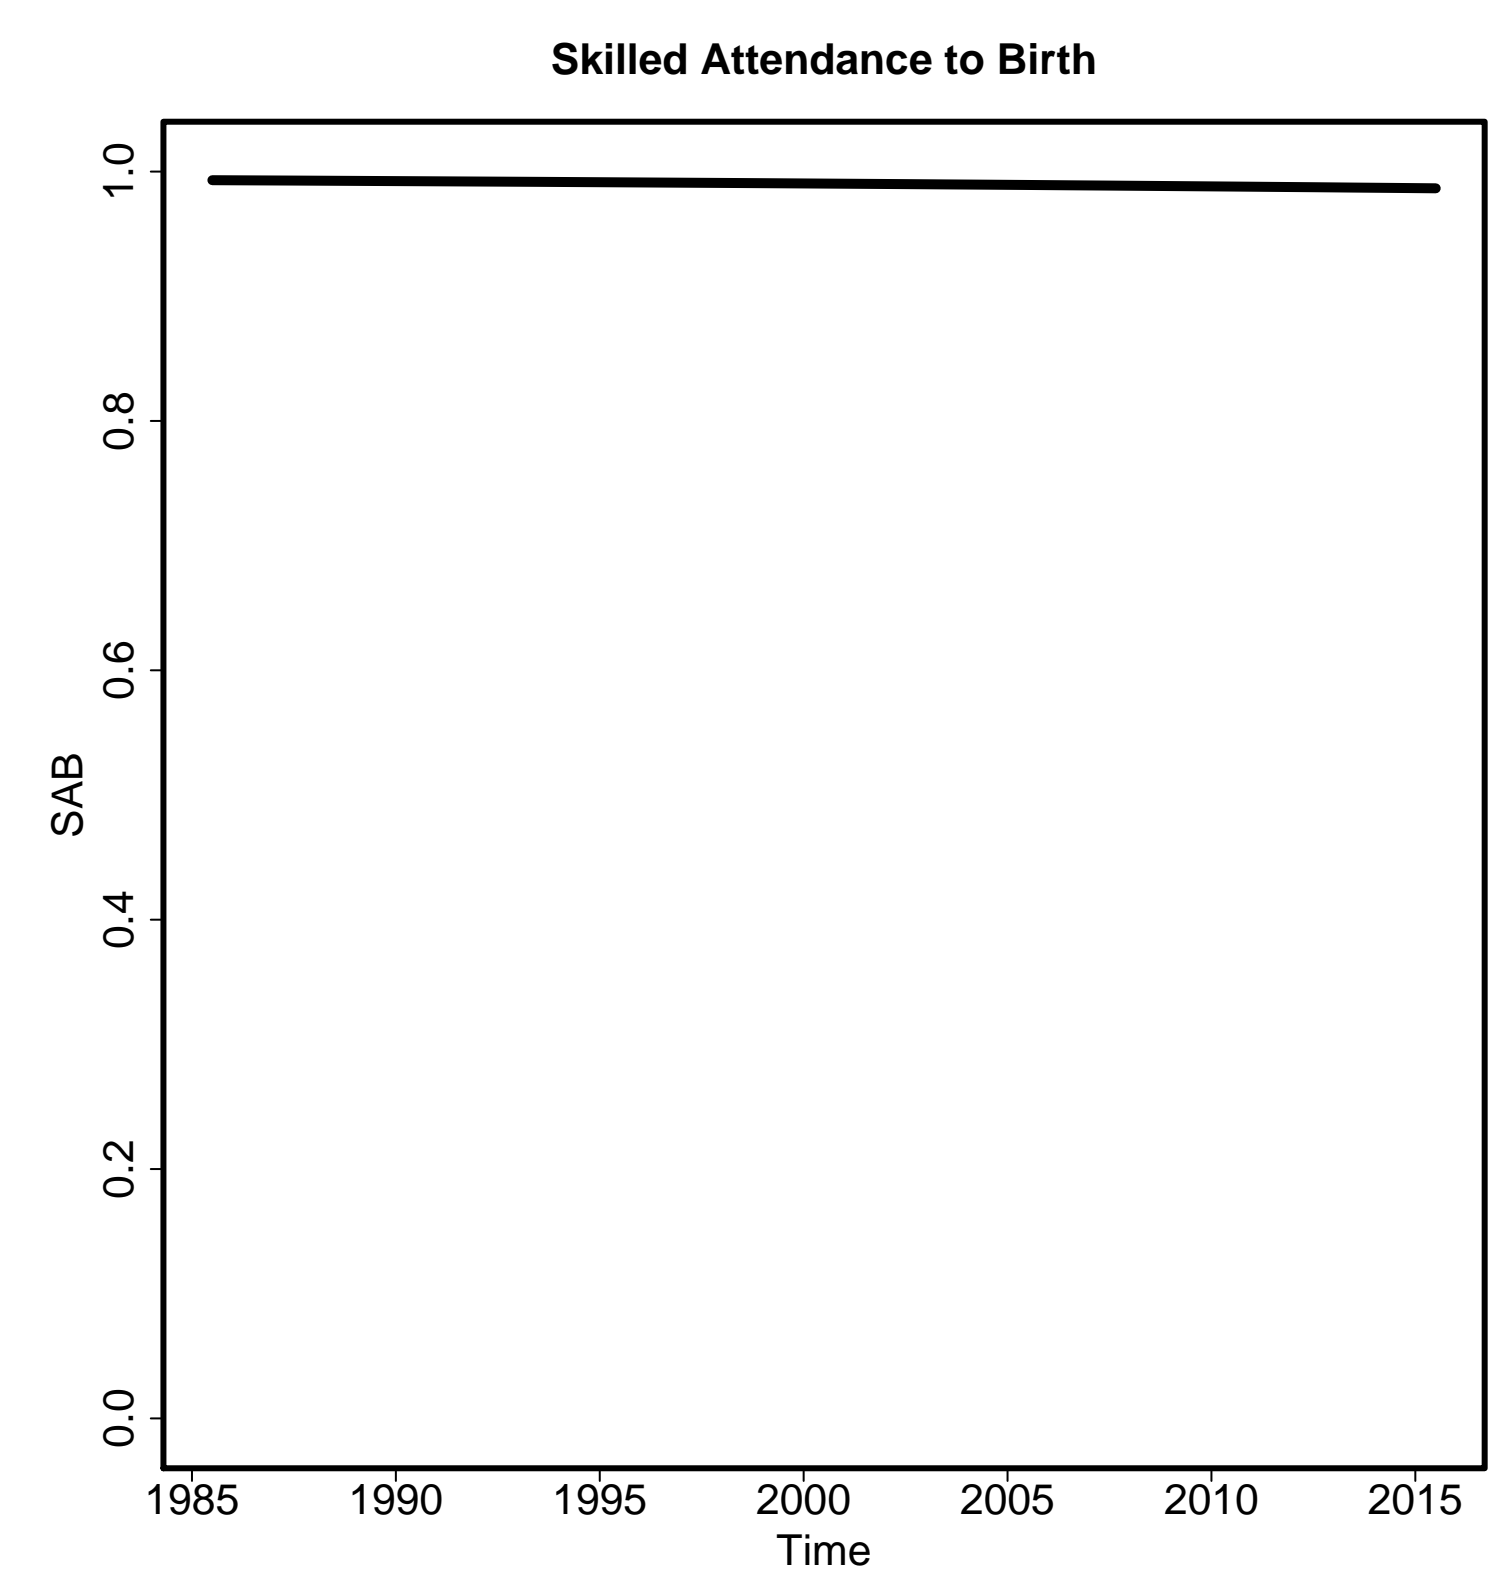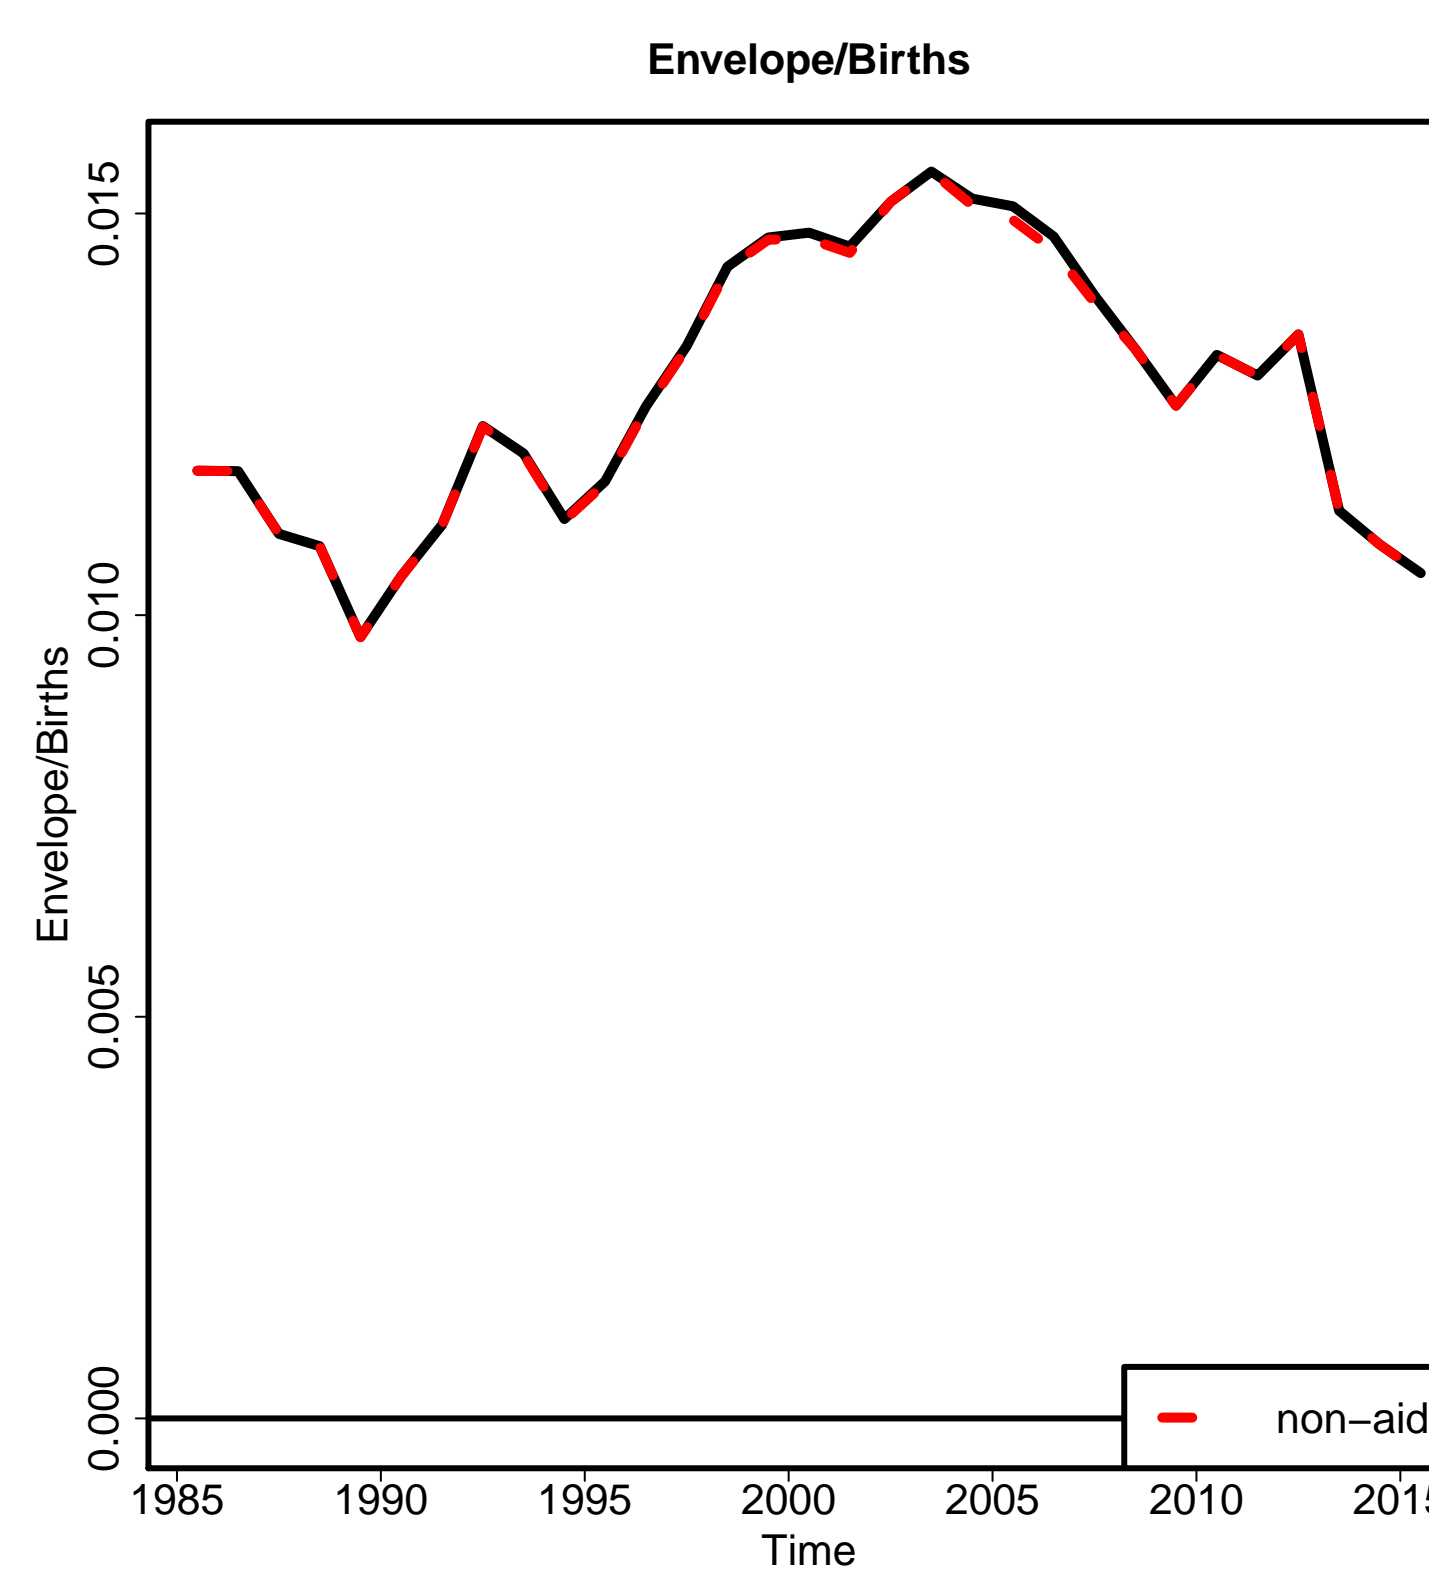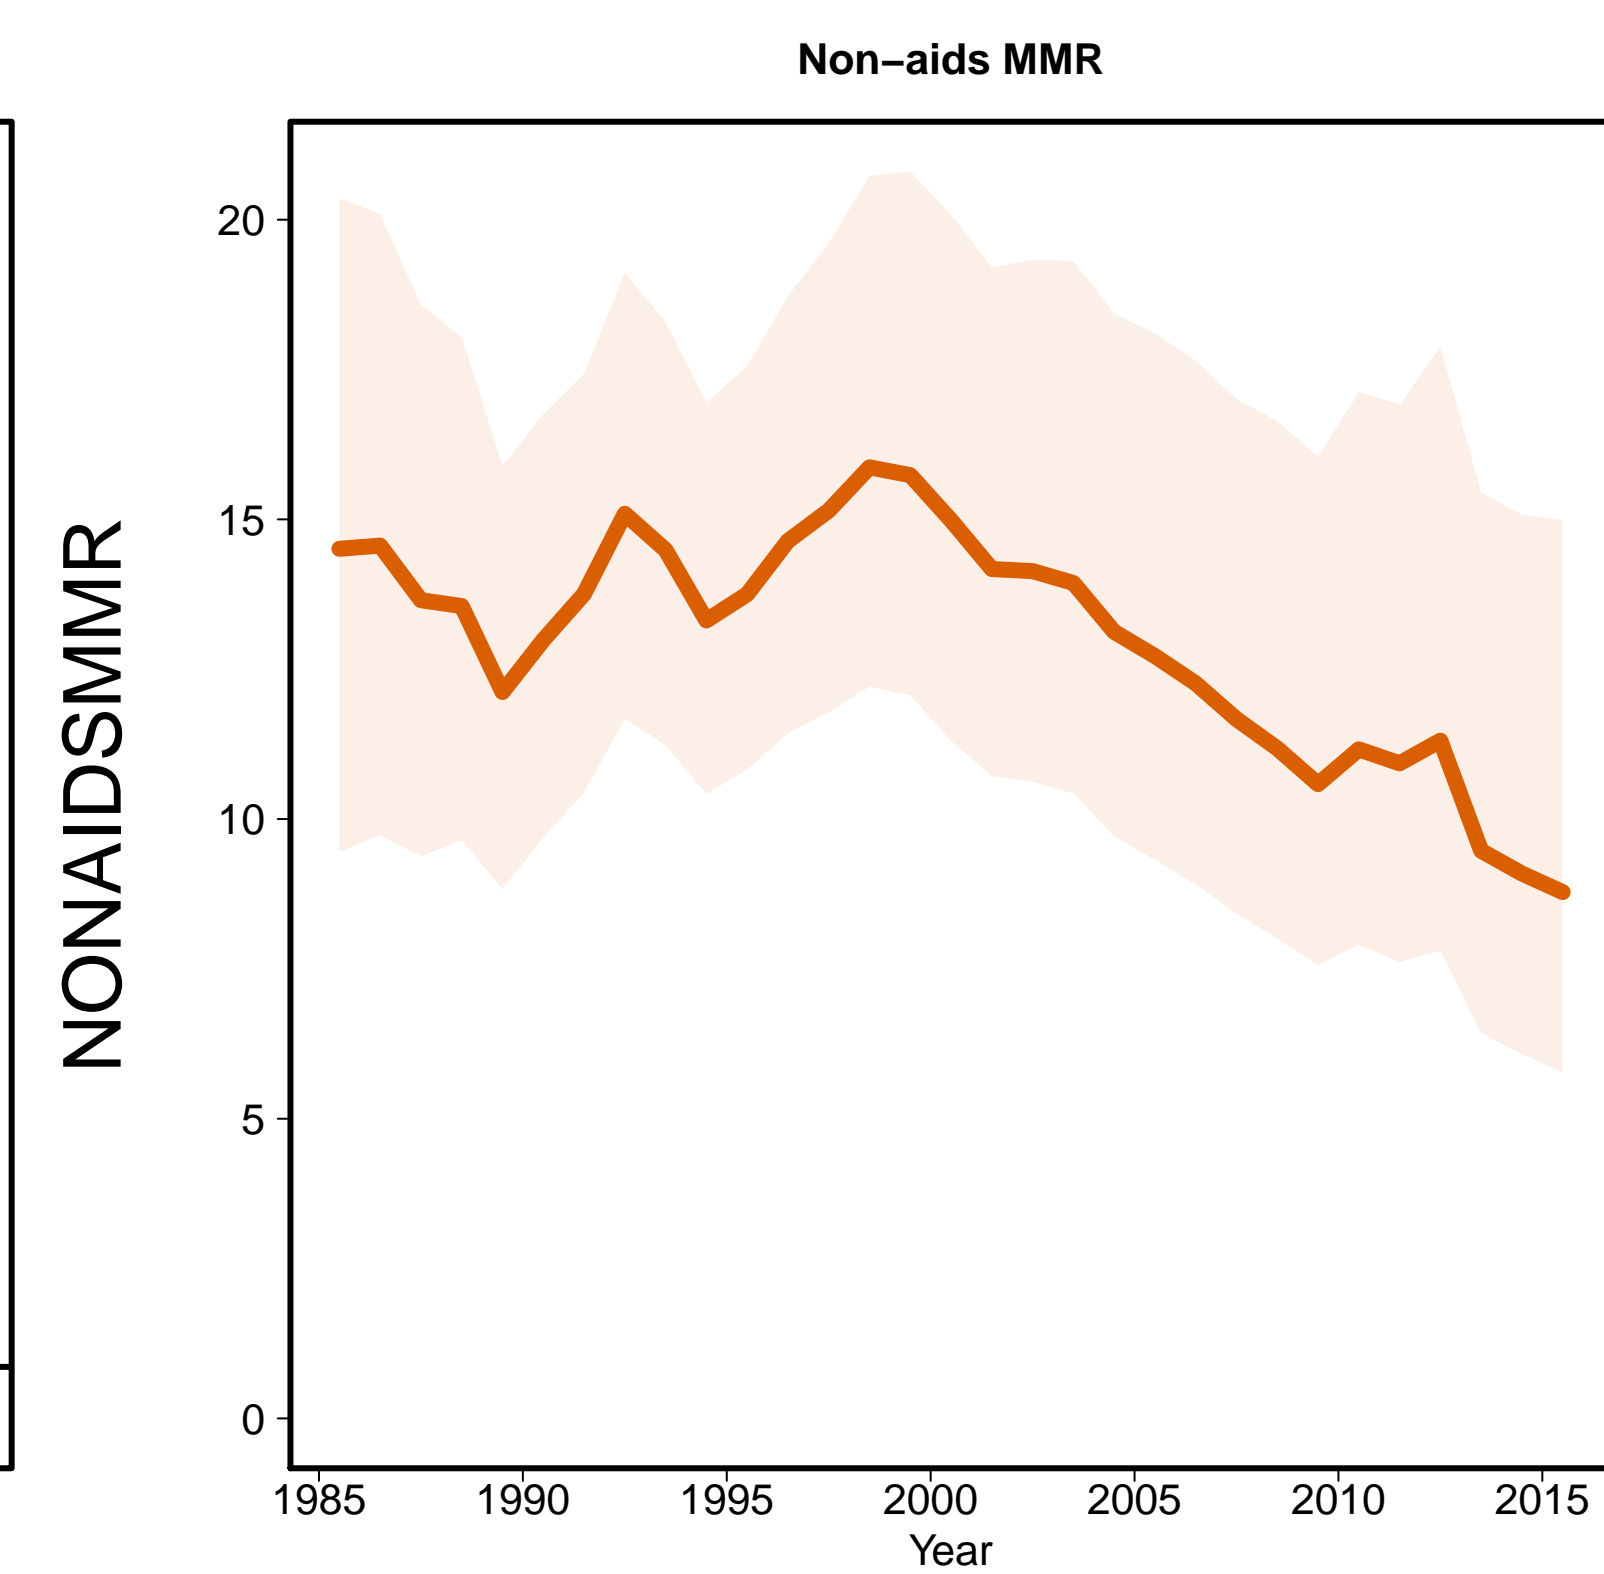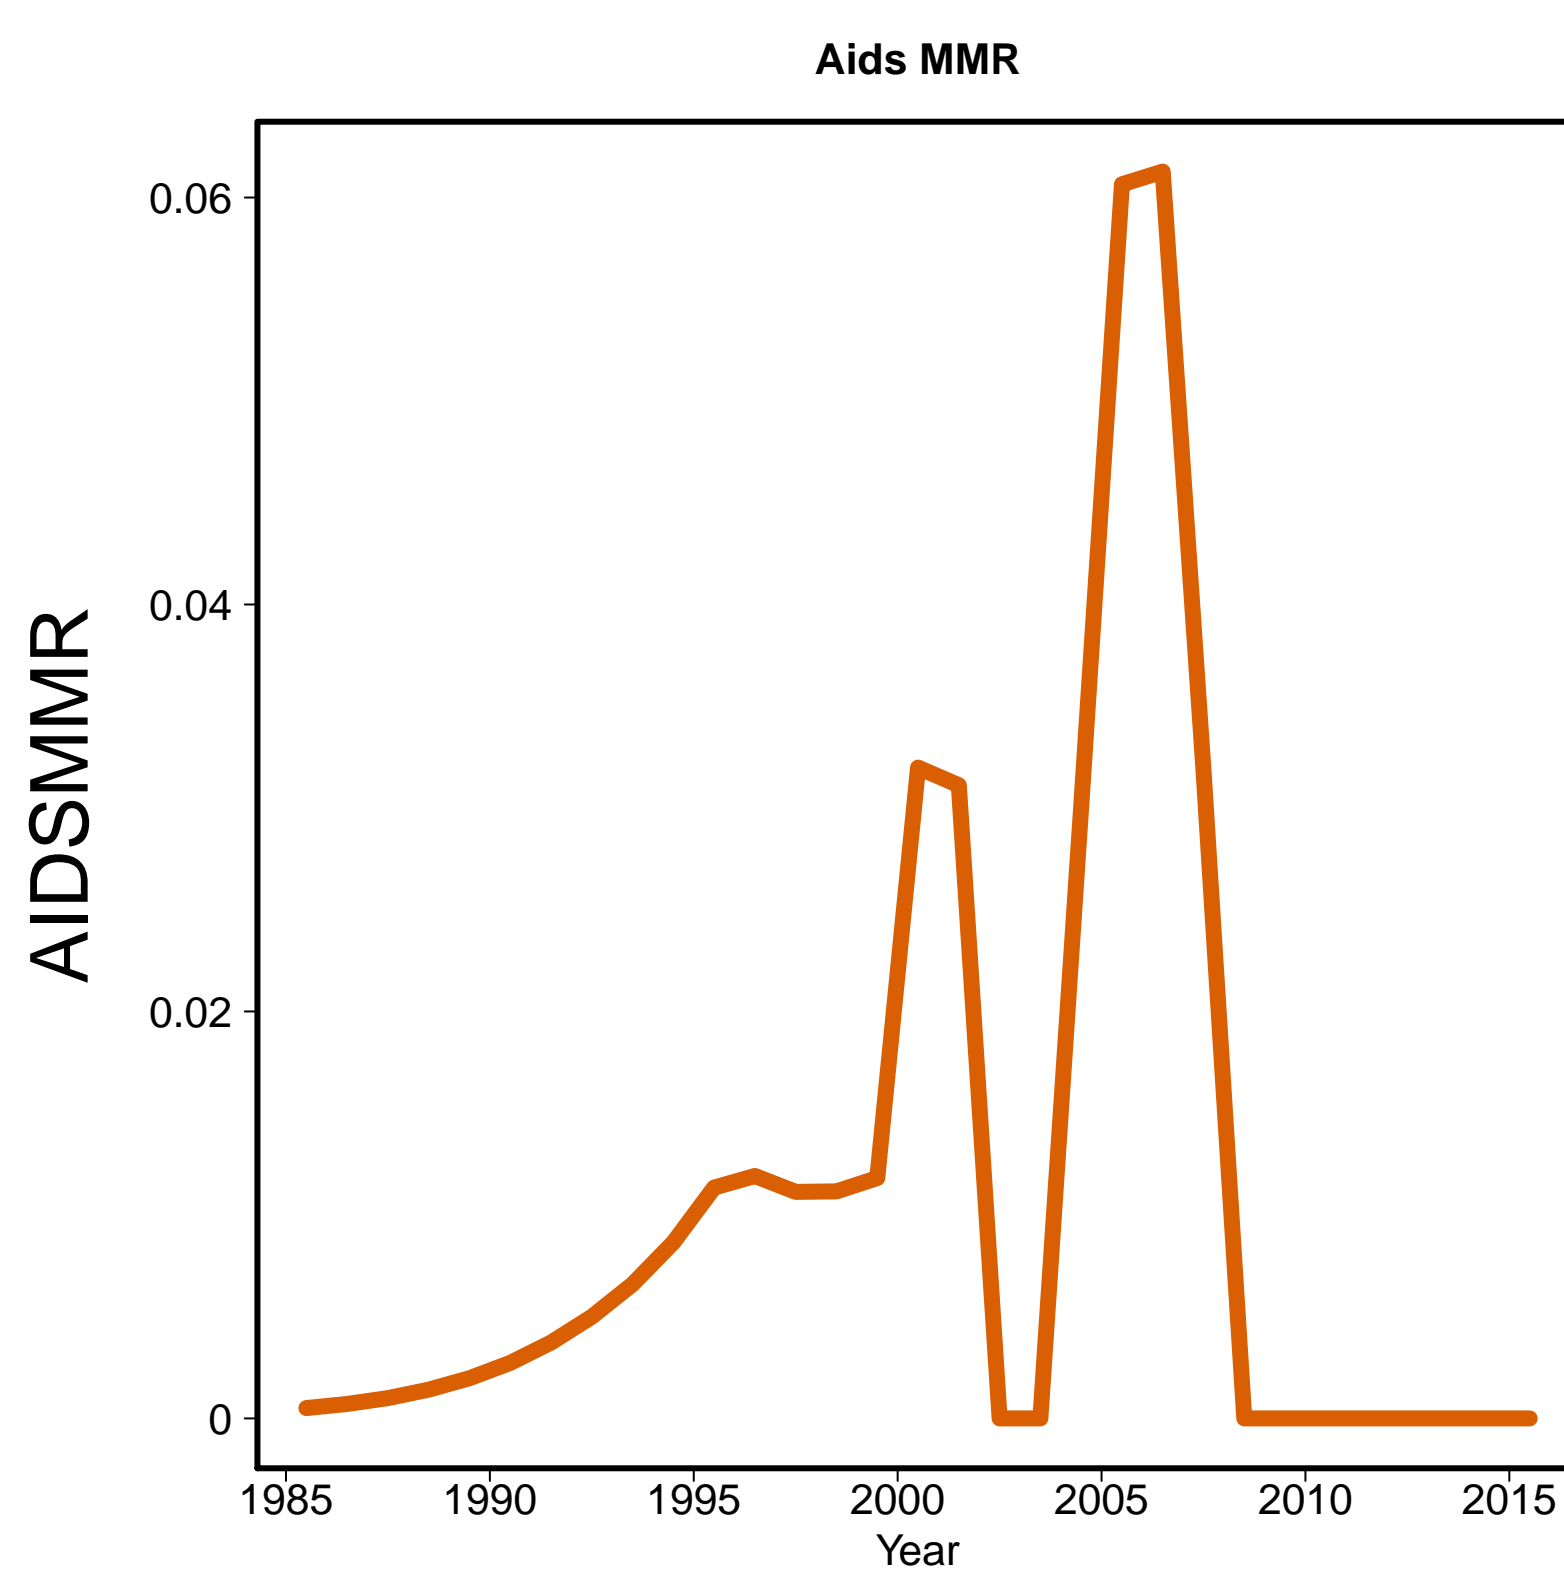

Mauritania [MRT]  
(Western Africa)

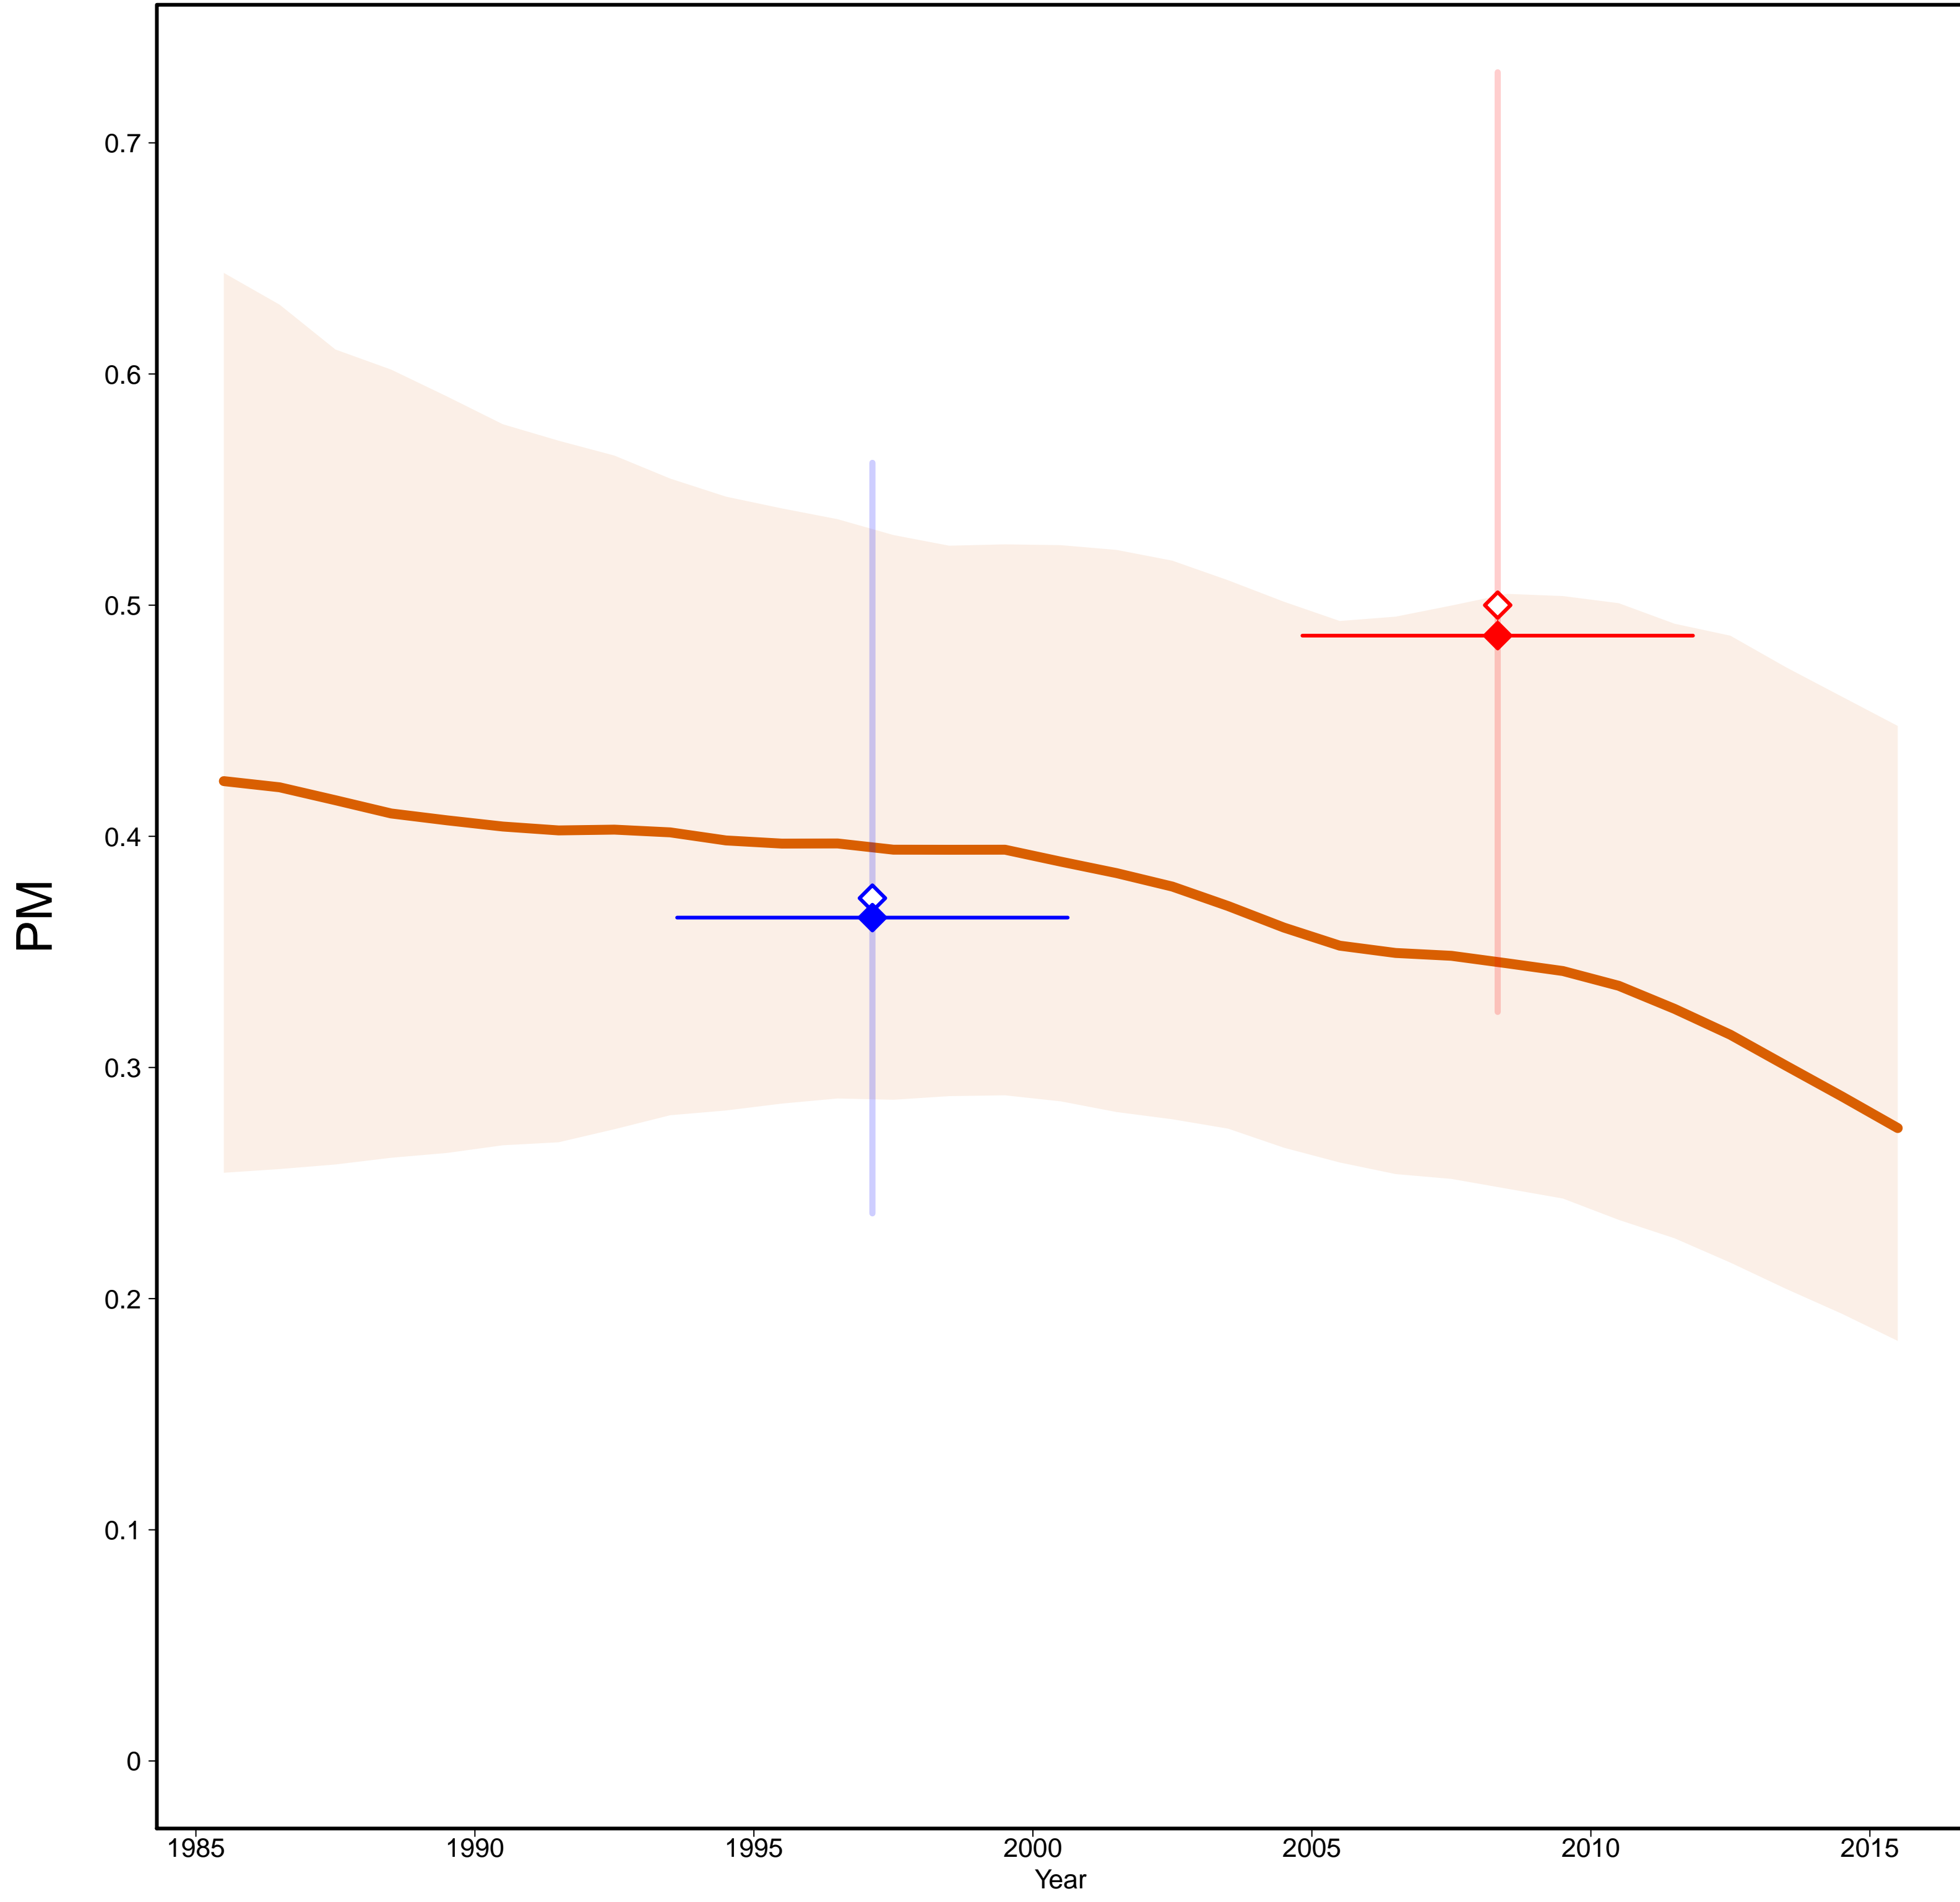

Mauritania [MRT]  
(Western Africa)

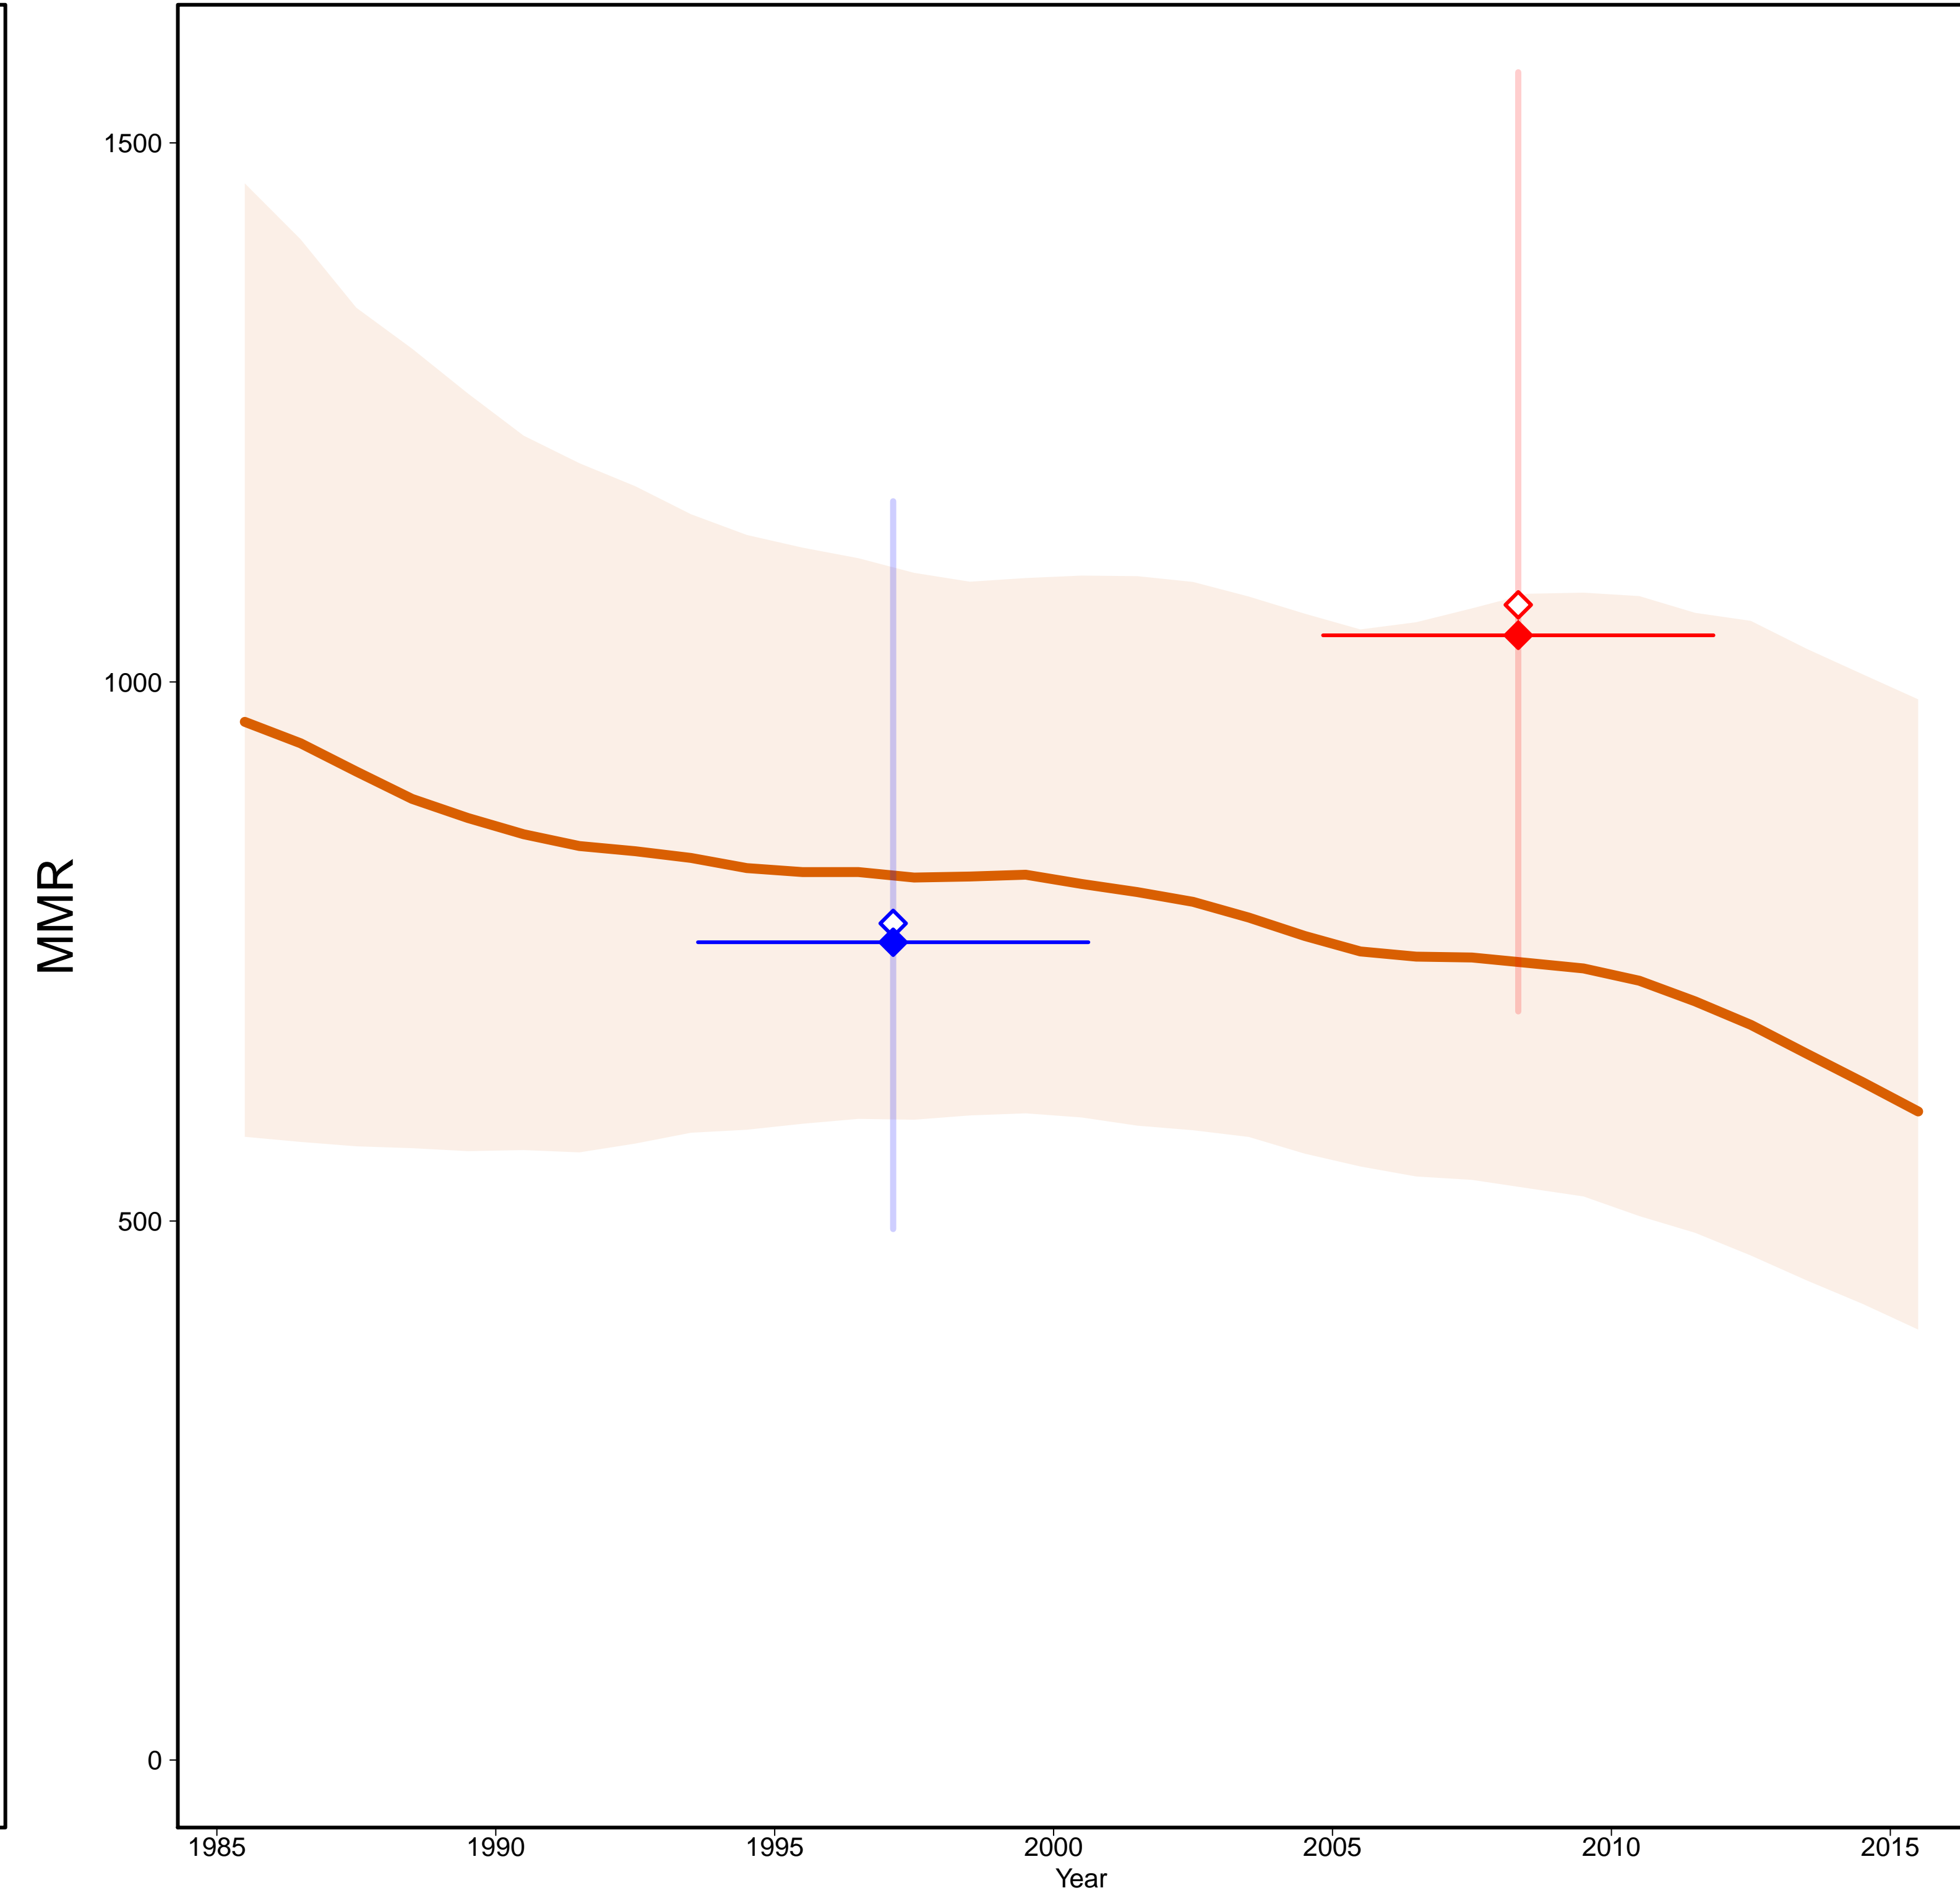

- Estimates —
- MMR Database 2015 —
- ◇ Observed Data
- ◆ Adjusted Data
- Data type —
- ◆ DHS
- ◆ Misc. studies

Gross Domestic Product

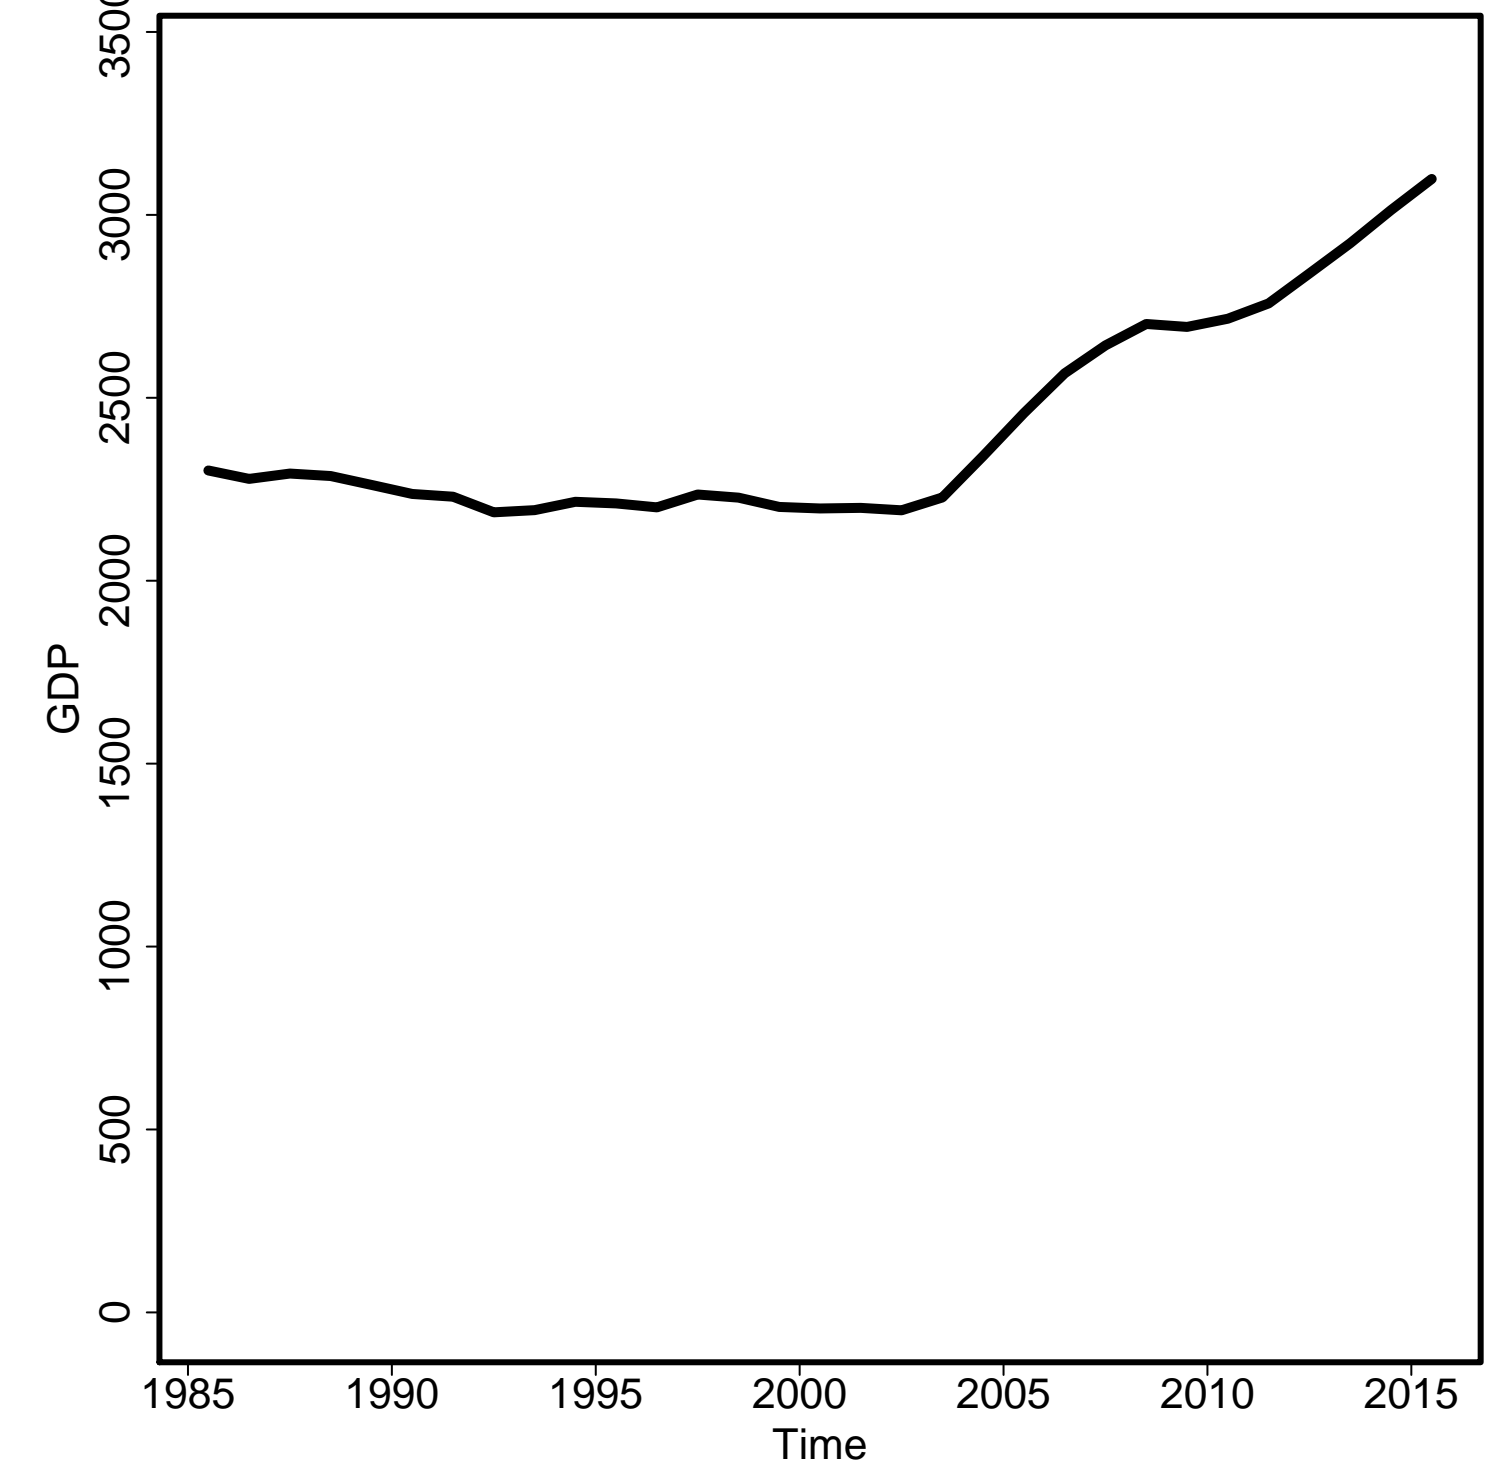

General Fertility Rate

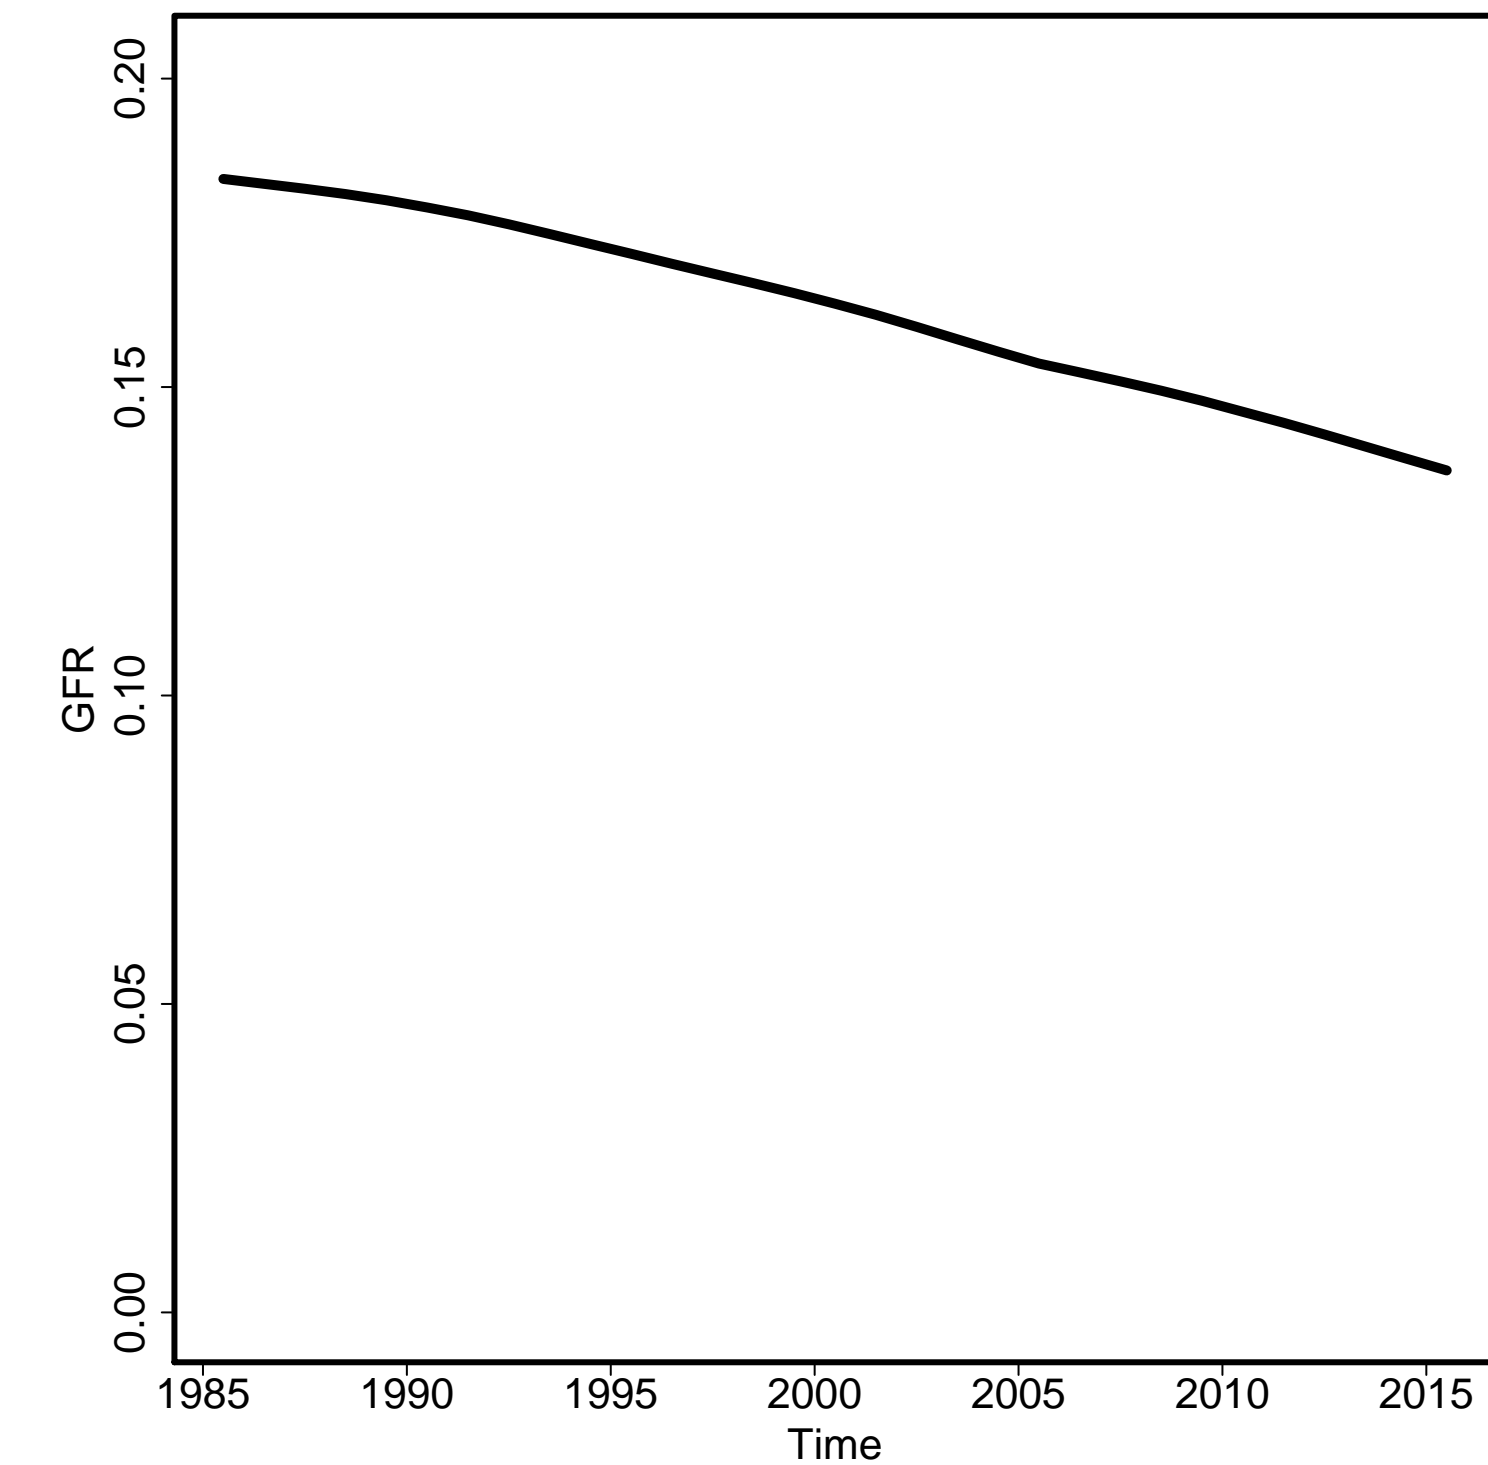

Skilled Attendance to Birth

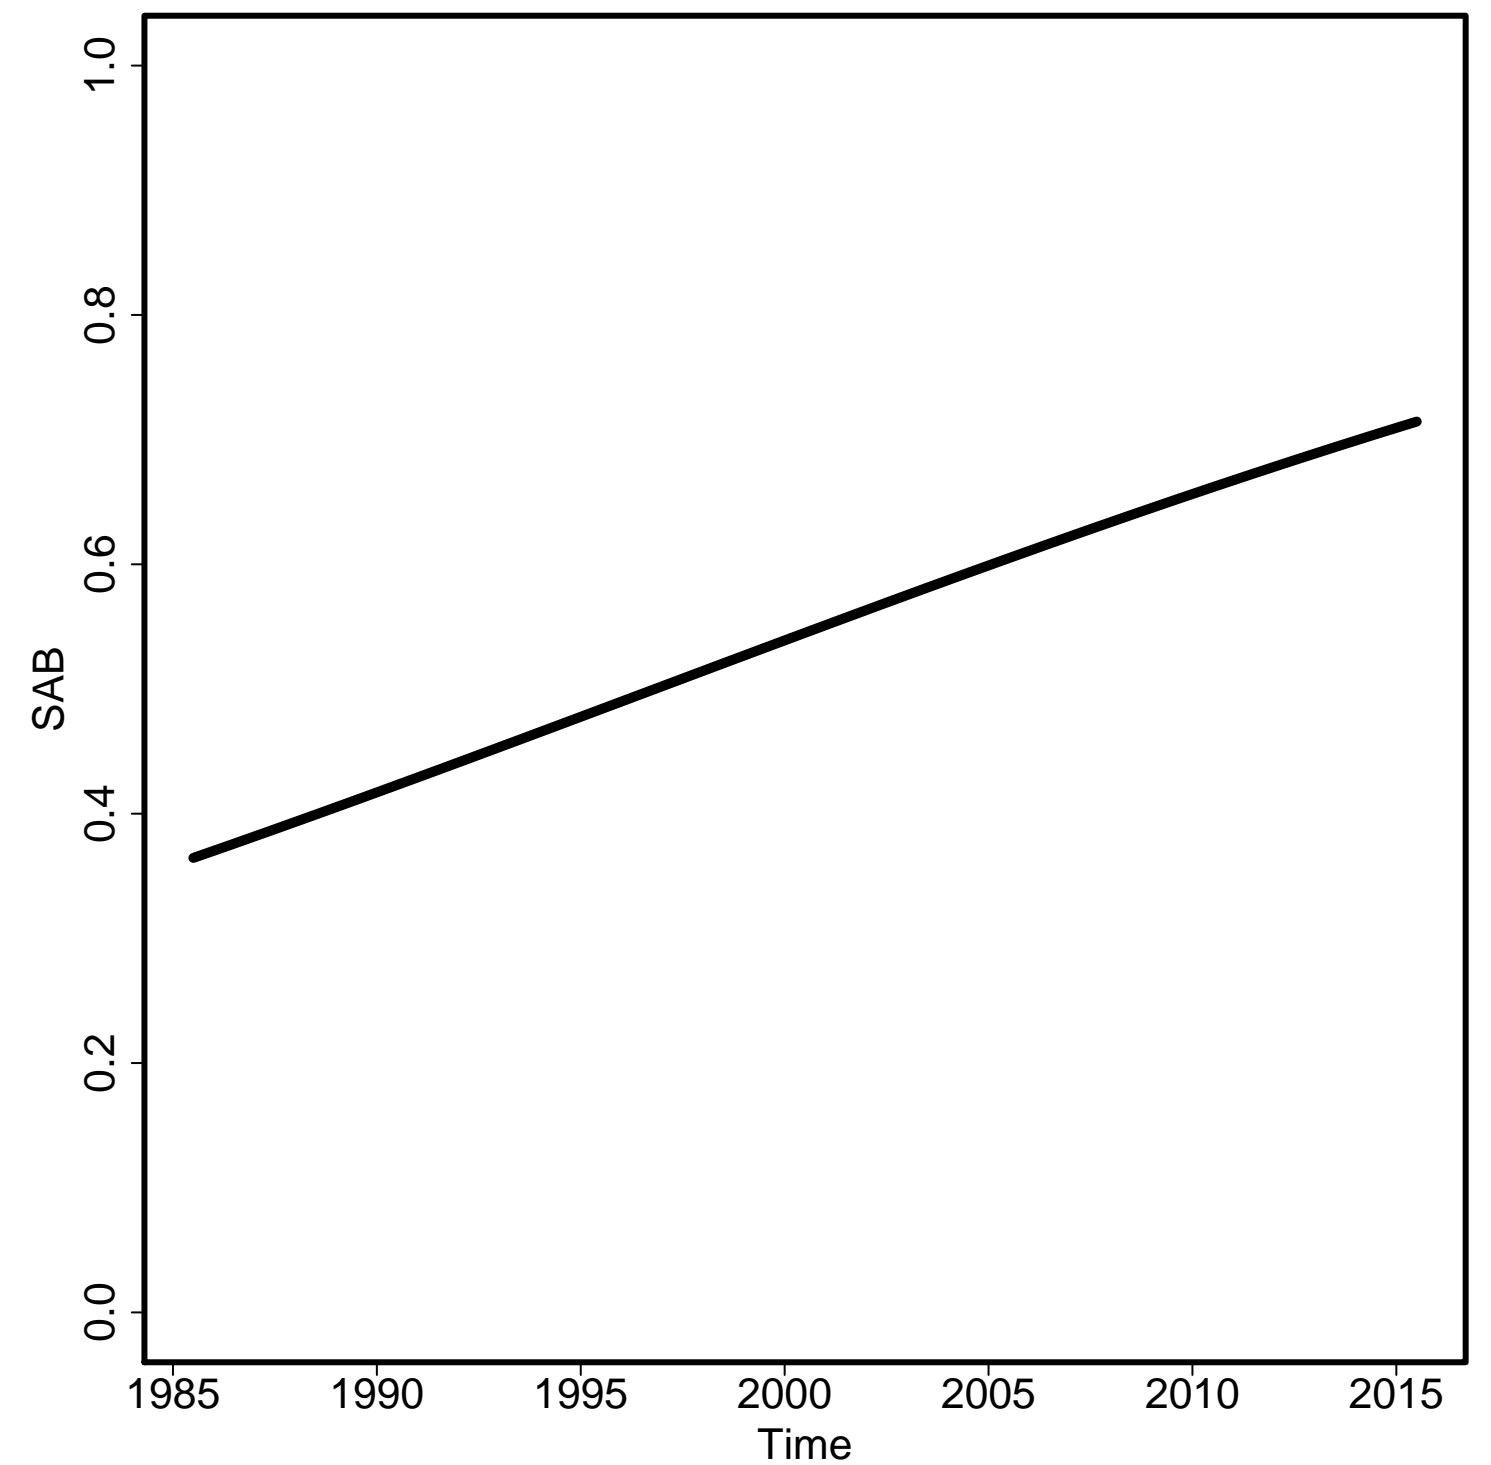

Envelope/Births

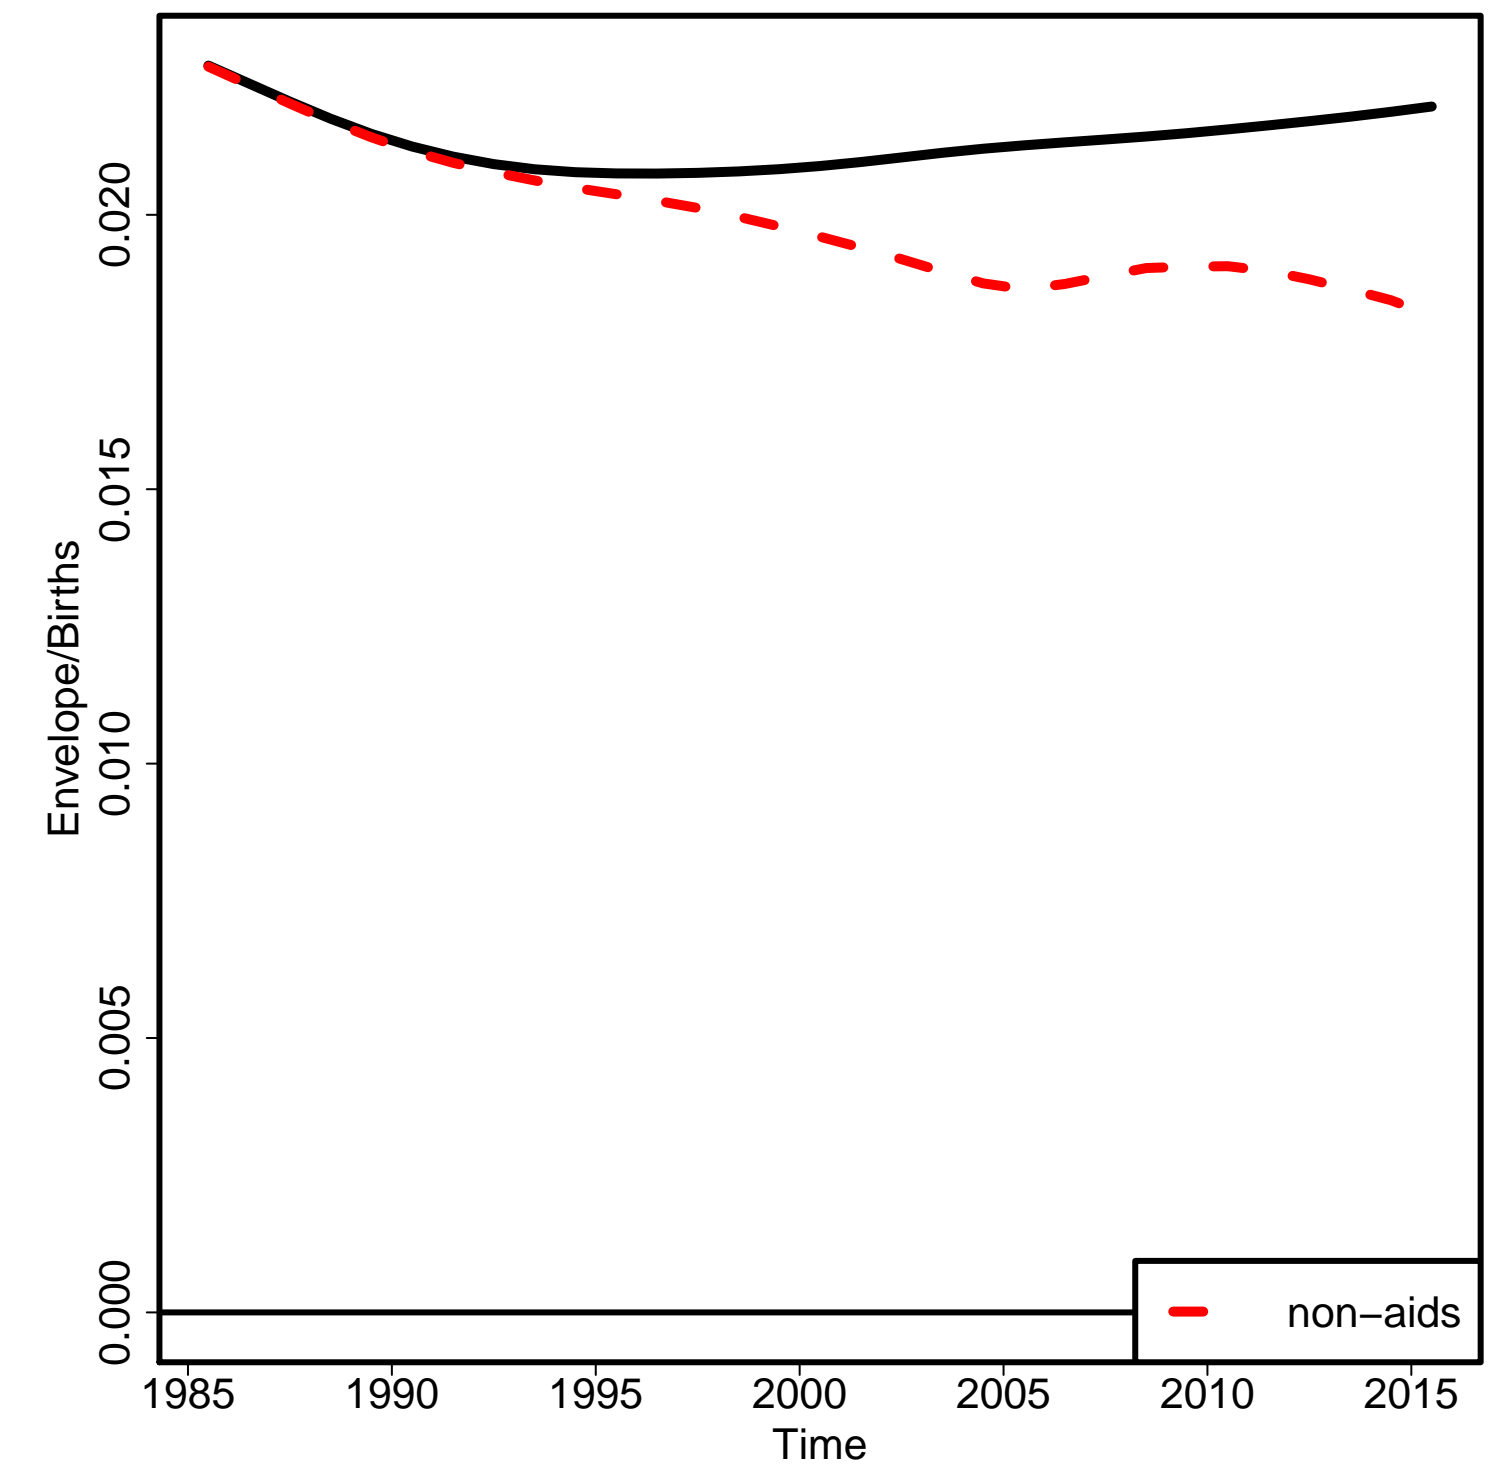

Non-aids MMR

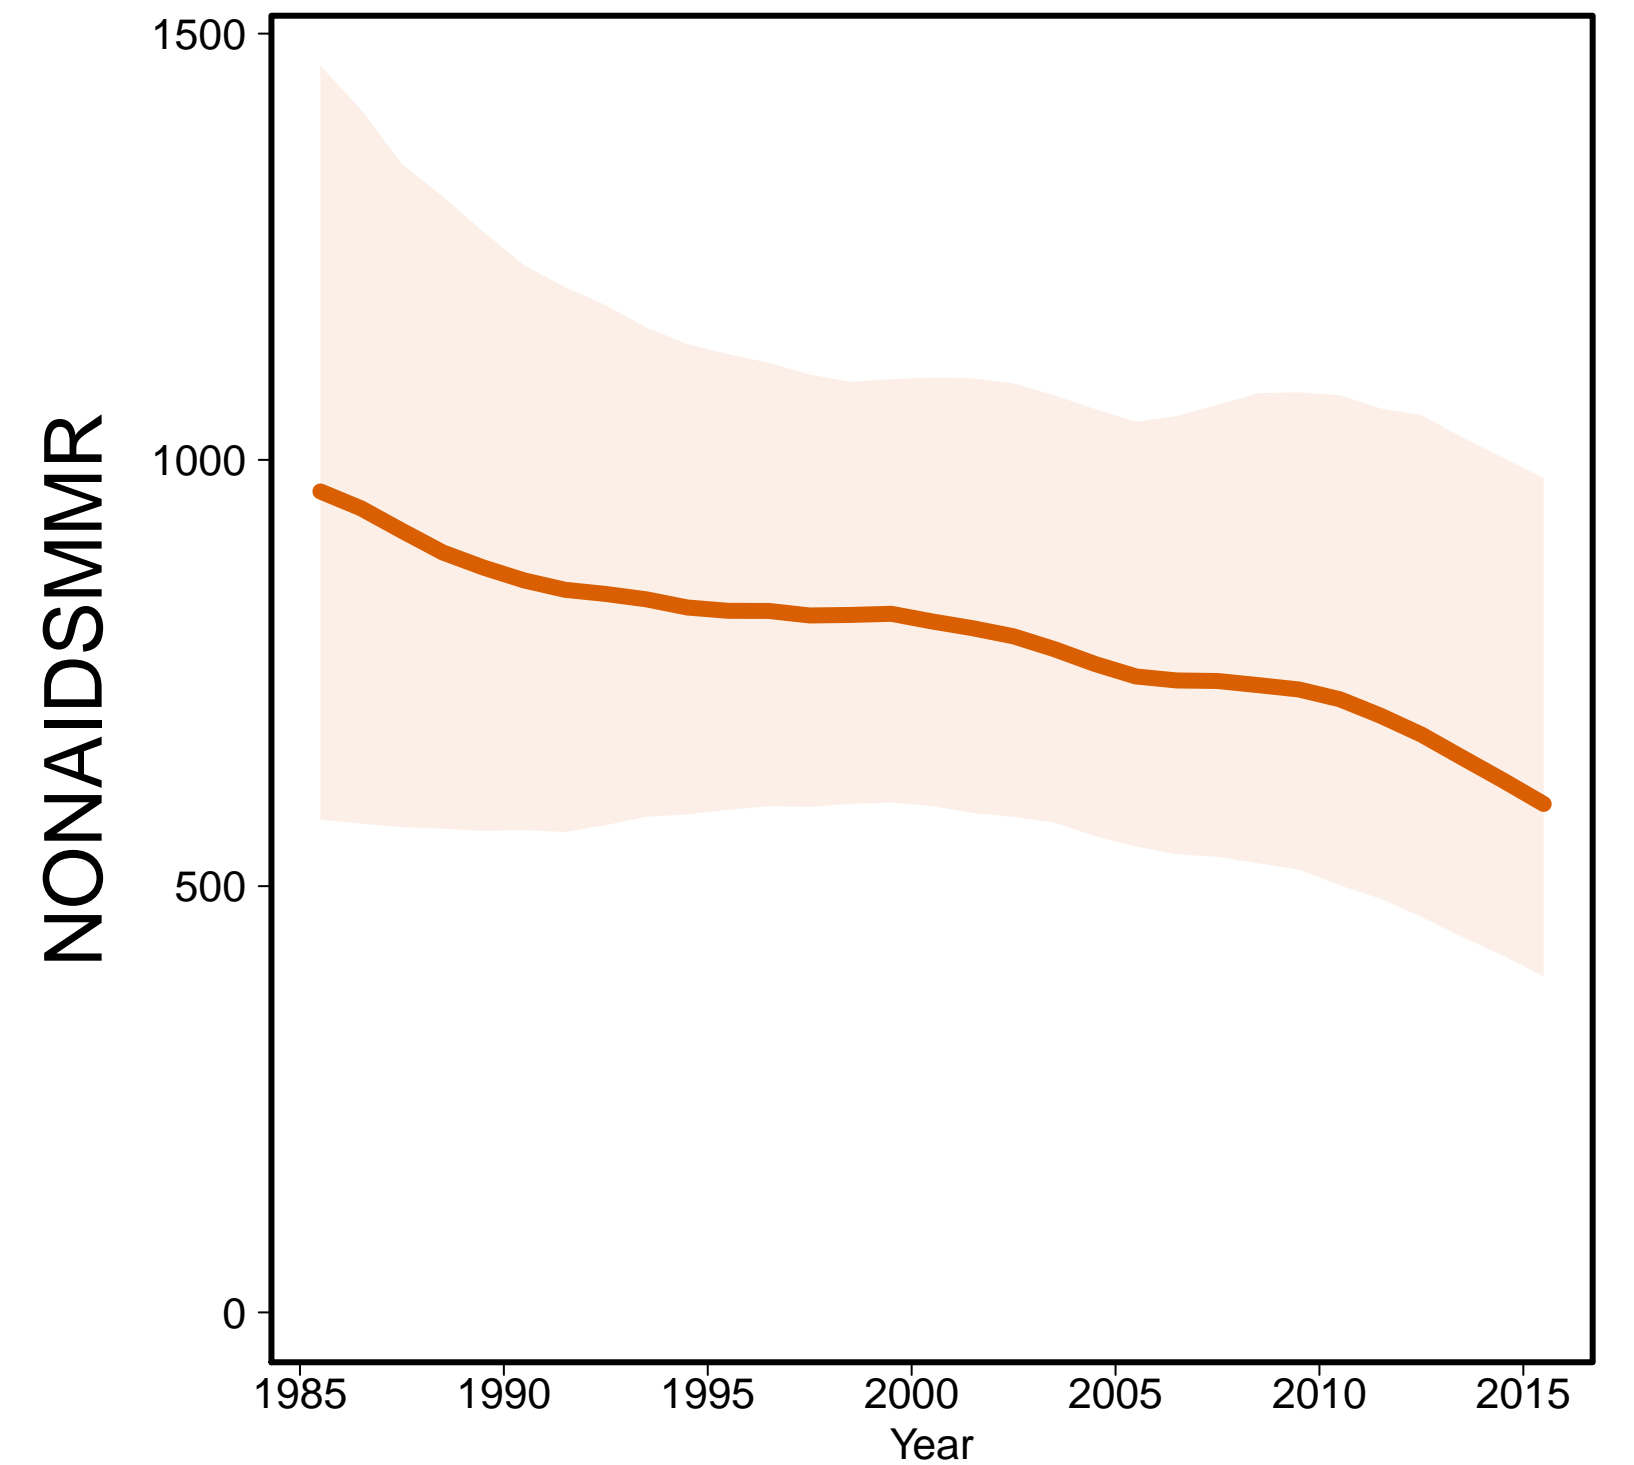

Aids MMR

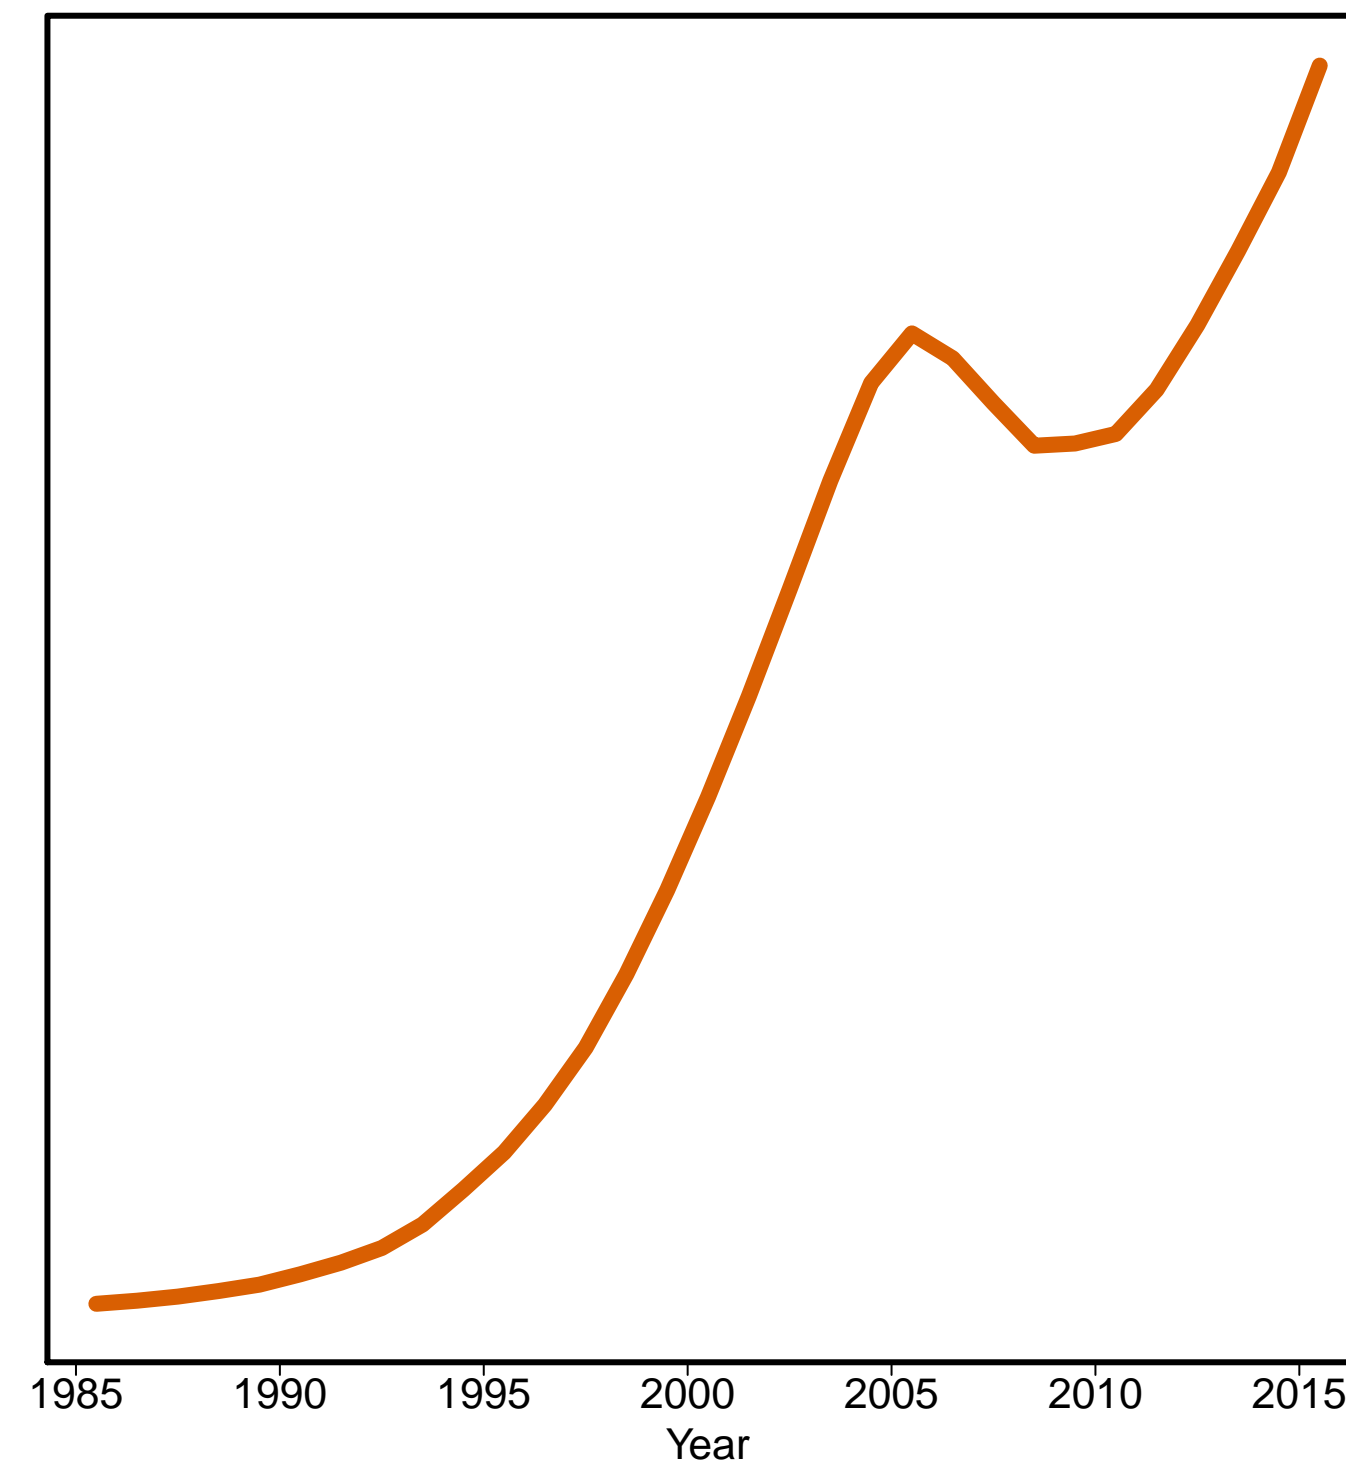

Mauritius [MUS]  
(Eastern Africa)

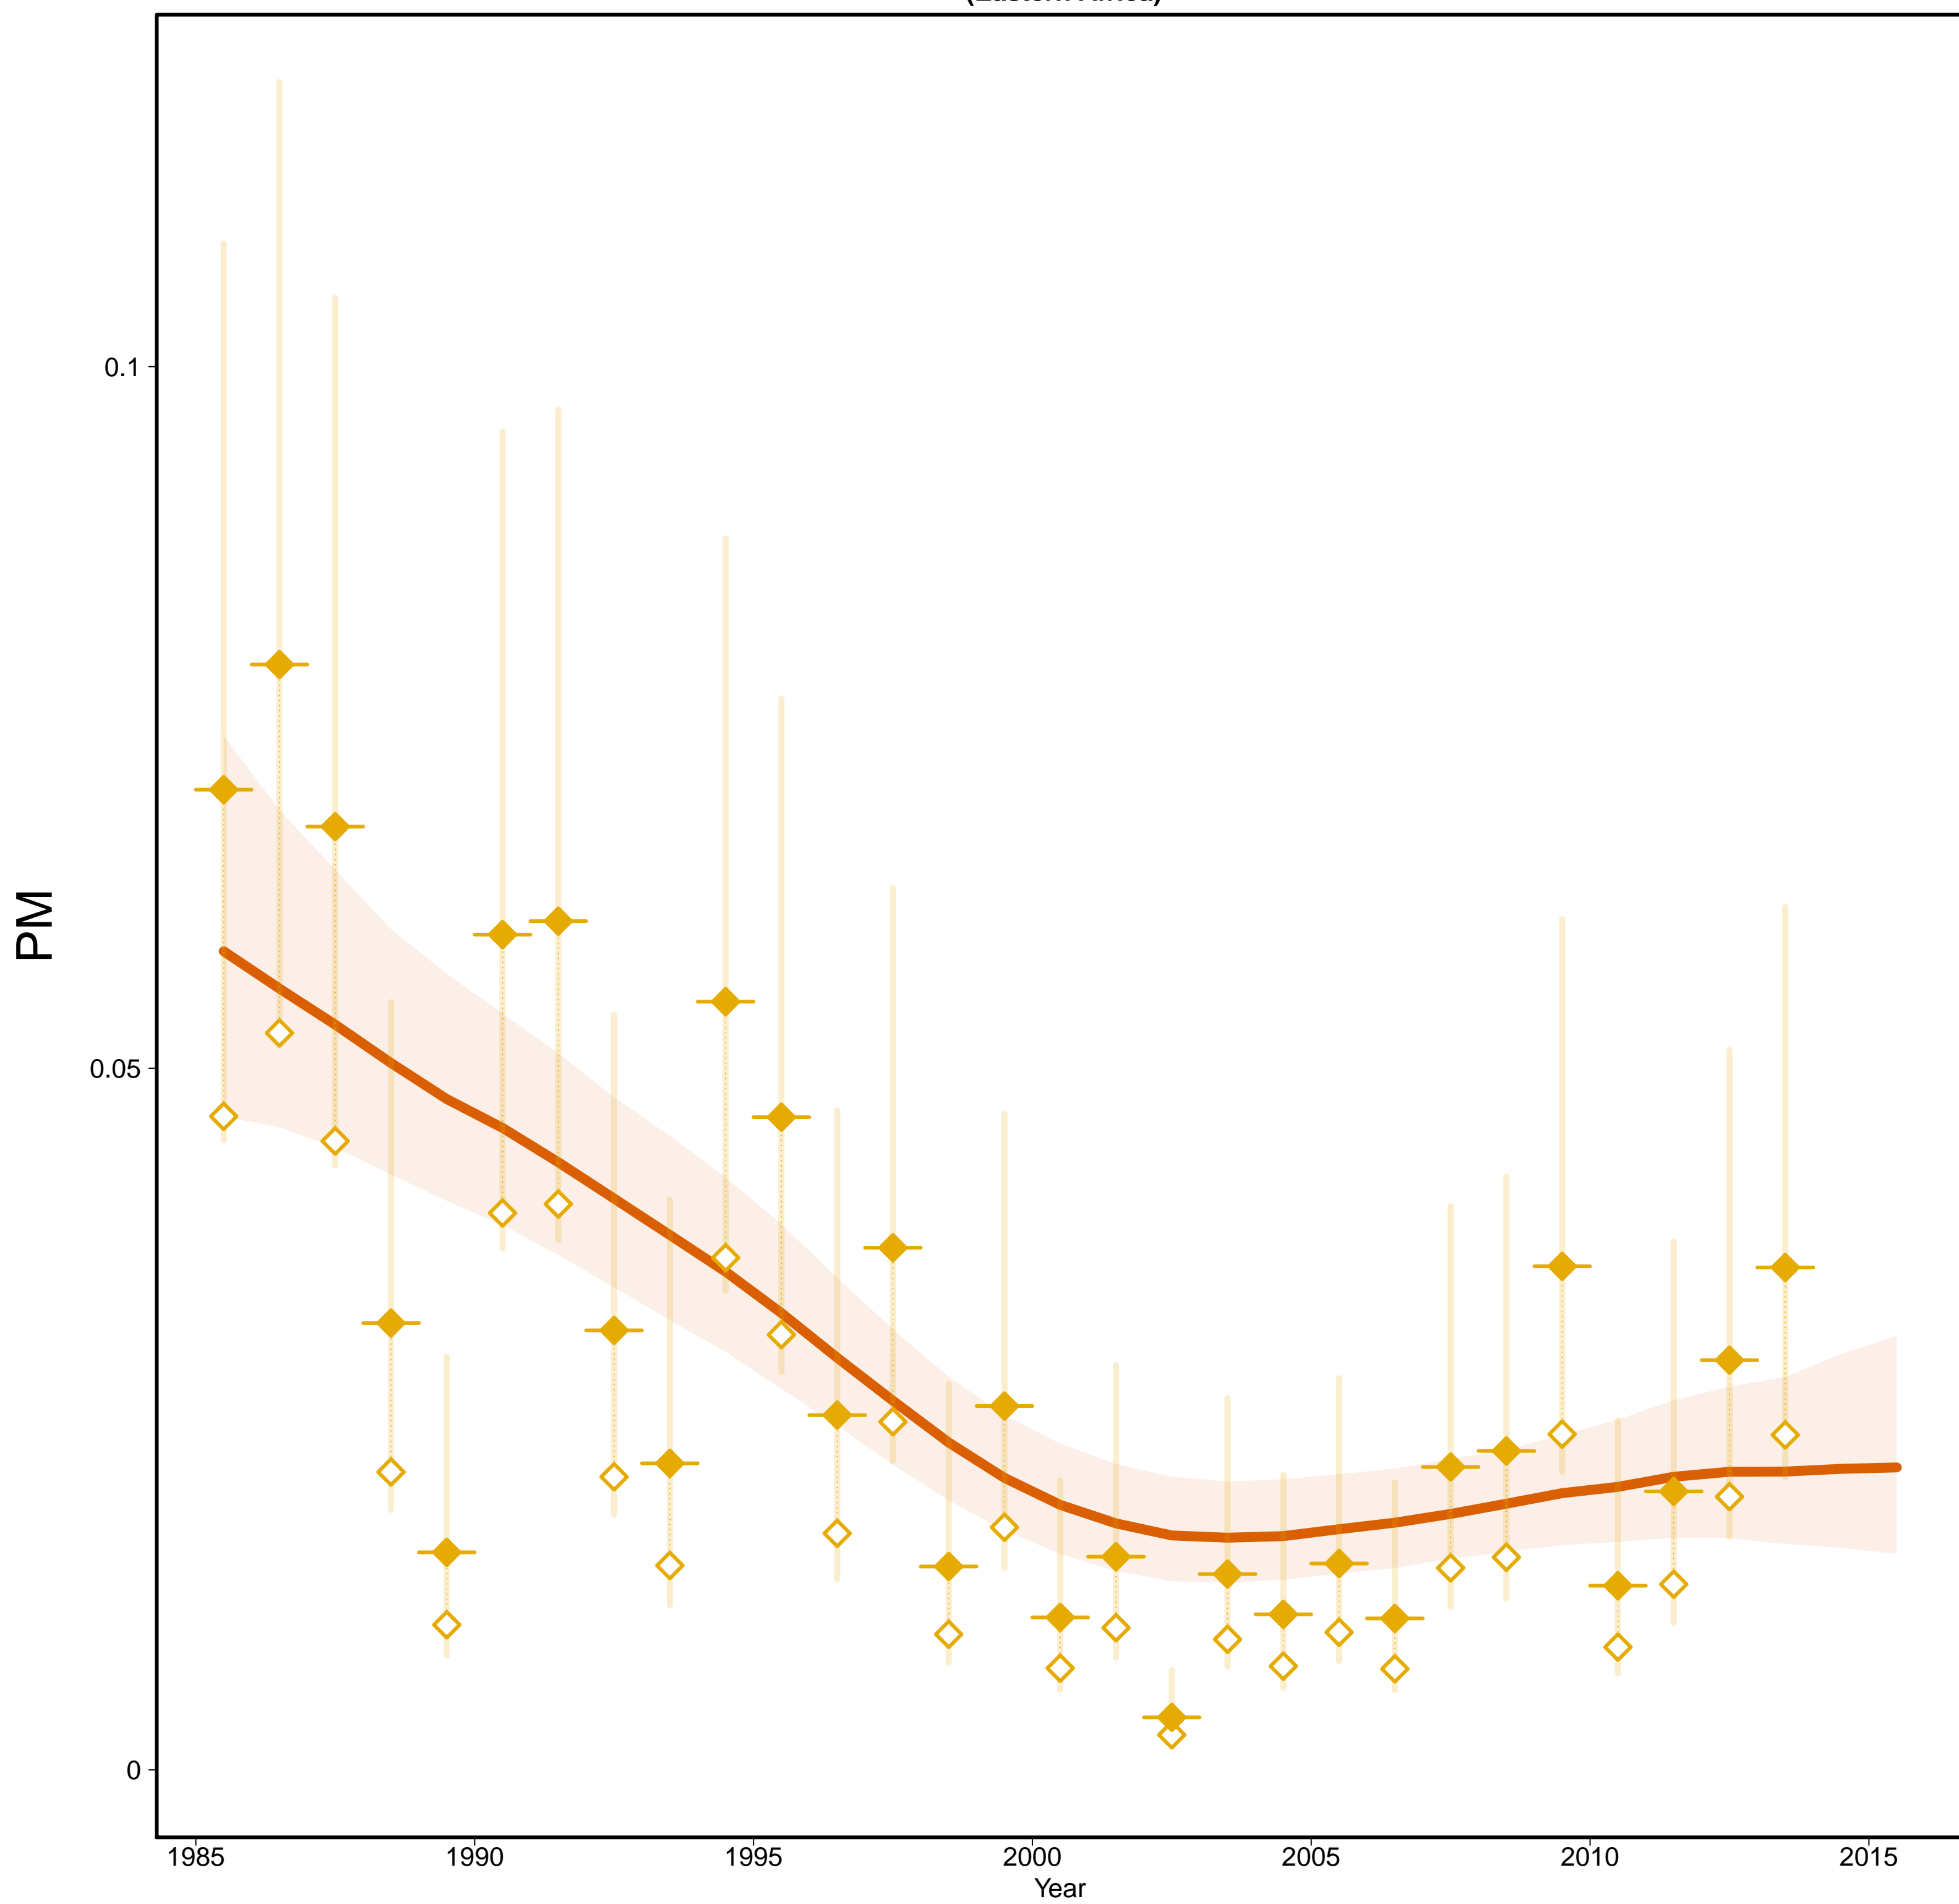

Mauritius [MUS]  
(Eastern Africa)

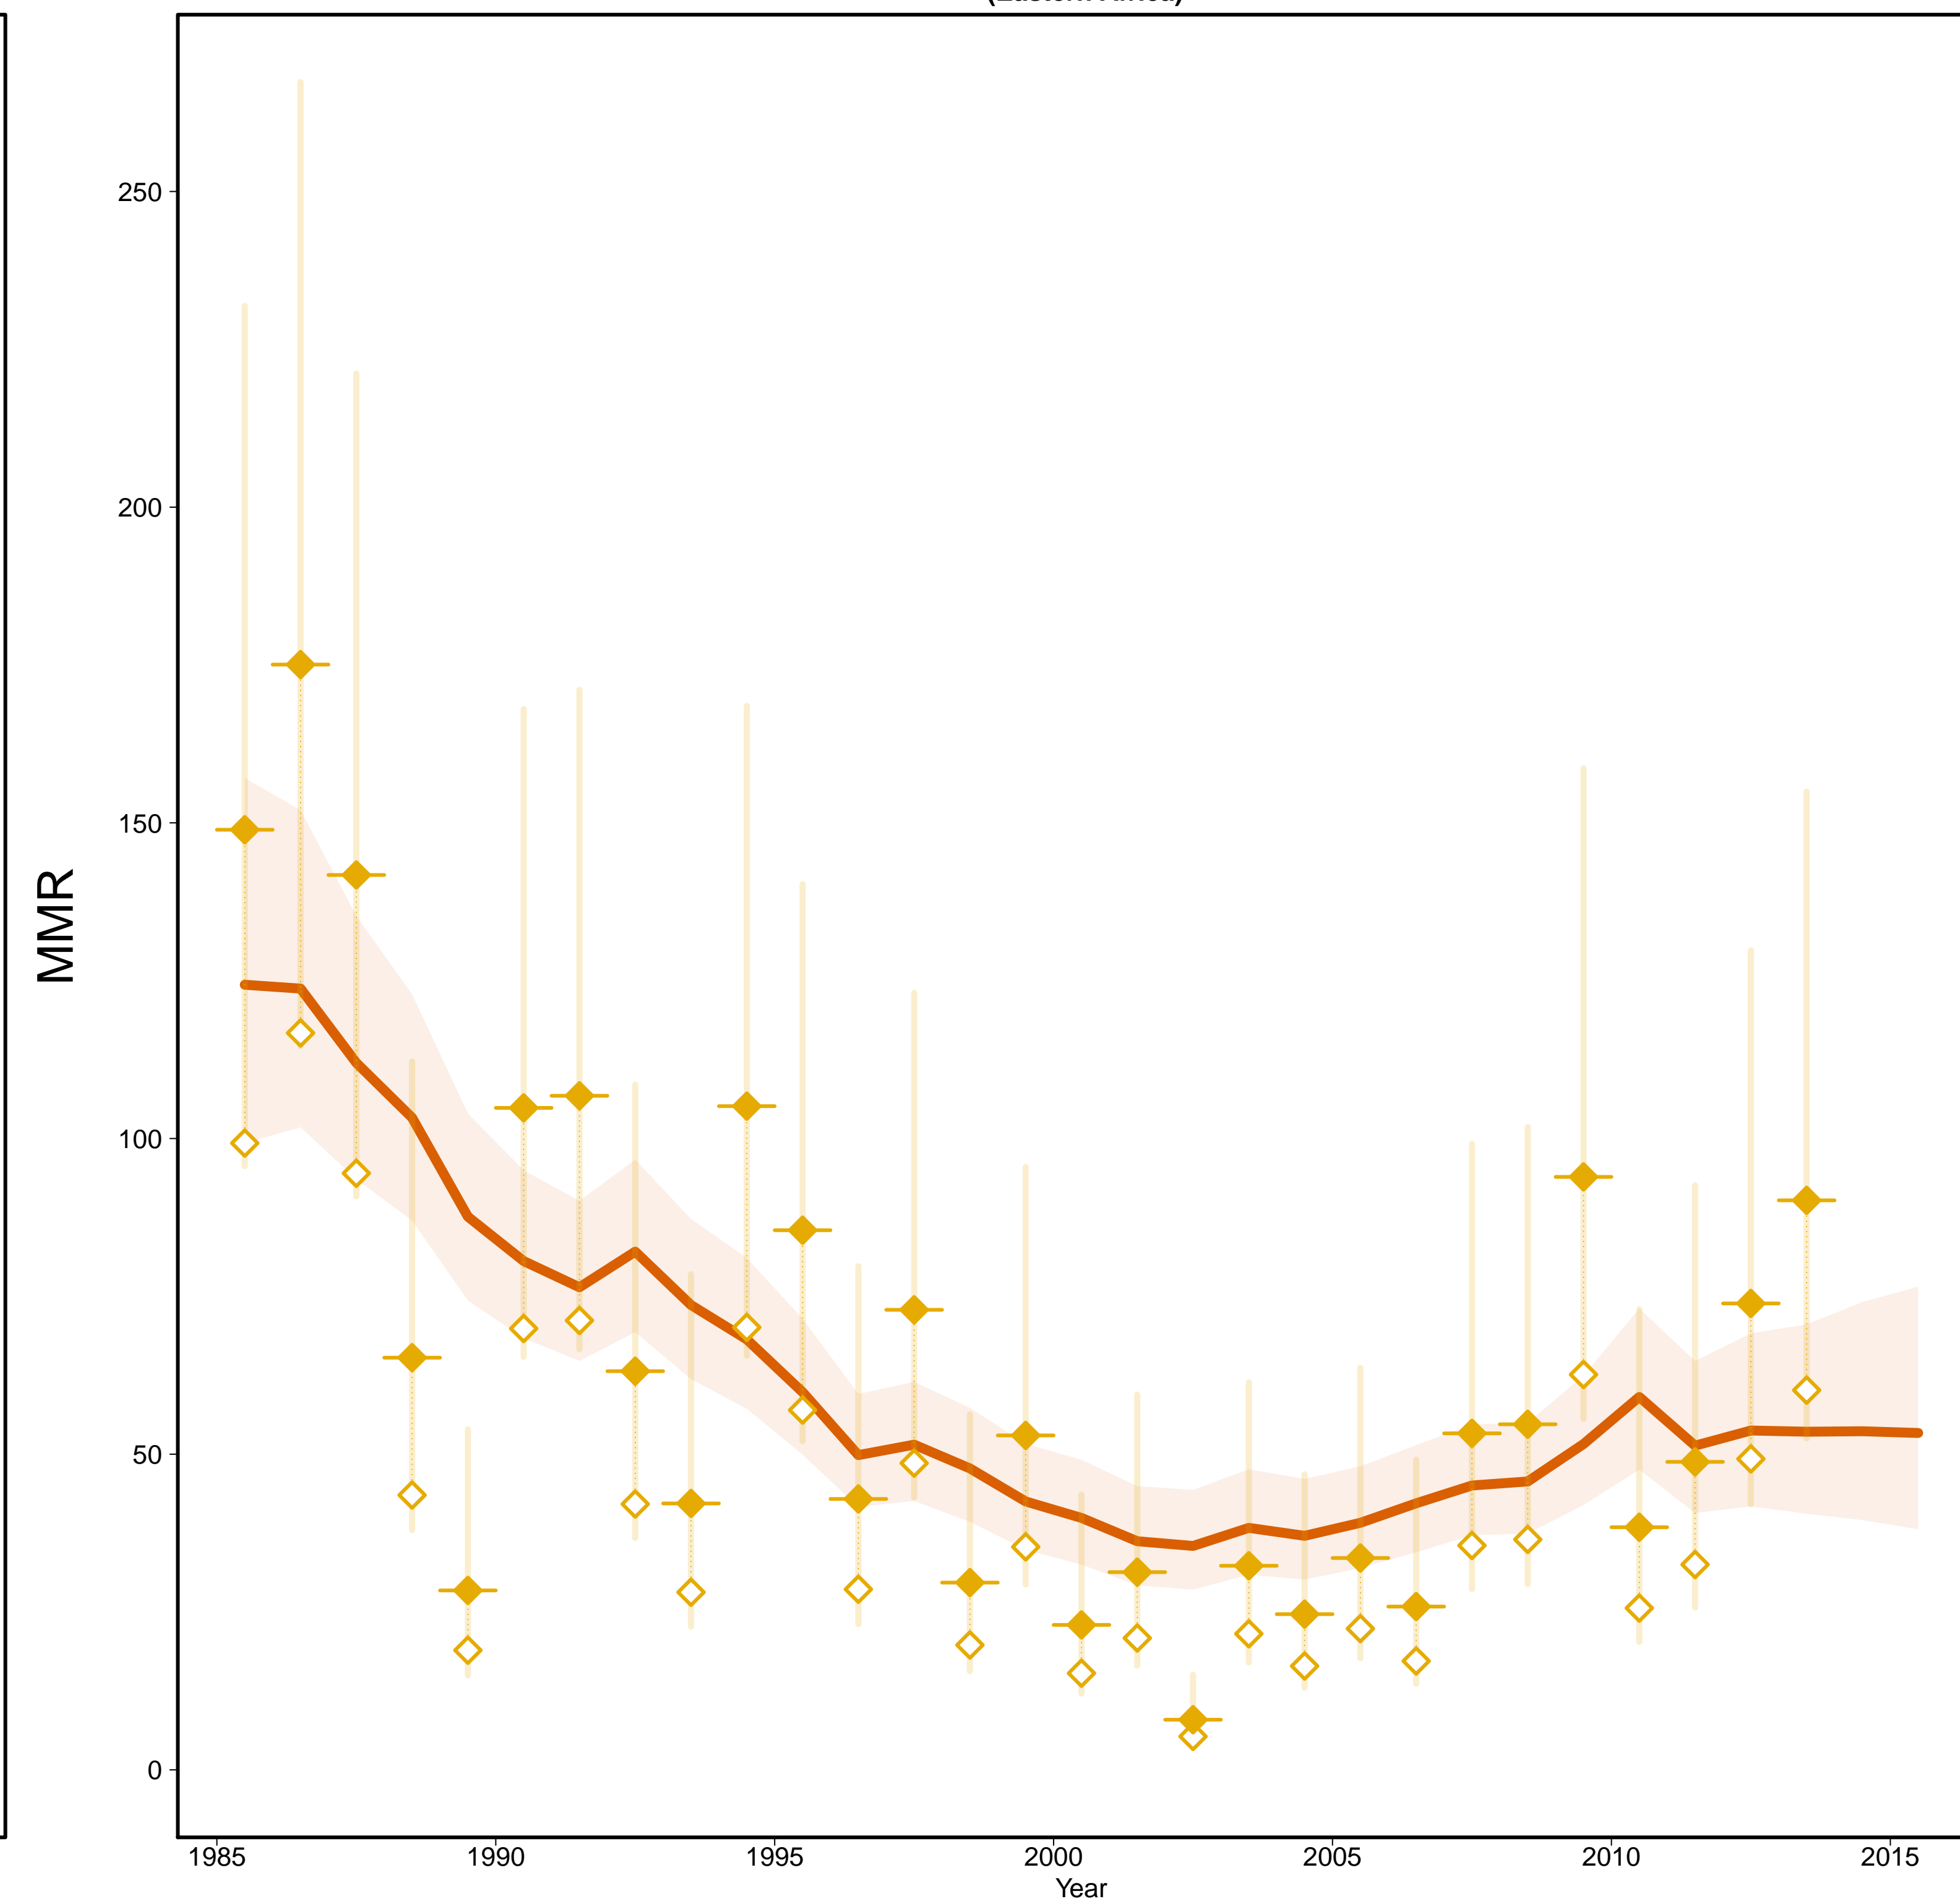

- Estimates —
- Mlate
- MMR Database 2015 —
- ◇ Observed Data
- ◆ Adjusted Data
- Data type —
- ◆ VR

Gross Domestic Product

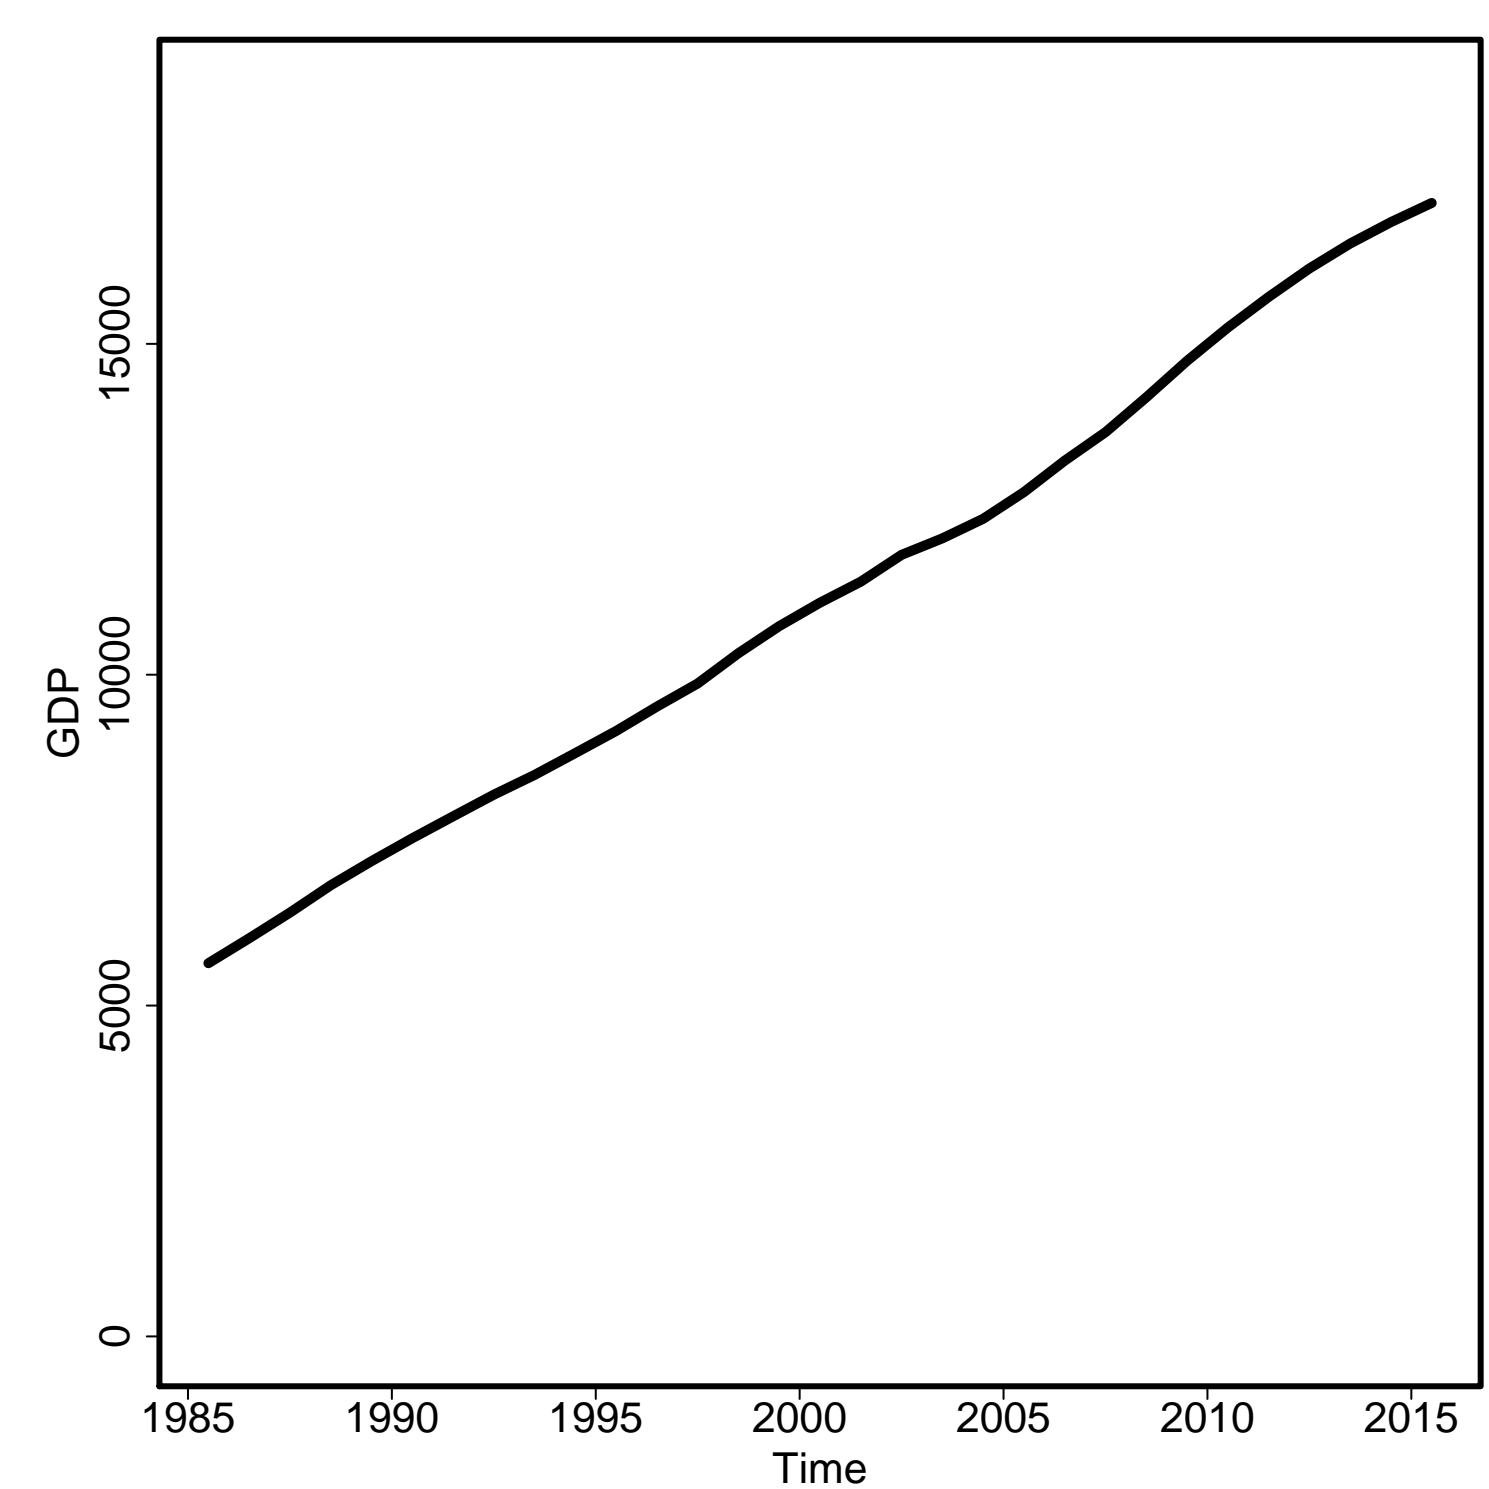

General Fertility Rate

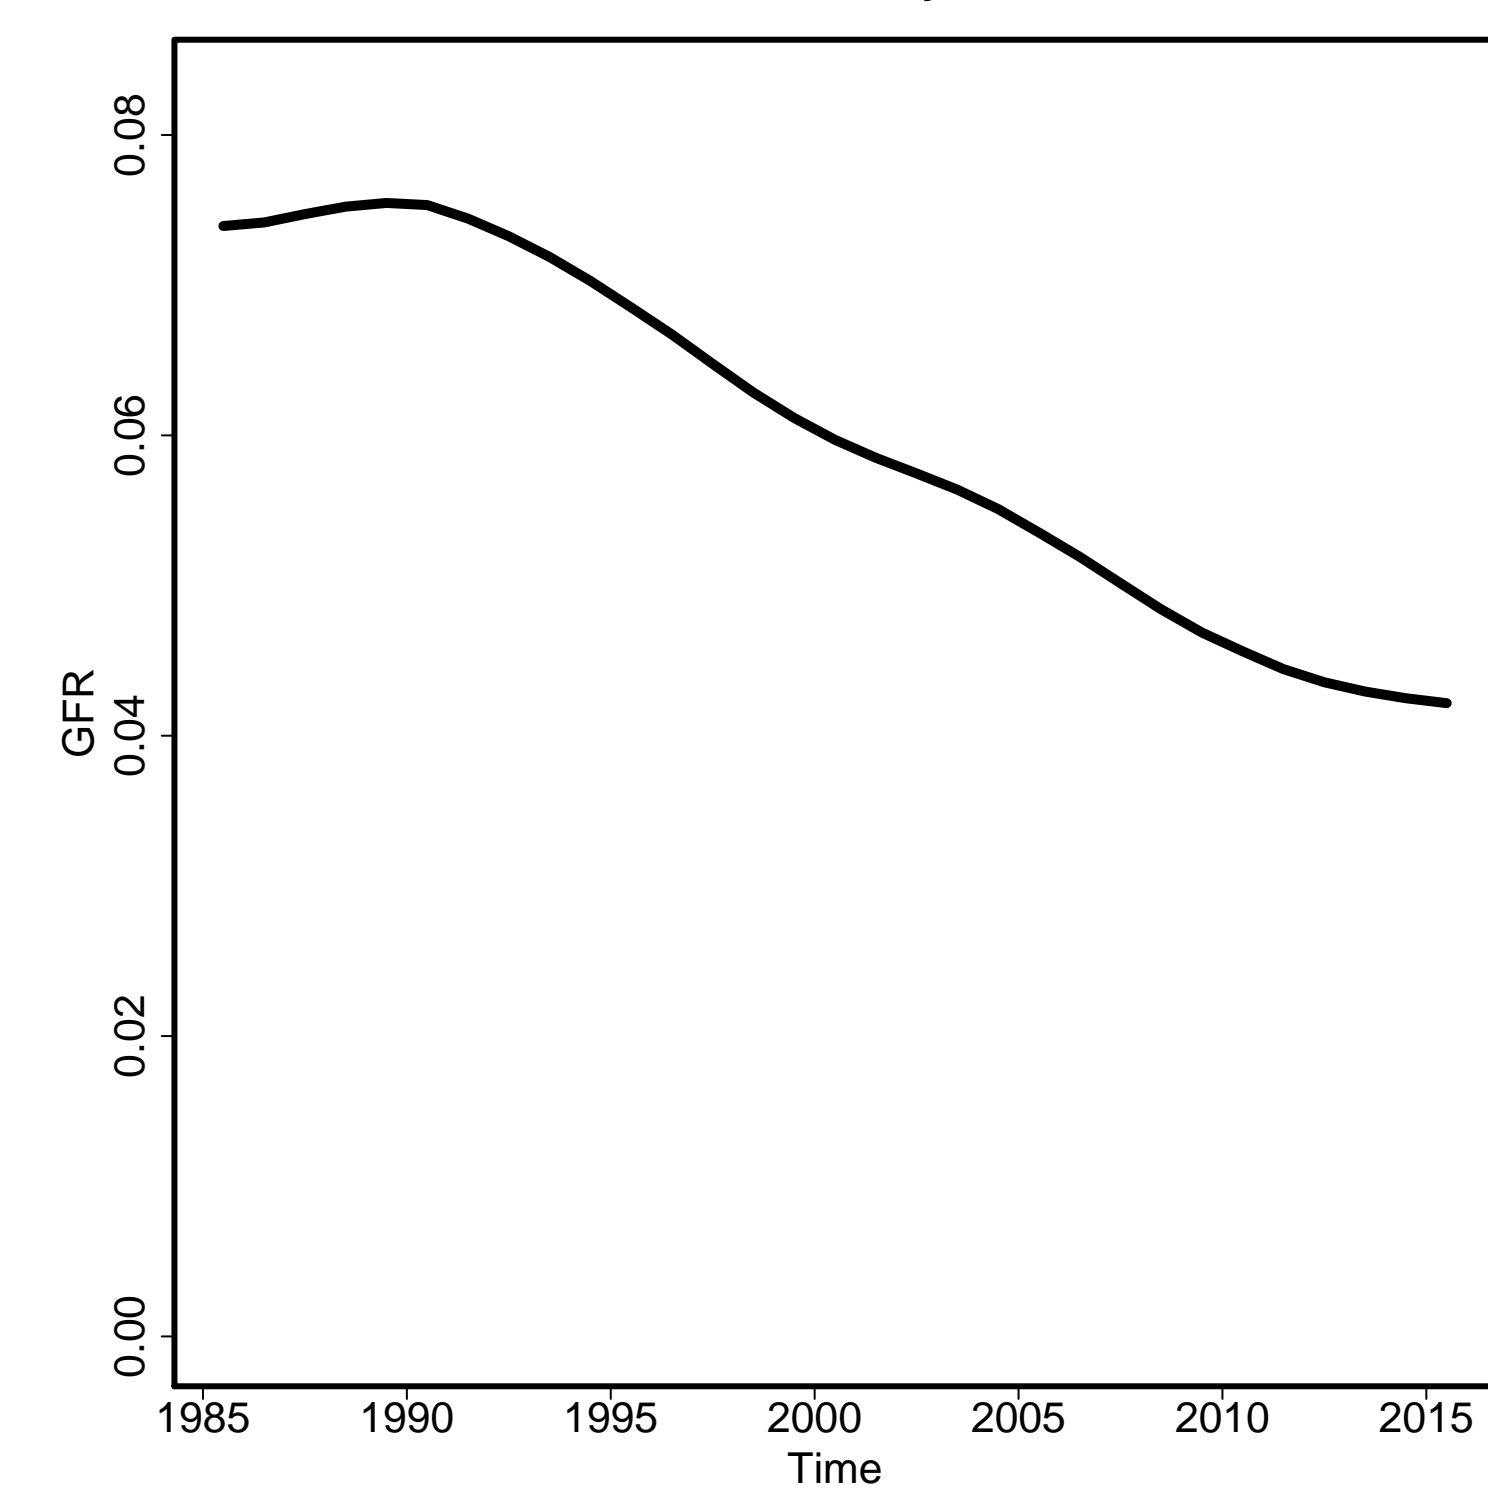

Skilled Attendance to Birth

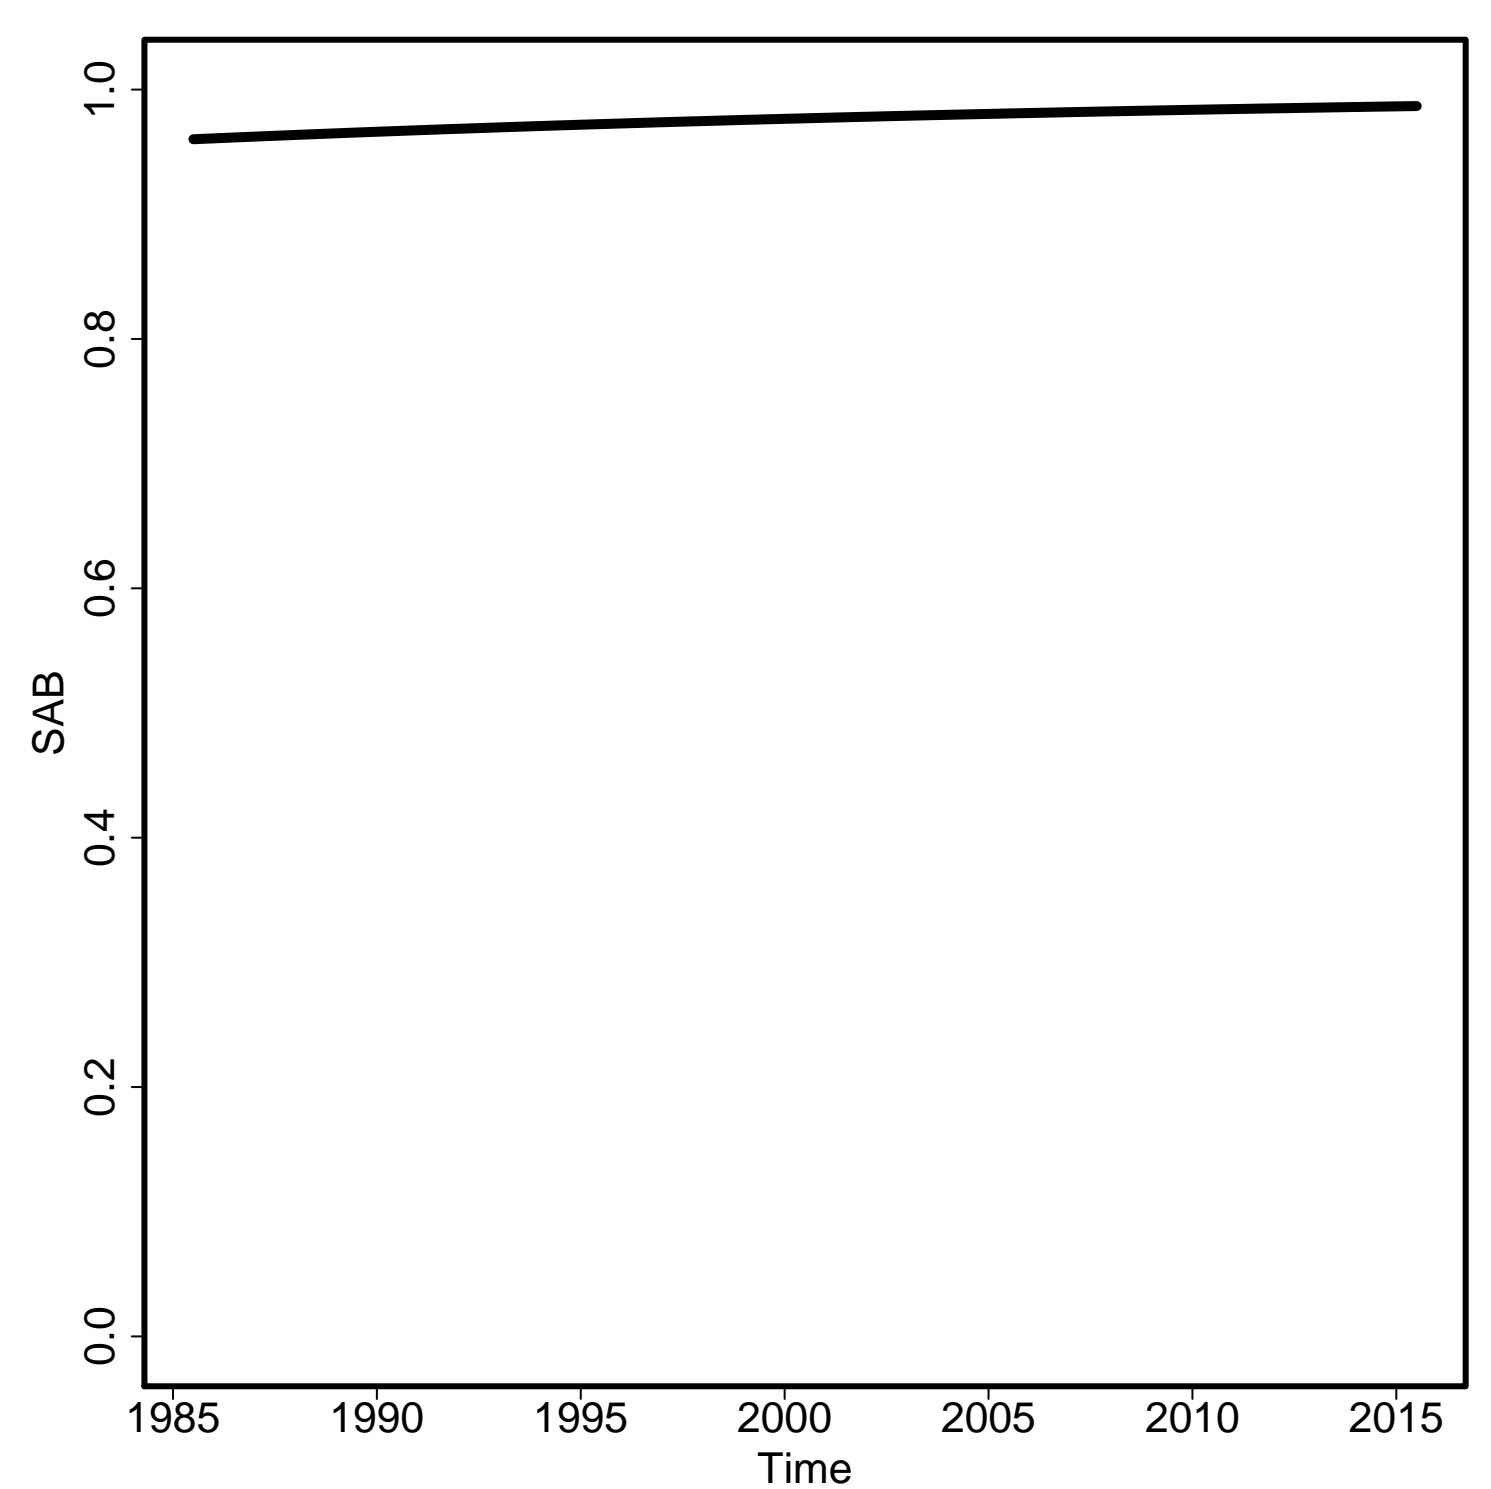

Envelope/Births

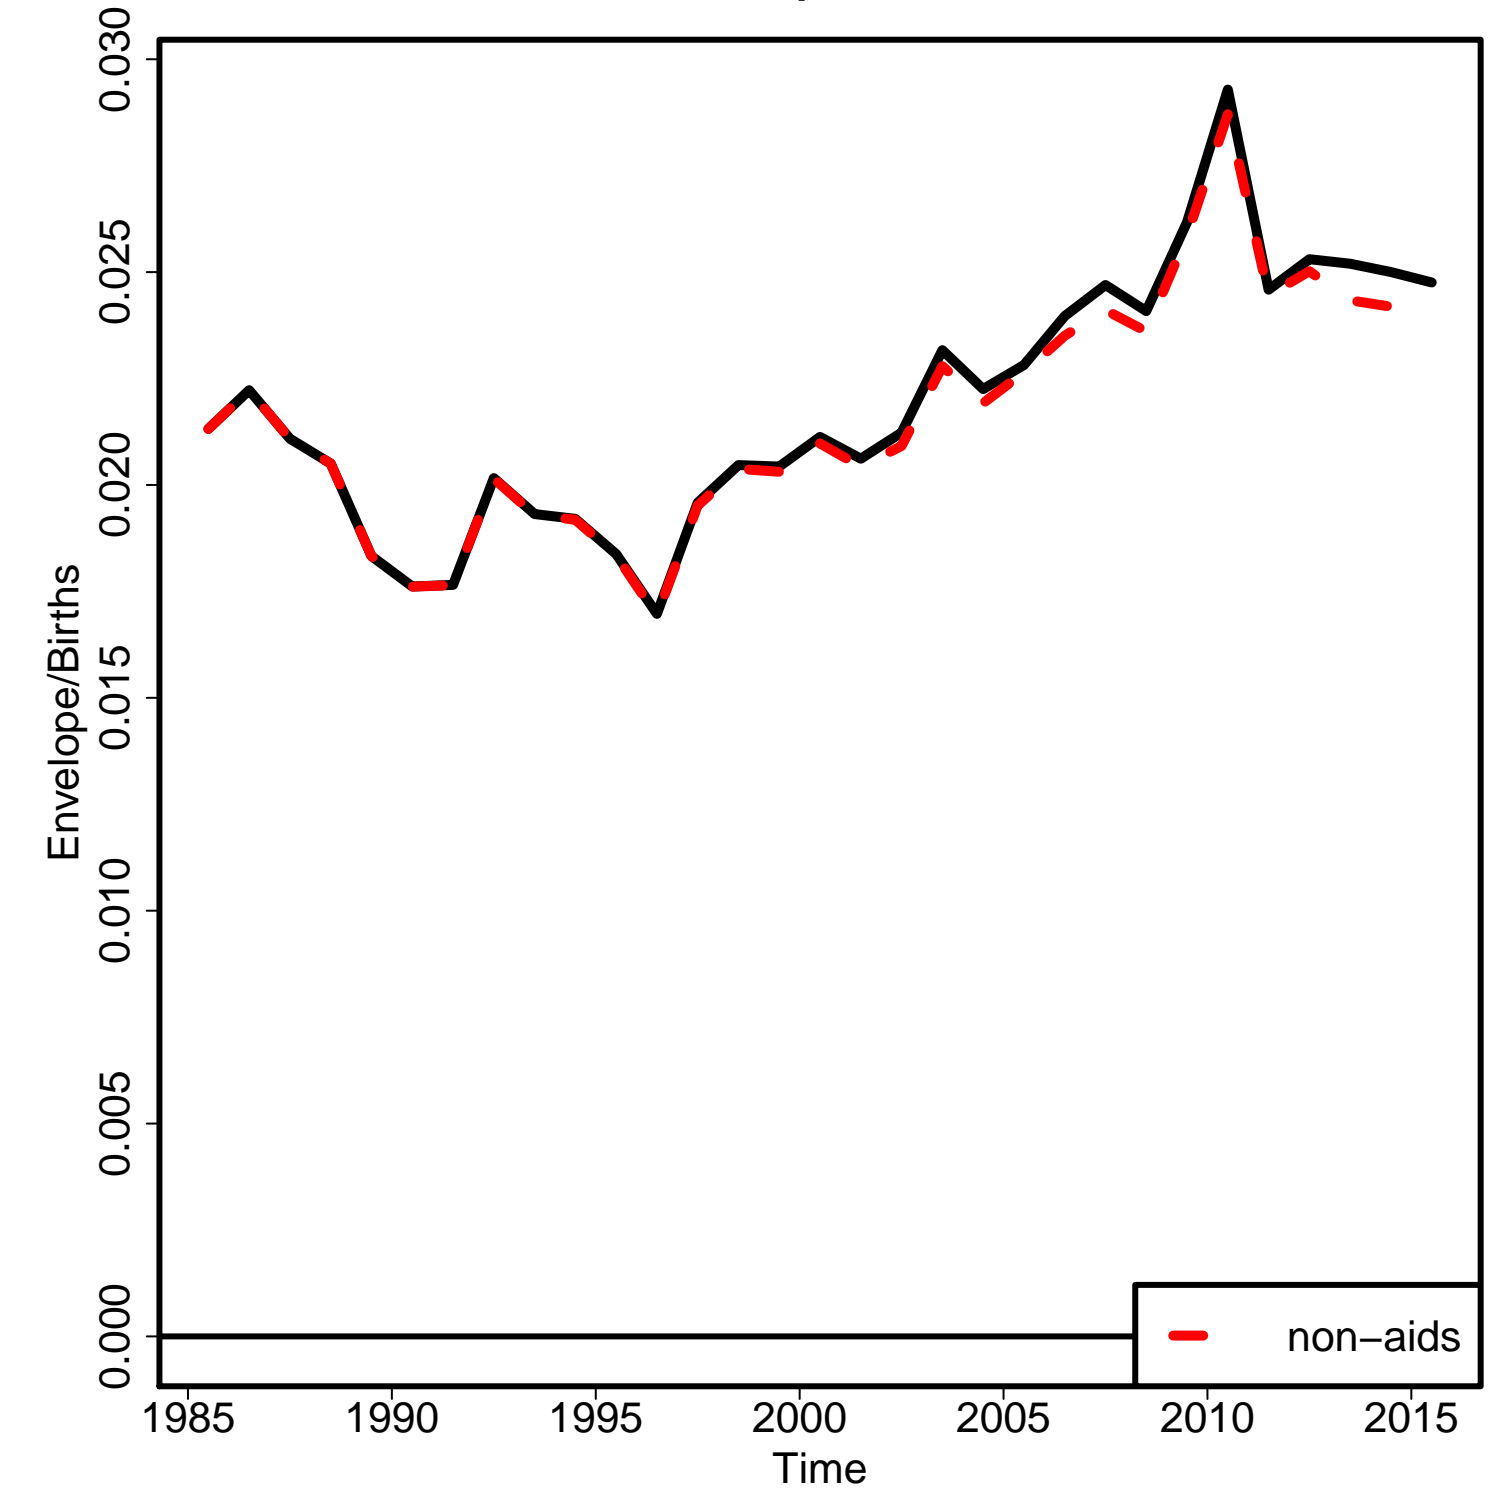

Non-aids MMR

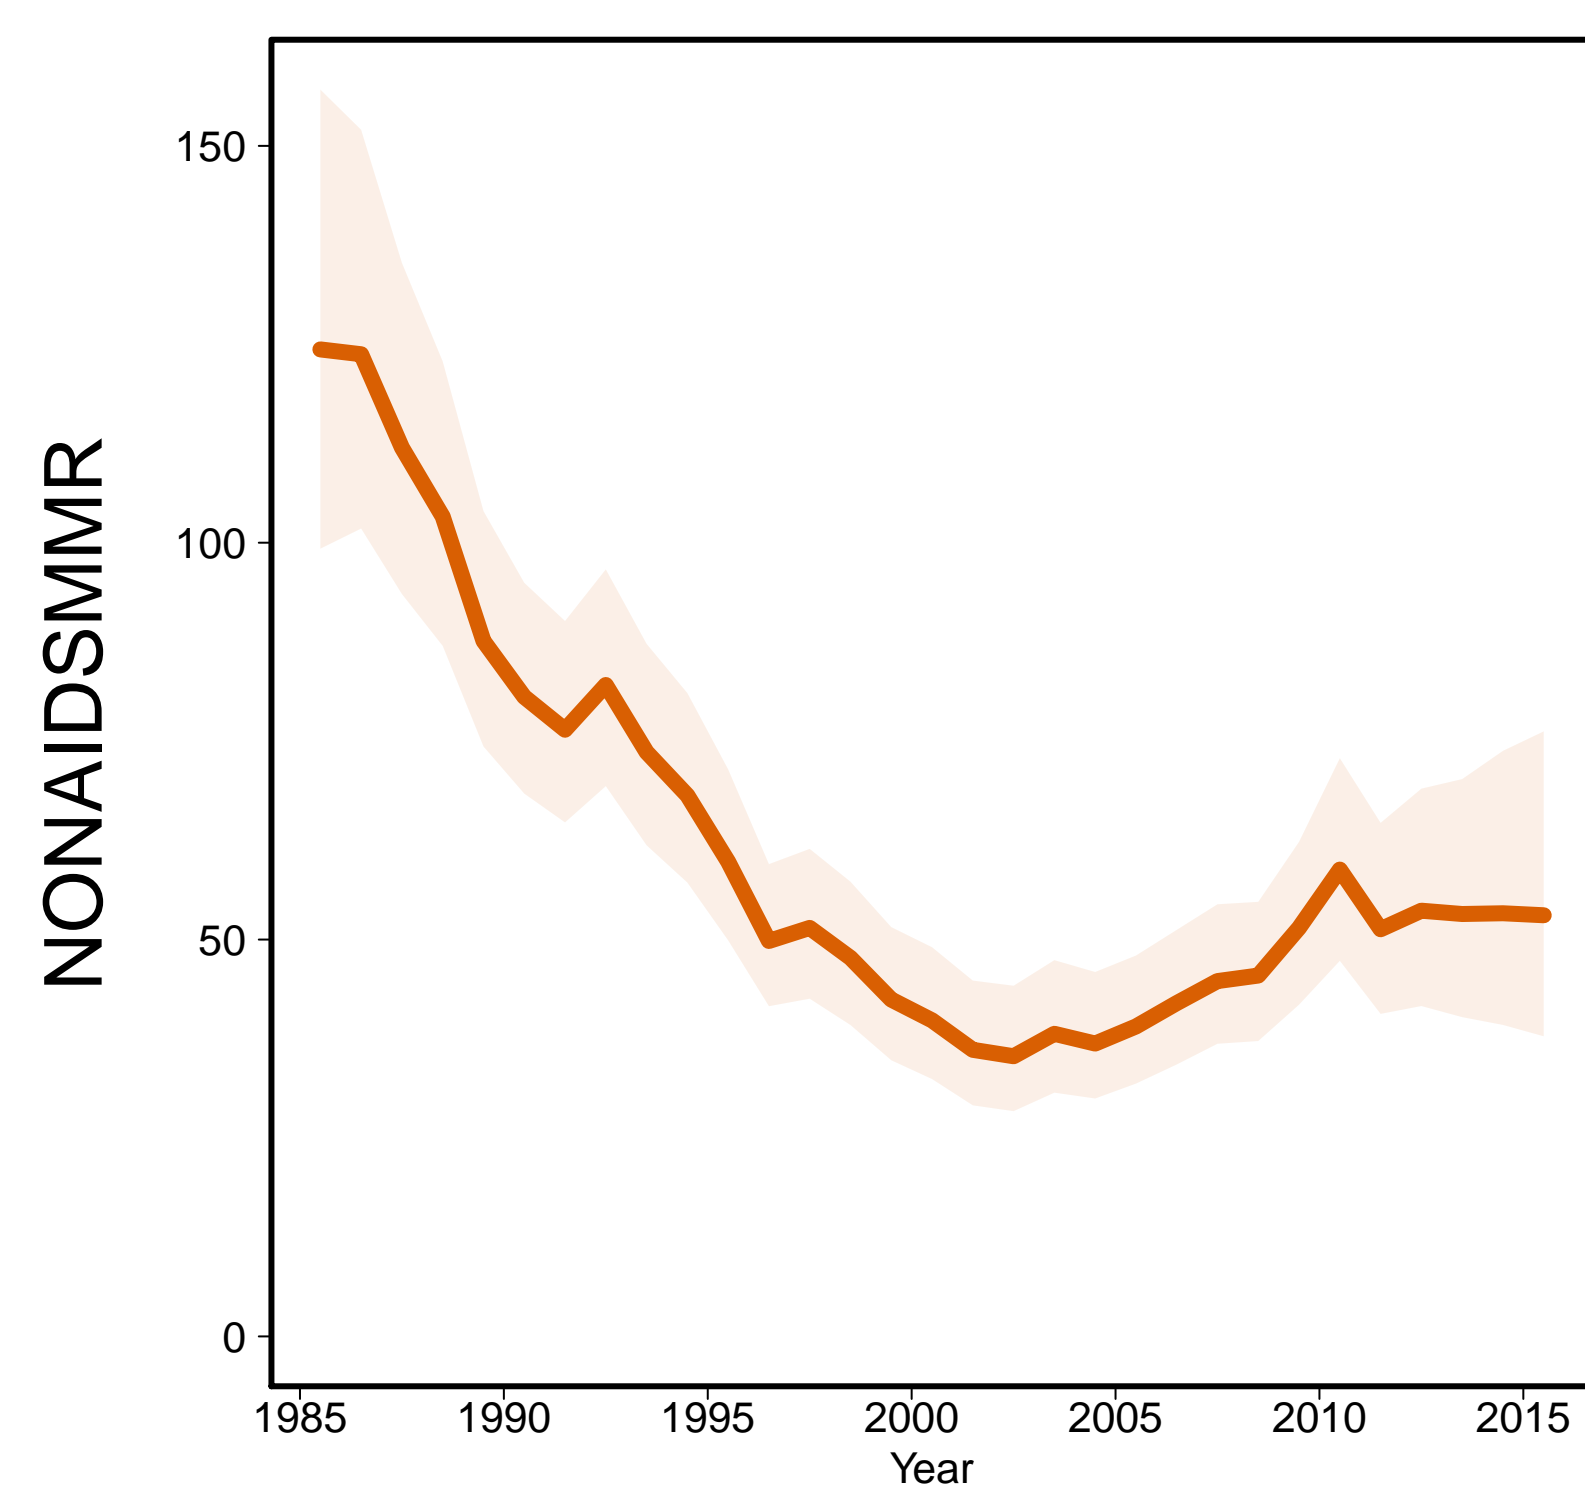

Aids MMR

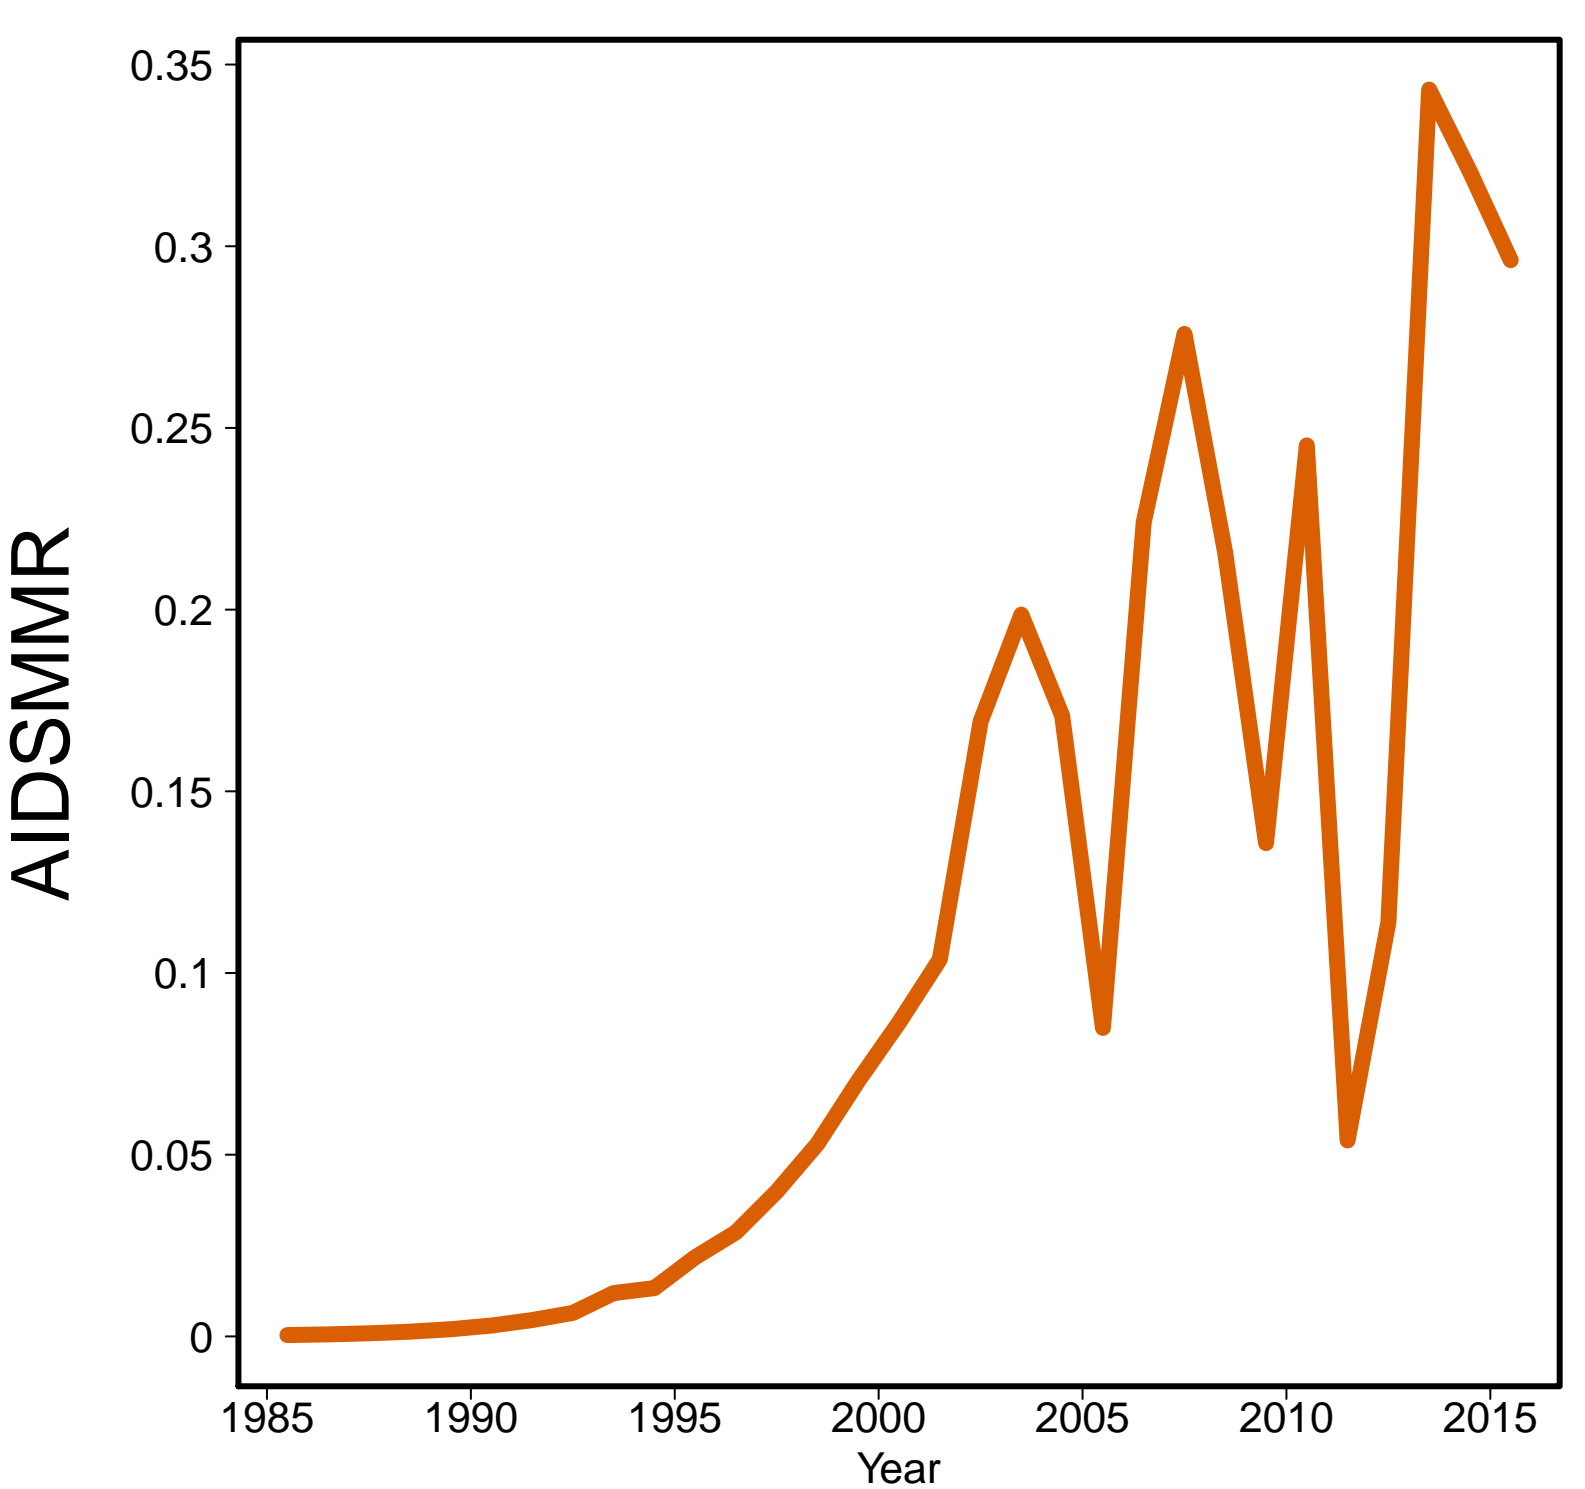



Mexico [MEX]  
(Central America)

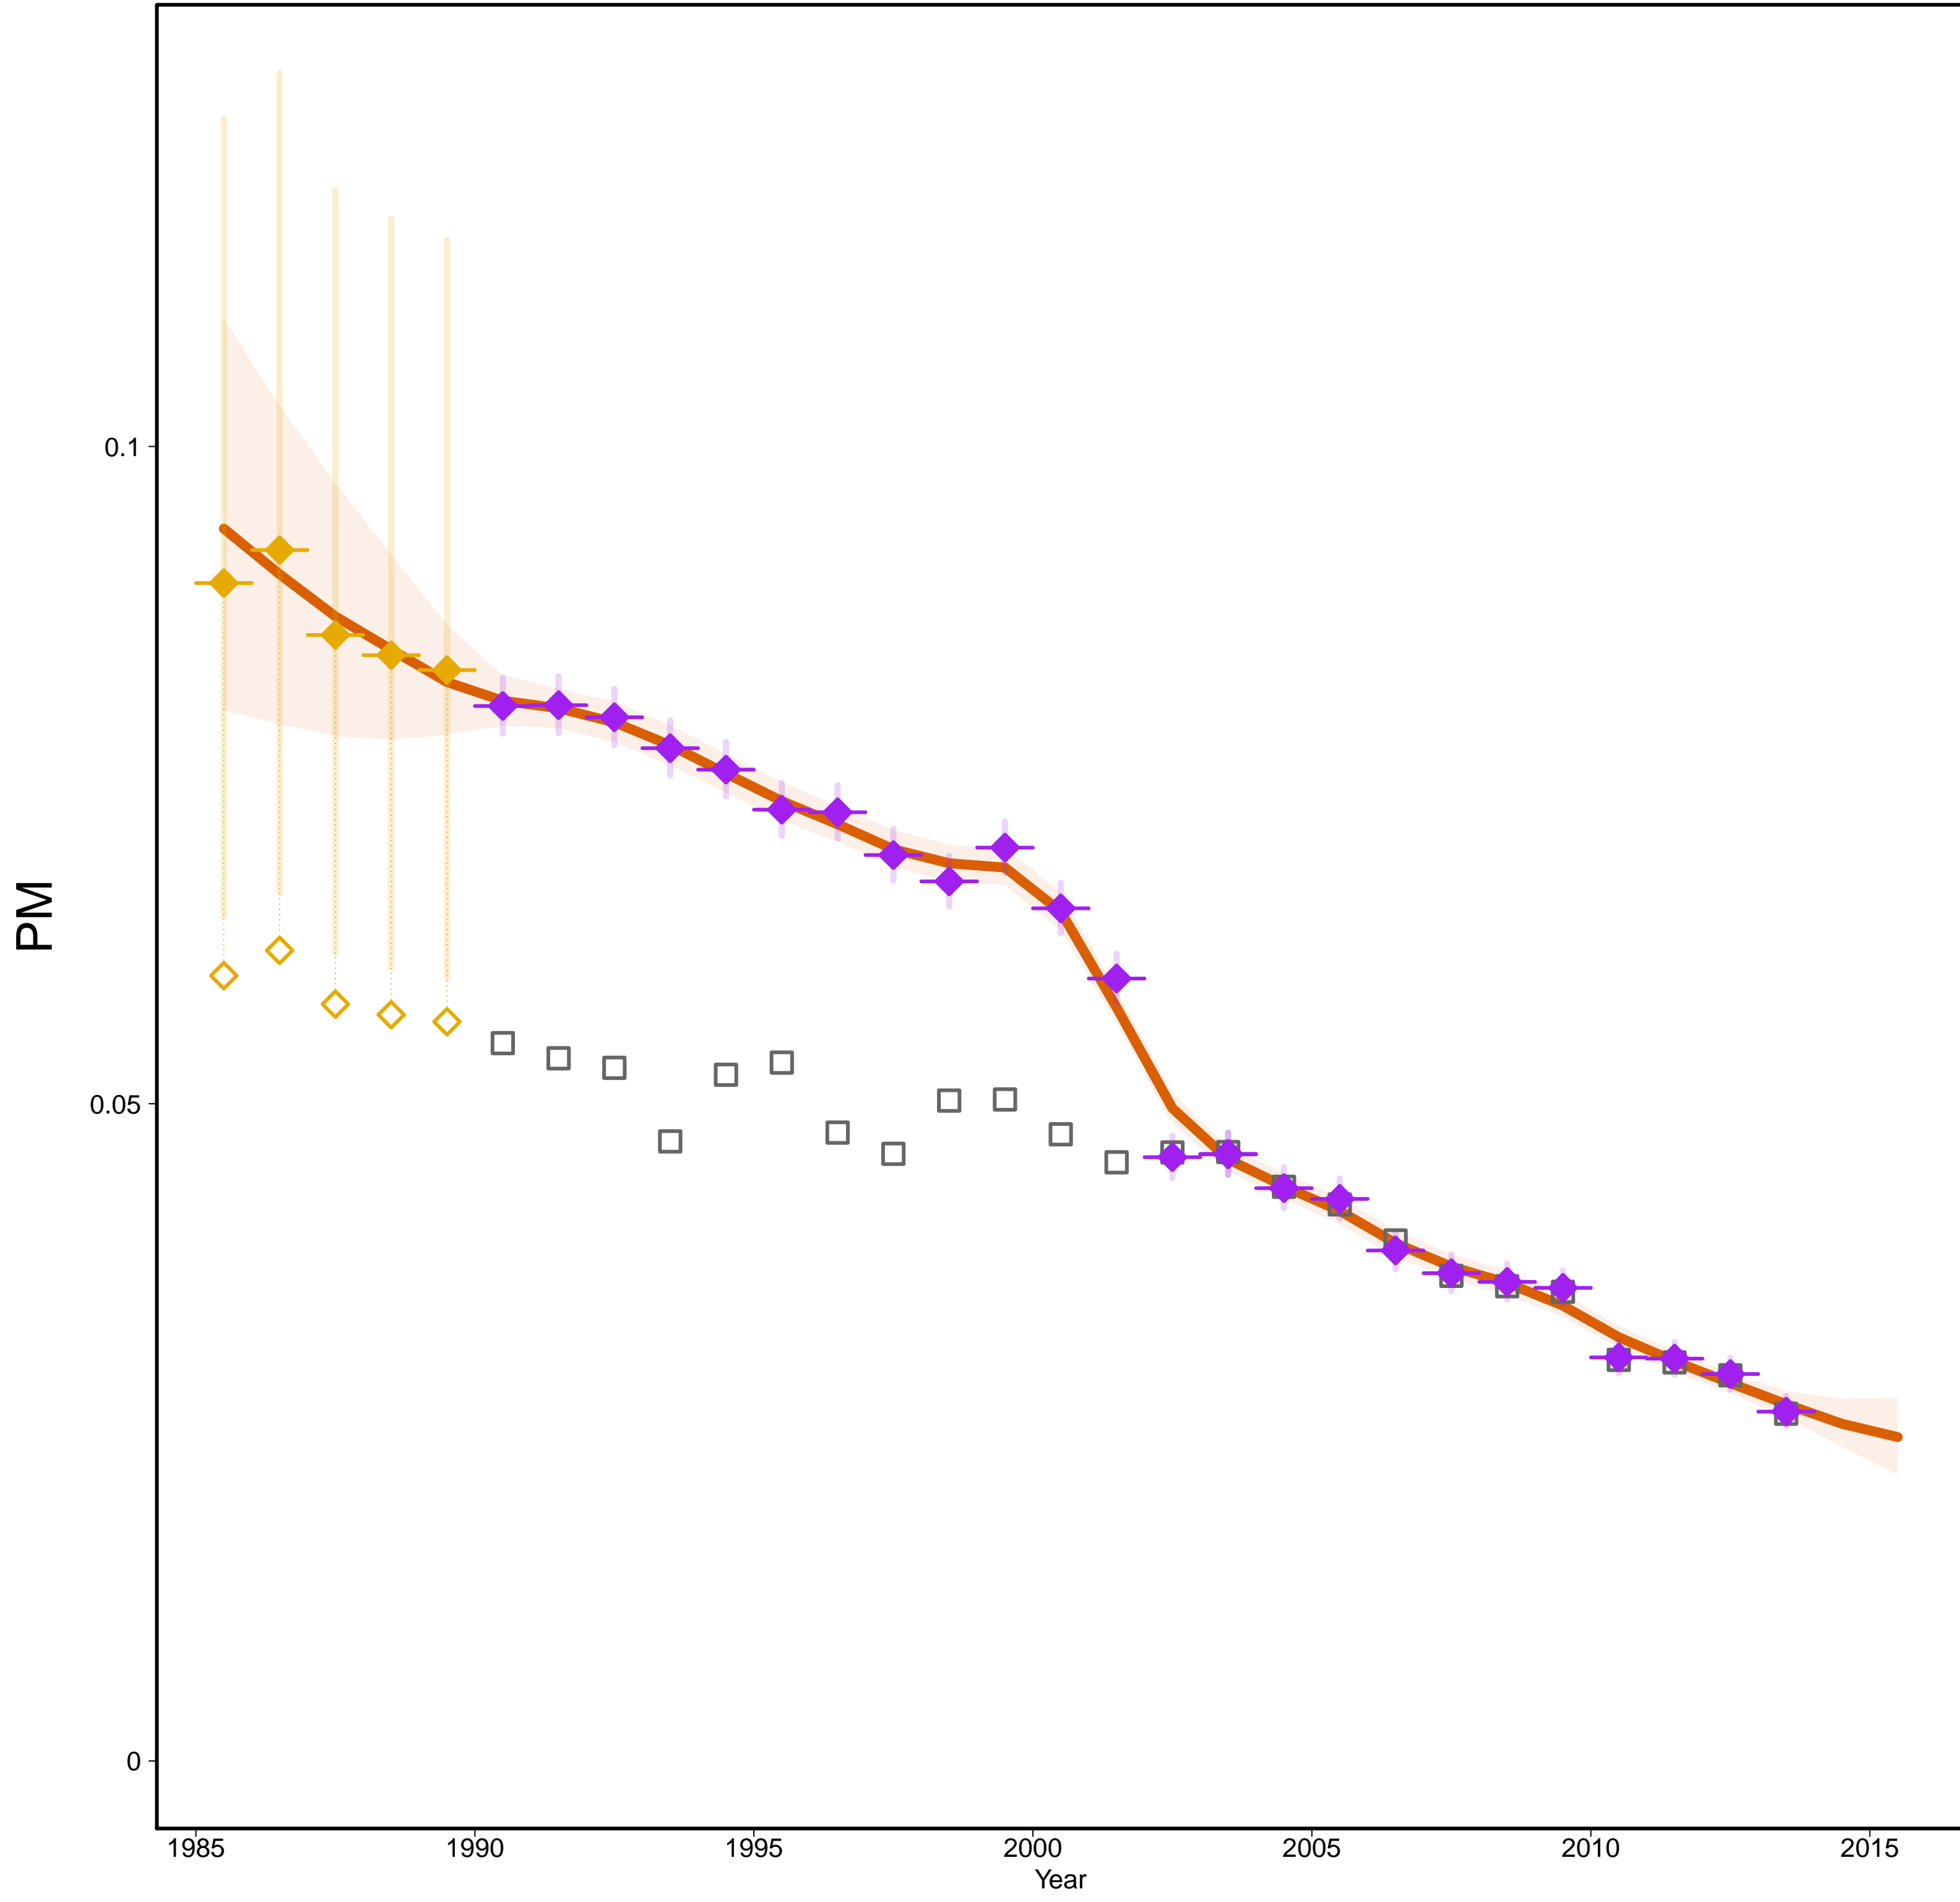

Mexico [MEX]  
(Central America)

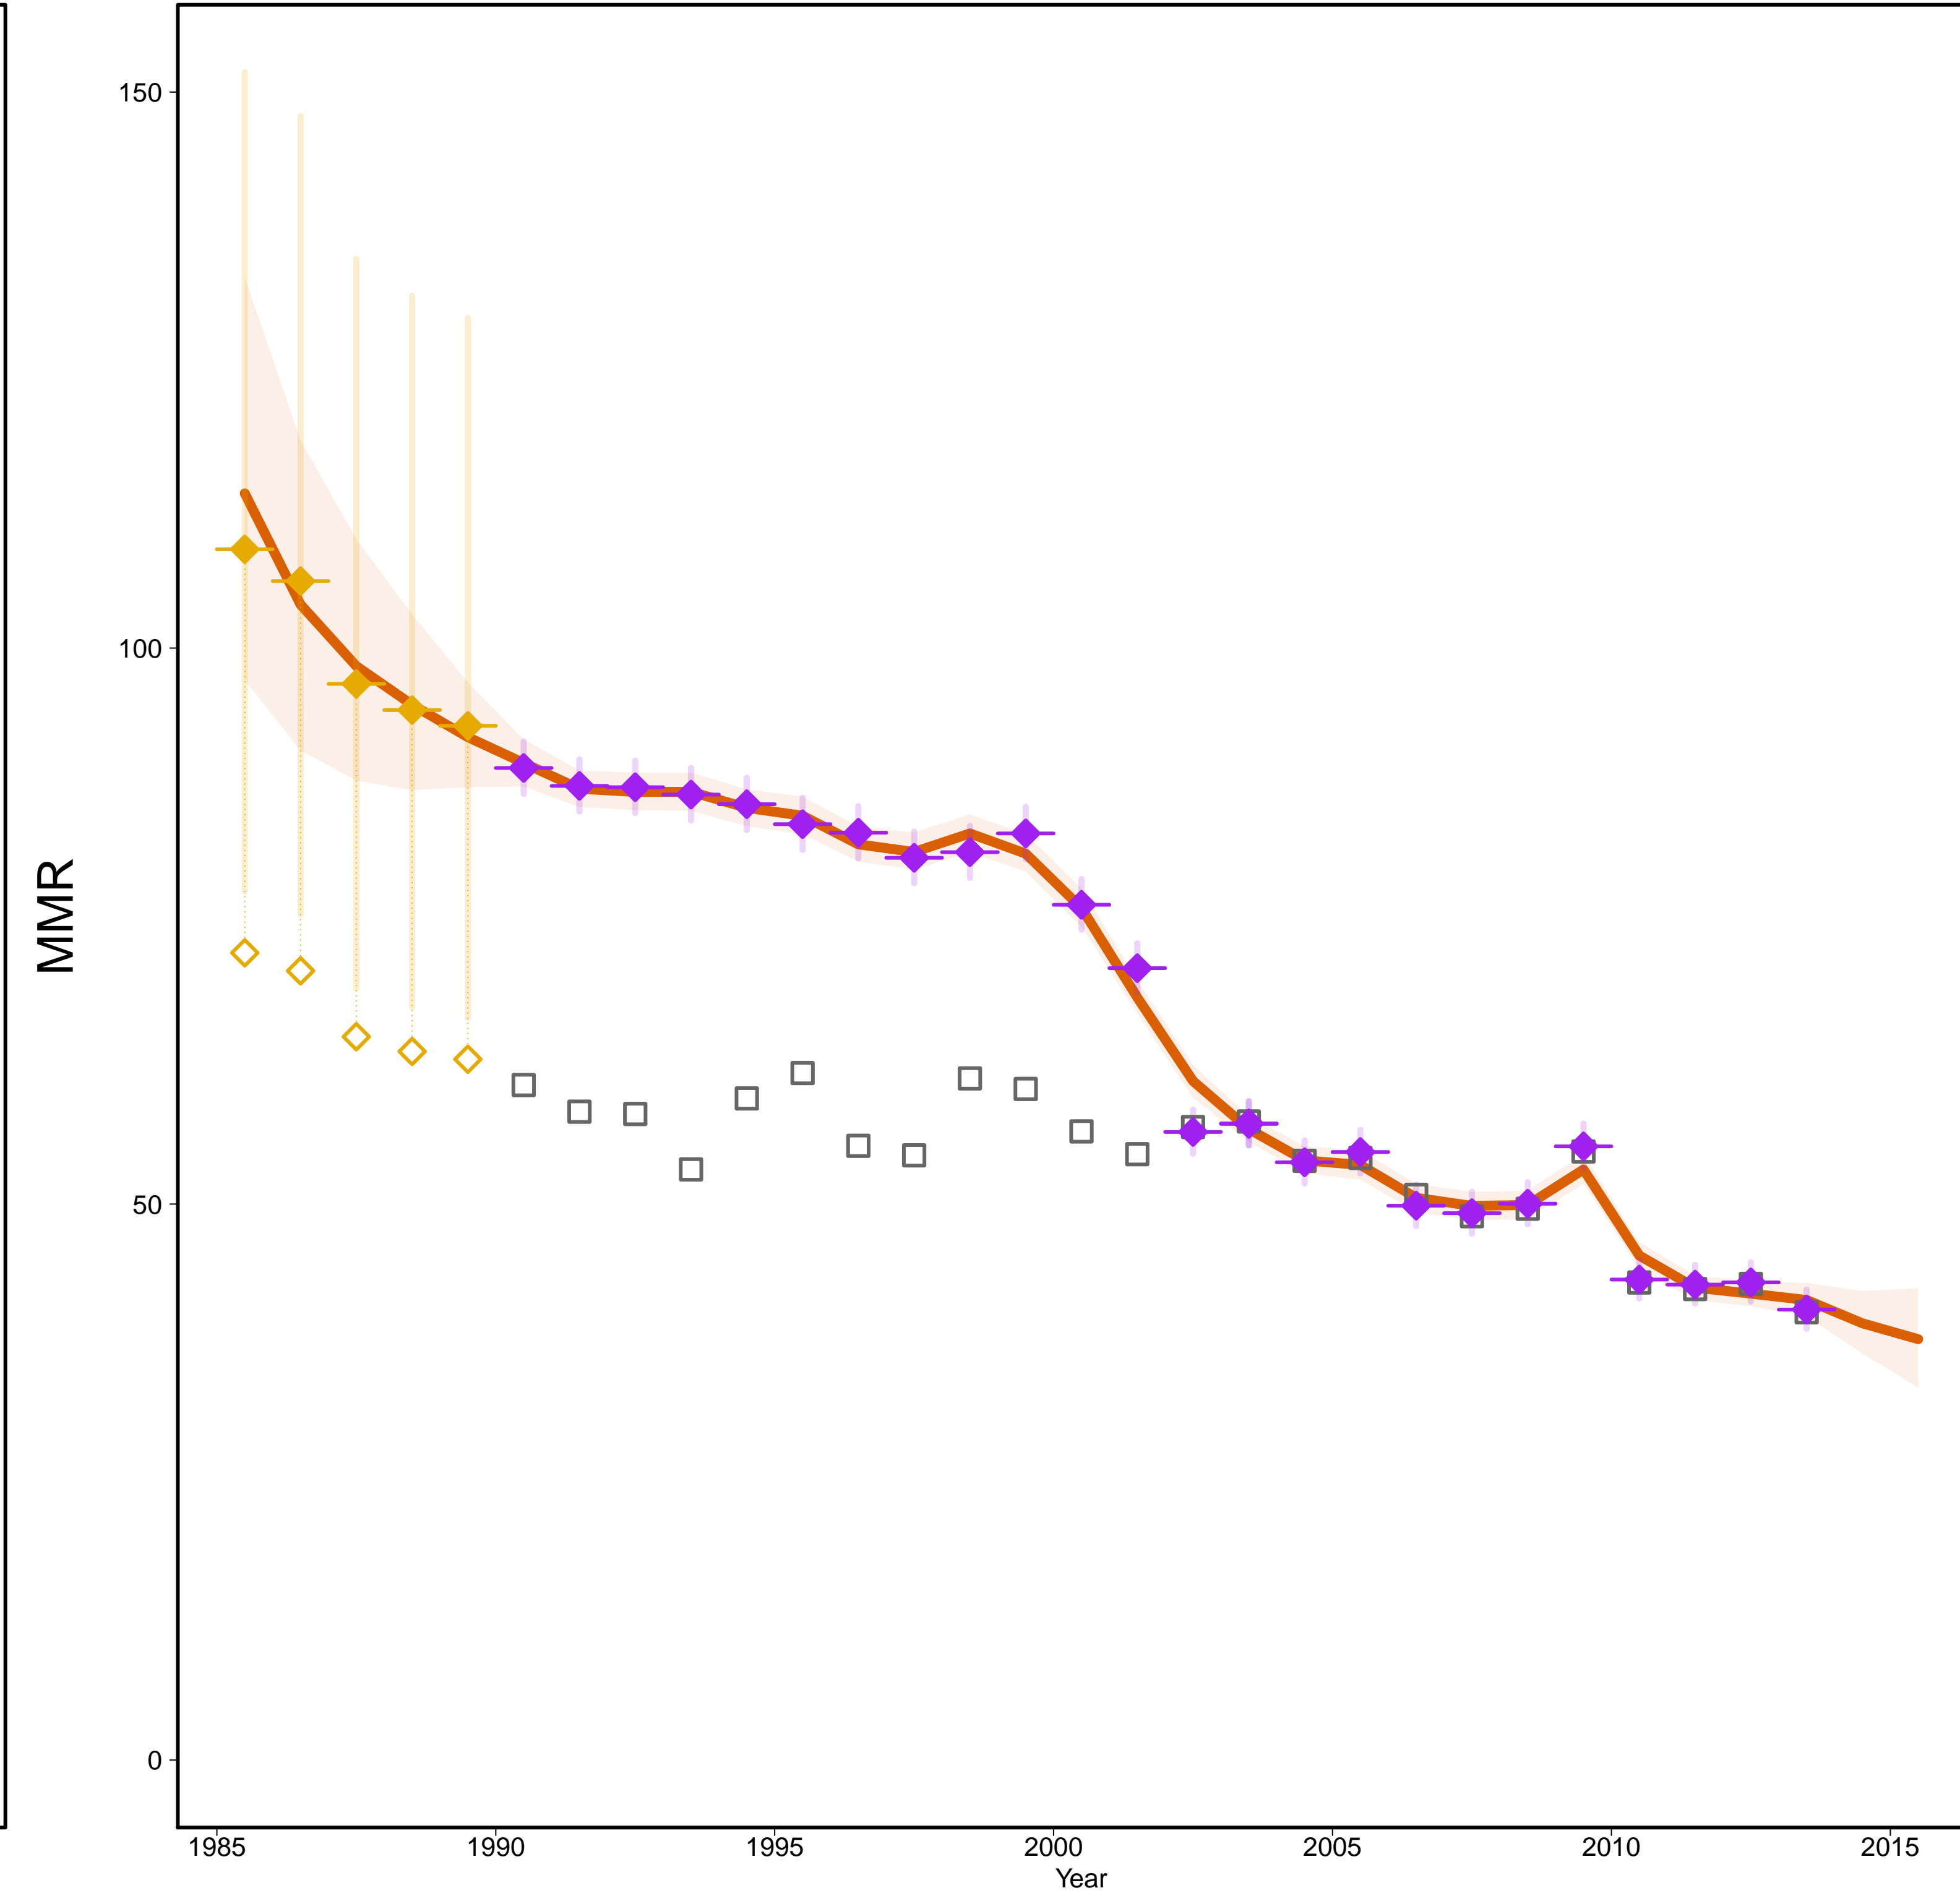

- Estimates –
- Mlate
- MMR Database 2015 –
- ◇ Observed Data
- ◆ Adjusted Data
- Data type –
- ◆ VR
- ◆ Spec. studies
- Excluded VR data  
(overlap with specialized study)

Gross Domestic Product

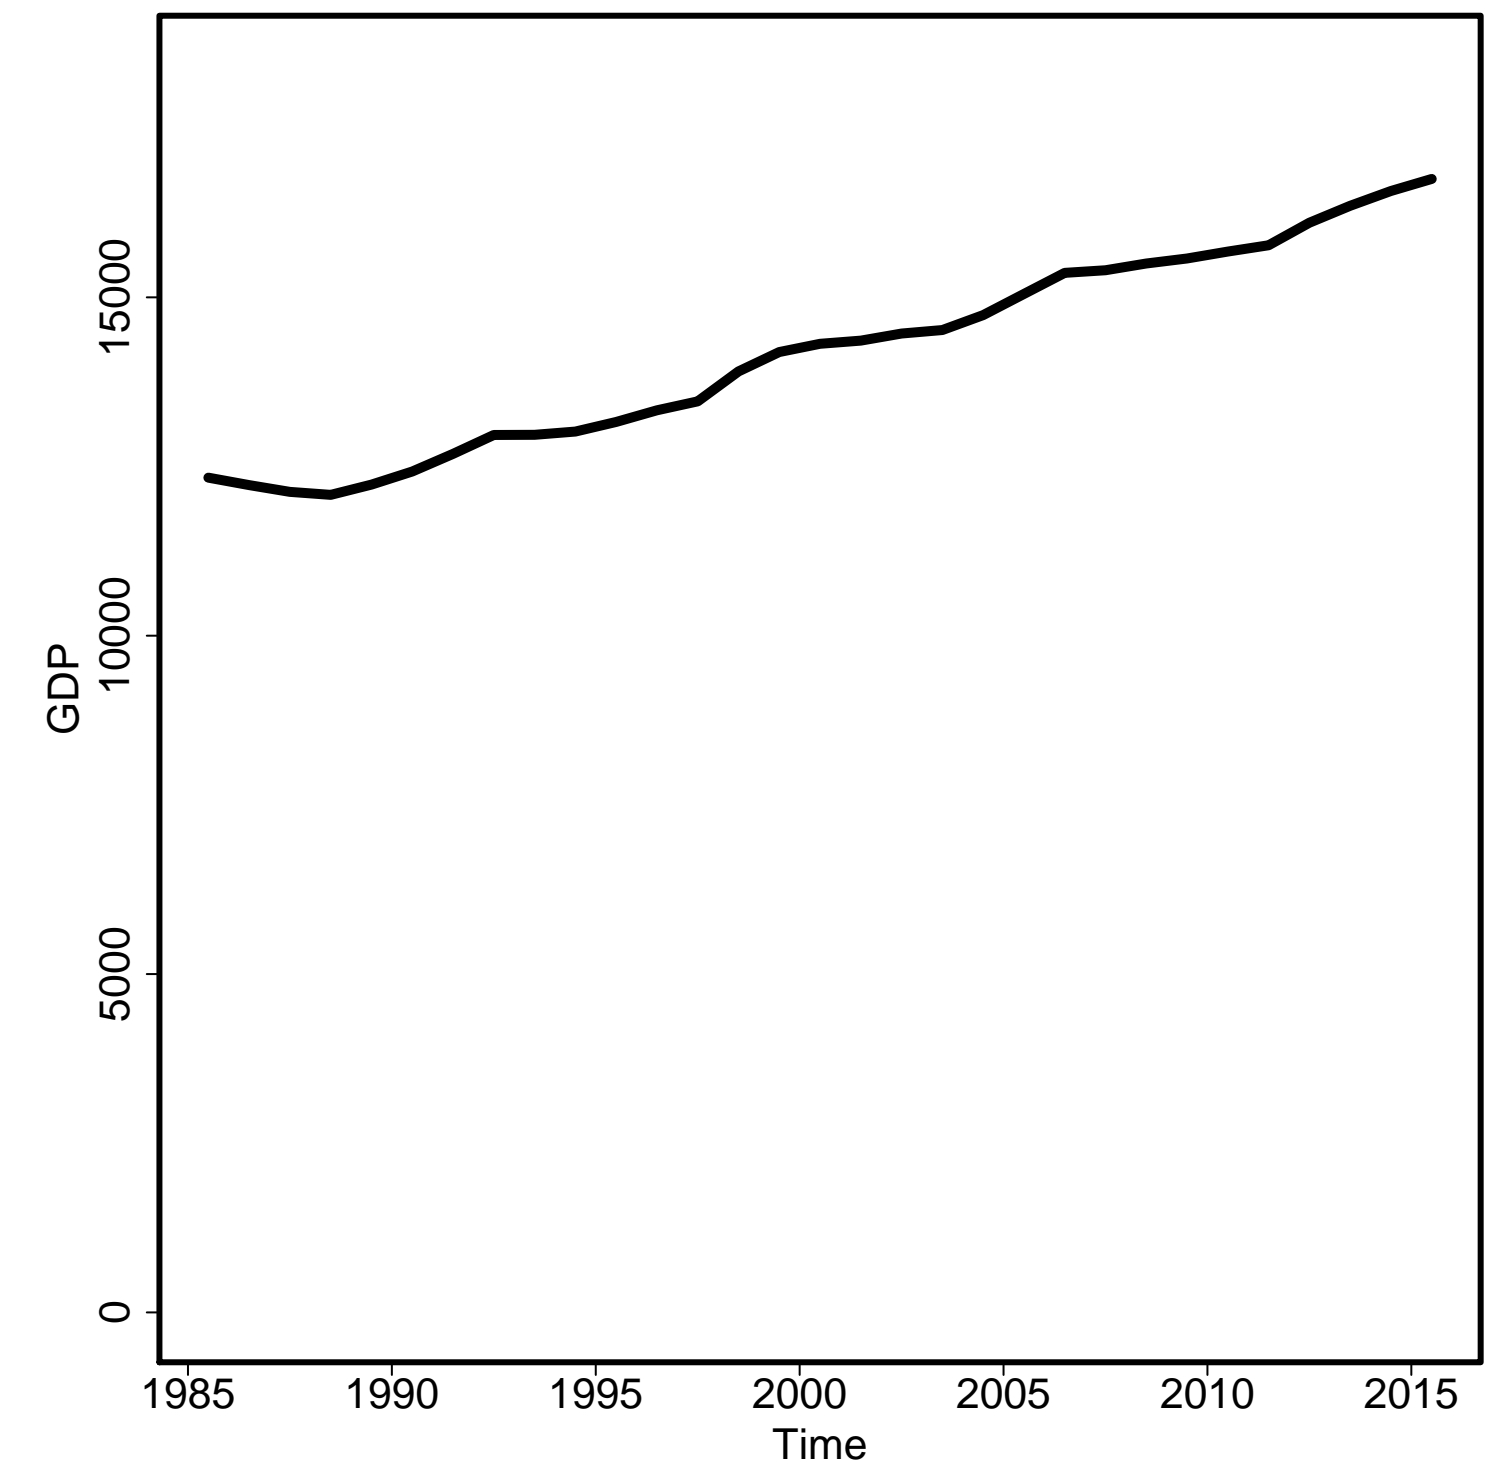

General Fertility Rate

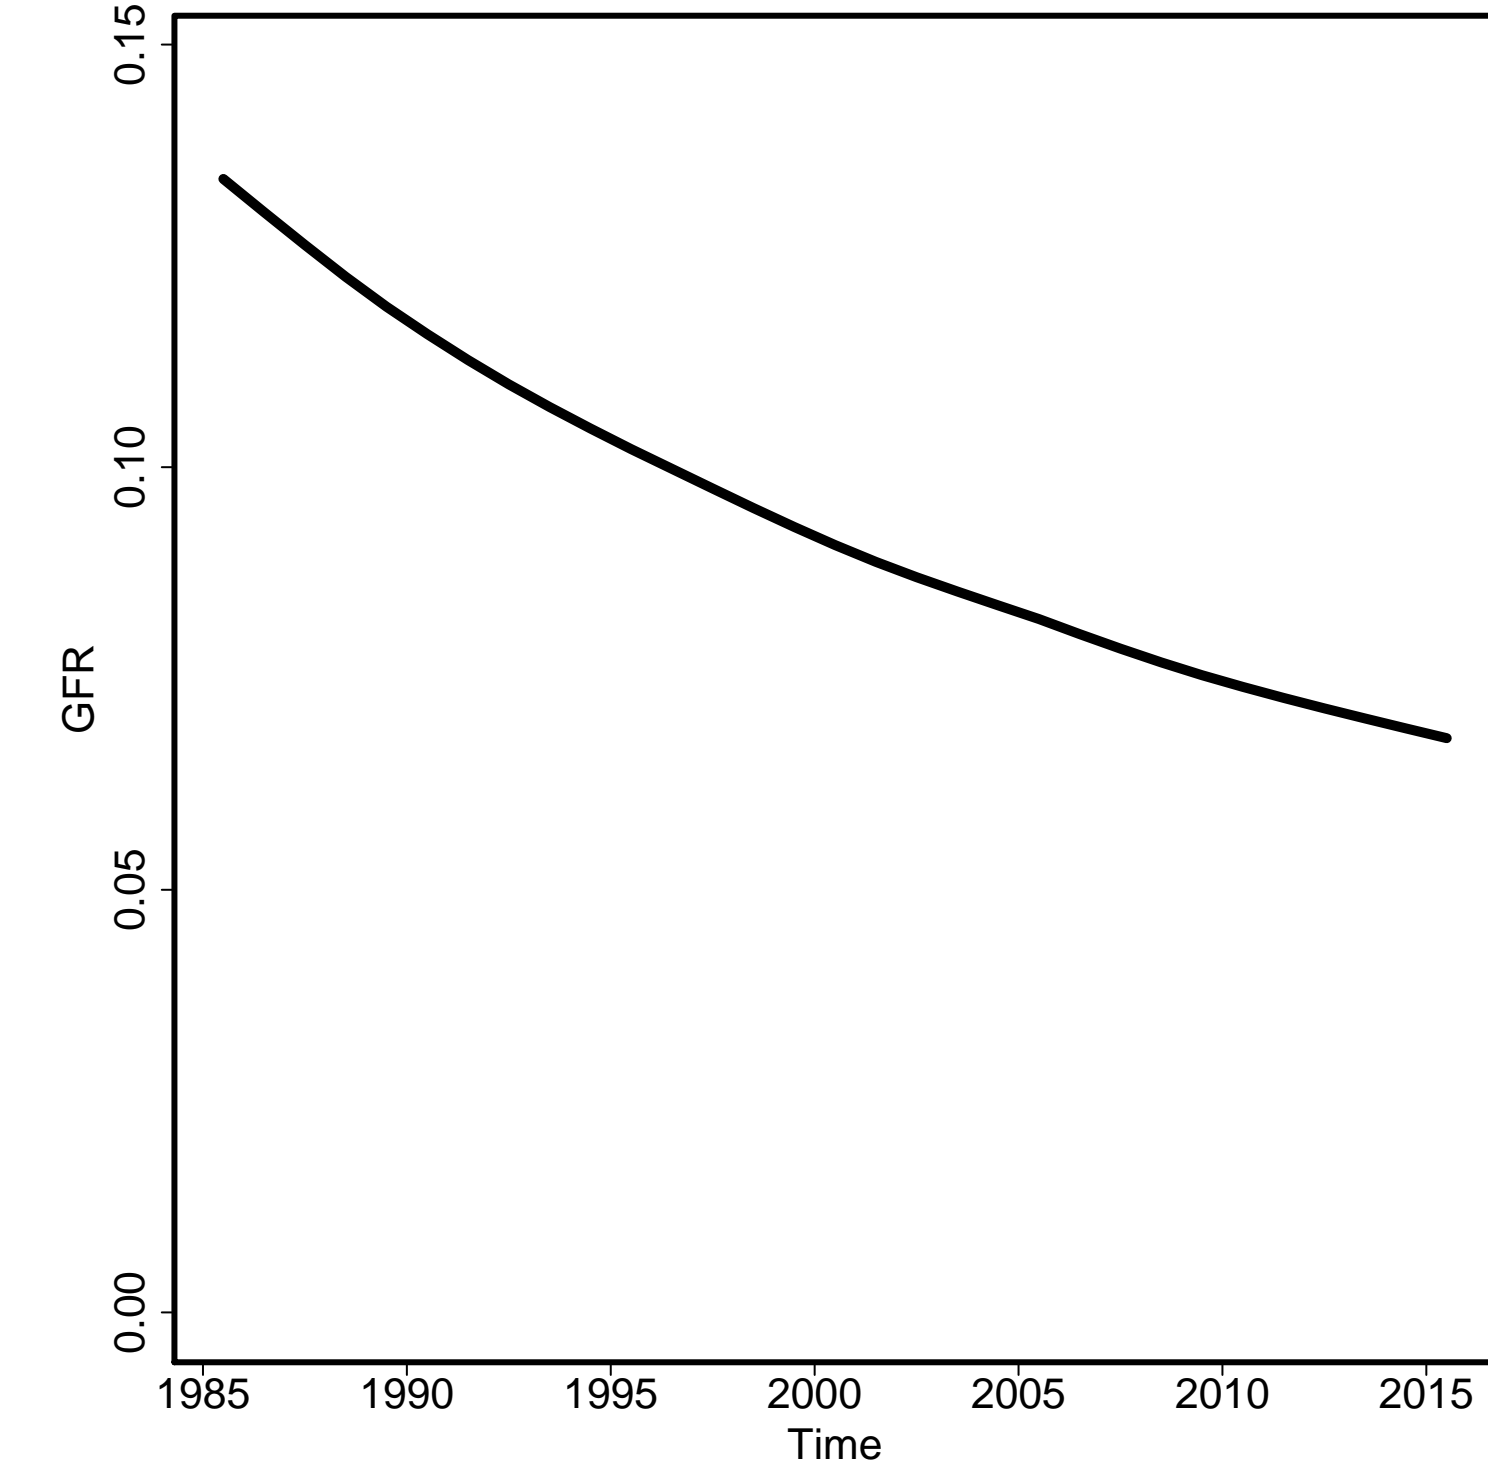

Skilled Attendance to Birth

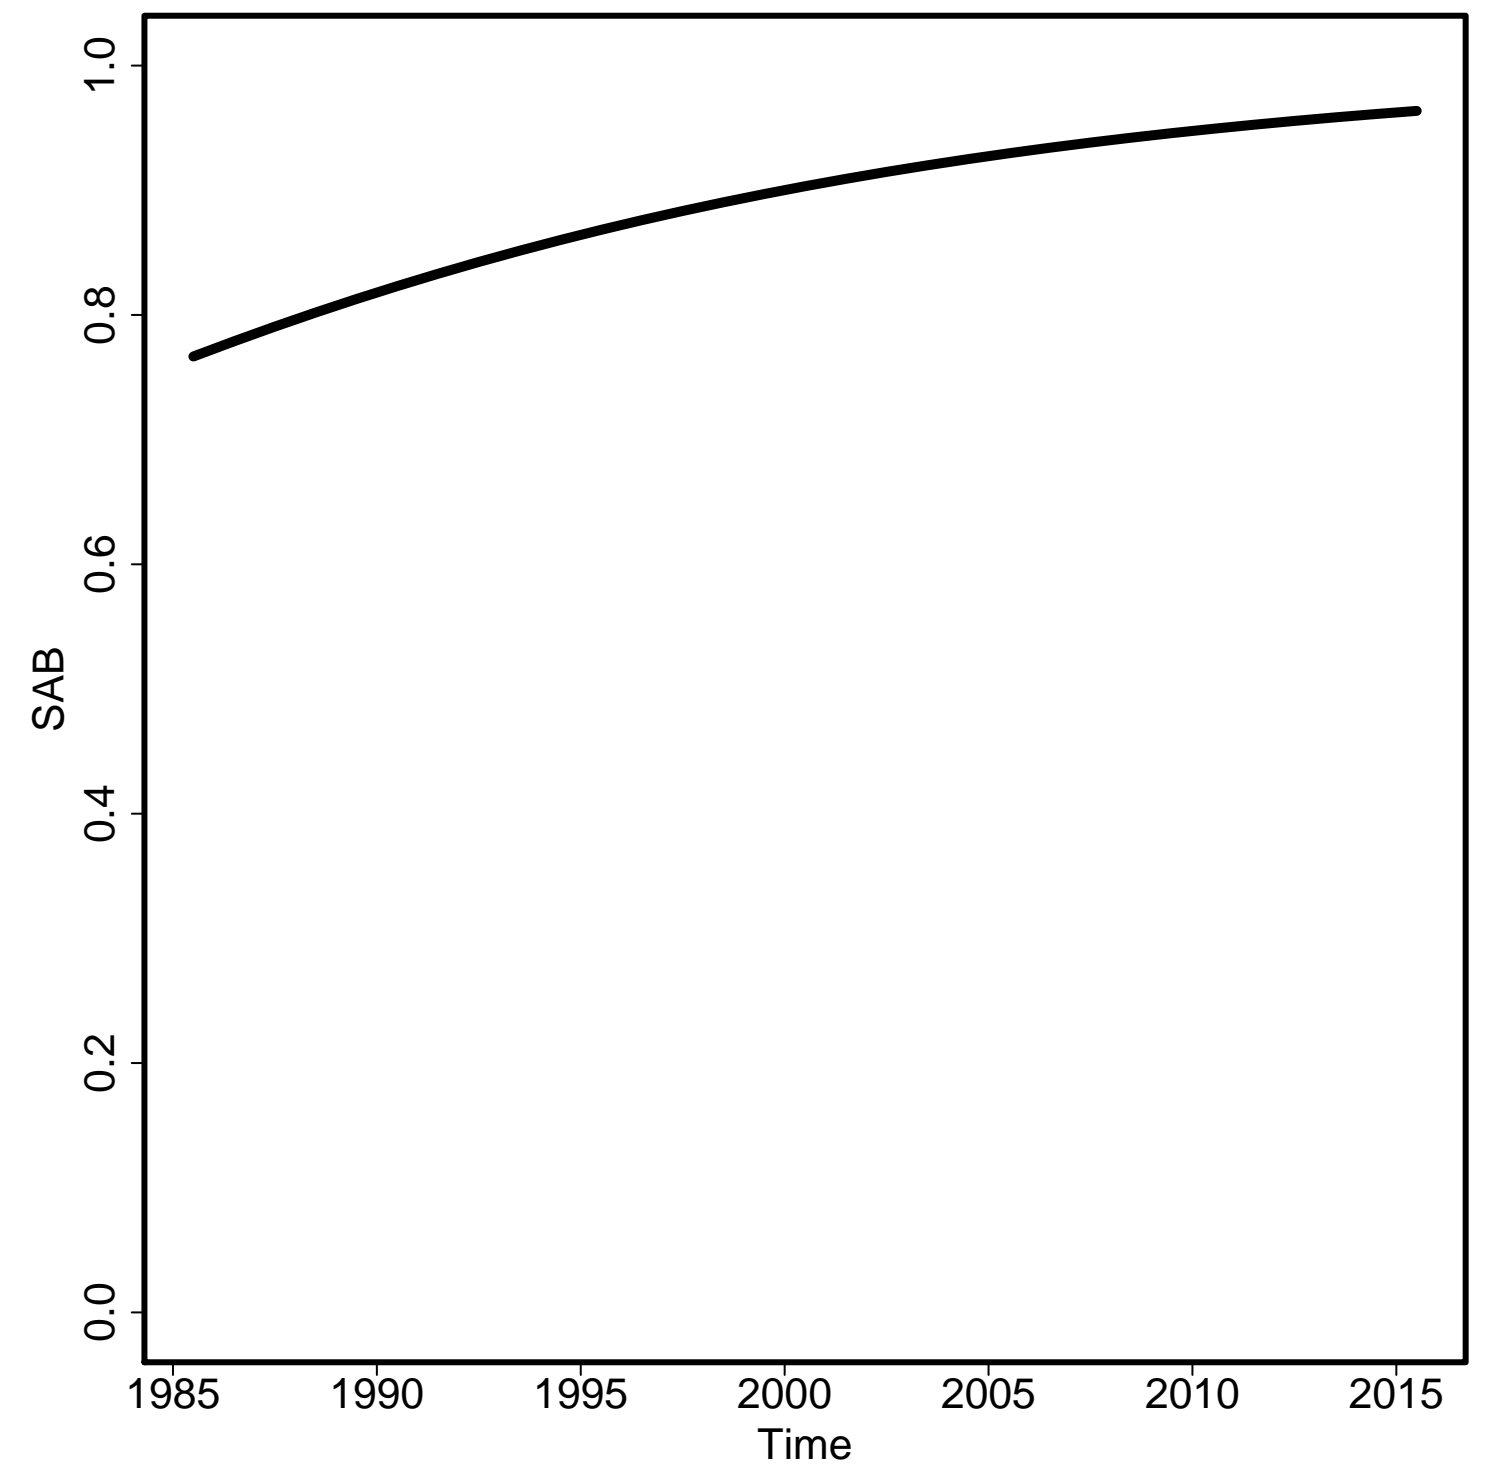

Envelope/Births

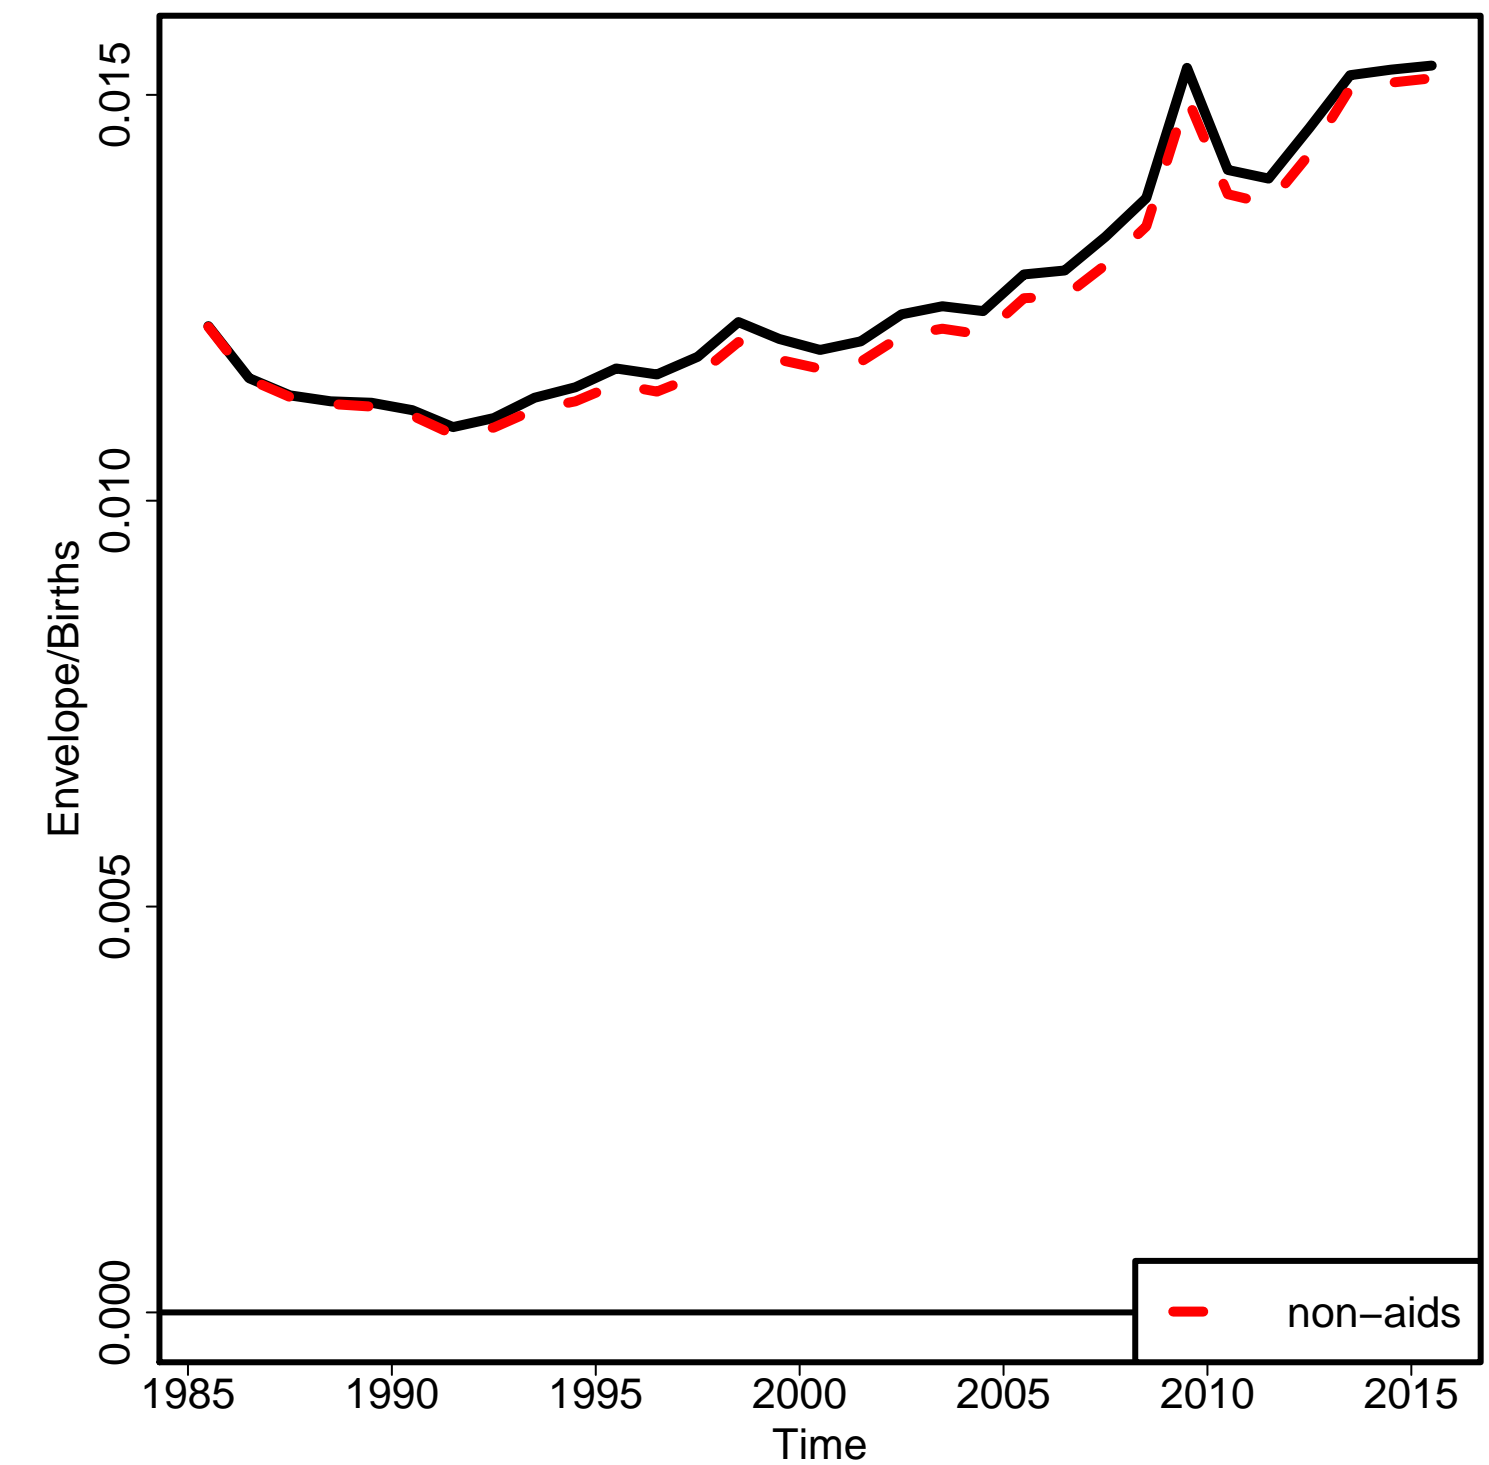

Non-aids MMR

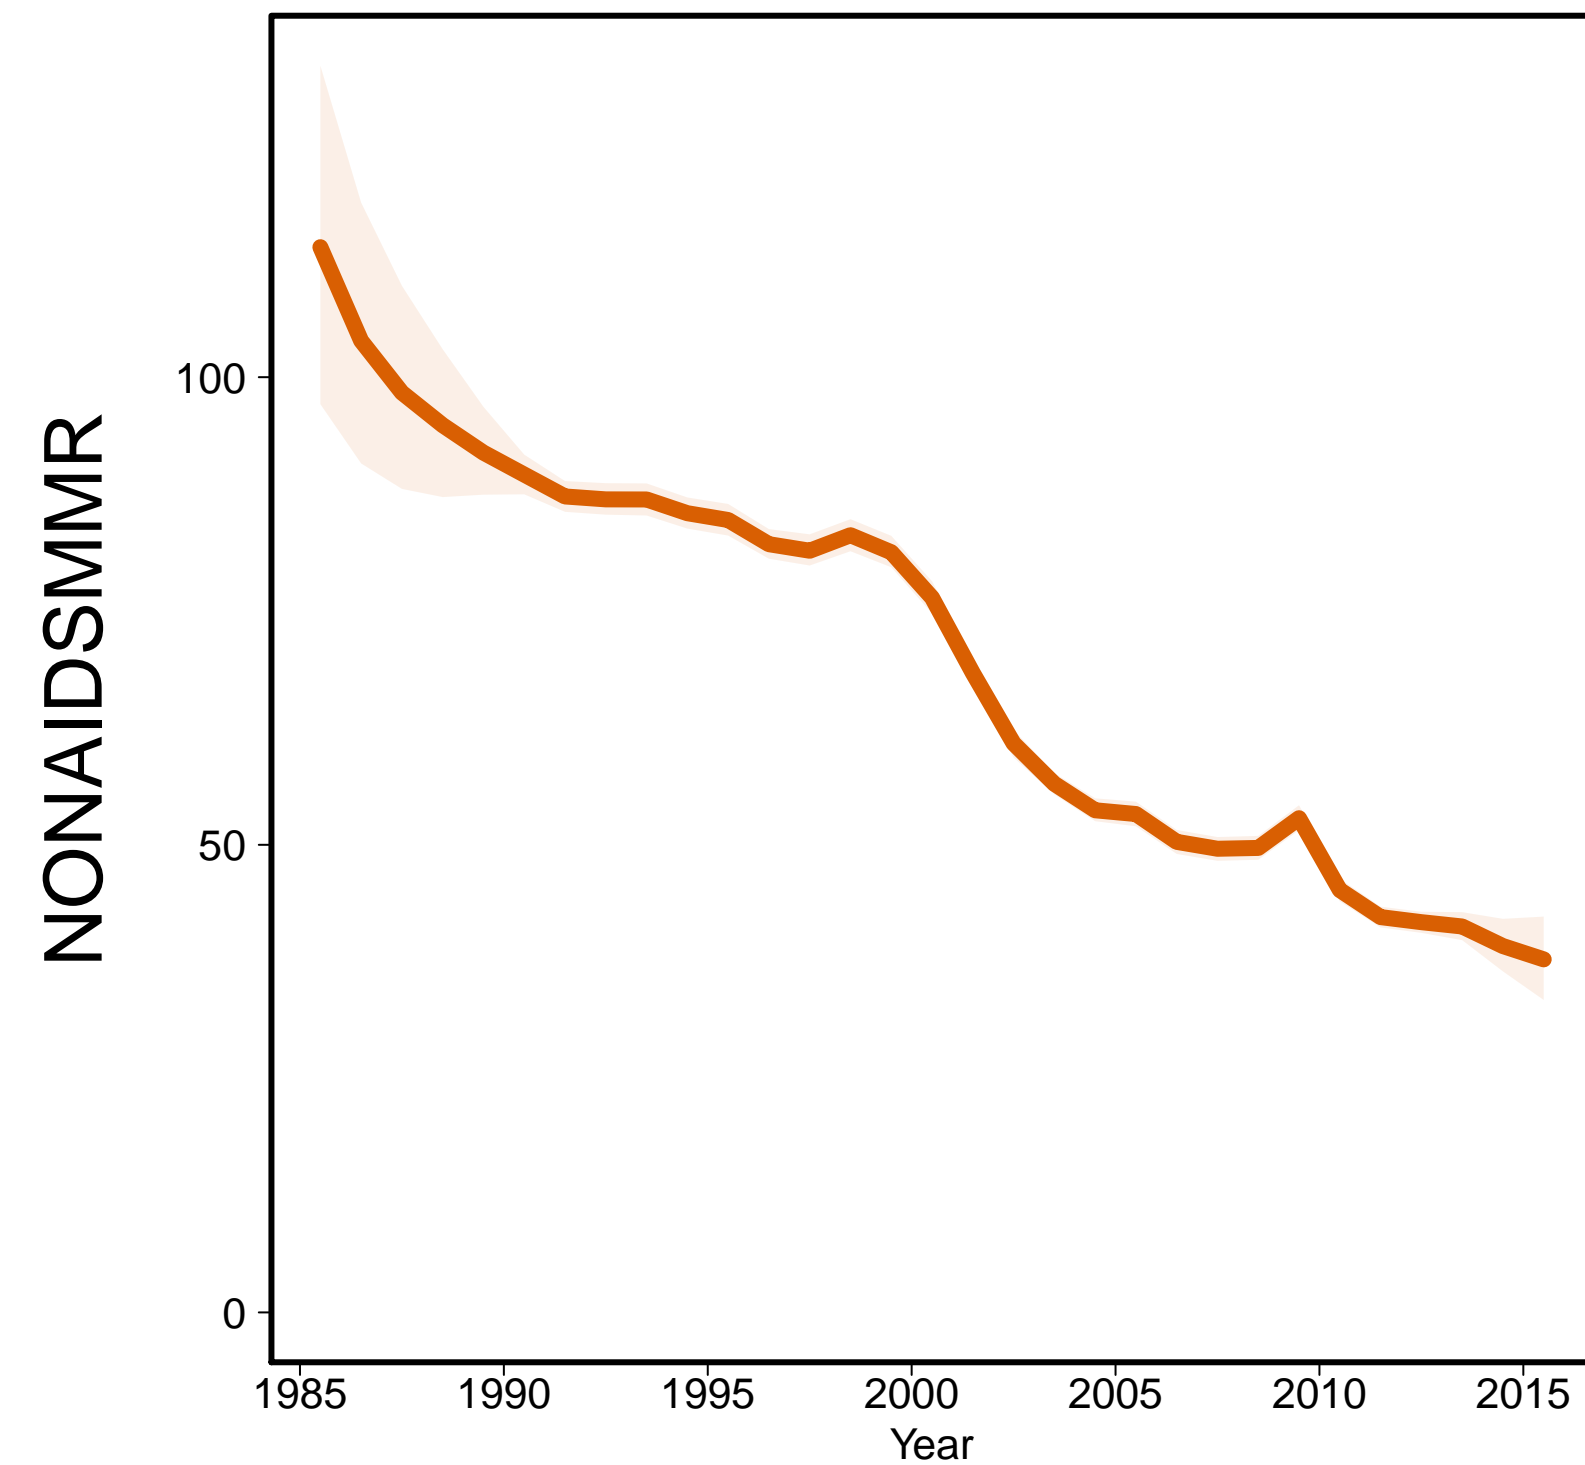

Aids MMR

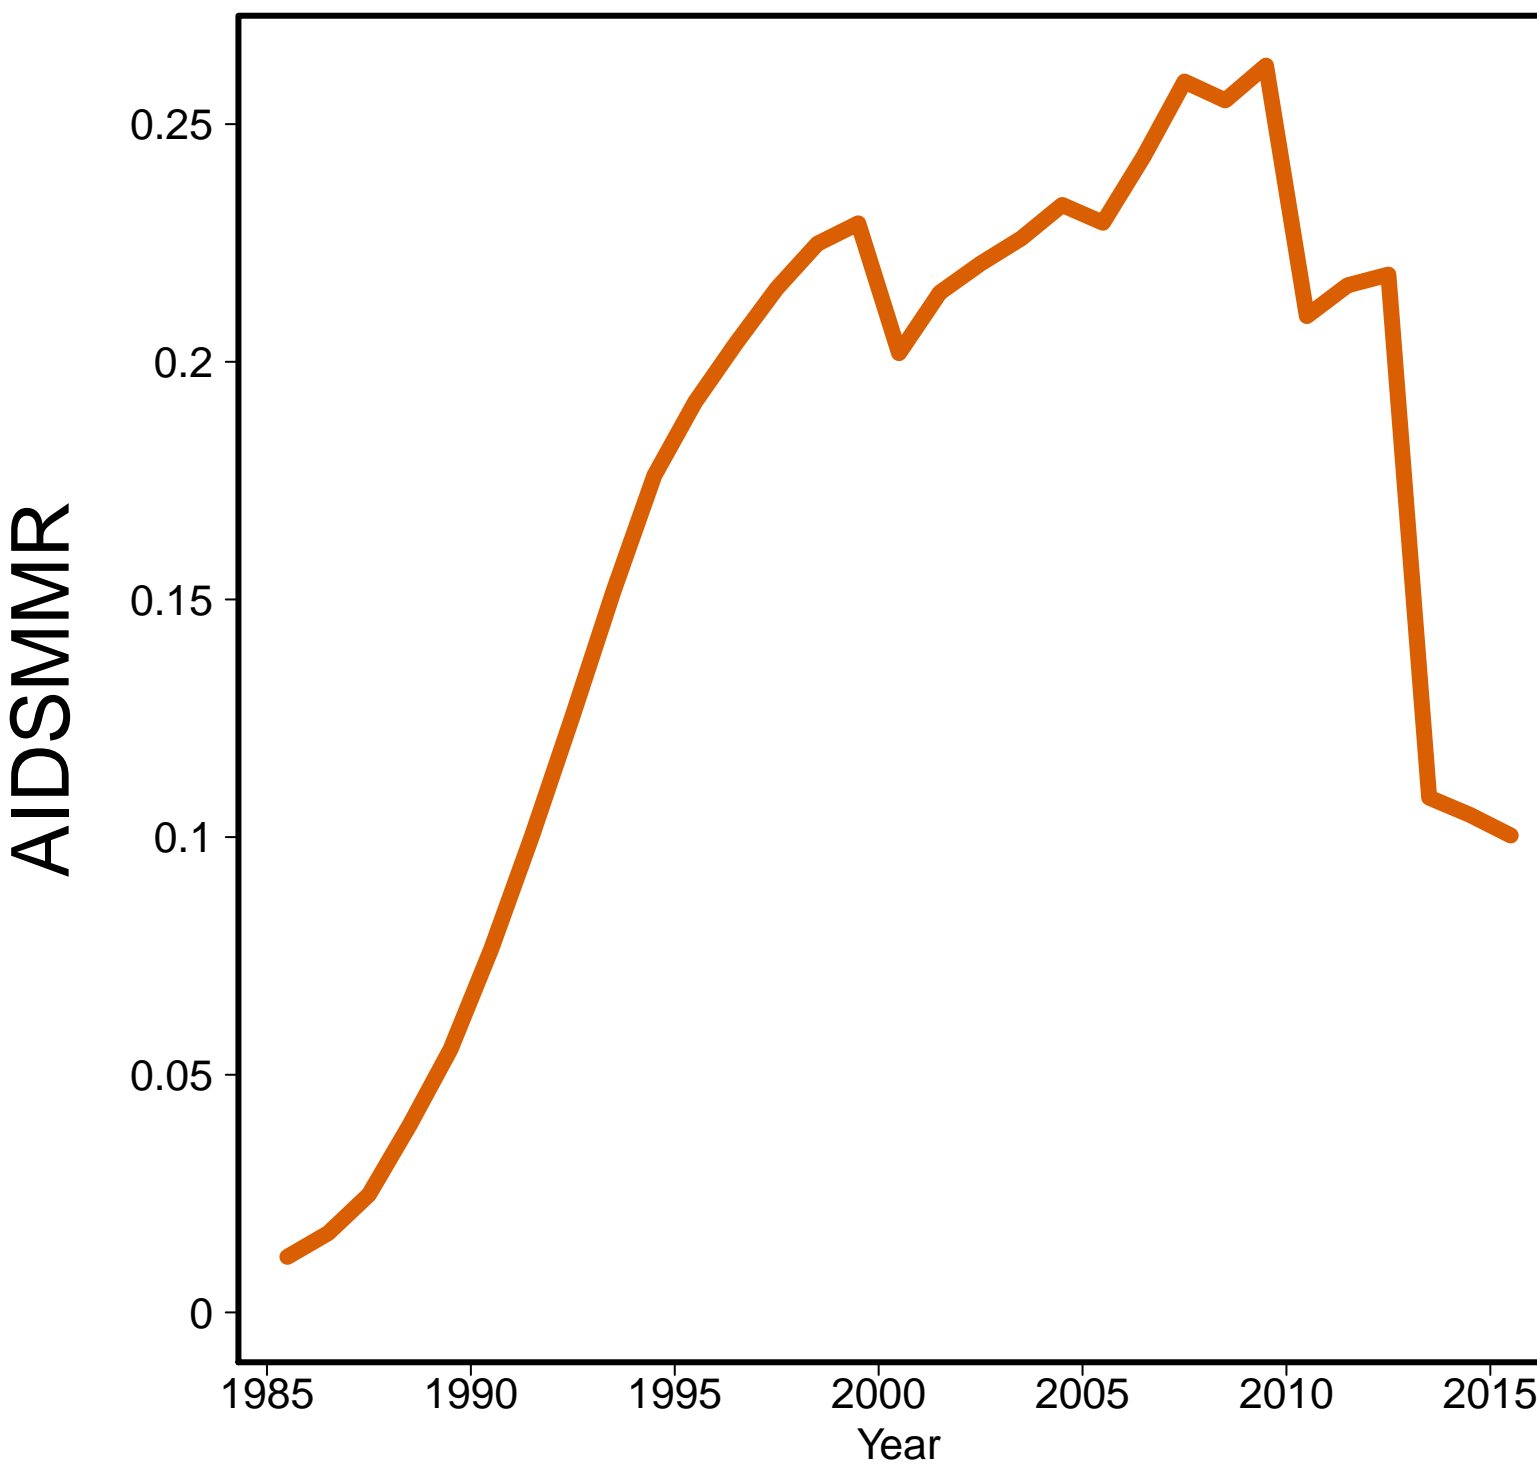

Micronesia [FSM]  
(South-Eastern Asia / Oceania)

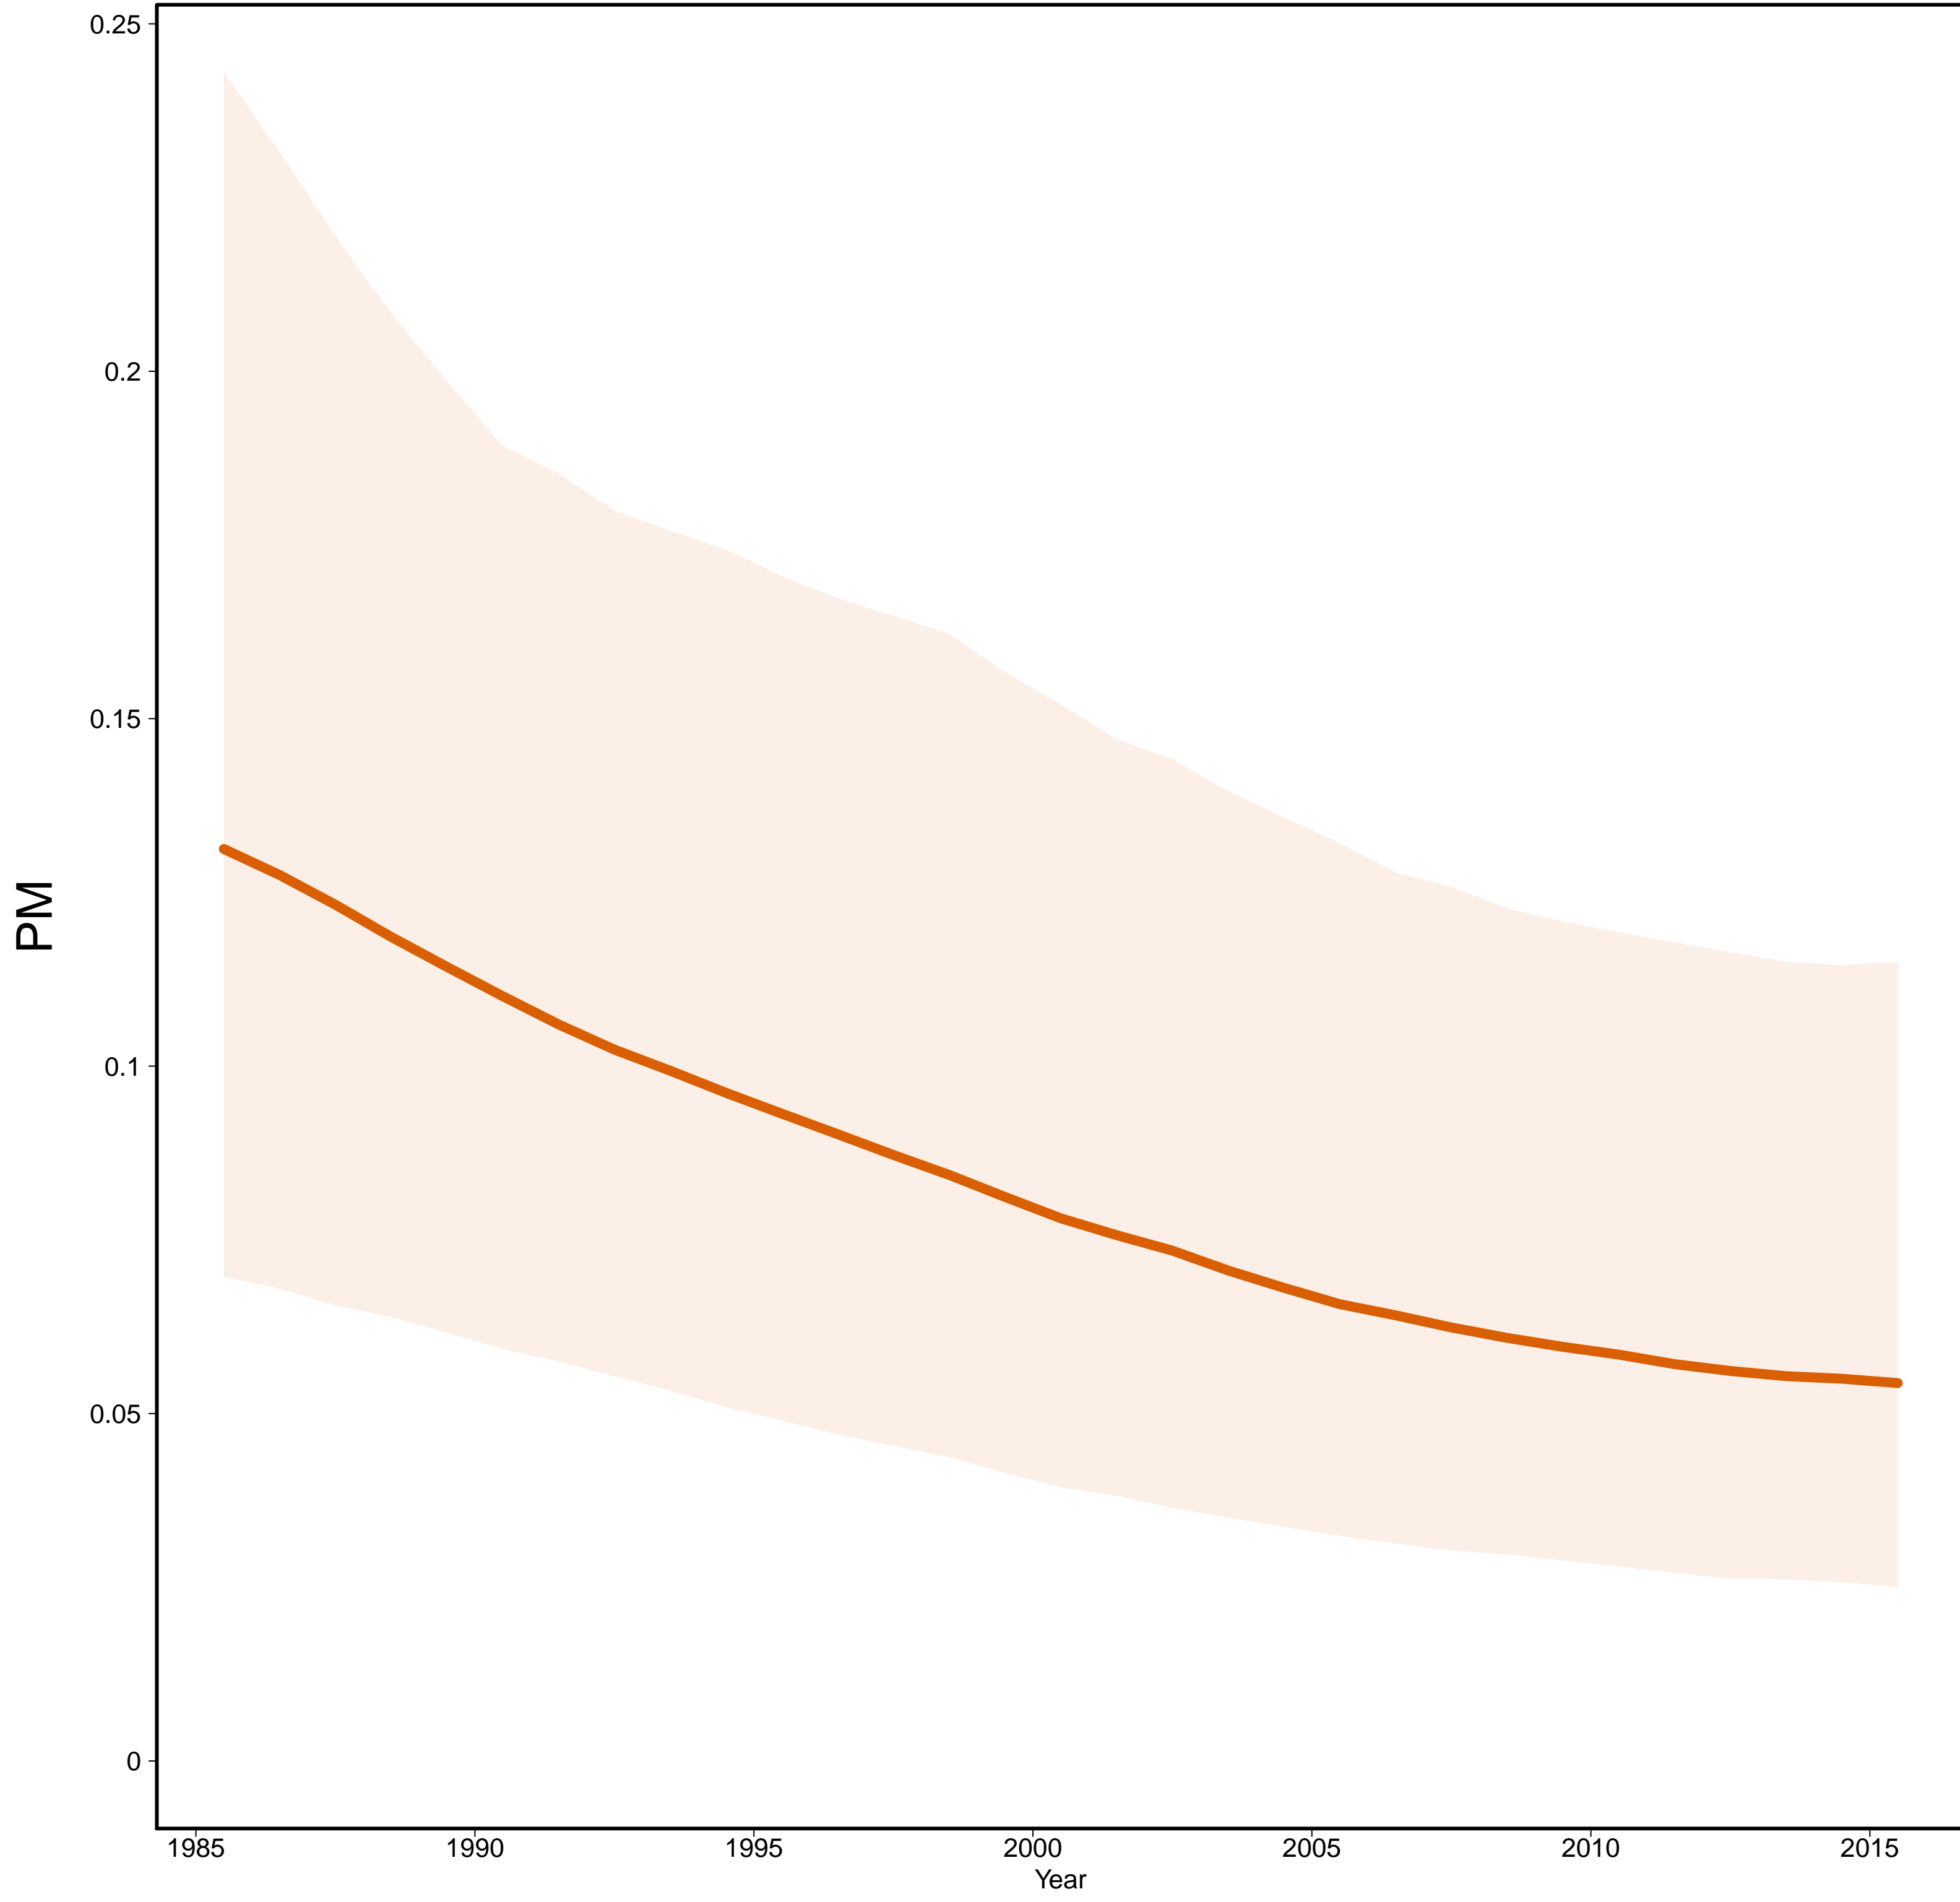

Micronesia [FSM]  
(South-Eastern Asia / Oceania)

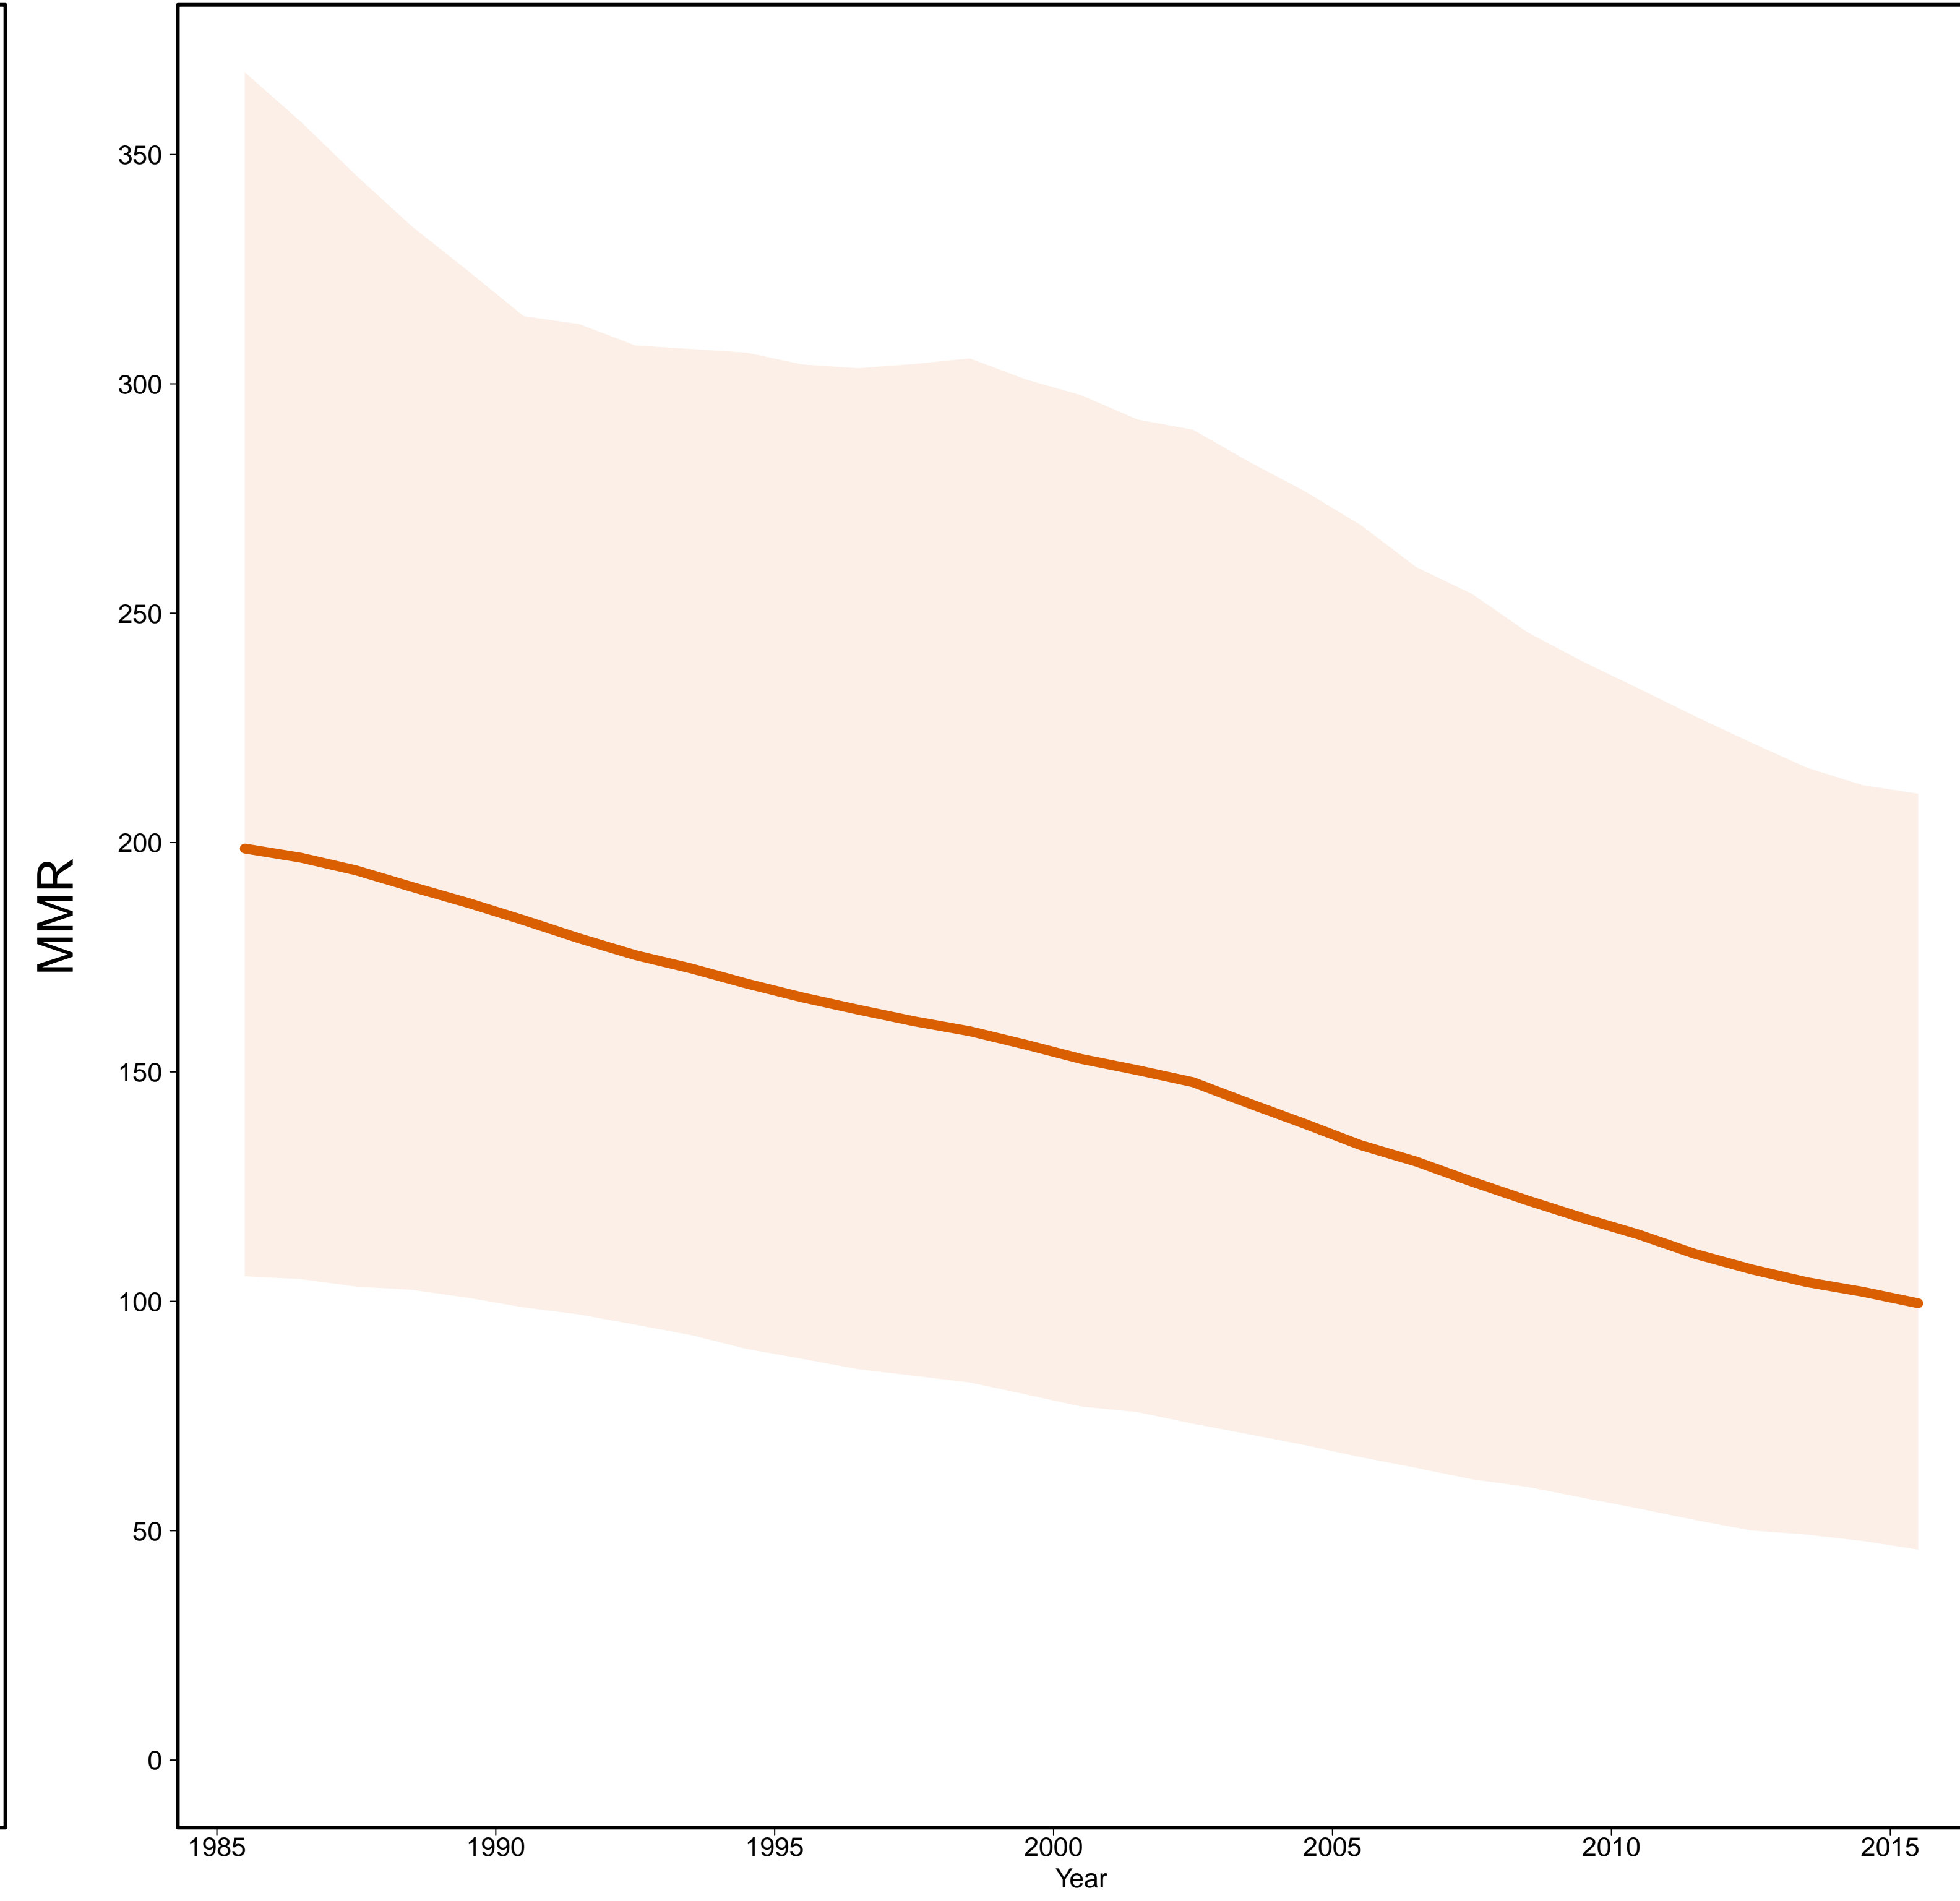

– Estimates –  
Mlate  
– MMR Database 2015 –

Gross Domestic Product

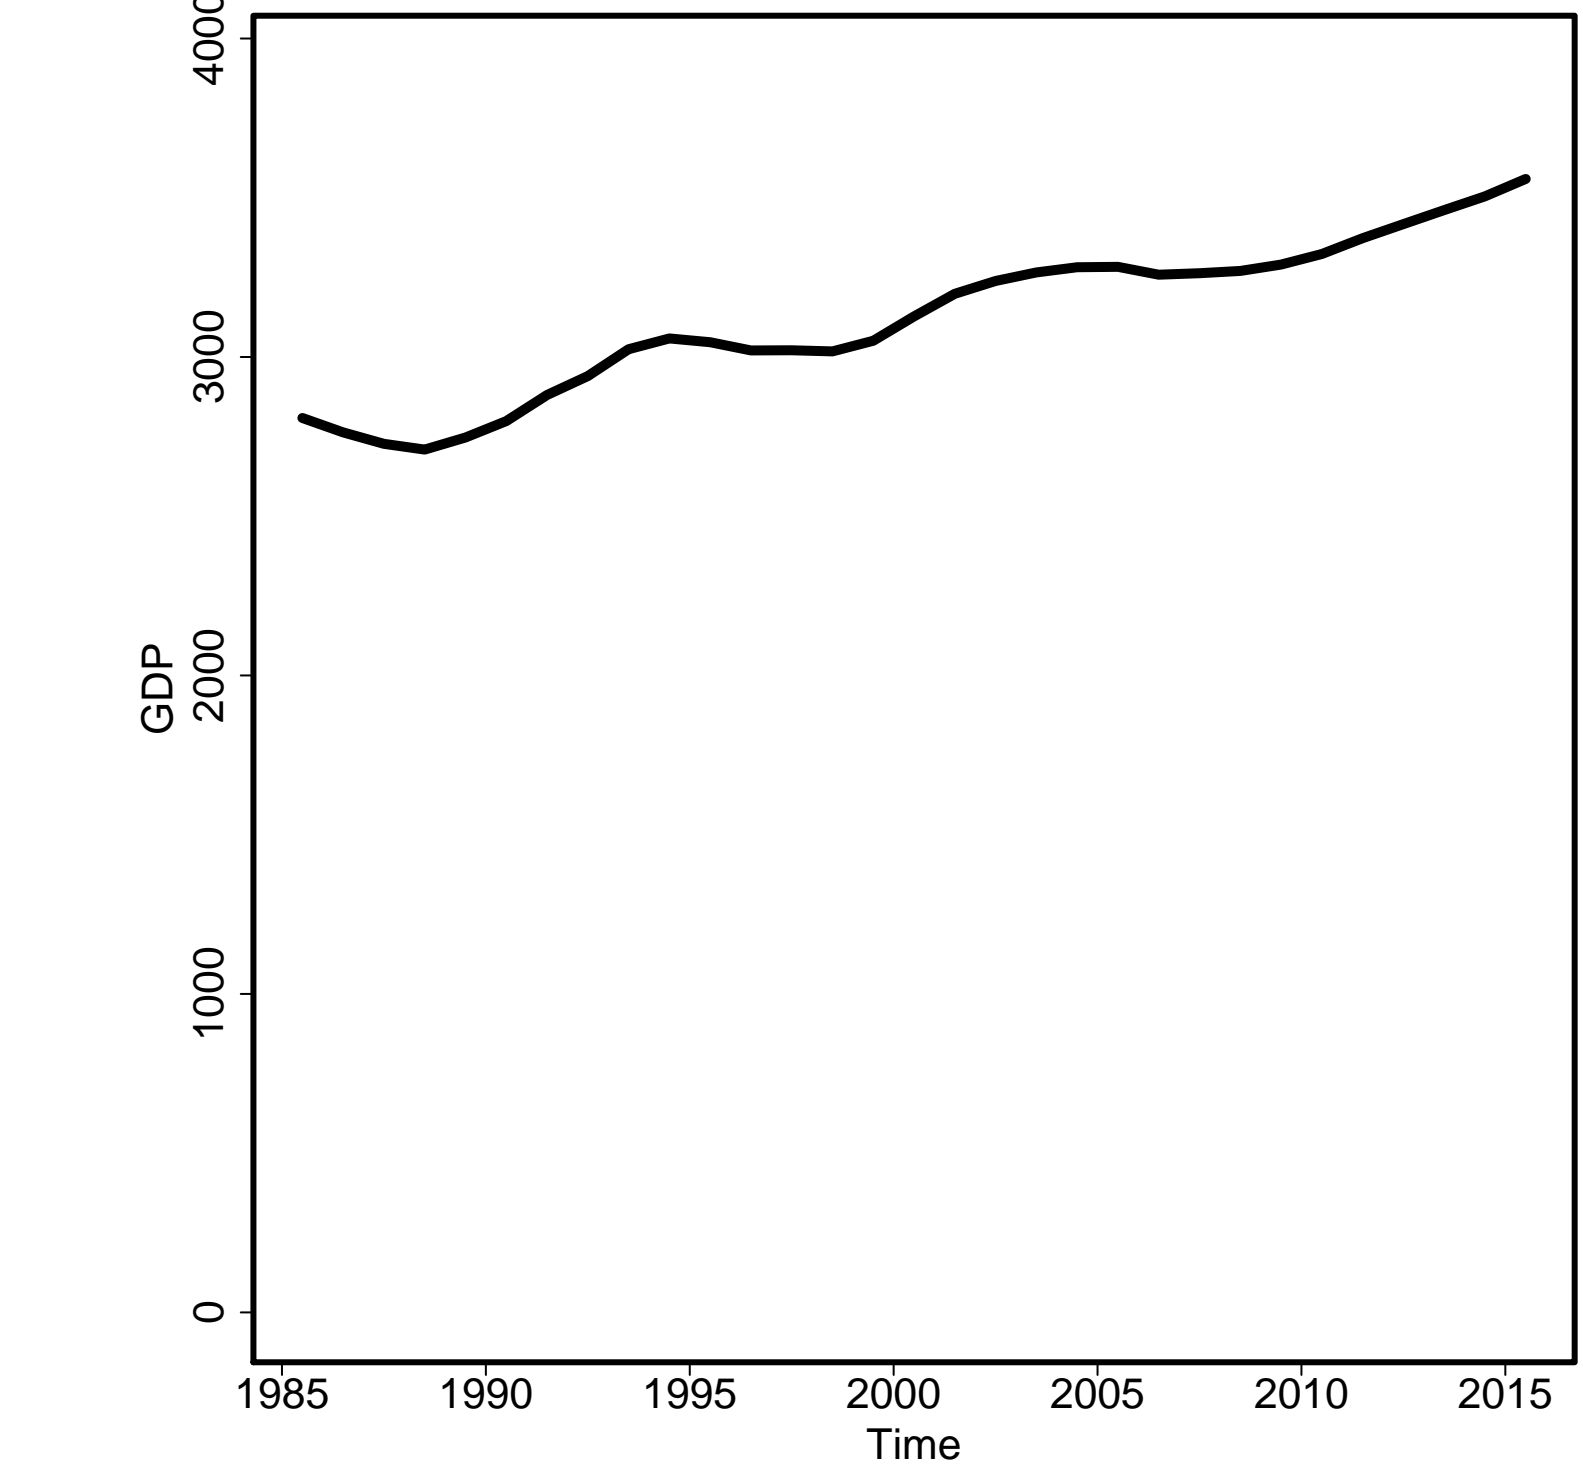

General Fertility Rate

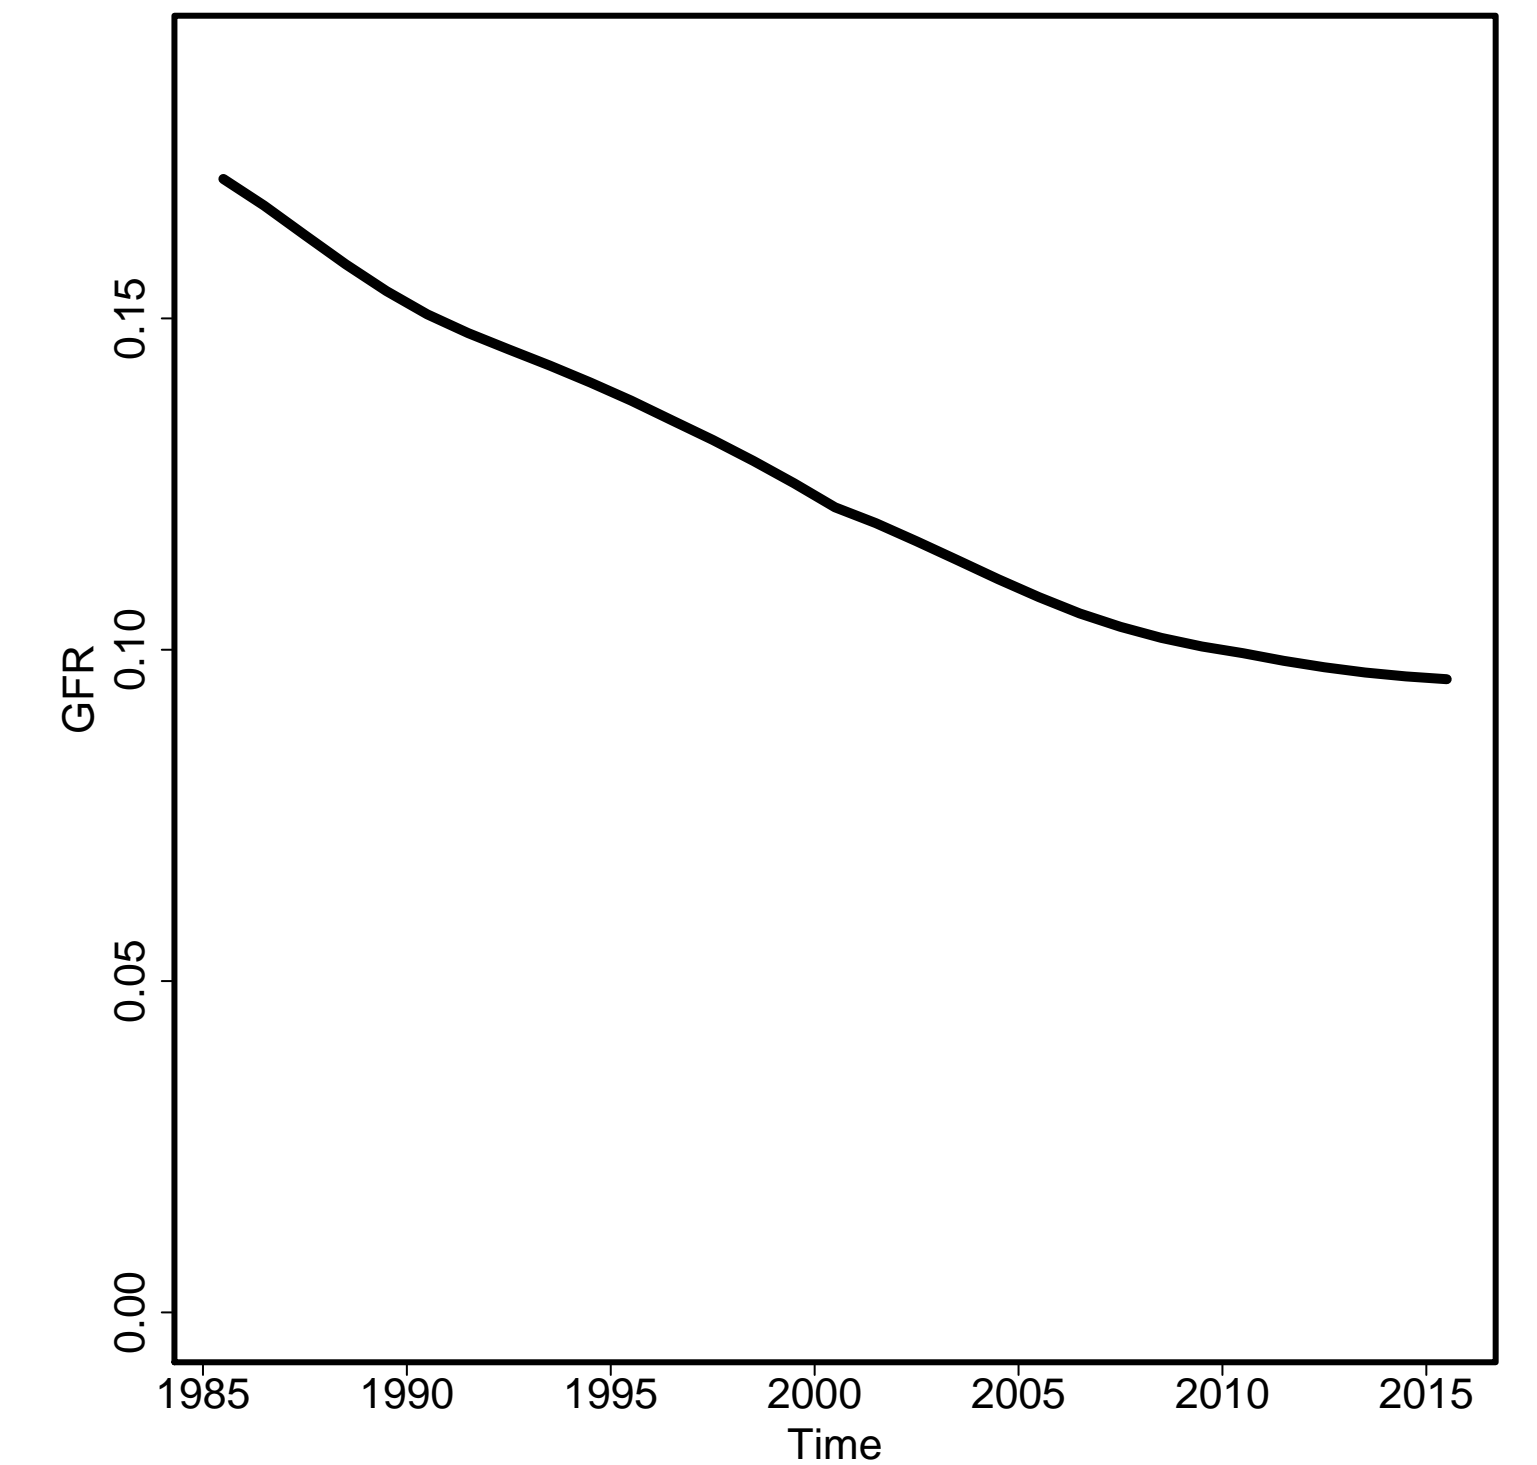

Skilled Attendance to Birth

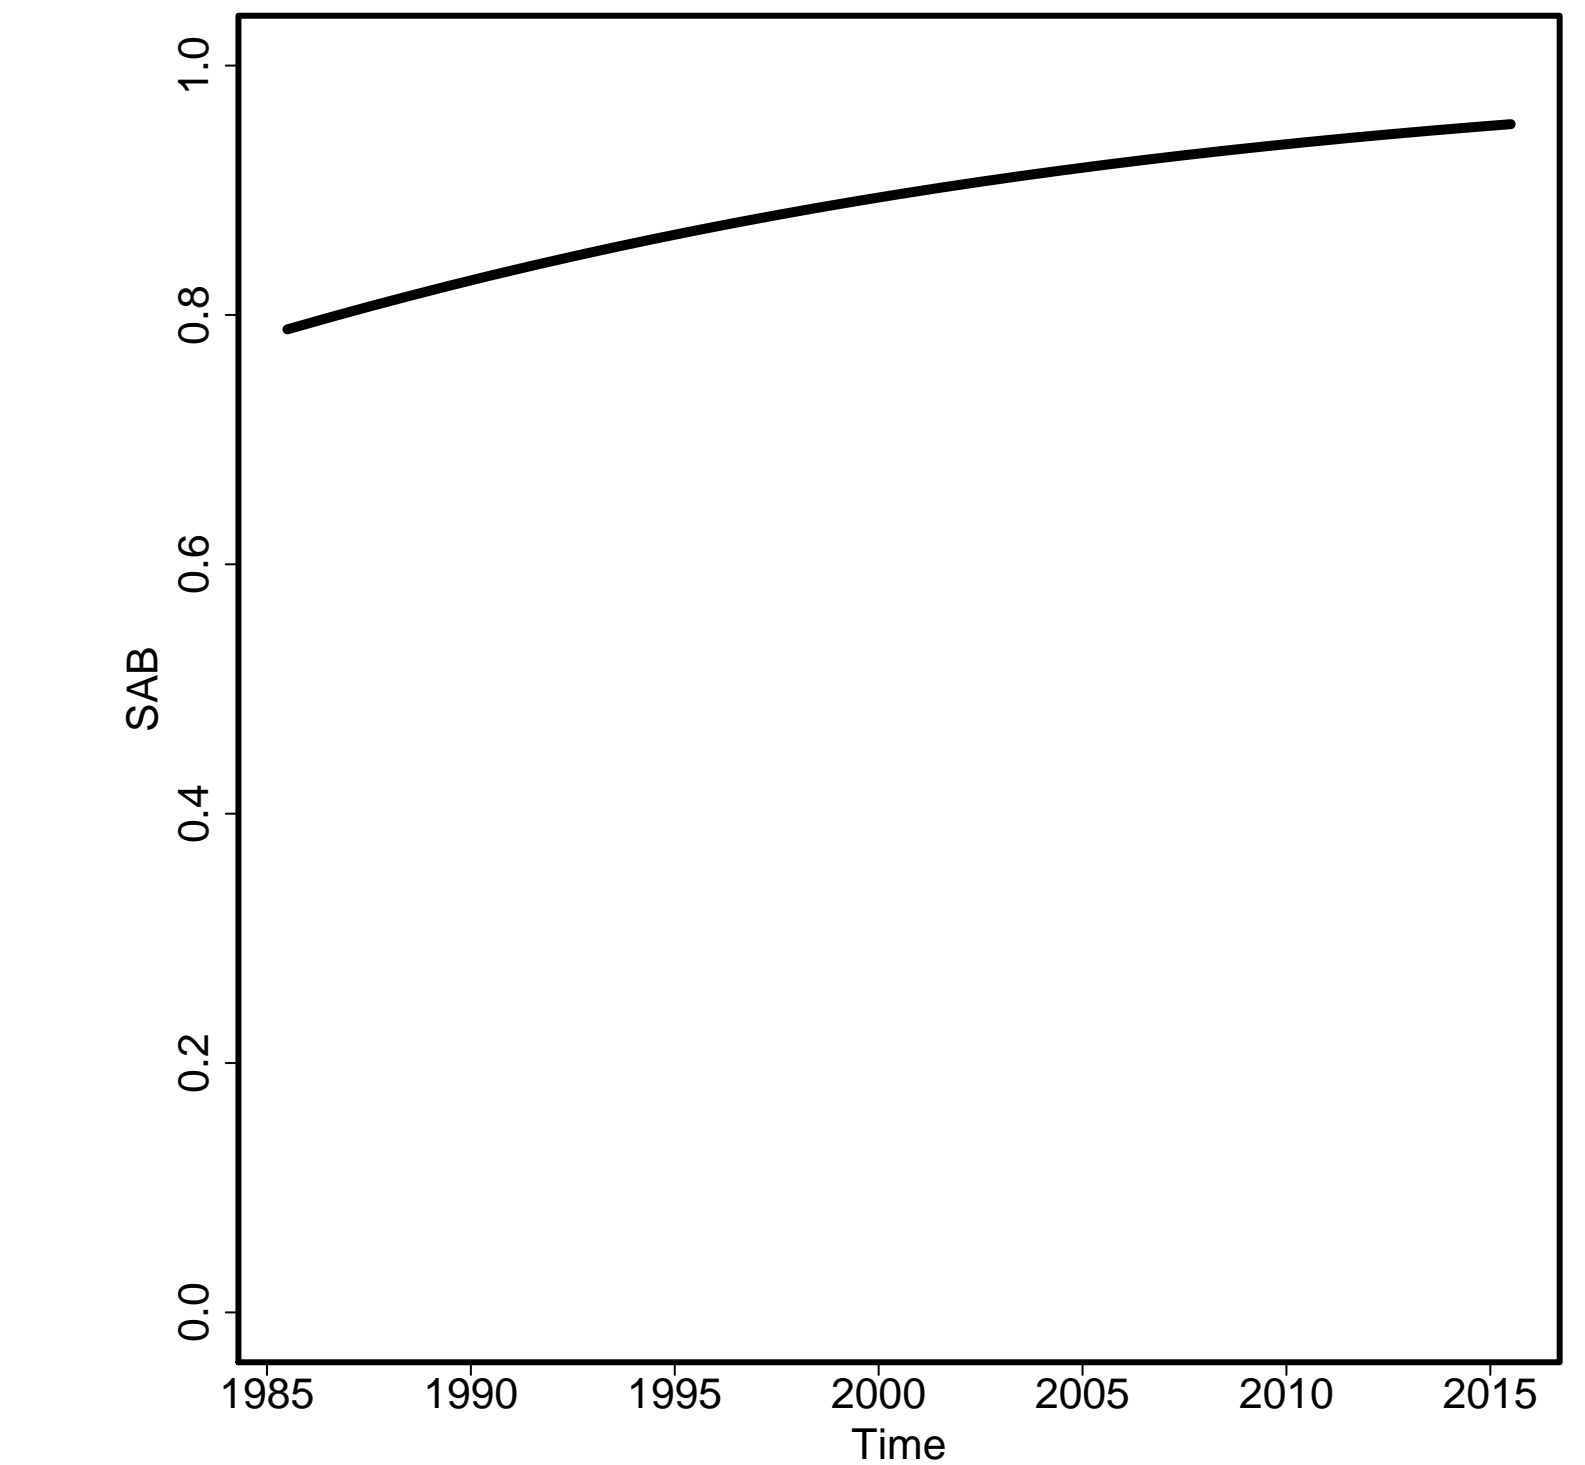

Envelope/Births

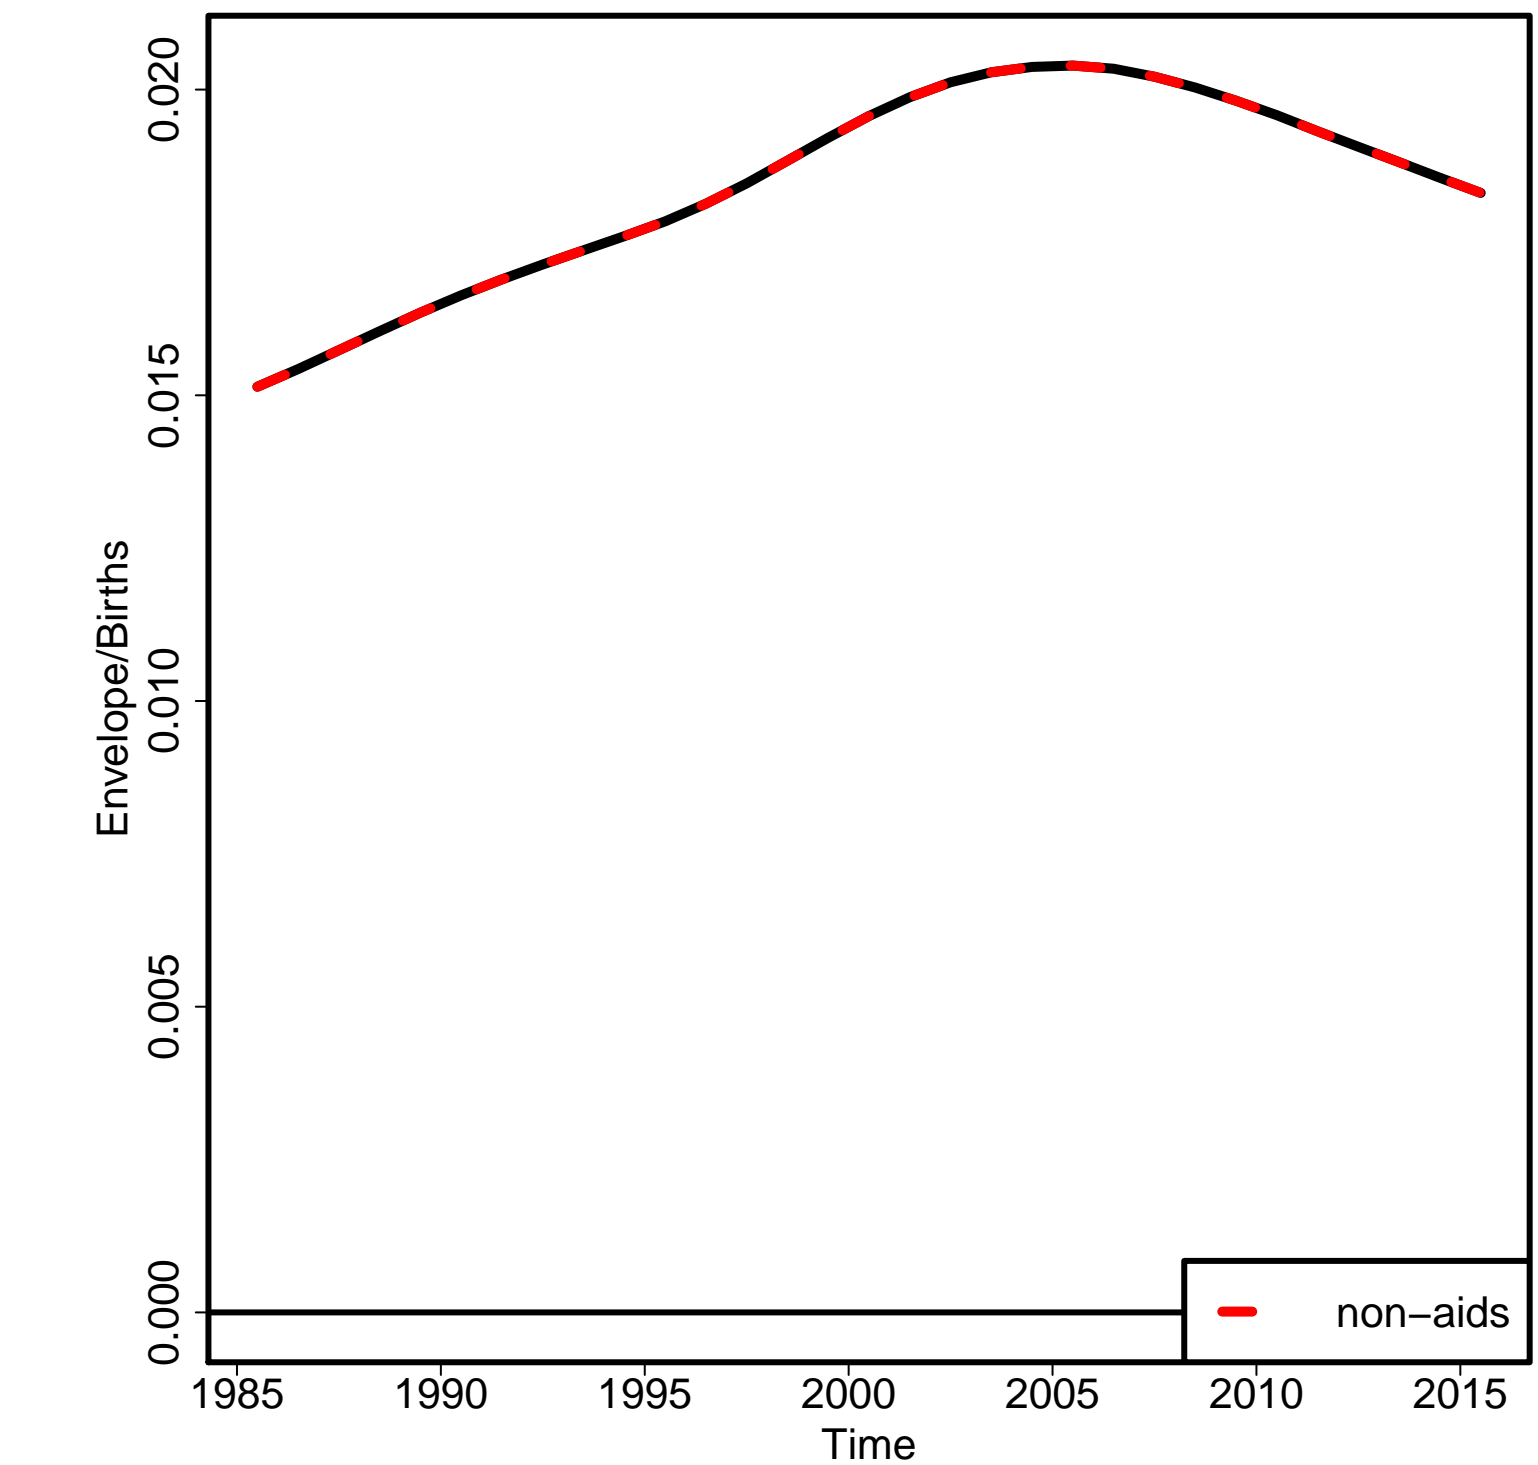

Non-aids MMR

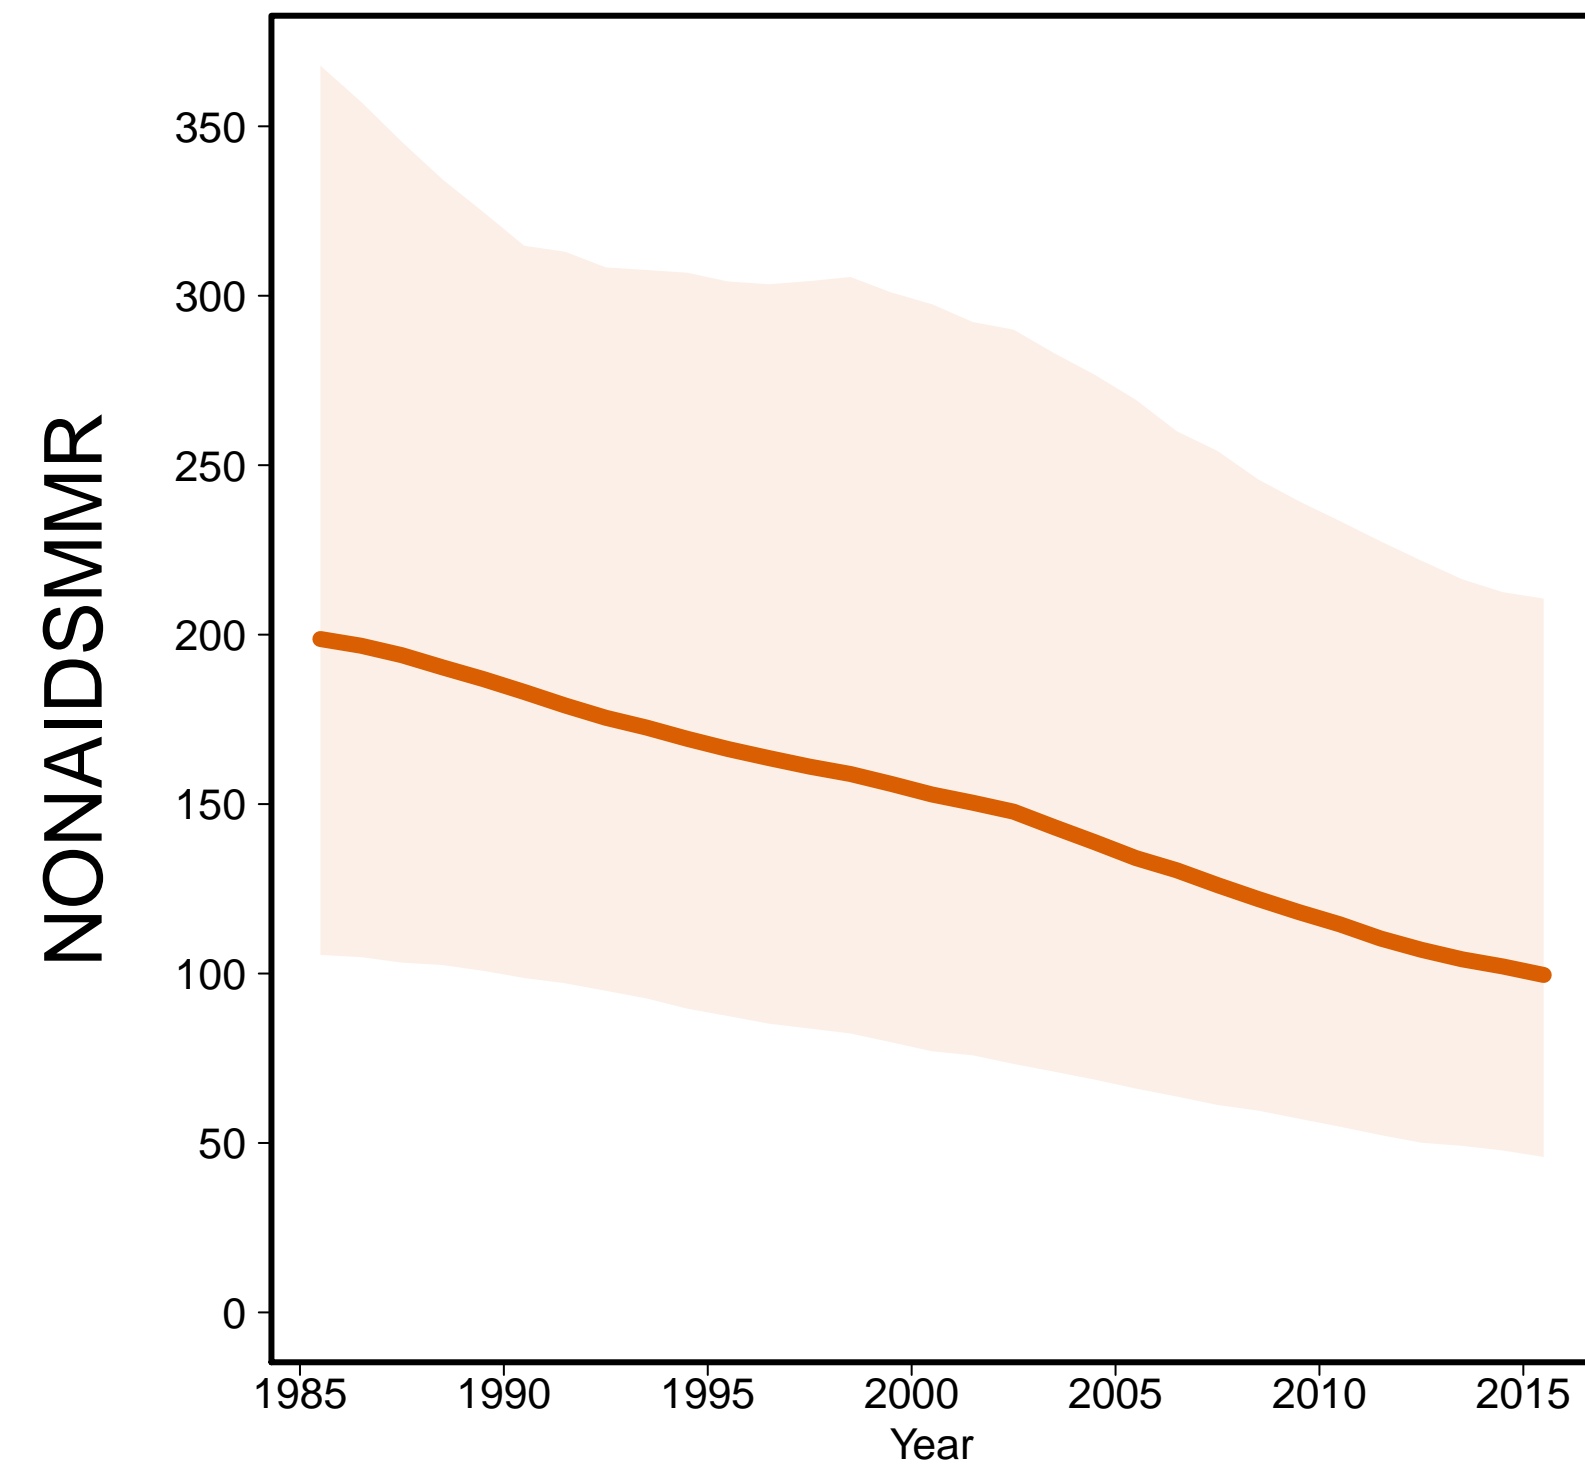

Aids MMR

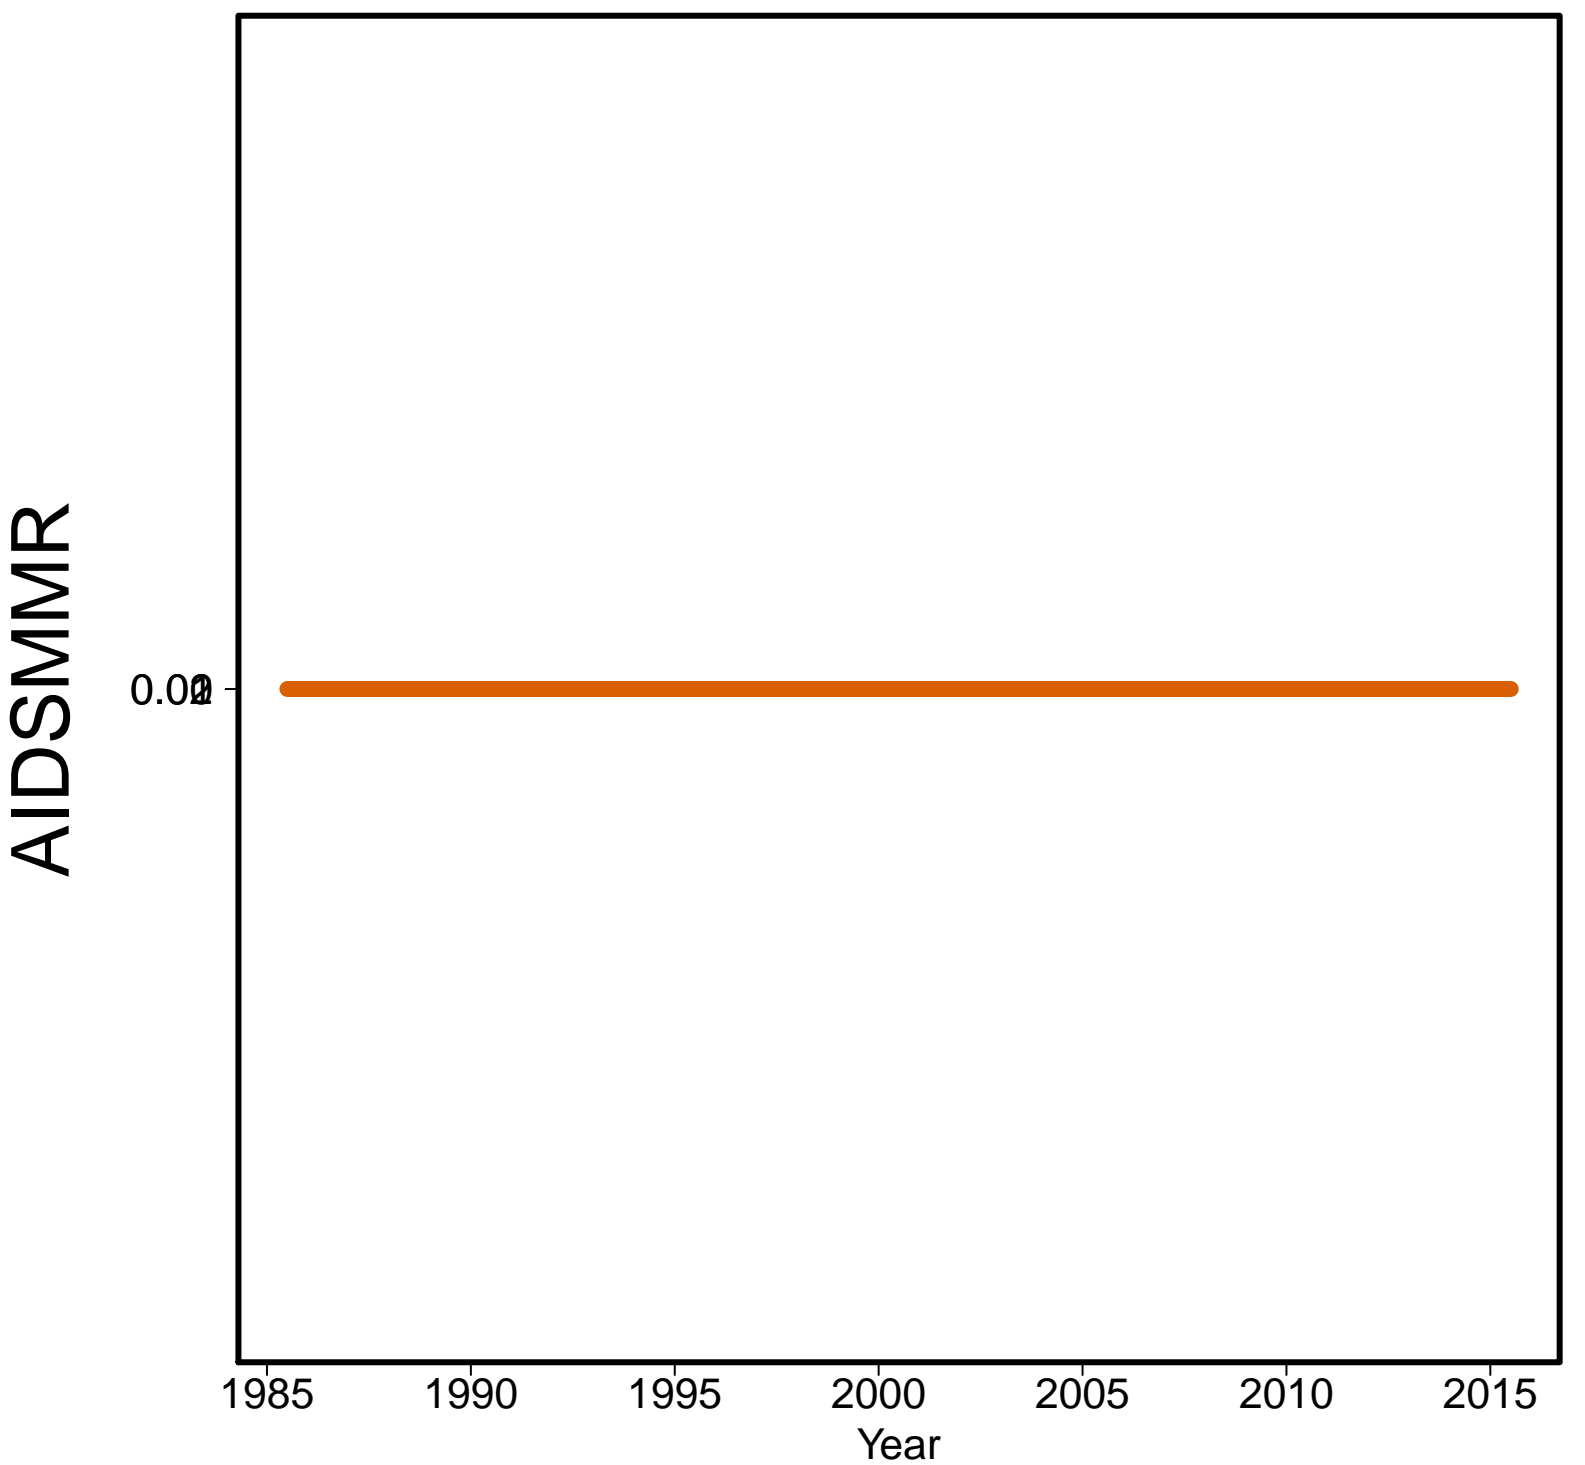

Mongolia [MNG]  
(Eastern Asia)

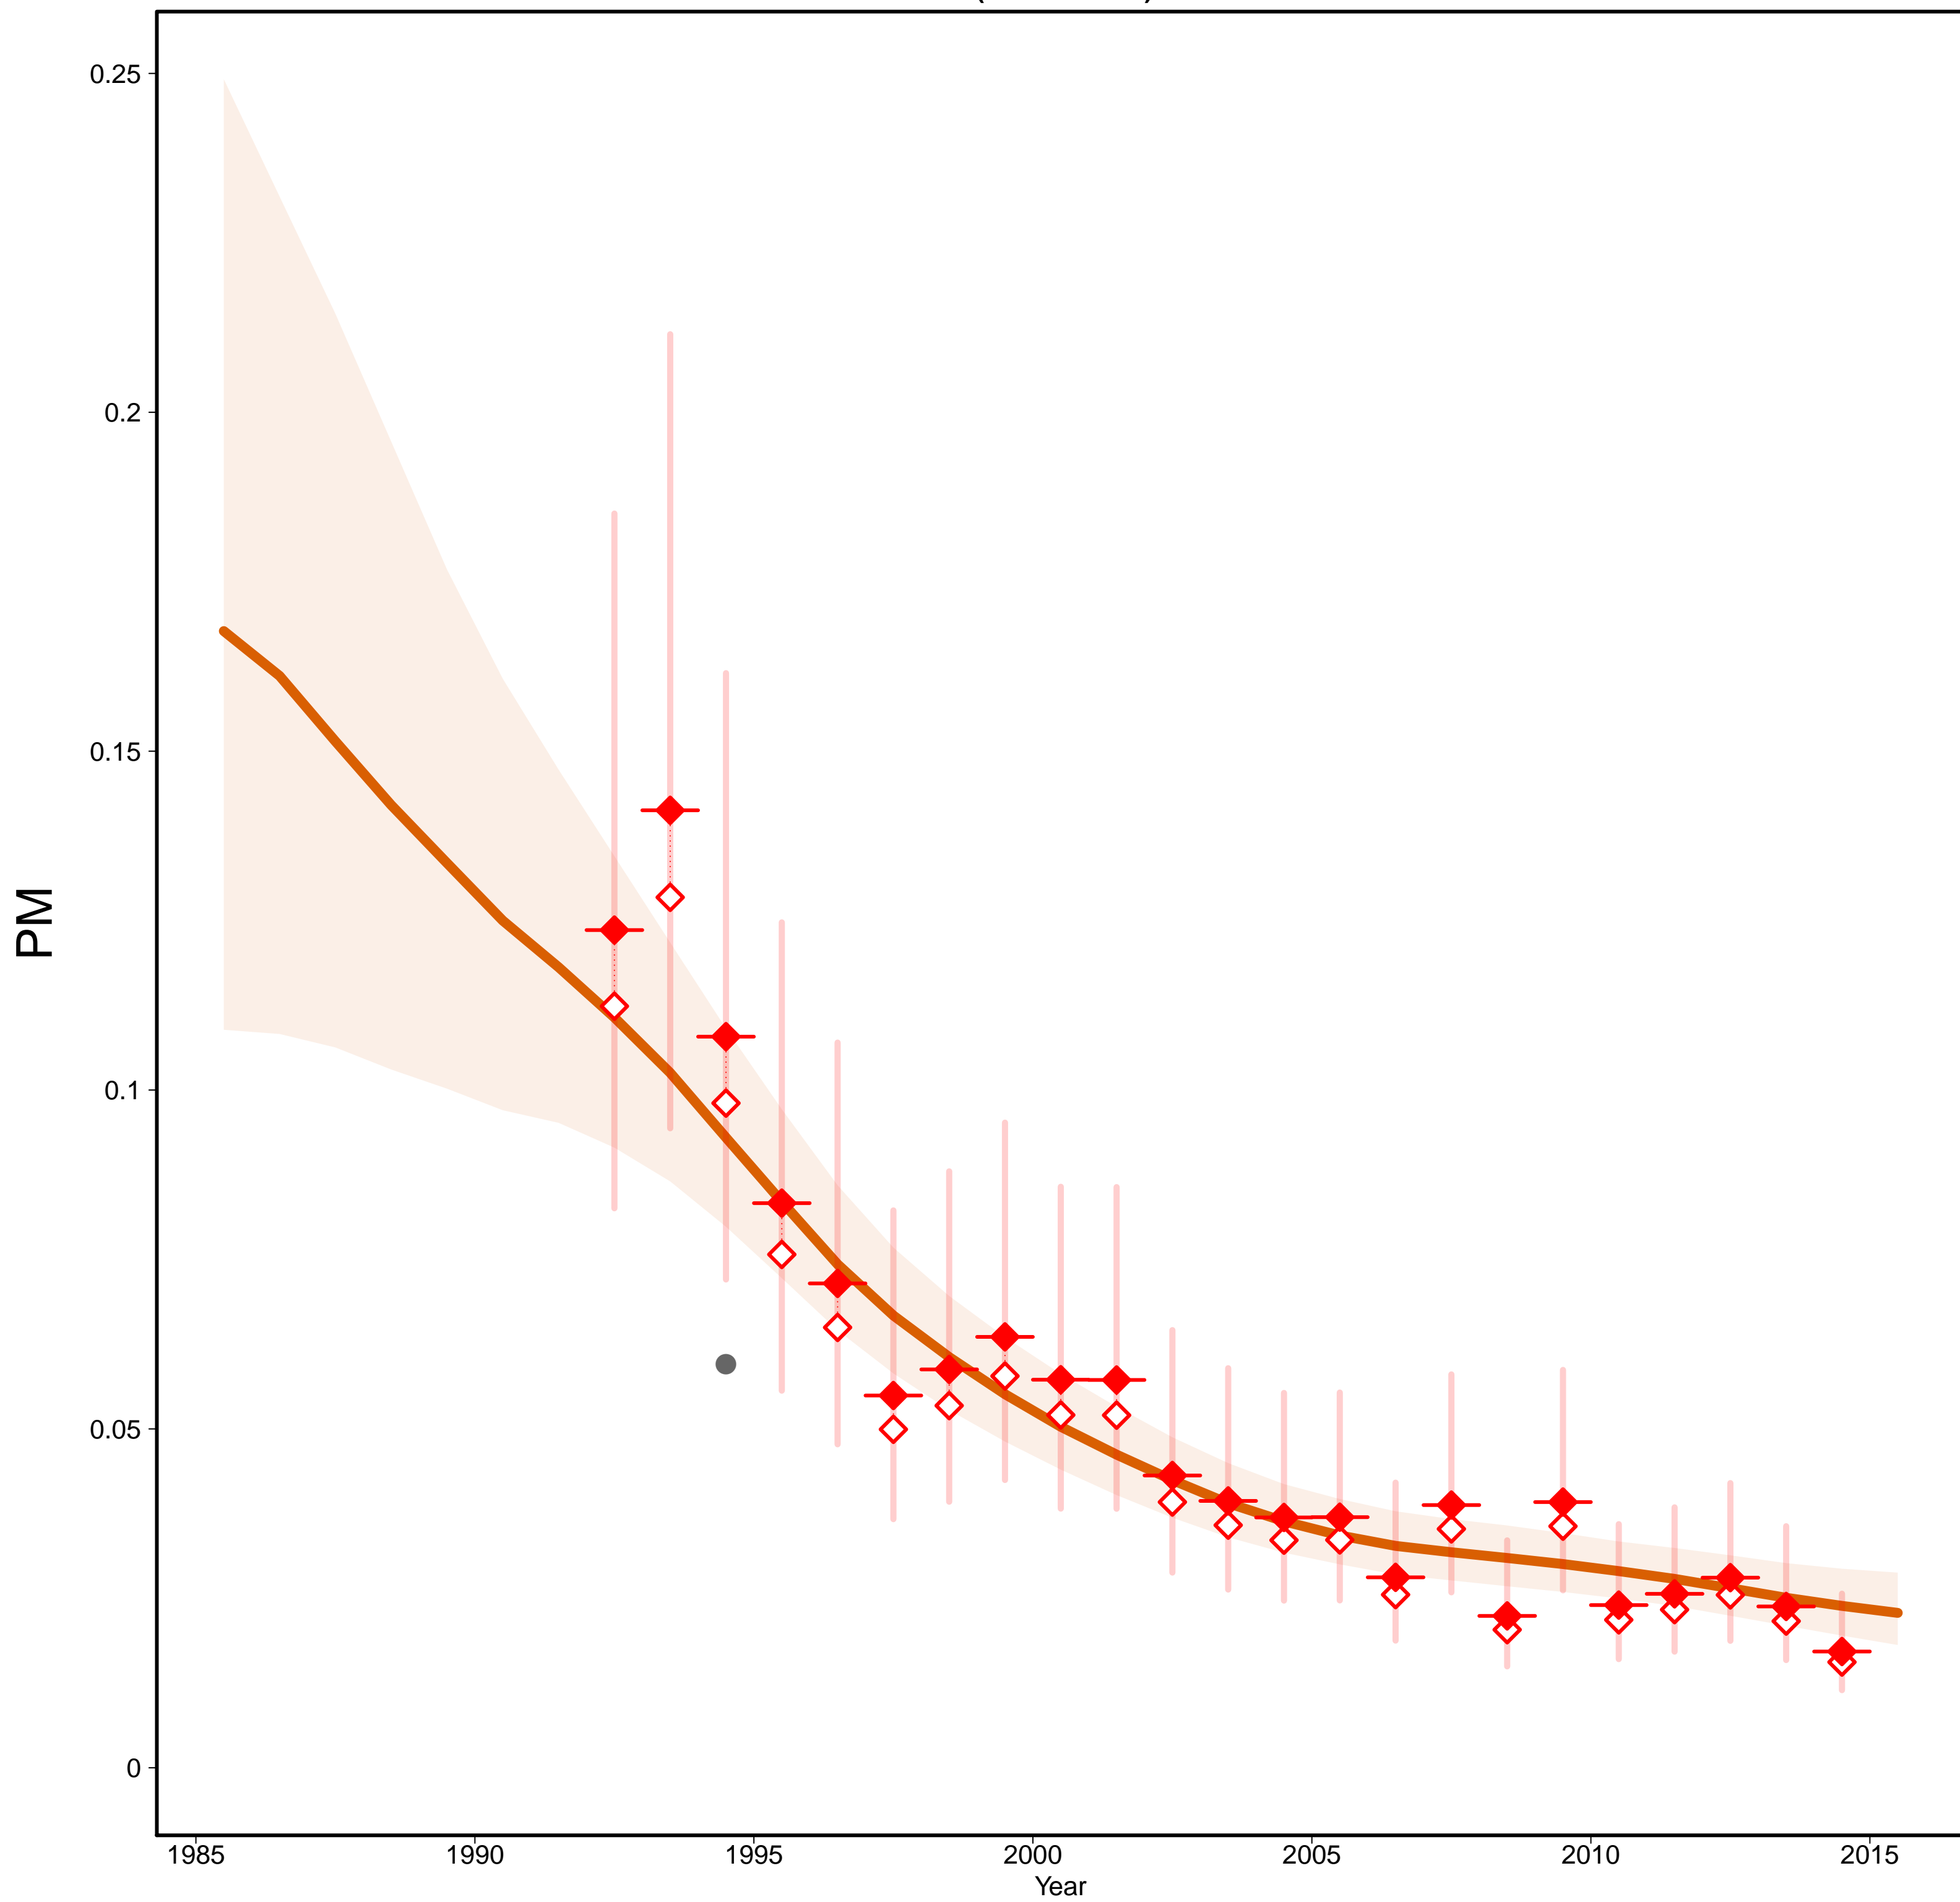

Mongolia [MNG]  
(Eastern Asia)

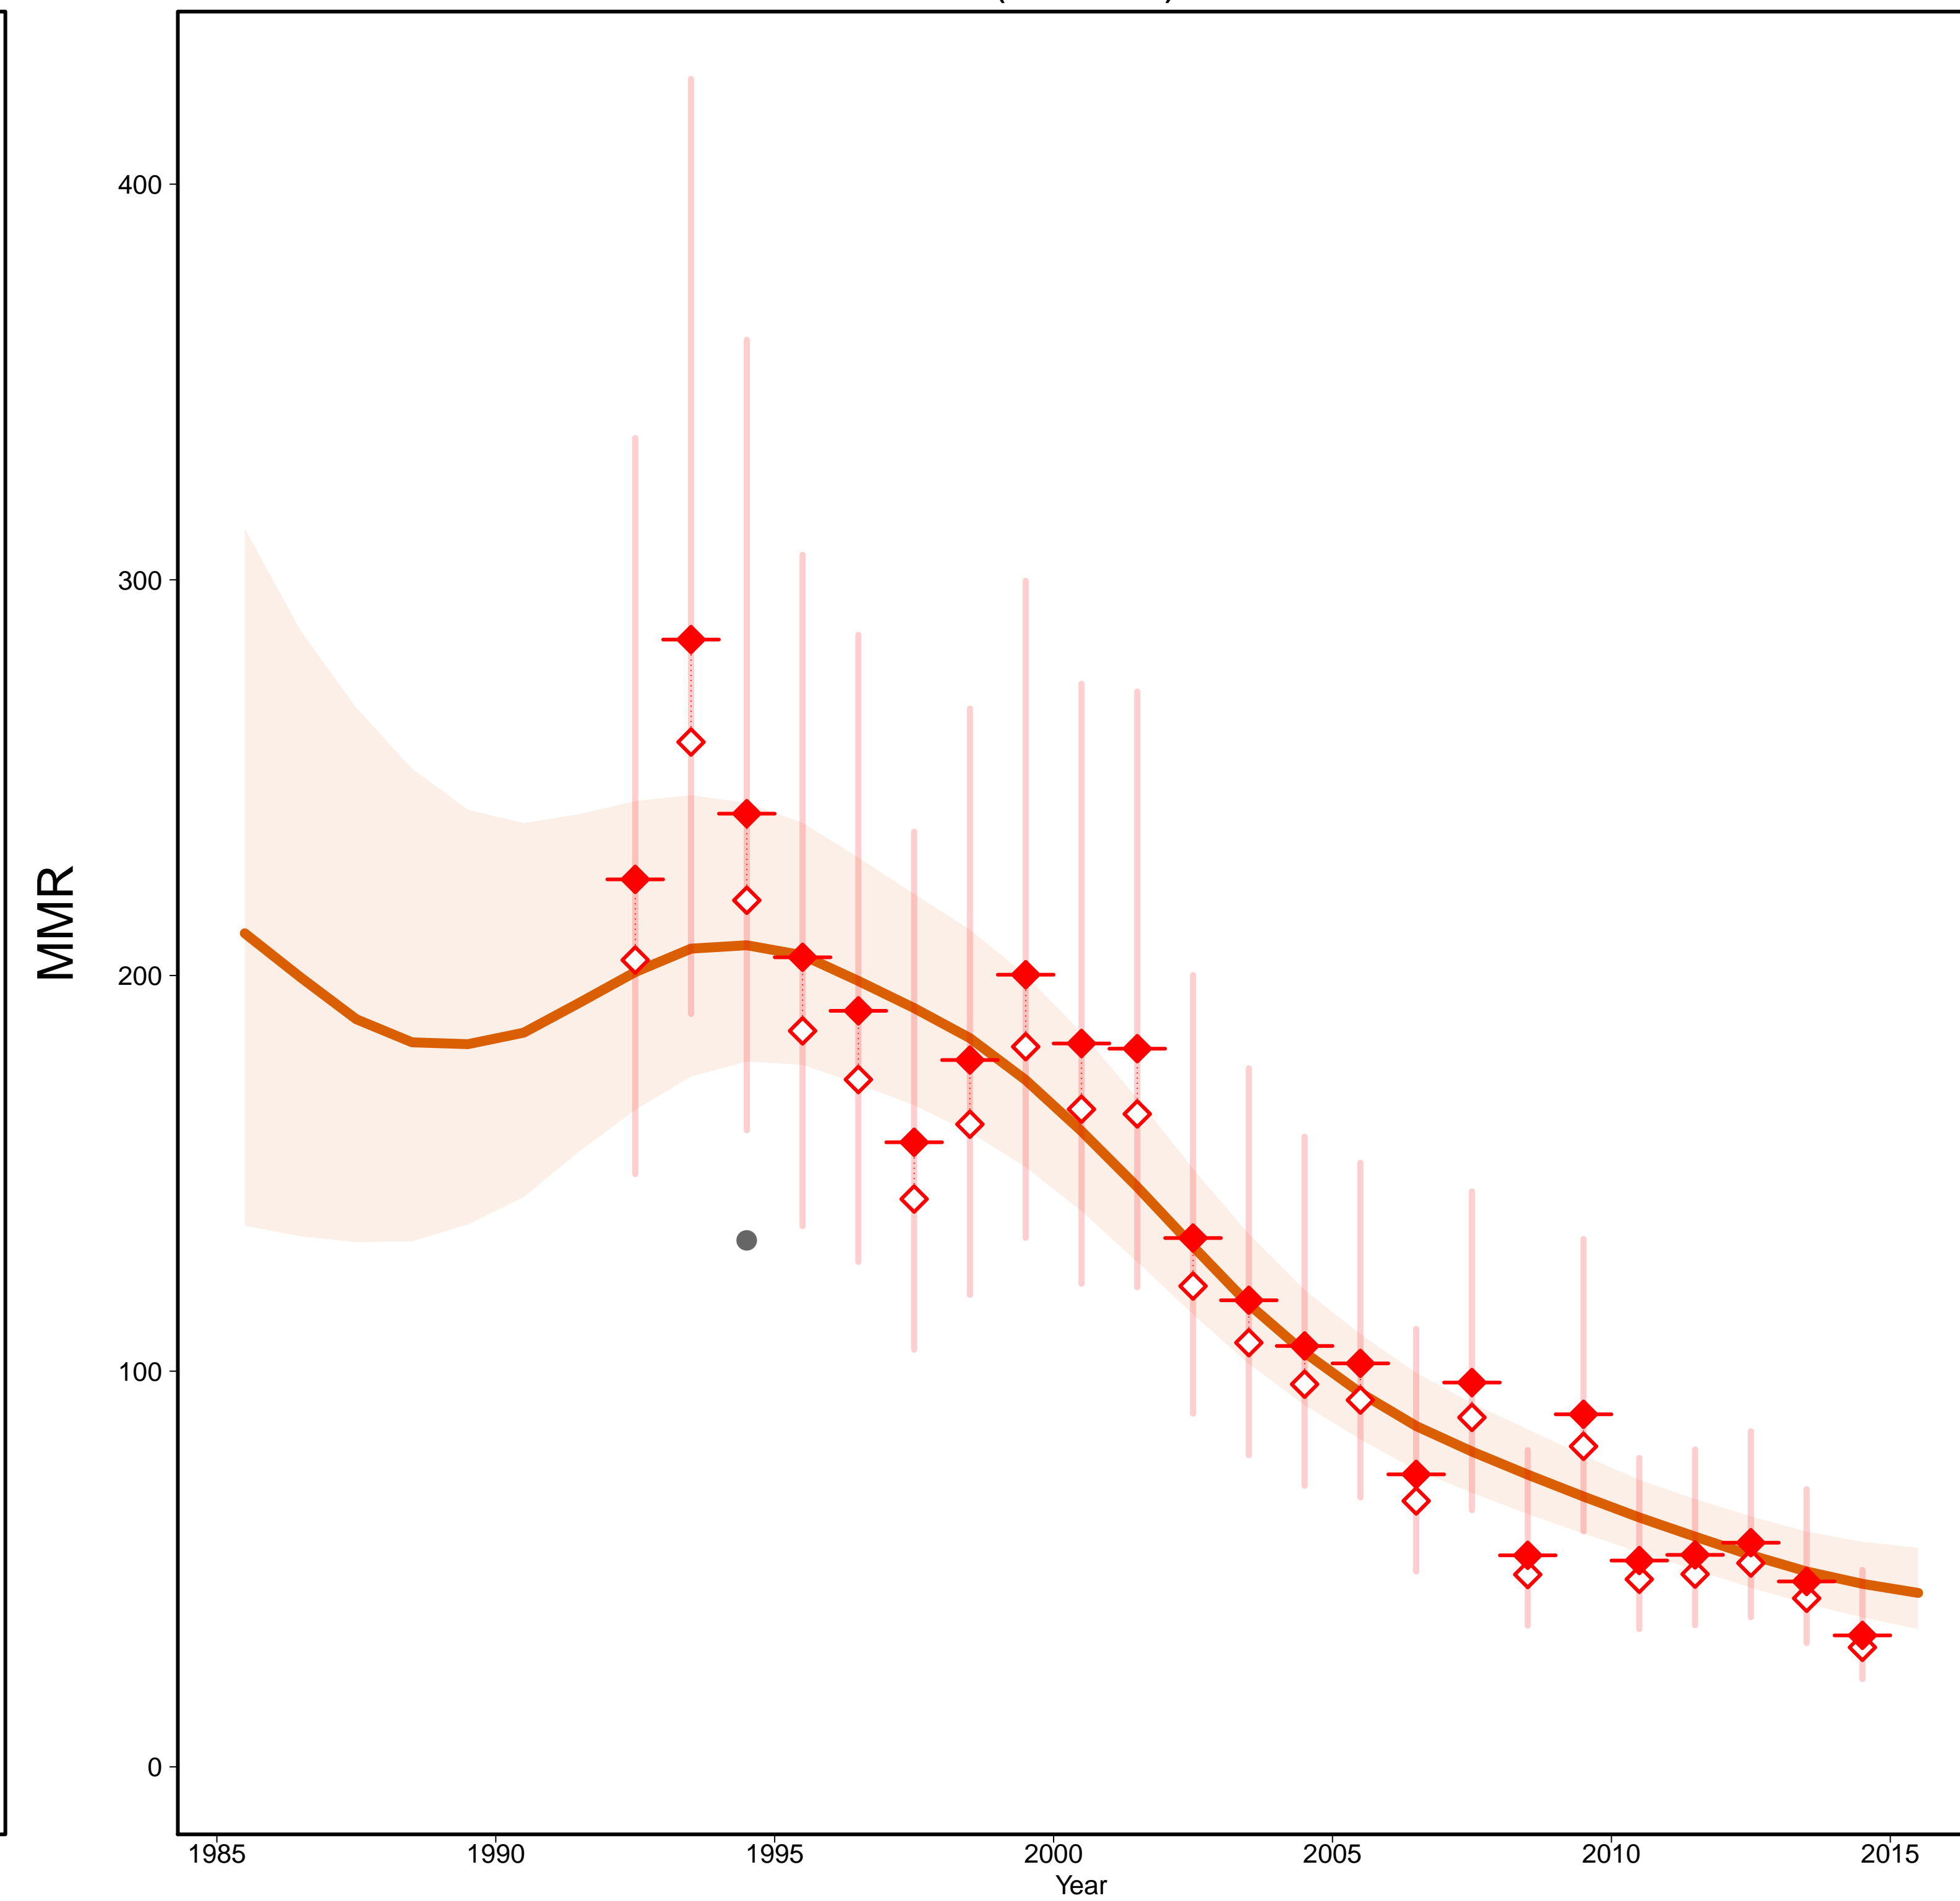

- Estimates –
- Mlate
- MMR Database 2015 –
- ◇ Observed Data
- ◆ Adjusted Data
- Data type –
- ◆ Misc. studies
- Excluded VR data (data quality issues)

Gross Domestic Product

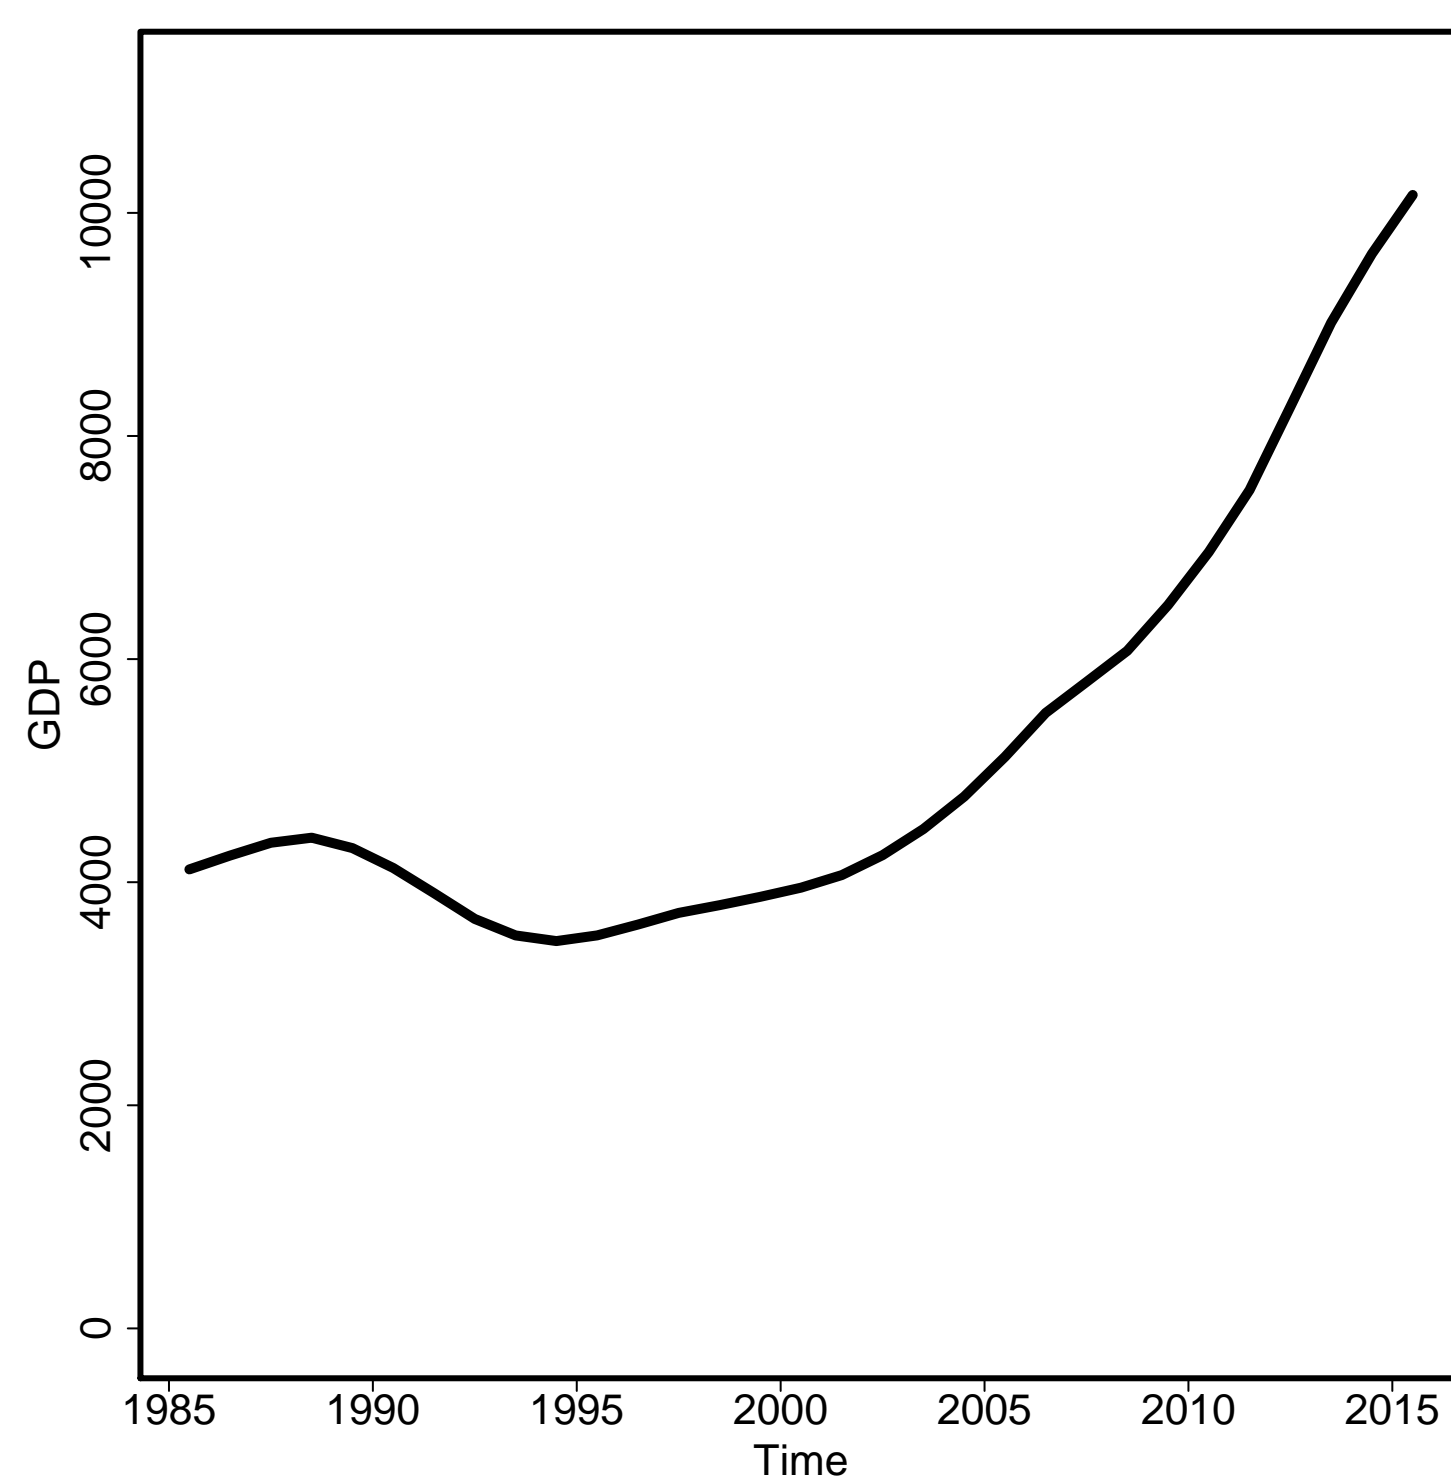

General Fertility Rate

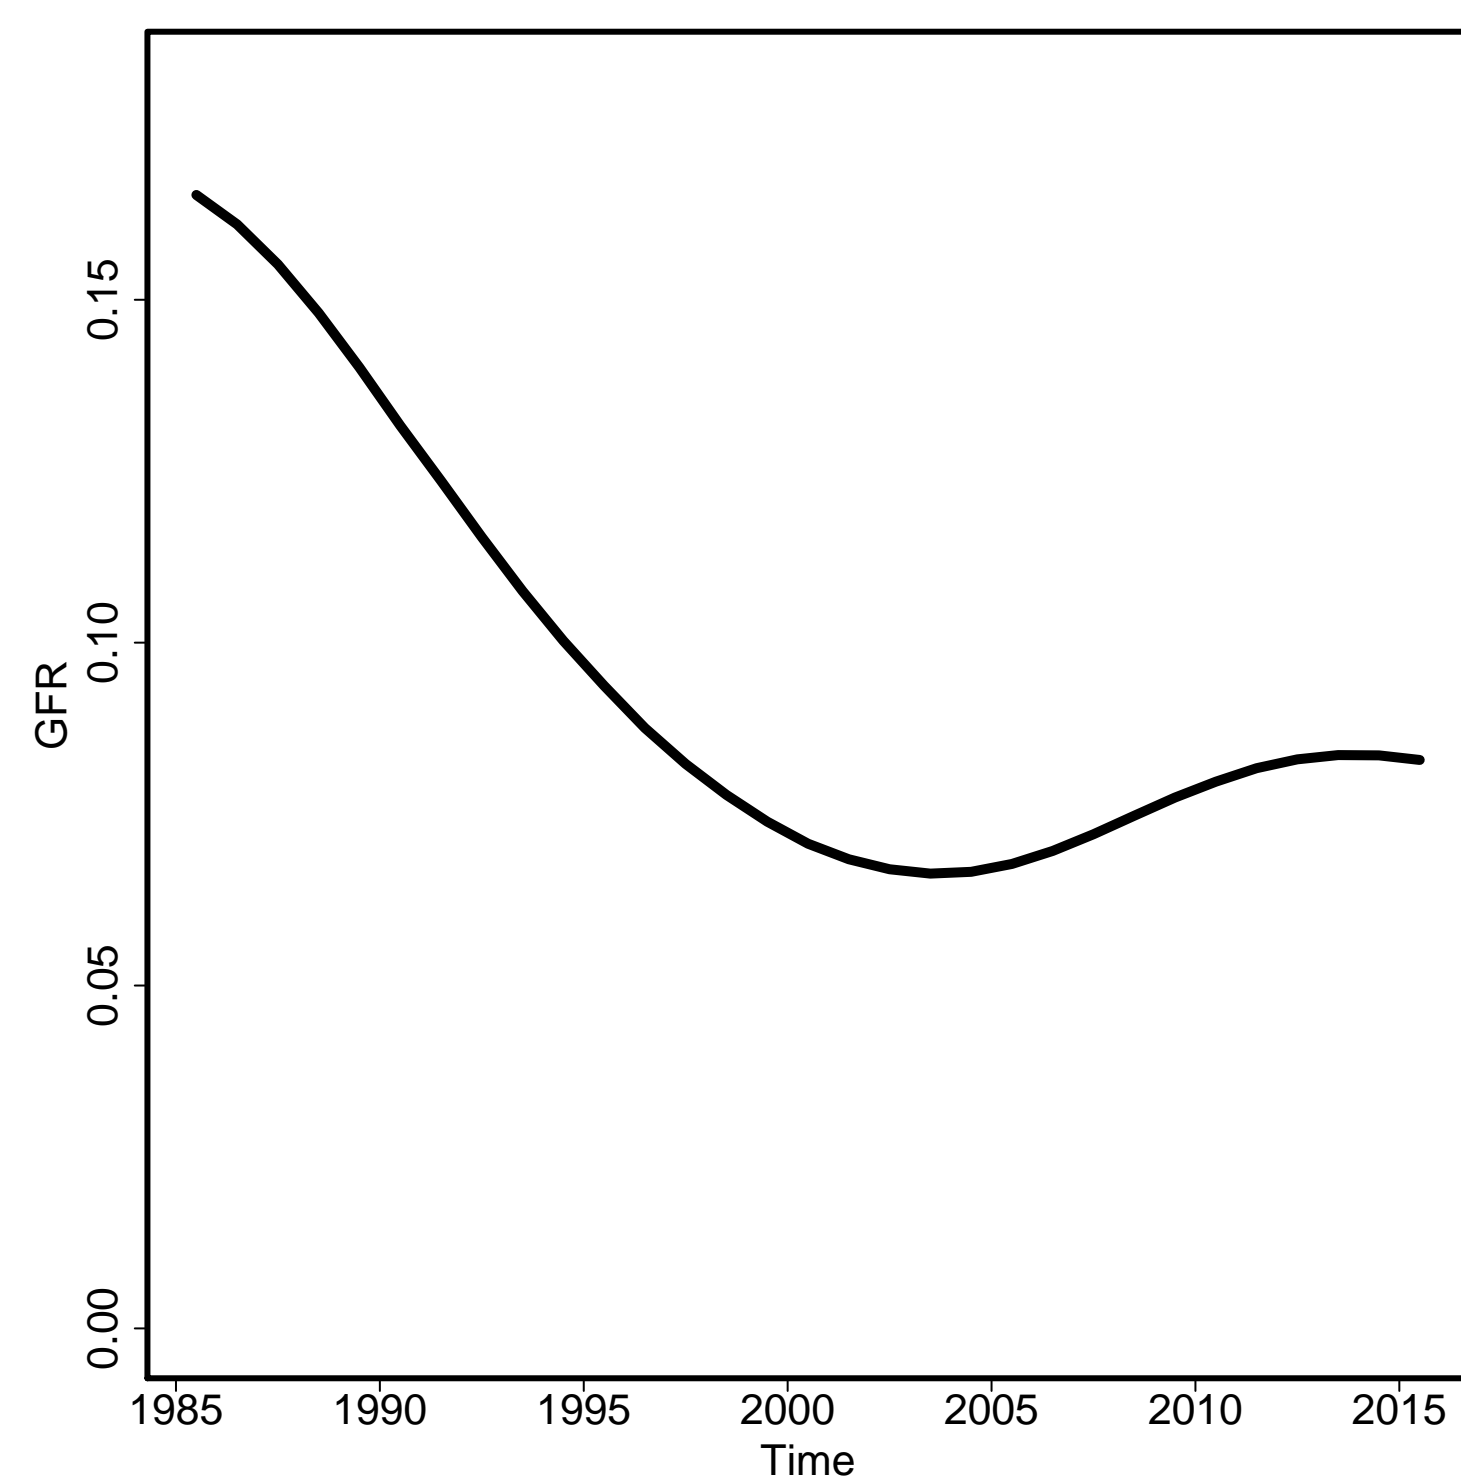

Skilled Attendance to Birth

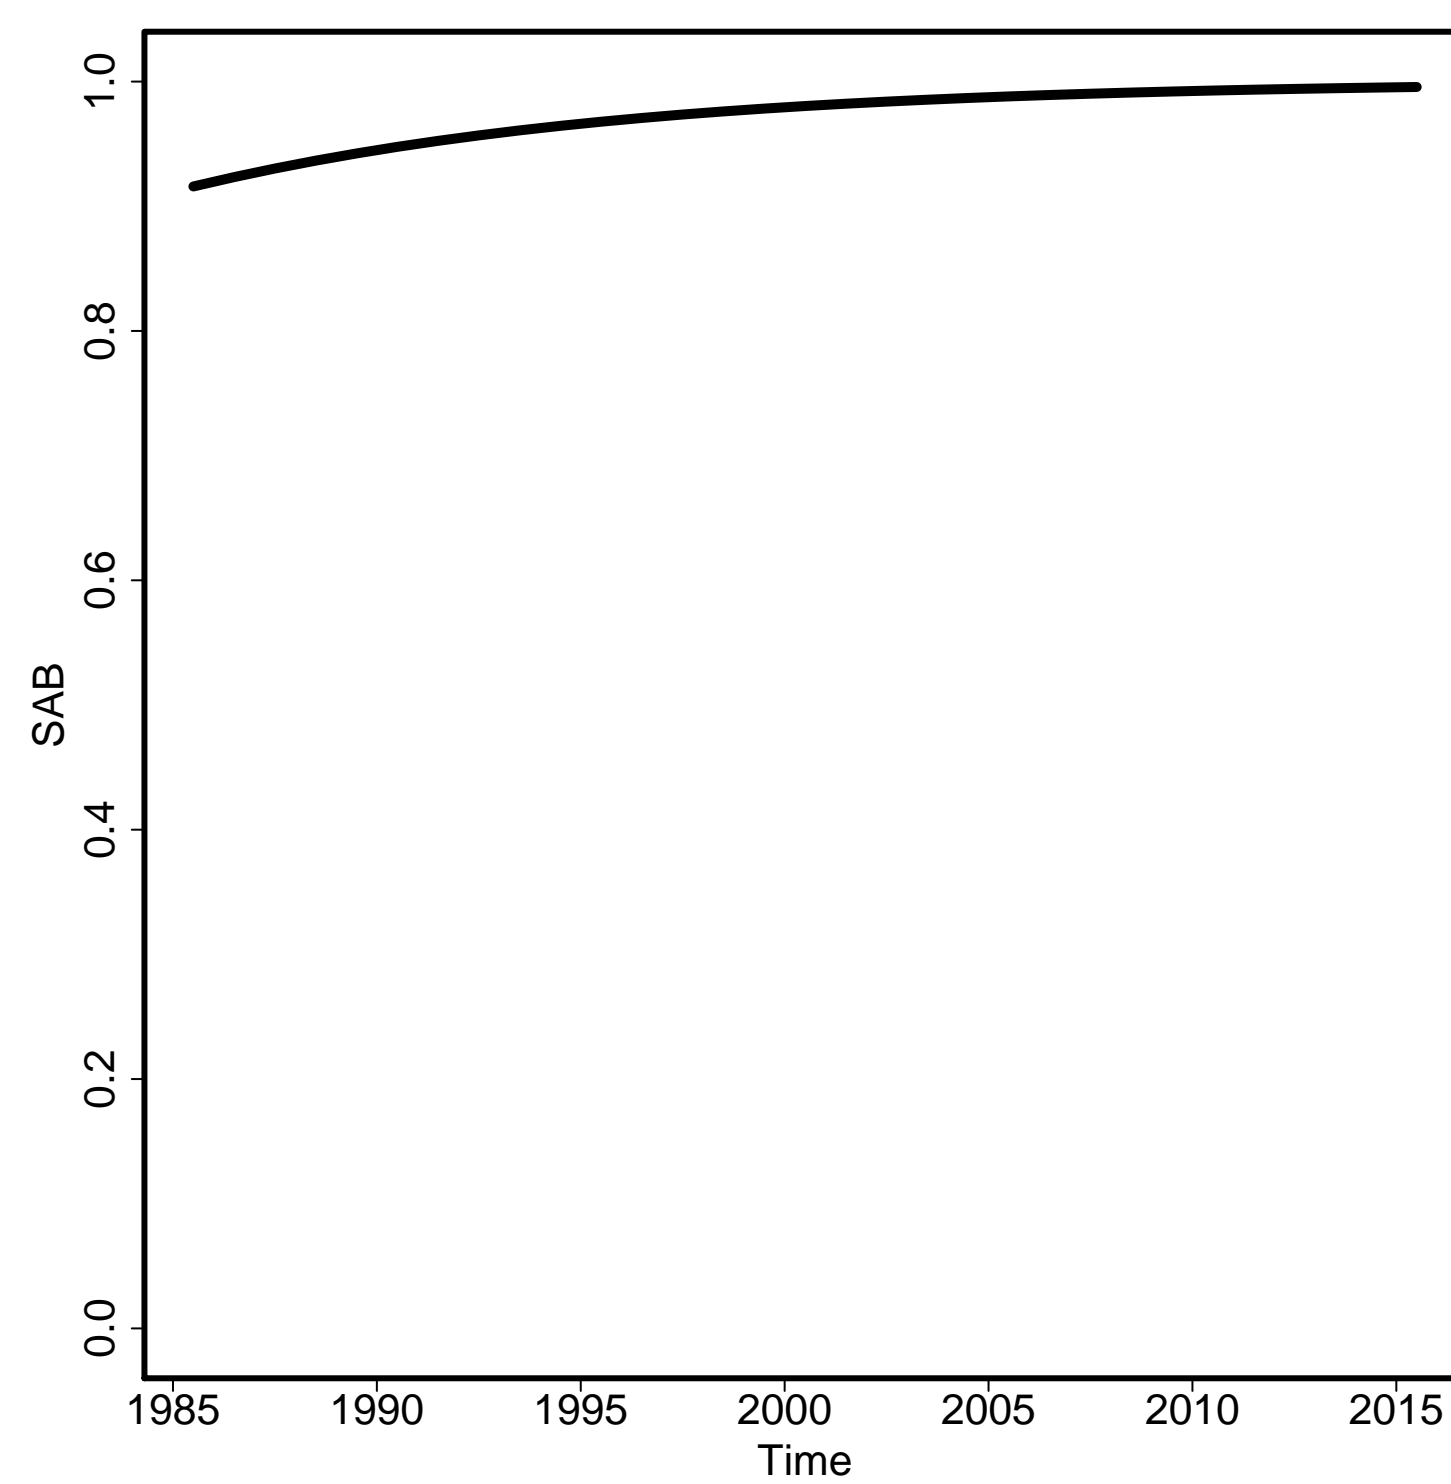

Envelope/Births

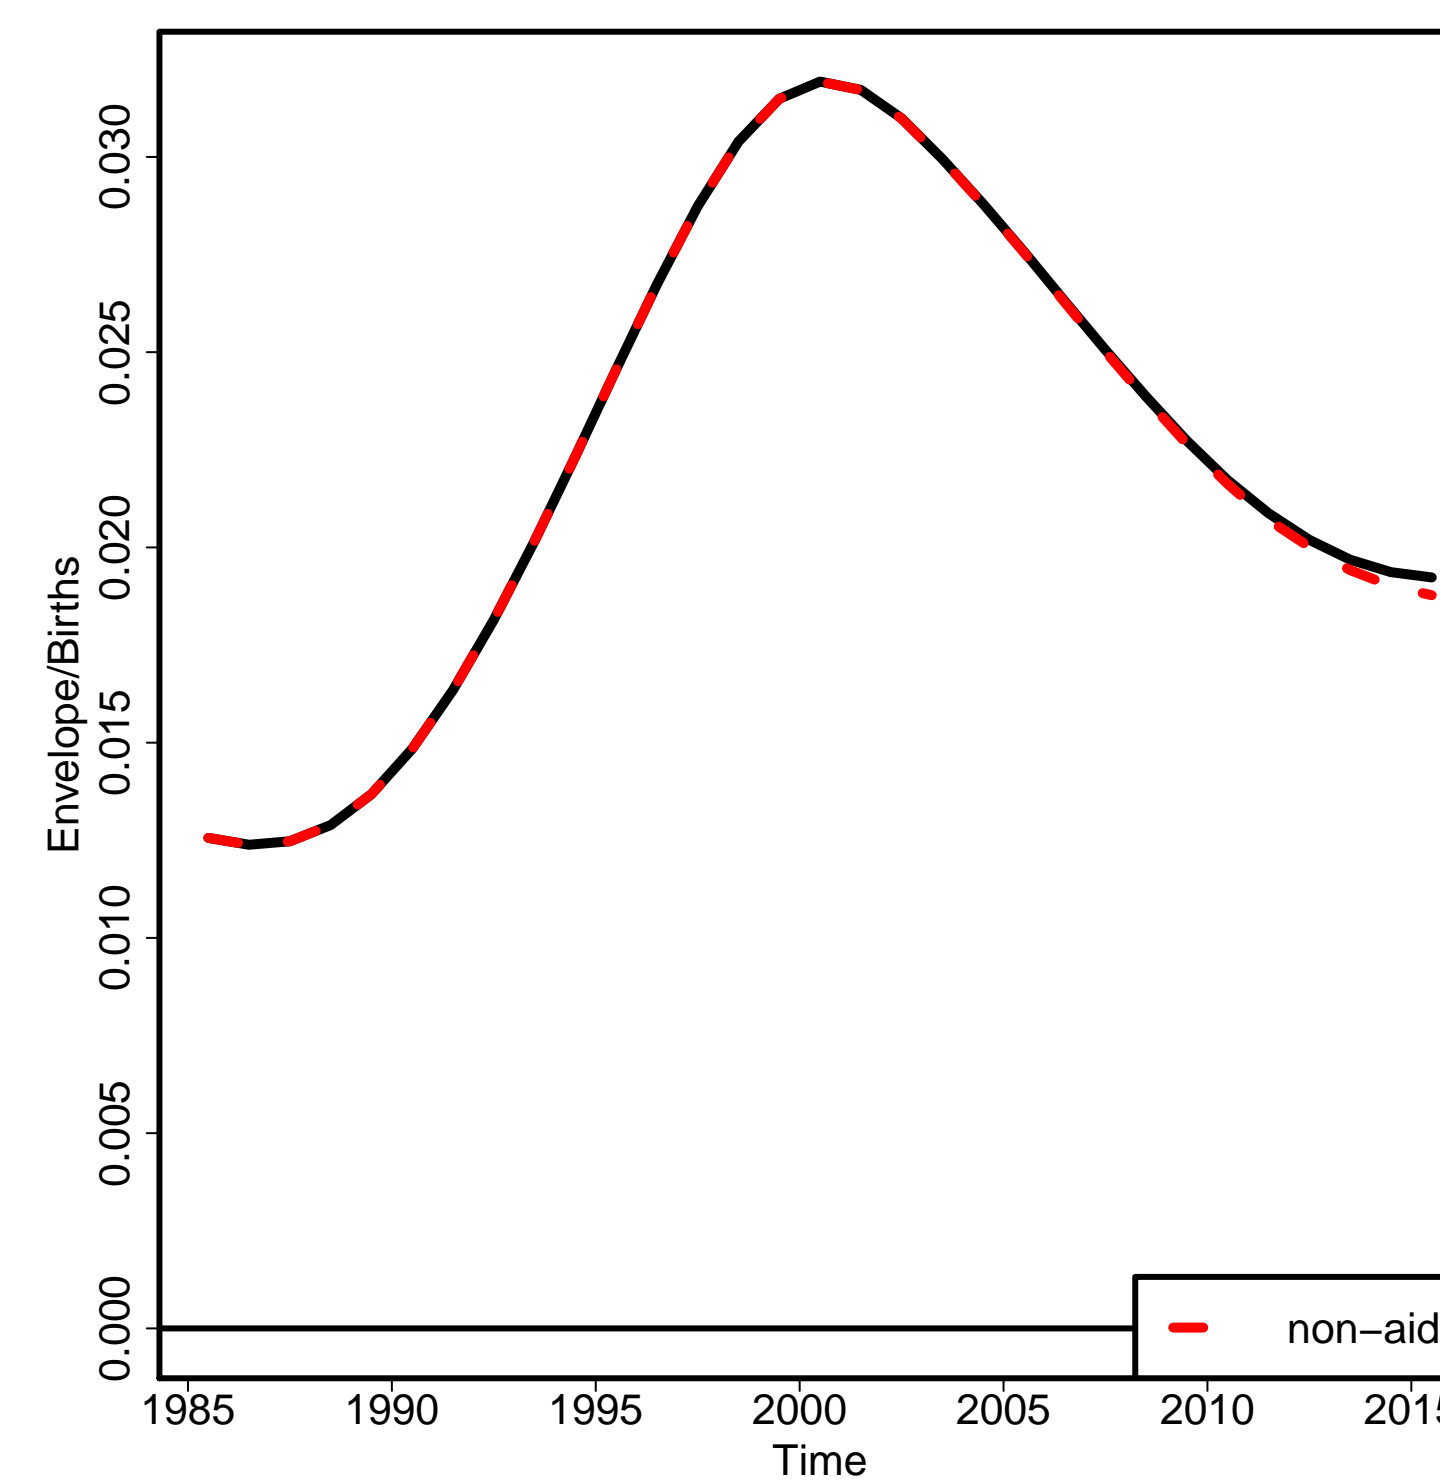

Non-aids MMR

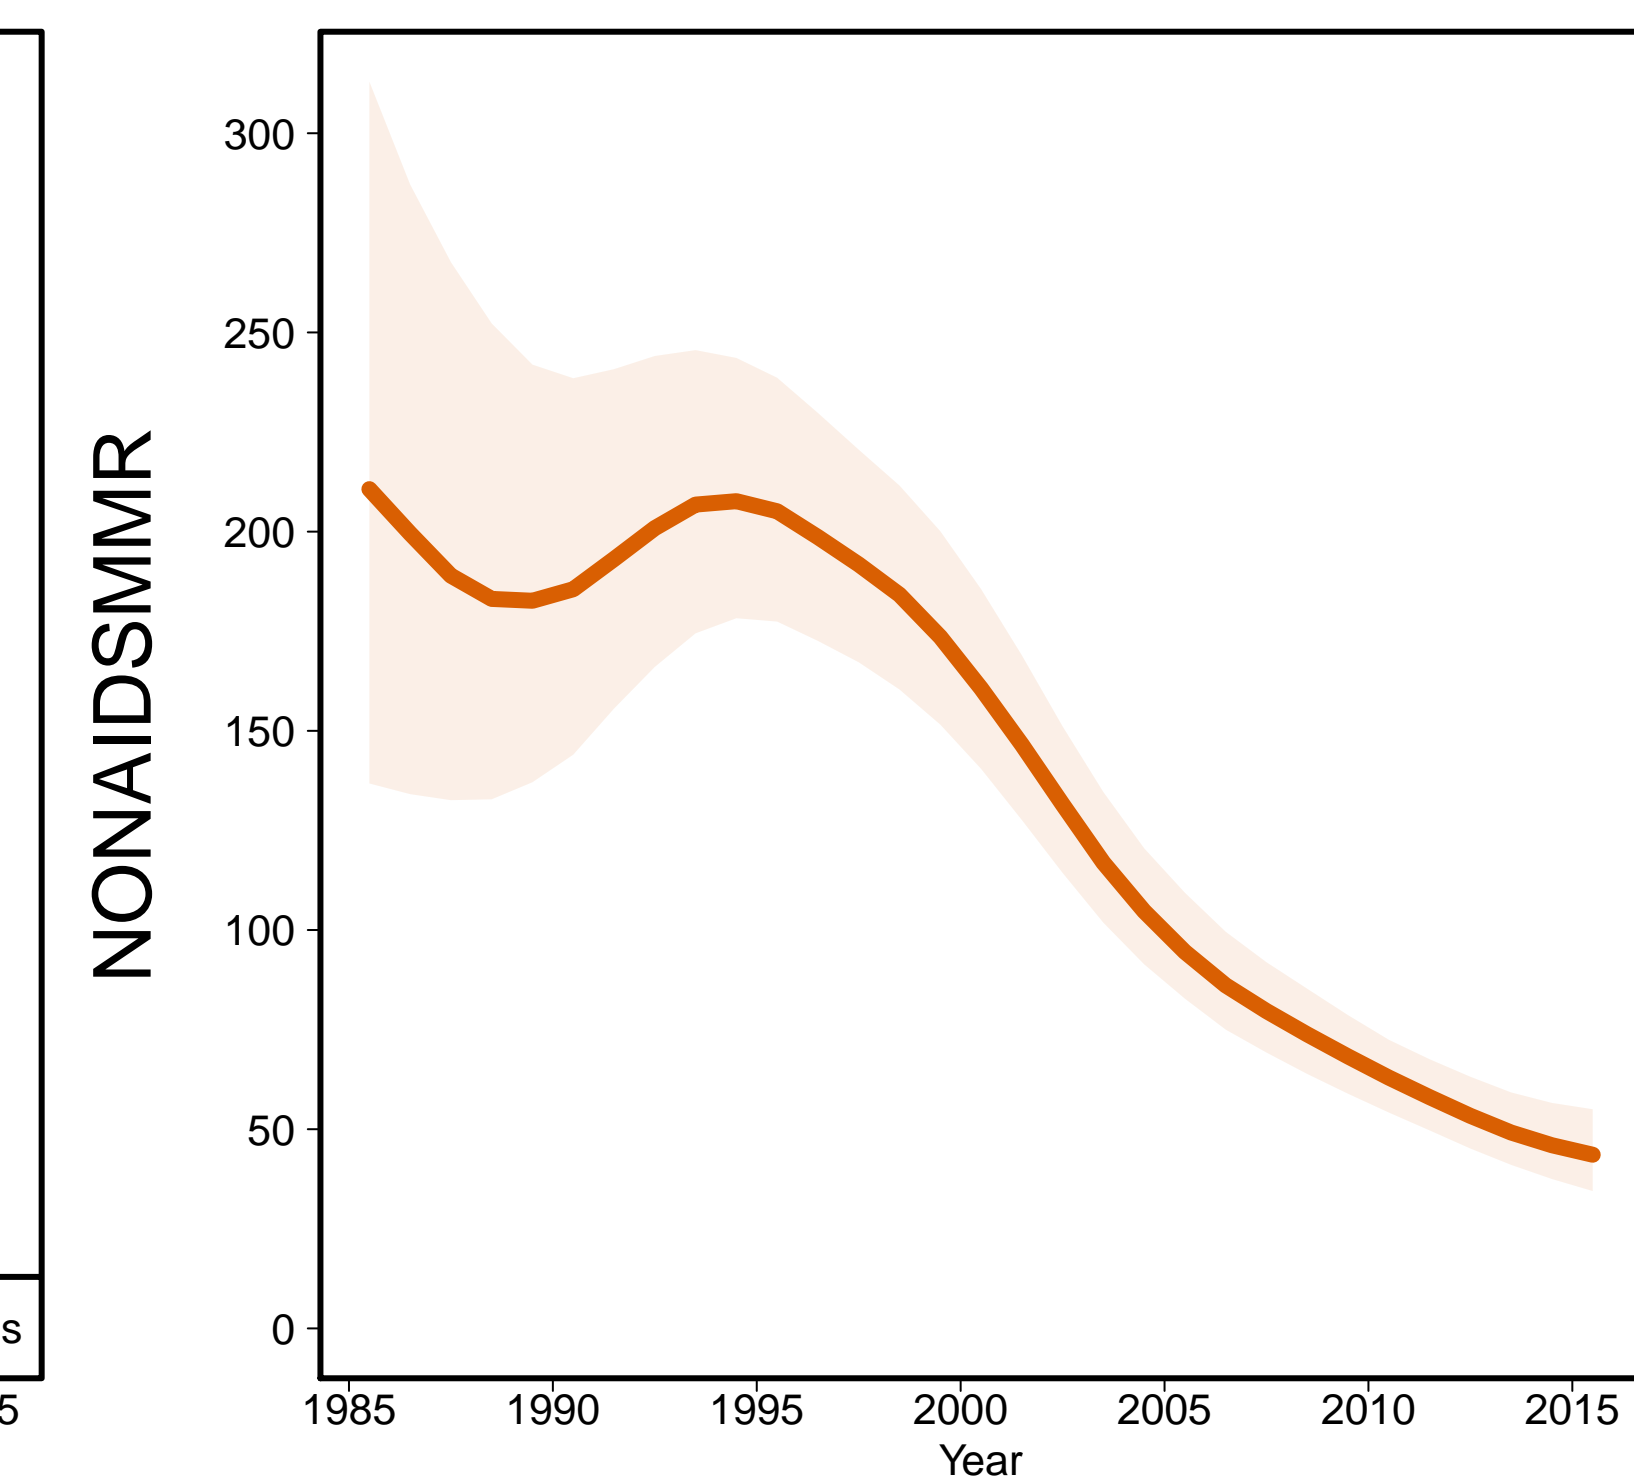

Aids MMR

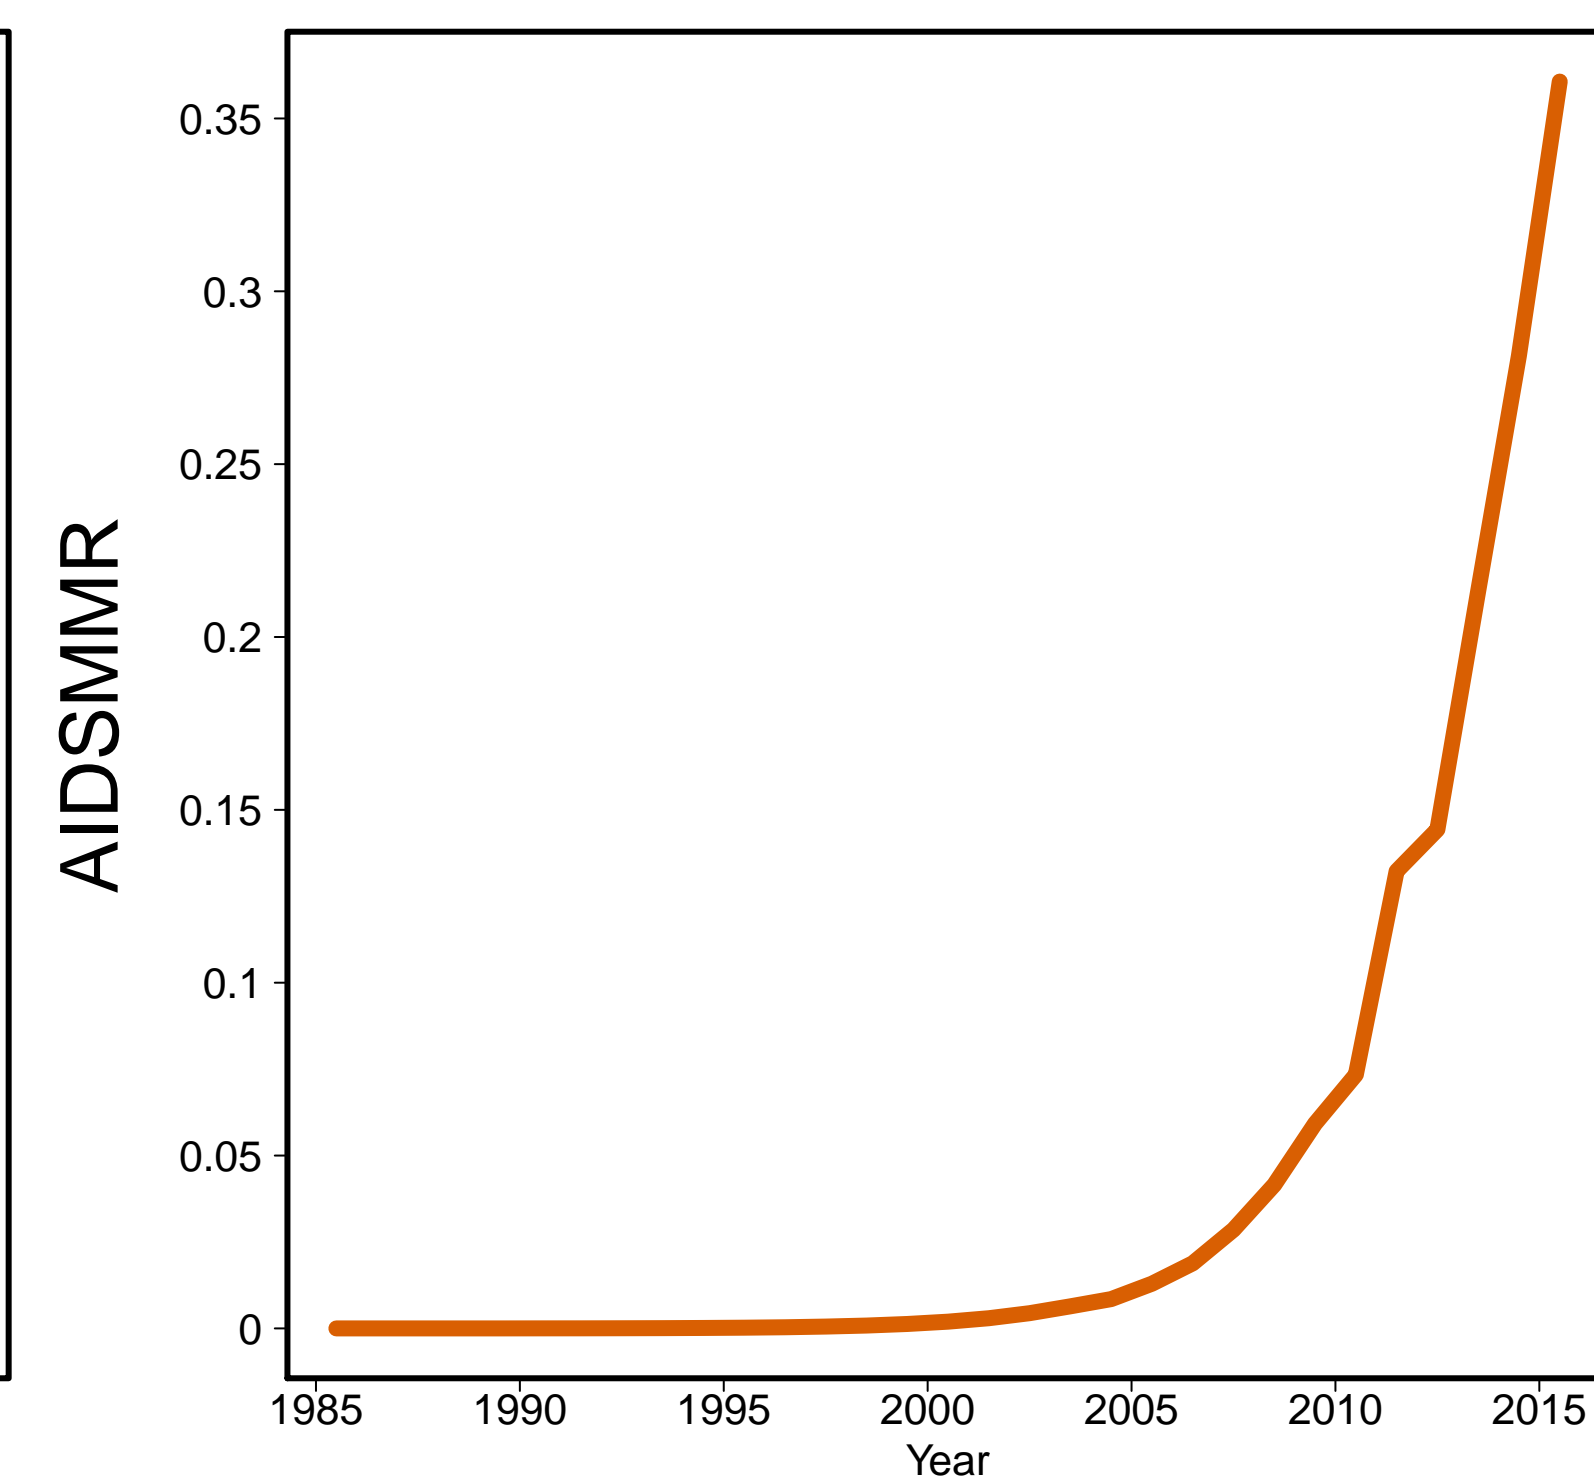

Montenegro [MNE]  
(Transition countries of South-Eastern Europe)

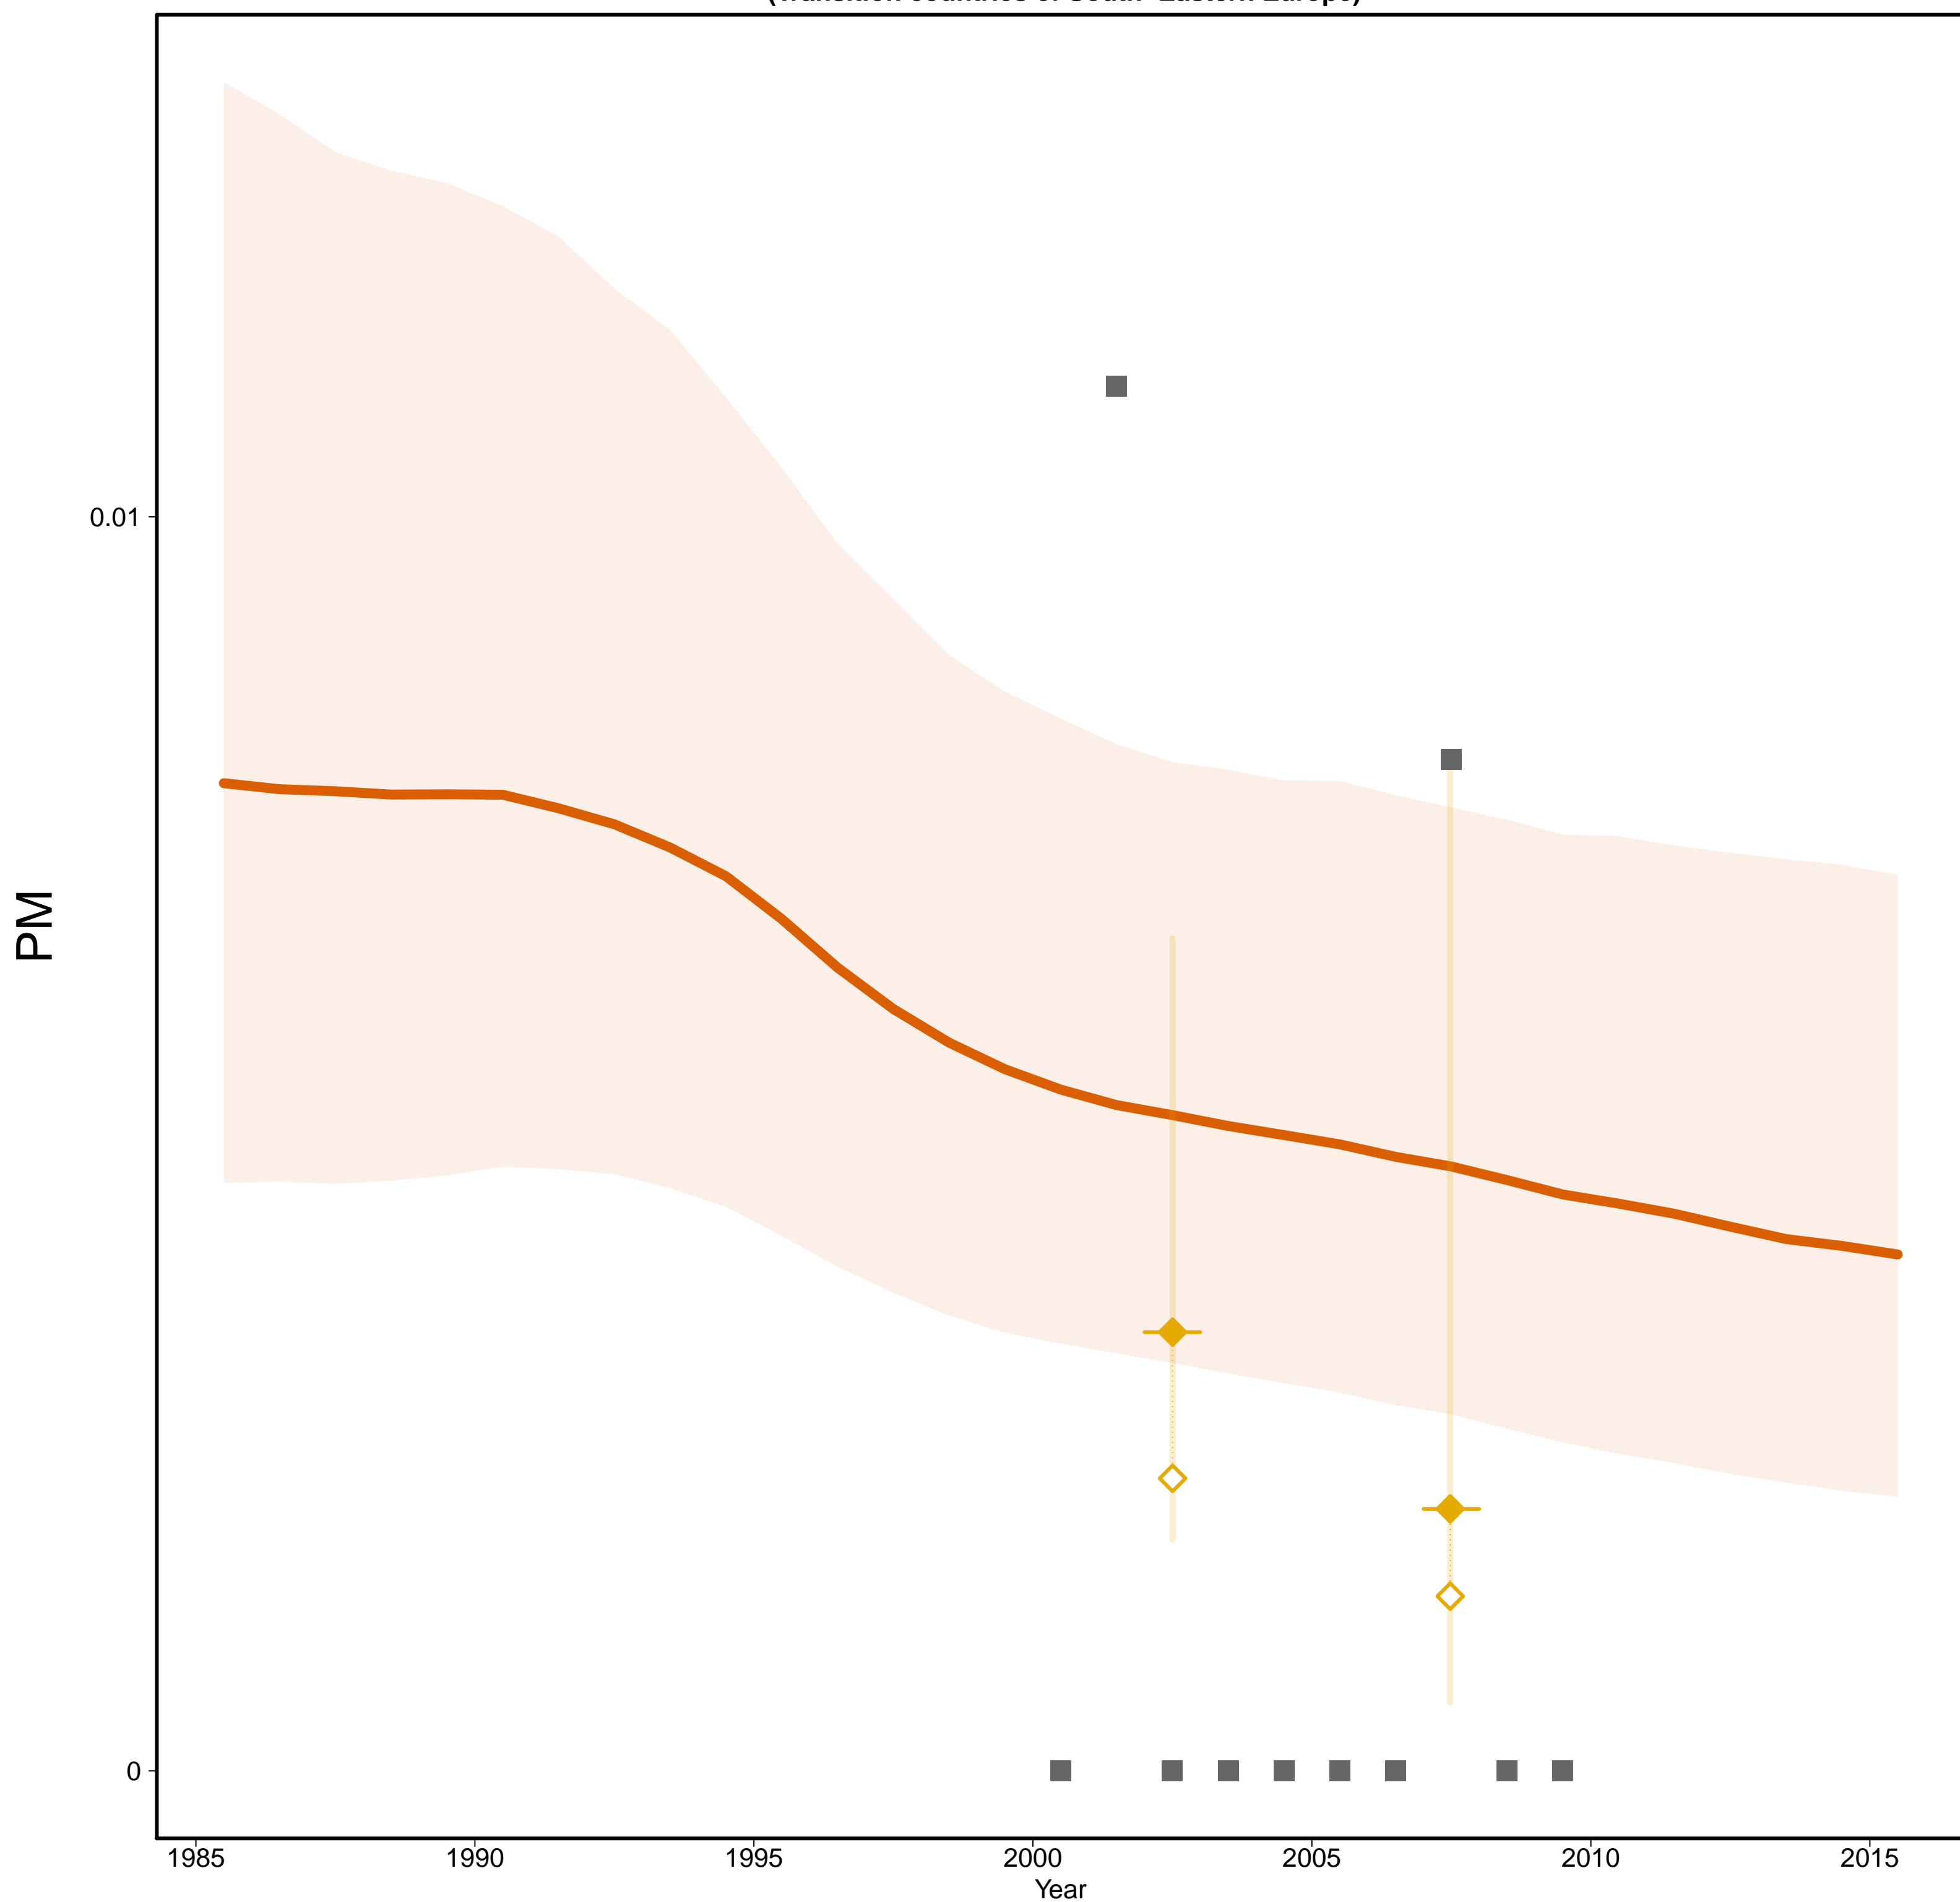

Montenegro [MNE]  
(Transition countries of South-Eastern Europe)

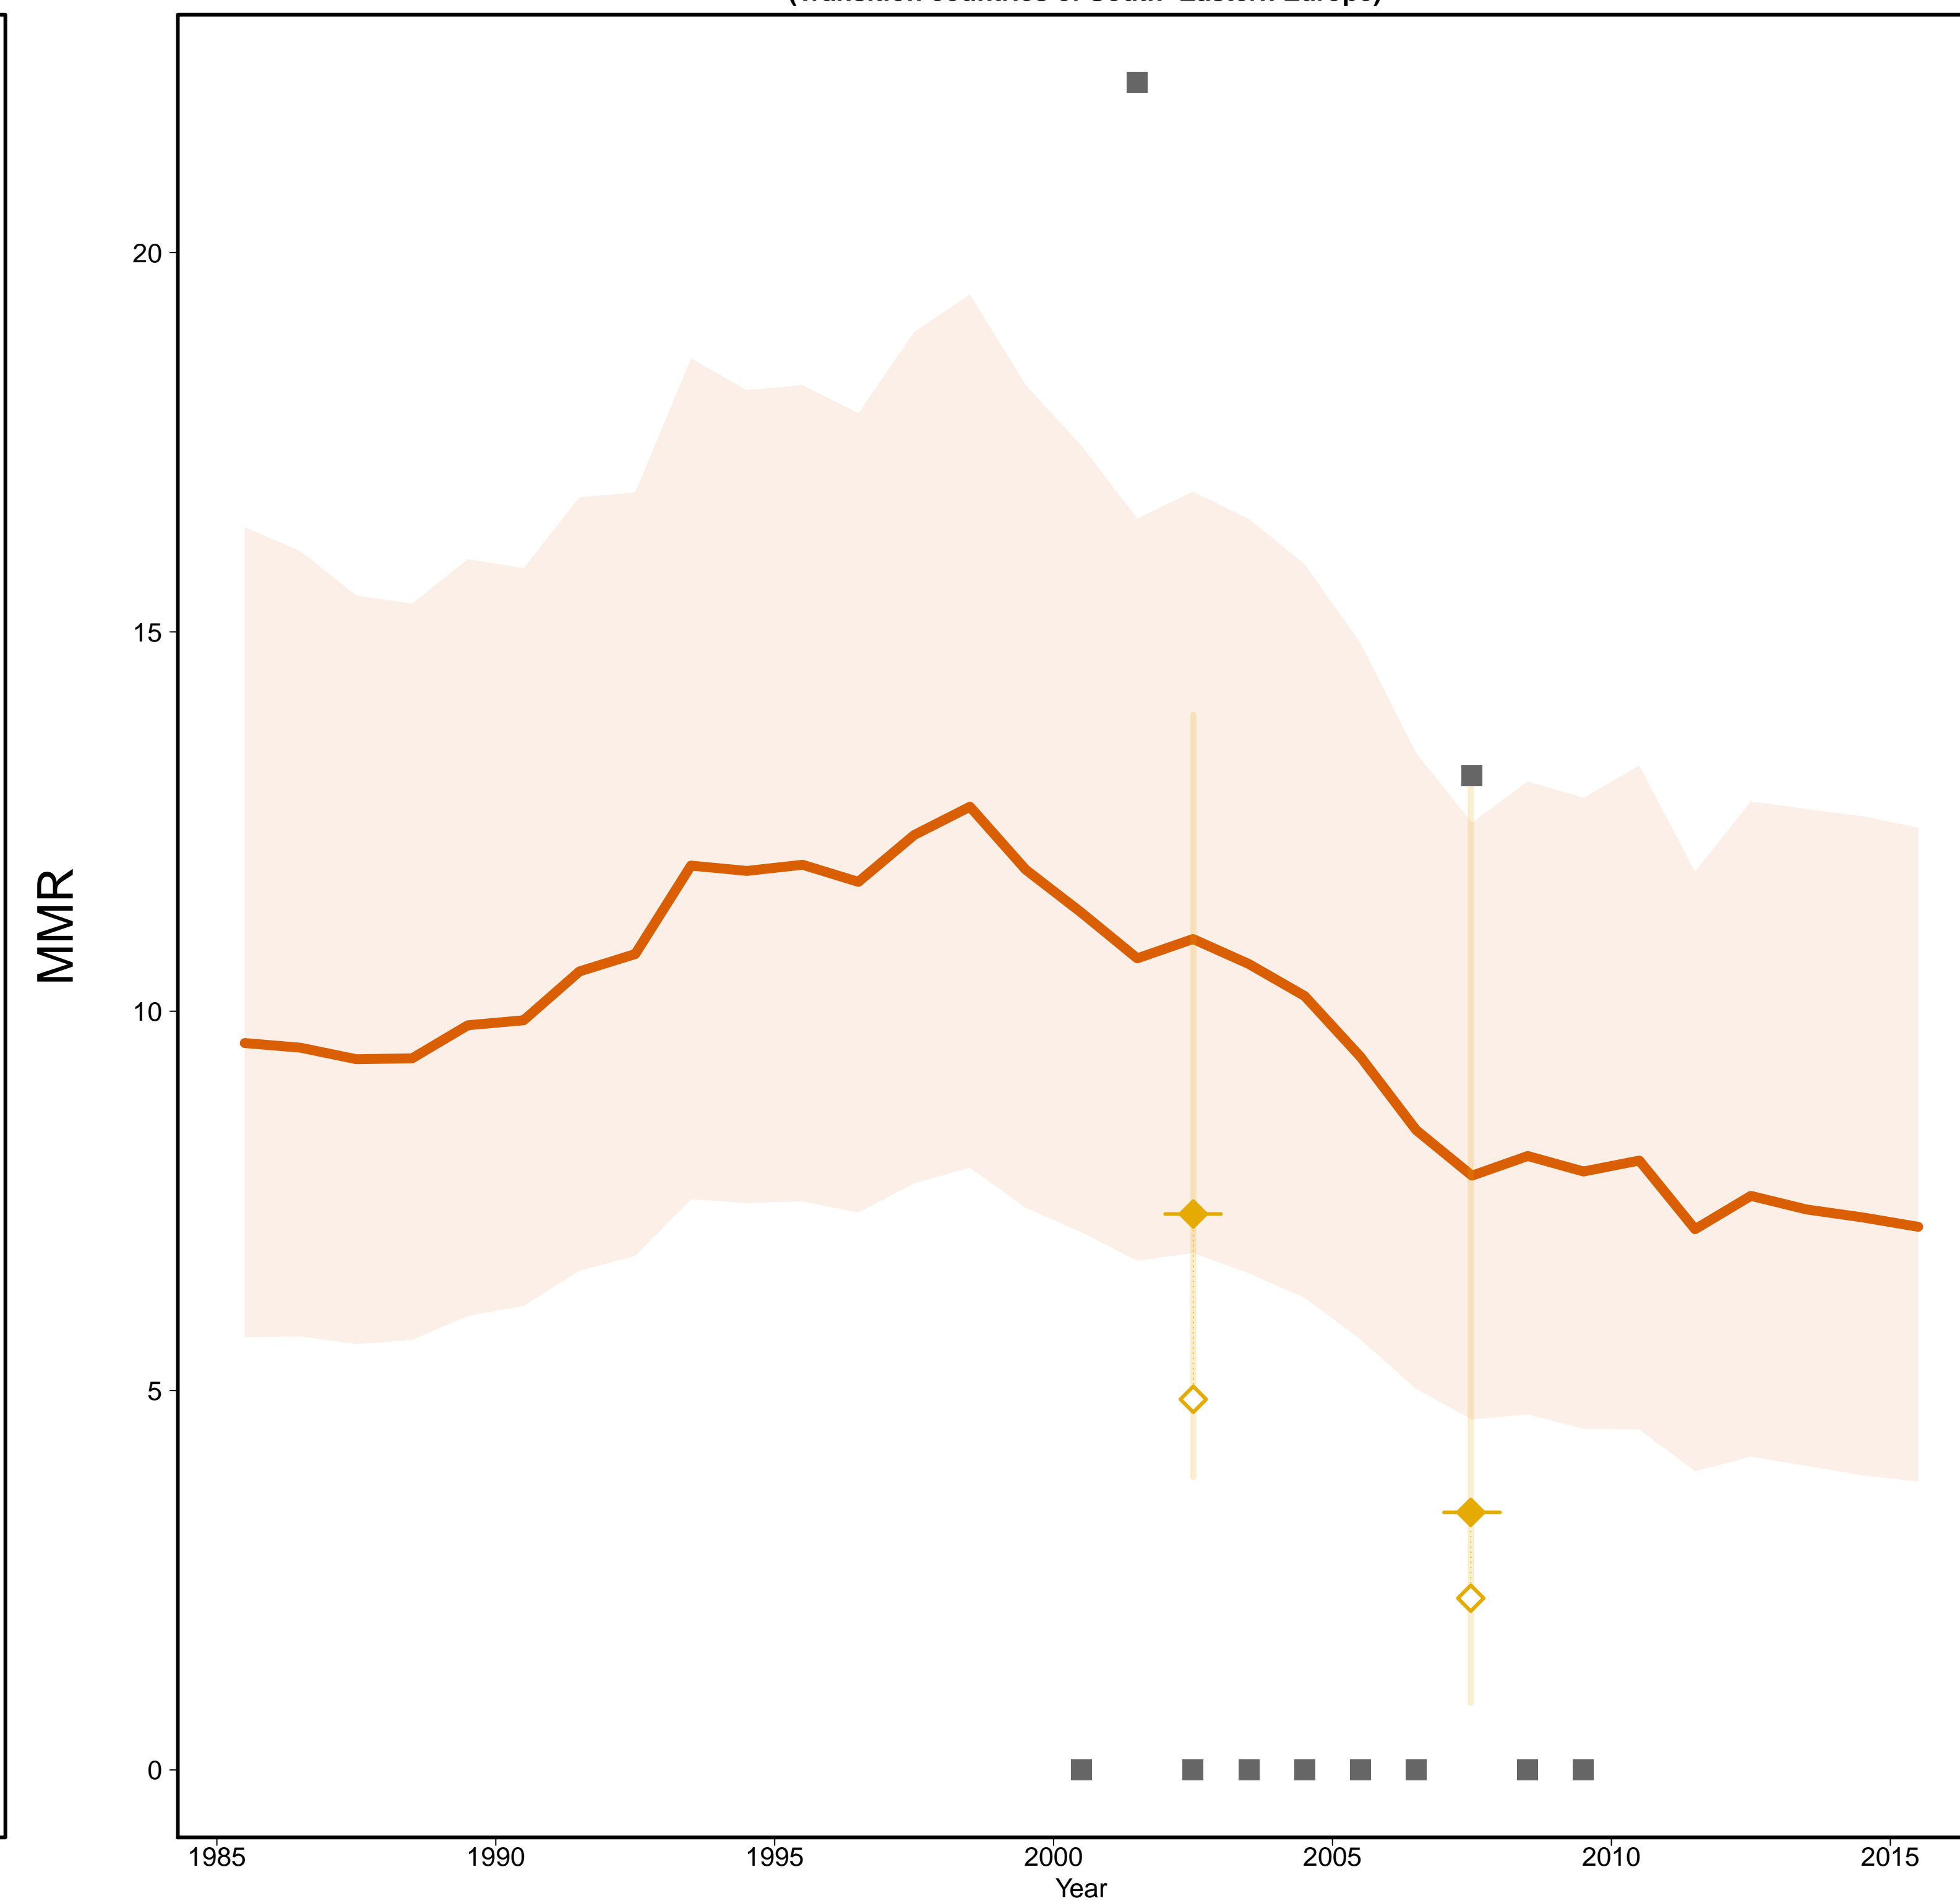

- Estimates –
- Mlate
- MMR Database 2015 –
- ◇ Observed Data
- ◆ Adjusted Data
- Data type –
- ◆ VR
- Reported VR before recalc.  
(related to 0 obs. mat. death)

Gross Domestic Product

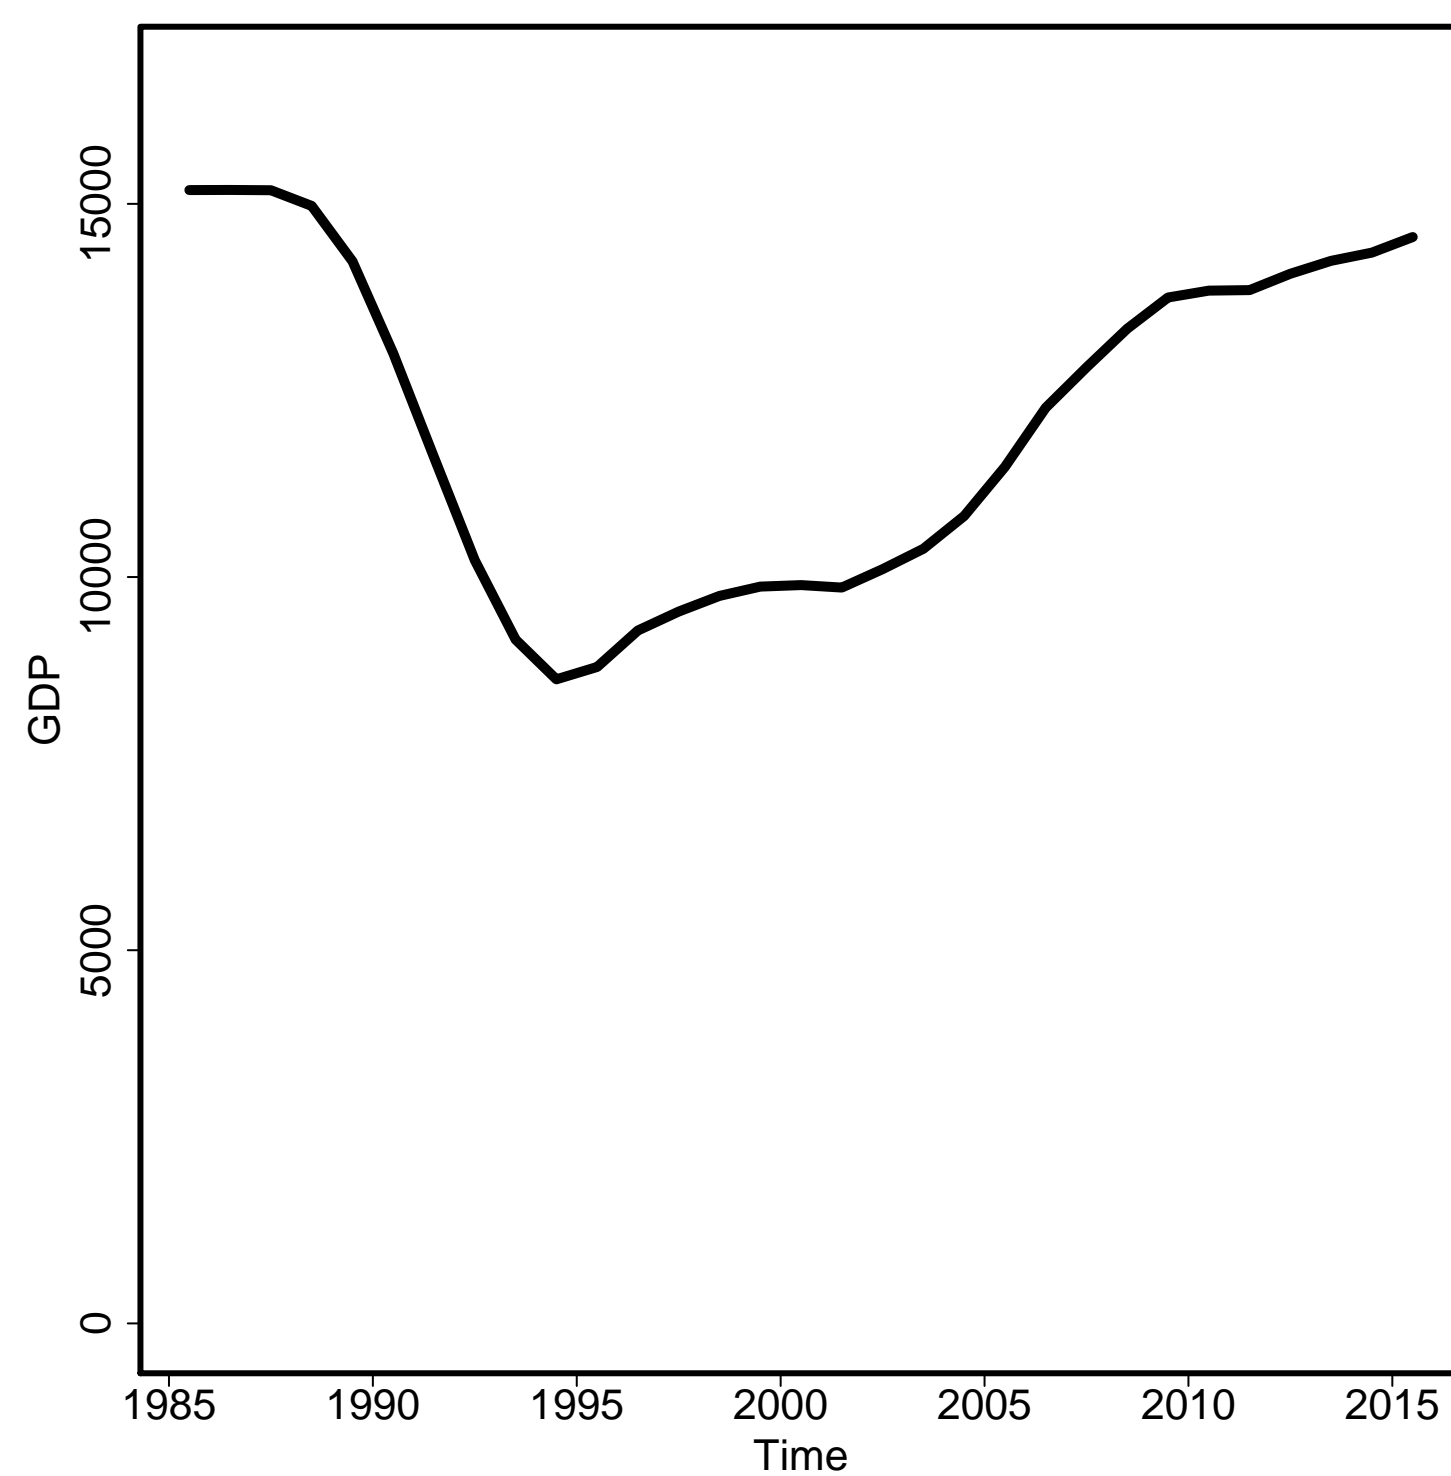

General Fertility Rate

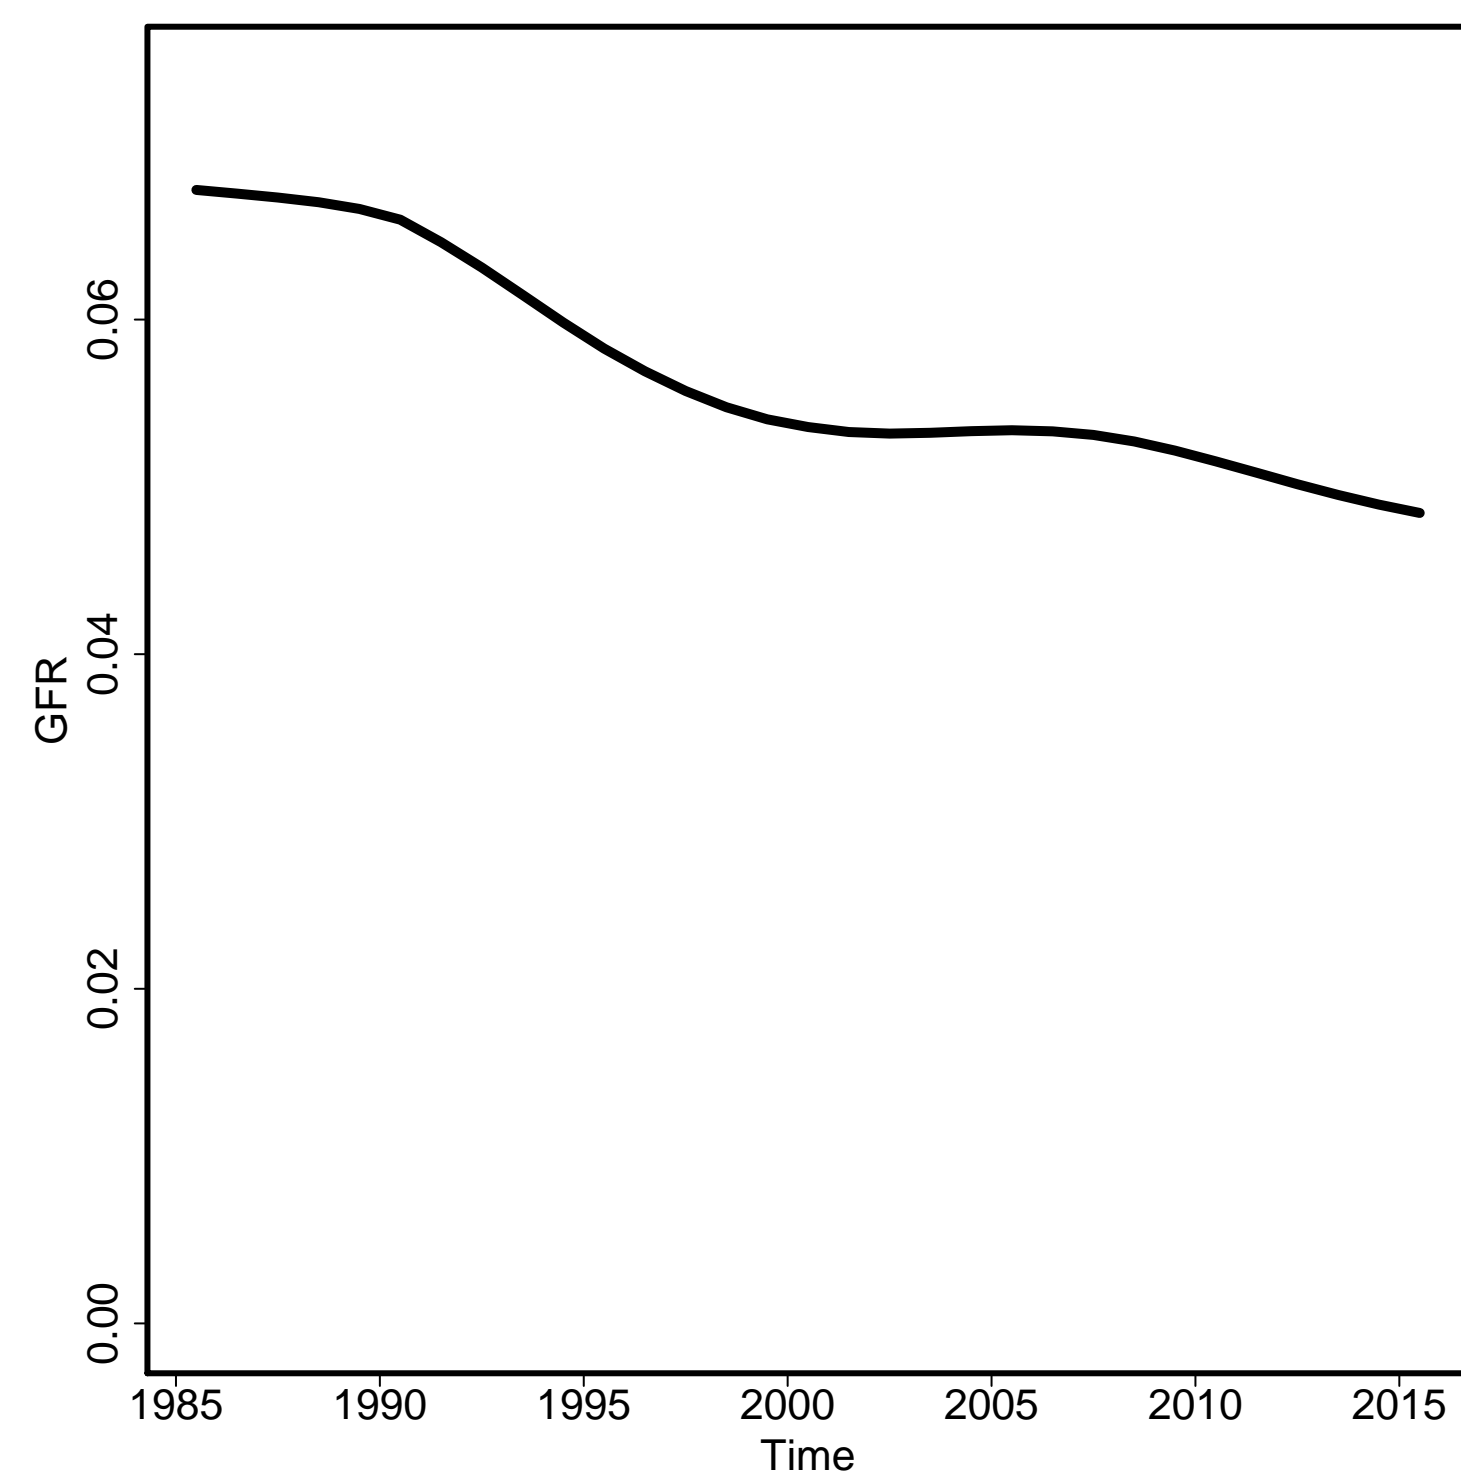

Skilled Attendance to Birth

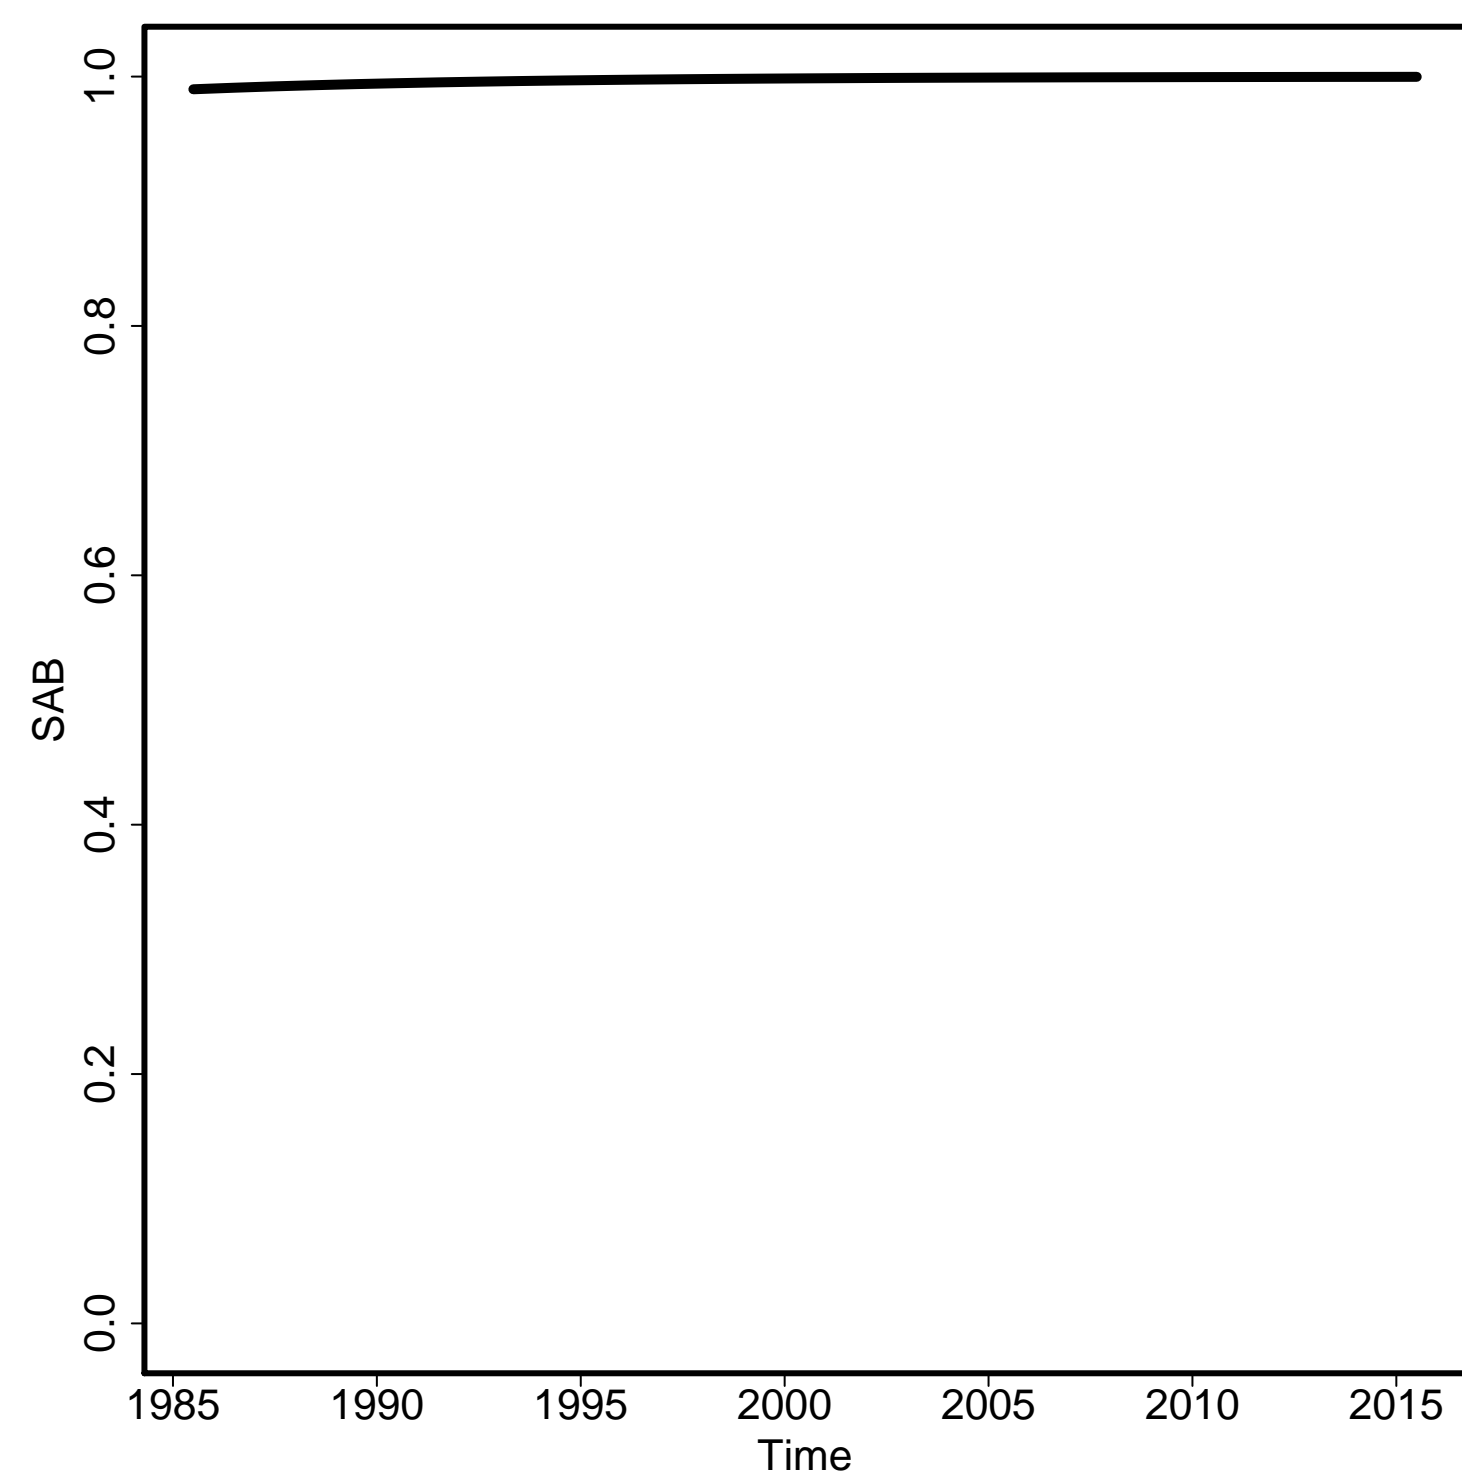

Envelope/Births

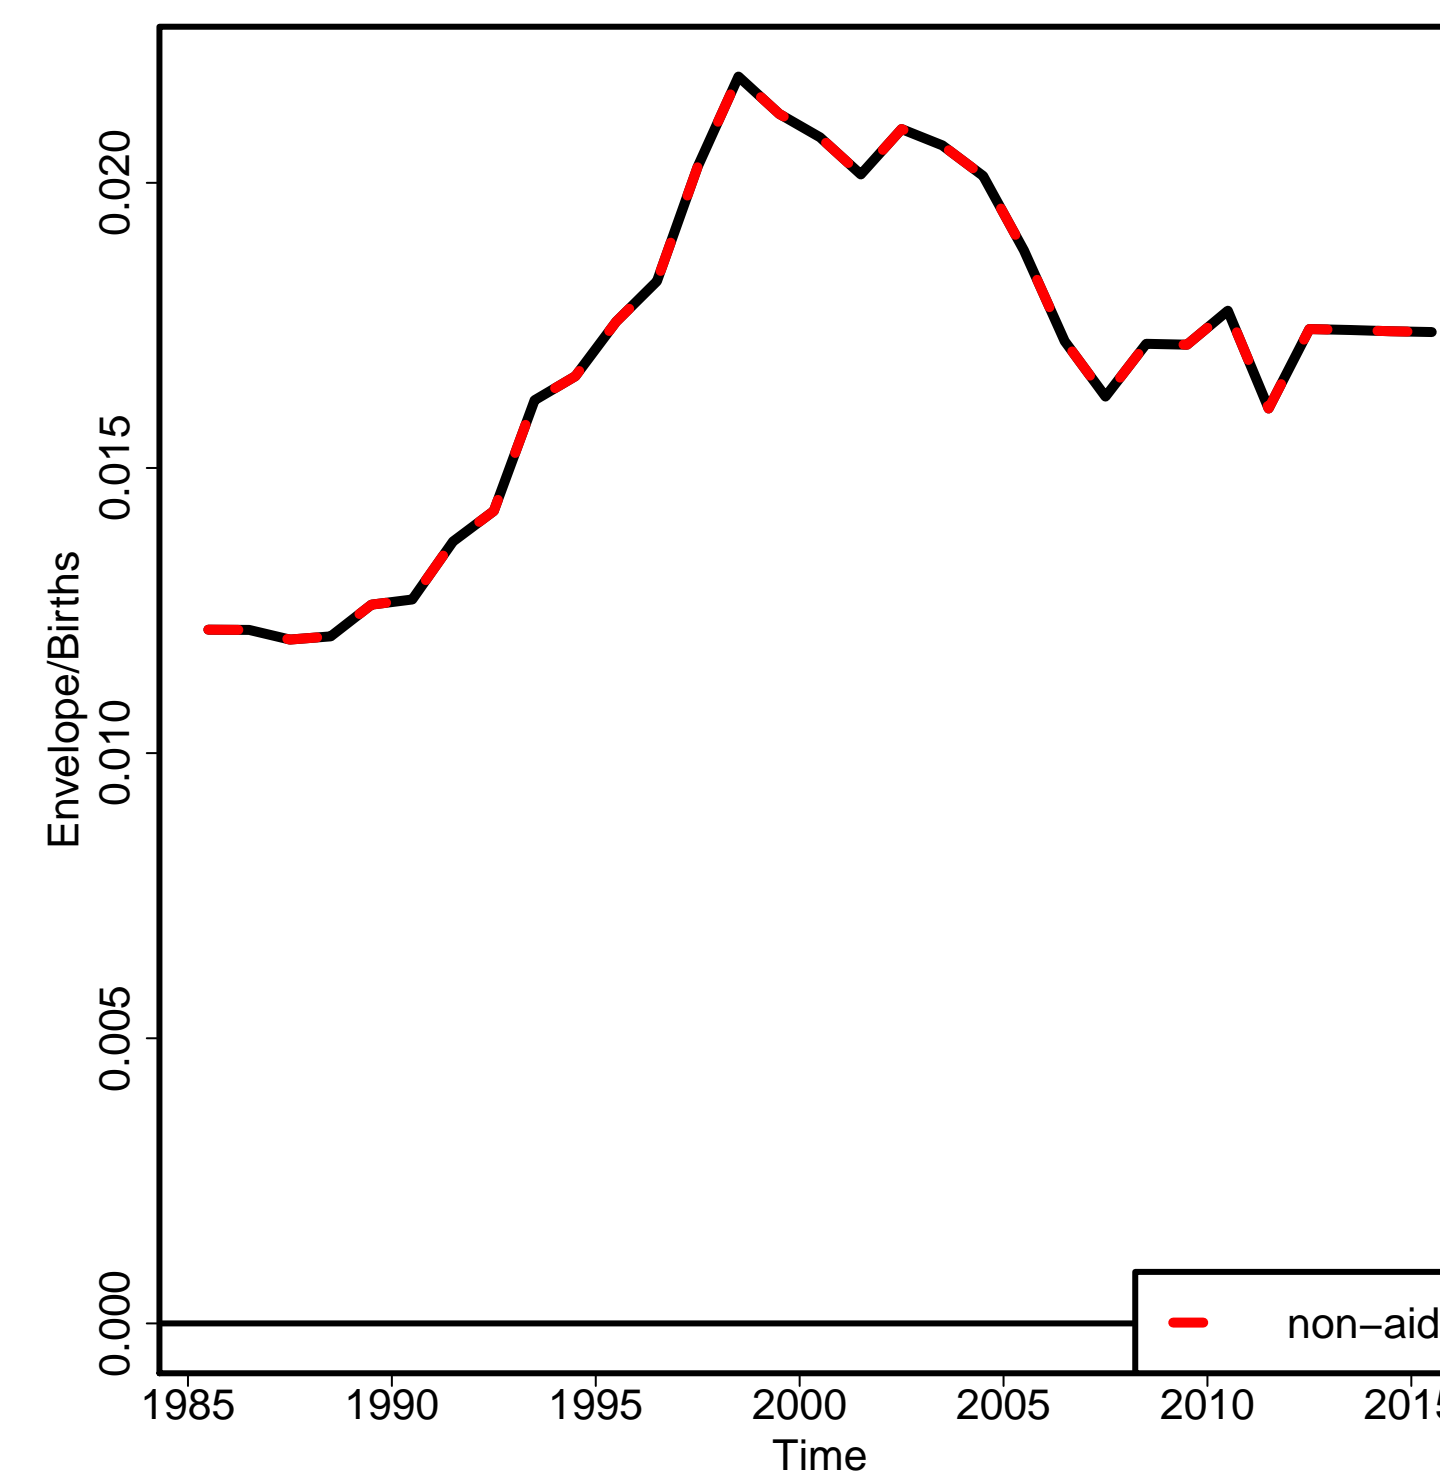

Non-aids MMR

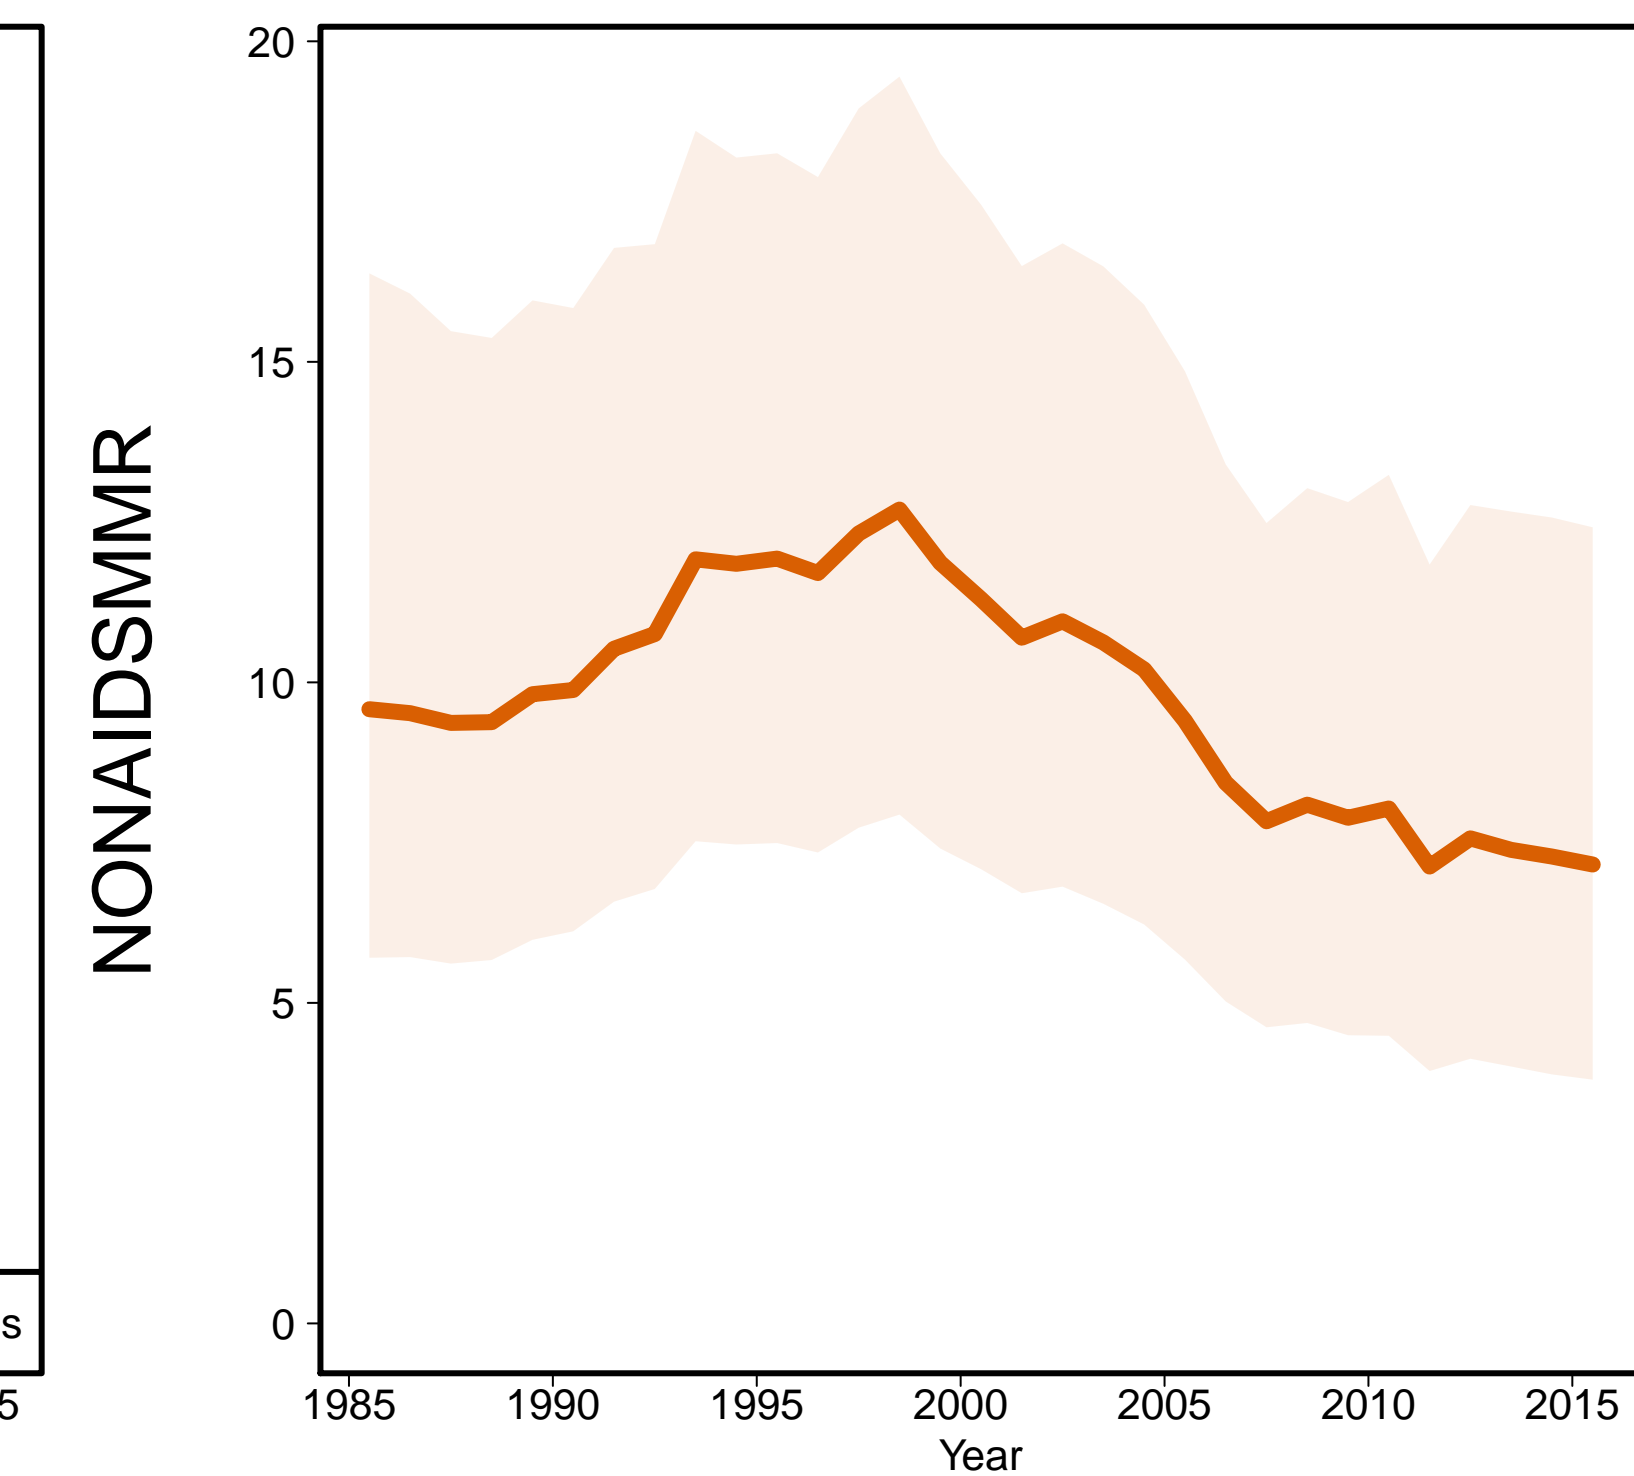

Aids MMR

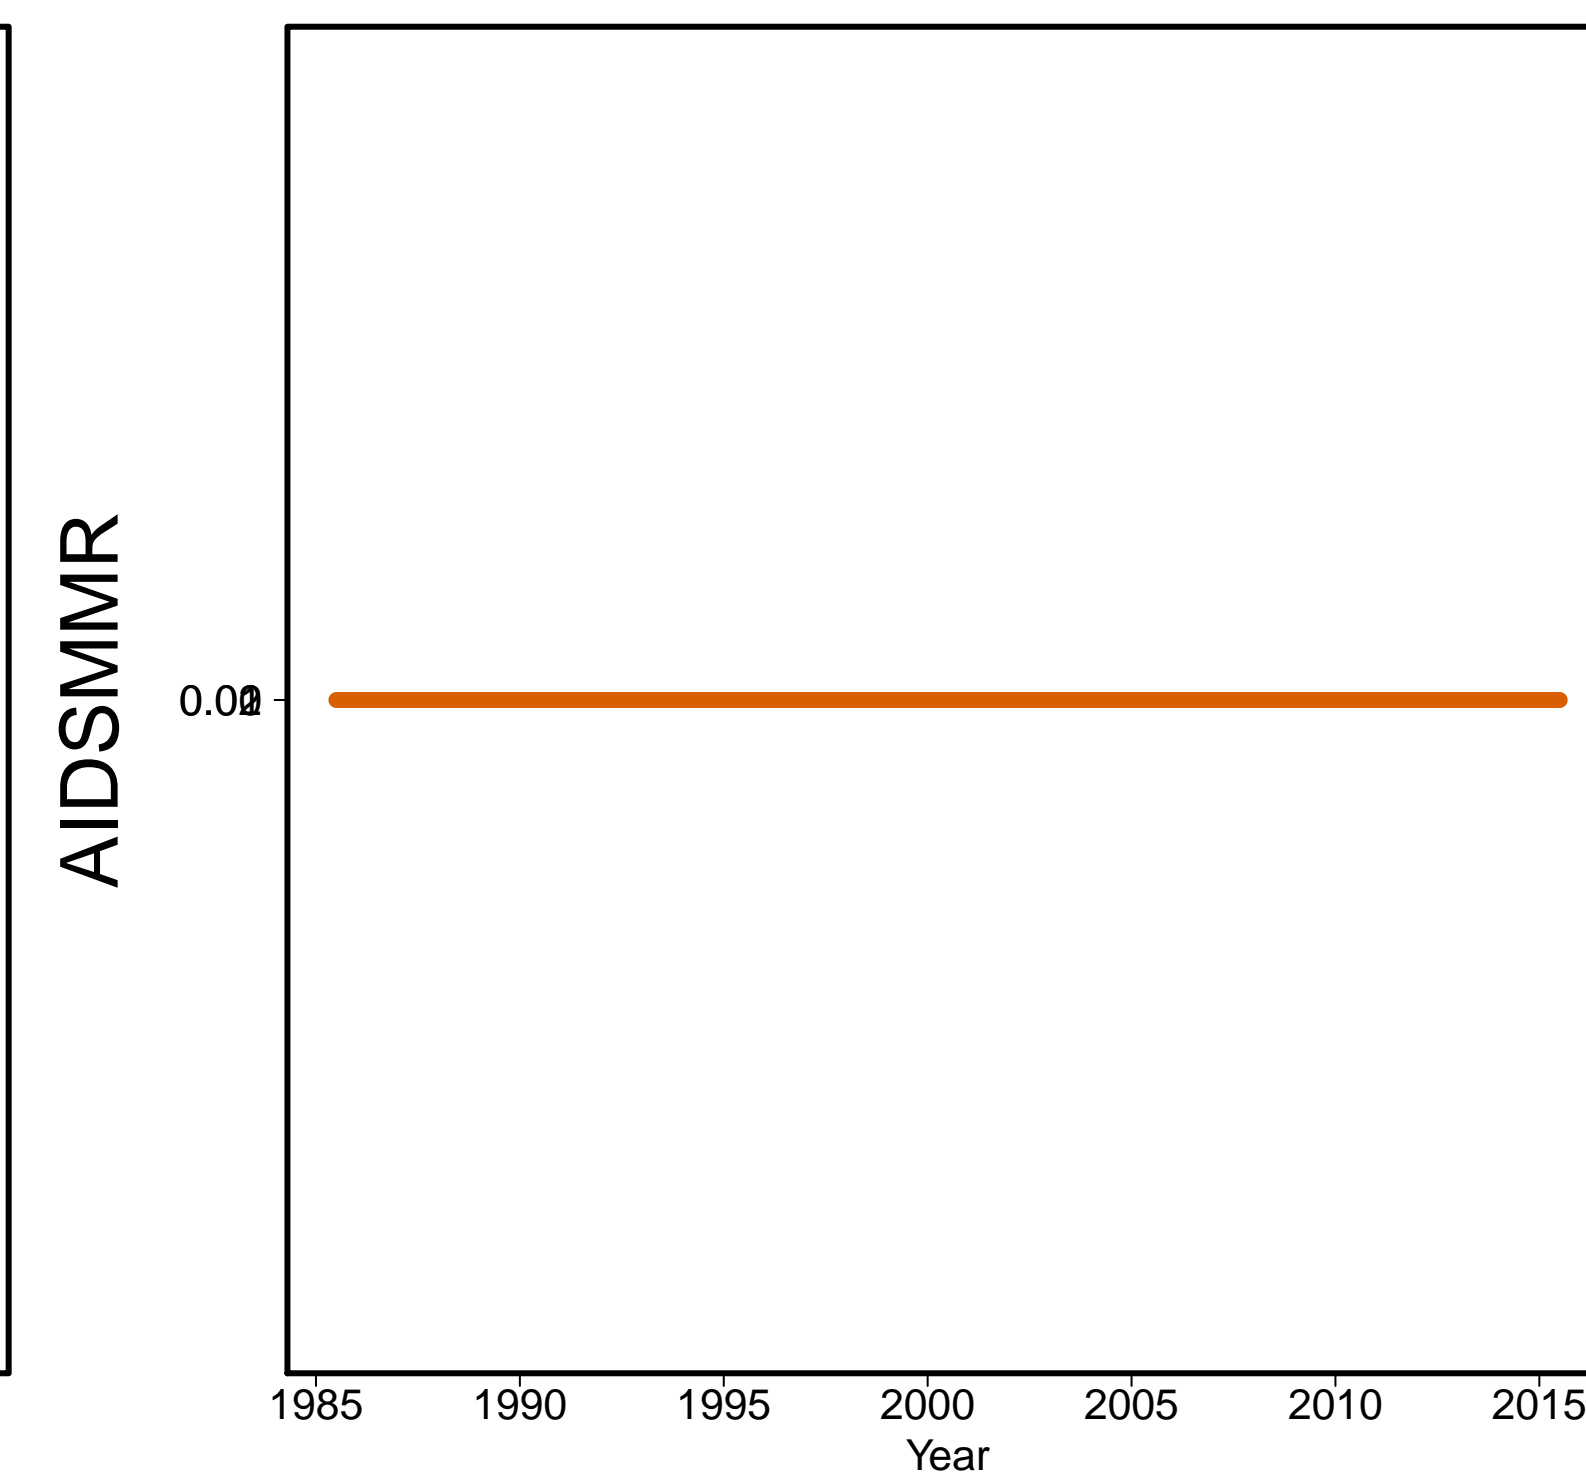

Morocco [MAR]  
(Northern Africa)

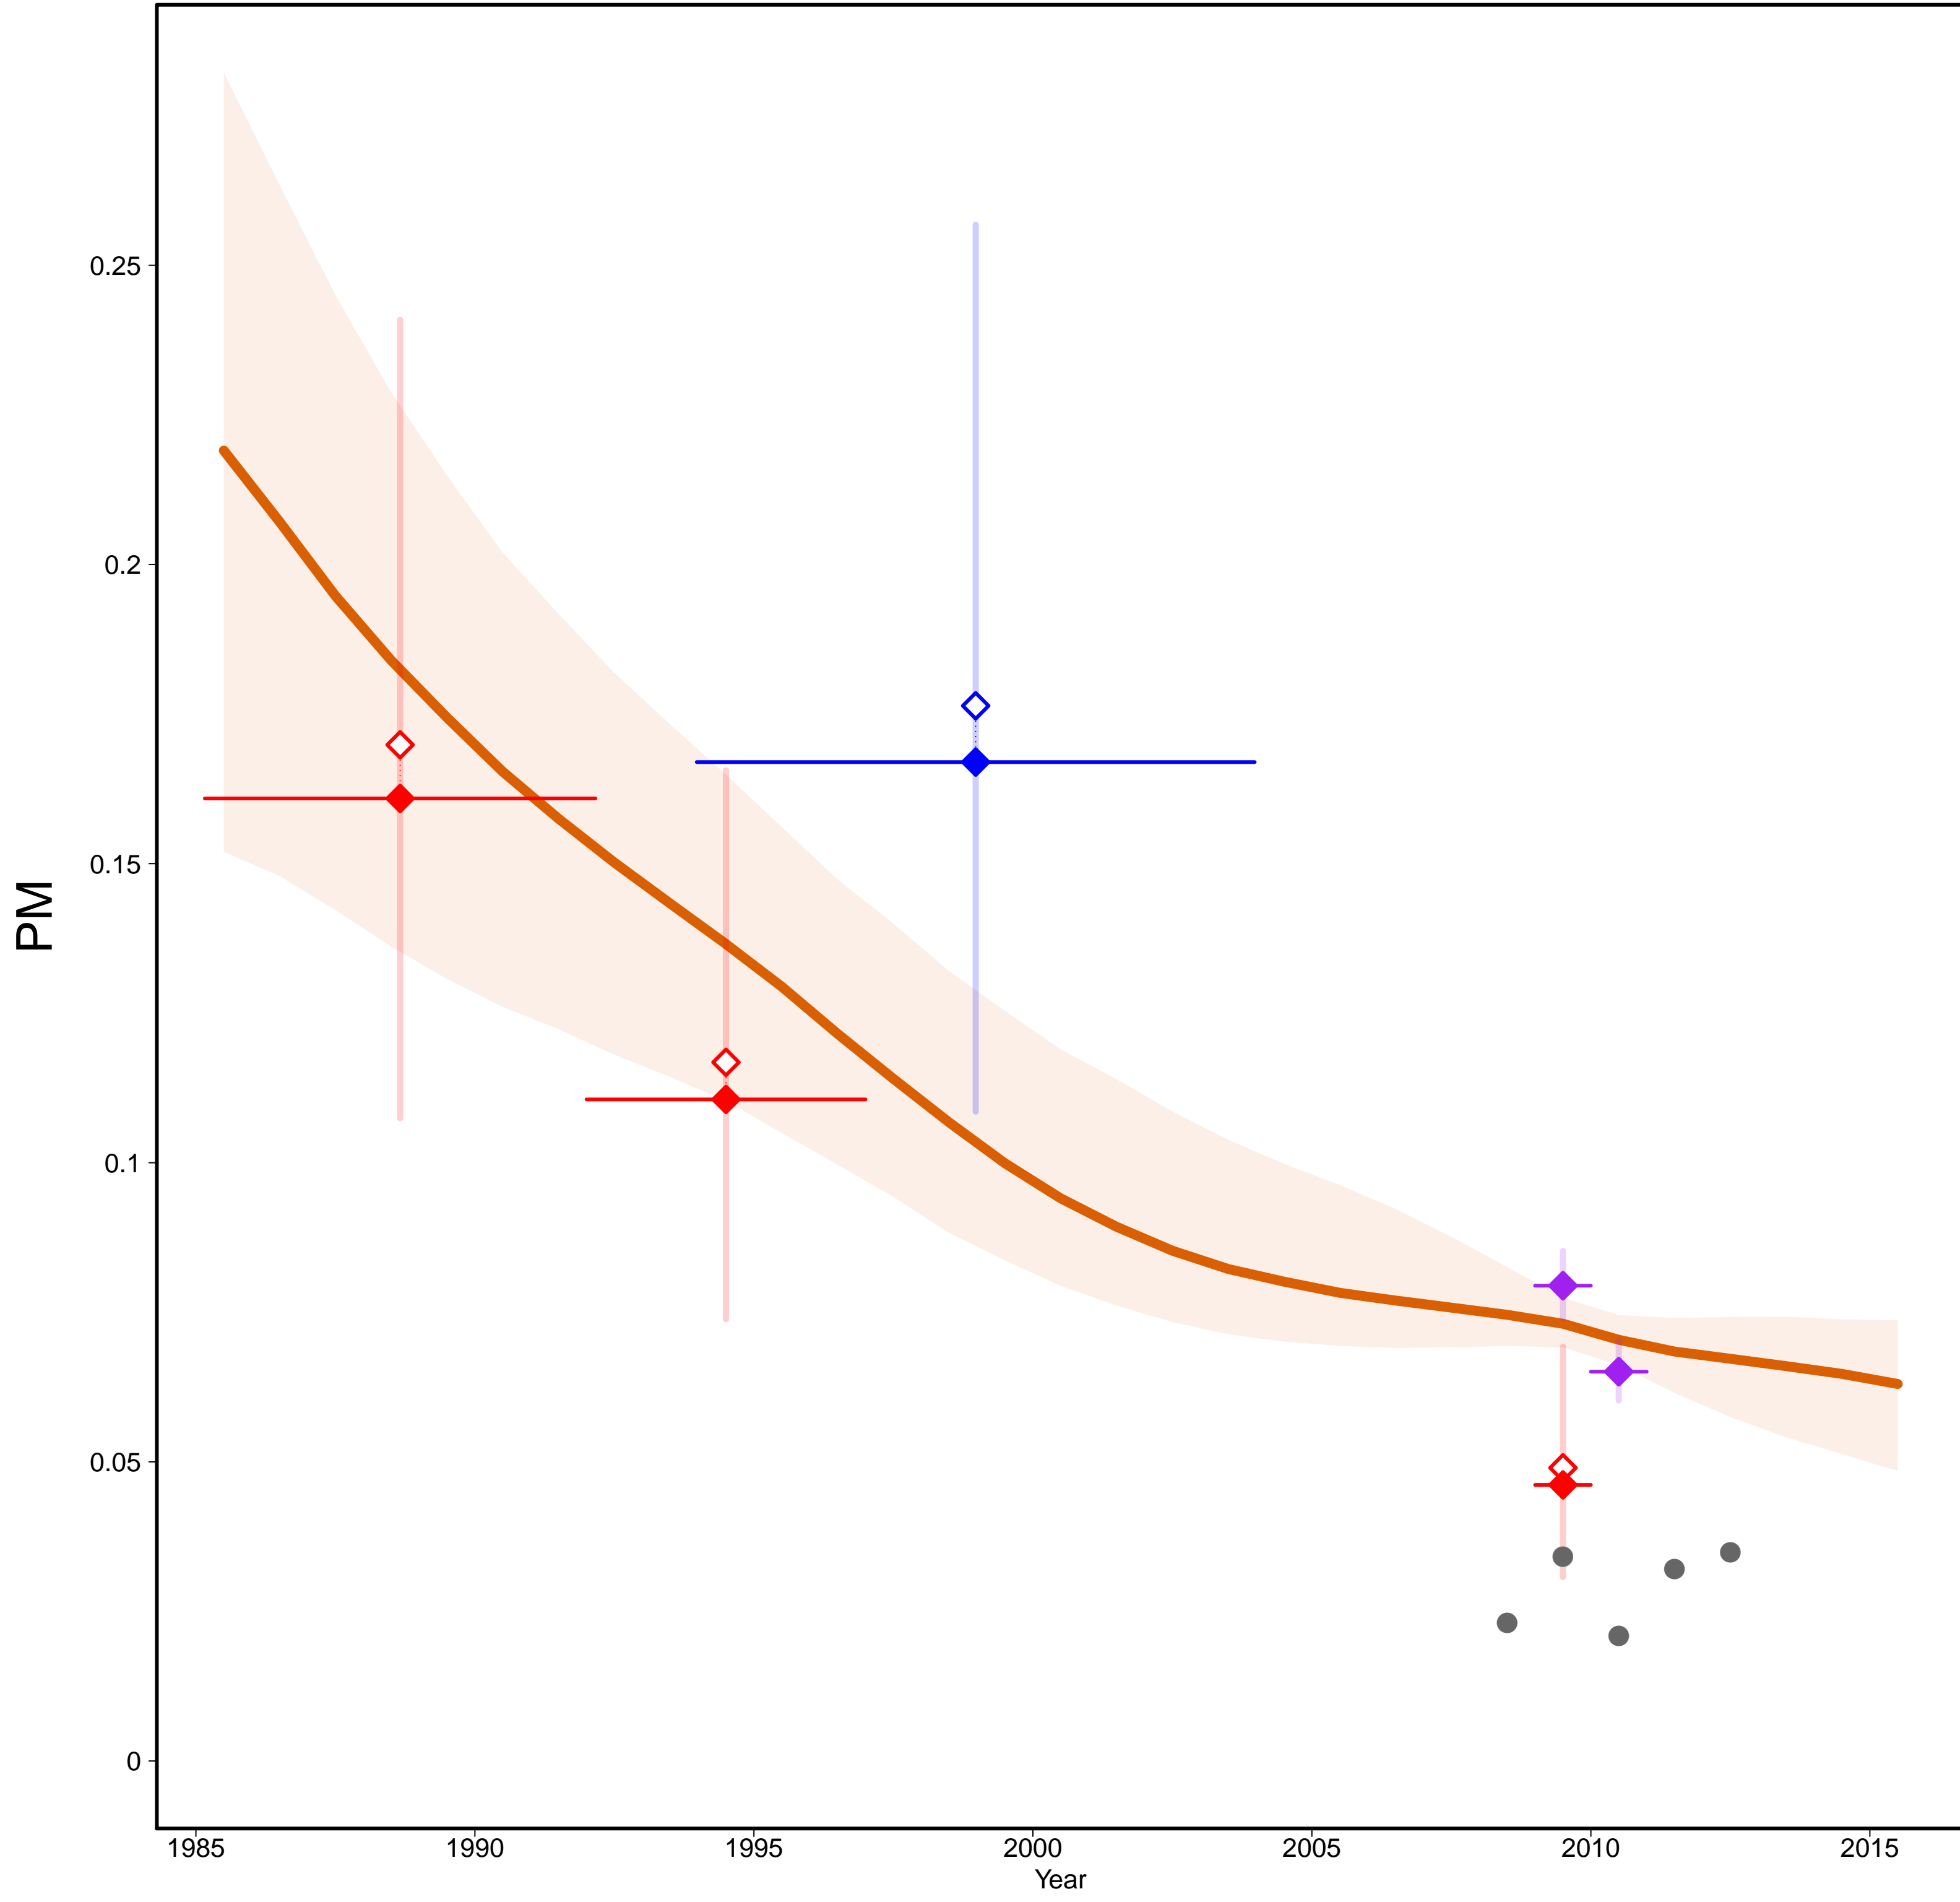

Morocco [MAR]  
(Northern Africa)

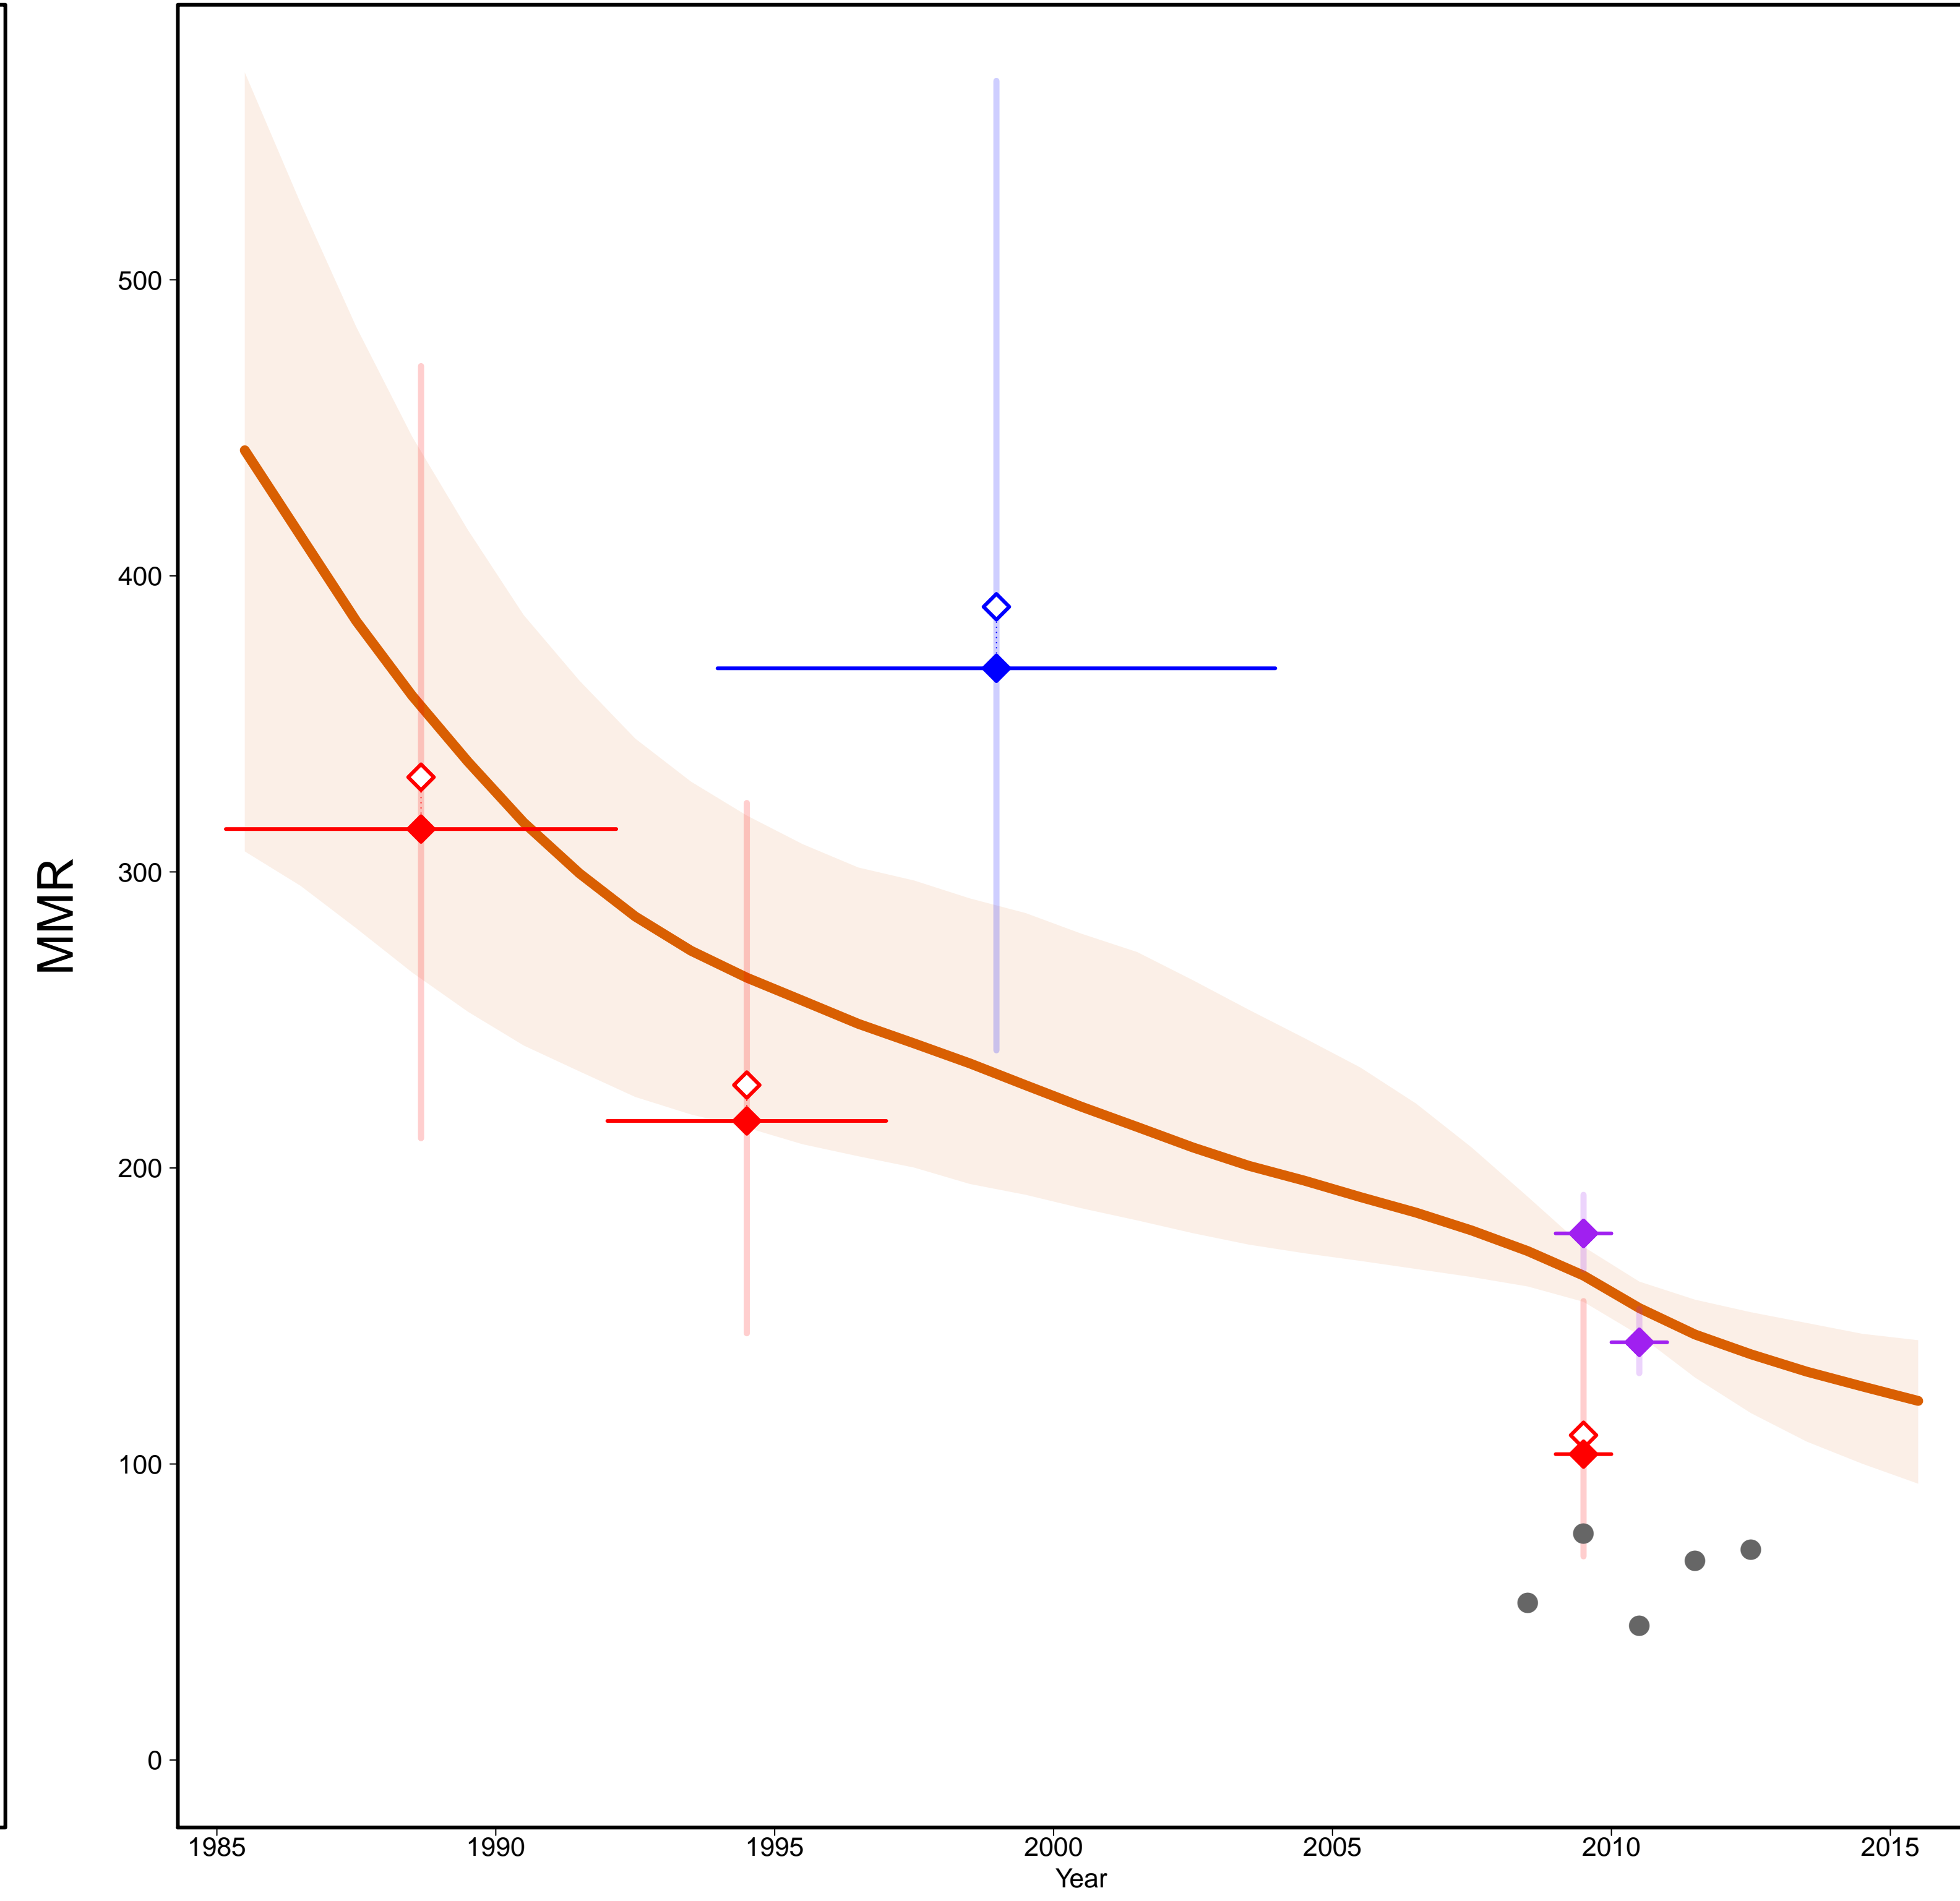

- Estimates –
- Mlate
- MMR Database 2015 –
- ◇ Observed Data
- ◆ Adjusted Data
- Data type –
- ◆ Spec. studies
- ◆ DHS
- ◆ Misc. studies
- Excluded VR data  
(data quality issues)

Gross Domestic Product

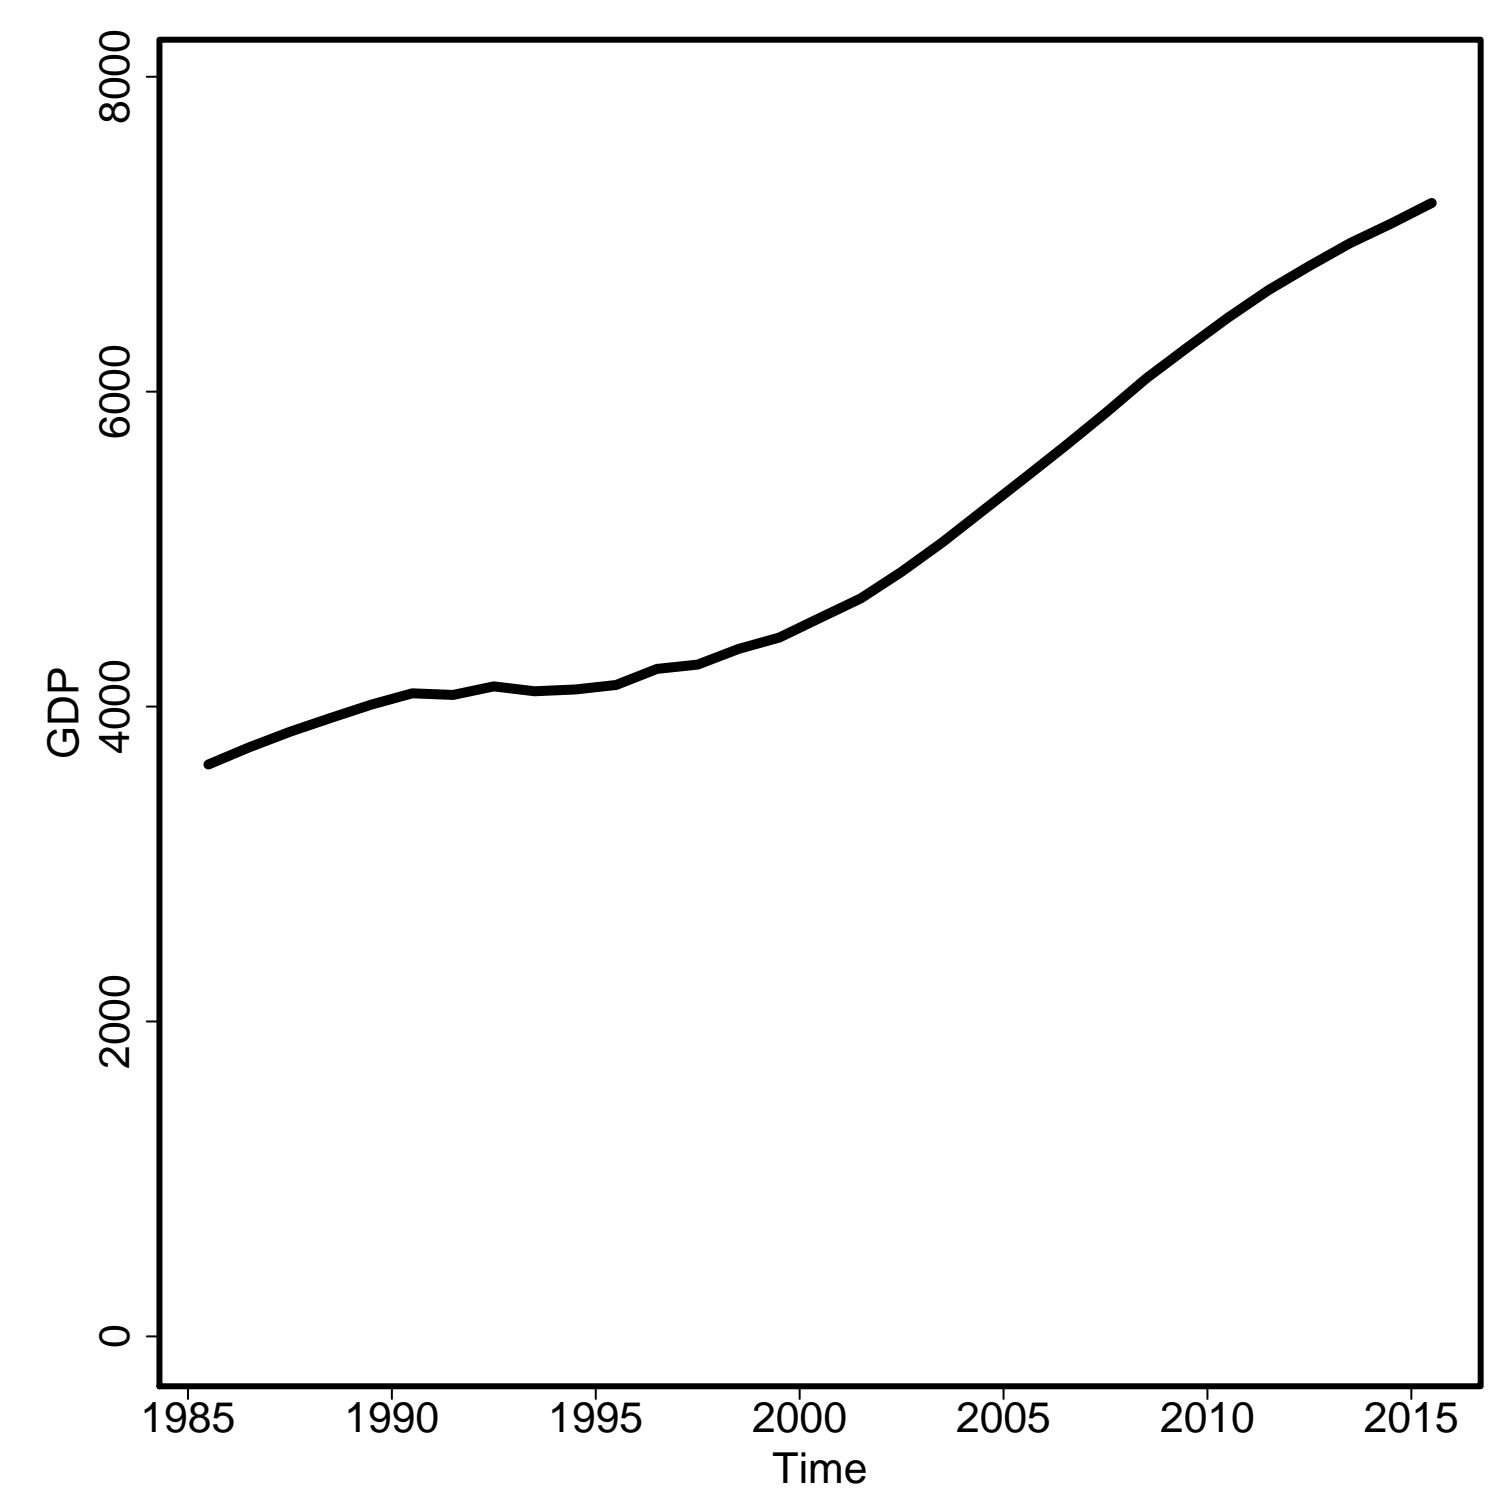

General Fertility Rate

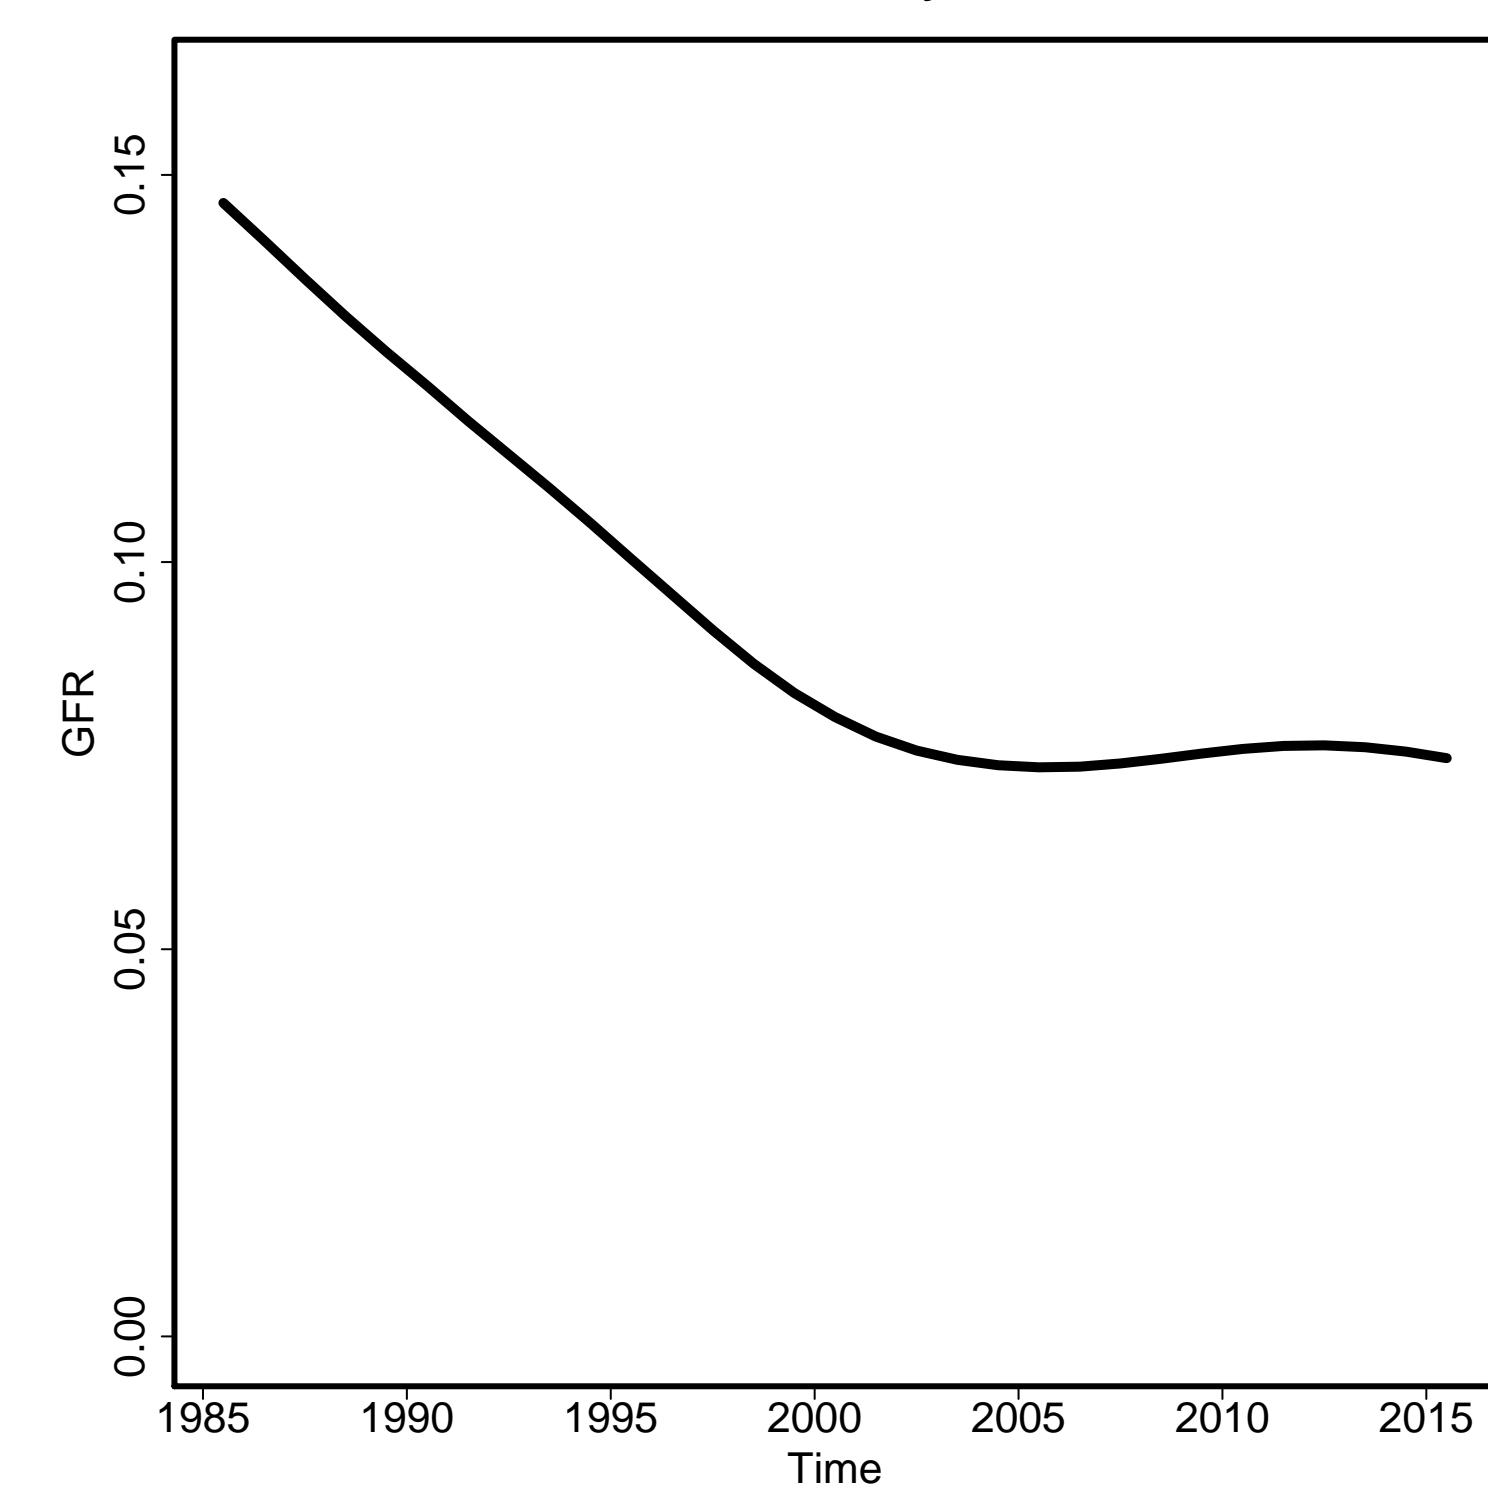

Skilled Attendance to Birth

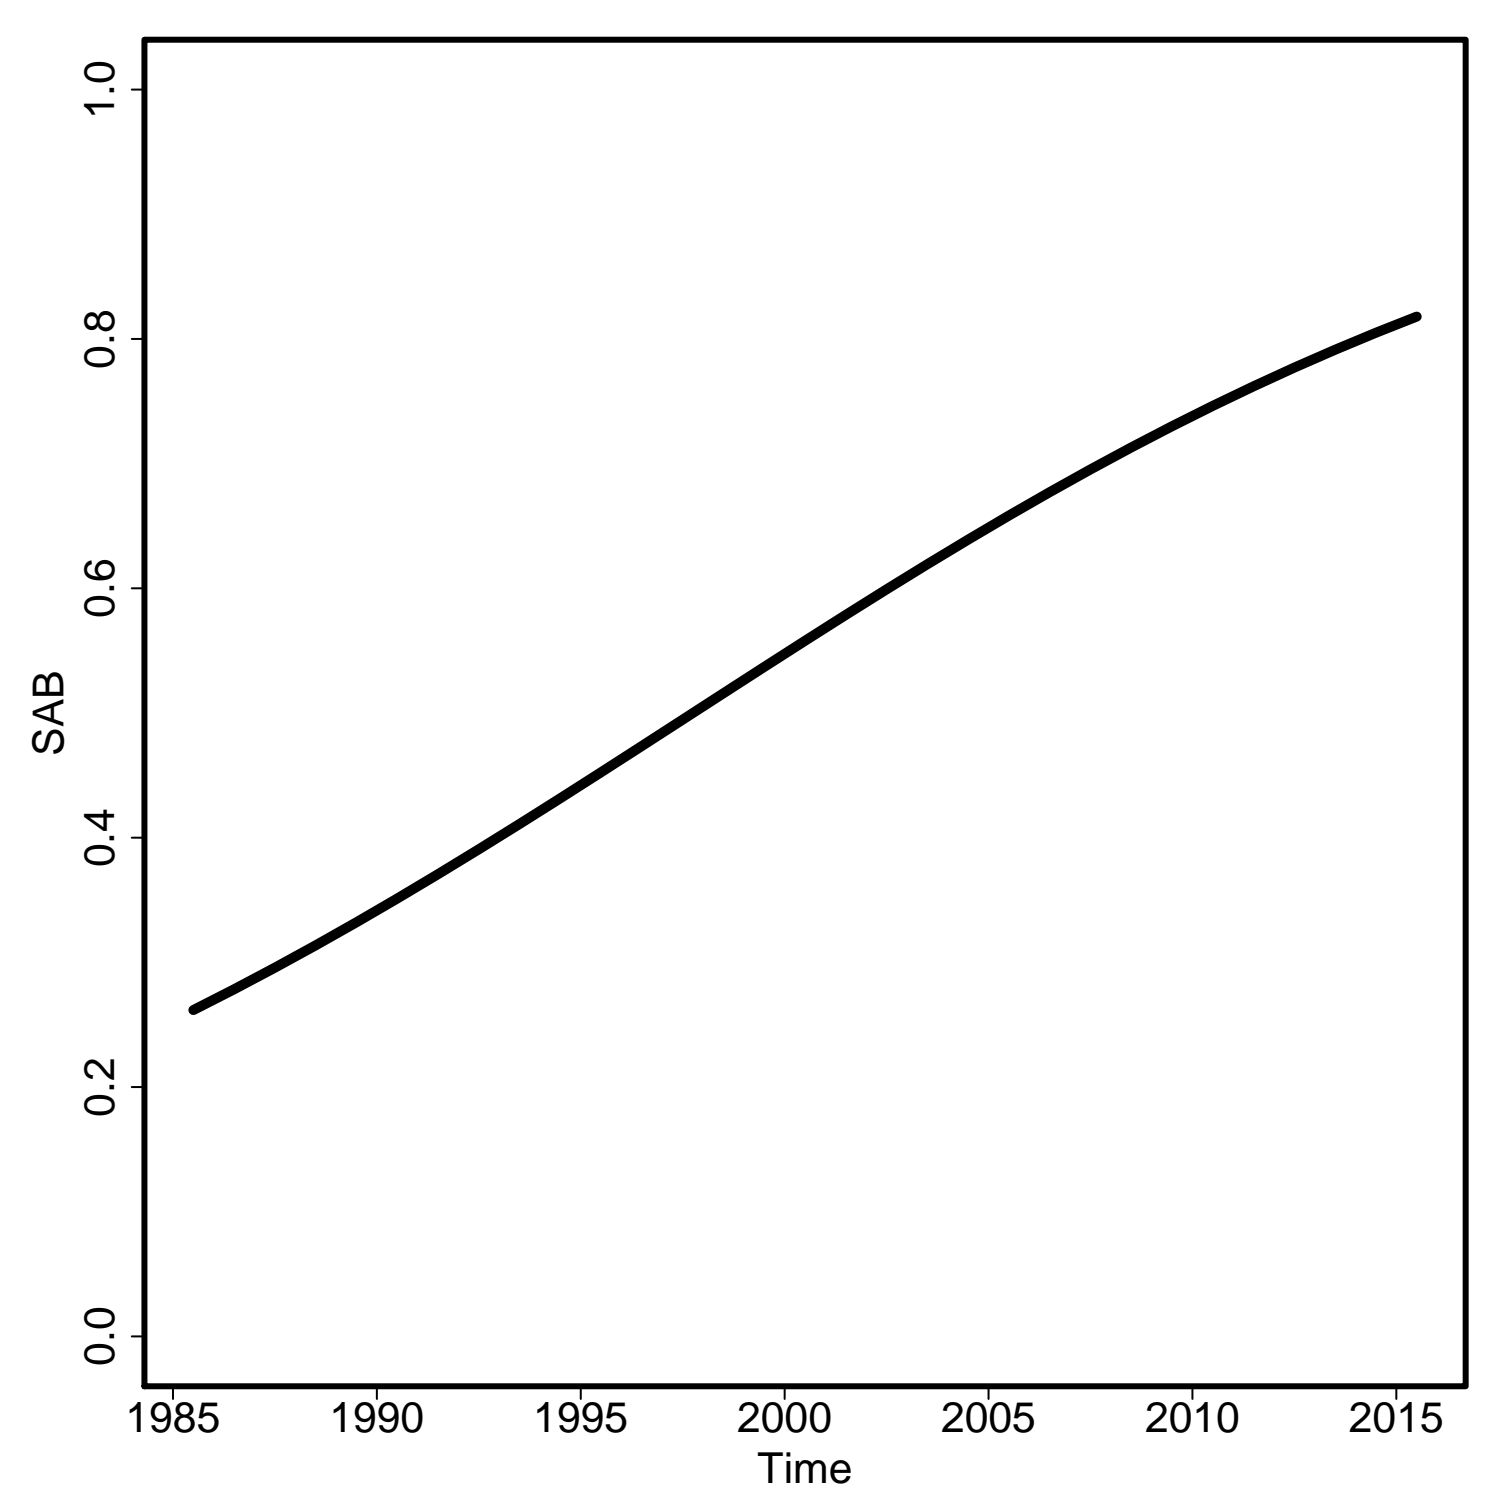

Envelope/Births

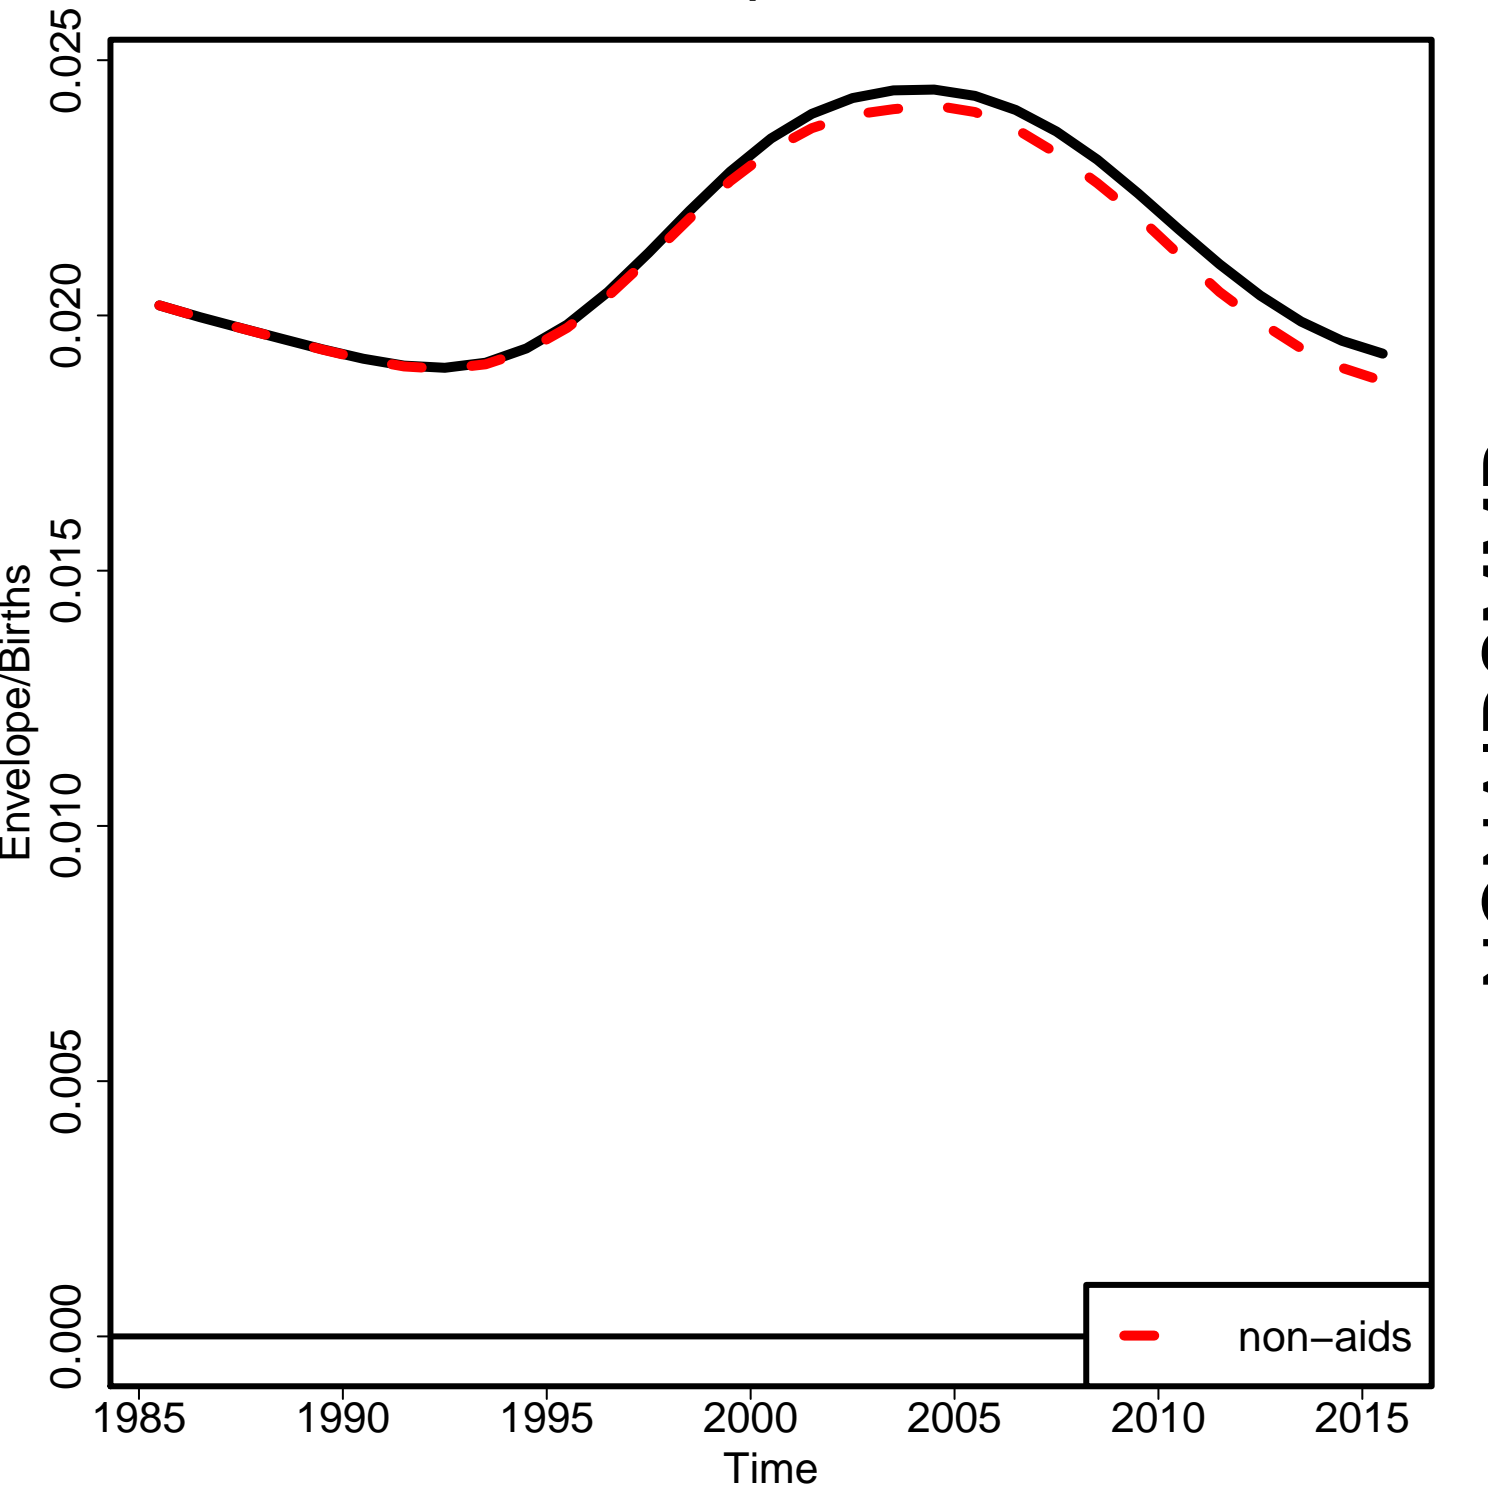

Non-aids MMR

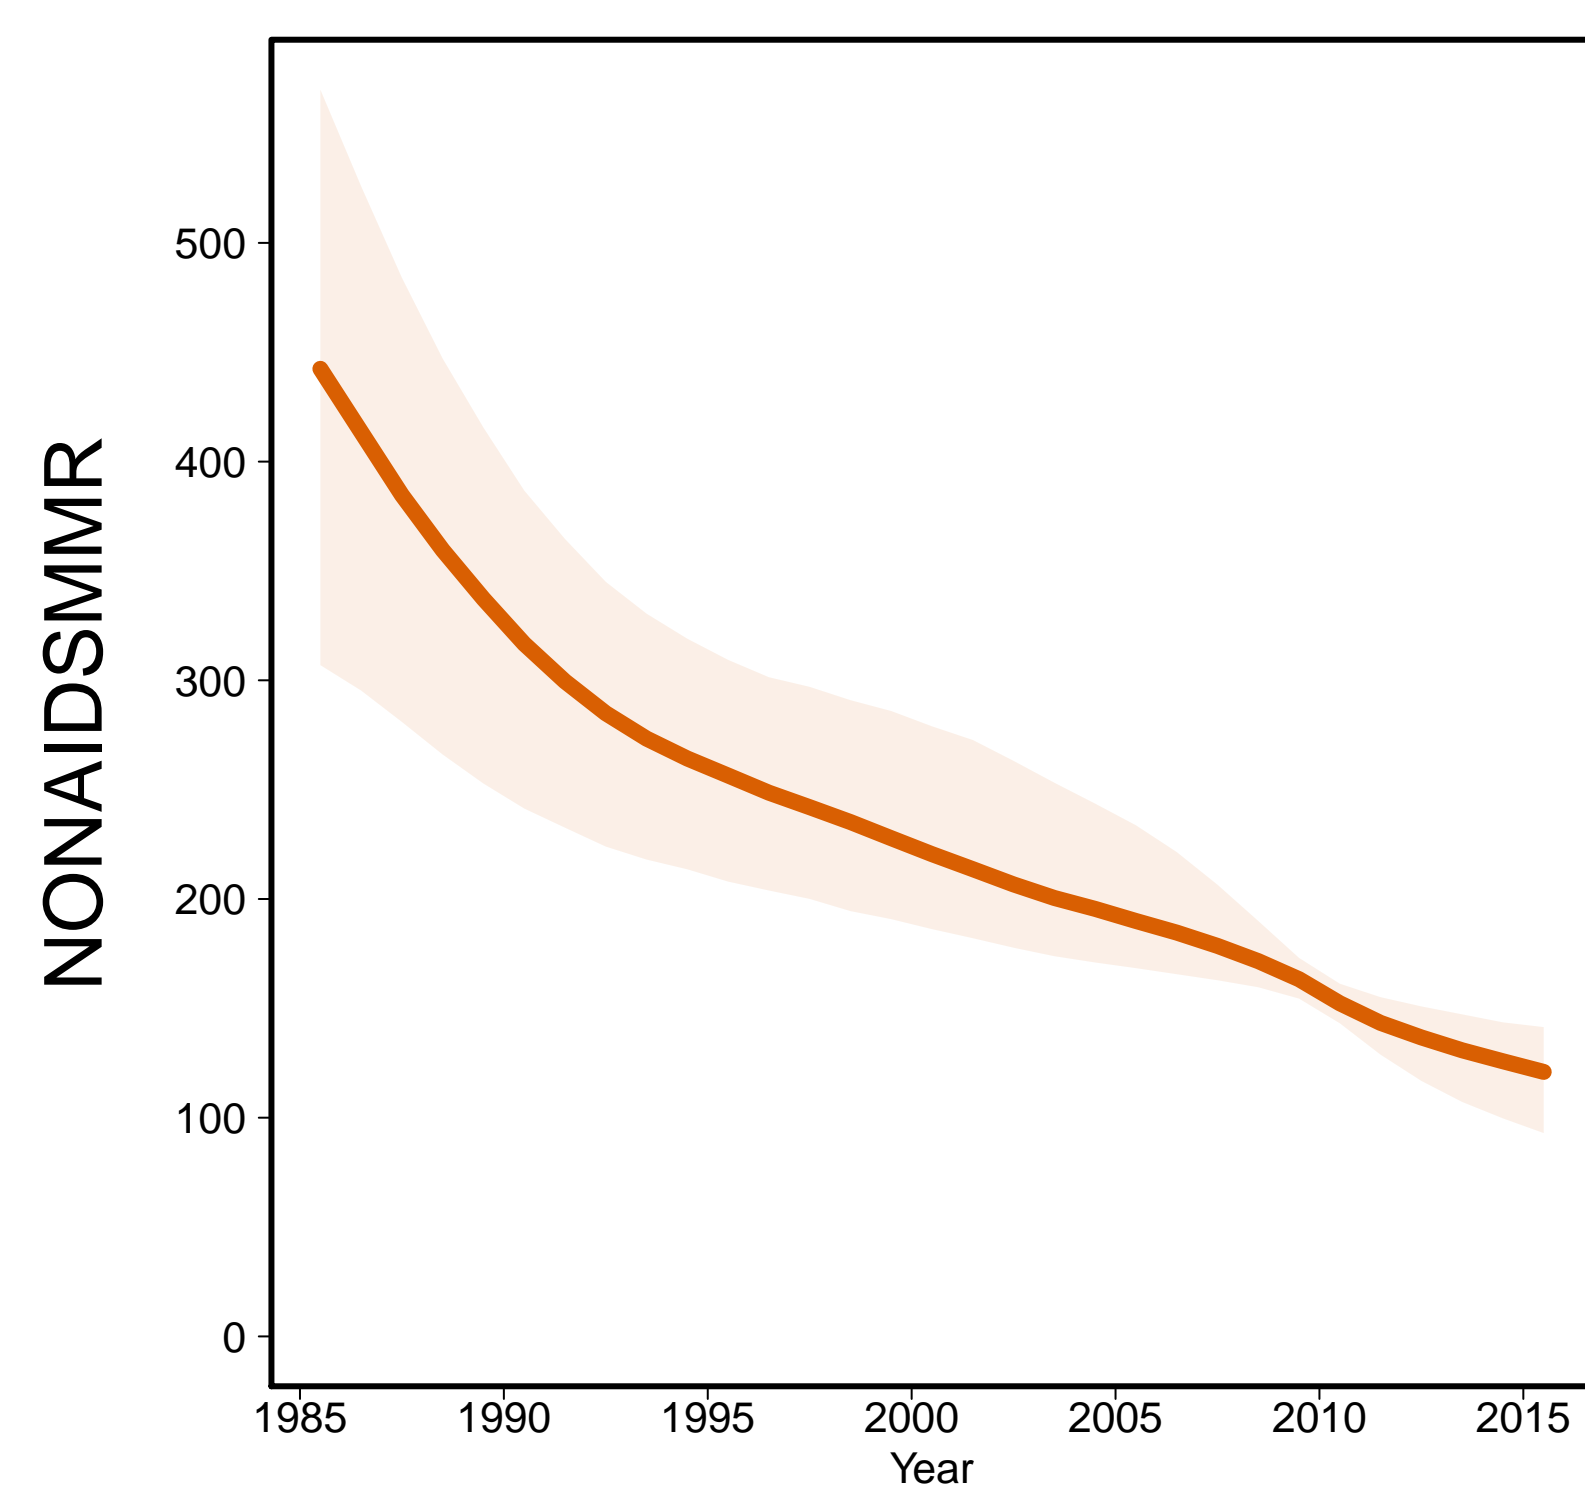

Aids MMR

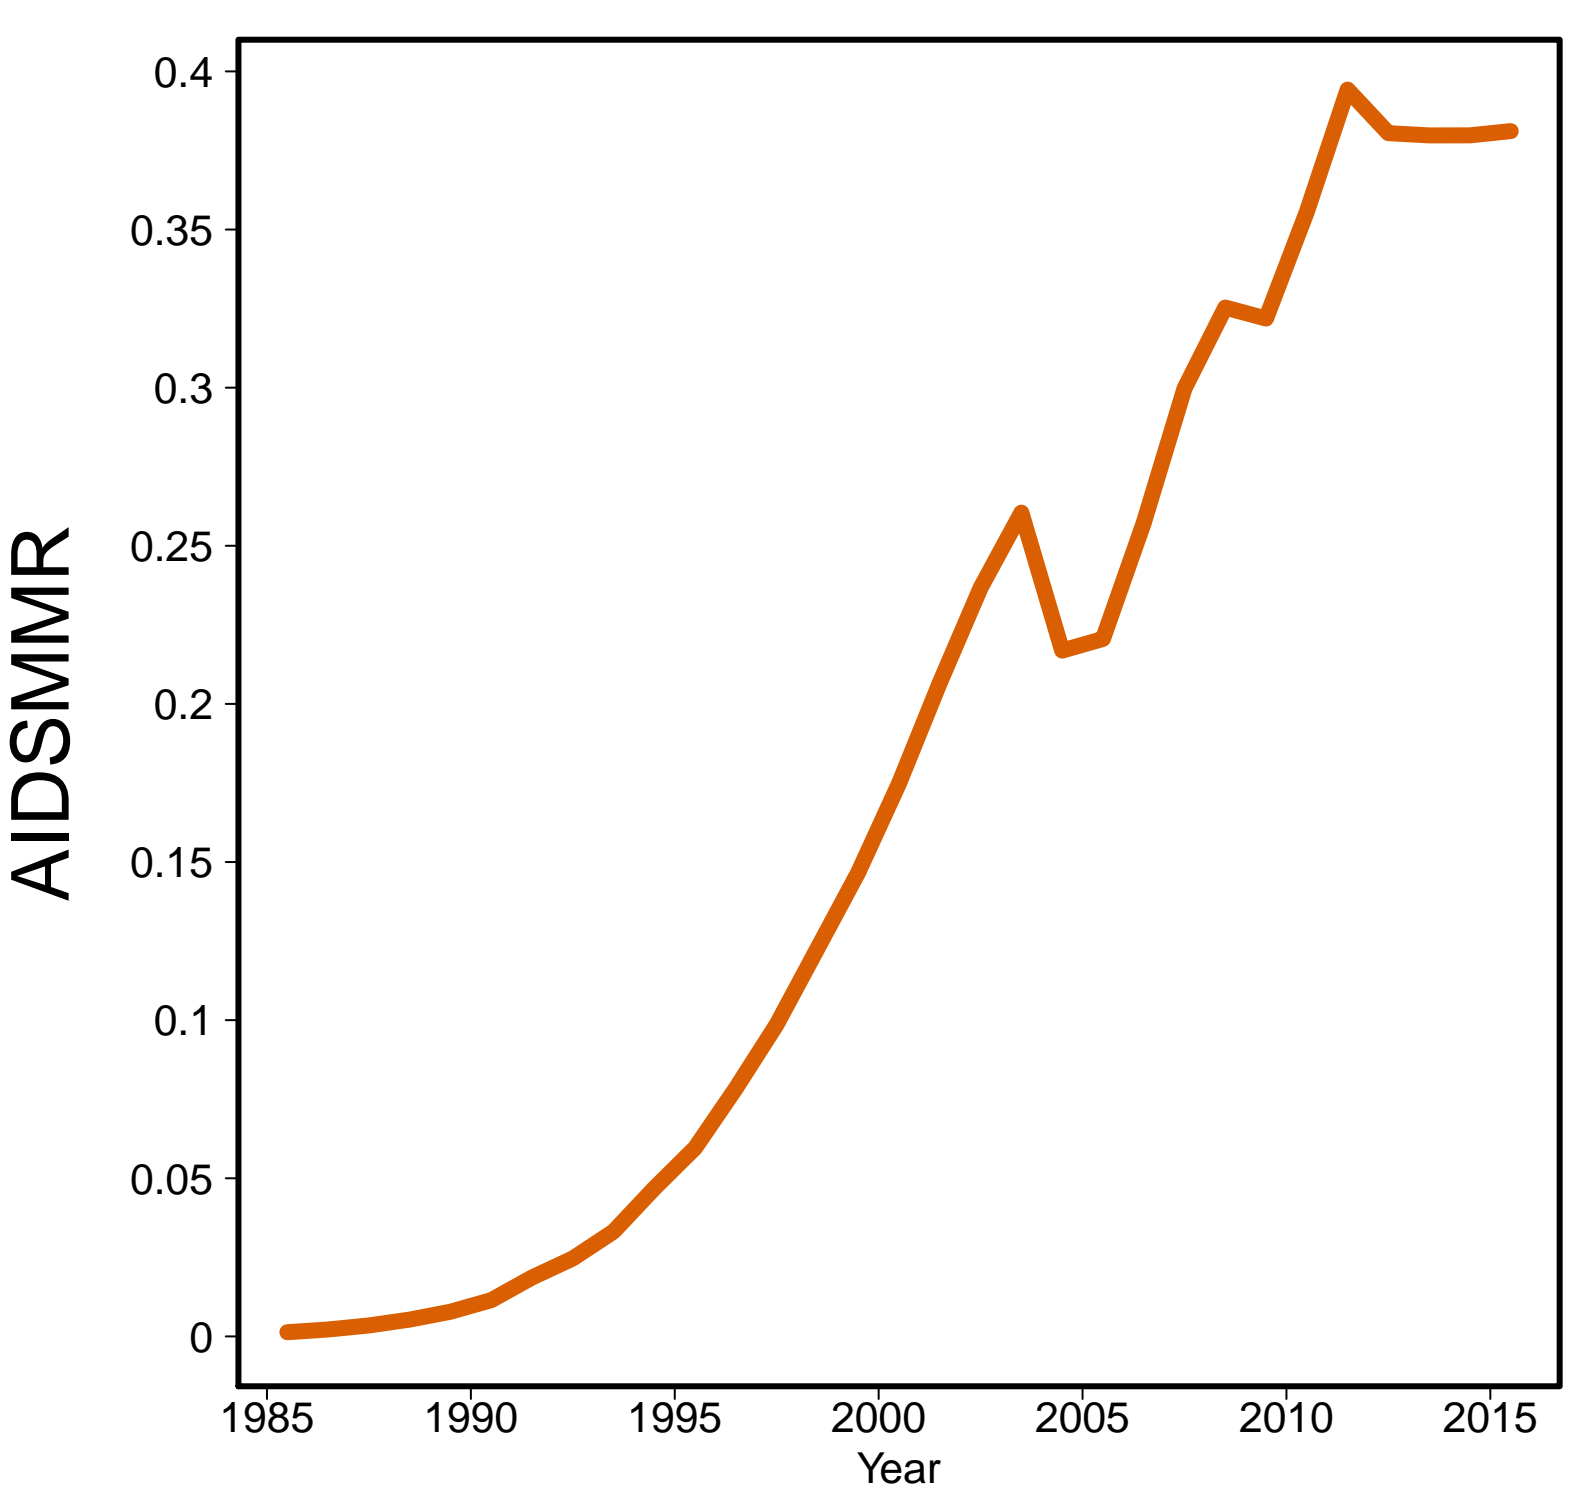

Mozambique [MOZ]  
(Eastern Africa)

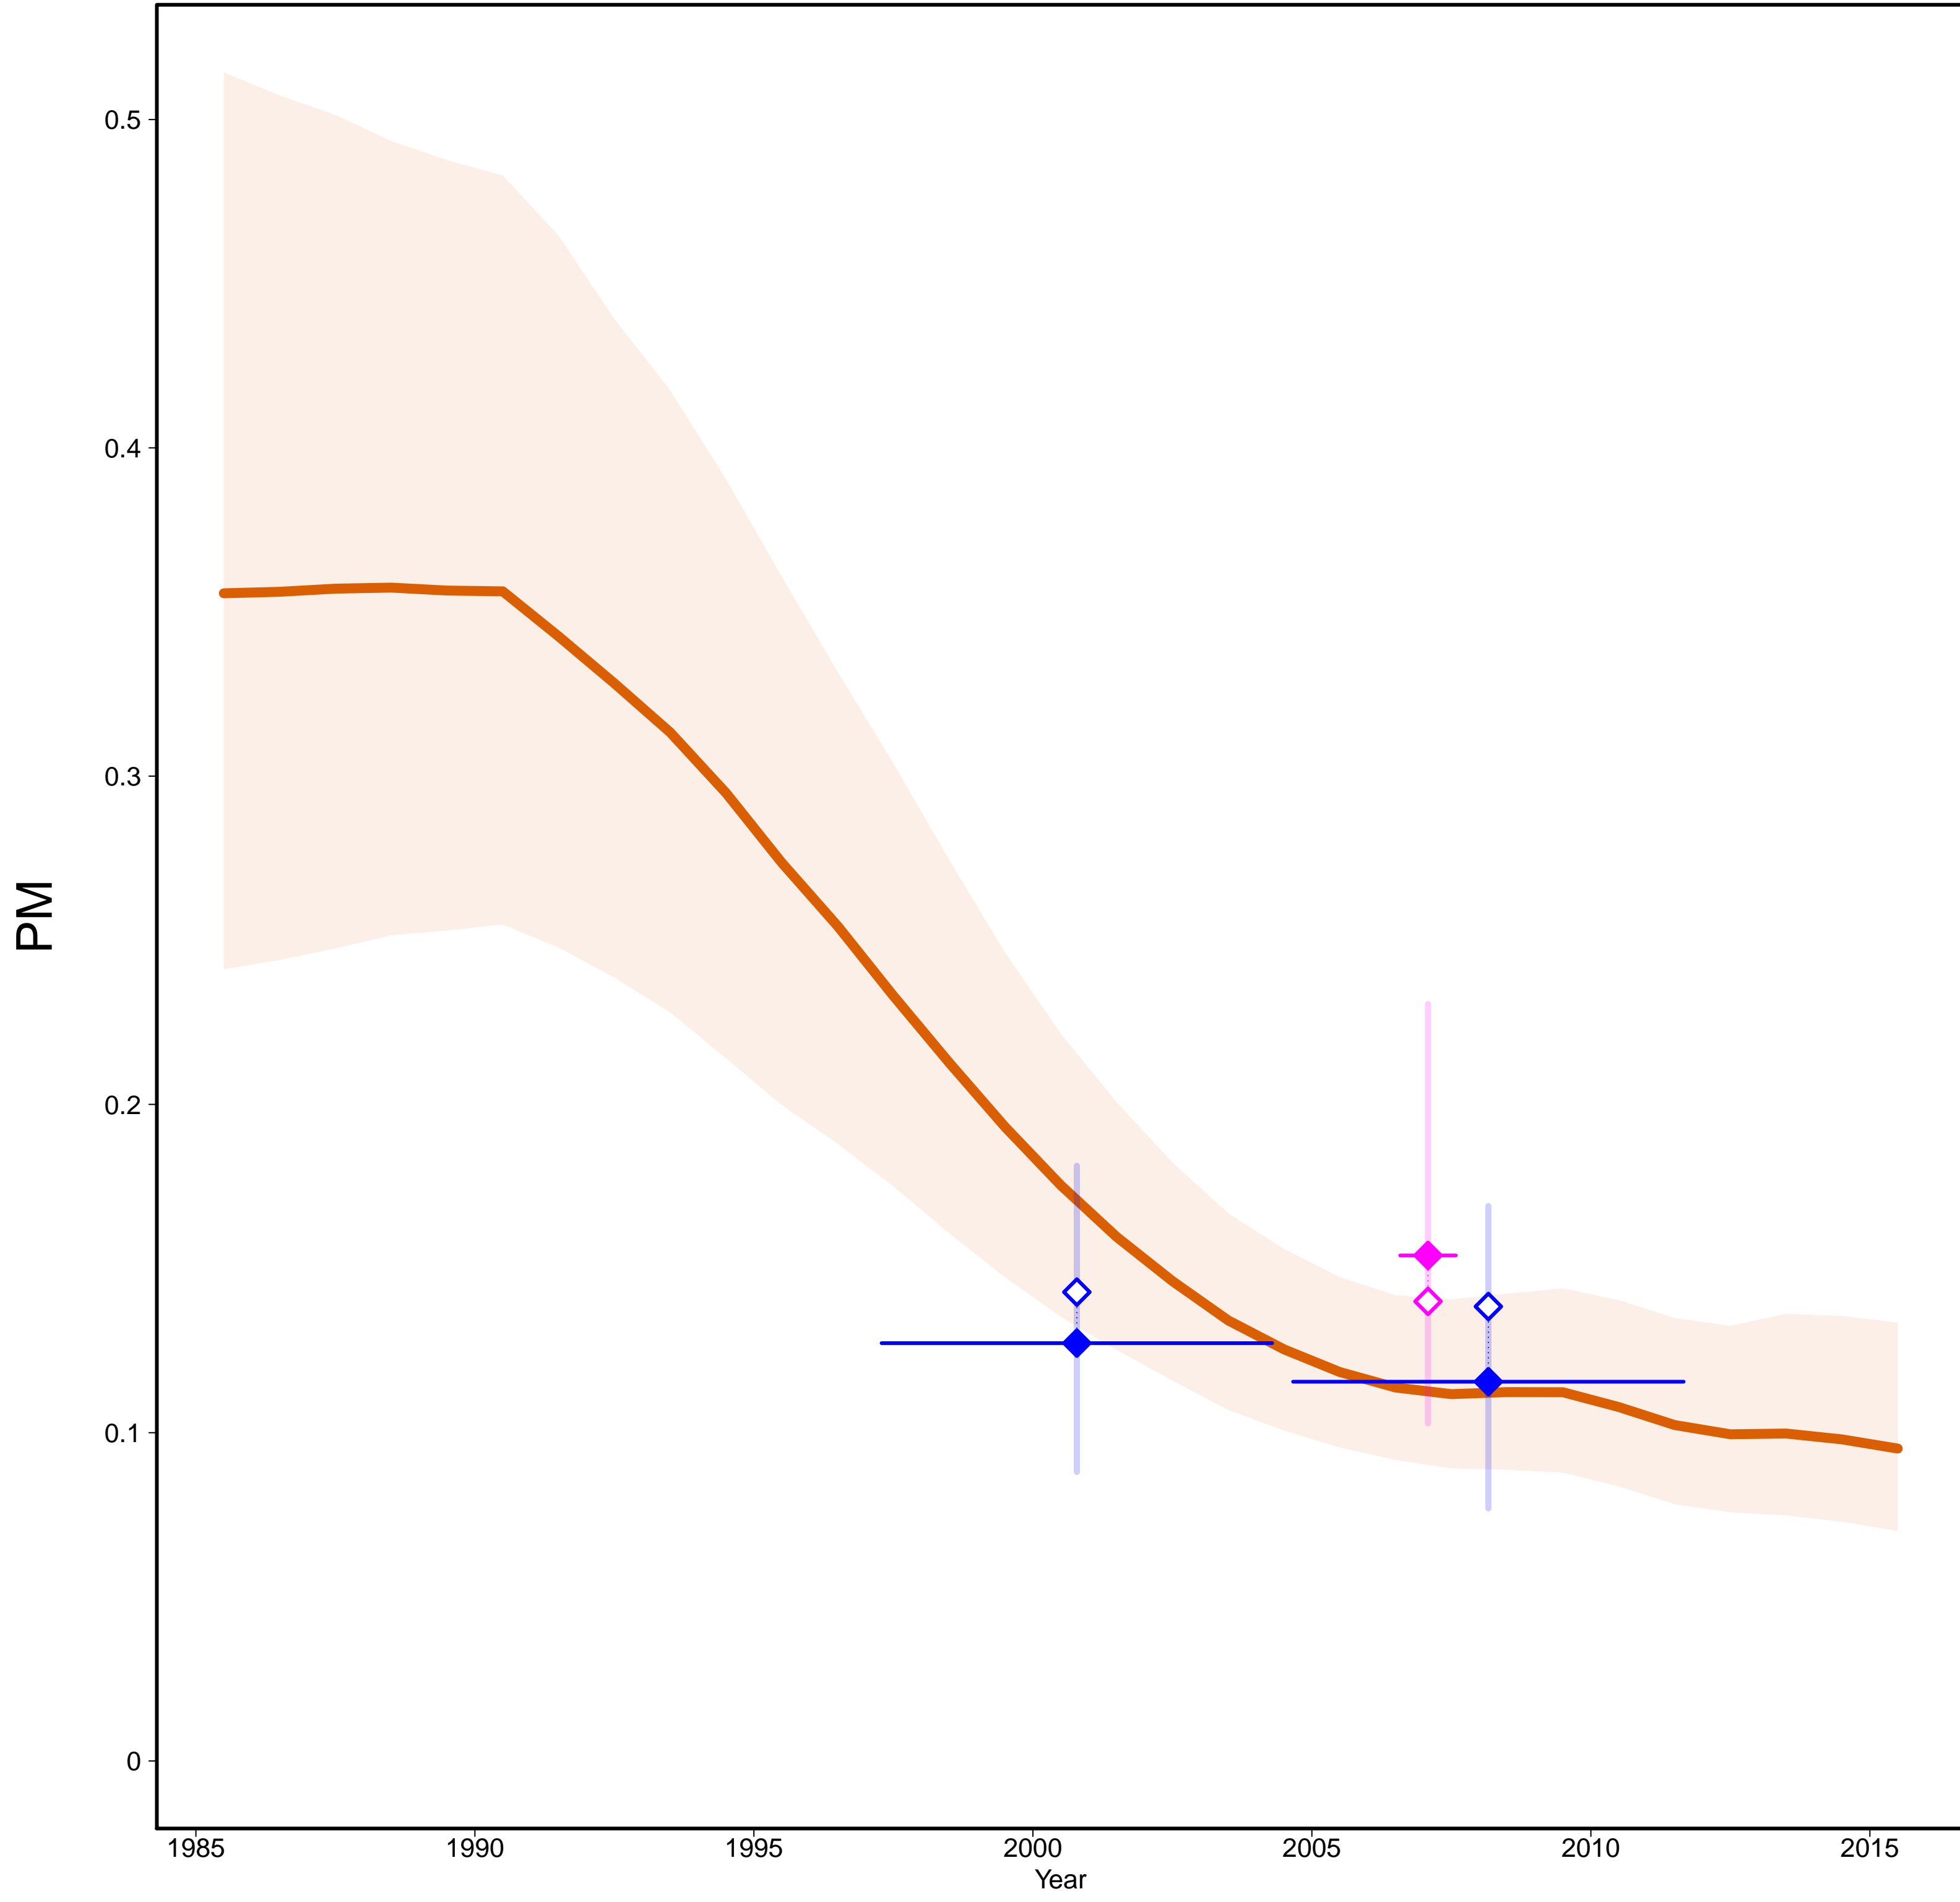

Mozambique [MOZ]  
(Eastern Africa)

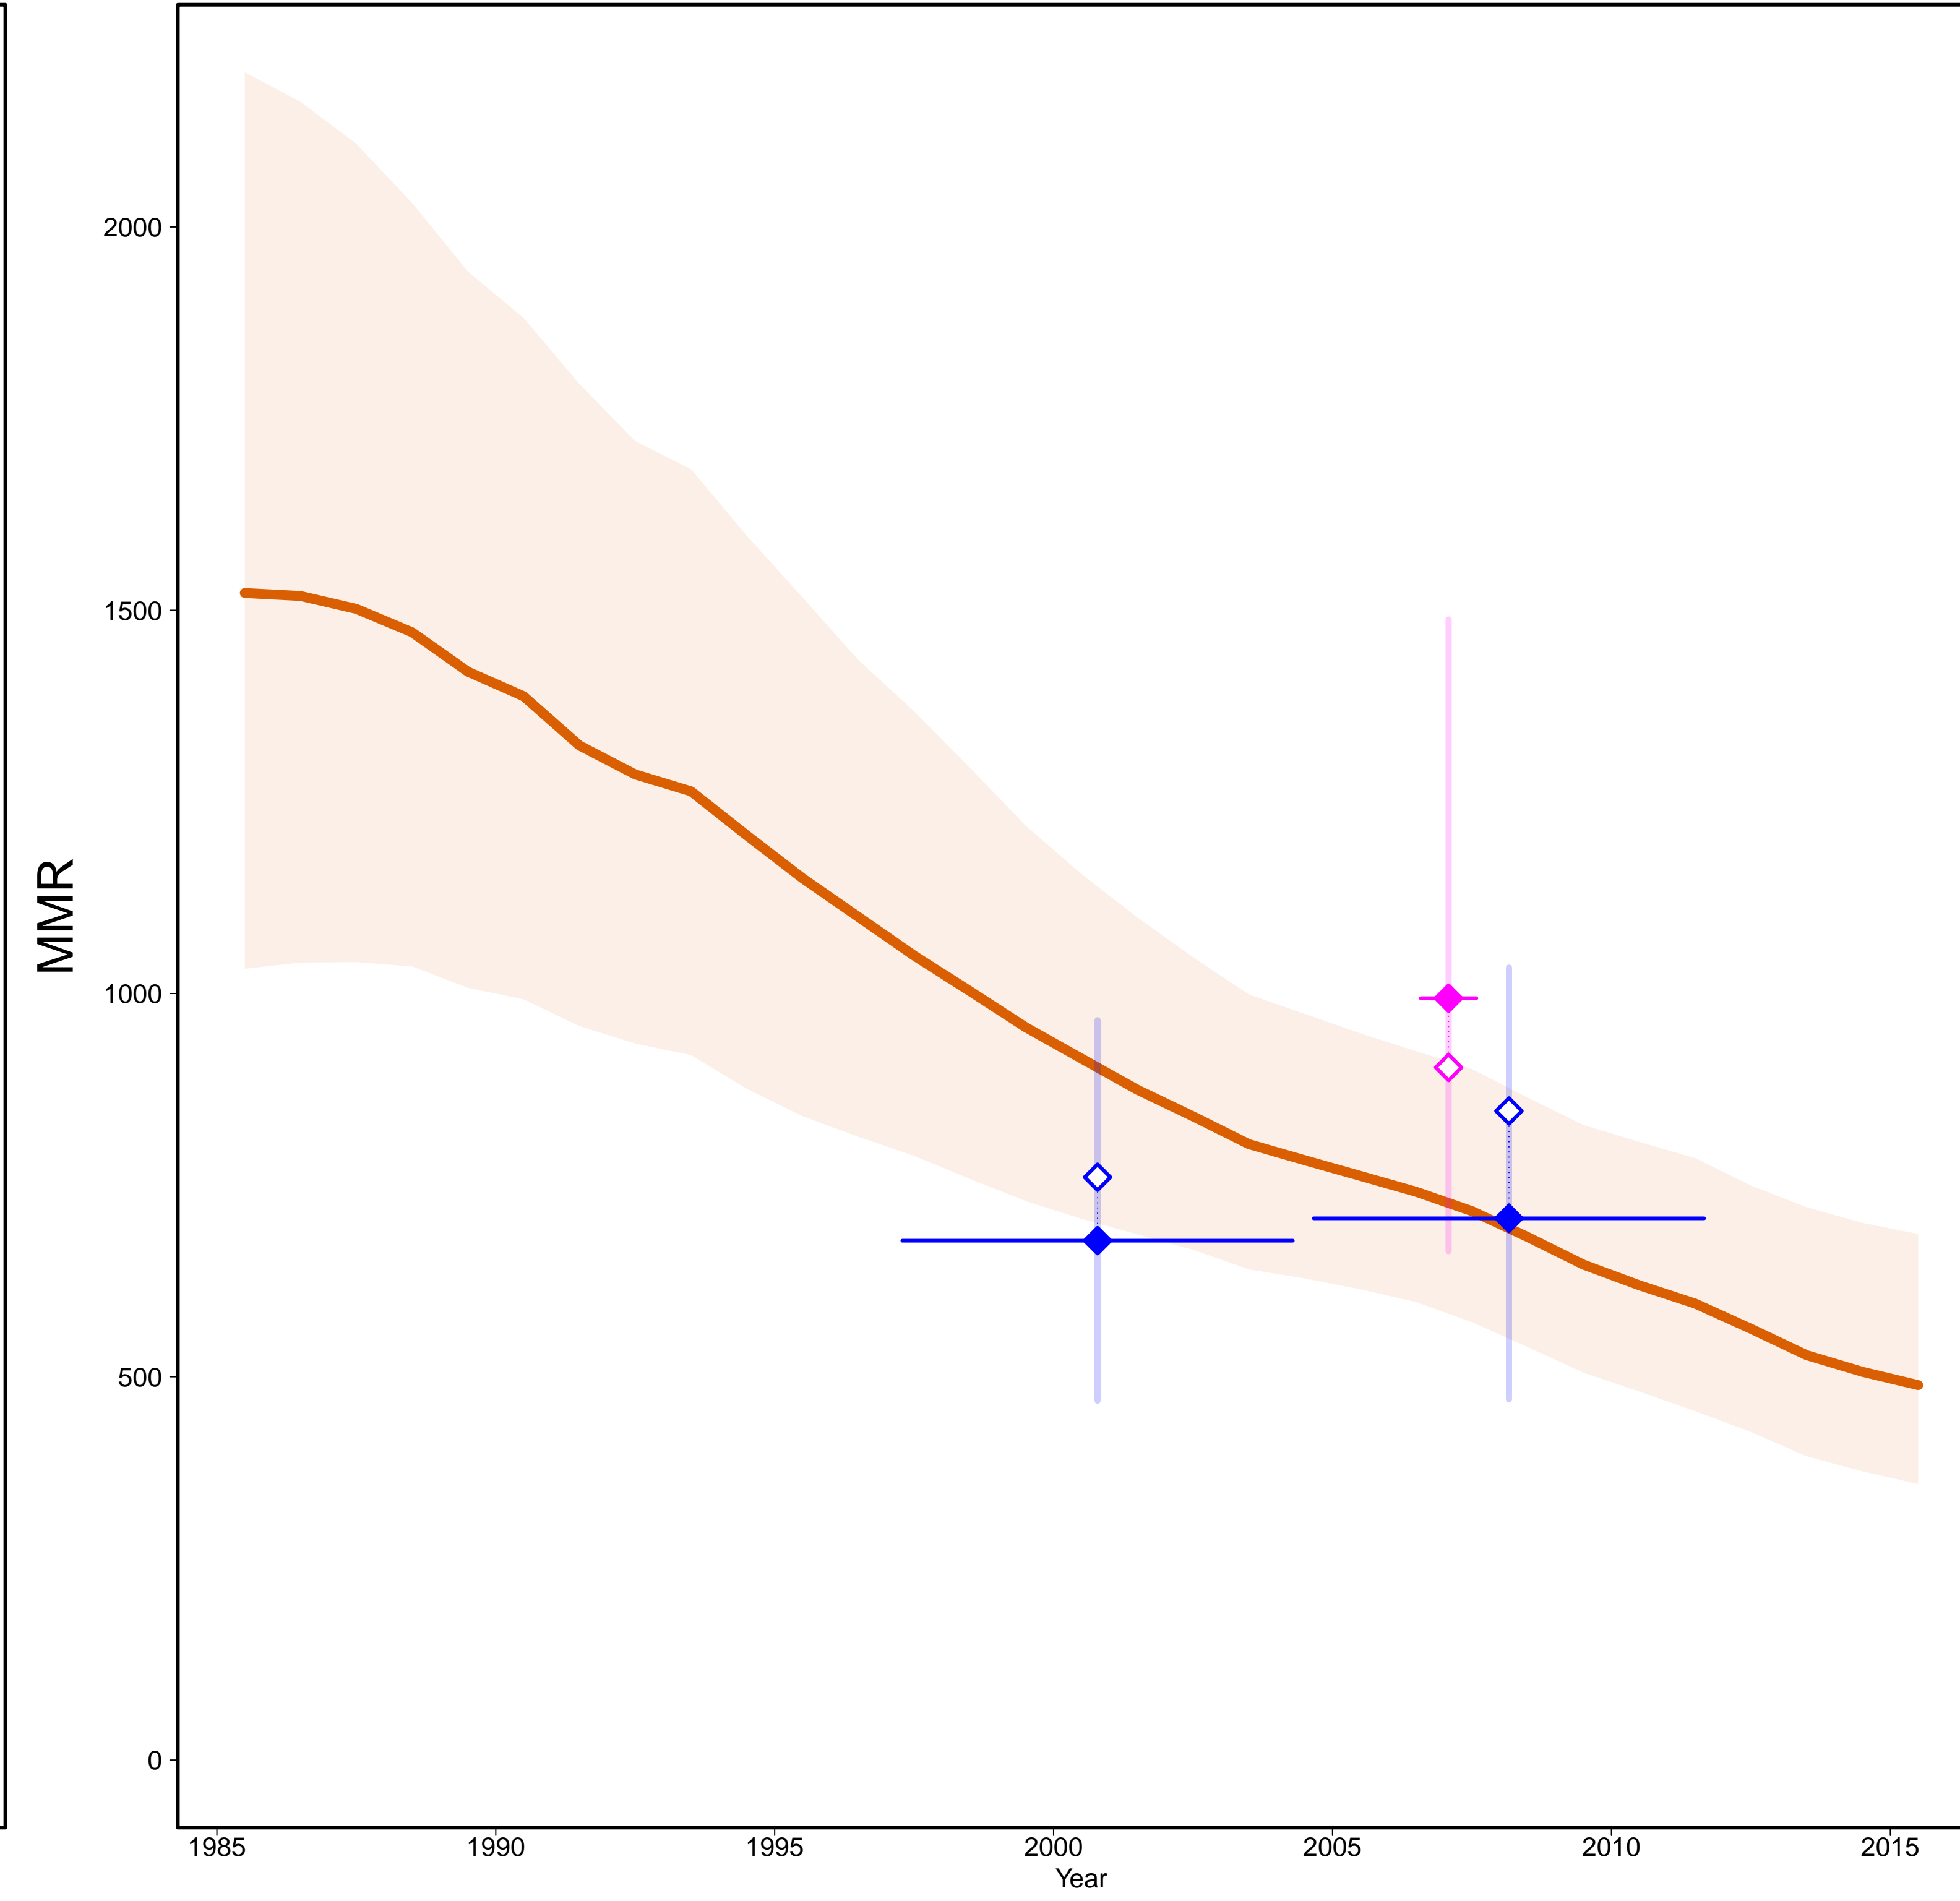

- Estimates —
- MMR Database 2015 —
- ◇ Observed Data
- ◆ Adjusted Data
- Data type —
- ◆ DHS
- ◆ Census

Gross Domestic Product

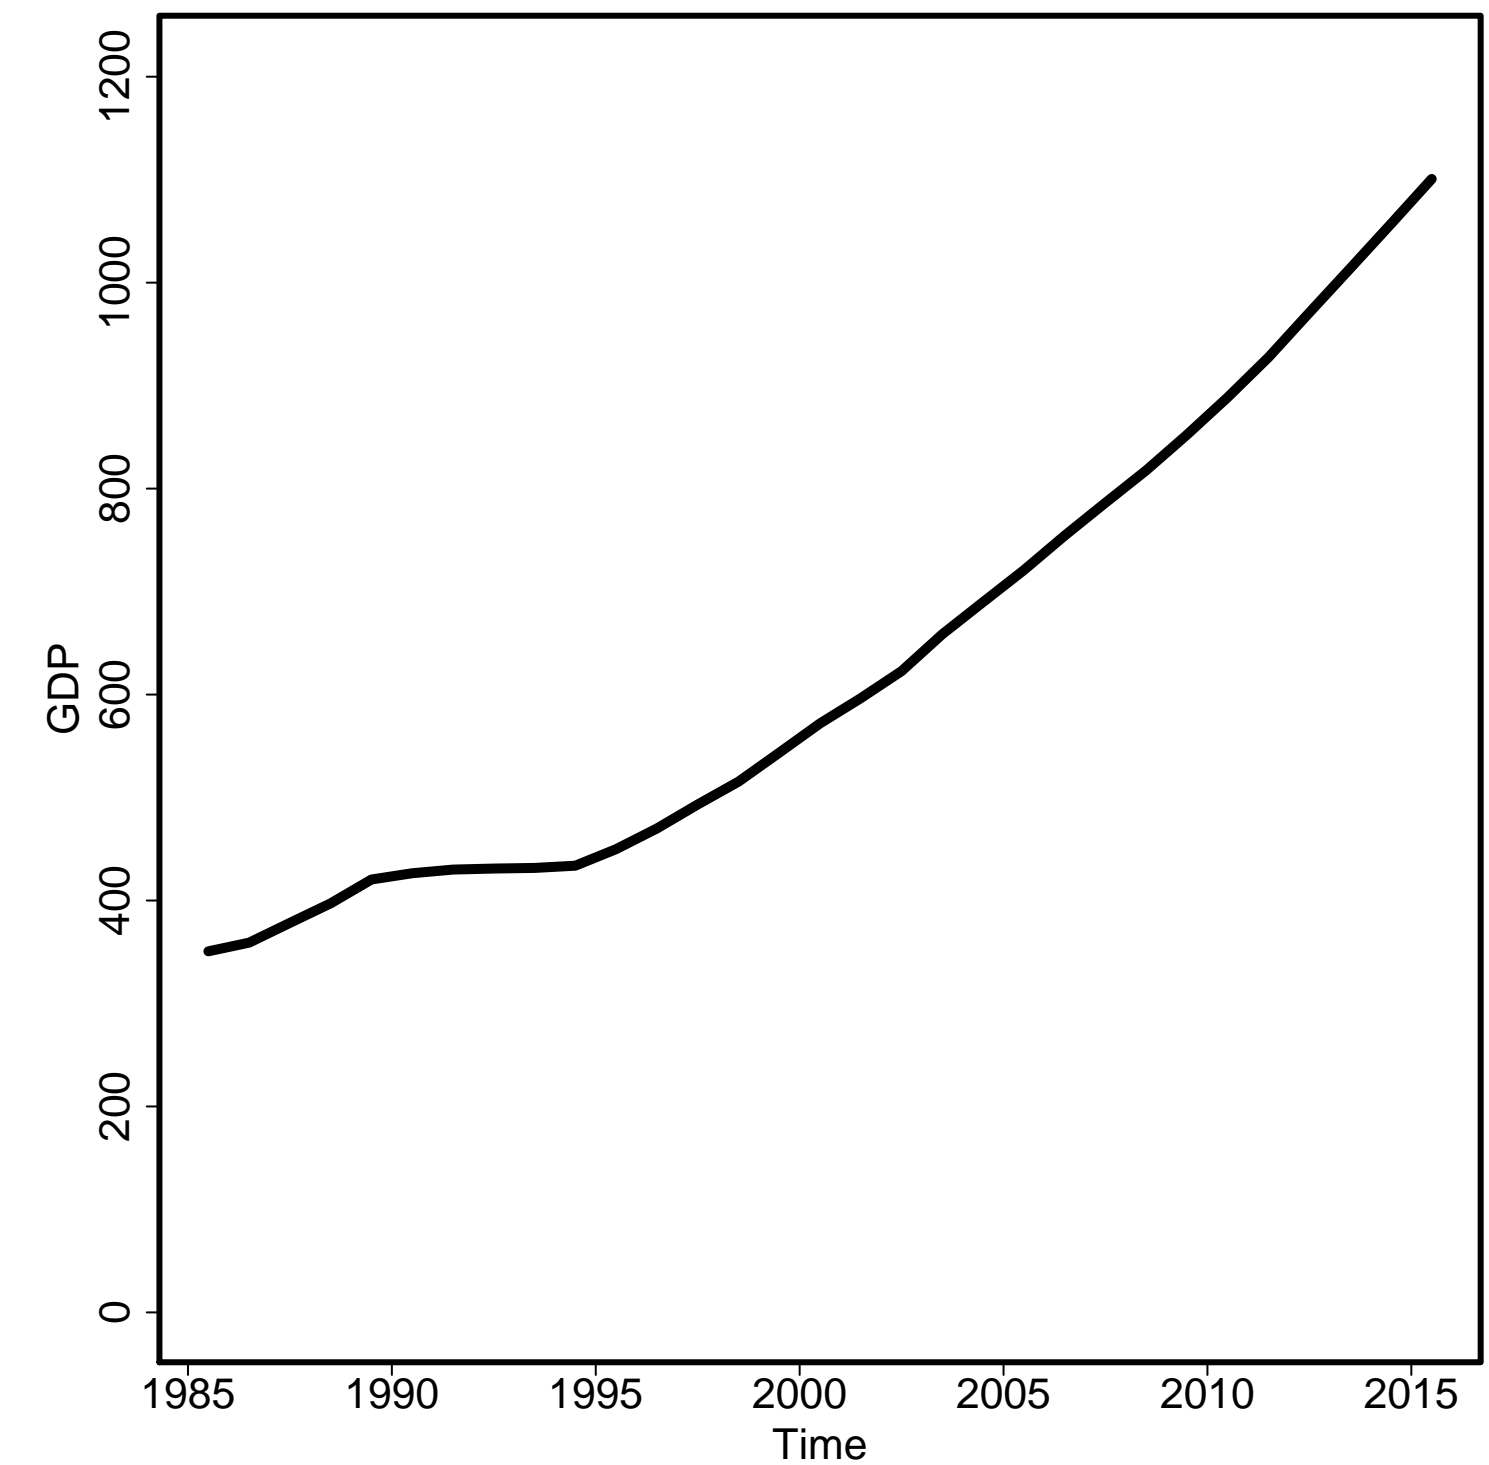

General Fertility Rate

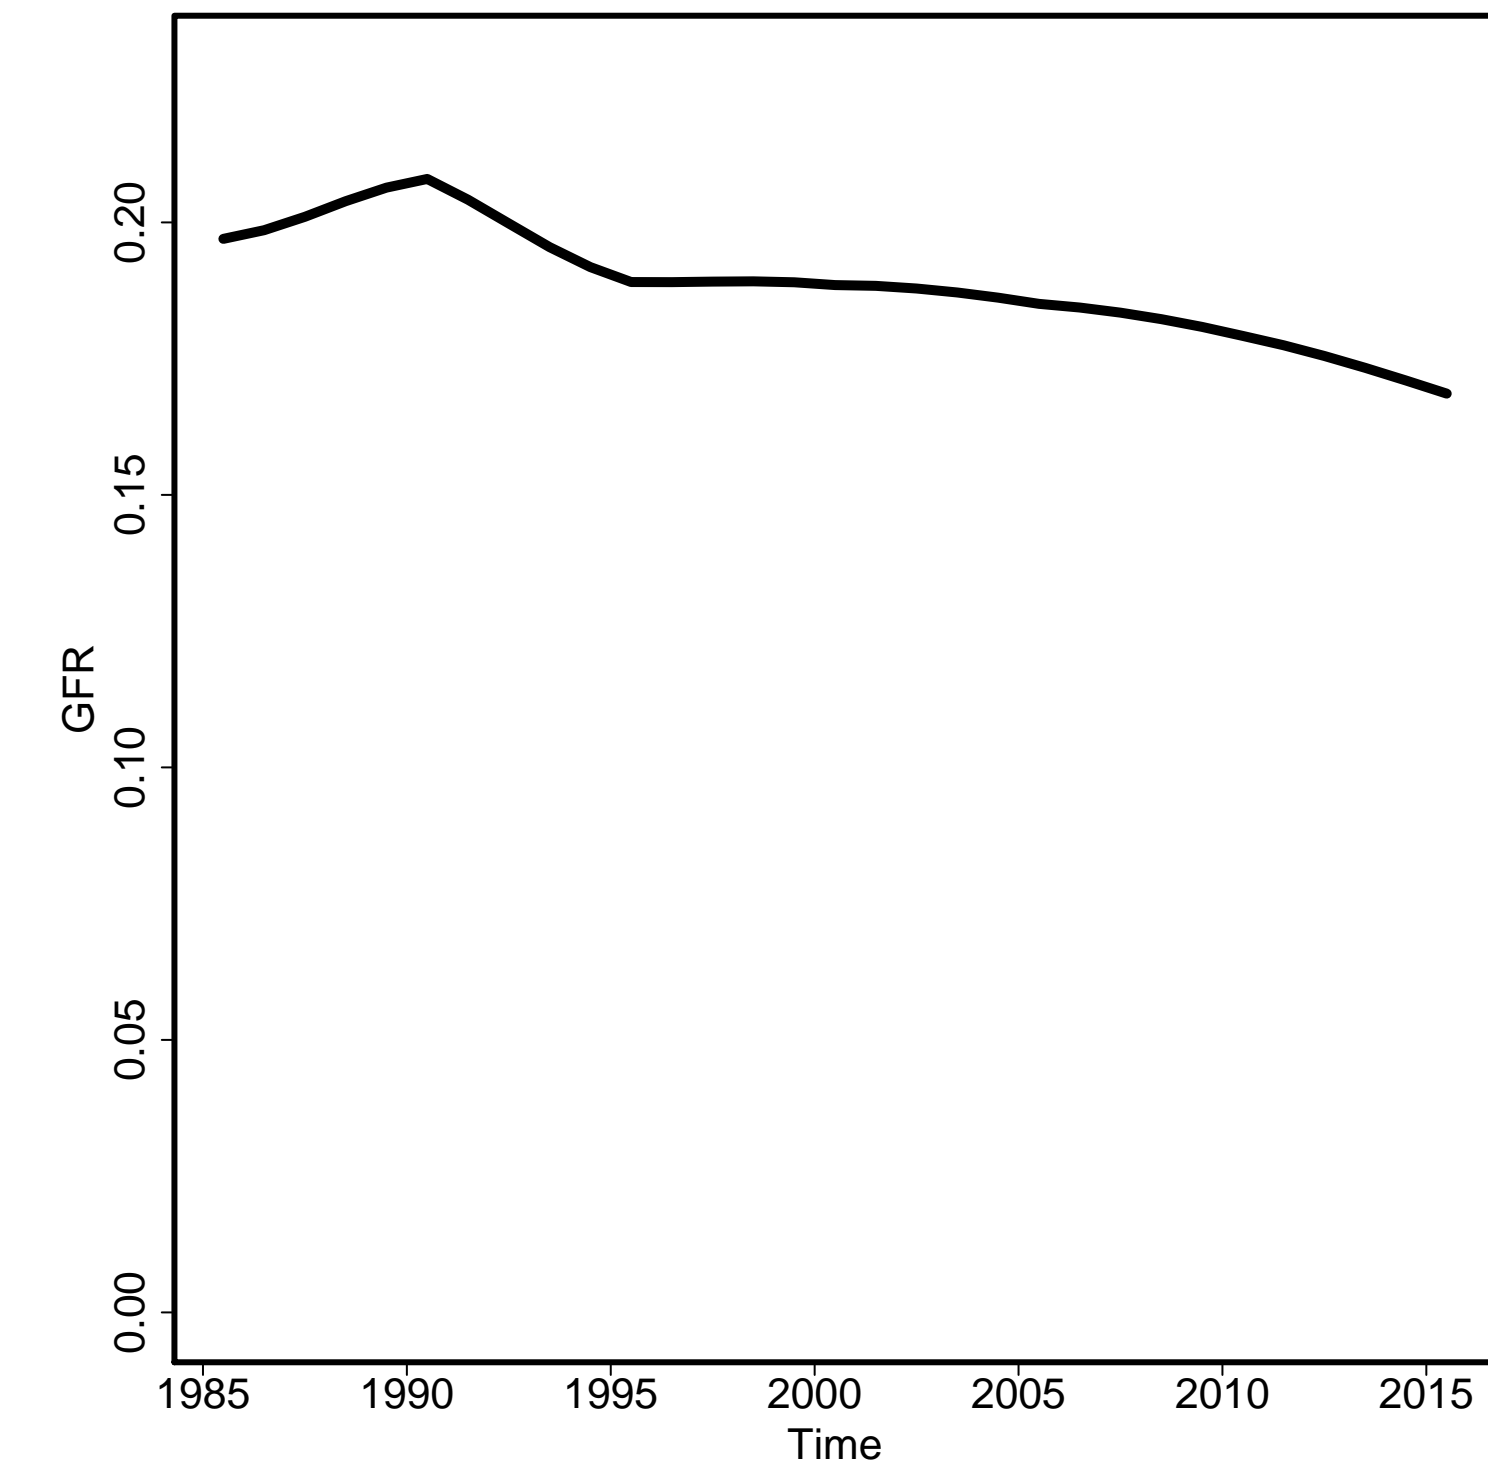

Skilled Attendance to Birth

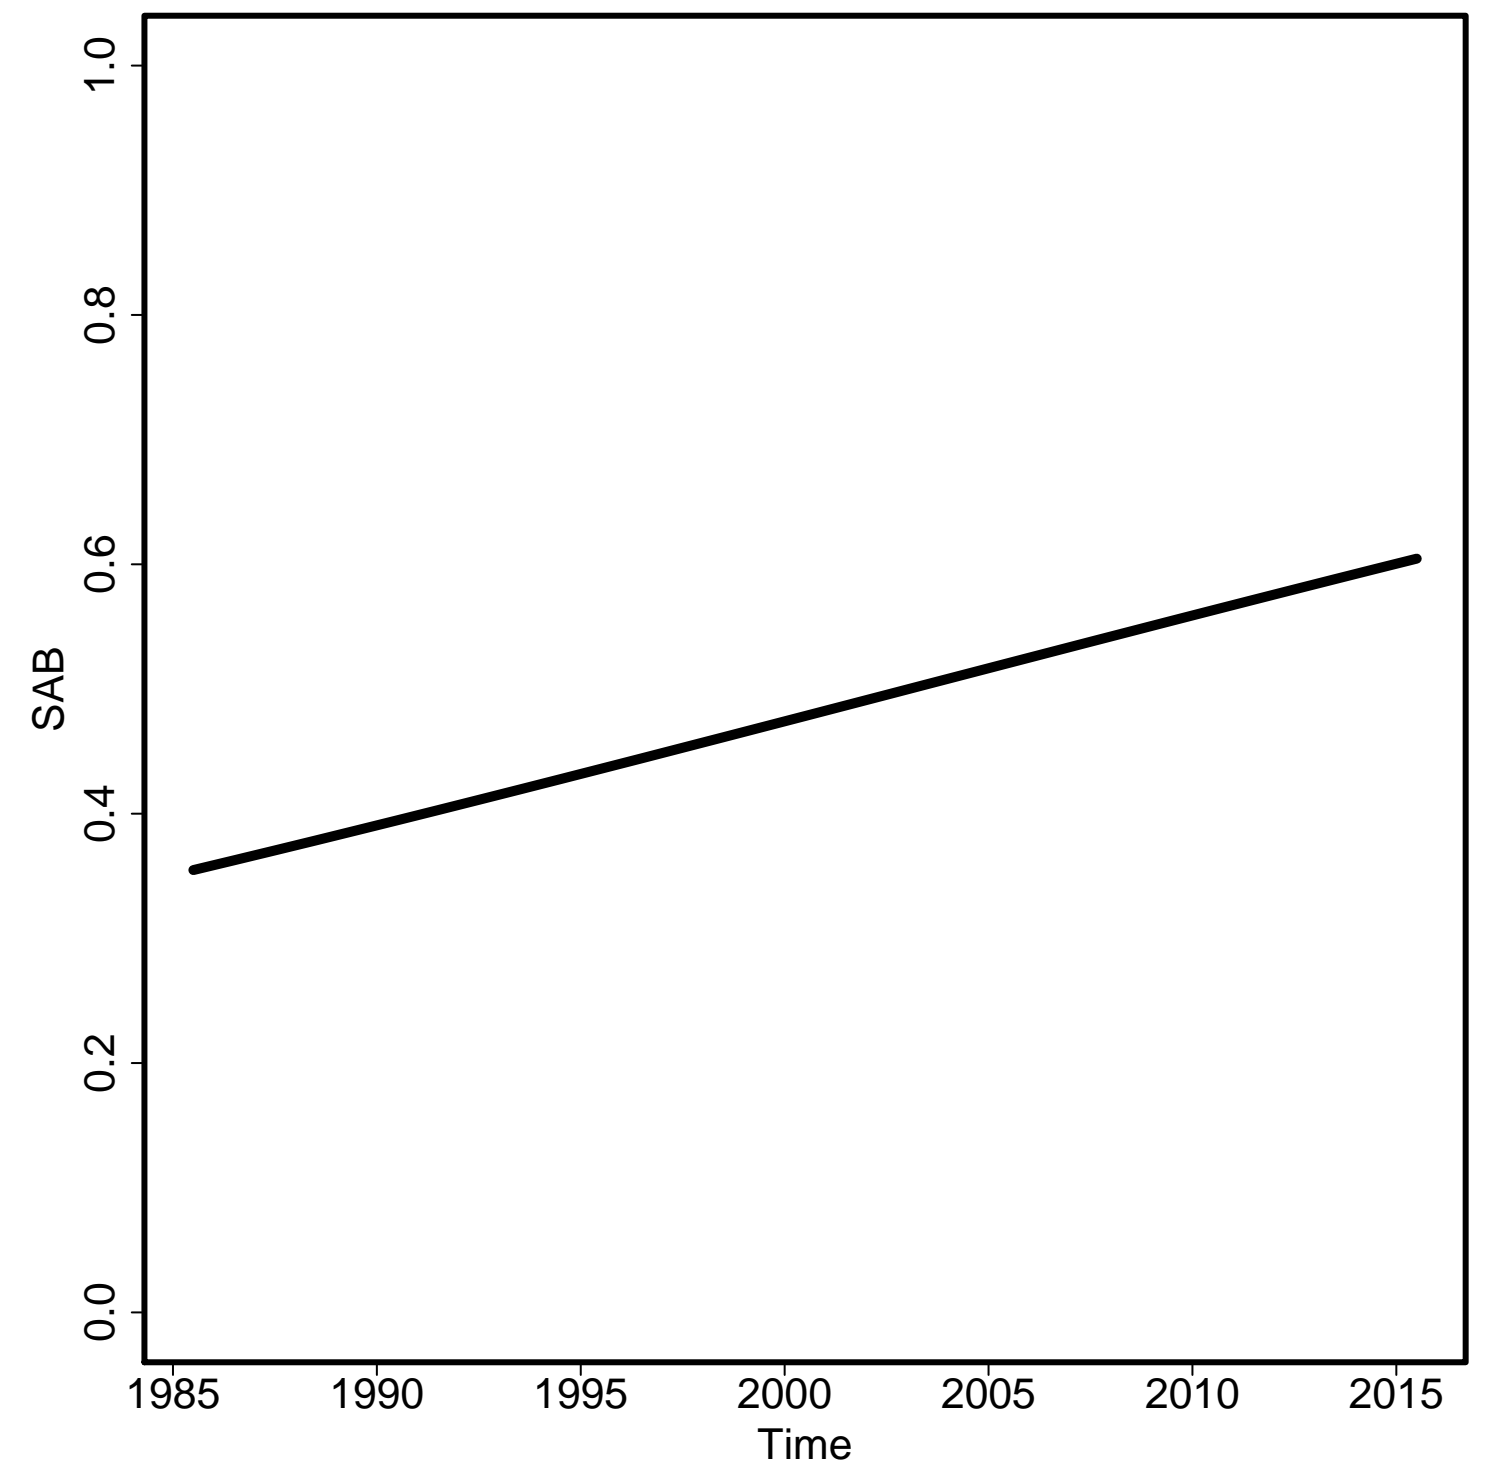

Envelope/Births

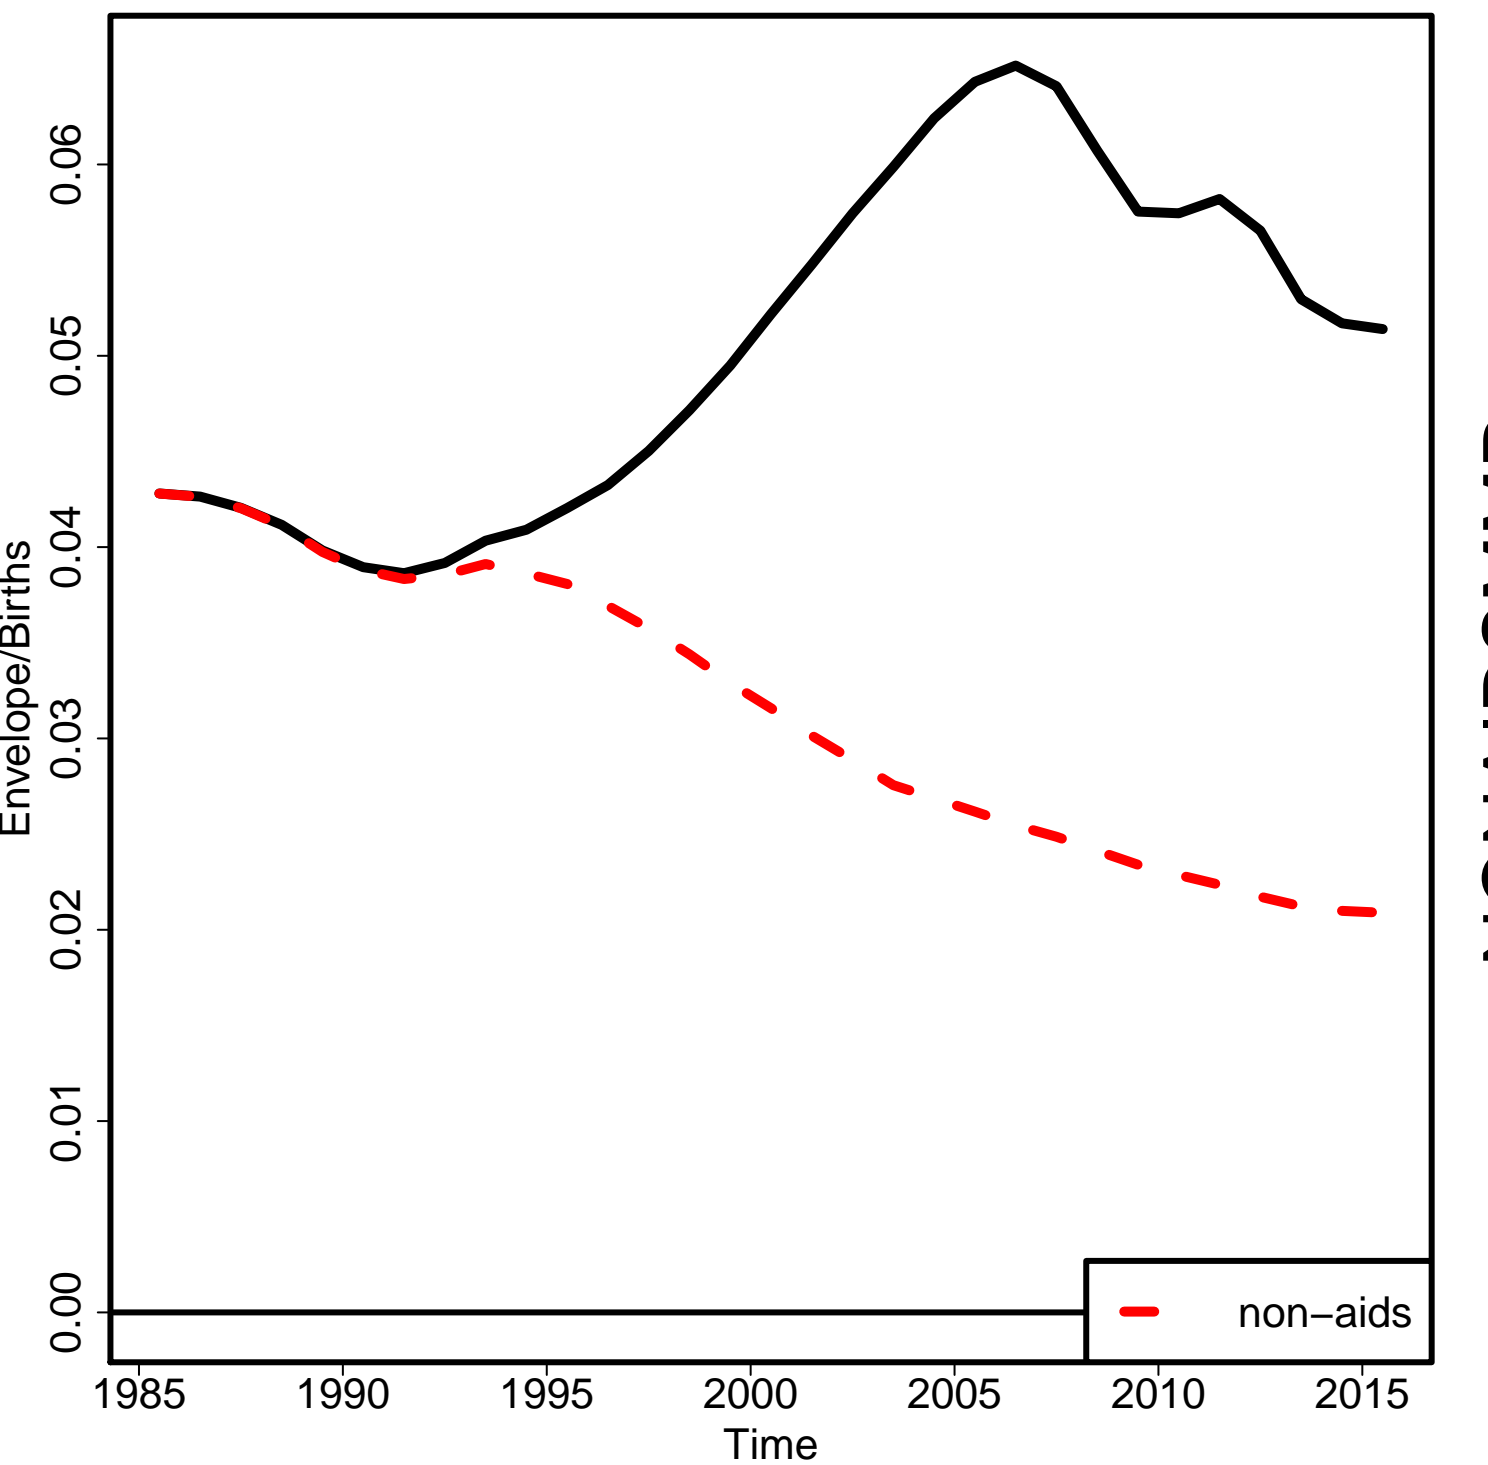

Non-aids MMR

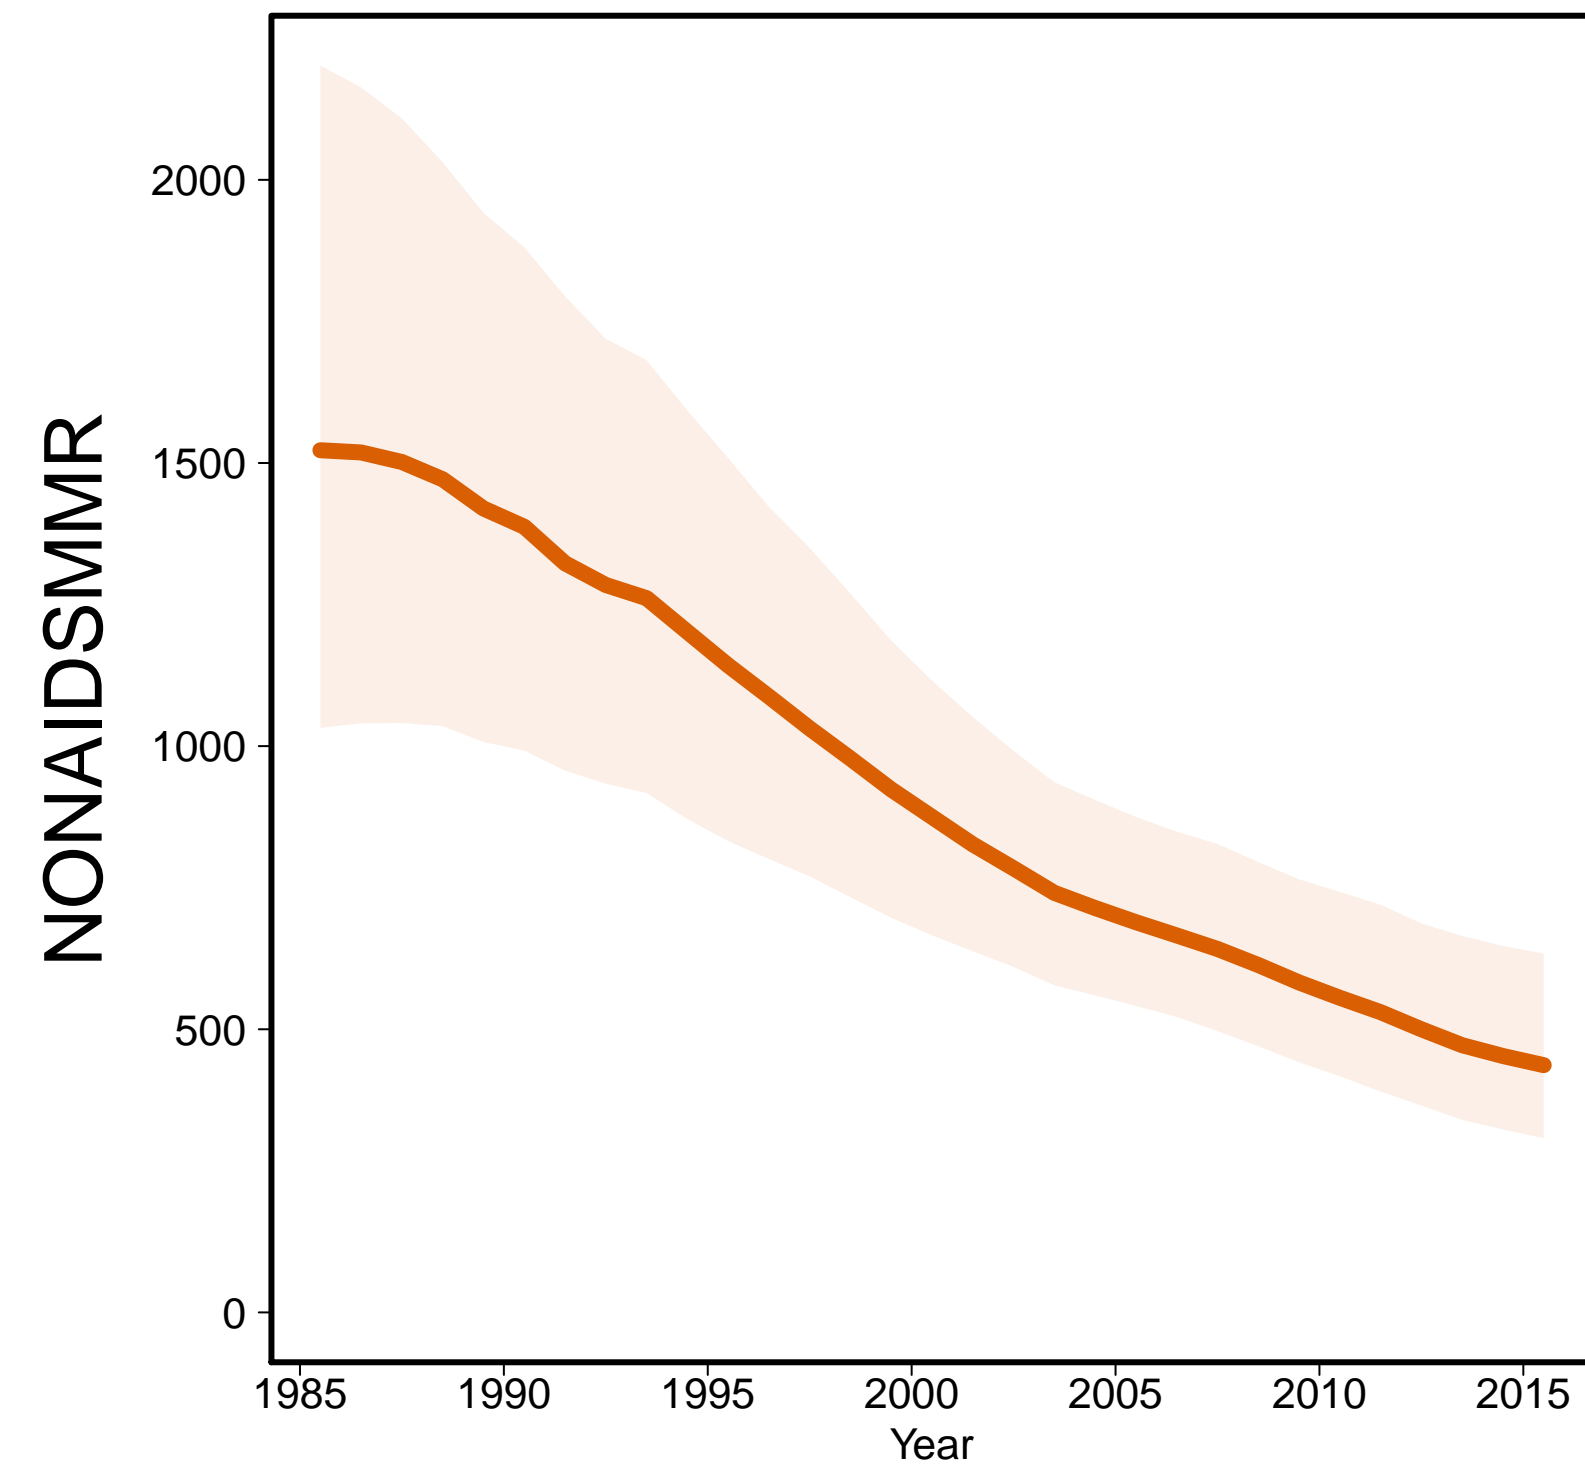

Aids MMR

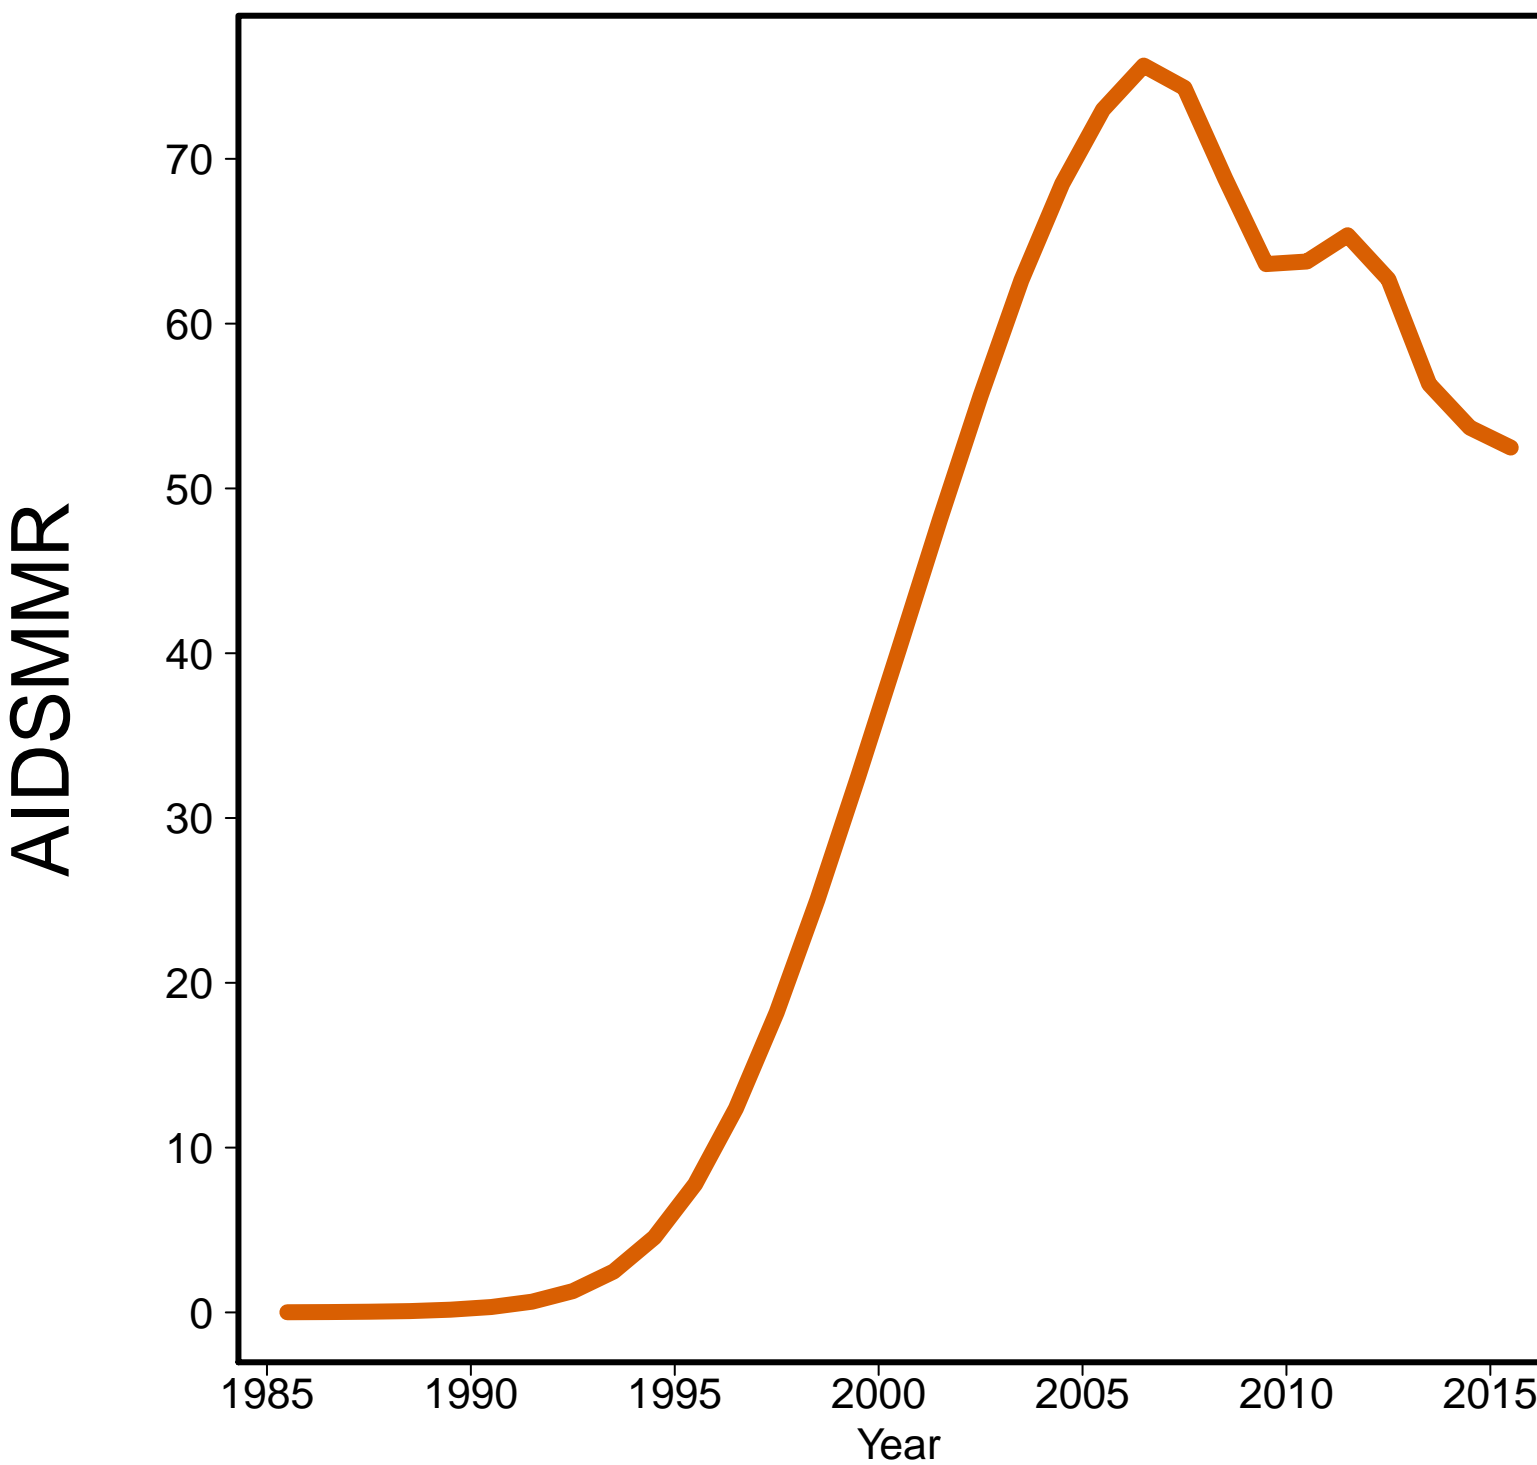

Myanmar [MMR]  
(South-Eastern Asia / Oceania)

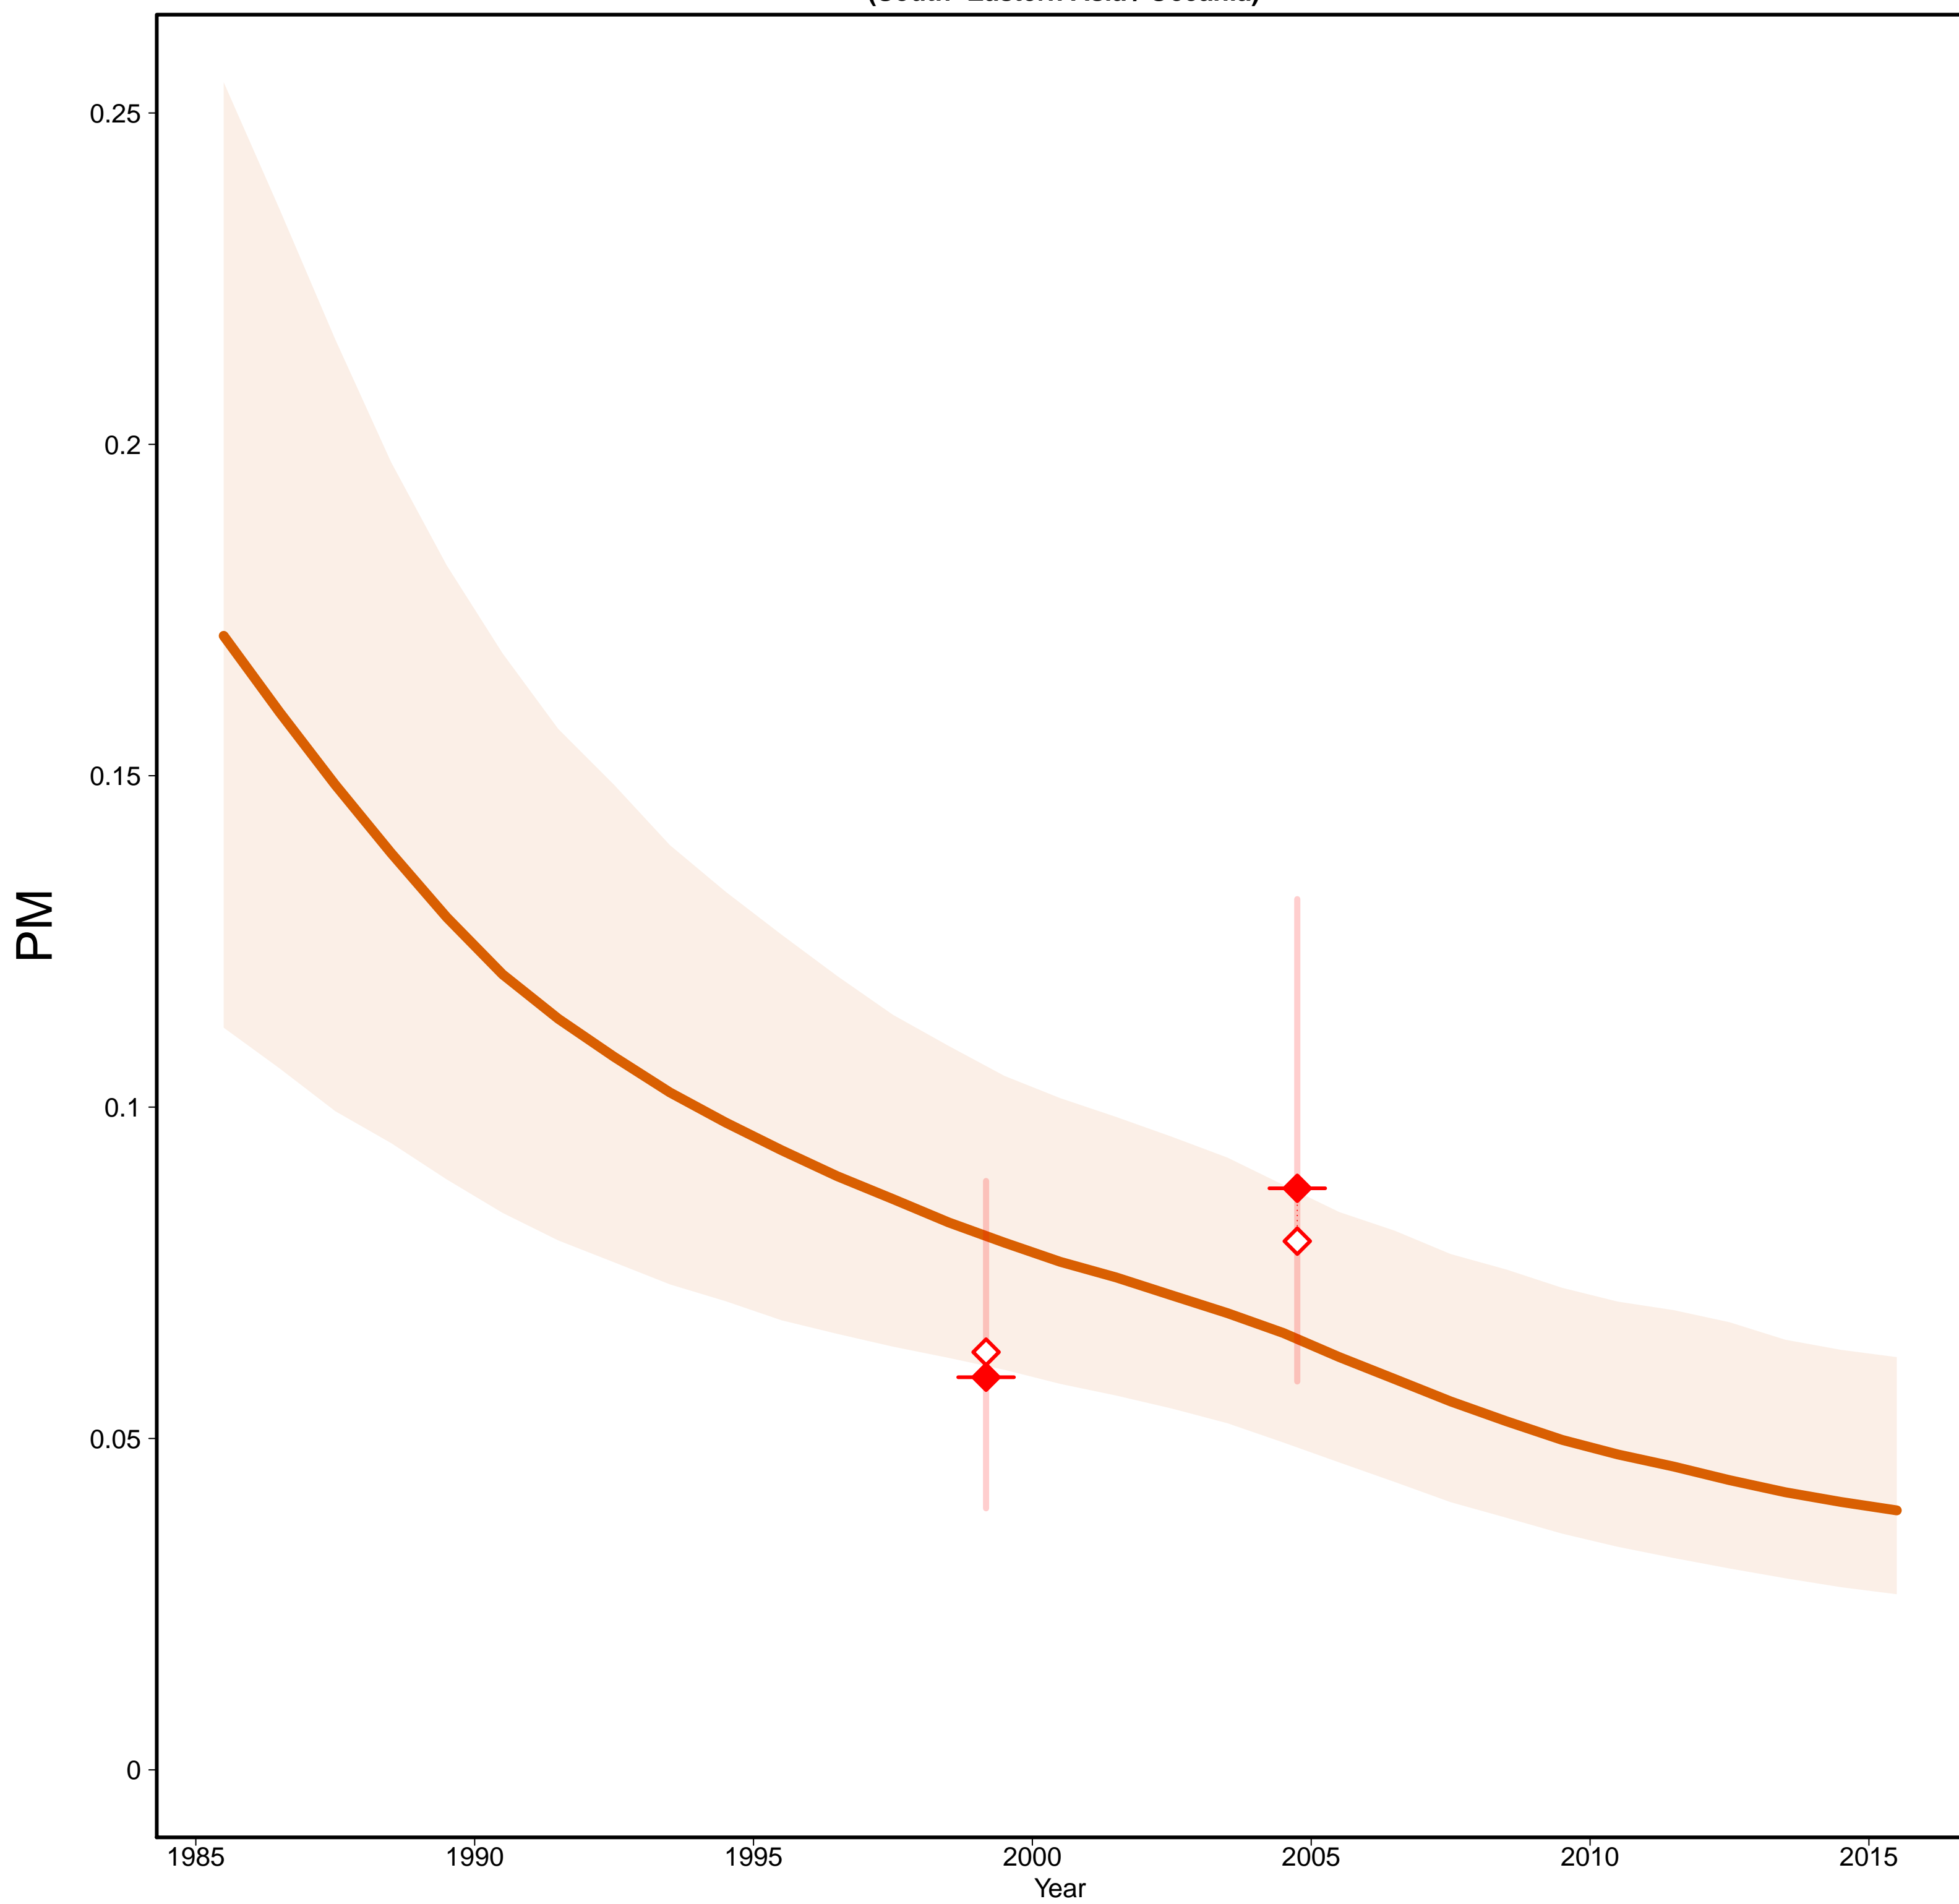

Myanmar [MMR]  
(South-Eastern Asia / Oceania)

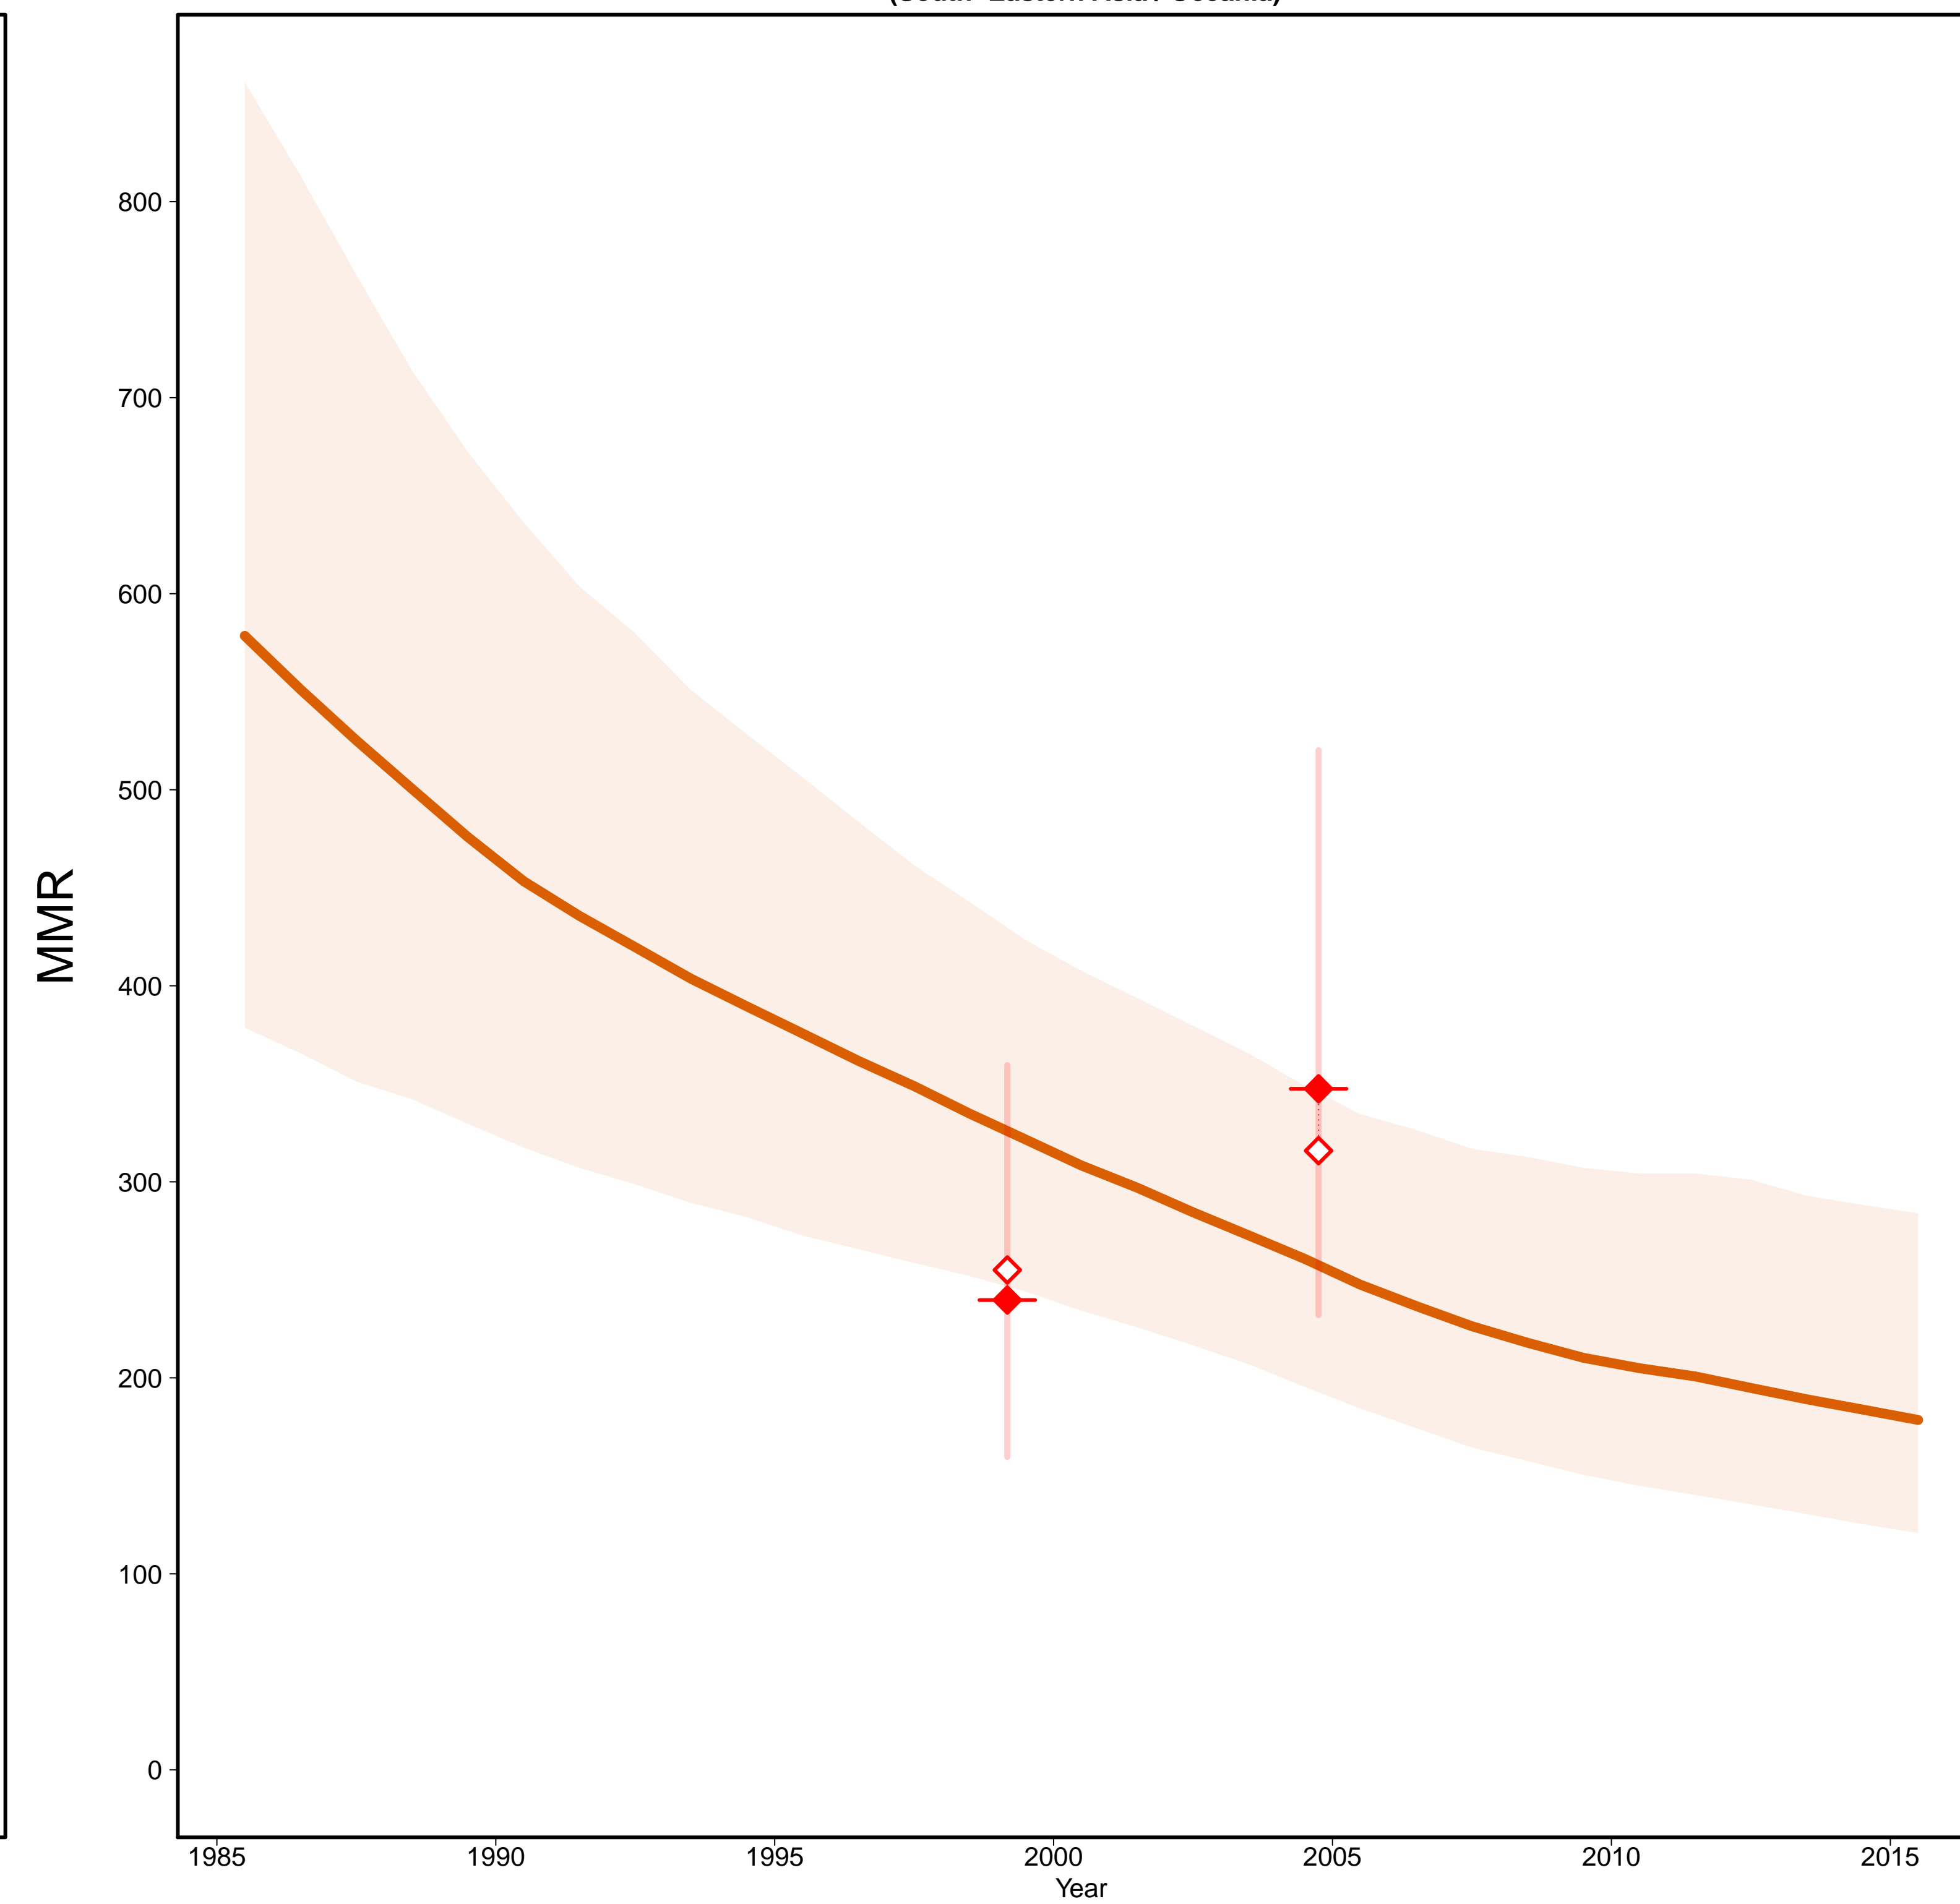

- Estimates —
- MMR Database 2015 —
- ◇ Observed Data
- ◆ Adjusted Data
- Data type —
- ◆ Misc. studies

Gross Domestic Product

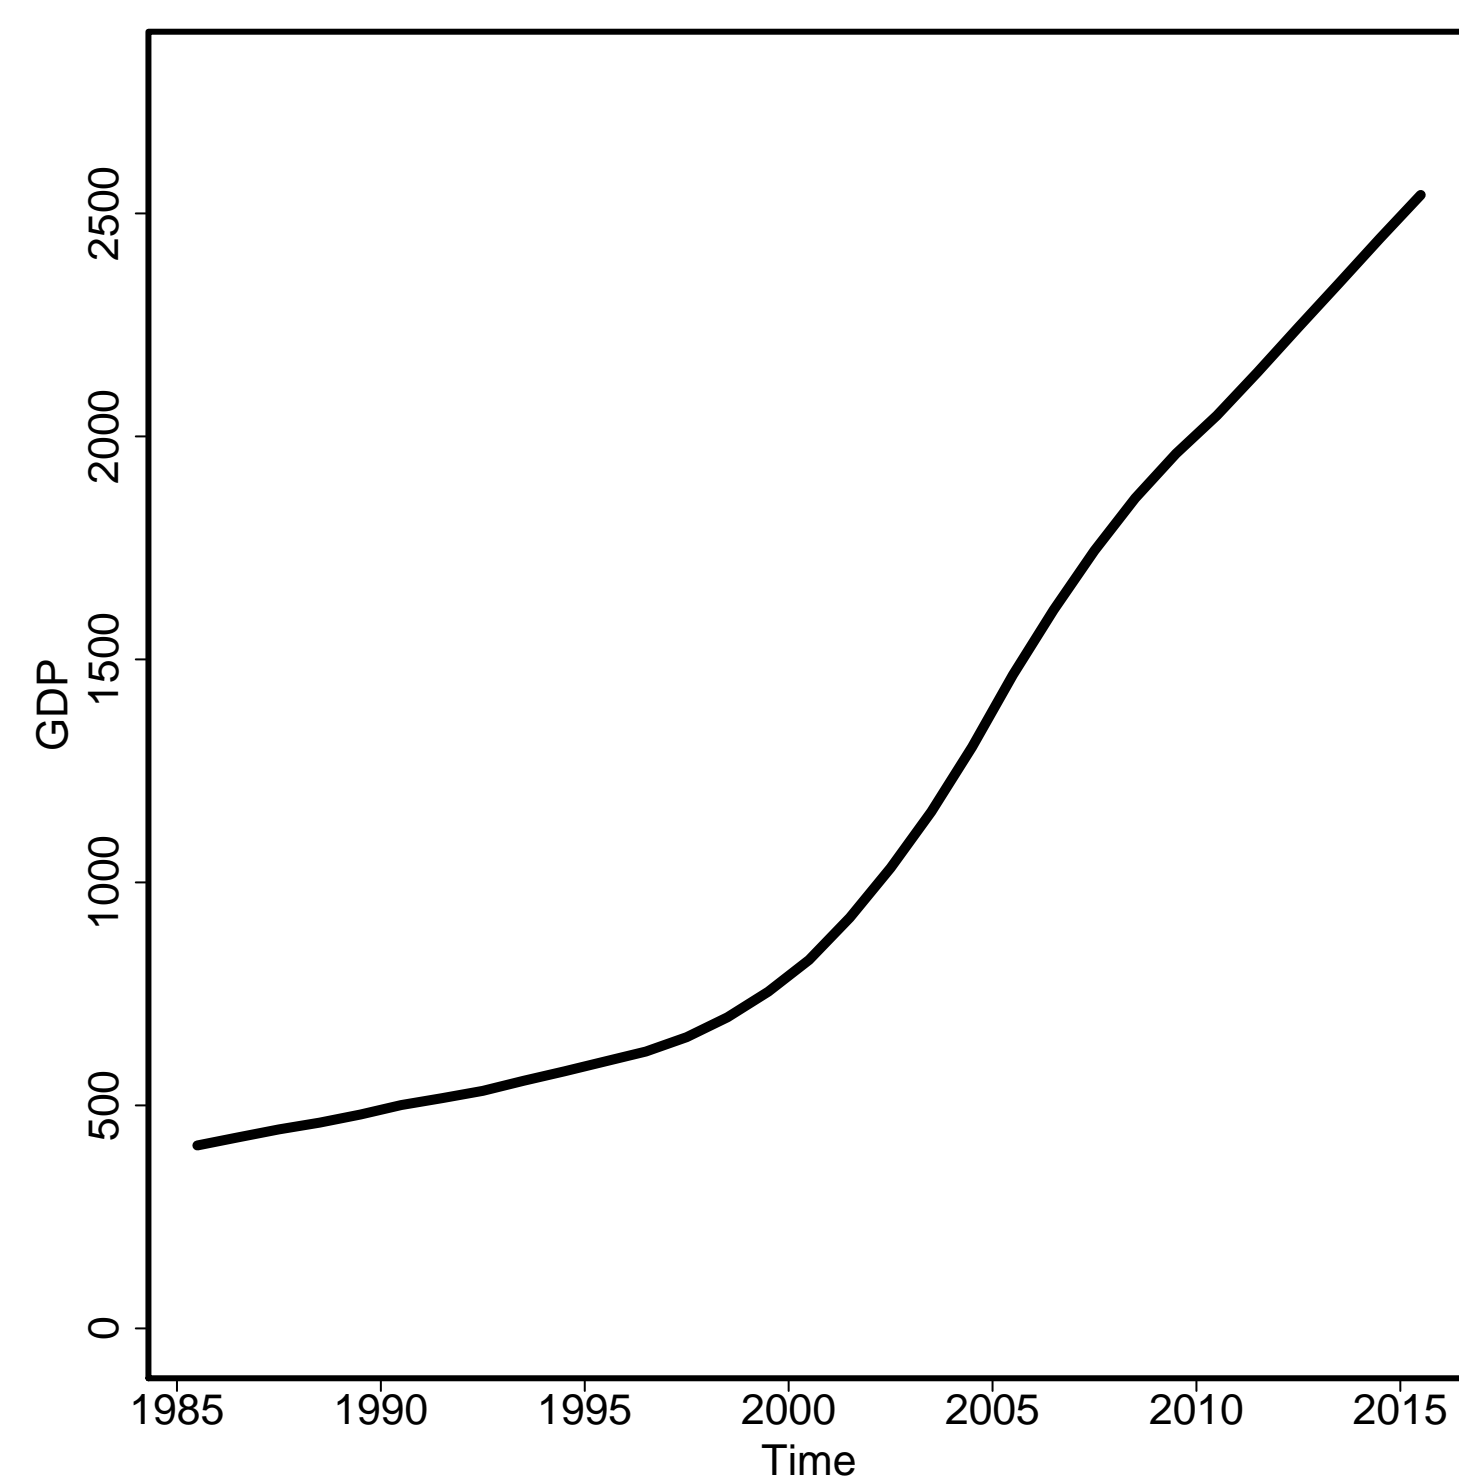

General Fertility Rate

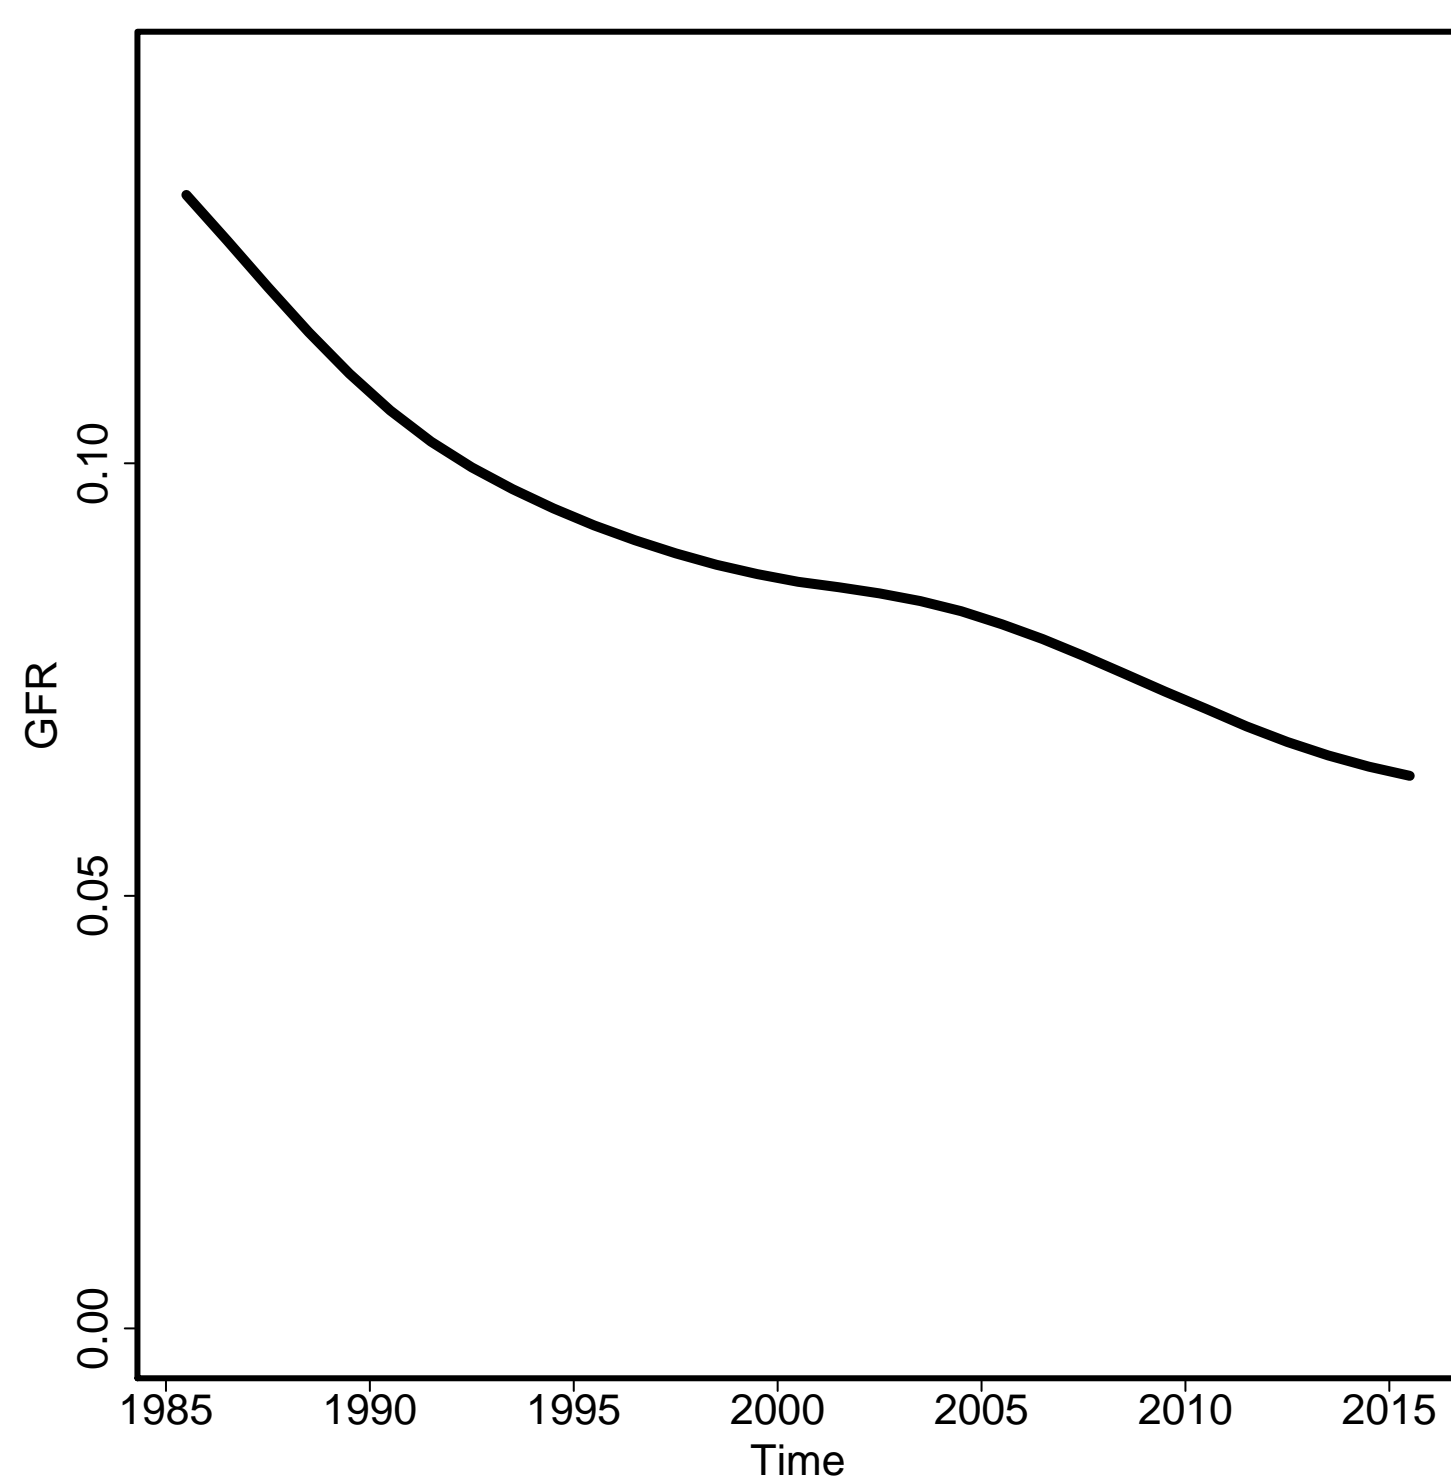

Skilled Attendance to Birth

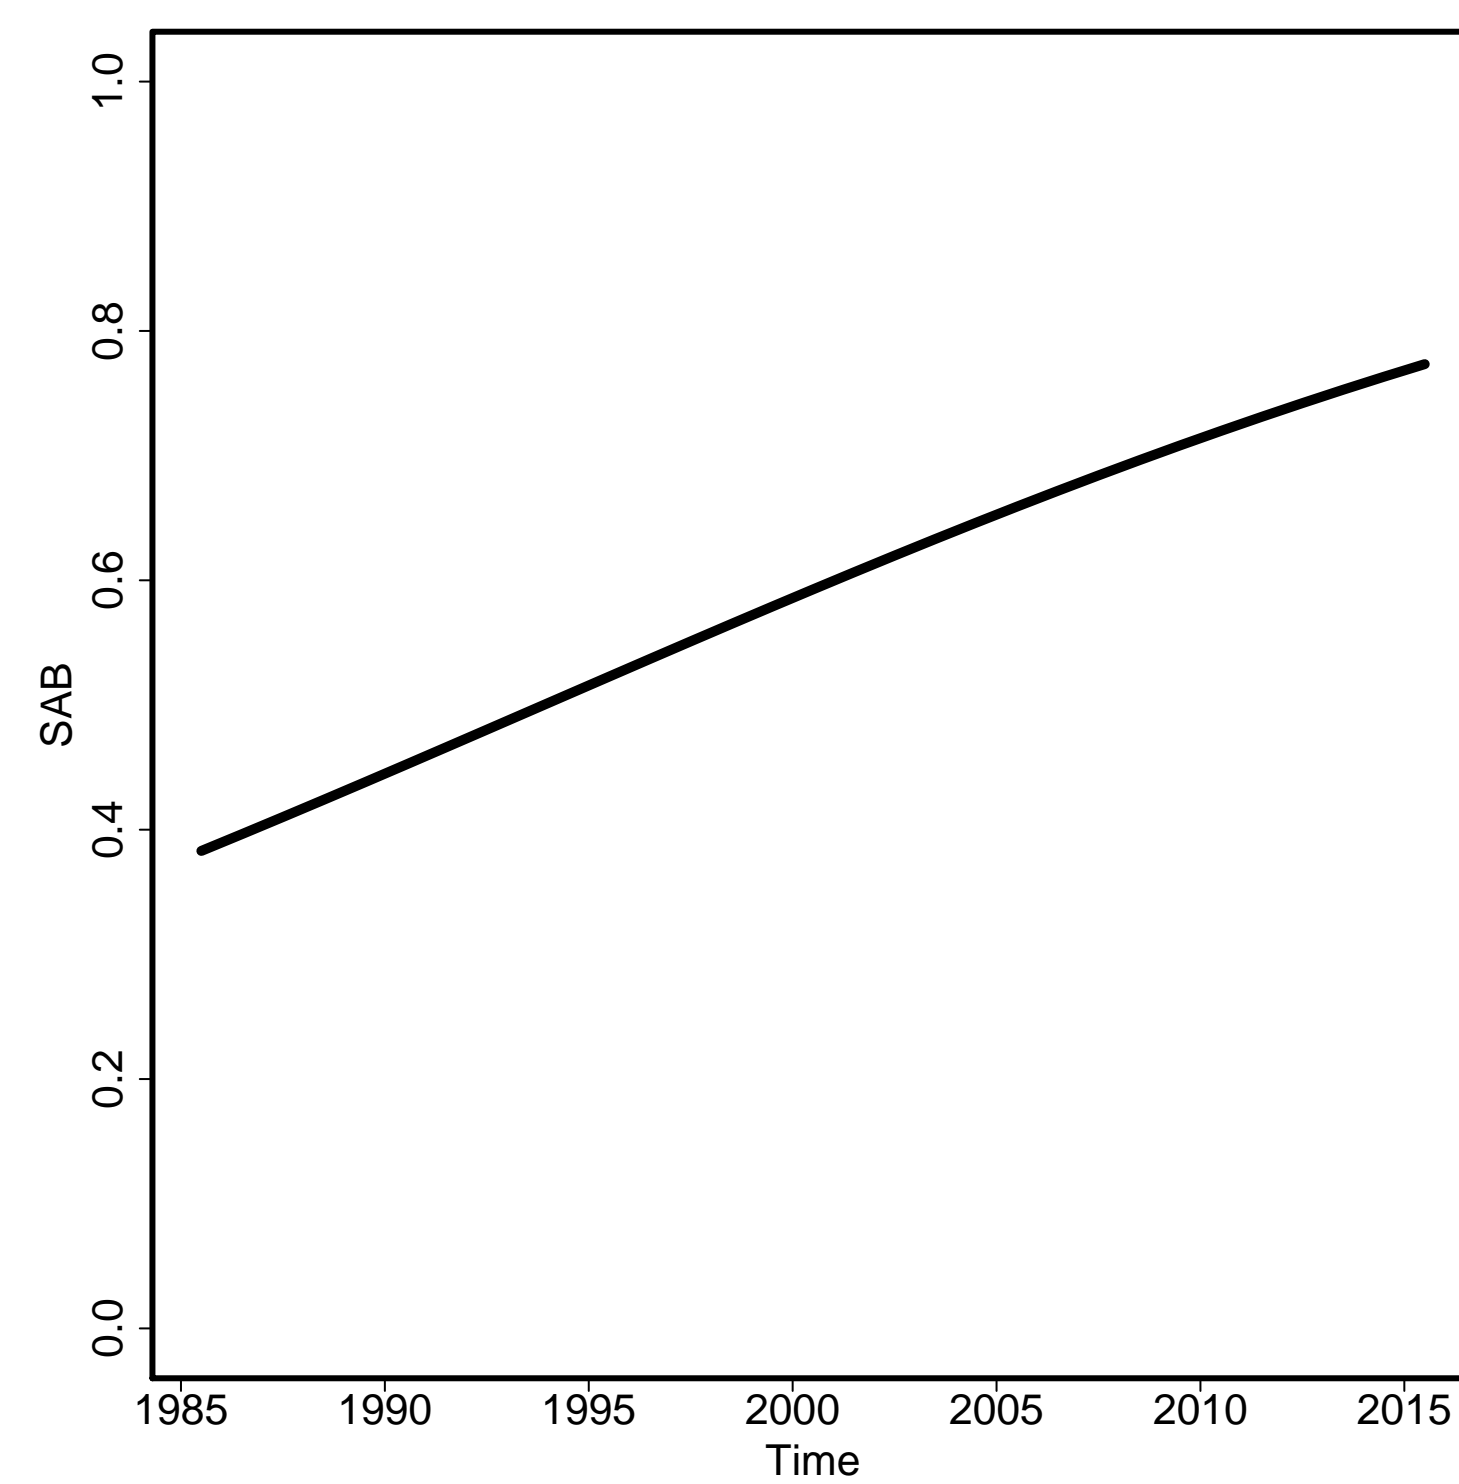

Envelope/Births

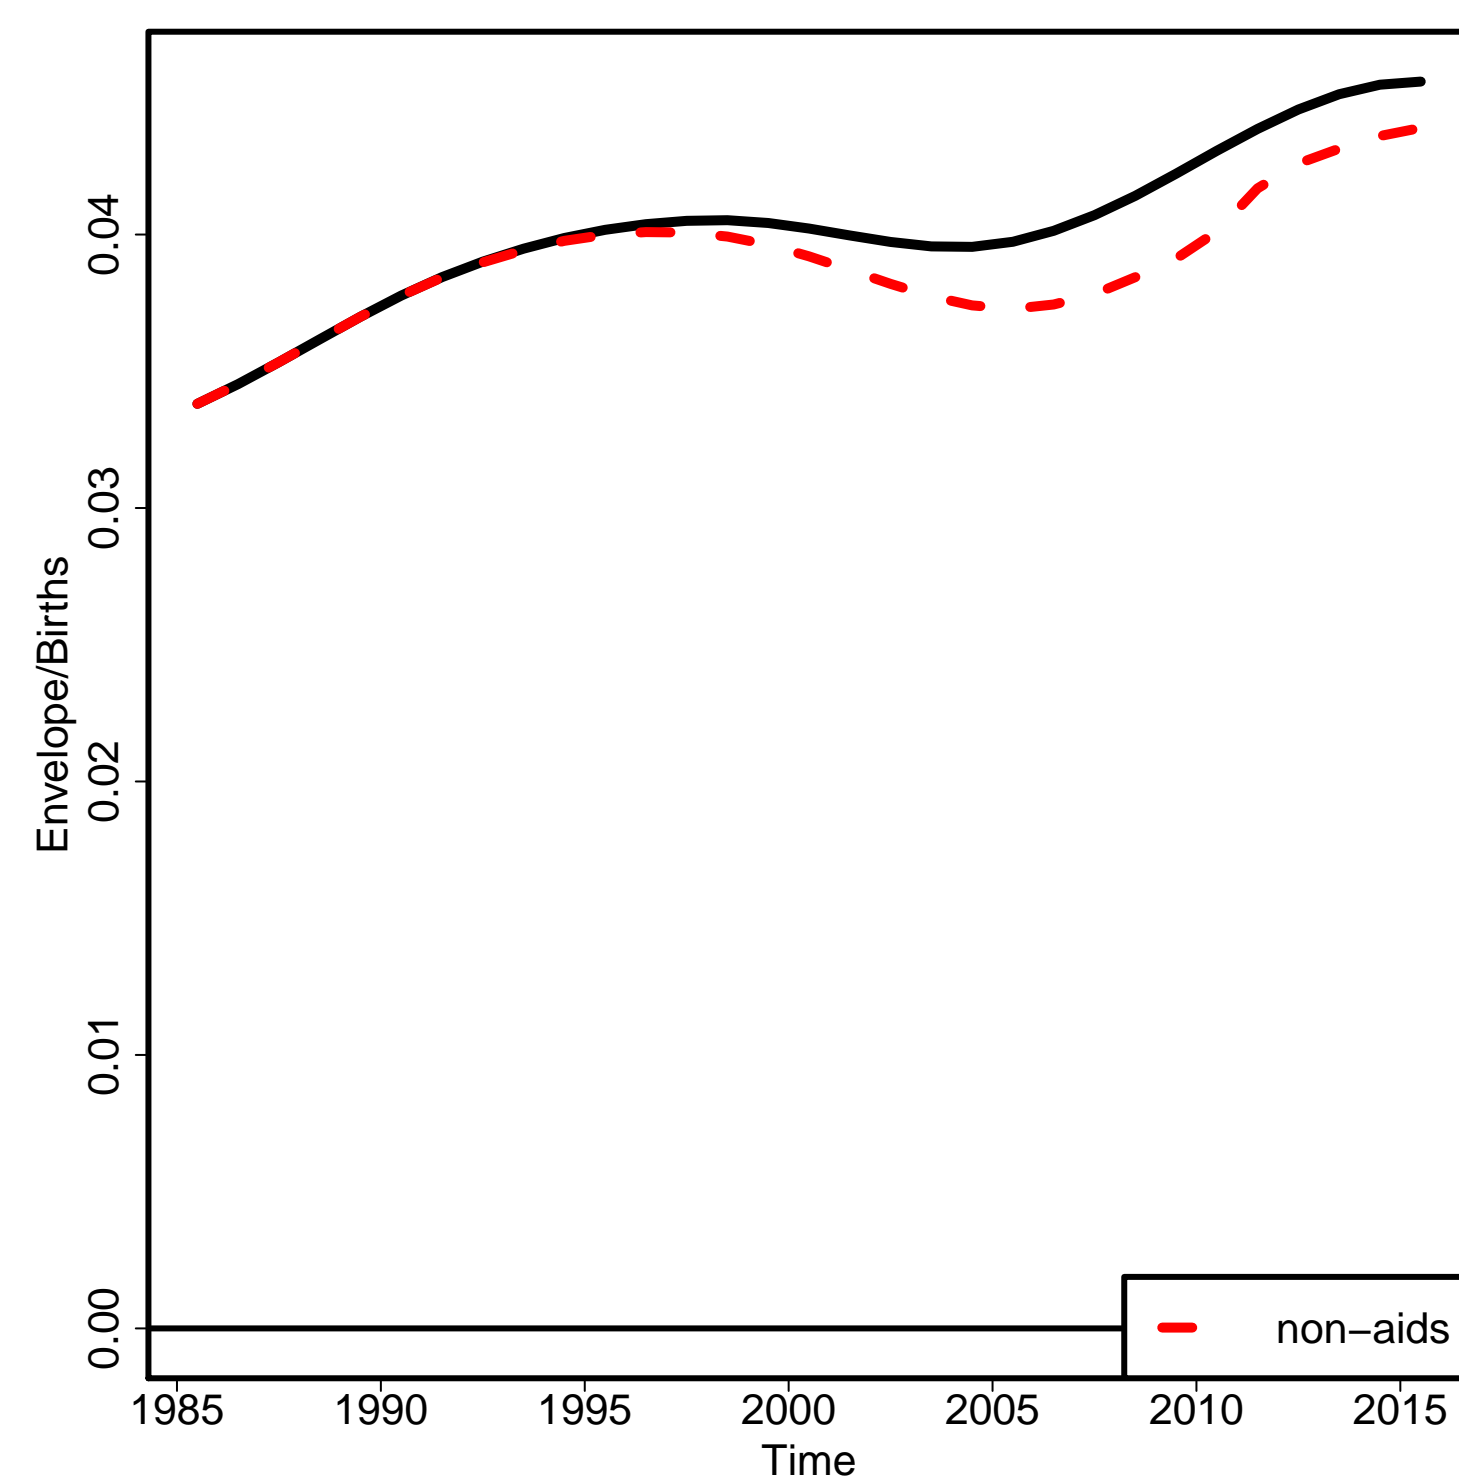

Non-aids MMR

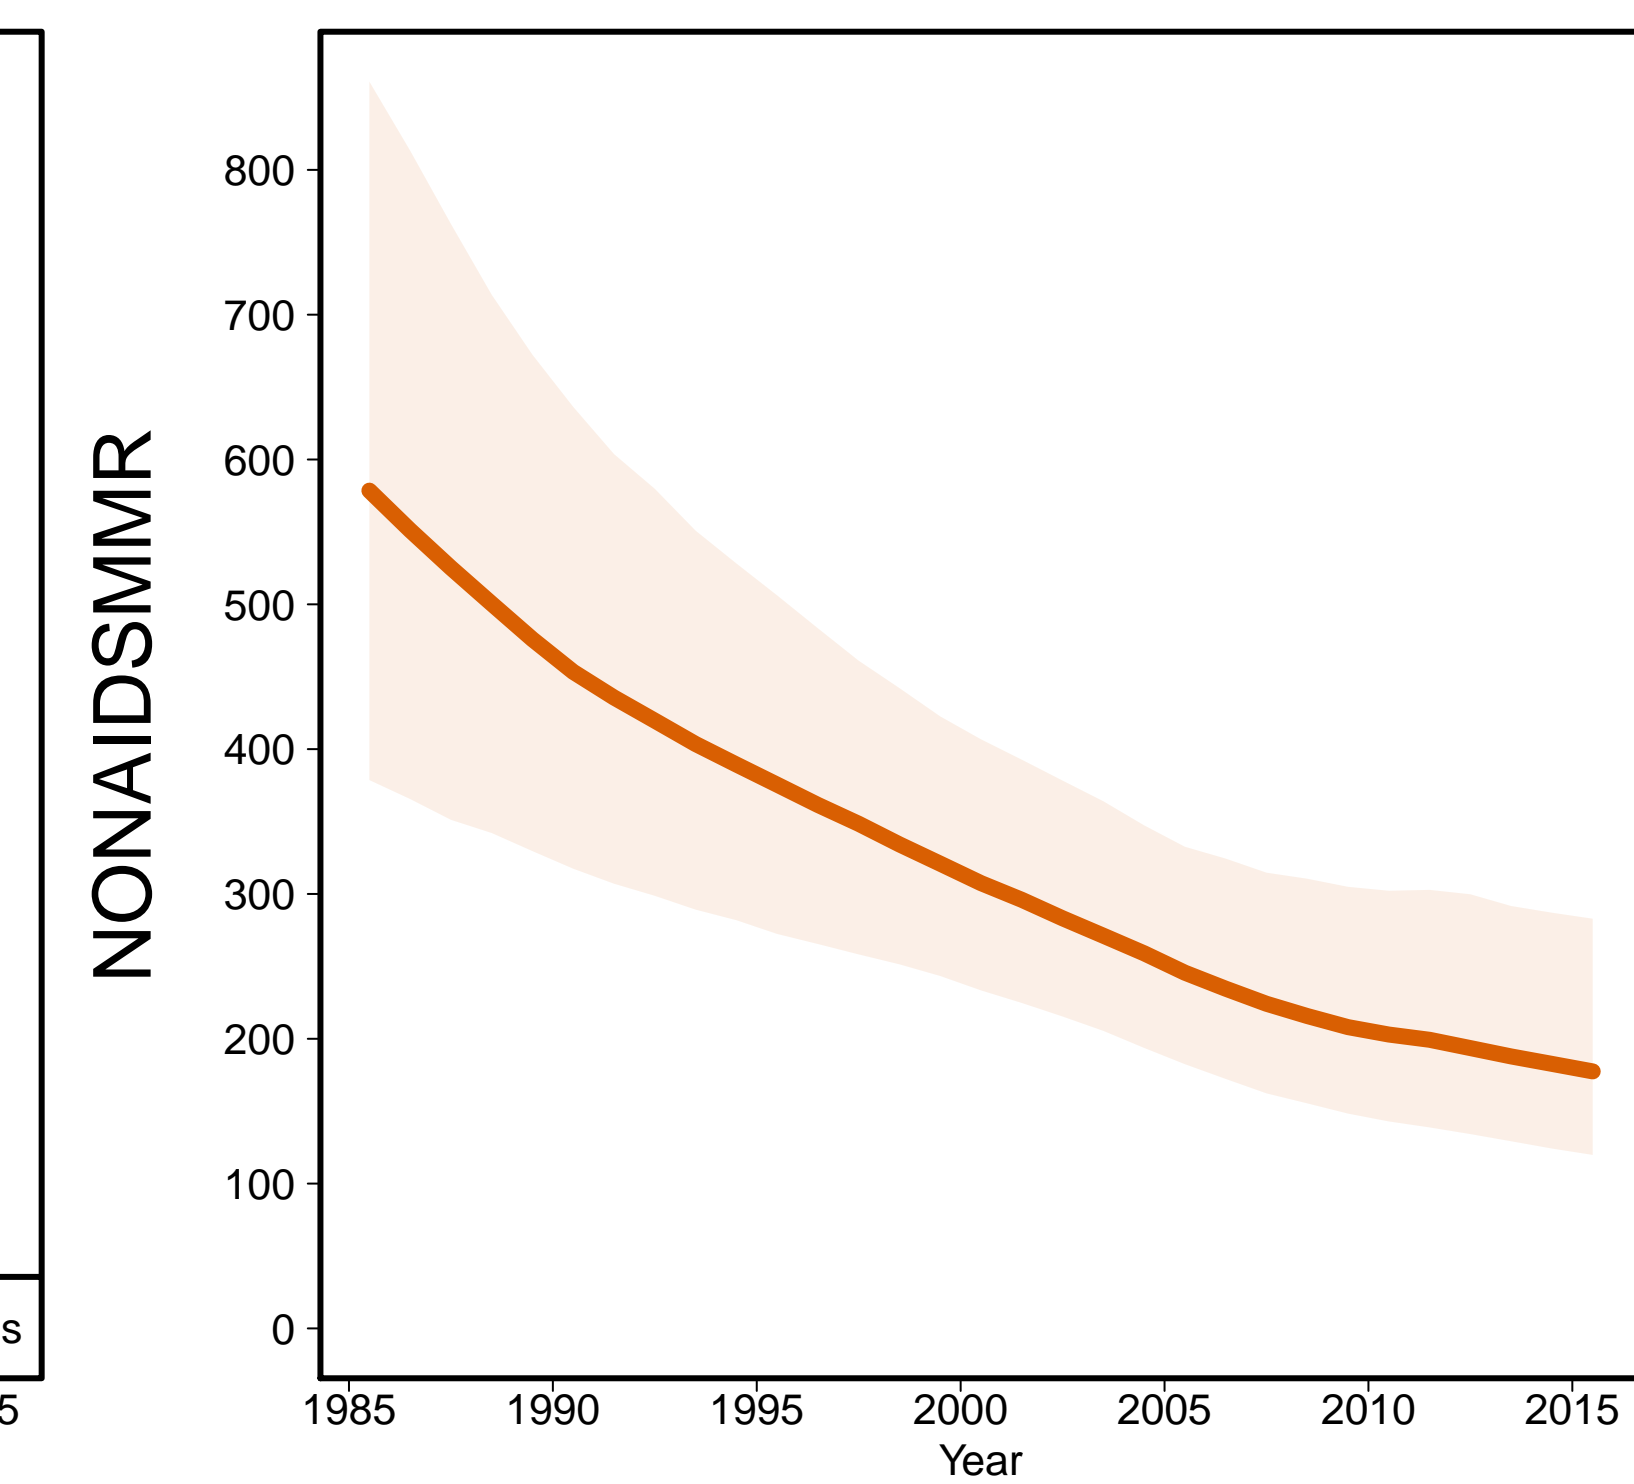

Aids MMR

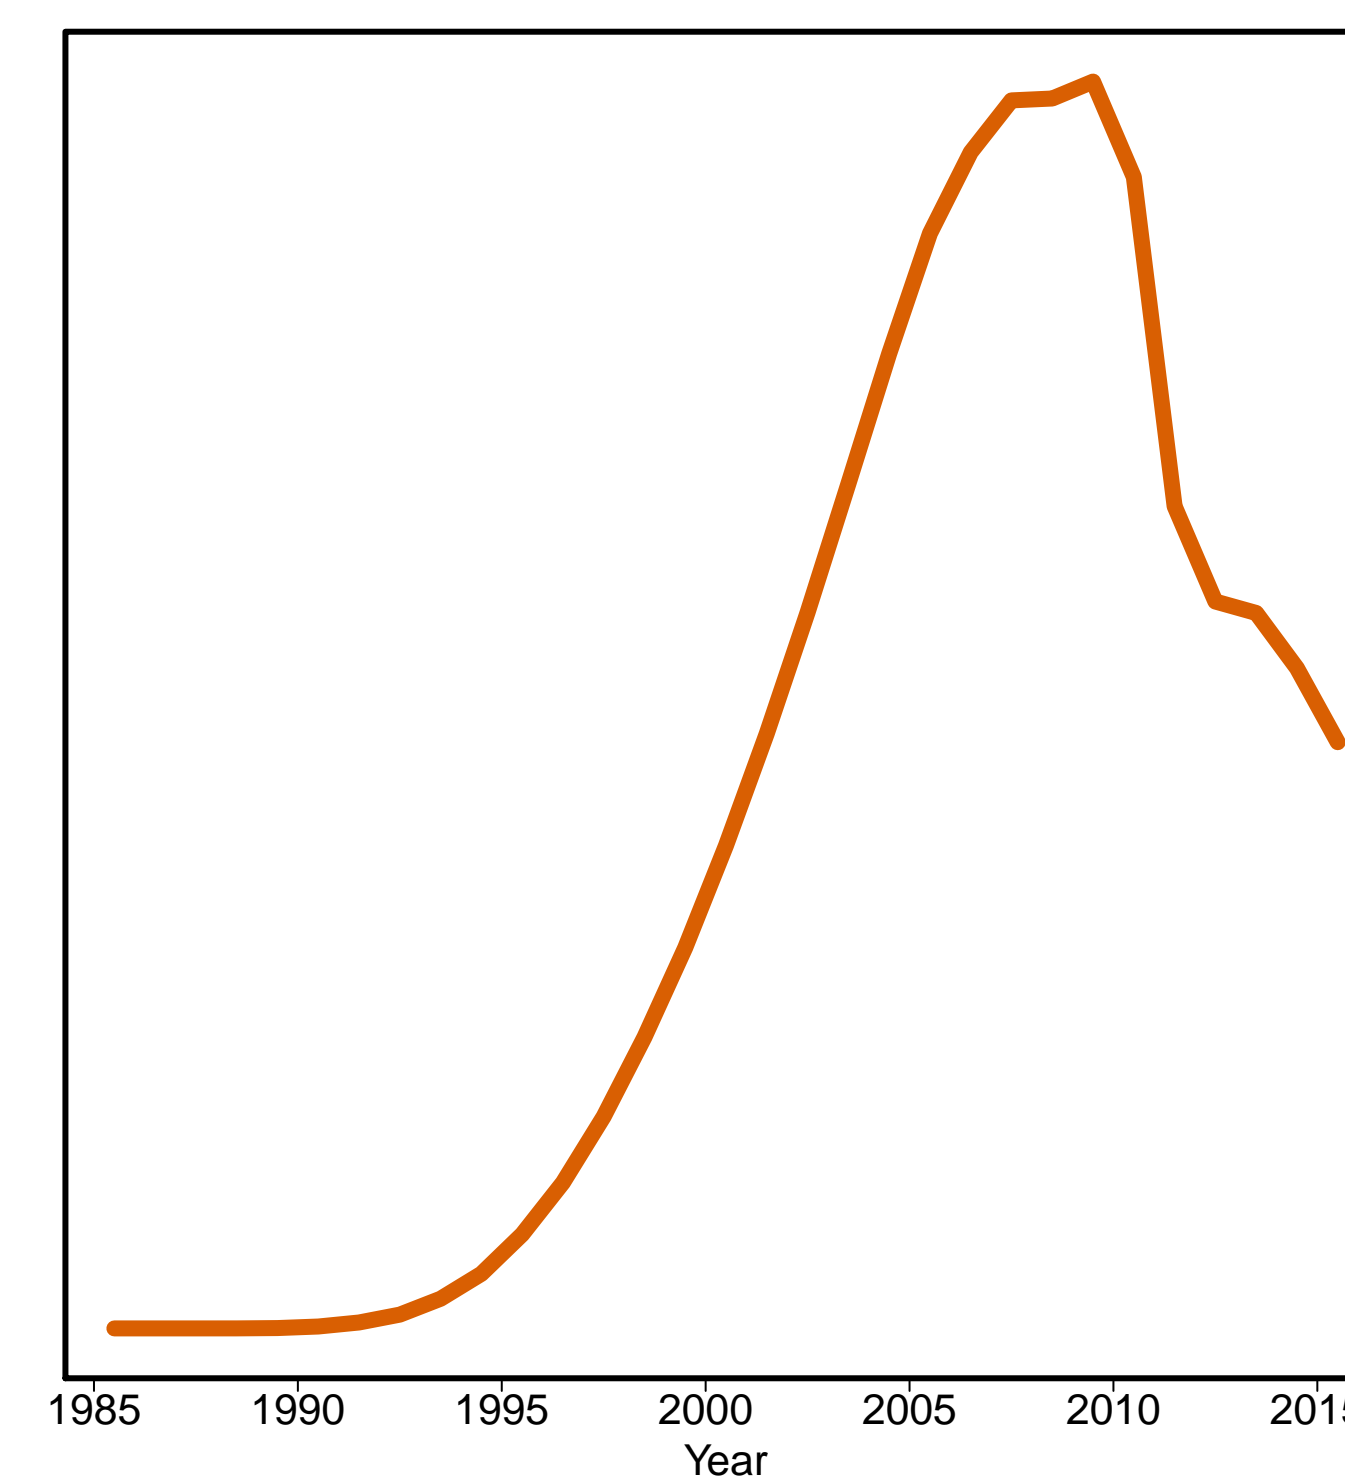

Namibia [NAM]  
(Southern Africa)

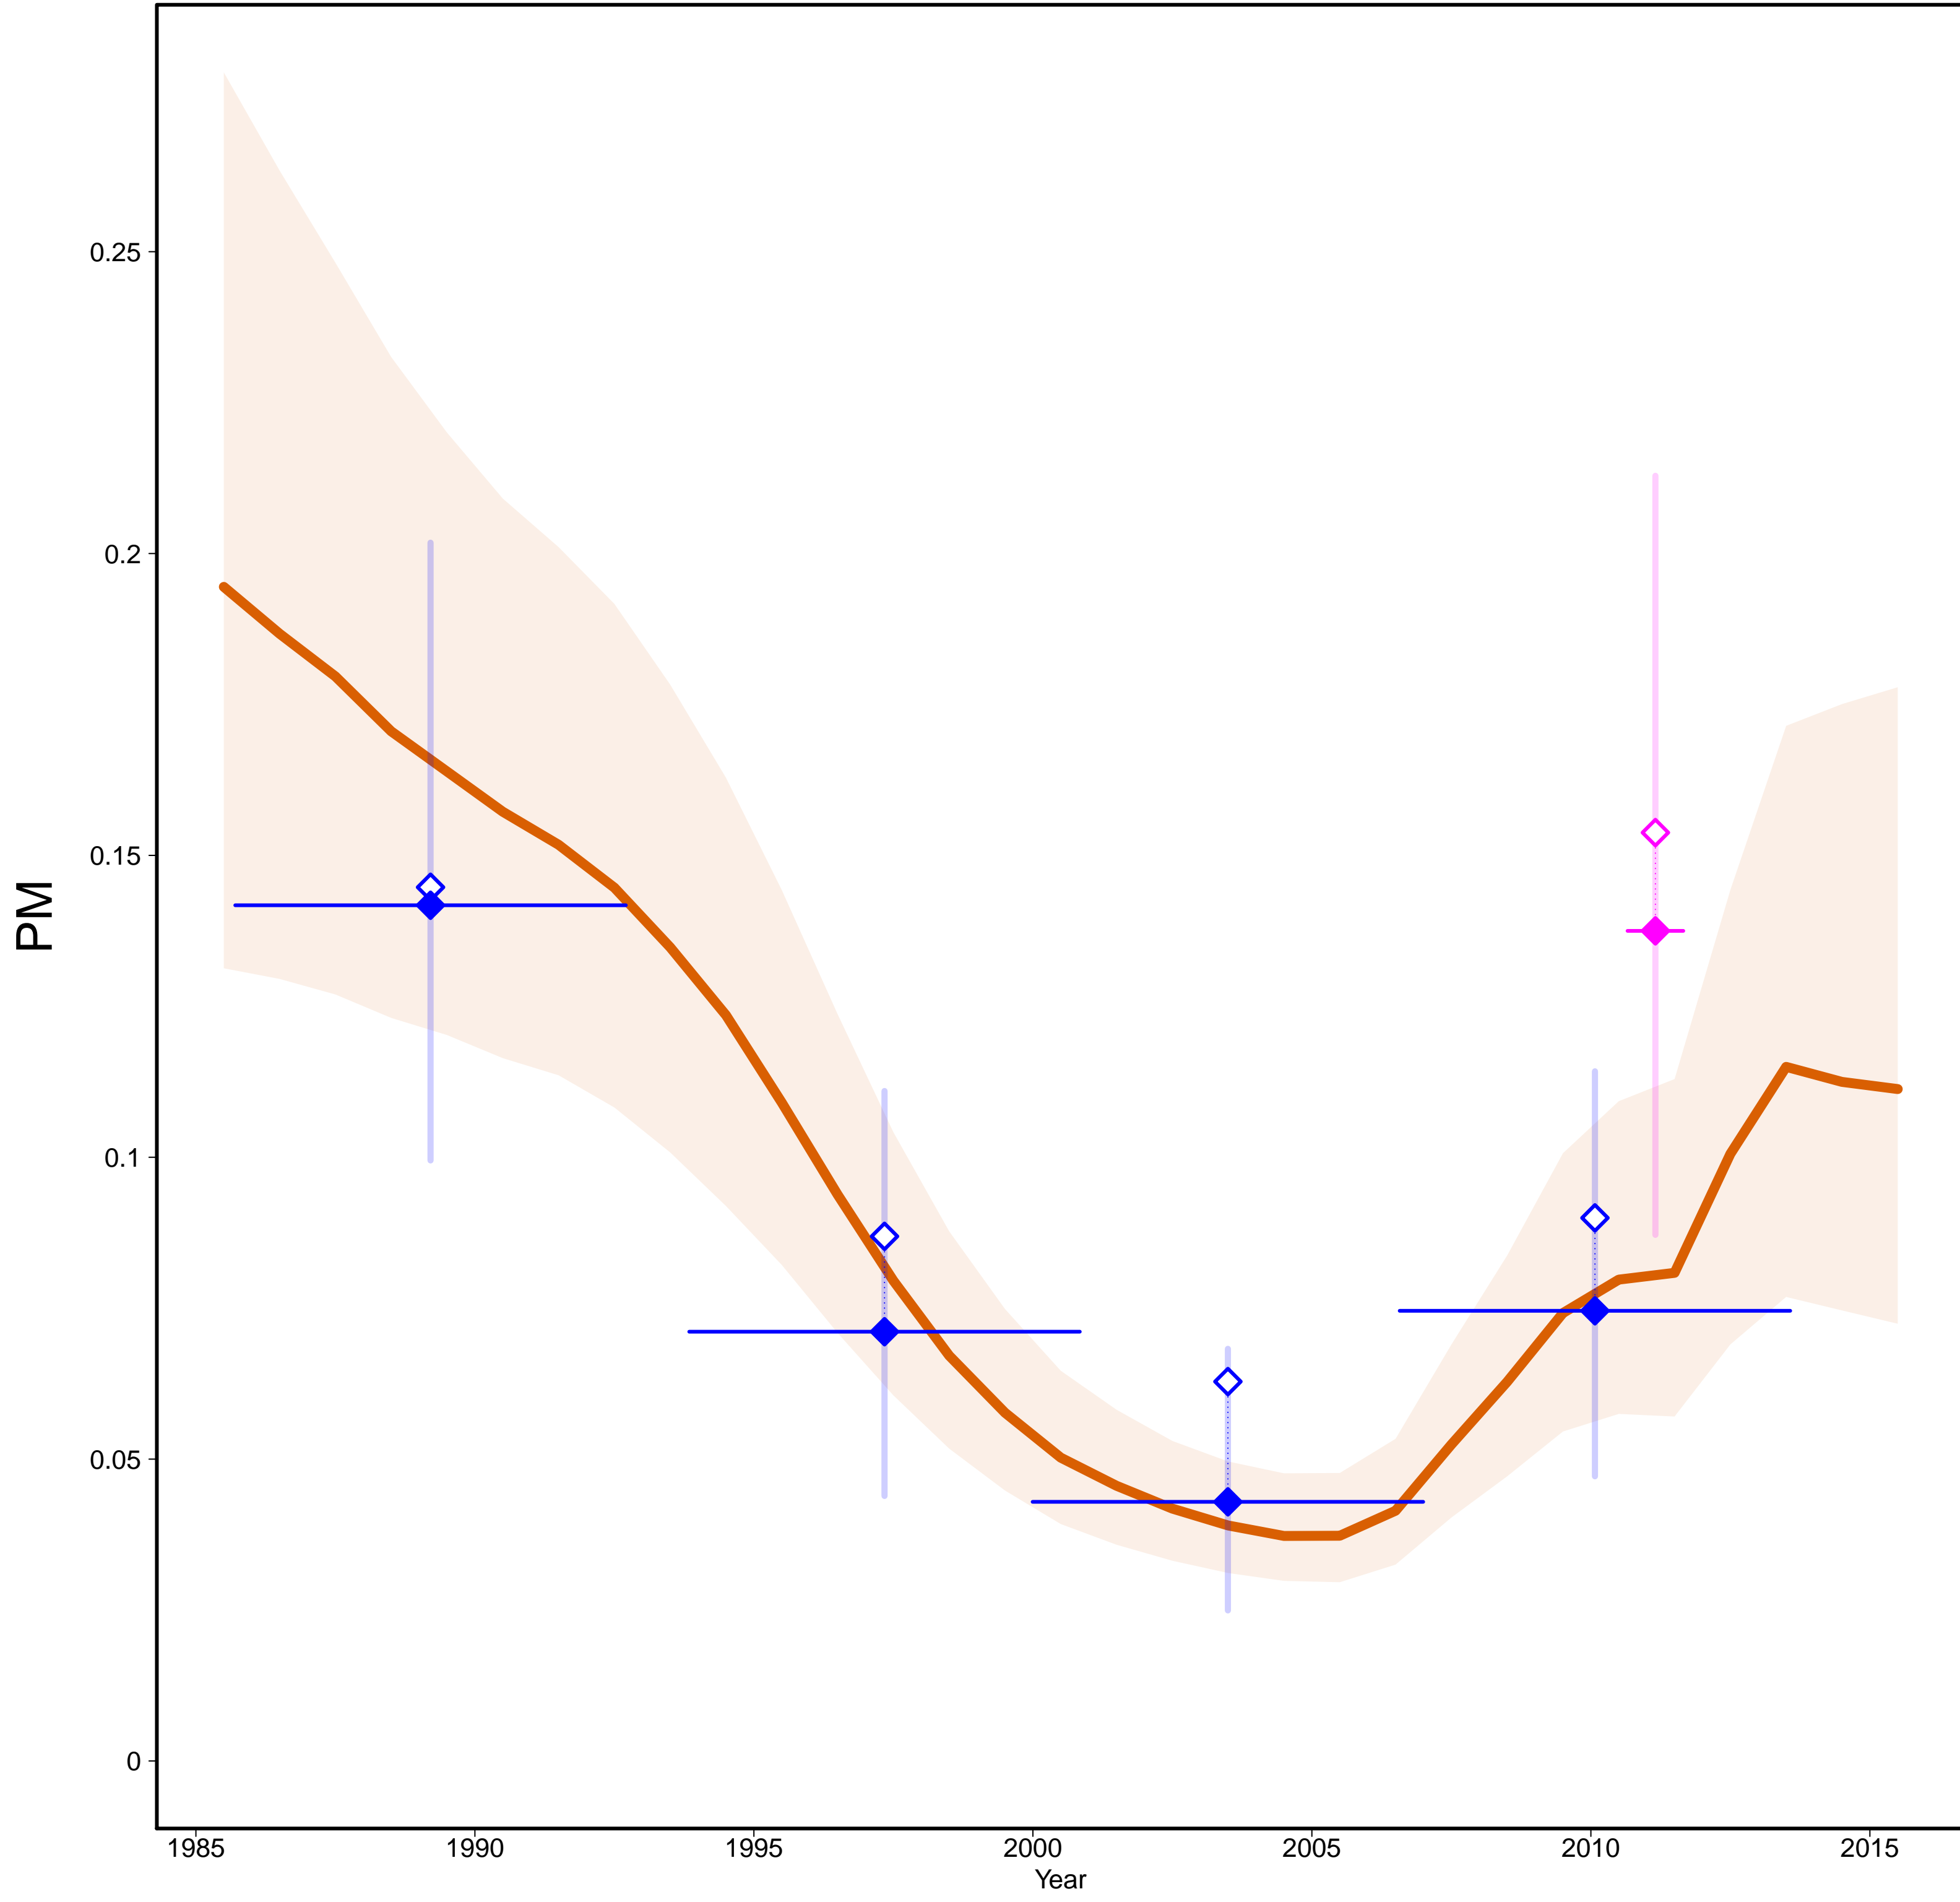

Namibia [NAM]  
(Southern Africa)

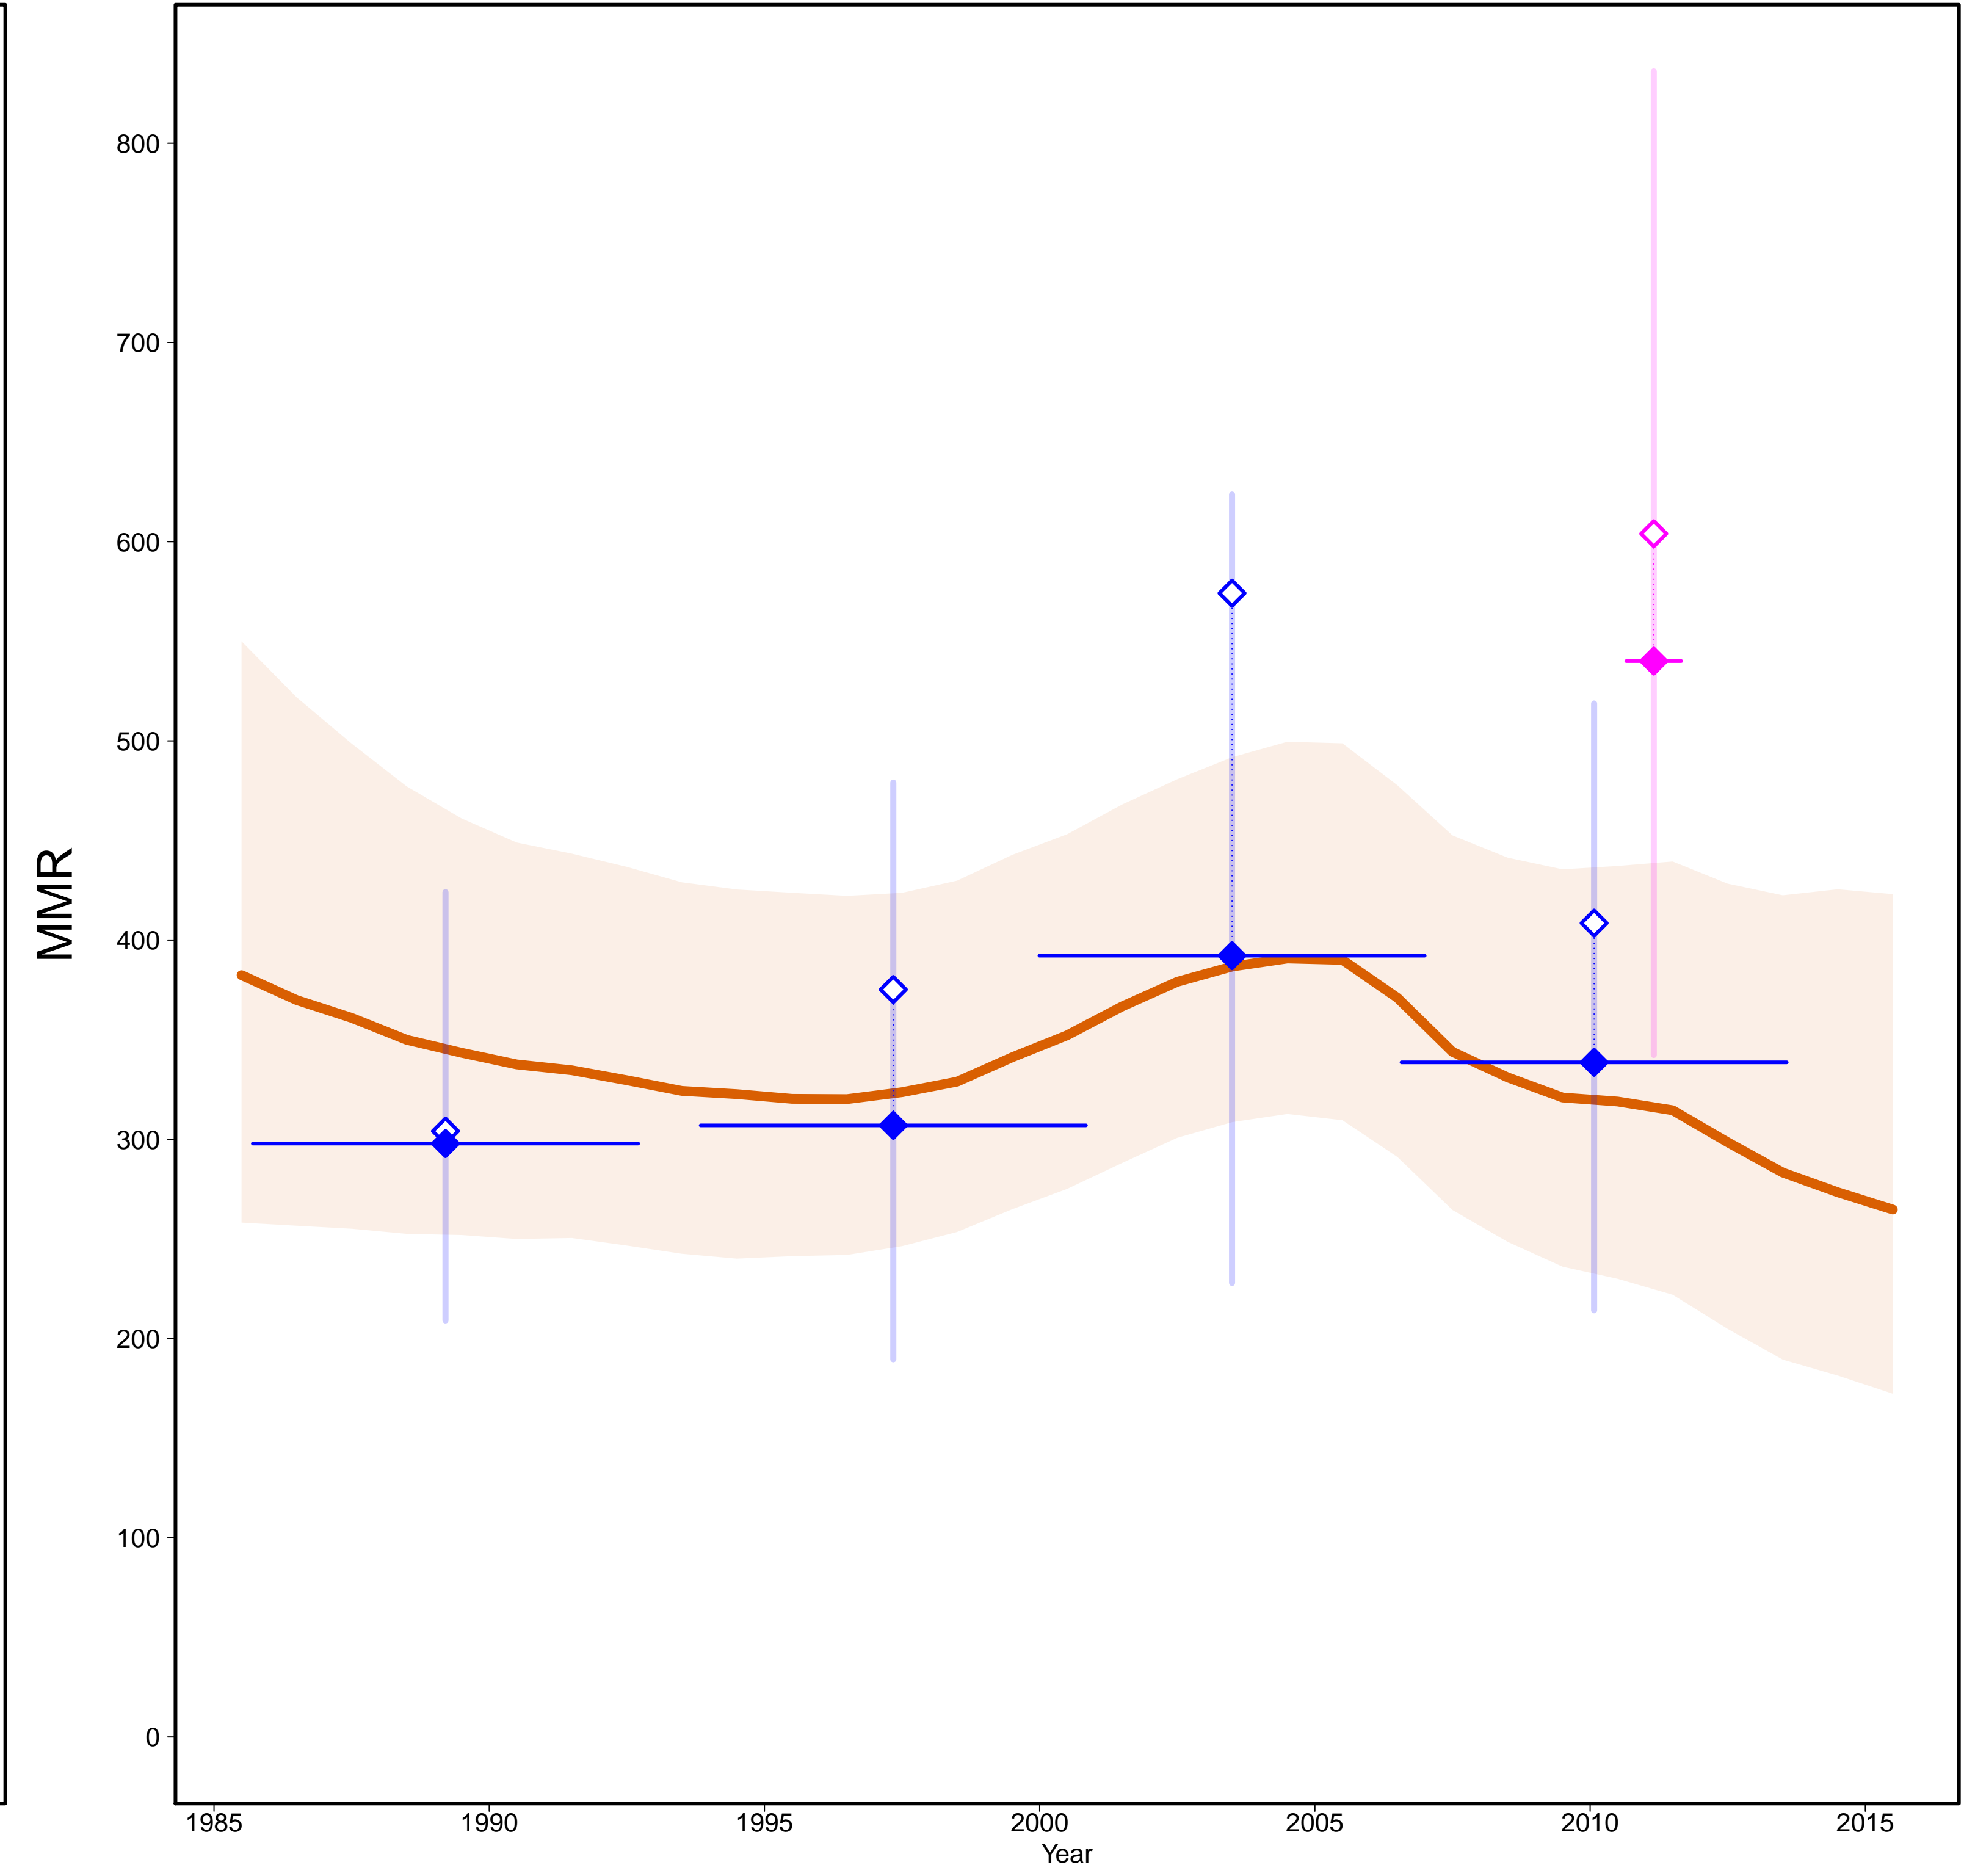

- Estimates —
- MMR Database 2015 —
- ◇ Observed Data
- ◆ Adjusted Data
- Data type —
- ◆ DHS
- ◆ Census

Gross Domestic Product

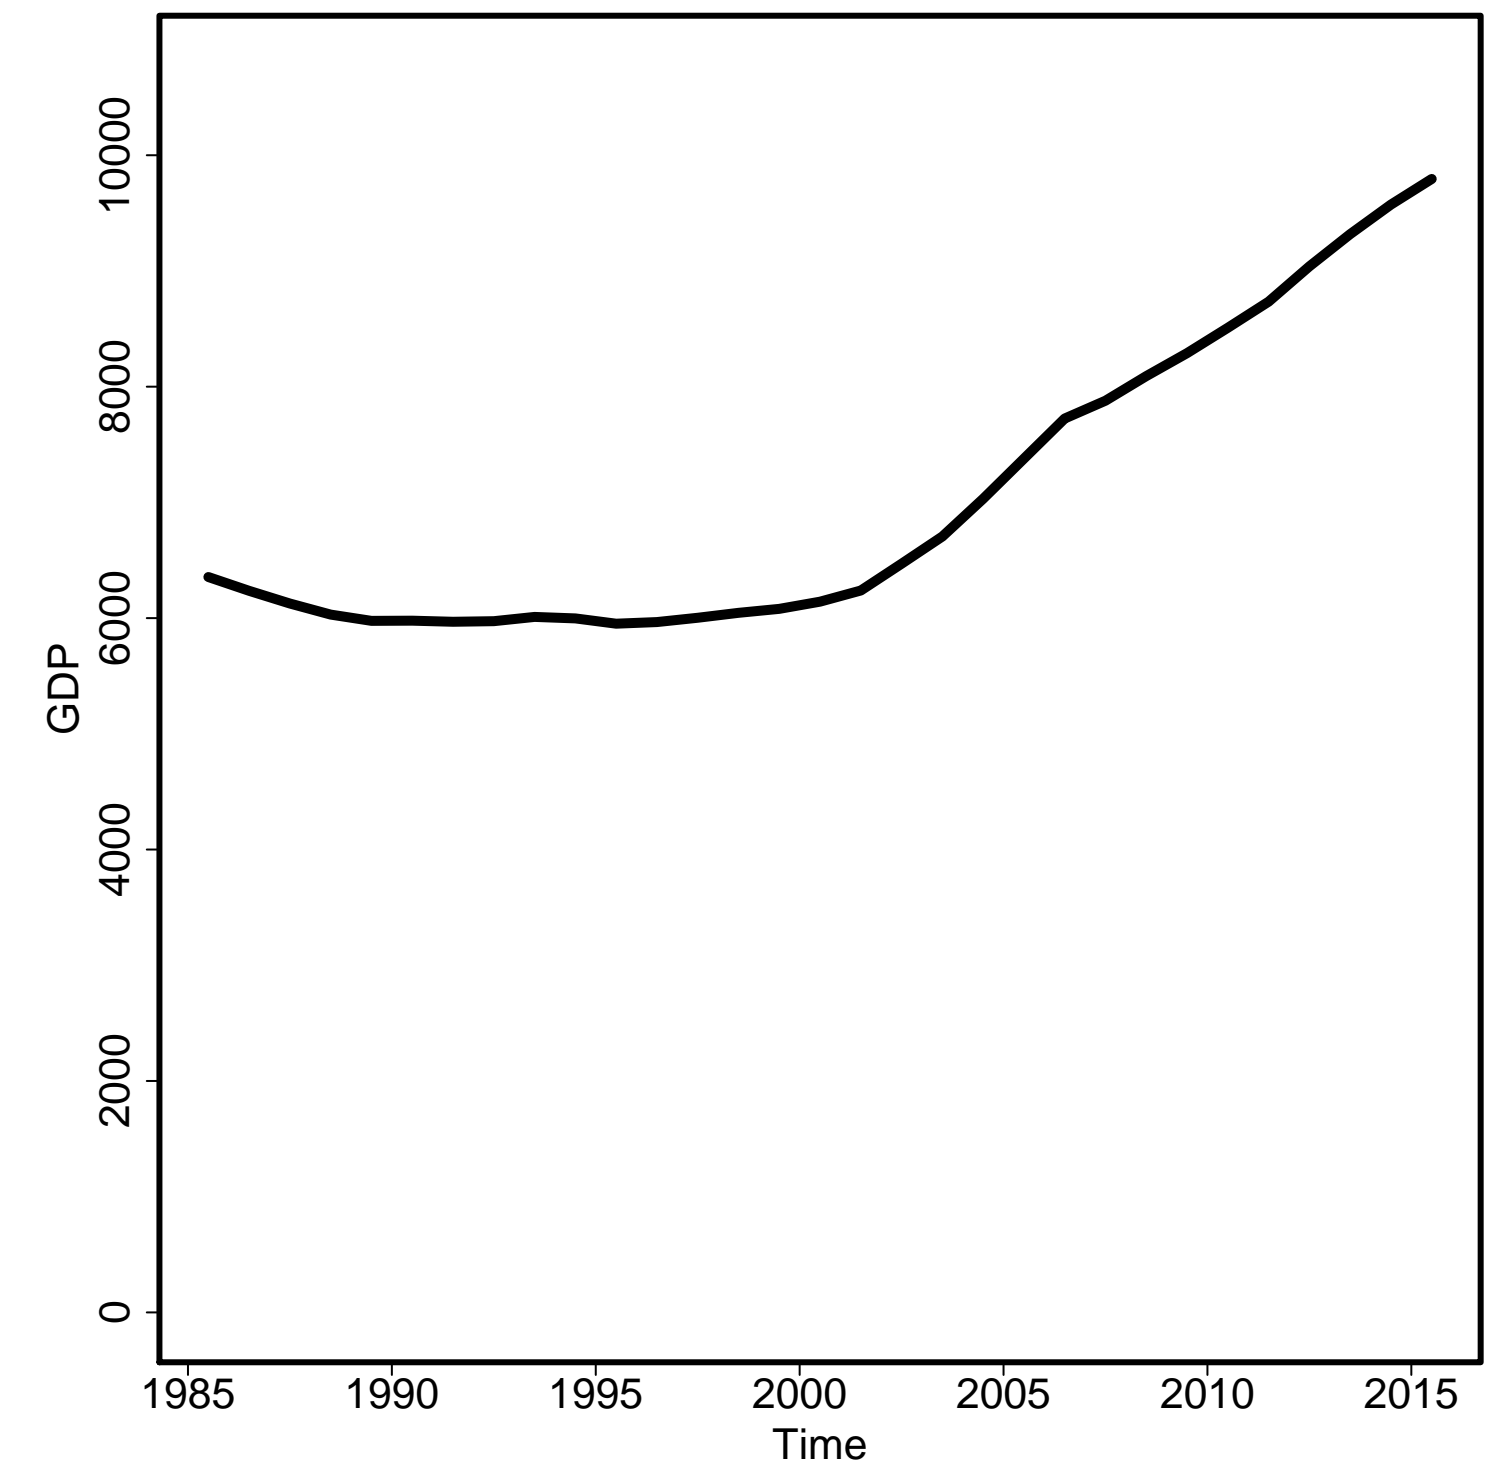

General Fertility Rate

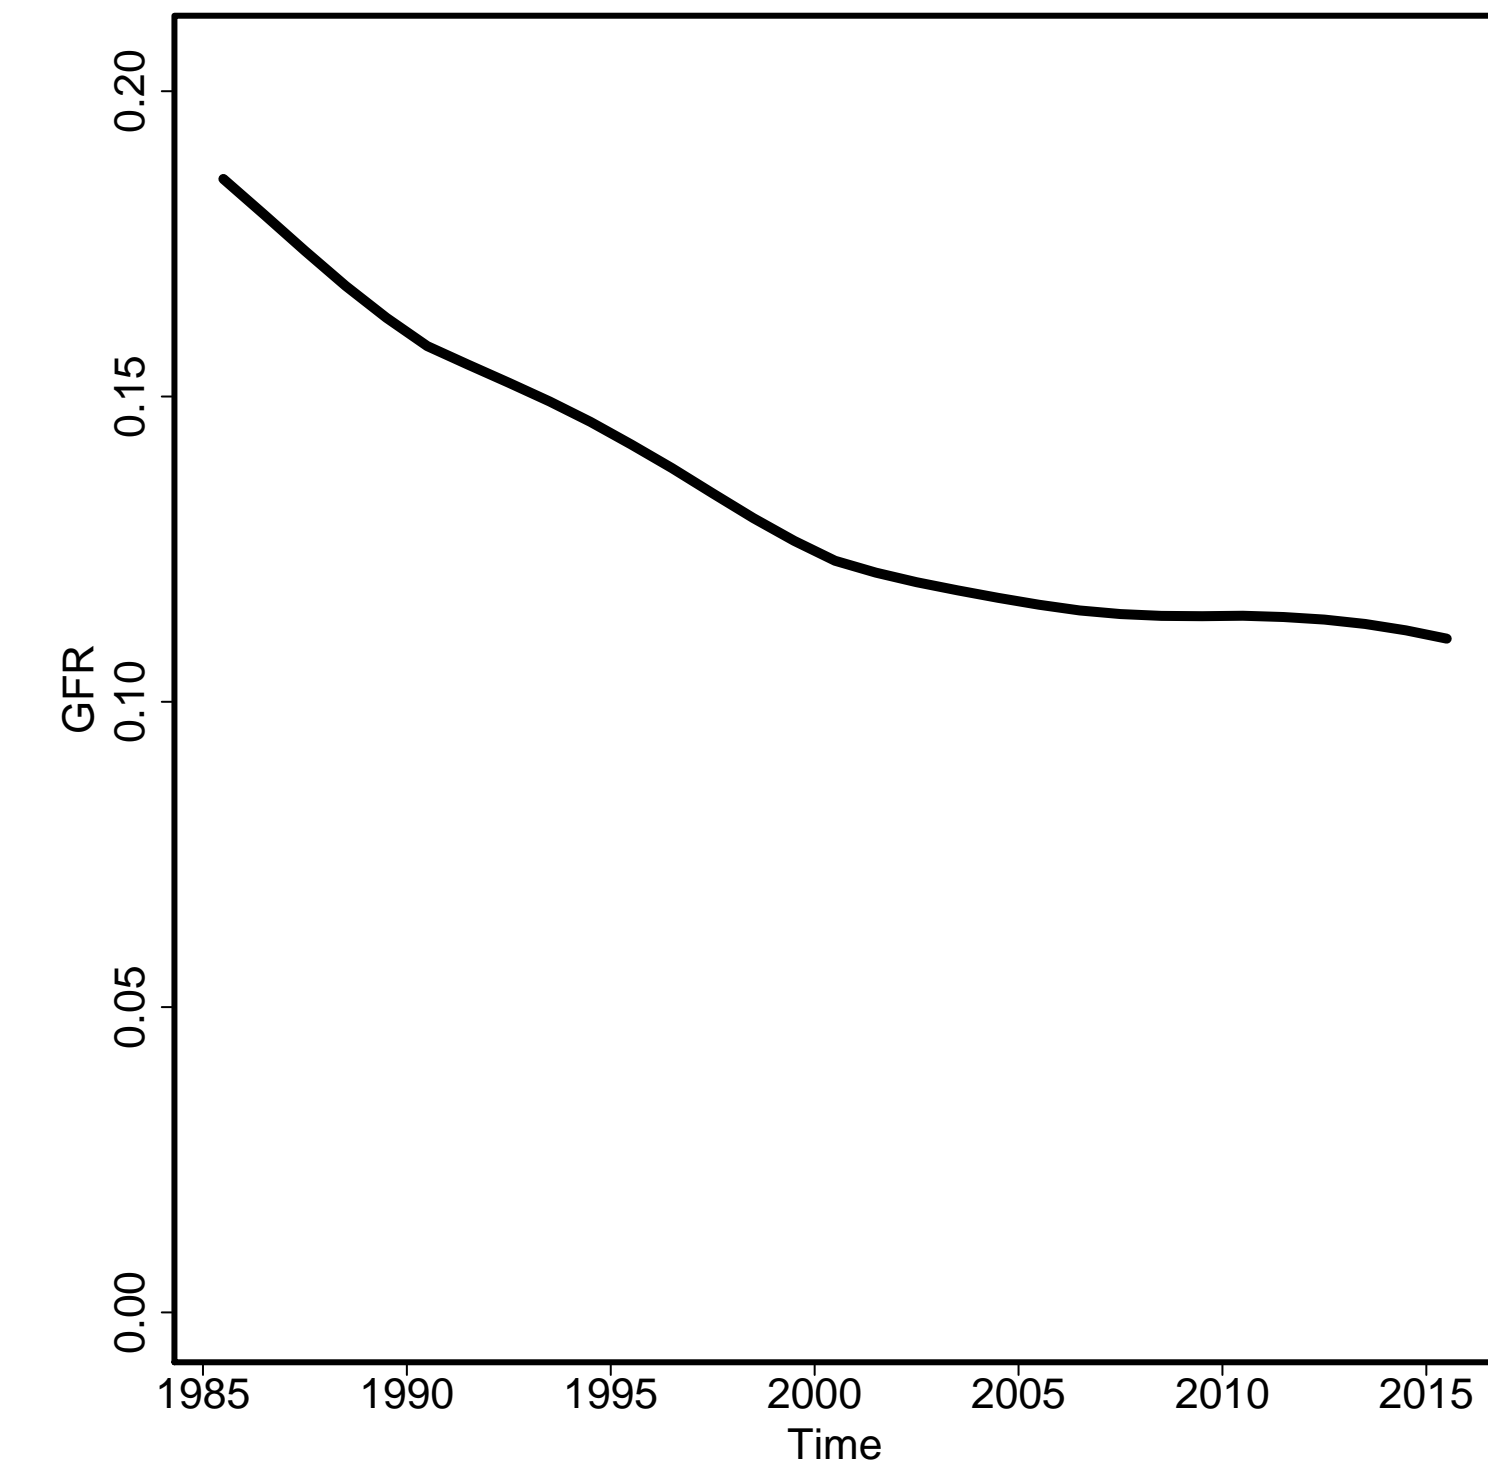

Skilled Attendance to Birth

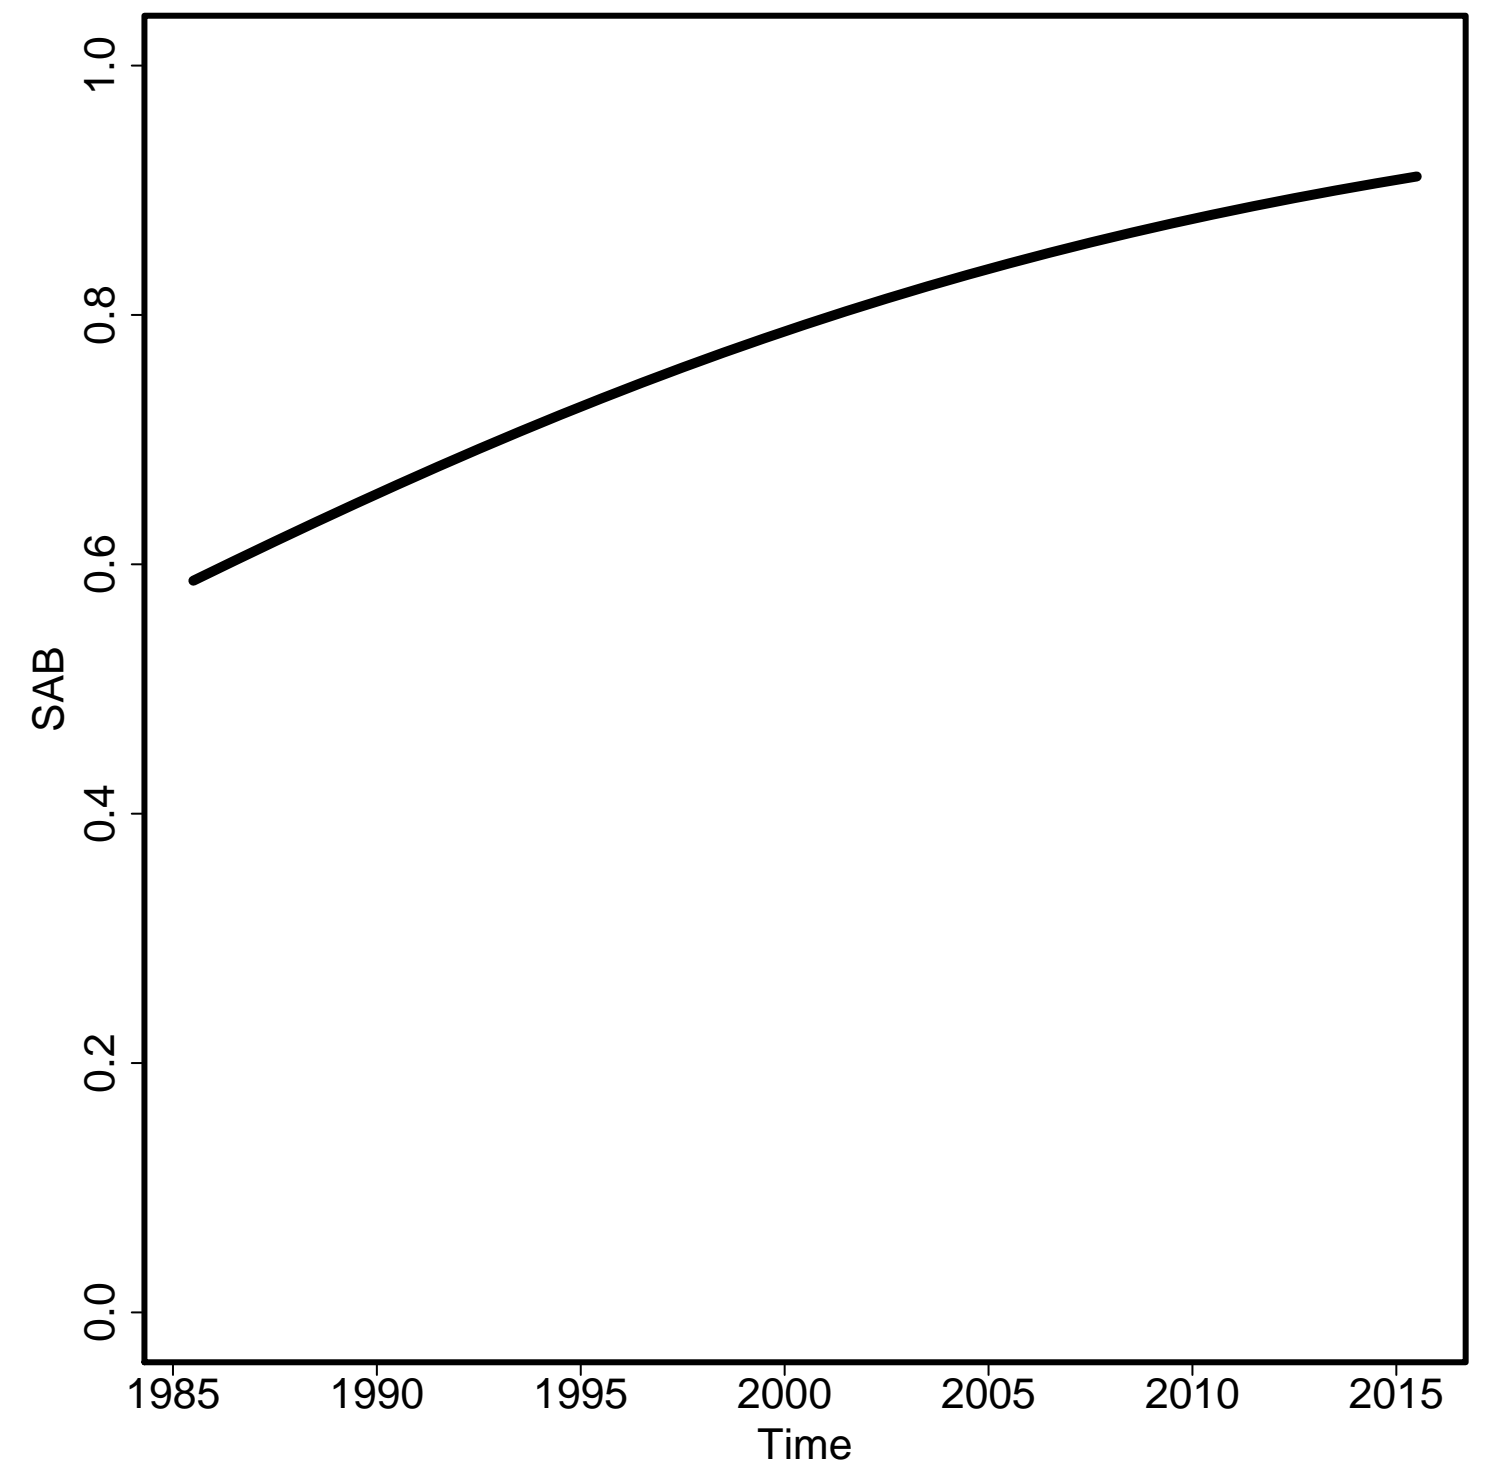

Envelope/Births

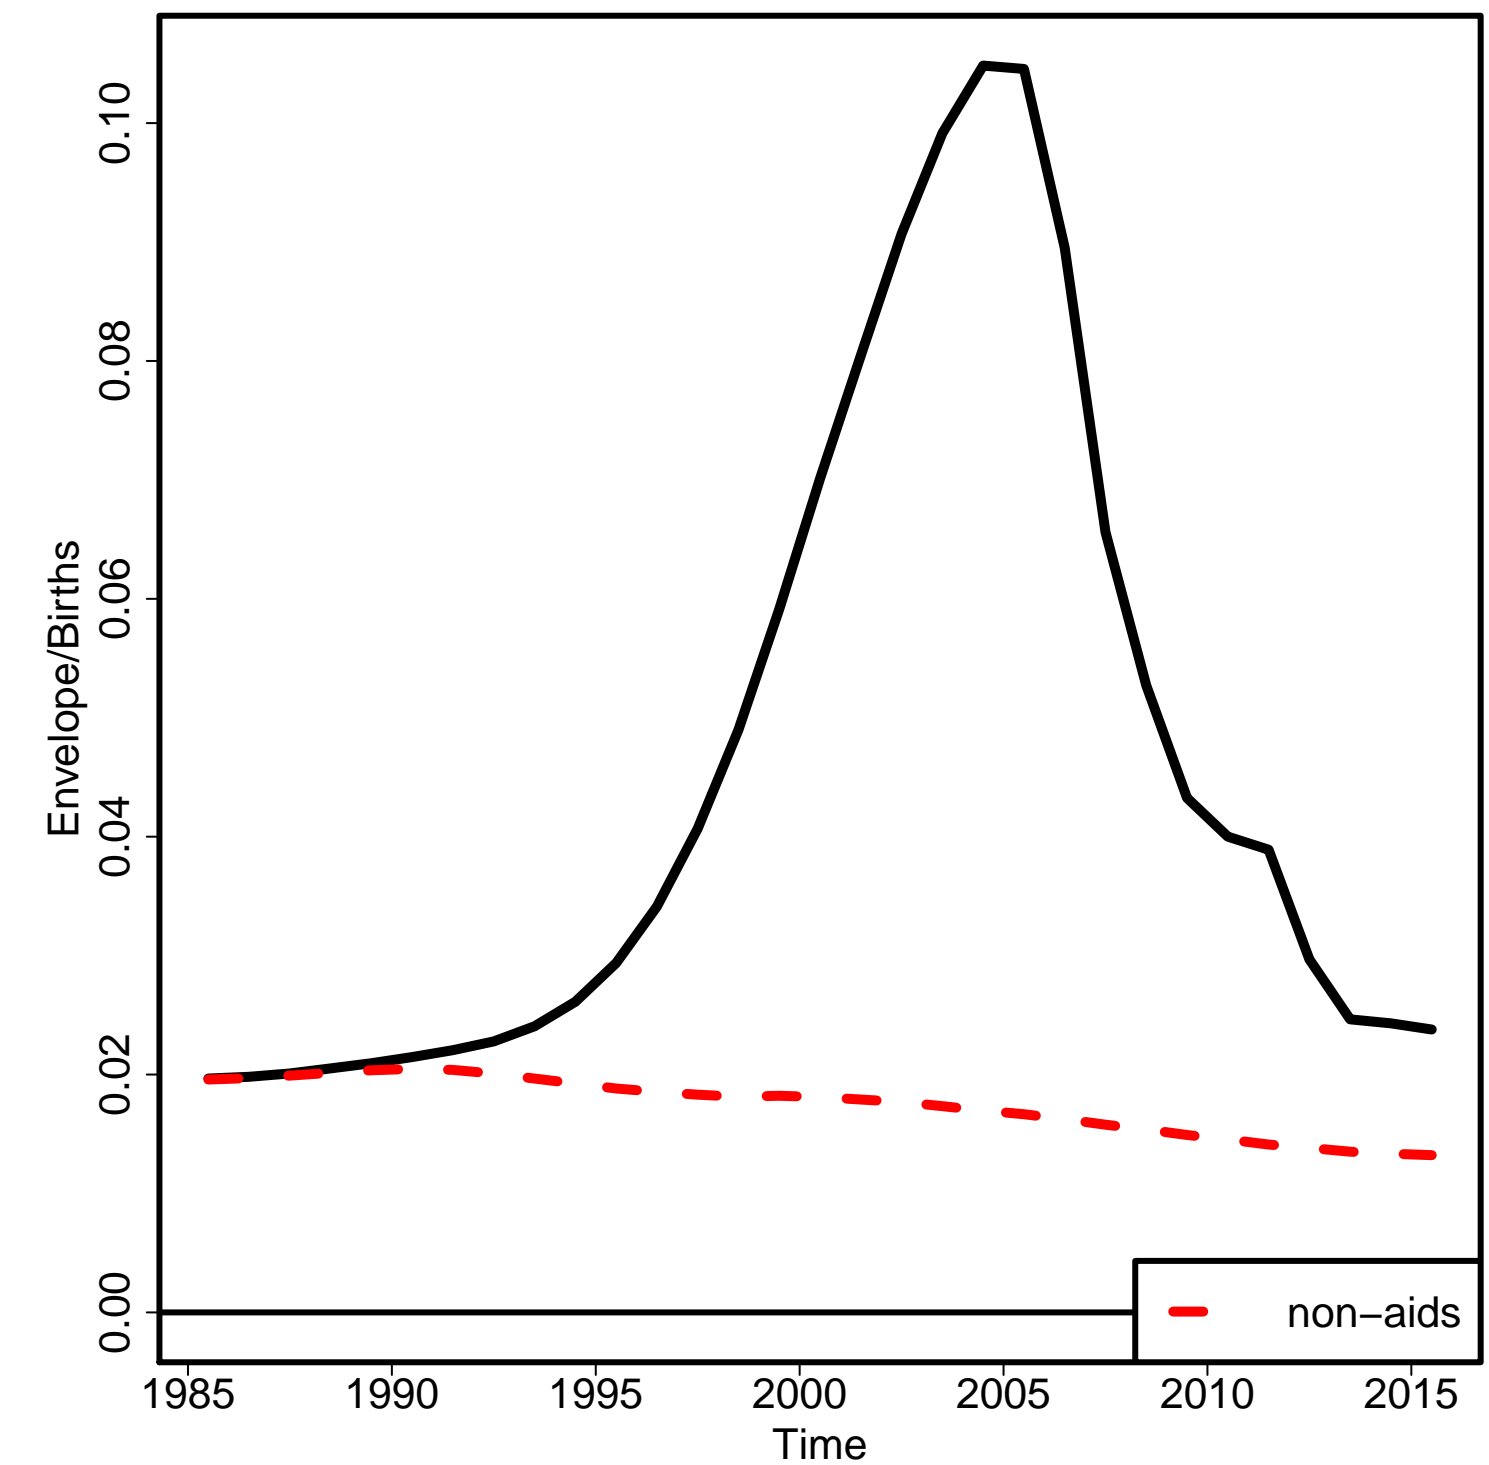

Non-aids MMR

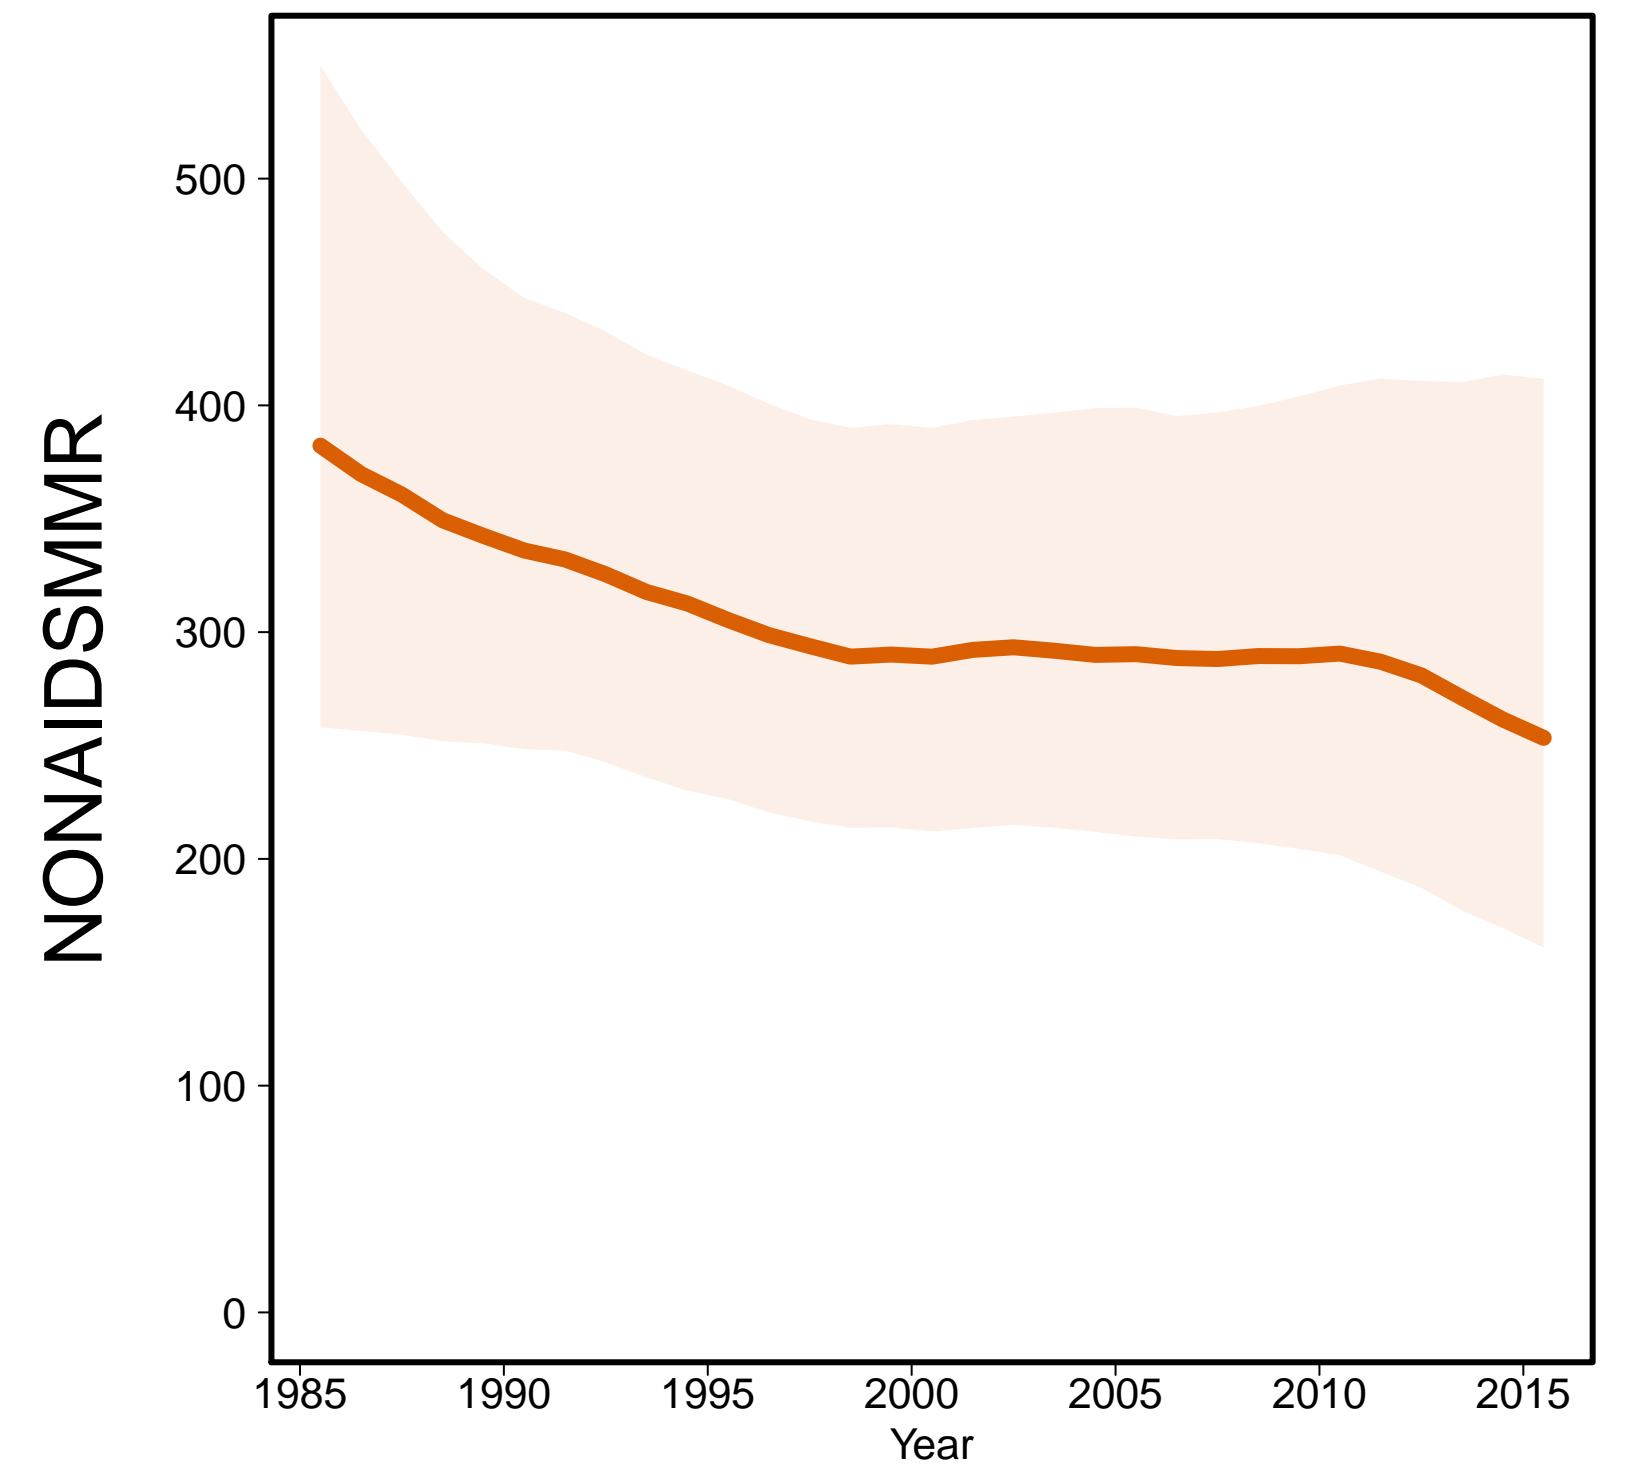

Aids MMR

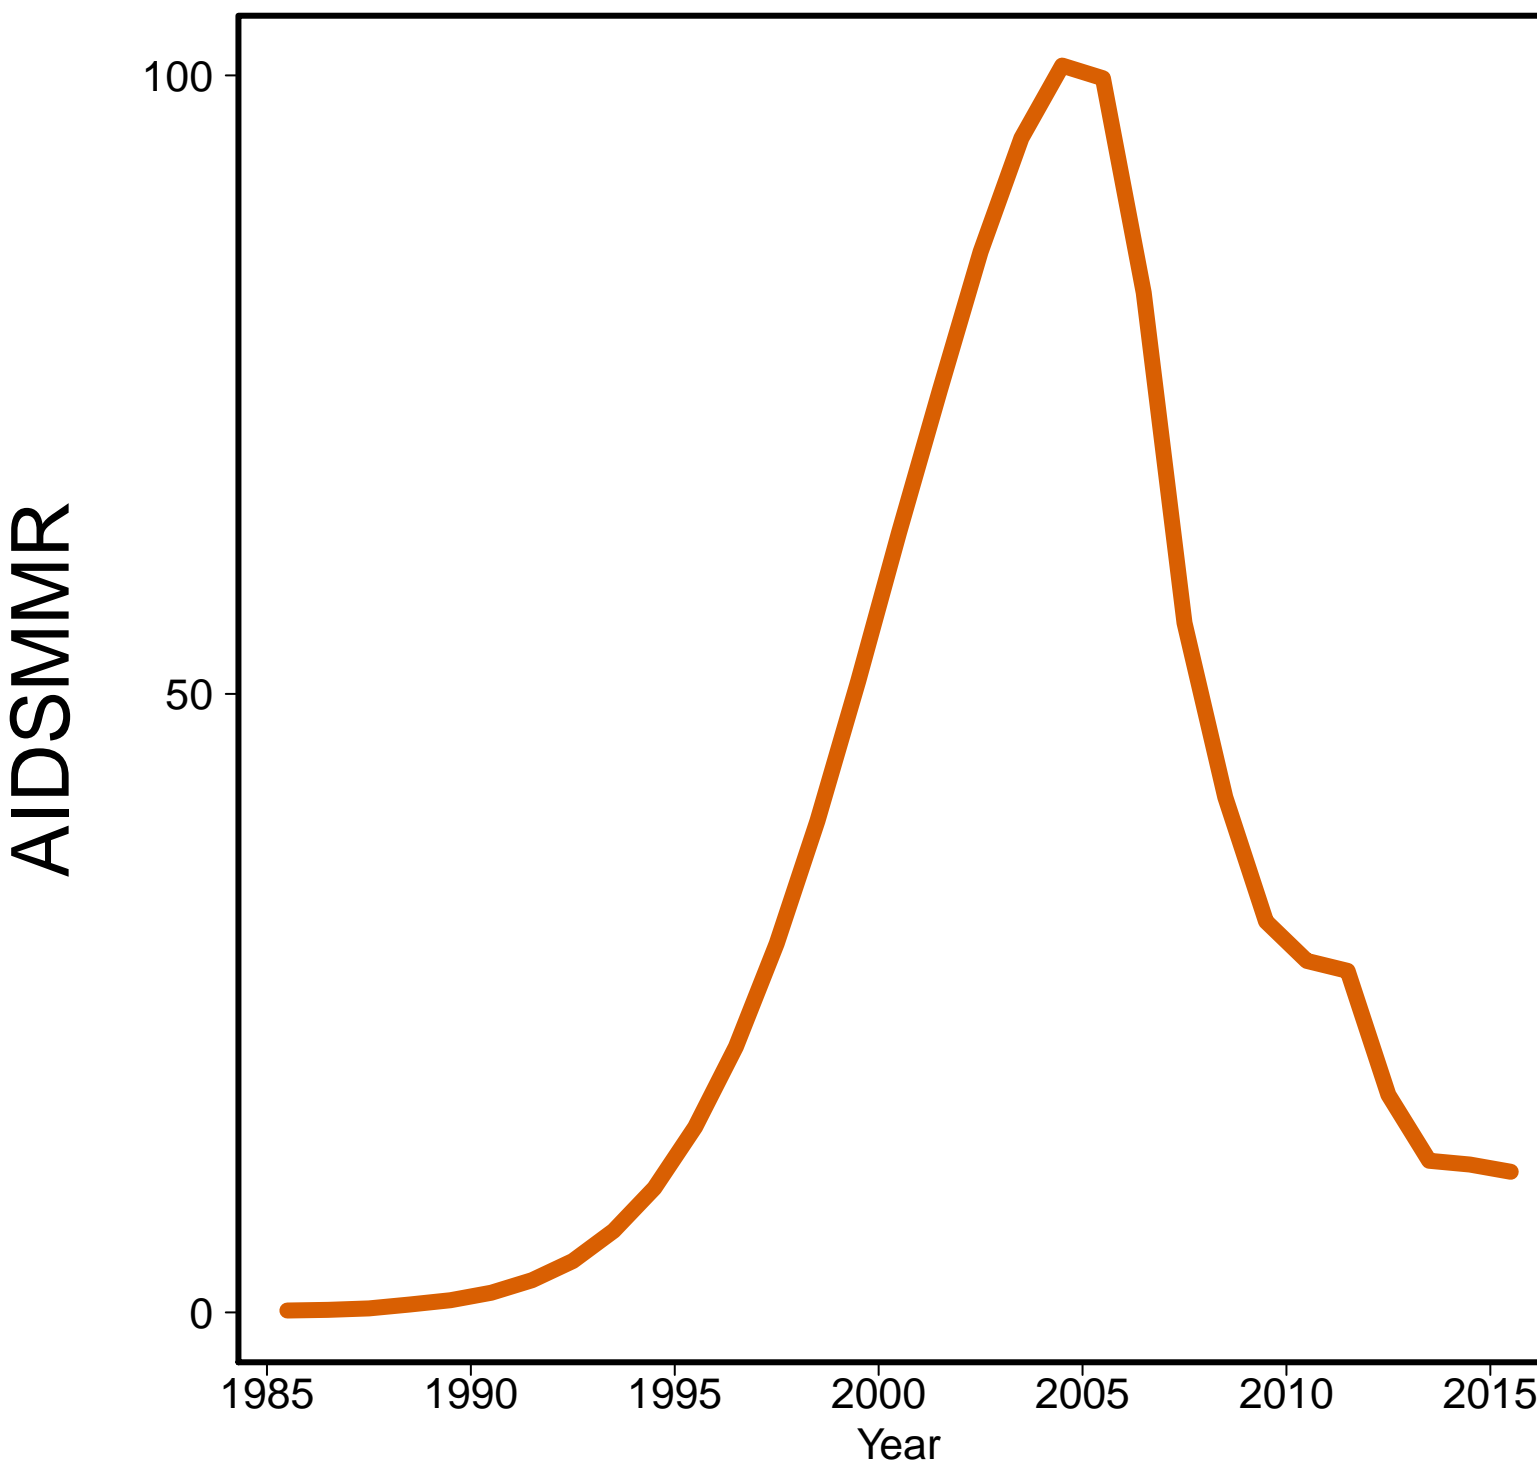



Nepal [NPL]  
(Southern Asia)

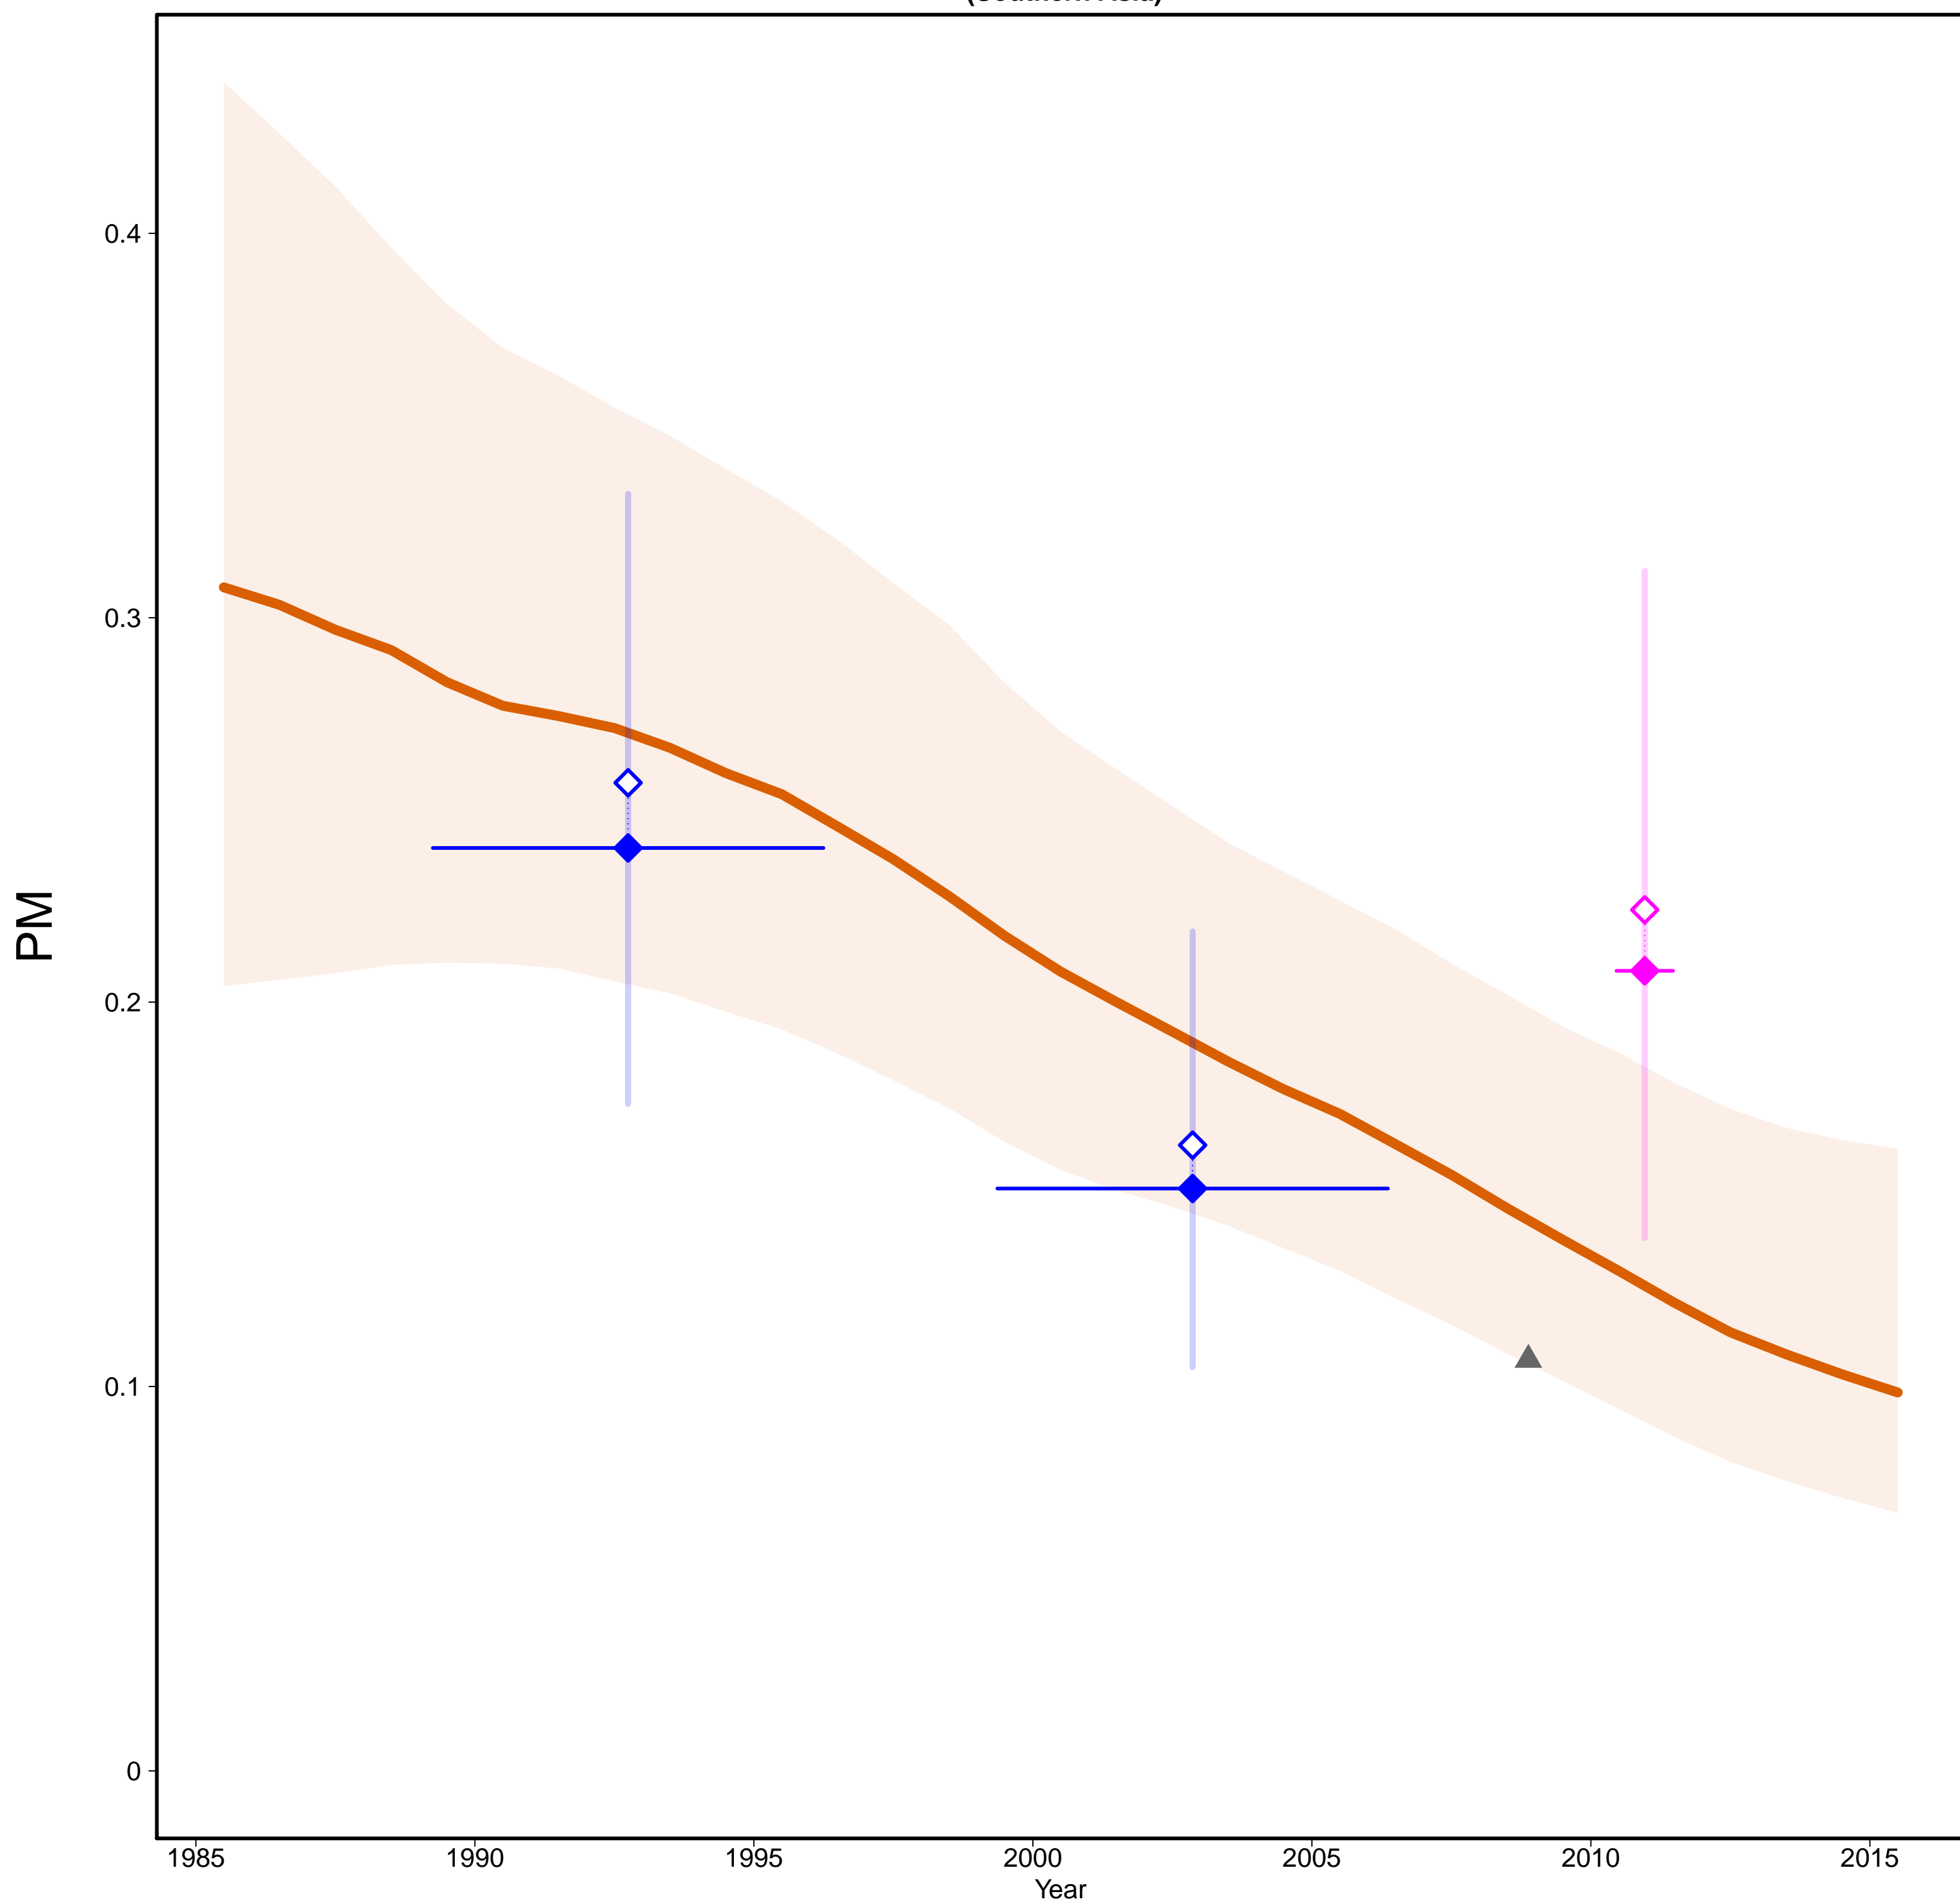

Nepal [NPL]  
(Southern Asia)

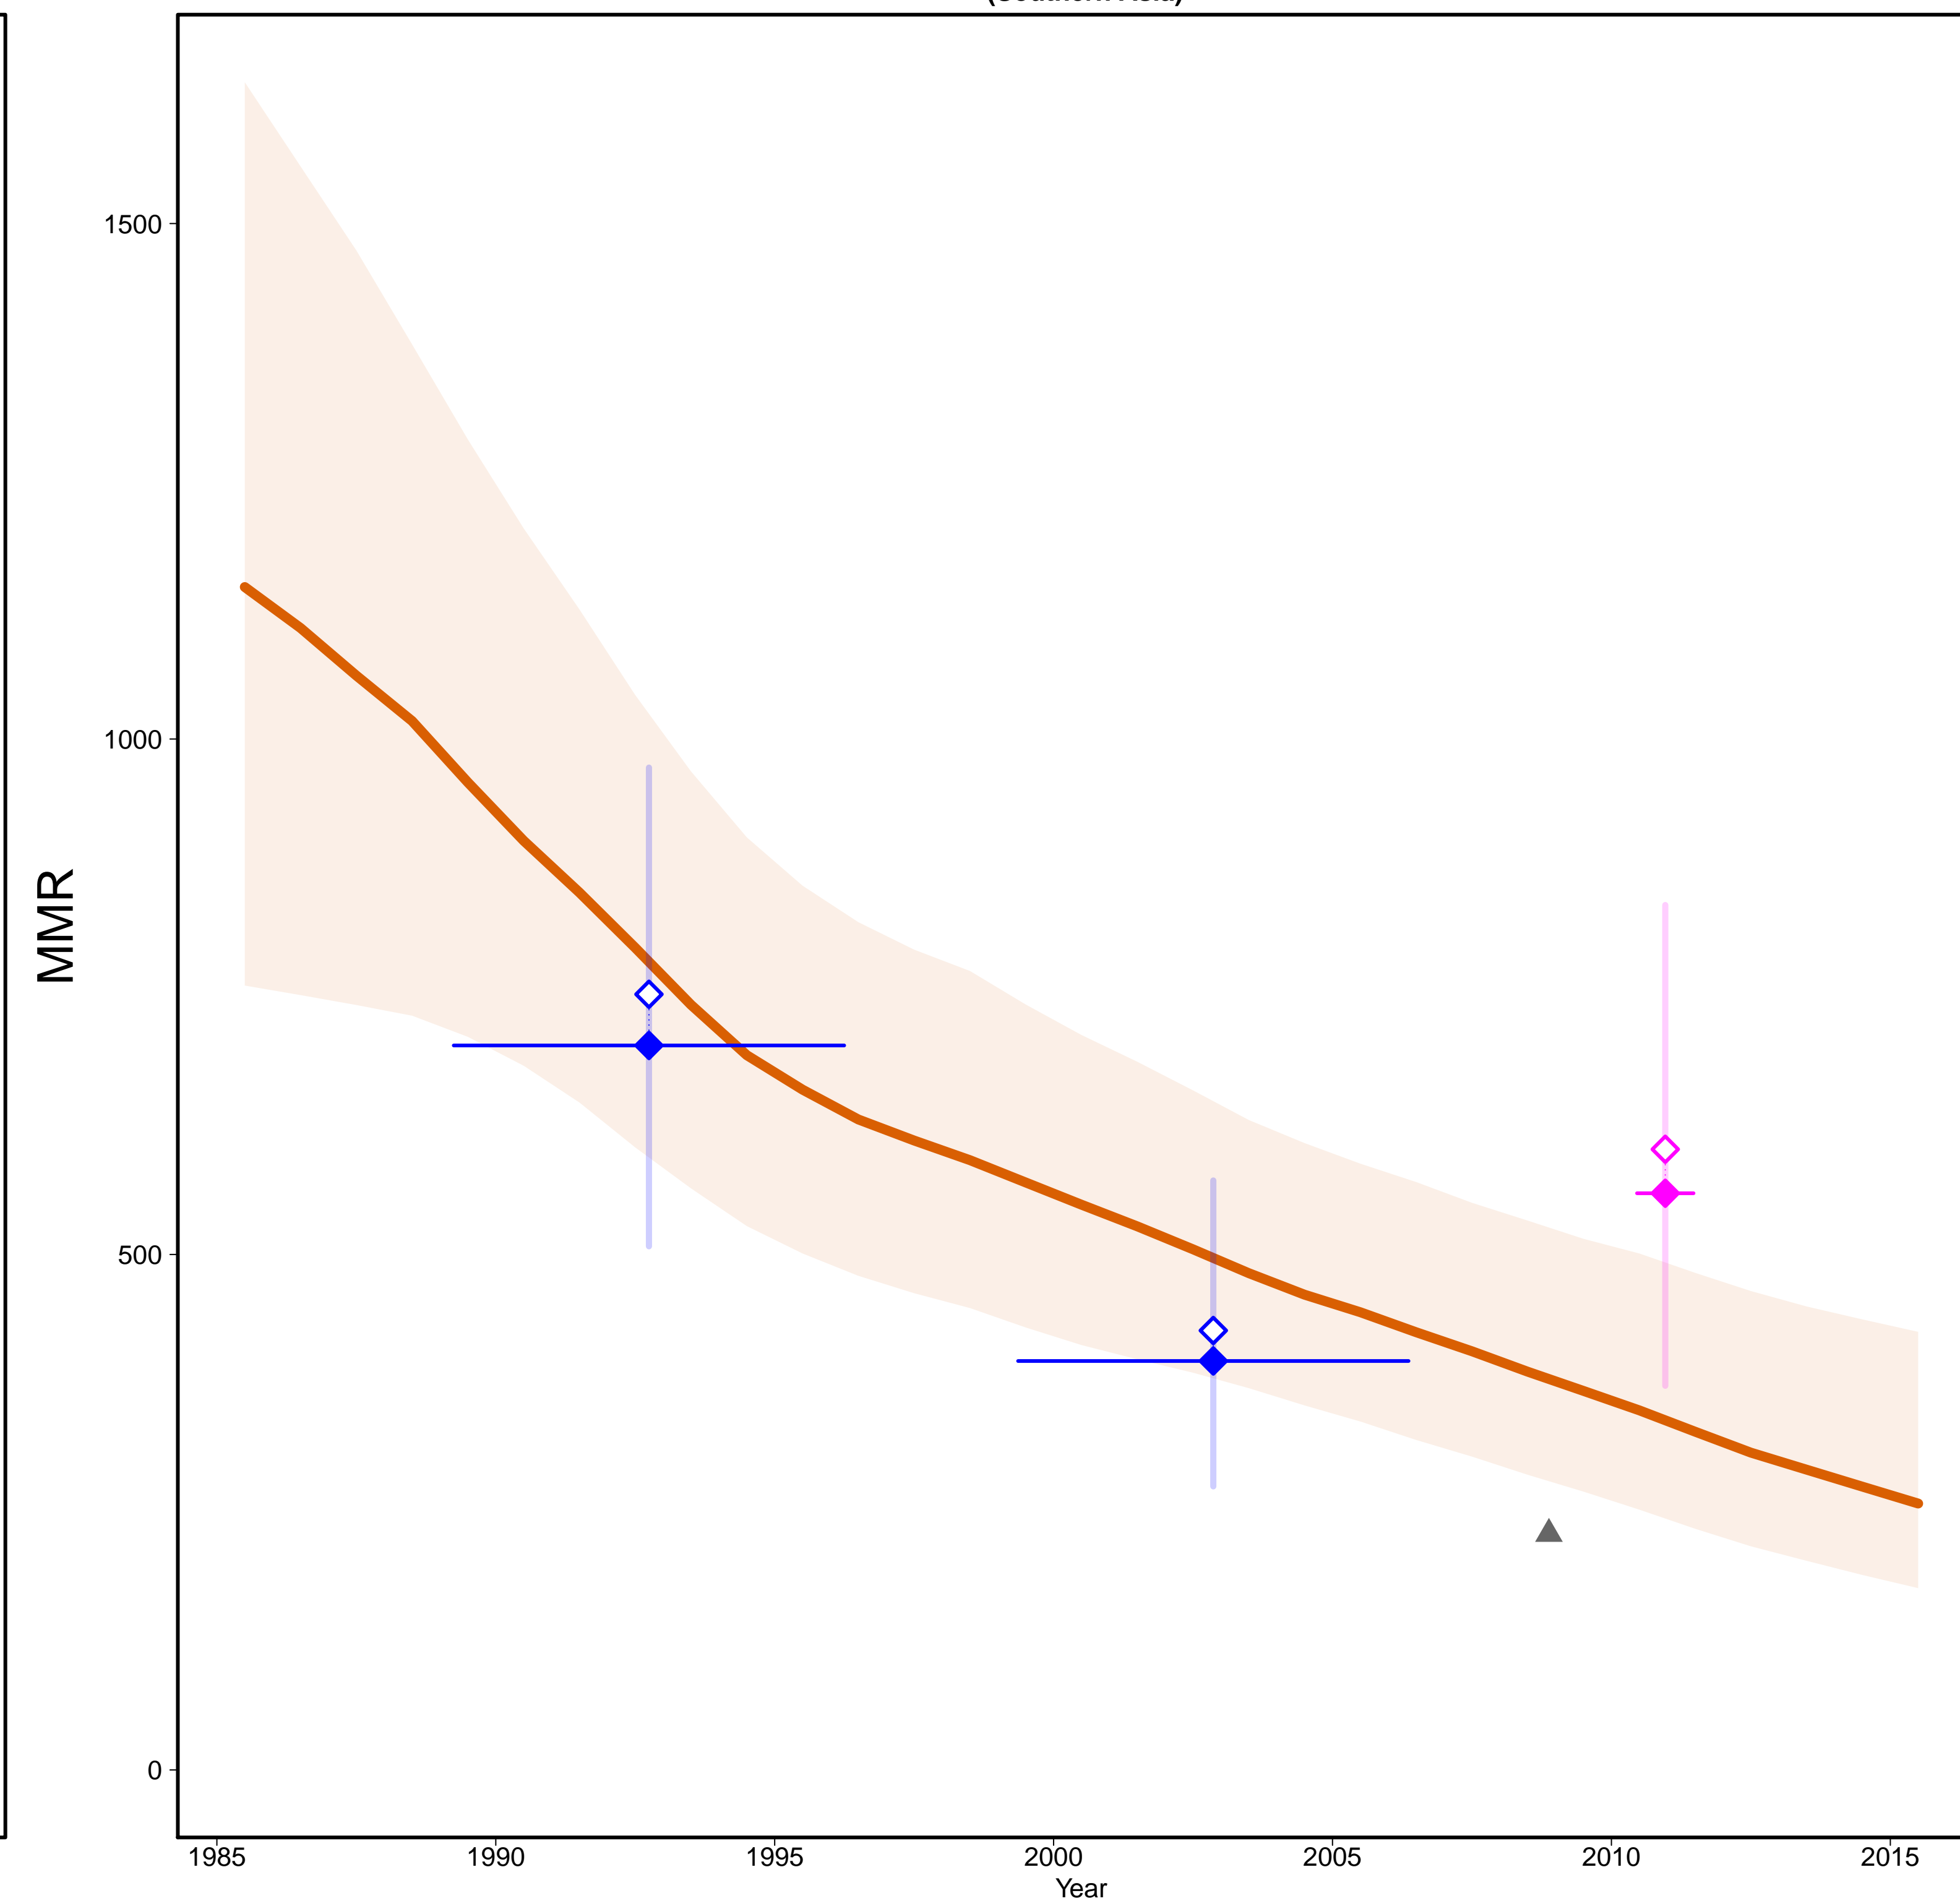

- Estimates –
- Mlate
- MMR Database 2015 –
- ◇ Observed Data
- ◆ Adjusted Data
- Data type –
- ◆ DHS
- ◆ Census
- ▲ Excluded misc. studies

Gross Domestic Product

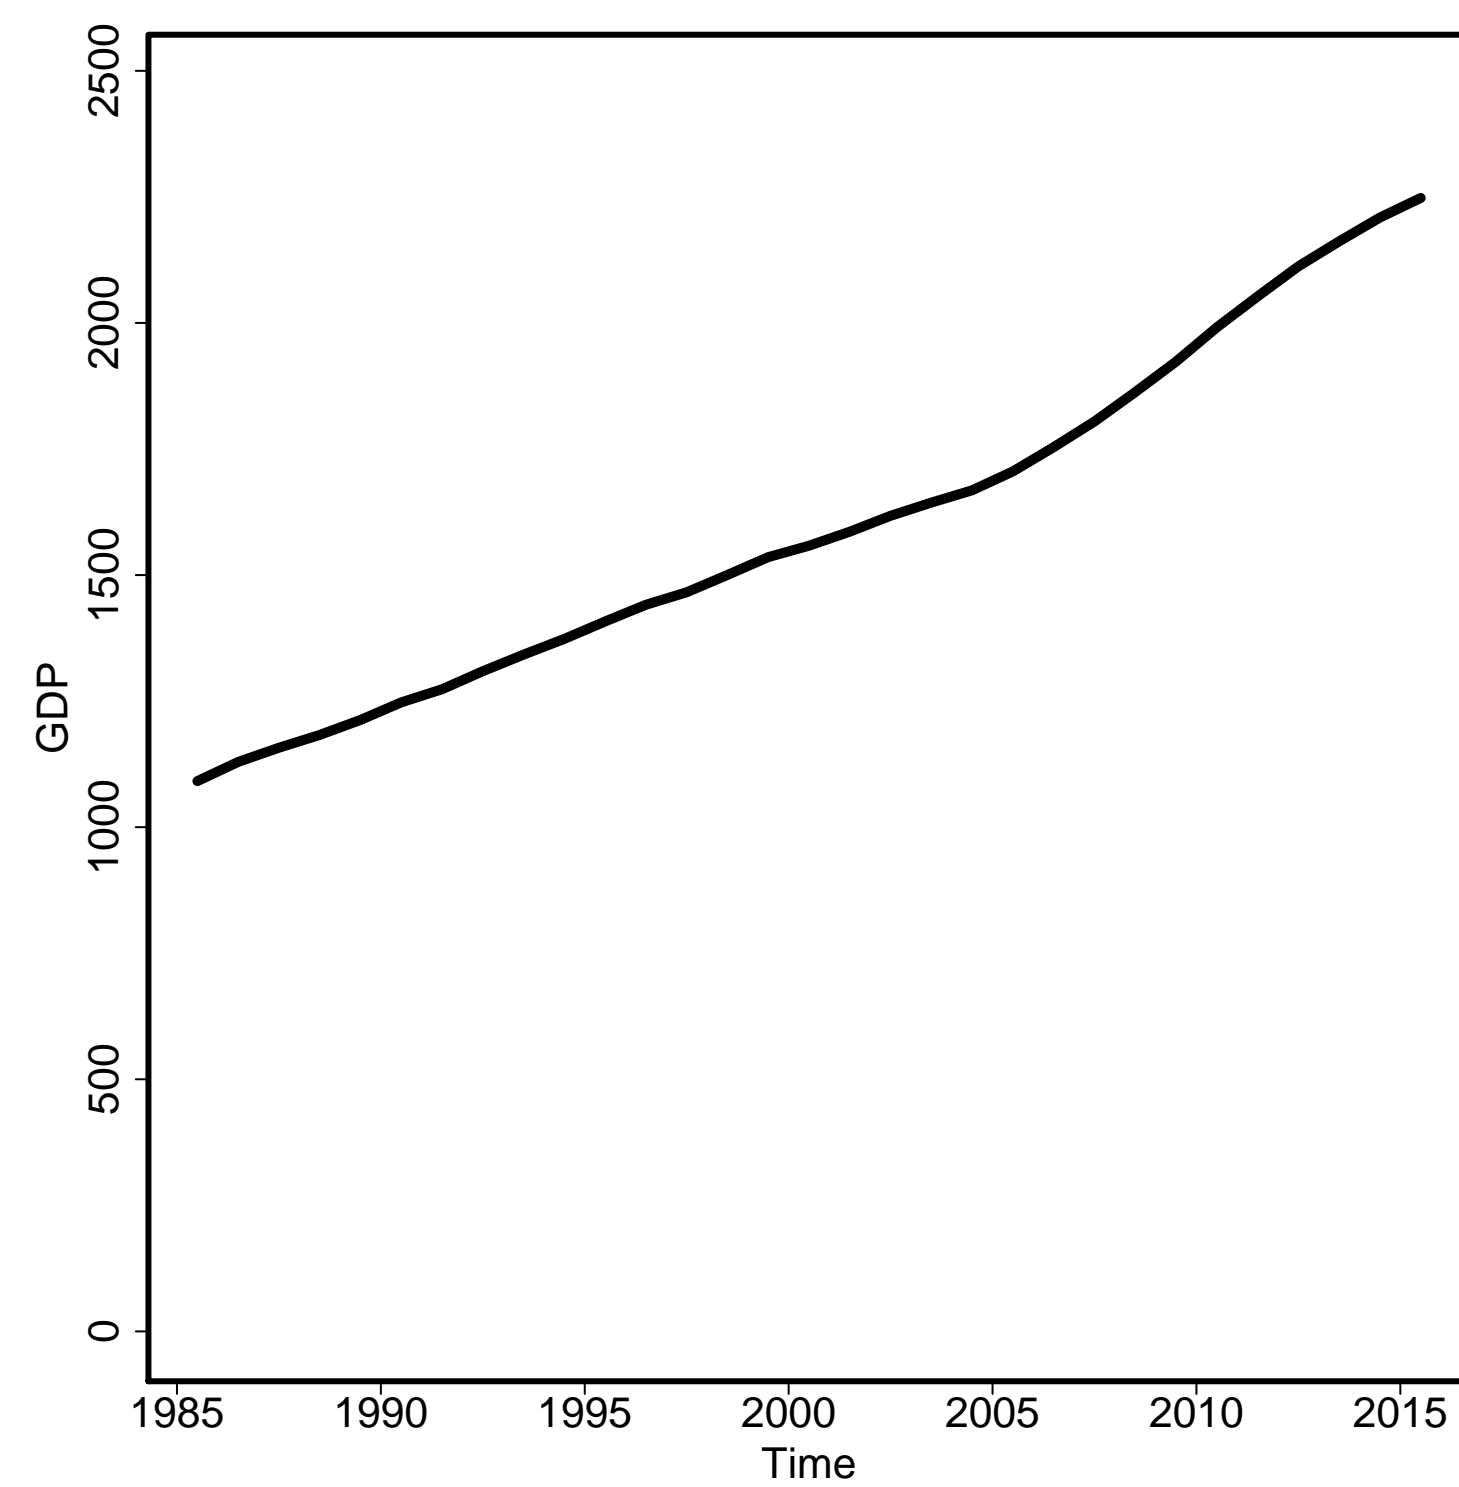

General Fertility Rate

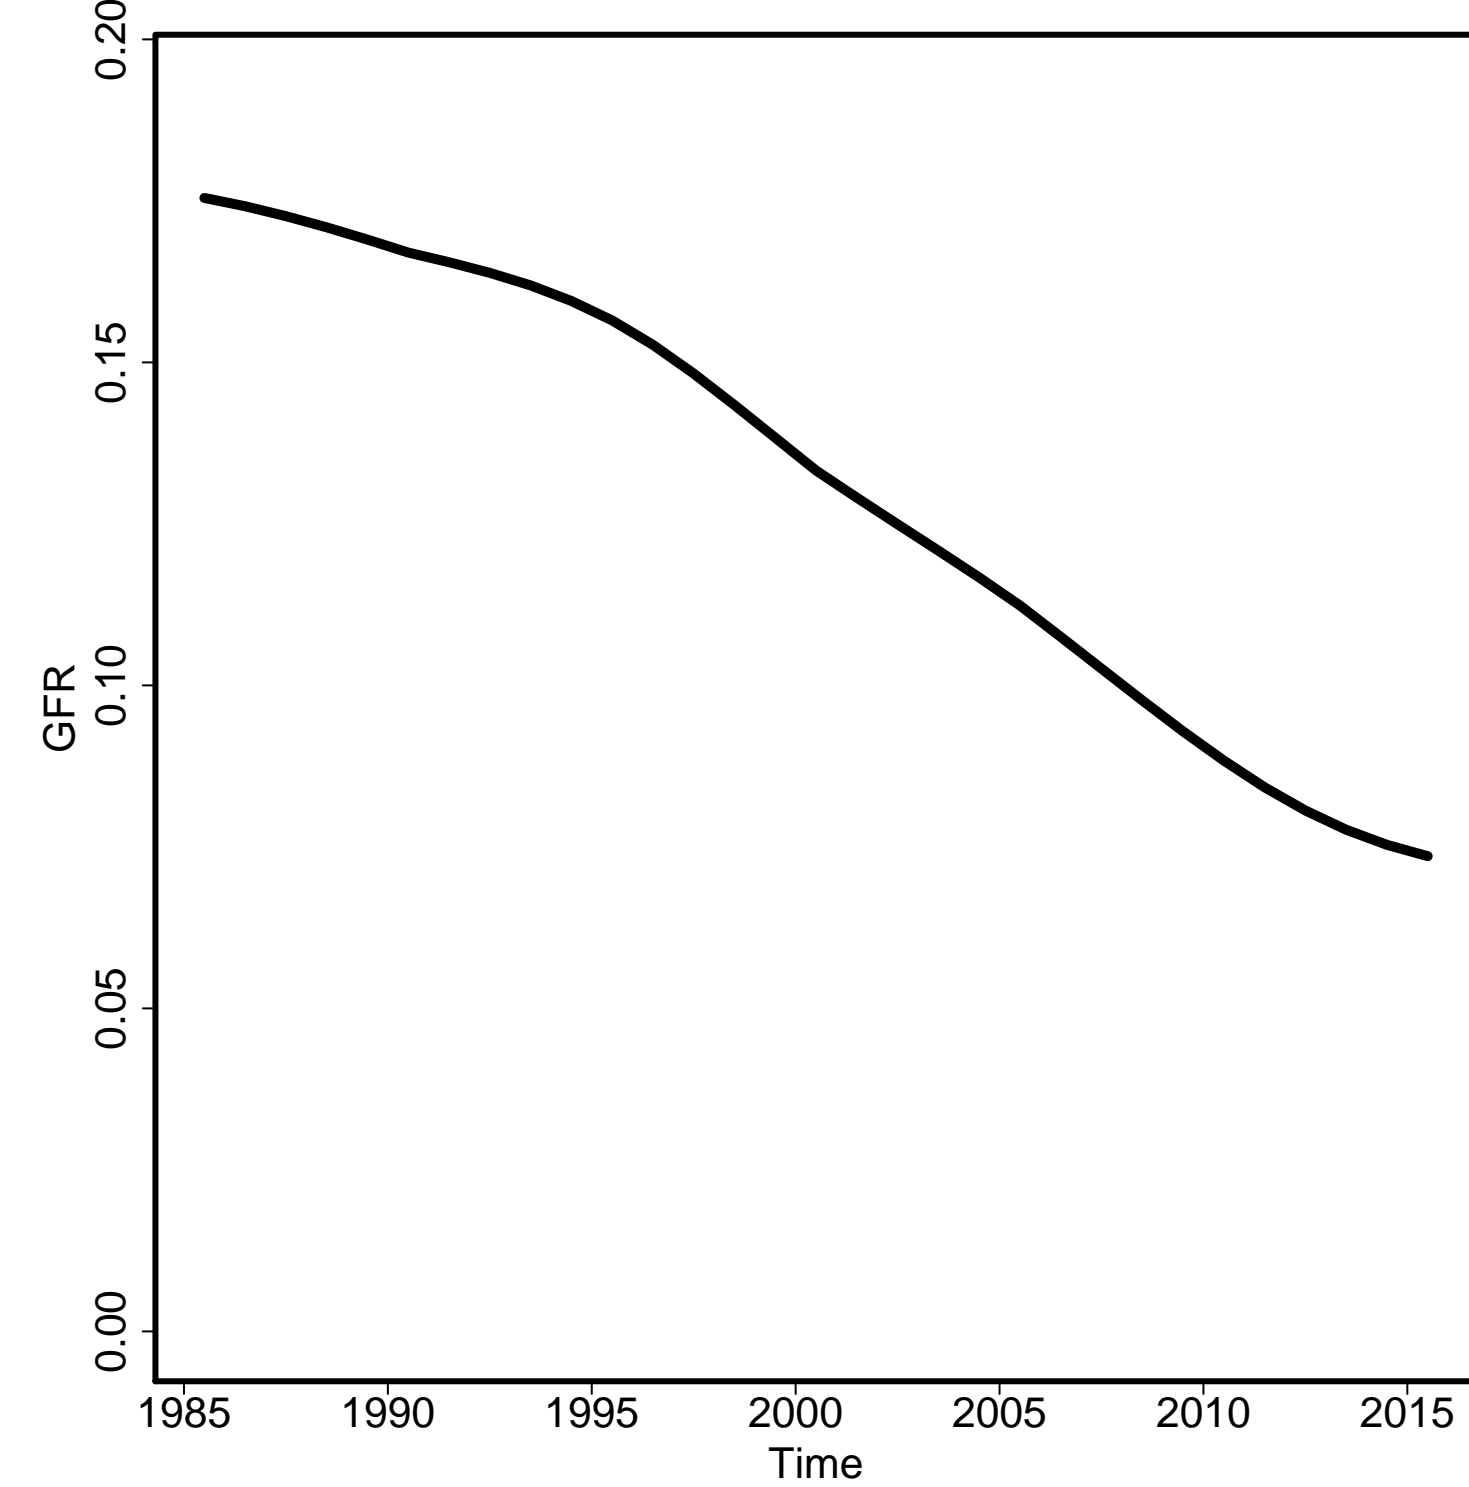

Skilled Attendance to Birth

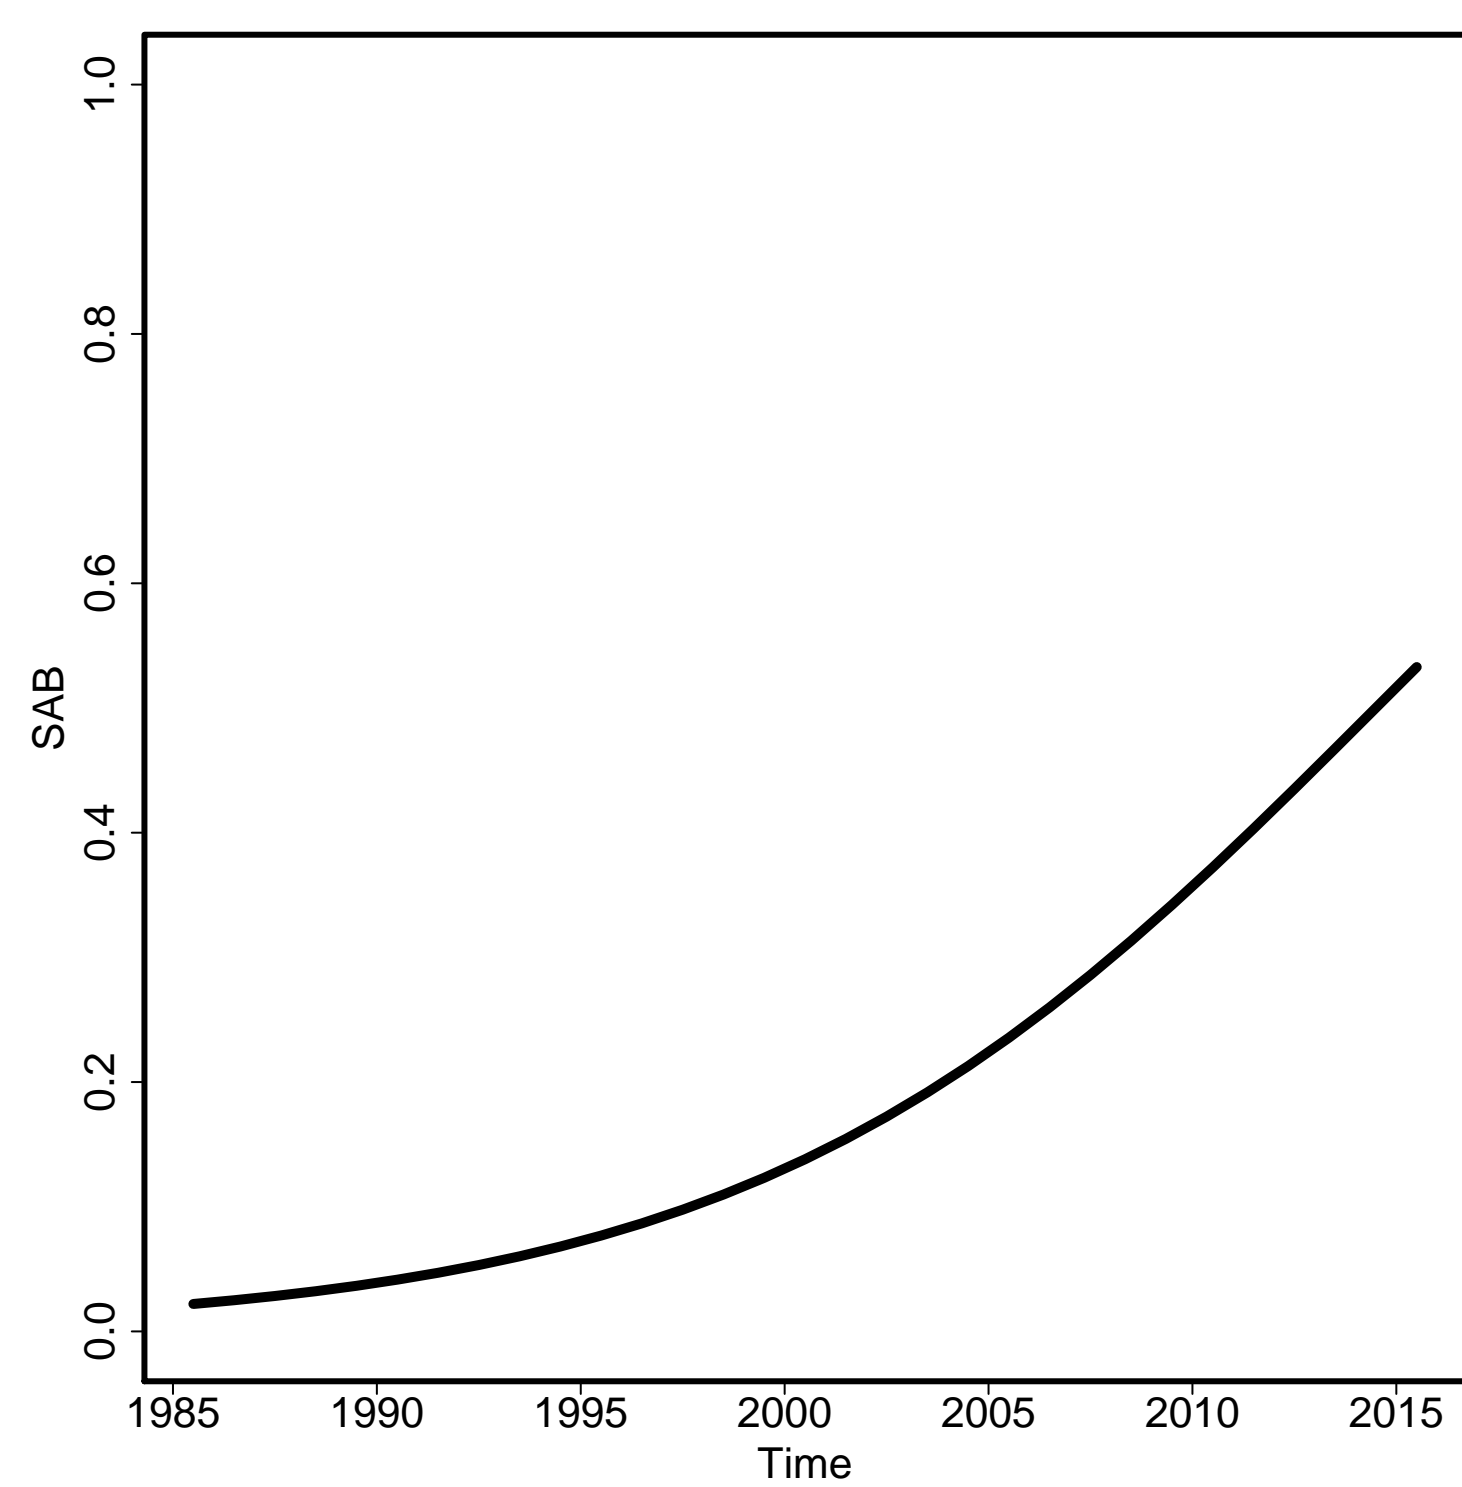

Envelope/Births

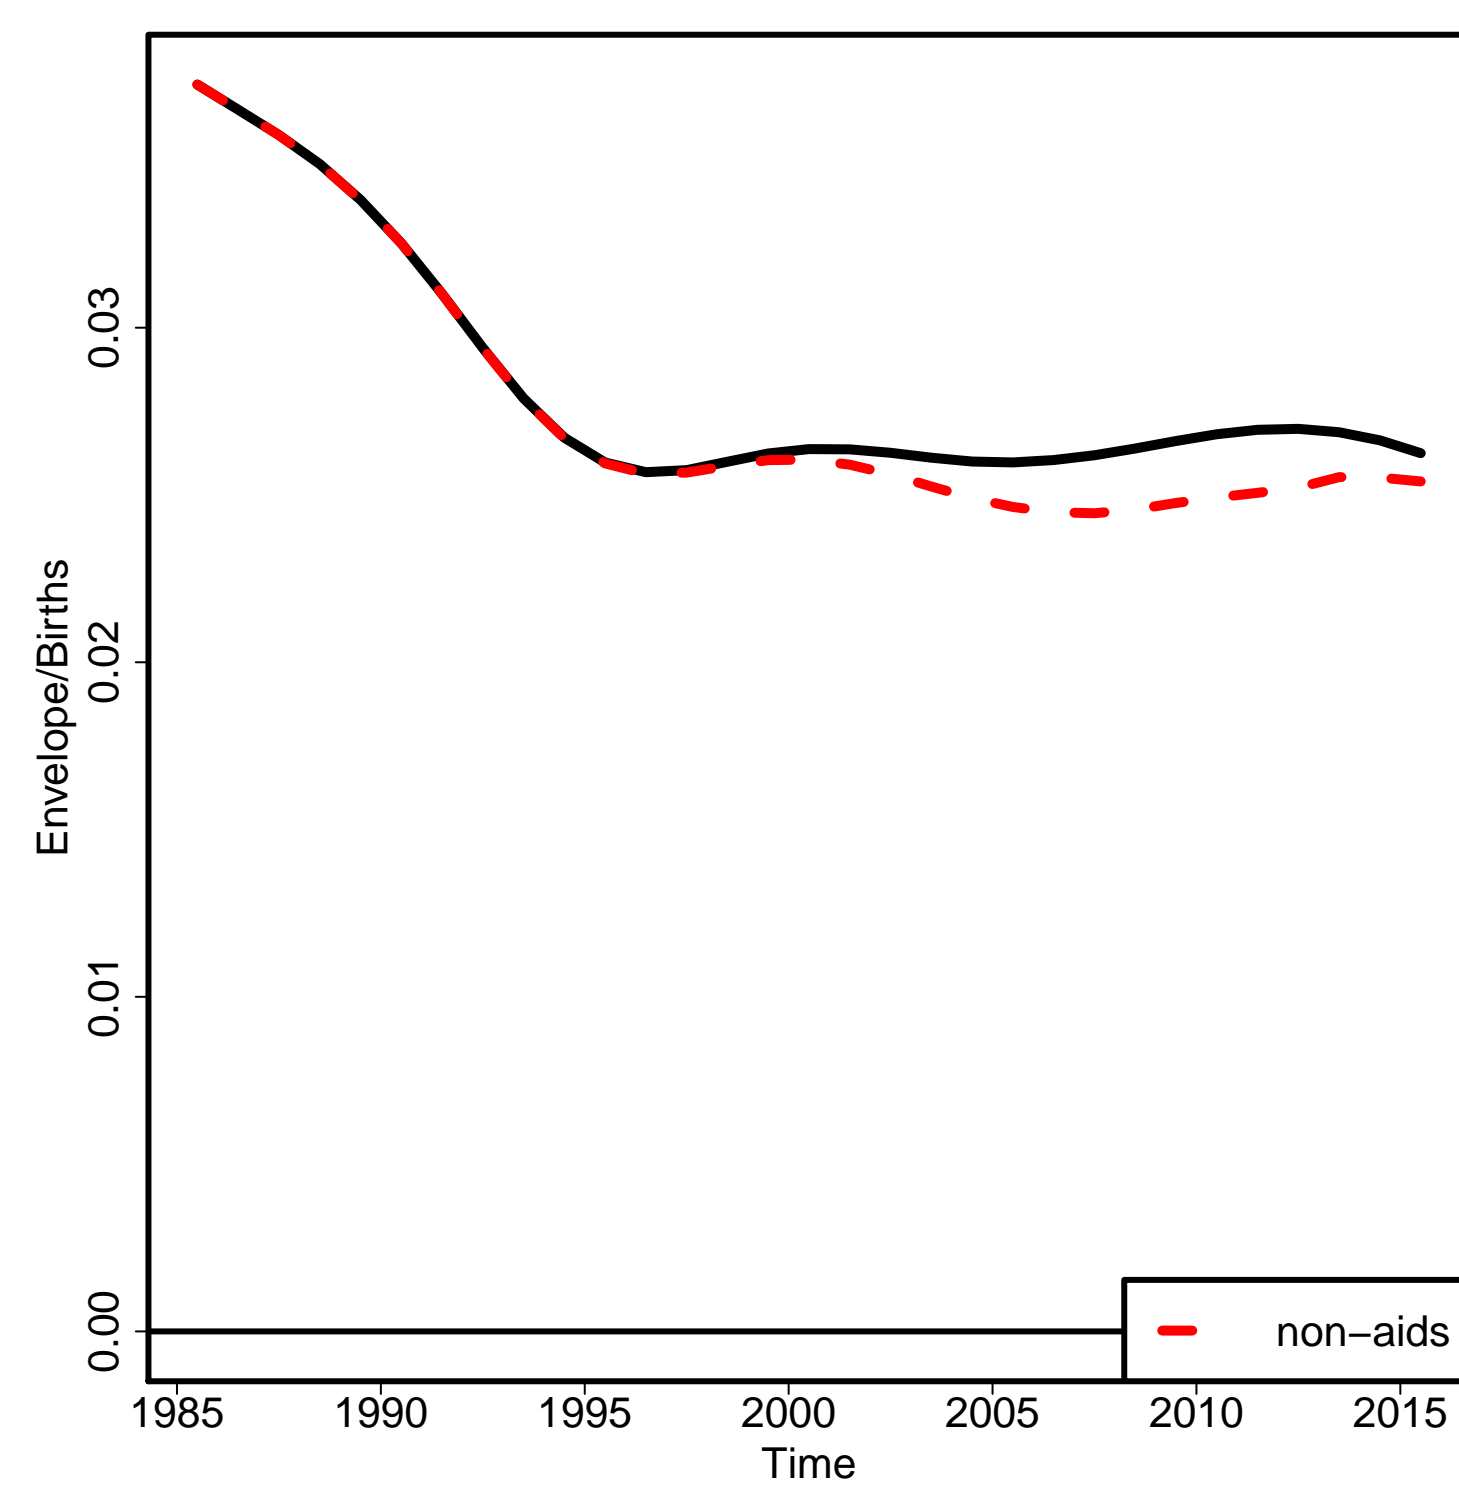

Non-aids MMR

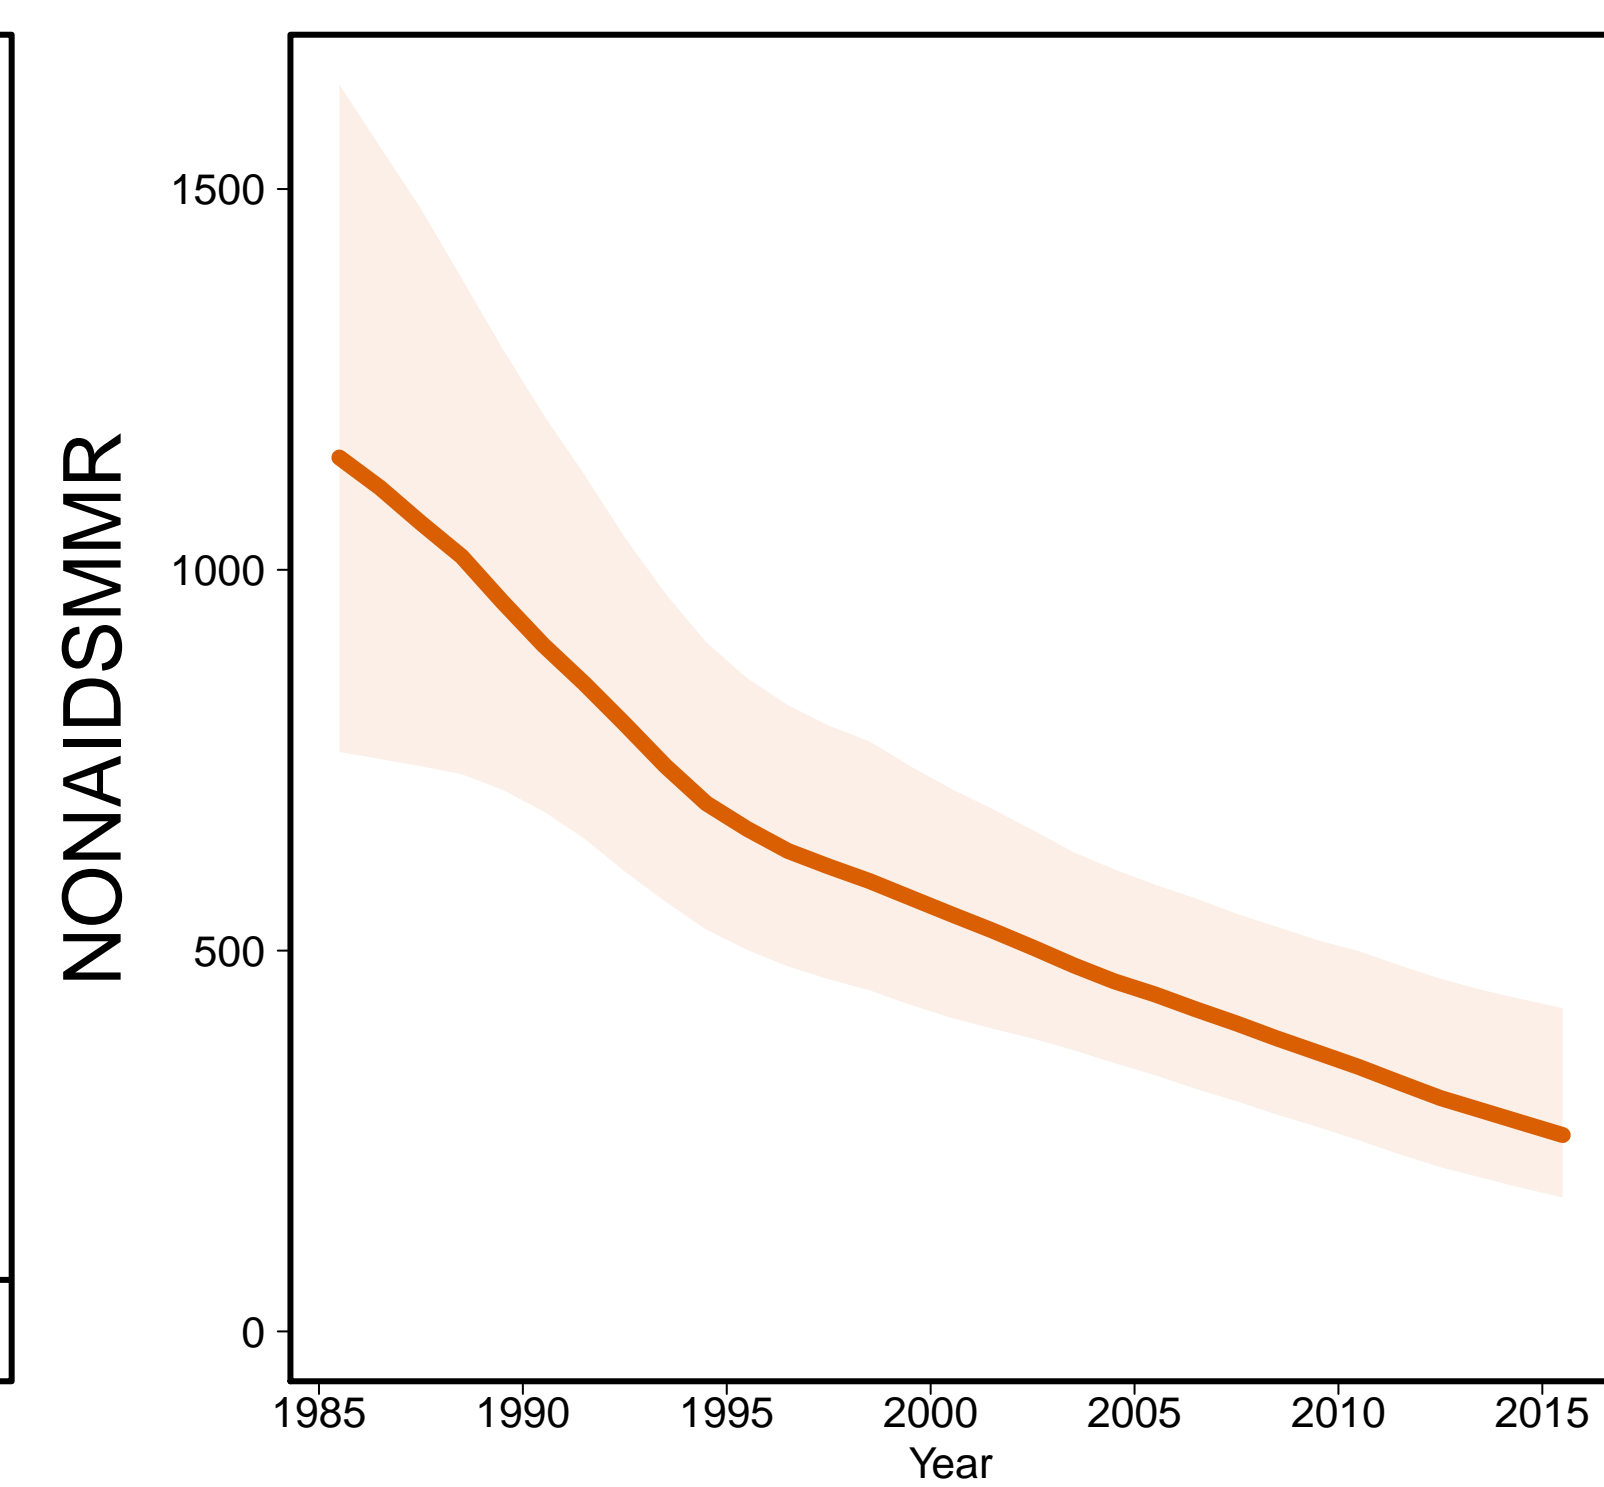

Aids MMR

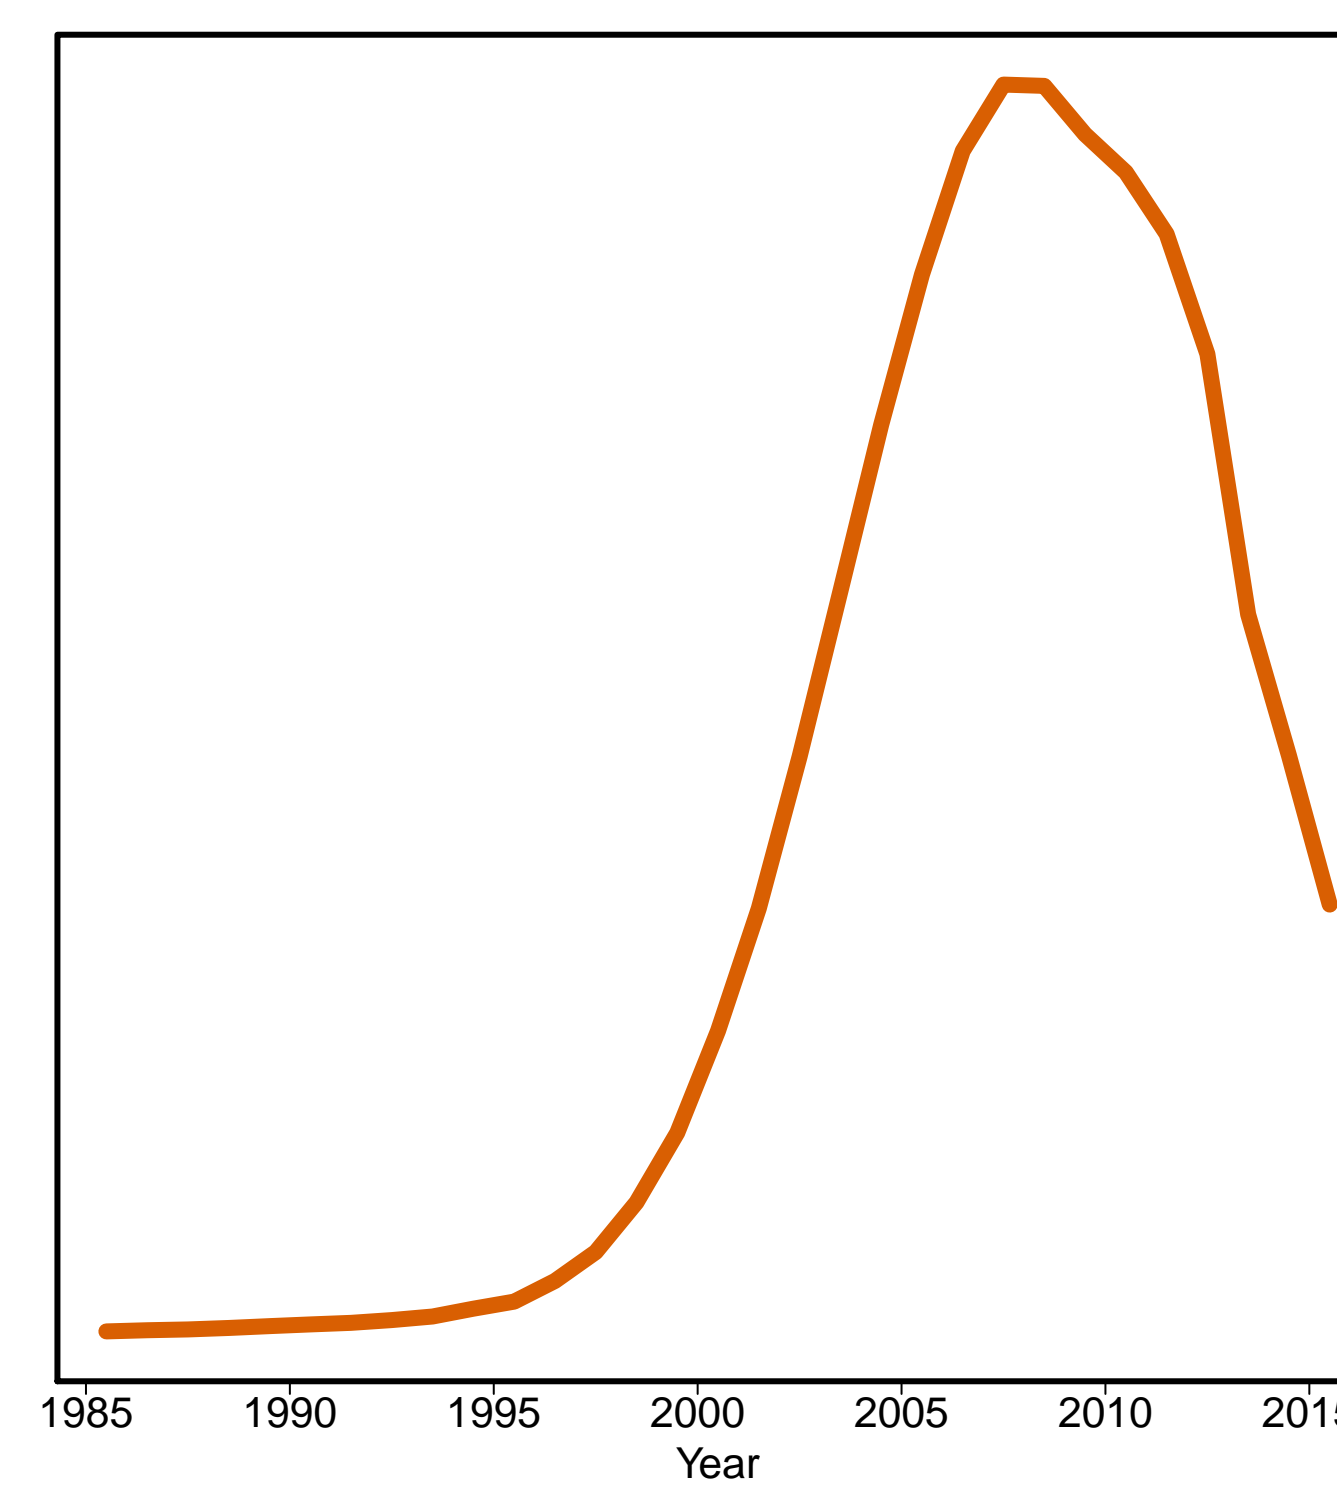

Netherlands [NLD]  
(Developed regions)

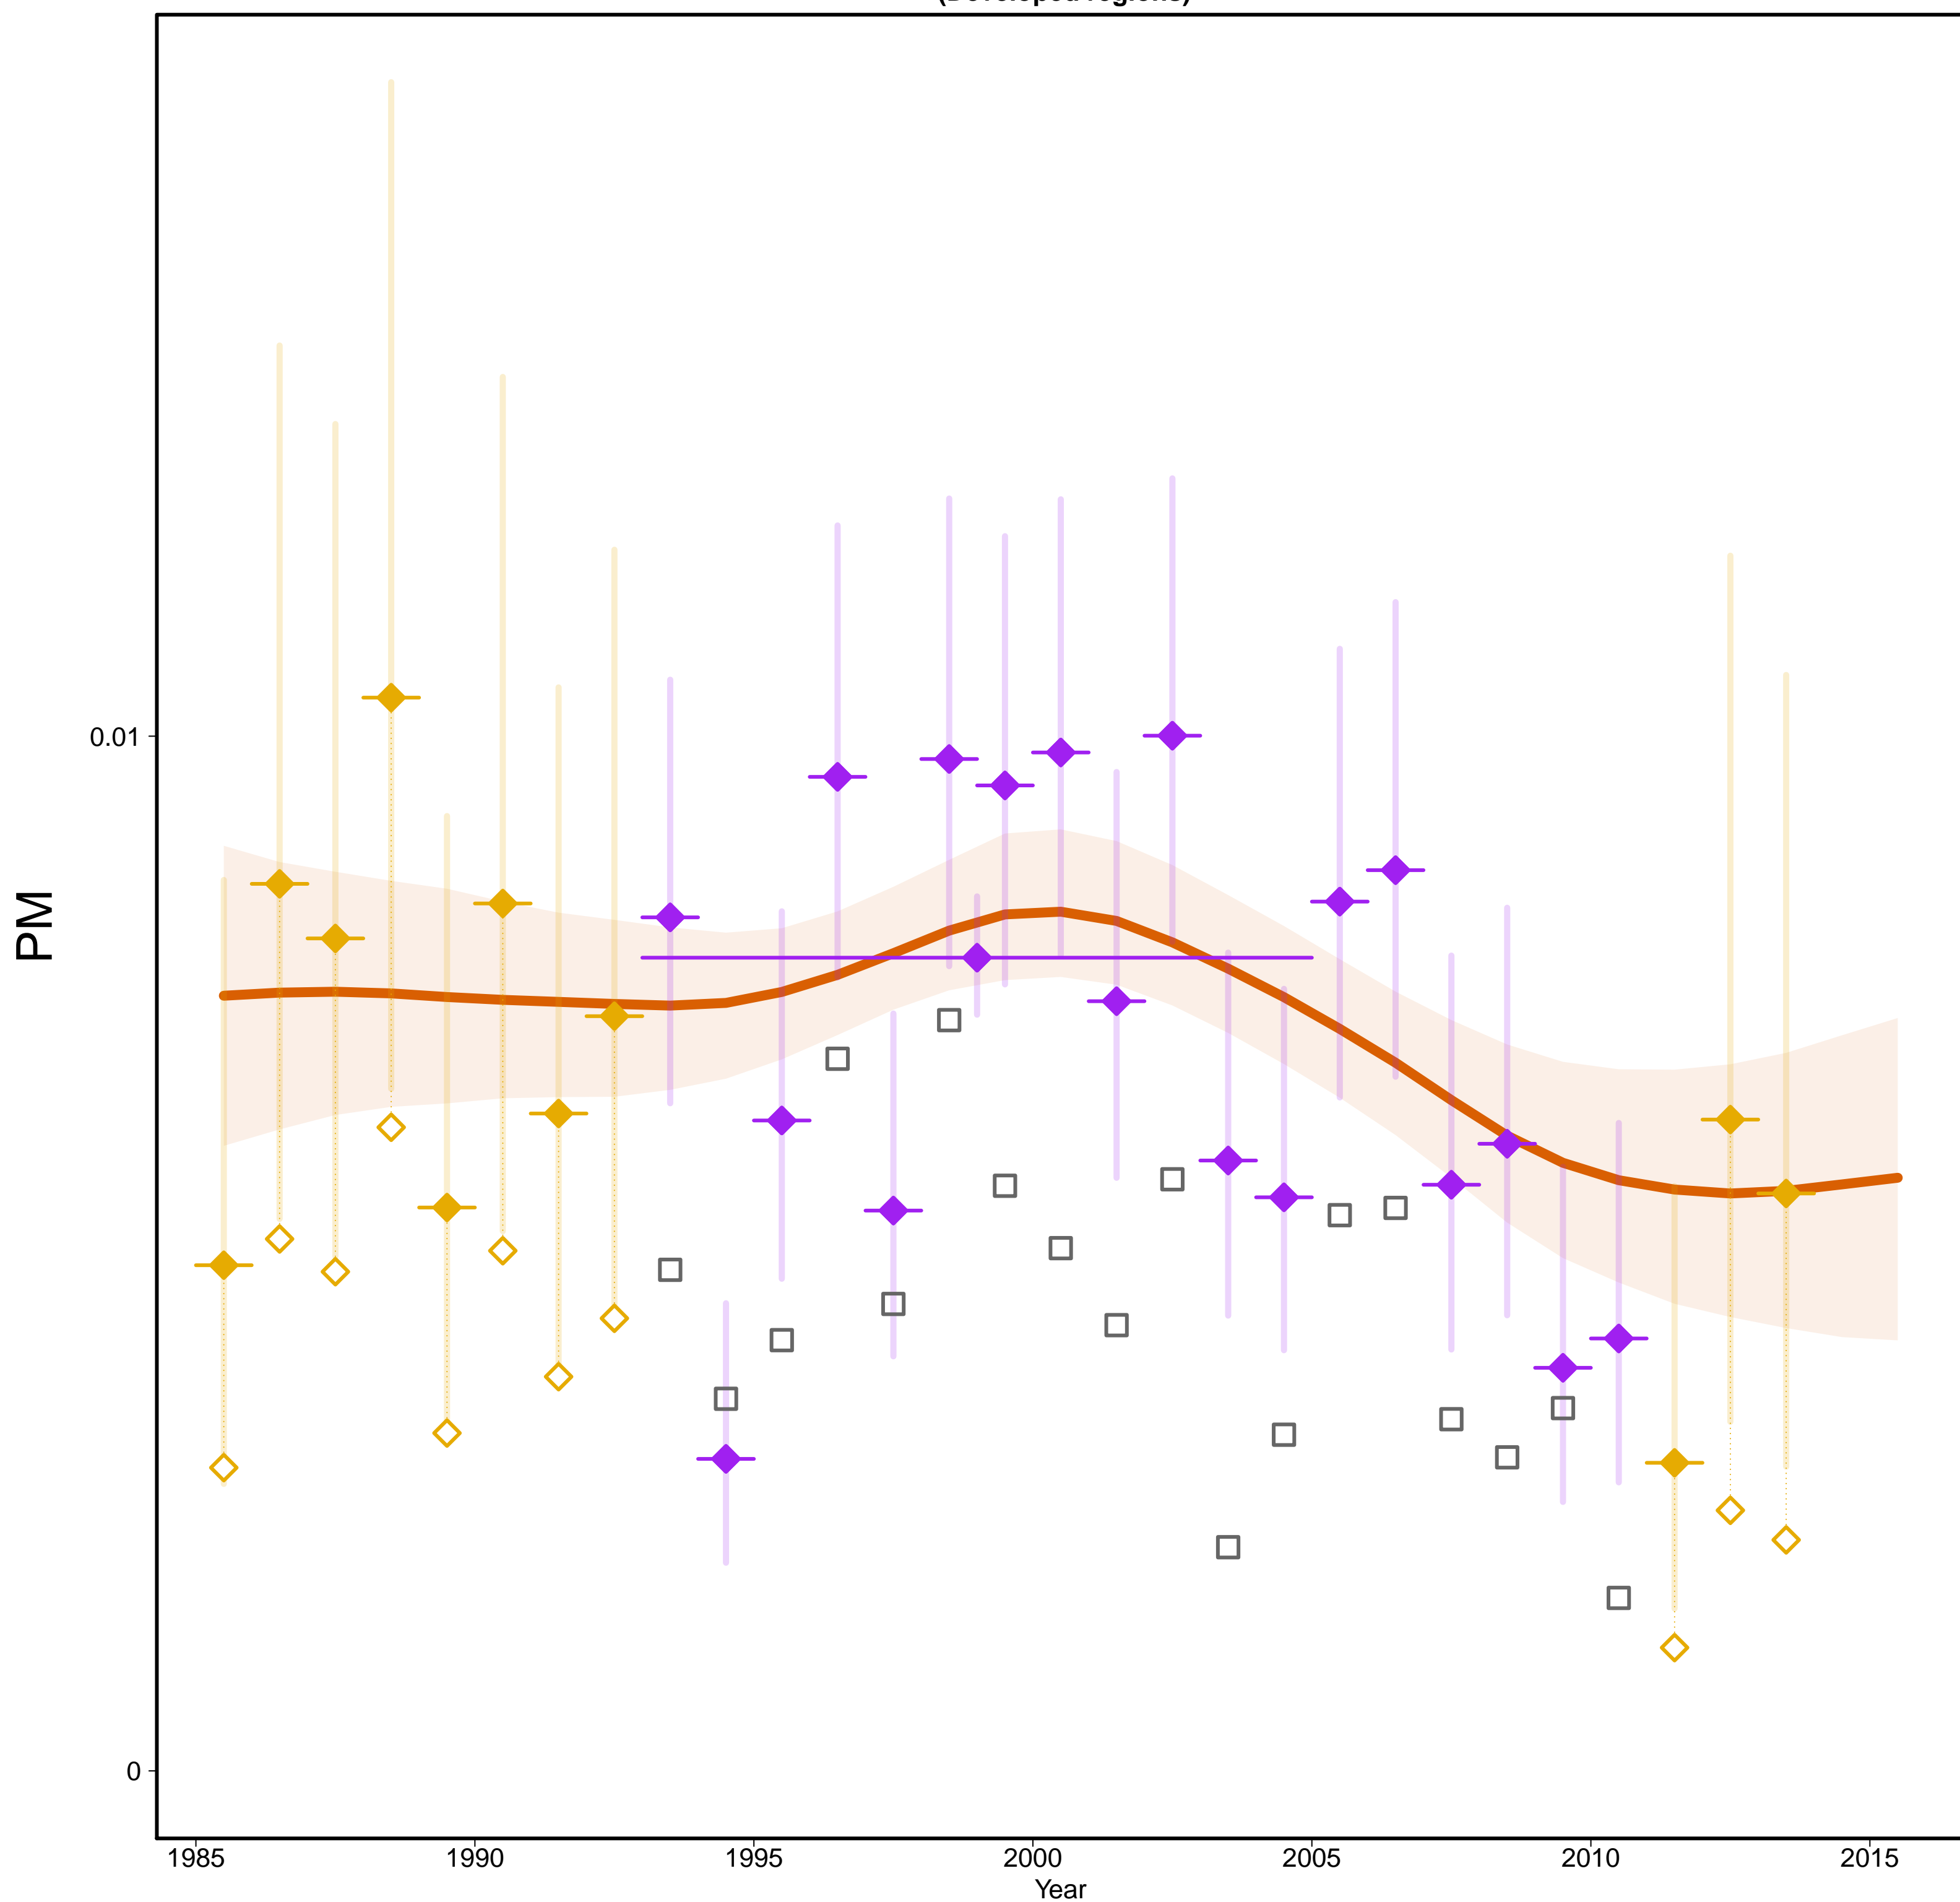

Netherlands [NLD]  
(Developed regions)

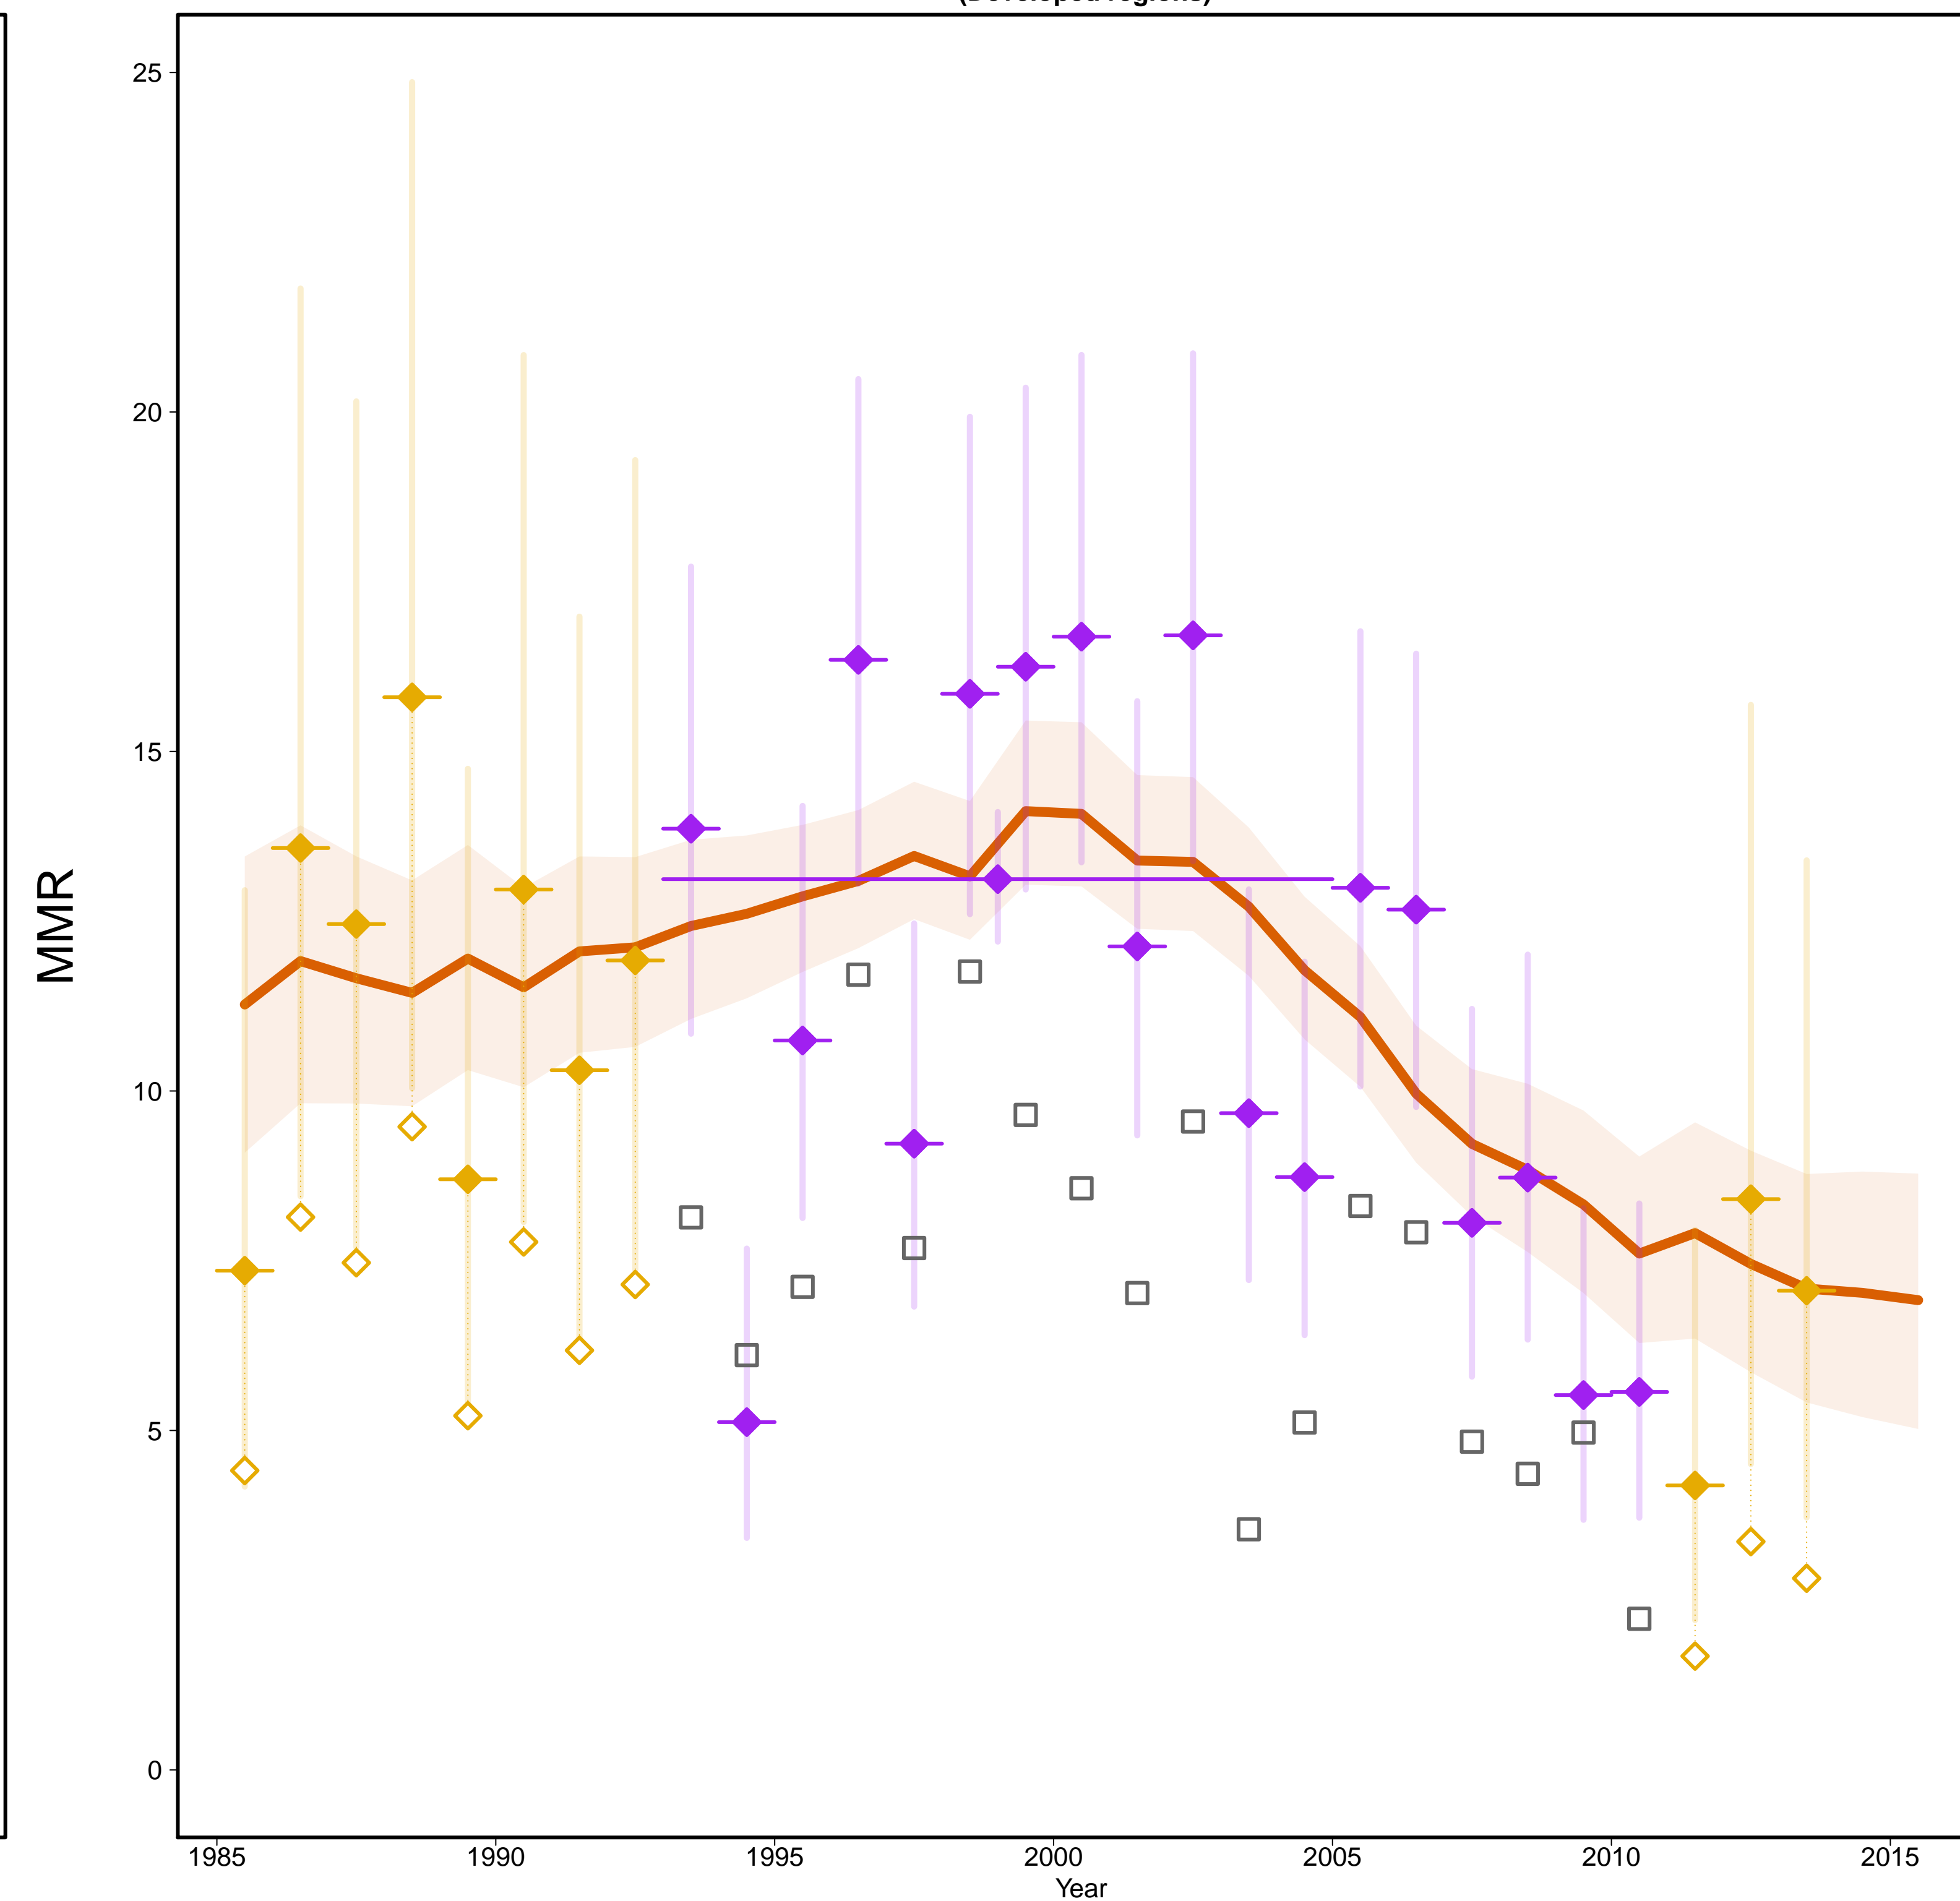

- Estimates —
- MMR Database 2015 —
- ◇ Observed Data
- ◆ Adjusted Data
- Data type —
- ◆ VR
- ◆ Spec. studies
- Excluded VR data  
(overlap with specialized study)

Gross Domestic Product

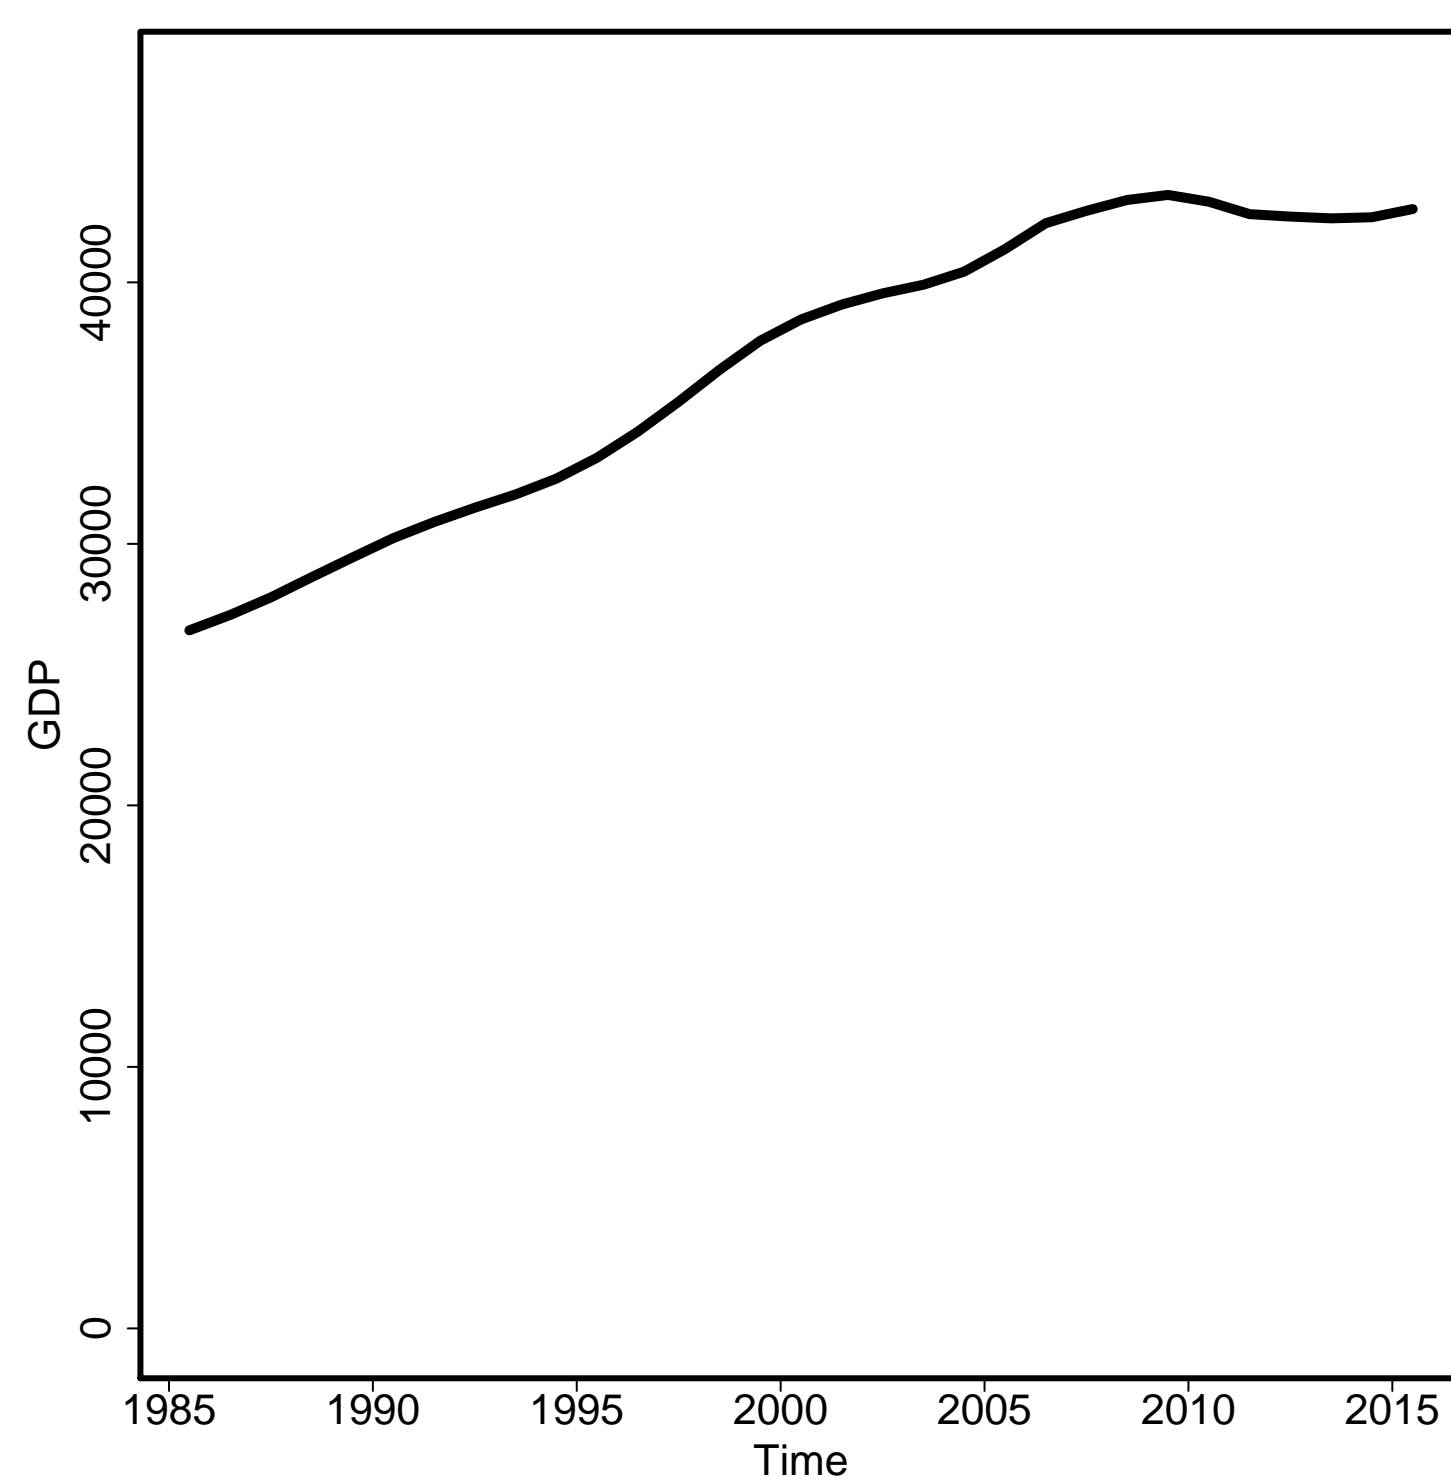

General Fertility Rate

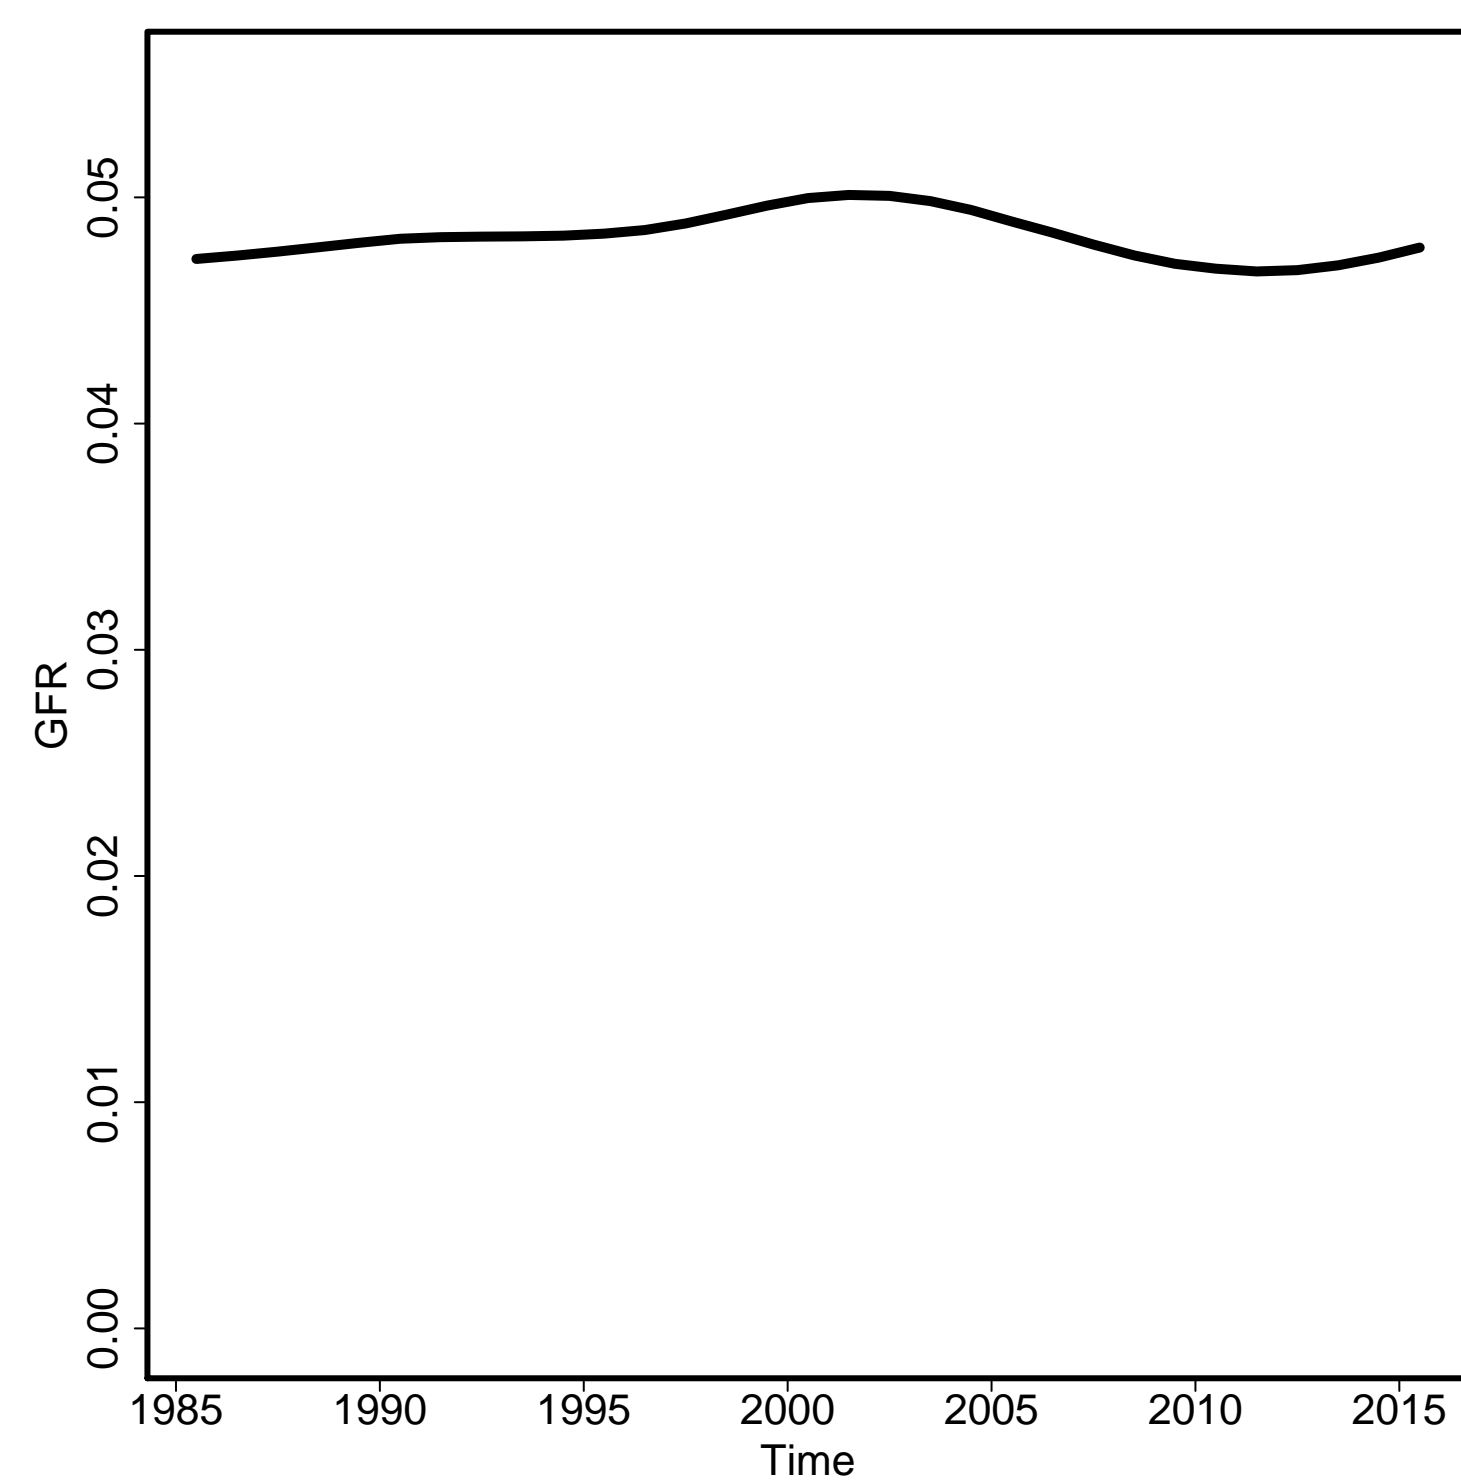

Skilled Attendance to Birth

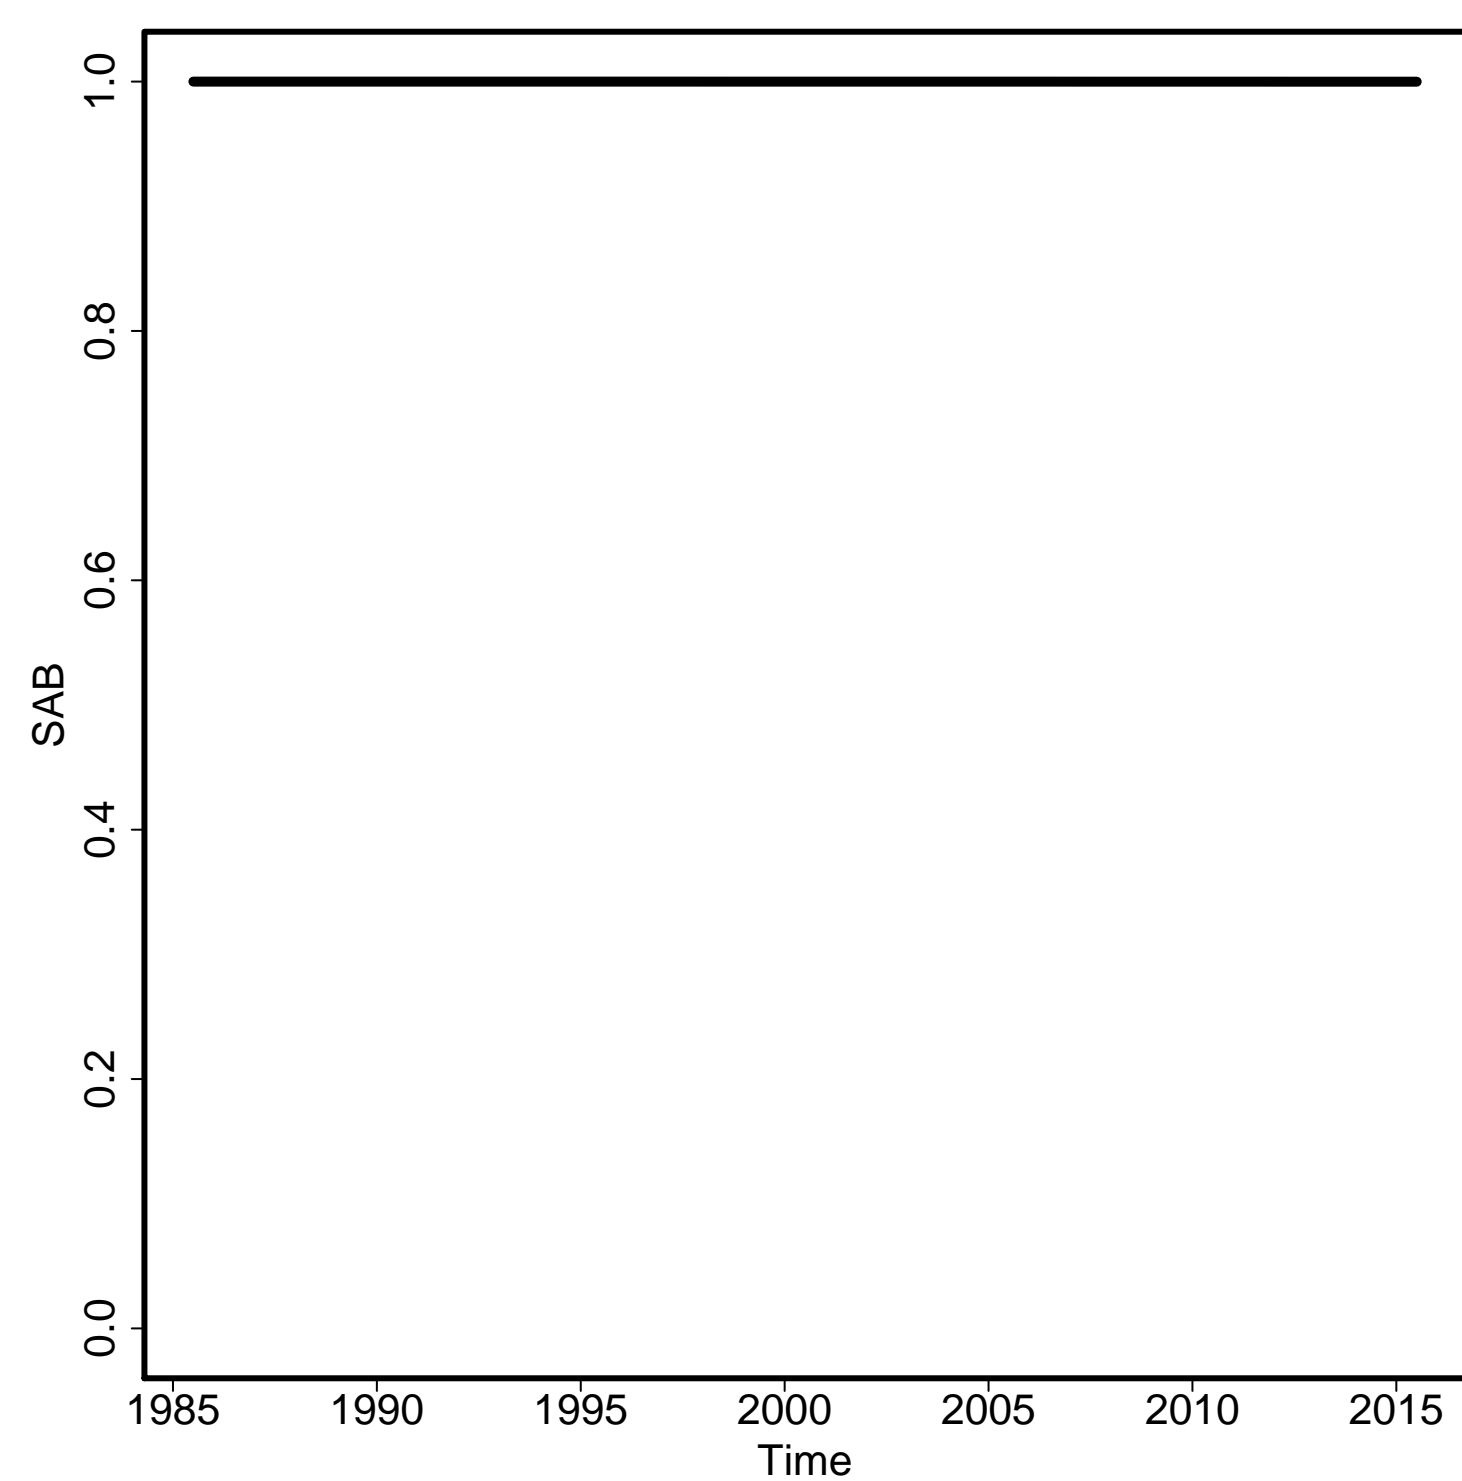

Envelope/Births

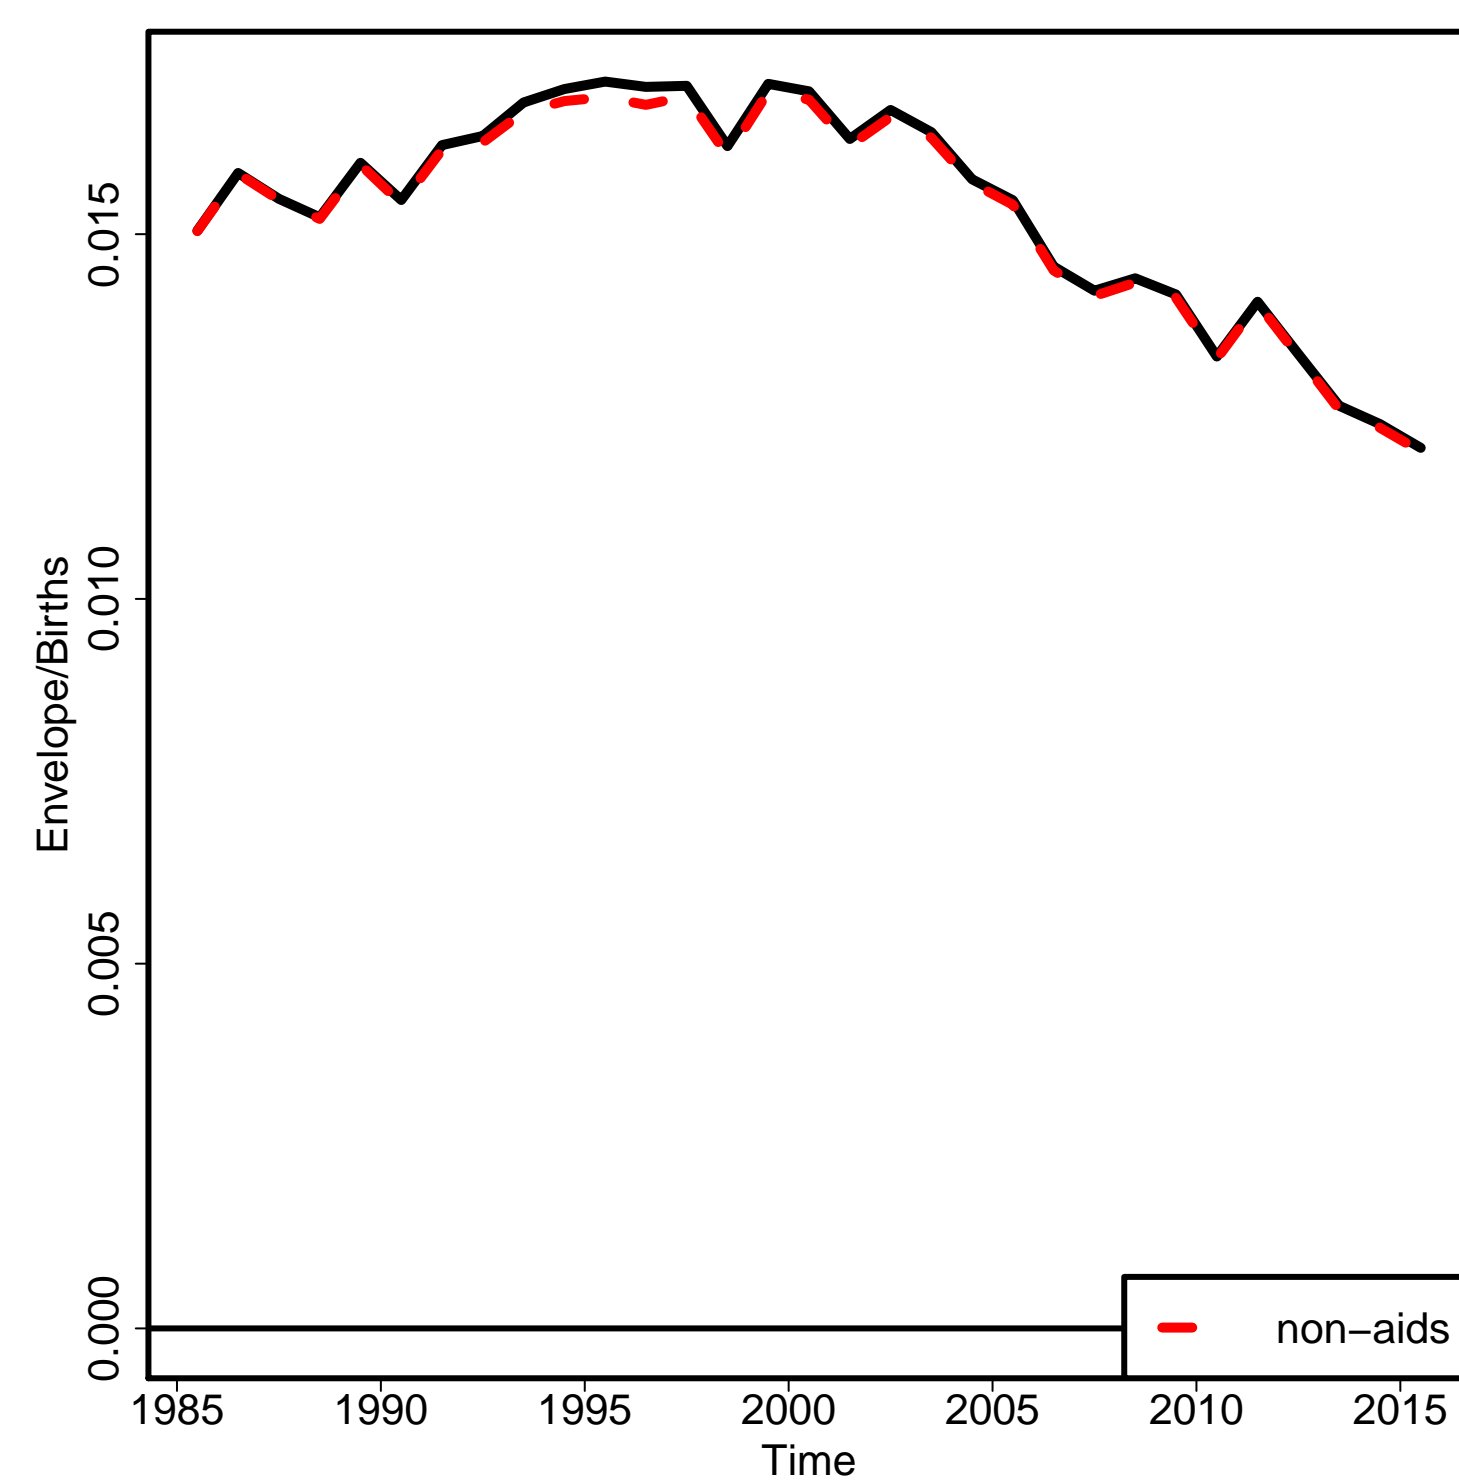

Non-aids MMR

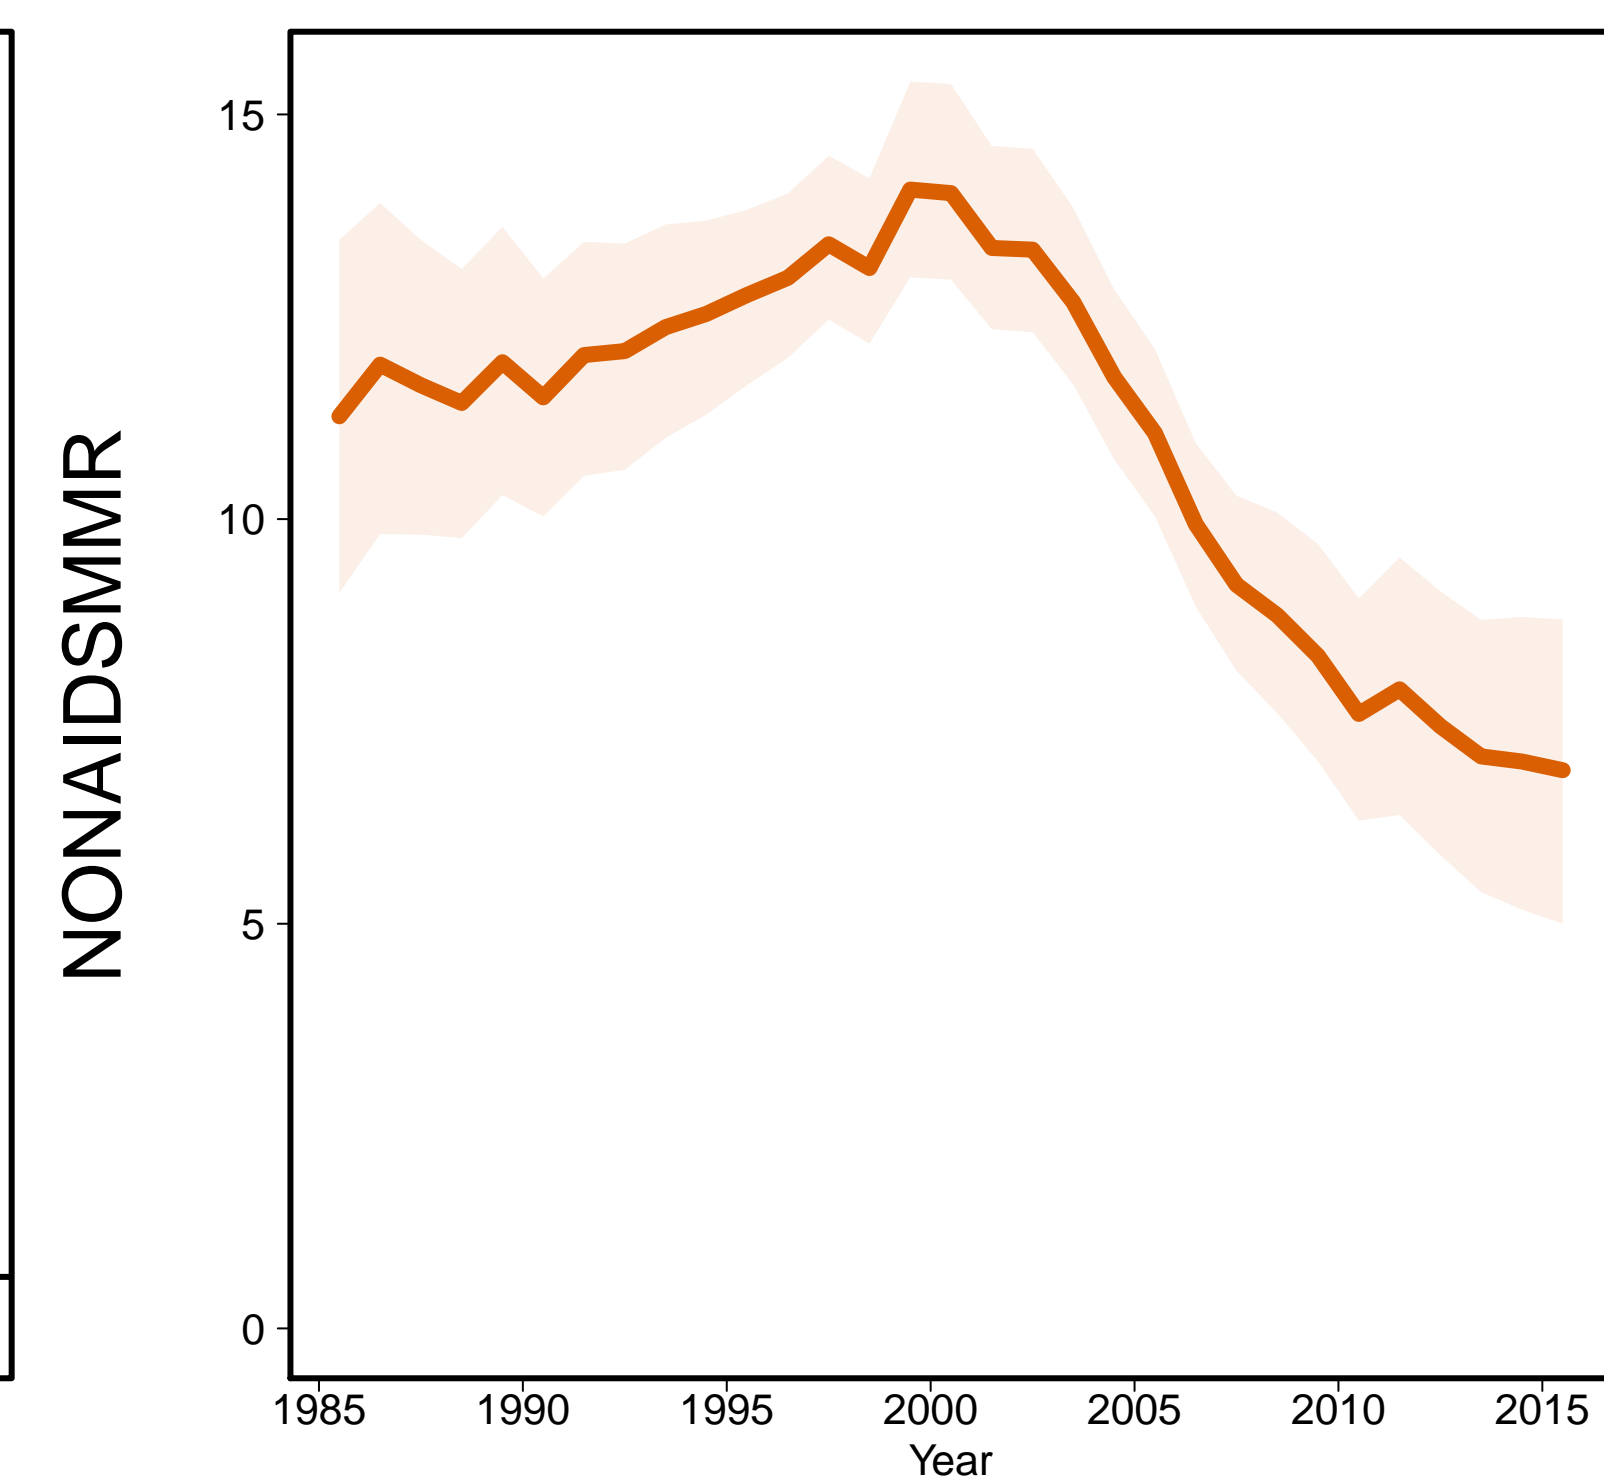

Aids MMR

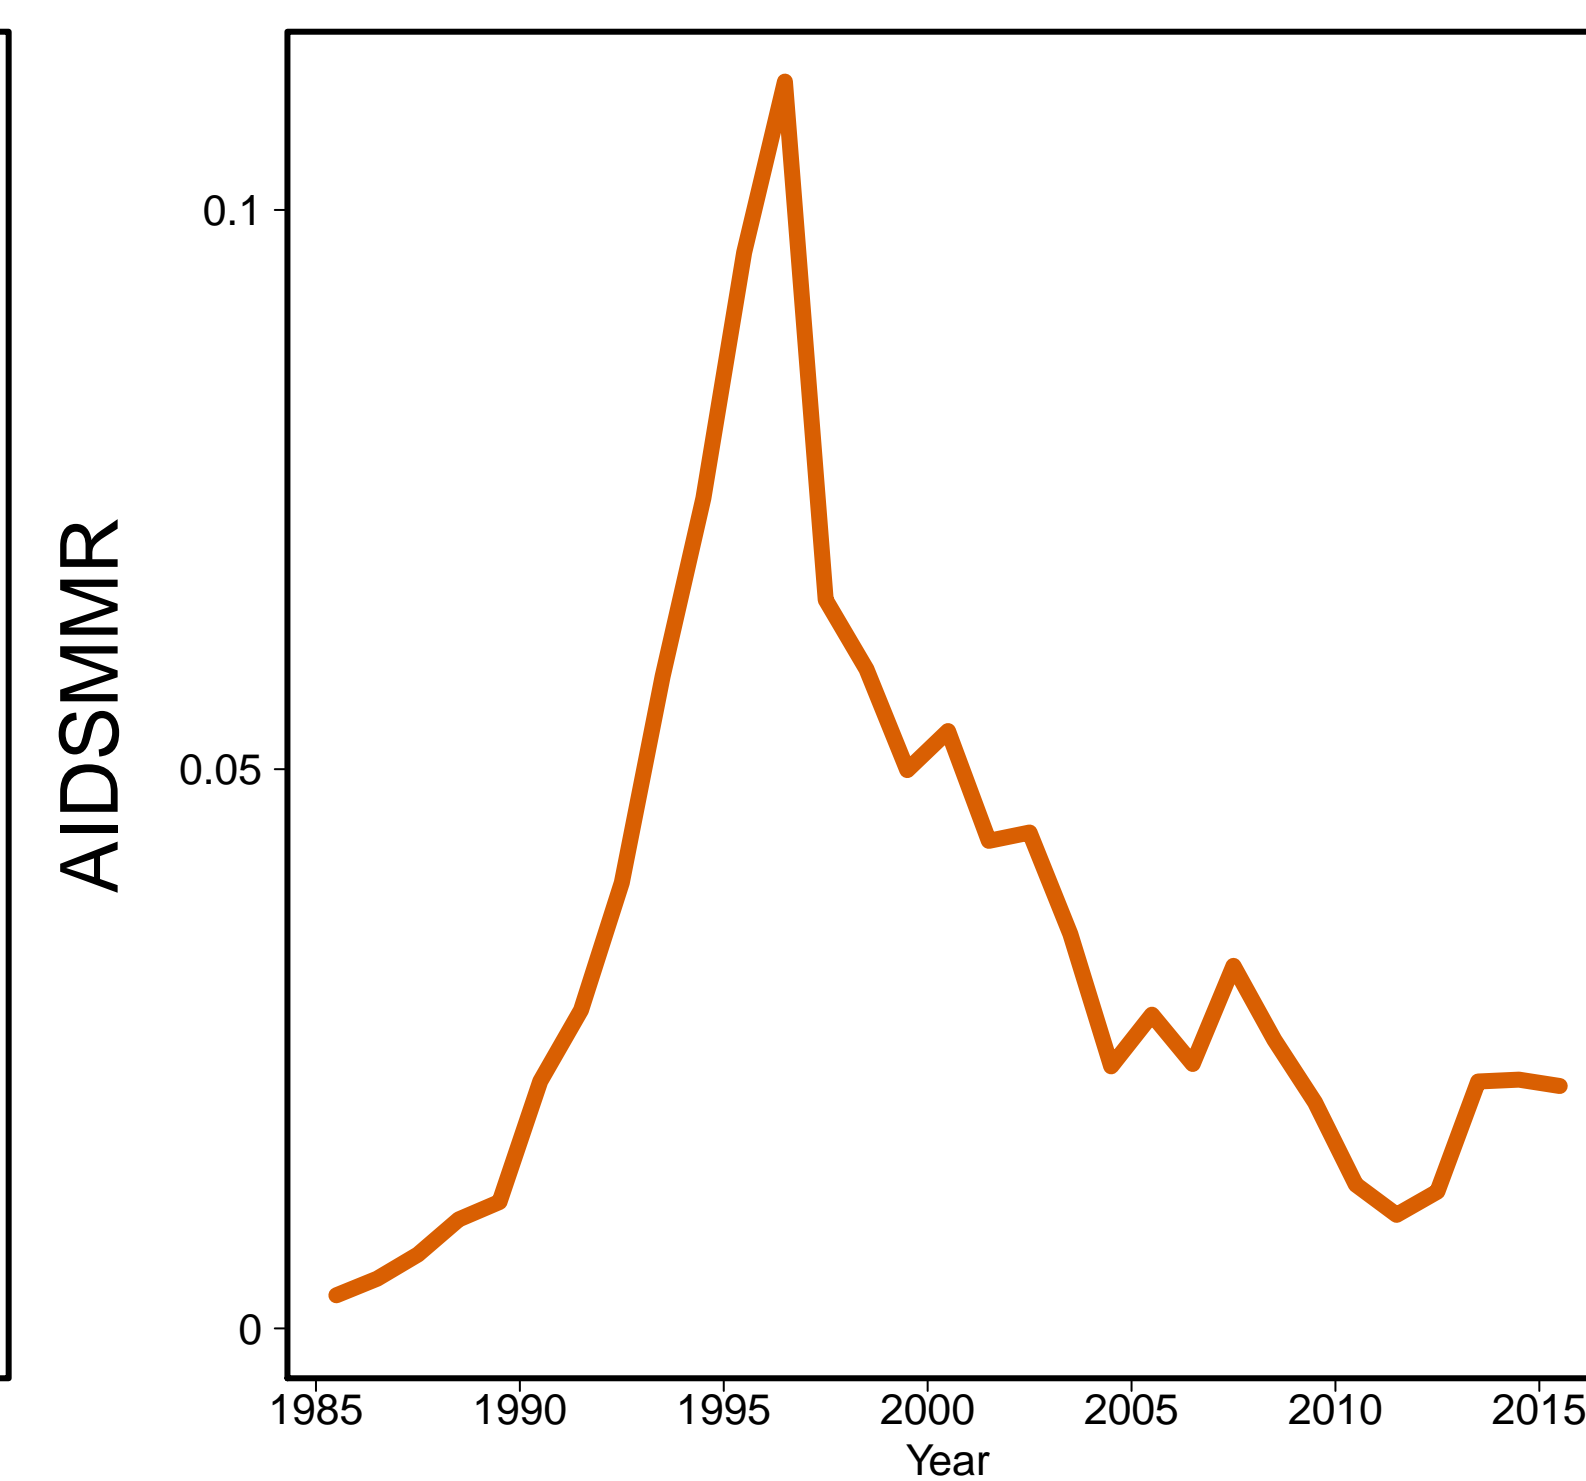

New Zealand [NZL]  
(Developed regions)

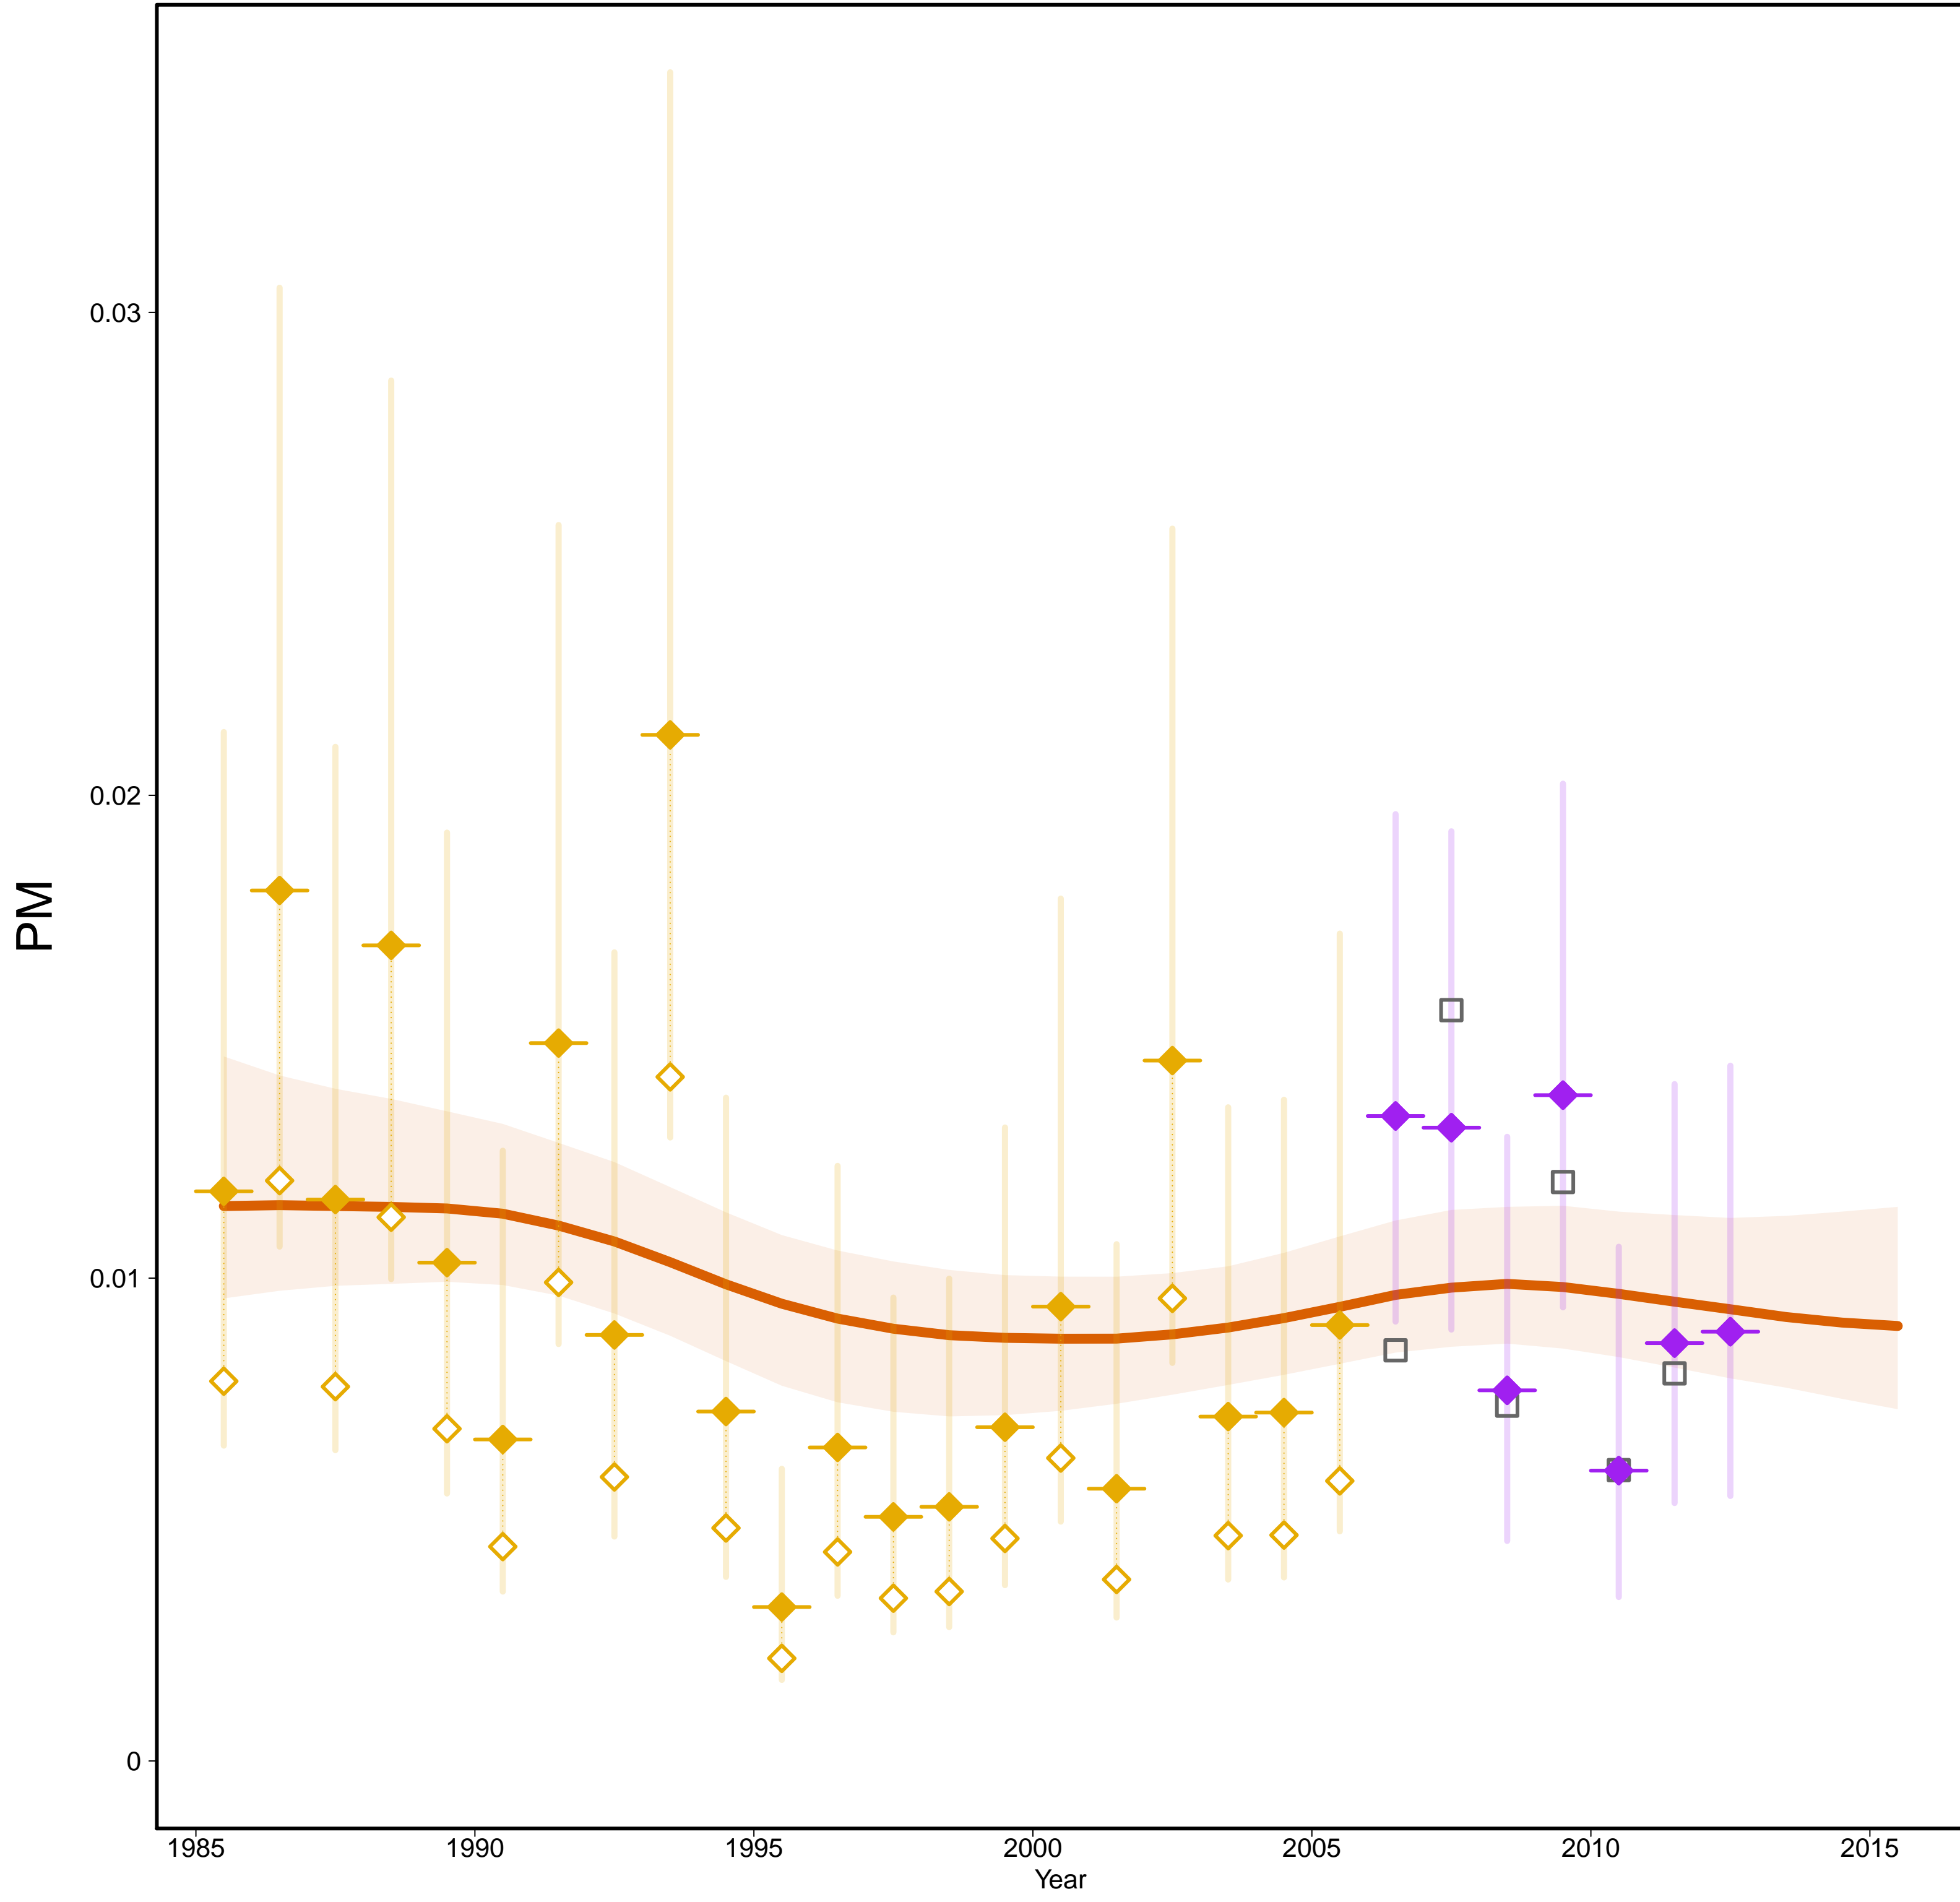

New Zealand [NZL]  
(Developed regions)

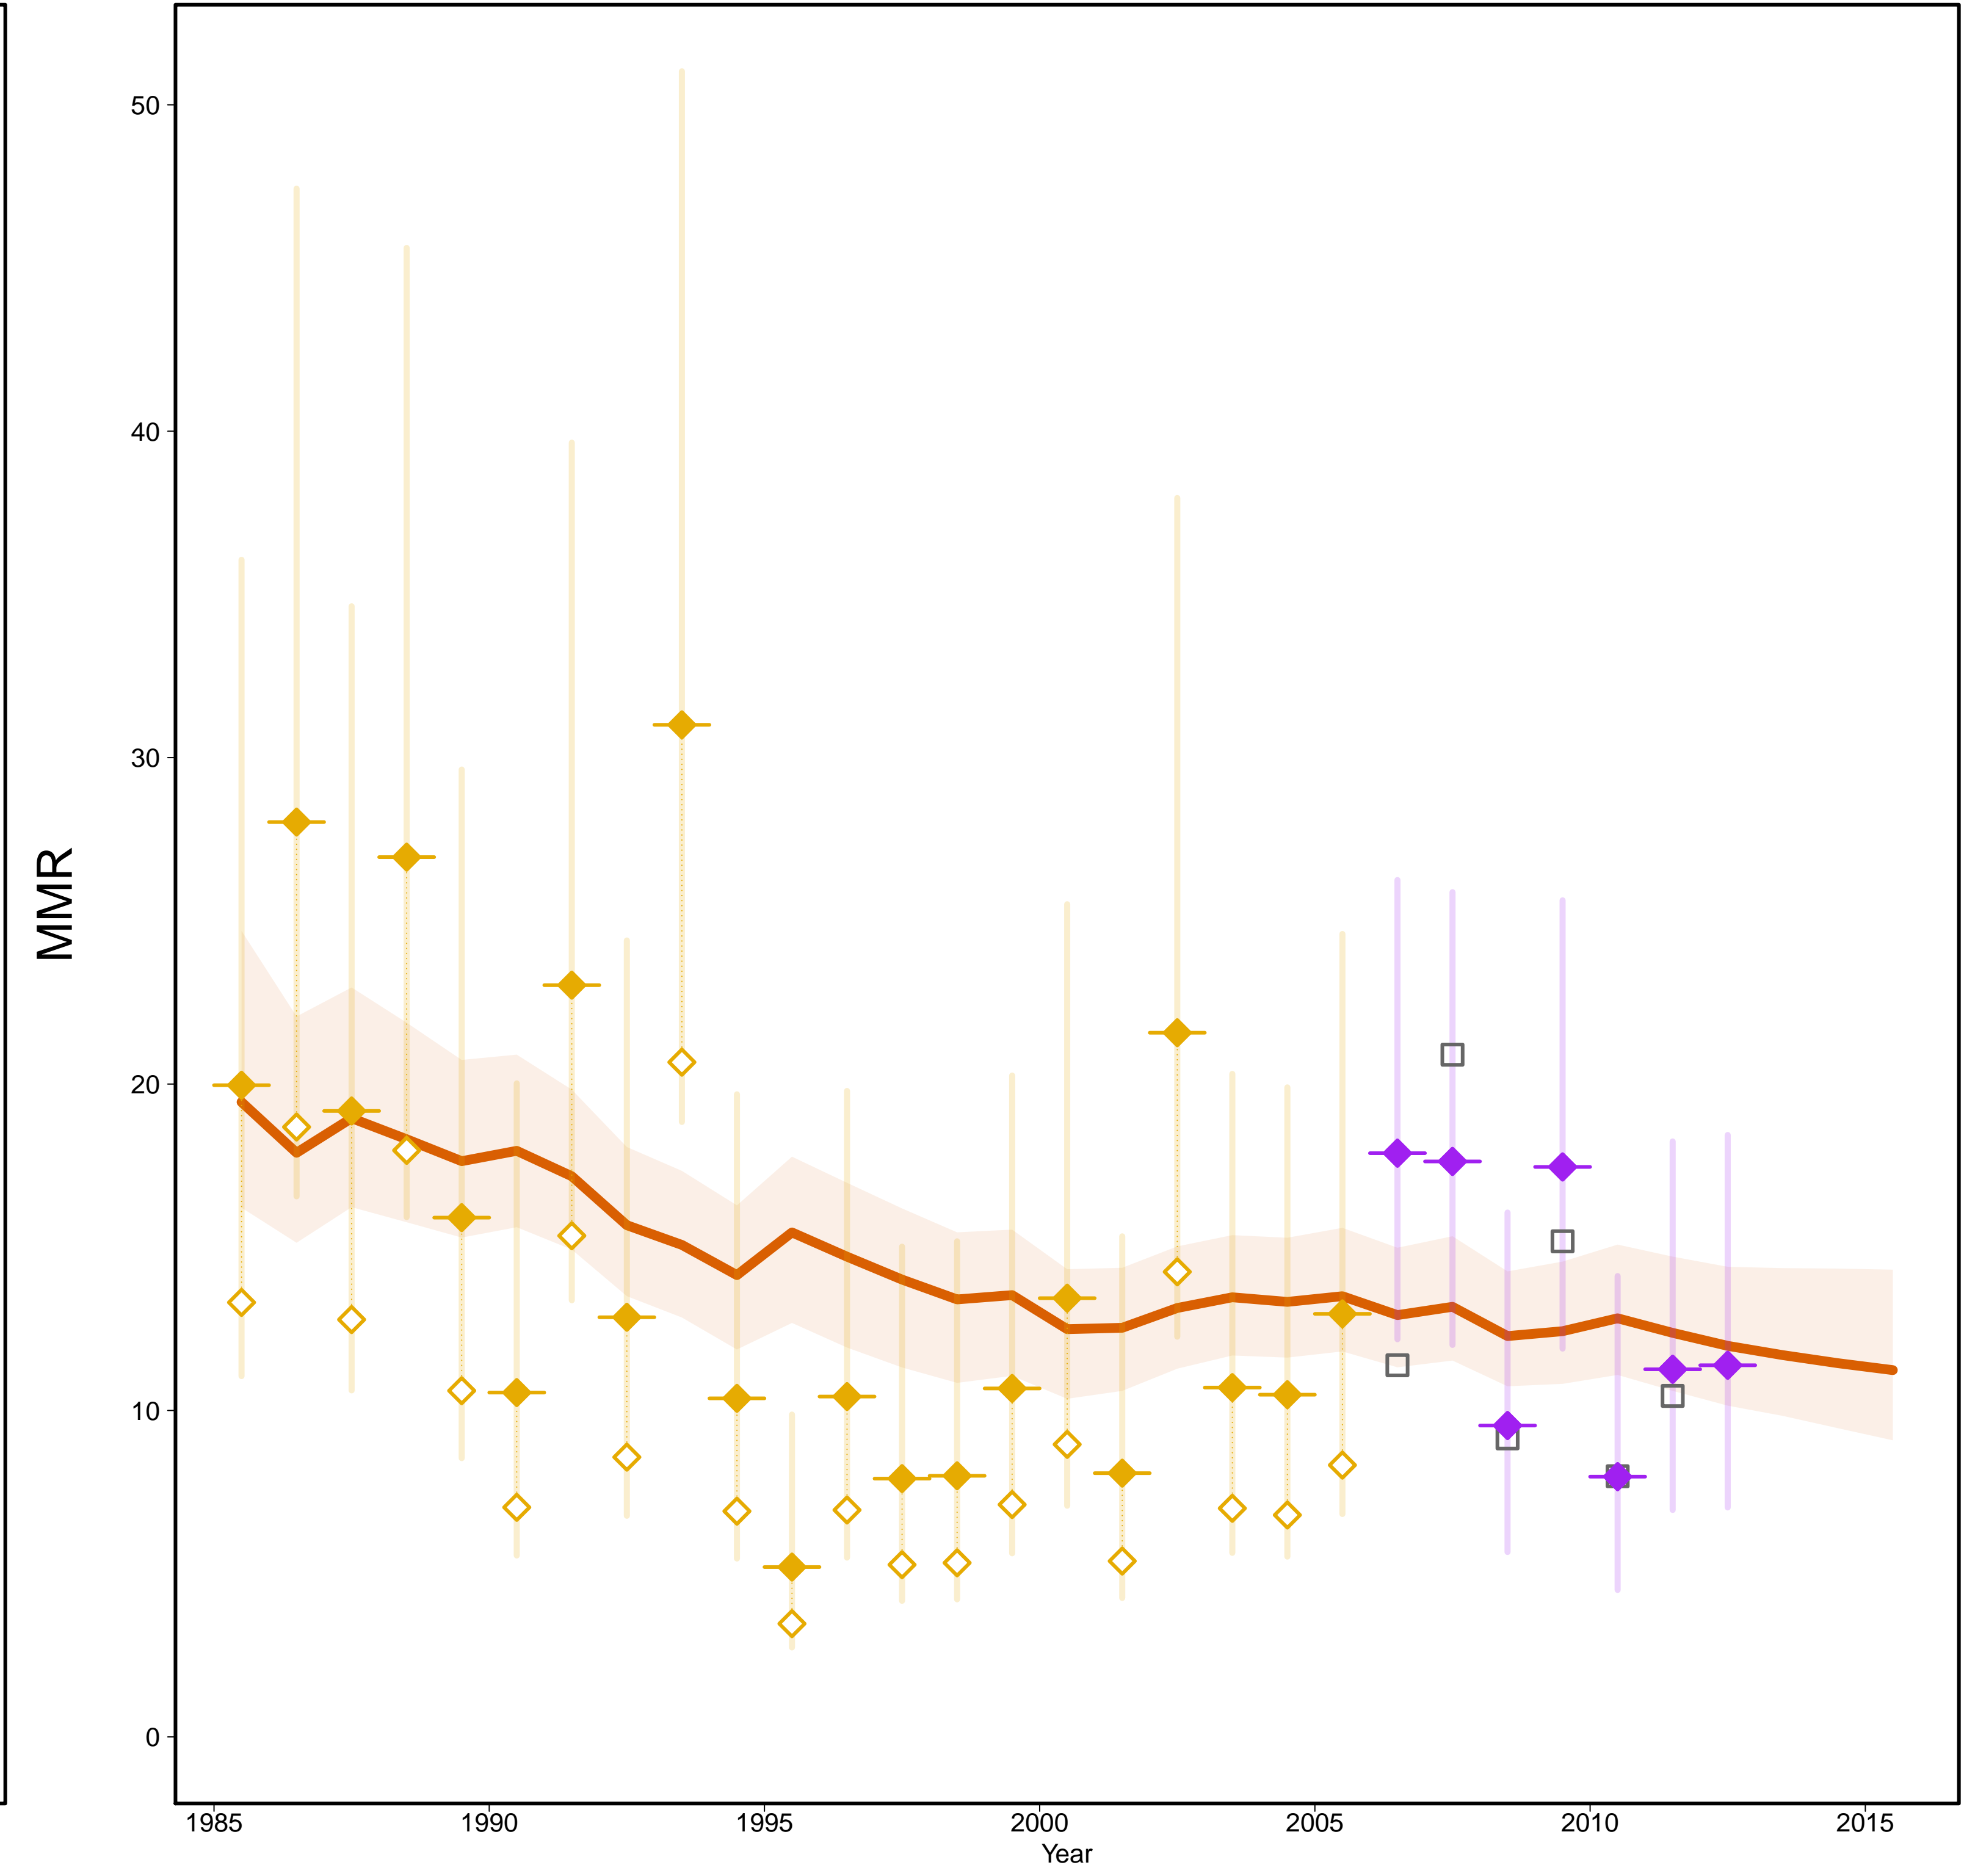

- Estimates —
- MMR Database 2015 —
- ◇ Observed Data
- ◆ Adjusted Data
- Data type —
- ◆ VR
- ◆ Spec. studies
- Excluded VR data  
(overlap with specialized study)

Gross Domestic Product

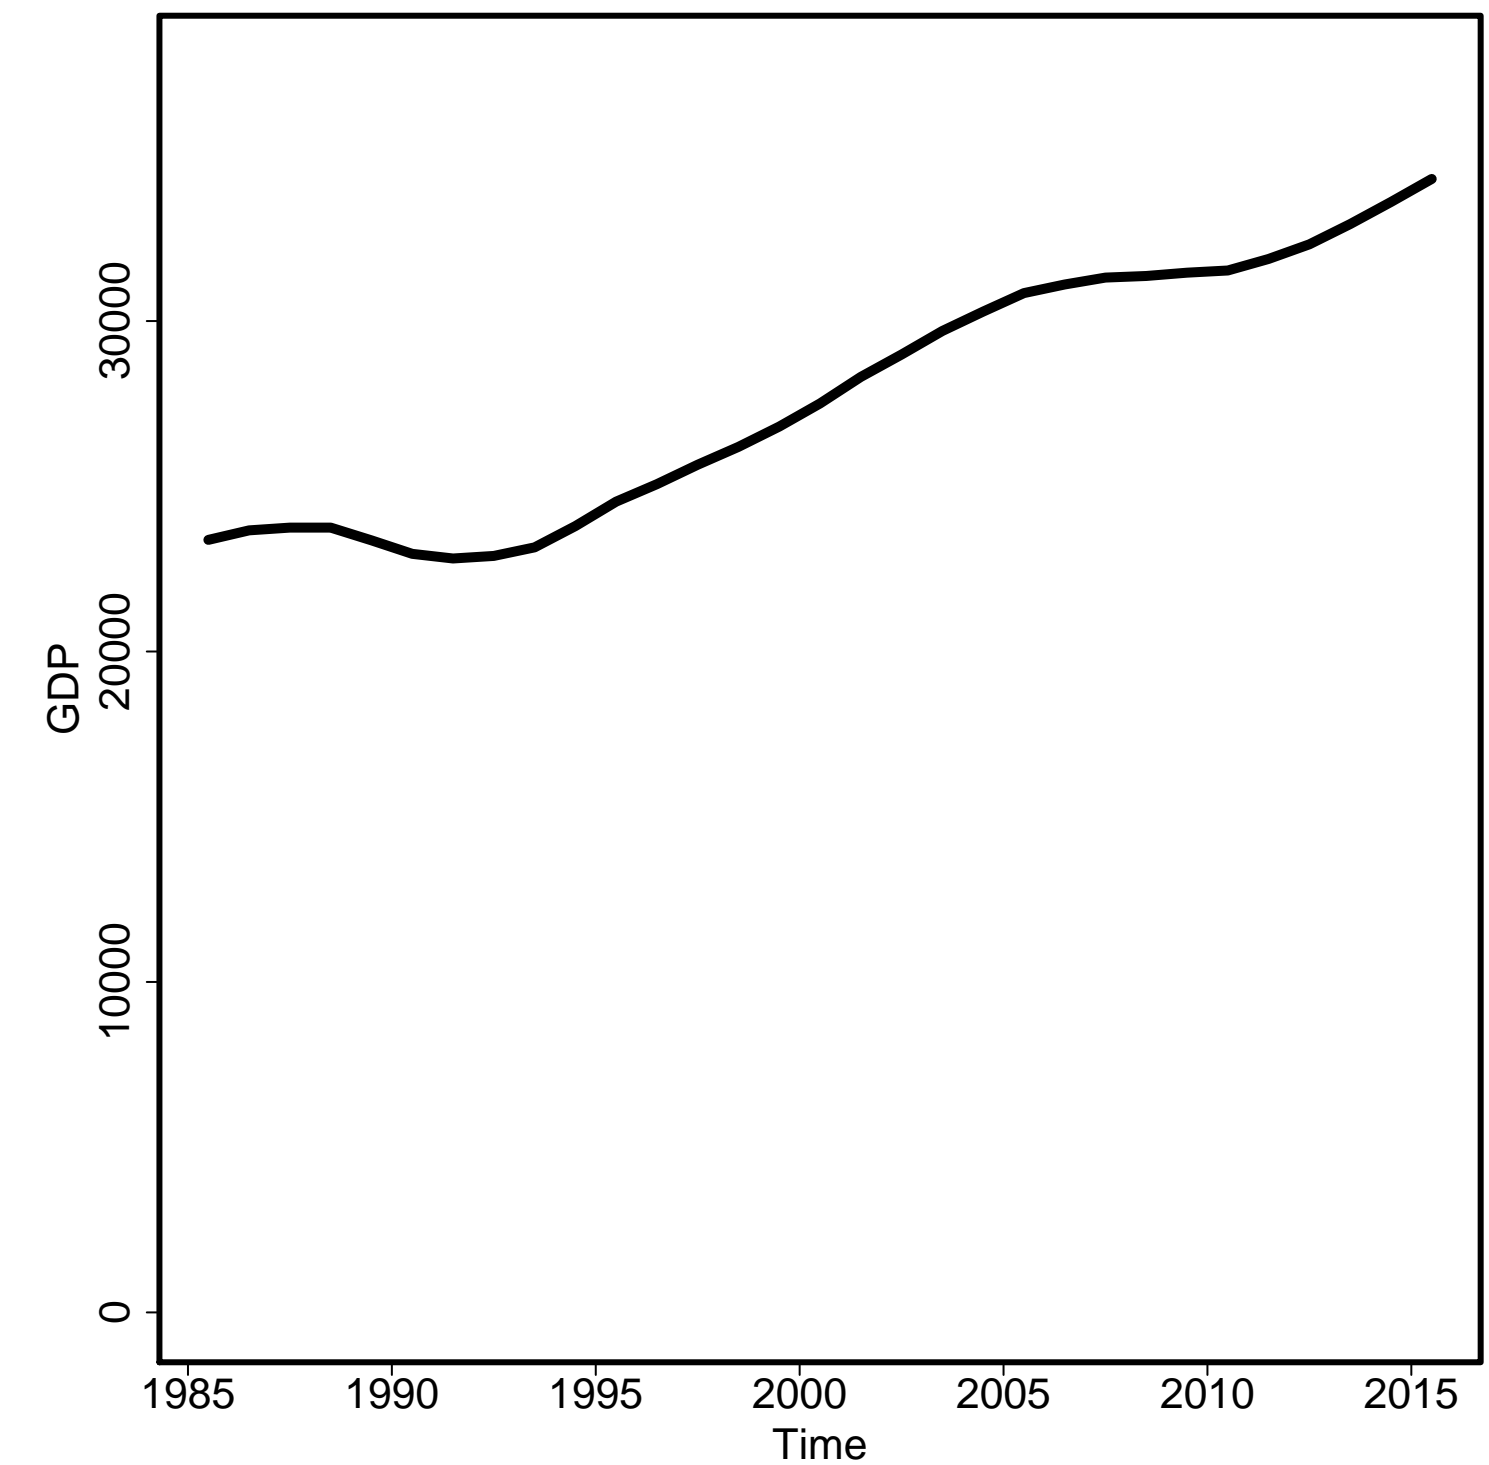

General Fertility Rate

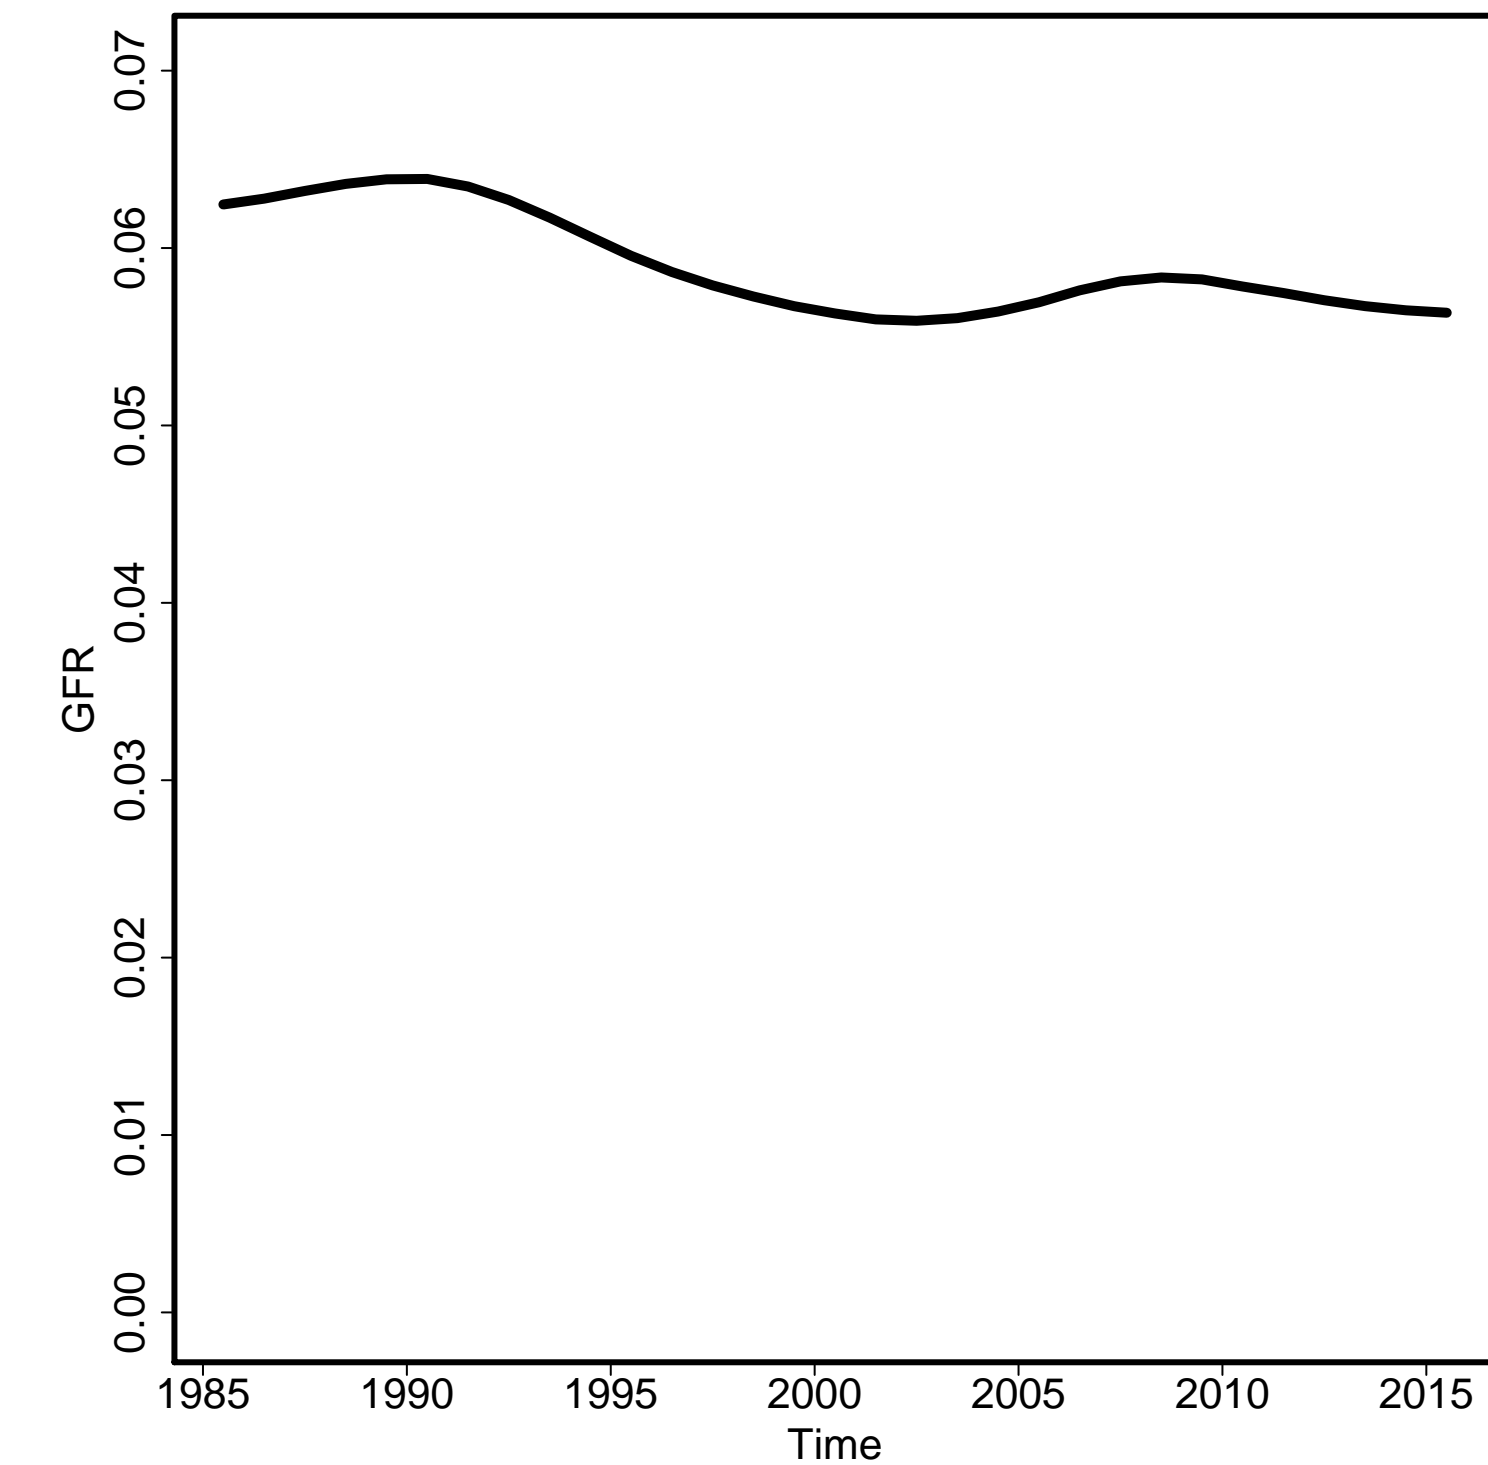

Skilled Attendance to Birth

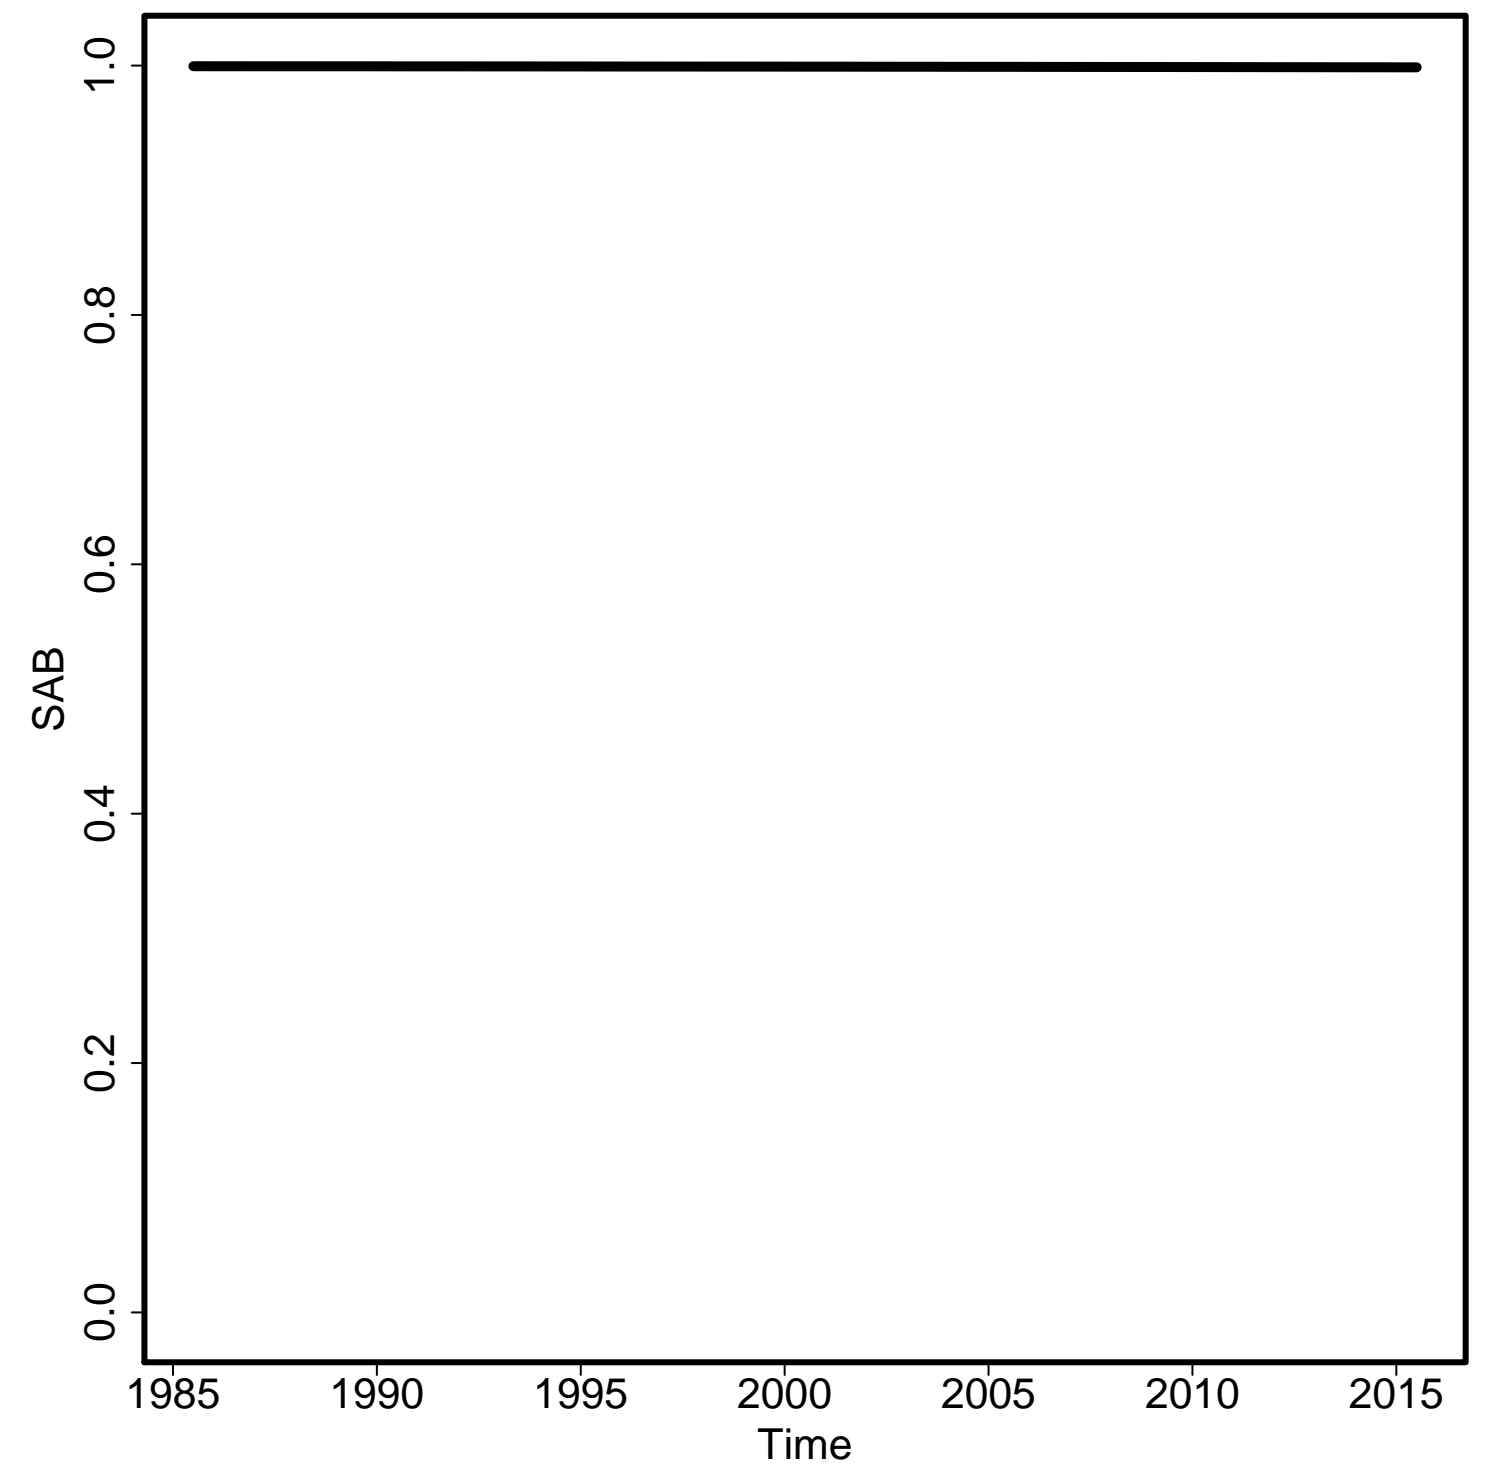

Envelope/Births

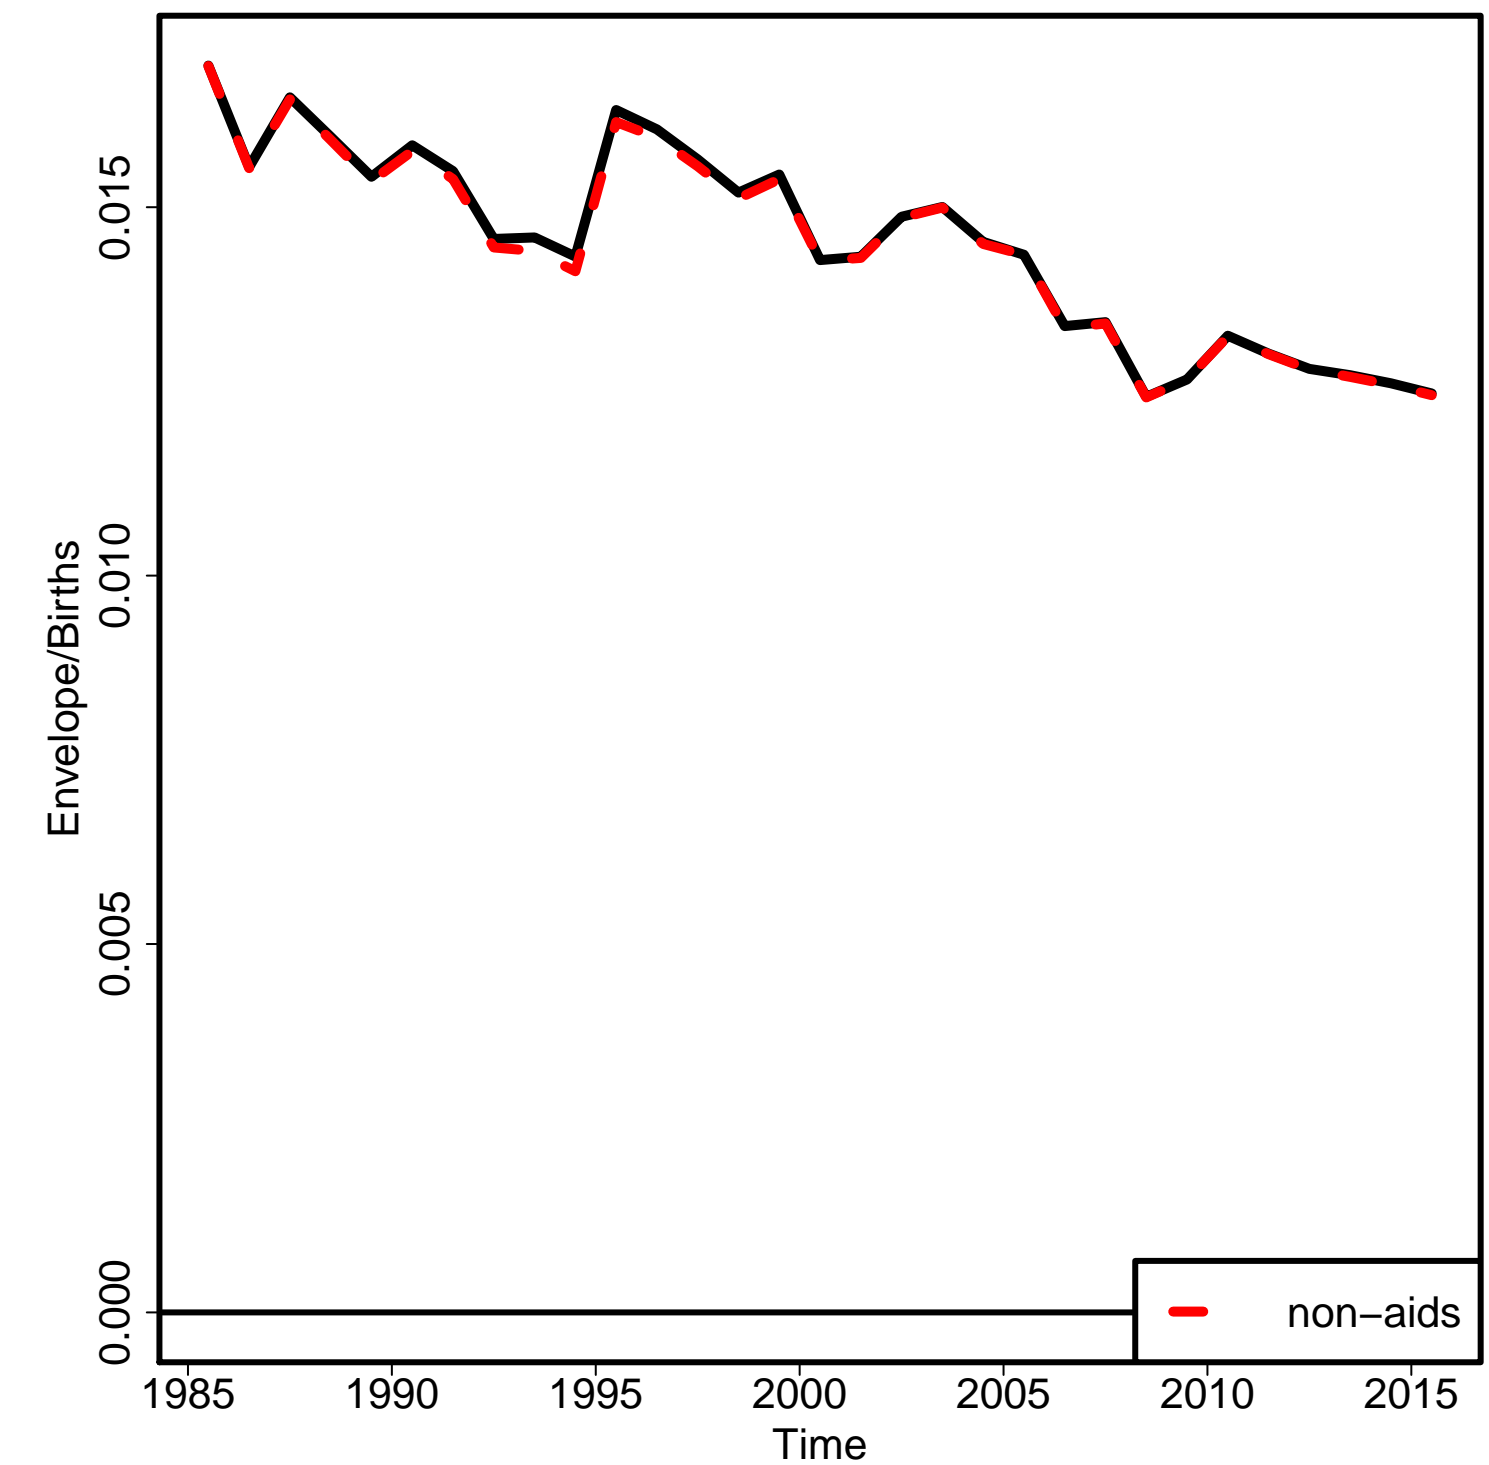

Non-aids MMR

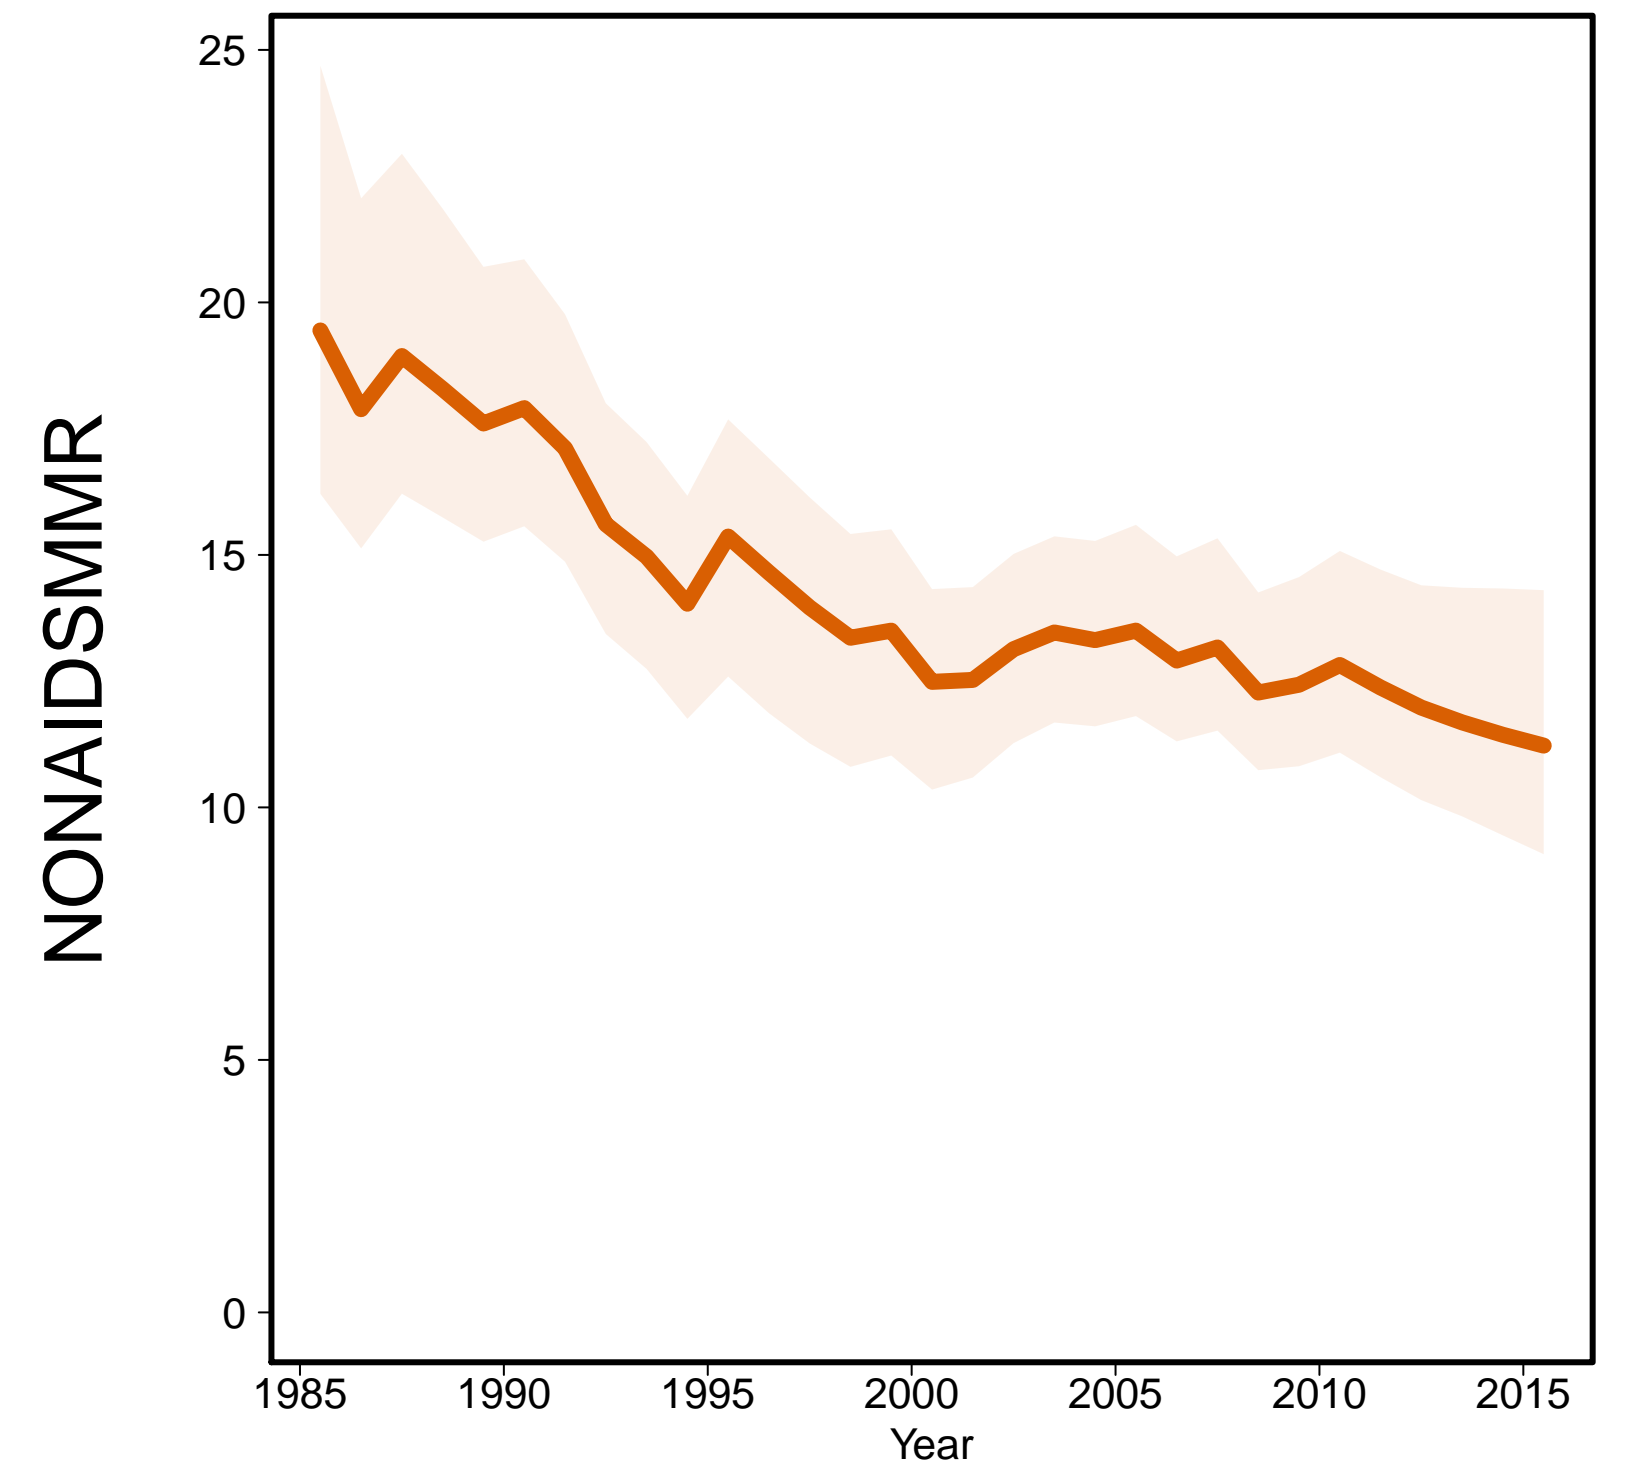

Aids MMR

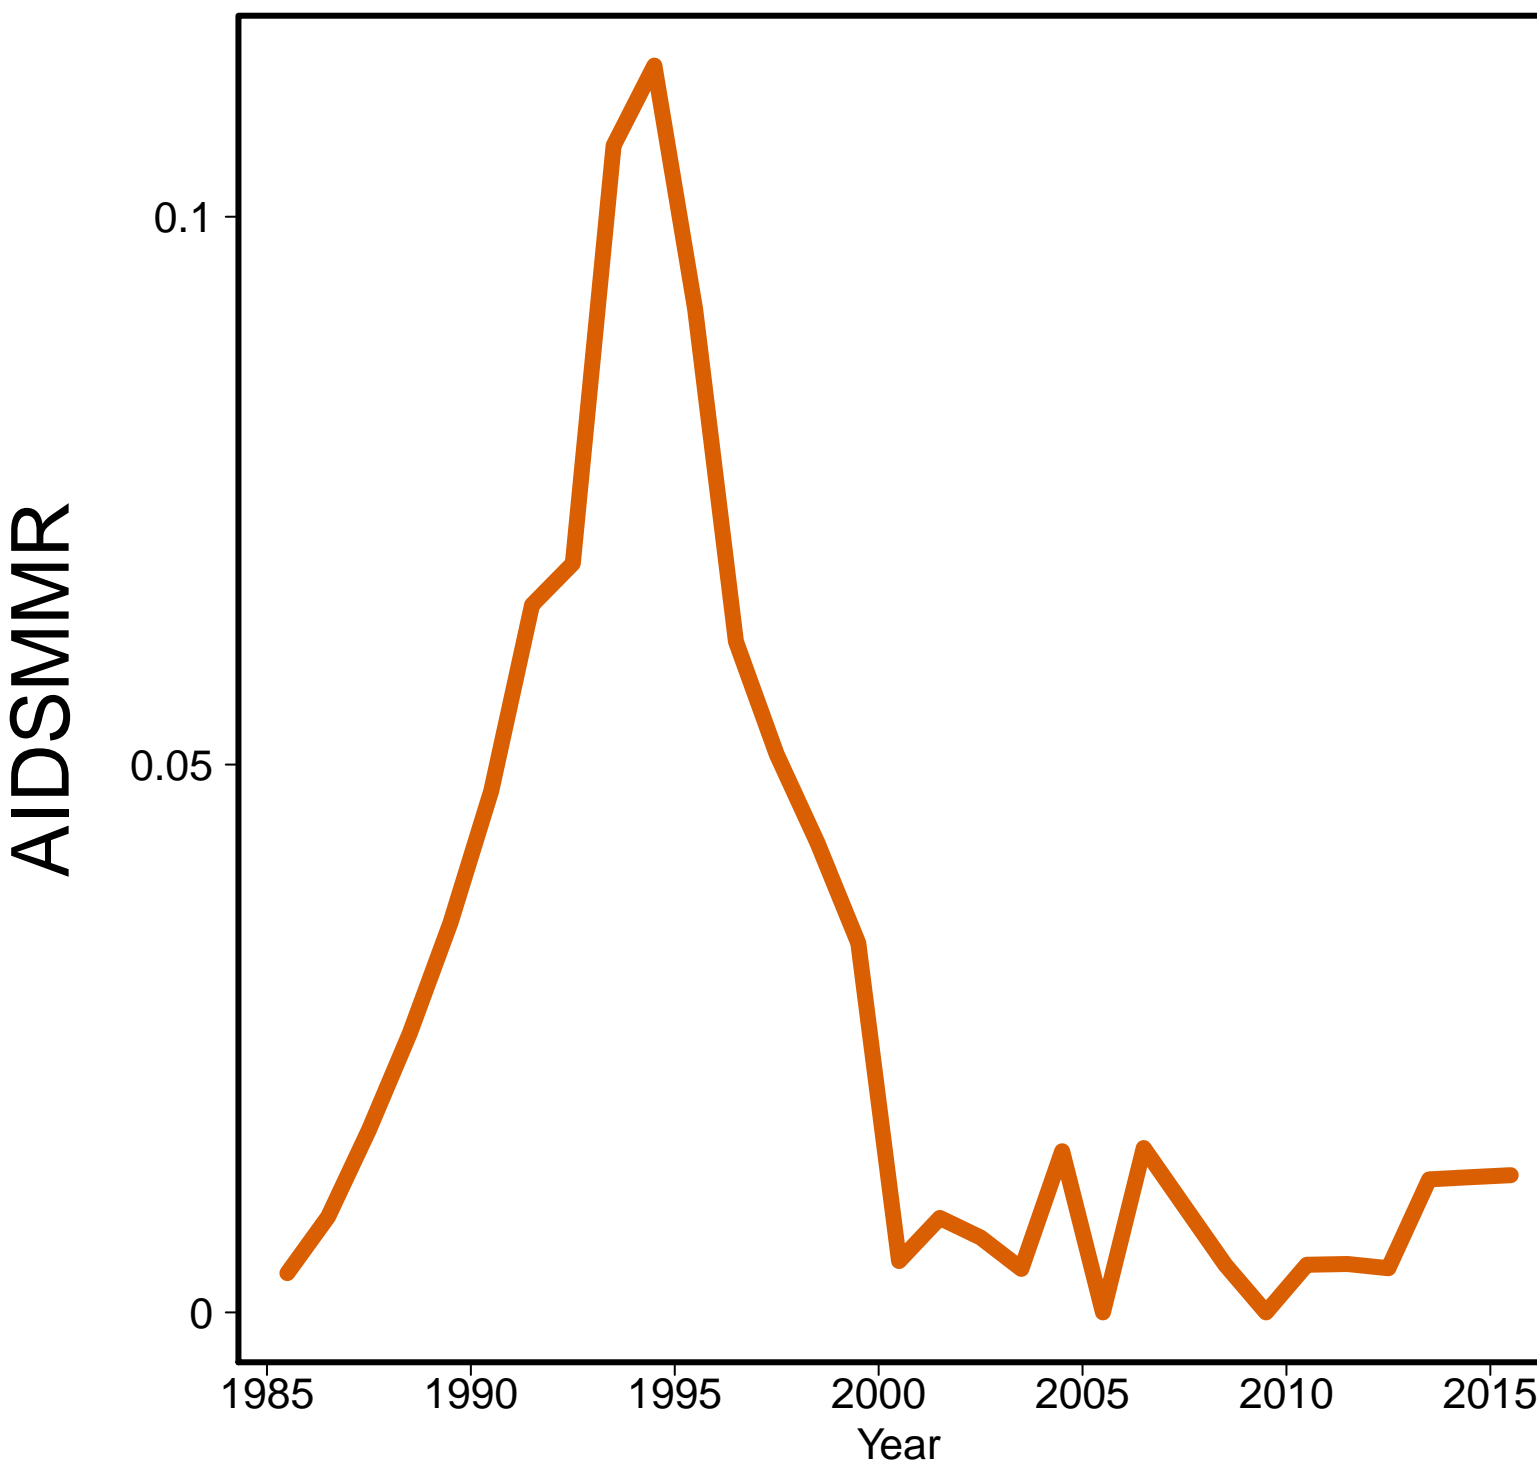

Nicaragua [NIC]  
(Central America)

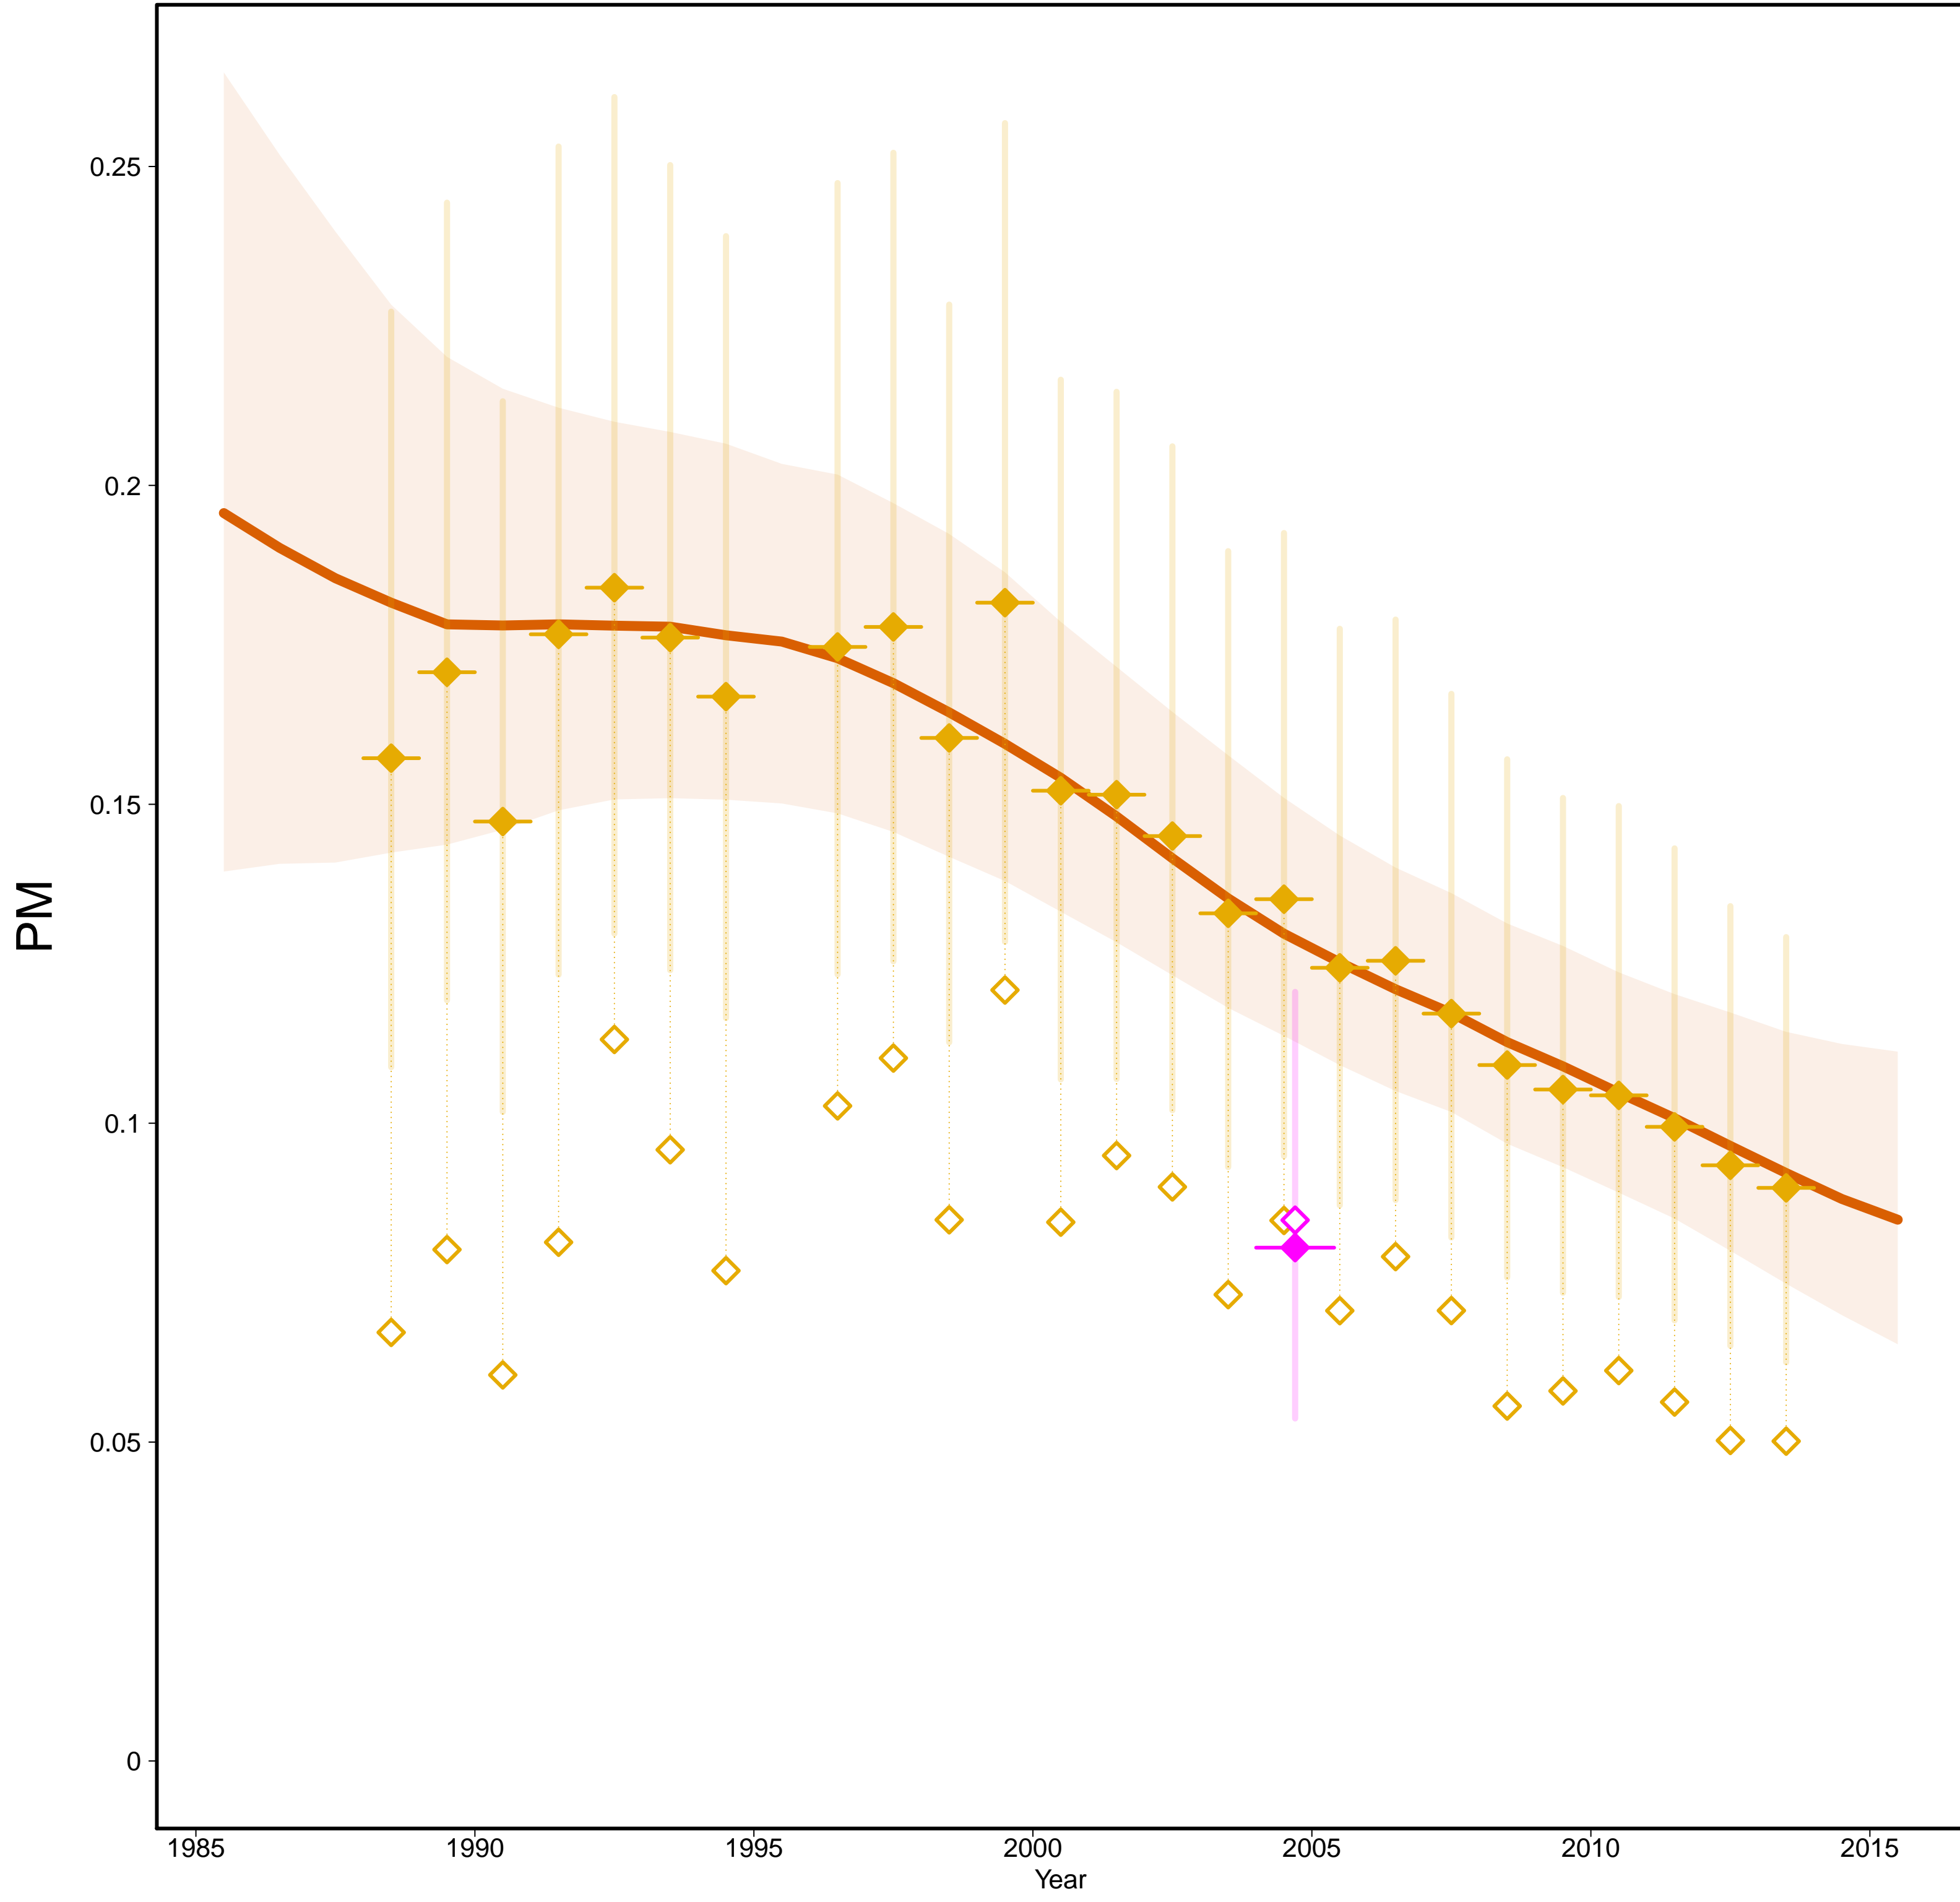

Nicaragua [NIC]  
(Central America)

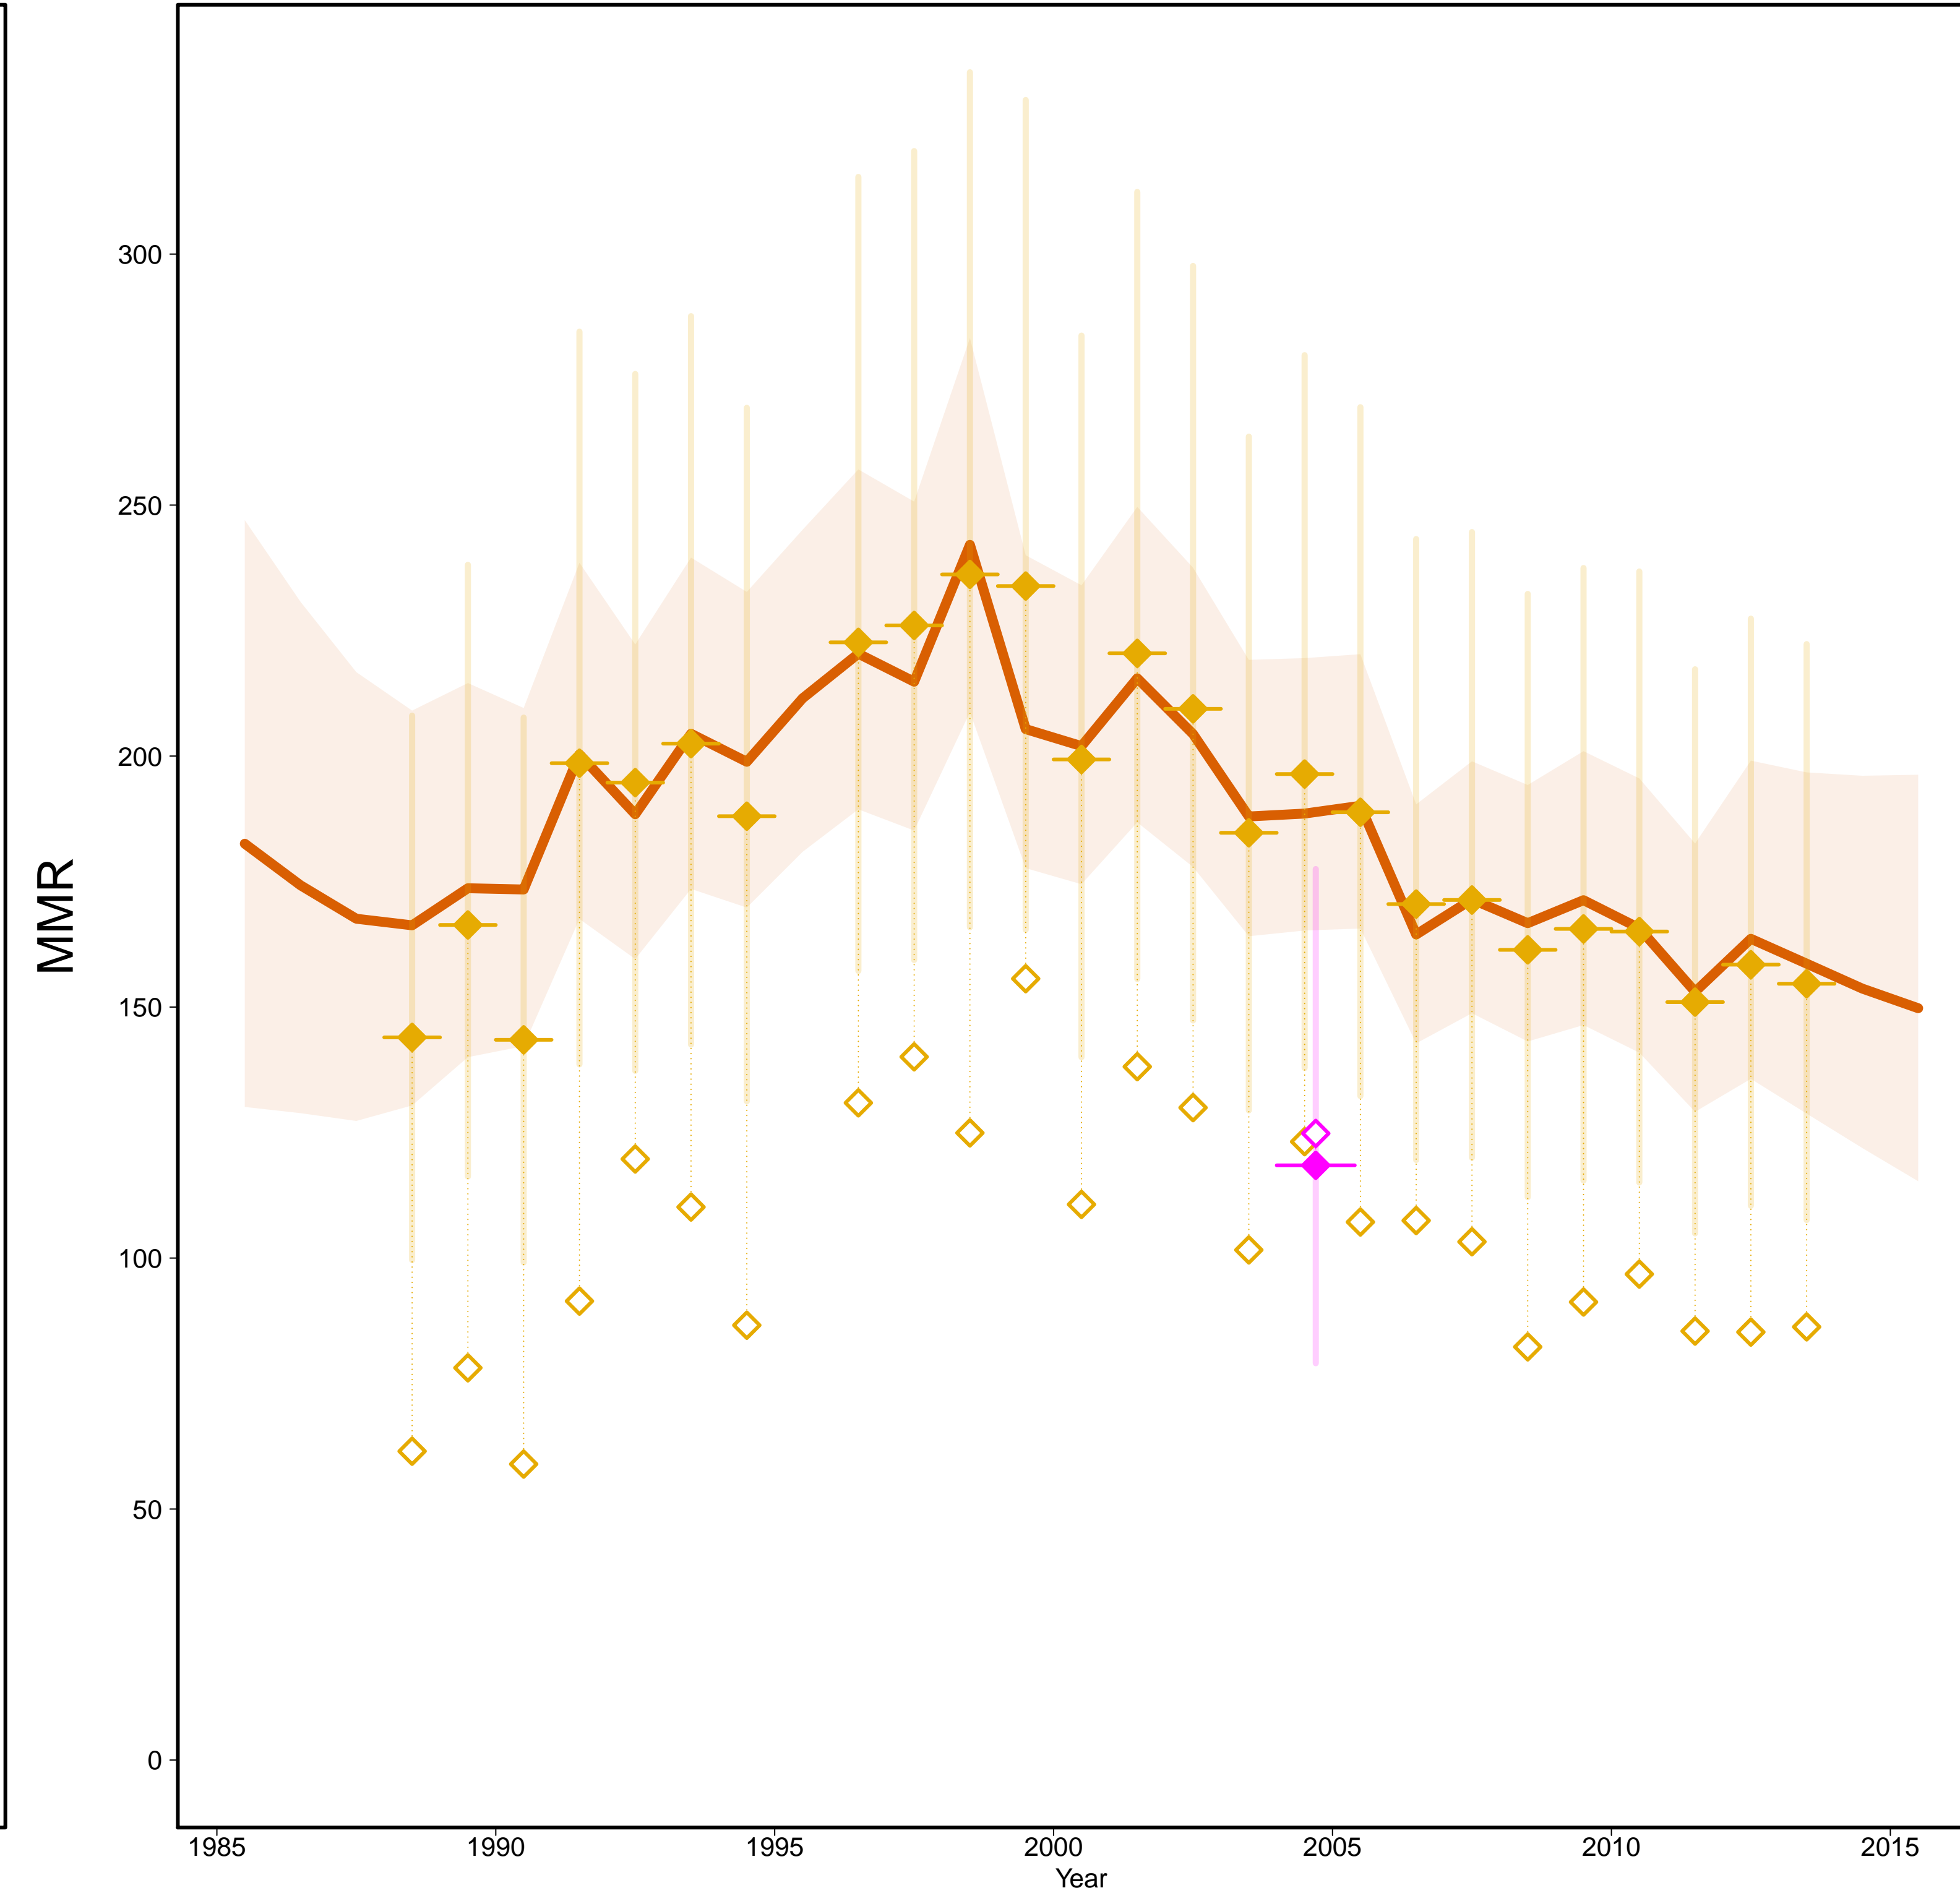

- Estimates —
- MMR Database 2015 —
- ◇ Observed Data
- ◆ Adjusted Data
- Data type —
- ◆ VR
- ◆ Census

Gross Domestic Product

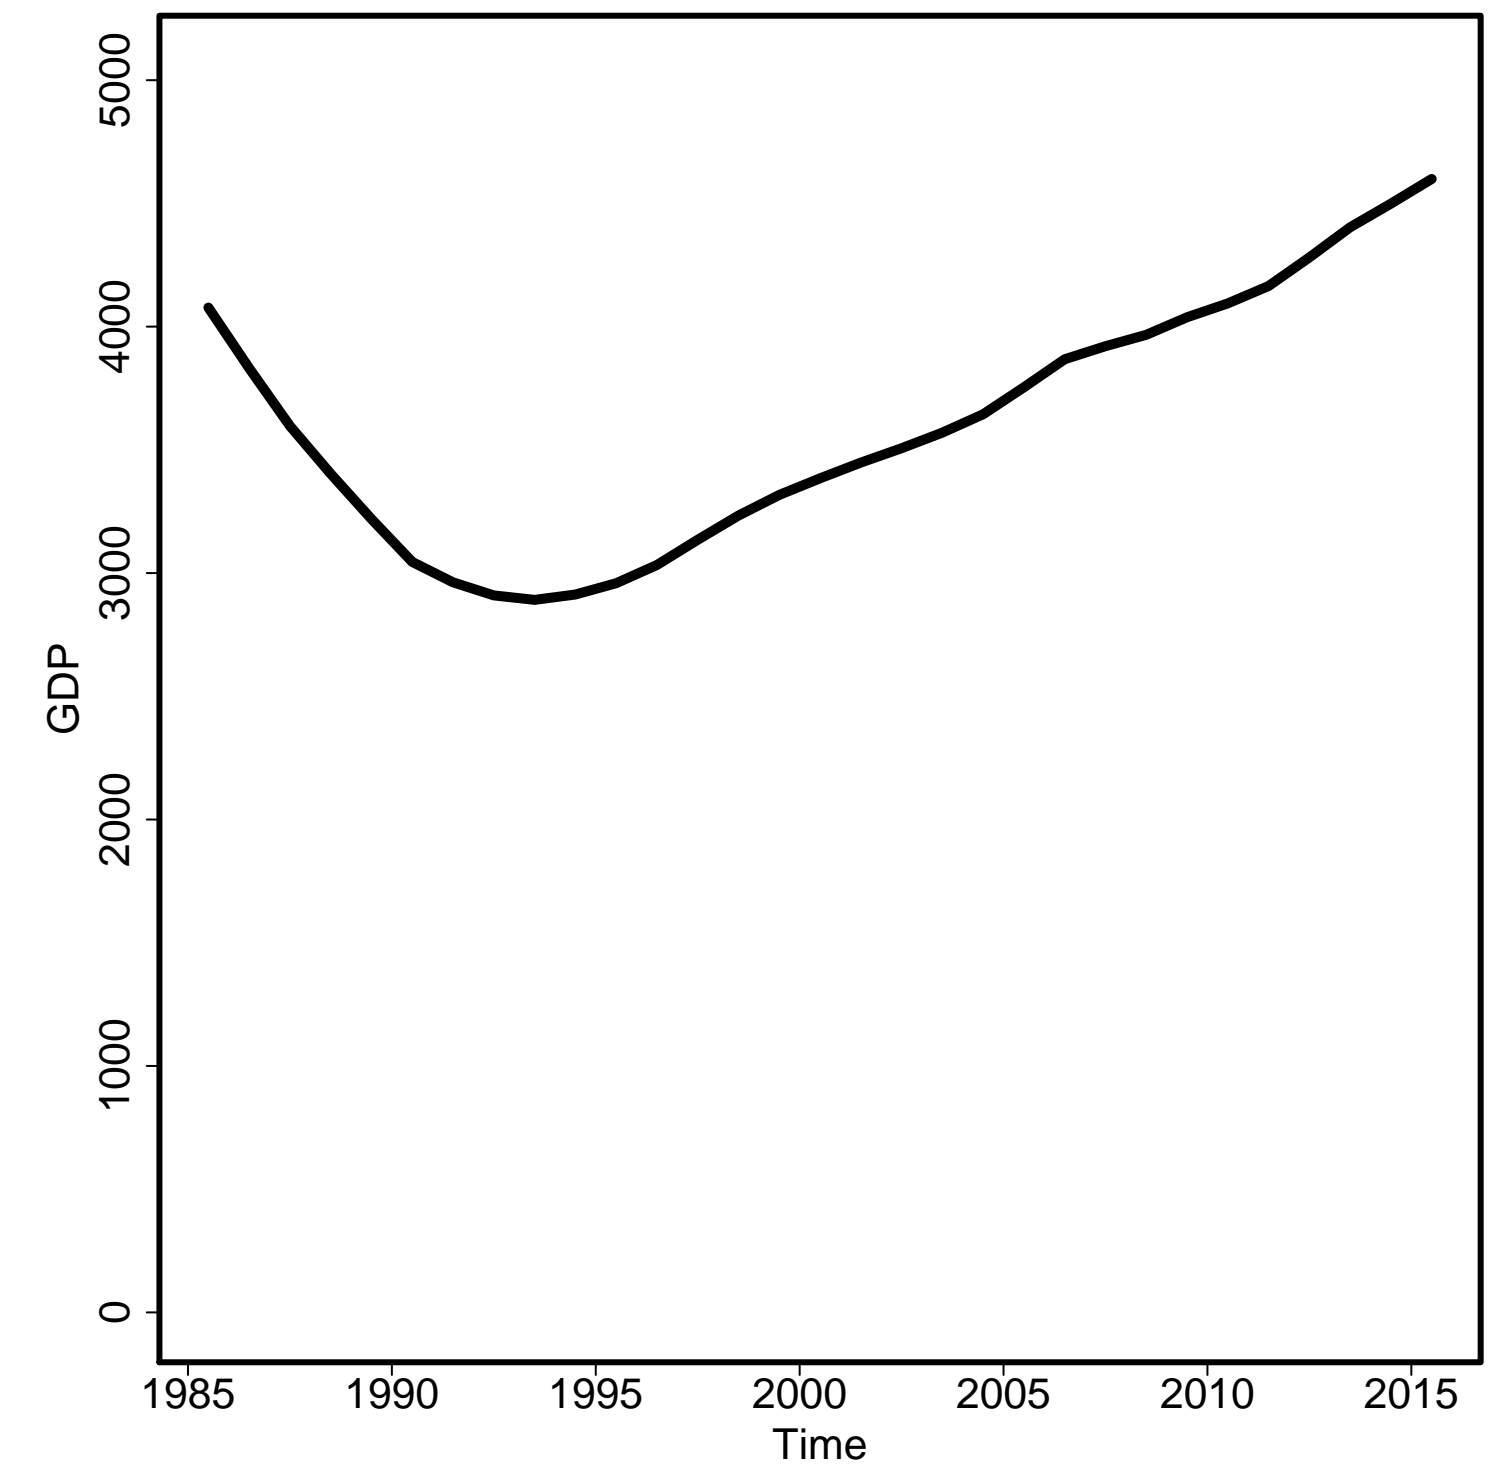

General Fertility Rate

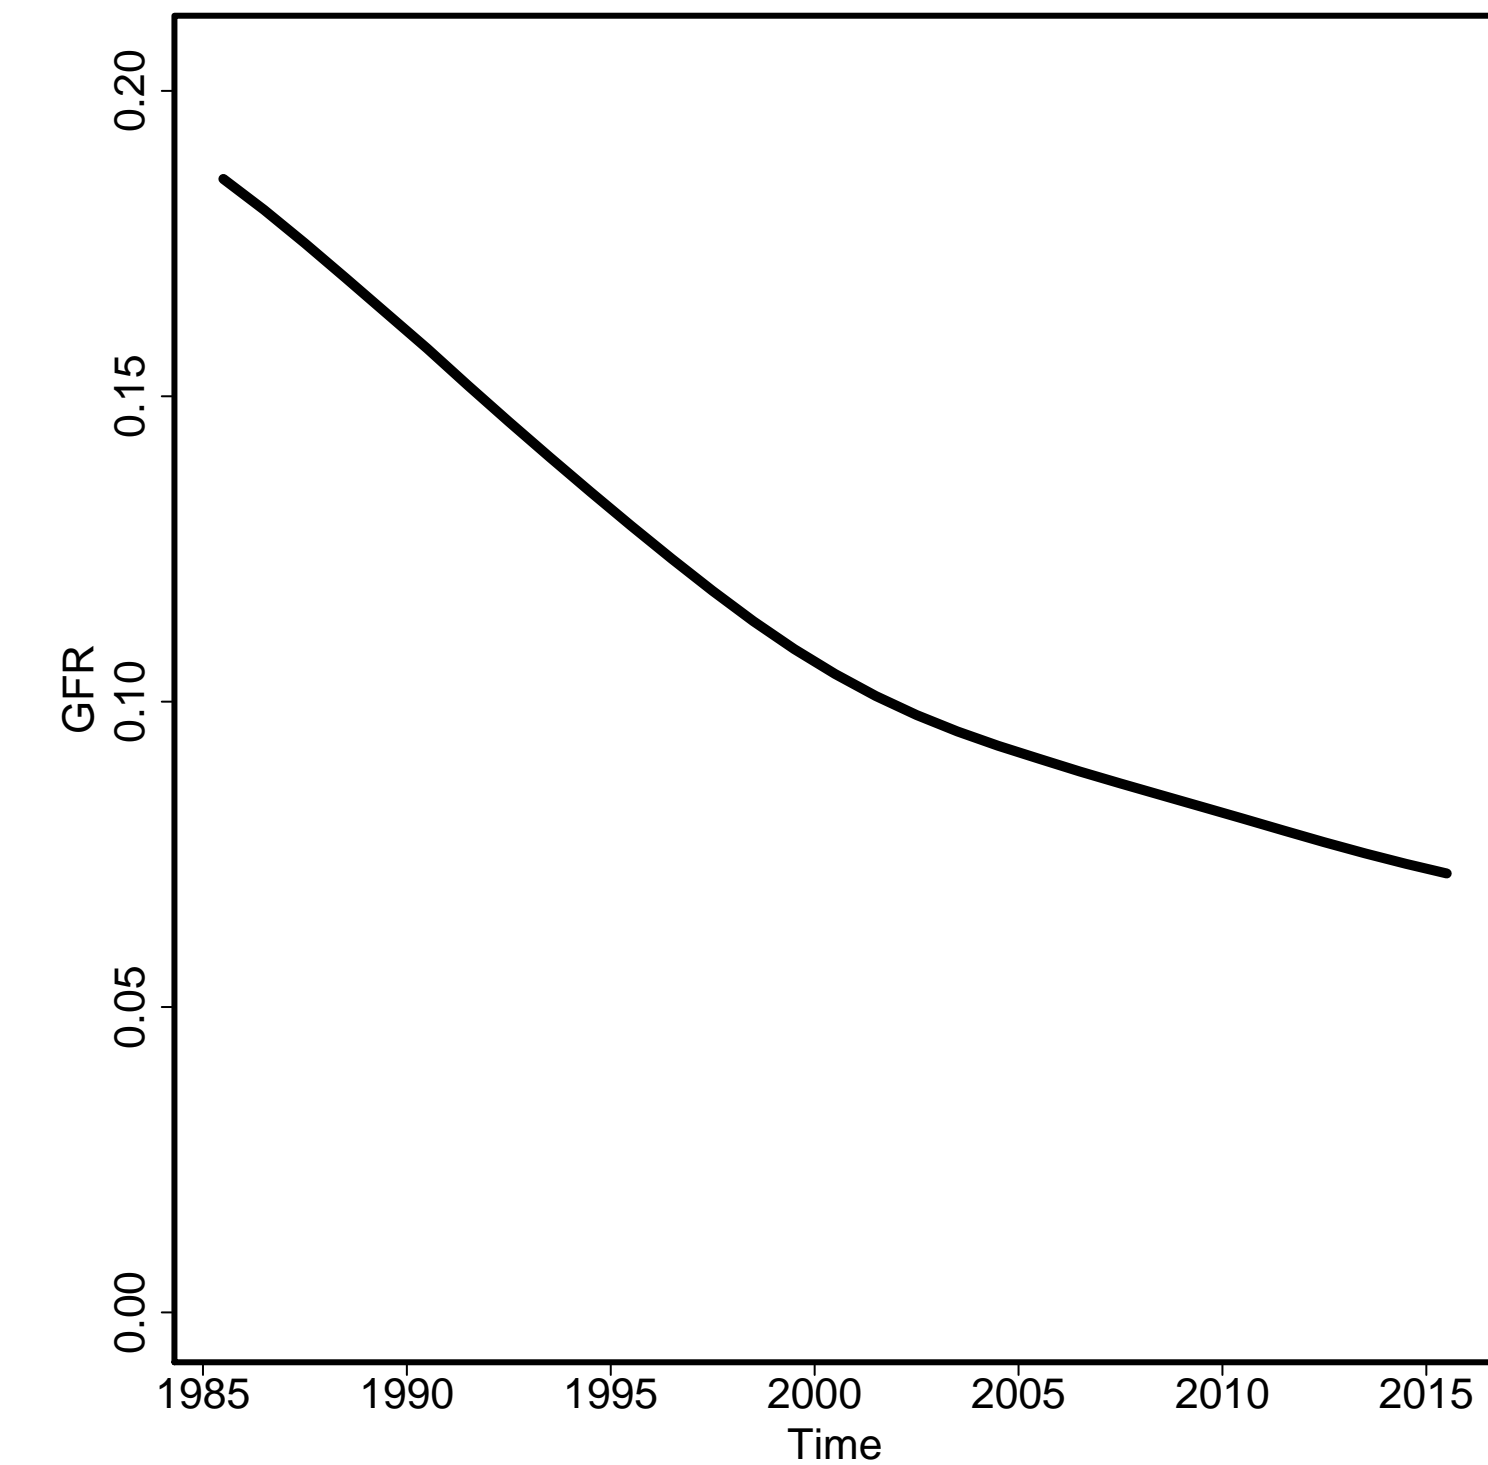

Skilled Attendance to Birth

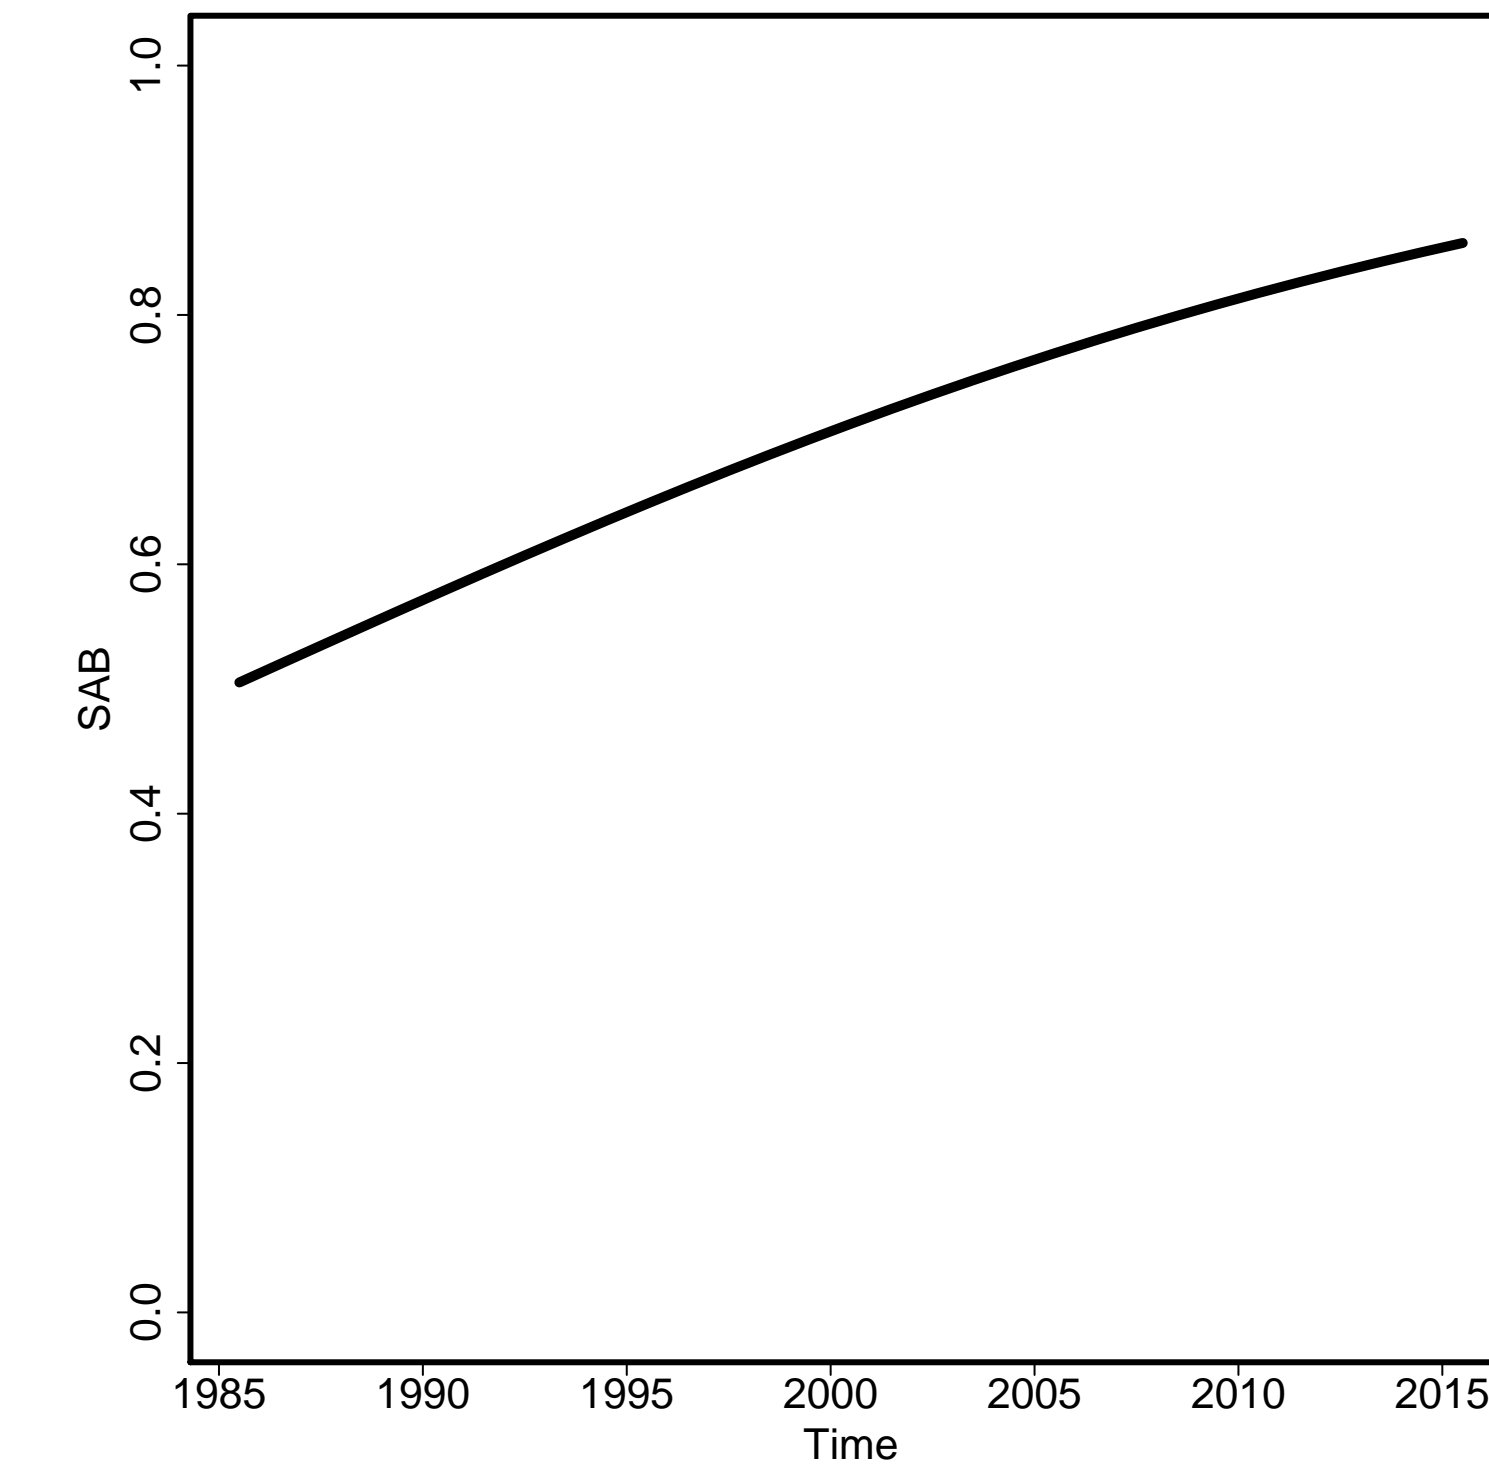

Envelope/Births

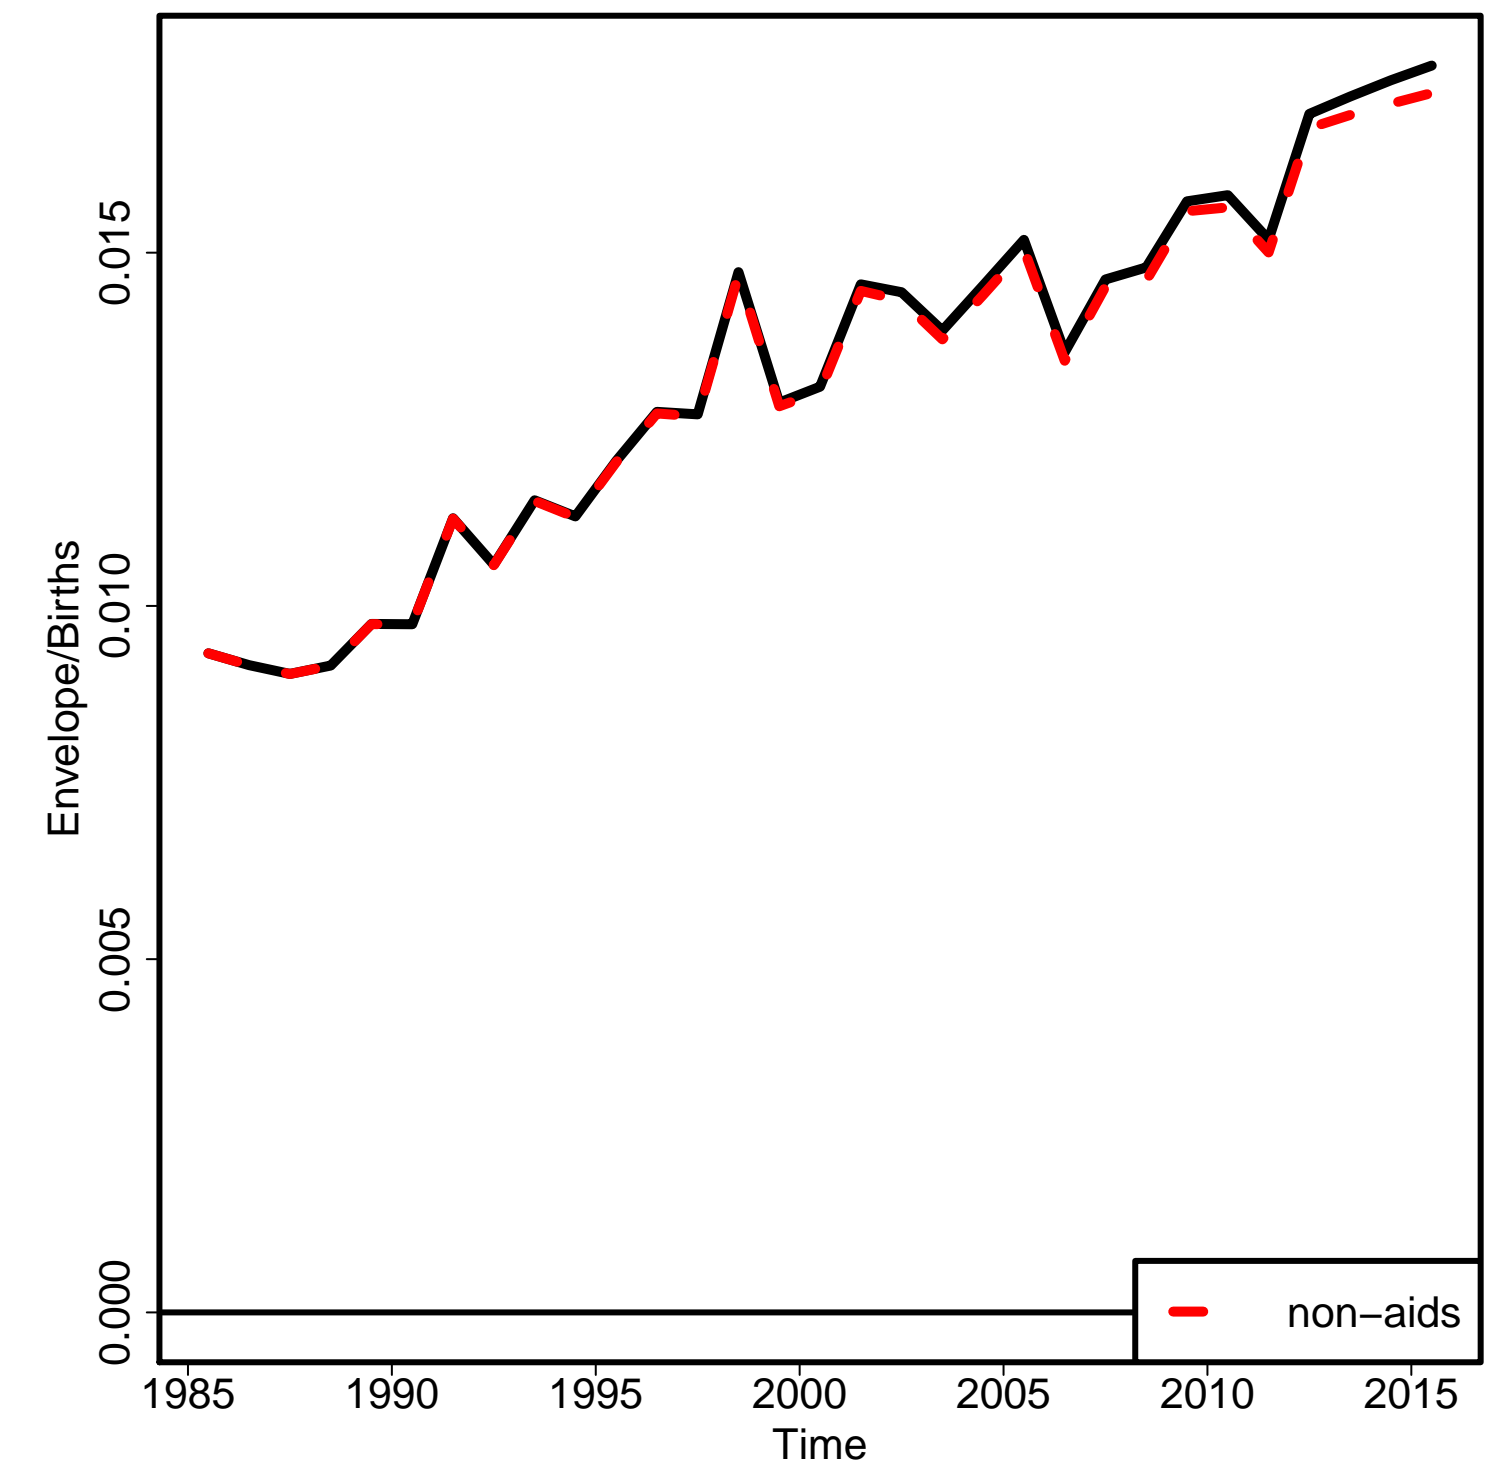

Non-aids MMR

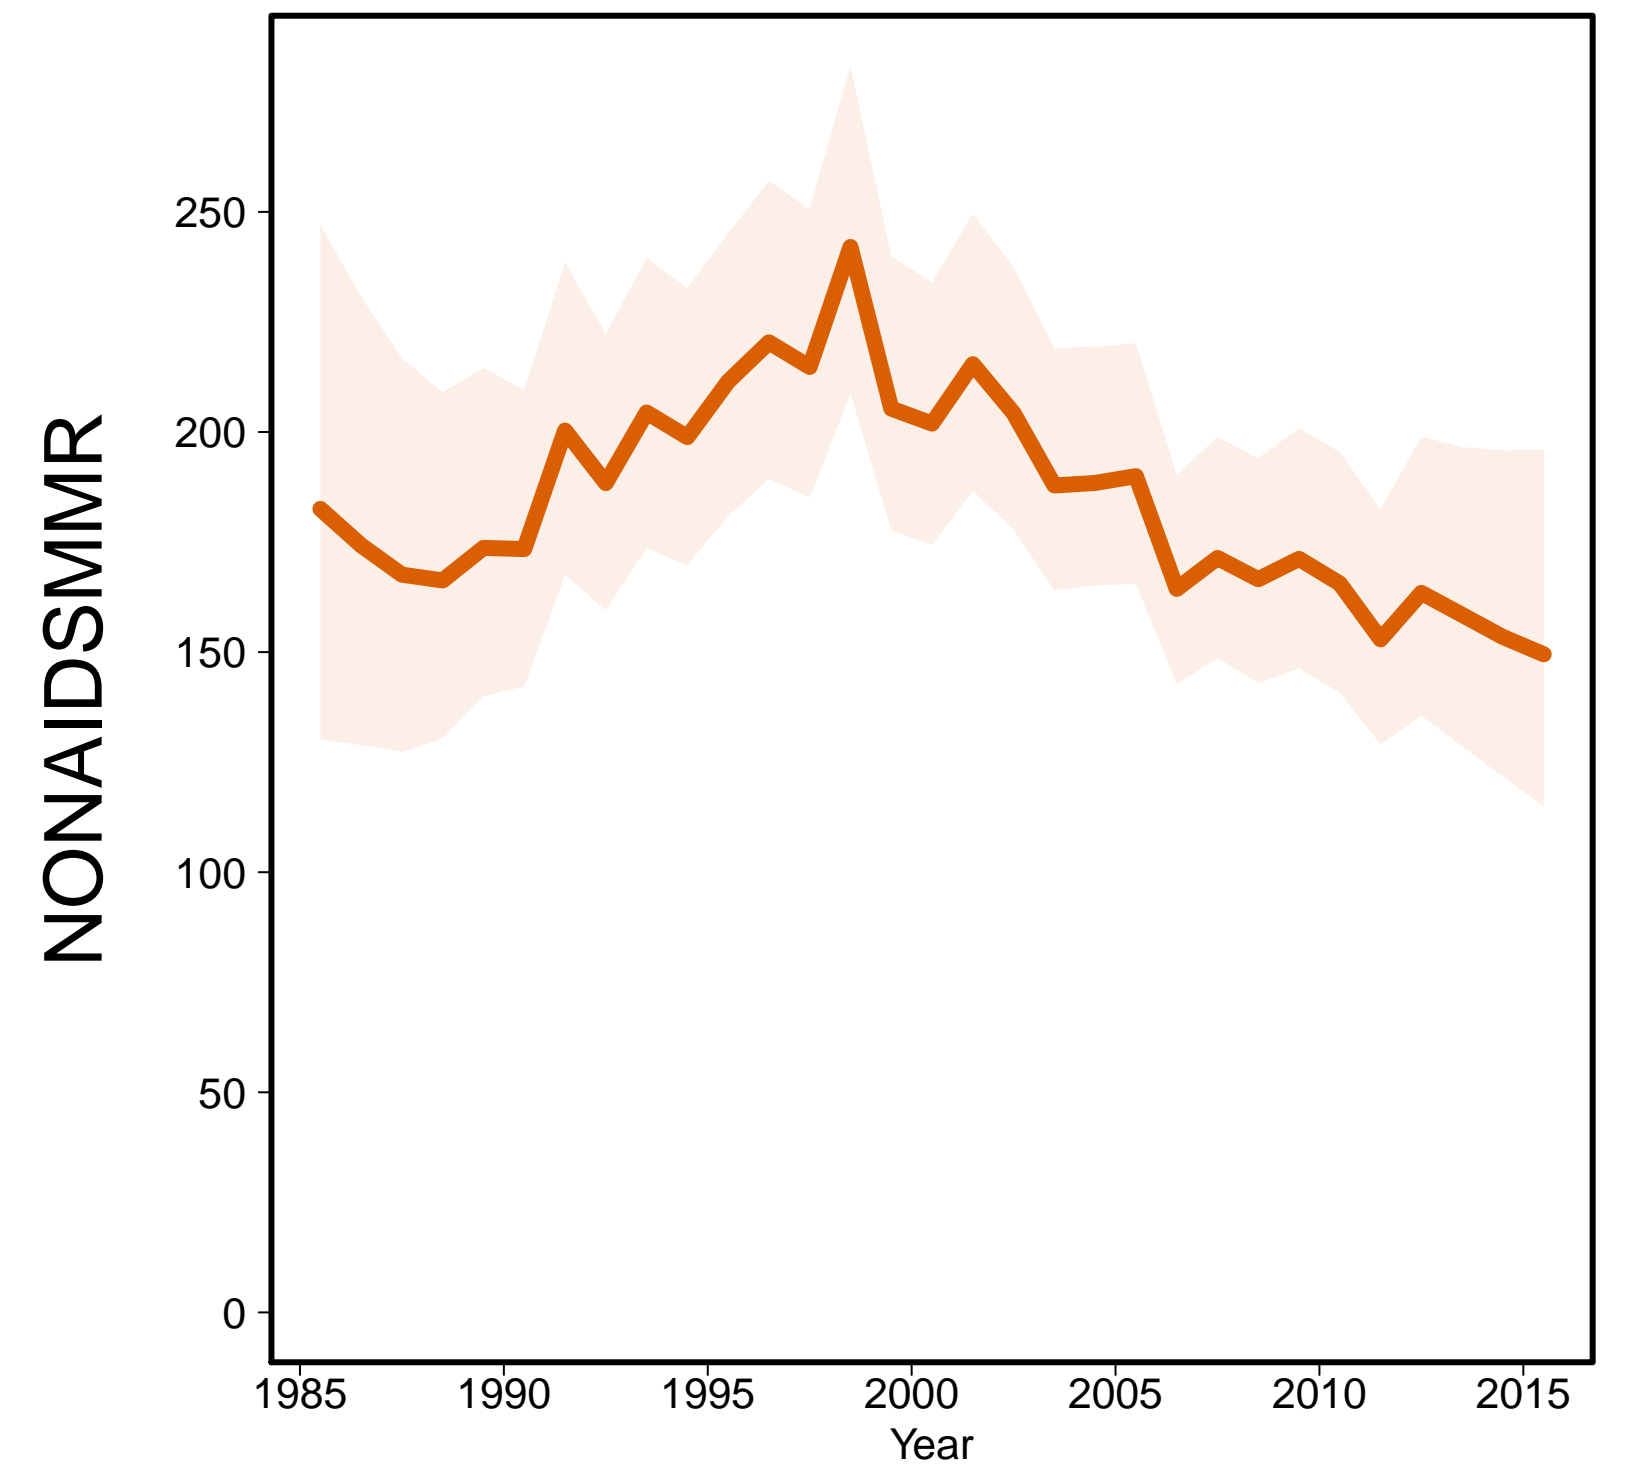

Aids MMR

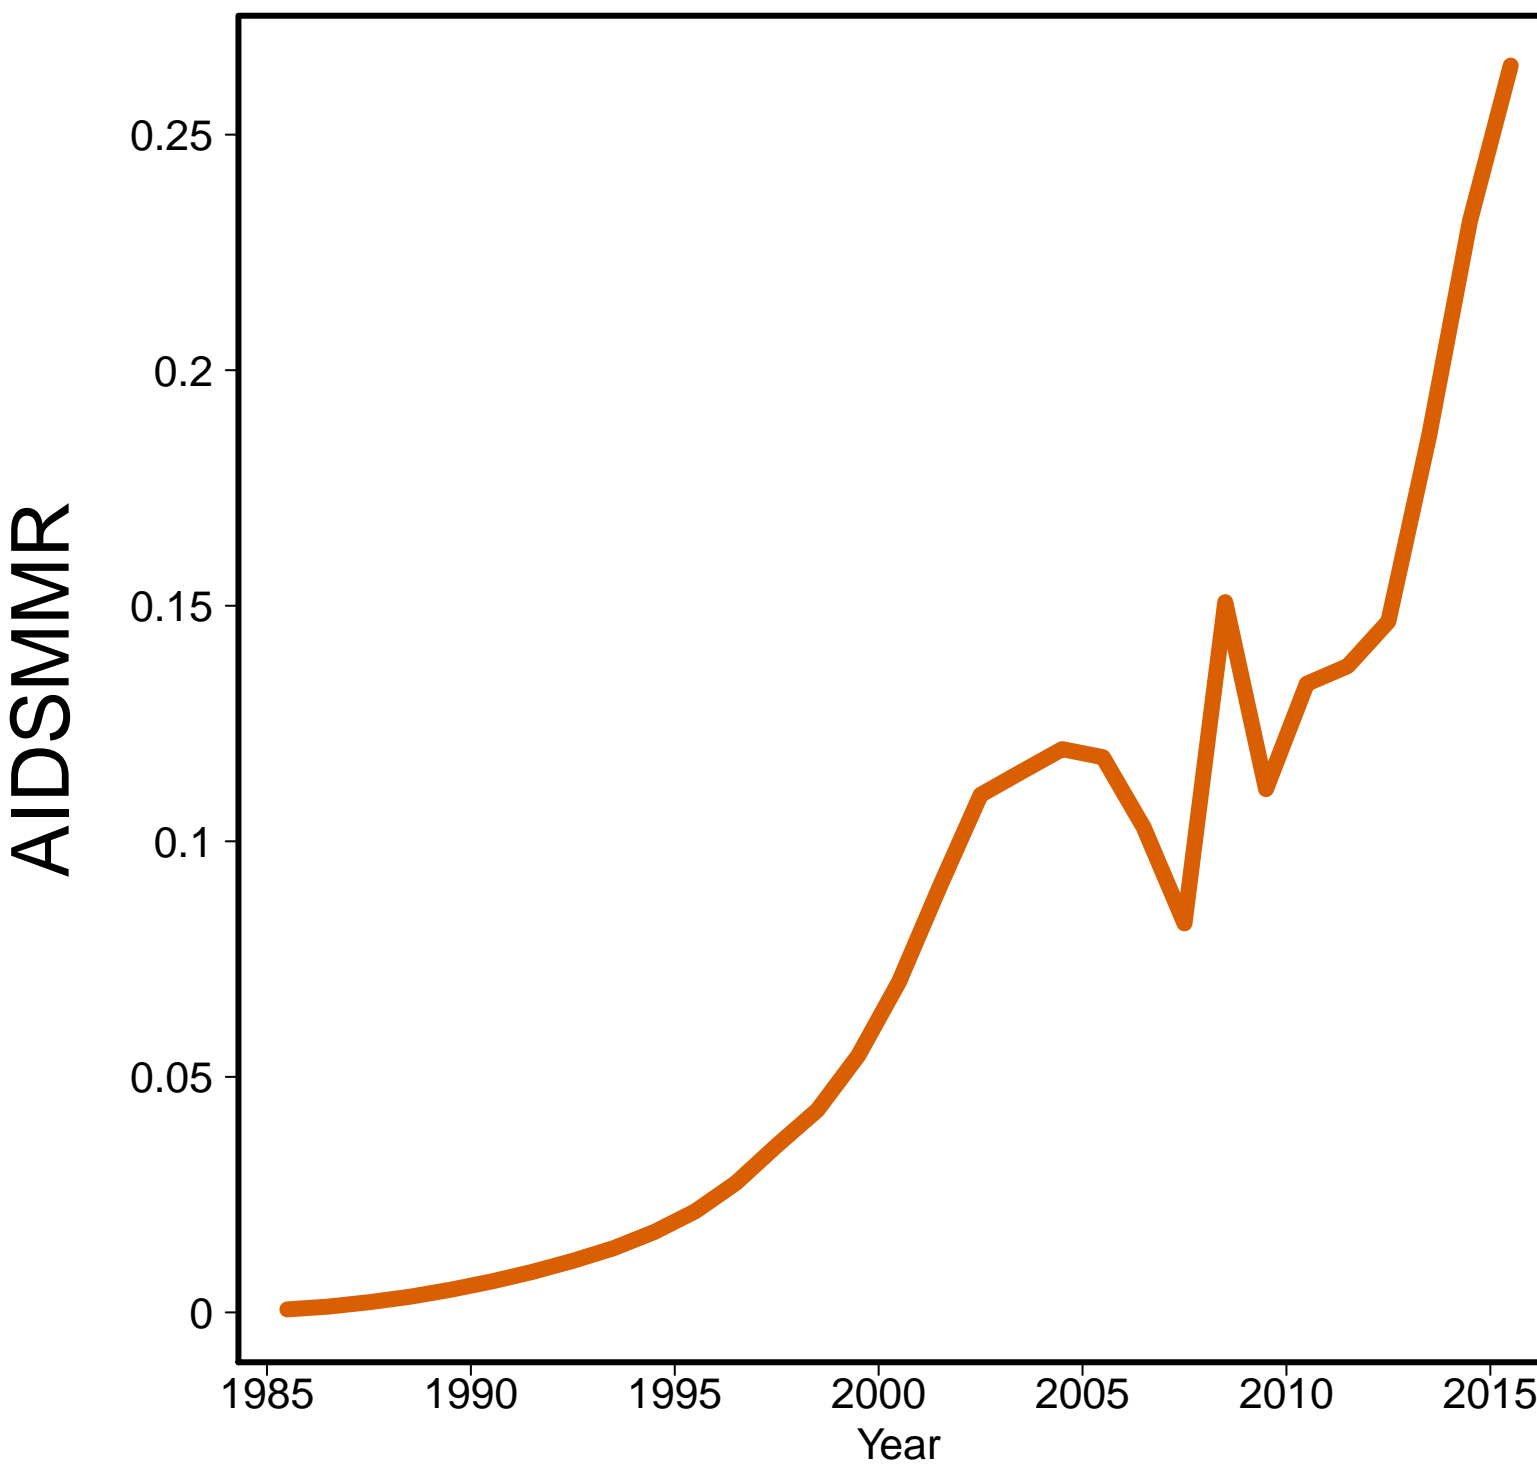

Niger [NER]  
(Western Africa)

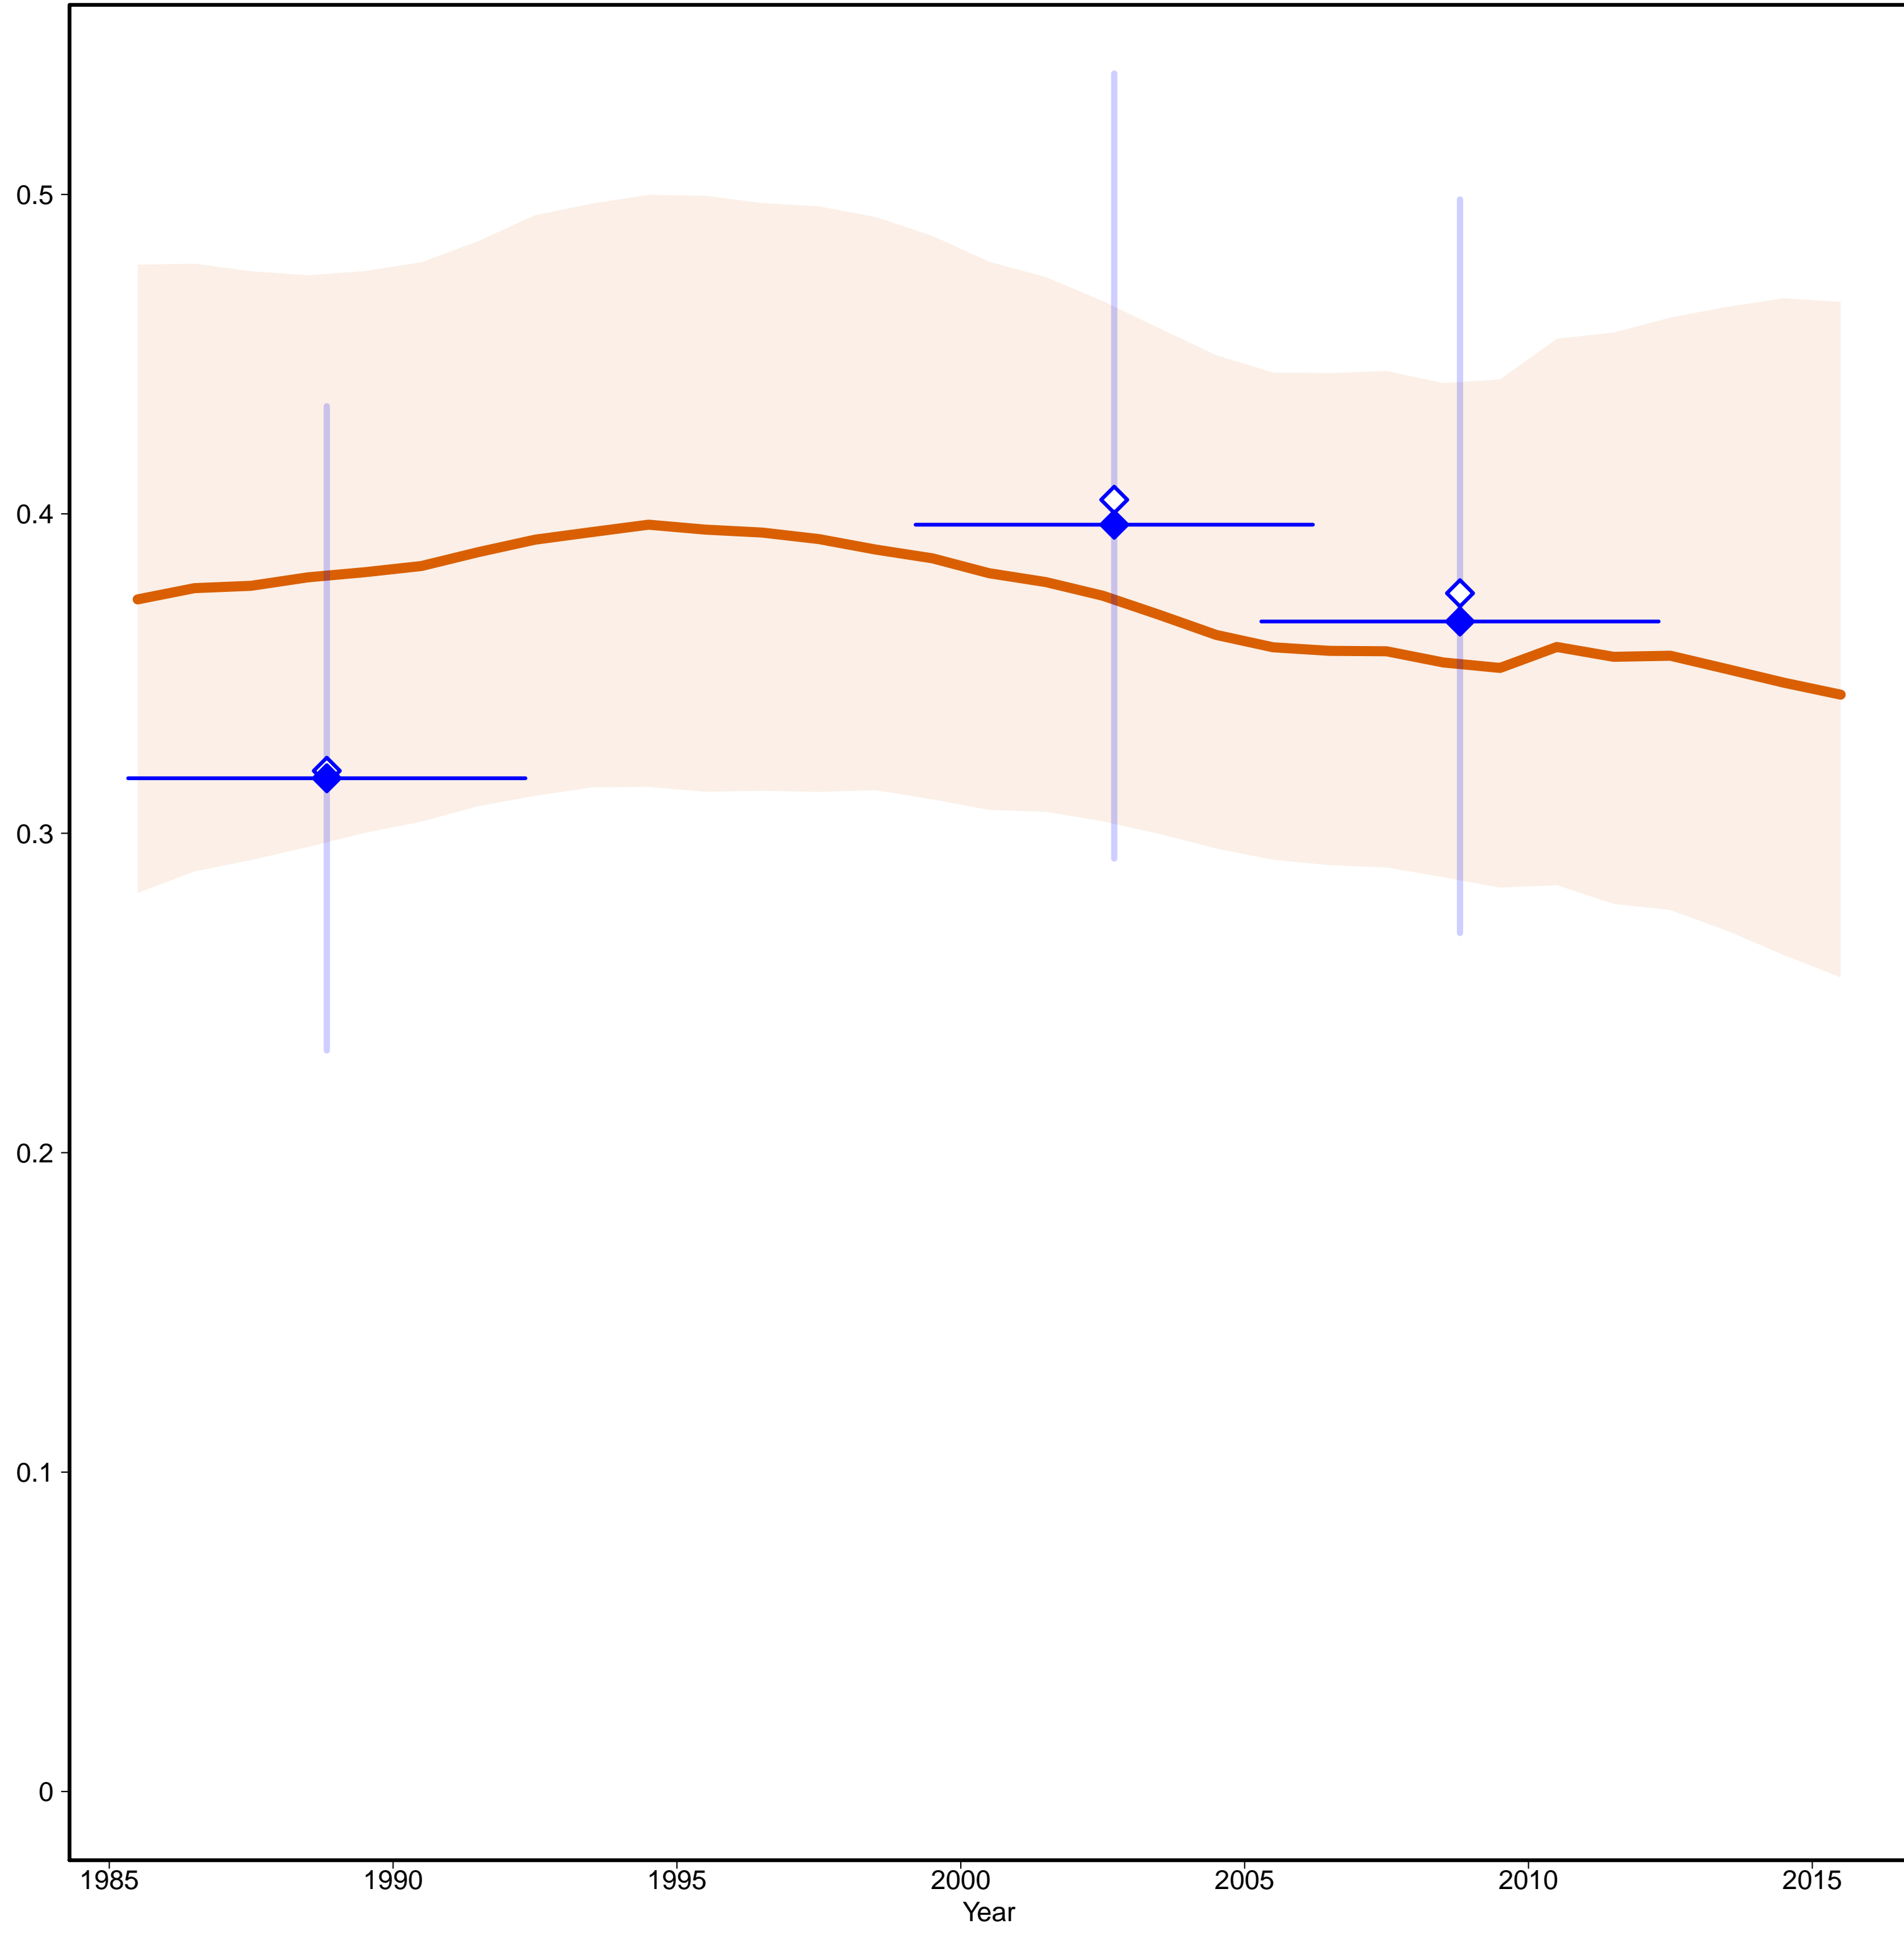

Niger [NER]  
(Western Africa)

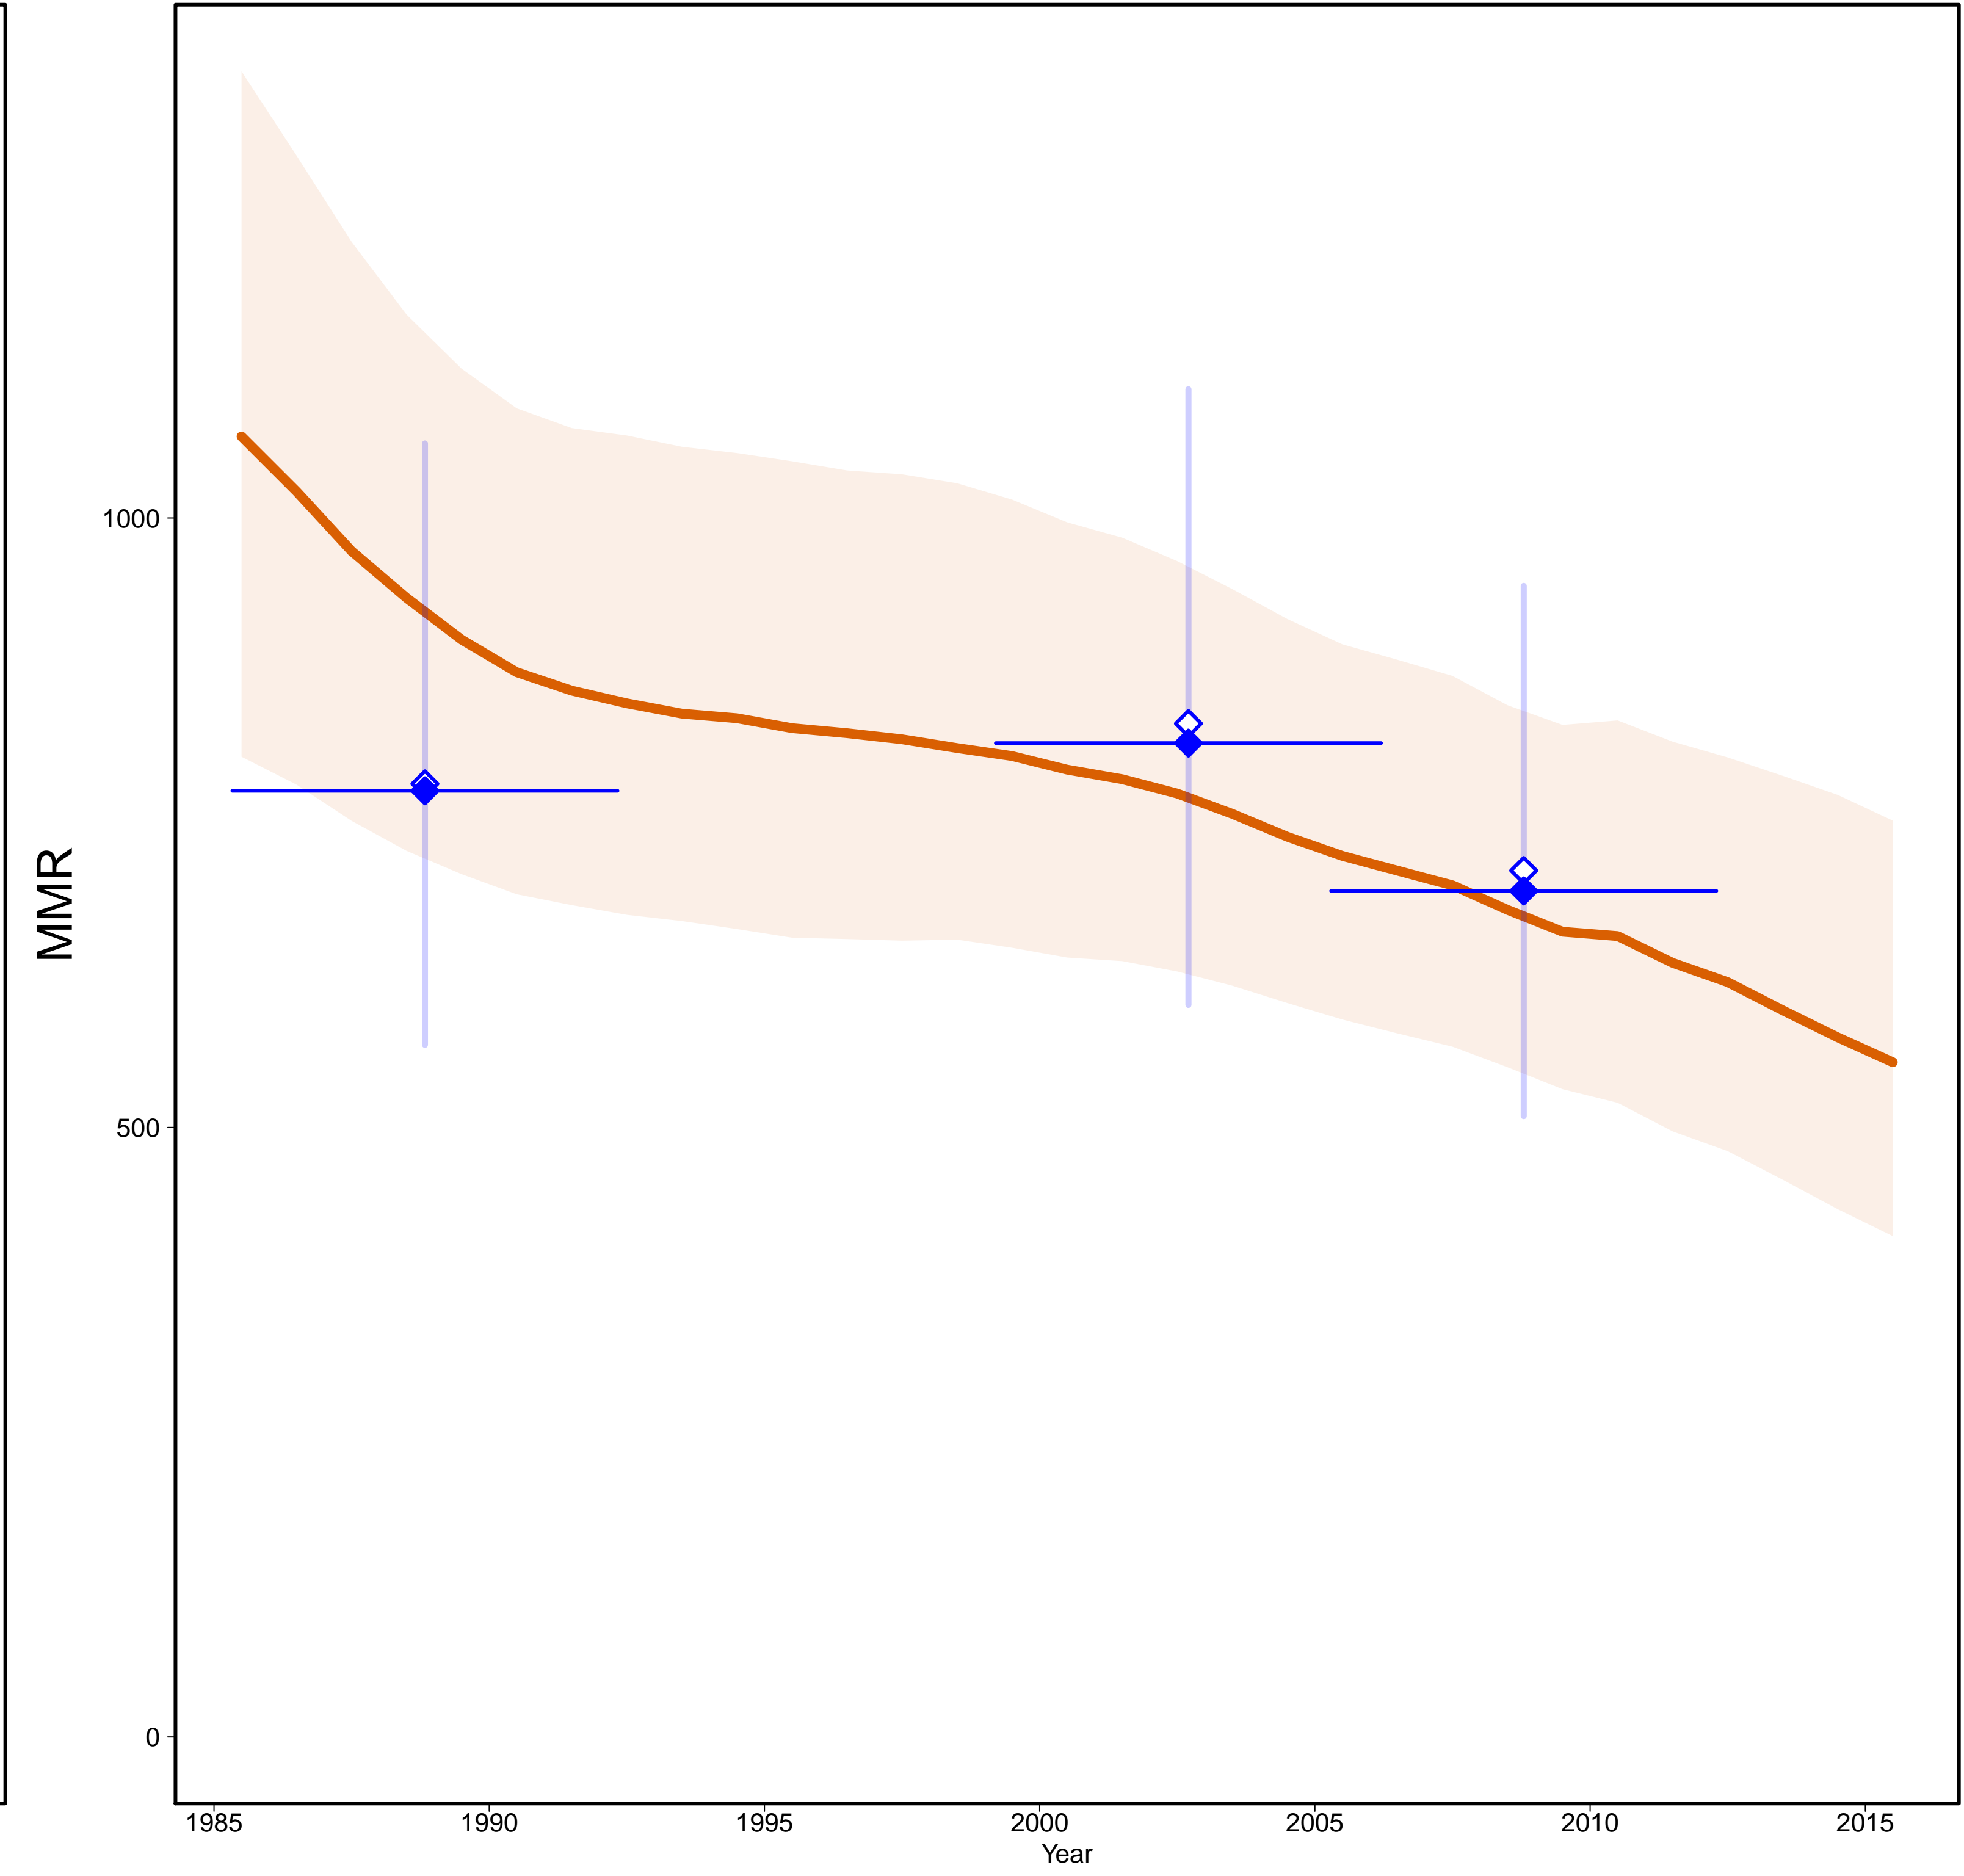

- Estimates —
- MMR Database 2015 —
- ◇ Observed Data
- ◆ Adjusted Data
- Data type —
- ◆ DHS

Gross Domestic Product

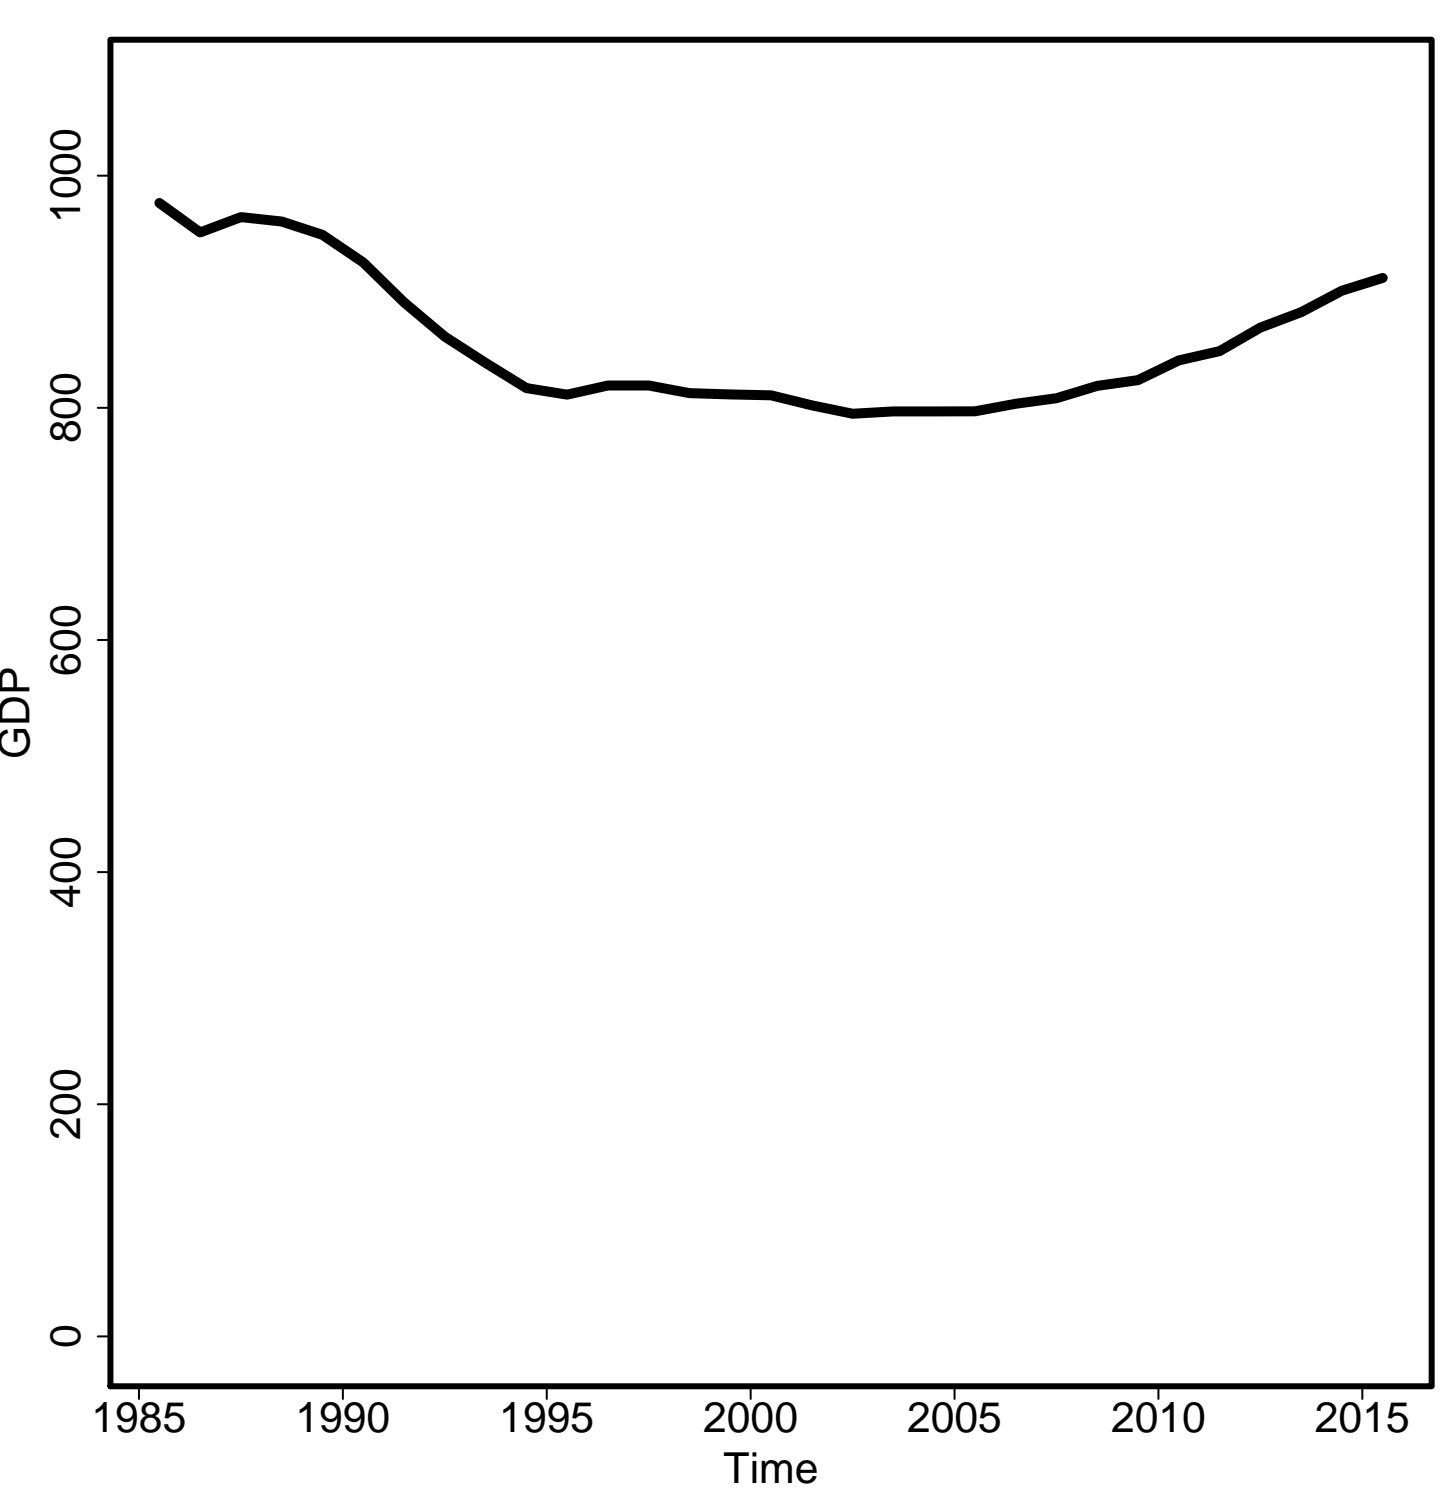

General Fertility Rate

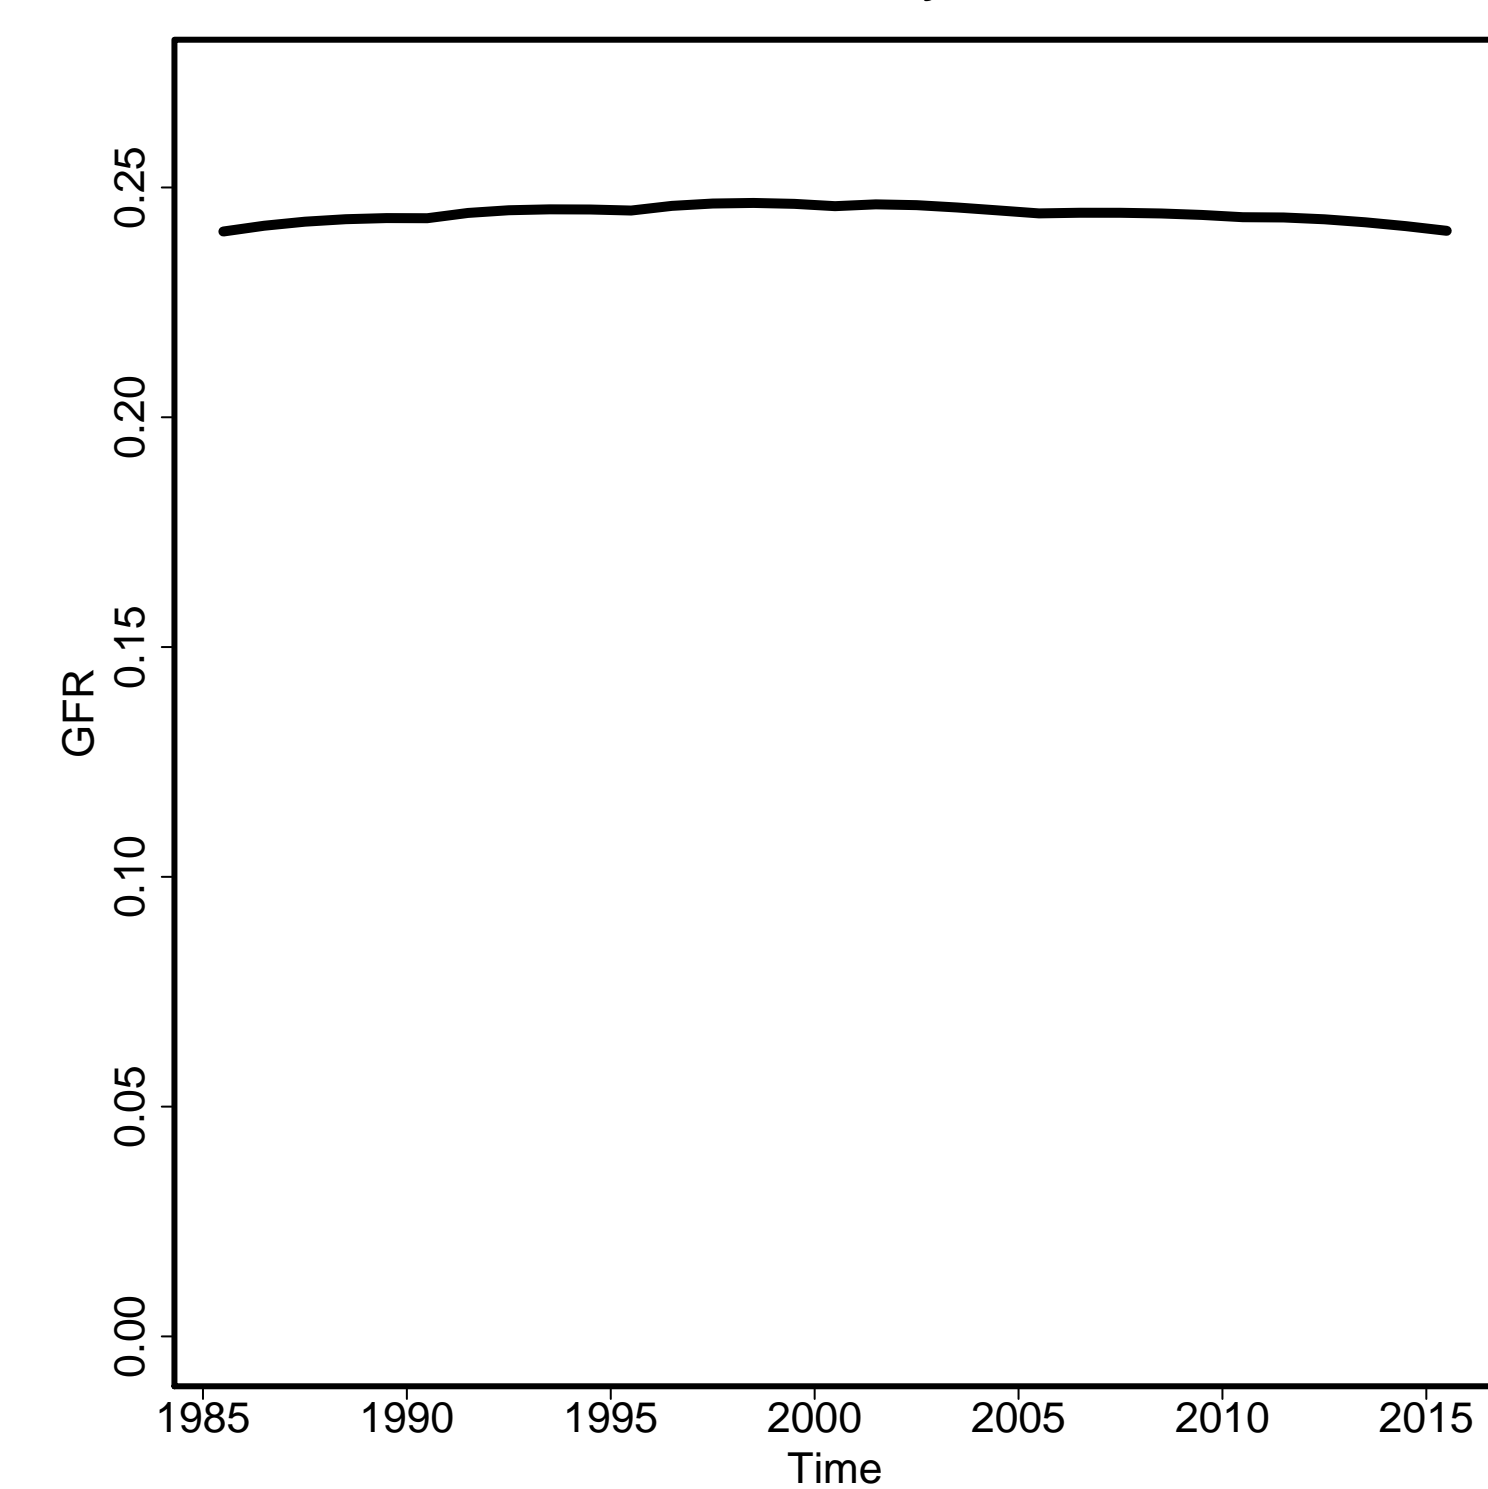

Skilled Attendance to Birth

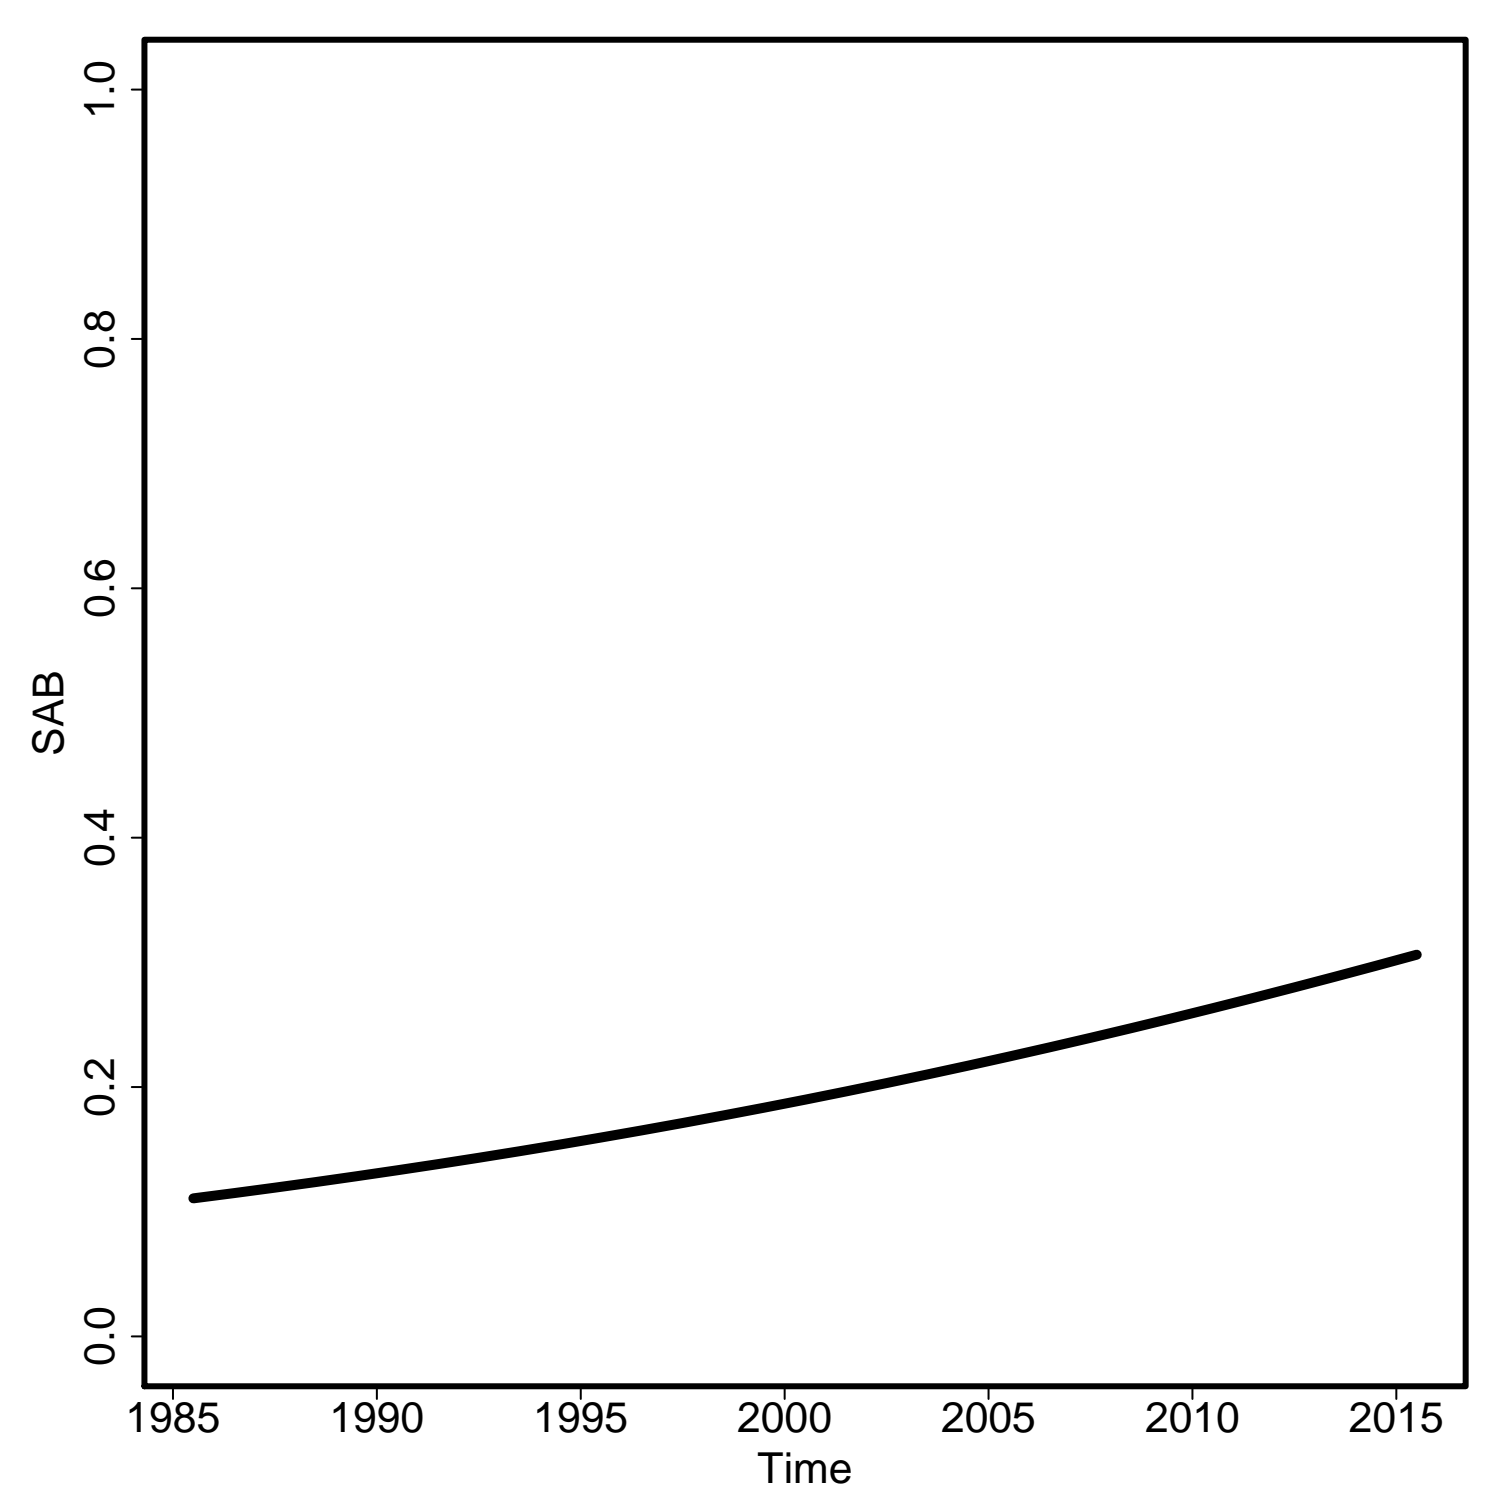

Envelope/Births

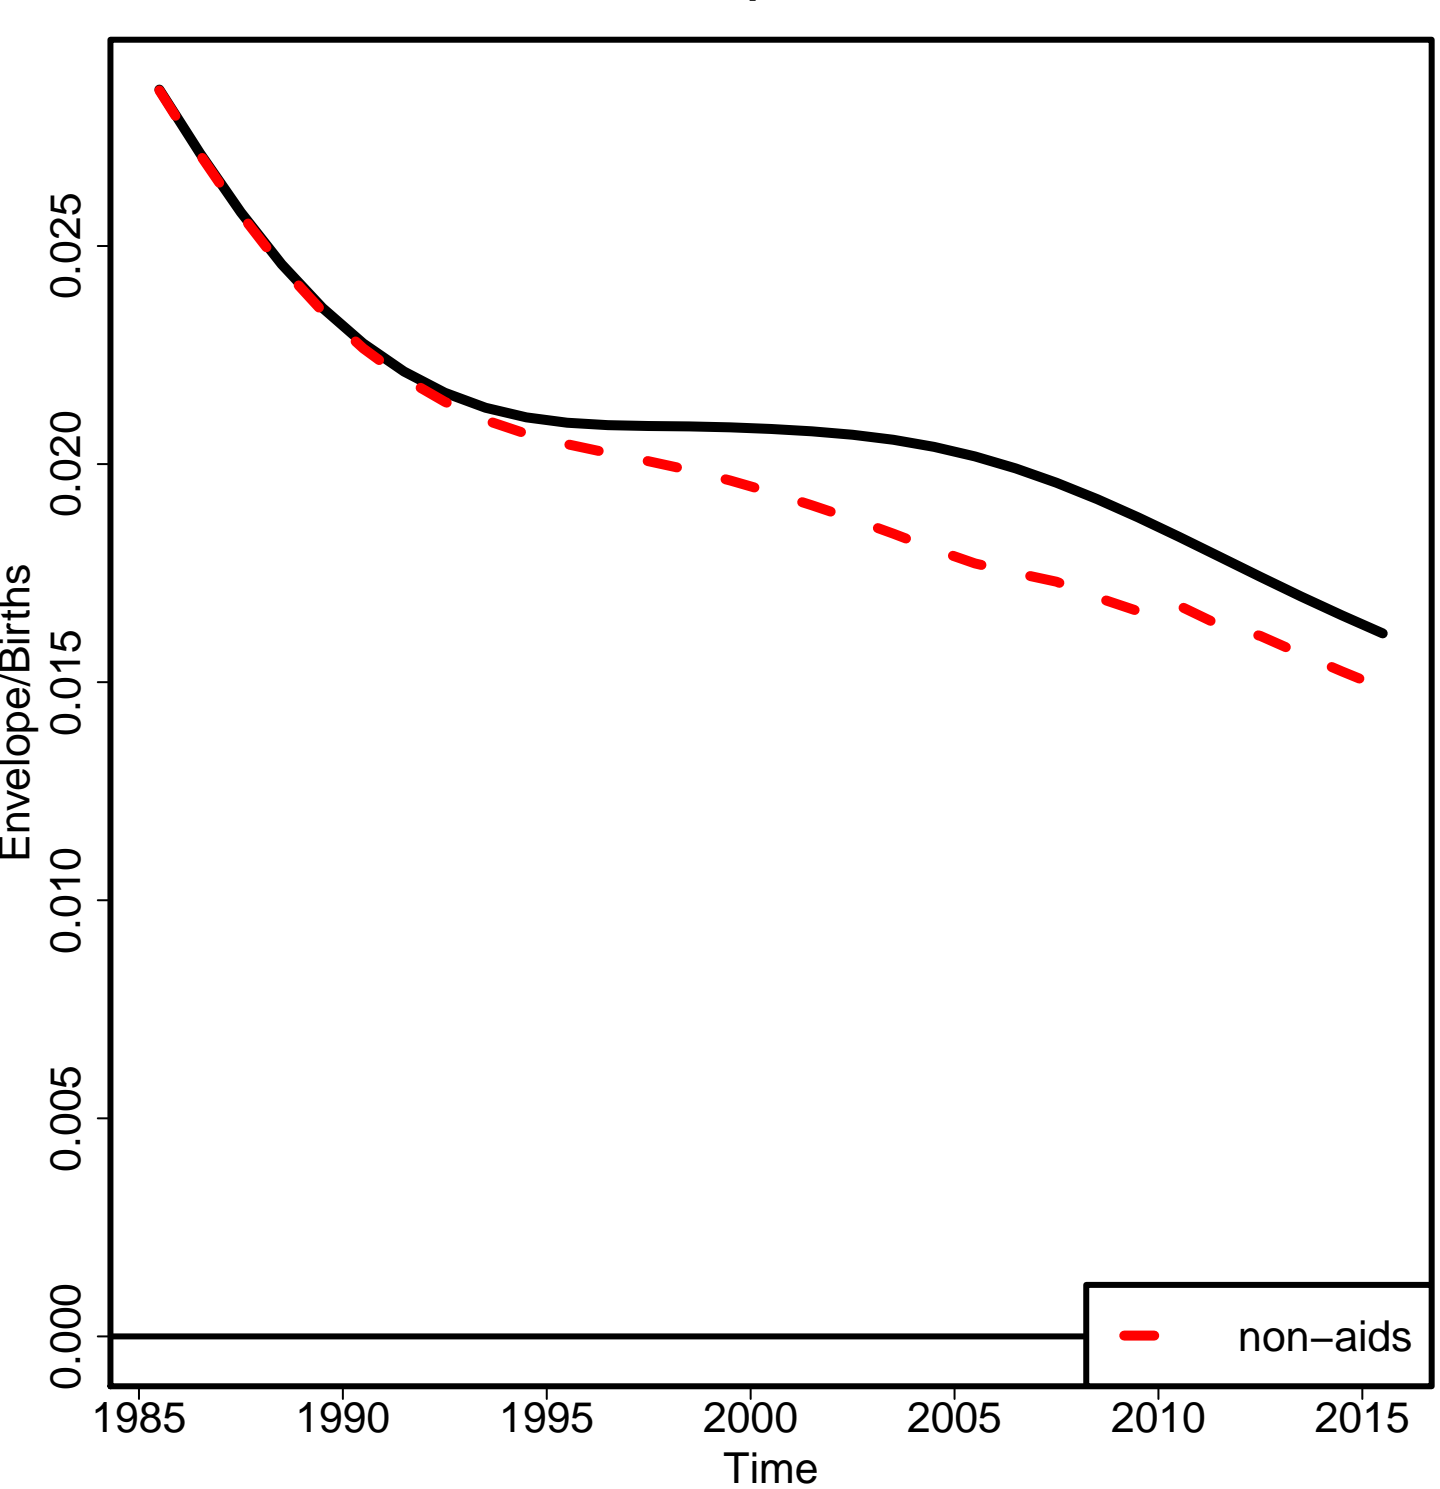

Non-aids MMR

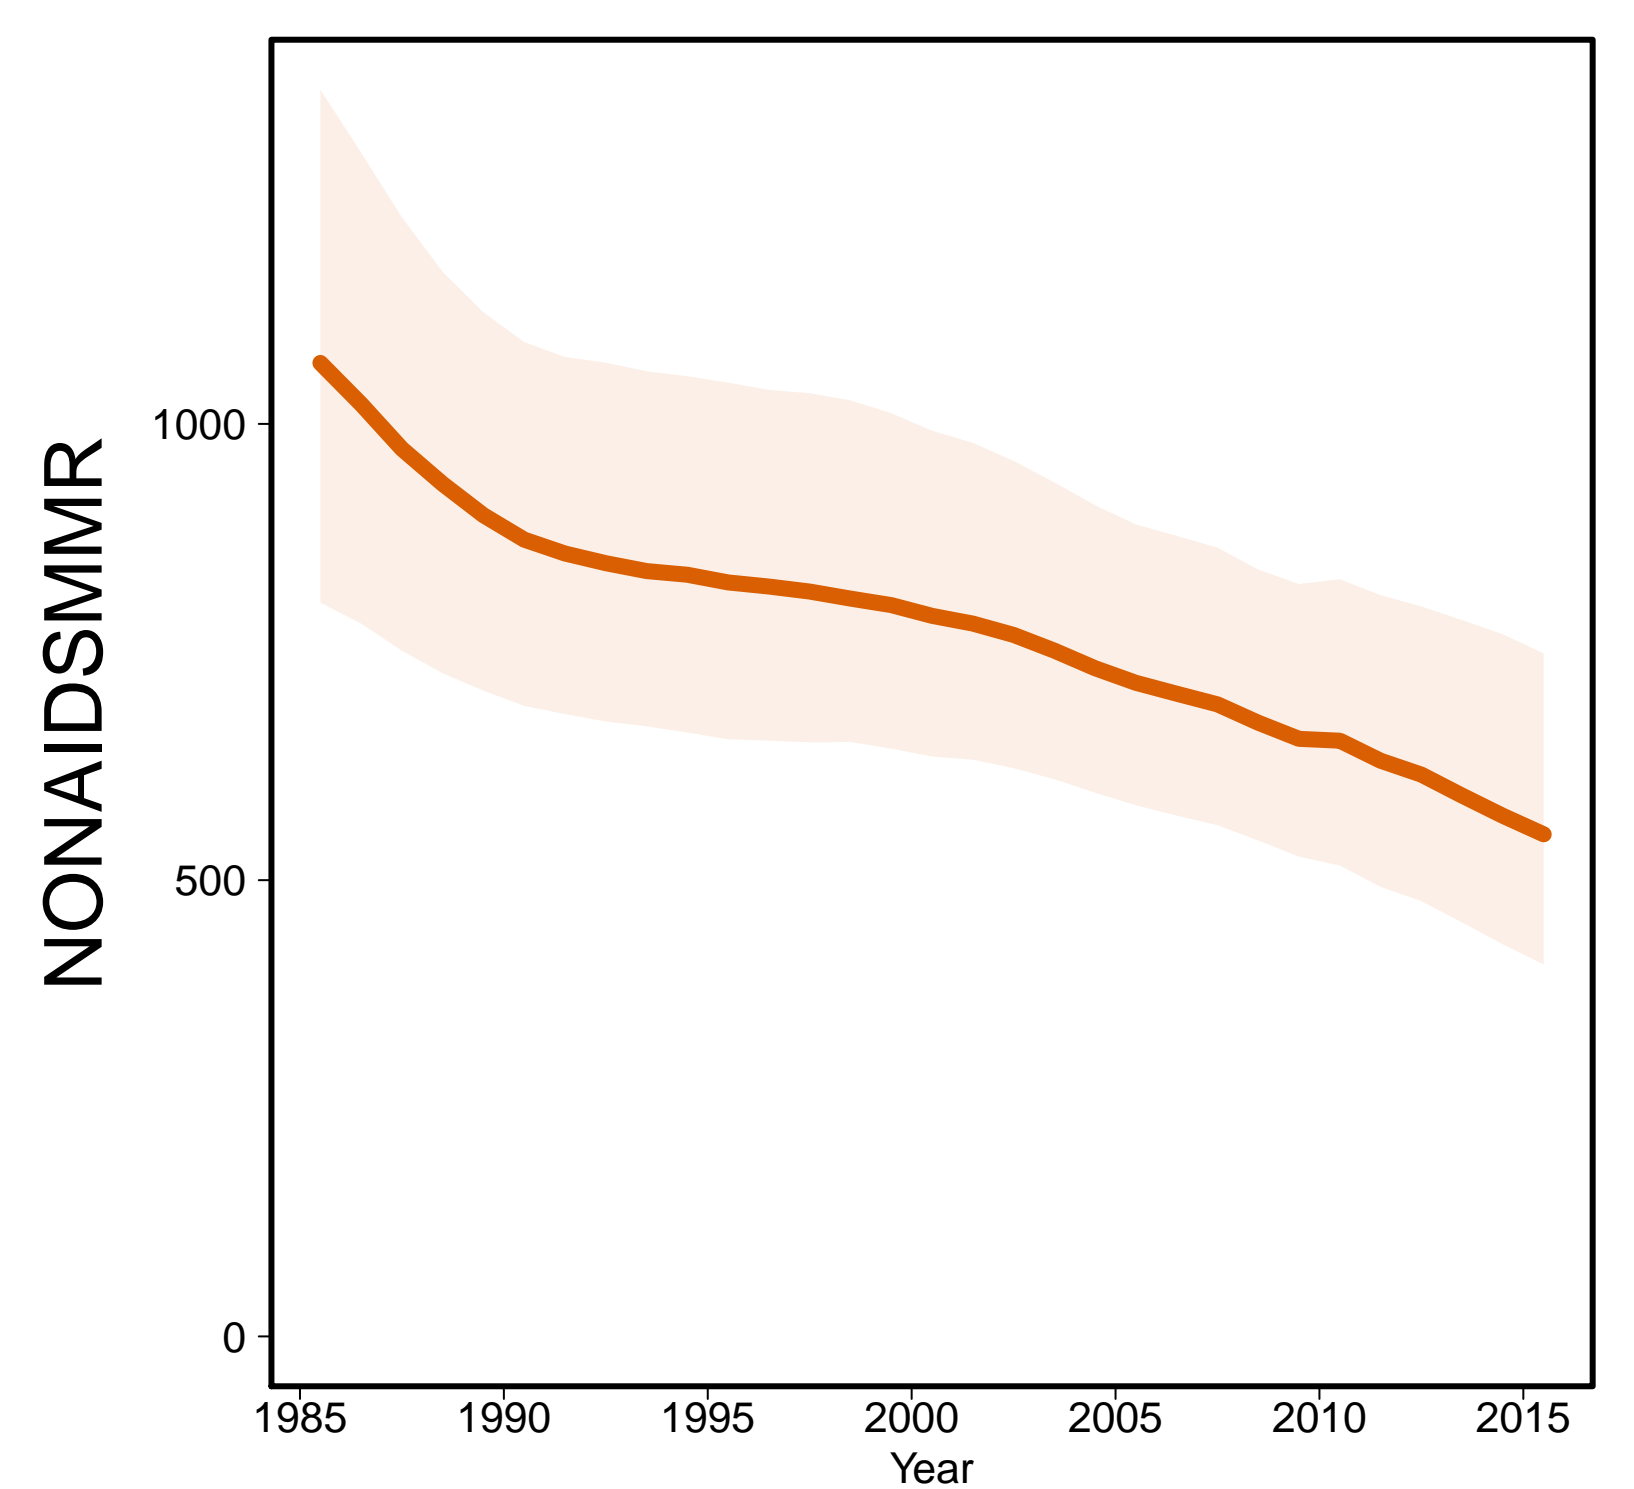

Aids MMR

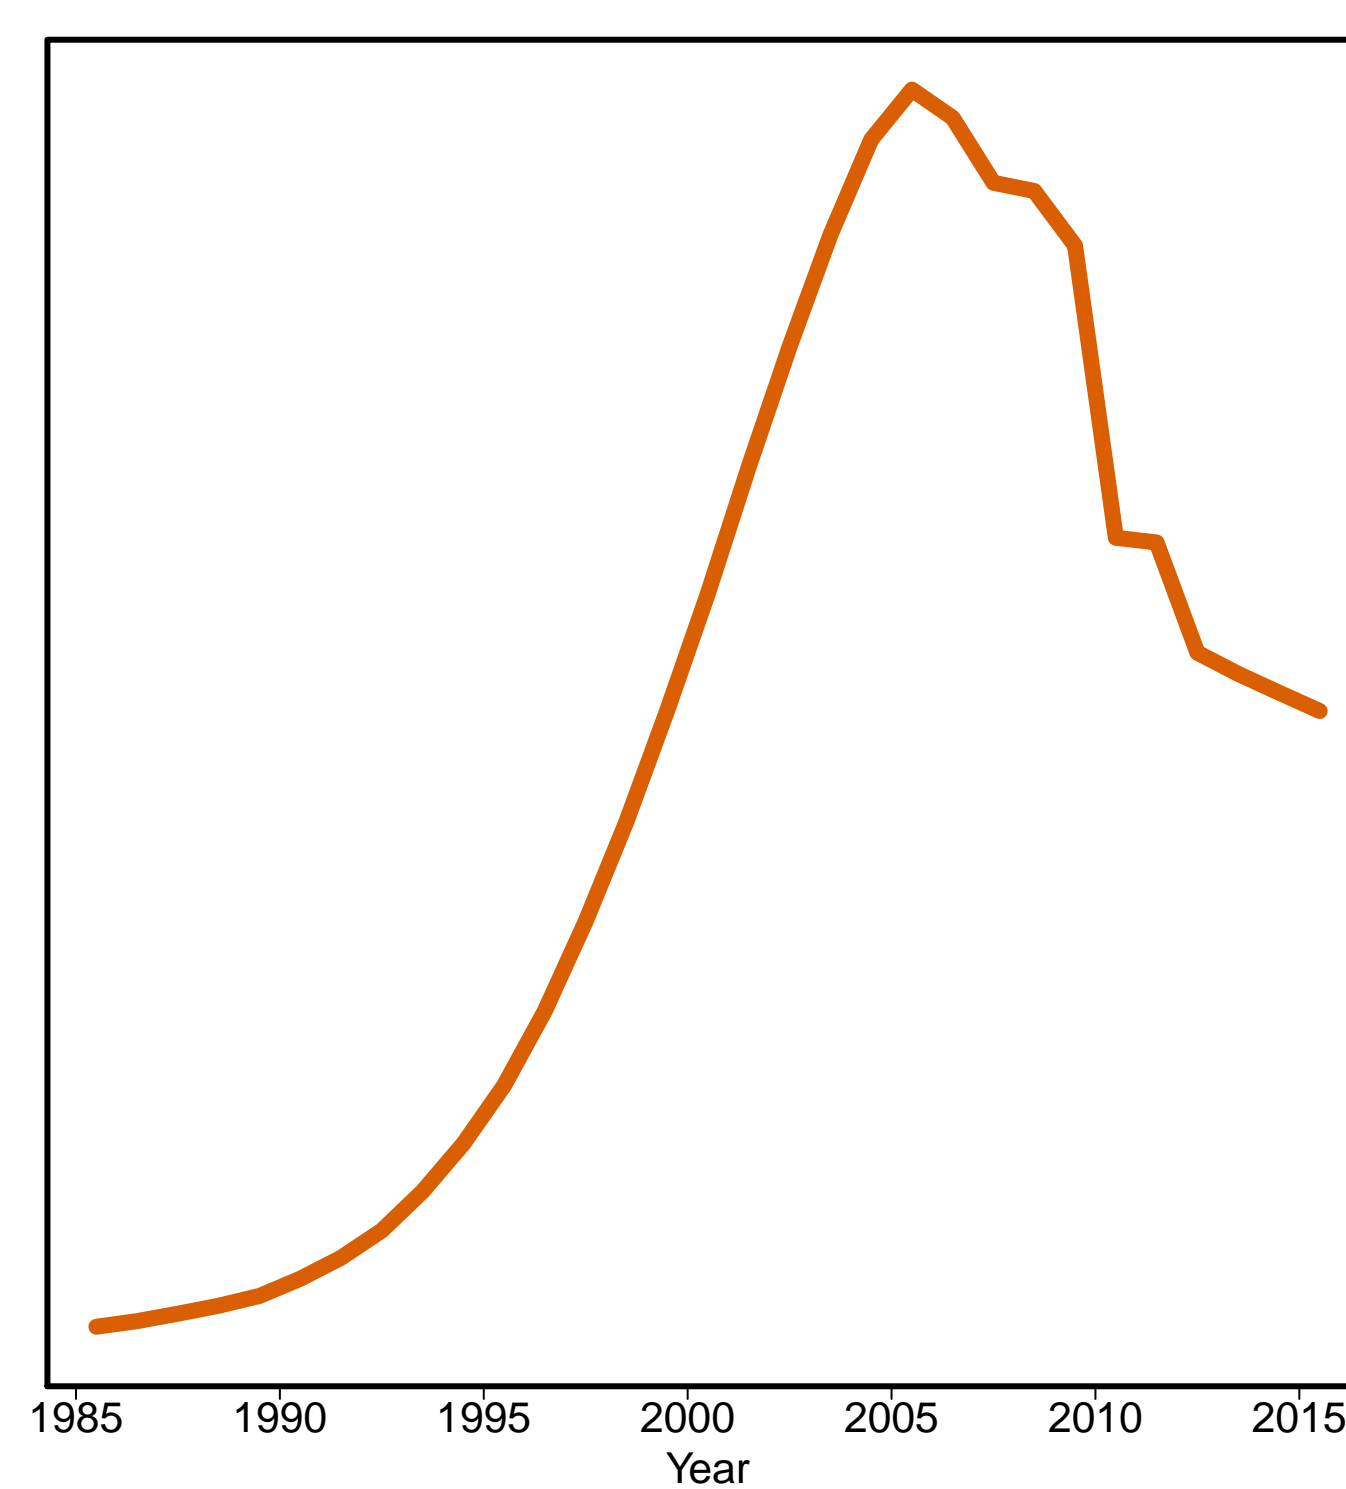

Nigeria [NGA]  
(Western Africa)

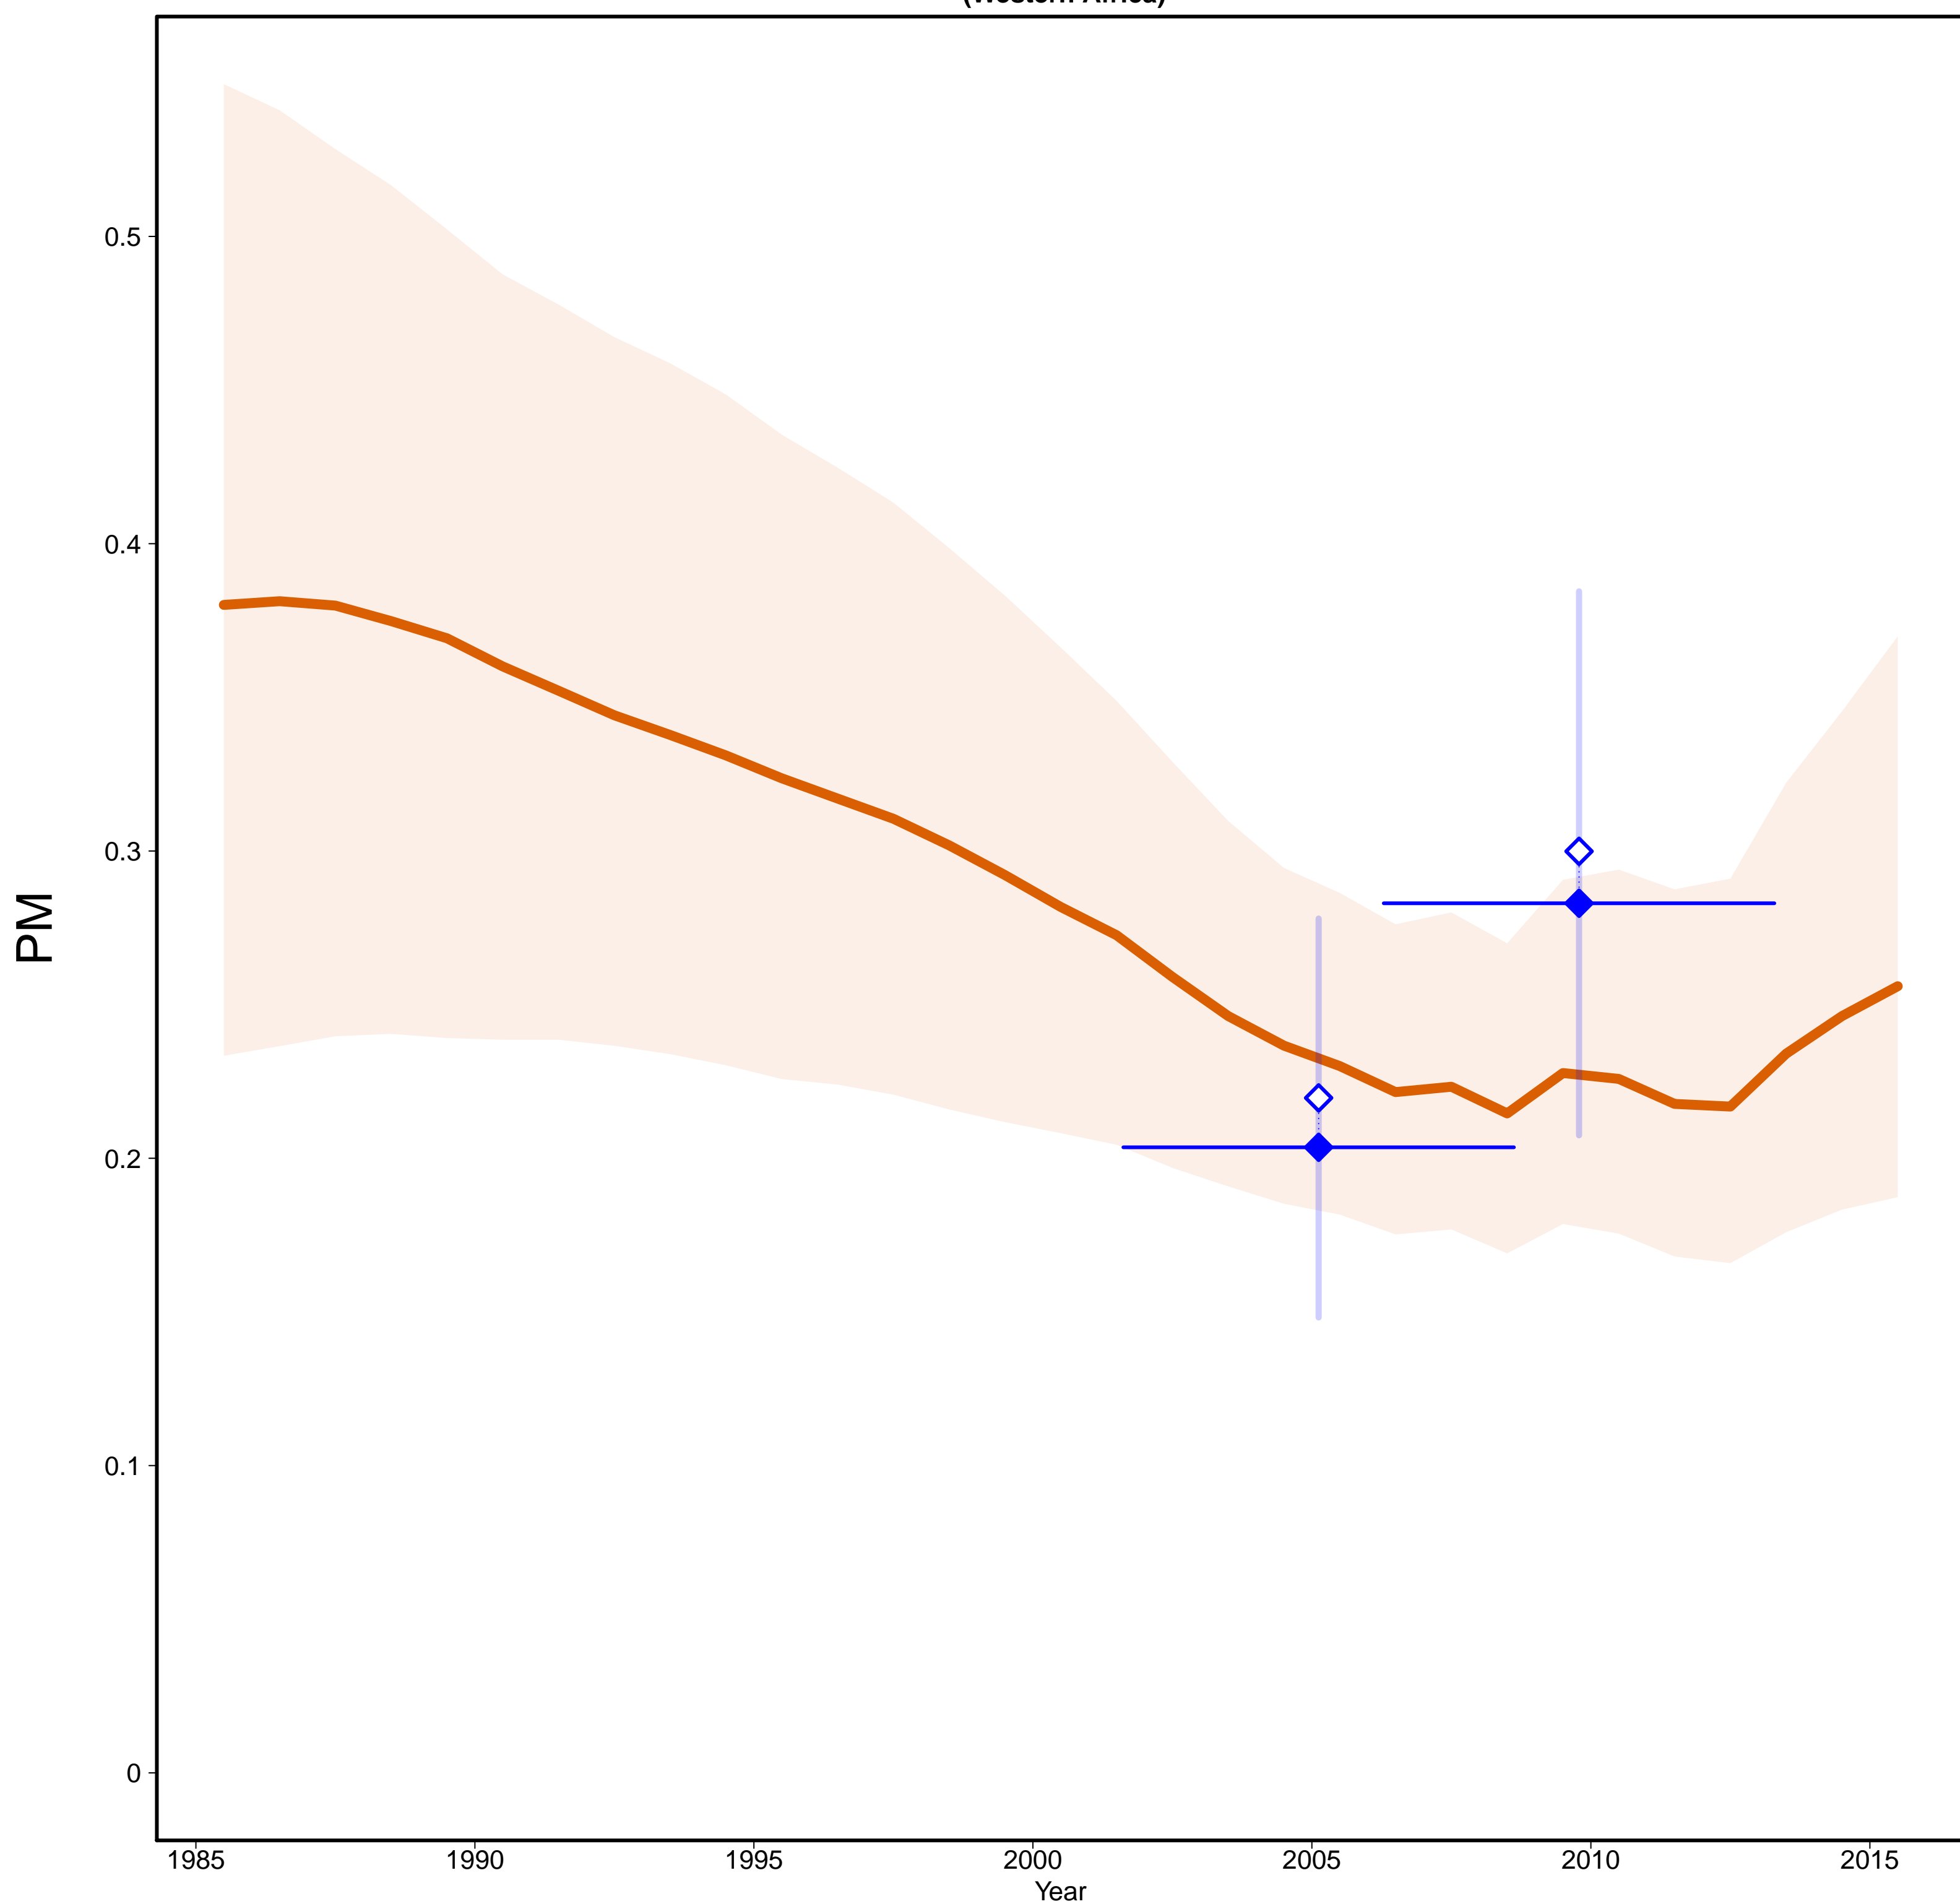

Nigeria [NGA]  
(Western Africa)

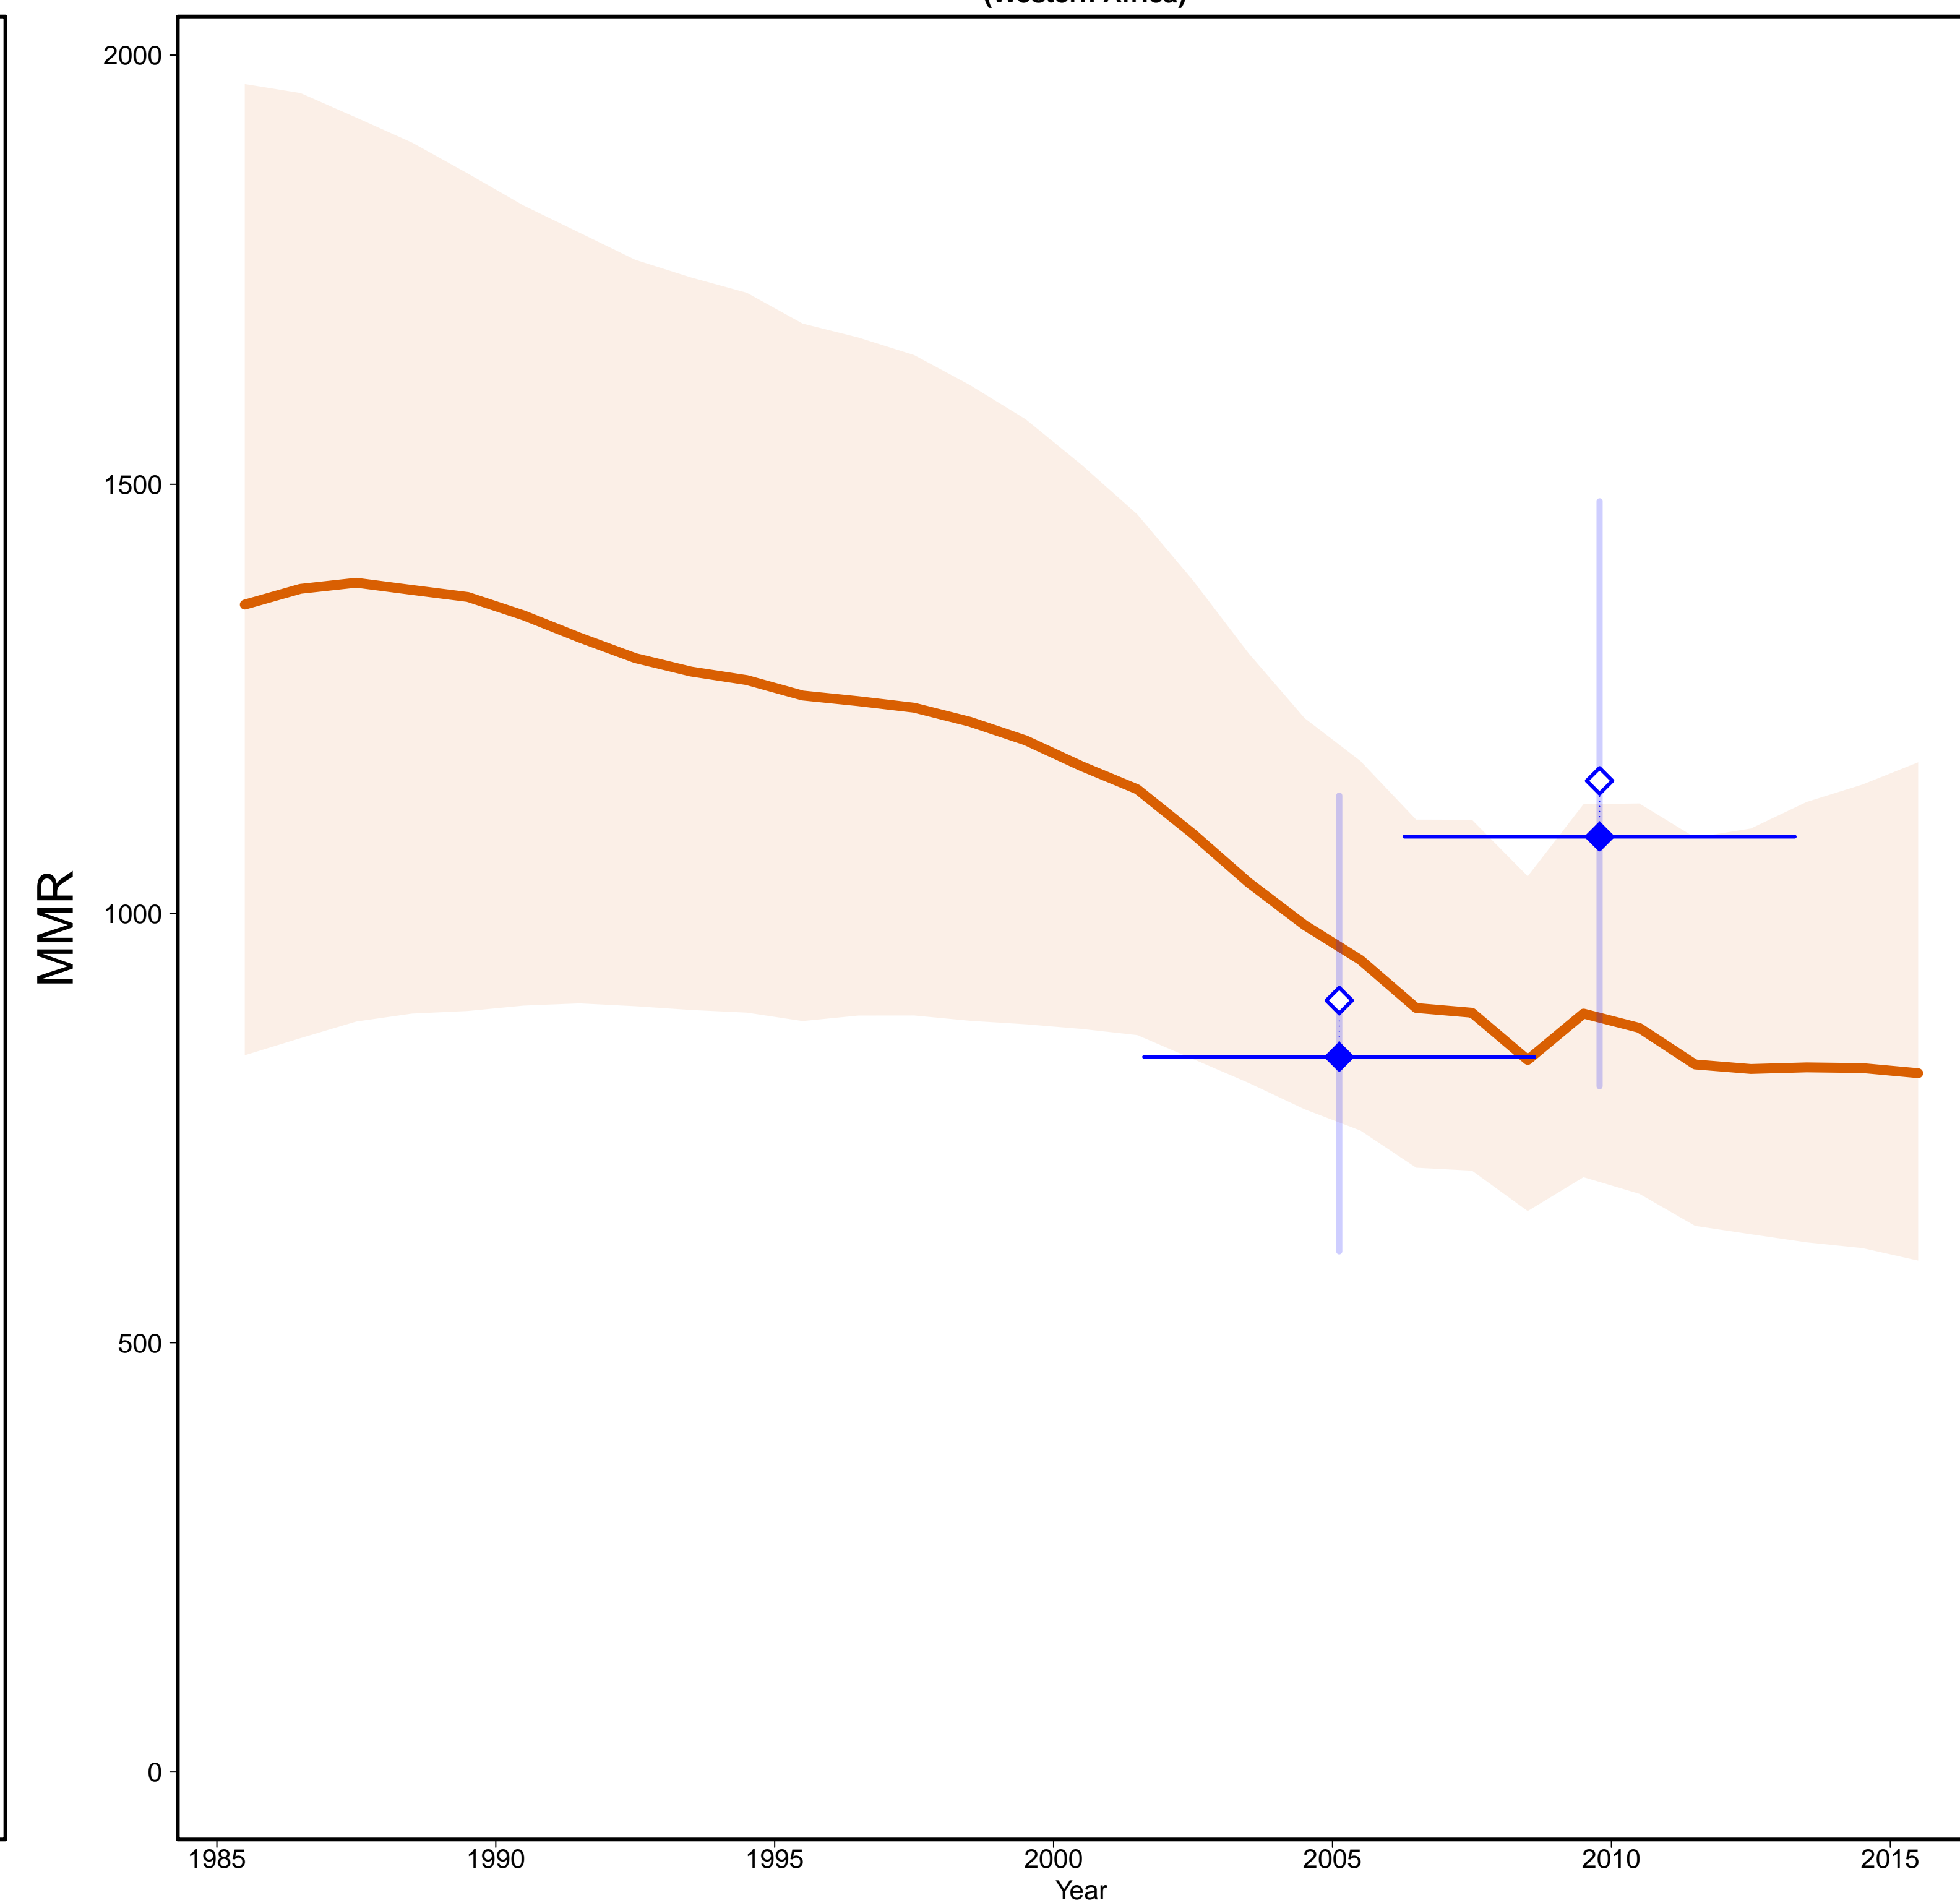

- Estimates —
- MMR Database 2015 —
- ◇ Observed Data
- ◆ Adjusted Data
- Data type —
- ◆ DHS

Gross Domestic Product

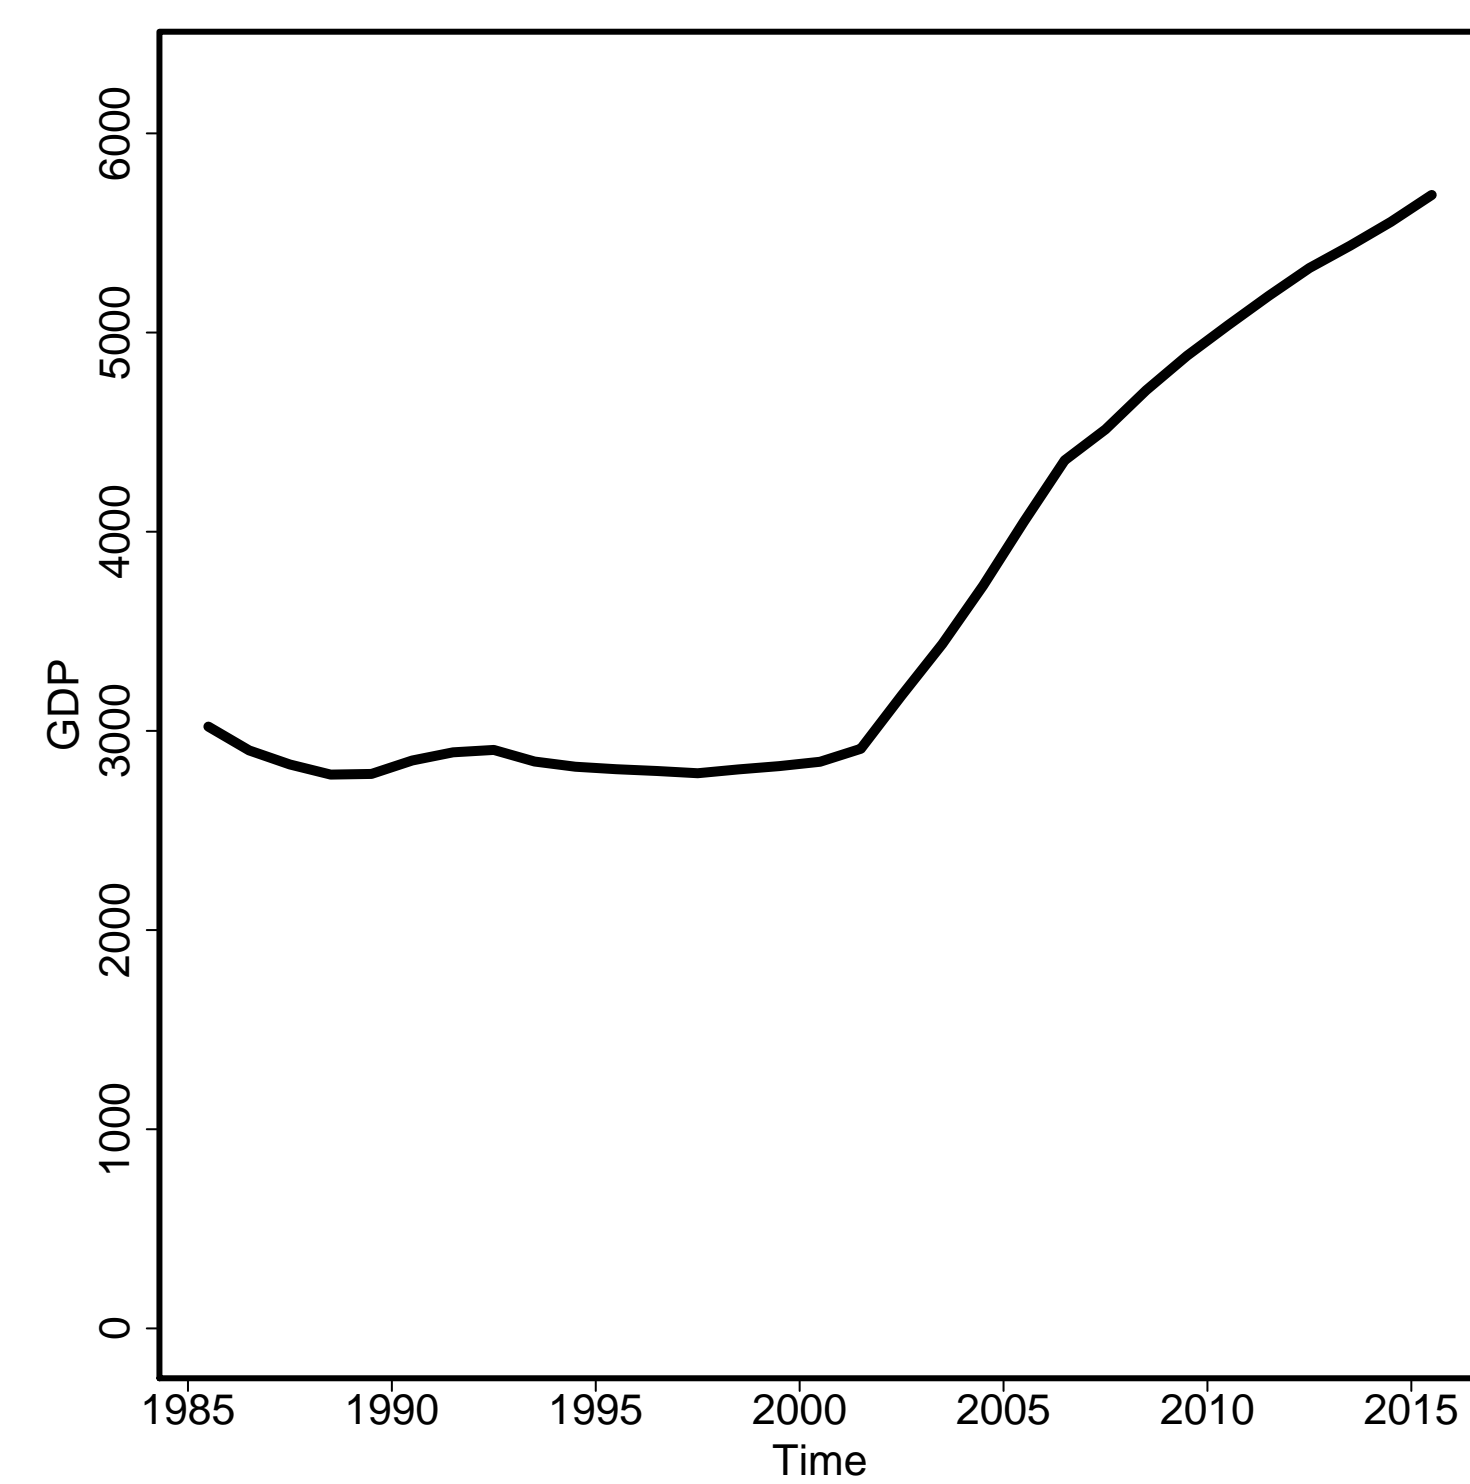

General Fertility Rate

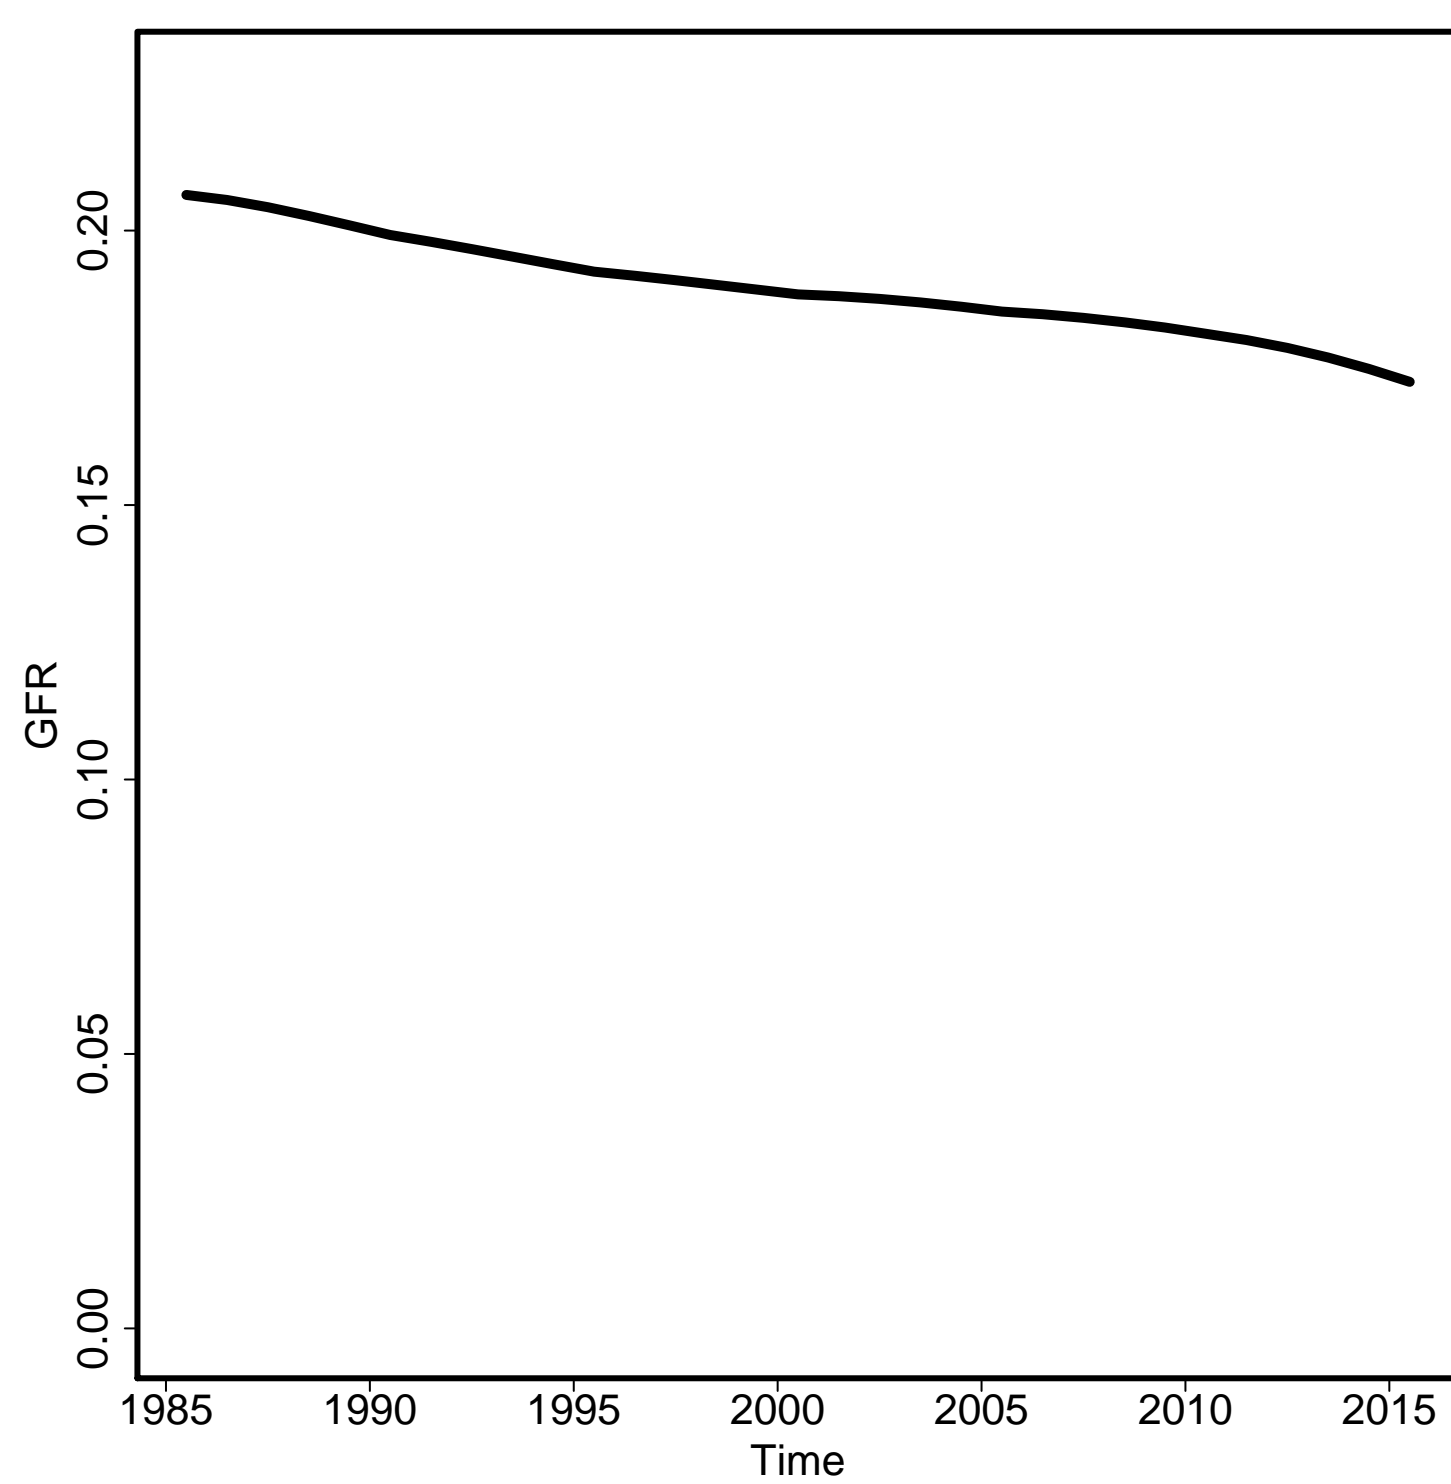

Skilled Attendance to Birth

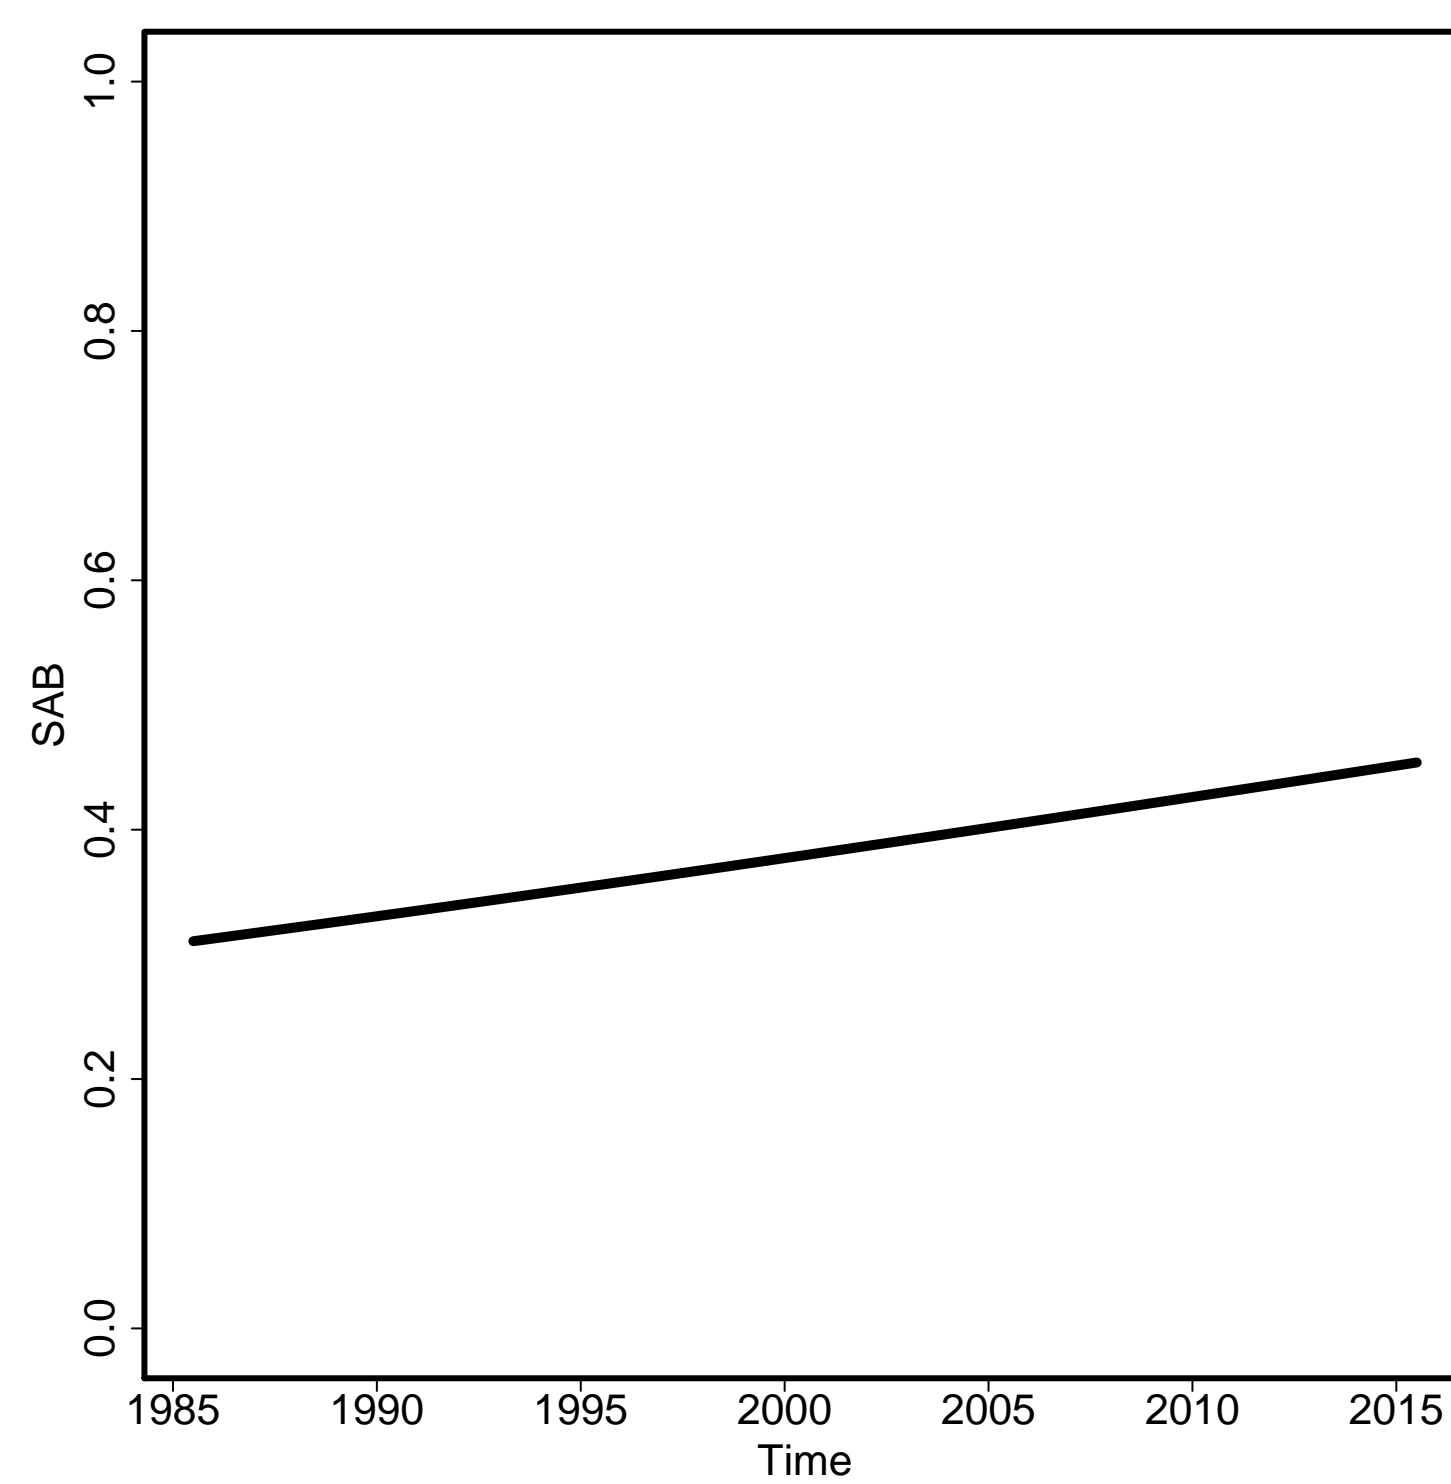

Envelope/Births

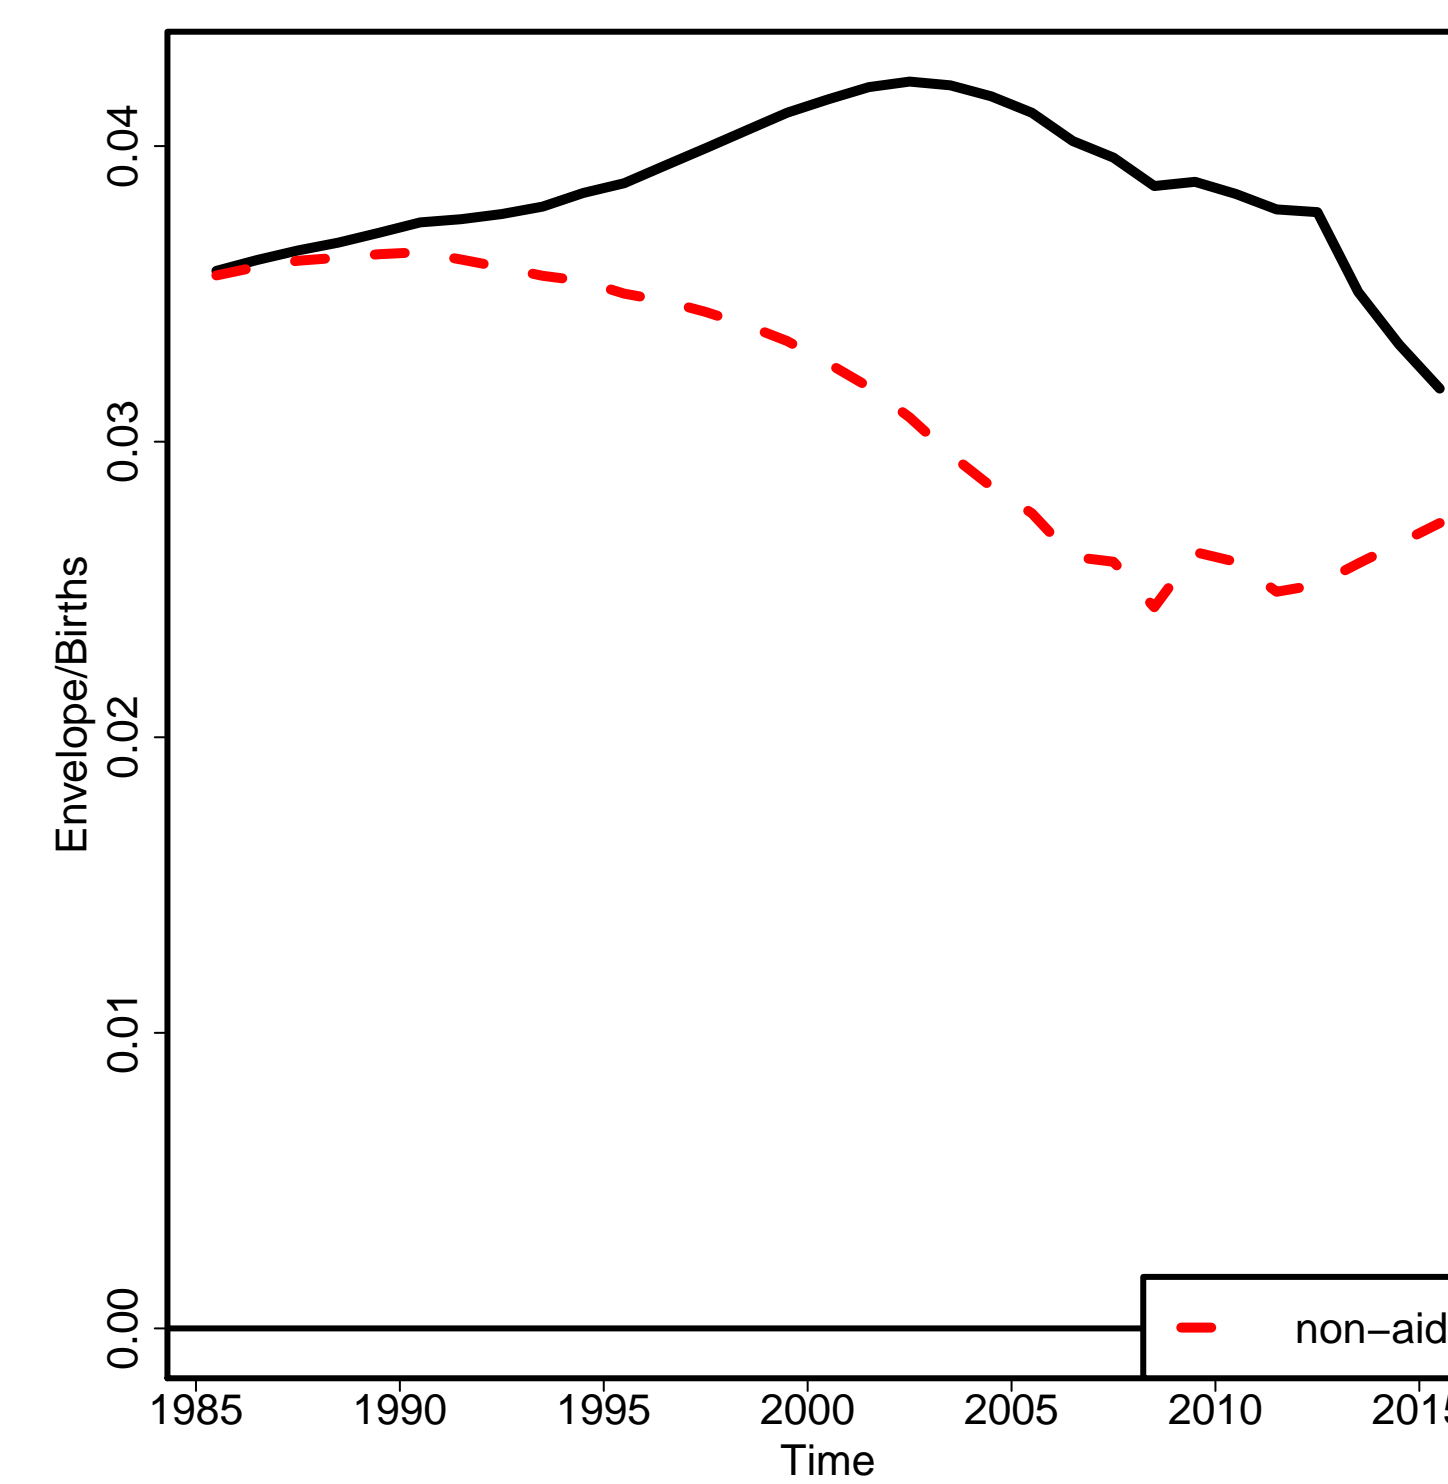

Non-aids MMR

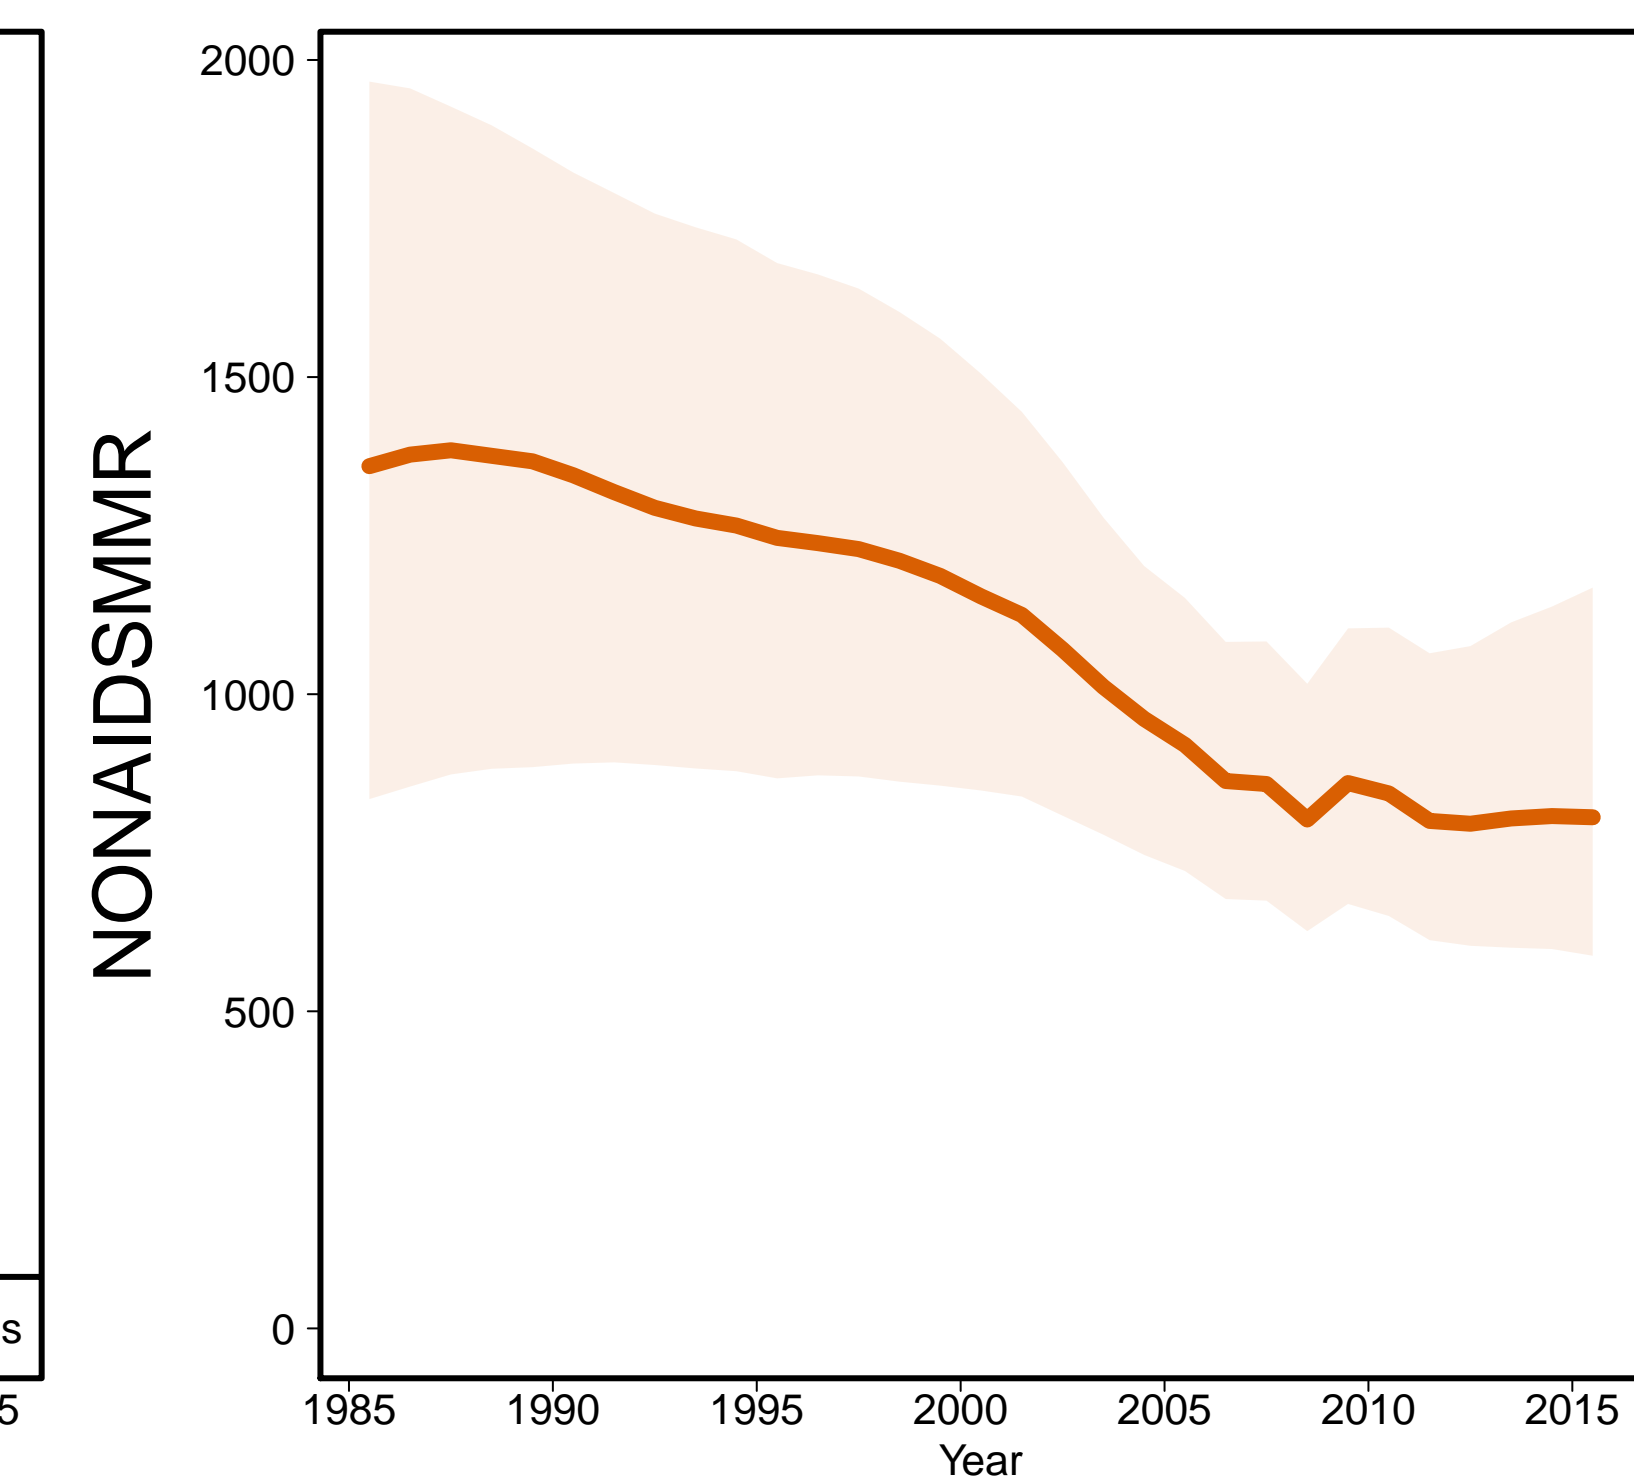

Aids MMR

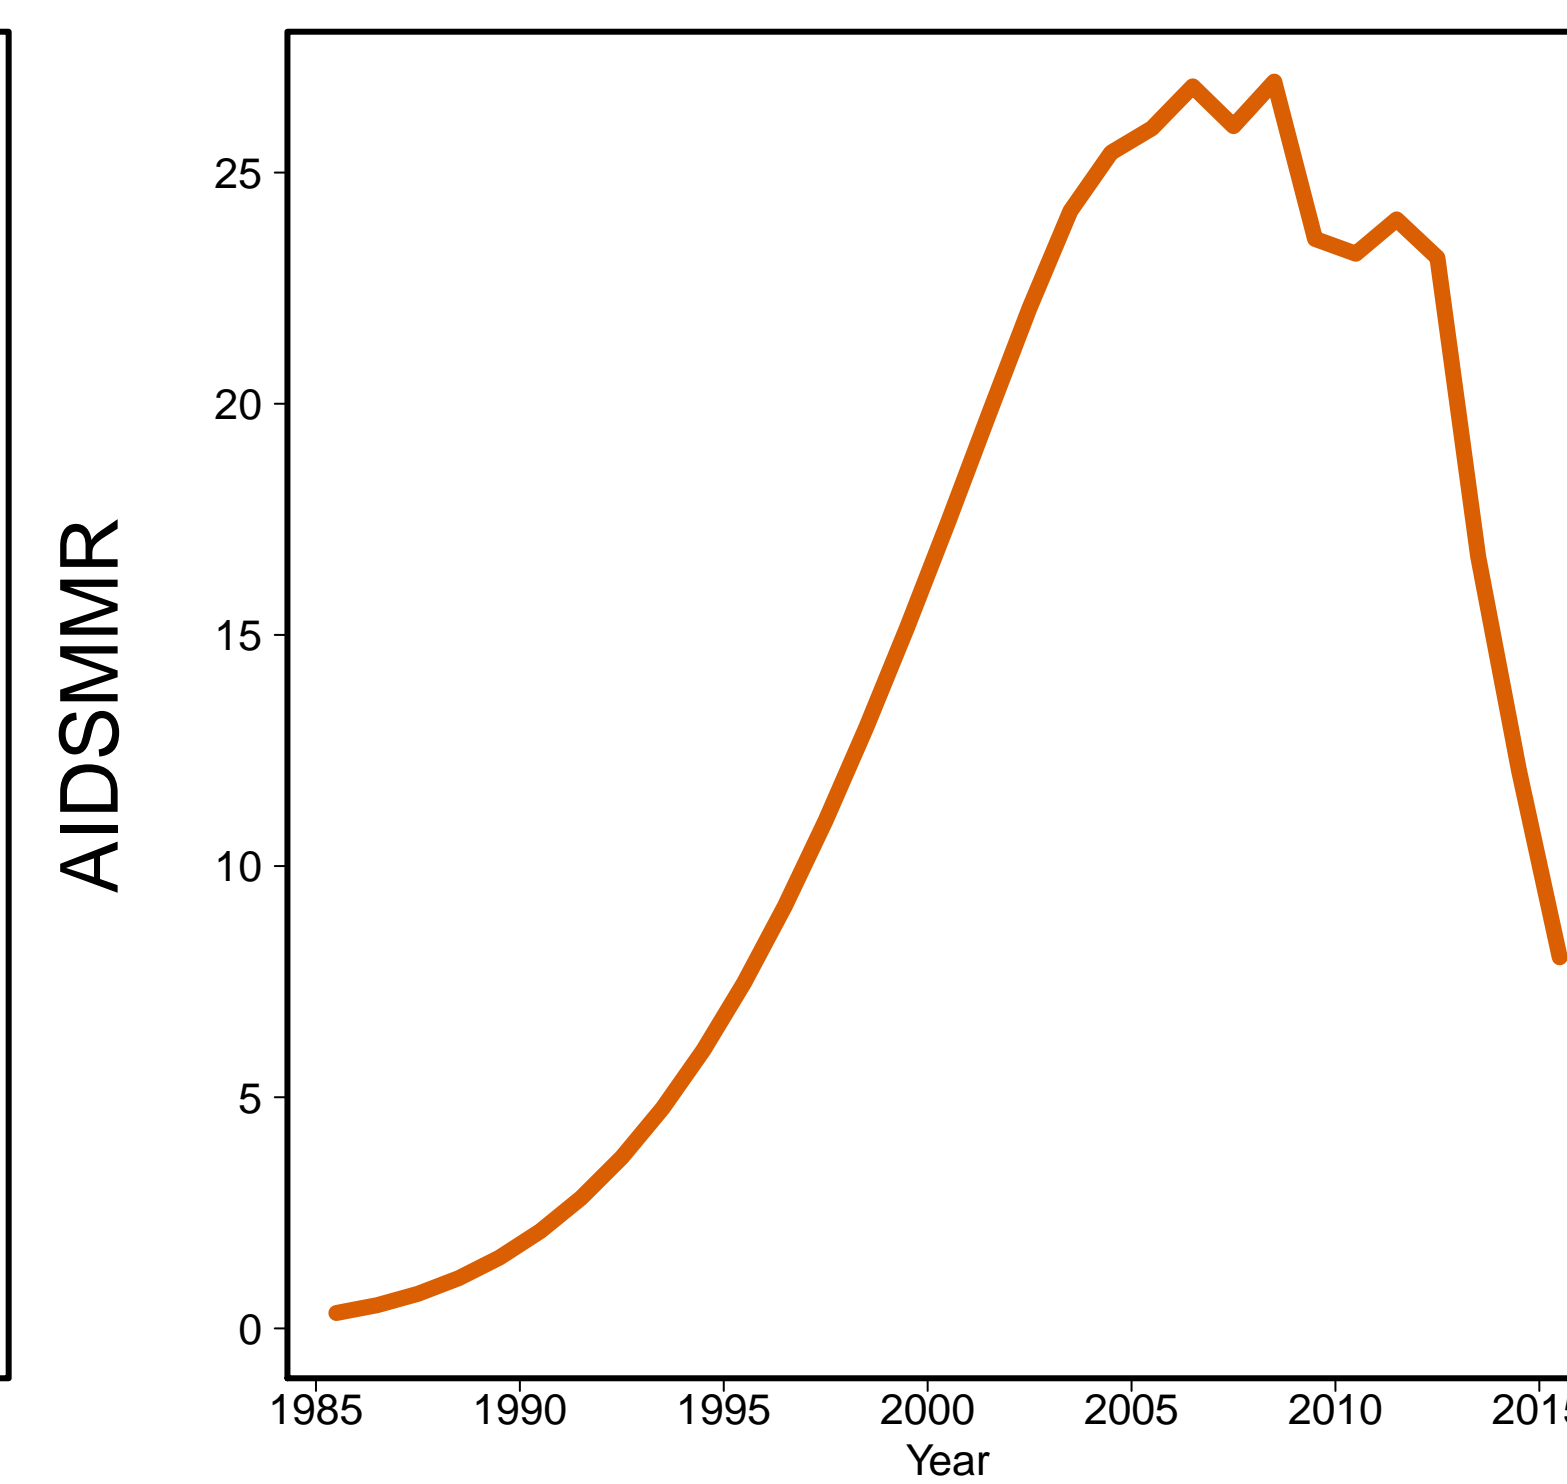

Norway [NOR]  
(Developed regions)

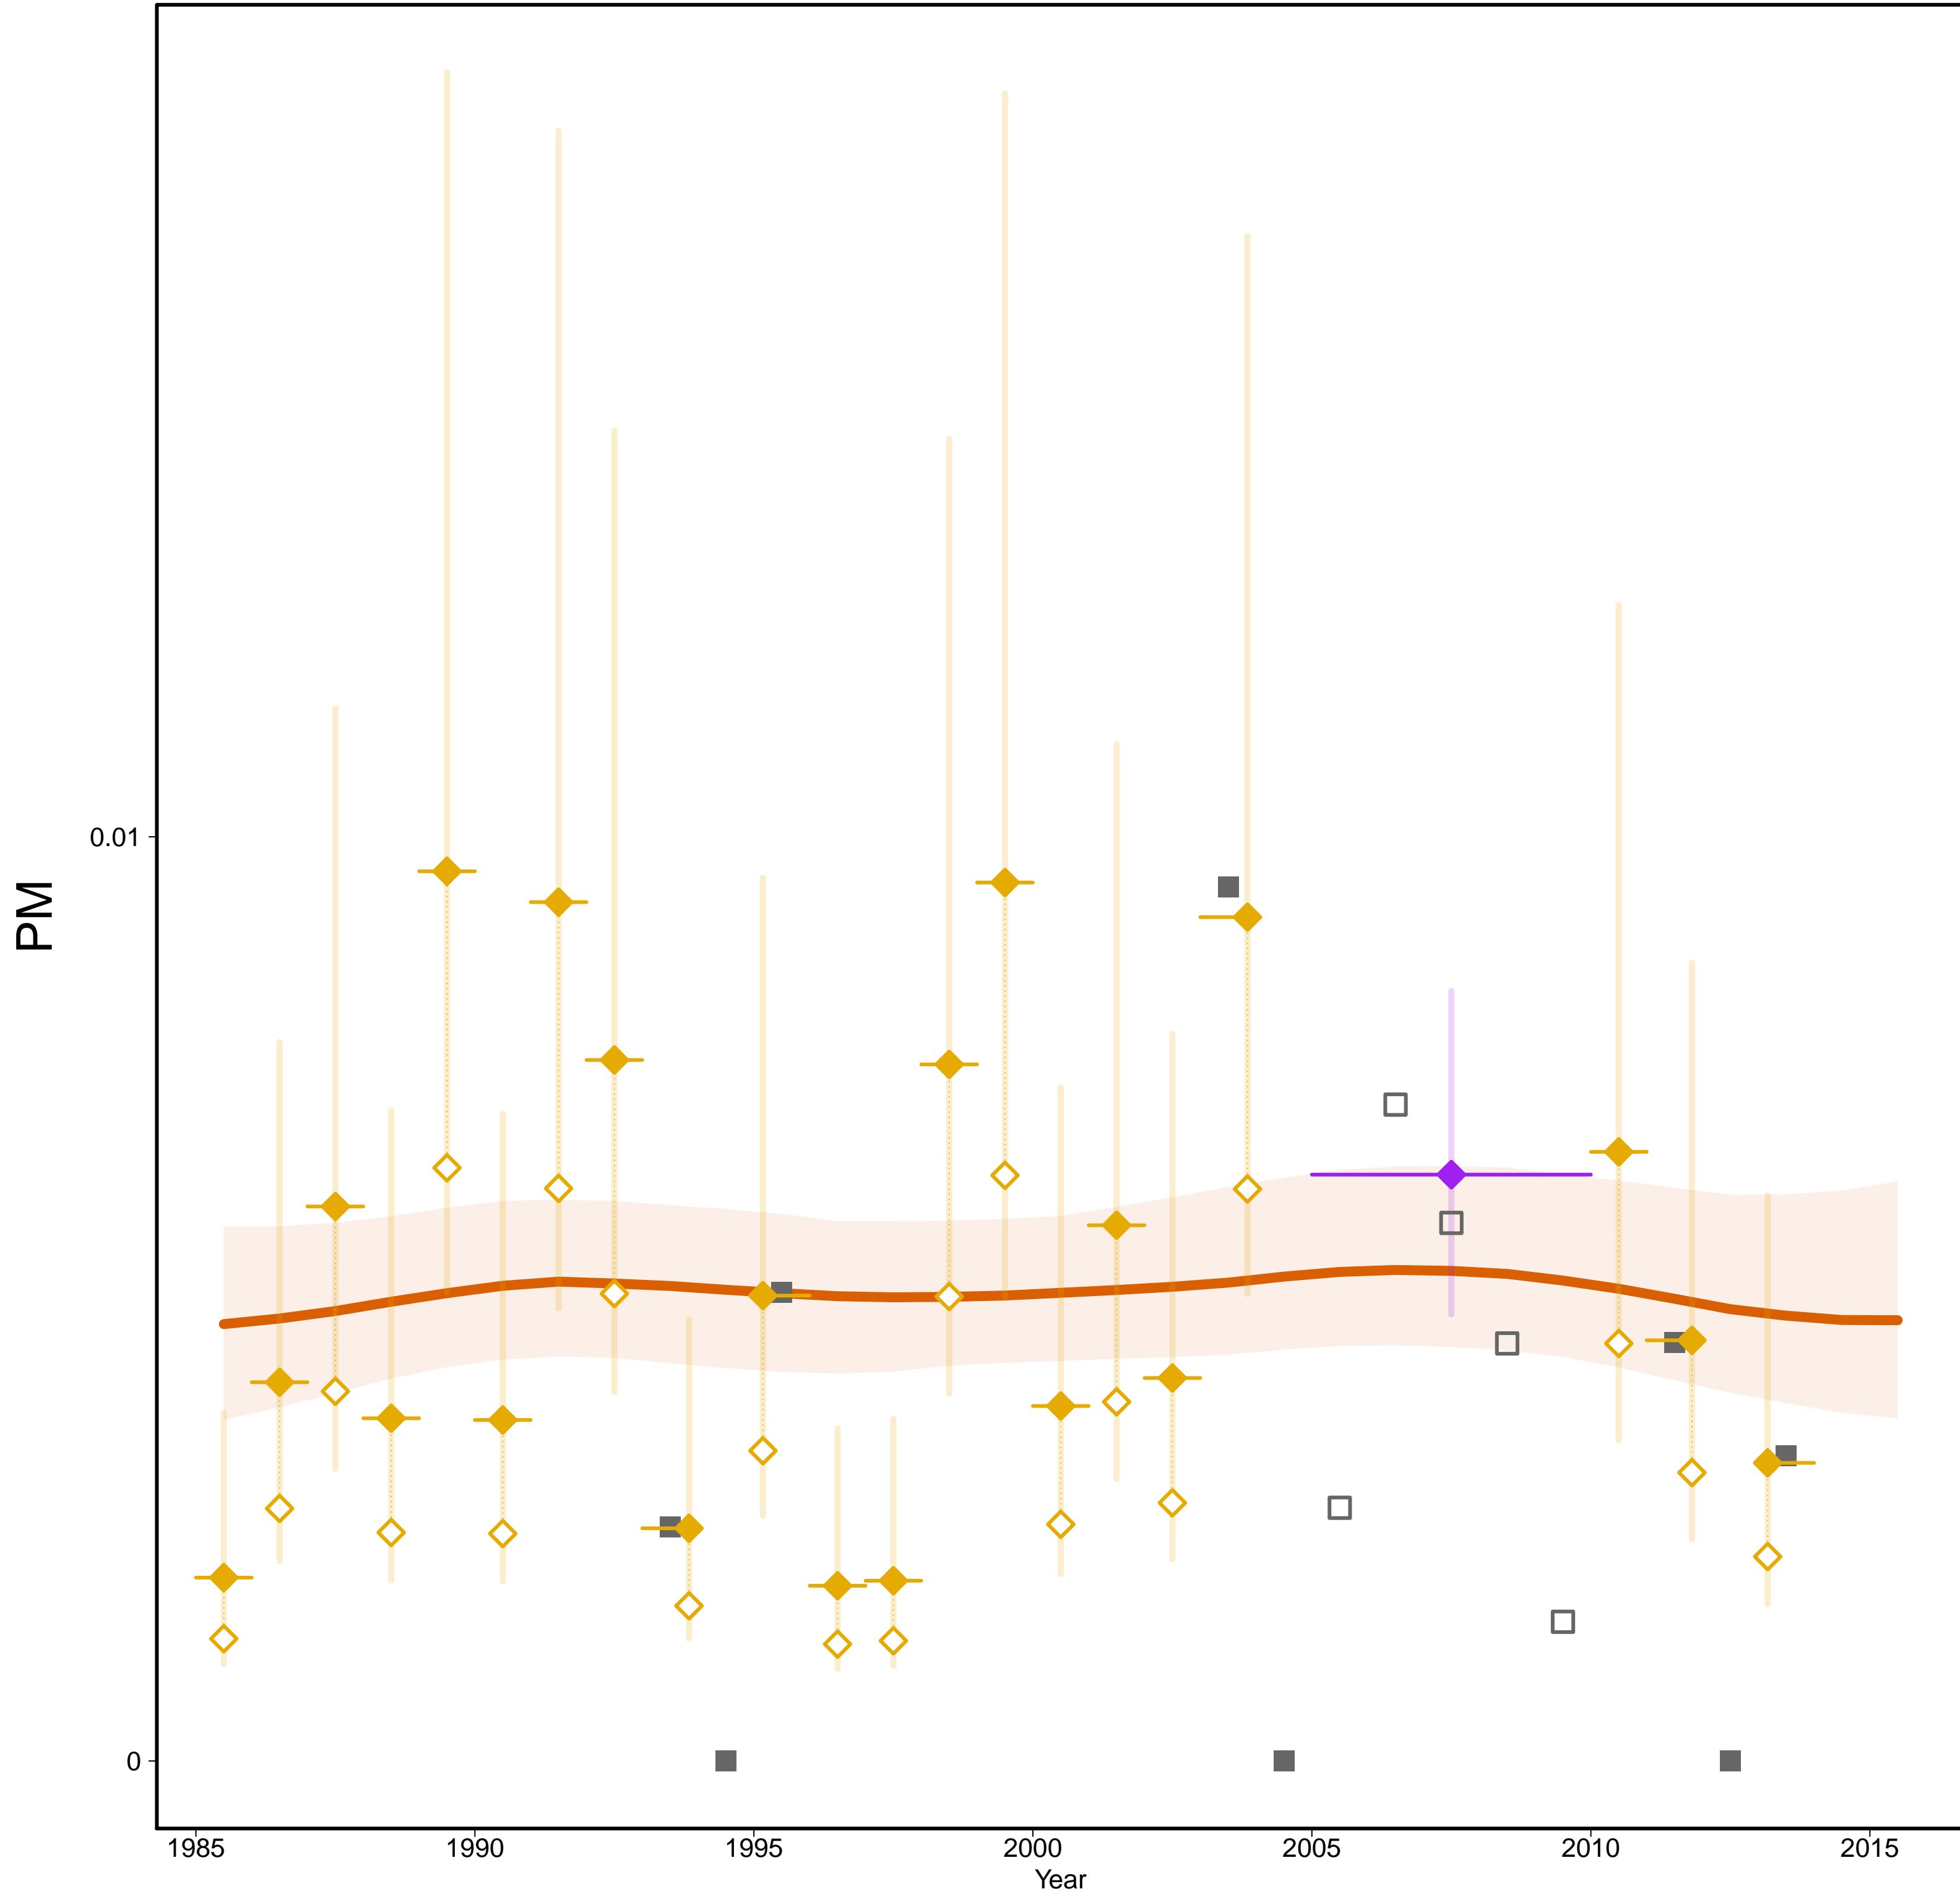

Norway [NOR]  
(Developed regions)

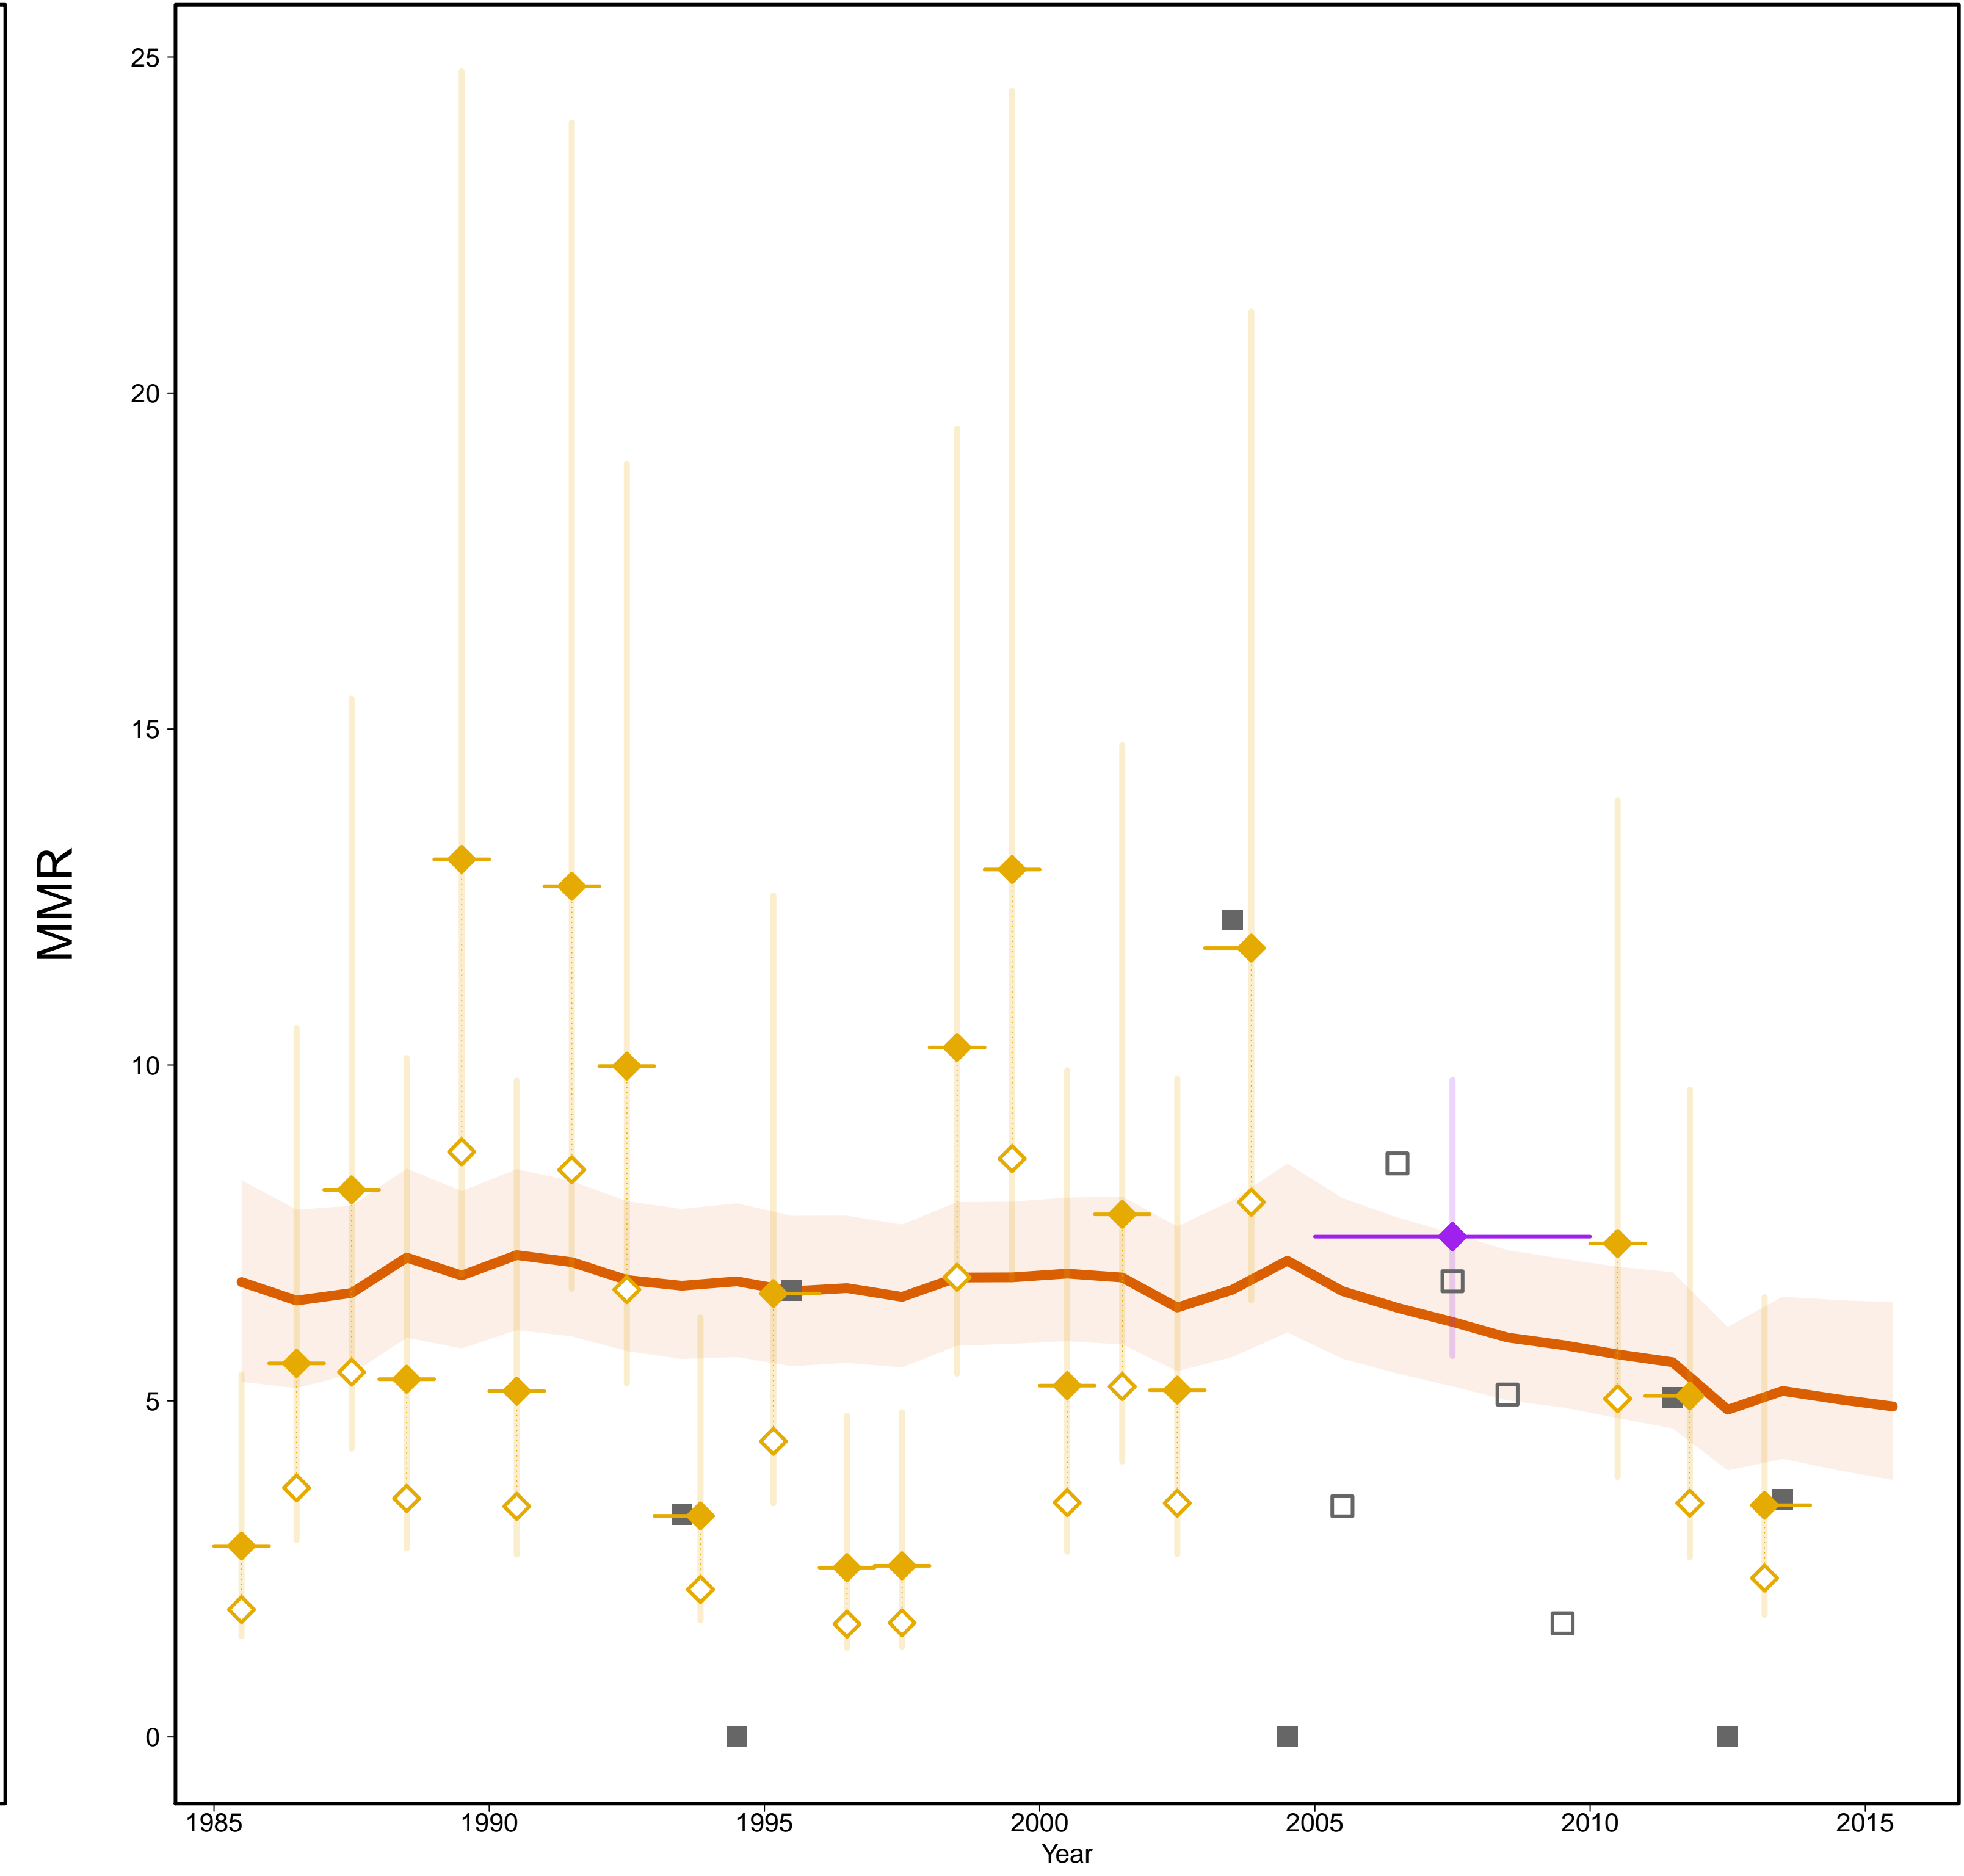

- Estimates —
- MMR Database 2015 —
- ◇ Observed Data
- ◆ Adjusted Data
- Data type —
- ◆ VR
- ◆ Spec. studies
- Reported VR before recalc.  
(related to 0 obs. mat. death)
- Excluded VR data  
(overlap with specialized study)

Gross Domestic Product

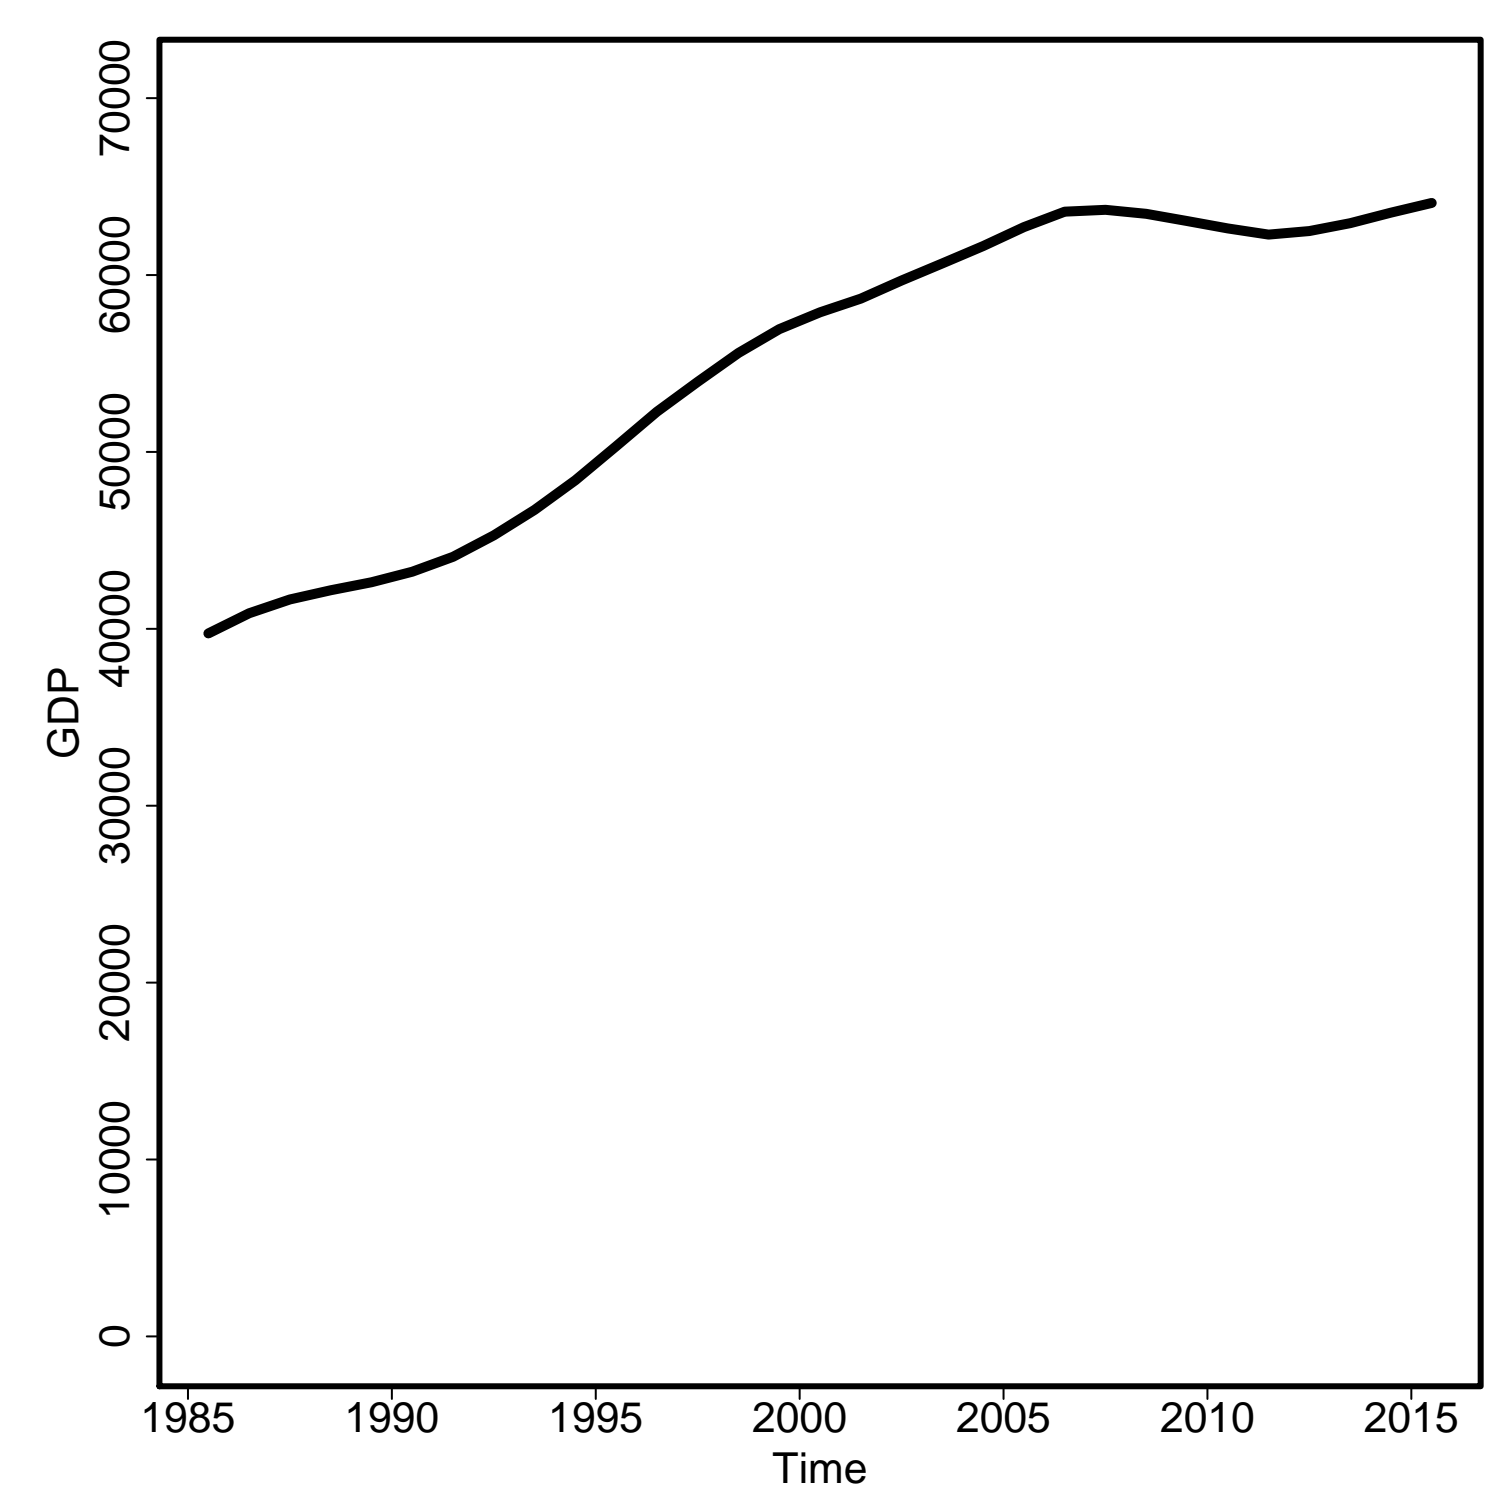

General Fertility Rate

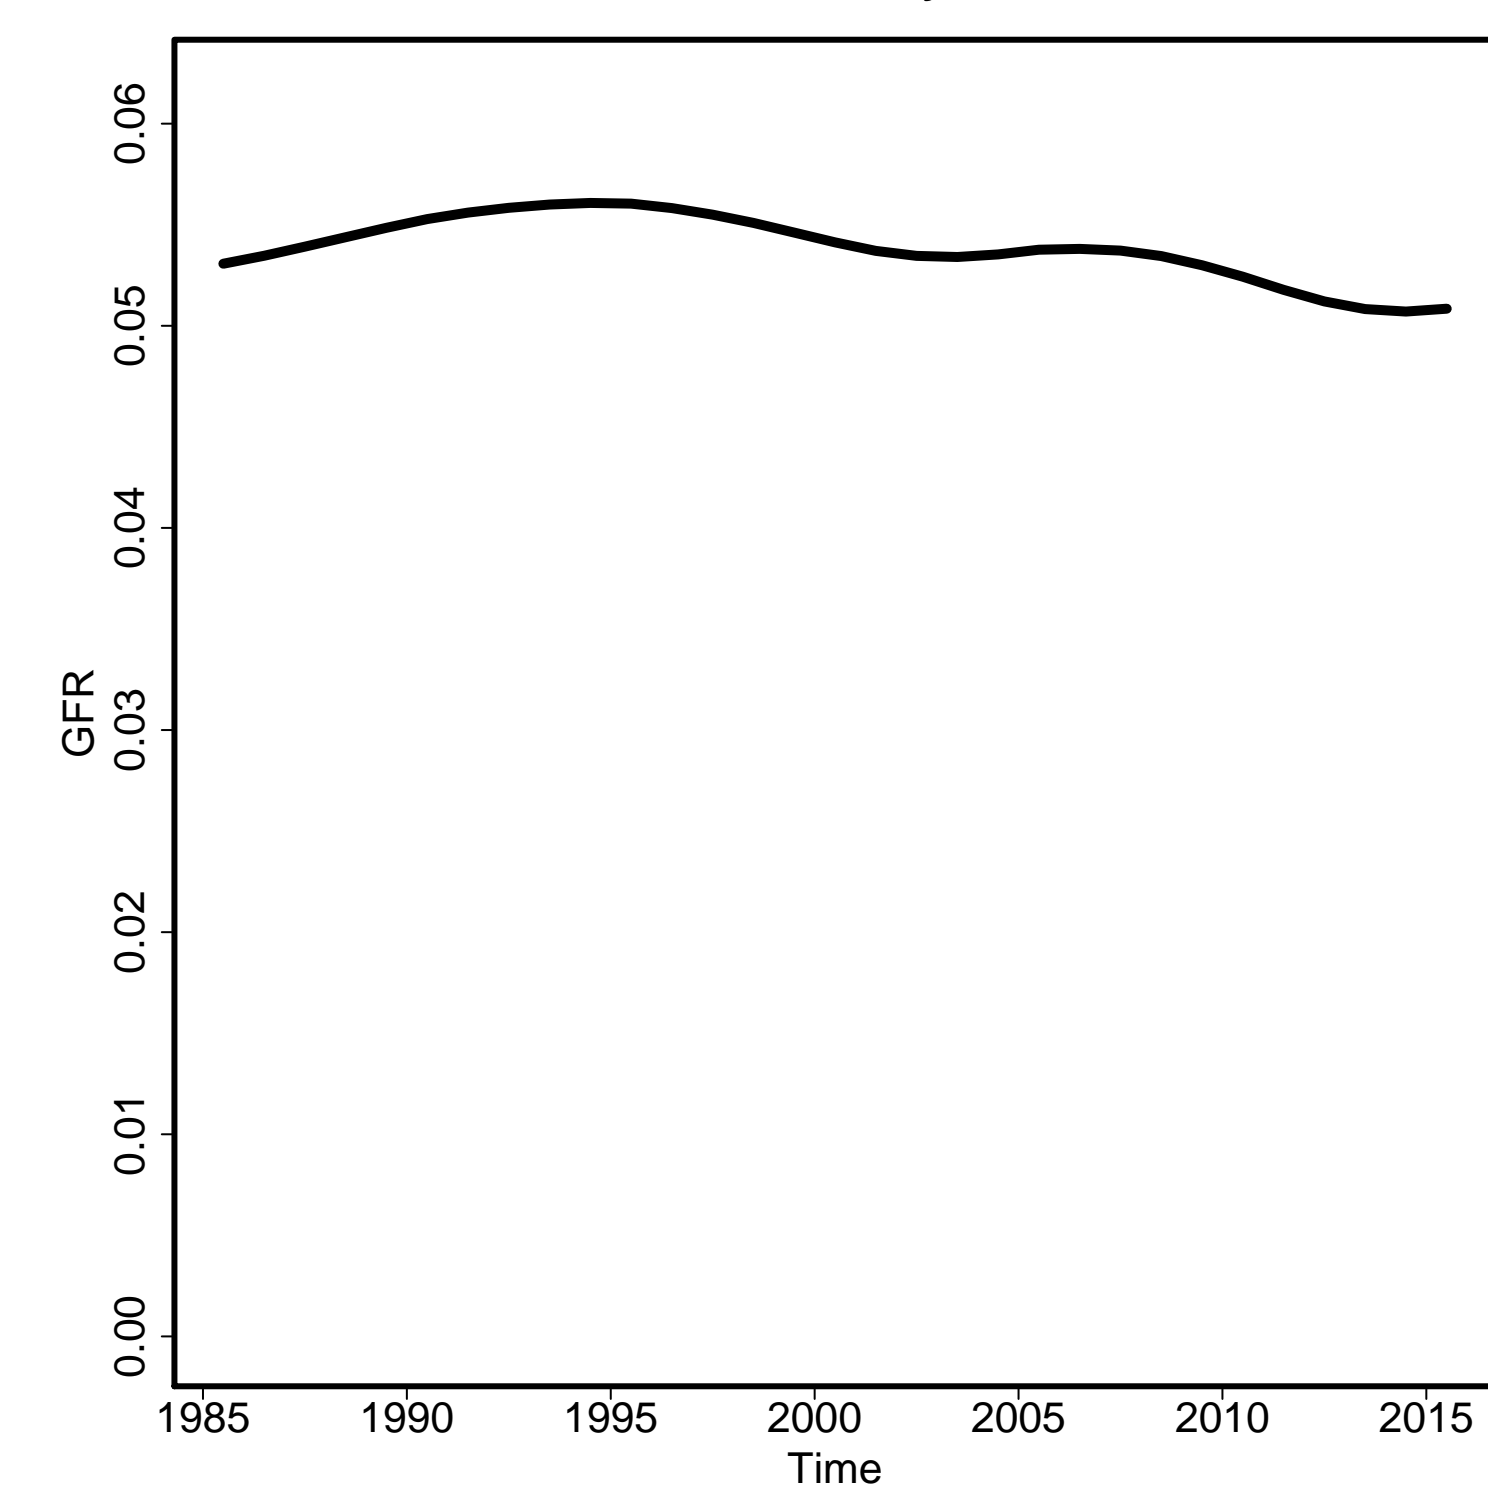

Skilled Attendance to Birth

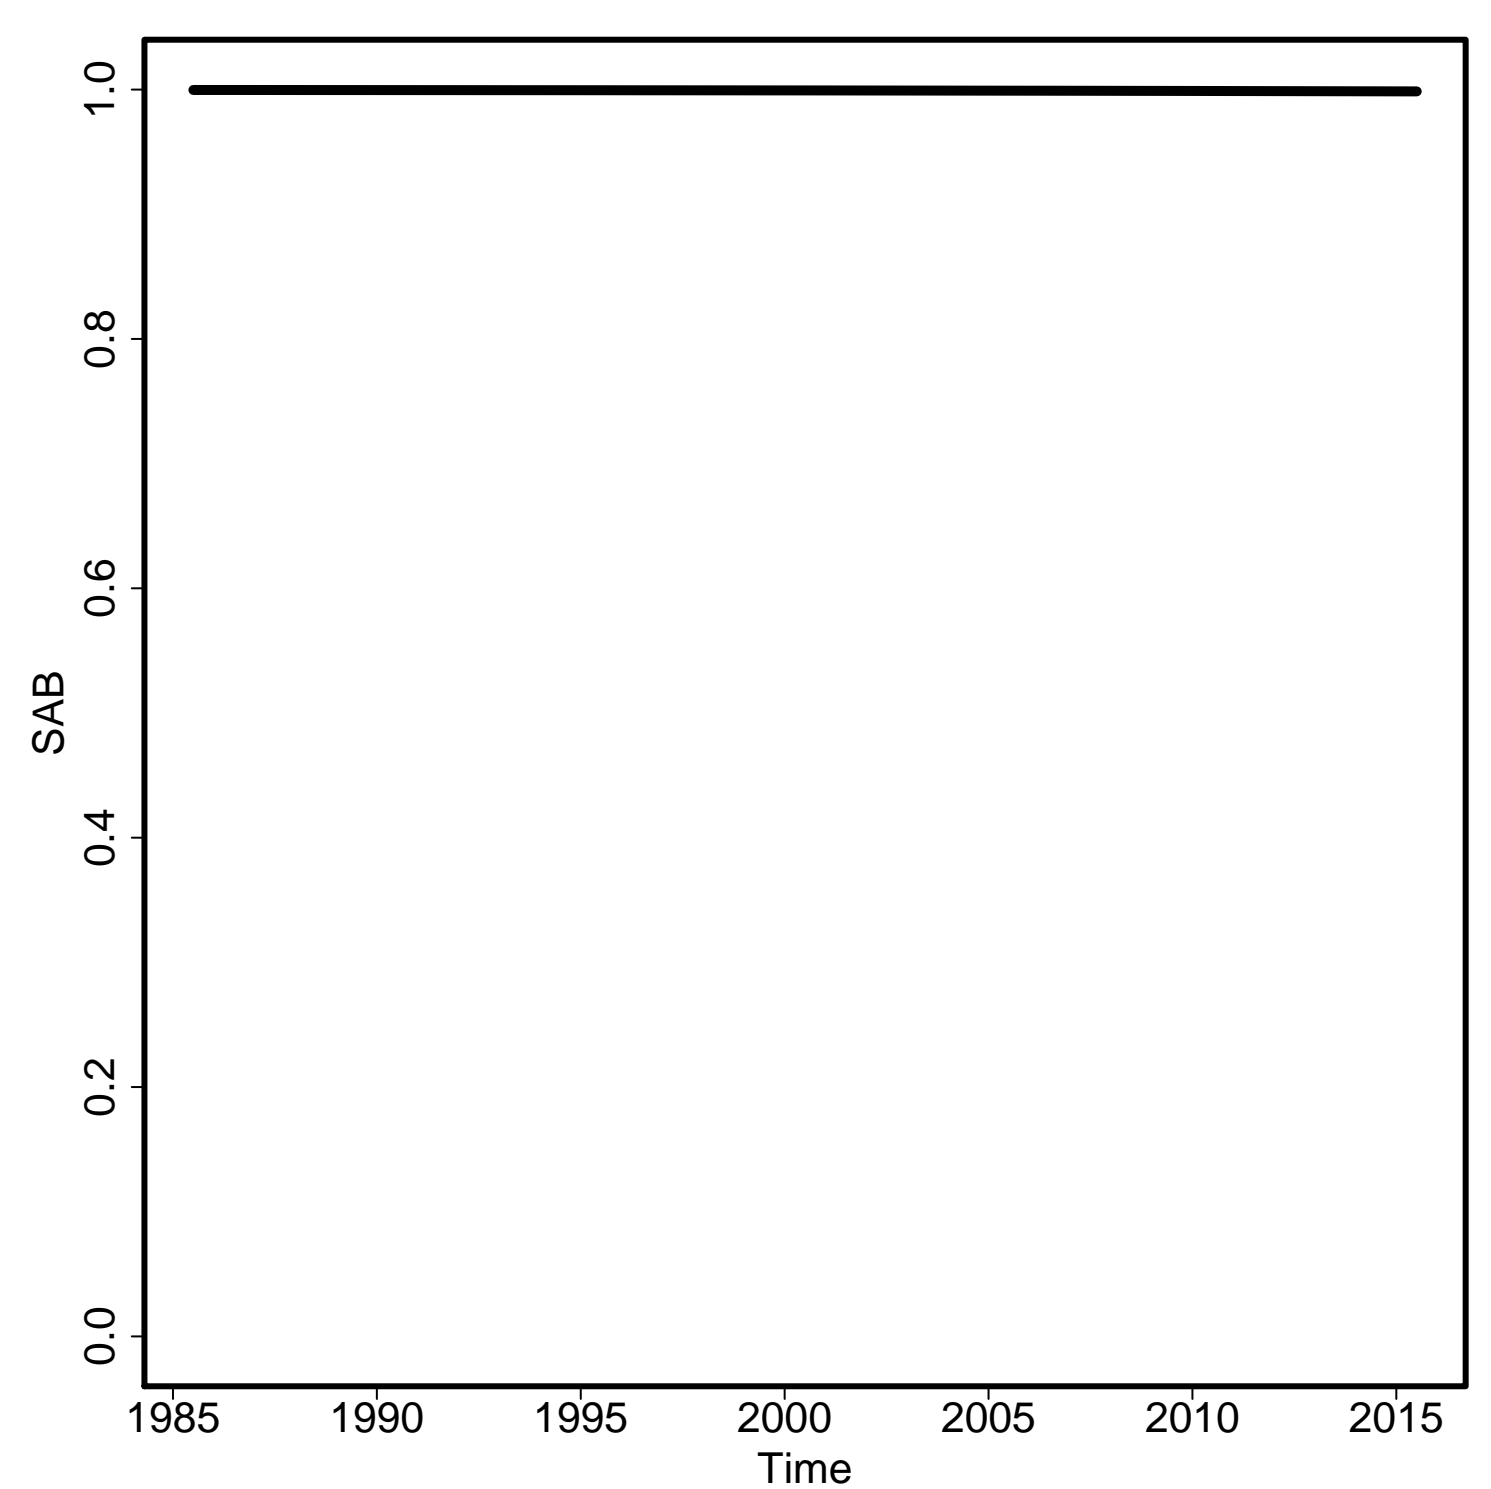

Envelope/Births

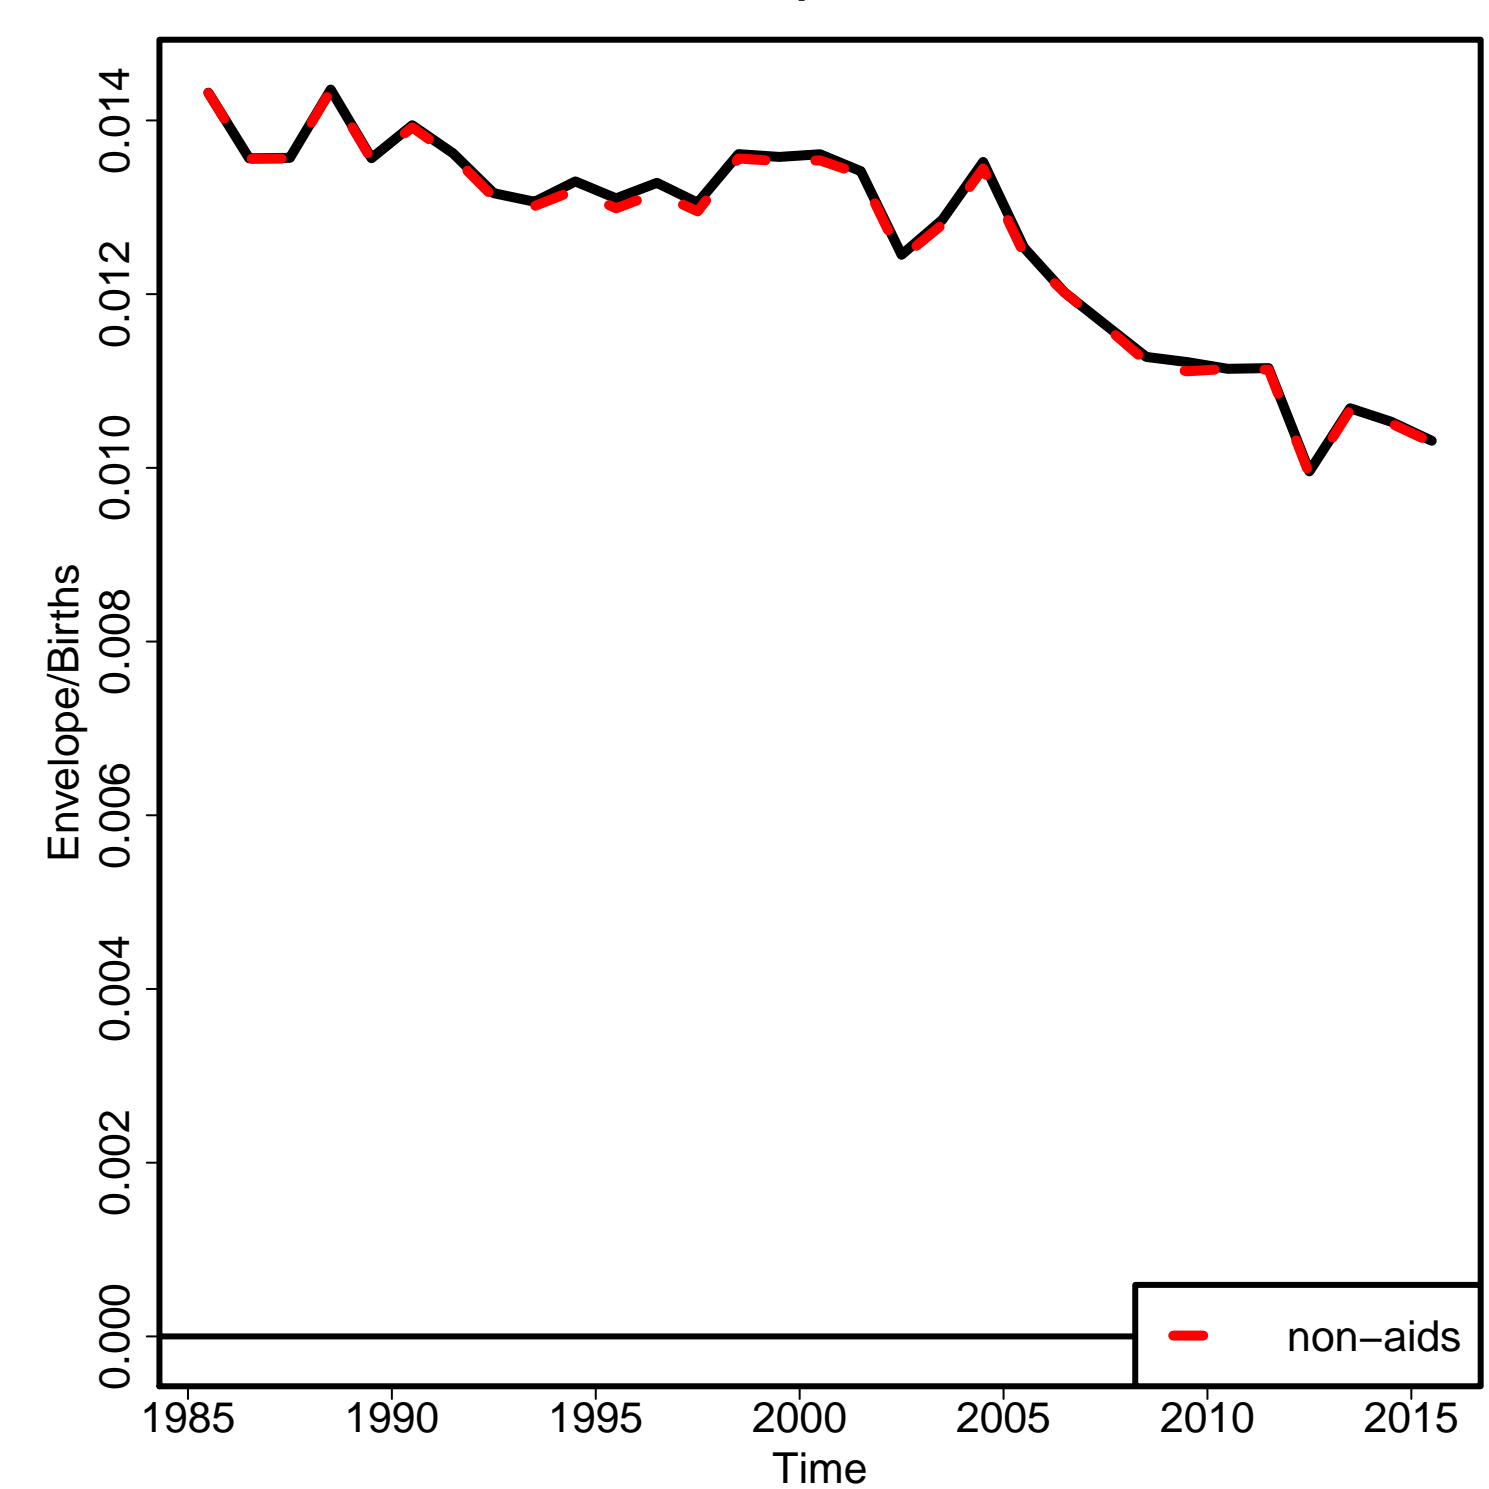

Non-aids MMR

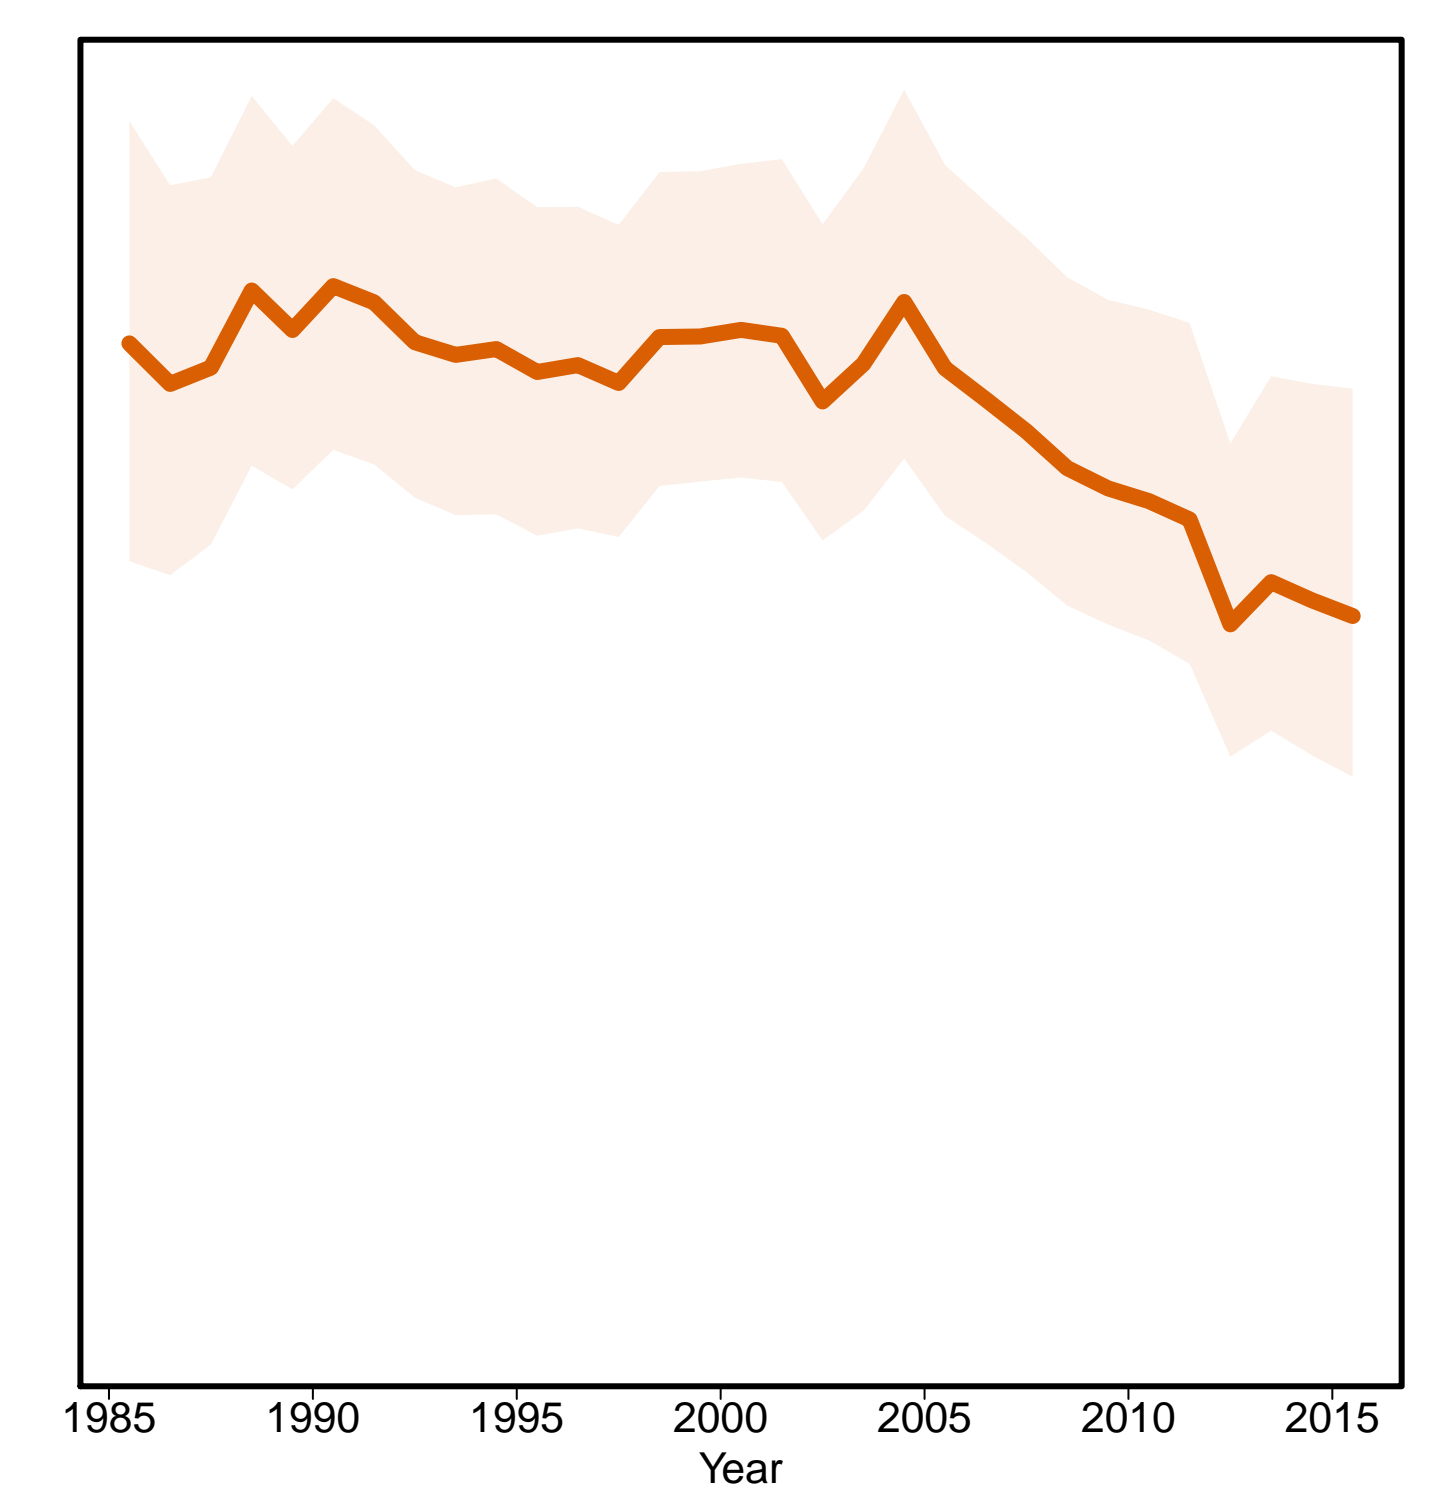

Aids MMR

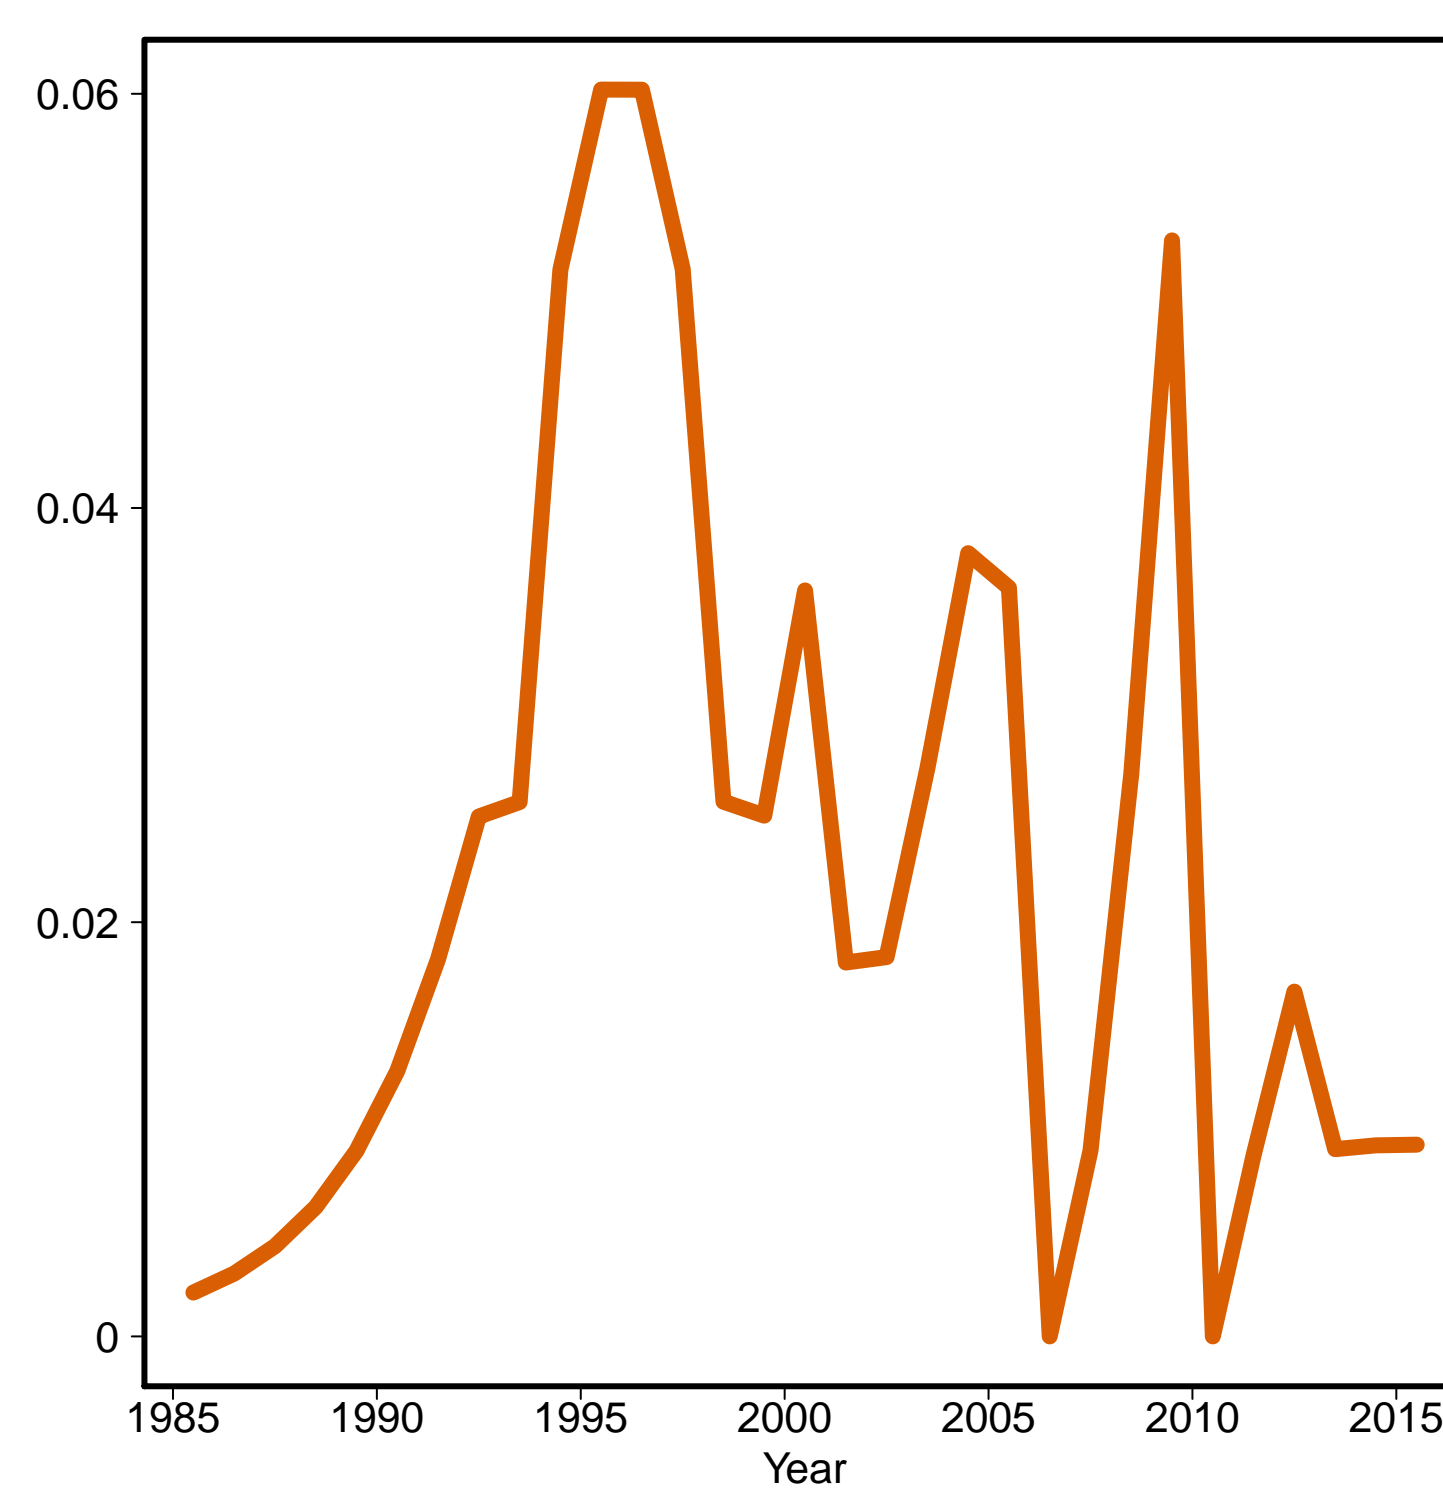

Occupied Palestinian Territory [PSE]  
(Western Asia)

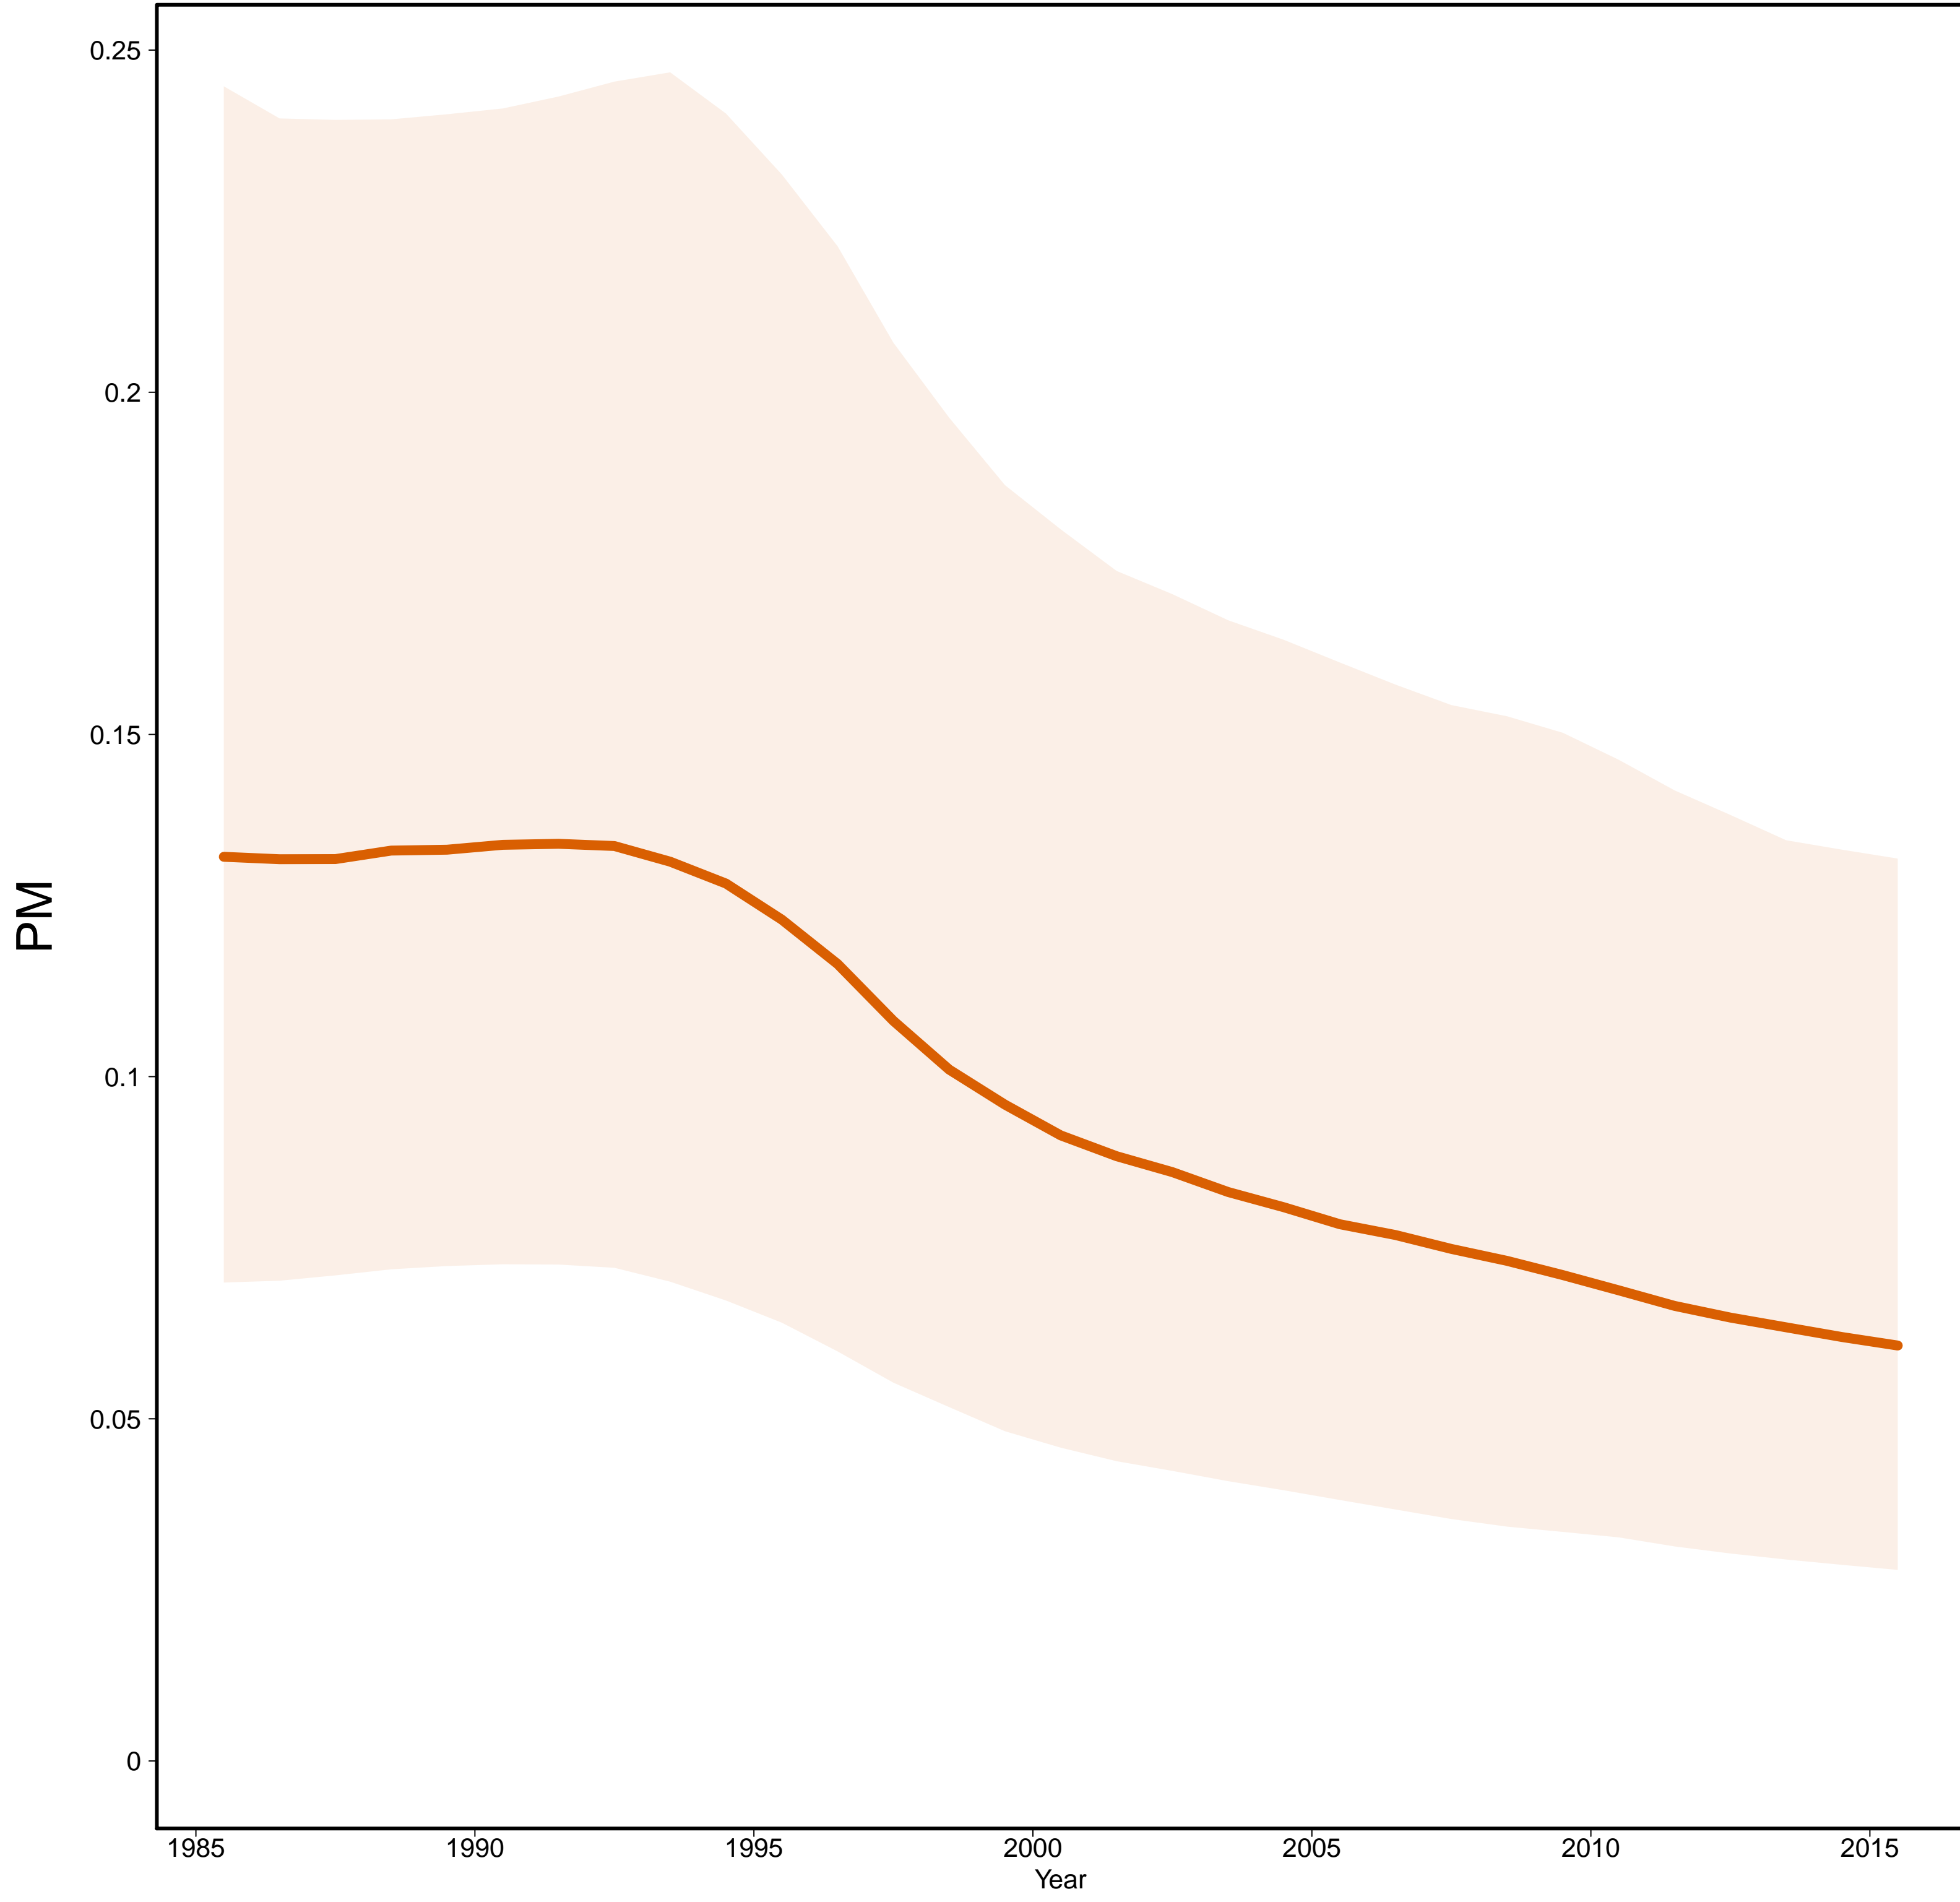

Occupied Palestinian Territory [PSE]  
(Western Asia)

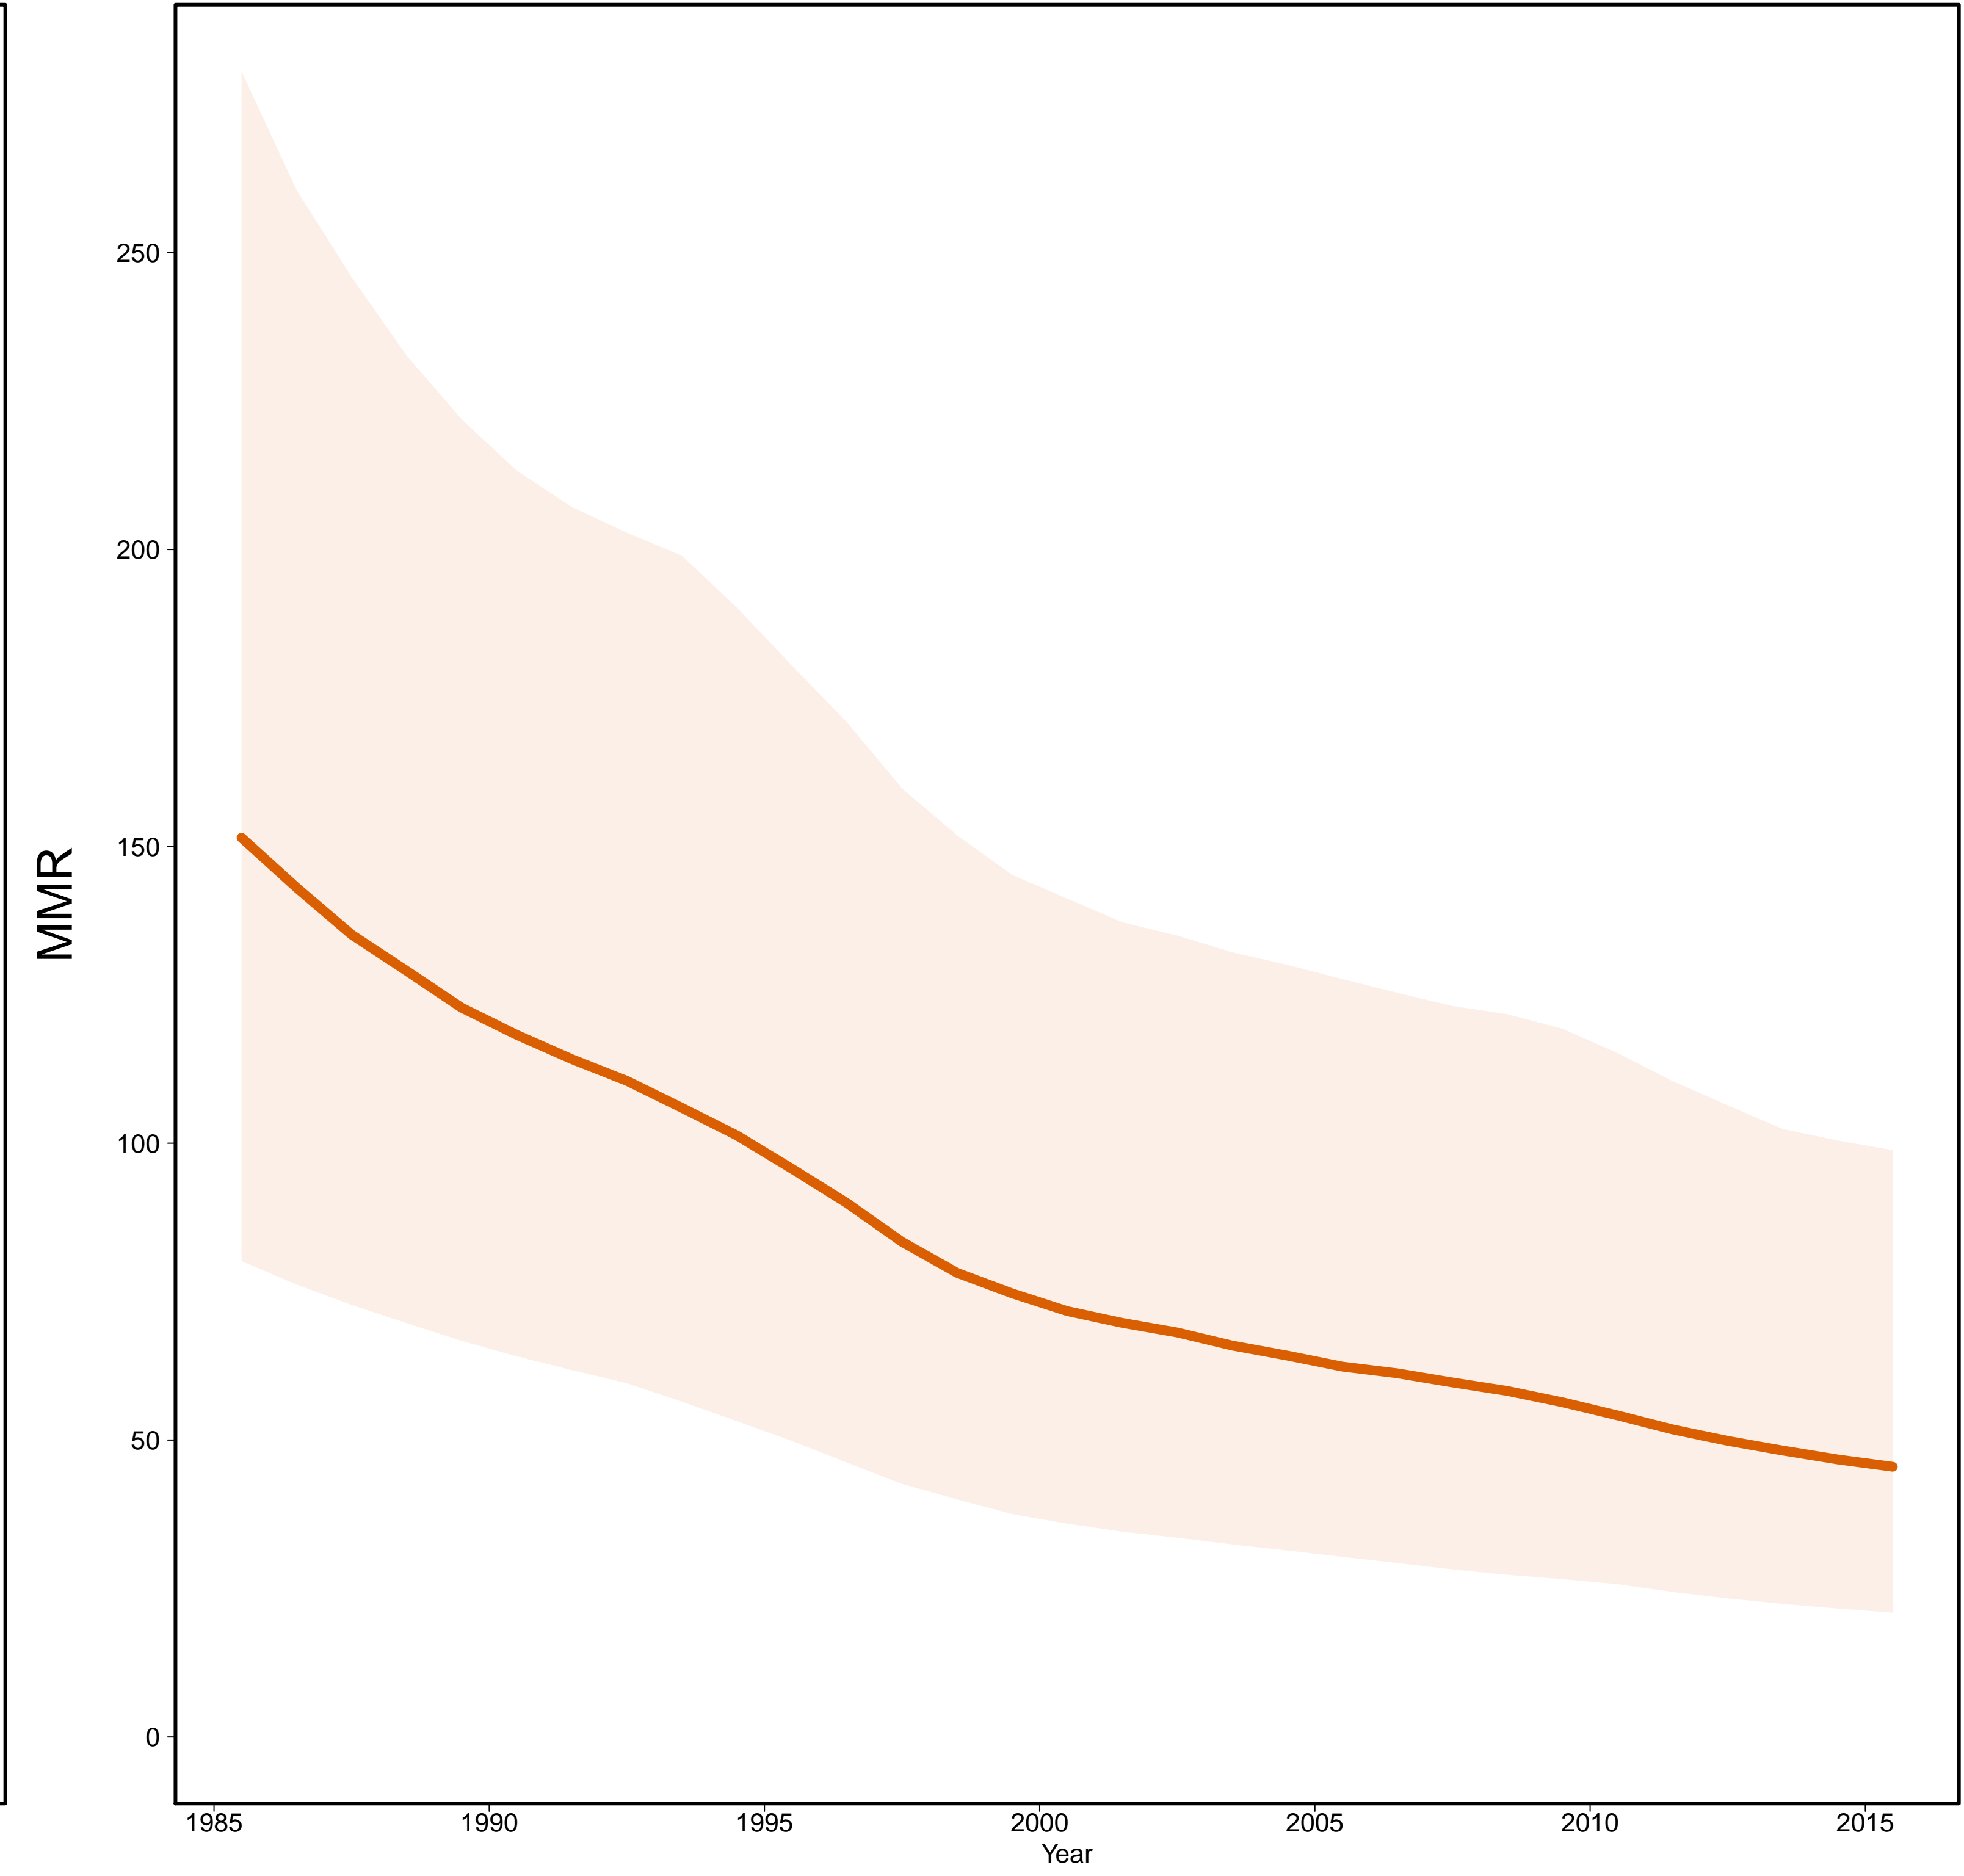

– Estimates –  
 Mlate  
 – MMR Database 2015 –

Gross Domestic Product

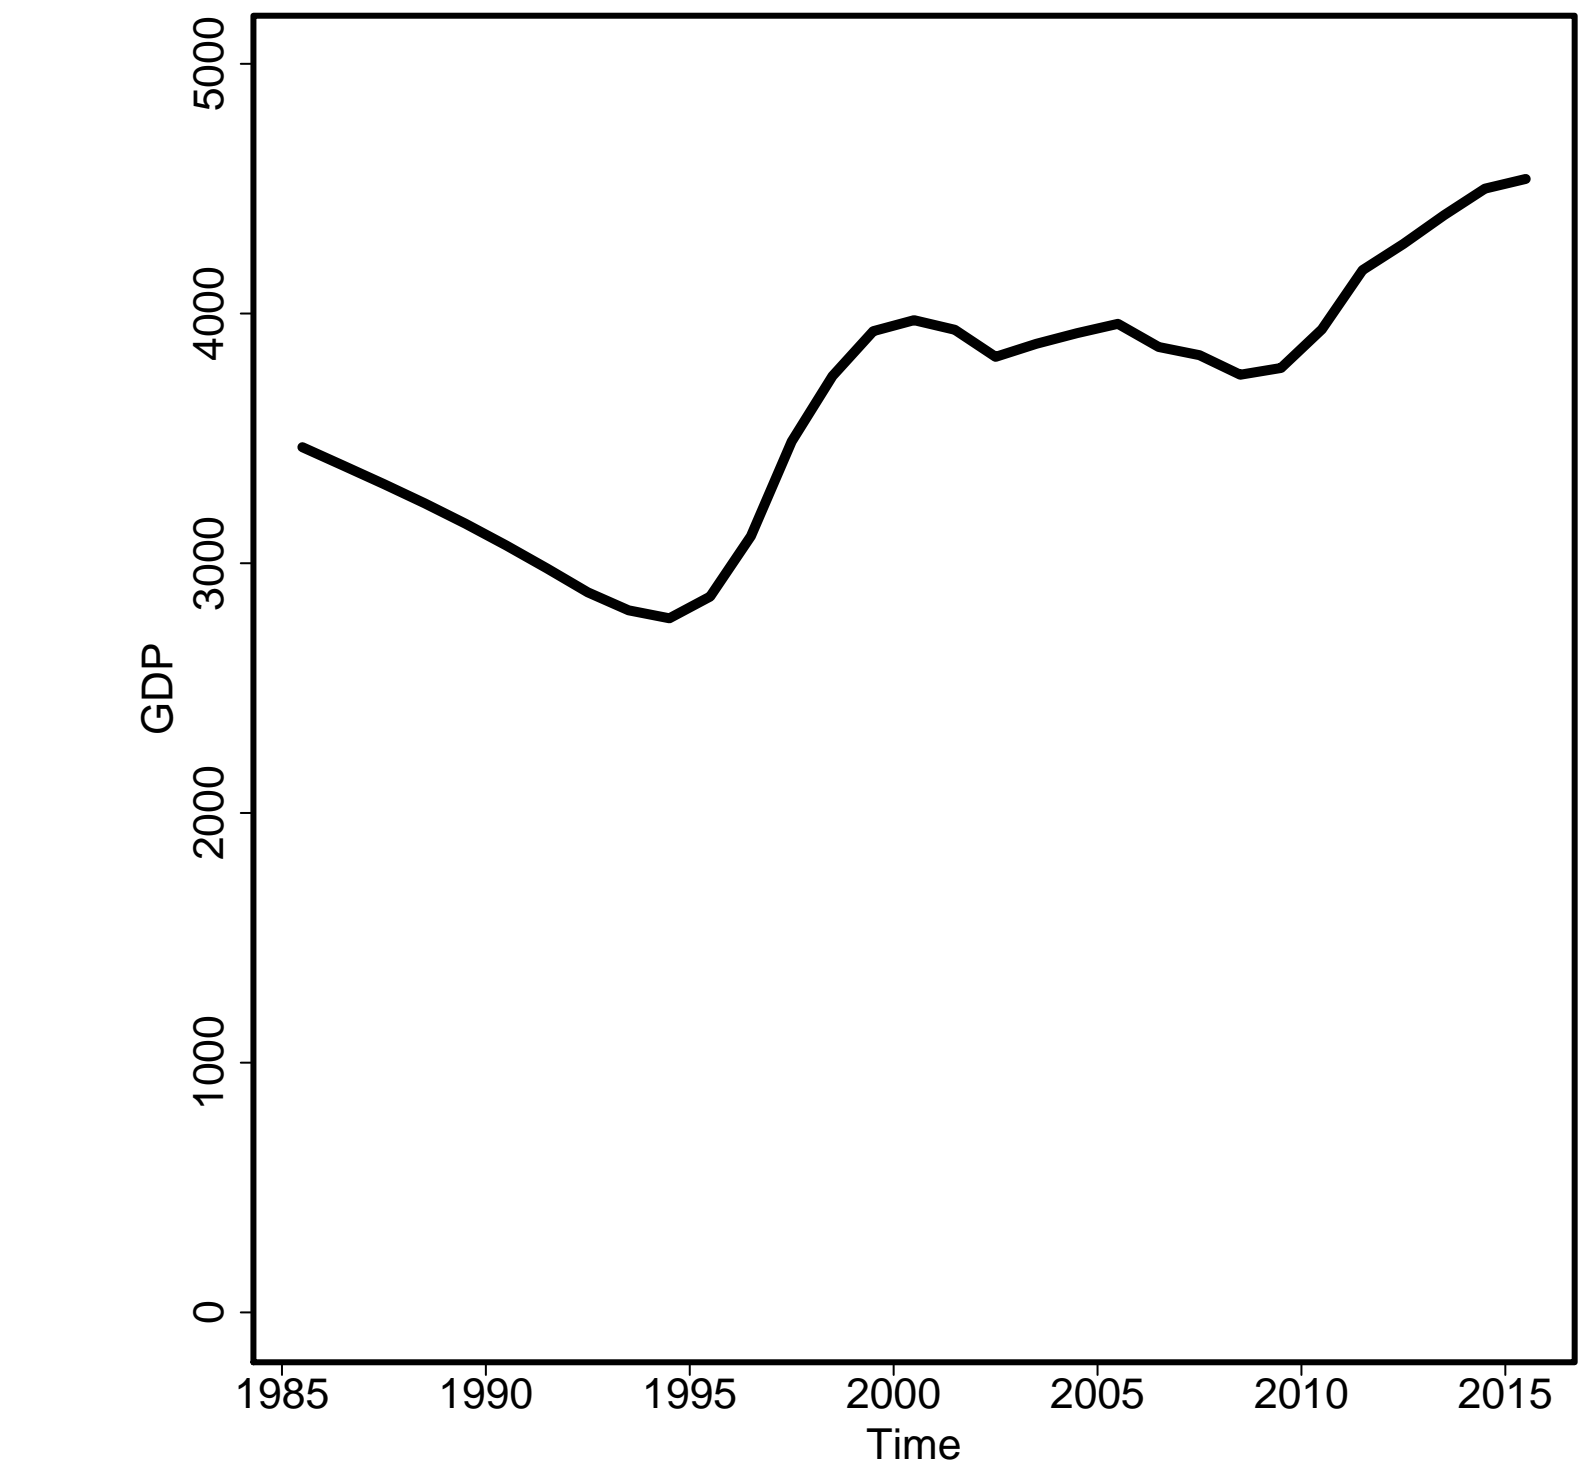

General Fertility Rate

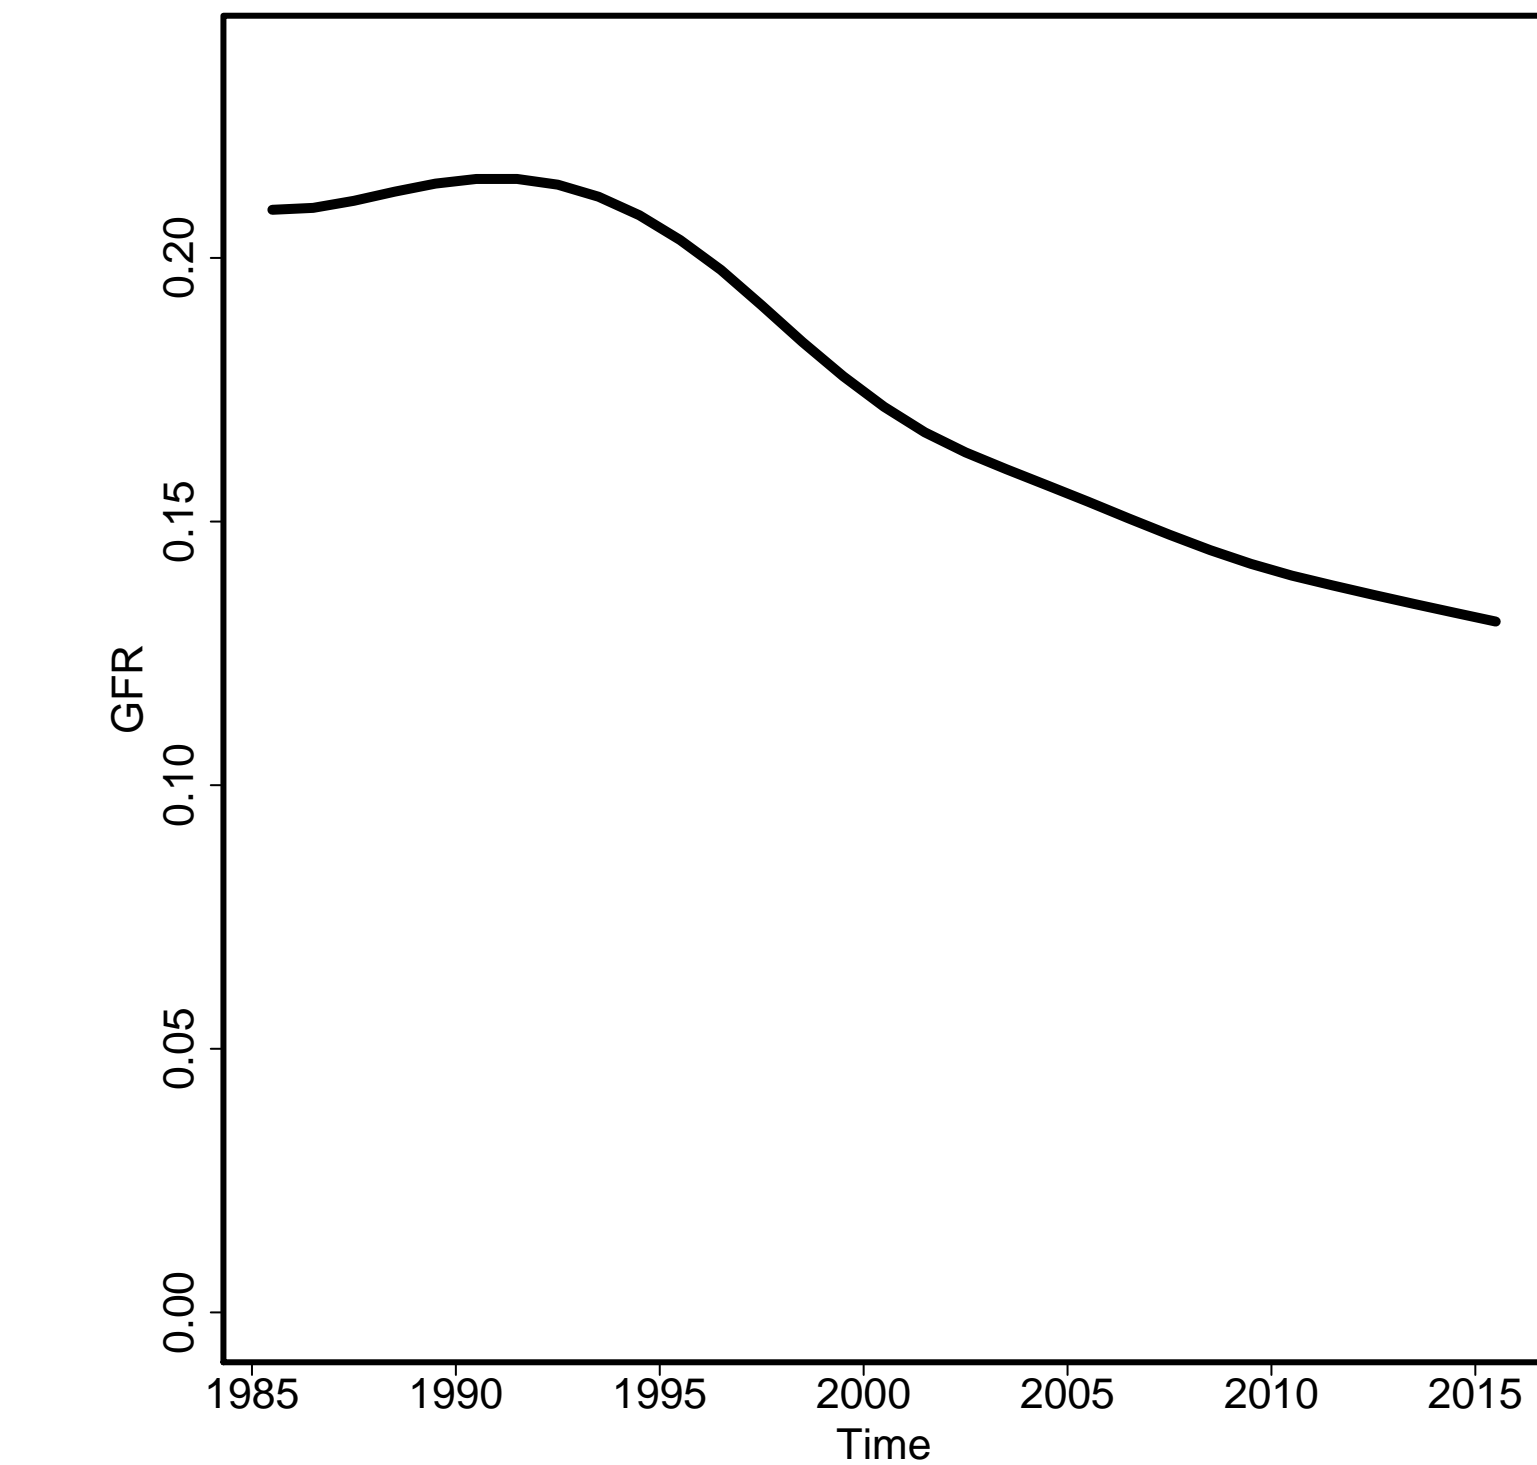

Skilled Attendance to Birth

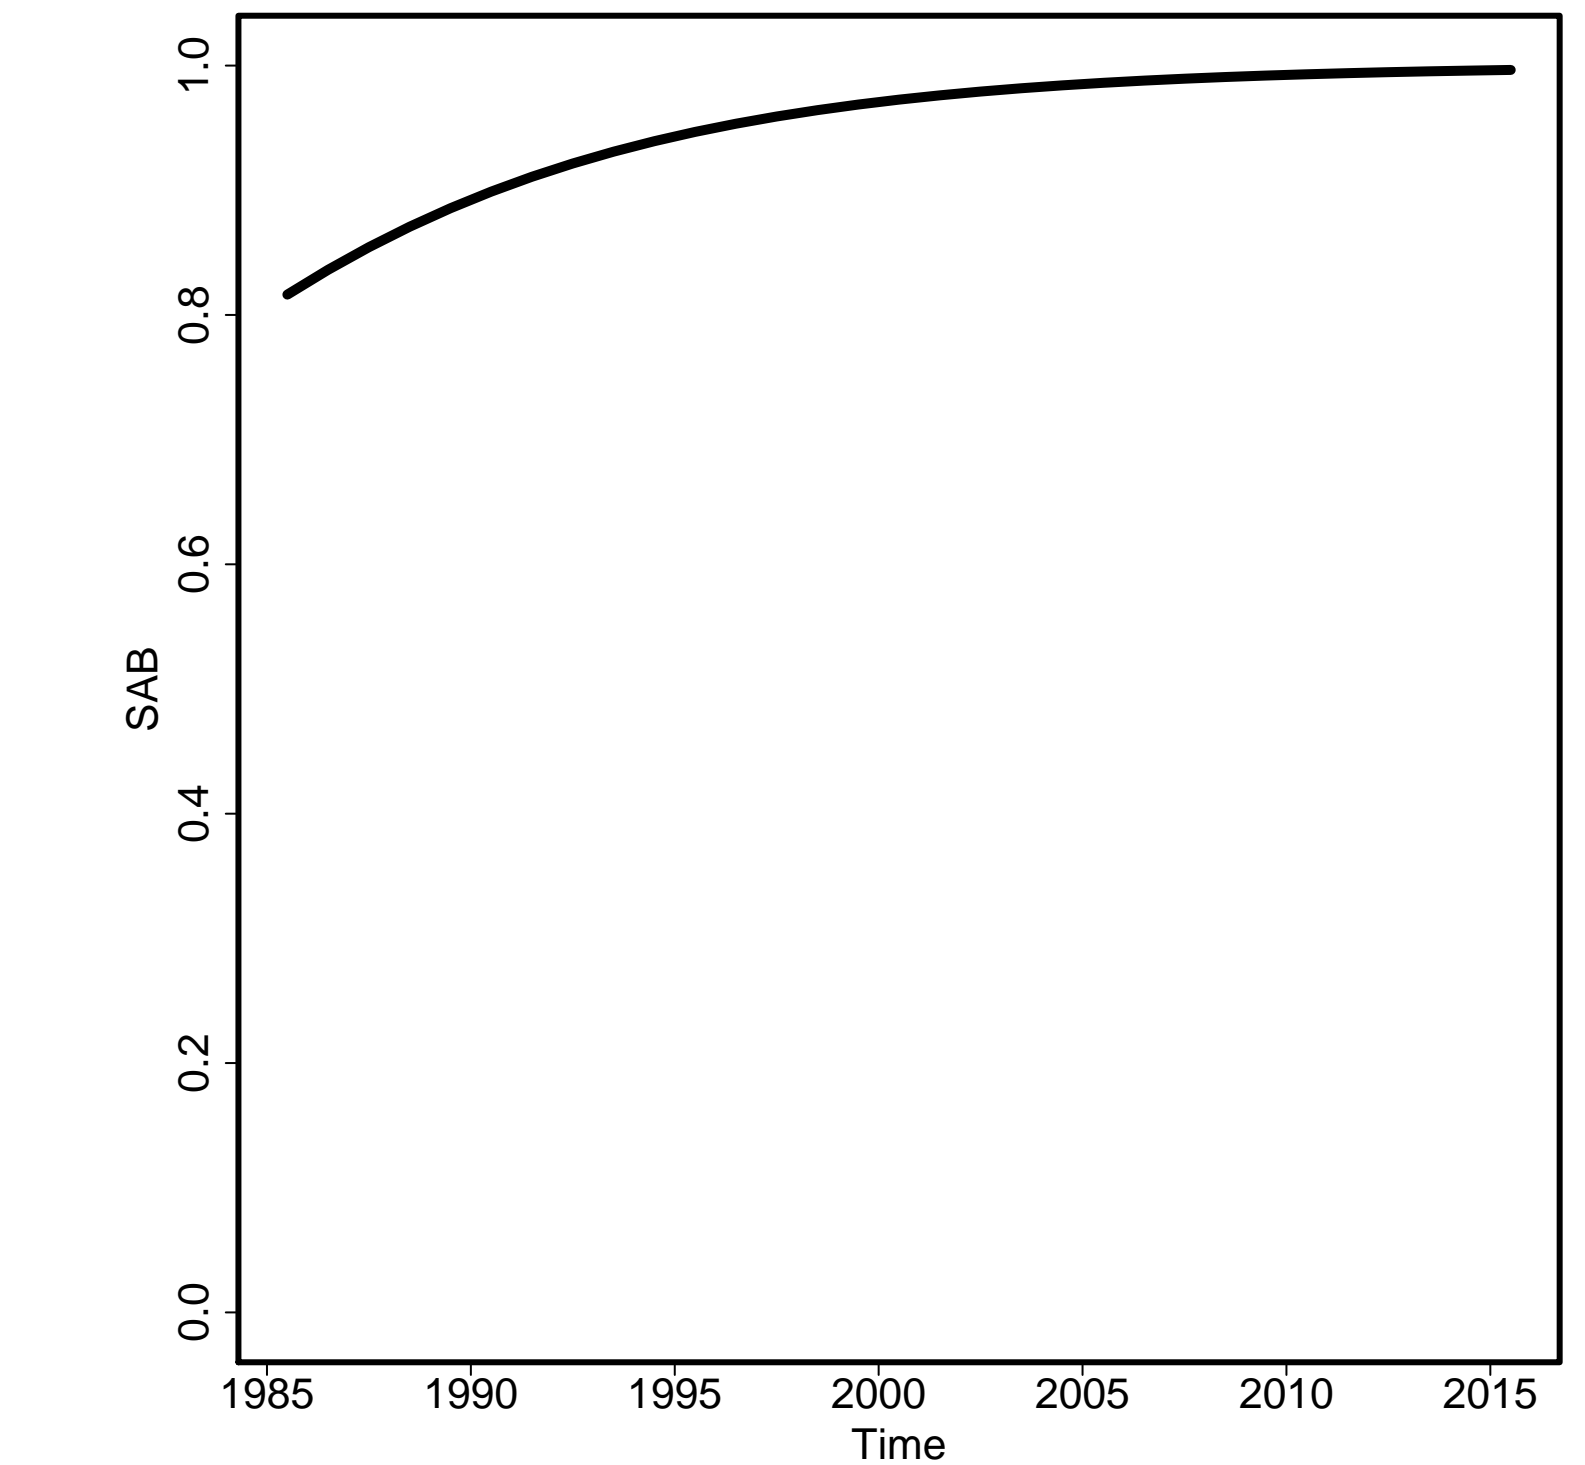

Envelope/Births

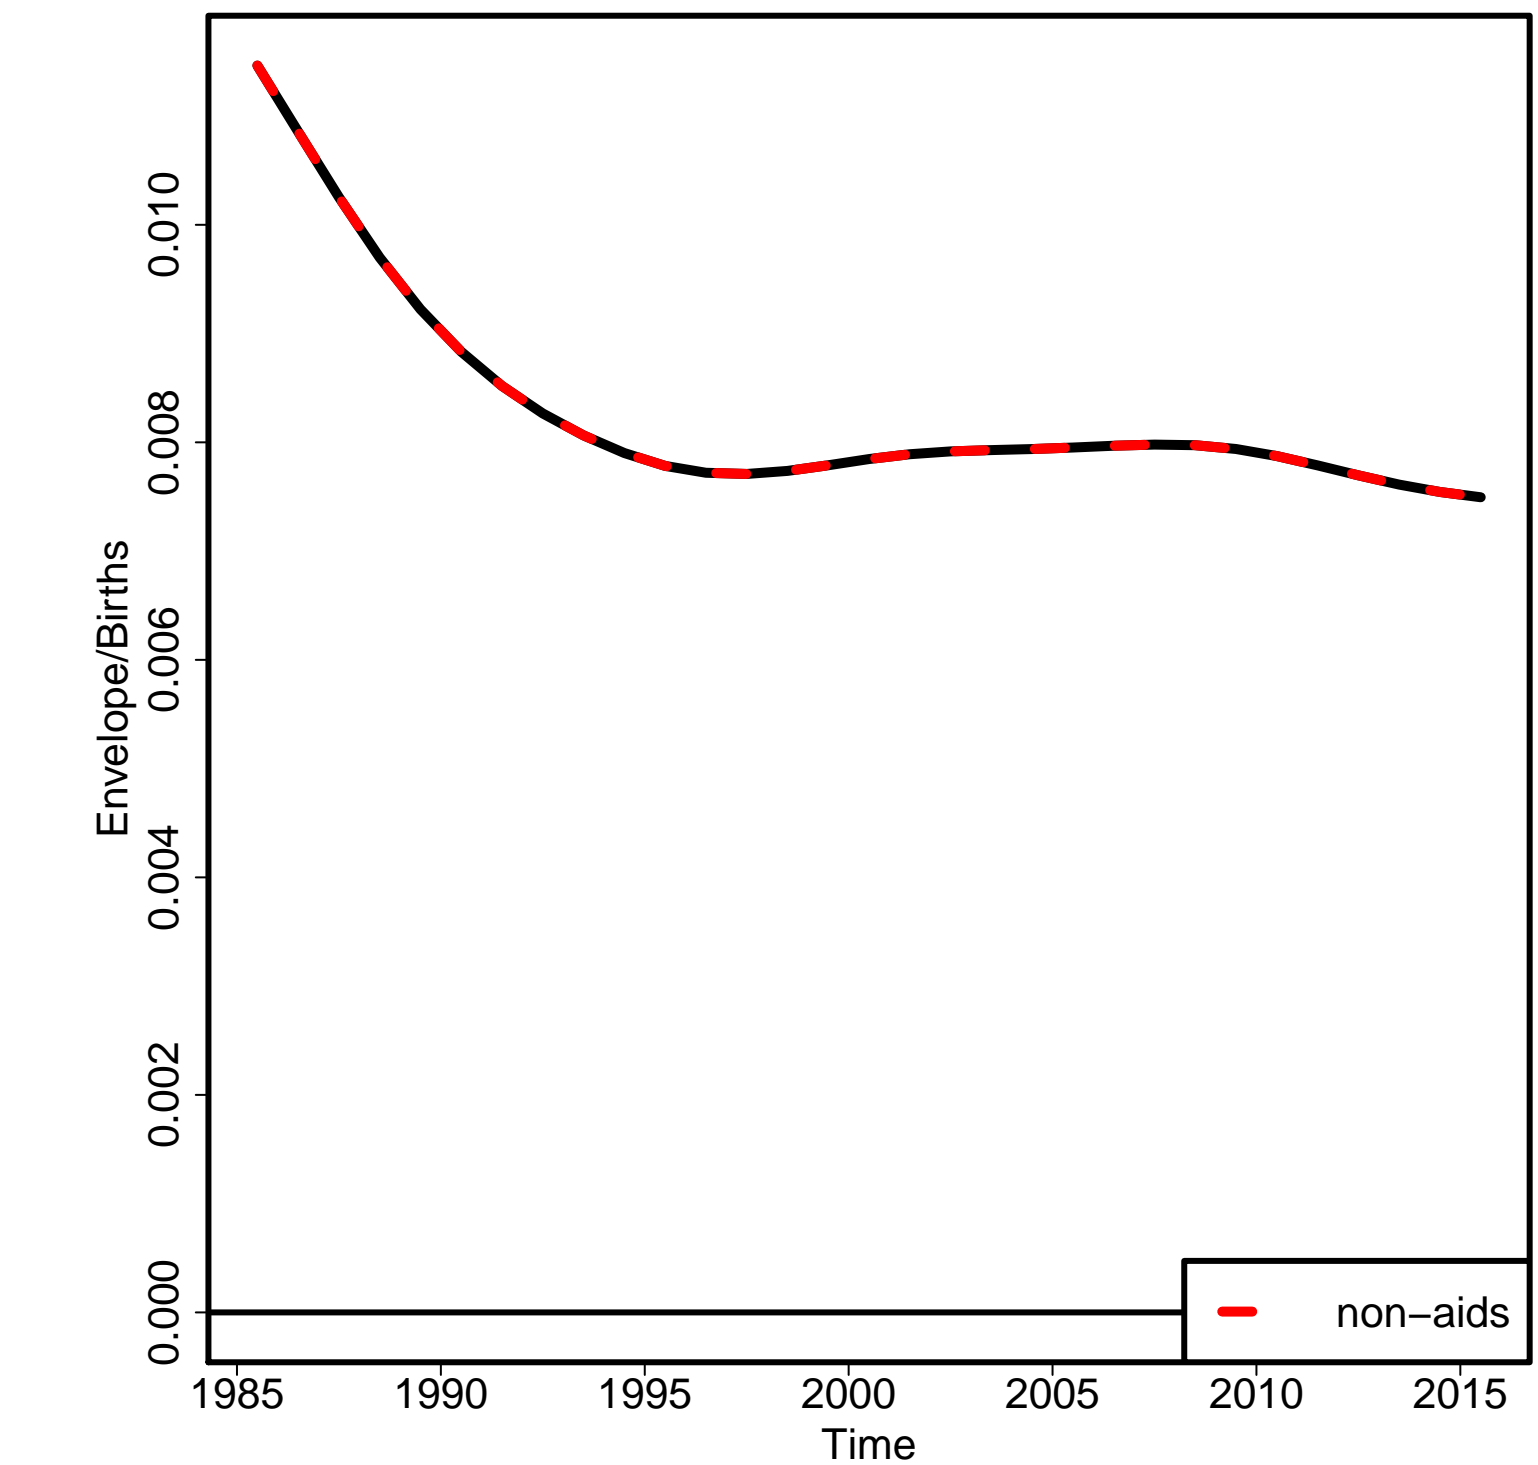

Non-aids MMR

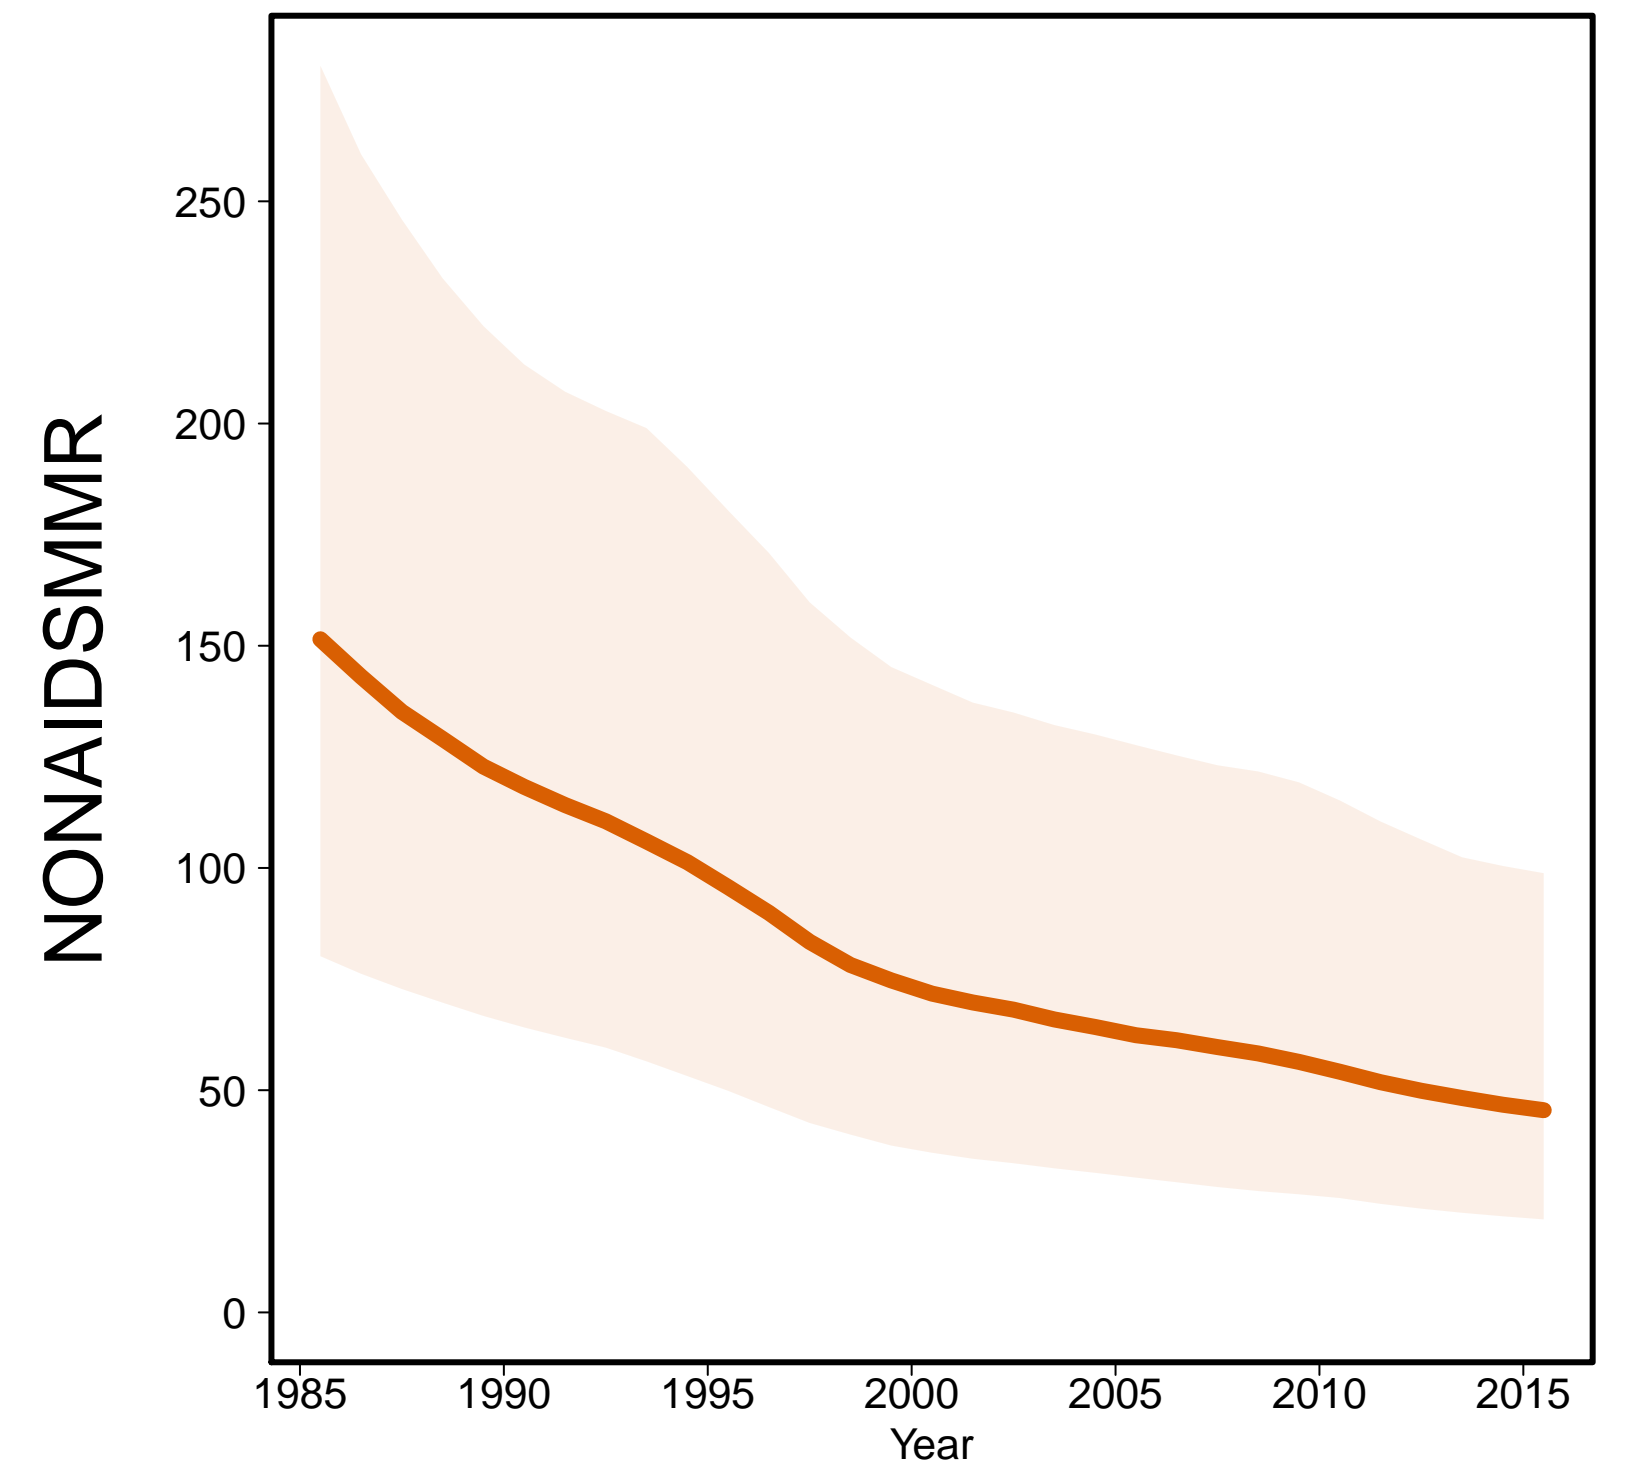

Aids MMR





Oman [OMN]  
(Western Asia)

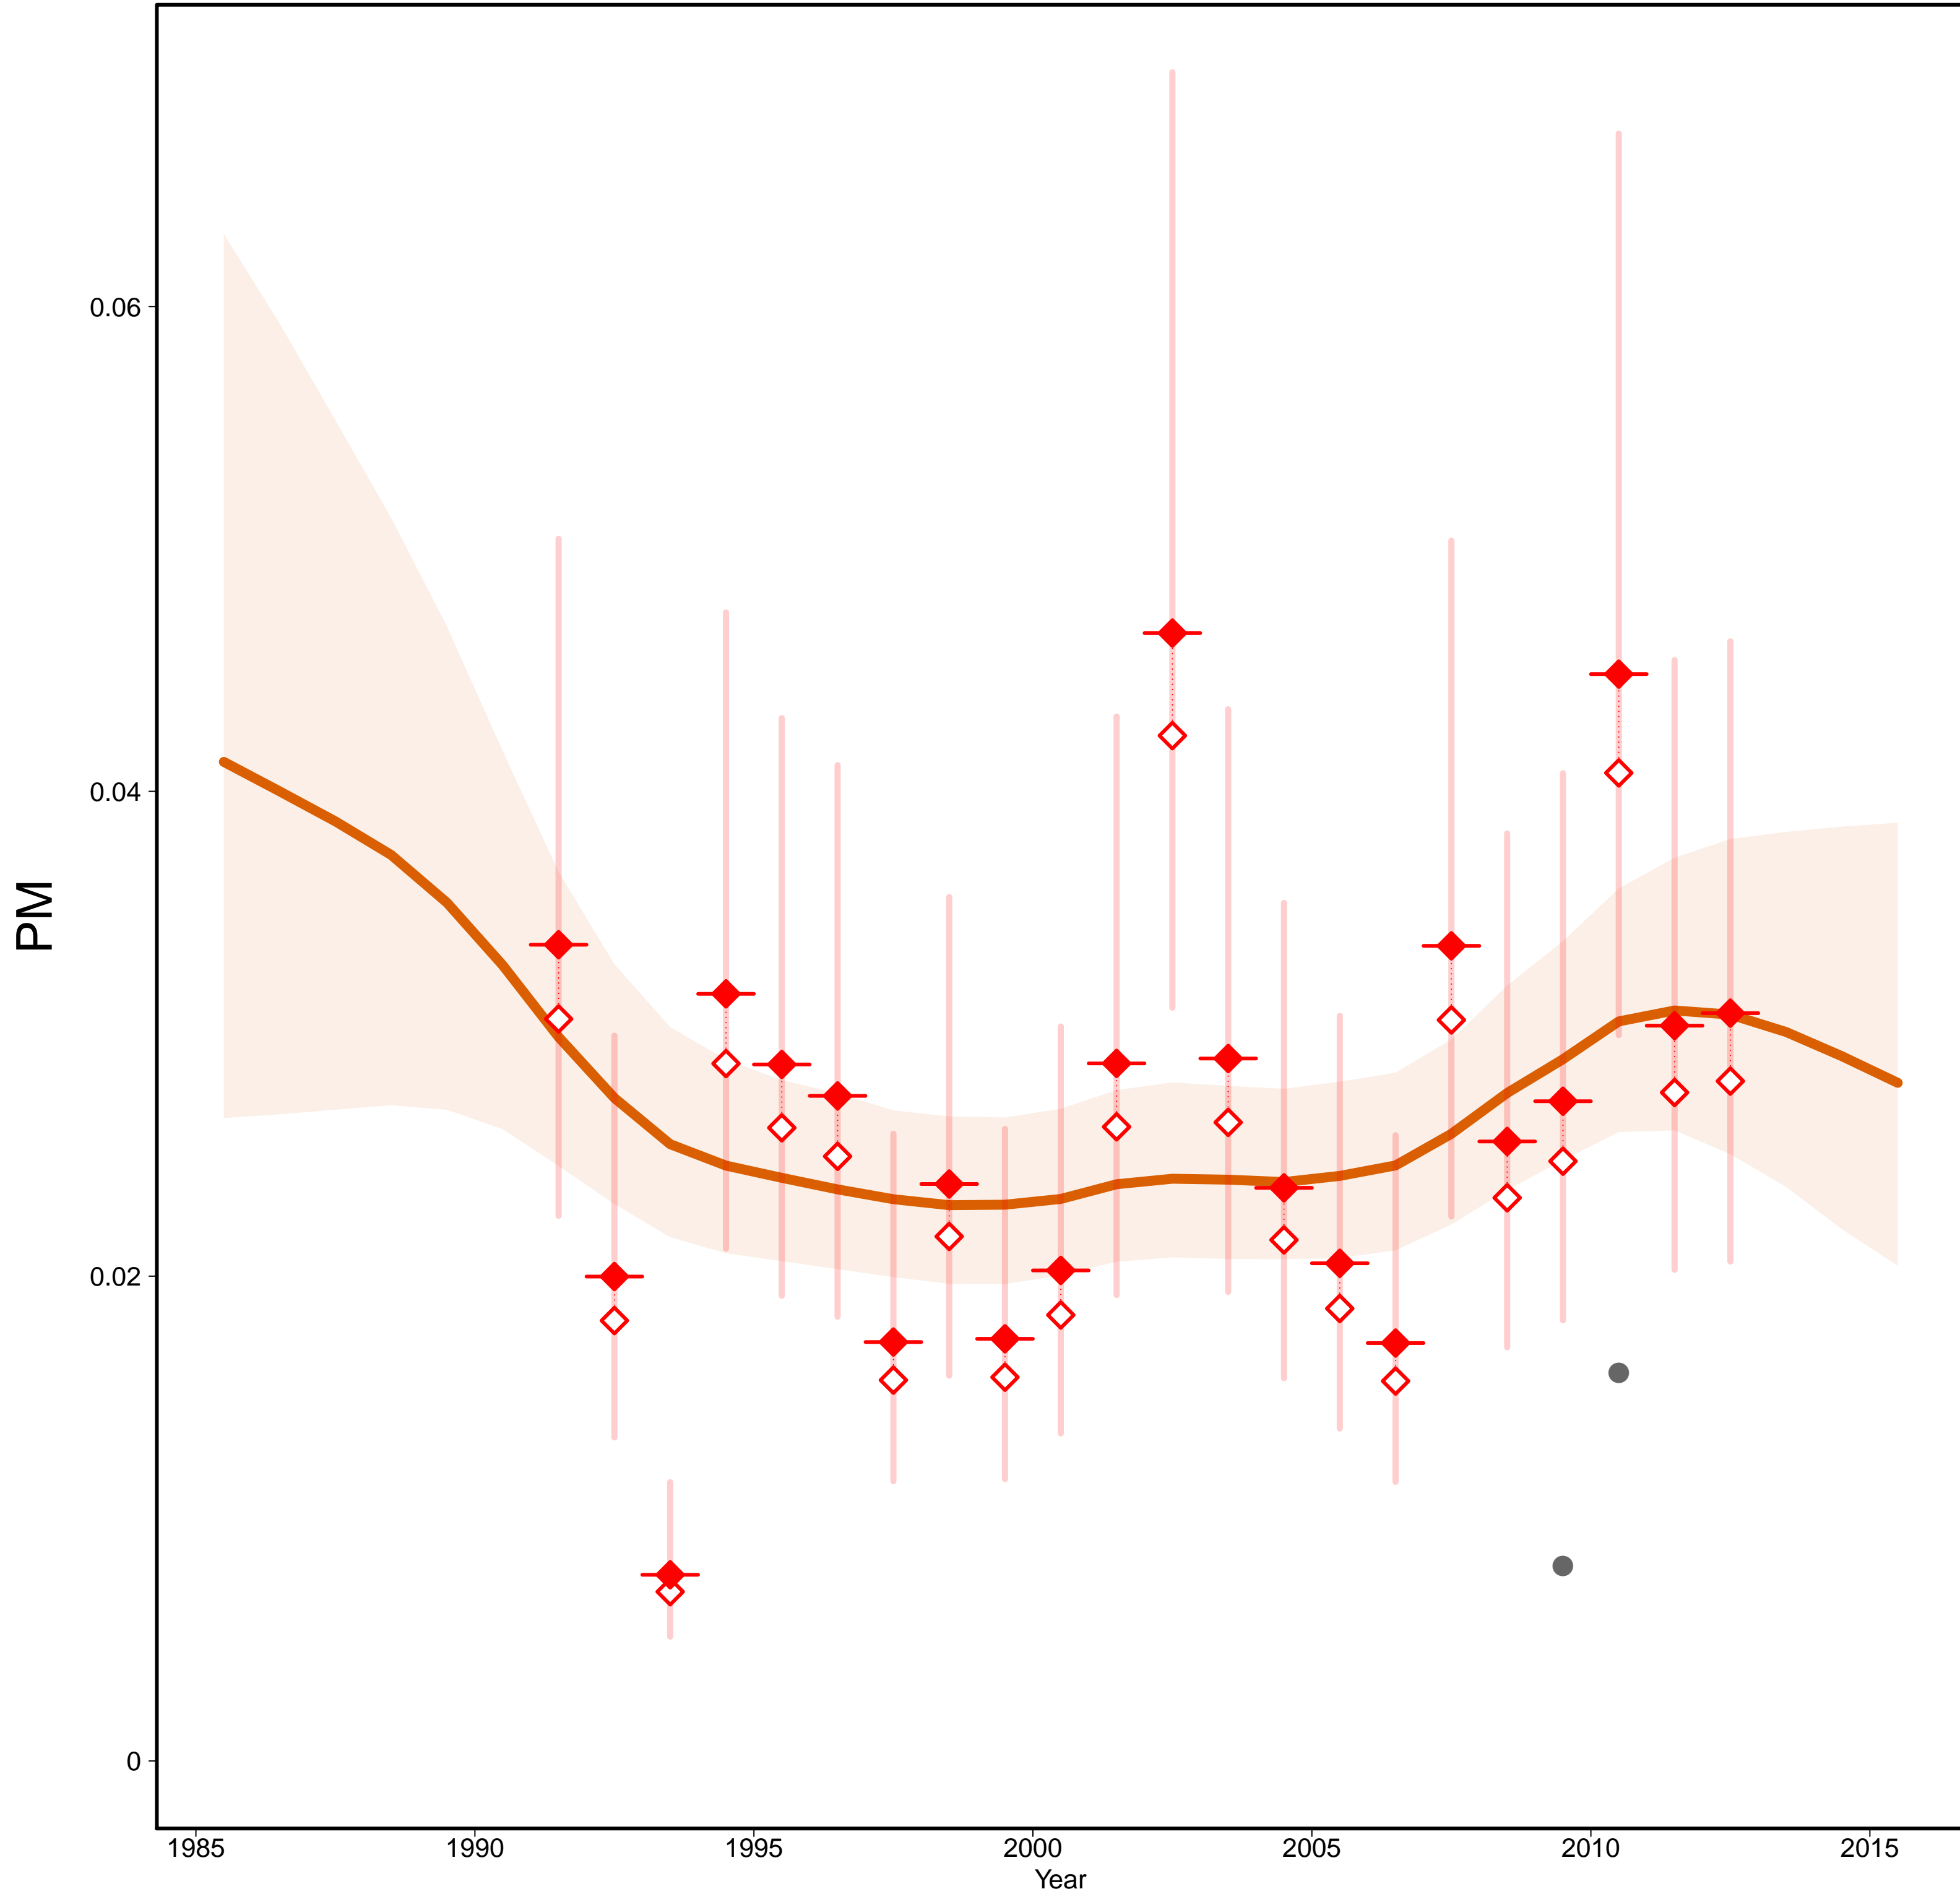

Oman [OMN]  
(Western Asia)

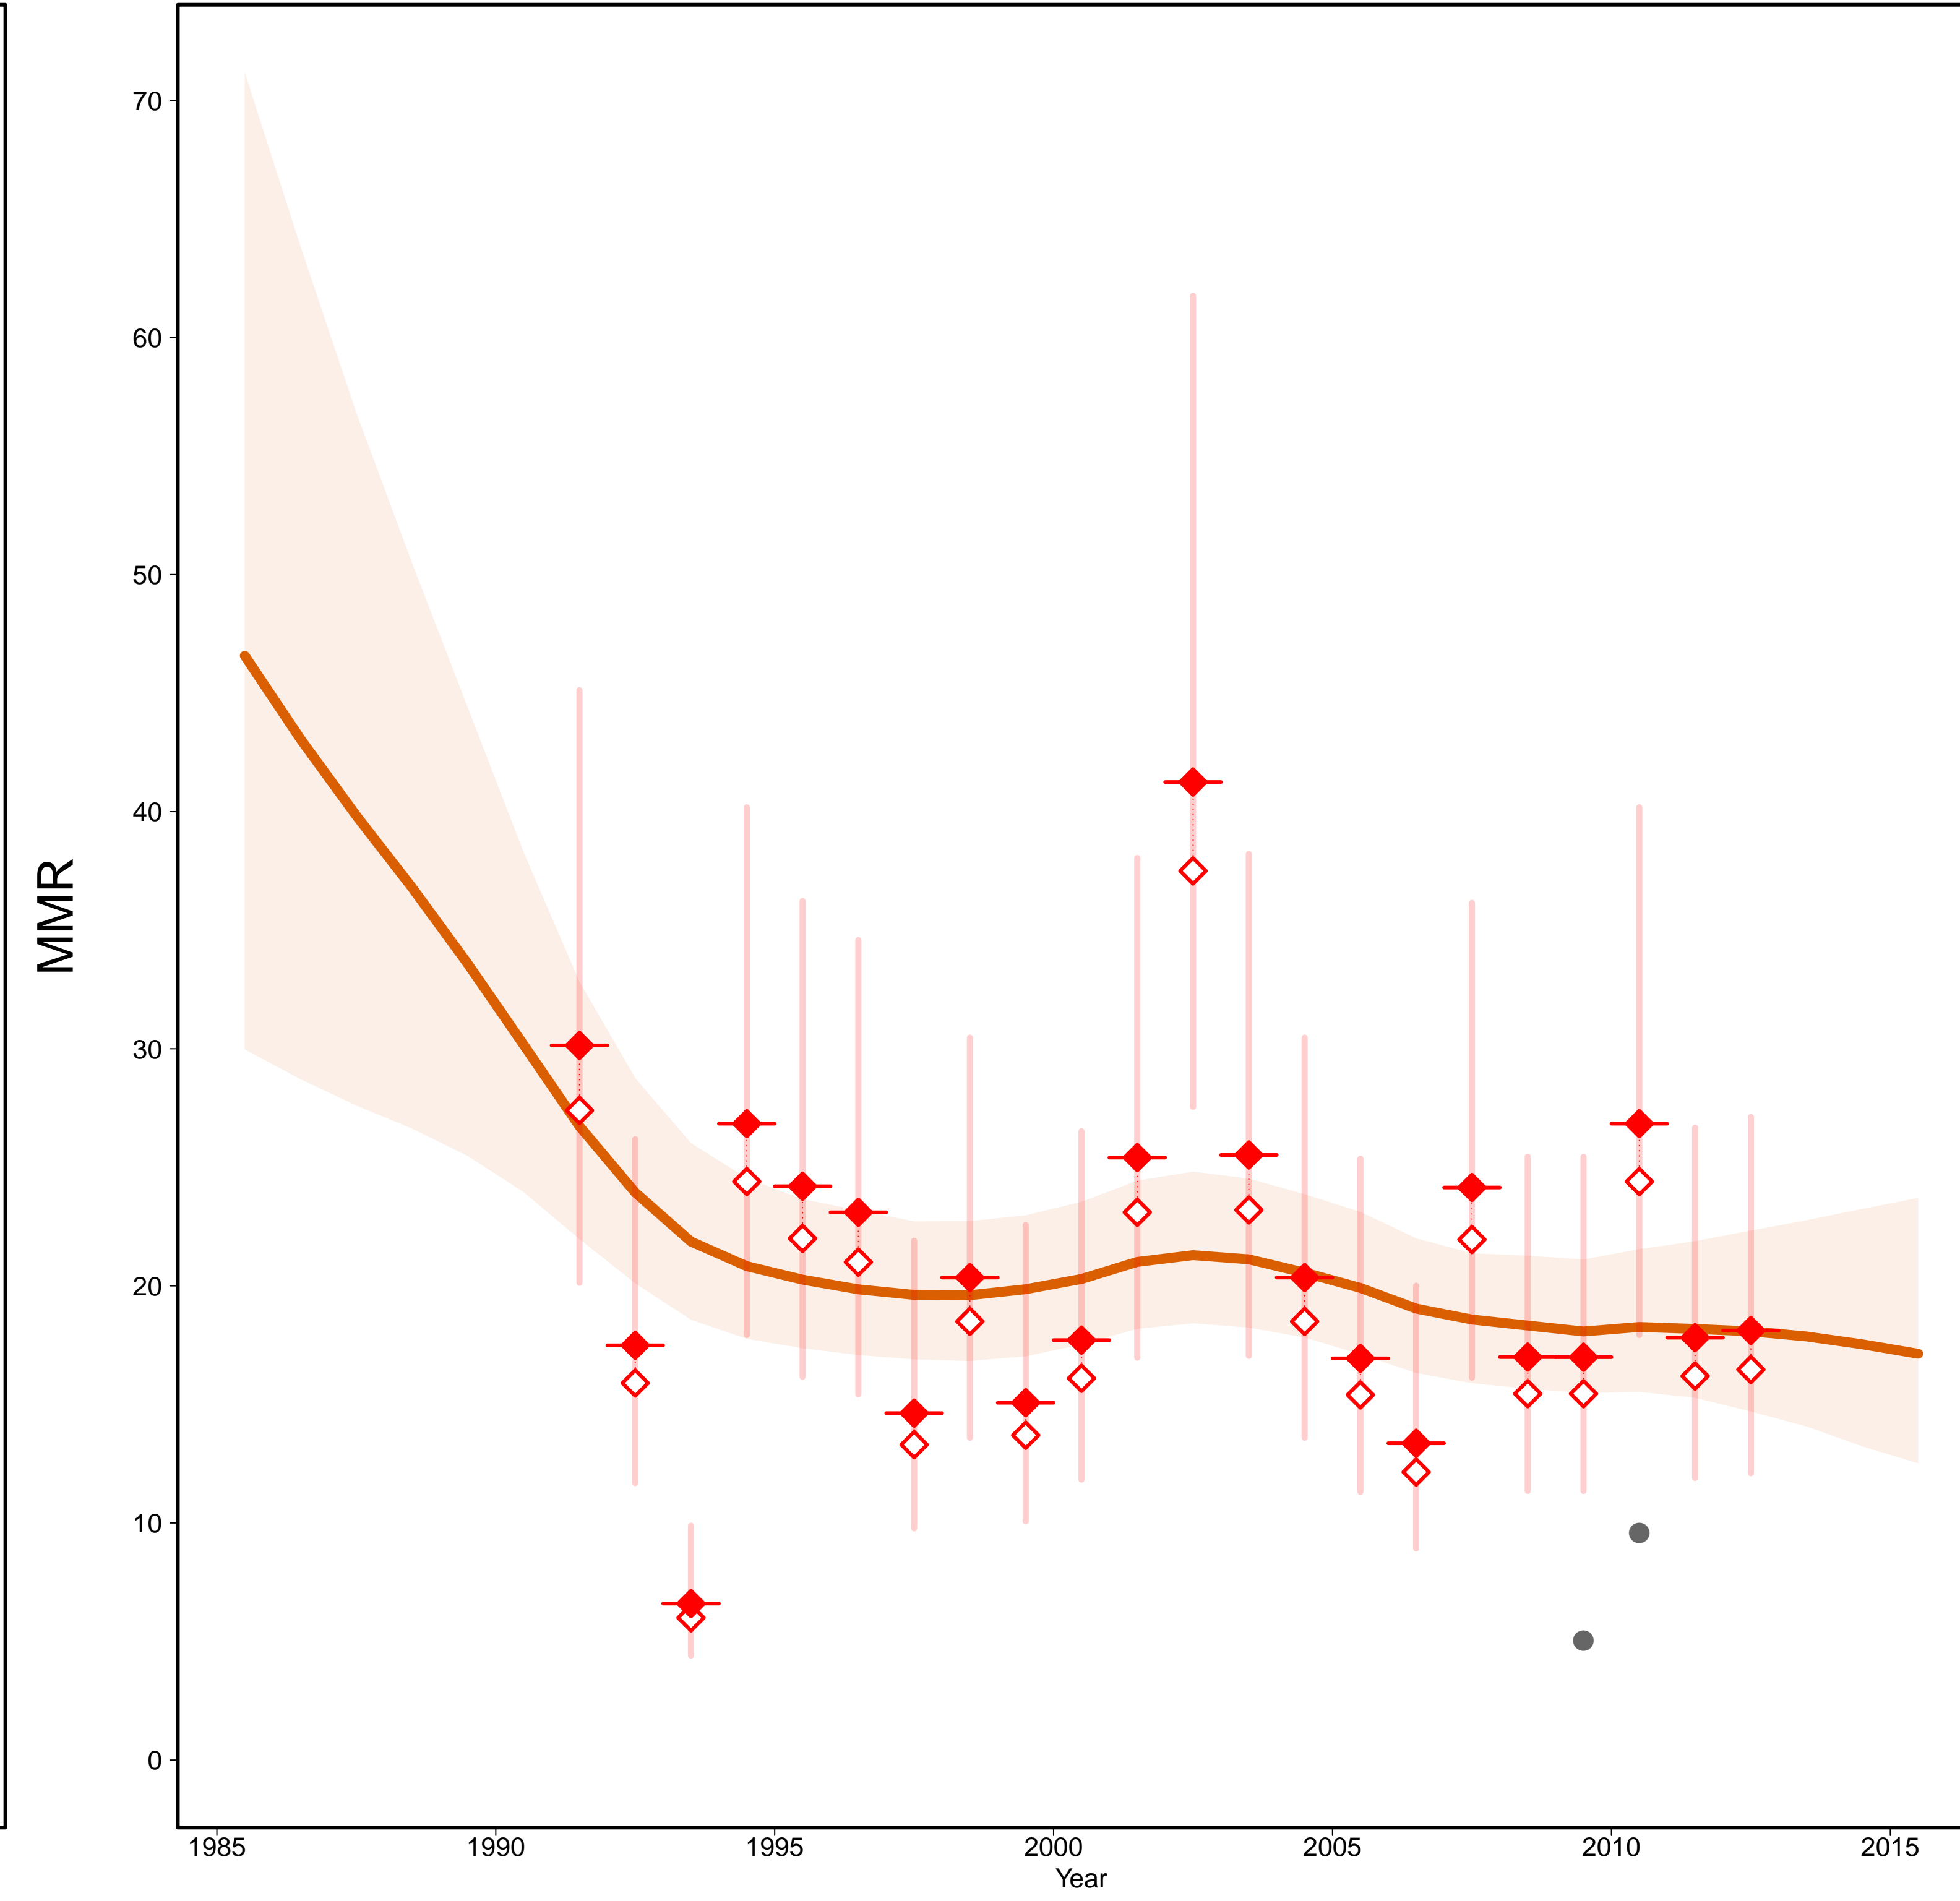

- Estimates —
- MMR Database 2015 —
- ◇ Observed Data
- ◆ Adjusted Data
- Data type —
- ◆ Misc. studies
- Excluded VR data  
(data quality issues)

Gross Domestic Product

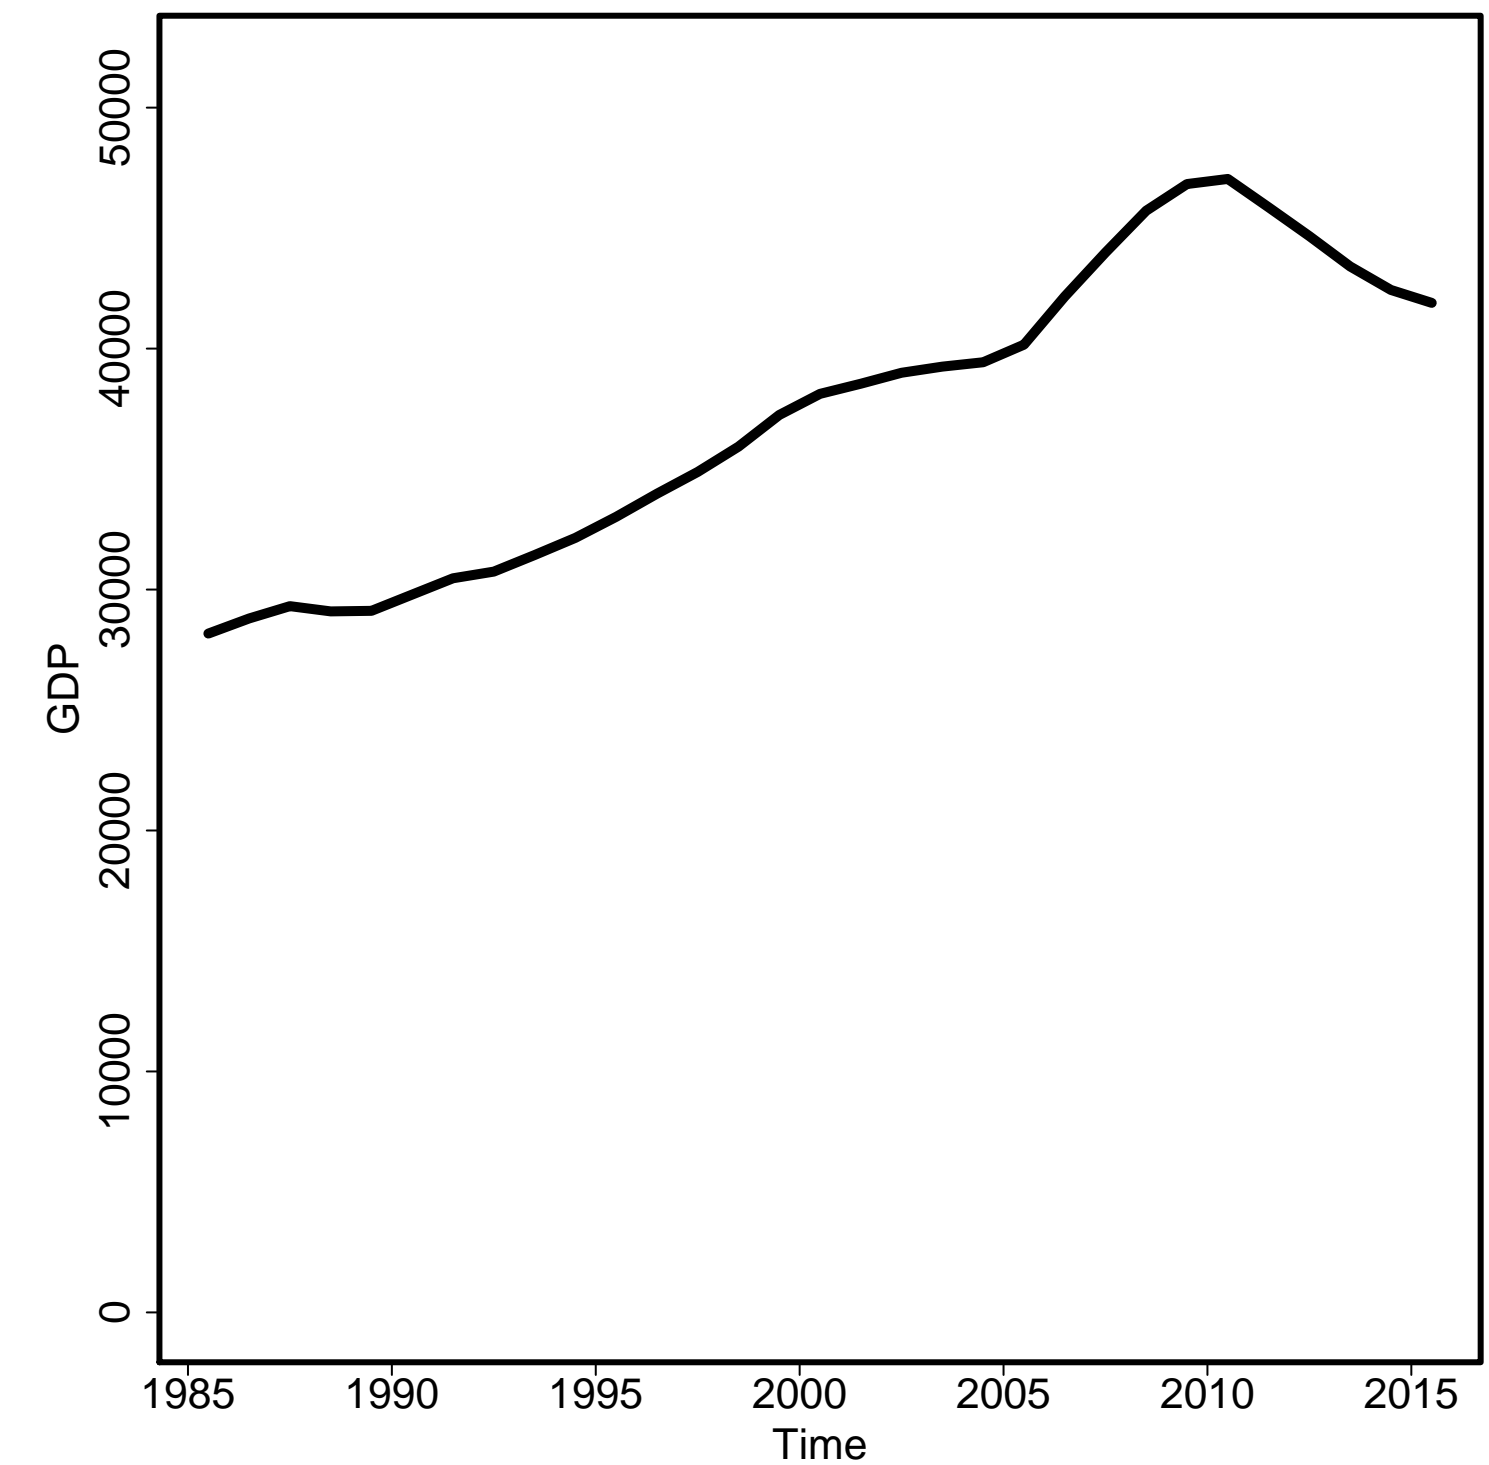

General Fertility Rate

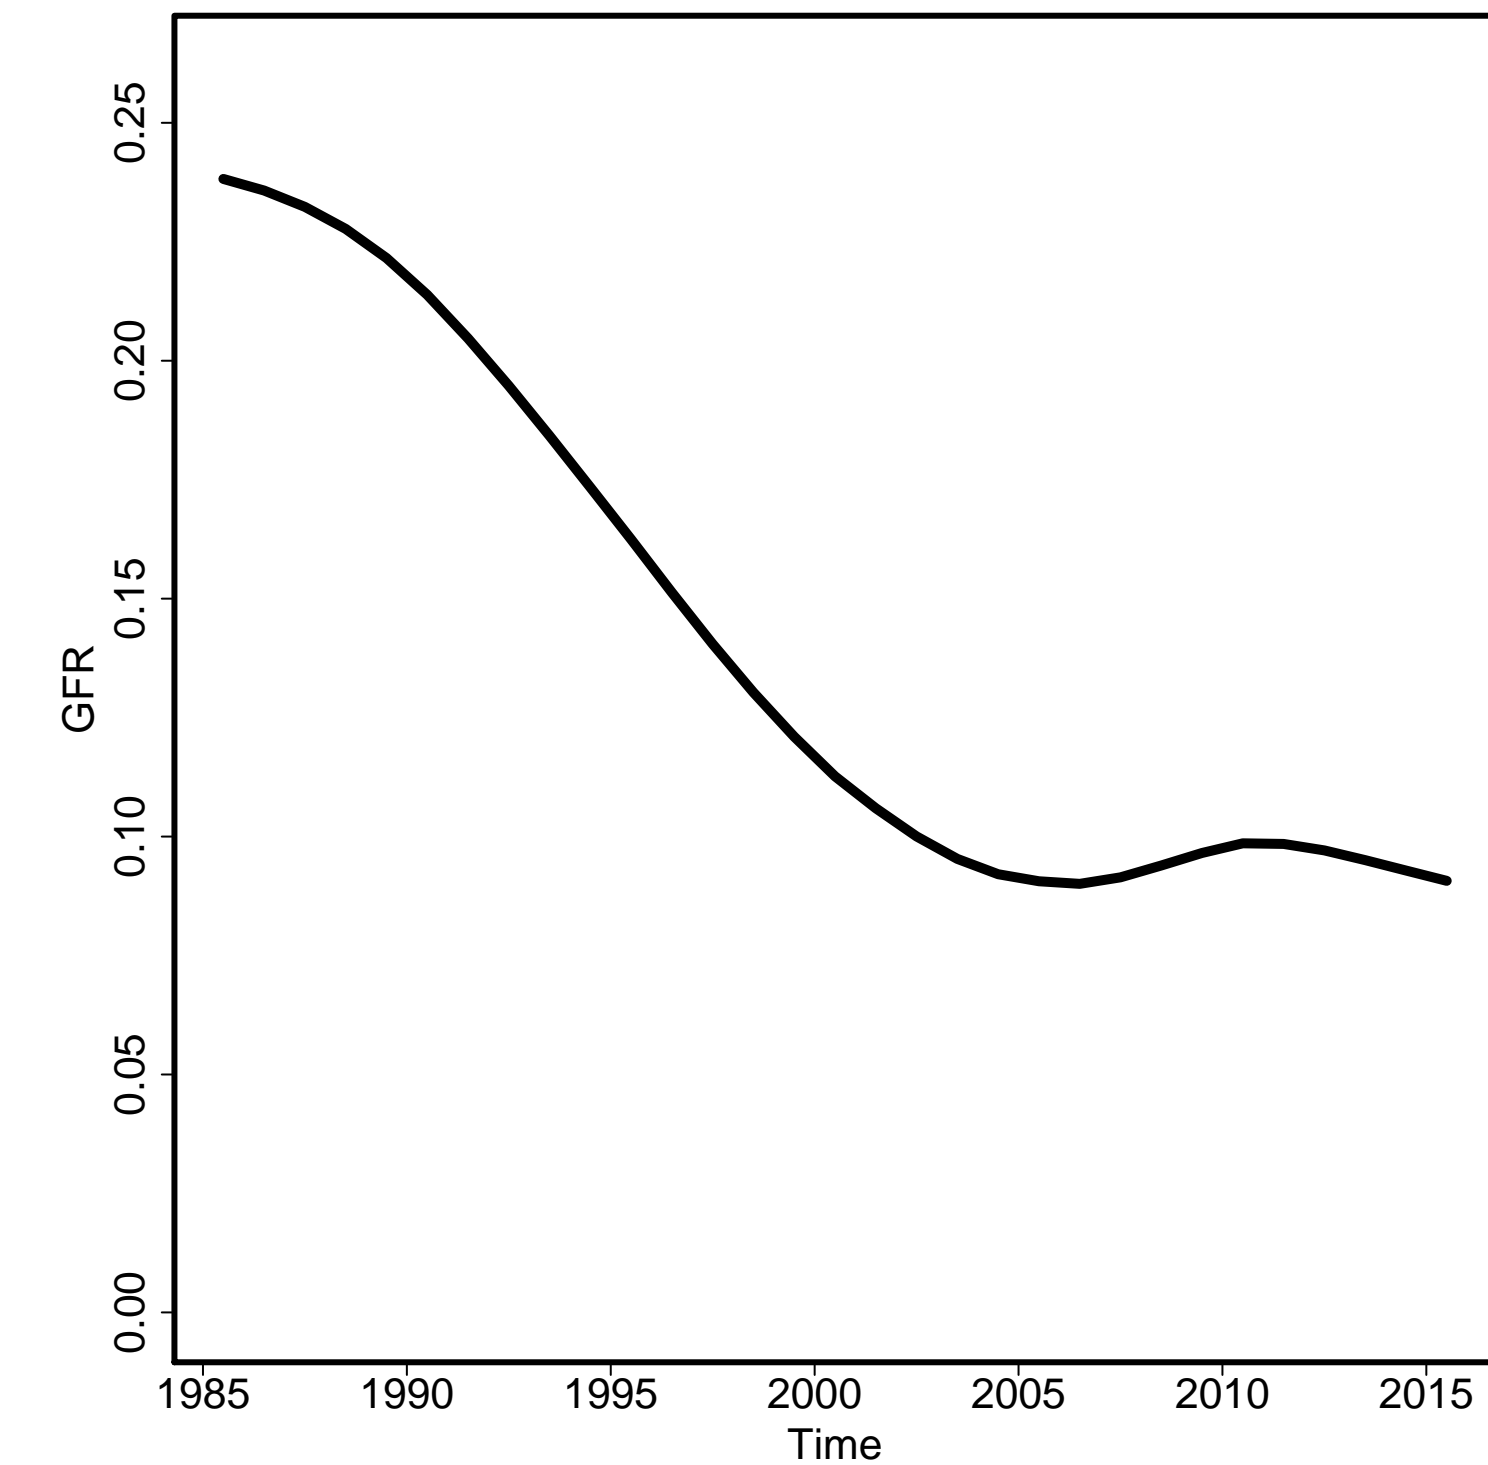

Skilled Attendance to Birth

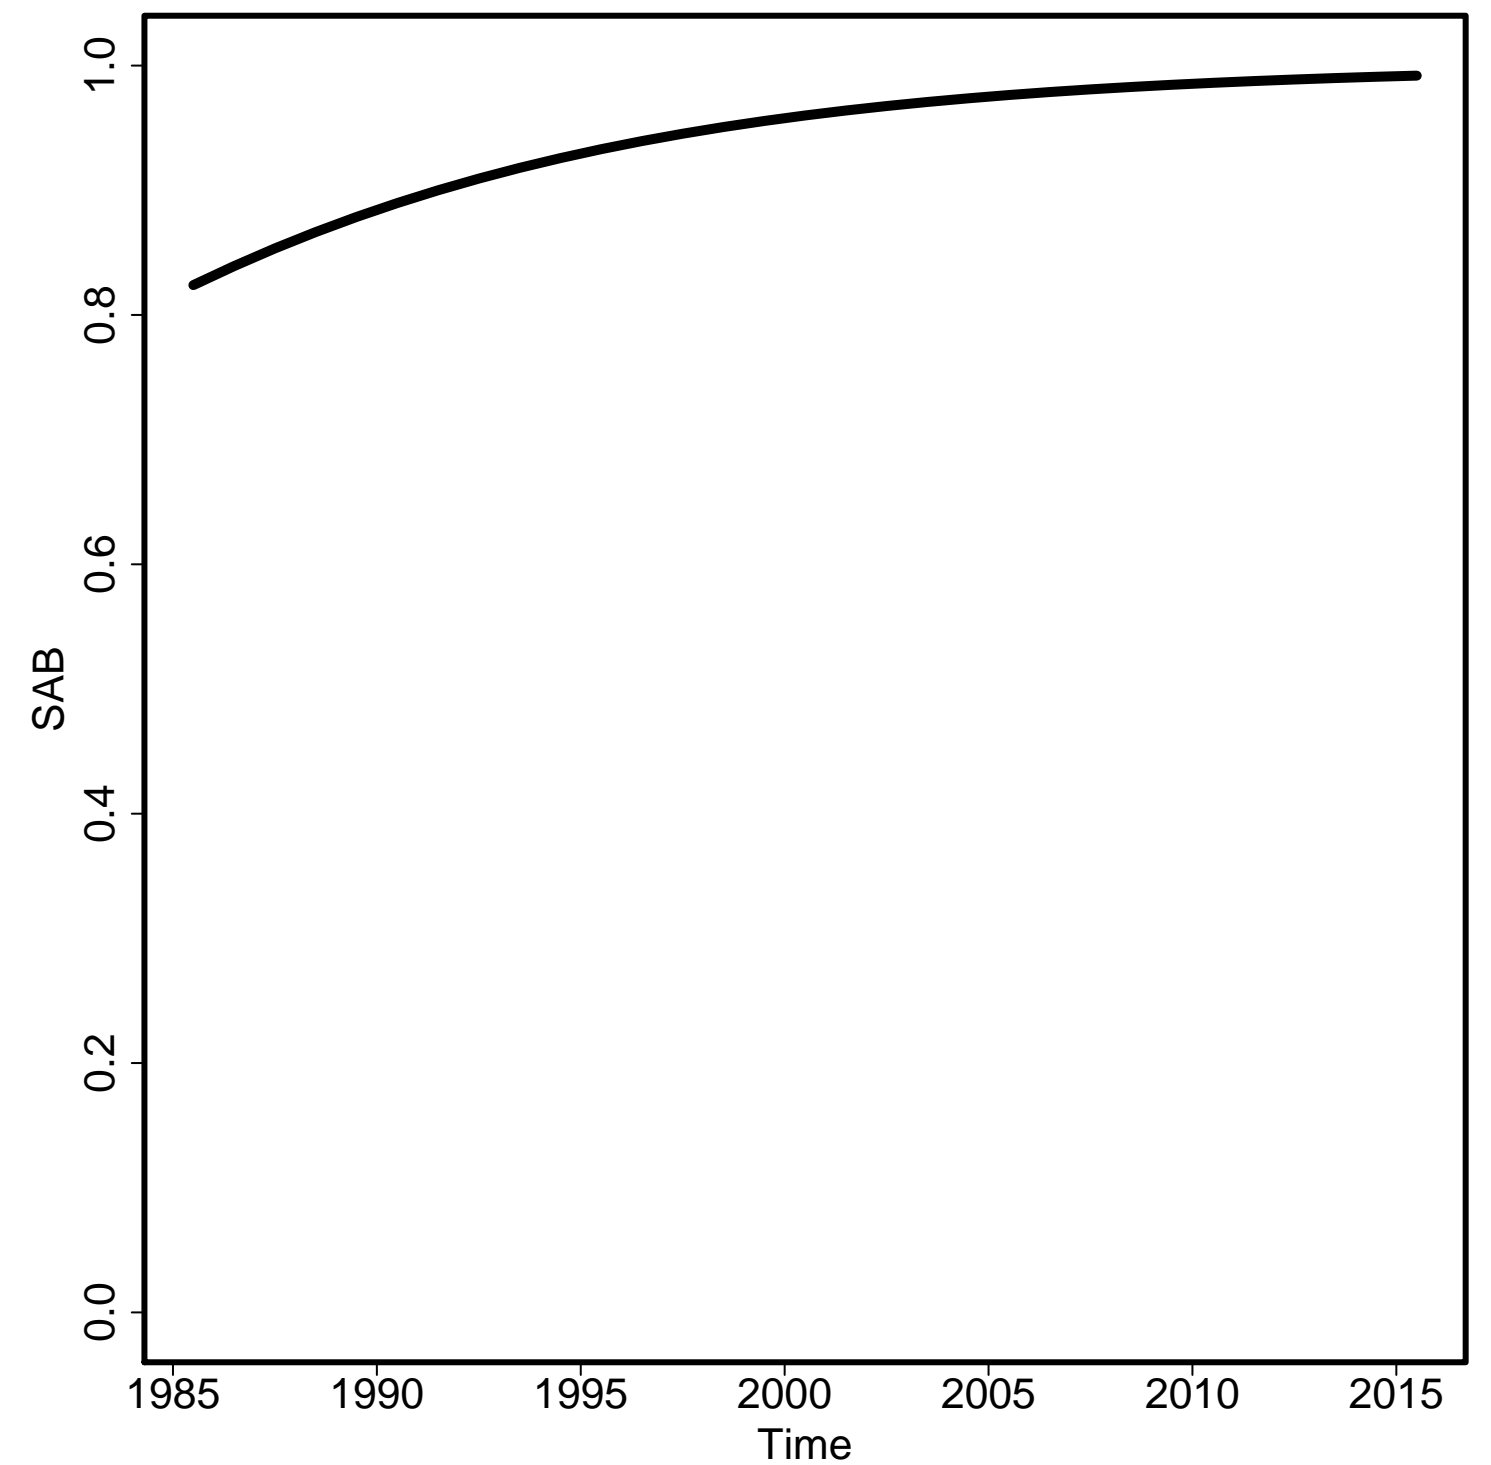

Envelope/Births

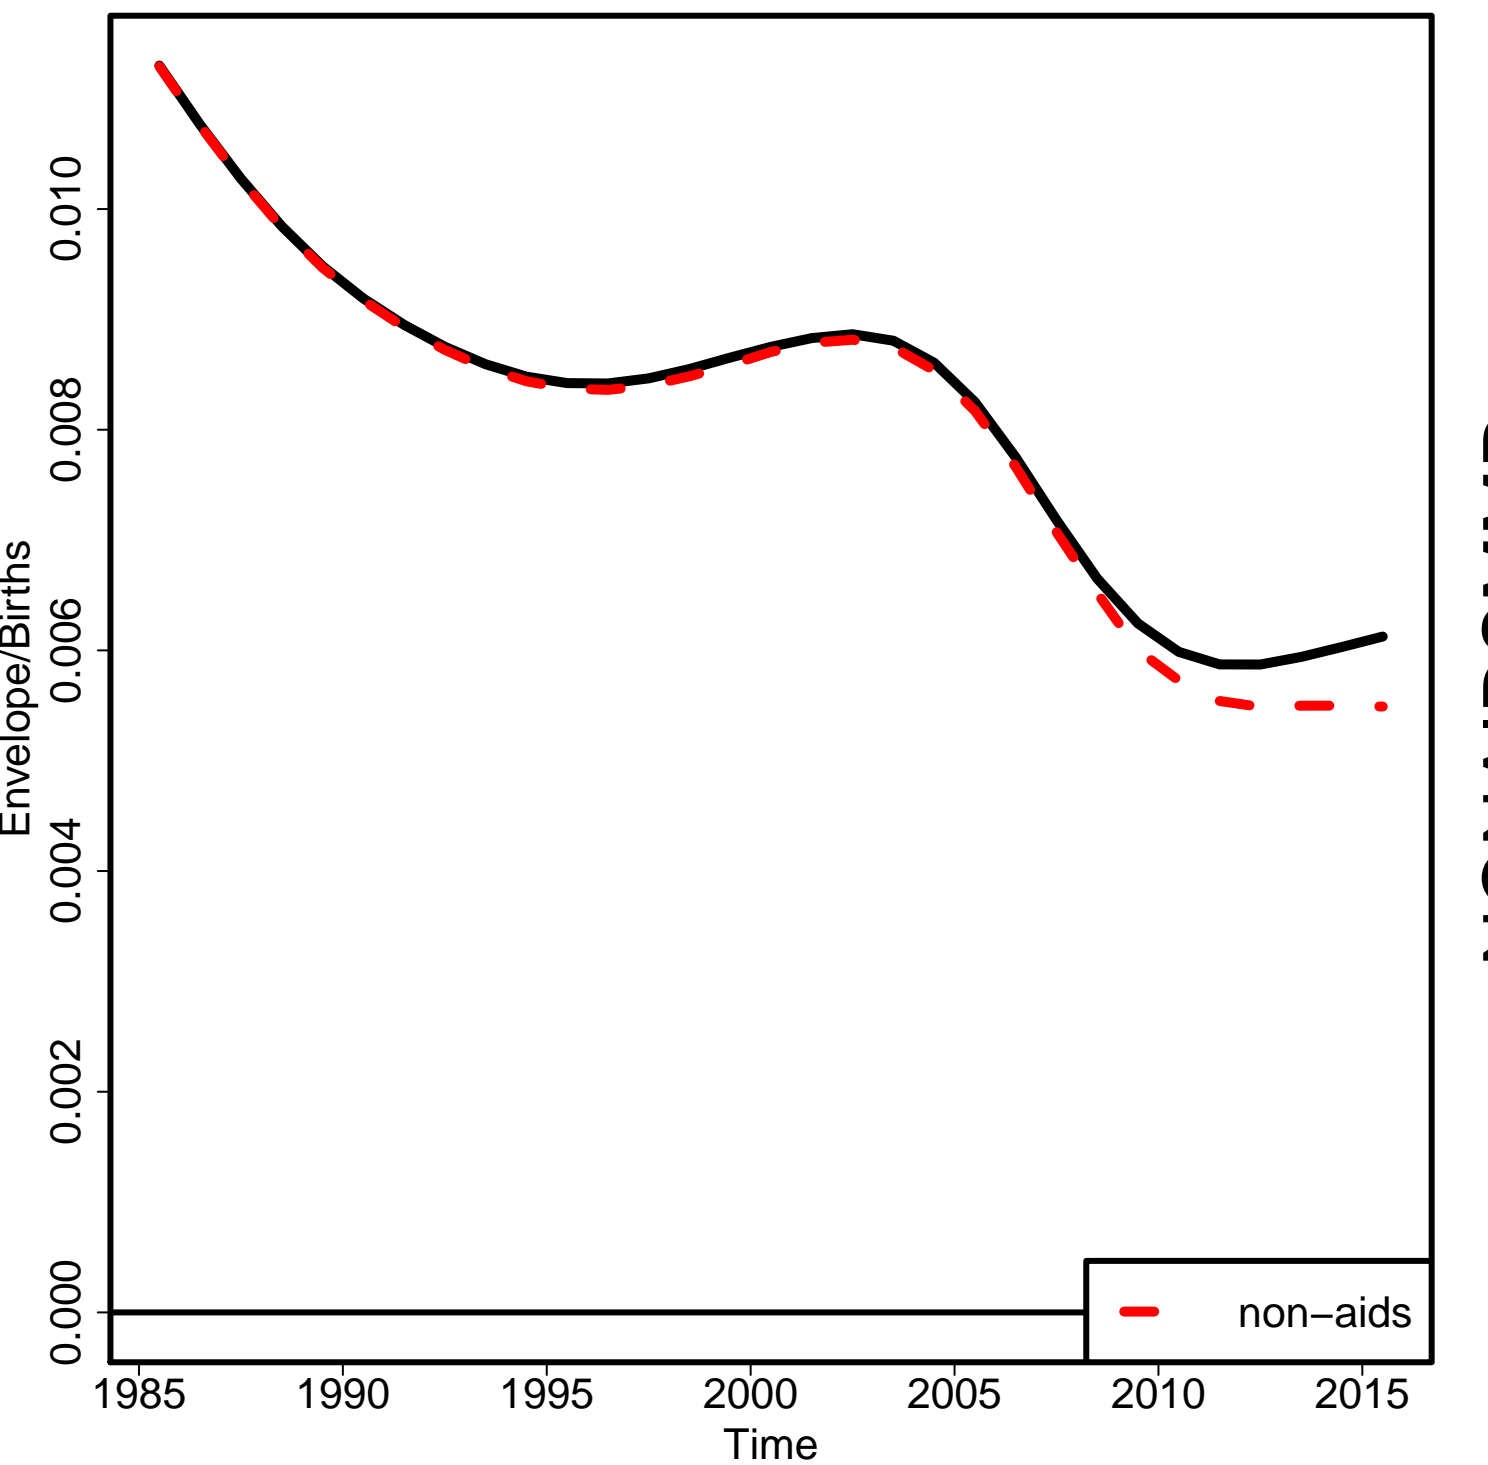

Non-aids MMR

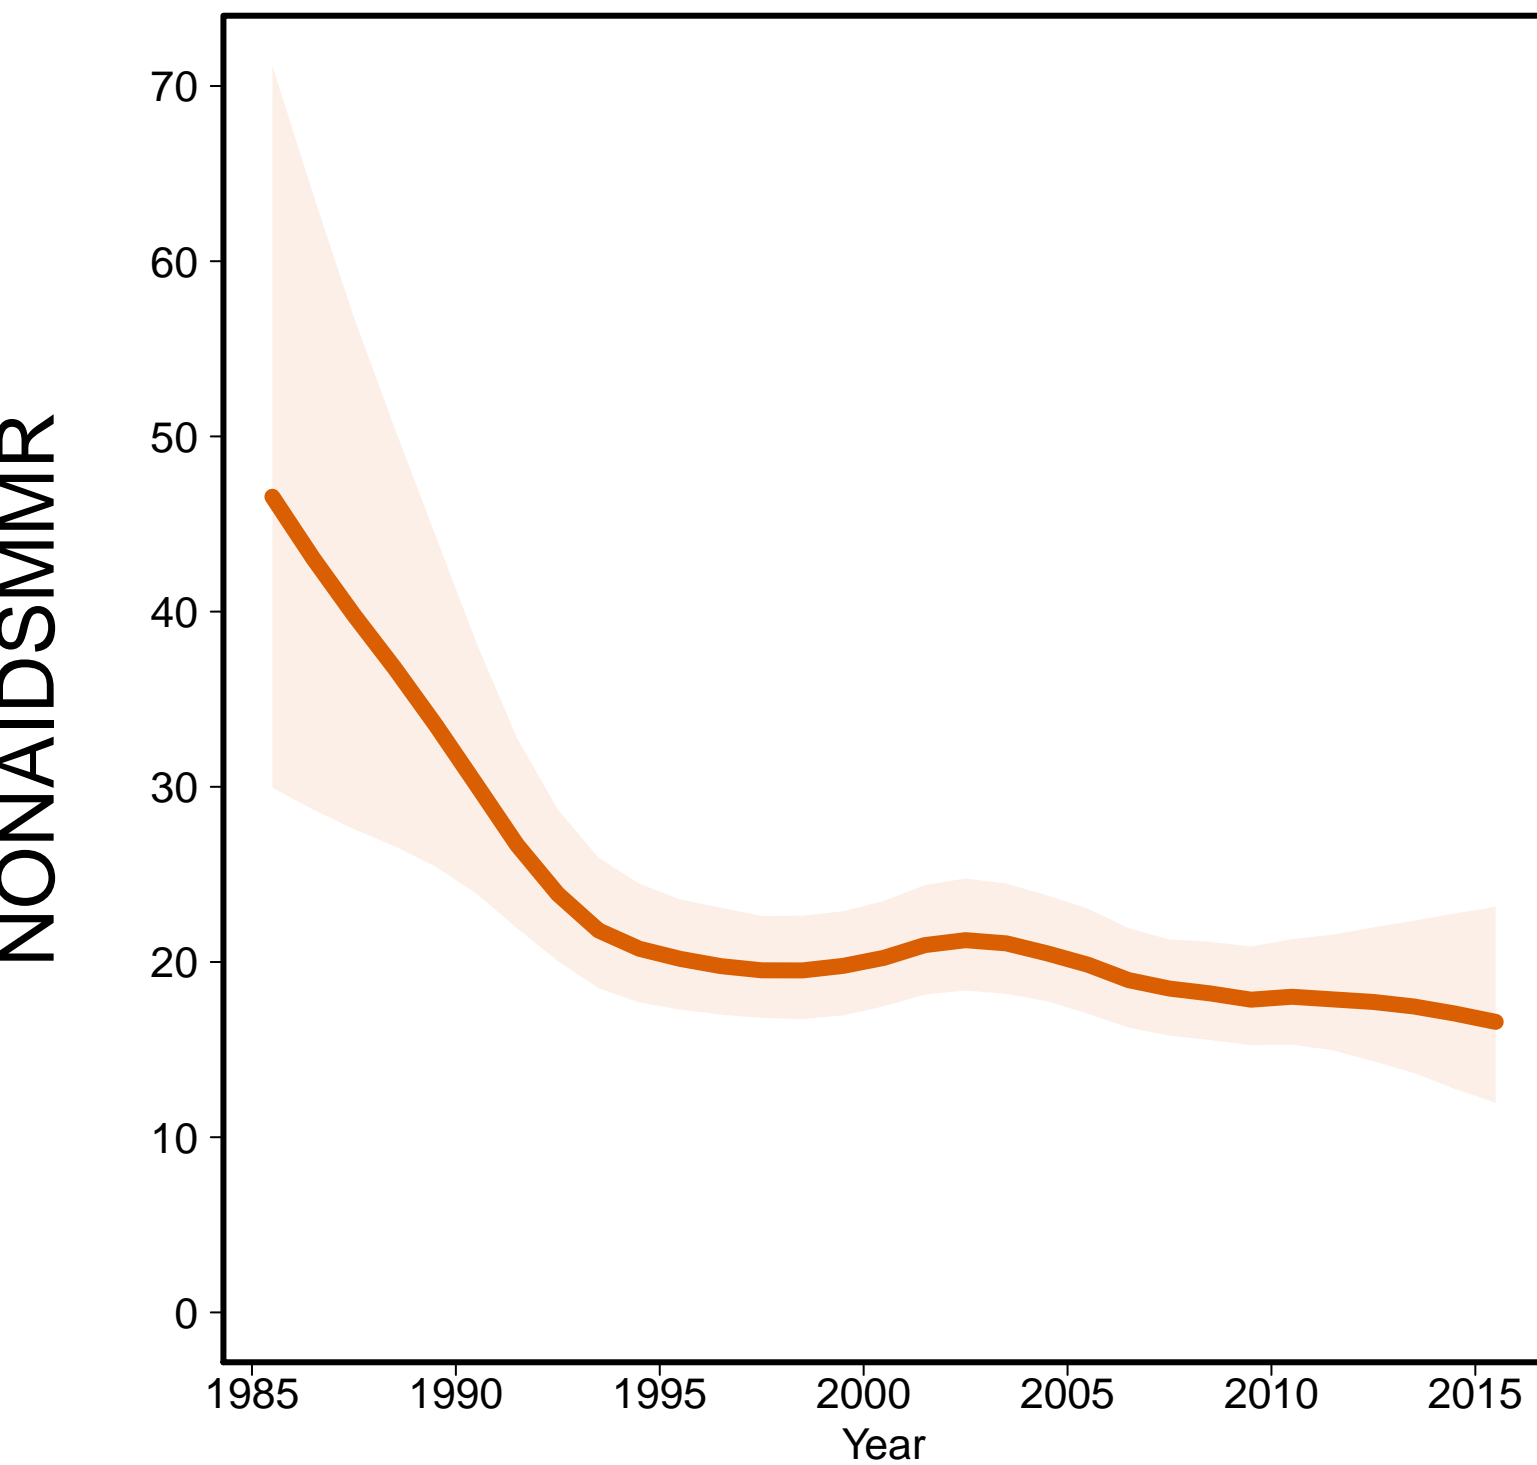

Aids MMR

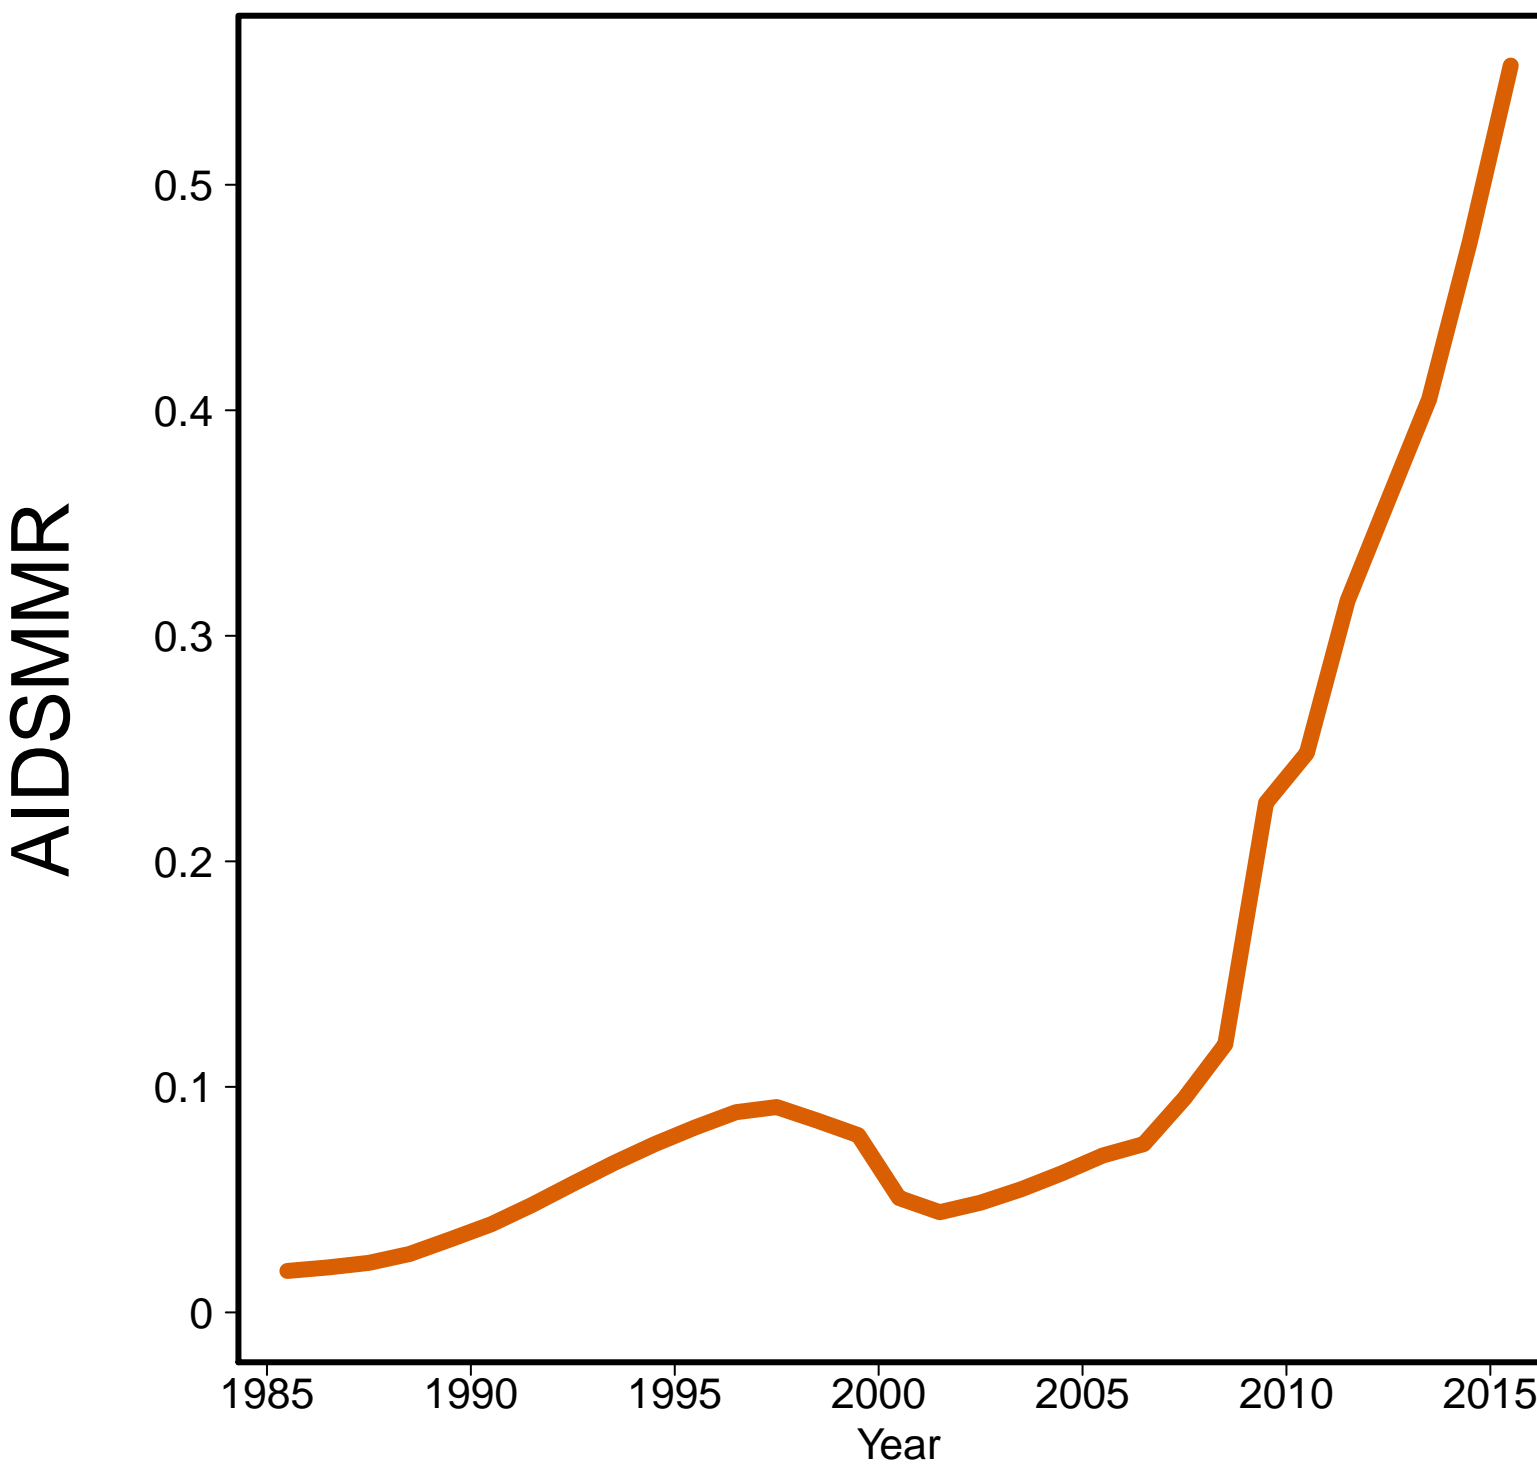

Pakistan [PAK]  
(Southern Asia)

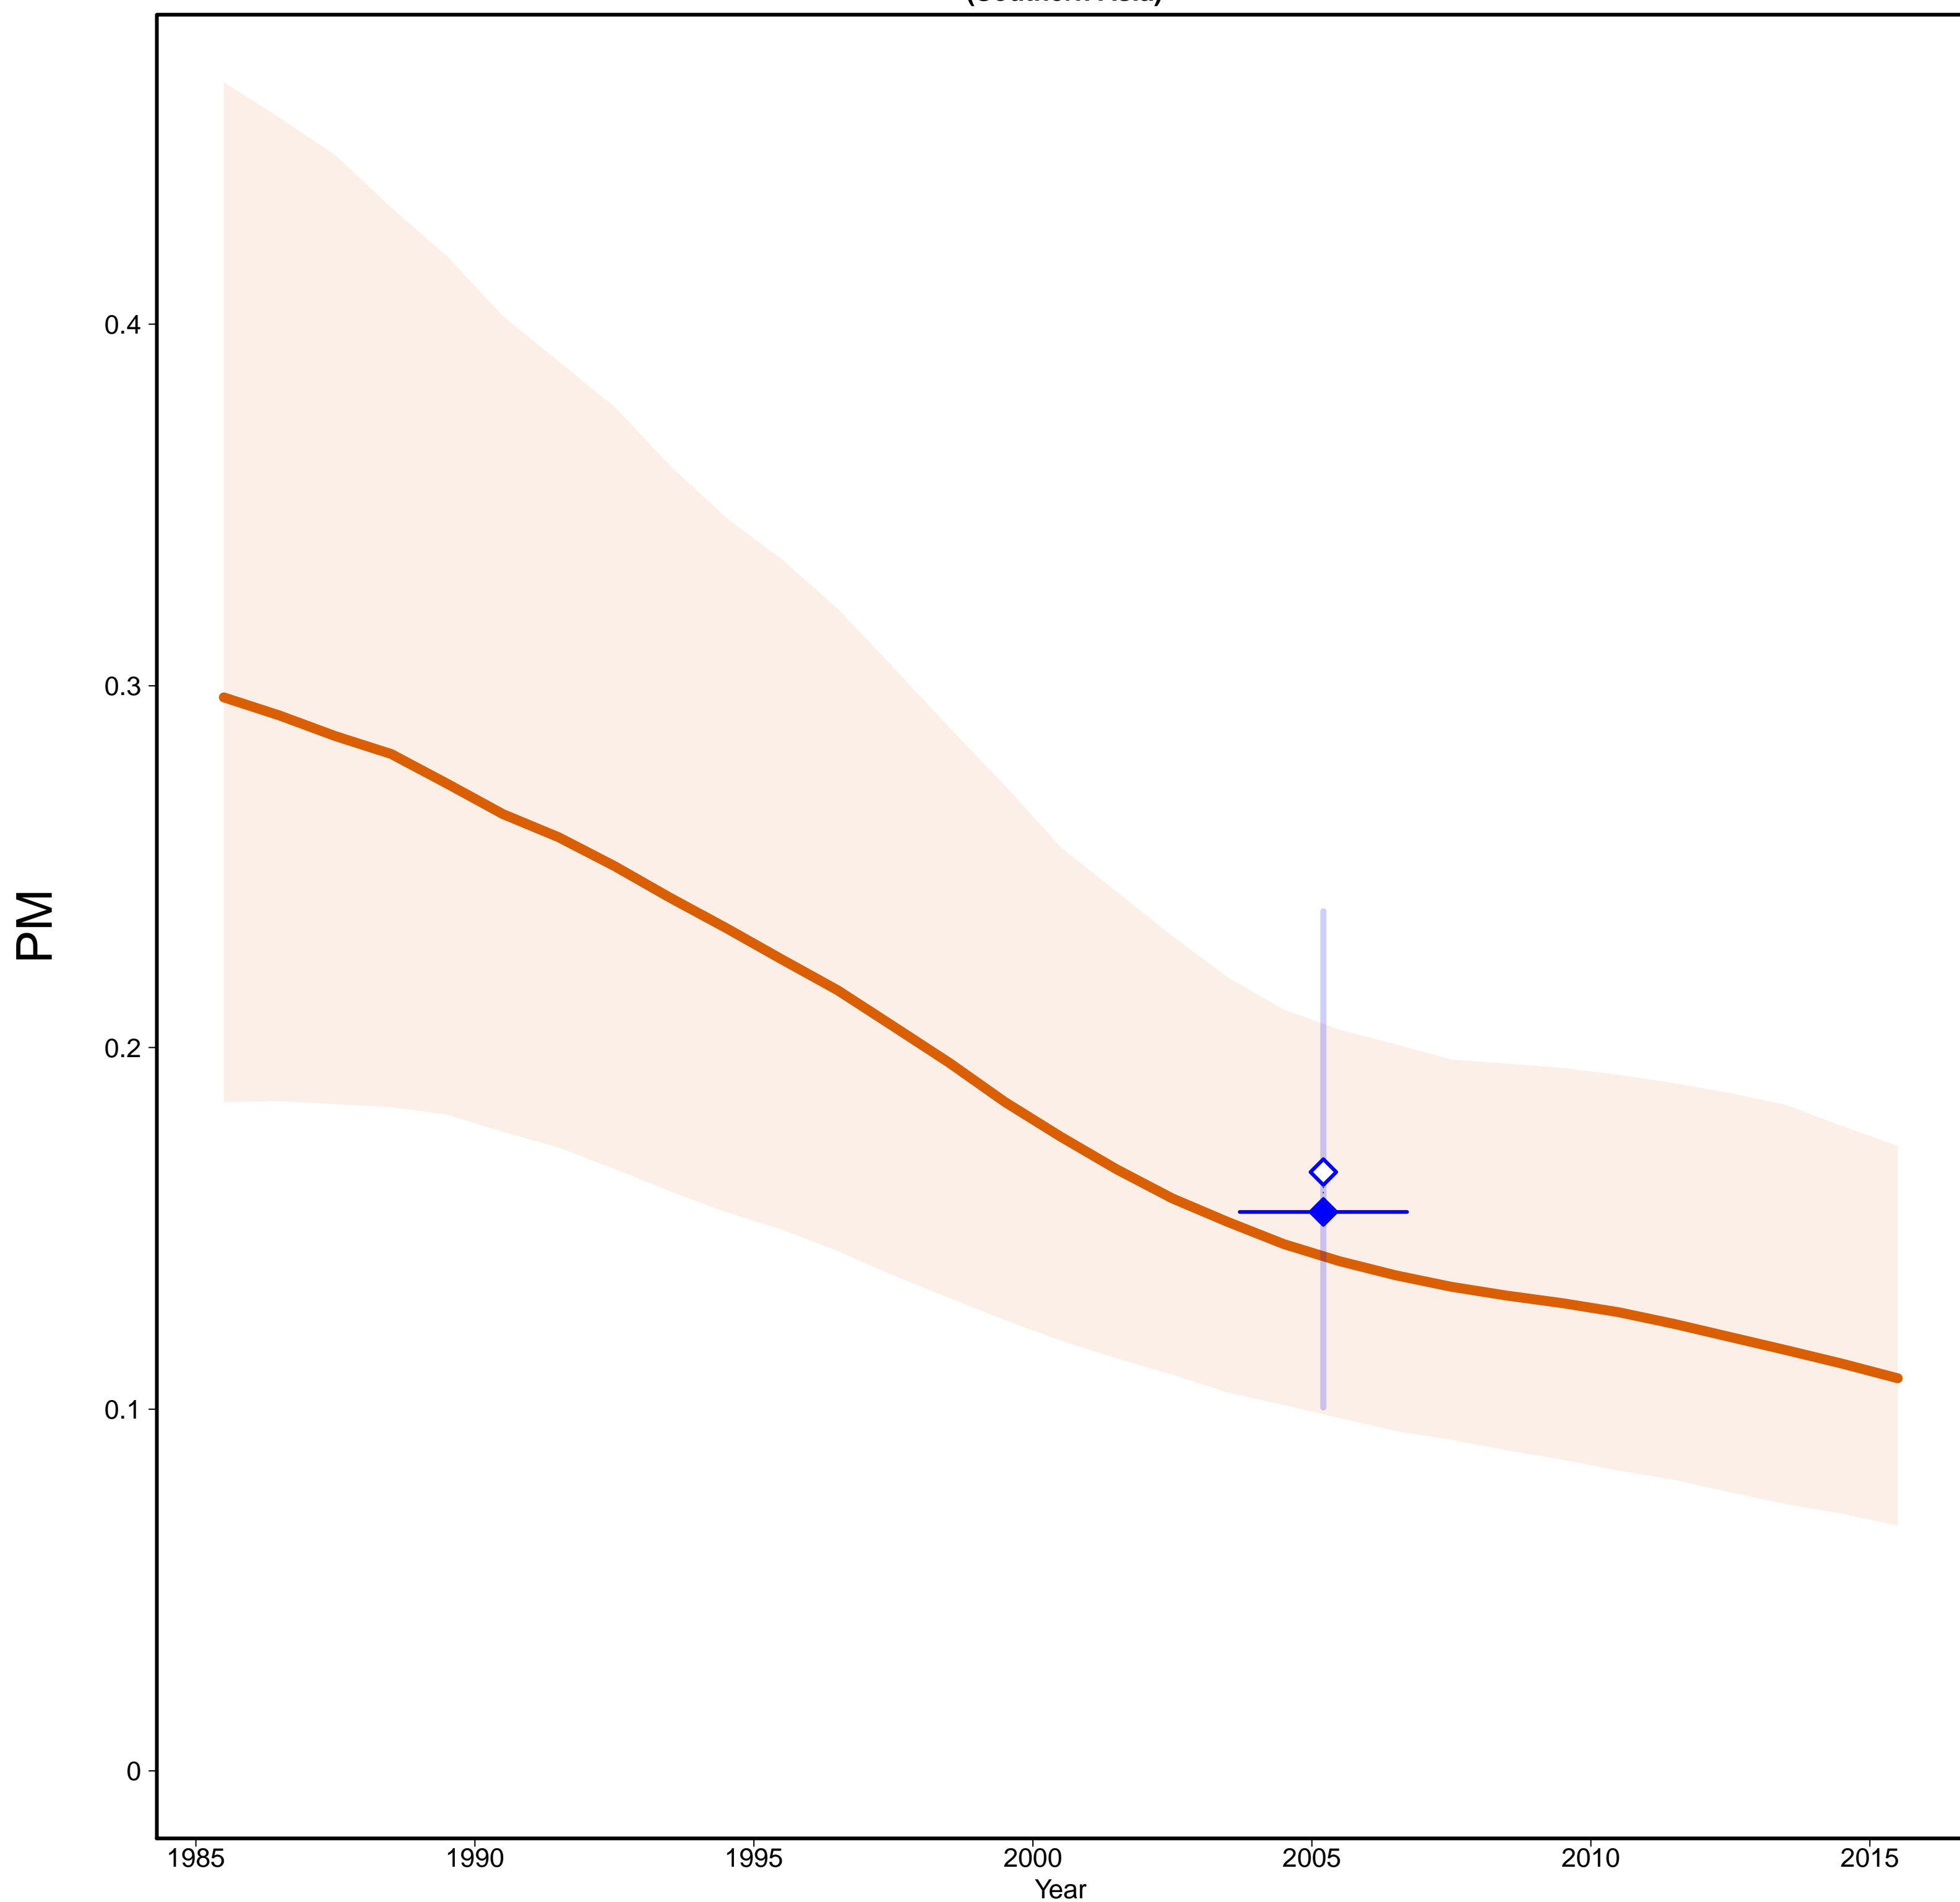

Pakistan [PAK]  
(Southern Asia)

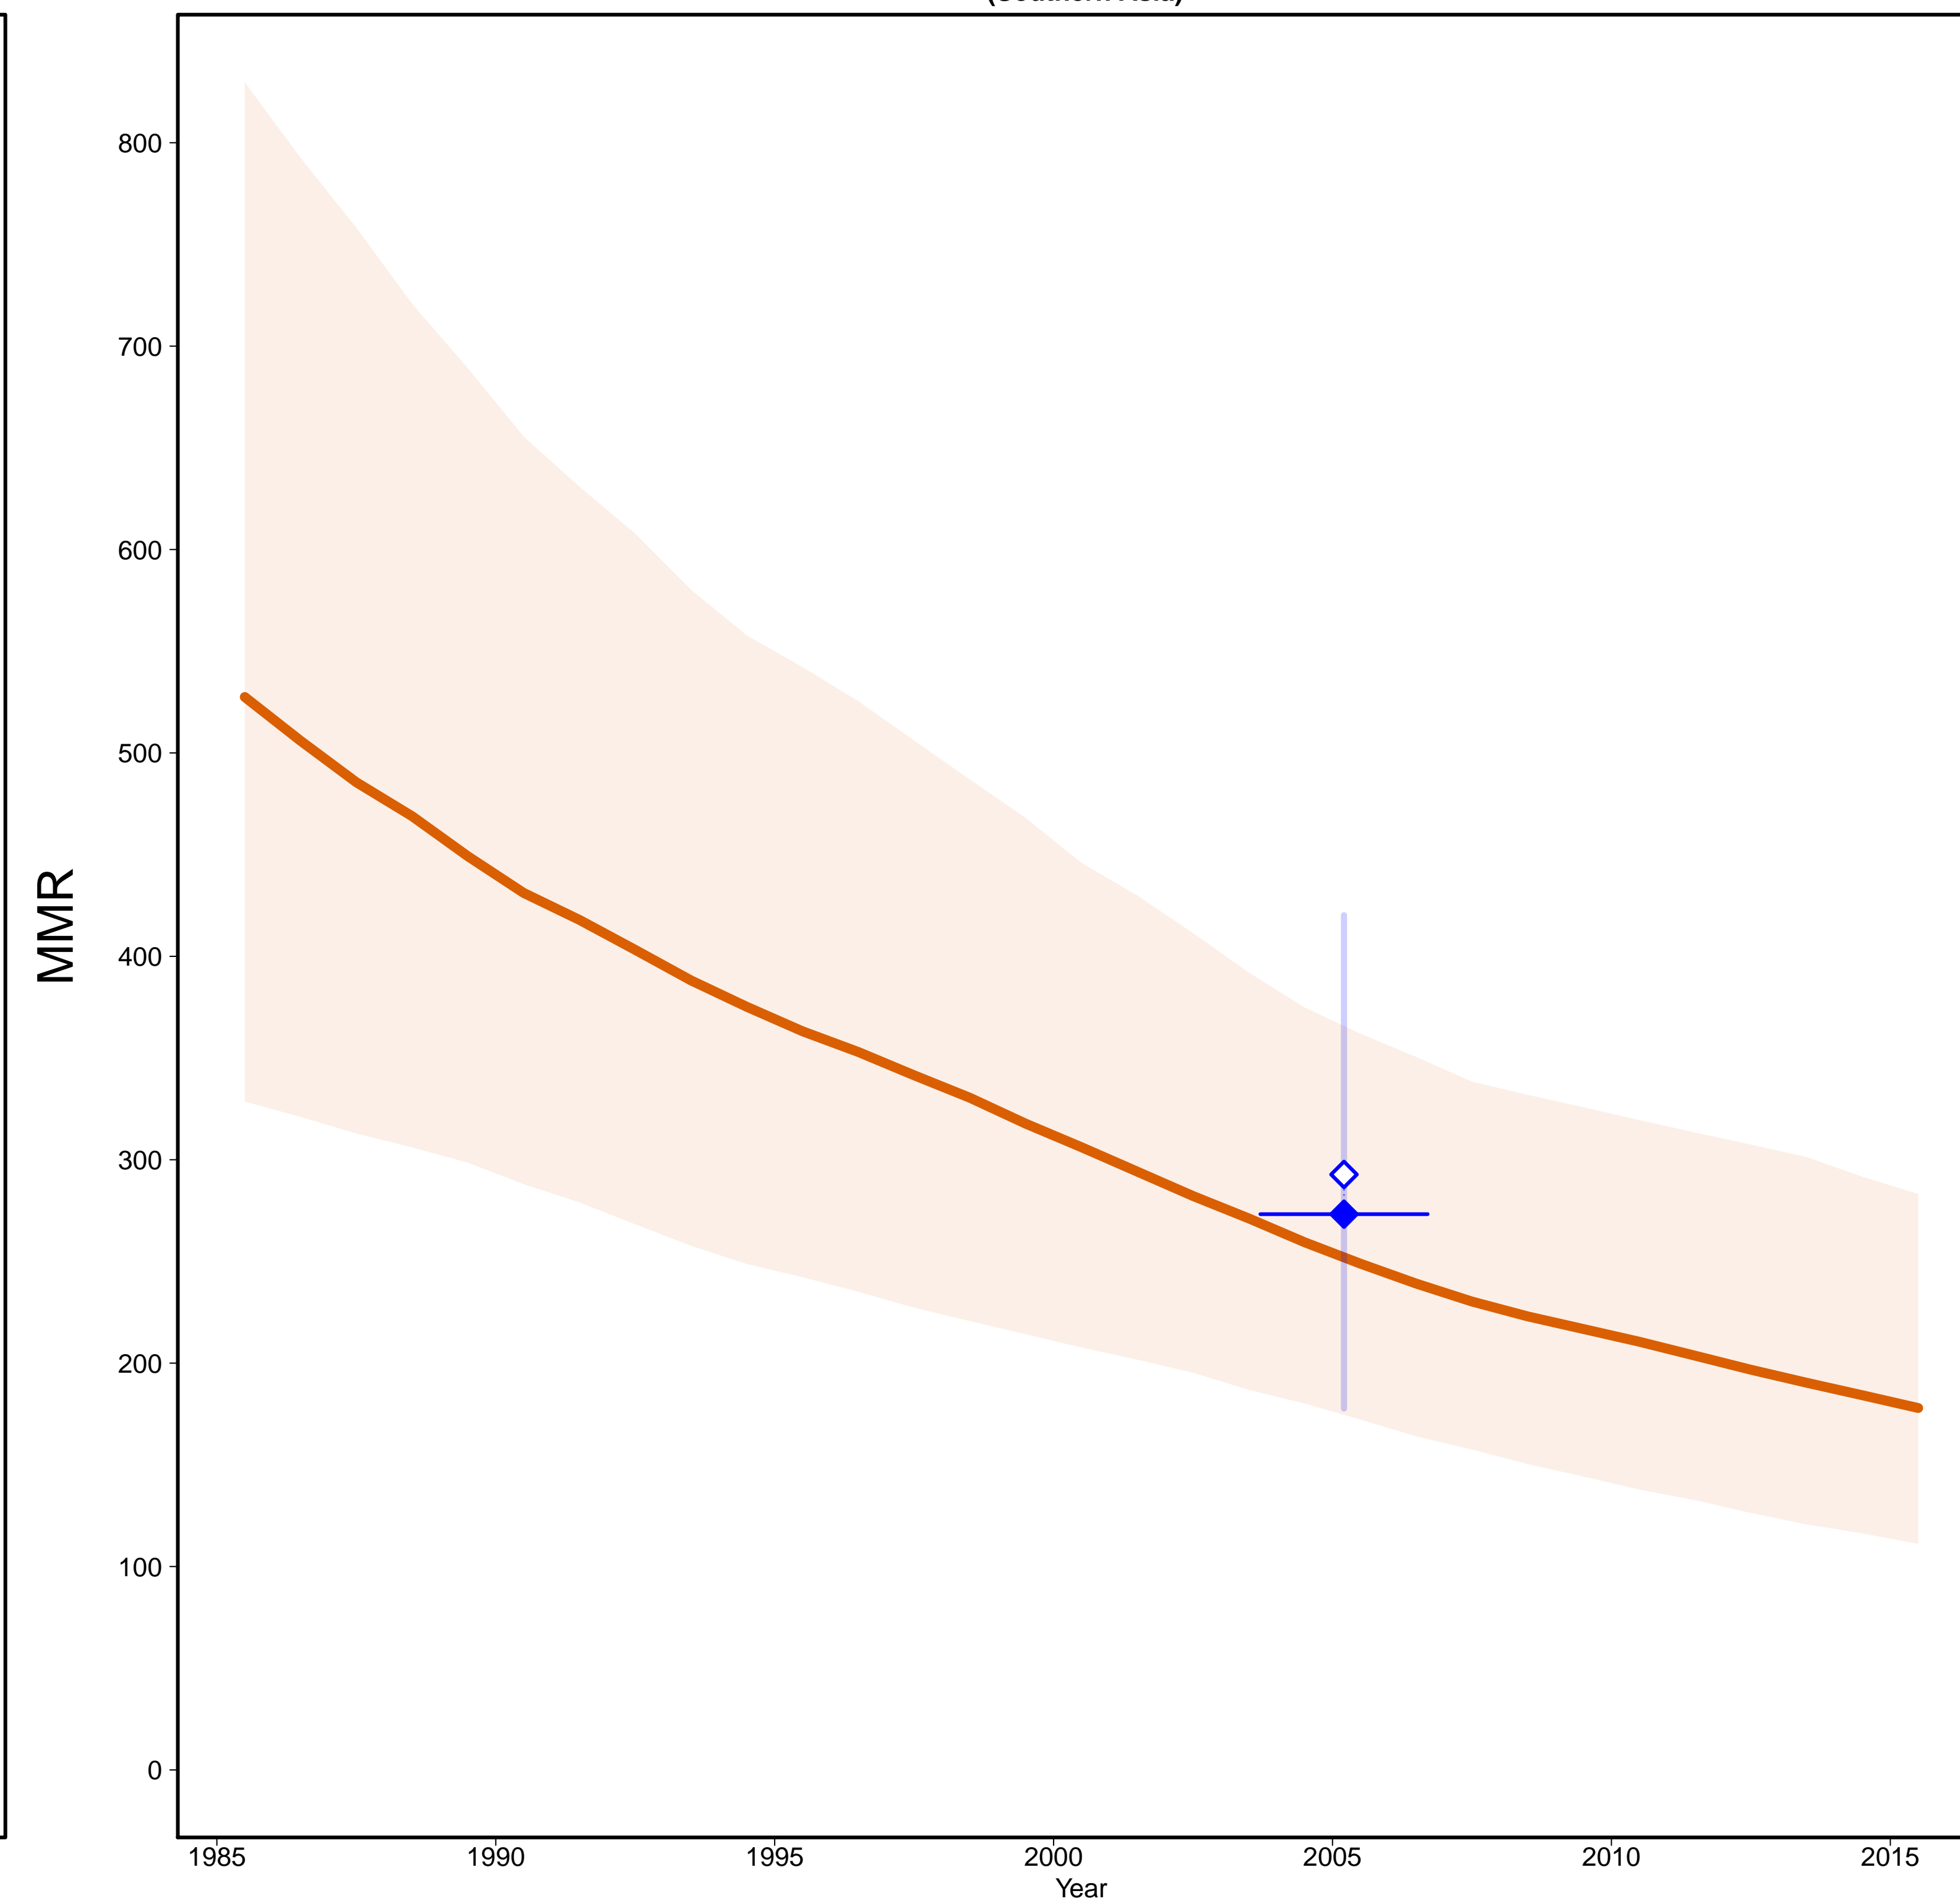

- Estimates —
- MMR Database 2015 —
- ◇ Observed Data
- ◆ Adjusted Data
- Data type —
- ◆ DHS

Gross Domestic Product

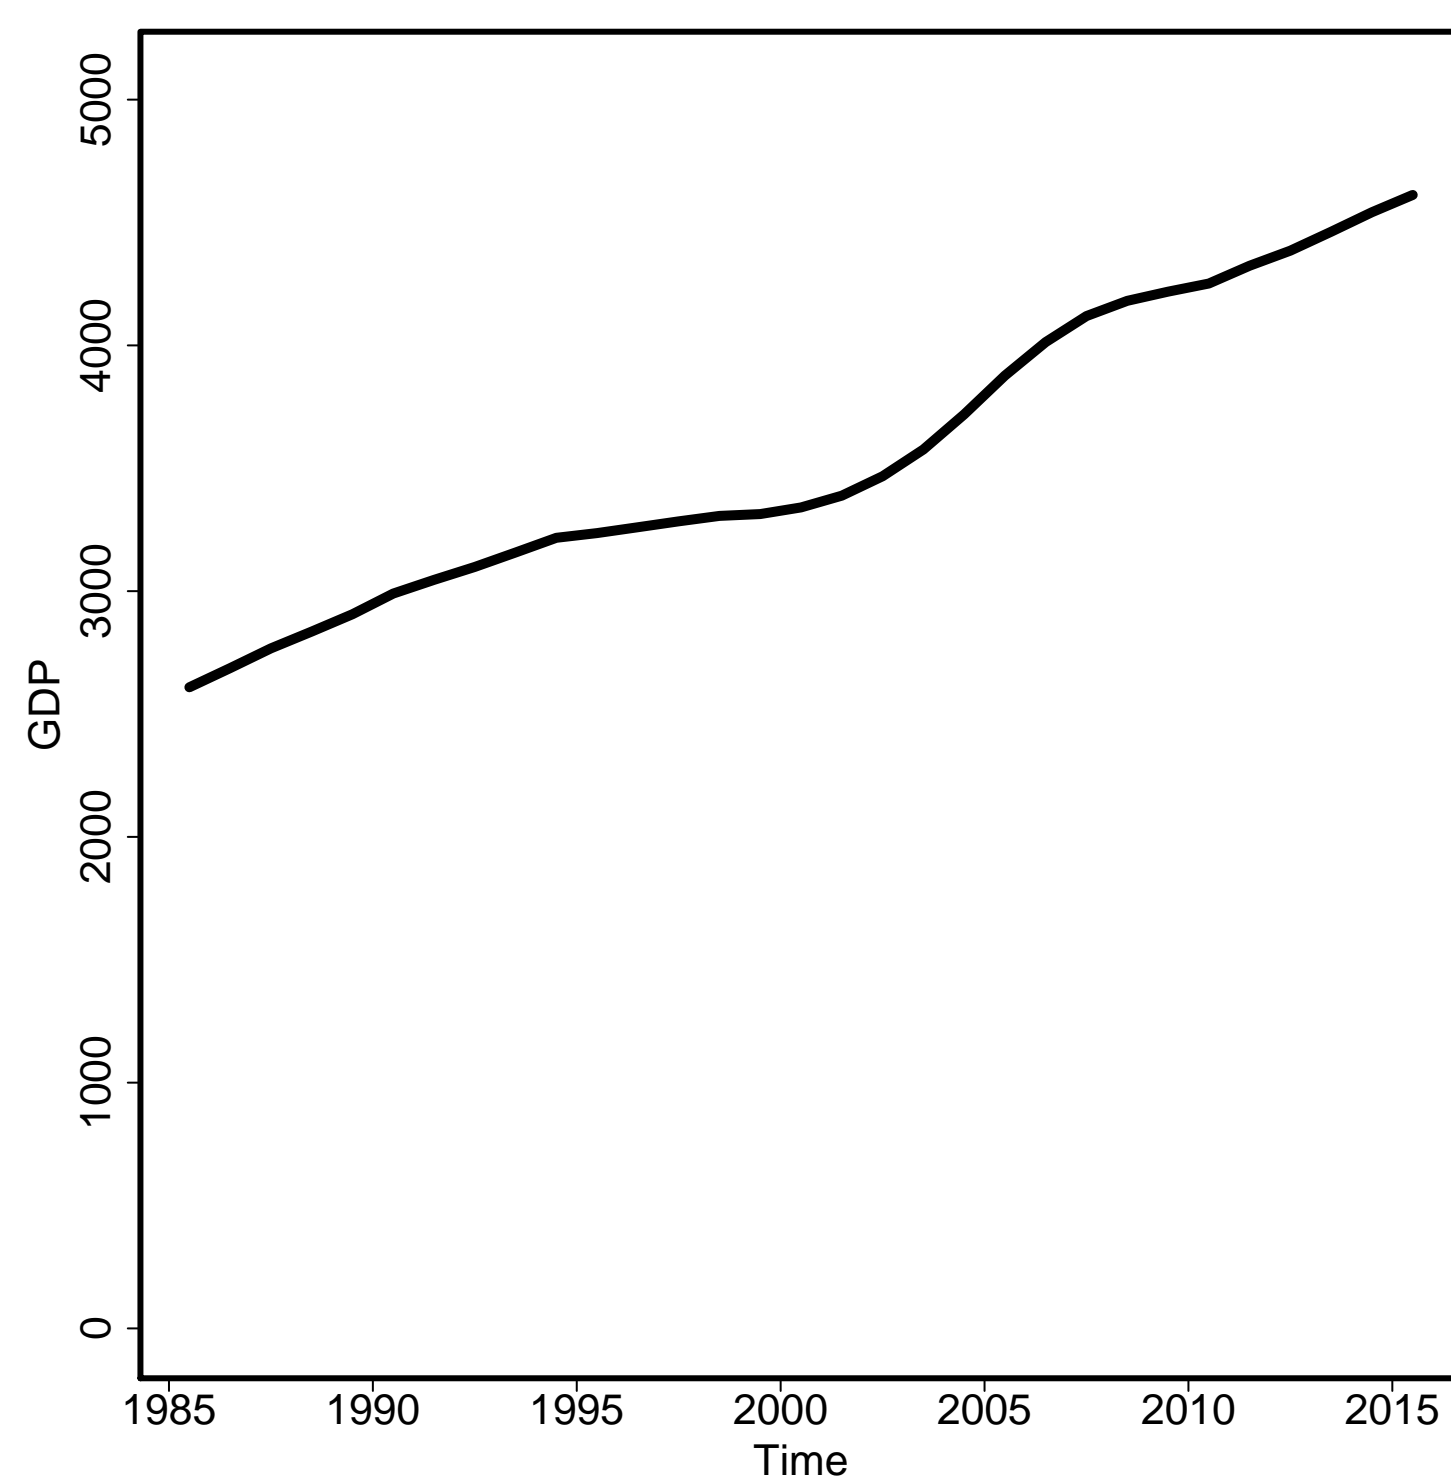

General Fertility Rate

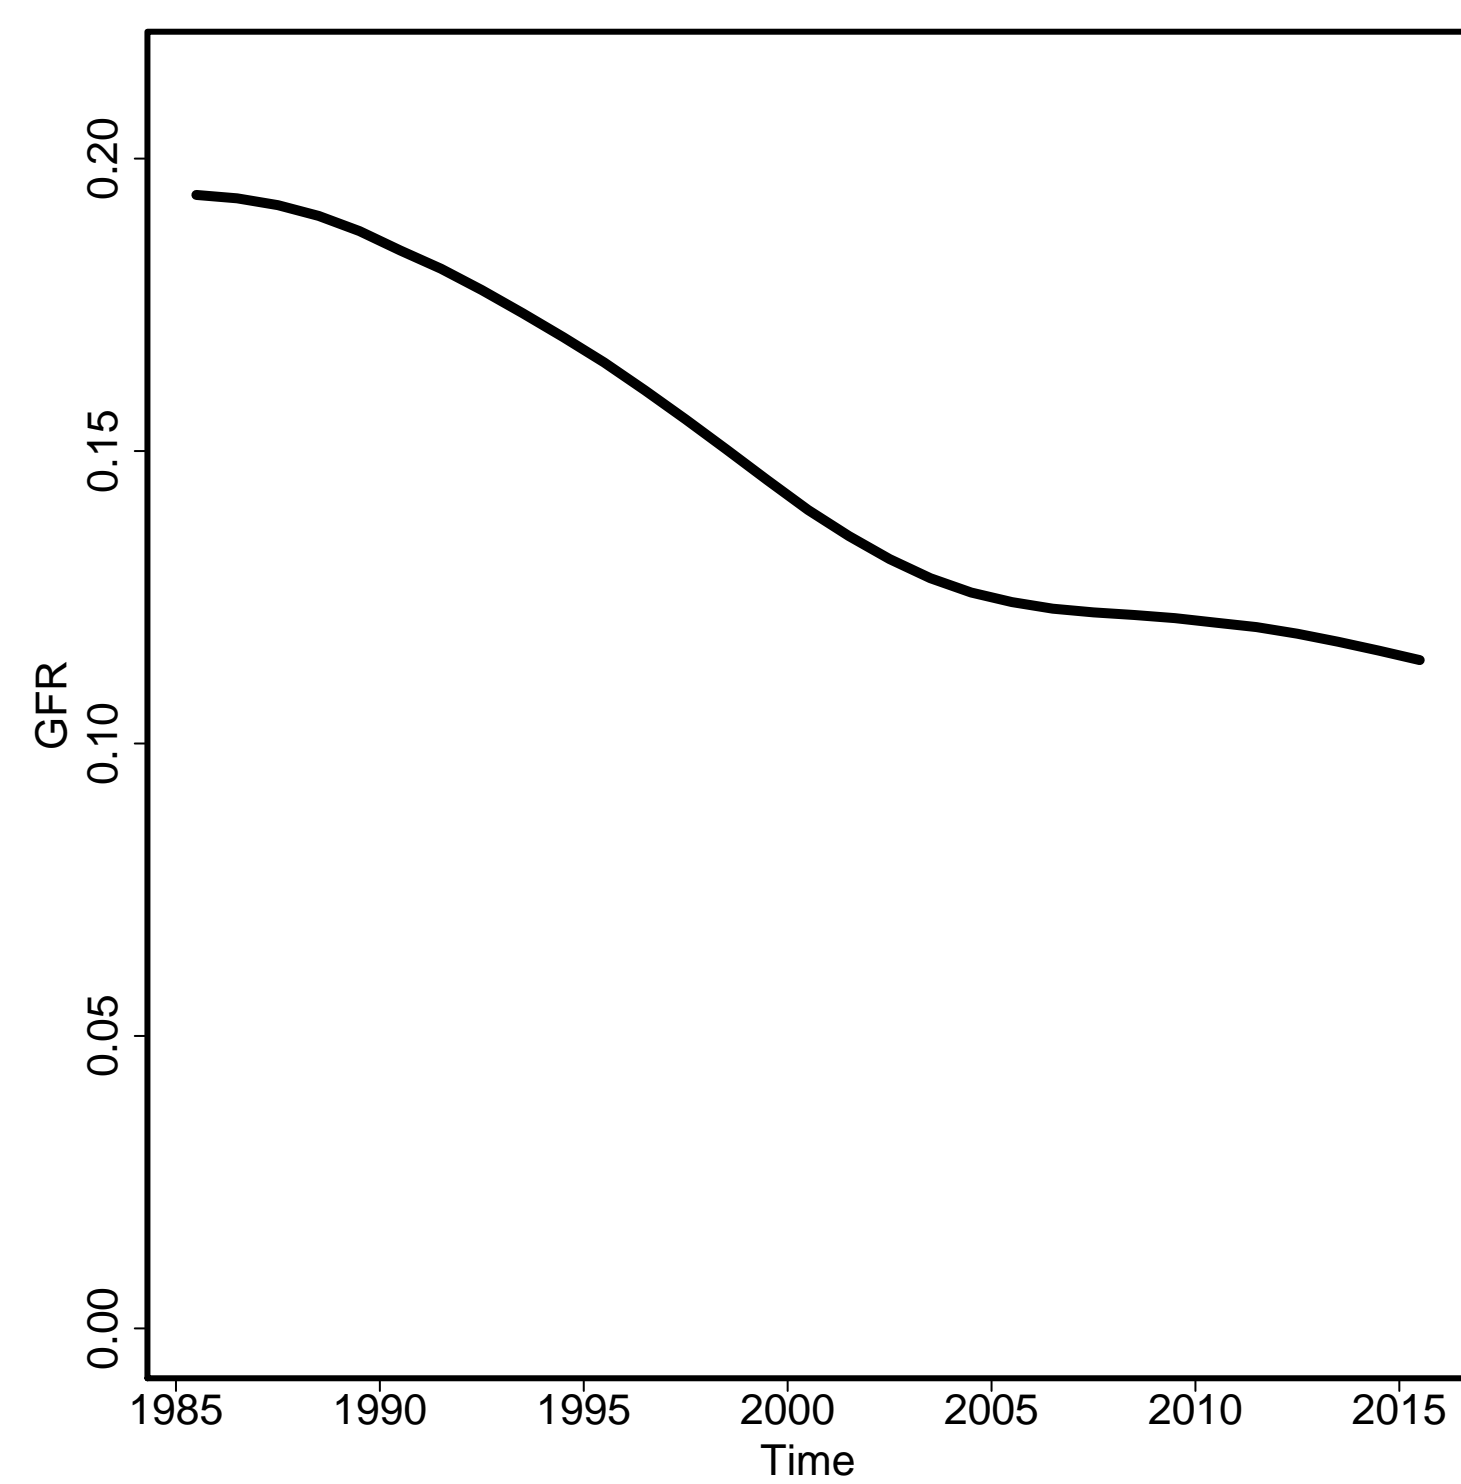

Skilled Attendance to Birth

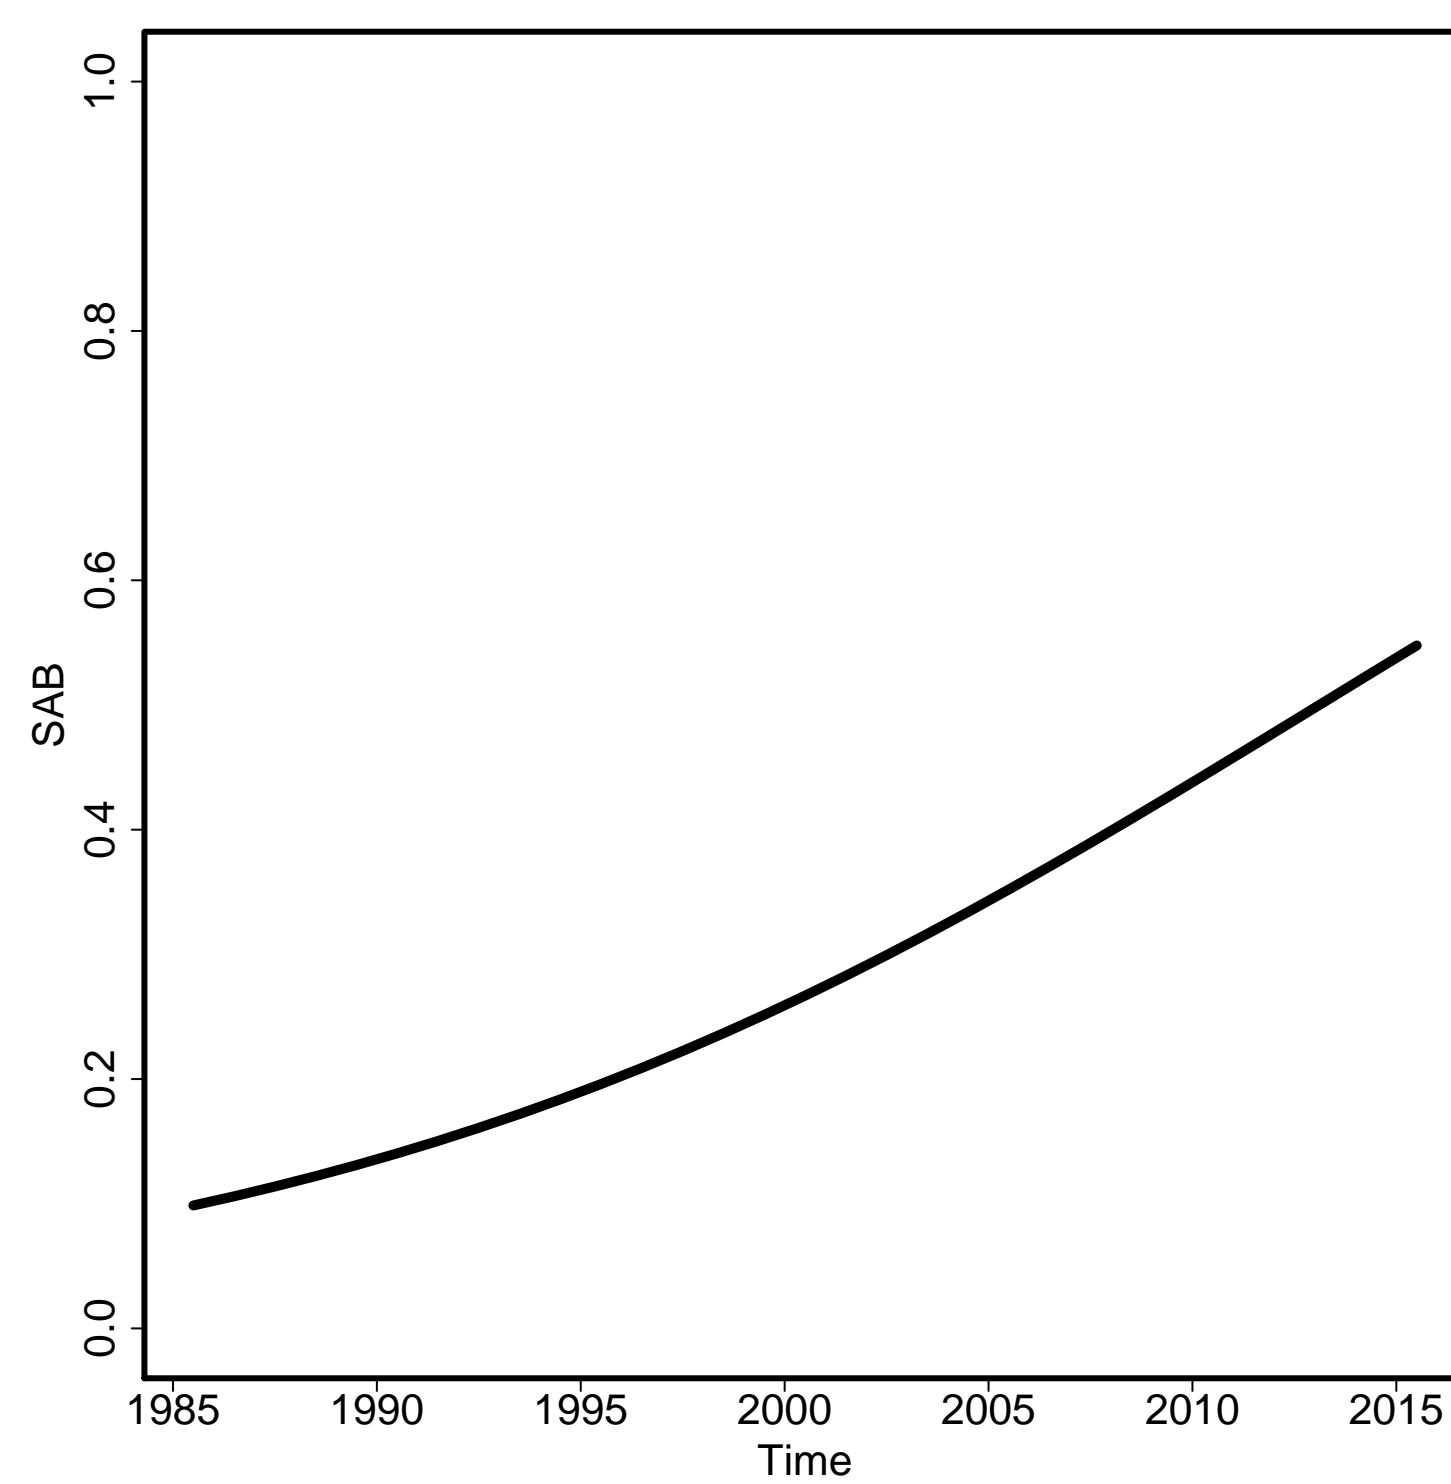

Envelope/Births

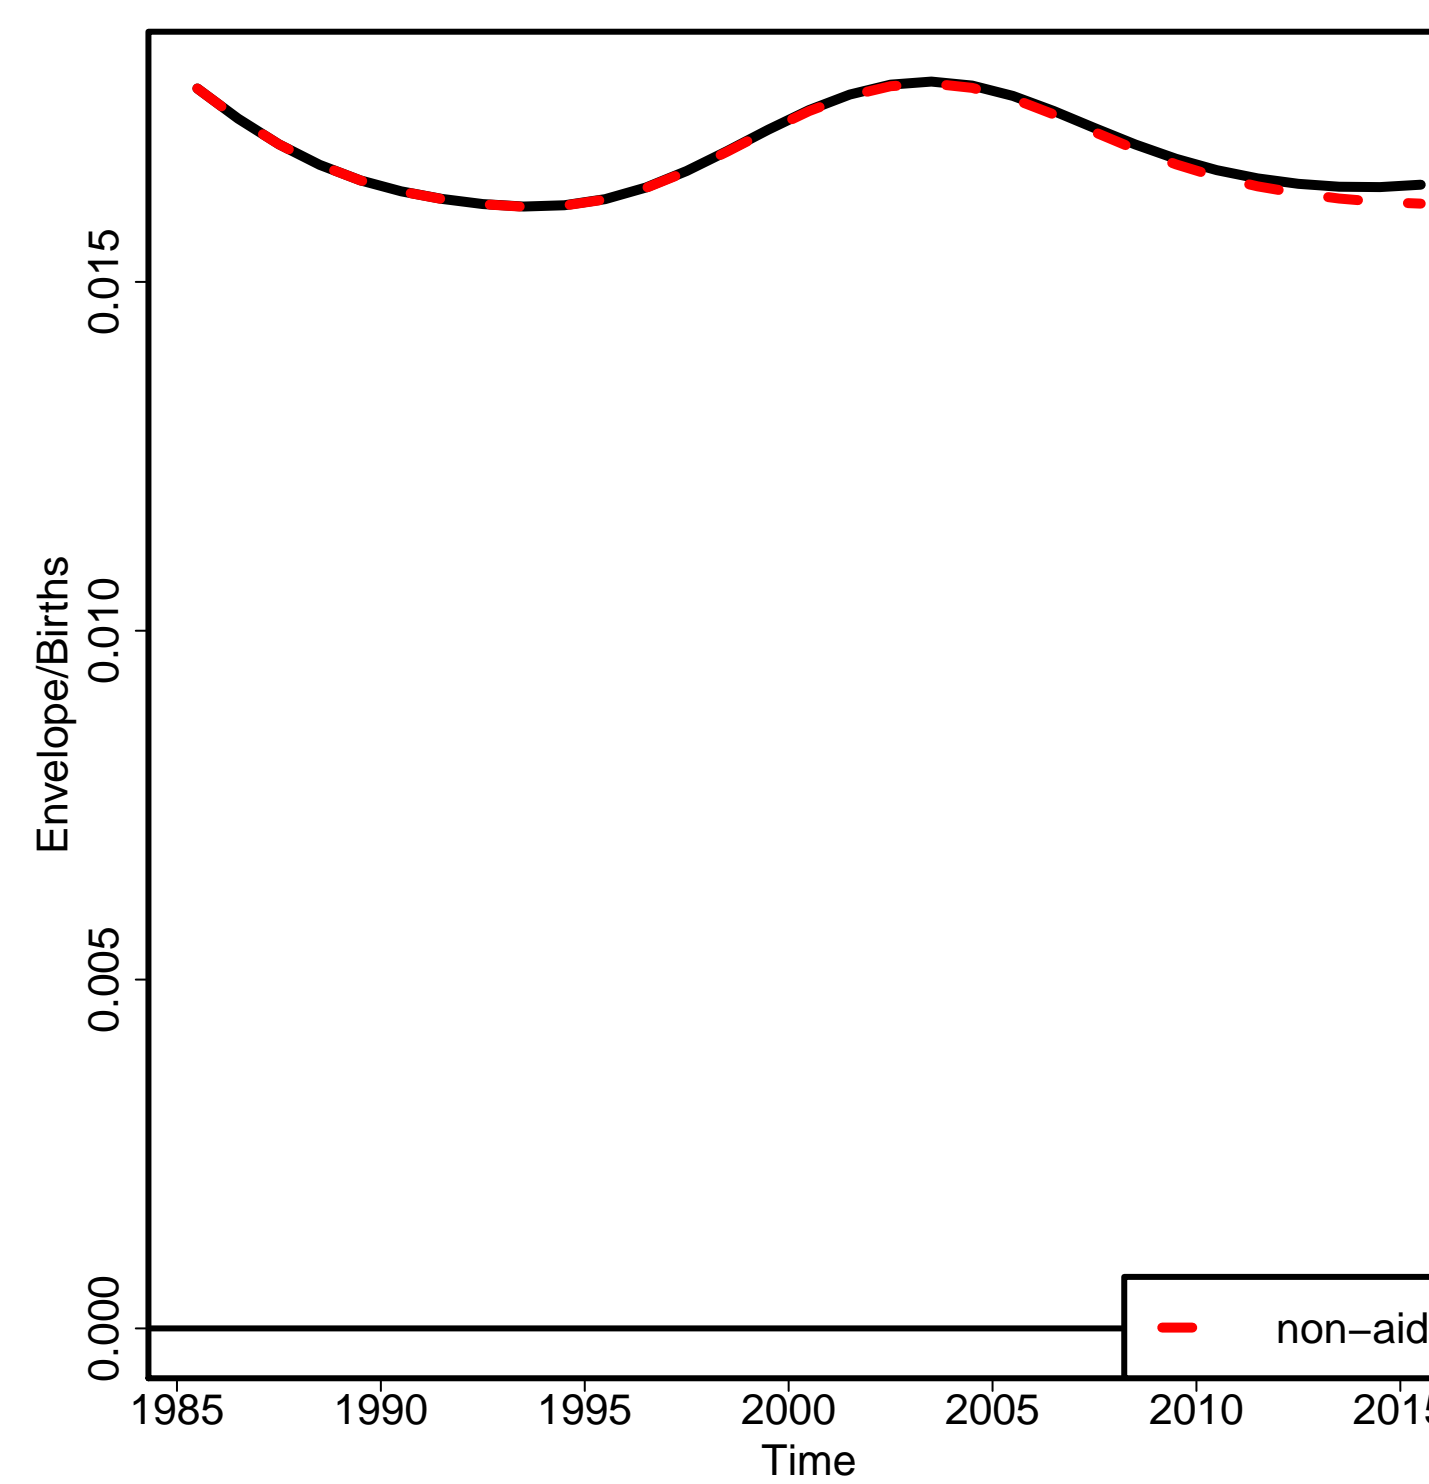

Non-aids MMR

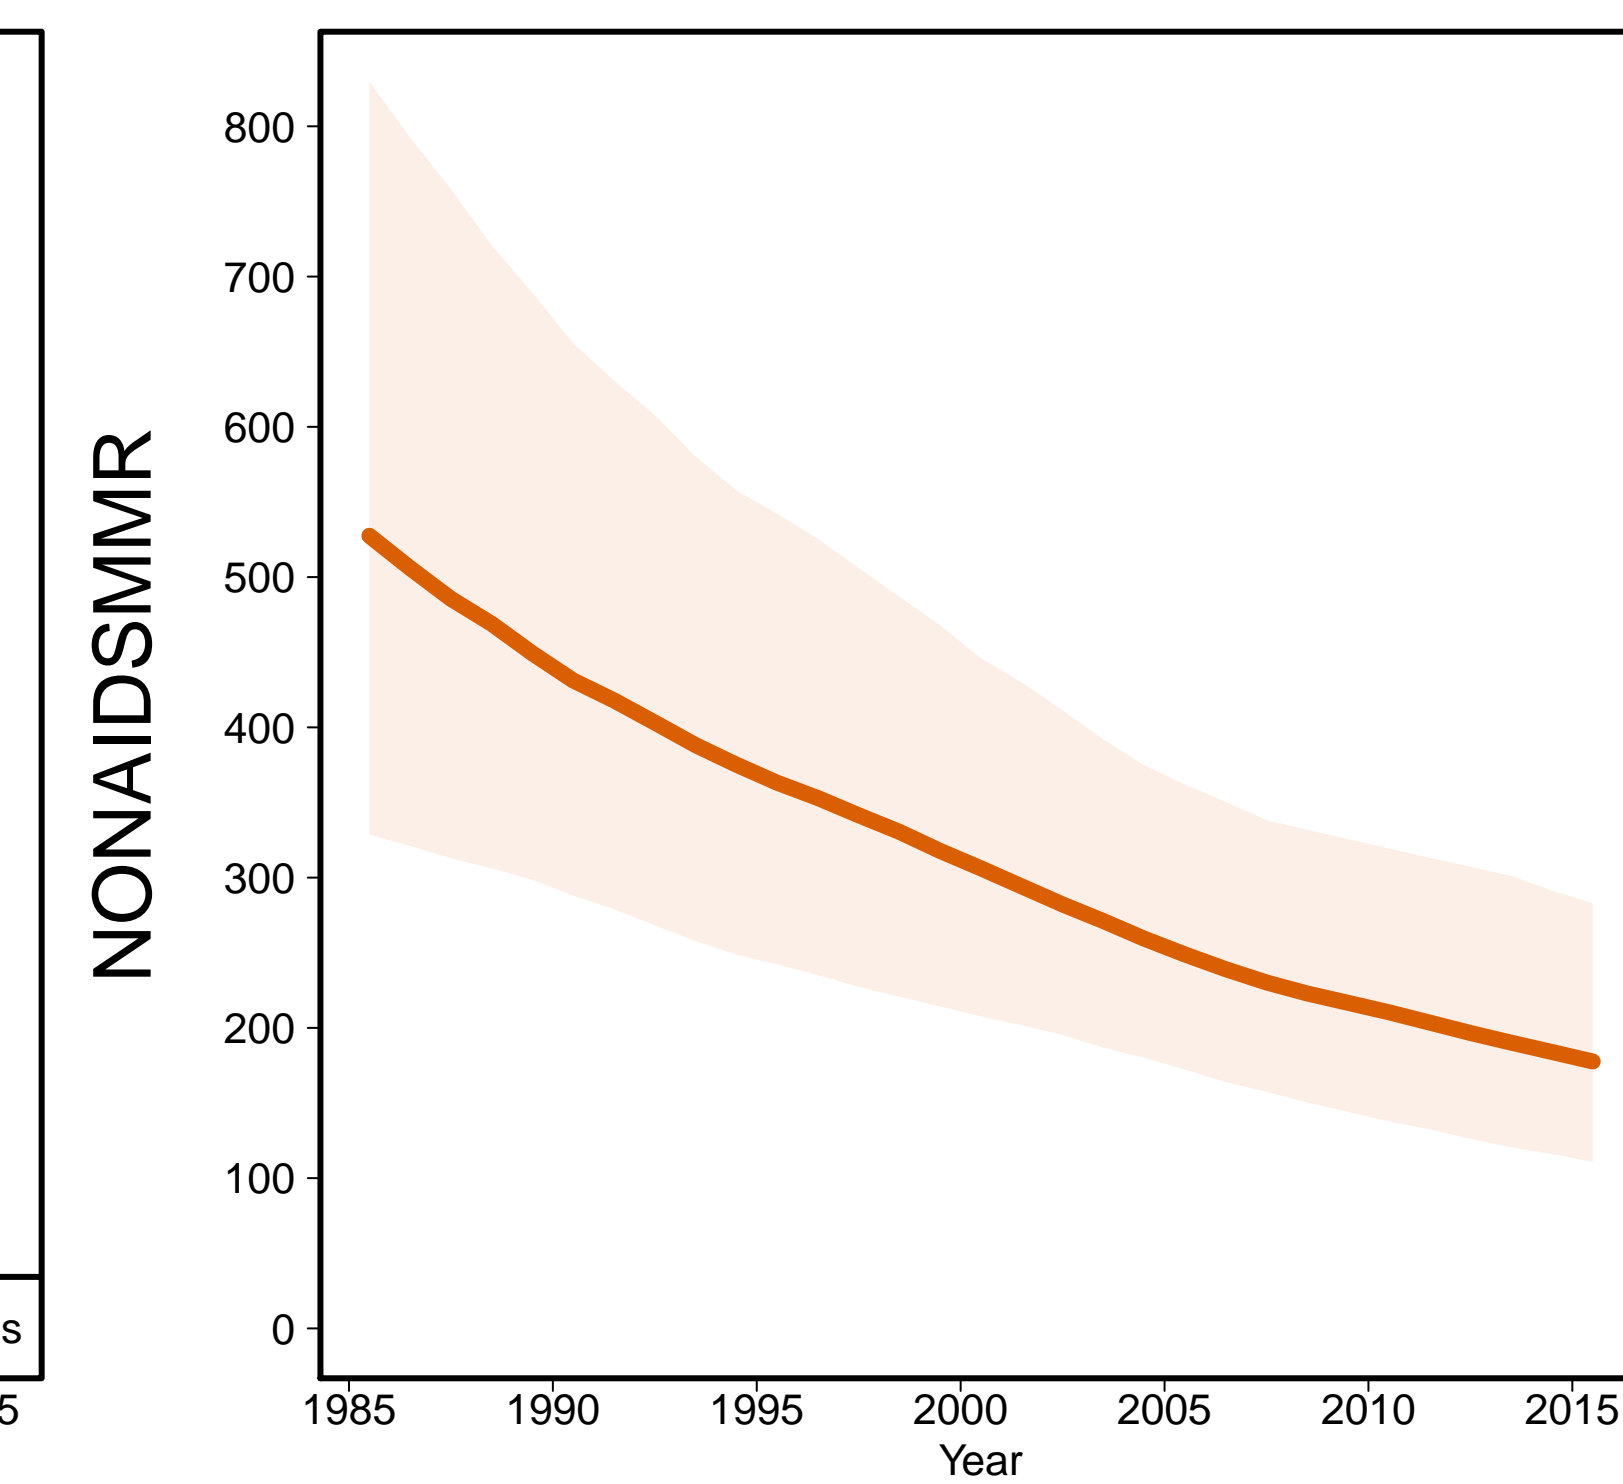

Aids MMR

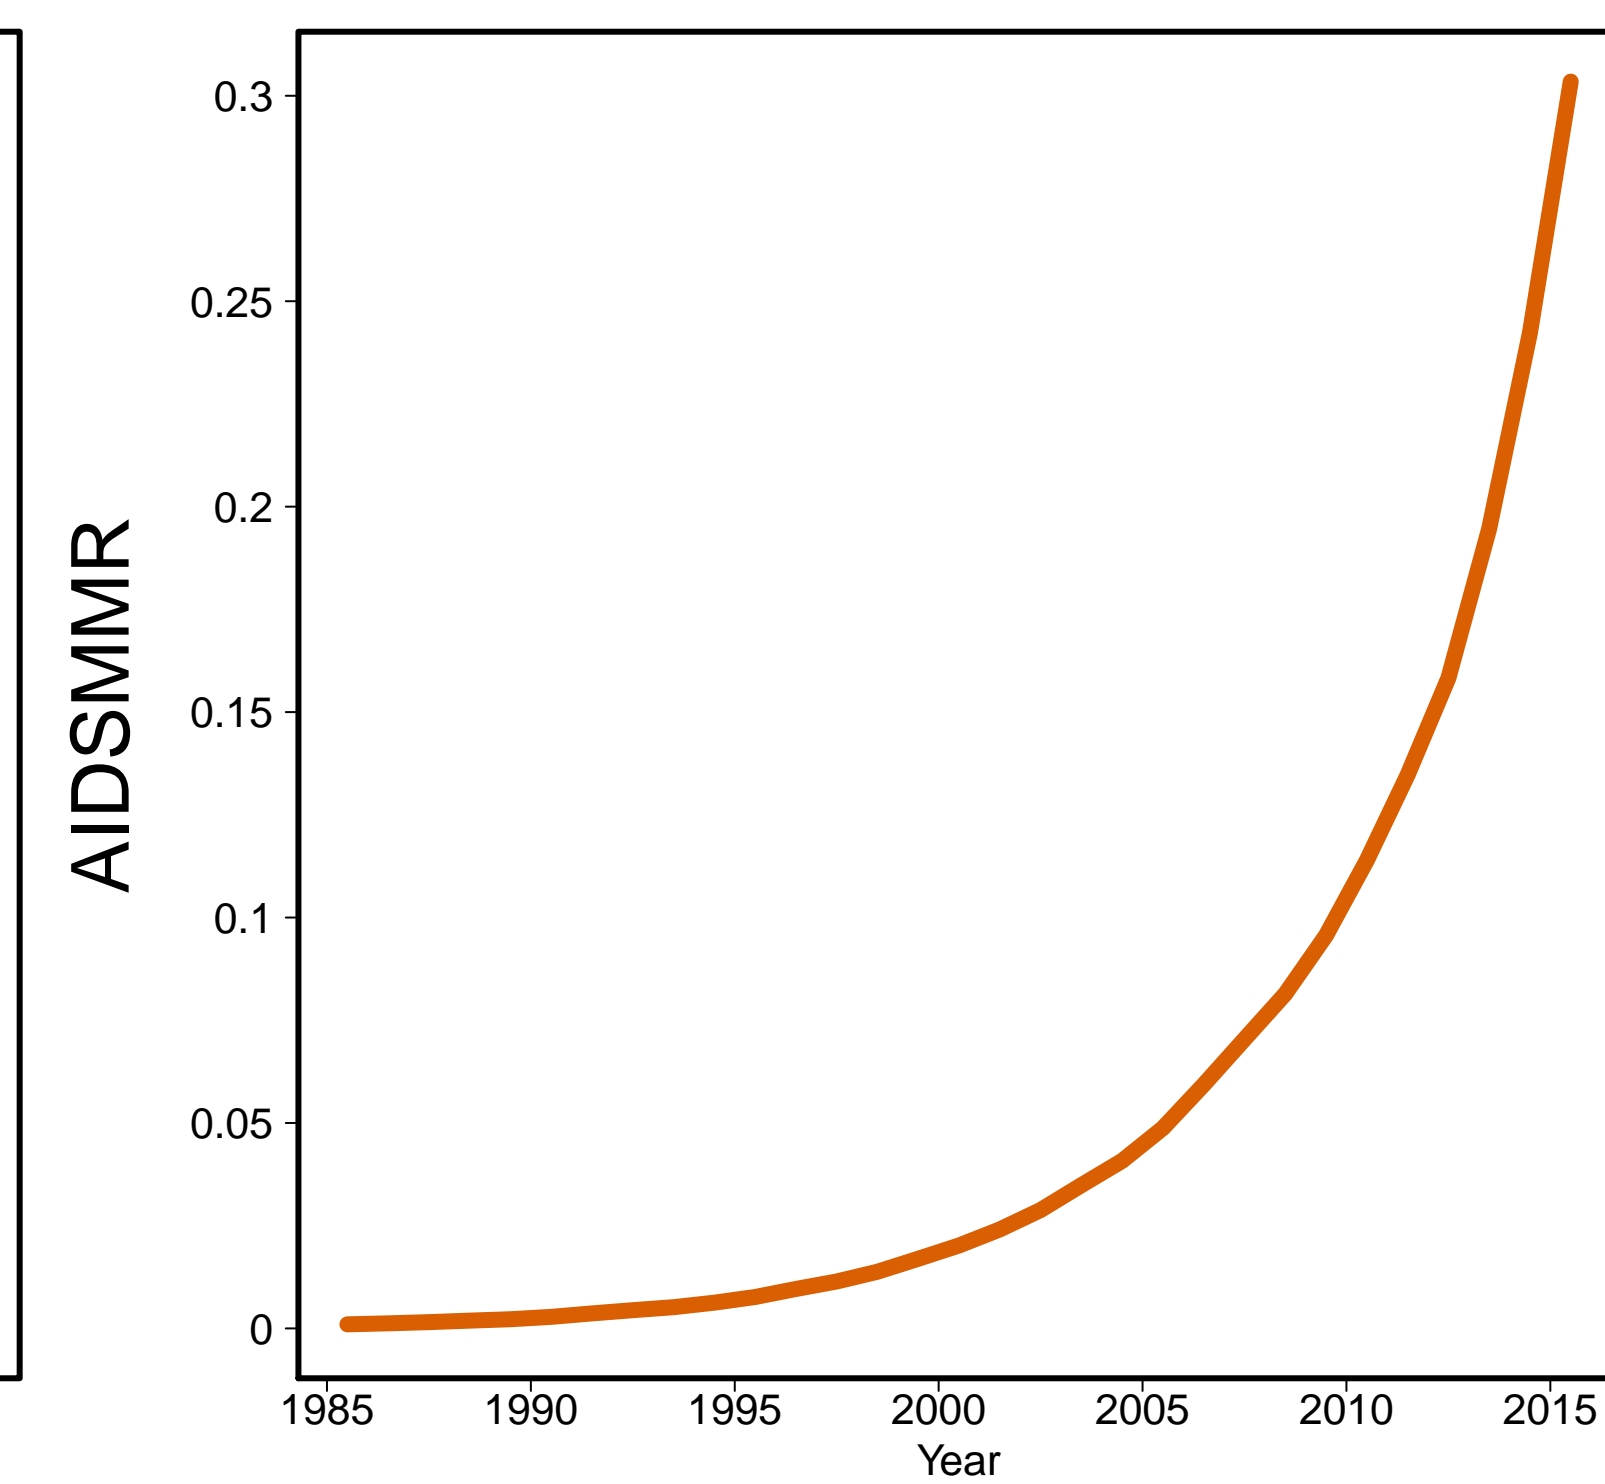

Panama [PAN]  
(Central America)

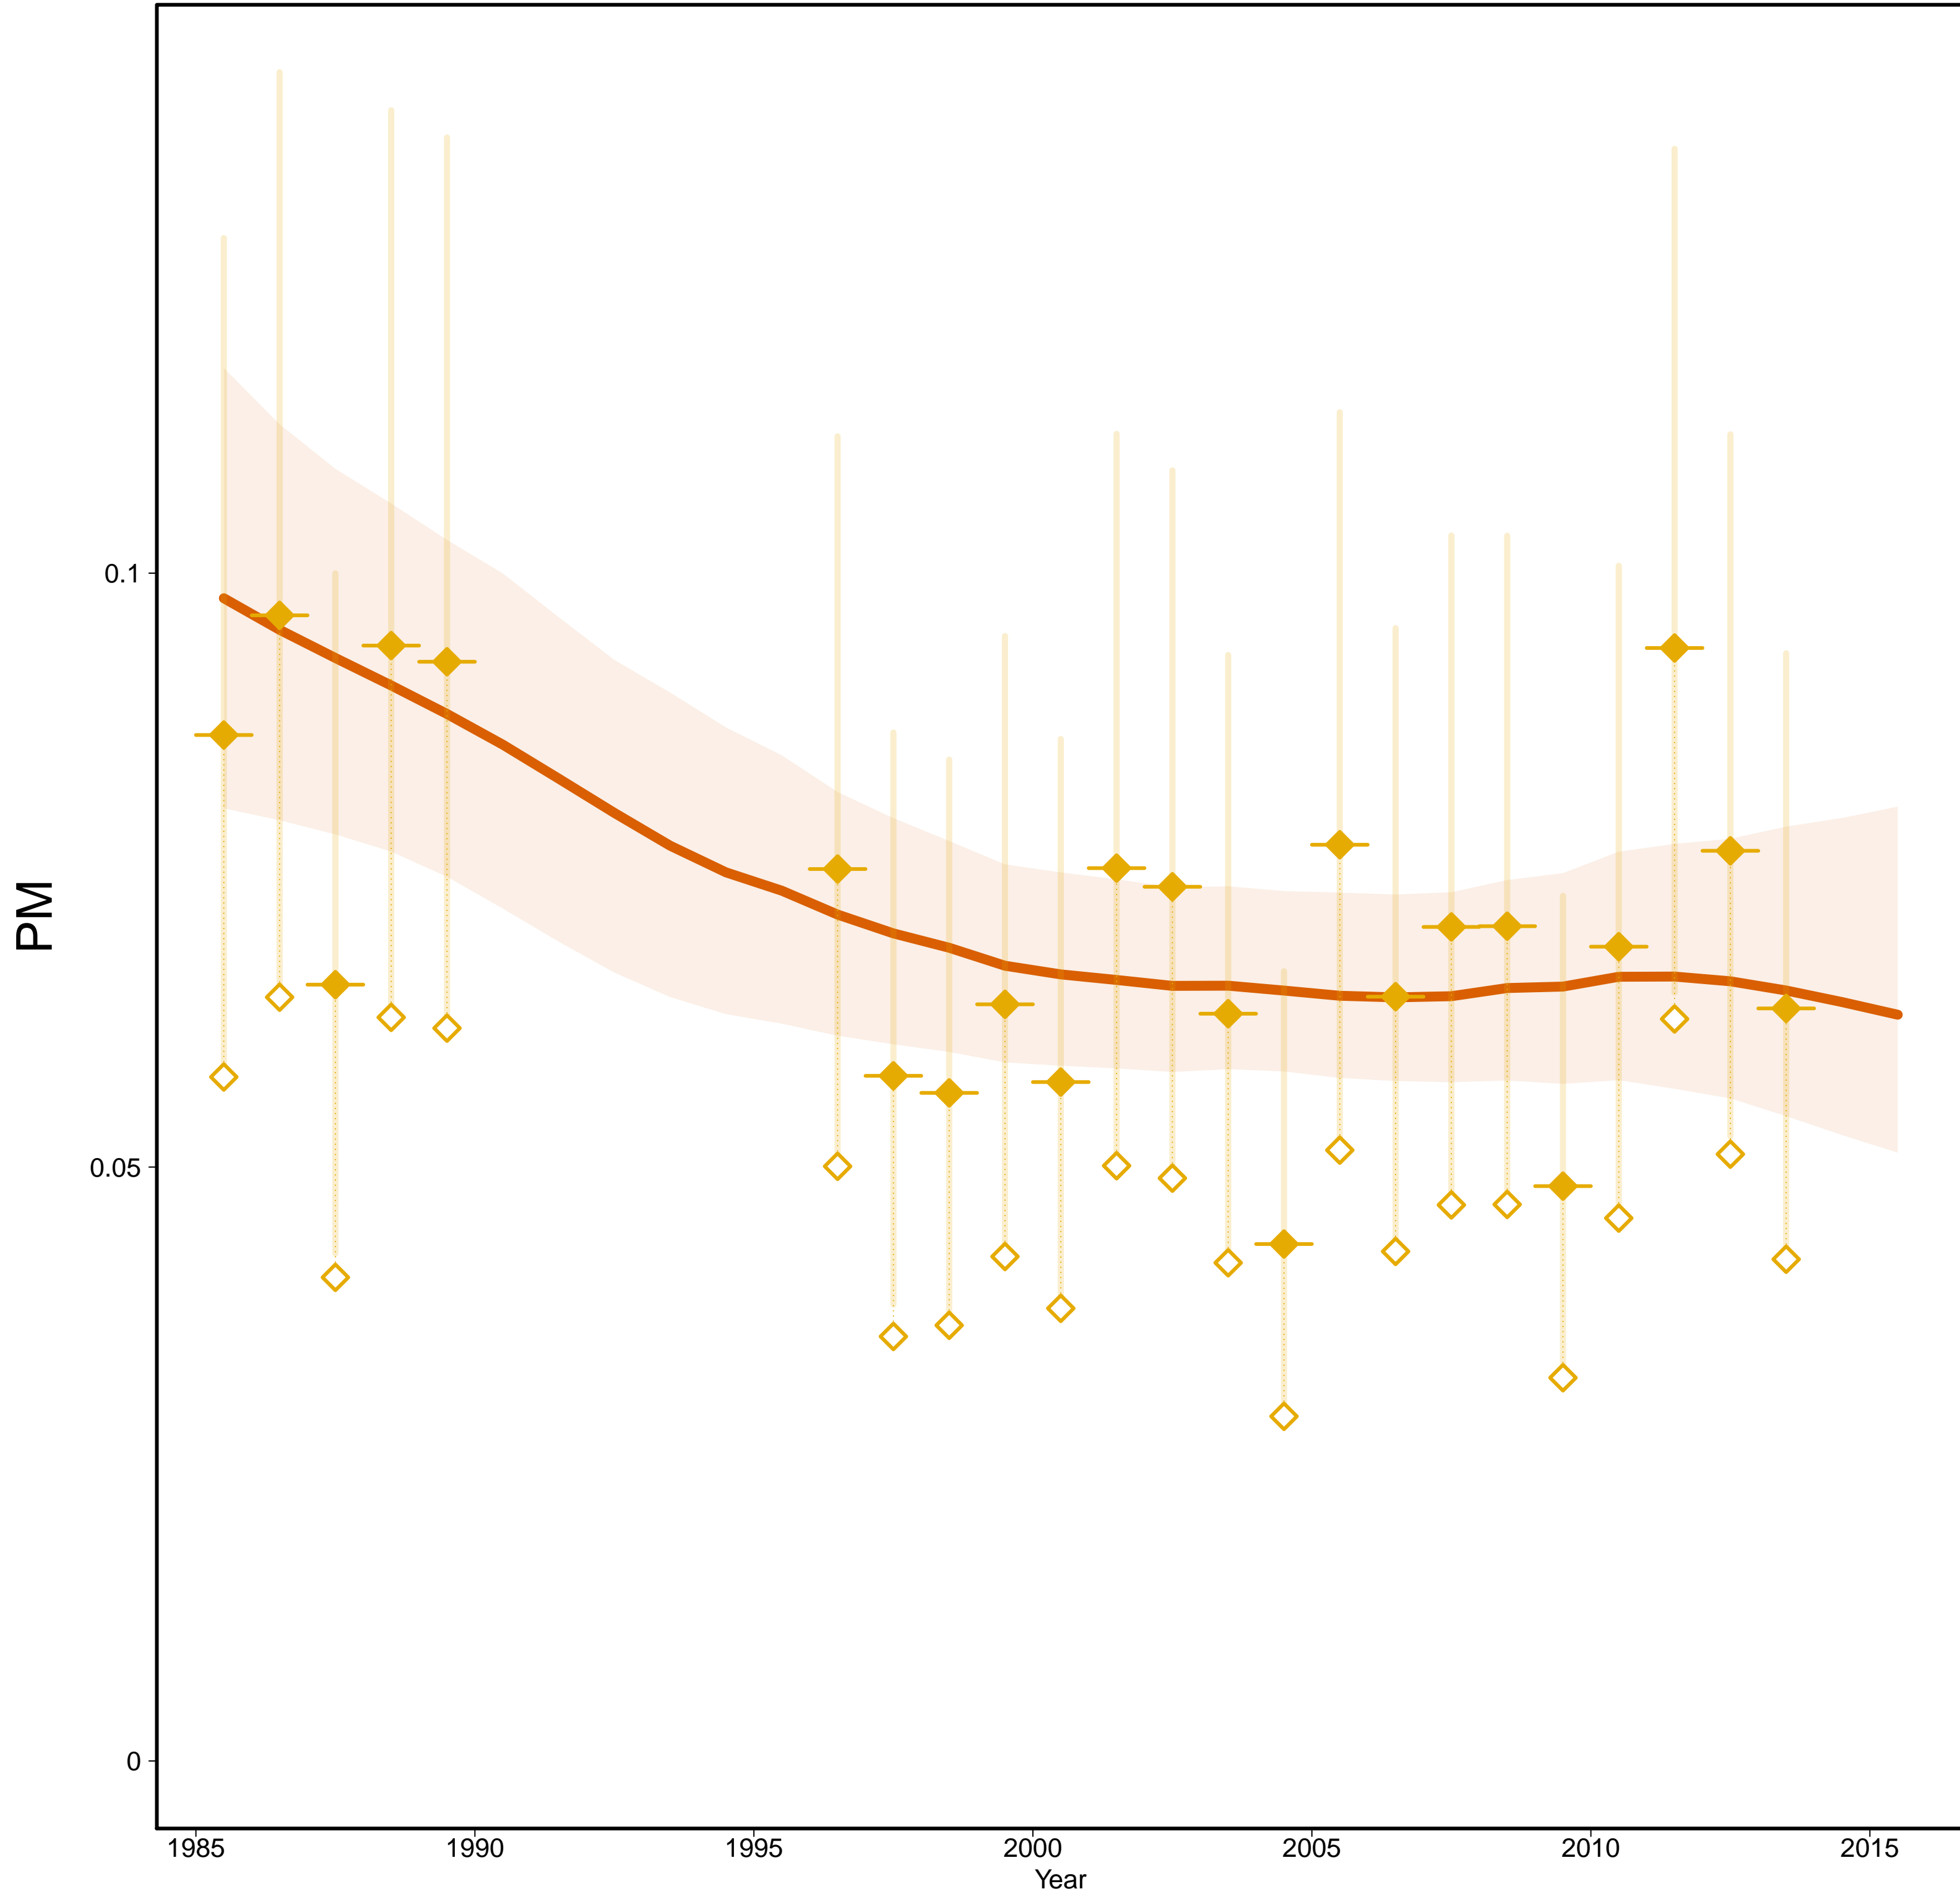

Panama [PAN]  
(Central America)

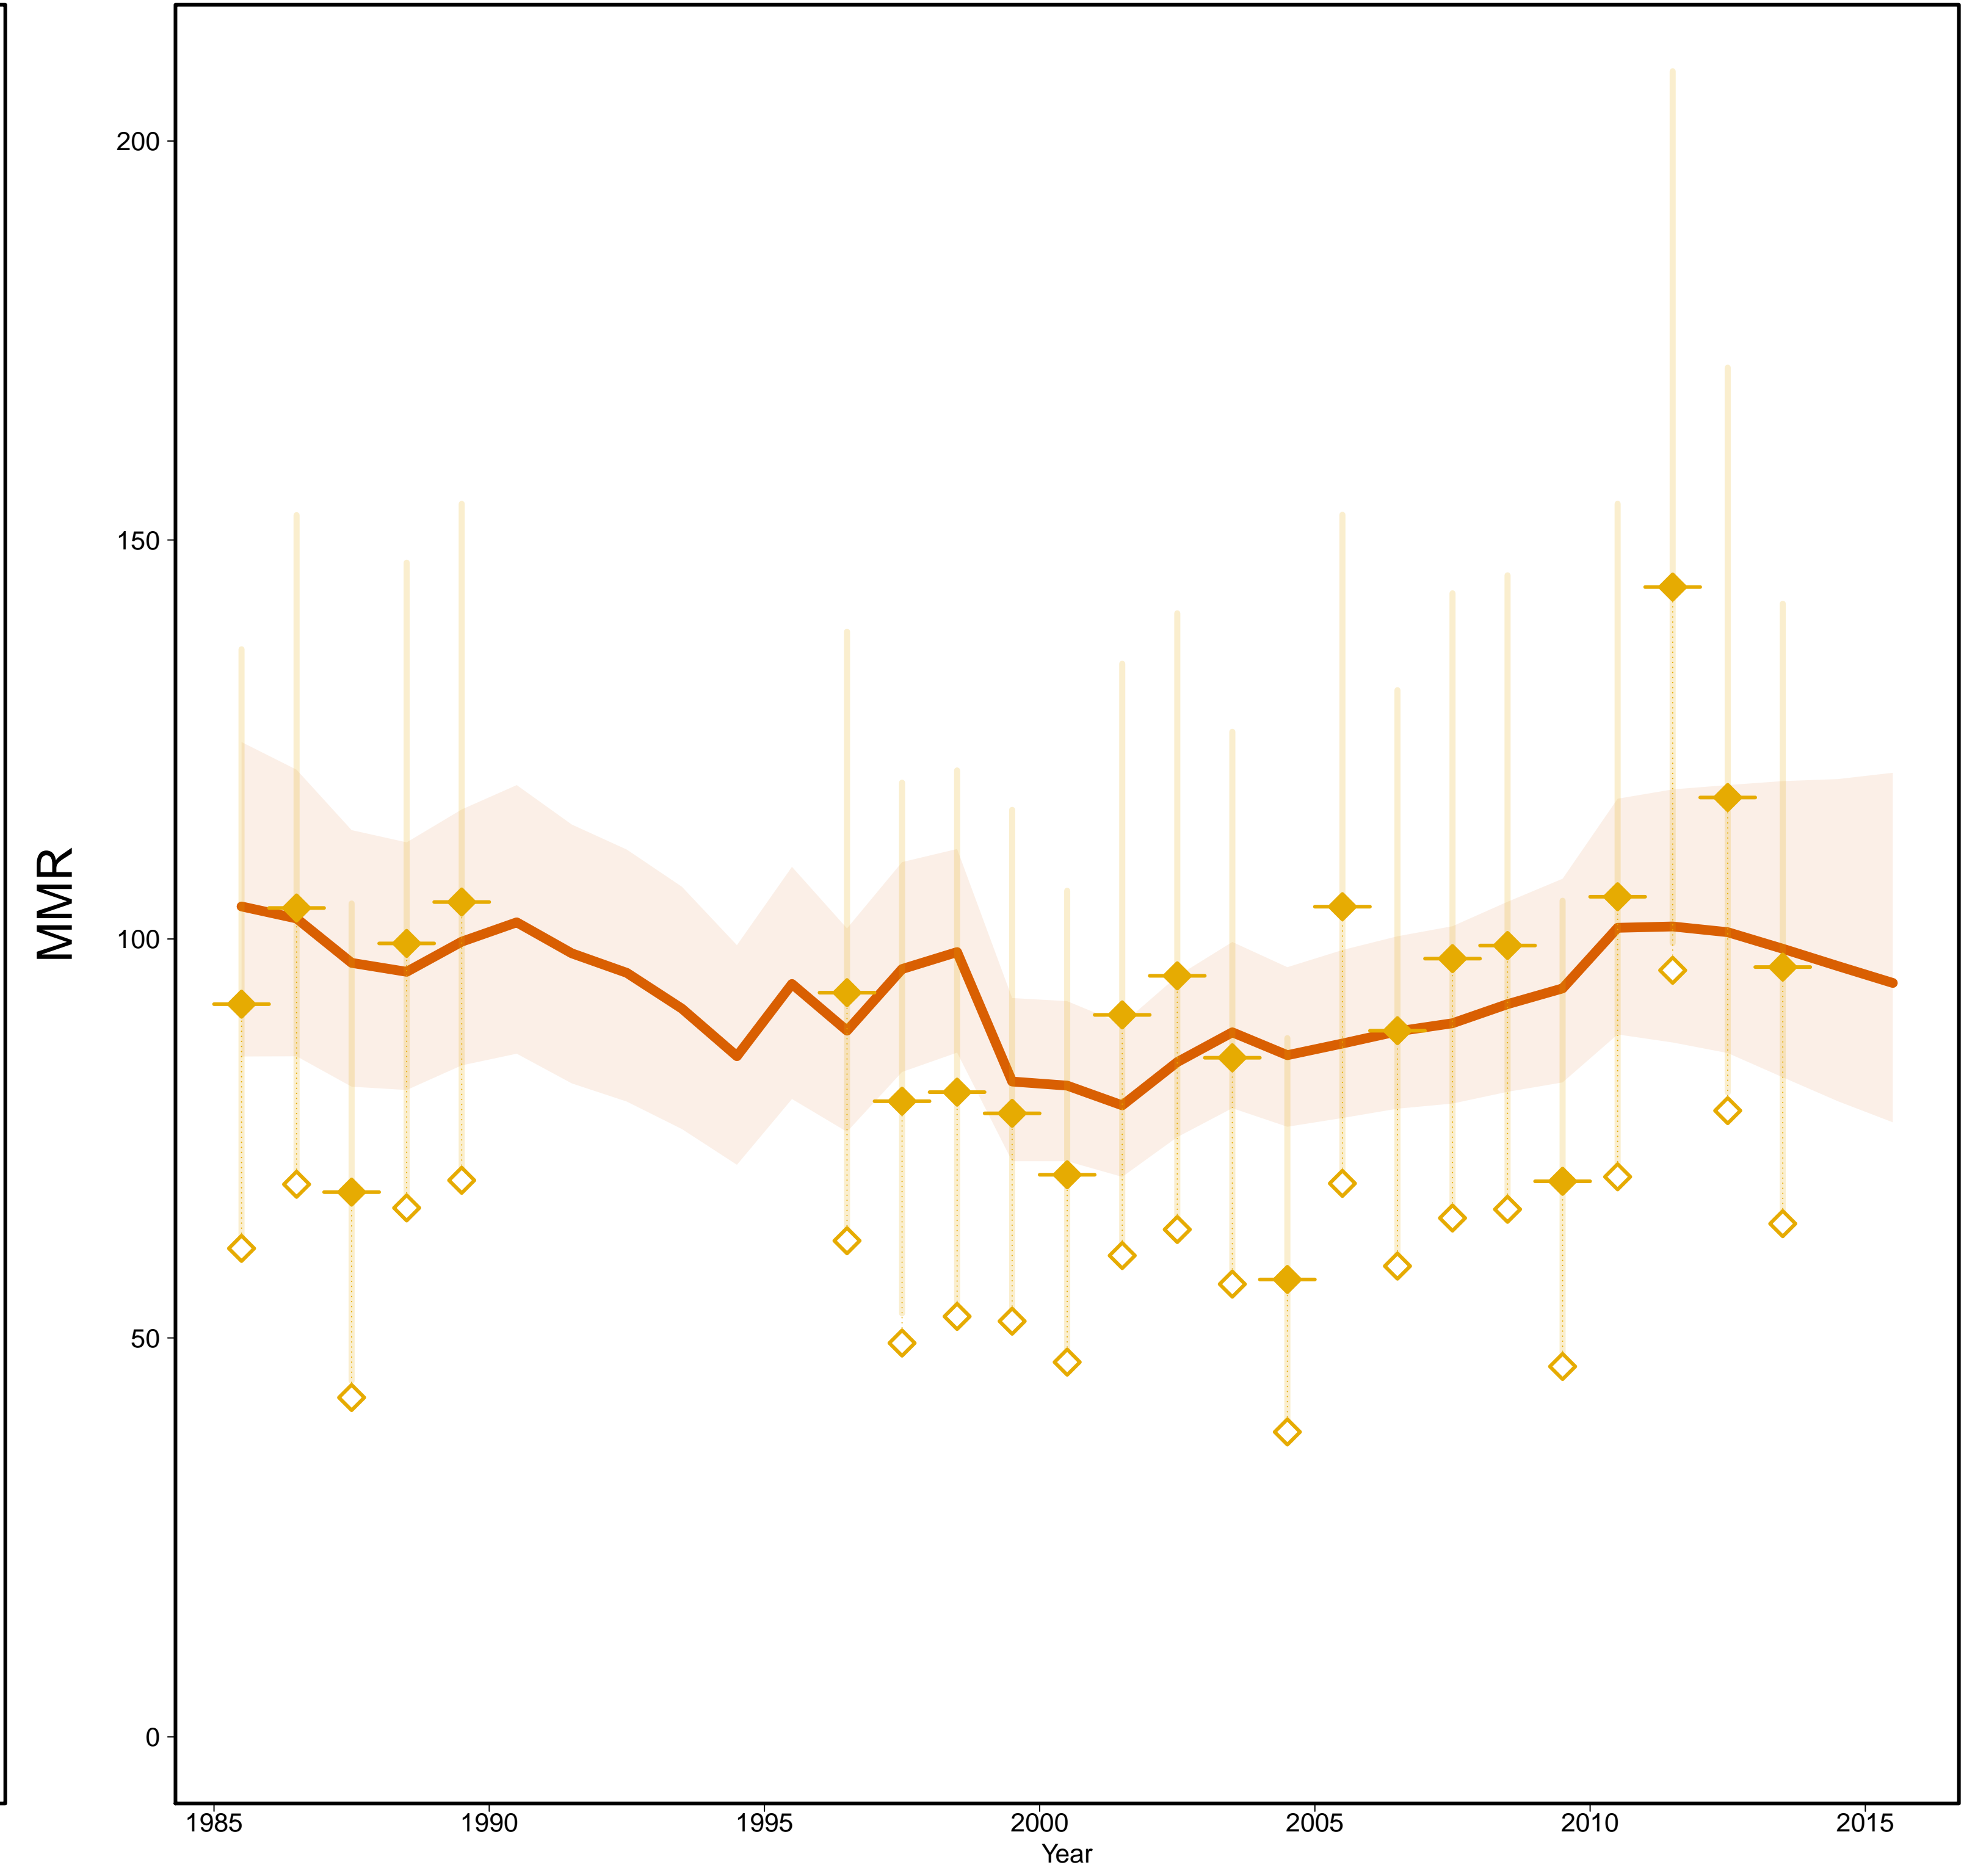

- Estimates —
- MMR Database 2015 —
- ◇ Observed Data
- ◆ Adjusted Data
- Data type —
- ◆ VR

Gross Domestic Product

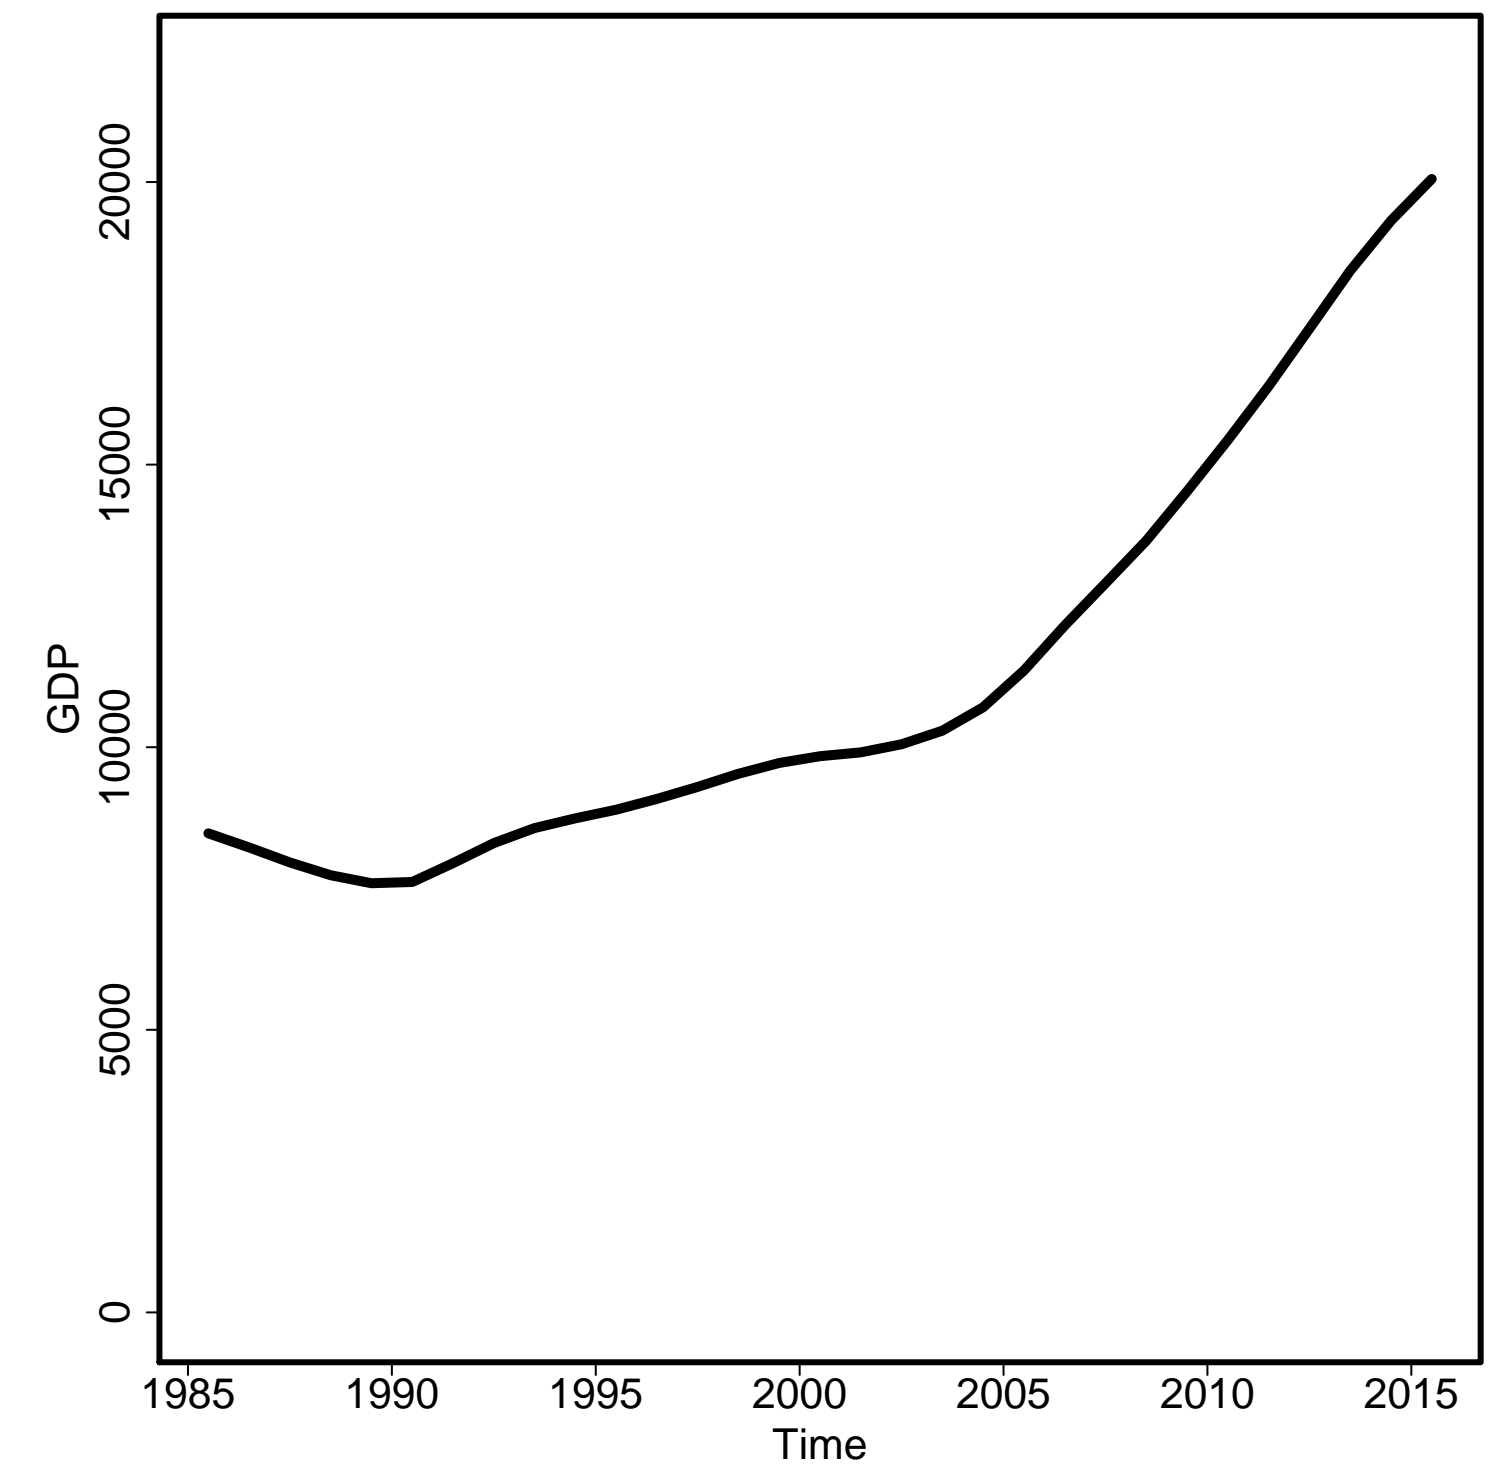

General Fertility Rate

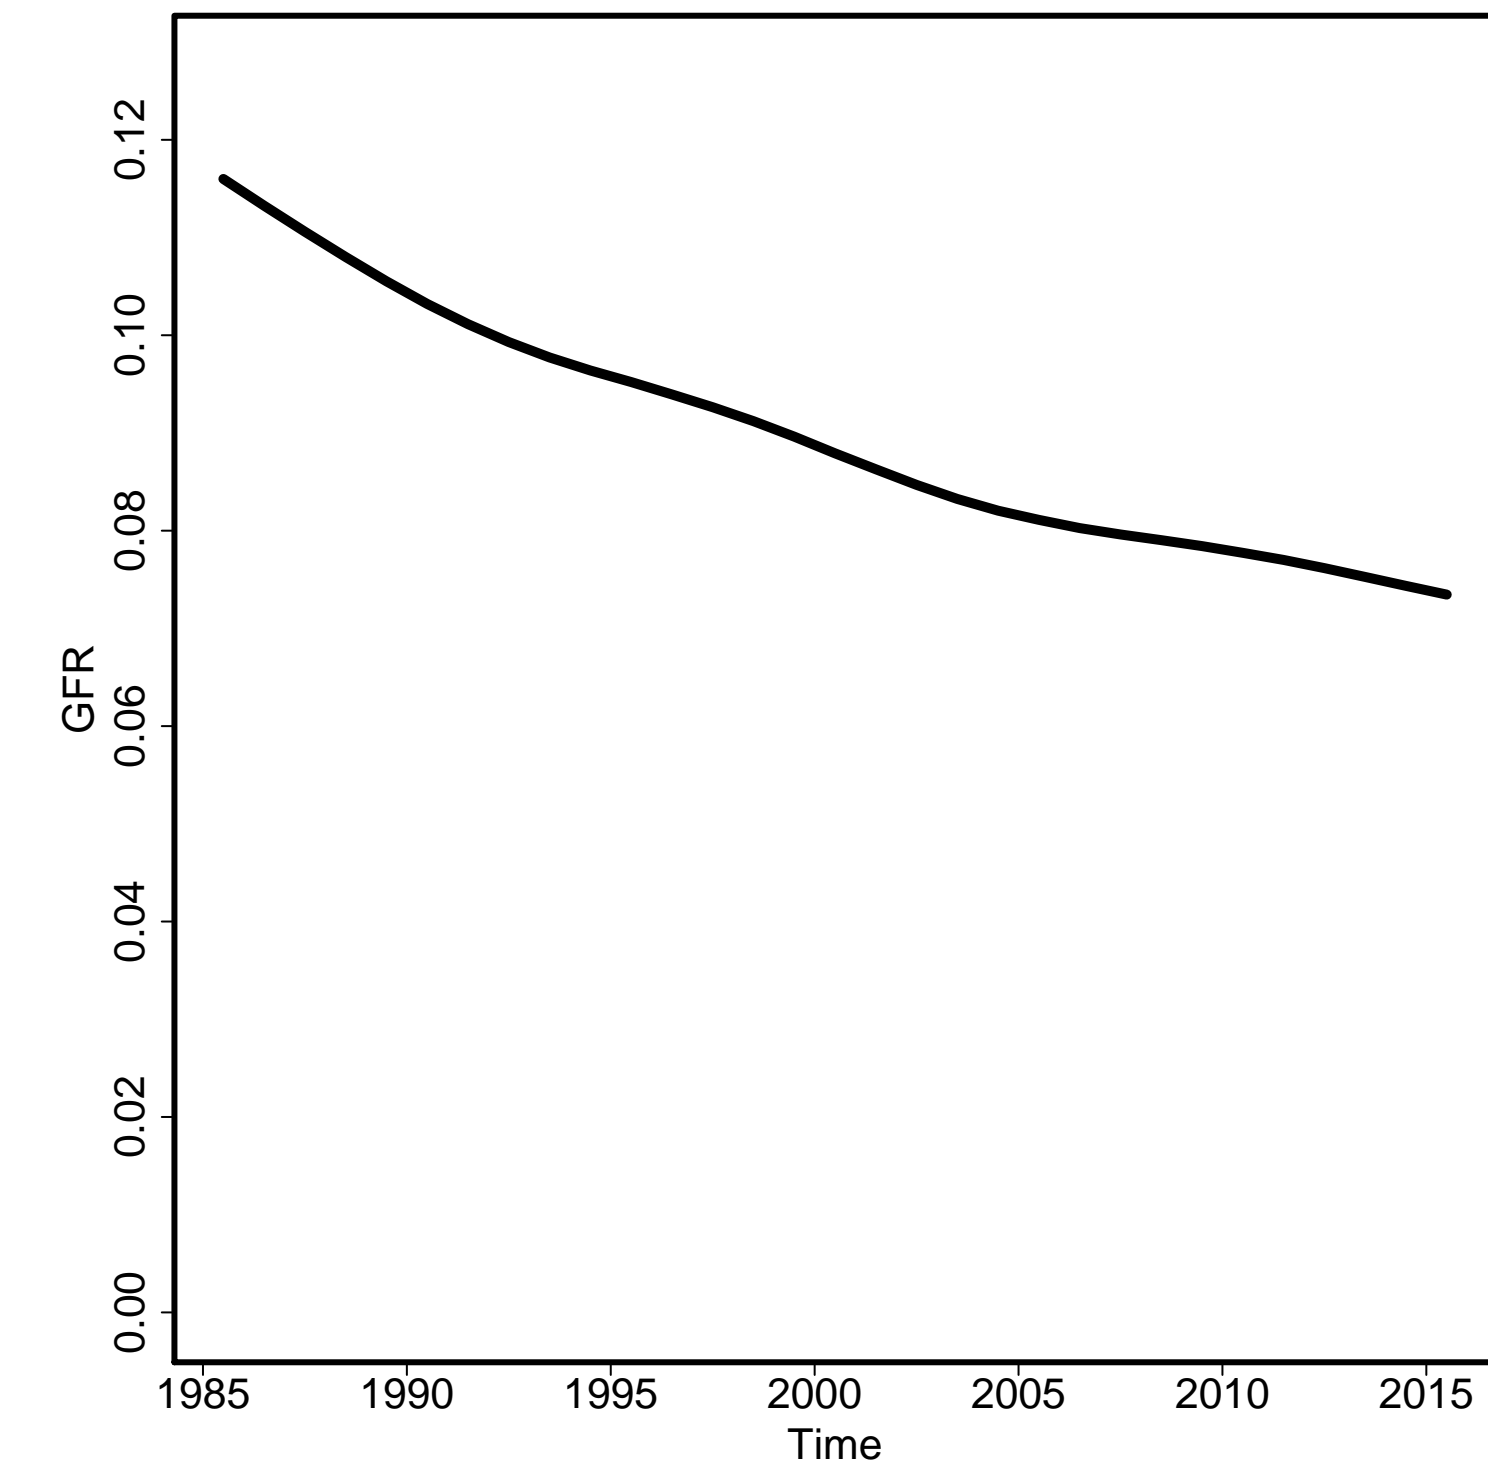

Skilled Attendance to Birth

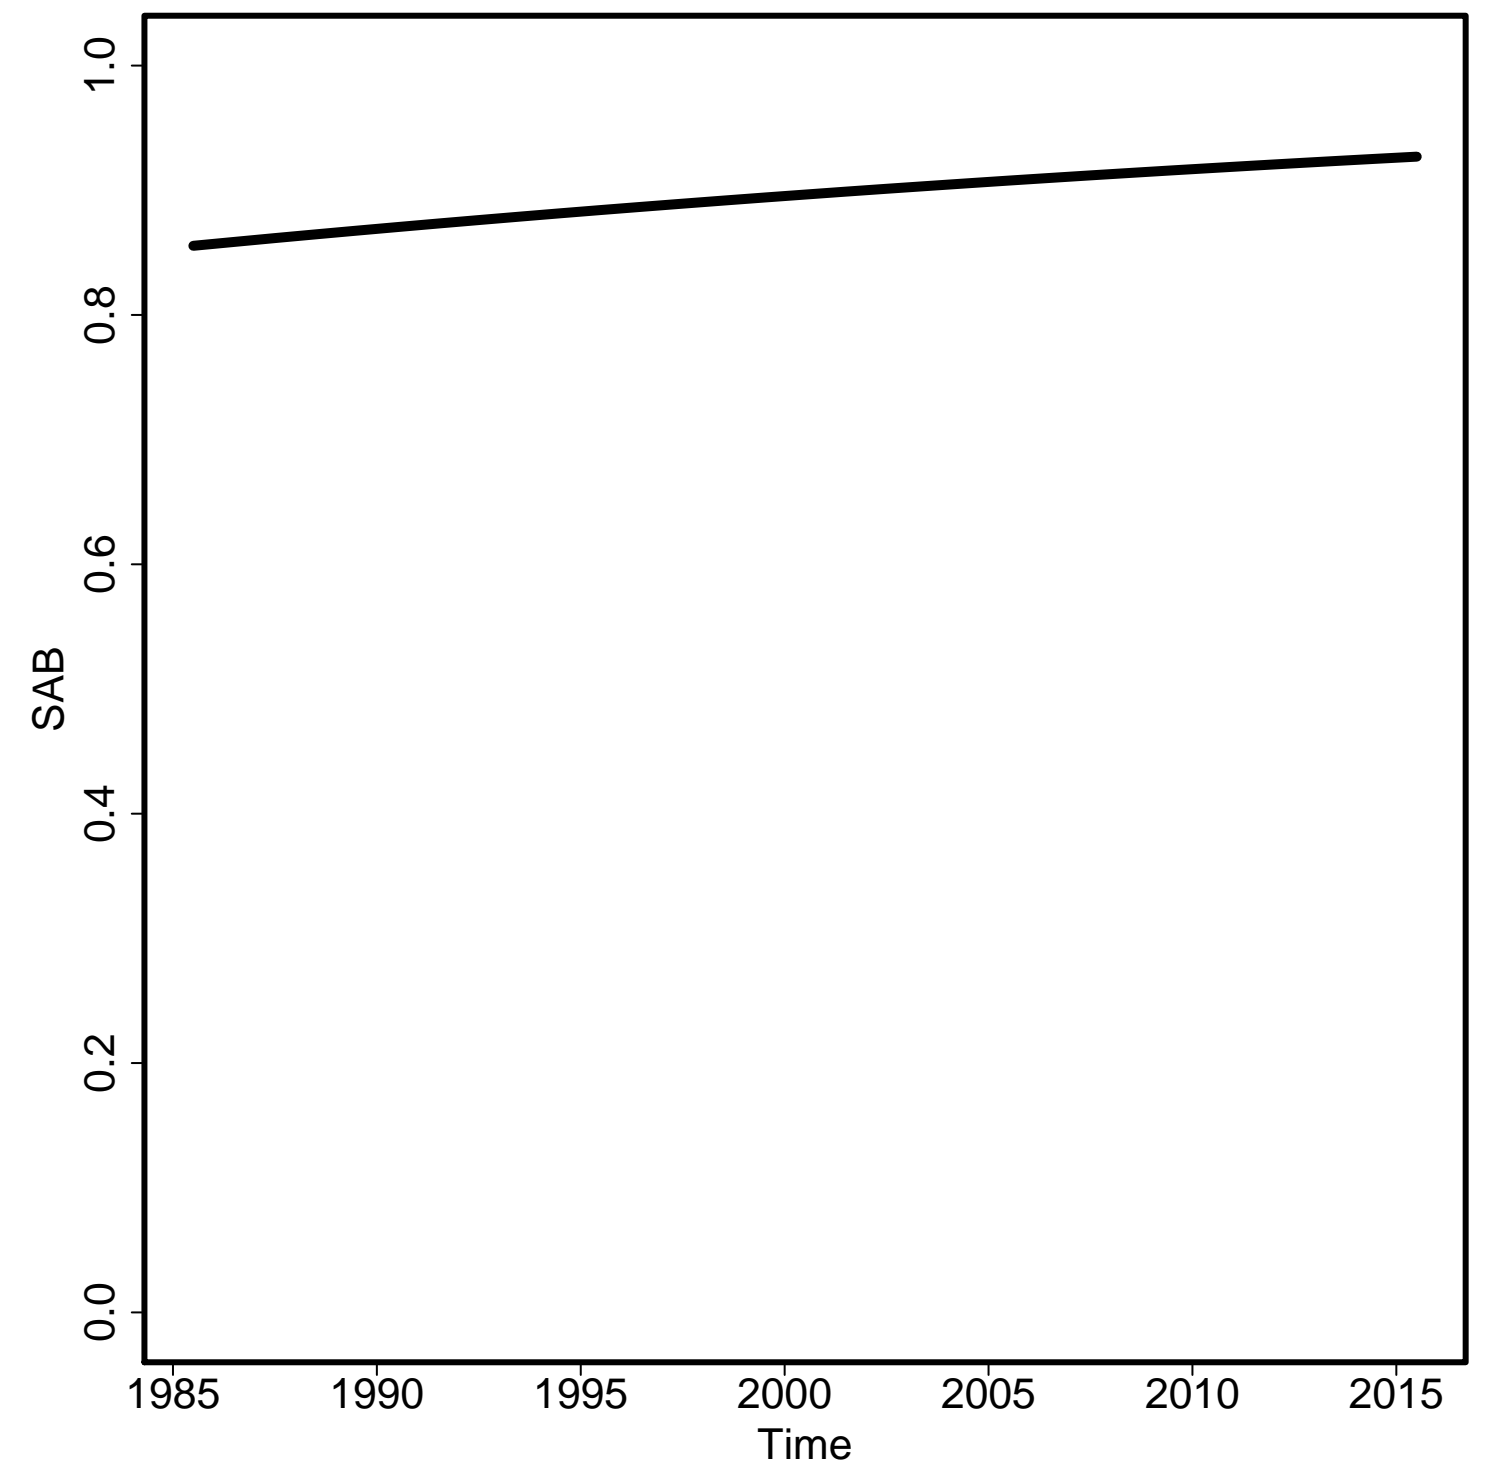

Envelope/Births

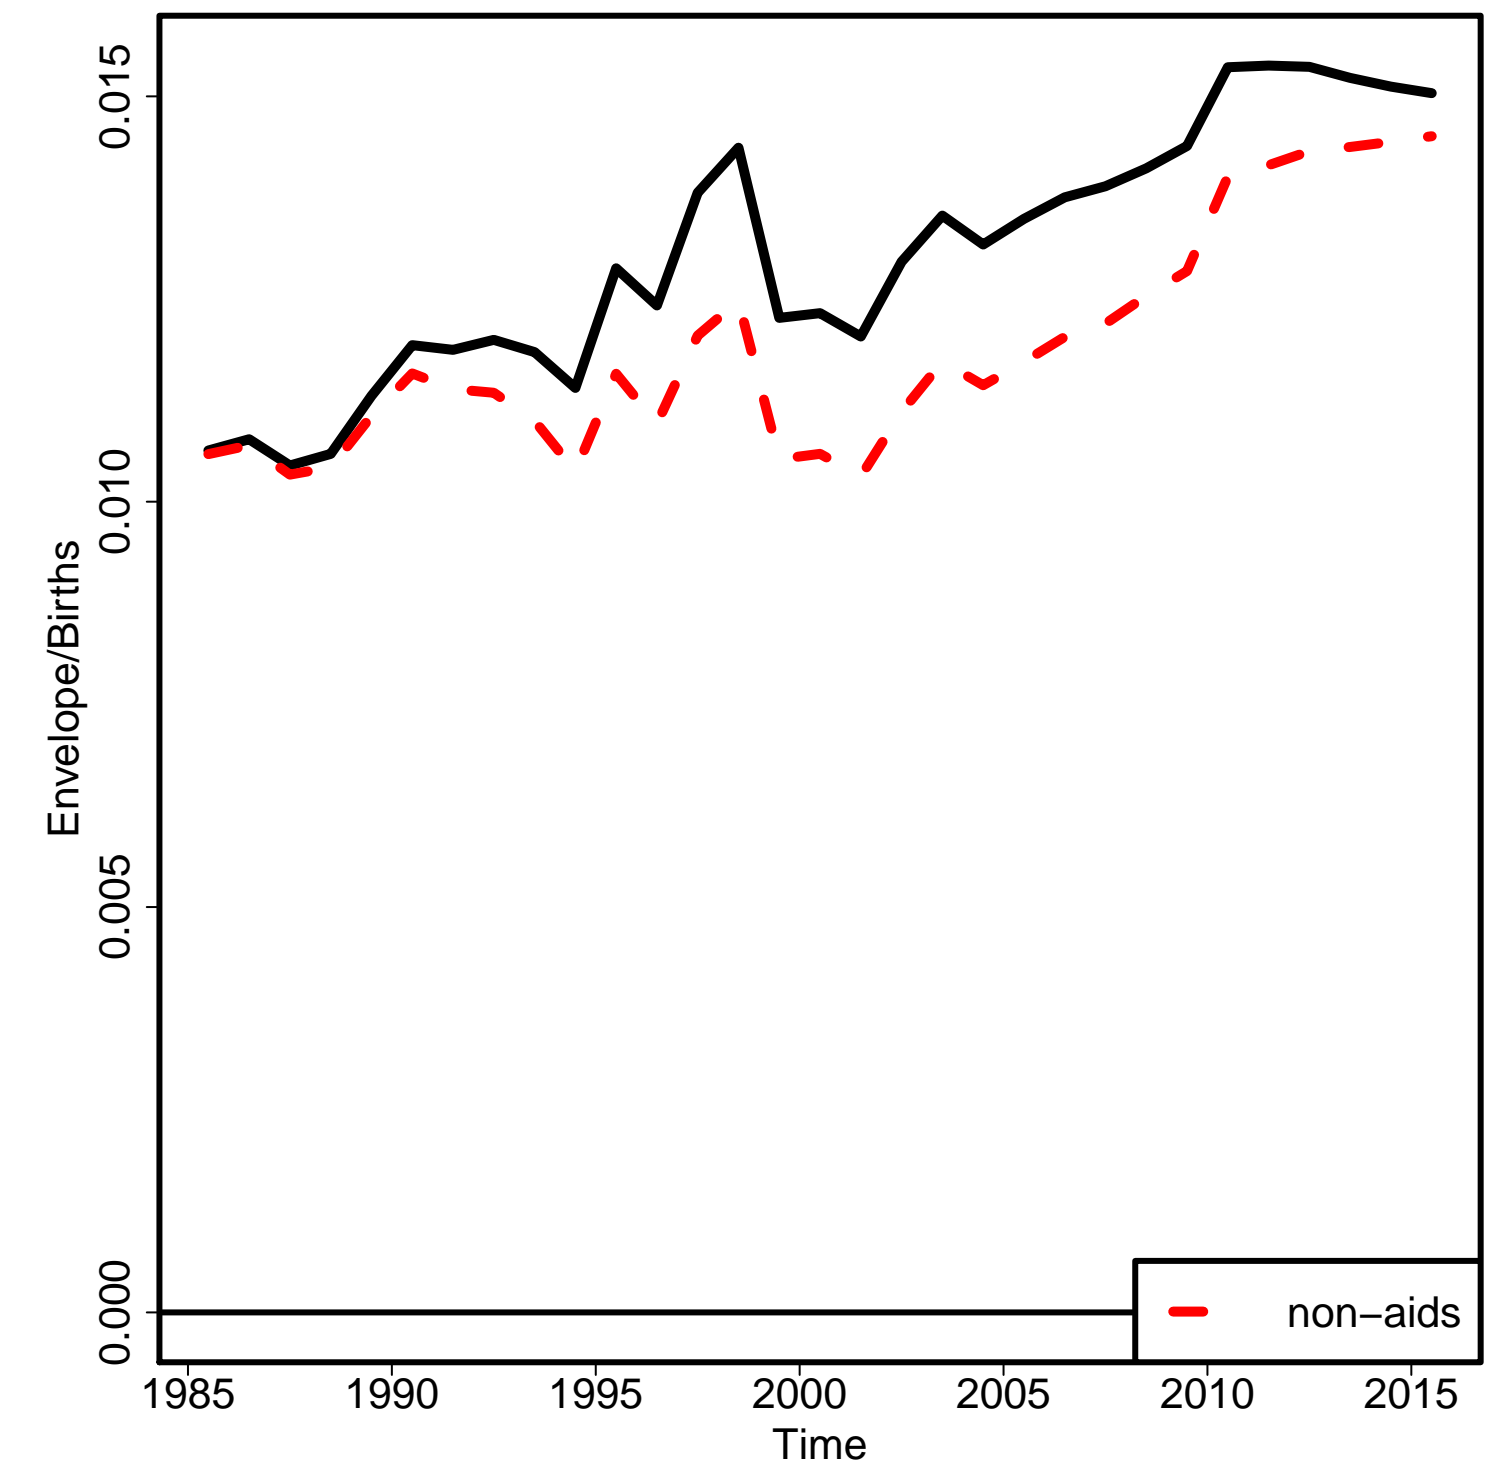

Non-aids MMR

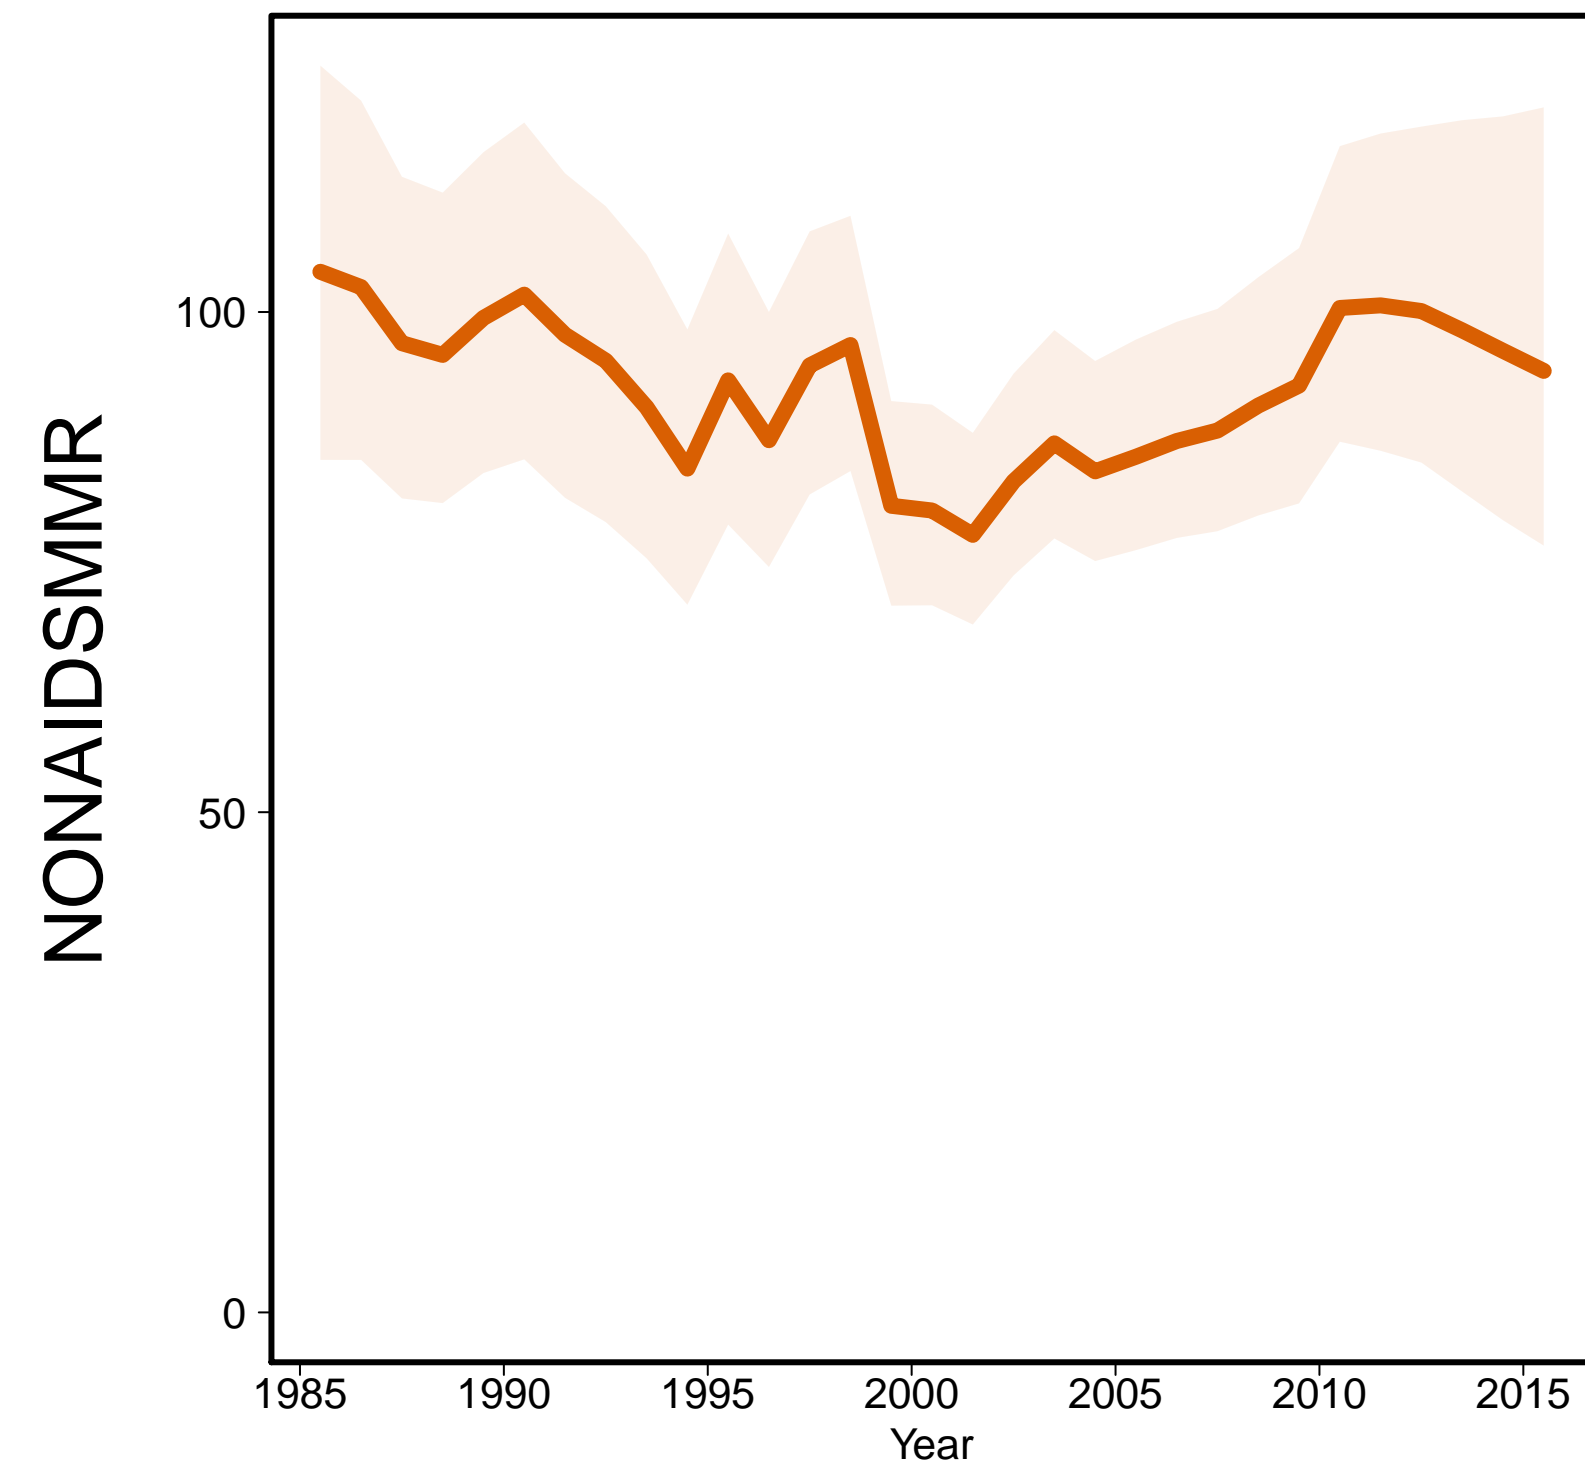

Aids MMR

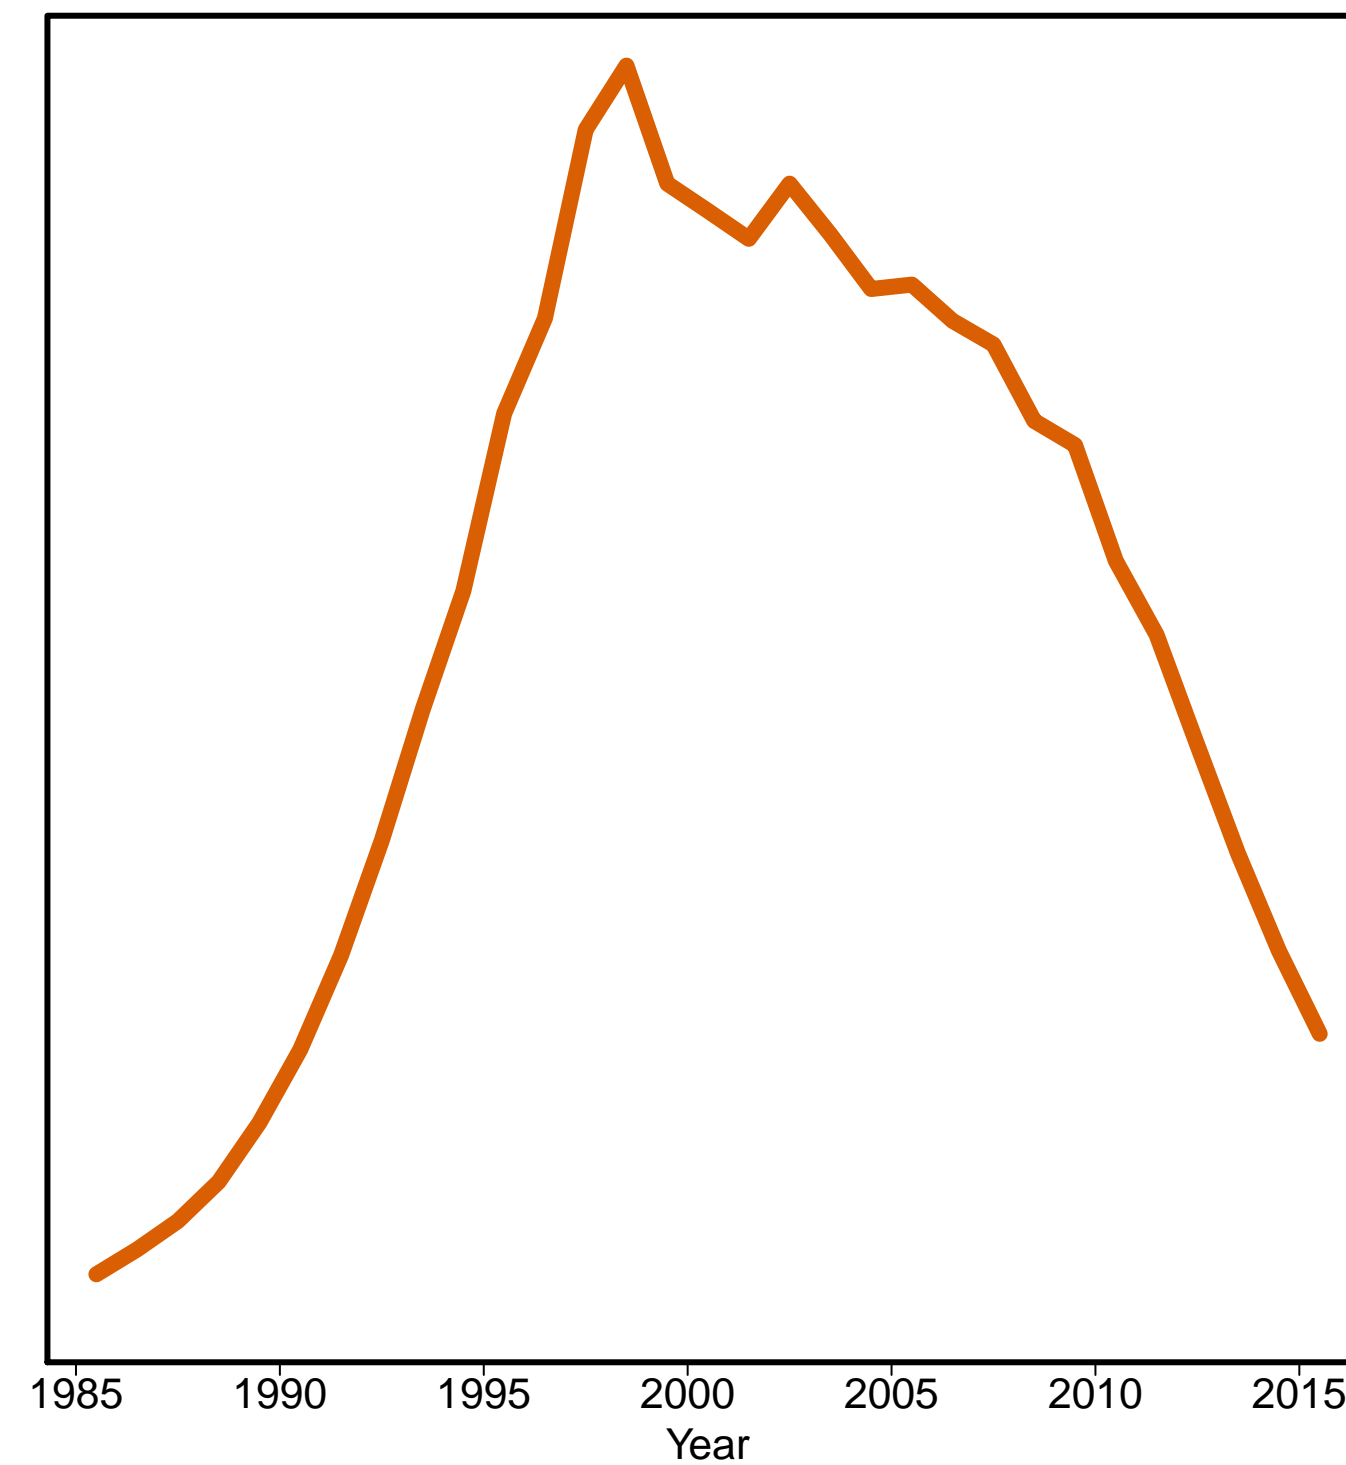

Papua New Guinea [PNG]  
(South-Eastern Asia / Oceania)

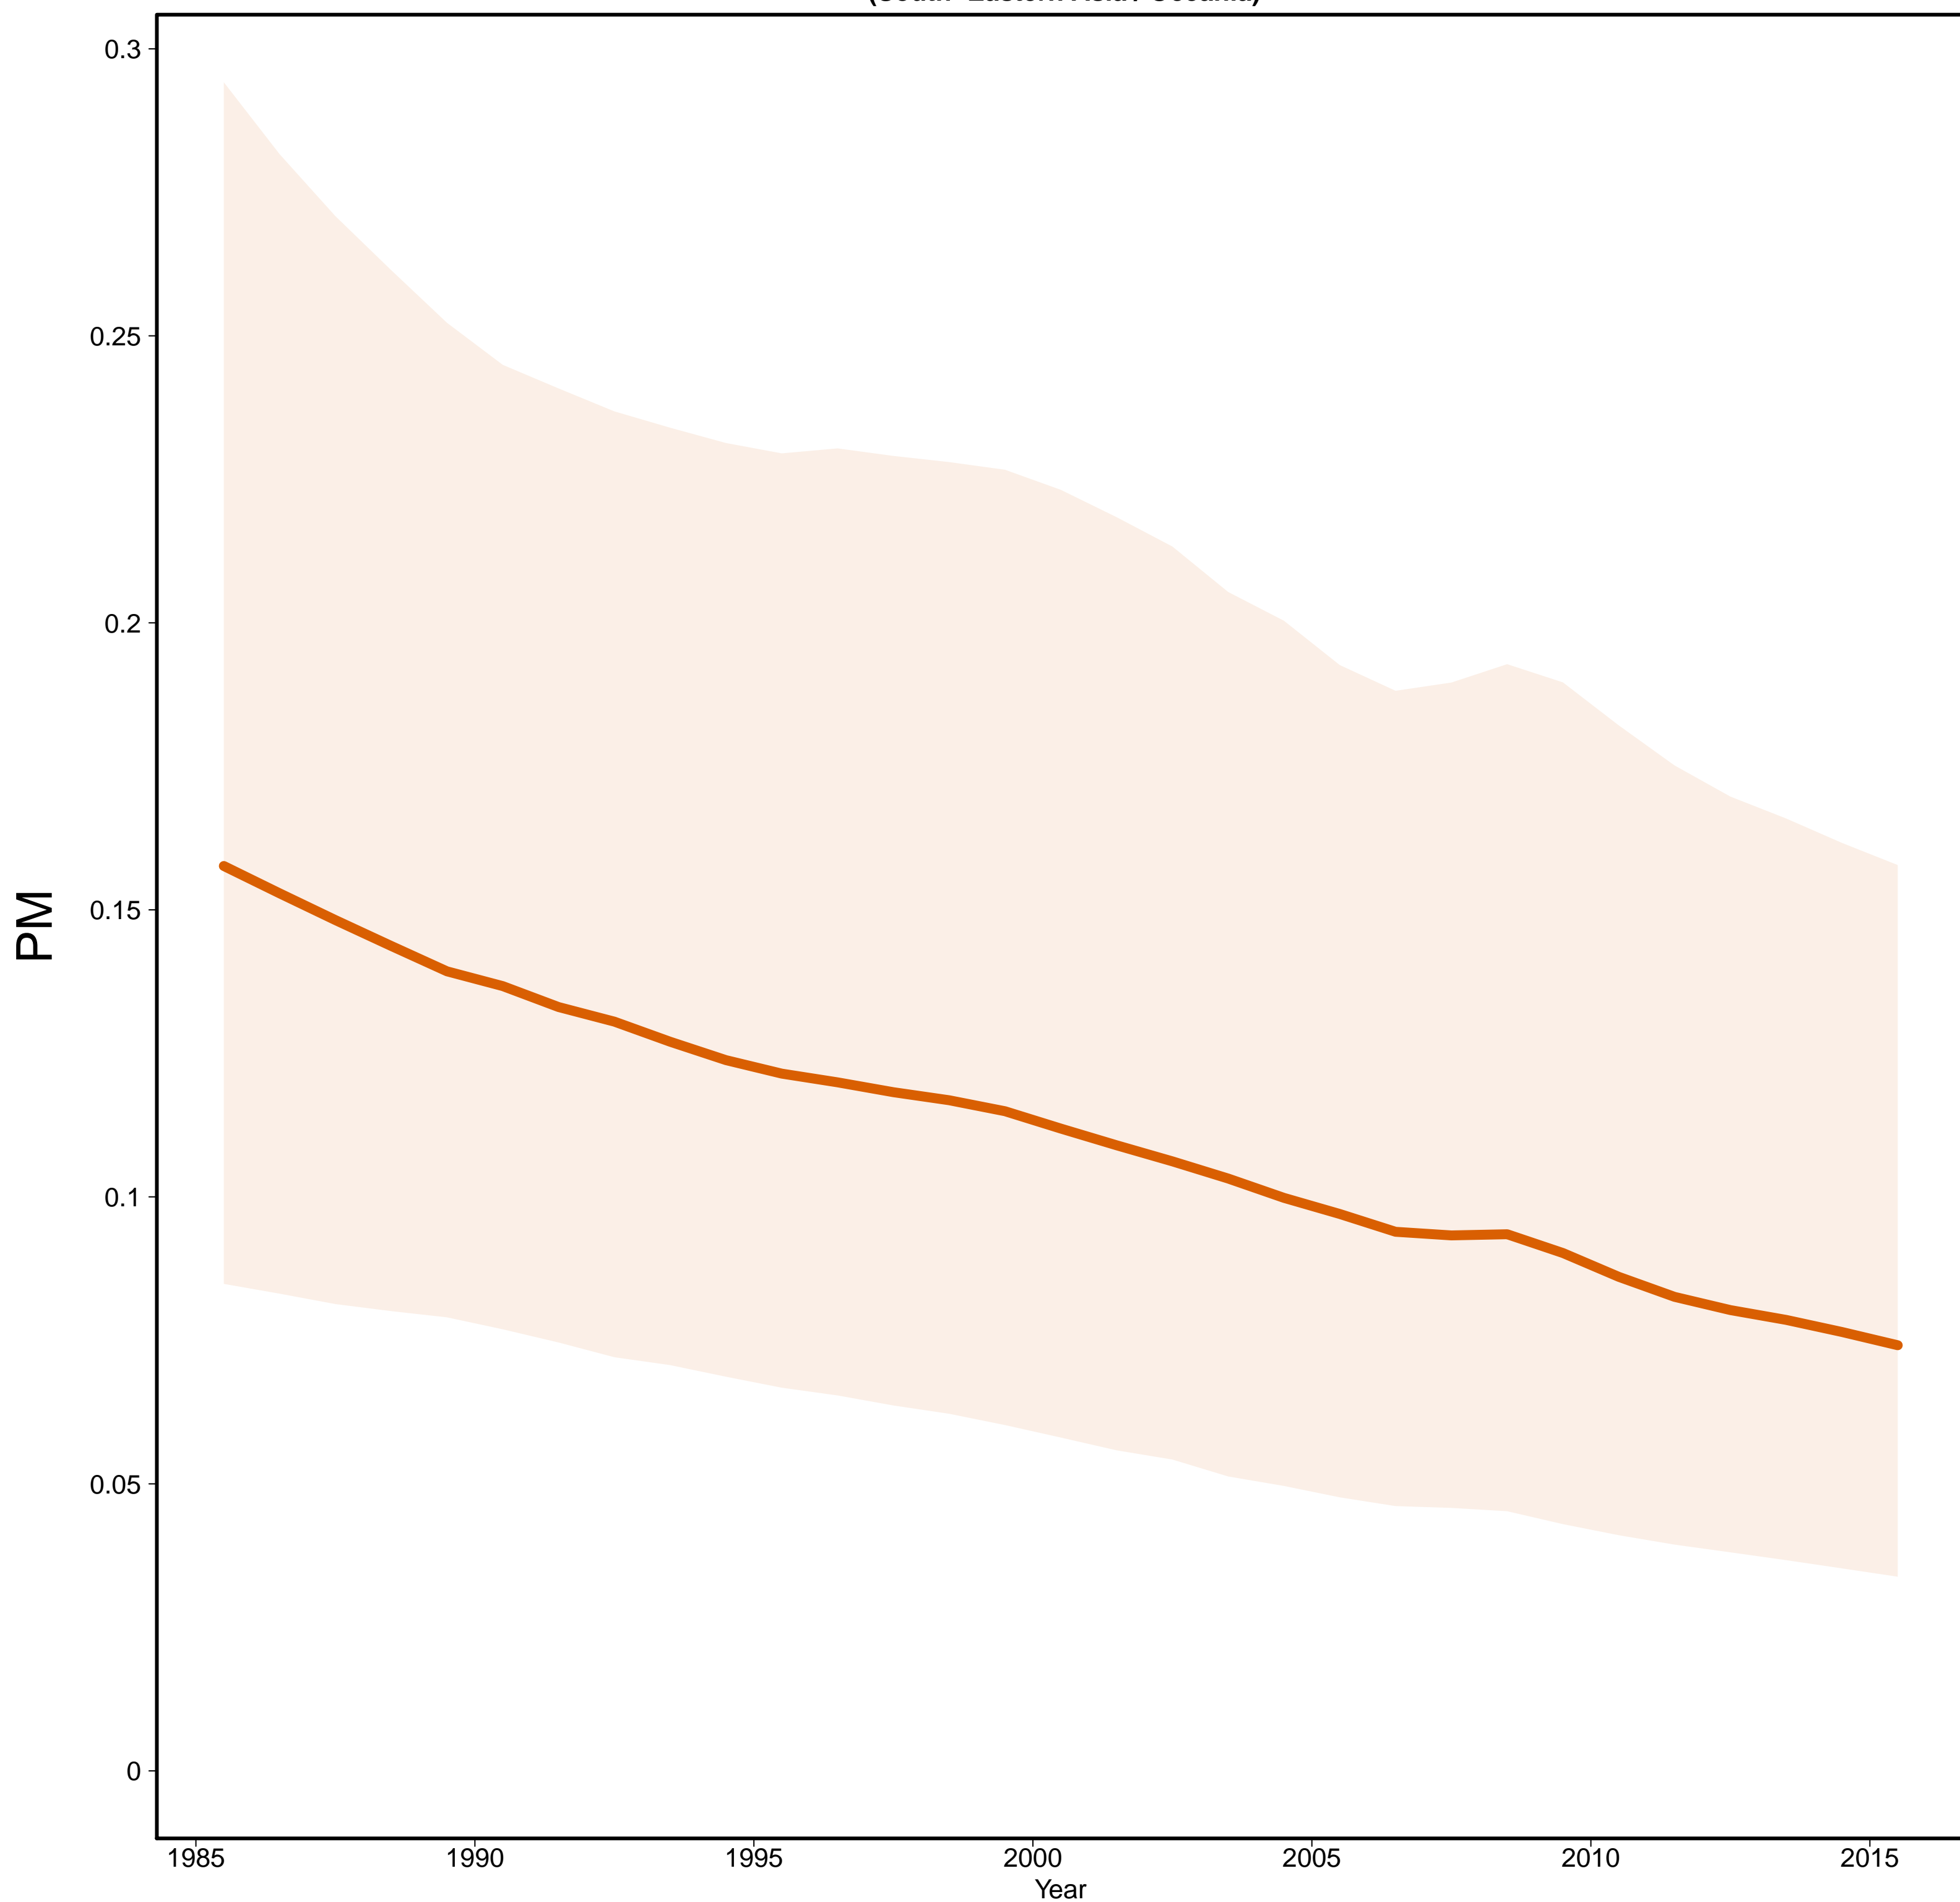

Papua New Guinea [PNG]  
(South-Eastern Asia / Oceania)

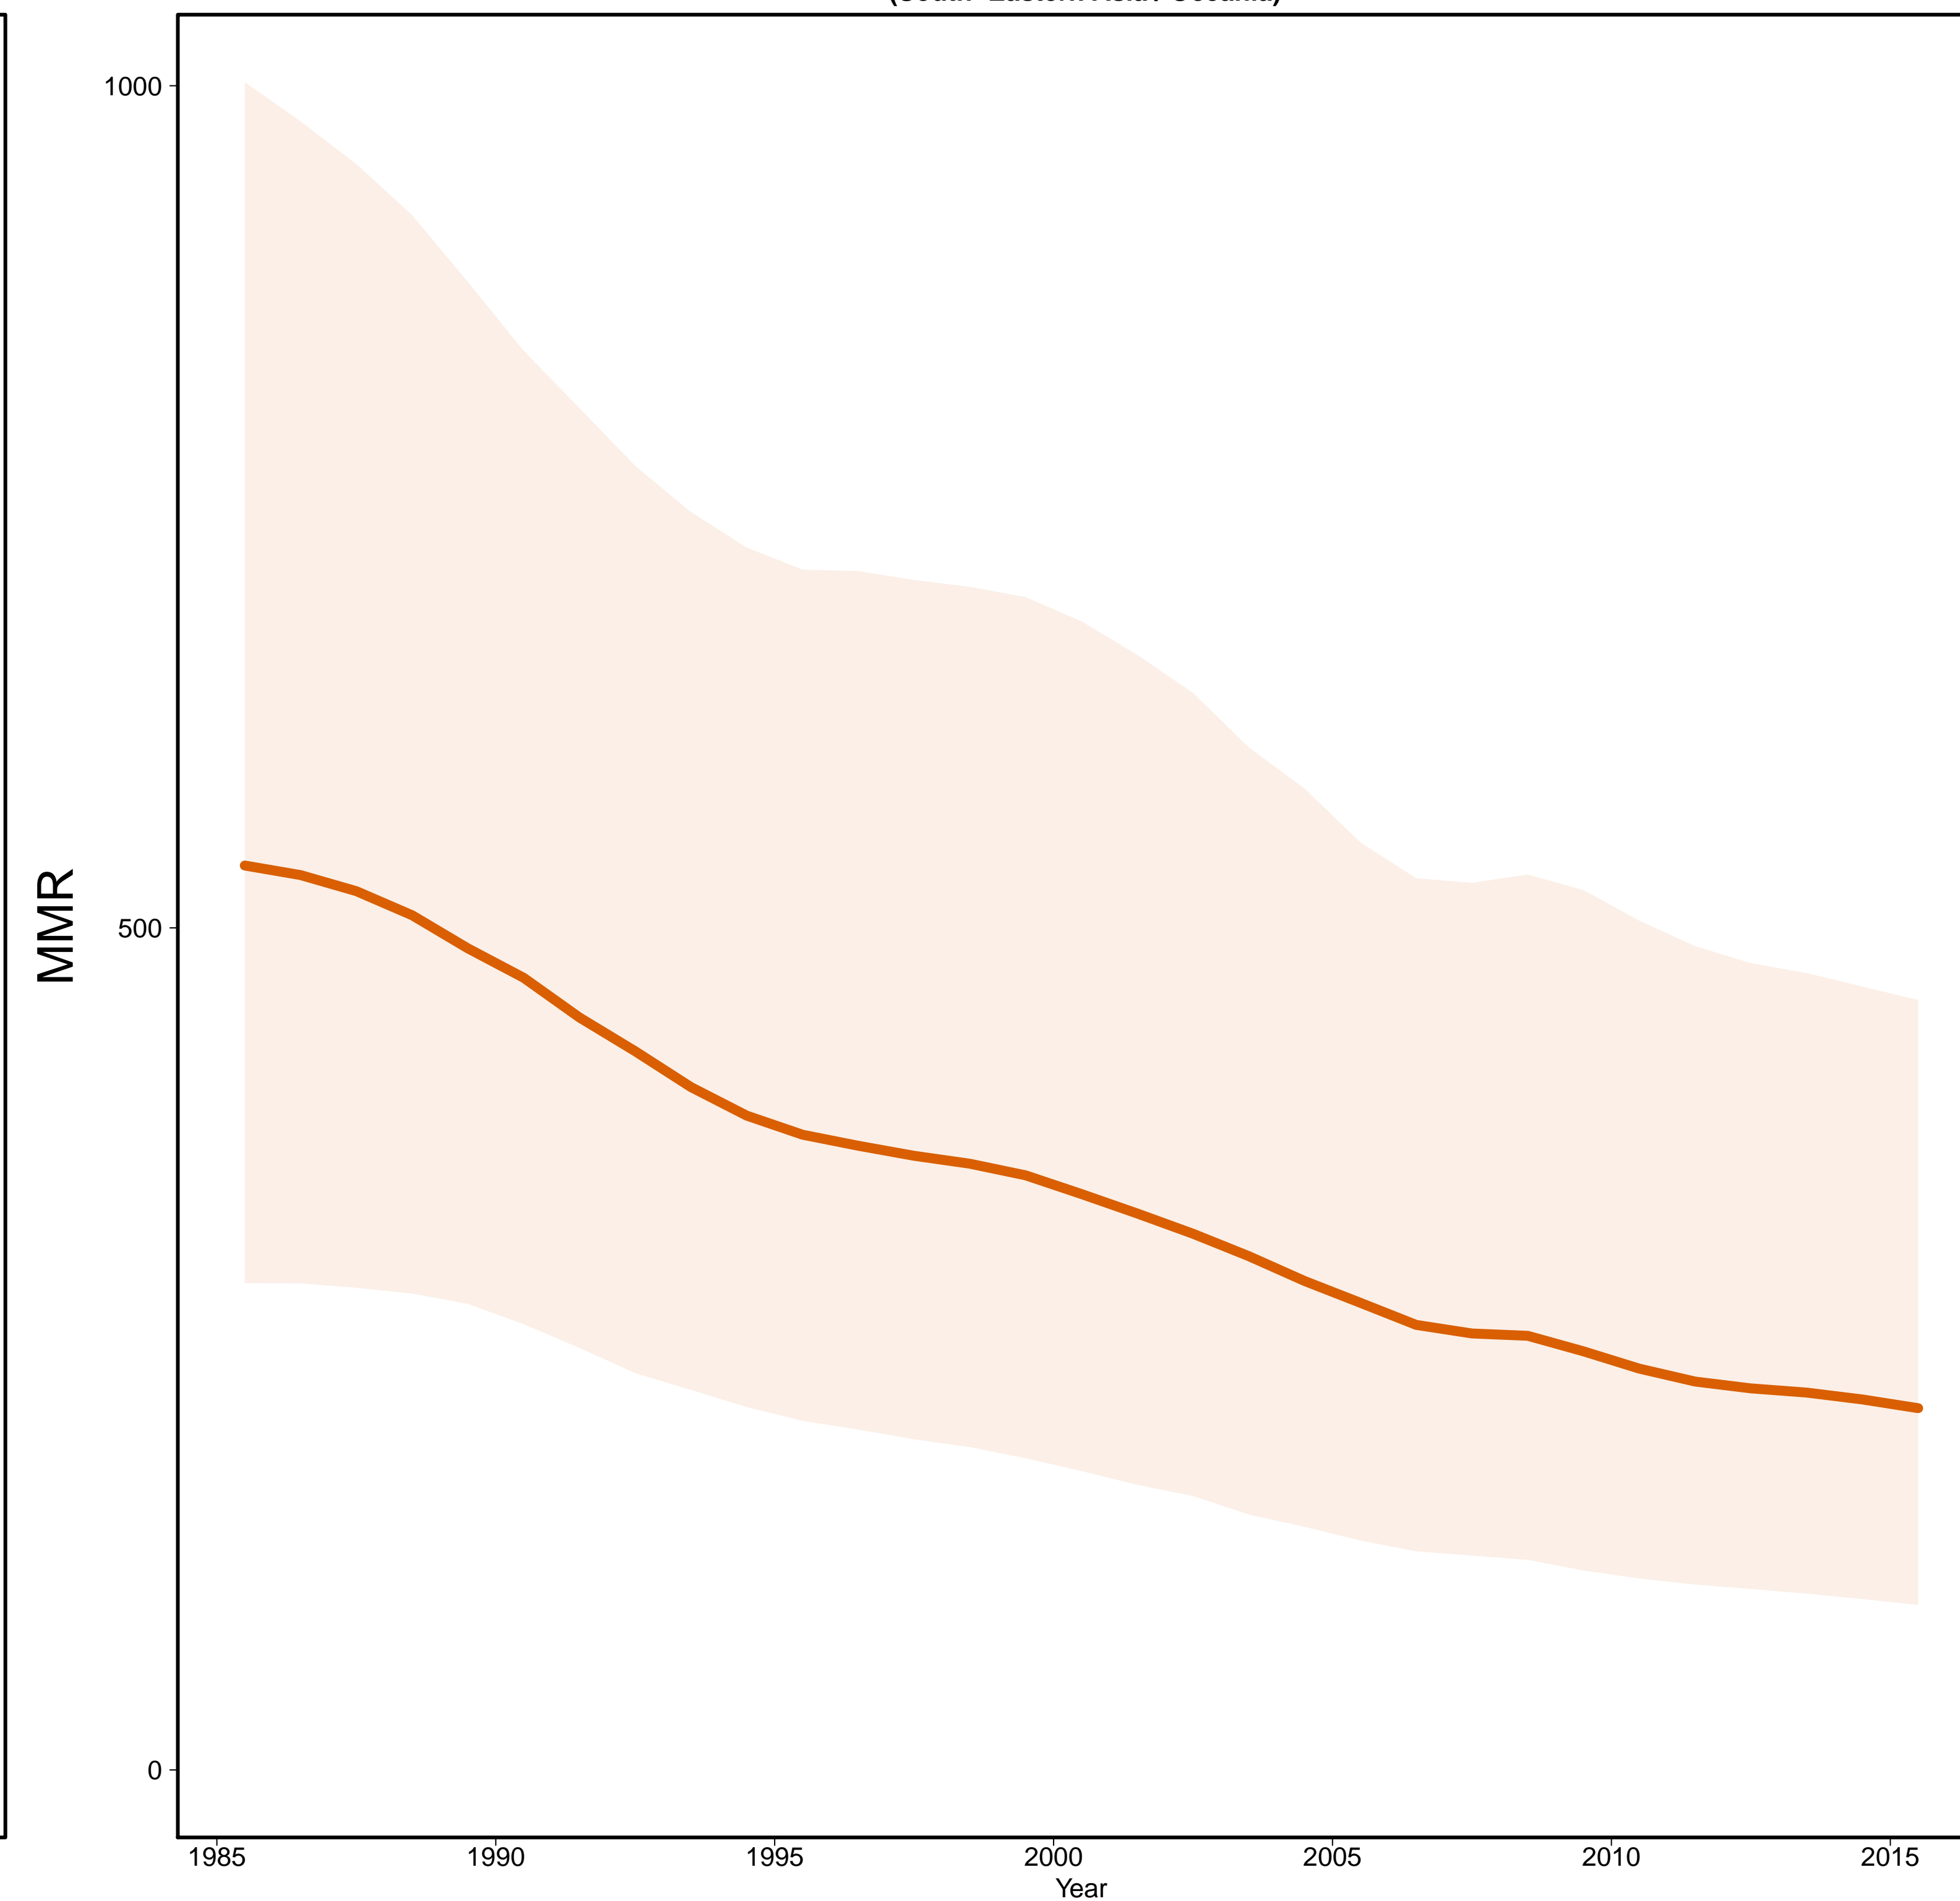

– Estimates –  
 Mlate  
 – MMR Database 2015 –

Gross Domestic Product

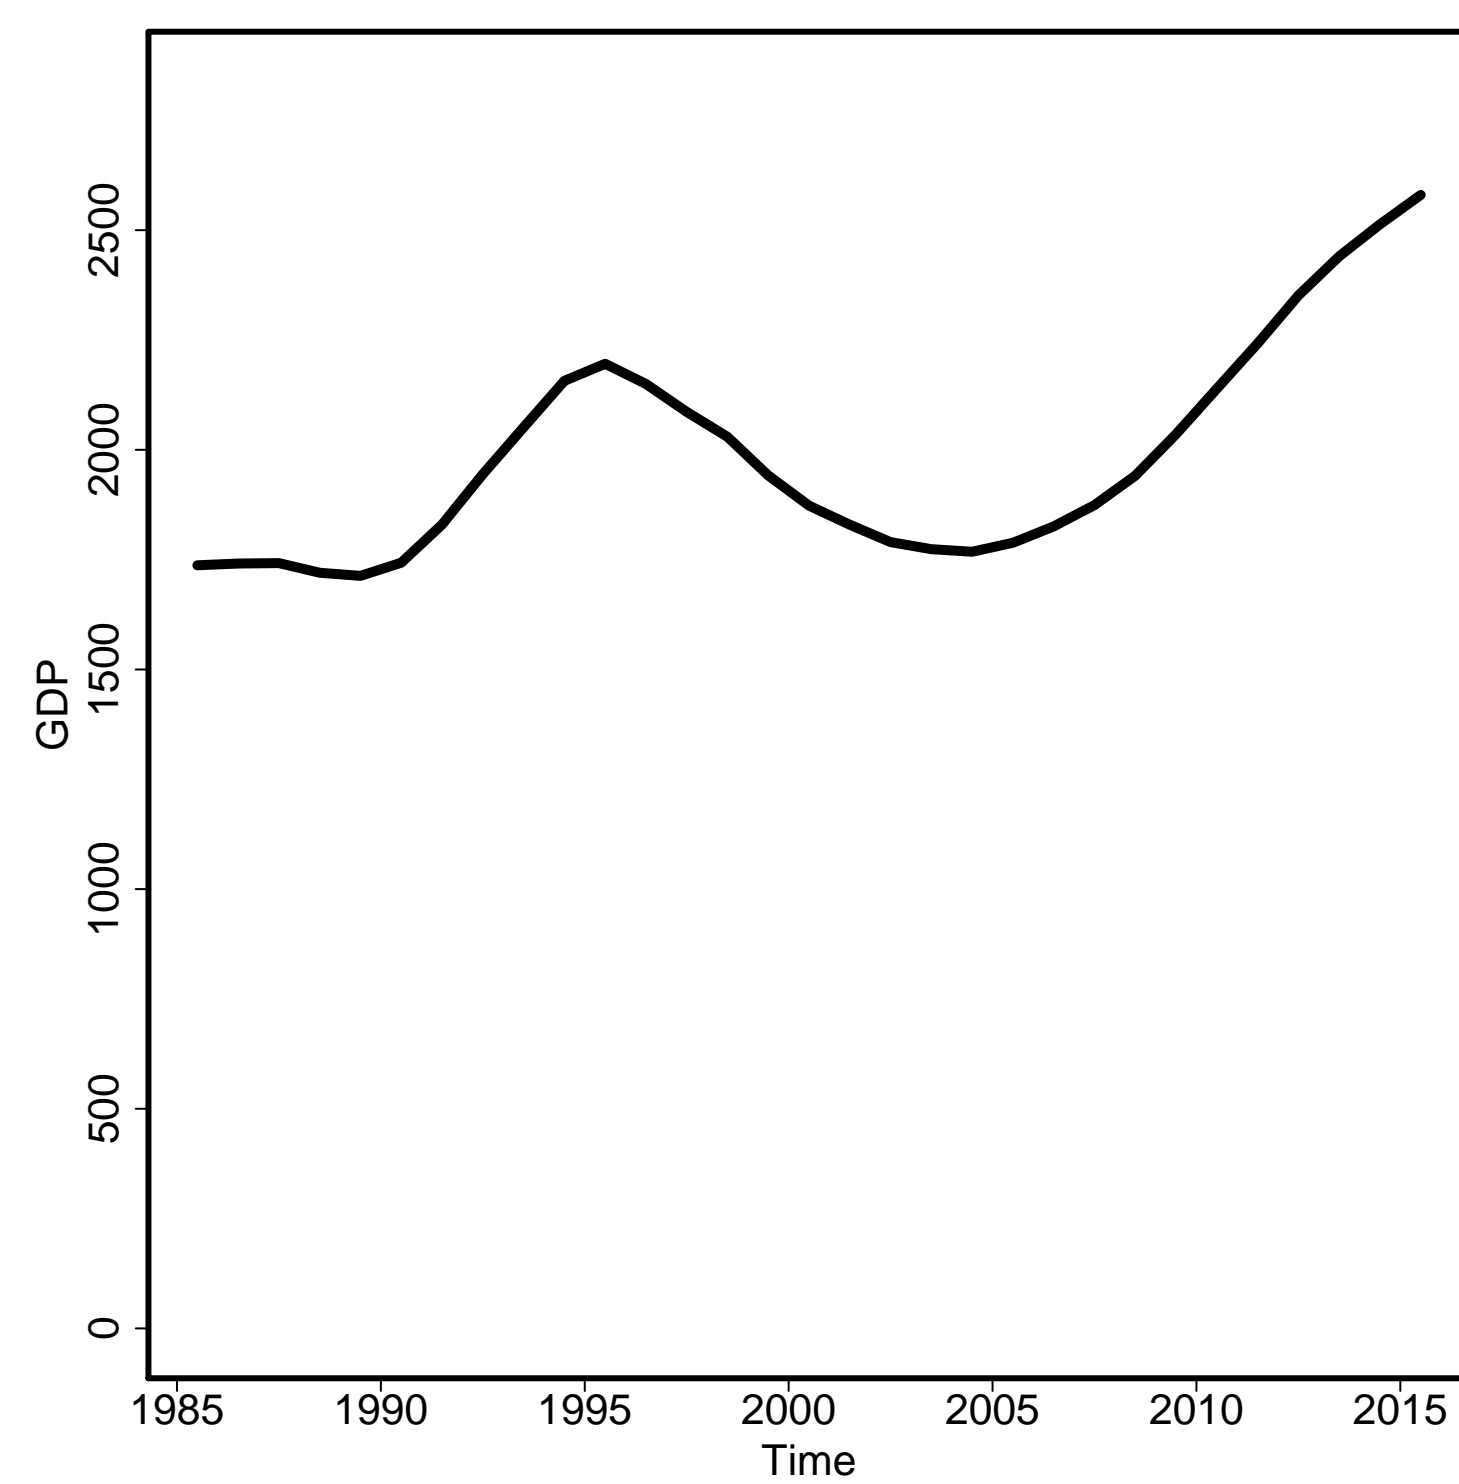

General Fertility Rate

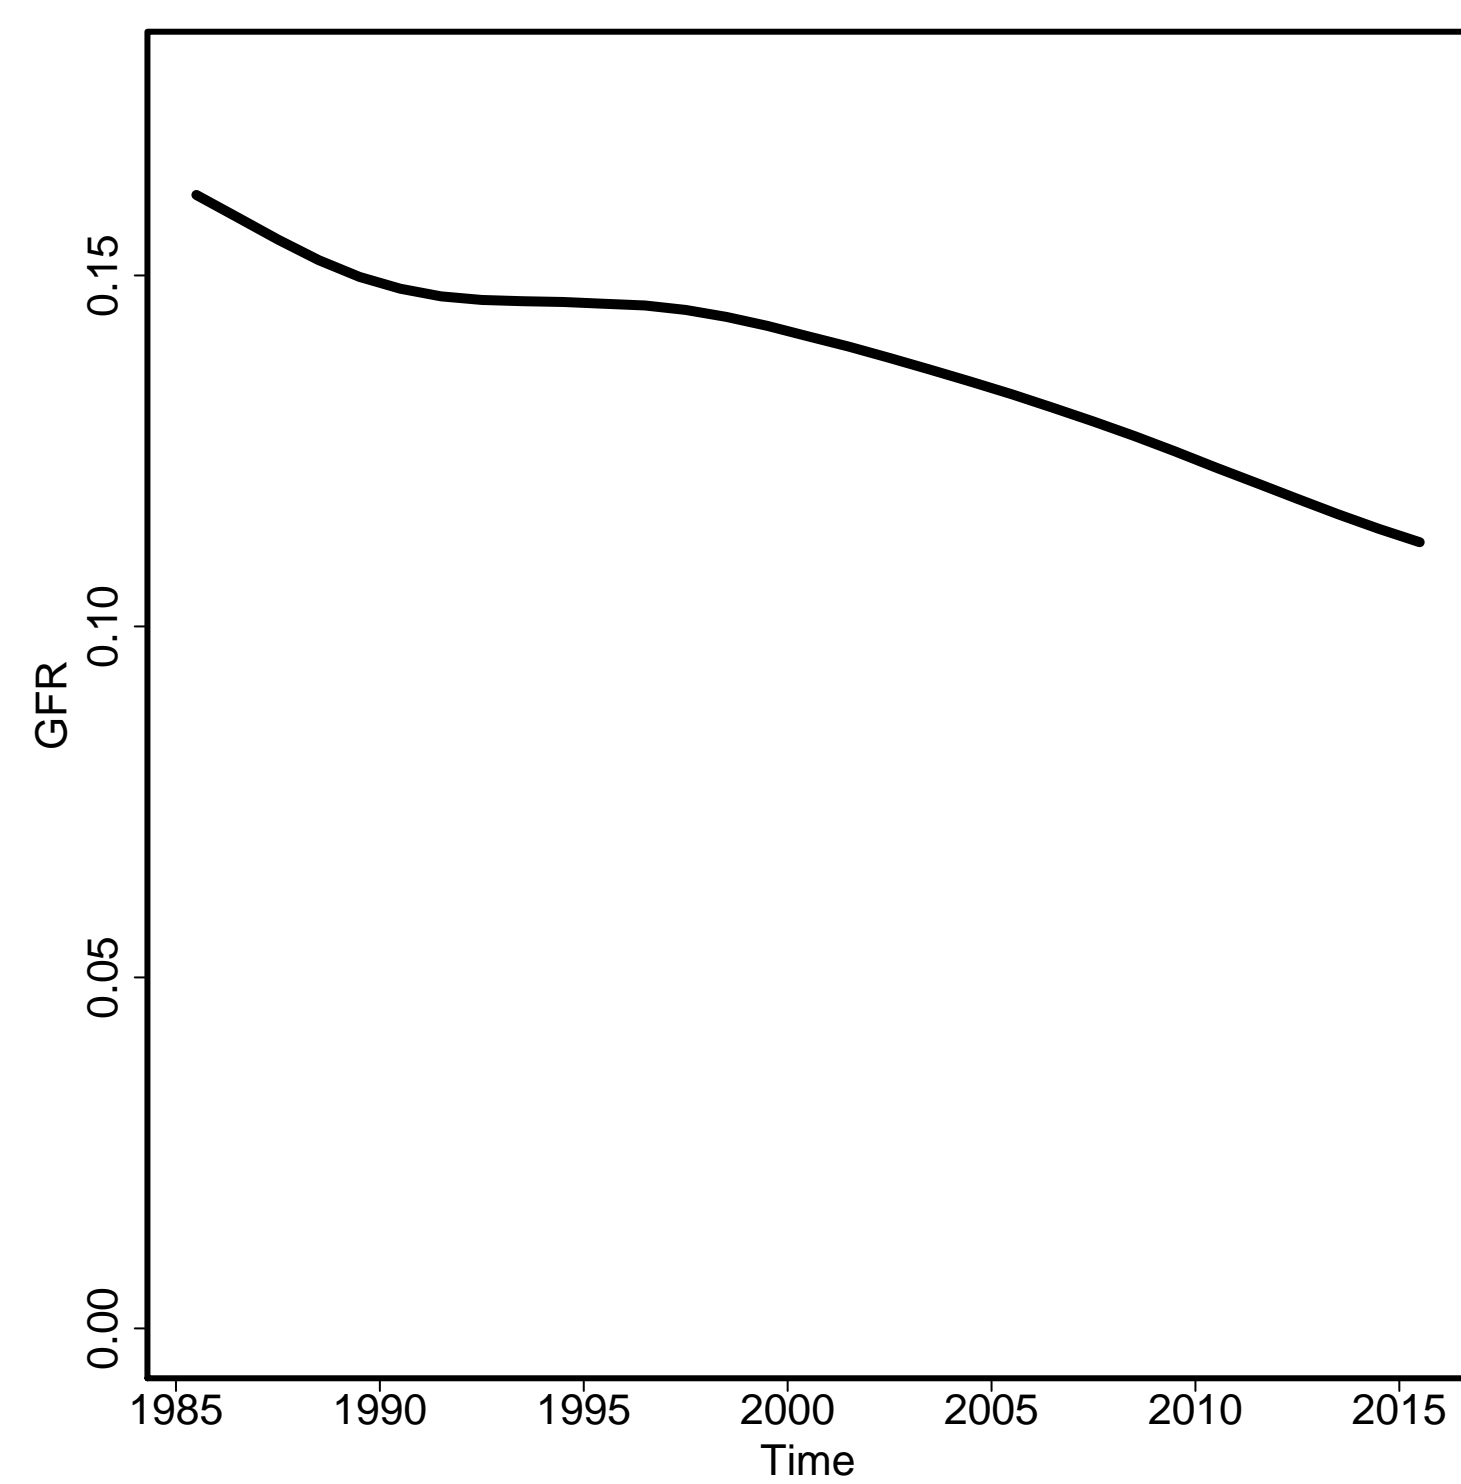

Skilled Attendance to Birth

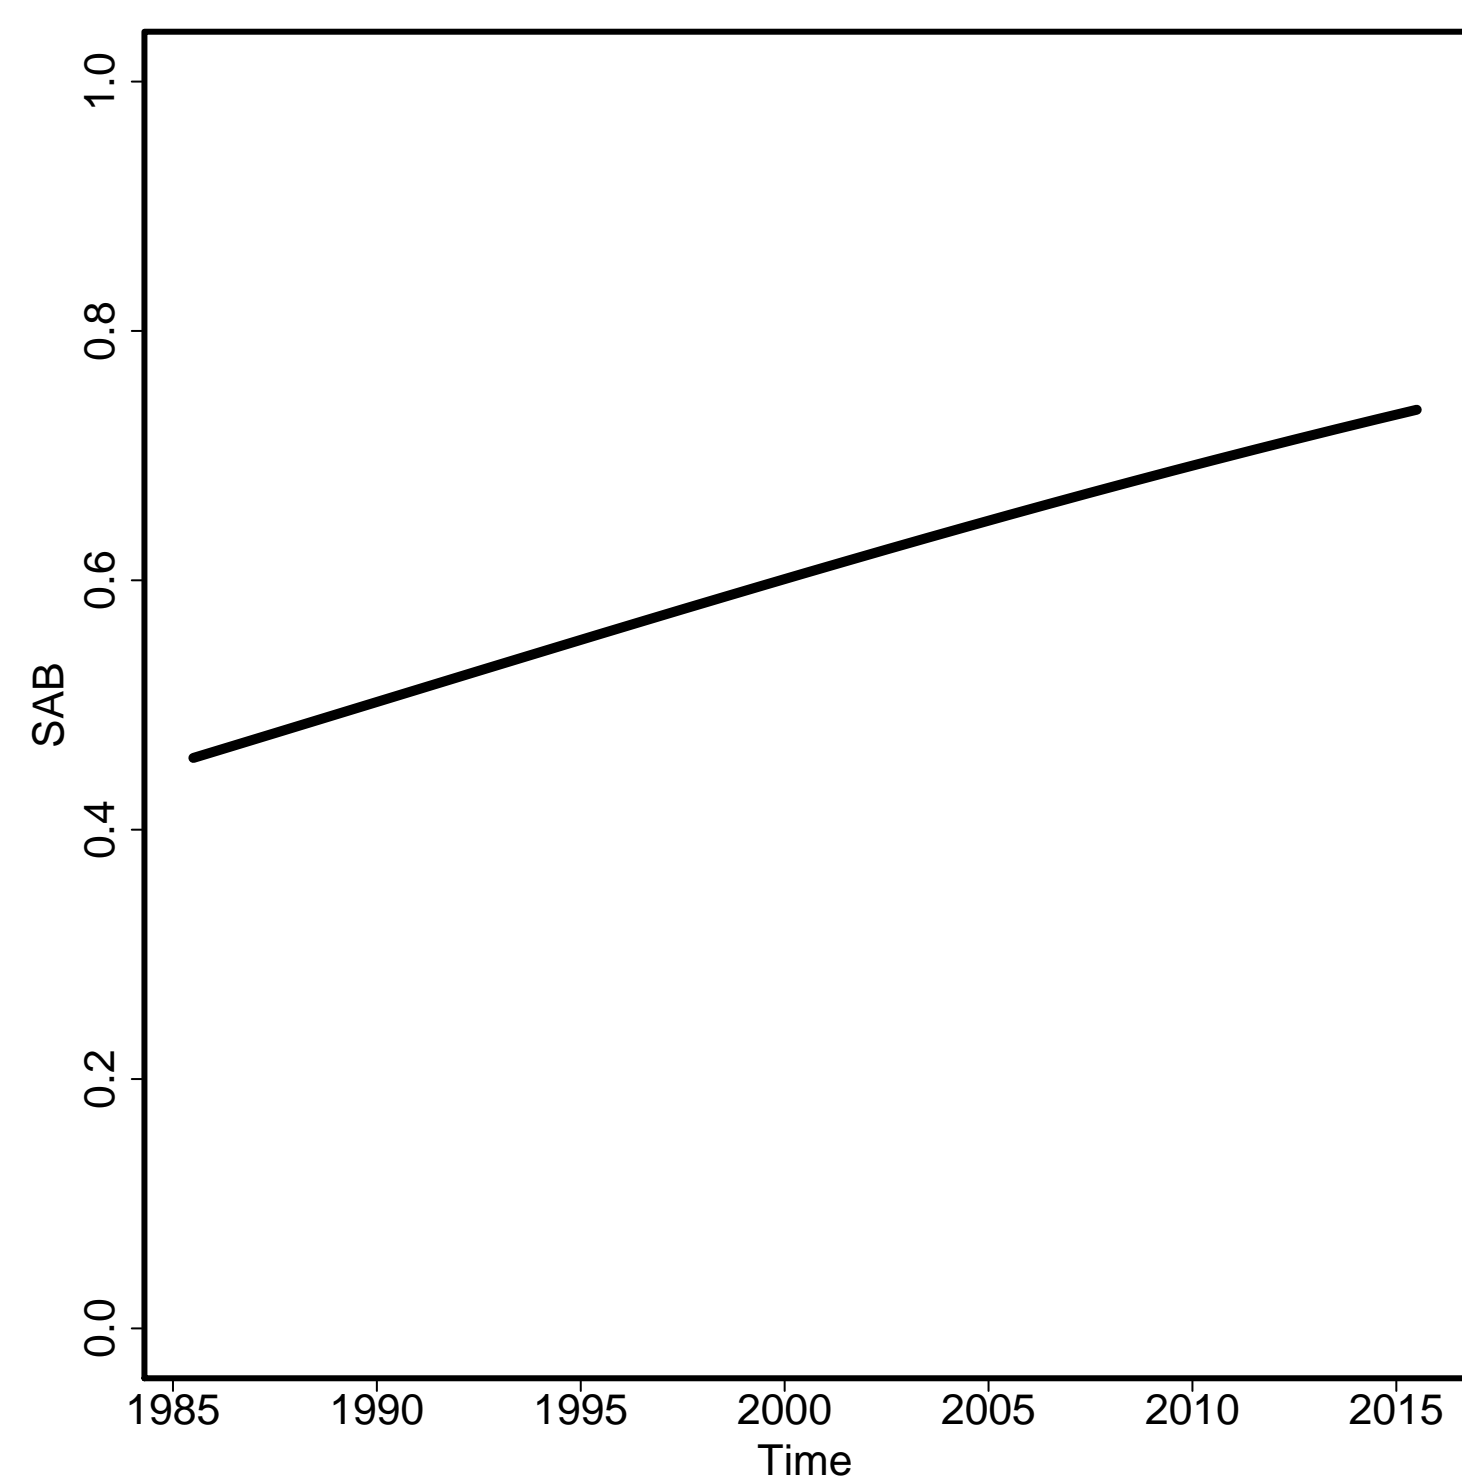

Envelope/Births

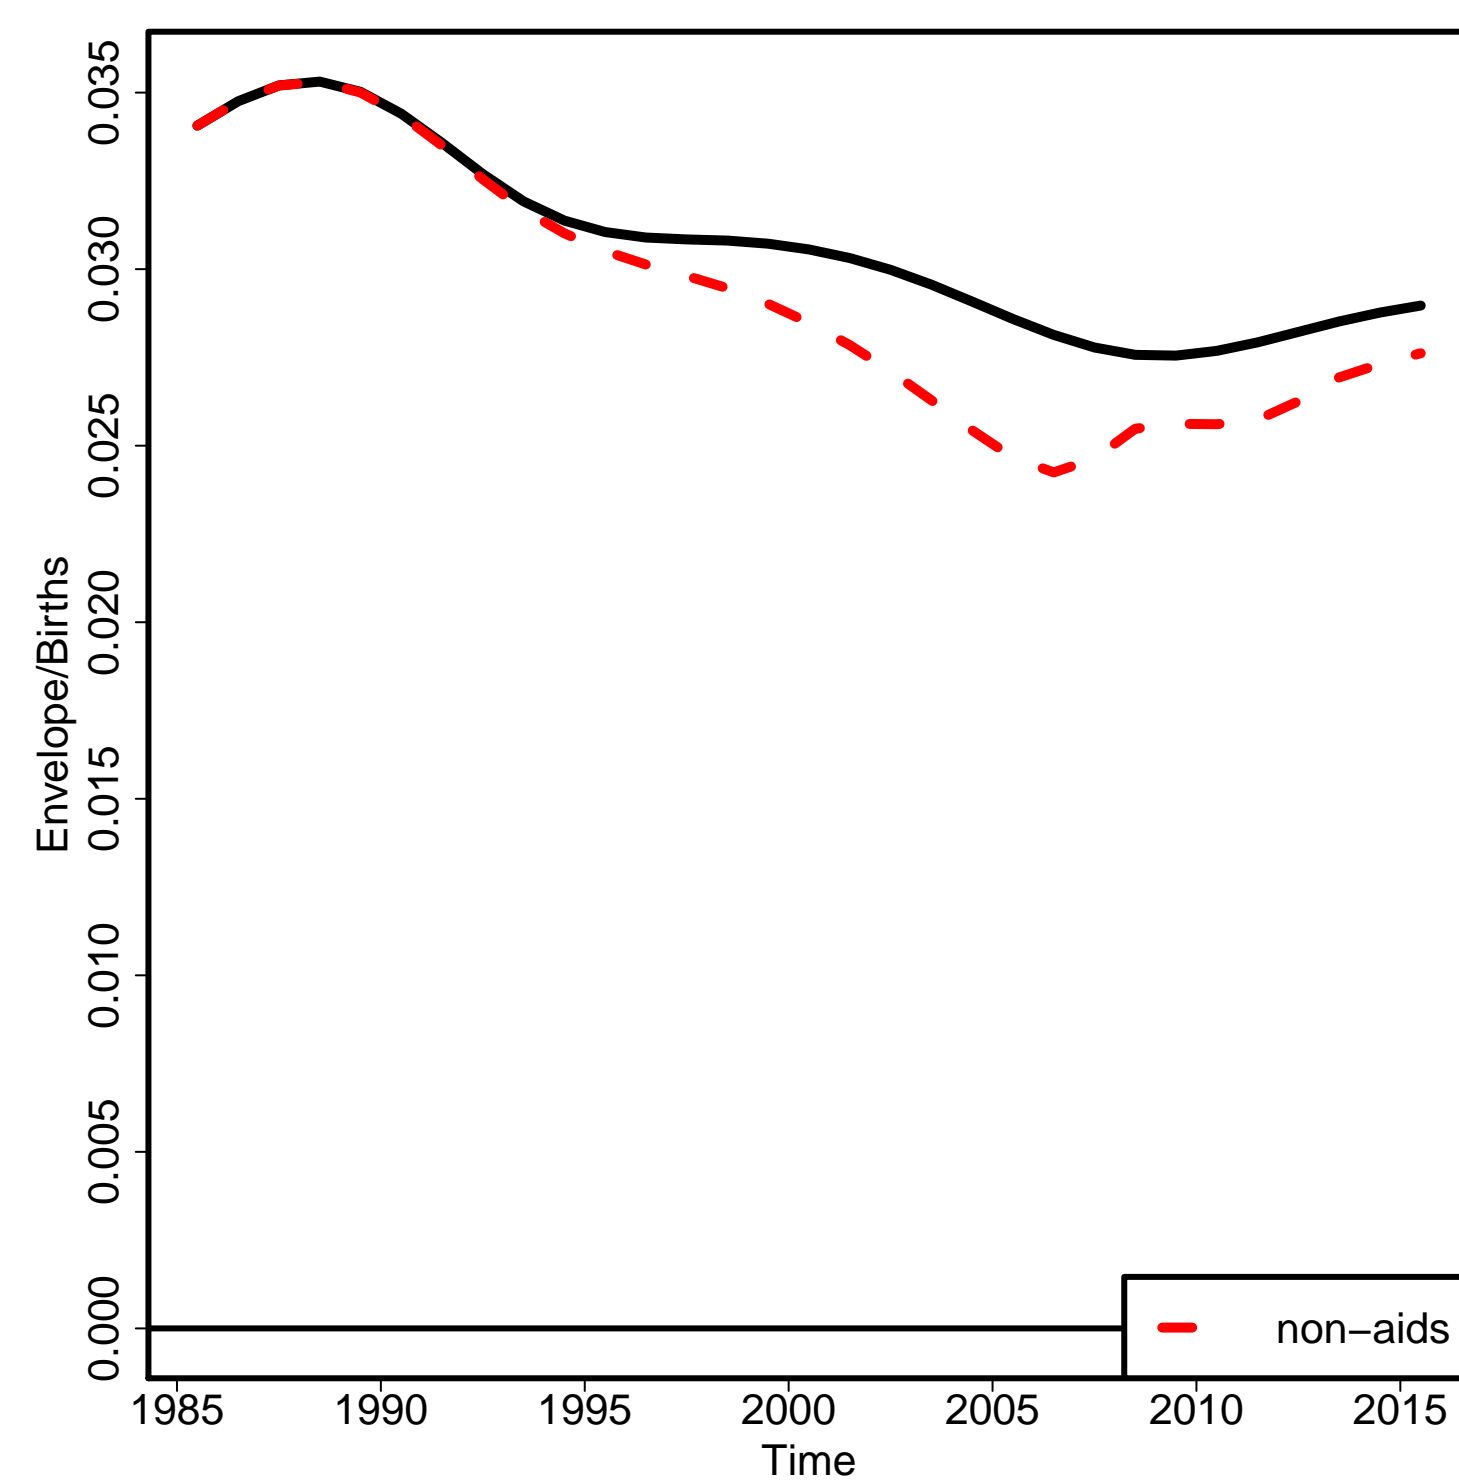

Non-aids MMR

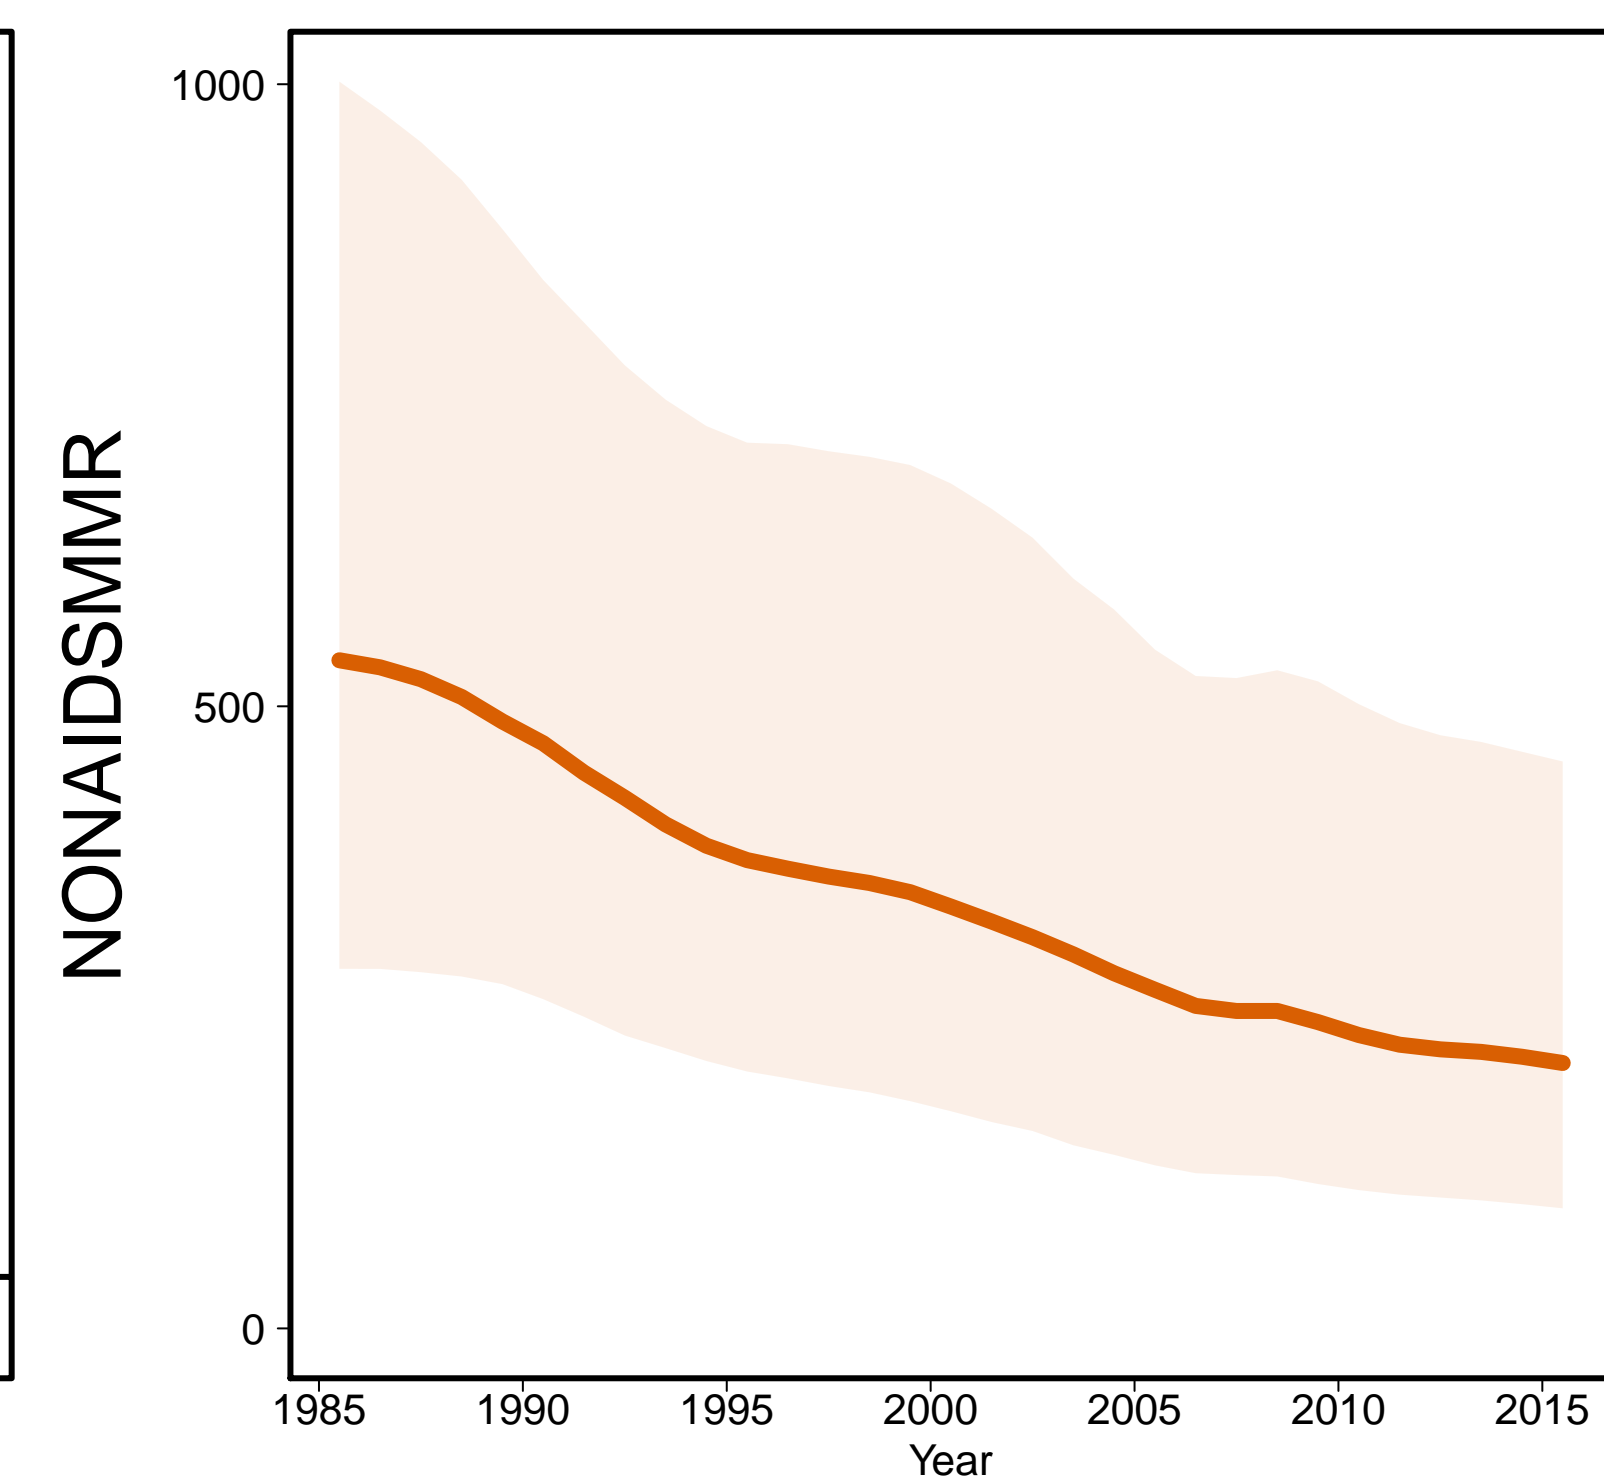

Aids MMR

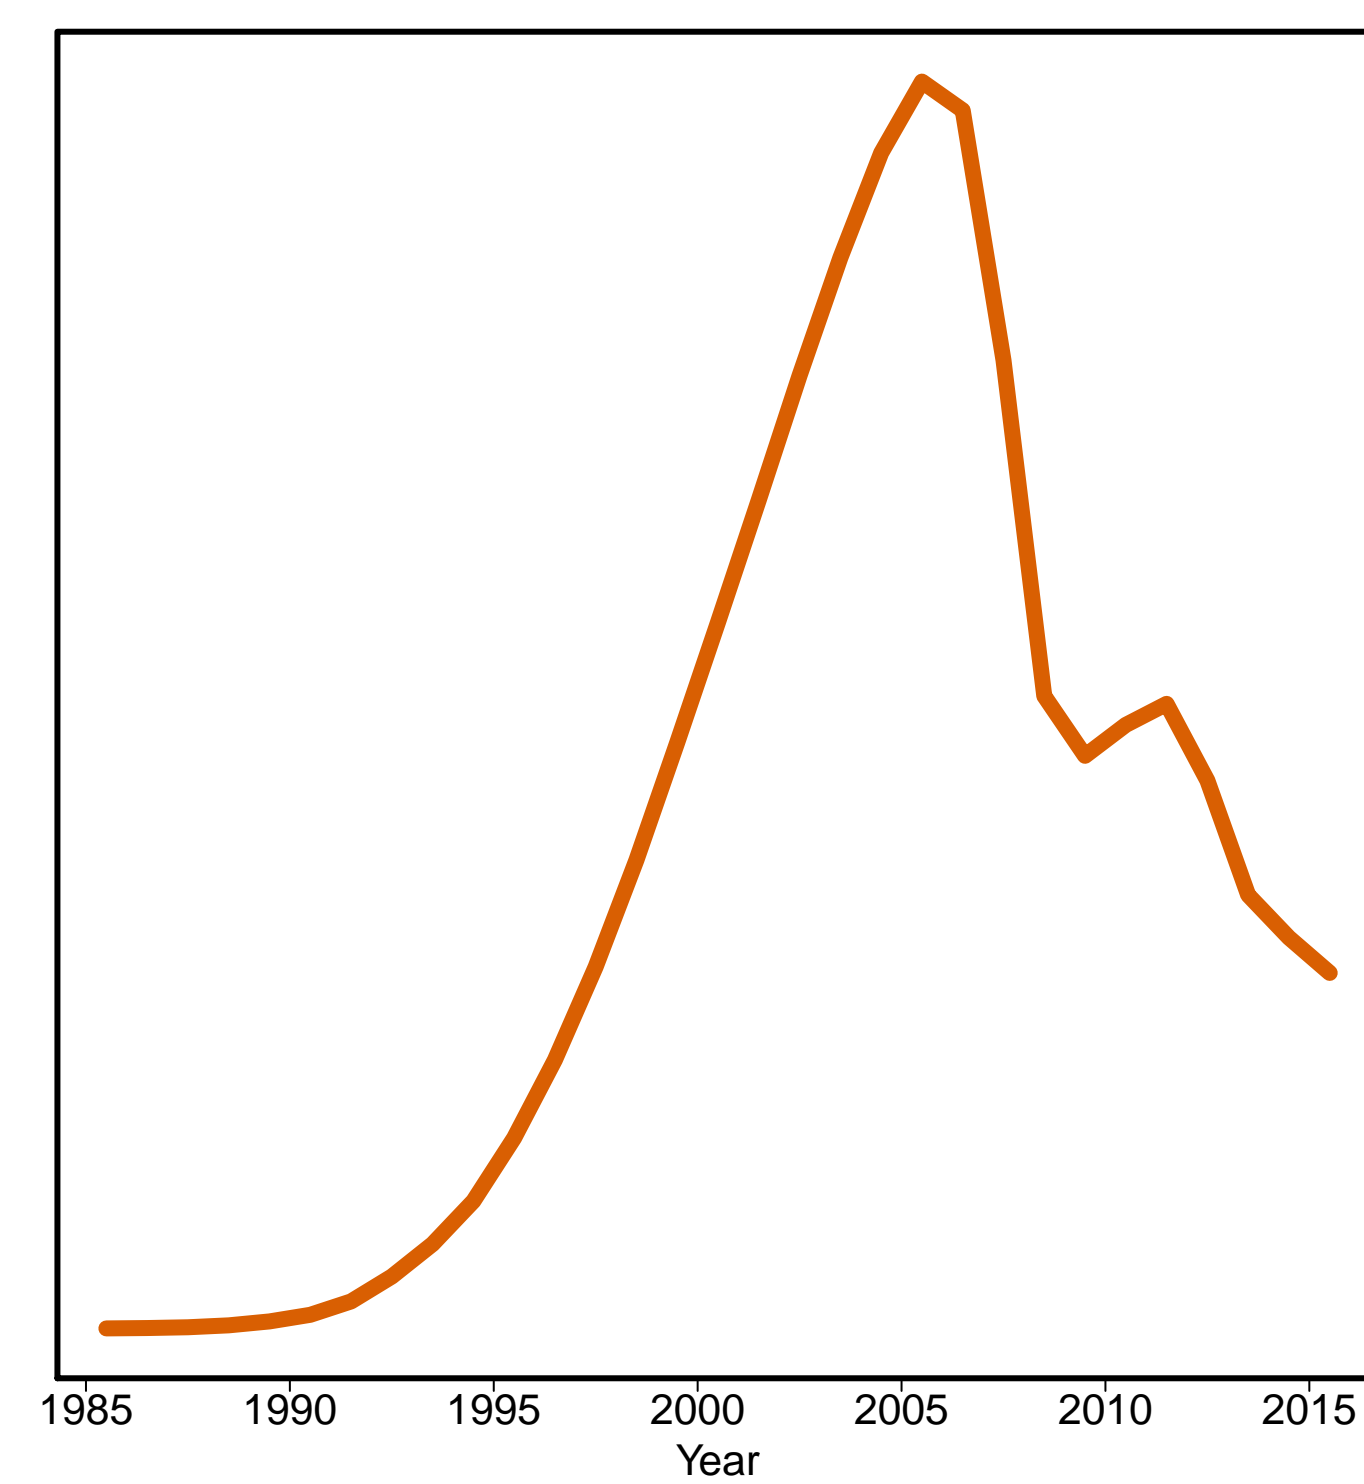

Paraguay [PRY]  
(South America)

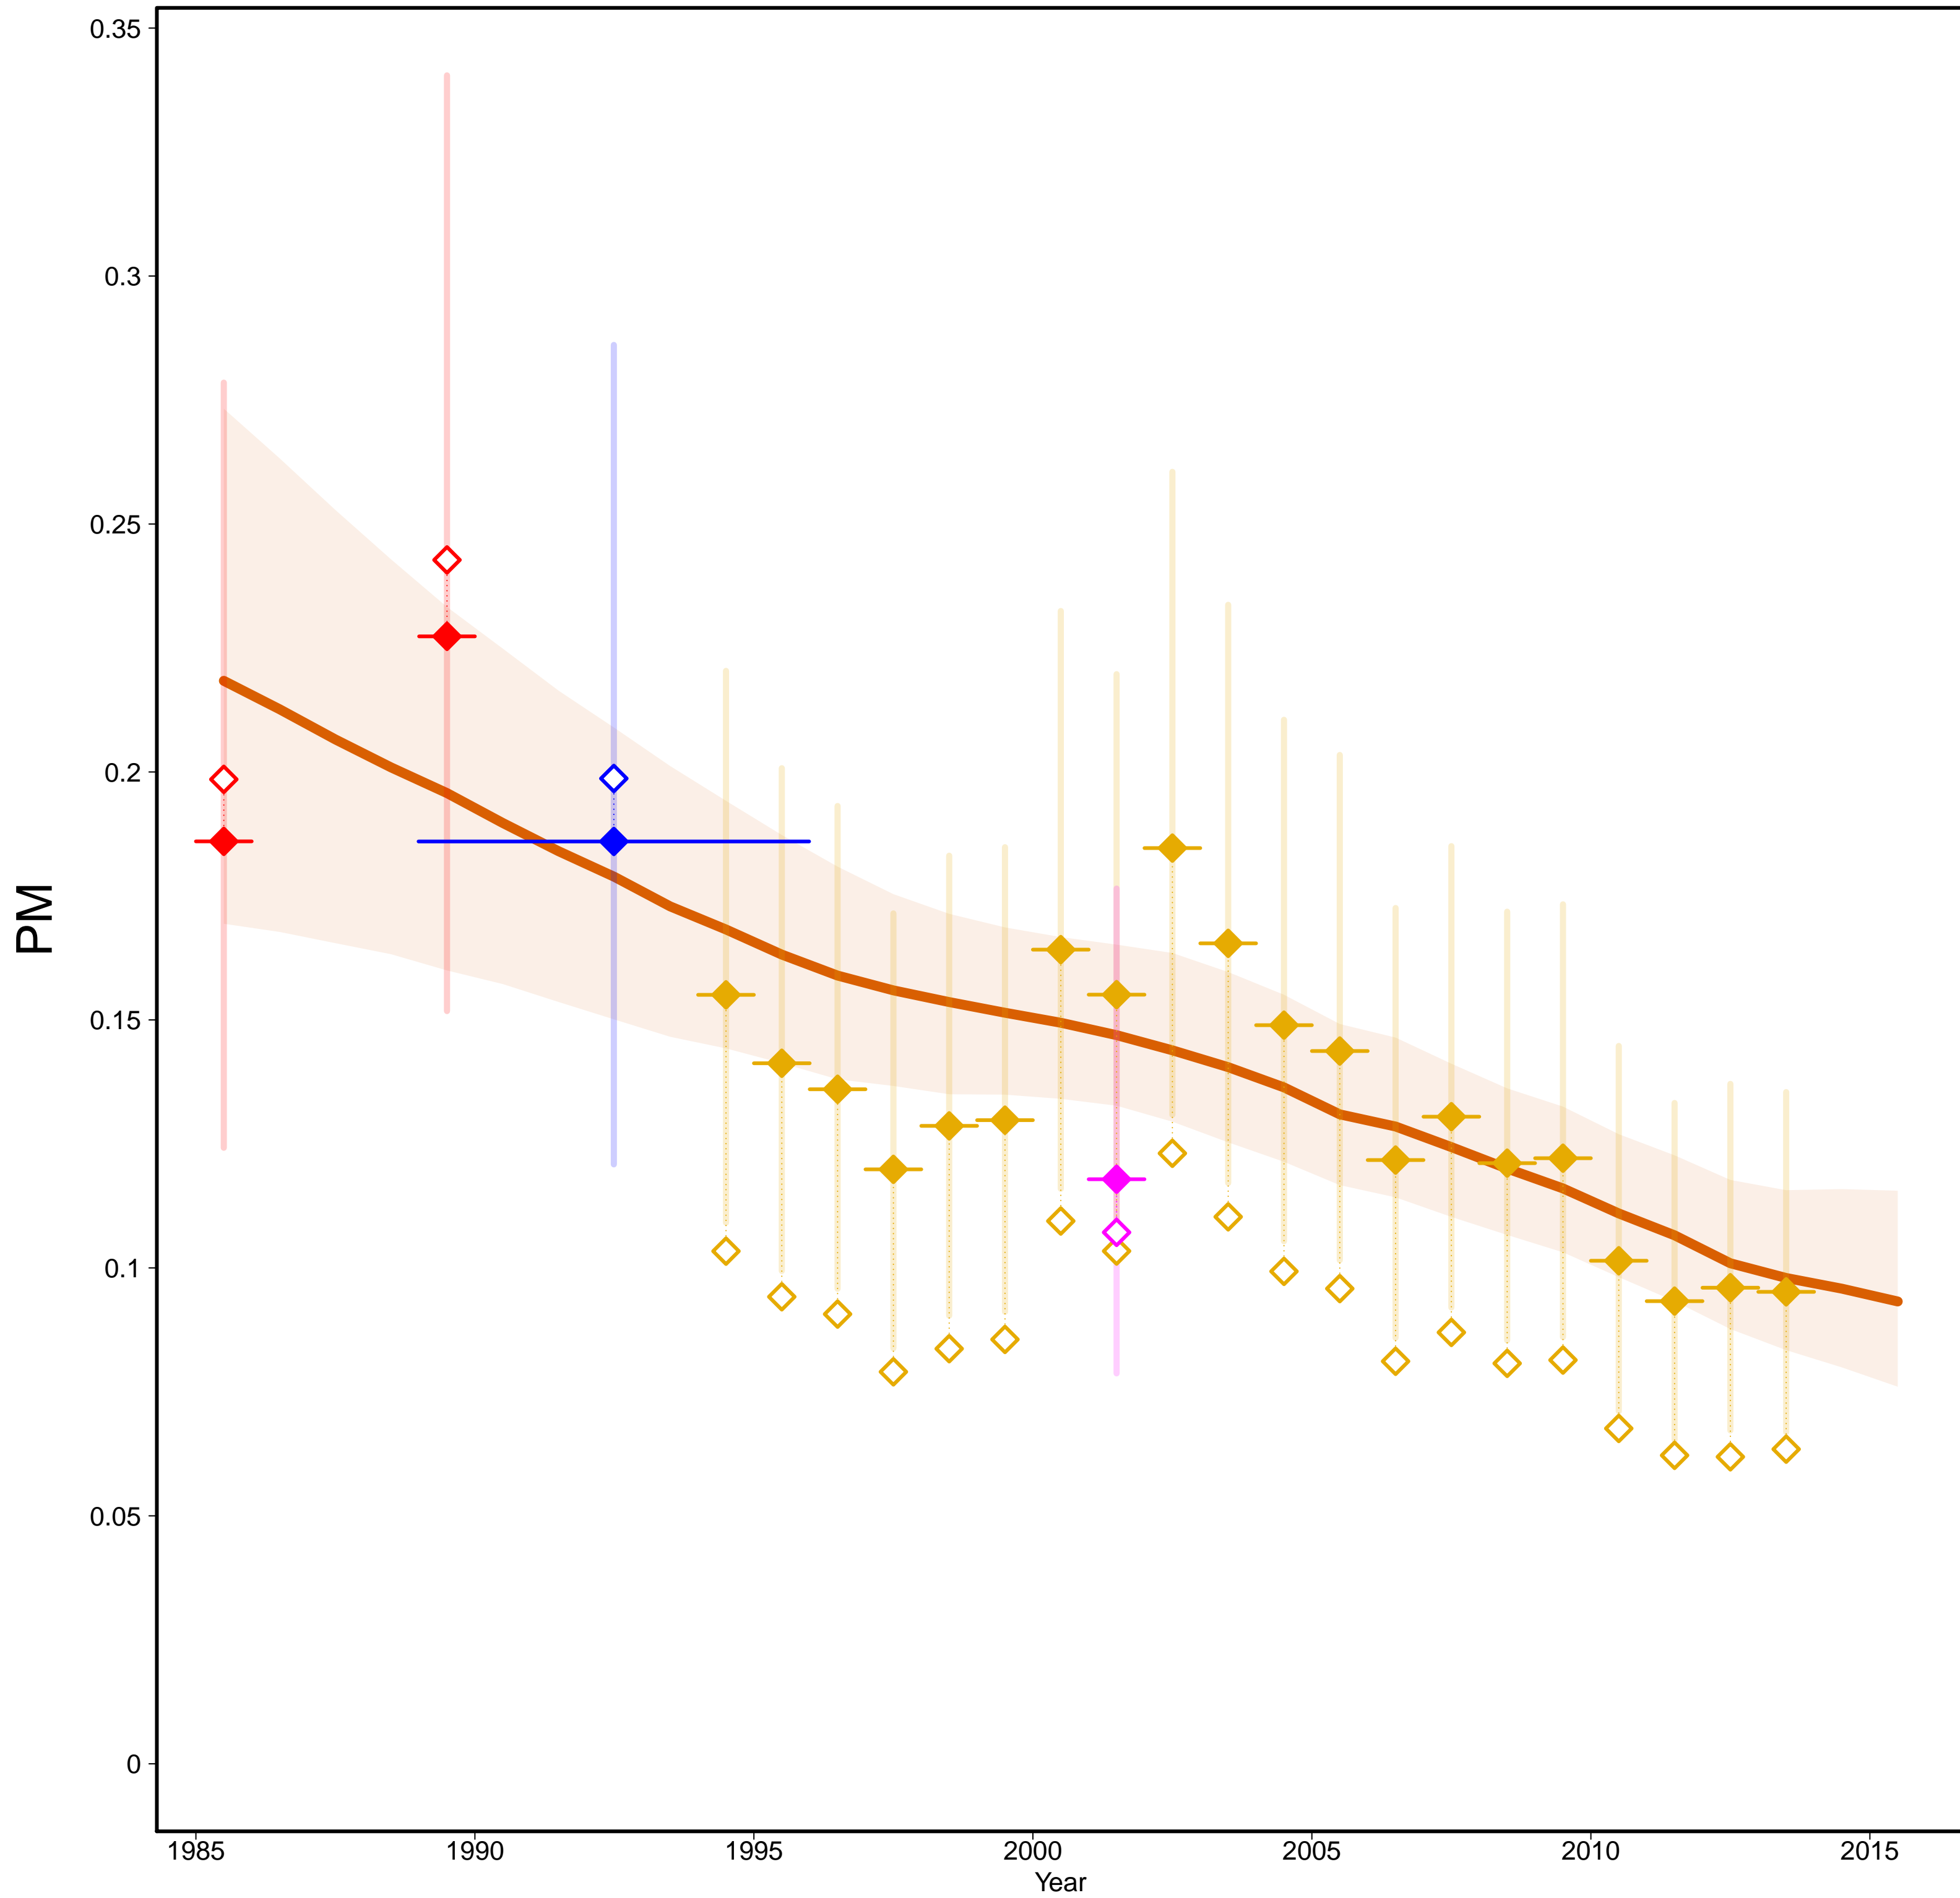

Paraguay [PRY]  
(South America)

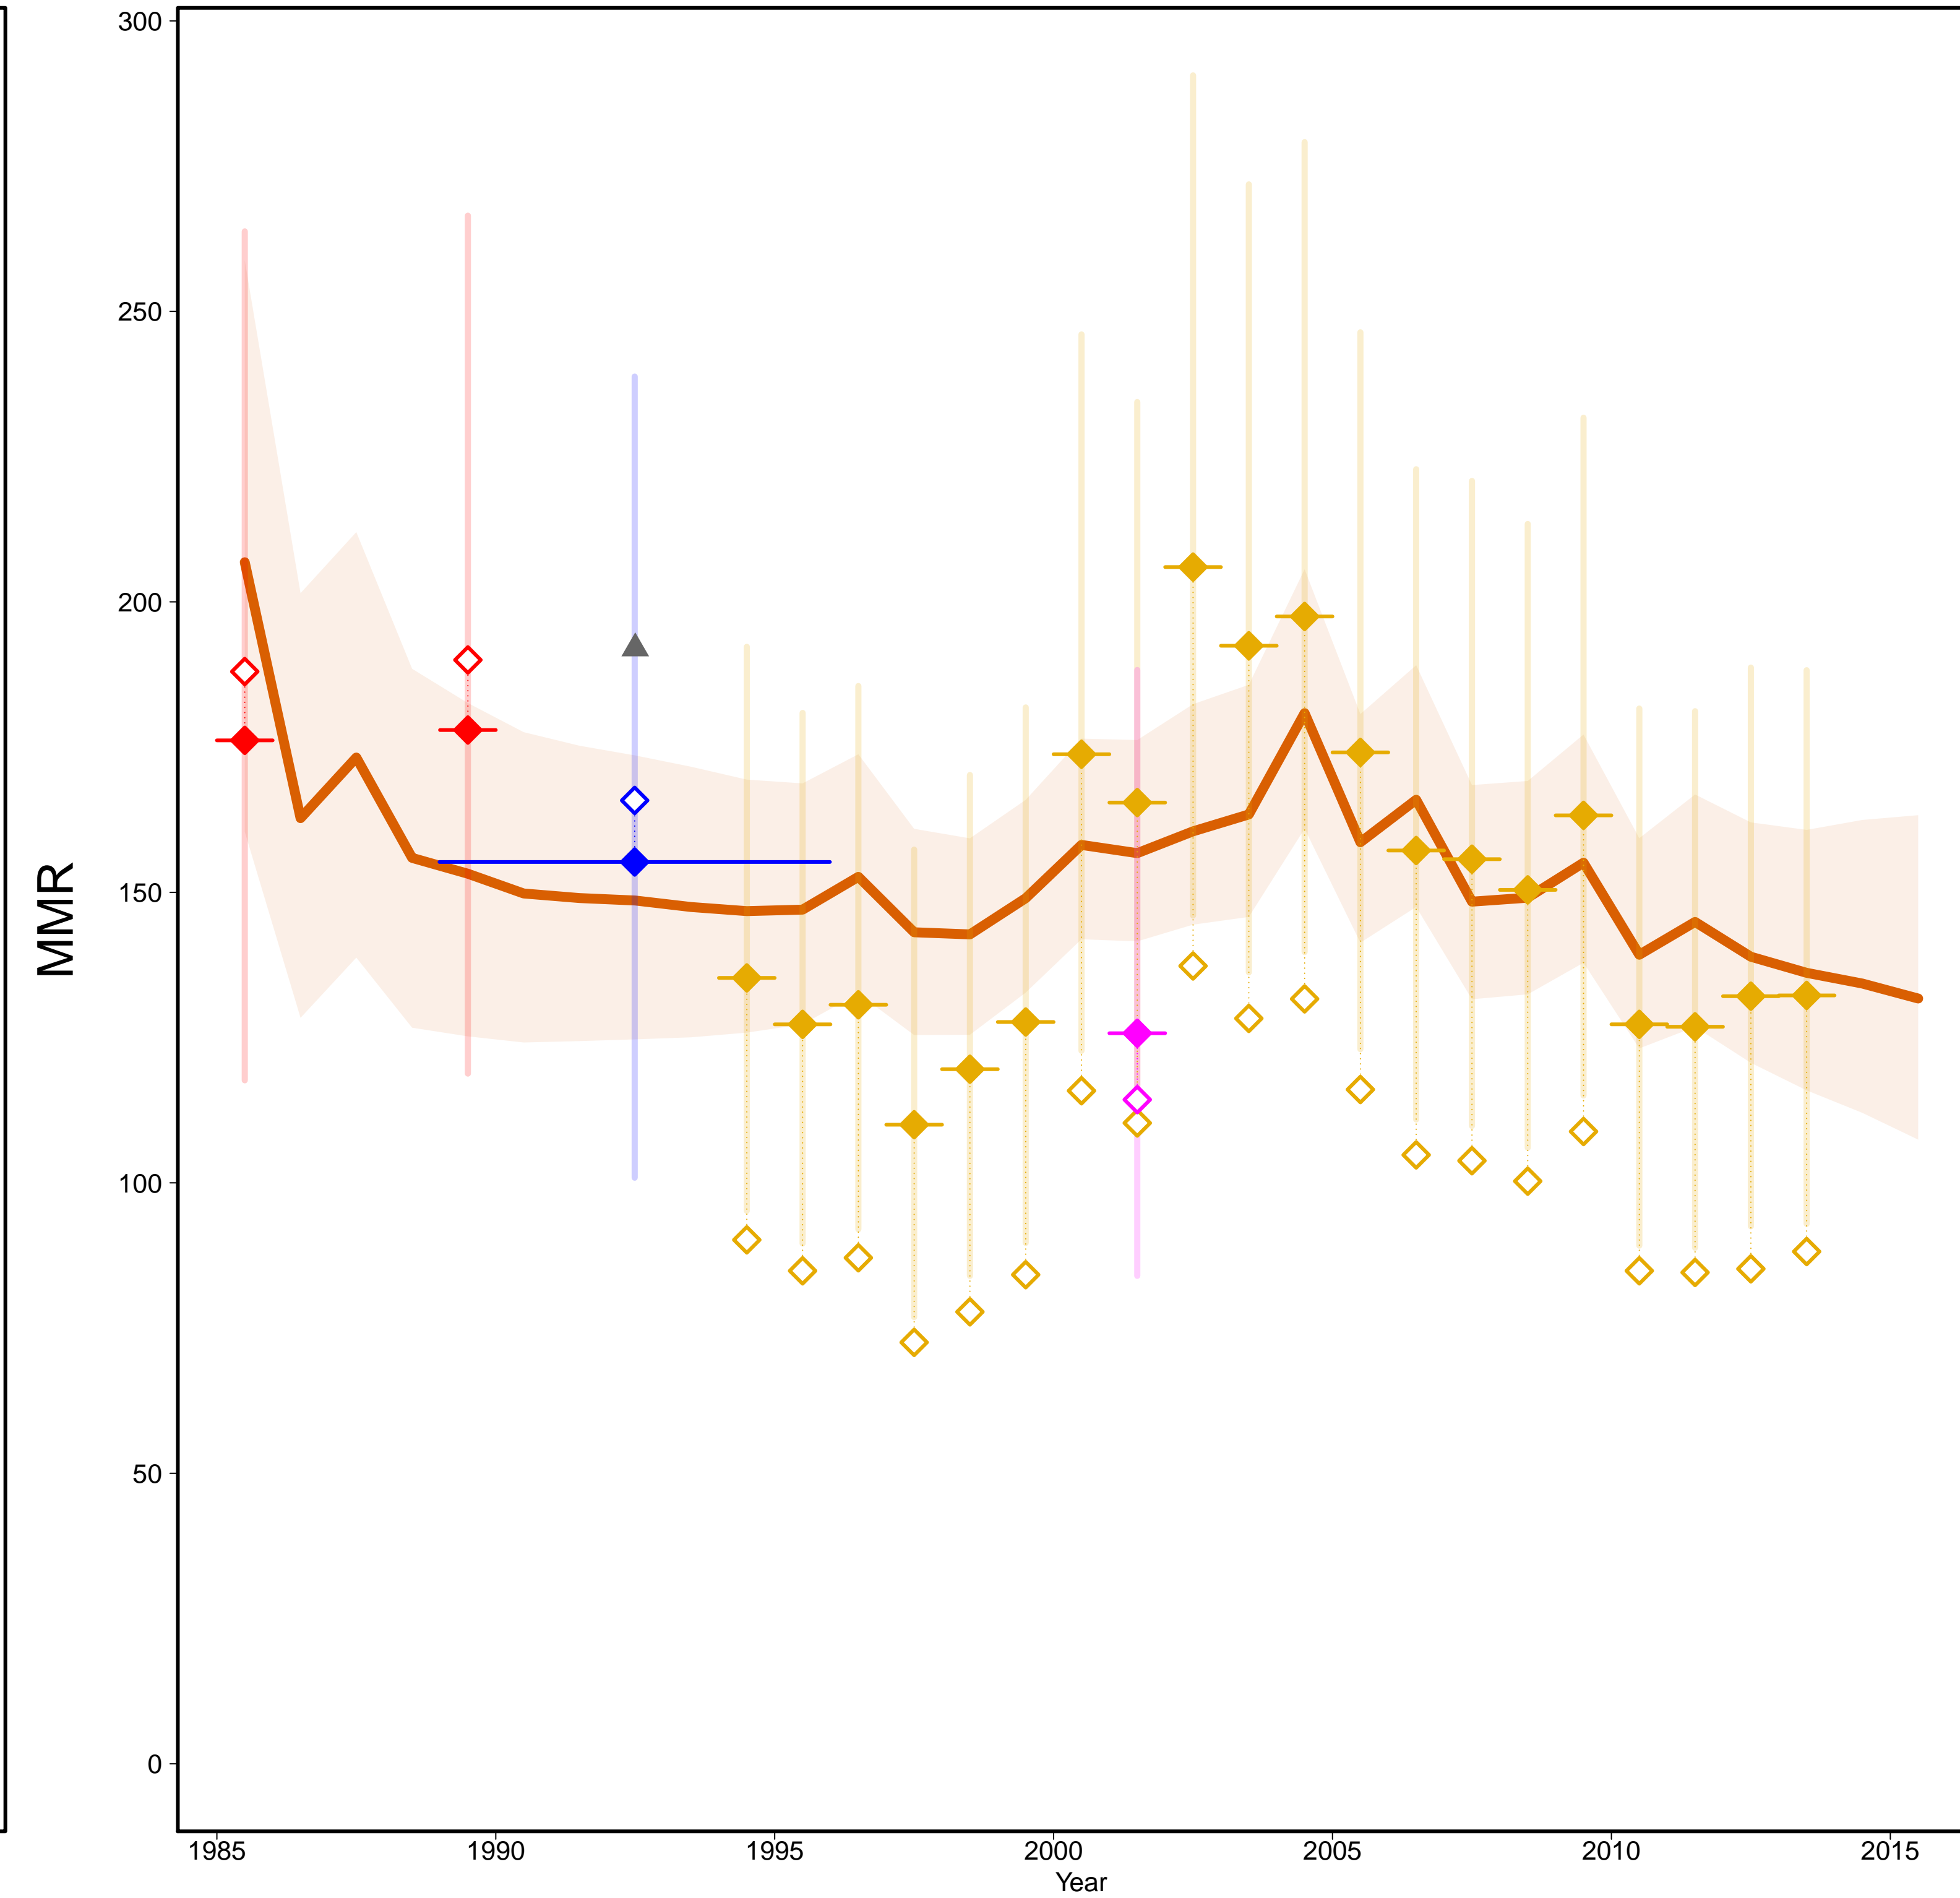

- Estimates —
- MMR Database 2015 —
- ◇ Observed Data
- ◆ Adjusted Data
- Data type —
- ◆ VR
- ◆ DHS
- ◆ Census
- ◆ Misc. studies
- ▲ Excluded misc. studies

Gross Domestic Product

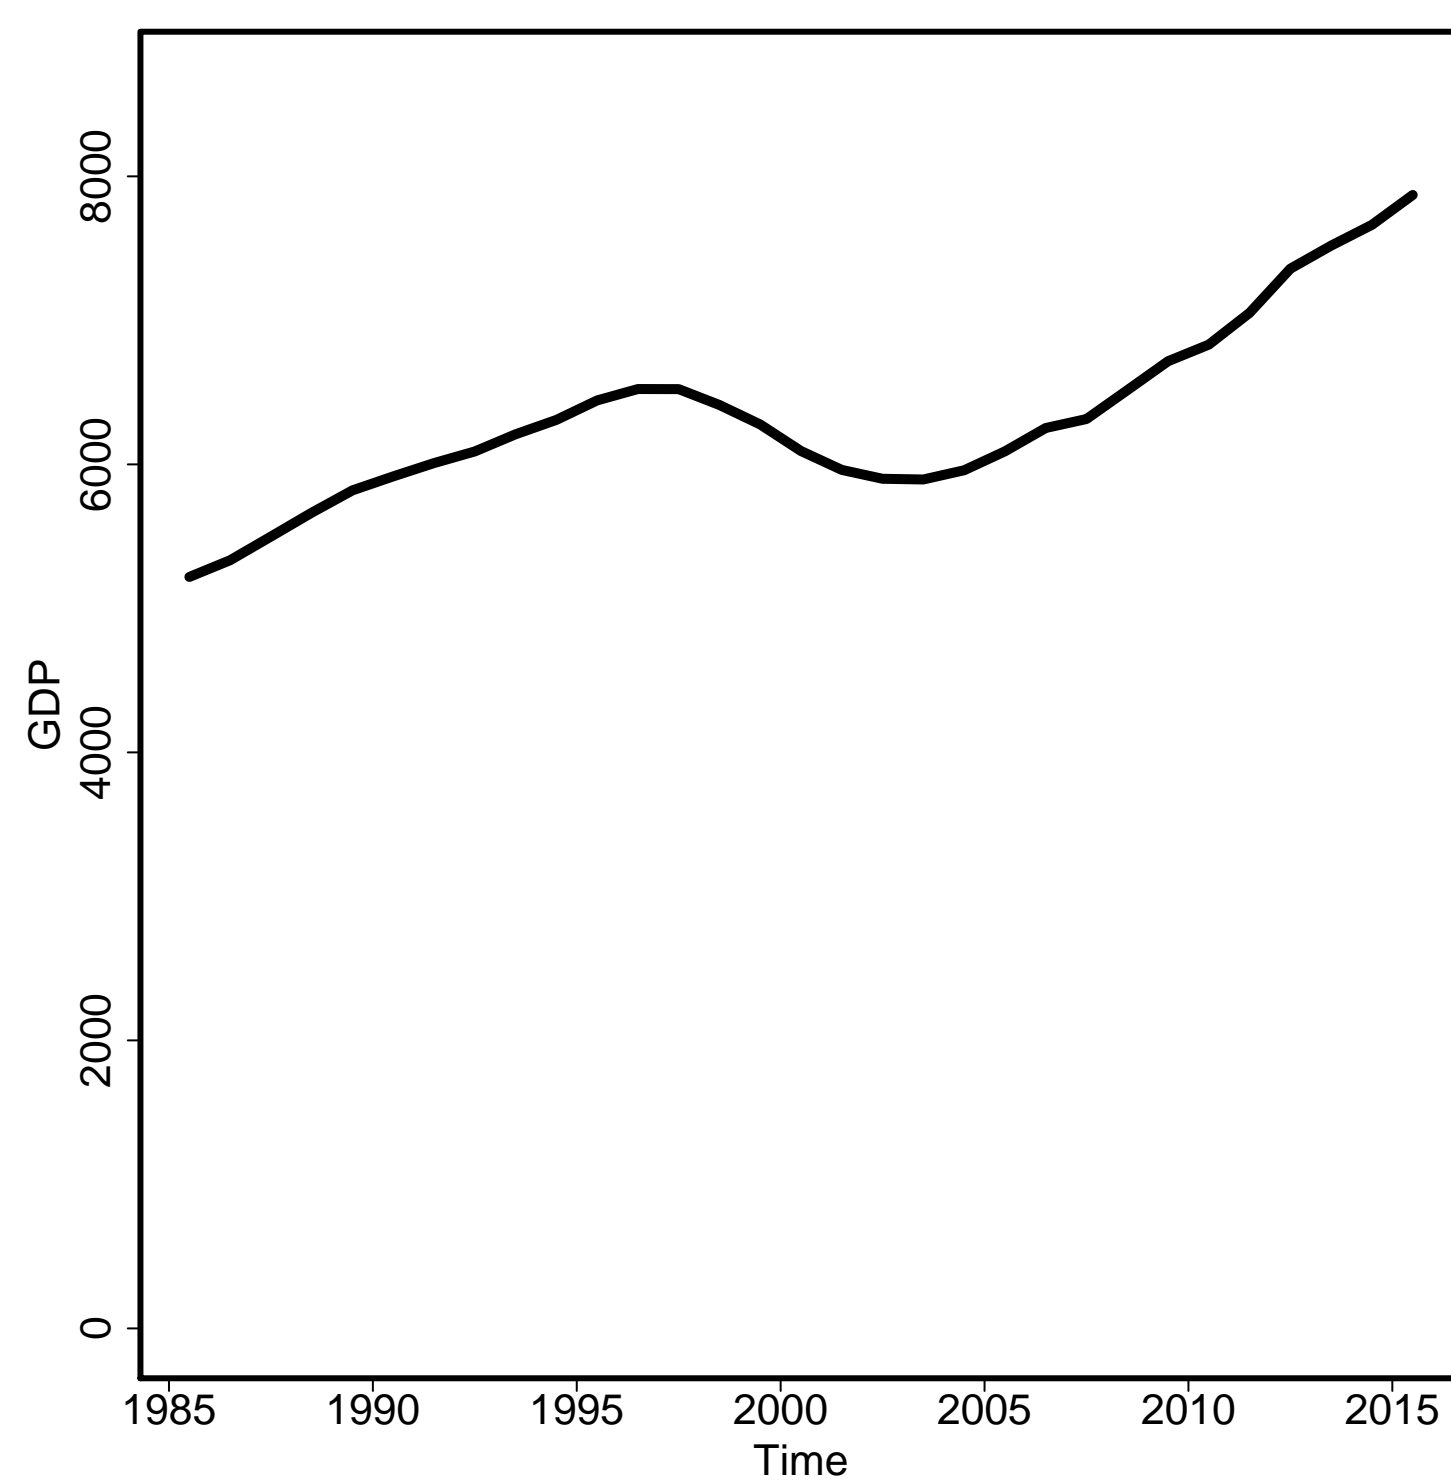

General Fertility Rate

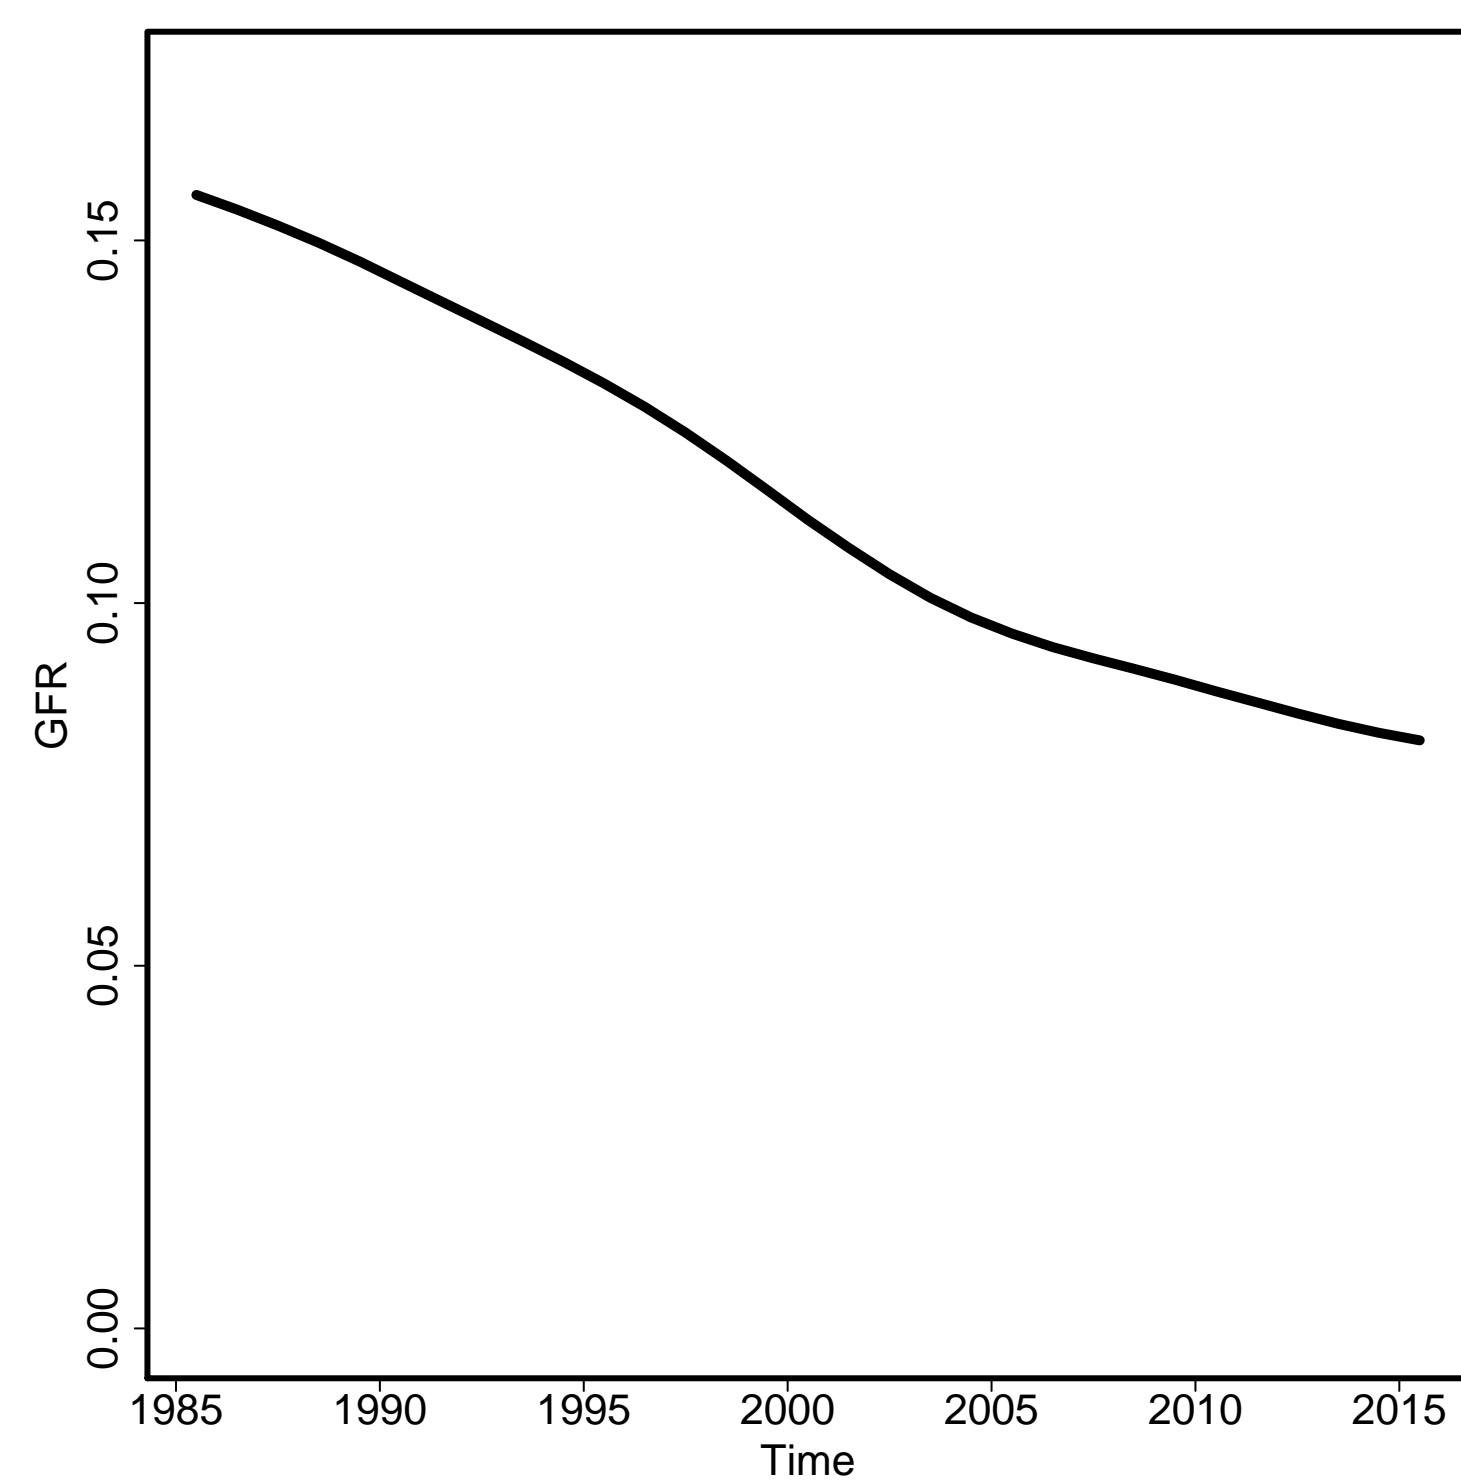

Skilled Attendance to Birth

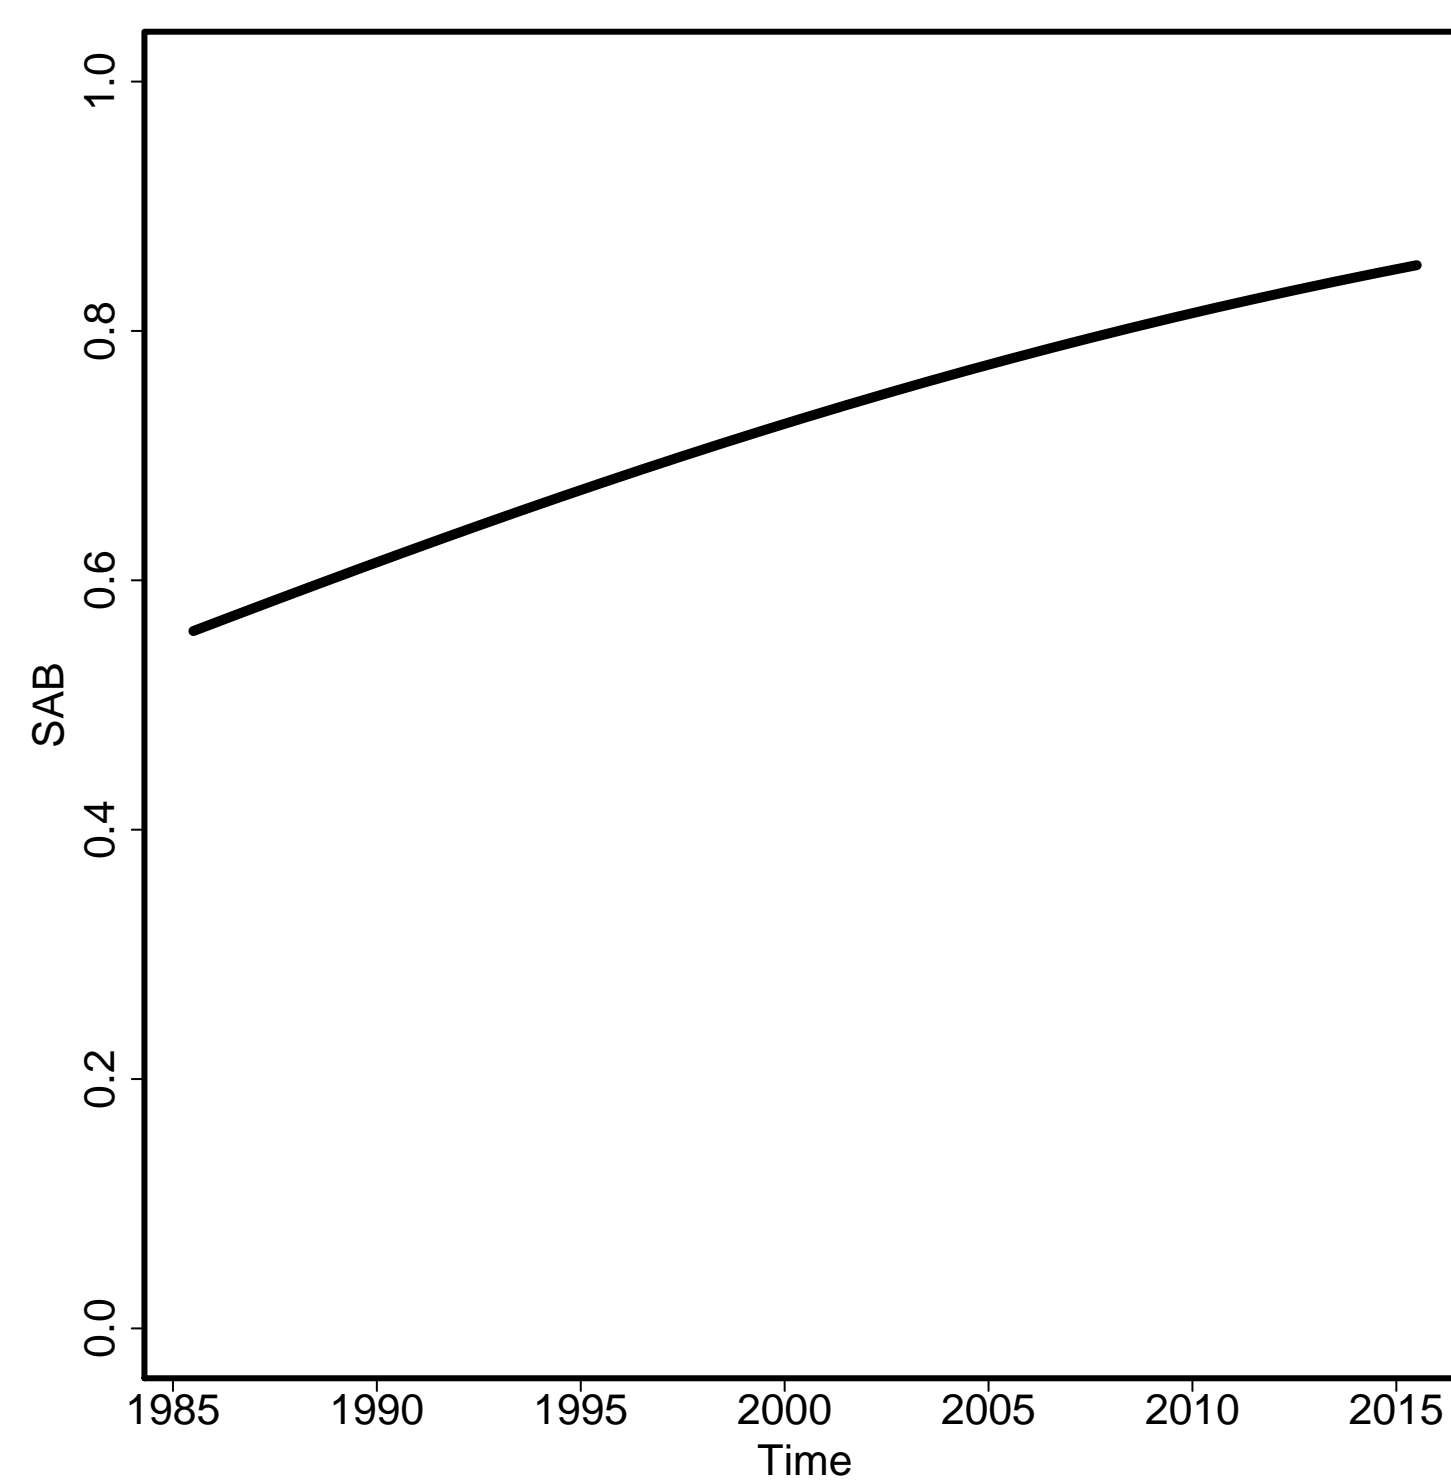

Envelope/Births

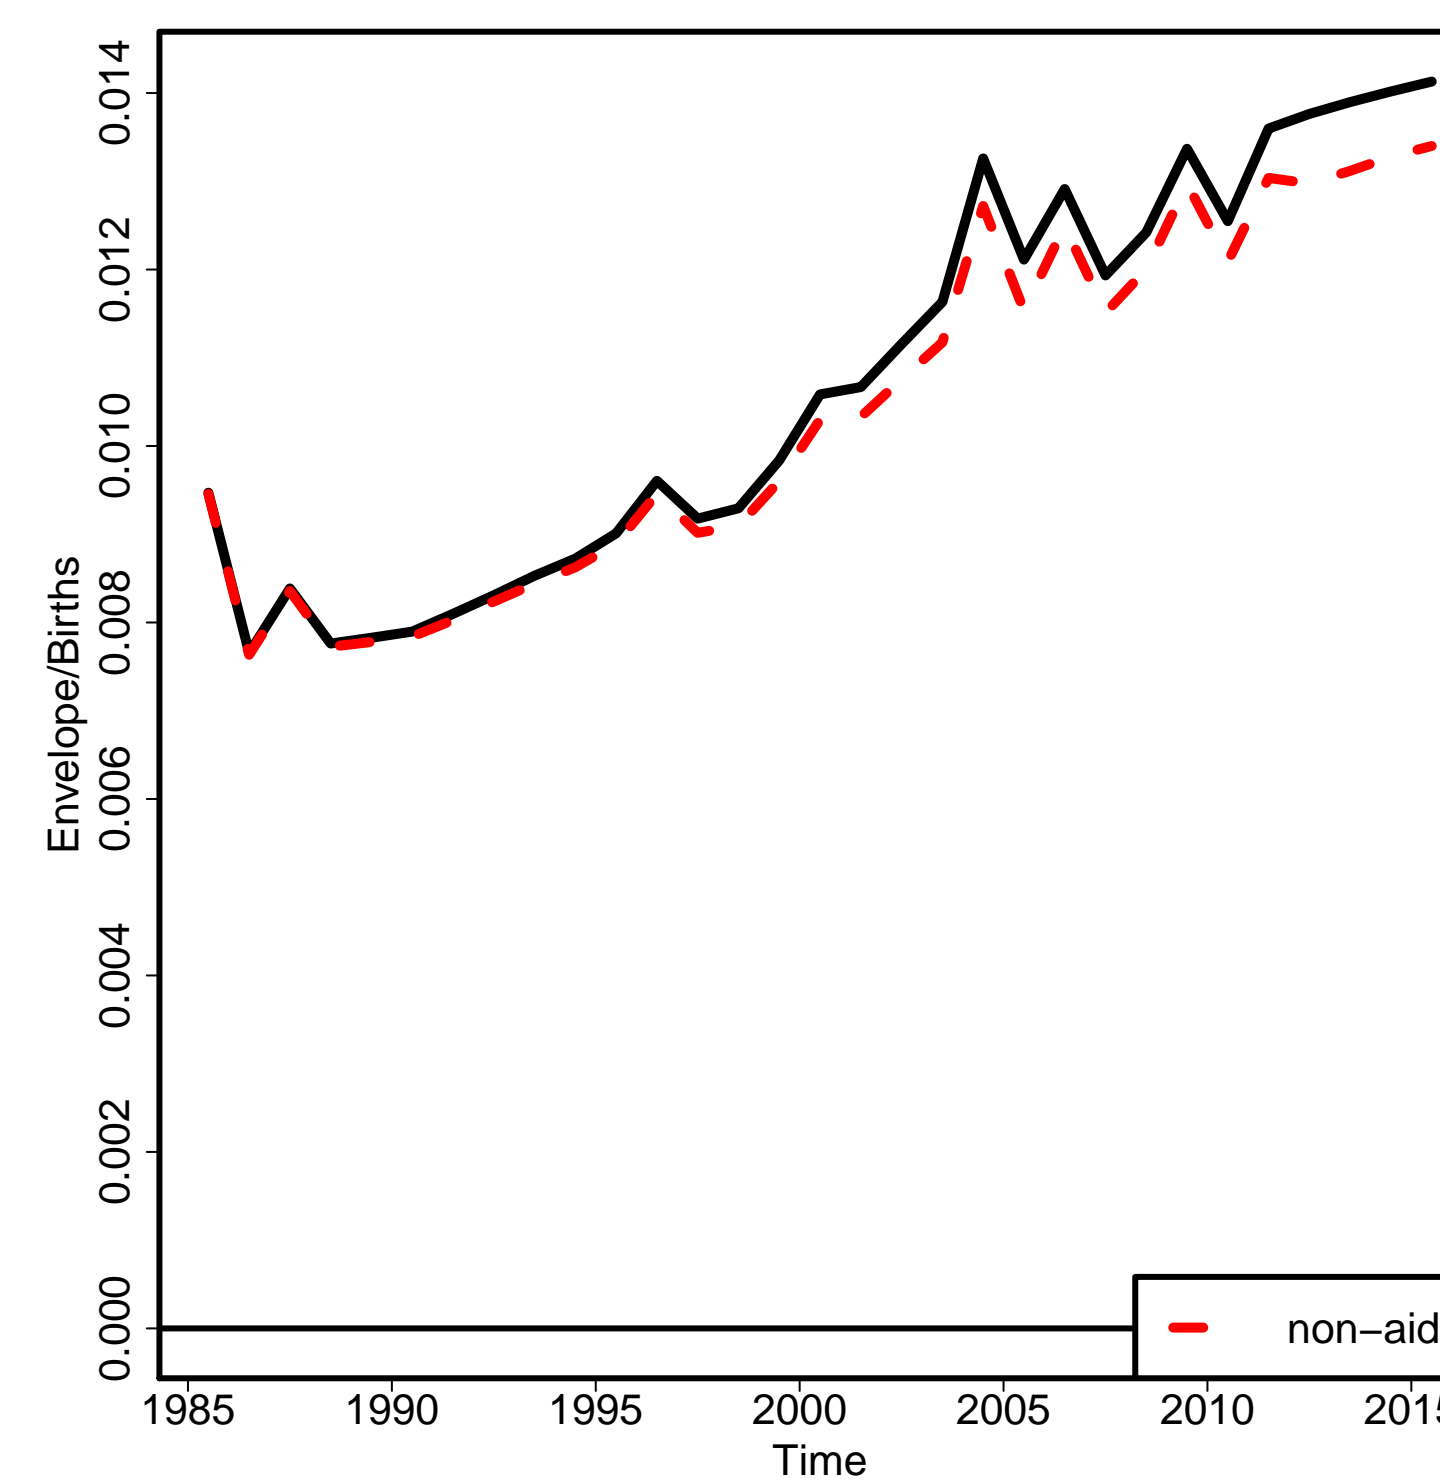

Non-aids MMR

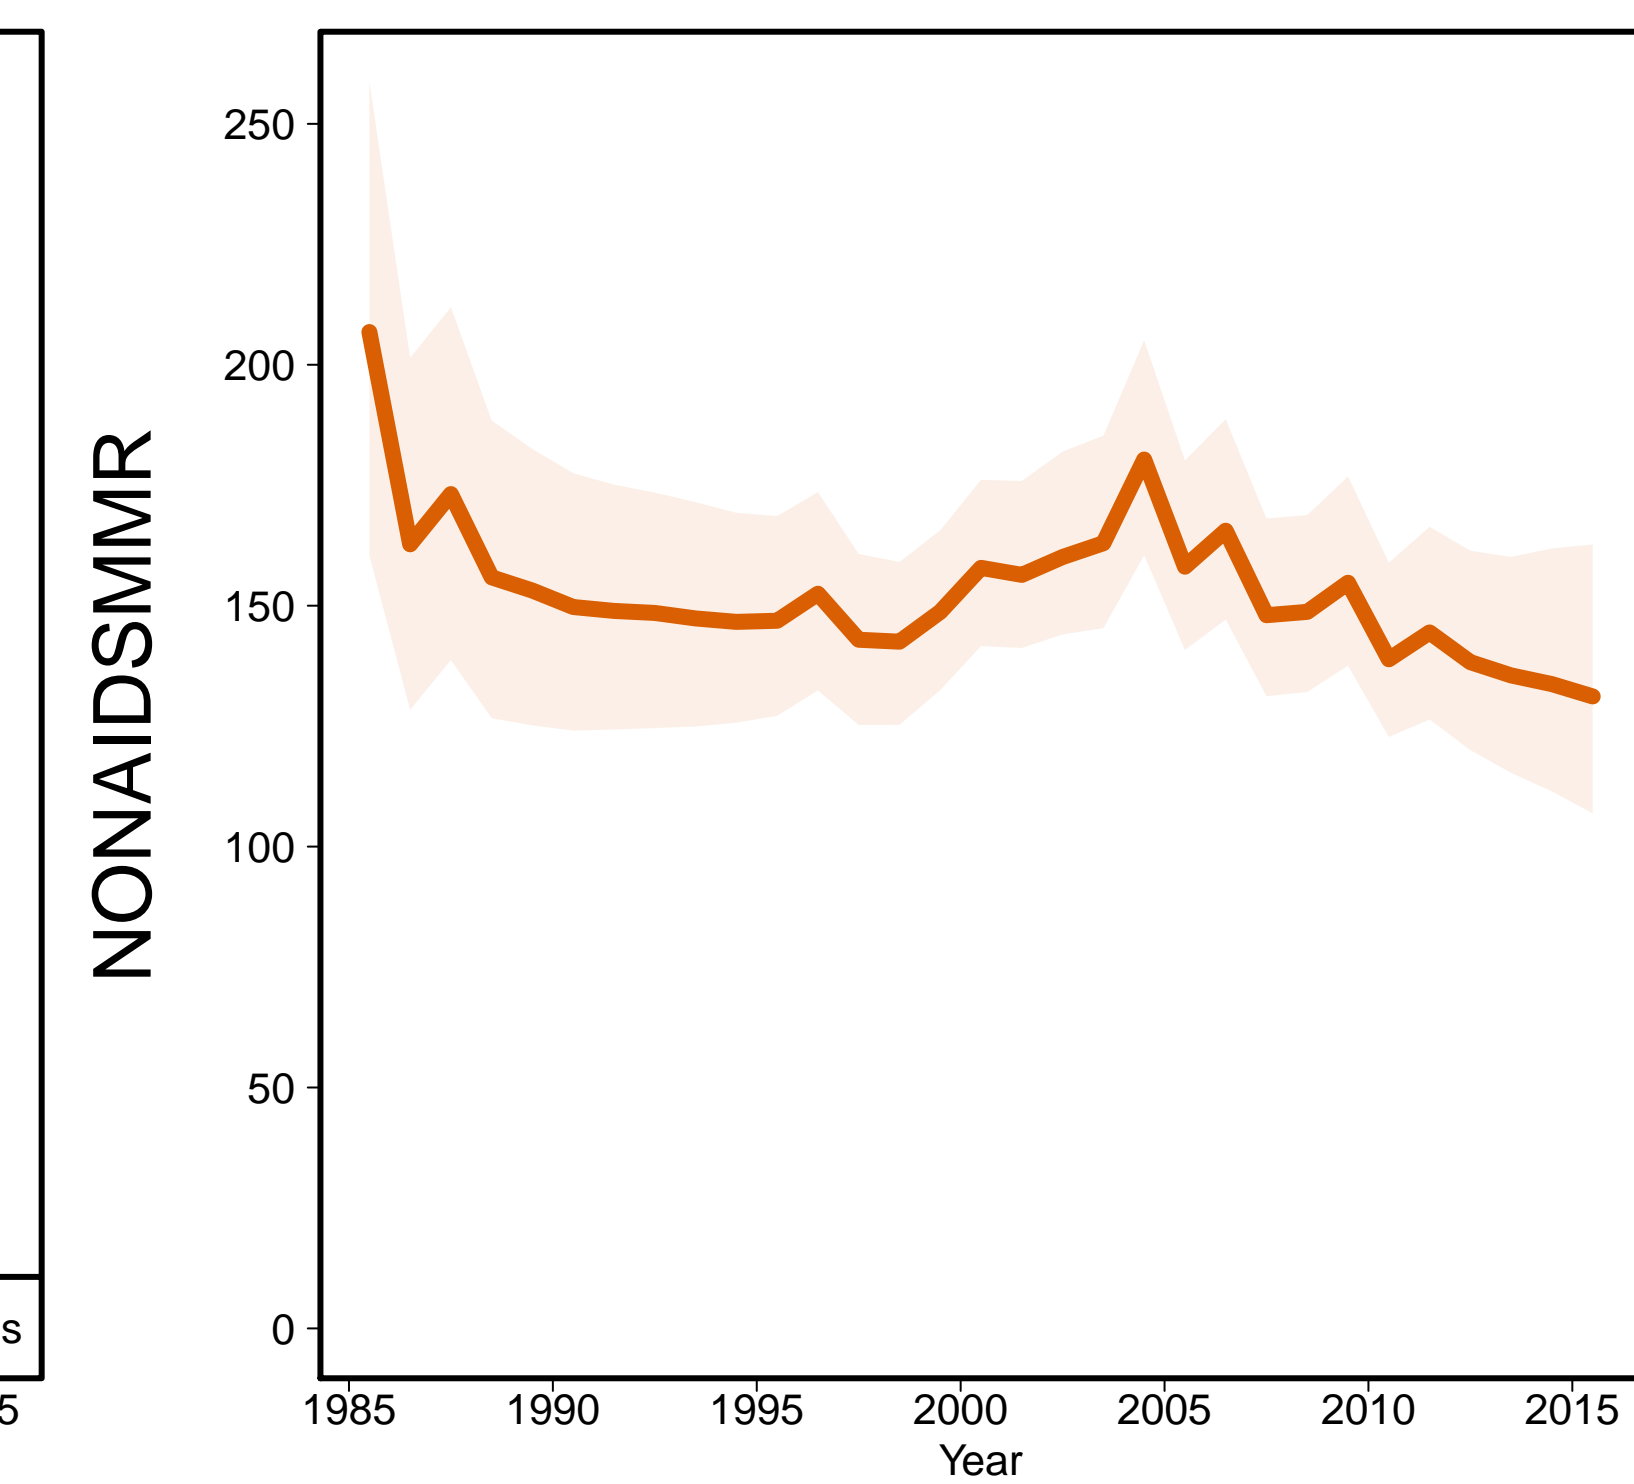

Aids MMR

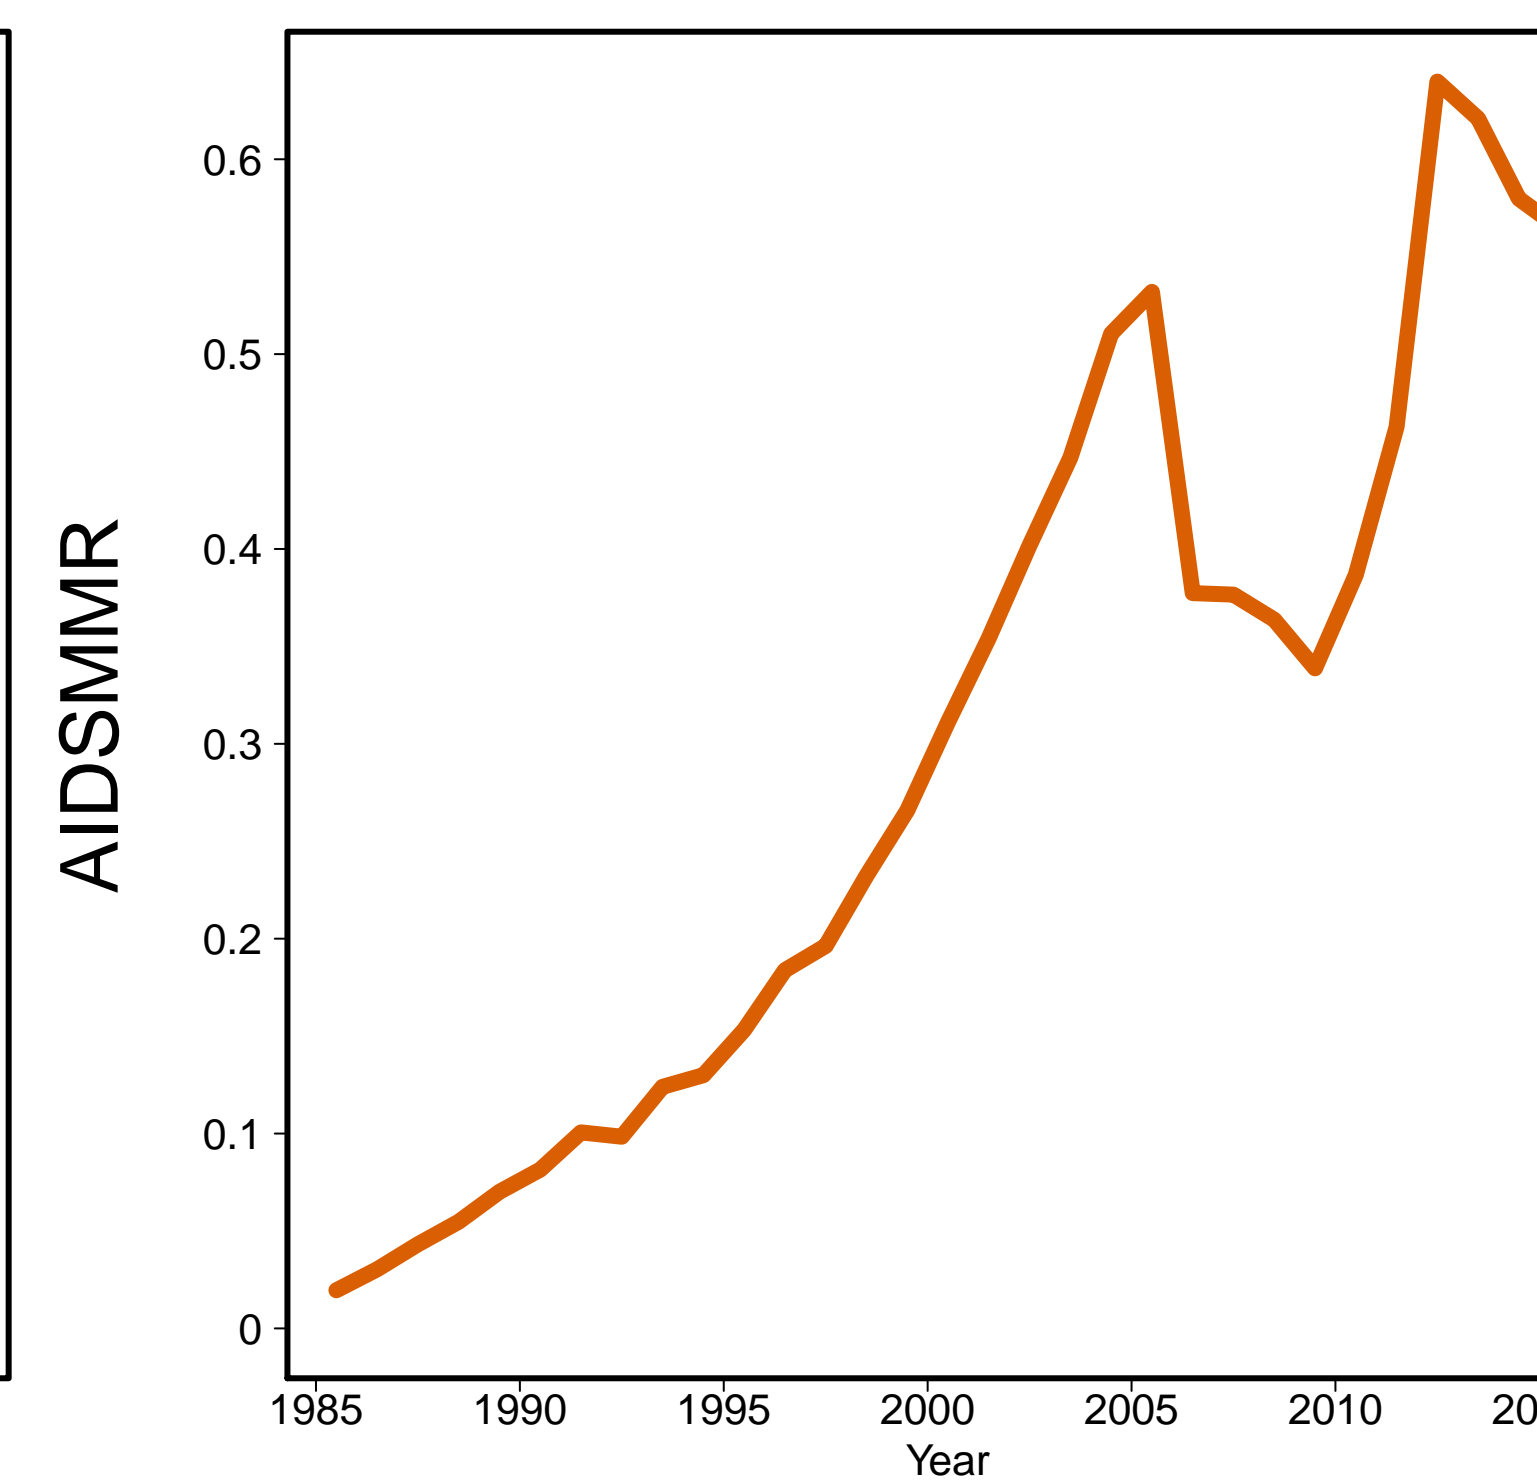

Peru [PER]  
(South America)

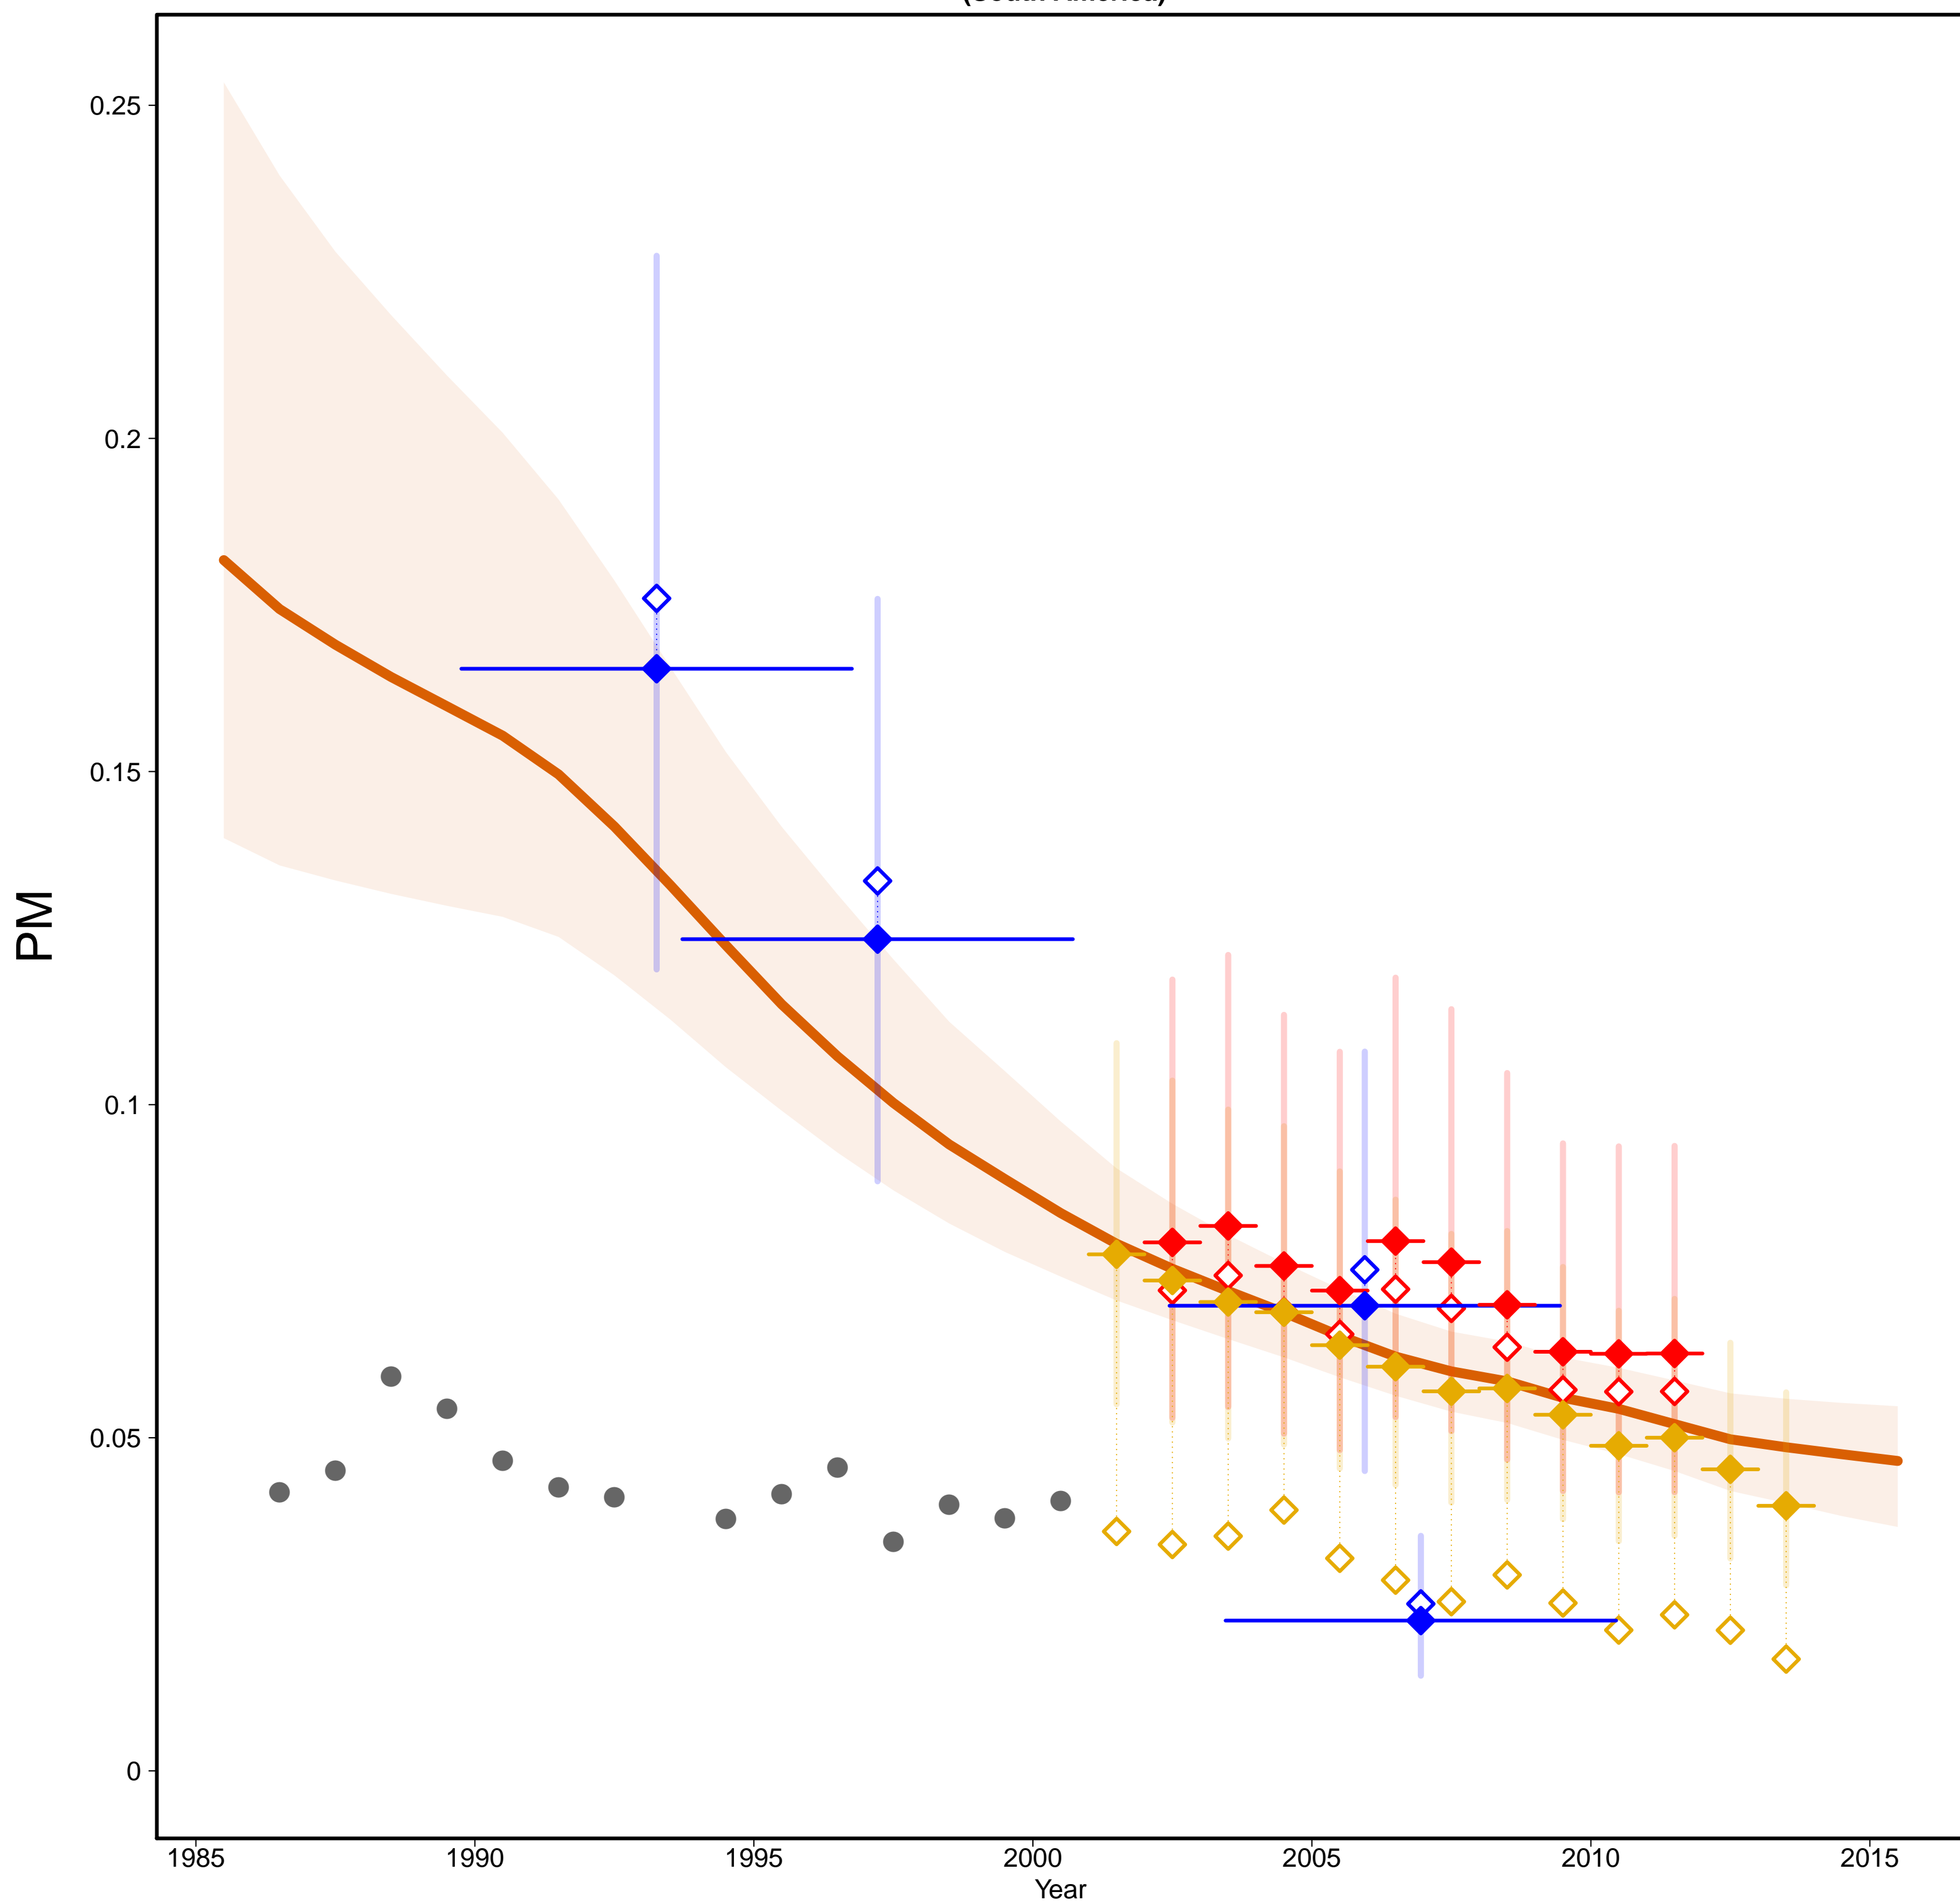

Peru [PER]  
(South America)

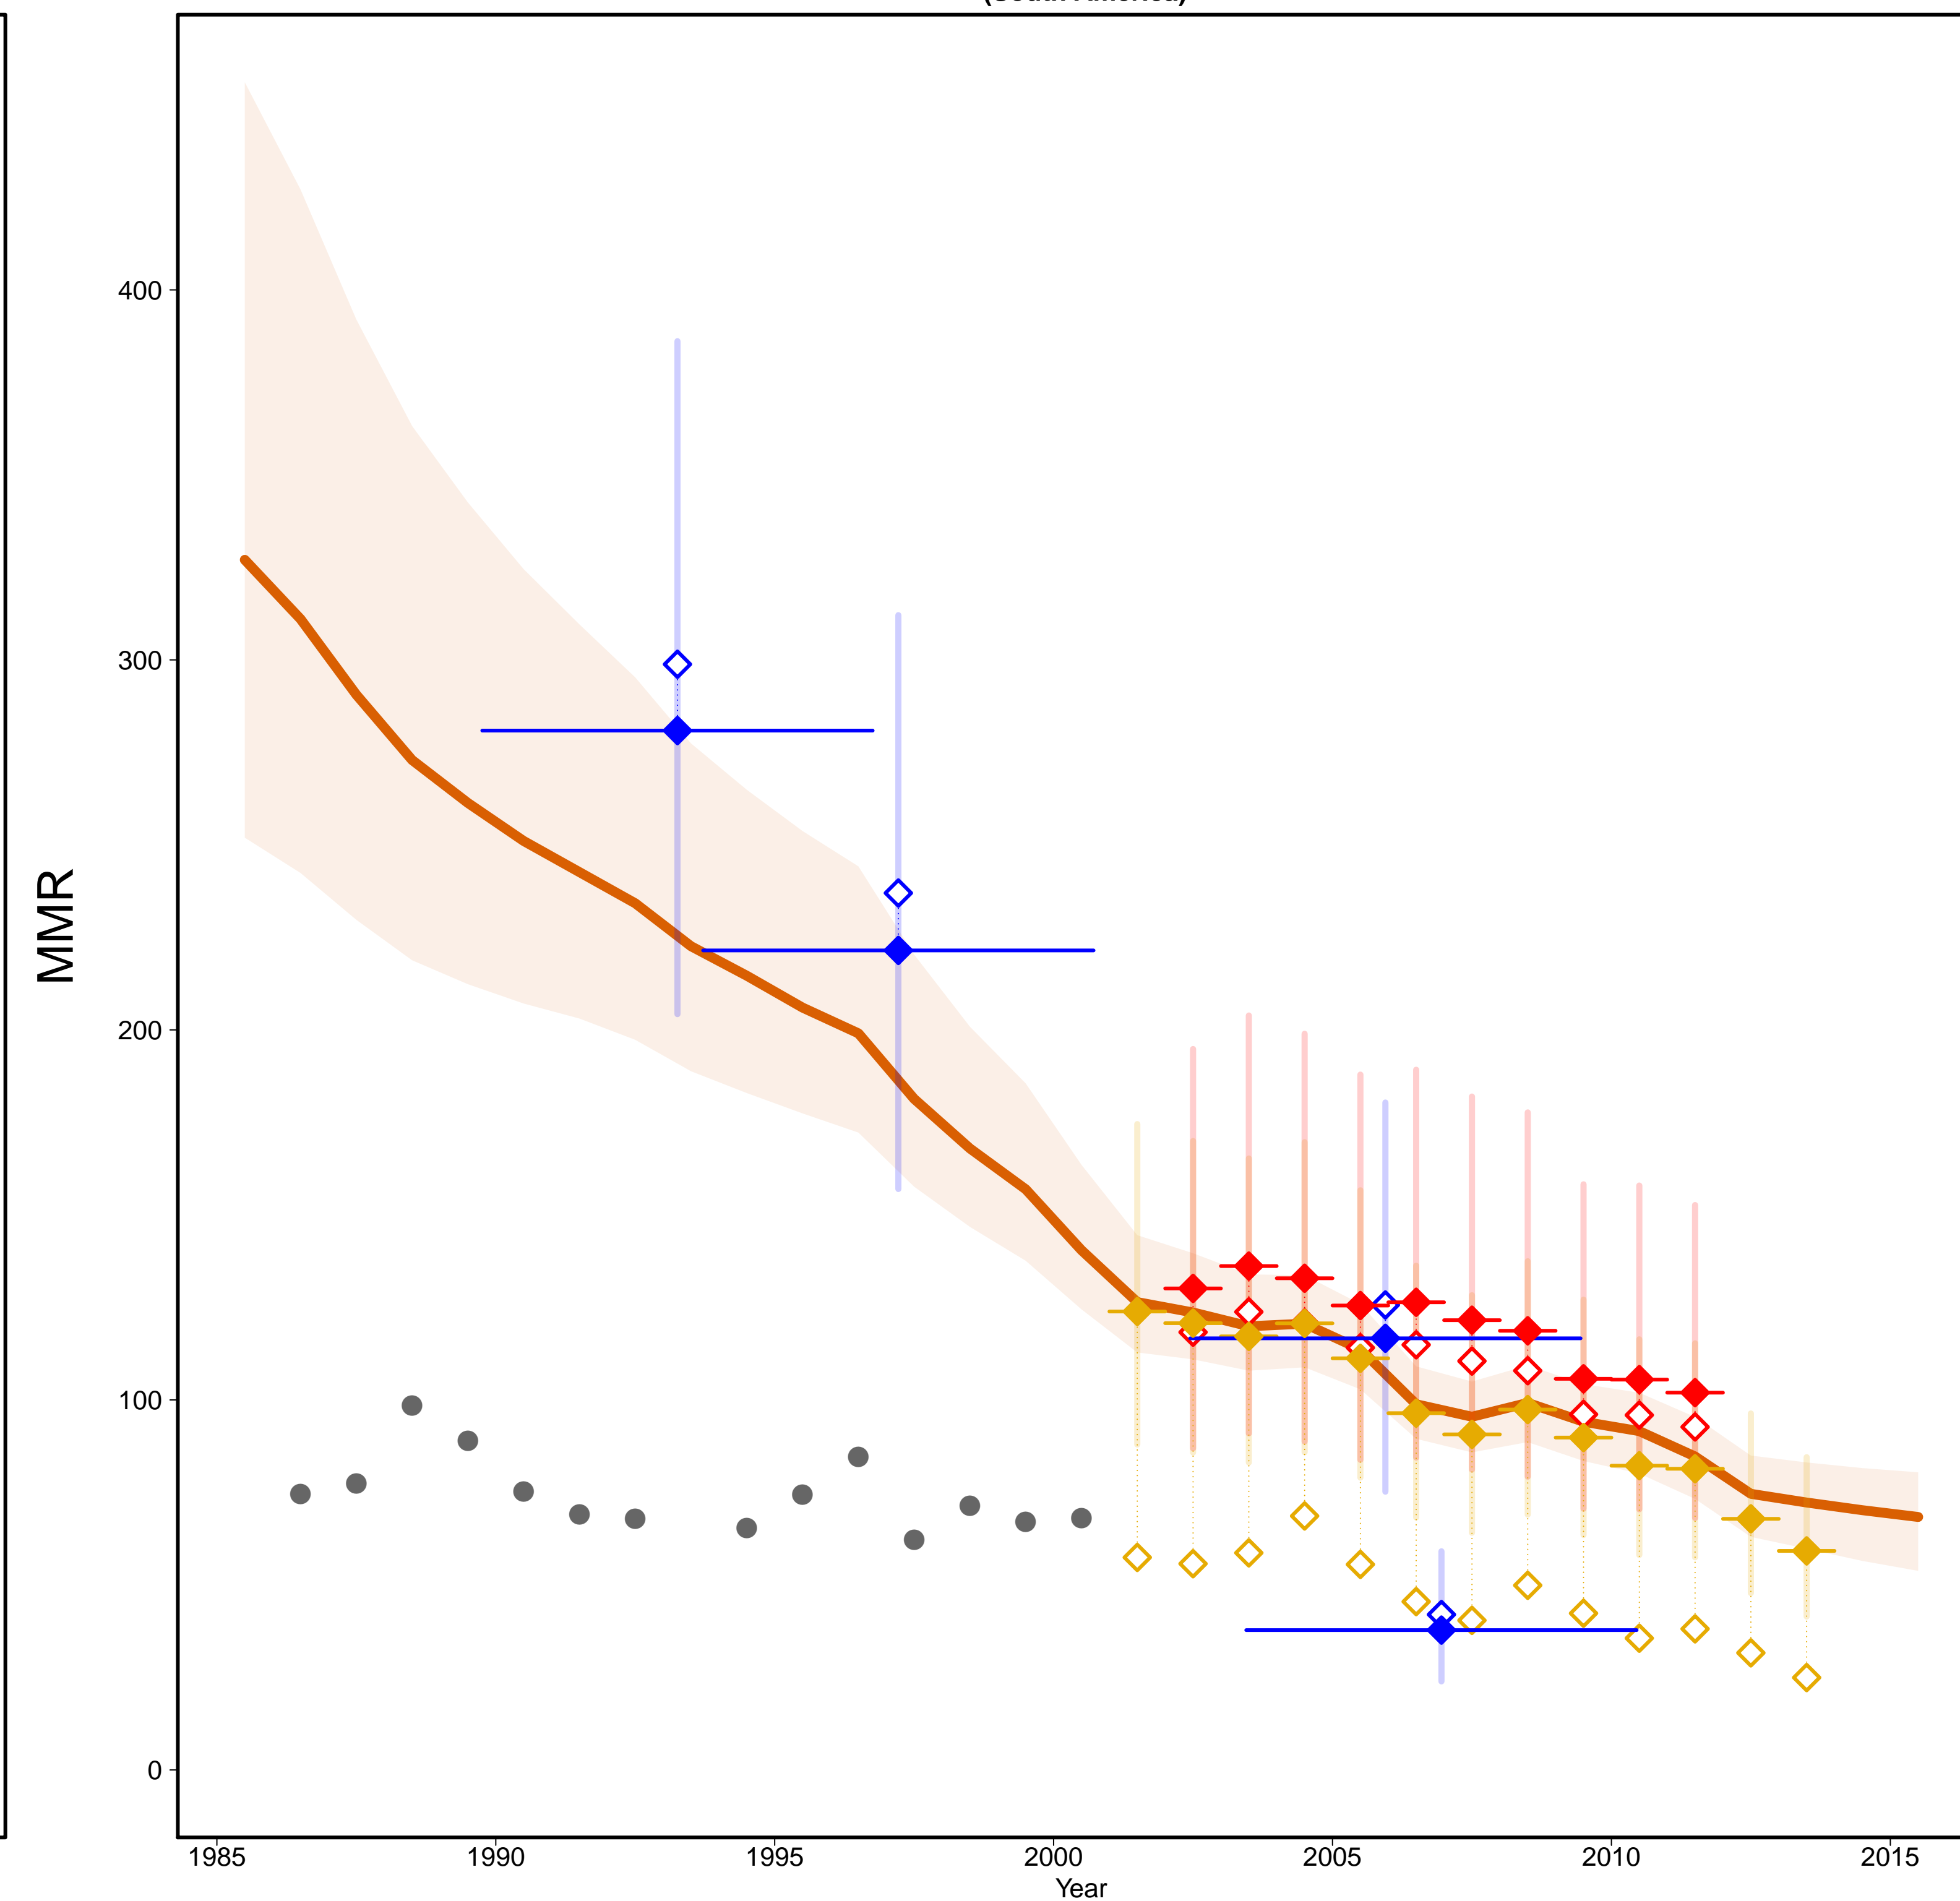

- Estimates –
- Mlate
- MMR Database 2015 –
- ◇ Observed Data
- ◆ Adjusted Data
- Data type –
- ◆ VR
- ◆ DHS
- ◆ Misc. studies
- Excluded VR data (data quality issues)

Gross Domestic Product

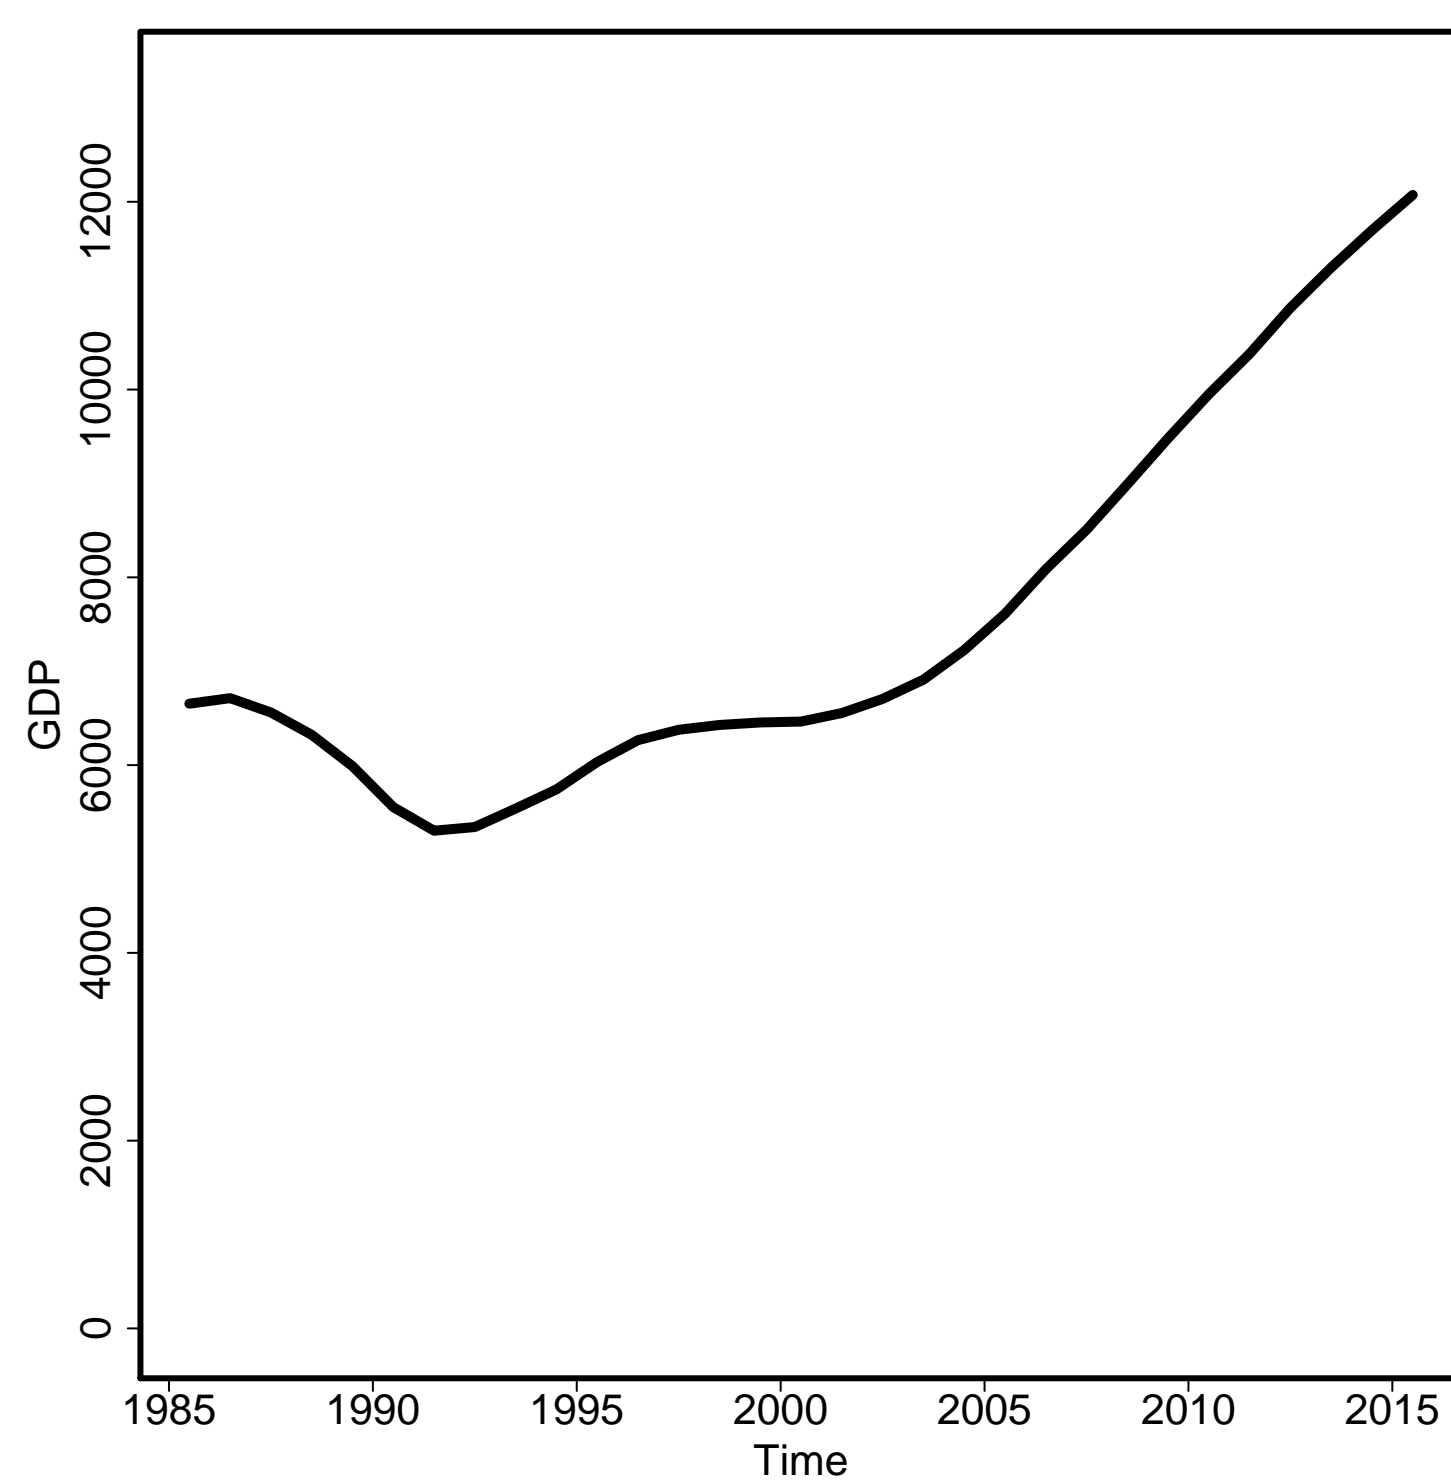

General Fertility Rate

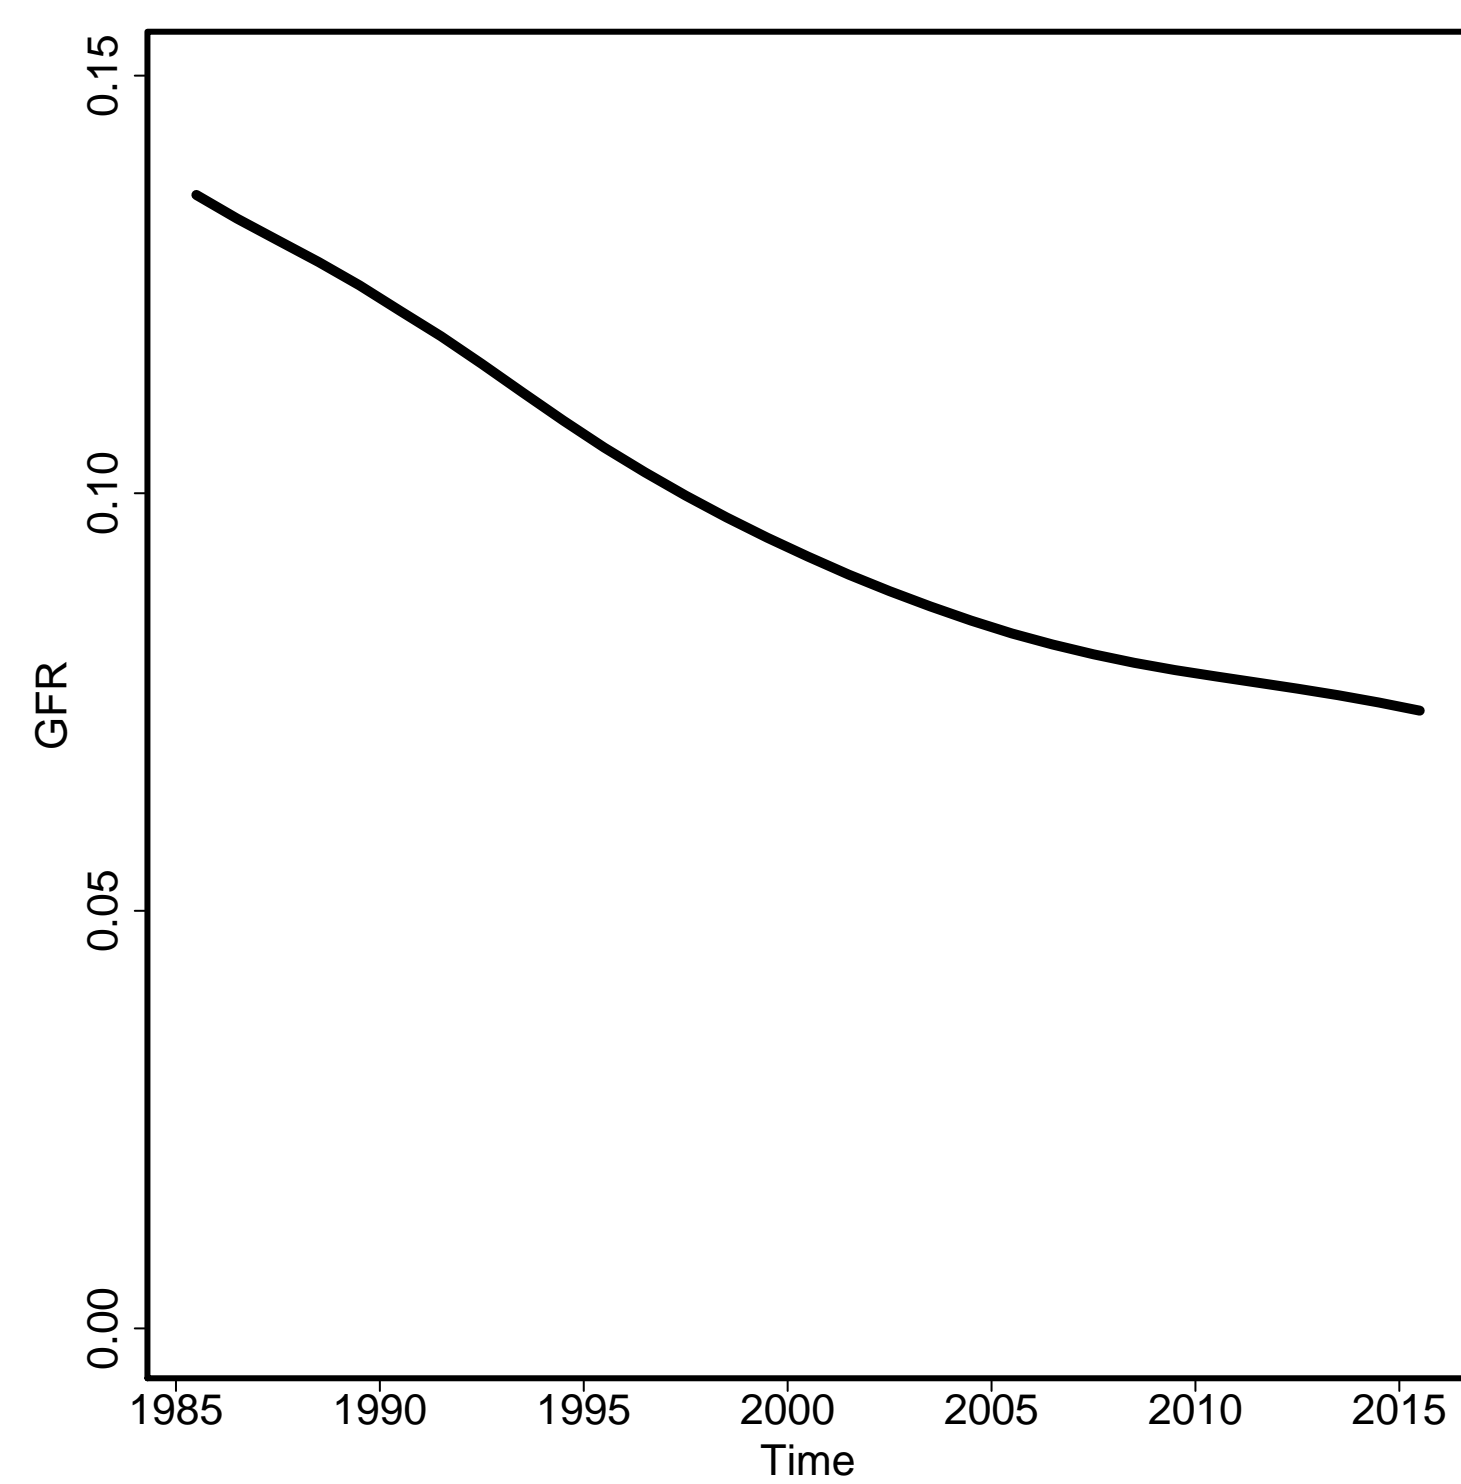

Skilled Attendance to Birth

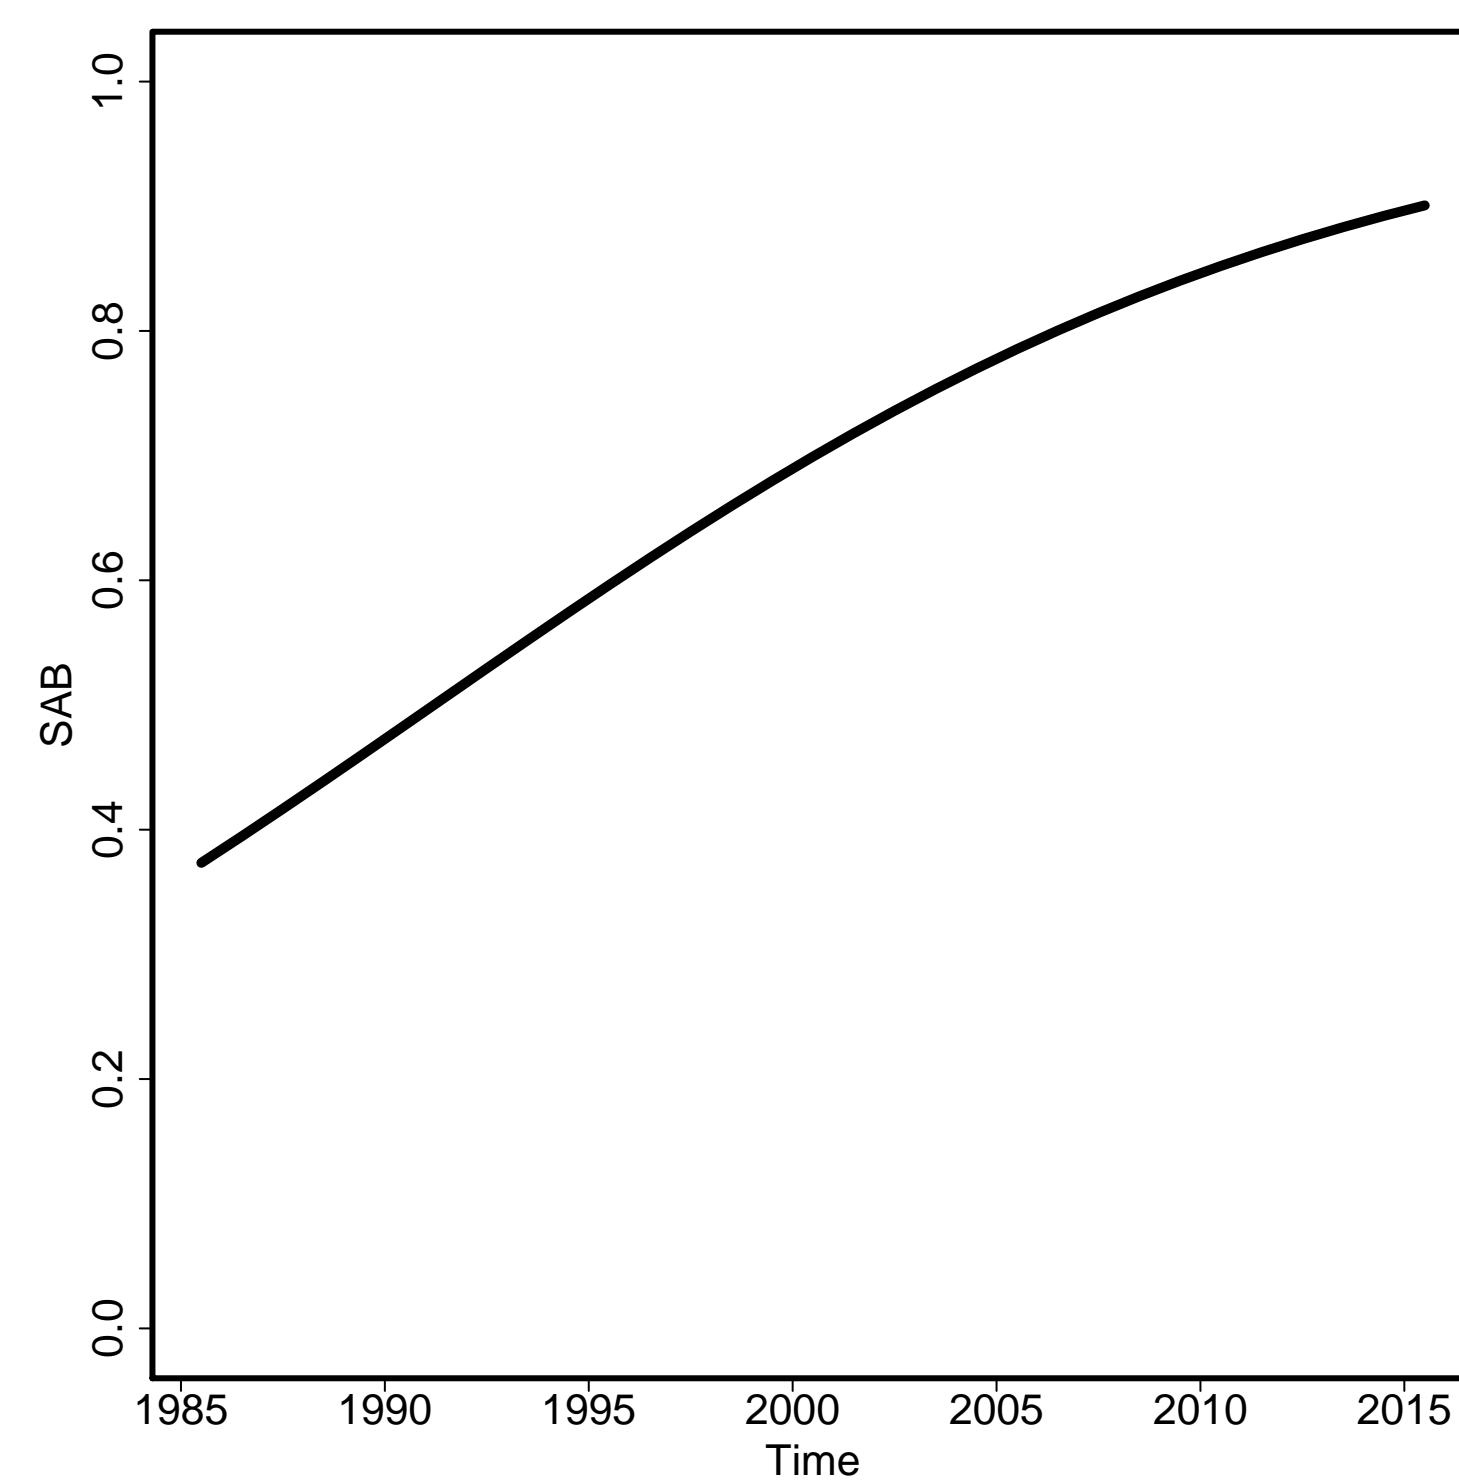

Envelope/Births

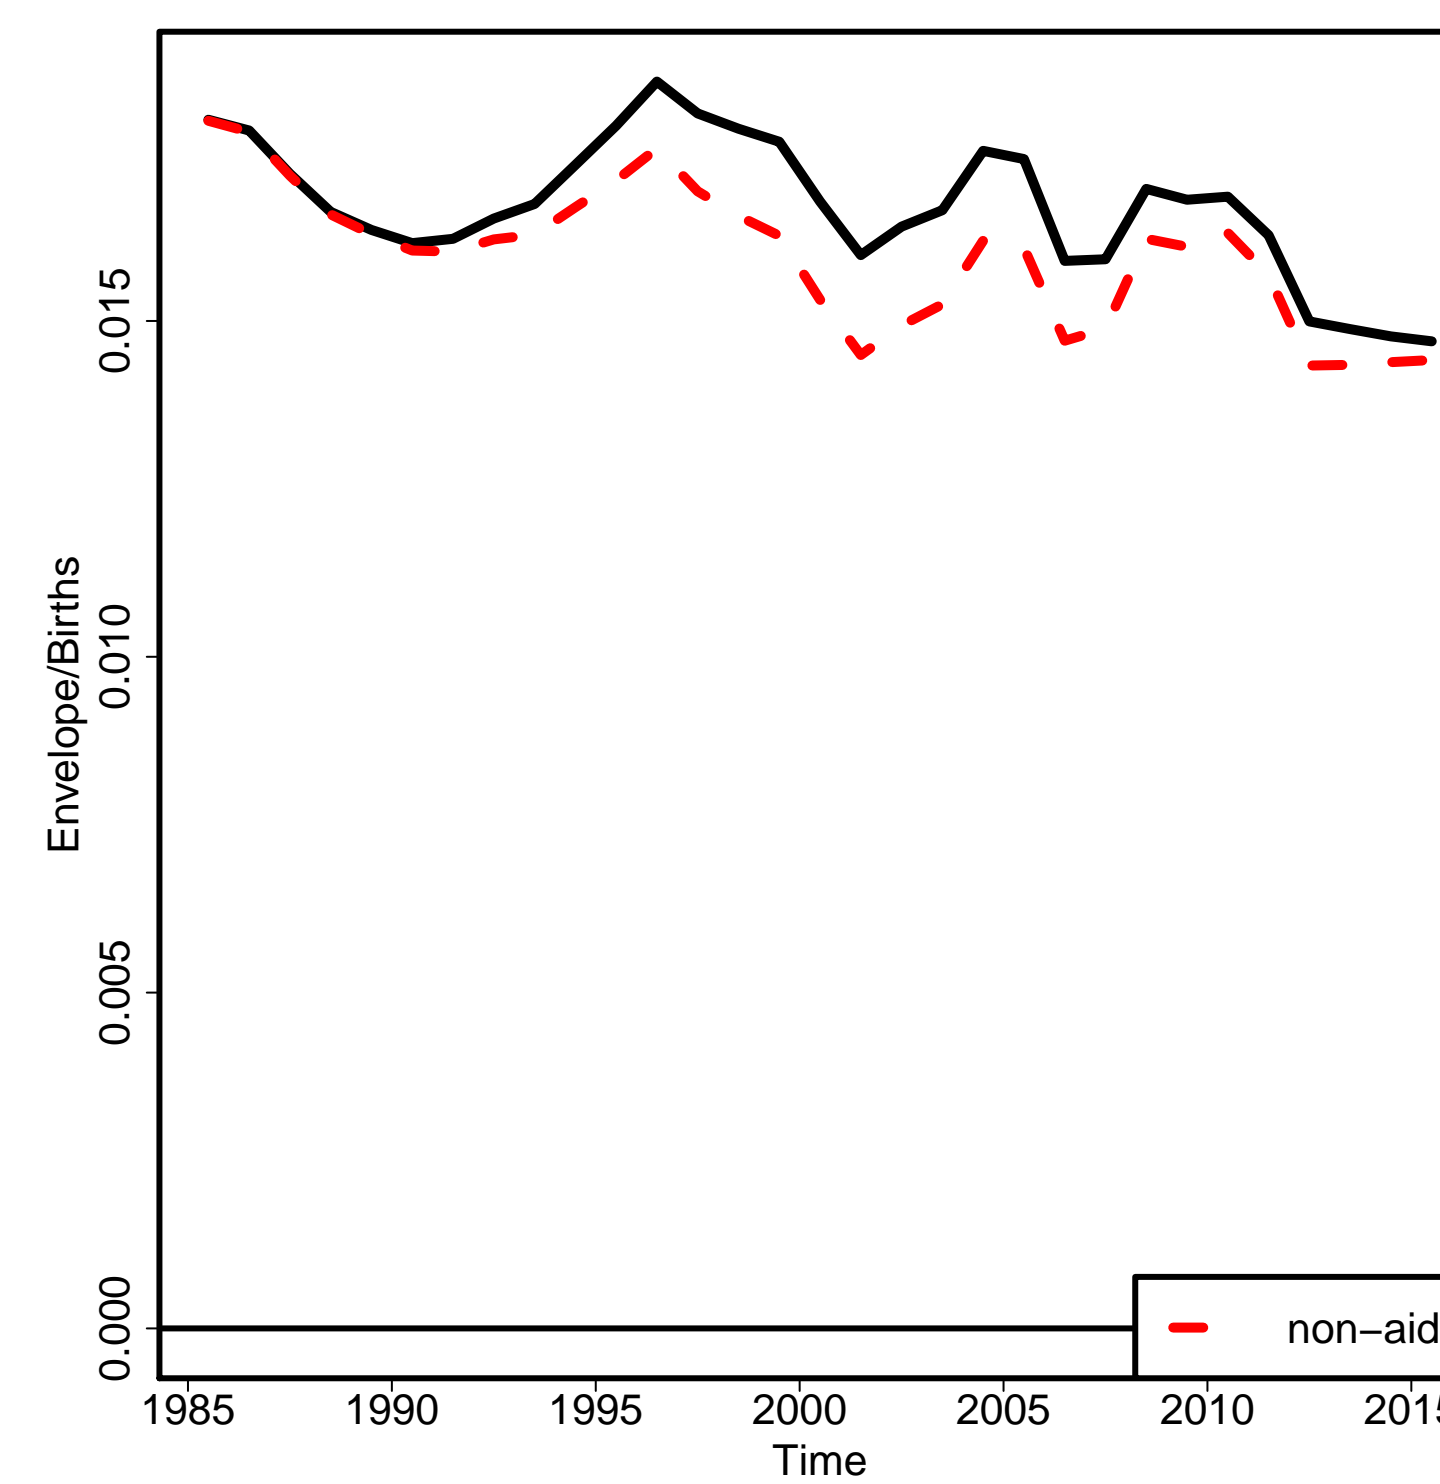

Non-aids MMR

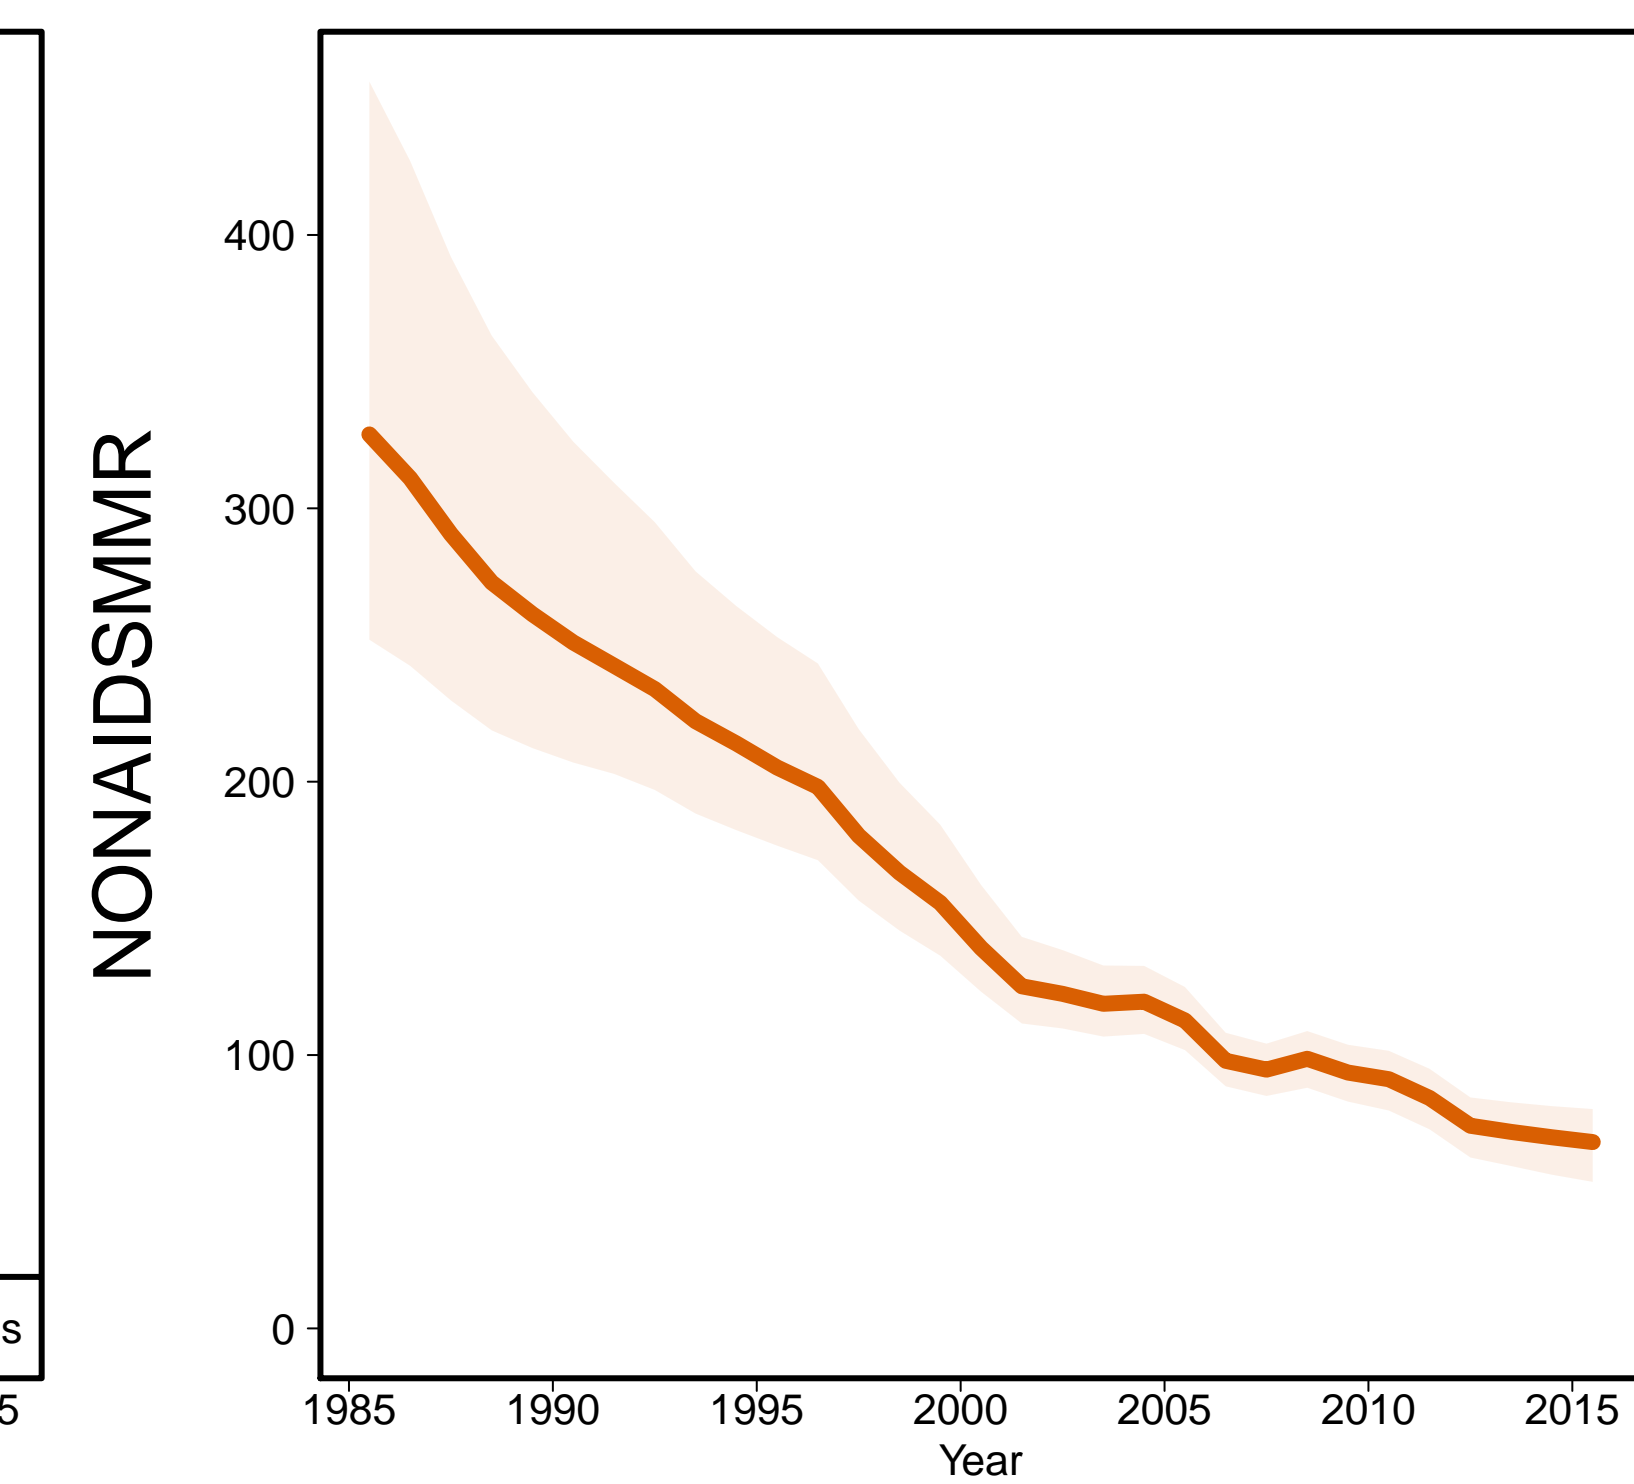

Aids MMR

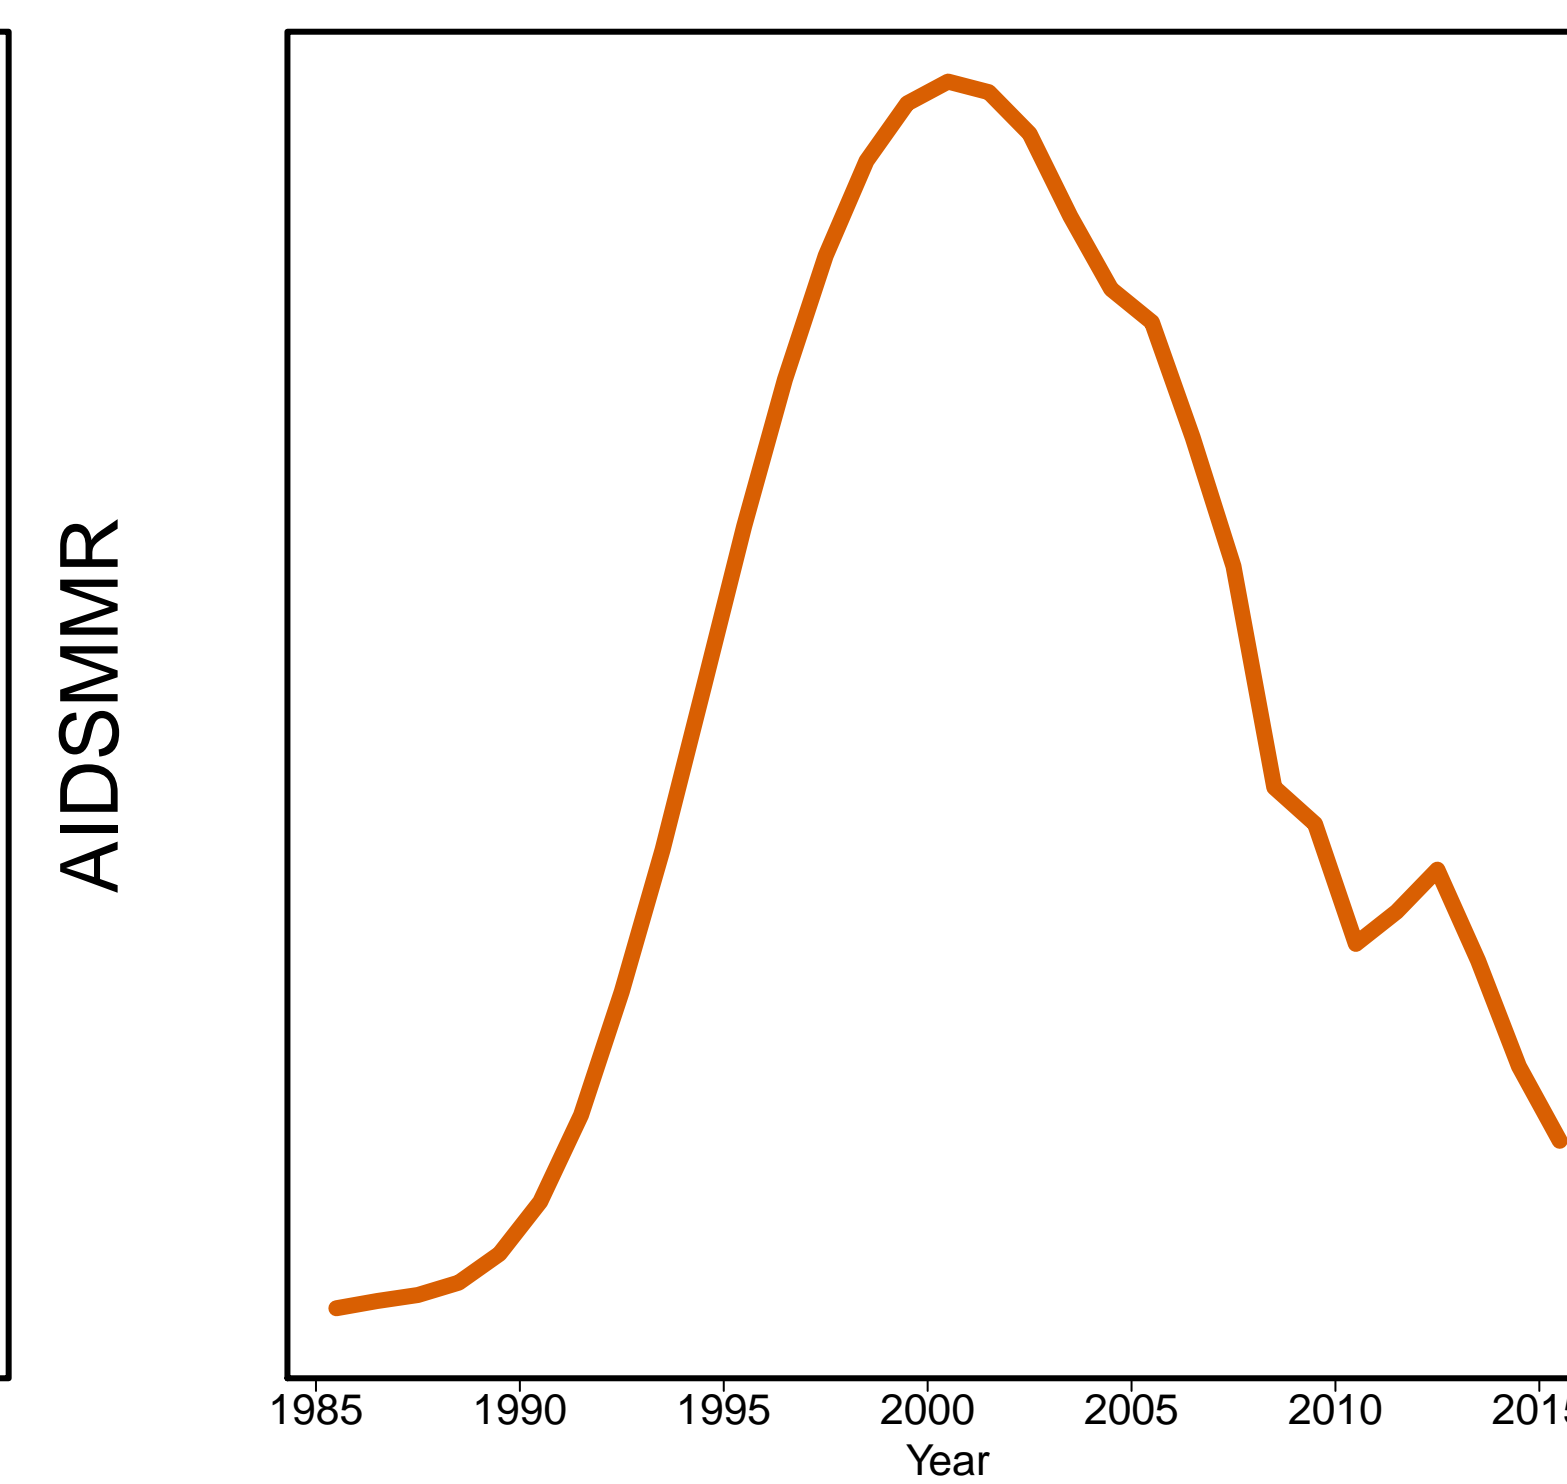

Philippines [PHL]  
(South-Eastern Asia / Oceania)

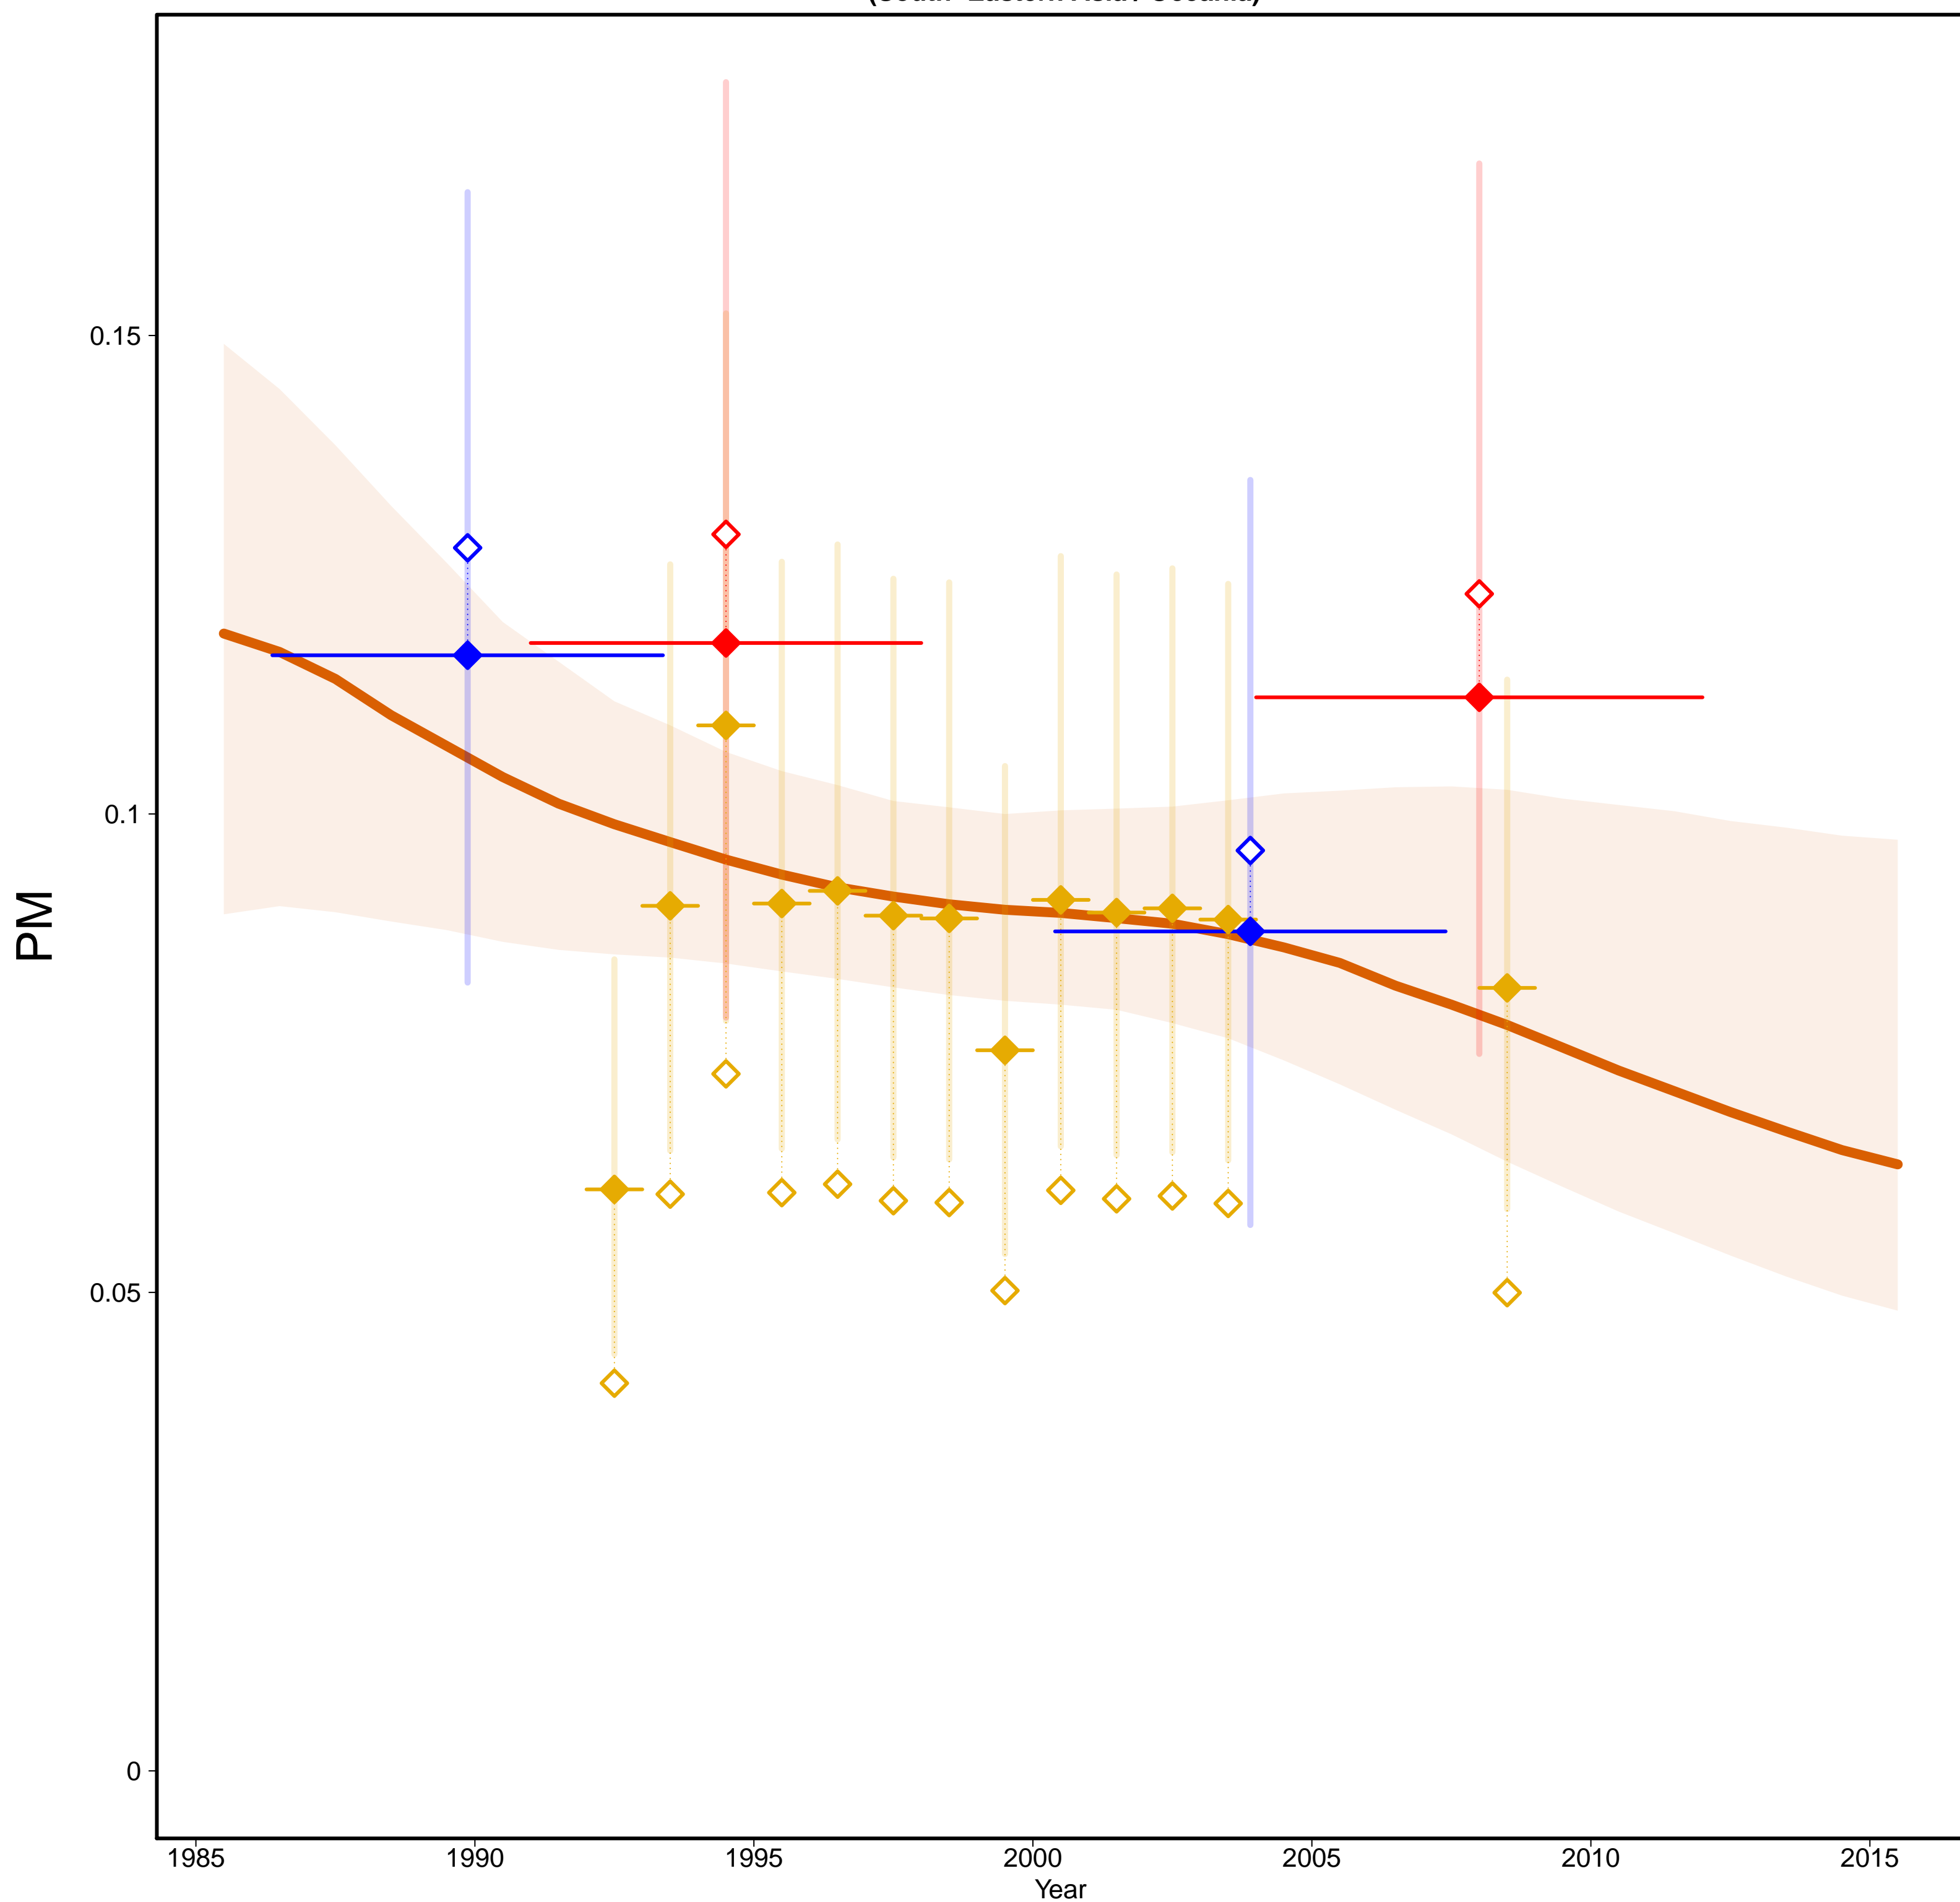

Philippines [PHL]  
(South-Eastern Asia / Oceania)

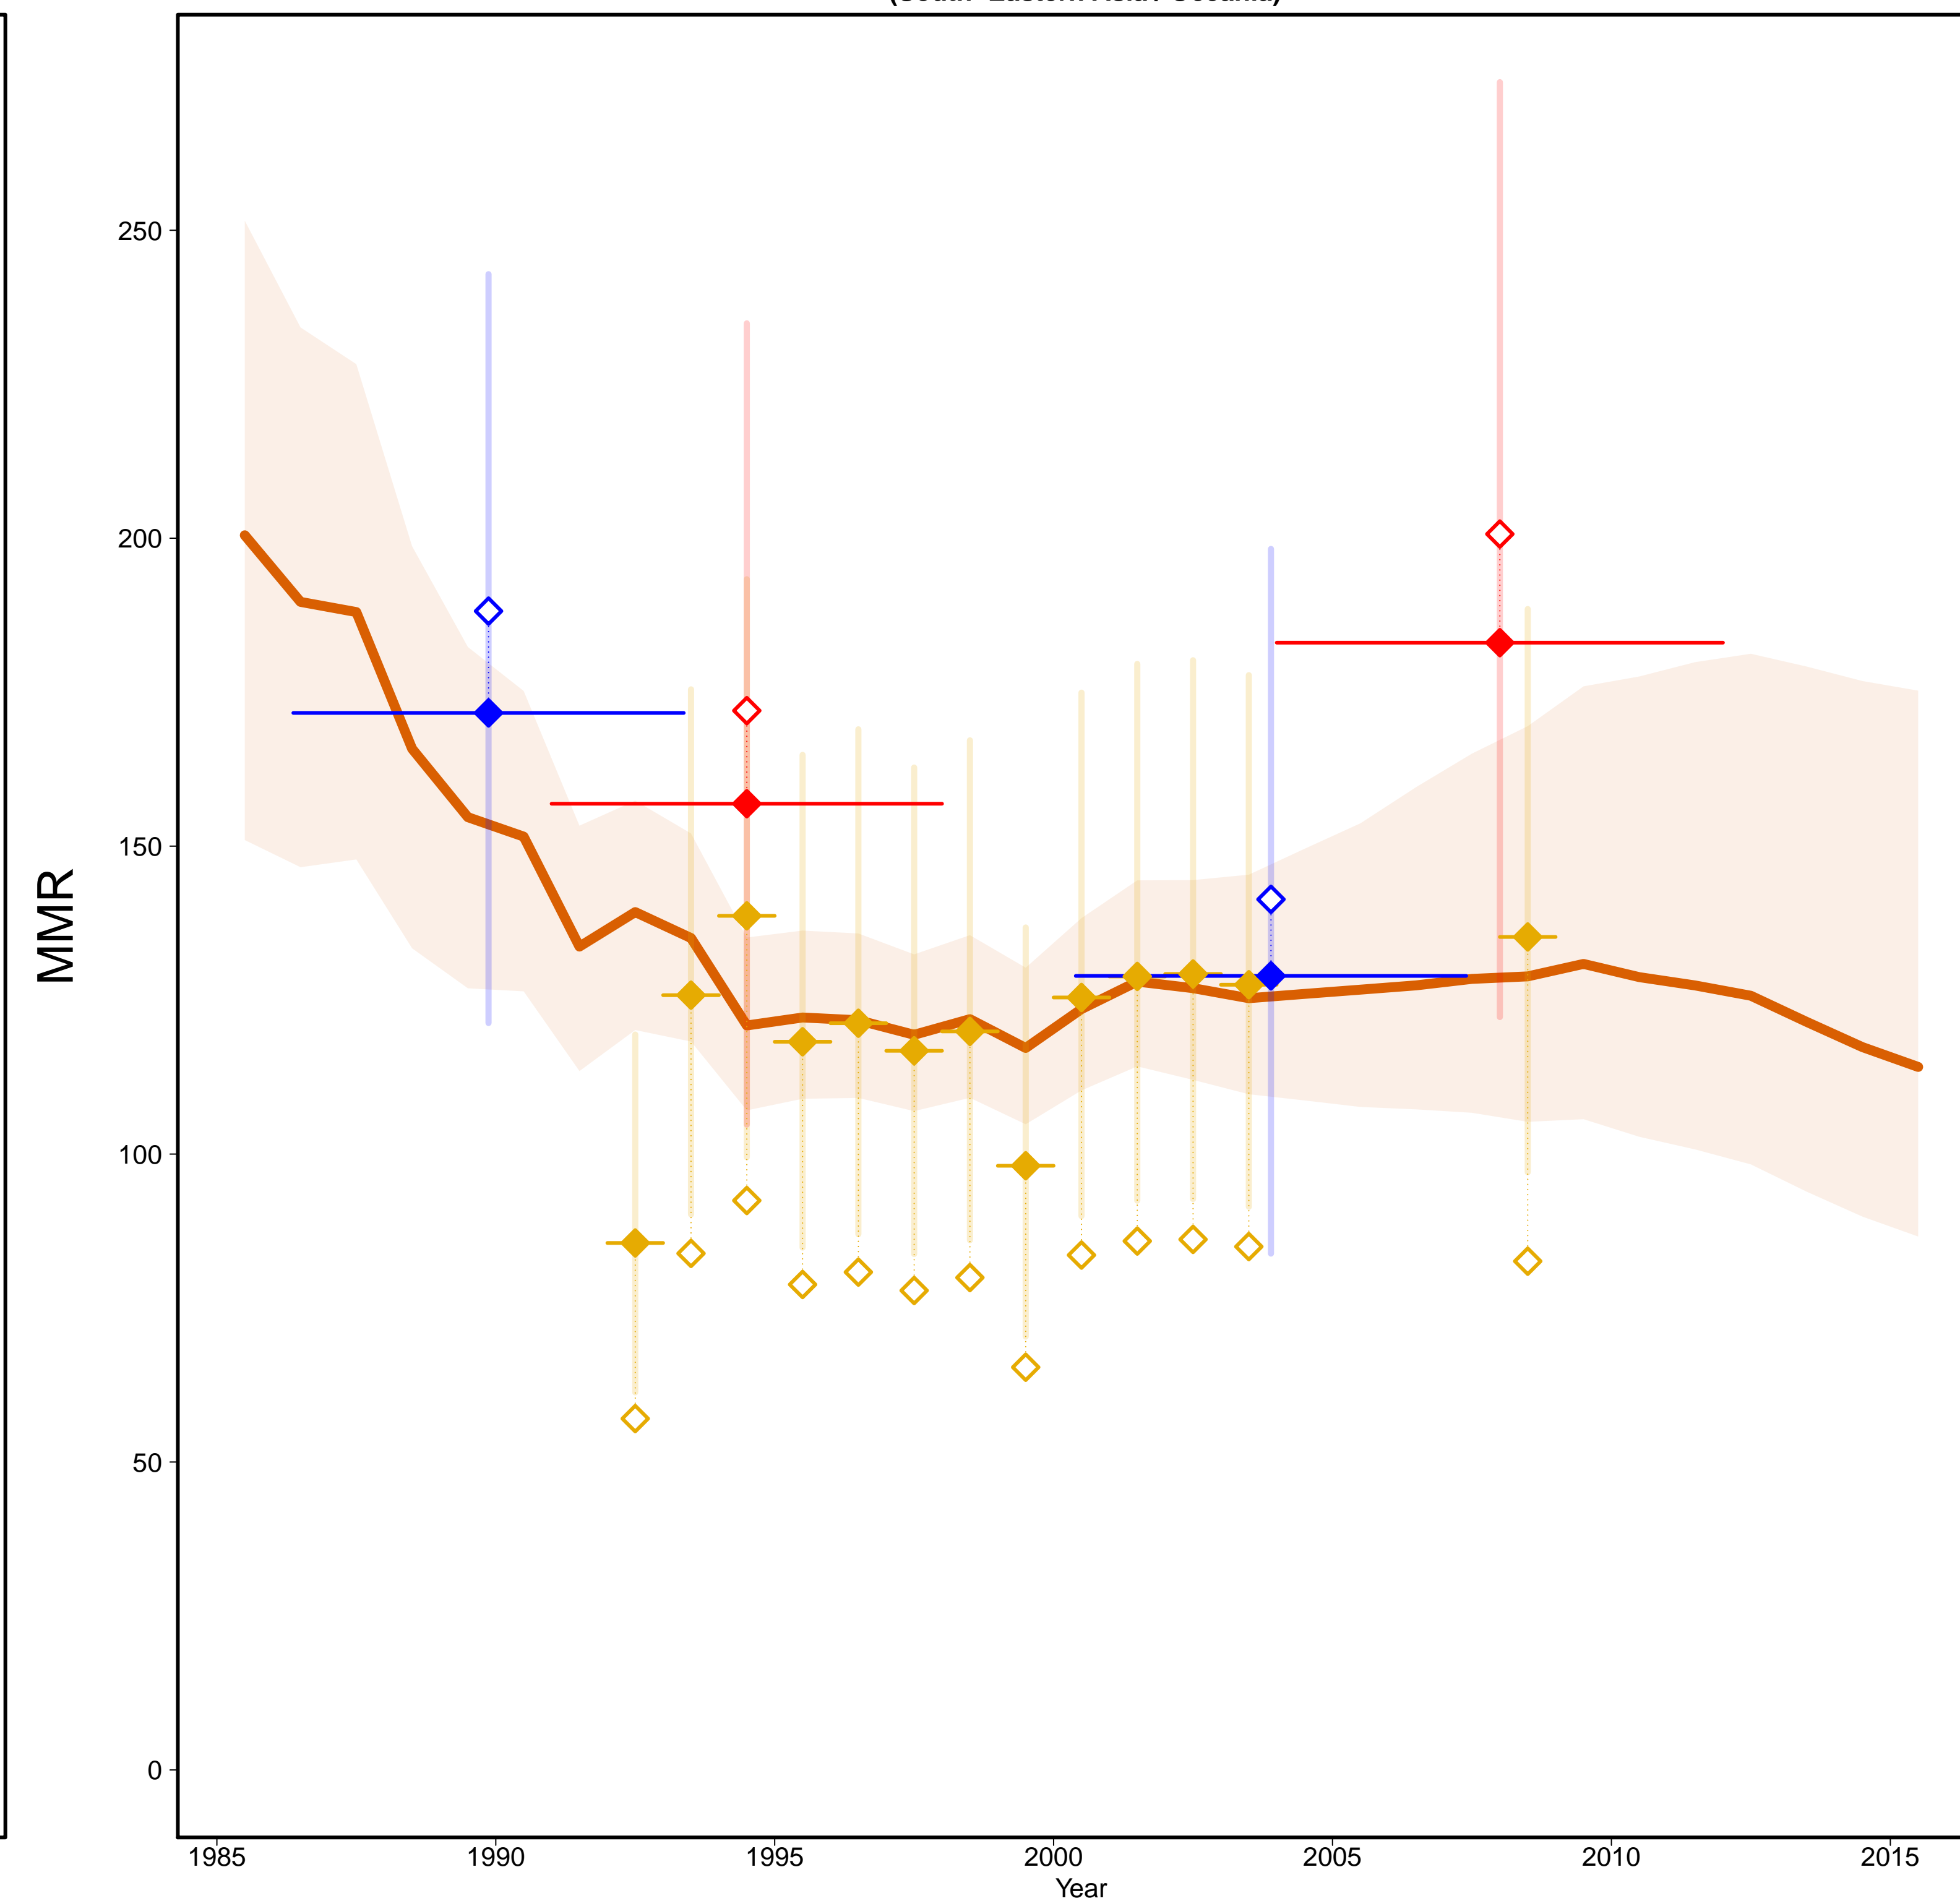

- Estimates —
- MMR Database 2015 —
- ◇ Observed Data
- ◆ Adjusted Data
- Data type —
- ◆ VR
- ◆ DHS
- ◆ Misc. studies

Gross Domestic Product

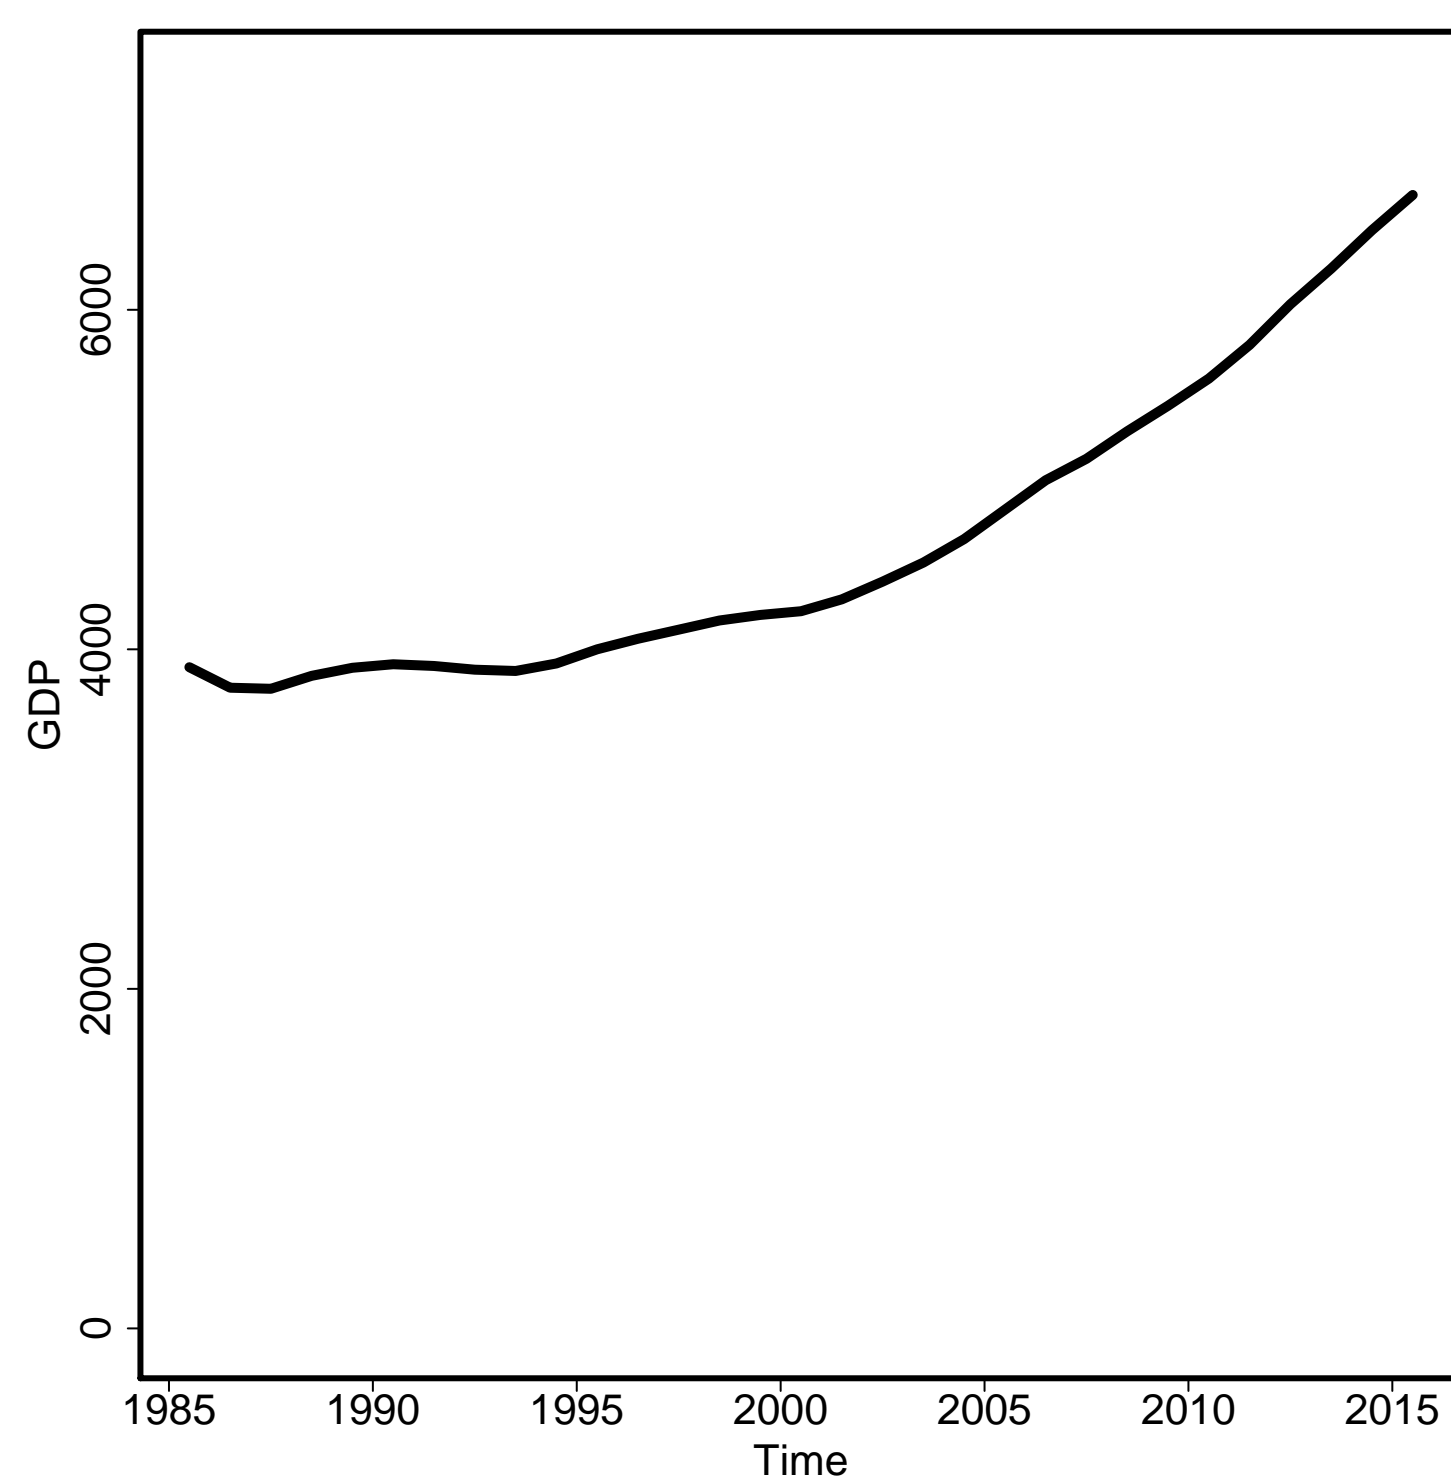

General Fertility Rate

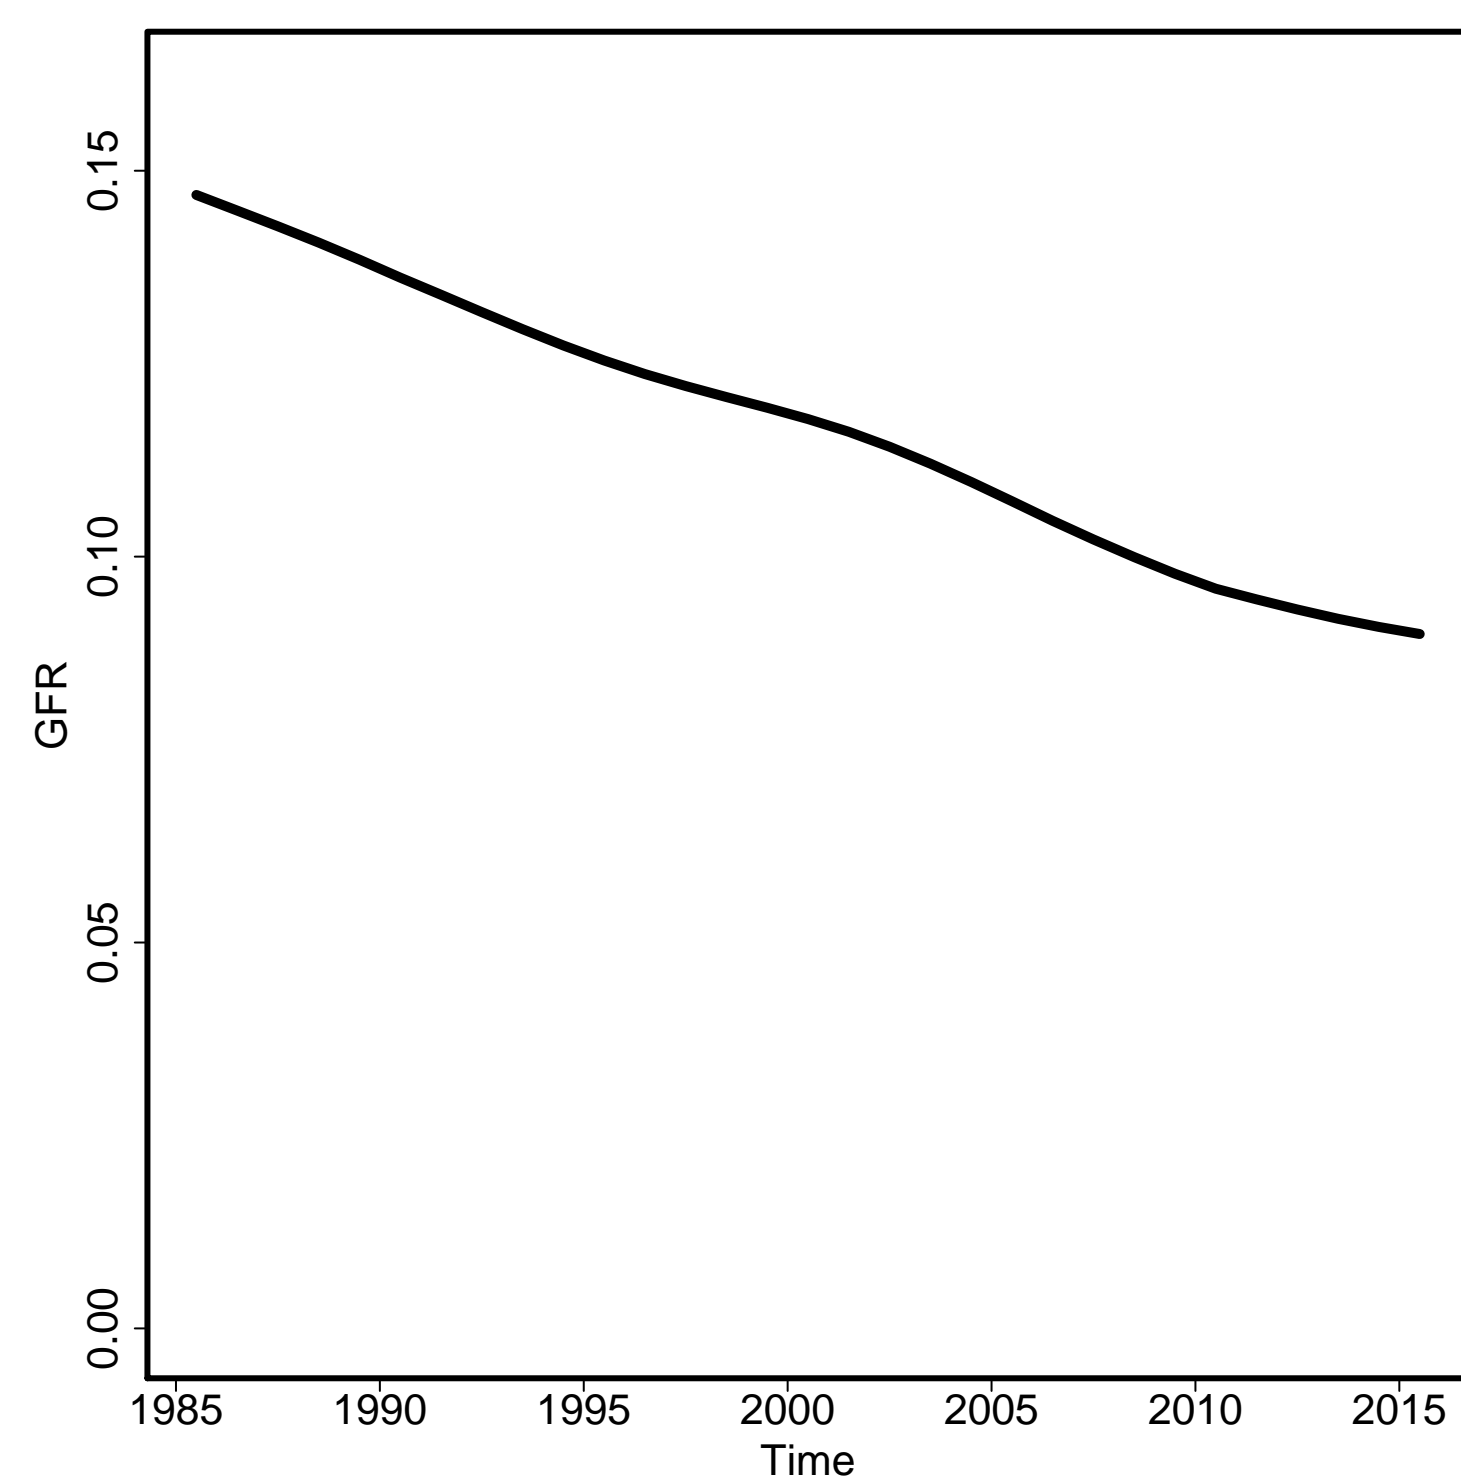

Skilled Attendance to Birth

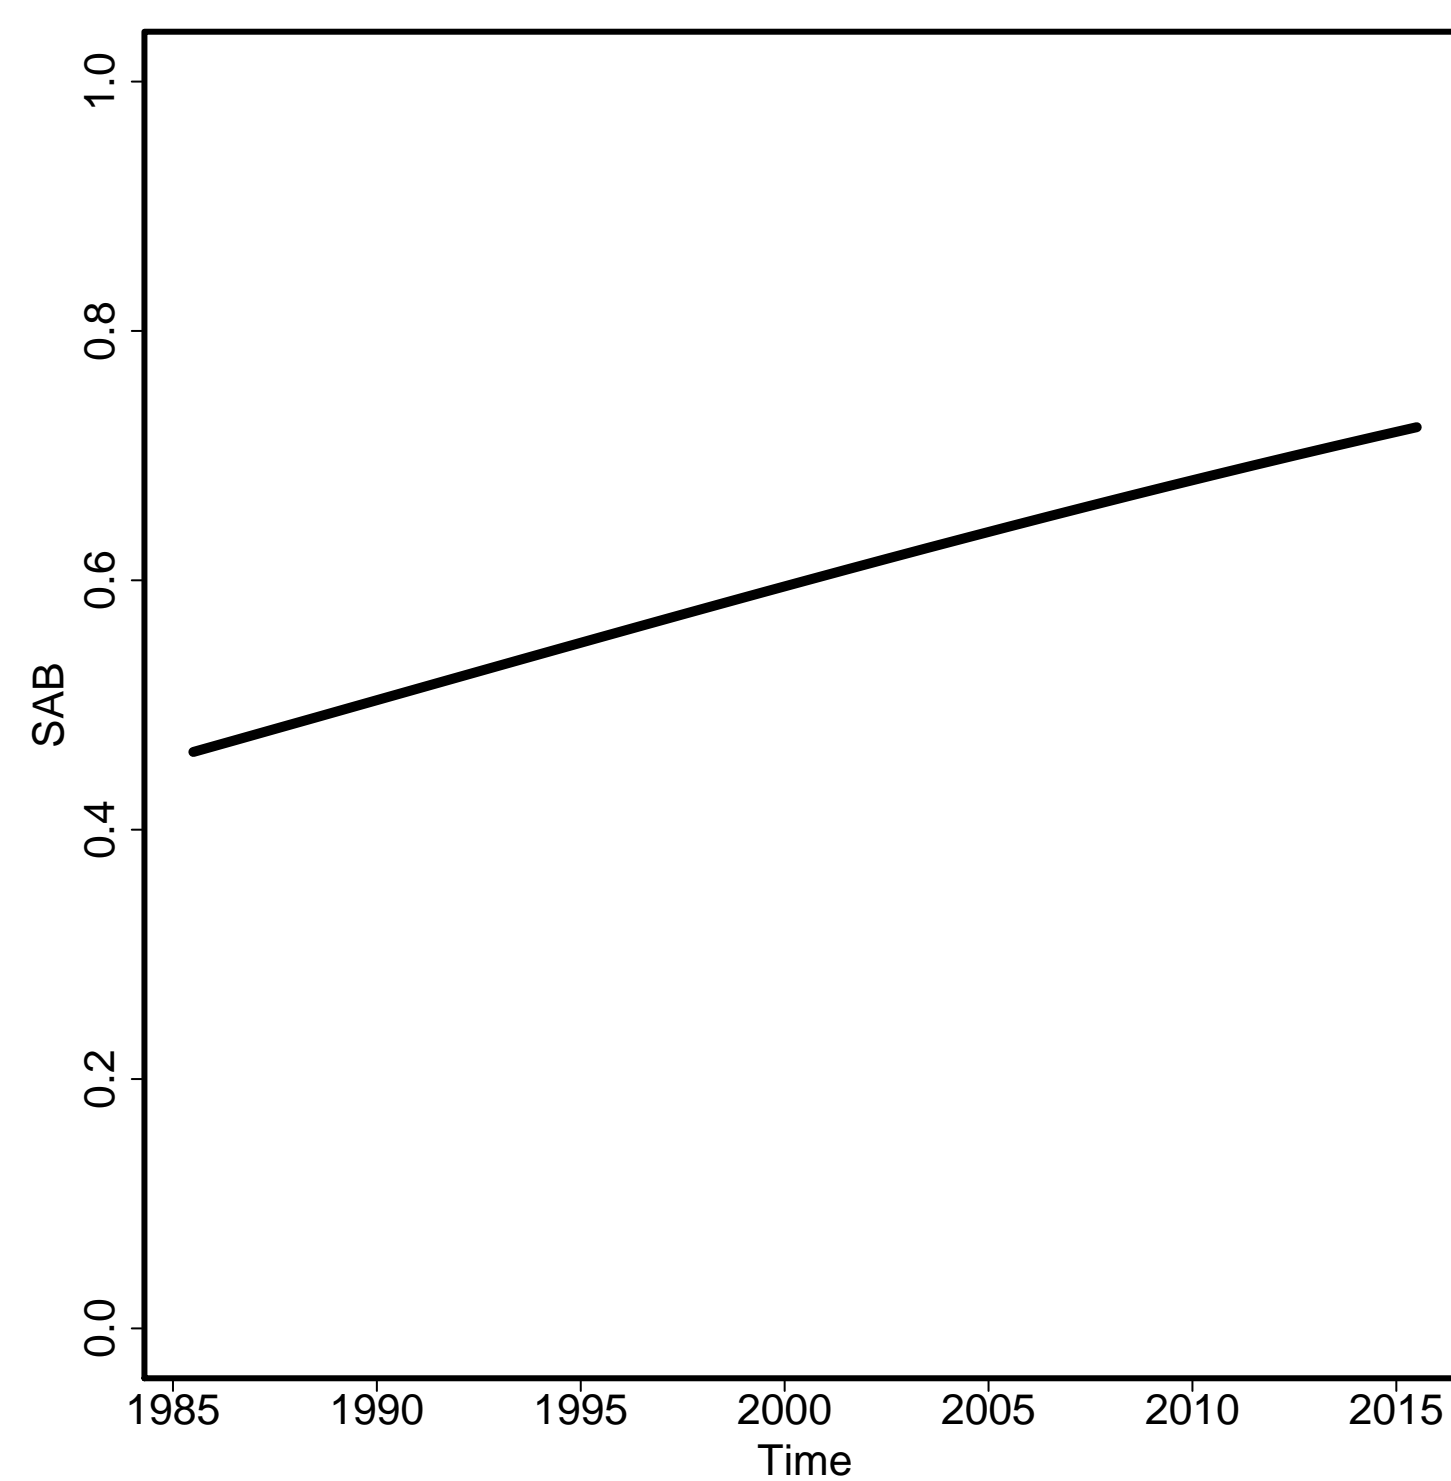

Envelope/Births

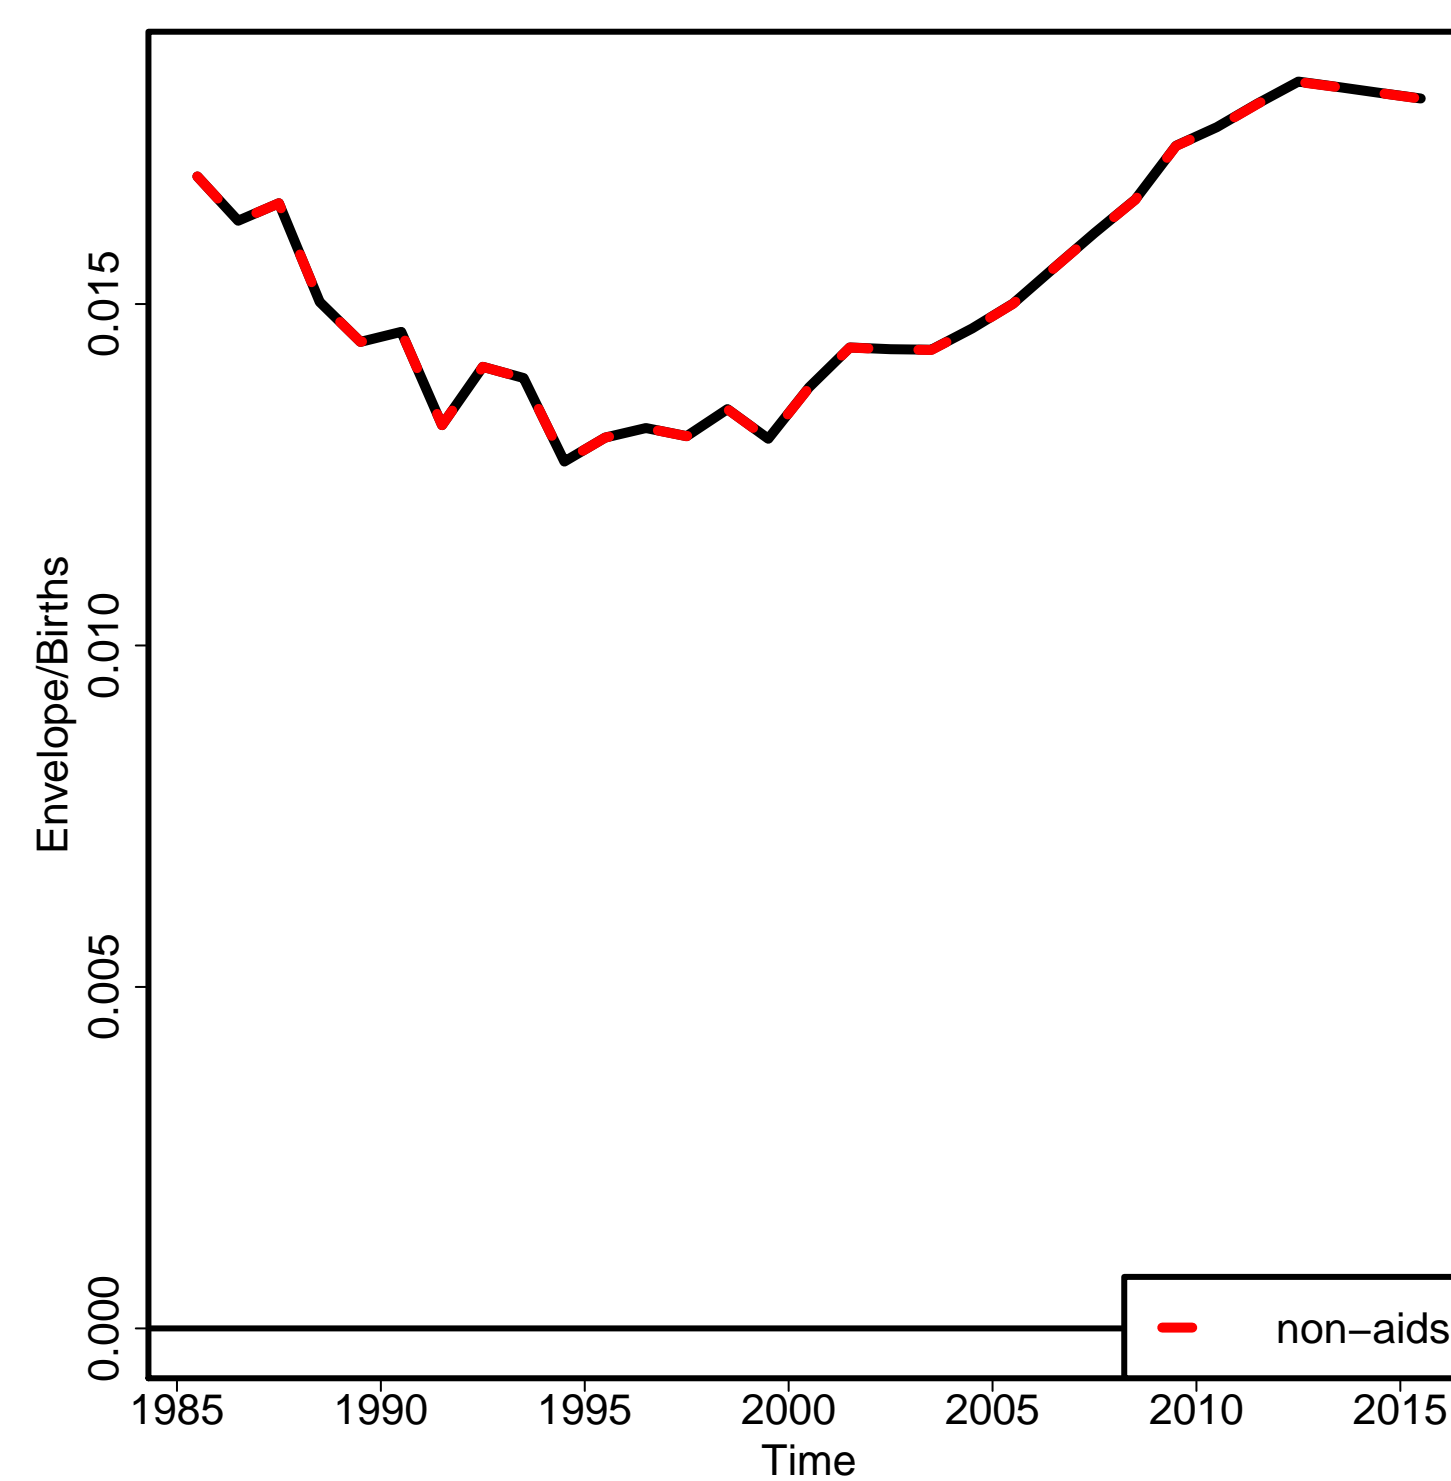

Non-aids MMR

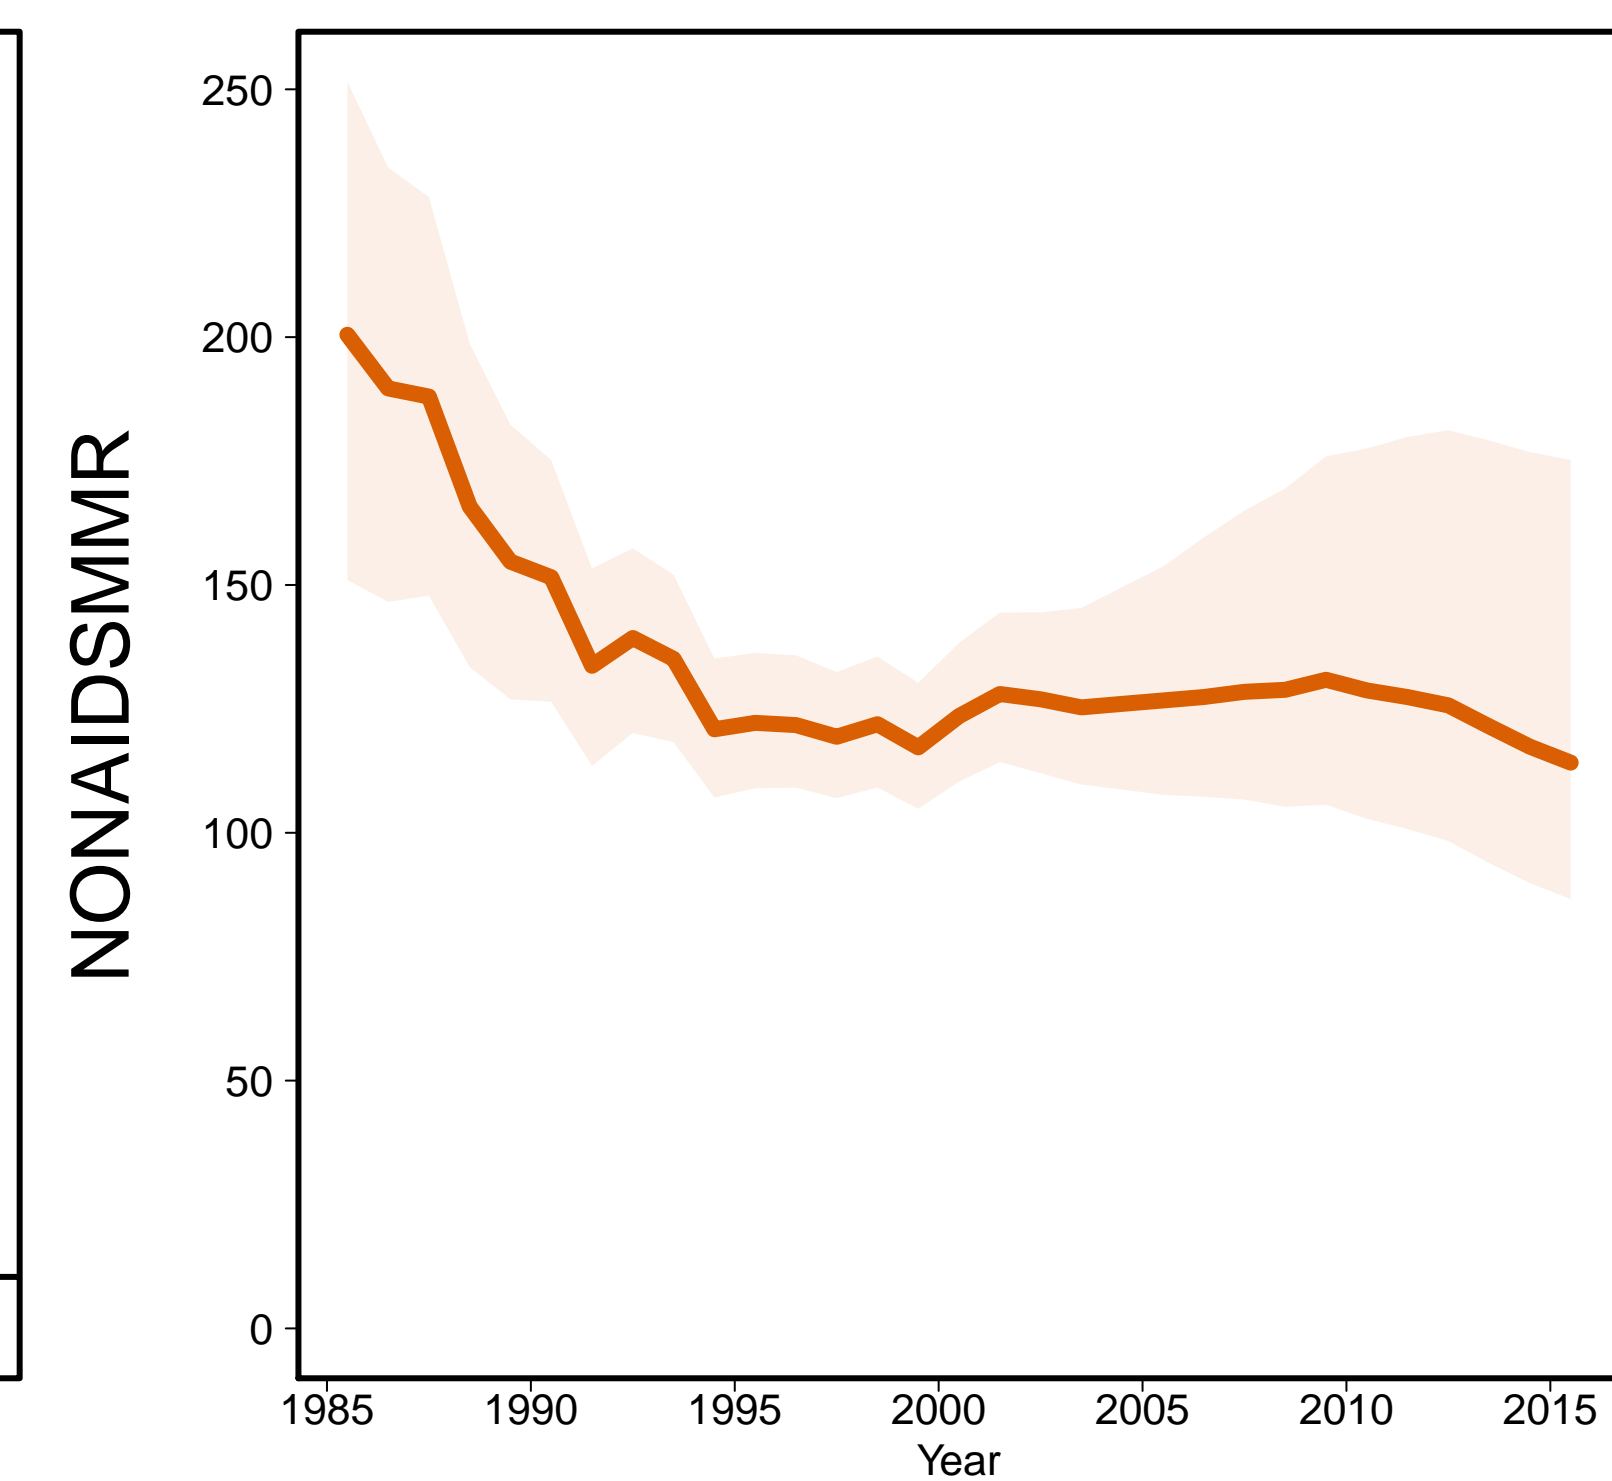

Aids MMR

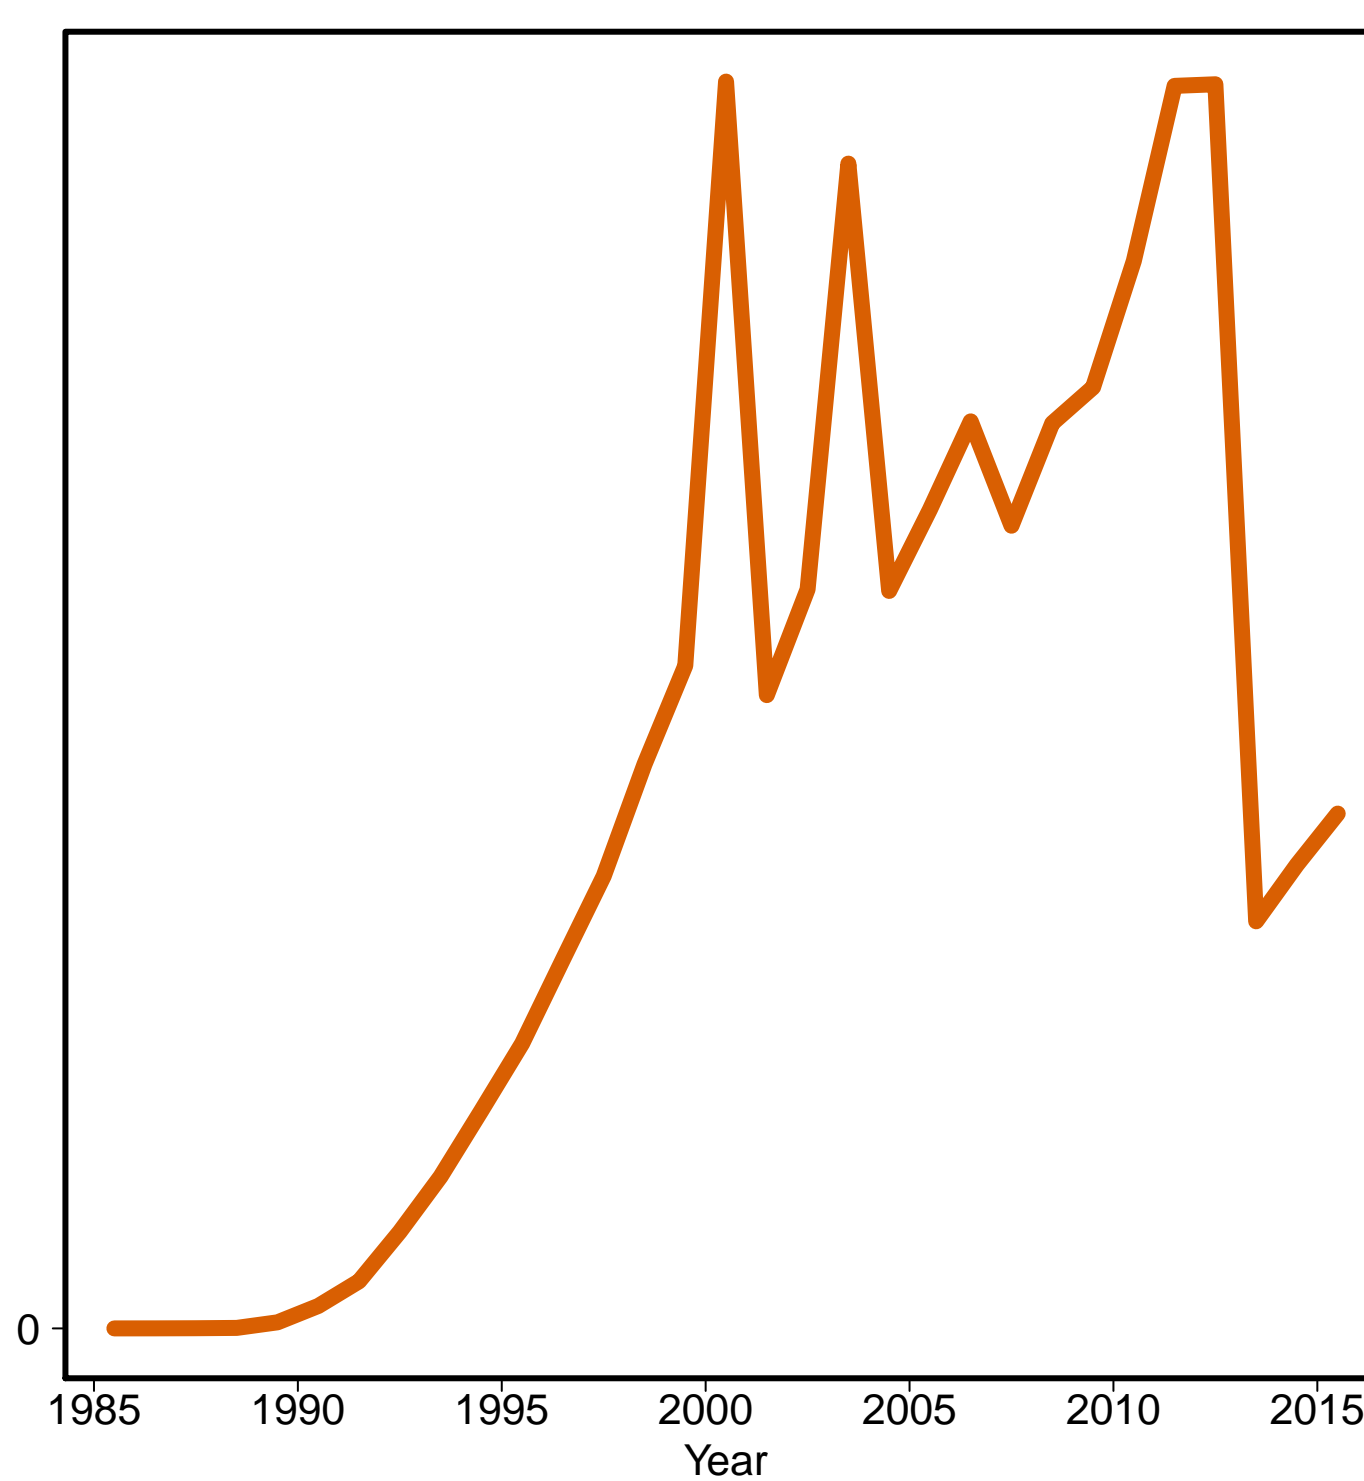

Poland [POL]  
(Developed regions)

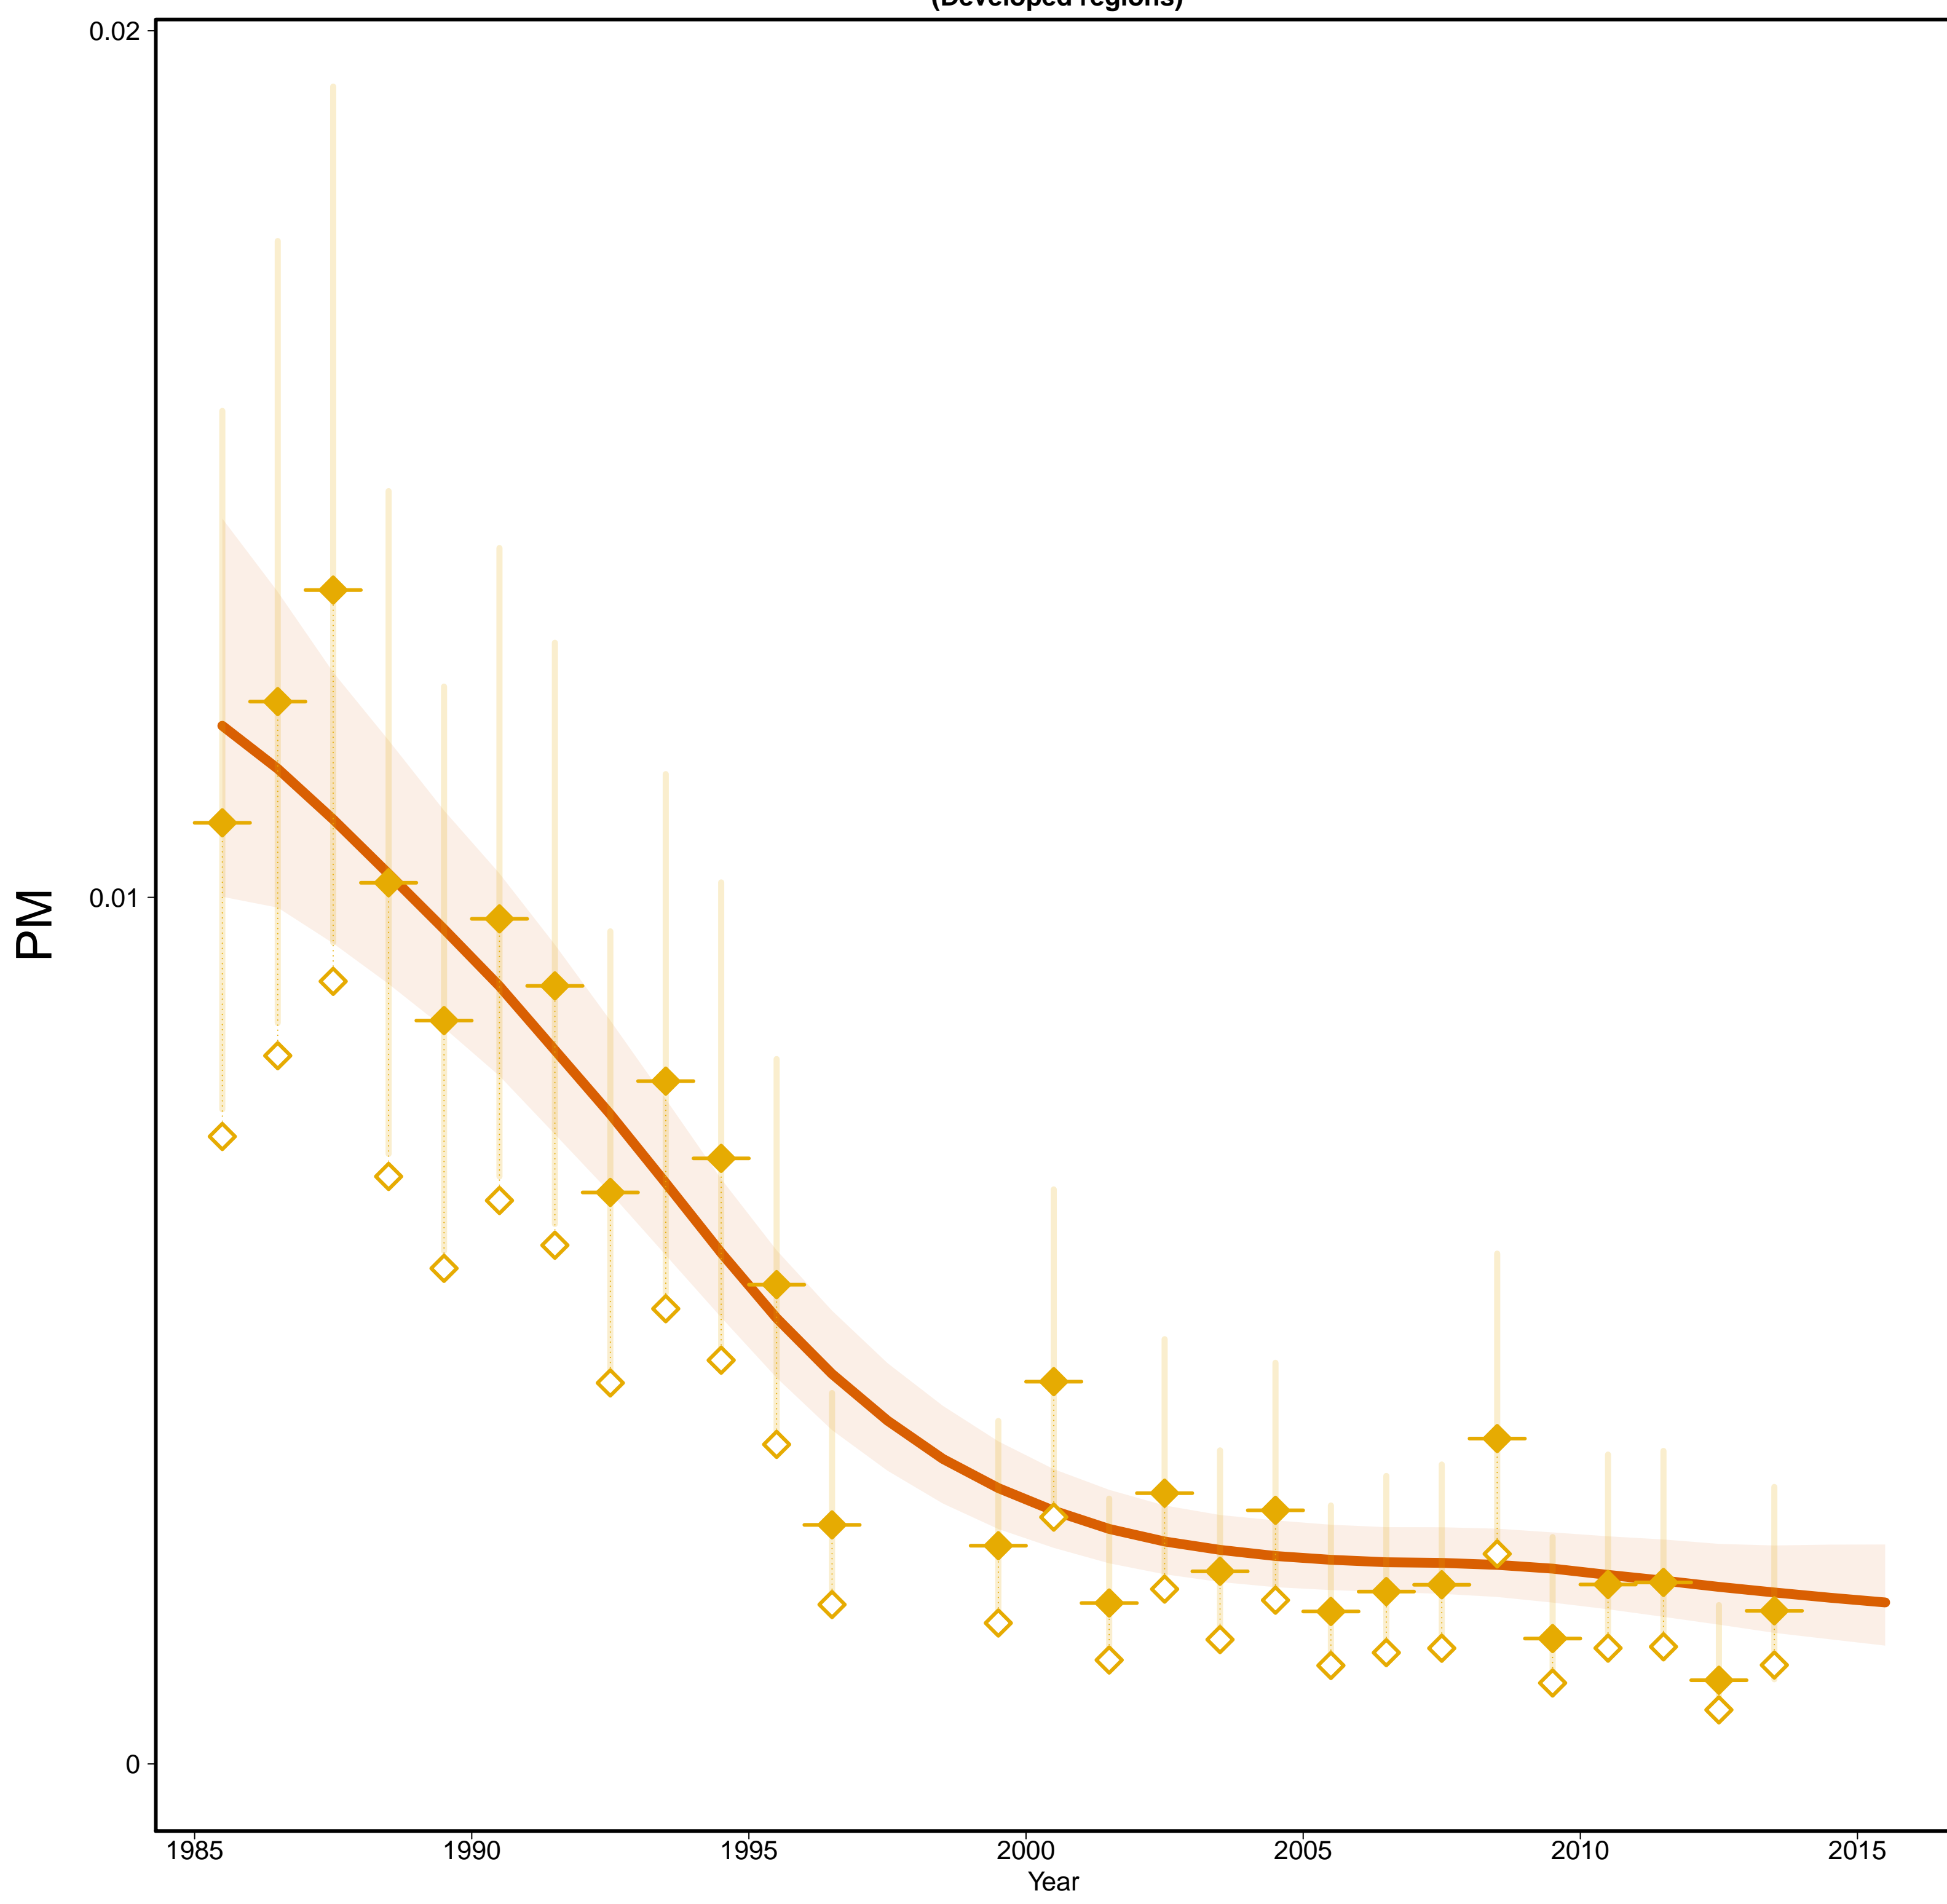

Poland [POL]  
(Developed regions)

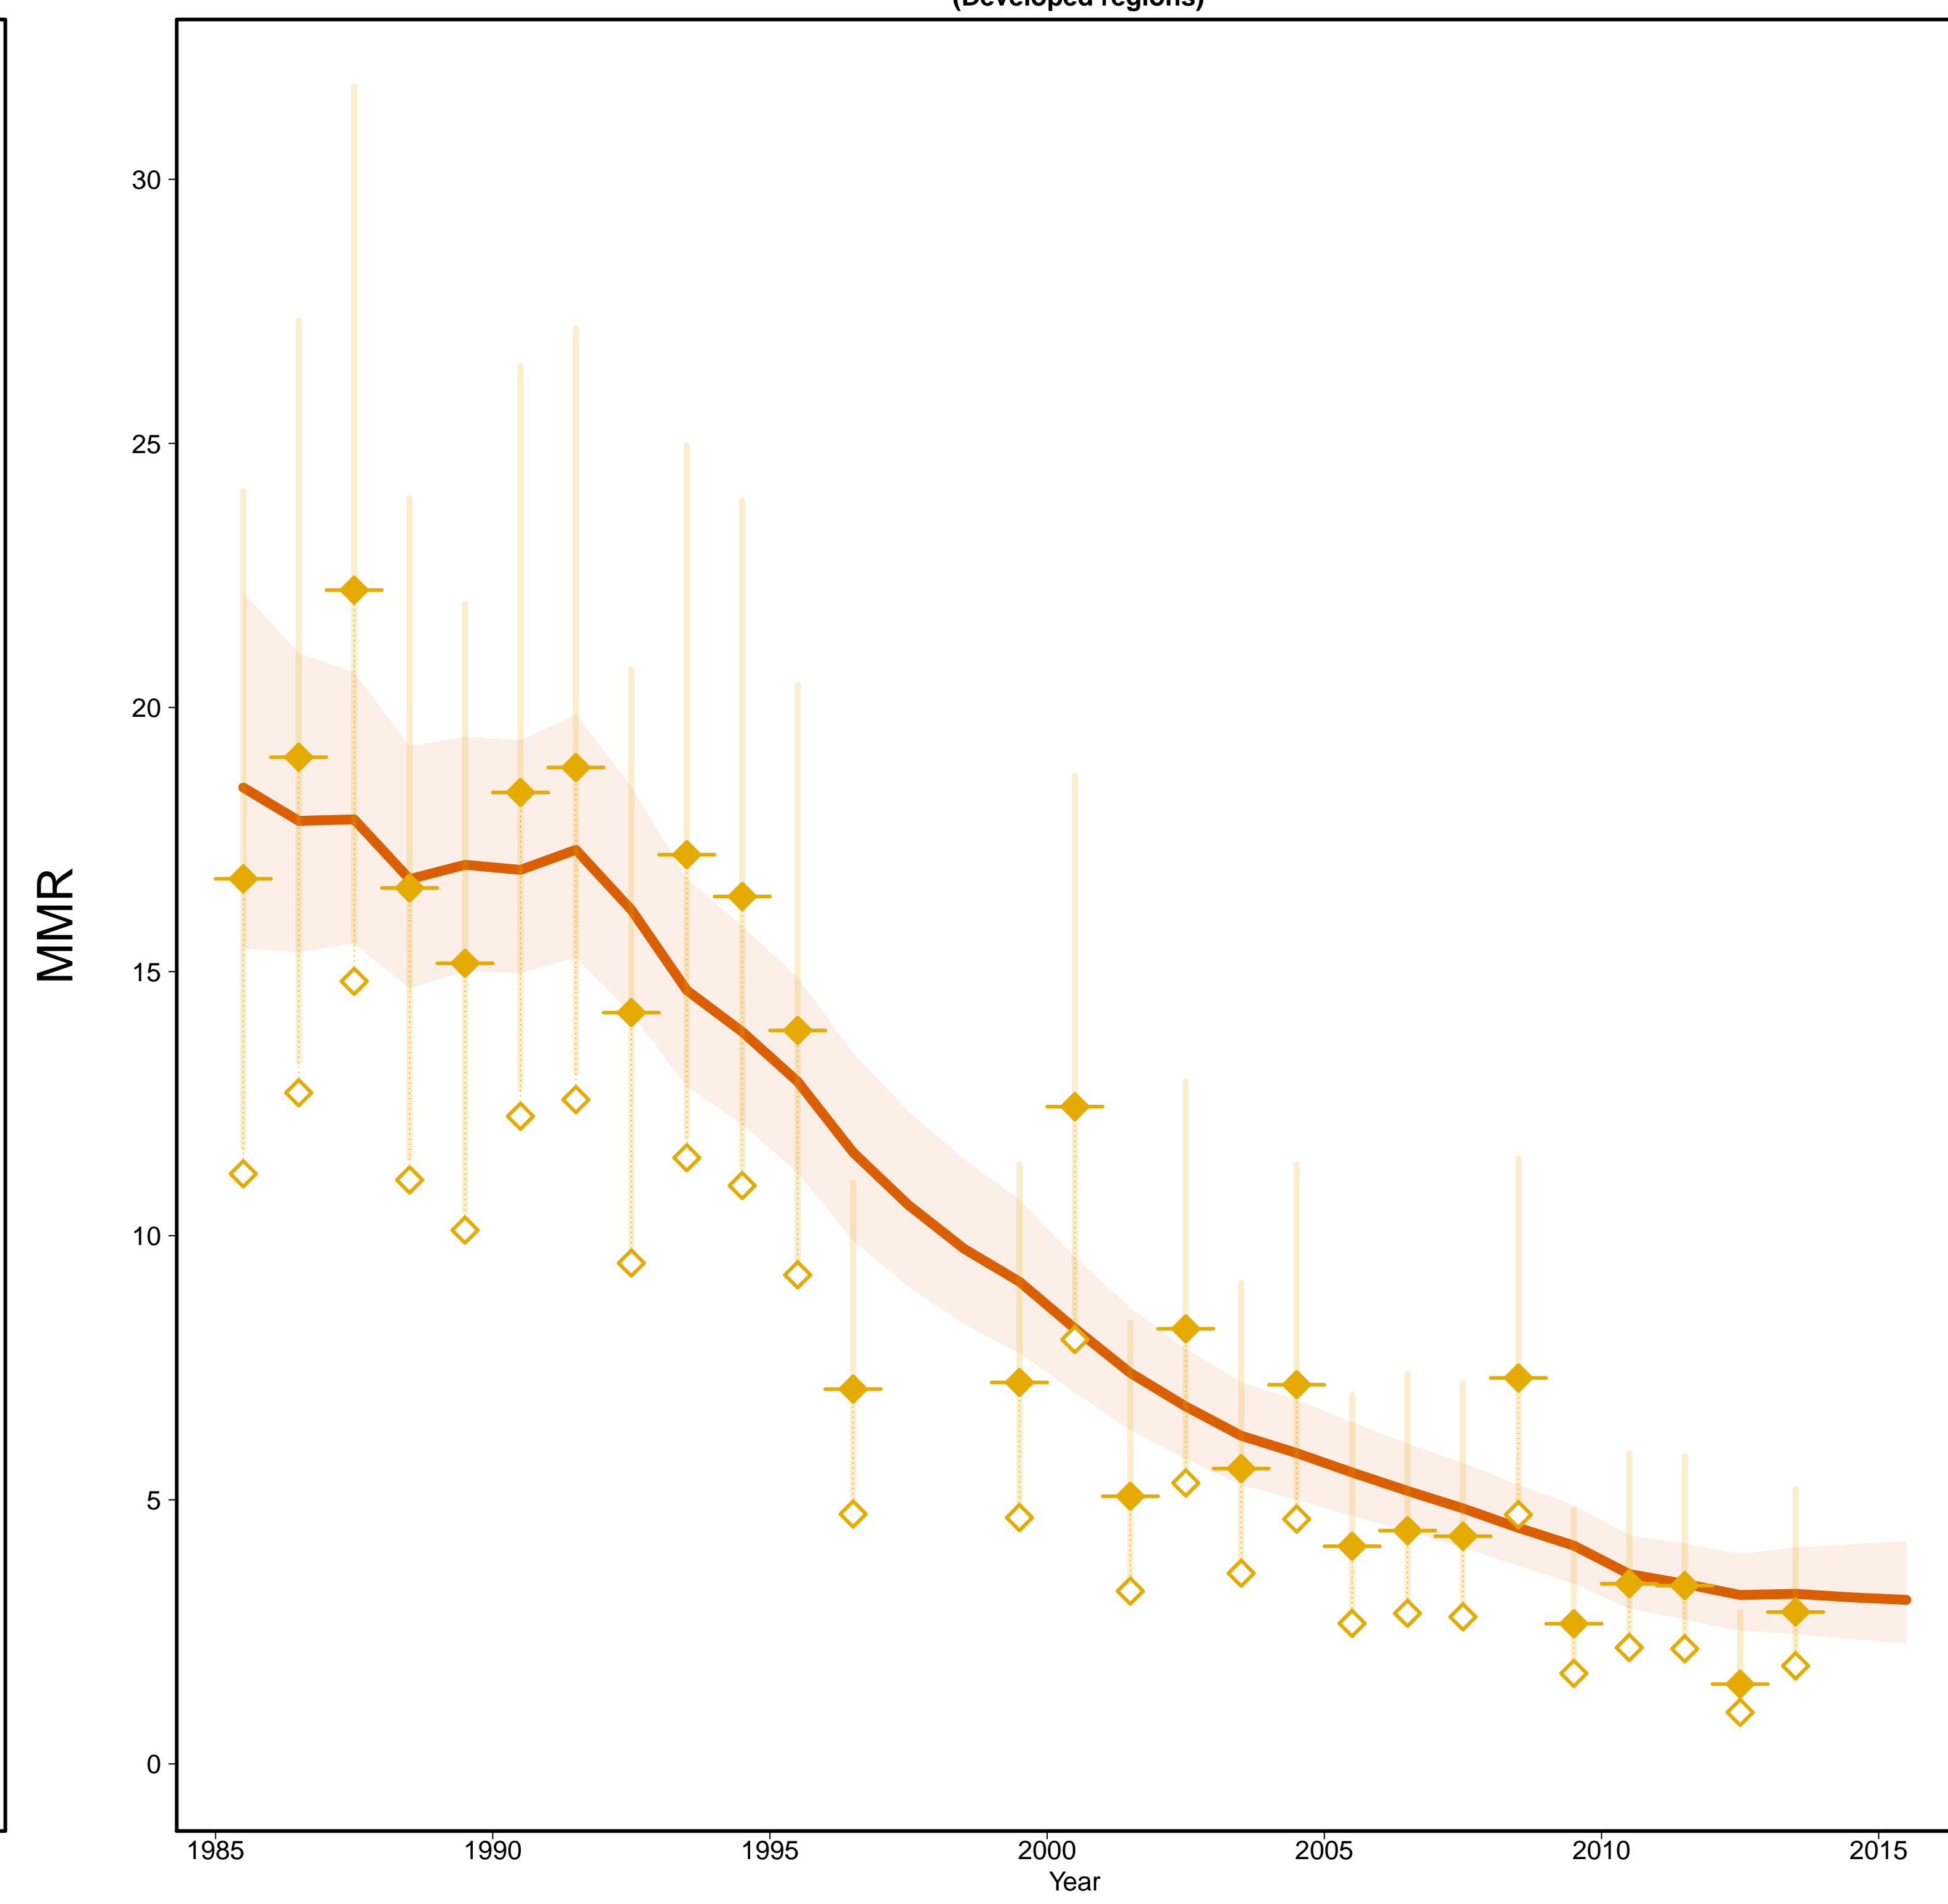

- Estimates —
- MMR Database 2015 —
- ◊ Observed Data
- ◆ Adjusted Data
- Data type —
- ◆ VR

Gross Domestic Product

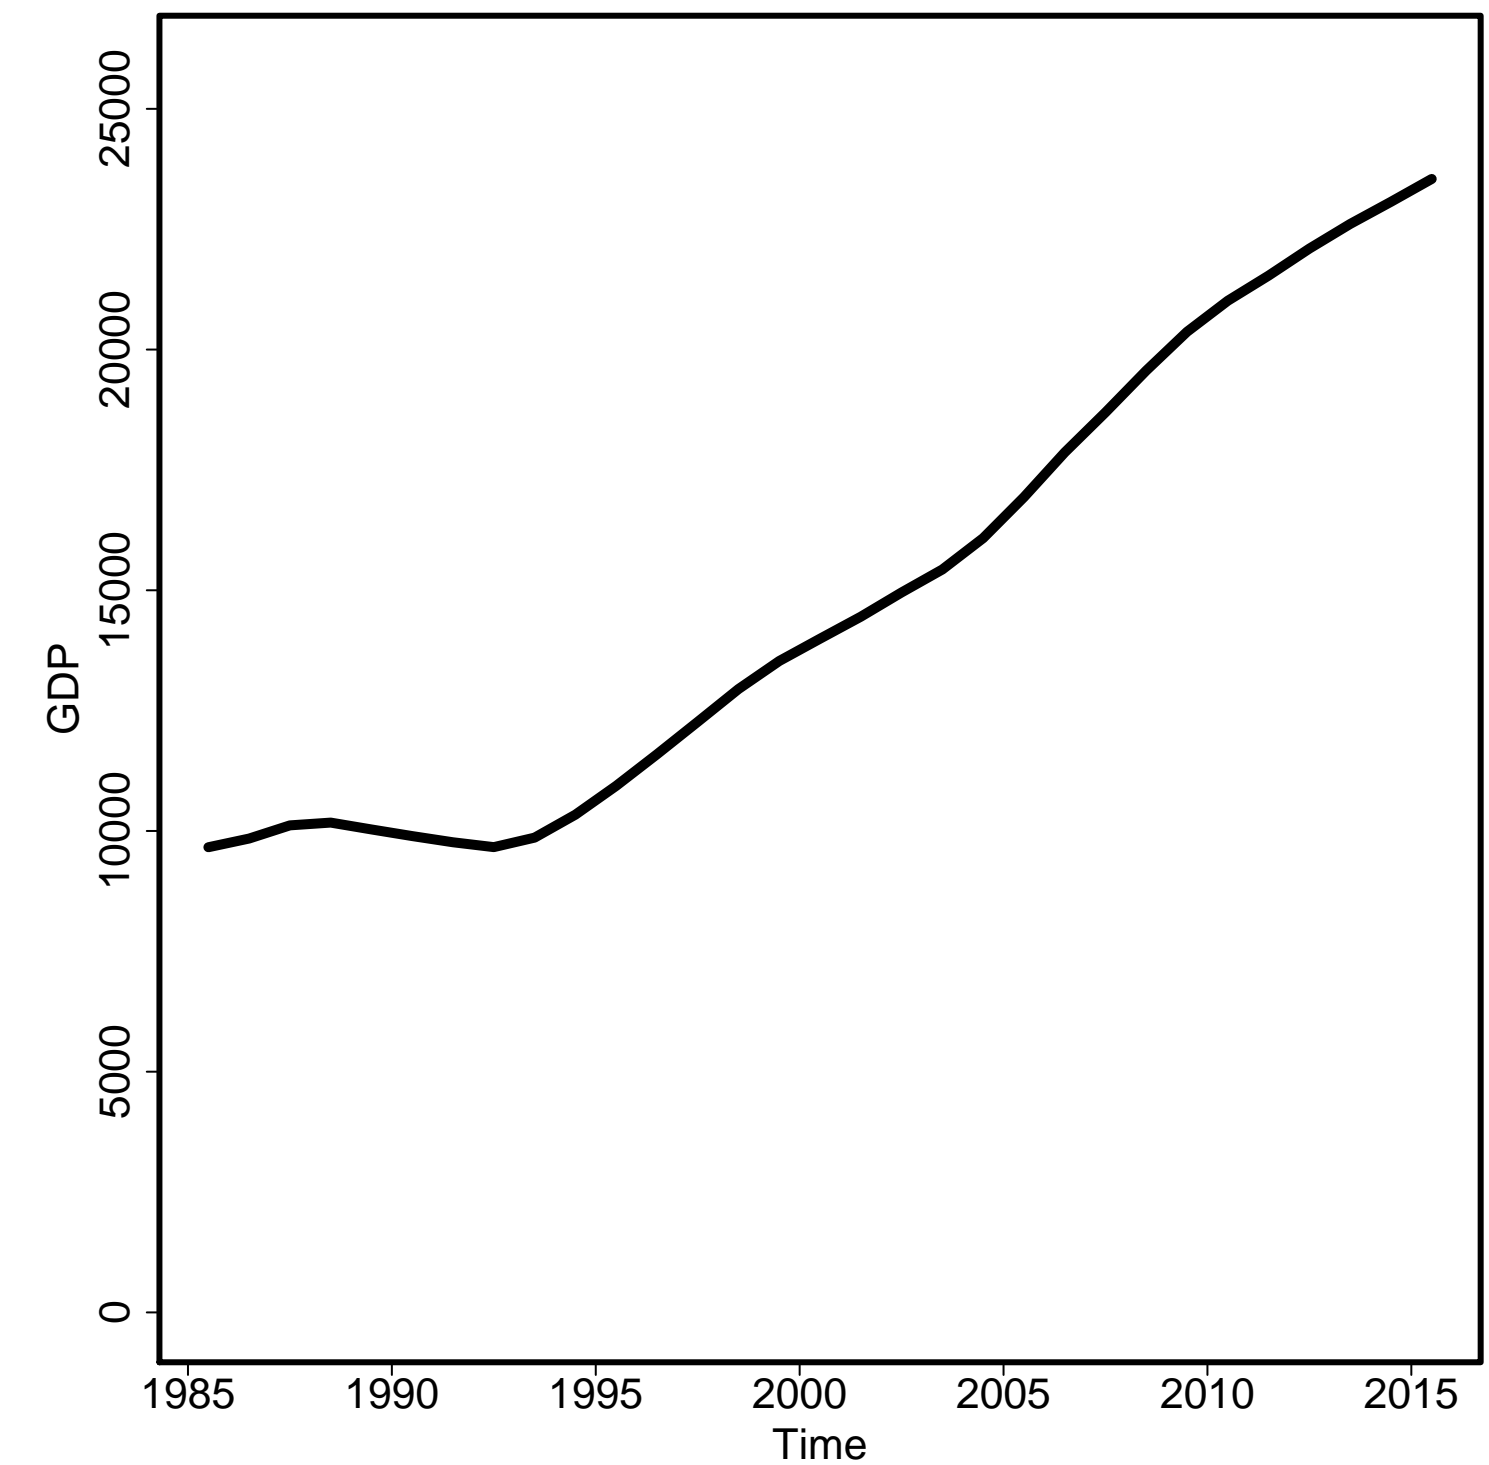

General Fertility Rate

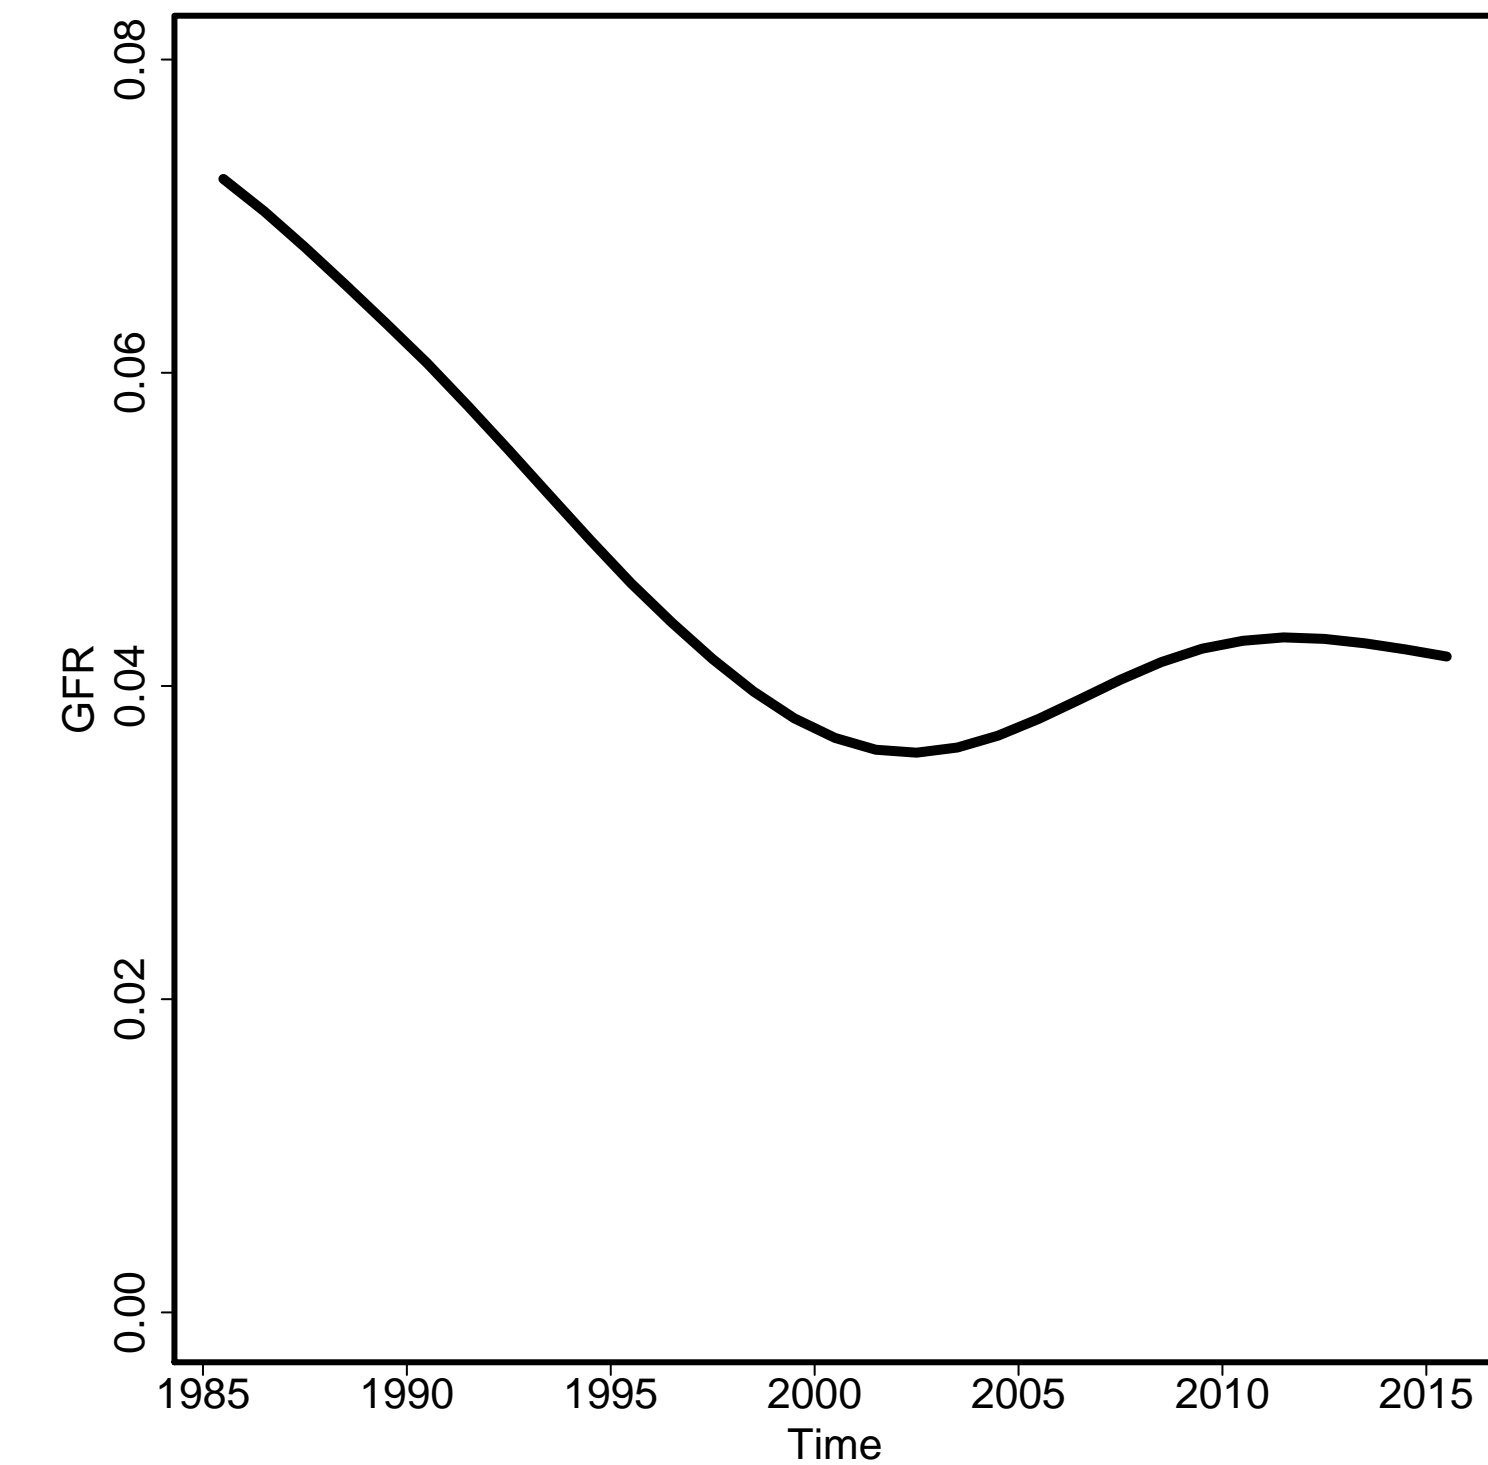

Skilled Attendance to Birth

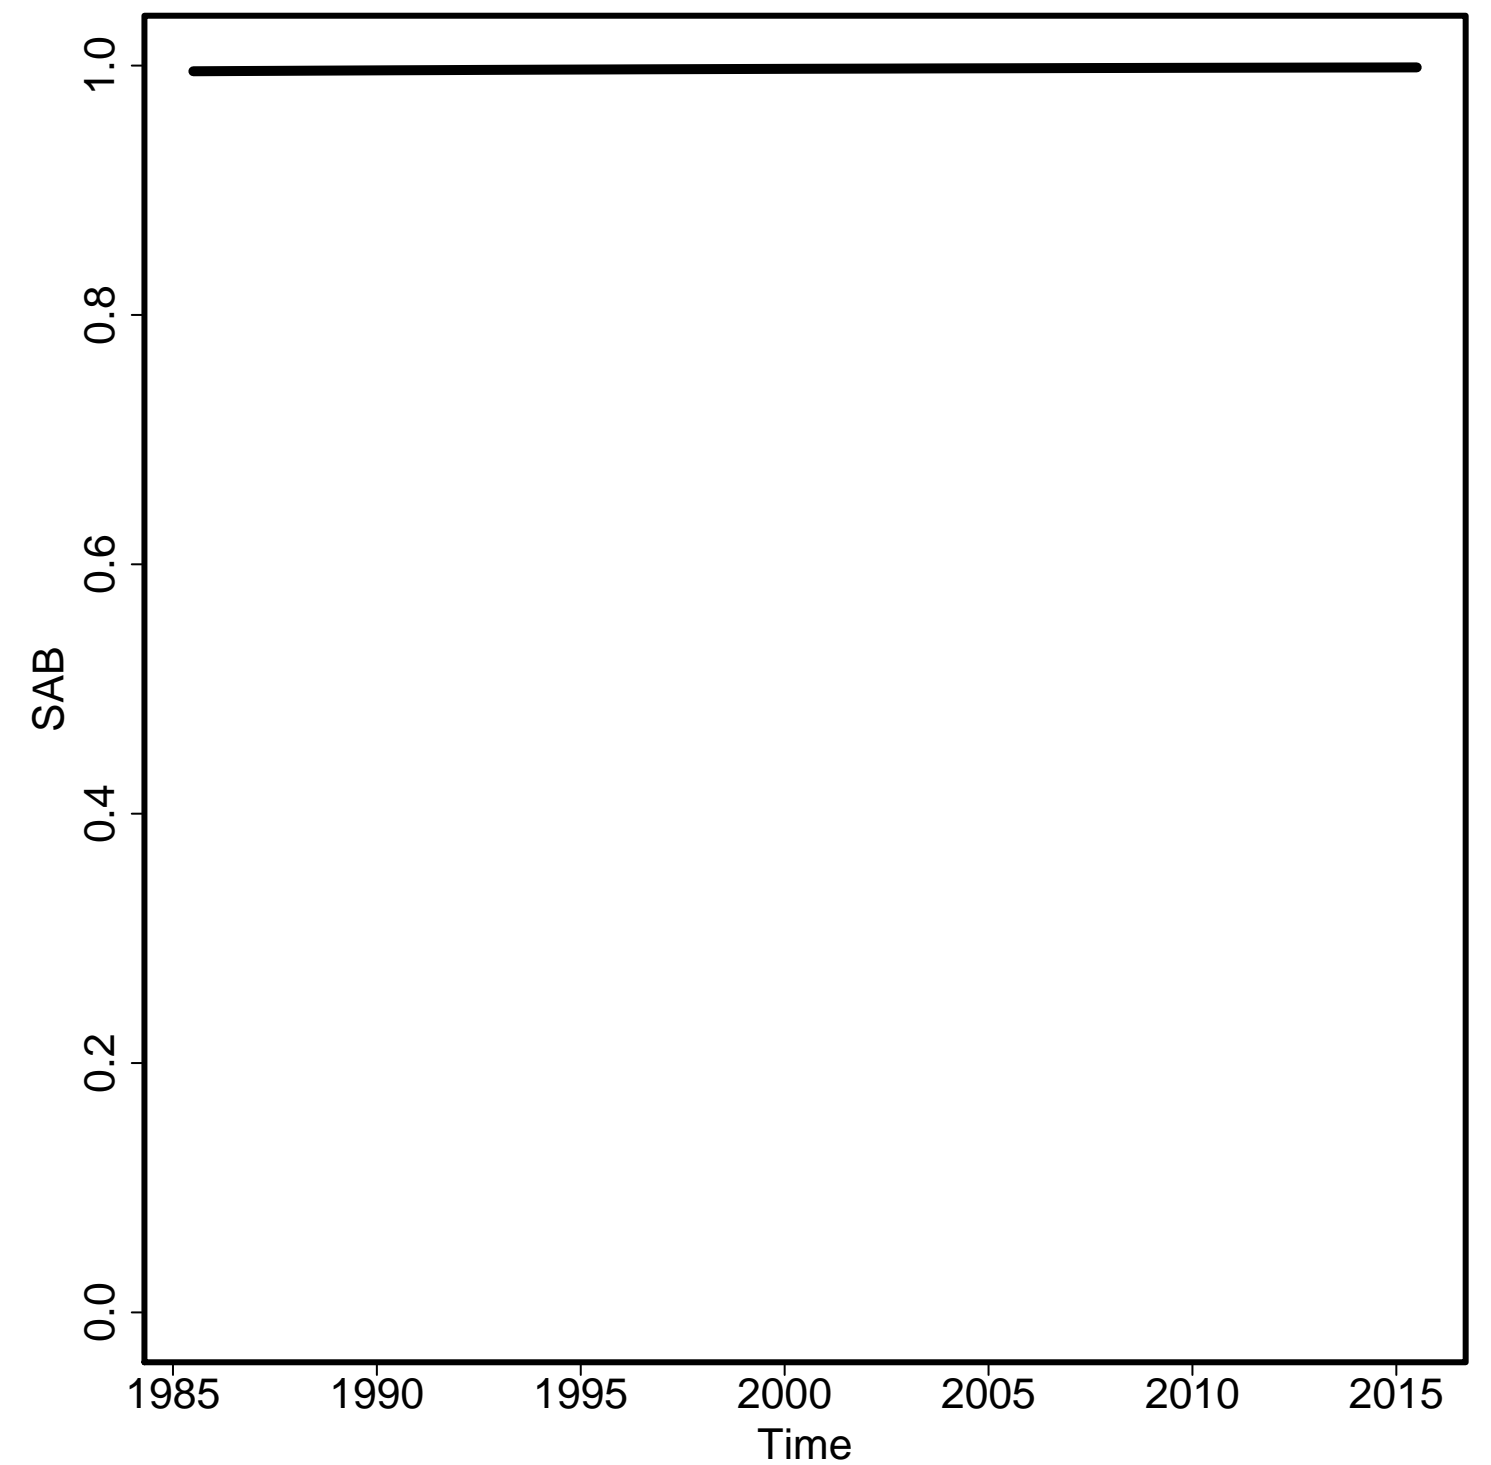

Envelope/Births

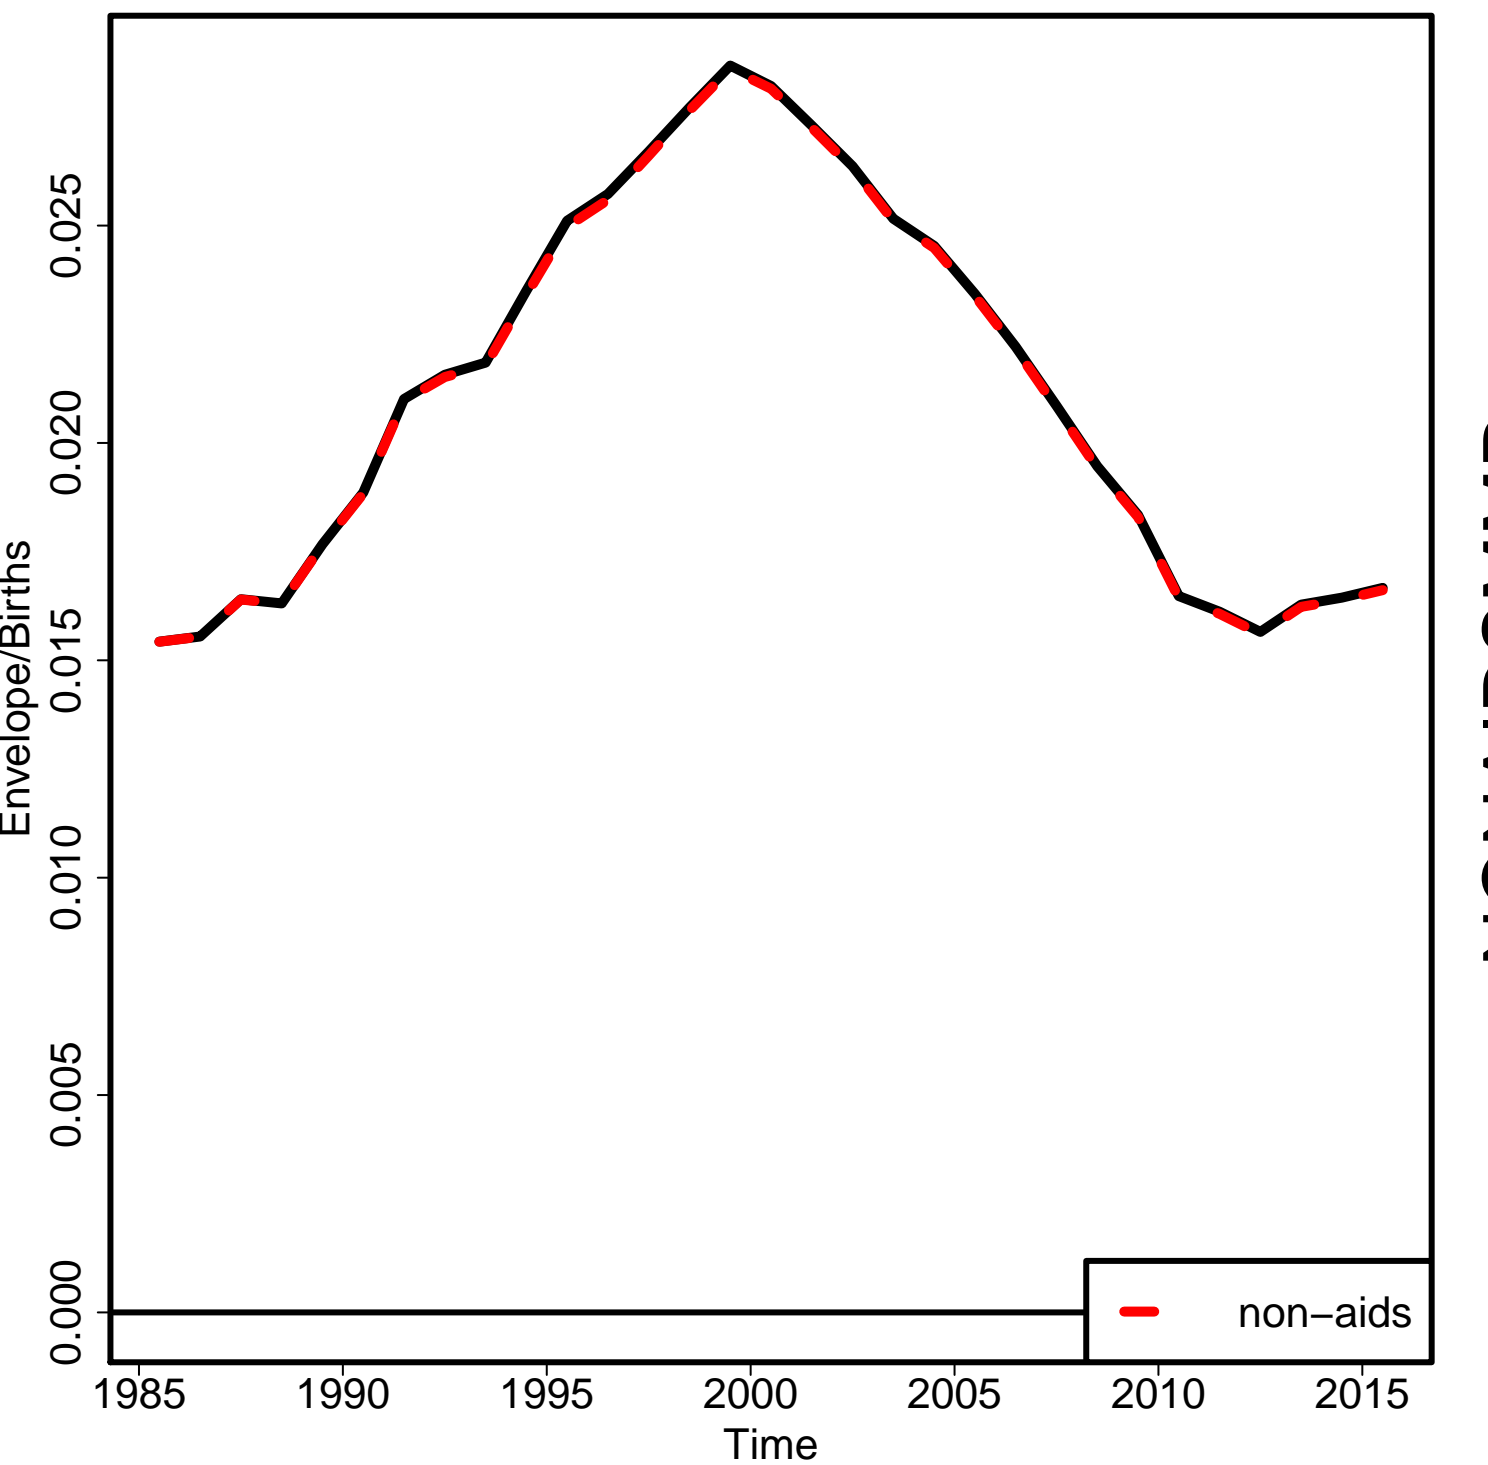

Non-aid MMR

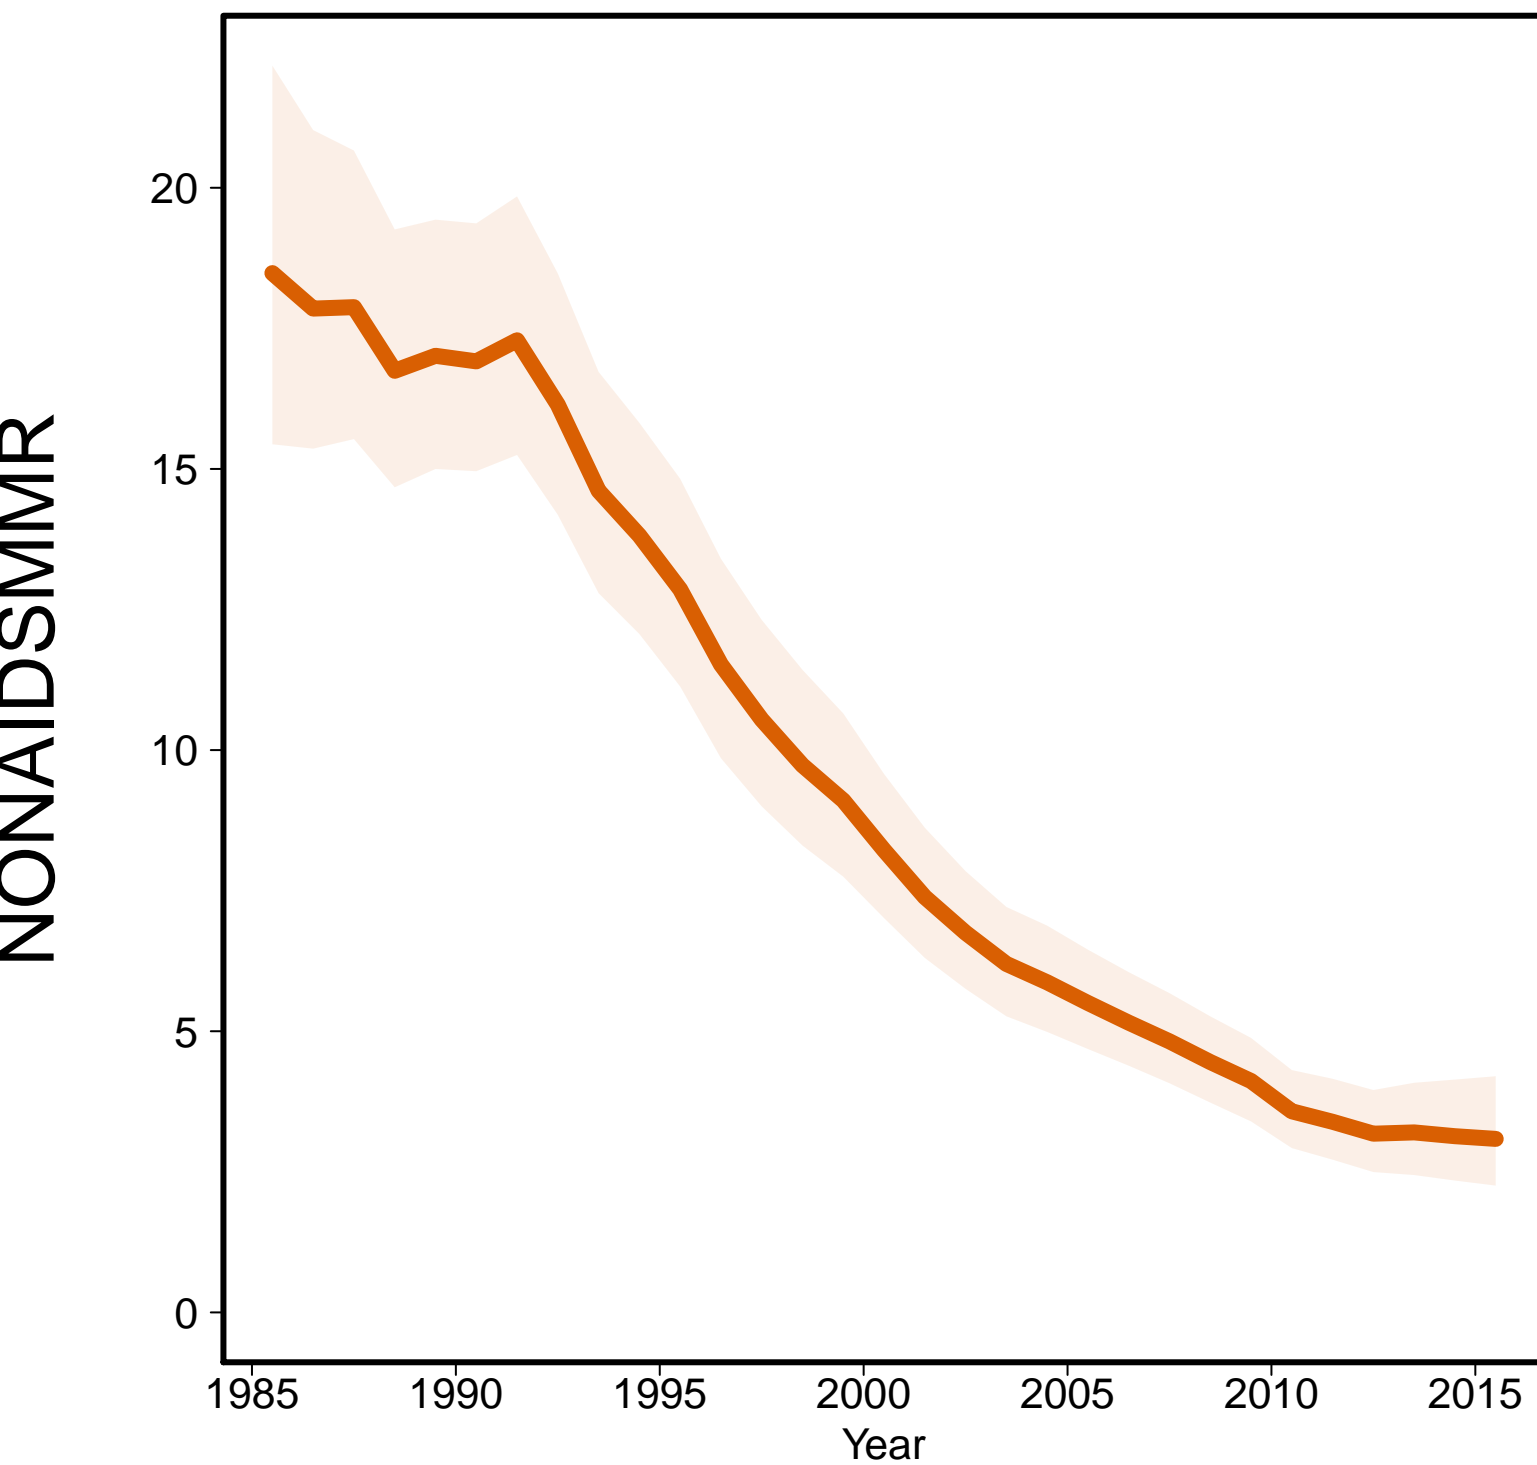

Aids MMR

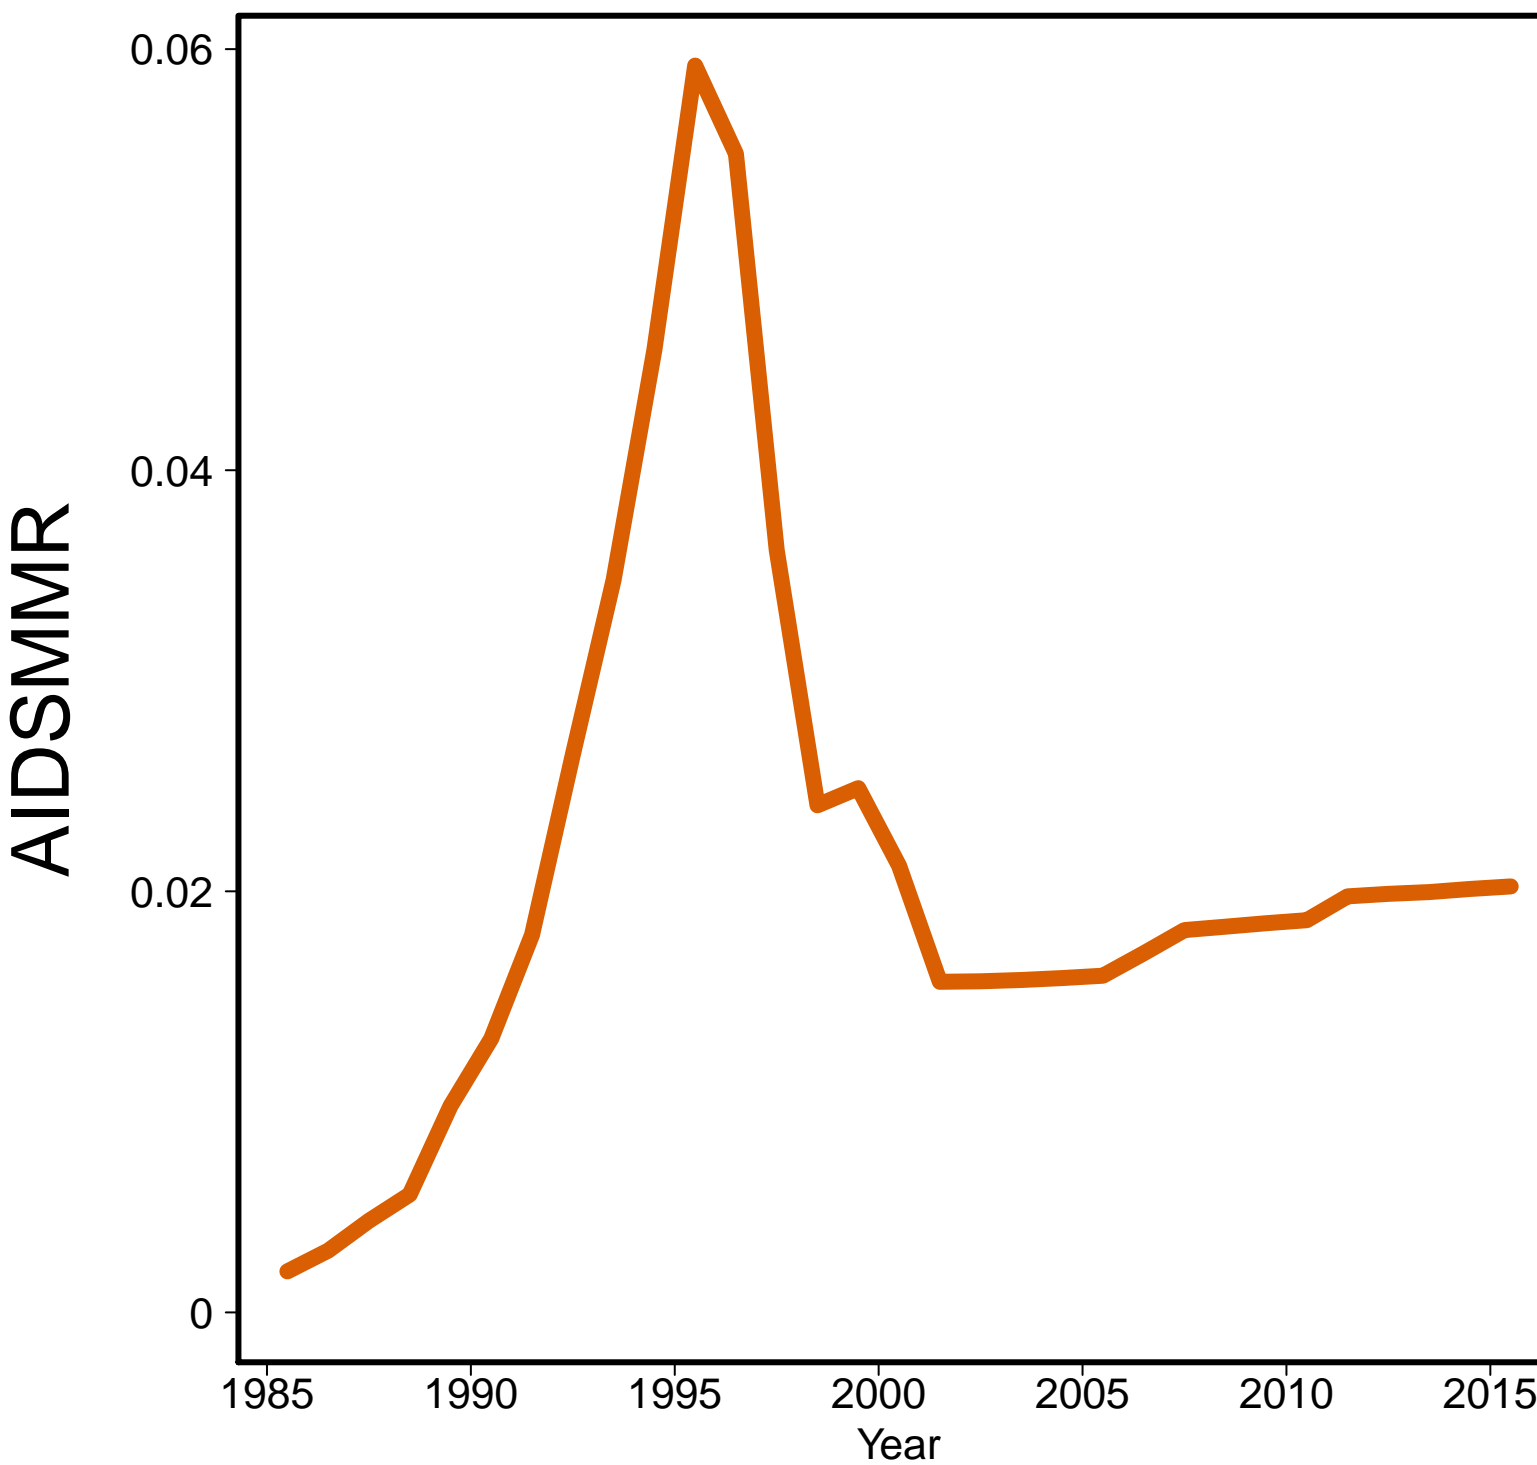



Portugal [PRT]  
(Developed regions)

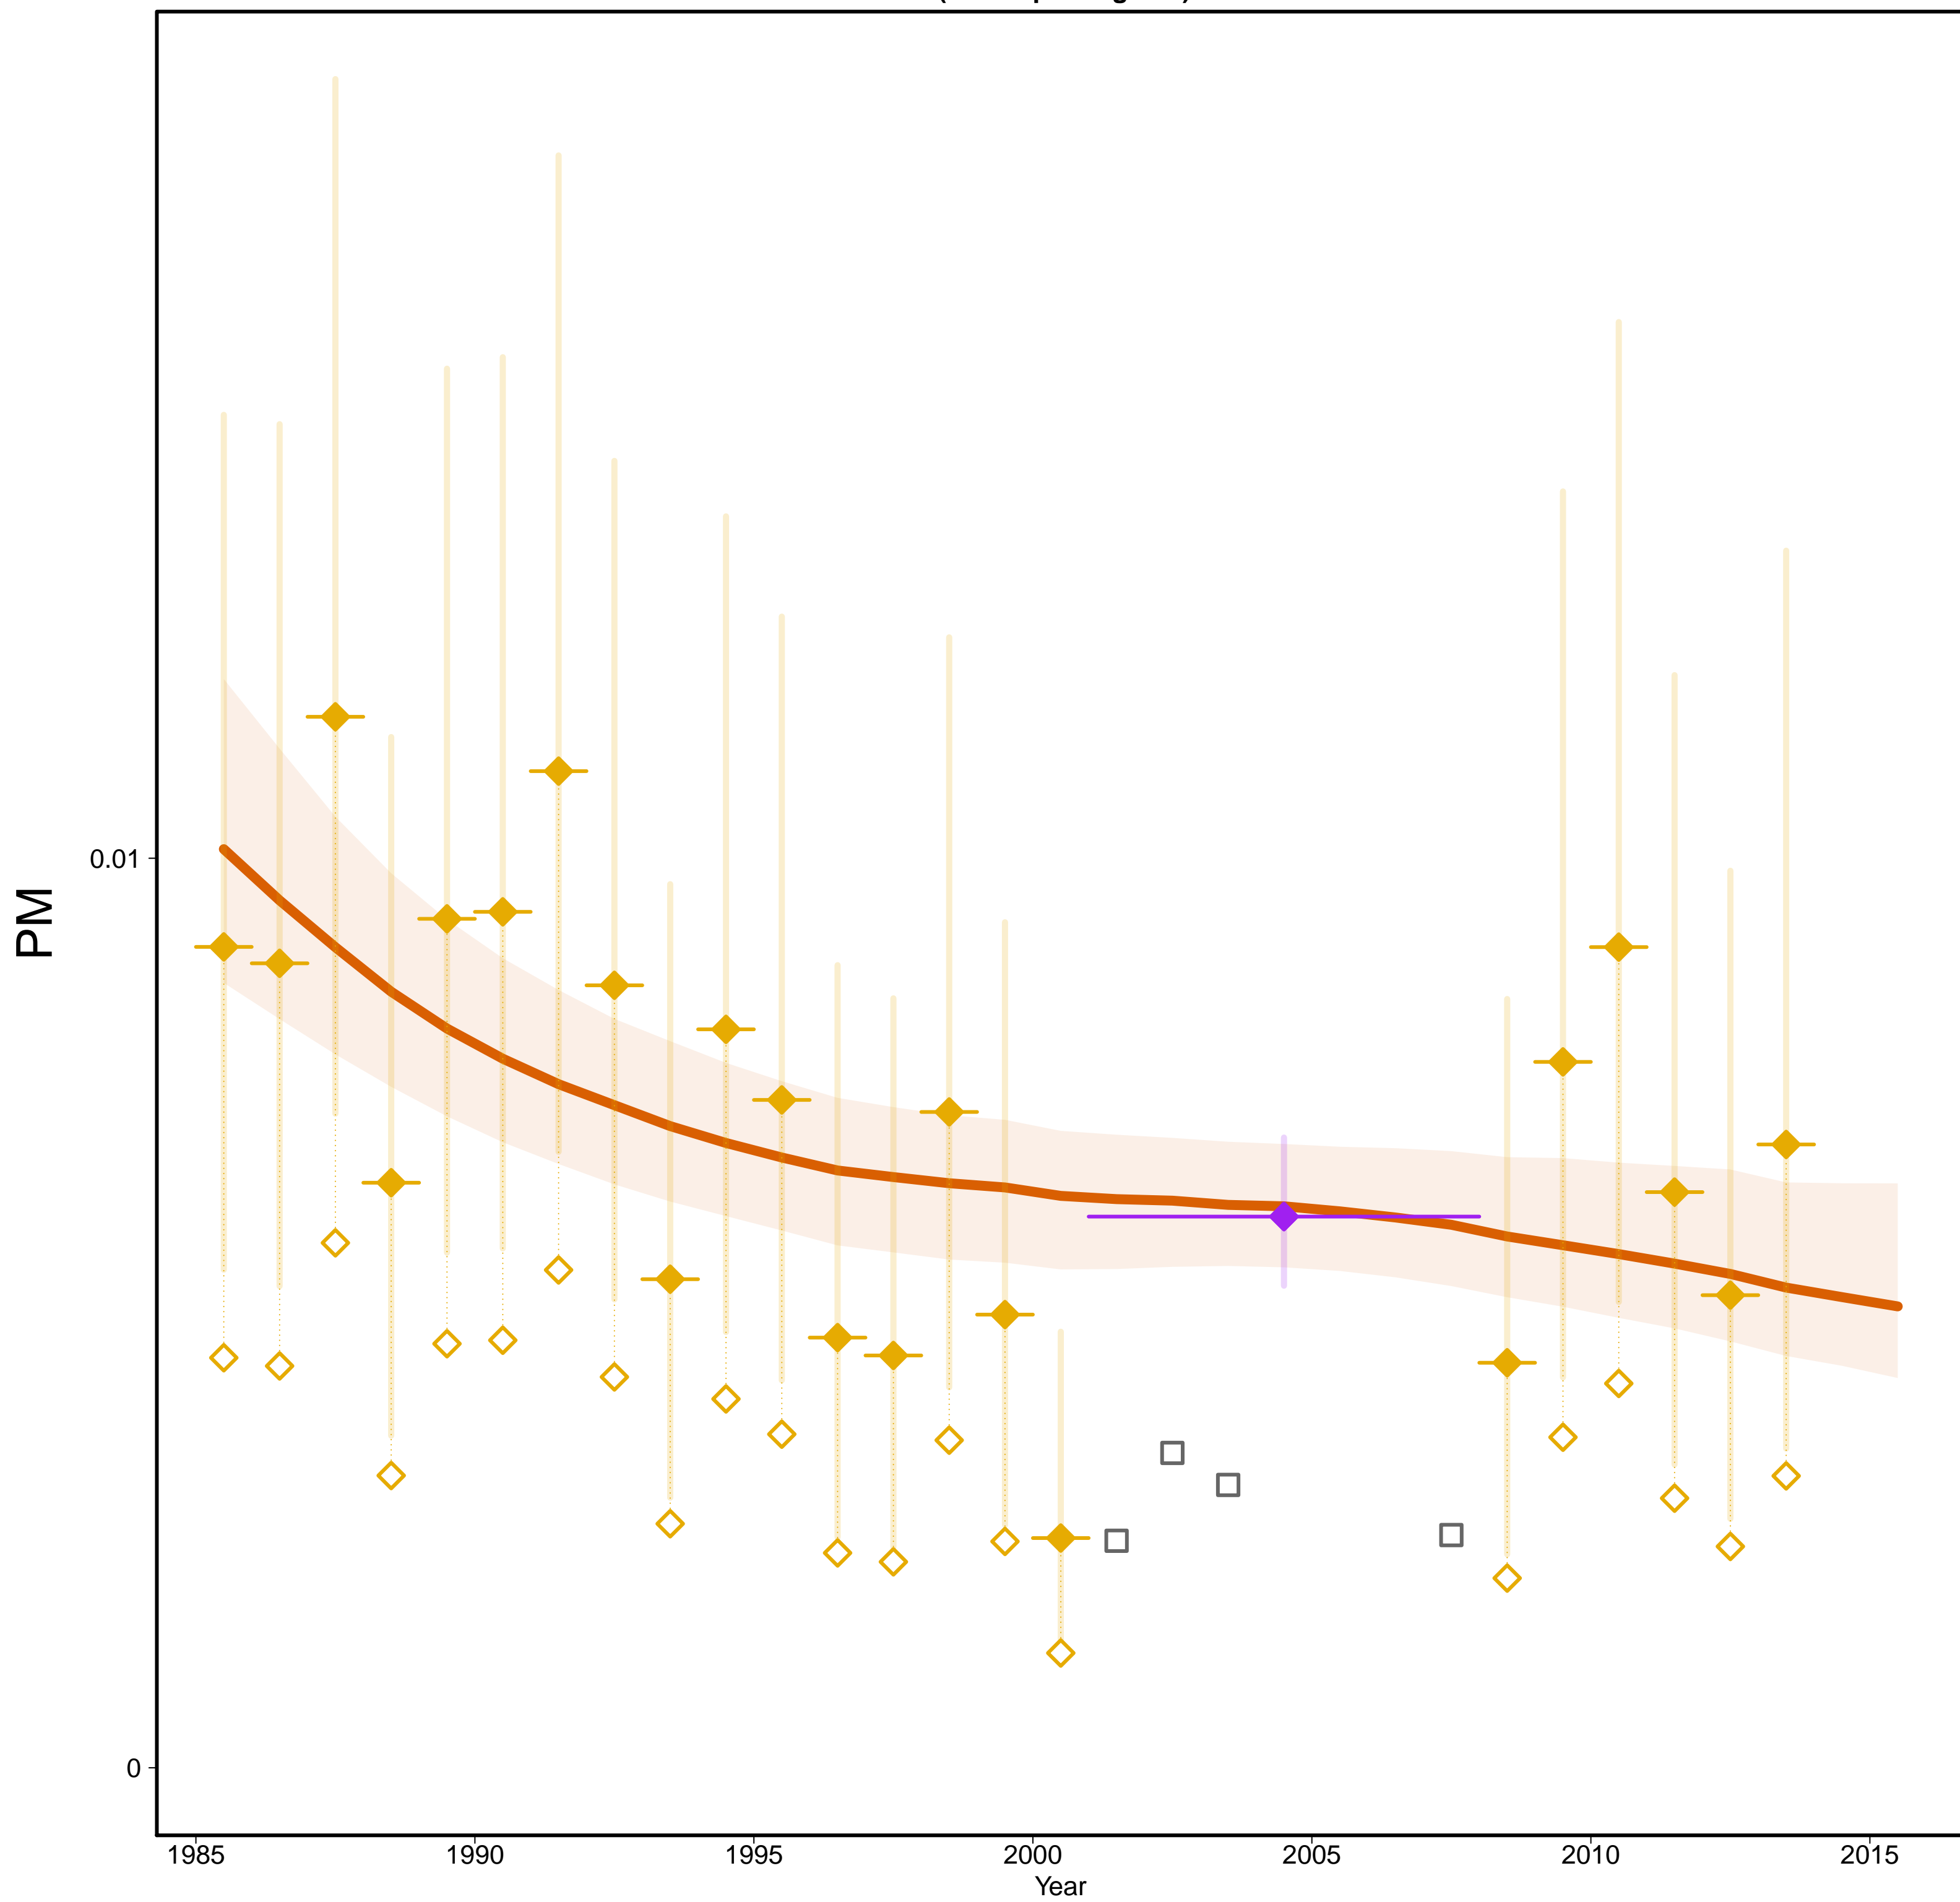

Portugal [PRT]  
(Developed regions)

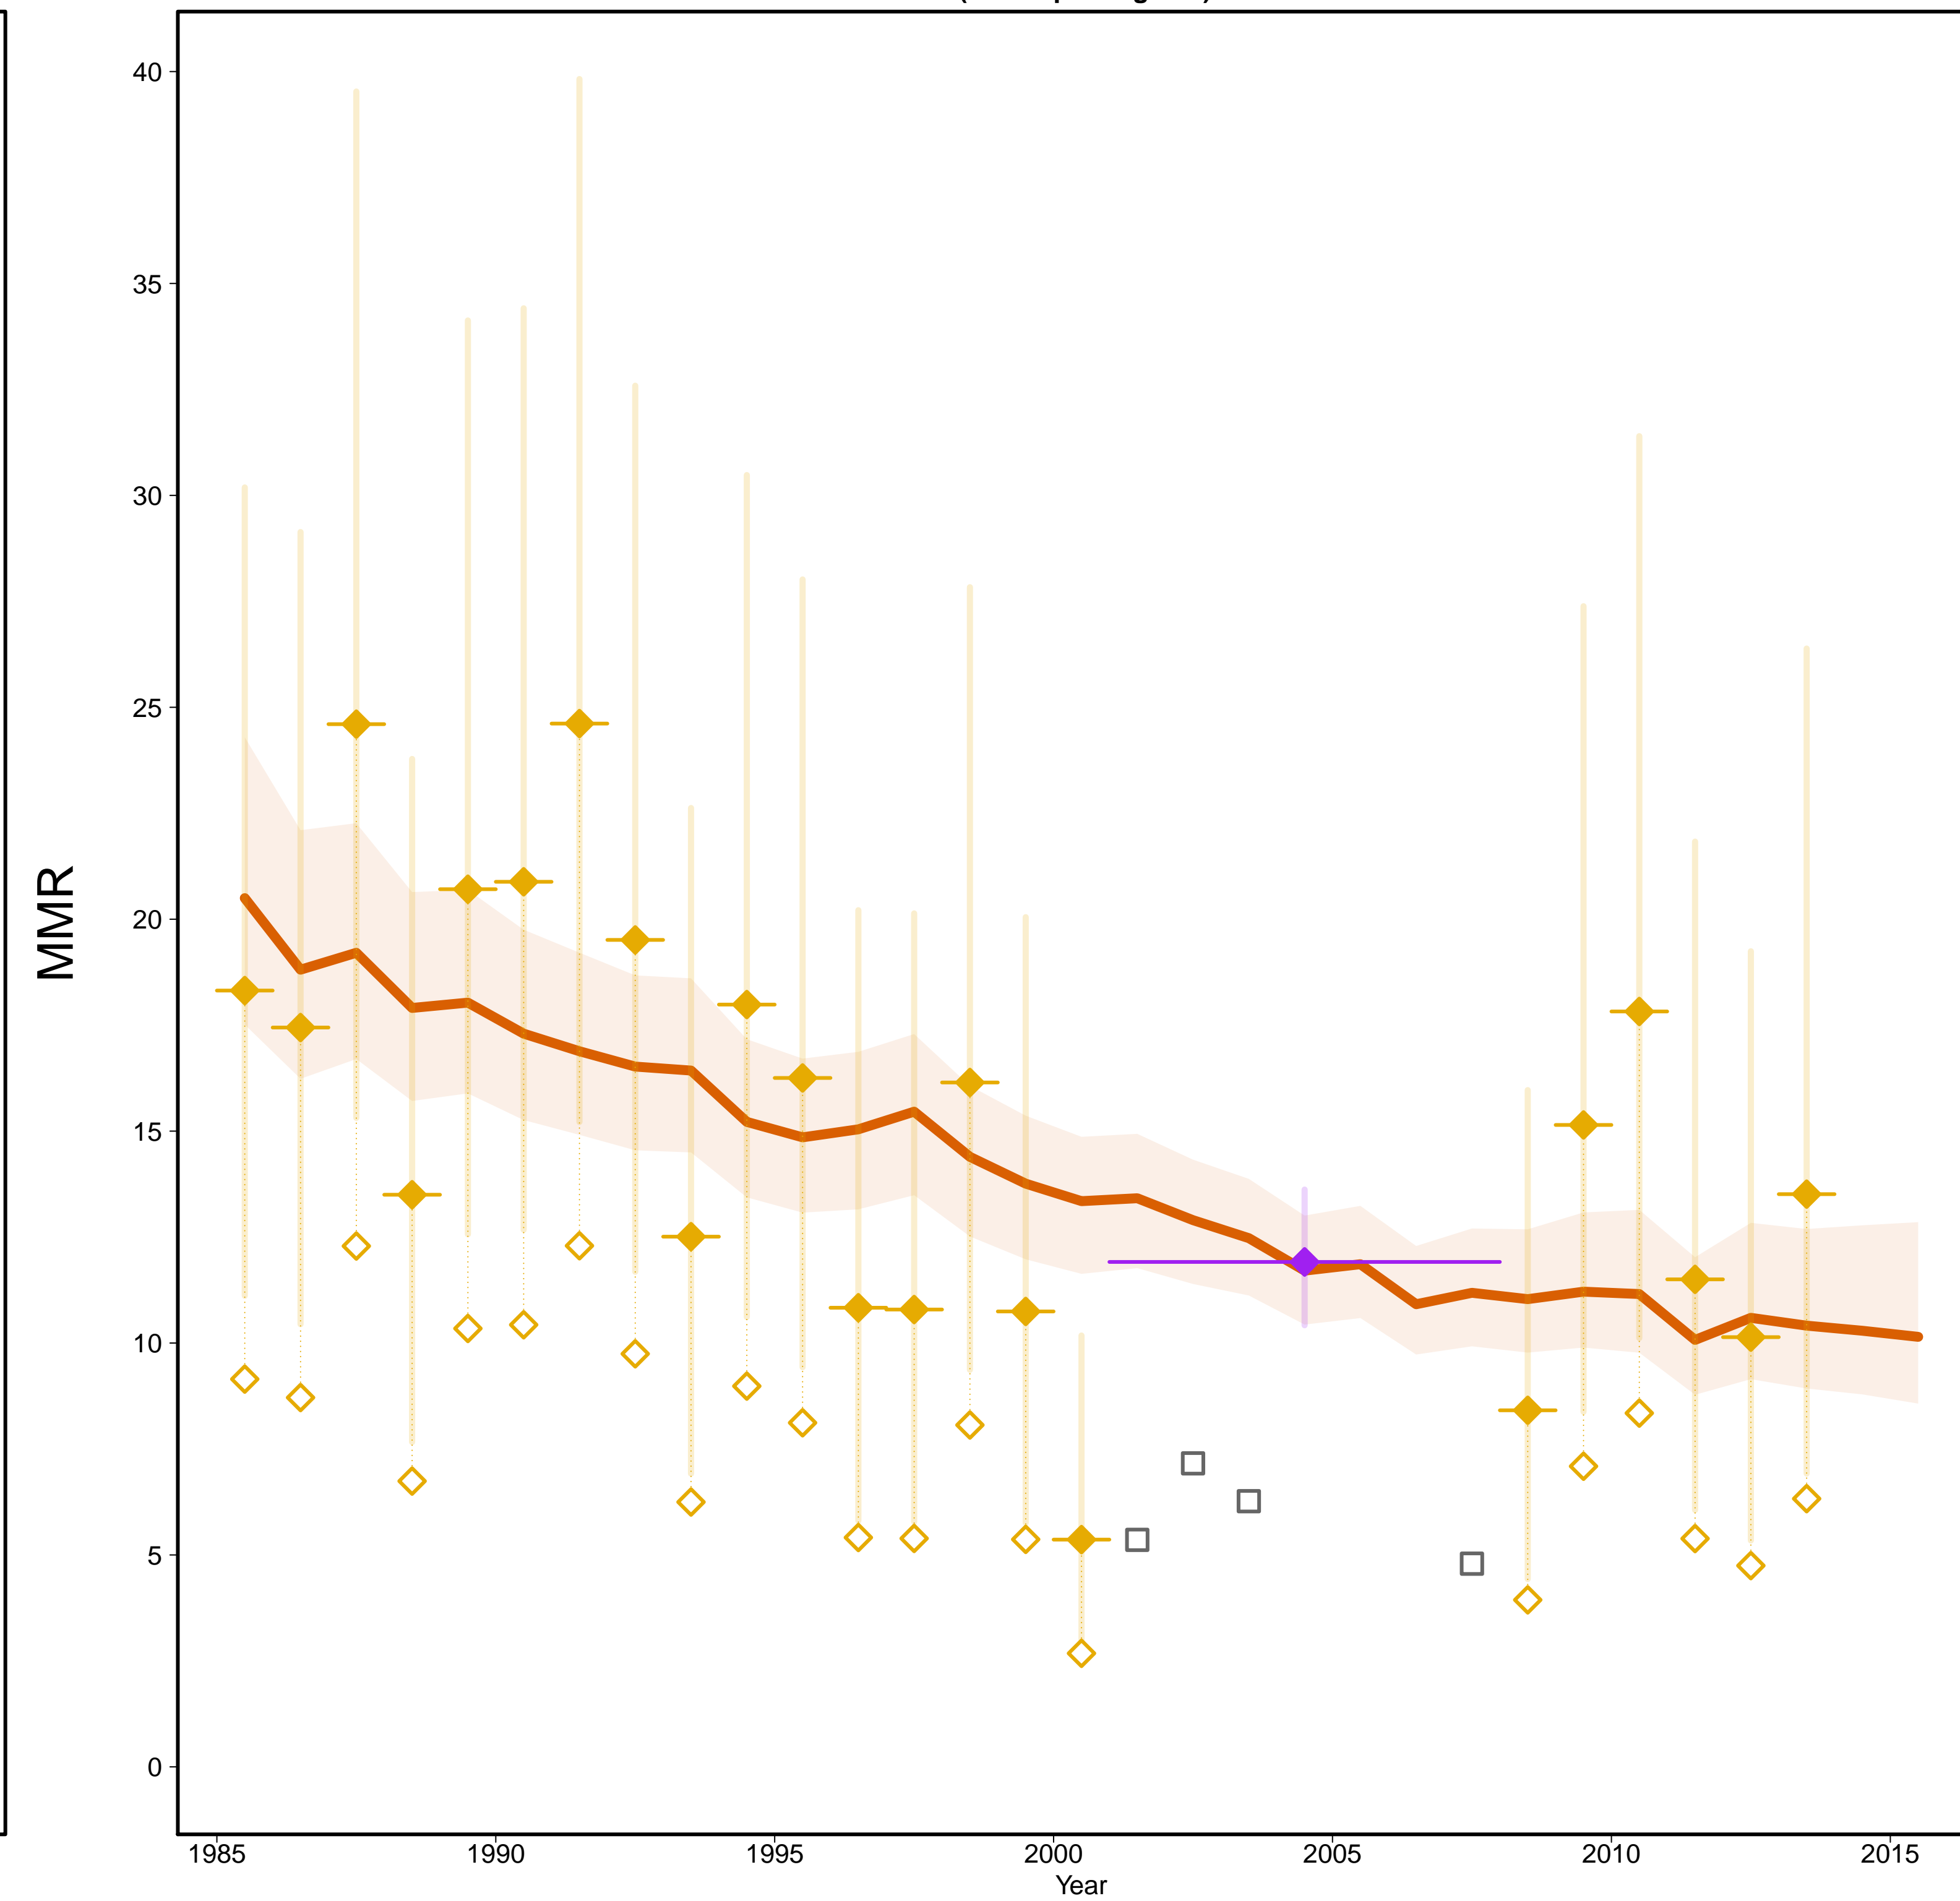

- Estimates –
- Mlate
- MMR Database 2015 –
- ◇ Observed Data
- ◆ Adjusted Data
- Data type –
- ◆ VR
- ◆ Spec. studies
- Excluded VR data  
(overlap with specialized study)

Gross Domestic Product

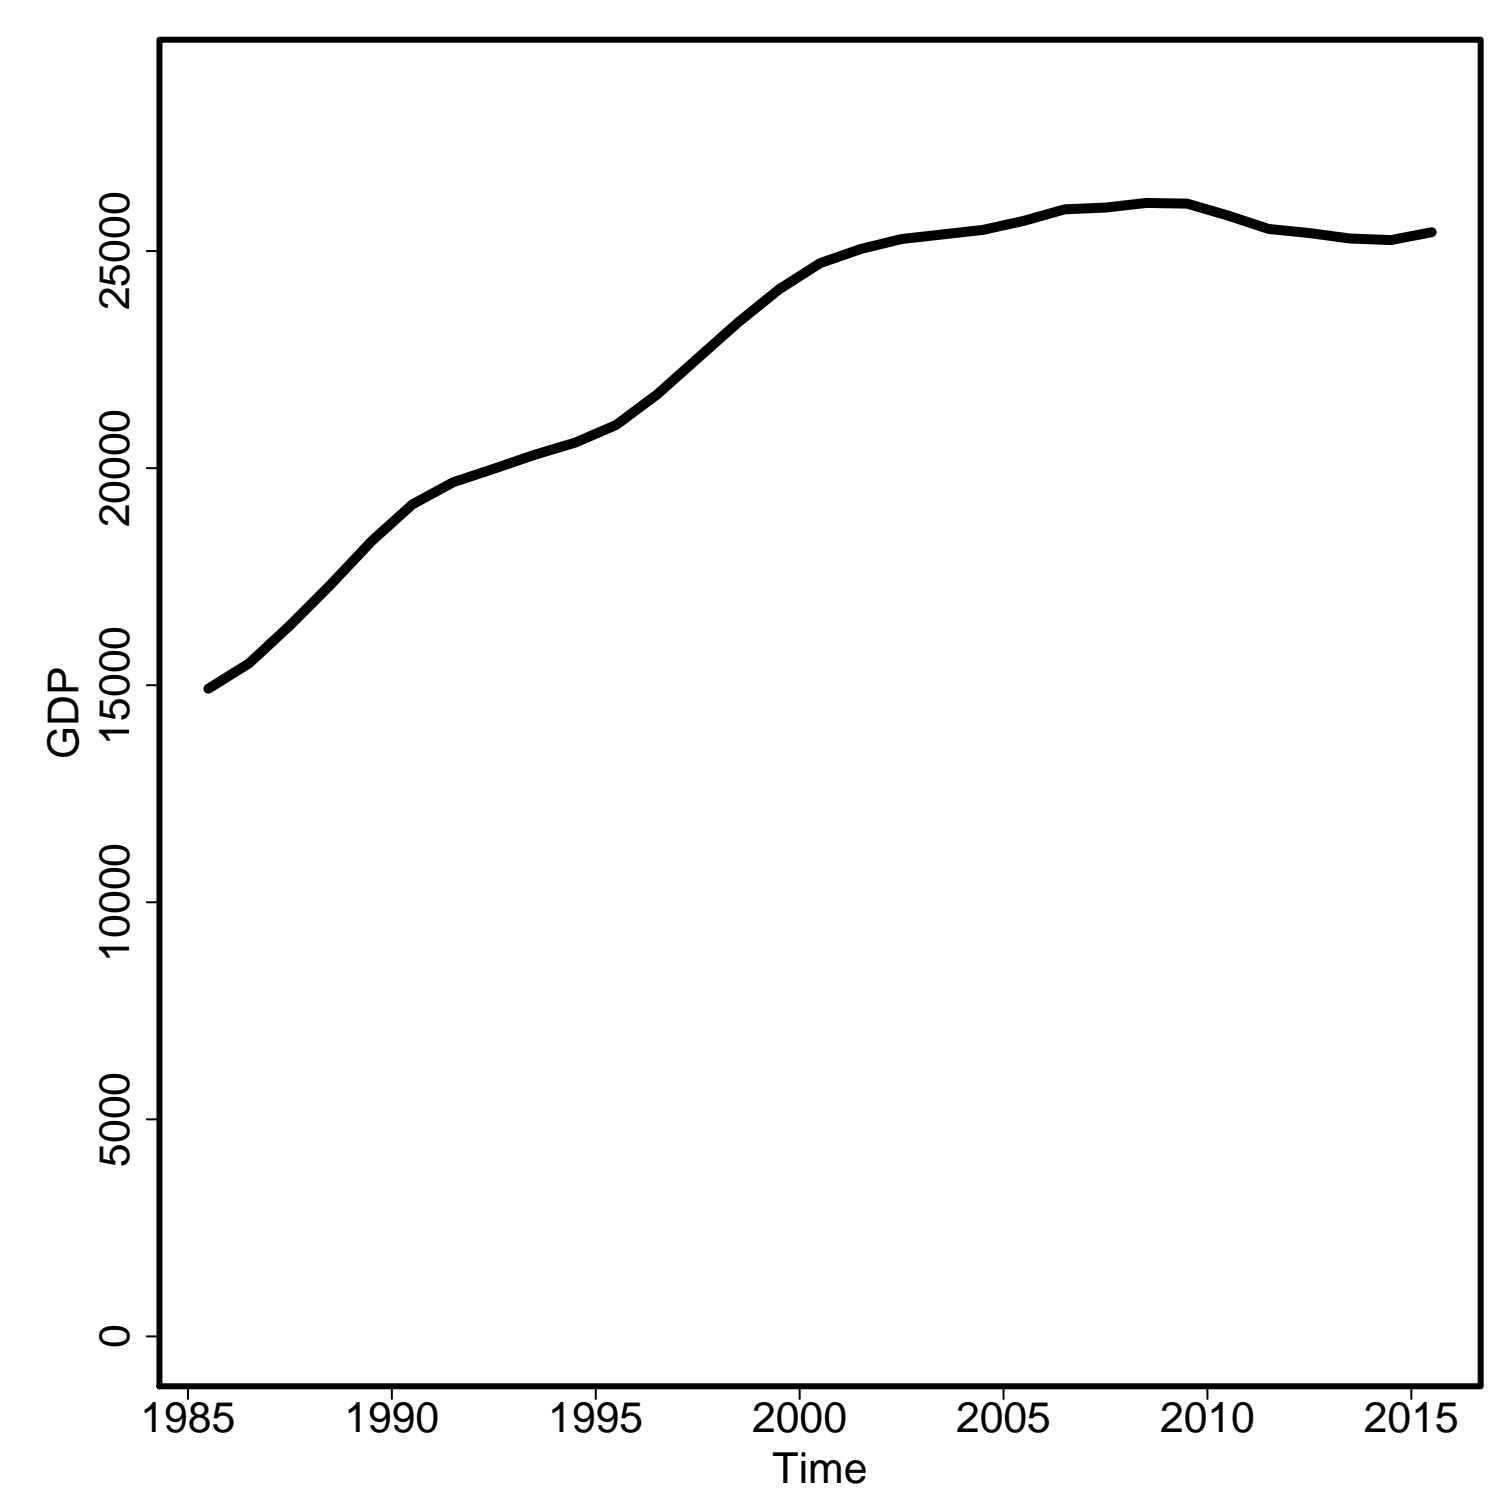

General Fertility Rate

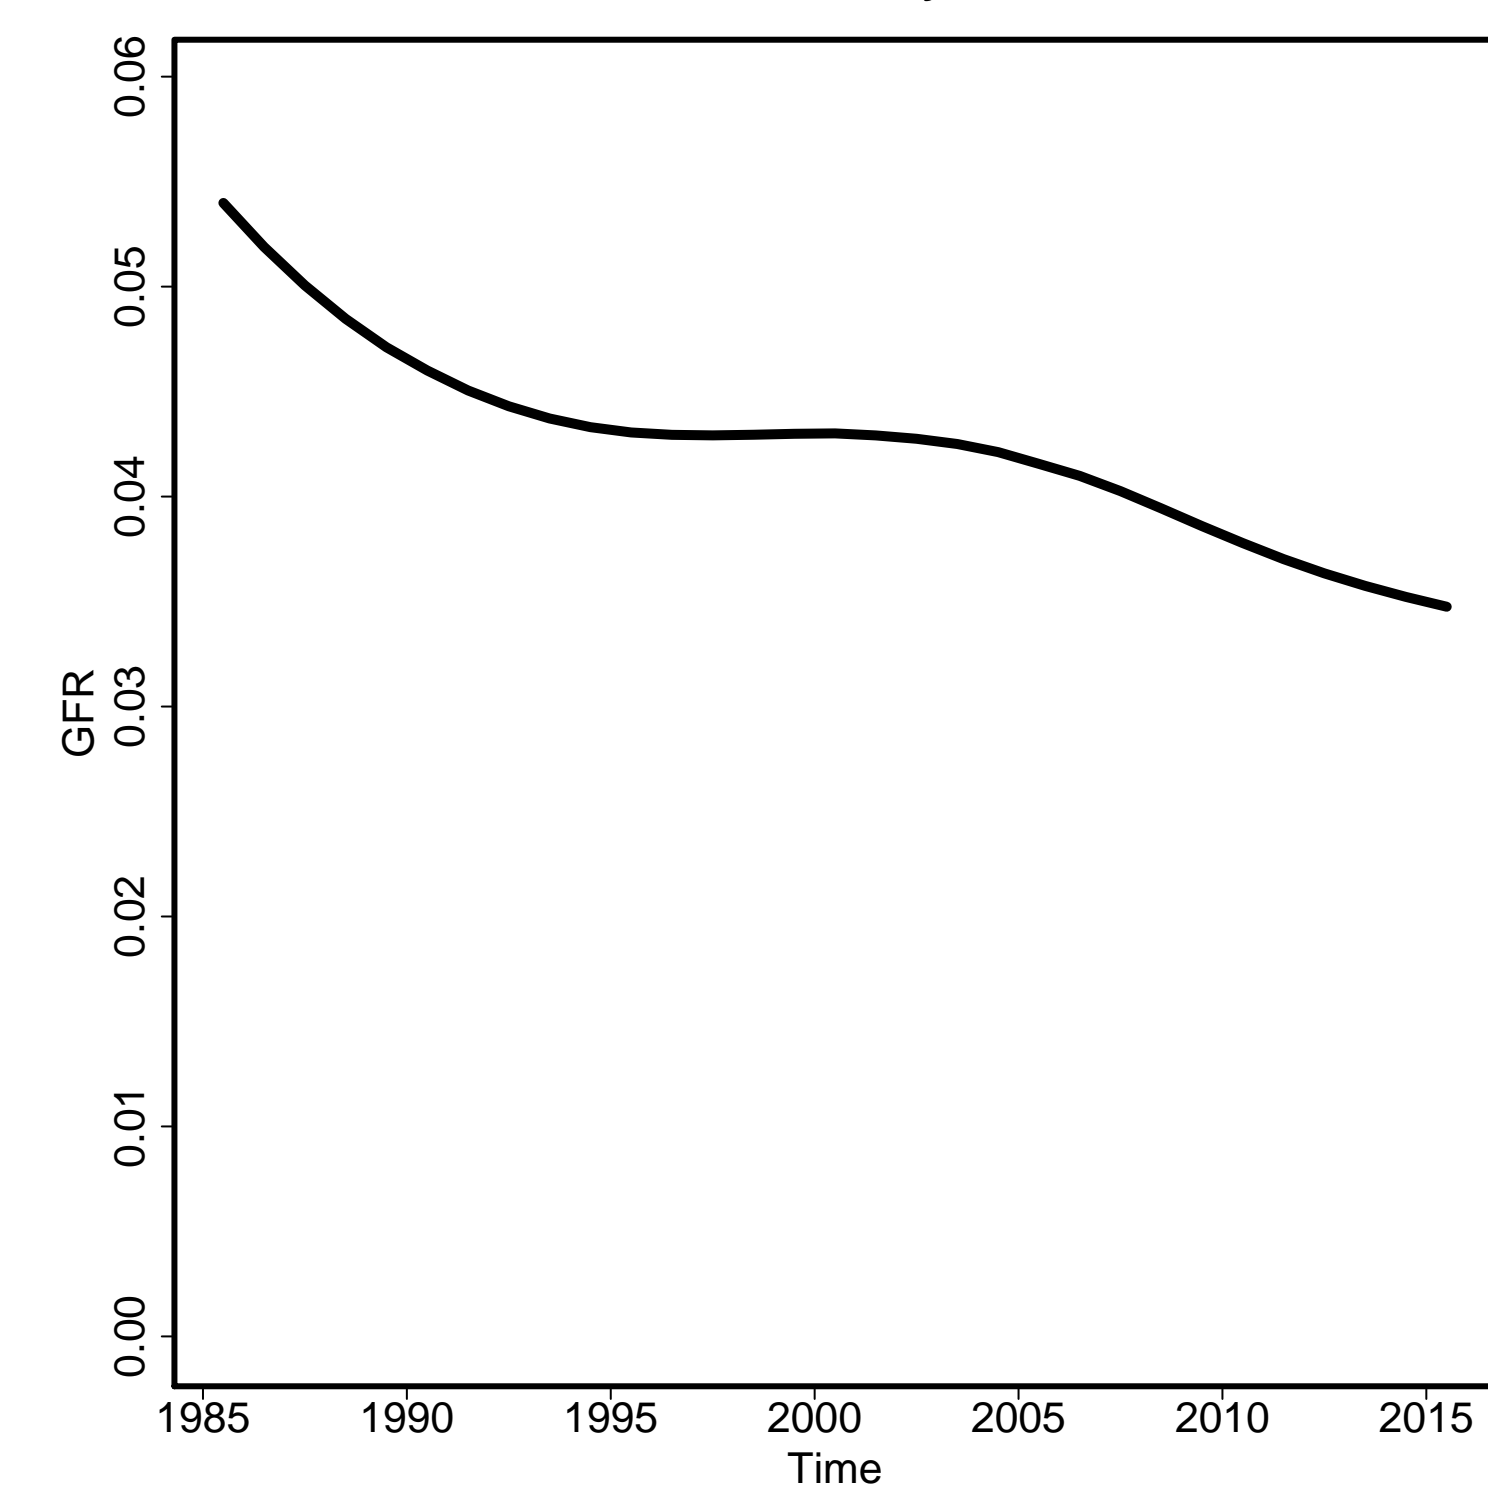

Skilled Attendance to Birth

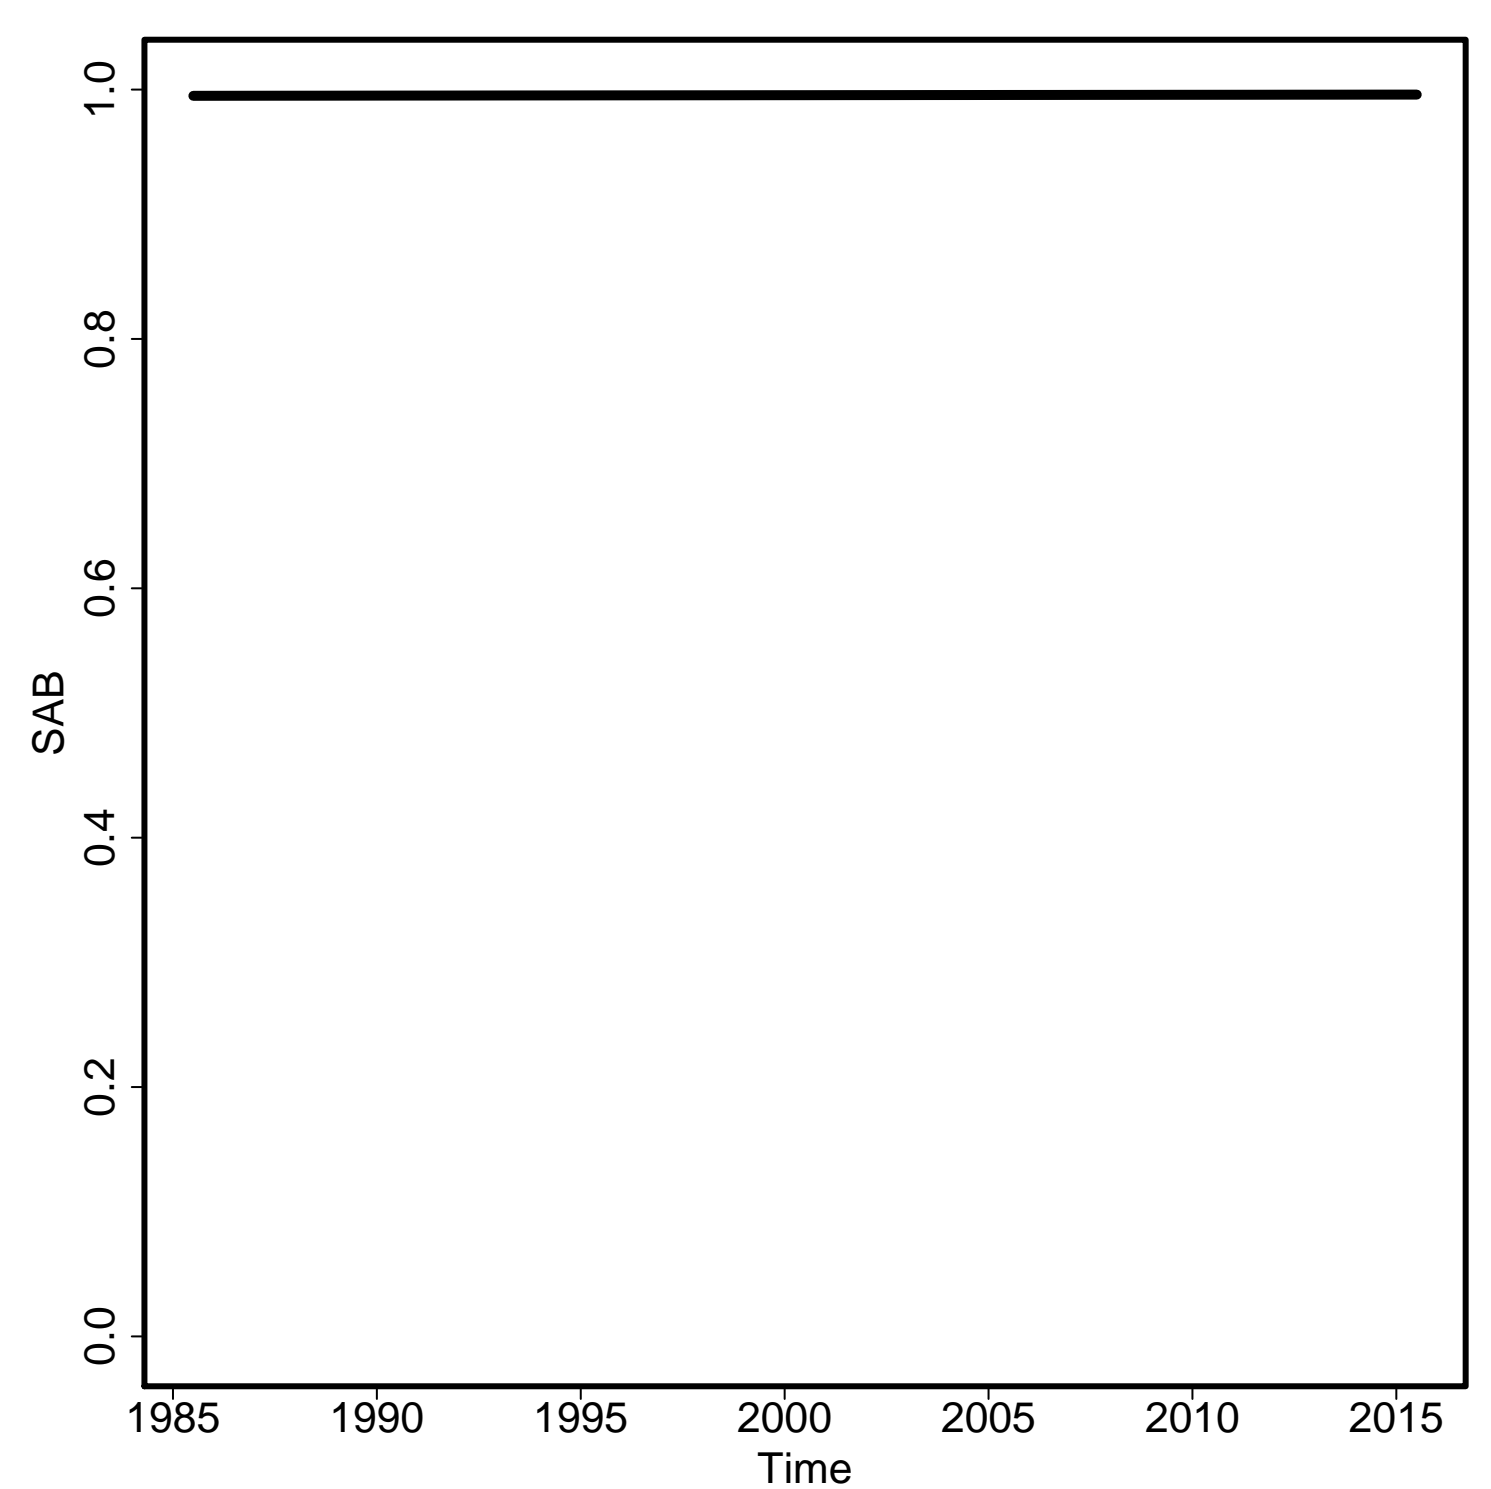

Envelope/Births

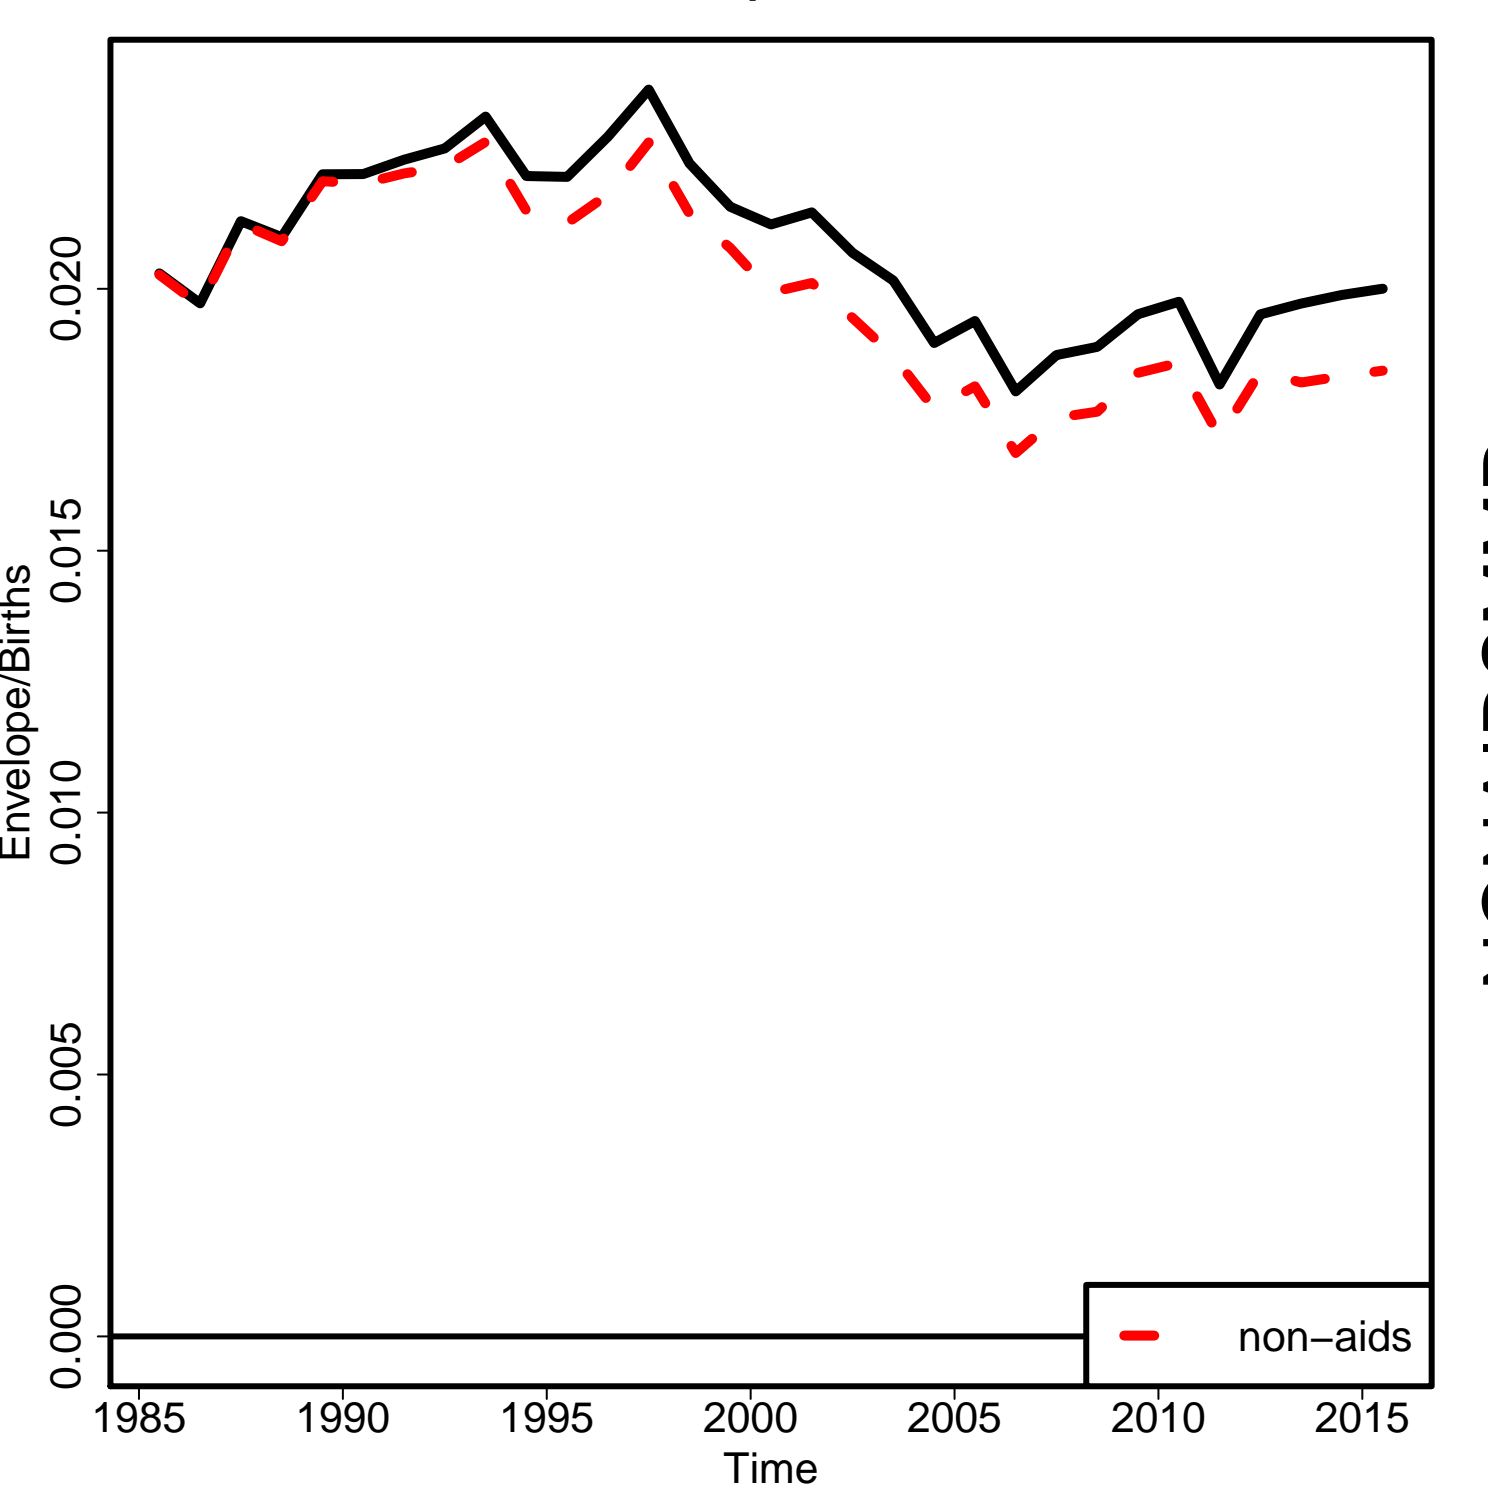

Non-aids MMR

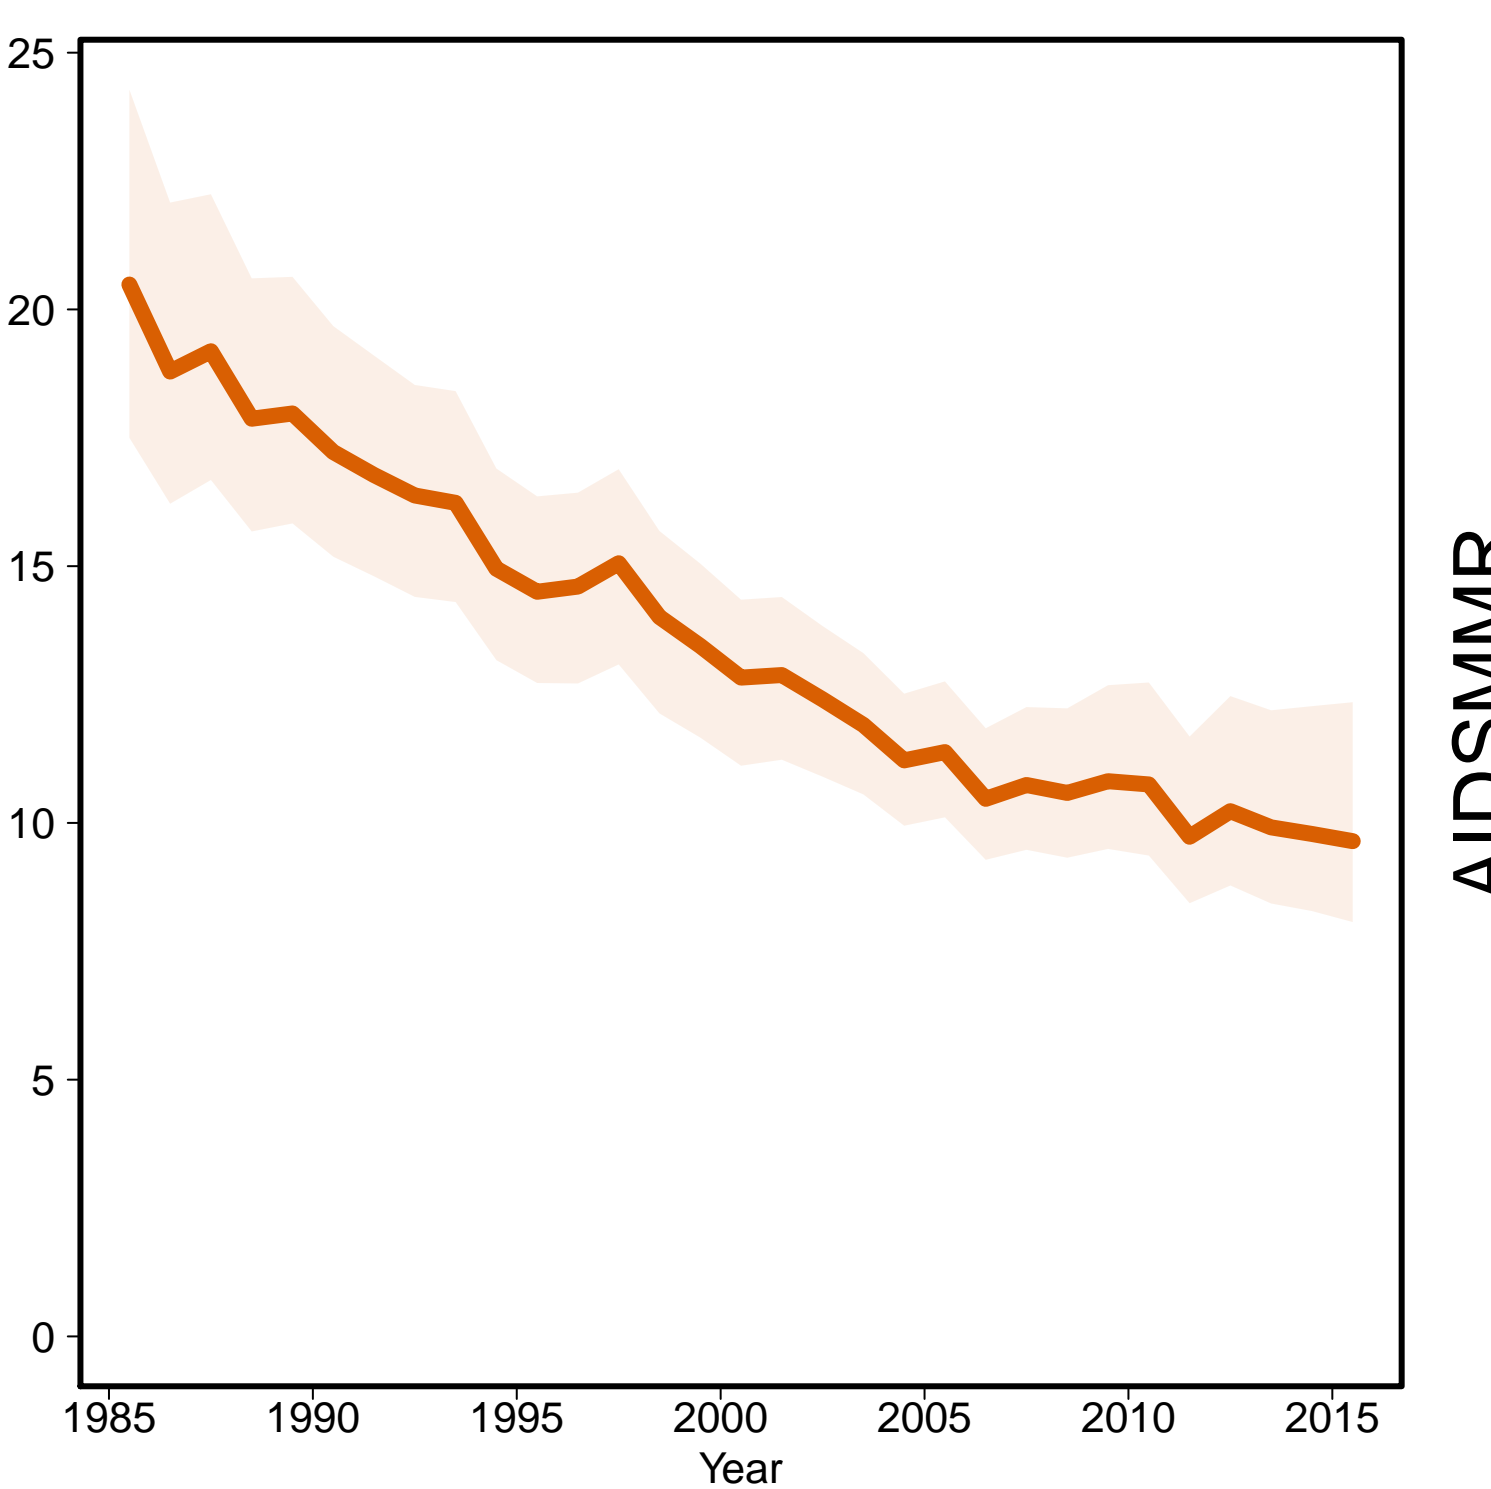

Aids MMR

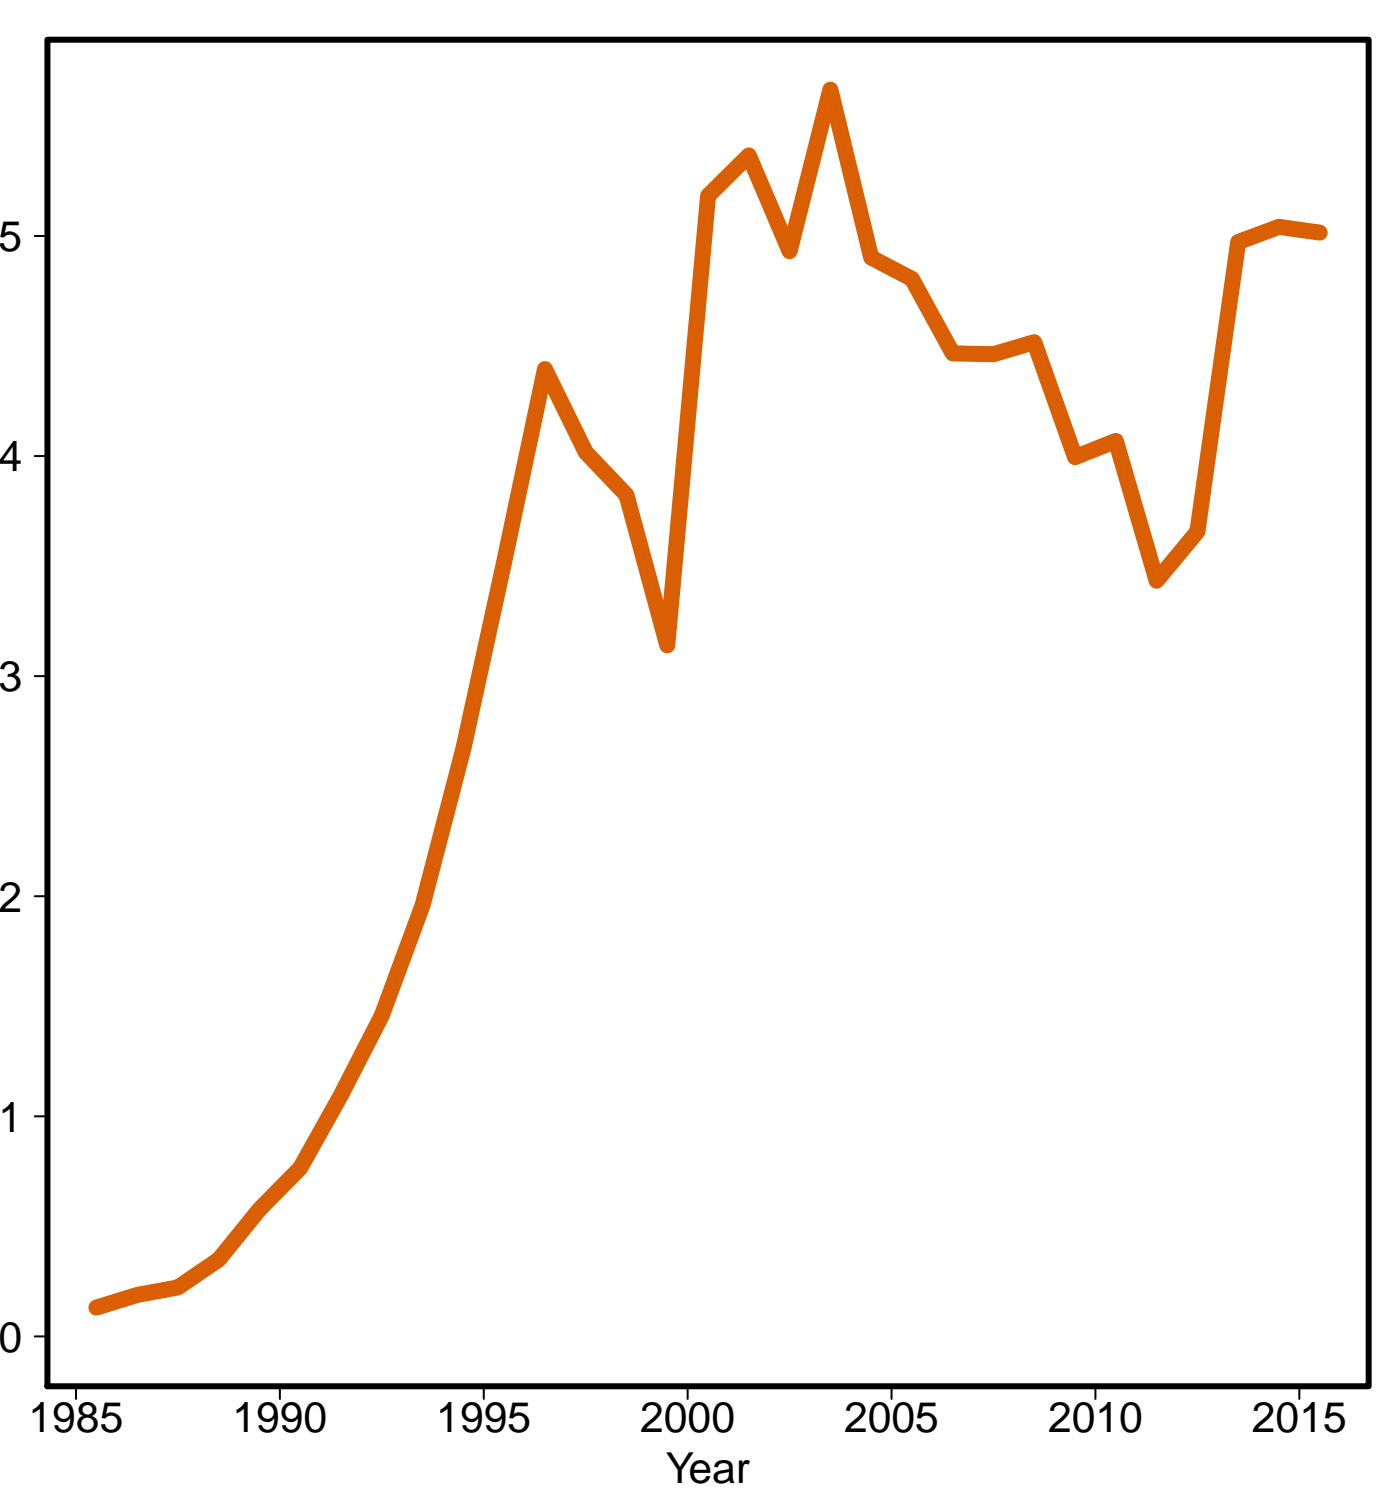

Puerto Rico [PRI]  
(Caribbean)

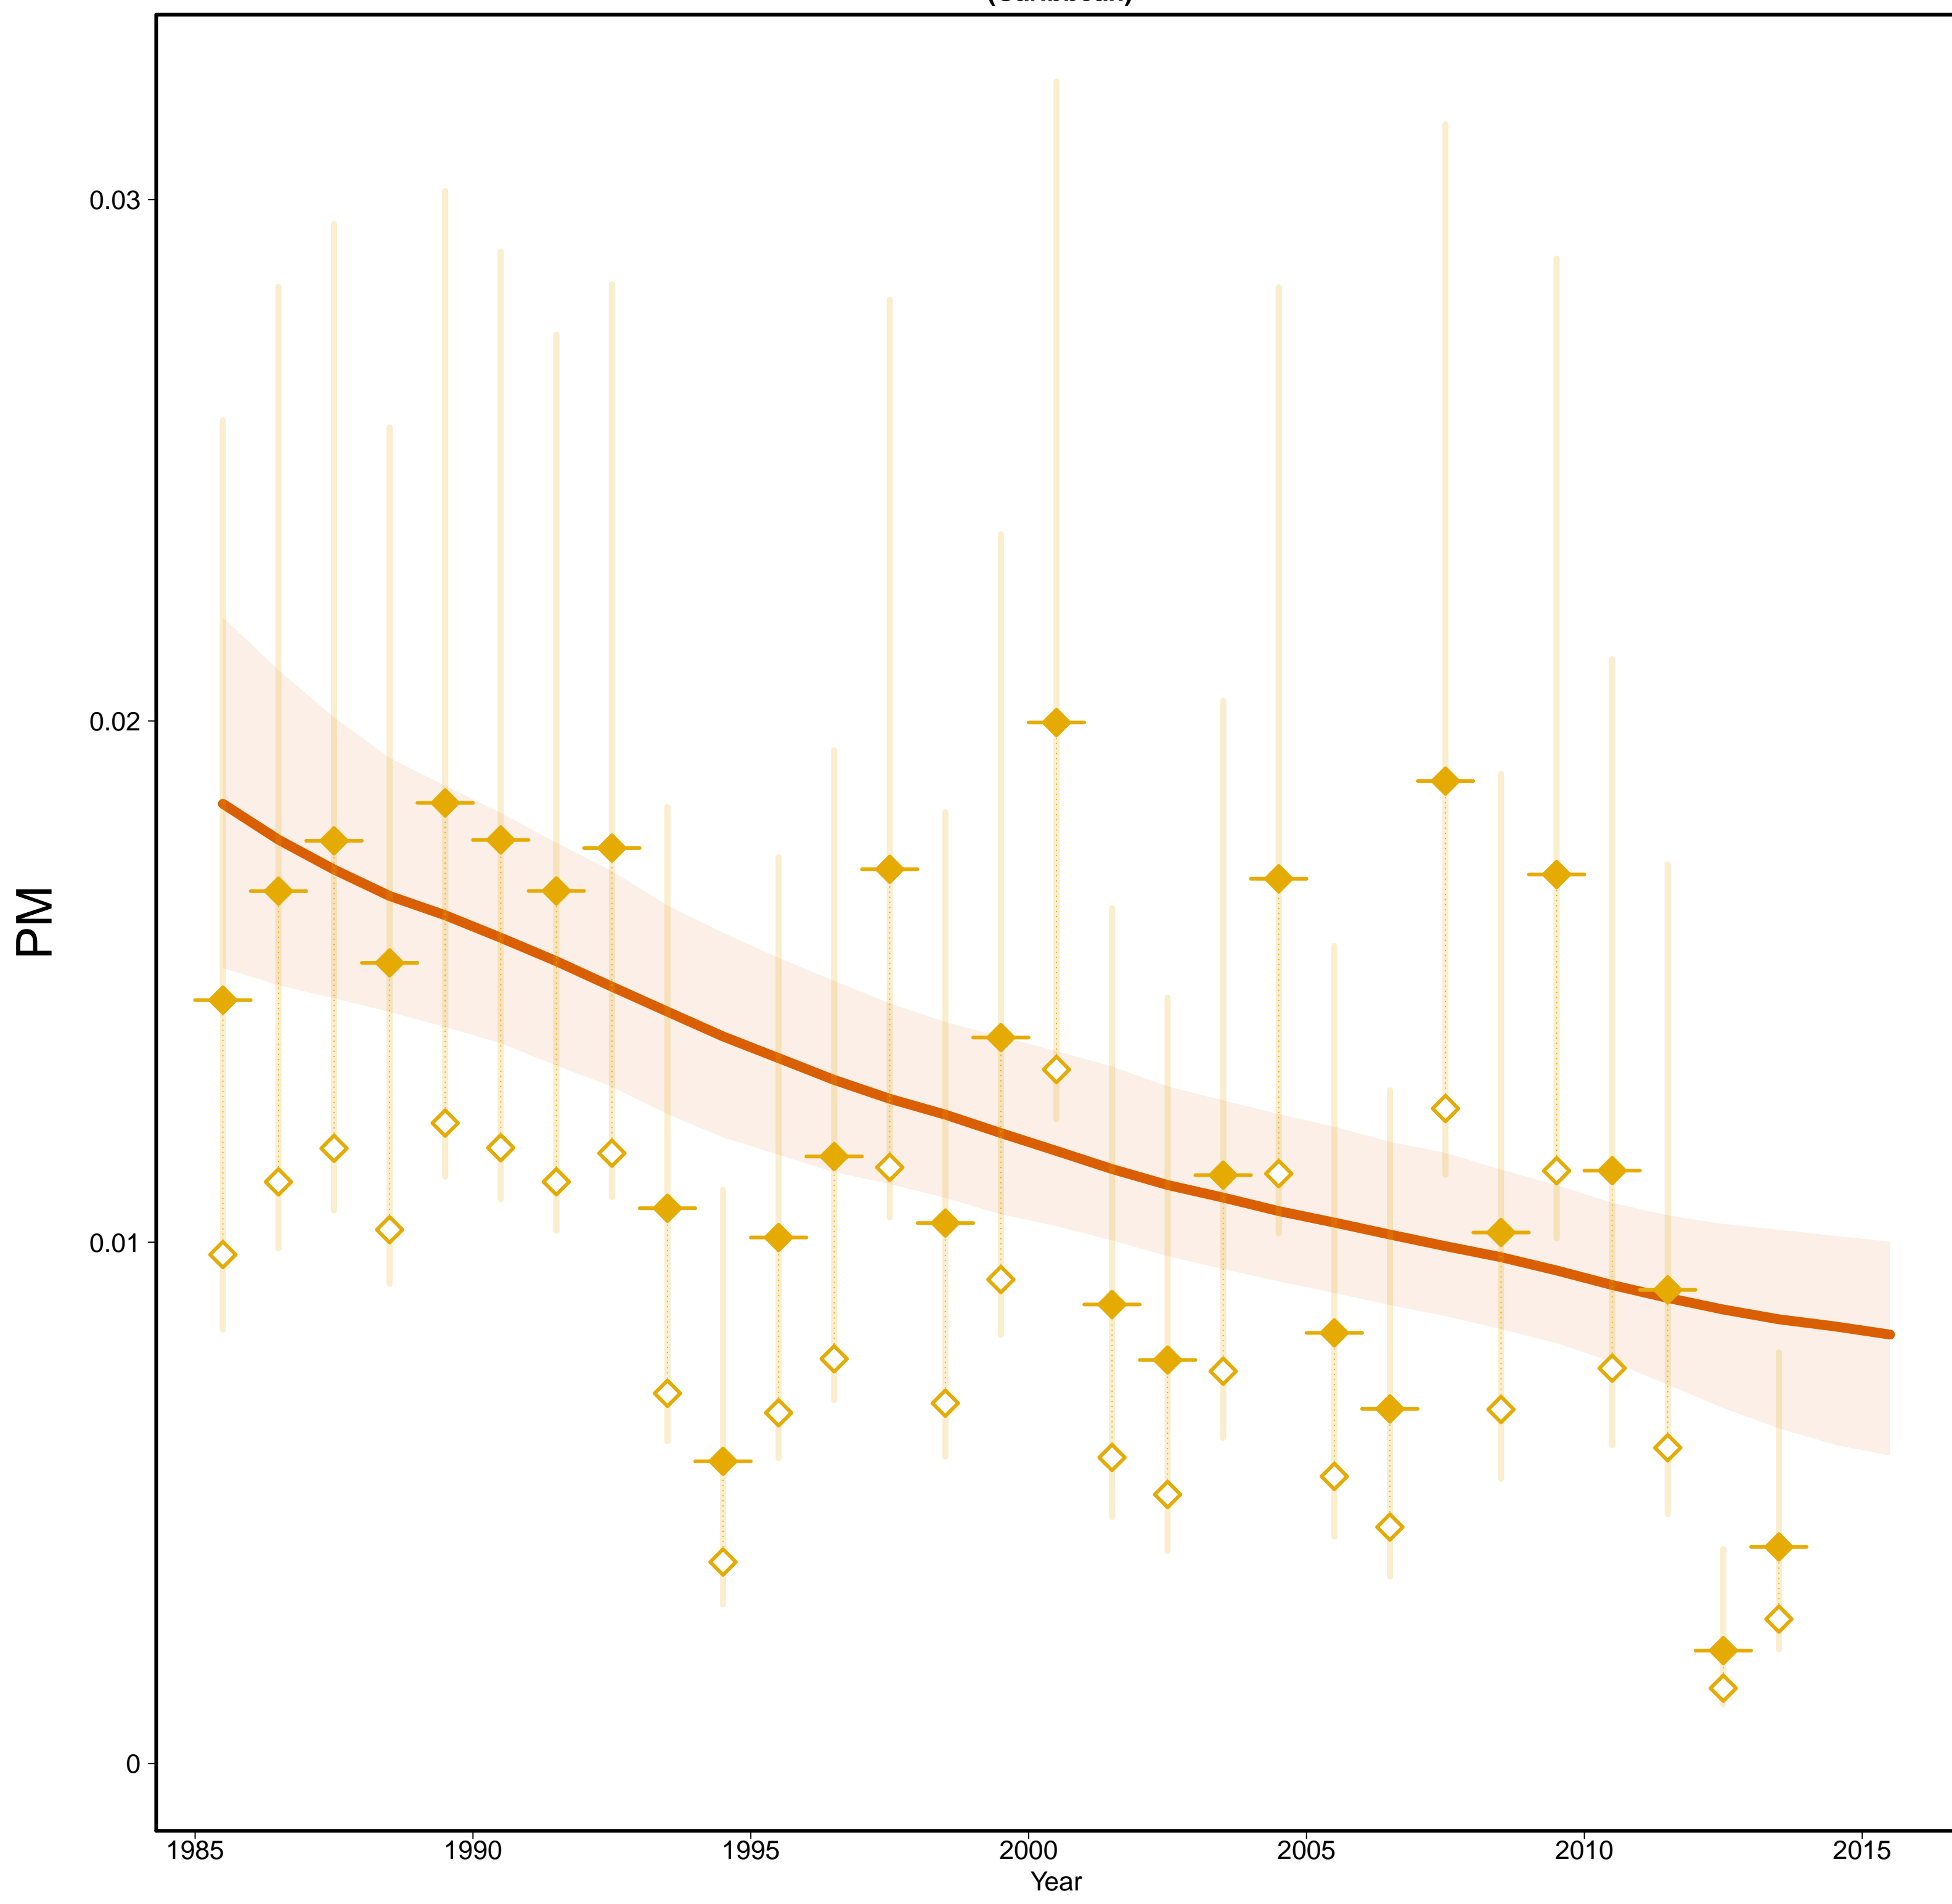

Puerto Rico [PRI]  
(Caribbean)

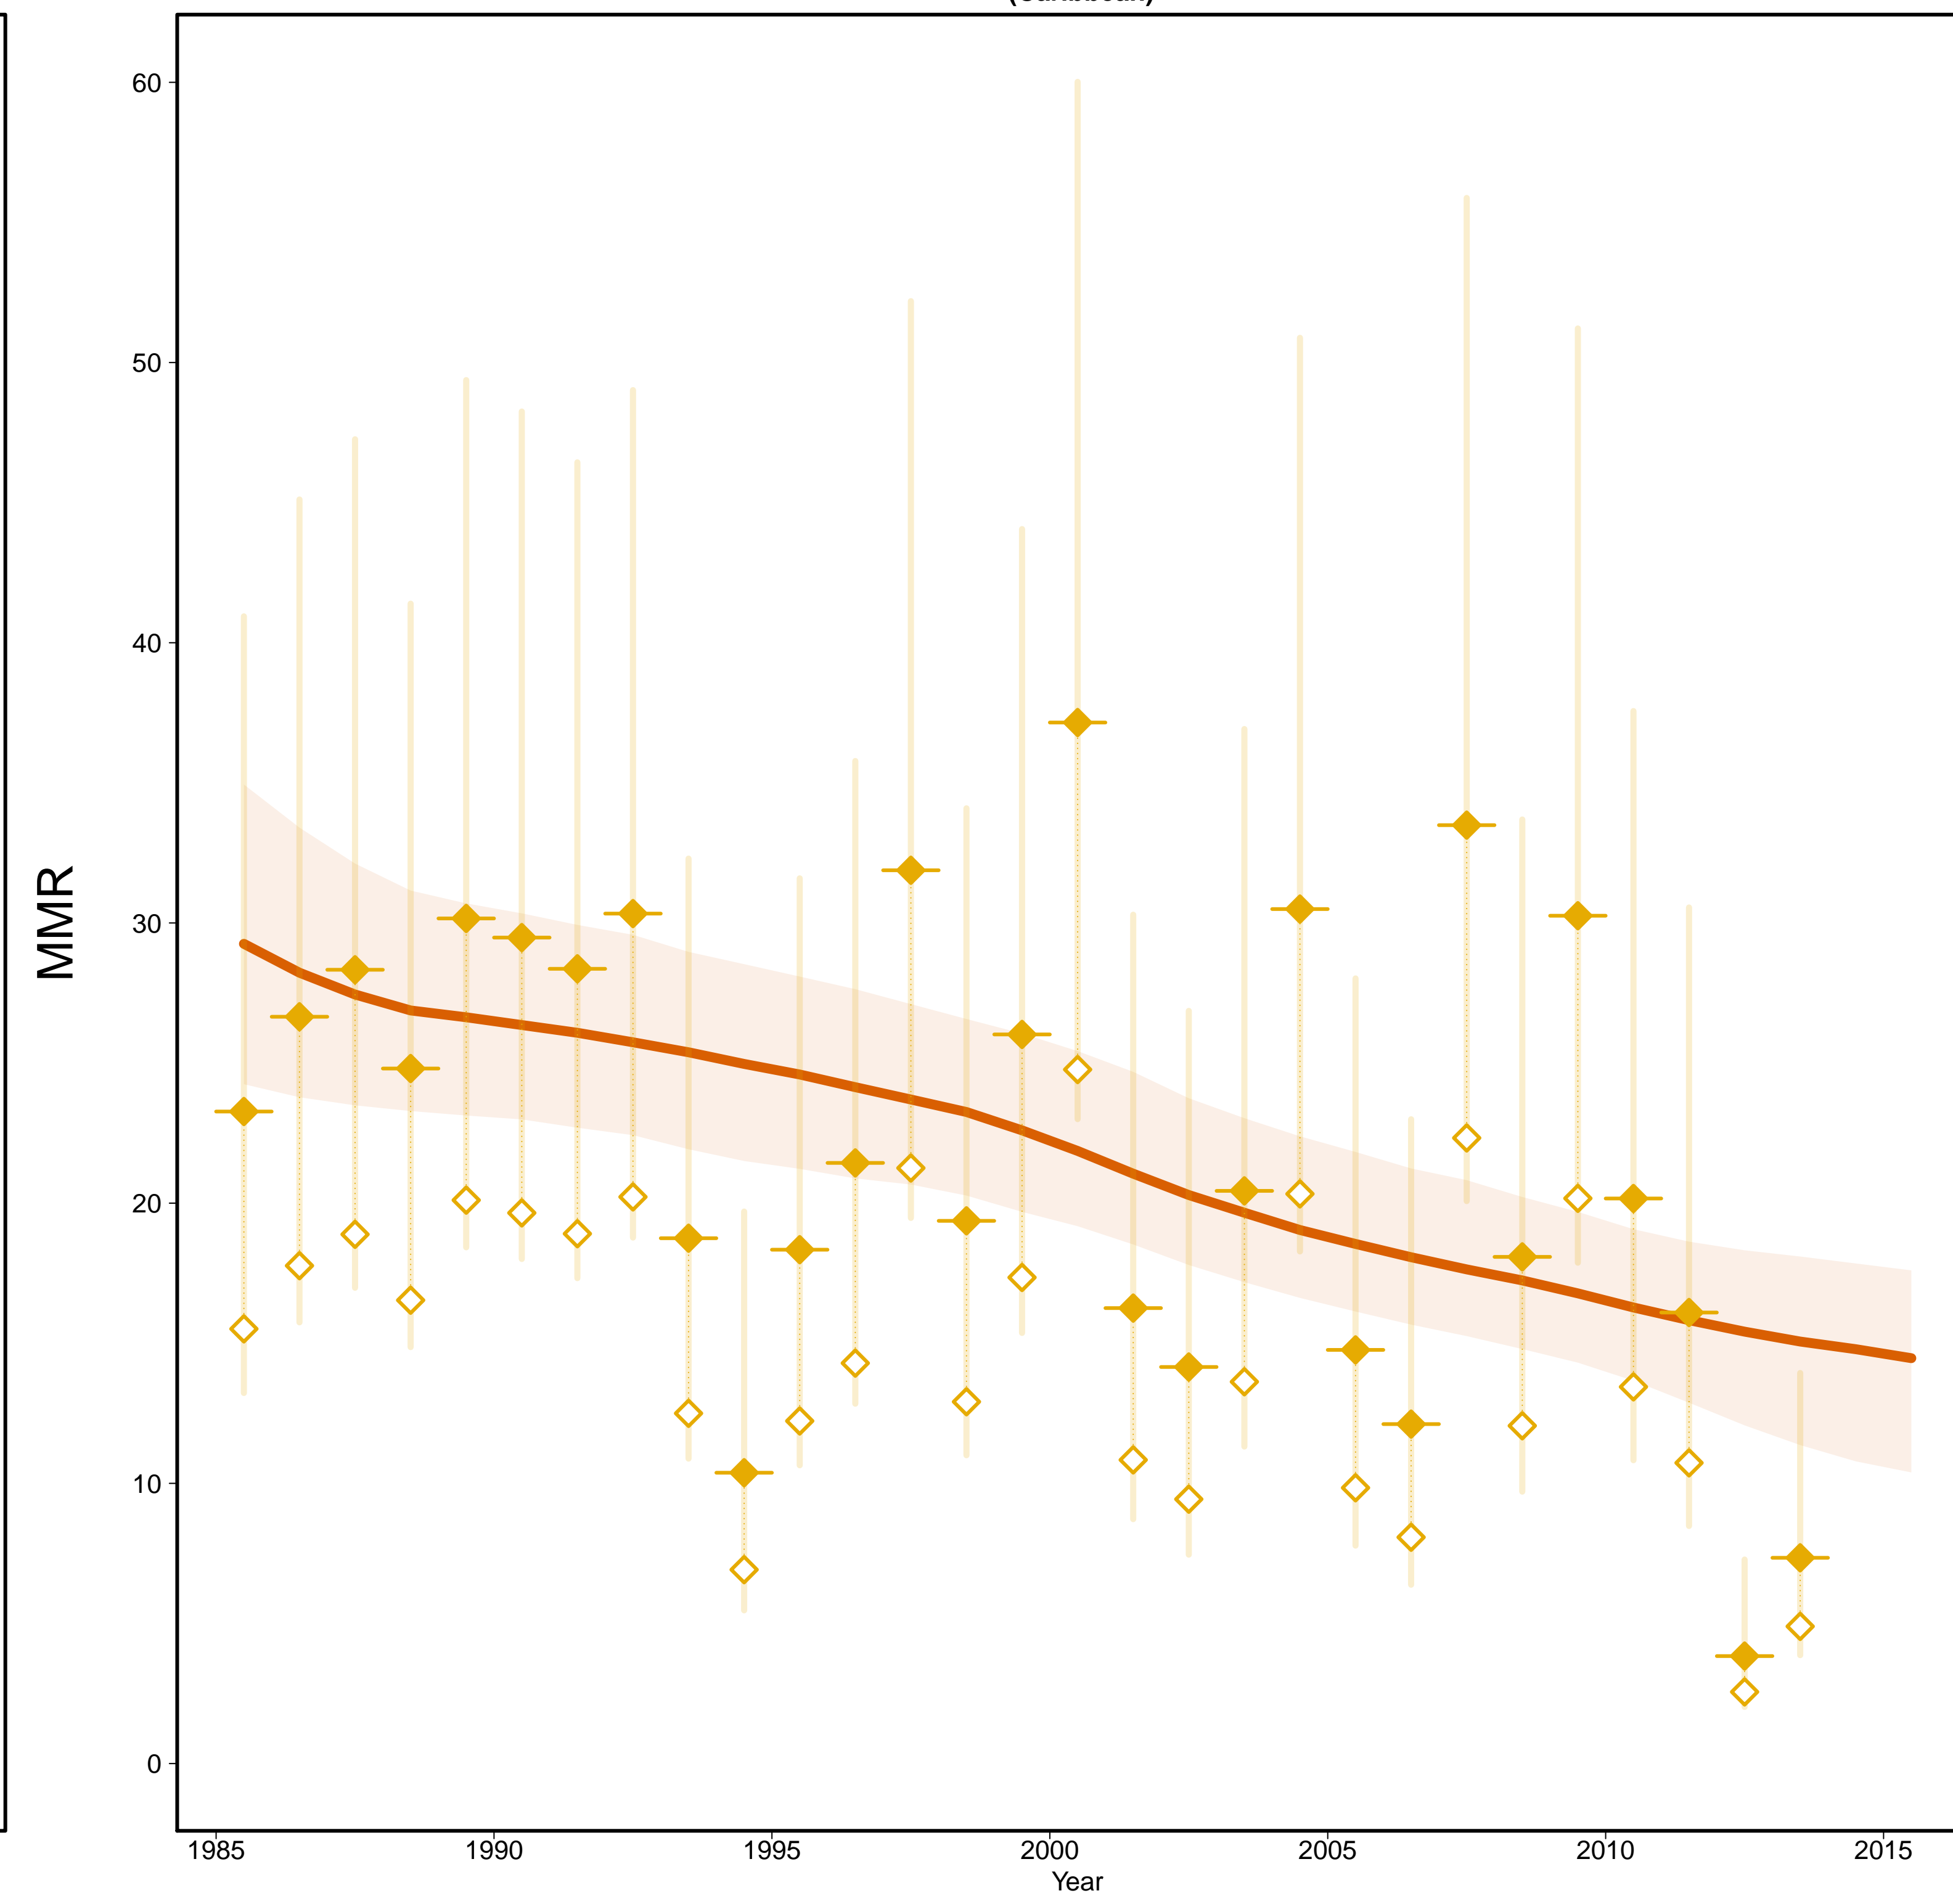

- Estimates —
- MMR Database 2015 —
- ◇ Observed Data
- ◆ Adjusted Data
- Data type —
- ◆ VR

Gross Domestic Product

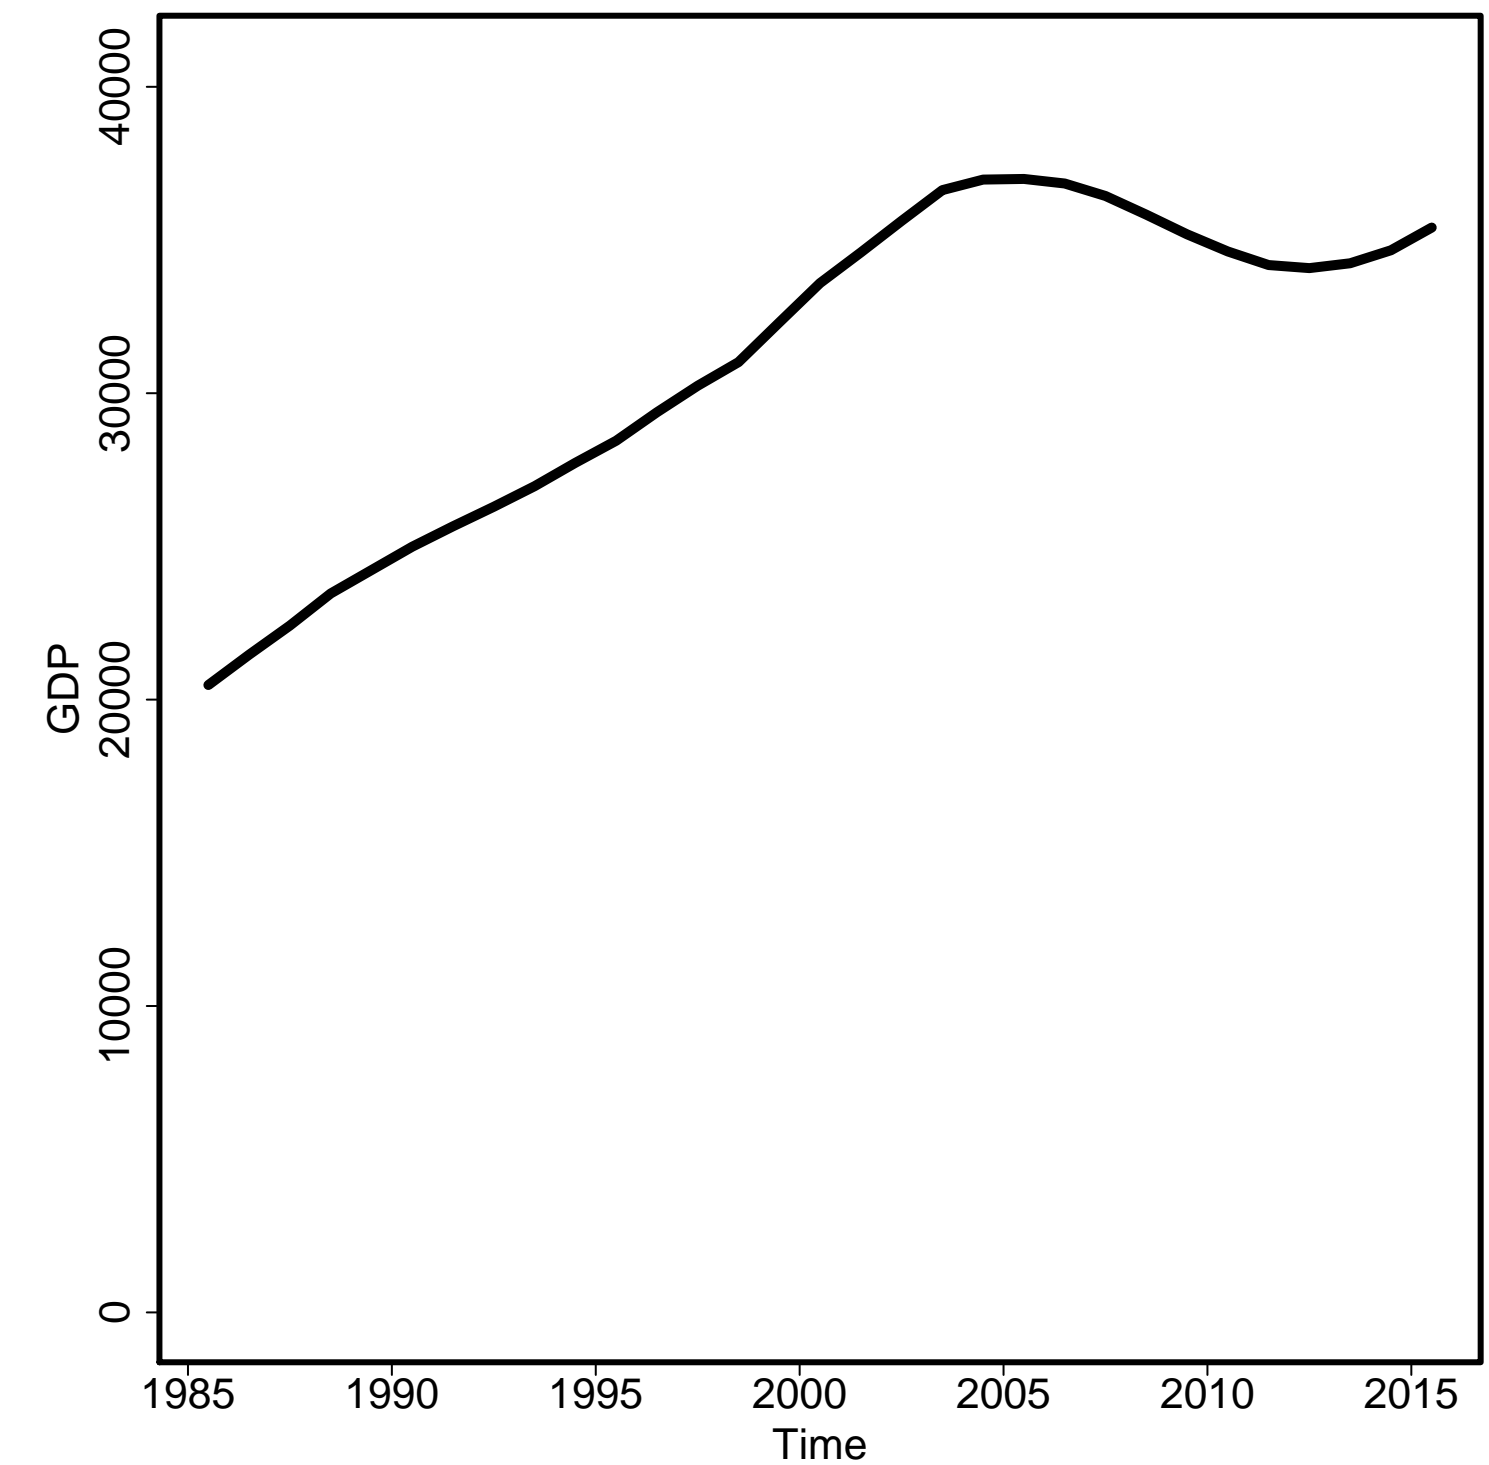

General Fertility Rate

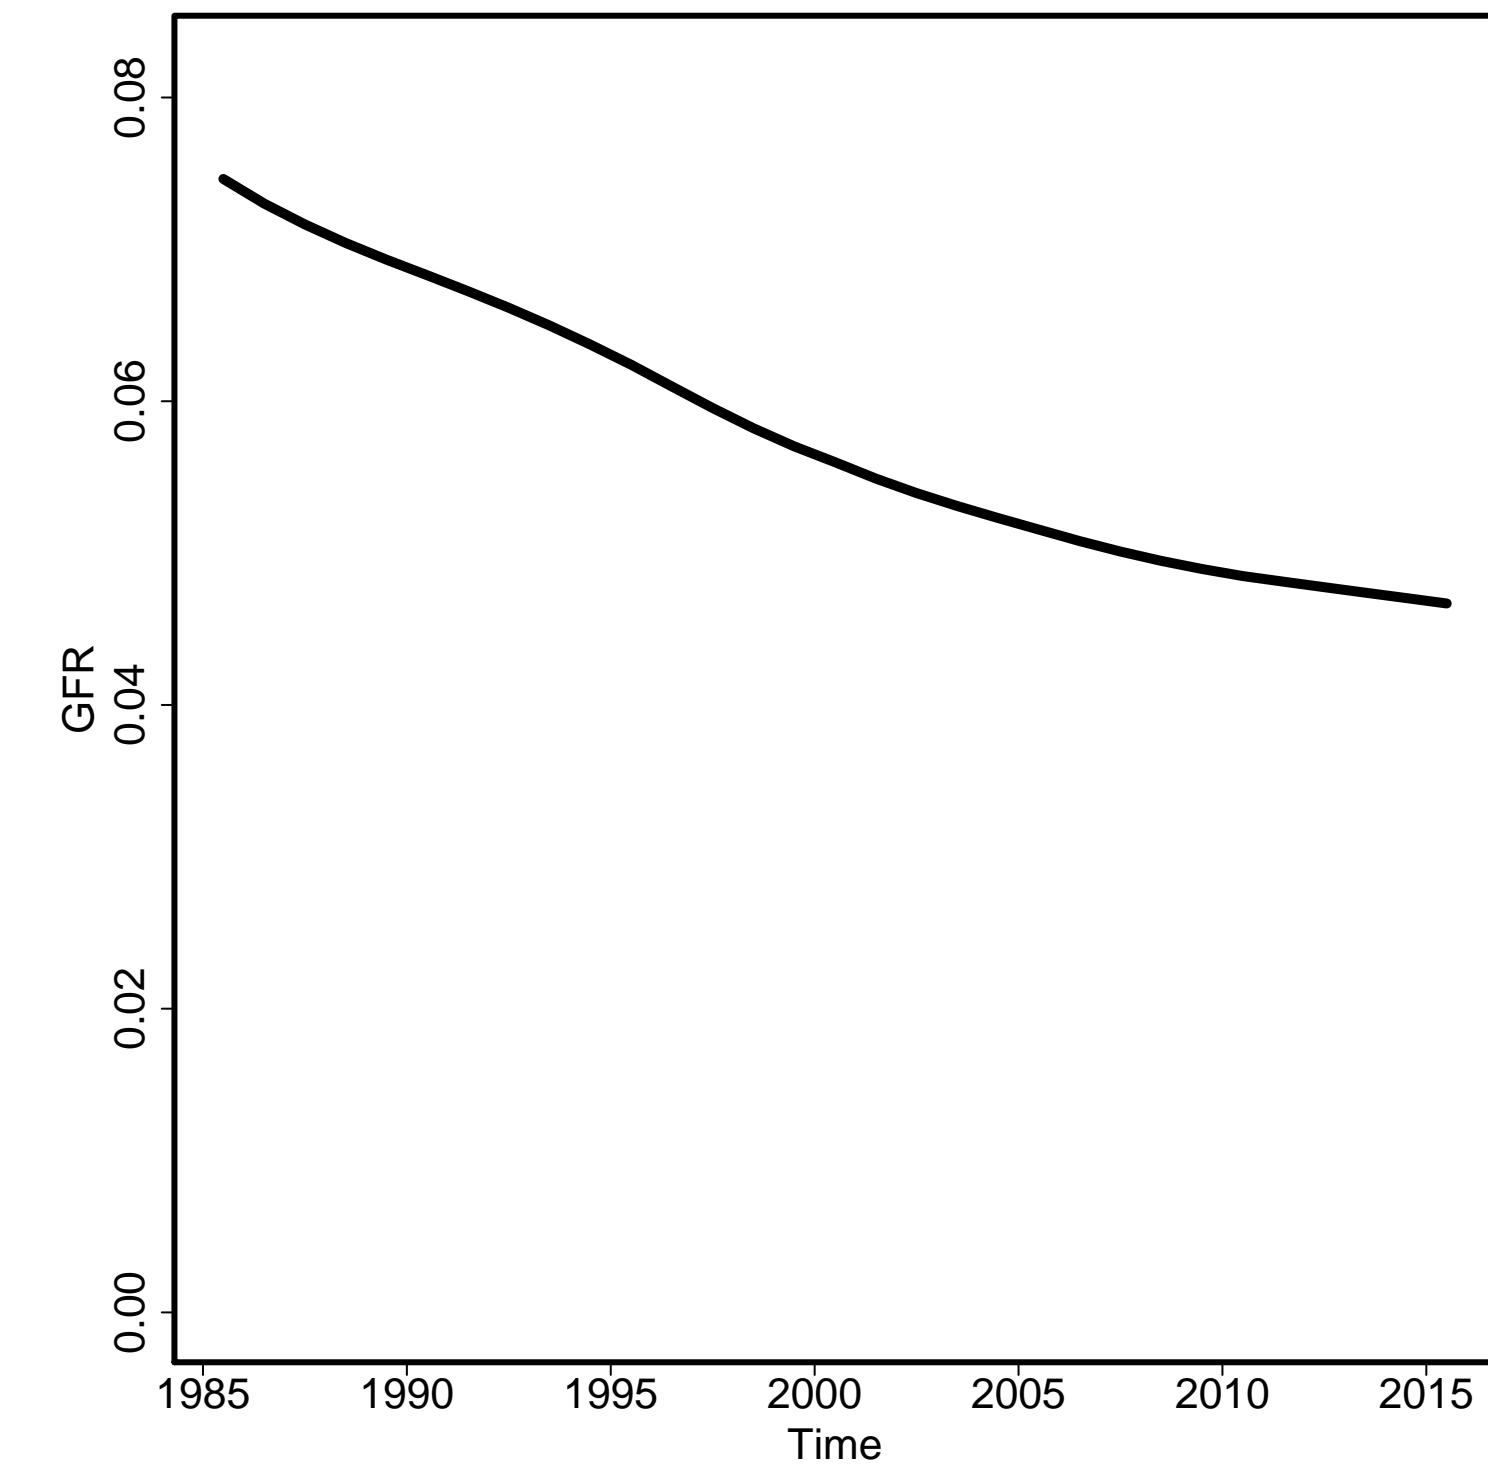

Skilled Attendance to Birth

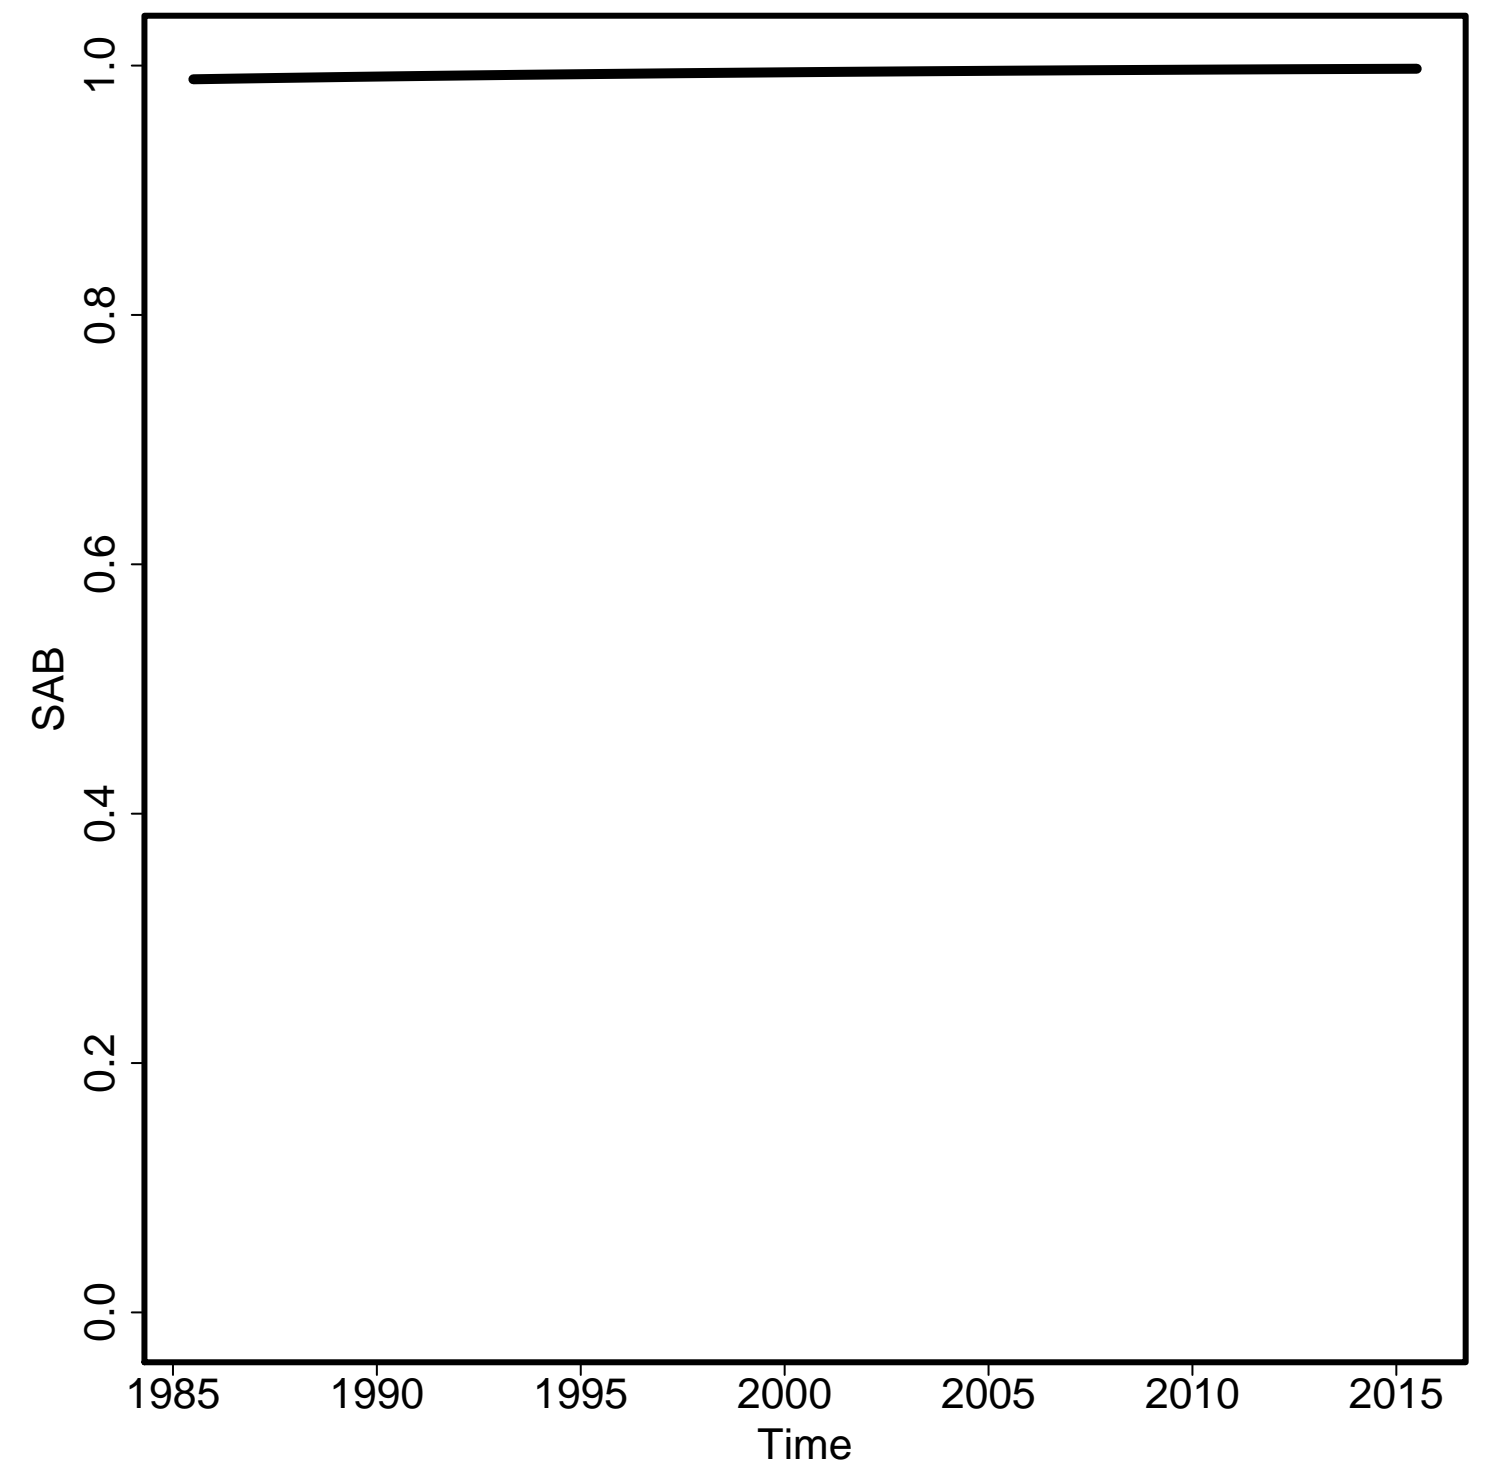

Envelope/Births

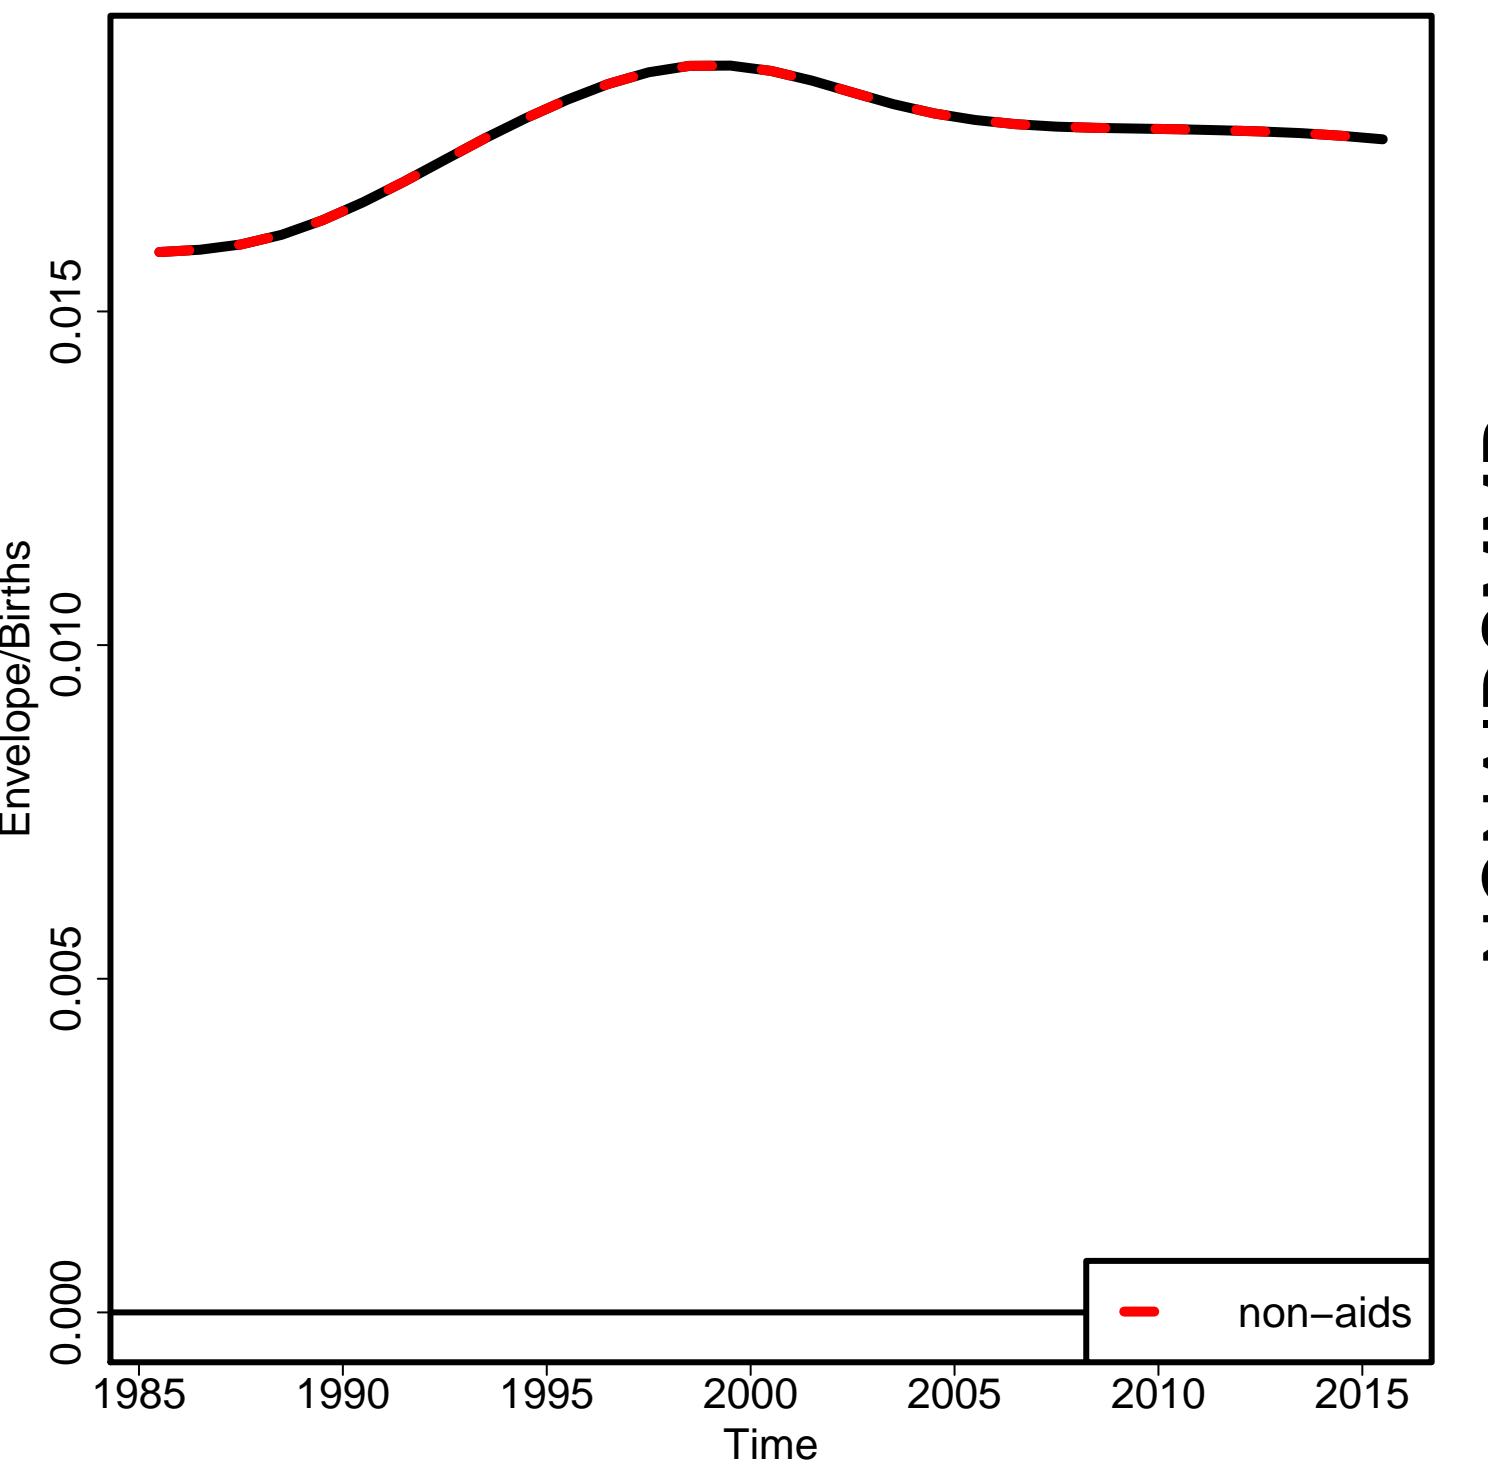

Non-aids MMR

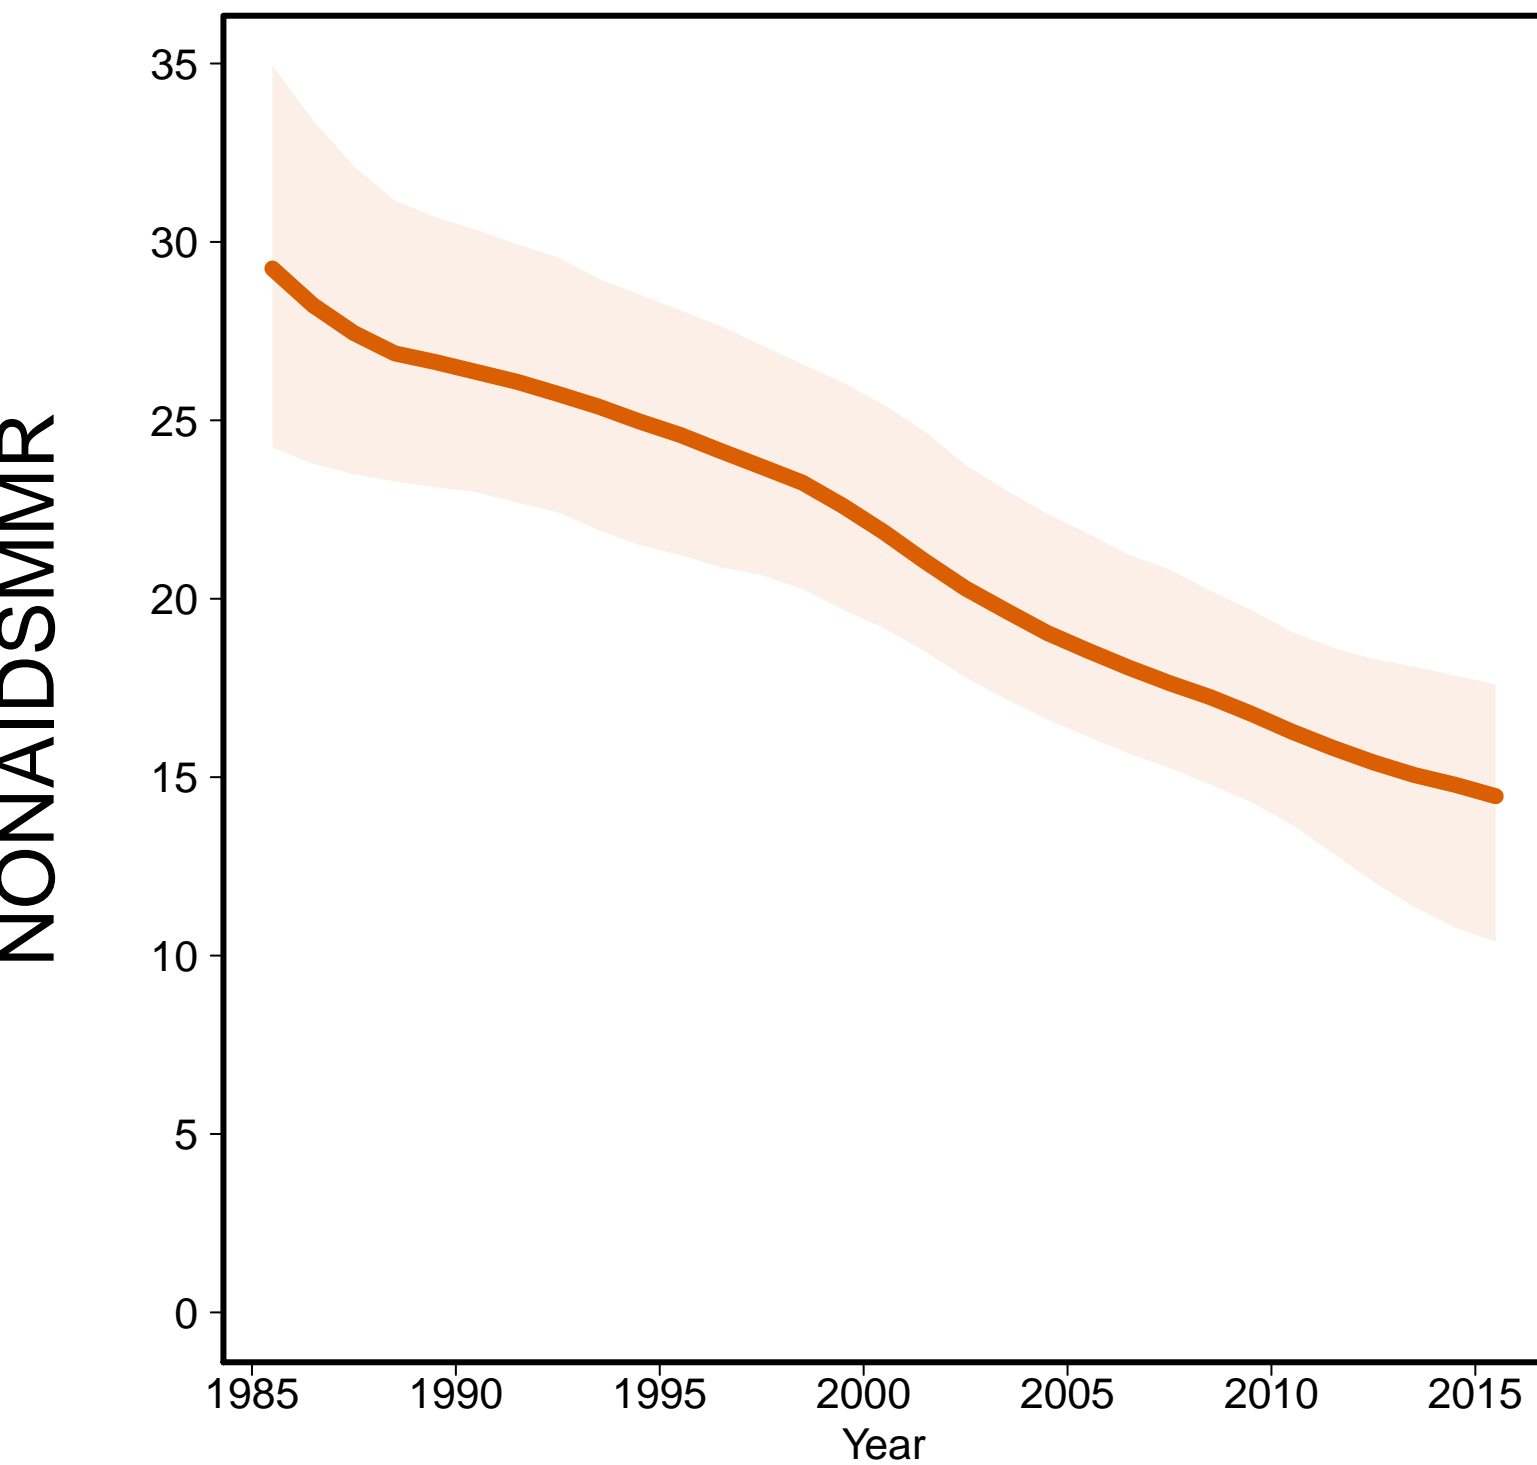

Aids MMR

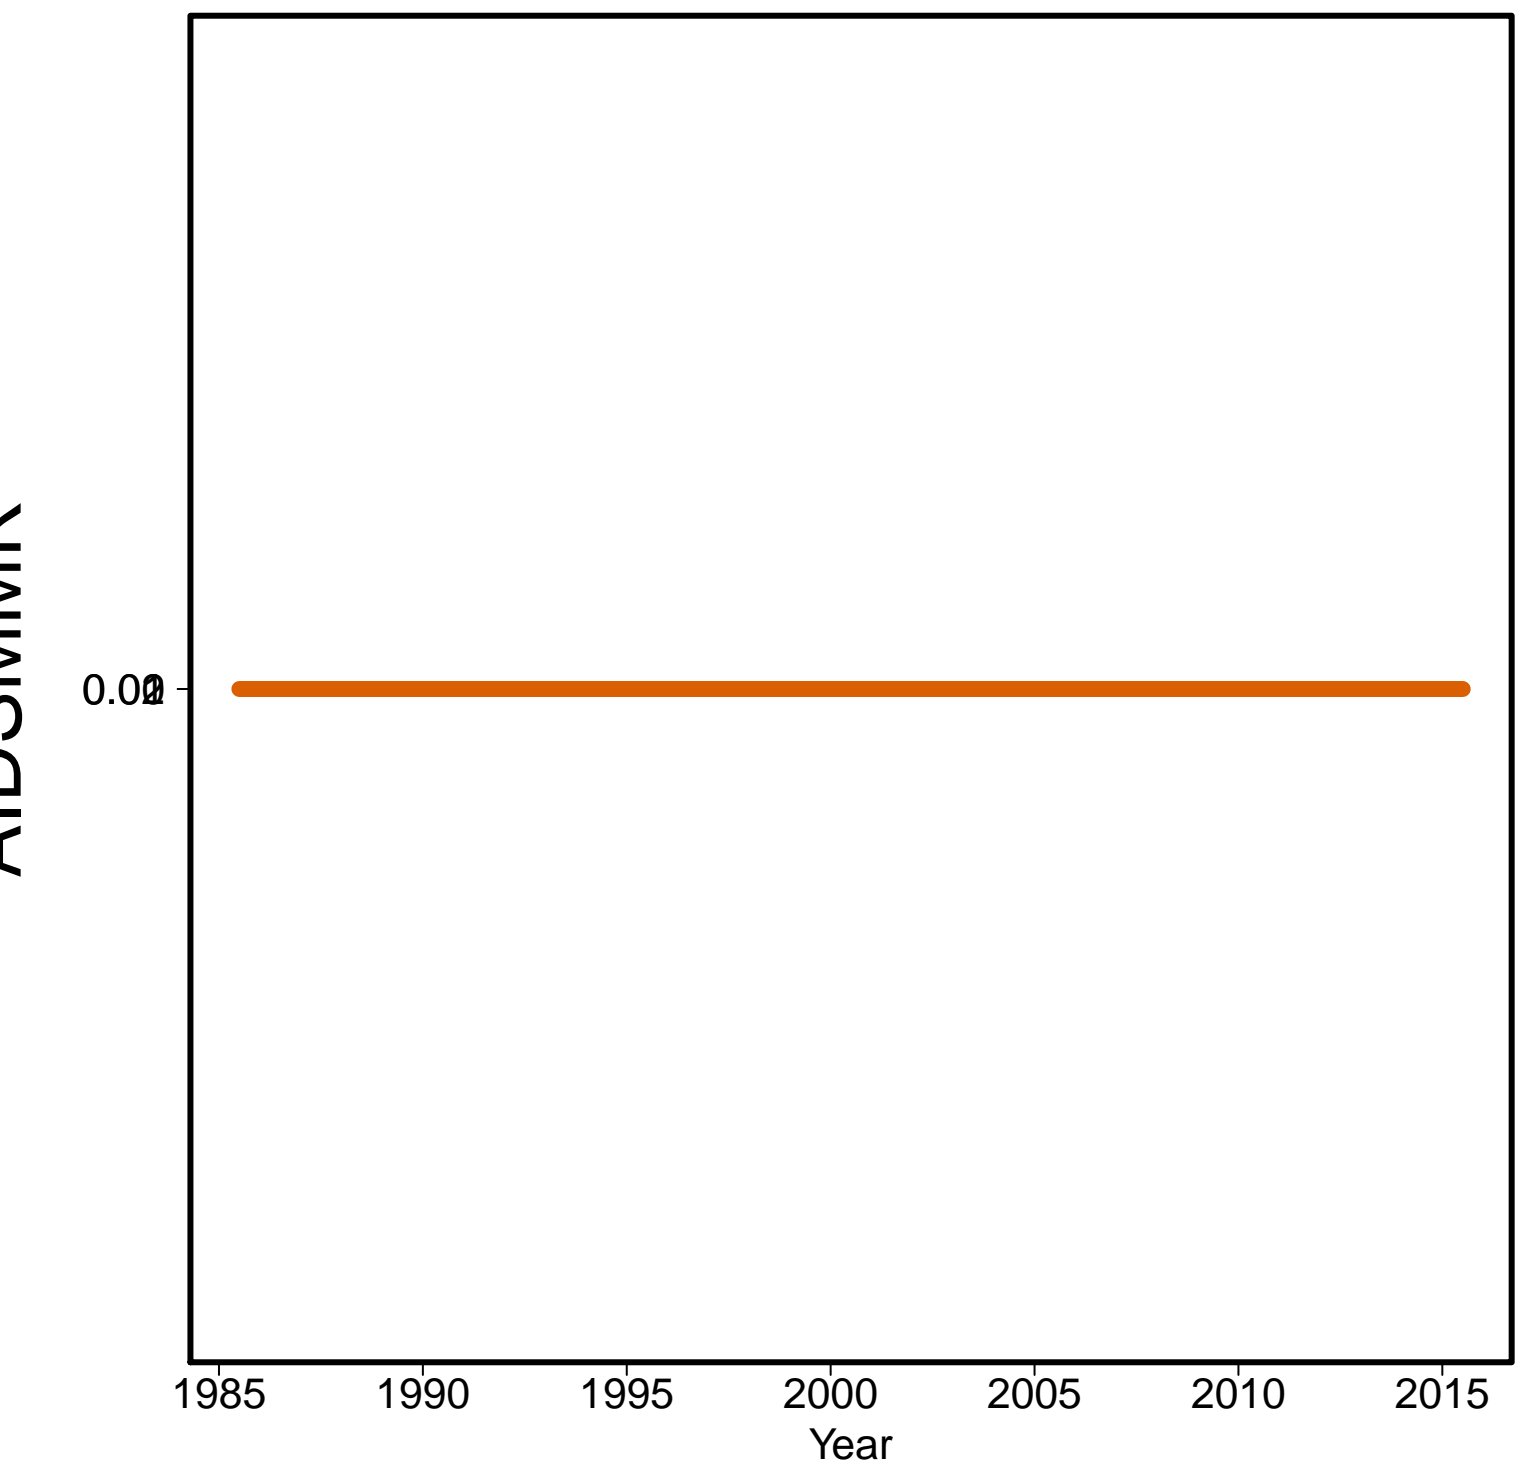

Qatar [QAT]  
(Western Asia)

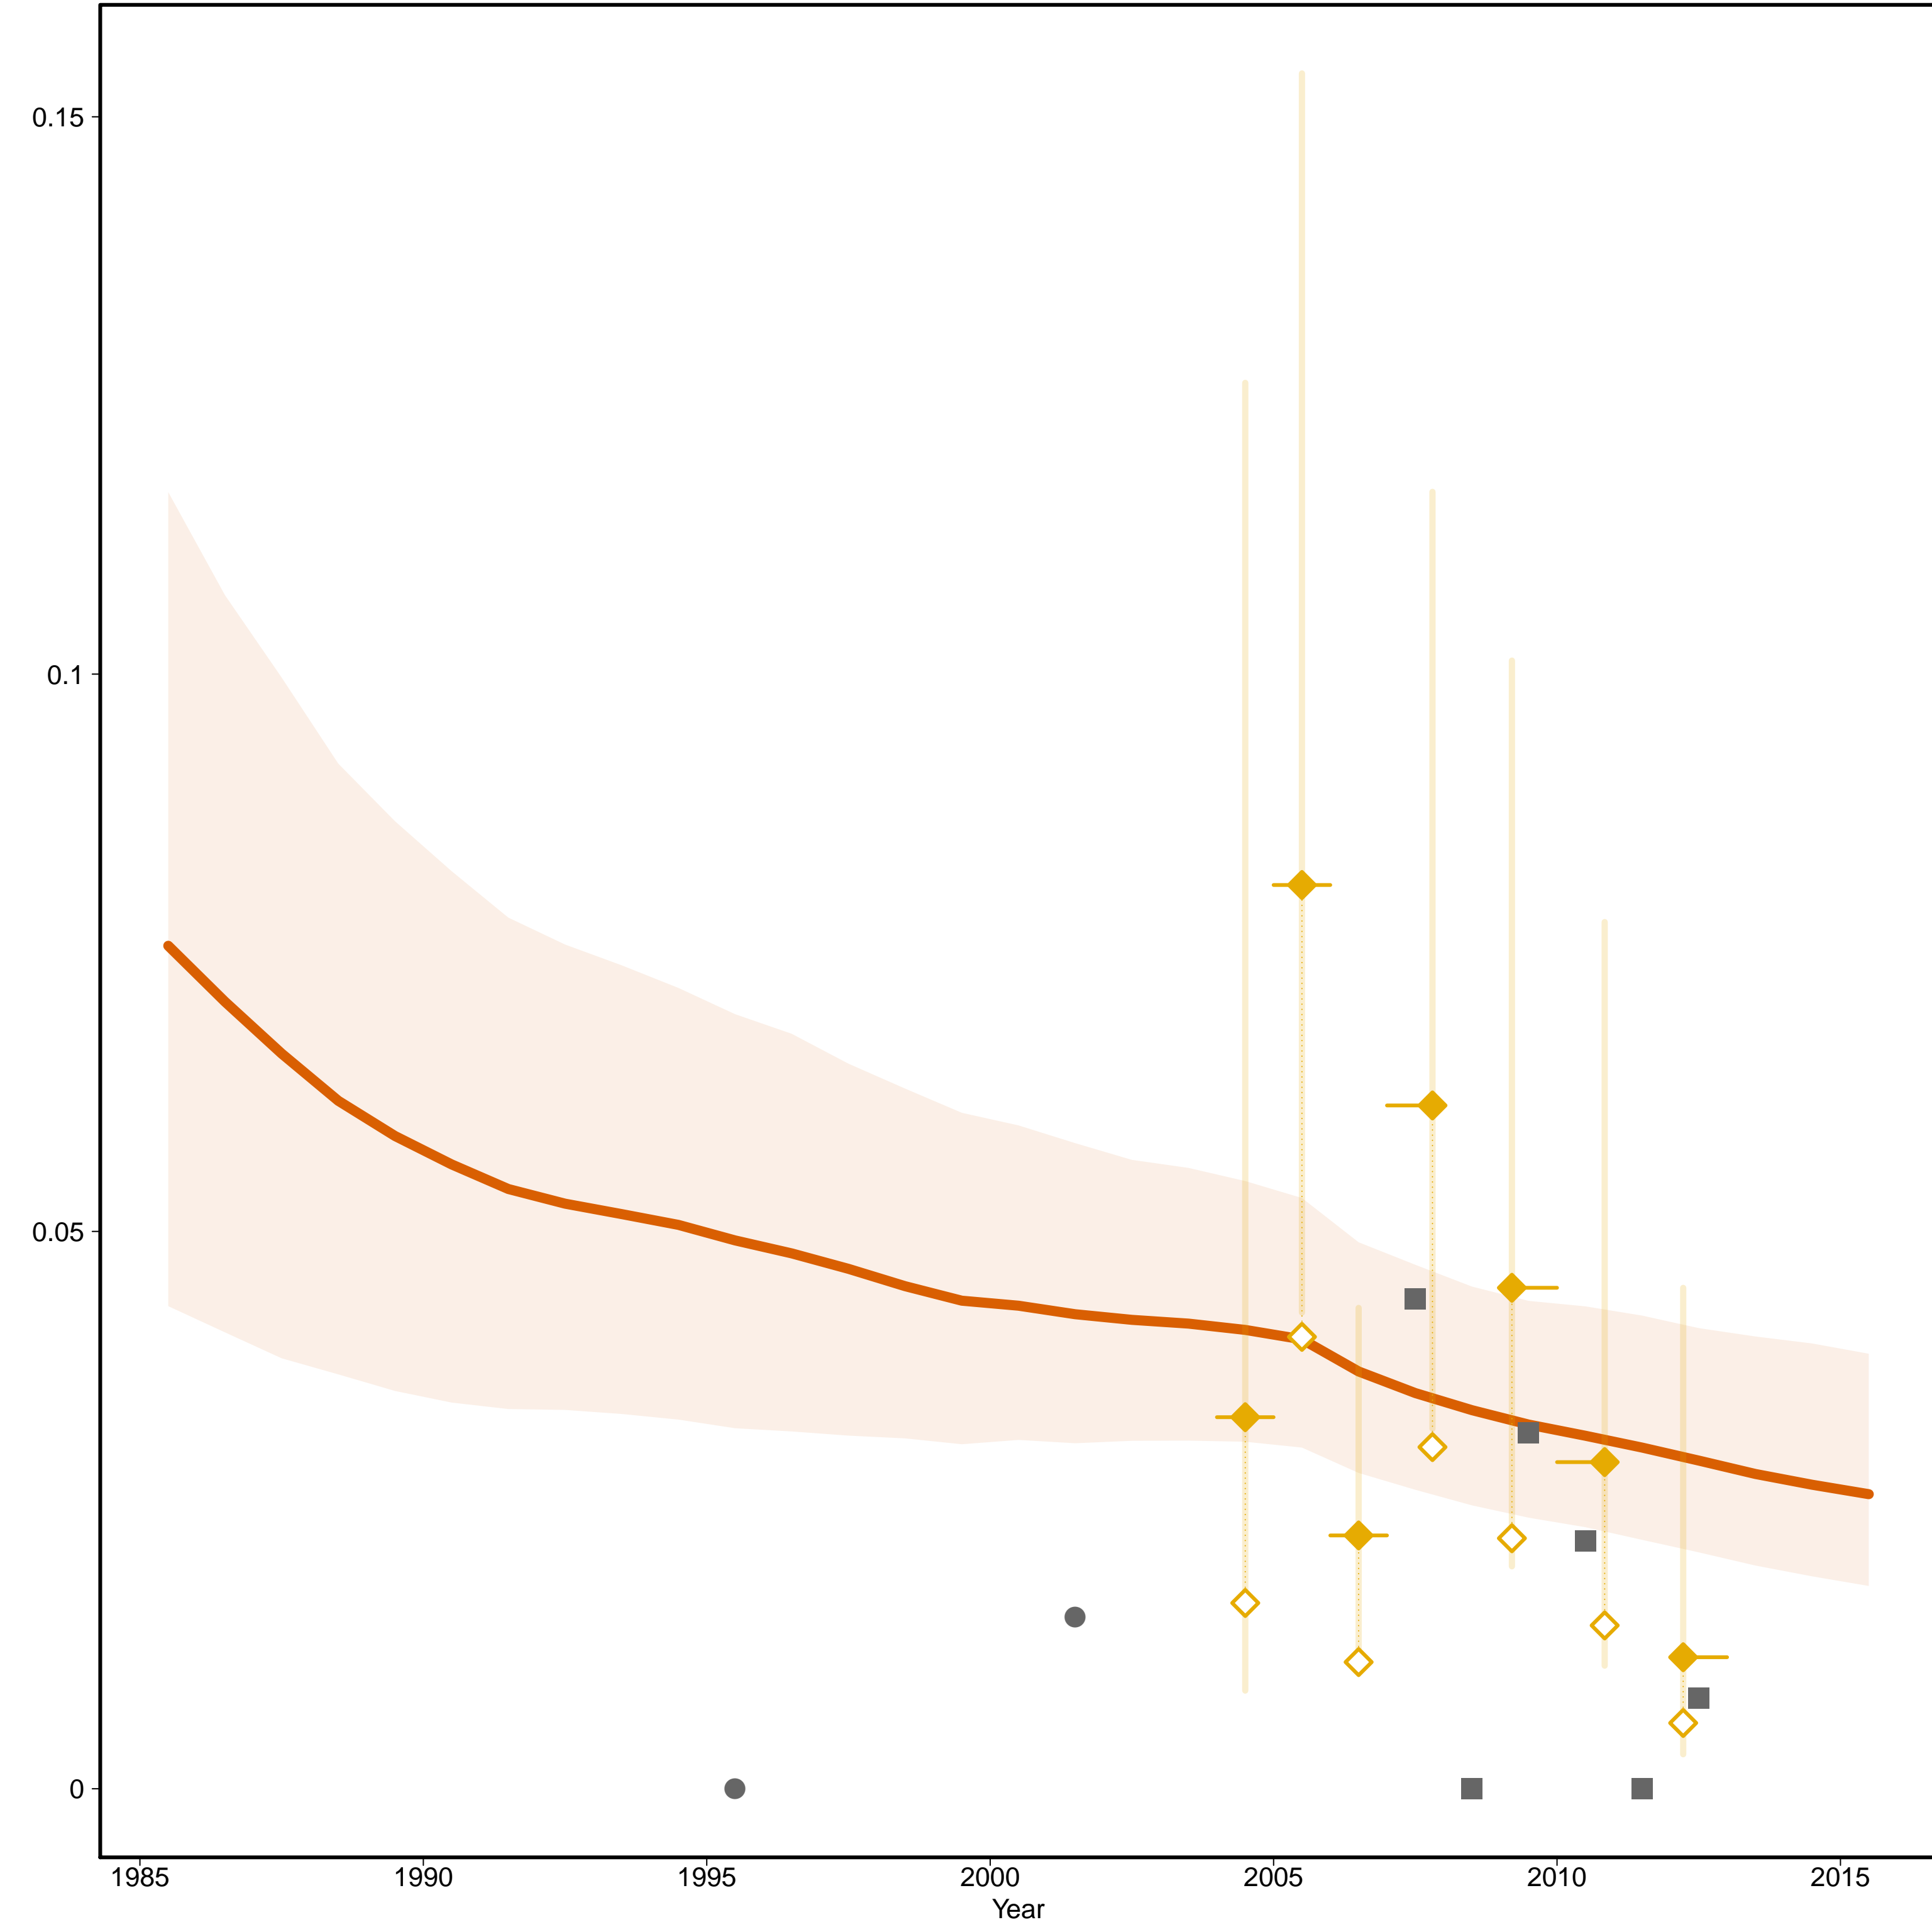

Qatar [QAT]  
(Western Asia)

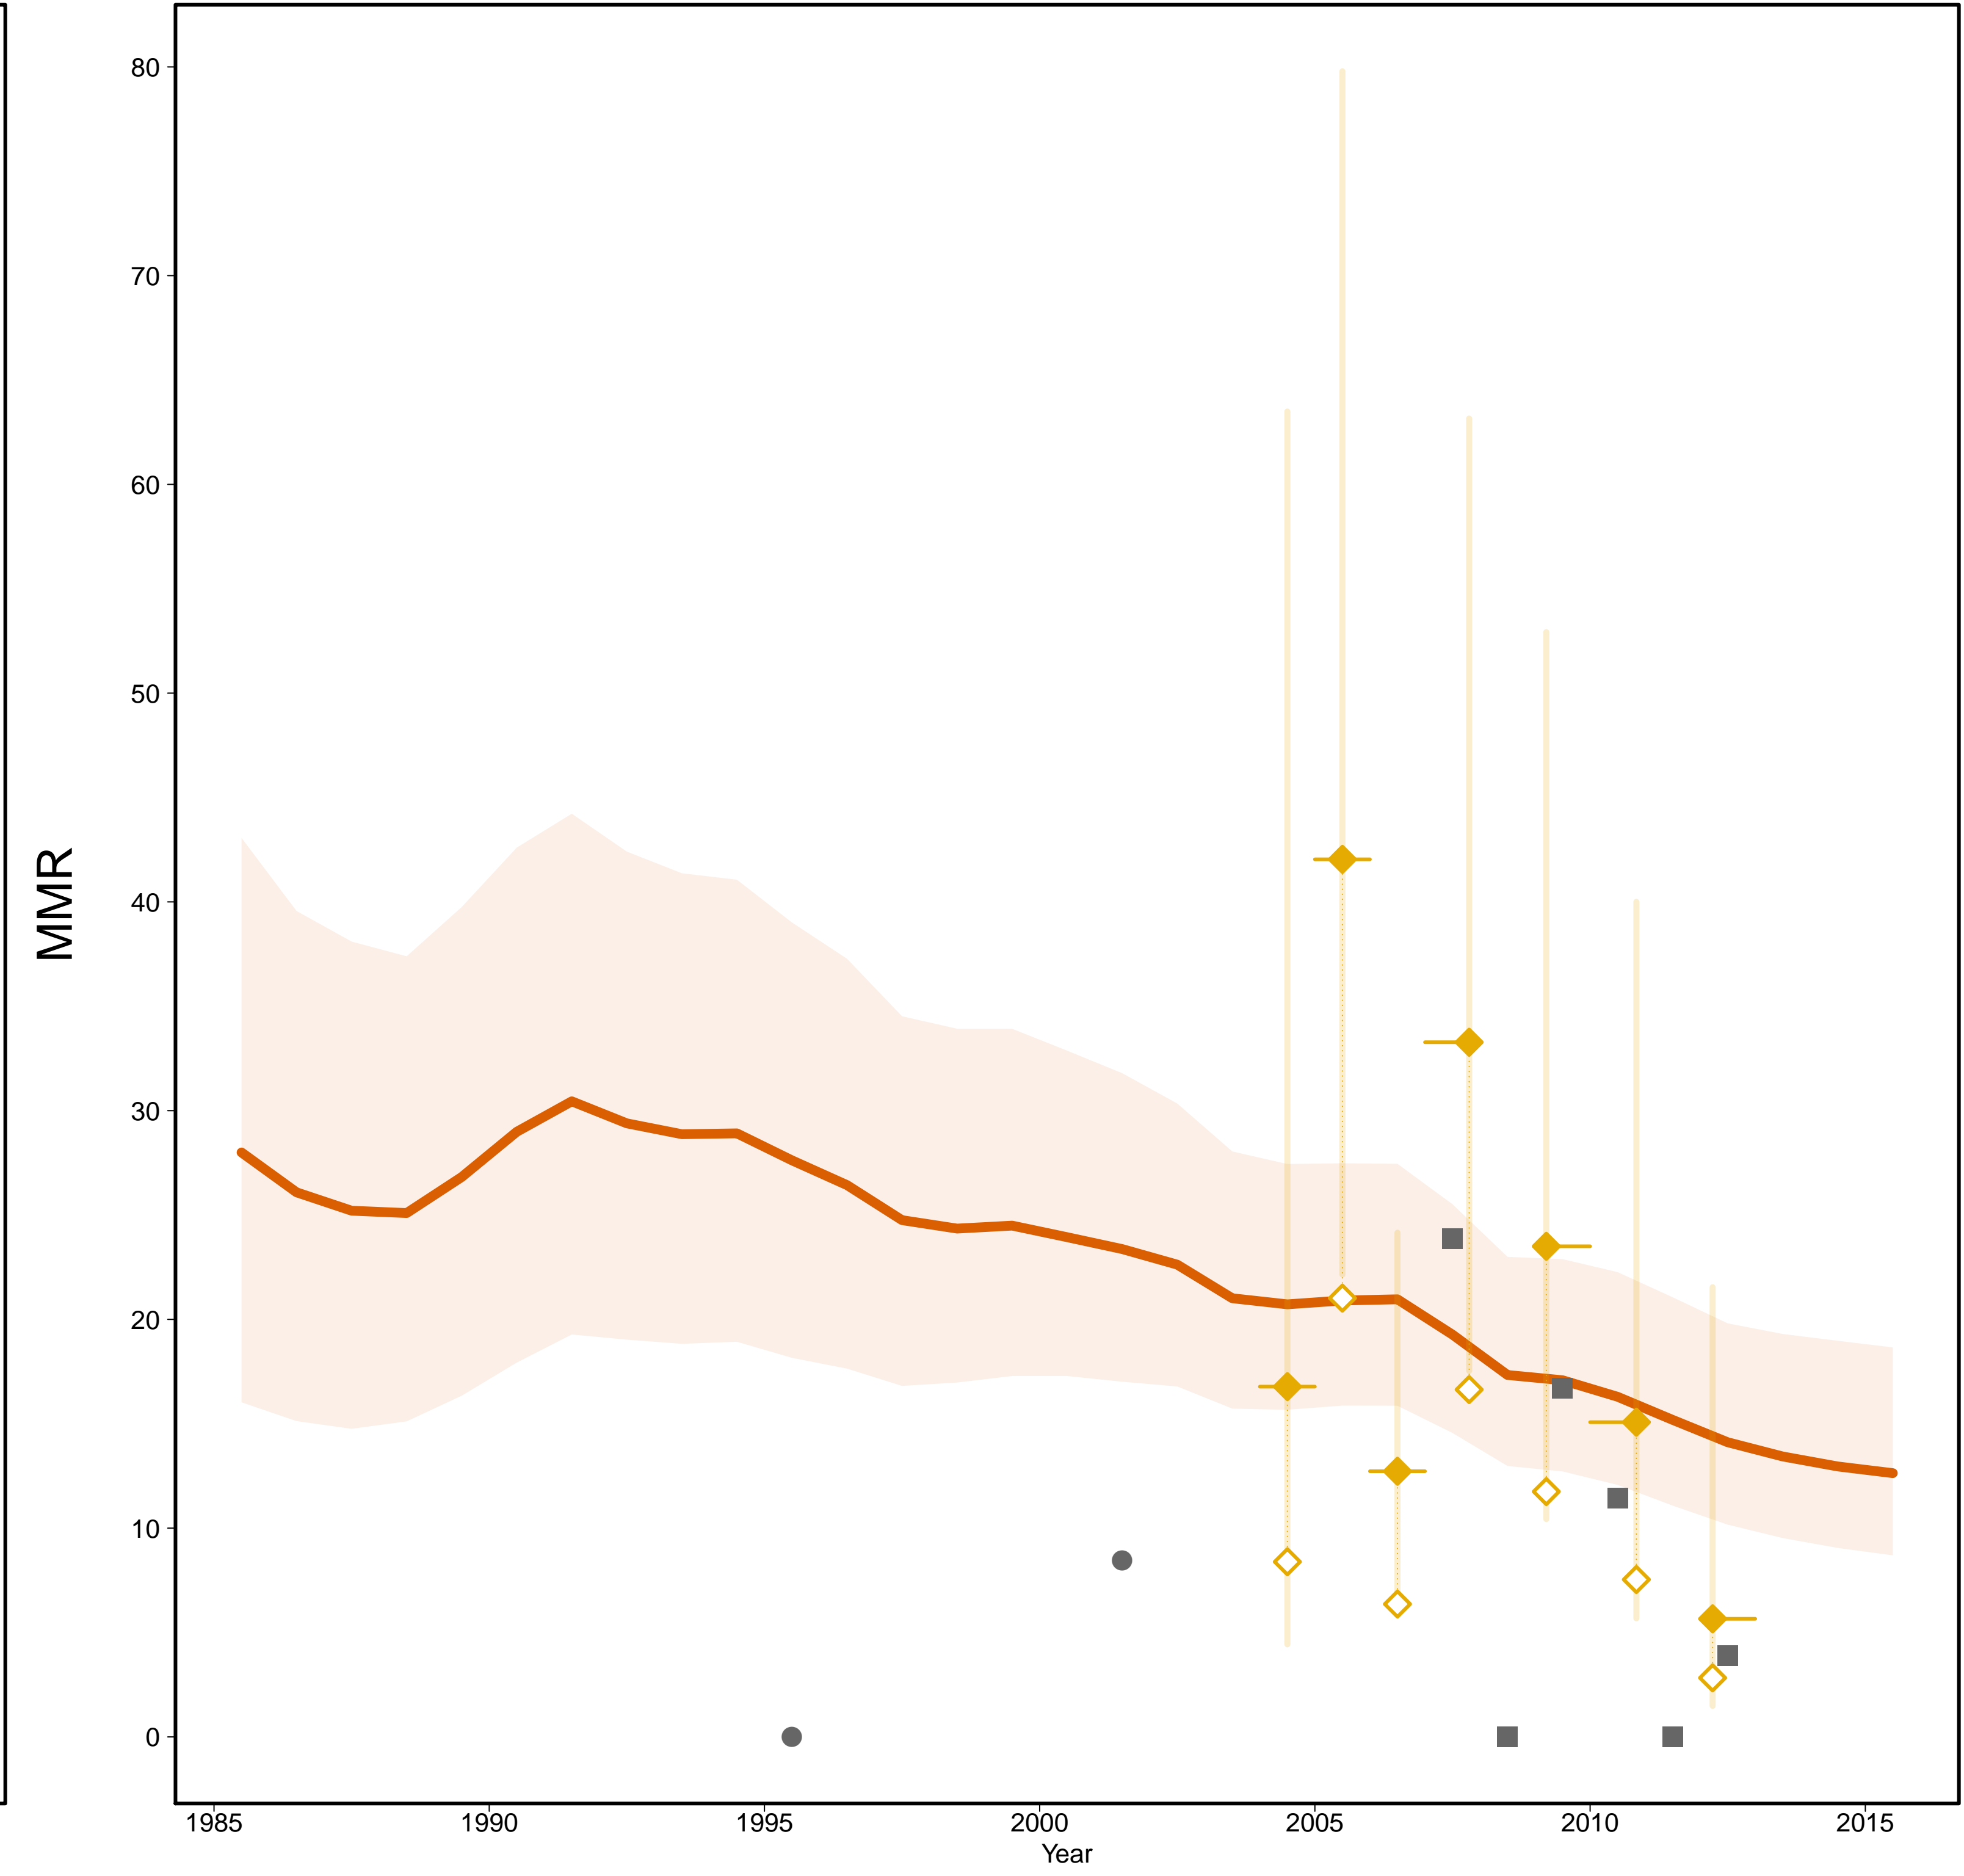

- Estimates —
- MMR Database 2015 —
- ◇ Observed Data
- ◆ Adjusted Data
- Data type —
- ◆ VR
- Reported VR before recalc.  
(related to 0 obs. mat. death)
- Excluded VR data  
(data quality issues)

Gross Domestic Product

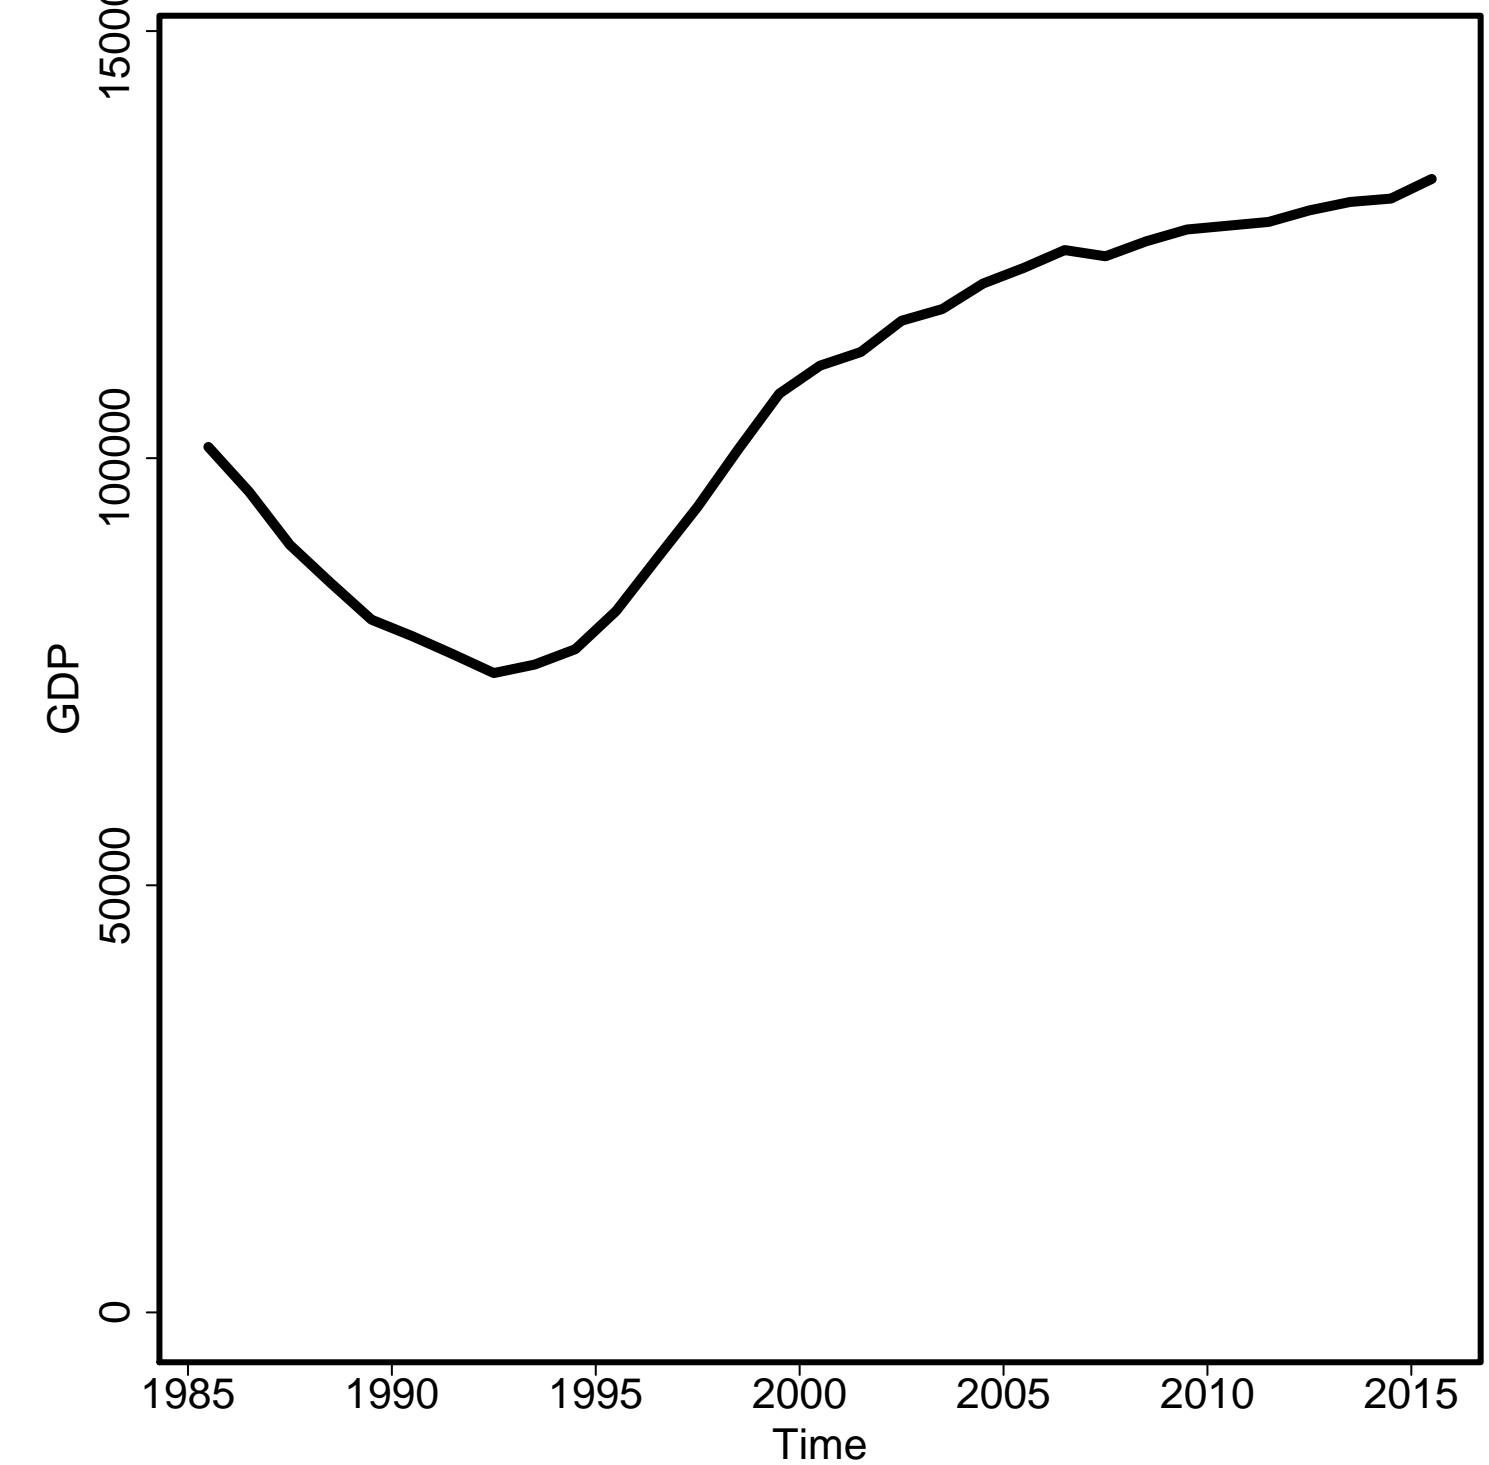

General Fertility Rate

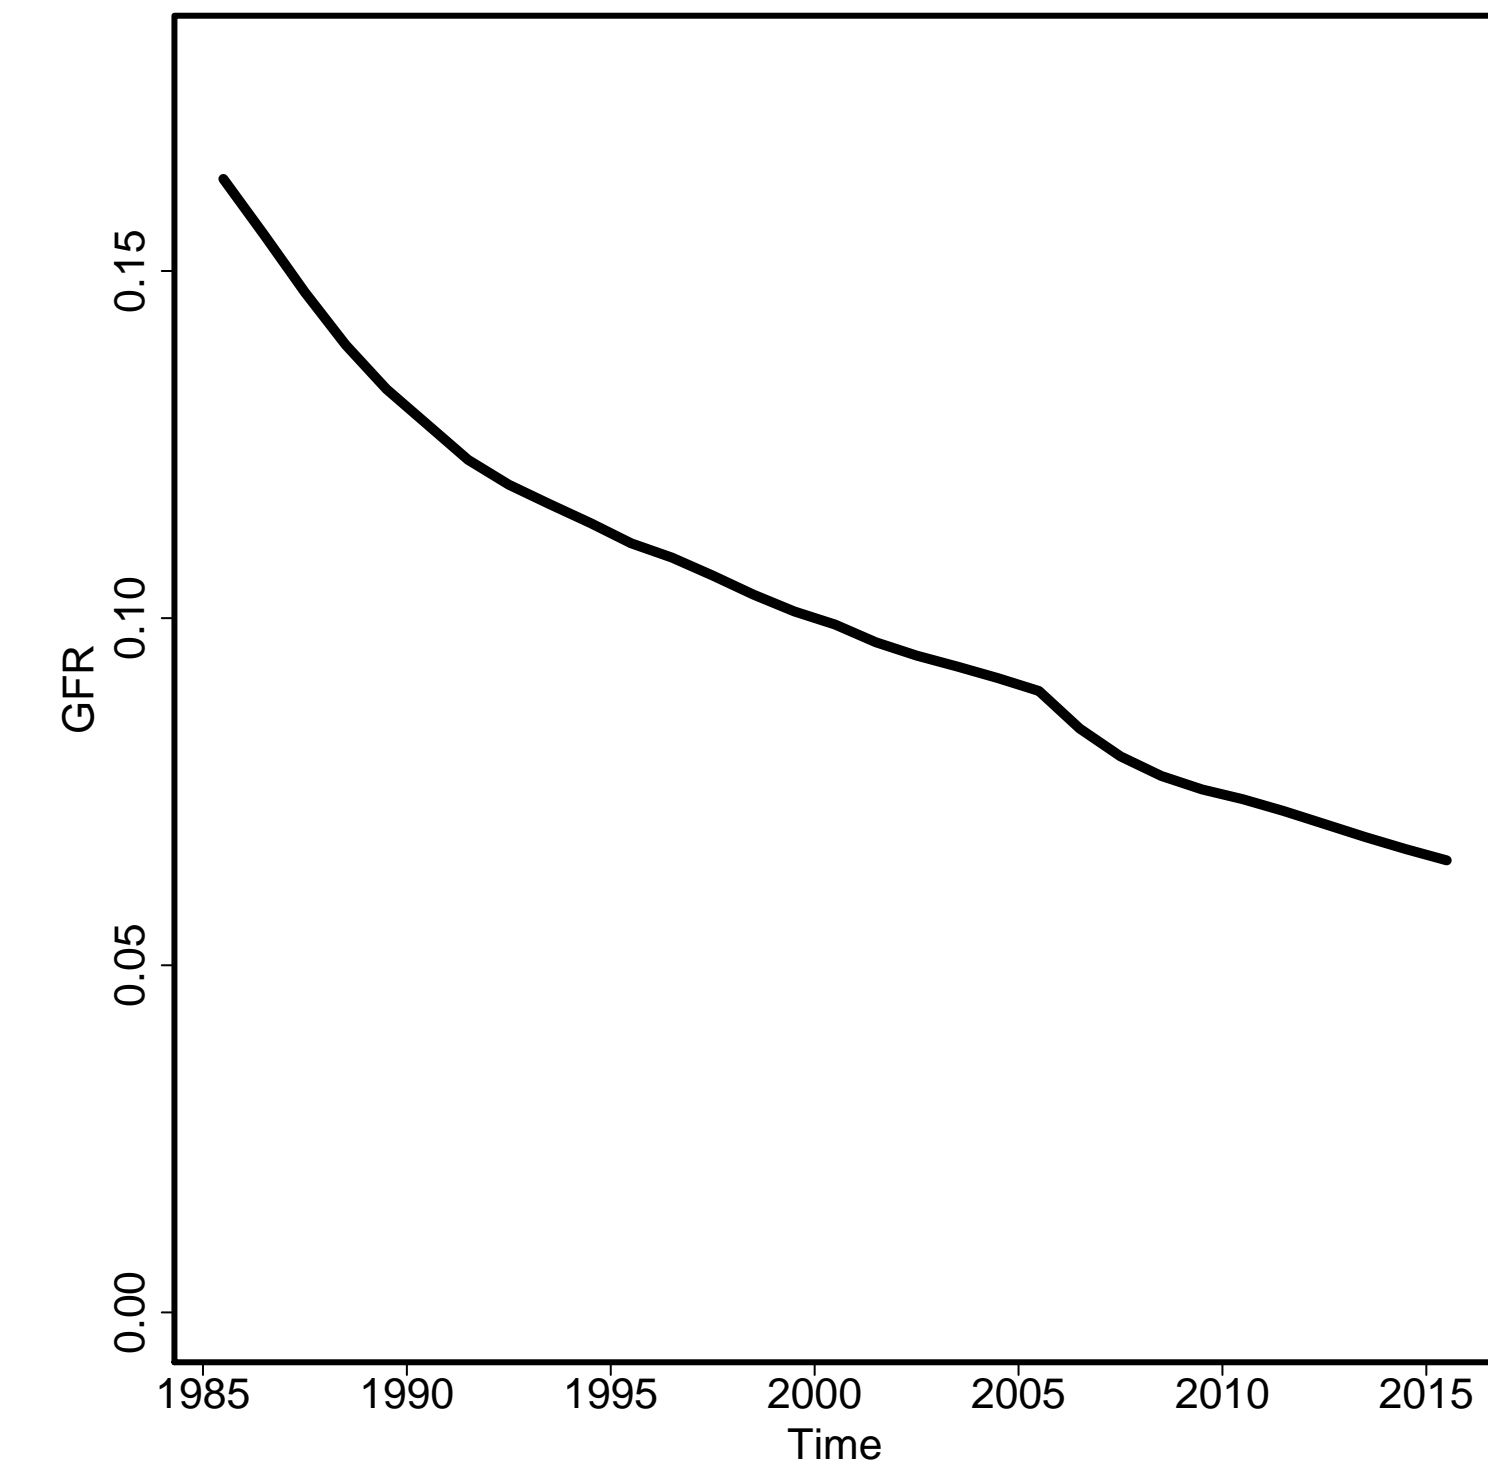

Skilled Attendance to Birth

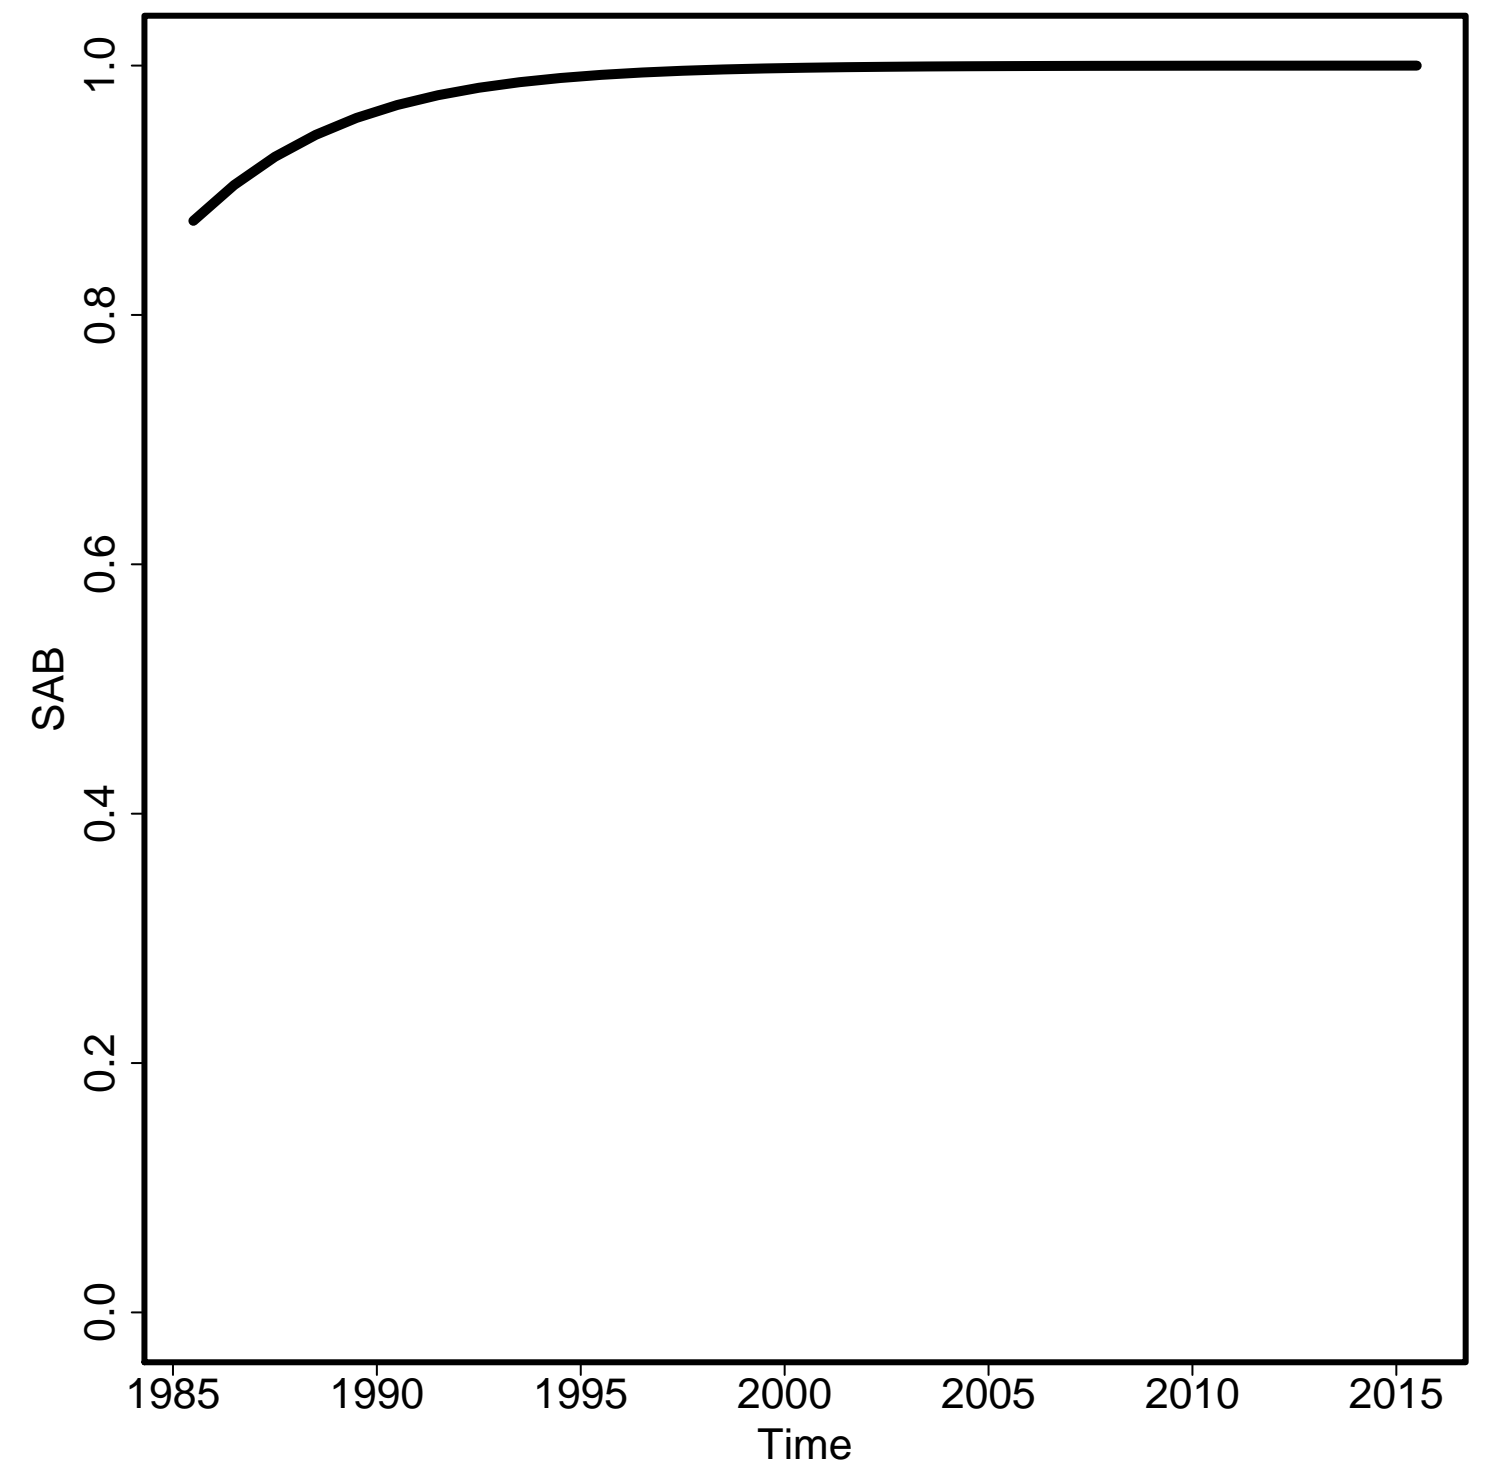

Envelope/Births

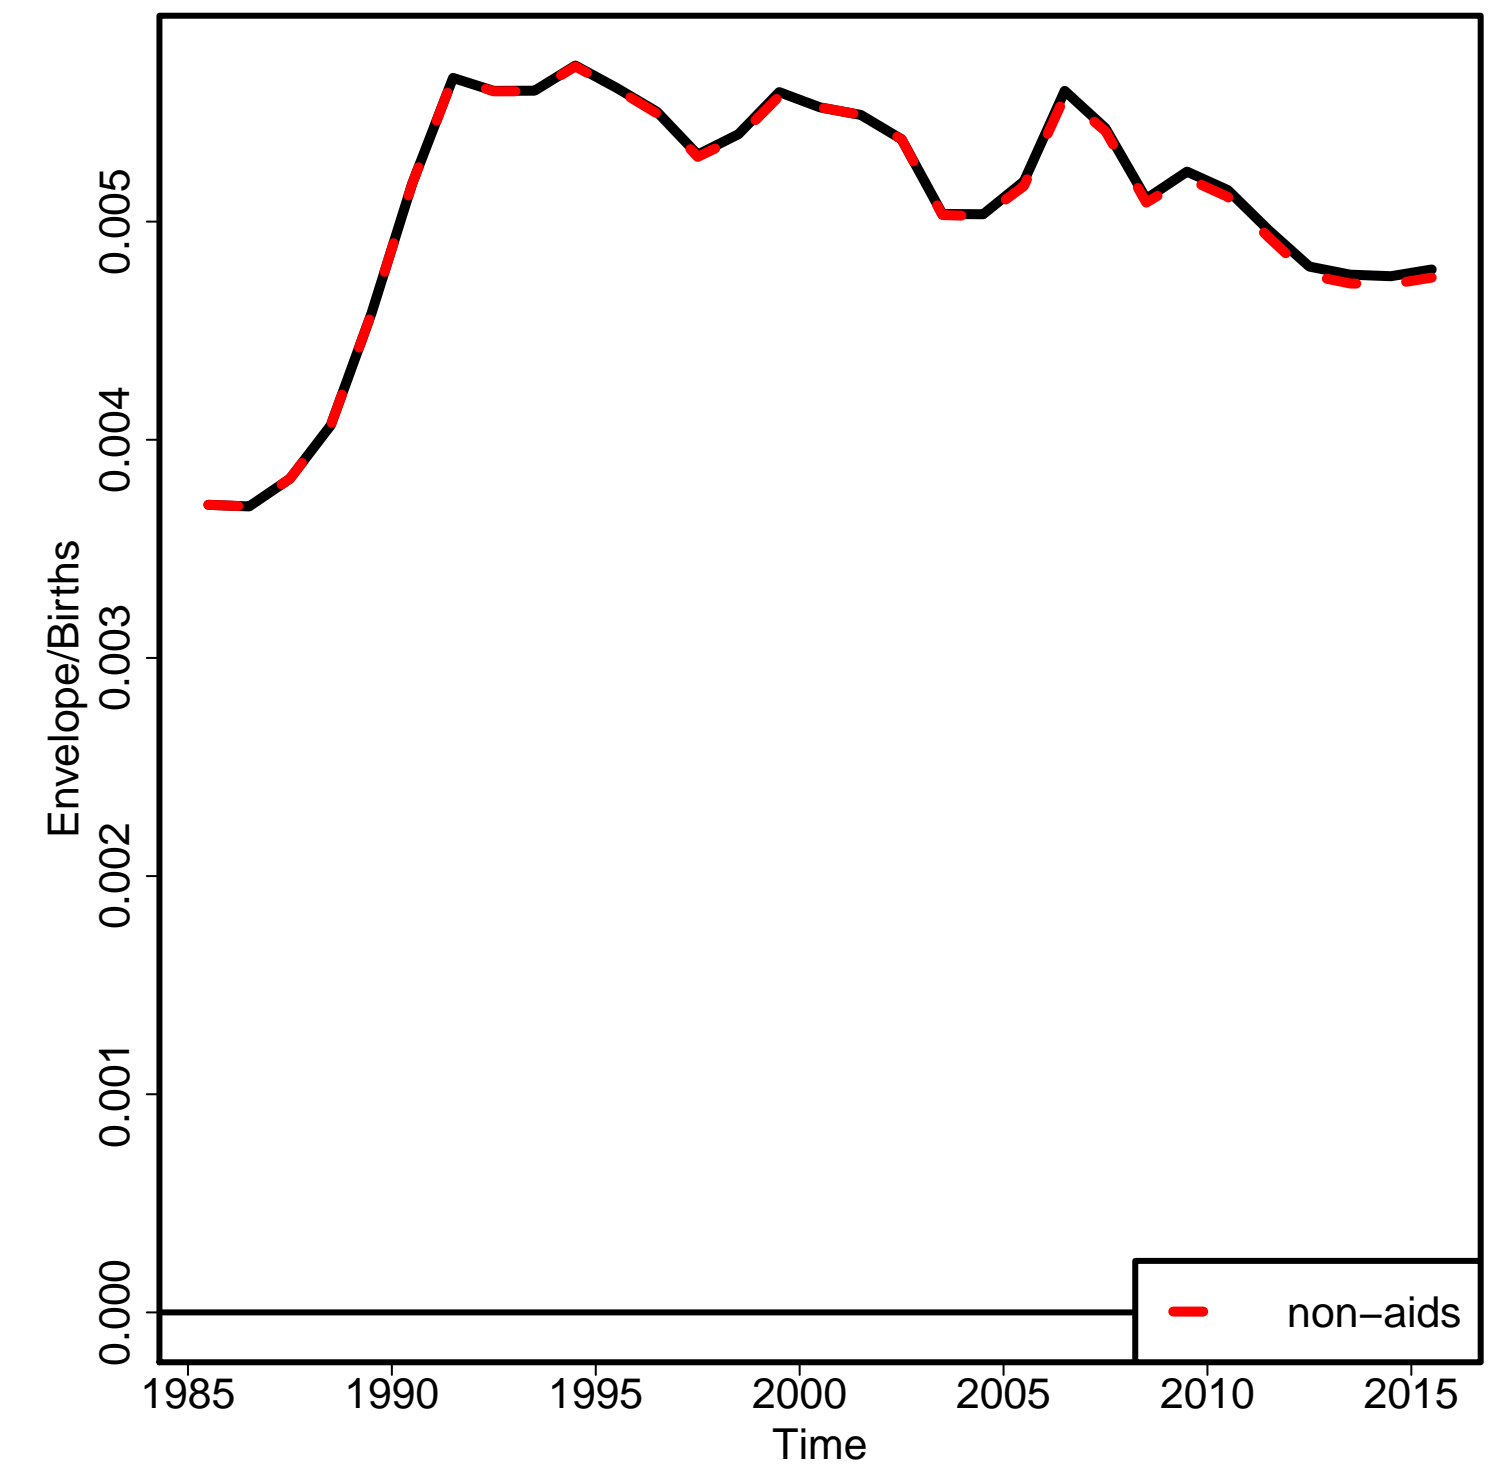

Non-aids MMR

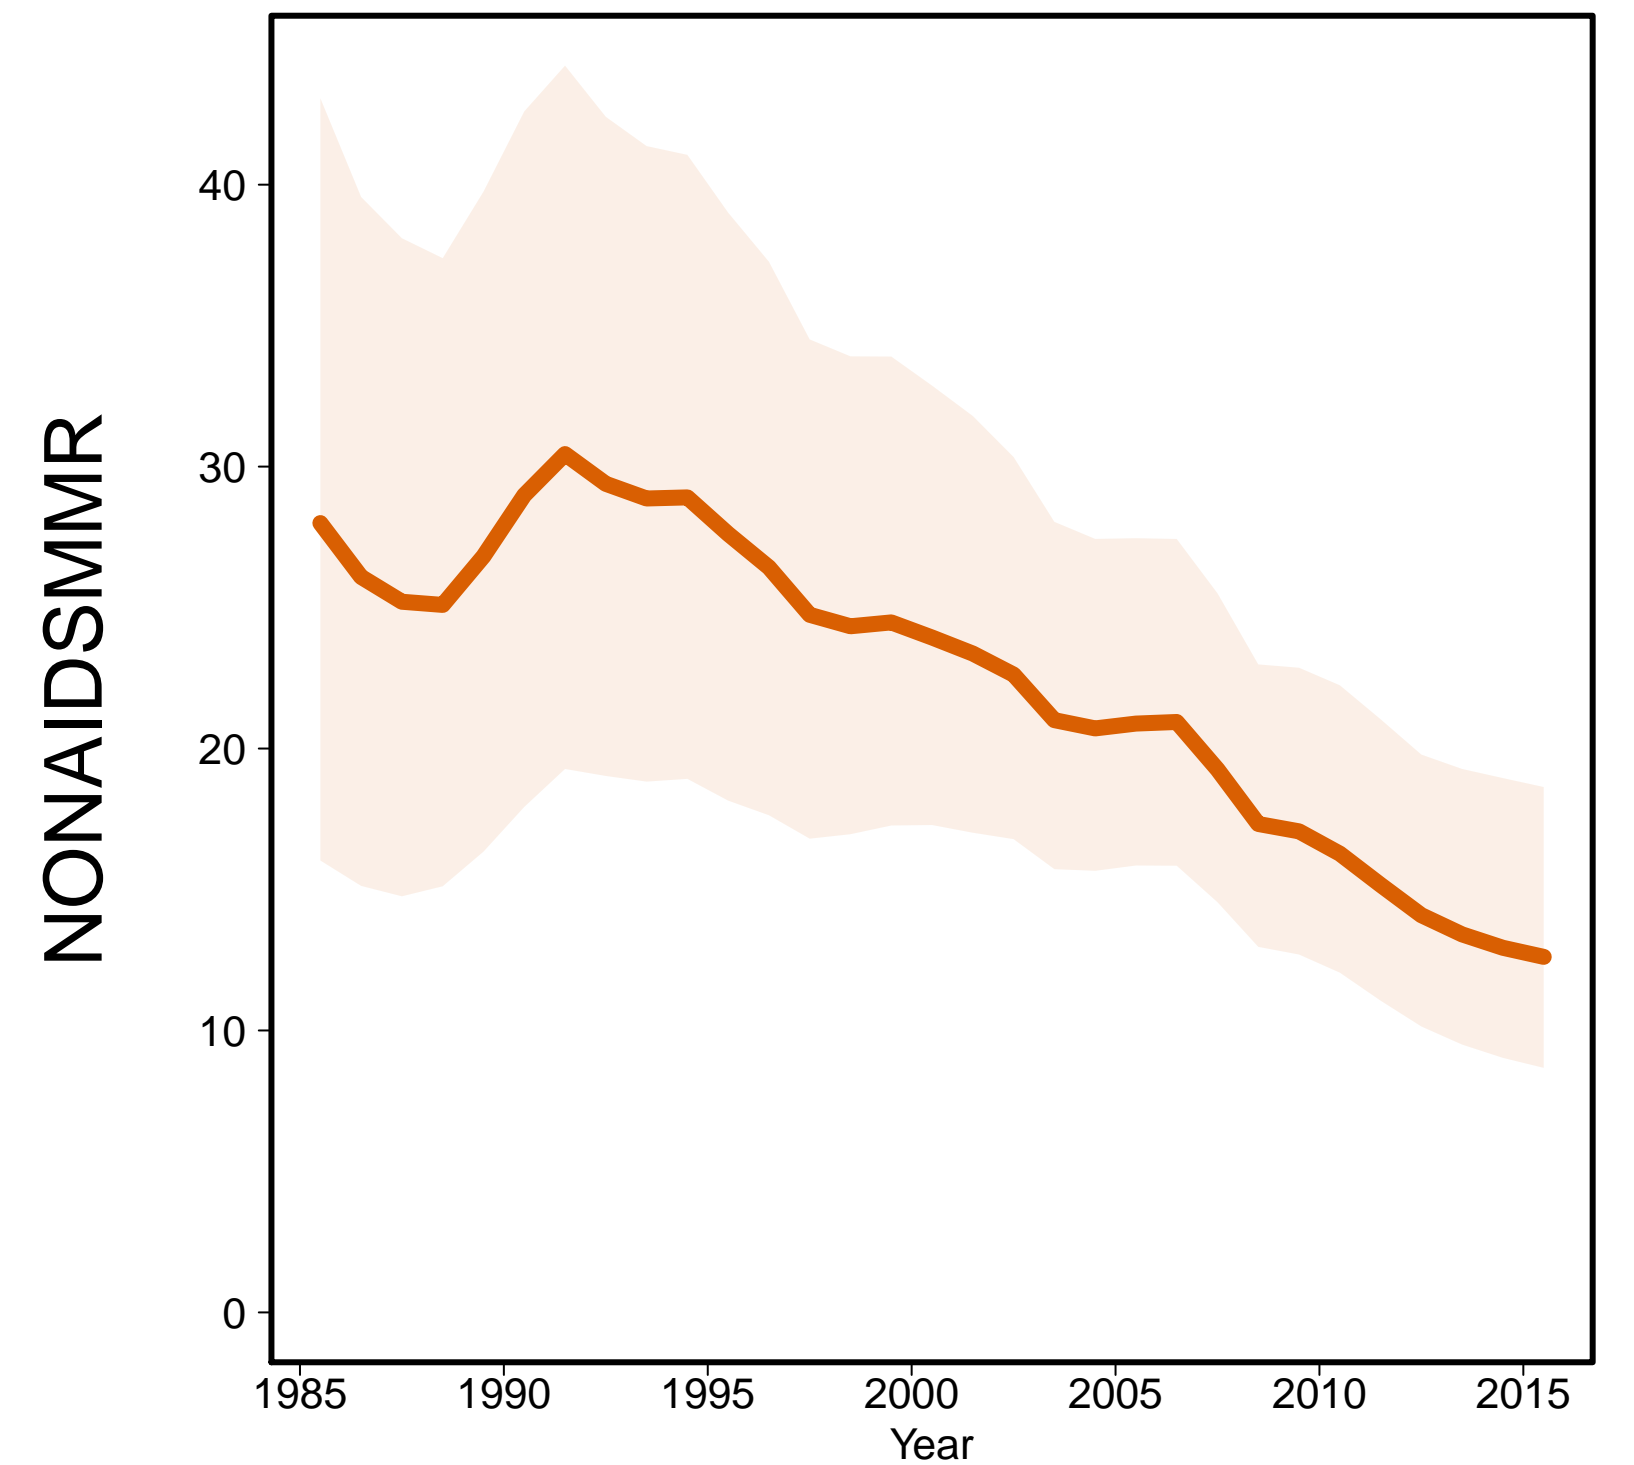

Aids MMR

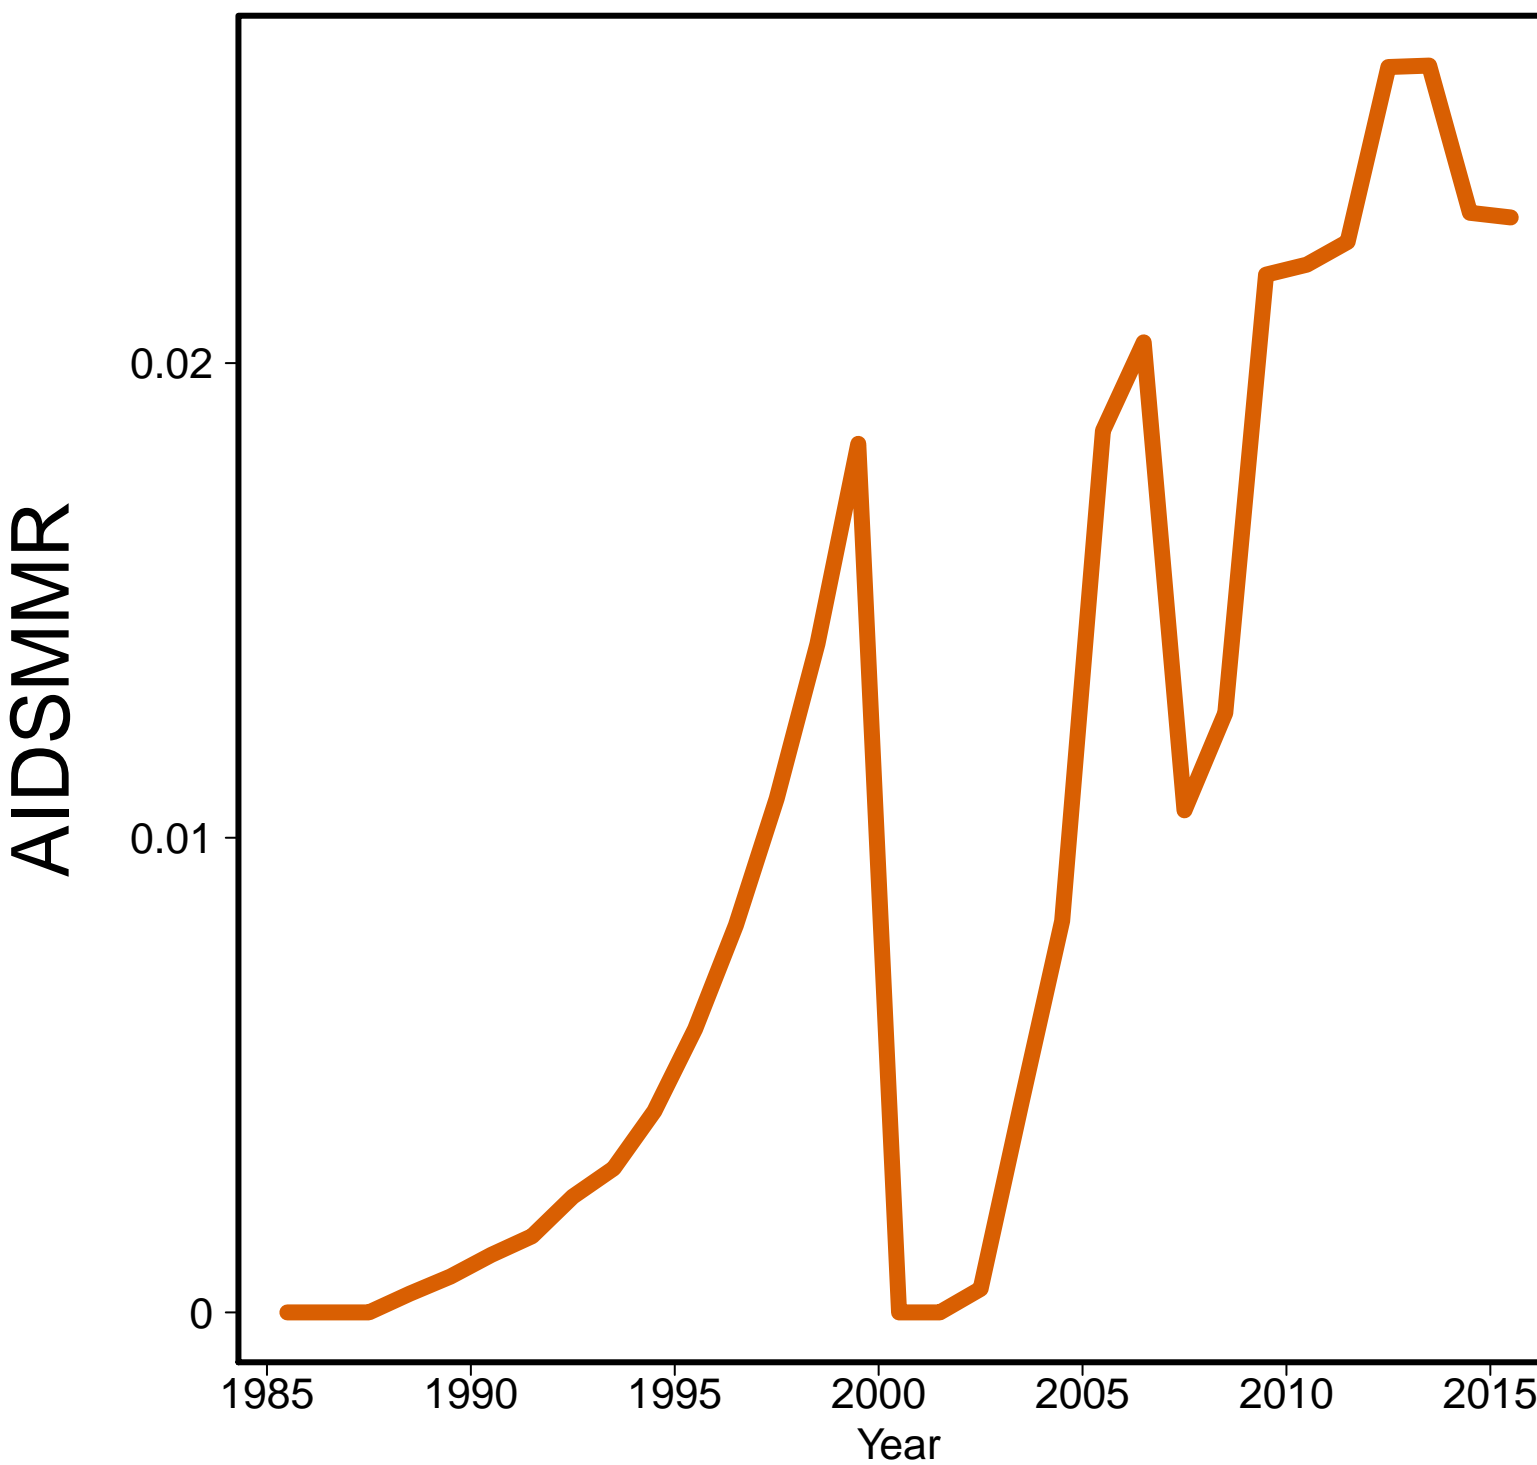

Republic of Korea [KOR]  
(Eastern Asia)

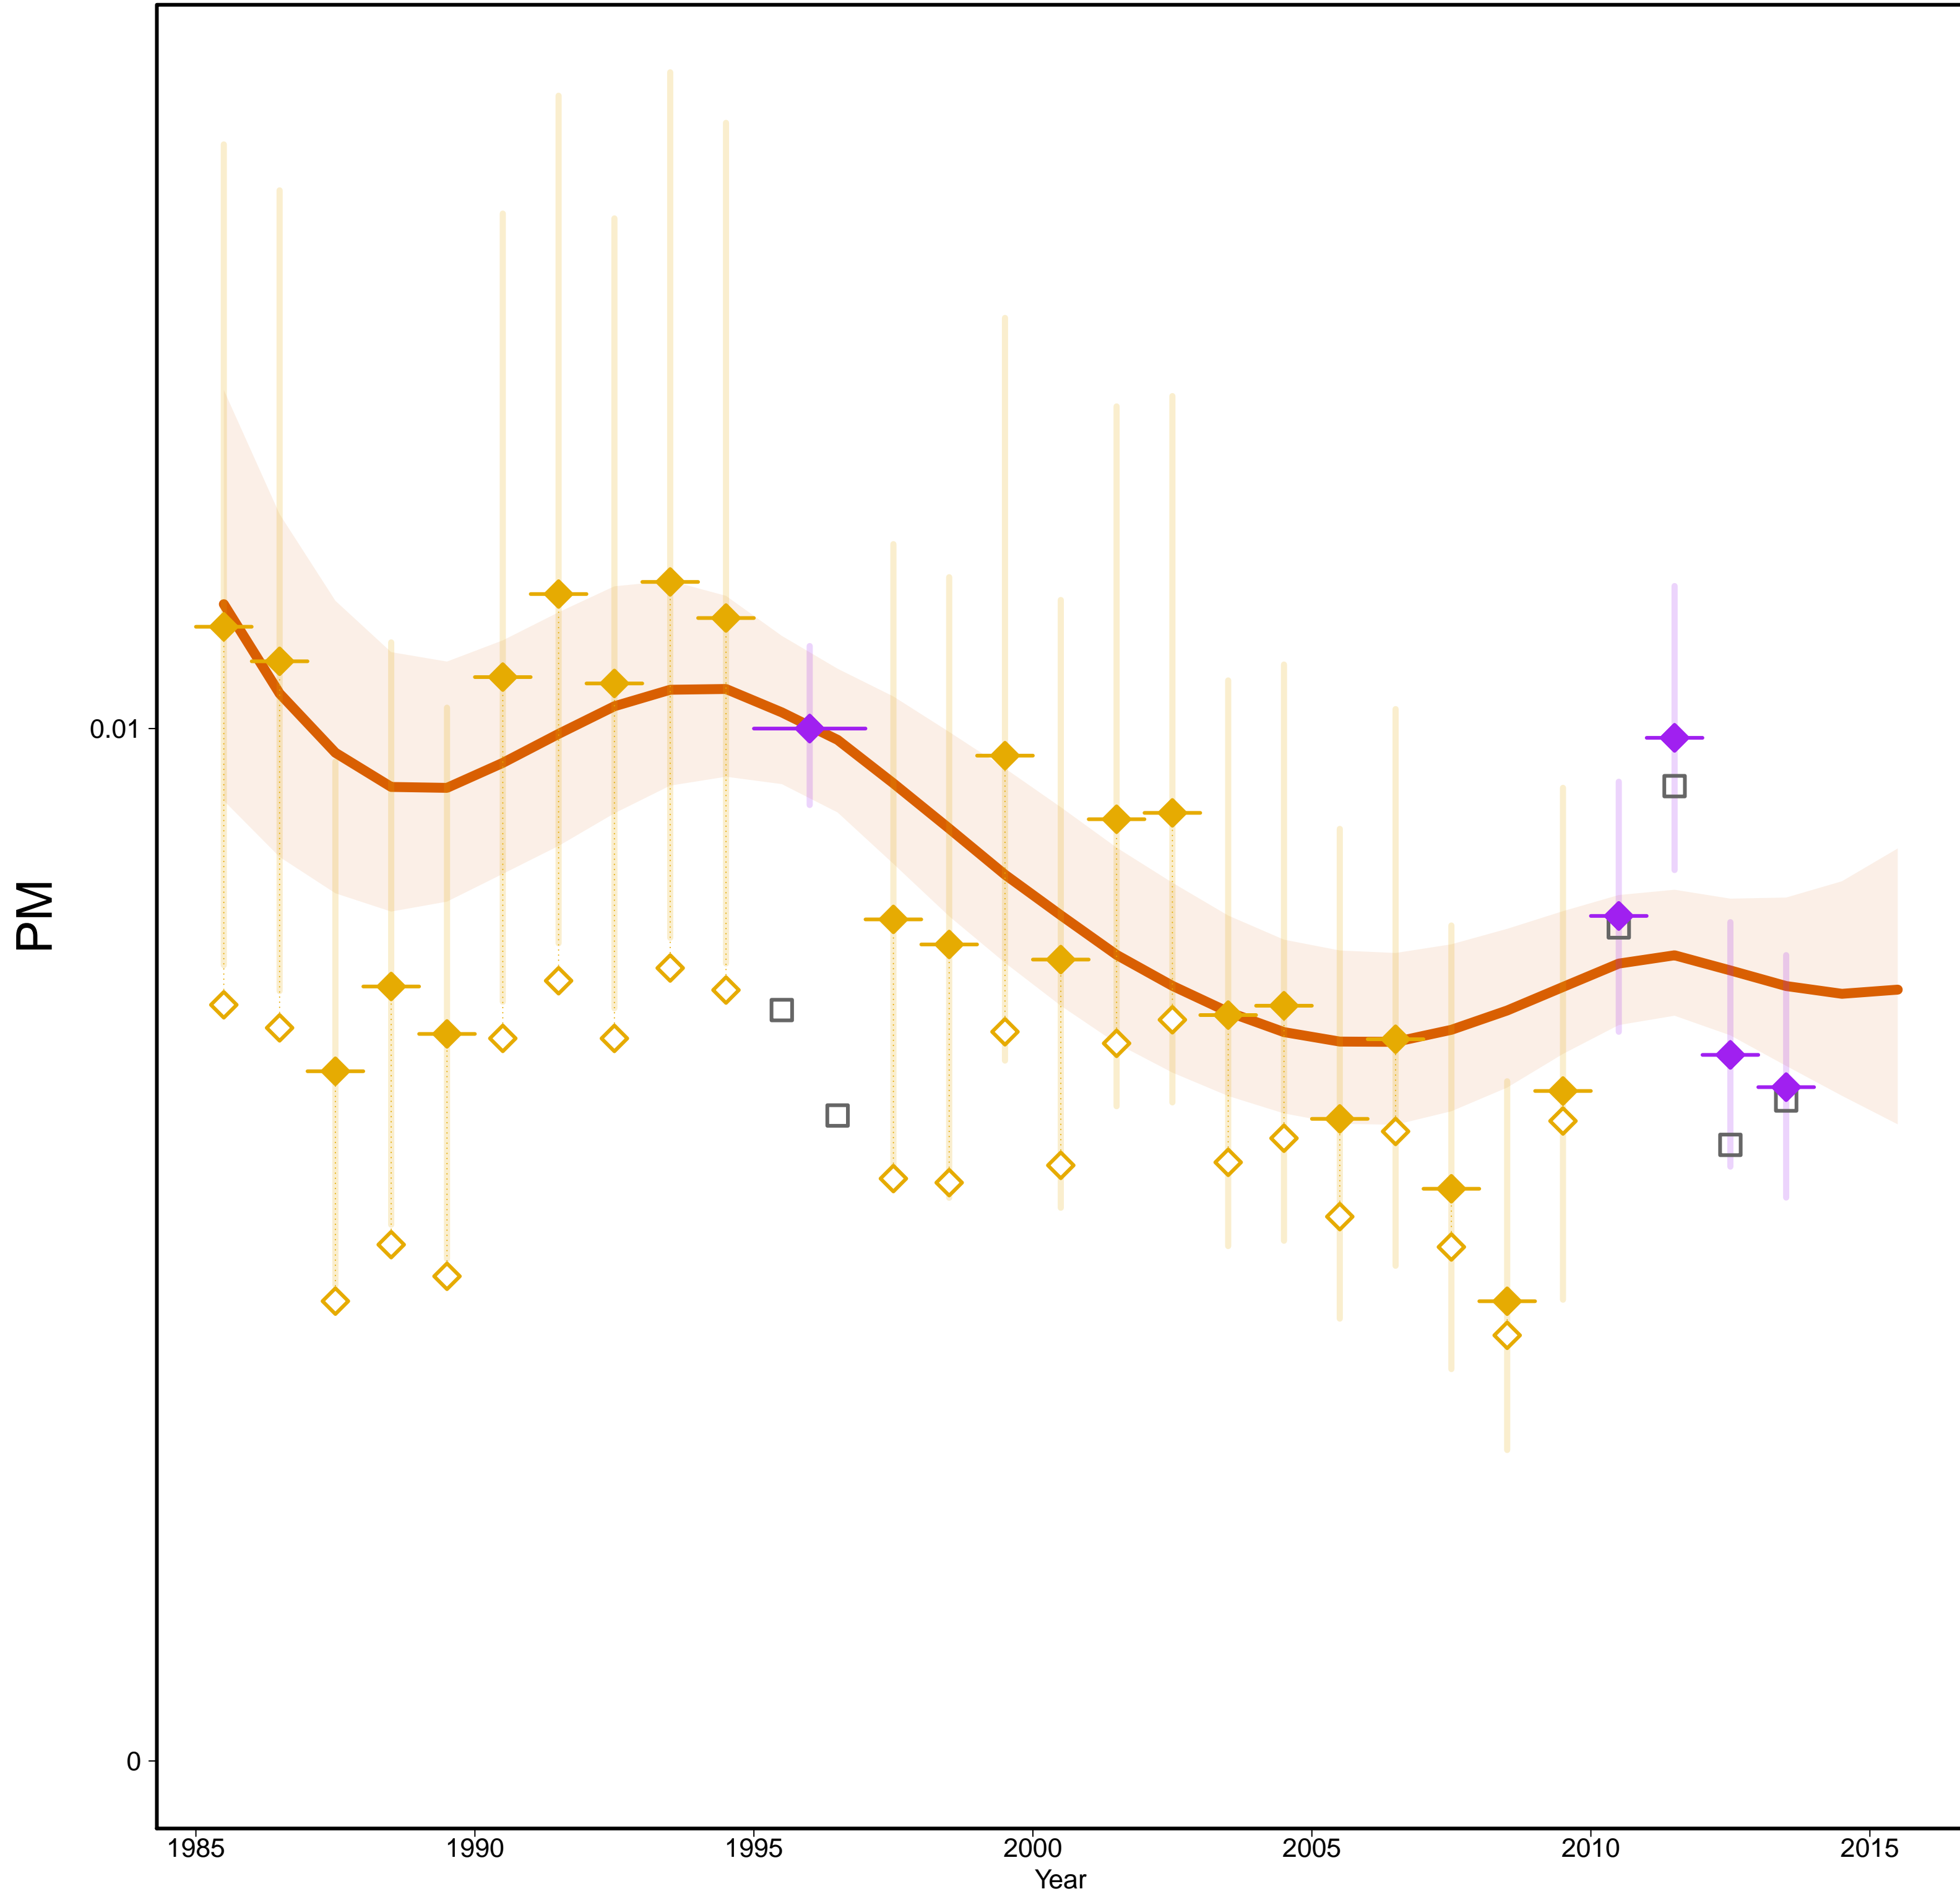

Republic of Korea [KOR]  
(Eastern Asia)

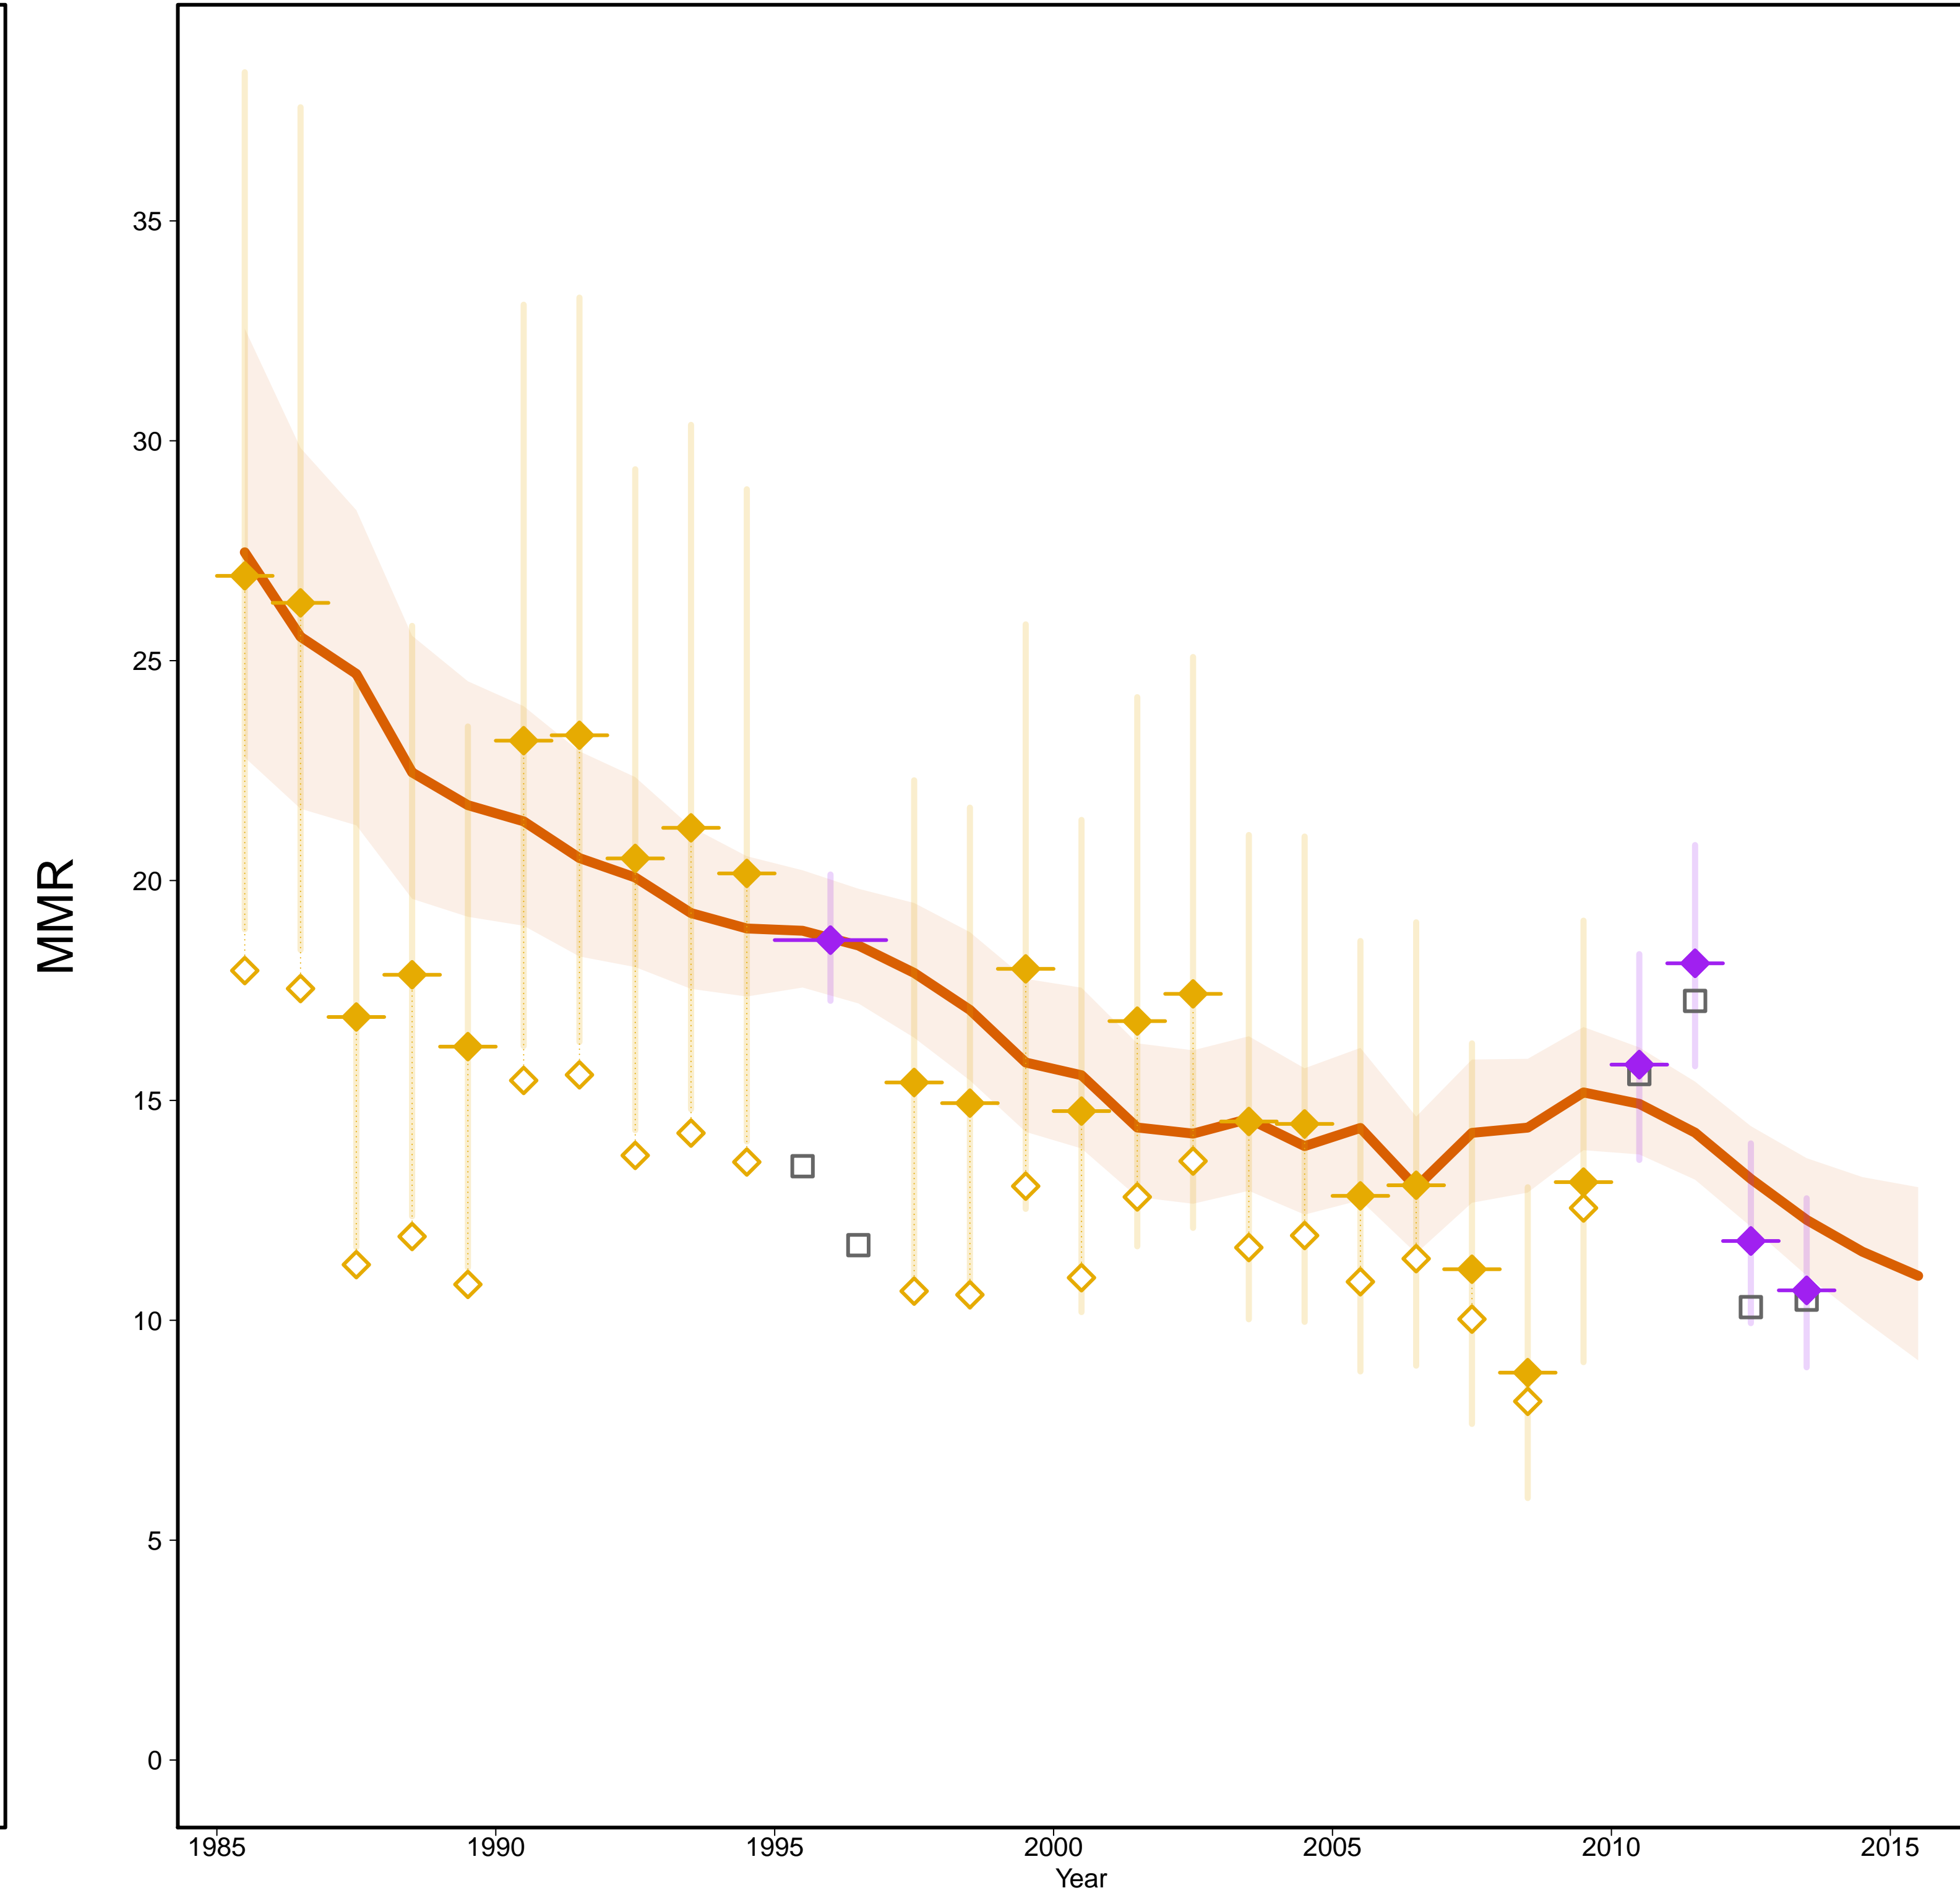

- Estimates –
- Mlate
- MMR Database 2015 –
- ◊ Observed Data
- ◆ Adjusted Data
- Data type –
- ◆ VR
- ◆ Spec. studies
- ◻ Excluded VR data  
(overlap with specialized study)

Gross Domestic Product

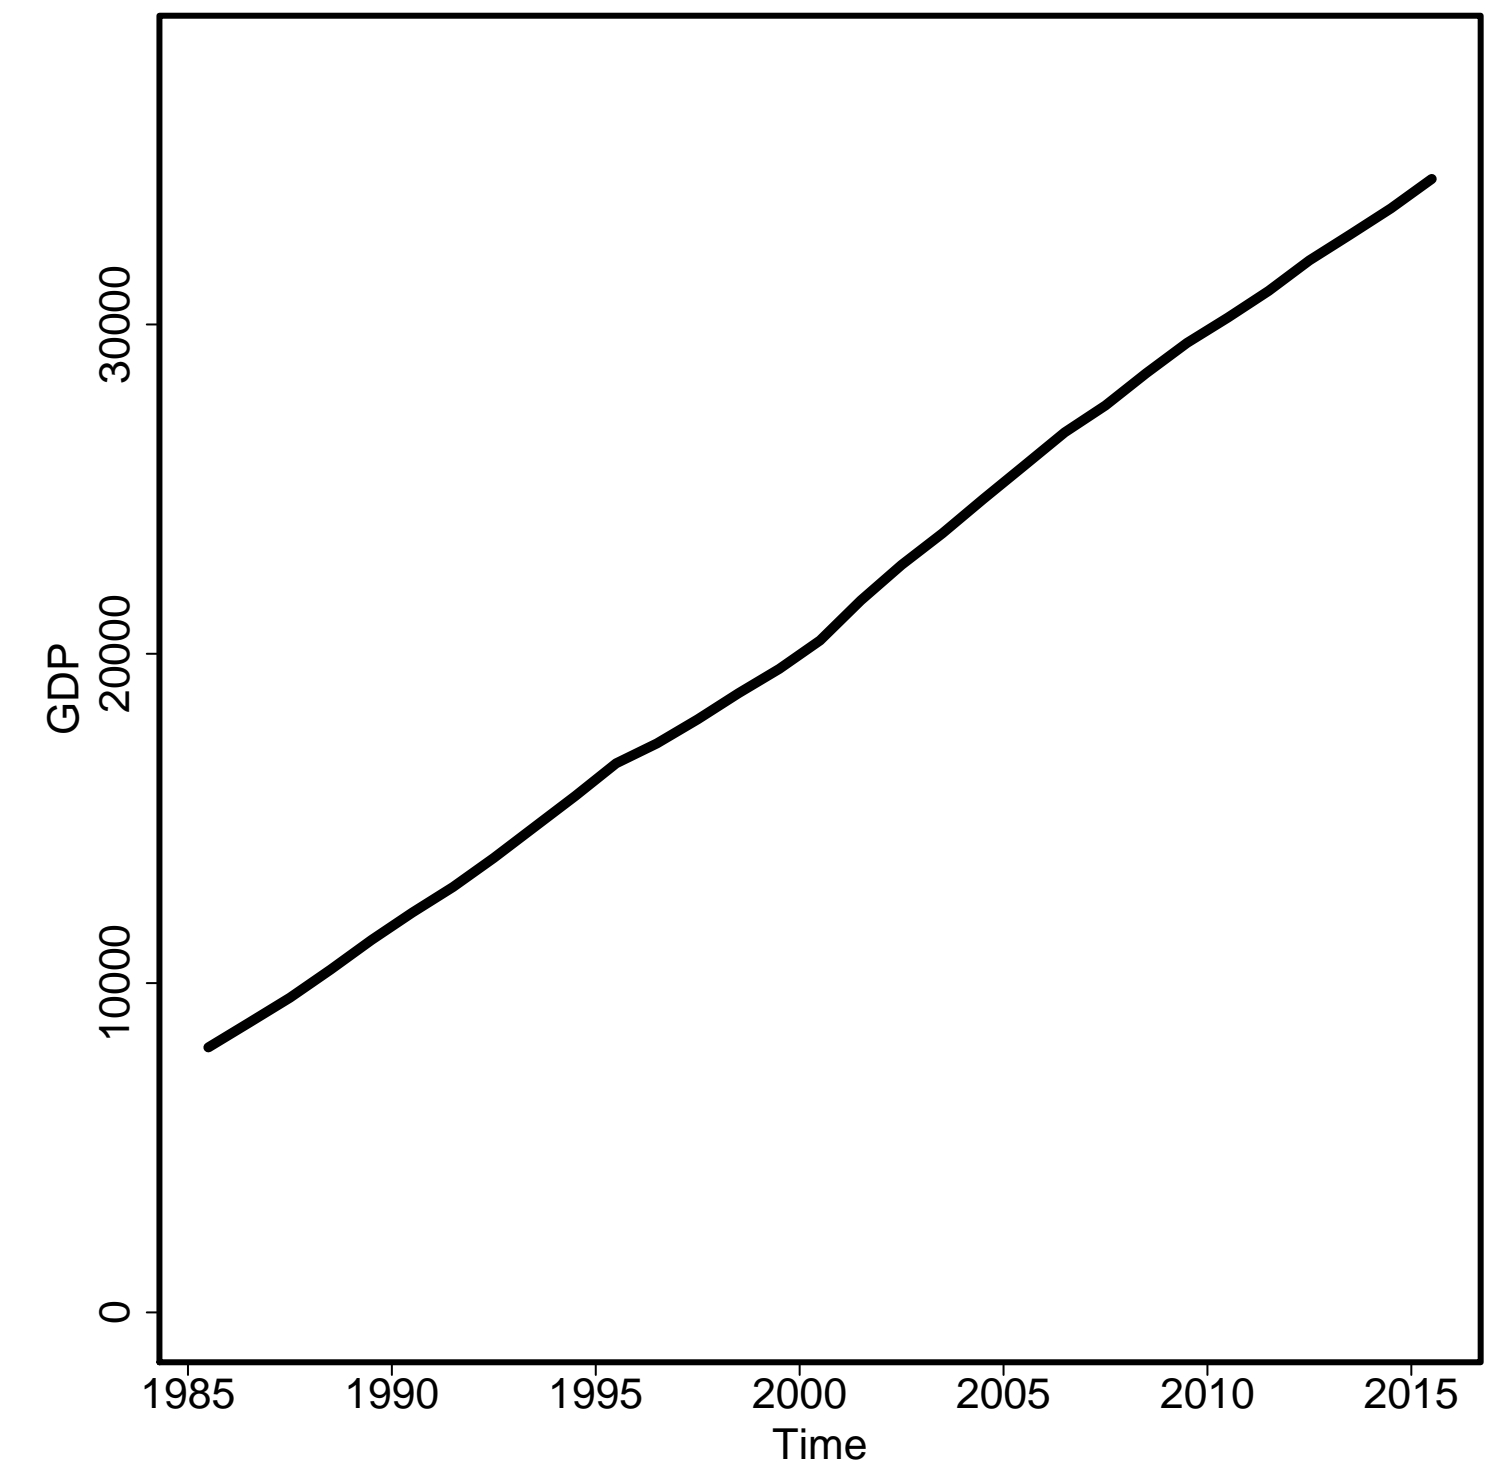

General Fertility Rate

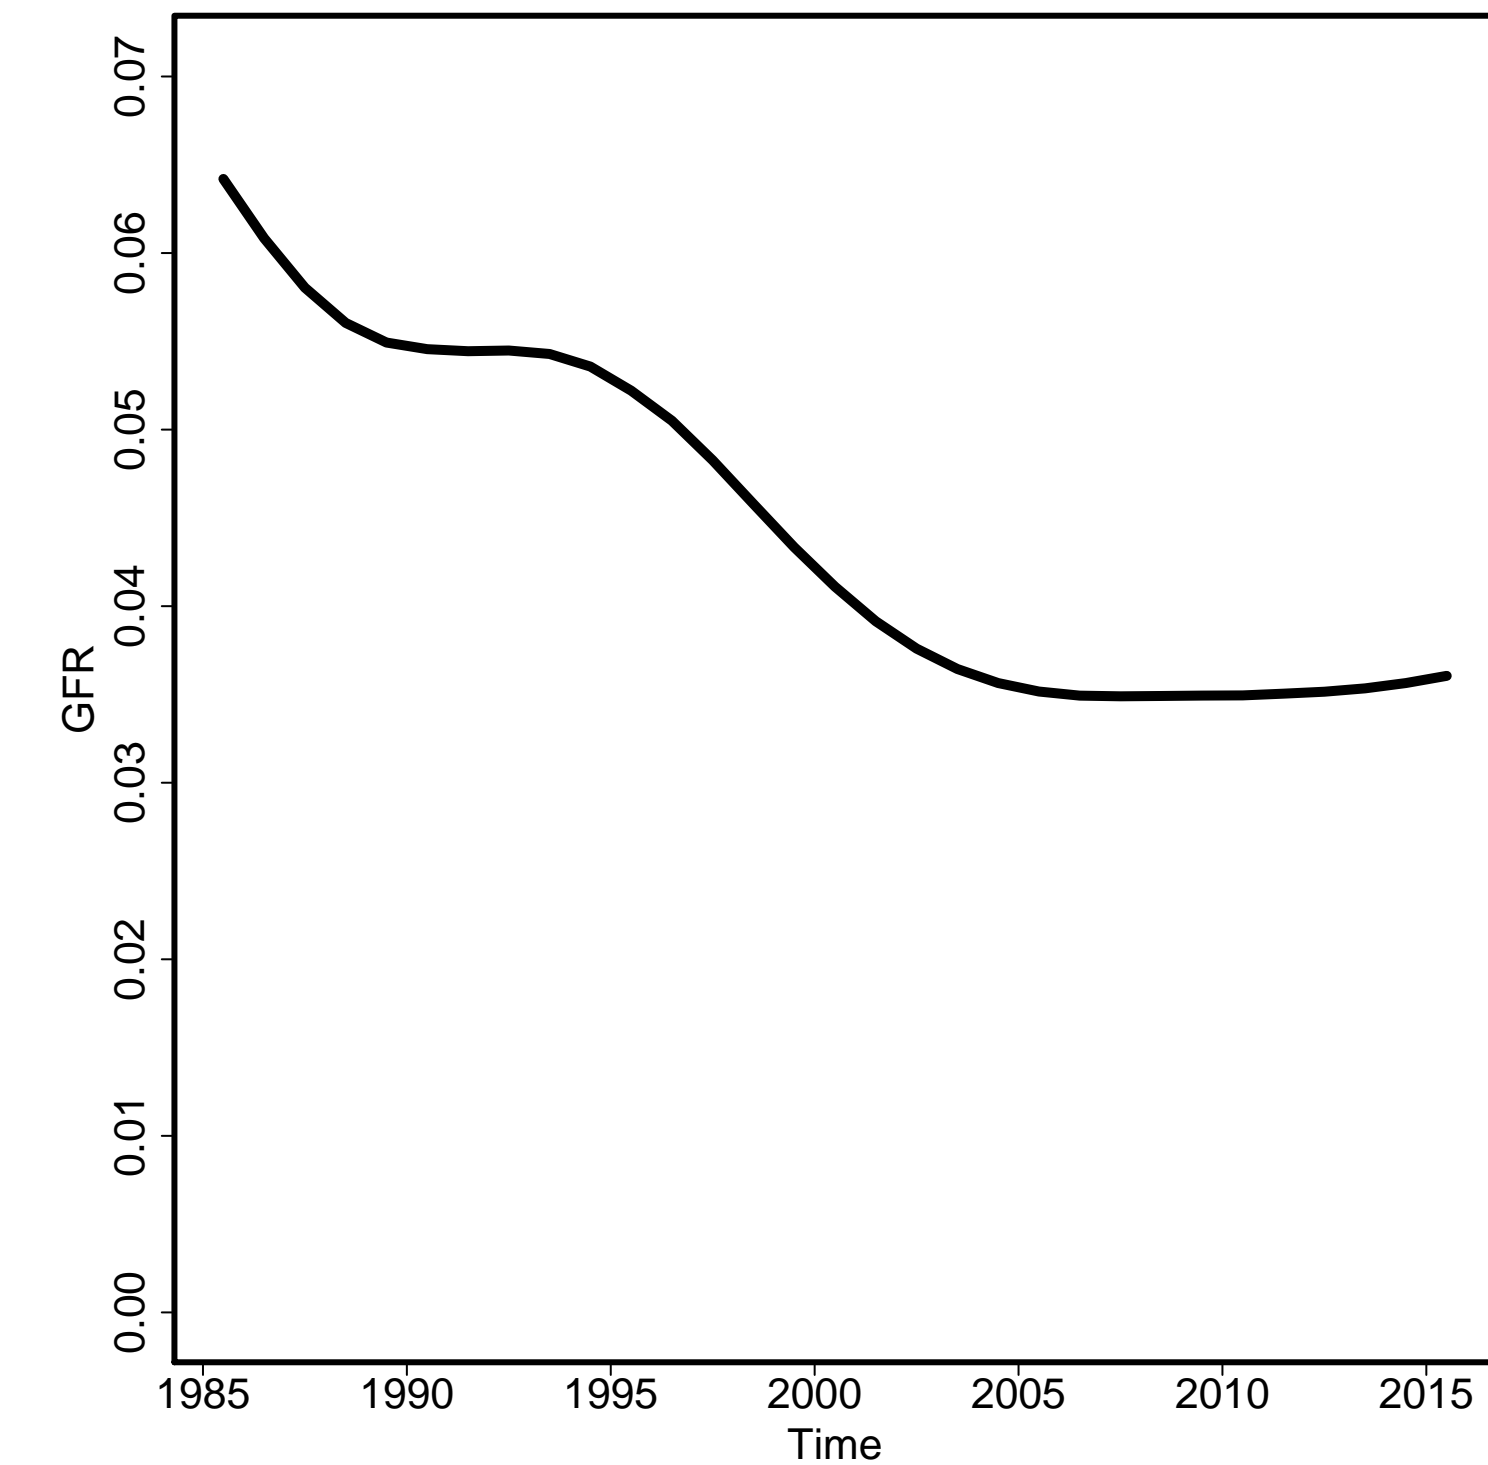

Skilled Attendance to Birth

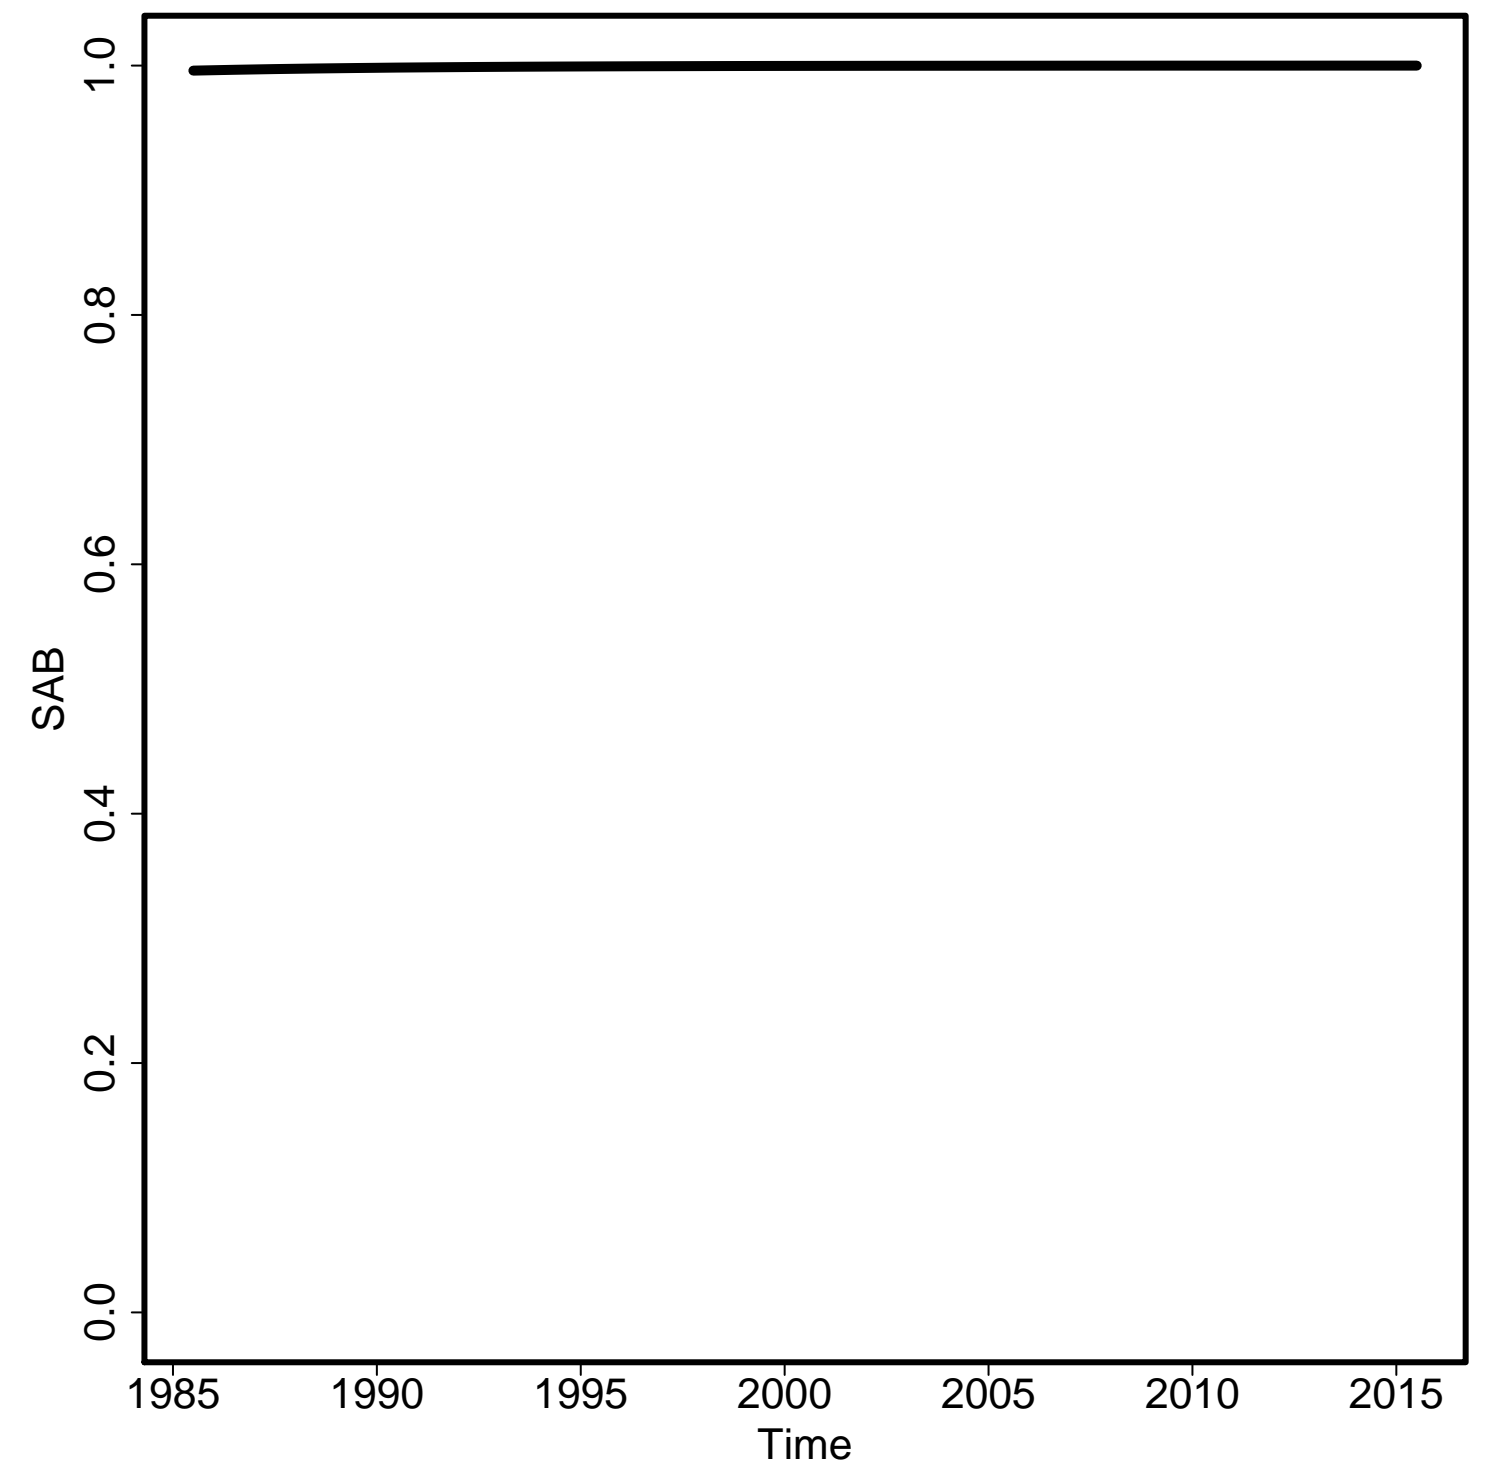

Envelope/Births

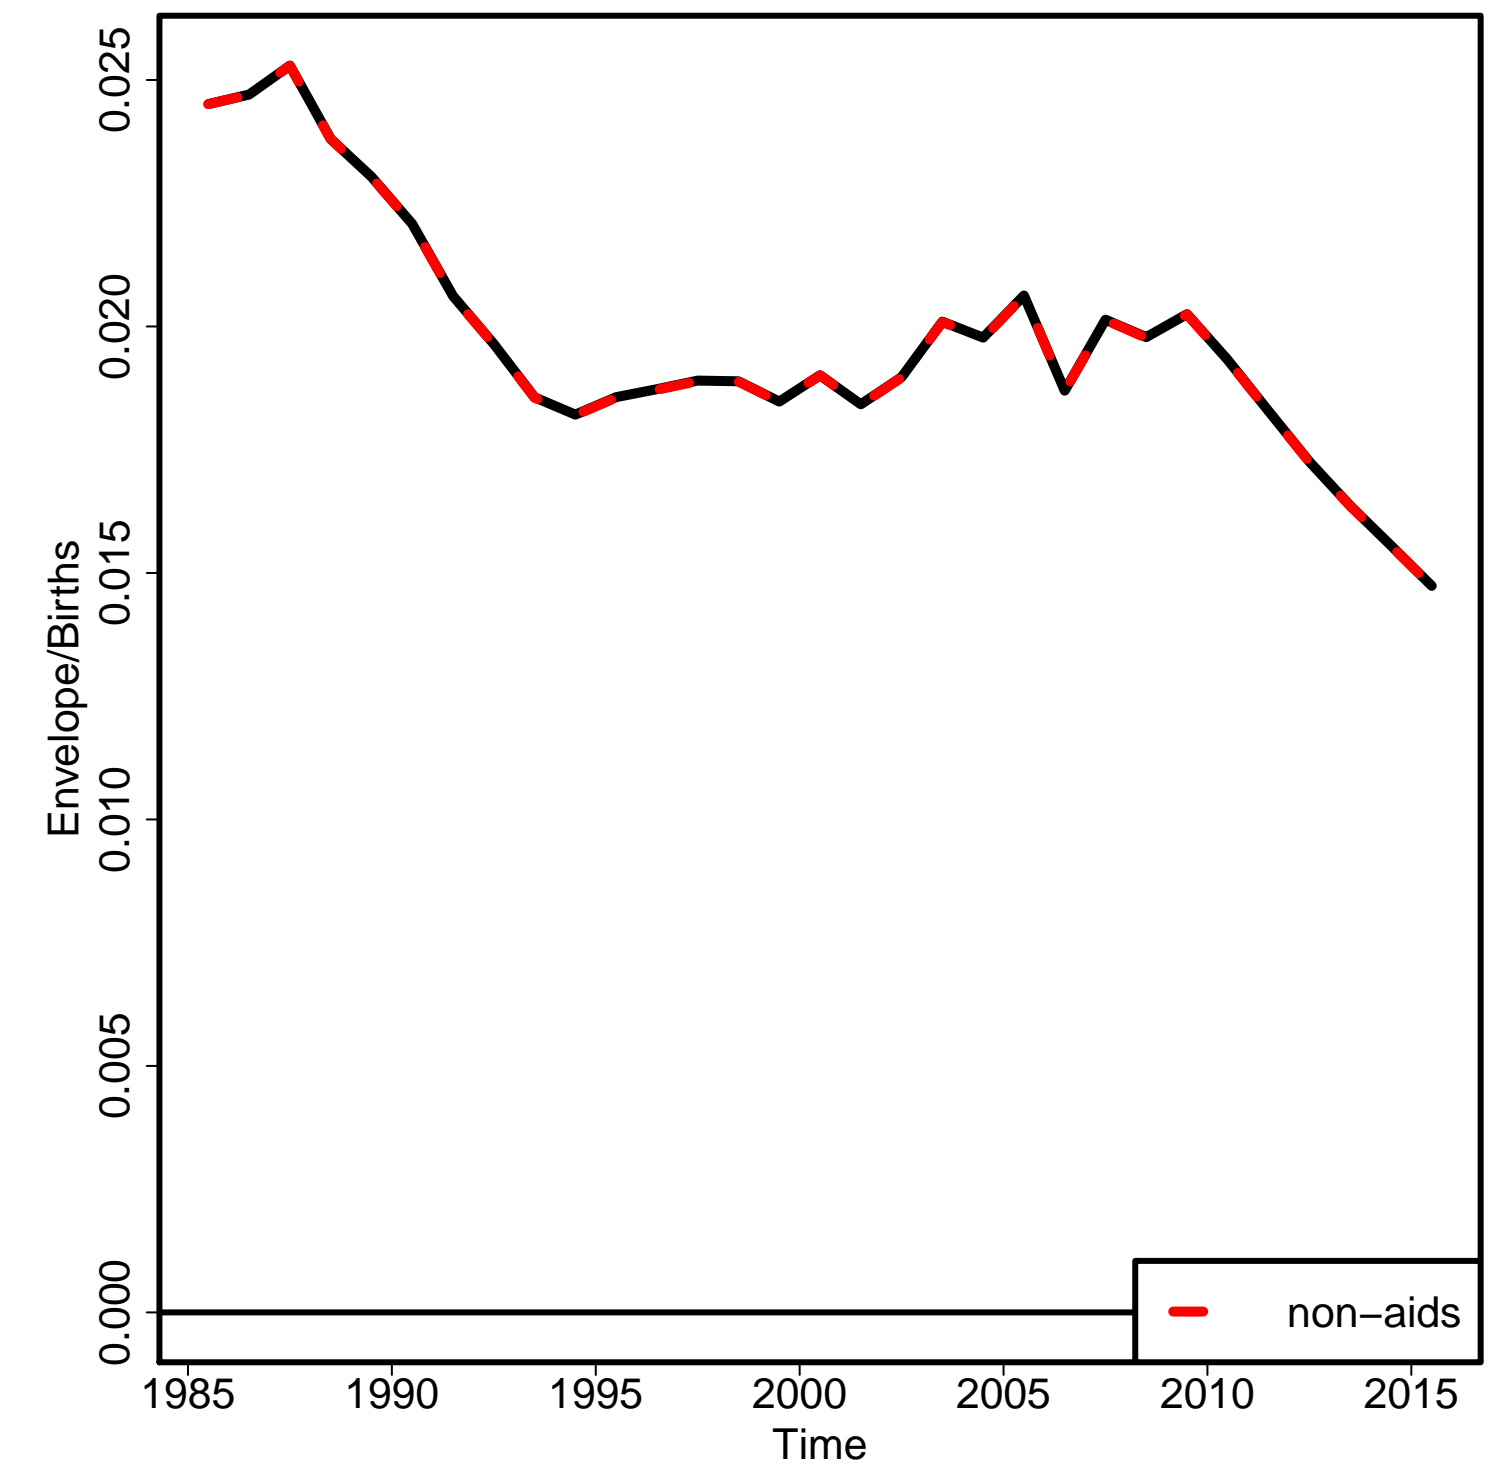

Non-aids MMR

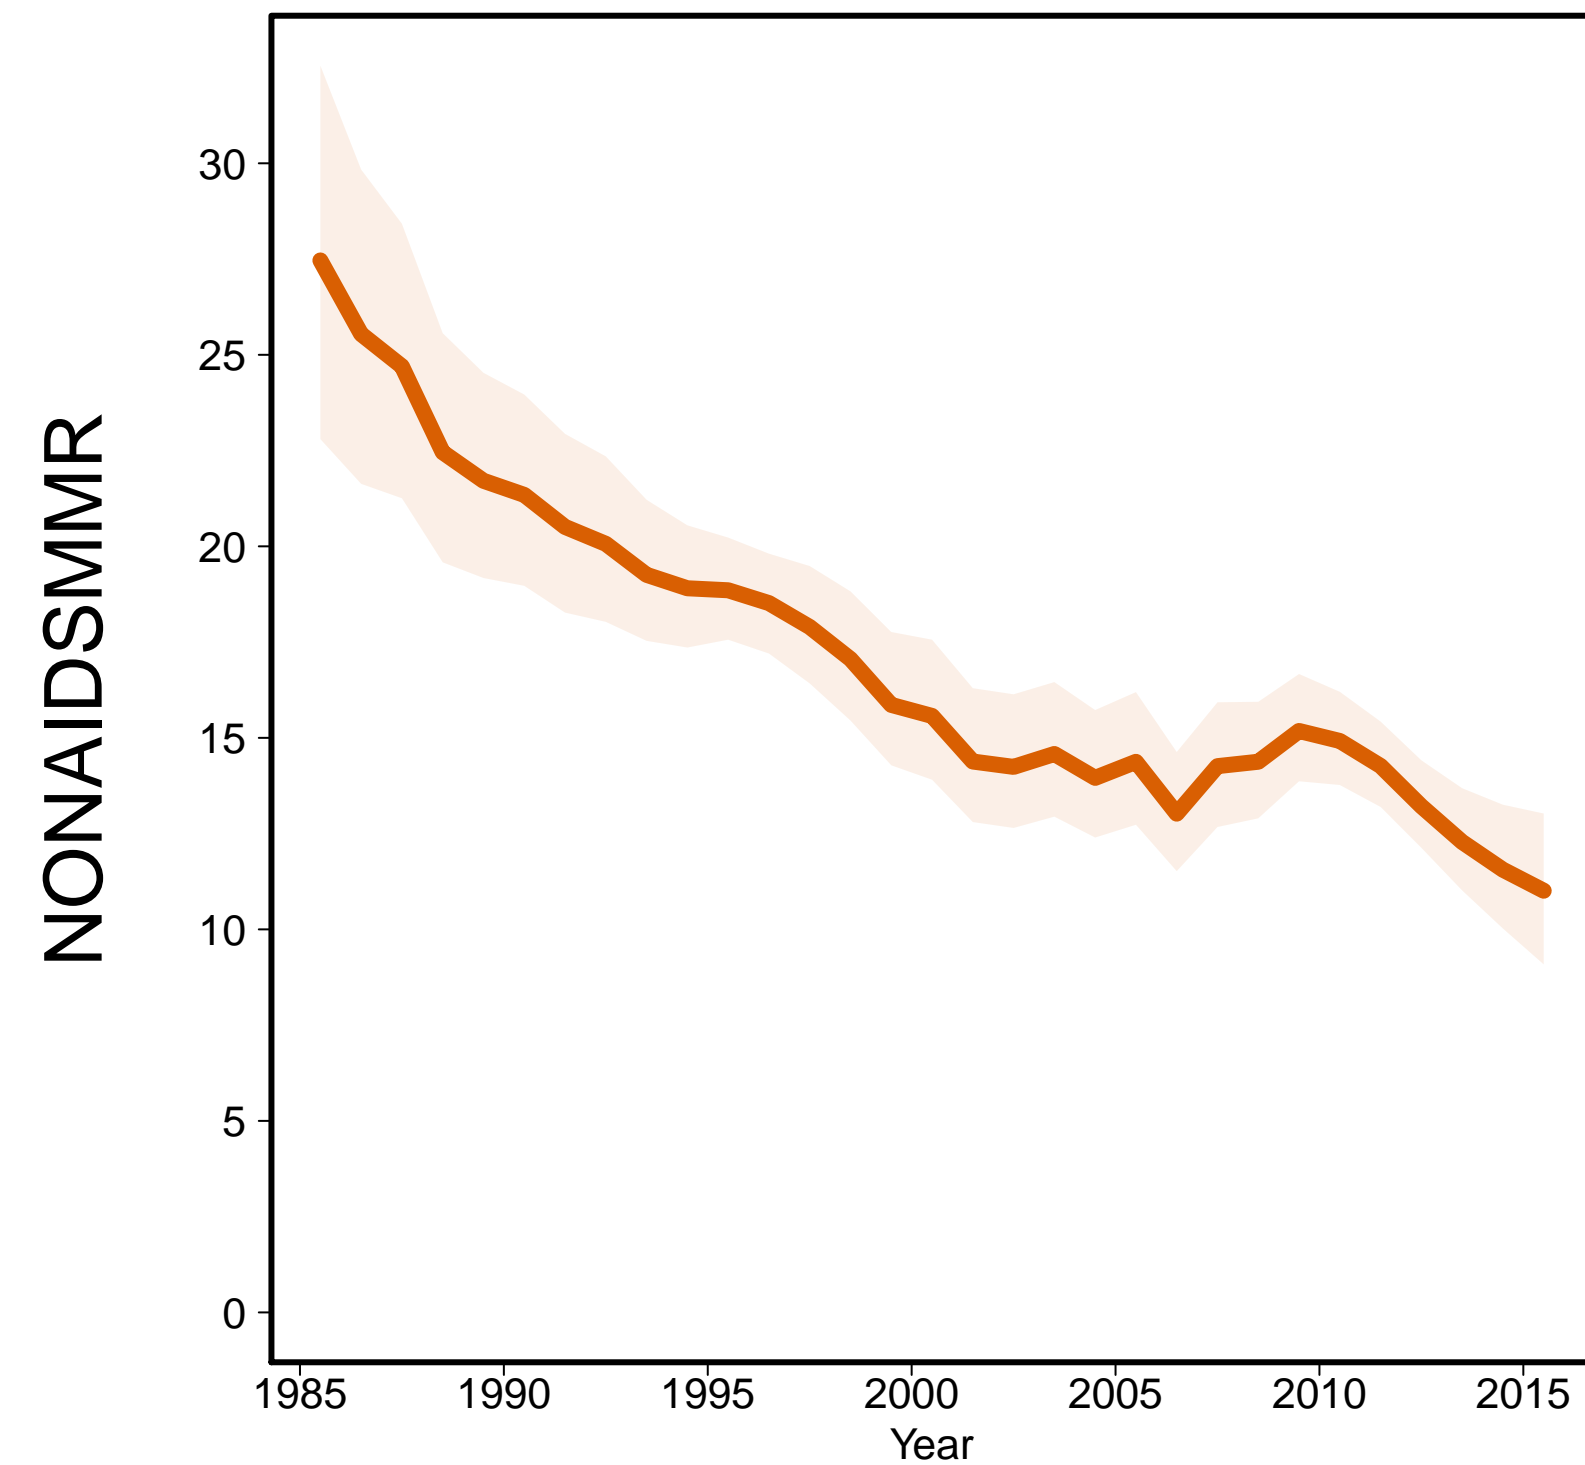

Aids MMR

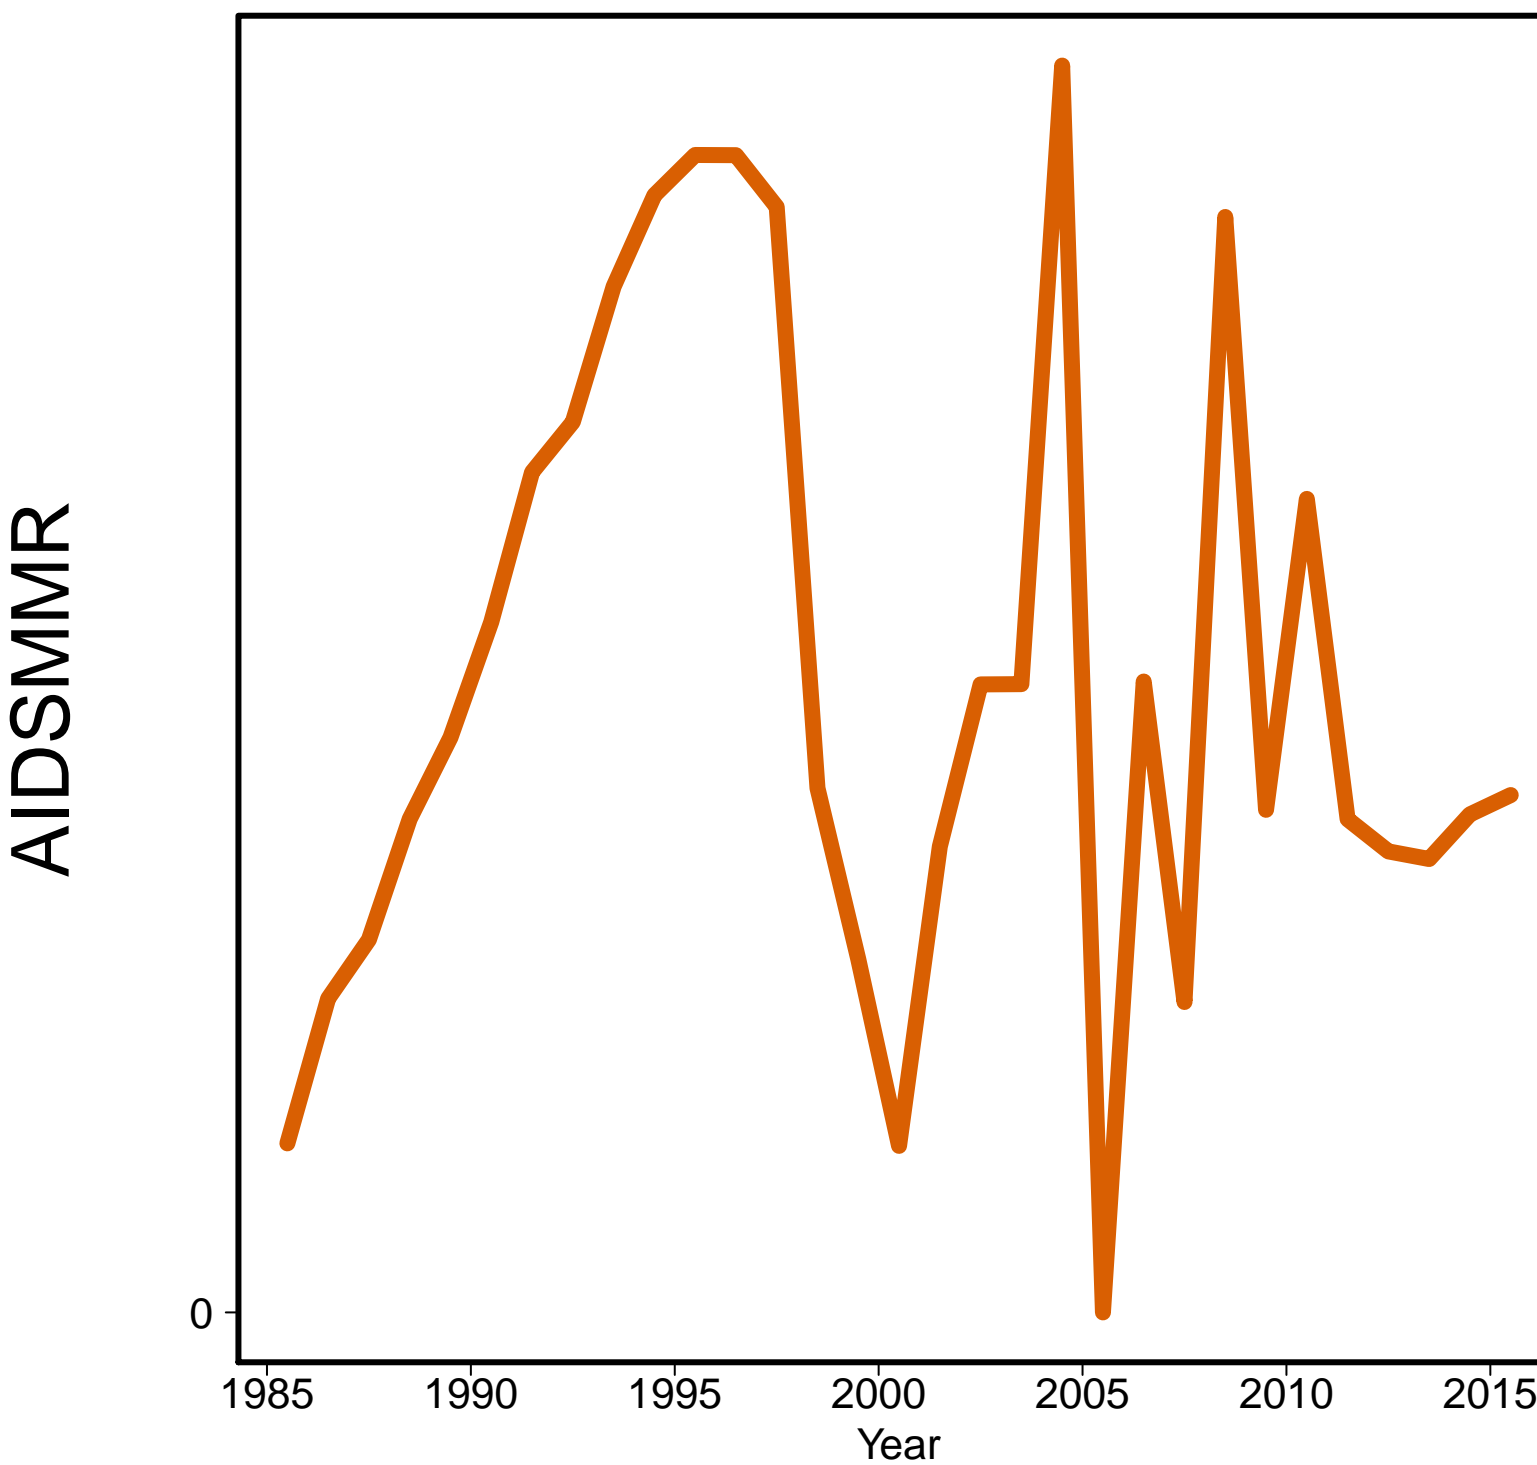

Republic of Moldova [MDA]  
(Developed regions)

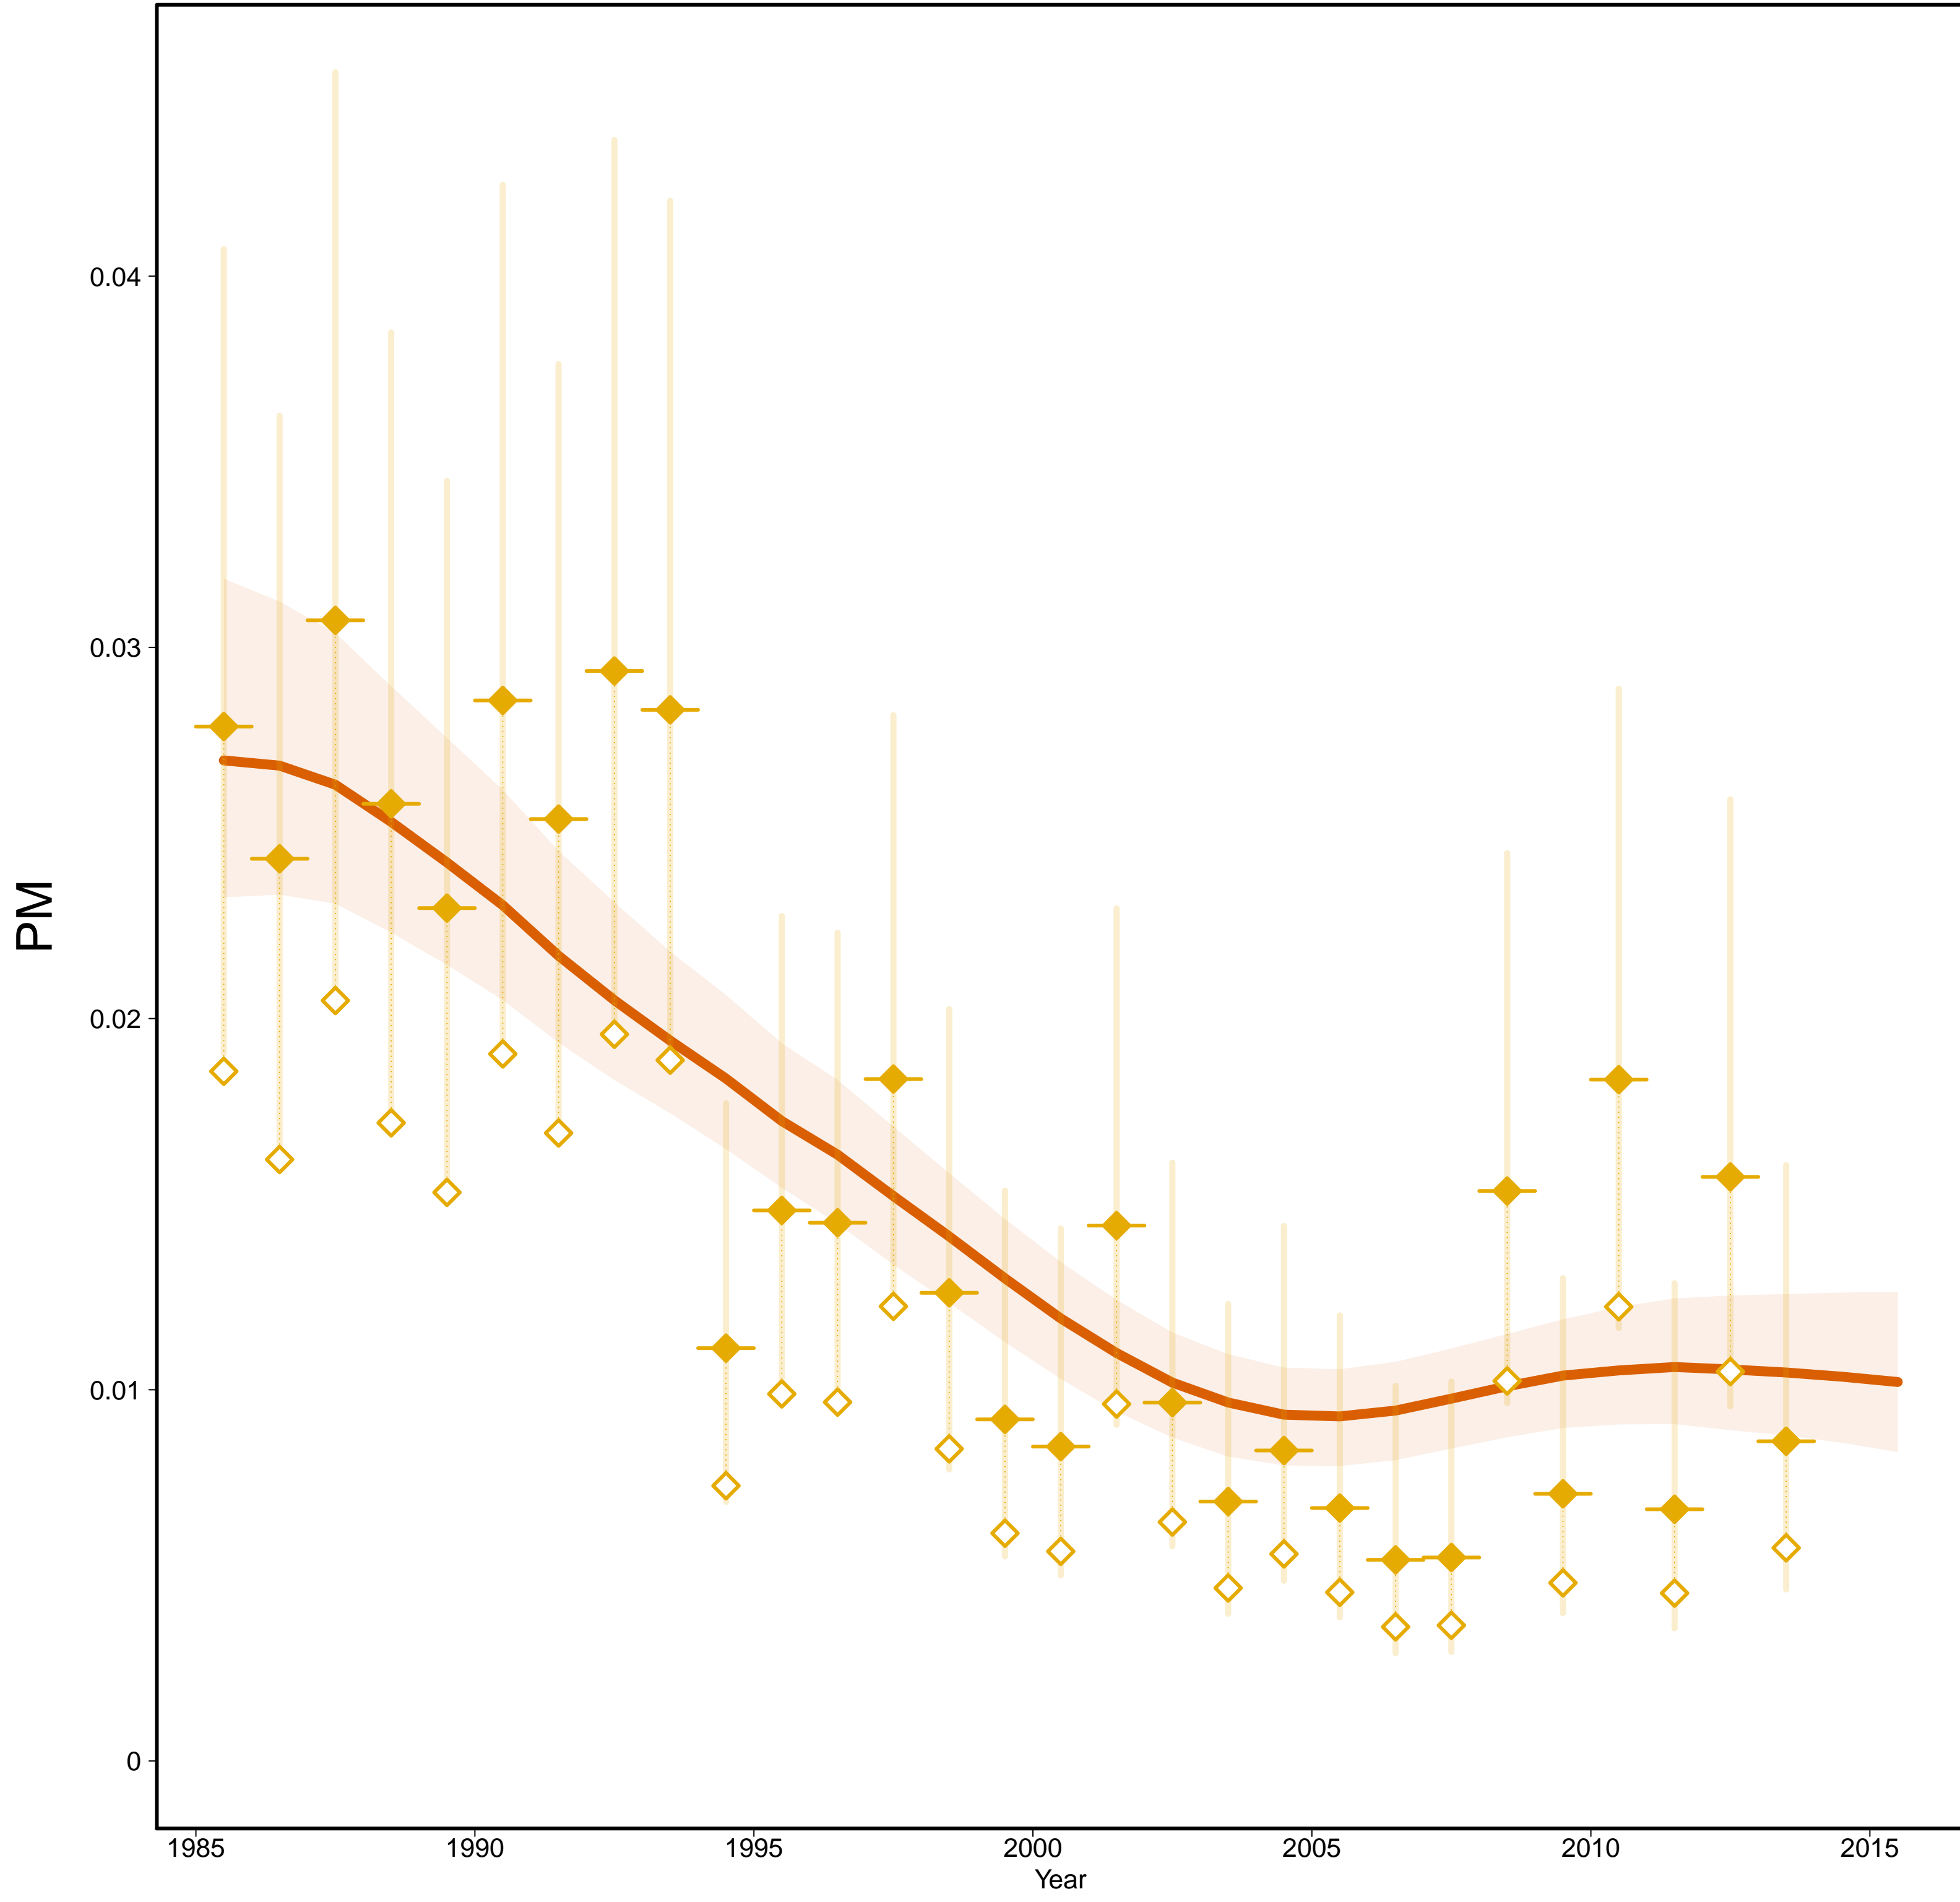

Republic of Moldova [MDA]  
(Developed regions)

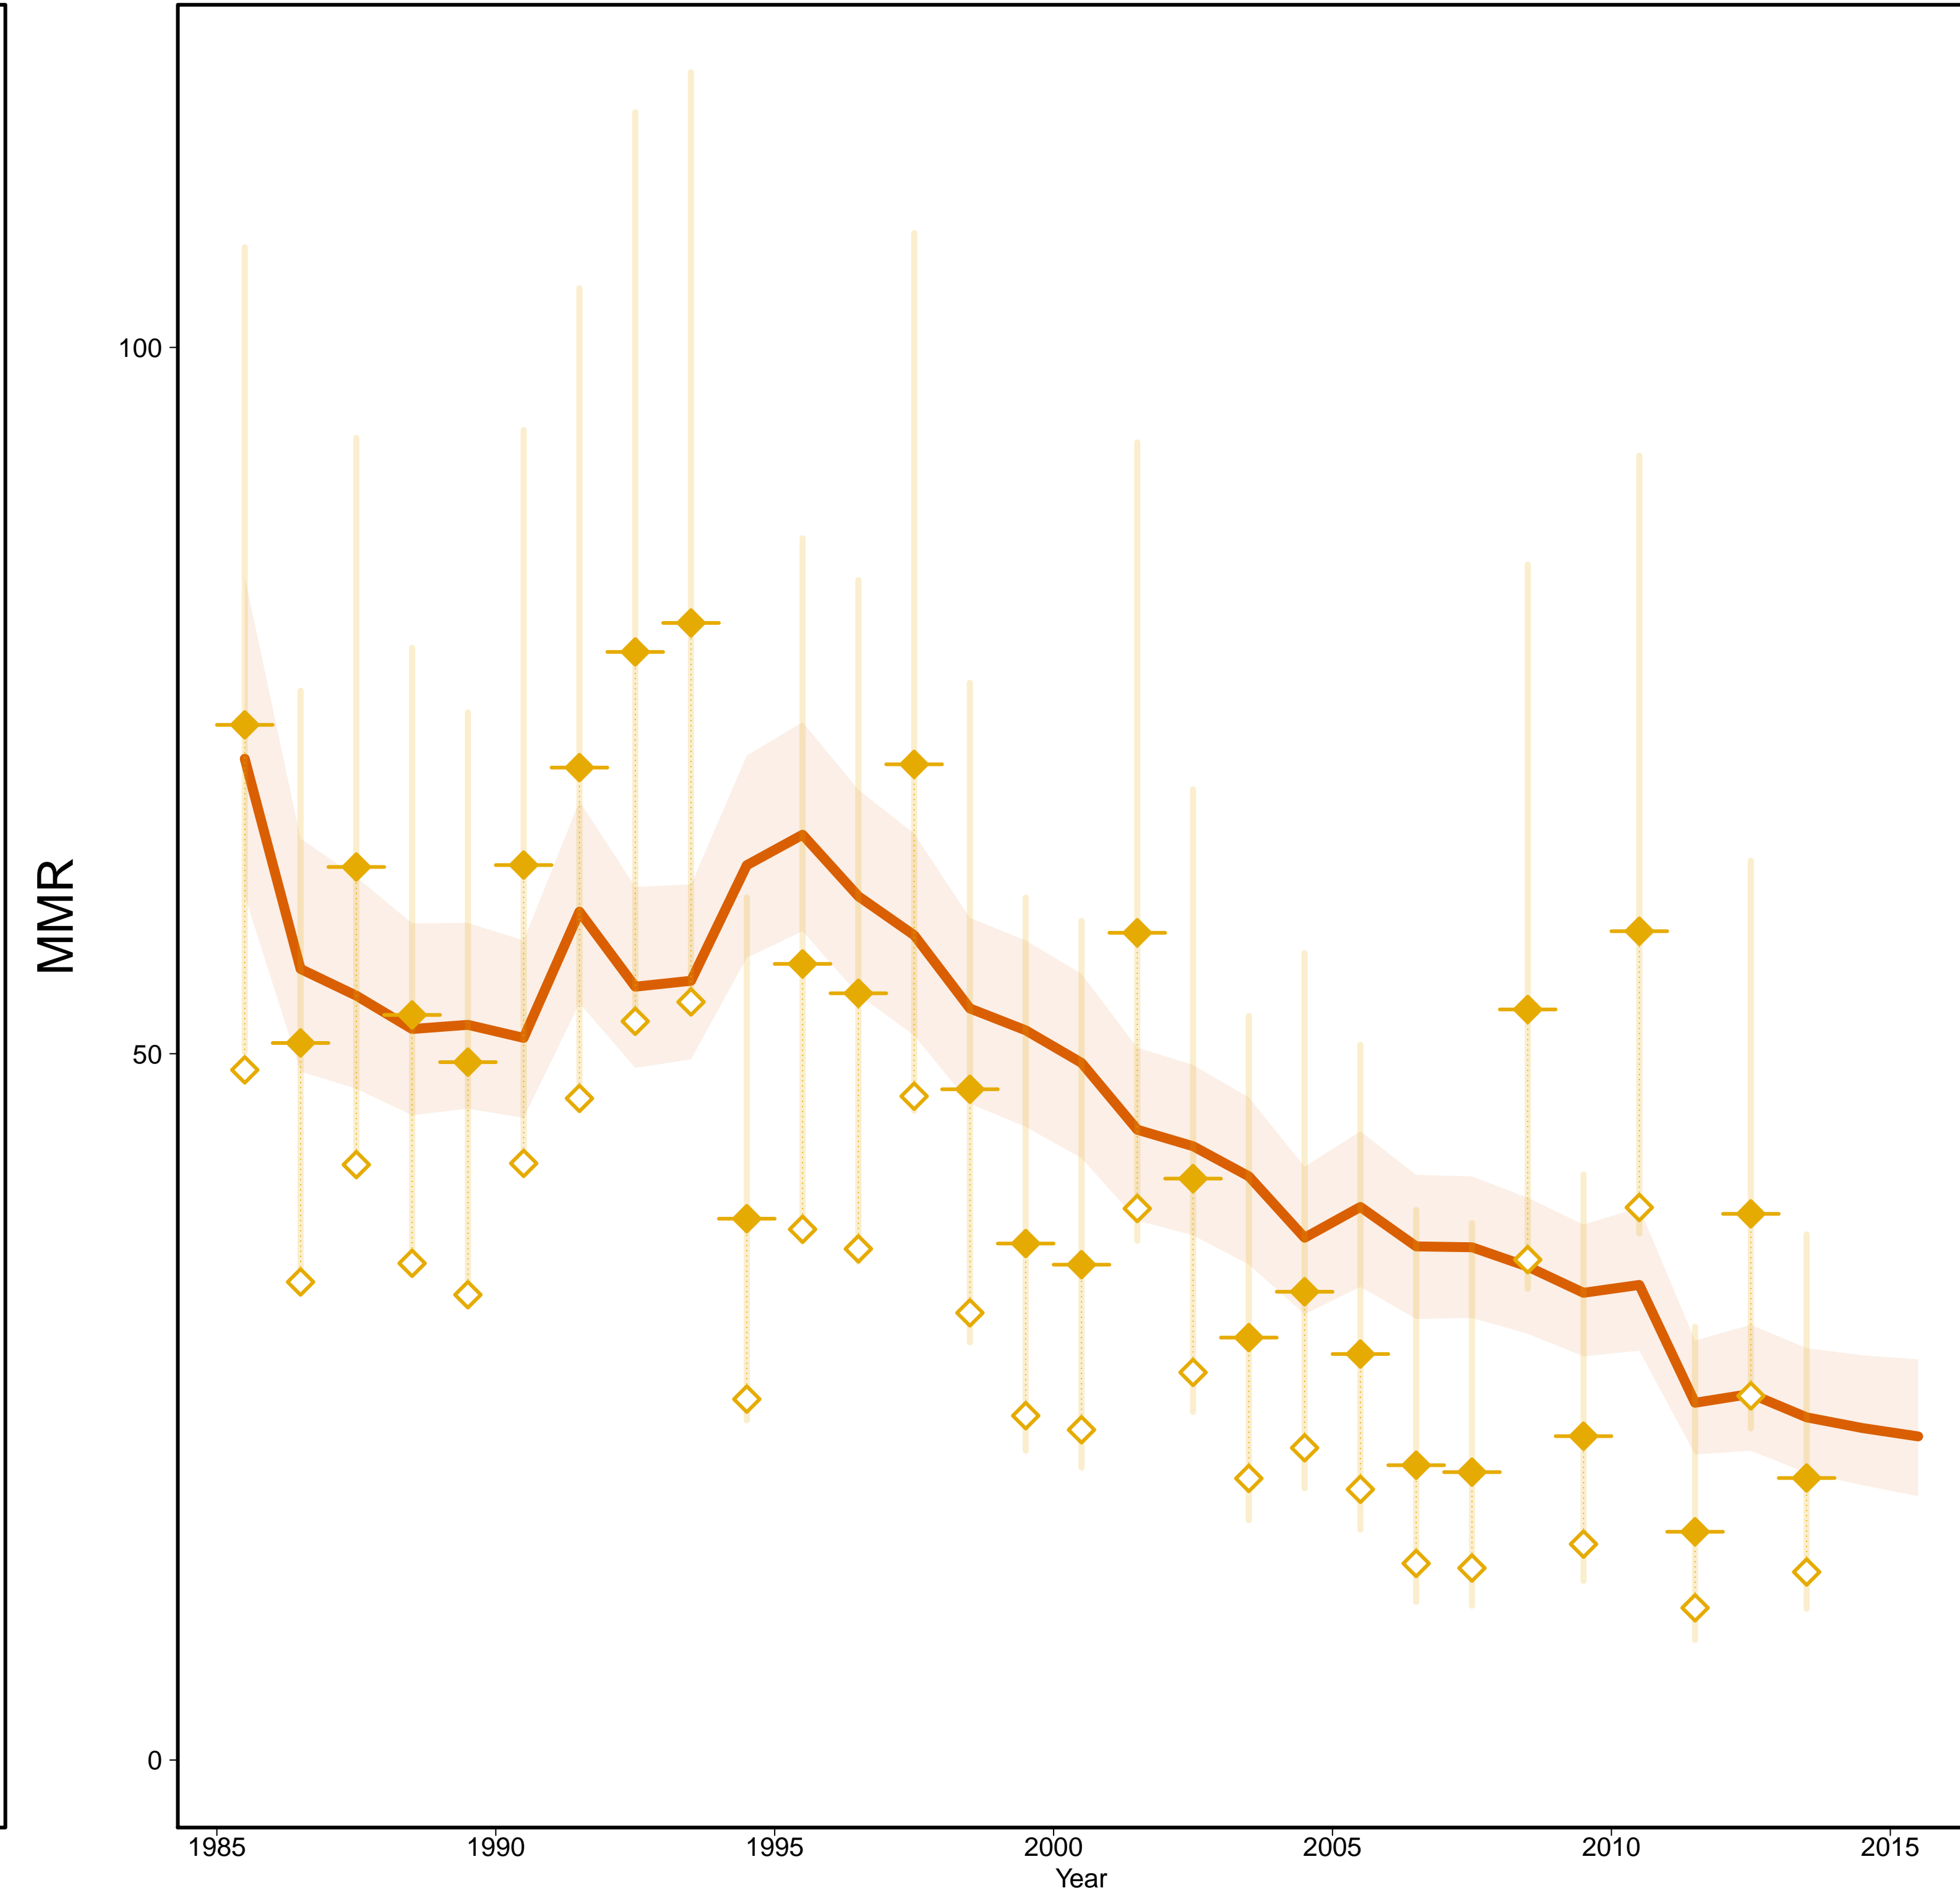

- Estimates —
- MMR Database 2015 —
- ◇ Observed Data
- ◆ Adjusted Data
- Data type —
- ◆ VR

Gross Domestic Product

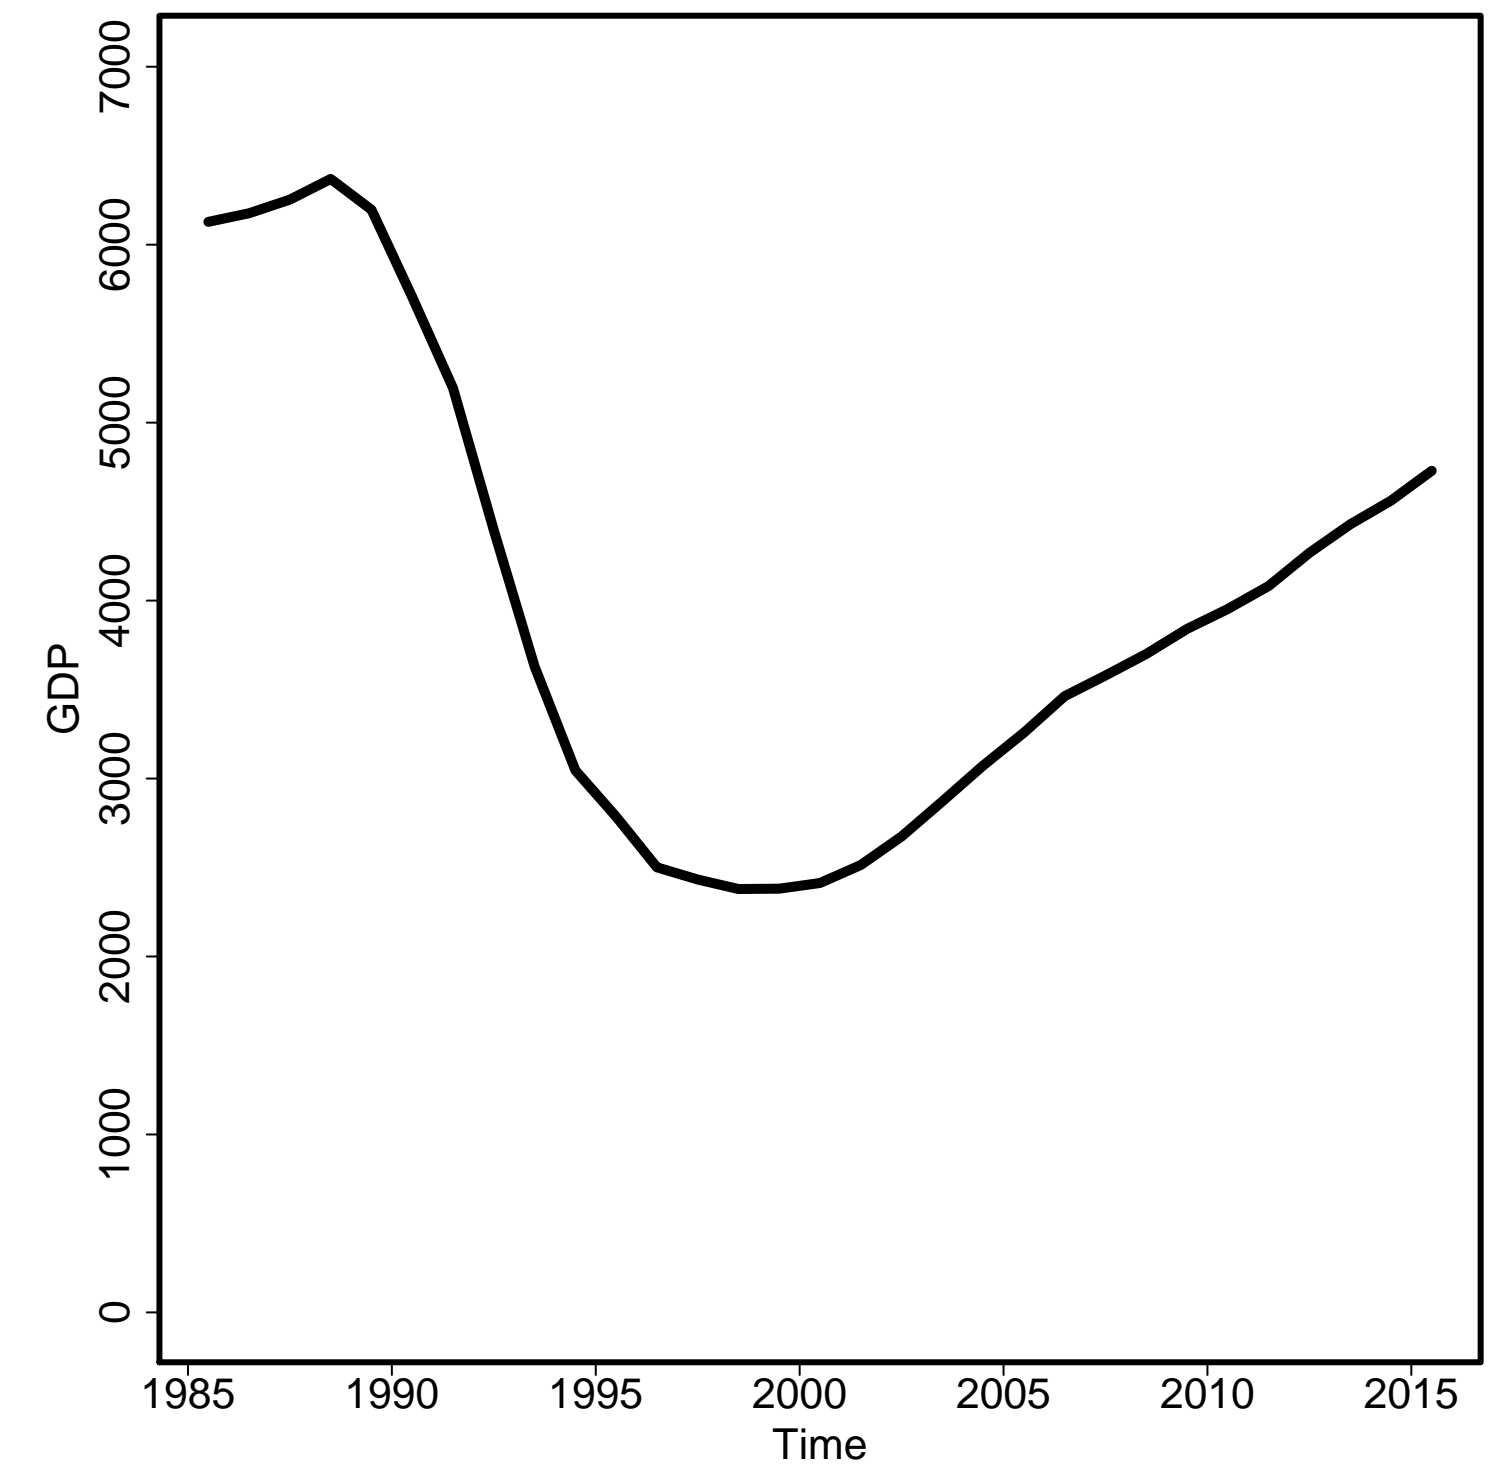

General Fertility Rate

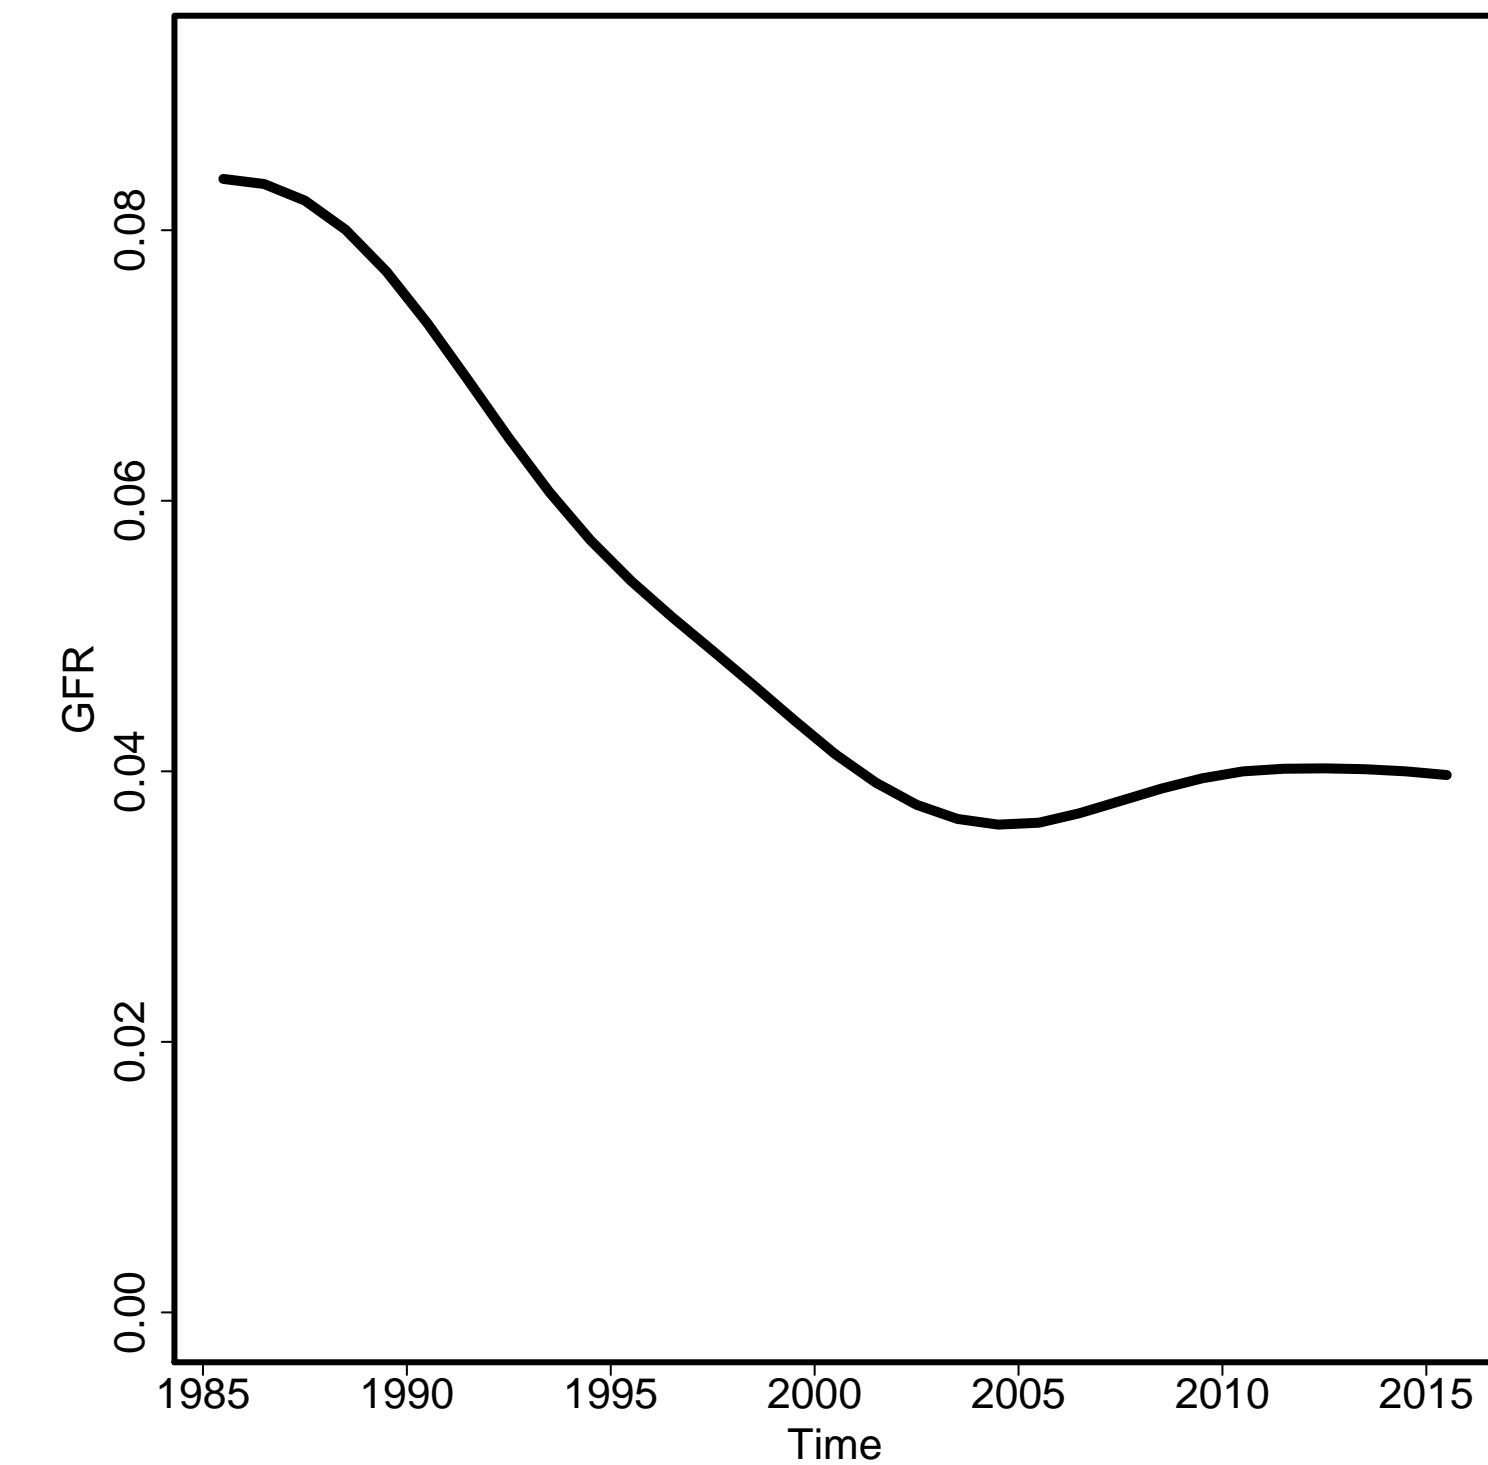

Skilled Attendance to Birth

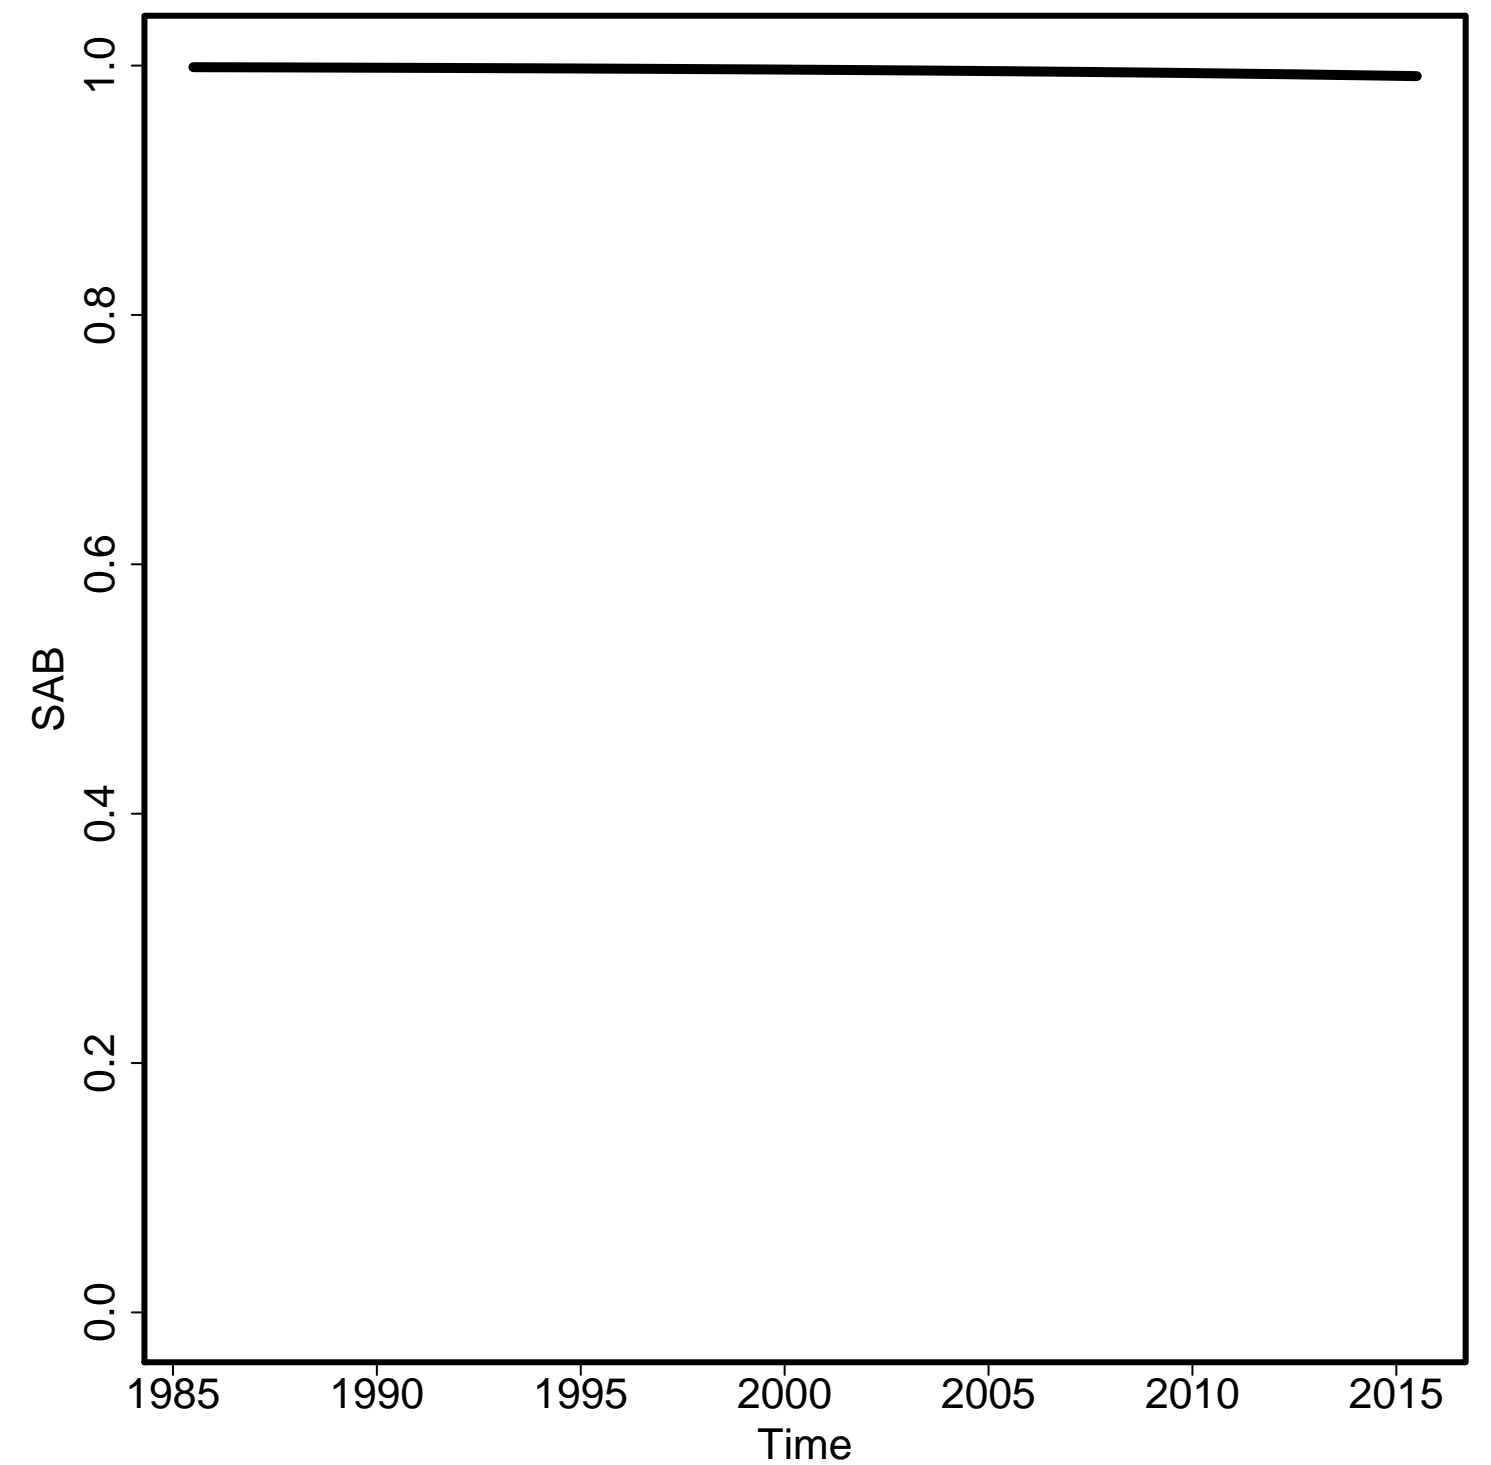

Envelope/Births

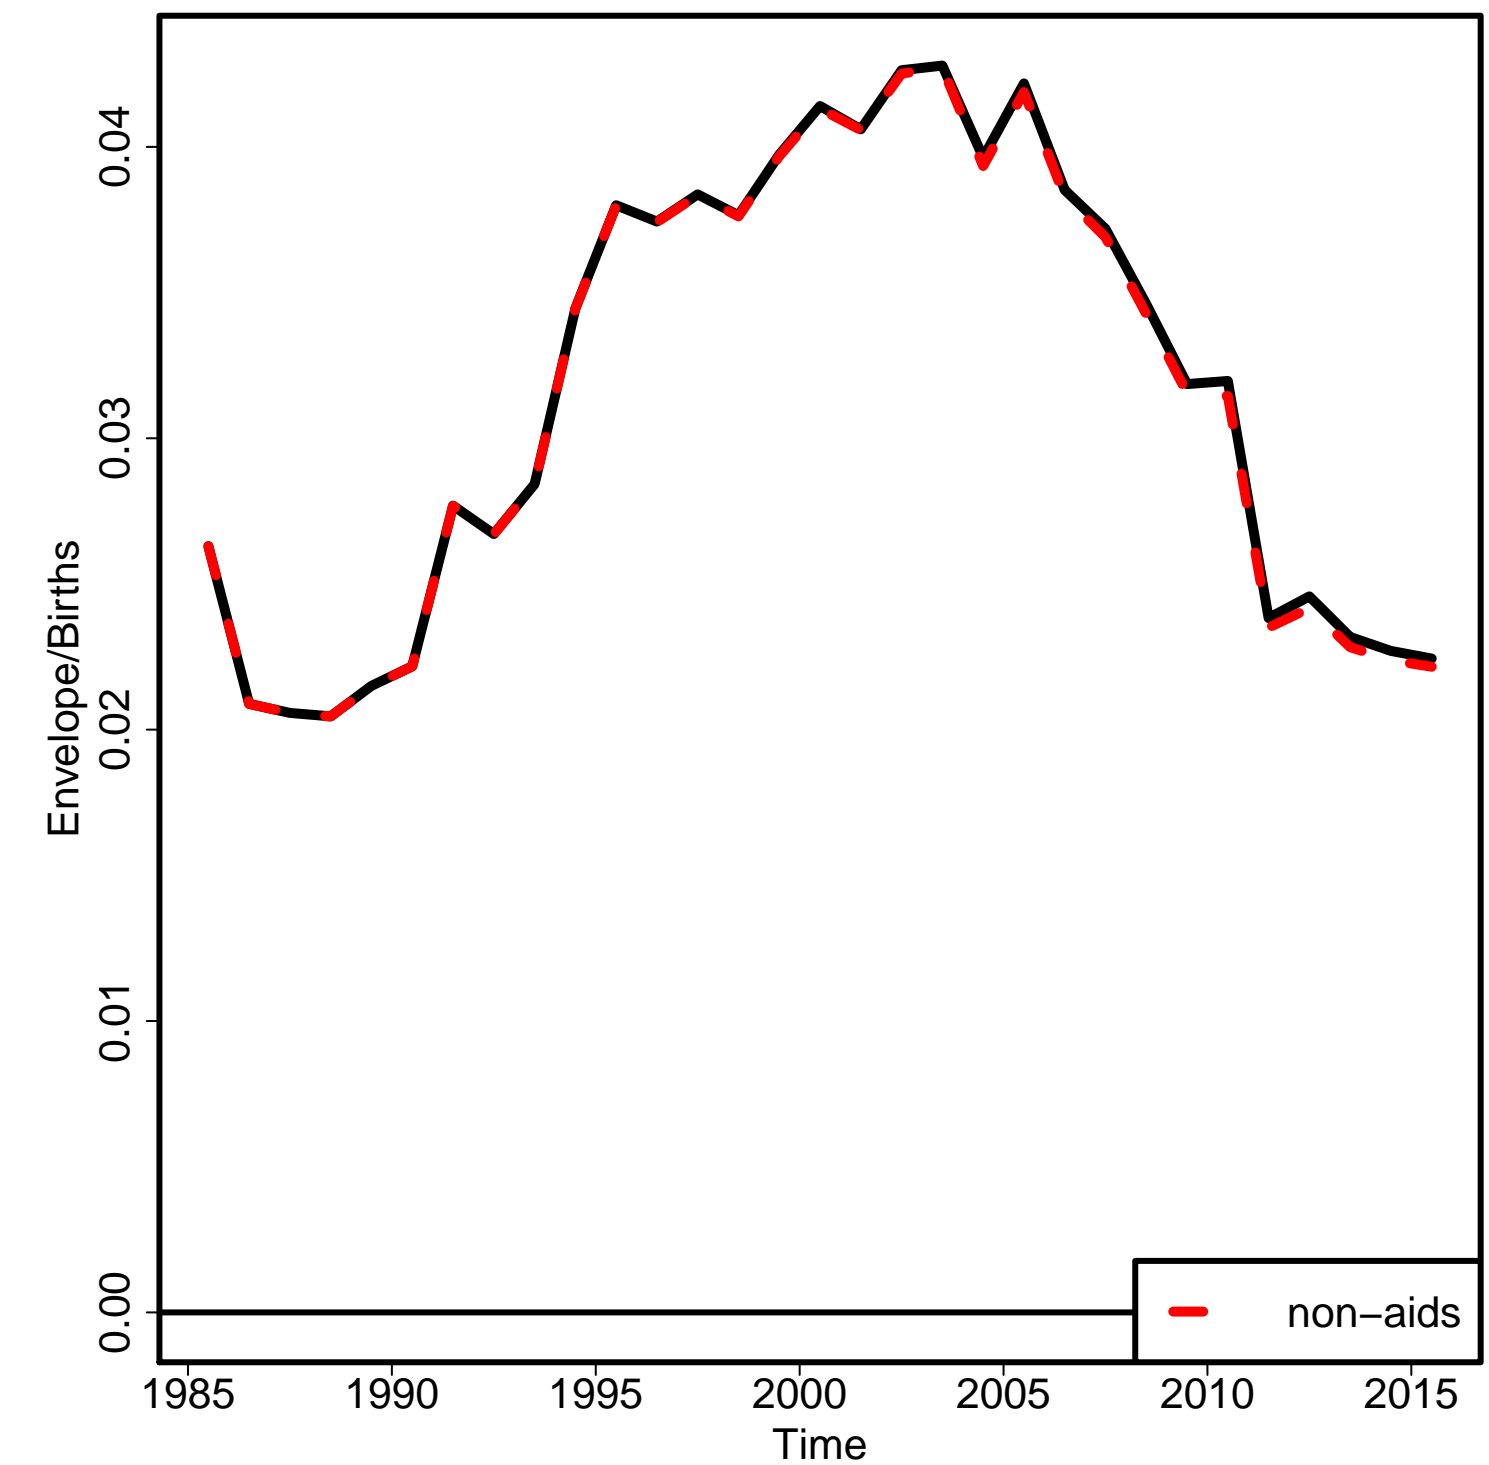

Non-aids MMR

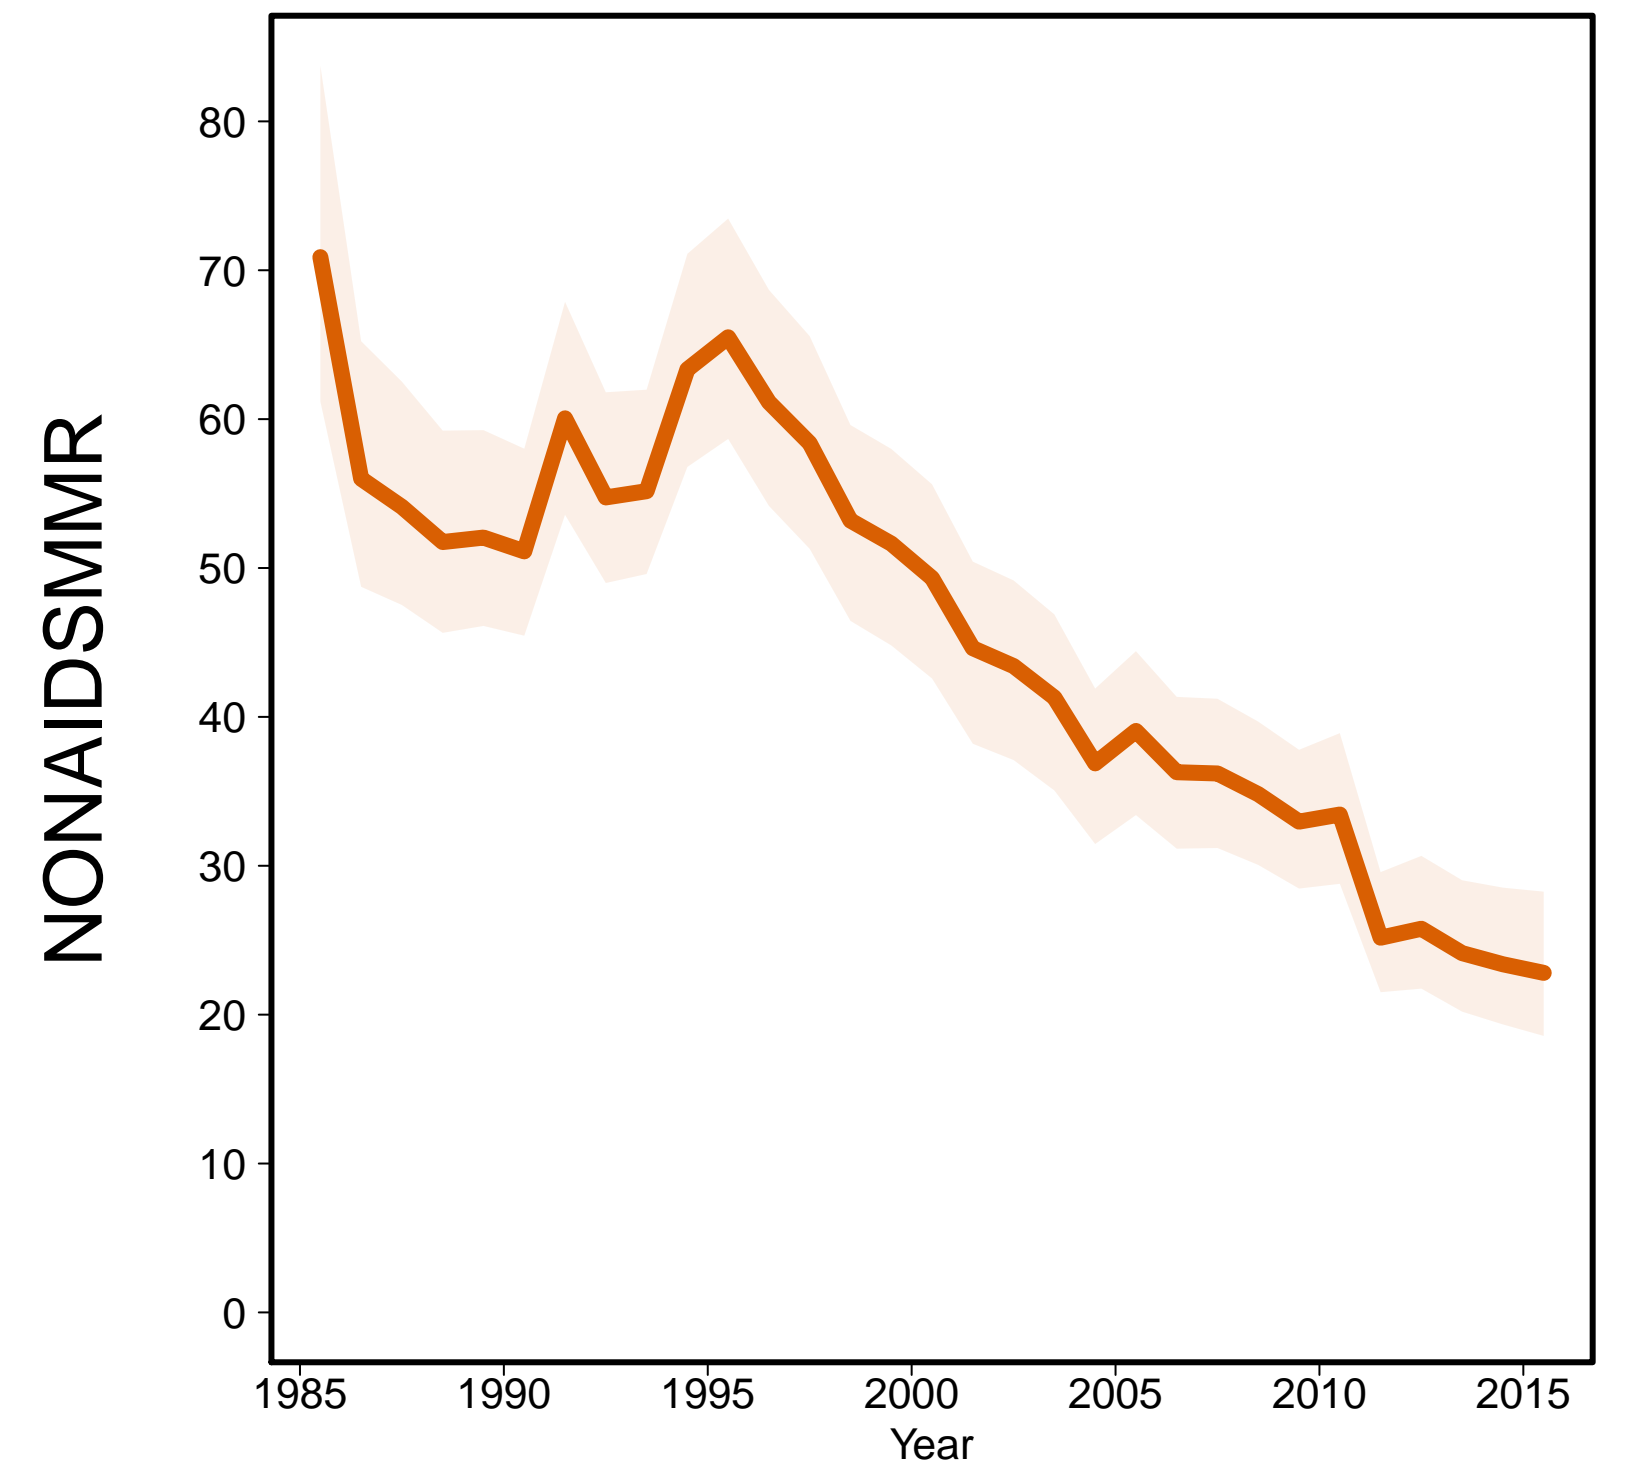

Aids MMR

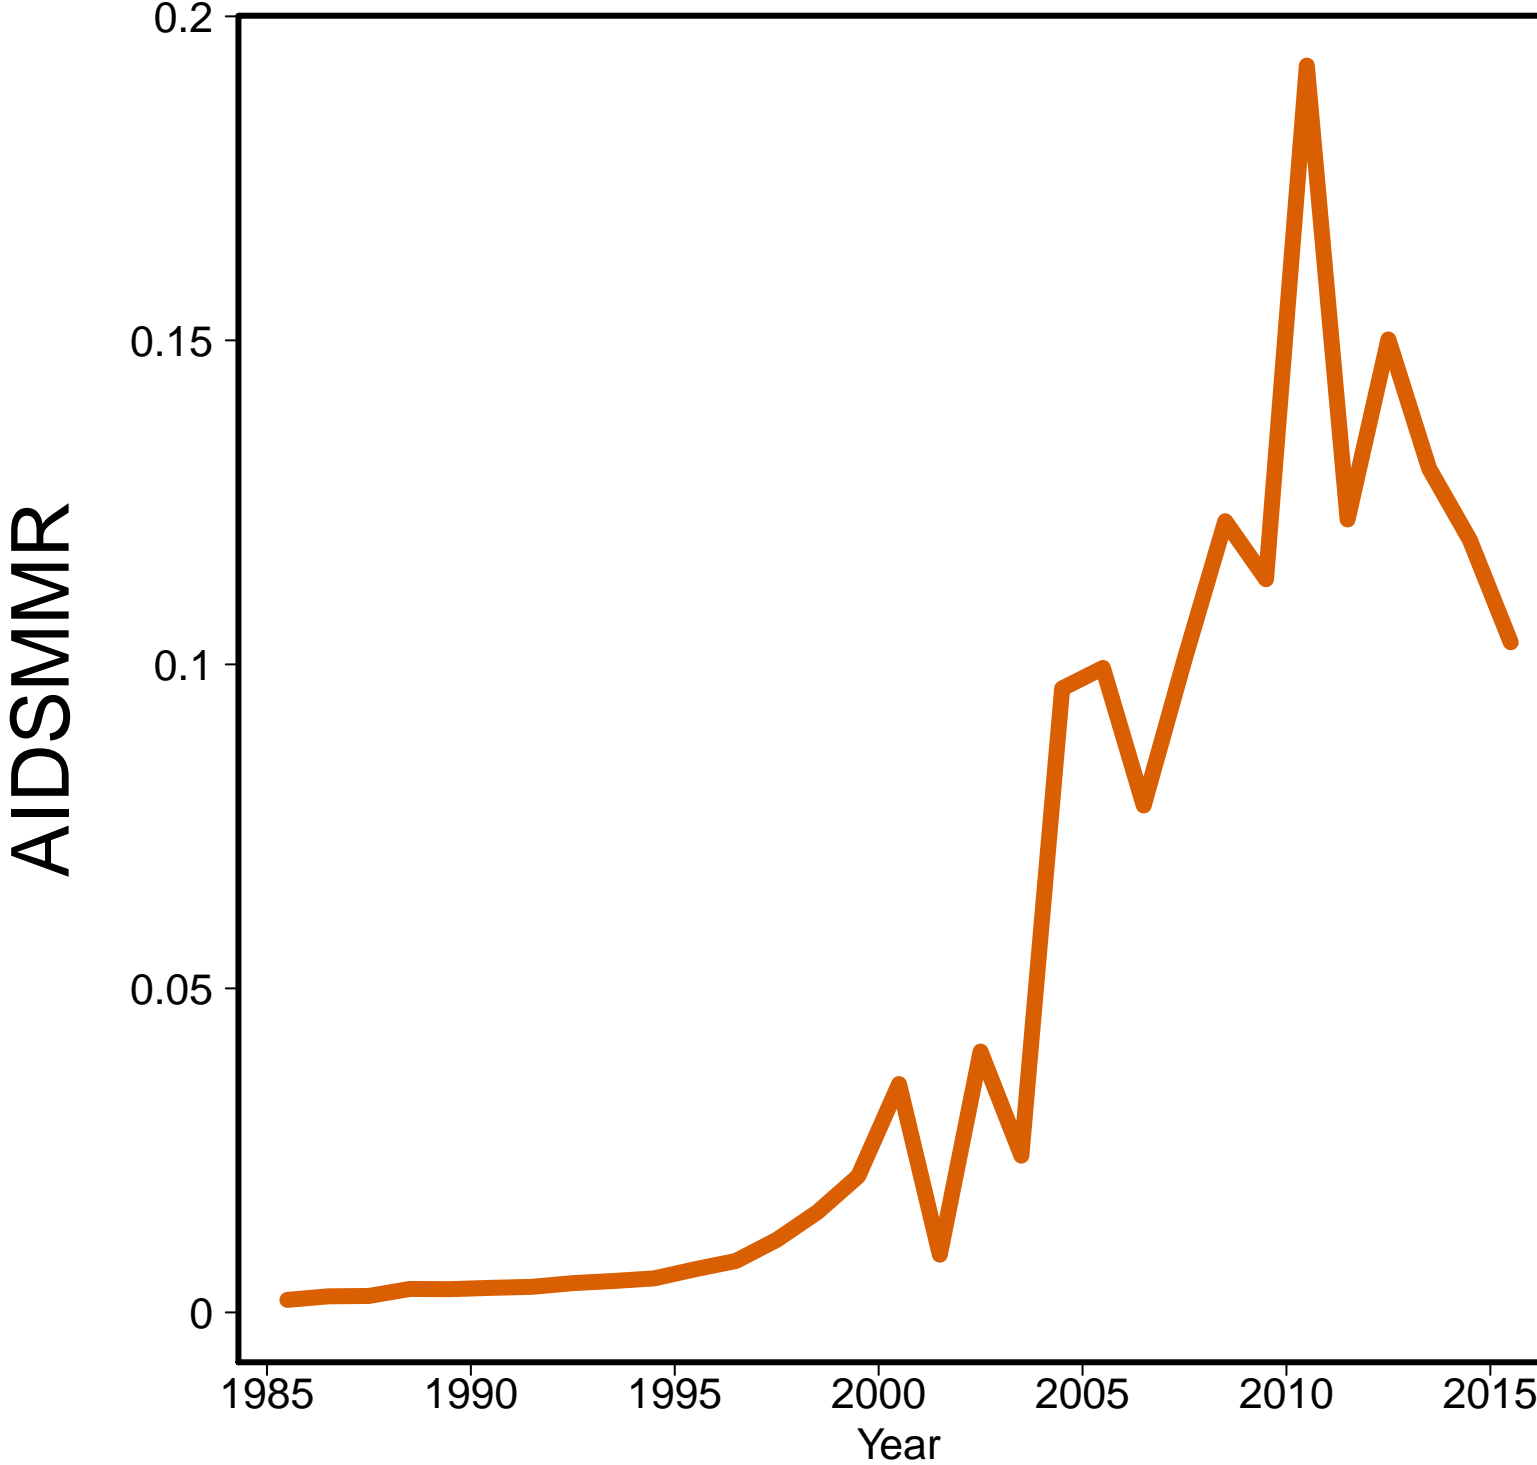

Romania [ROU]  
(Developed regions)

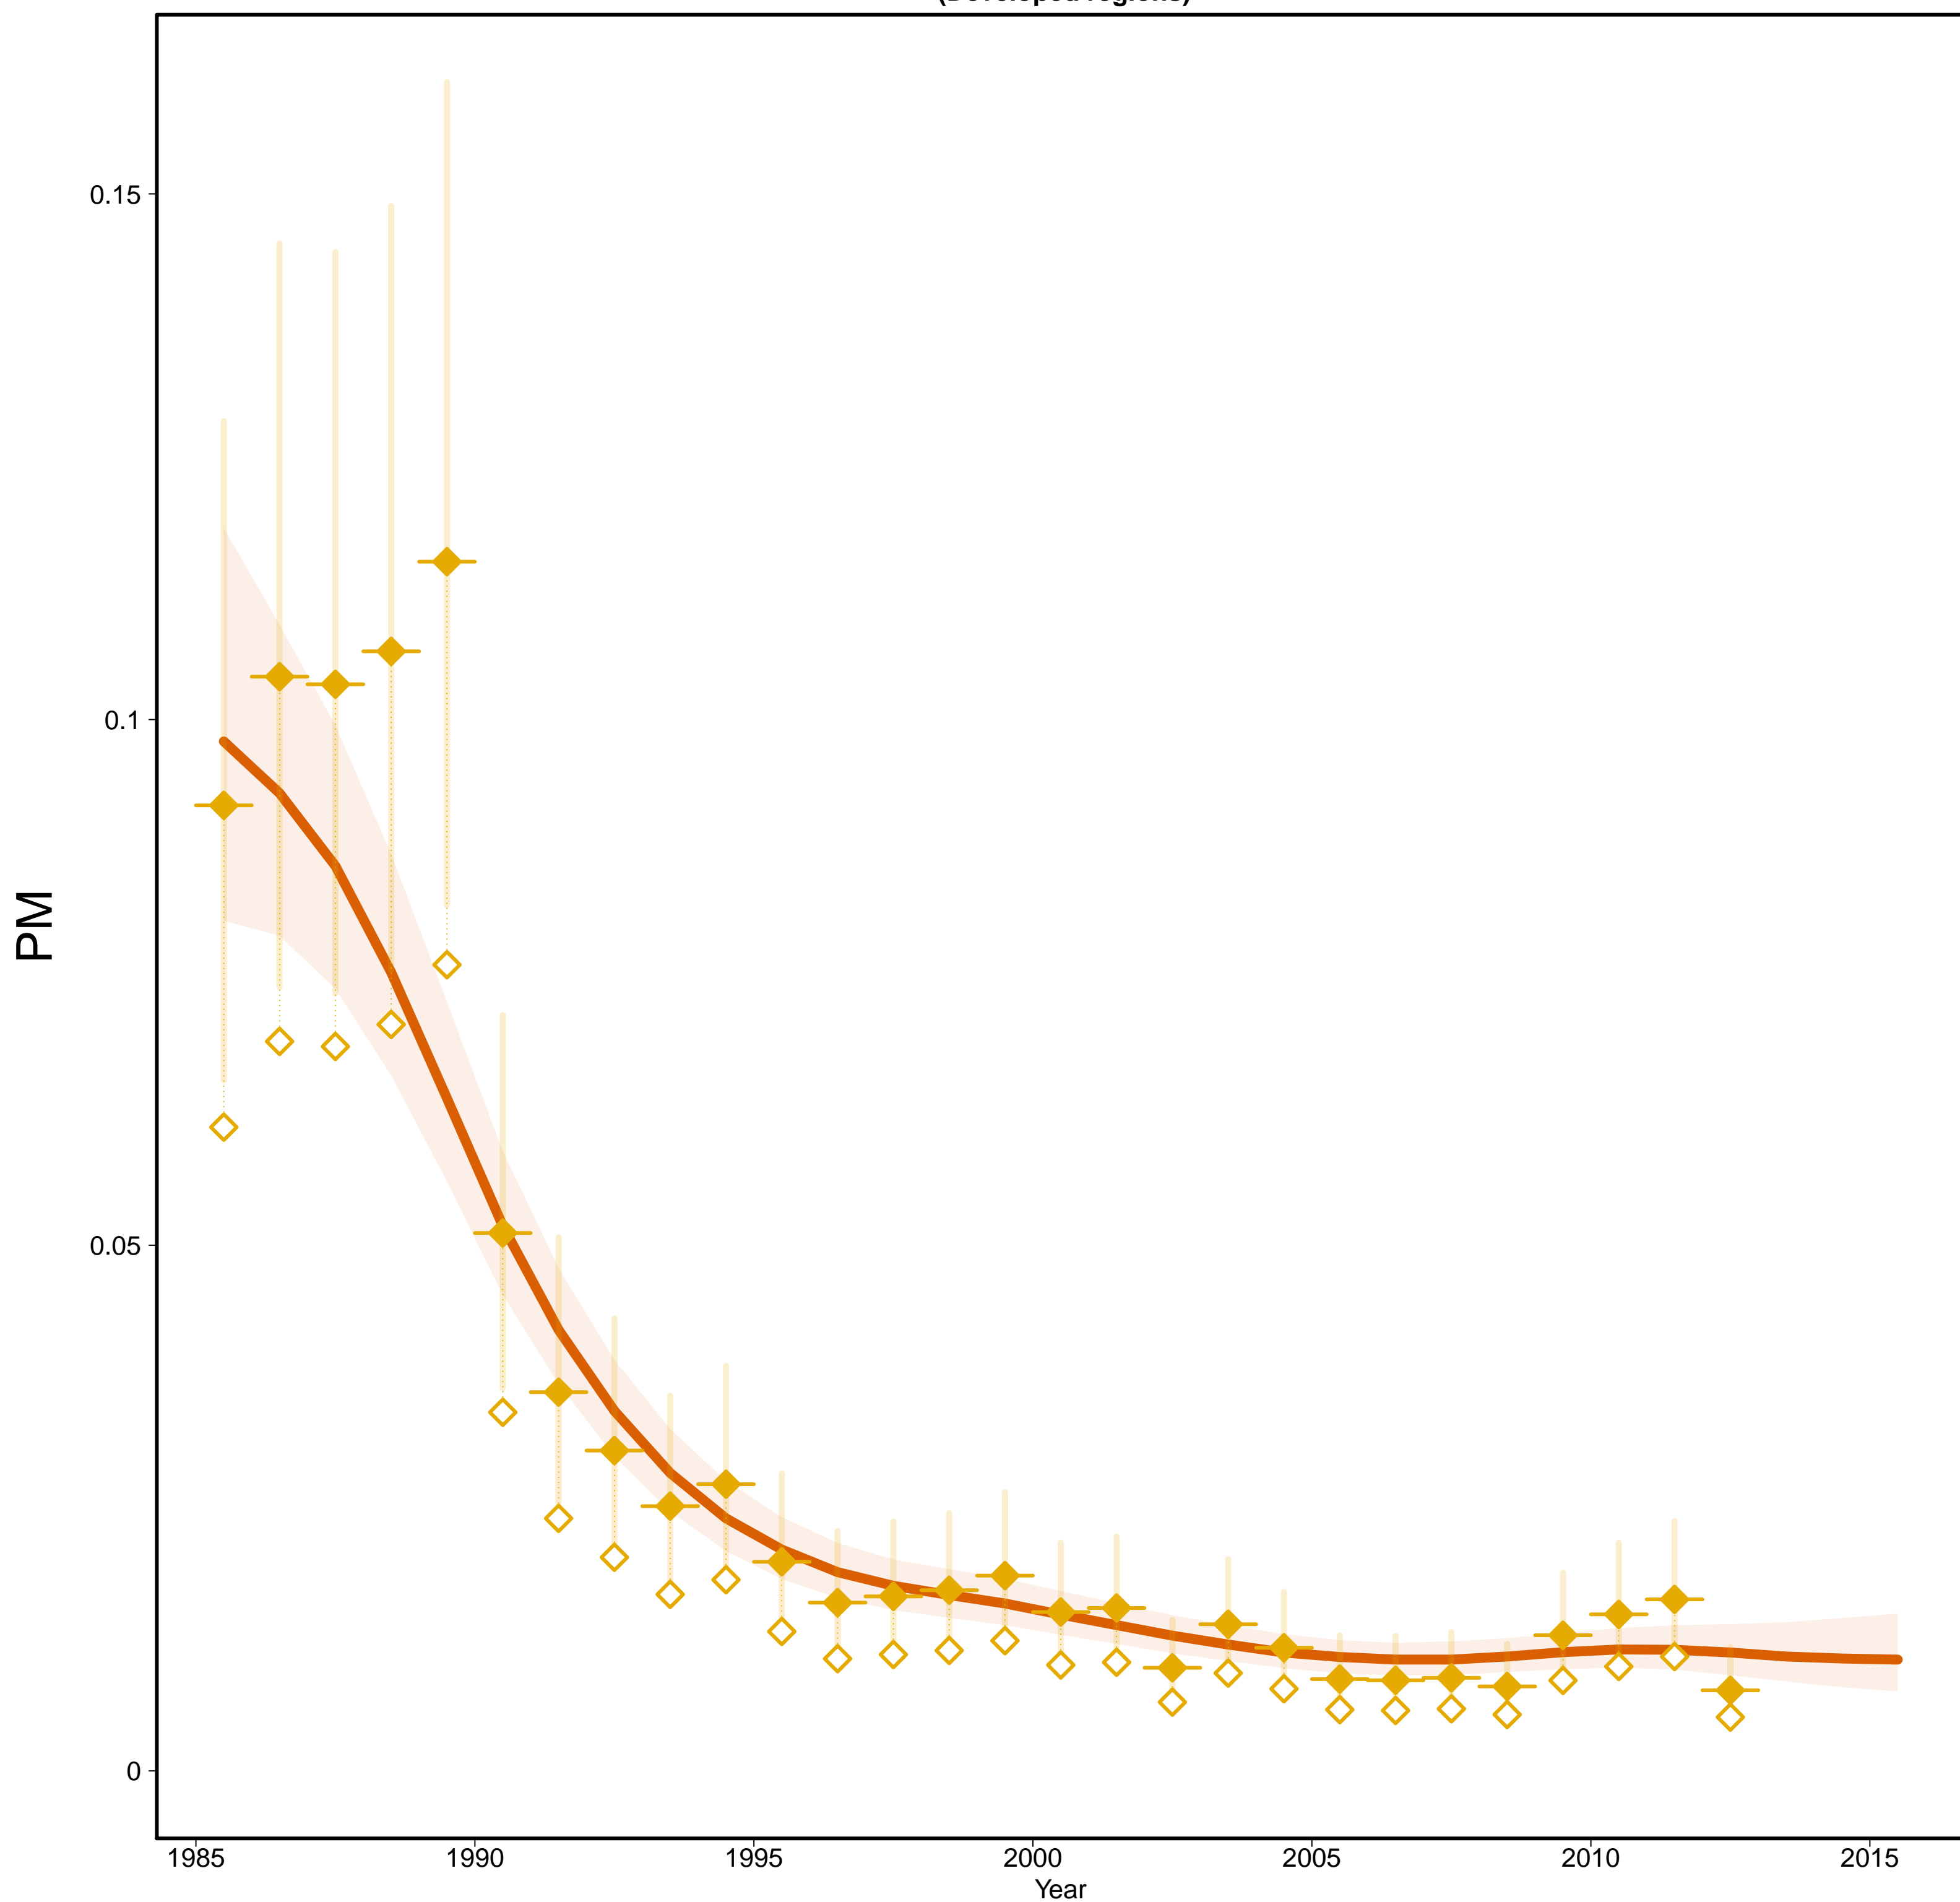

Romania [ROU]  
(Developed regions)

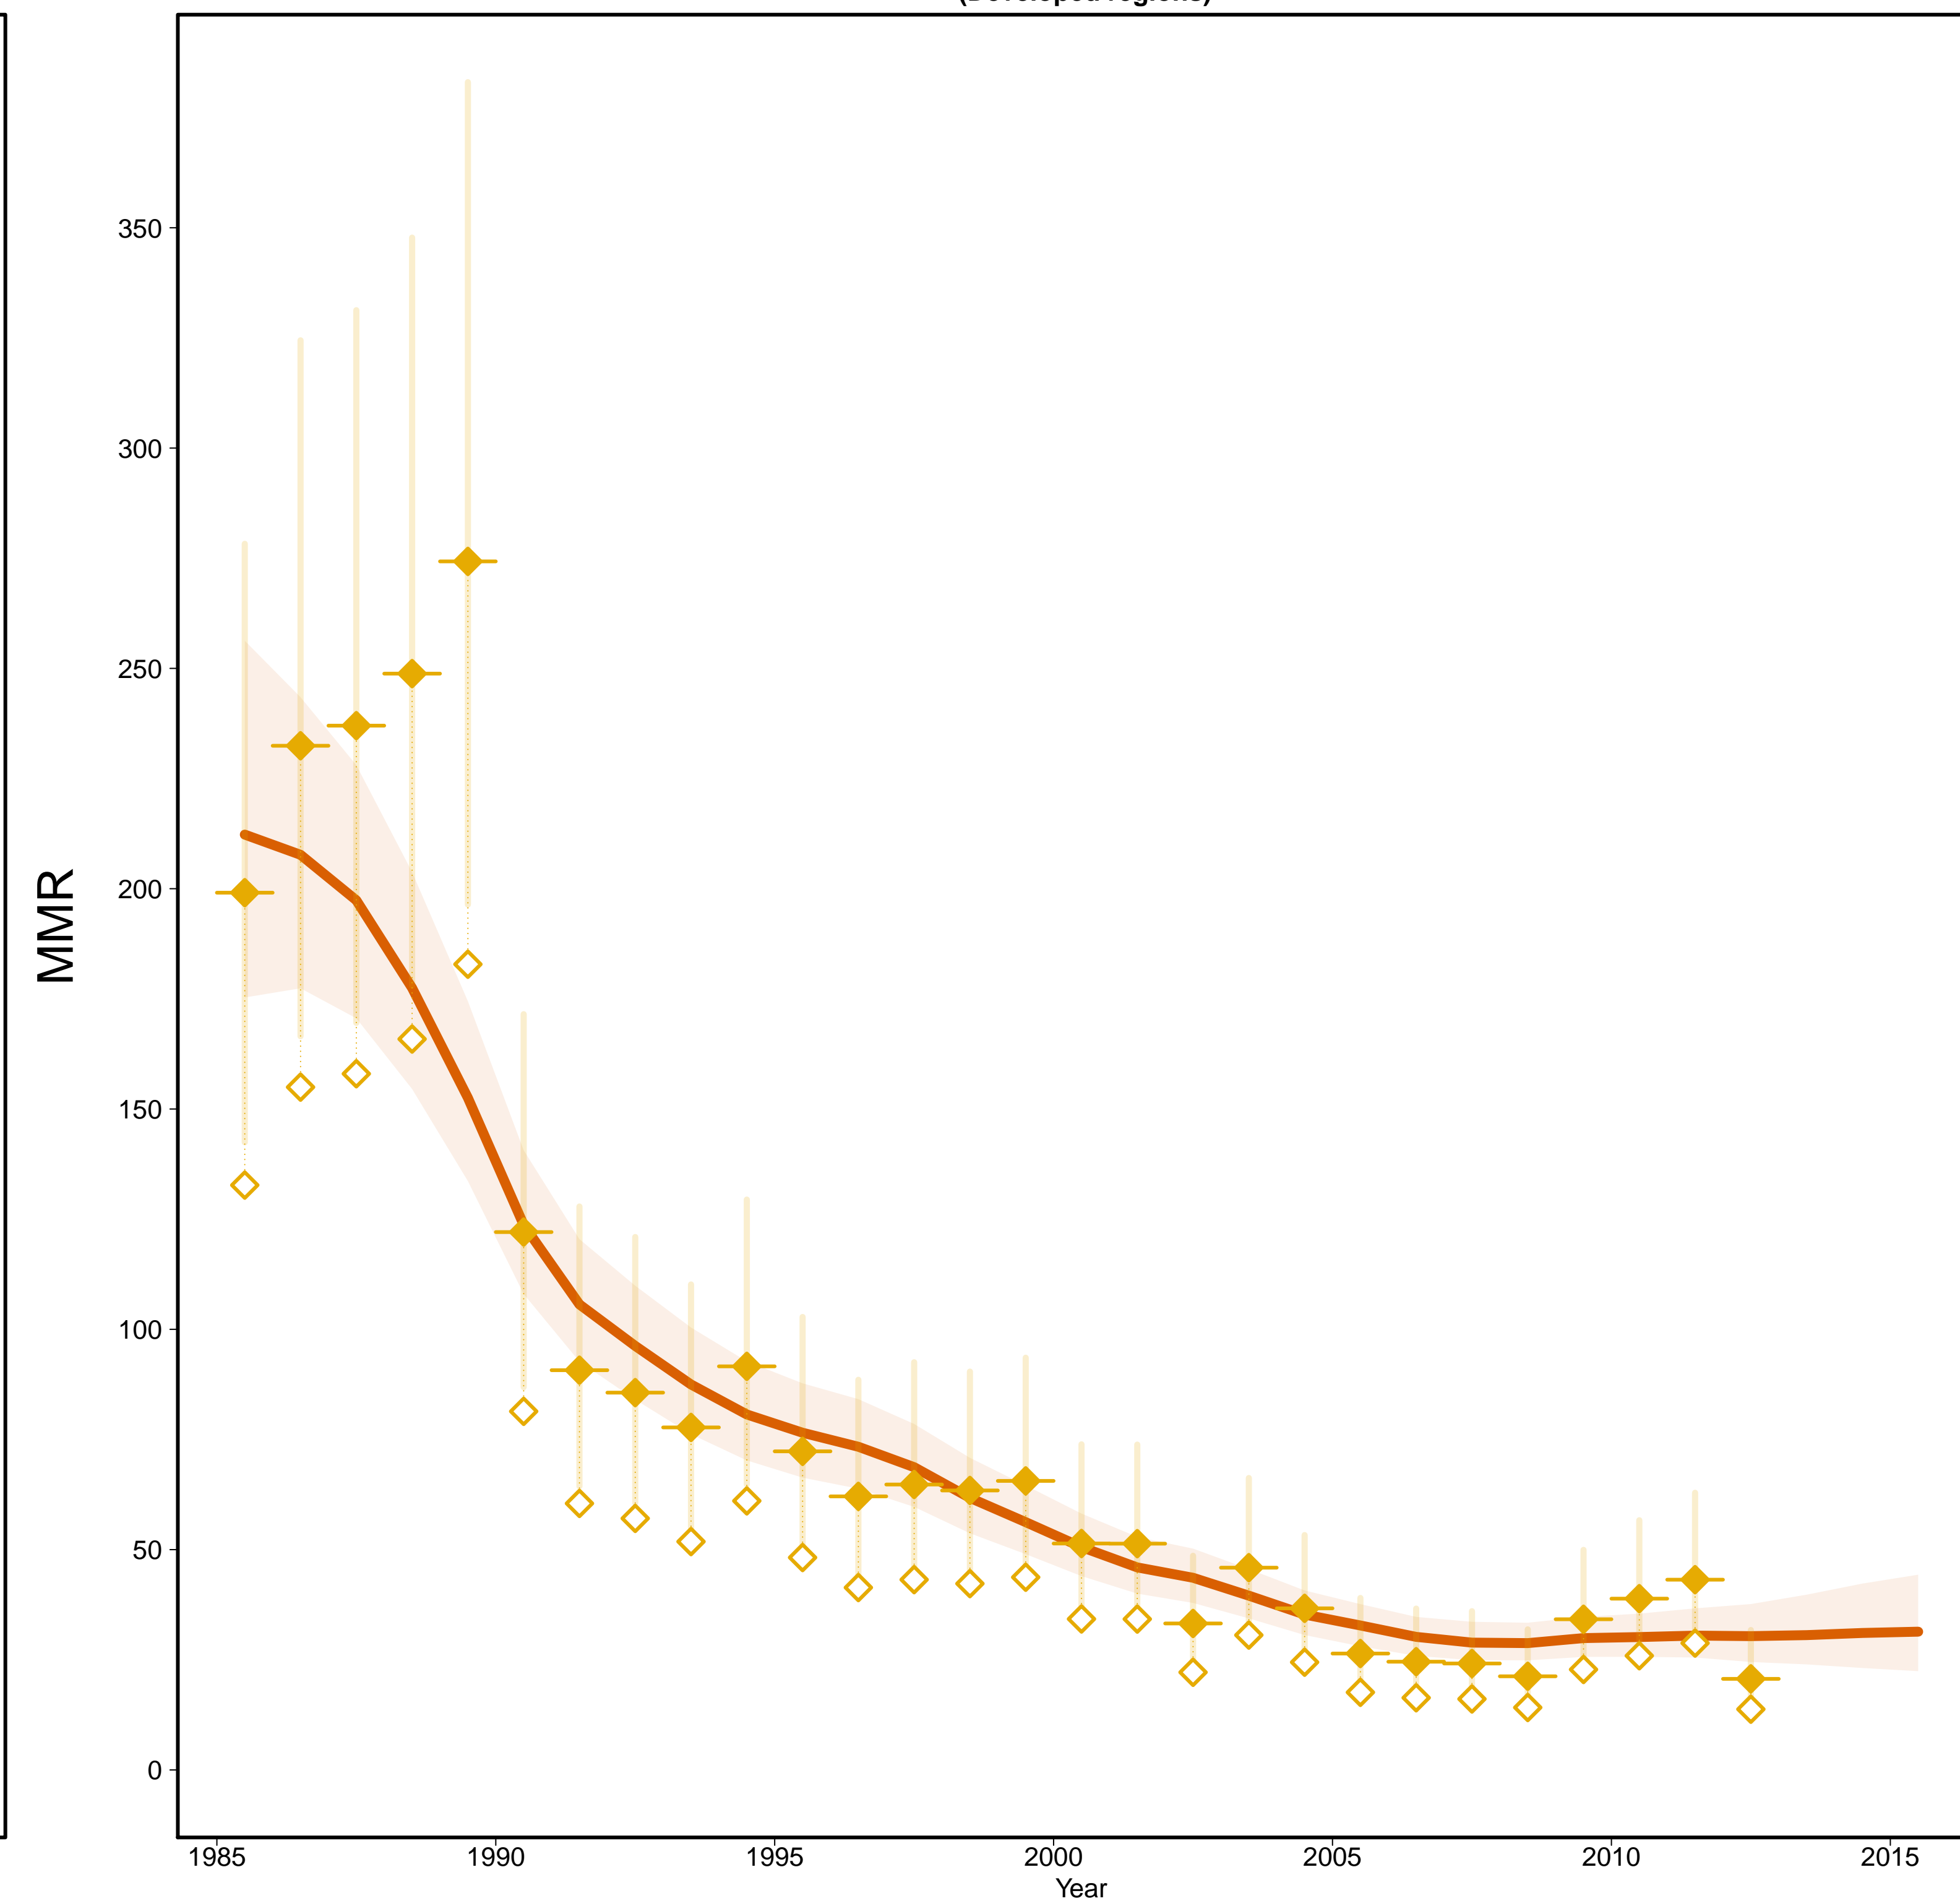

- Estimates —
- Mlate
- MMR Database 2015 —
- ◇ Observed Data
- ◆ Adjusted Data
- Data type —
- ◆ VR

Gross Domestic Product

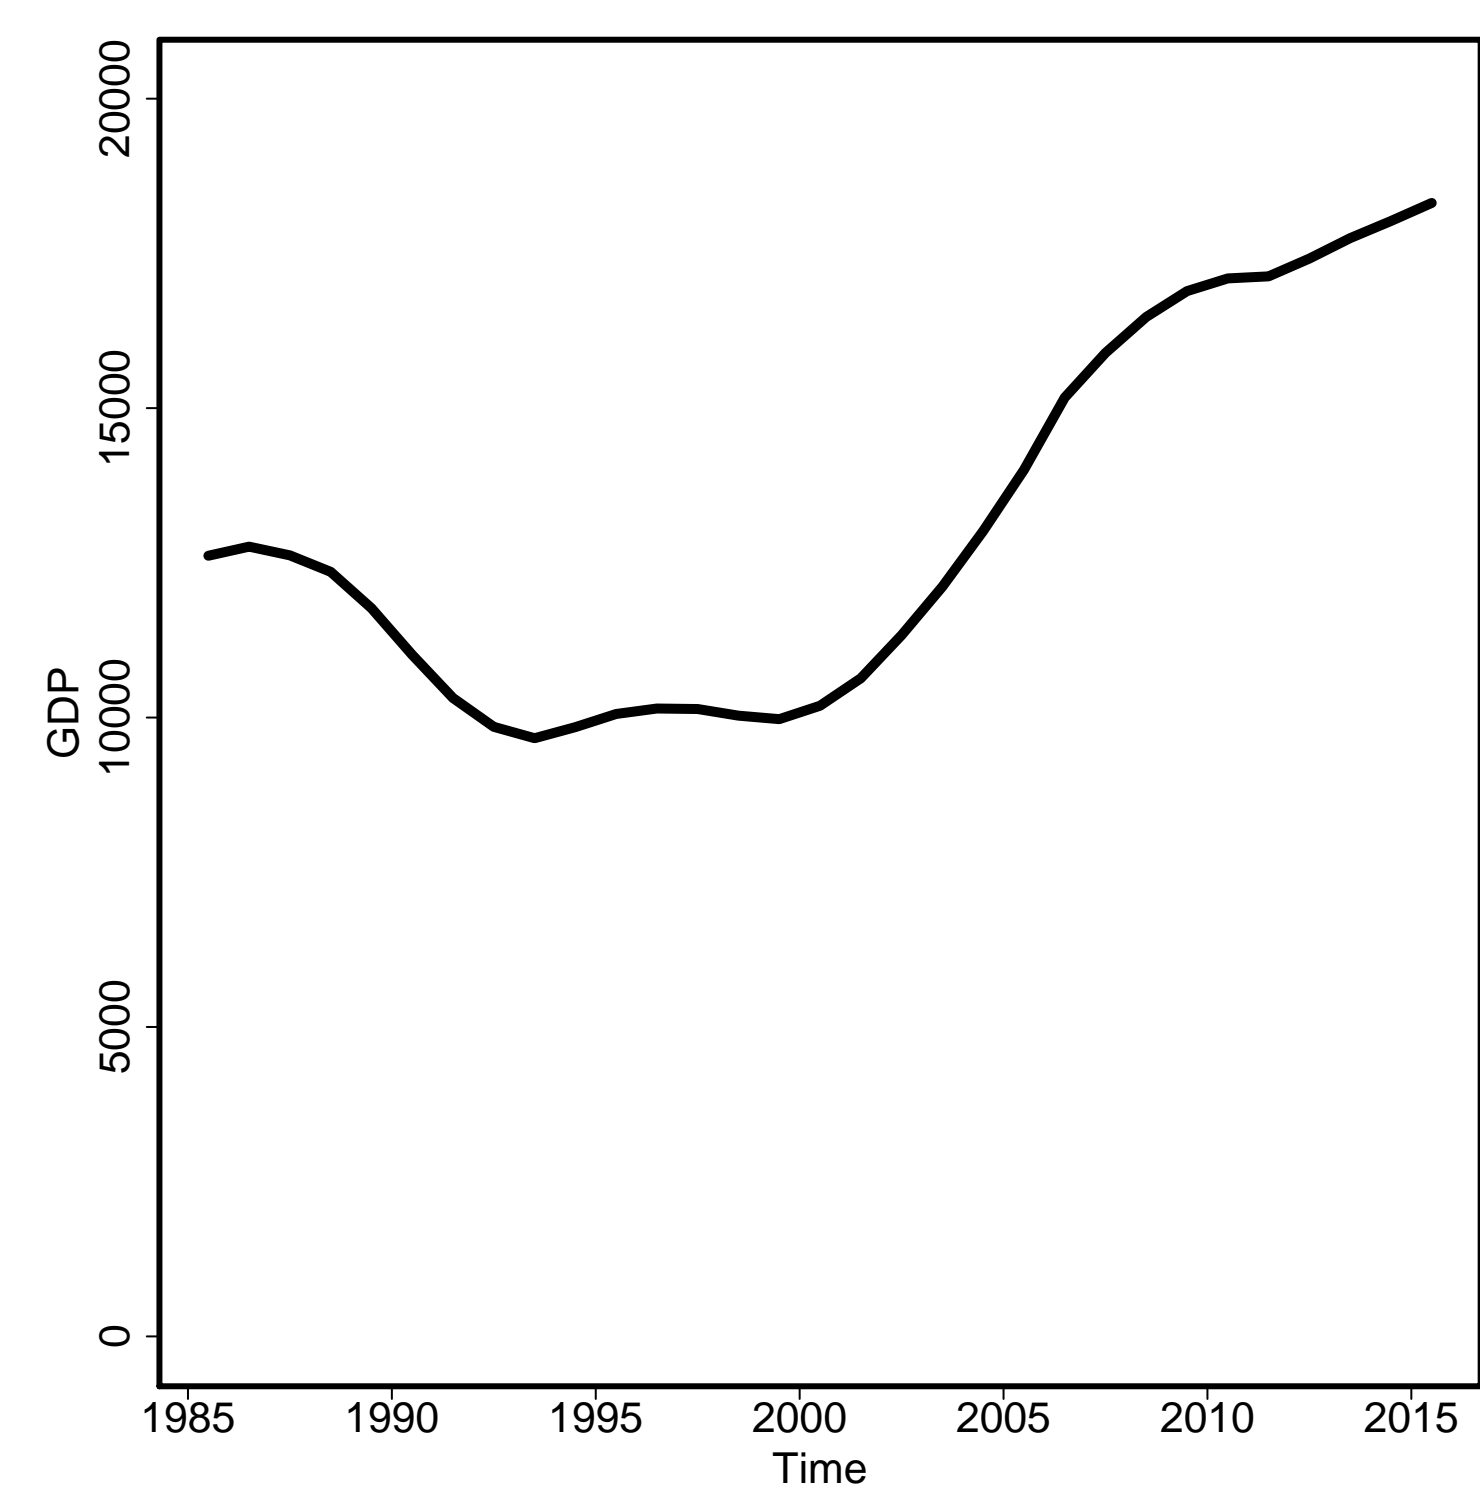

General Fertility Rate

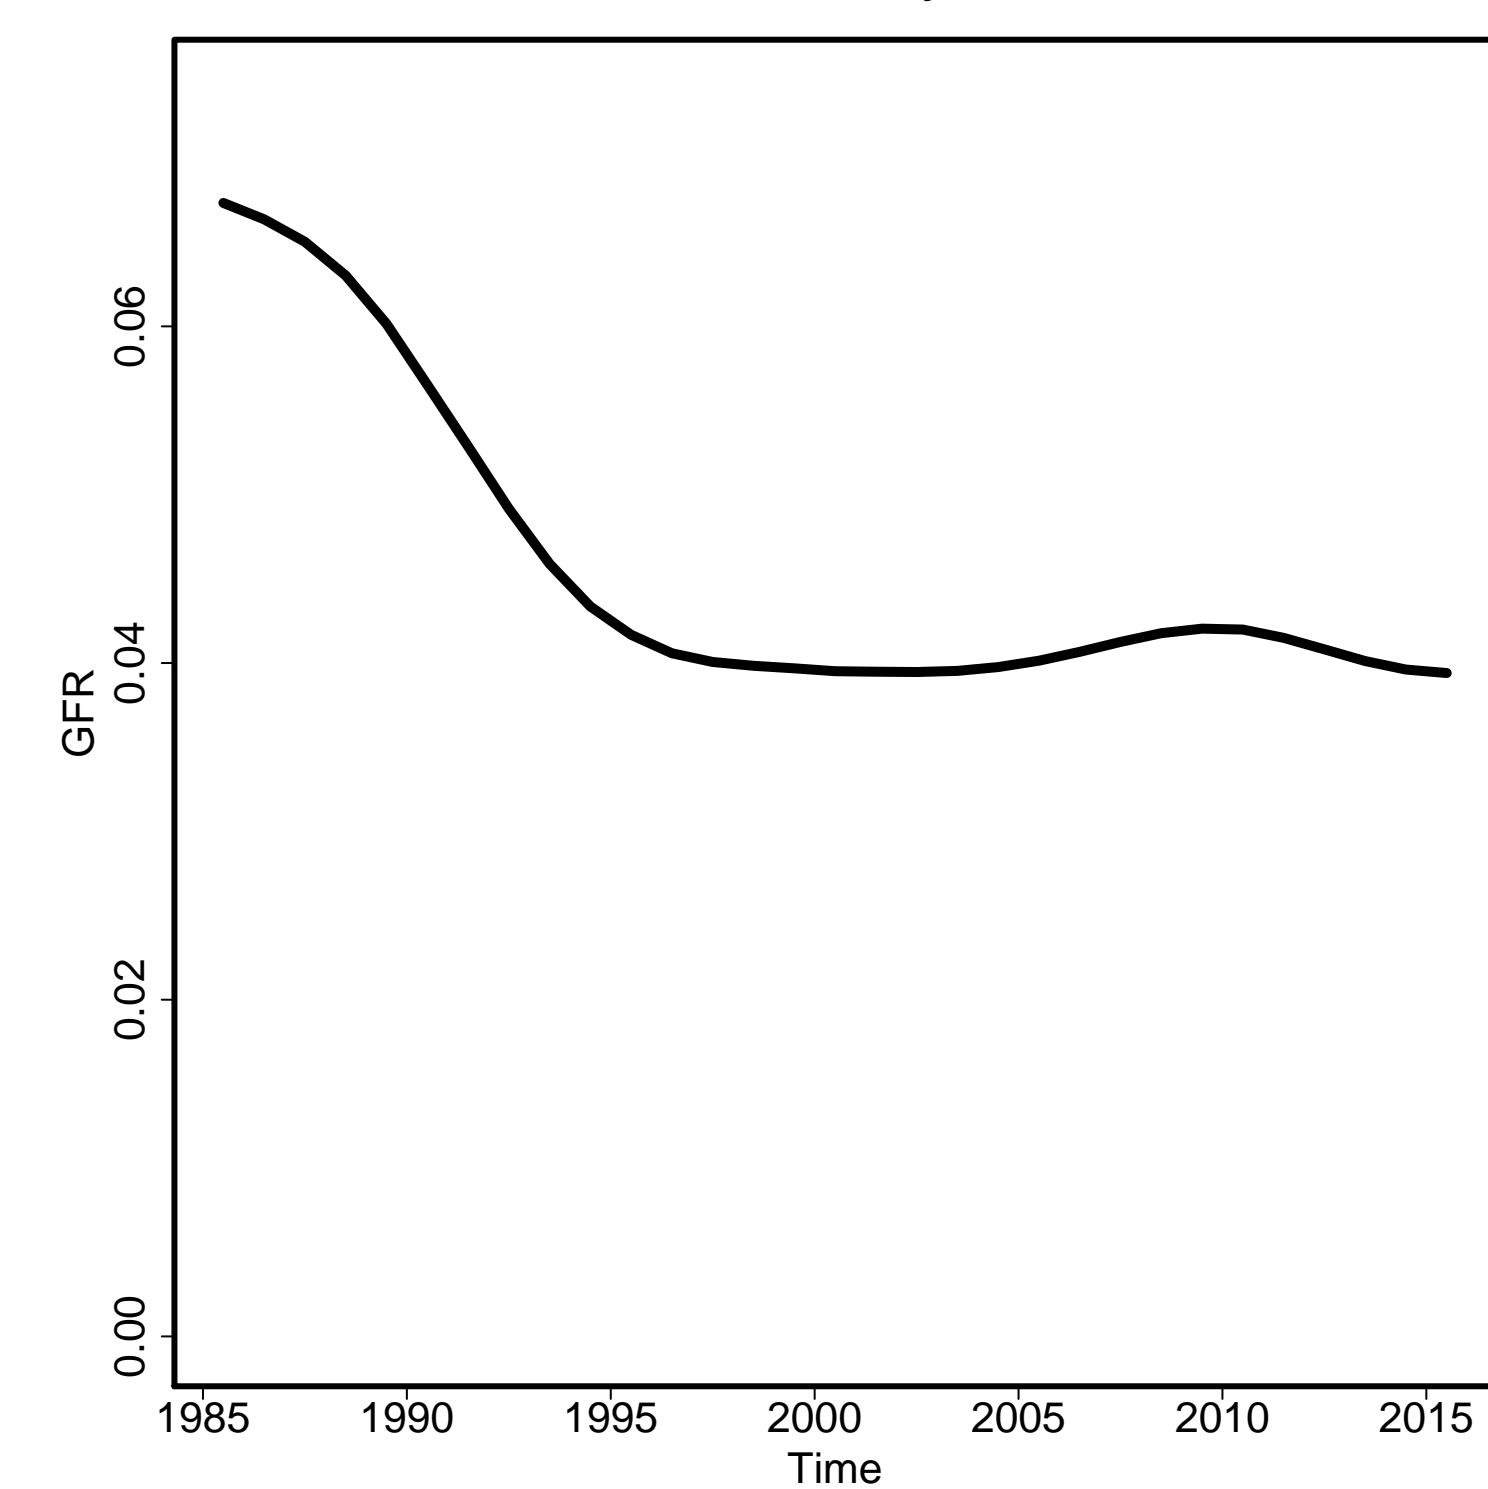

Skilled Attendance to Birth

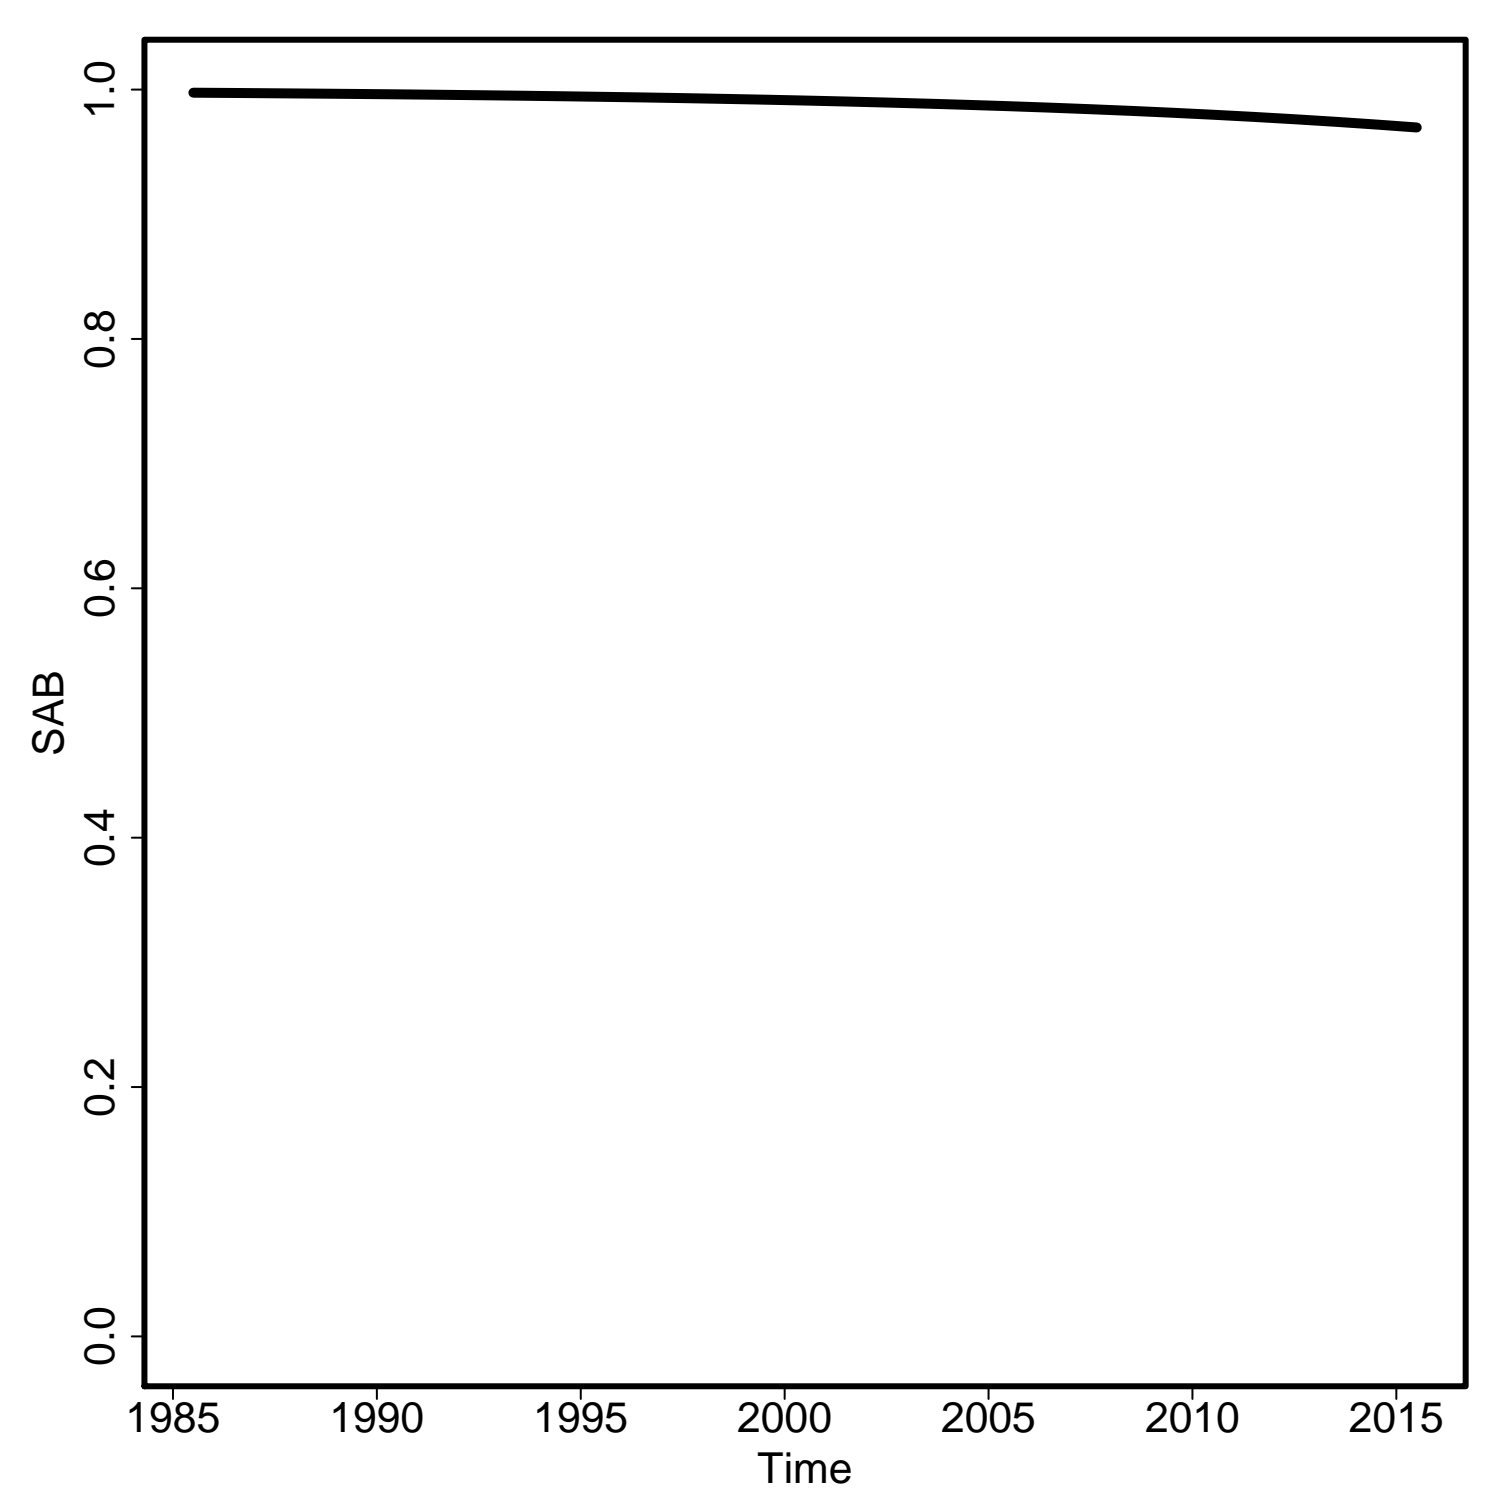

Envelope/Births

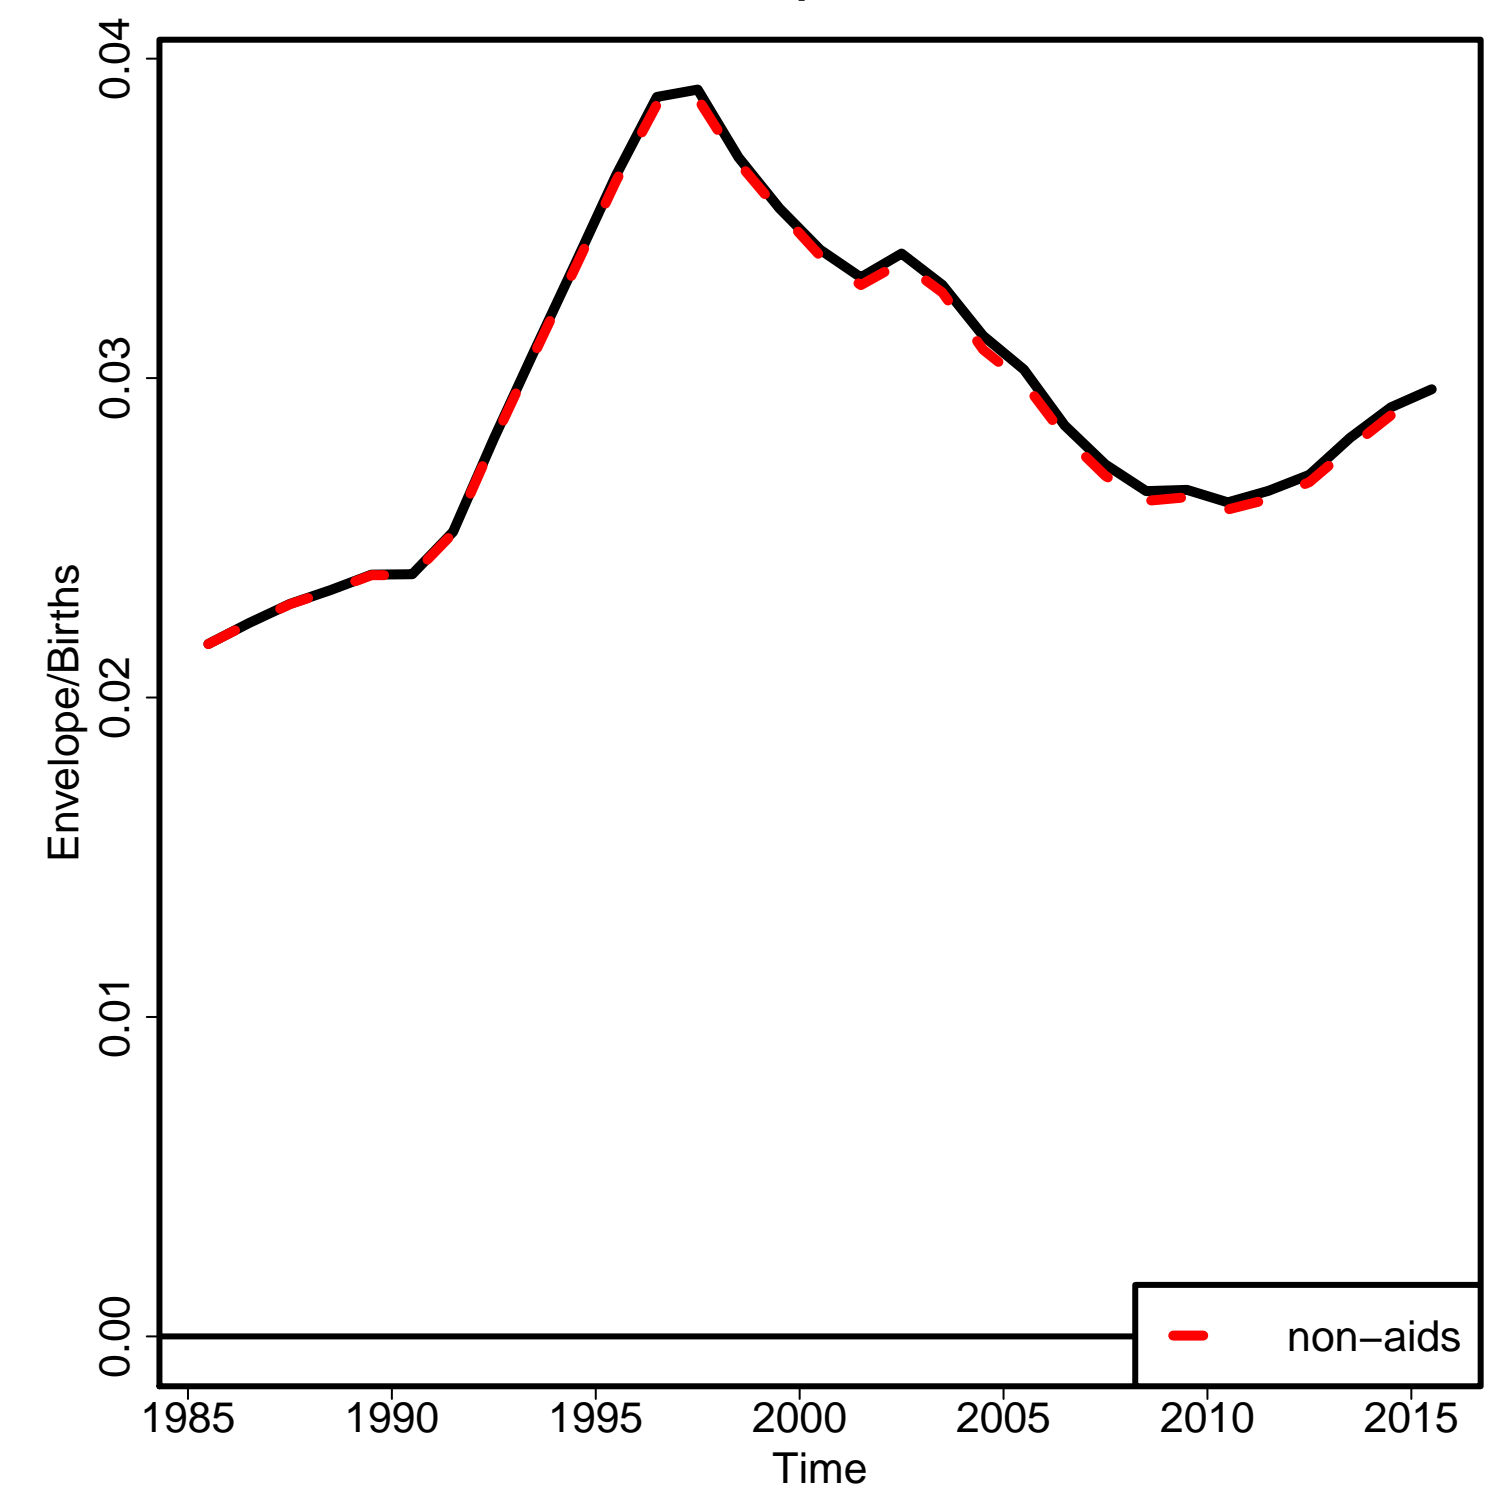

Non-aids MMR

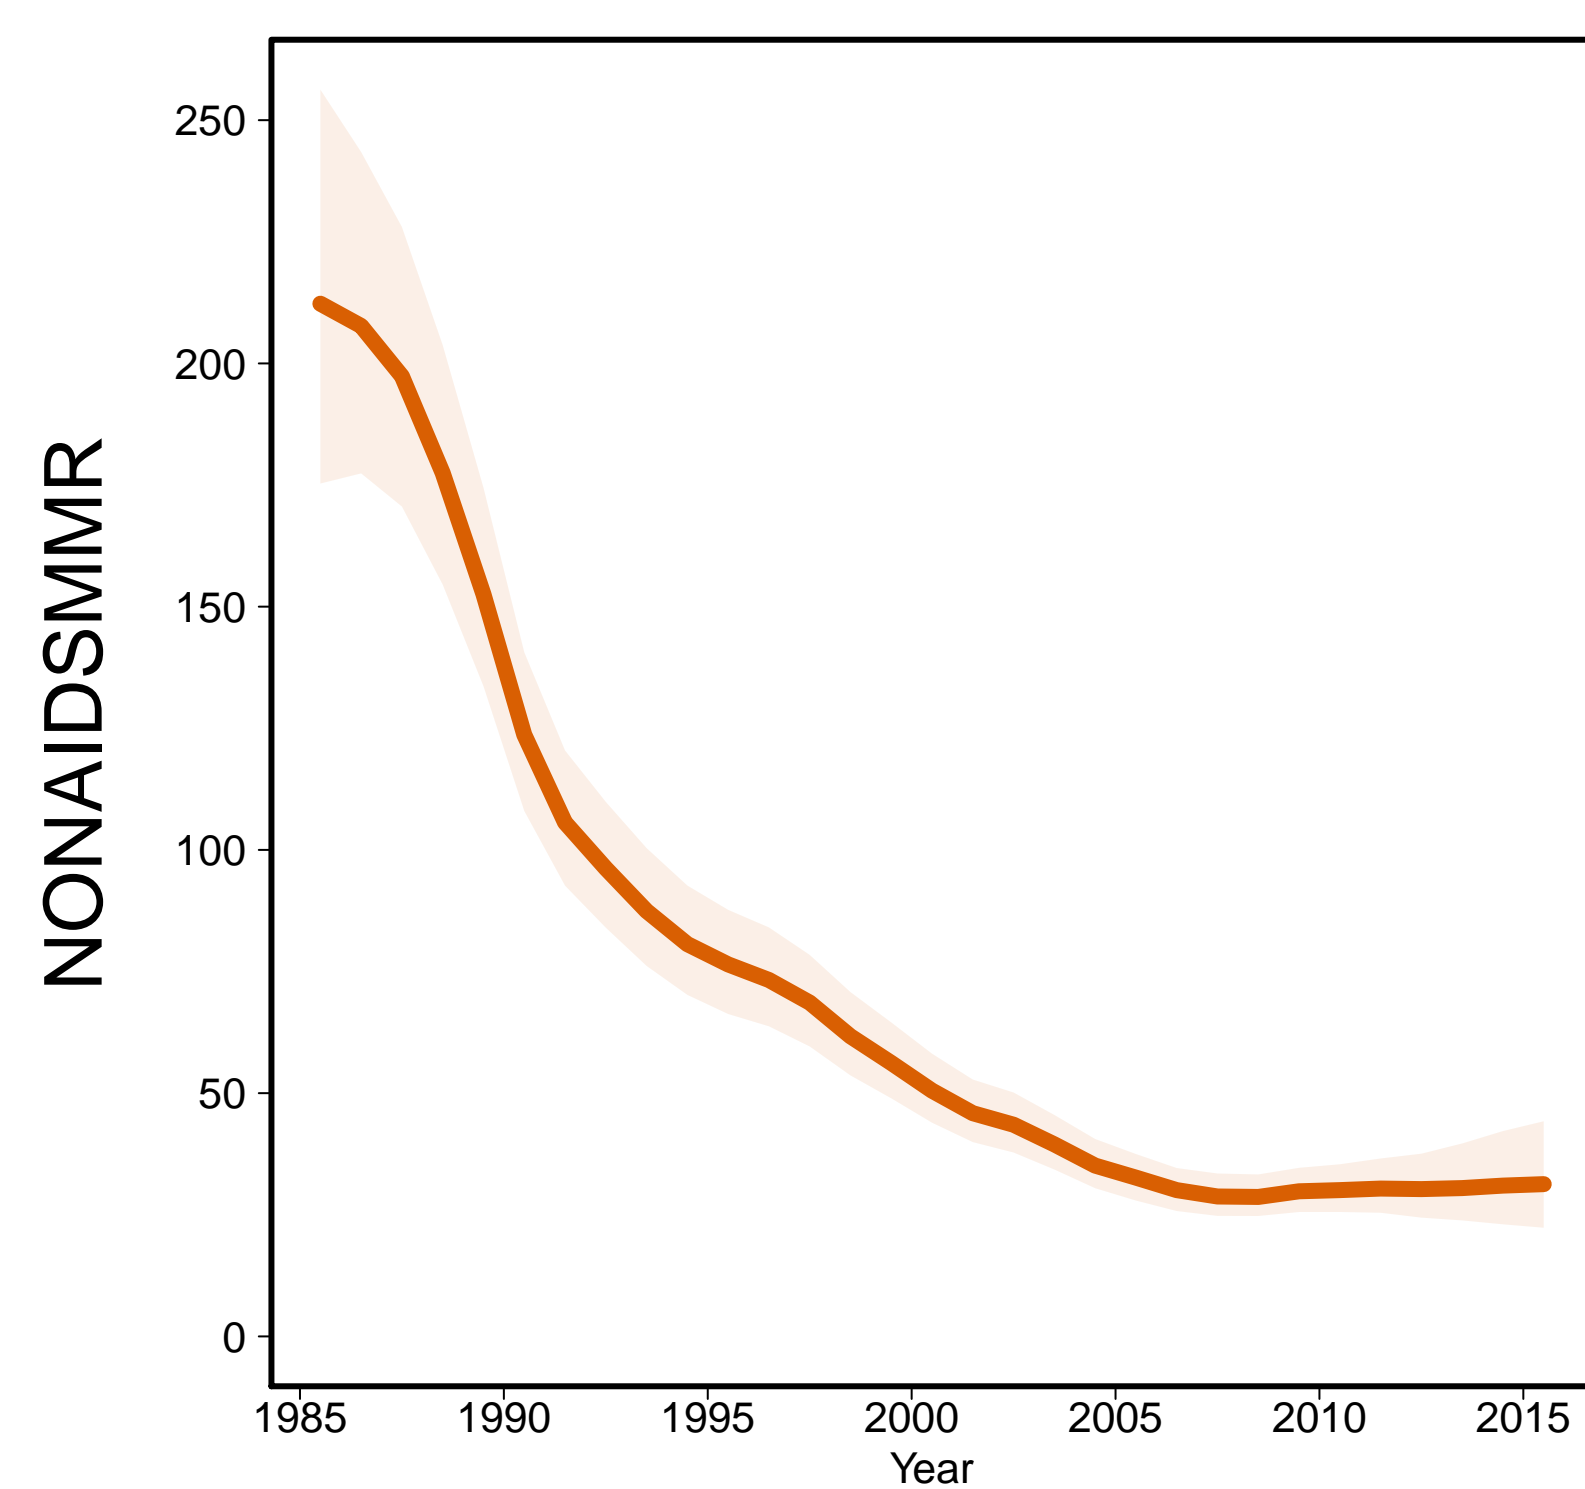

Aids MMR

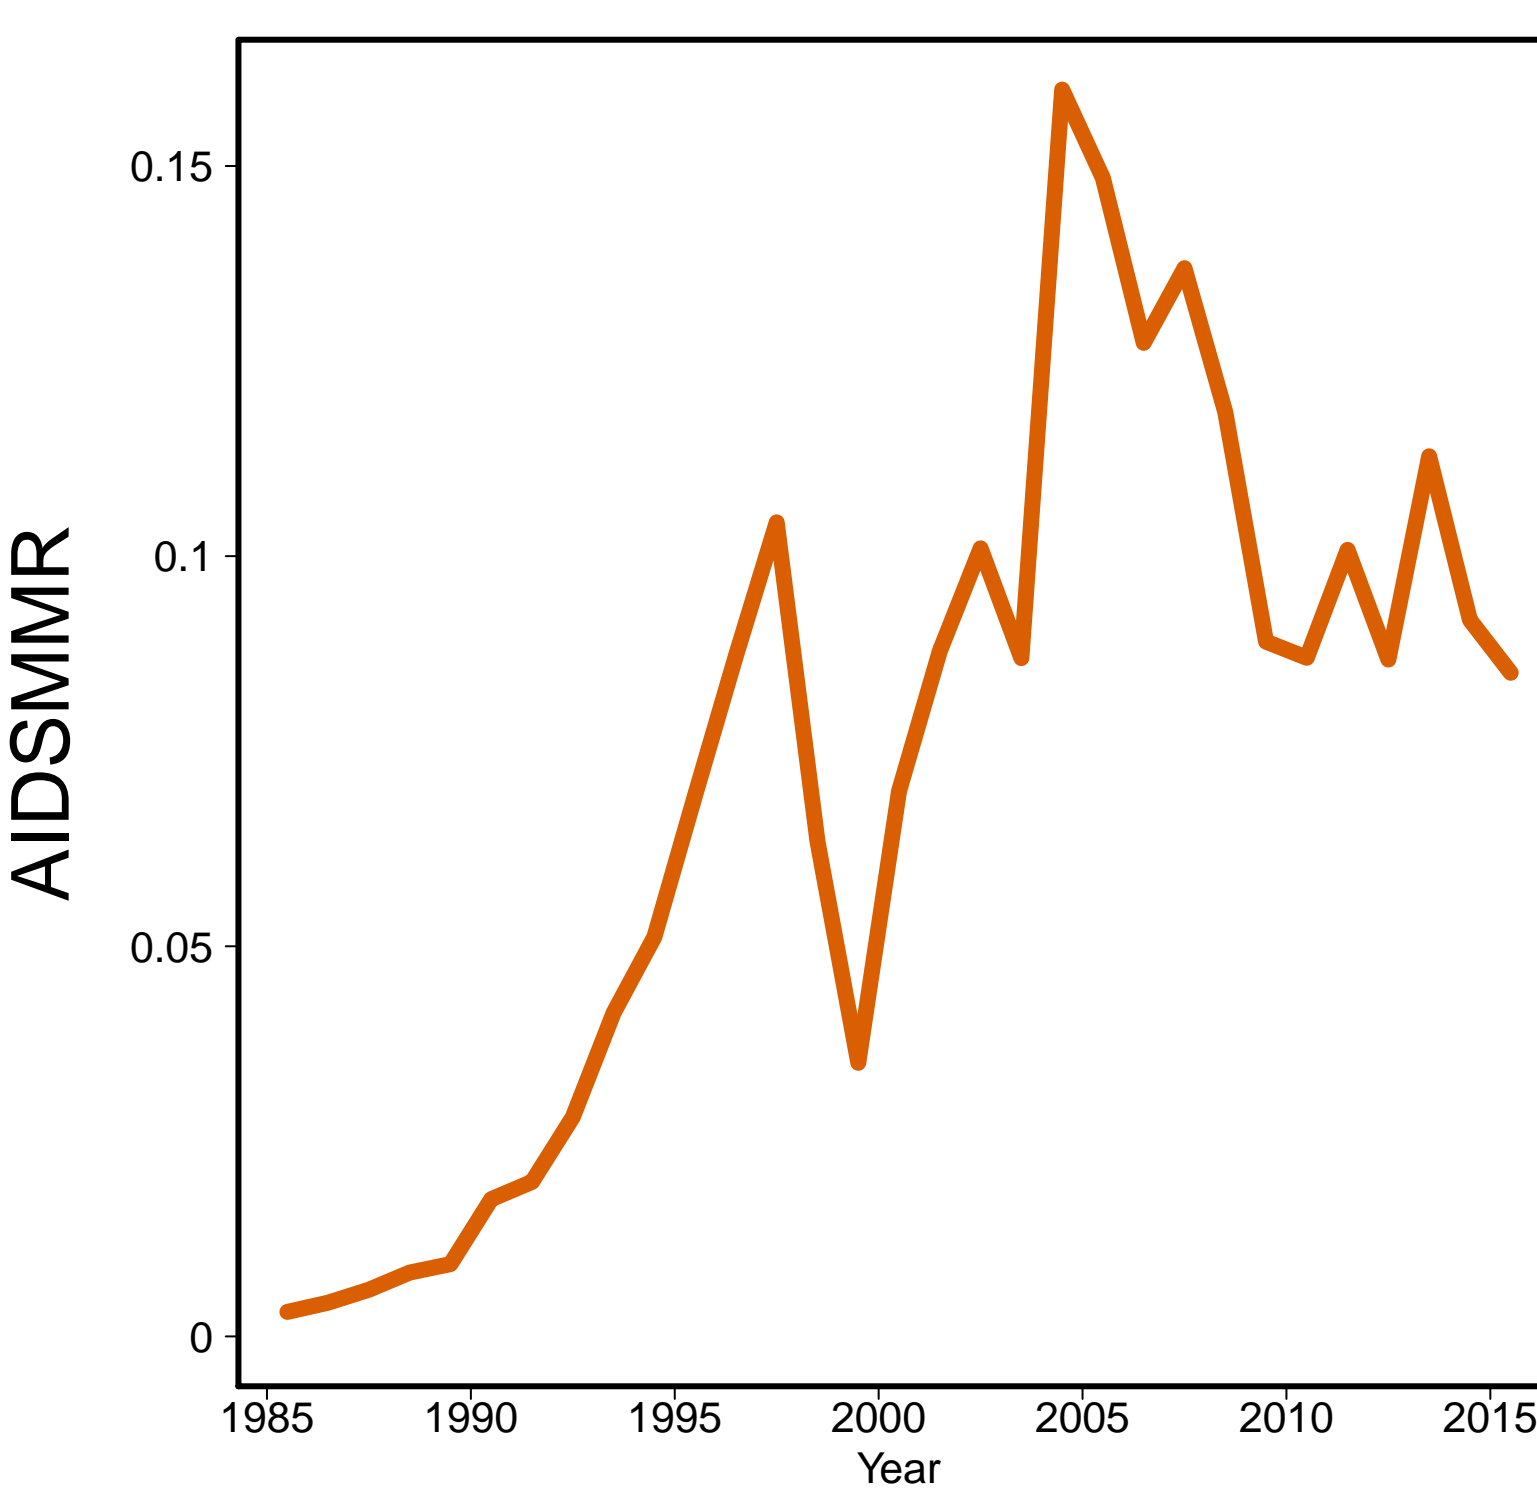

Russian Federation [RUS]  
(Developed regions)

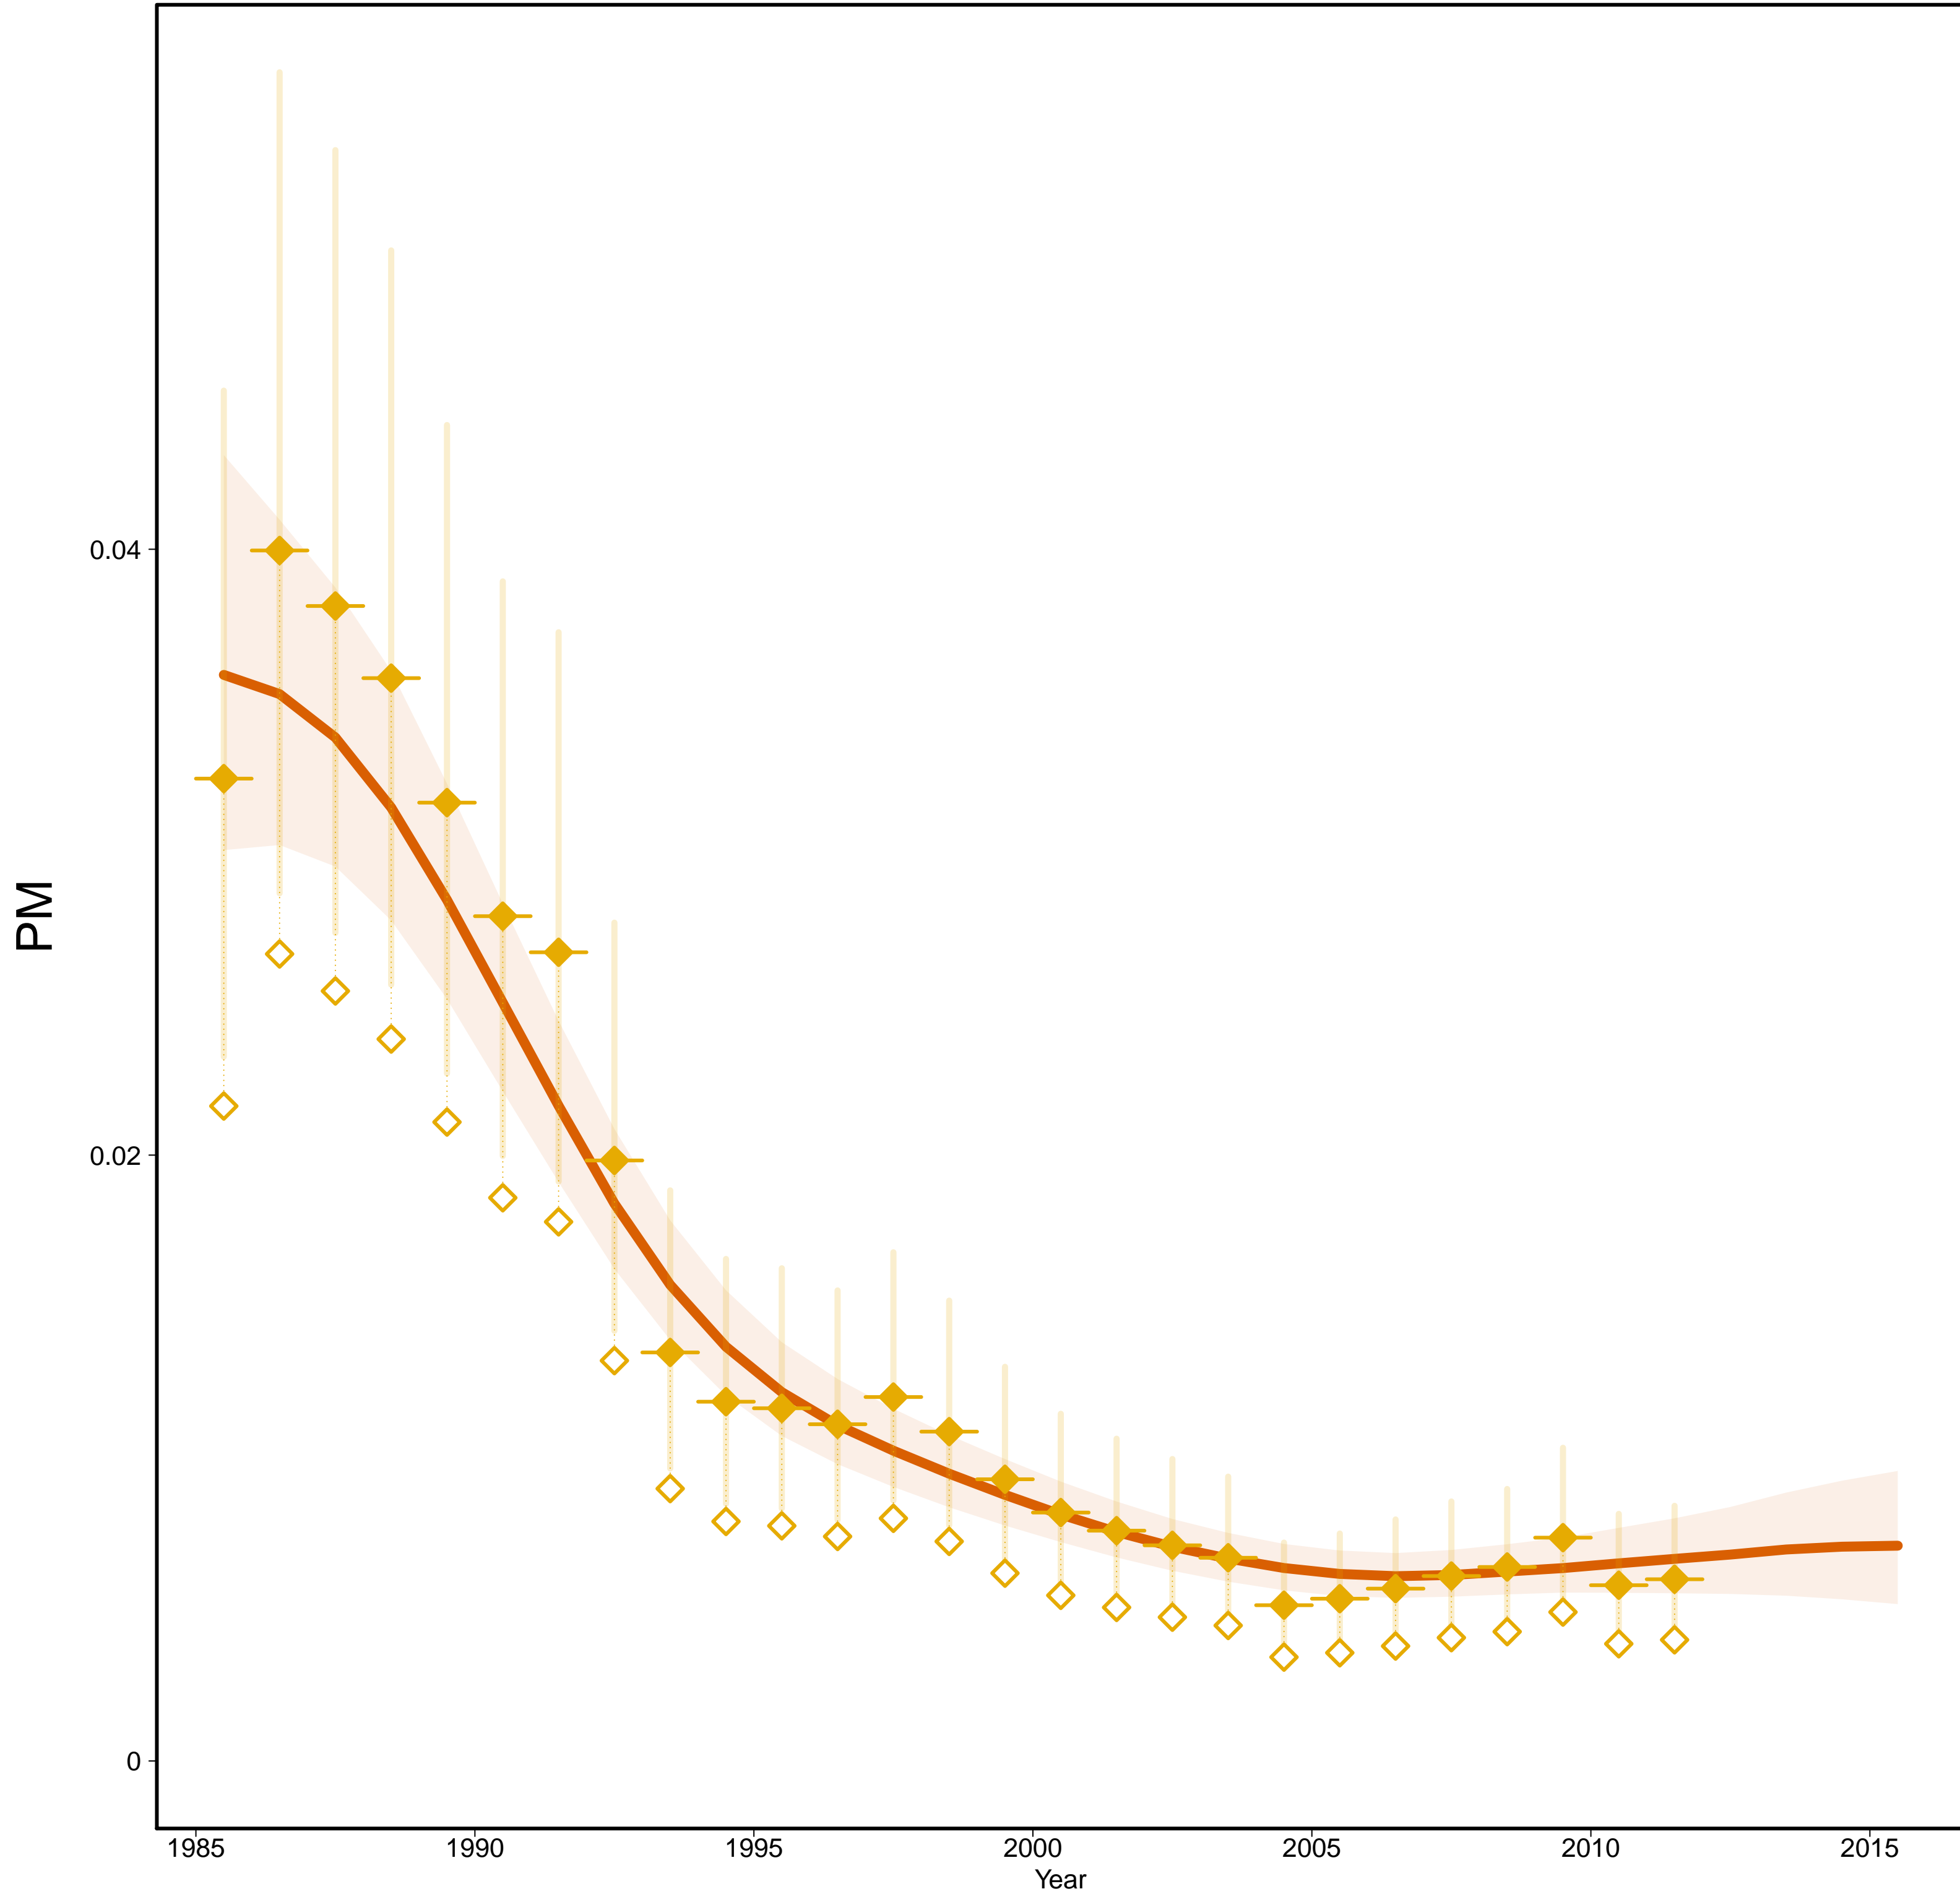

Russian Federation [RUS]  
(Developed regions)

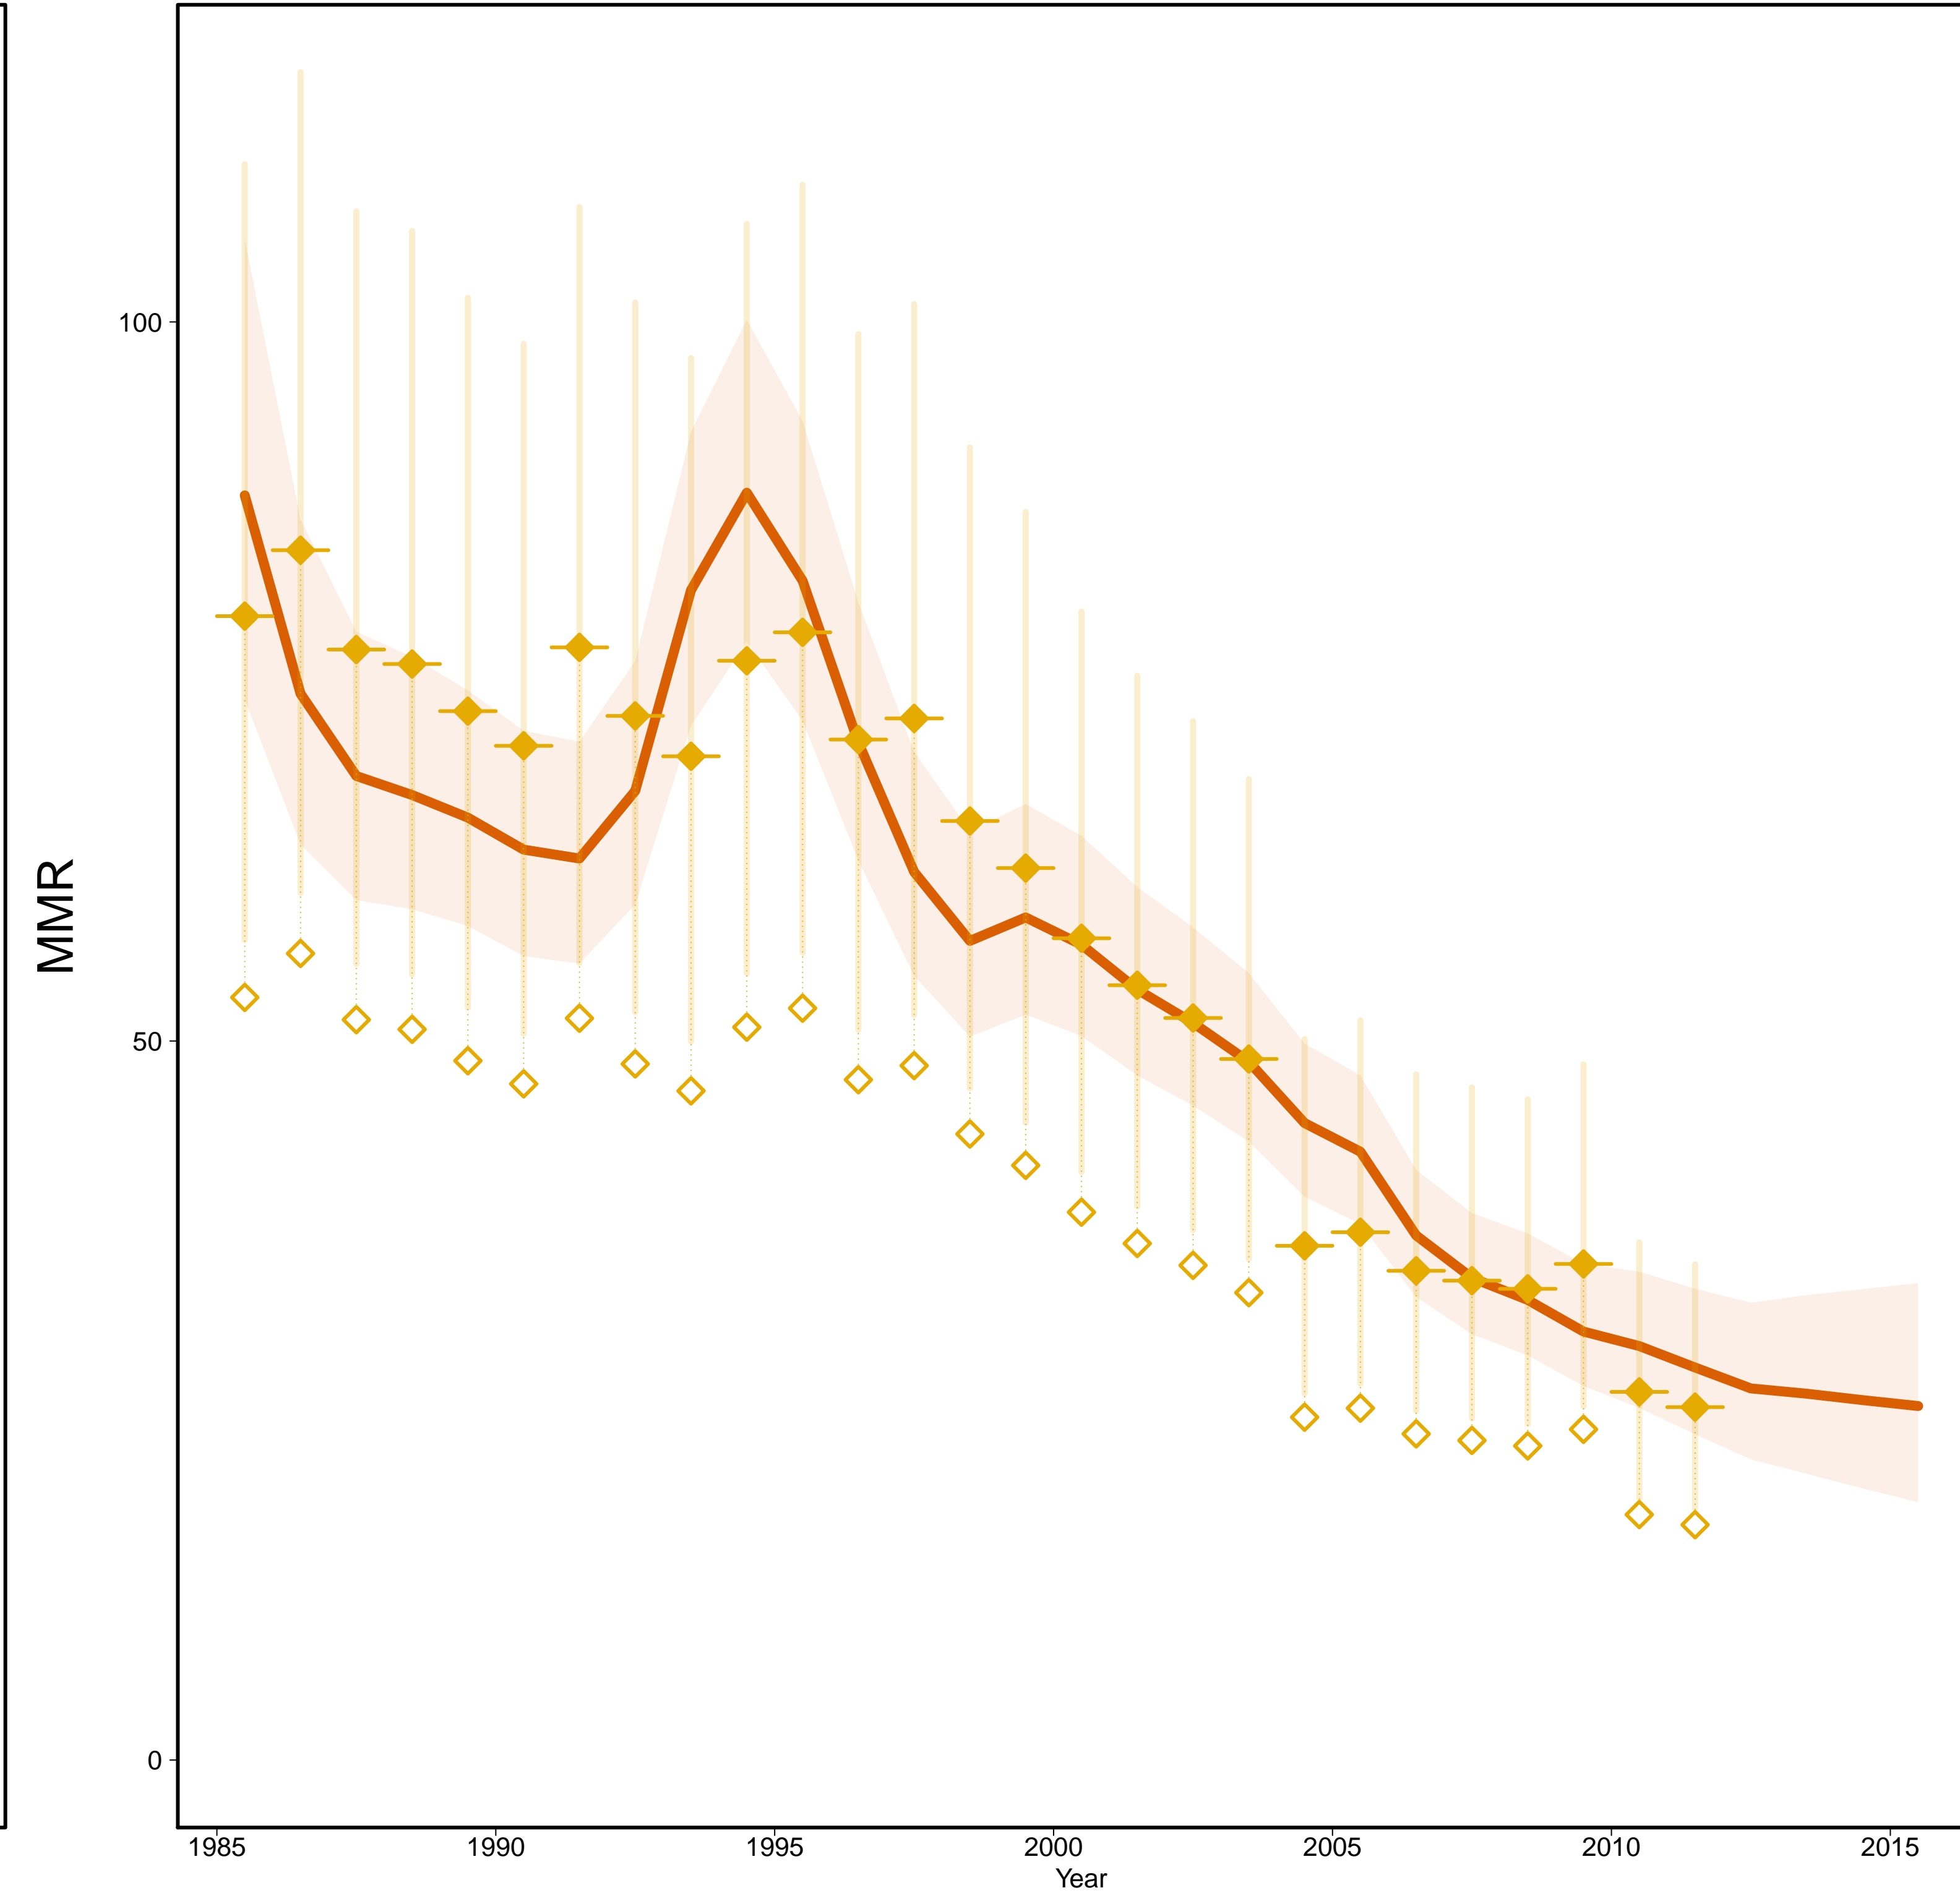

- Estimates —
- Mlate
- MMR Database 2015 —
- ◇ Observed Data
- ◆ Adjusted Data
- Data type —
- ◆ VR

Gross Domestic Product

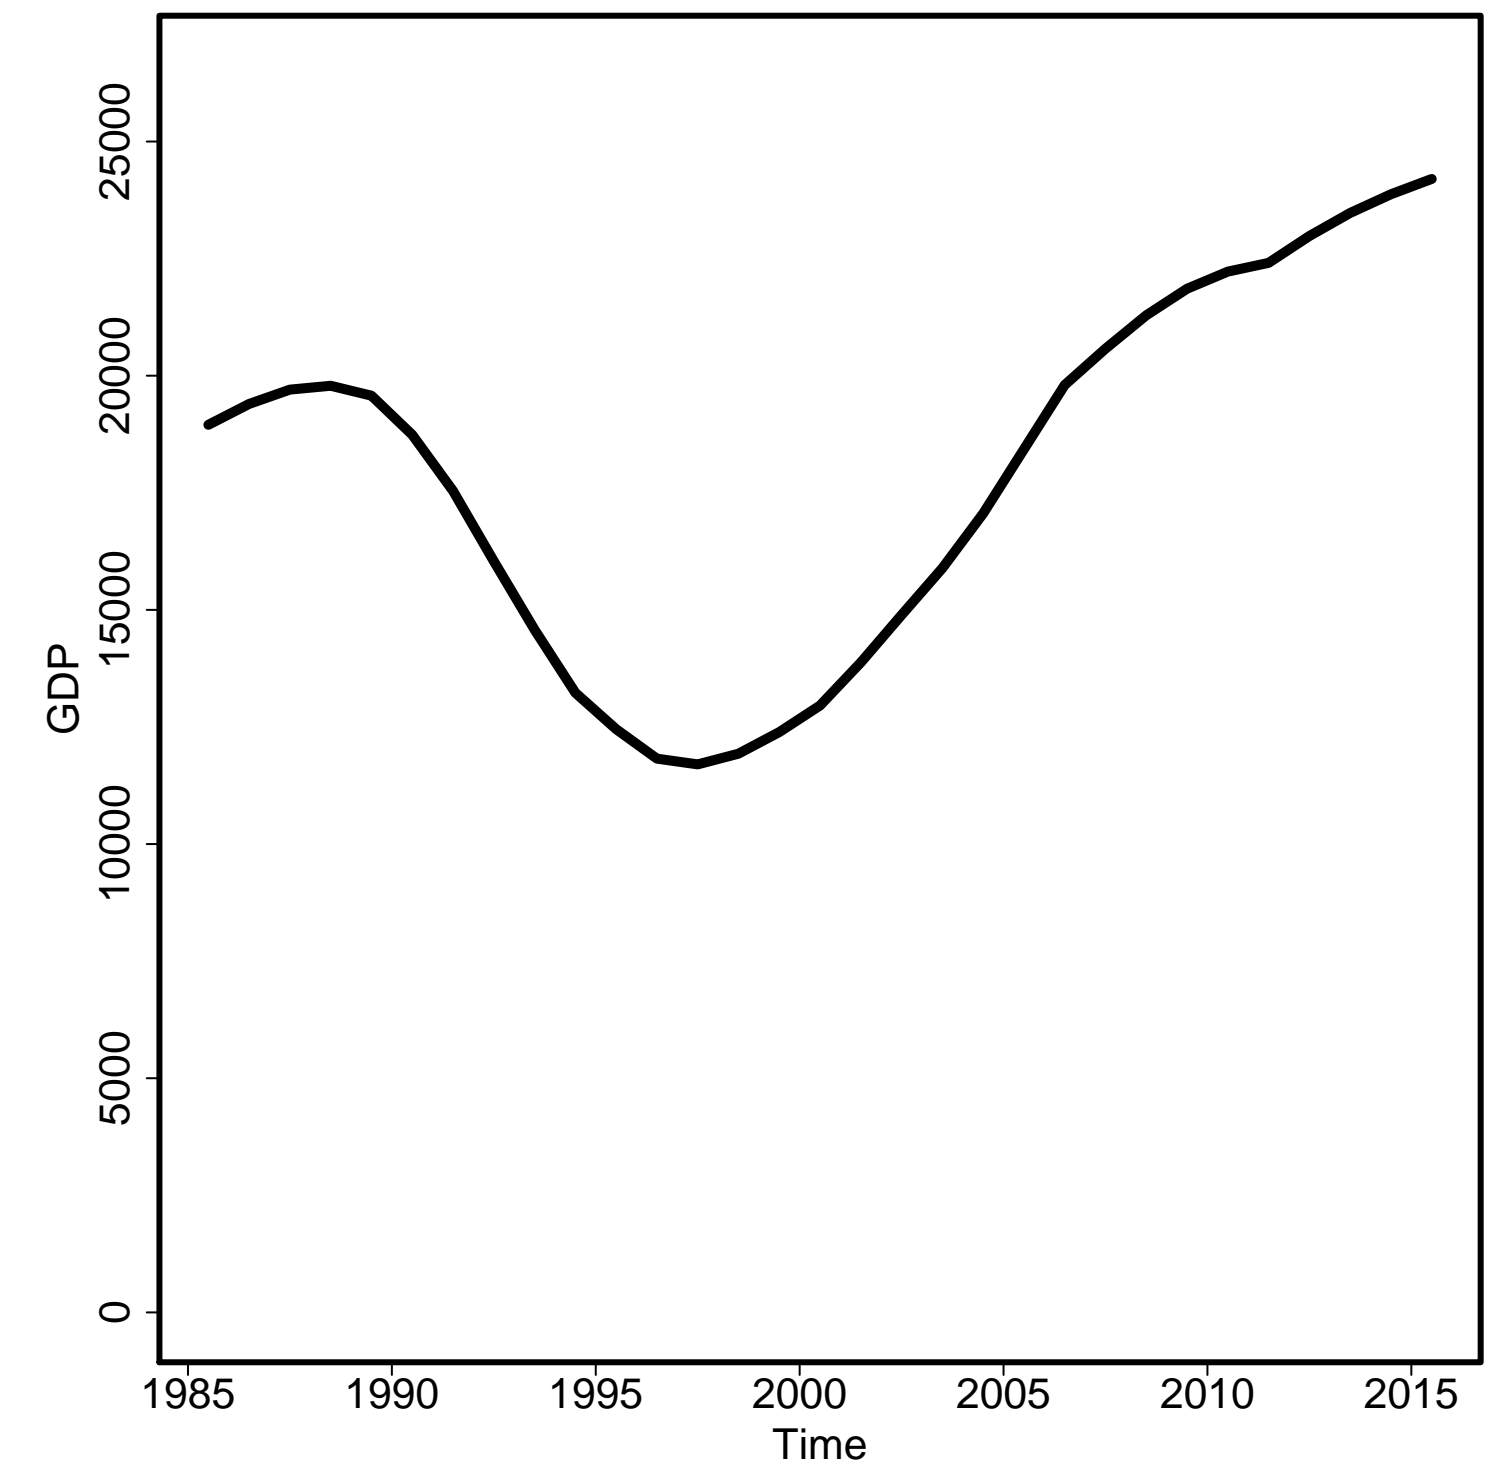

General Fertility Rate

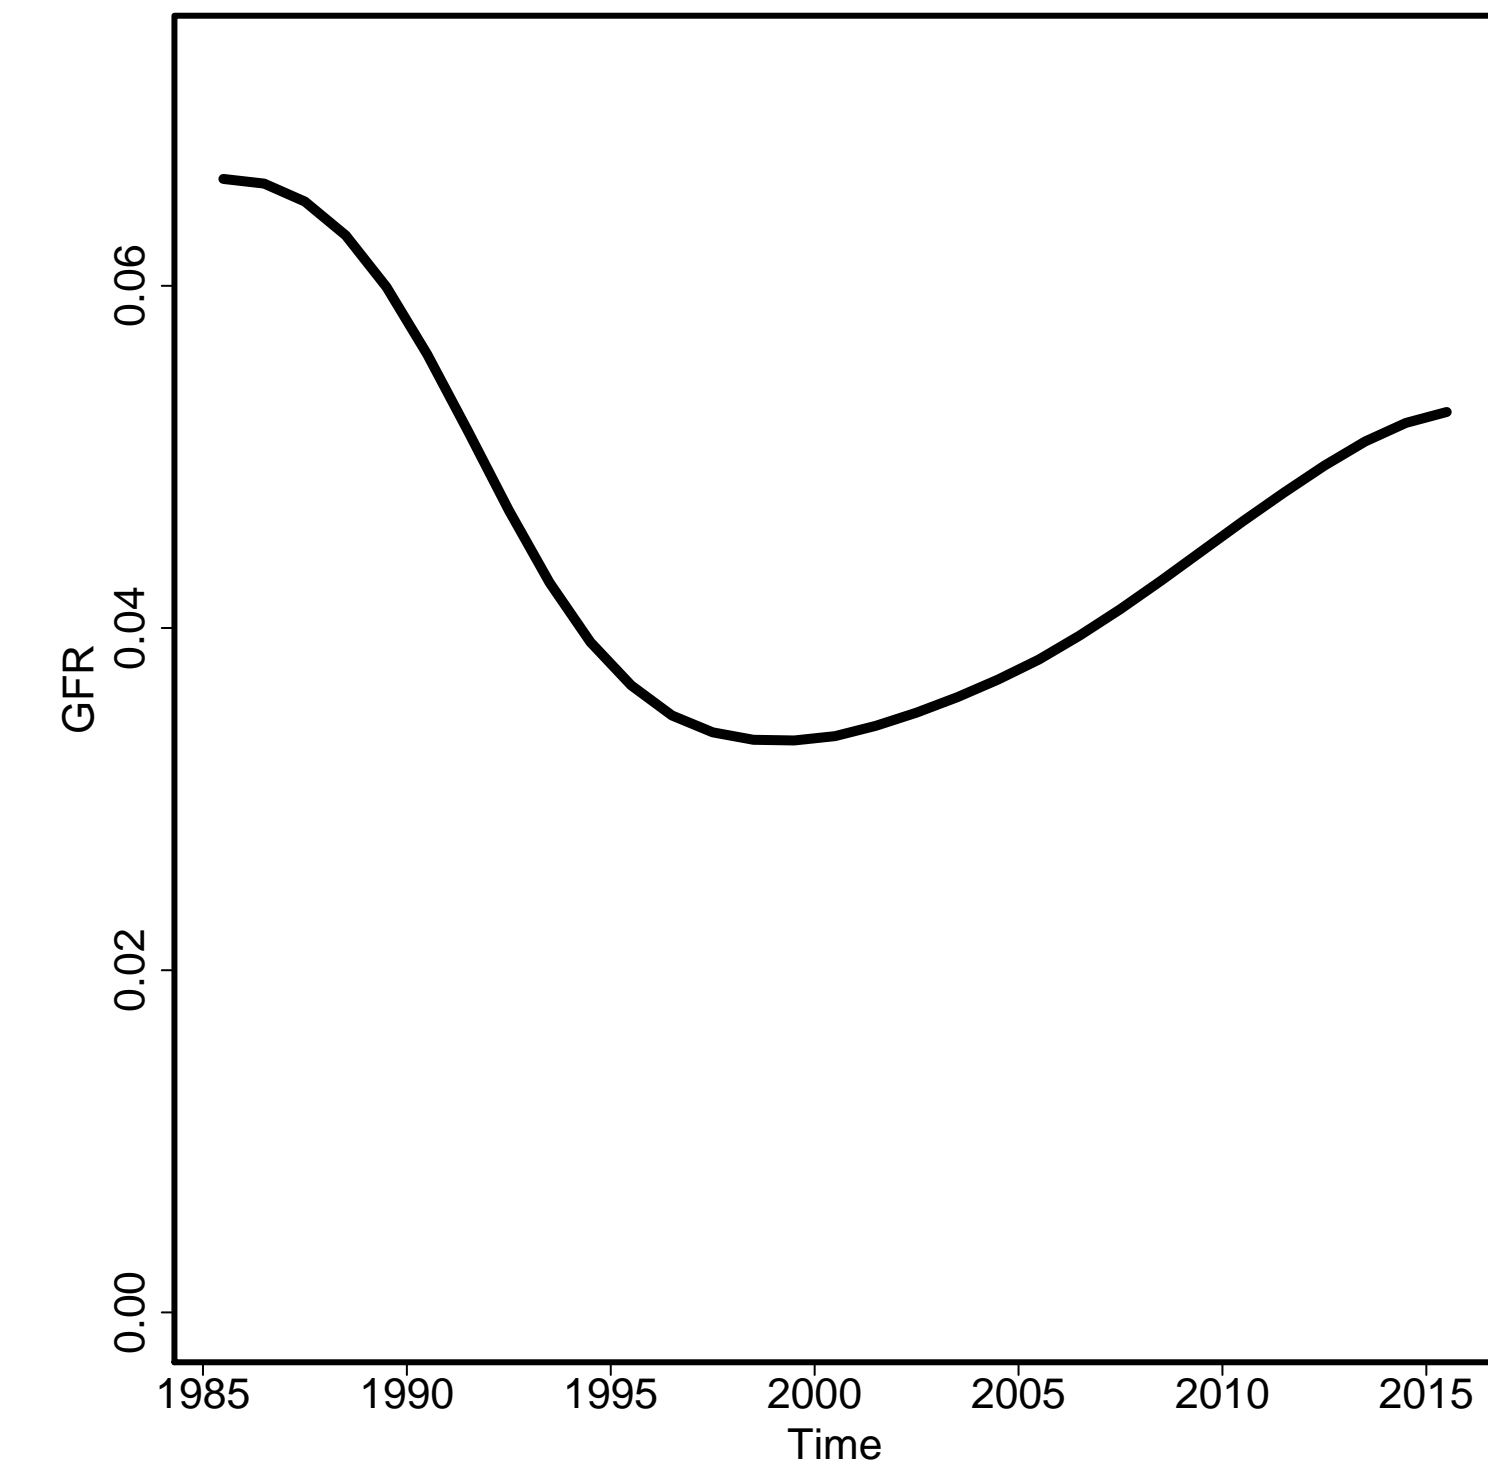

Skilled Attendance to Birth

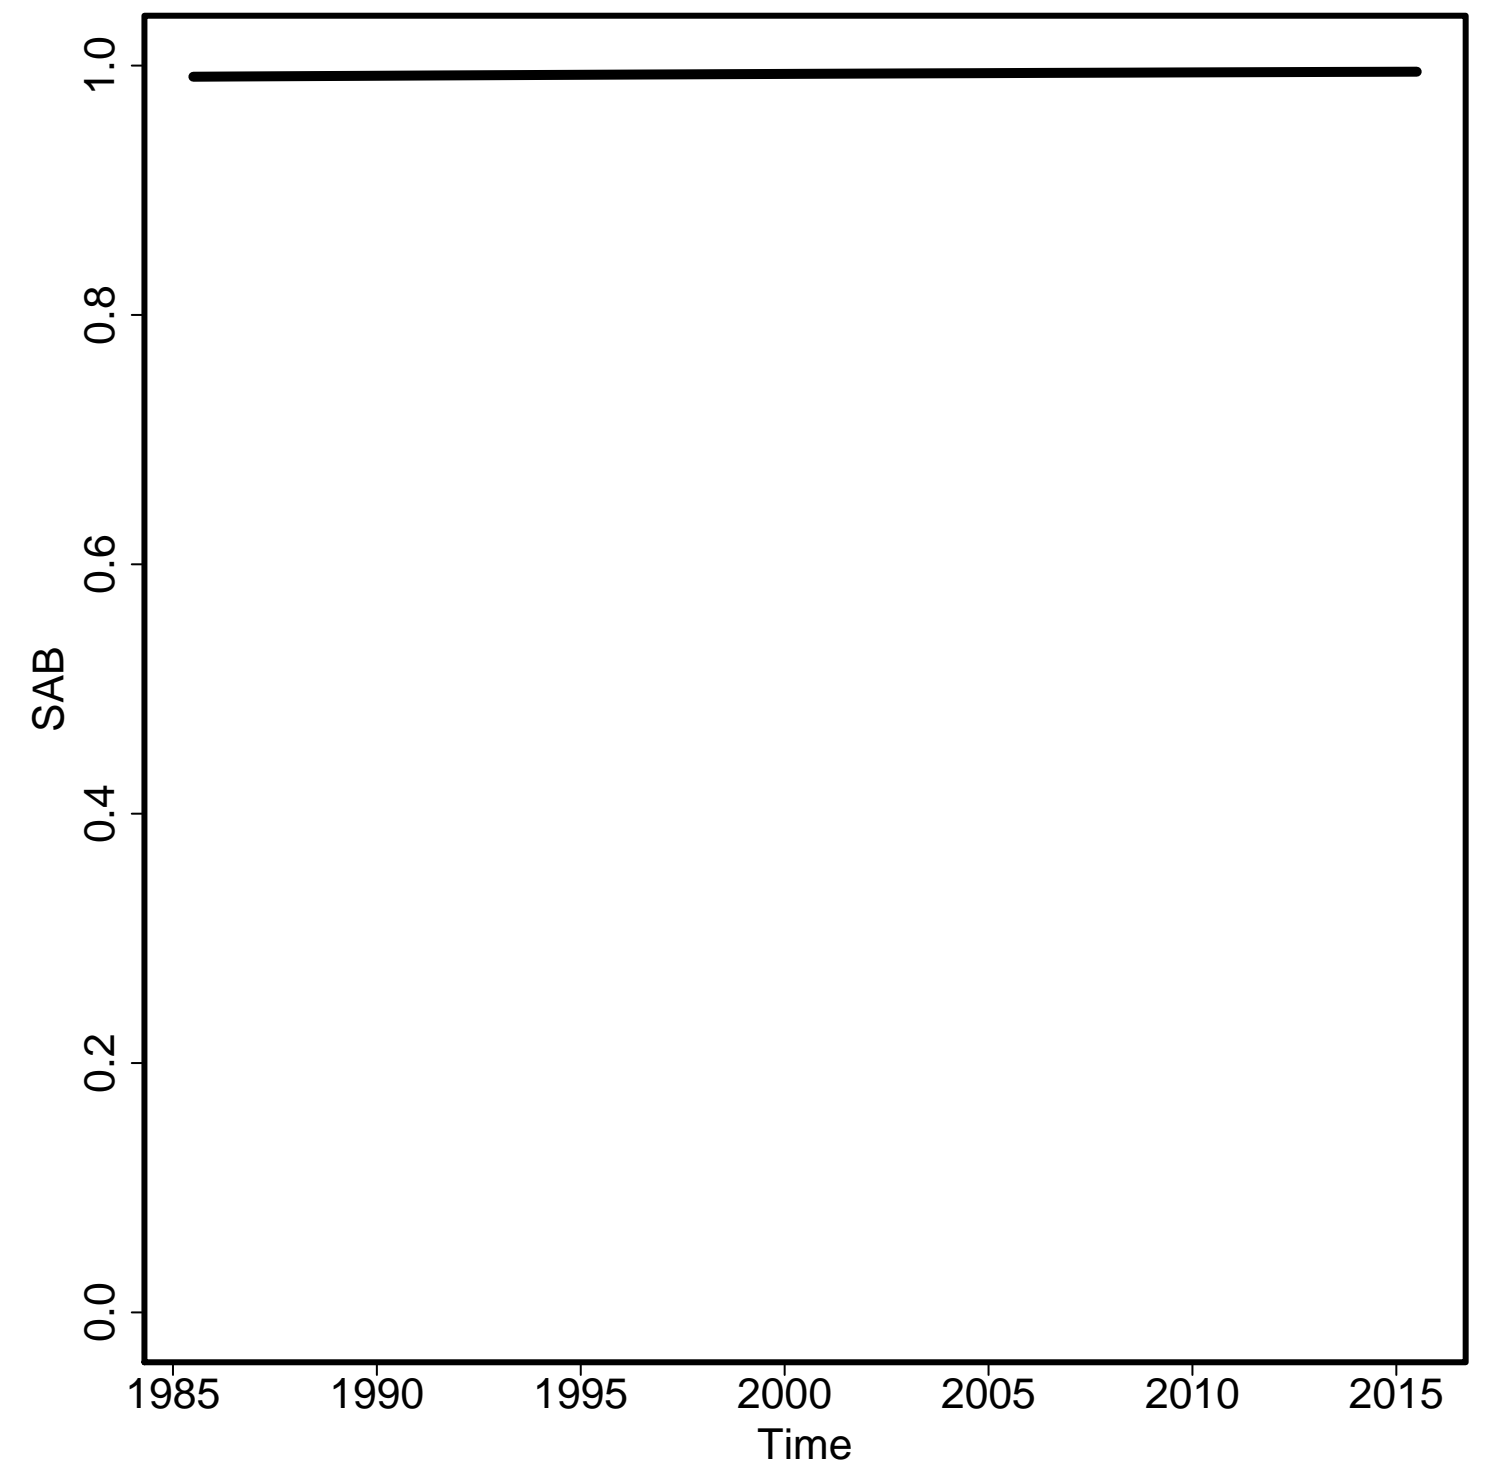

Envelope/Births

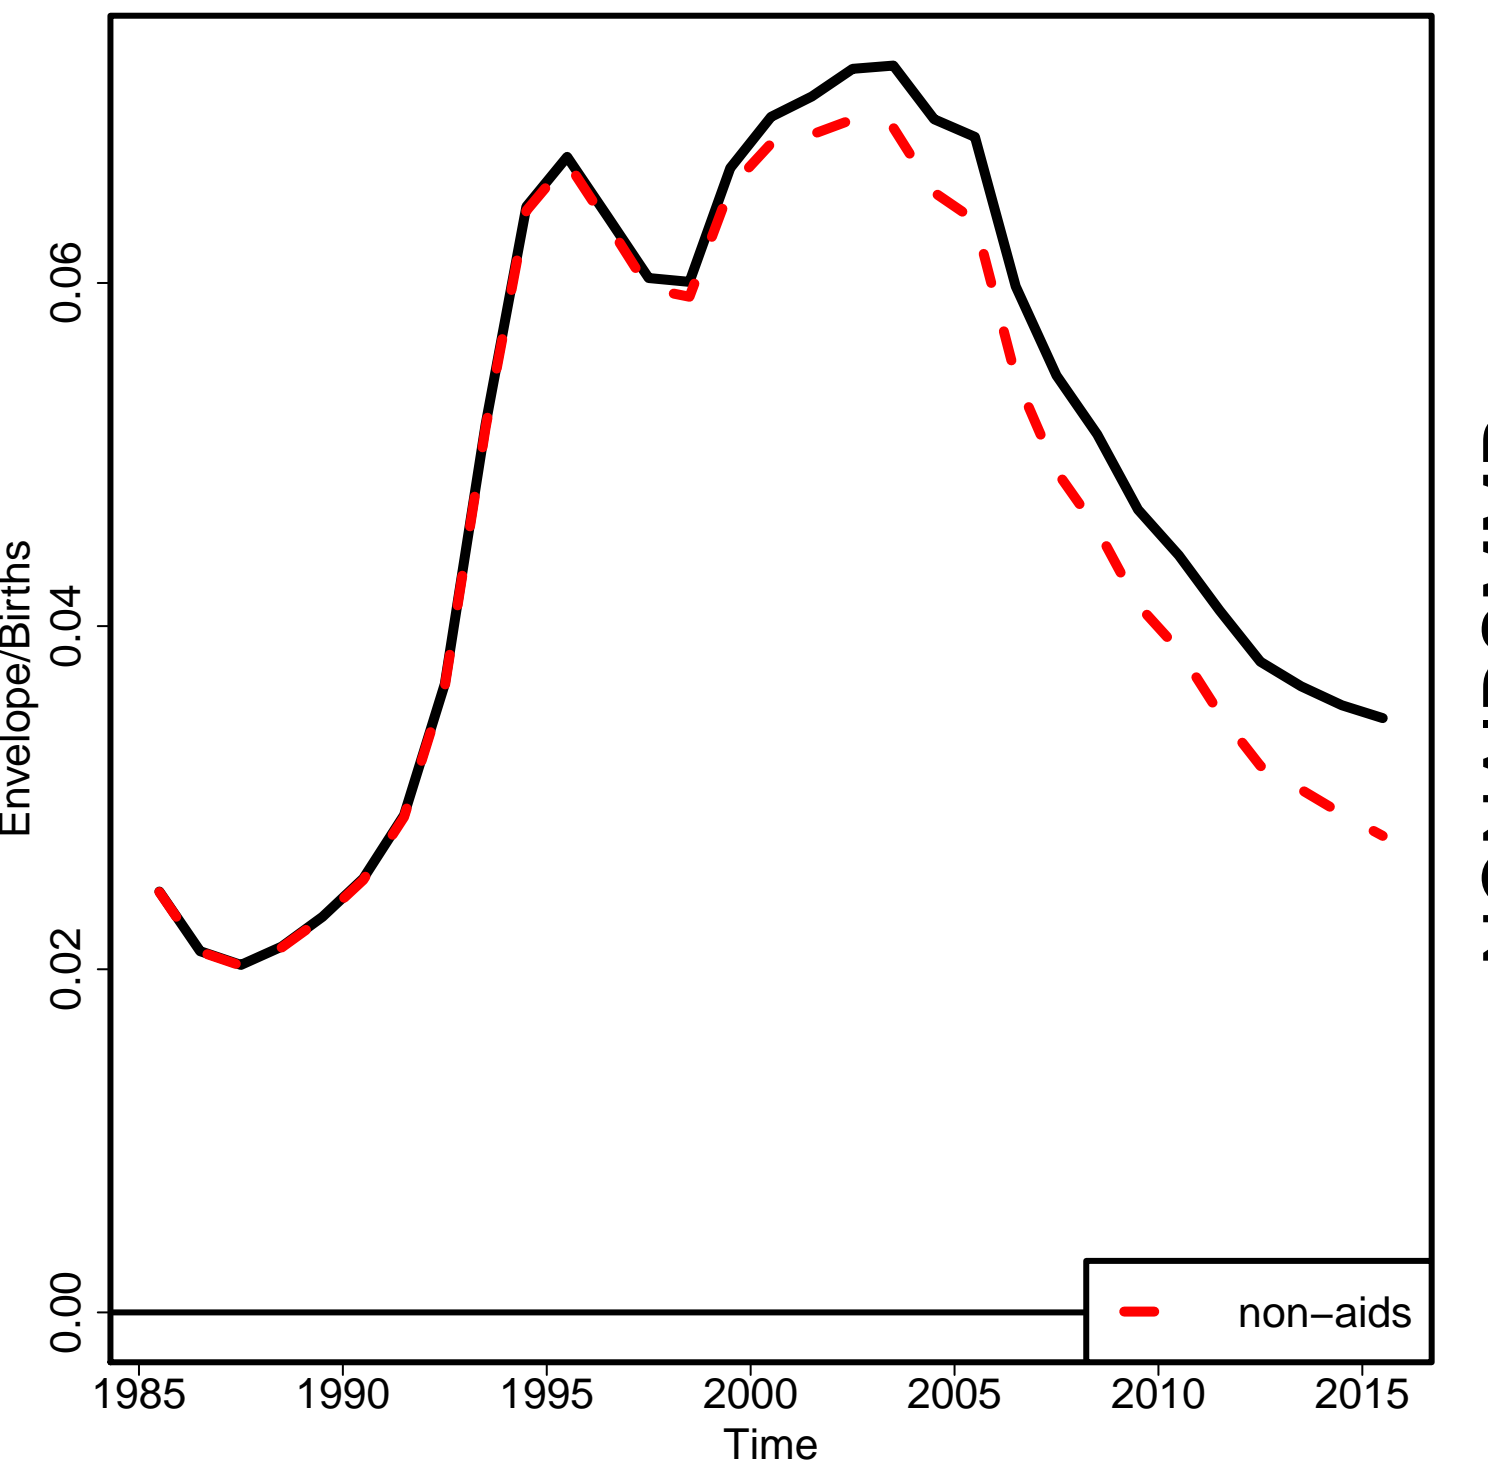

Non-aids MMR

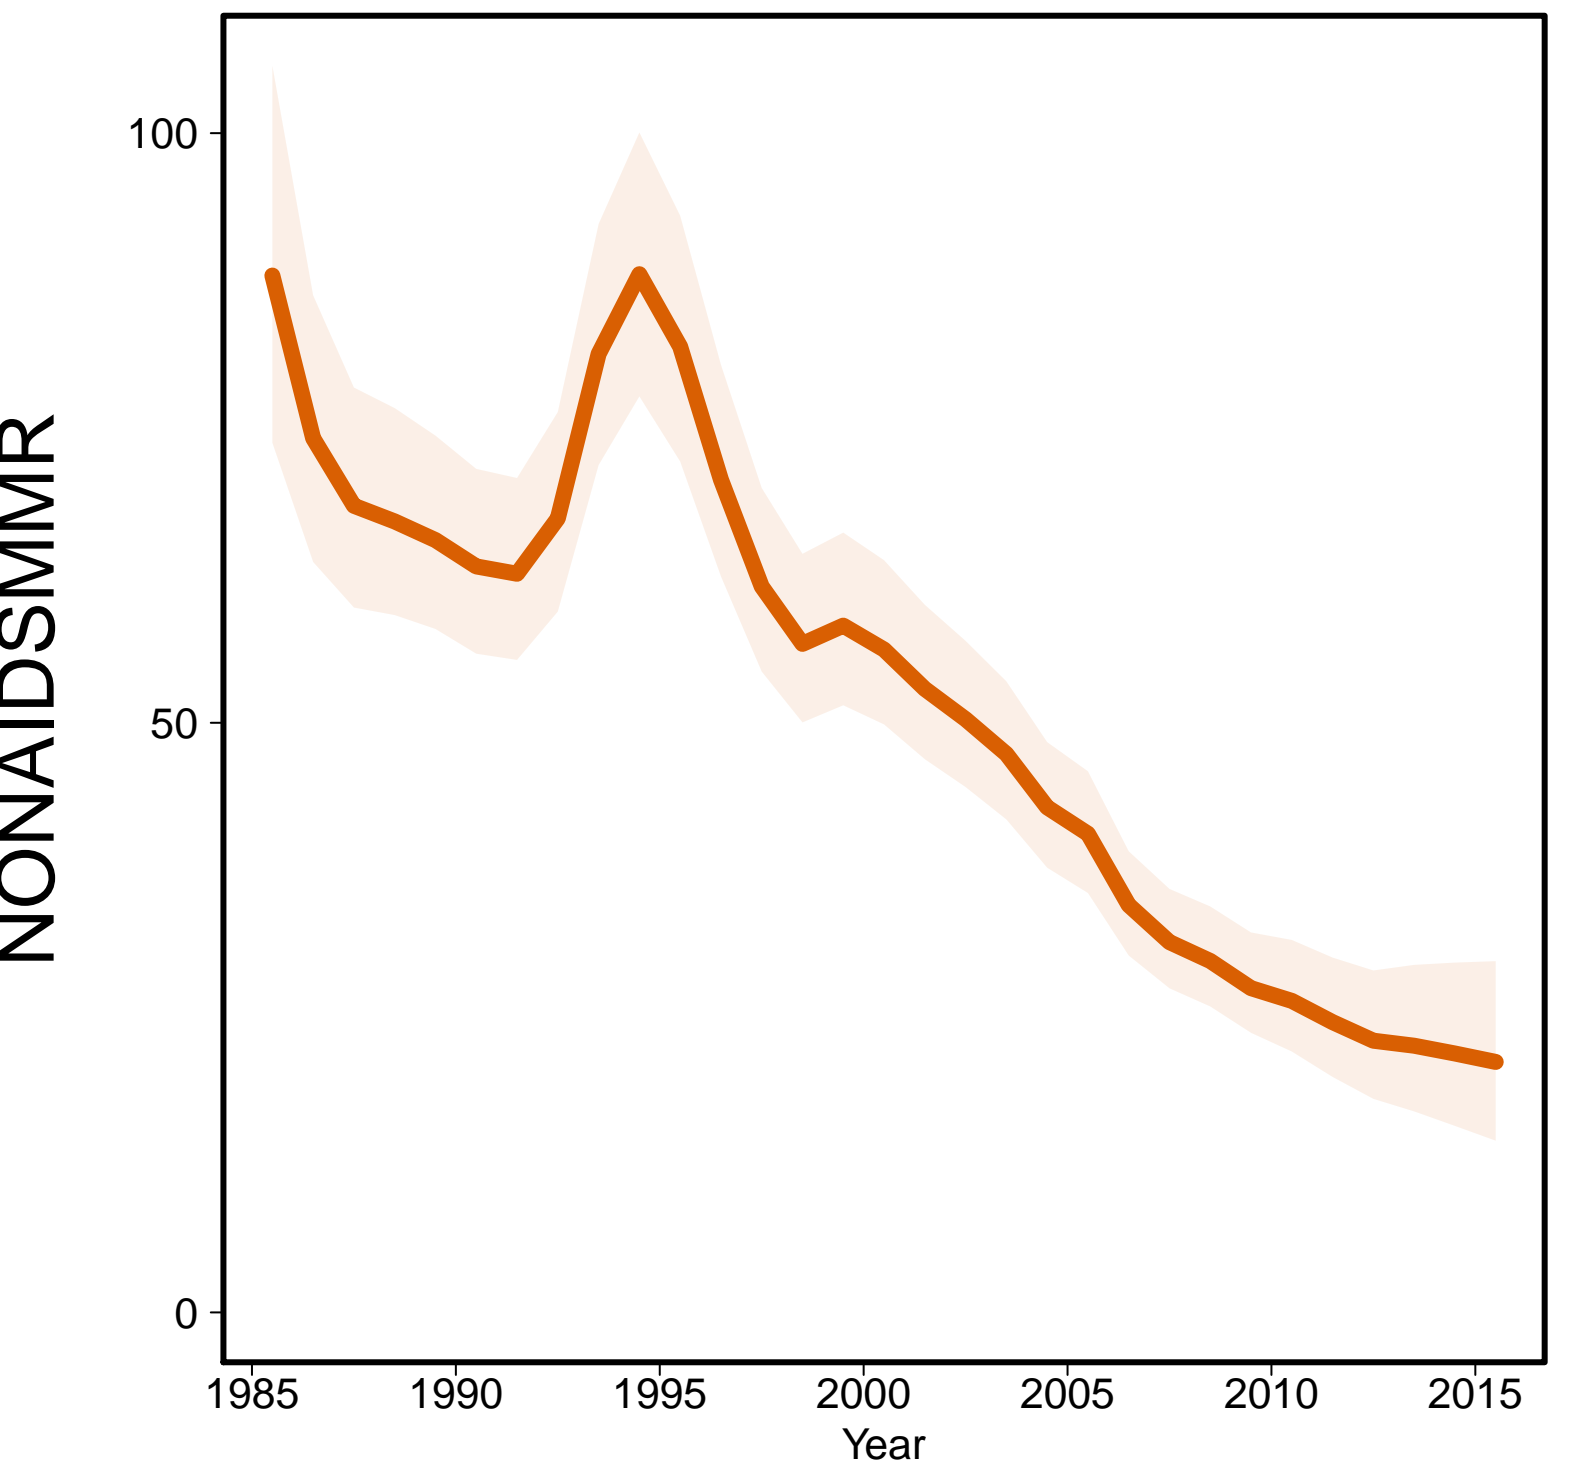

Aids MMR

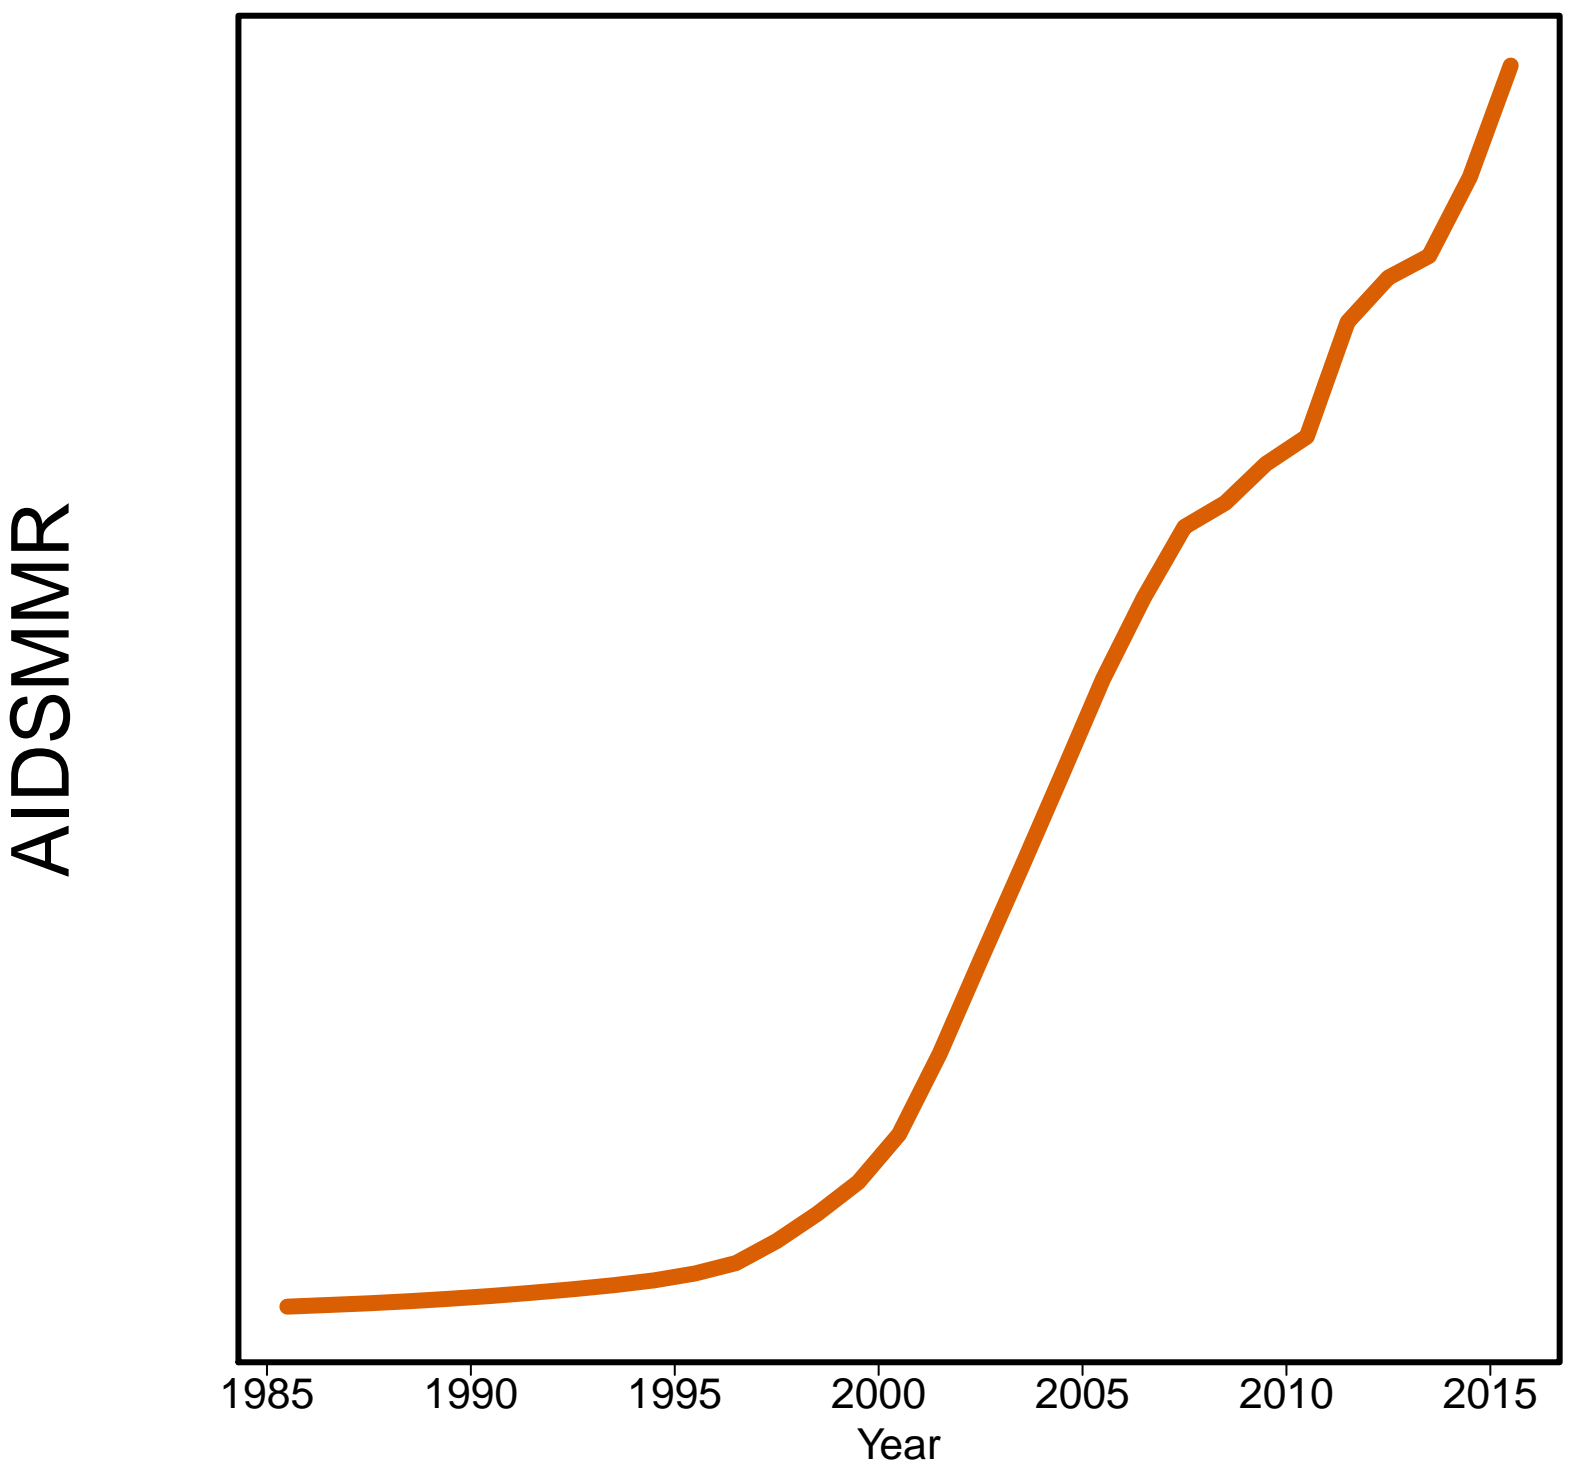

Rwanda [RWA]  
(Eastern Africa)

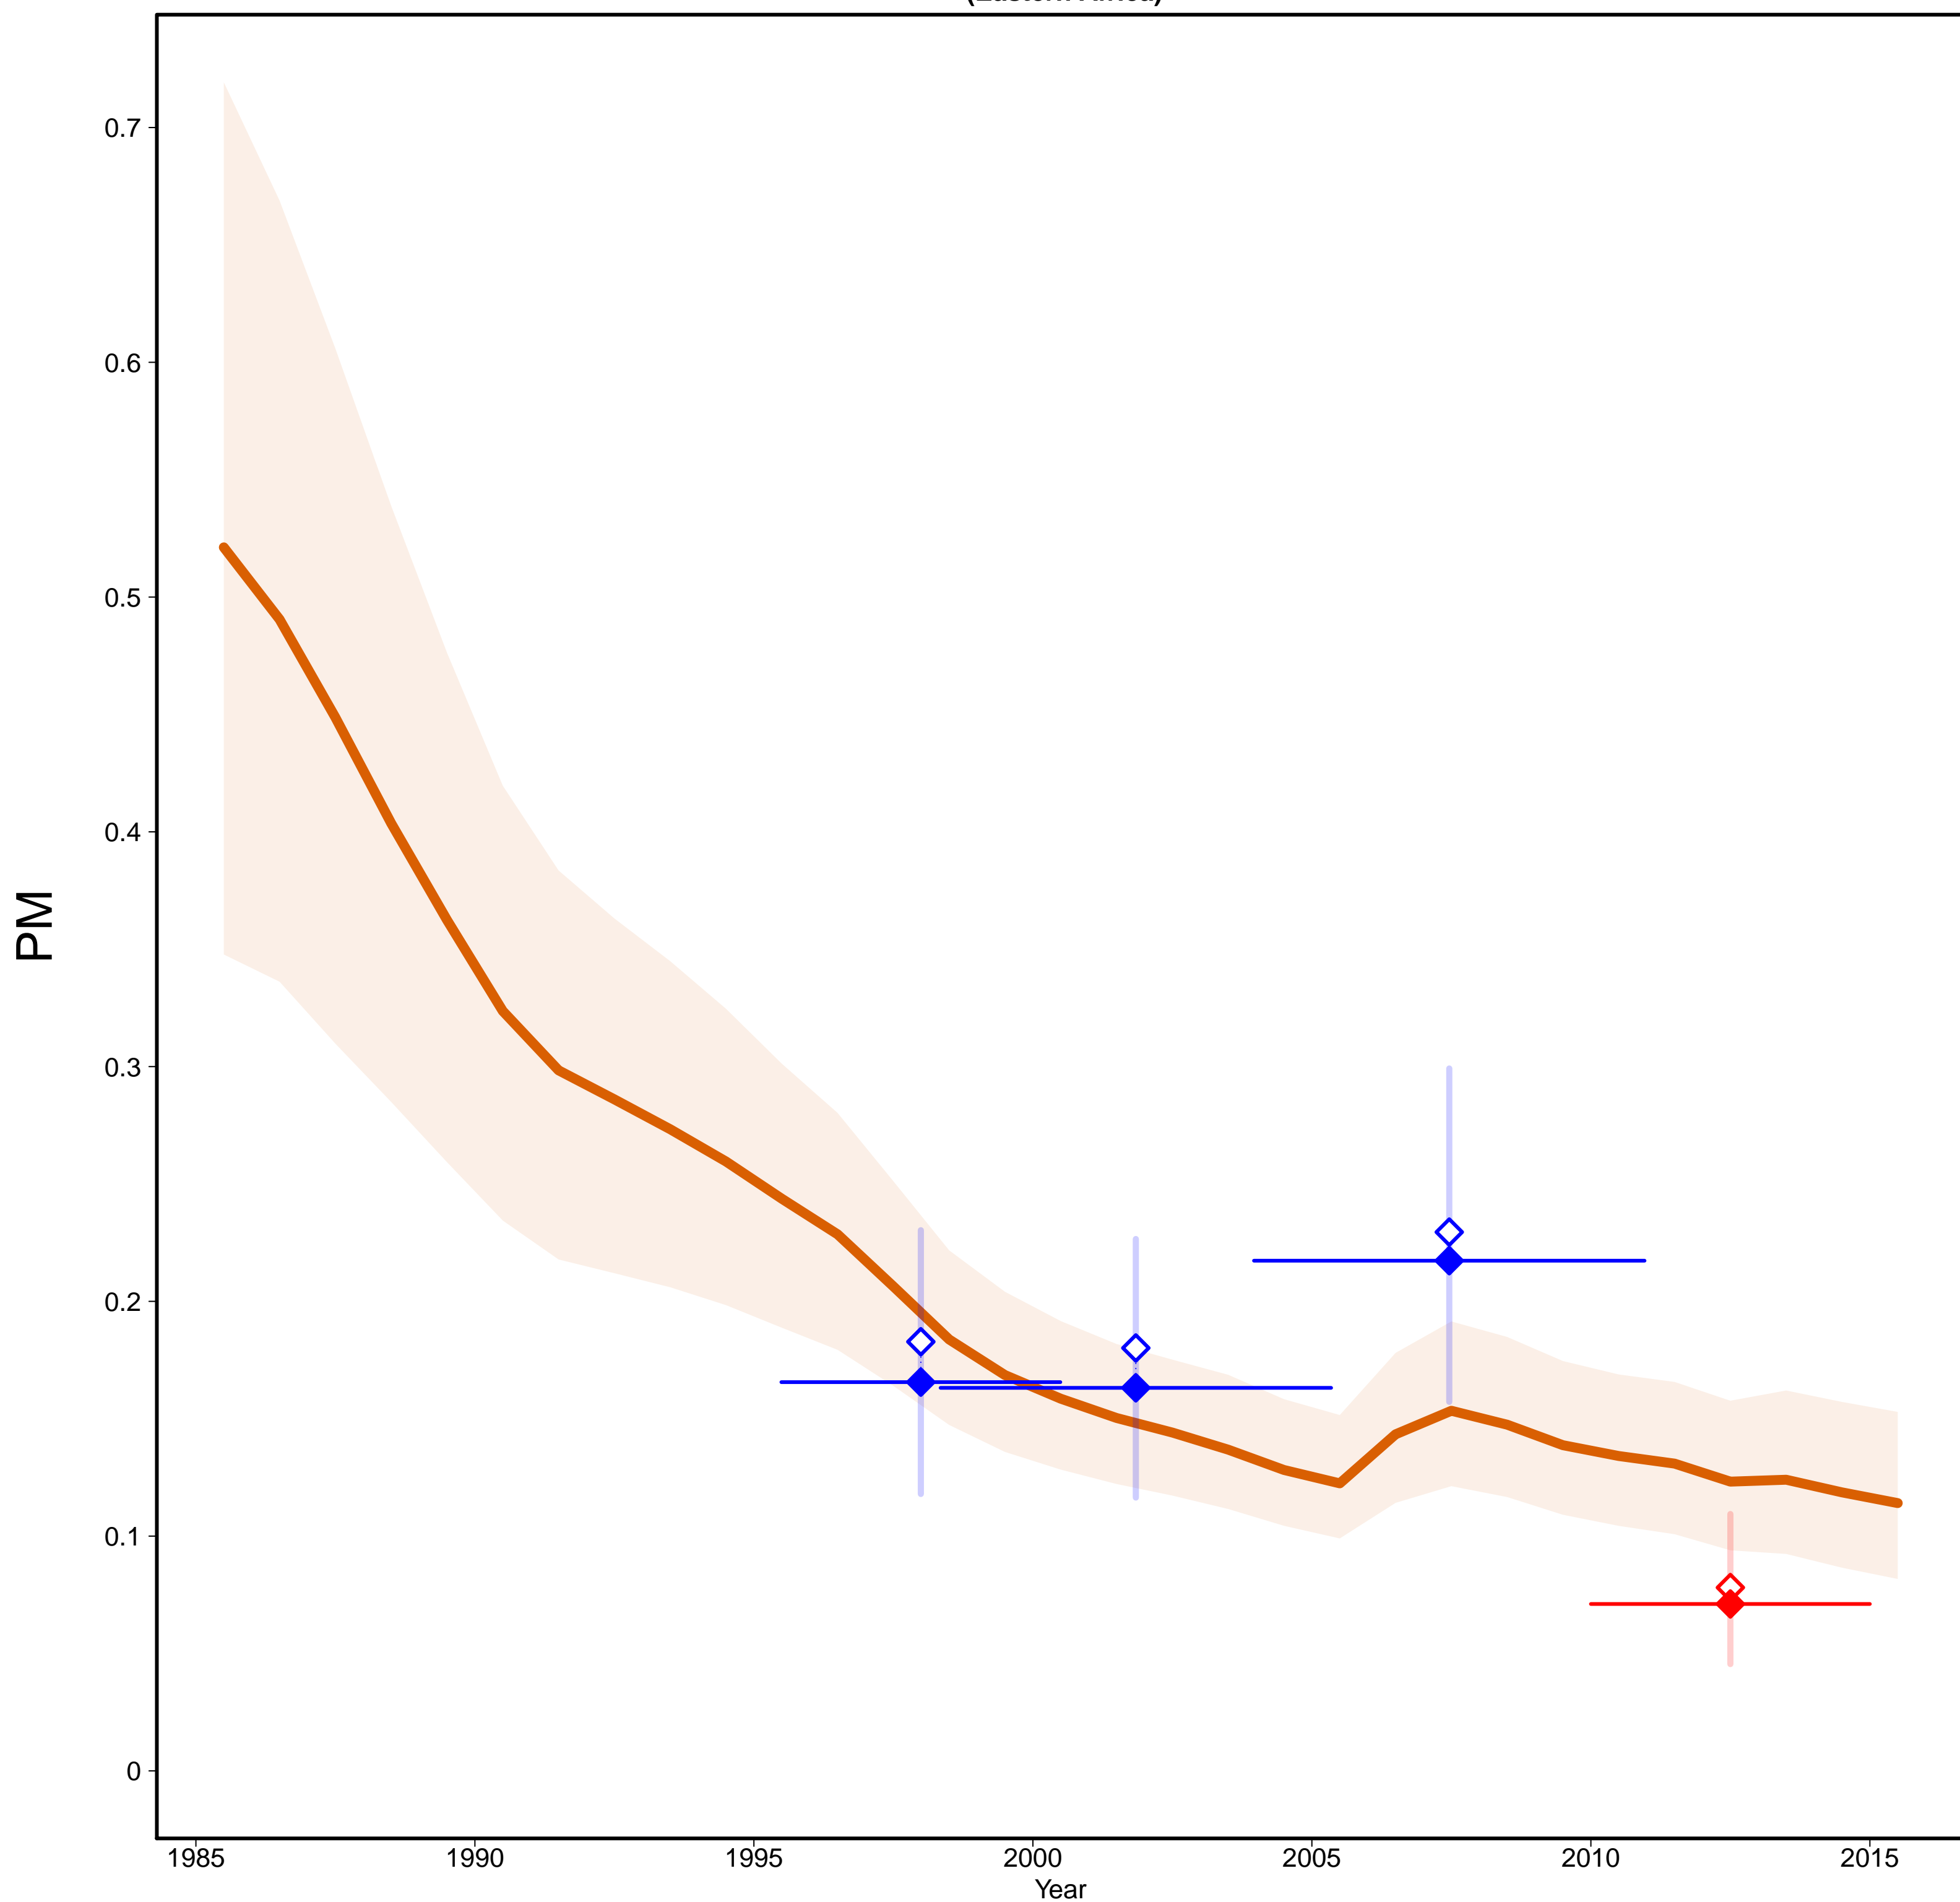

Rwanda [RWA]  
(Eastern Africa)

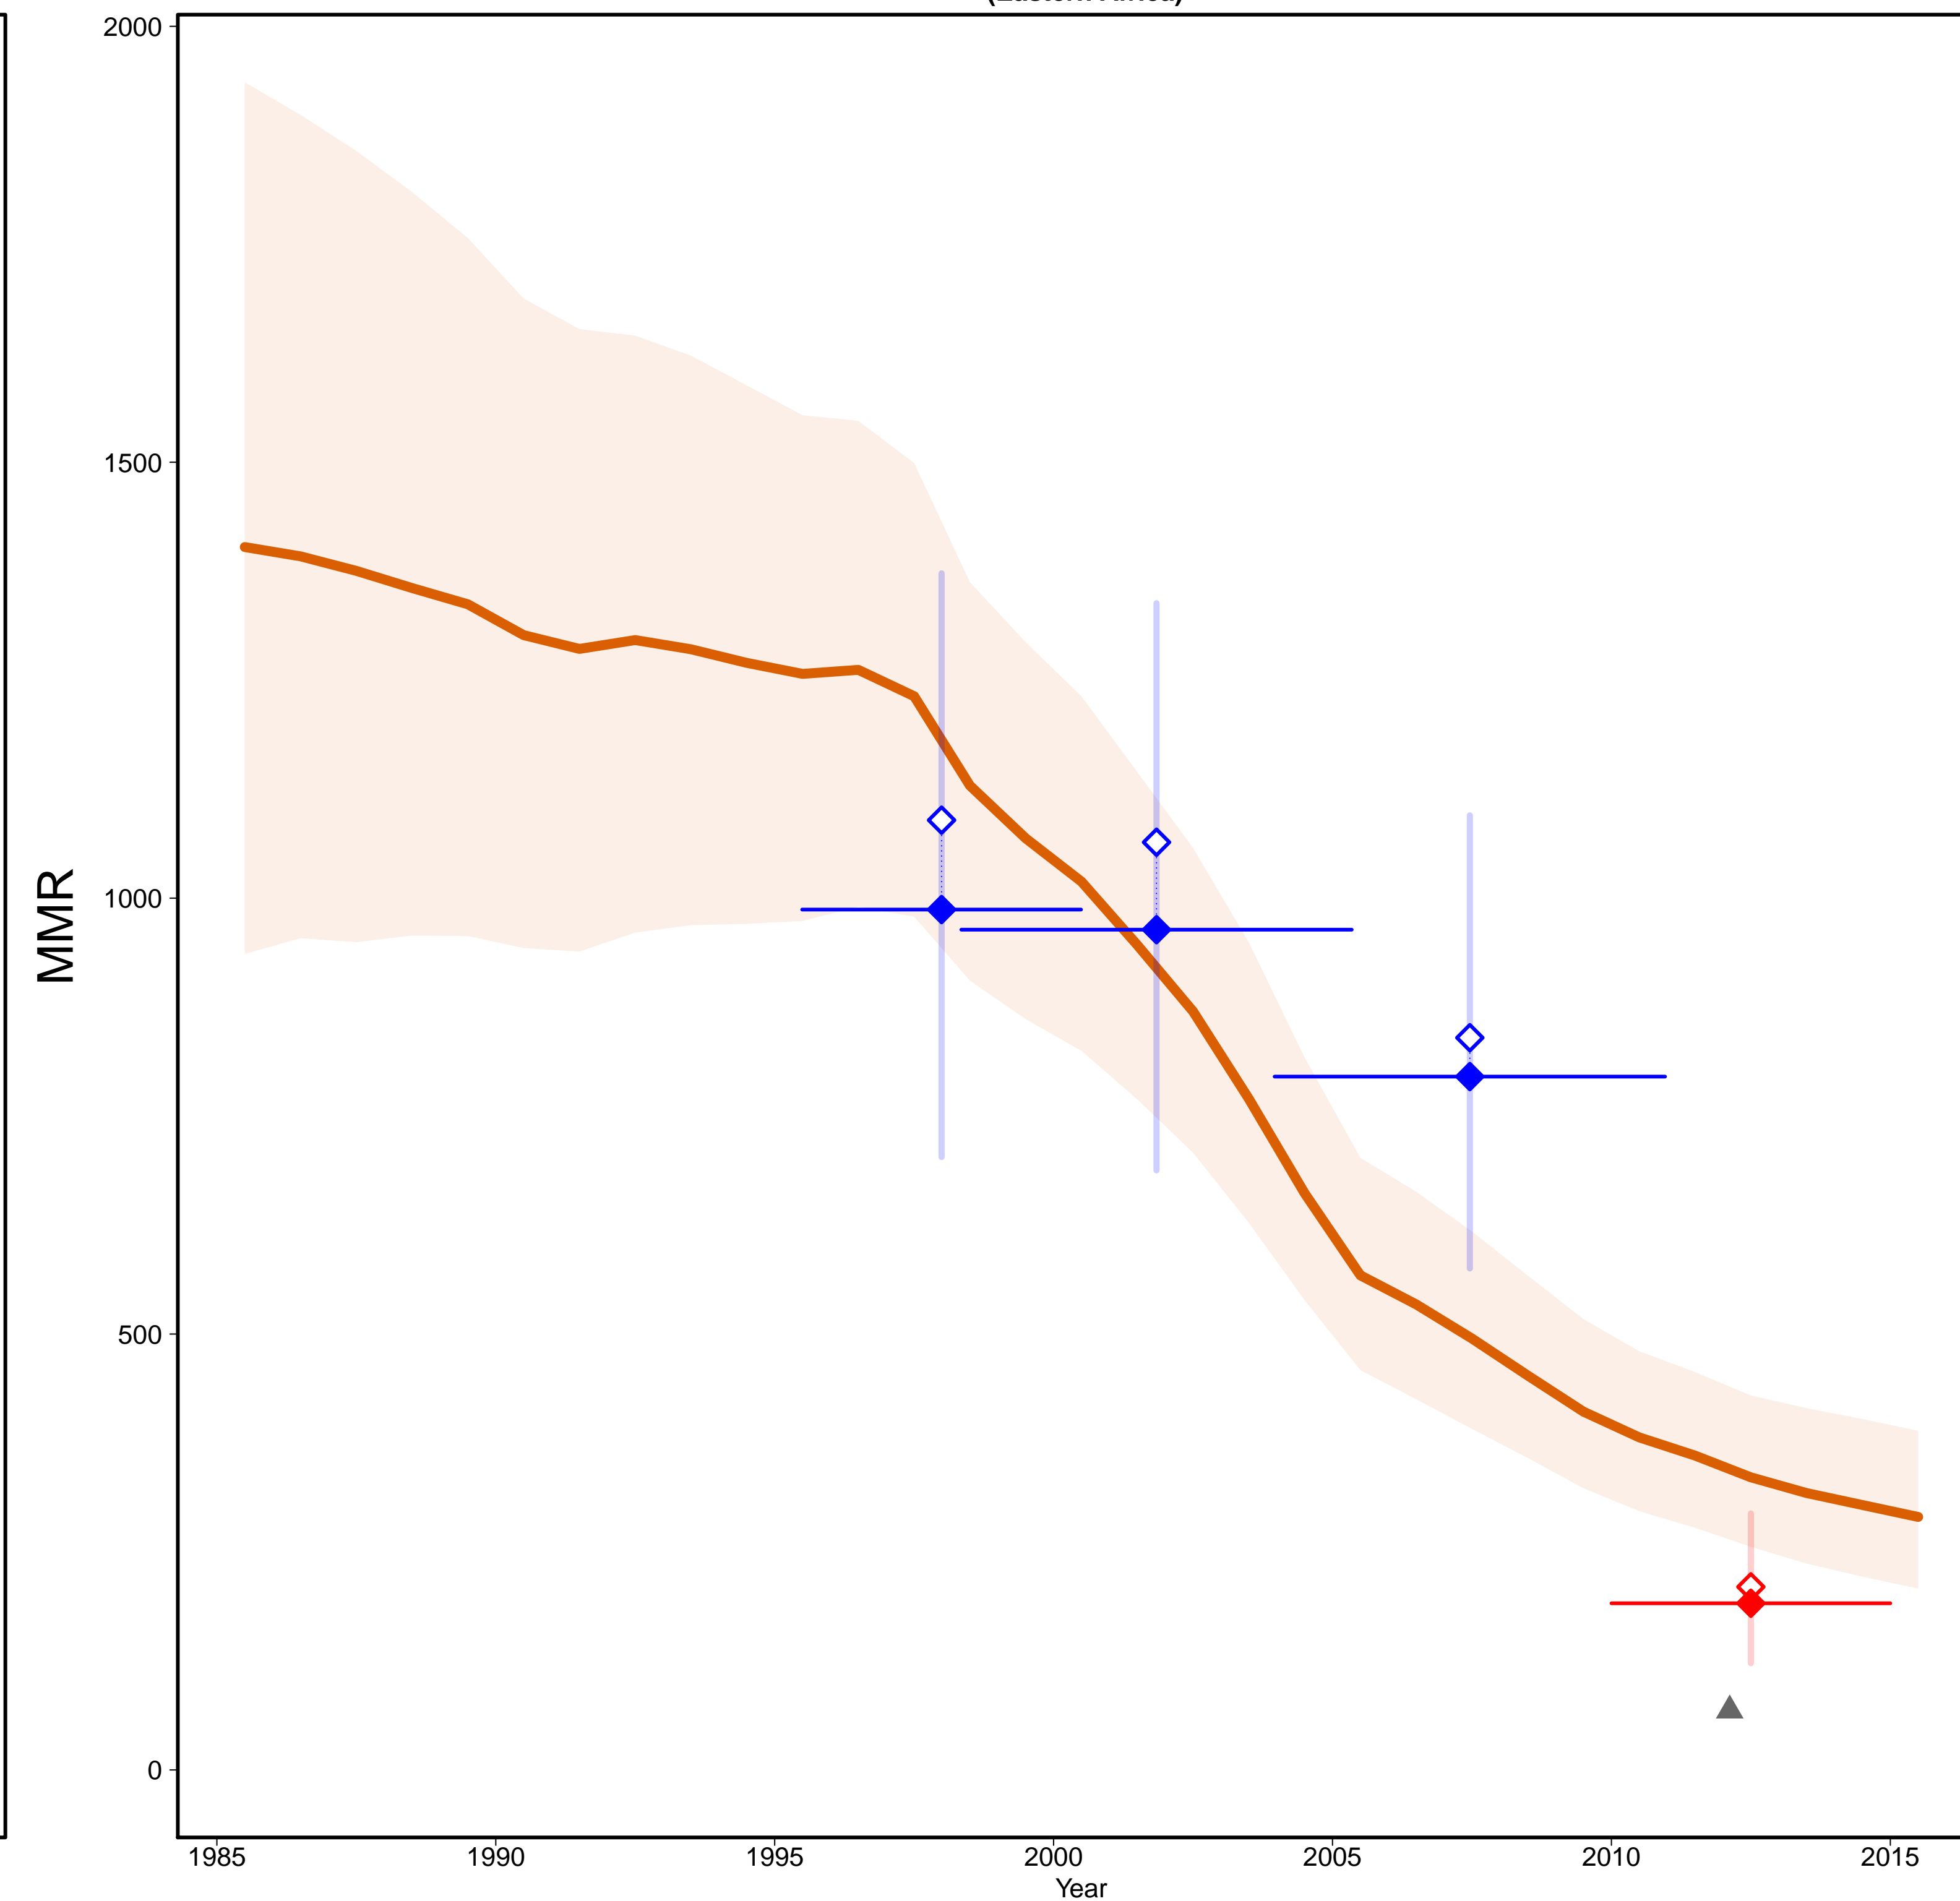

- Estimates —
- MMR Database 2015 —
- ◇ Observed Data
- ◆ Adjusted Data
- Data type —
- ◆ DHS
- ◆ Misc. studies
- ▲ Excluded misc. studies

Gross Domestic Product

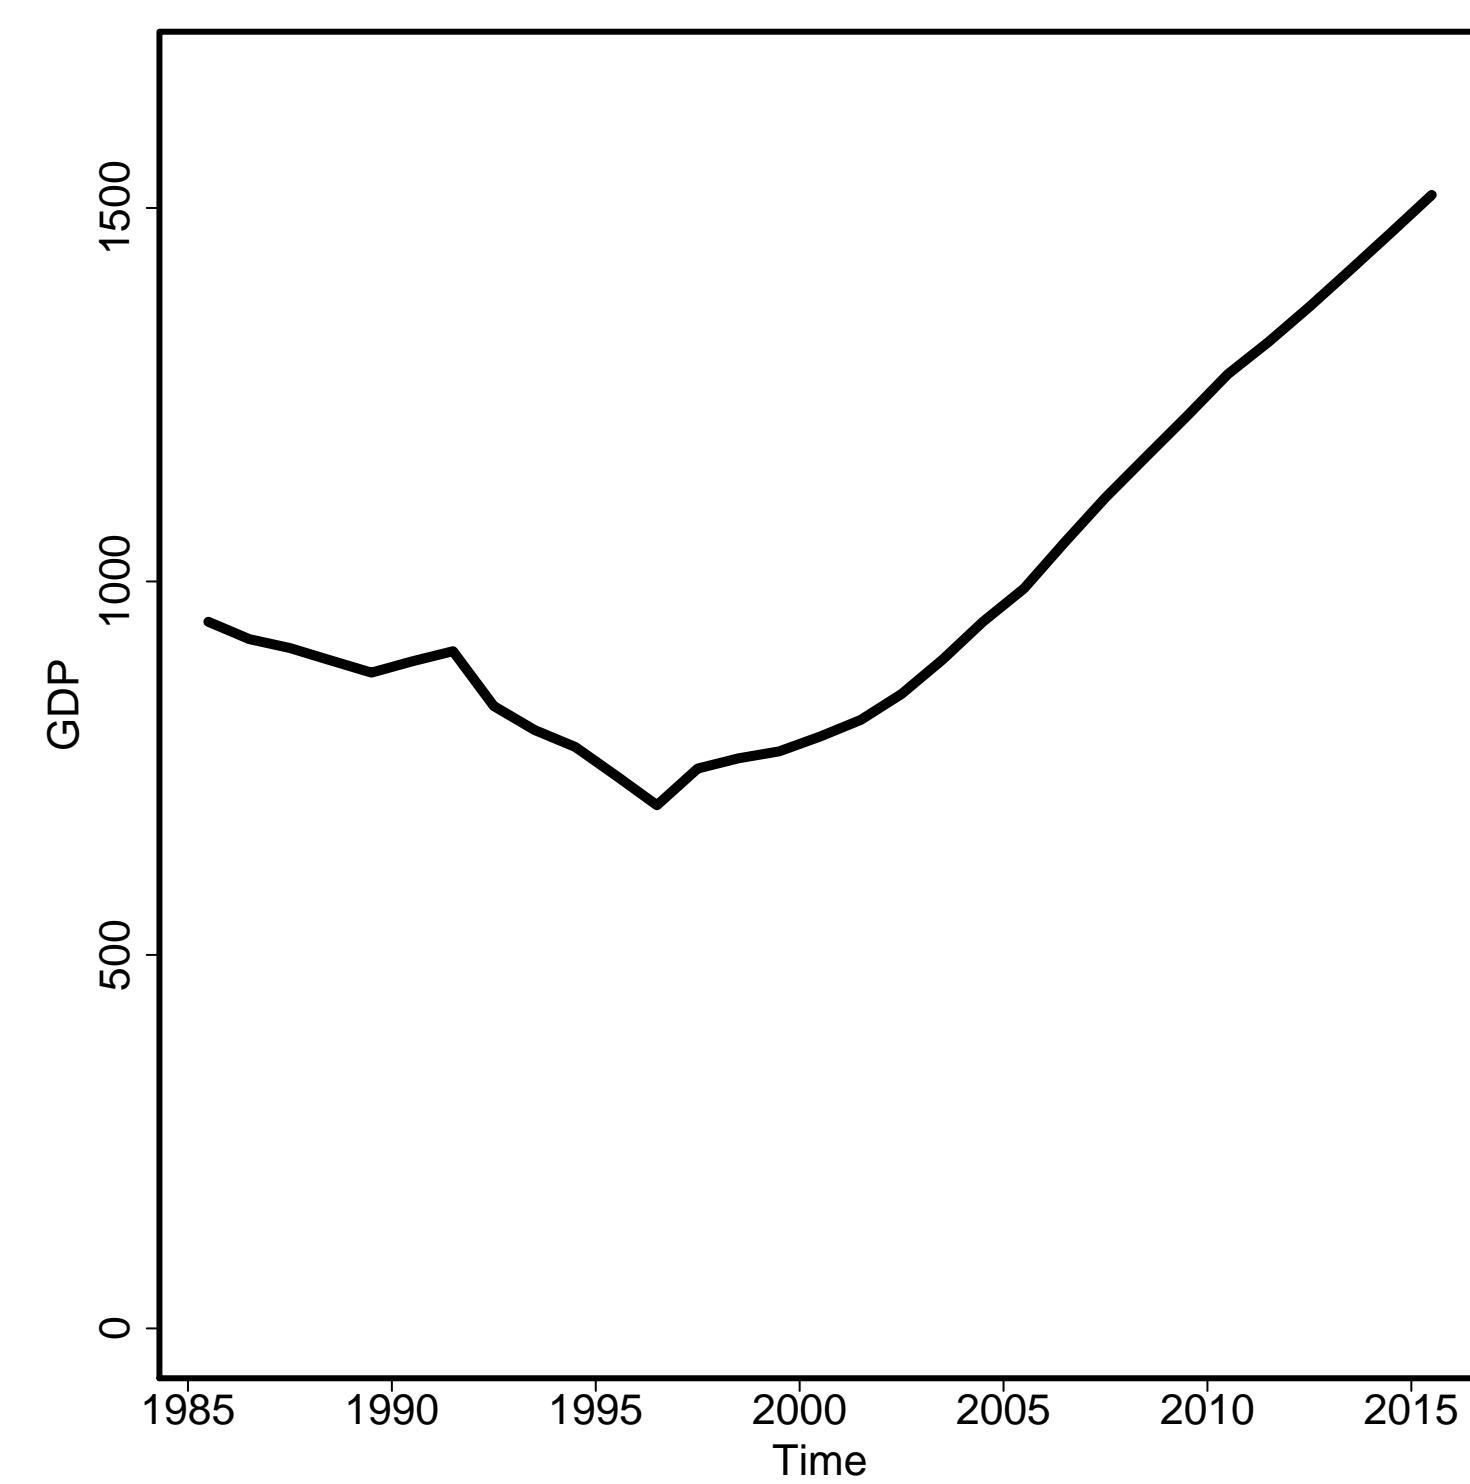

General Fertility Rate

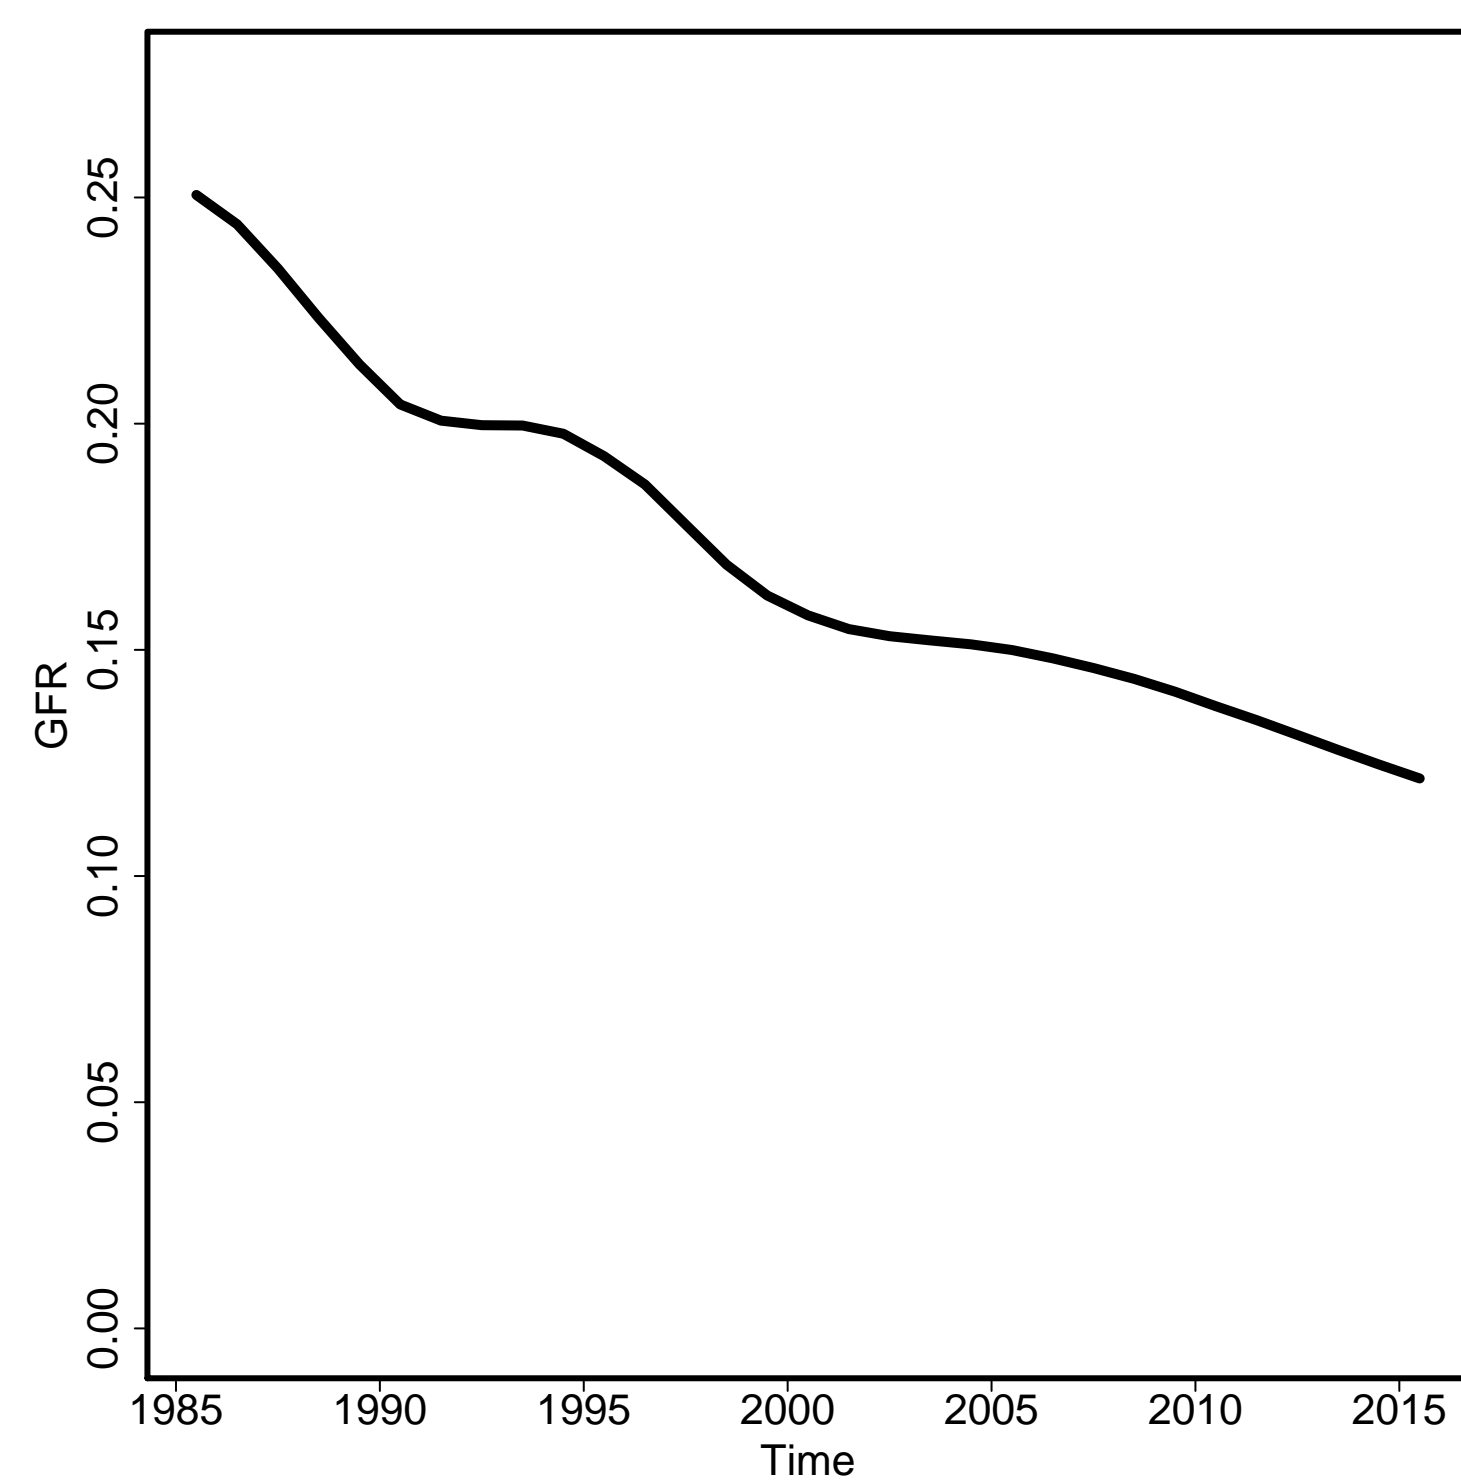

Skilled Attendance to Birth

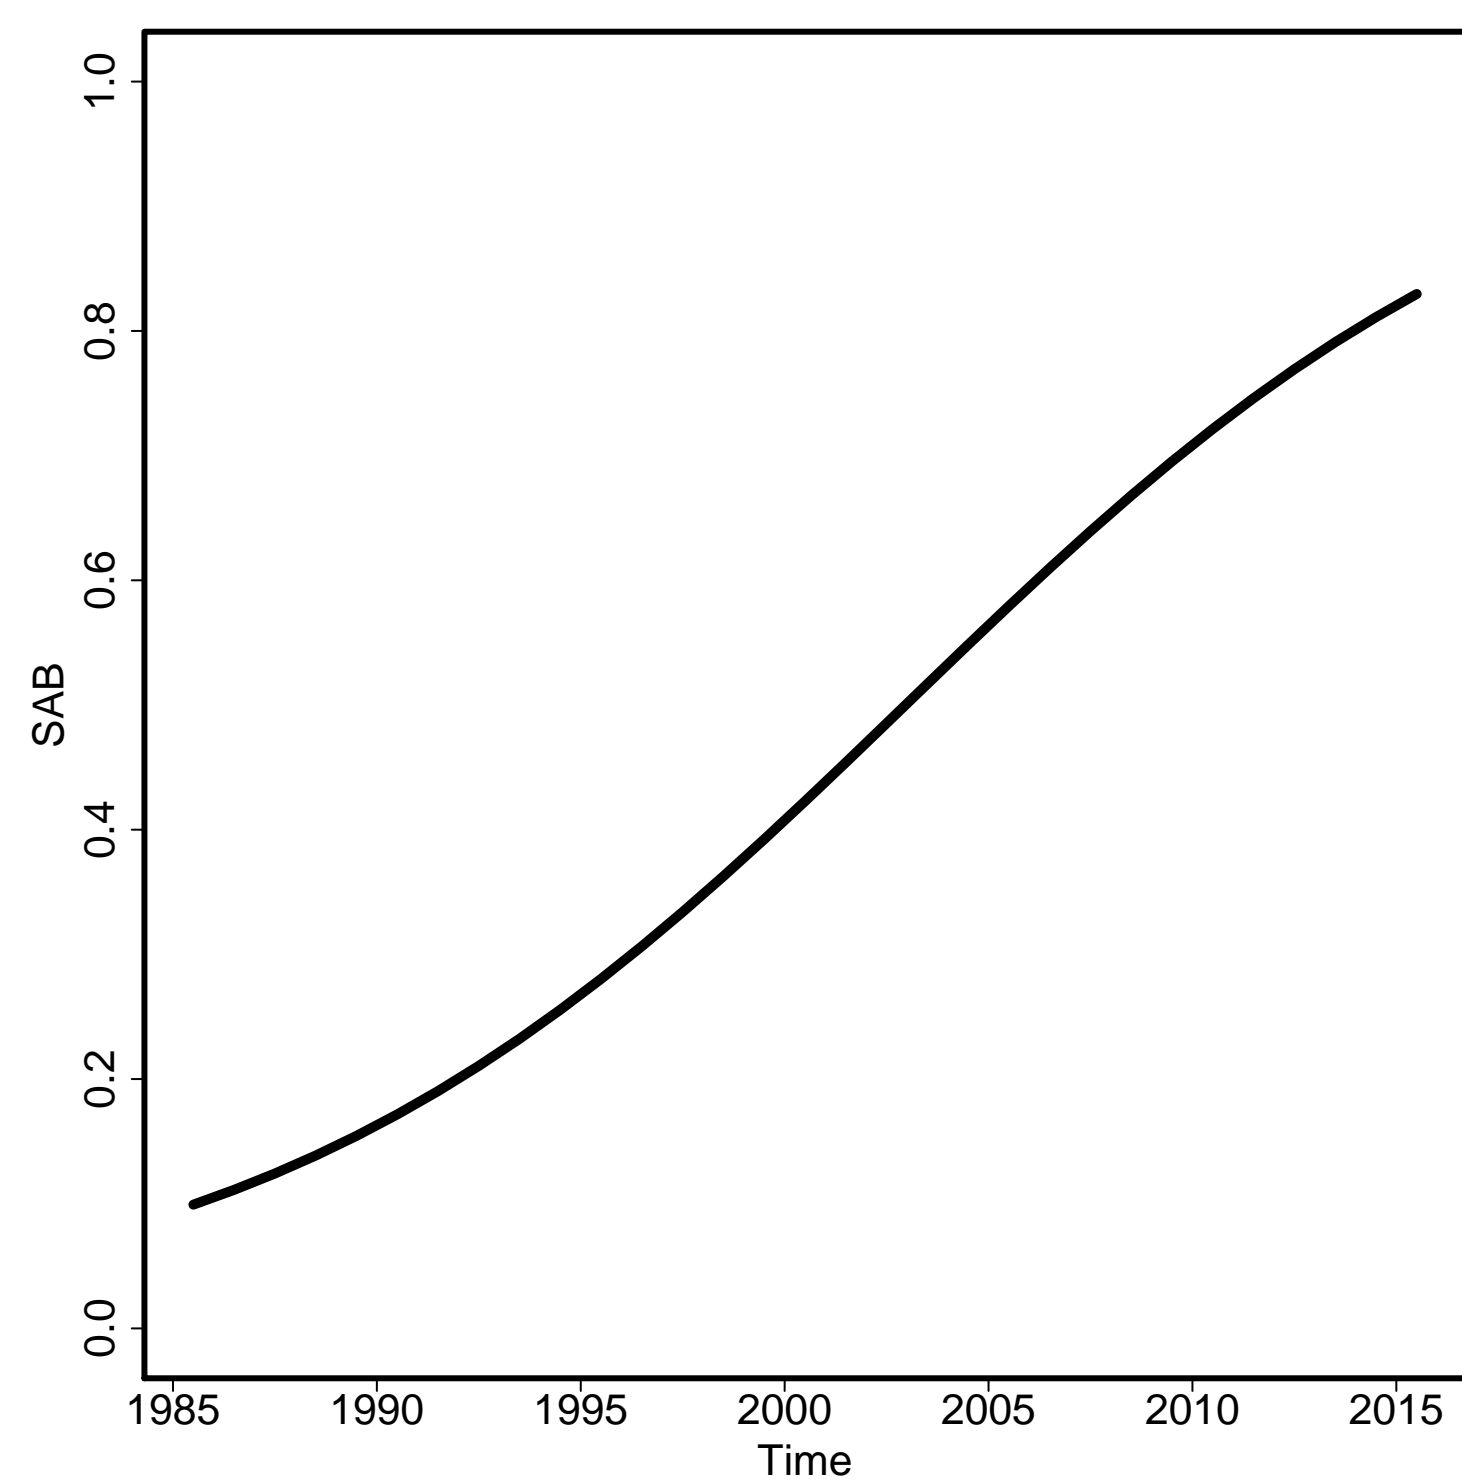

Envelope/Births

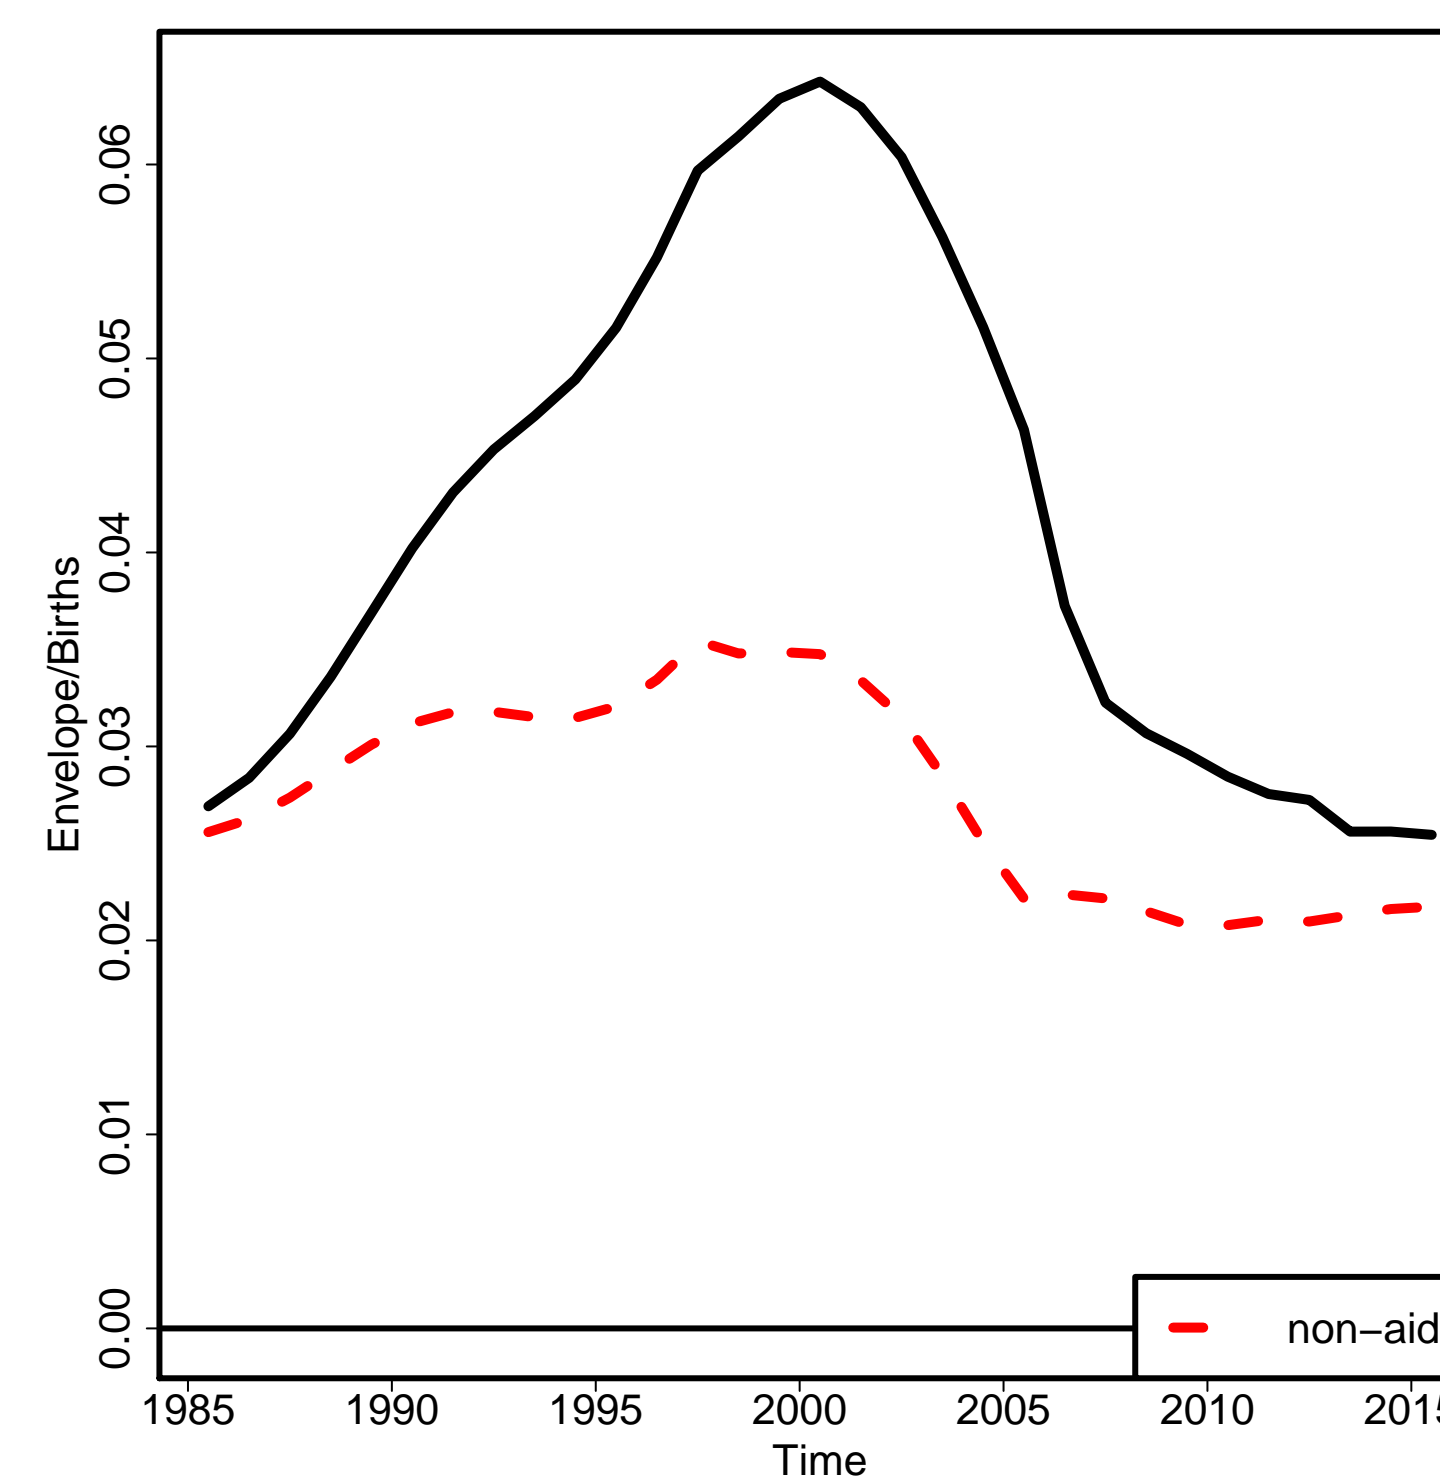

Non-aids MMR

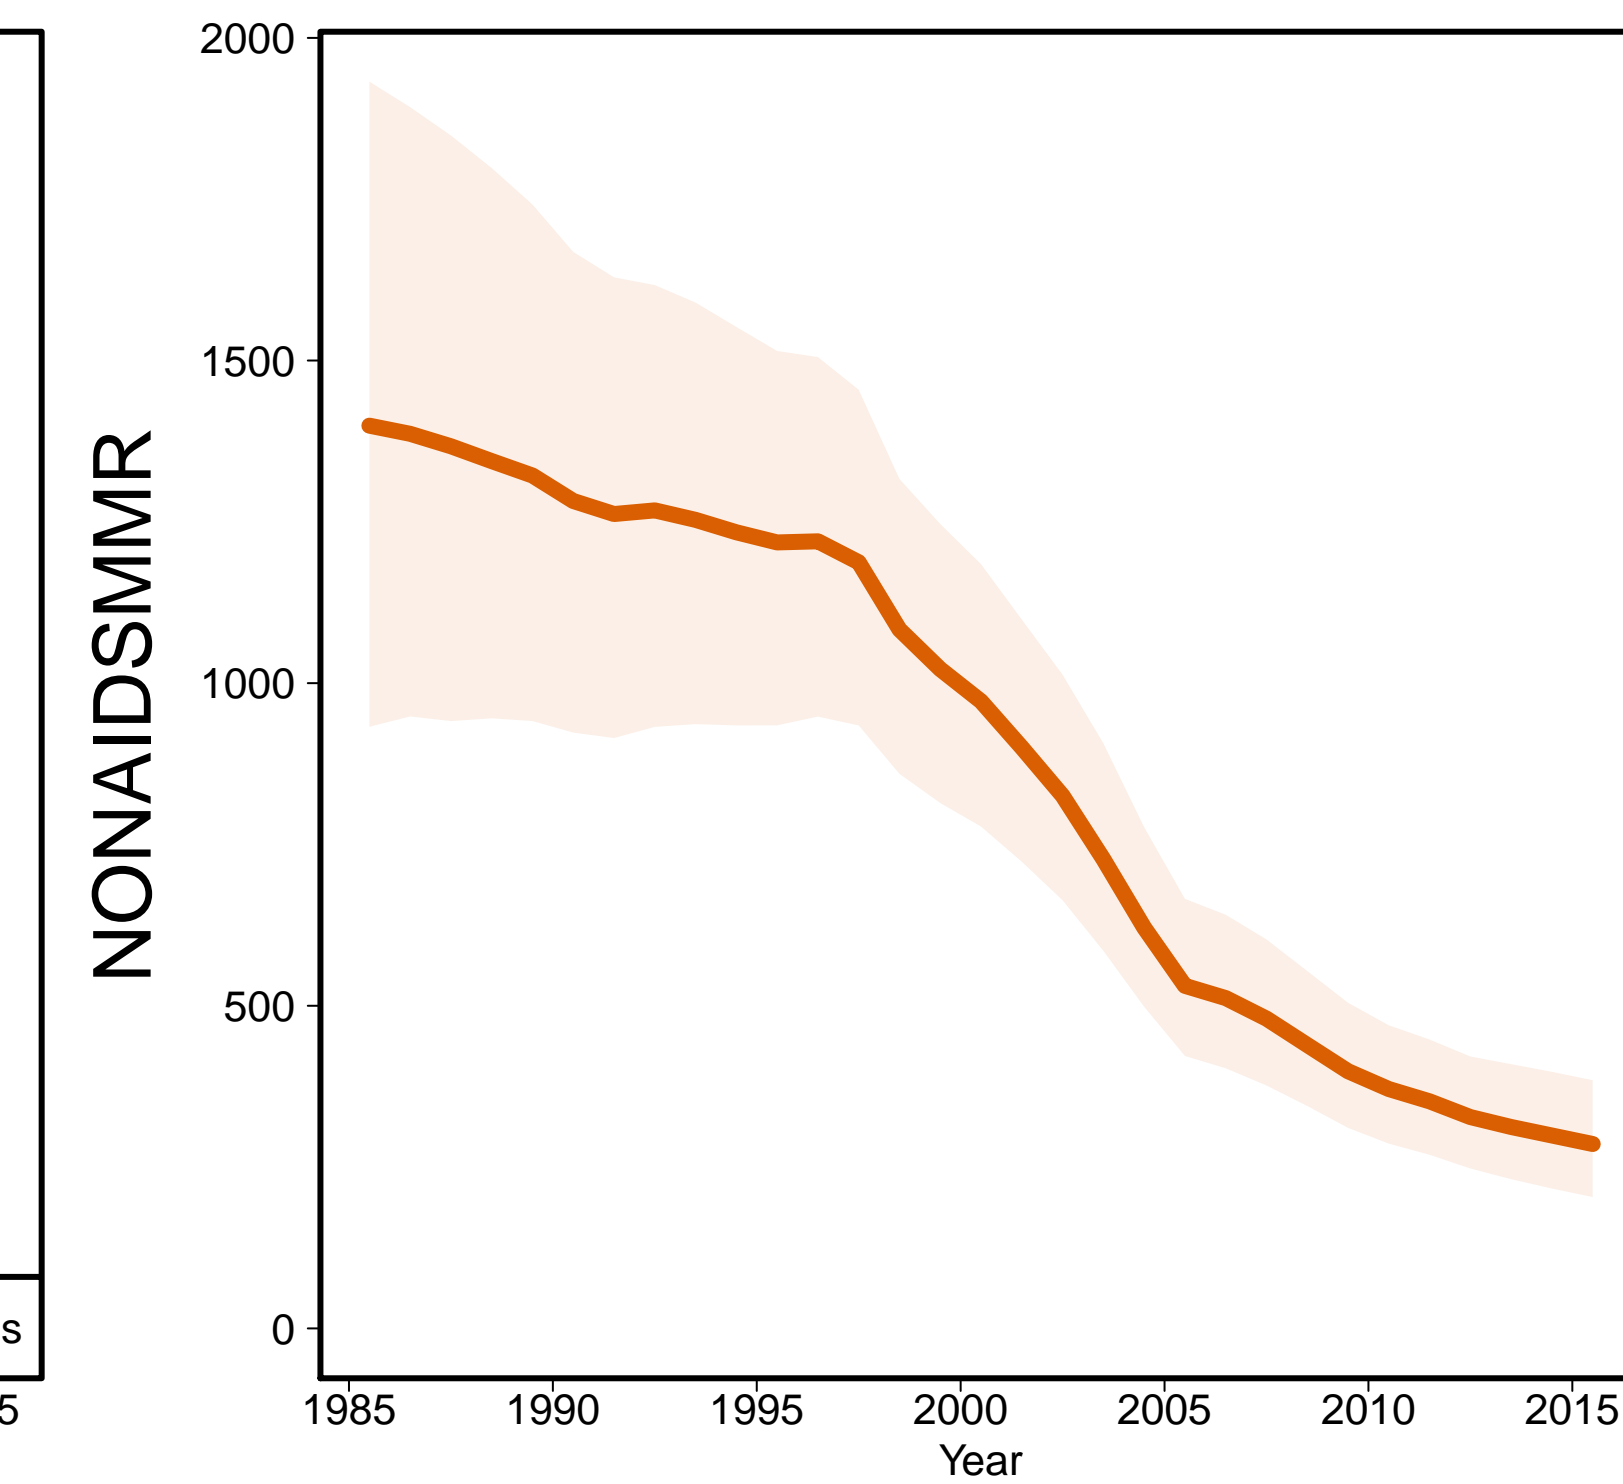

Aids MMR

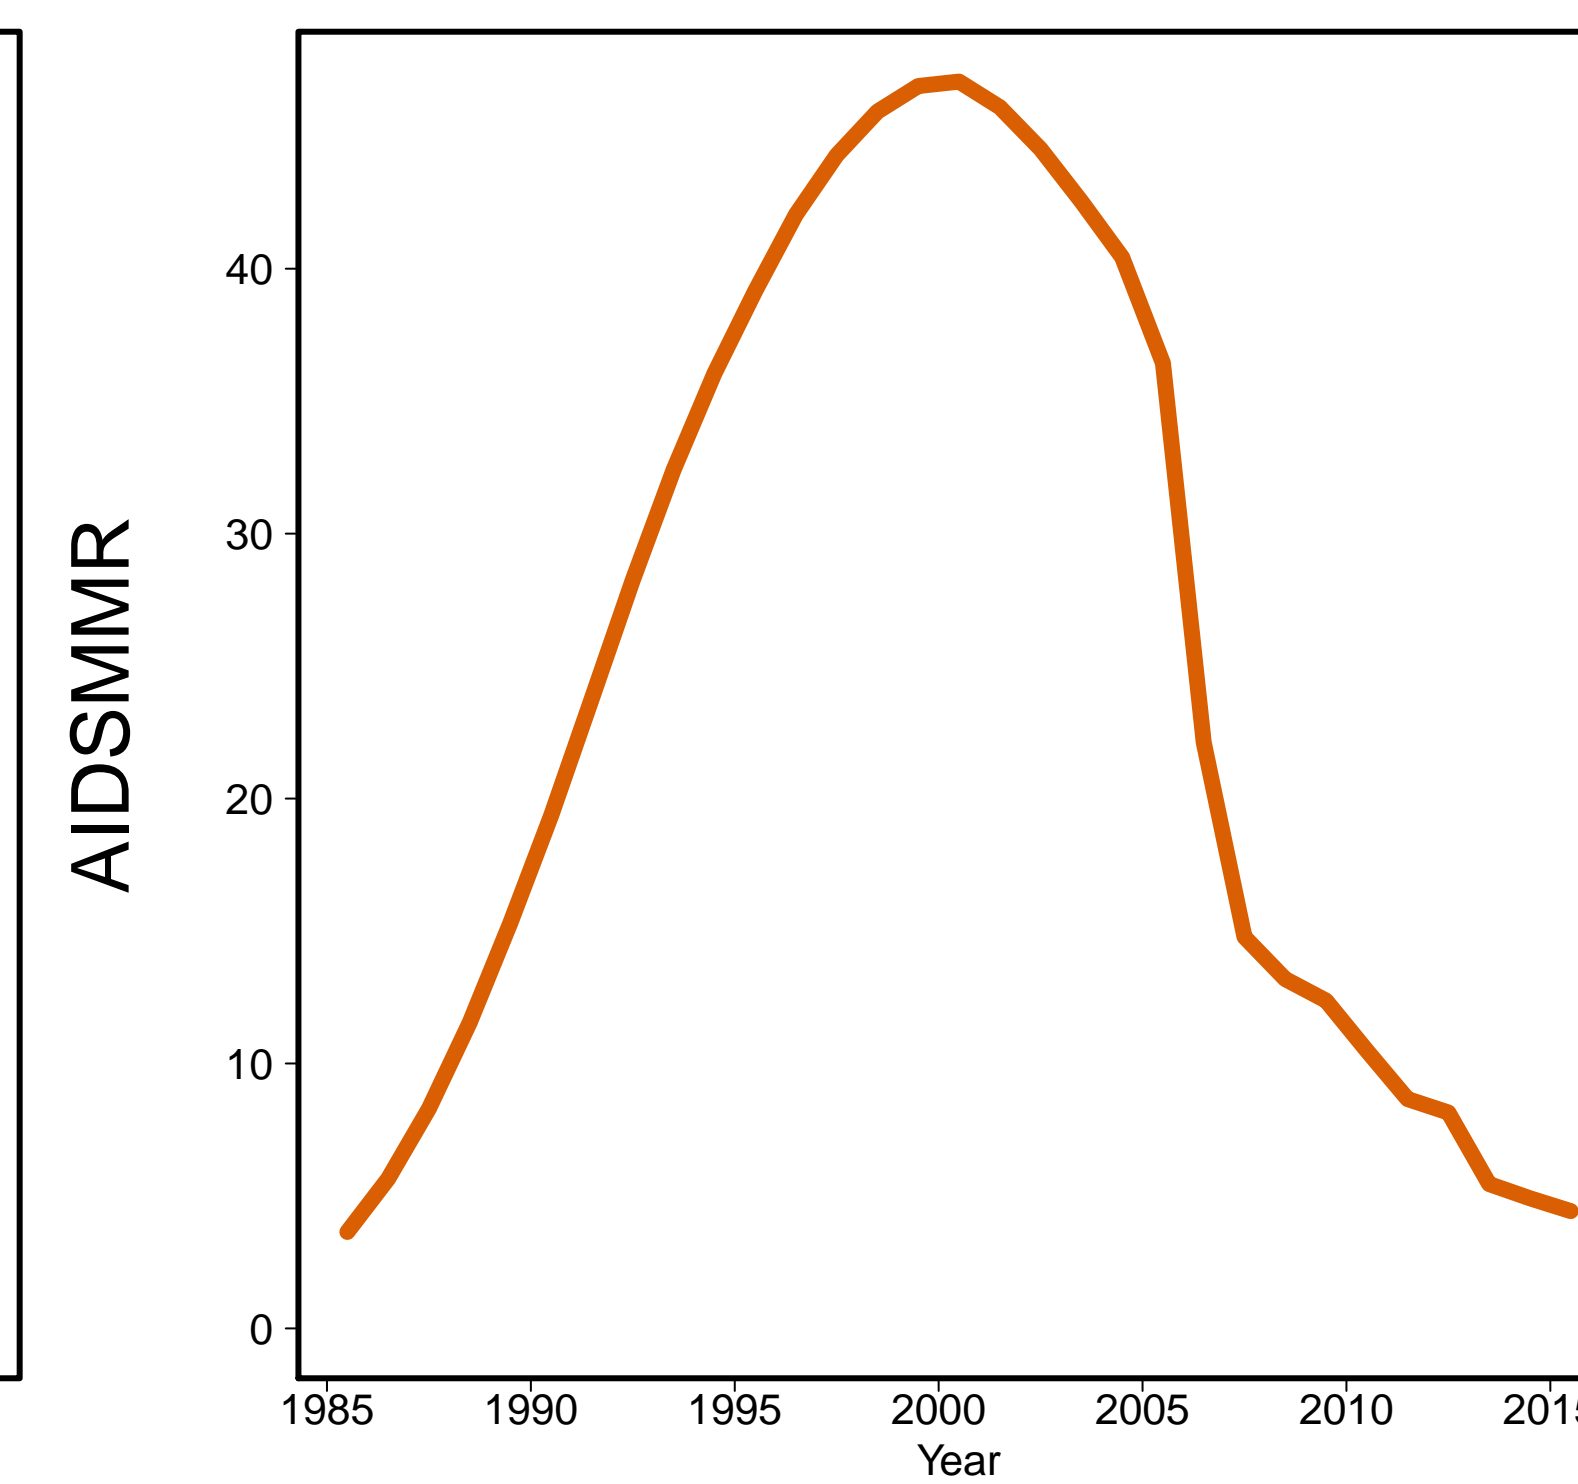



Saint Lucia [LCA]  
(Caribbean)

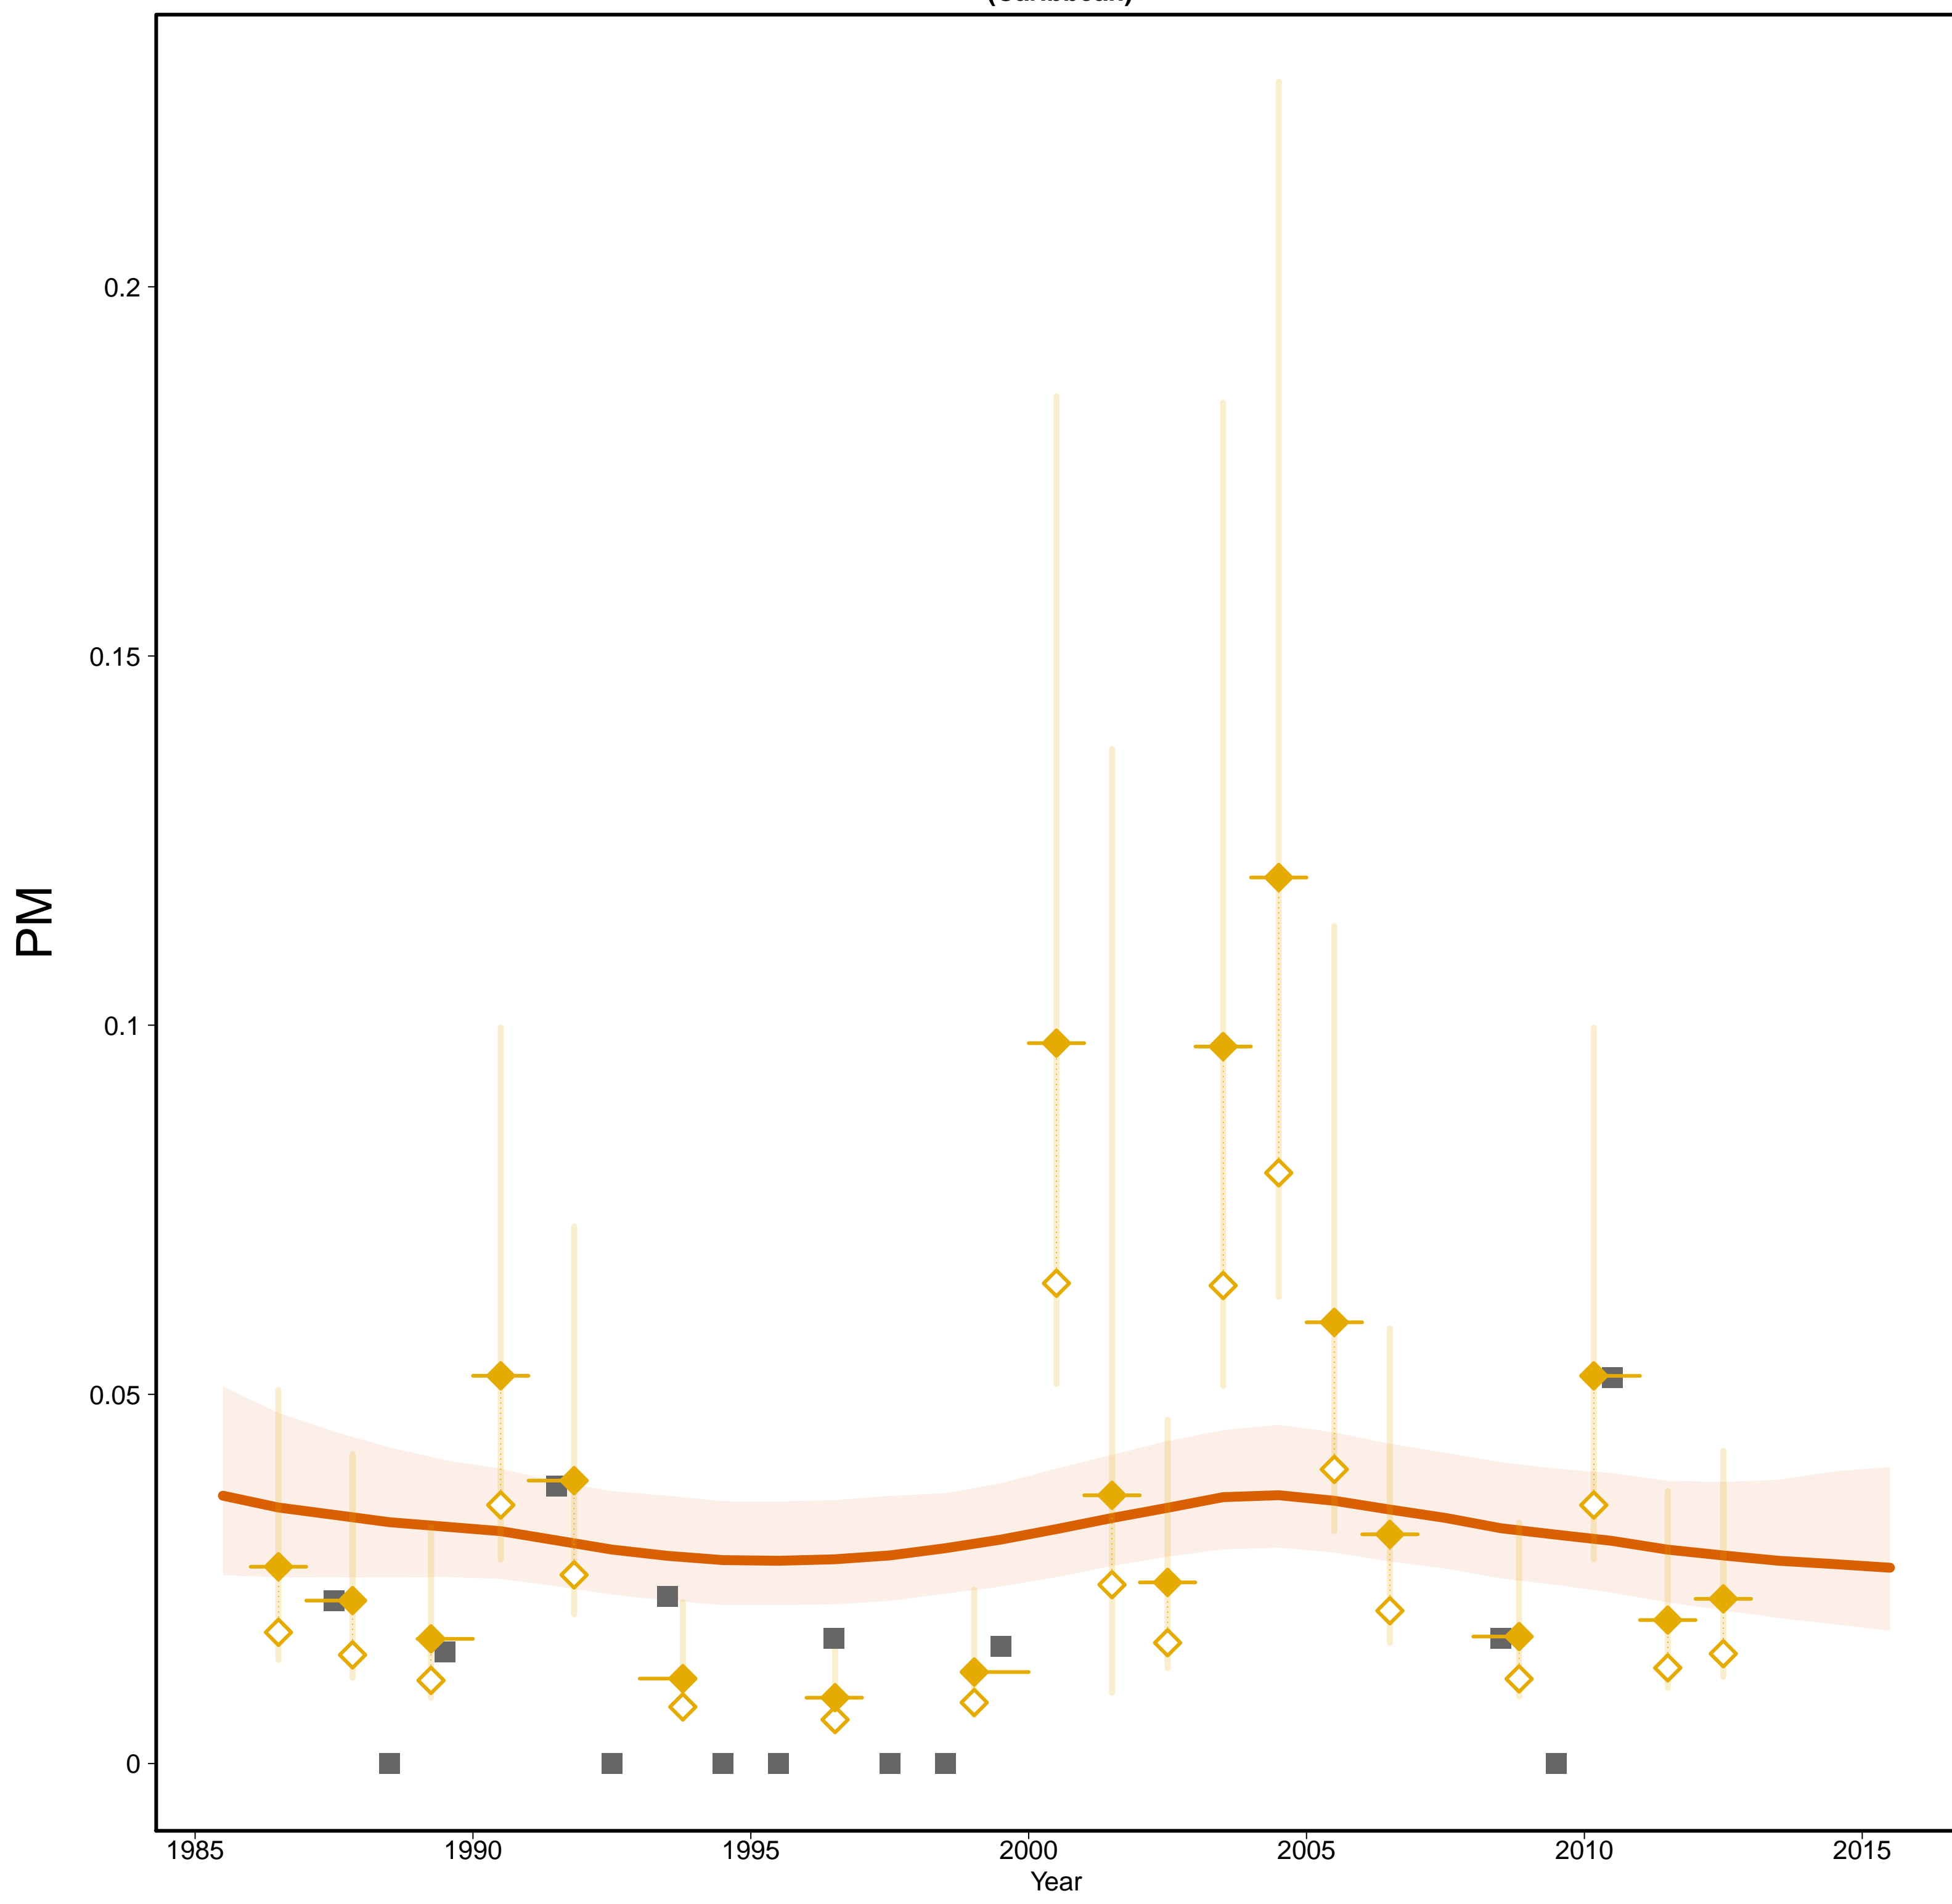

Saint Lucia [LCA]  
(Caribbean)

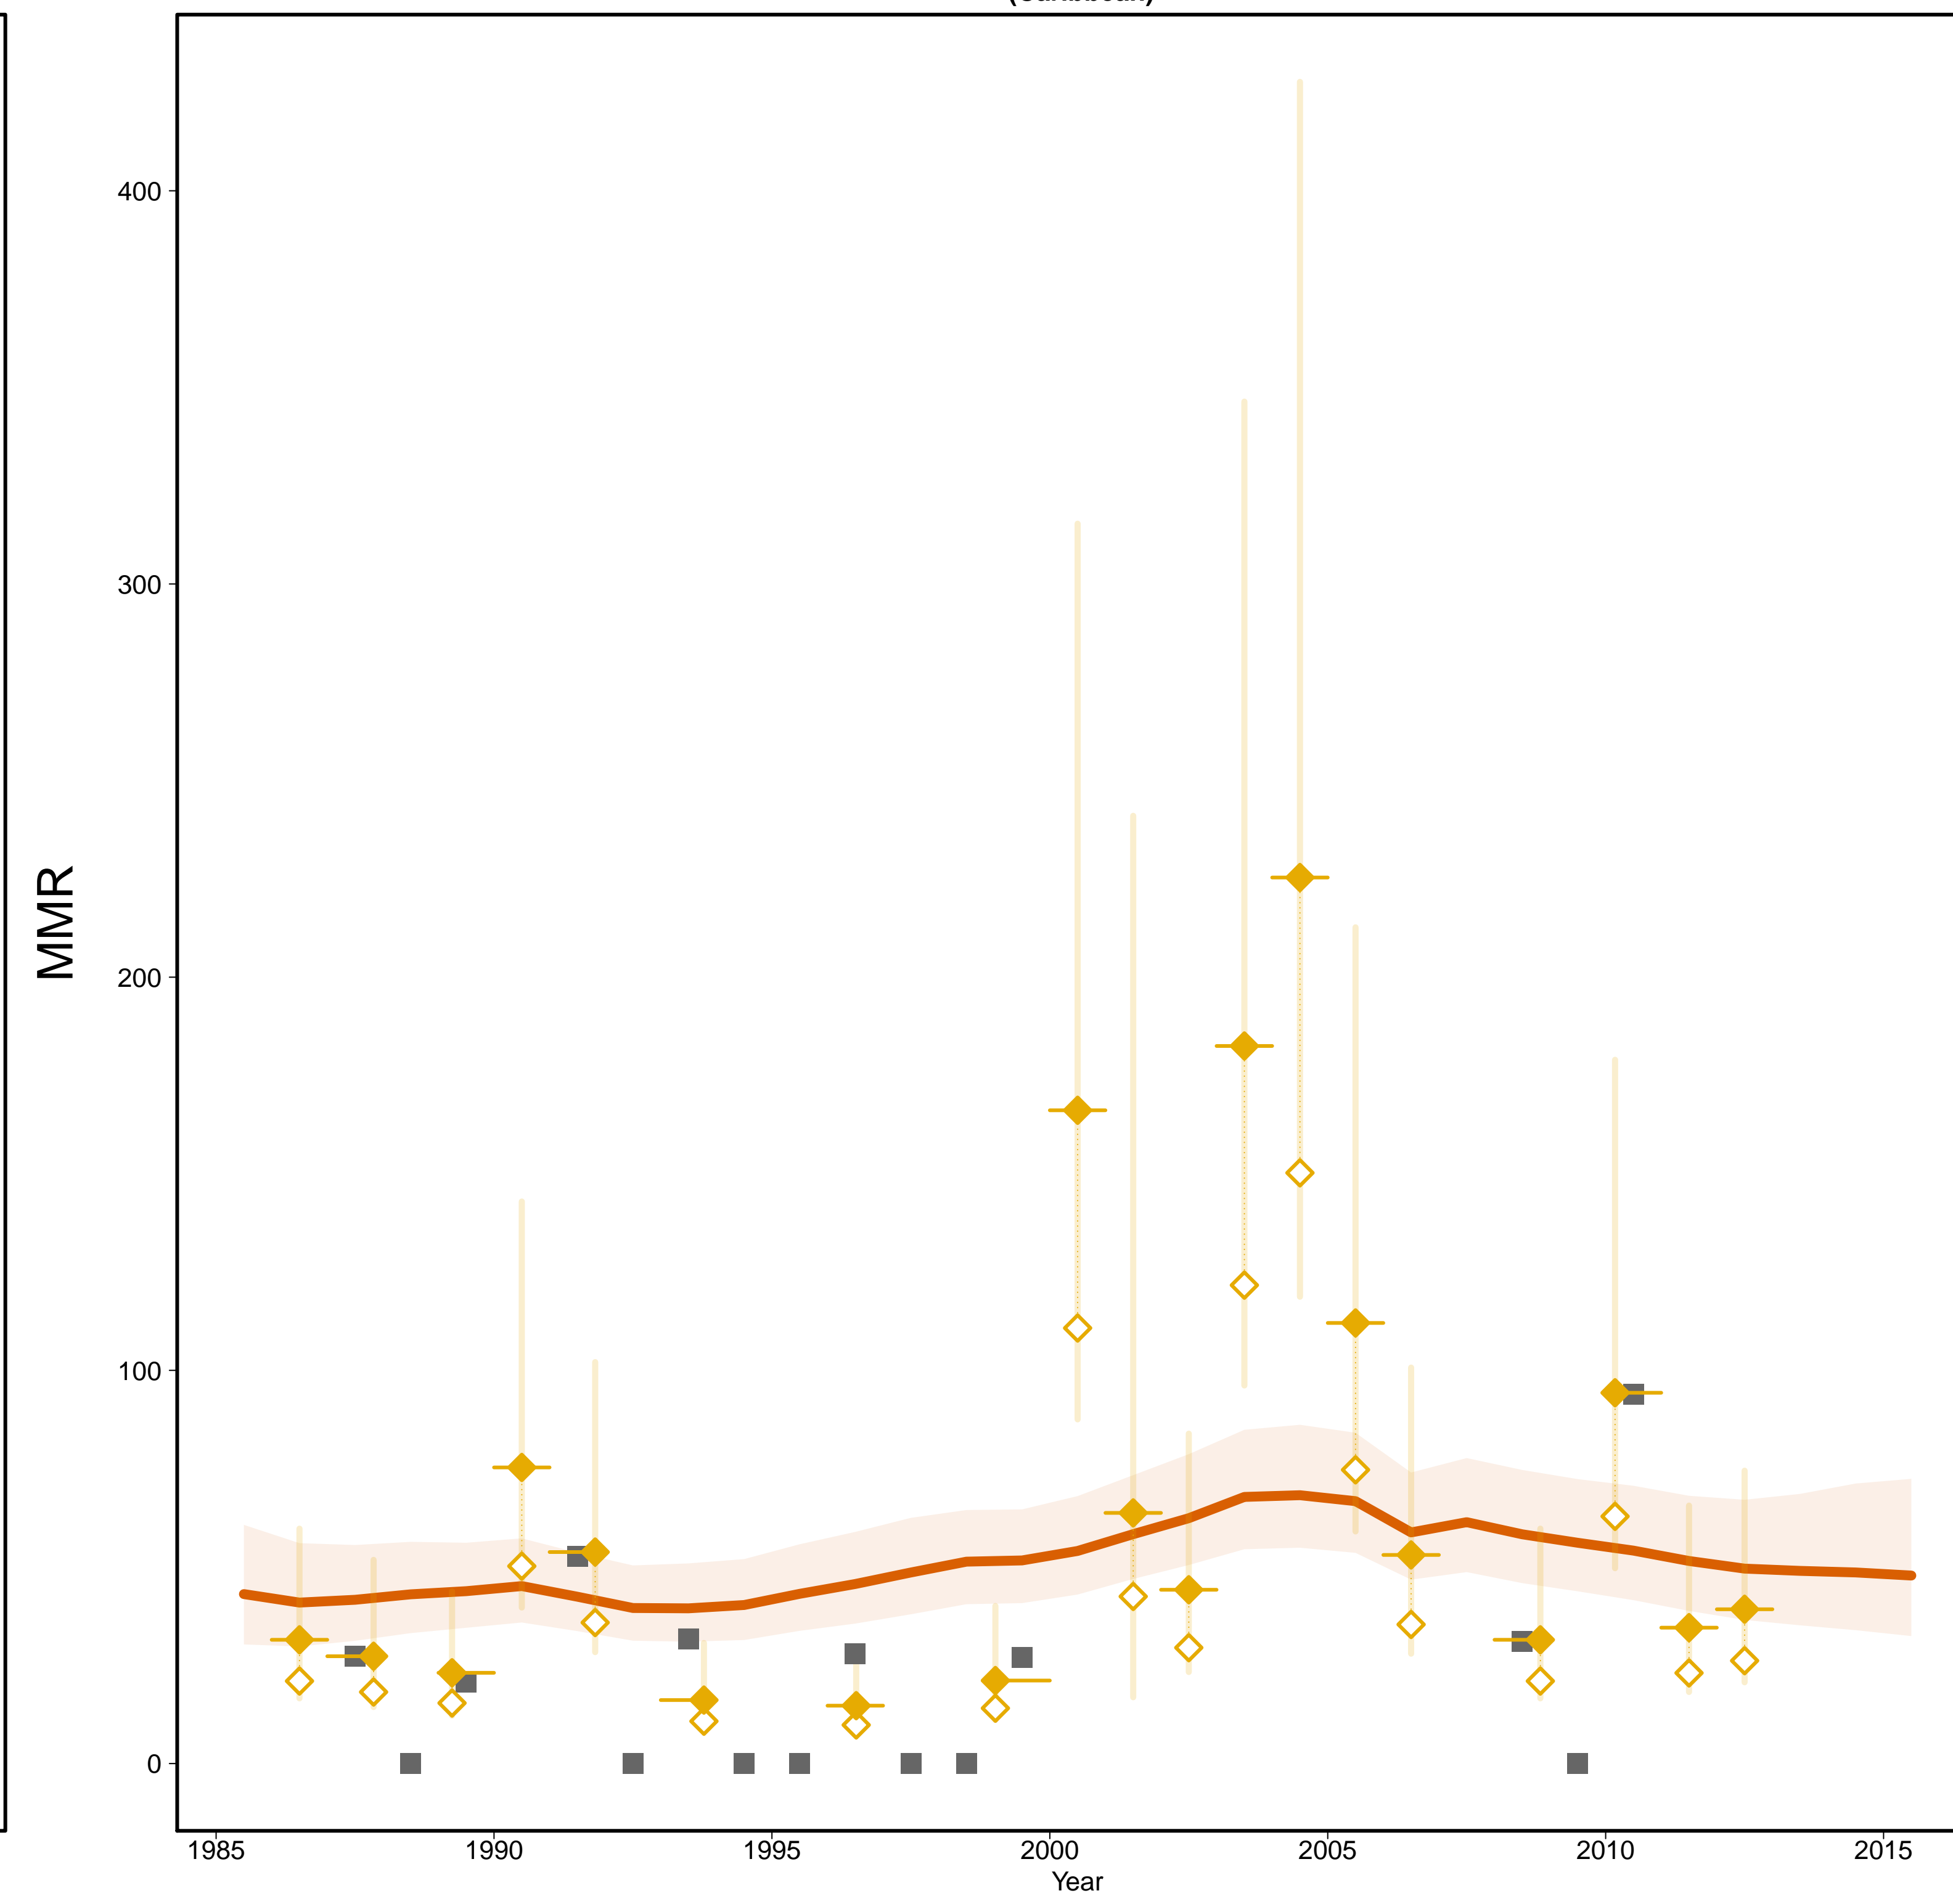

- Estimates –
- Mlate
- MMR Database 2015 –
- ◇ Observed Data
- ◆ Adjusted Data
- Data type –
- ◆ VR
- Reported VR before recalc.  
(related to 0 obs. mat. death)

Gross Domestic Product

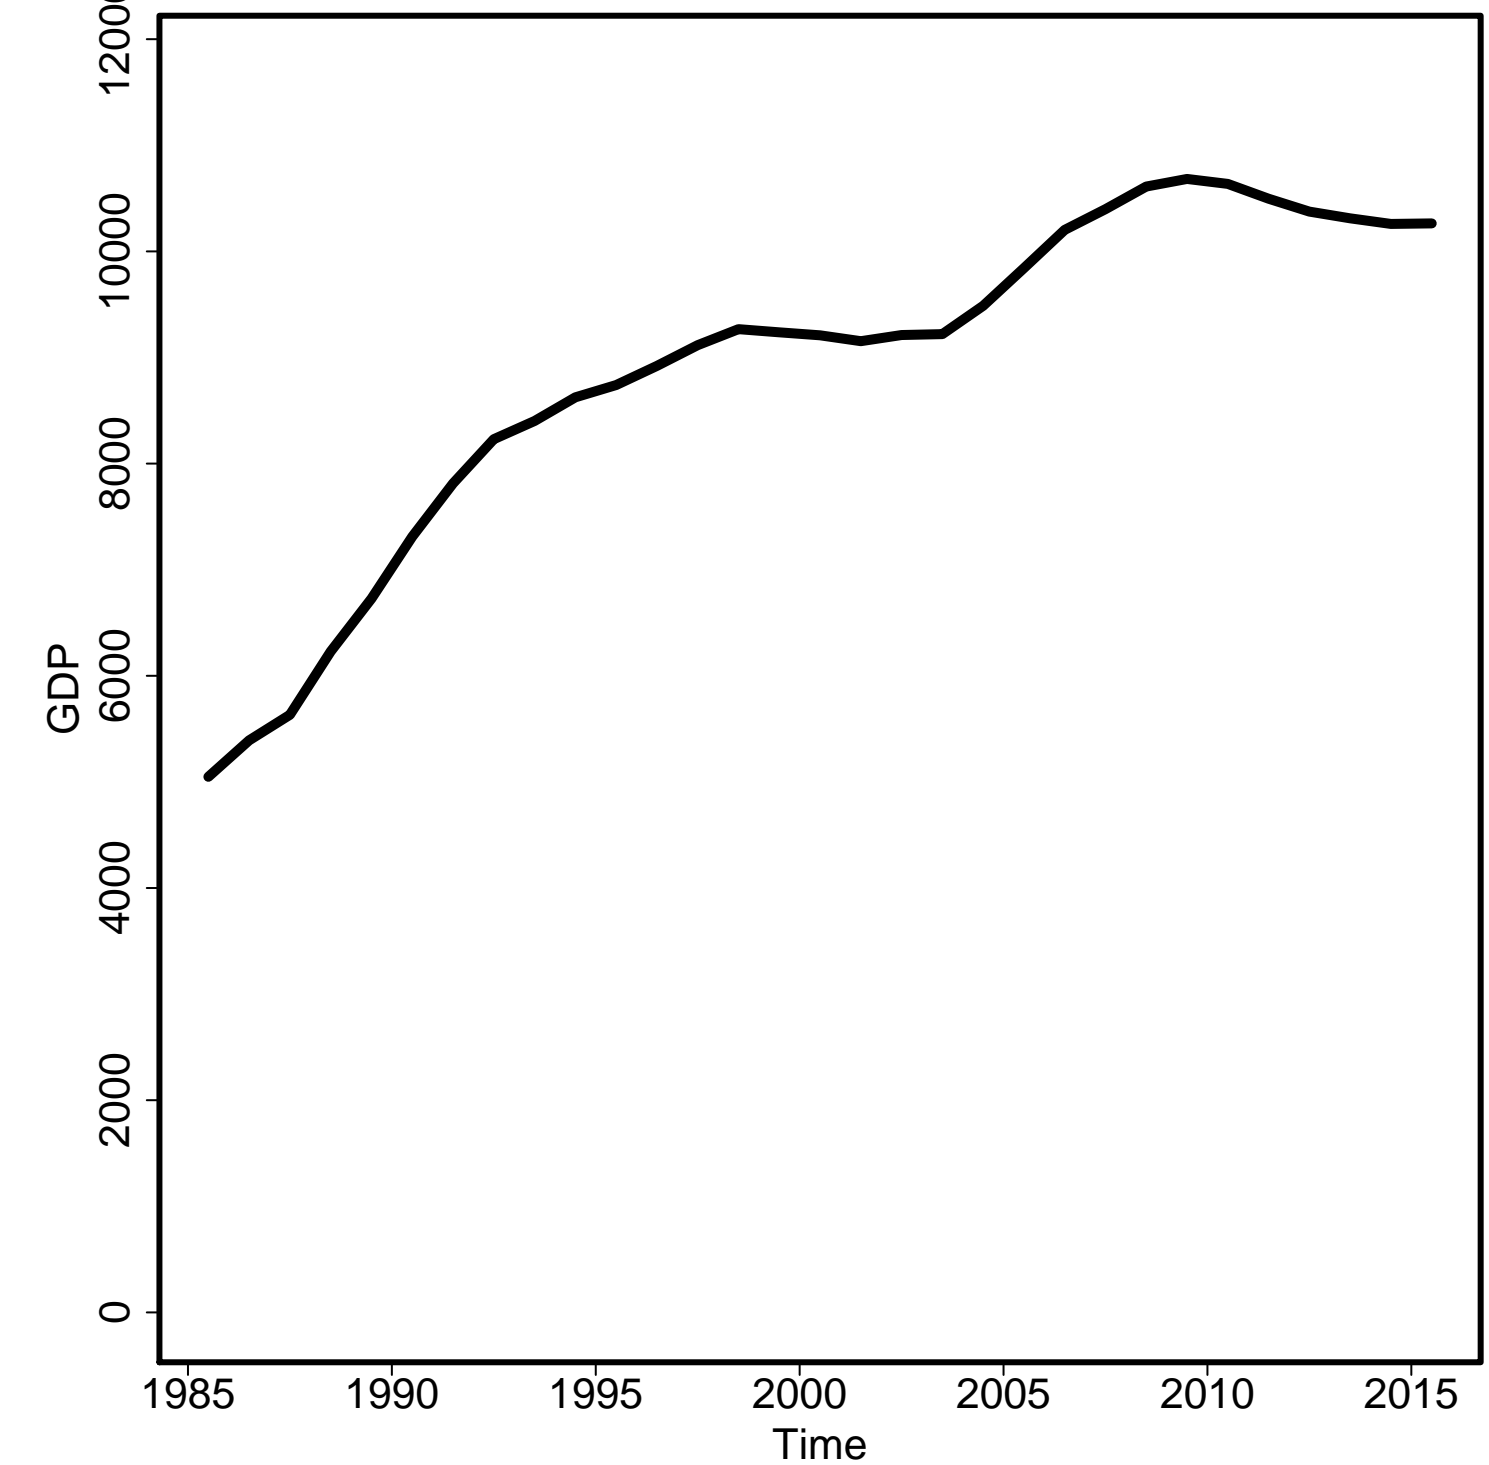

General Fertility Rate

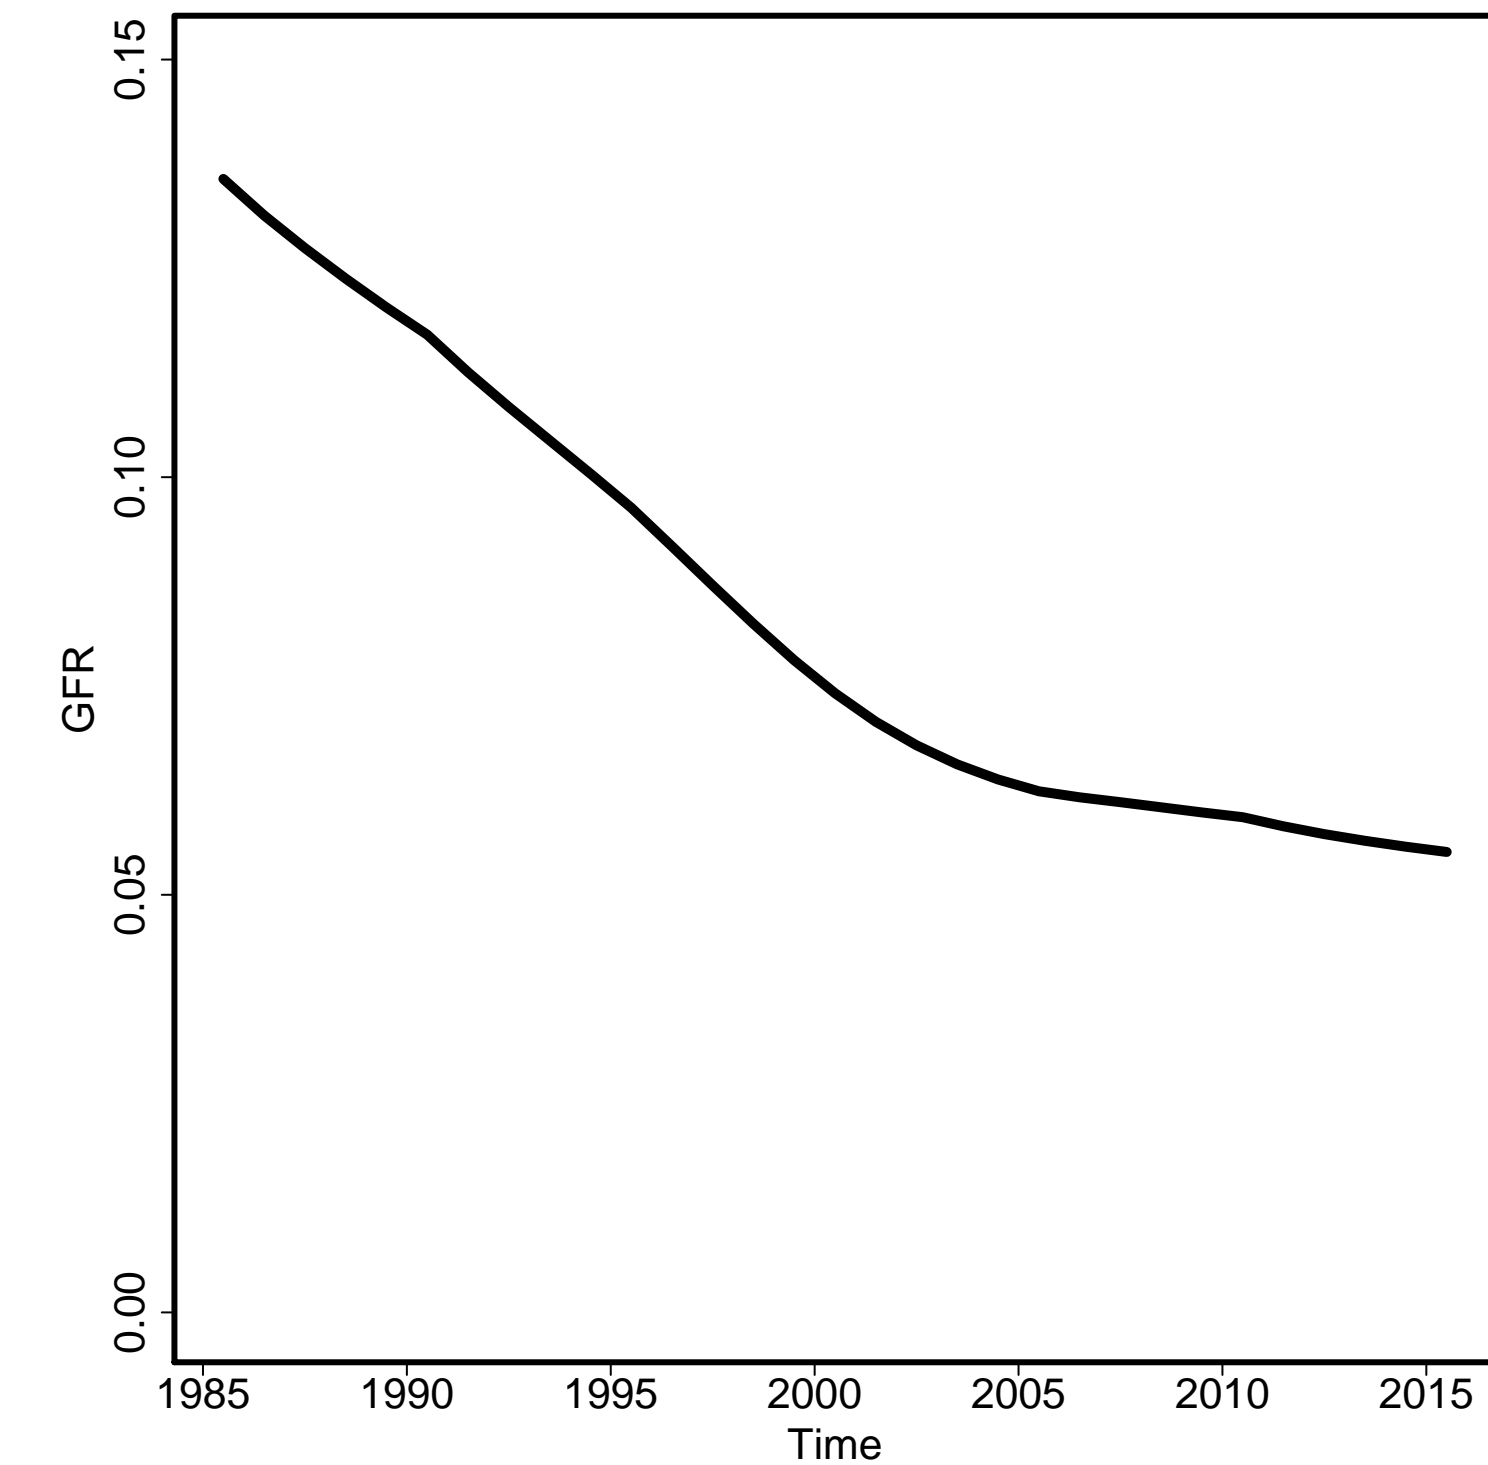

Skilled Attendance to Birth

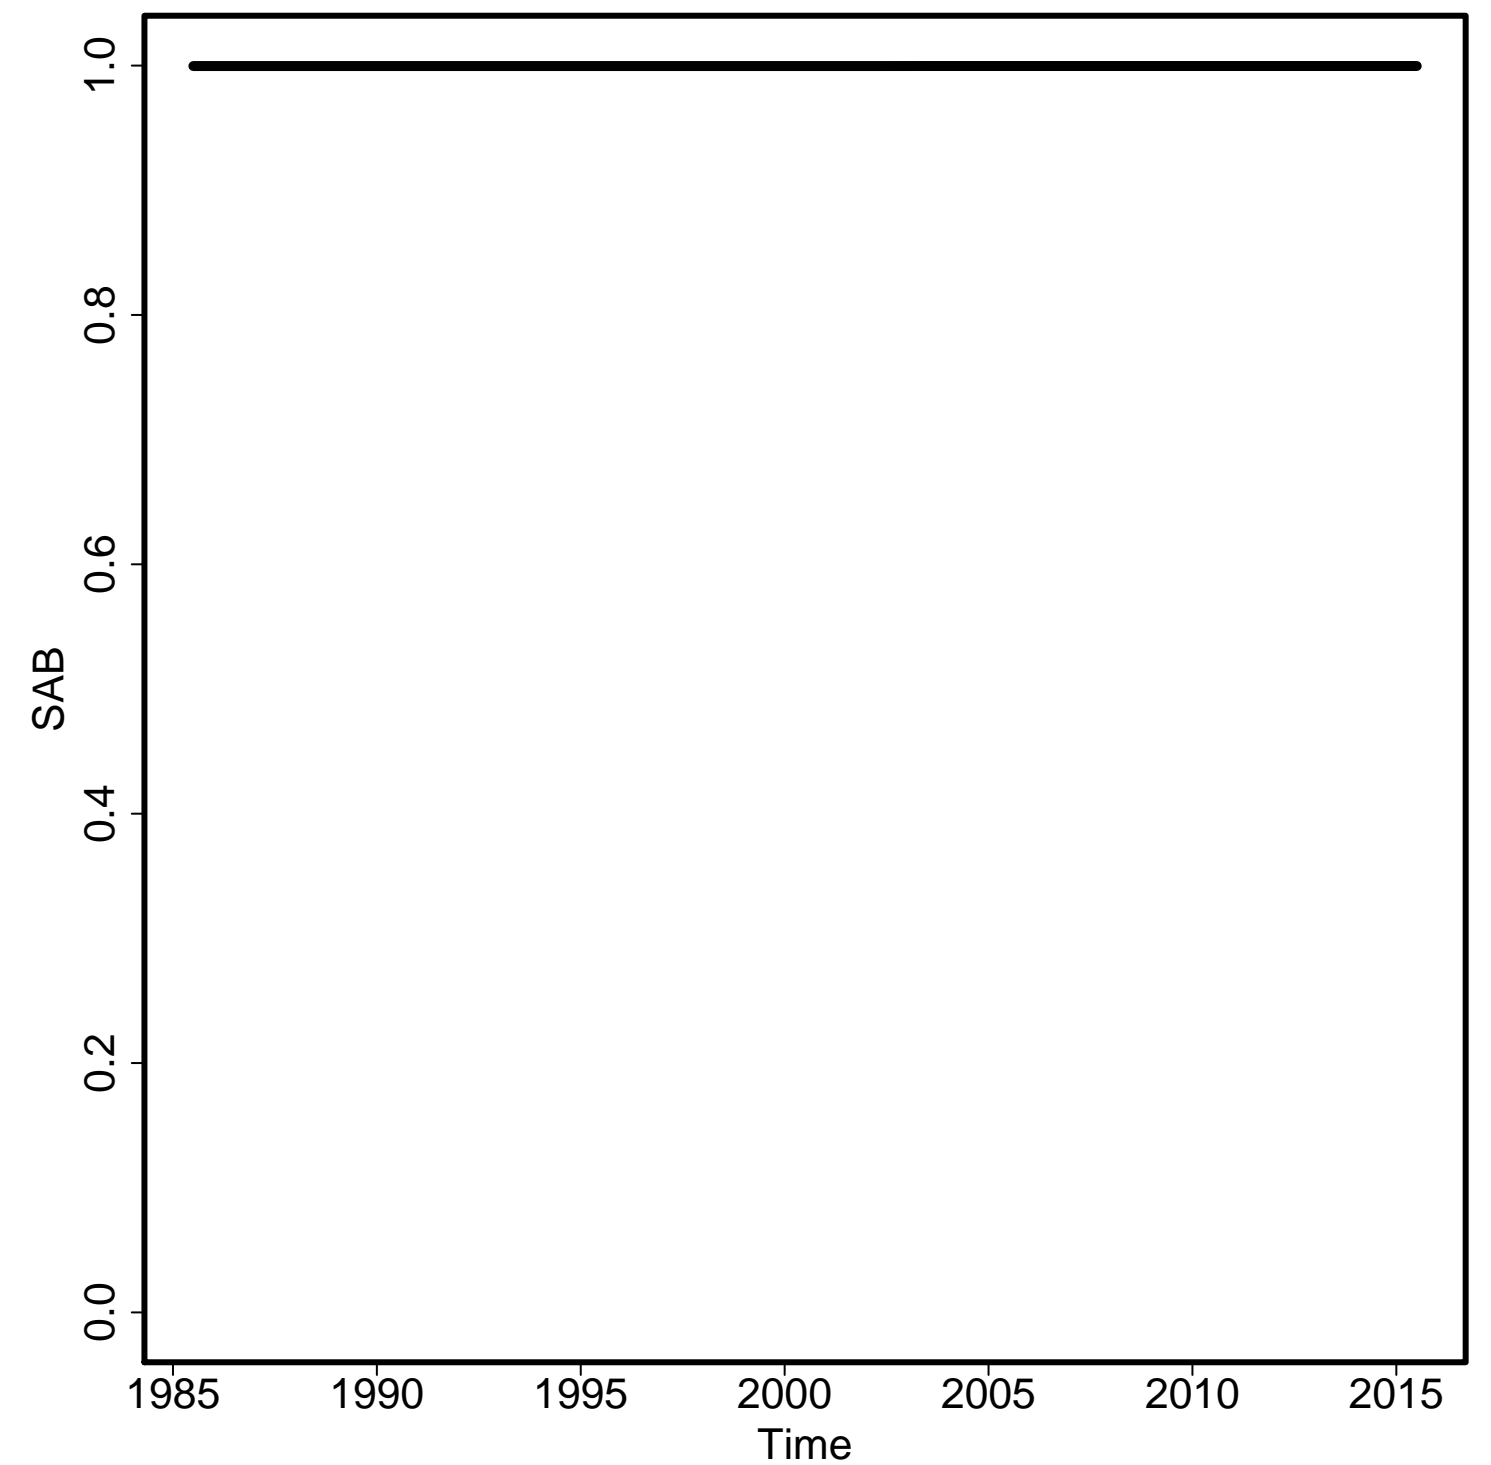

Envelope/Births

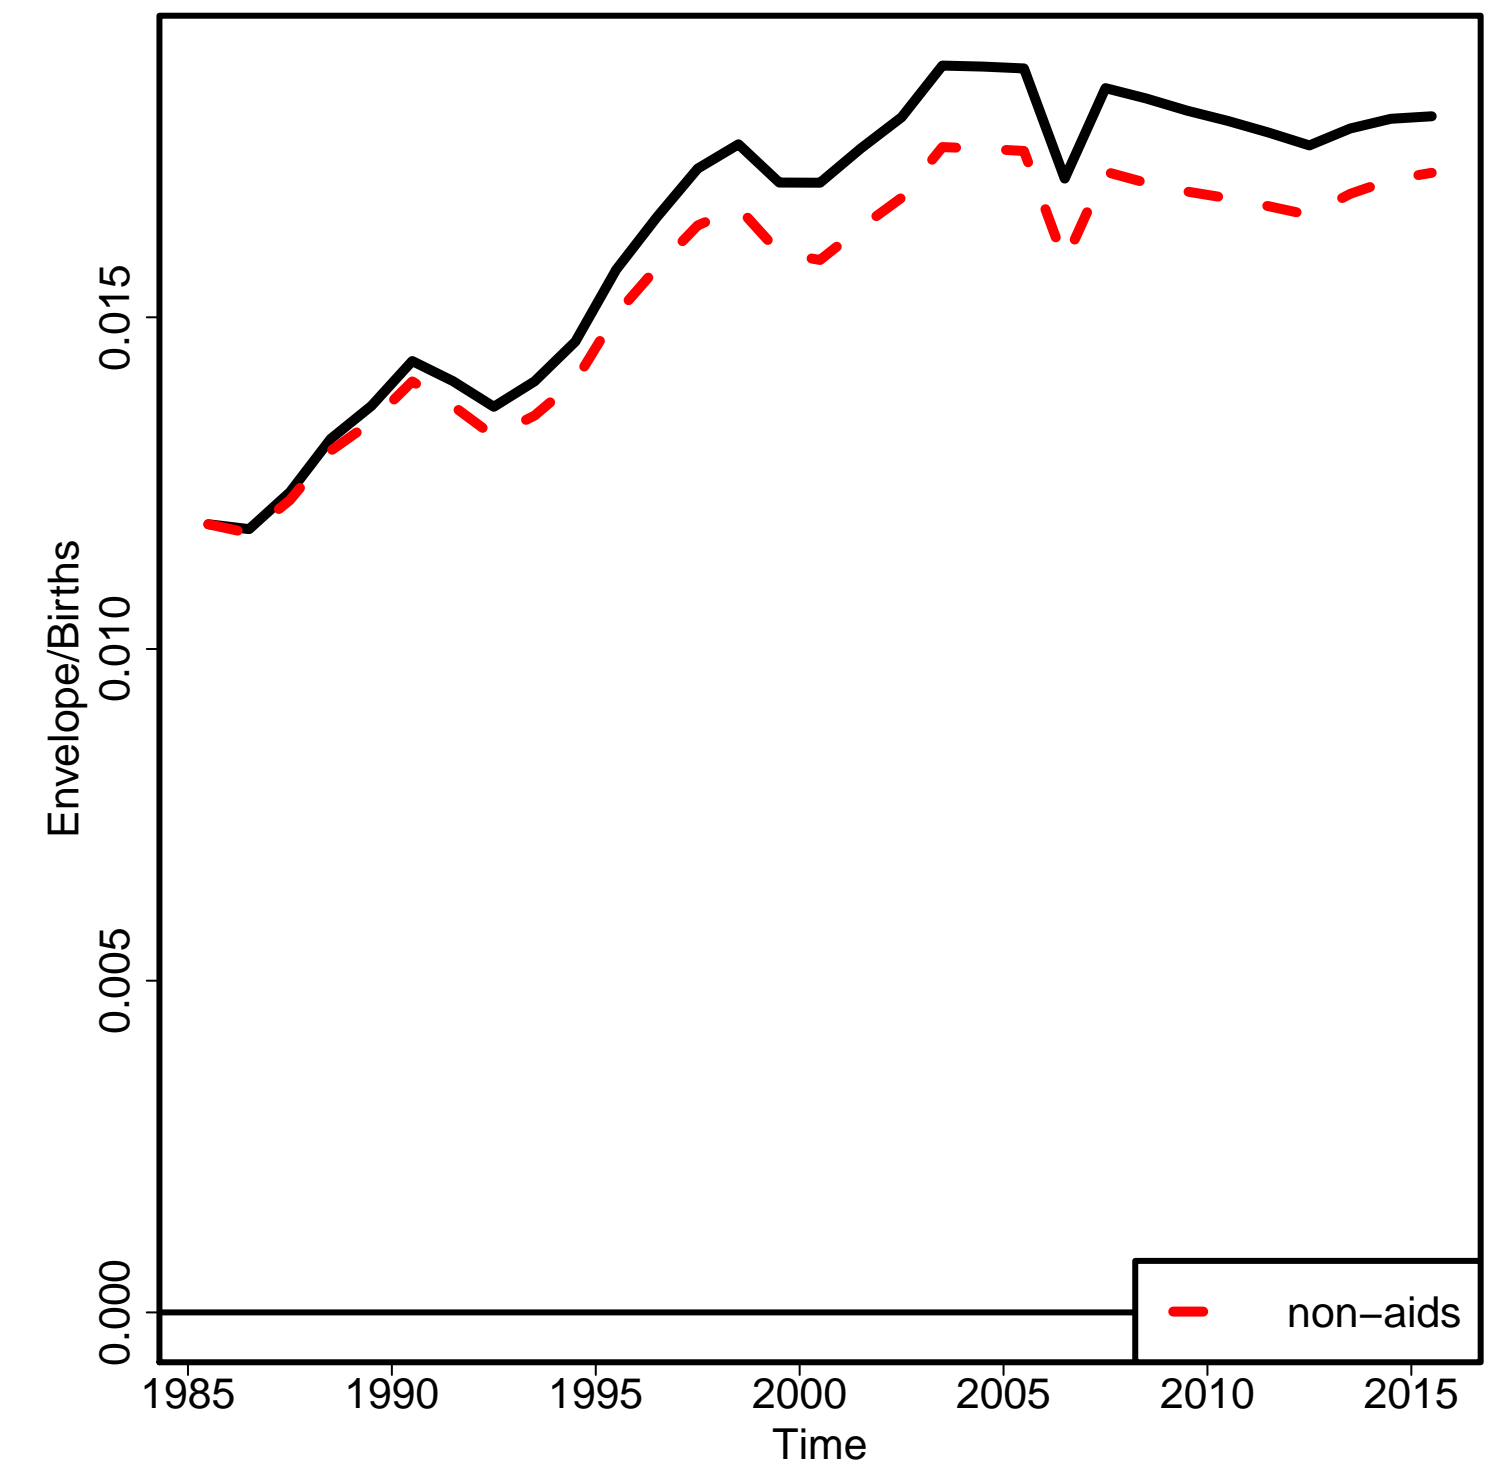

Non-aids MMR

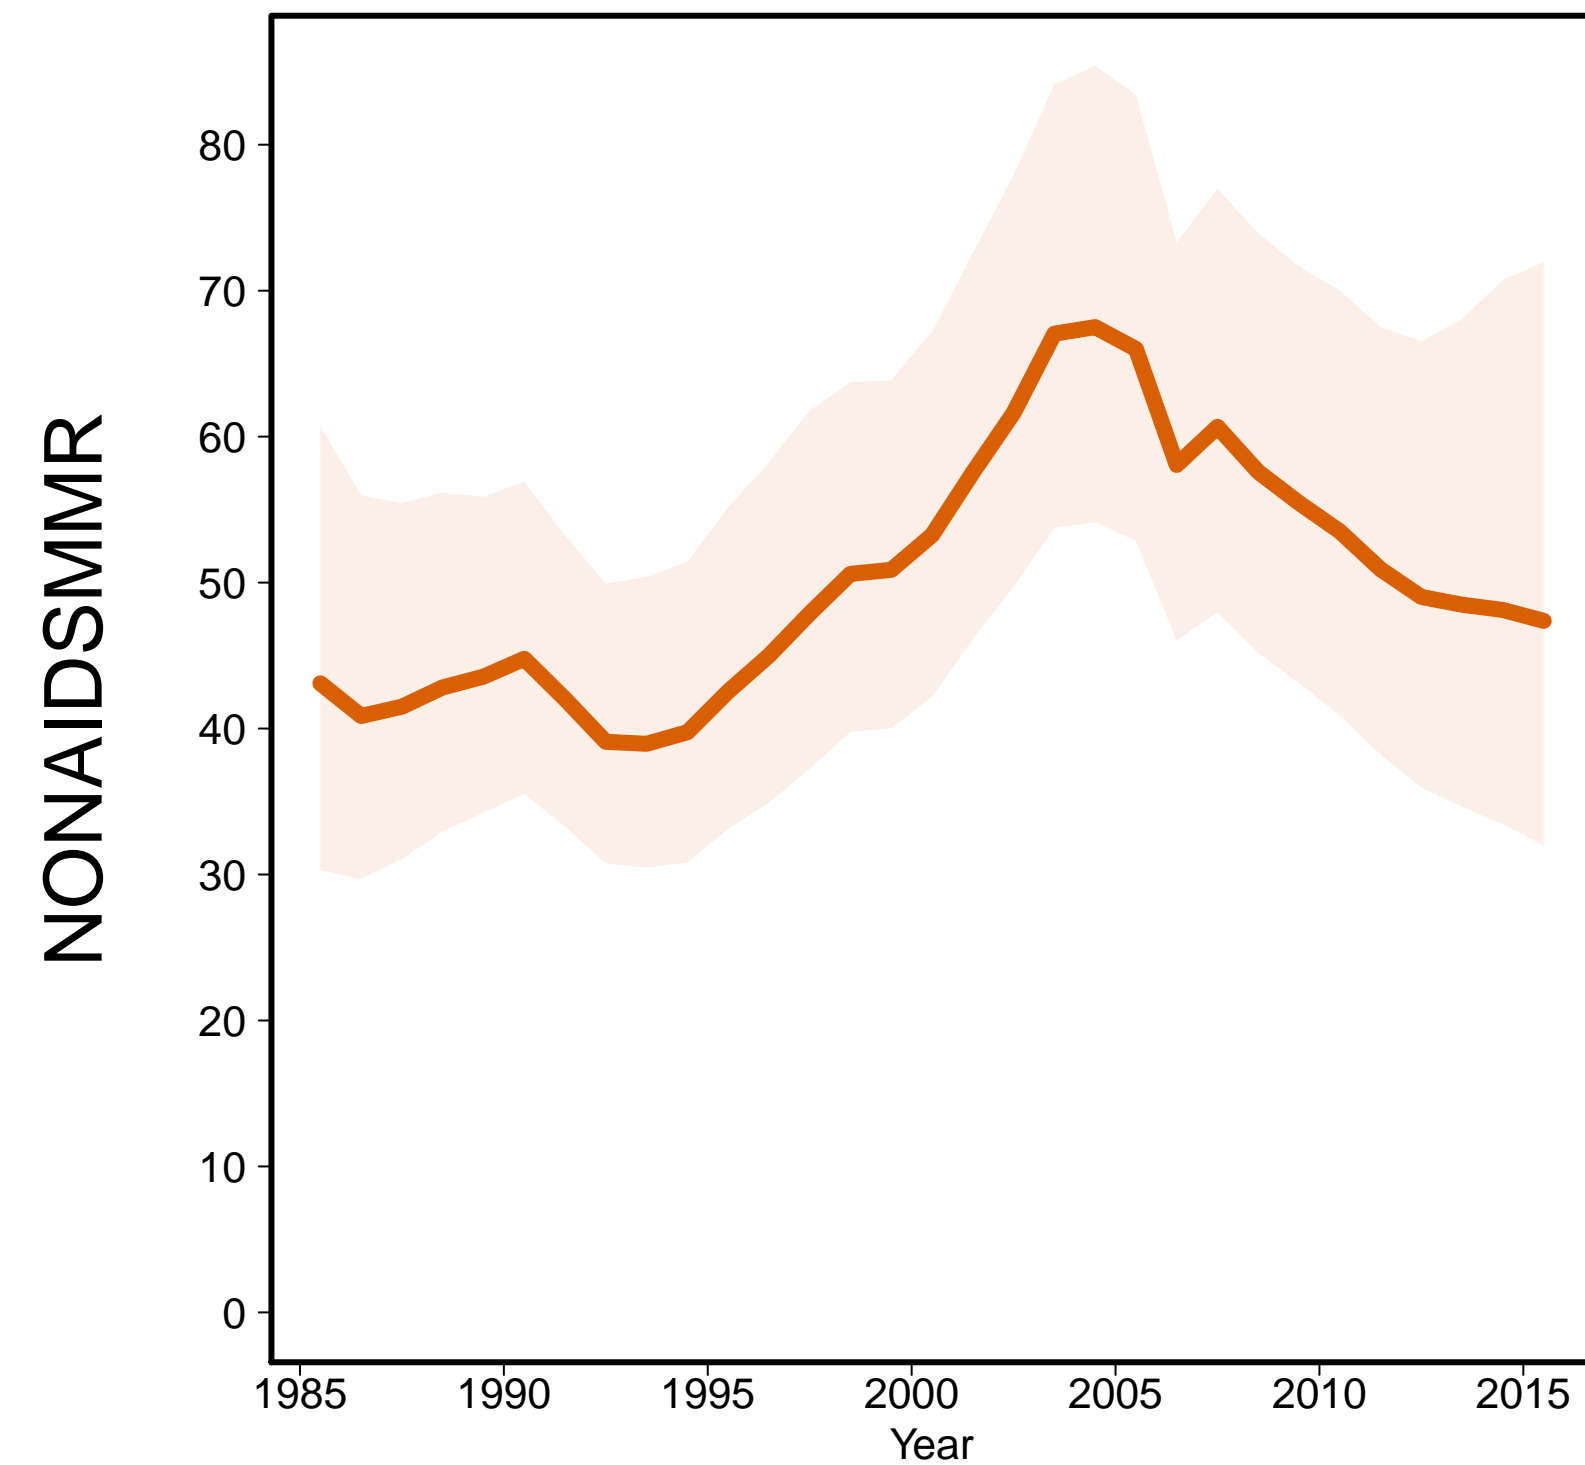

Aids MMR

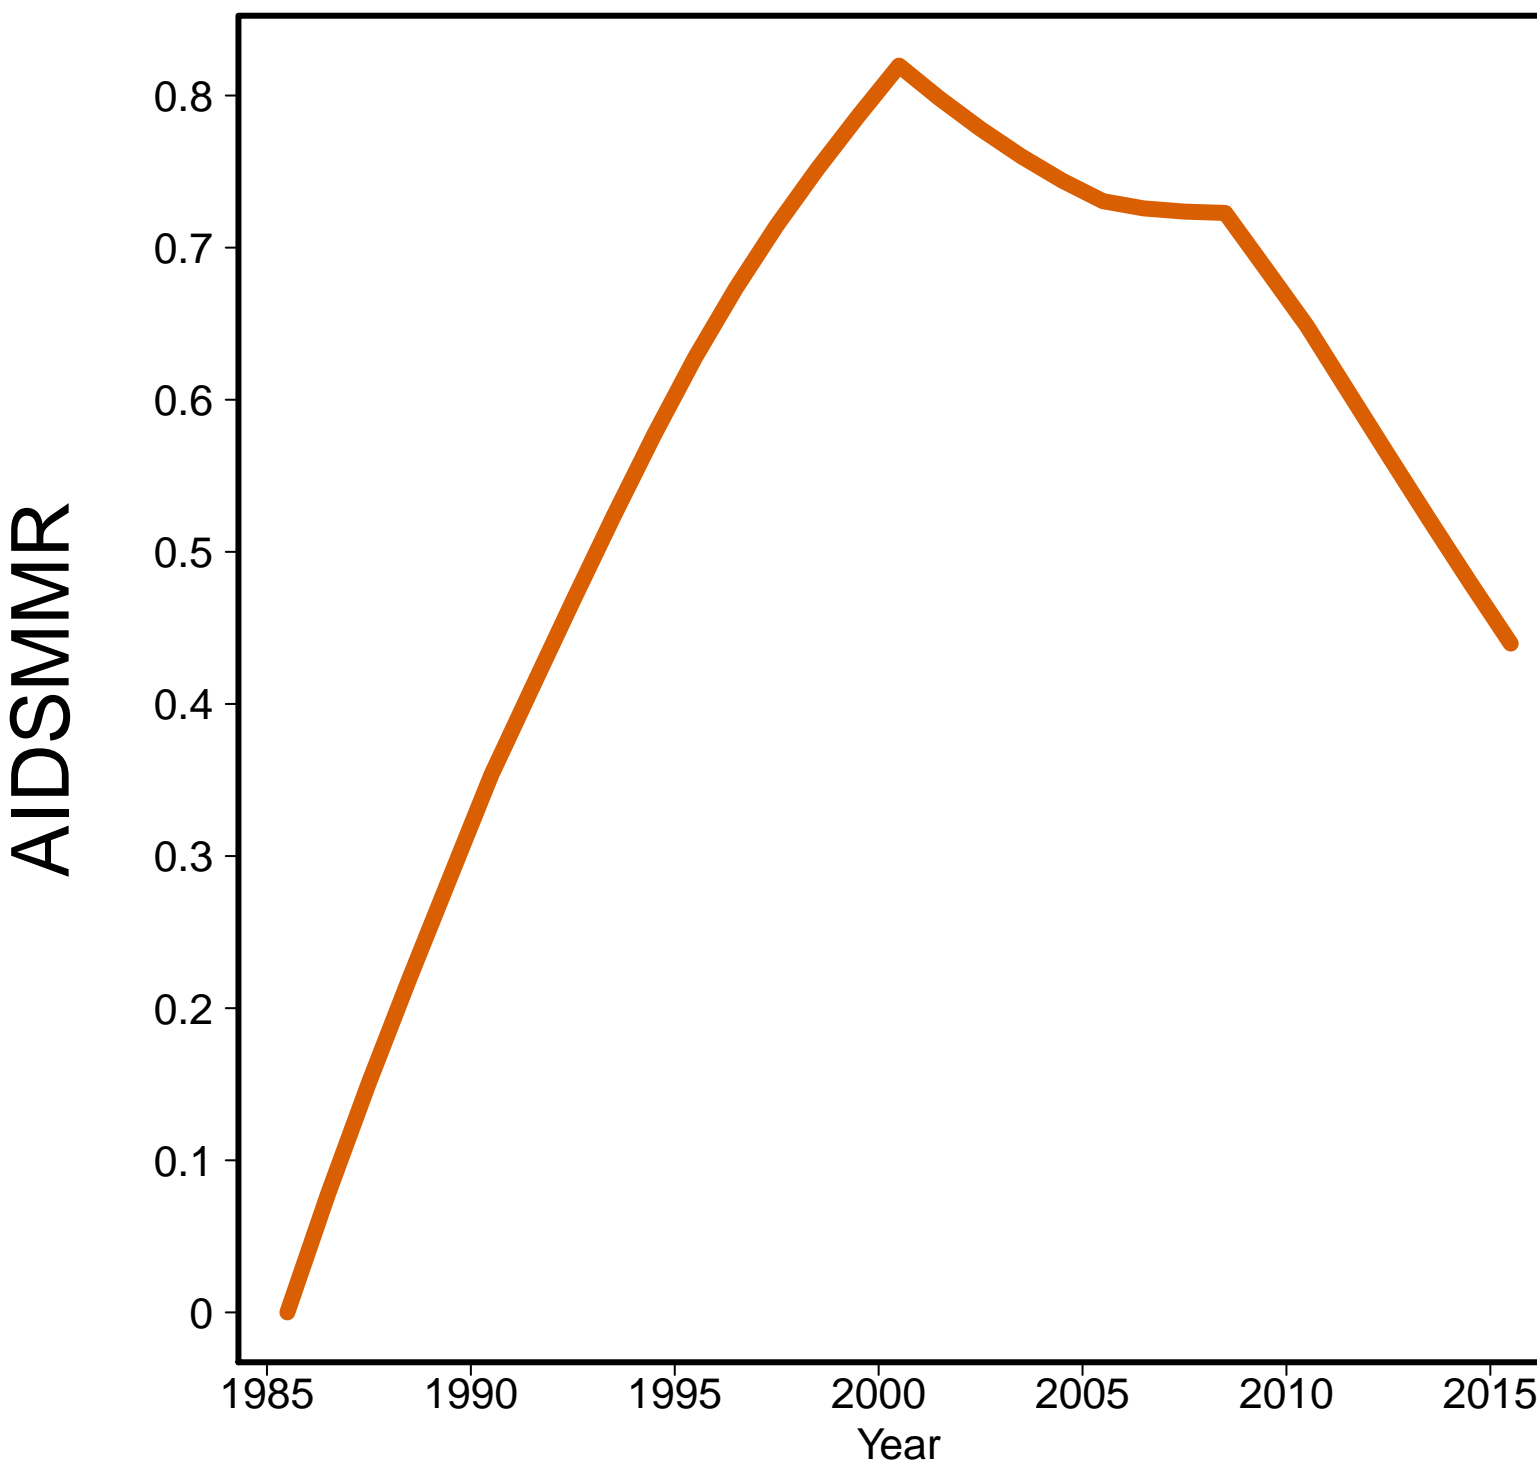

Samoa [WSM]  
(South-Eastern Asia / Oceania)

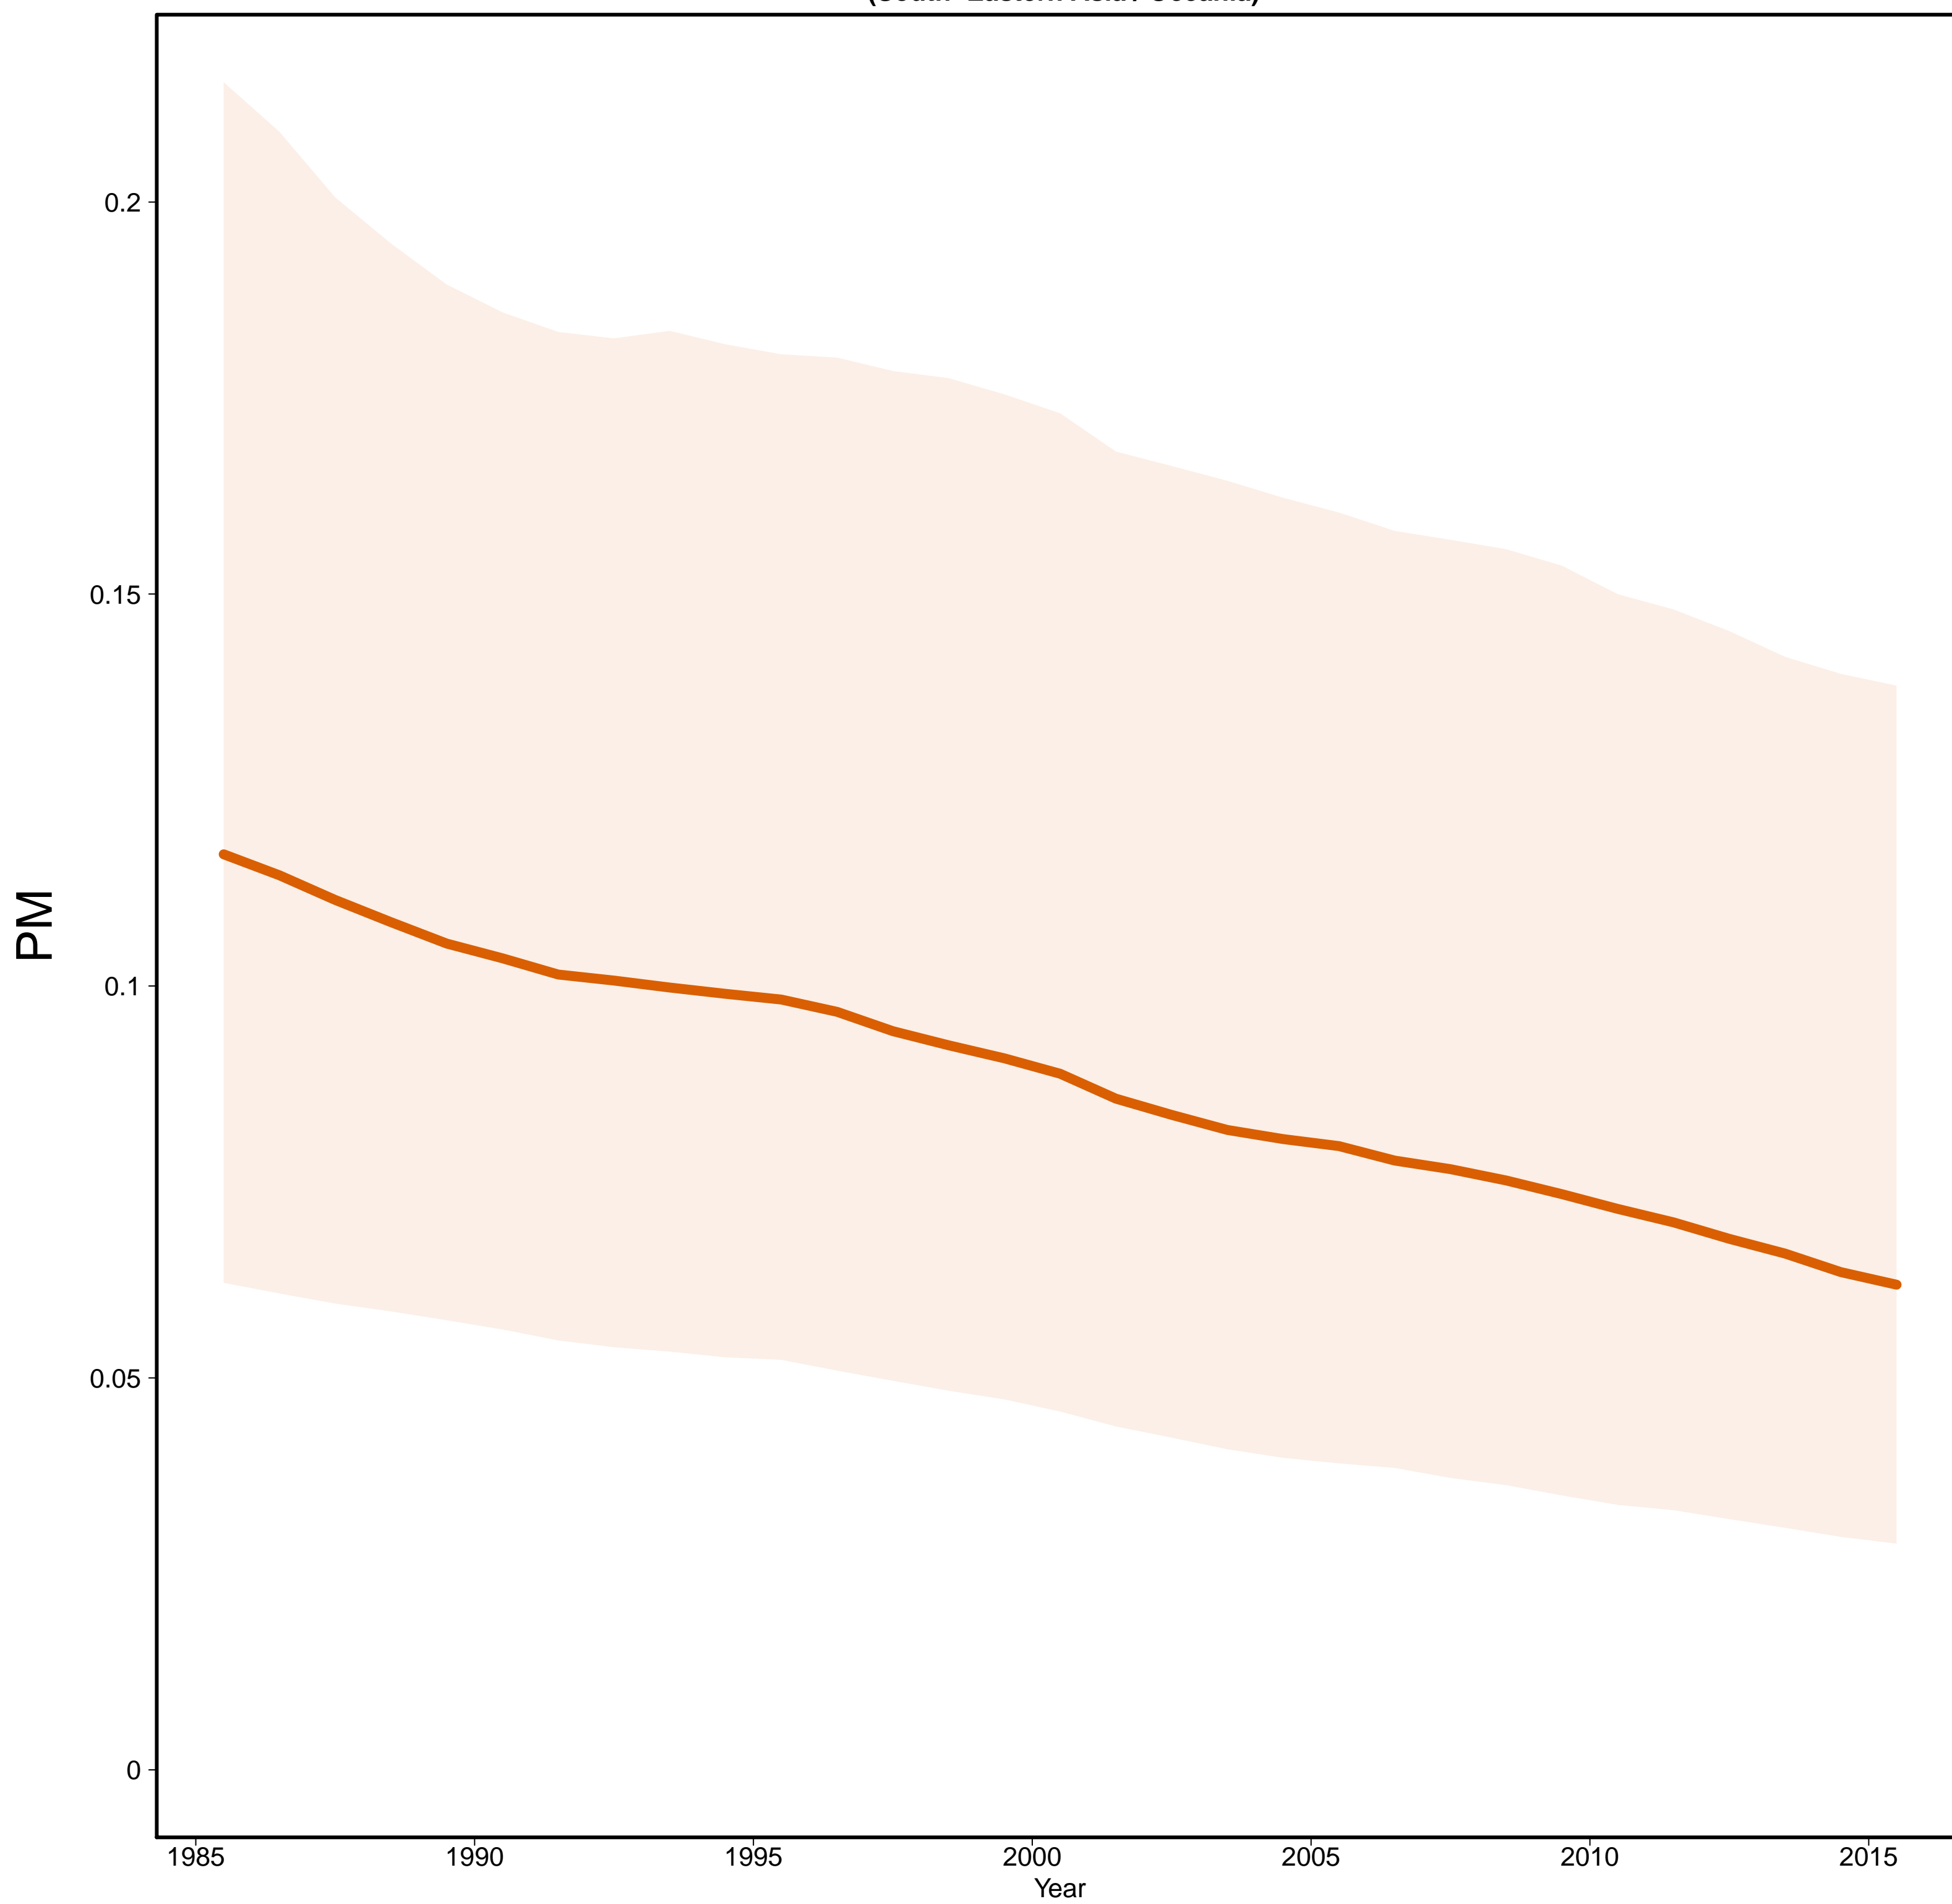

Samoa [WSM]  
(South-Eastern Asia / Oceania)

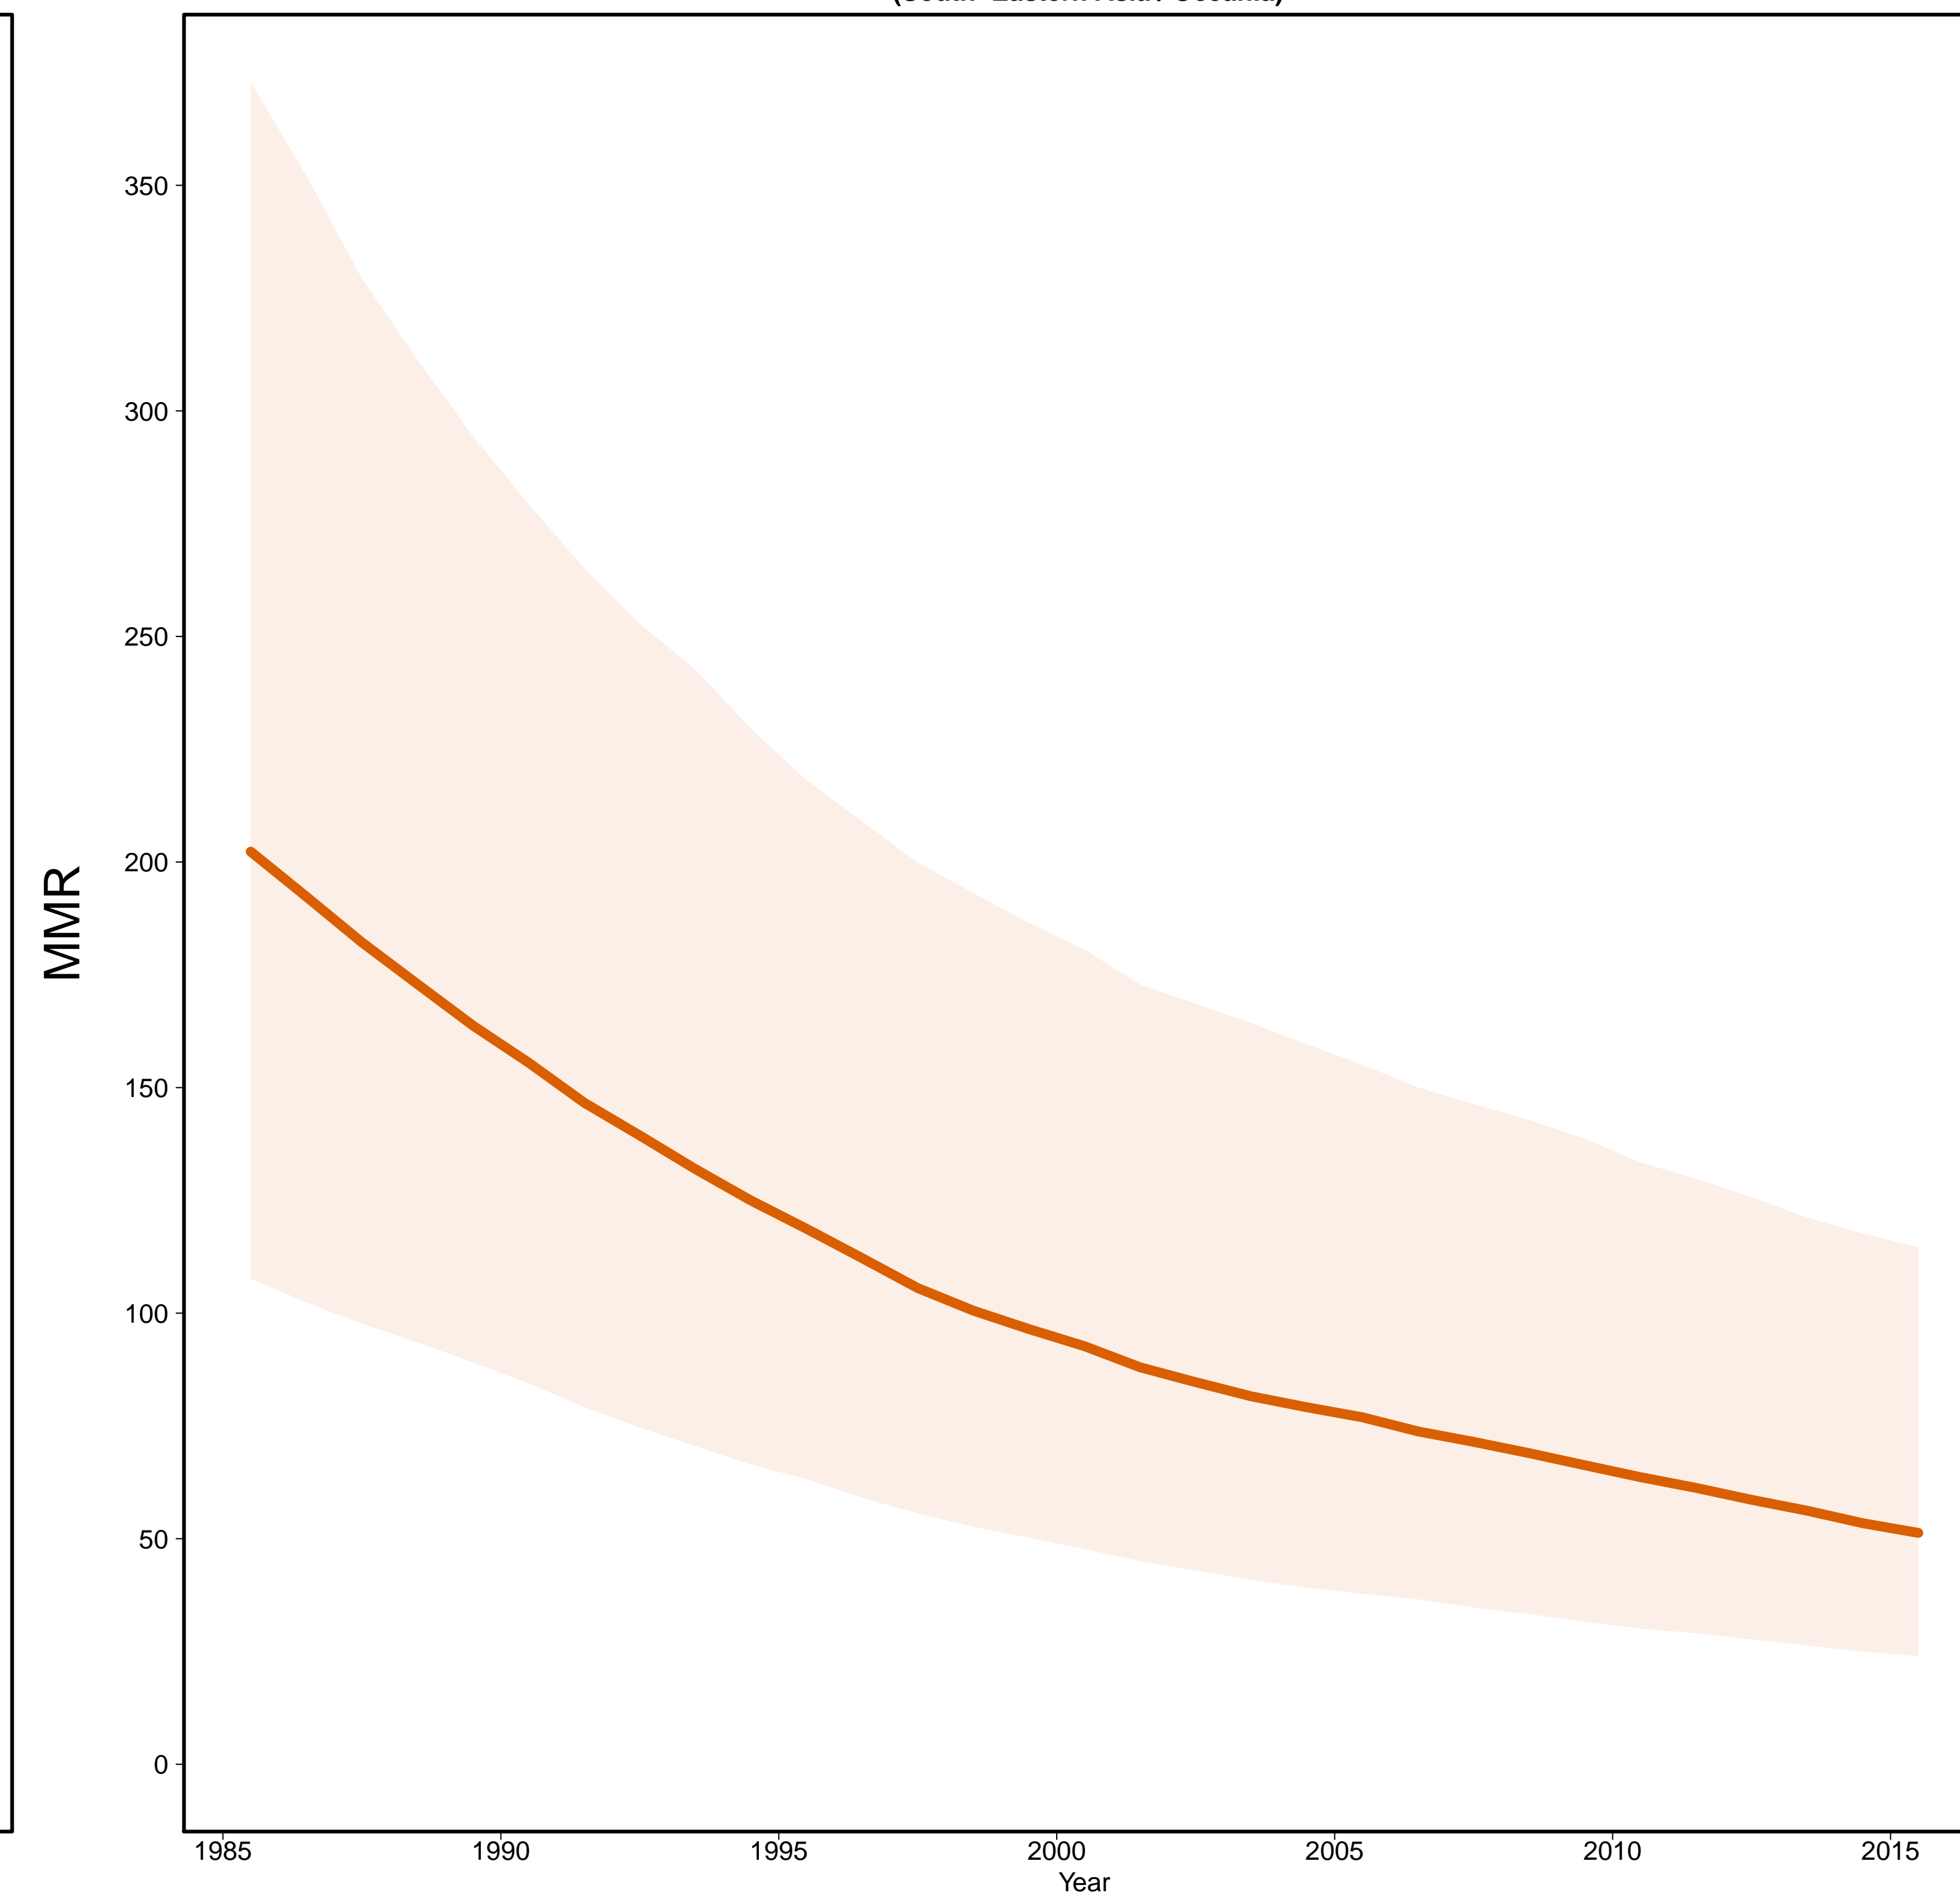

– Estimates –  
Mlate  
– MMR Database 2015 –

Gross Domestic Product

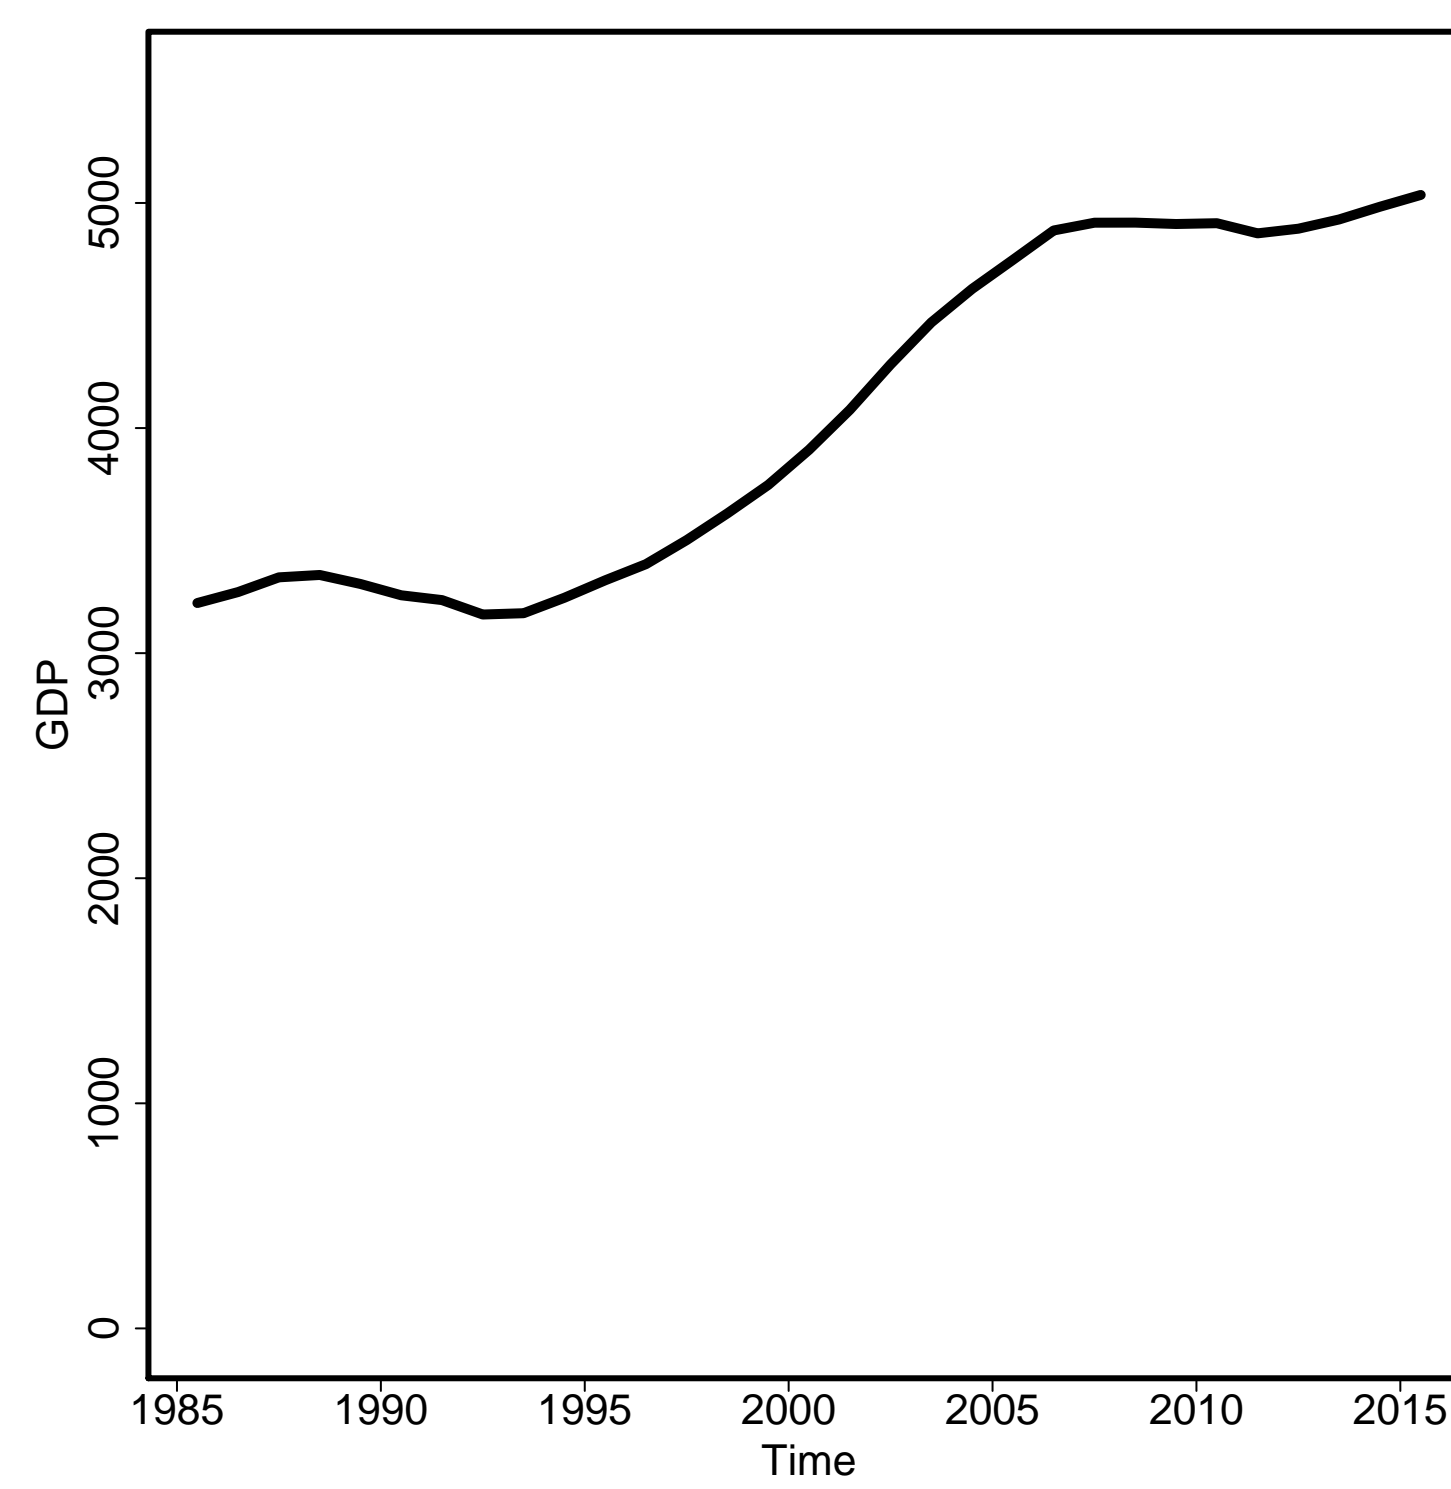

General Fertility Rate

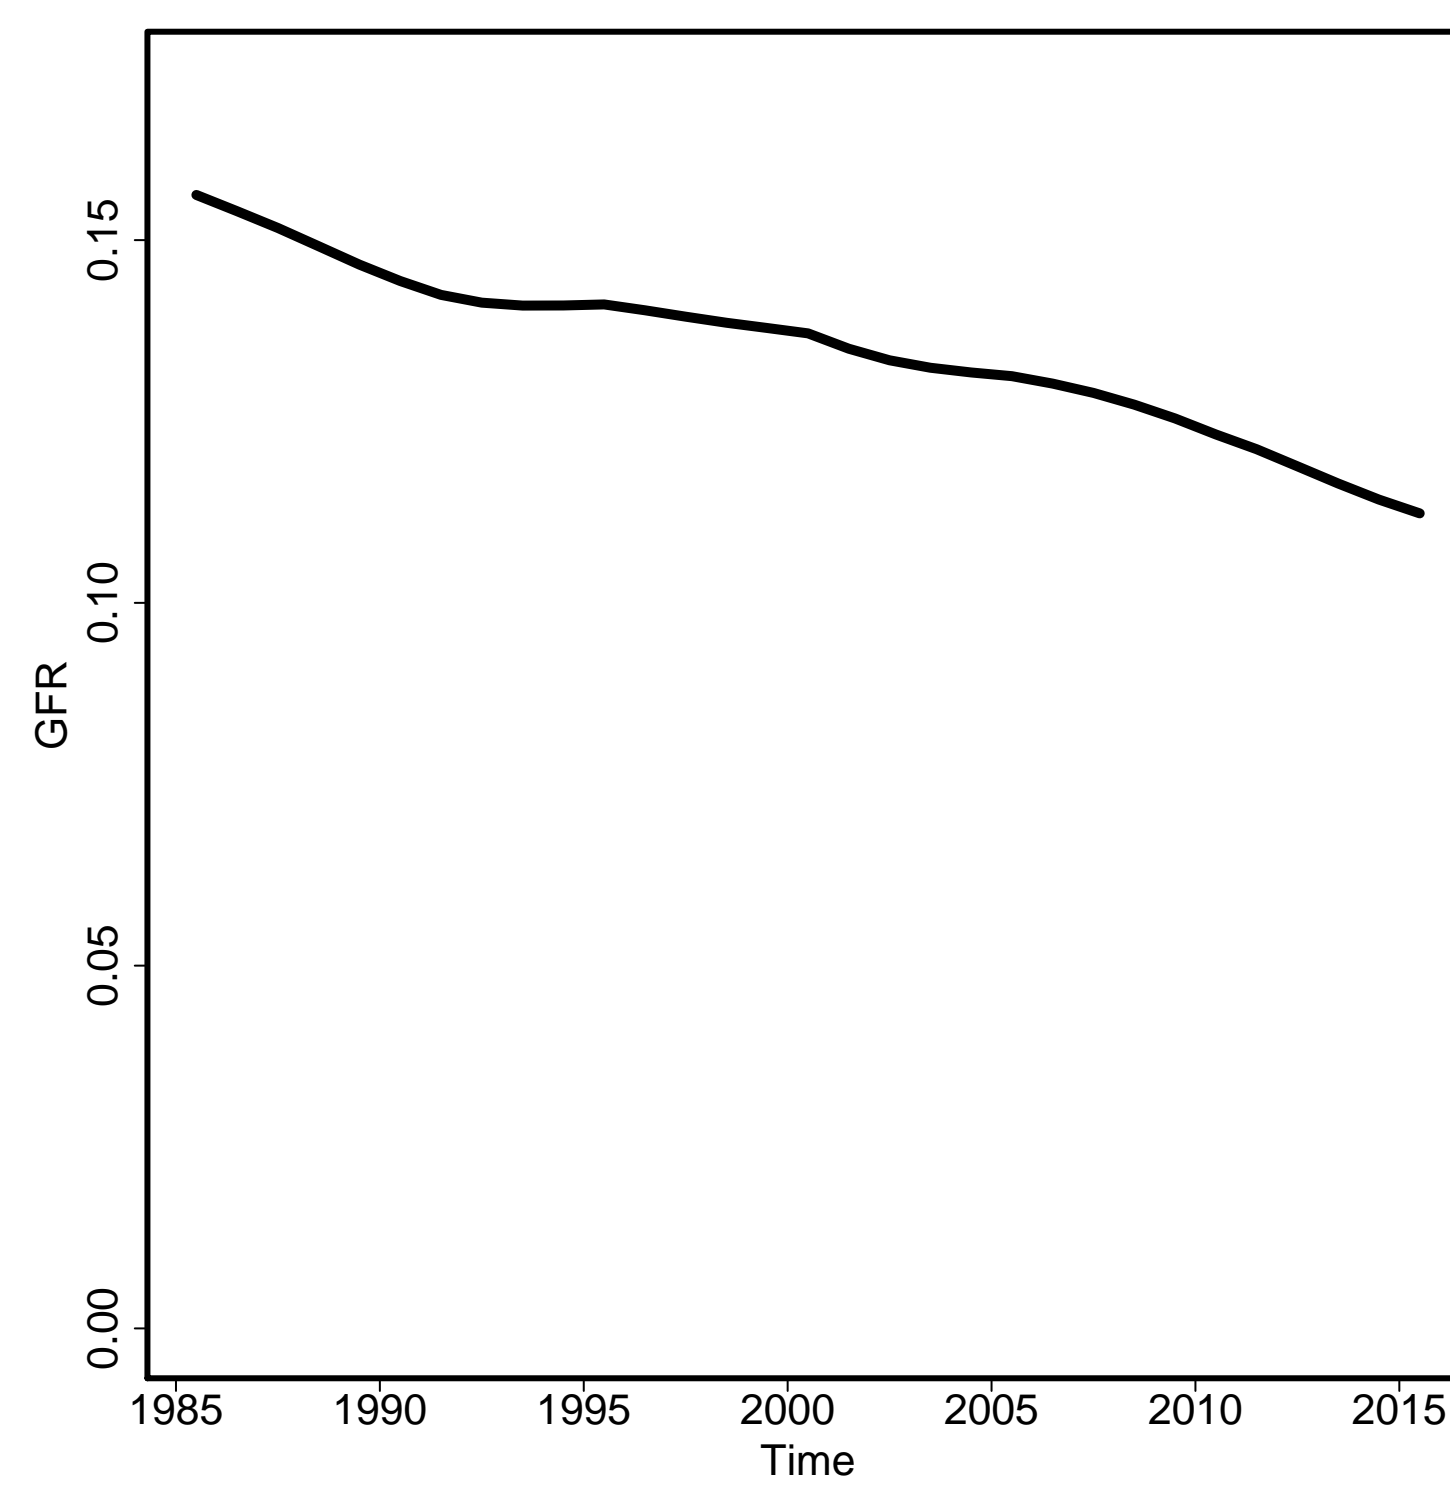

Skilled Attendance to Birth

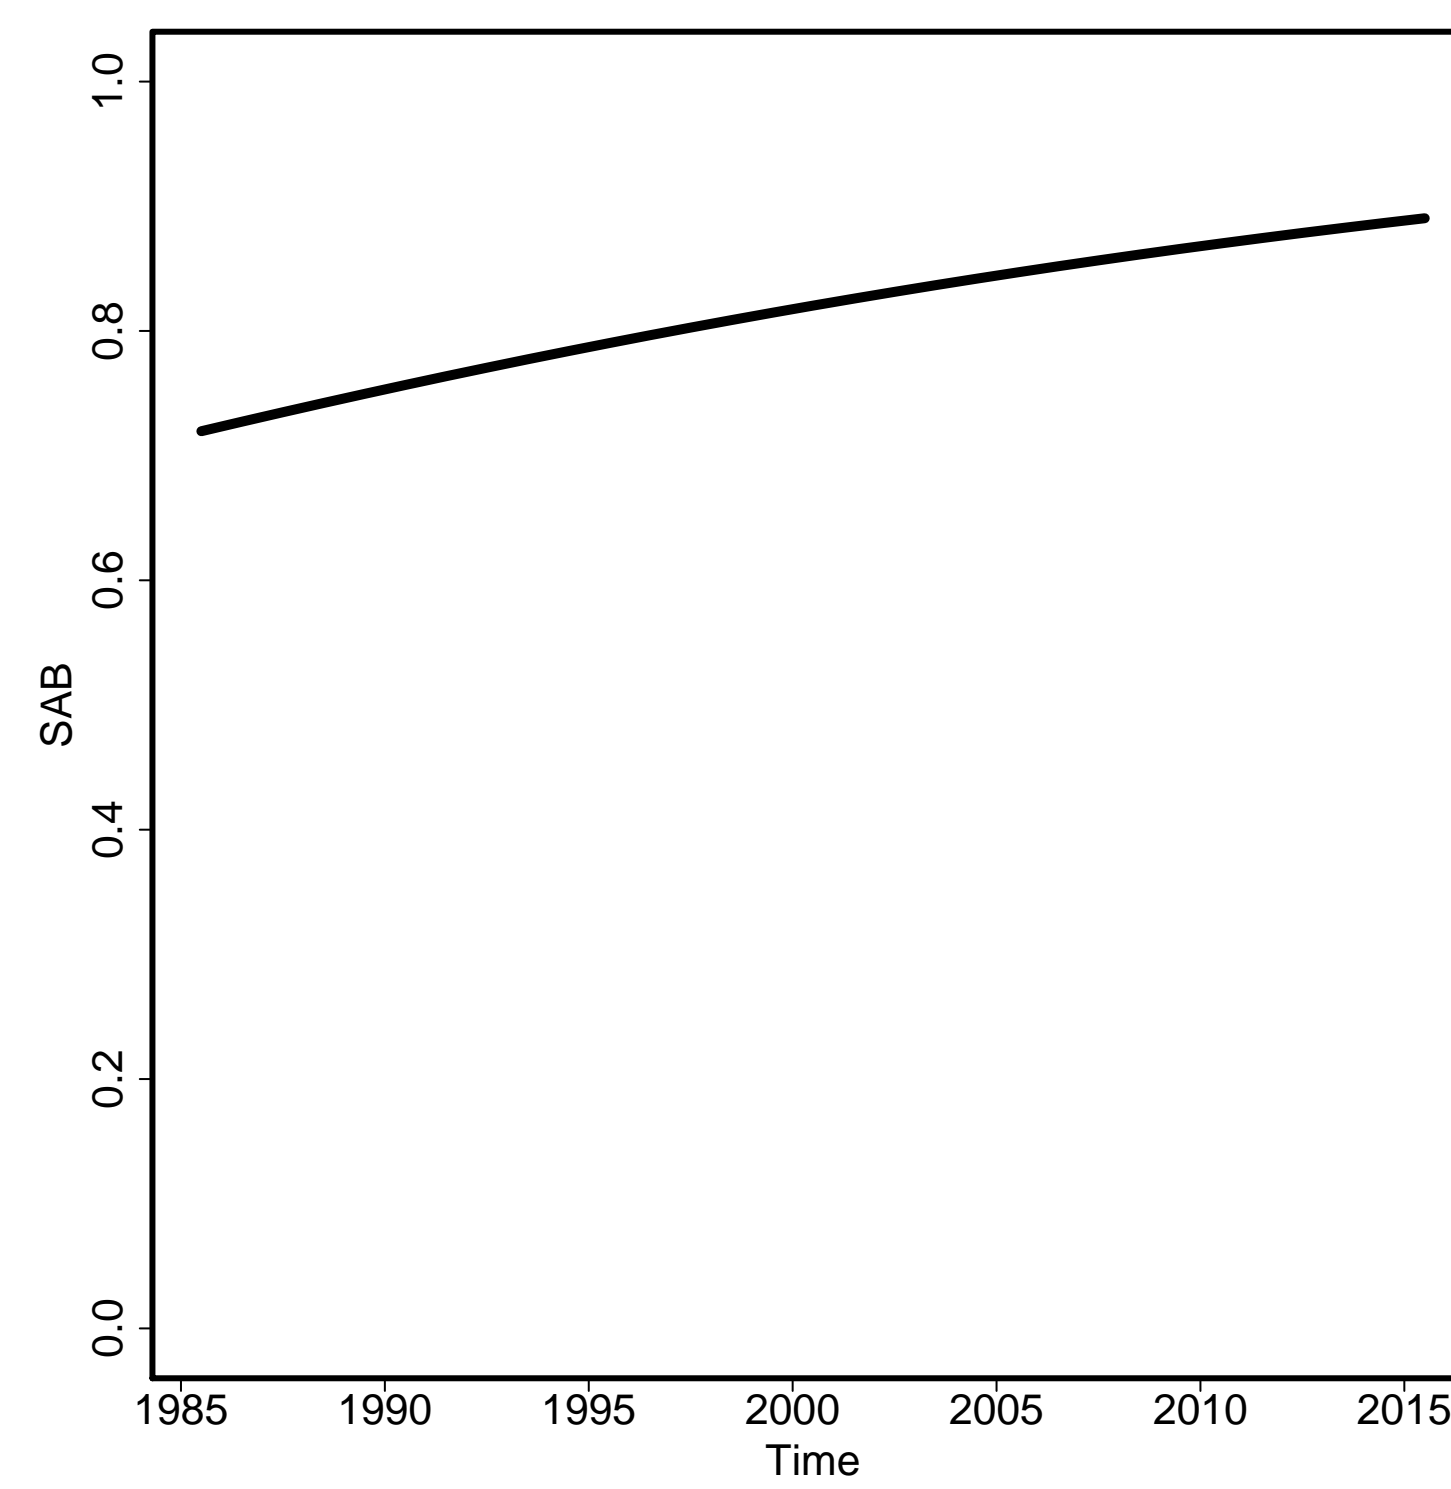

Envelope/Births

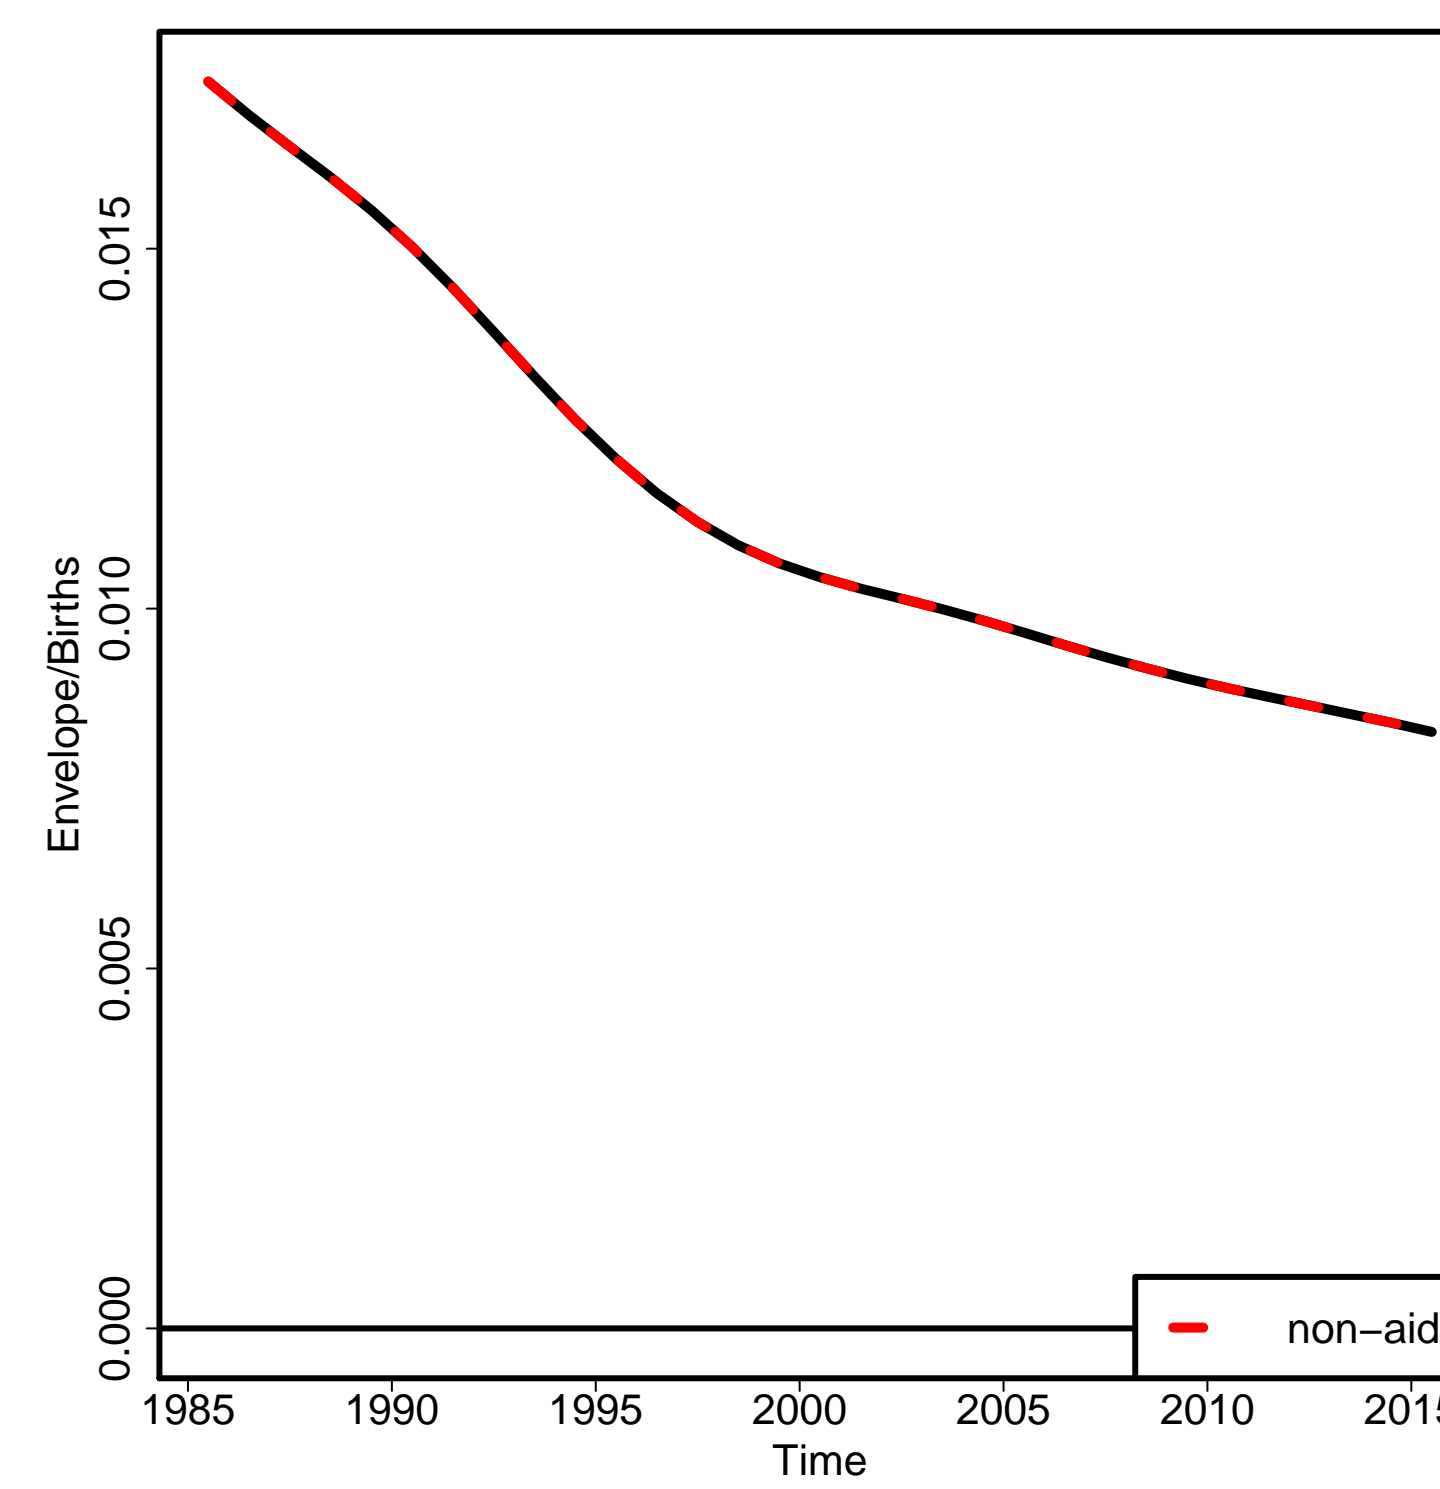

Non-aids MMR

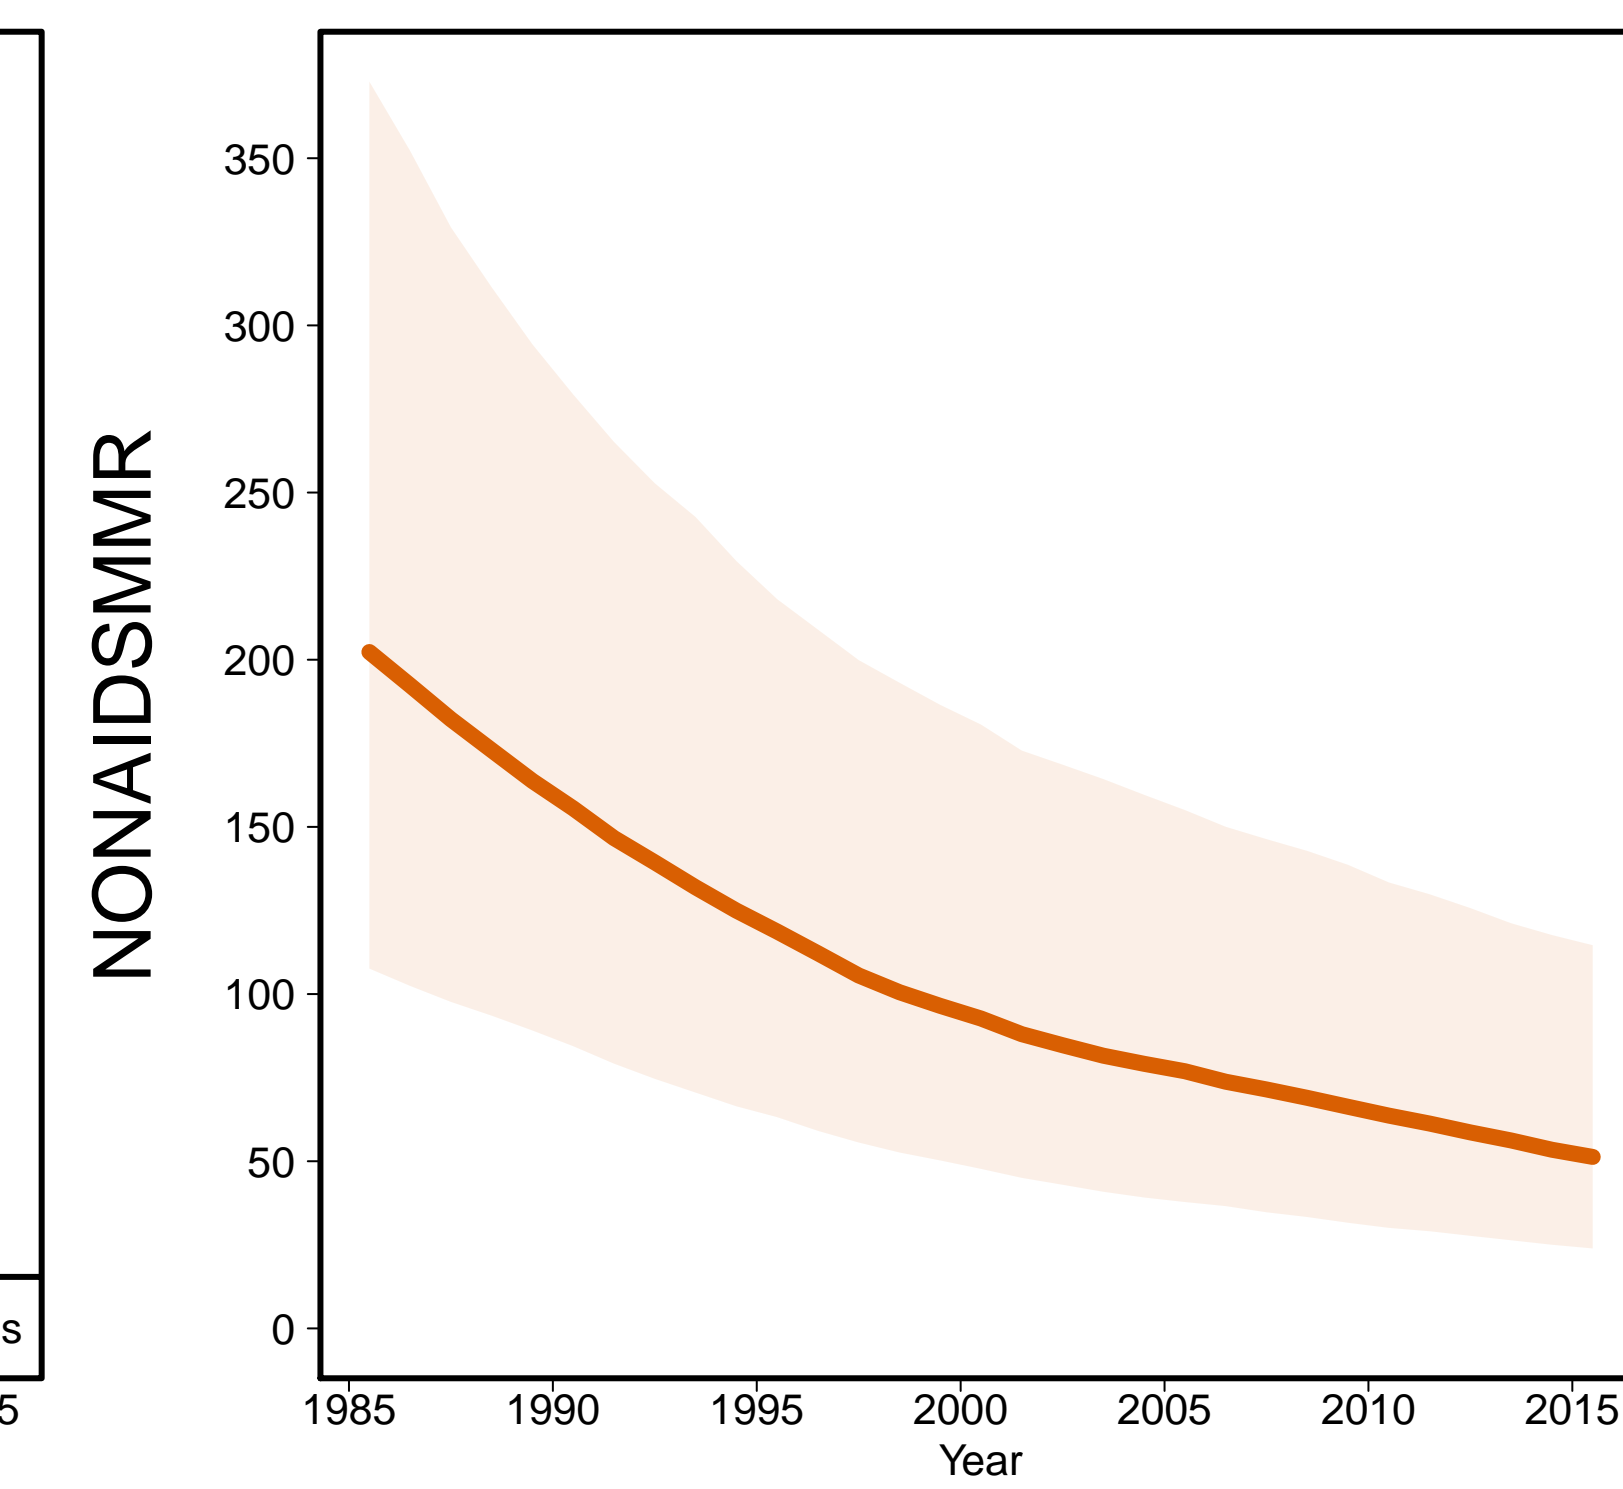

Aids MMR

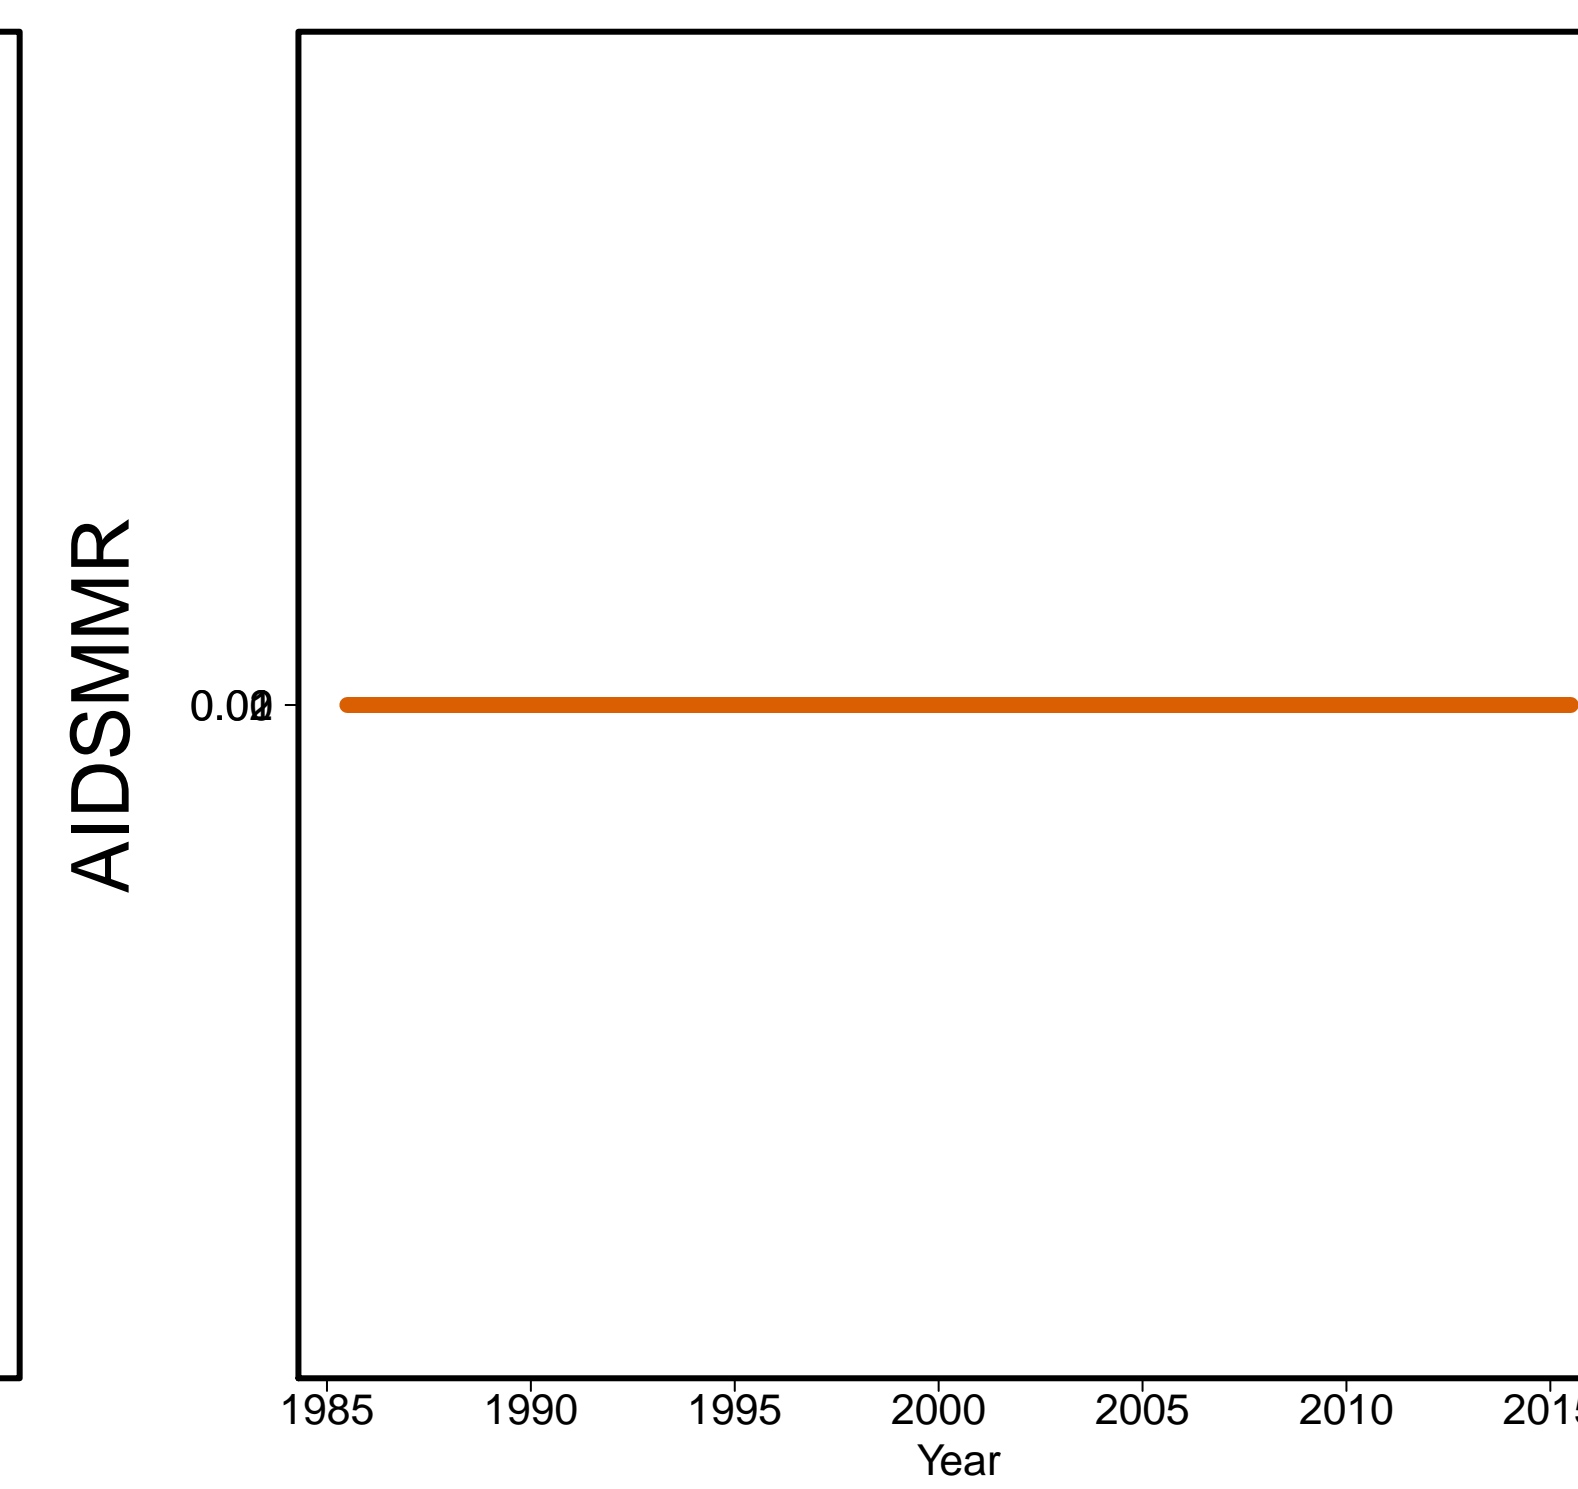

Sao Tome and Principe [STP]  
(Middle Africa)

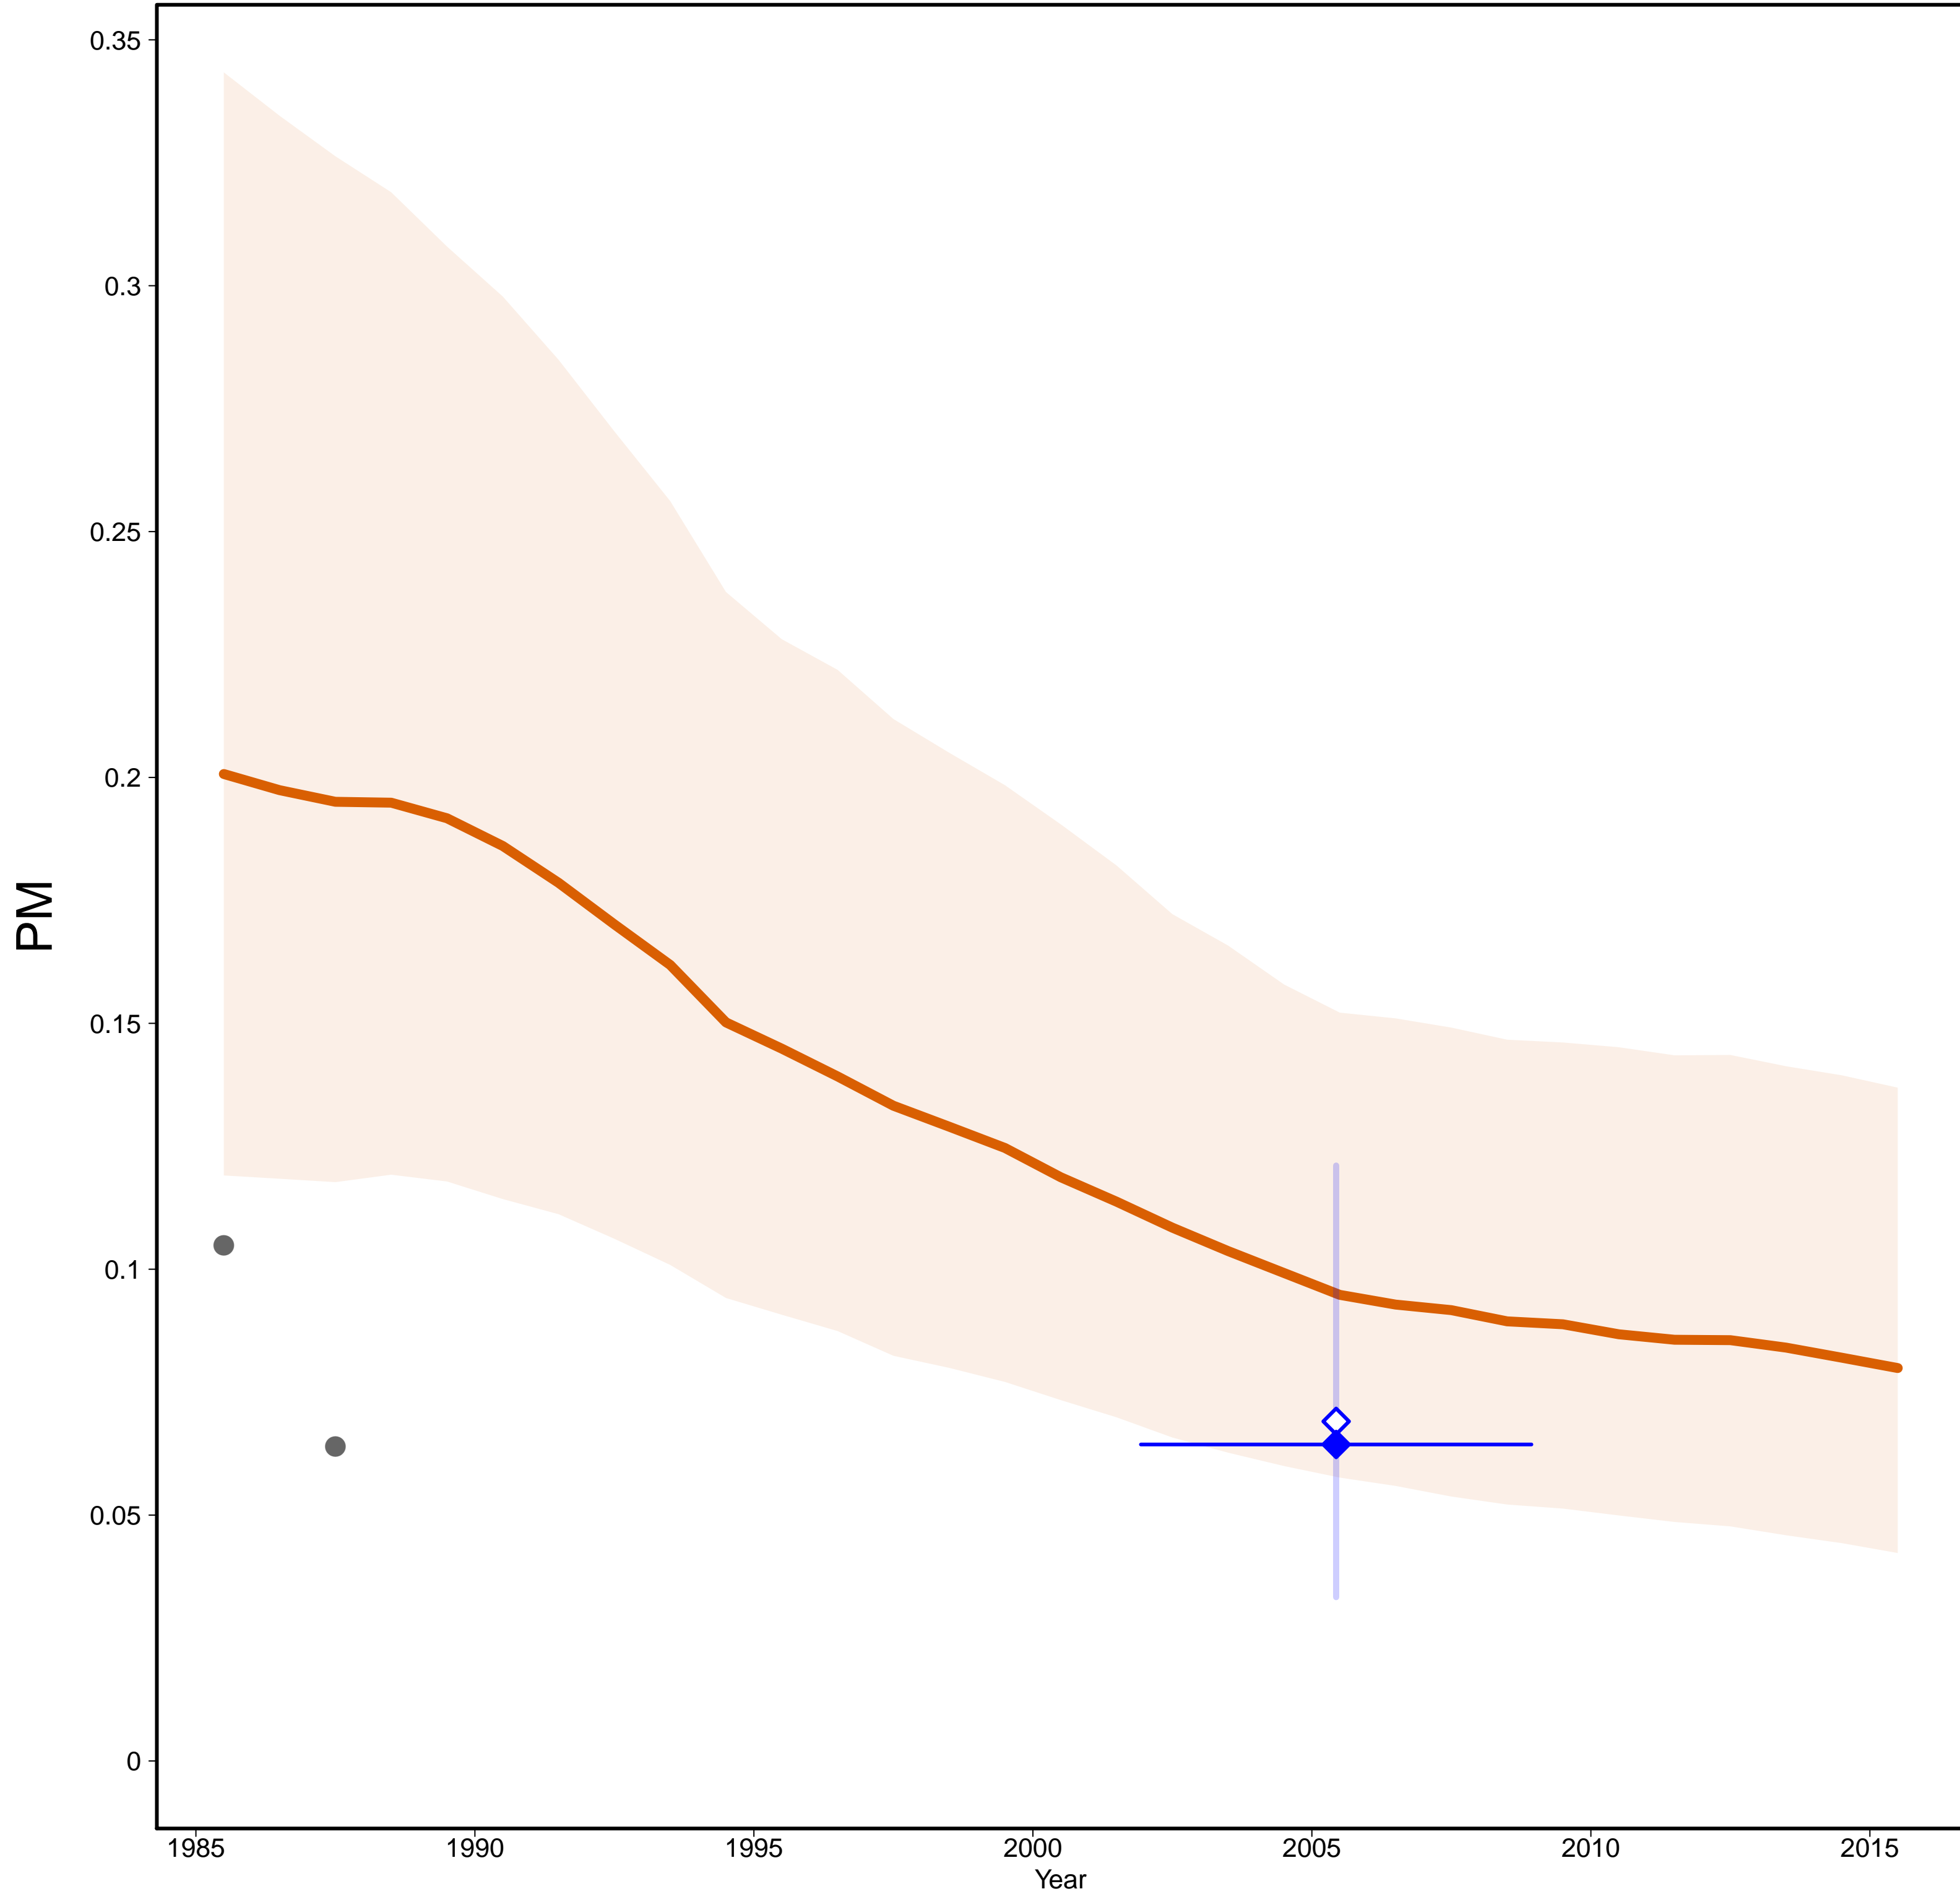

Sao Tome and Principe [STP]  
(Middle Africa)

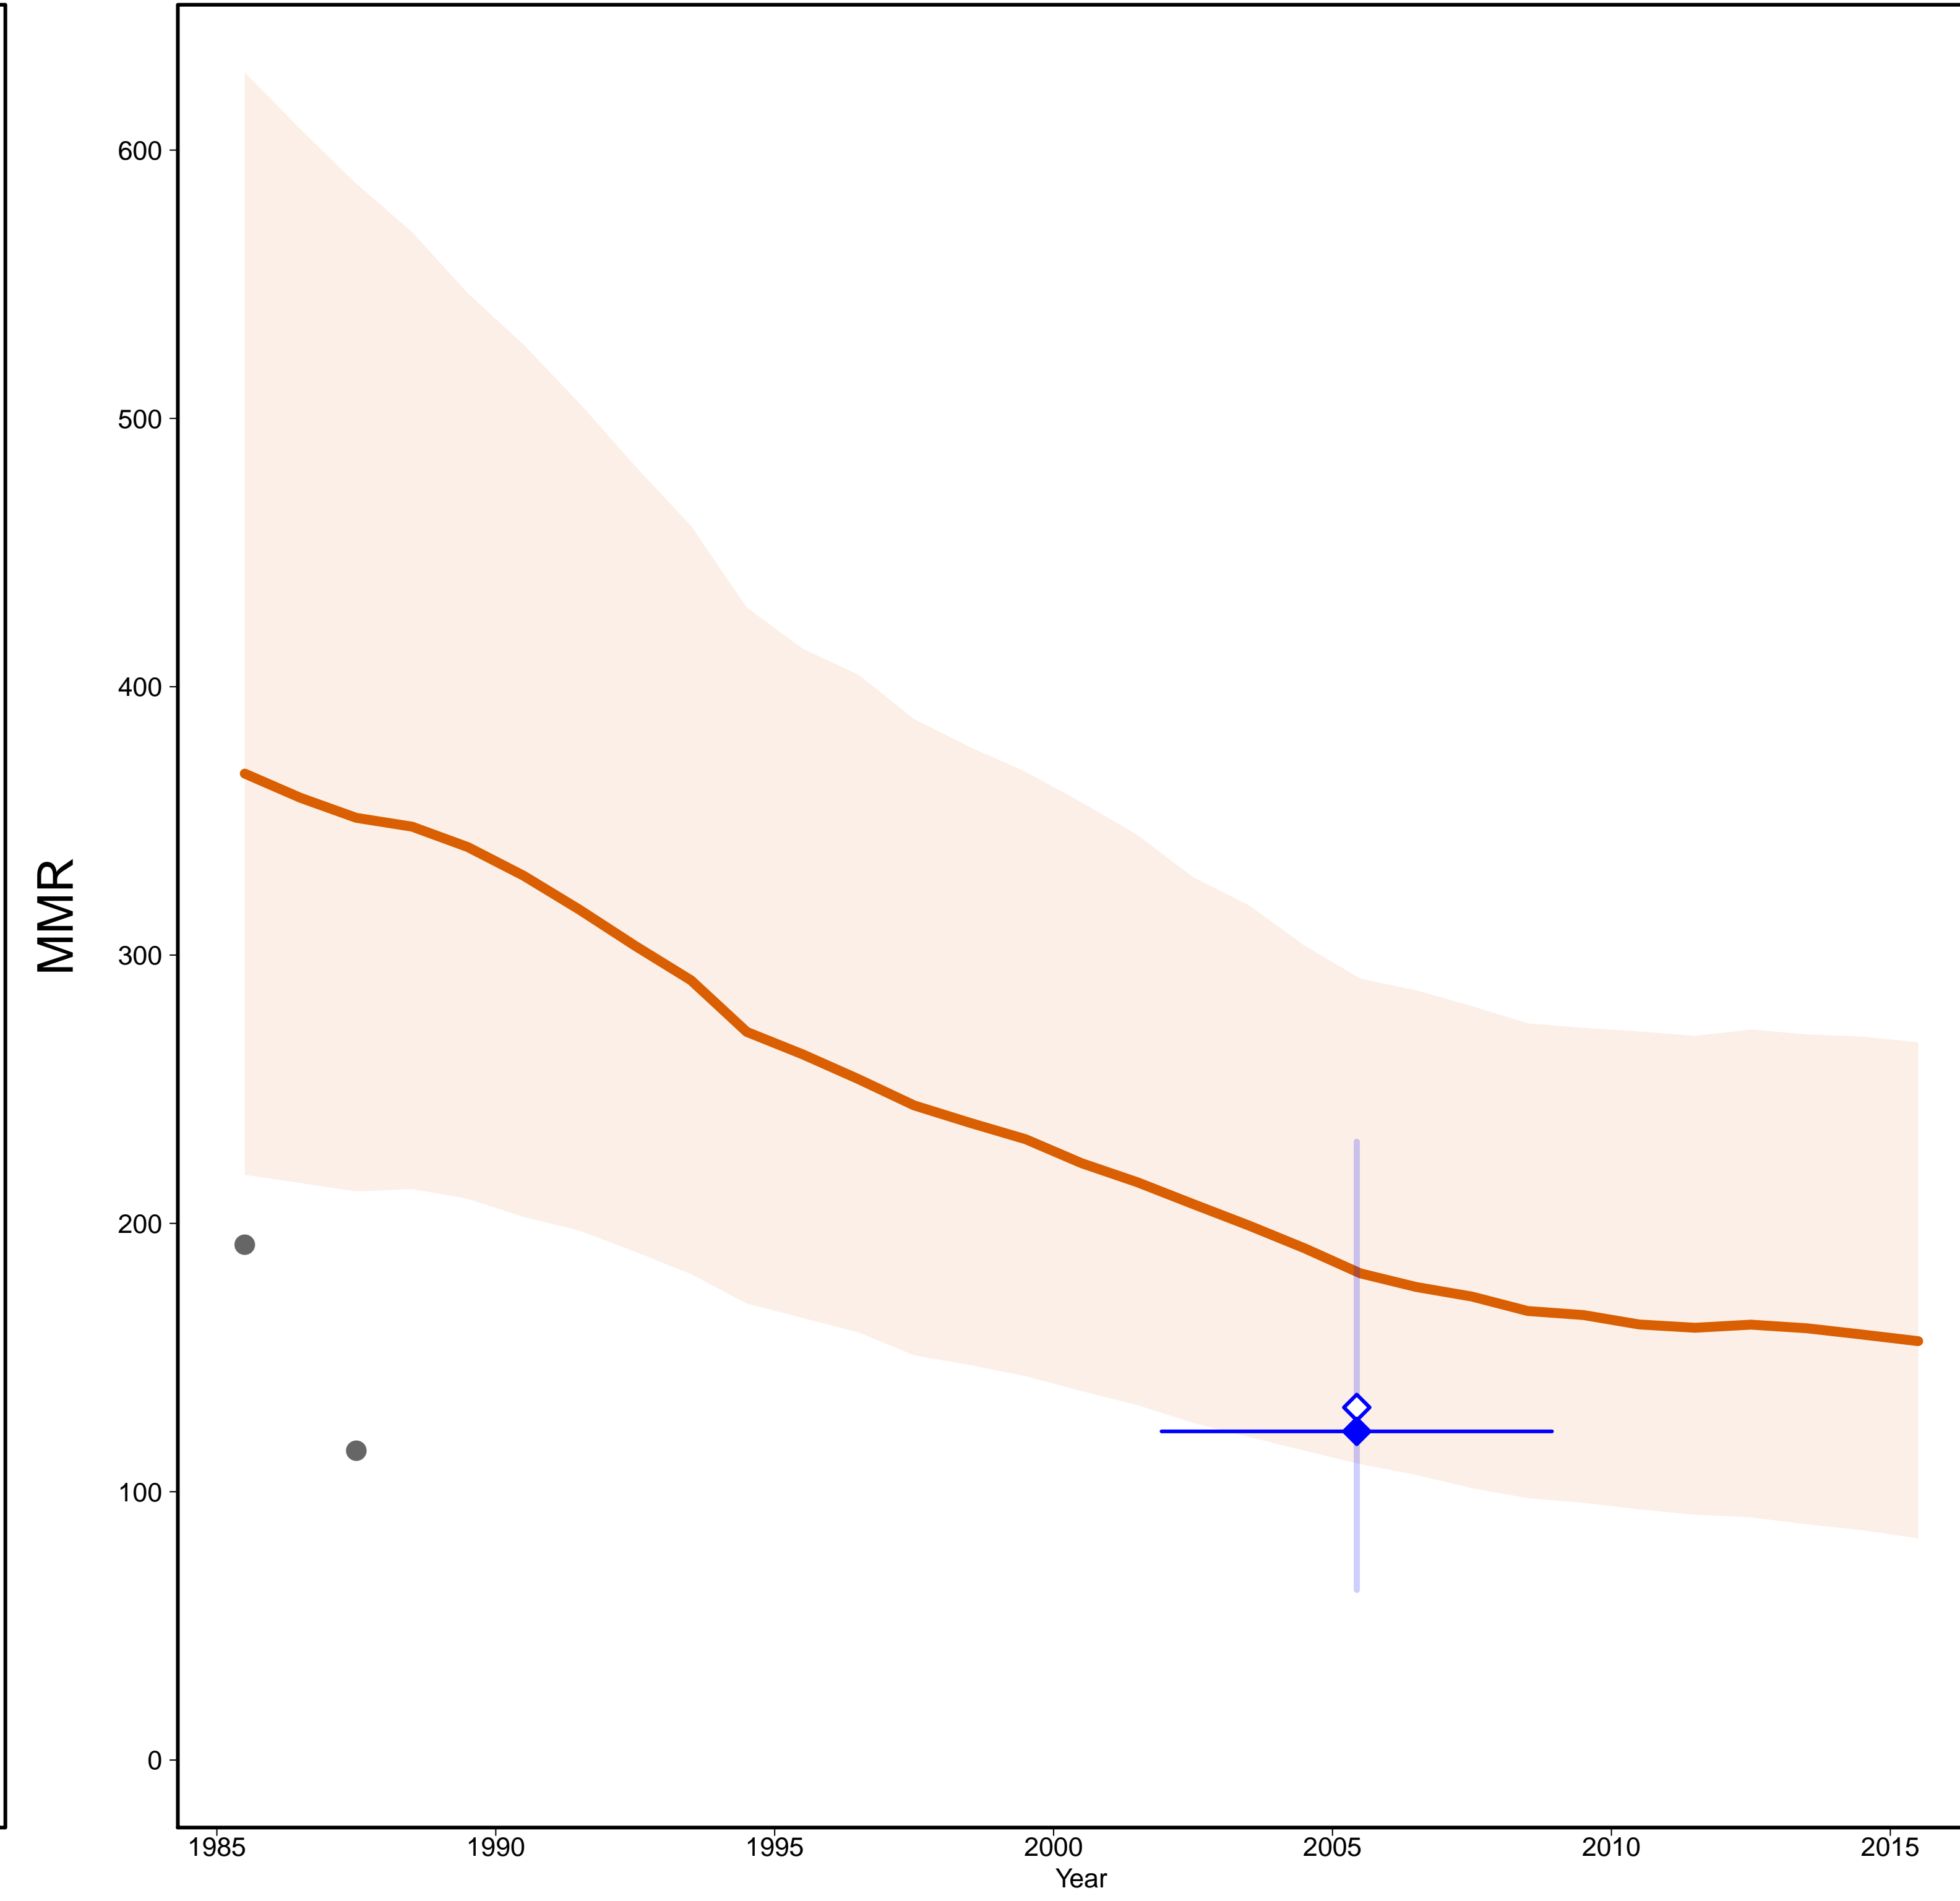

- Estimates –
- Mlate
- MMR Database 2015 –
- ◇ Observed Data
- ◆ Adjusted Data
- Data type –
- ◆ DHS
- Excluded VR data  
(data quality issues)

Gross Domestic Product

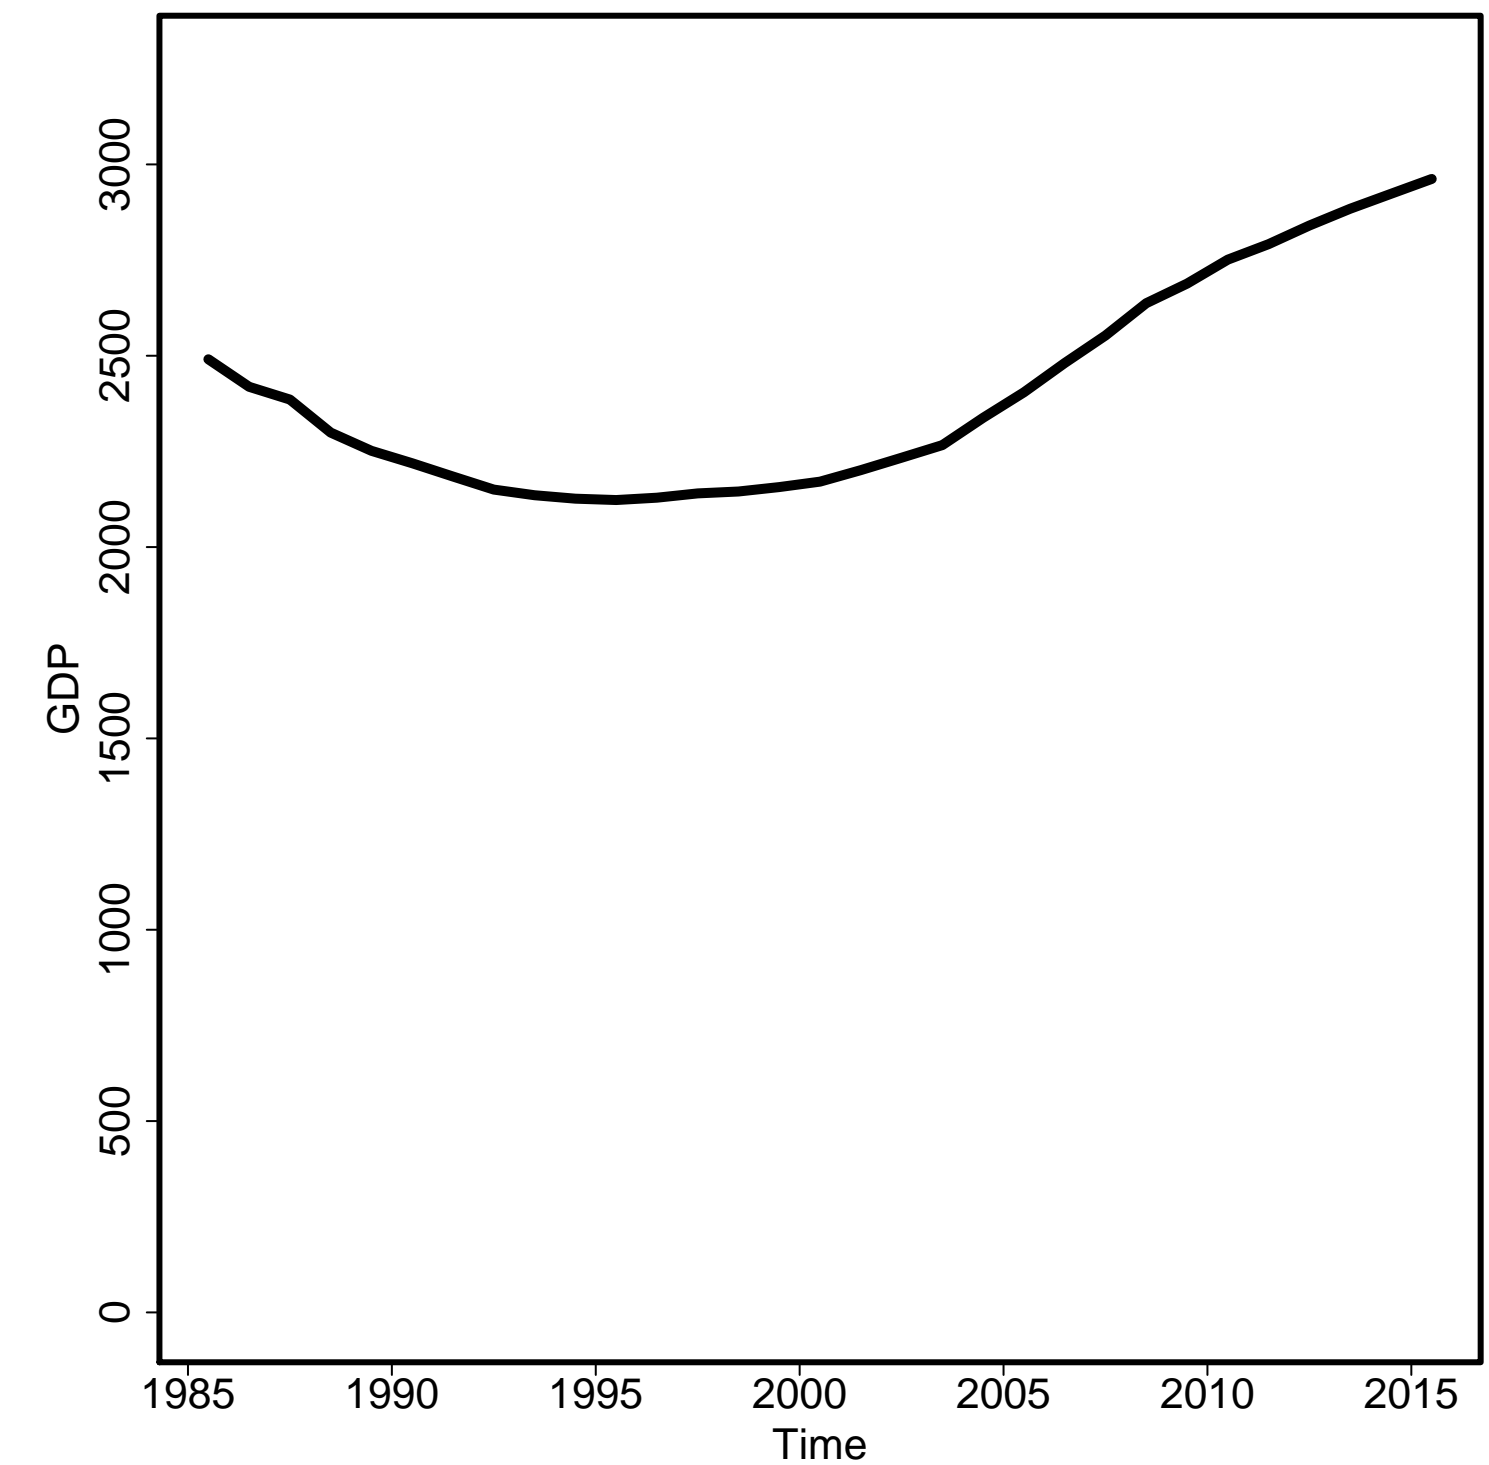

General Fertility Rate

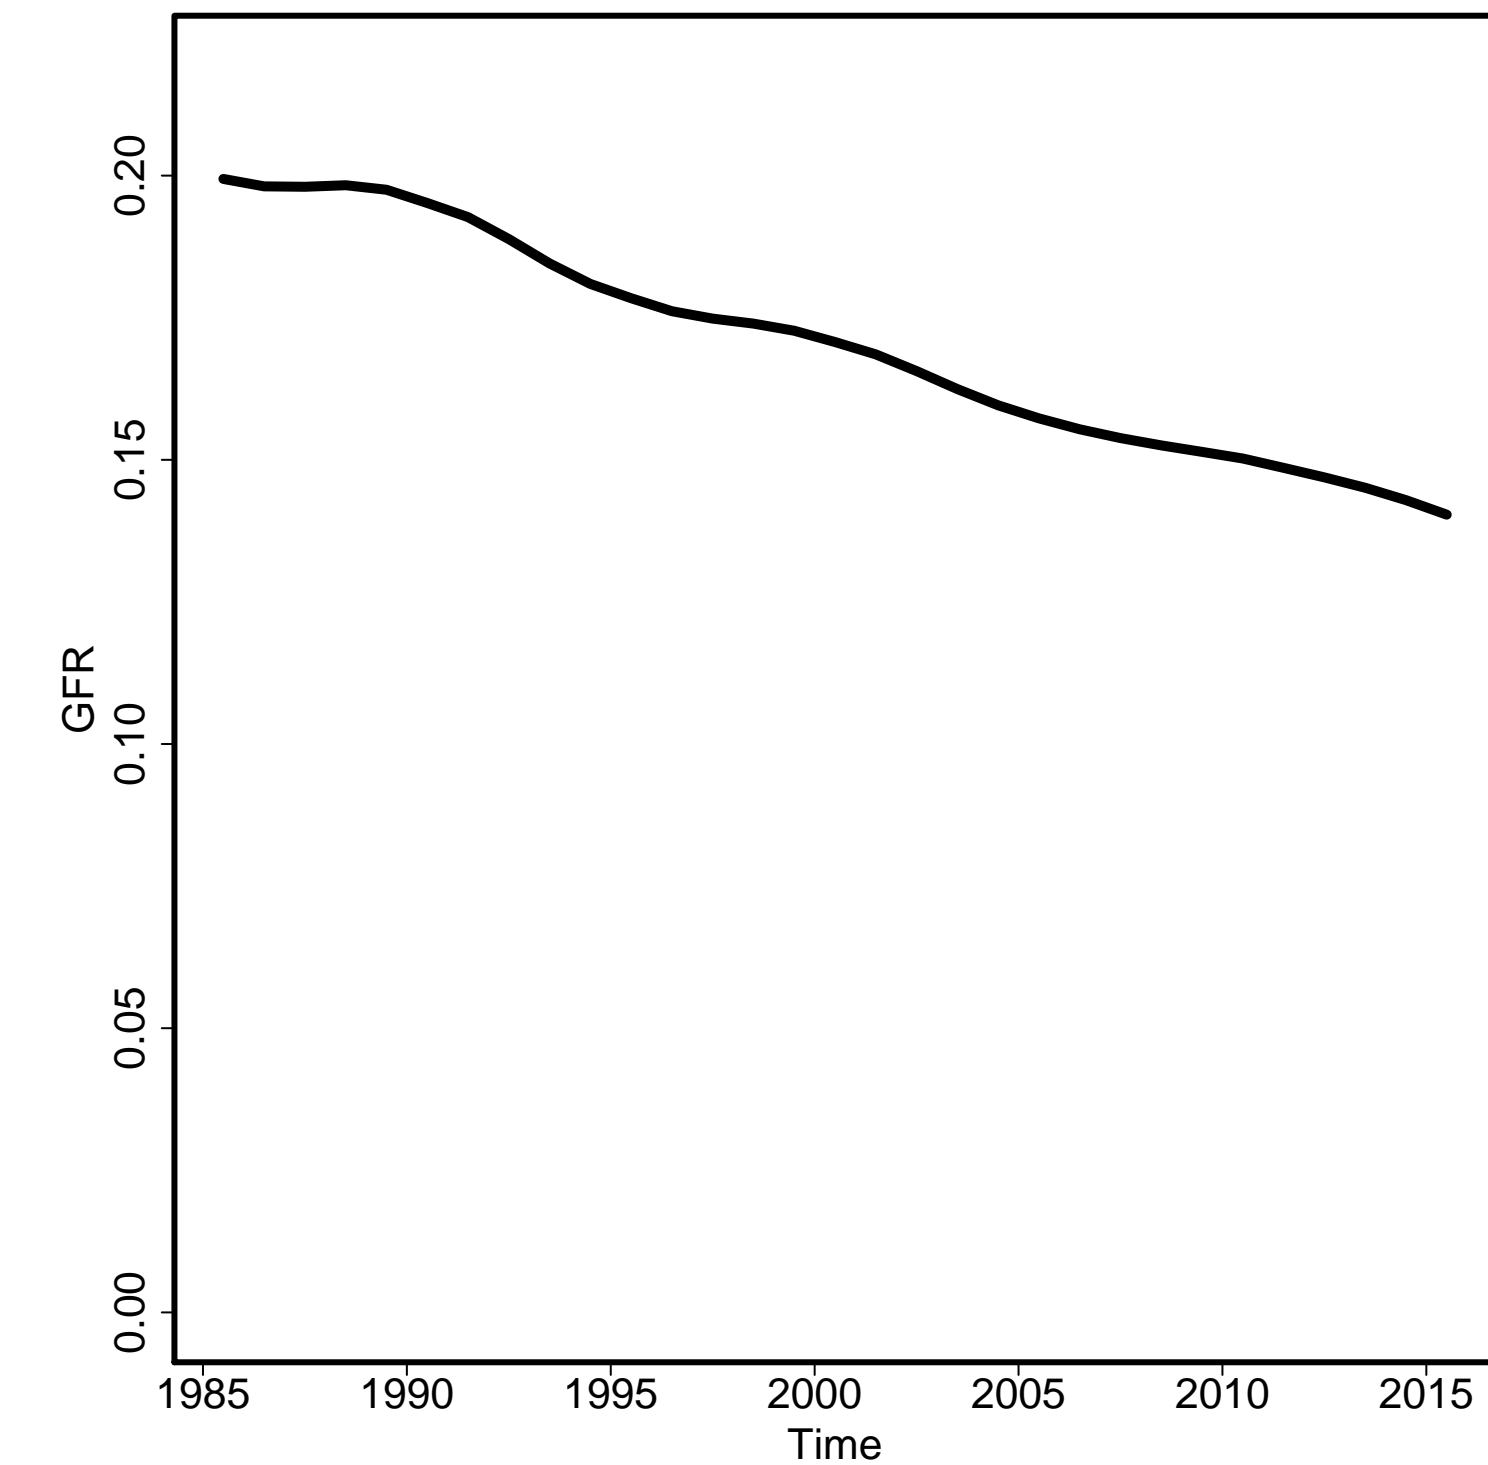

Skilled Attendance to Birth

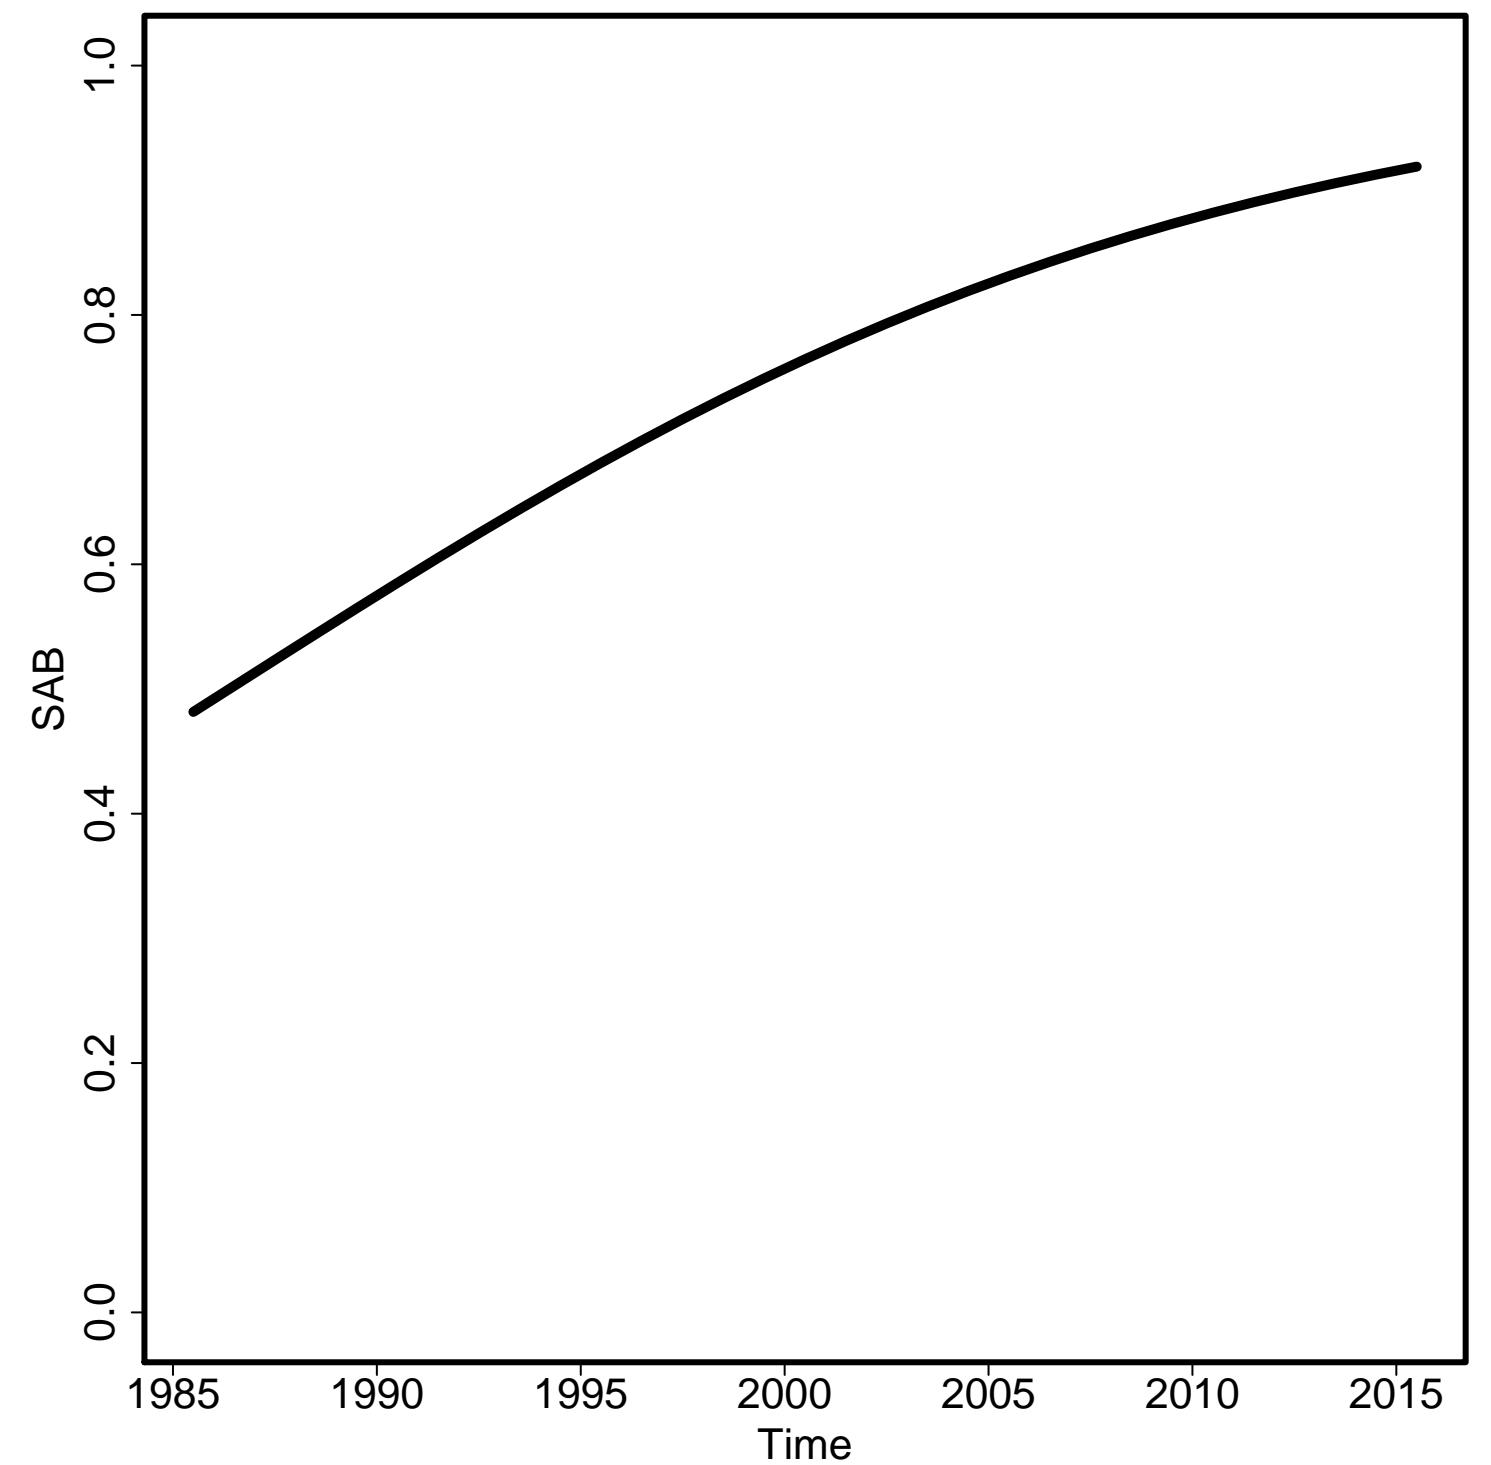

Envelope/Births

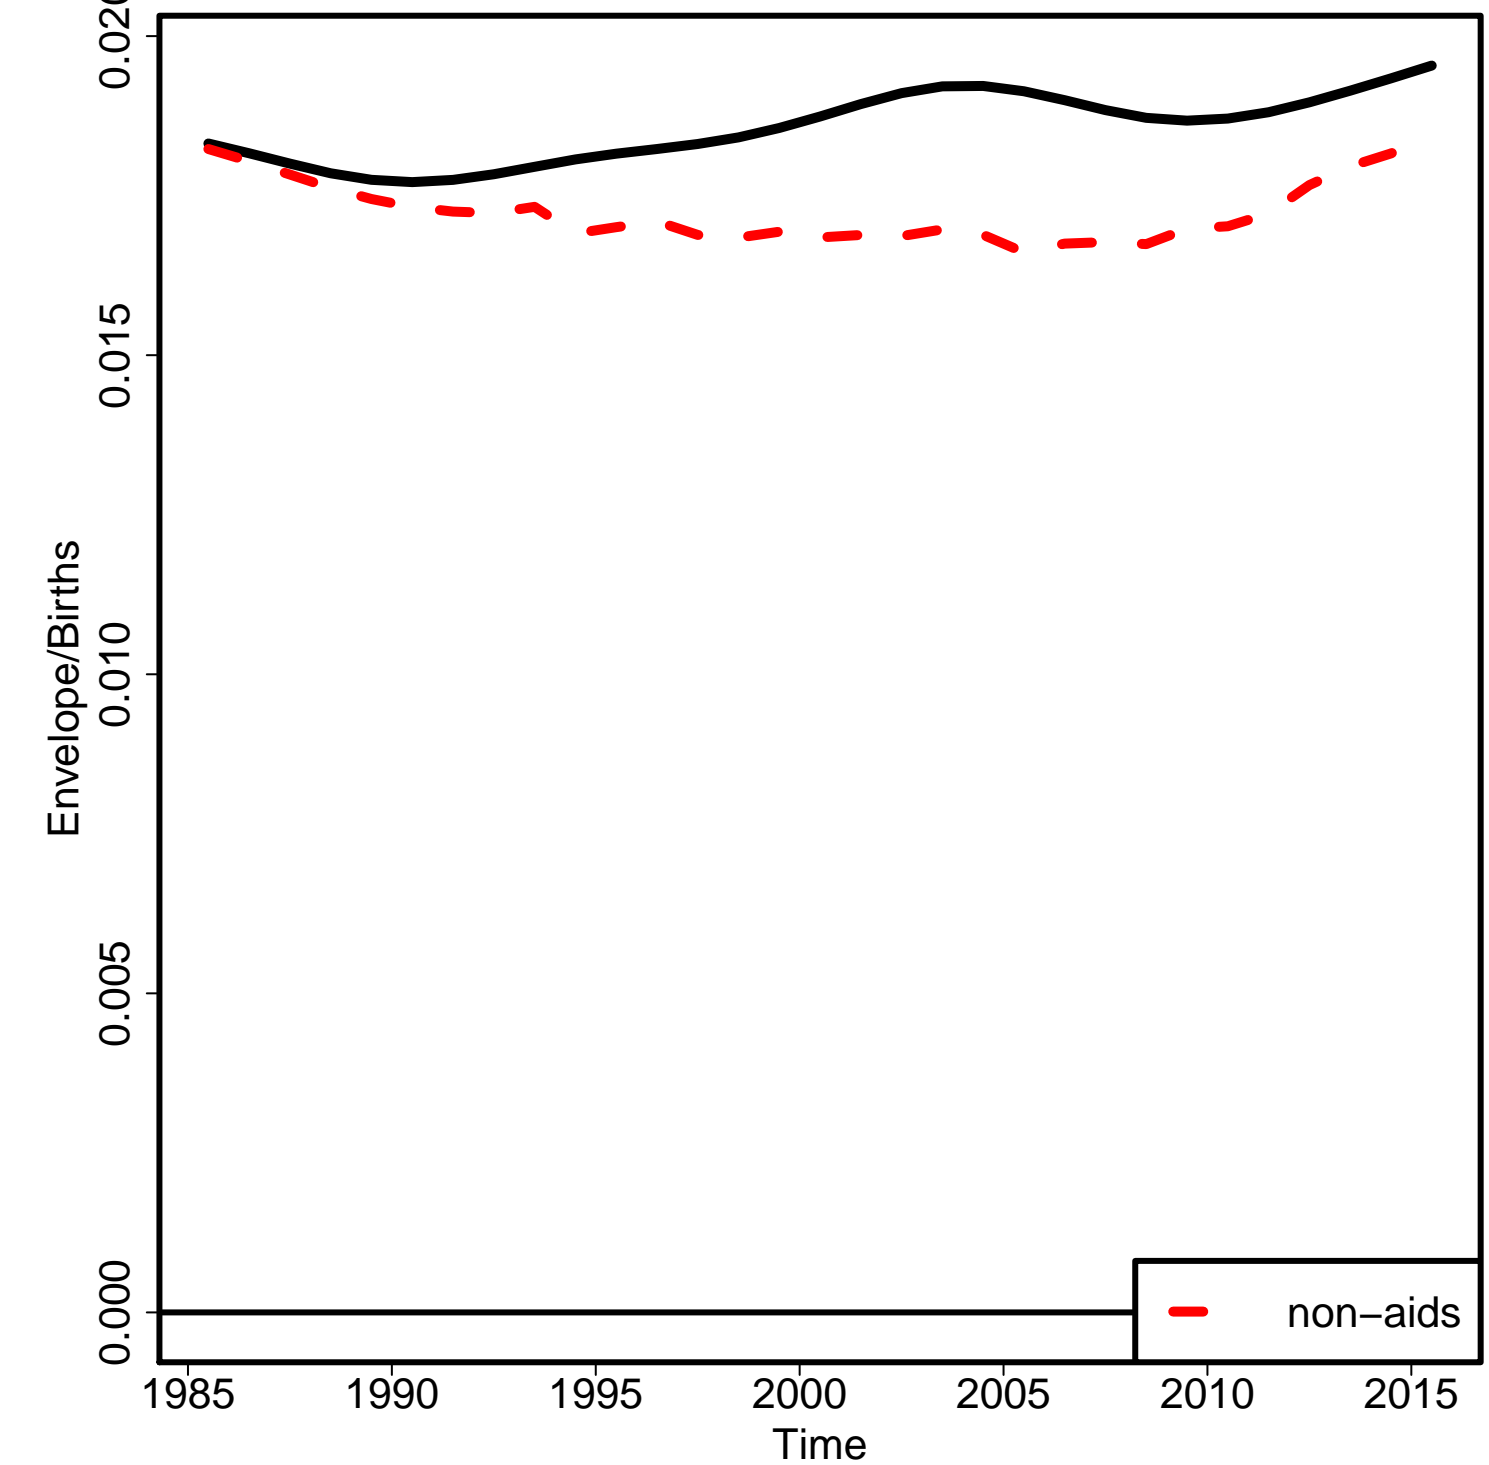

Non-aids MMR

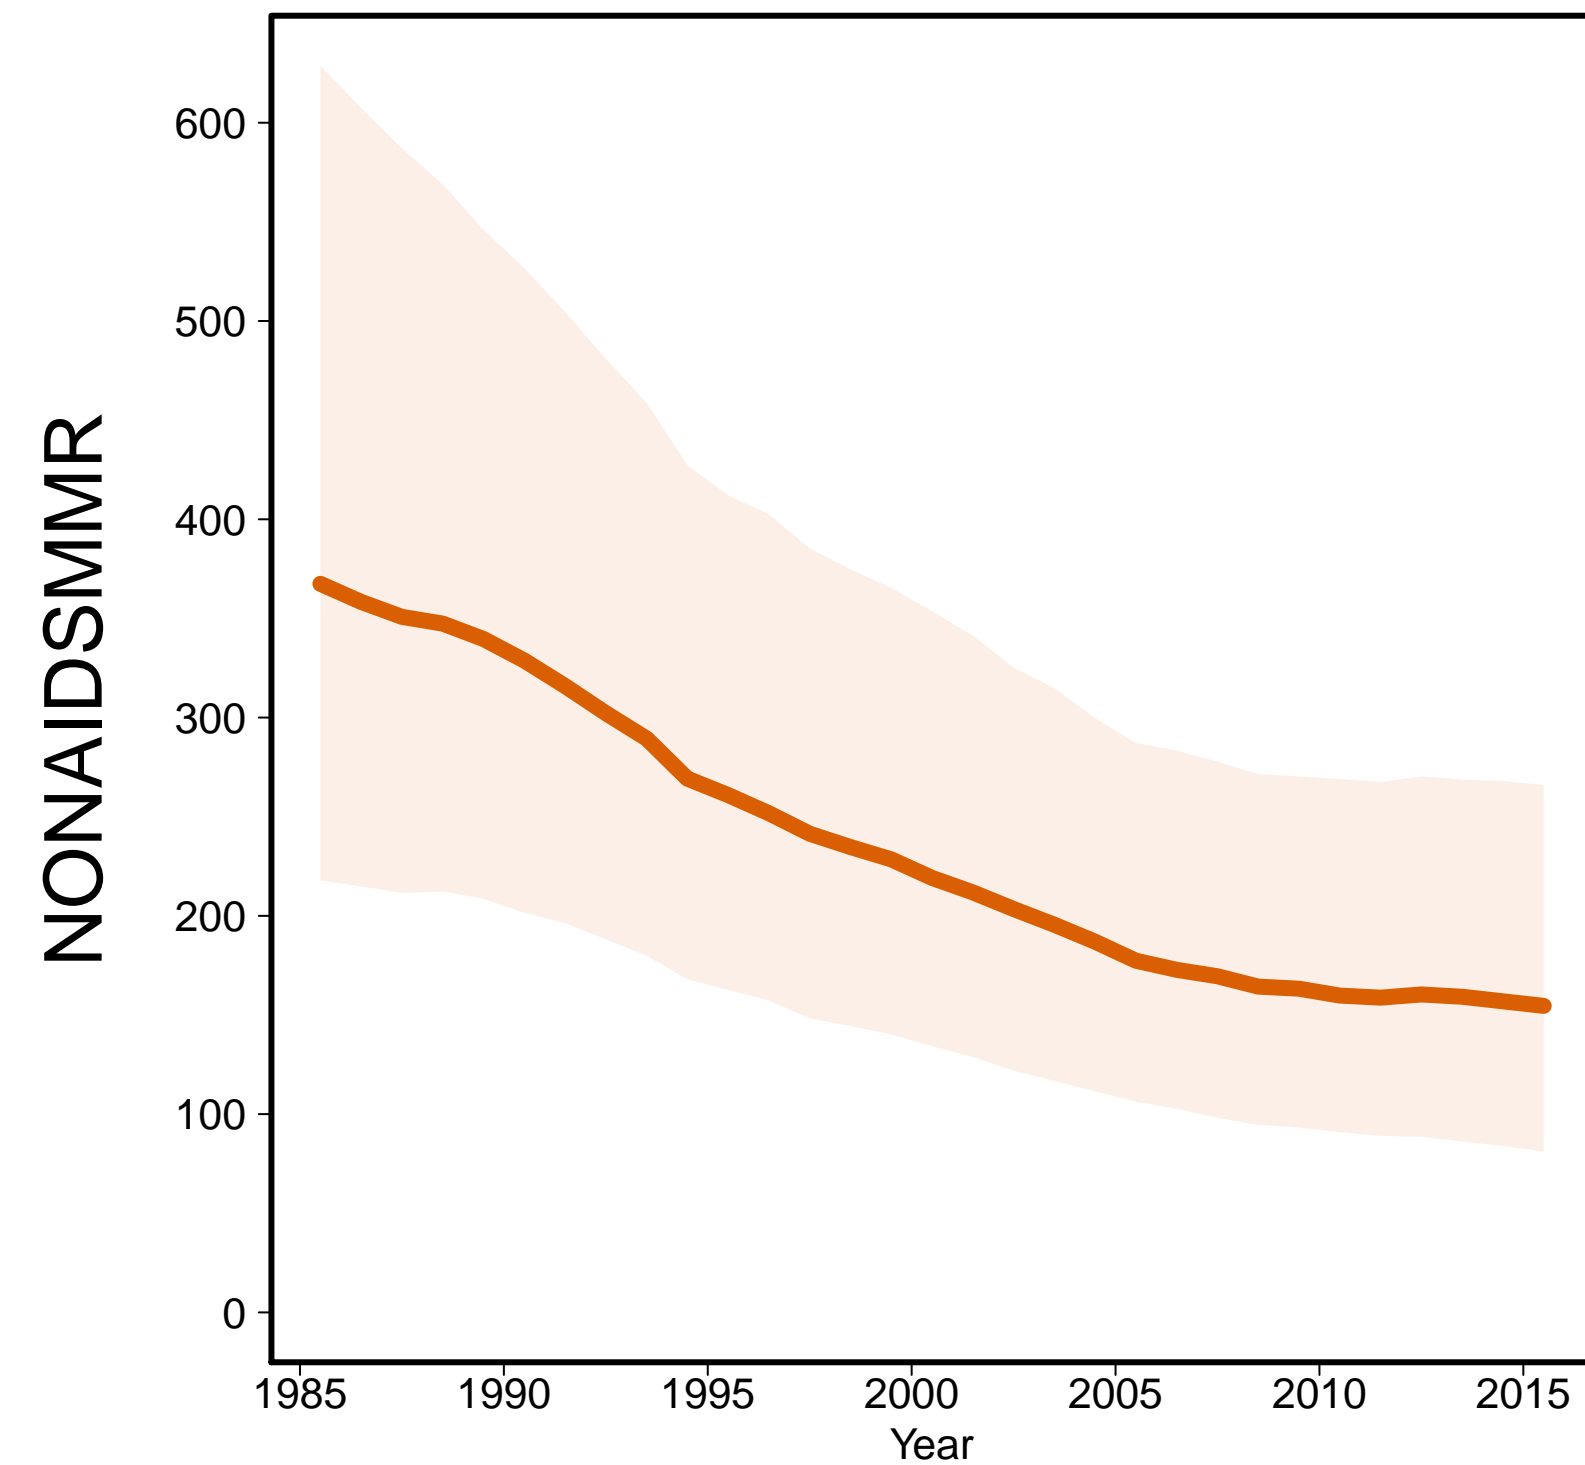

Aids MMR

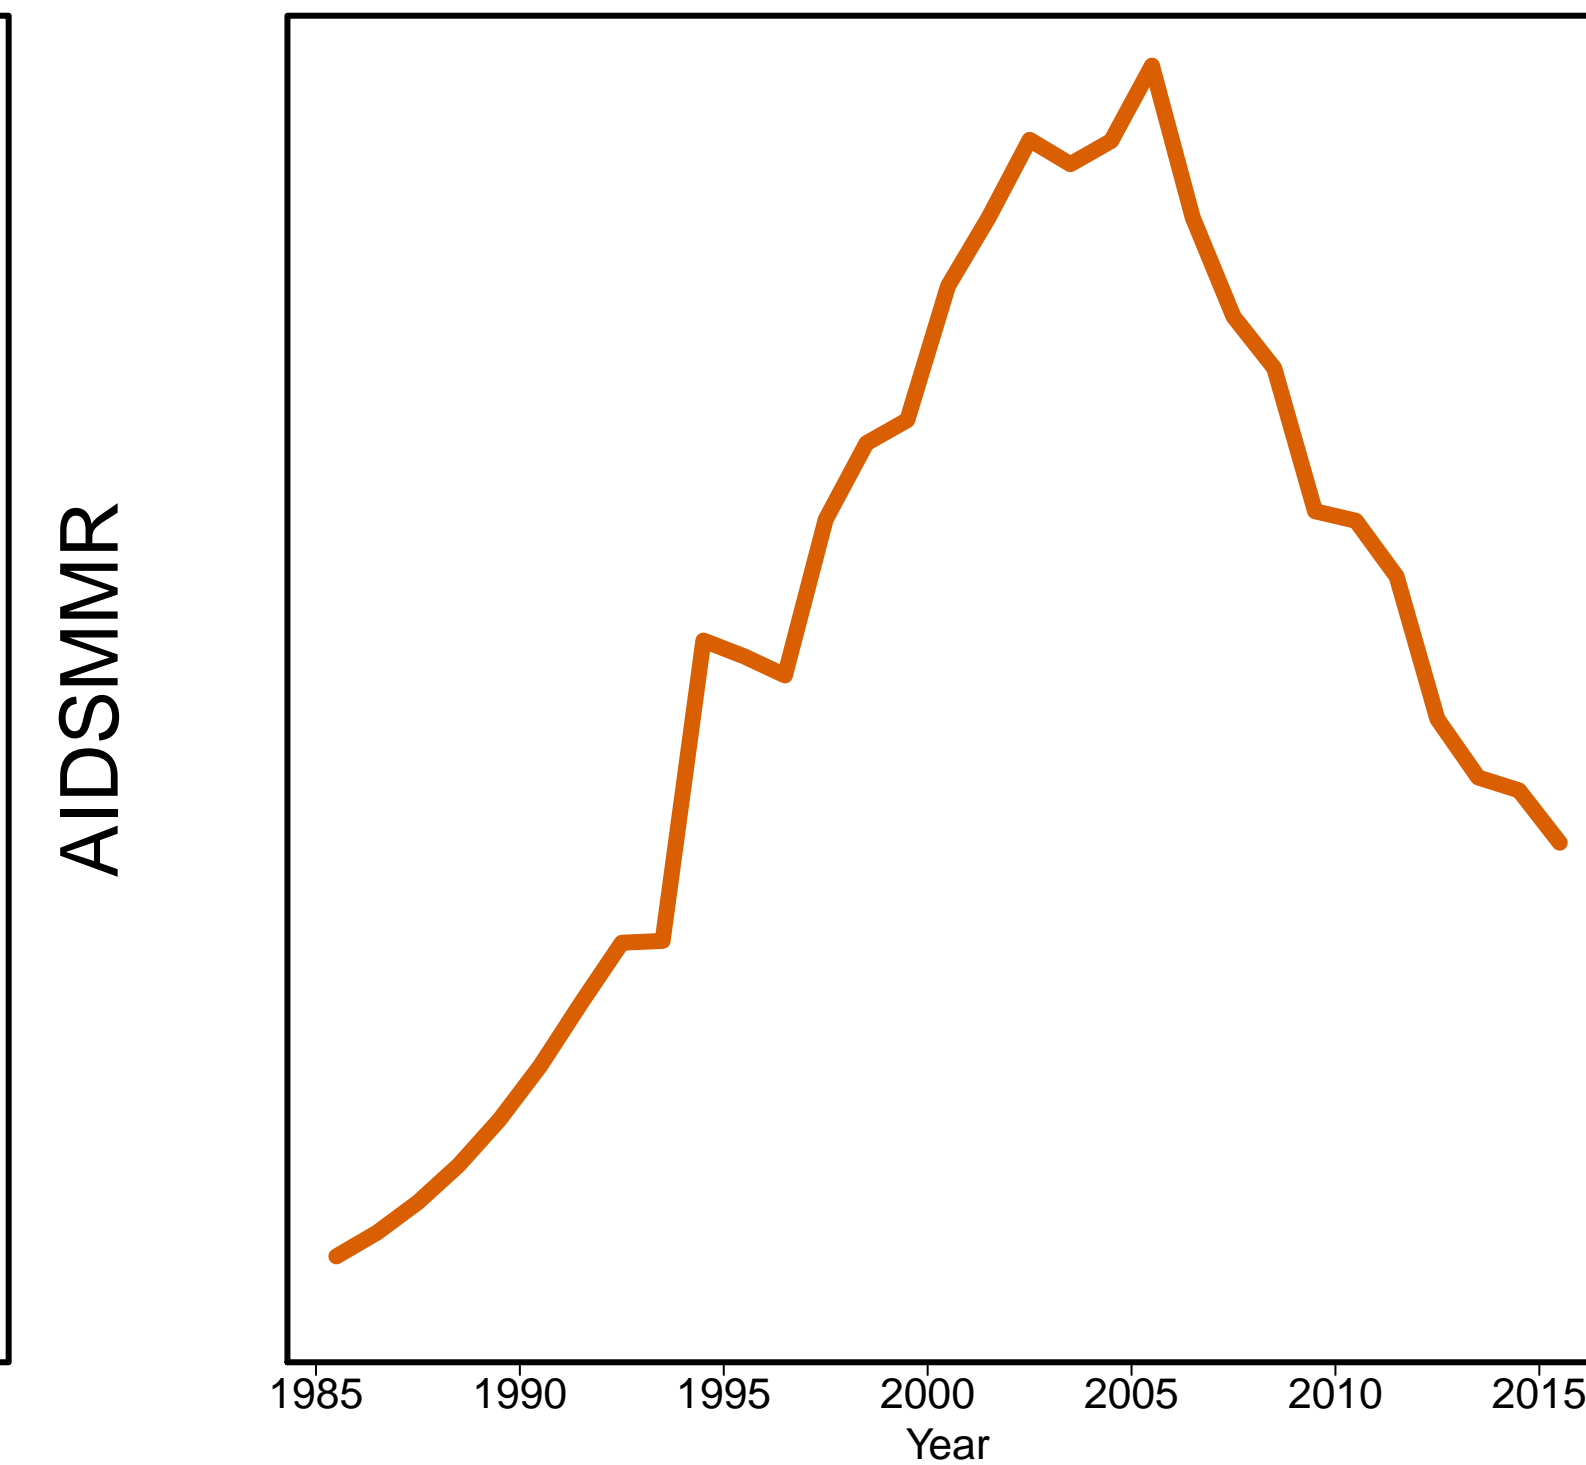

Saudi Arabia [SAU]  
(Western Asia)

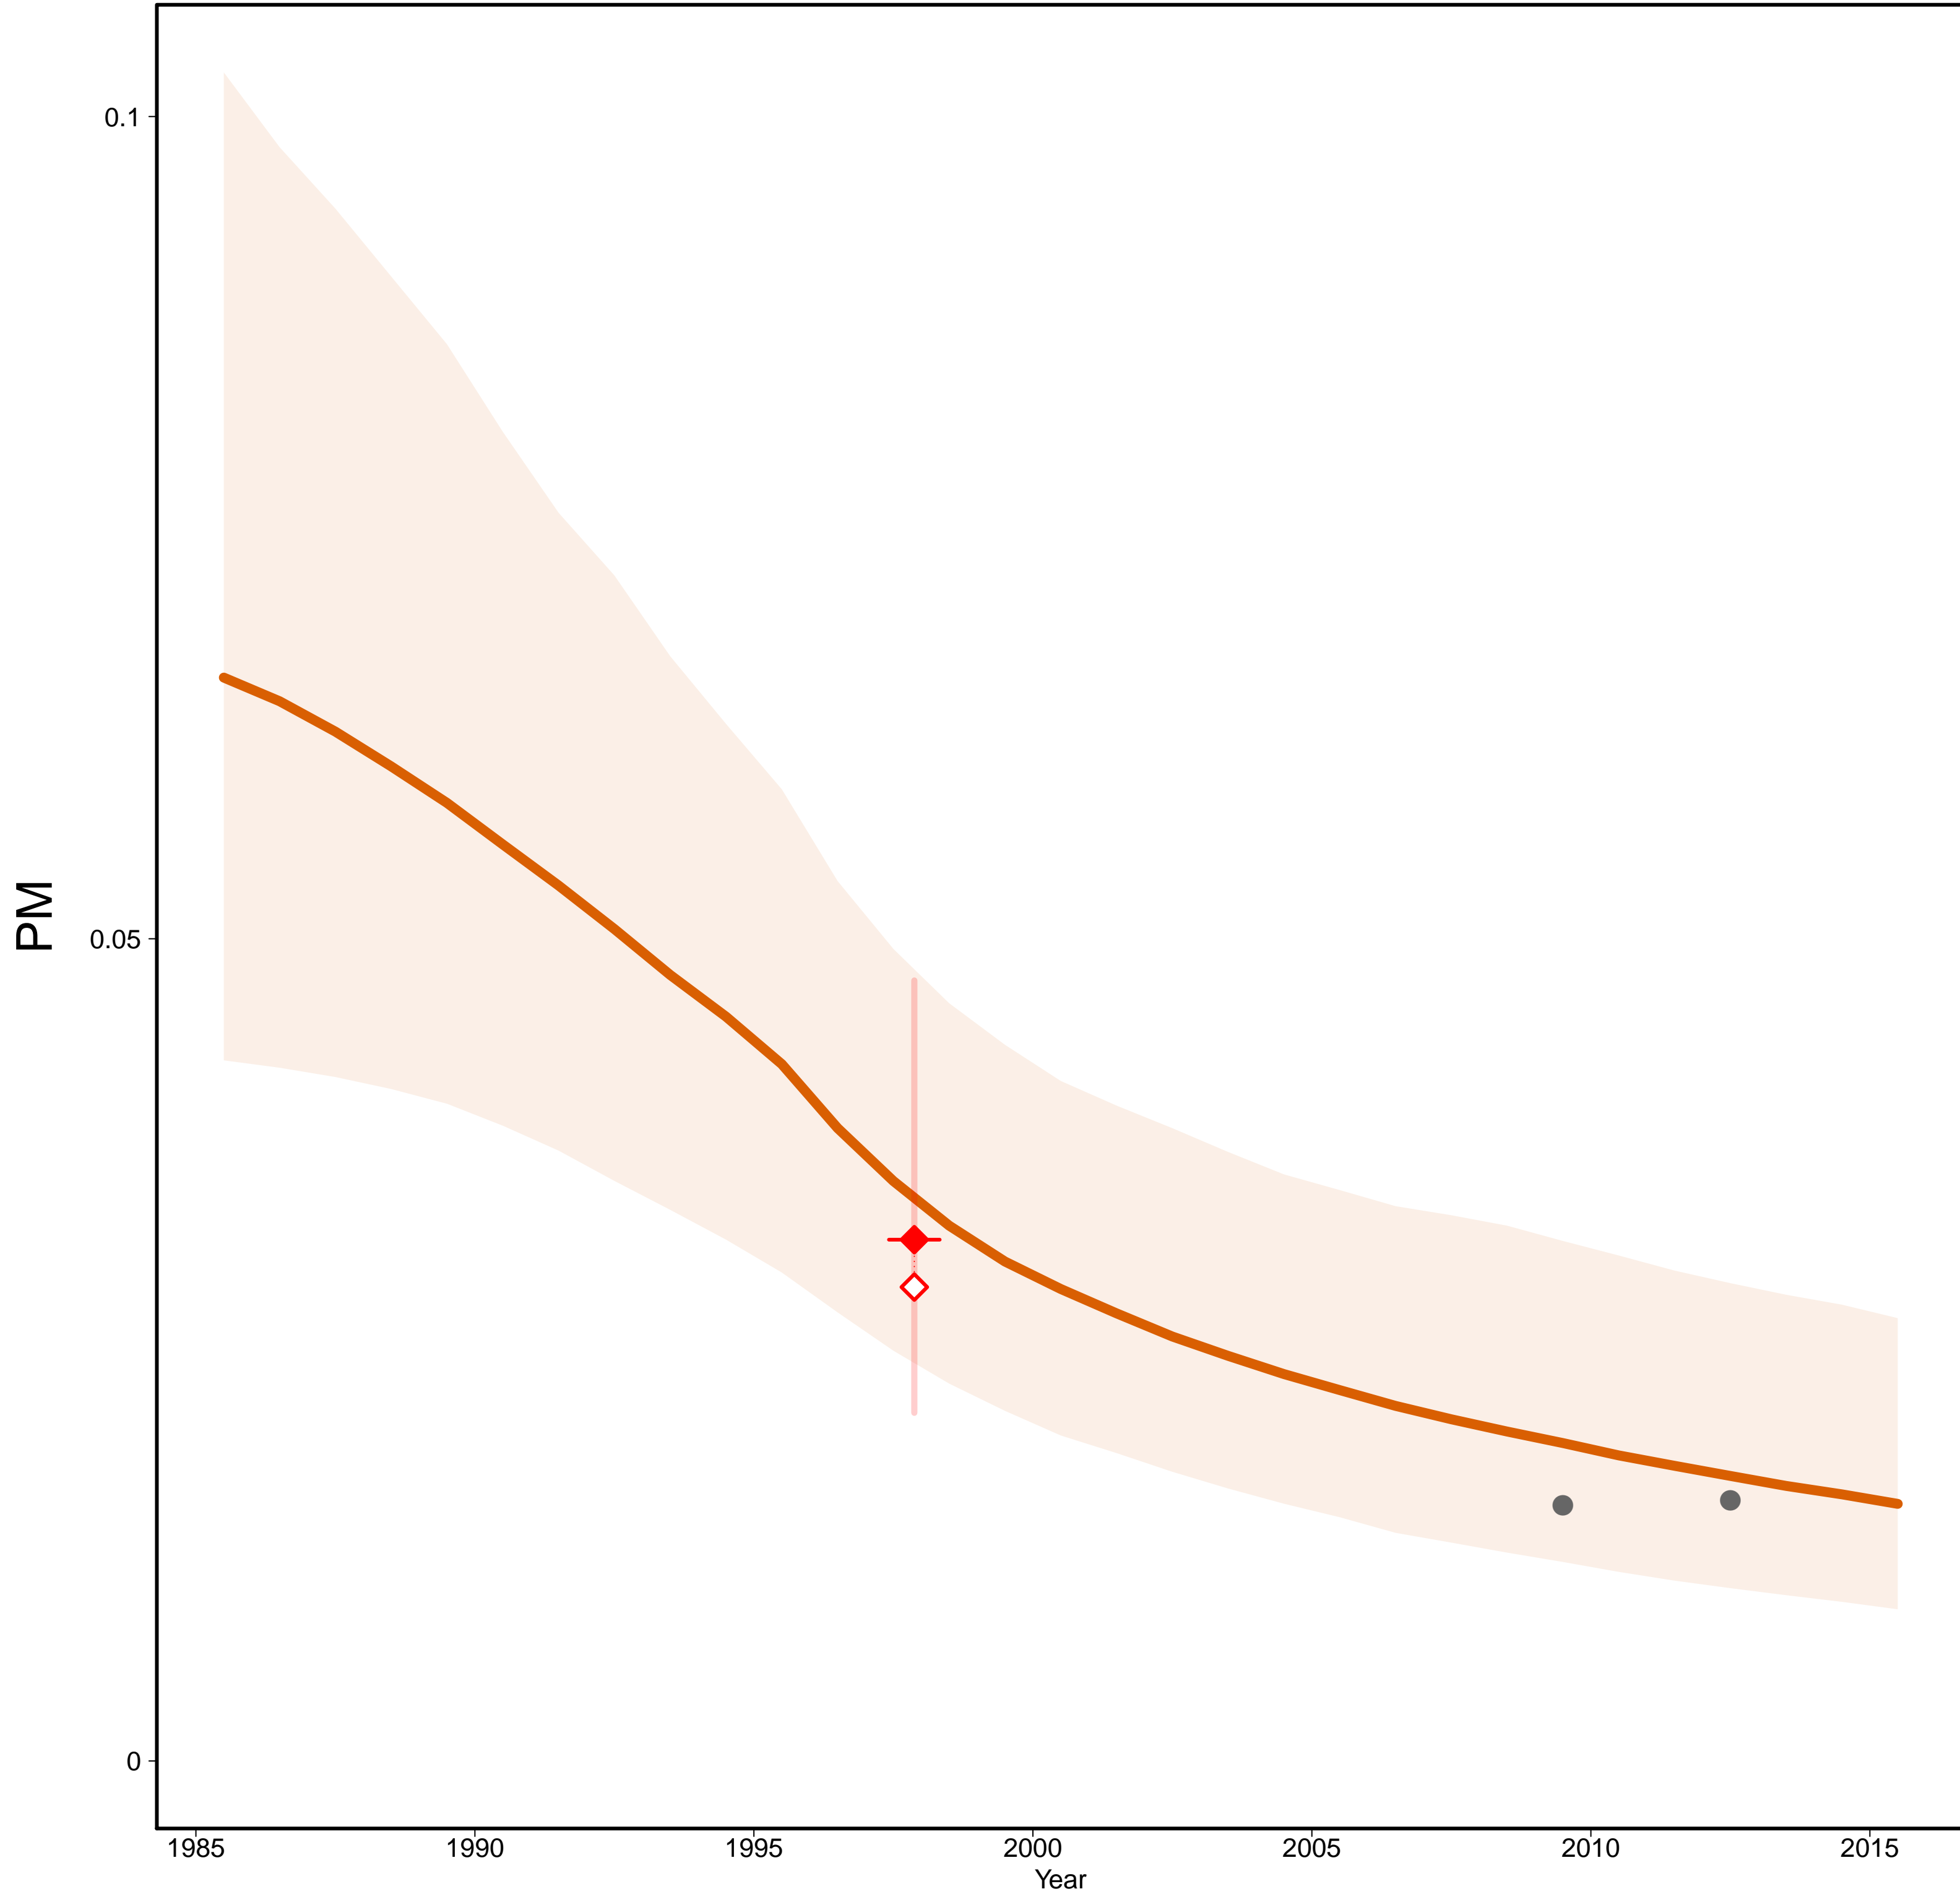

Saudi Arabia [SAU]  
(Western Asia)

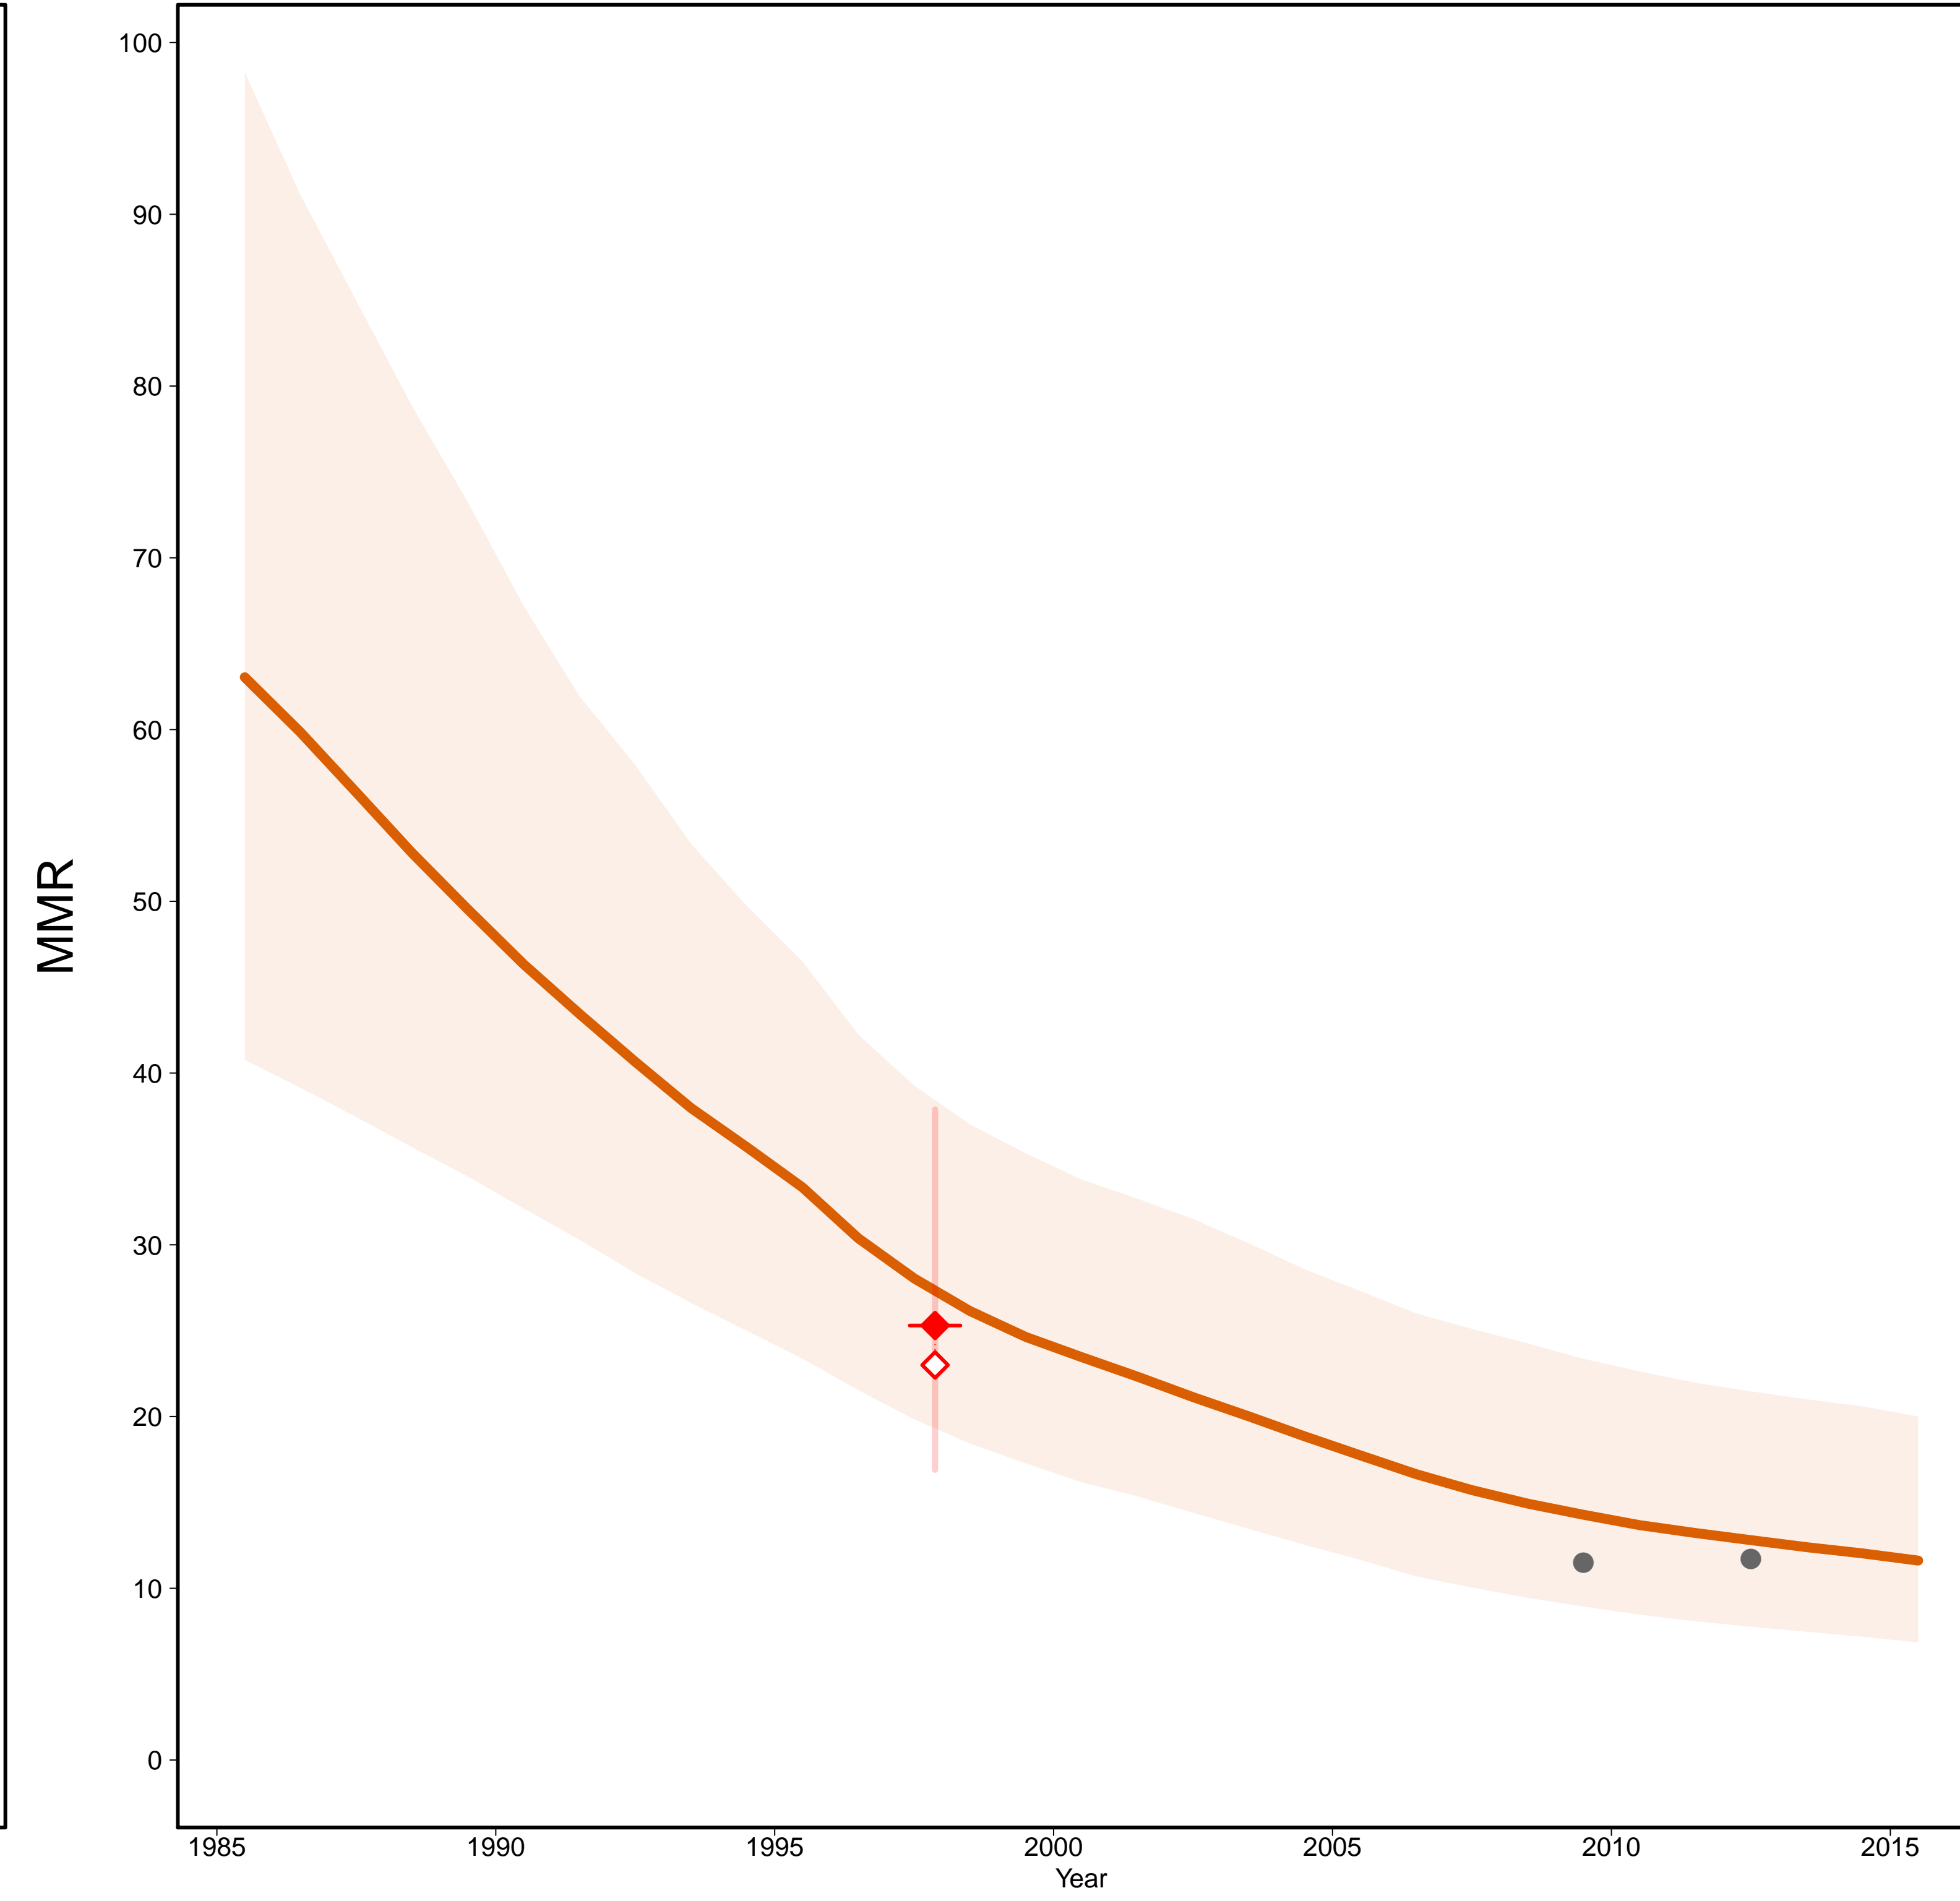

- Estimates –
- Mlate
- MMR Database 2015 –
- ◇ Observed Data
- ◆ Adjusted Data
- Data type –
- ◆ Misc. studies
- Excluded VR data  
(data quality issues)

Gross Domestic Product

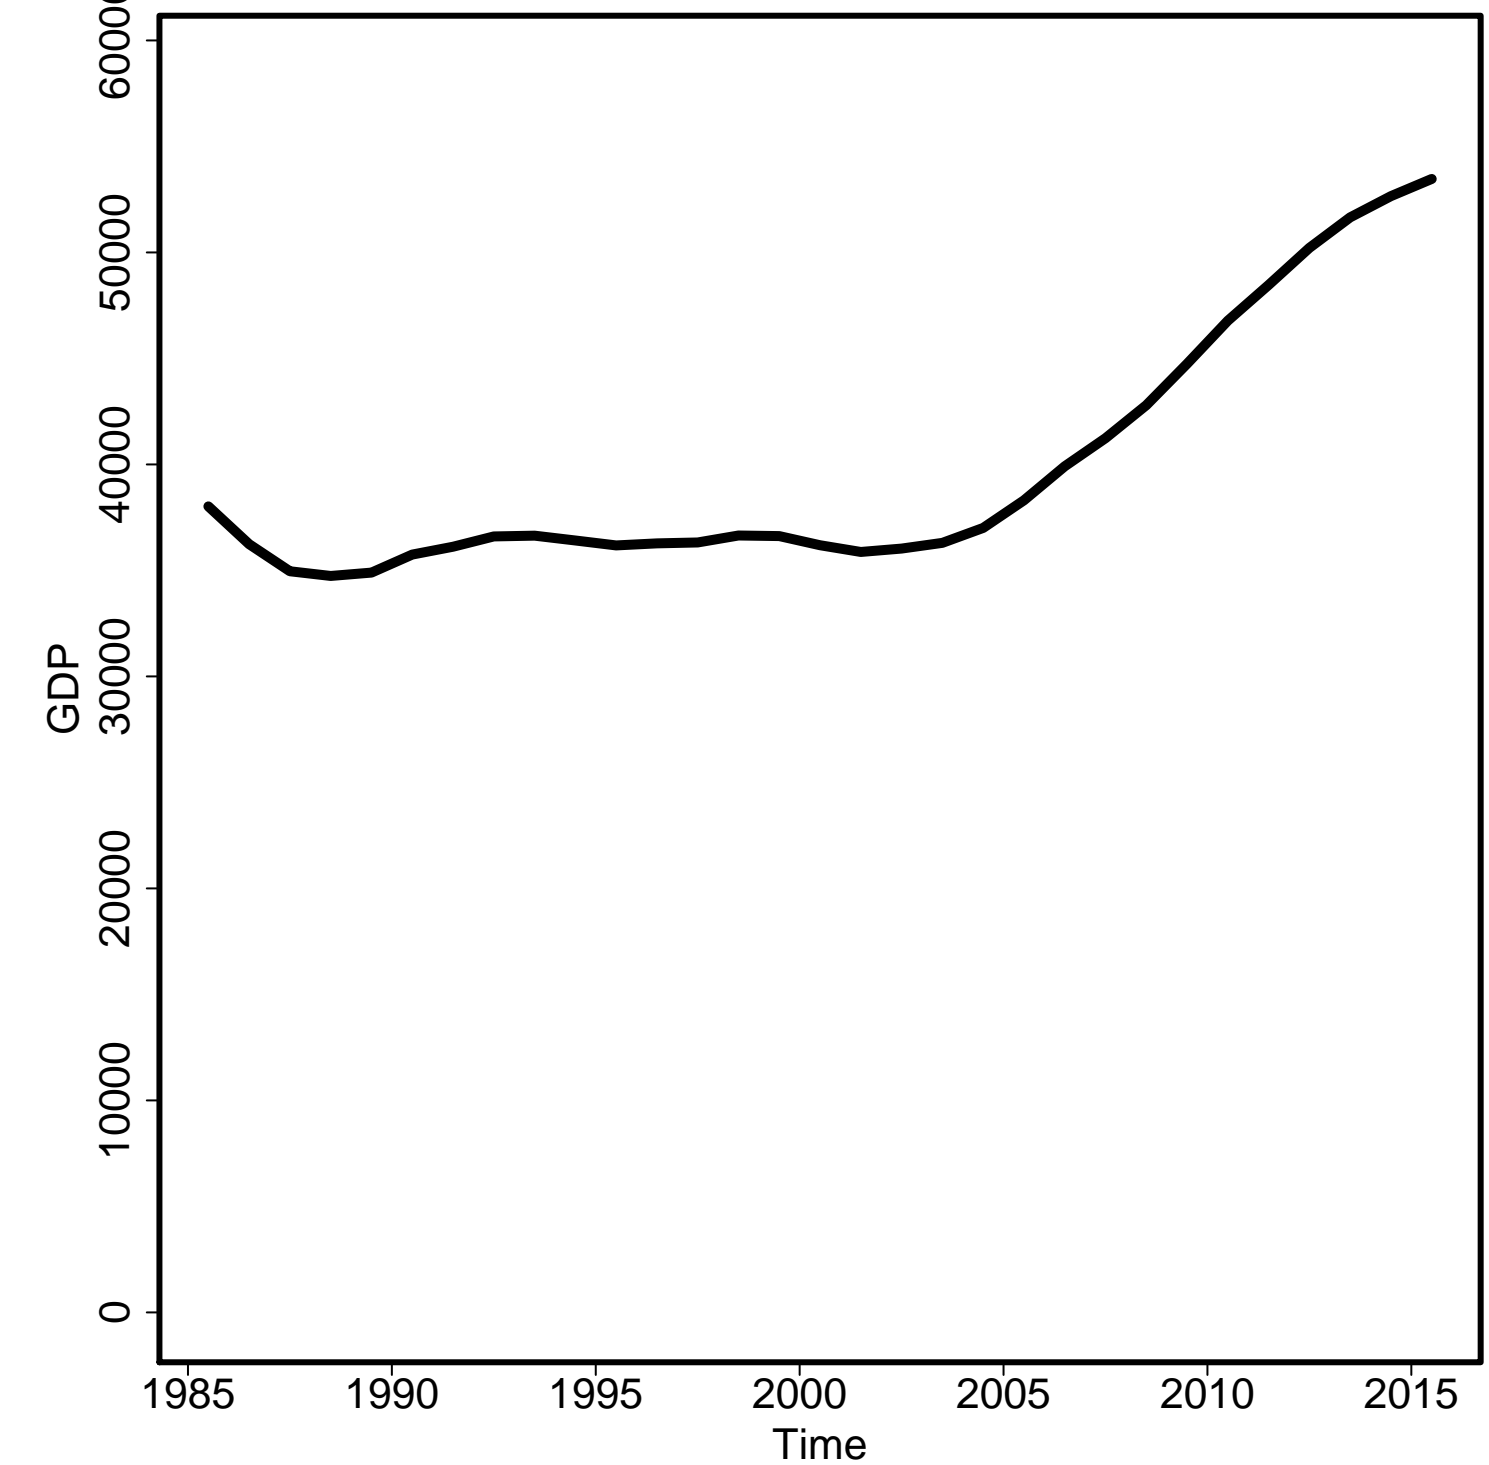

General Fertility Rate

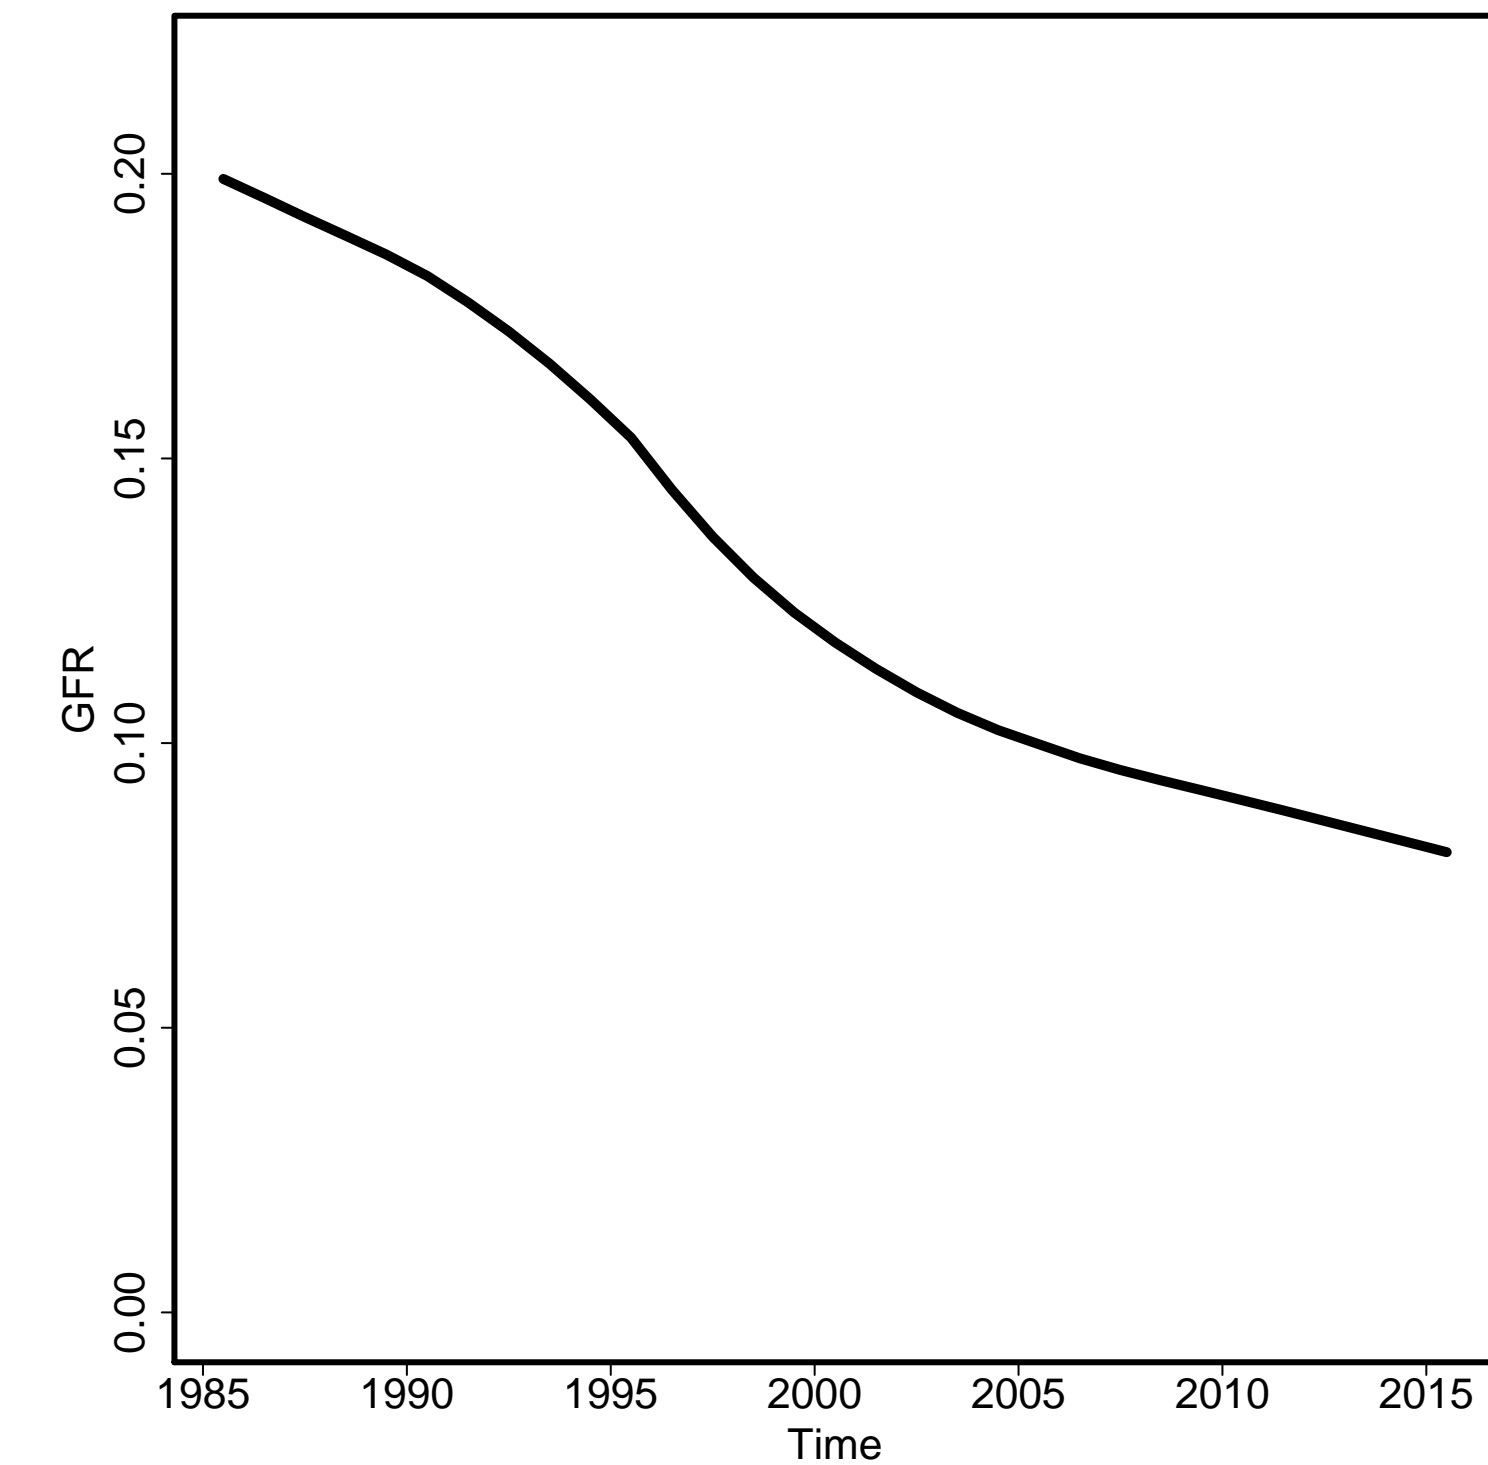

Skilled Attendance to Birth

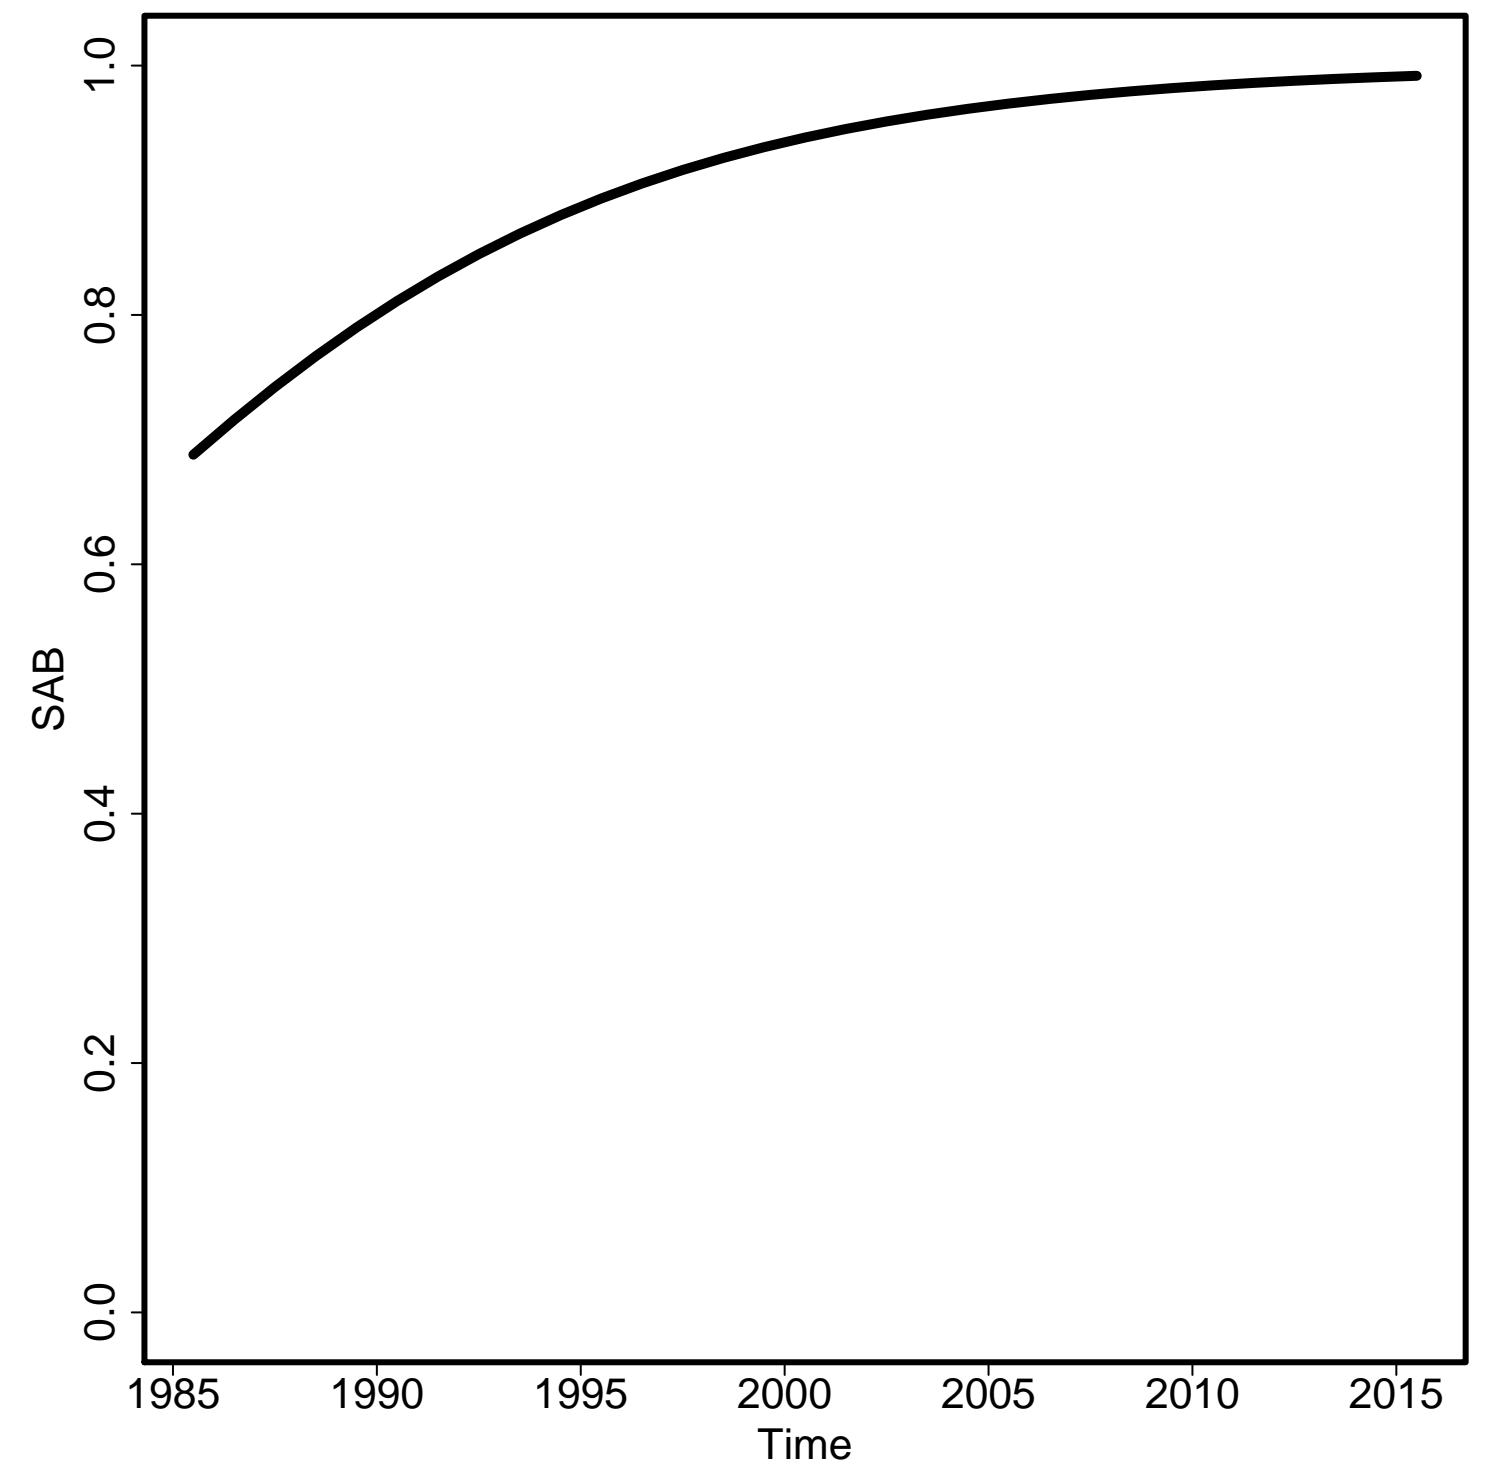

Envelope/Births

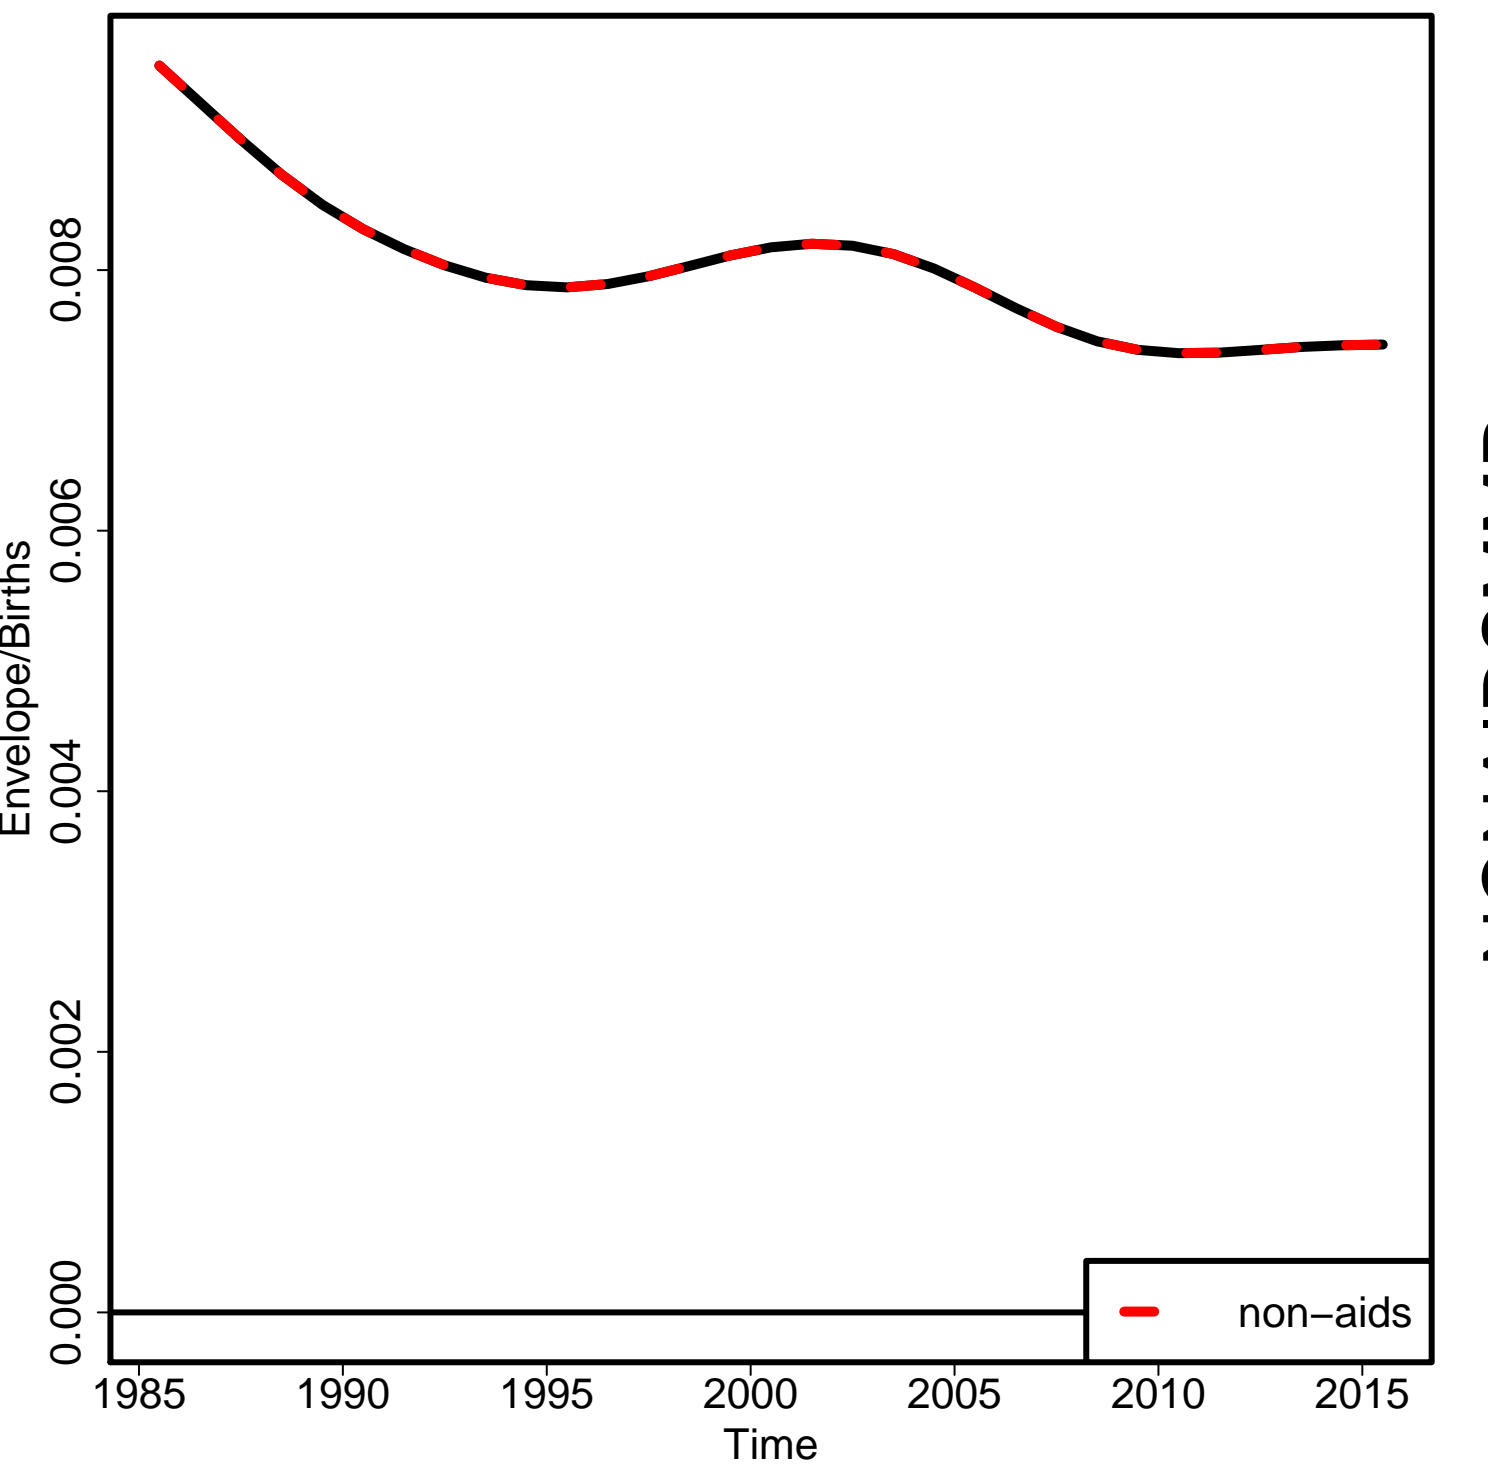

Non-aids MMR

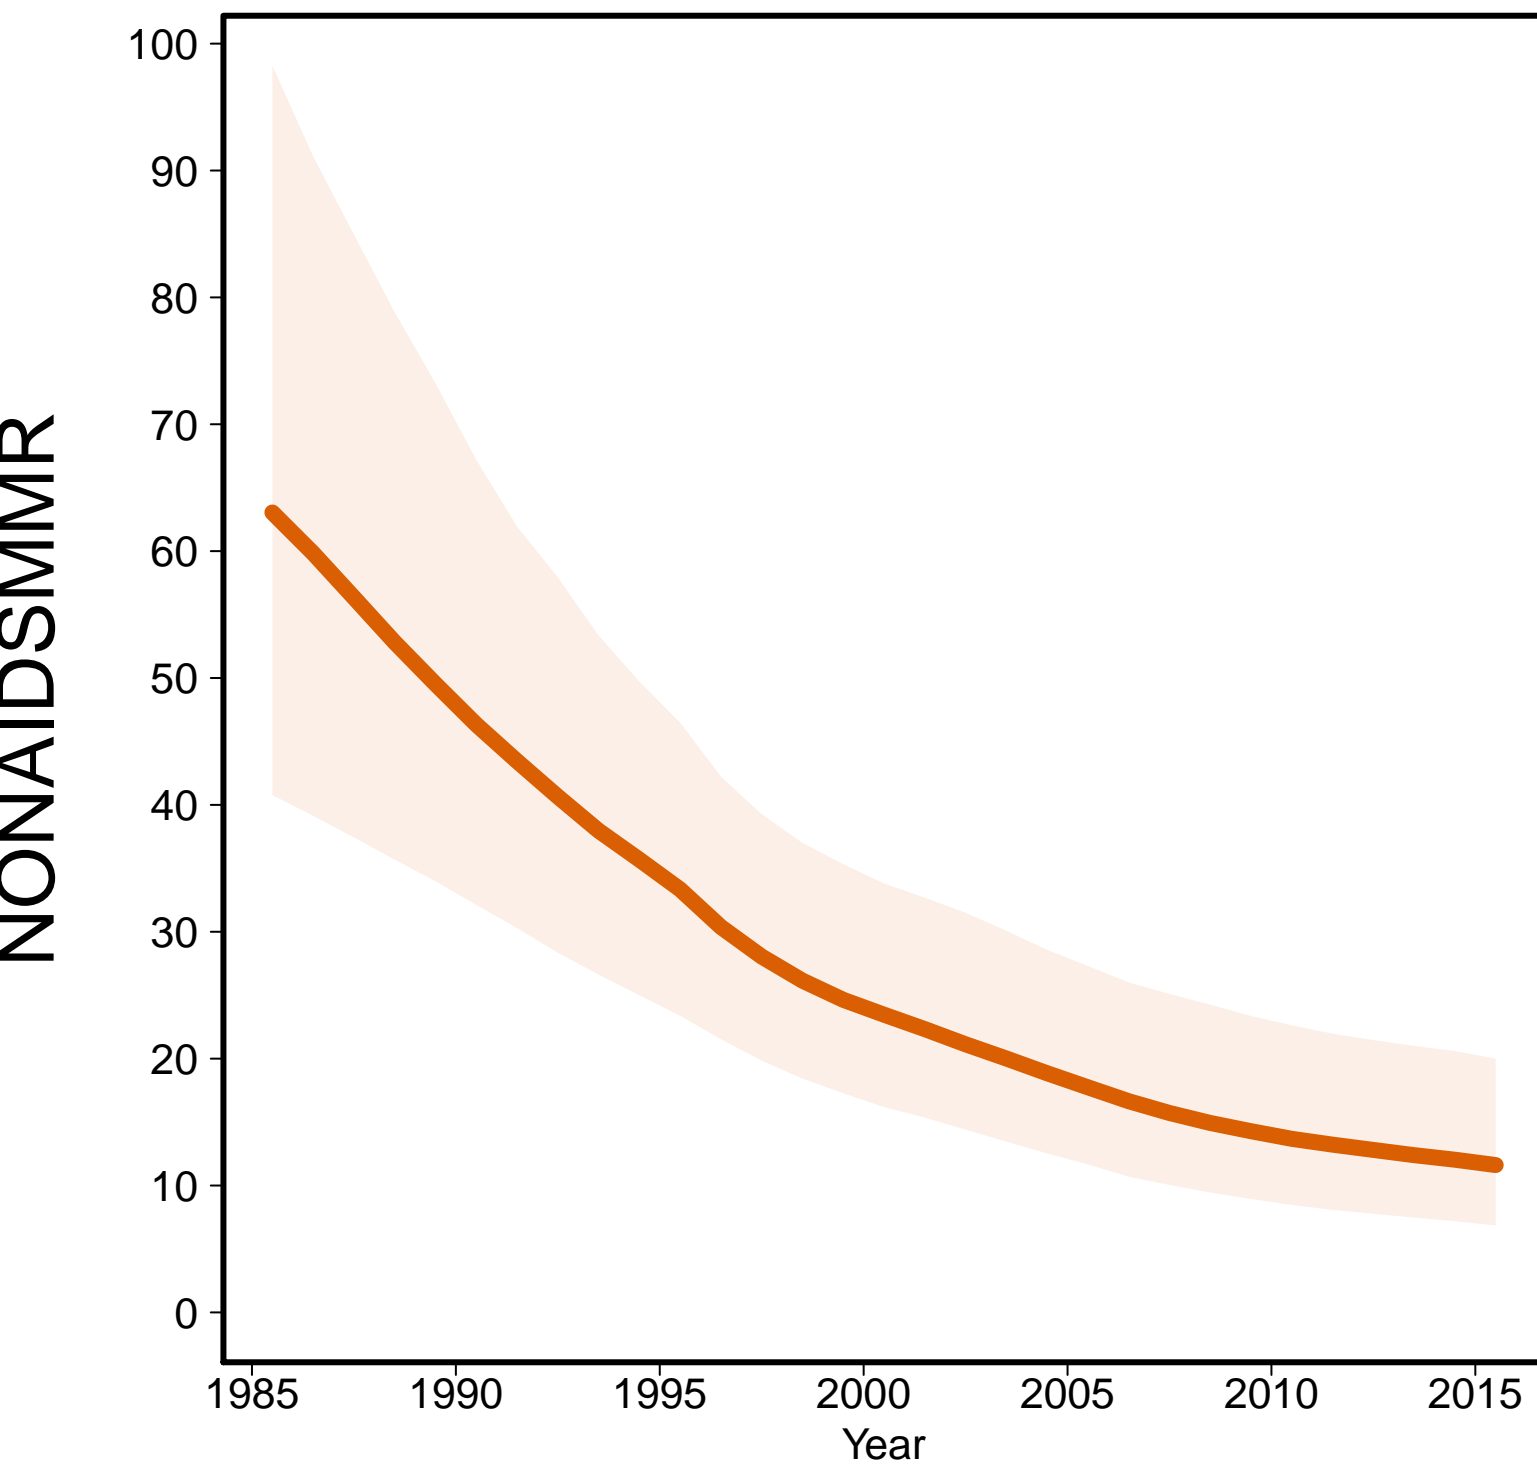

Aids MMR



Senegal [SEN]  
(Western Africa)

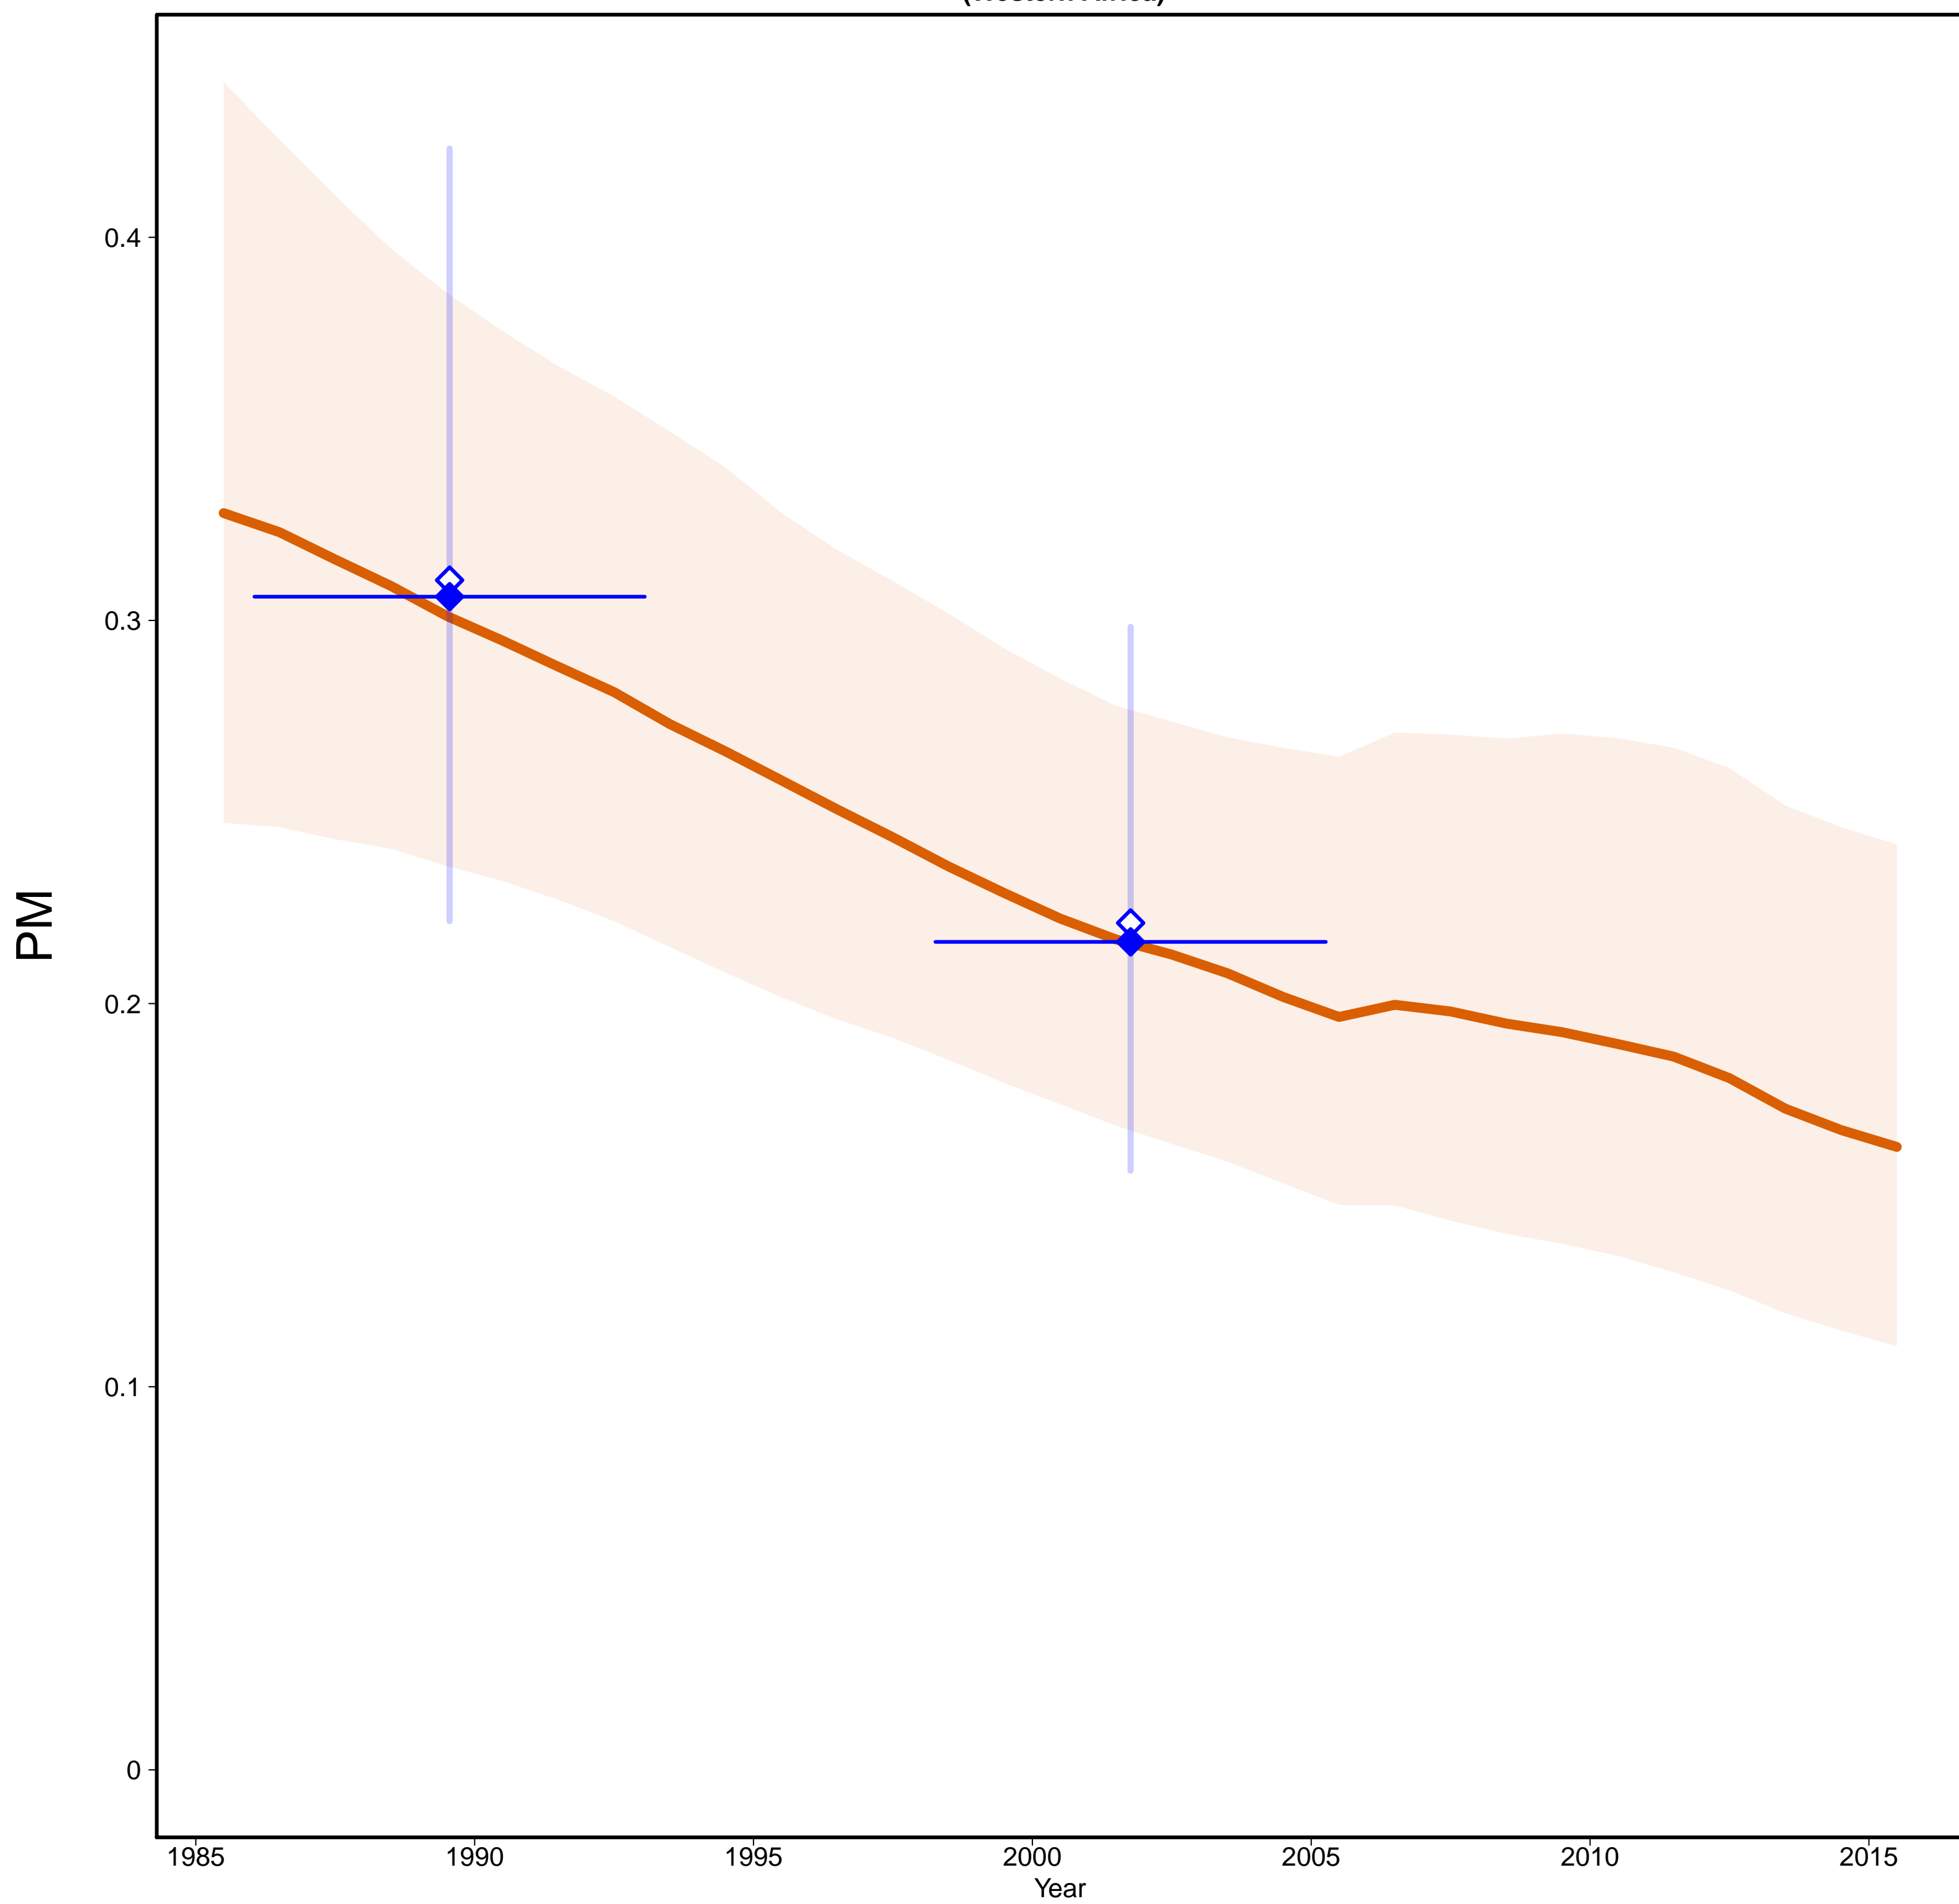

Senegal [SEN]  
(Western Africa)

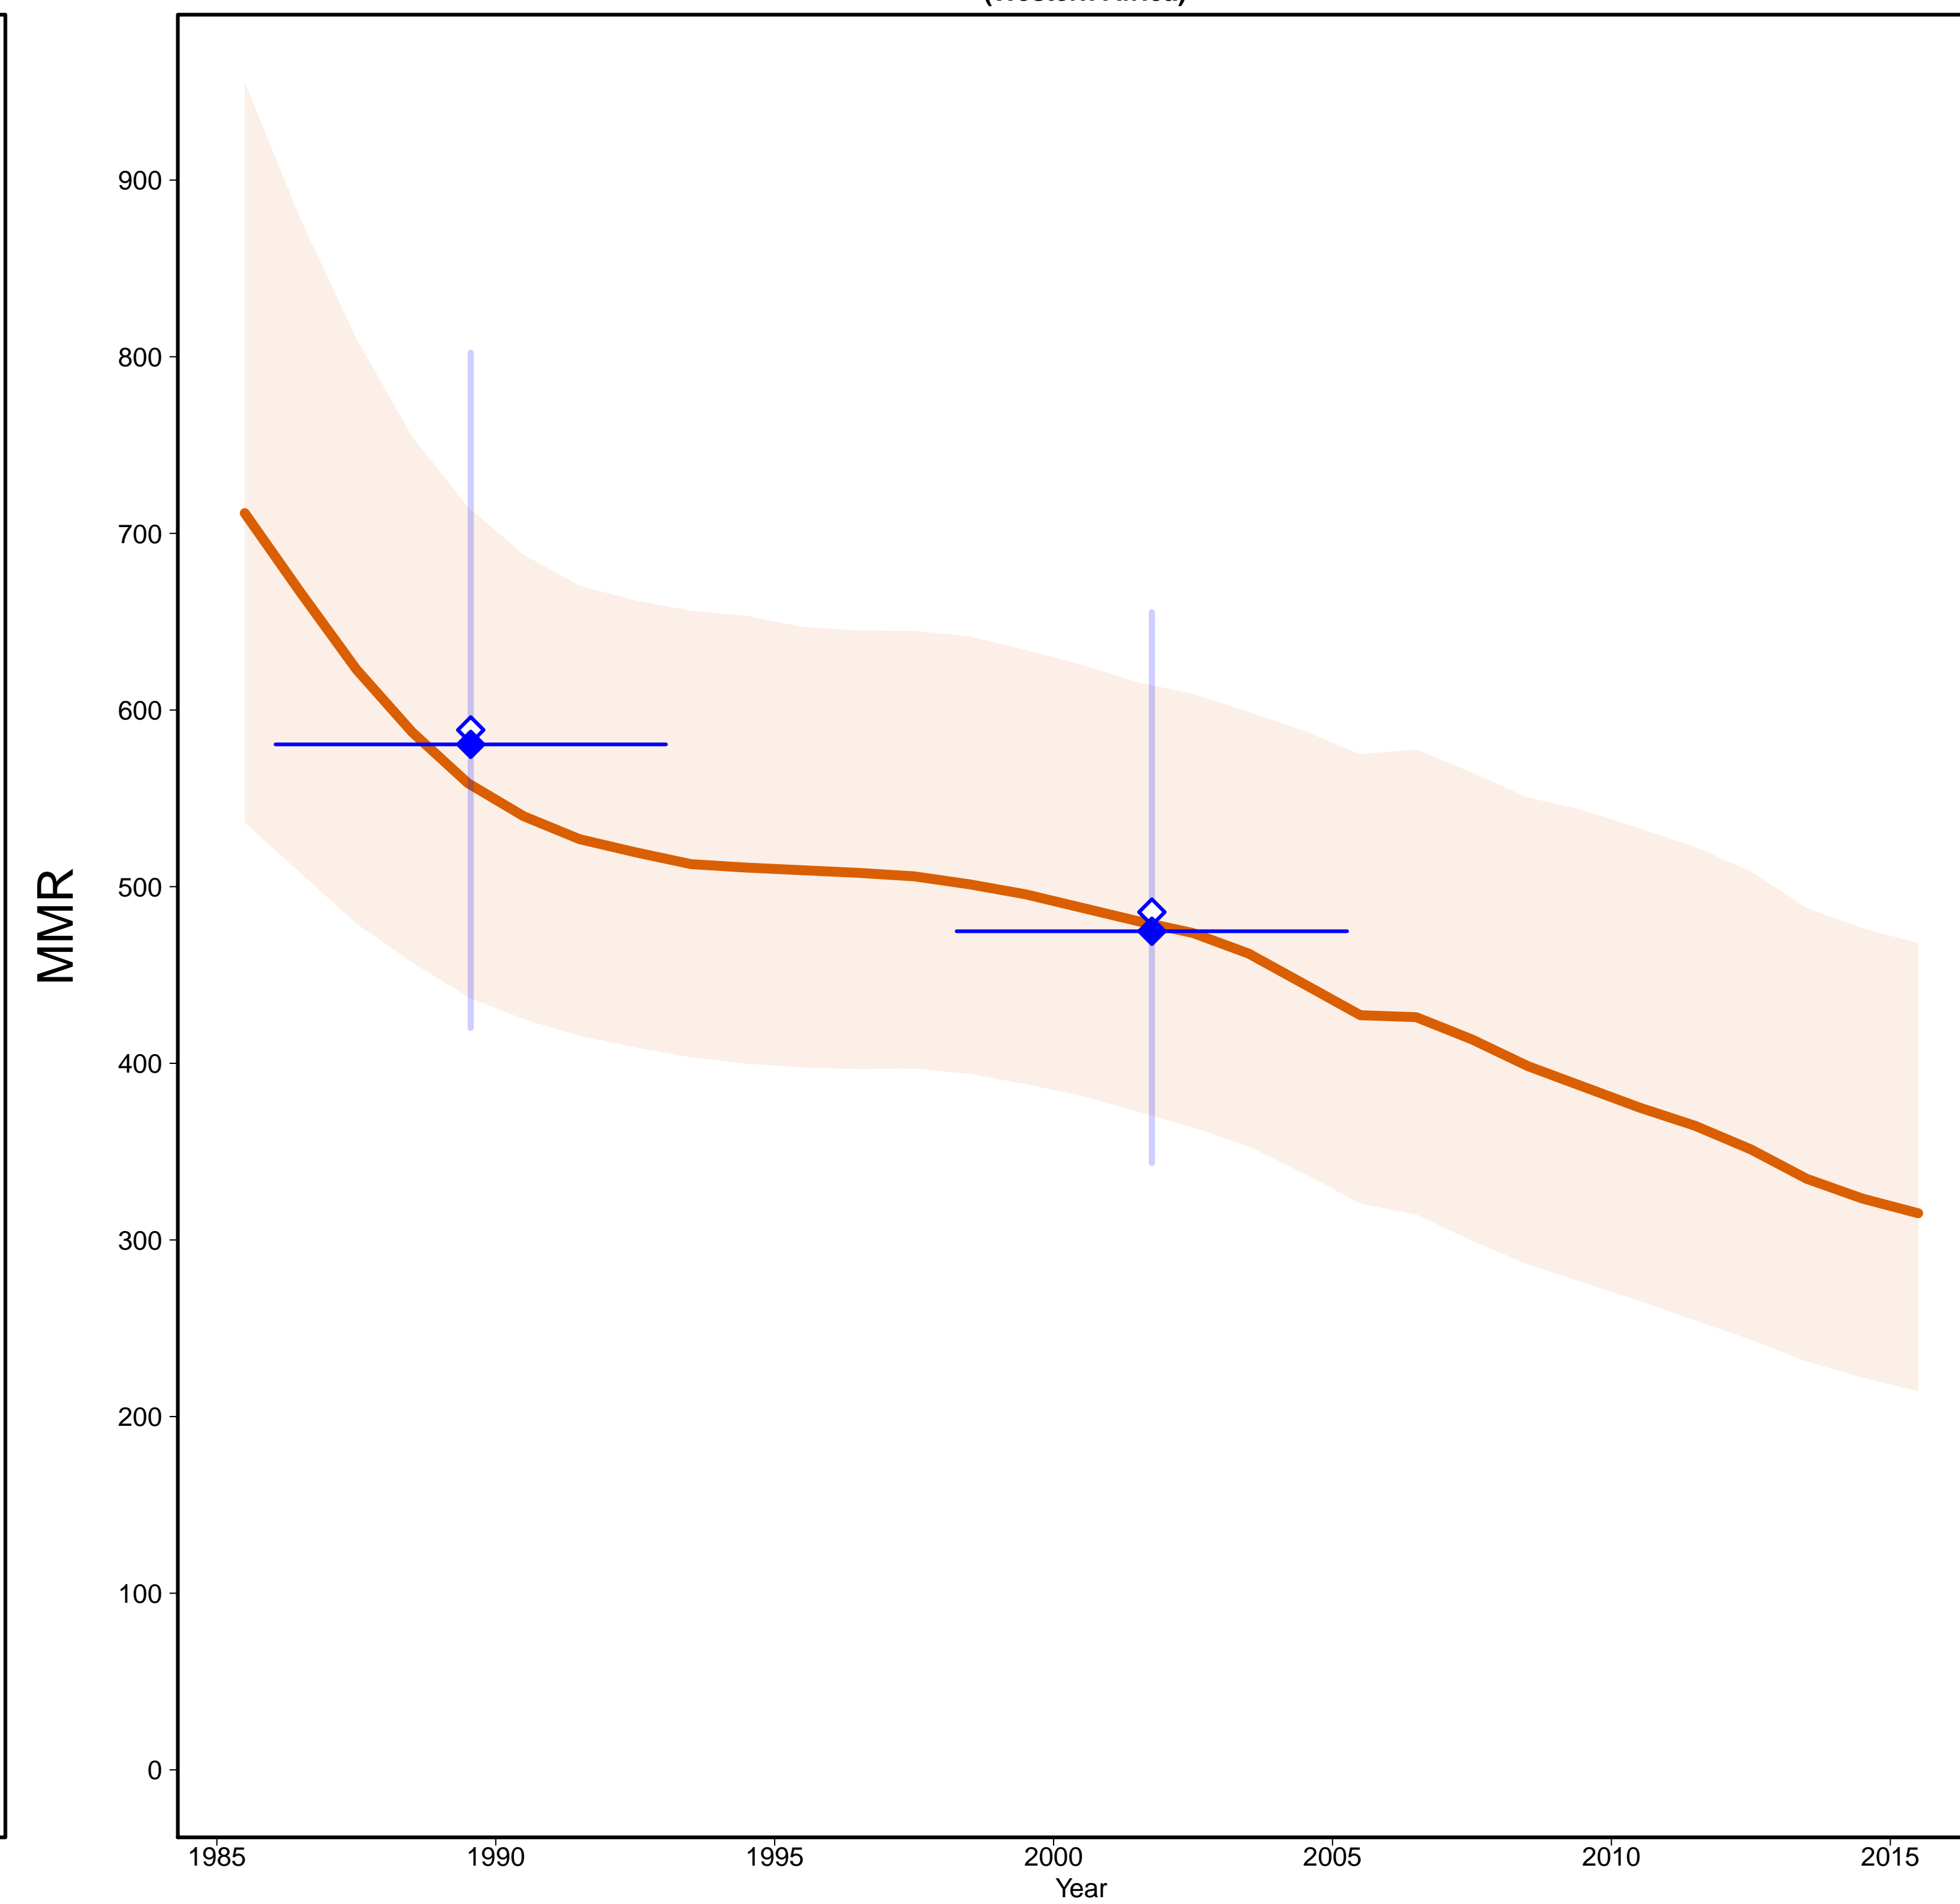

- Estimates —
- MMR Database 2015 —
- ◇ Observed Data
- ◆ Adjusted Data
- Data type —
- ◆ DHS

Gross Domestic Product

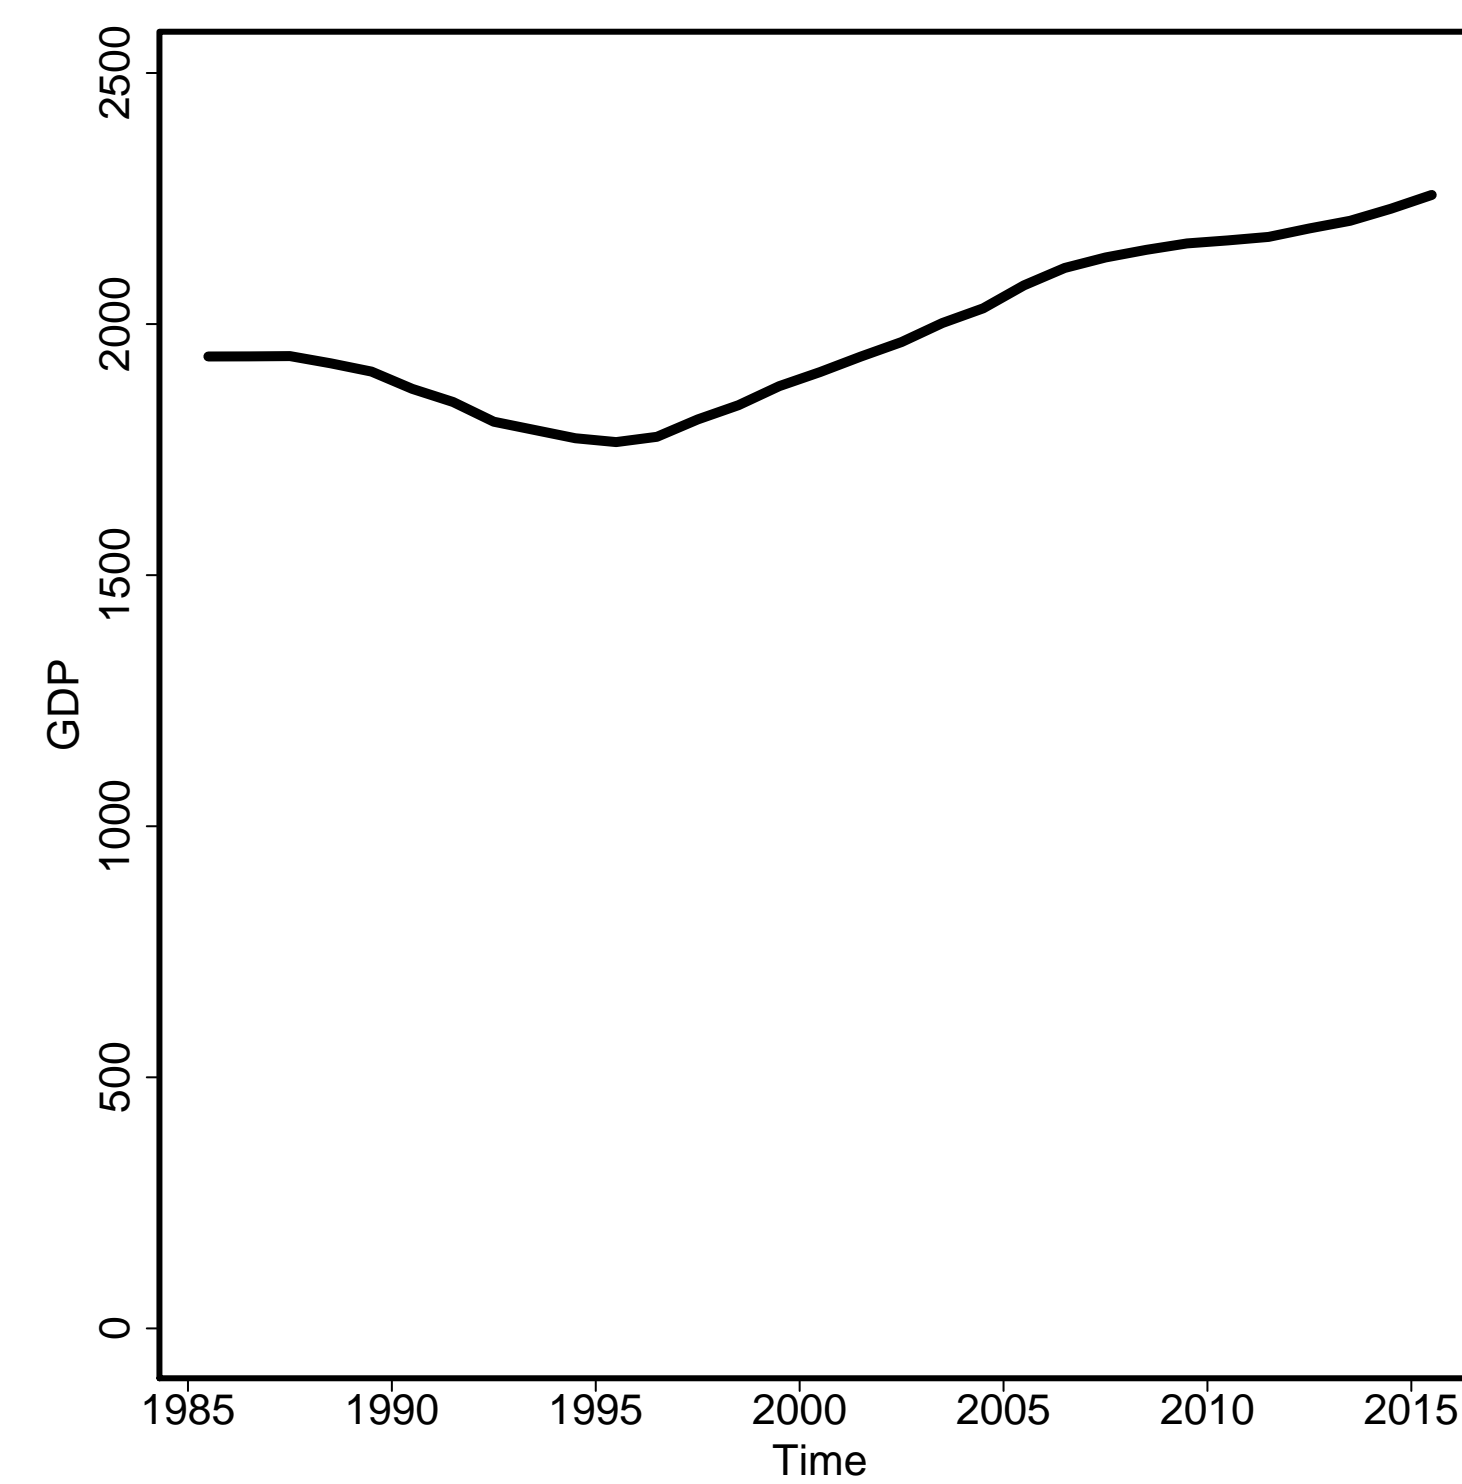

General Fertility Rate

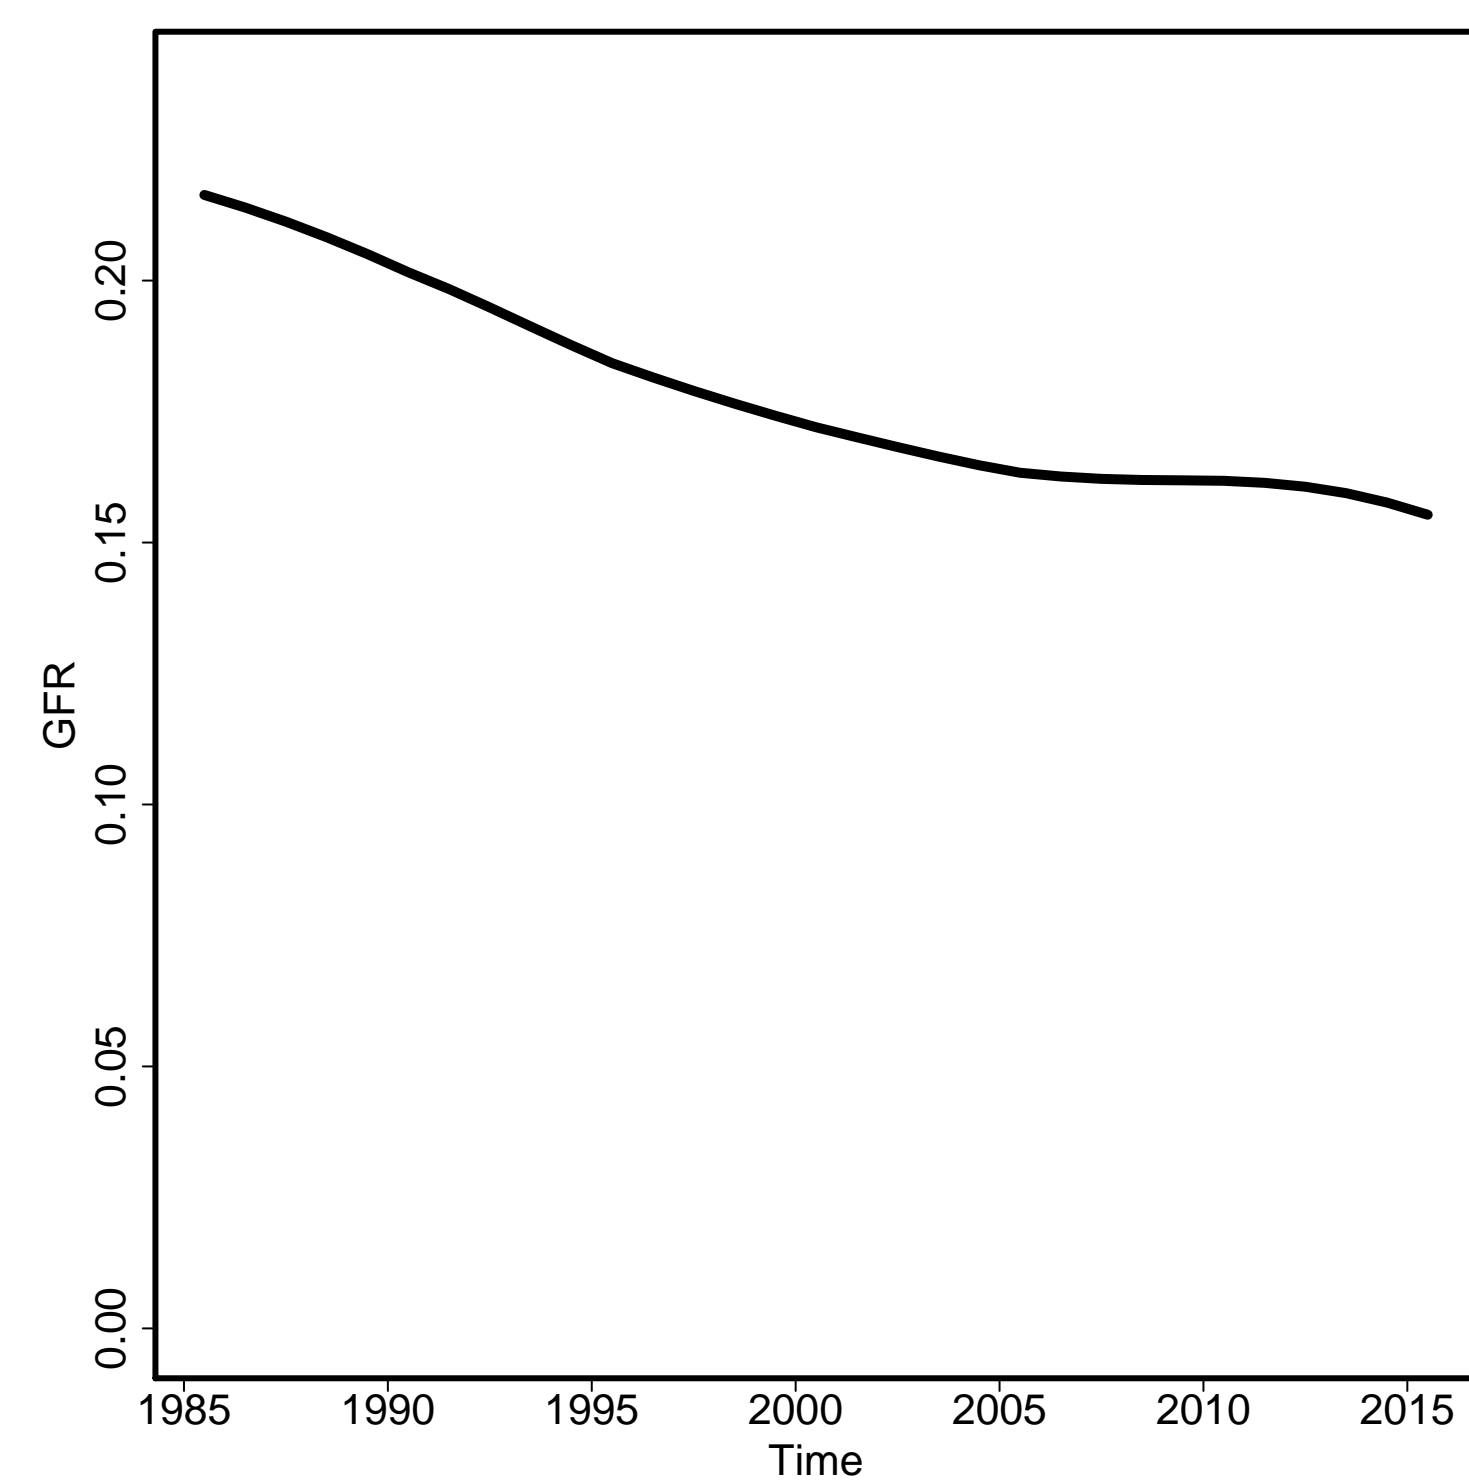

Skilled Attendance to Birth

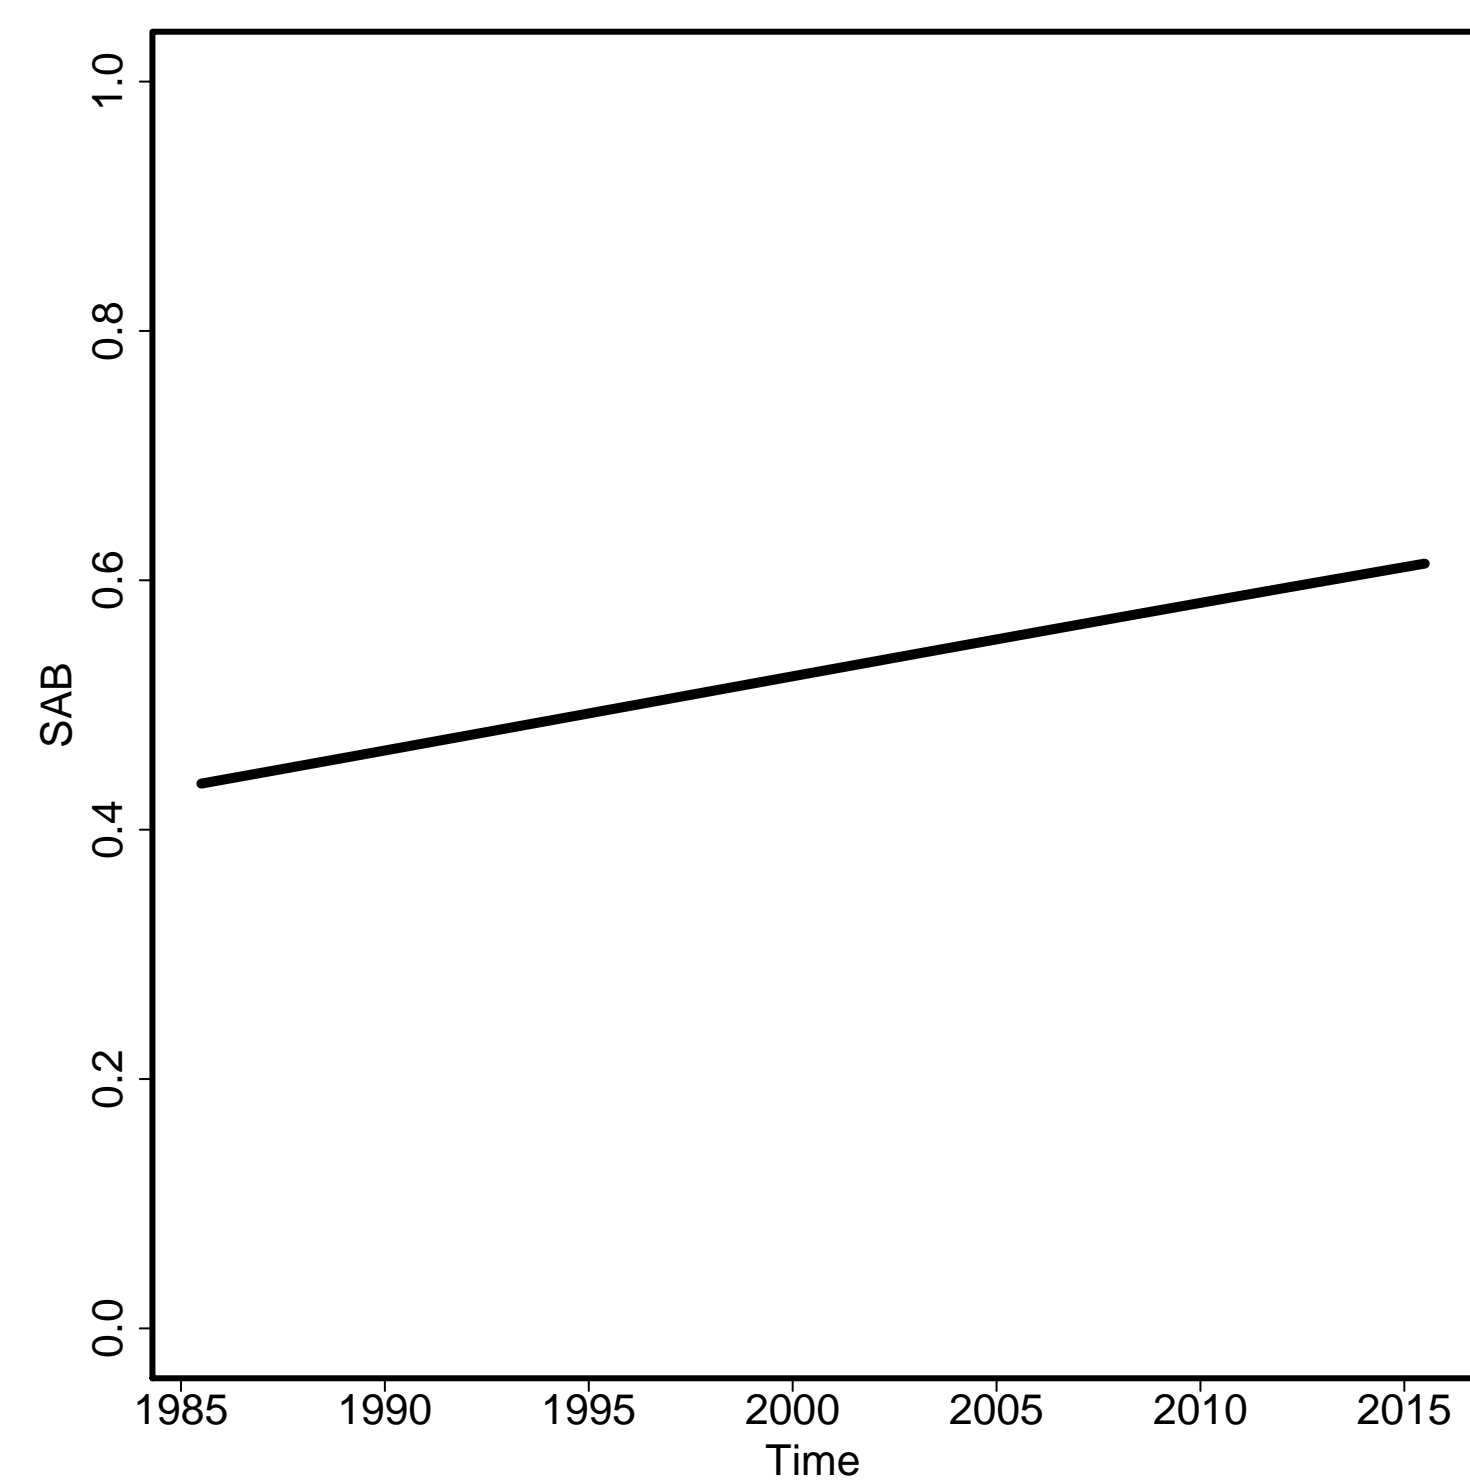

Envelope/Births

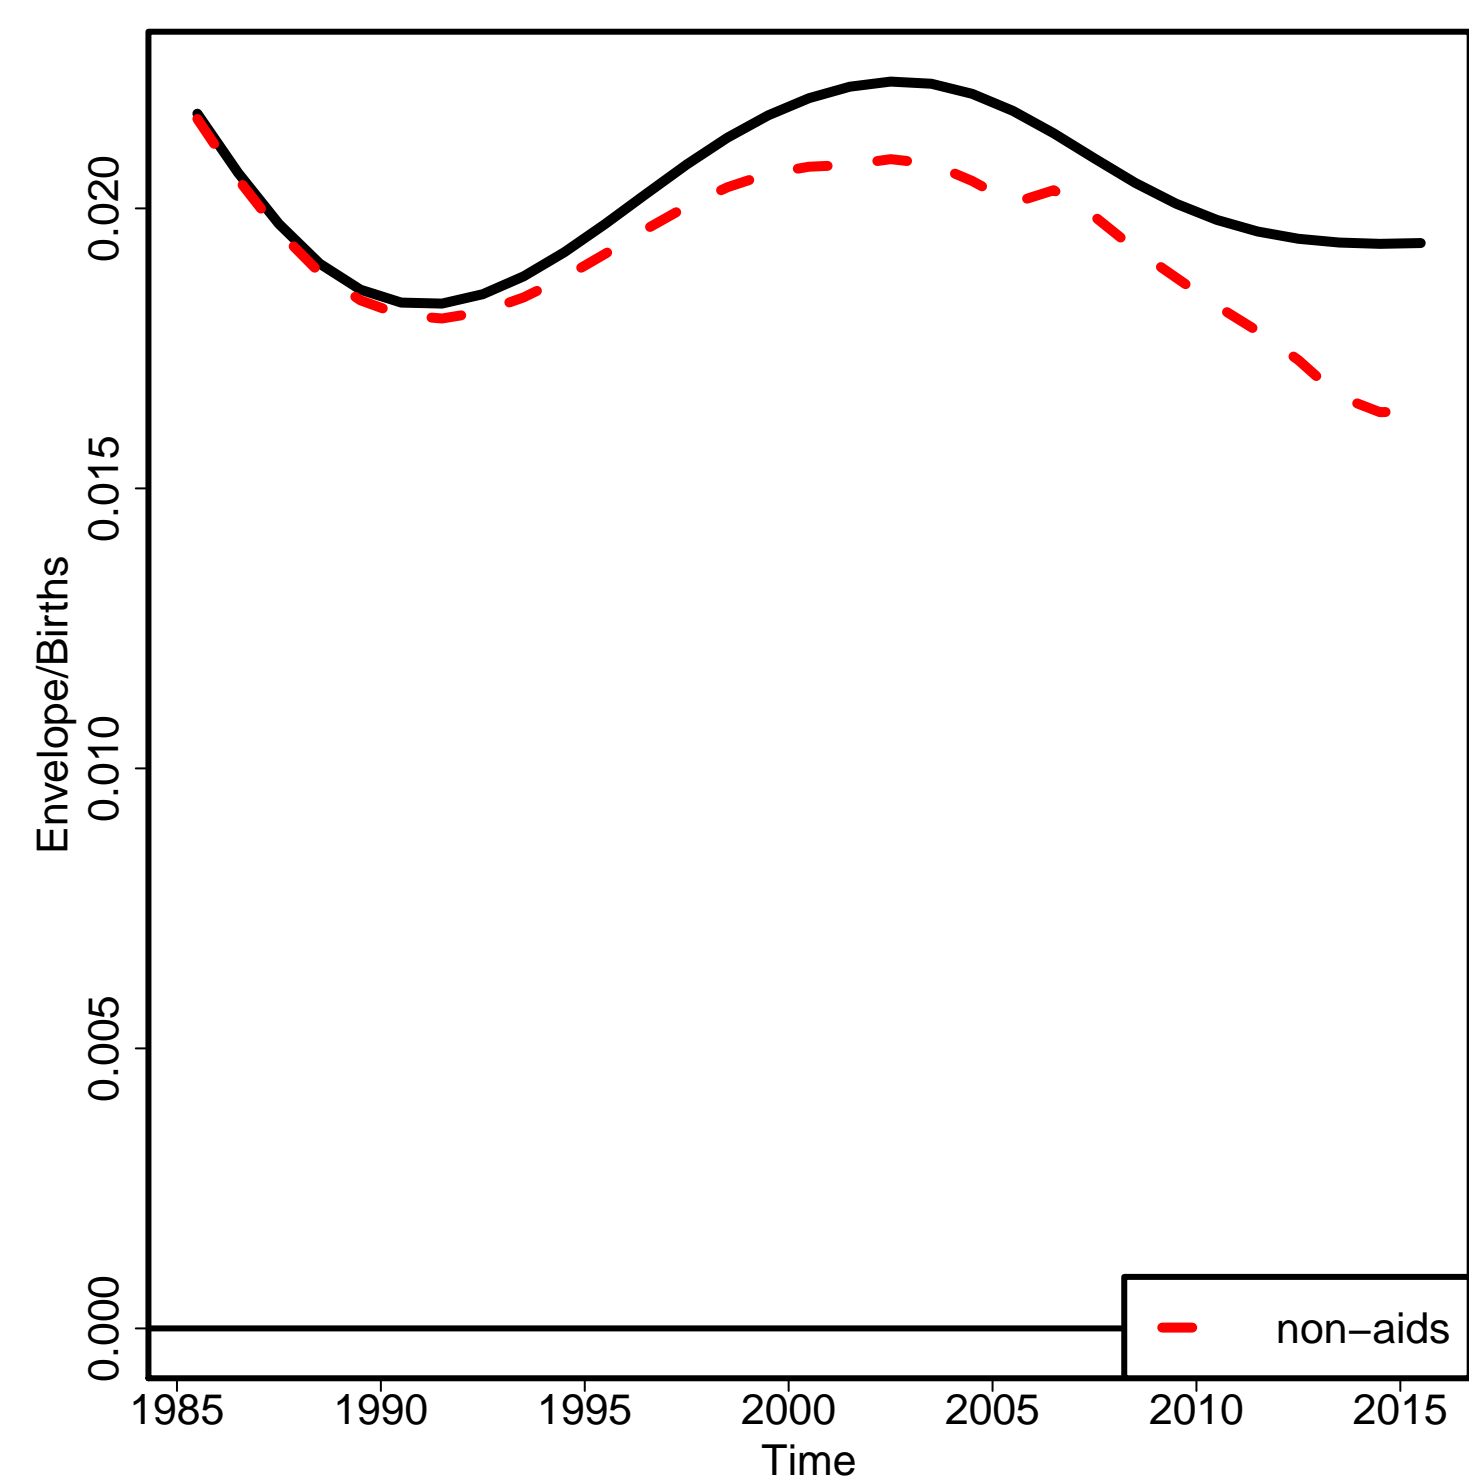

Non-aids MMR

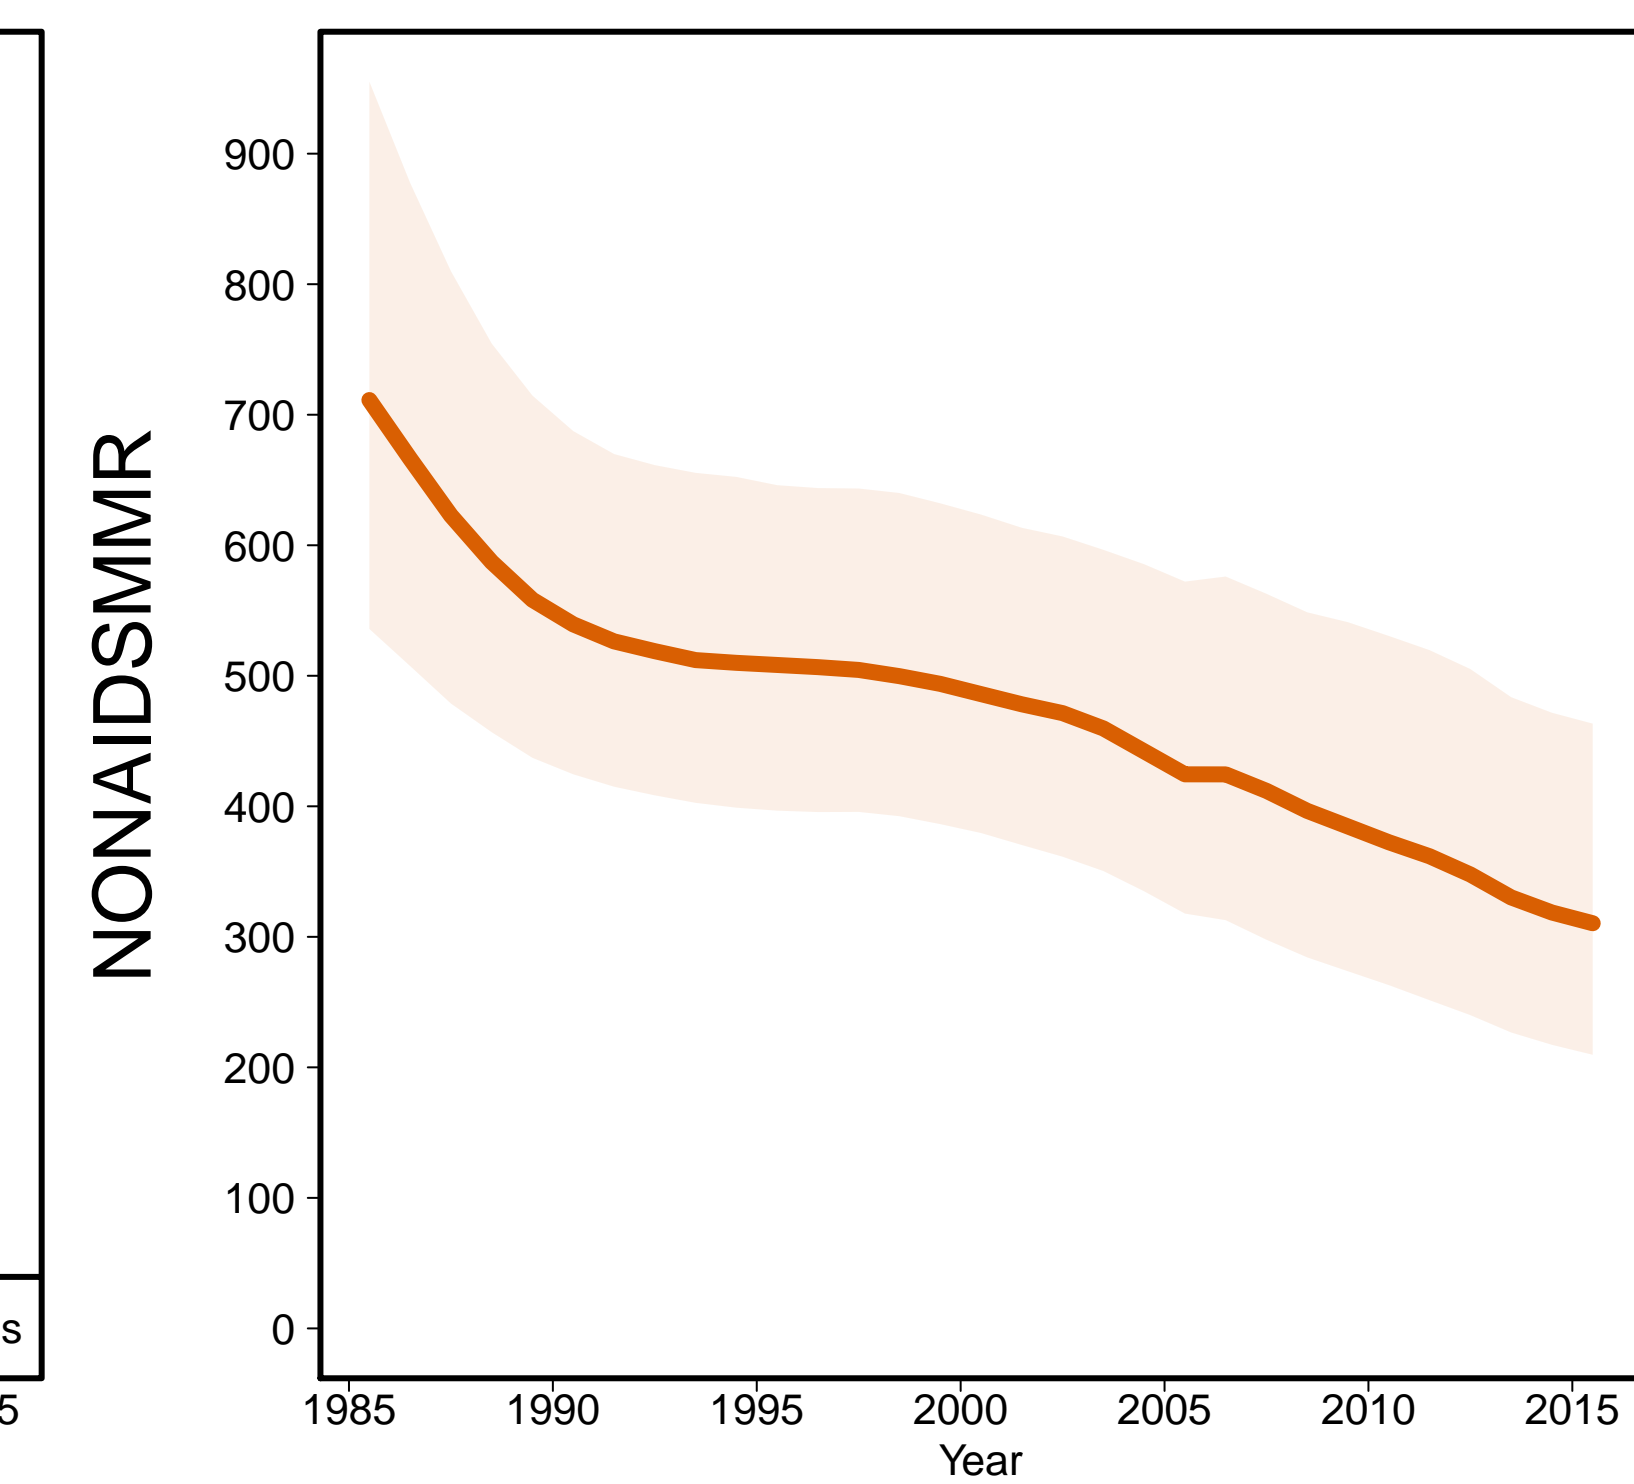

Aids MMR

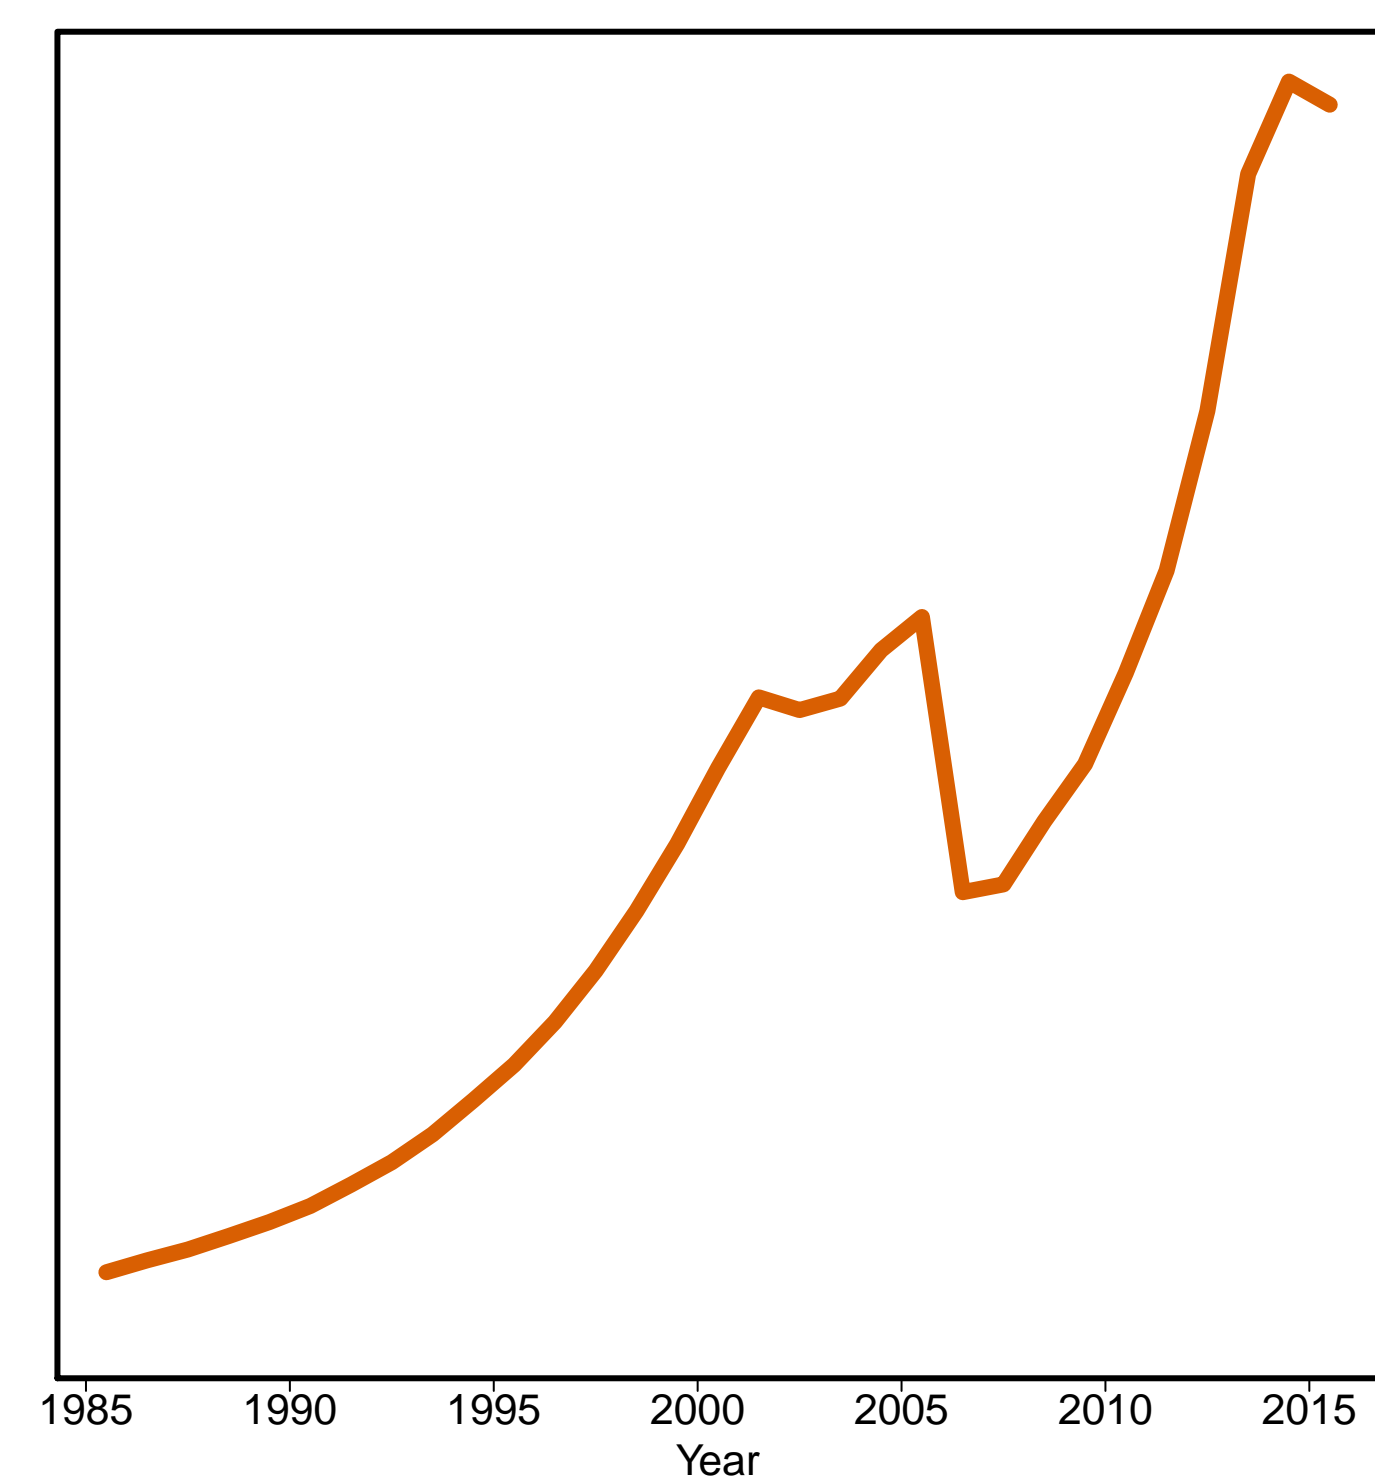

Serbia [SRB]  
(Transition countries of South-Eastern Europe)

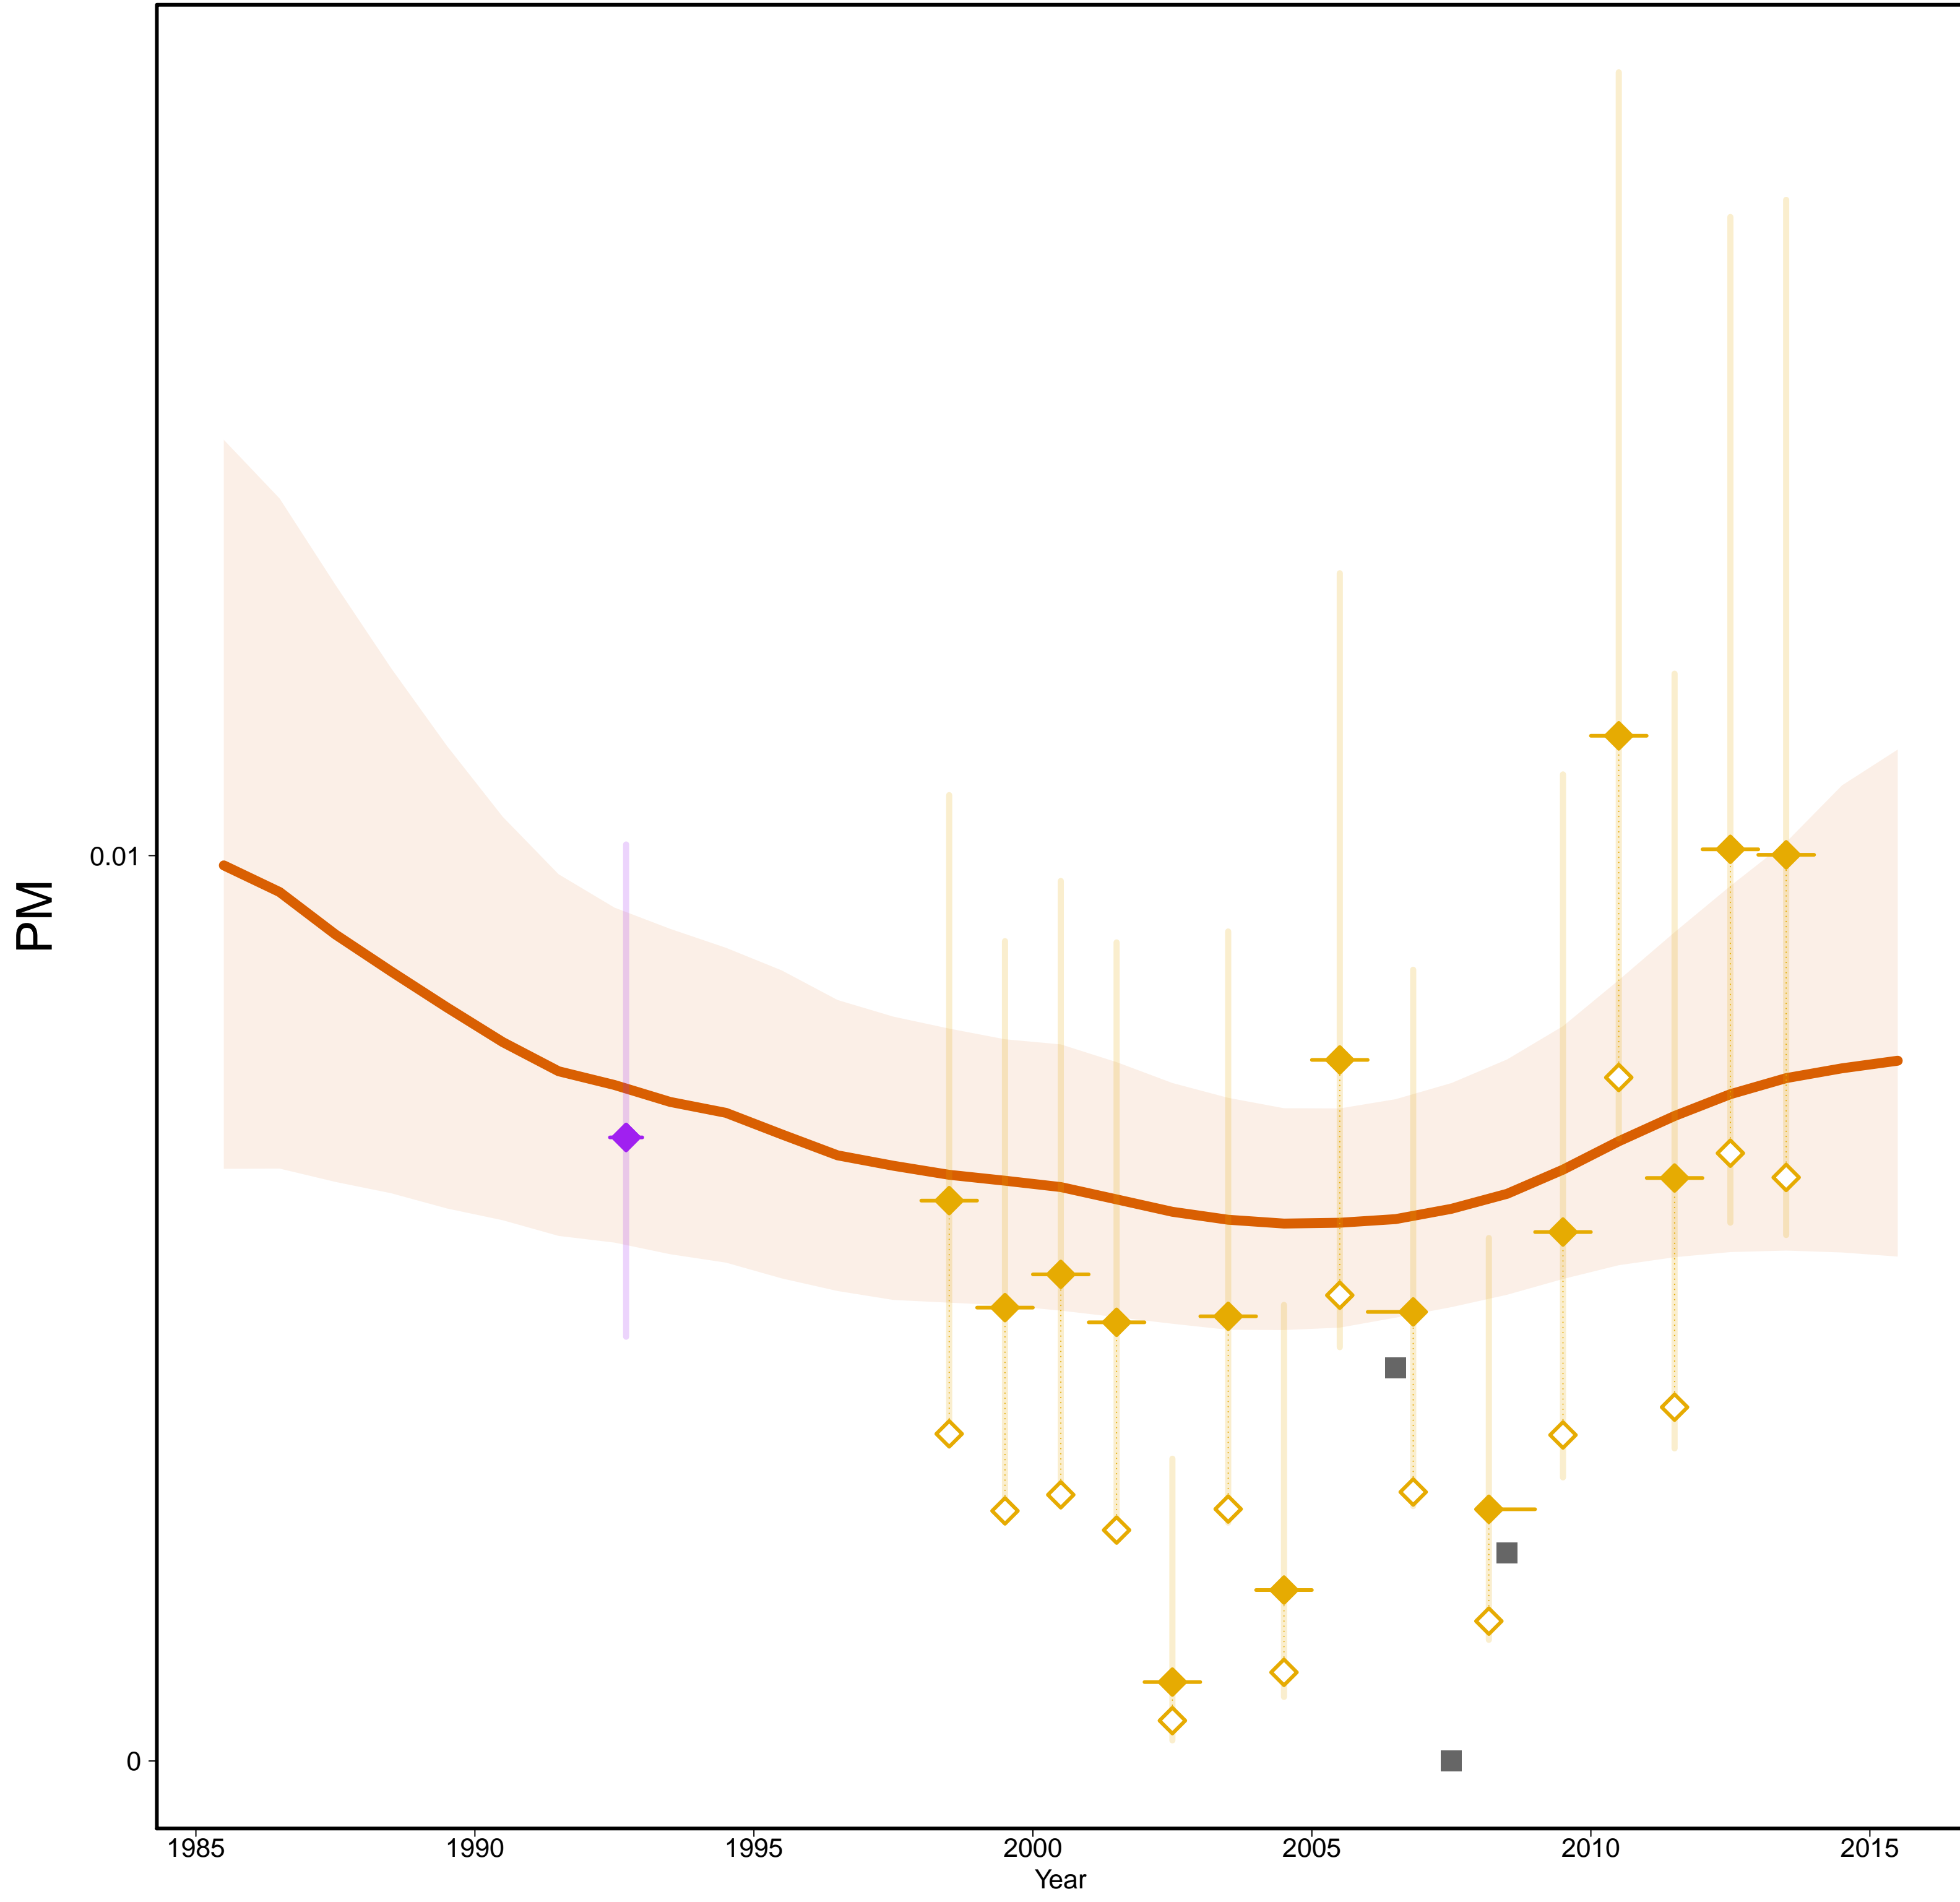

Serbia [SRB]  
(Transition countries of South-Eastern Europe)

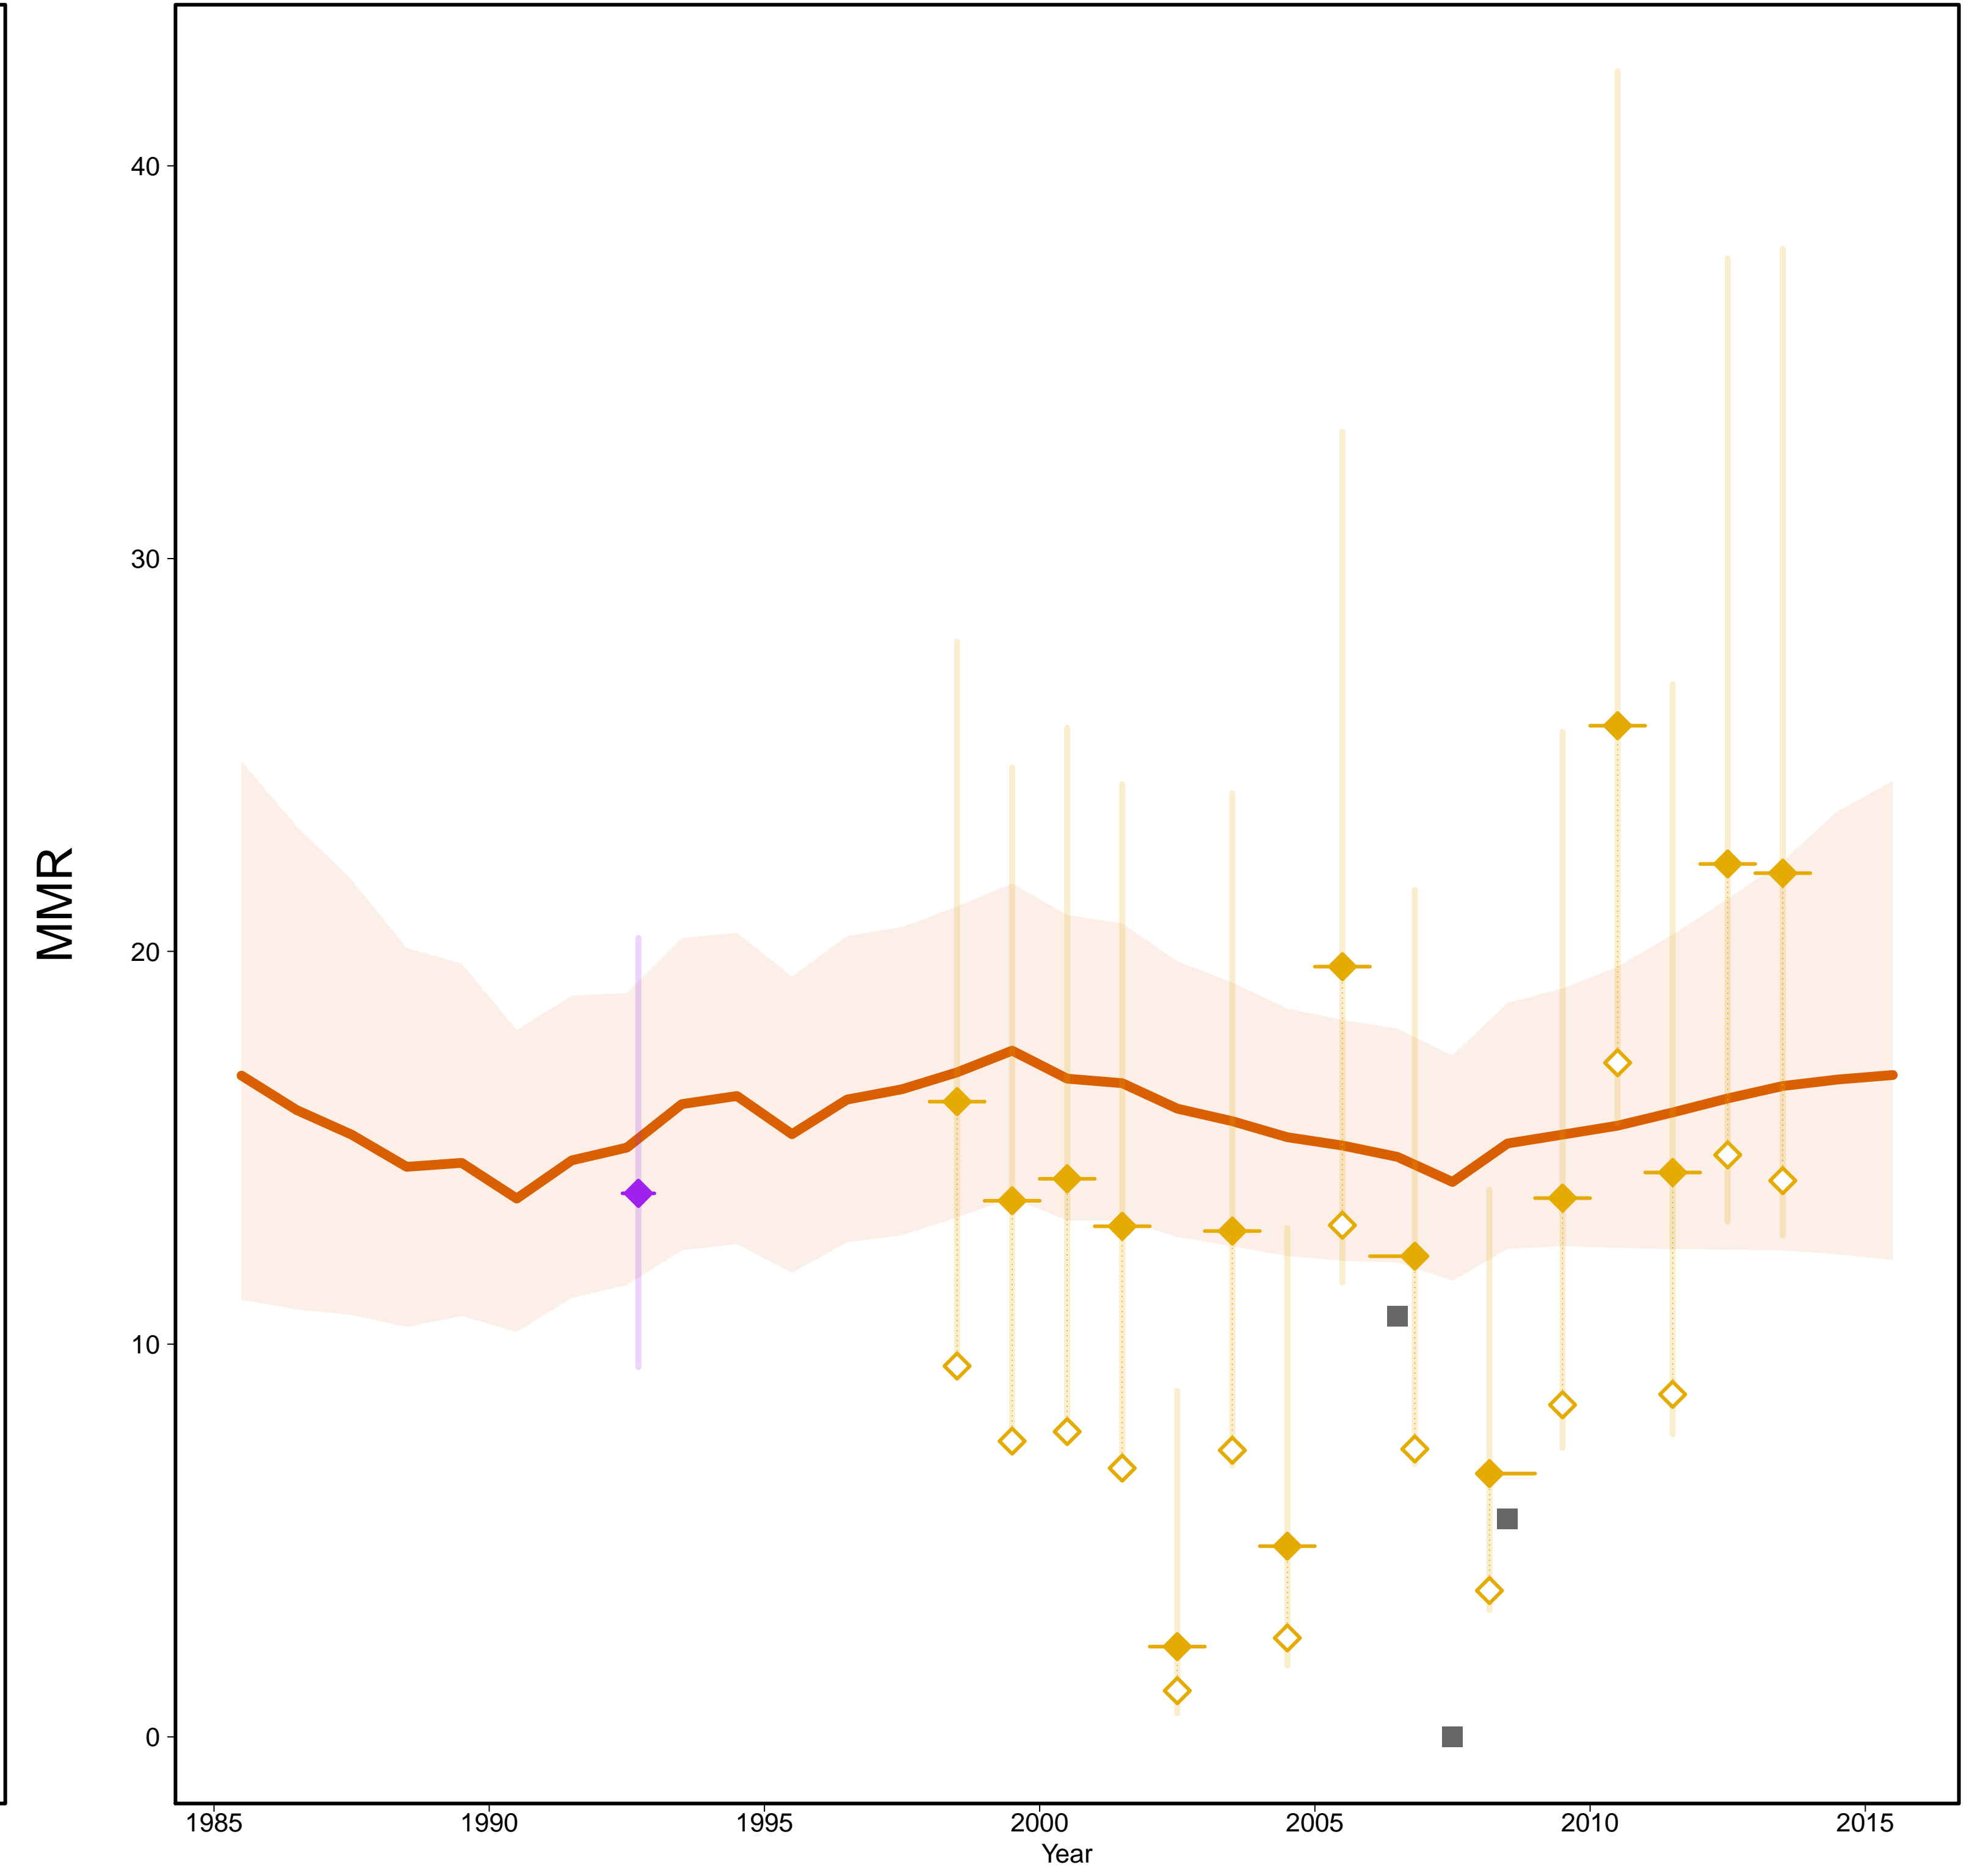

- Estimates –
- Mlate
- MMR Database 2015 –
- ◇ Observed Data
- ◆ Adjusted Data
- Data type –
- ◆ VR
- ◆ Spec. studies
- Reported VR before recalc. (related to 0 obs. mat. death)

Gross Domestic Product

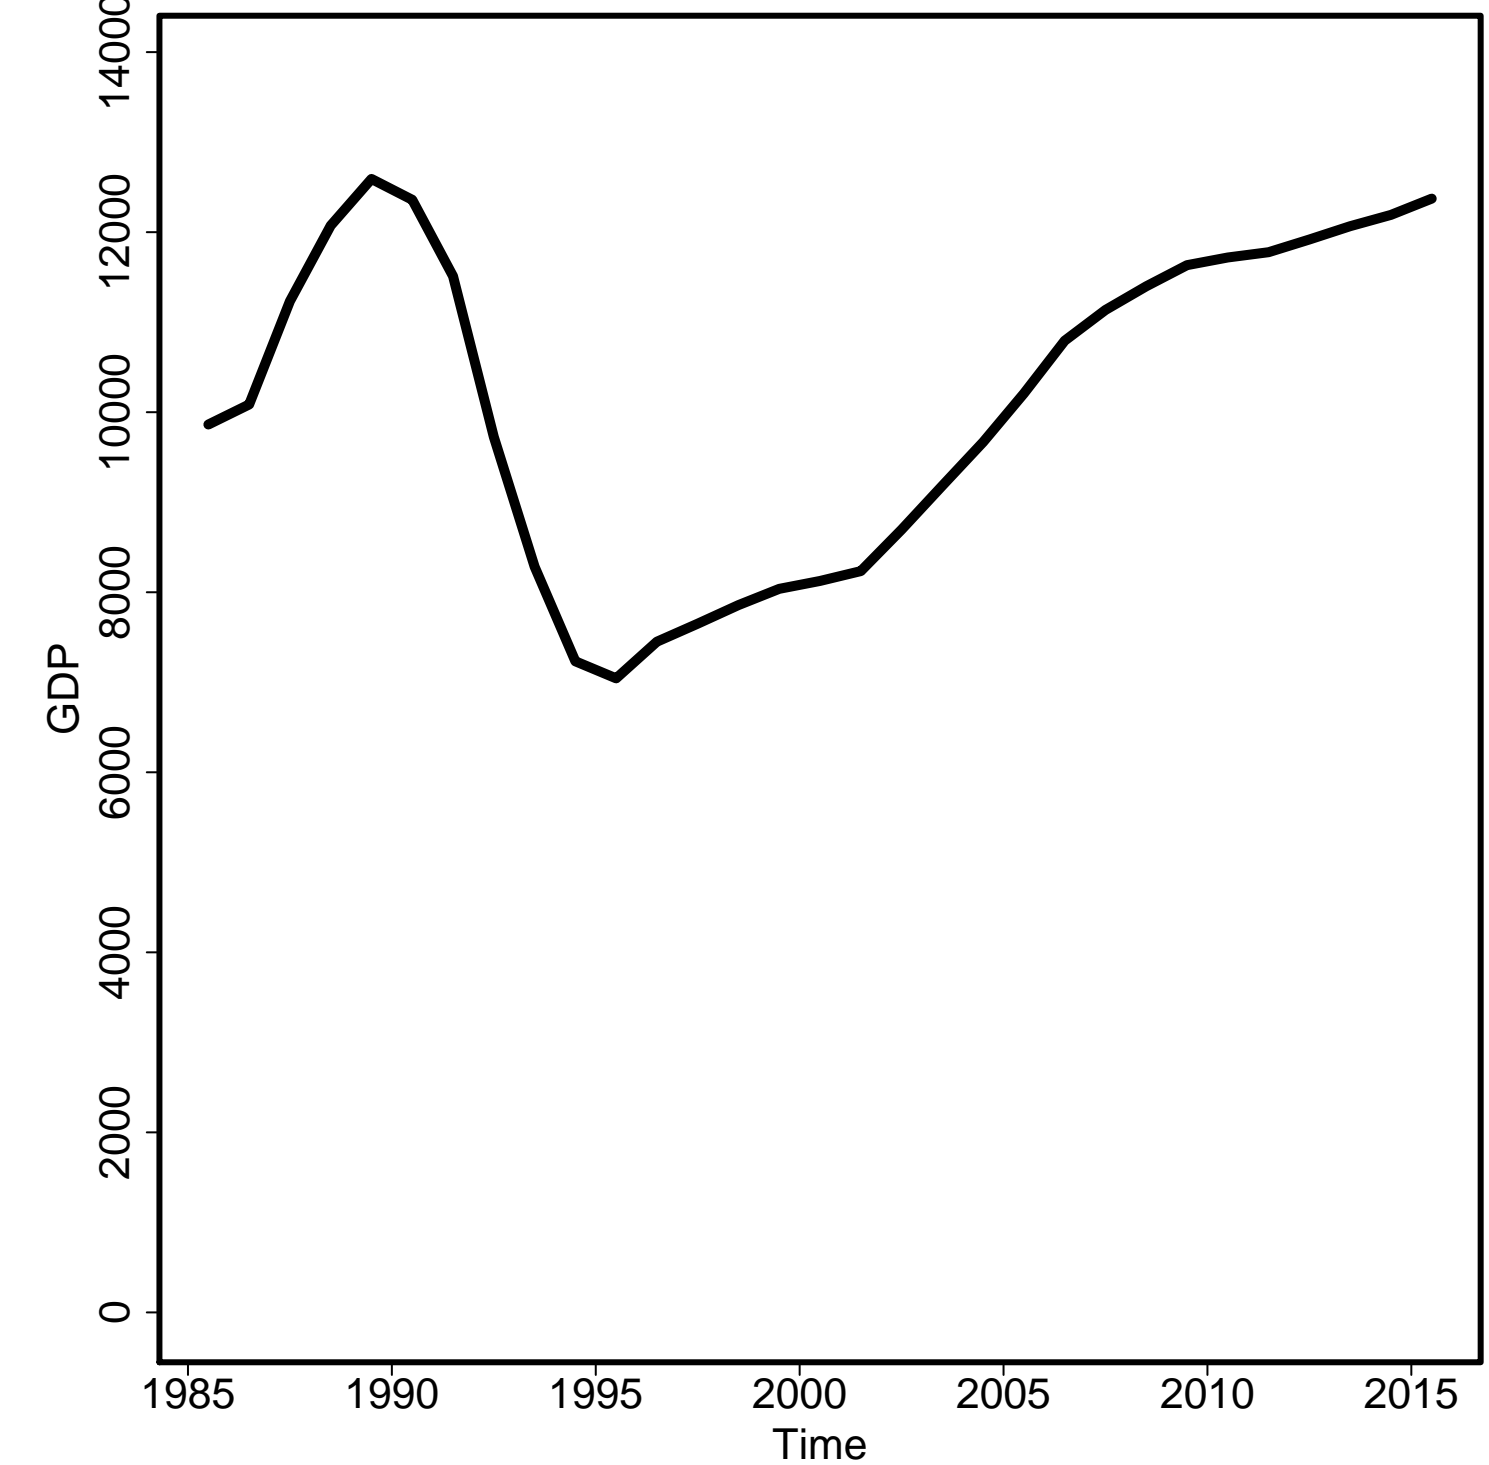

General Fertility Rate

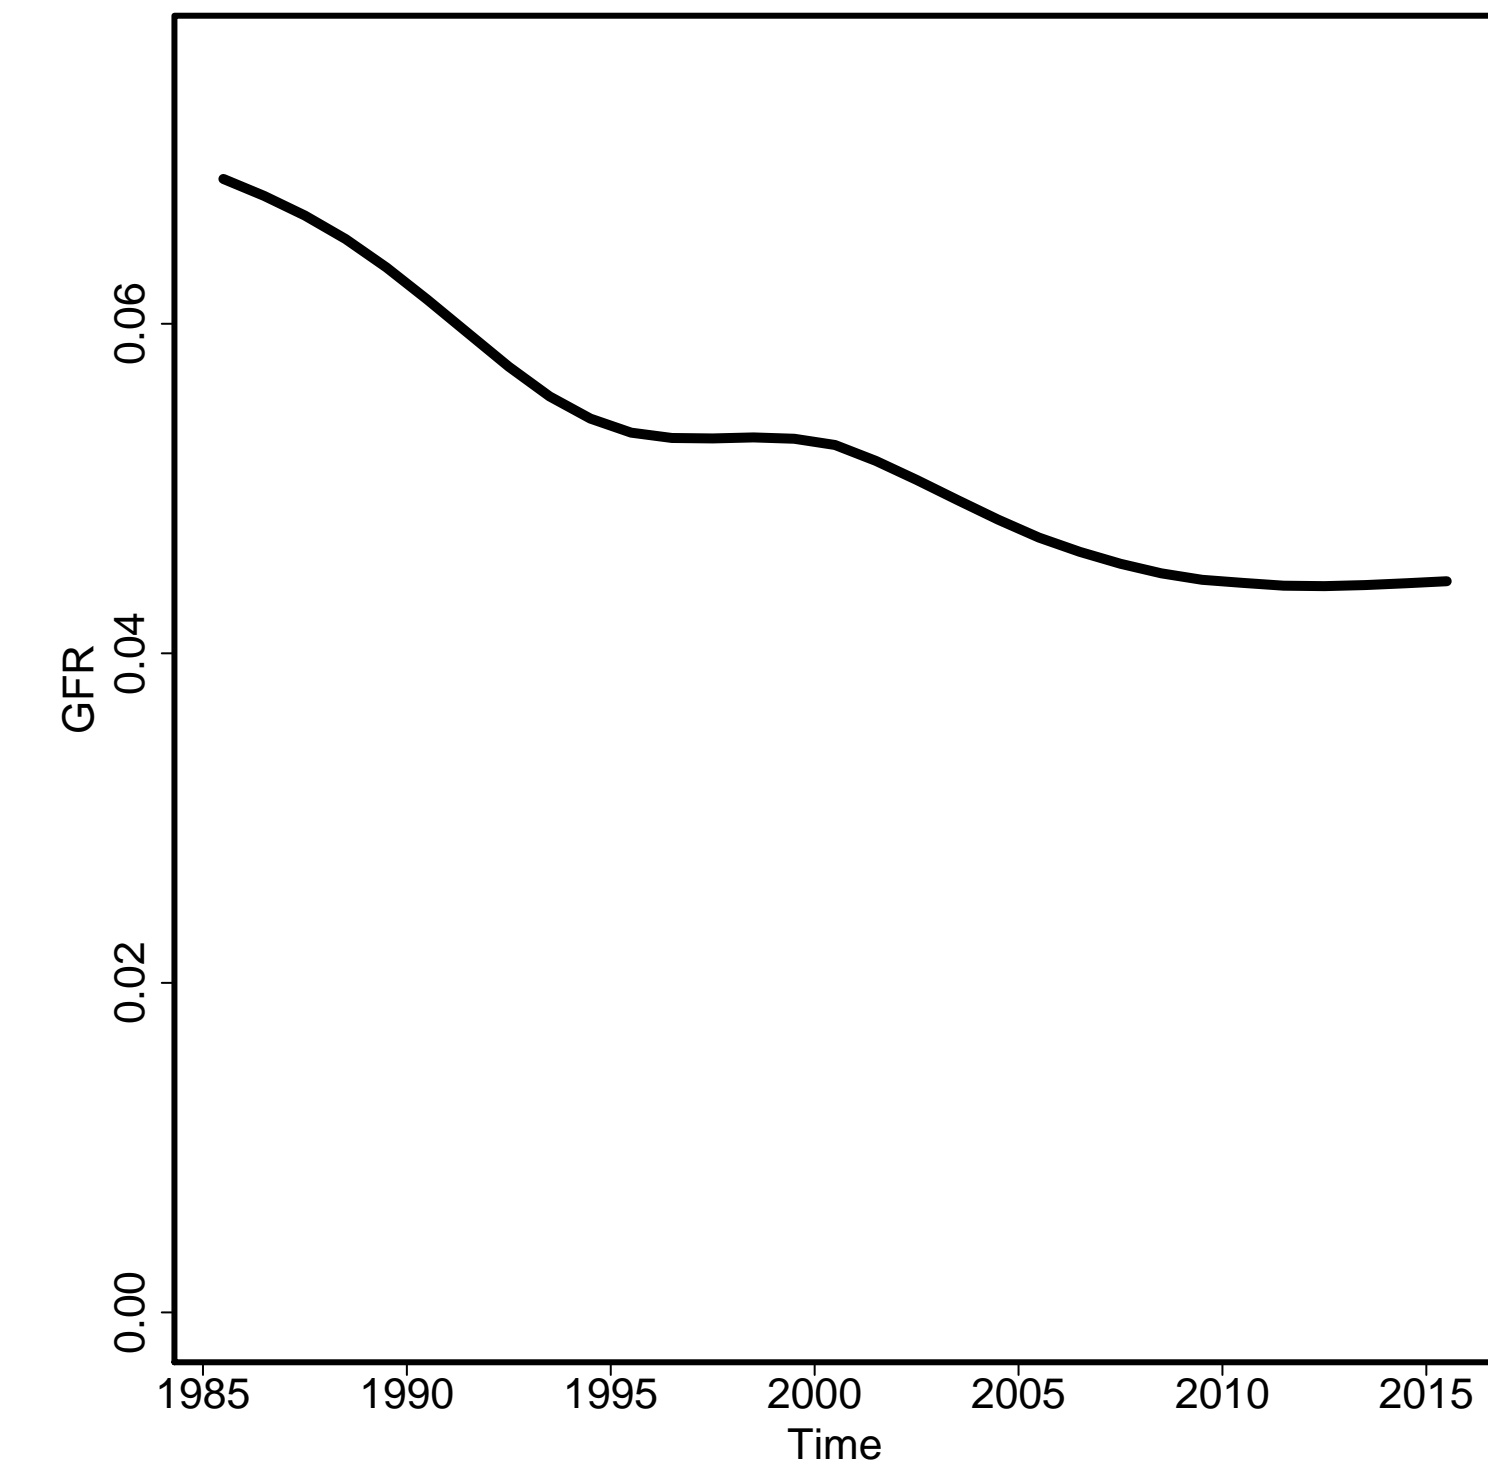

Skilled Attendance to Birth

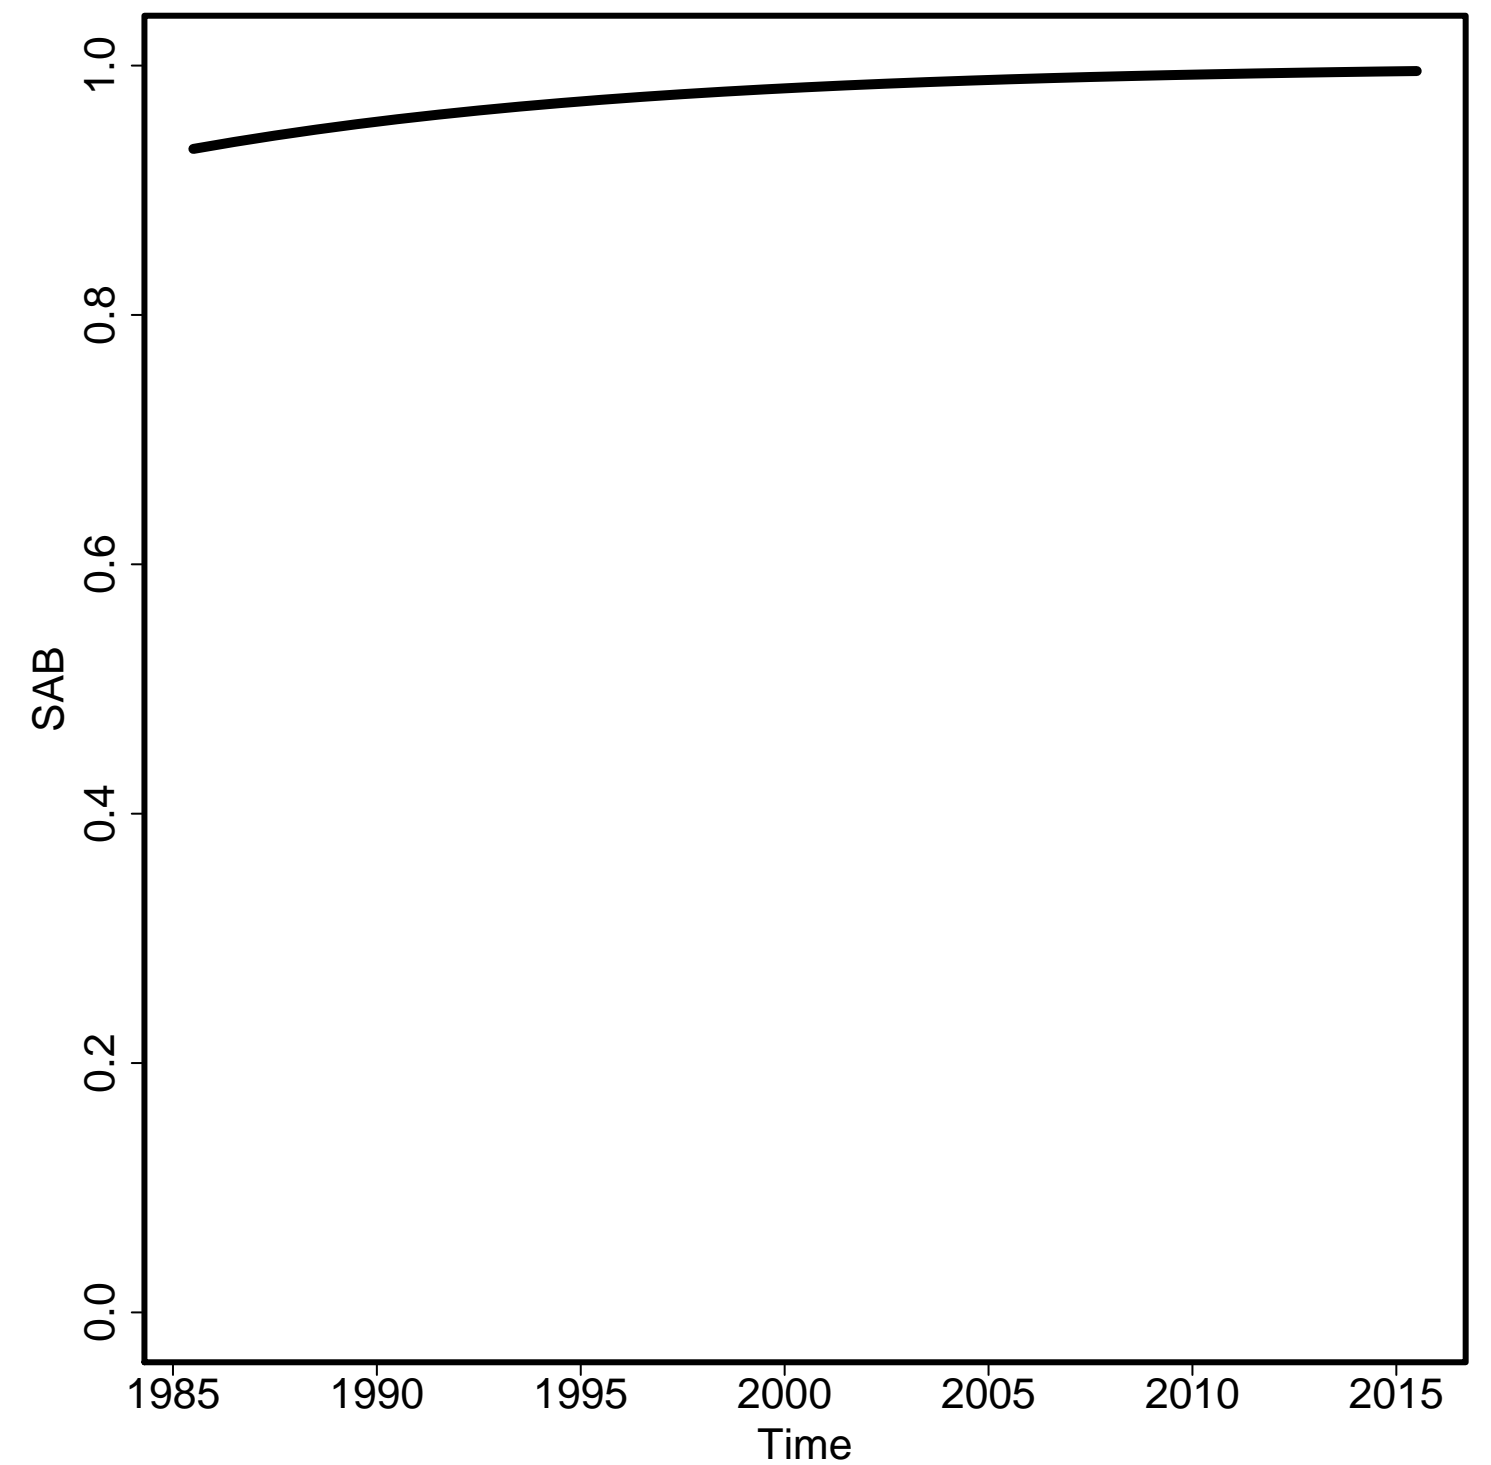

Envelope/Births

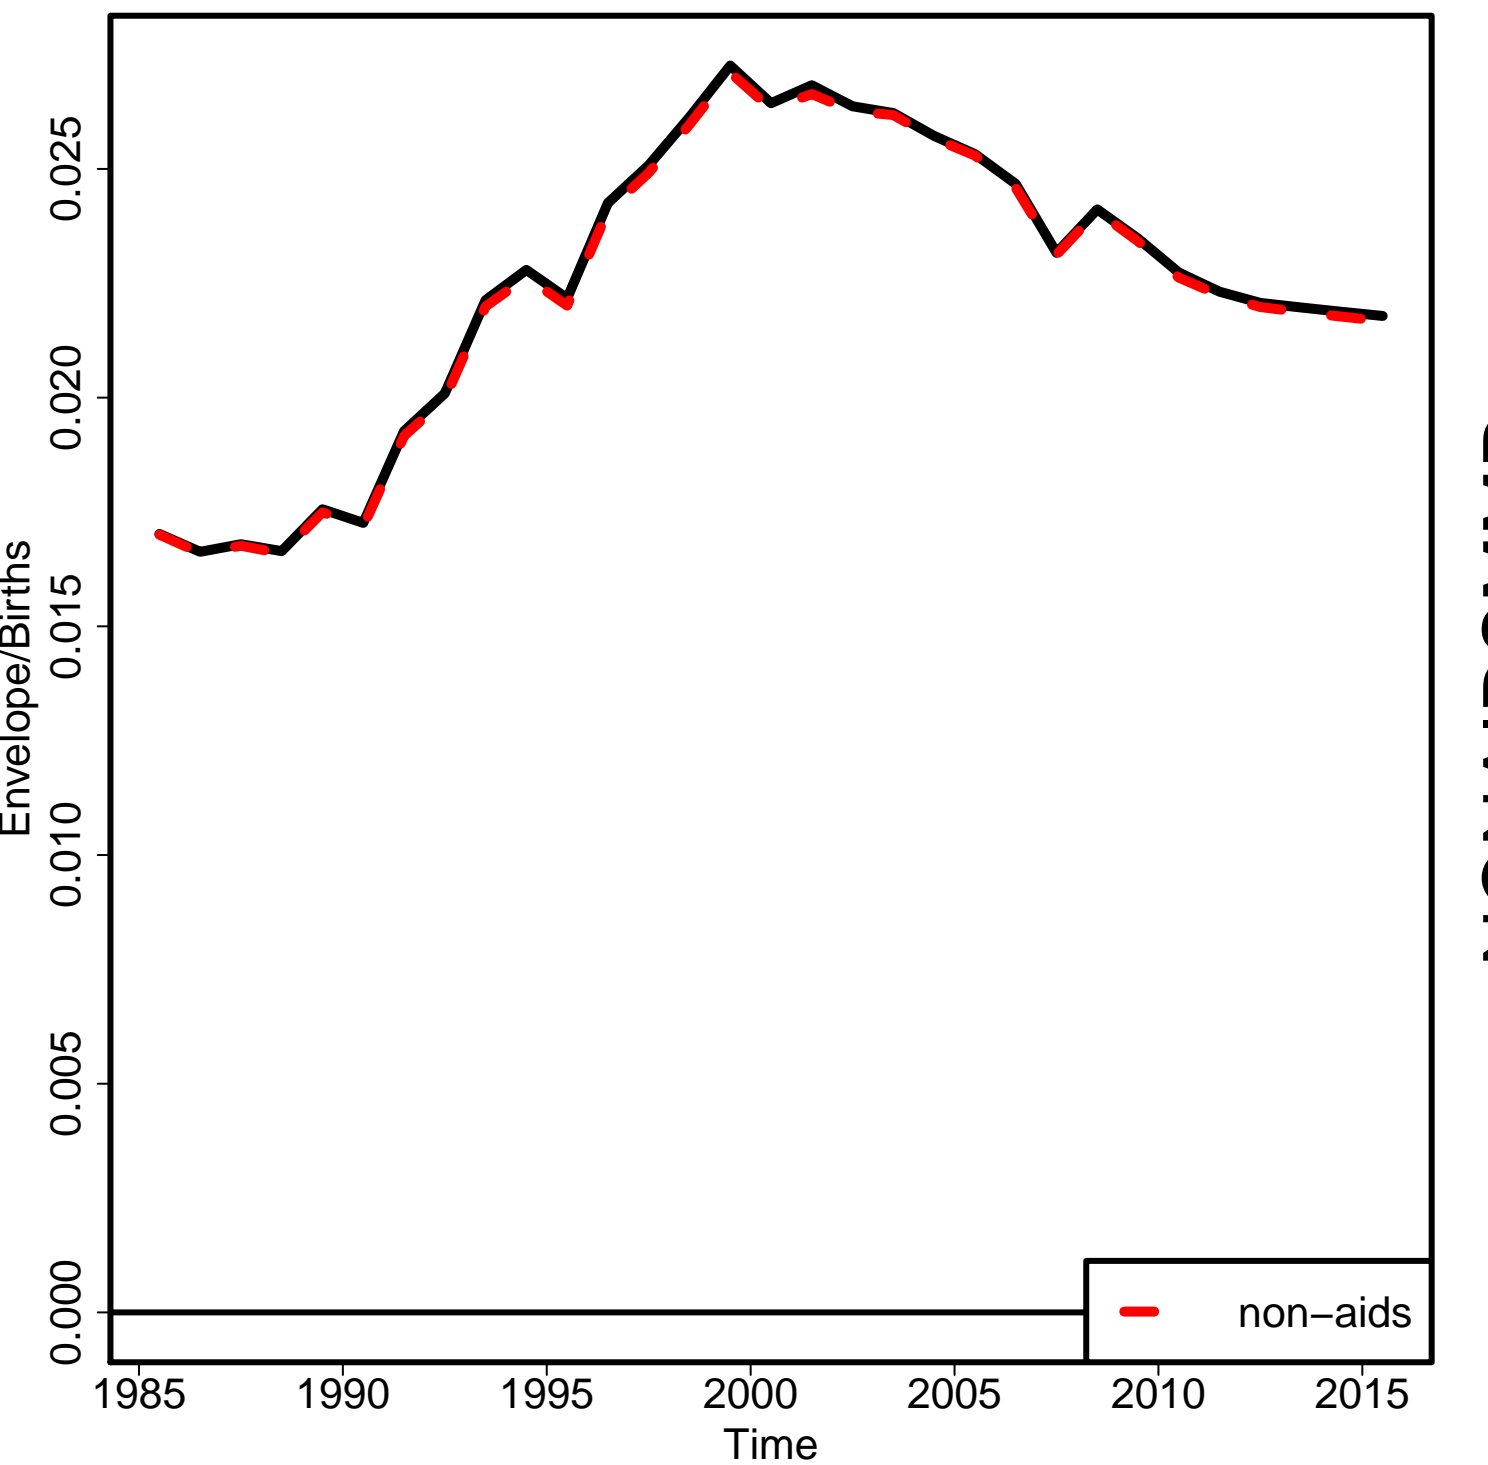

Non-aids MMR

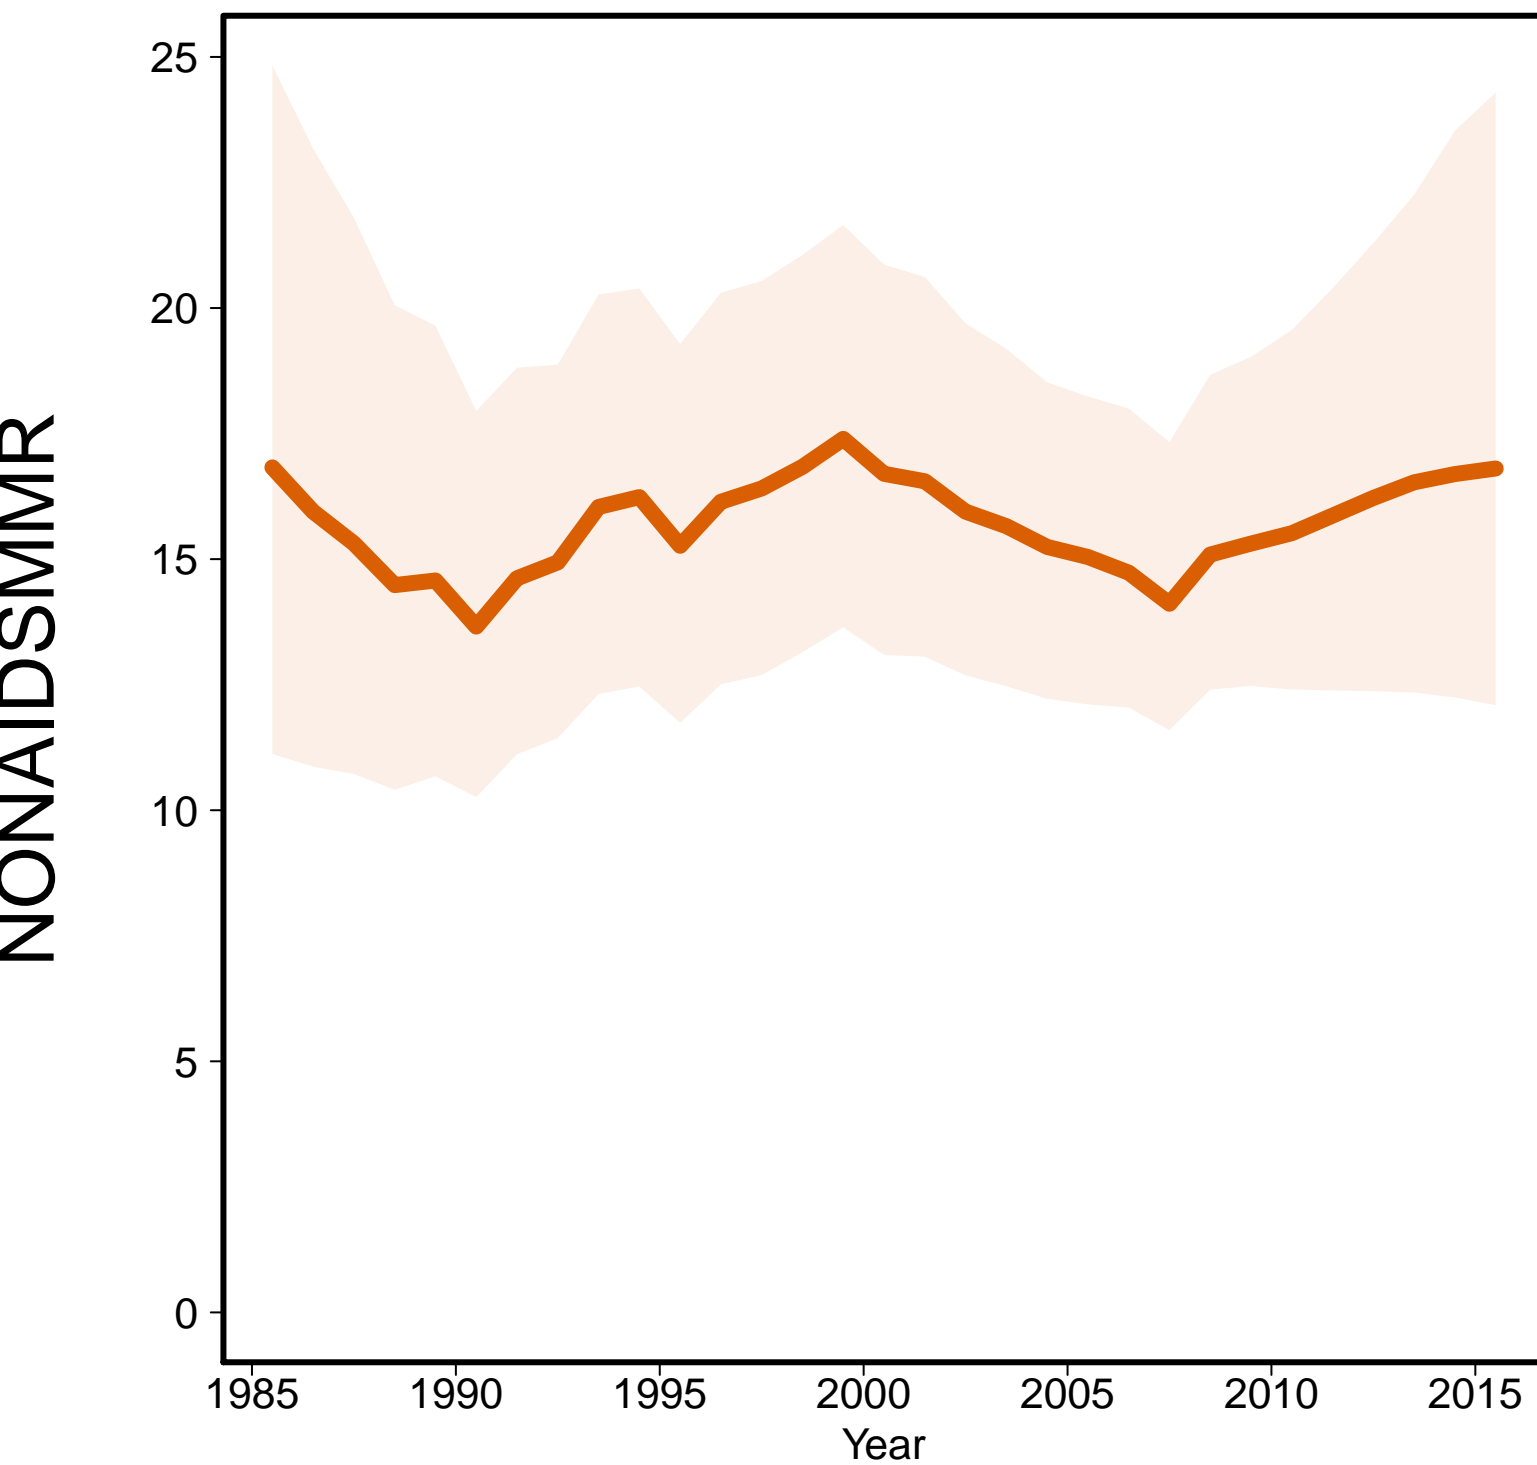

Aids MMR

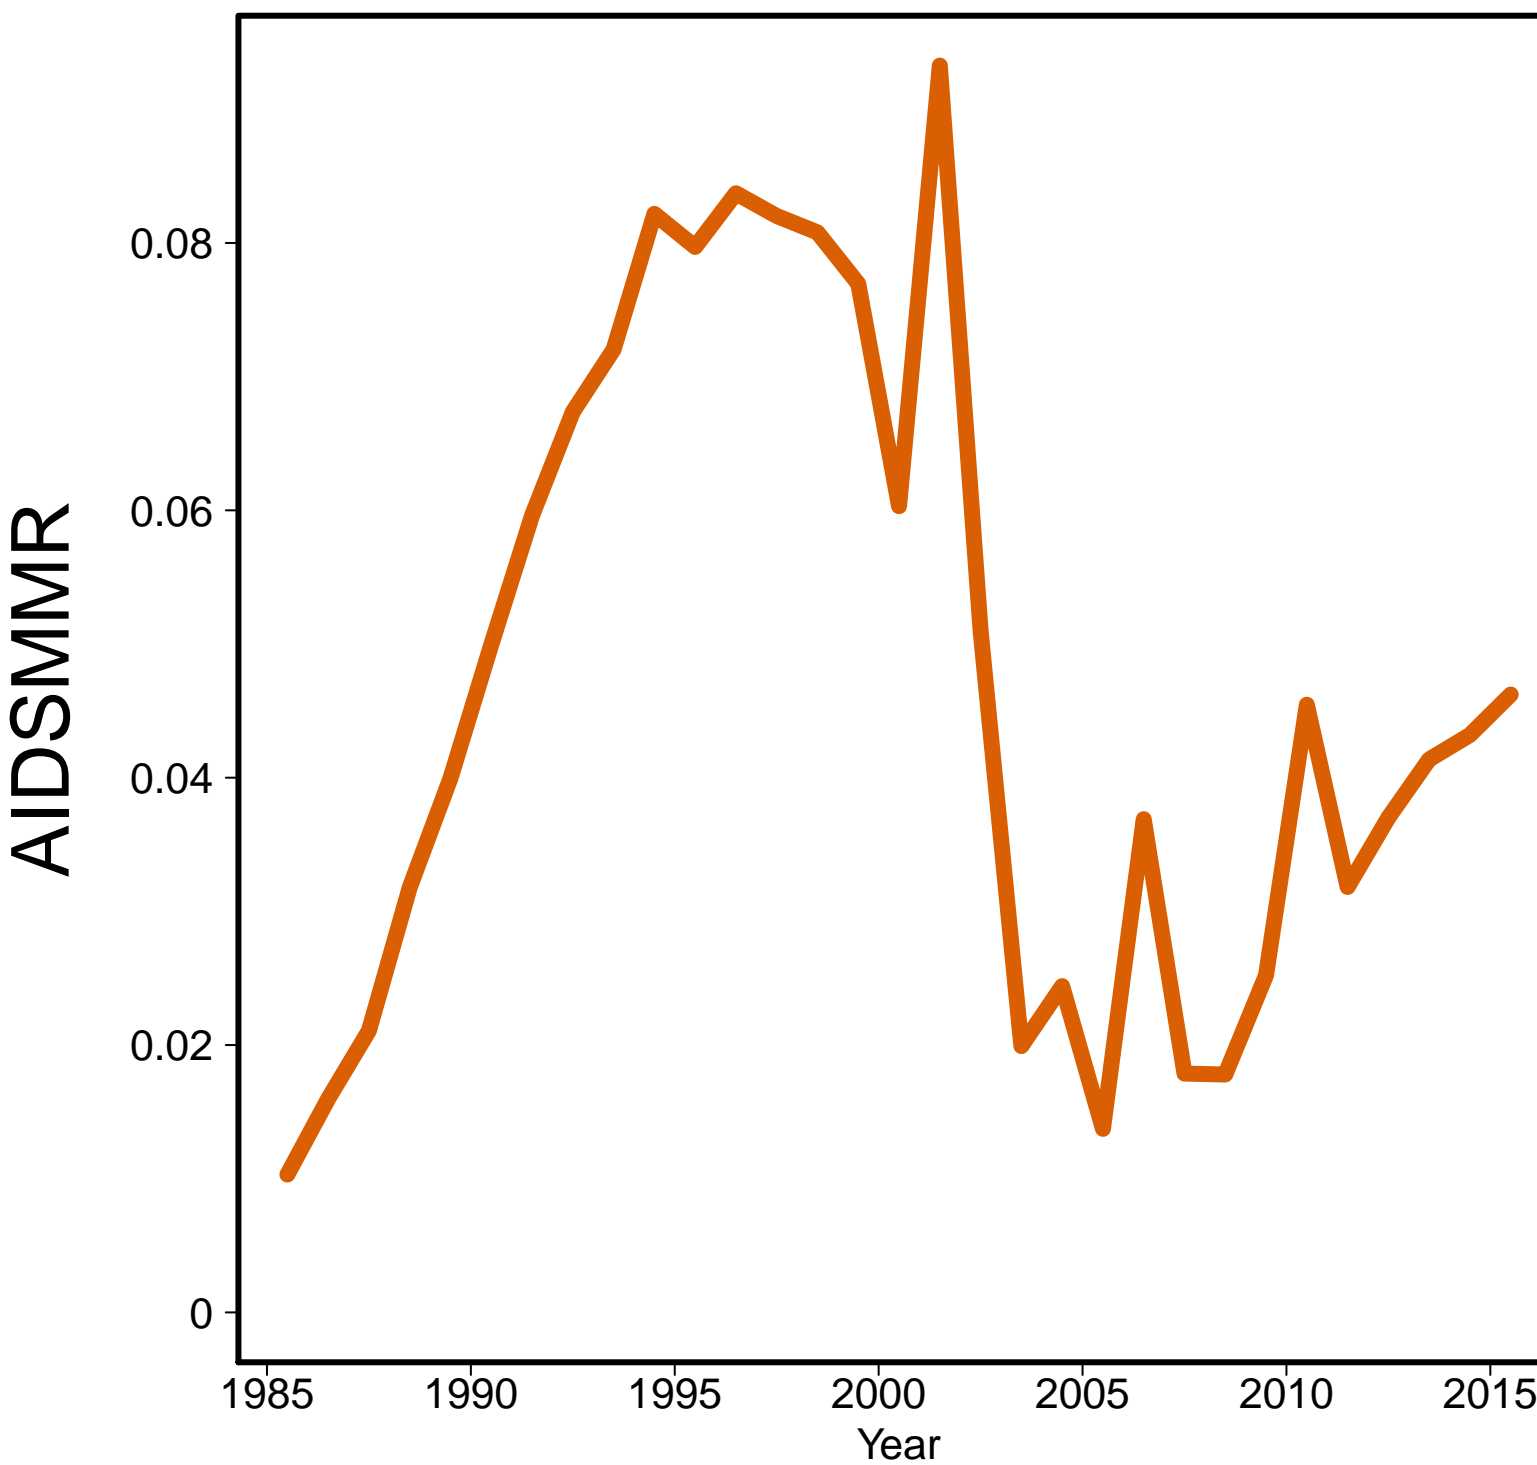

Sierra Leone [SLE]  
(Western Africa)

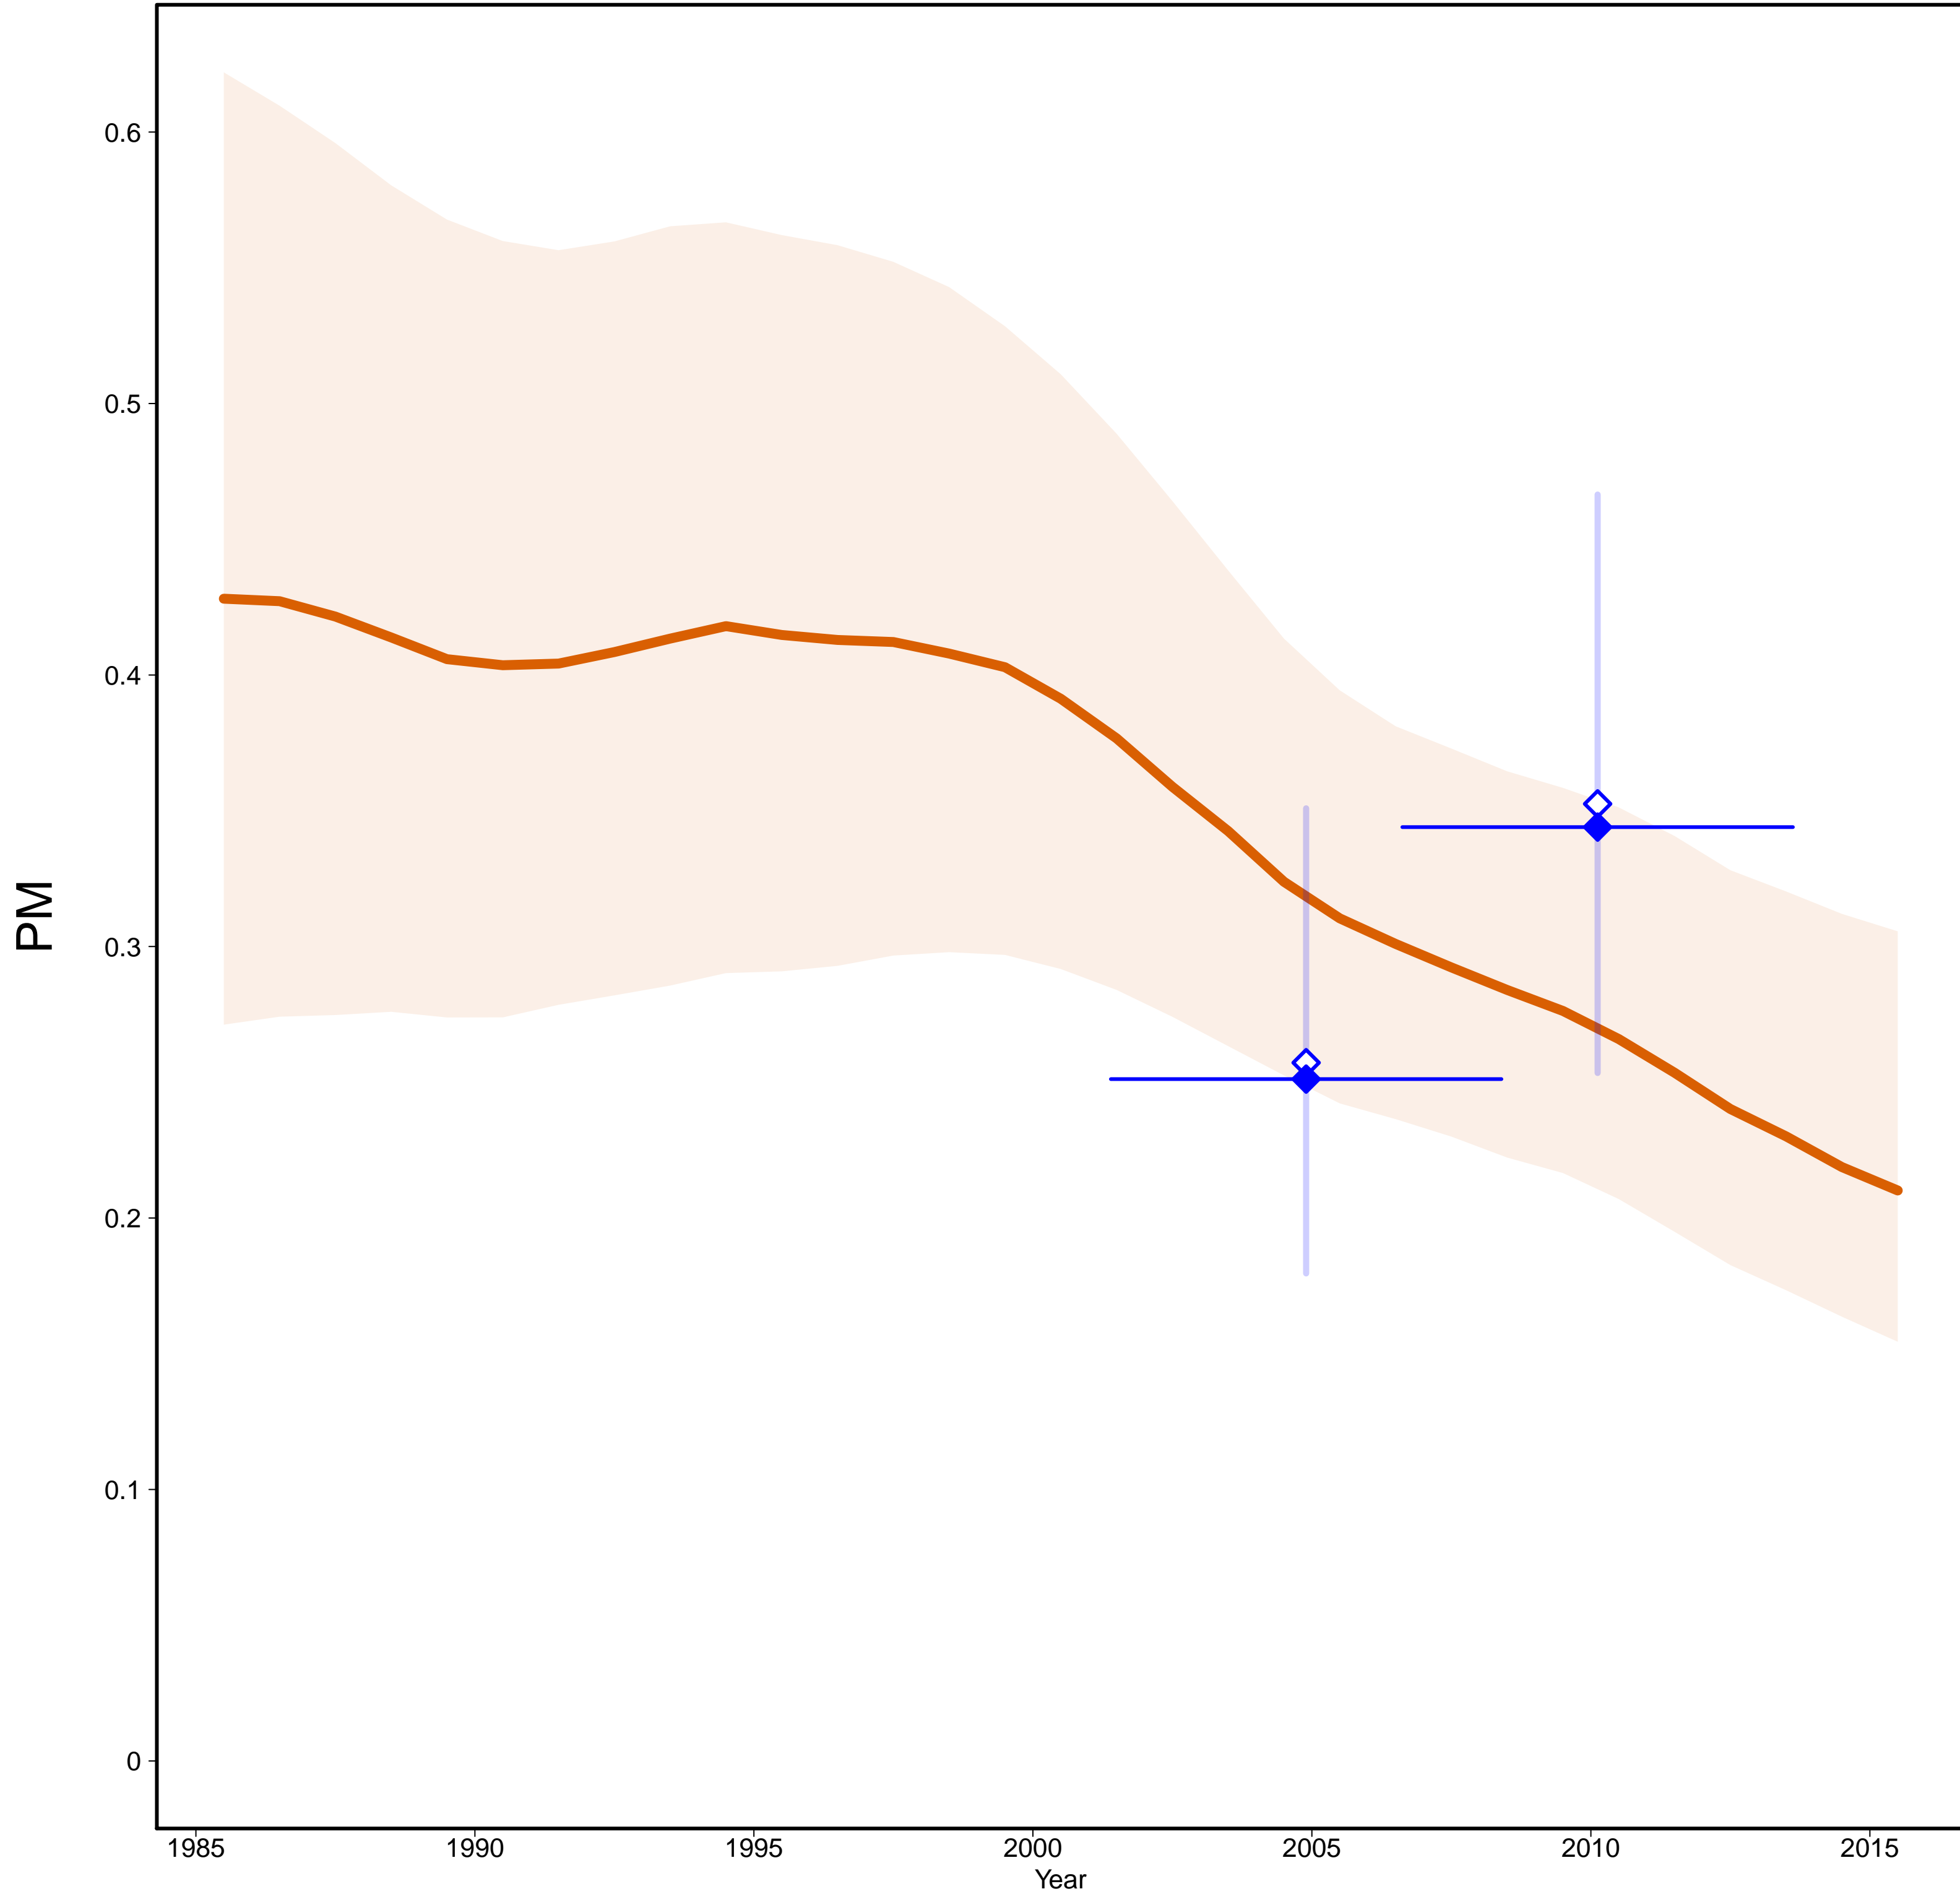

Sierra Leone [SLE]  
(Western Africa)

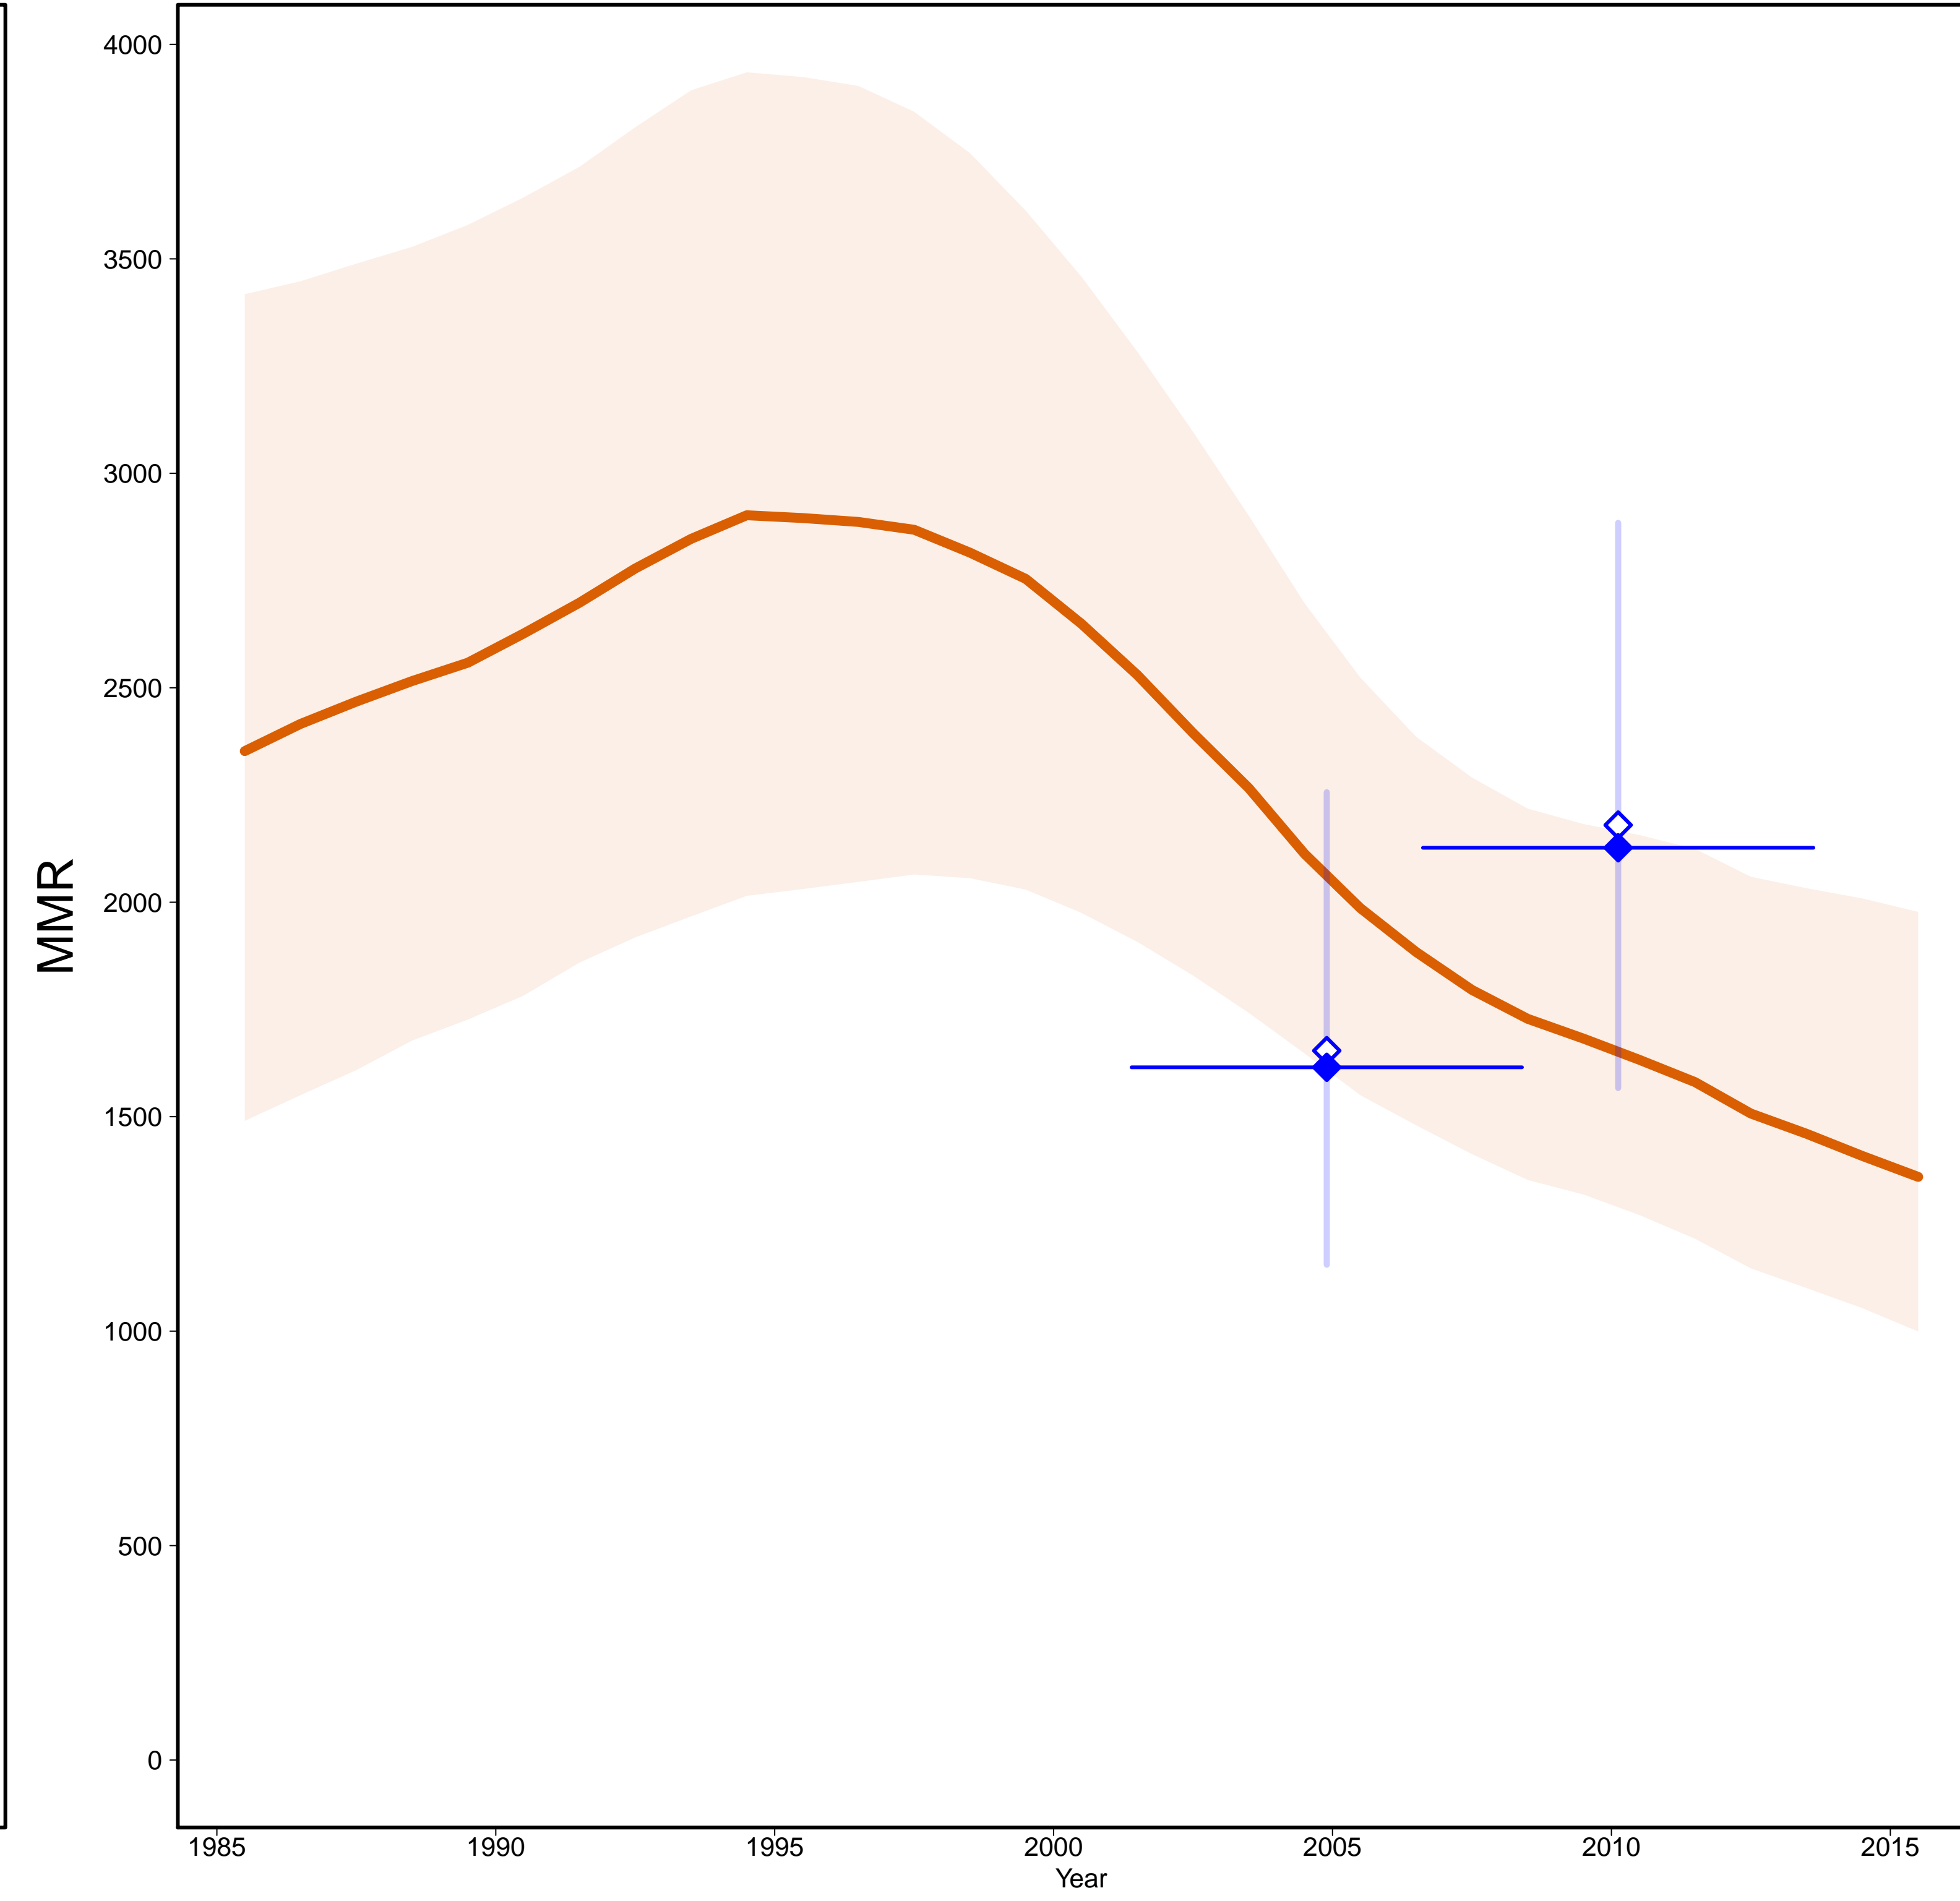

- Estimates —
- MMR Database 2015 —
- ◇ Observed Data
- ◆ Adjusted Data
- Data type —
- ◆ DHS

Gross Domestic Product

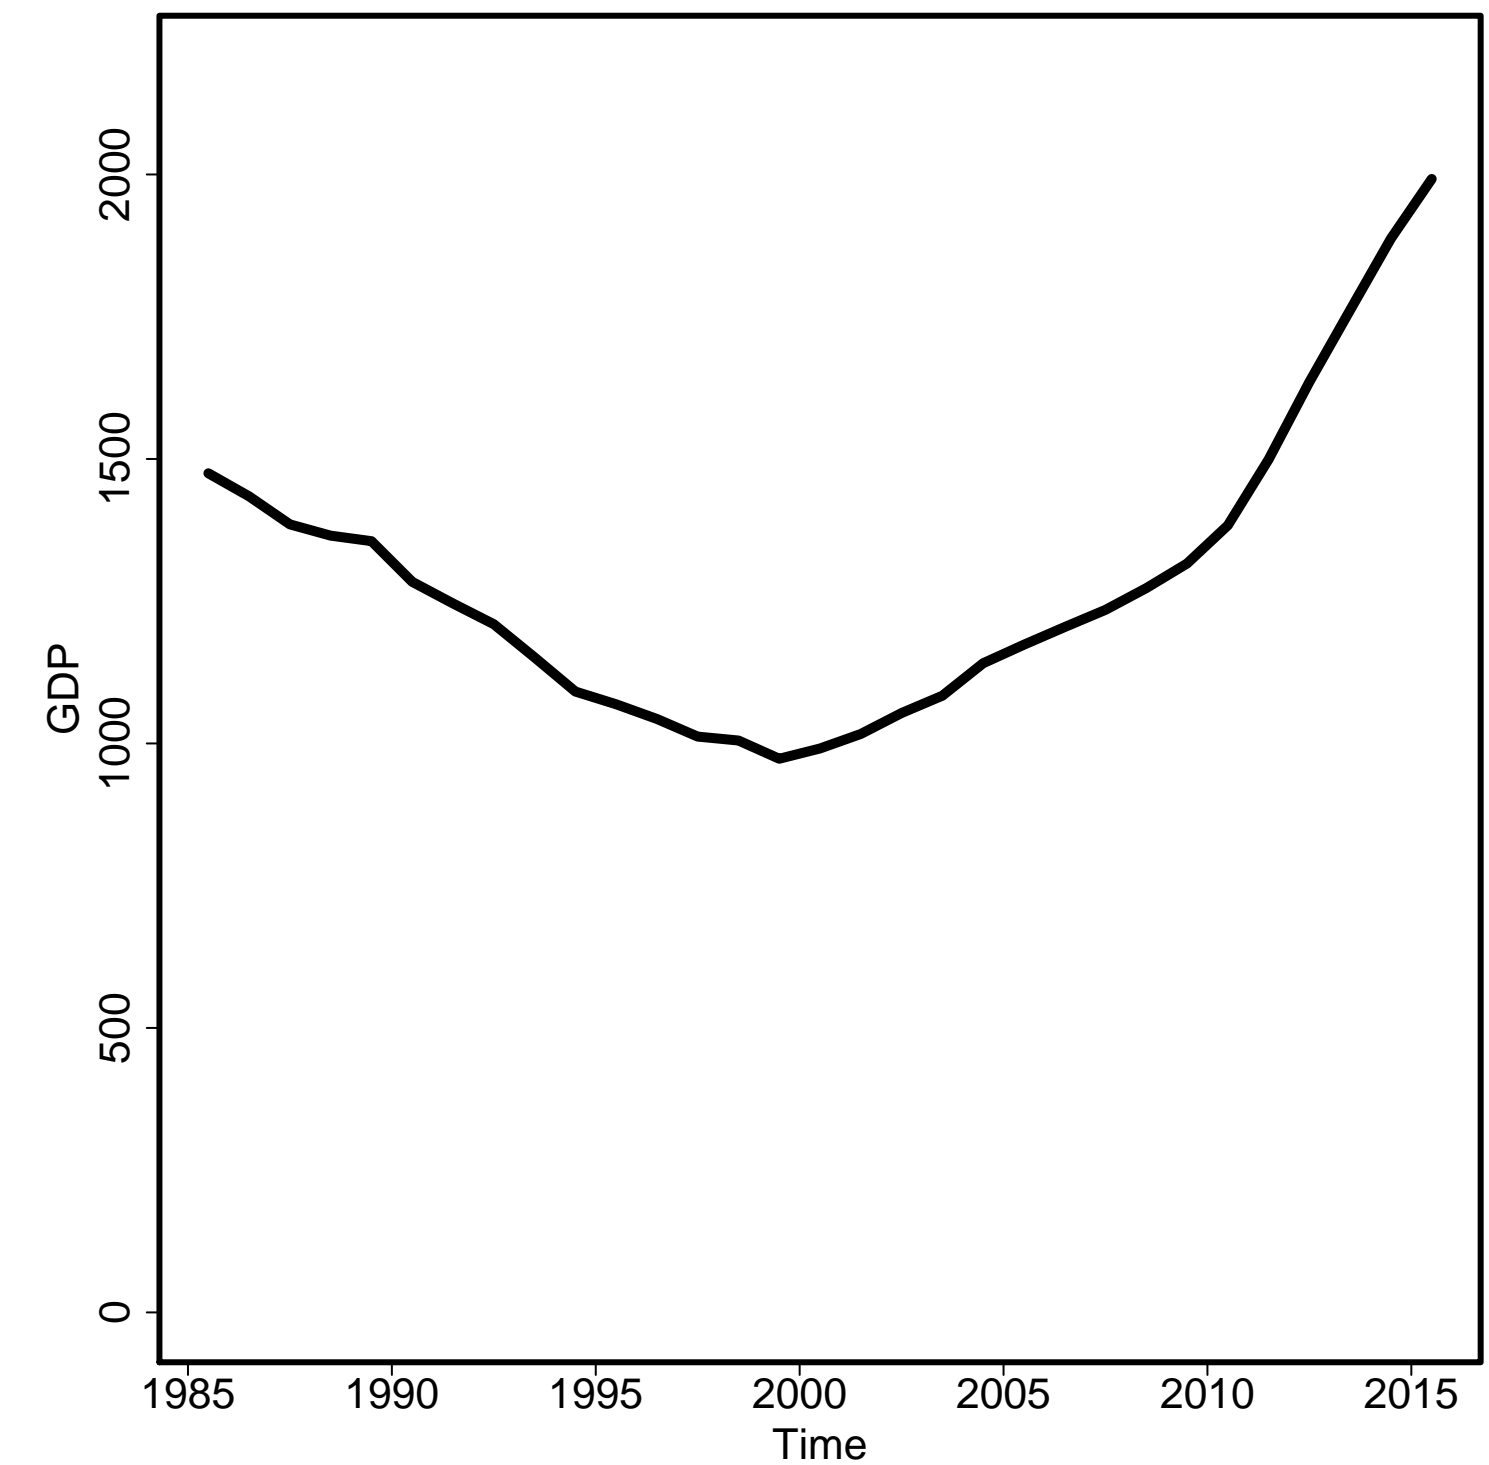

General Fertility Rate

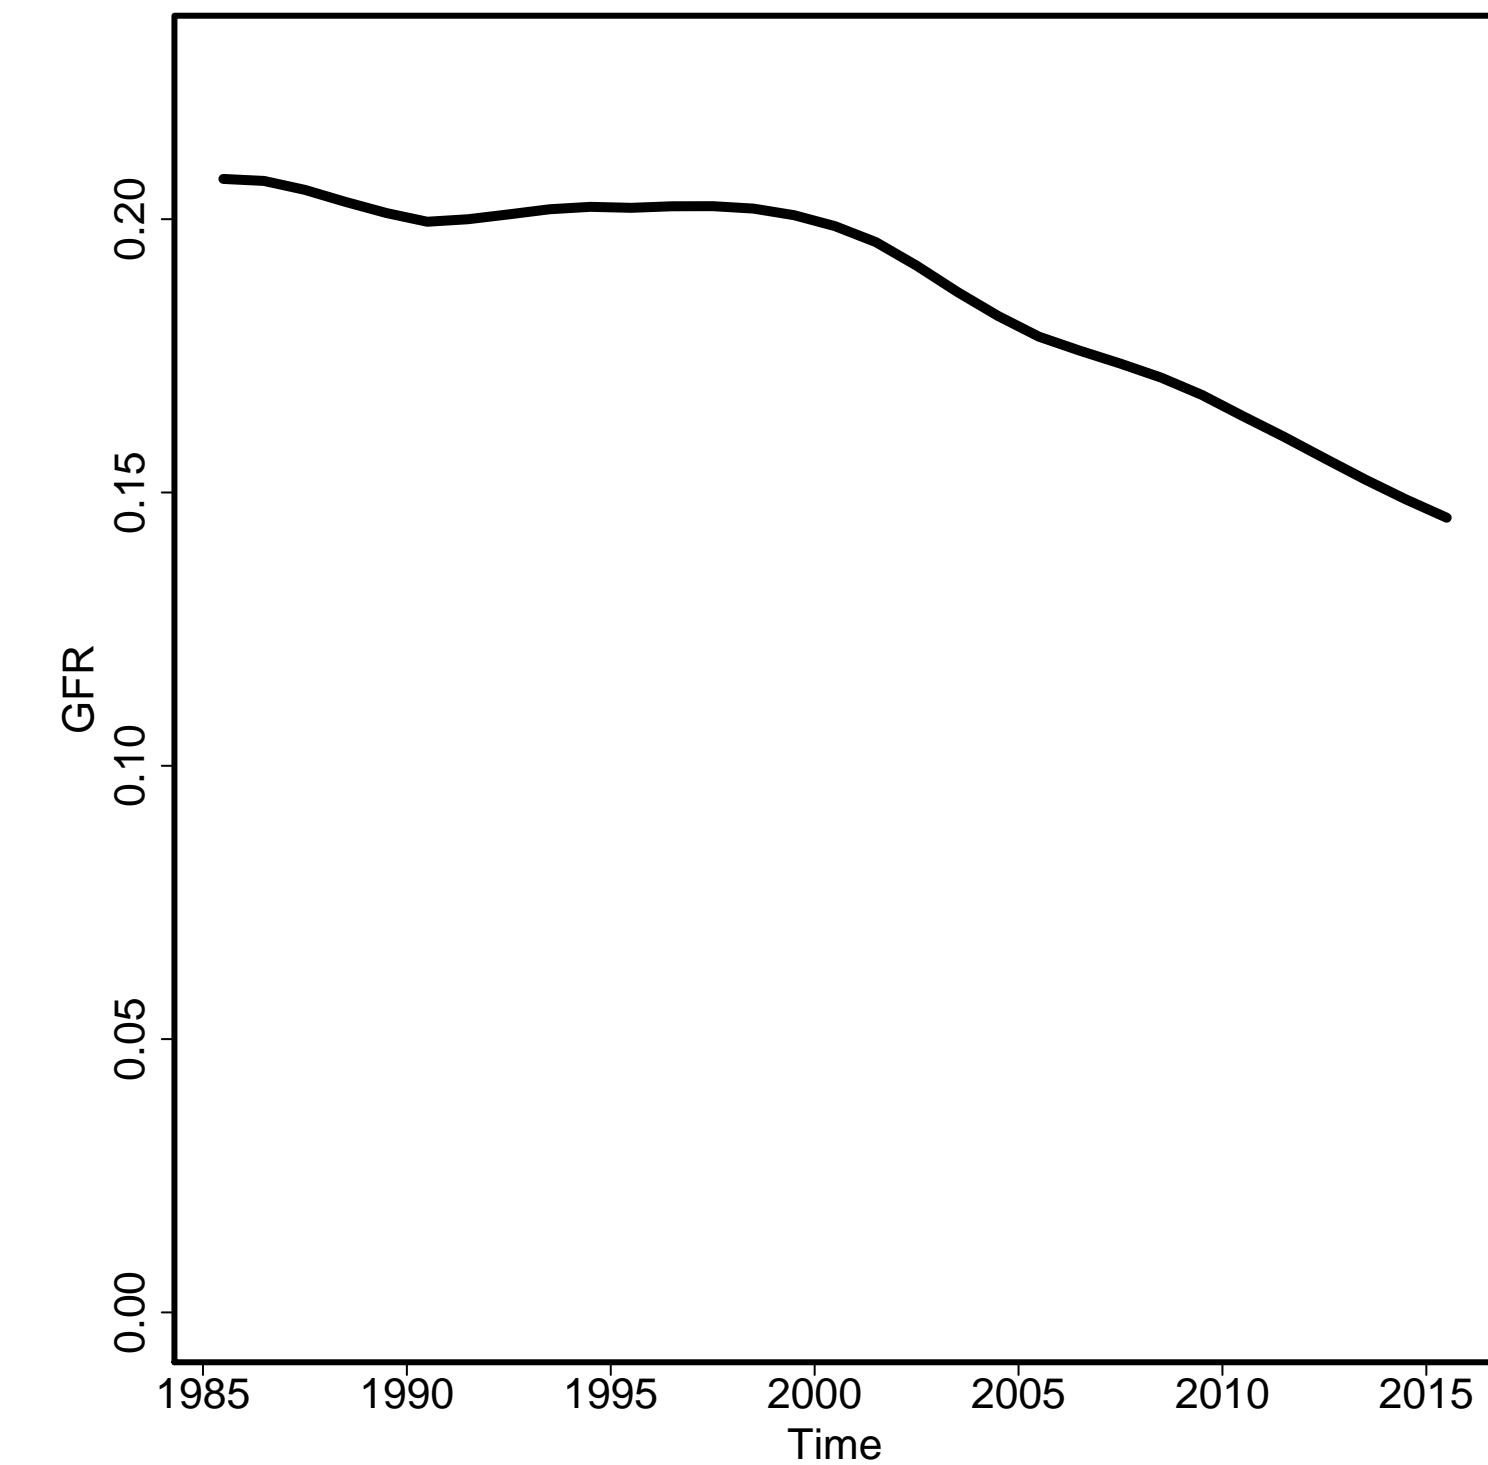

Skilled Attendance to Birth

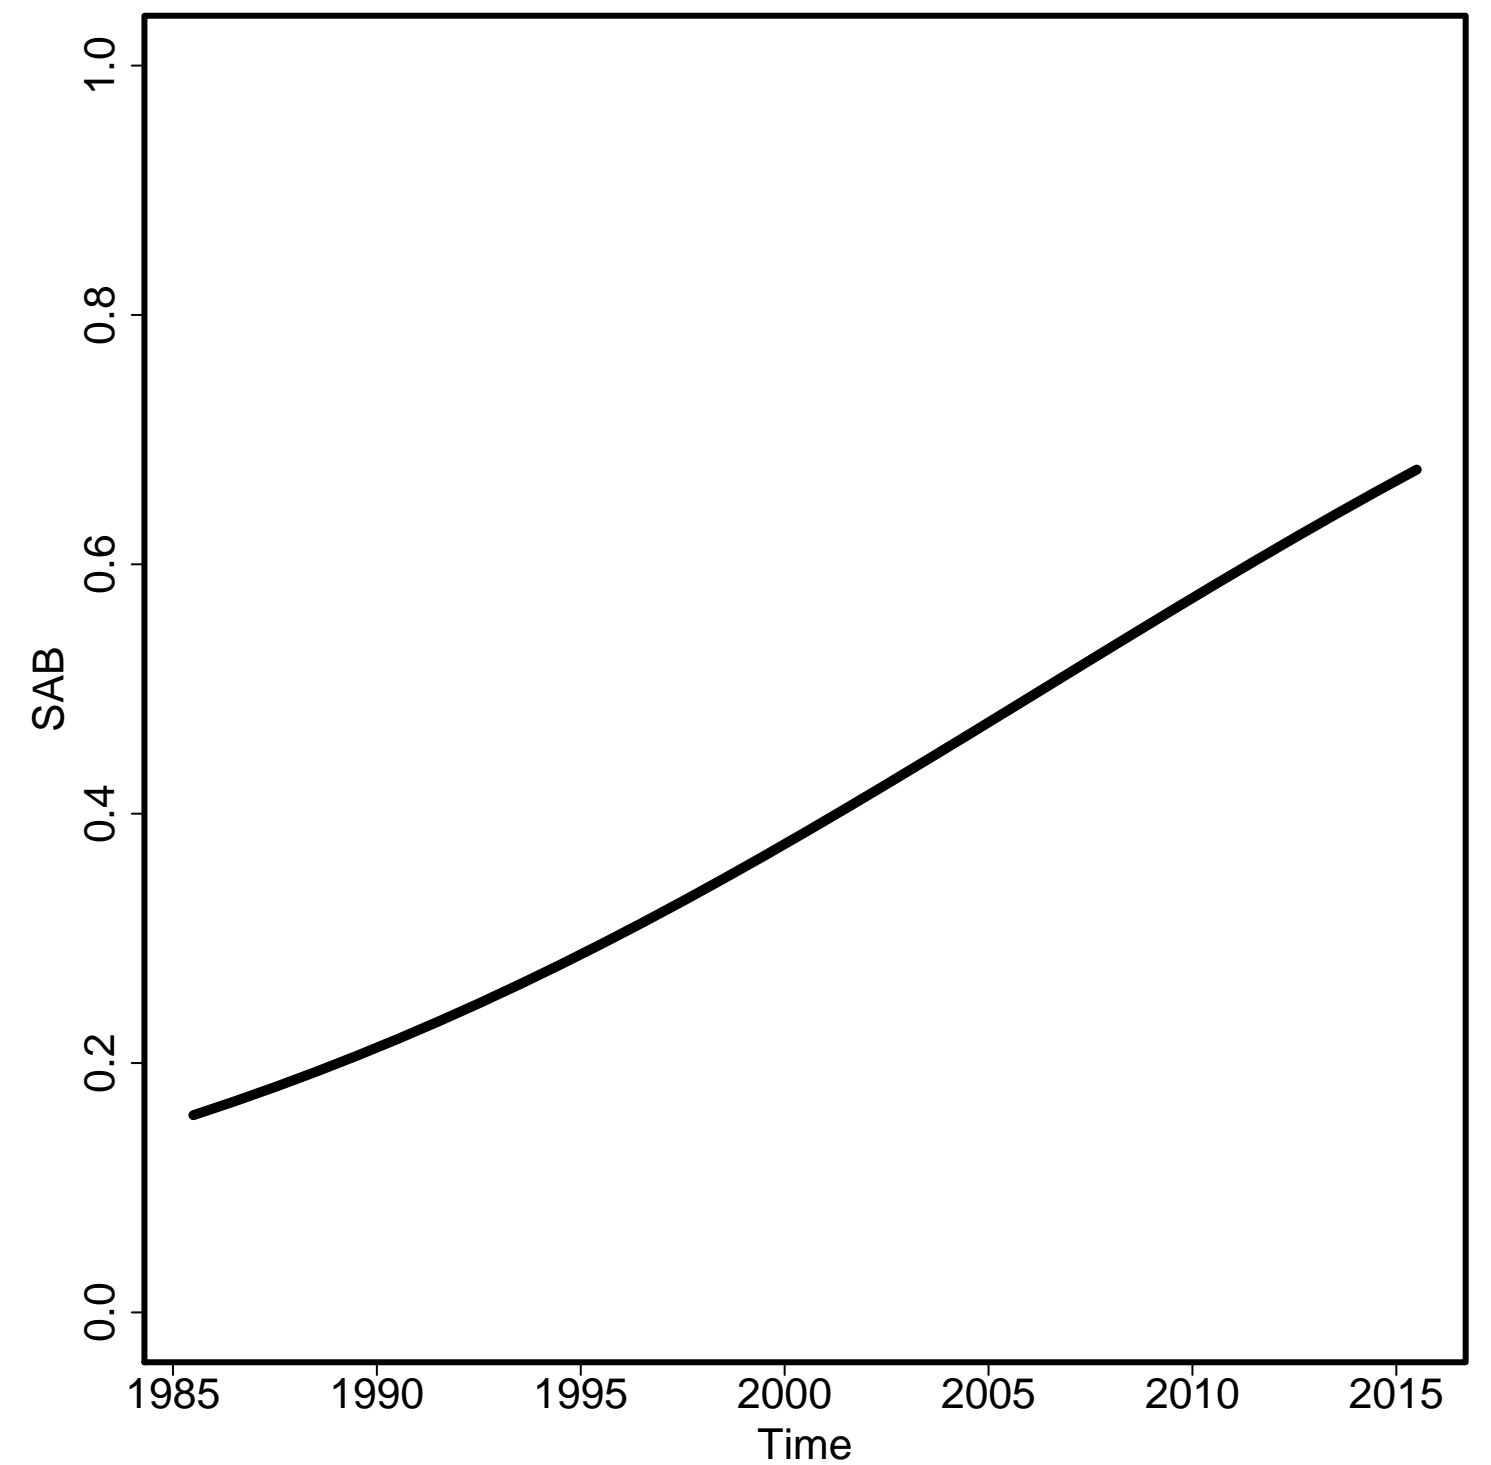

Envelope/Births

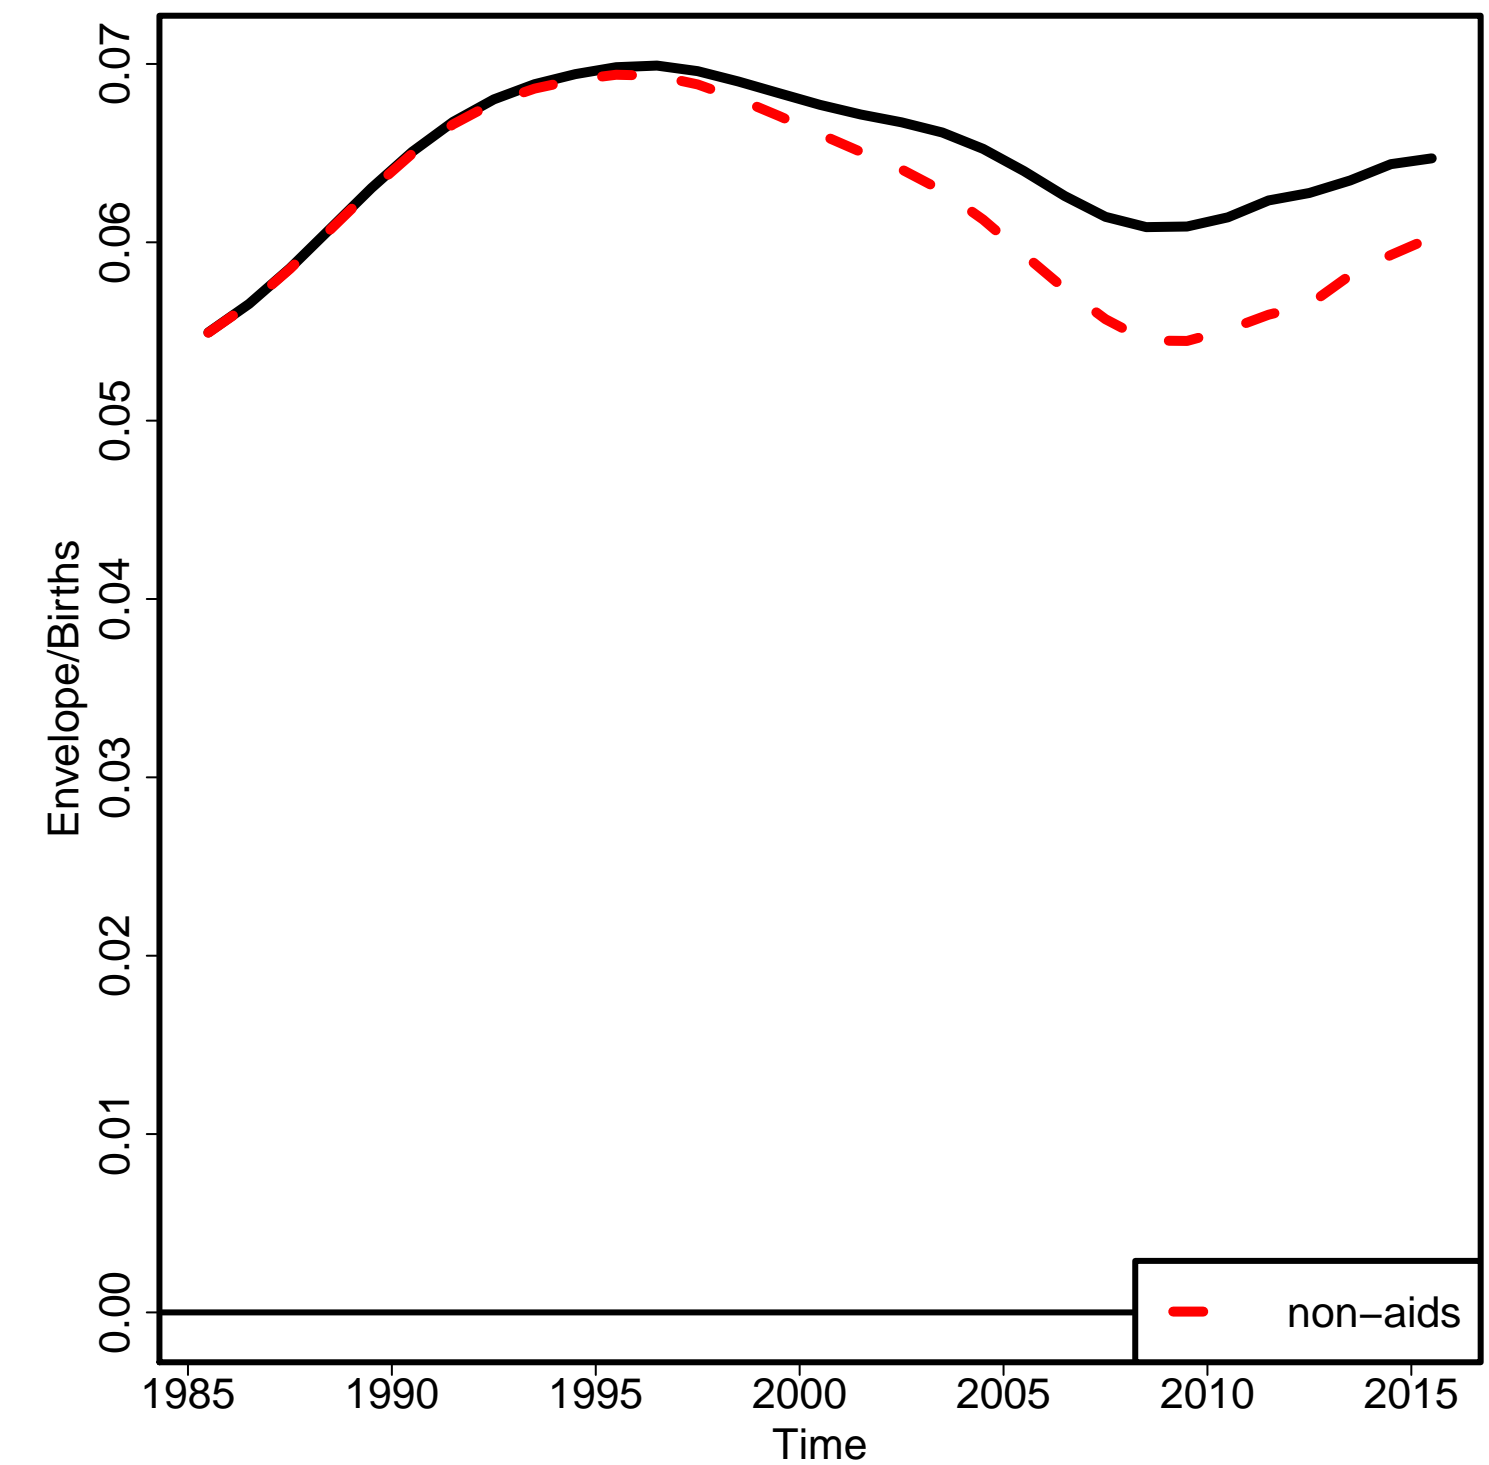

Non-aids MMR

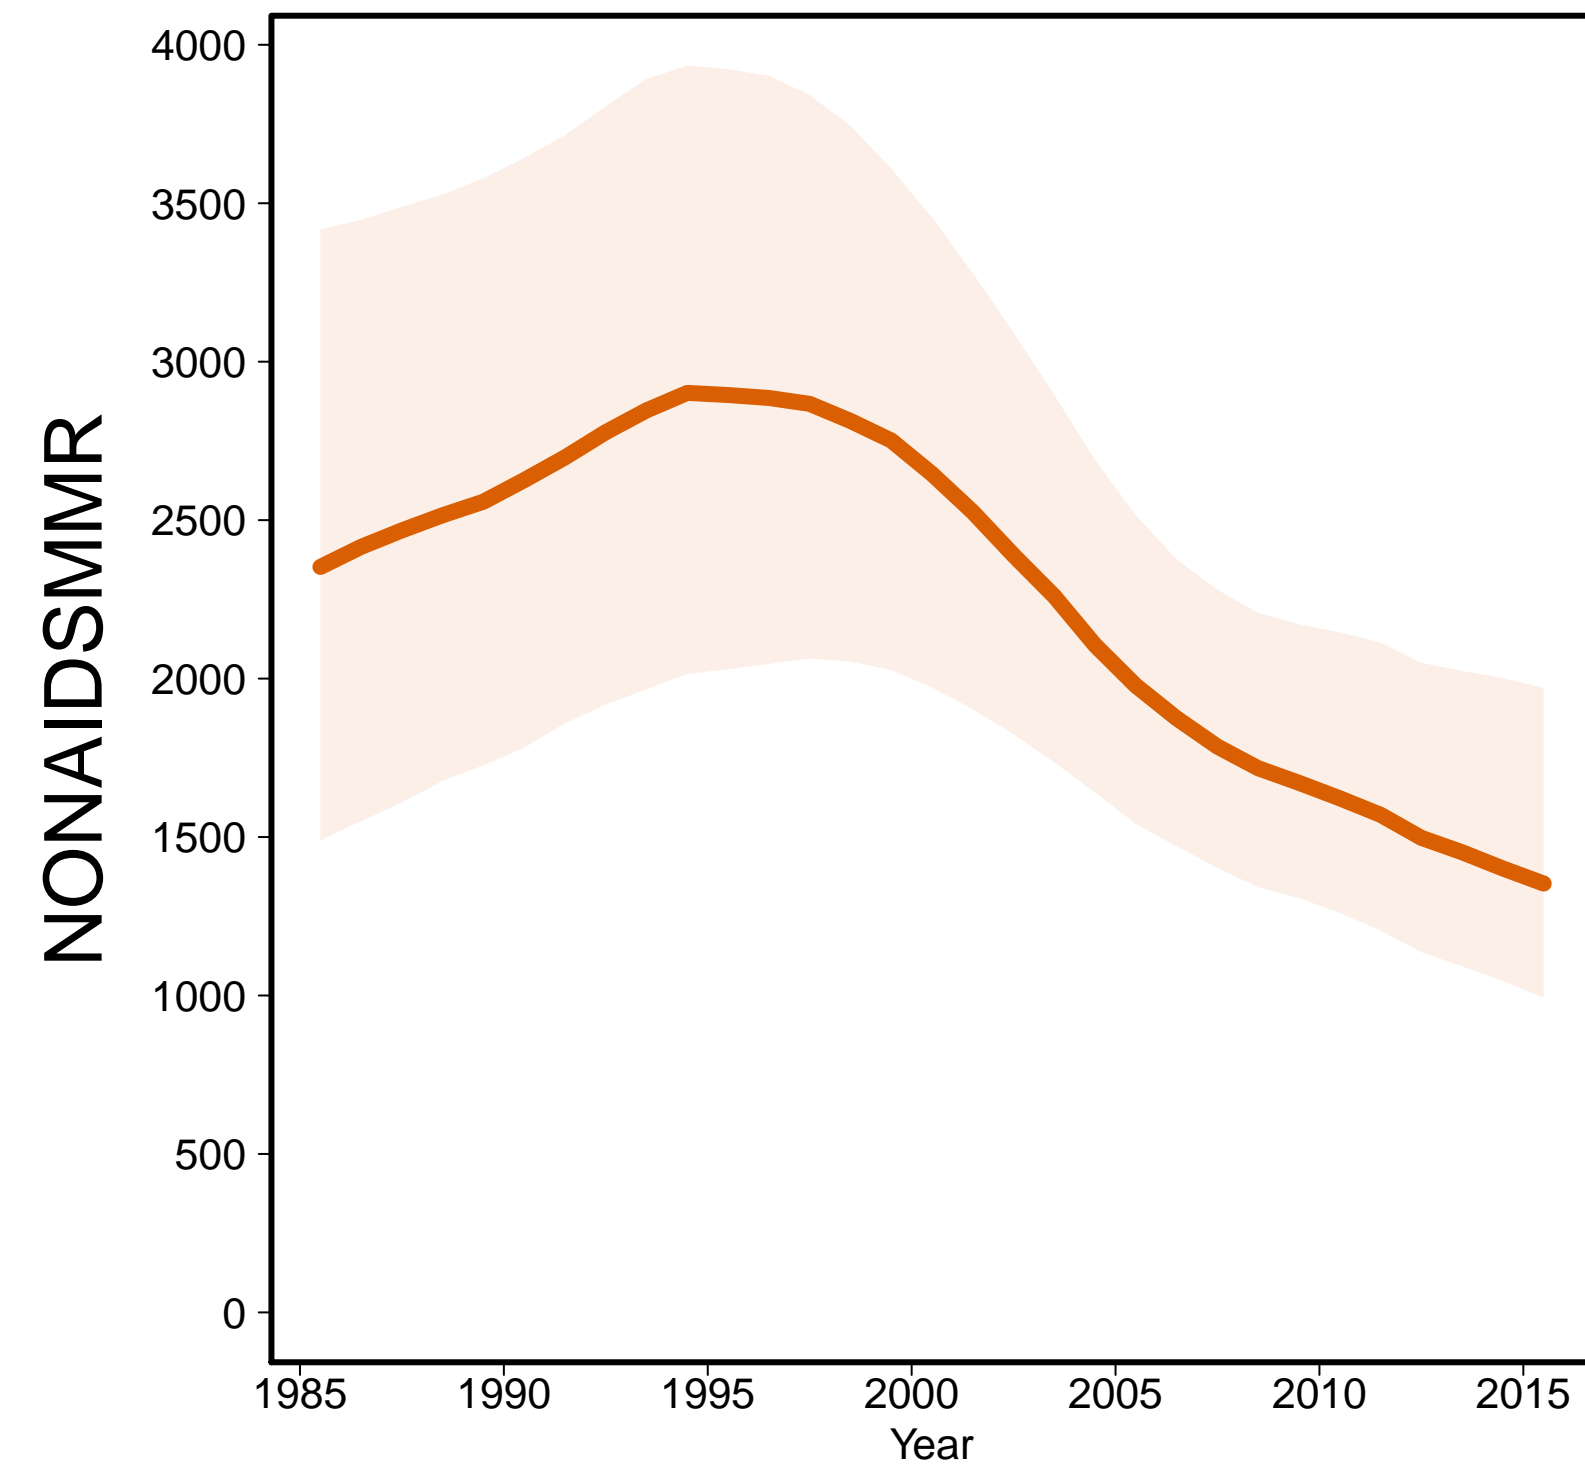

Aids MMR

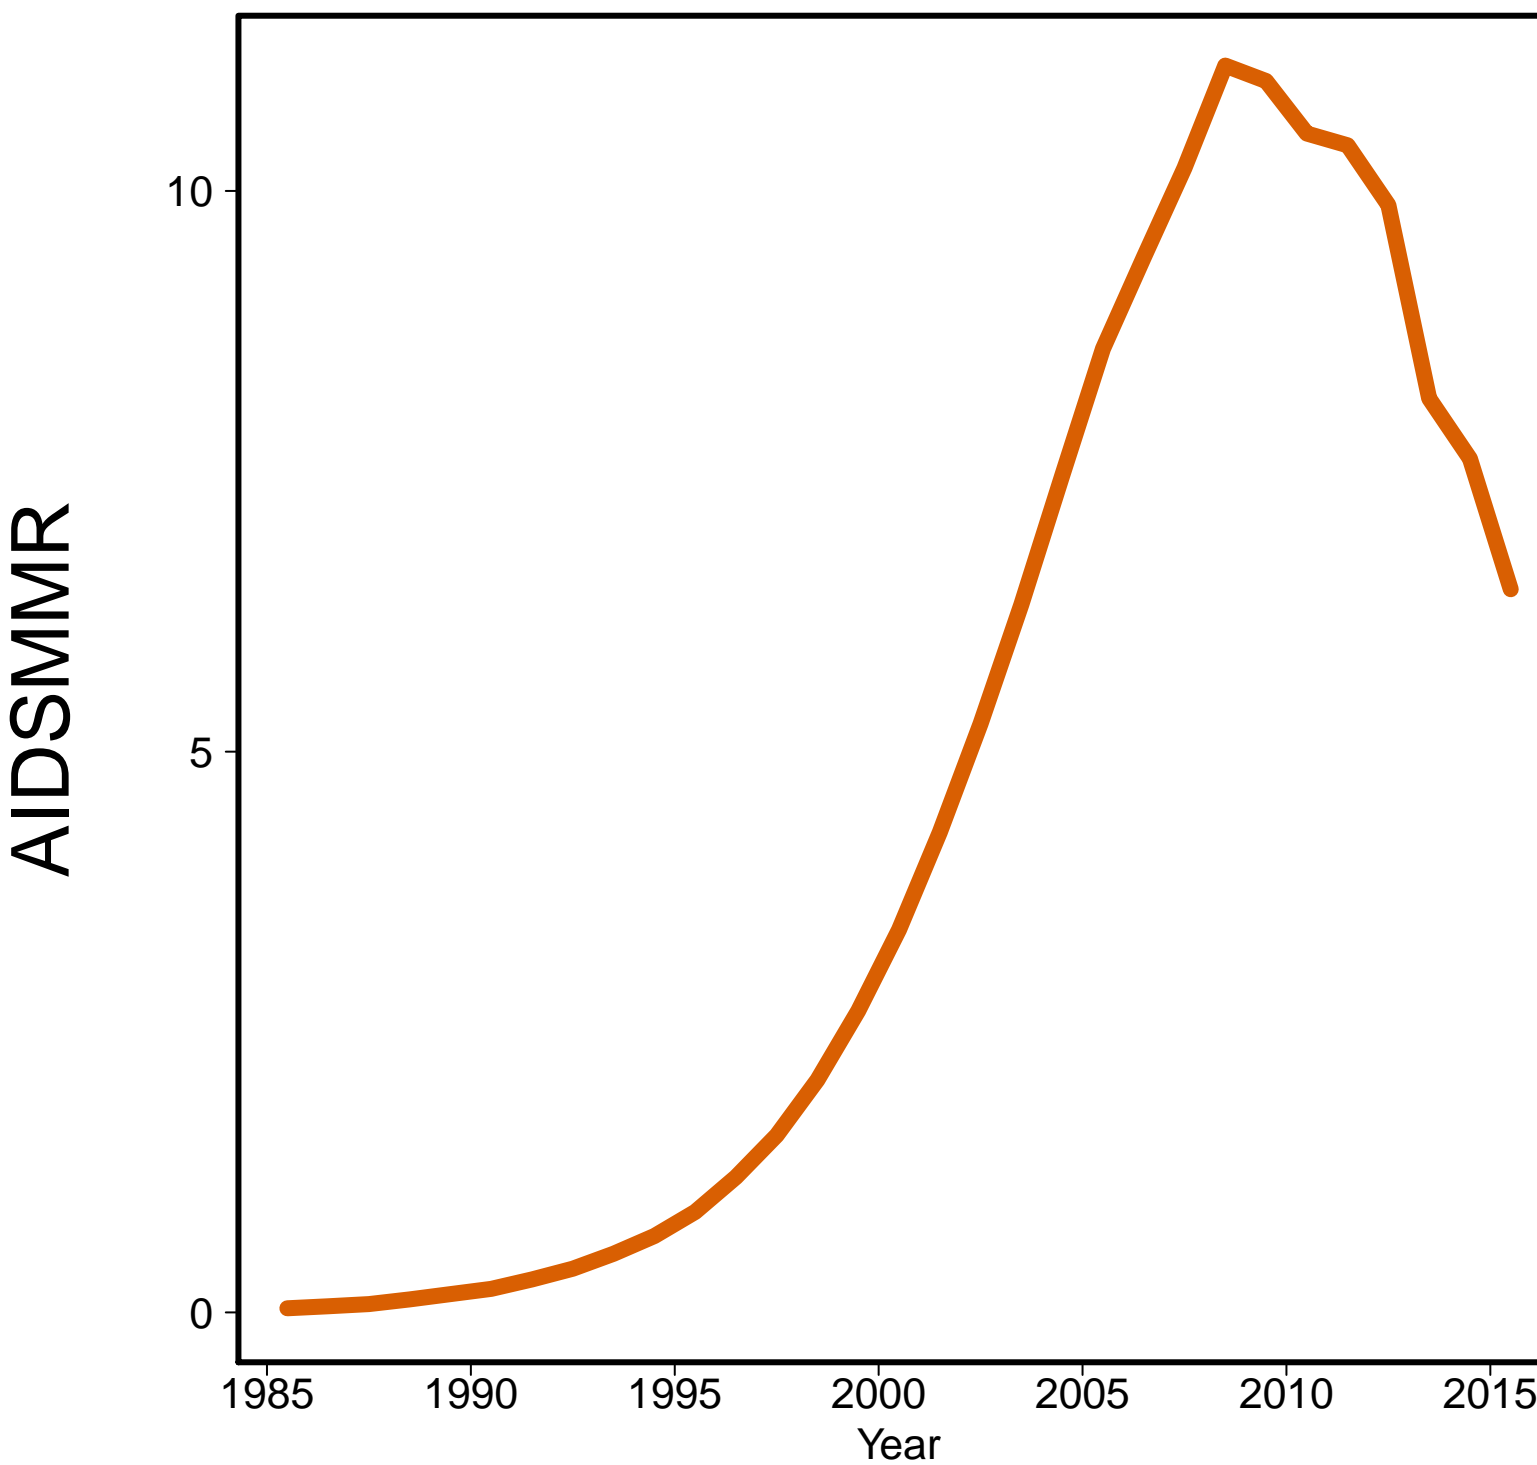

Singapore [SGP]  
(South-Eastern Asia / Oceania)

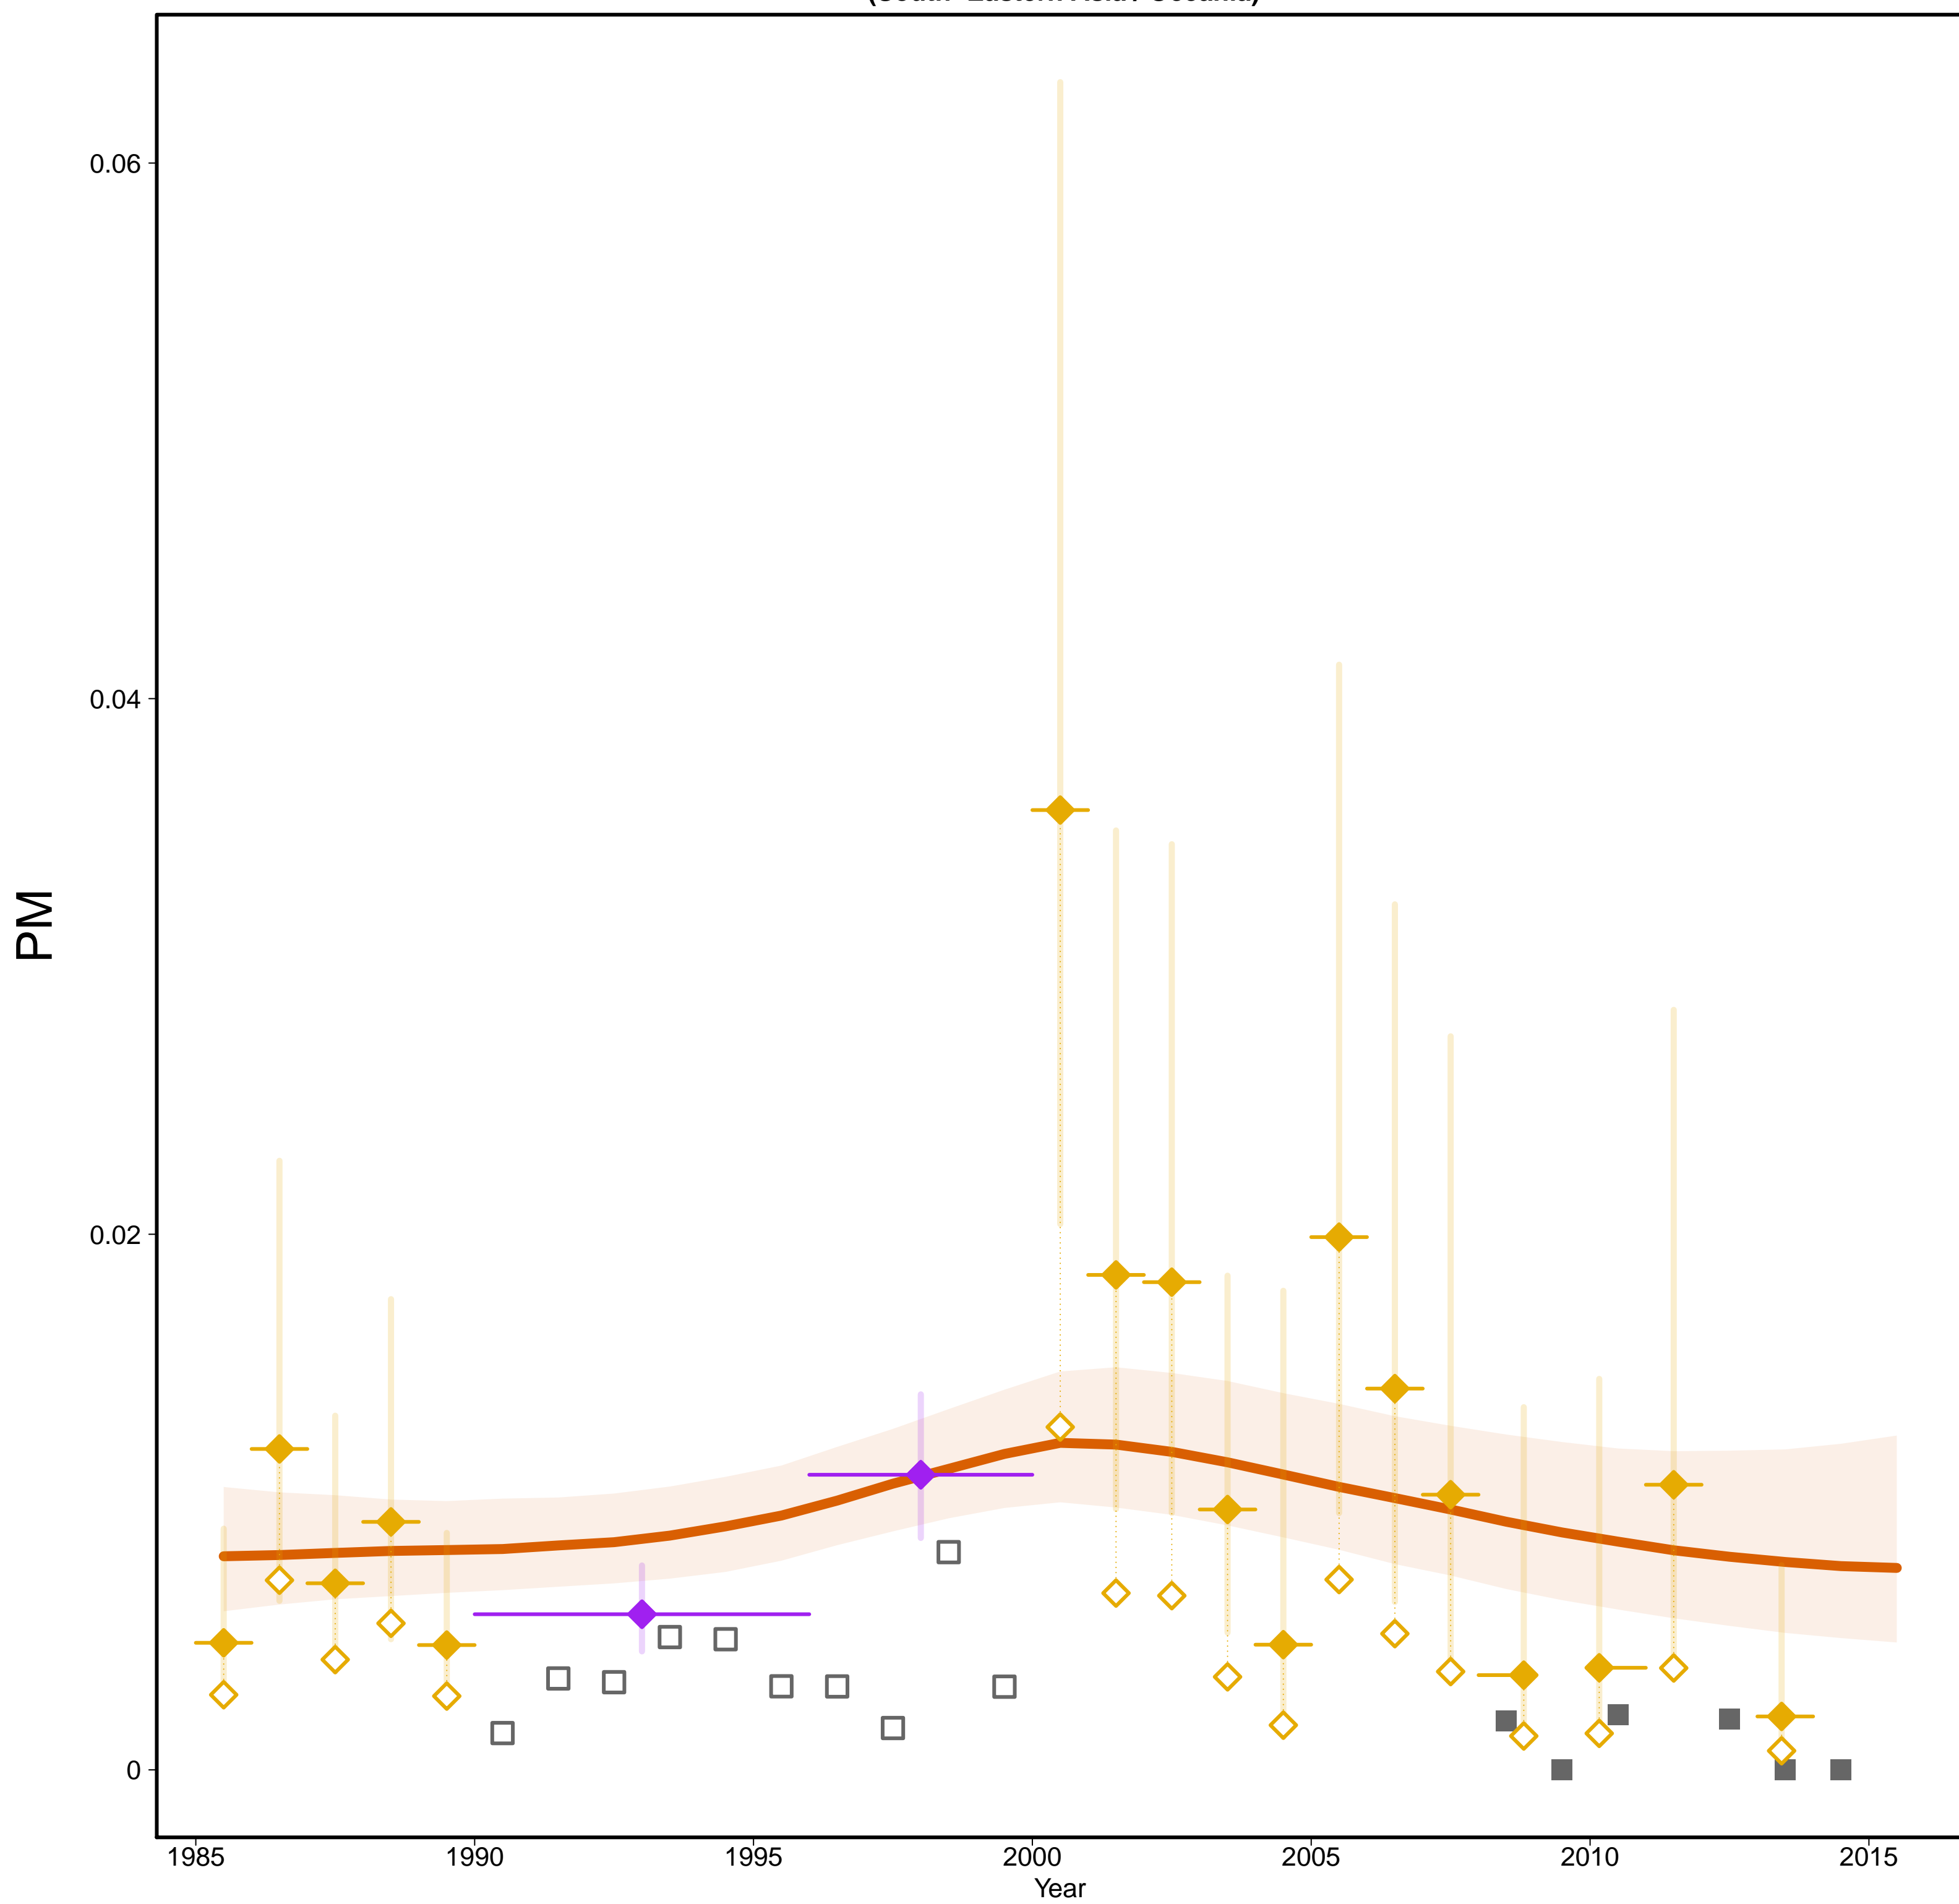

Singapore [SGP]  
(South-Eastern Asia / Oceania)

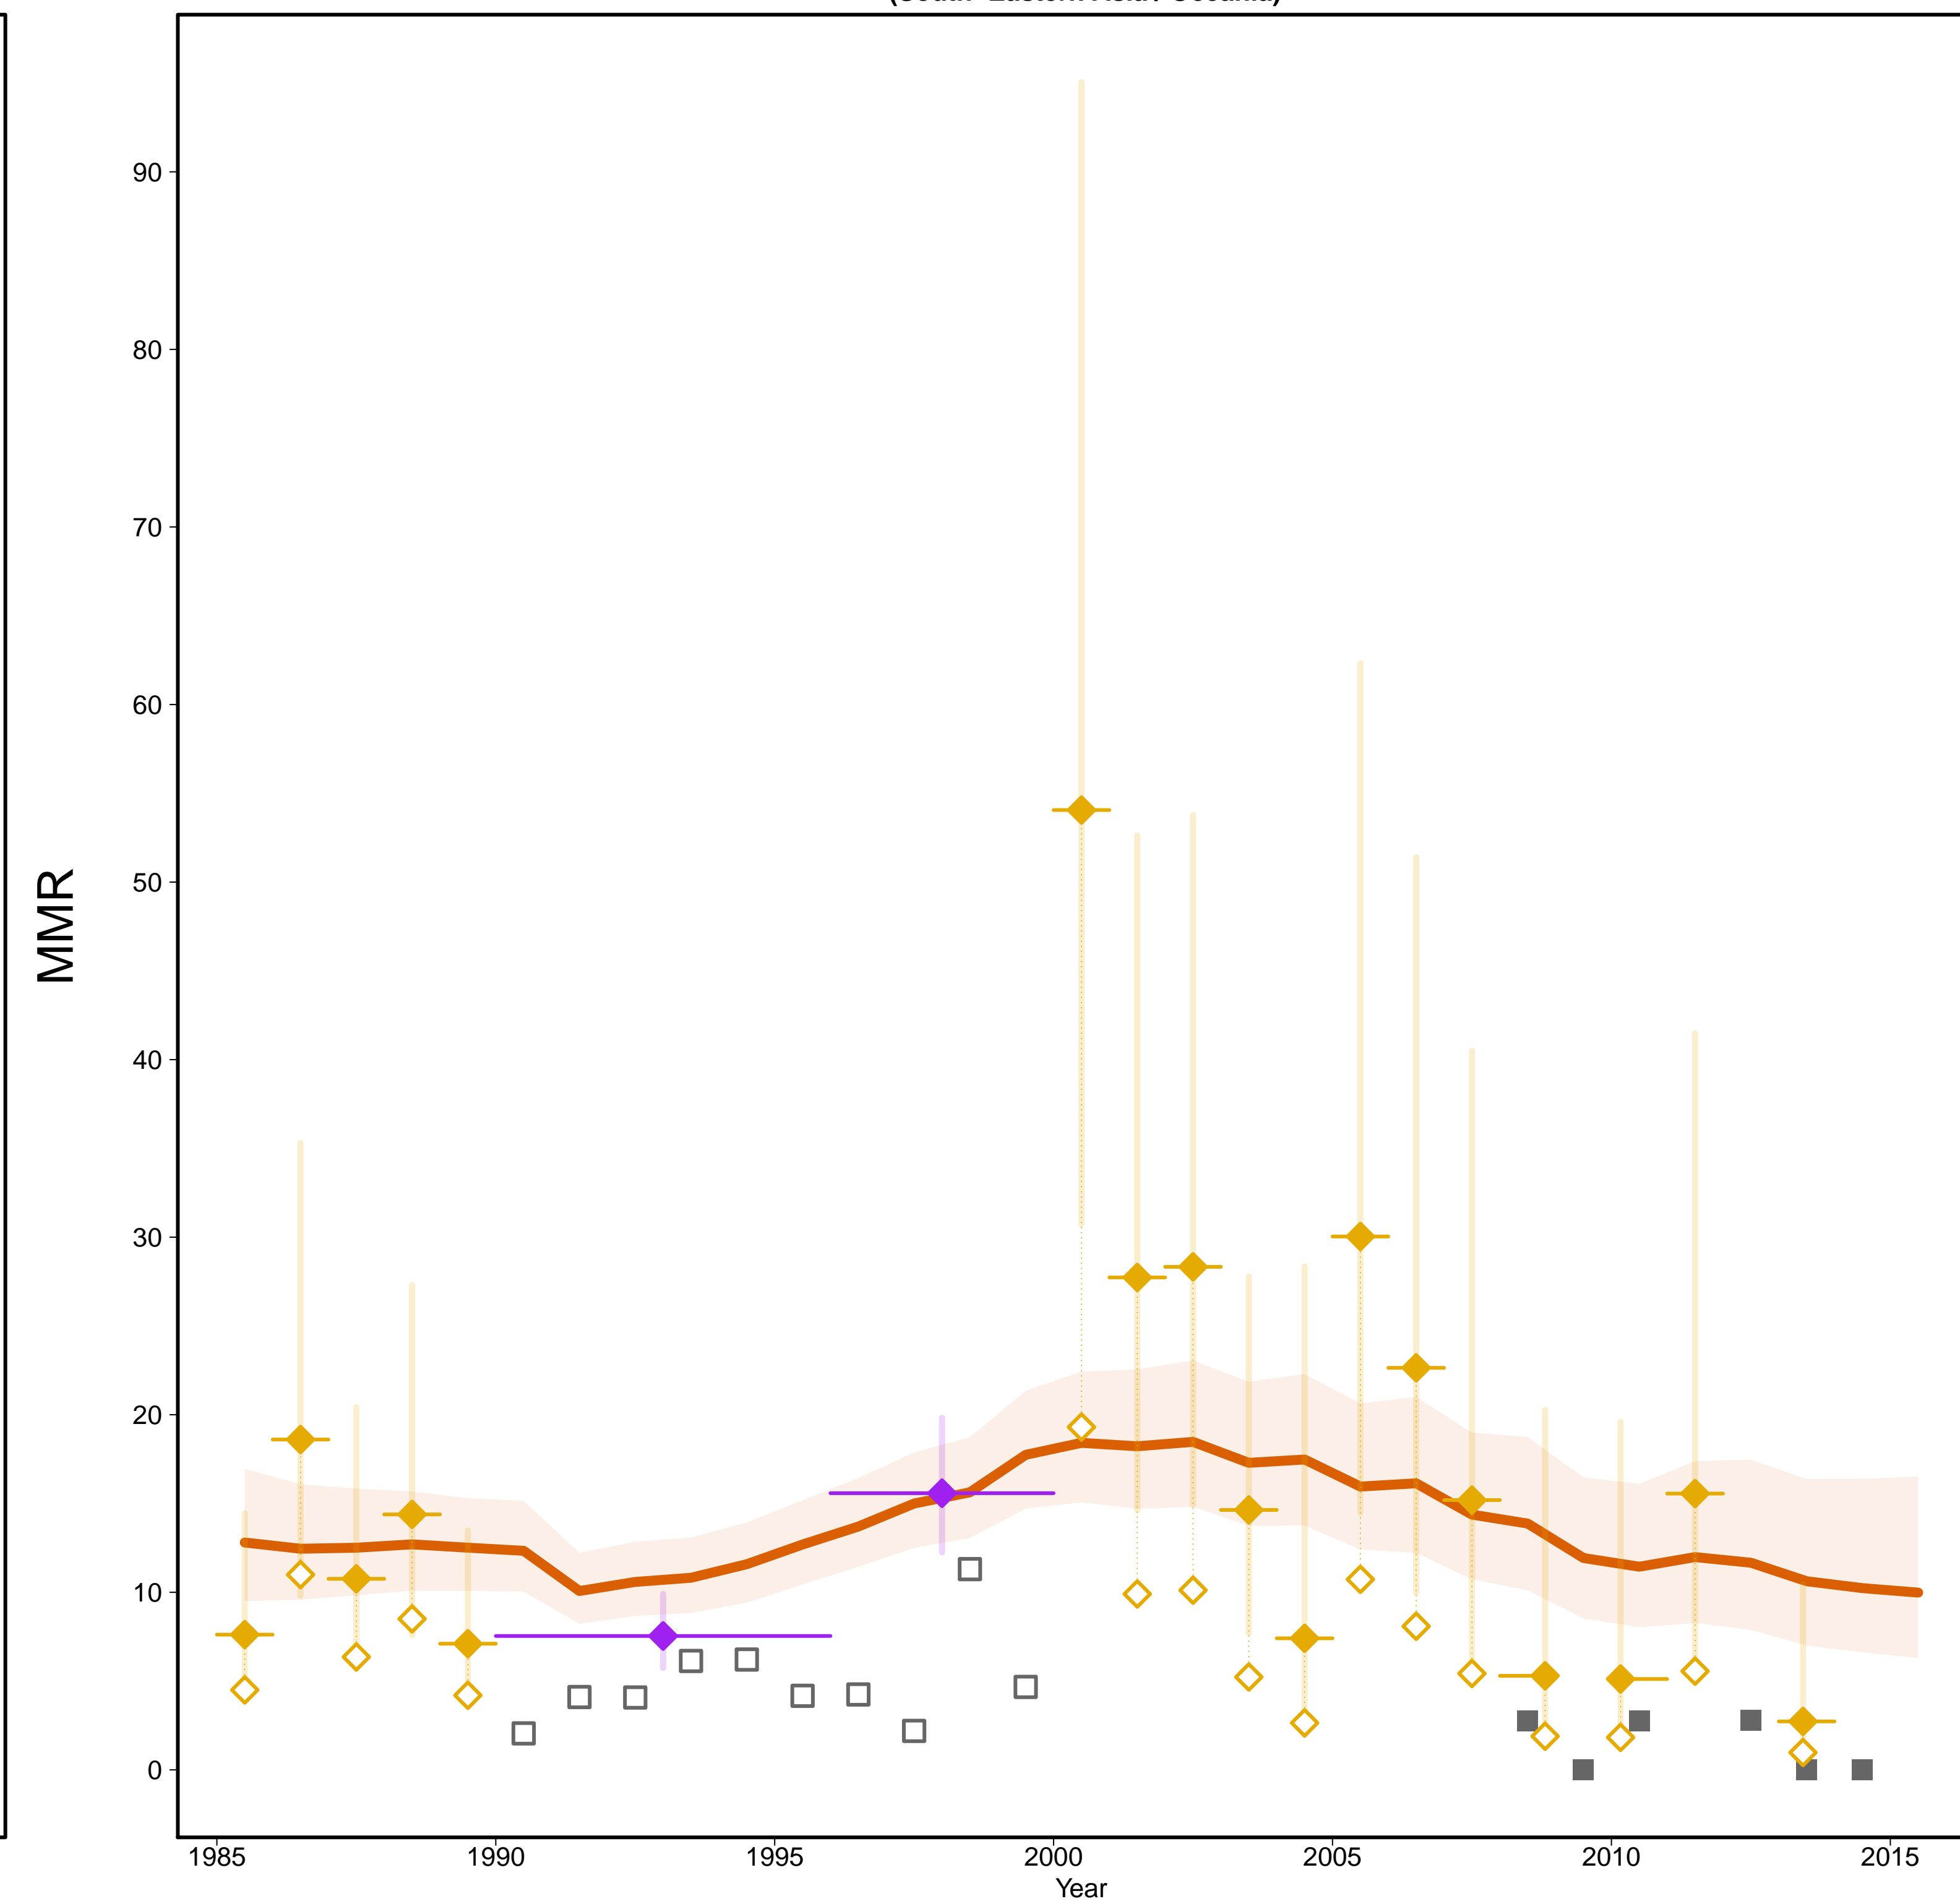

- Estimates —
- MMR Database 2015 —
- ◇ Observed Data
- ◆ Adjusted Data
- Data type —
- ◆ VR
- ◆ Spec. studies
- Reported VR before recalc.  
(related to 0 obs. mat. death)
- Excluded VR data  
(overlap with specialized study)

Gross Domestic Product

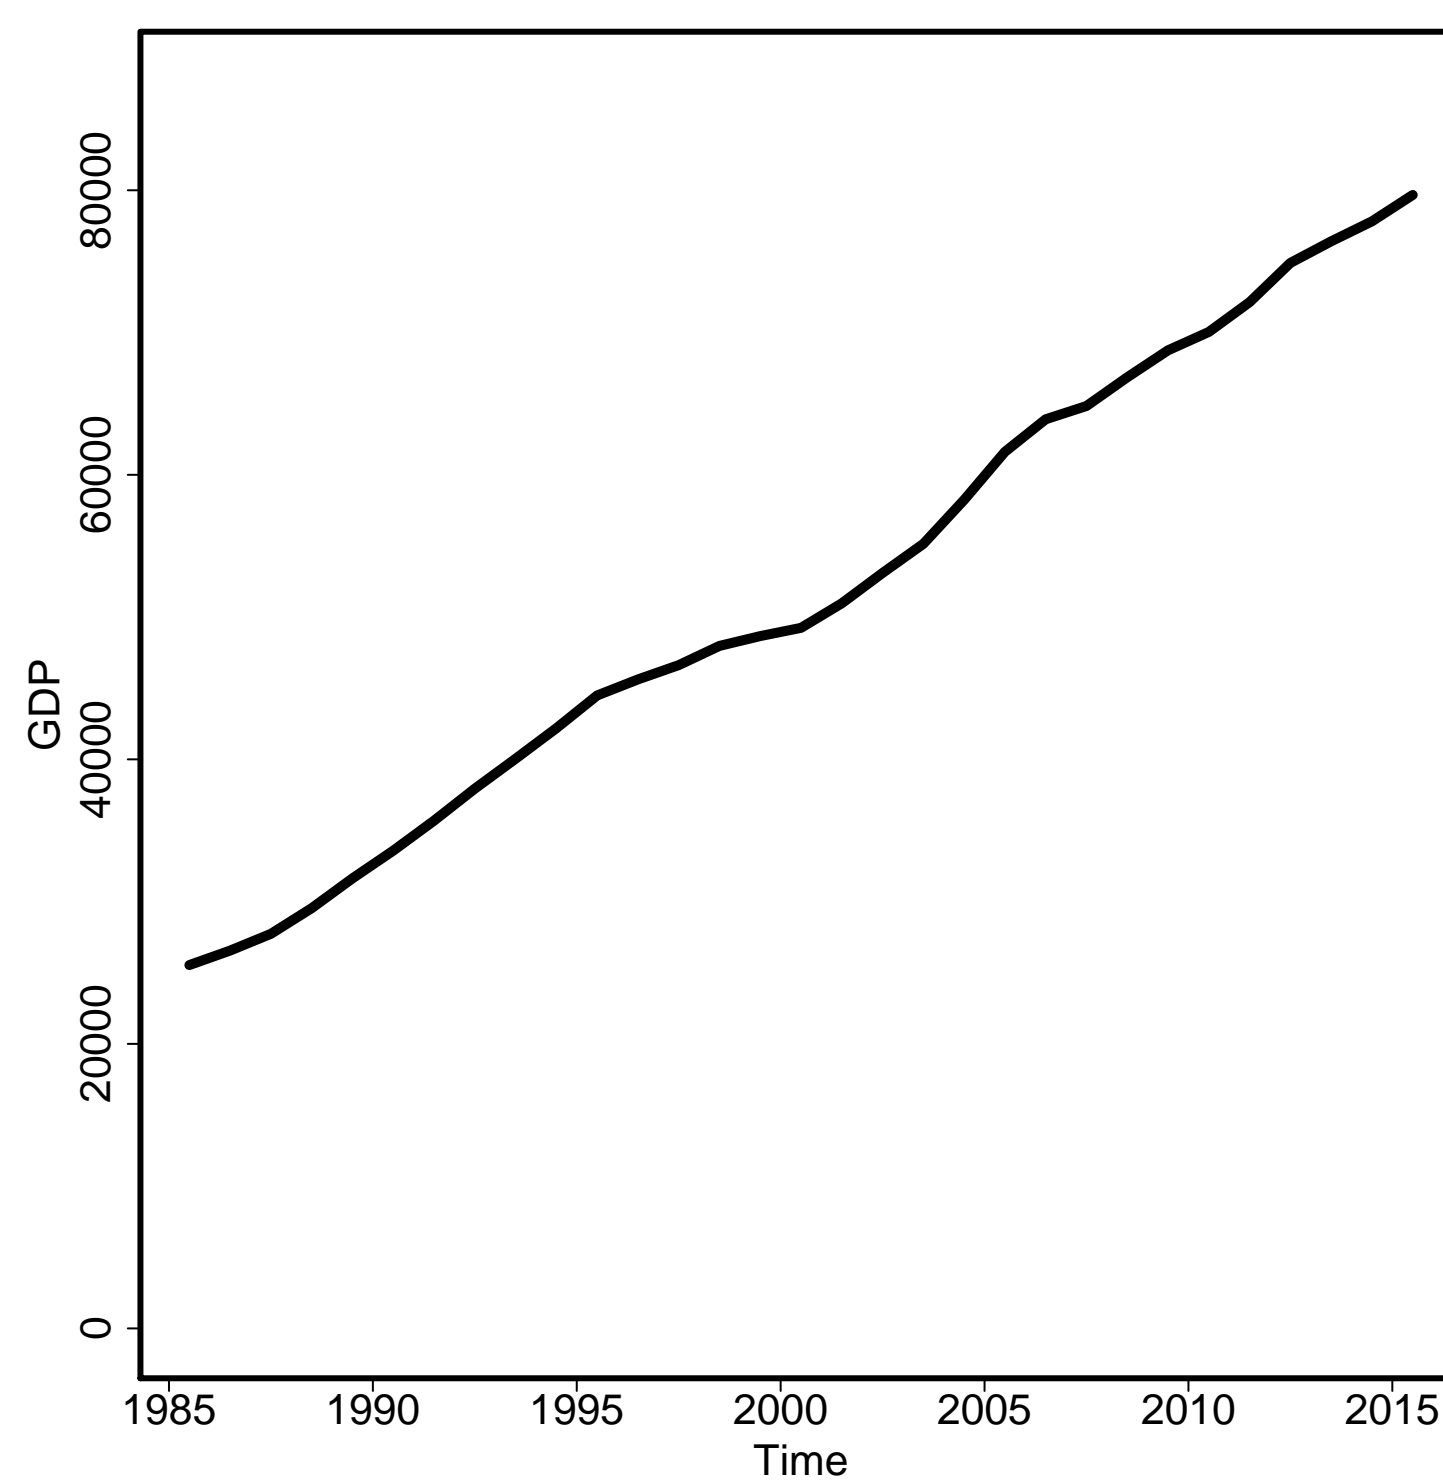

General Fertility Rate

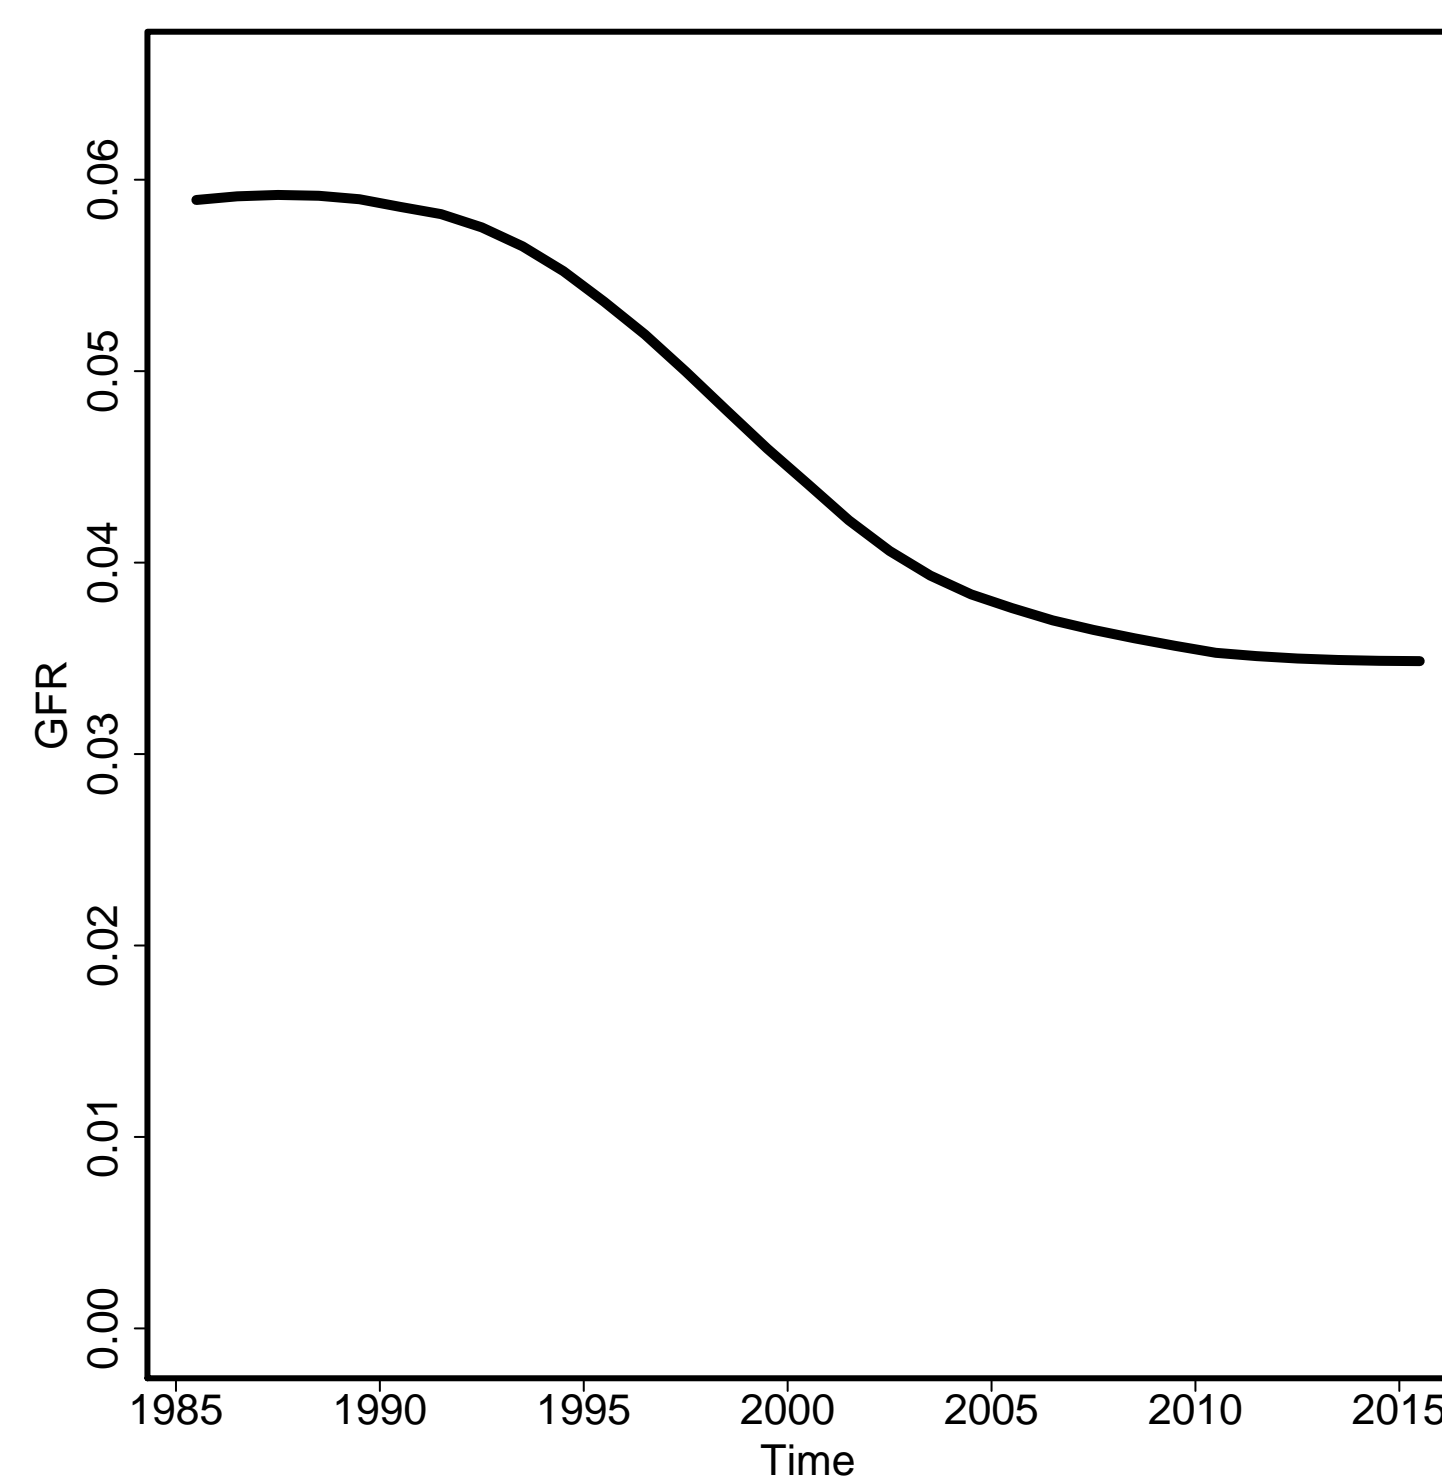

Skilled Attendance to Birth

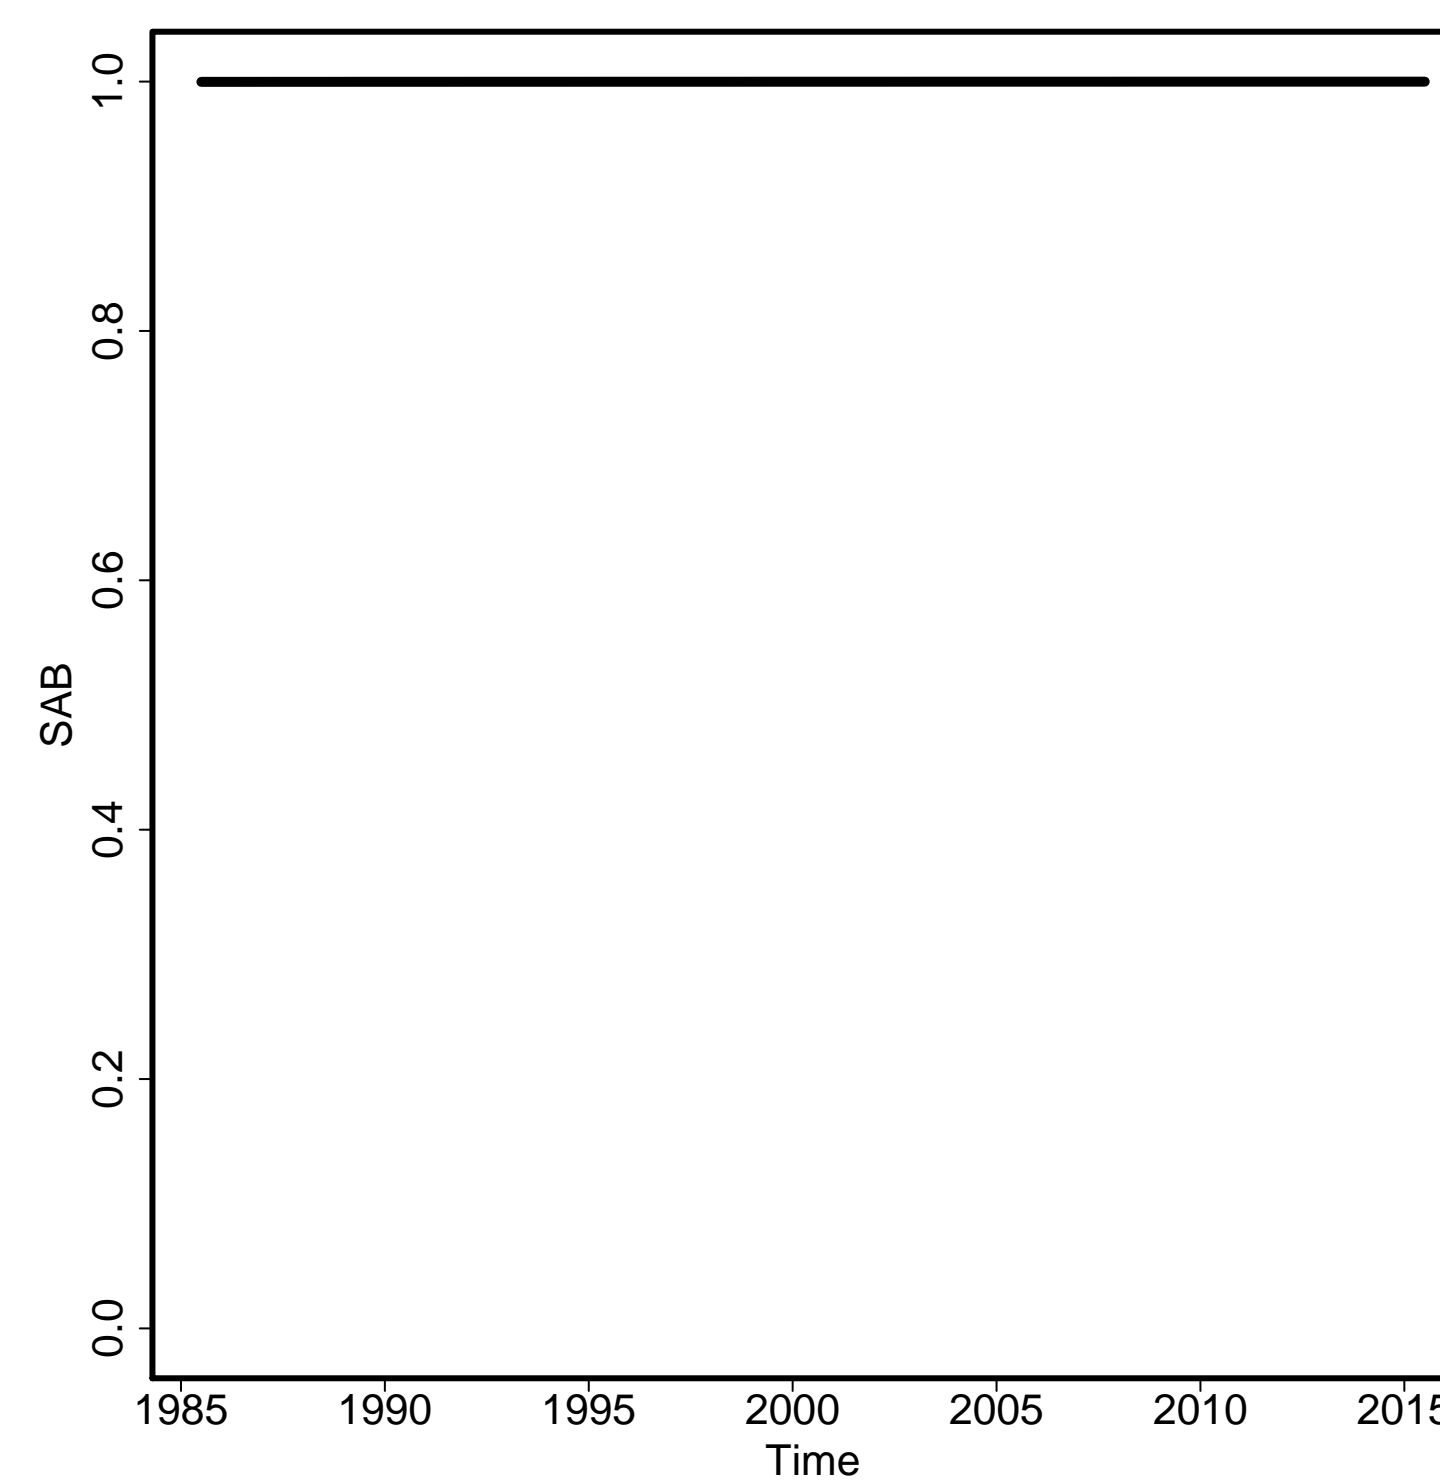

Envelope/Births

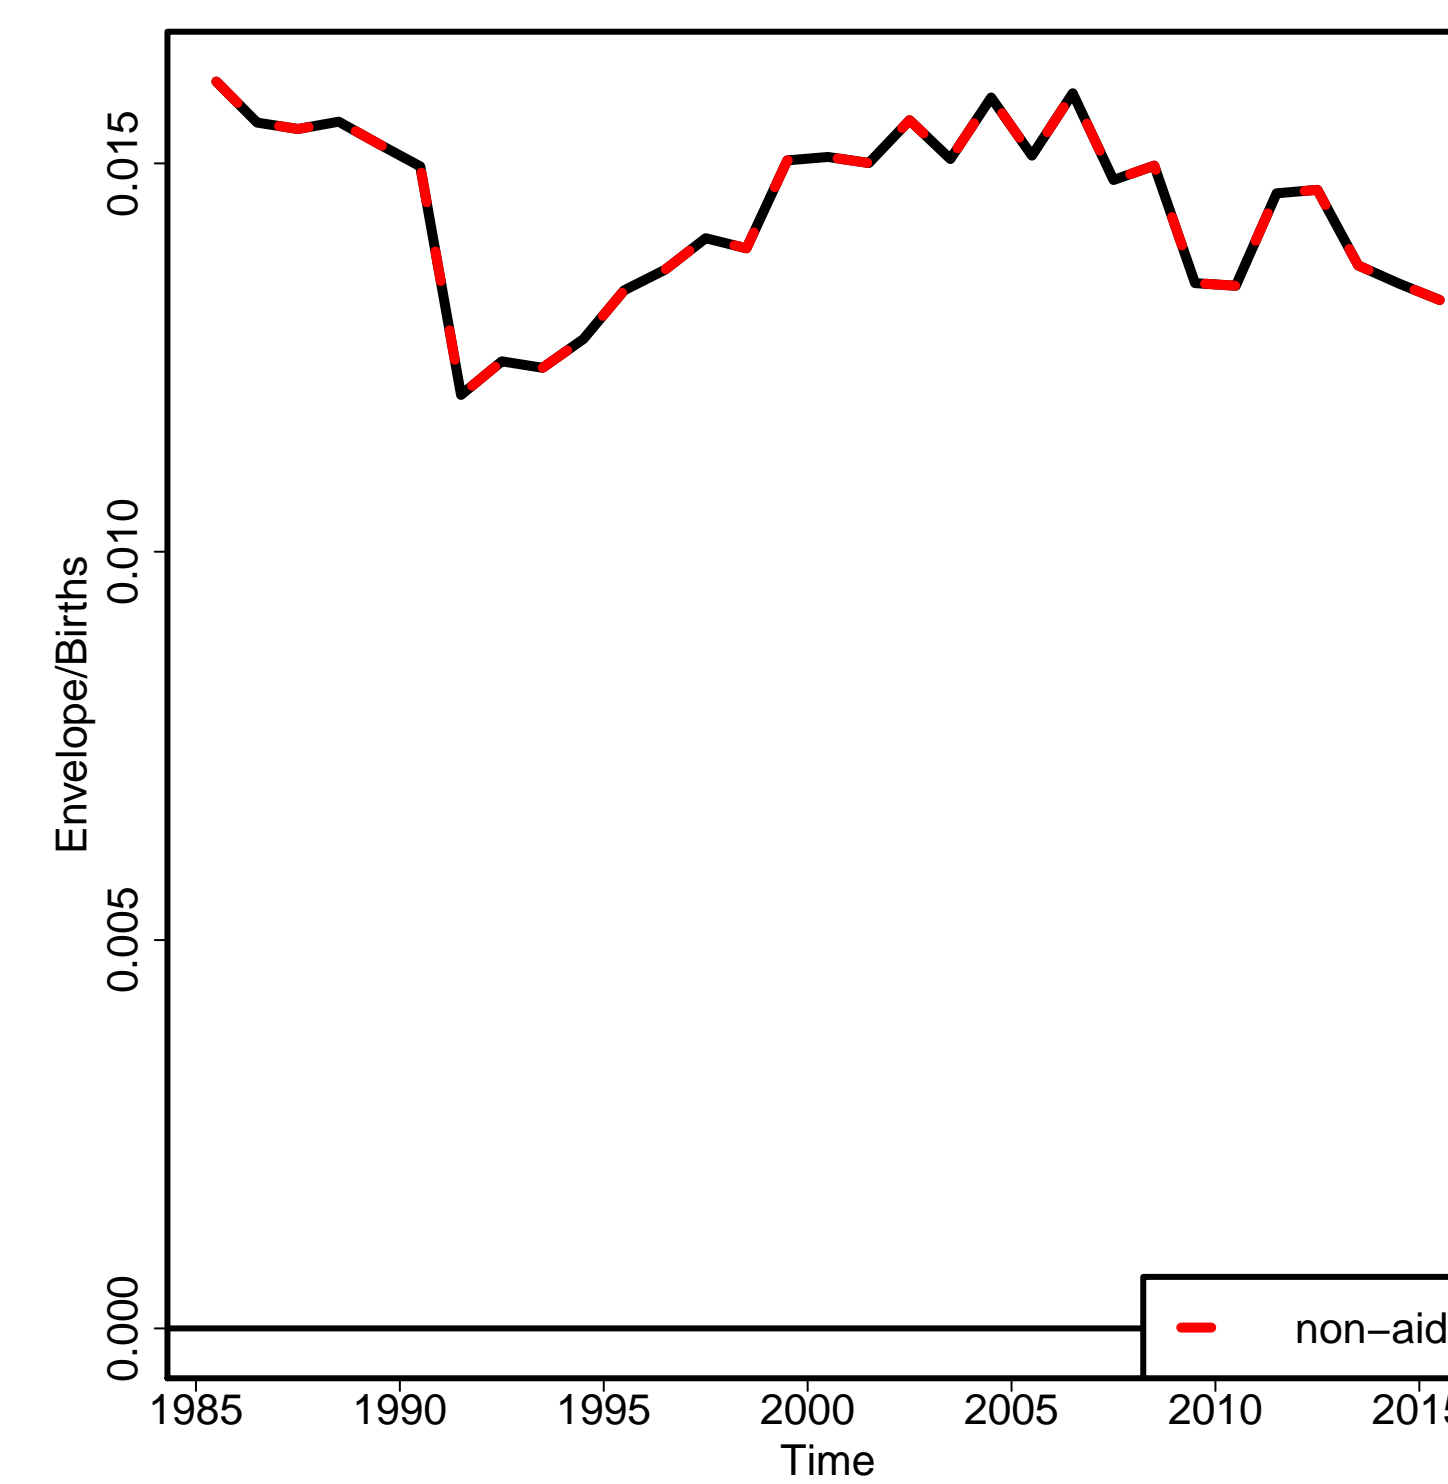

Non-aids MMR

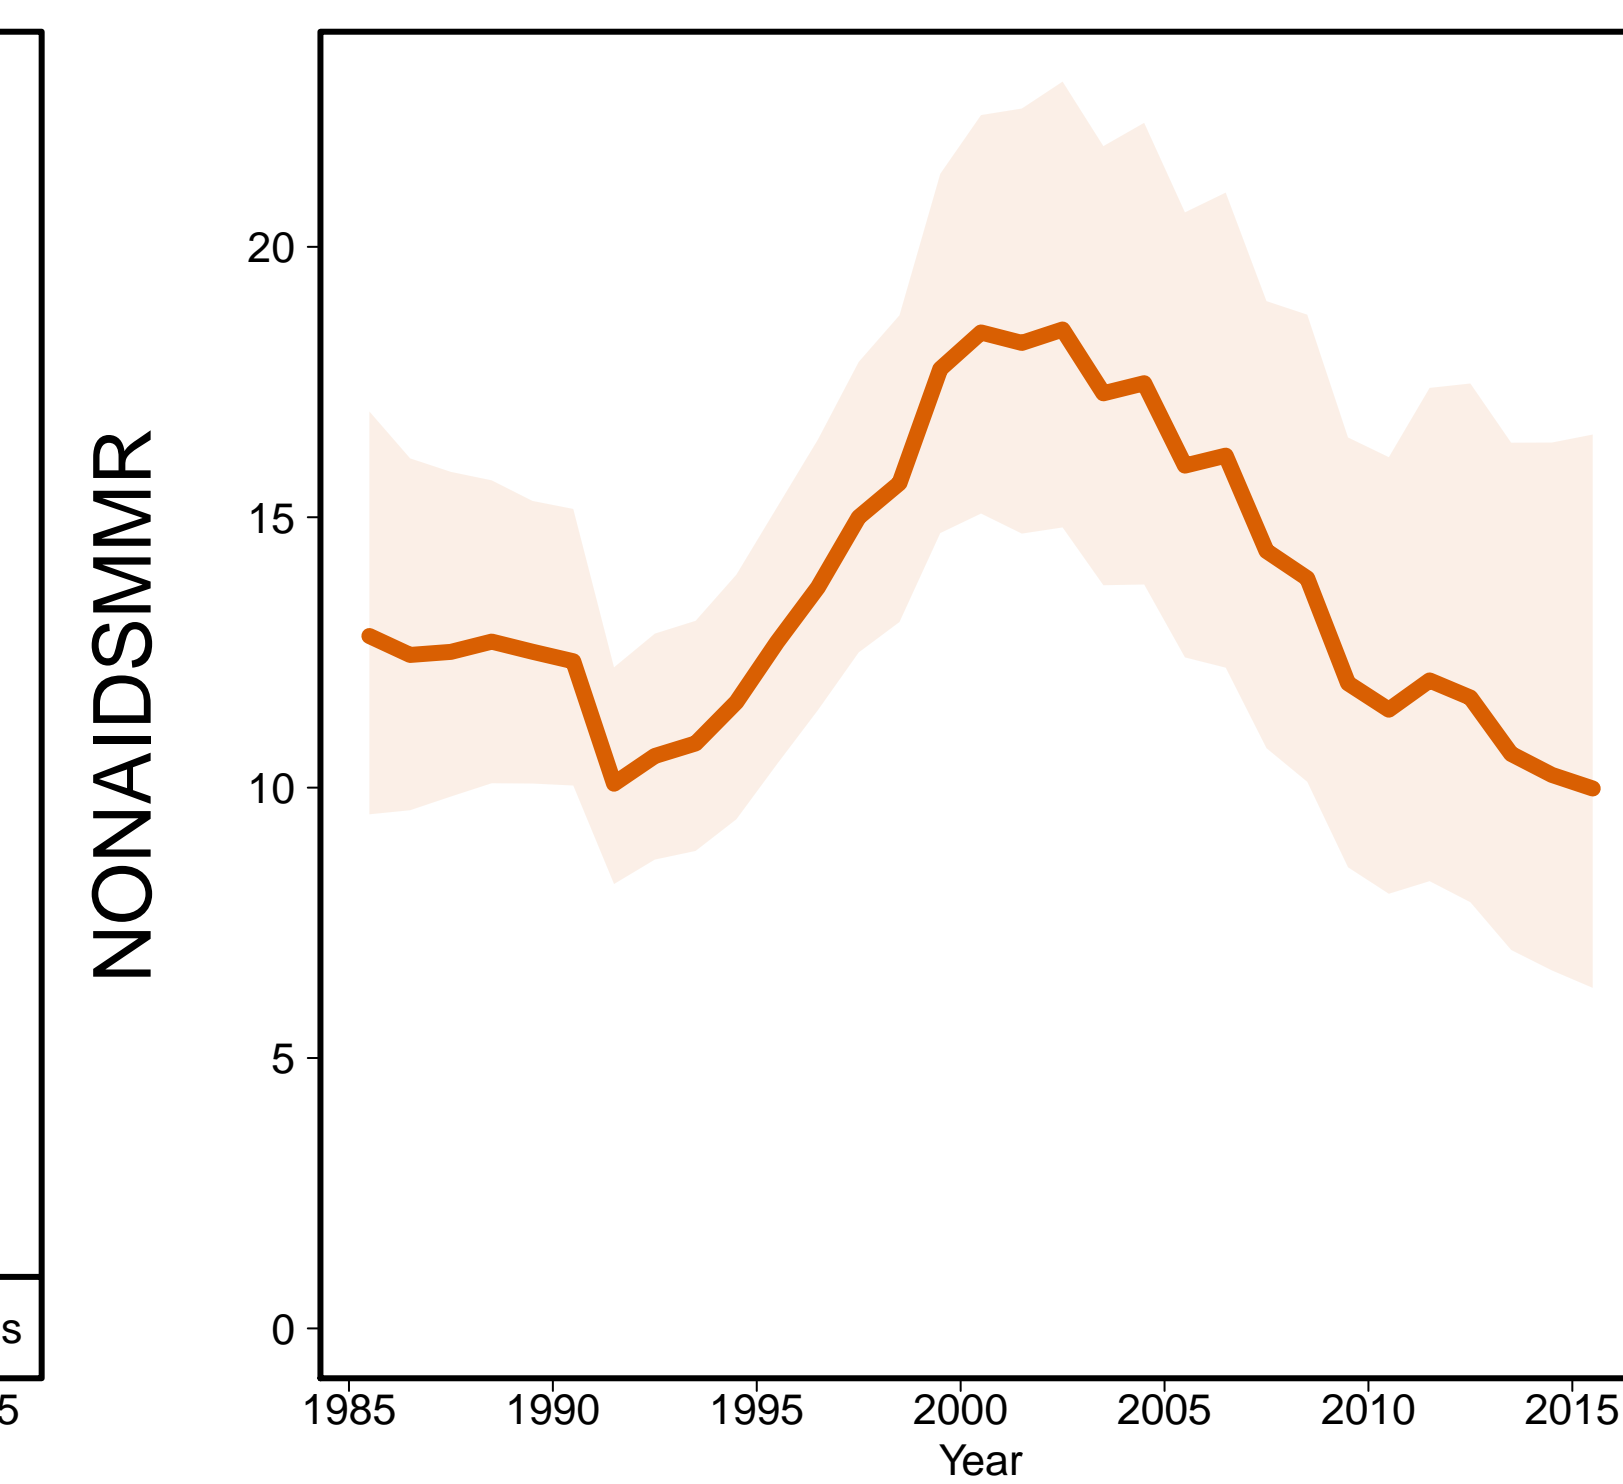

Aids MMR





Slovakia [SVK]  
(Developed regions)

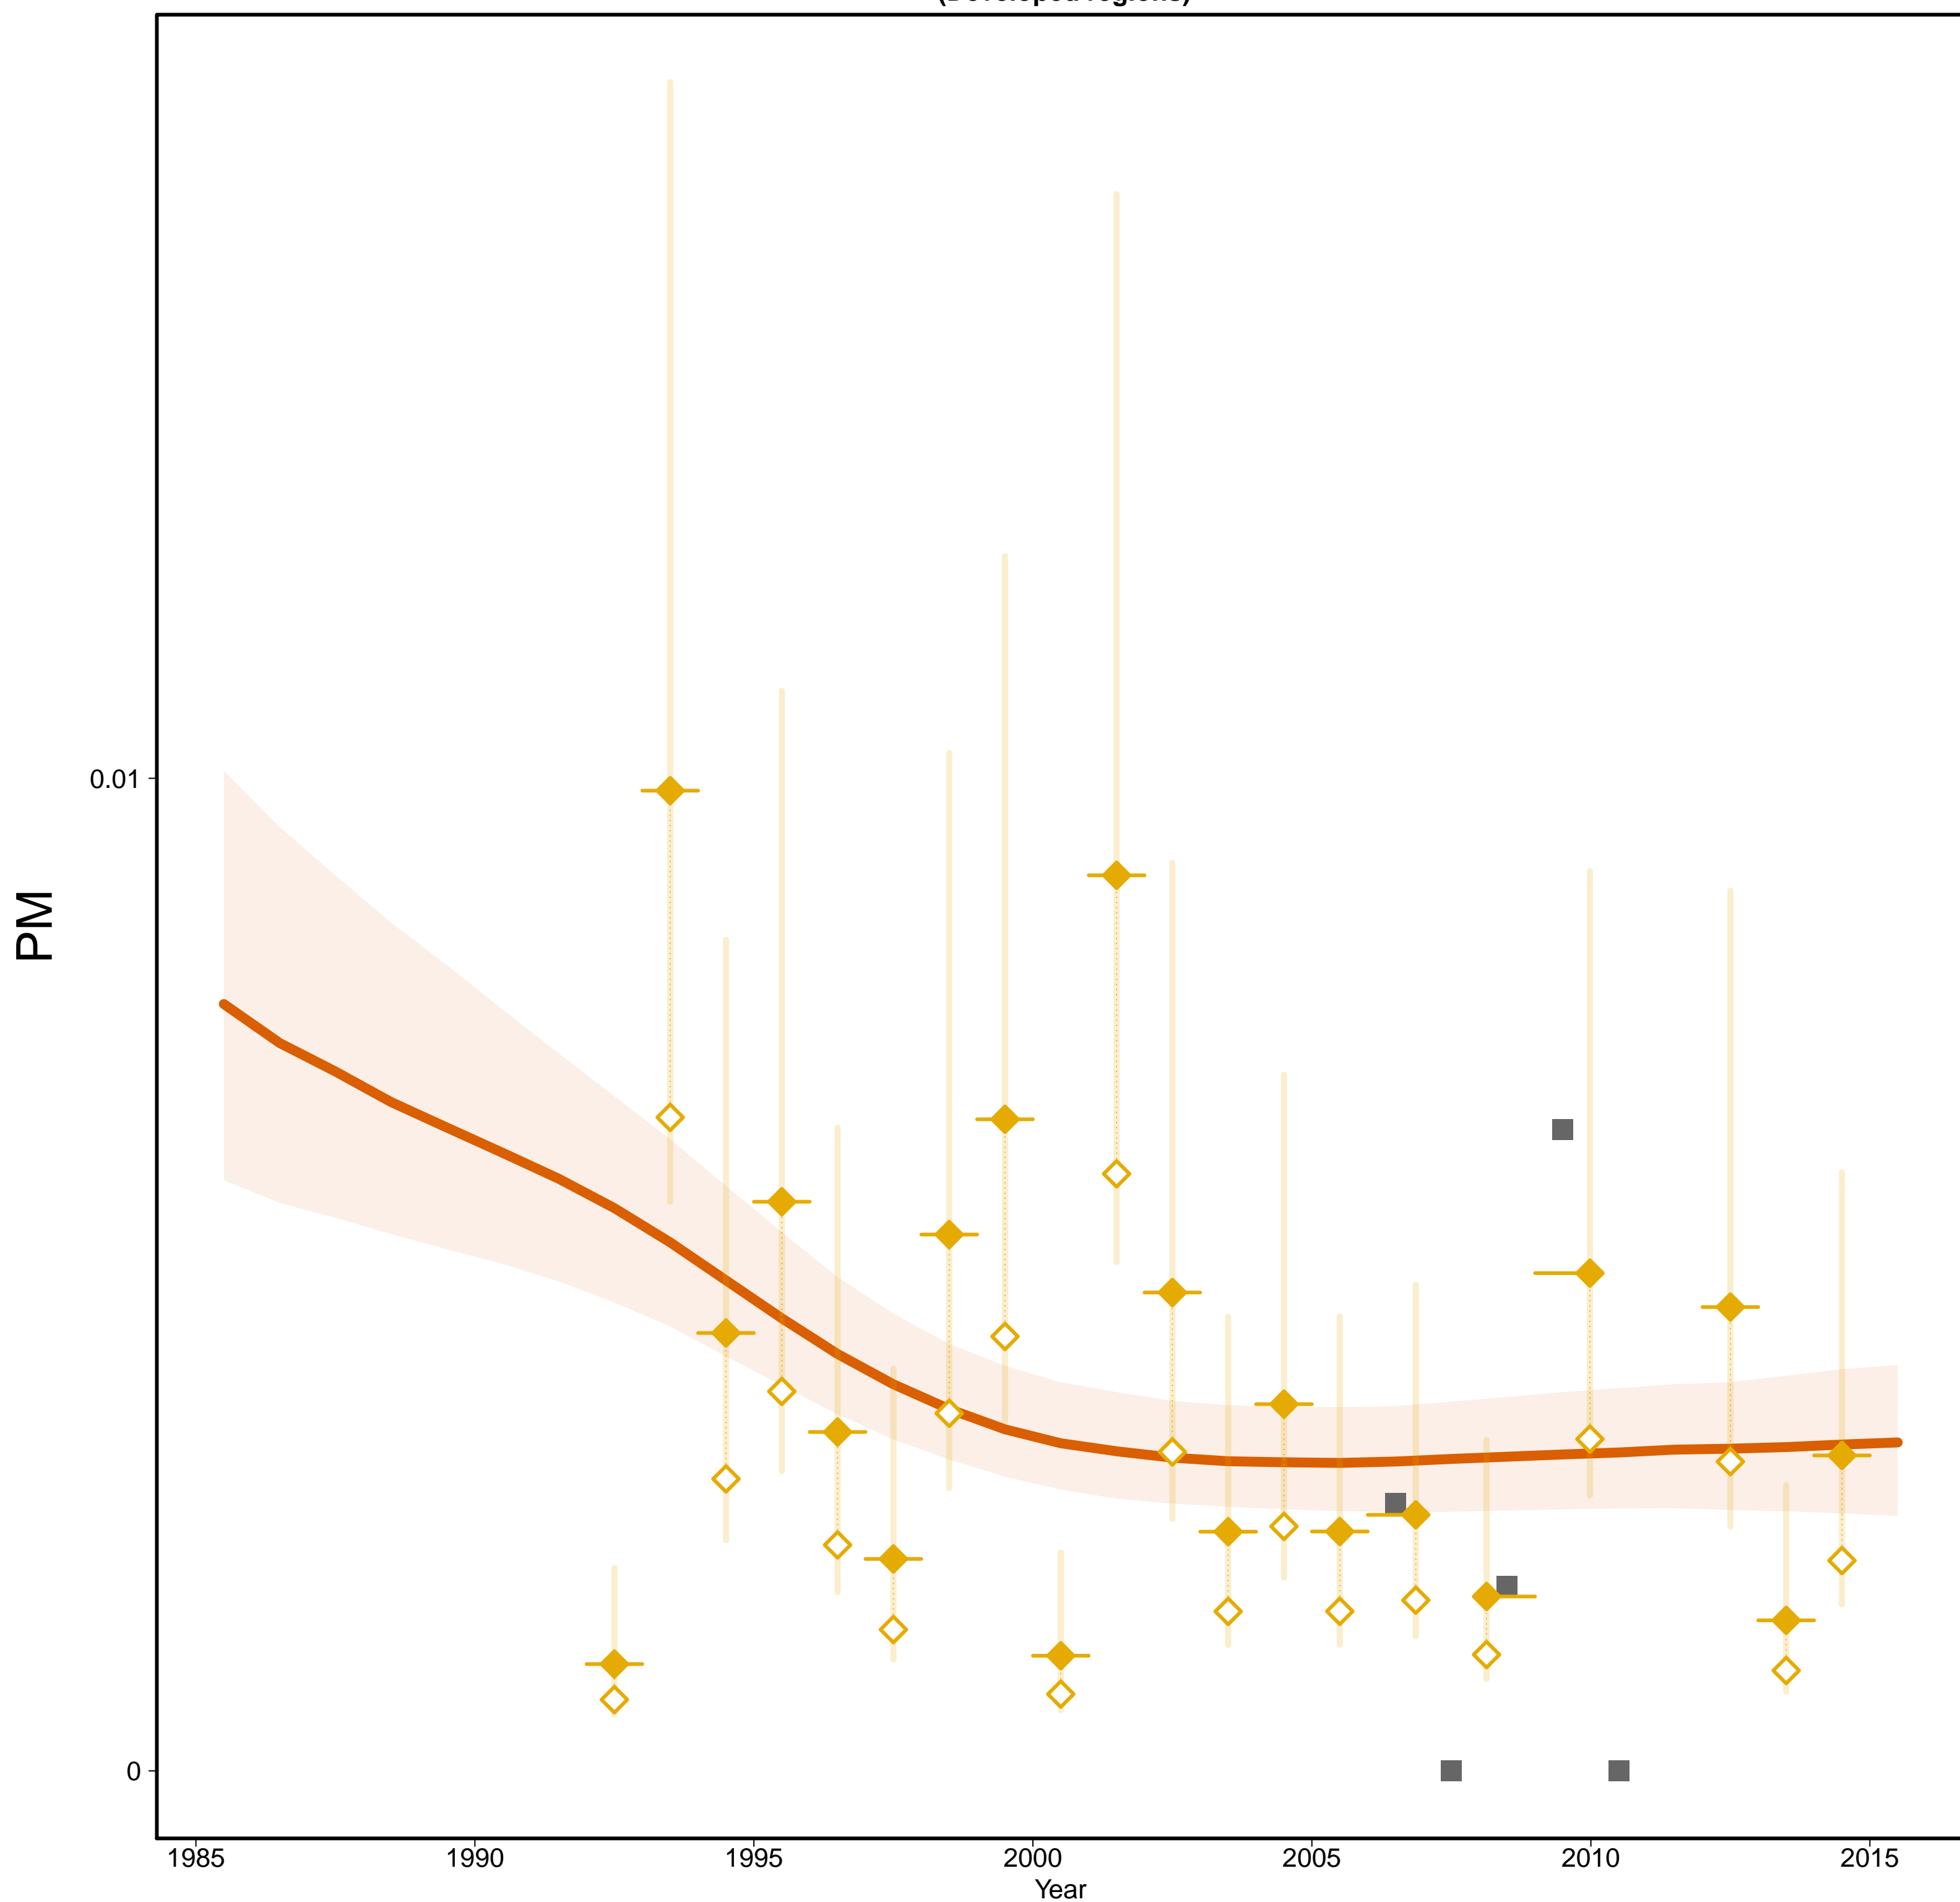

Slovakia [SVK]  
(Developed regions)

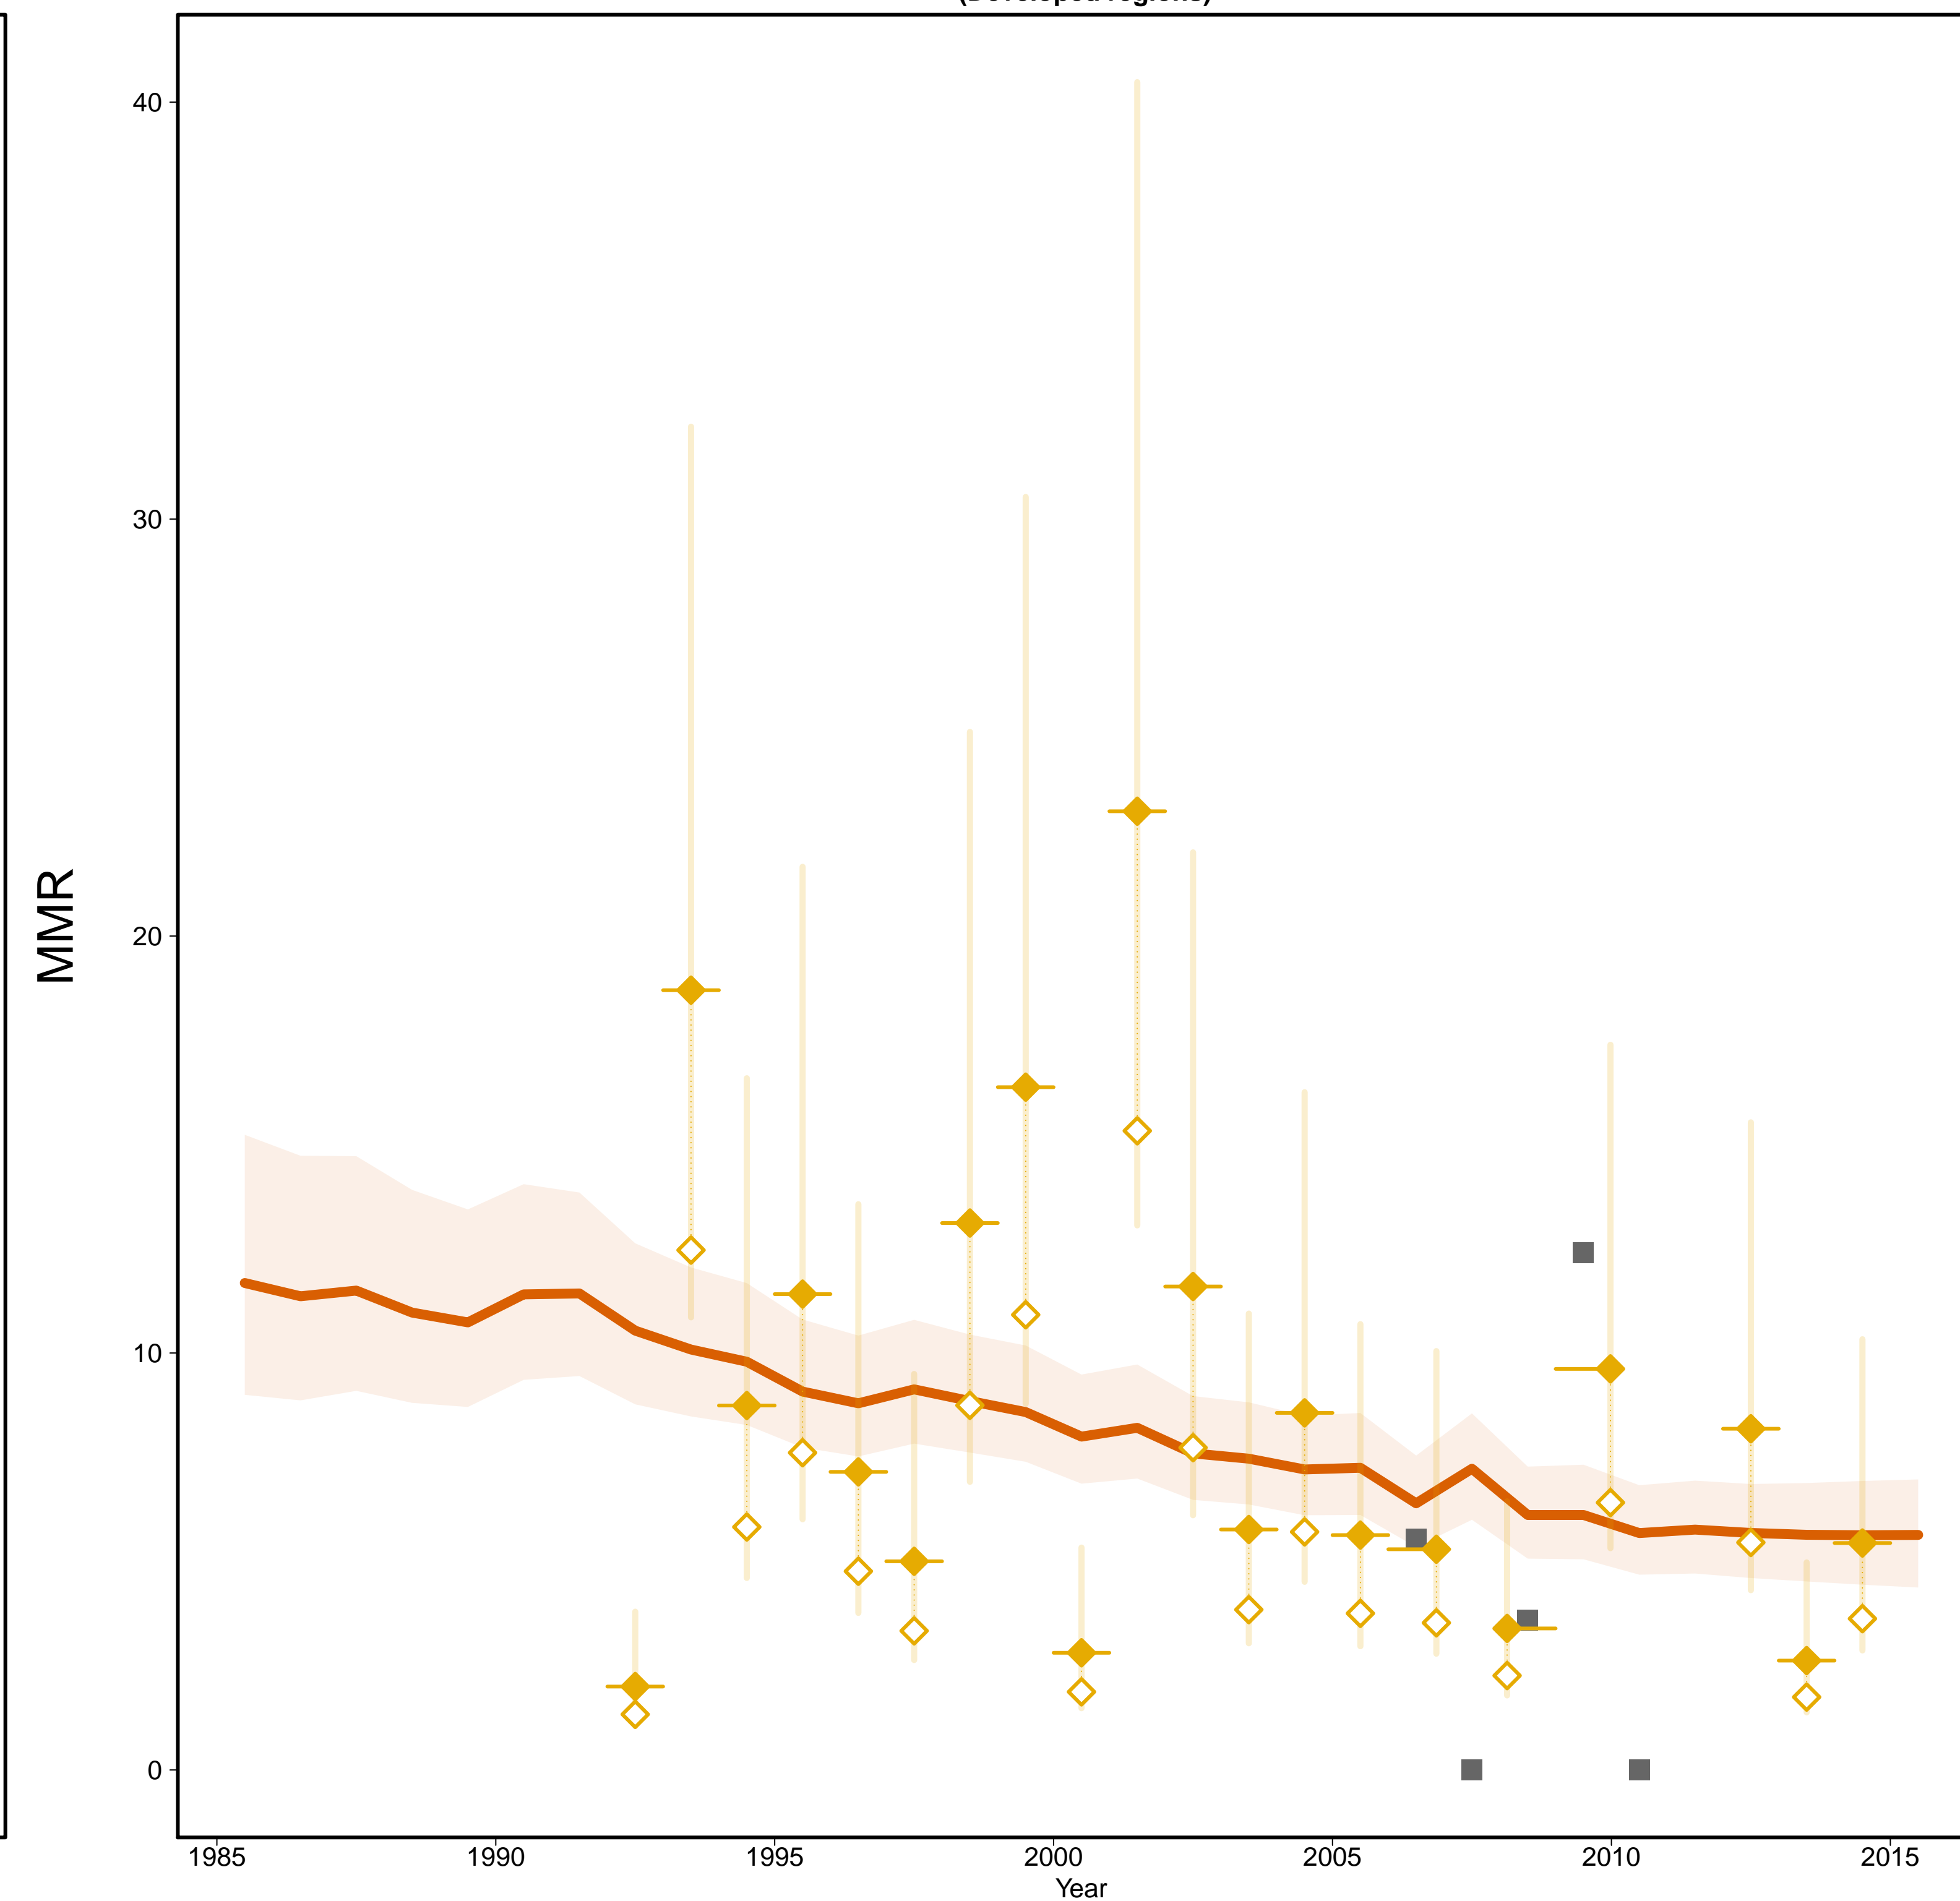

- Estimates —
- MMR Database 2015 —
- ◇ Observed Data
- ◆ Adjusted Data
- Data type —
- ◆ VR
- Reported VR before recalc.  
(related to 0 obs. mat. death)

Gross Domestic Product

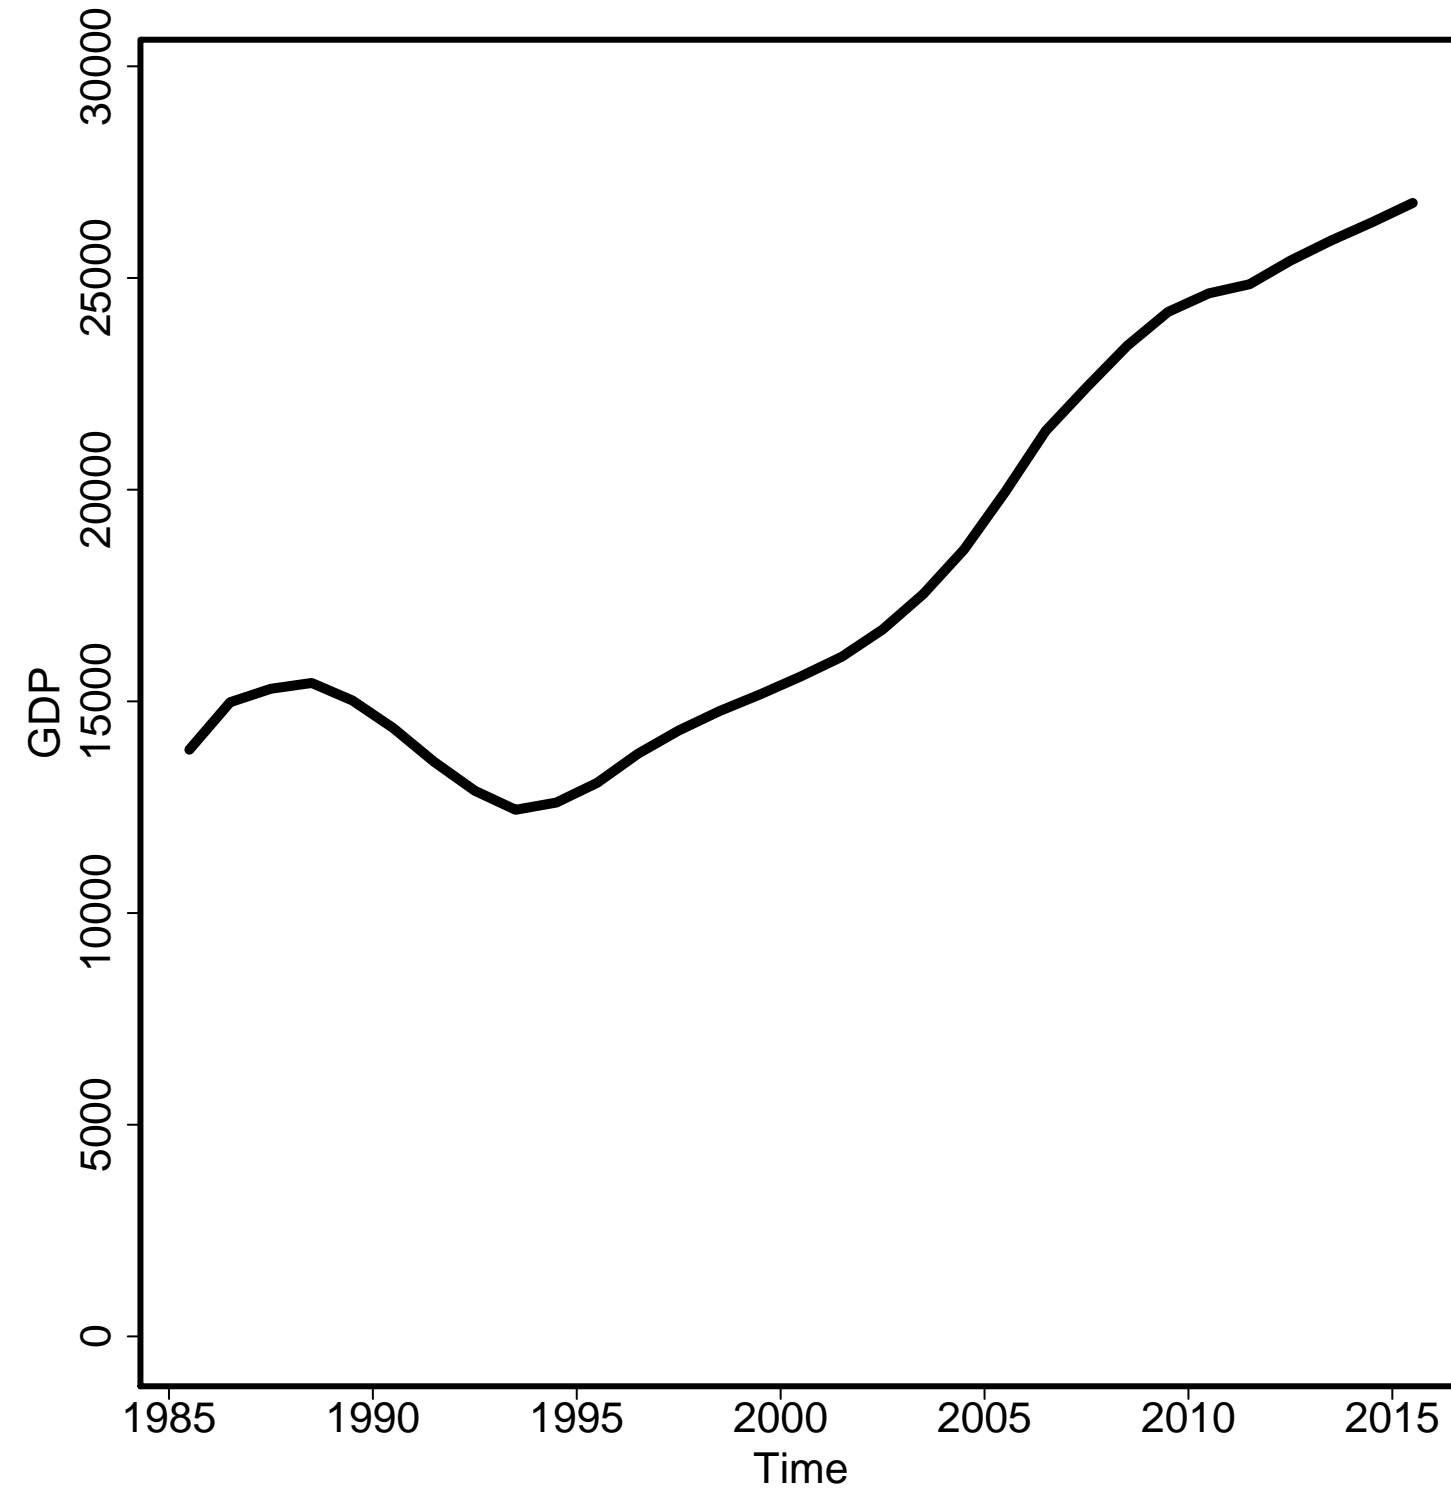

General Fertility Rate

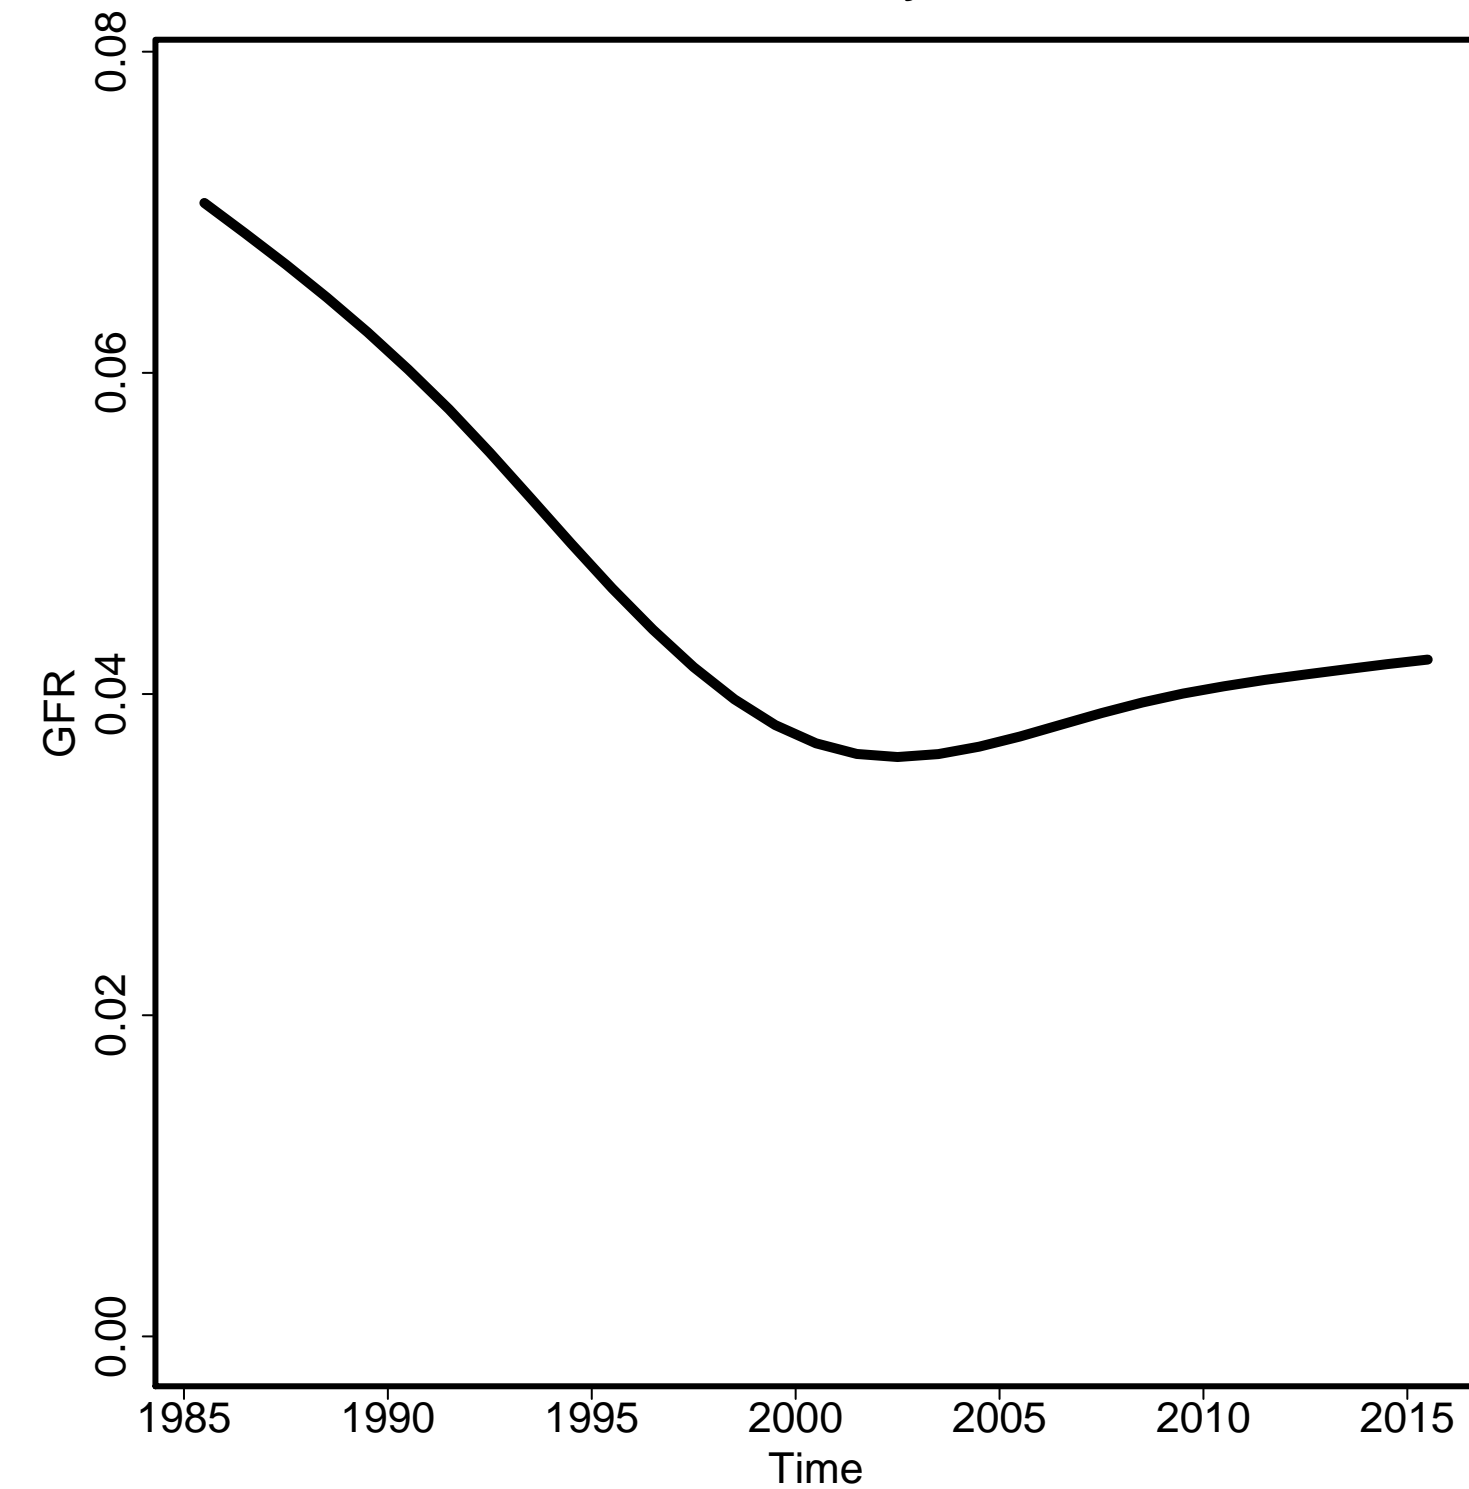

Skilled Attendance to Birth

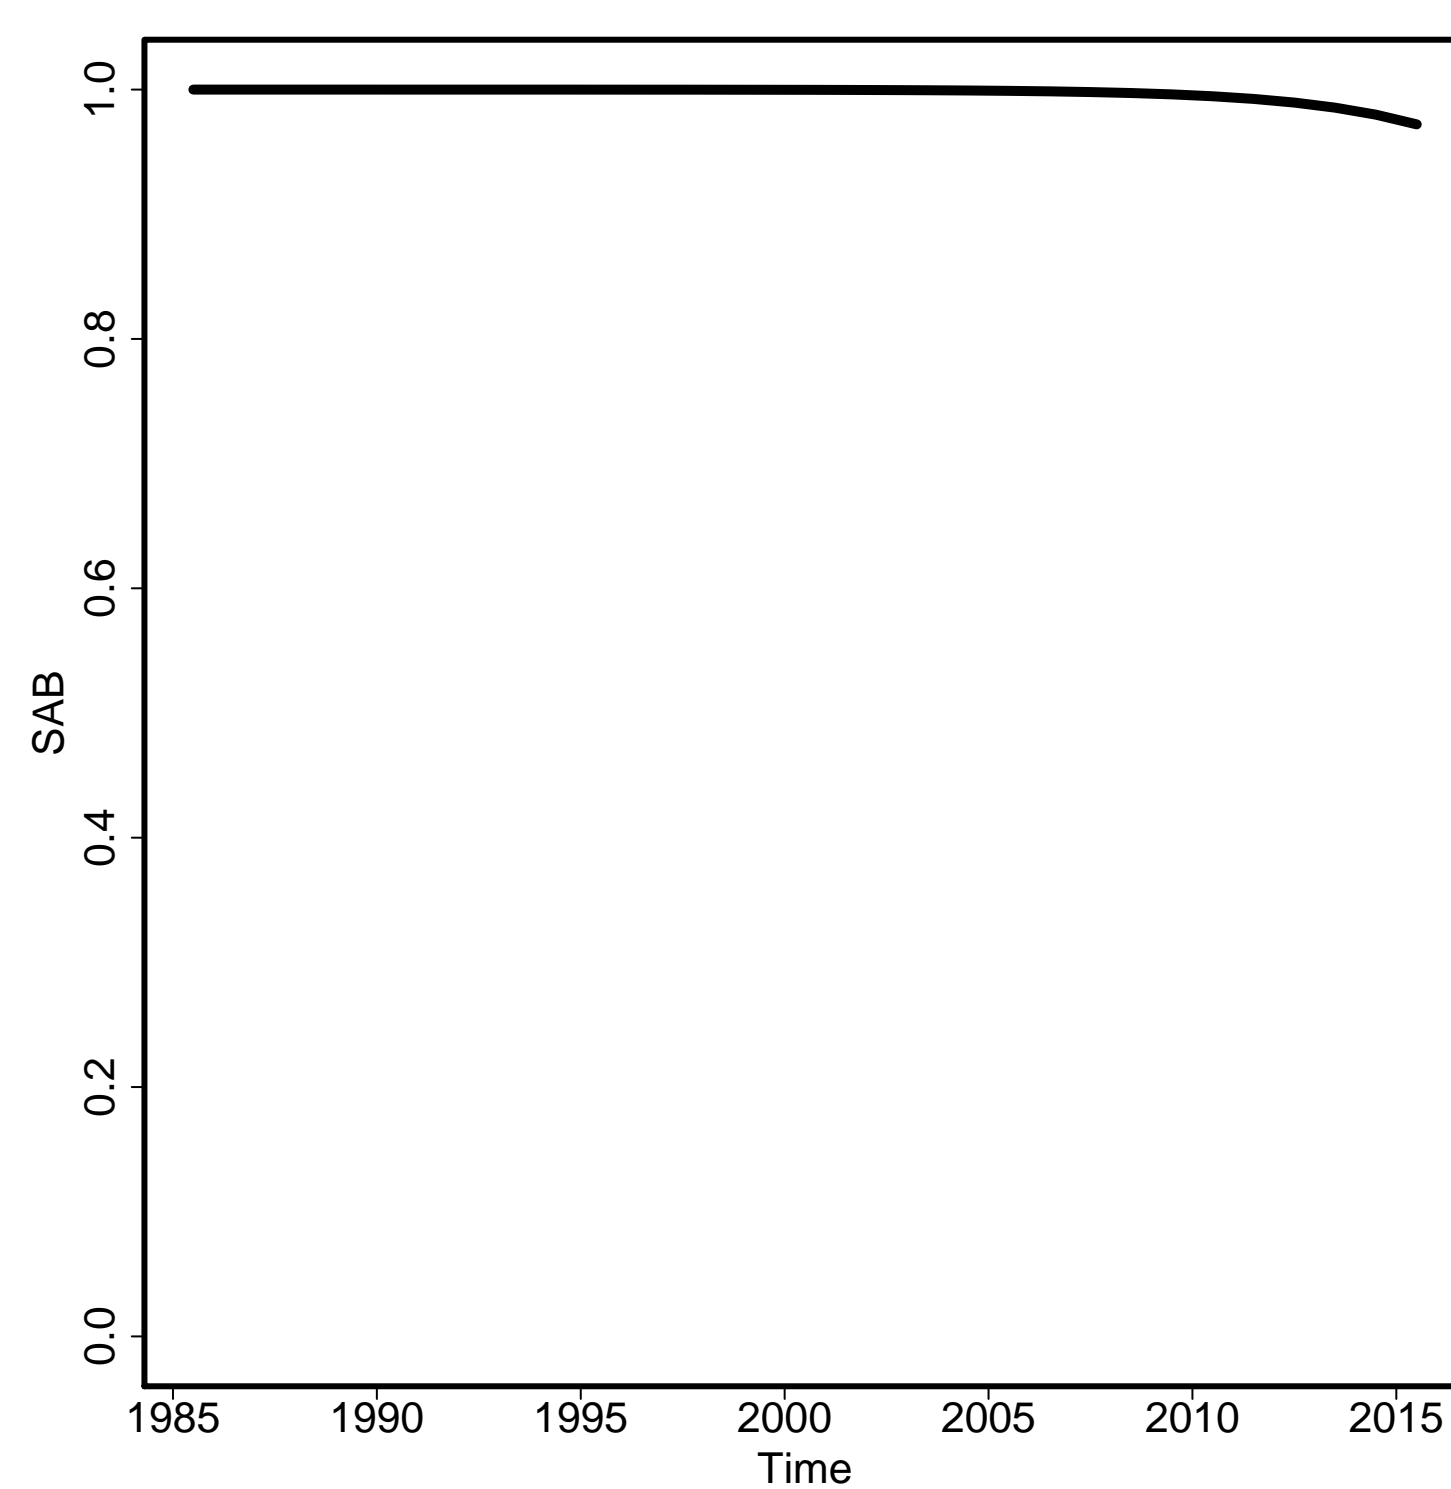

Envelope/Births

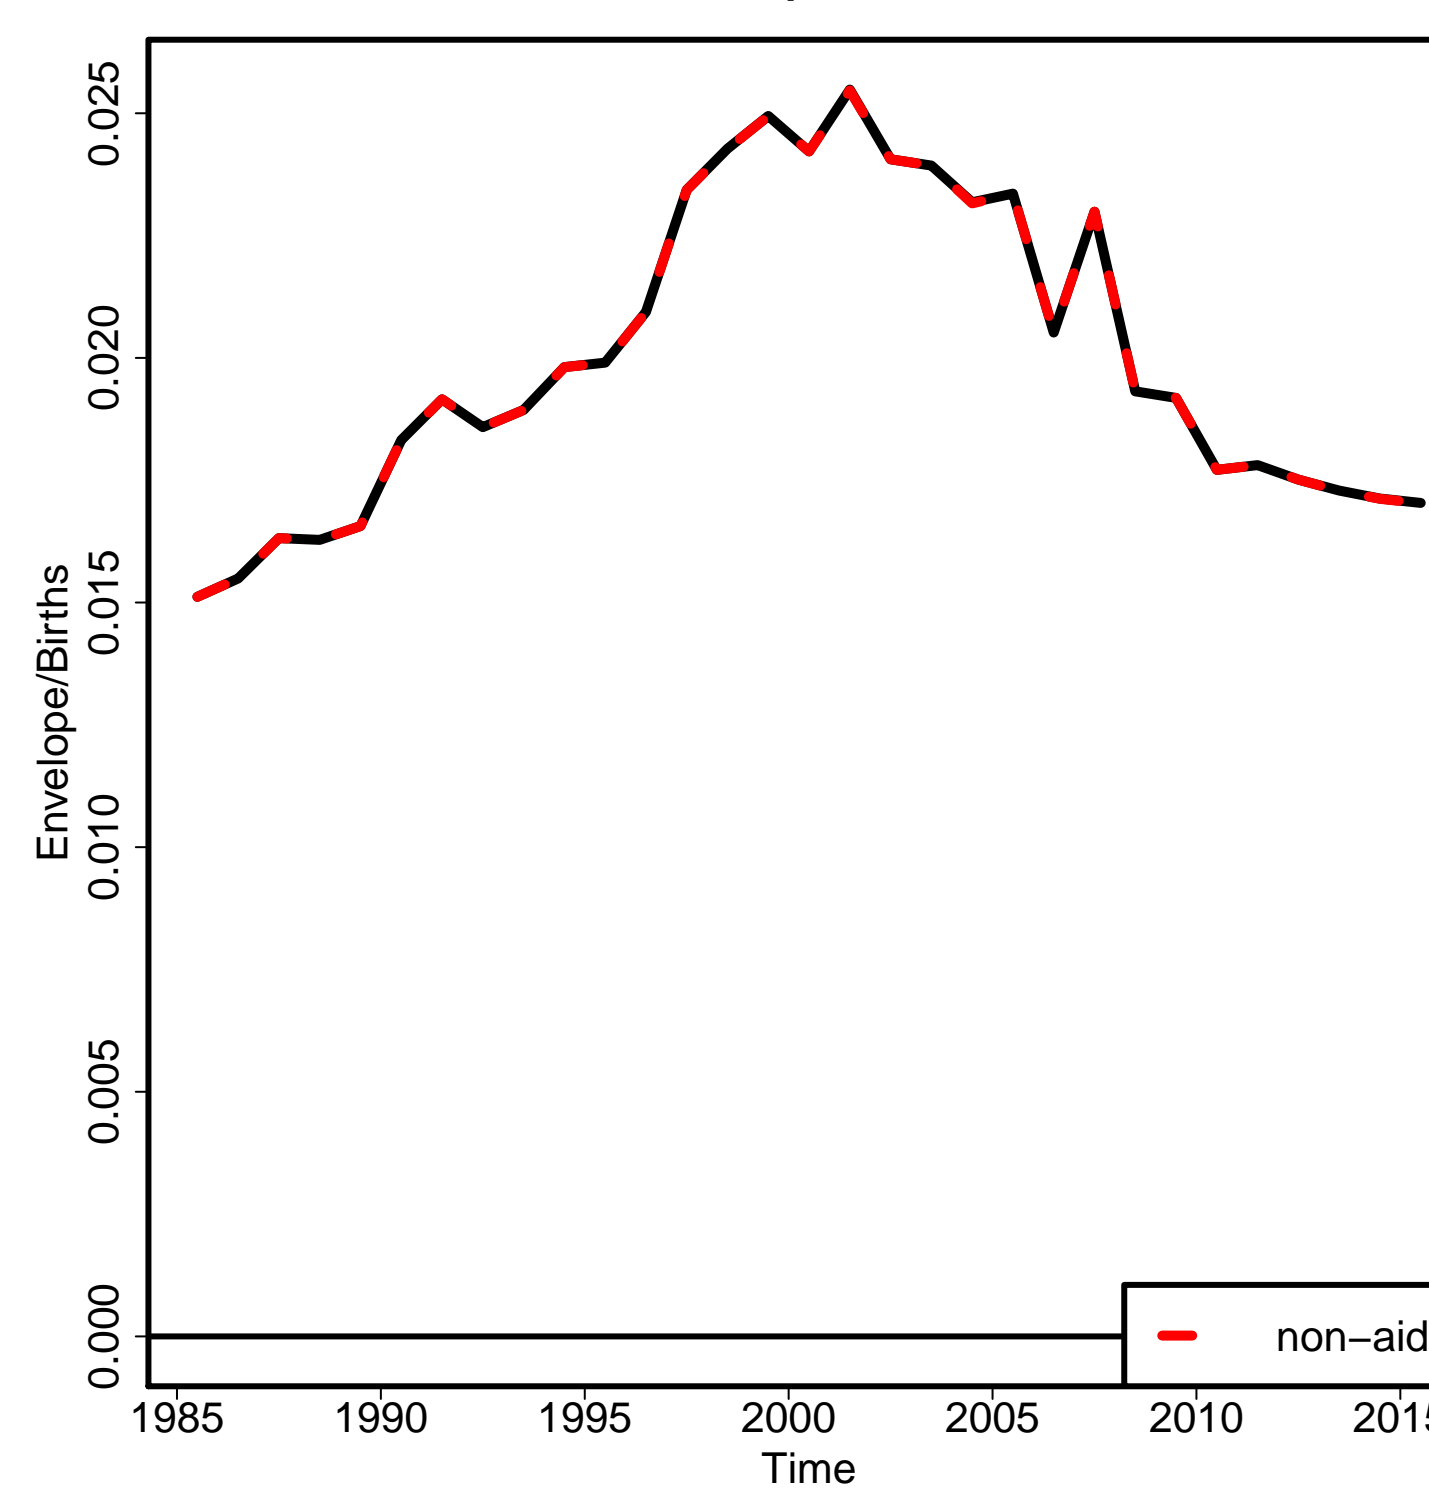

Non-aids MMR

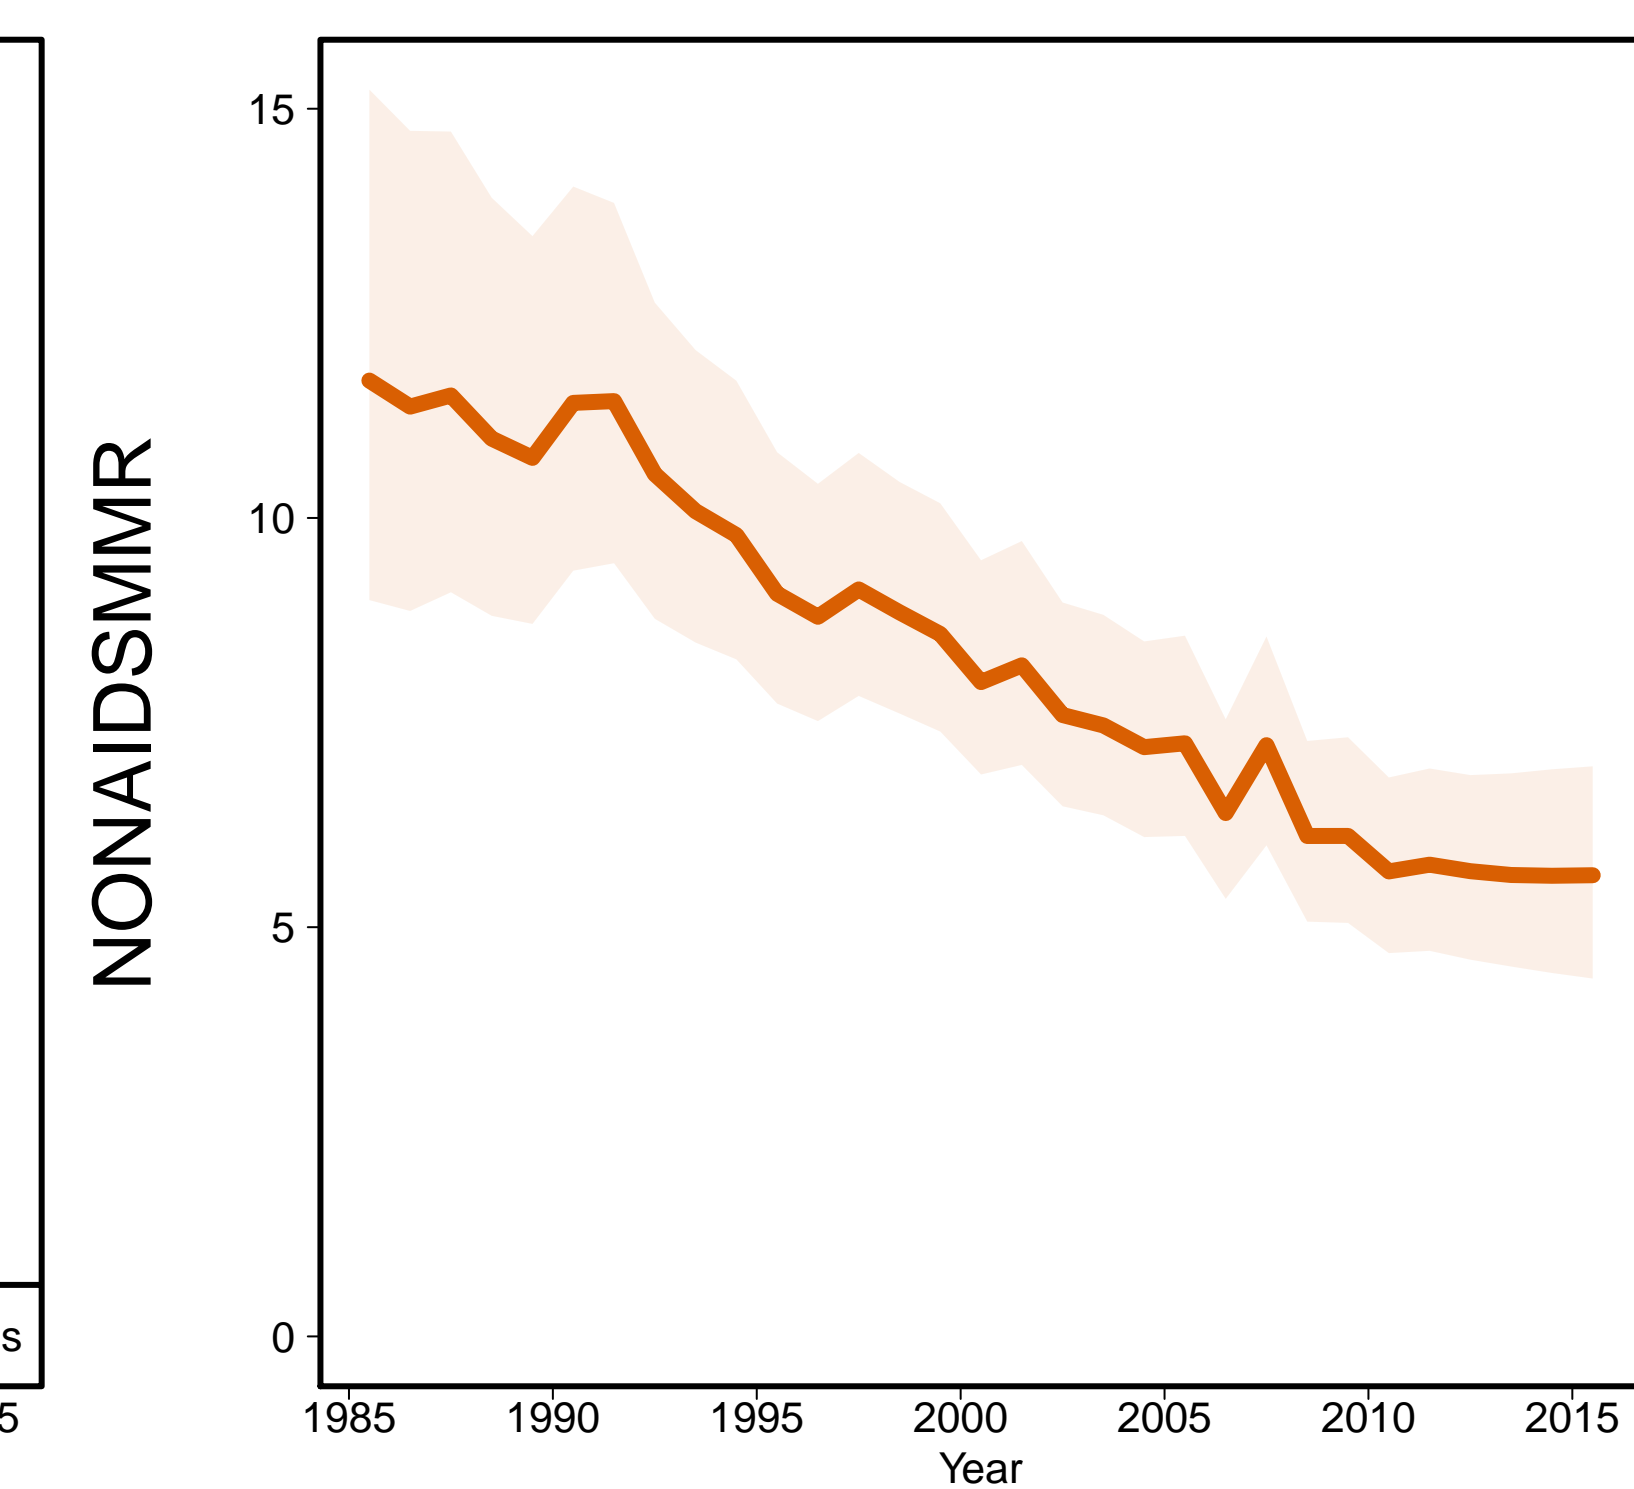

Aids MMR

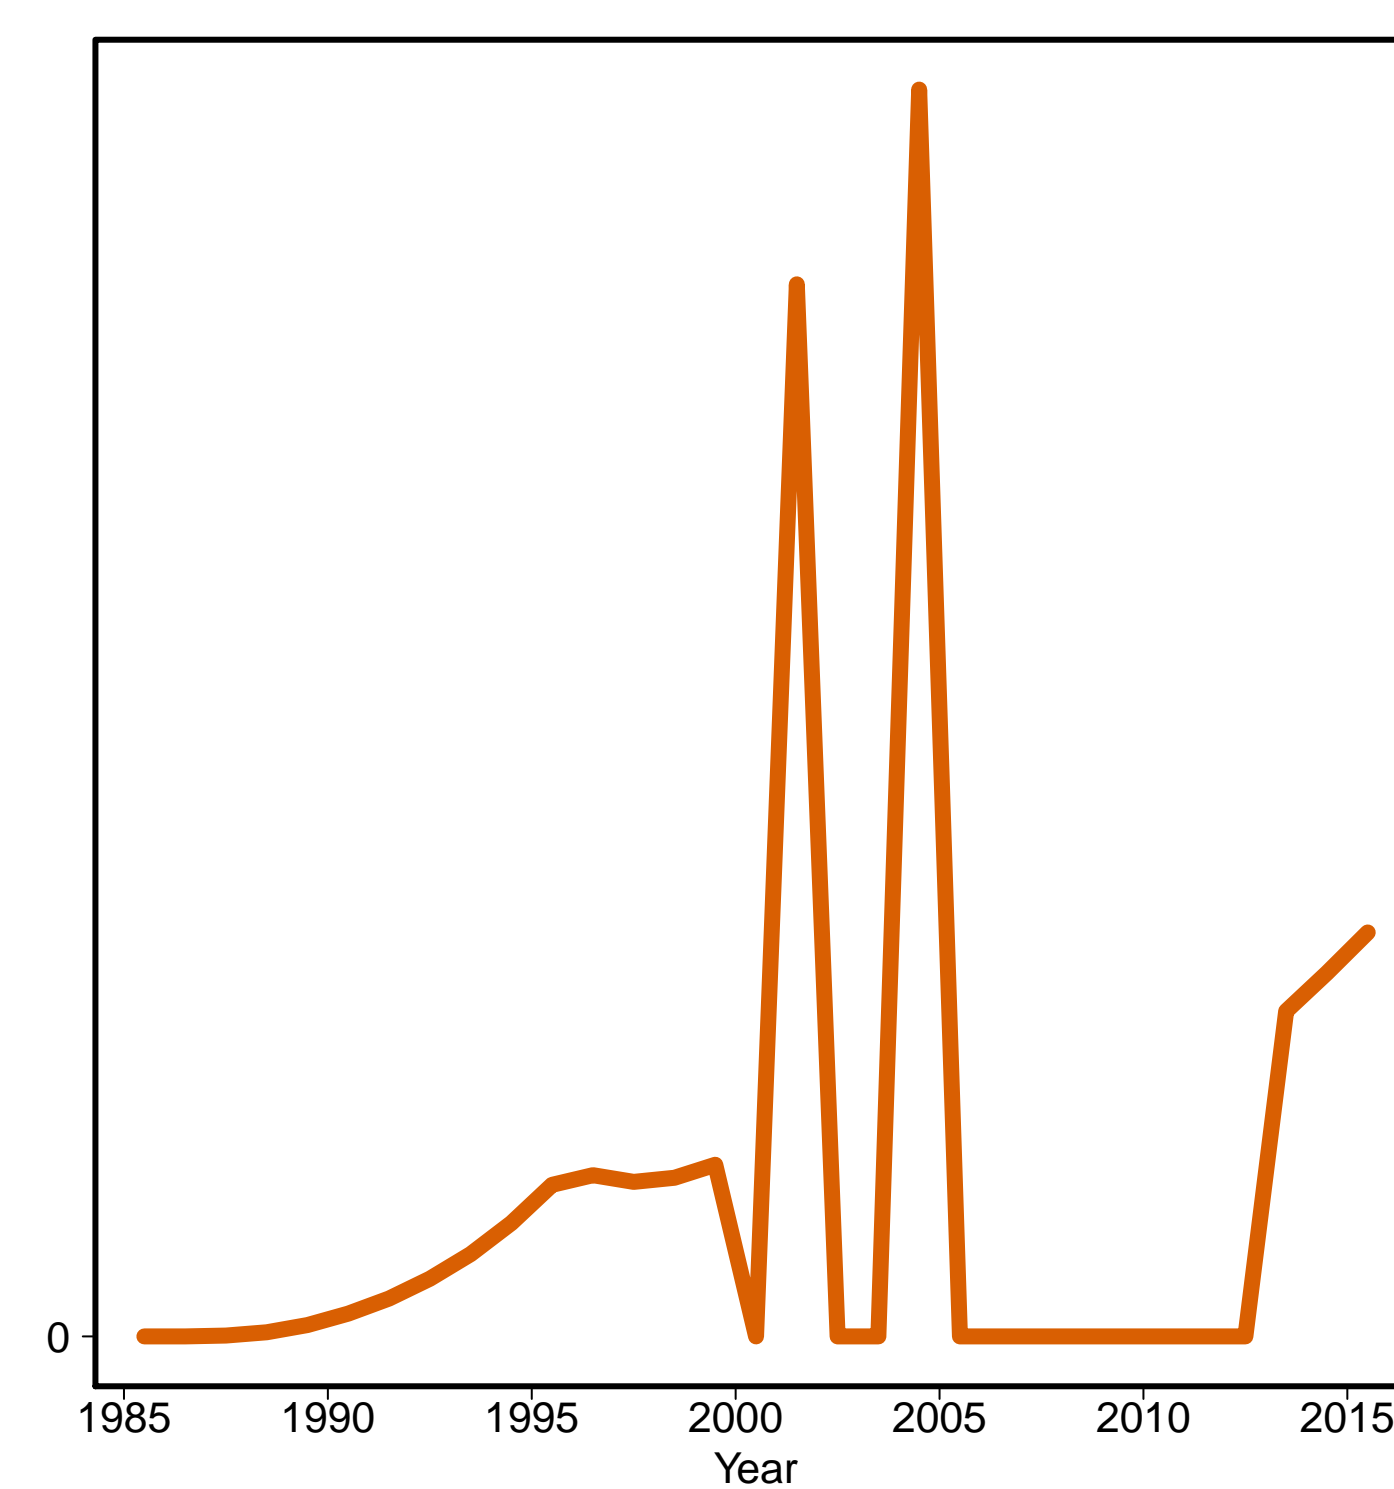

Slovenia [SVN]  
(Developed regions)

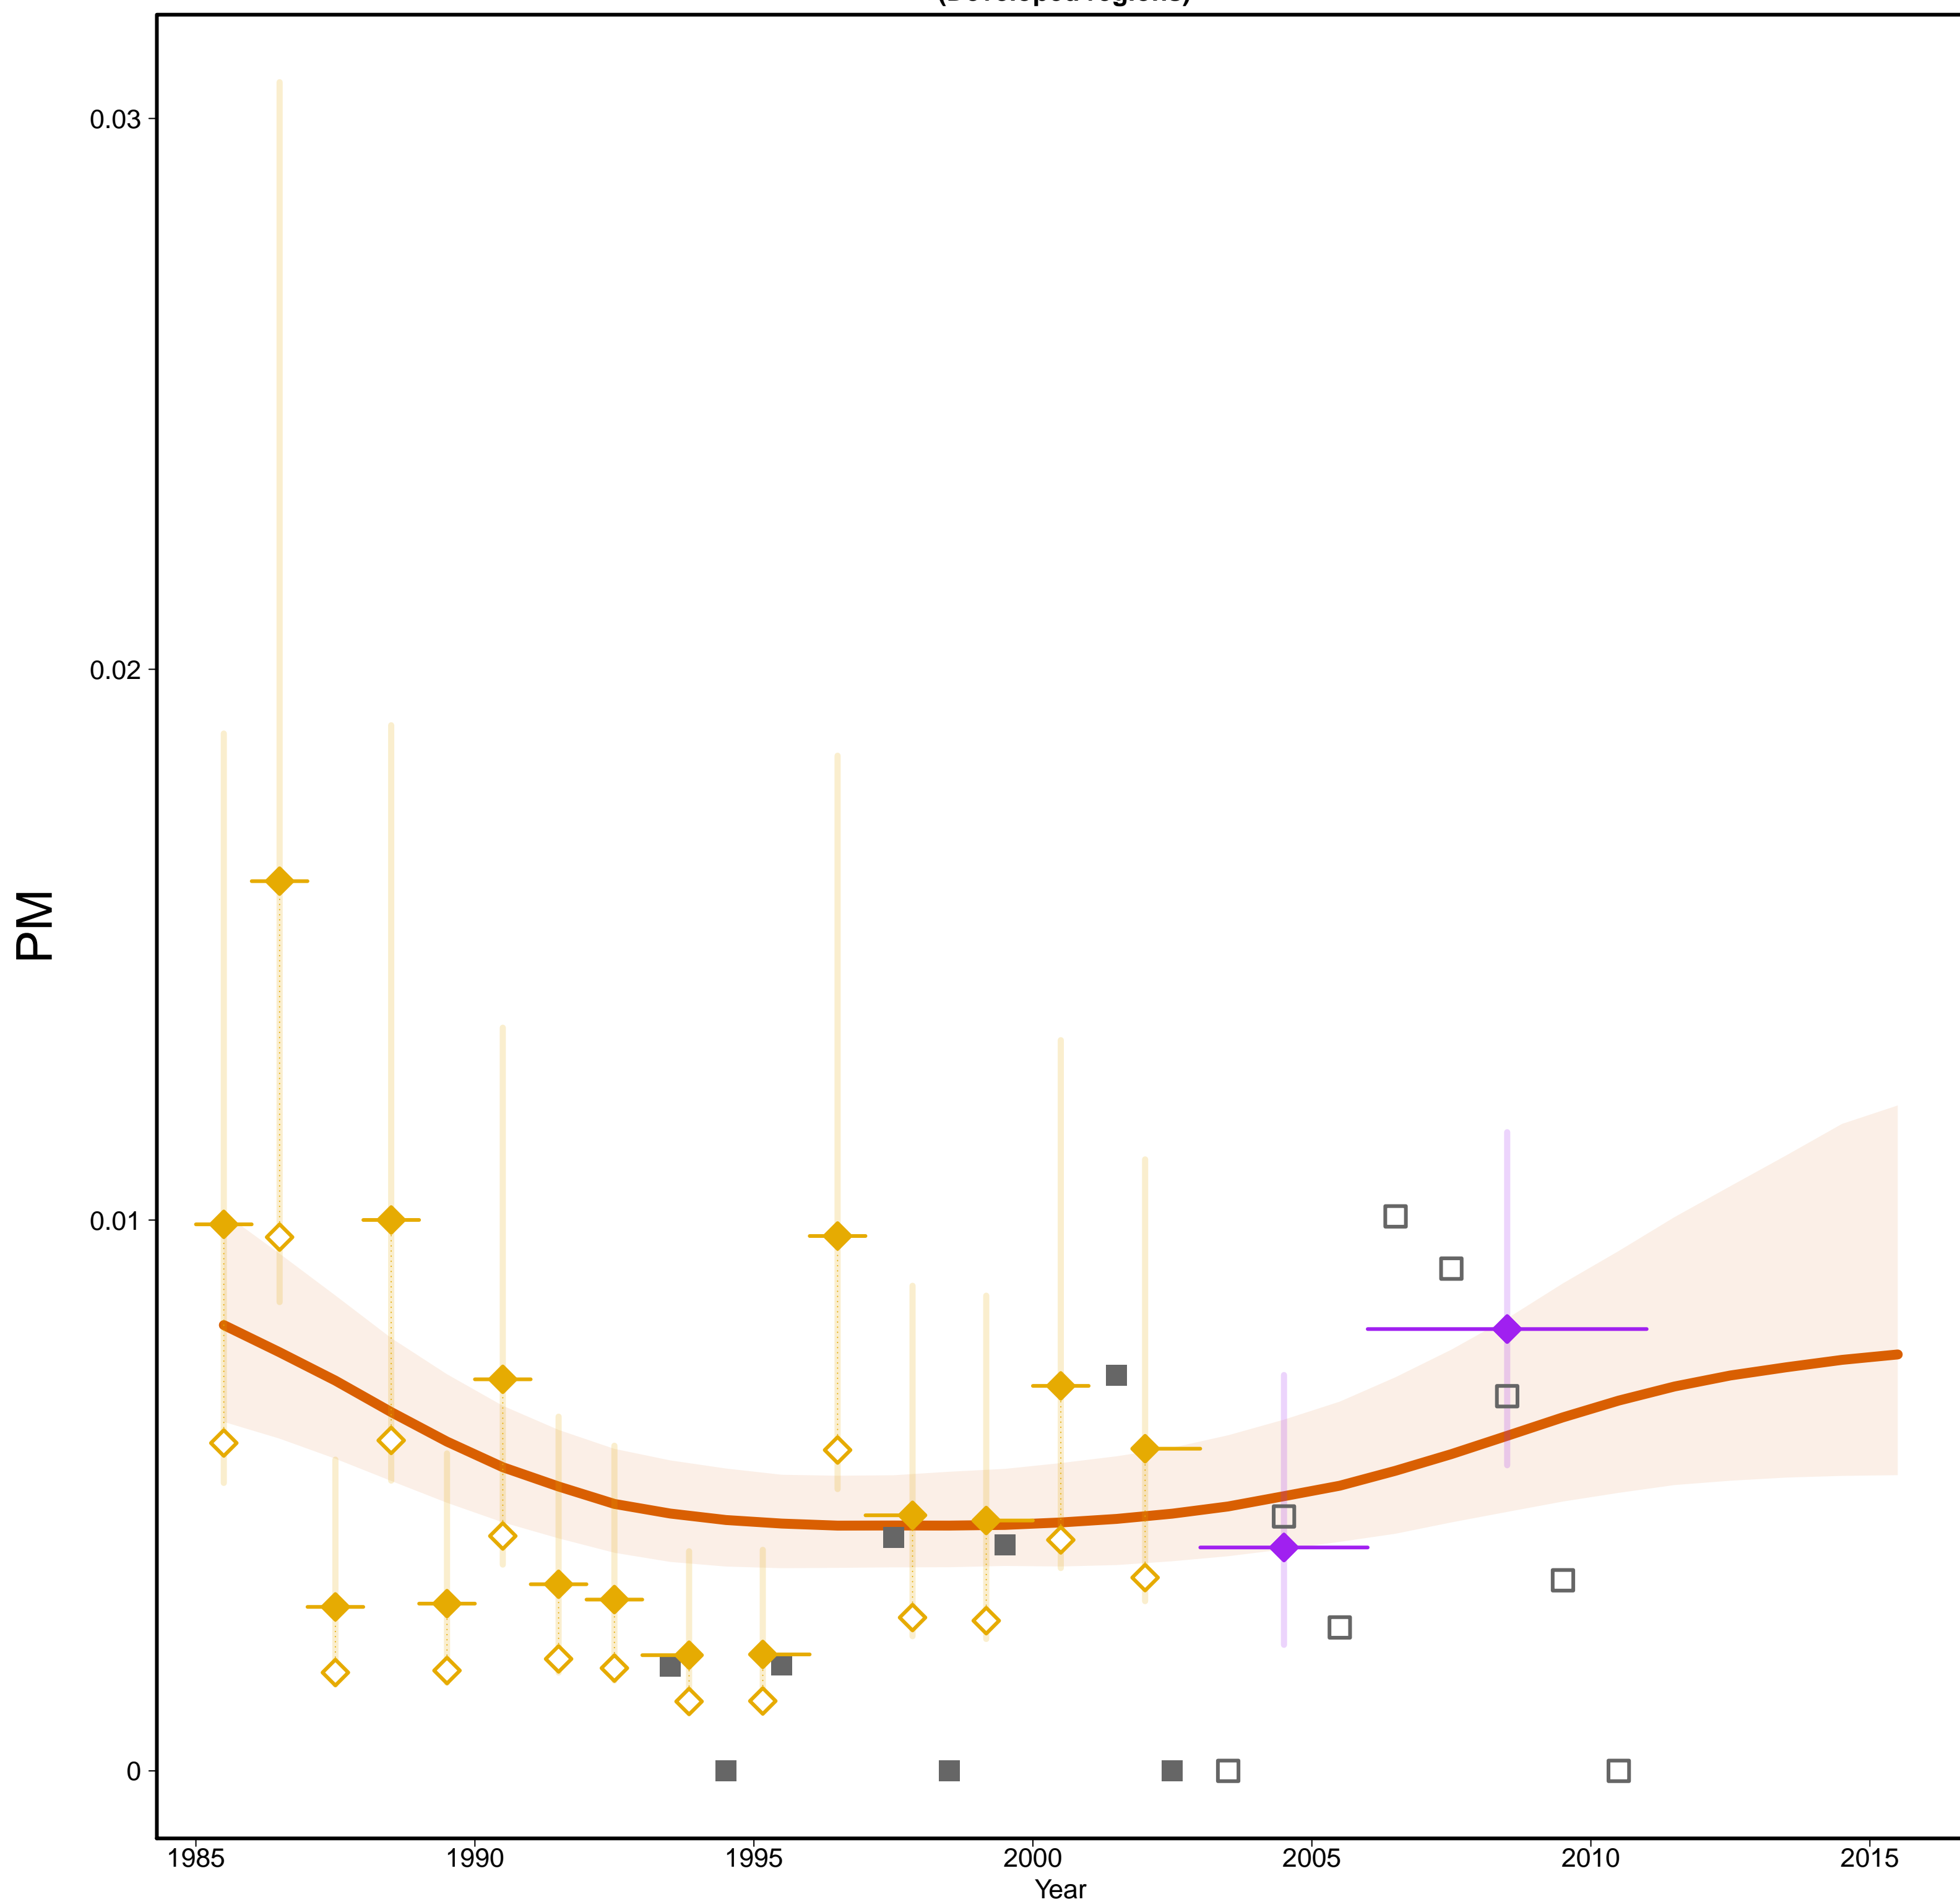

Slovenia [SVN]  
(Developed regions)

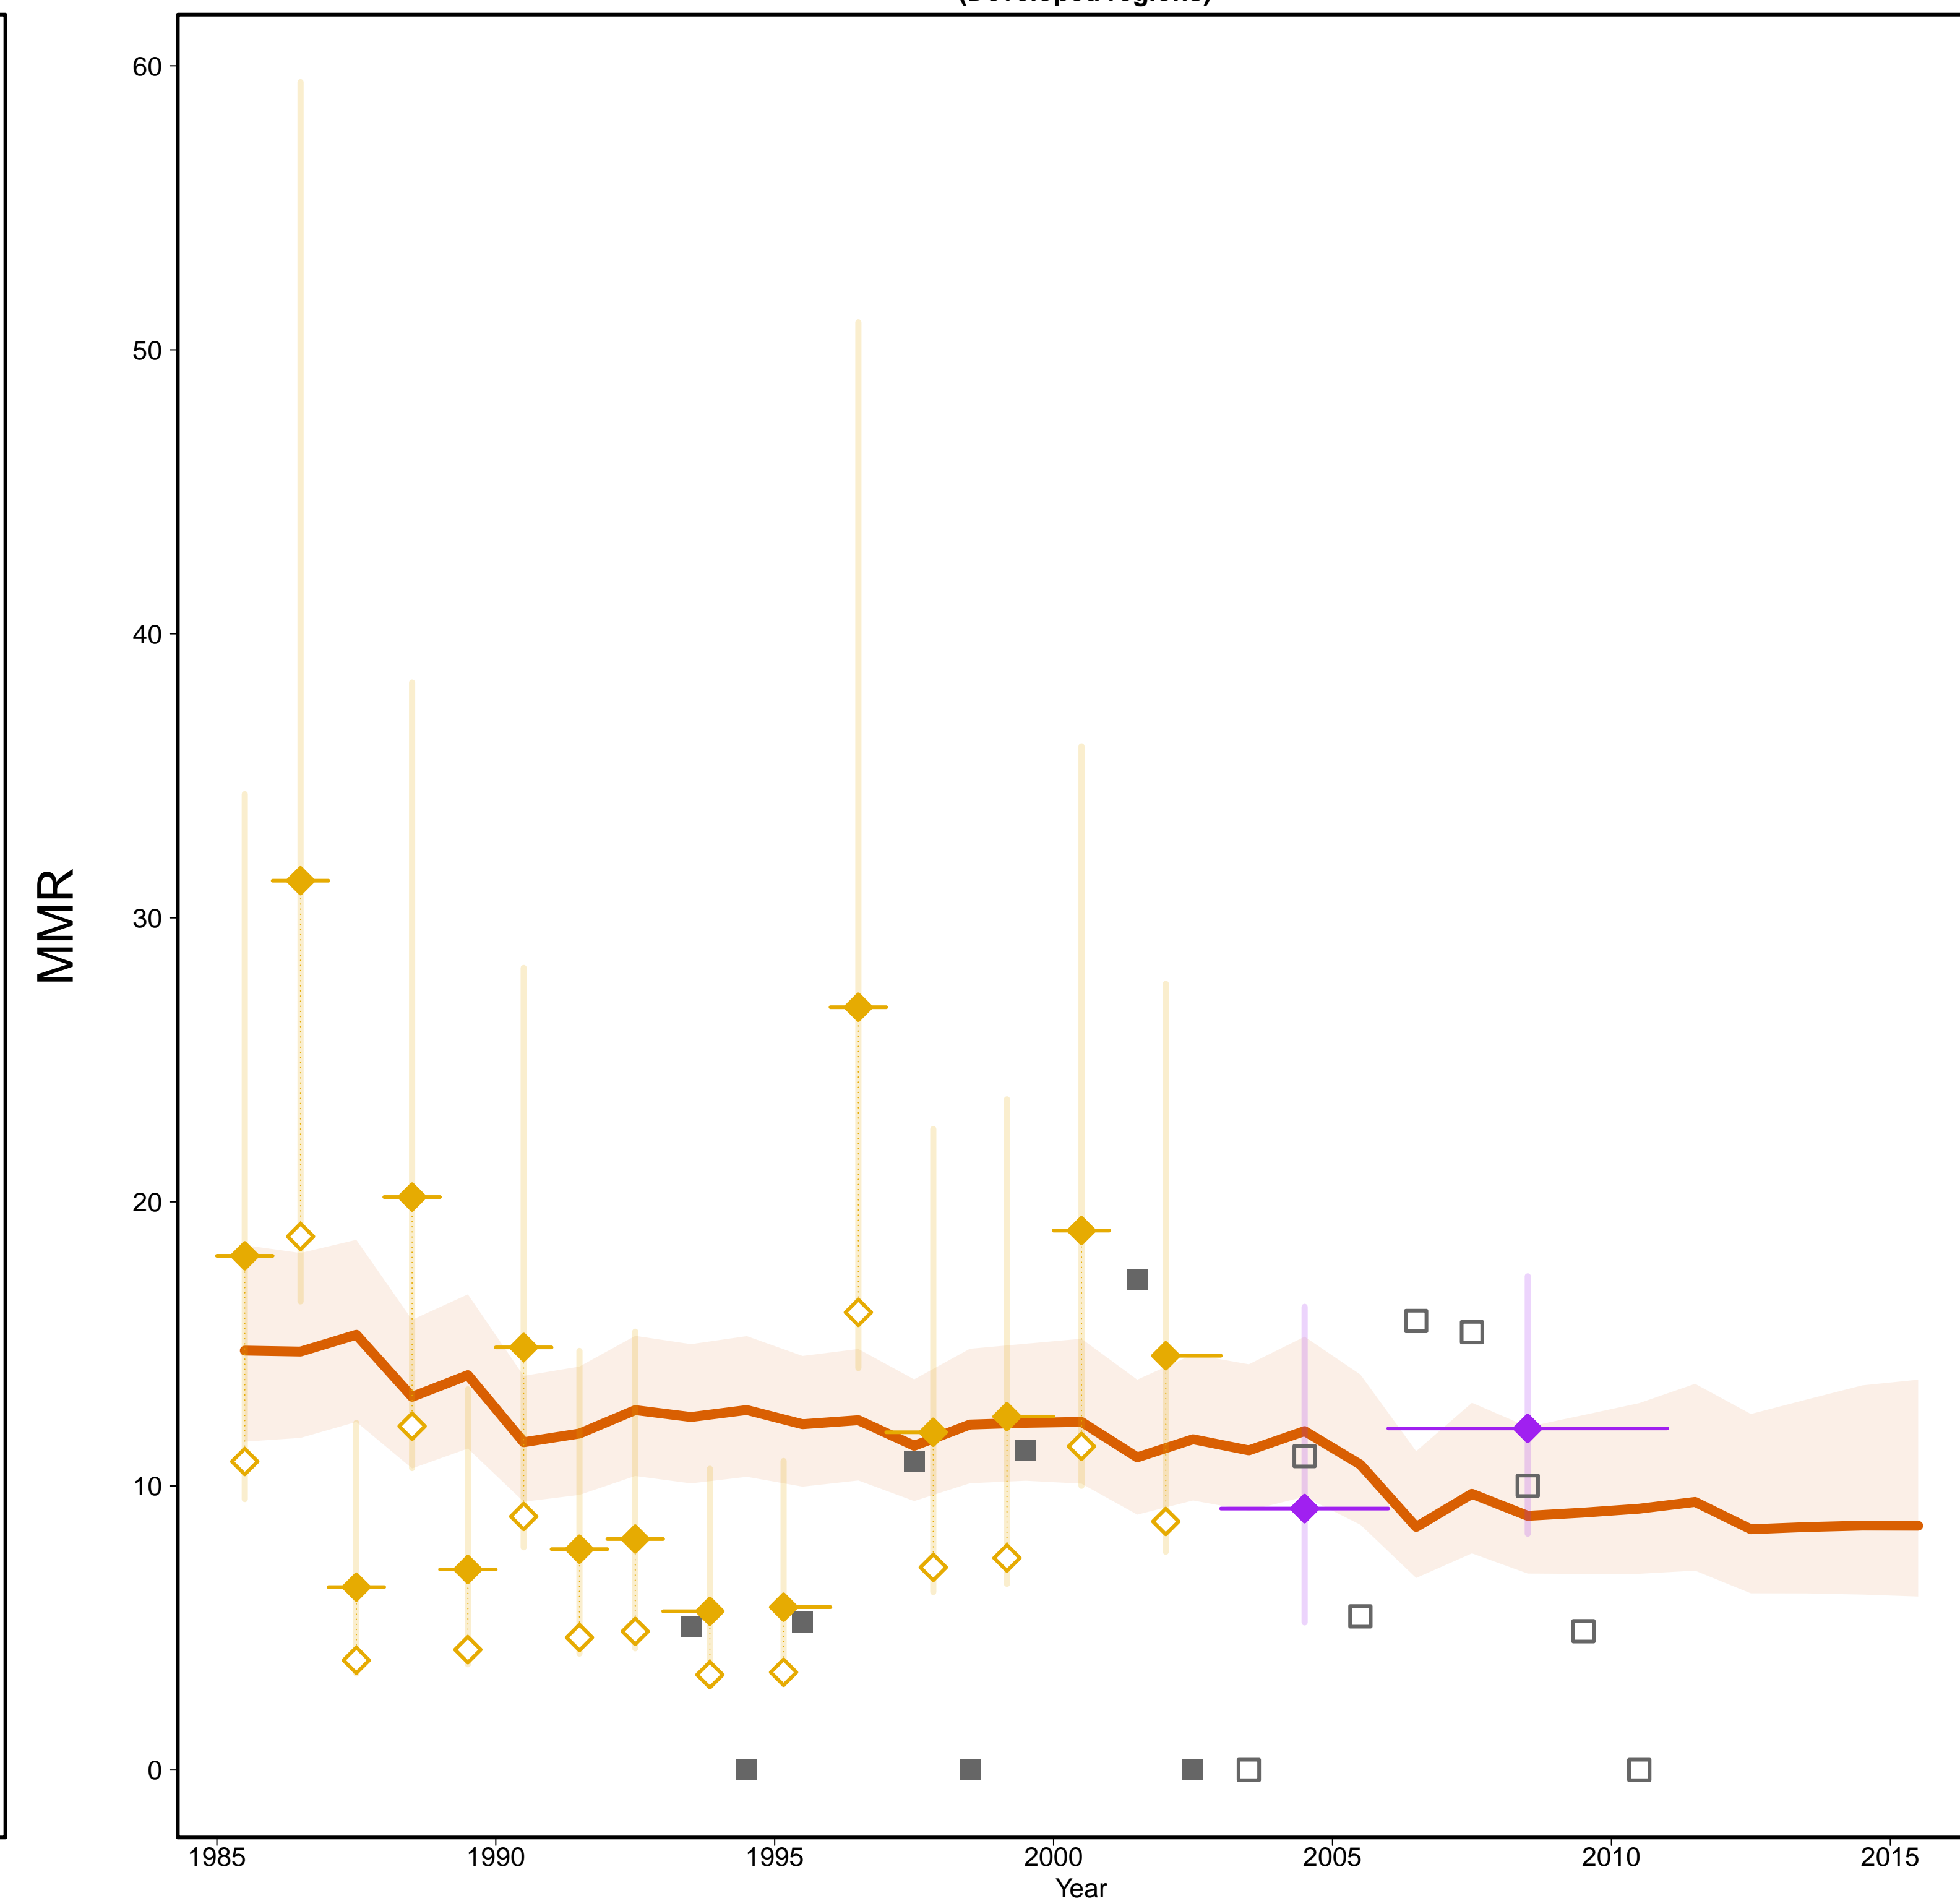

- Estimates —
- MMR Database 2015 —
- ◇ Observed Data
- ◆ Adjusted Data
- Data type —
- ◆ VR
- ◆ Spec. studies
- Reported VR before recalc.  
(related to 0 obs. mat. death)
- Excluded VR data  
(overlap with specialized study)

Gross Domestic Product

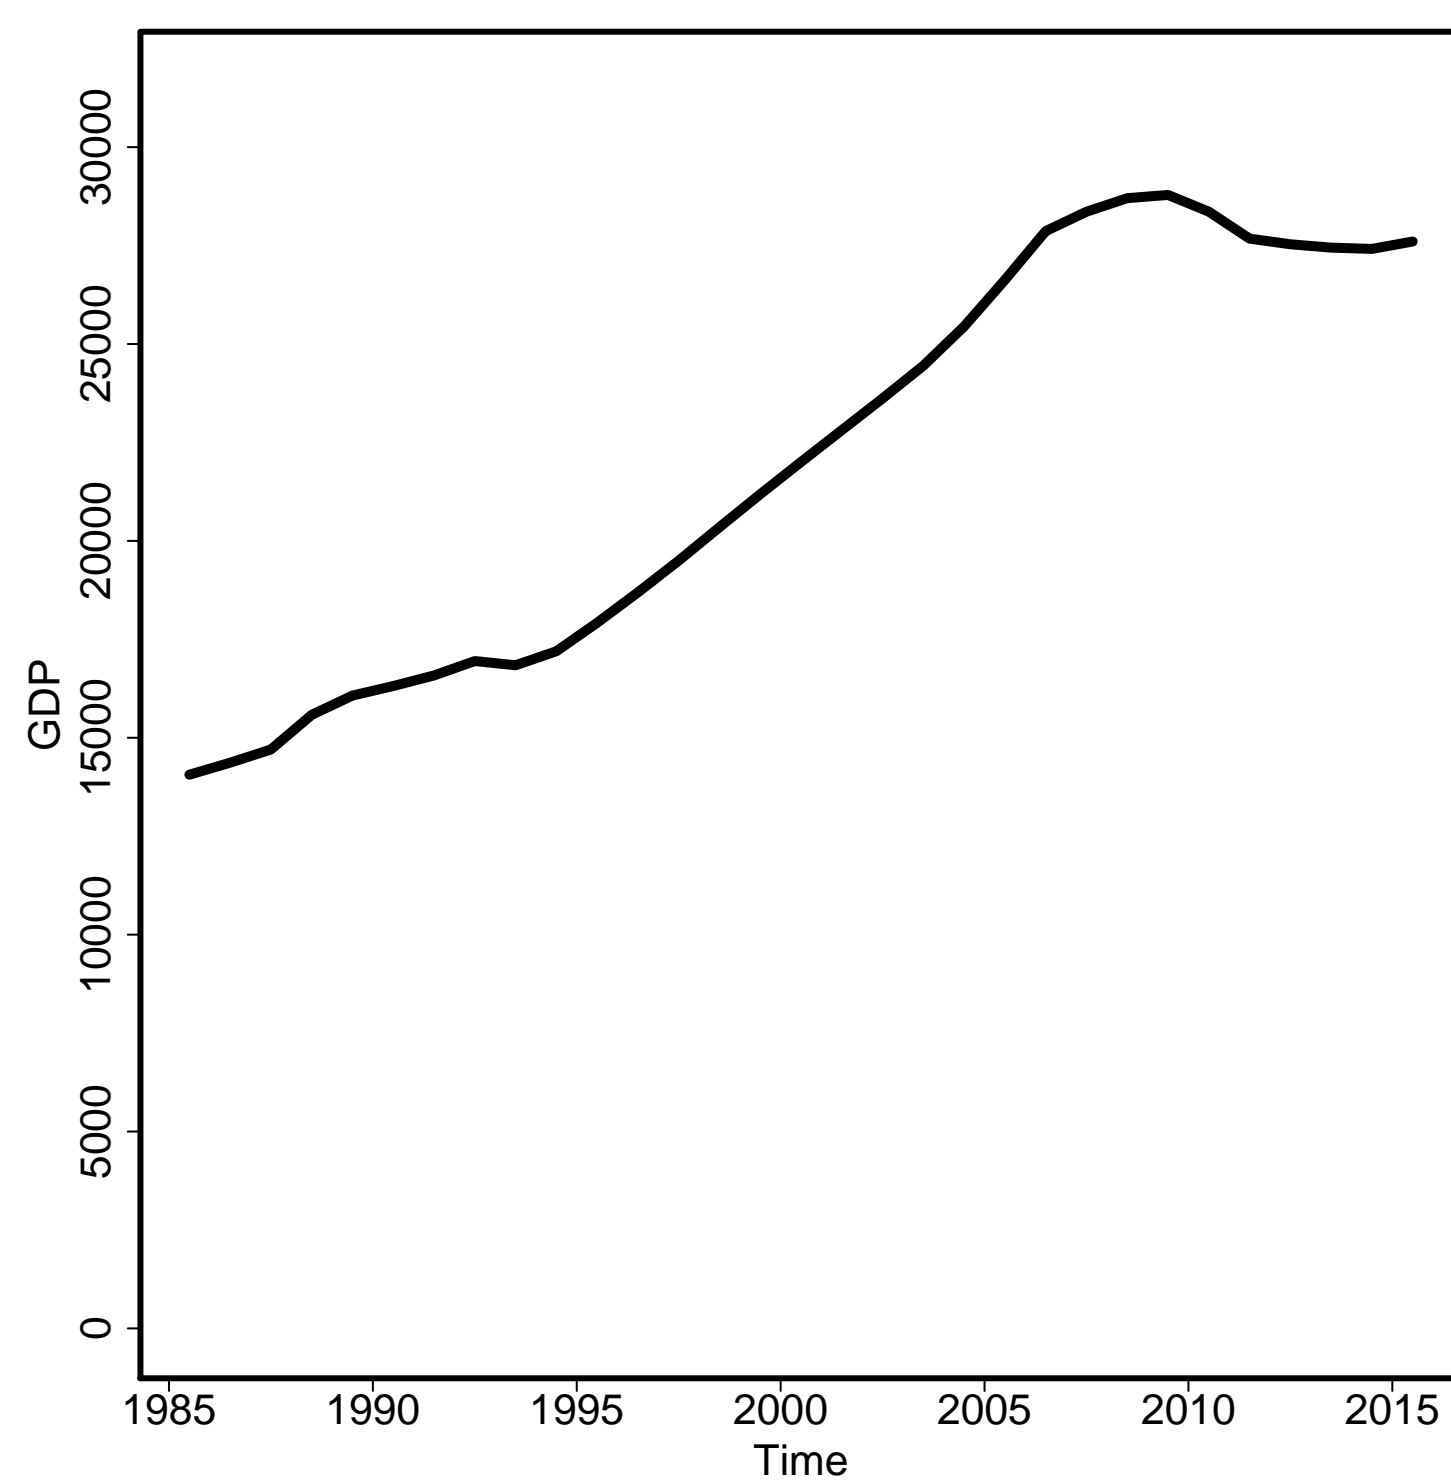

General Fertility Rate

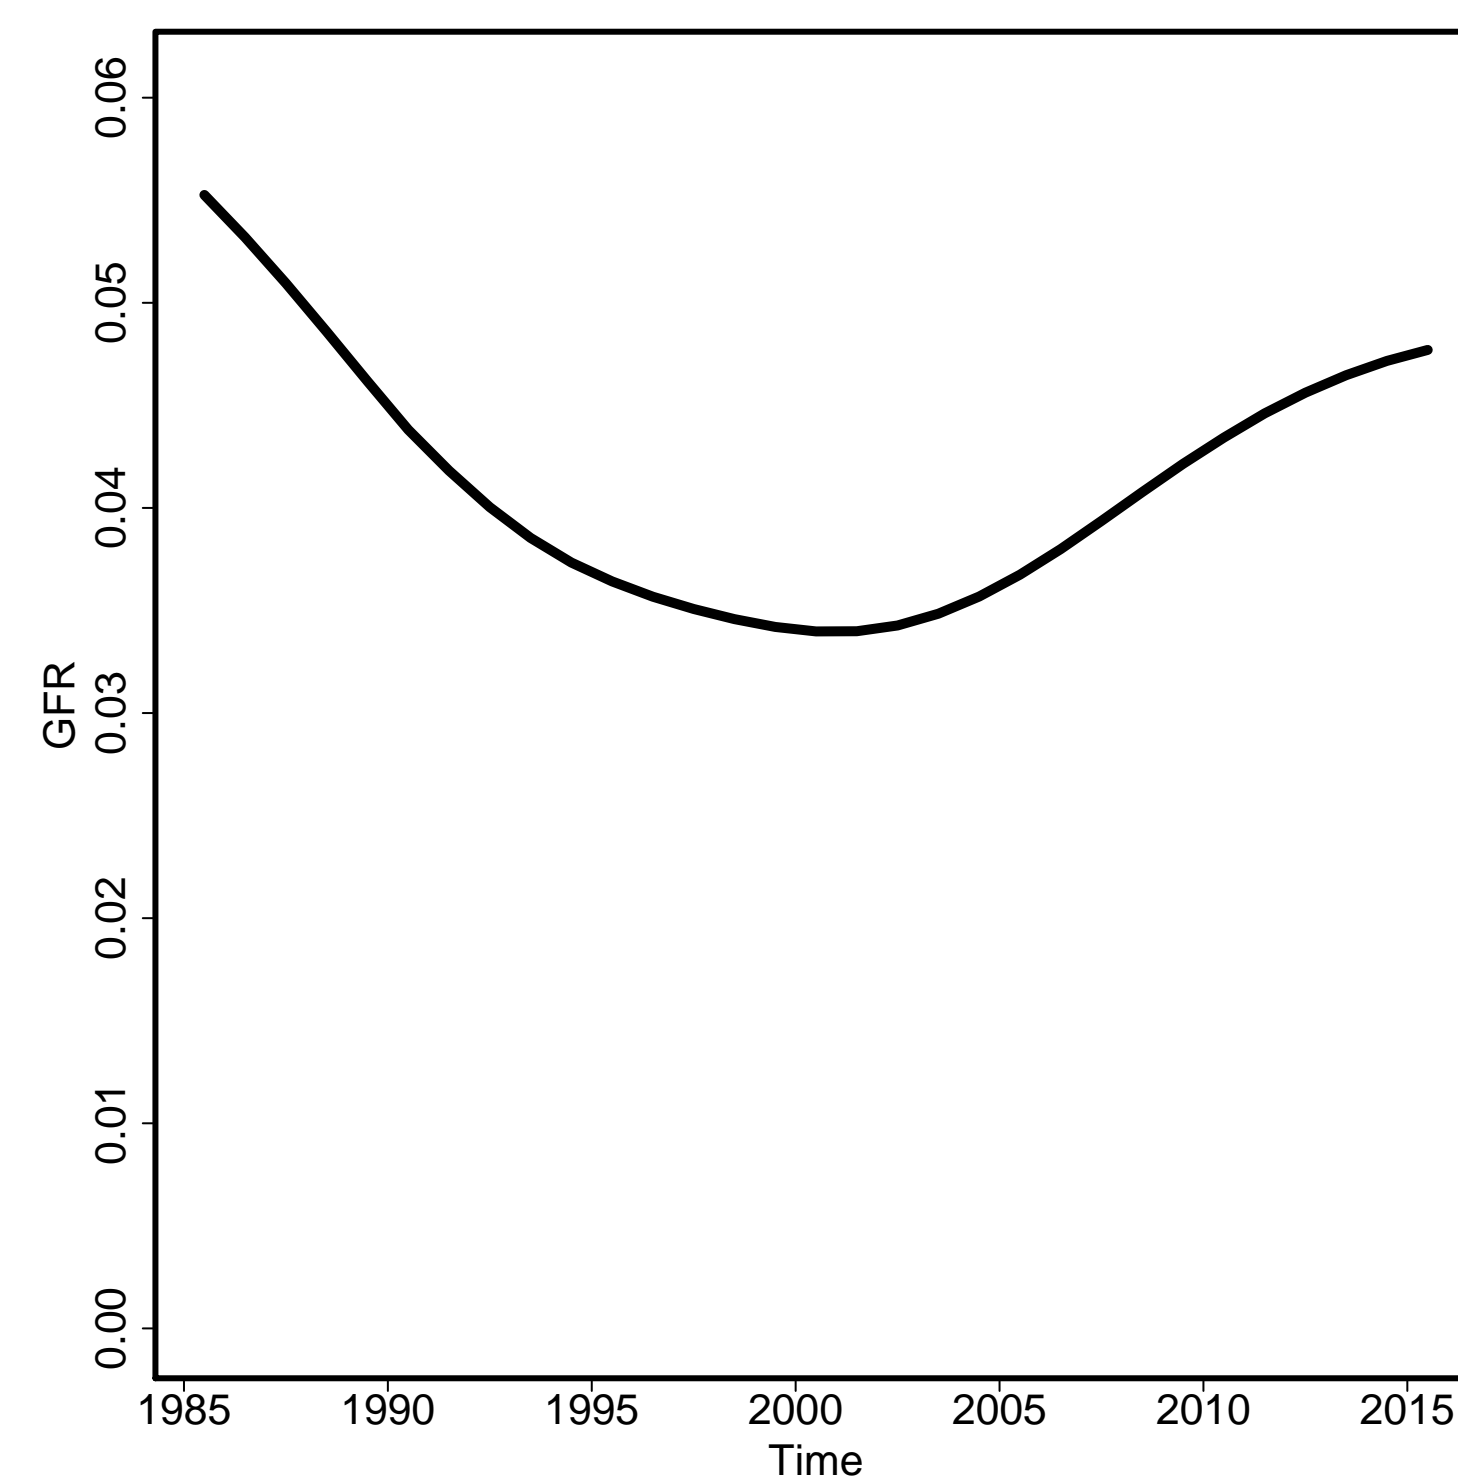

Skilled Attendance to Birth

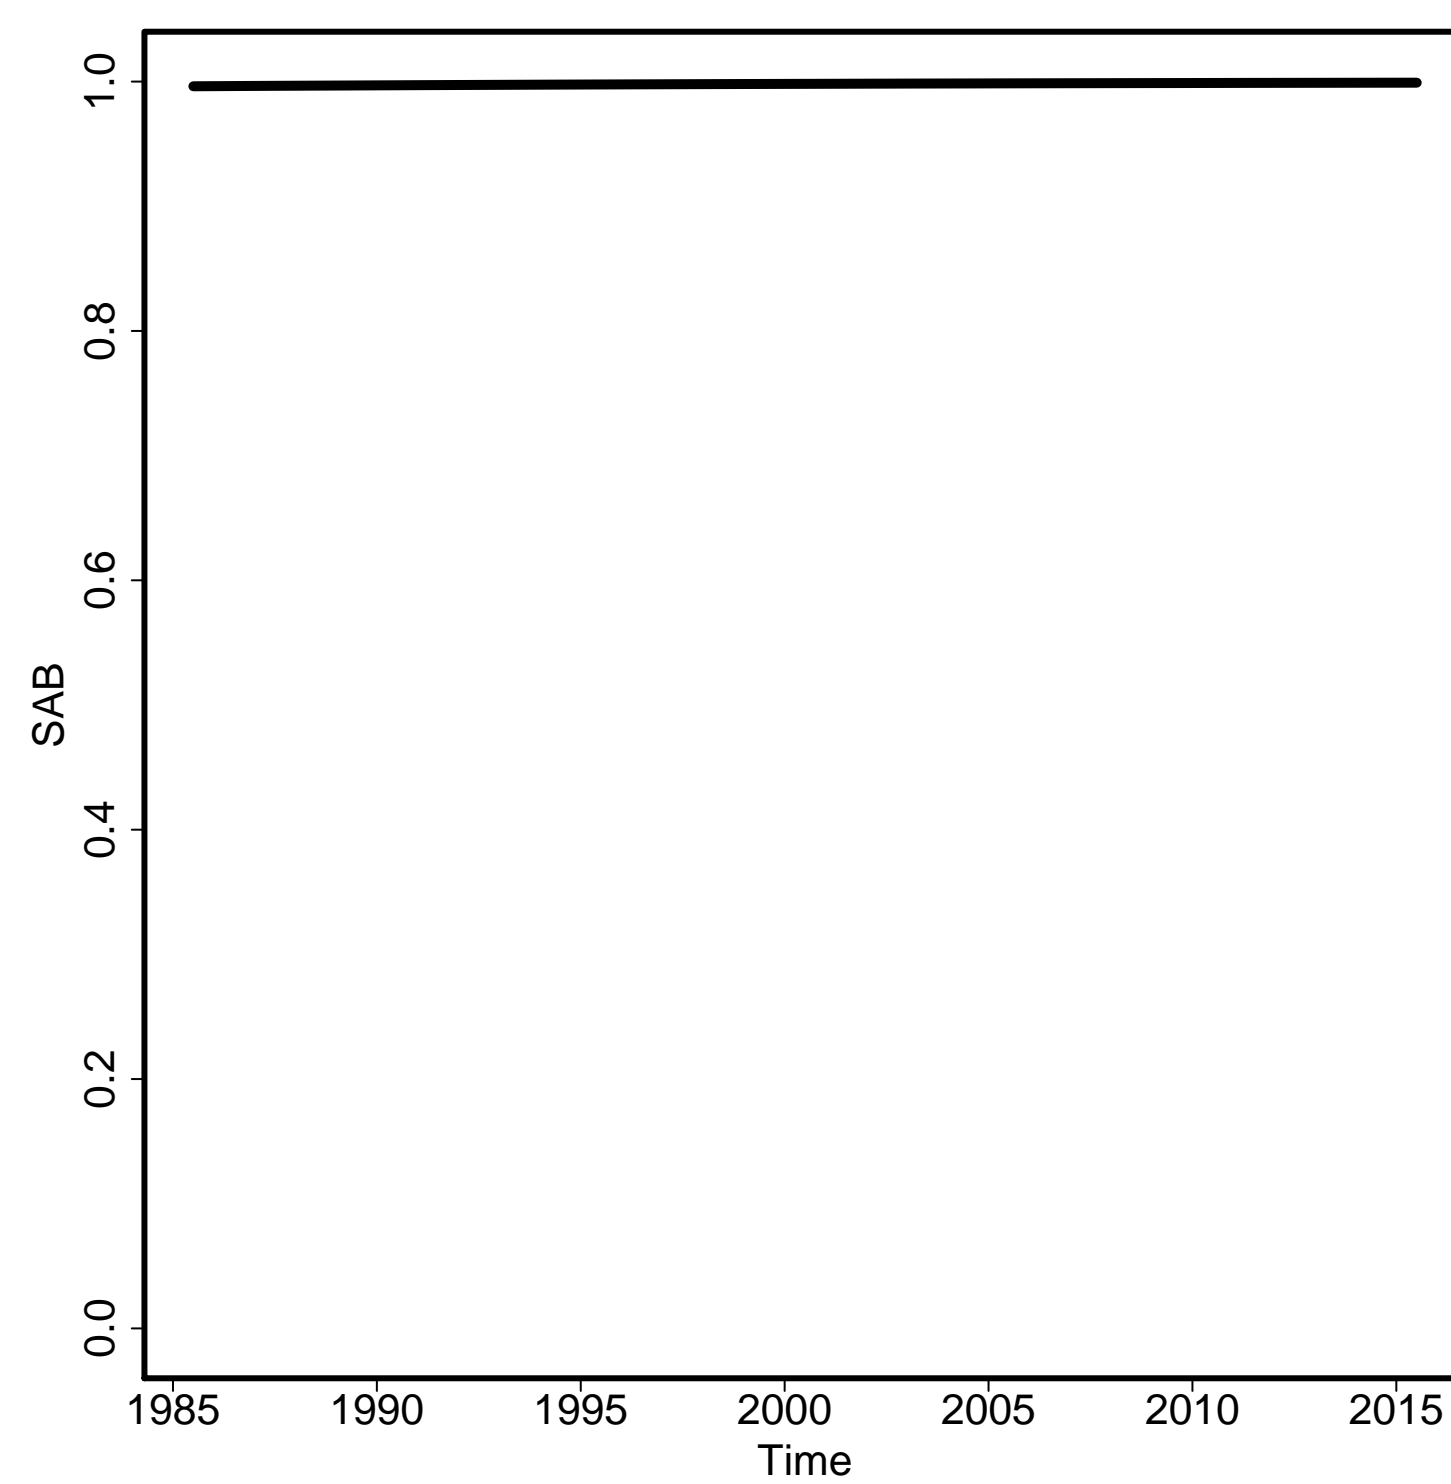

Envelope/Births

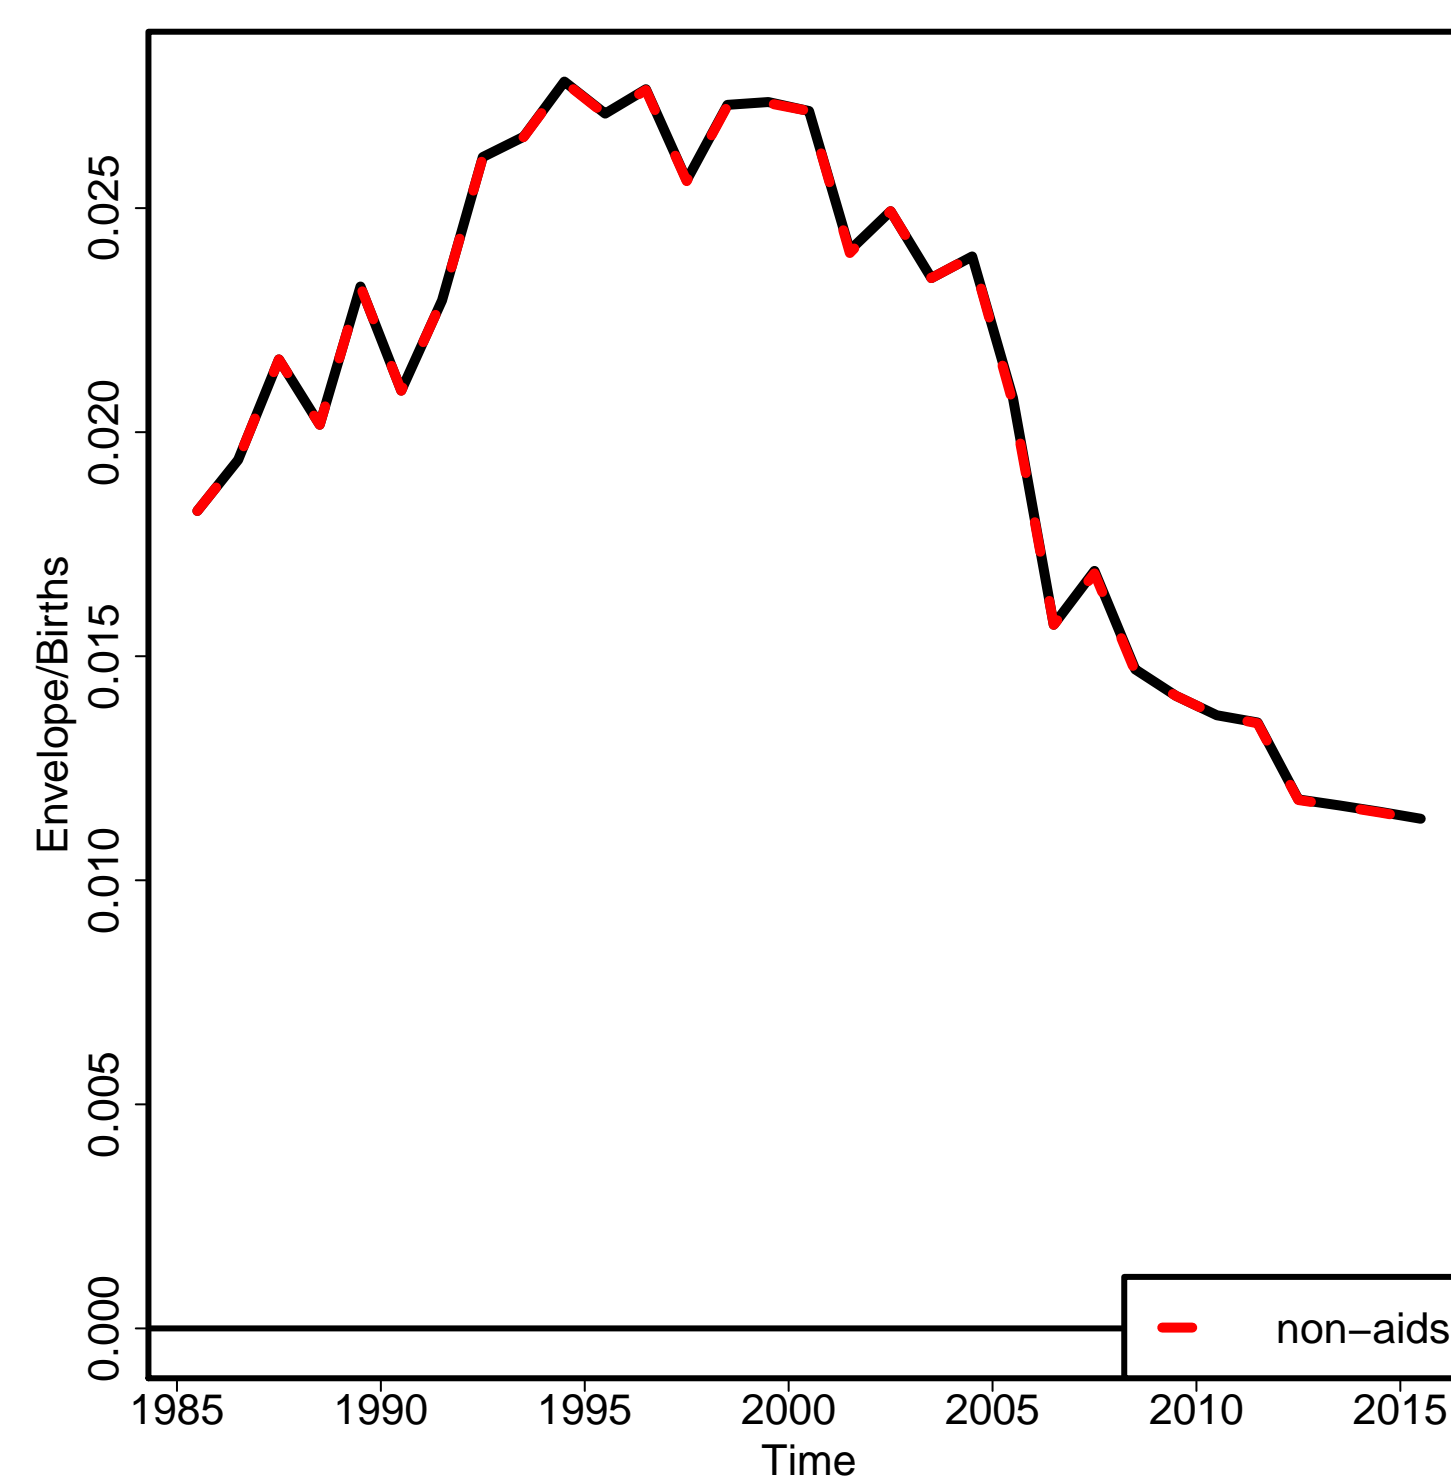

Non-aids MMR

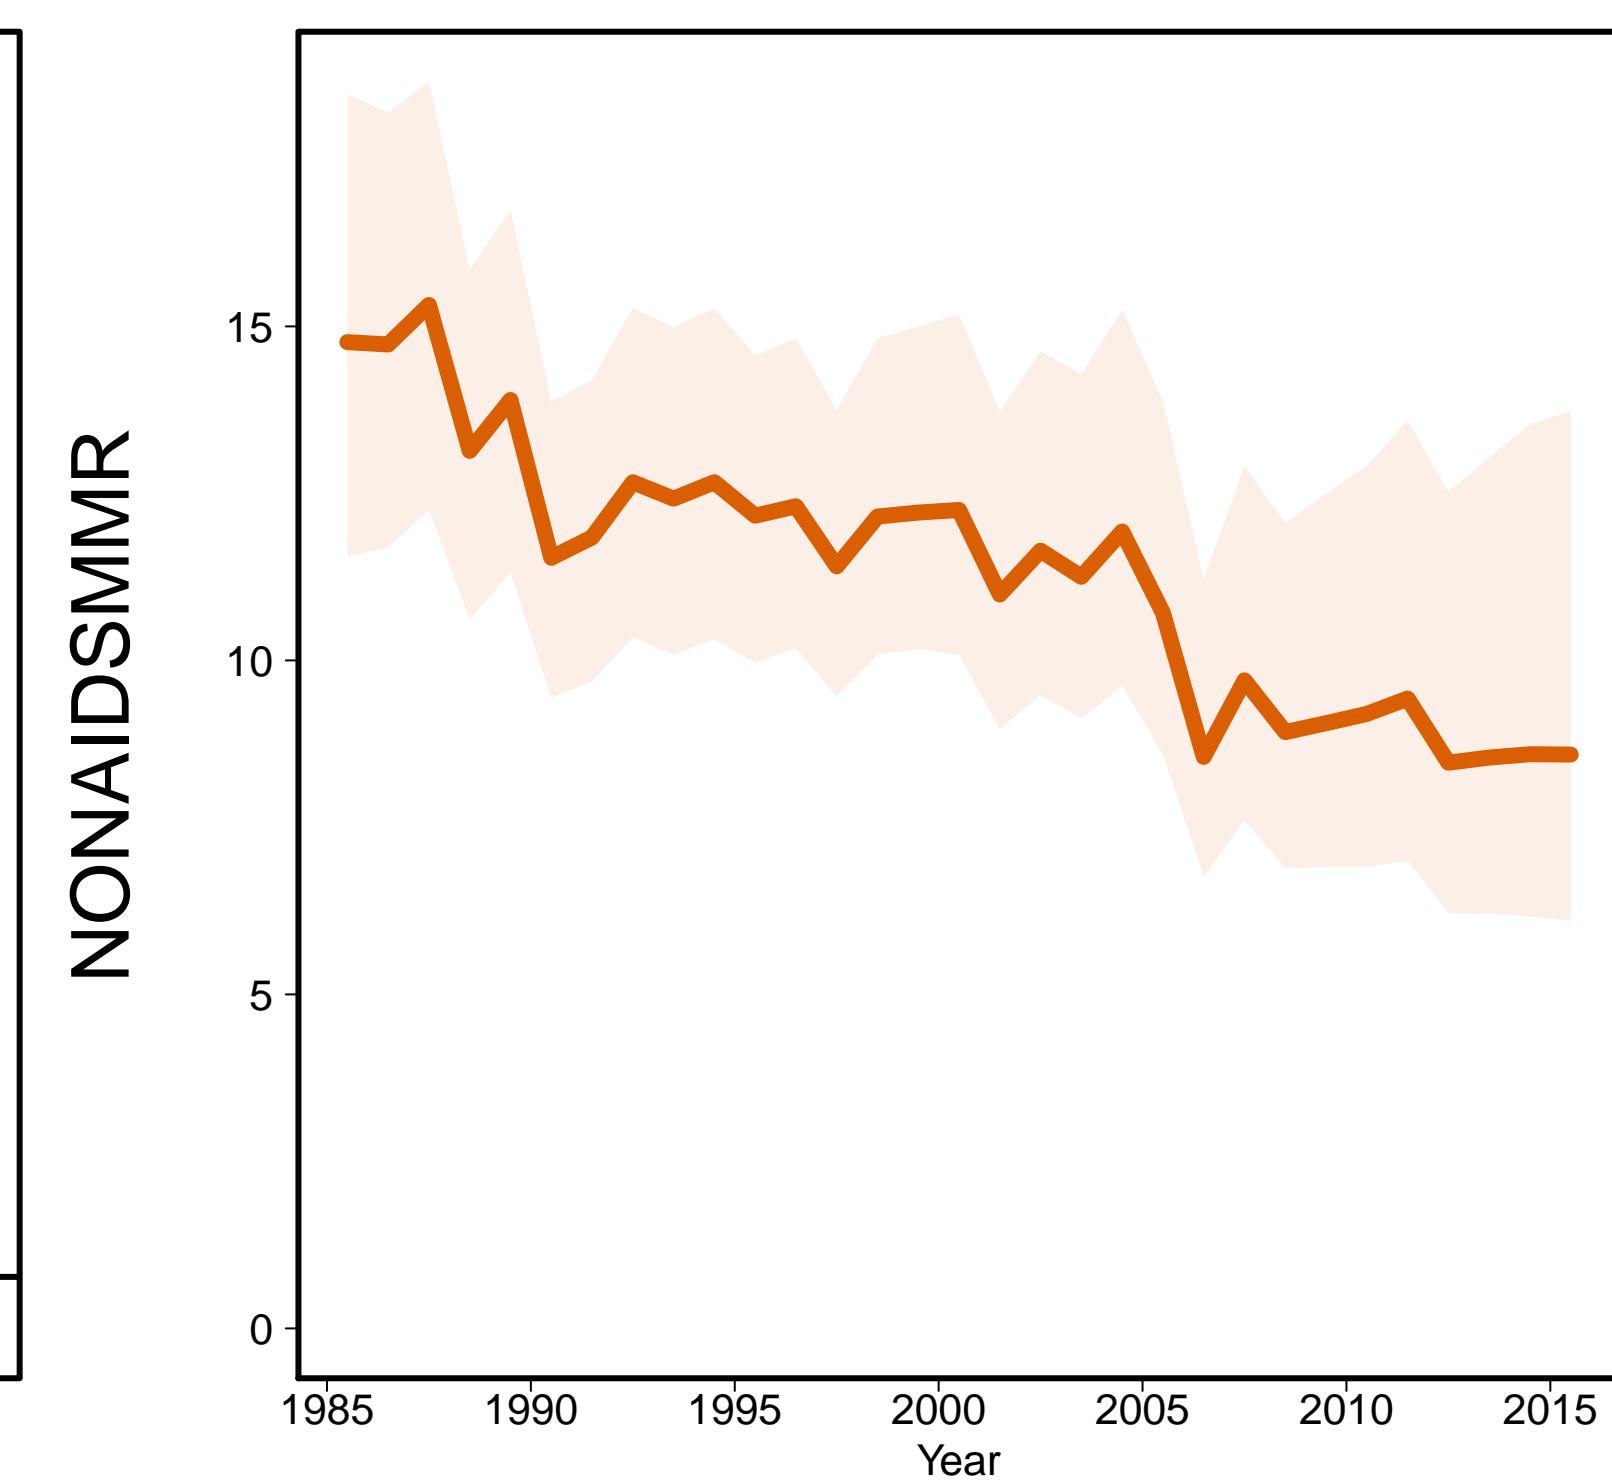

Aids MMR

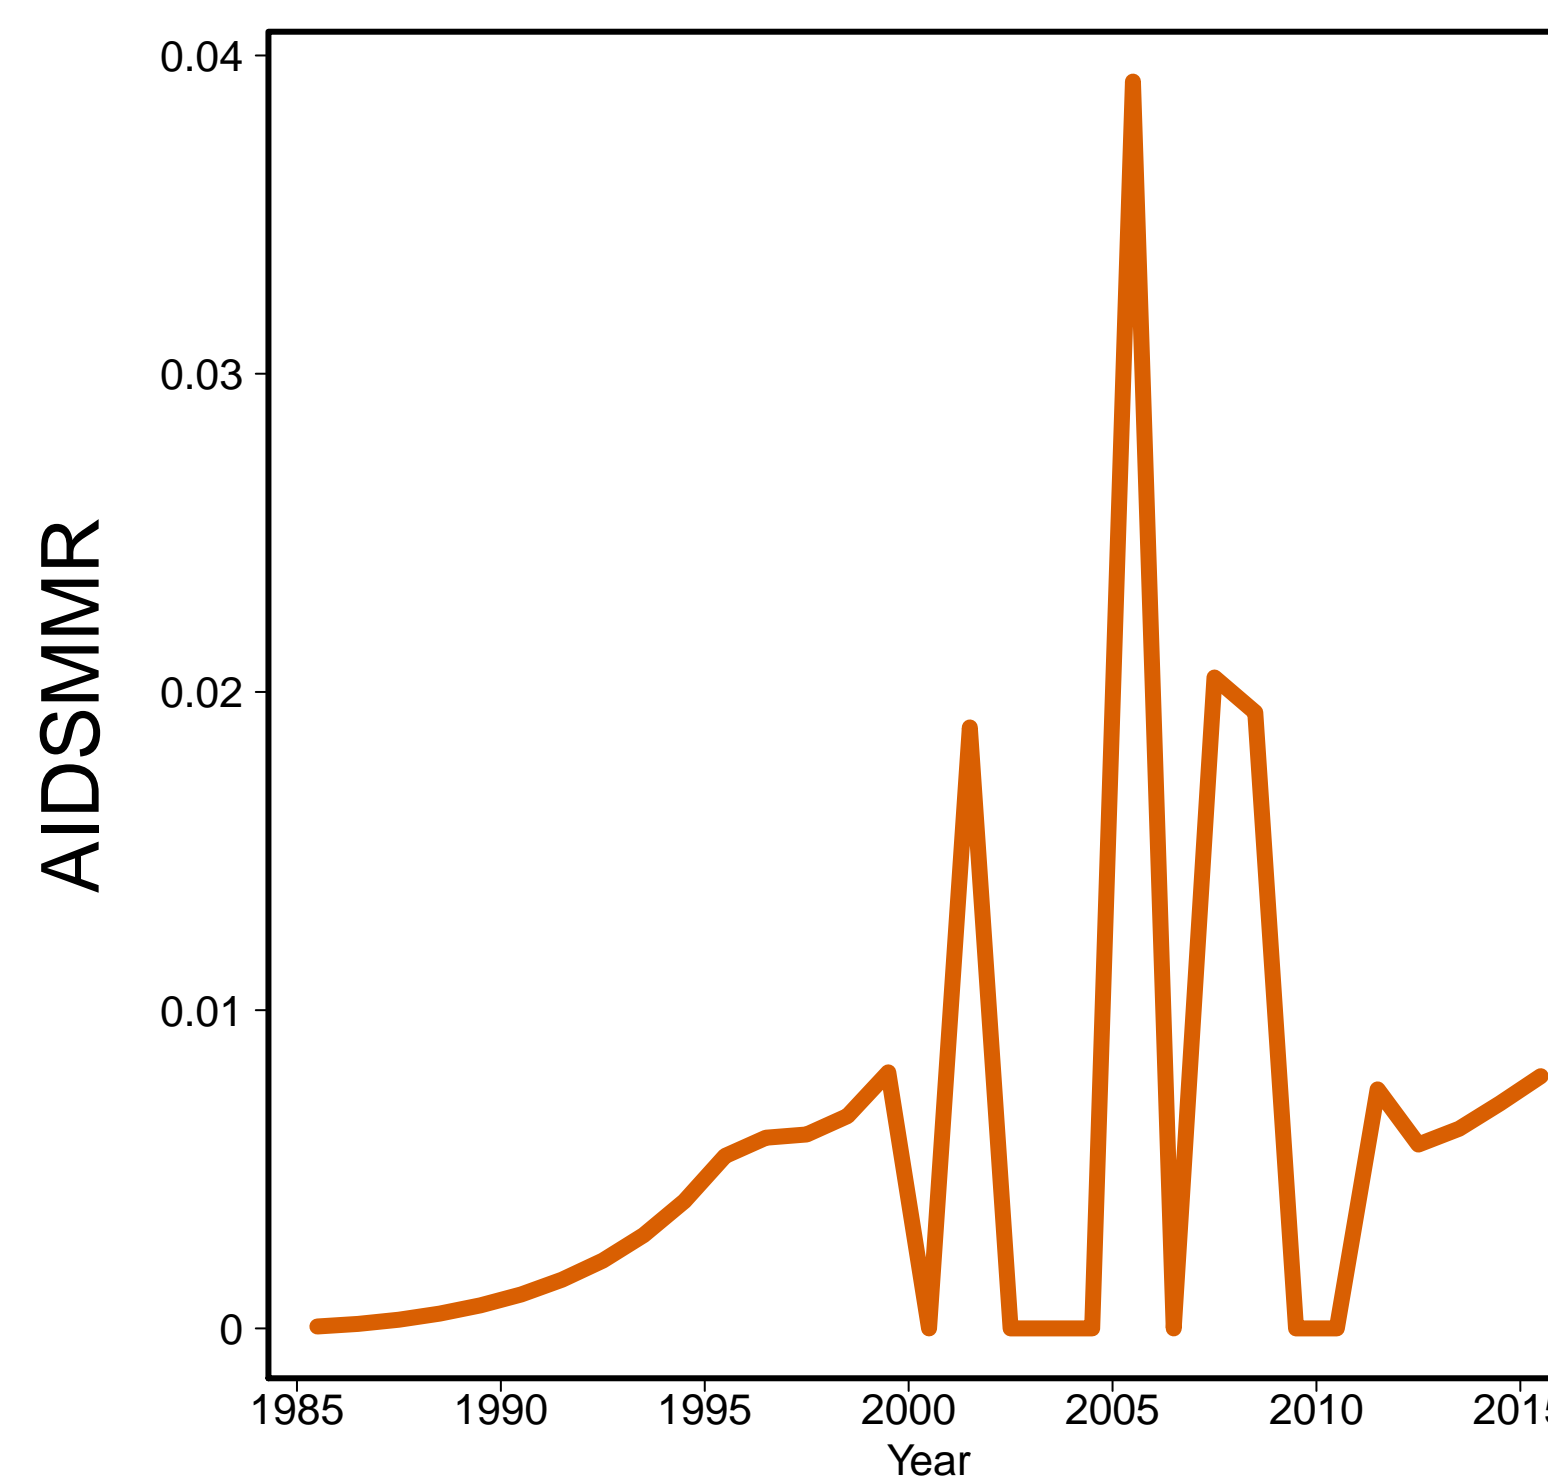

Solomon Islands [SLB]  
(South-Eastern Asia / Oceania)

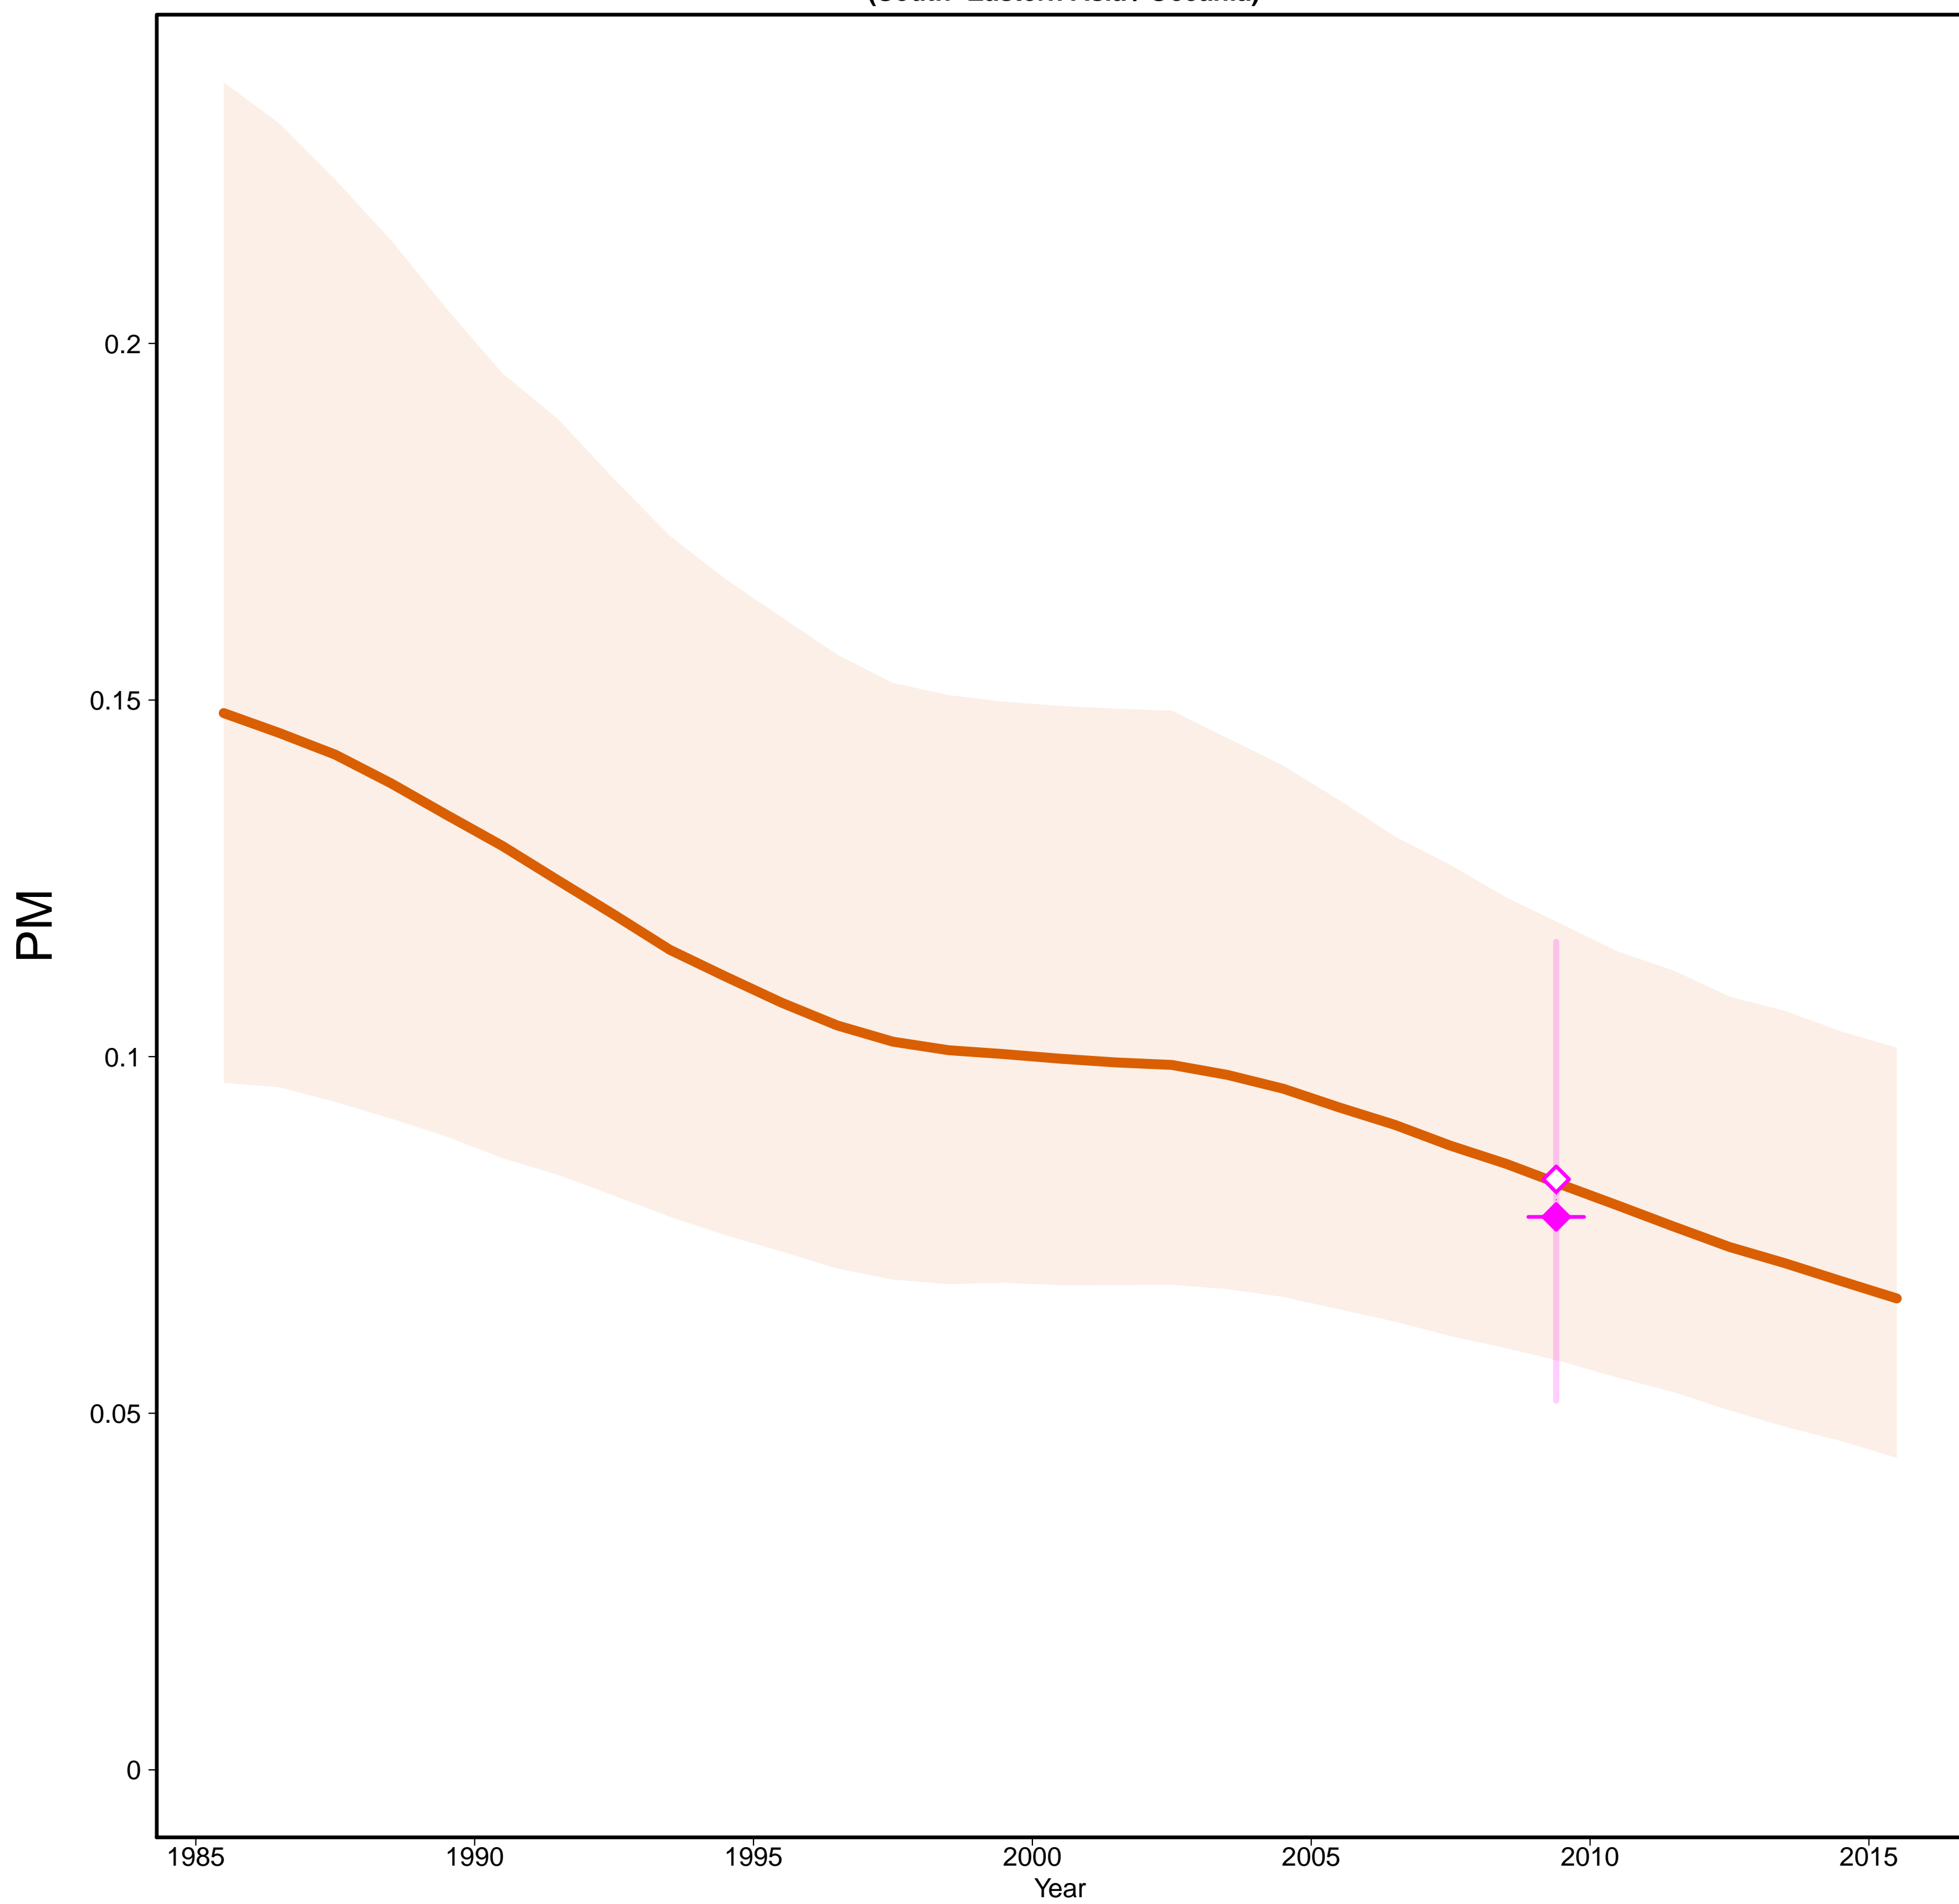

Solomon Islands [SLB]  
(South-Eastern Asia / Oceania)

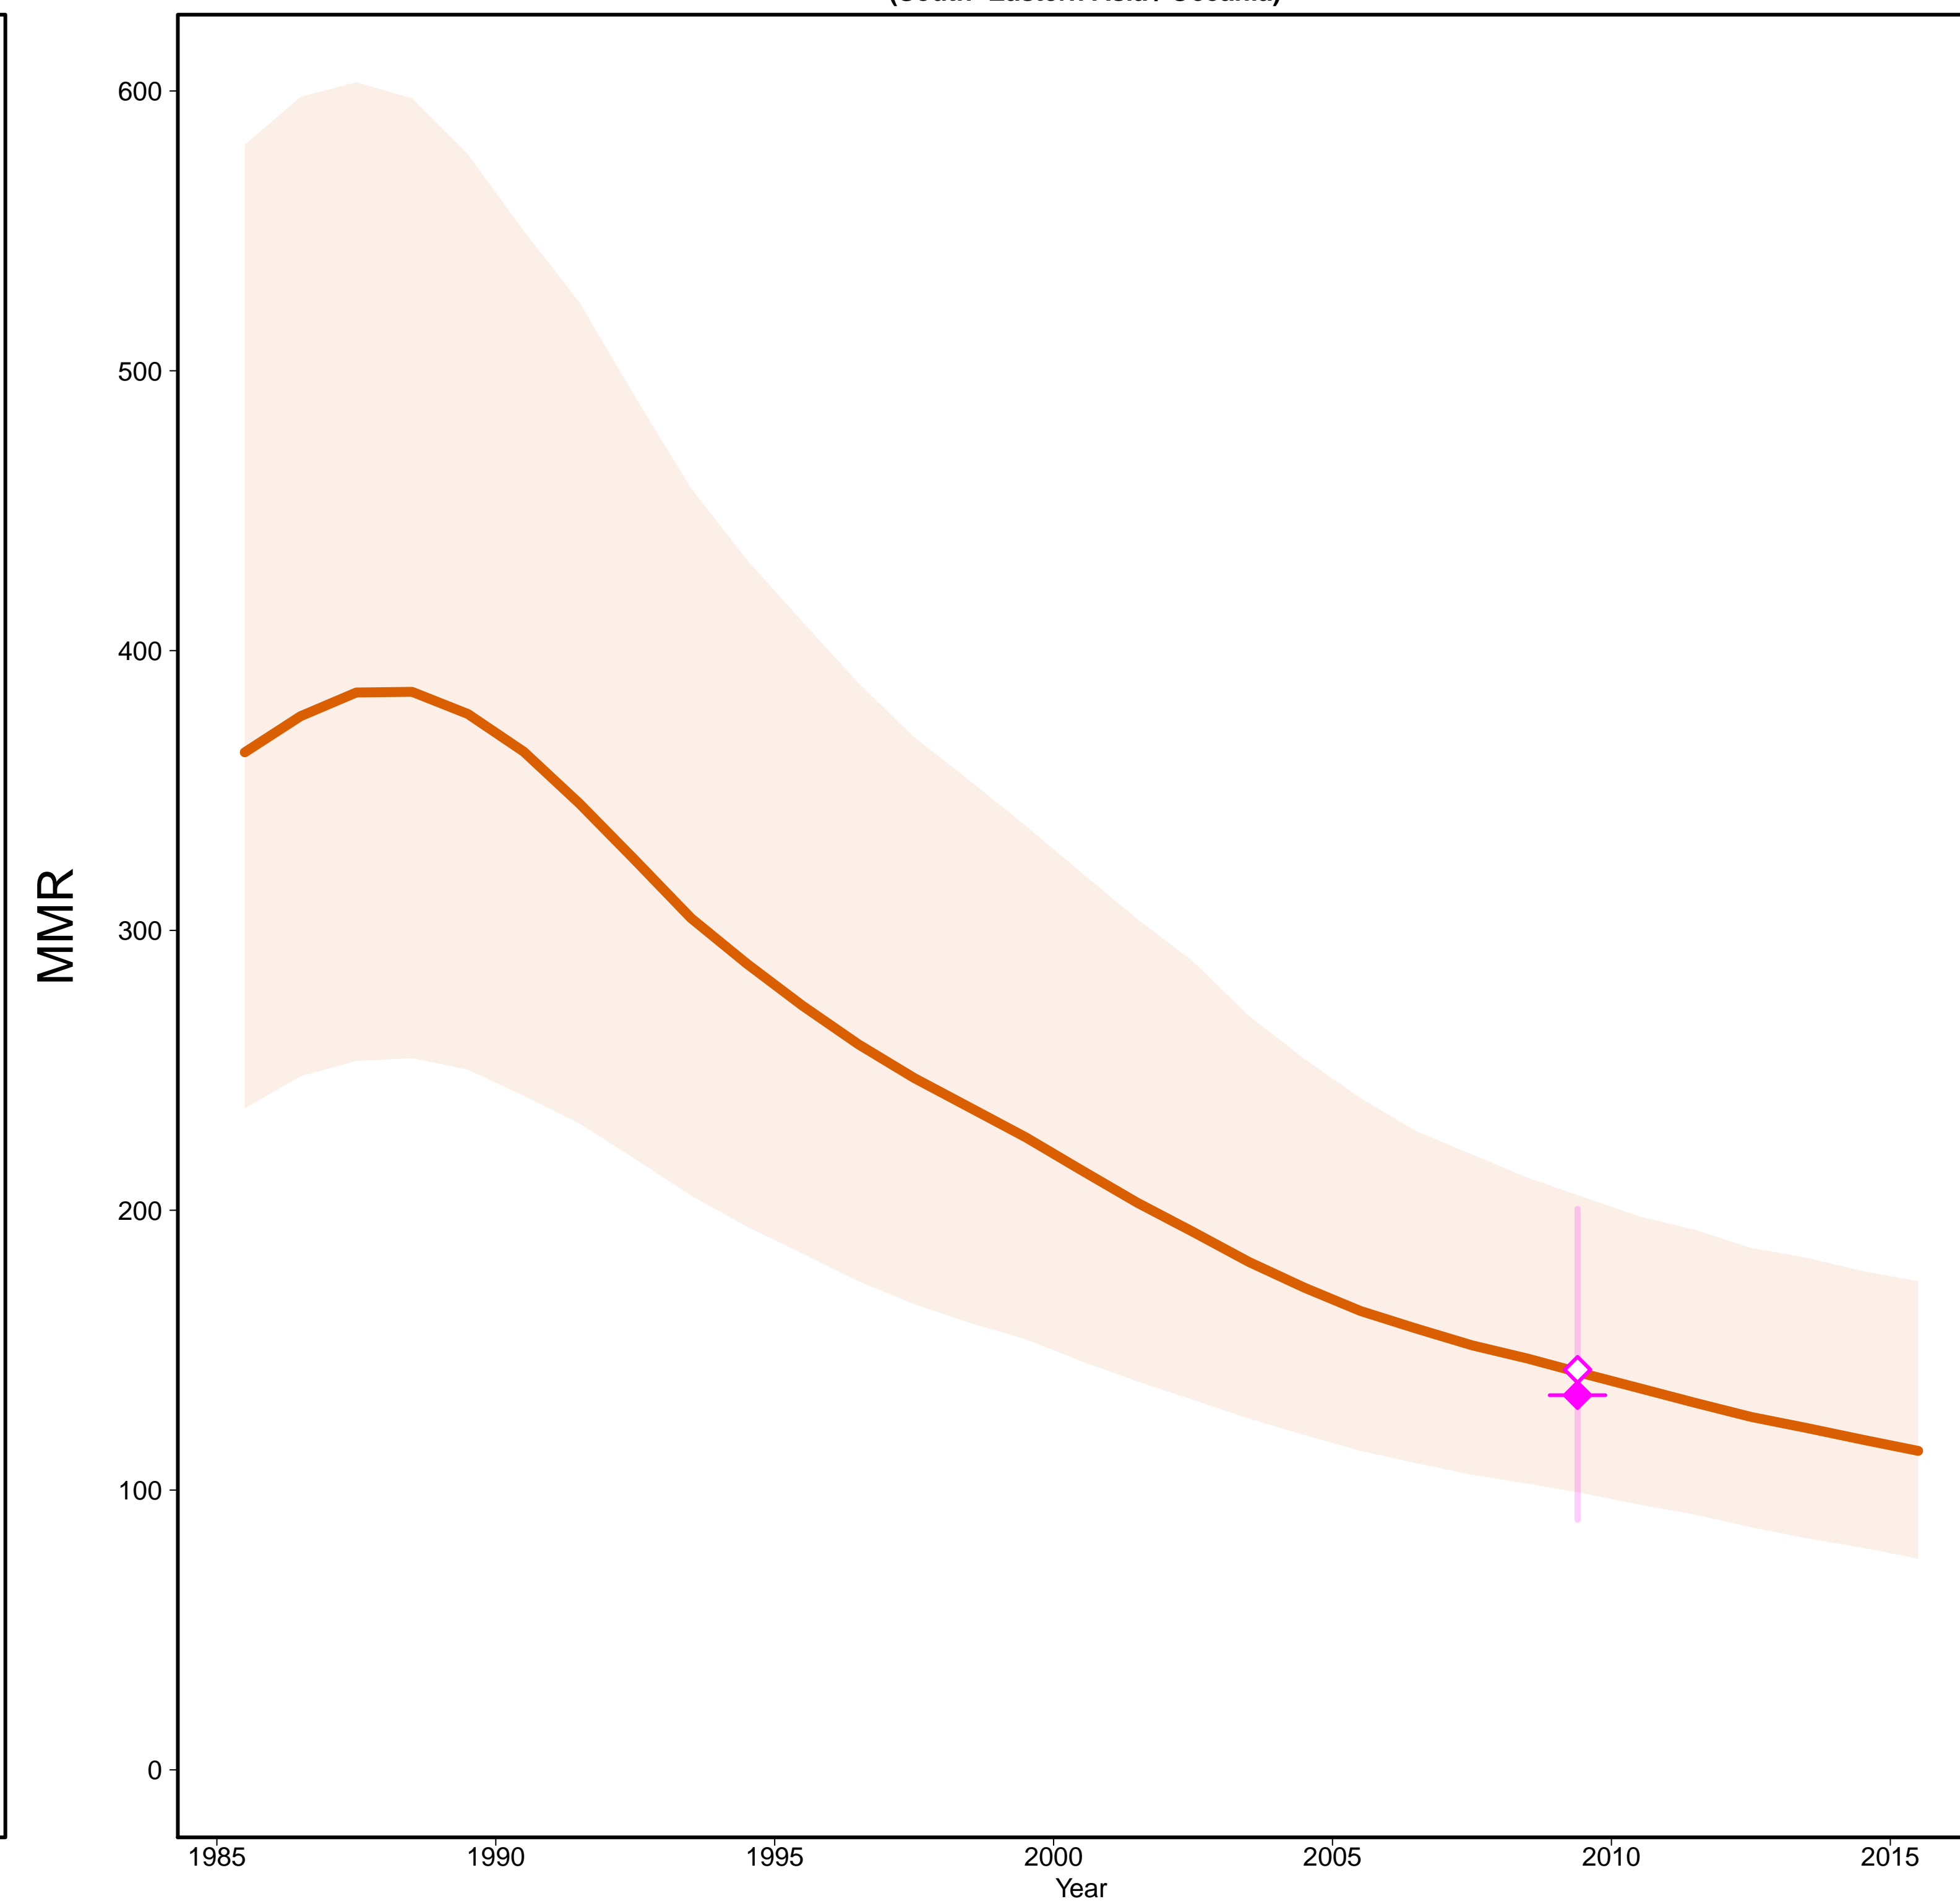

— Estimates —  
— MMR Database 2015 —  
◇ Observed Data  
◆ Adjusted Data  
— Data type —  
◆ Census

Gross Domestic Product

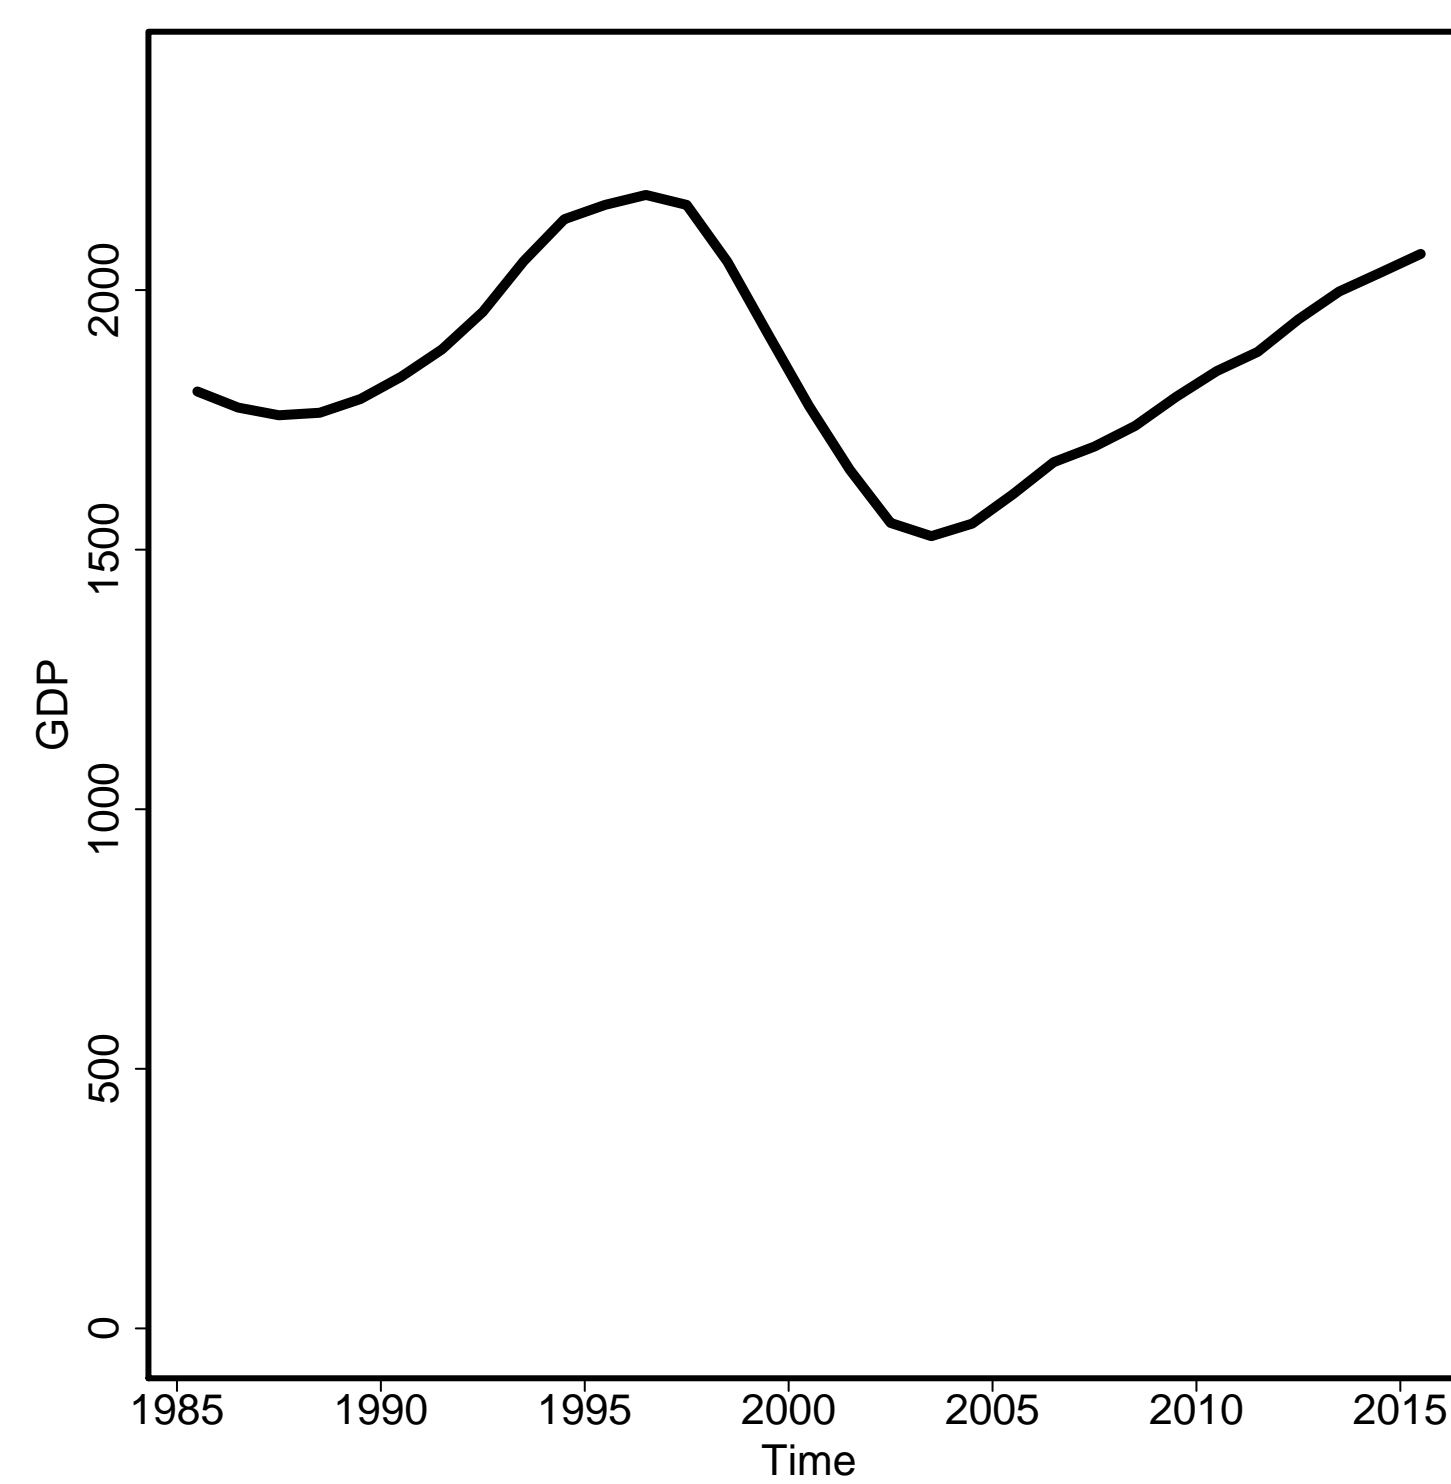

General Fertility Rate

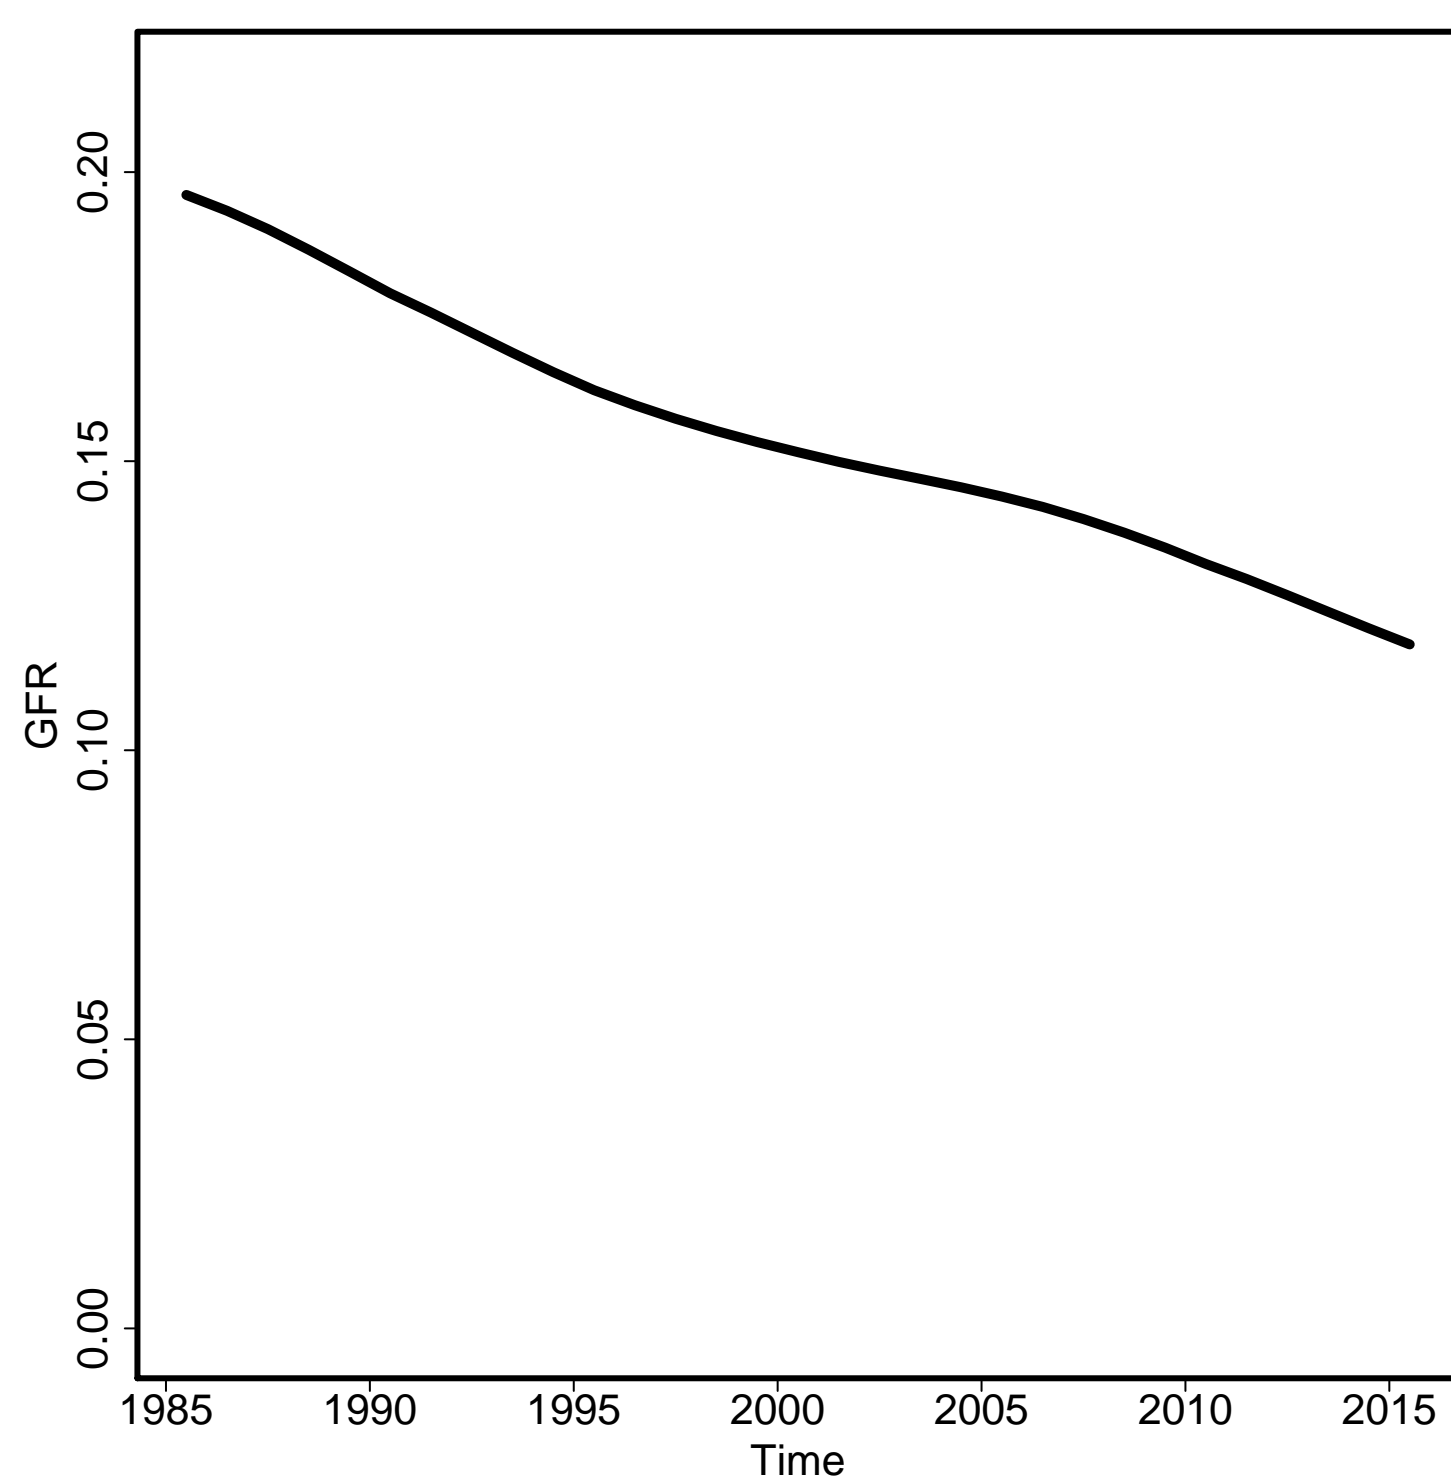

Skilled Attendance to Birth

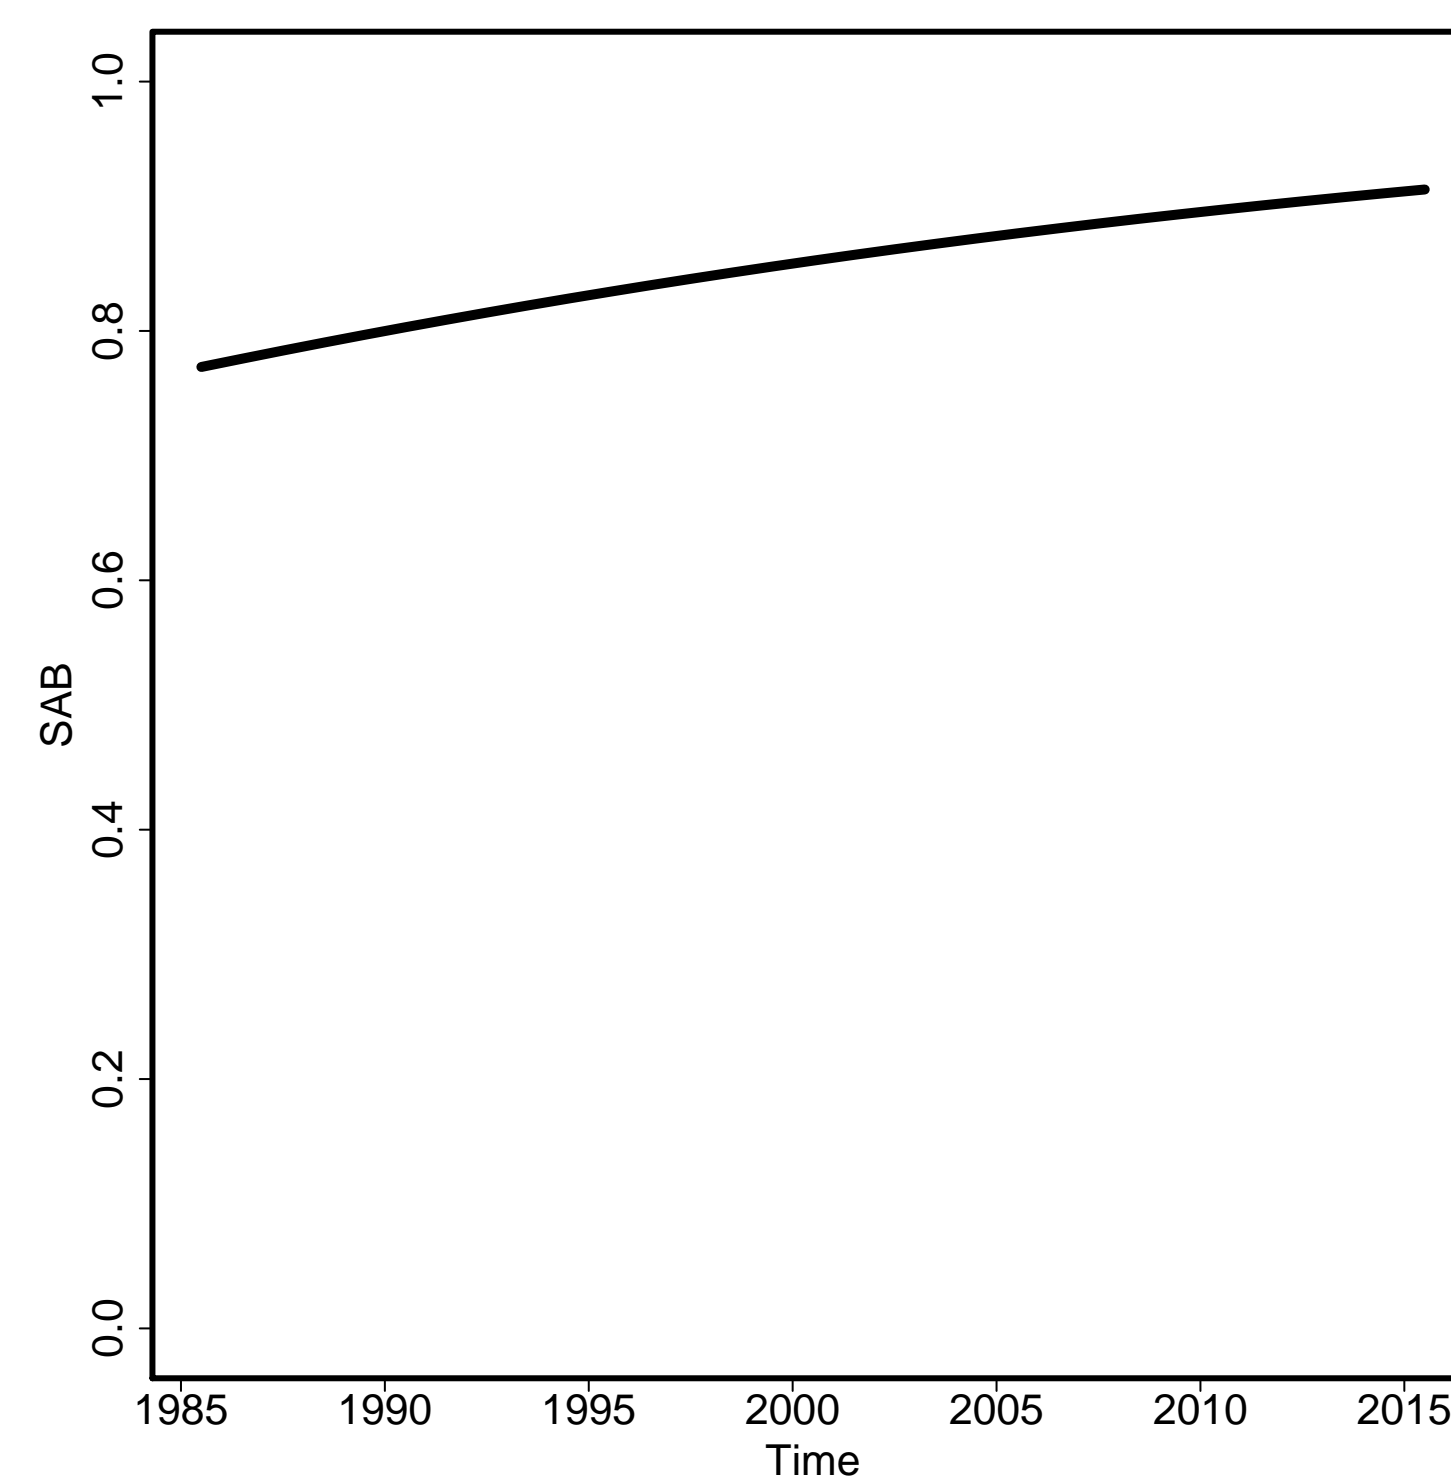

Envelope/Births

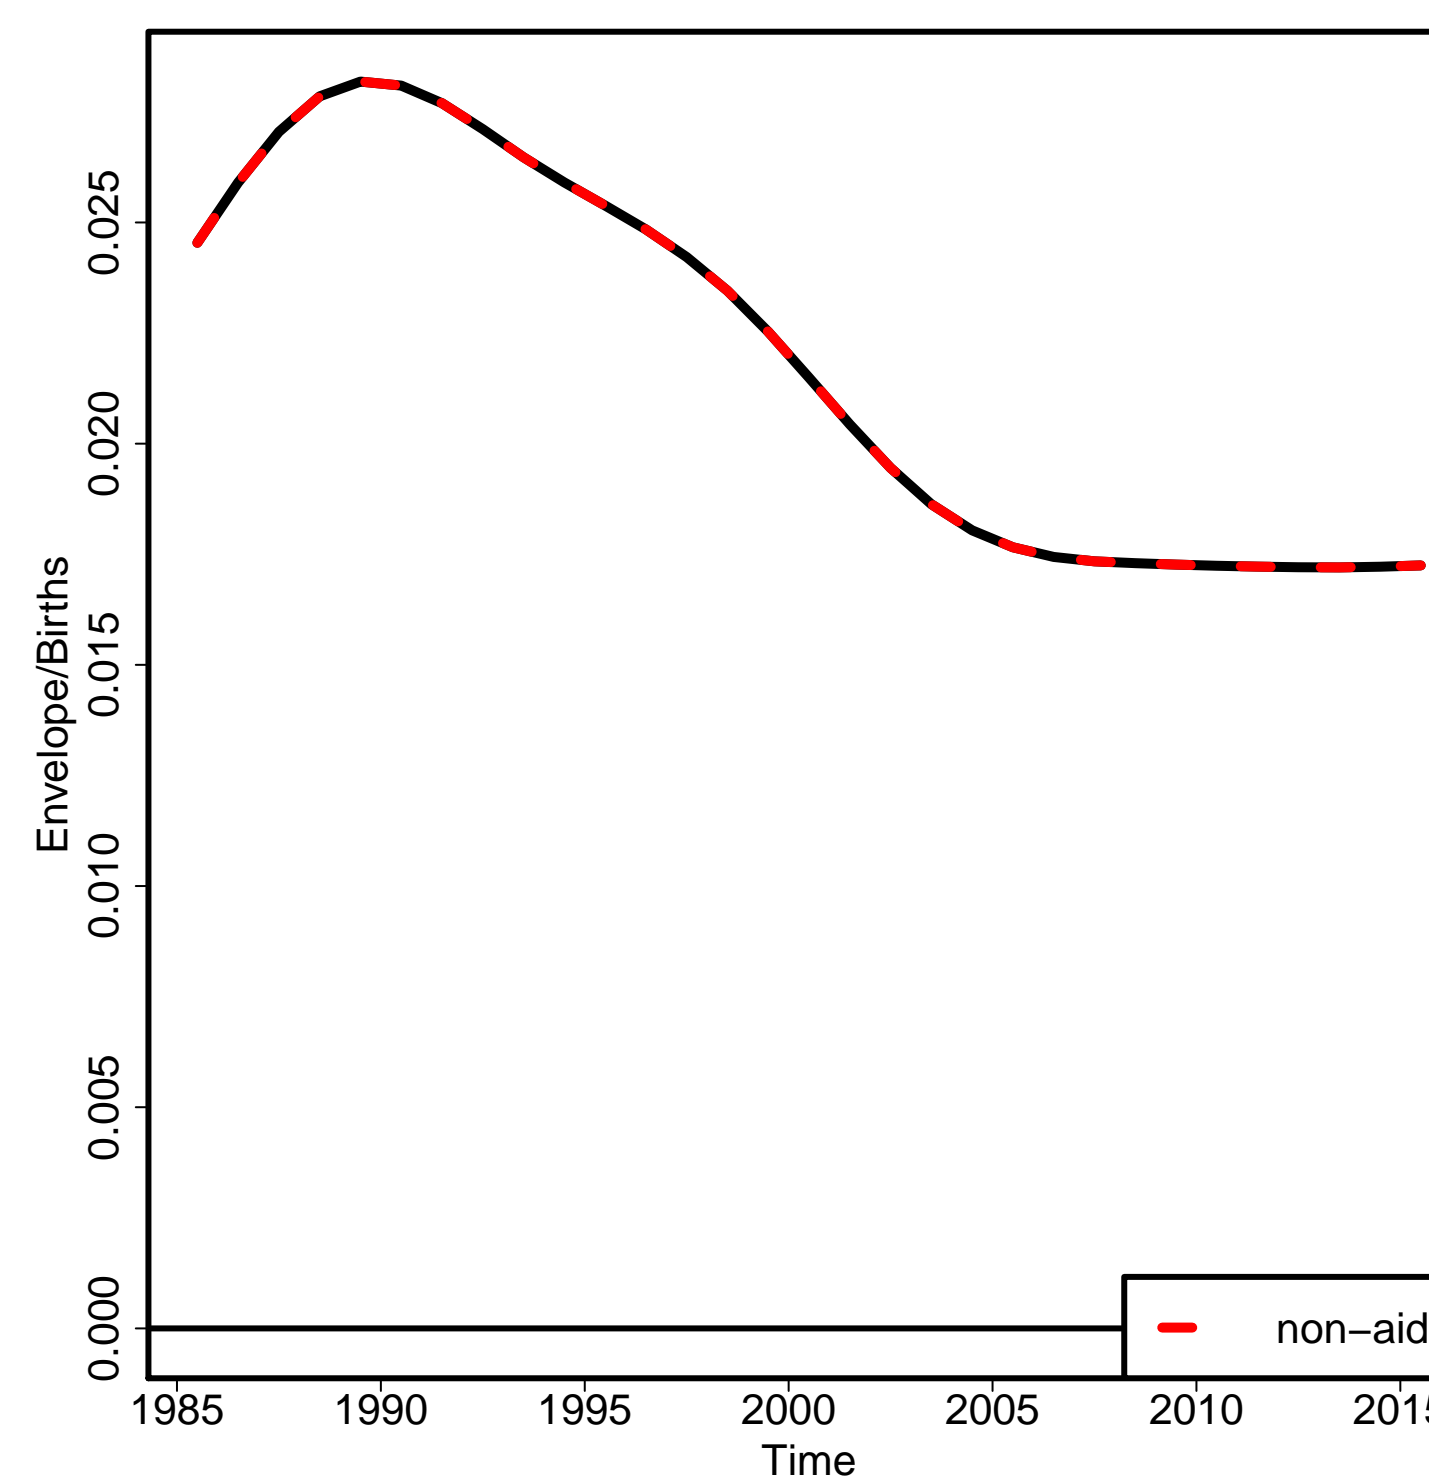

Non-aids MMR

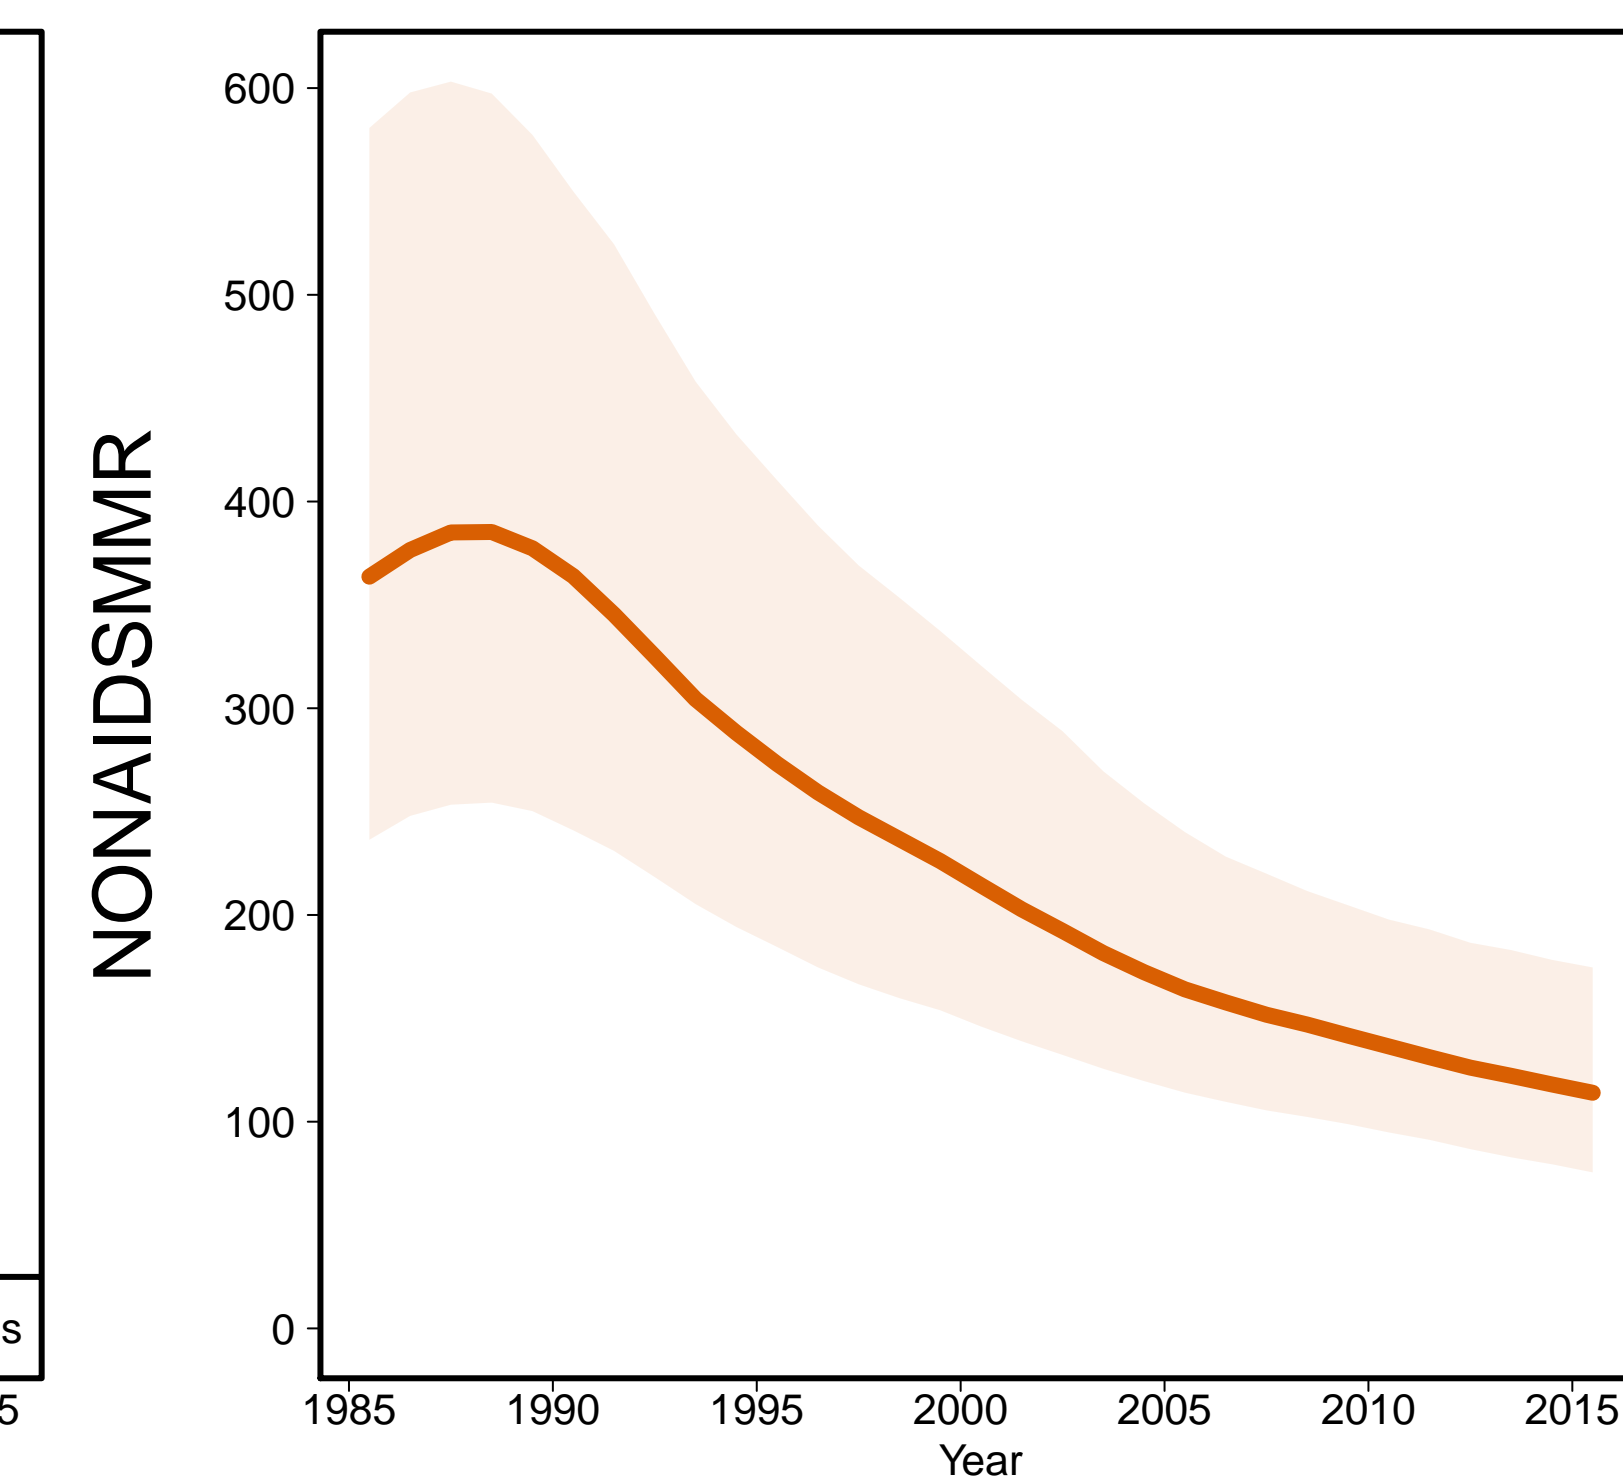

Aids MMR



Somalia [SOM]  
(Eastern Africa)

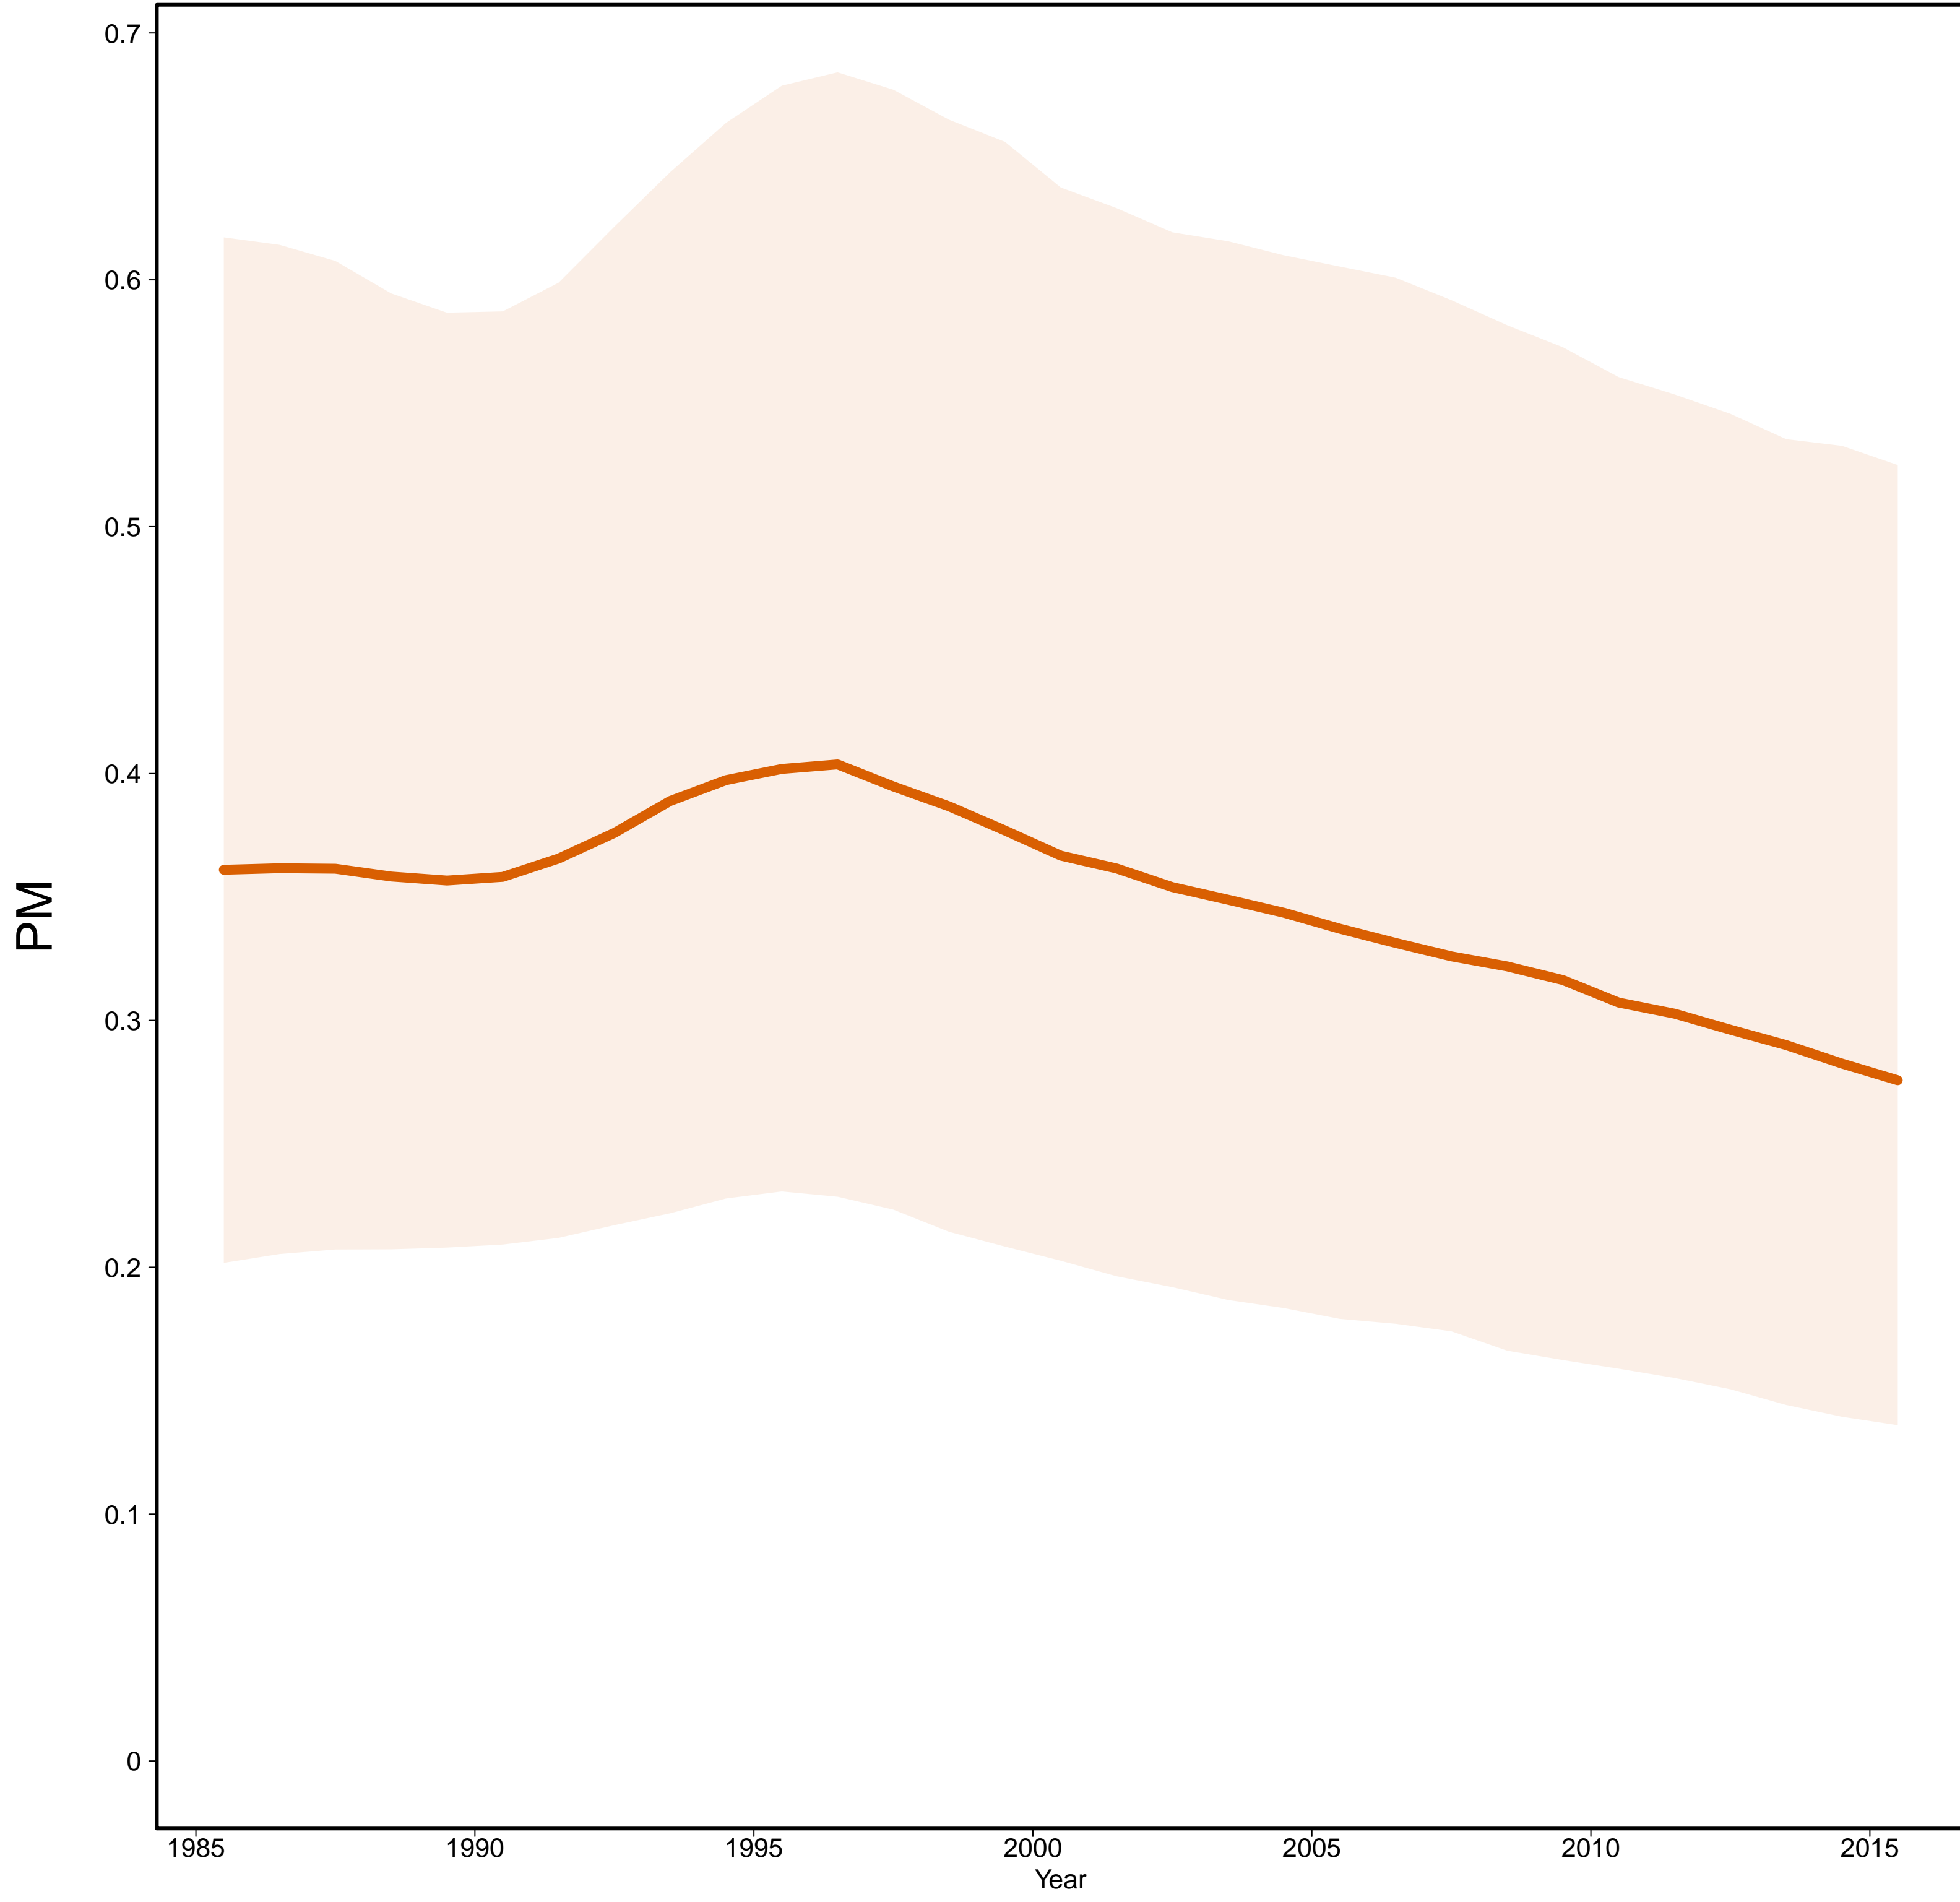

Somalia [SOM]  
(Eastern Africa)

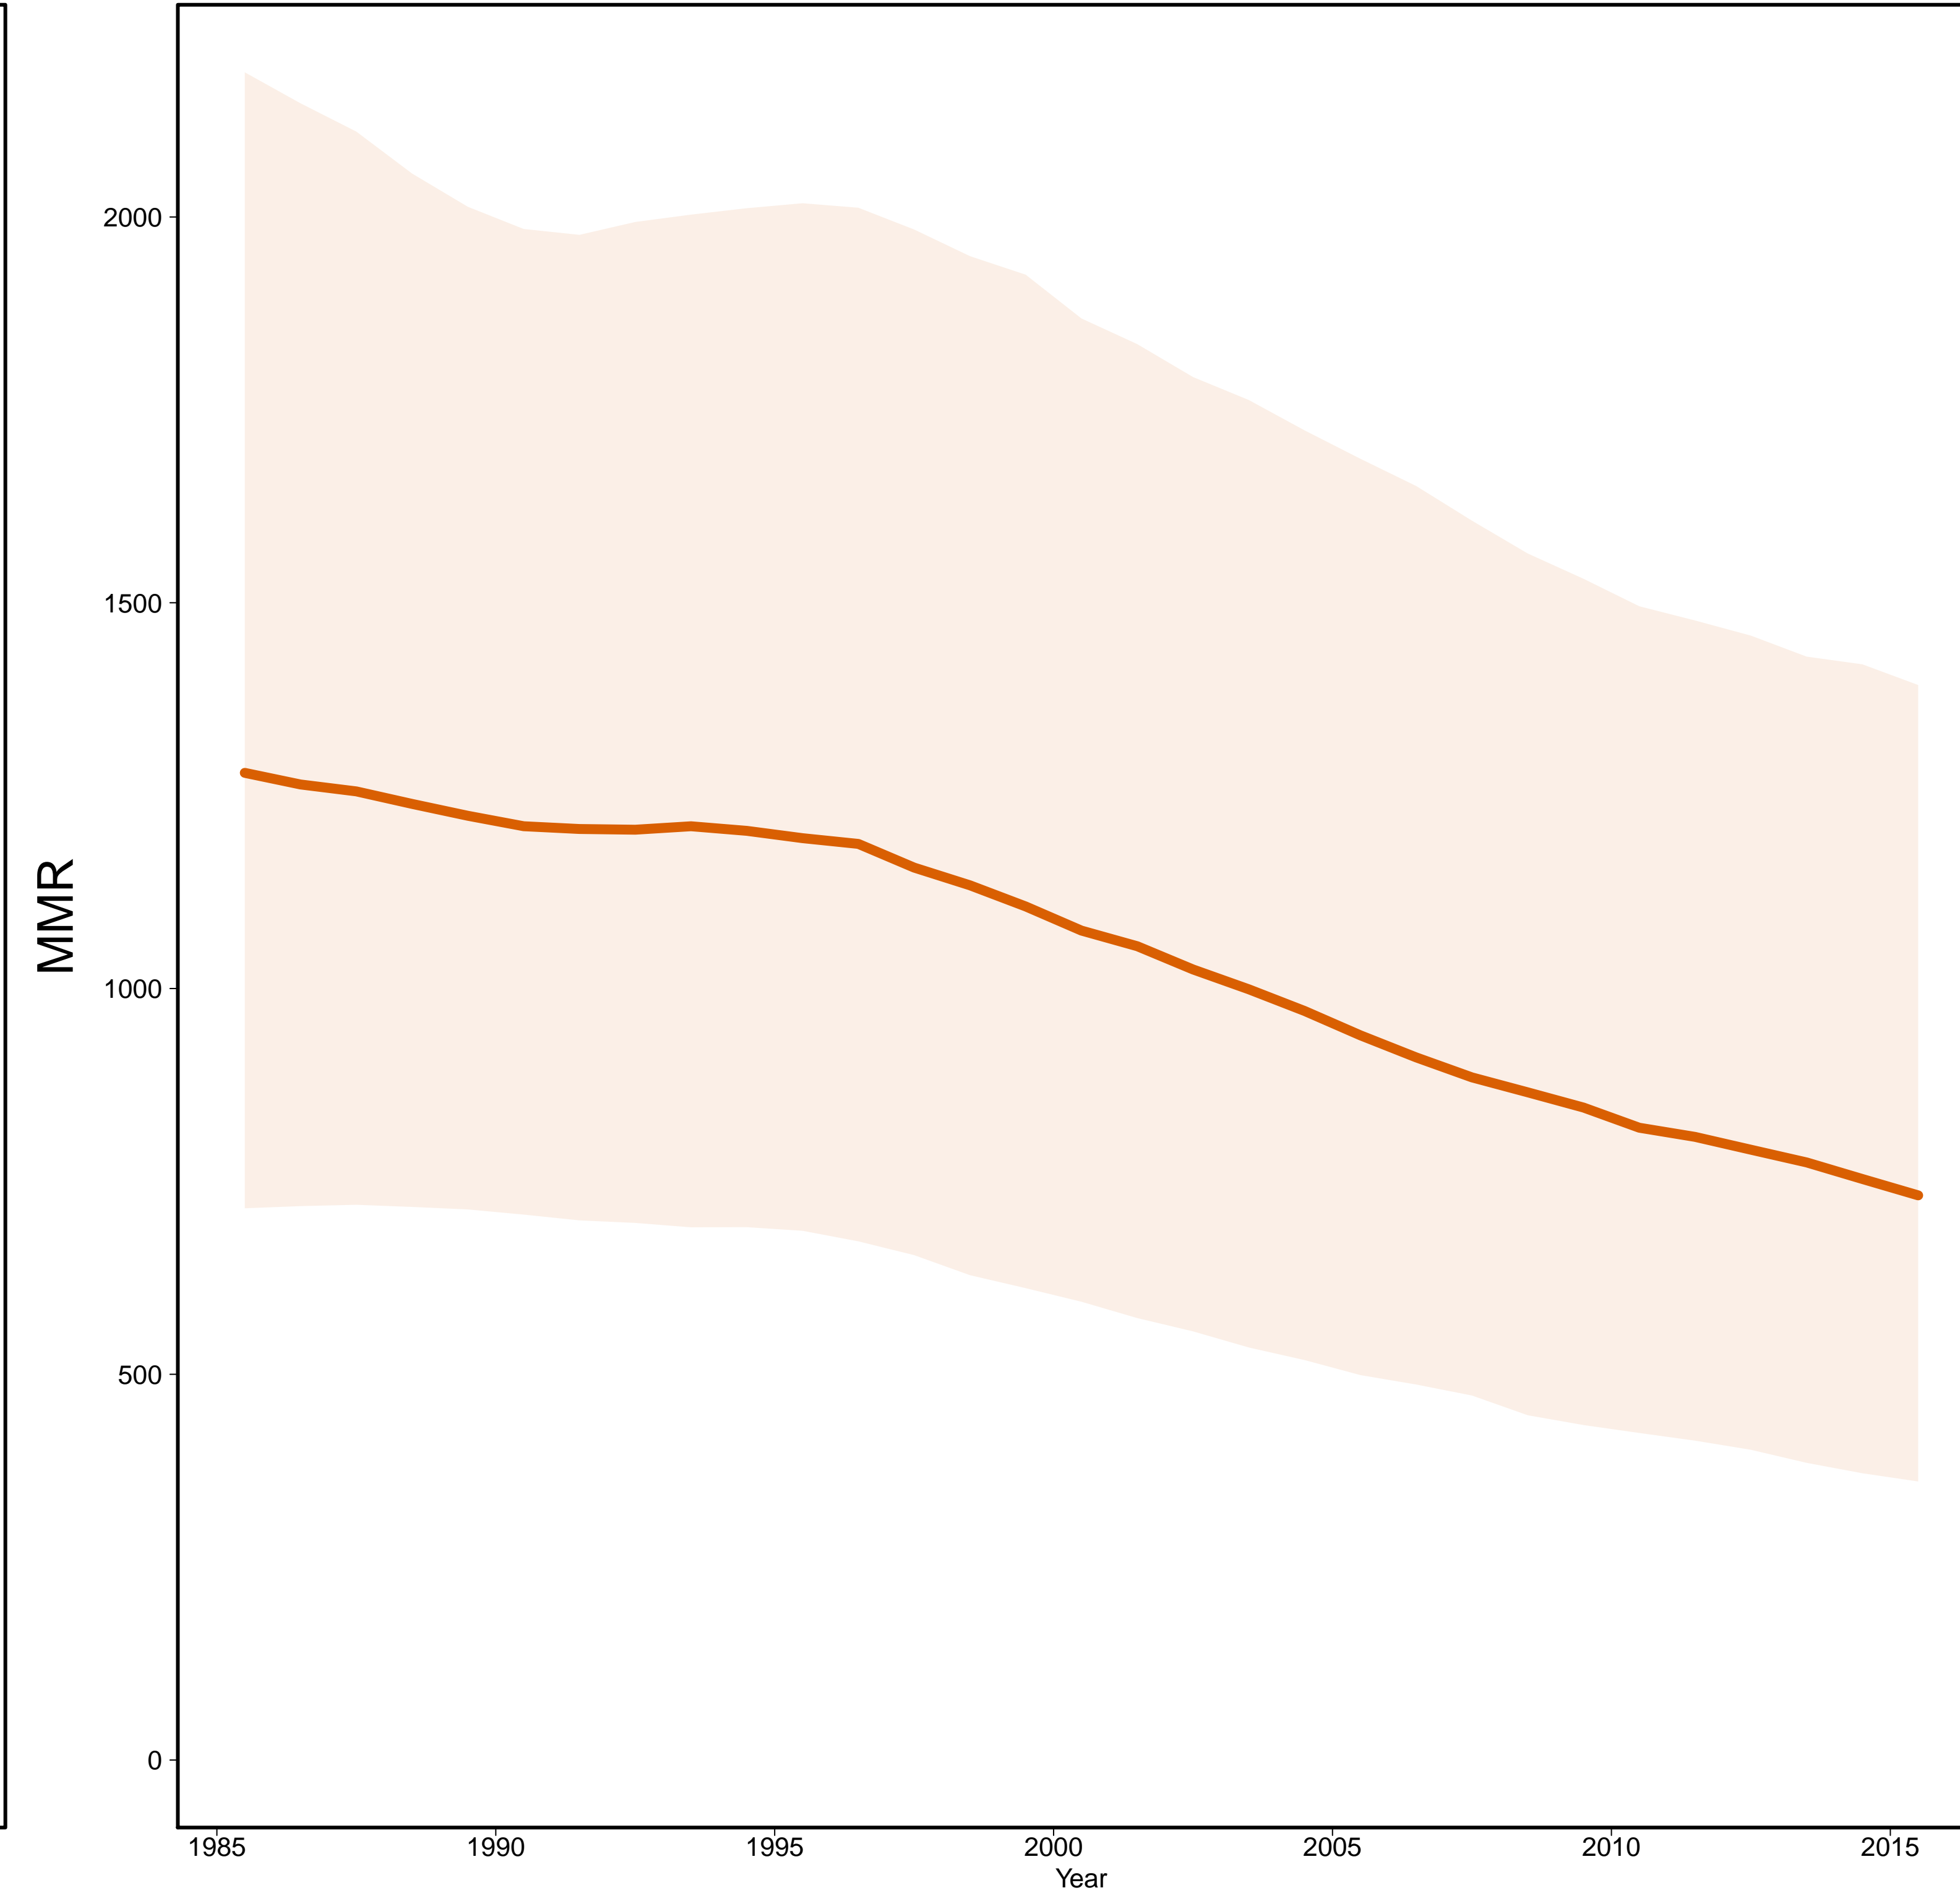

– Estimates –  
 Mlate  
 – MMR Database 2015 –

Gross Domestic Product

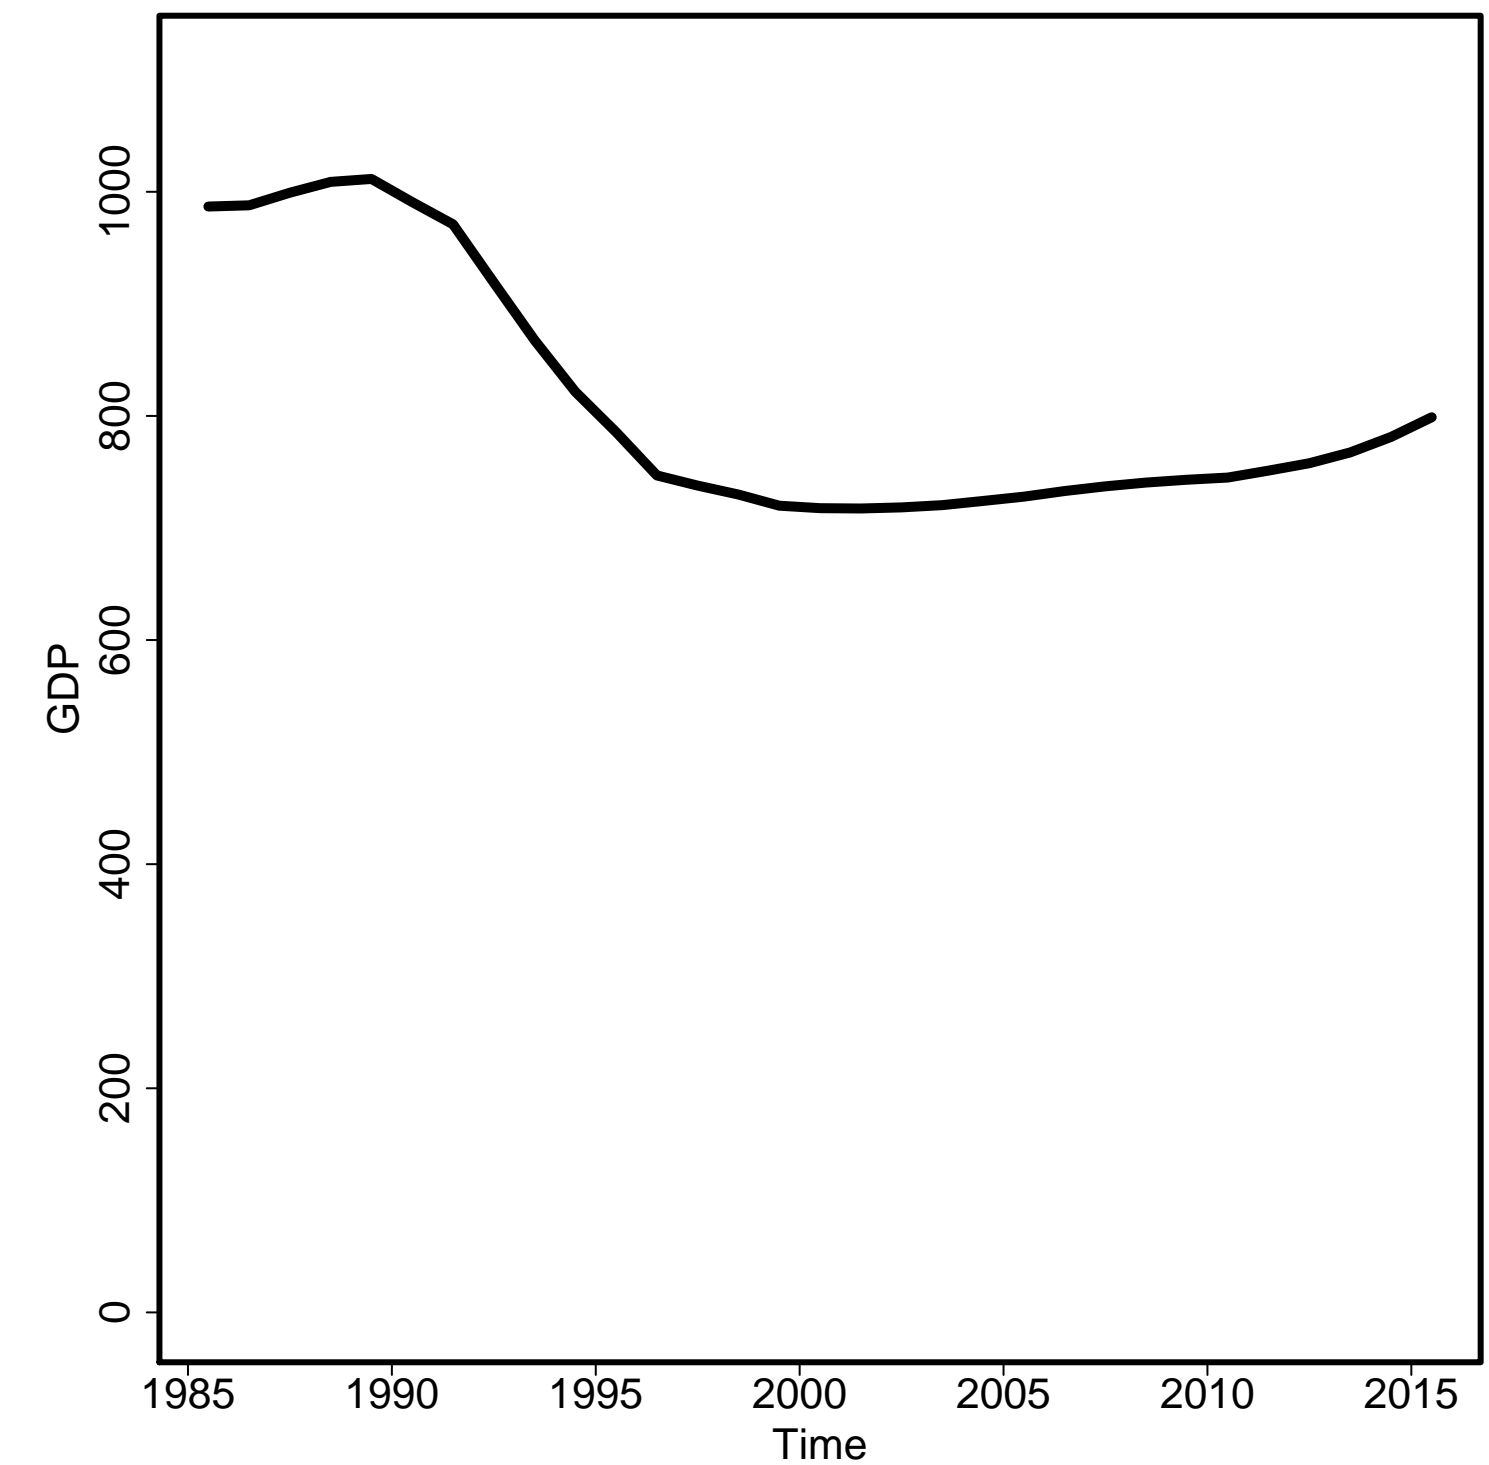

General Fertility Rate

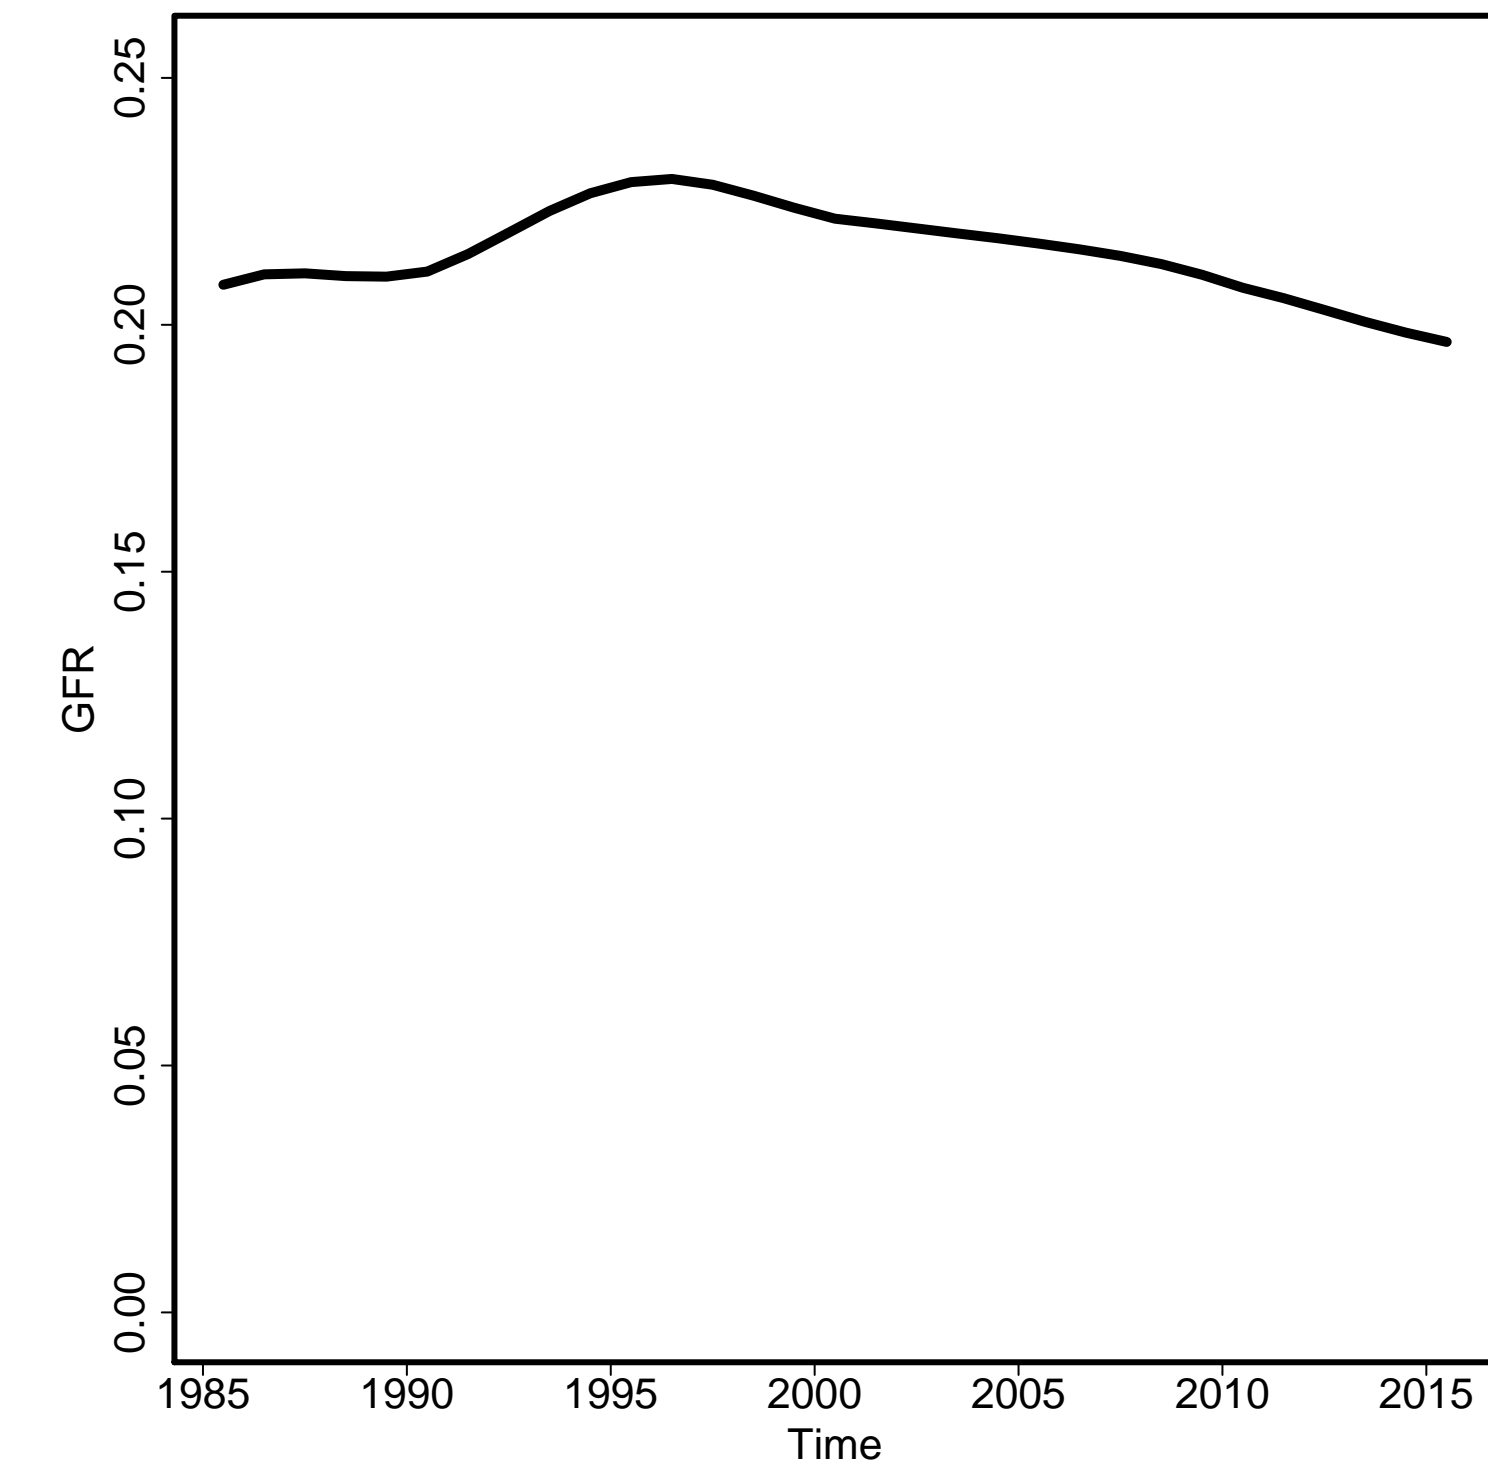

Skilled Attendance to Birth

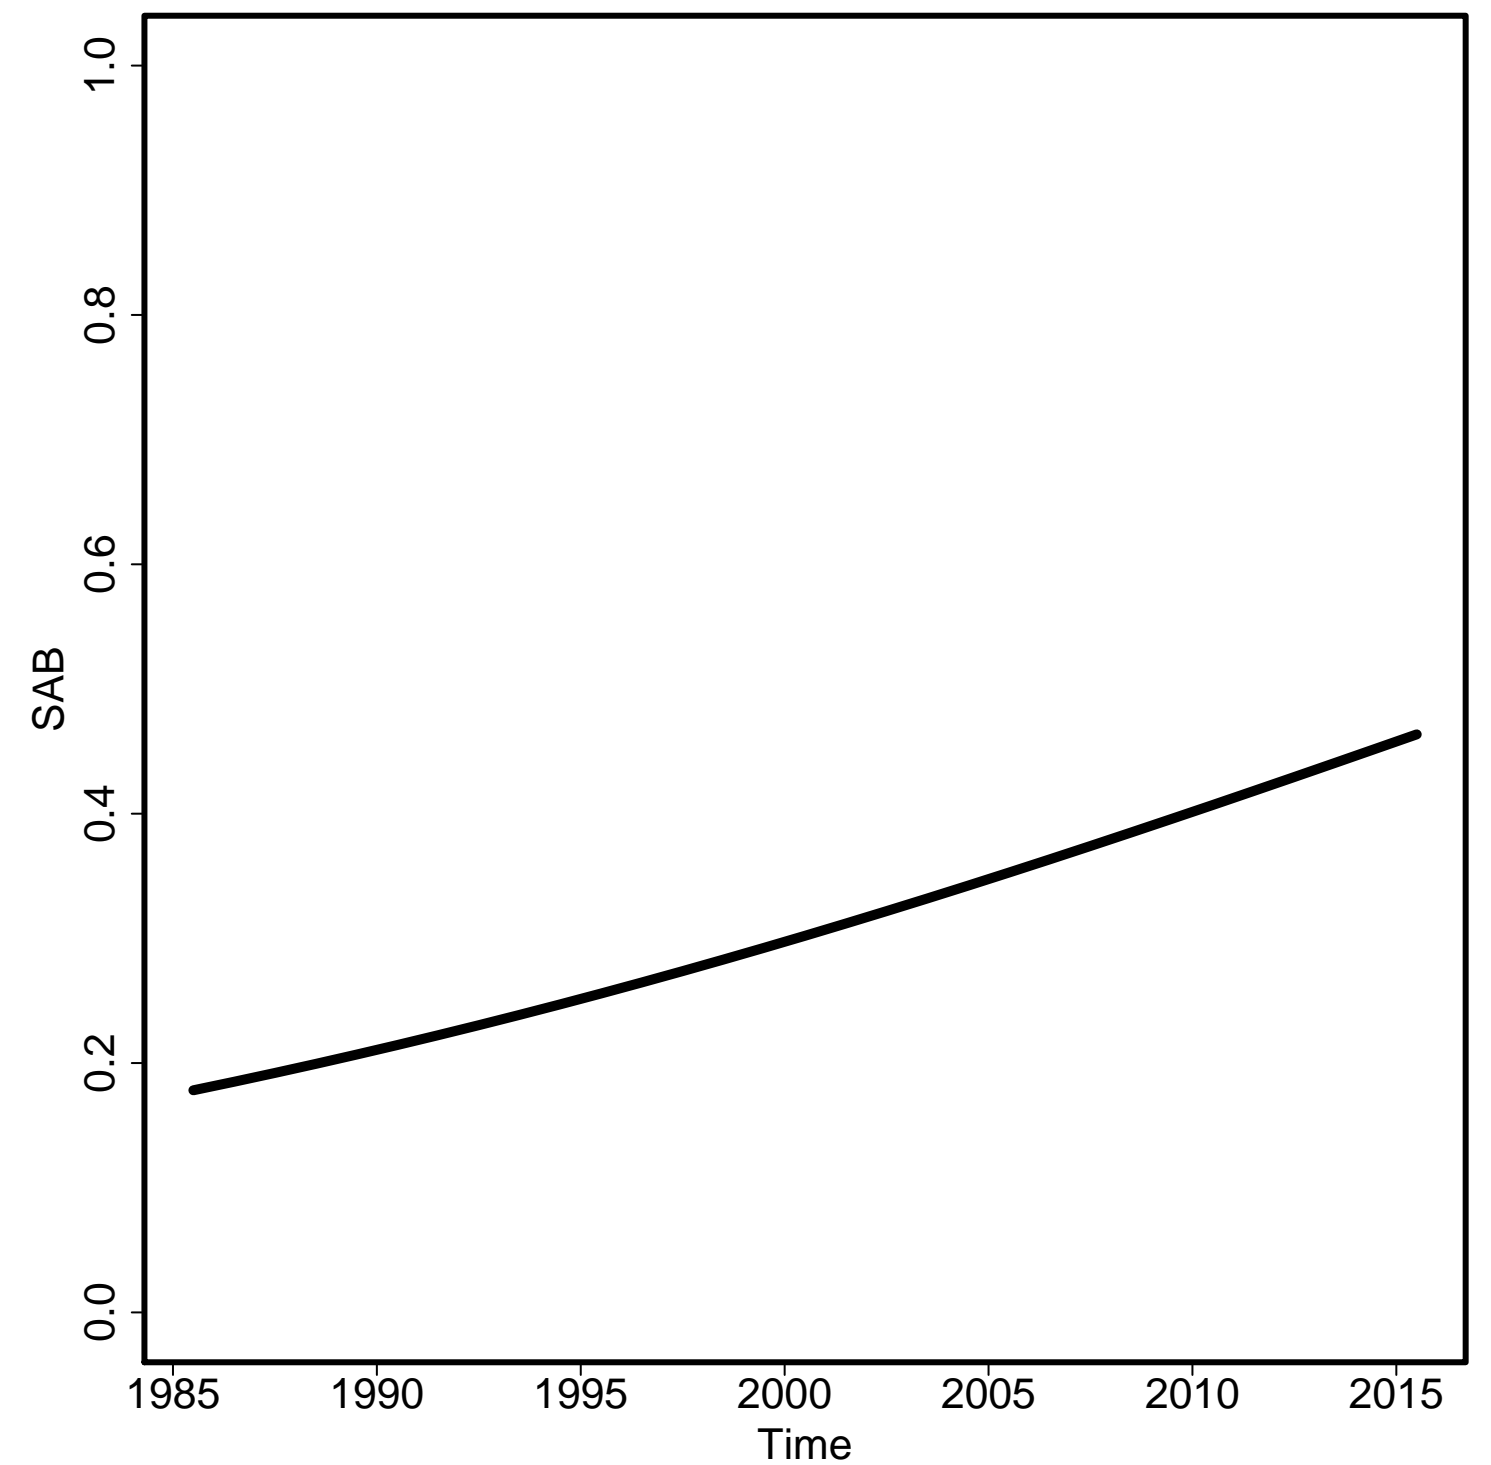

Envelope/Births

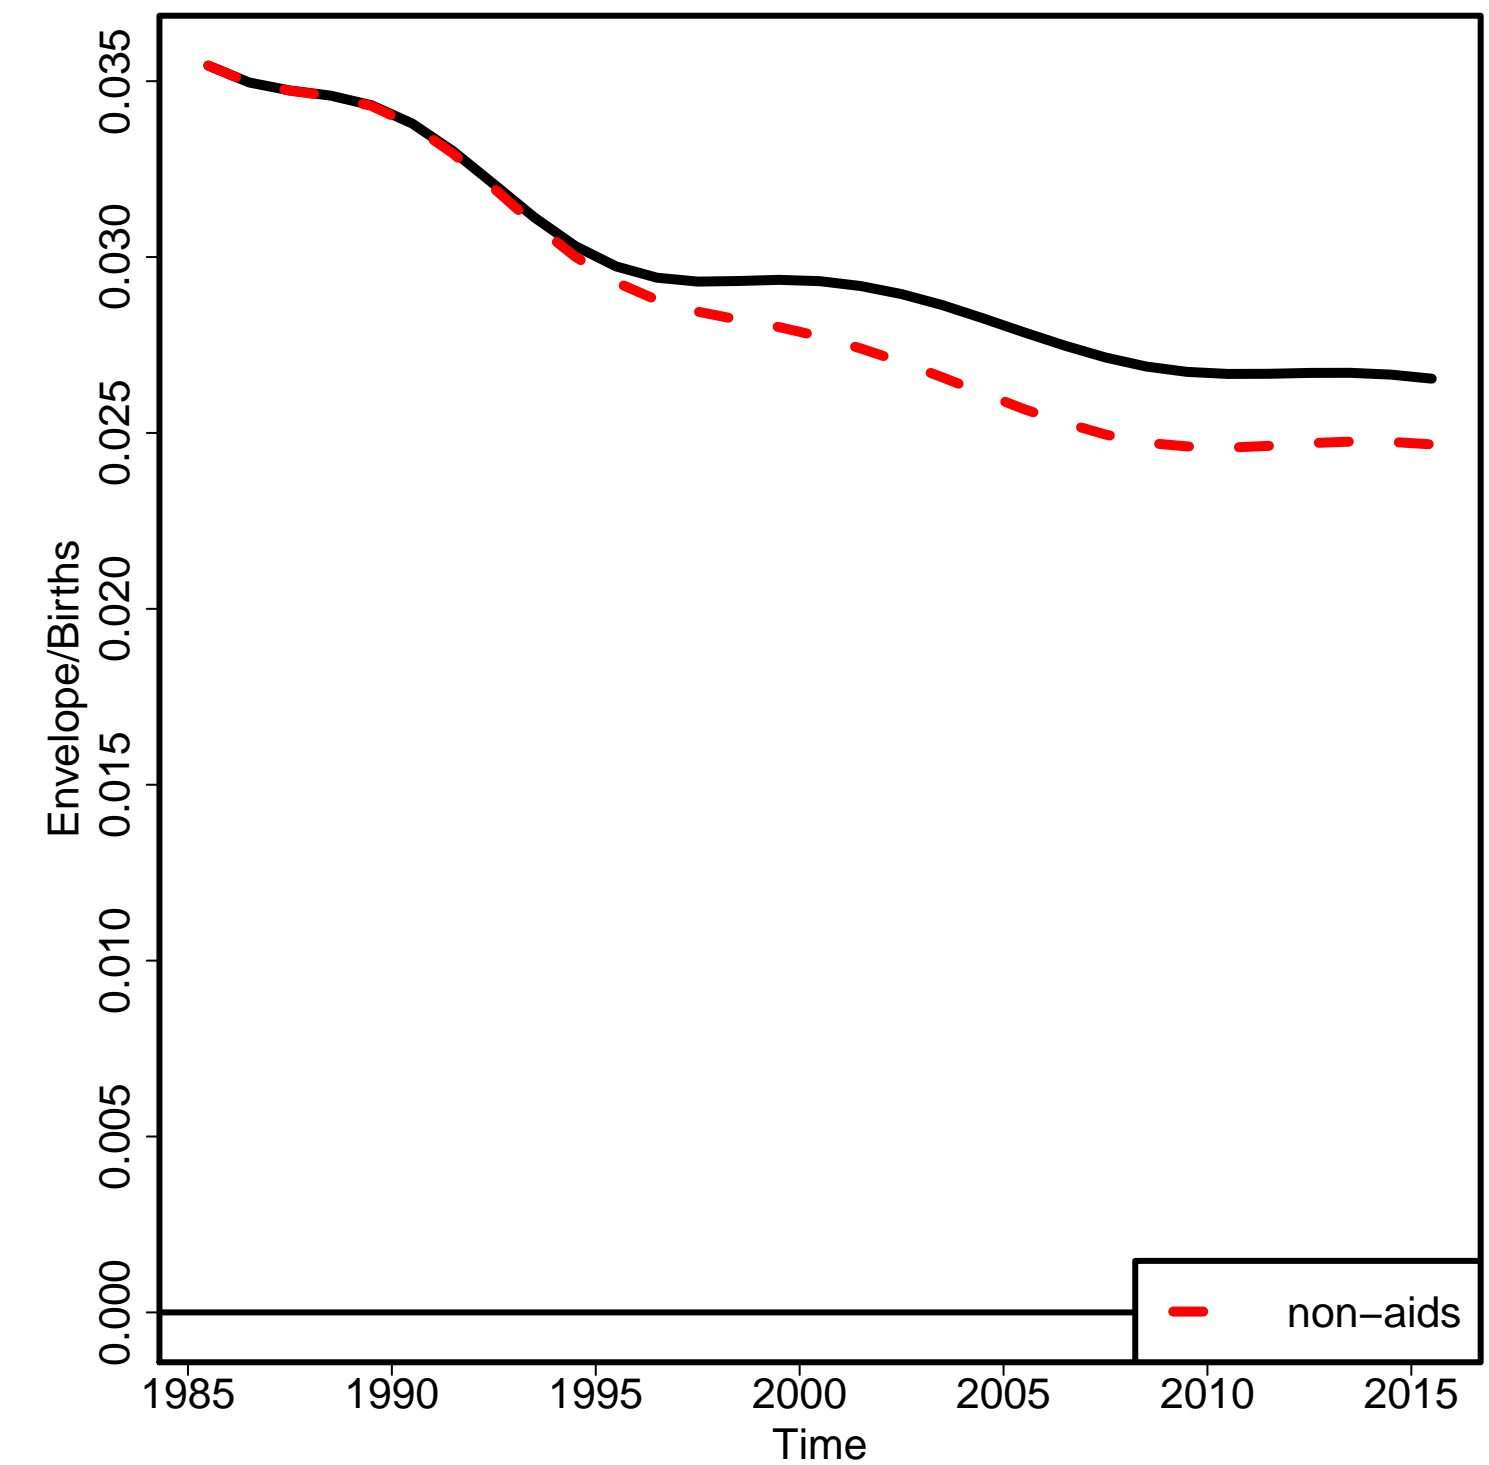

Non-aids MMR

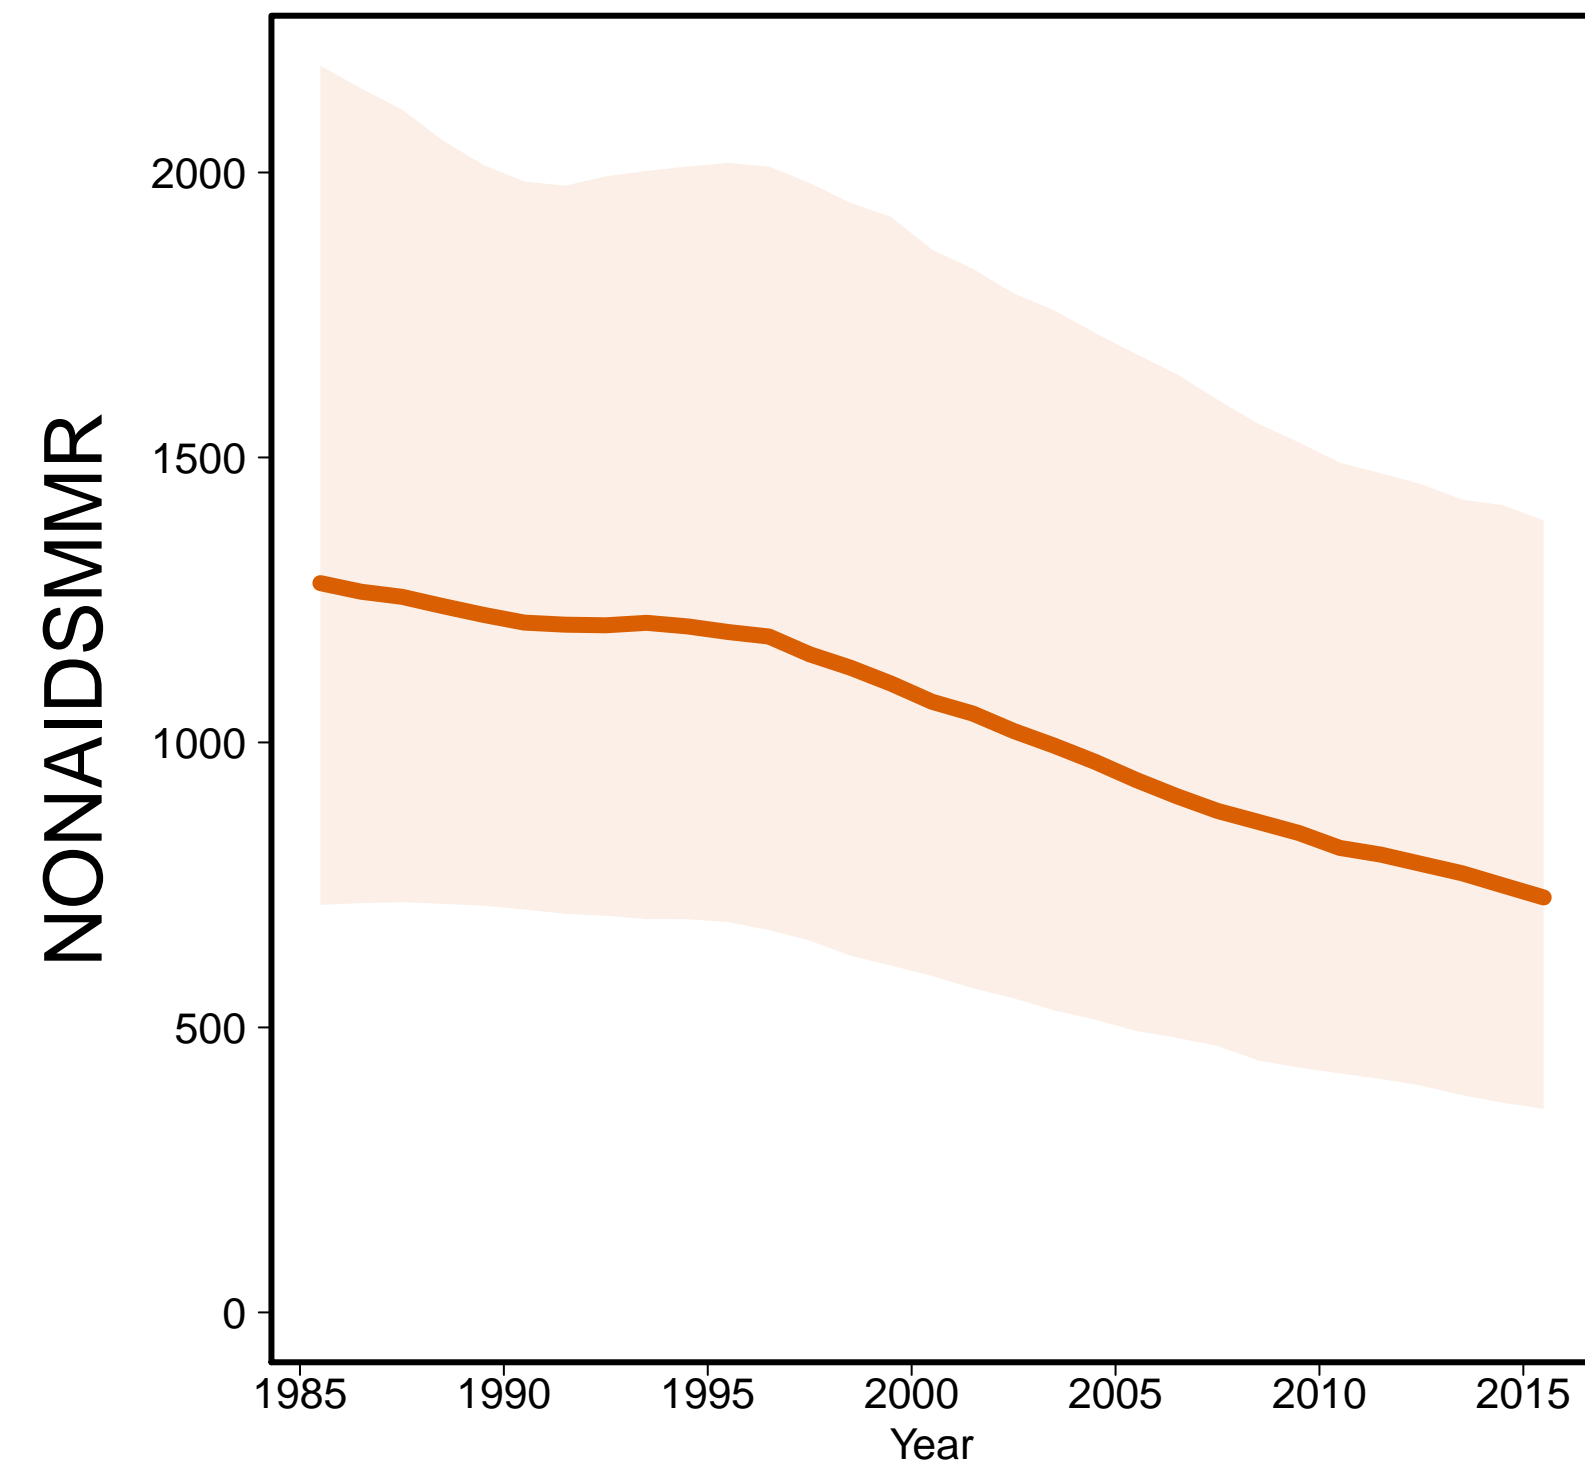

Aids MMR

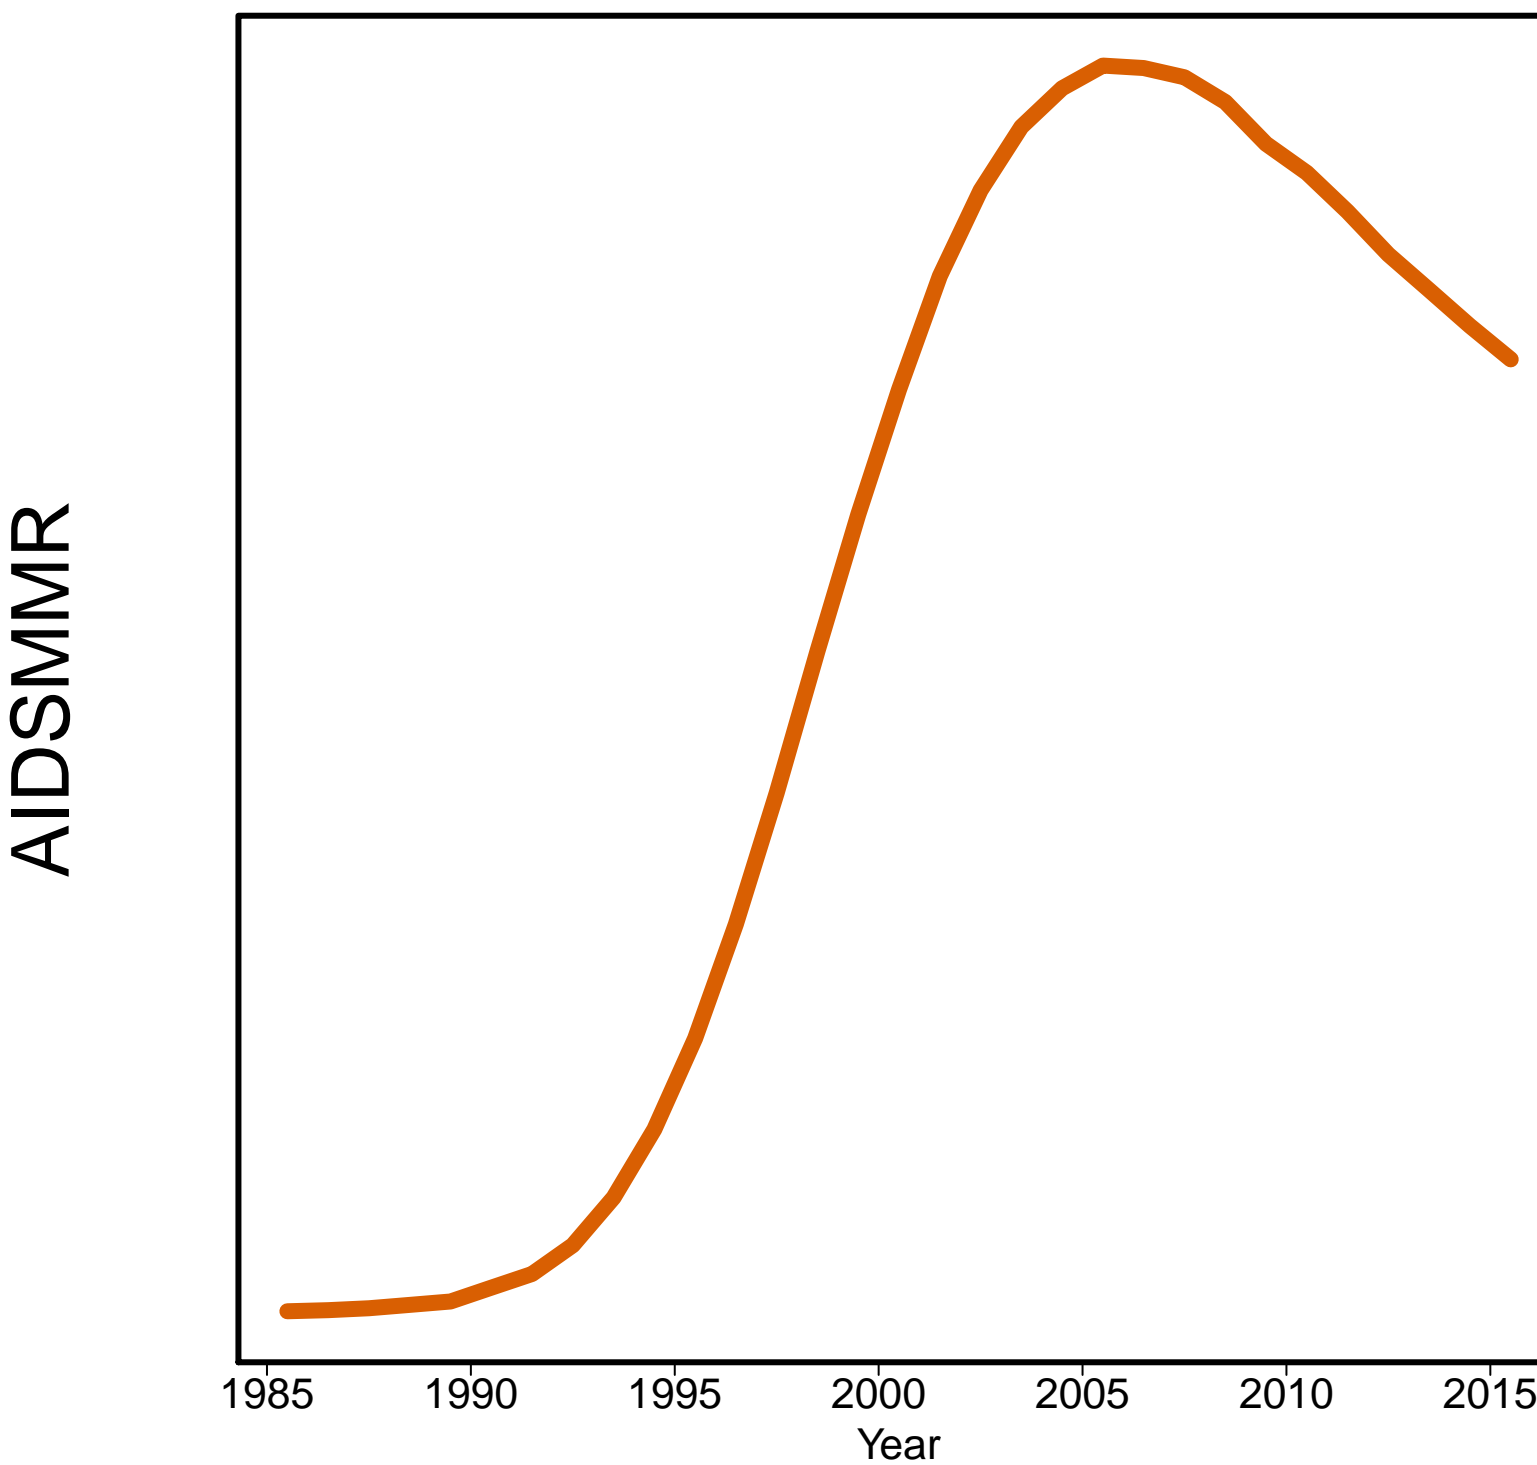

South Africa [ZAF]  
(Southern Africa)

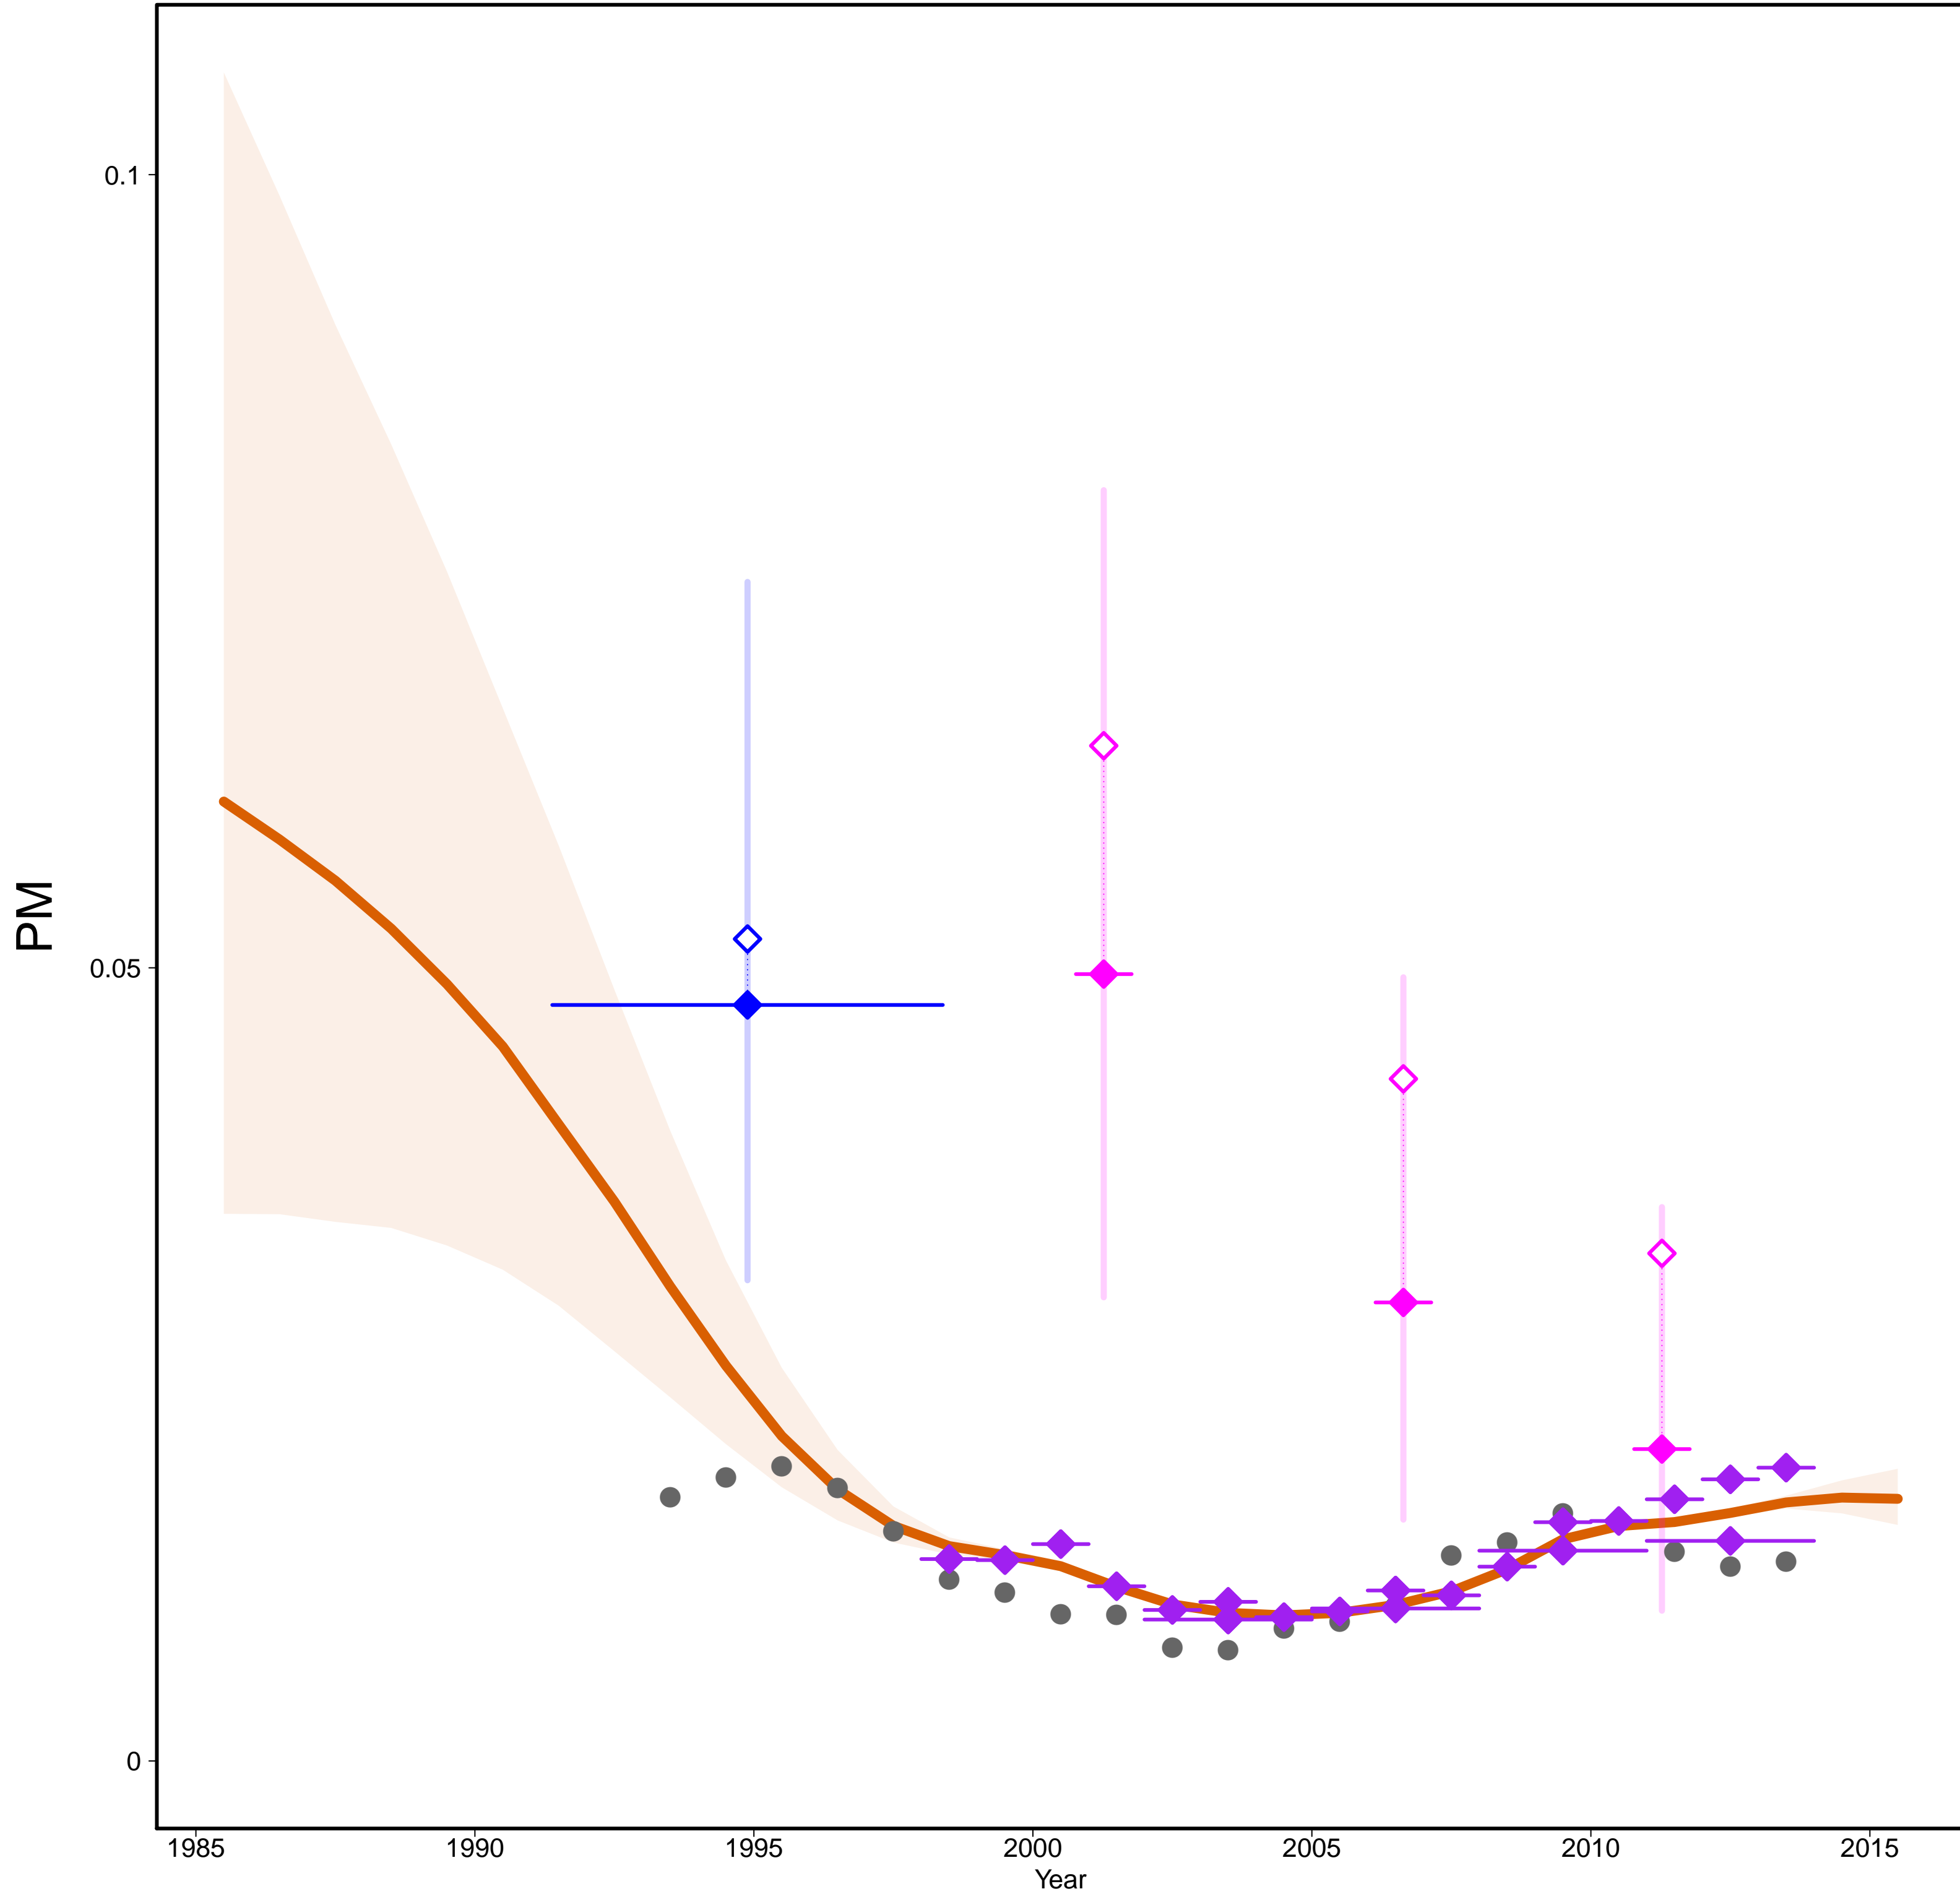

South Africa [ZAF]  
(Southern Africa)

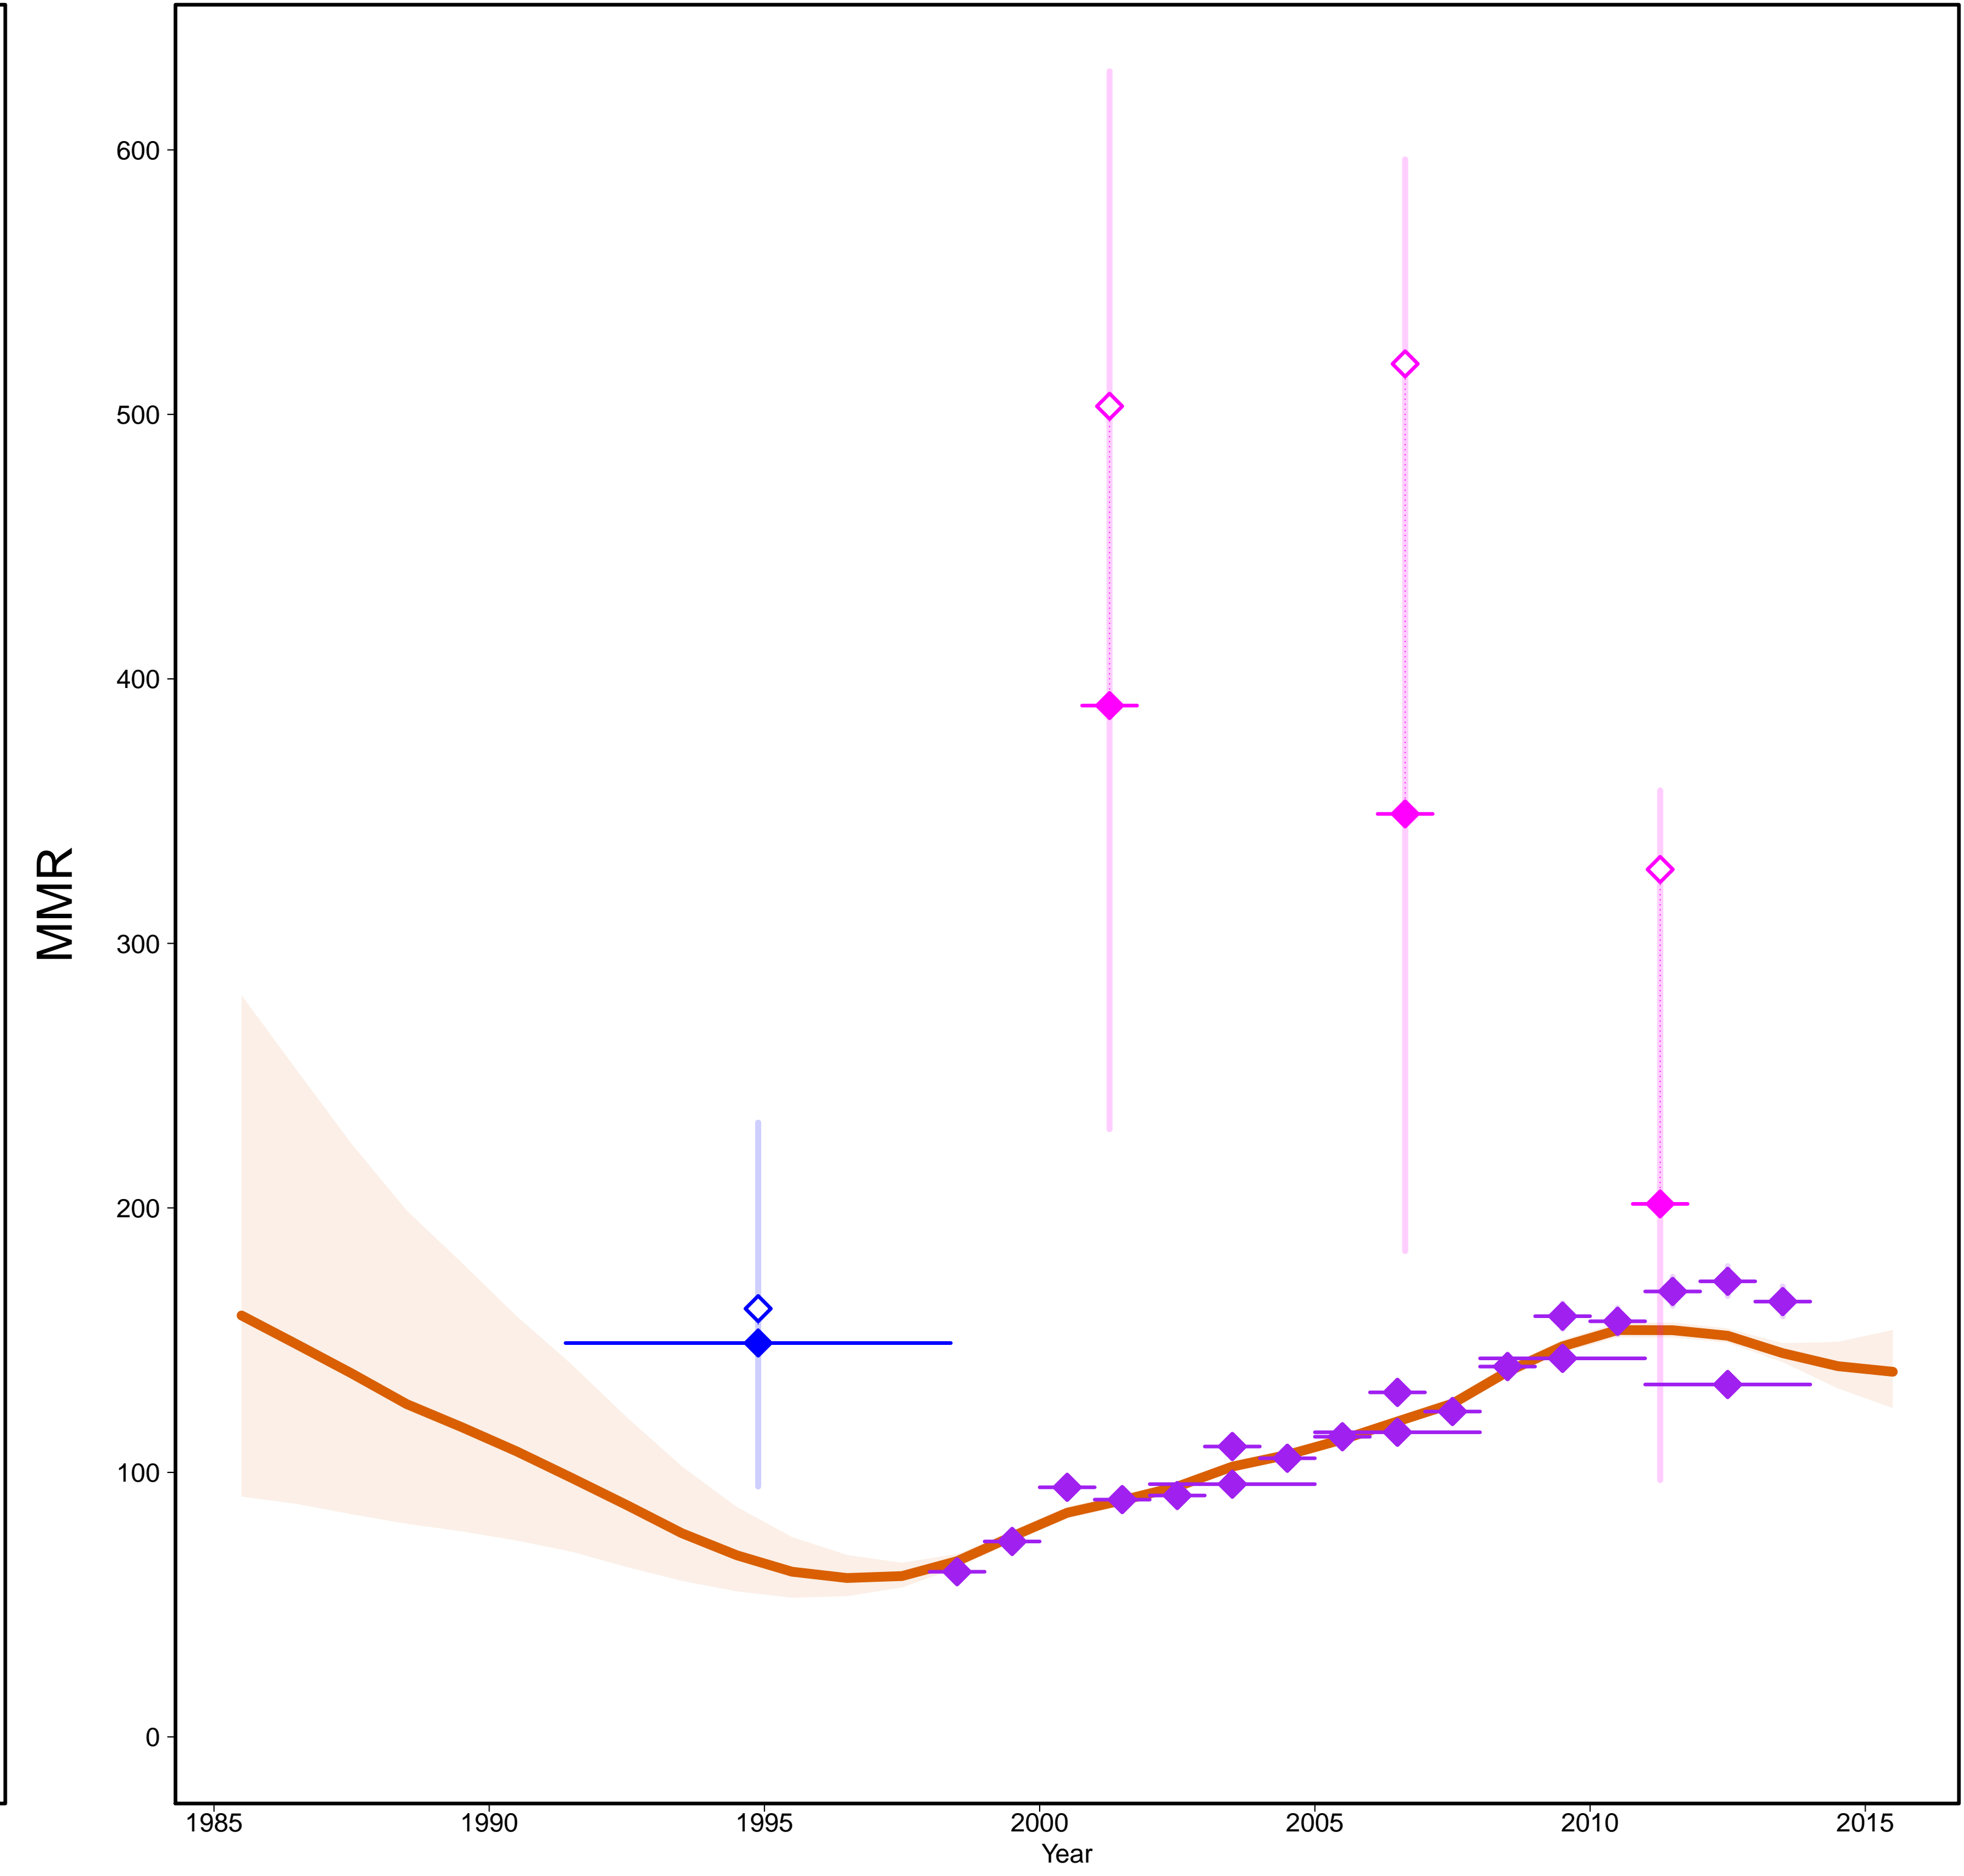

- Estimates –
- Mlate
- MMR Database 2015 –
- ◇ Observed Data
- ◆ Adjusted Data
- Data type –
- ◆ Spec. studies
- ◆ DHS
- ◆ Census
- Excluded VR data  
(data quality issues)

Gross Domestic Product

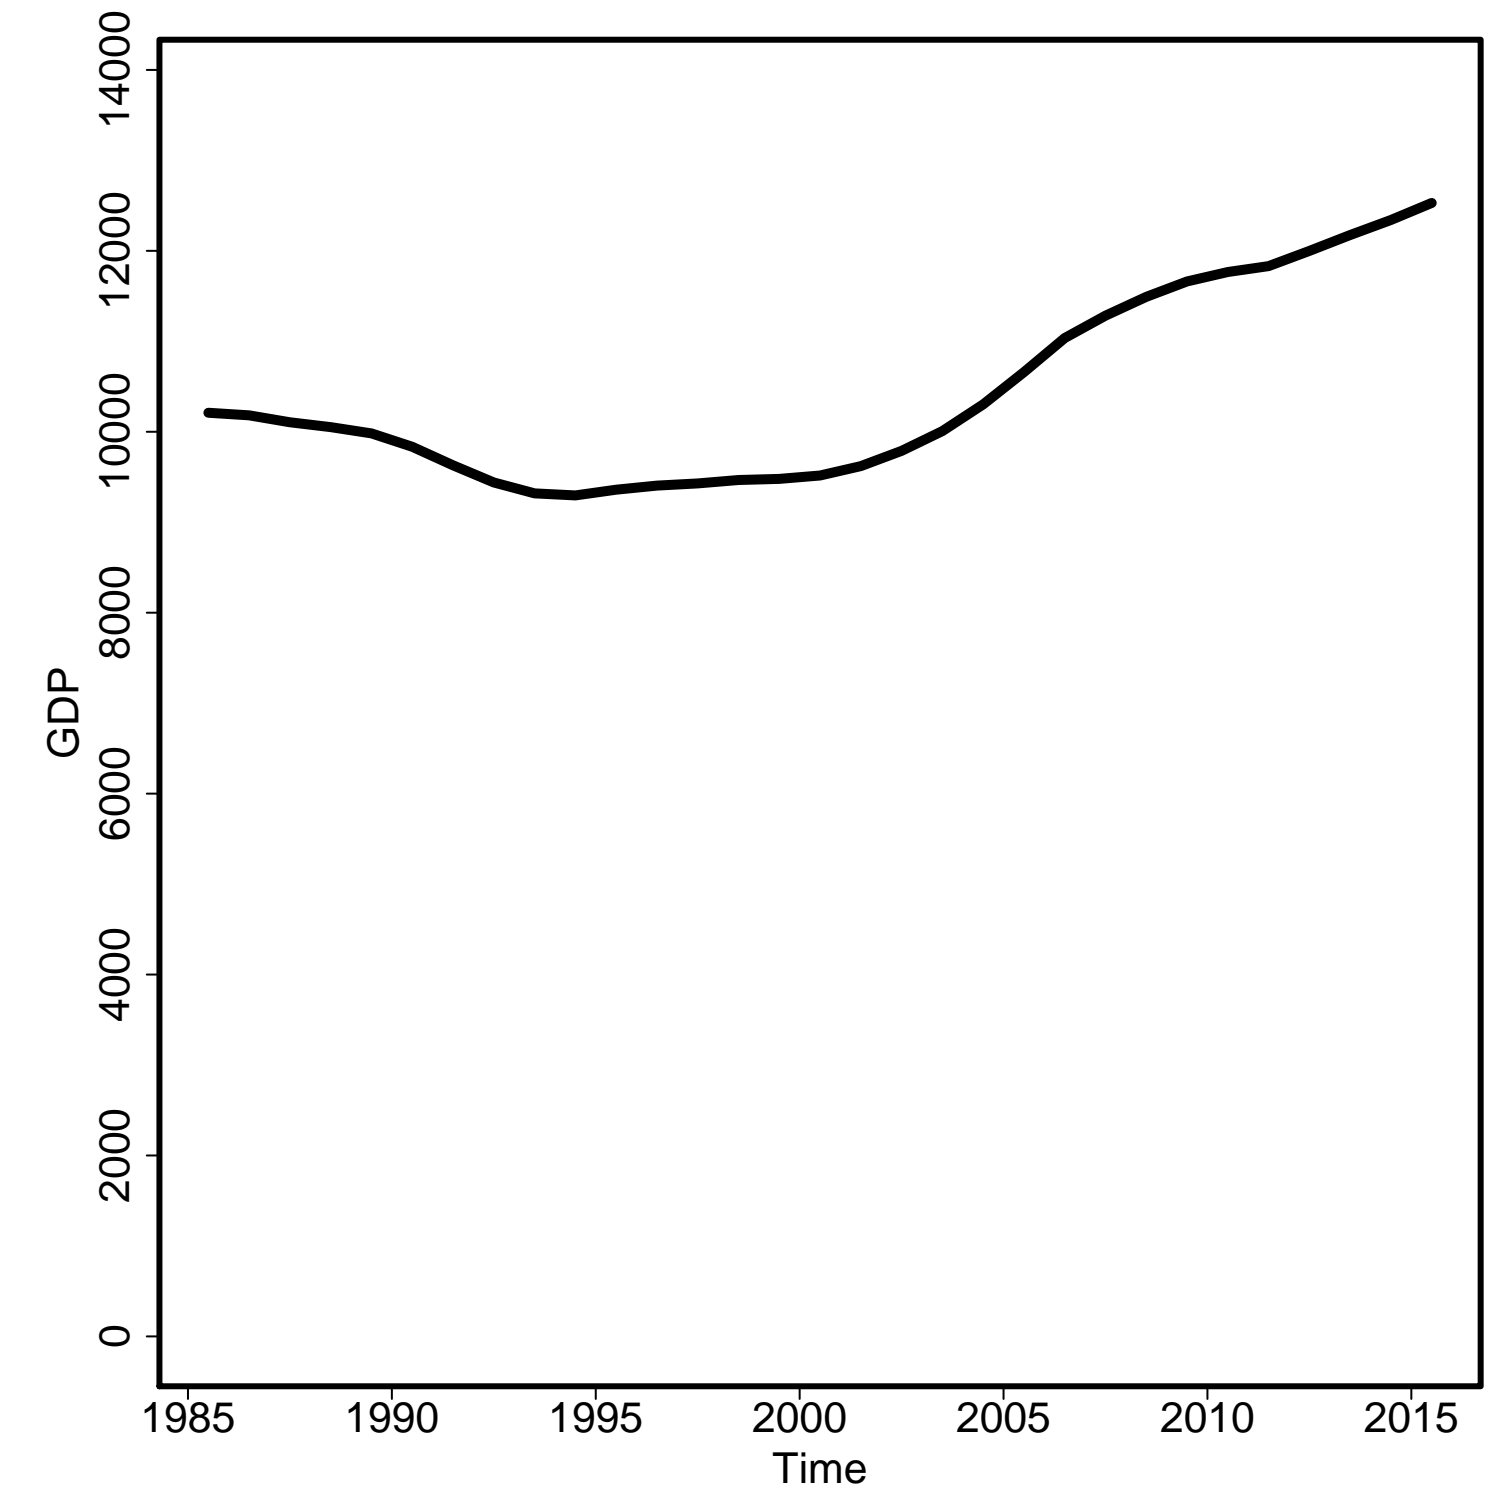

General Fertility Rate

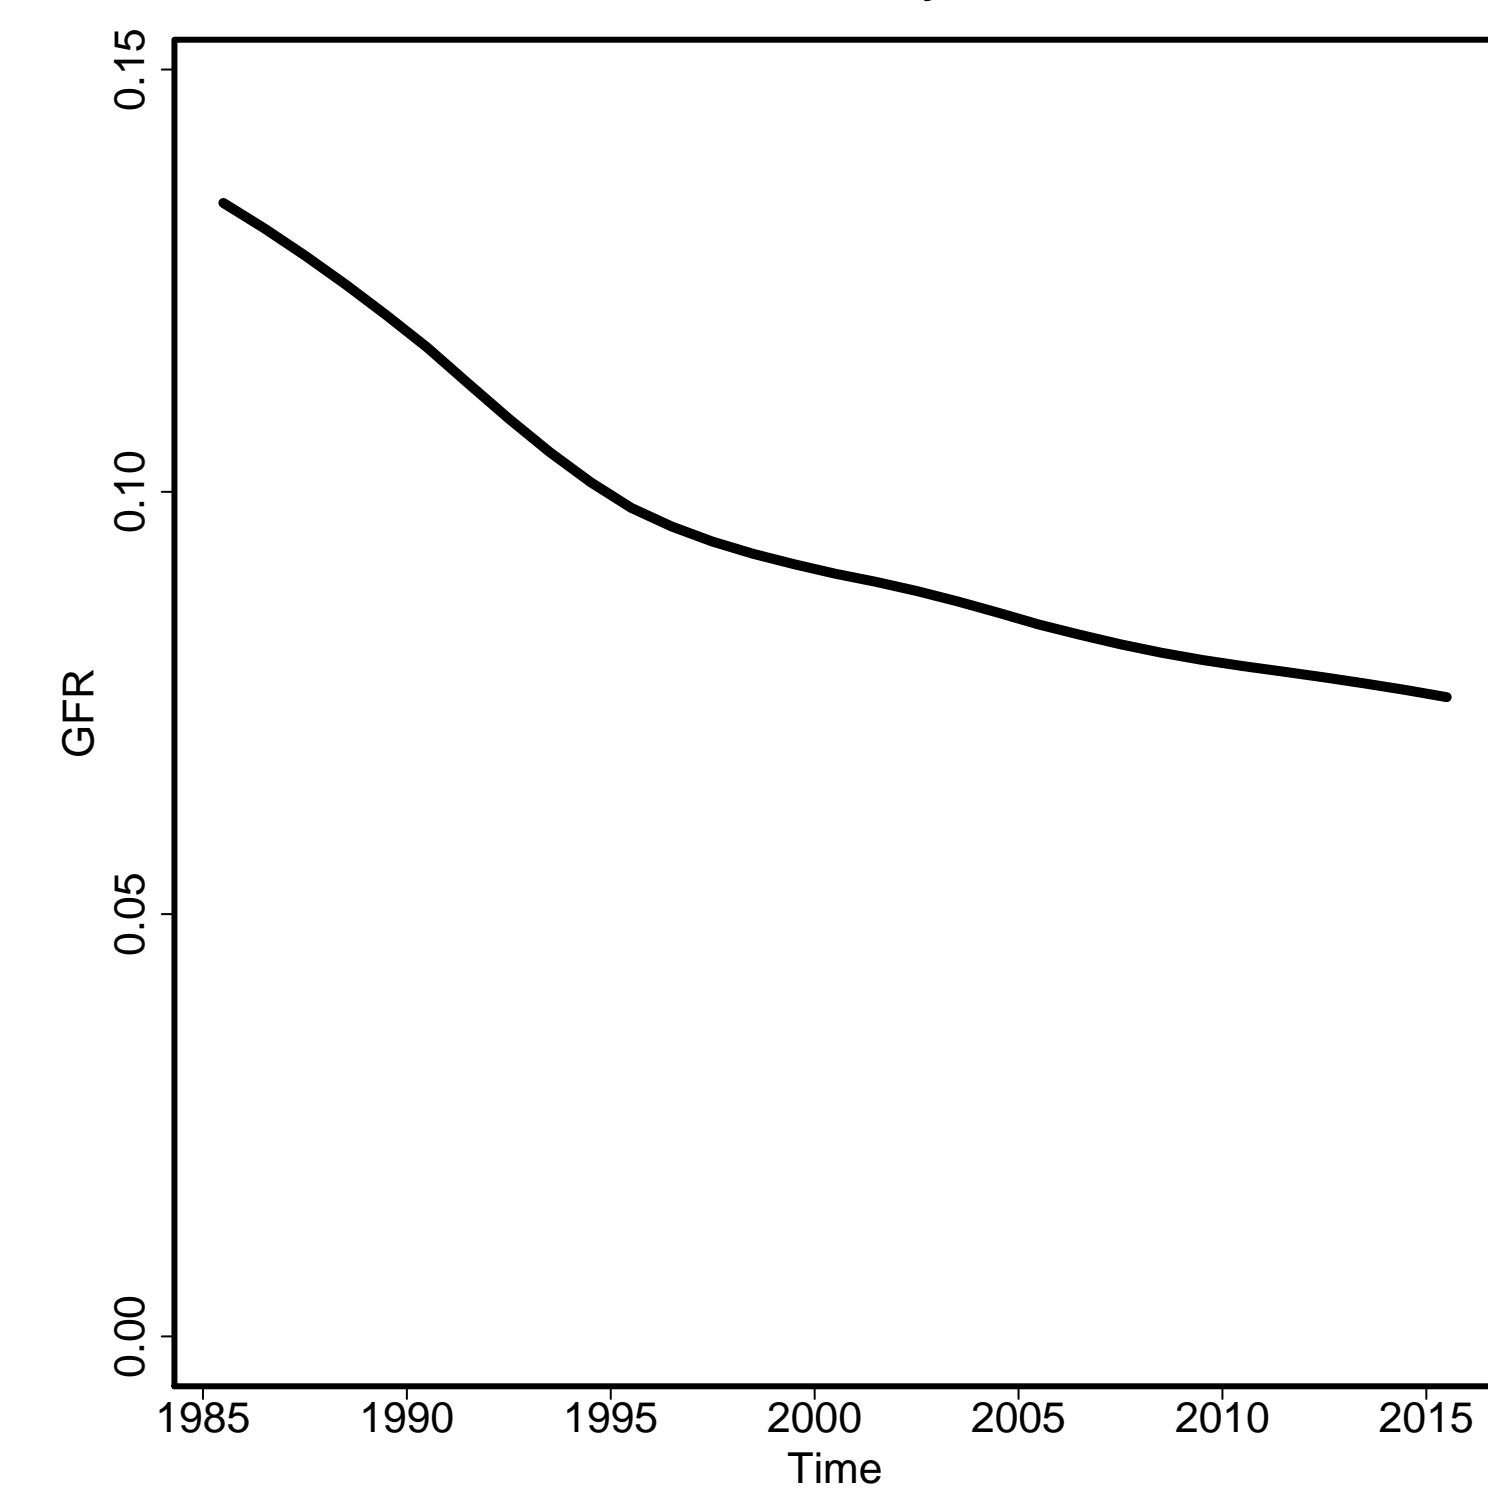

Skilled Attendance to Birth

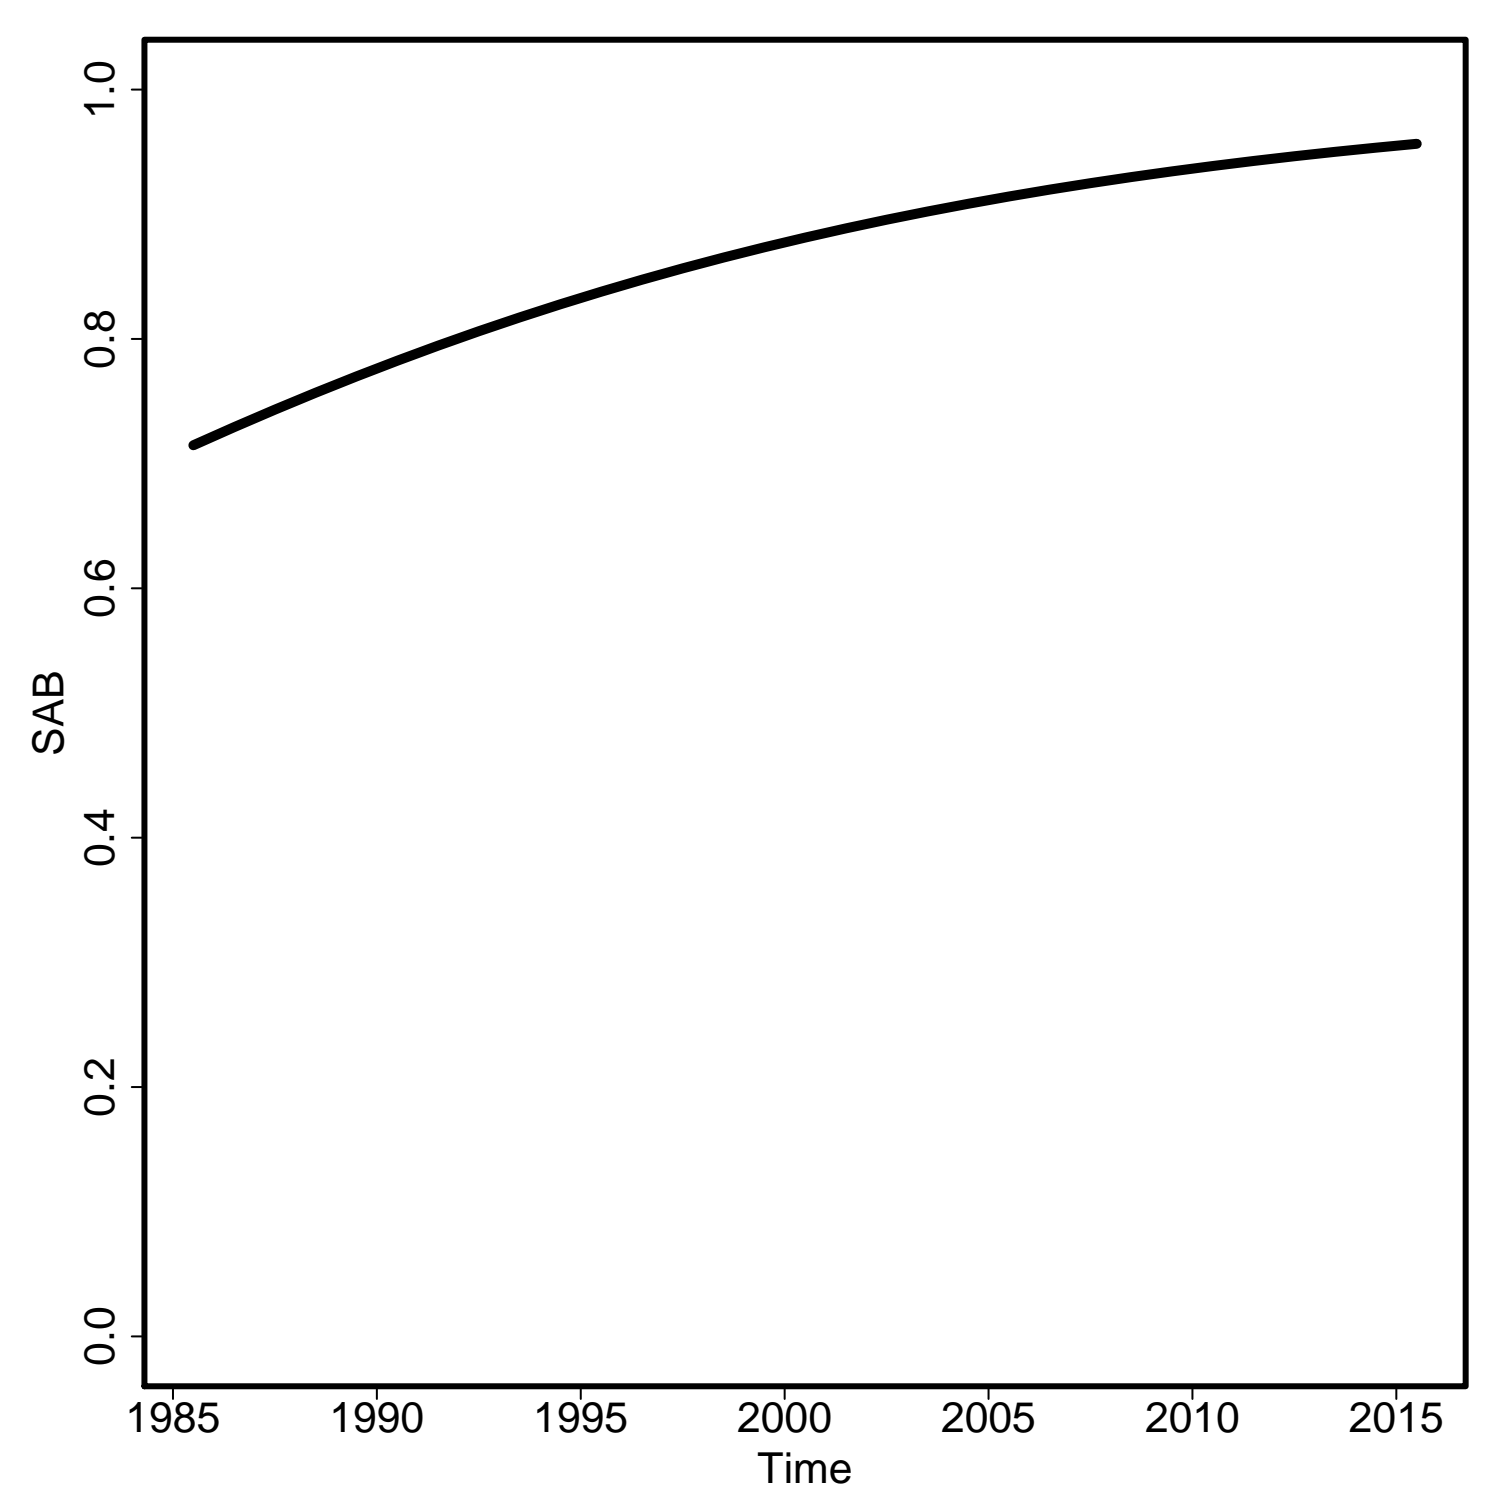

Envelope/Births

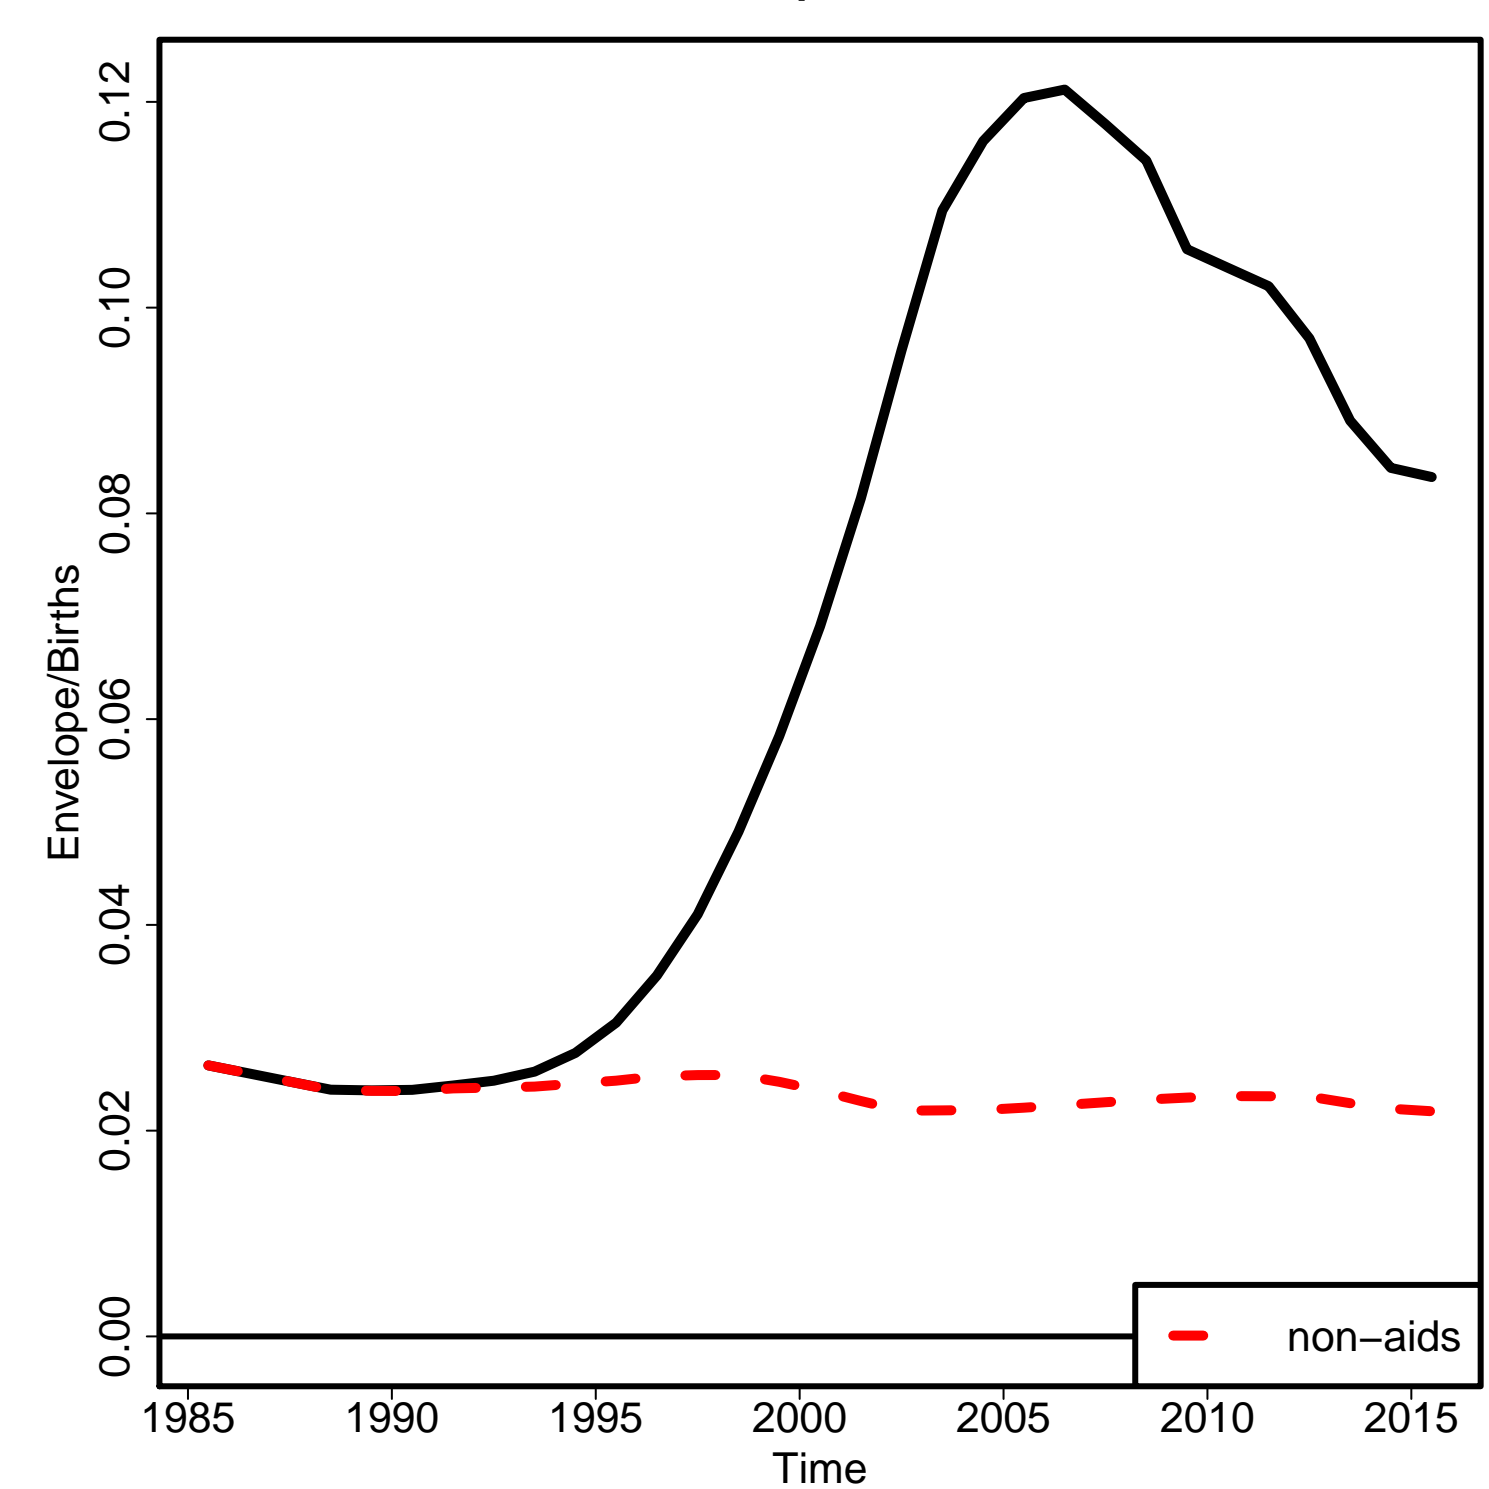

Non-aids MMR

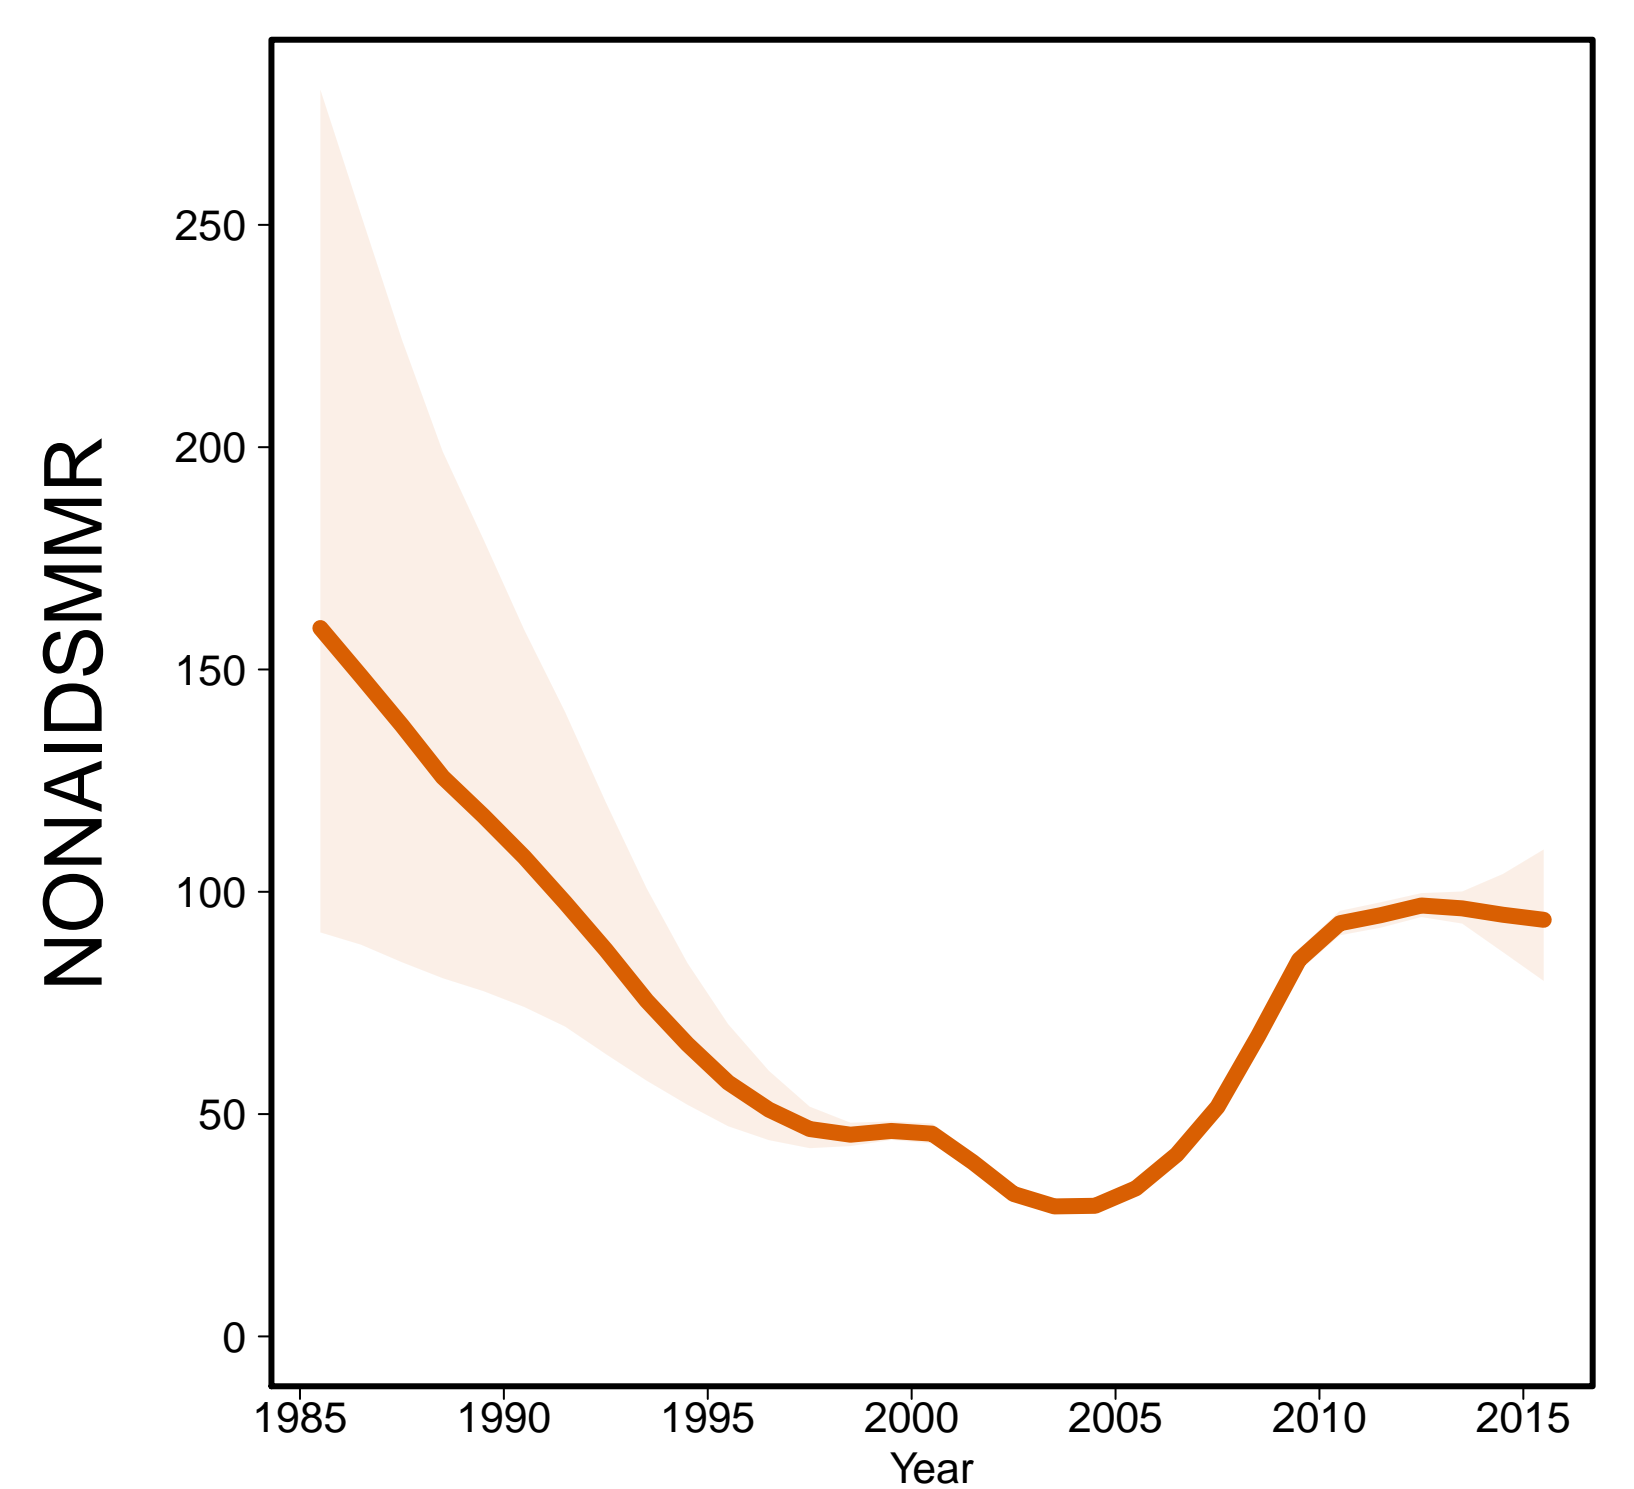

Aids MMR

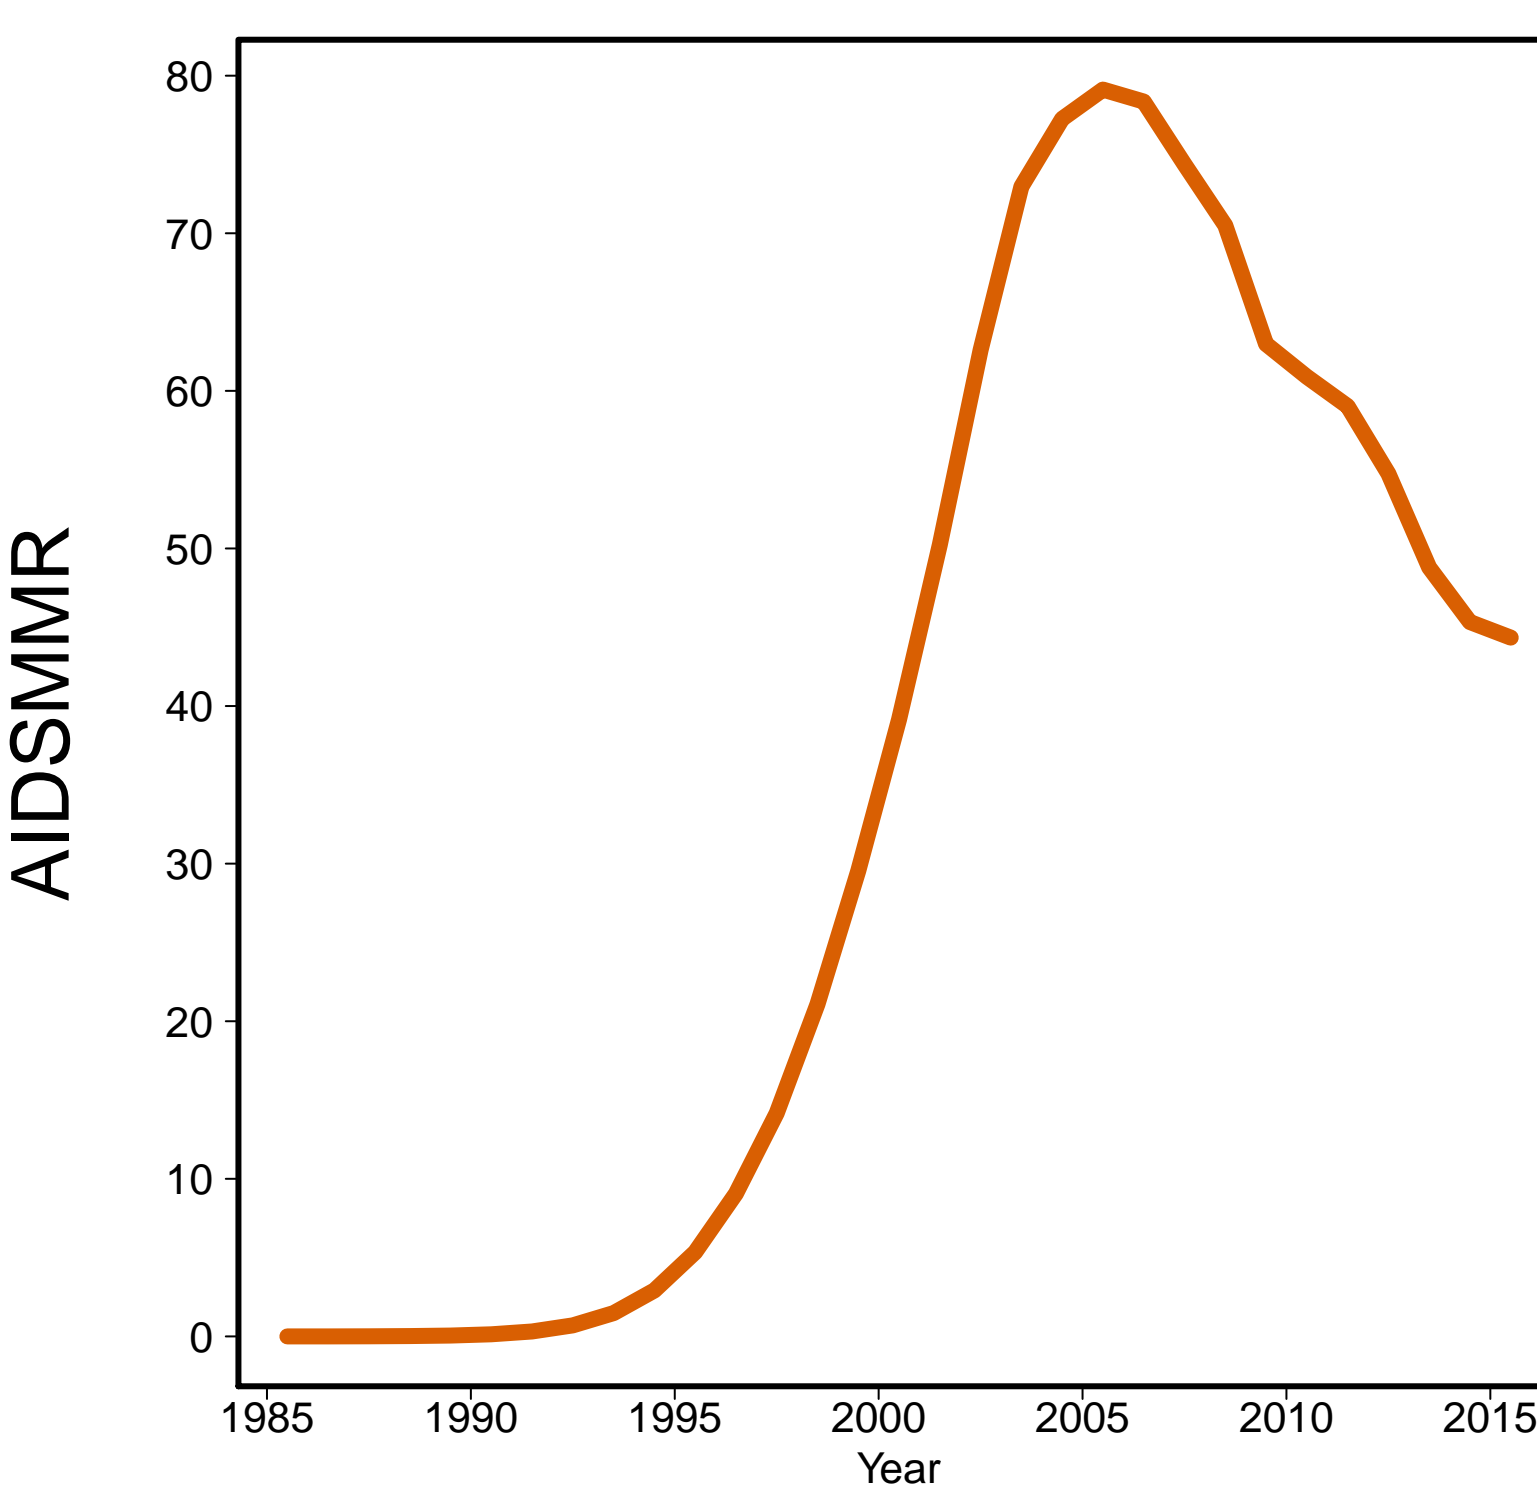

South Sudan [SSD]  
(Eastern Africa)

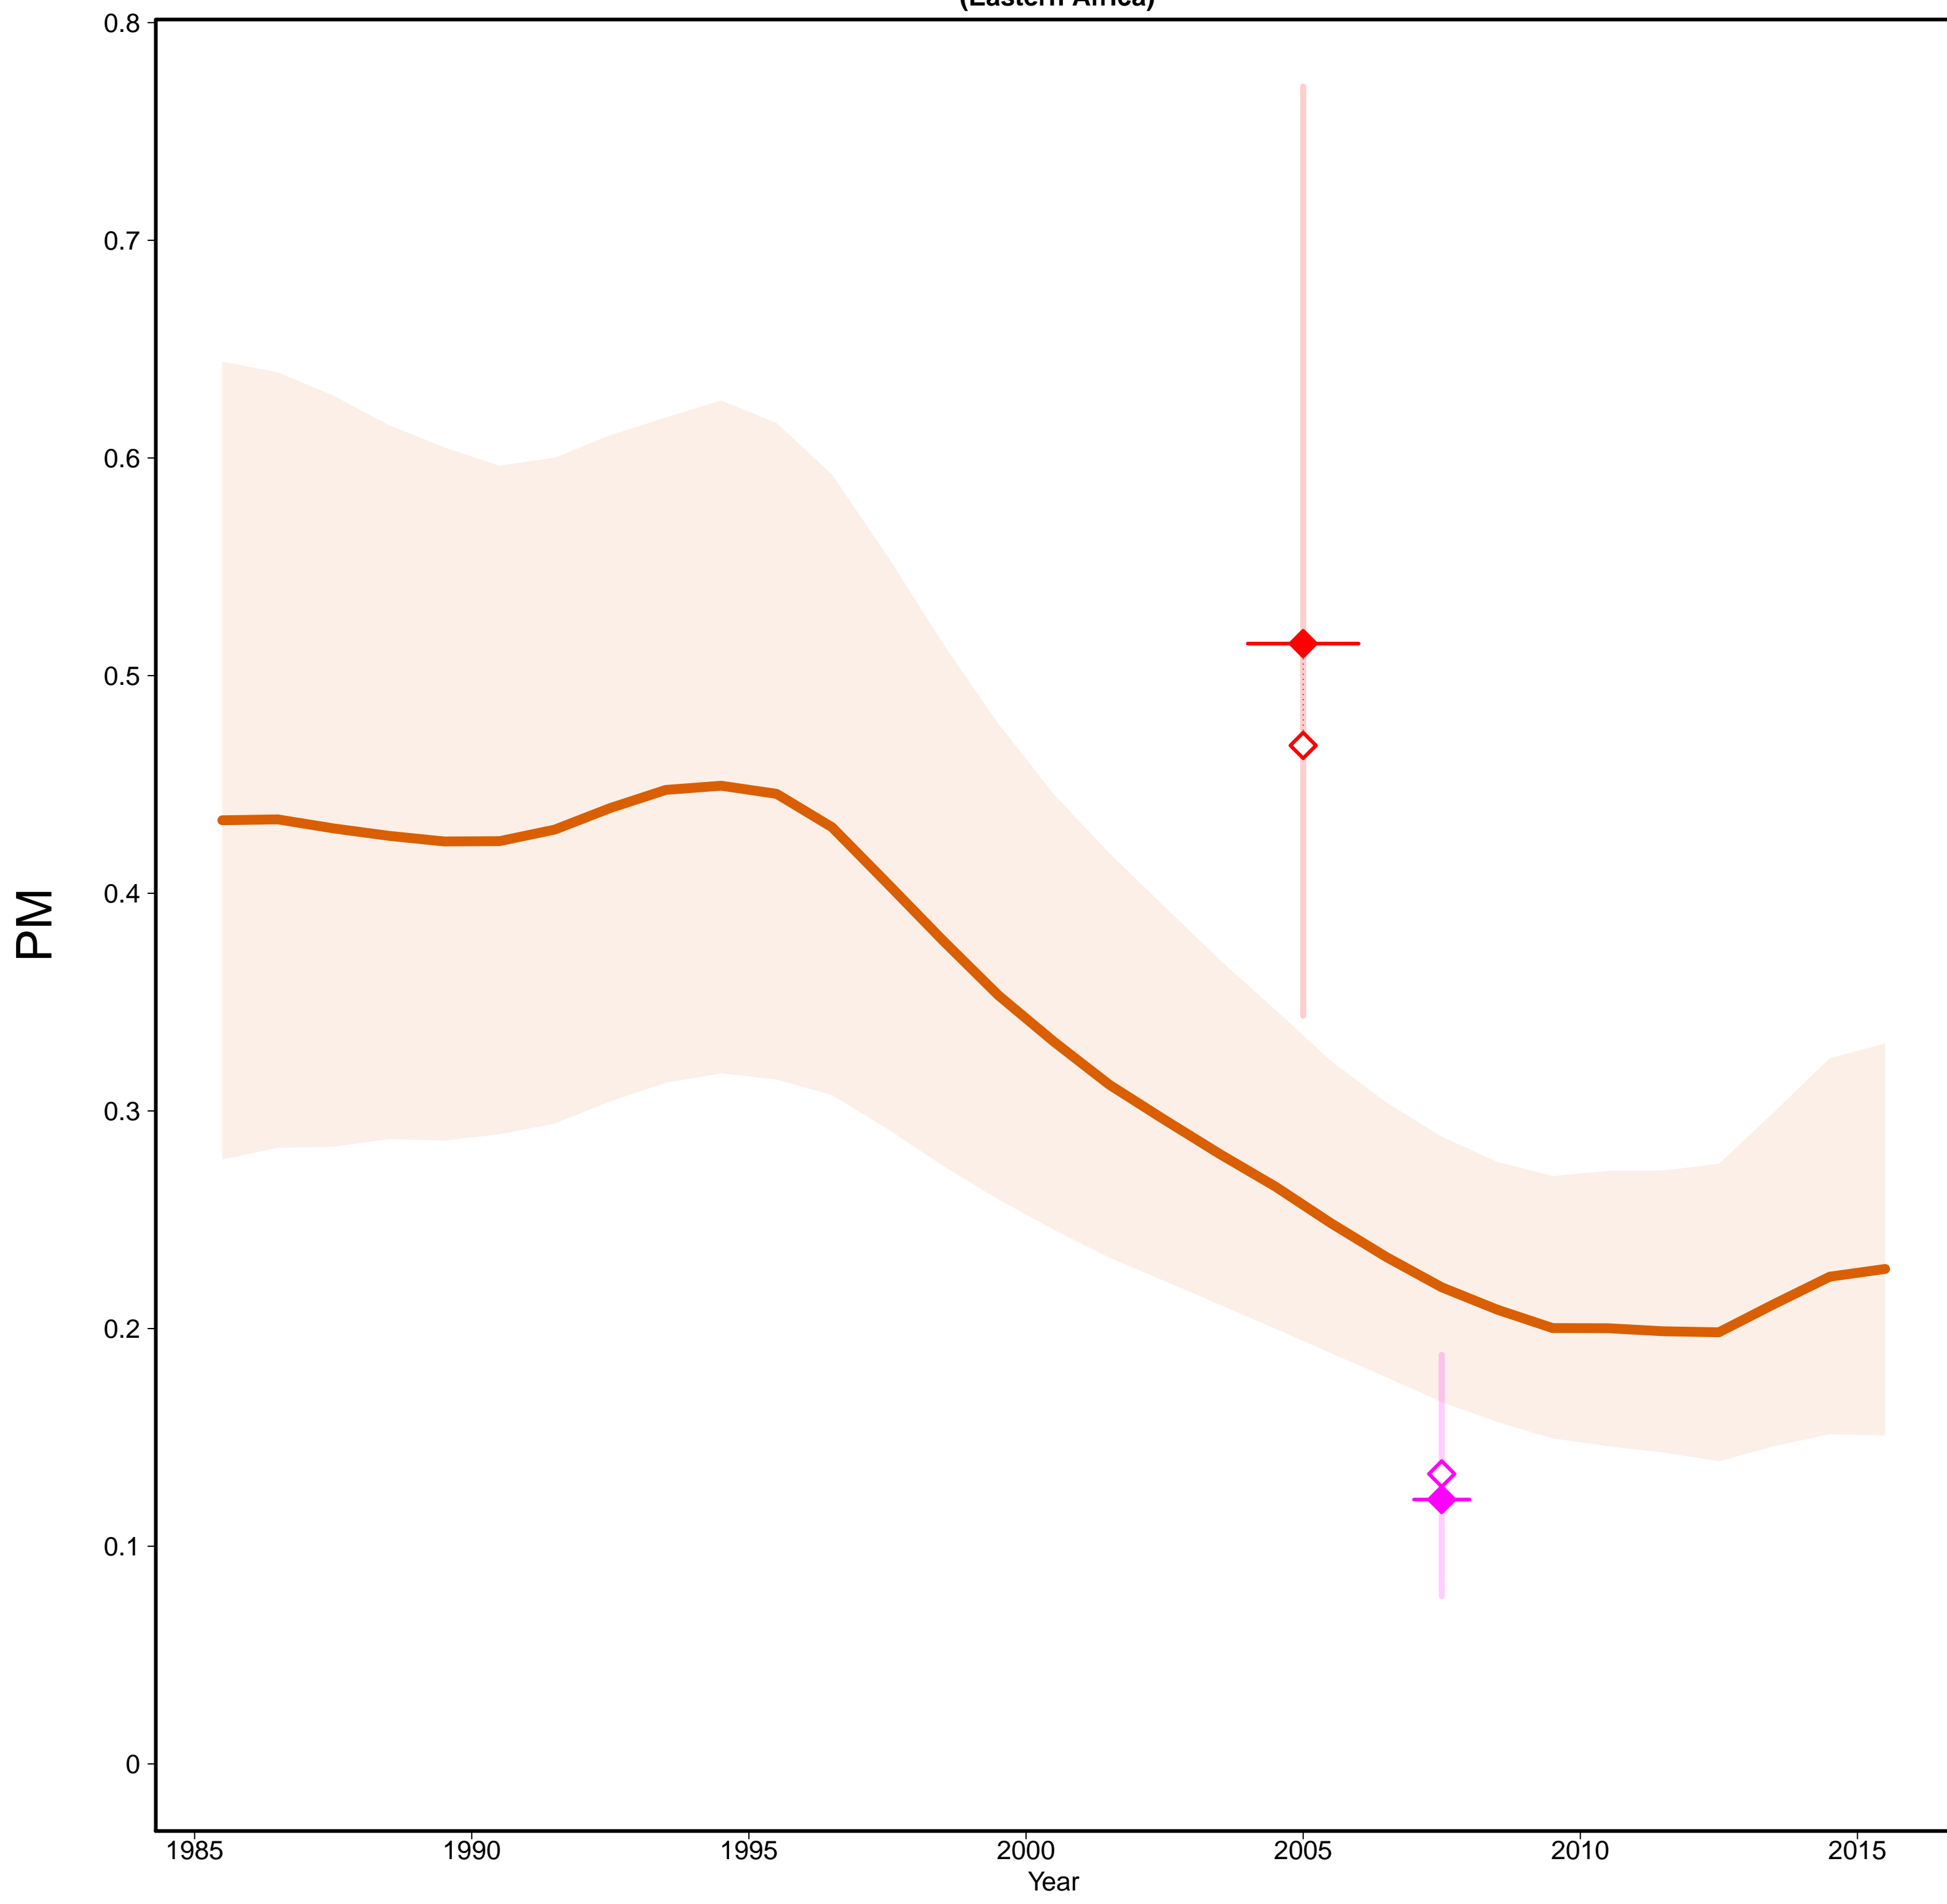

South Sudan [SSD]  
(Eastern Africa)

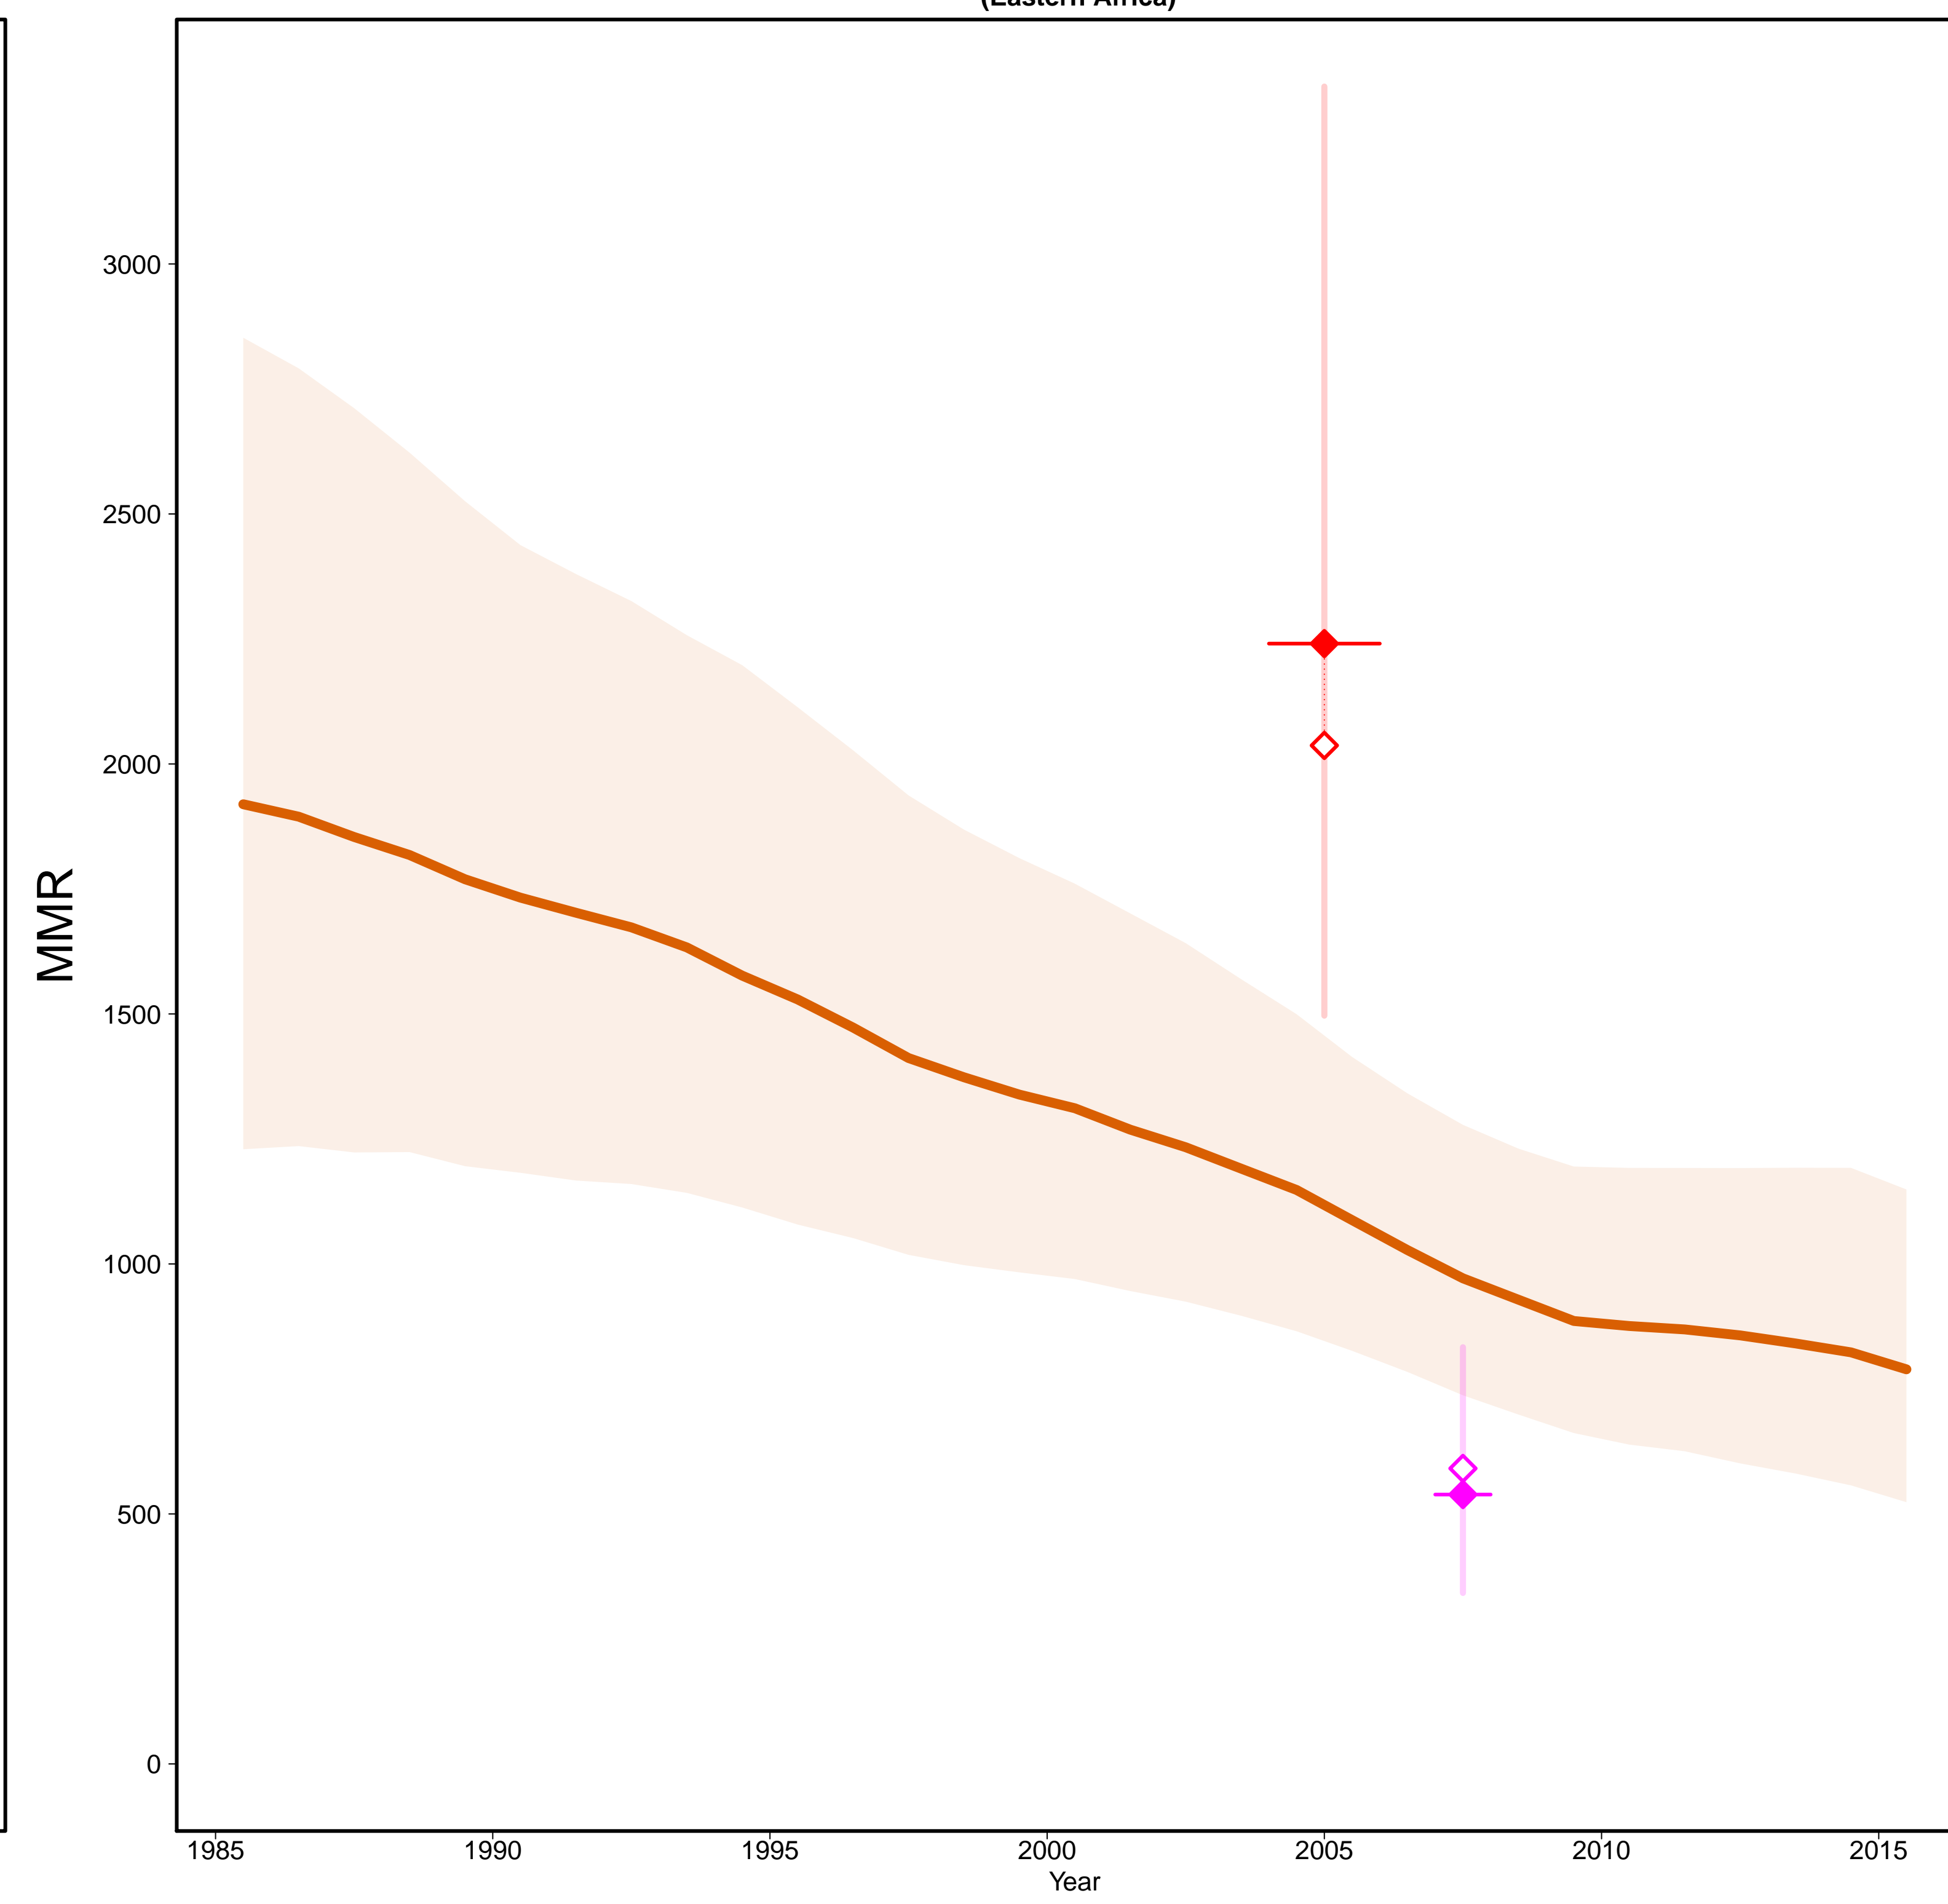

- Estimates –
- MMR Database 2015 –
- ◇ Observed Data
- ◆ Adjusted Data
- Data type –
- ◆ Census
- ◆ Misc. studies

Gross Domestic Product

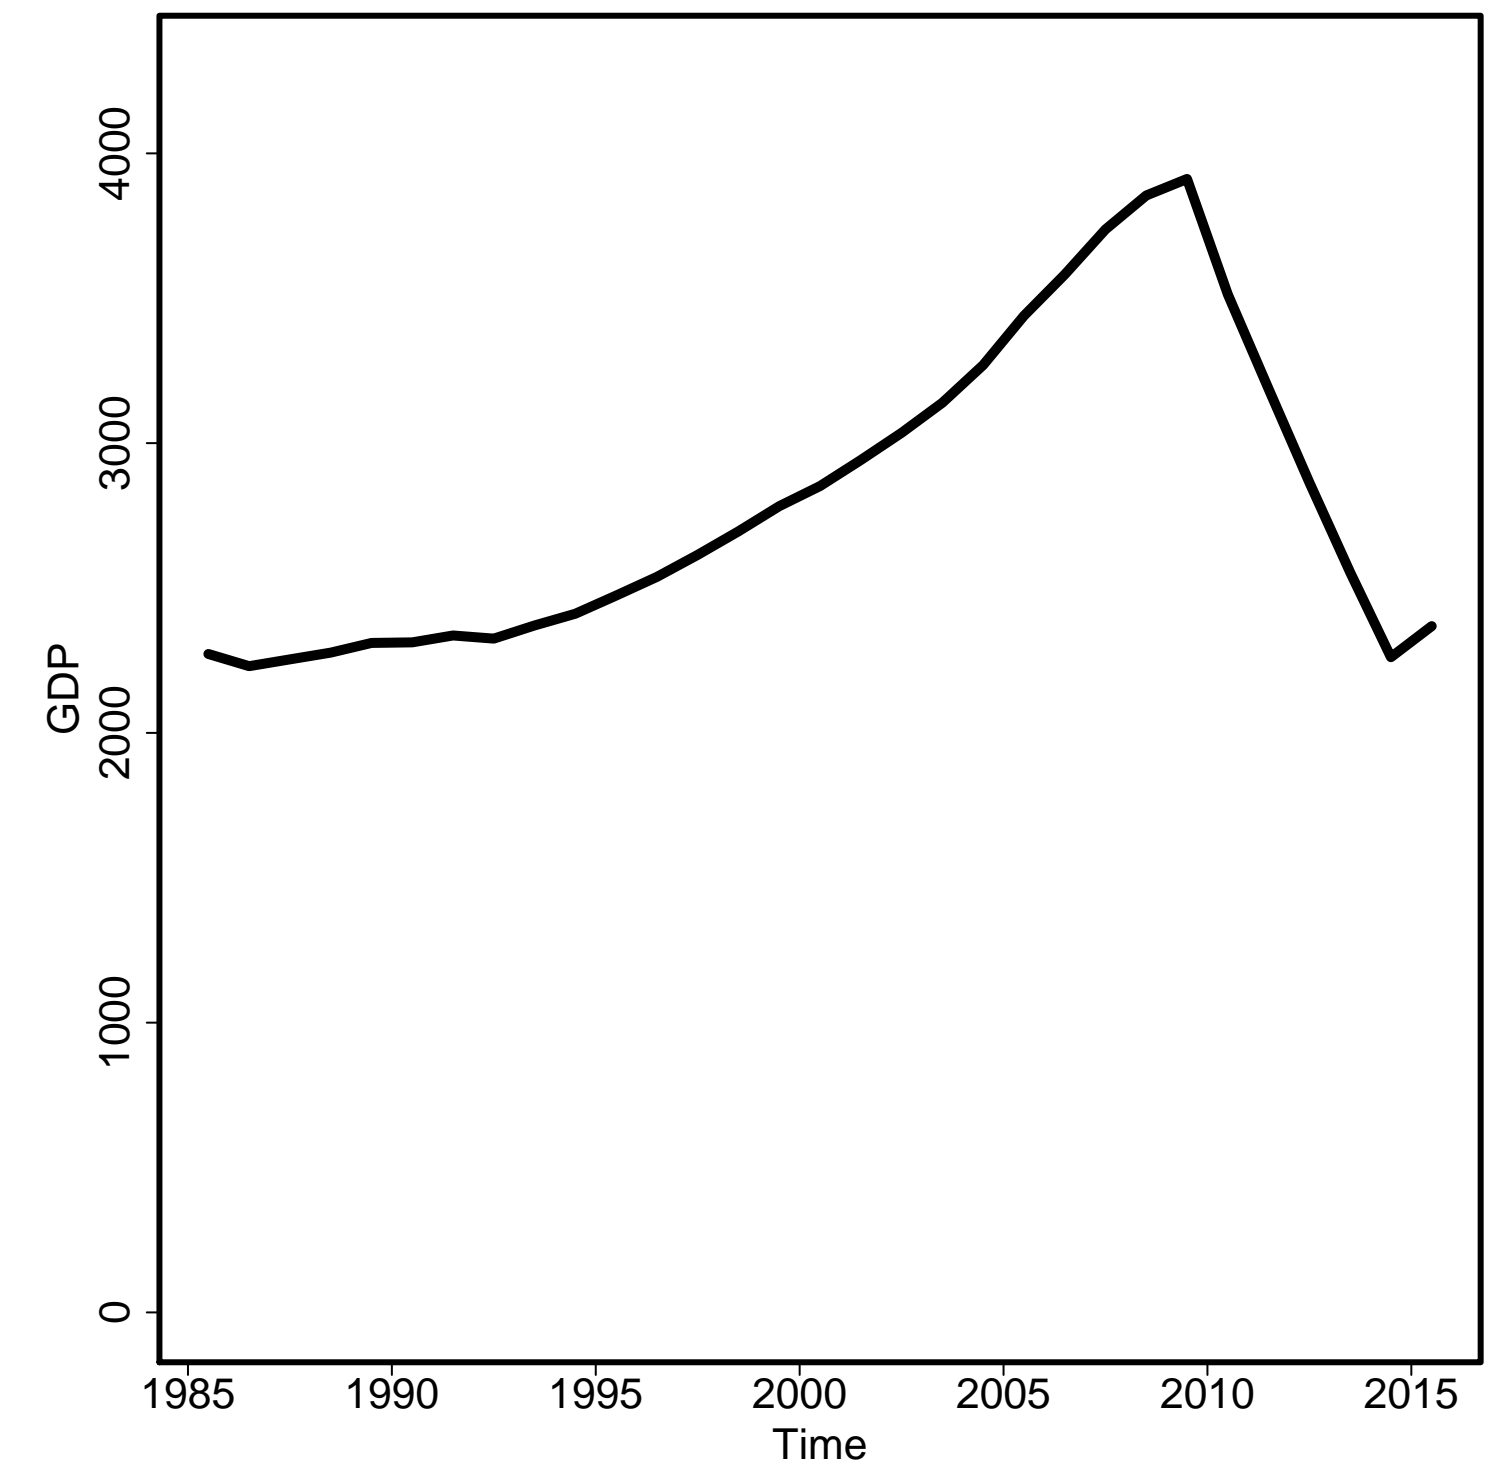

General Fertility Rate

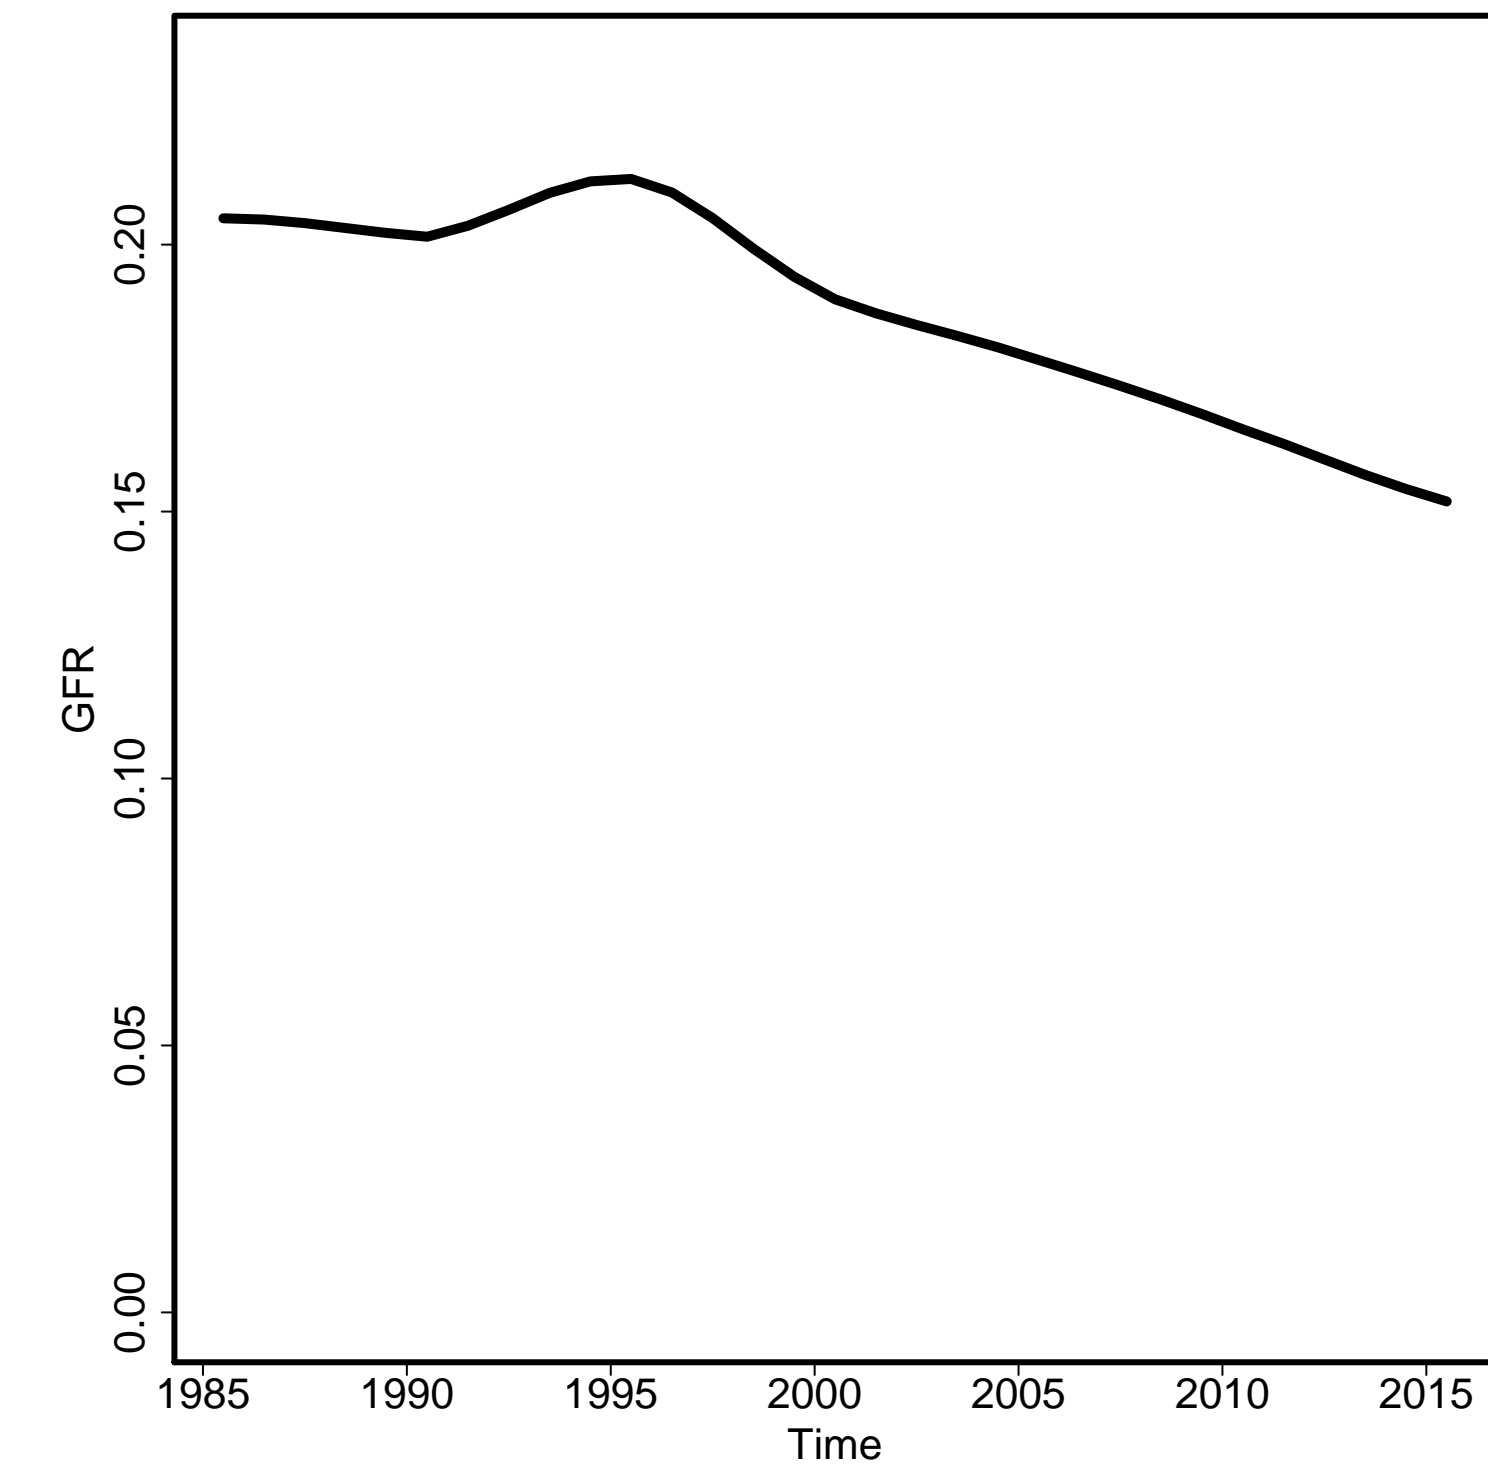

Skilled Attendance to Birth

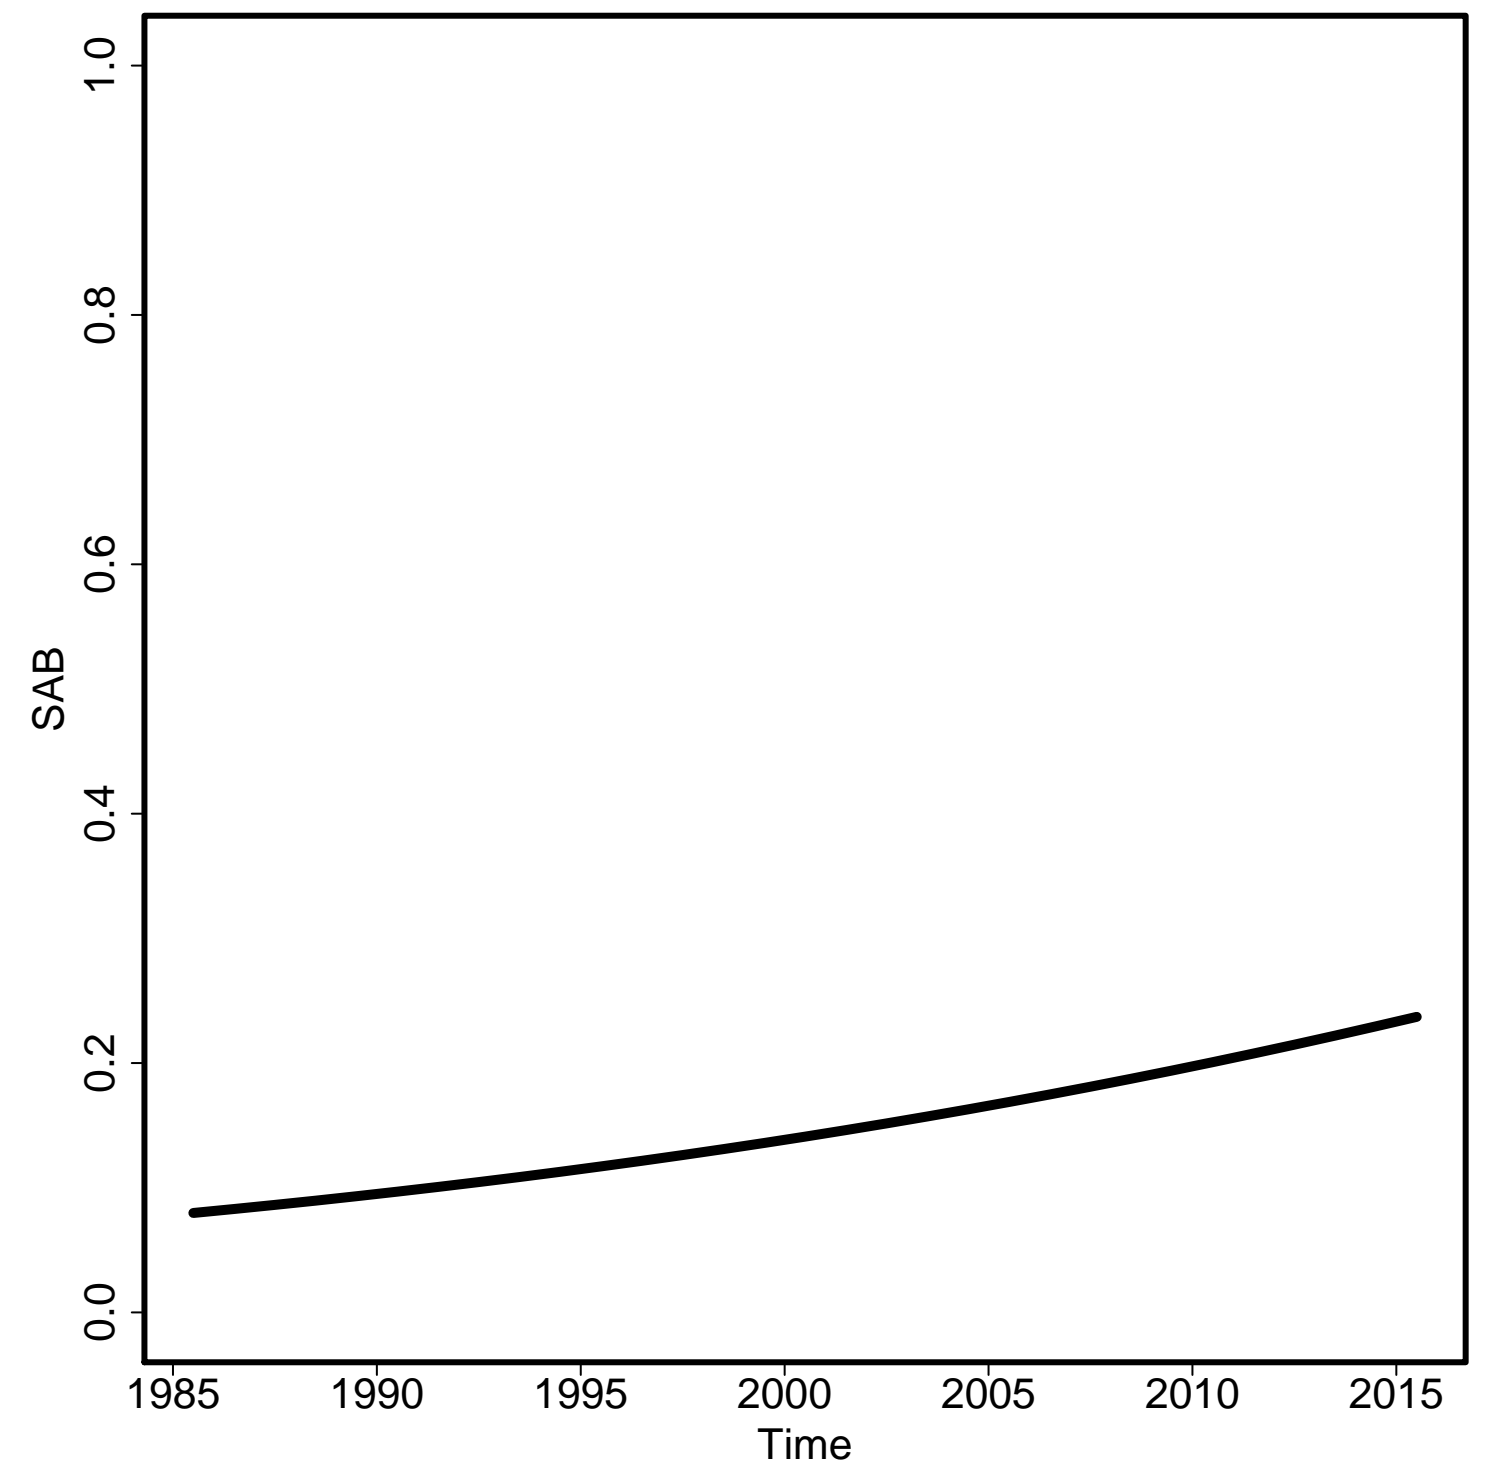

Envelope/Births

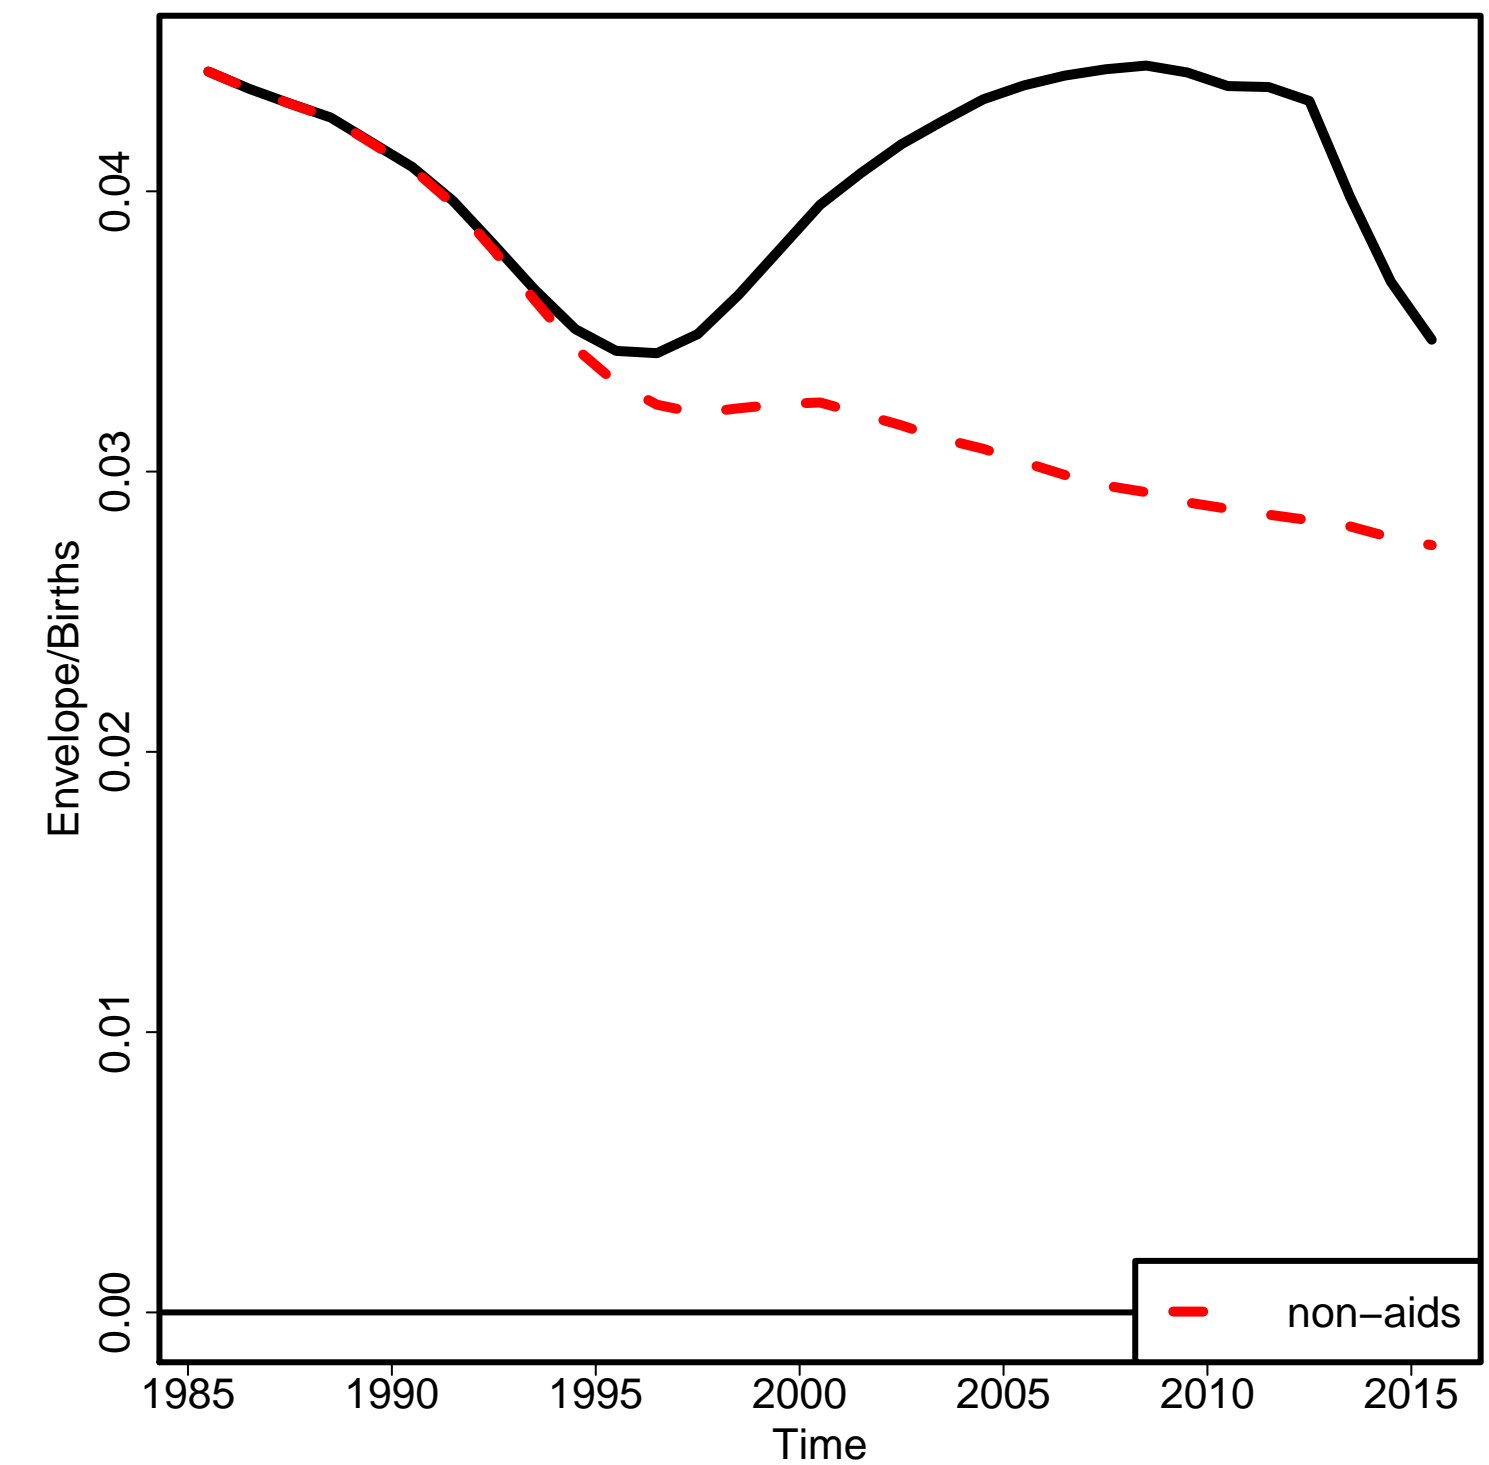

Non-aids MMR

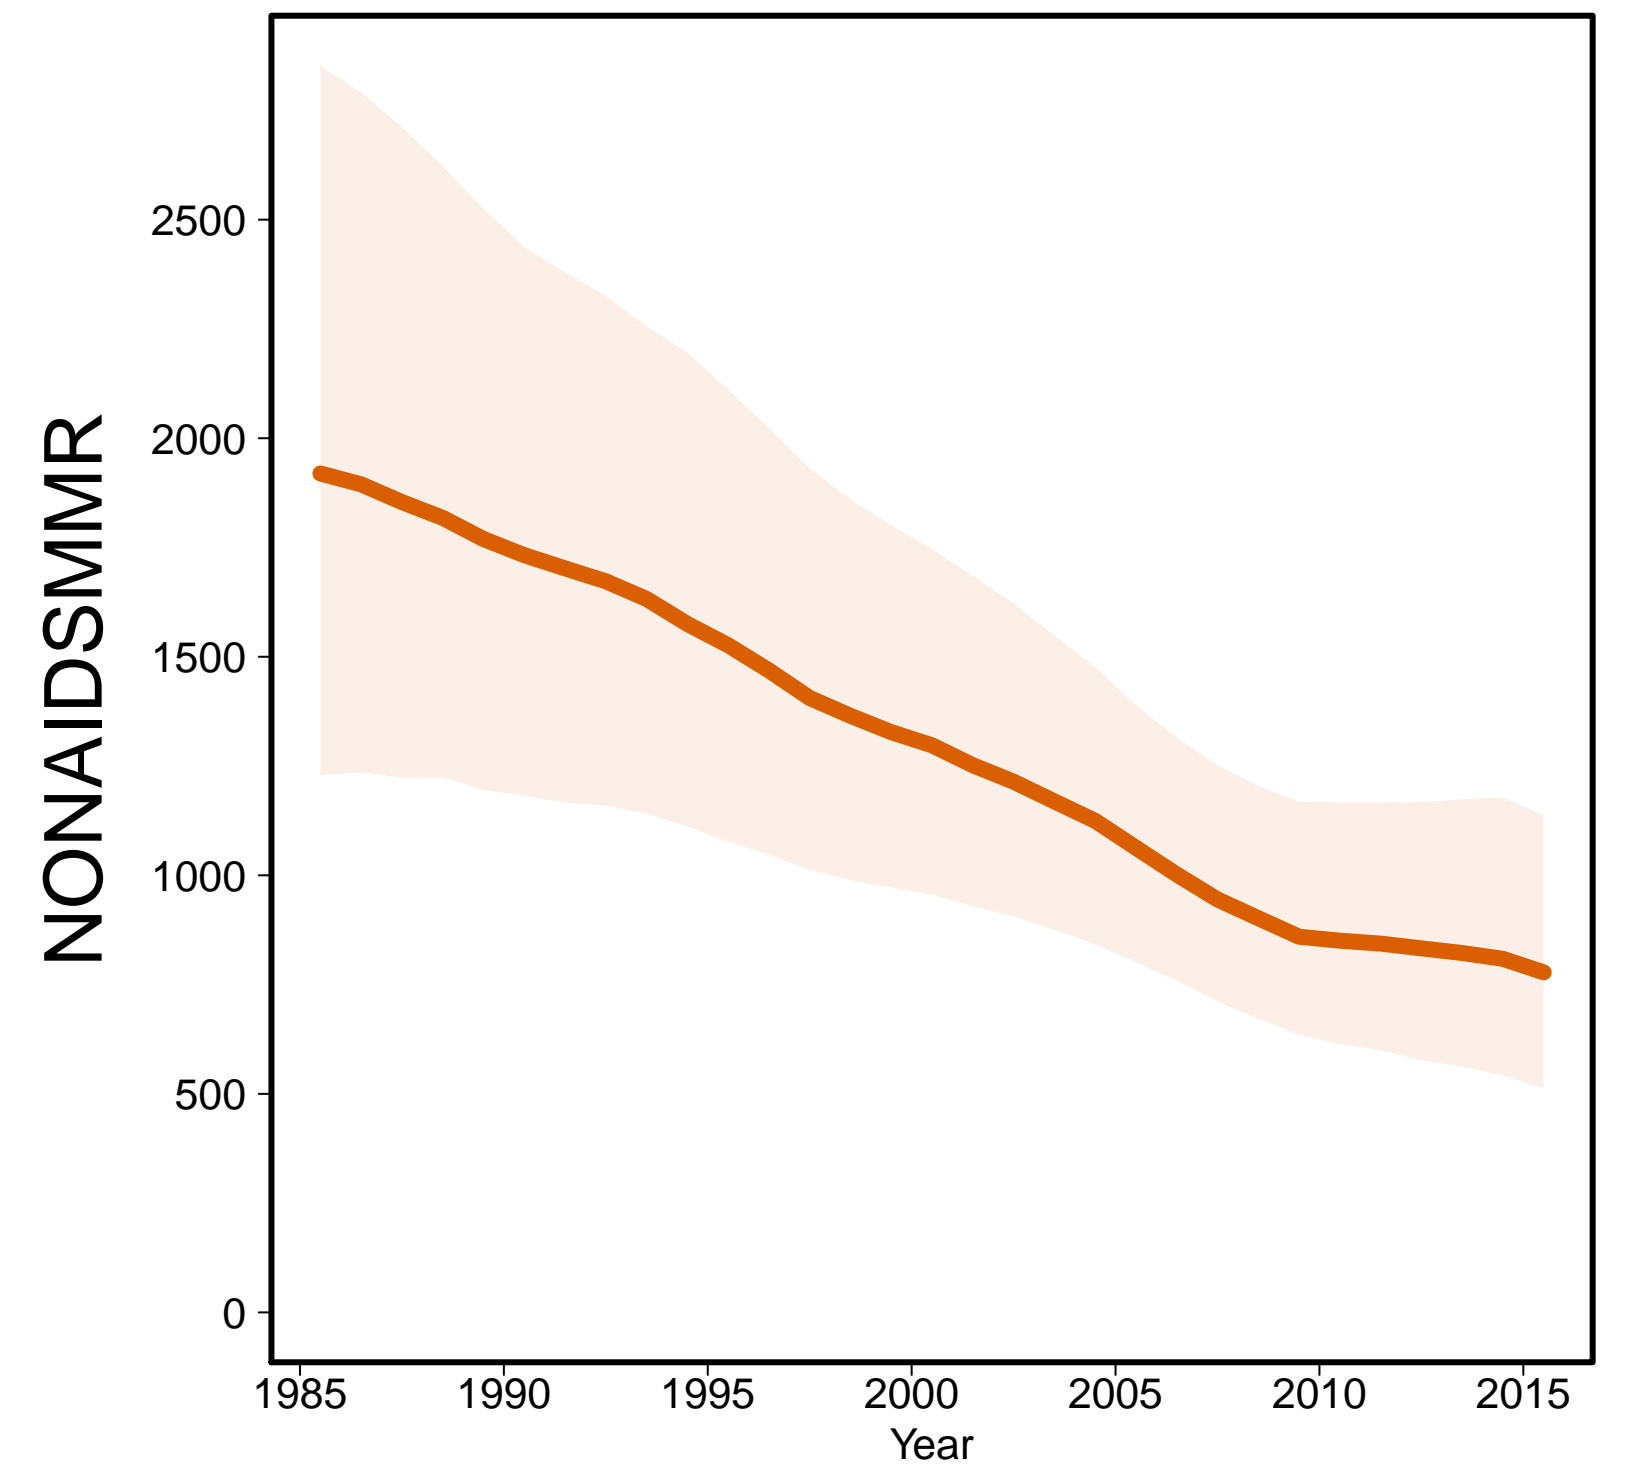

Aids MMR

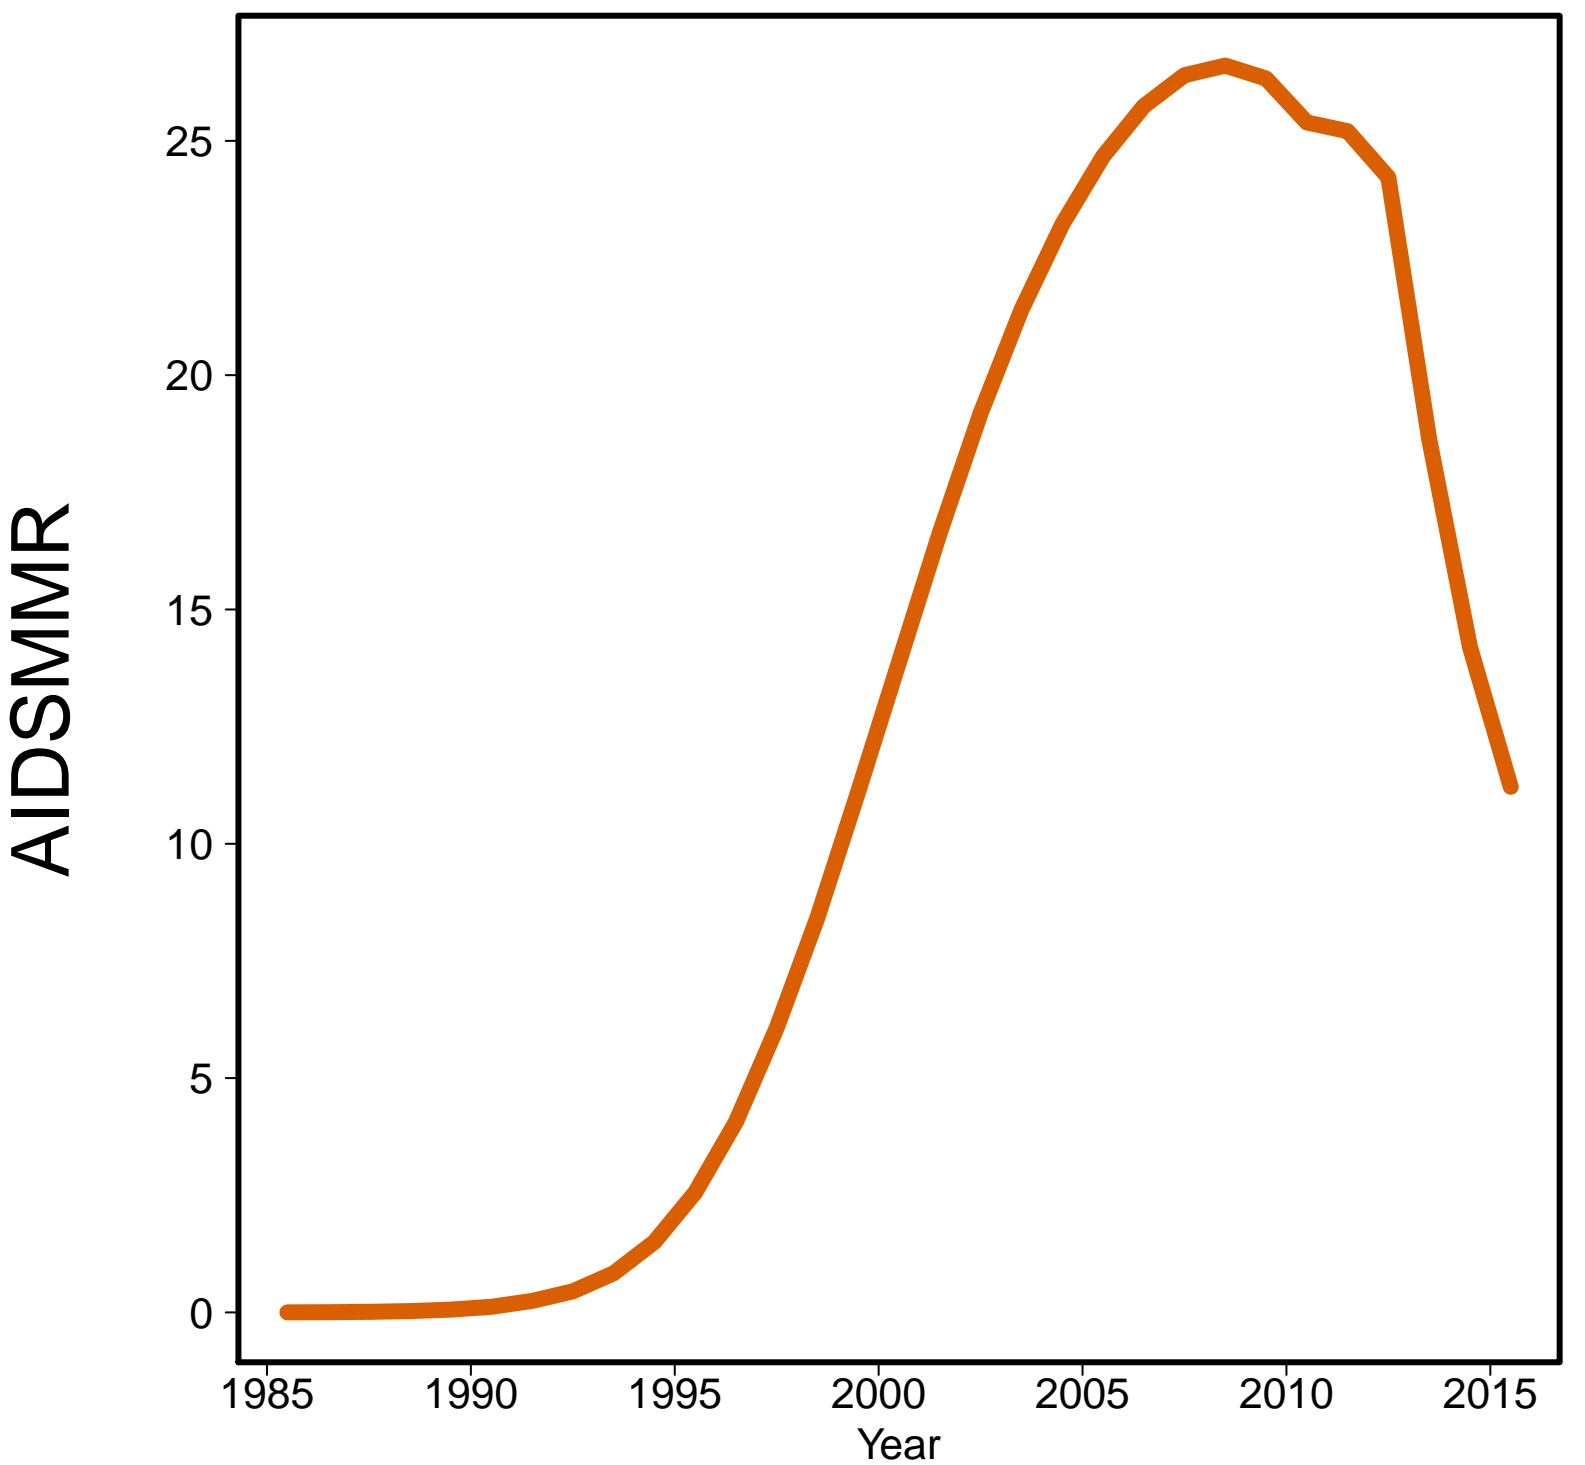

Spain [ESP]  
(Developed regions)

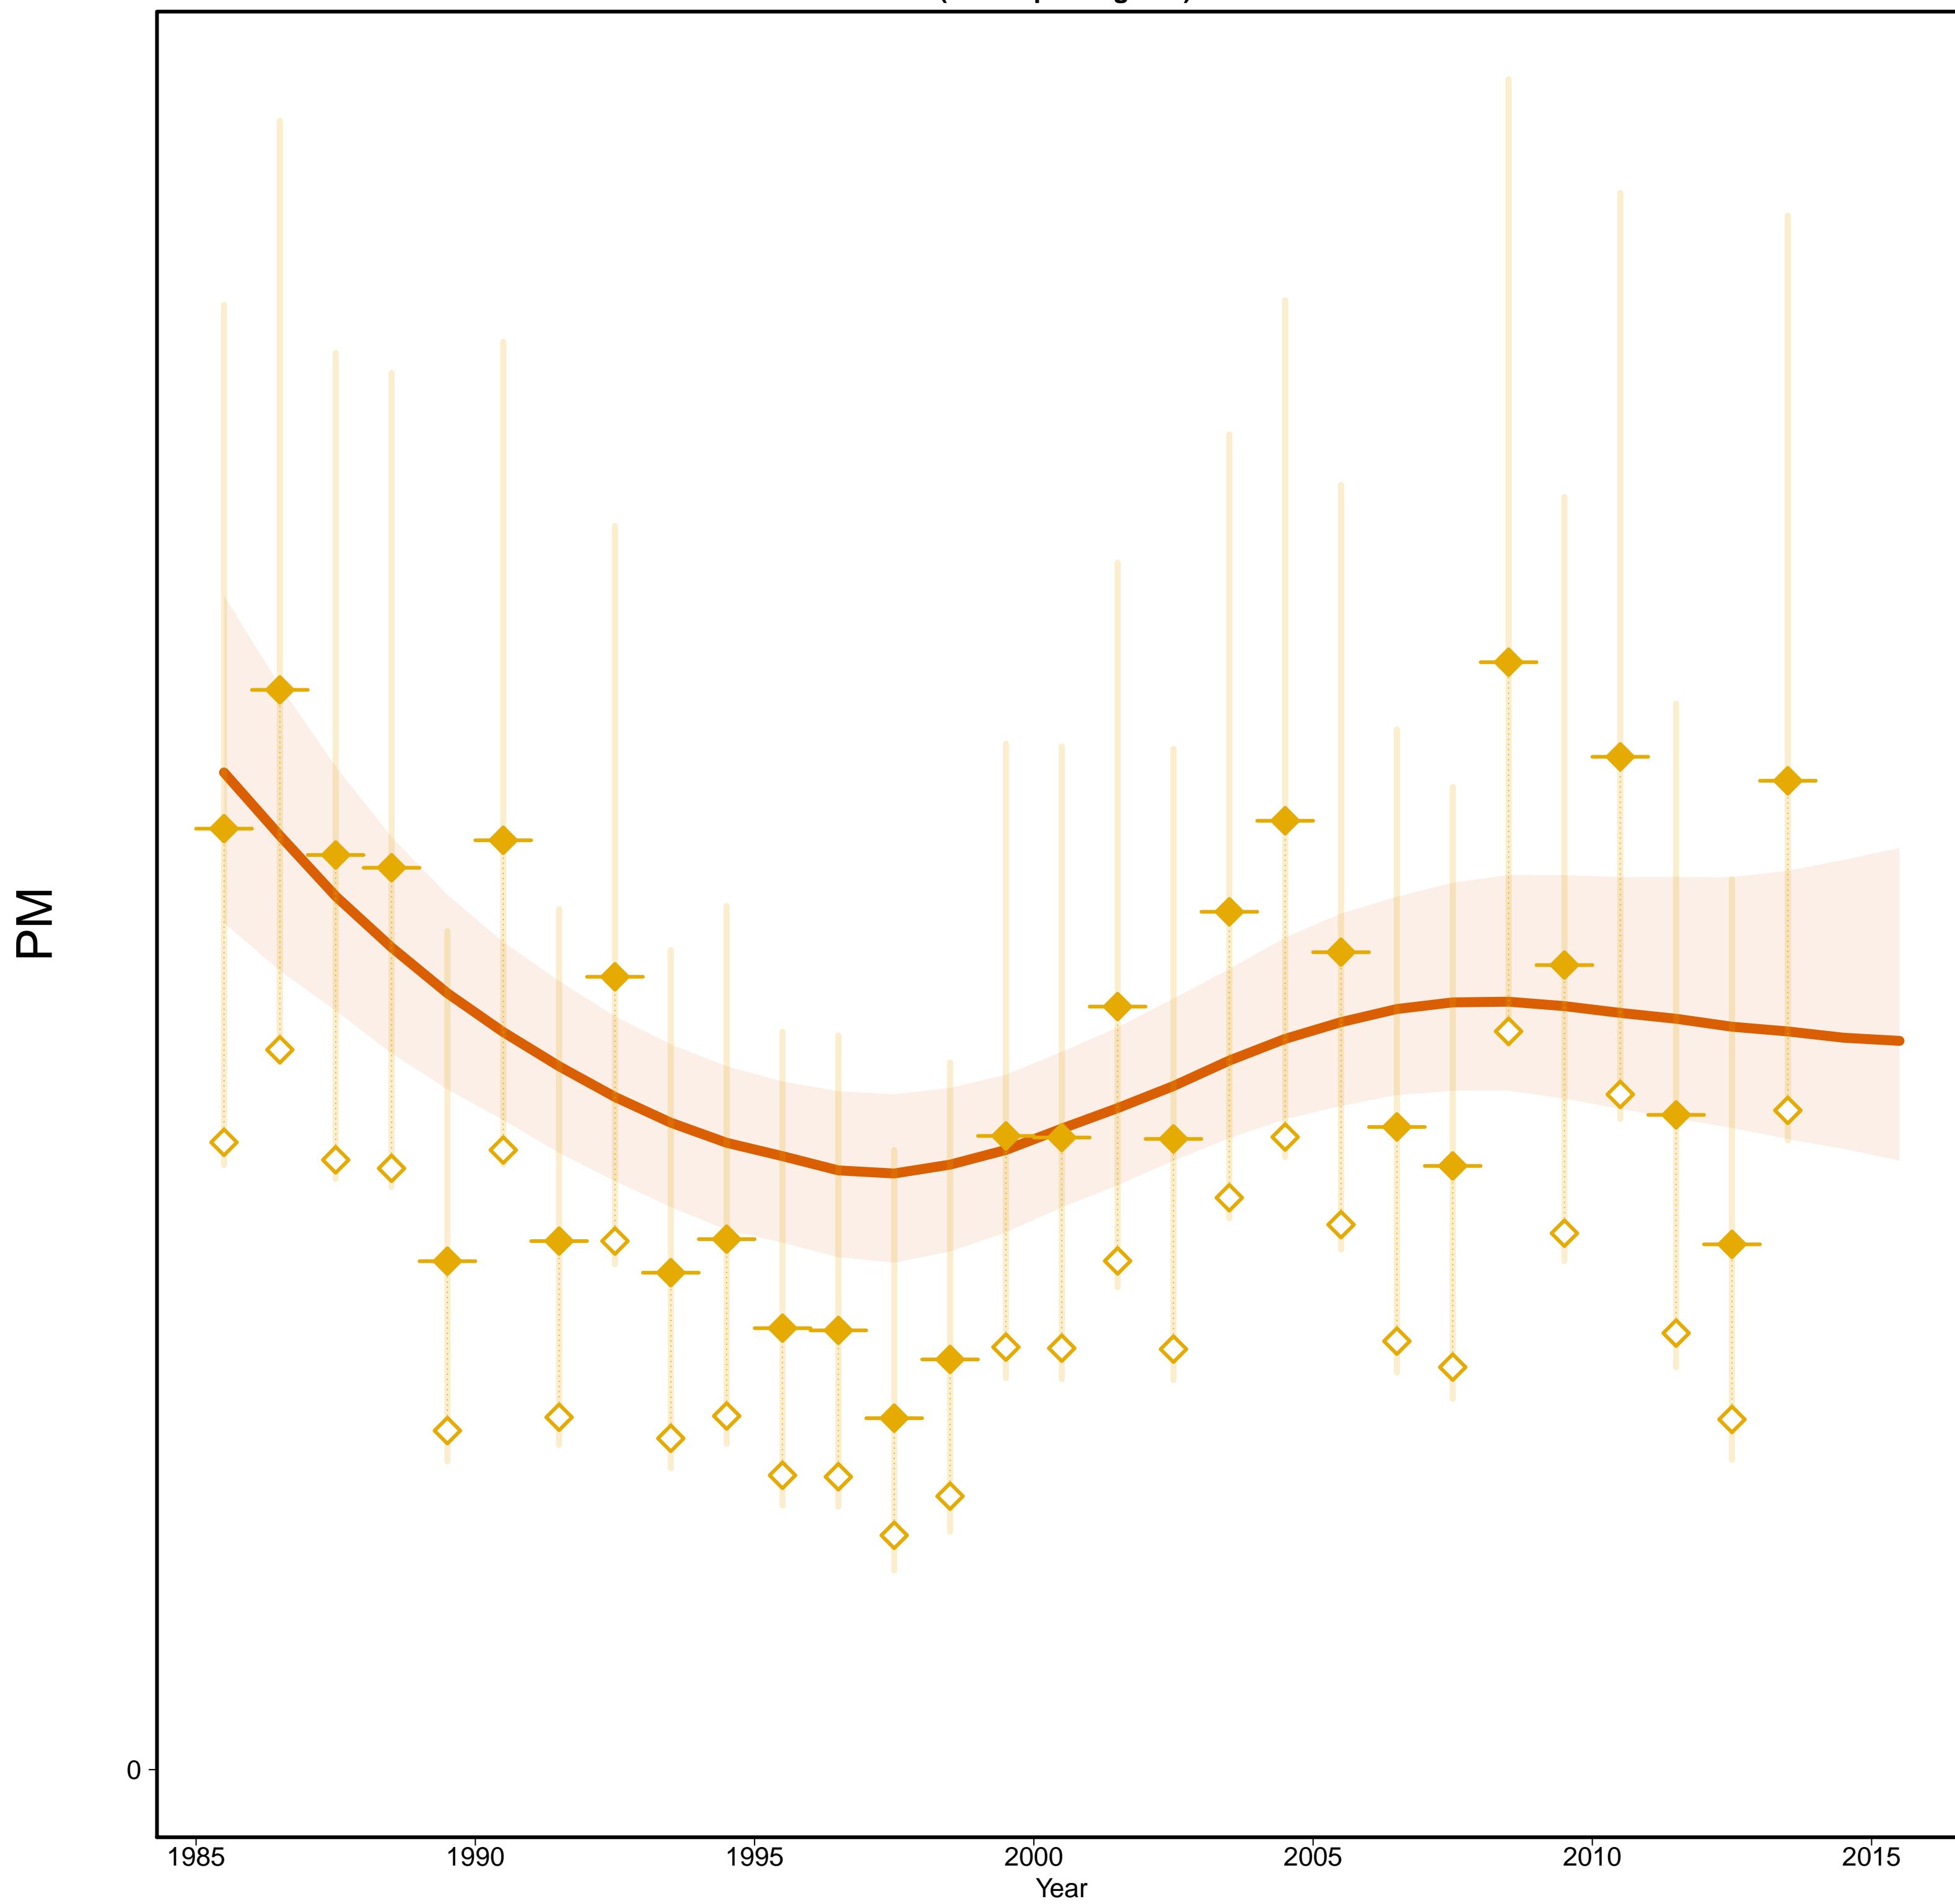

Spain [ESP]  
(Developed regions)

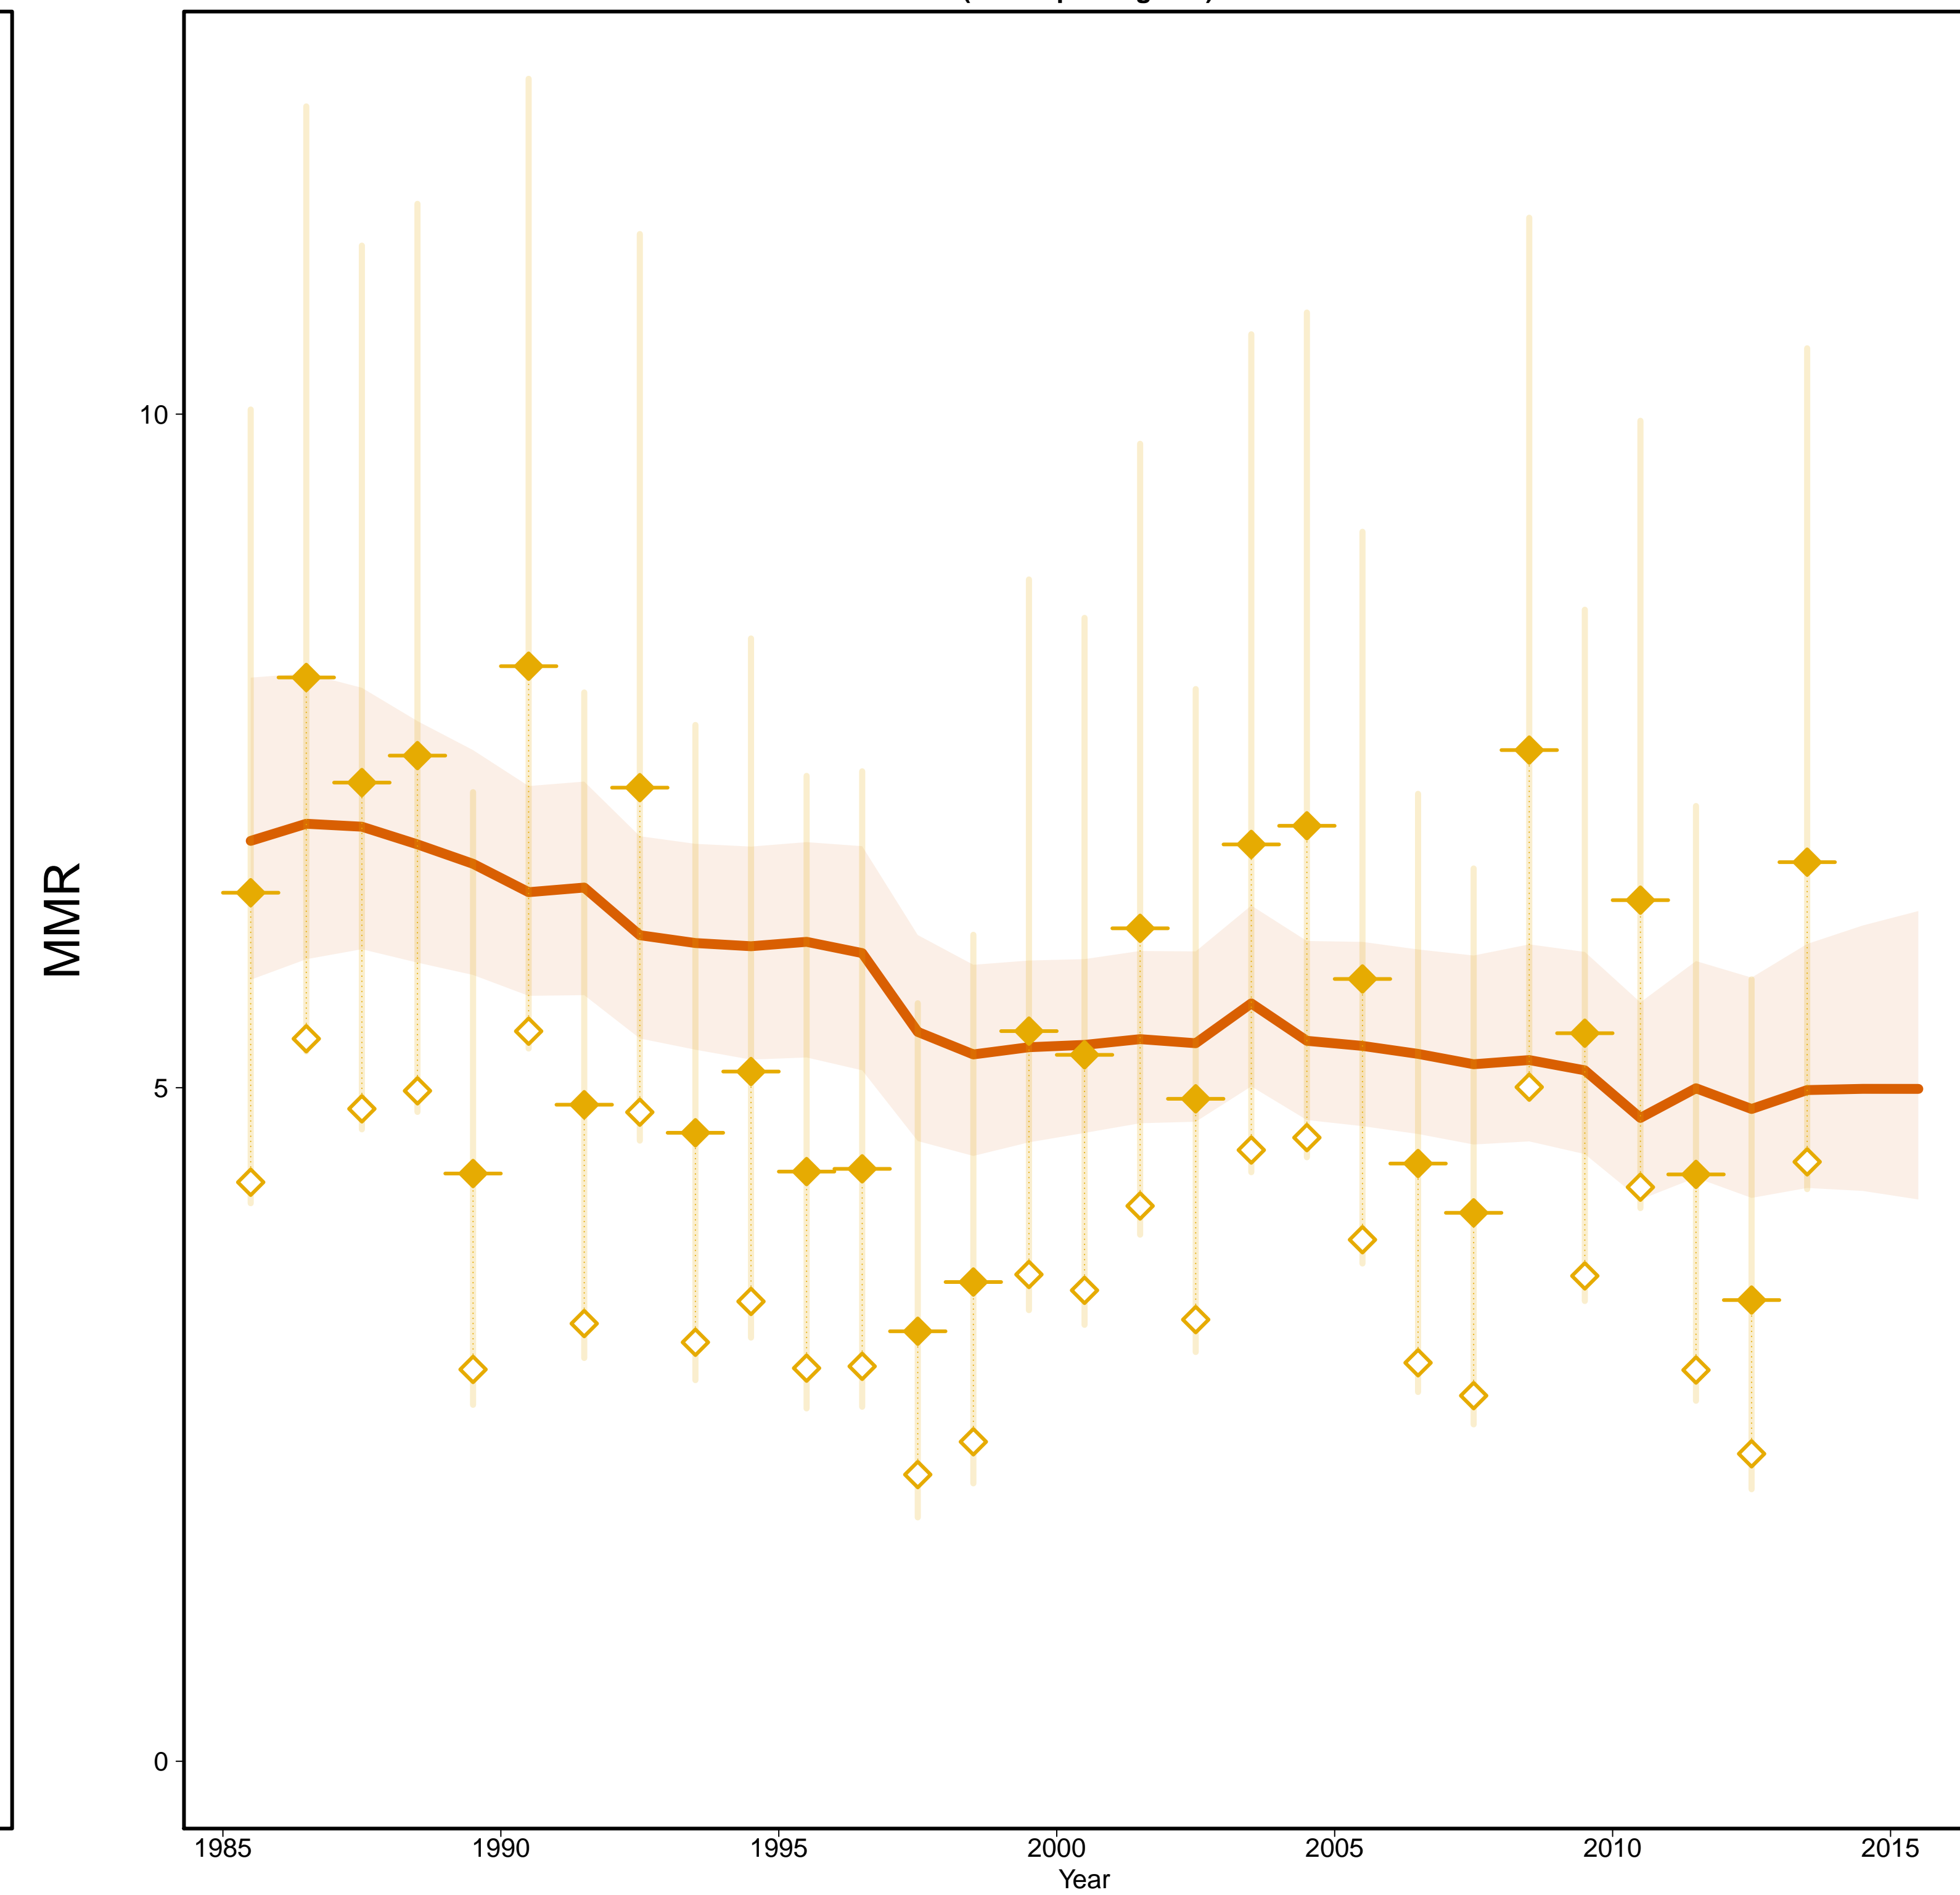

- Estimates —
- Mlate
- MMR Database 2015 —
- ◇ Observed Data
- ◆ Adjusted Data
- Data type —
- ◆ VR

Gross Domestic Product

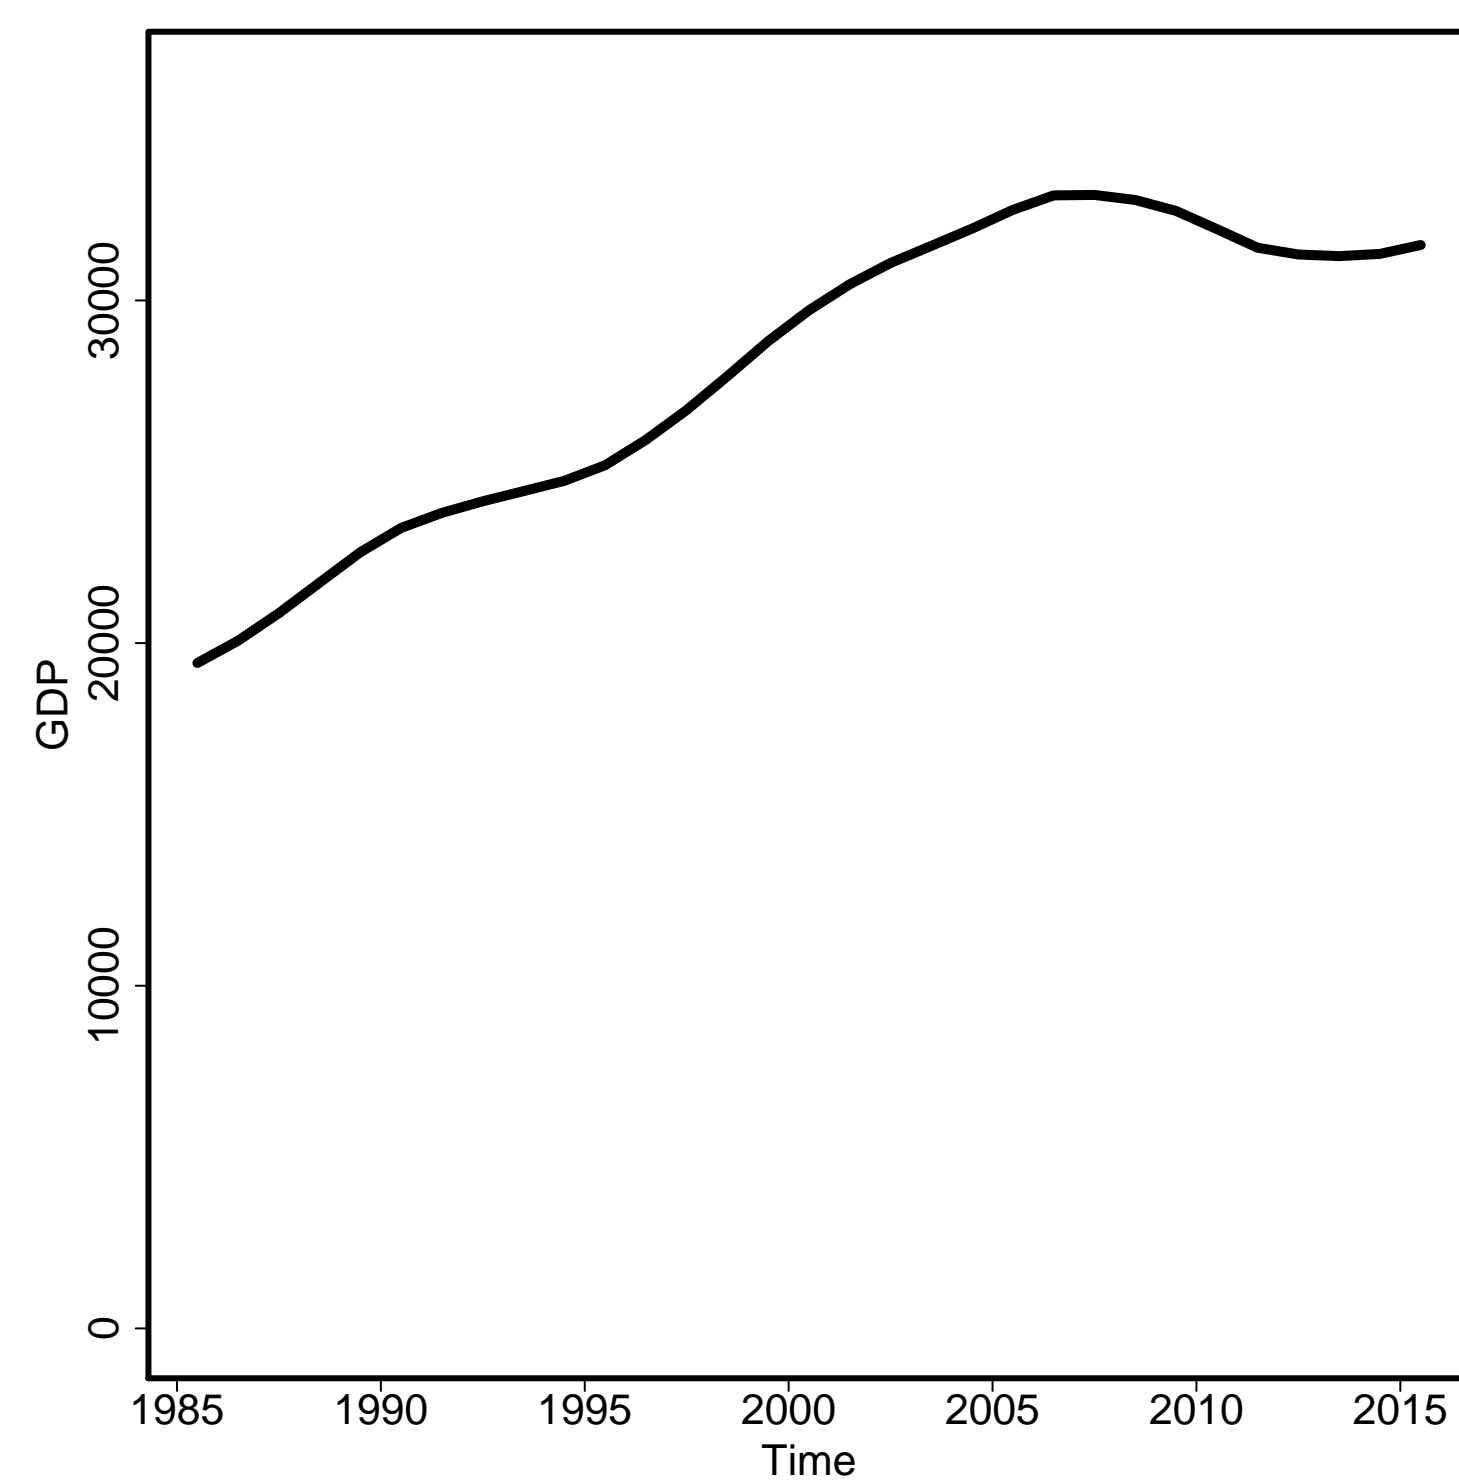

General Fertility Rate

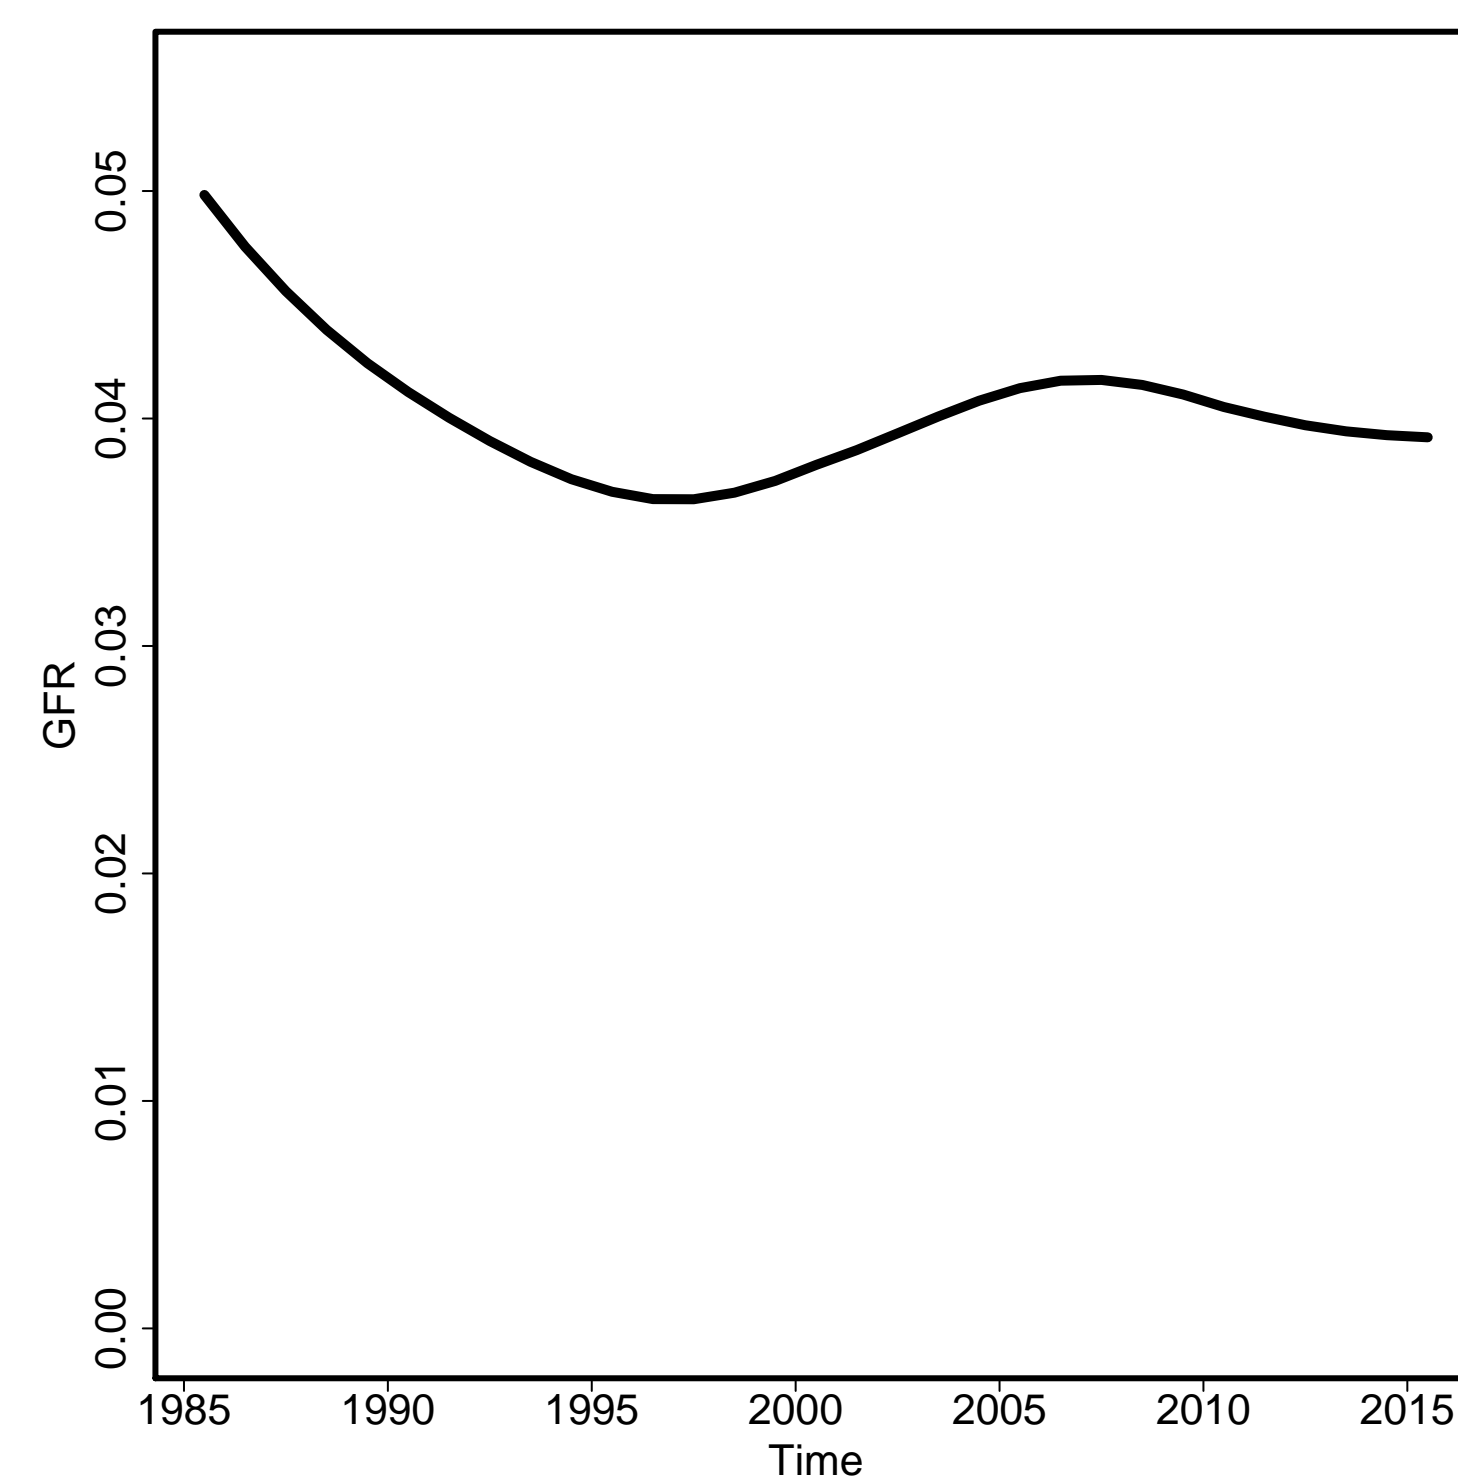

Skilled Attendance to Birth

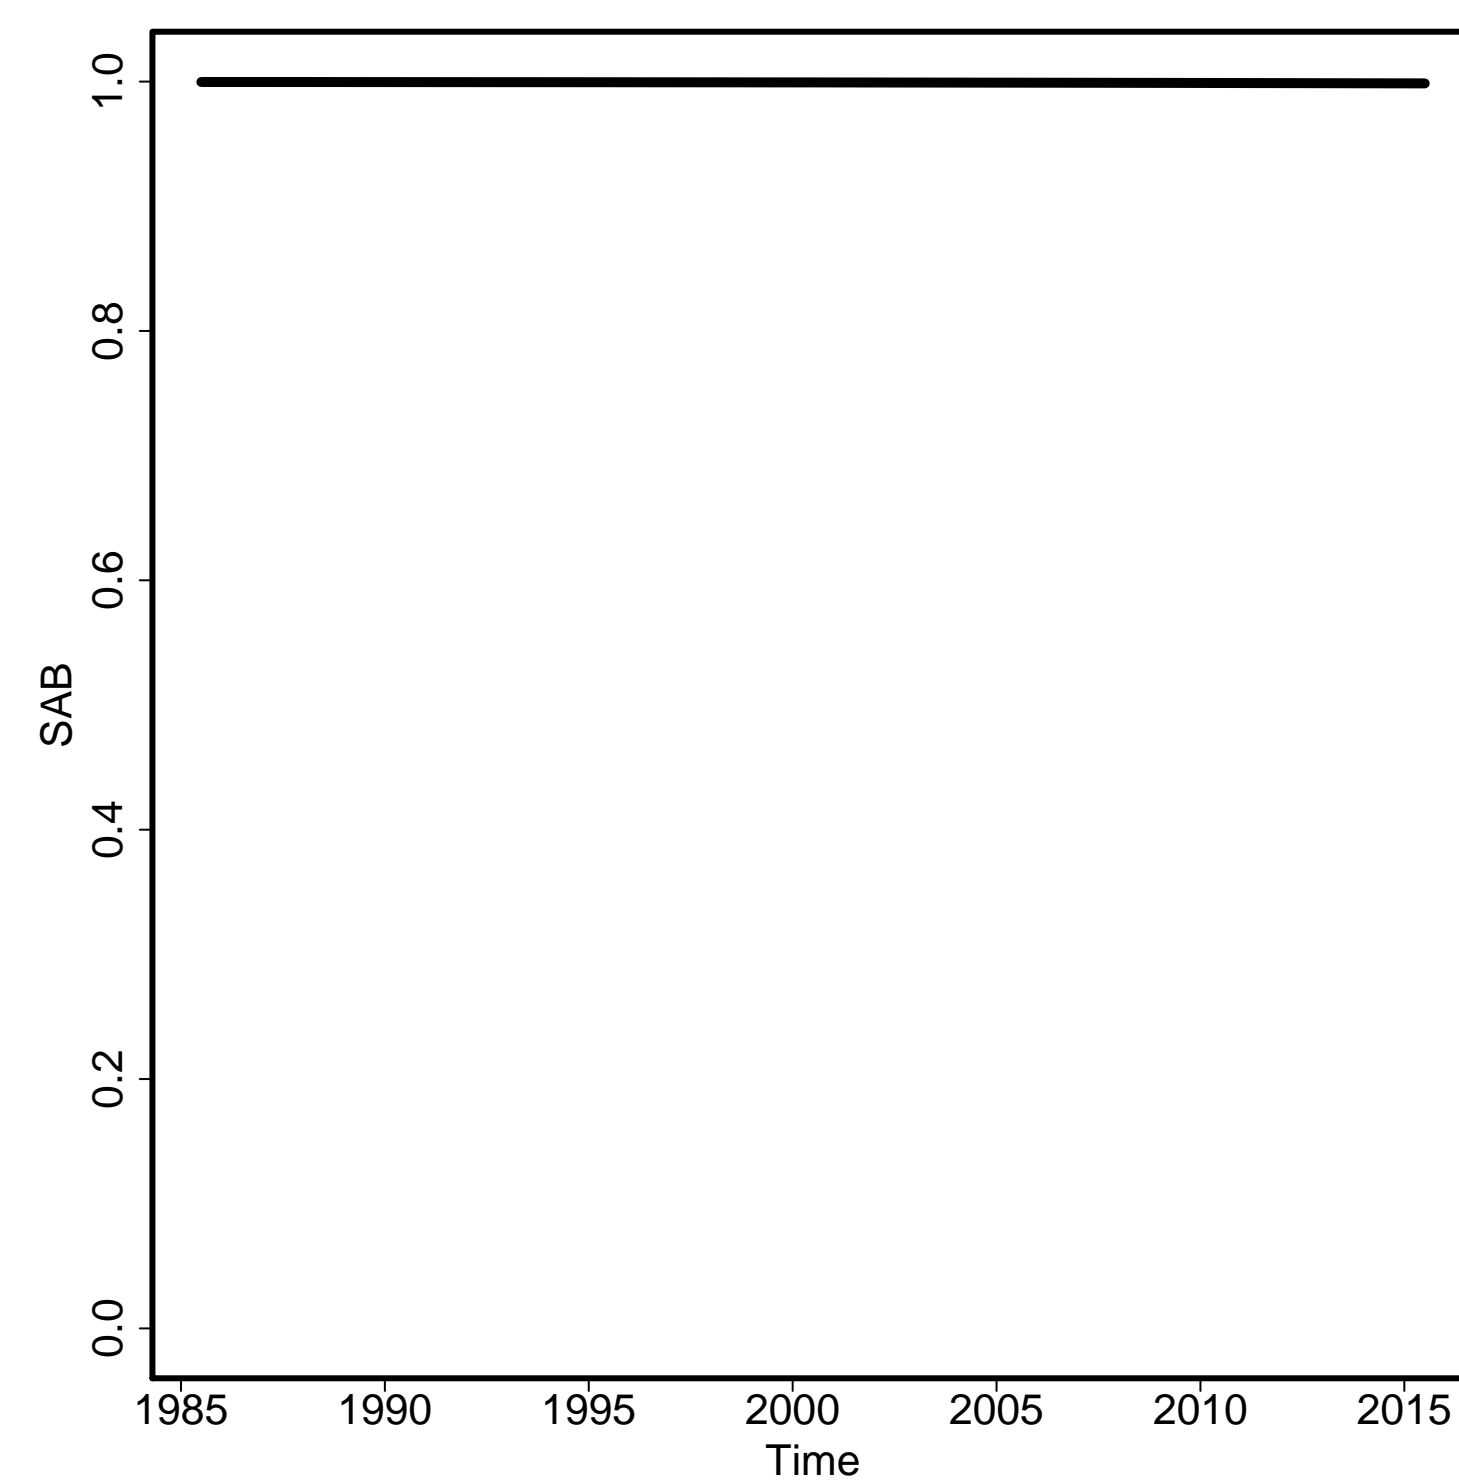

Envelope/Births

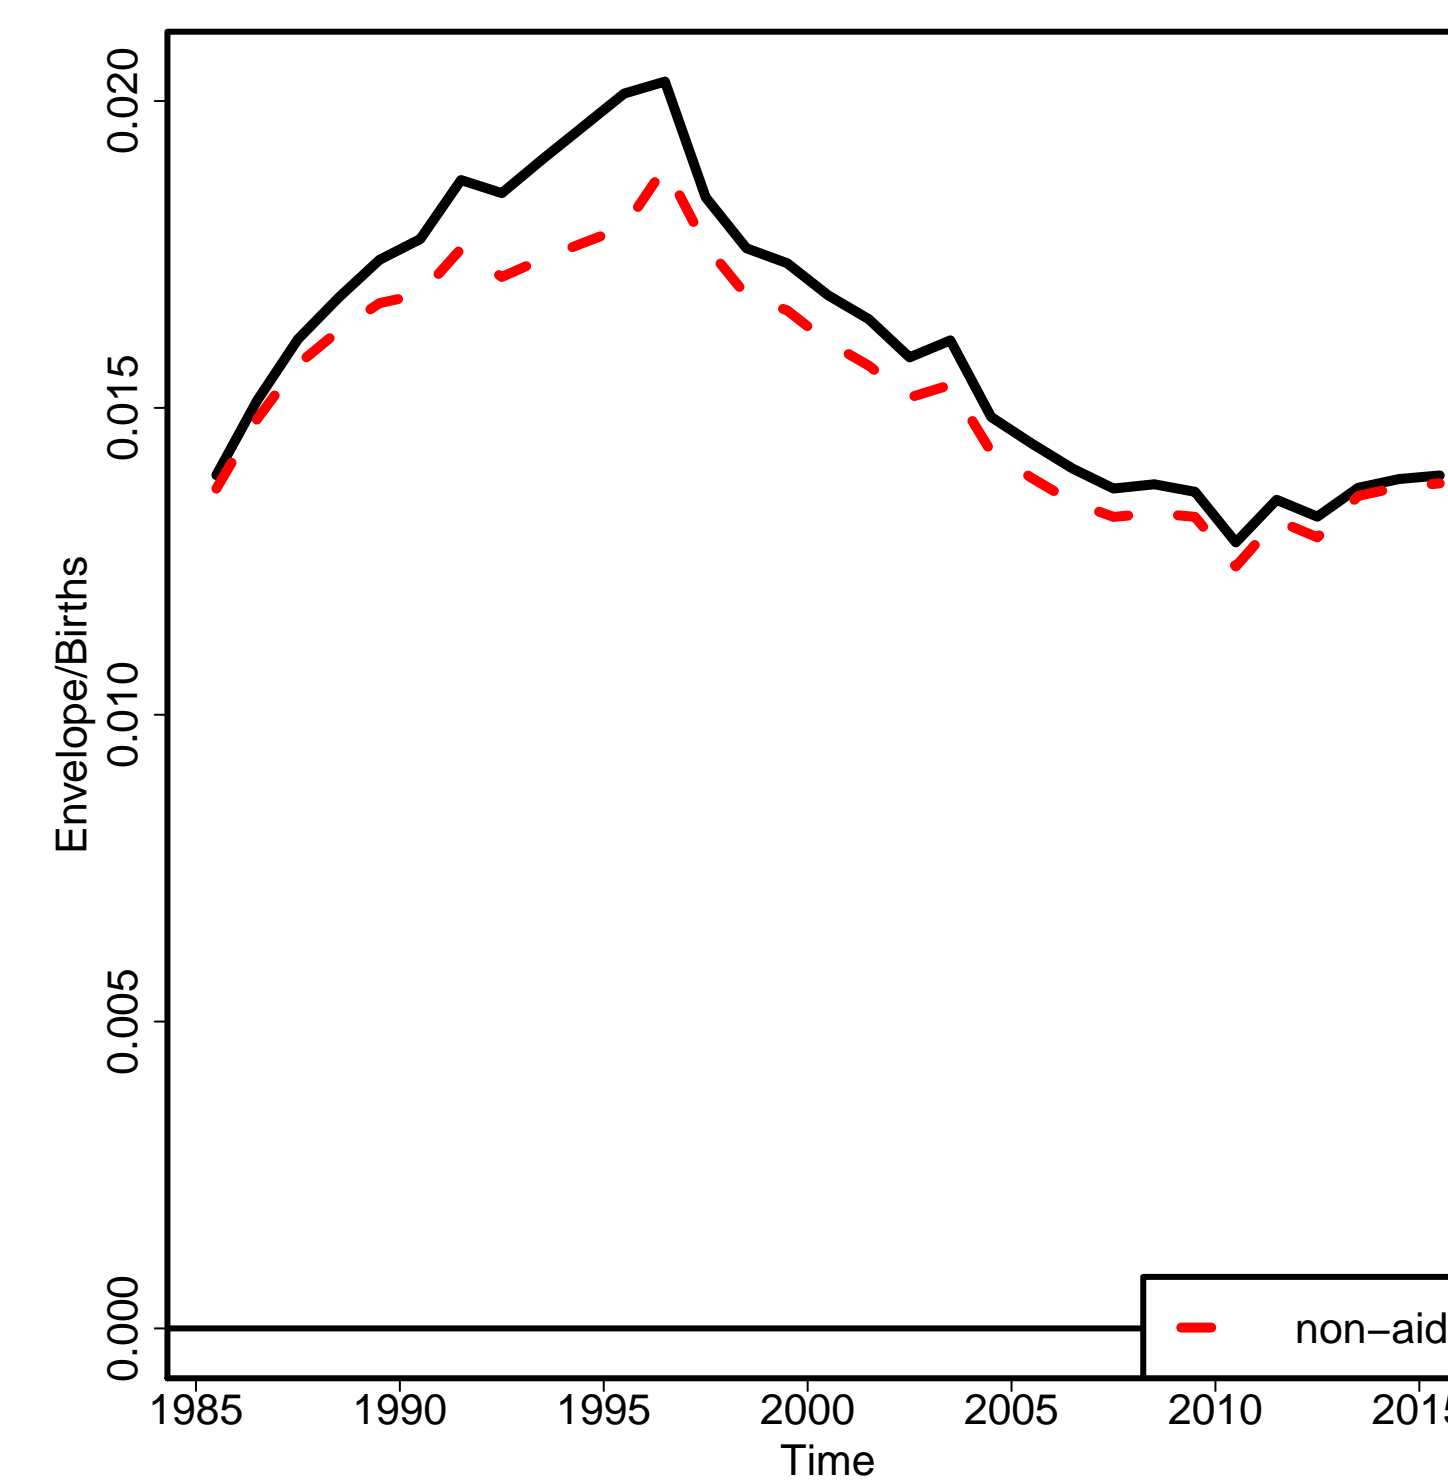

NONAIDSMMR

Non-aids MMR

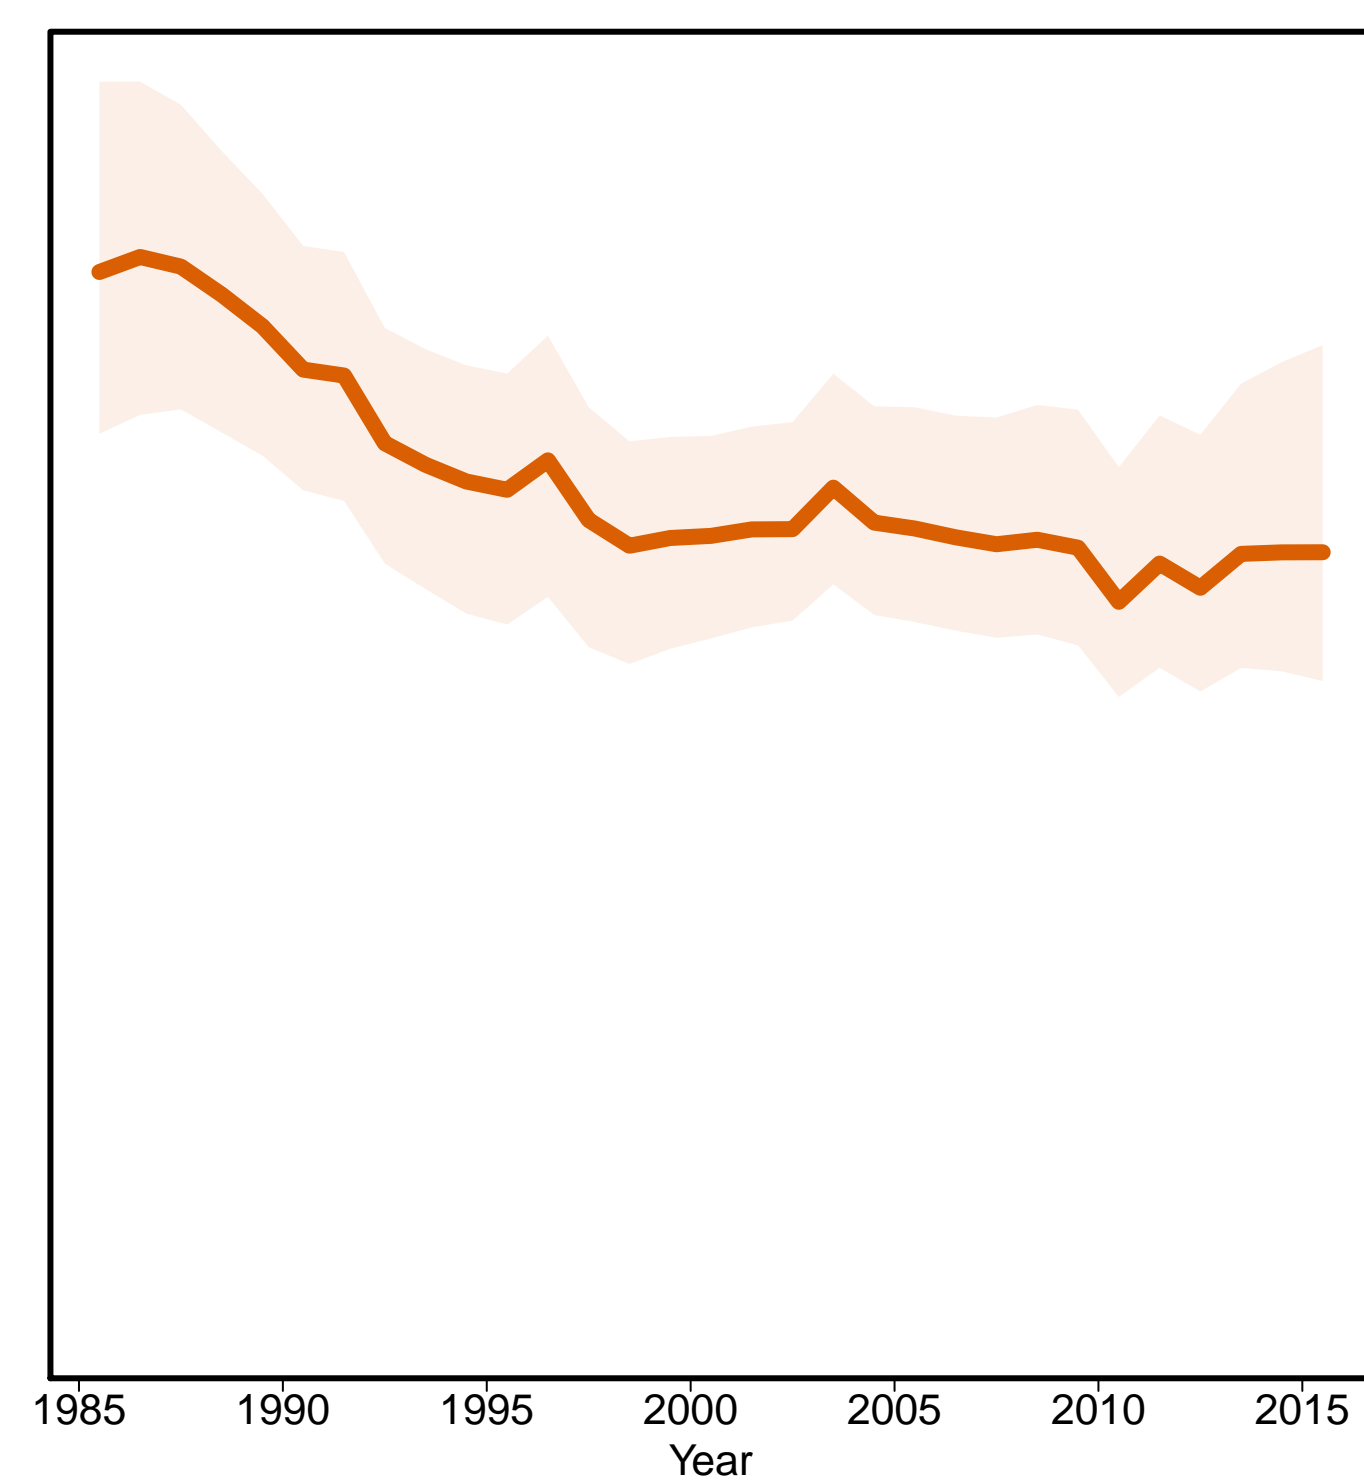

Aids MMR

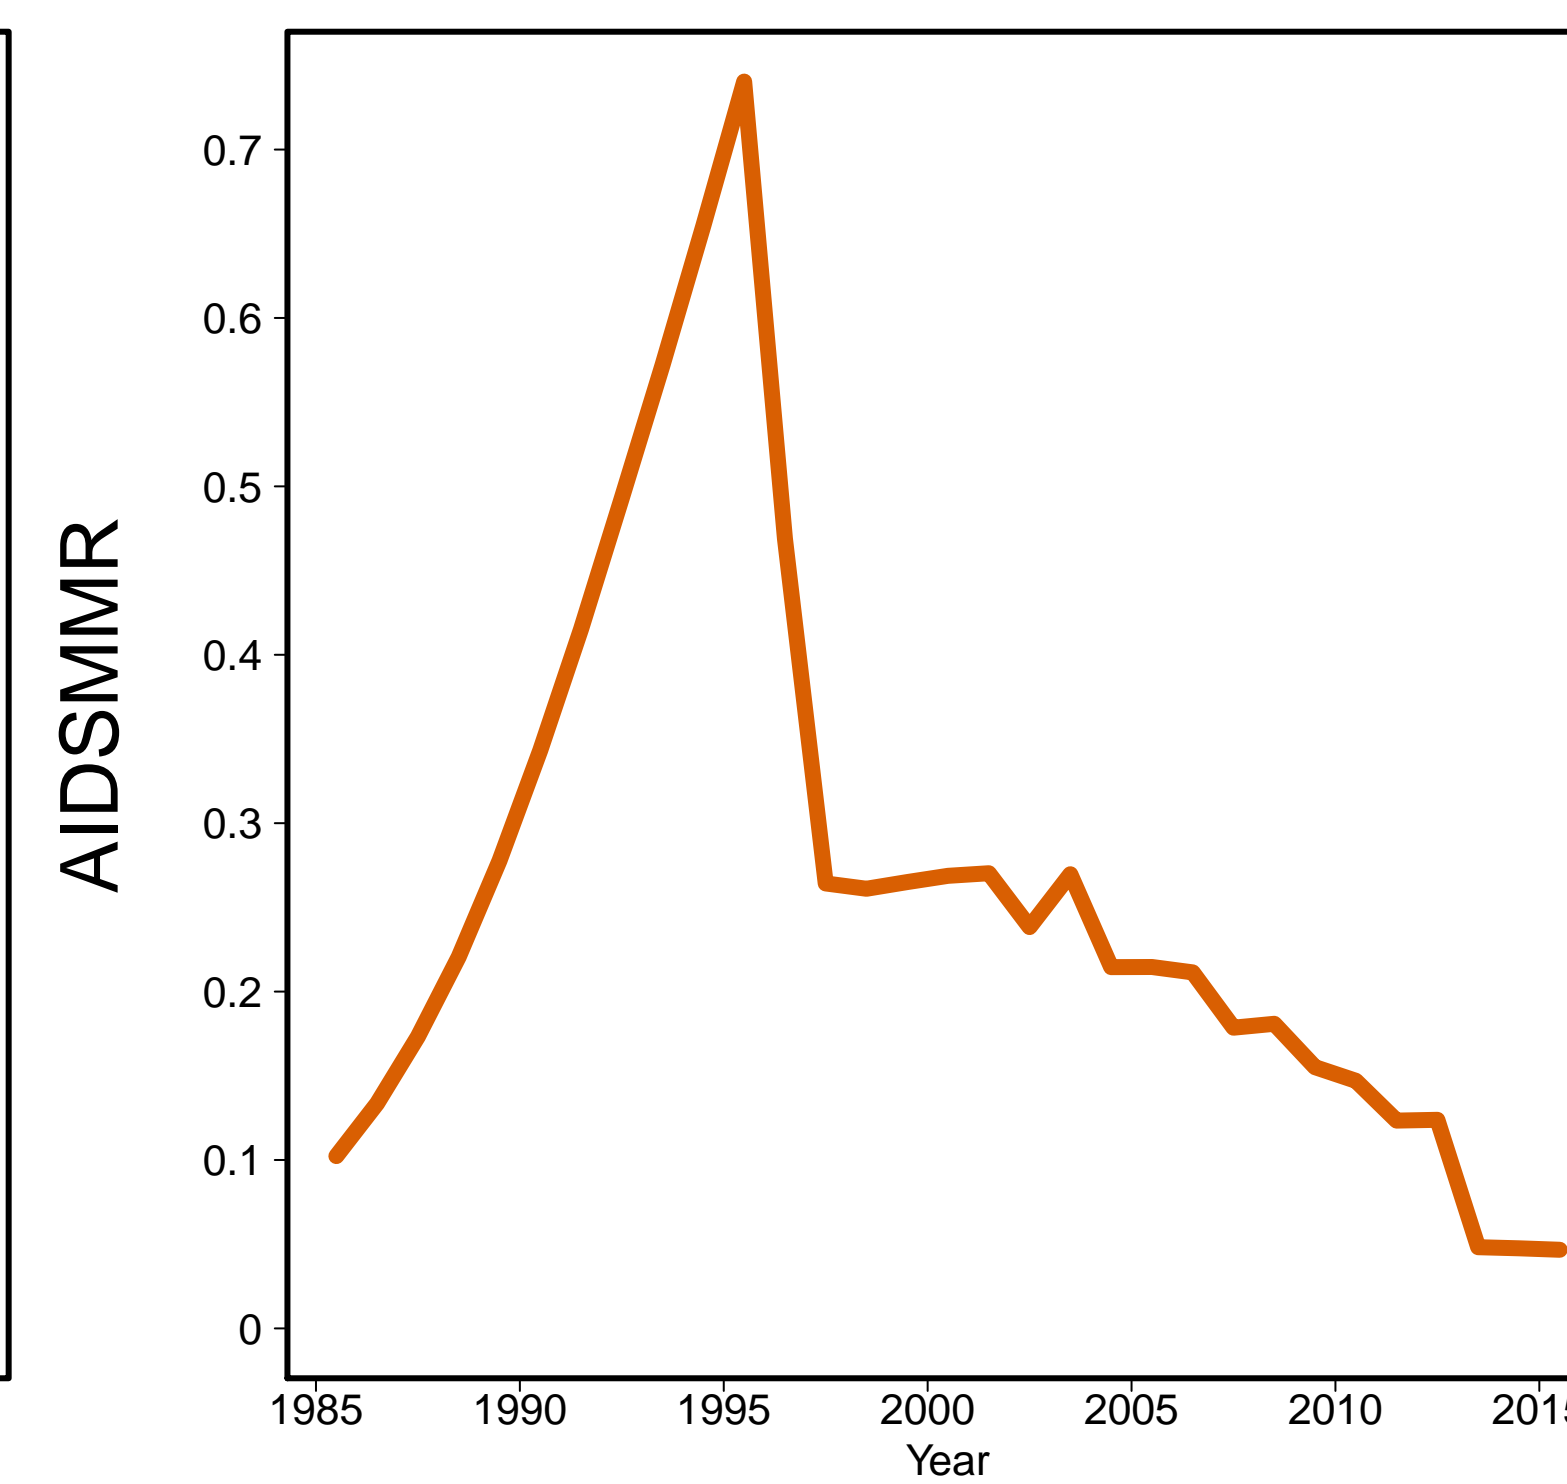

Sri Lanka [LKA]  
(Southern Asia)

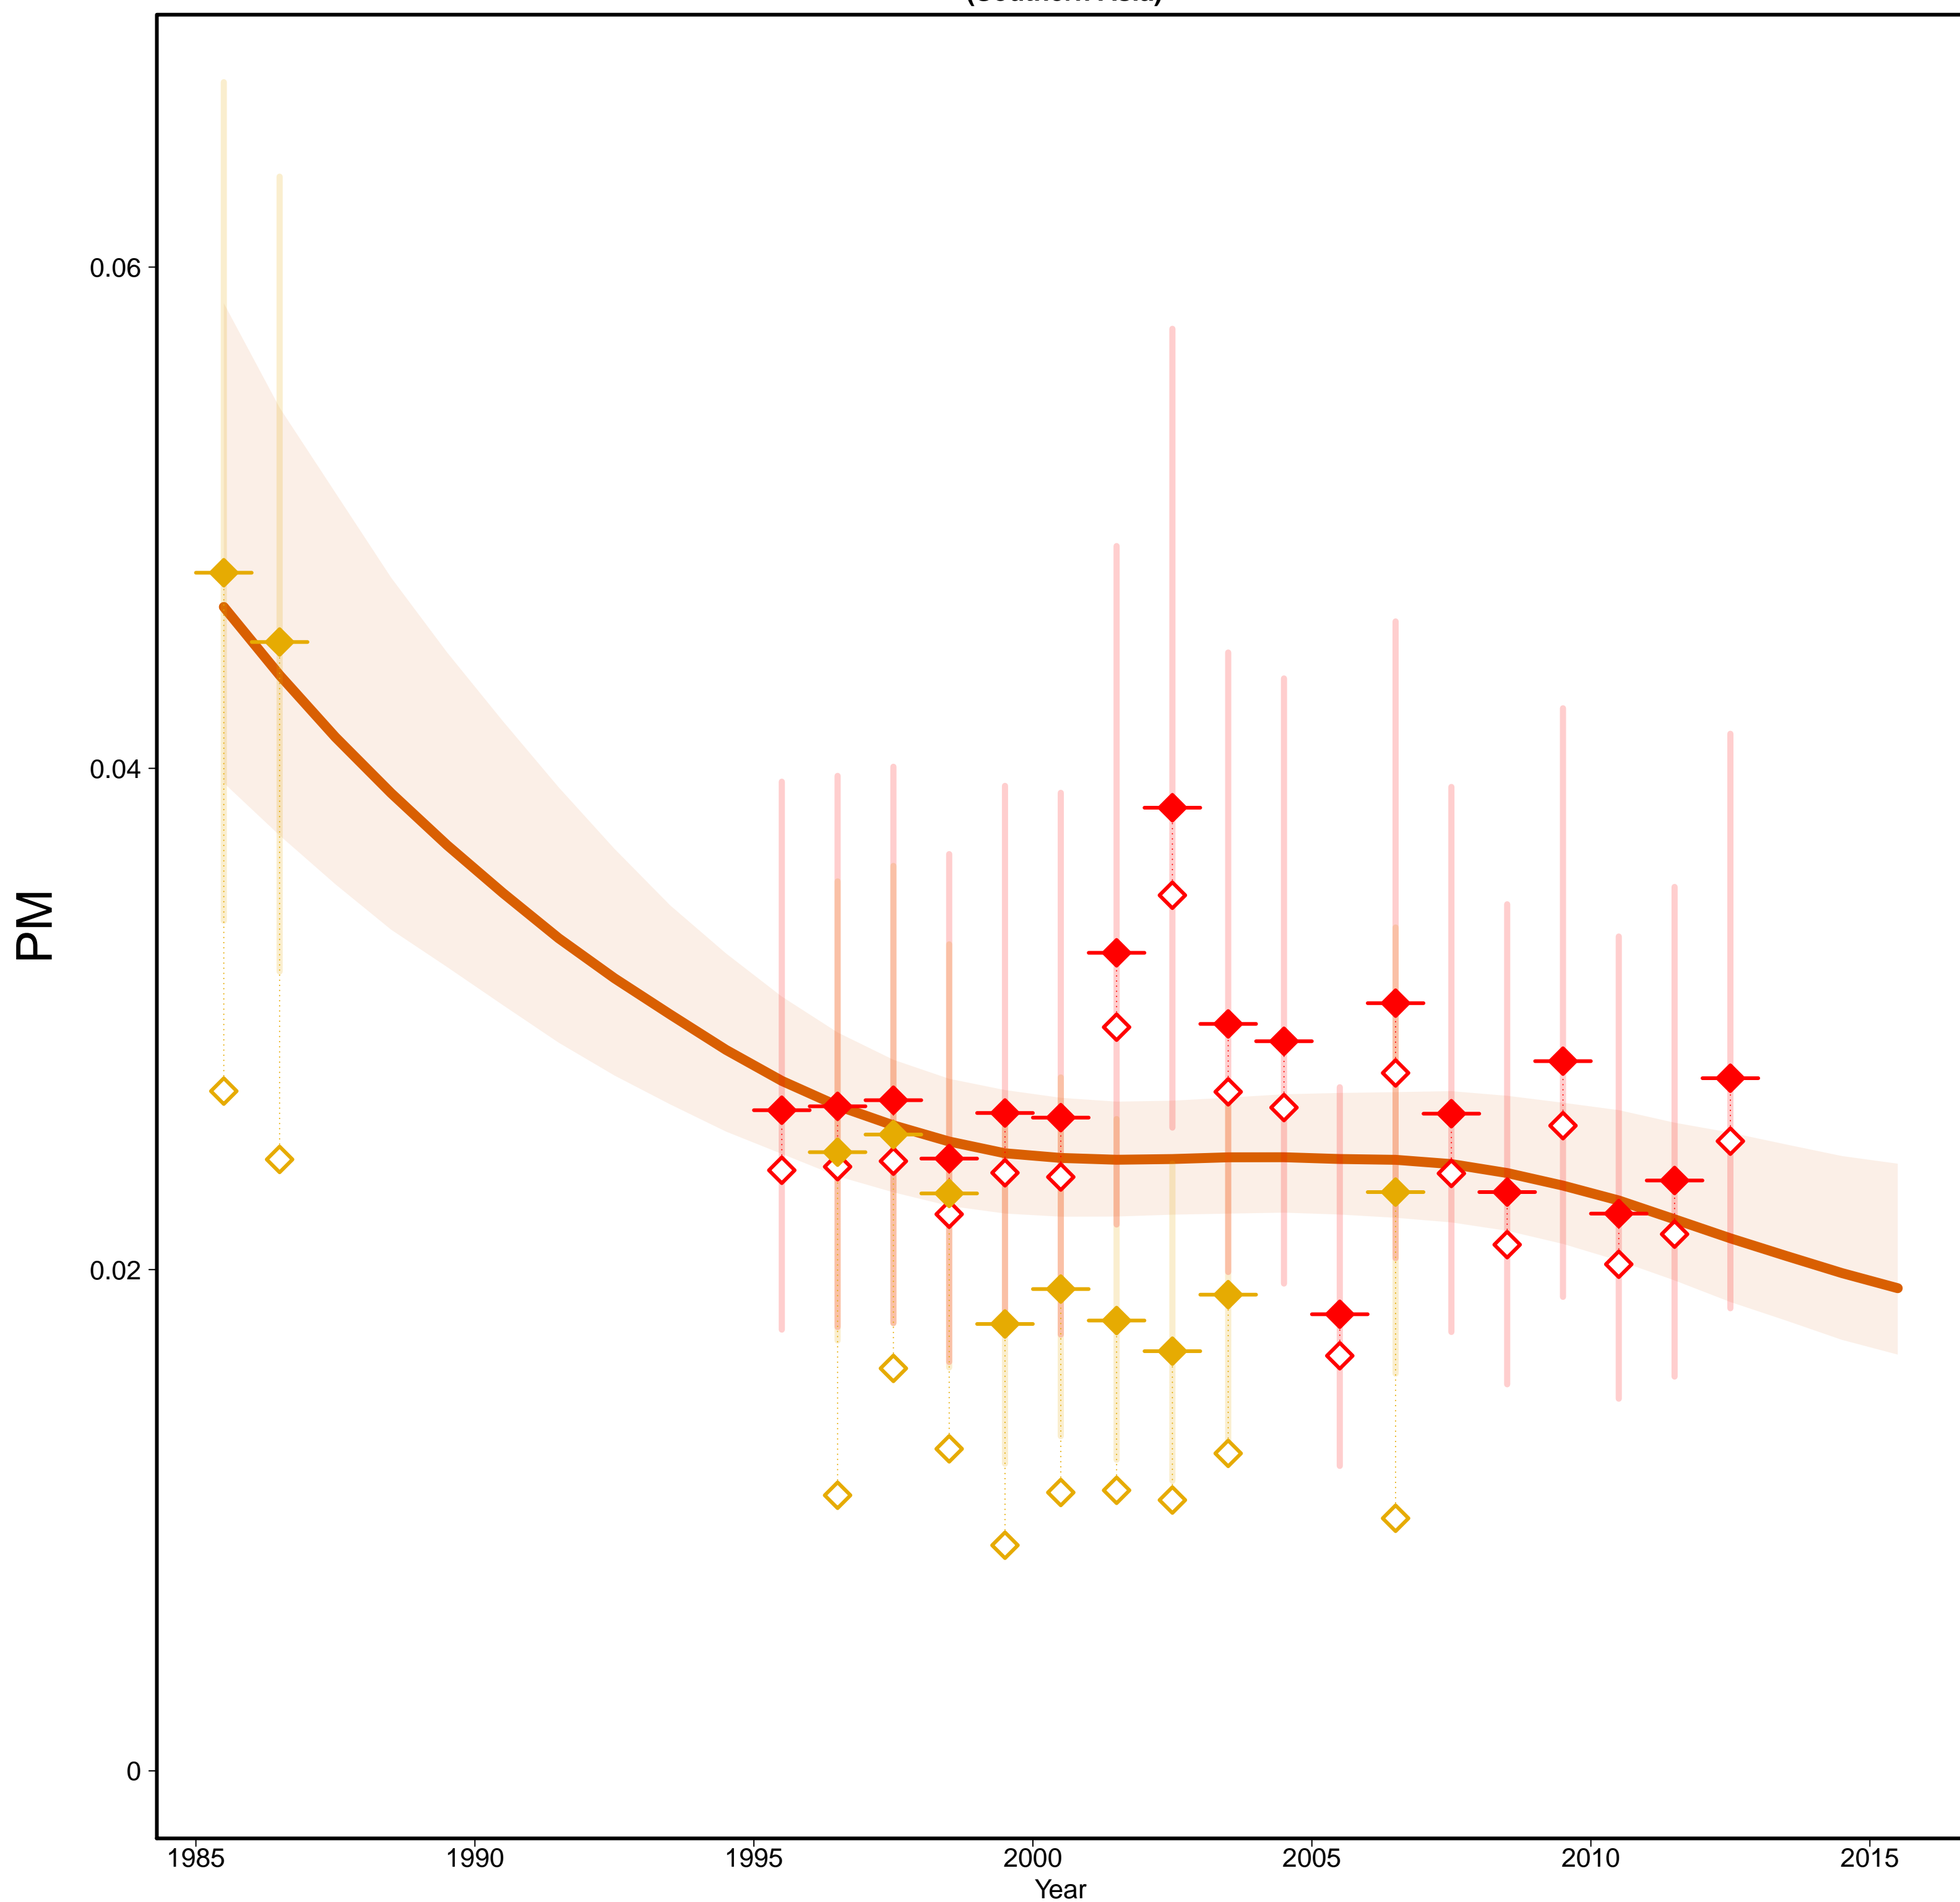

Sri Lanka [LKA]  
(Southern Asia)

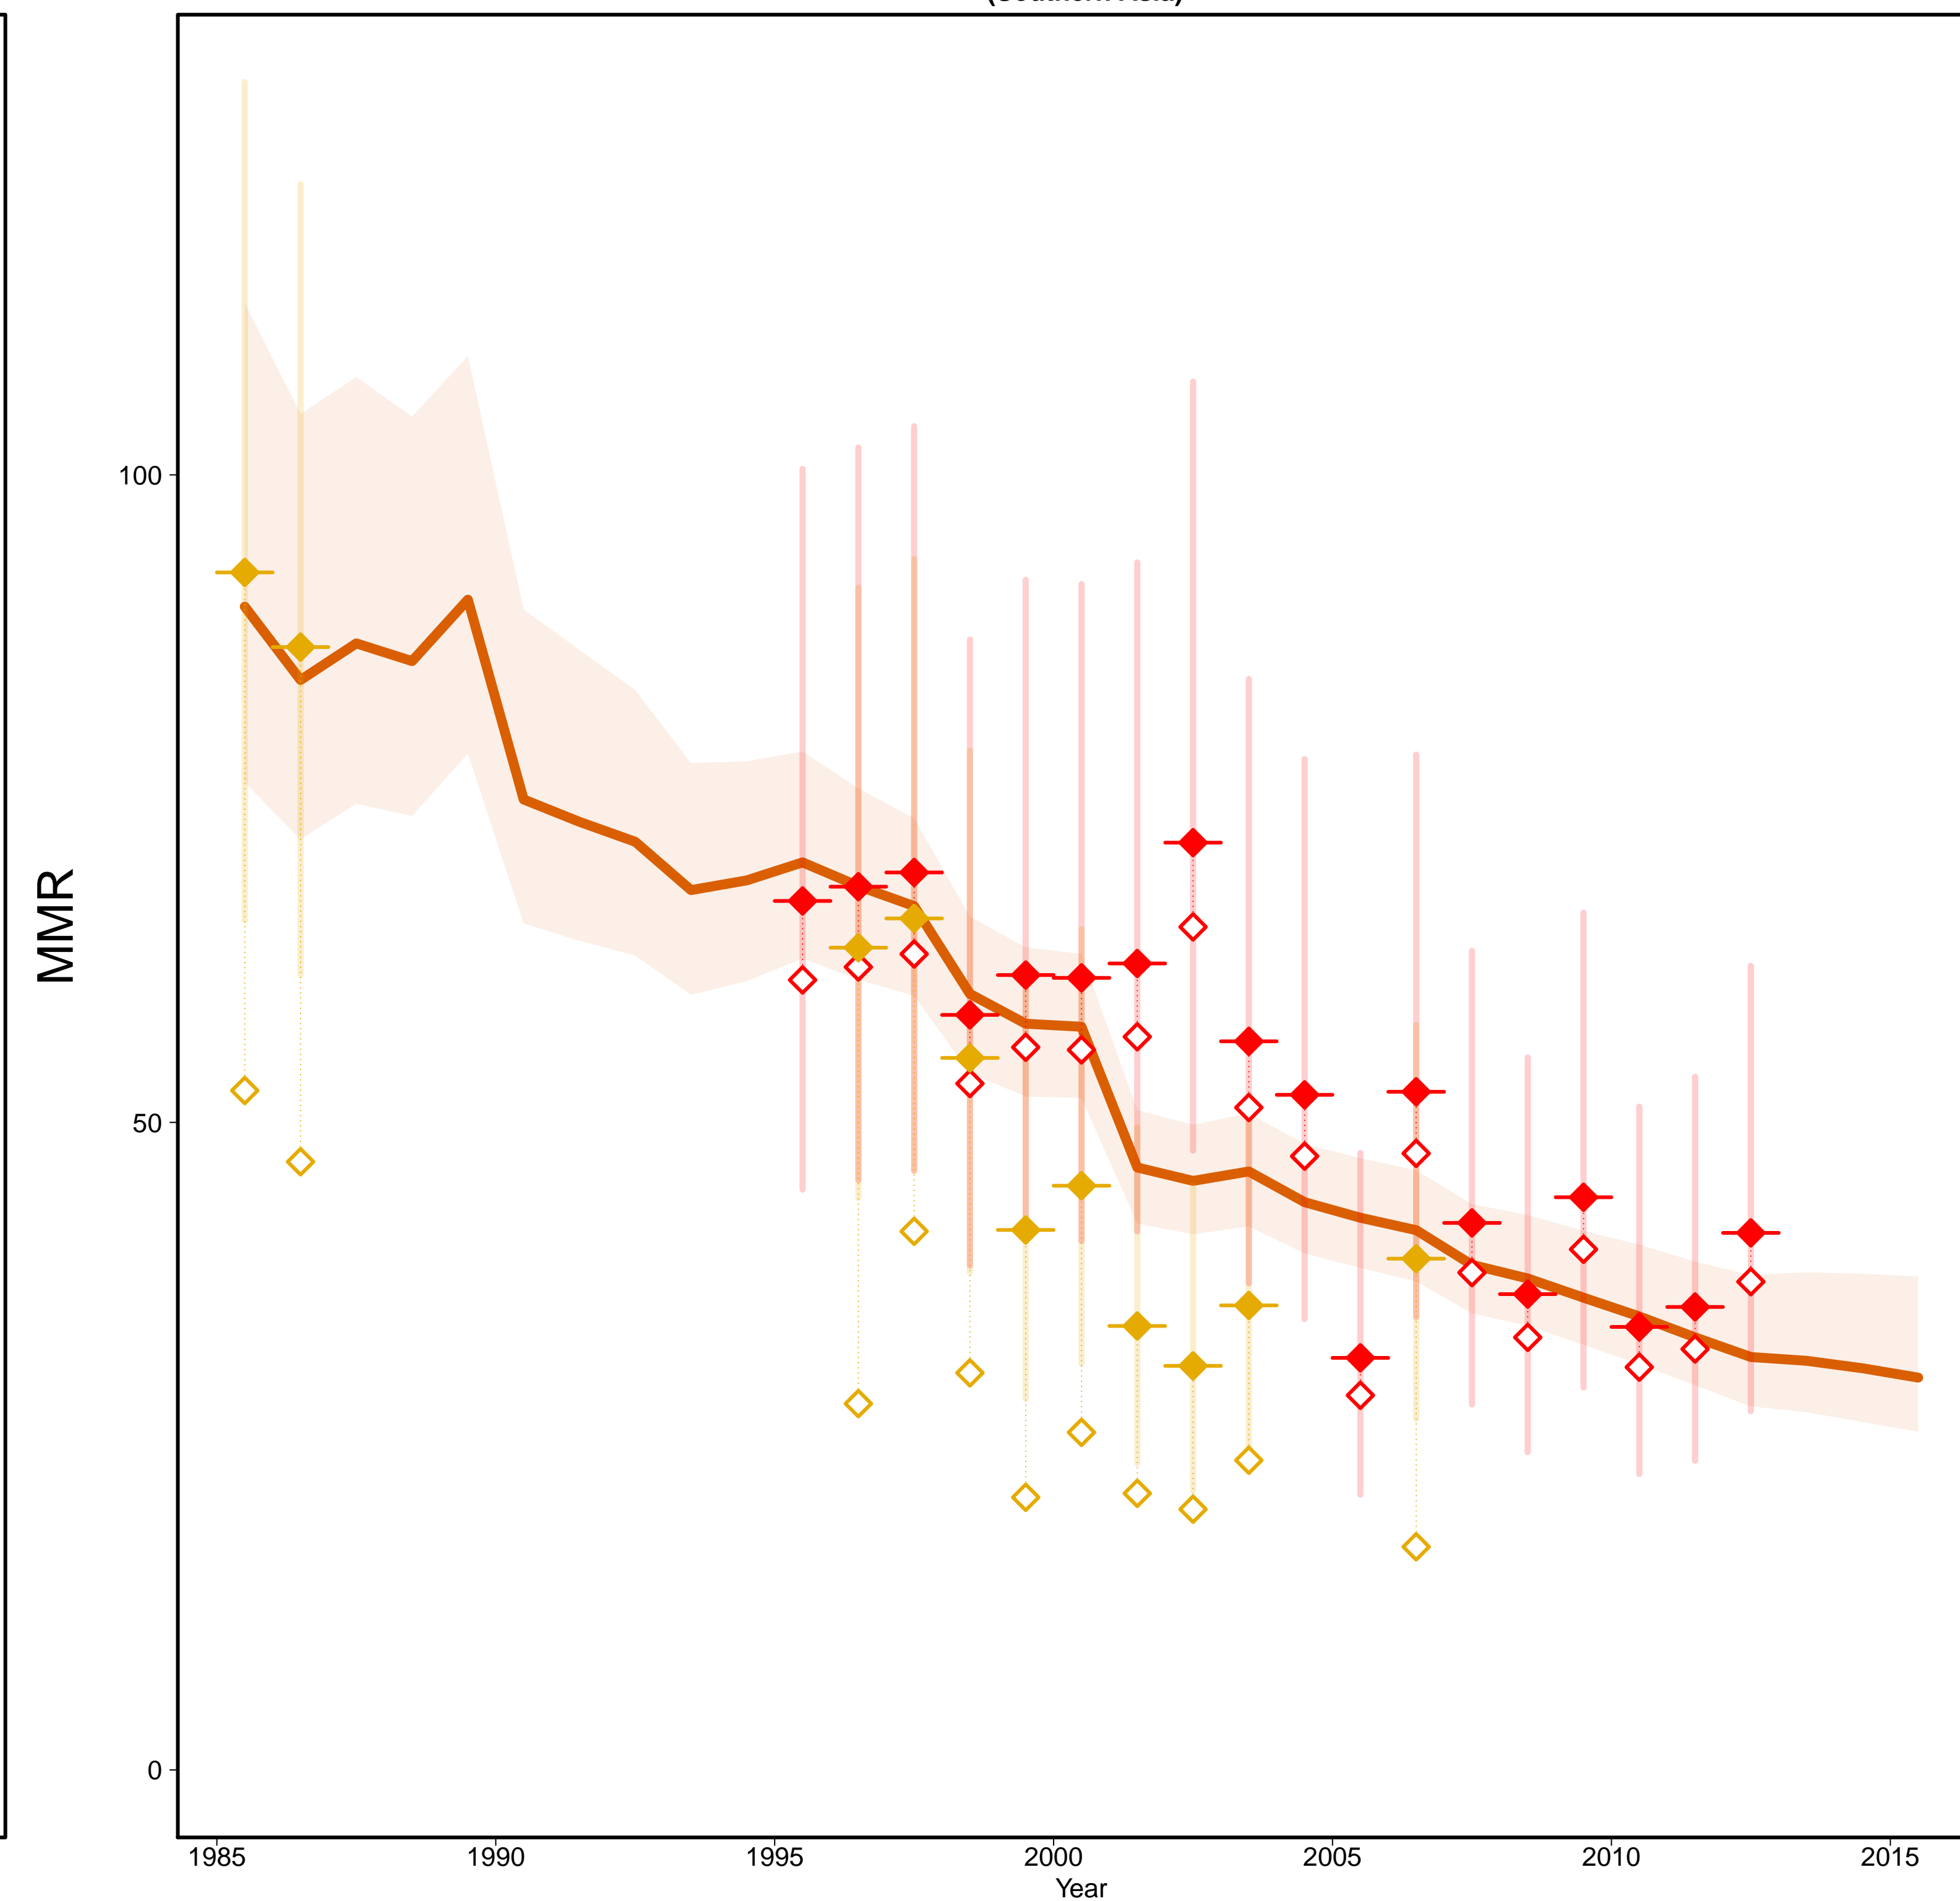

- Estimates —
- MMR Database 2015 —
- ◇ Observed Data
- ◆ Adjusted Data
- Data type —
- ◆ VR
- ◆ Misc. studies

Gross Domestic Product

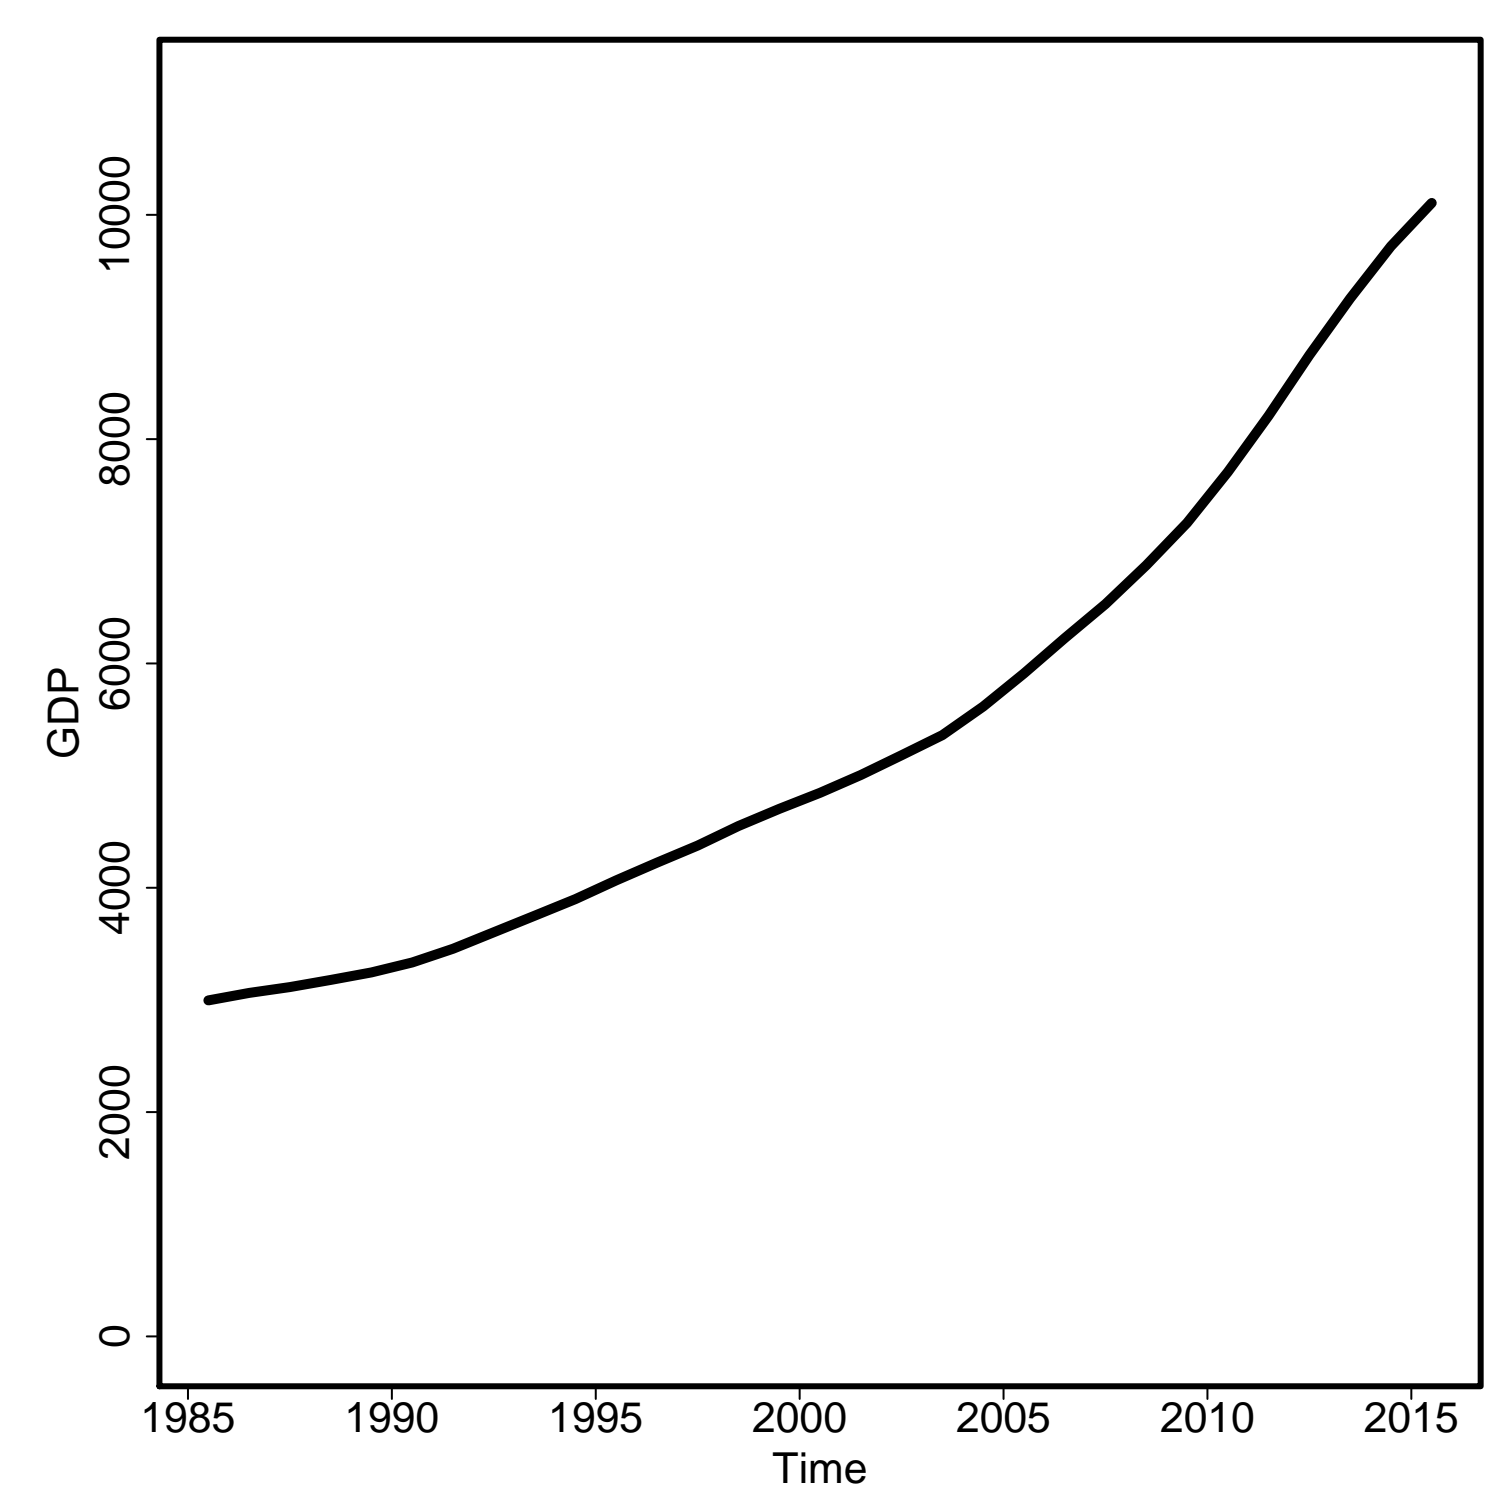

General Fertility Rate

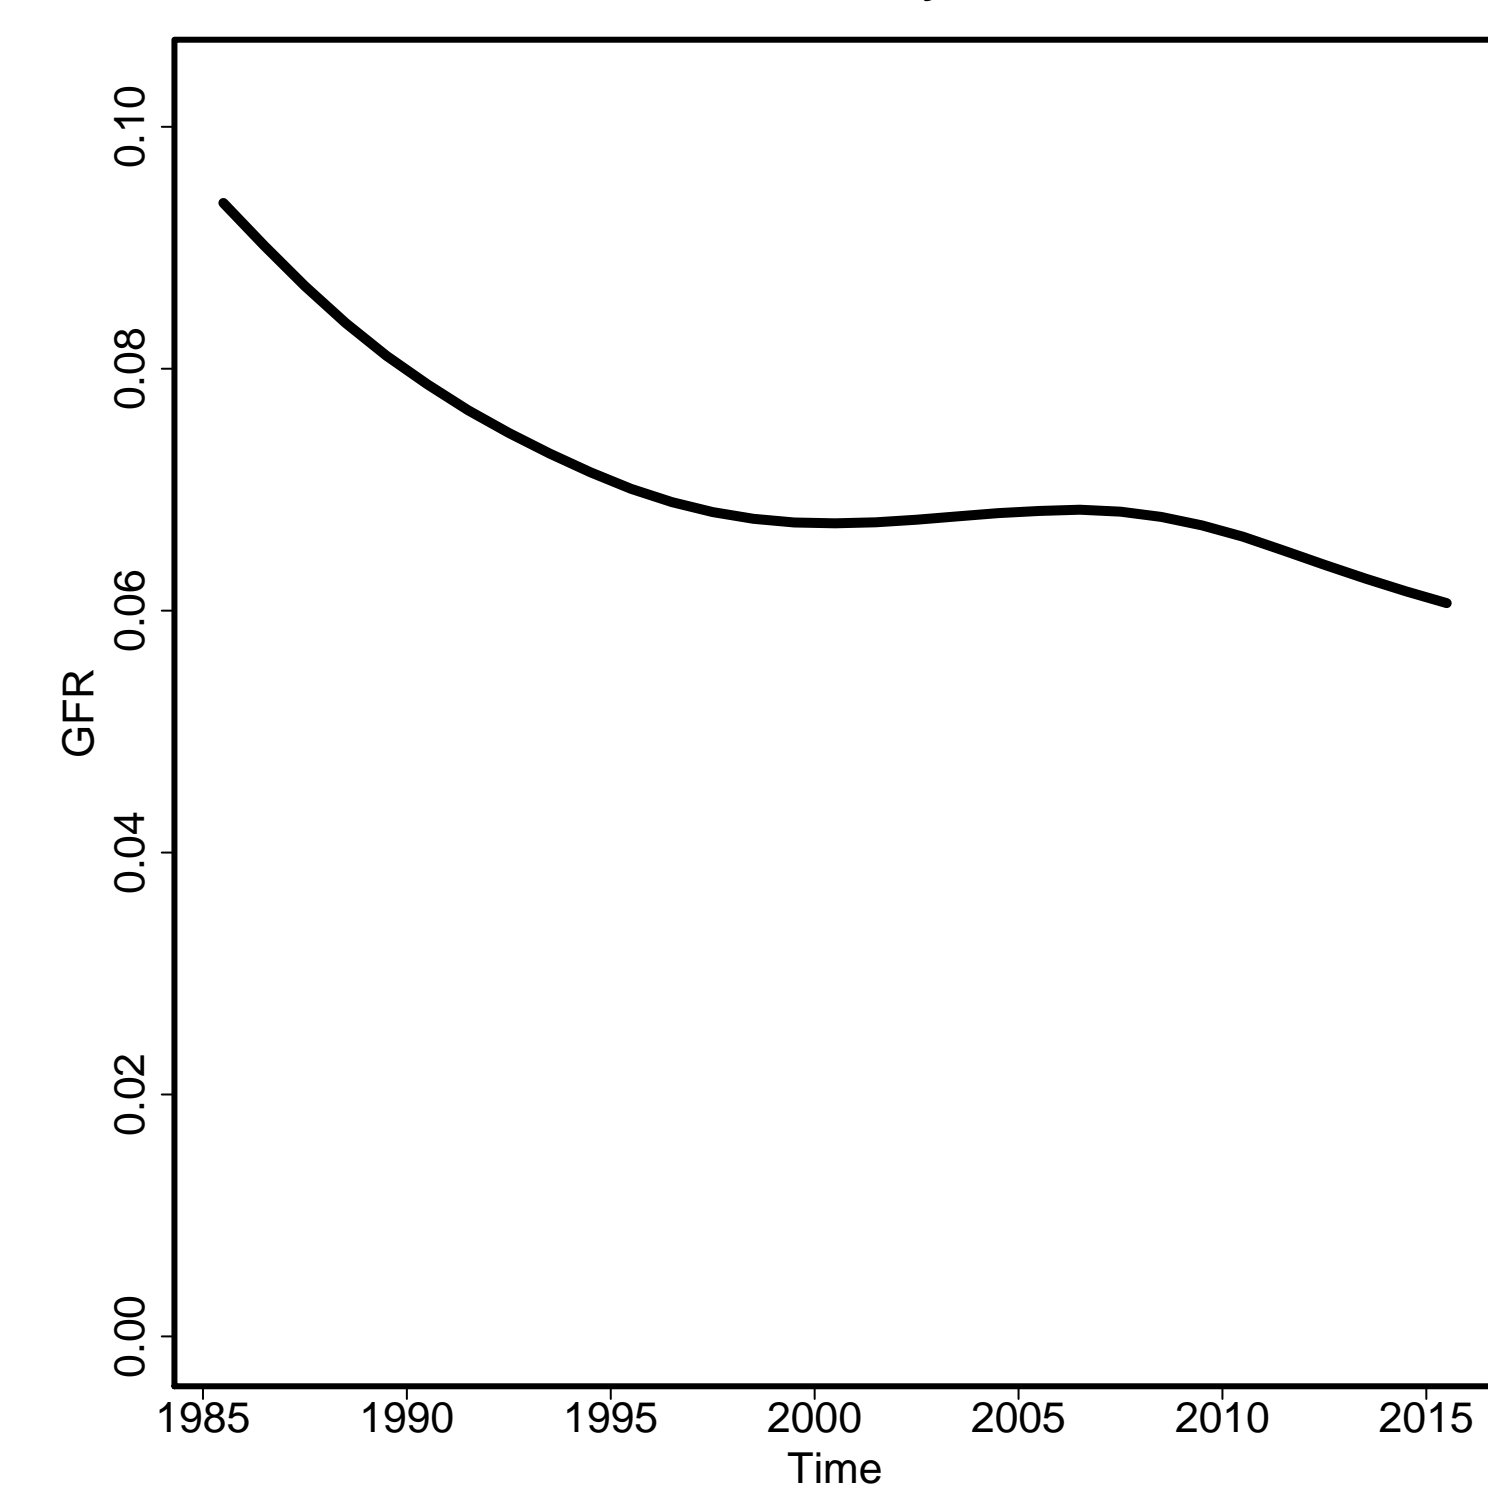

Skilled Attendance to Birth

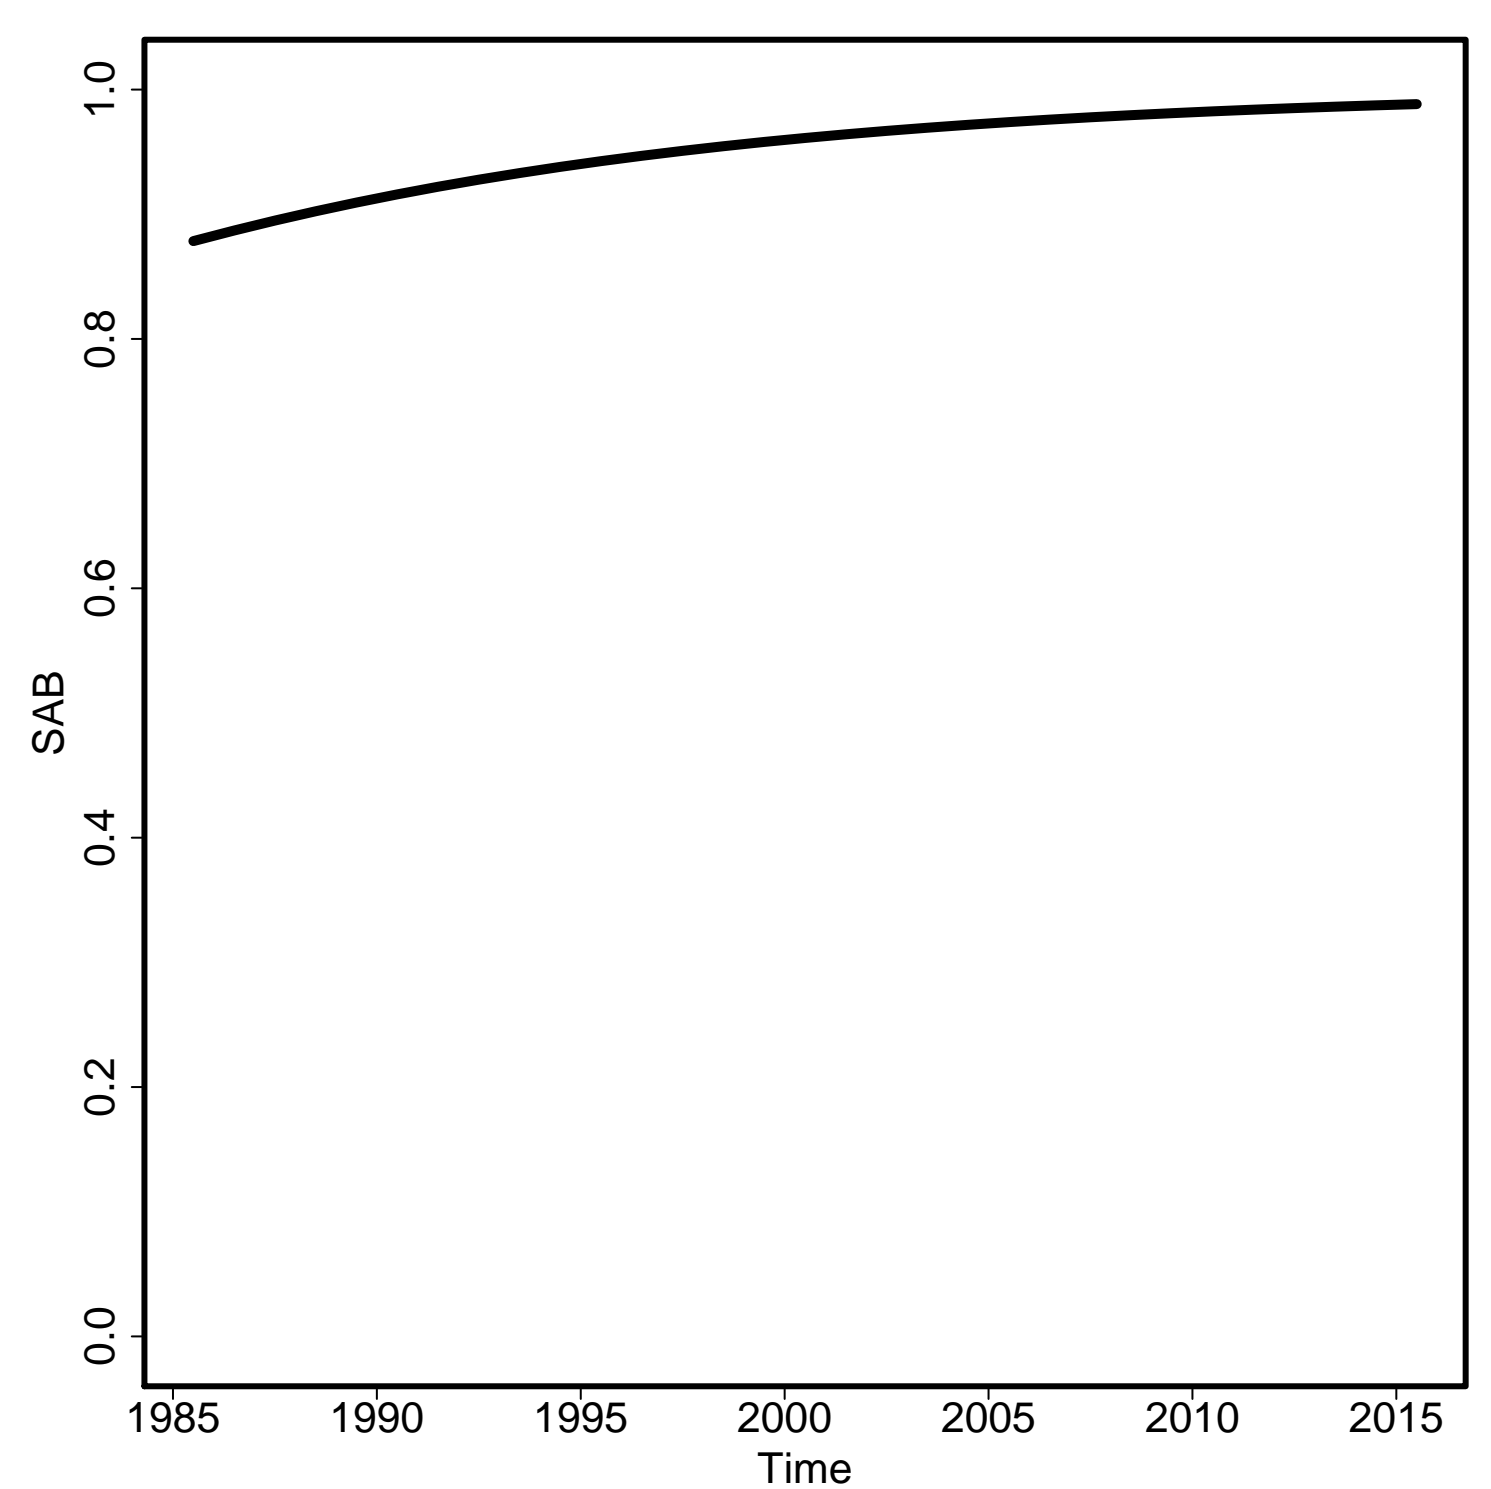

Envelope/Births

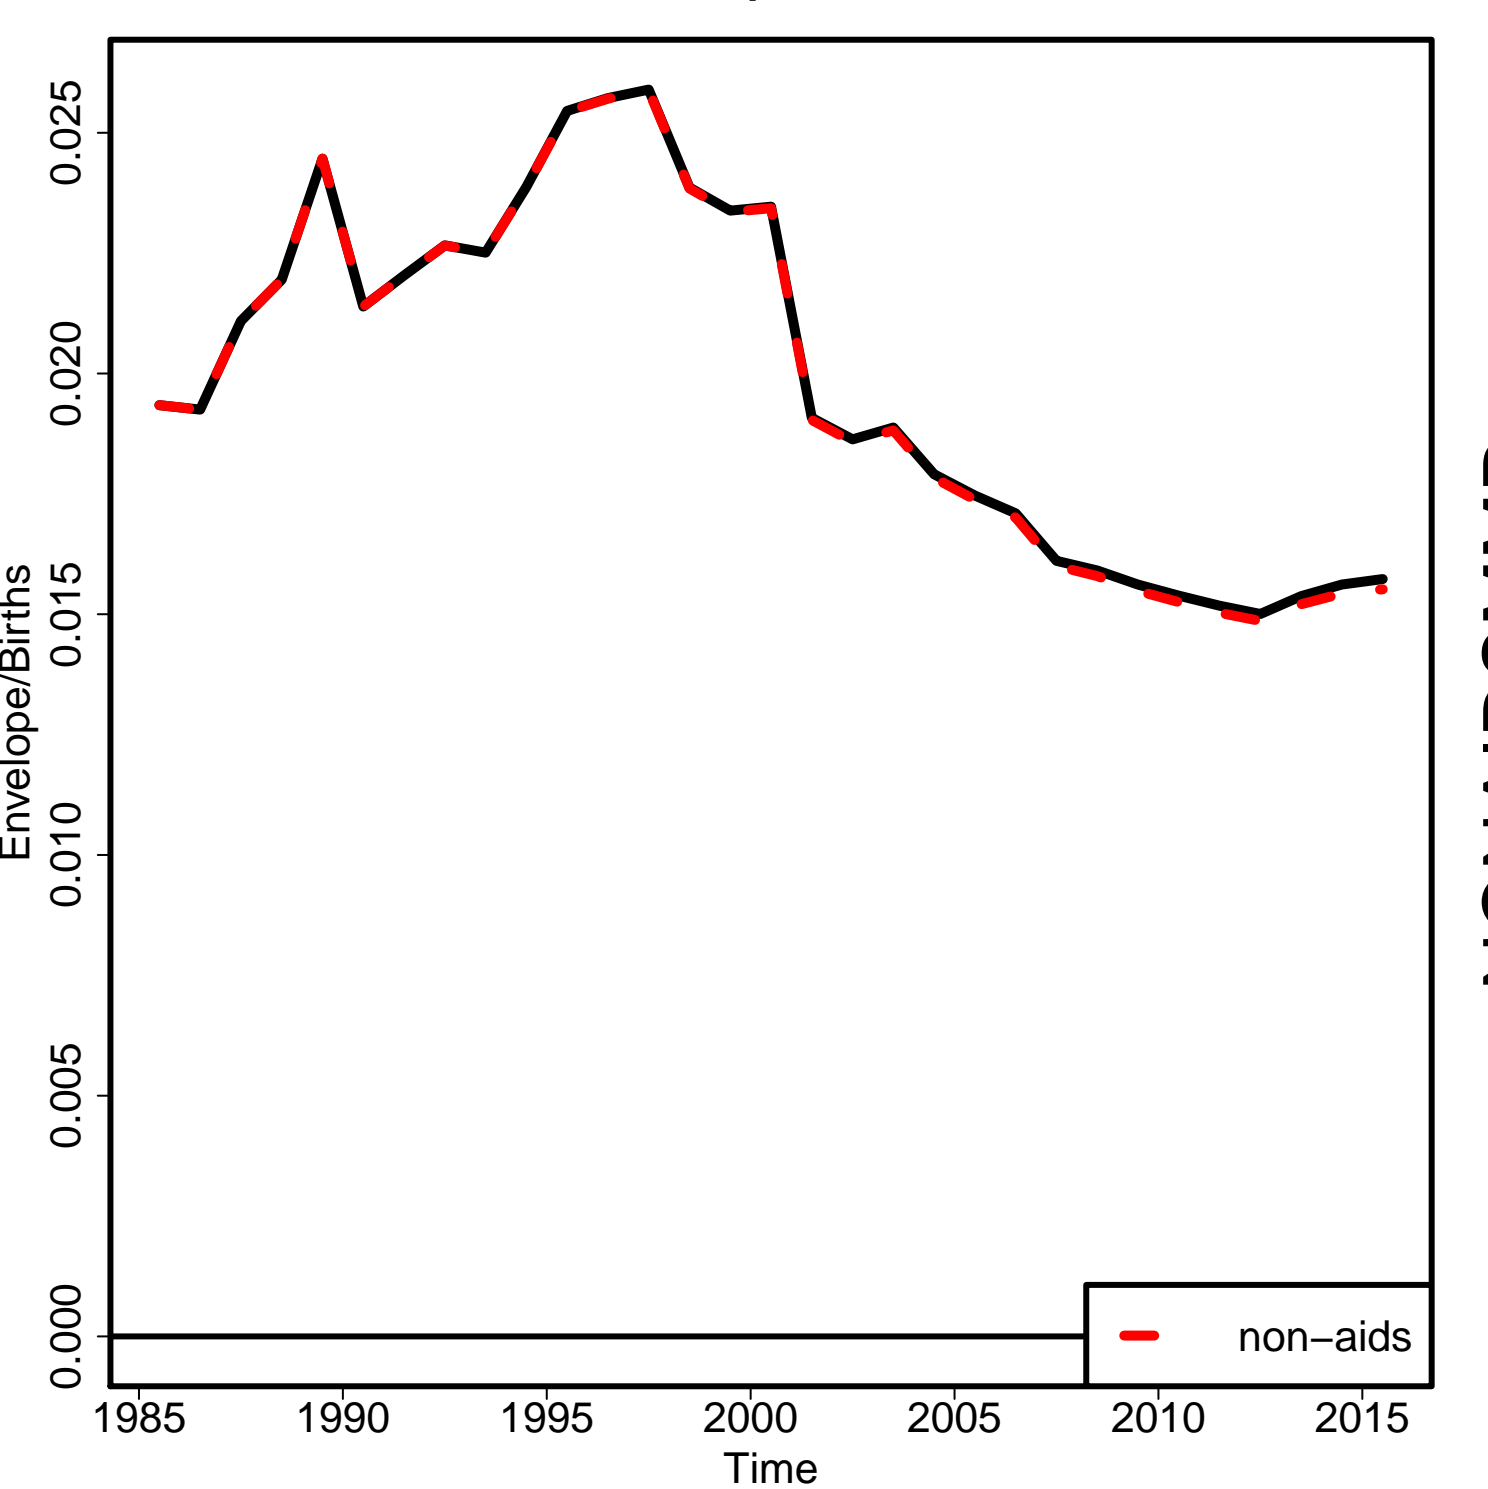

Non-aids MMR

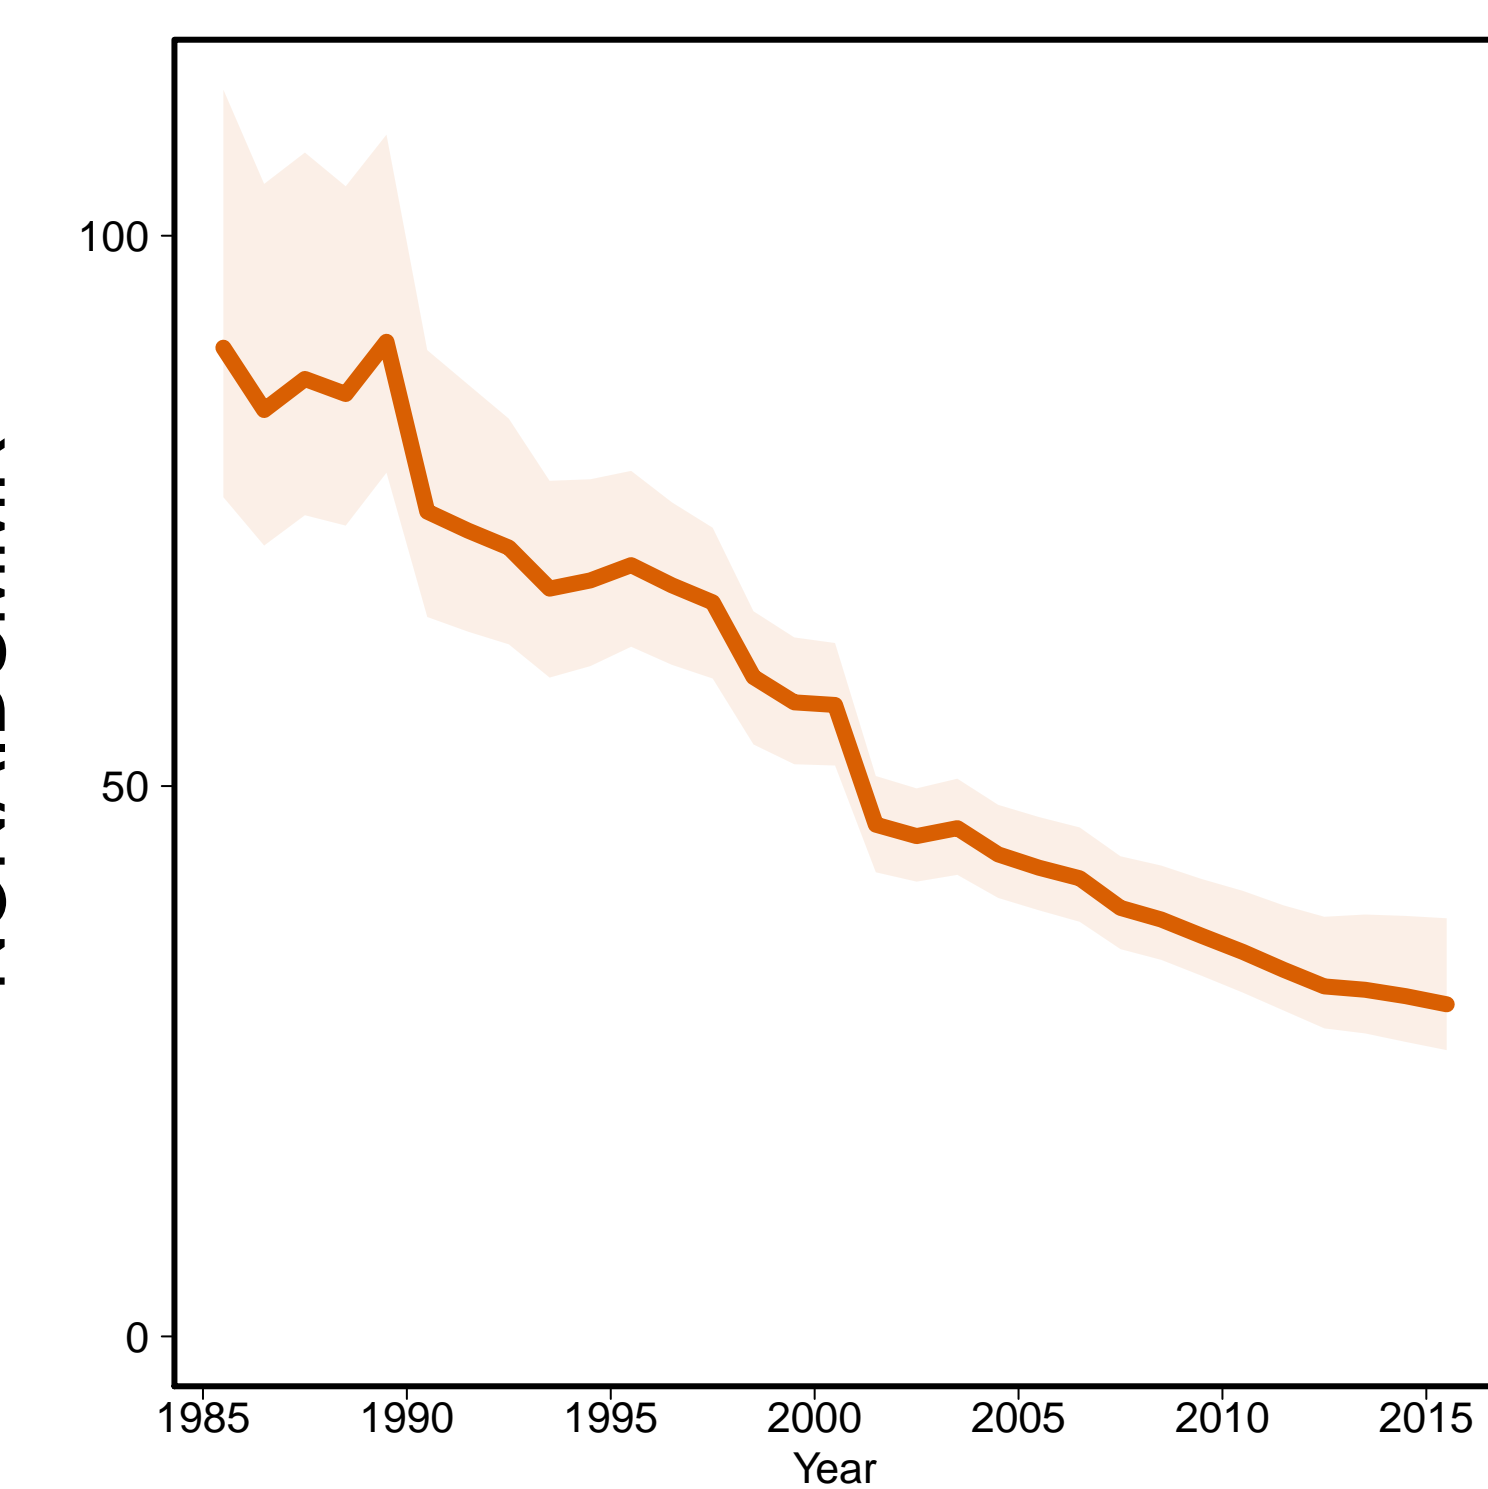

Aids MMR

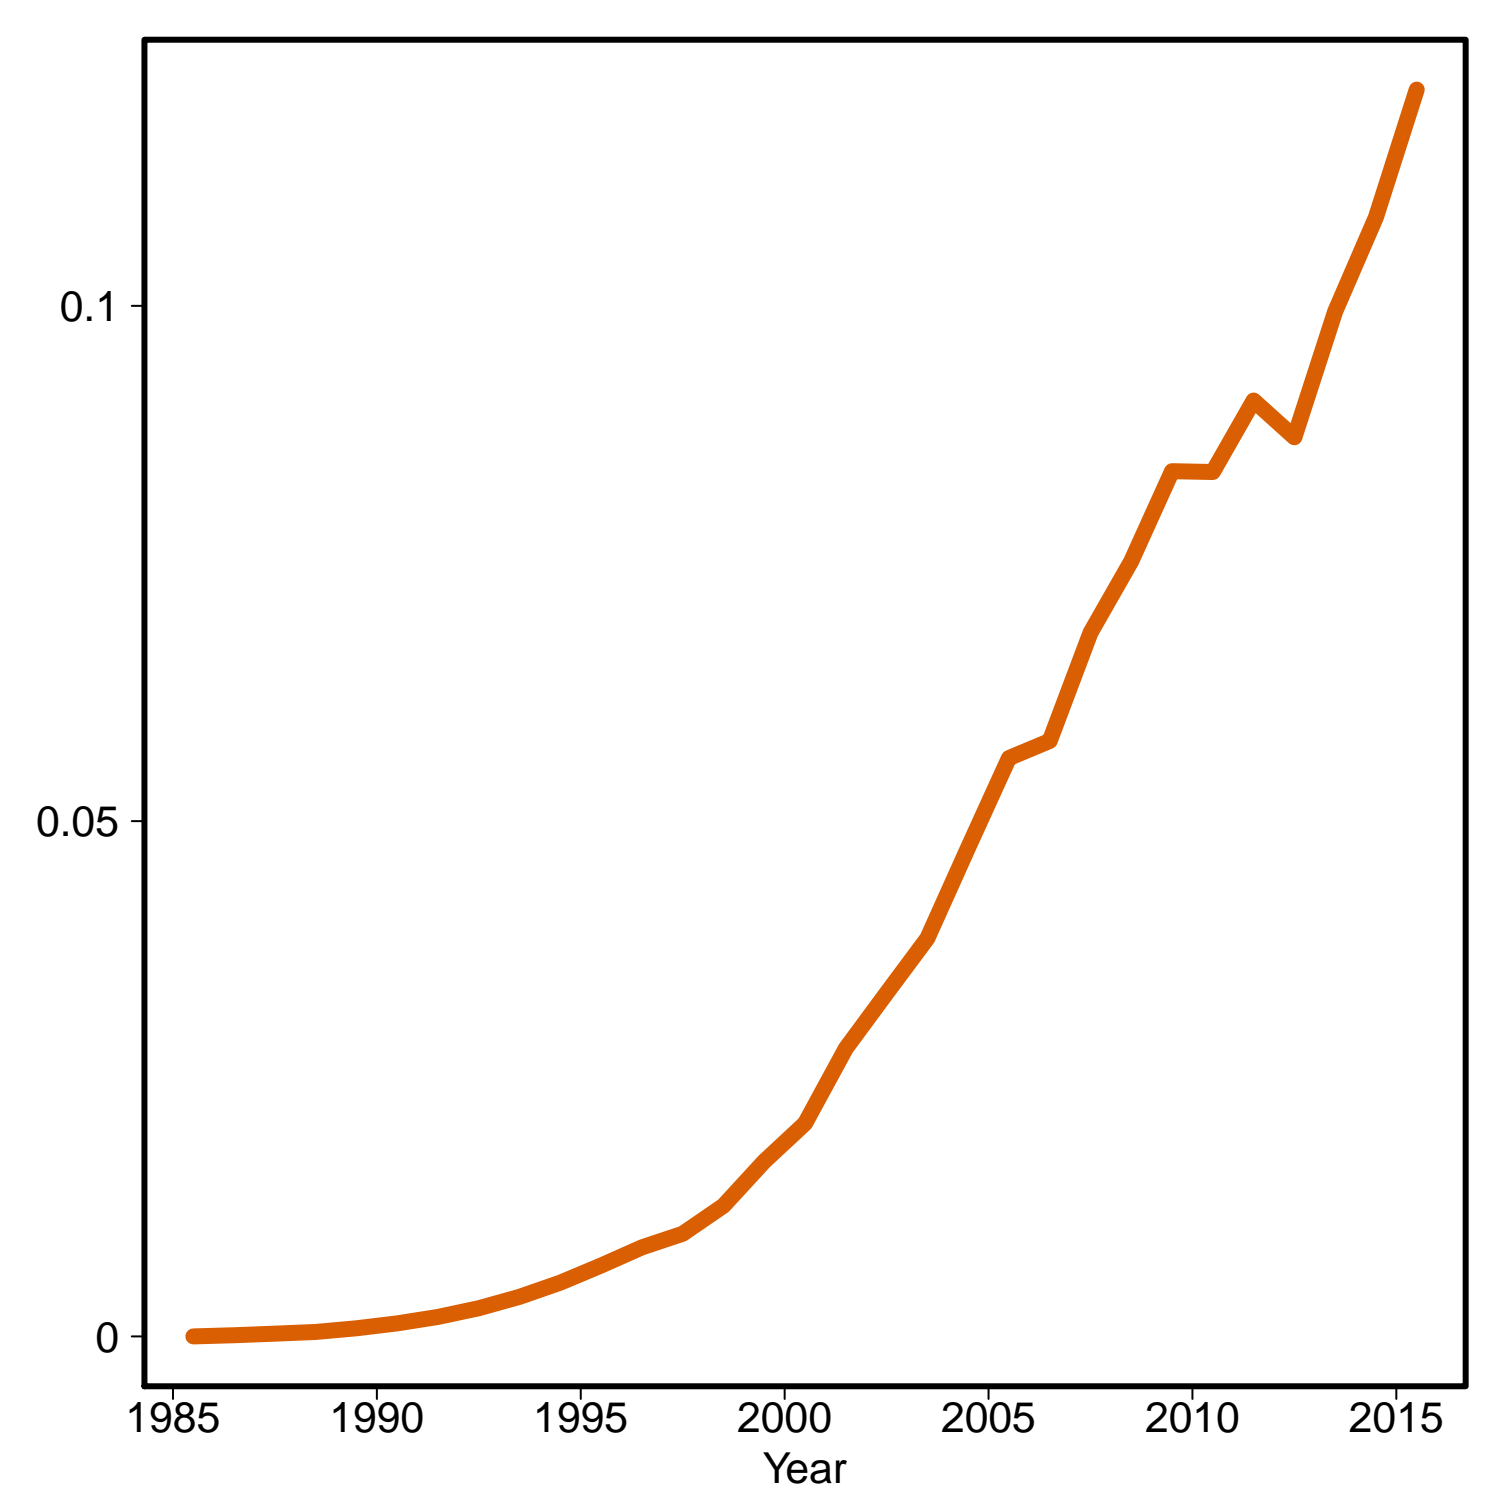



St Vincent and the Grenadines [VCT] (Caribbean)

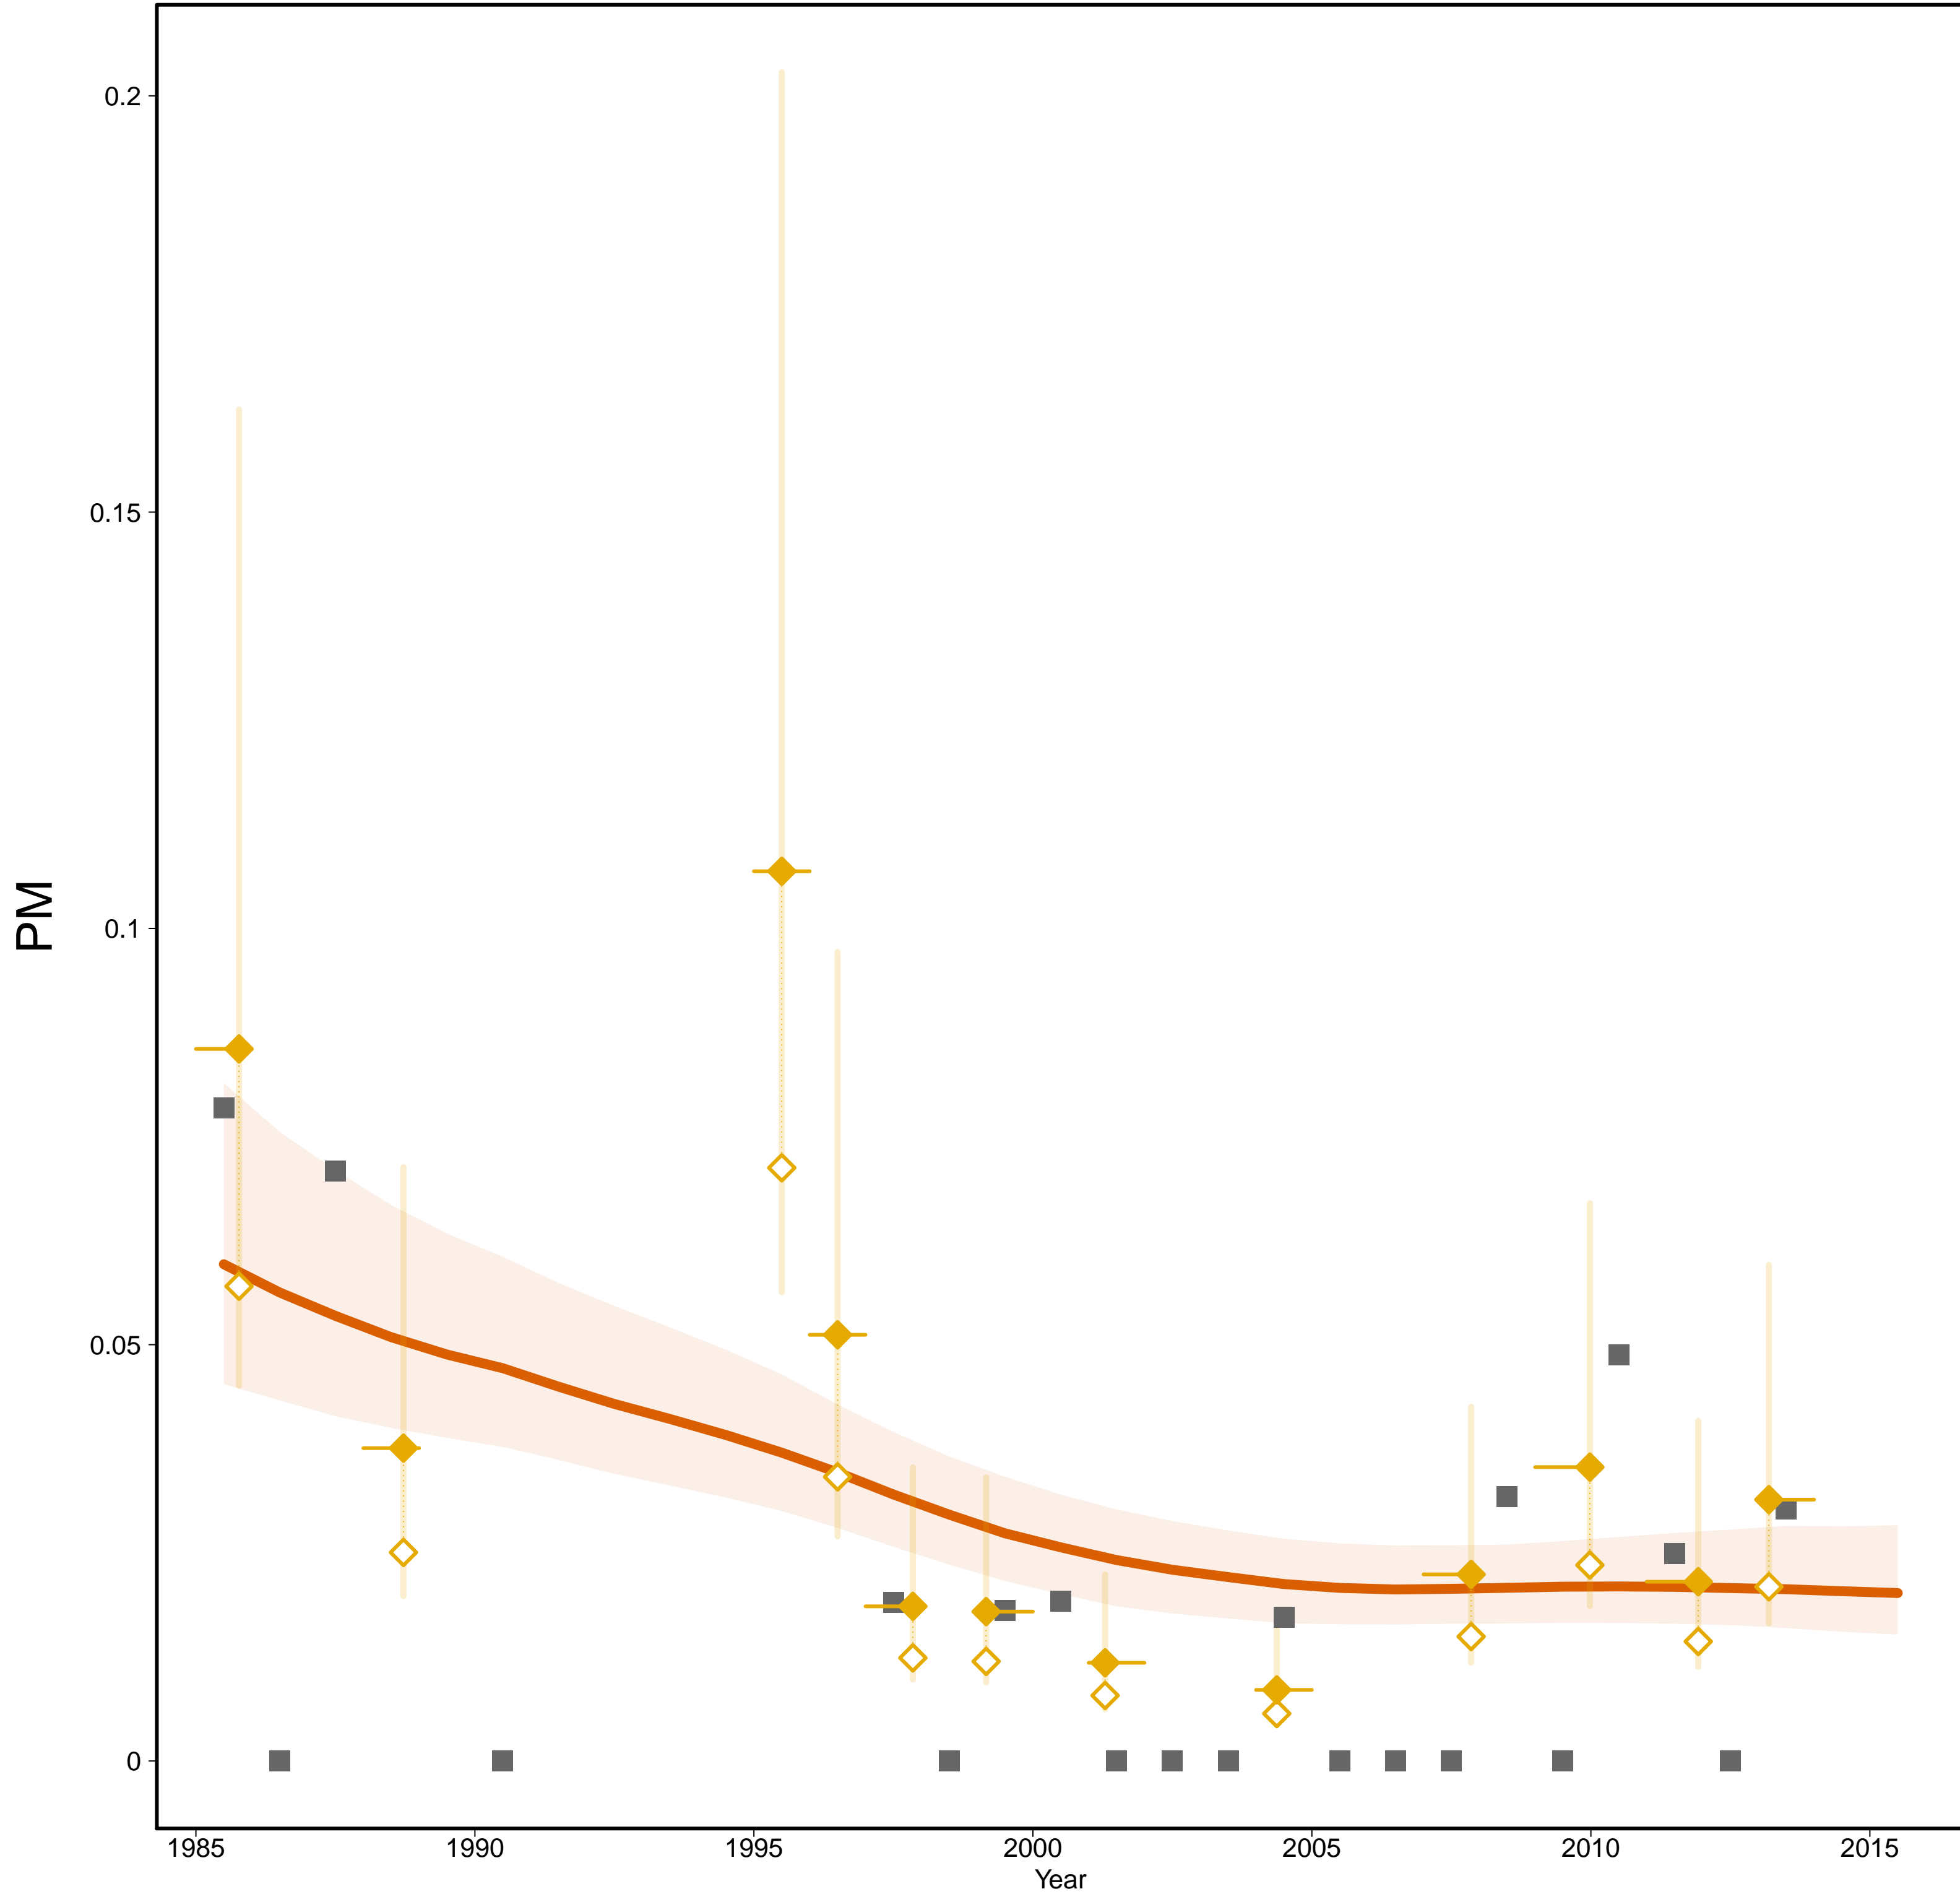

St Vincent and the Grenadines [VCT] (Caribbean)

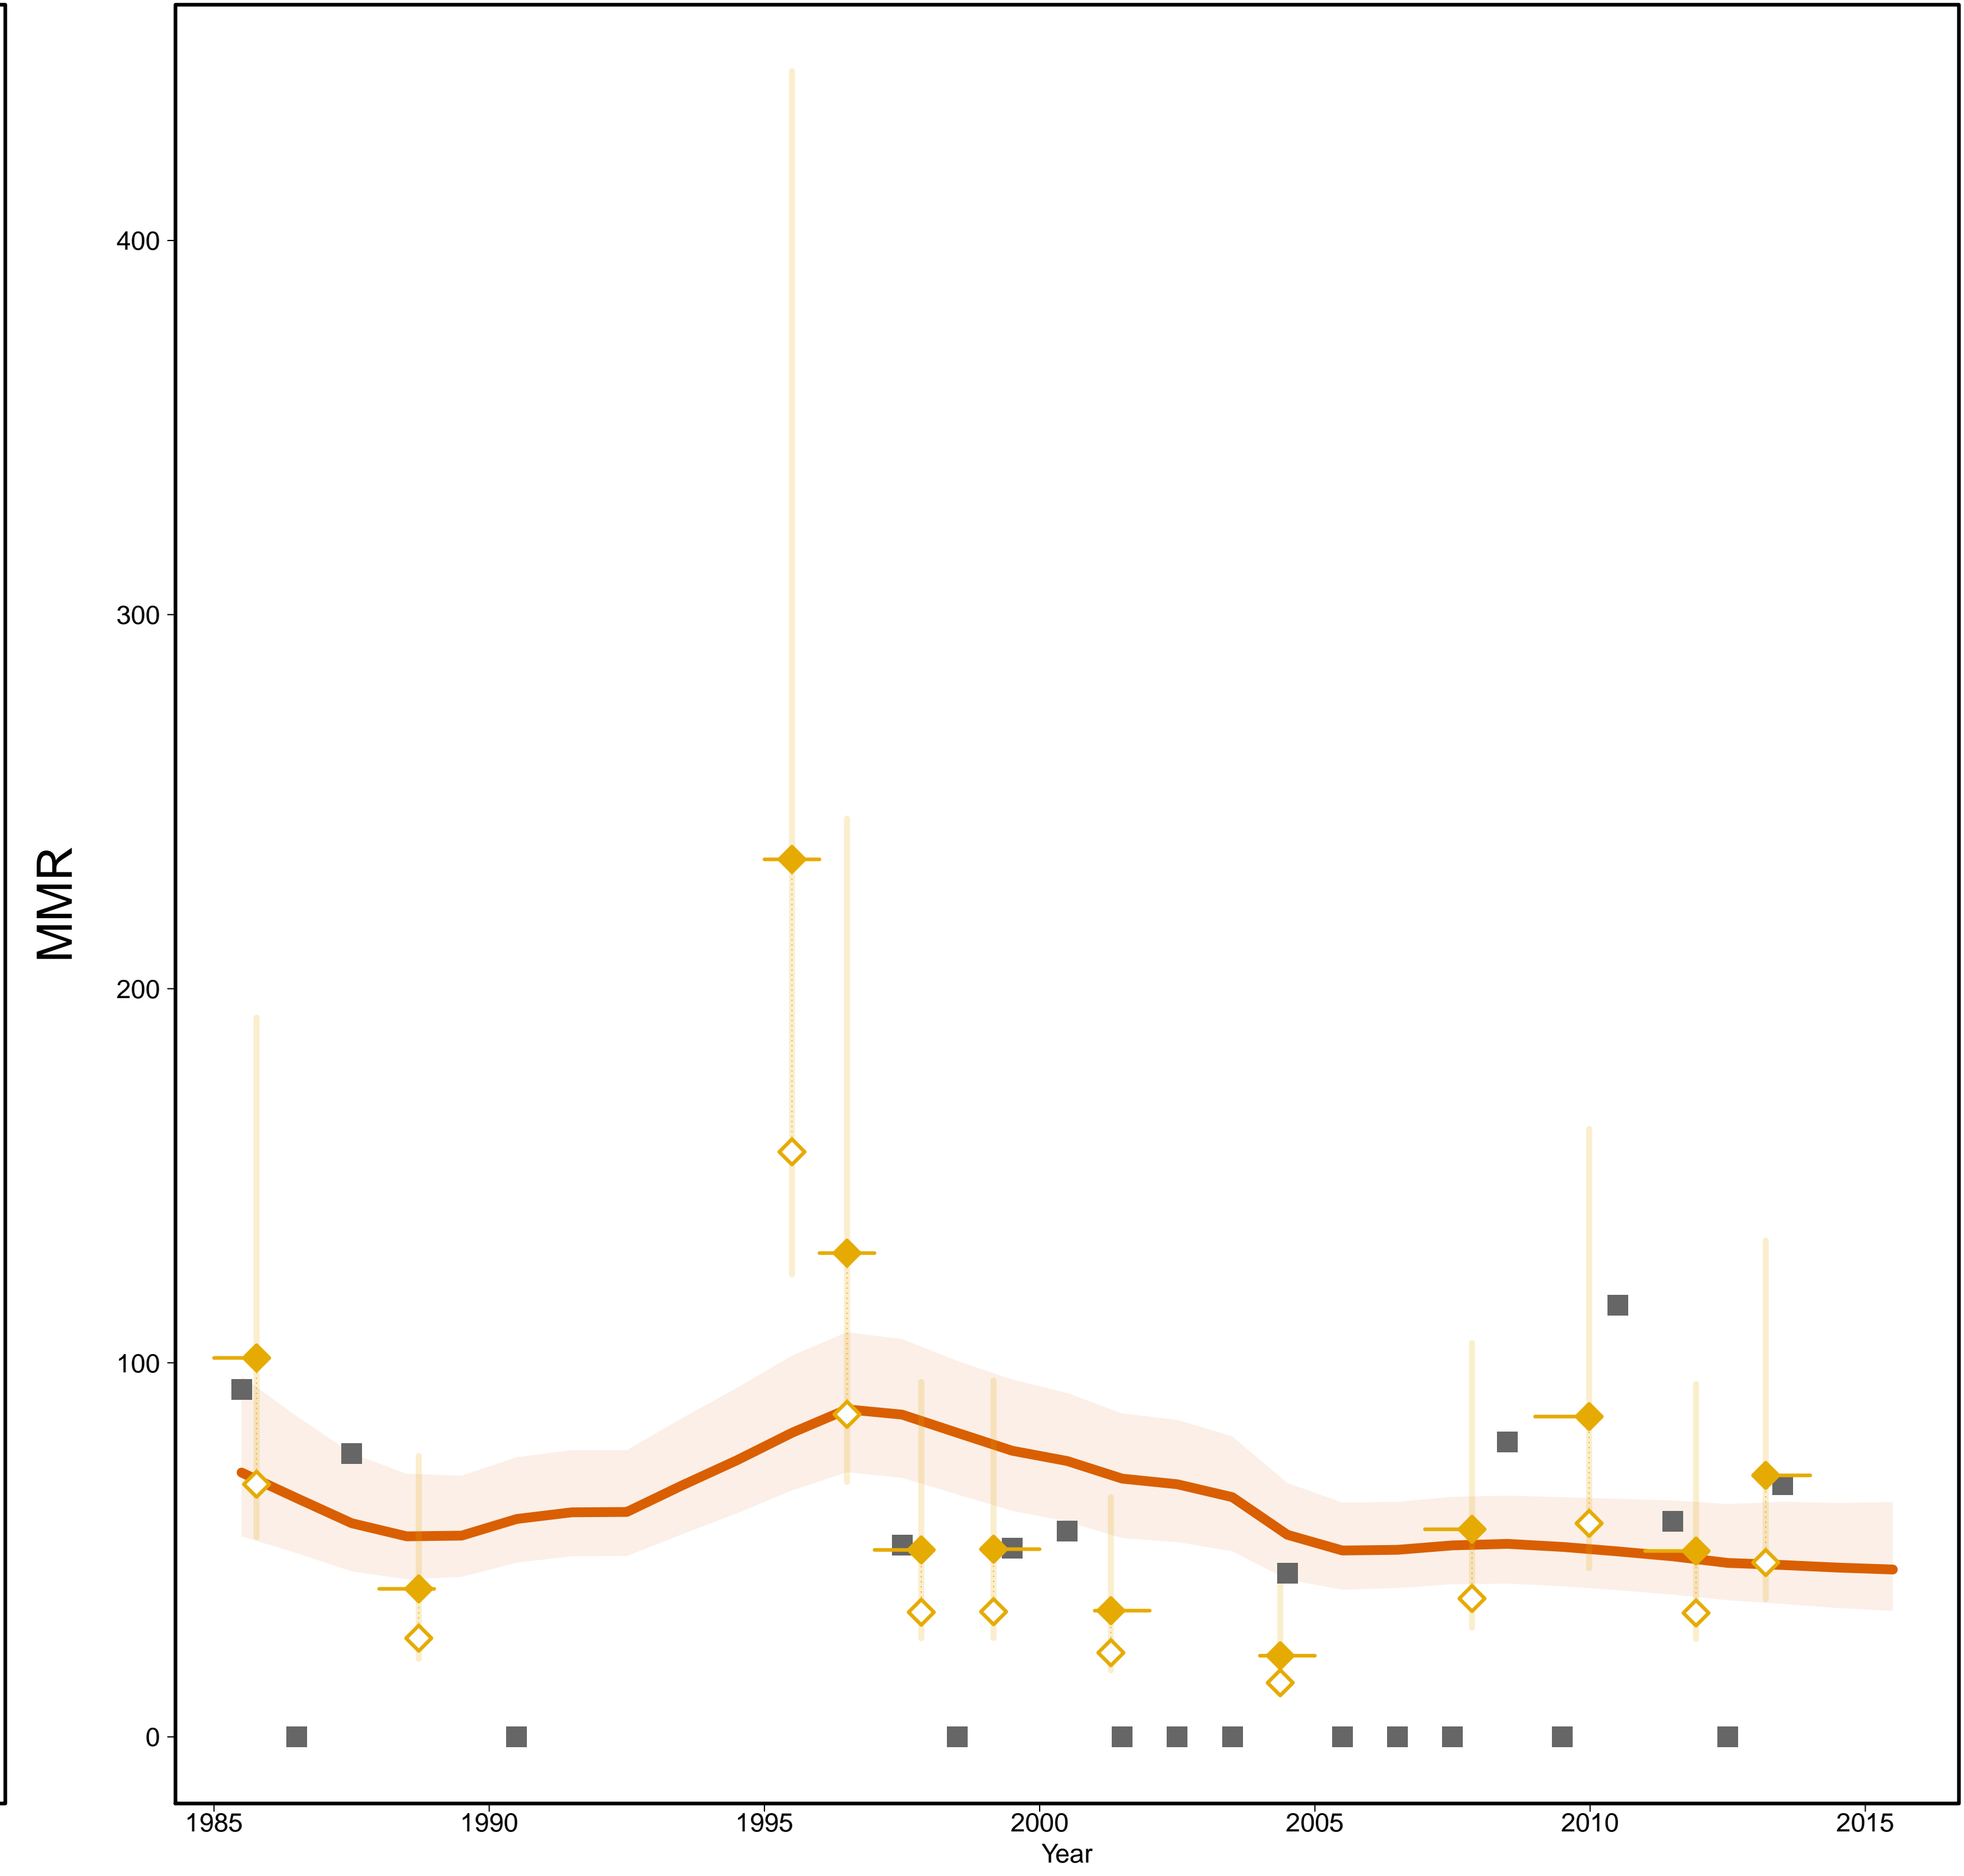

- Estimates –
- Mlate
- MMR Database 2015 –
- ◇ Observed Data
- ◆ Adjusted Data
- Data type –
- ◆ VR
- Reported VR before recalc. (related to 0 obs. mat. death)

Gross Domestic Product

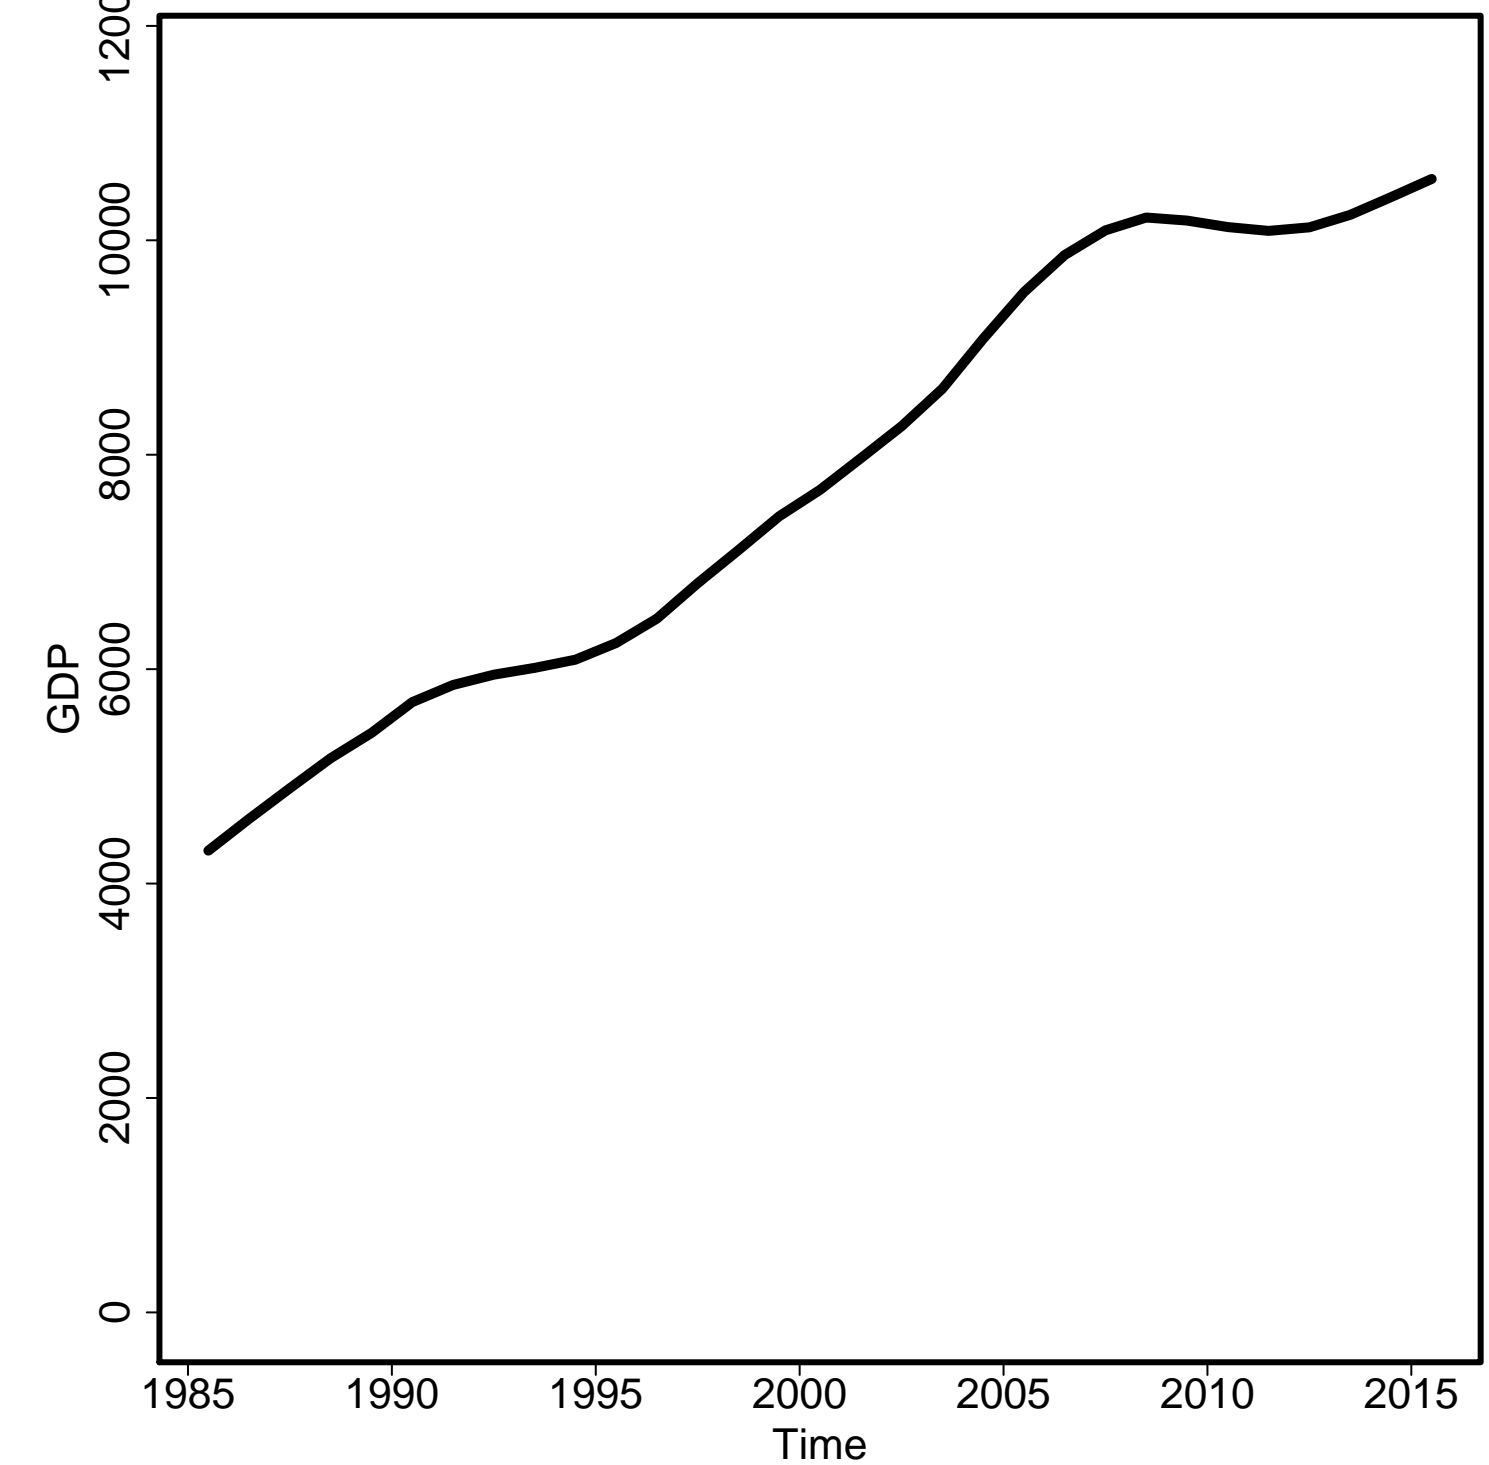

General Fertility Rate

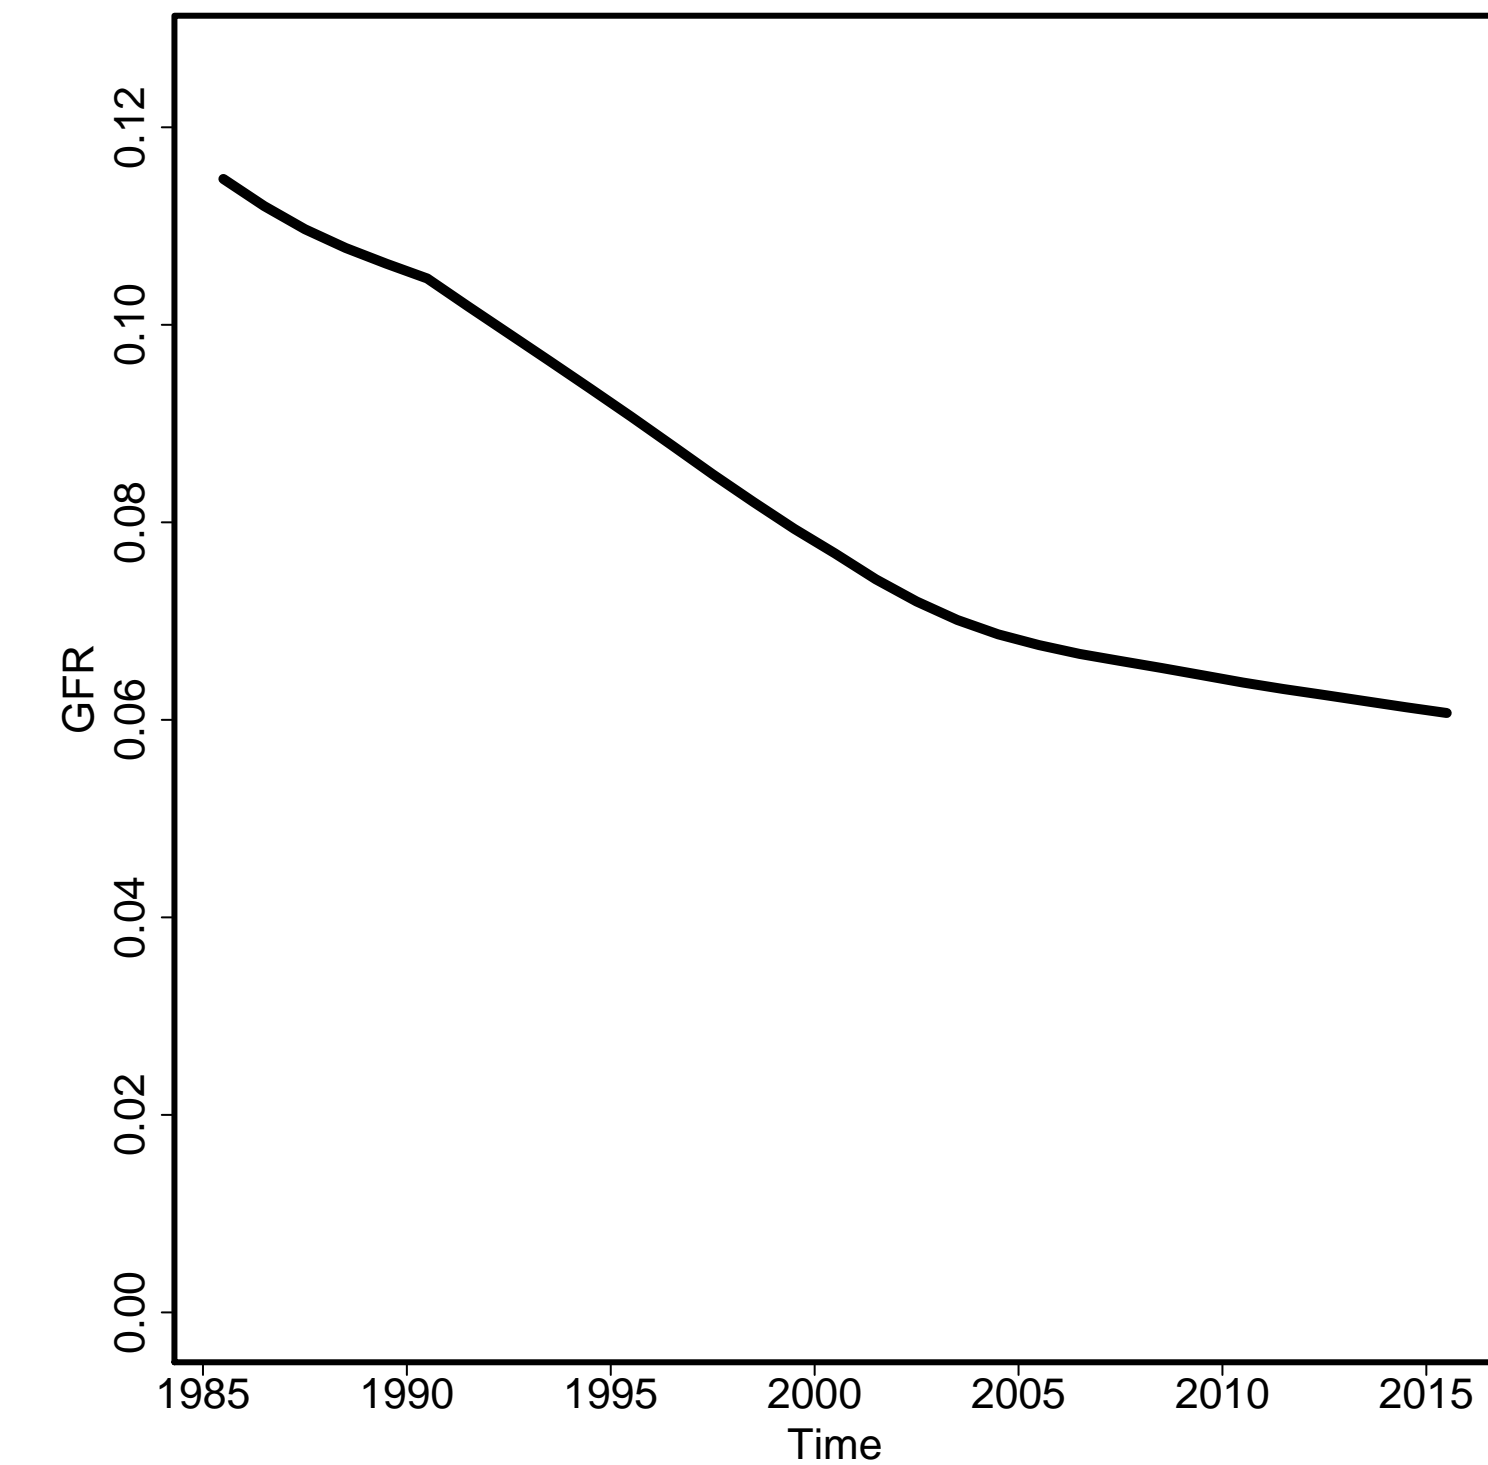

Skilled Attendance to Birth

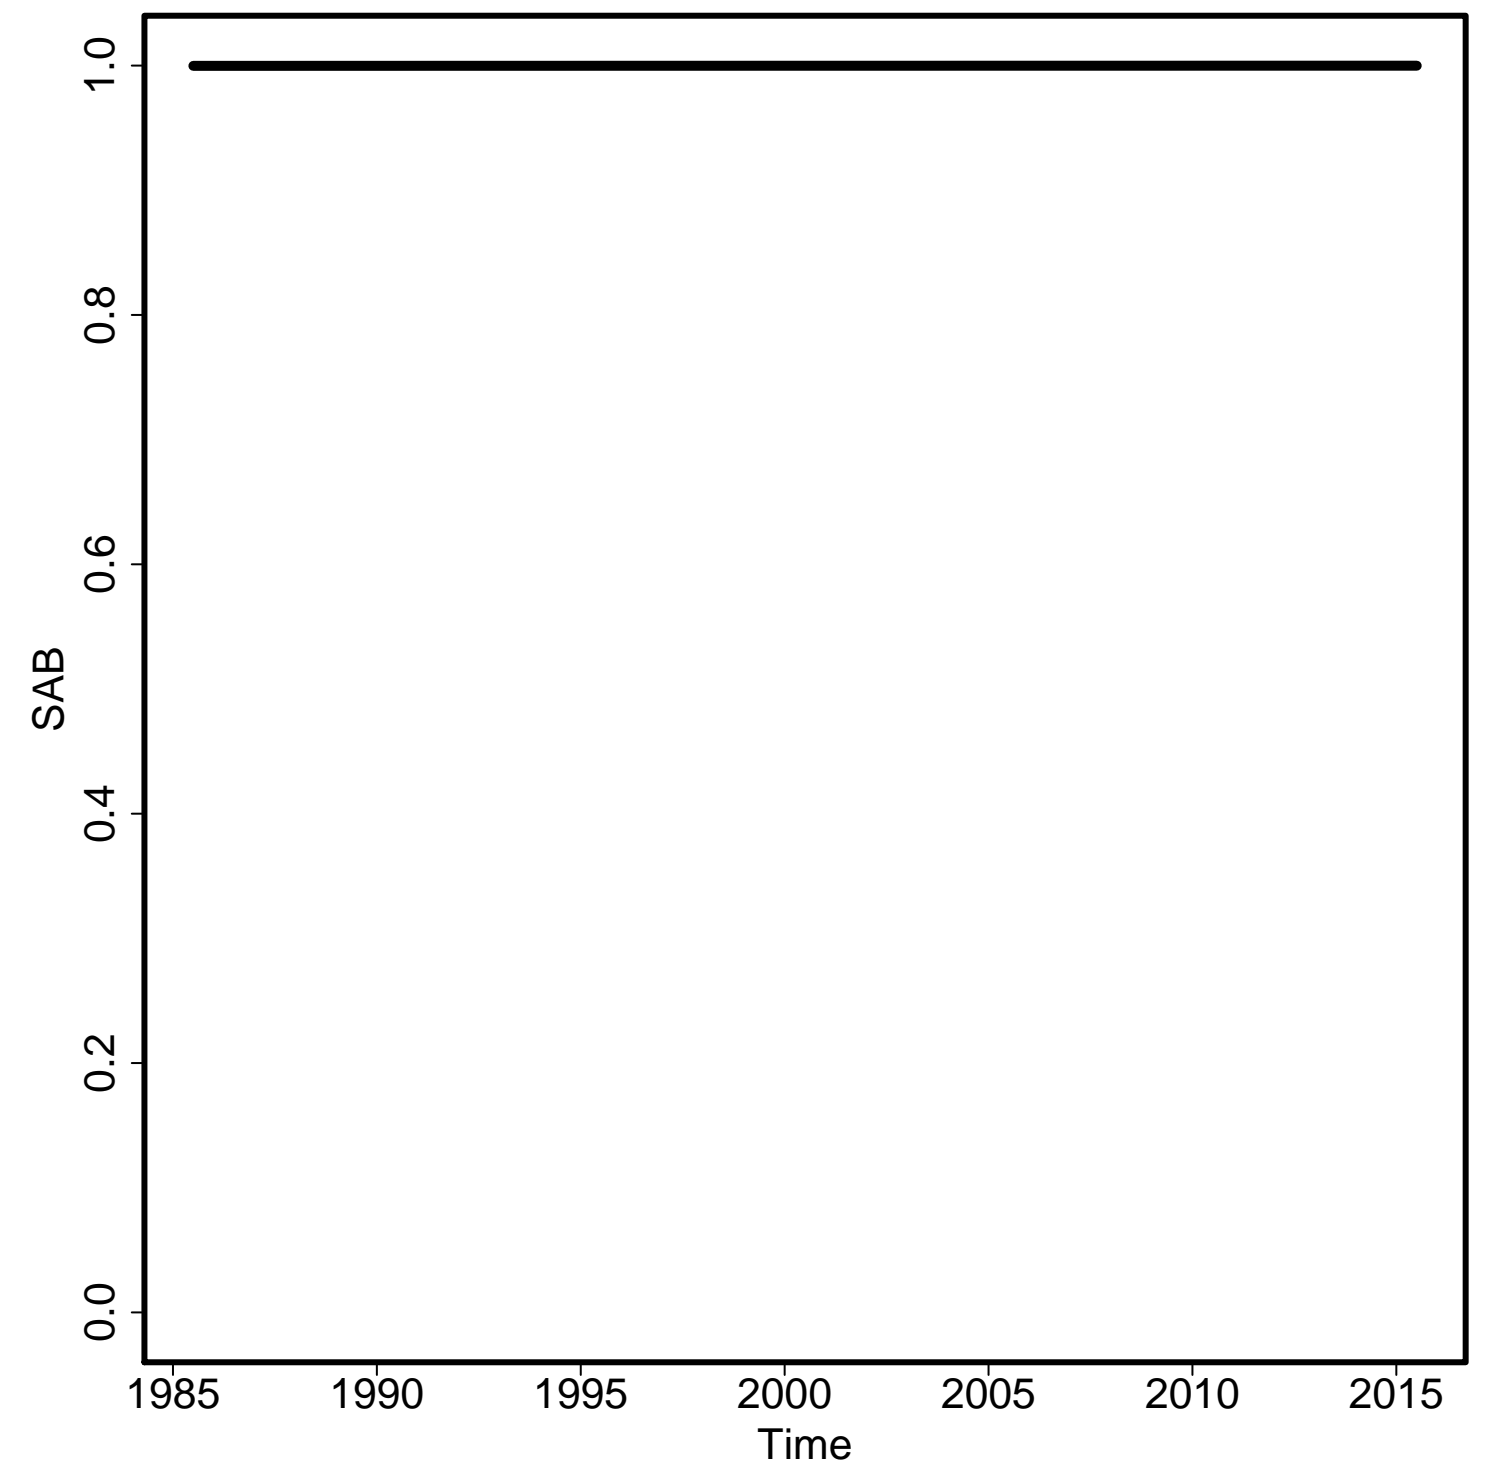

Envelope/Births

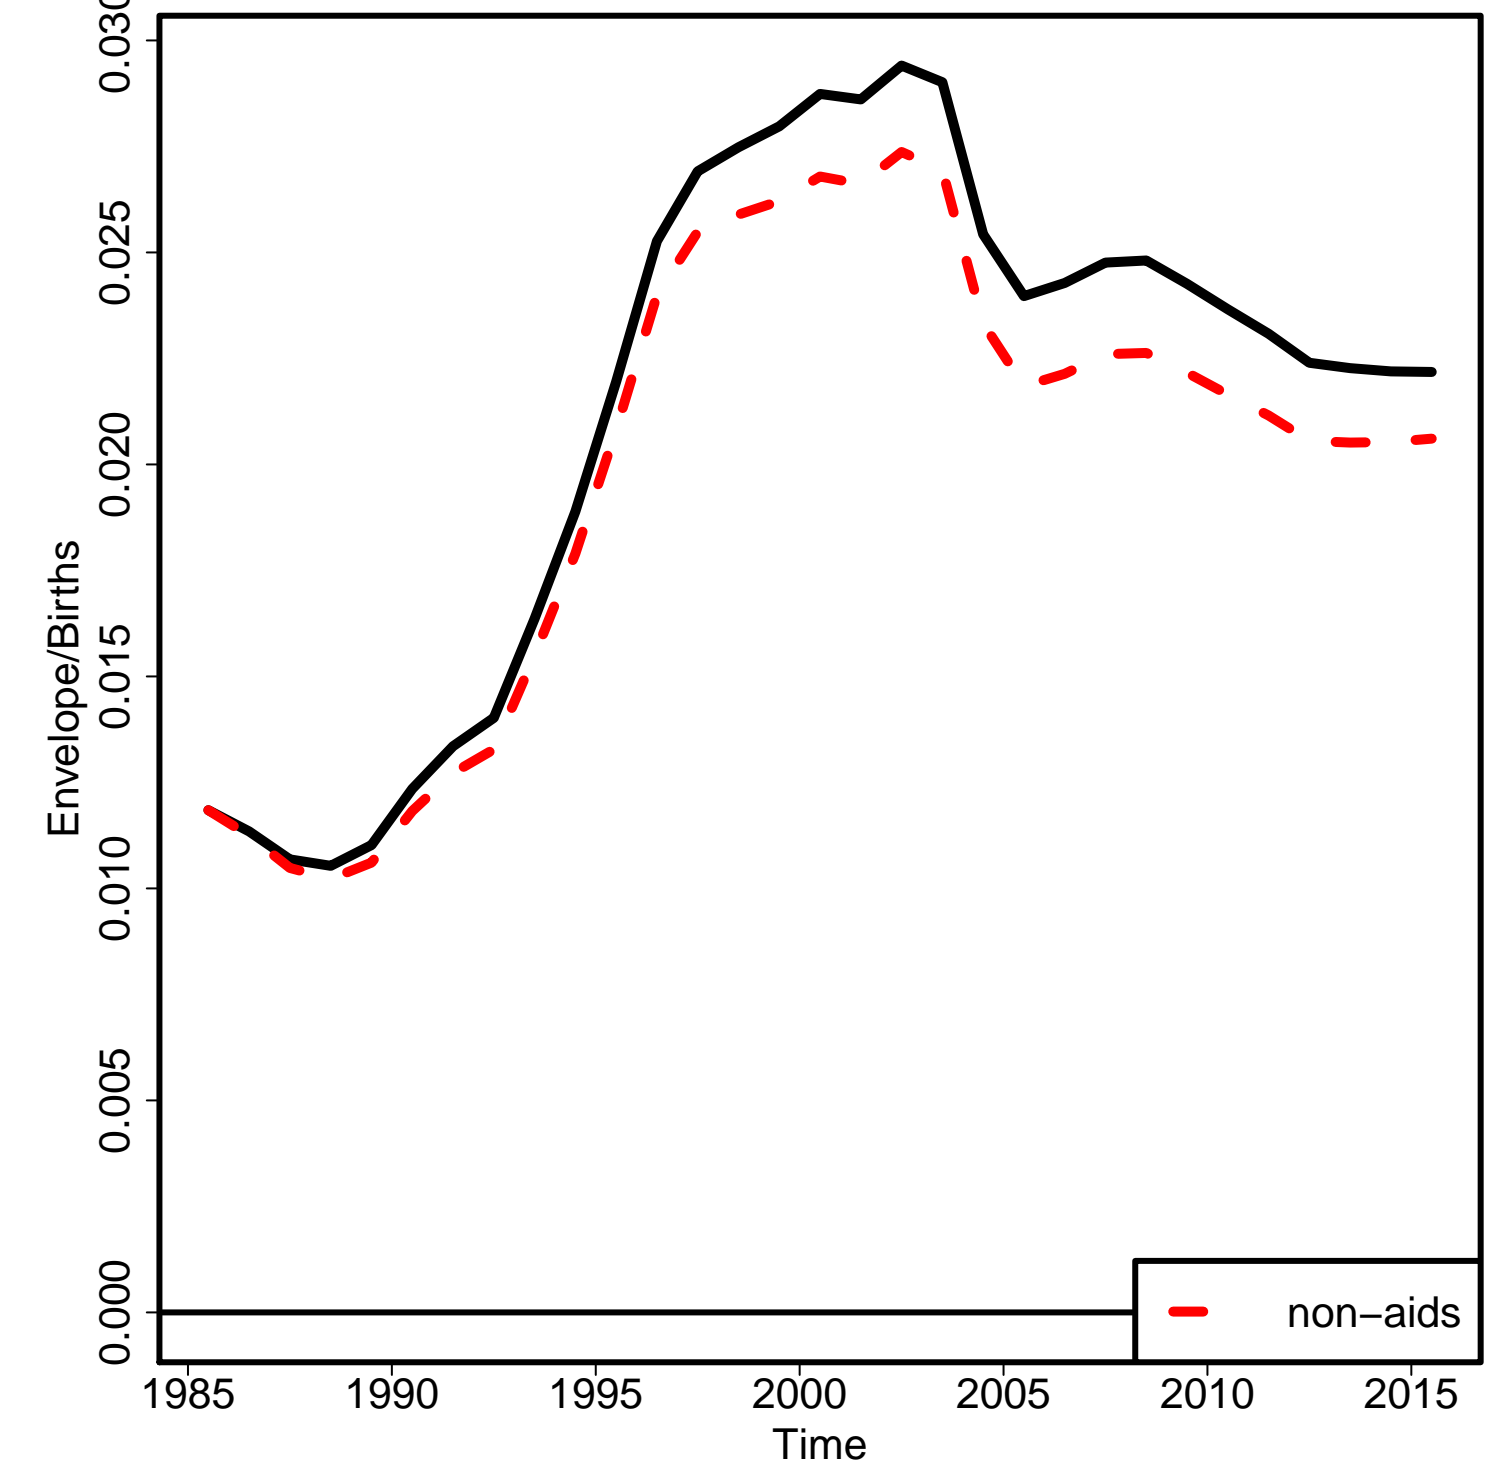

Non-aids MMR

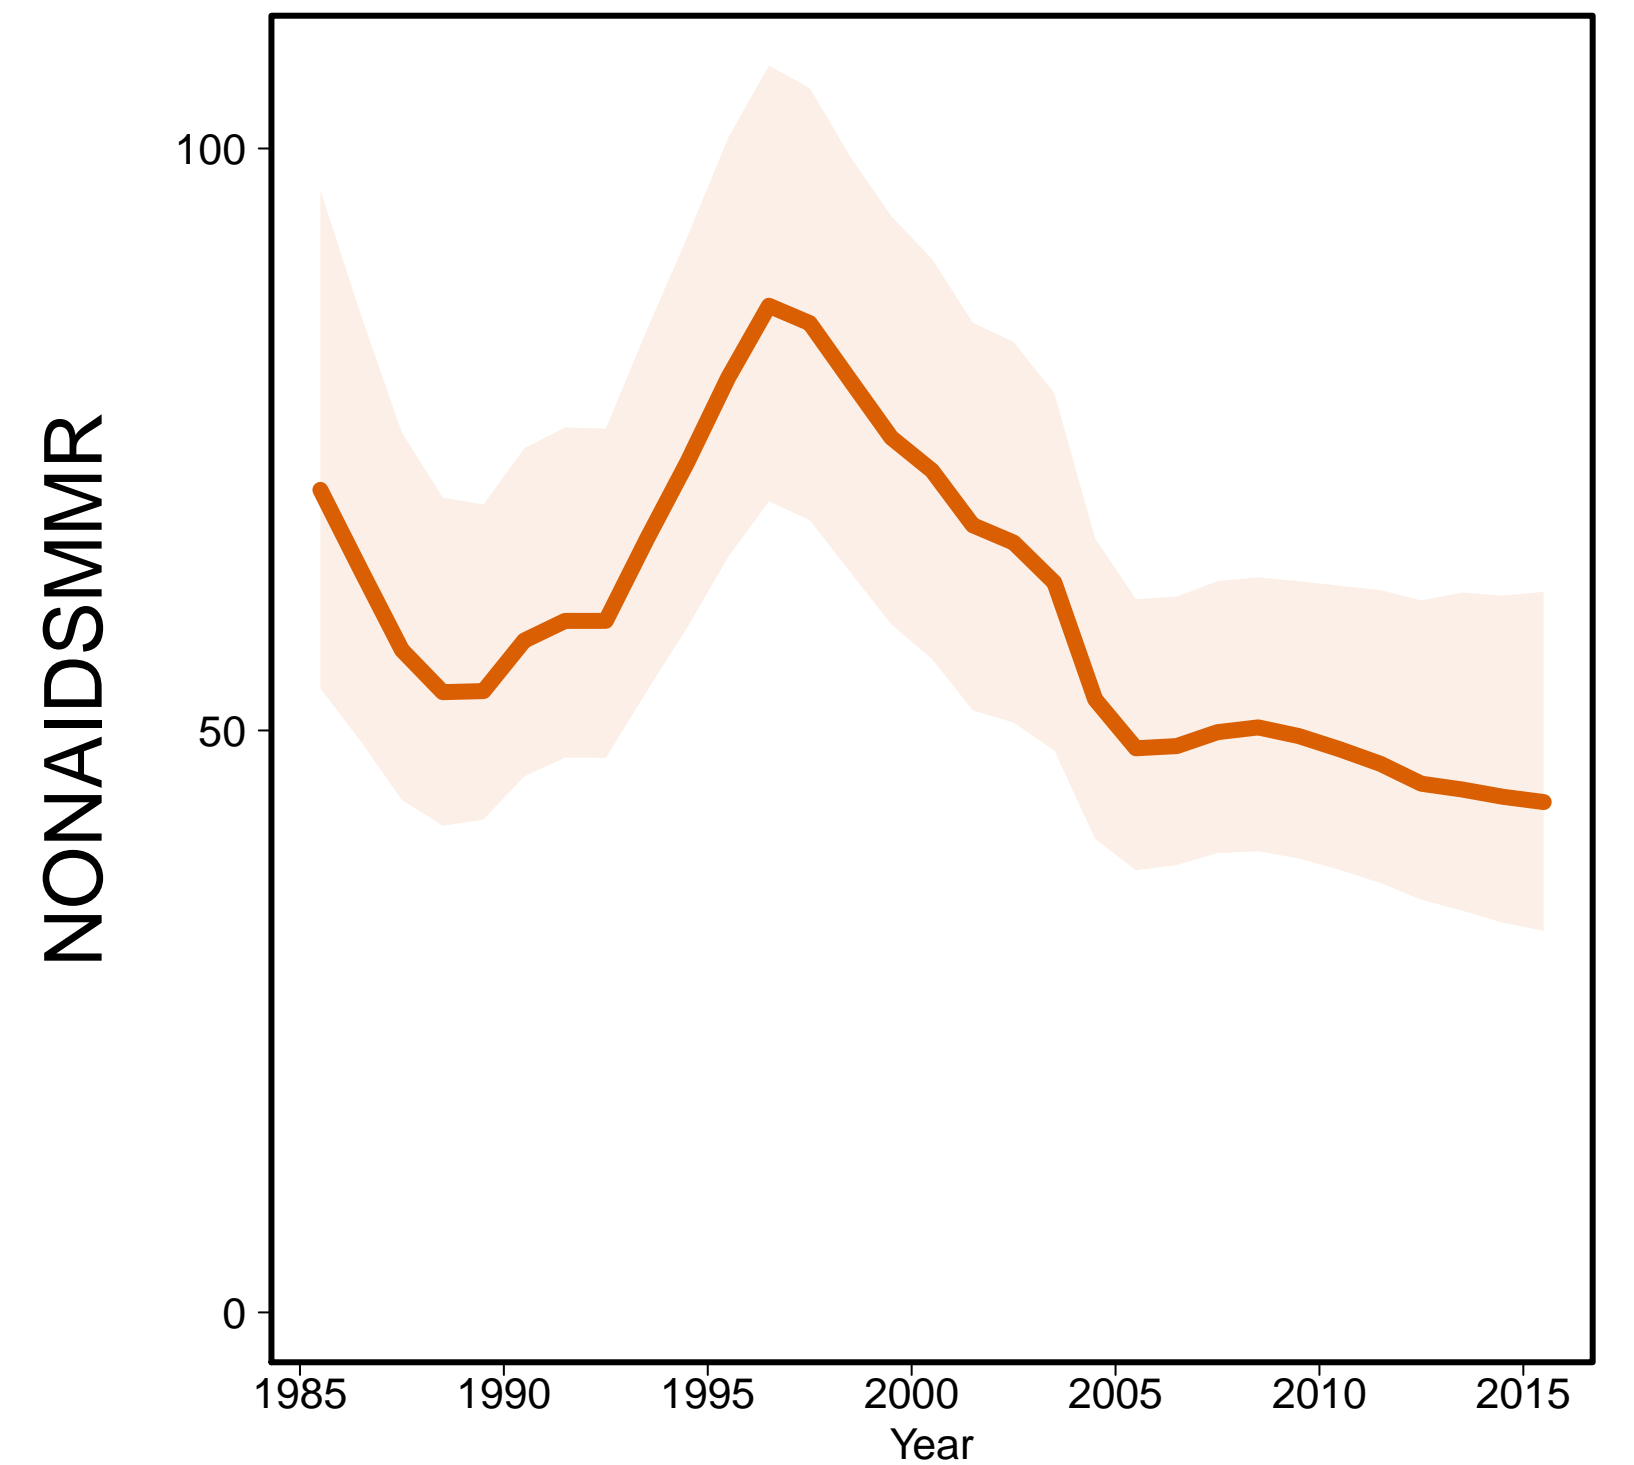

Aids MMR

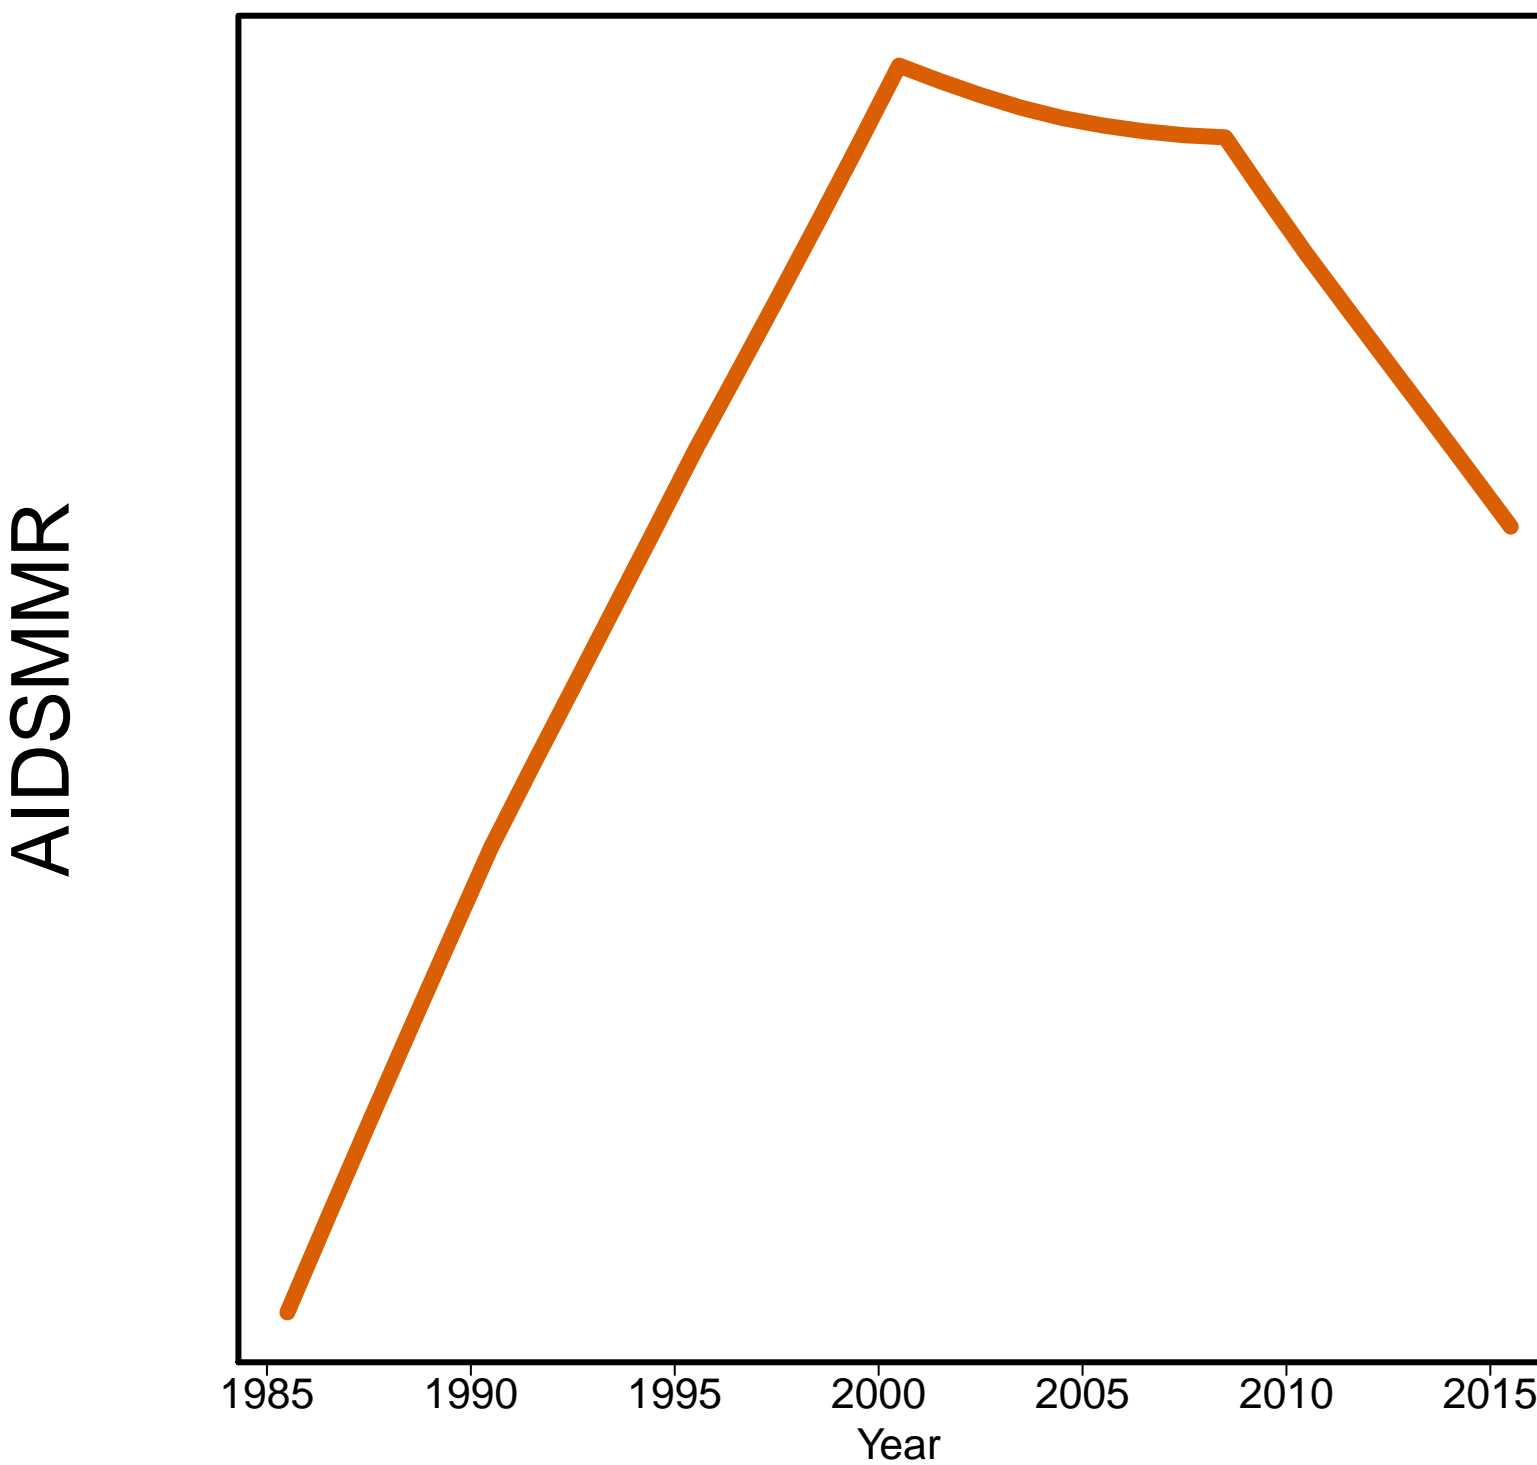

Sudan [SDN]  
(Eastern Africa)

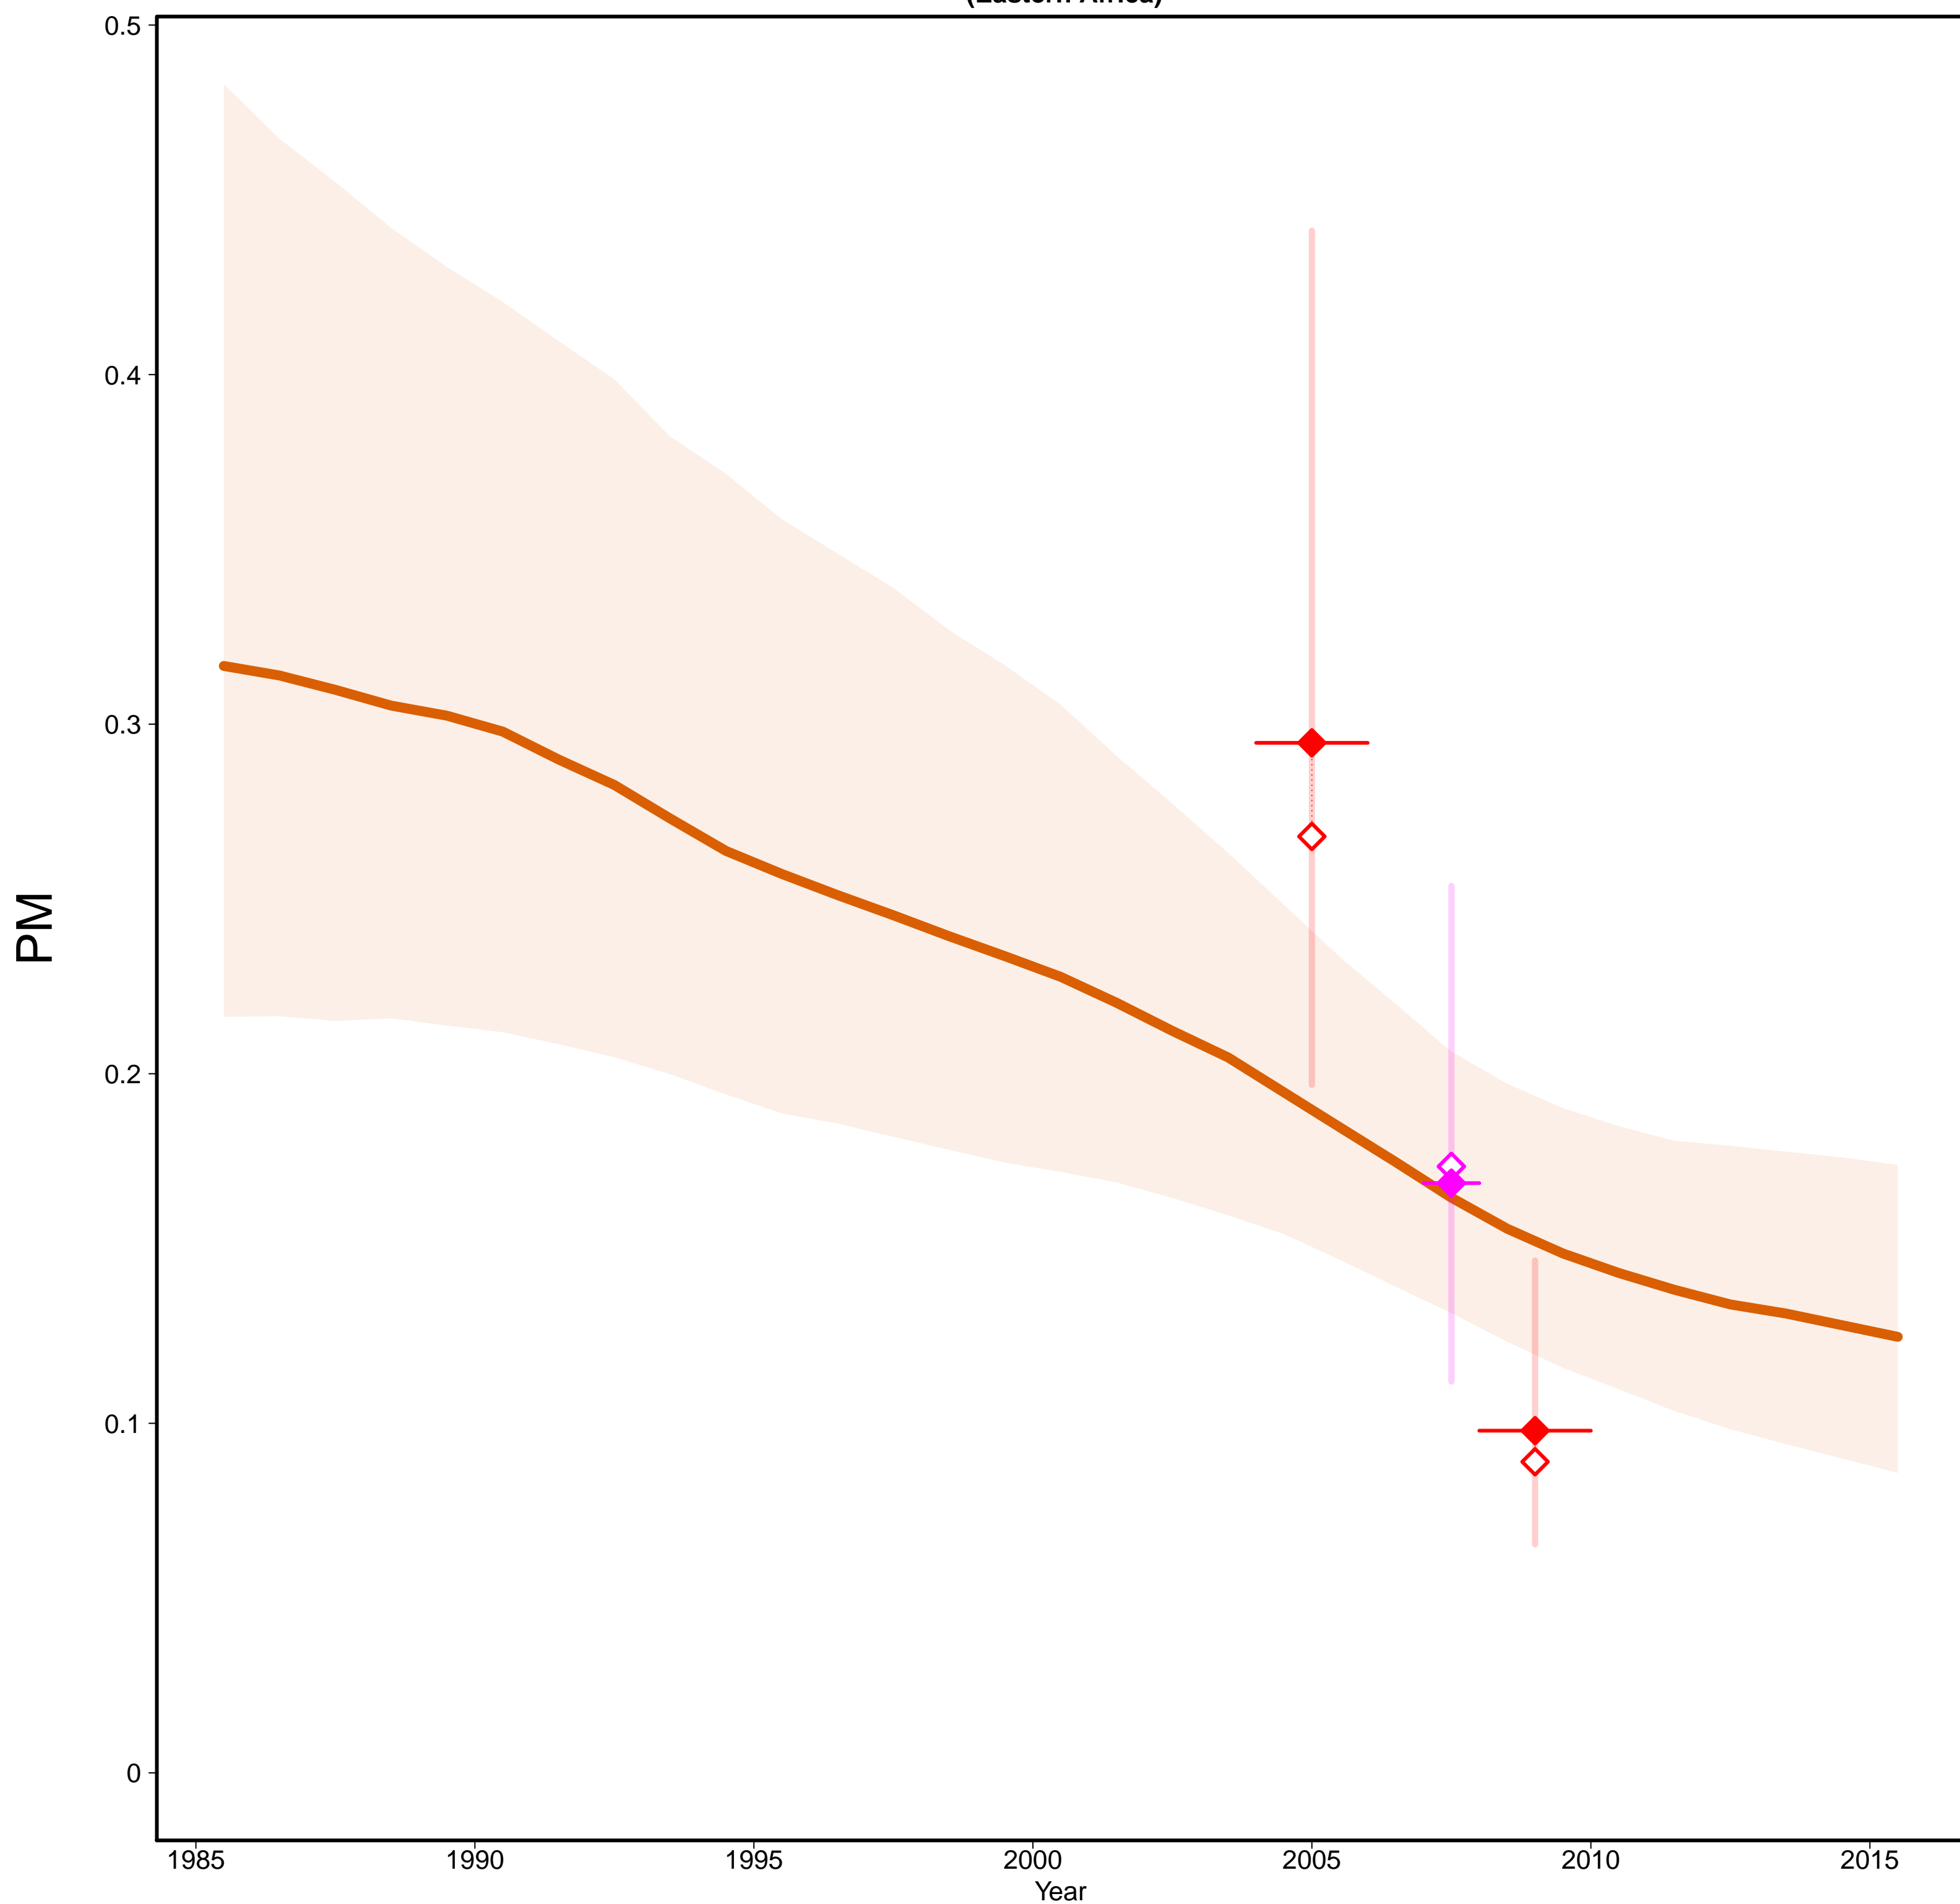

Sudan [SDN]  
(Eastern Africa)

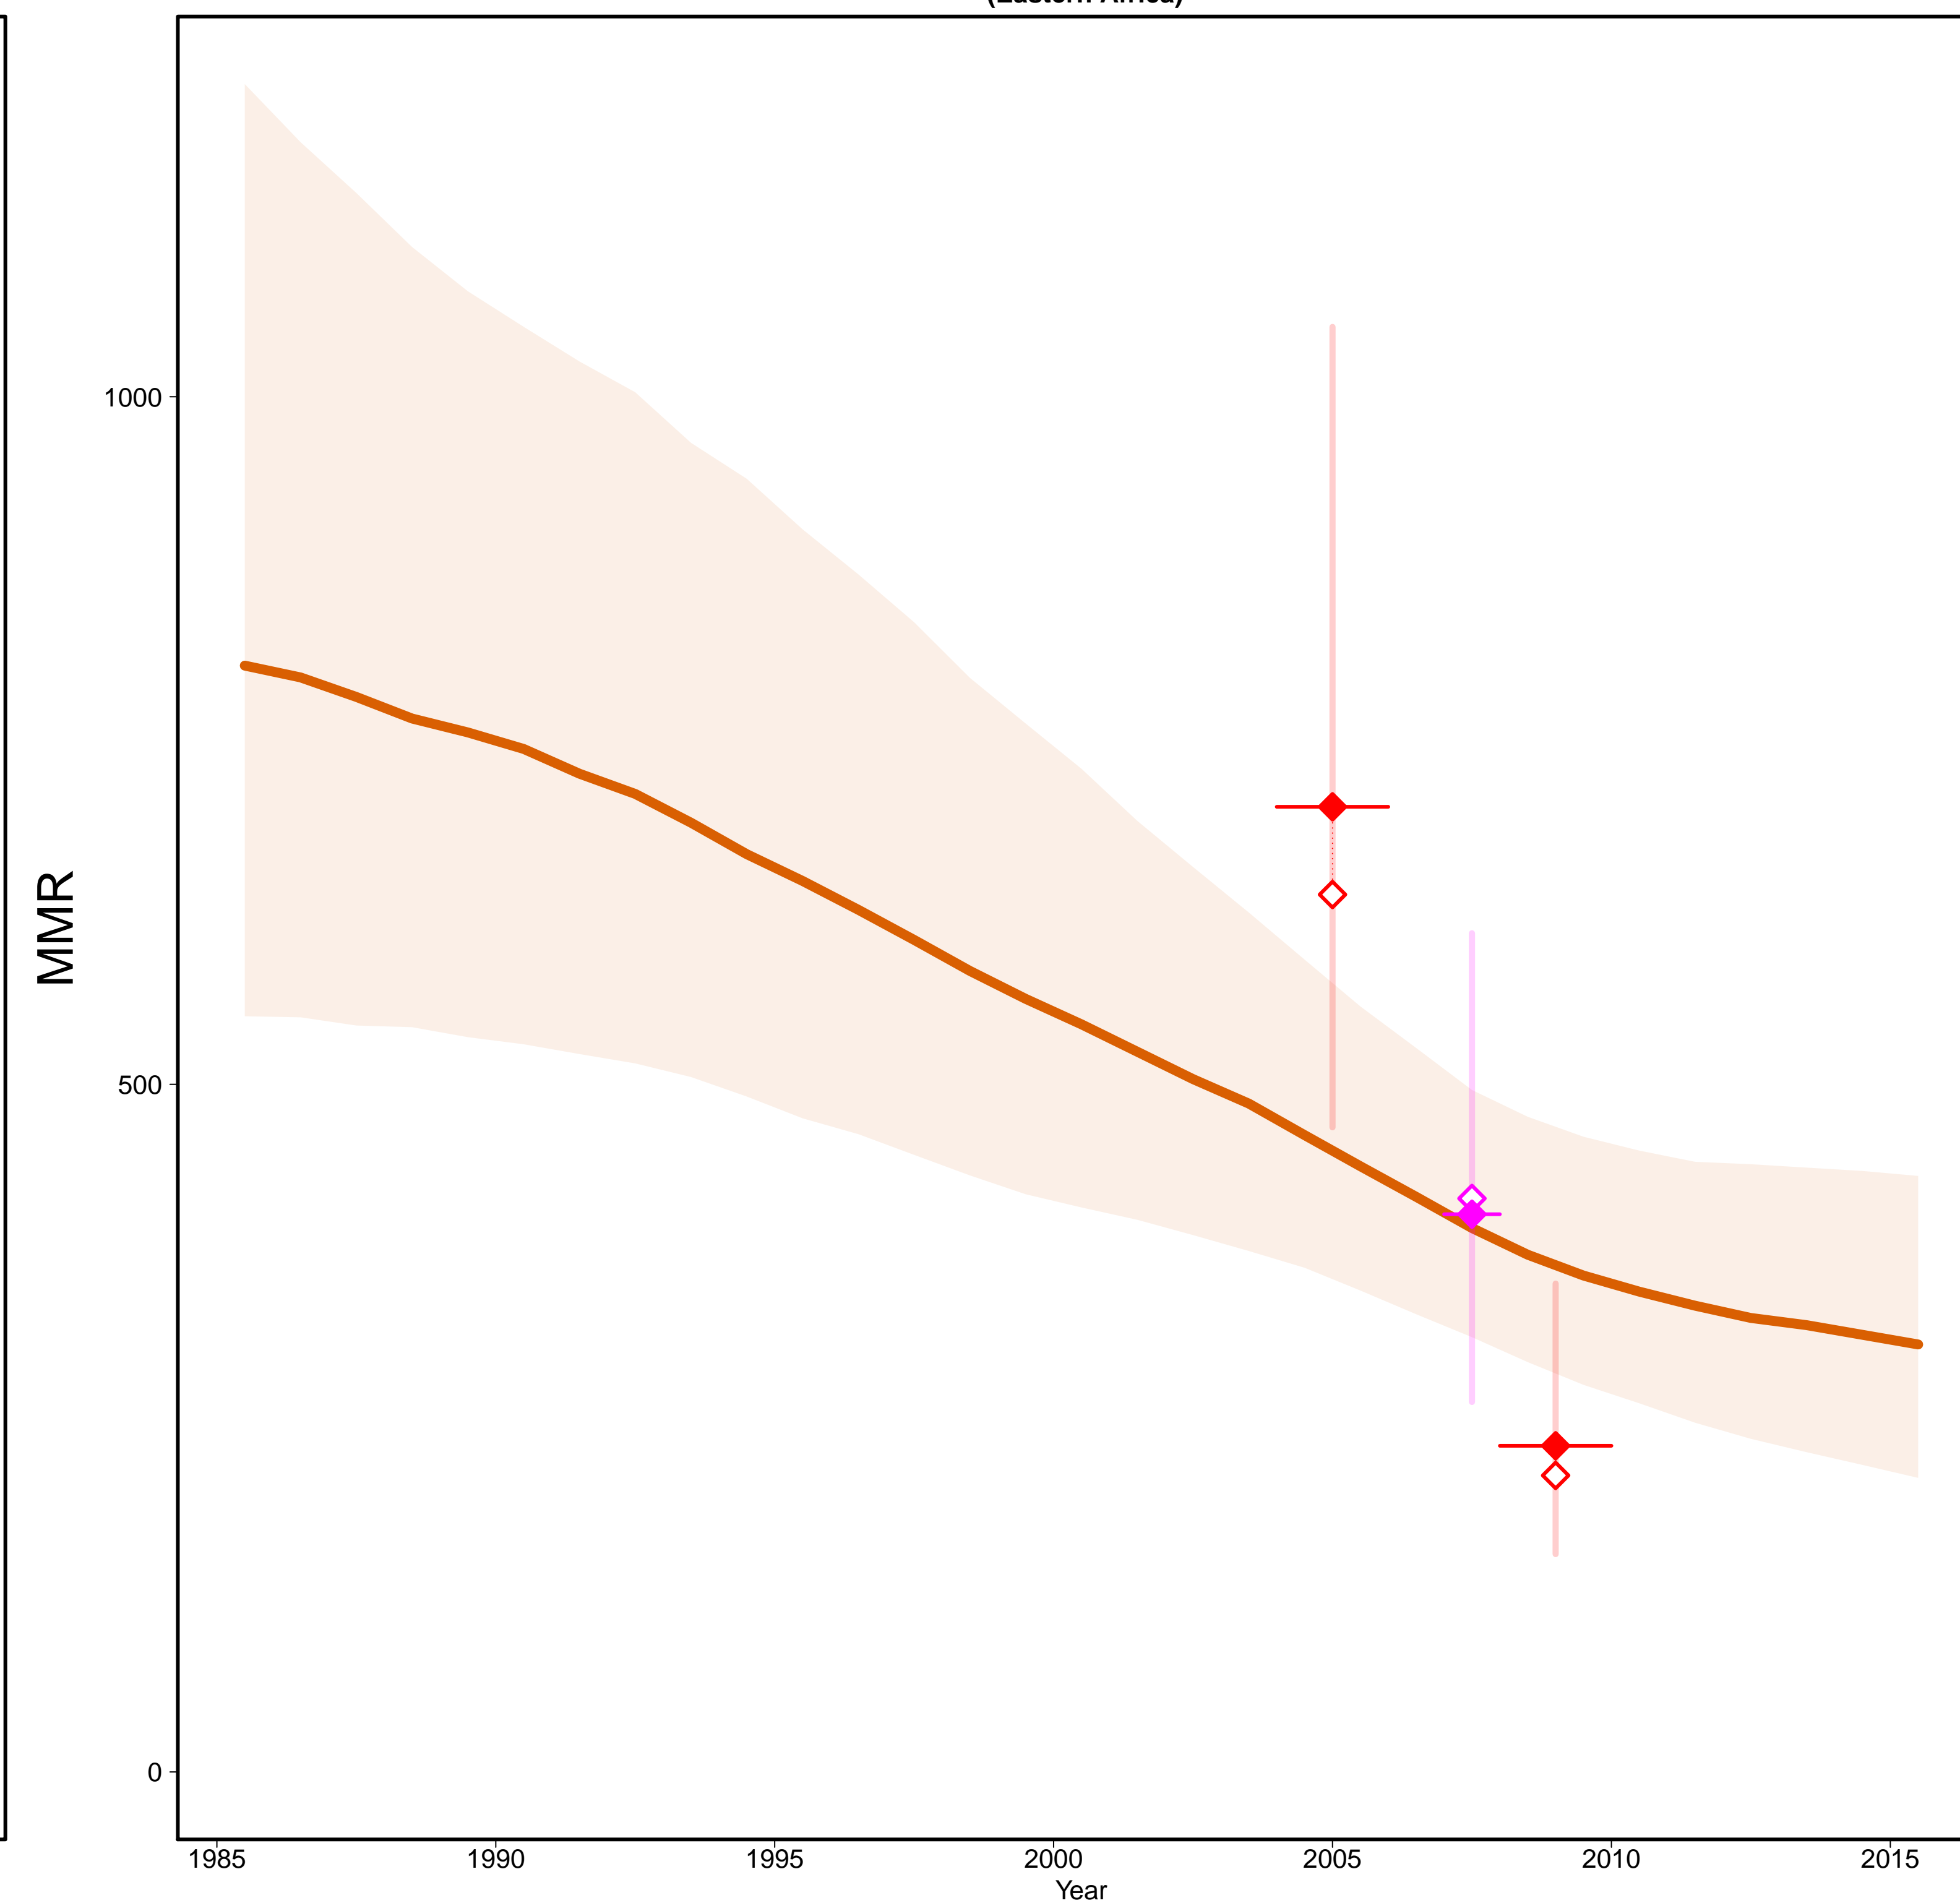

- Estimates —
- MMR Database 2015 —
- ◇ Observed Data
- ◆ Adjusted Data
- Data type —
- ◆ Census
- ◆ Misc. studies

Gross Domestic Product

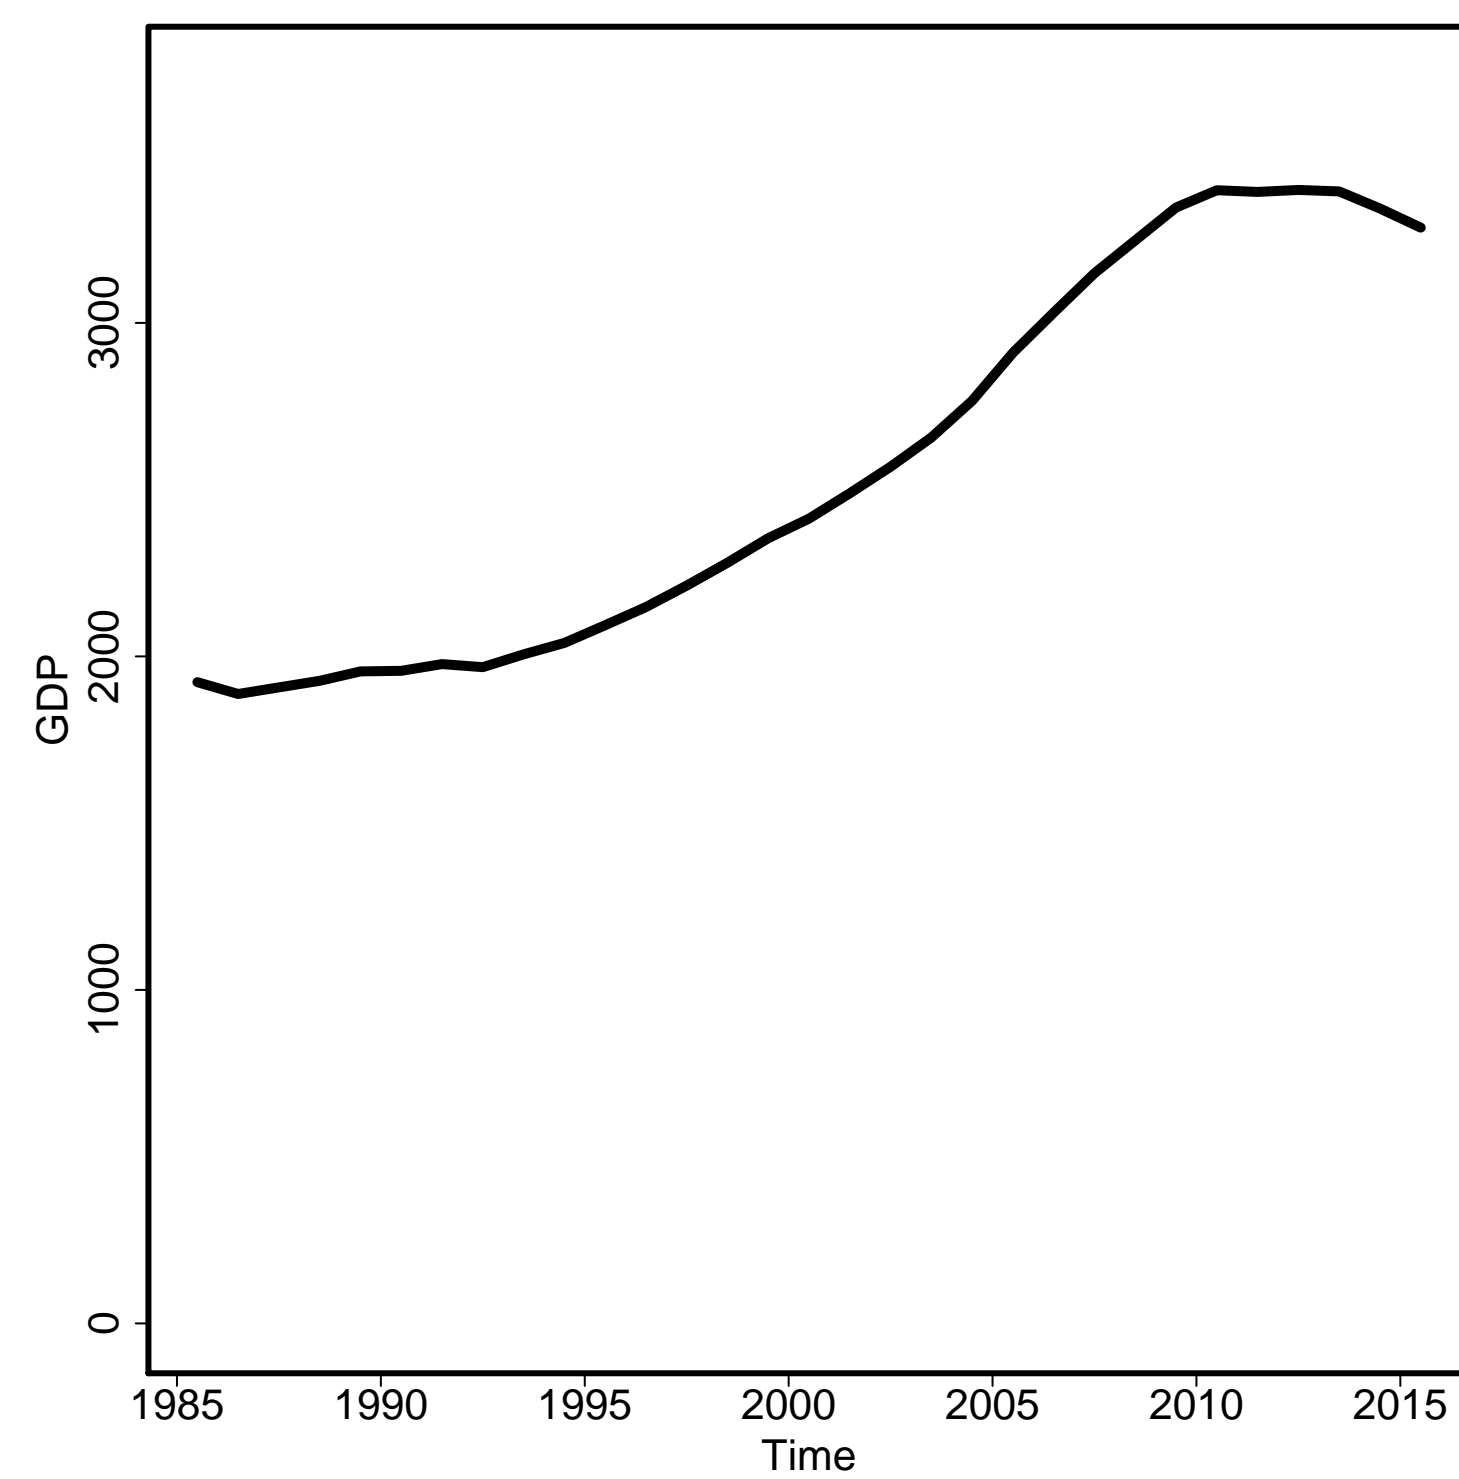

General Fertility Rate

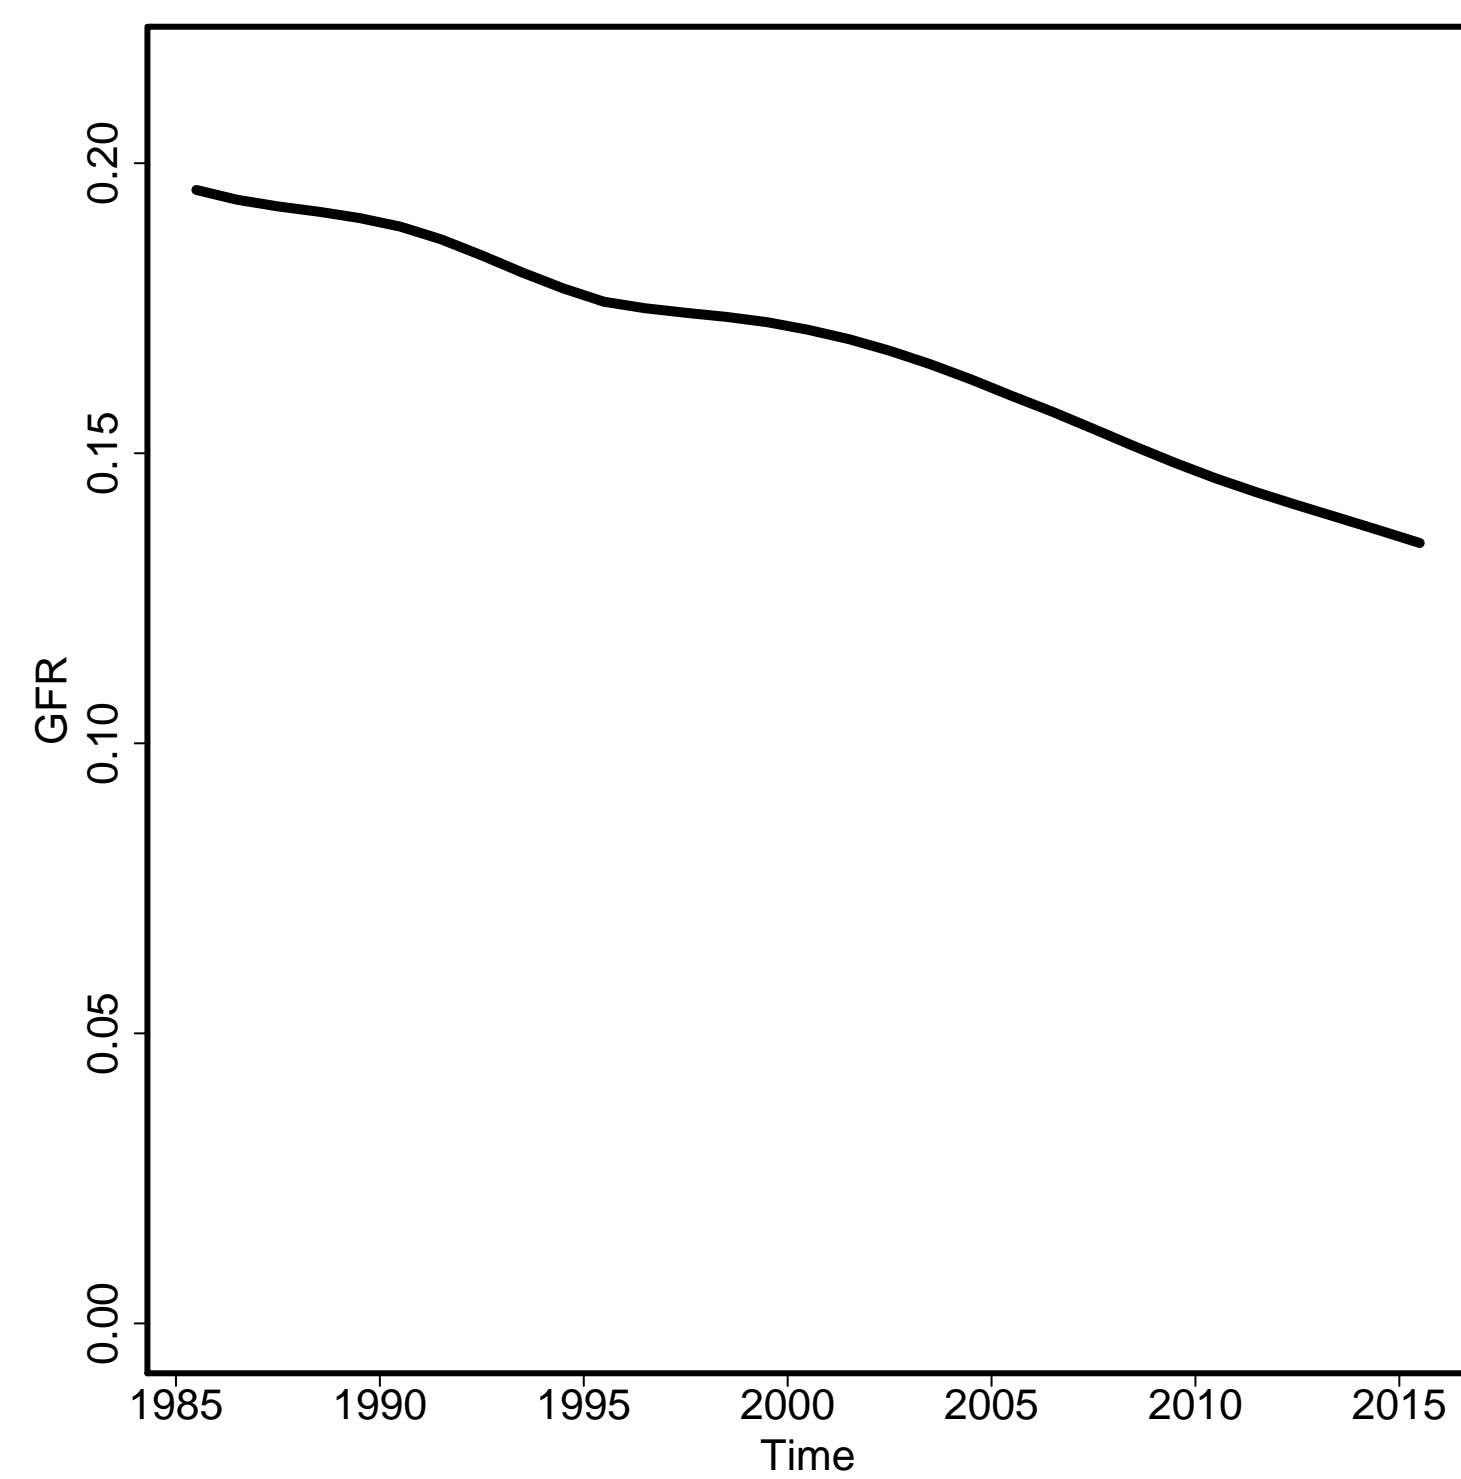

Skilled Attendance to Birth

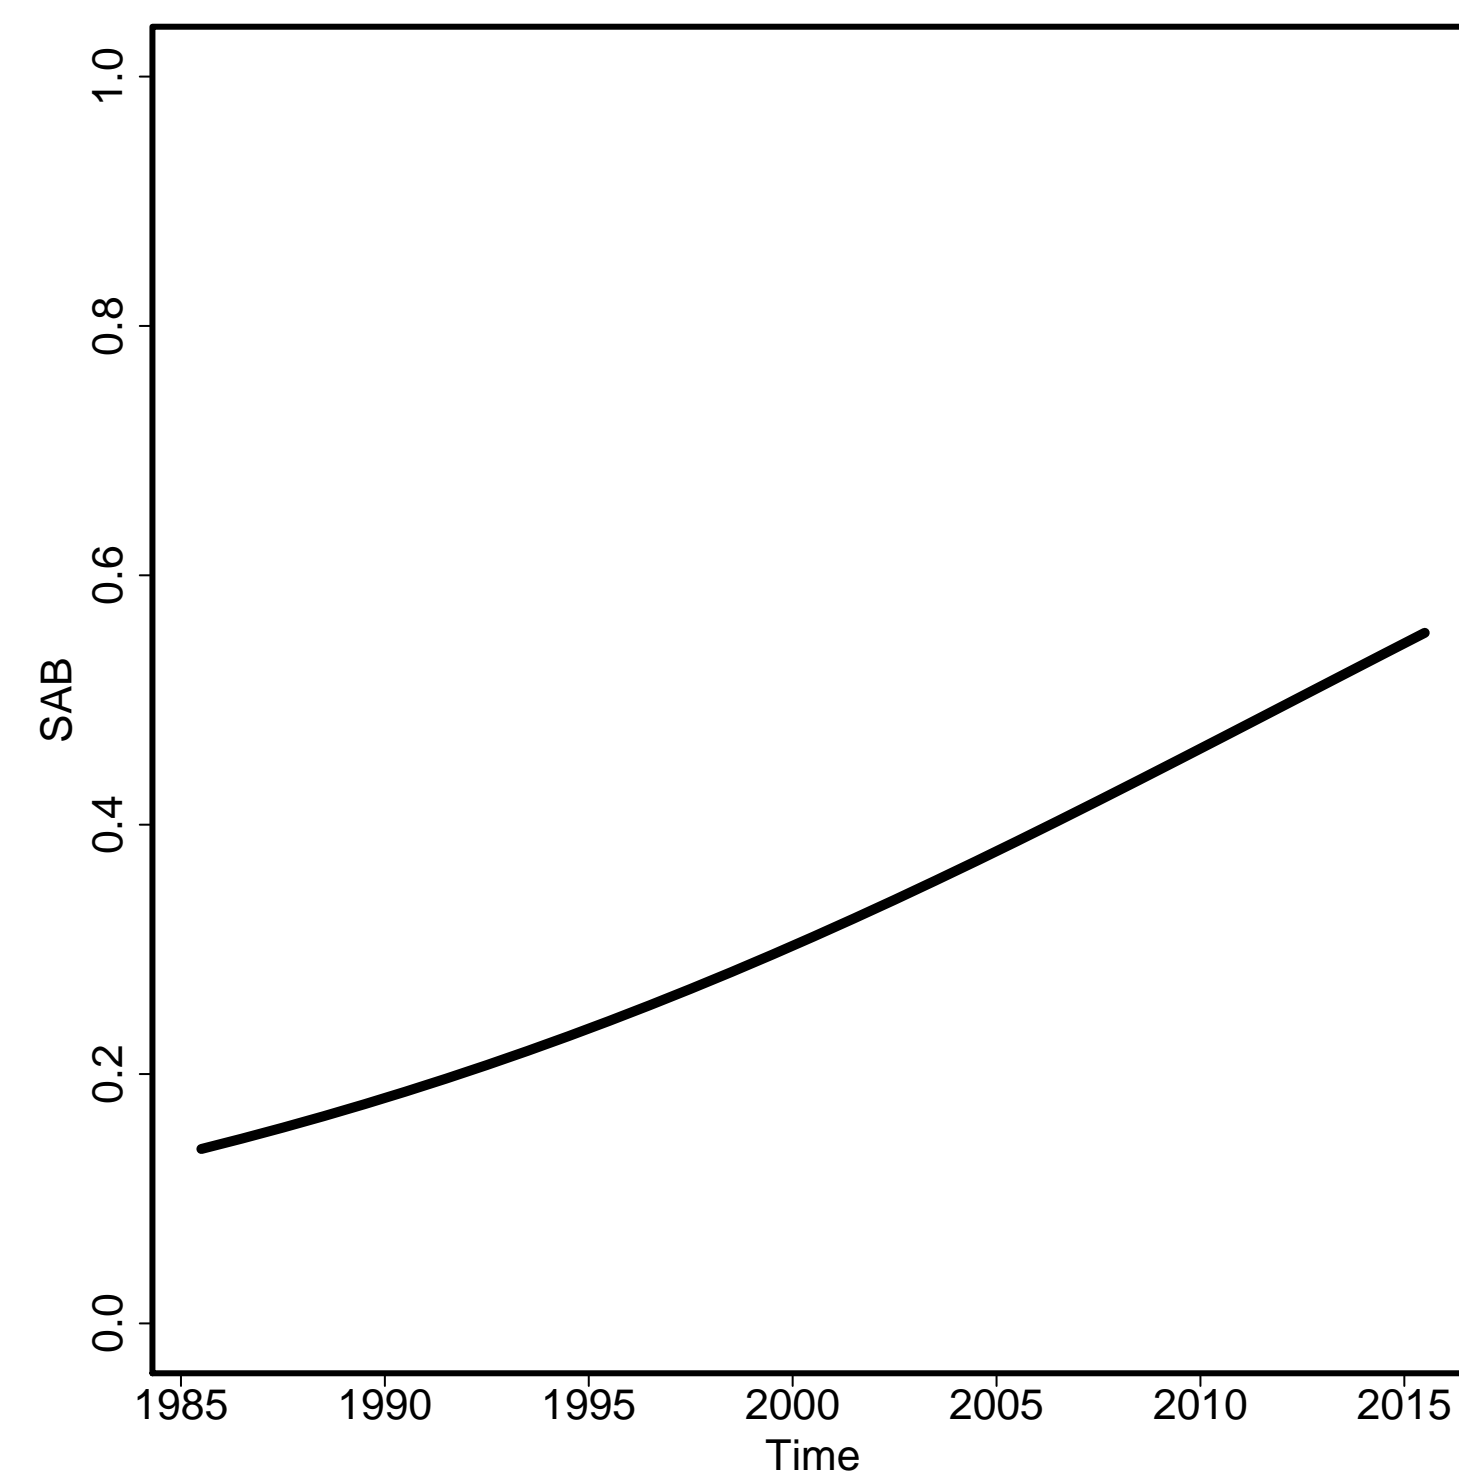

Envelope/Births

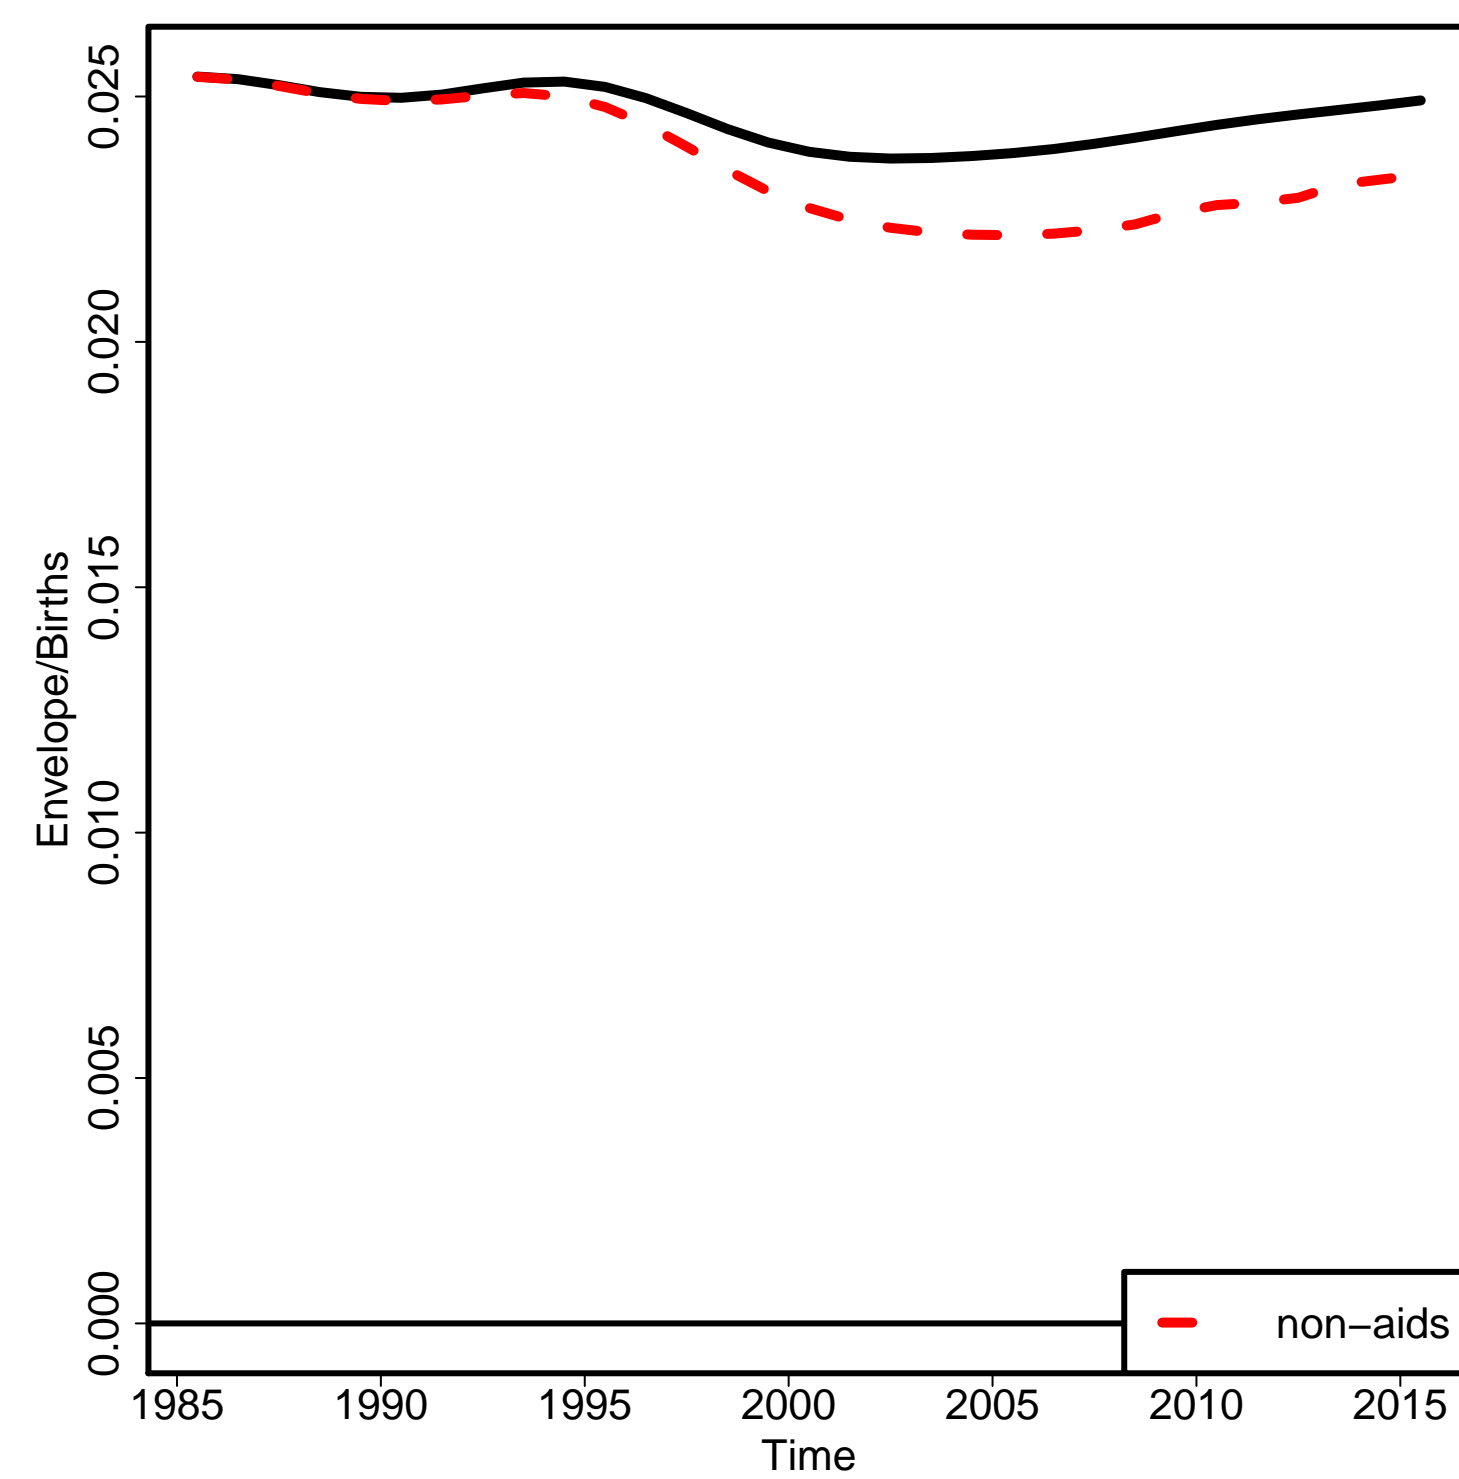

Non-aids MMR

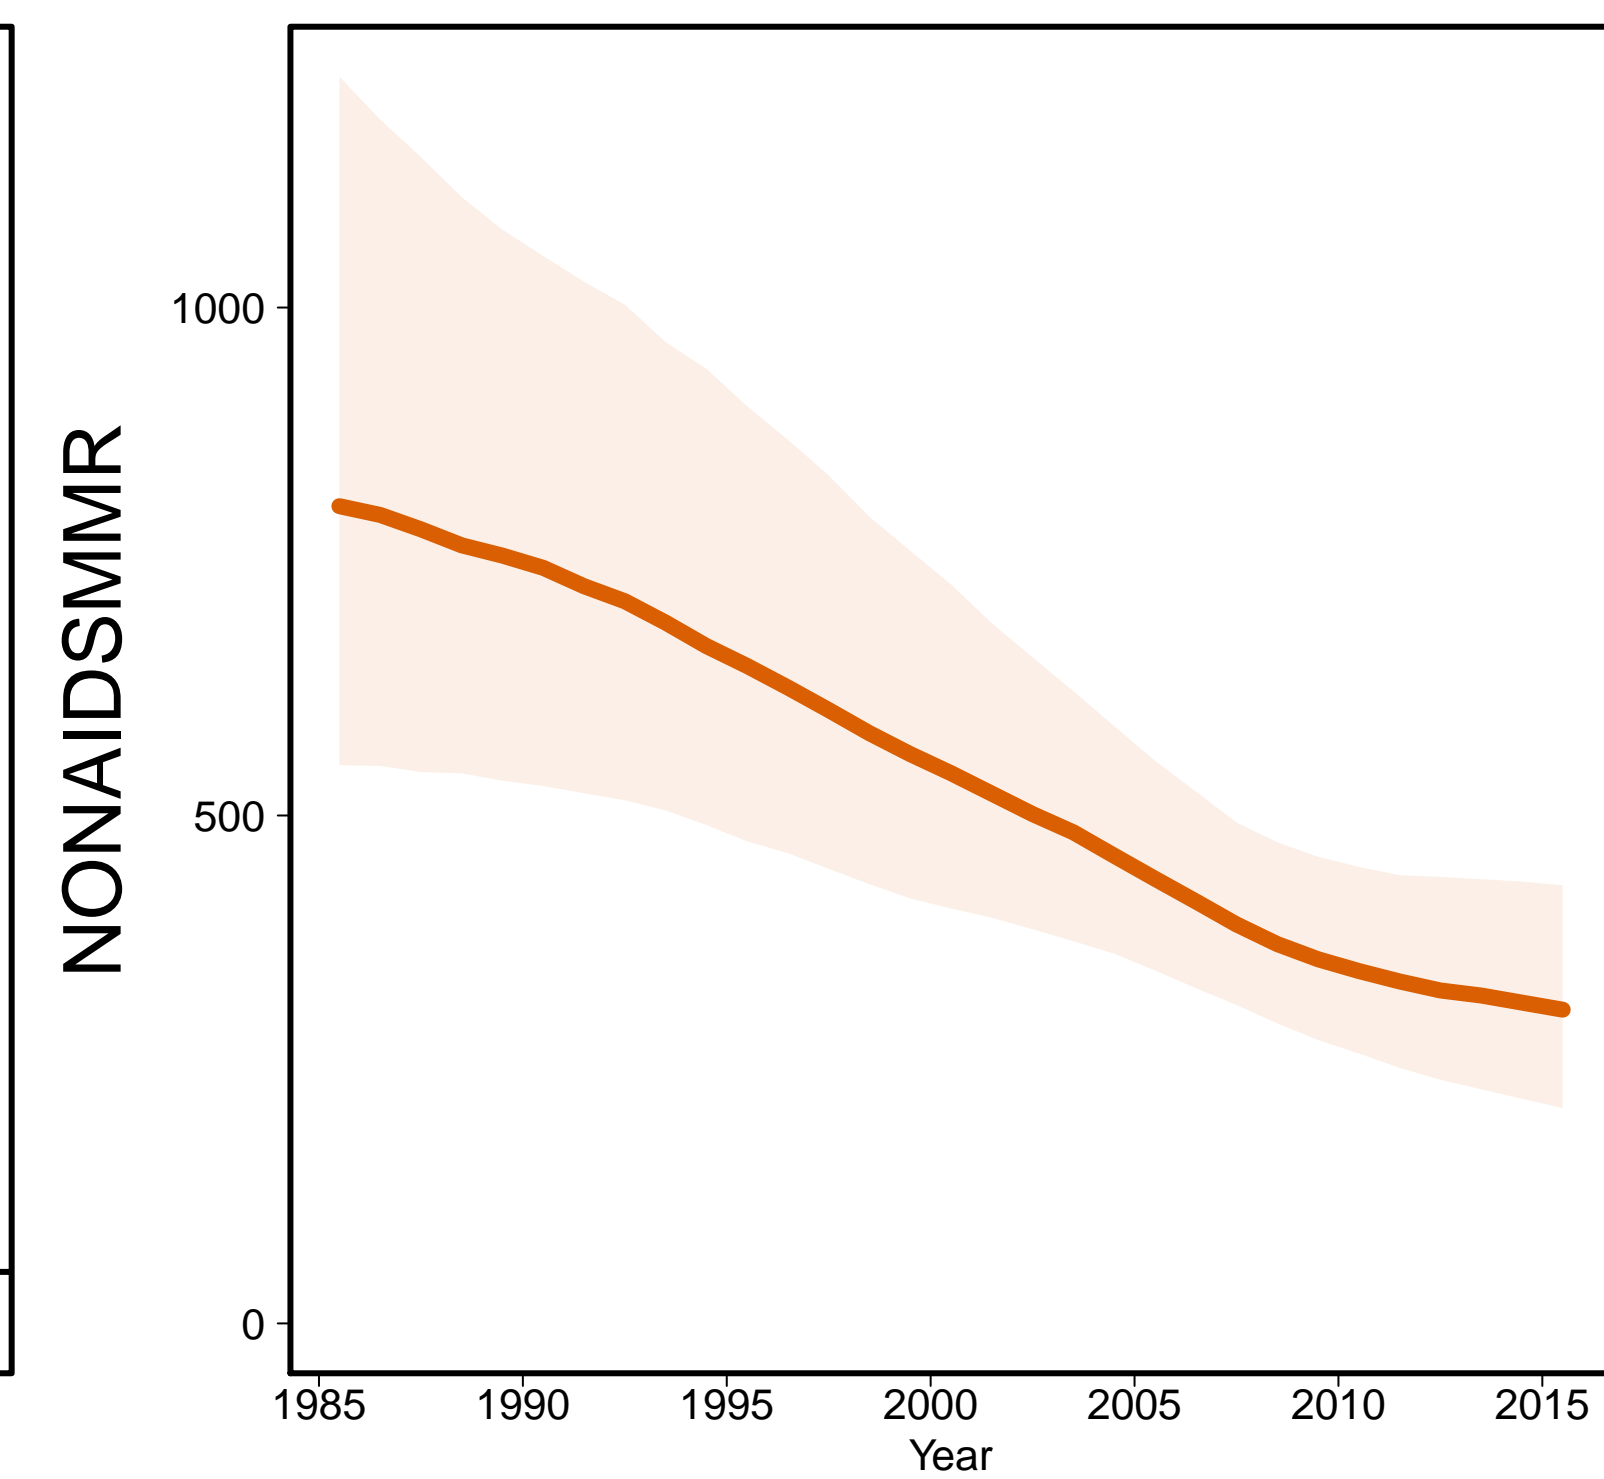

Aids MMR

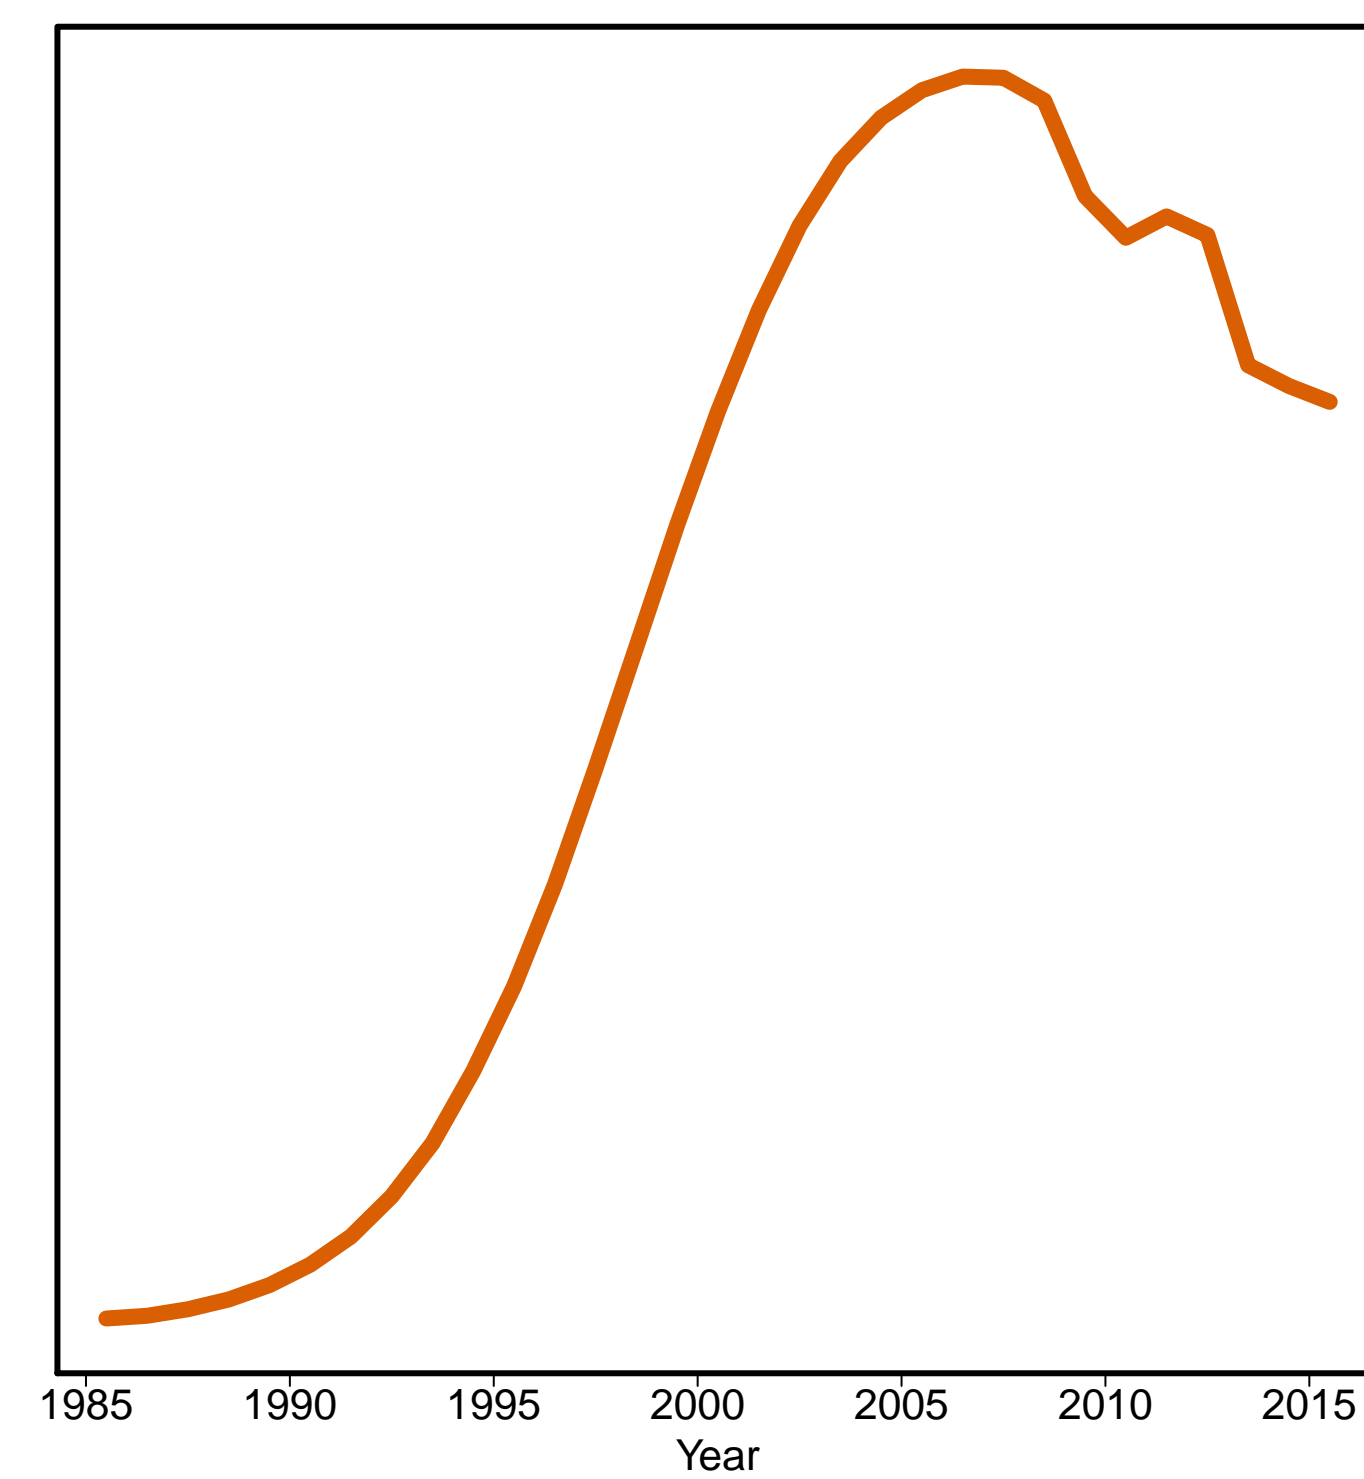

Suriname [SUR]  
(South America)

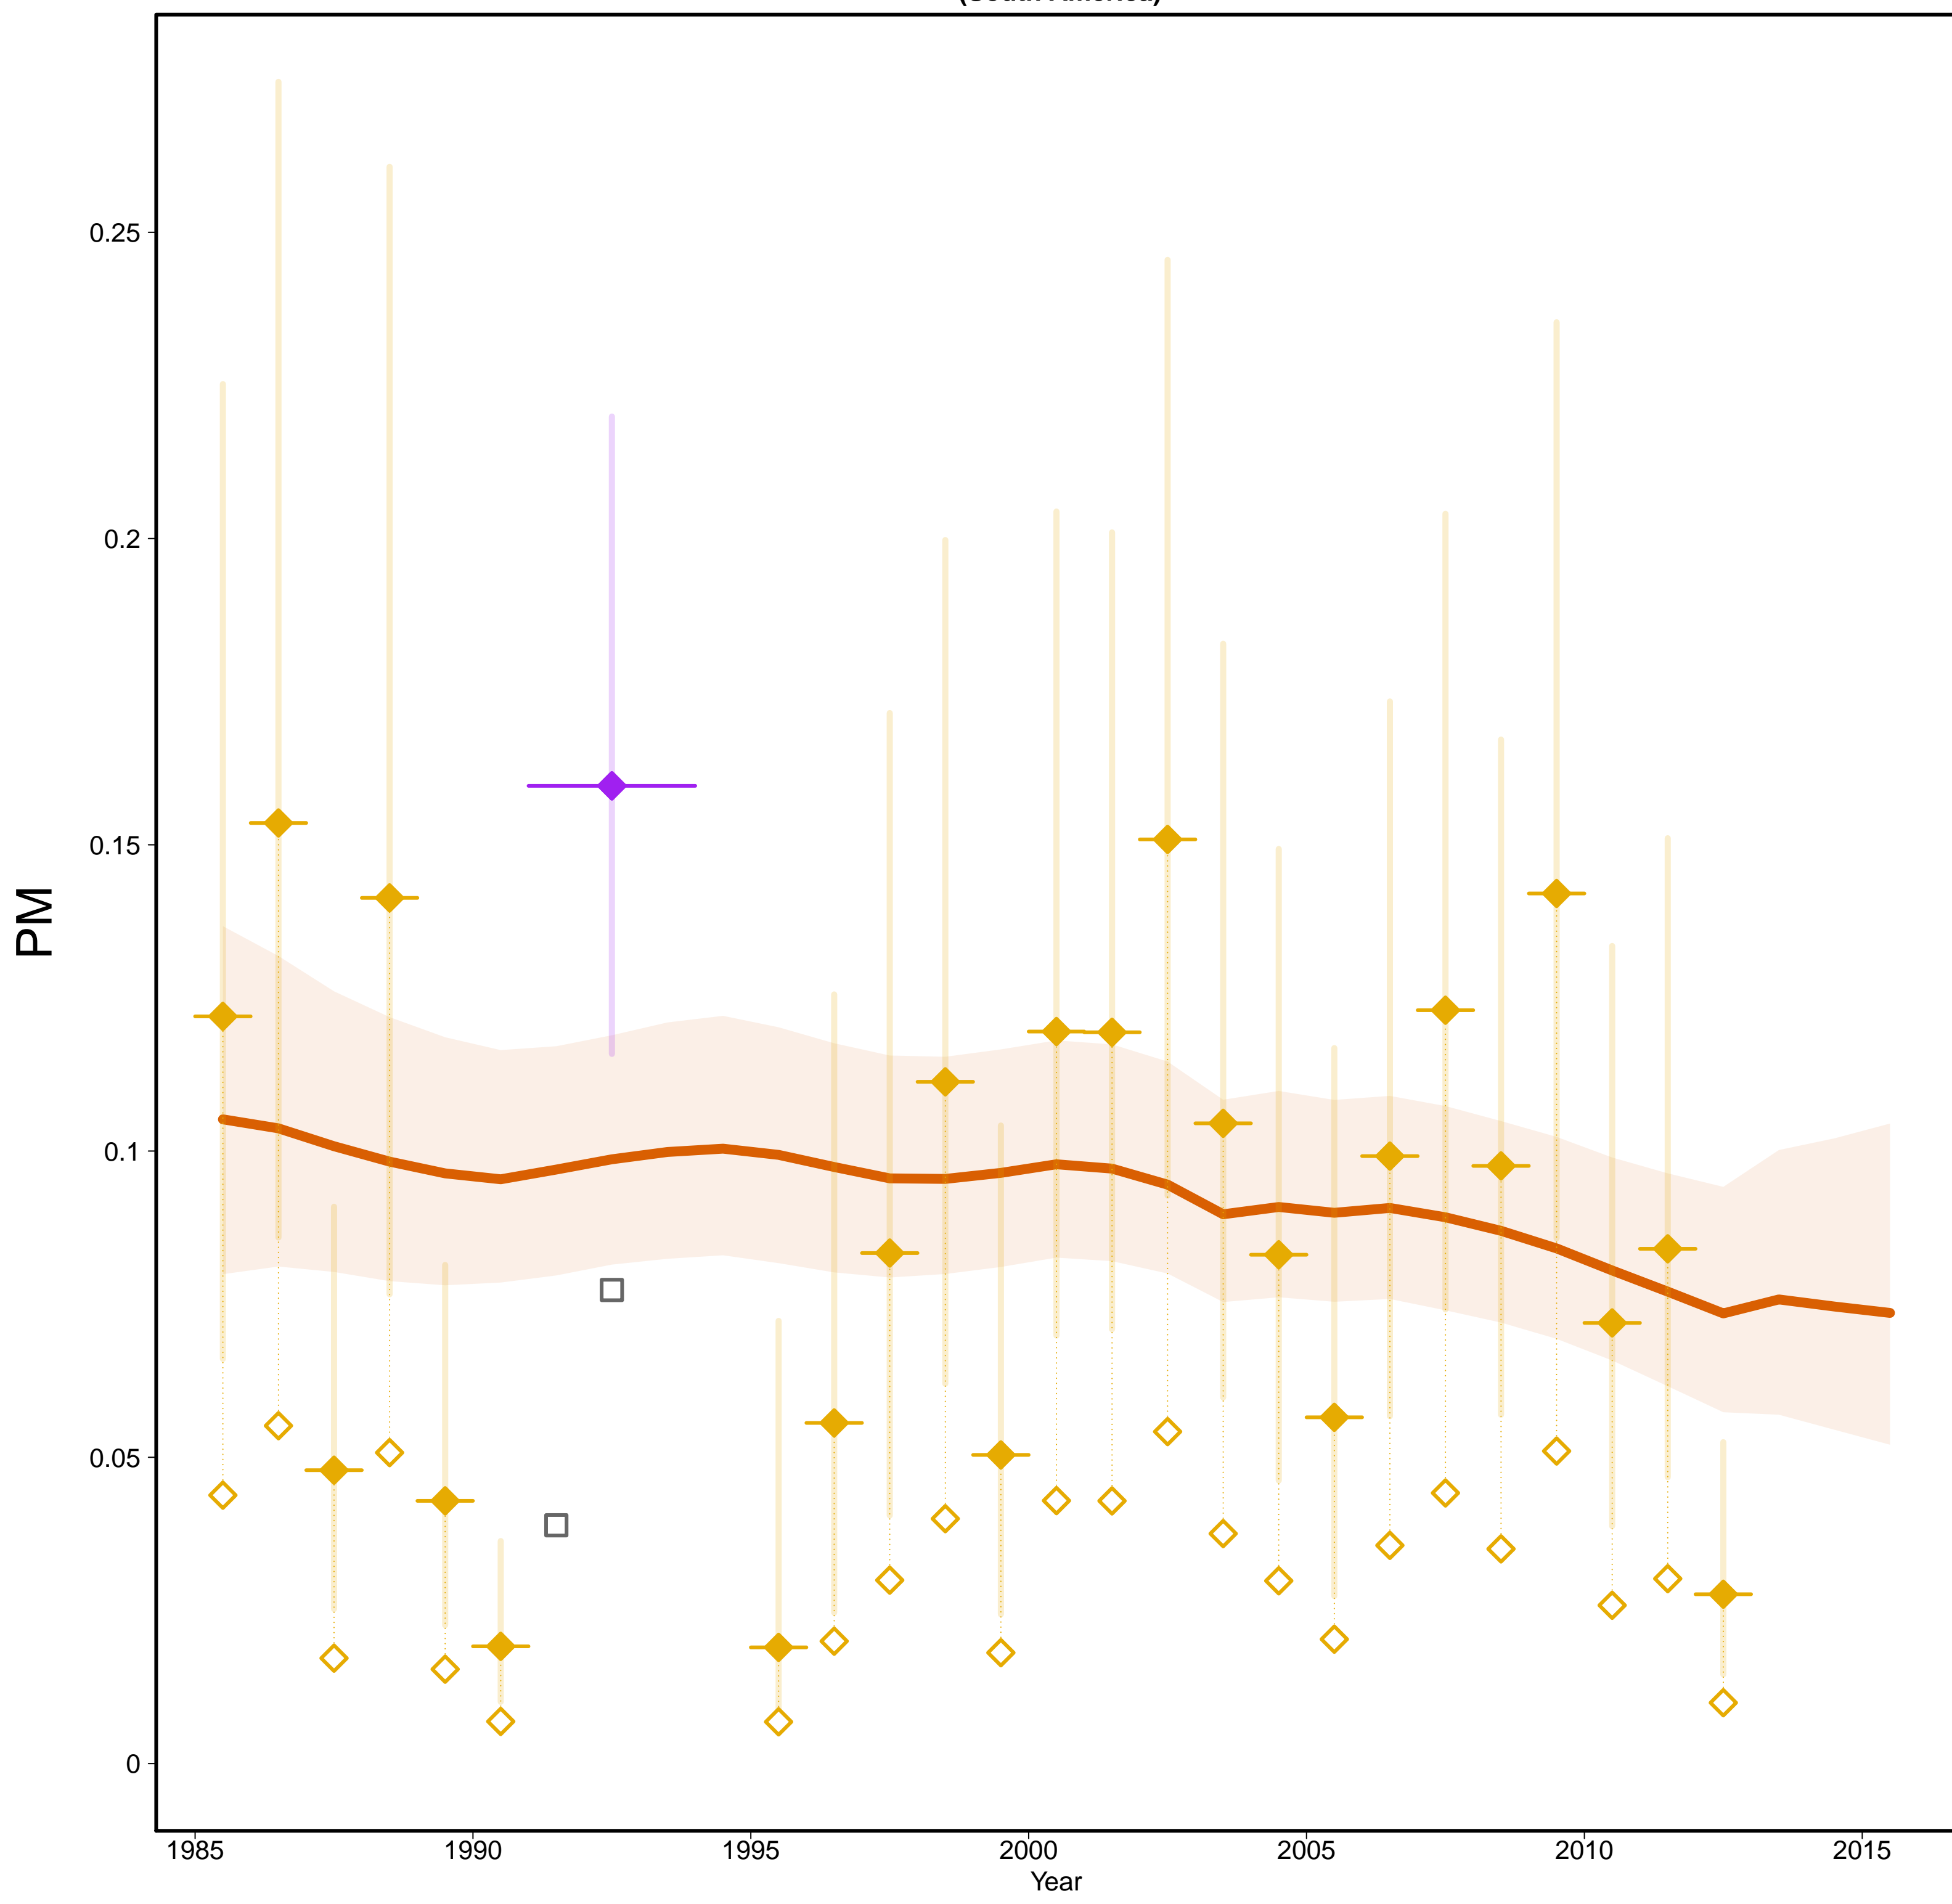

Suriname [SUR]  
(South America)

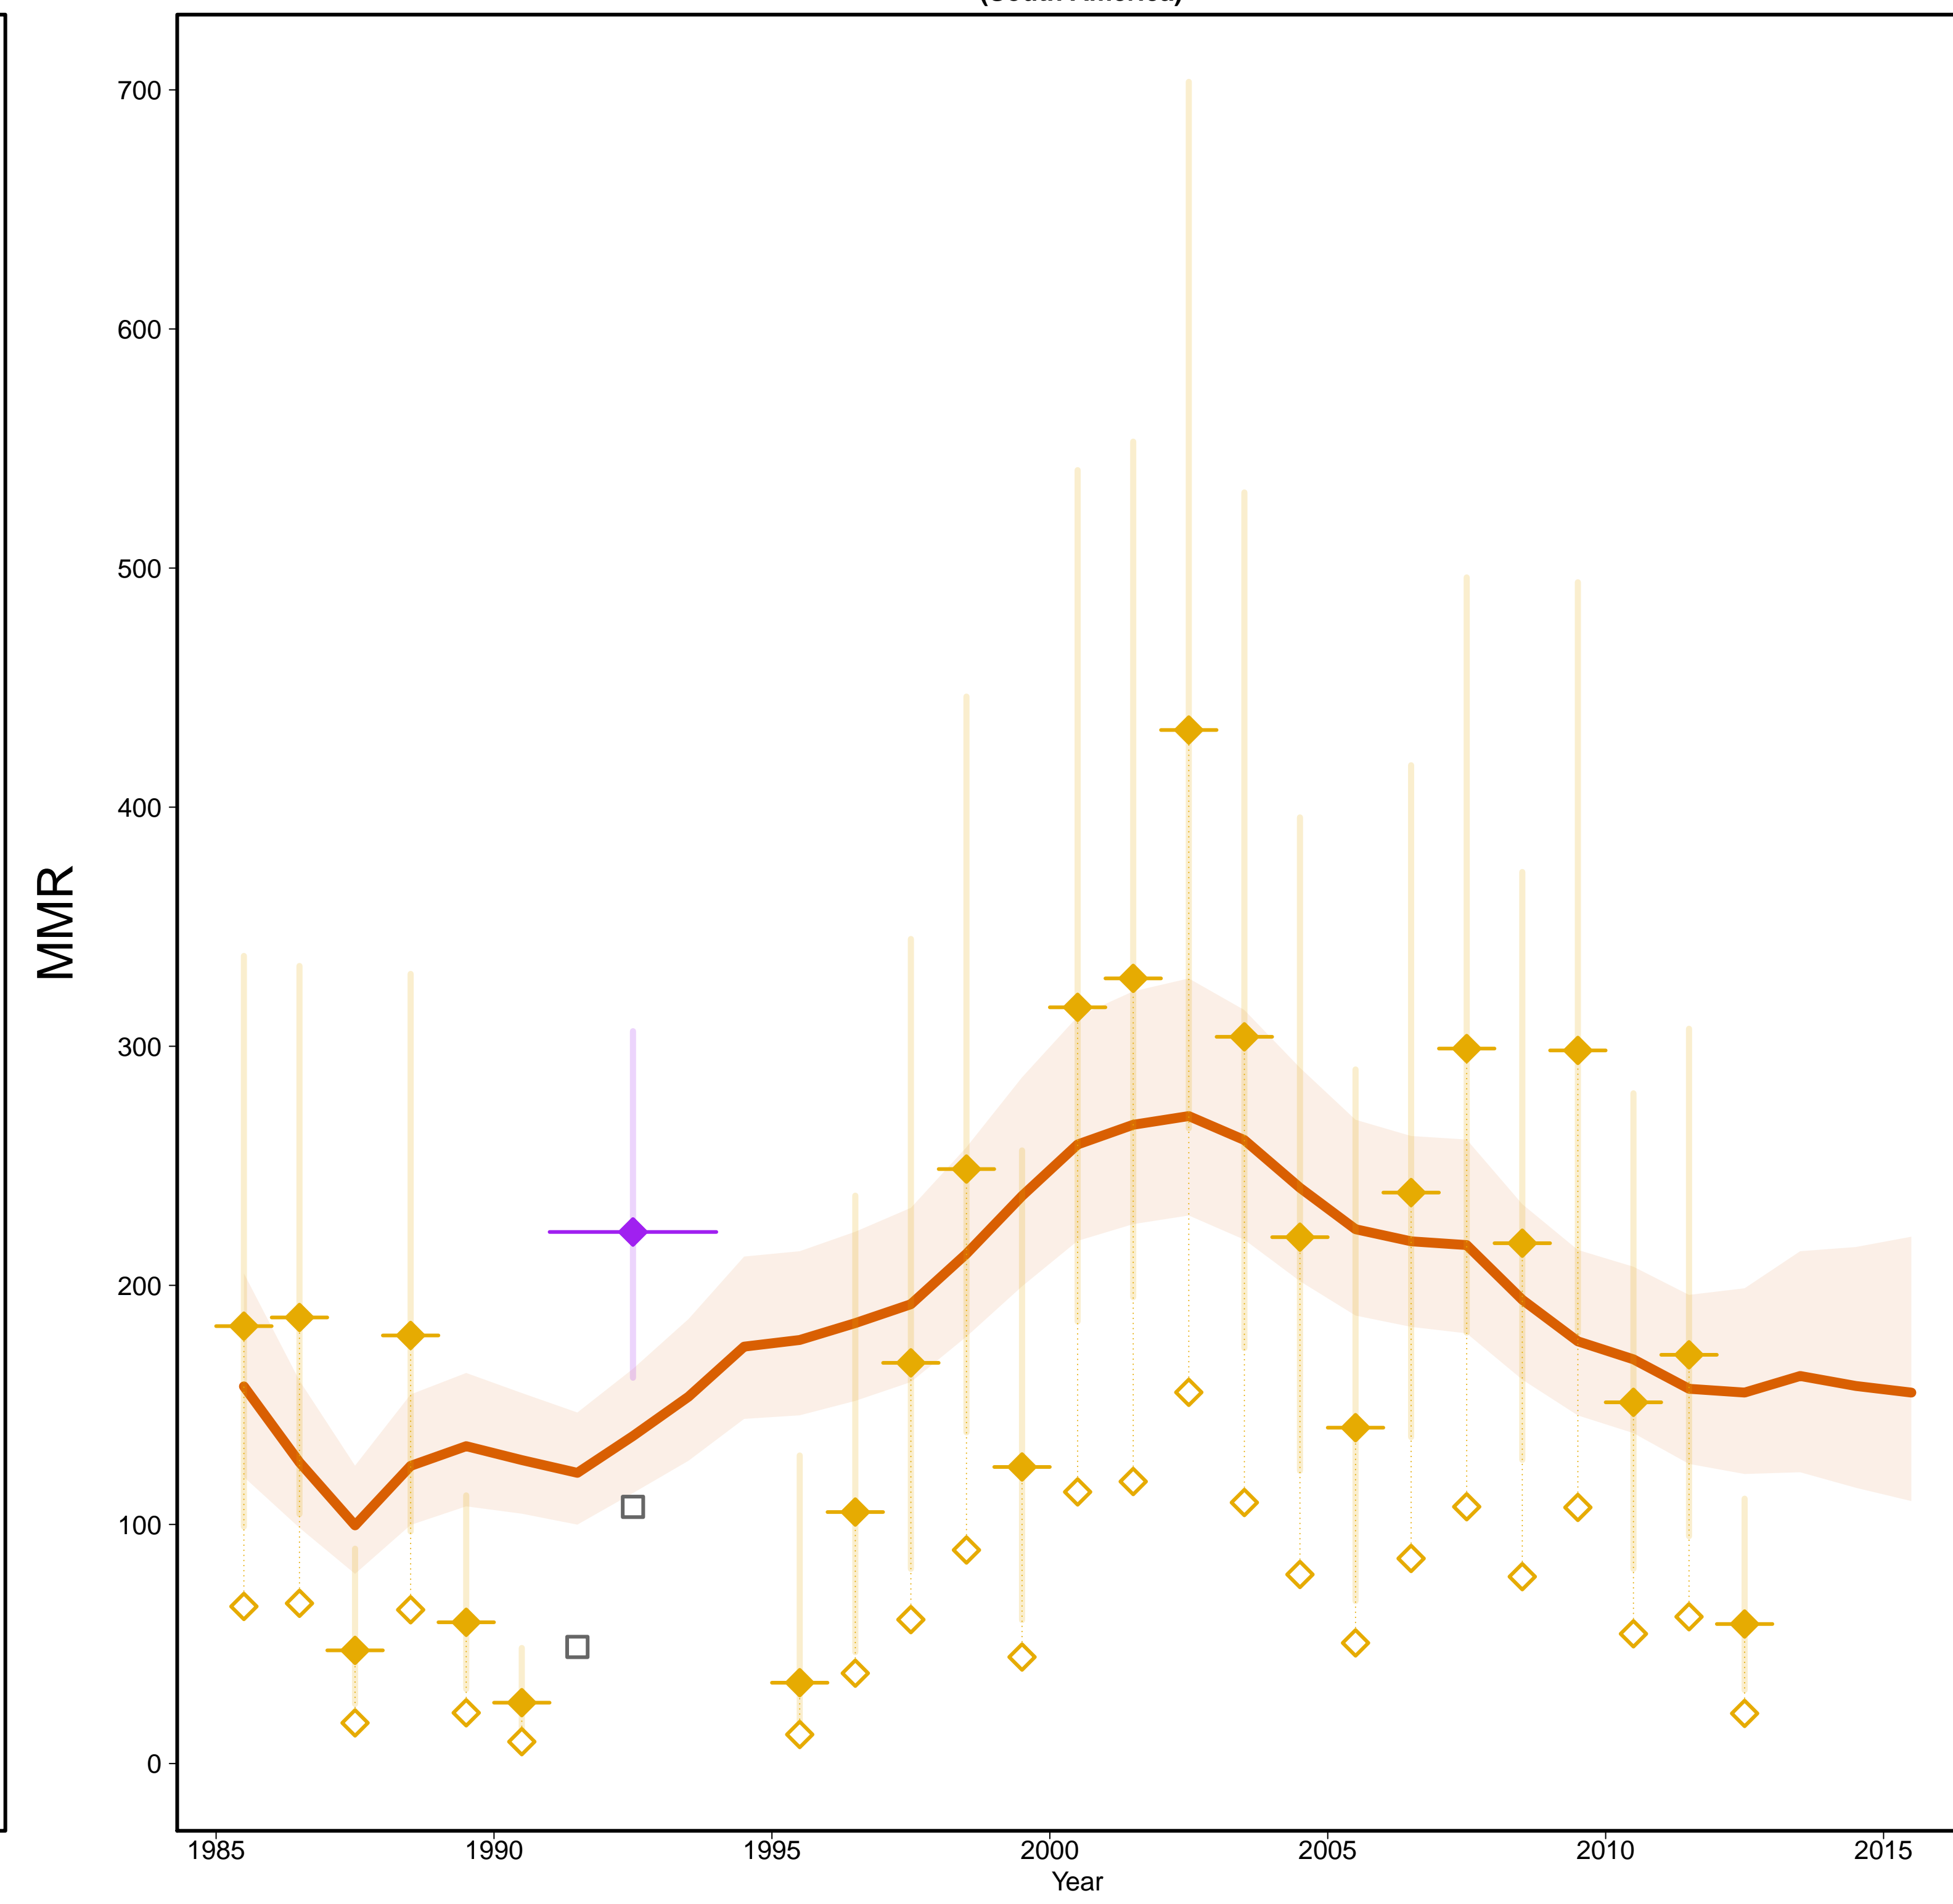

- Estimates –
- Mlate
- MMR Database 2015 –
- ◇ Observed Data
- ◆ Adjusted Data
- Data type –
- ◆ VR
- ◆ Spec. studies
- Excluded VR data  
(overlap with specialized study)

Gross Domestic Product

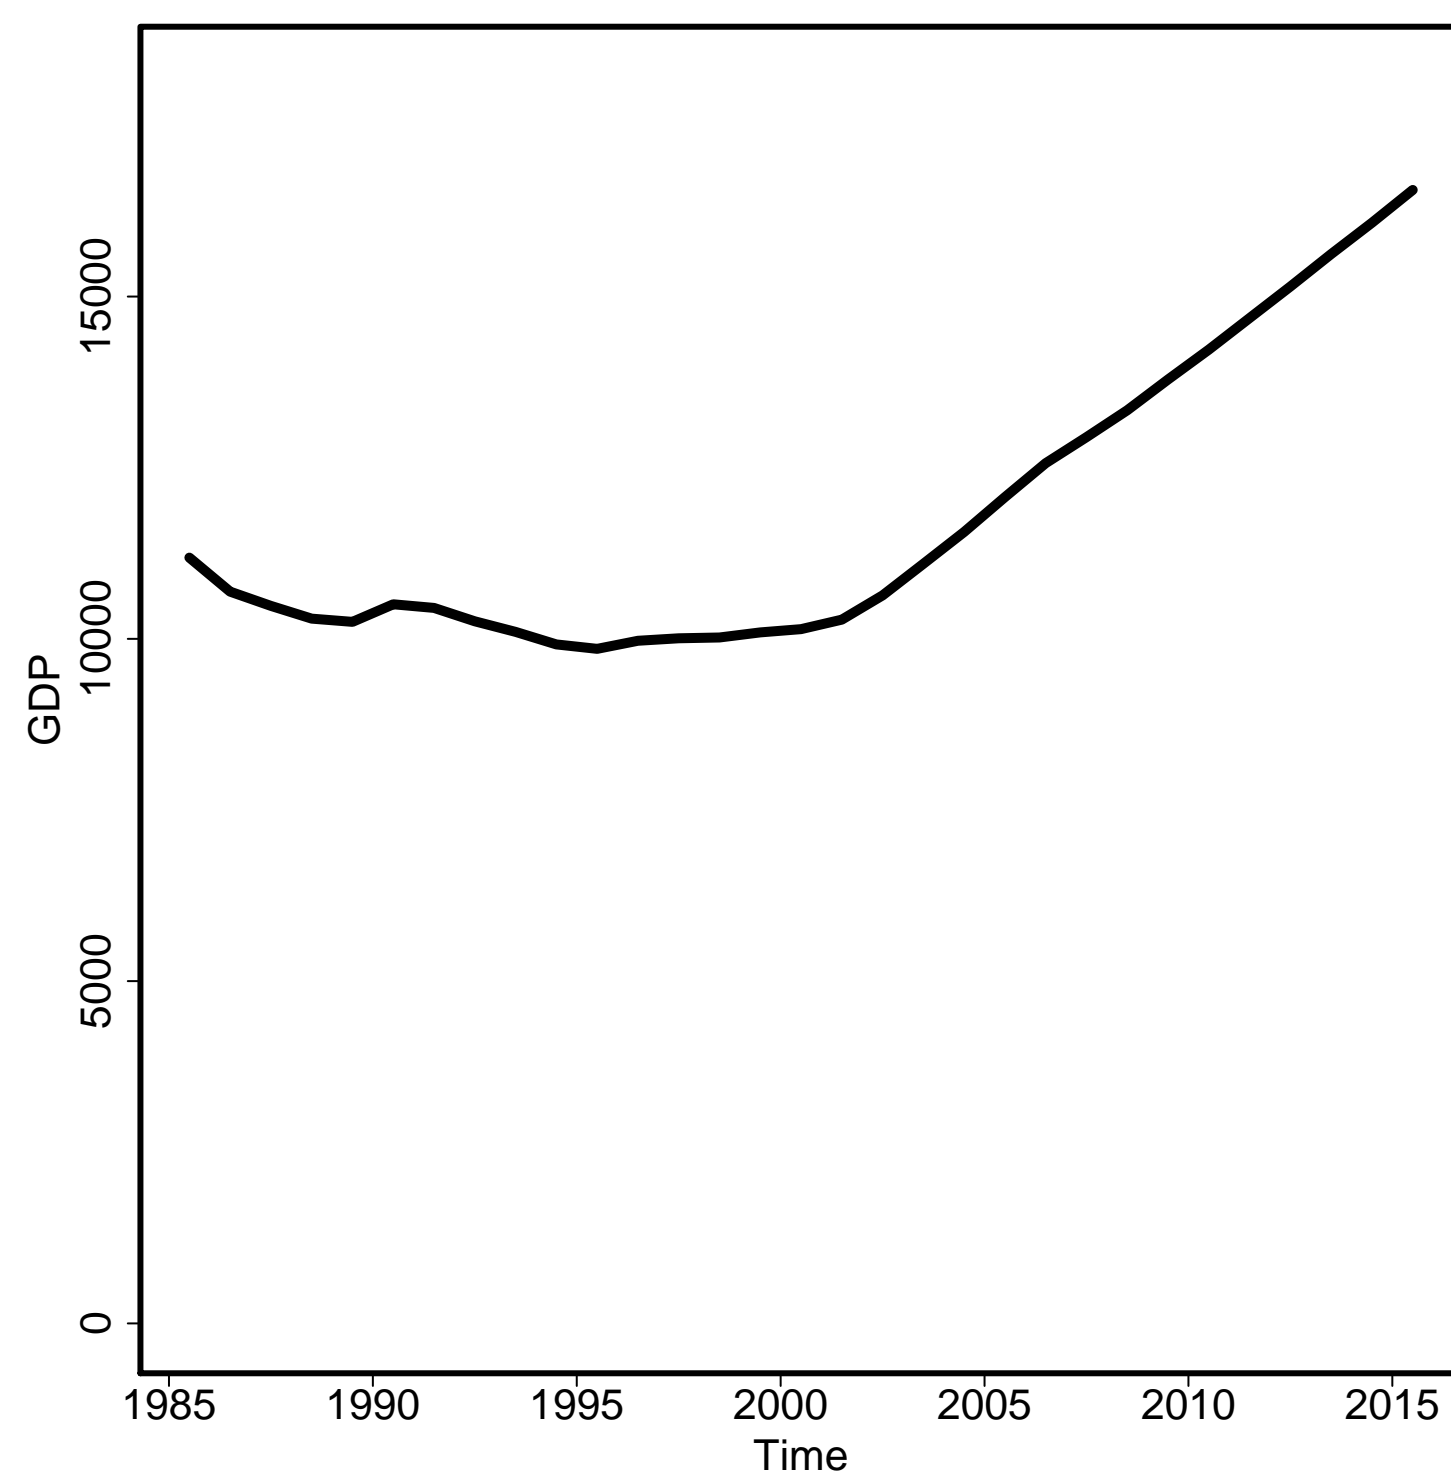

General Fertility Rate

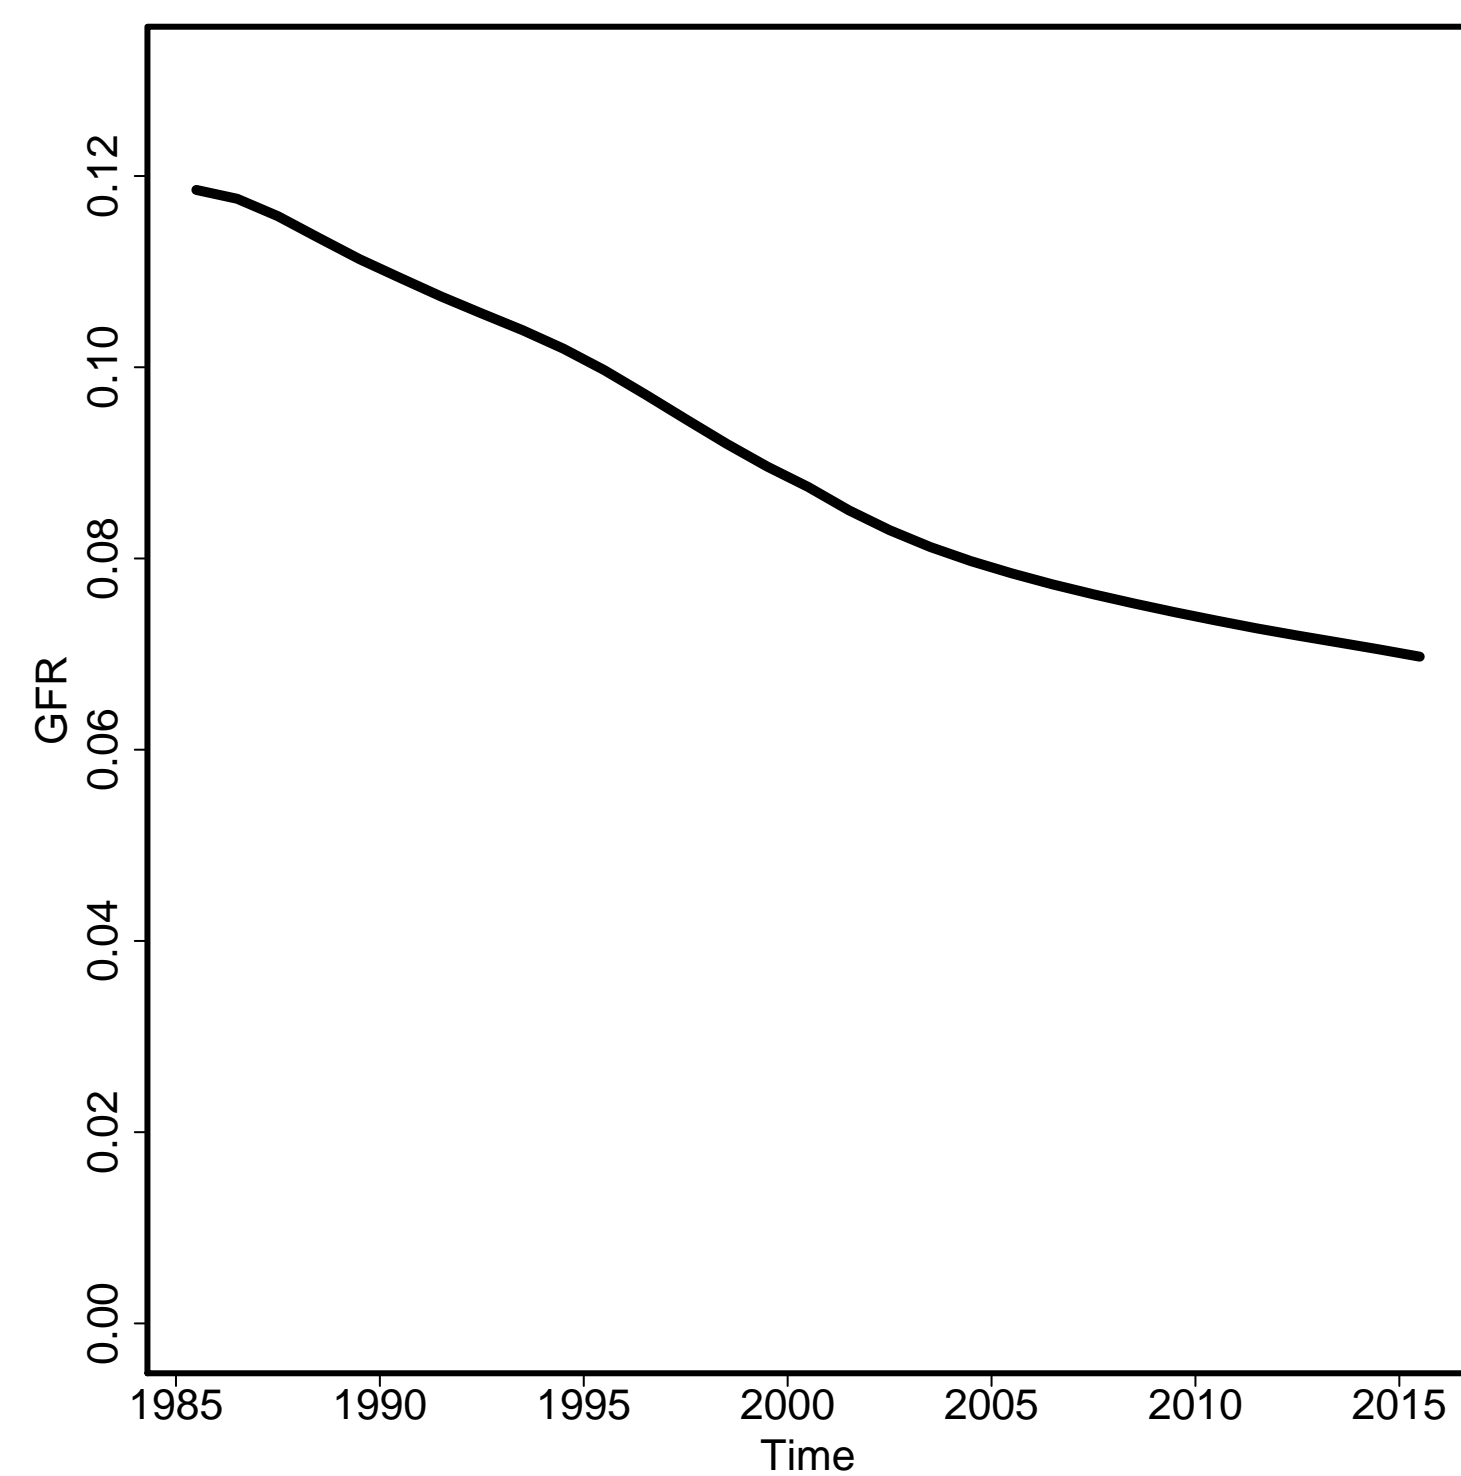

Skilled Attendance to Birth

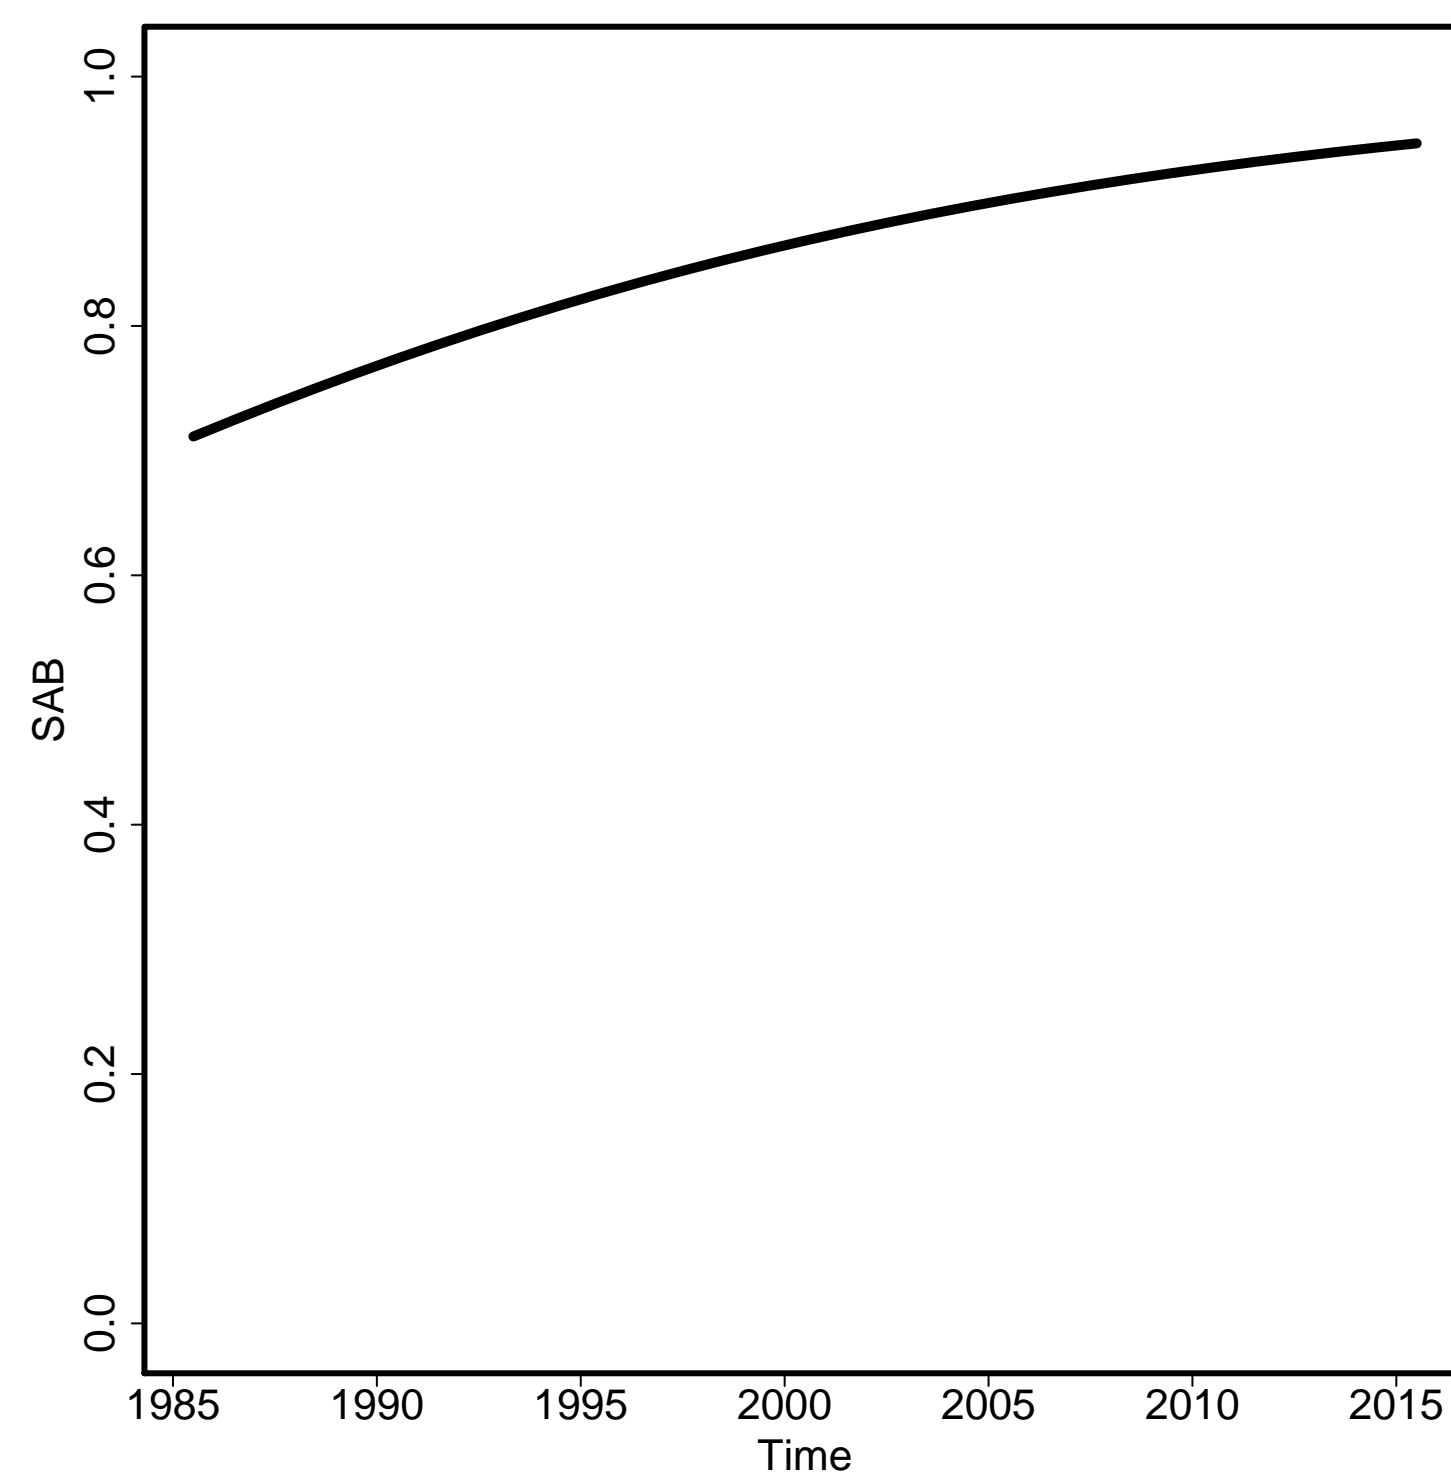

Envelope/Births

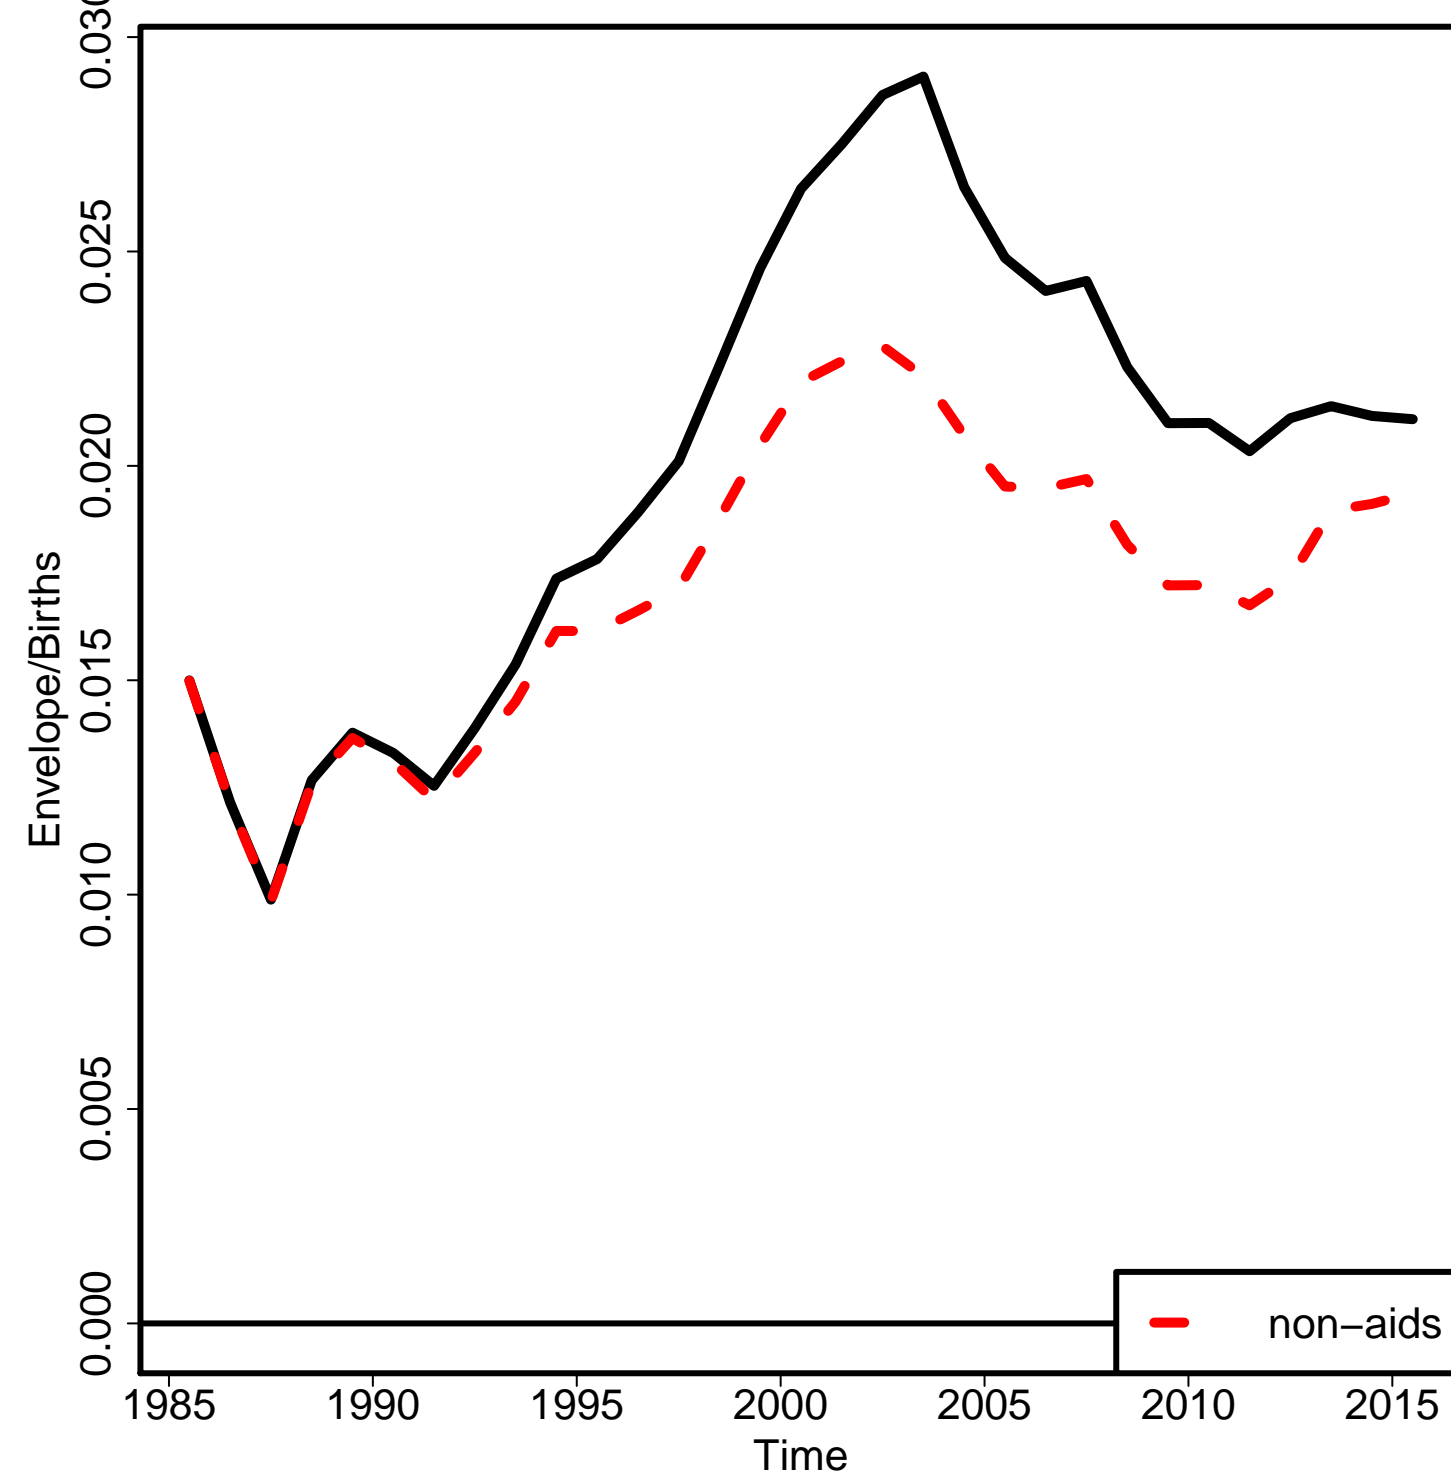

Non-aids MMR

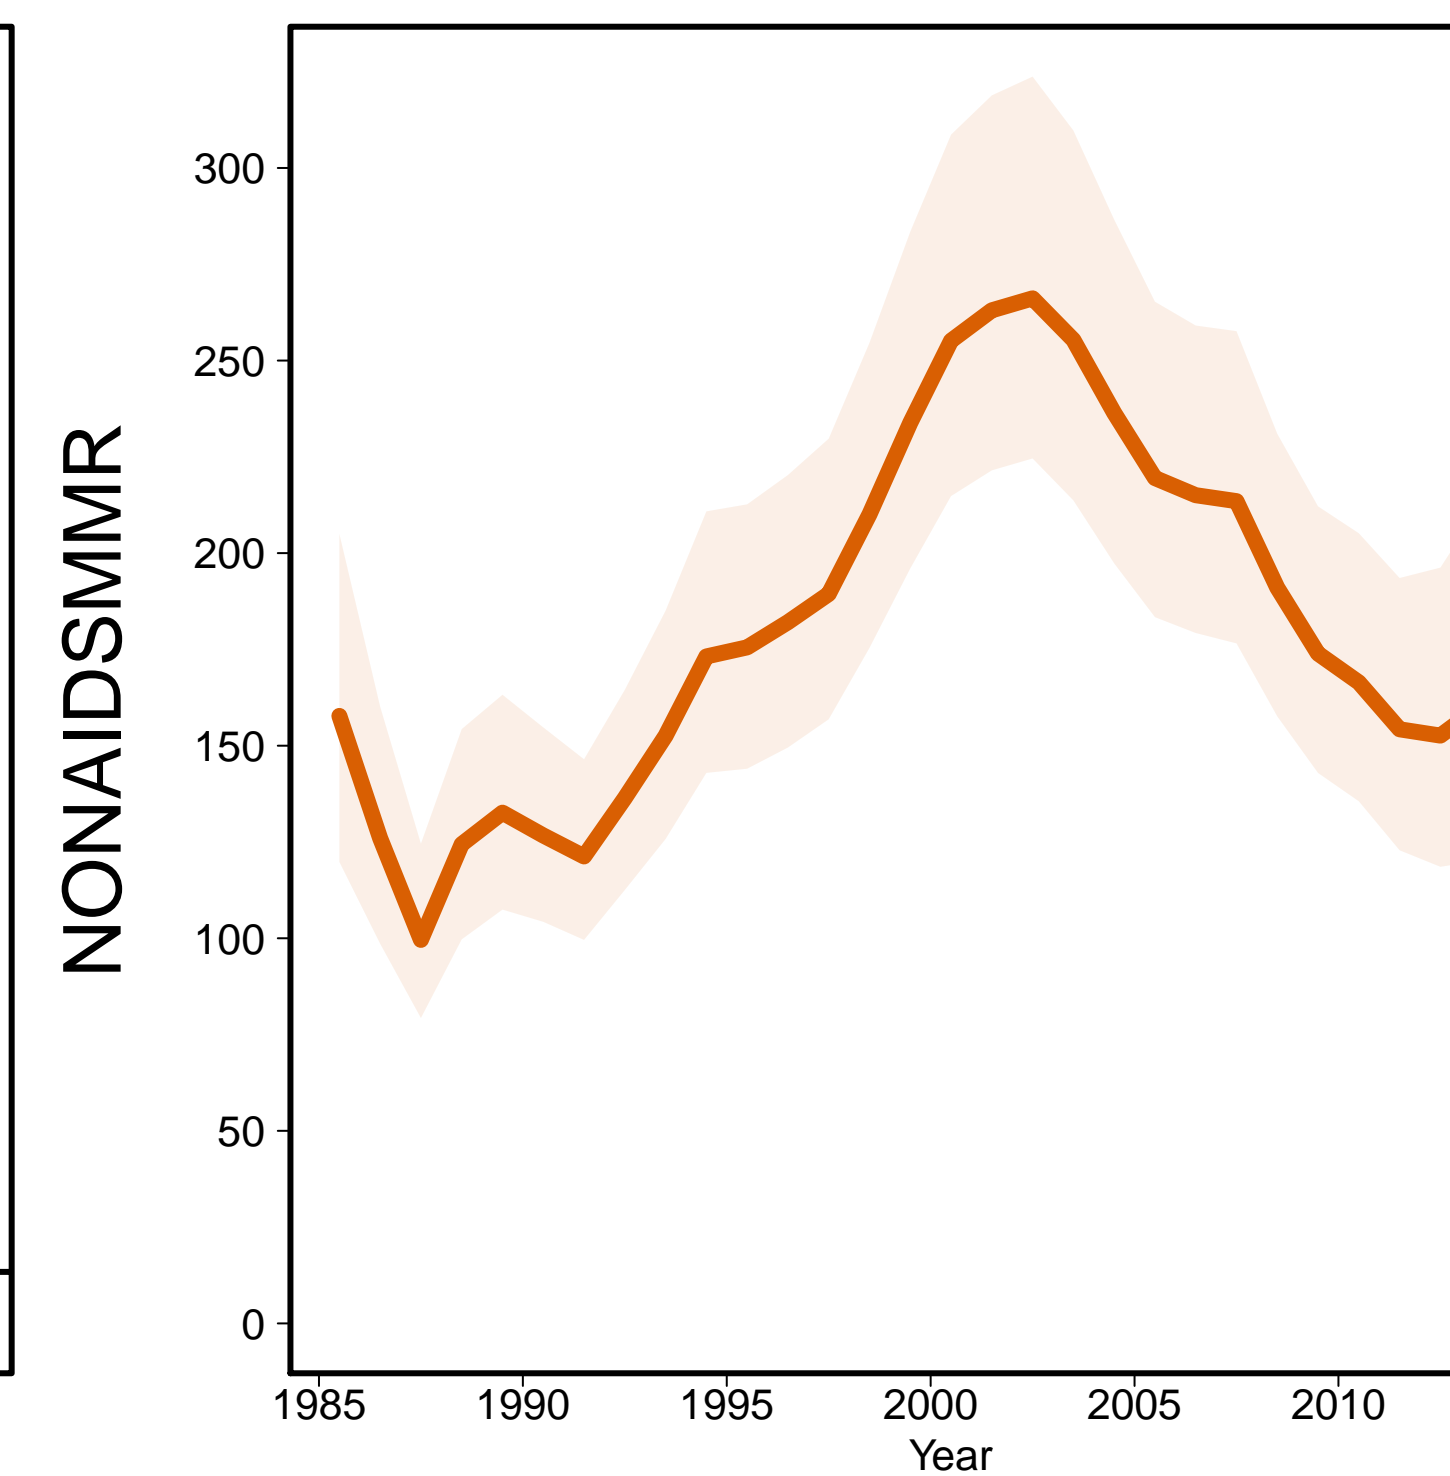

Aids MMR

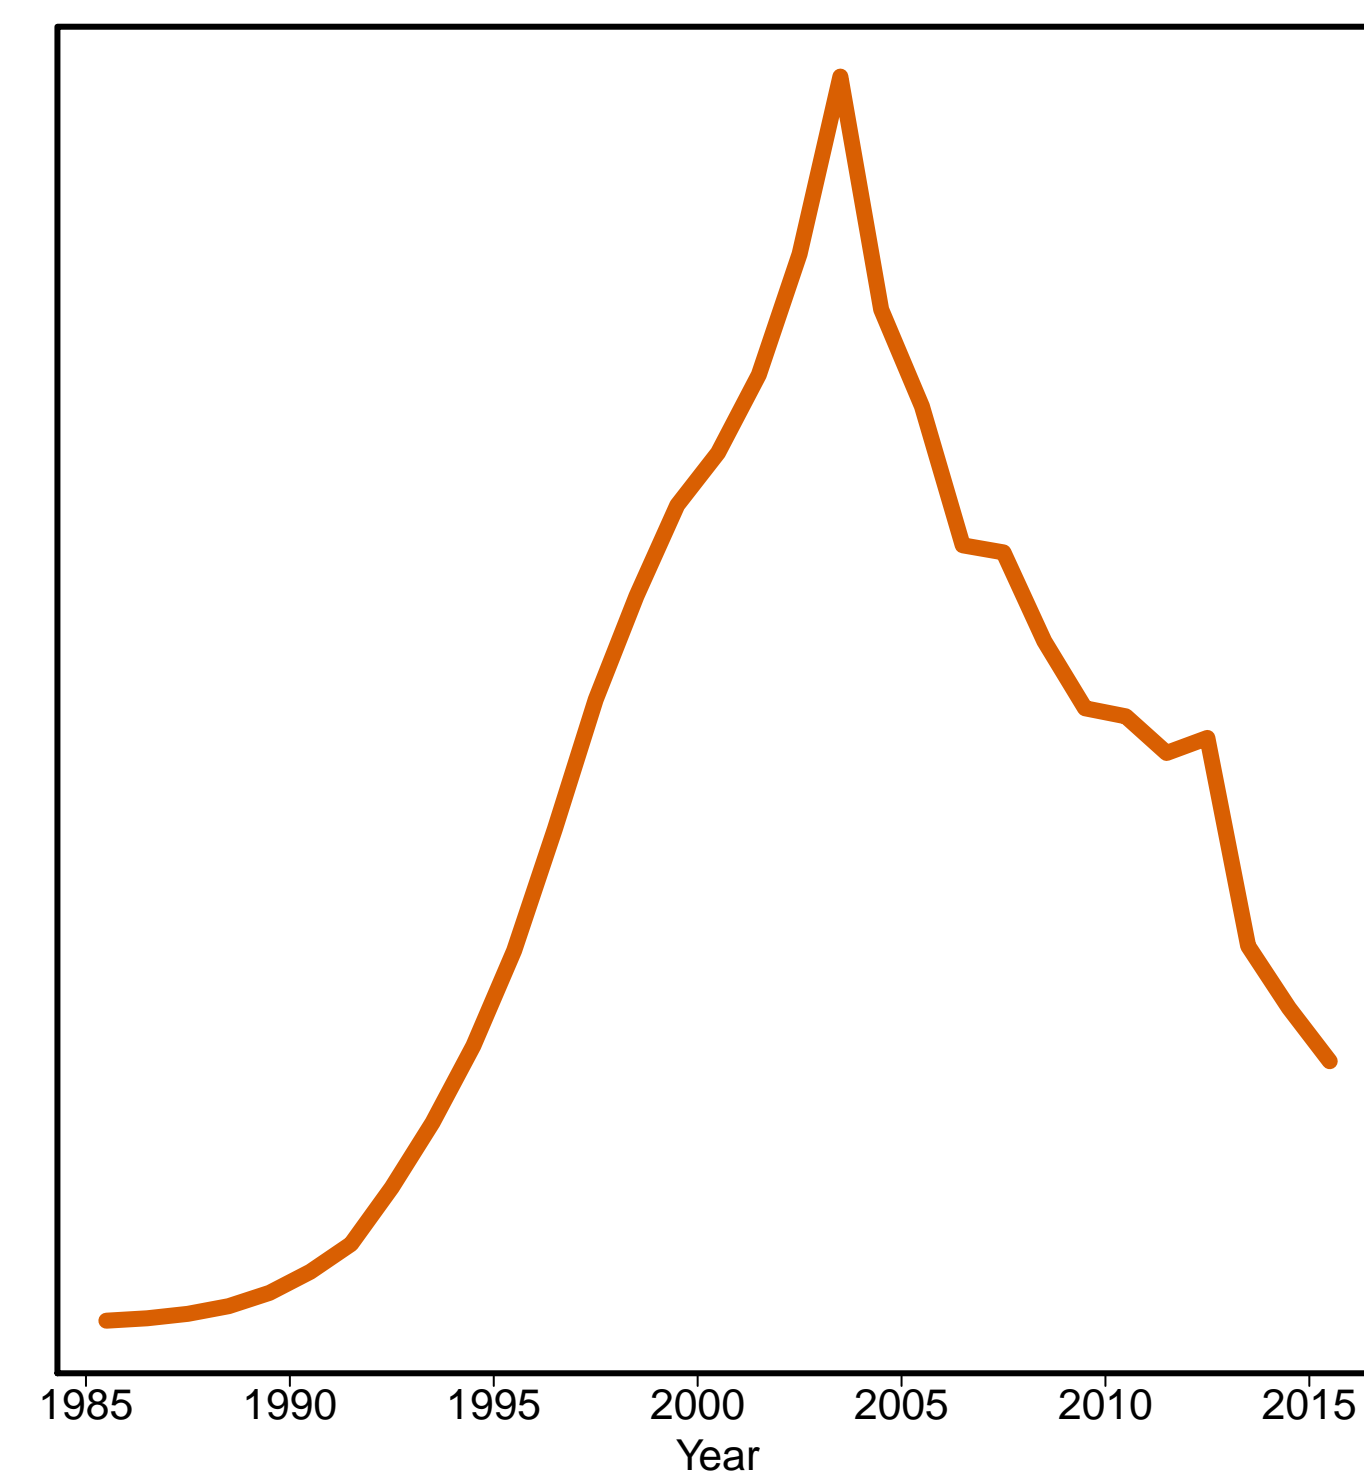

Swaziland [SWZ]  
(Southern Africa)

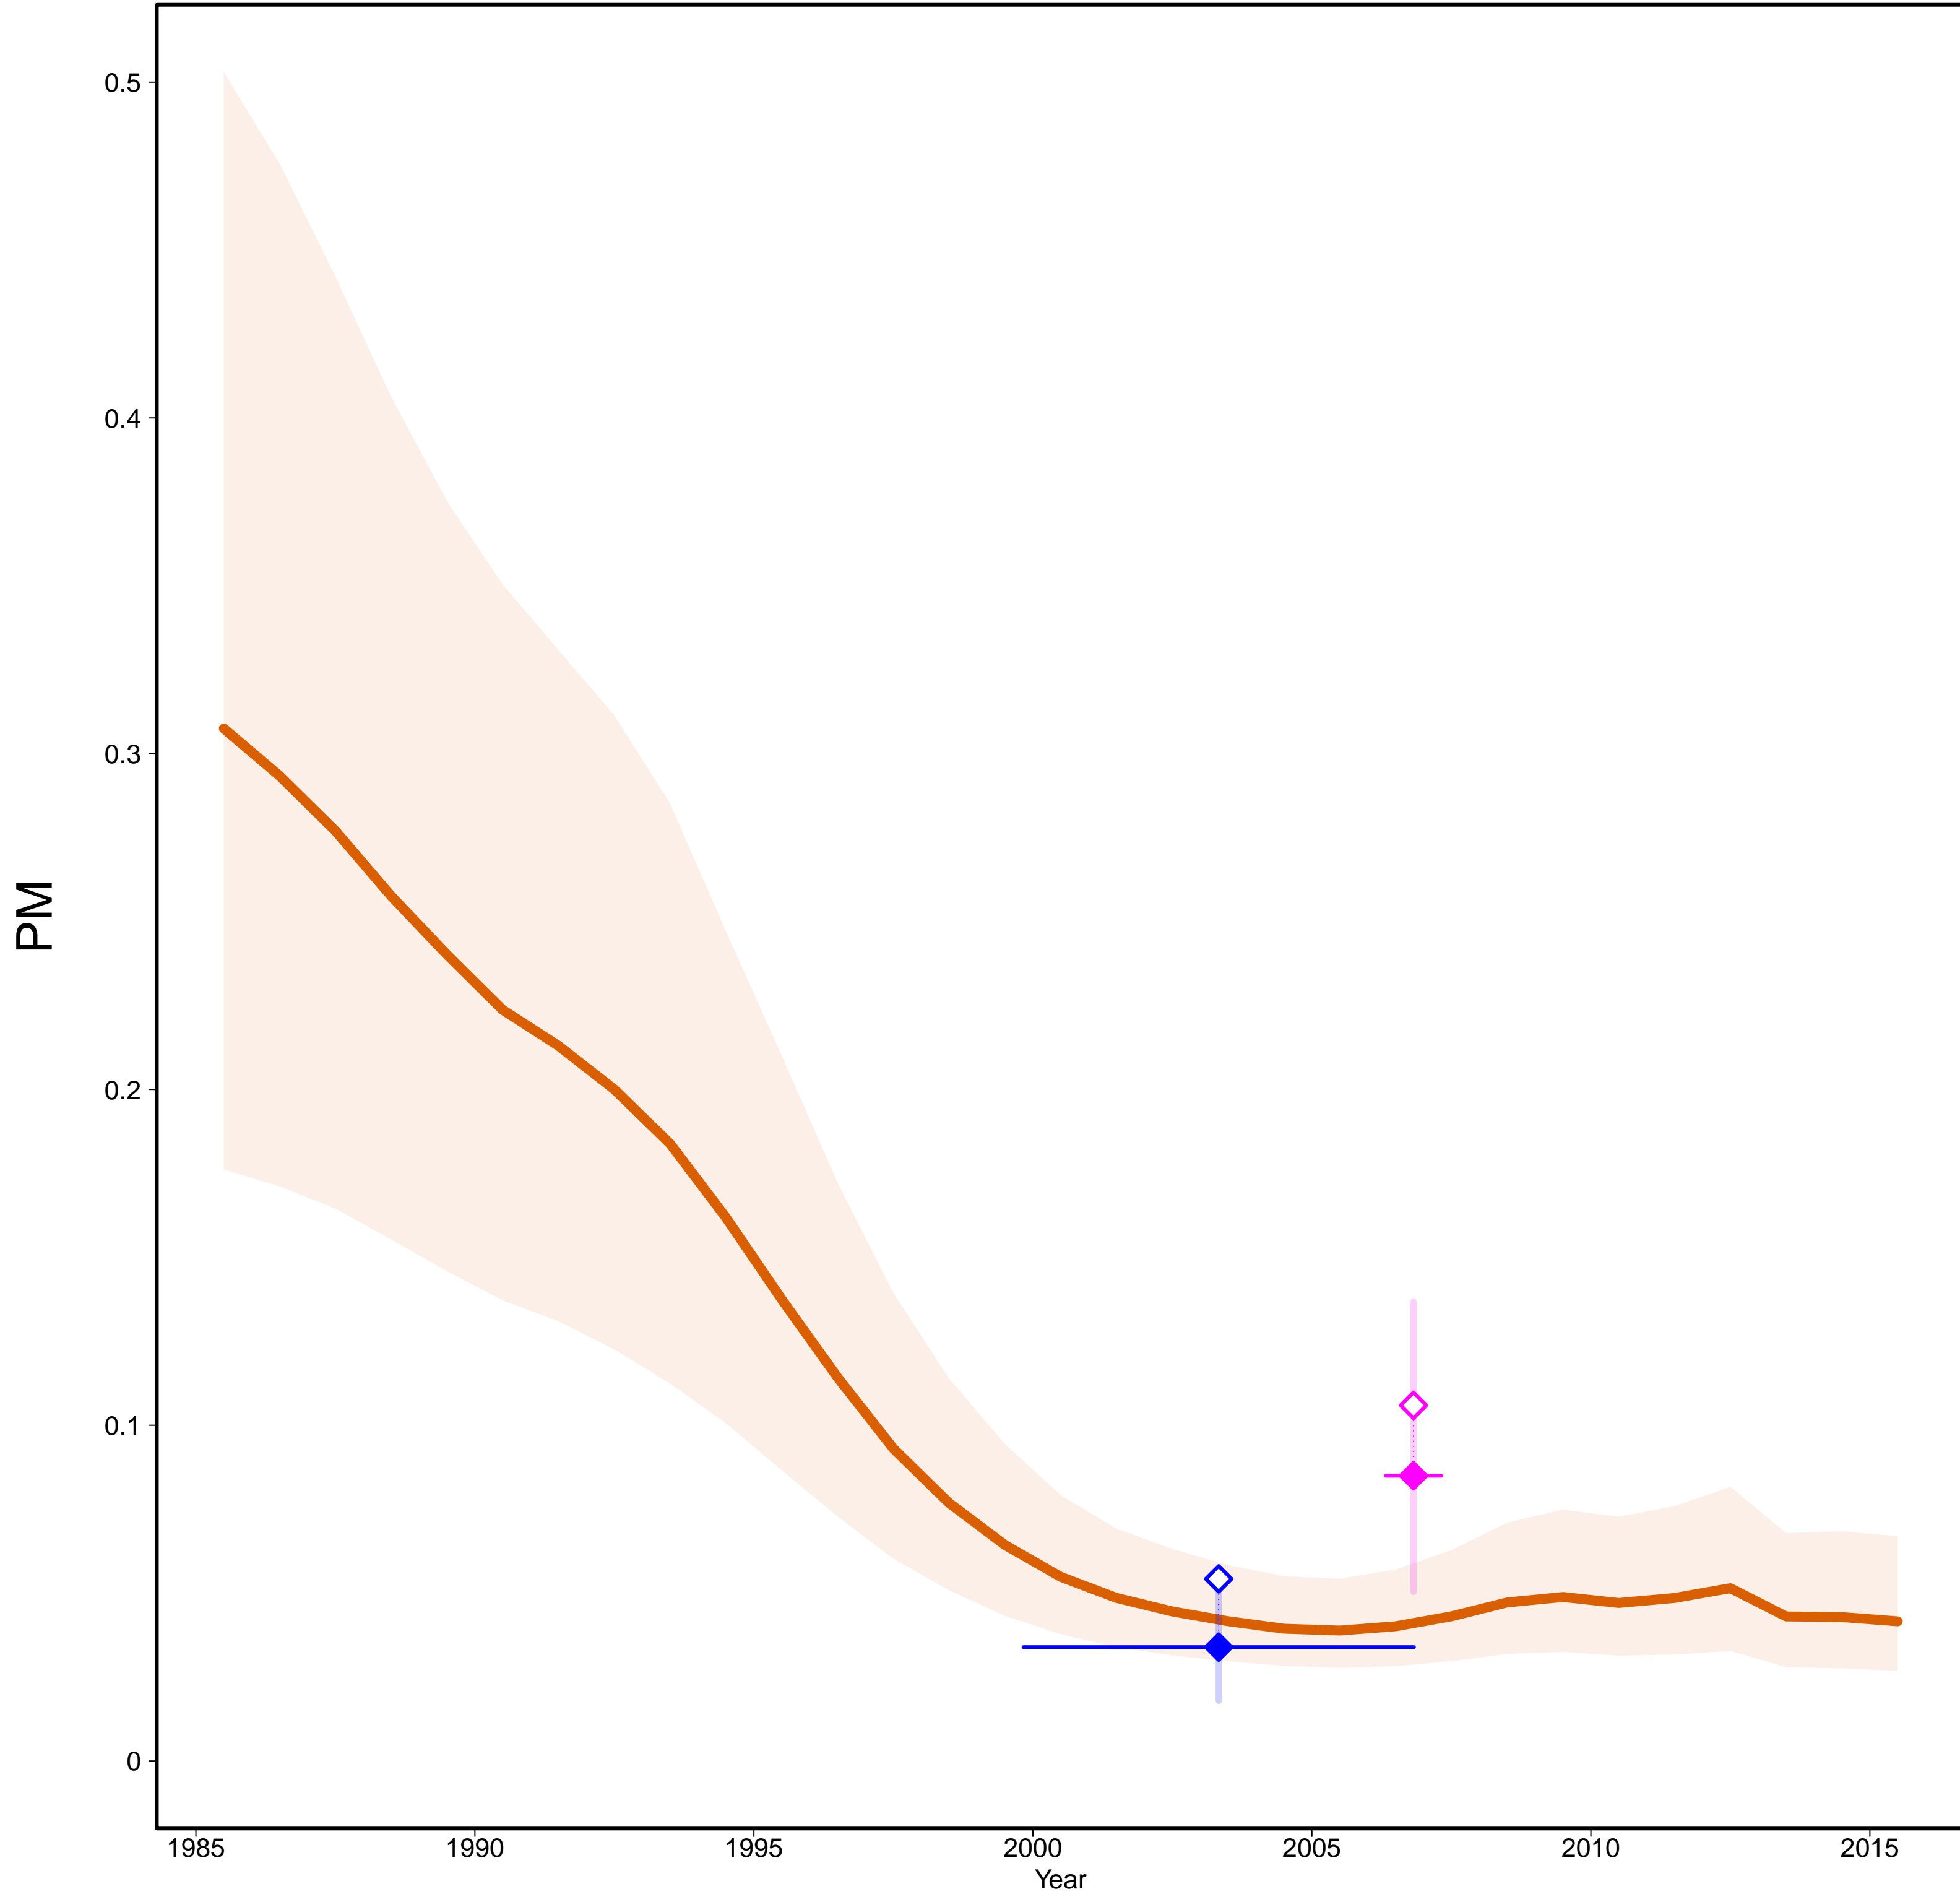

Swaziland [SWZ]  
(Southern Africa)

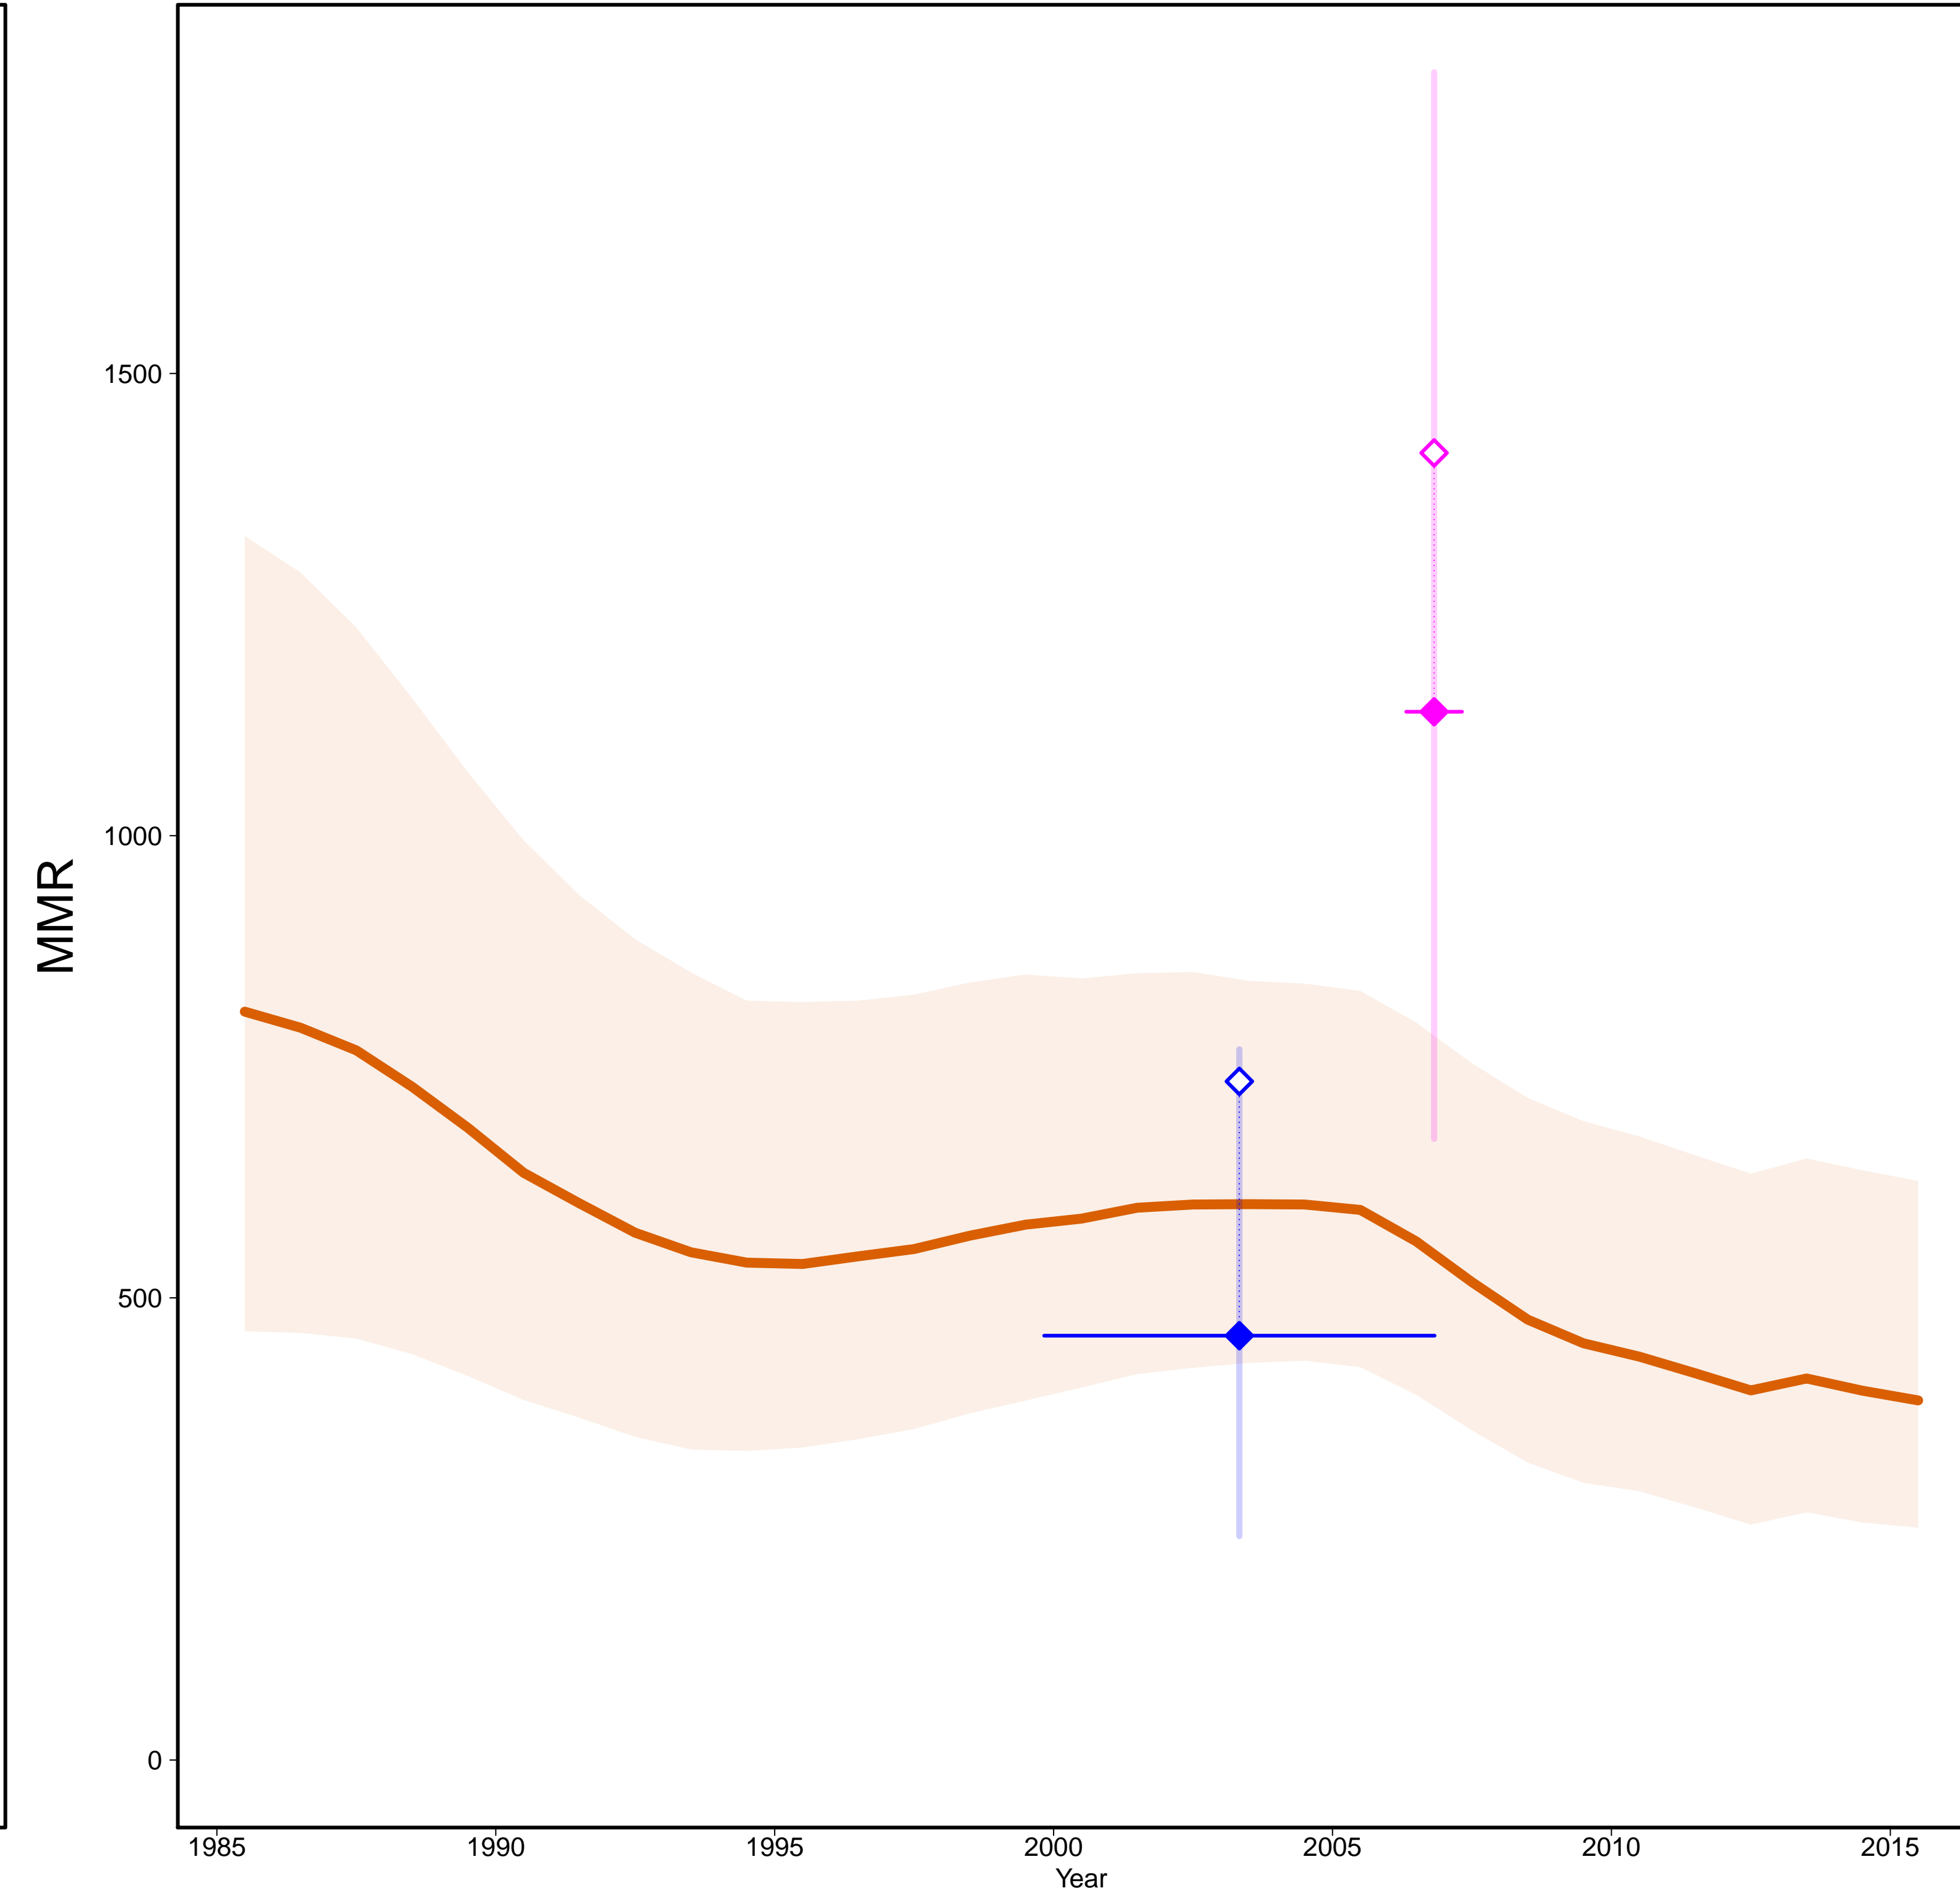

- Estimates —
- MMR Database 2015 —
- ◇ Observed Data
- ◆ Adjusted Data
- Data type —
- ◆ DHS
- ◆ Census

Gross Domestic Product

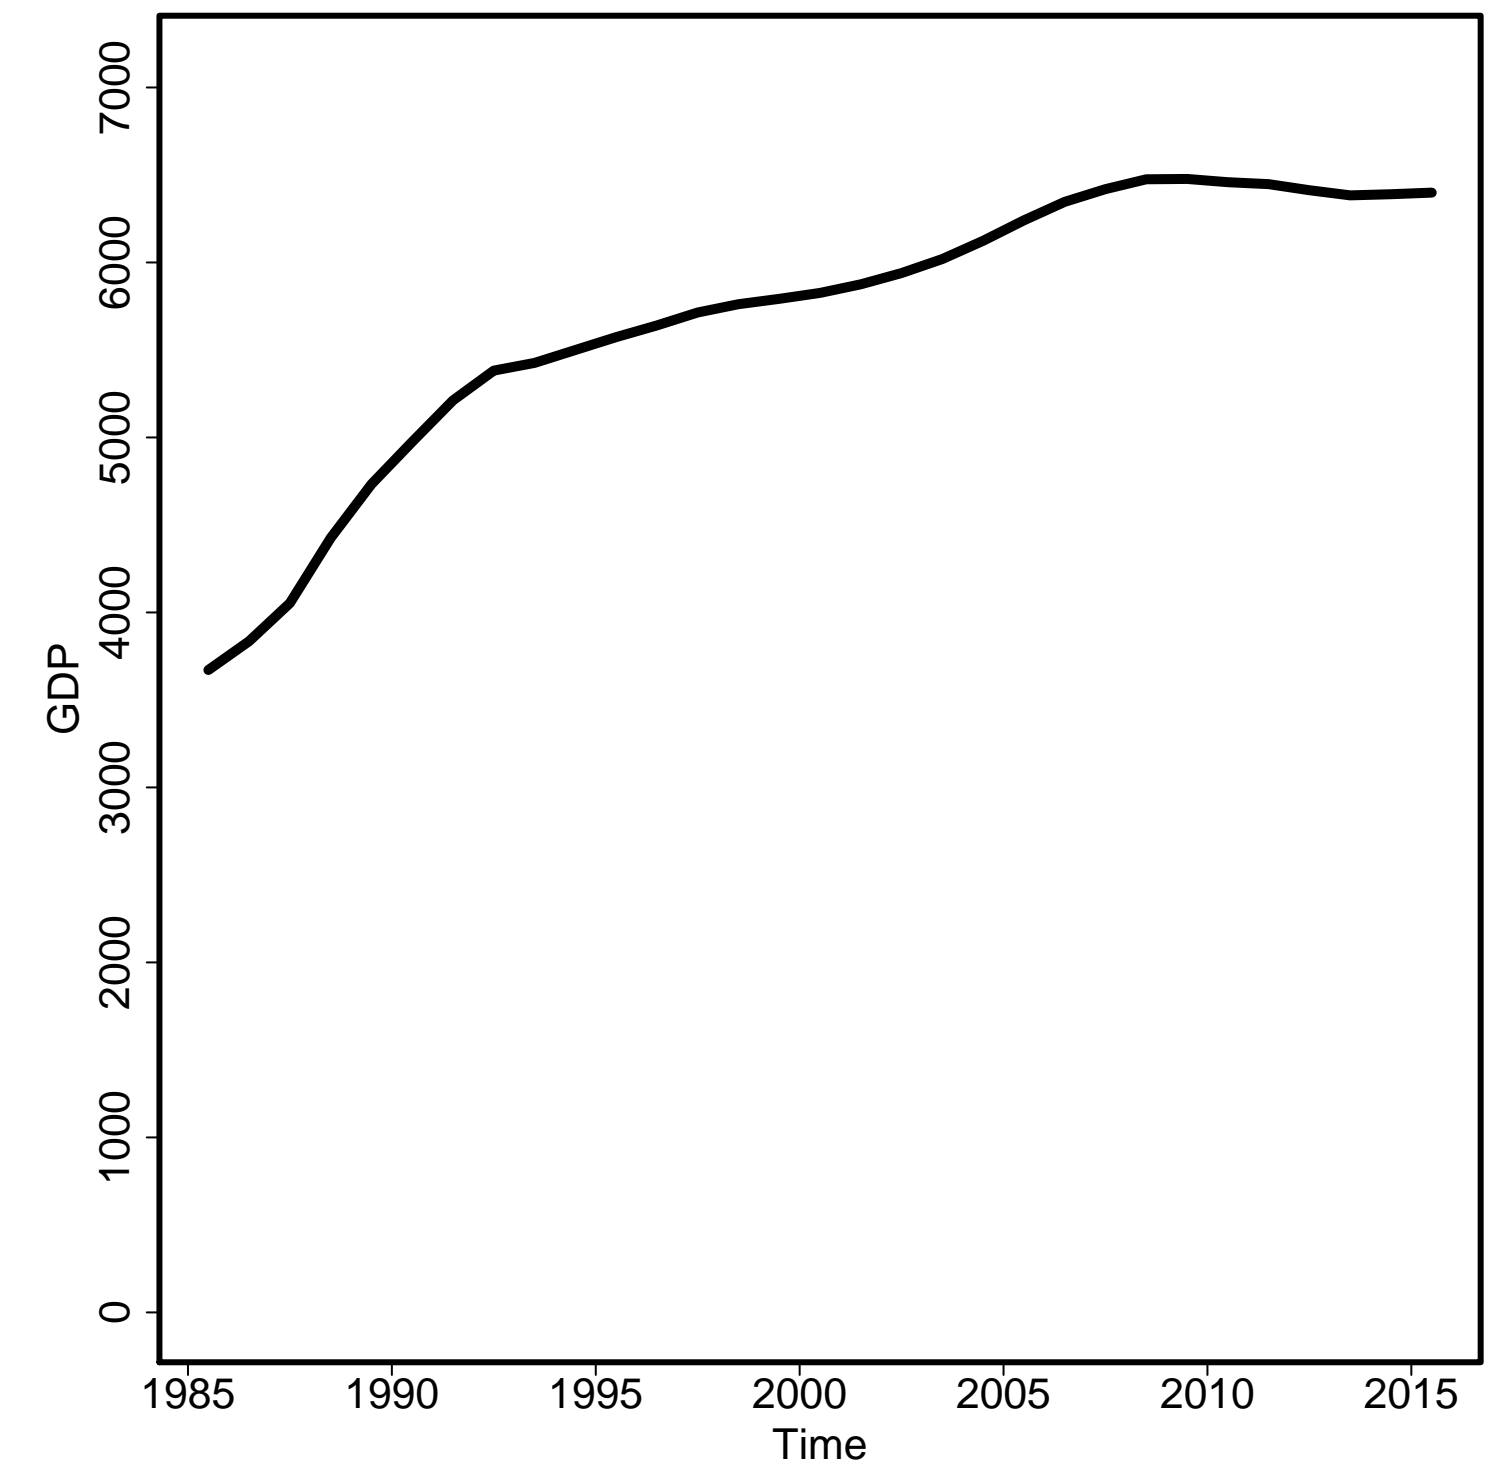

General Fertility Rate

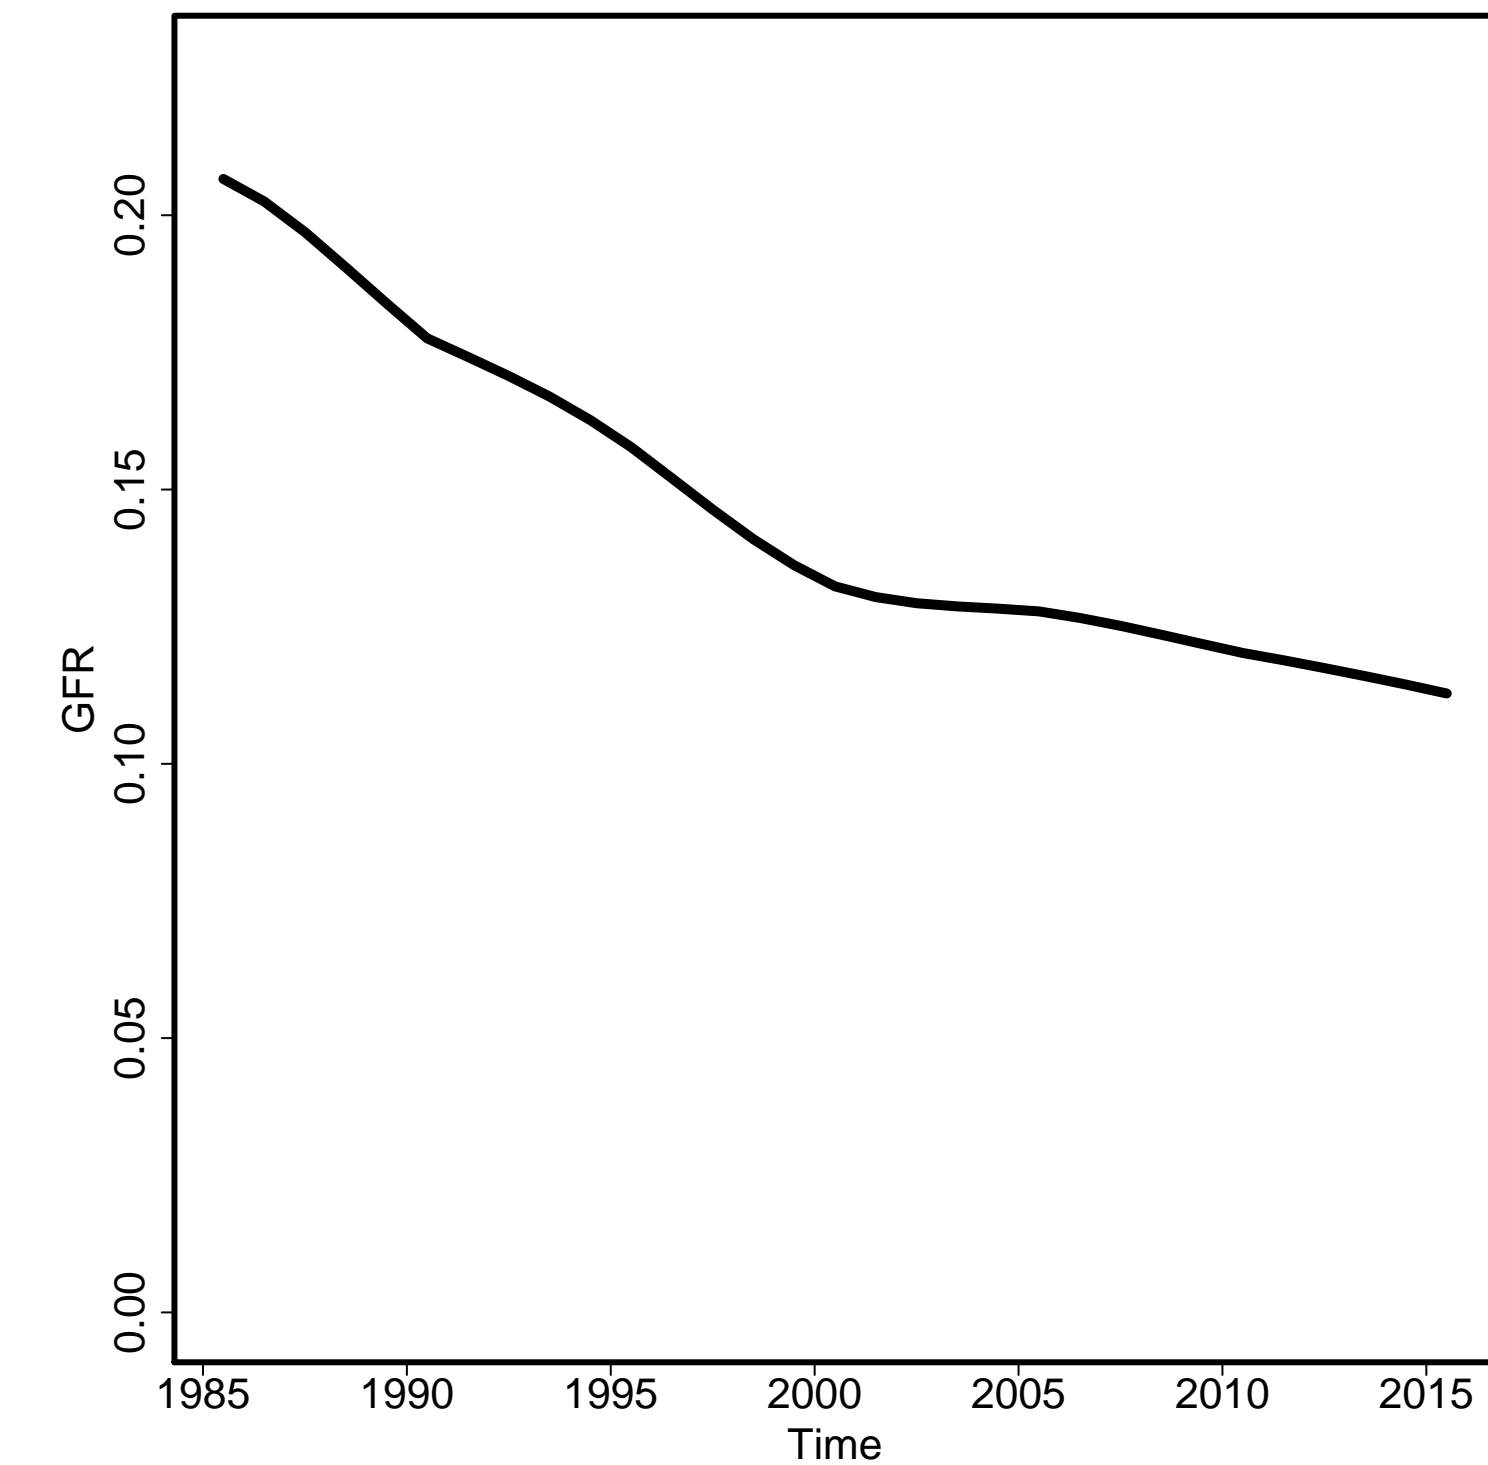

Skilled Attendance to Birth

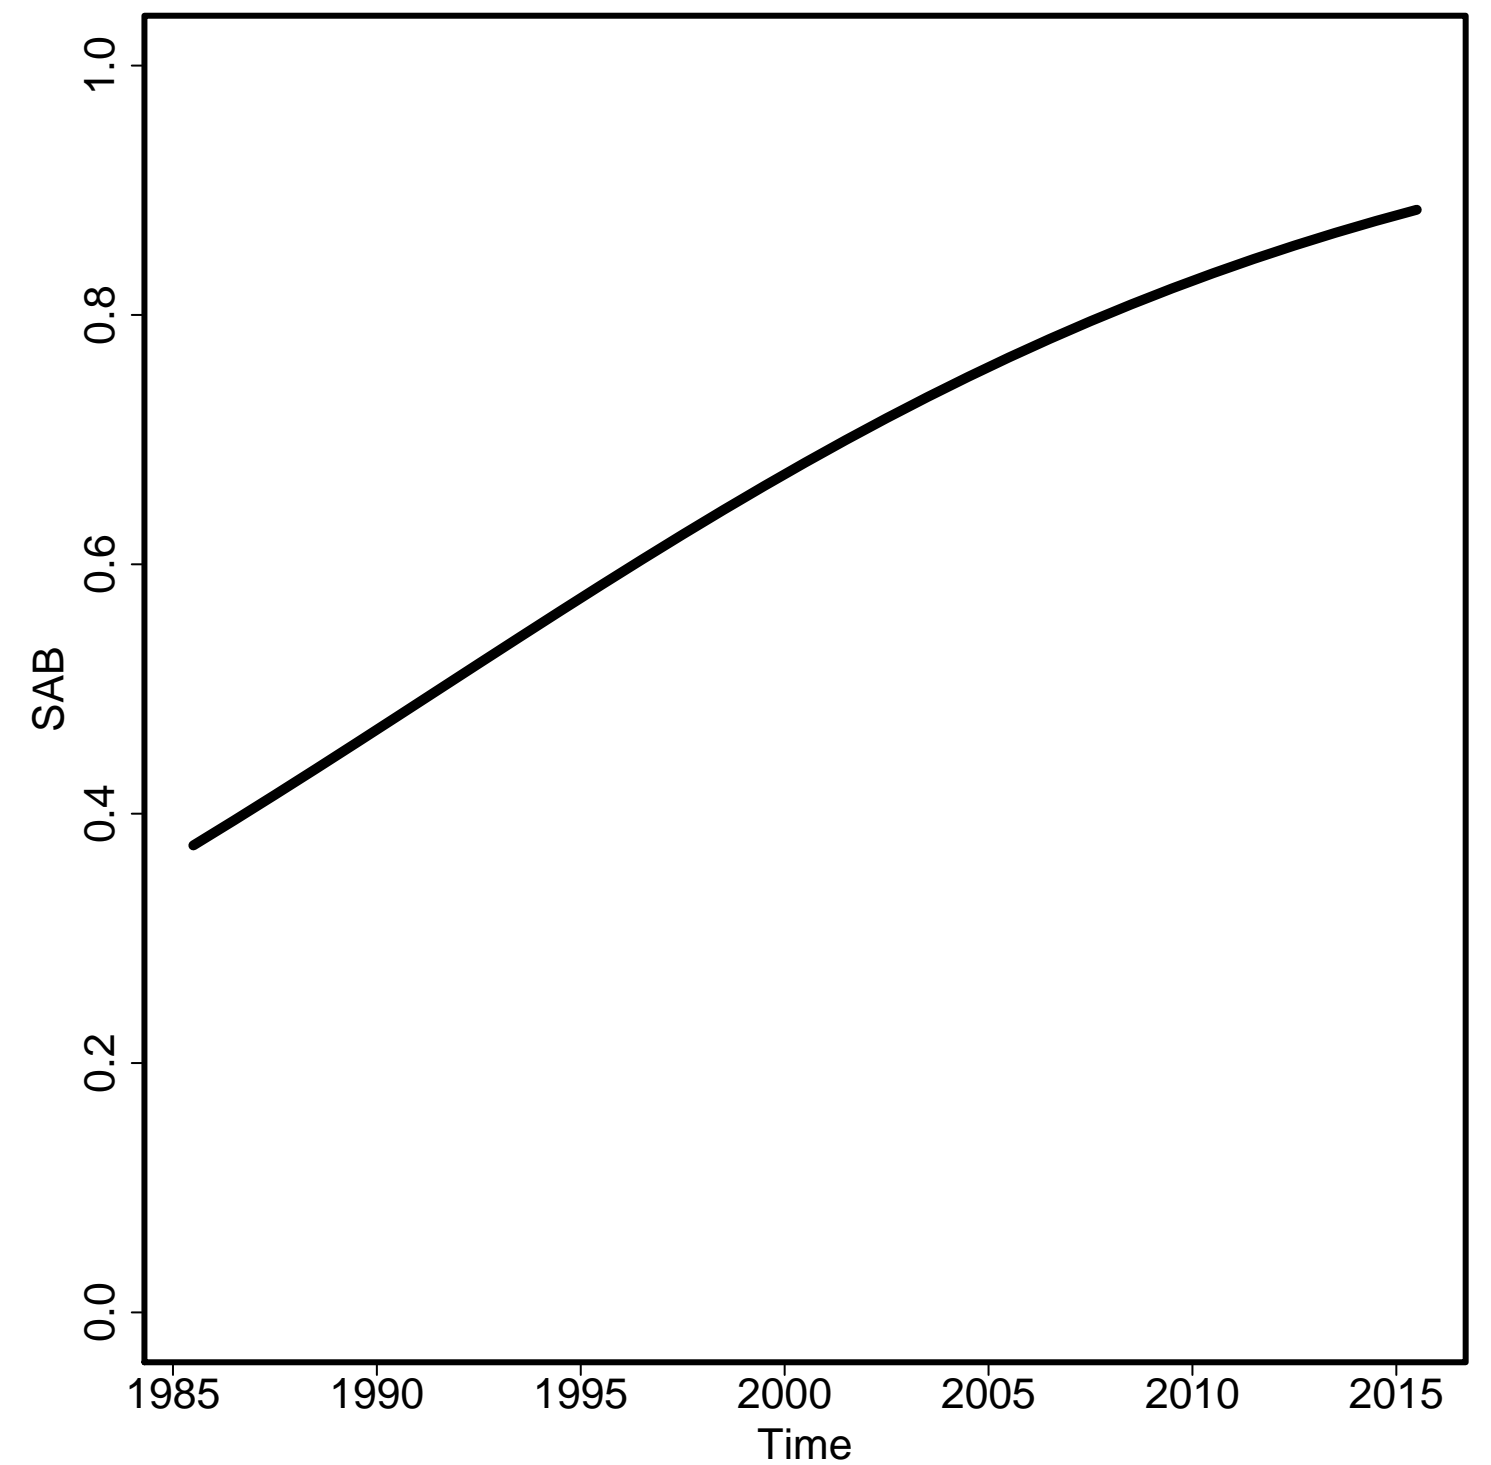

Envelope/Births

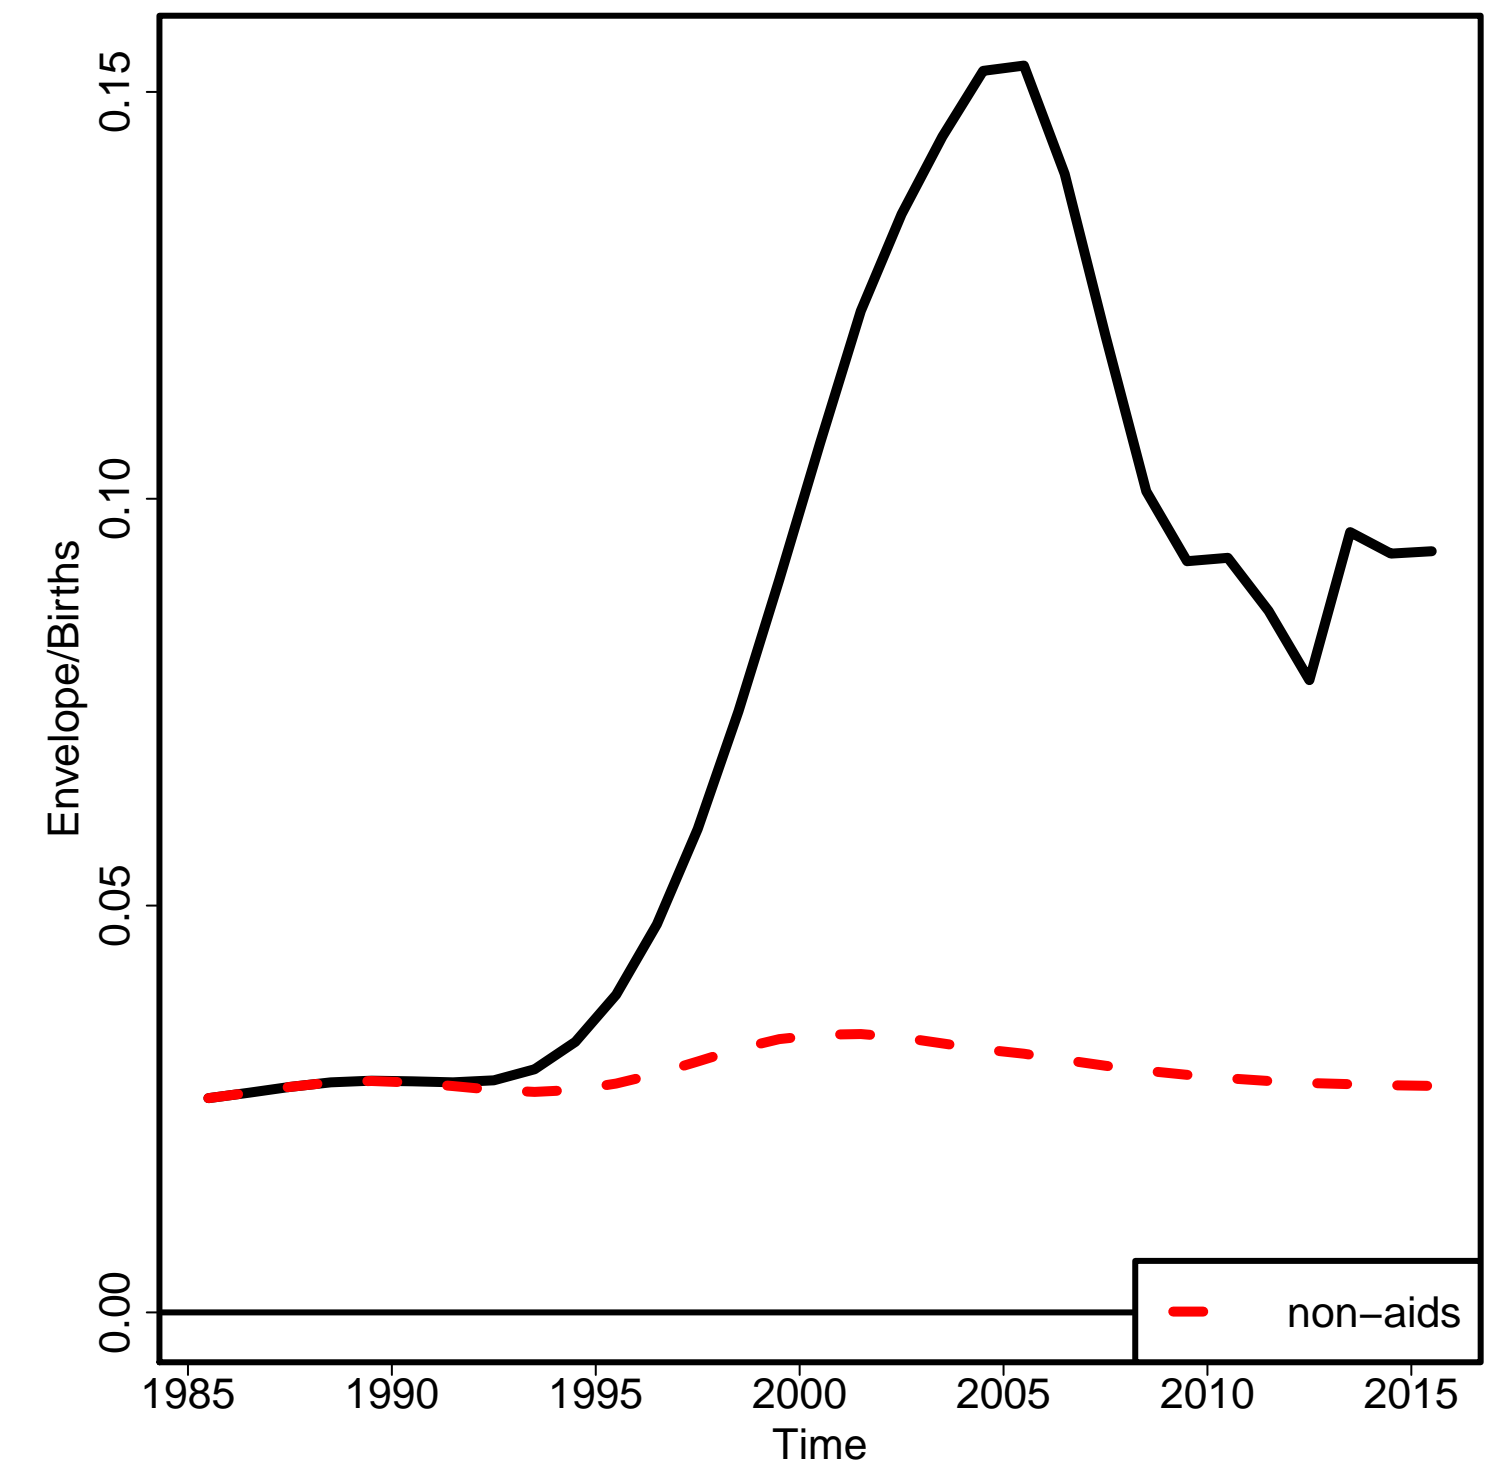

Non-aids MMR

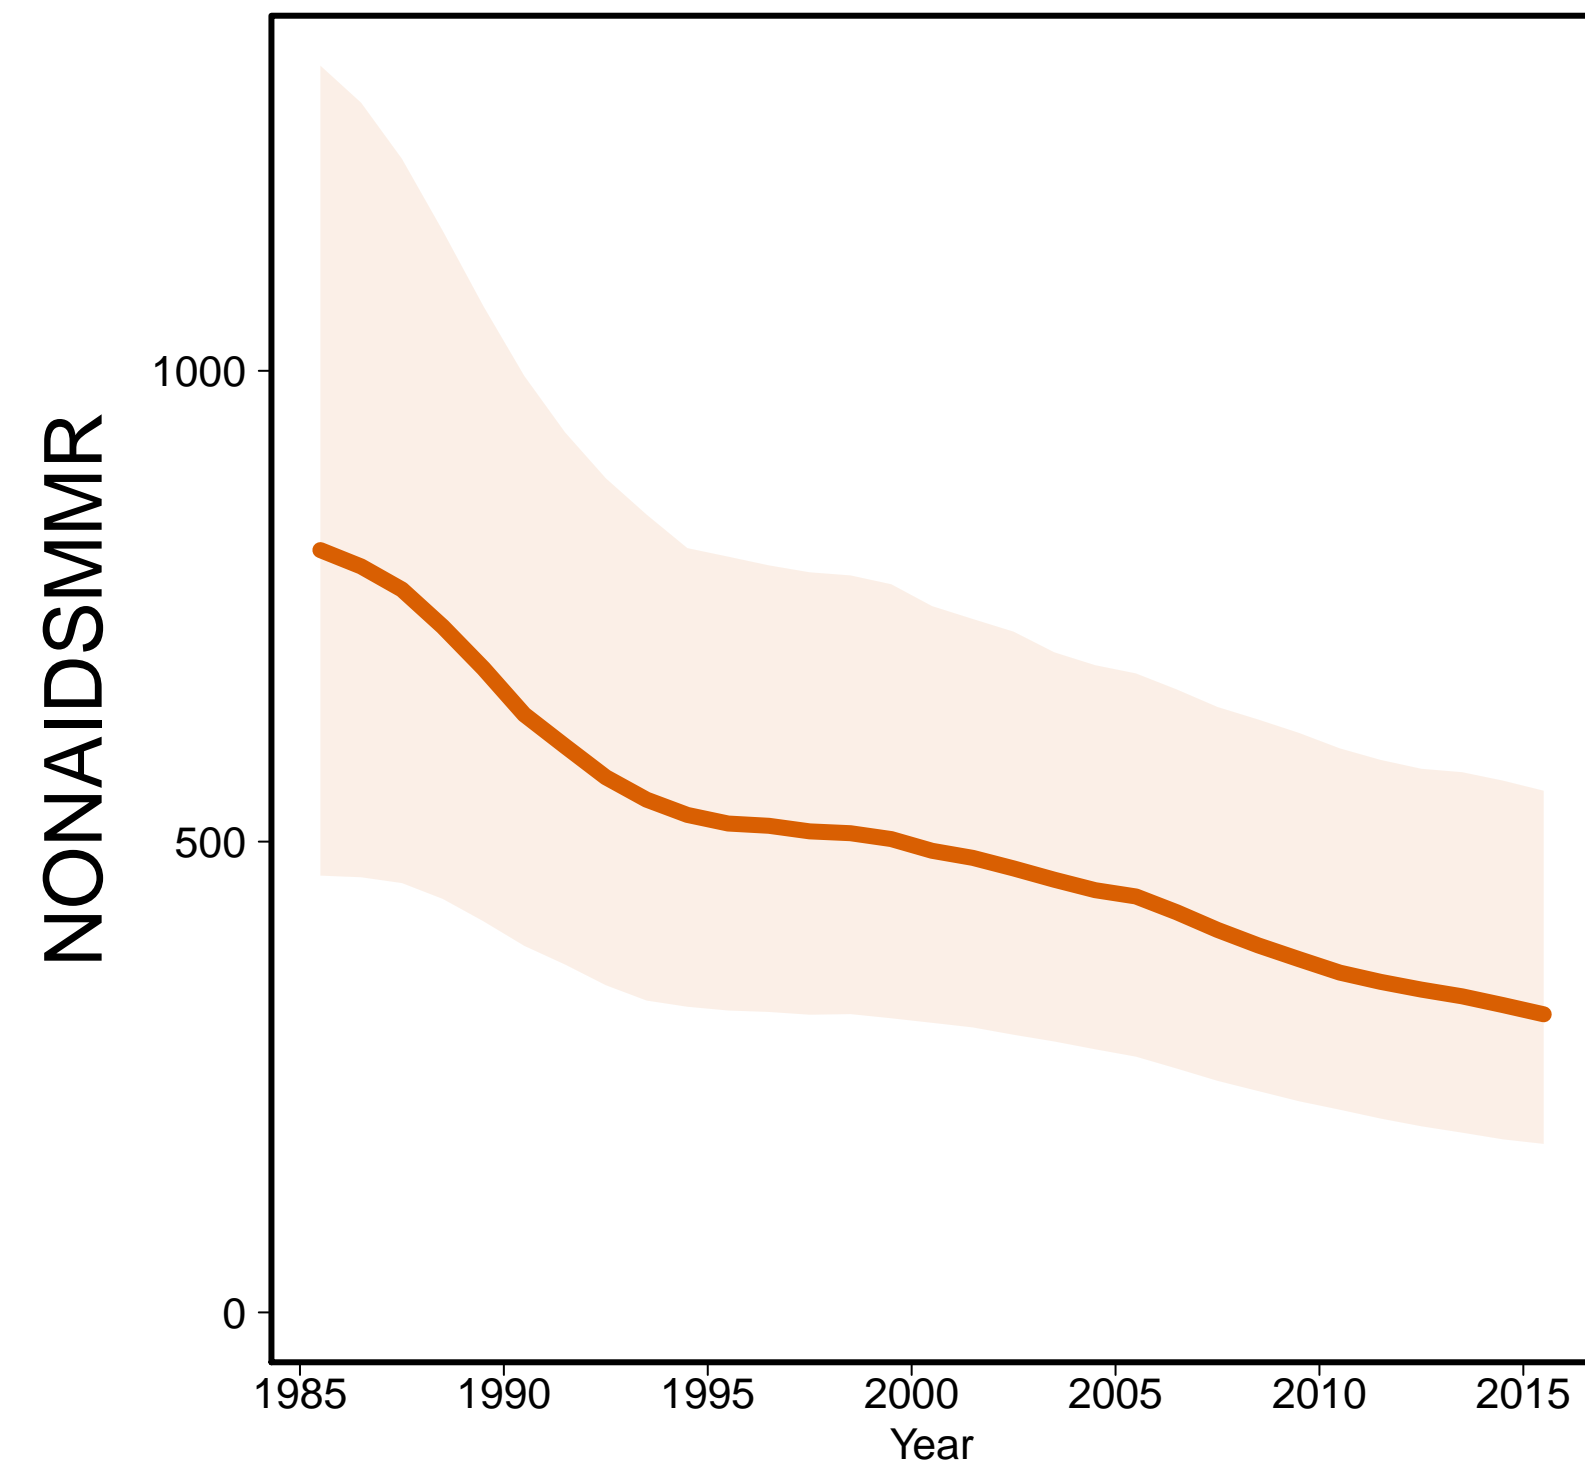

Aids MMR

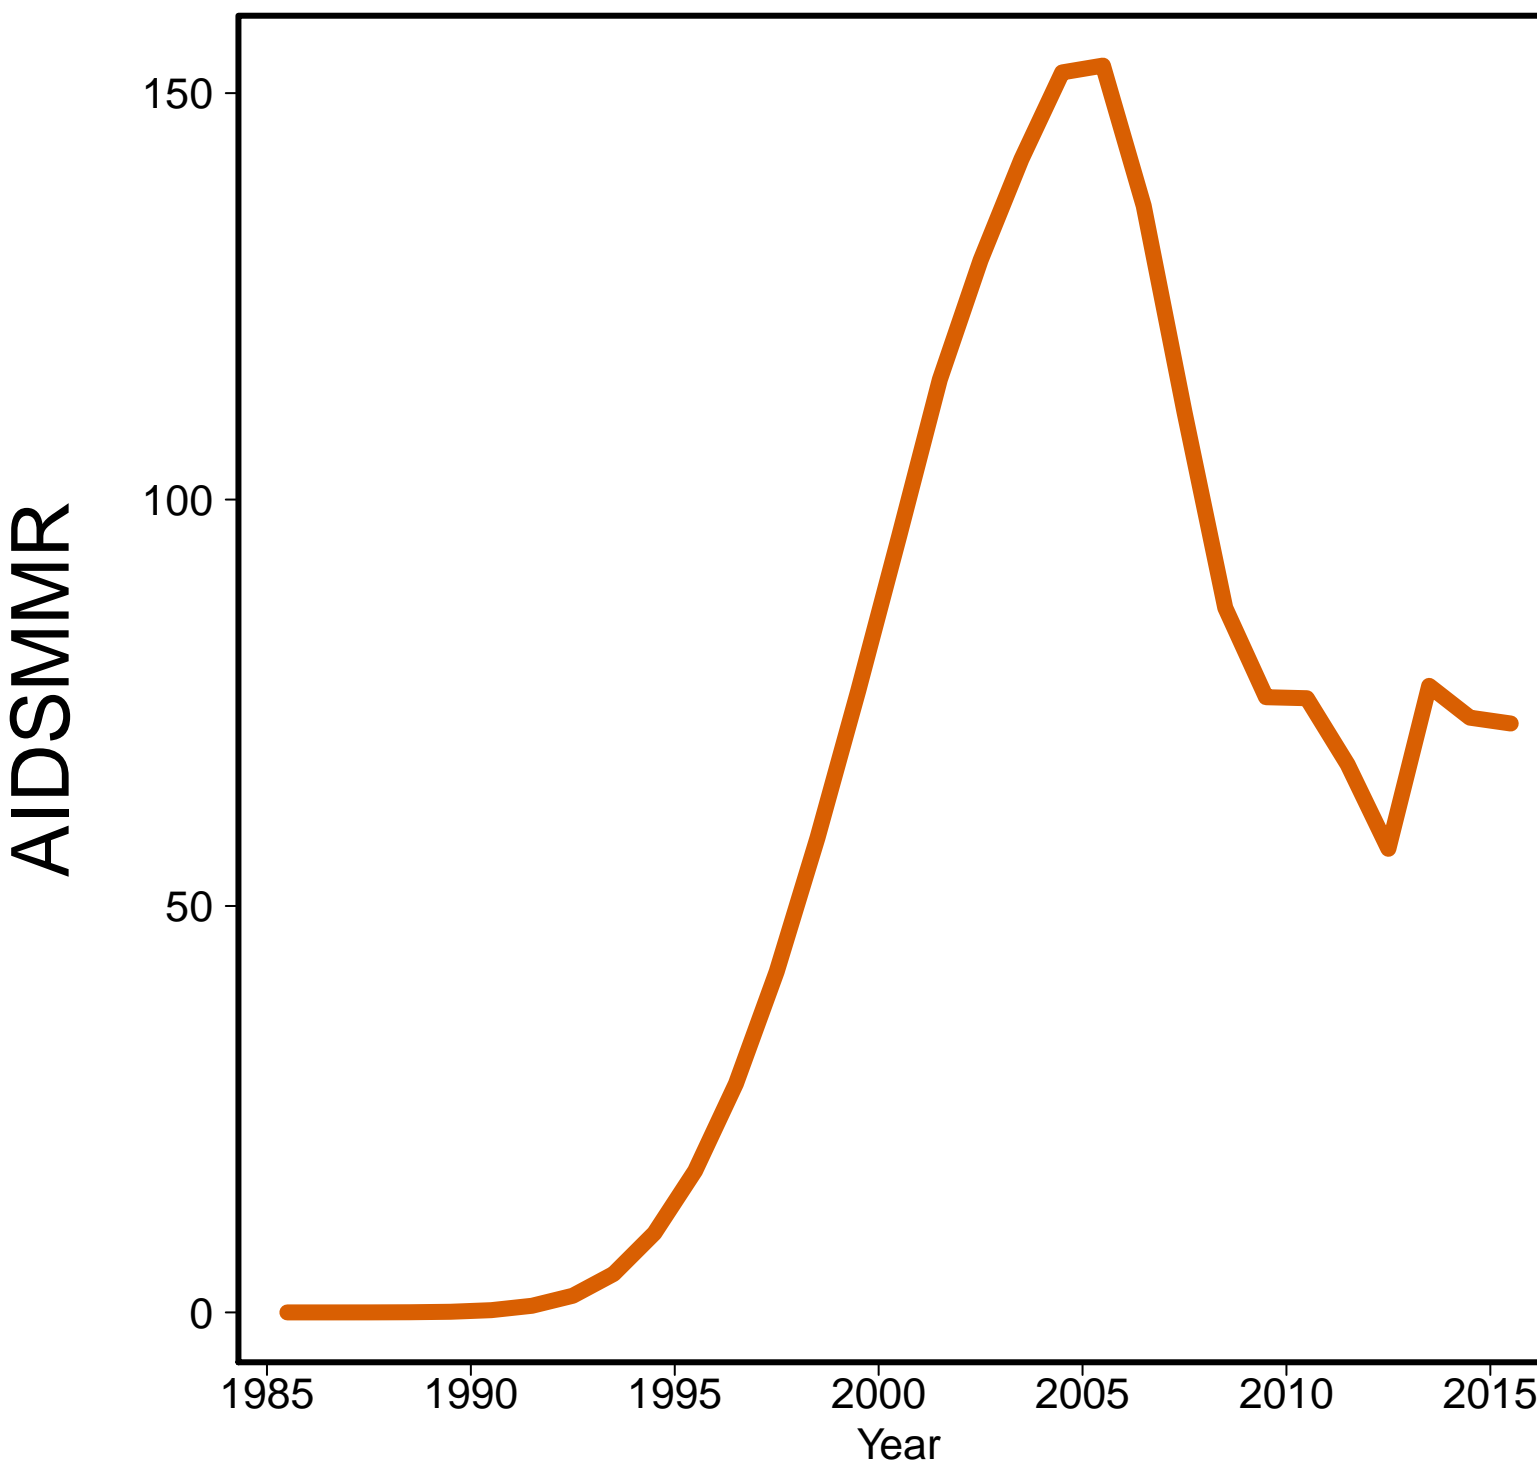

Sweden [SWE]  
(Developed regions)

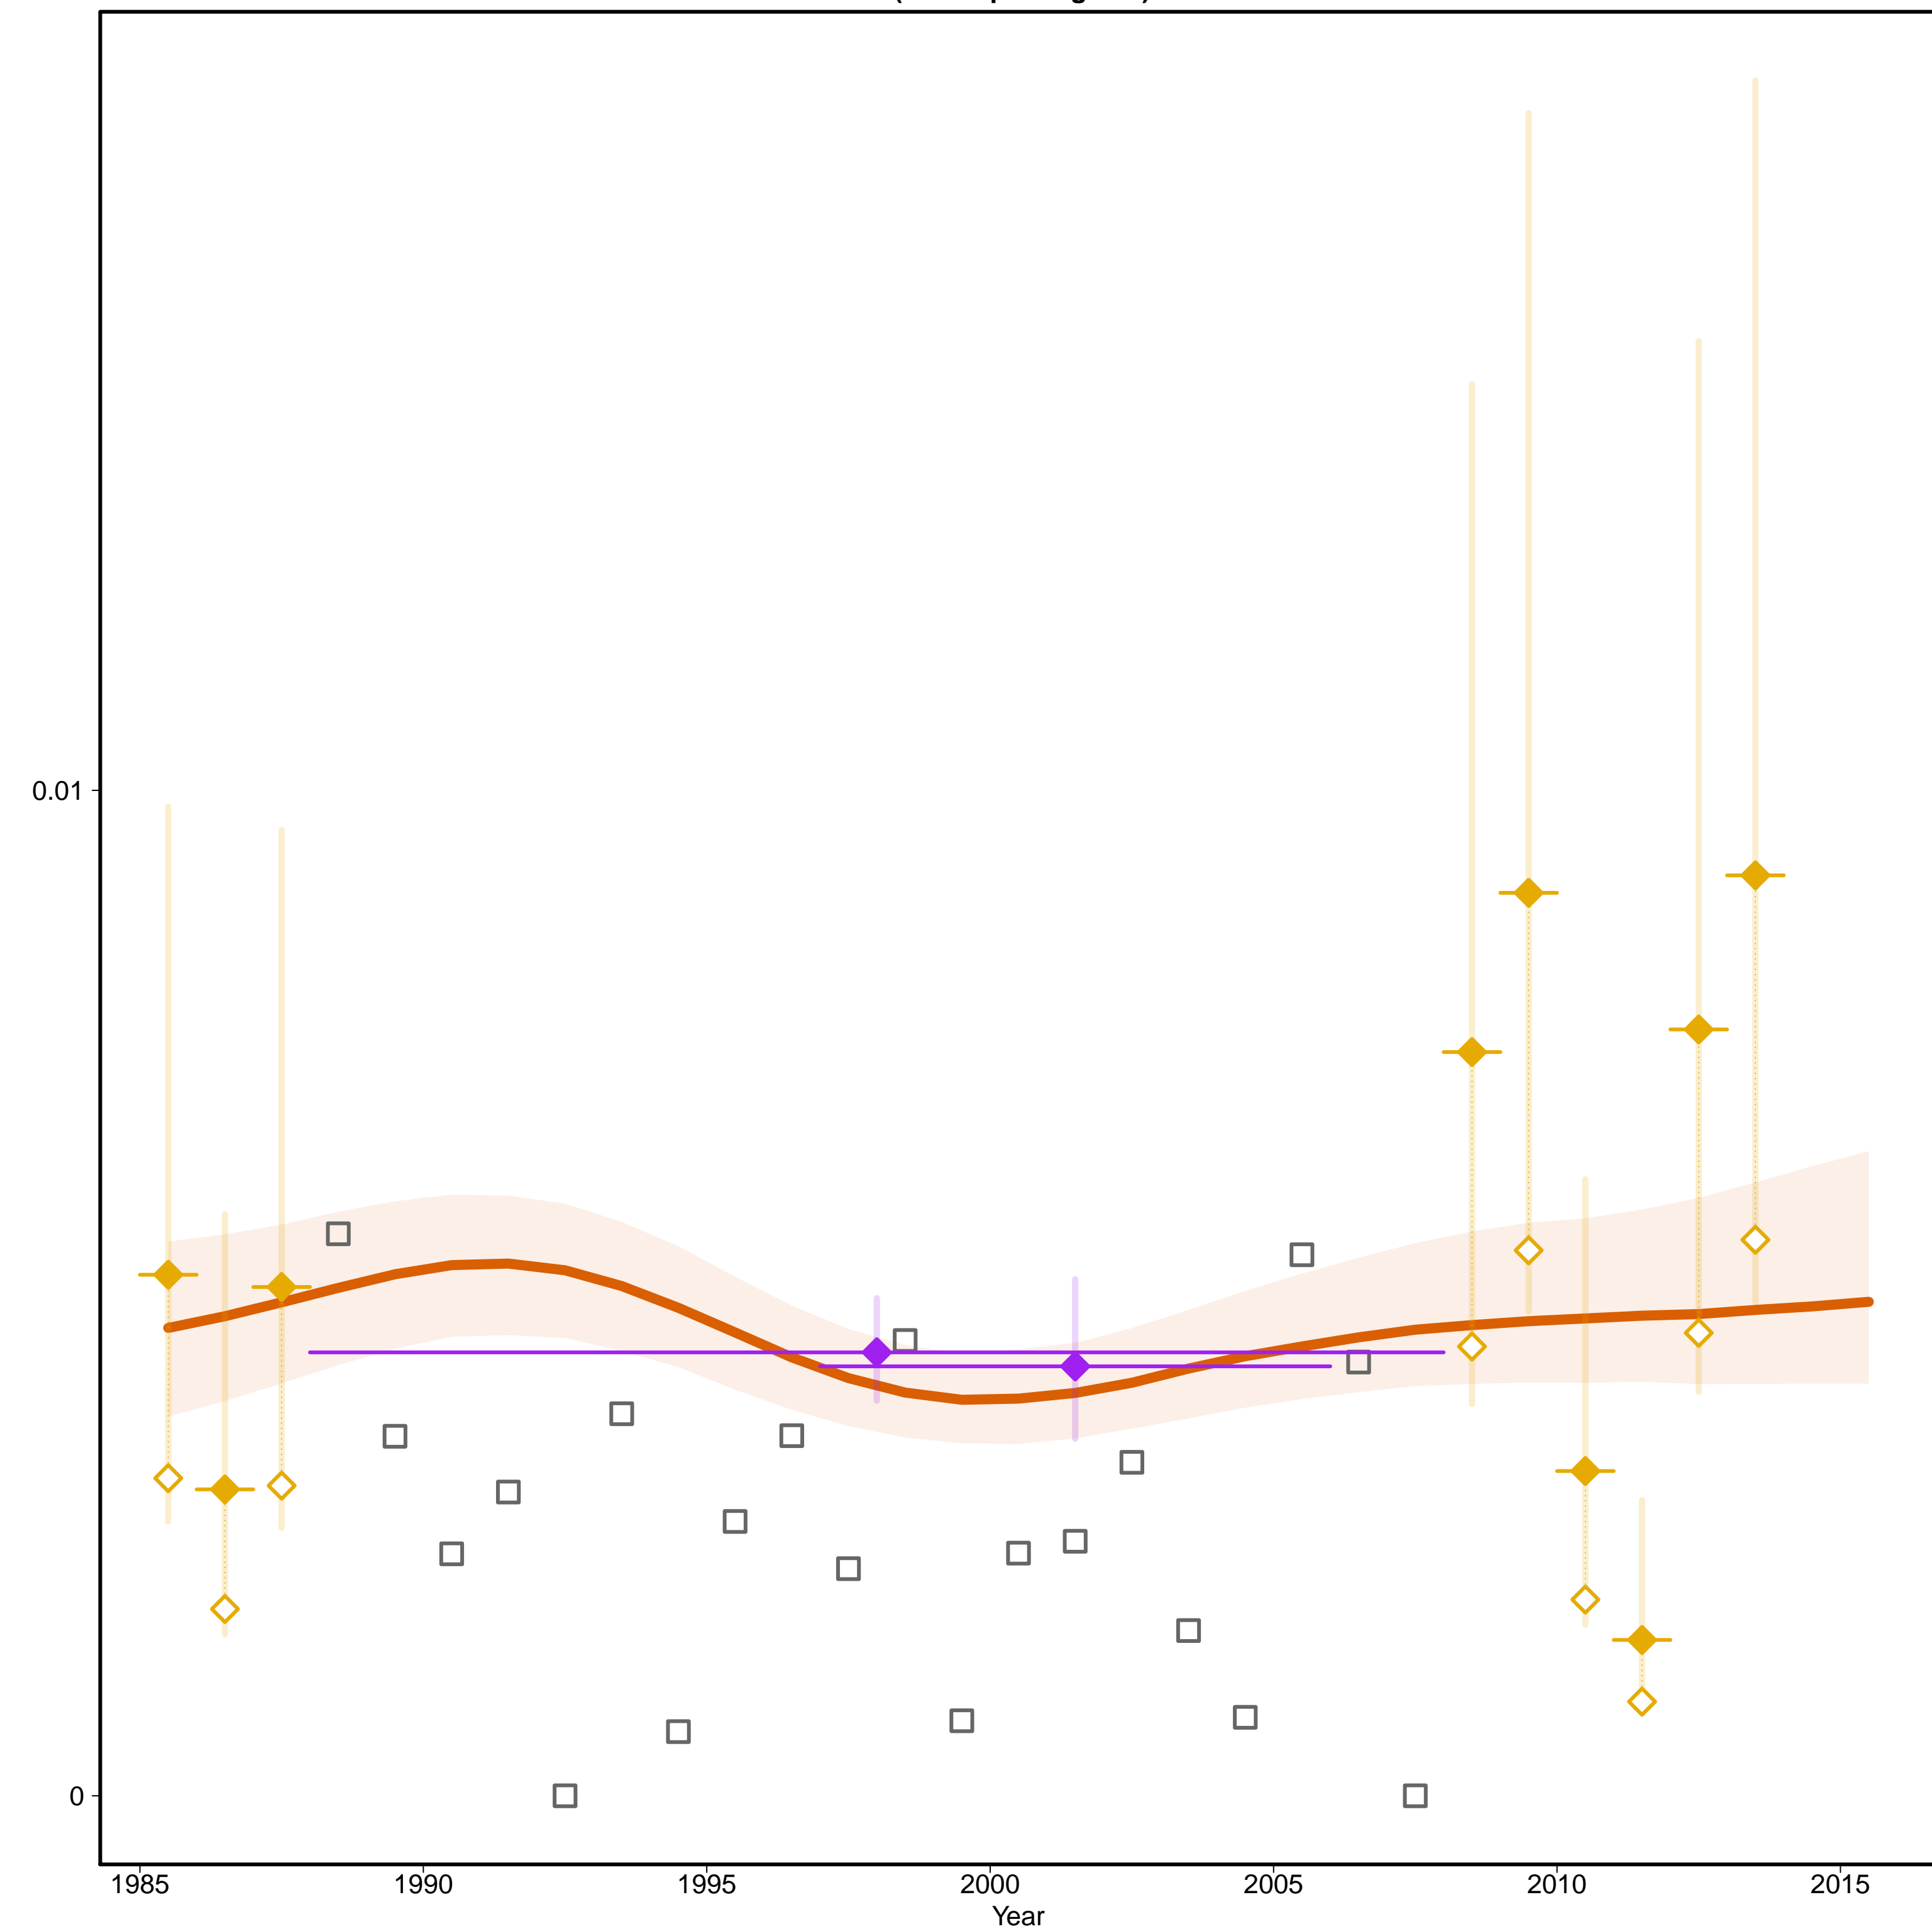

Sweden [SWE]  
(Developed regions)

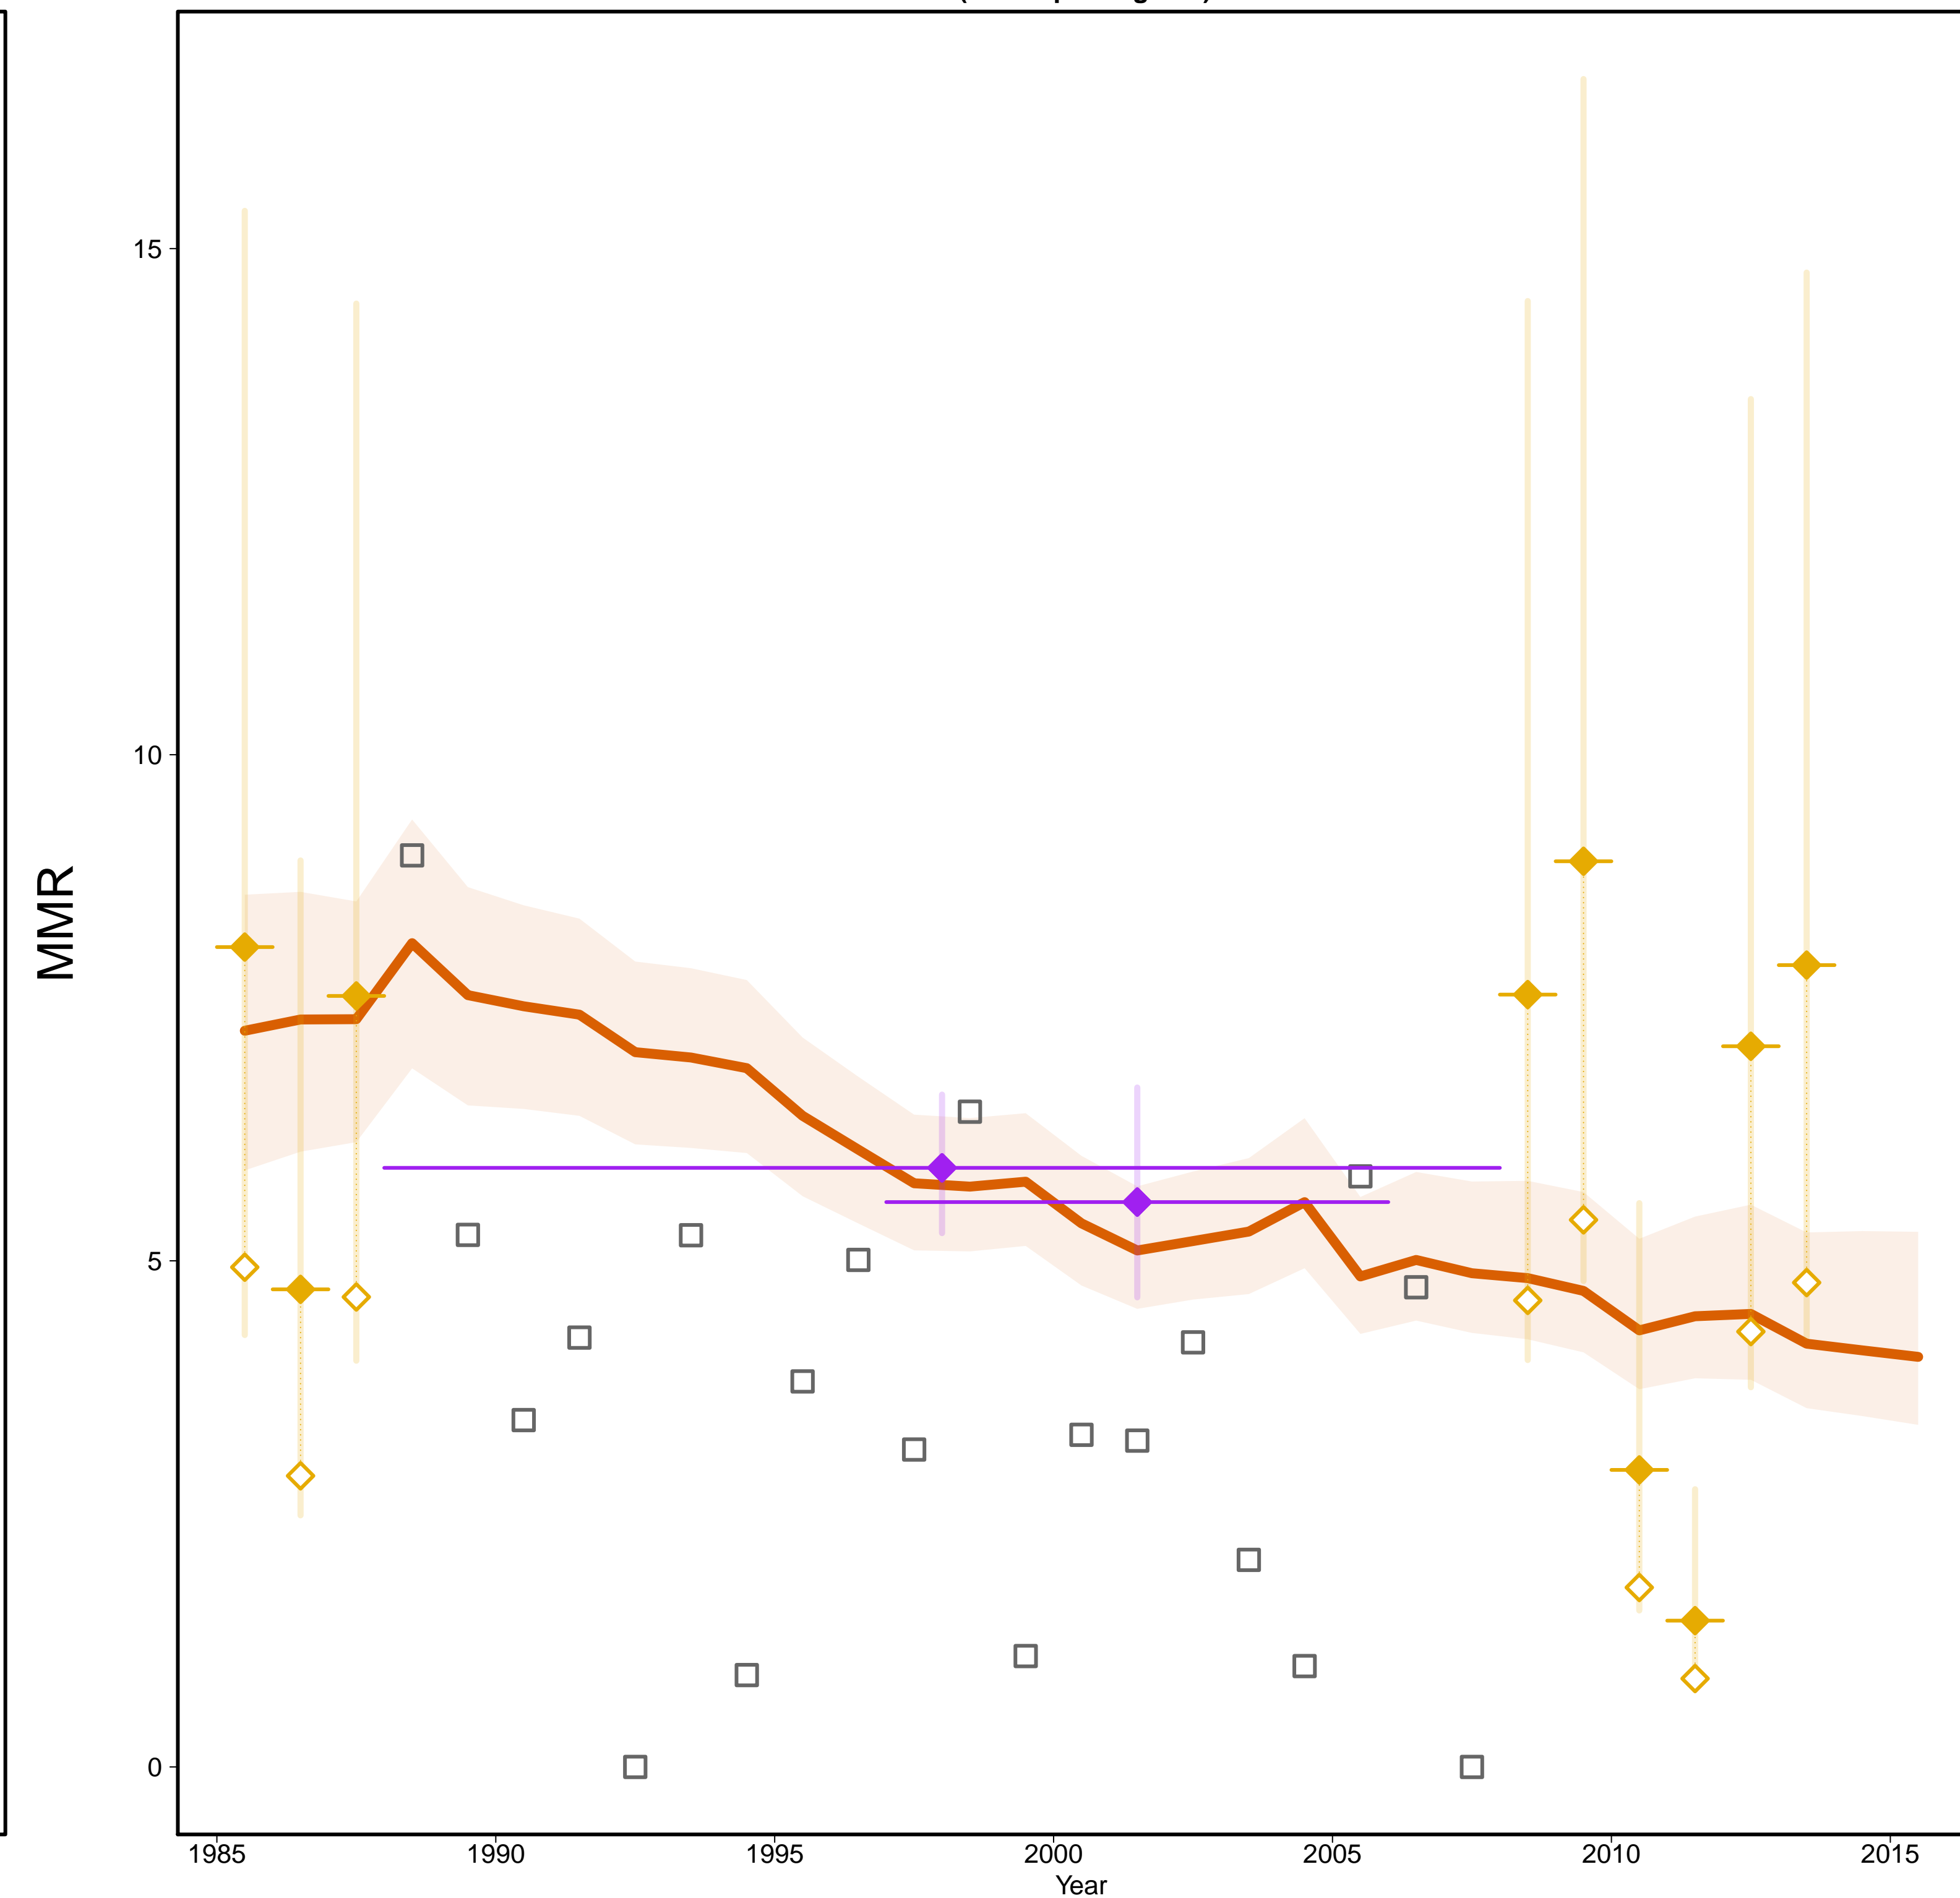

- Estimates –
- Mlate
- MMR Database 2015 –
- ◇ Observed Data
- ◆ Adjusted Data
- Data type –
- ◆ VR
- ◆ Spec. studies
- Excluded VR data  
(overlap with specialized study)

Gross Domestic Product

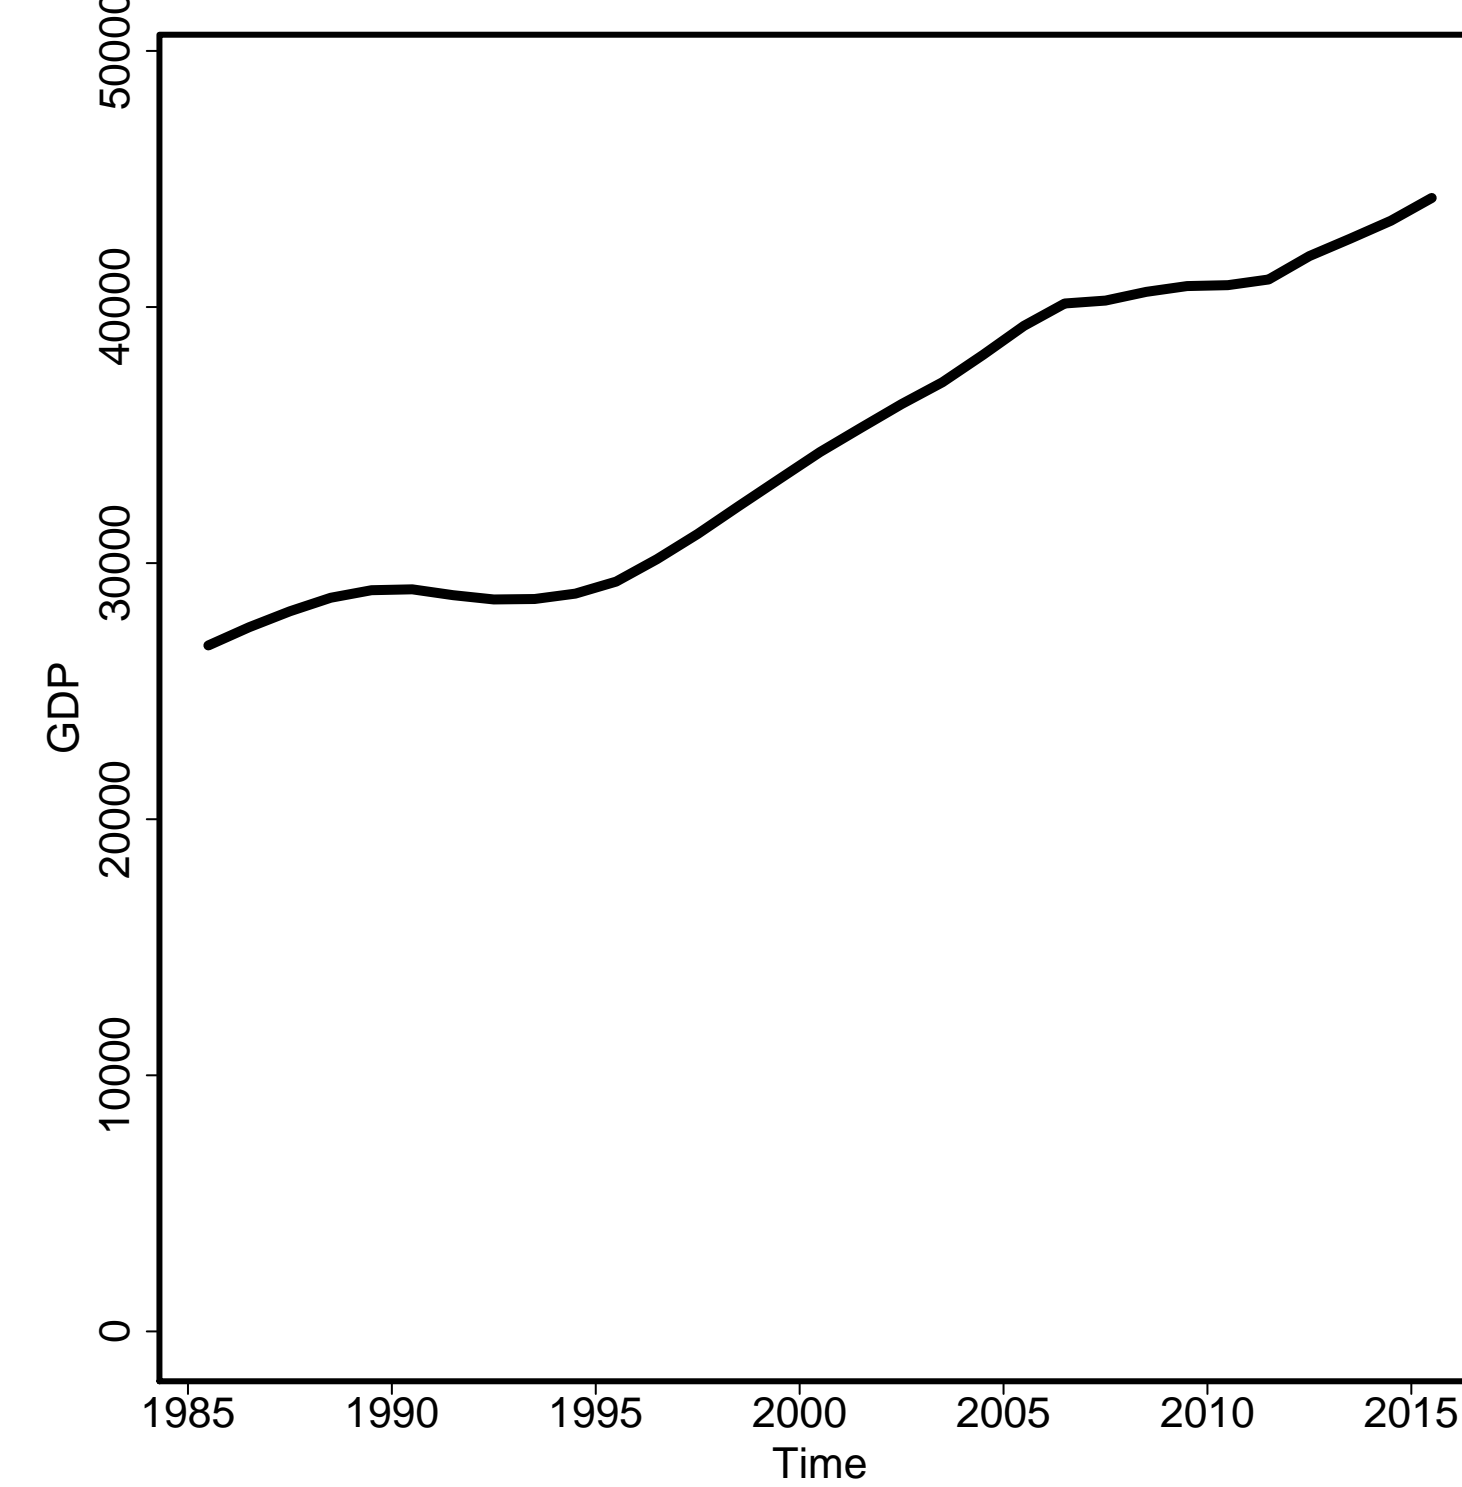

General Fertility Rate

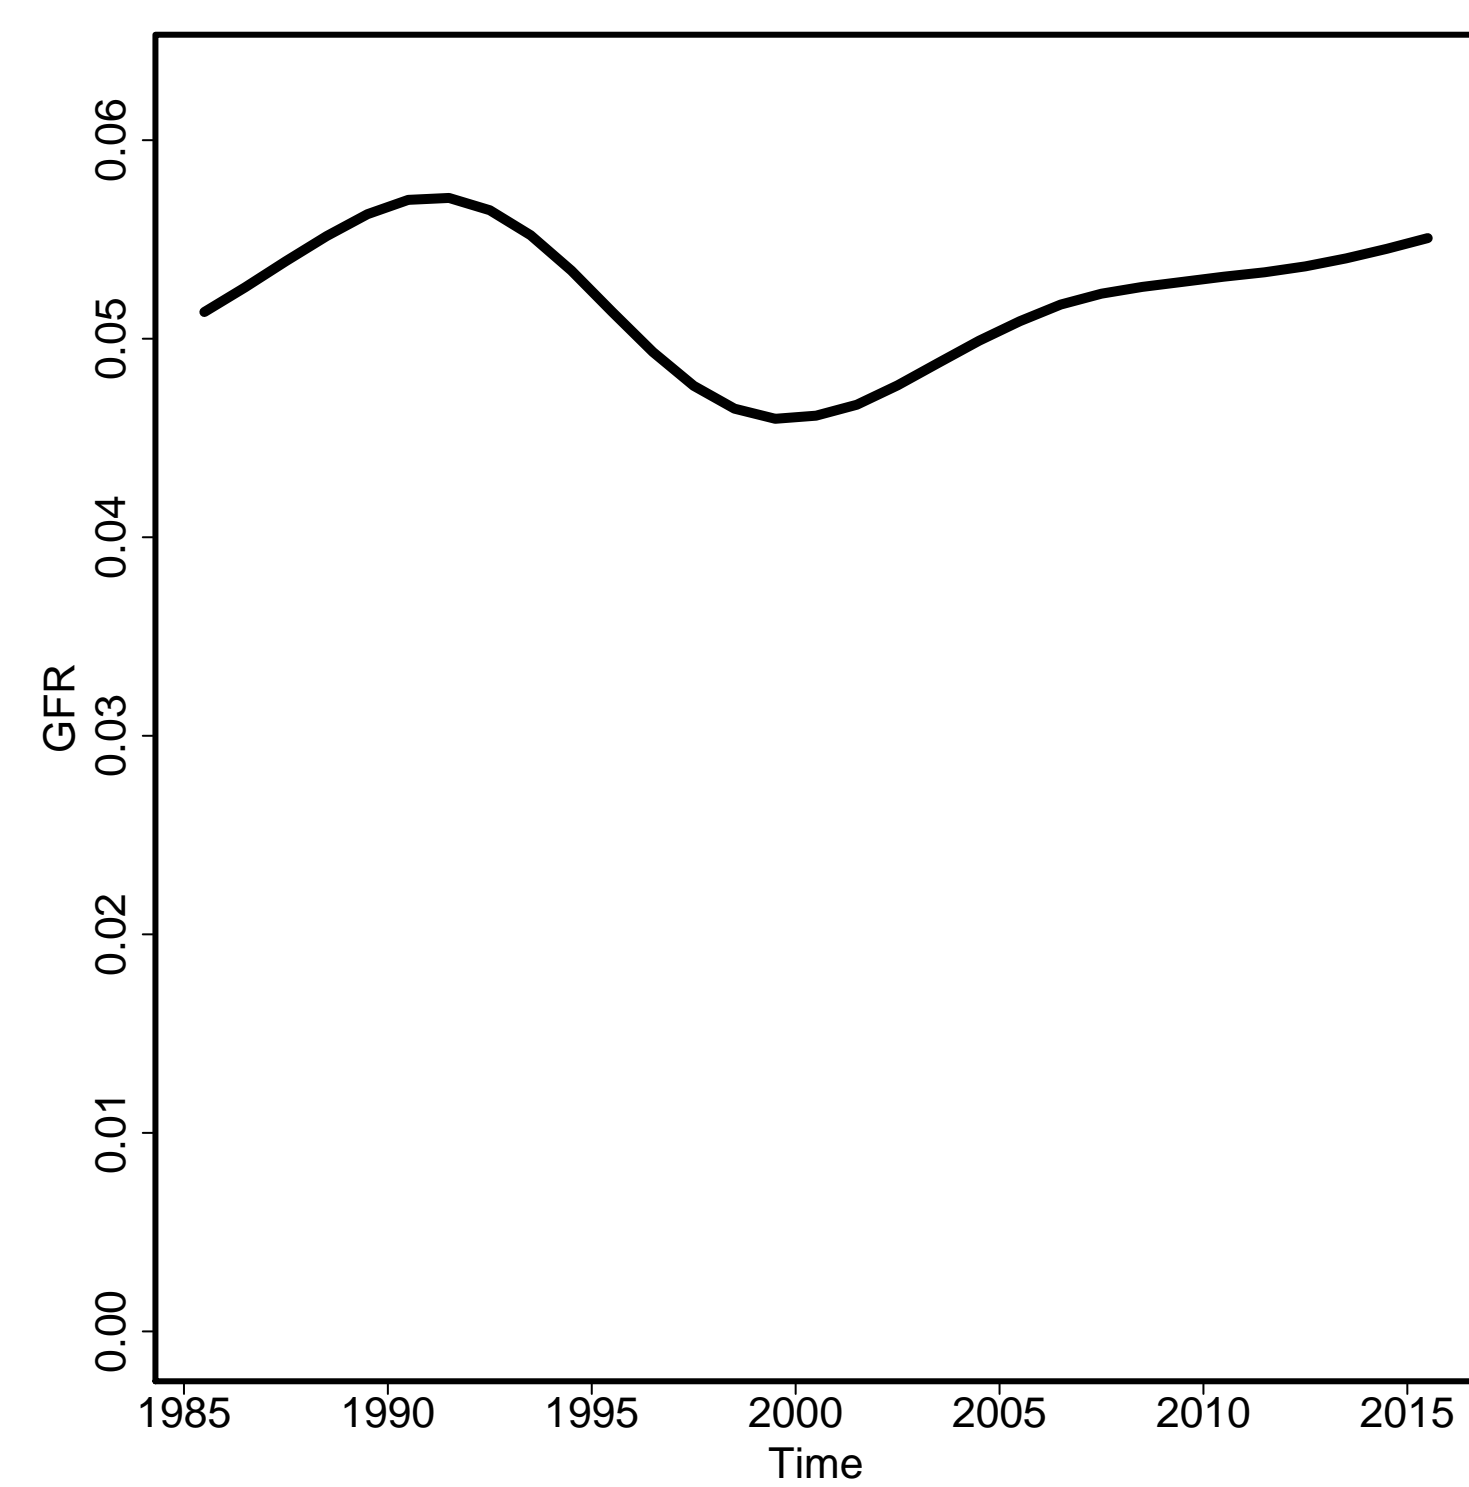

Skilled Attendance to Birth

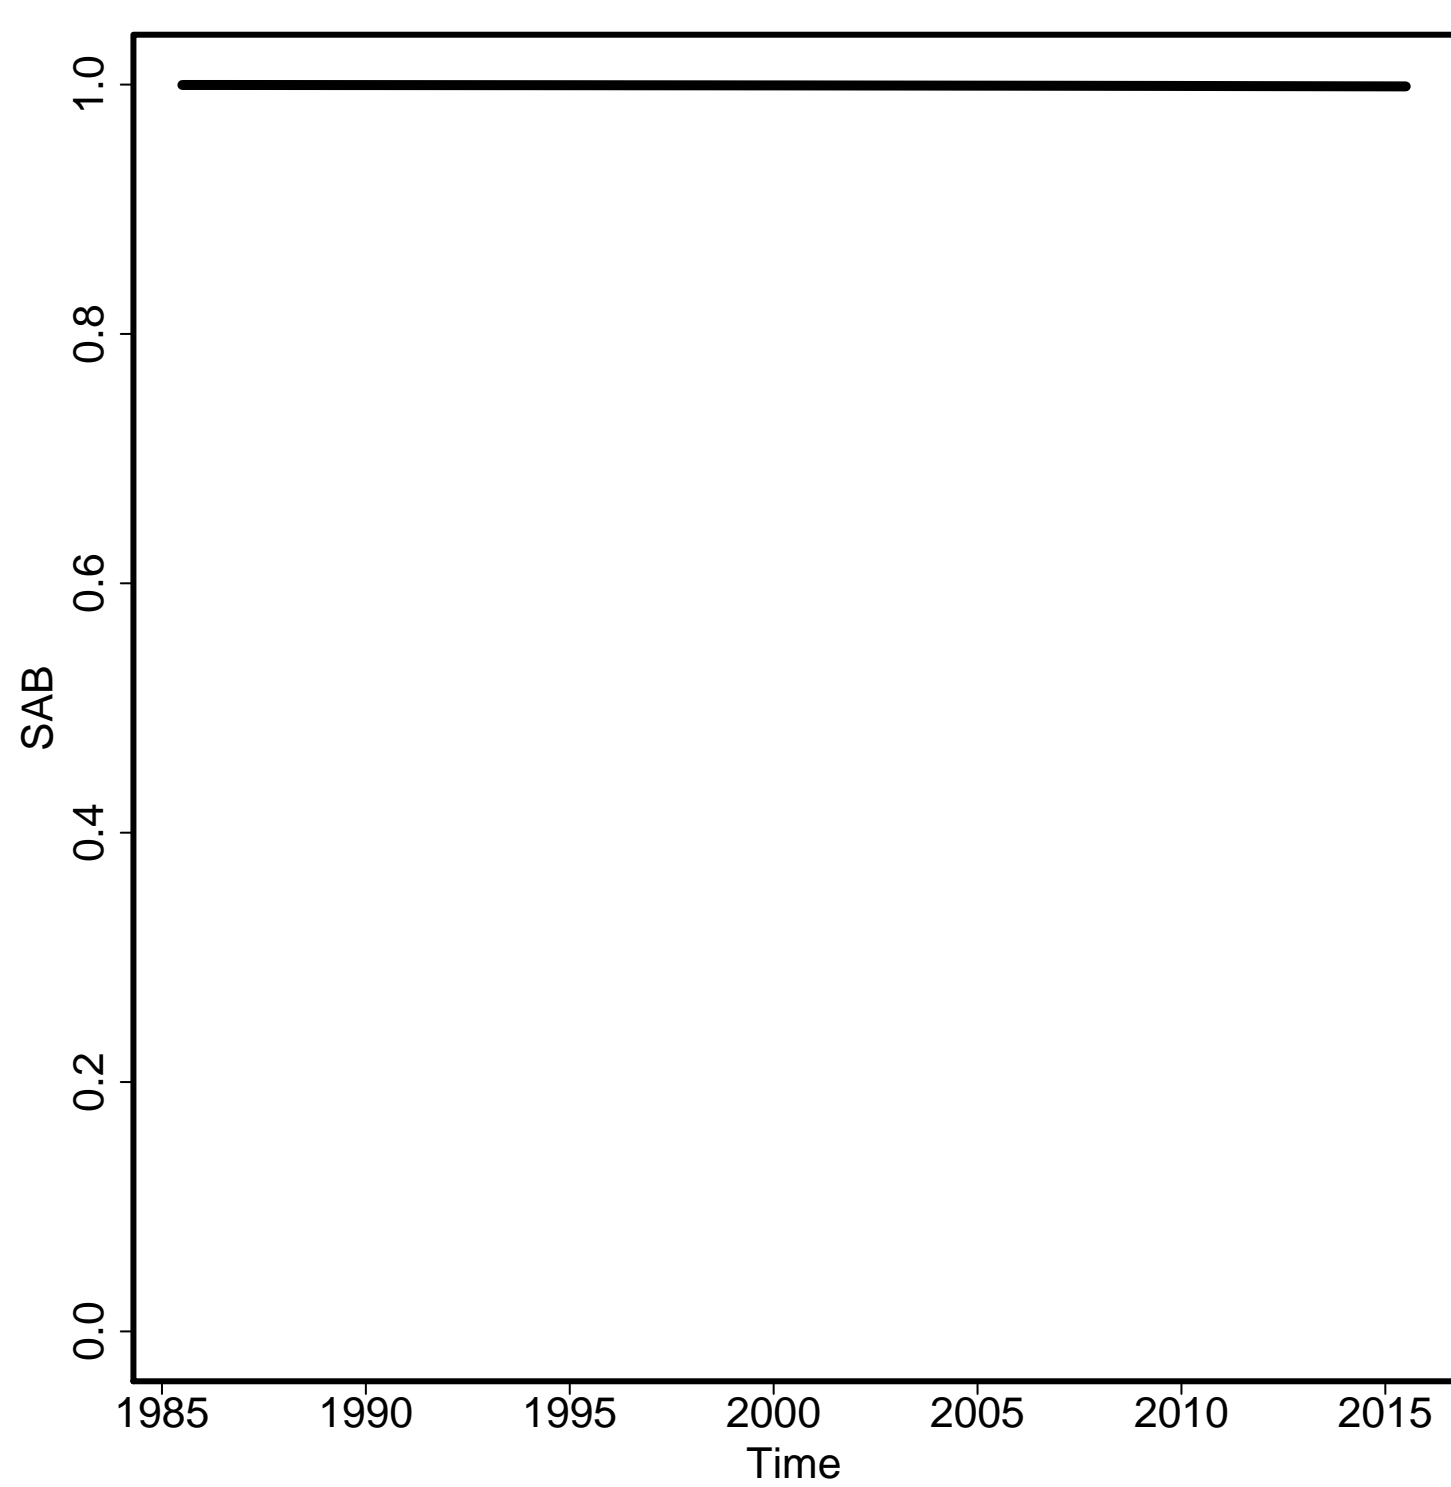

Envelope/Births

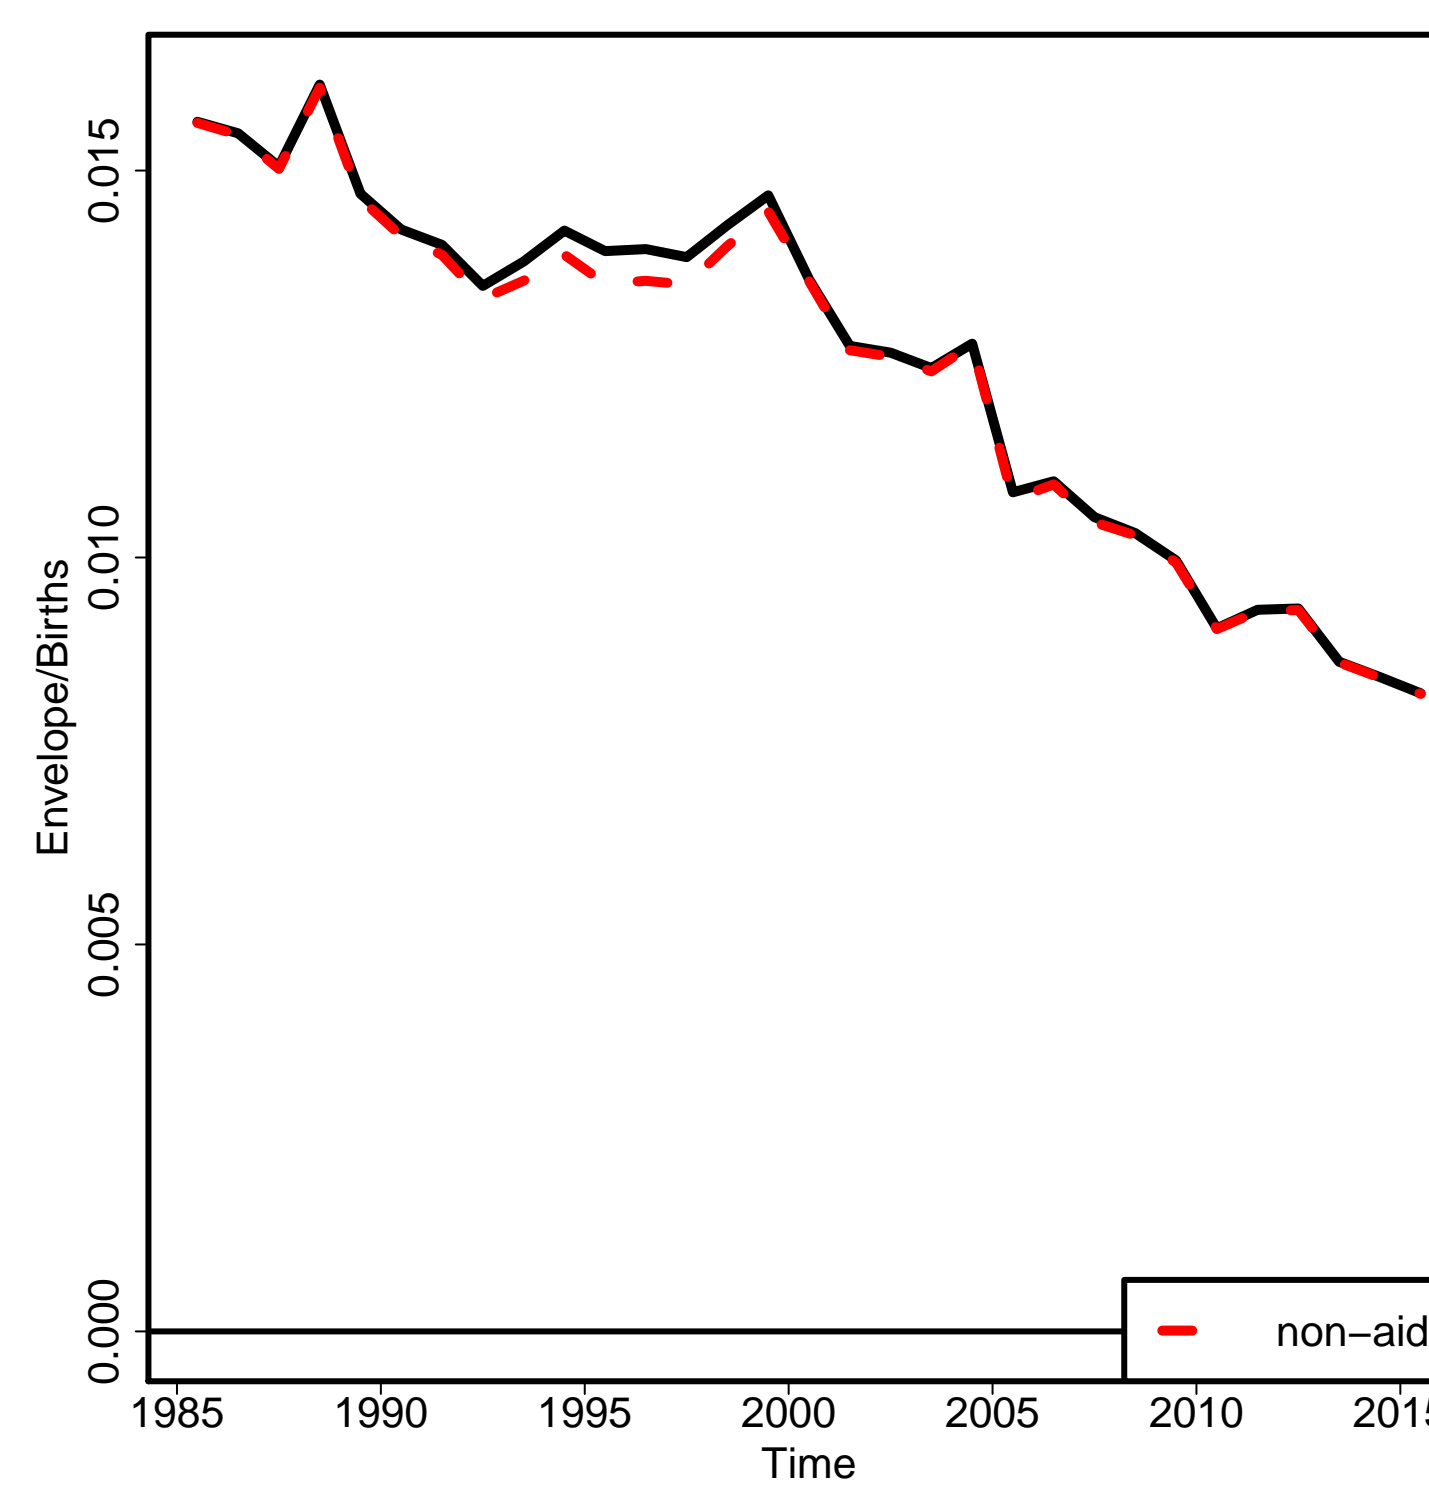

NONAIDSMMR

Non-aids MMR

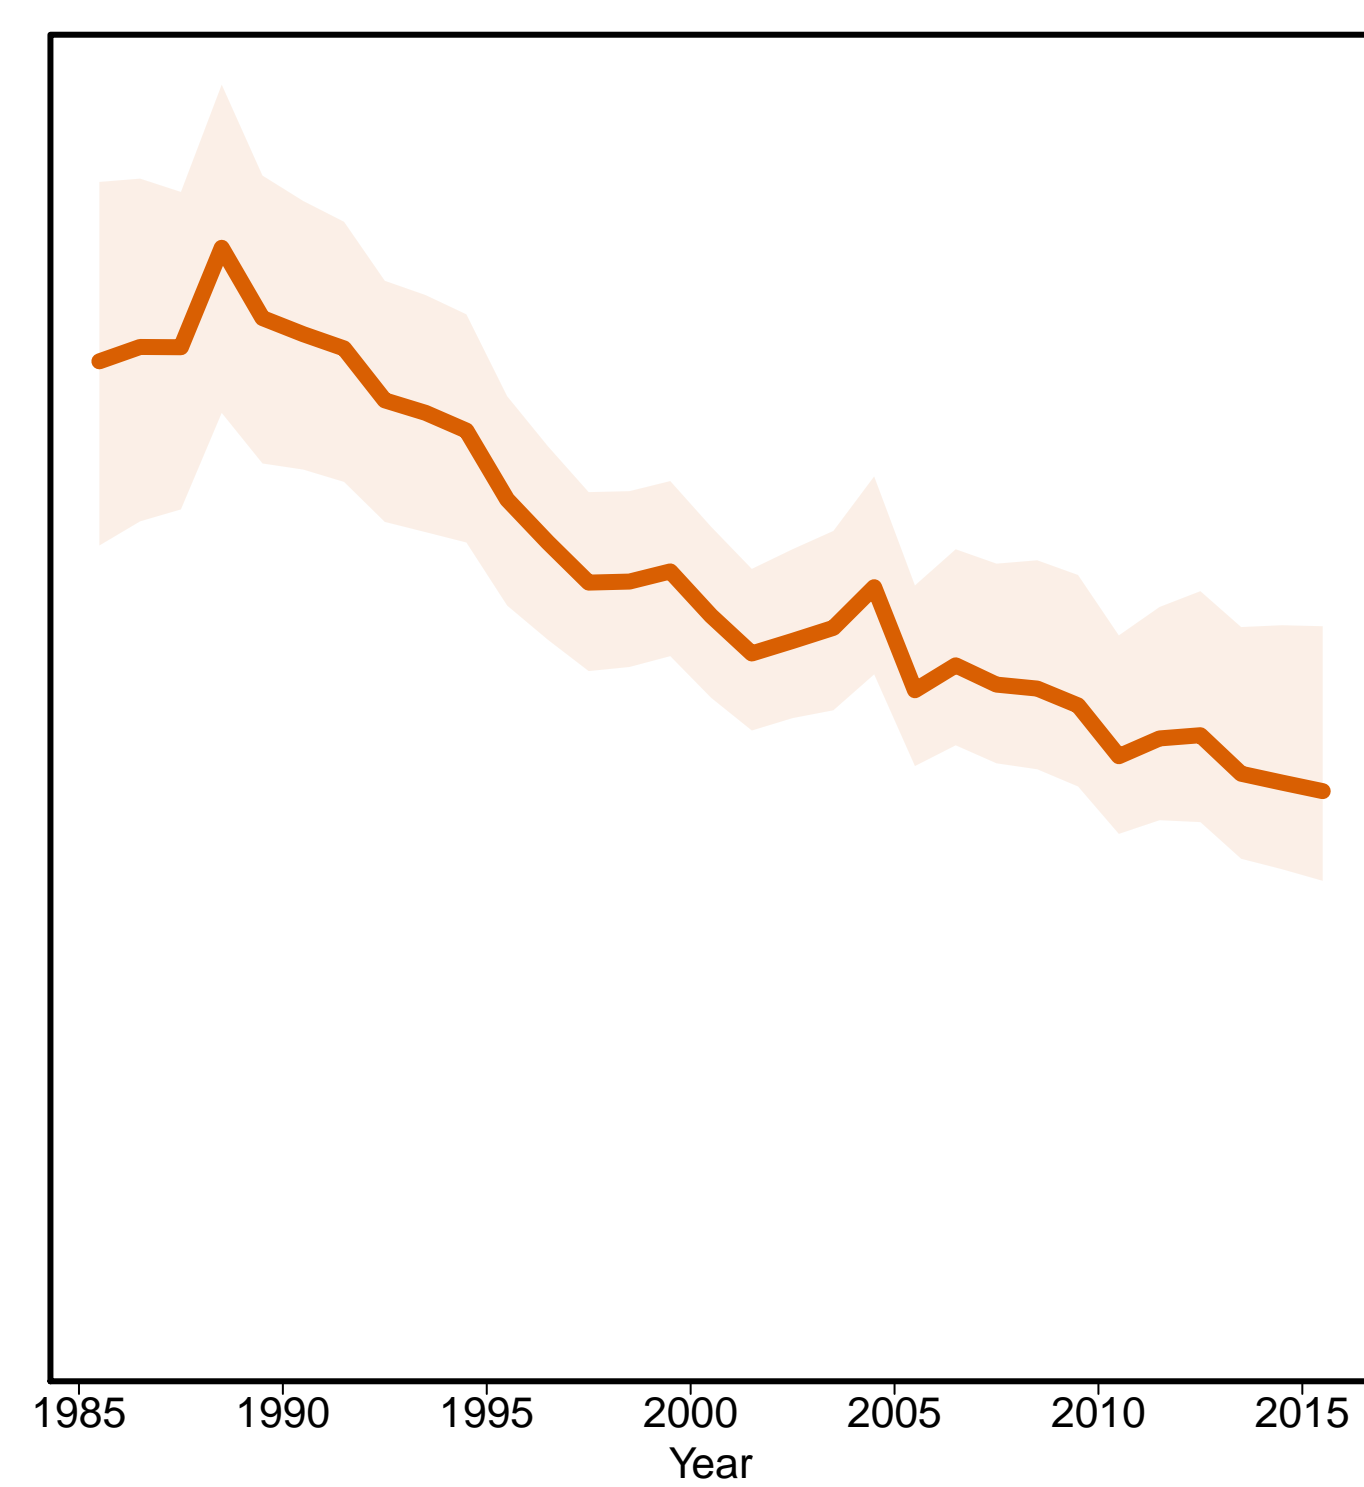

Aids MMR

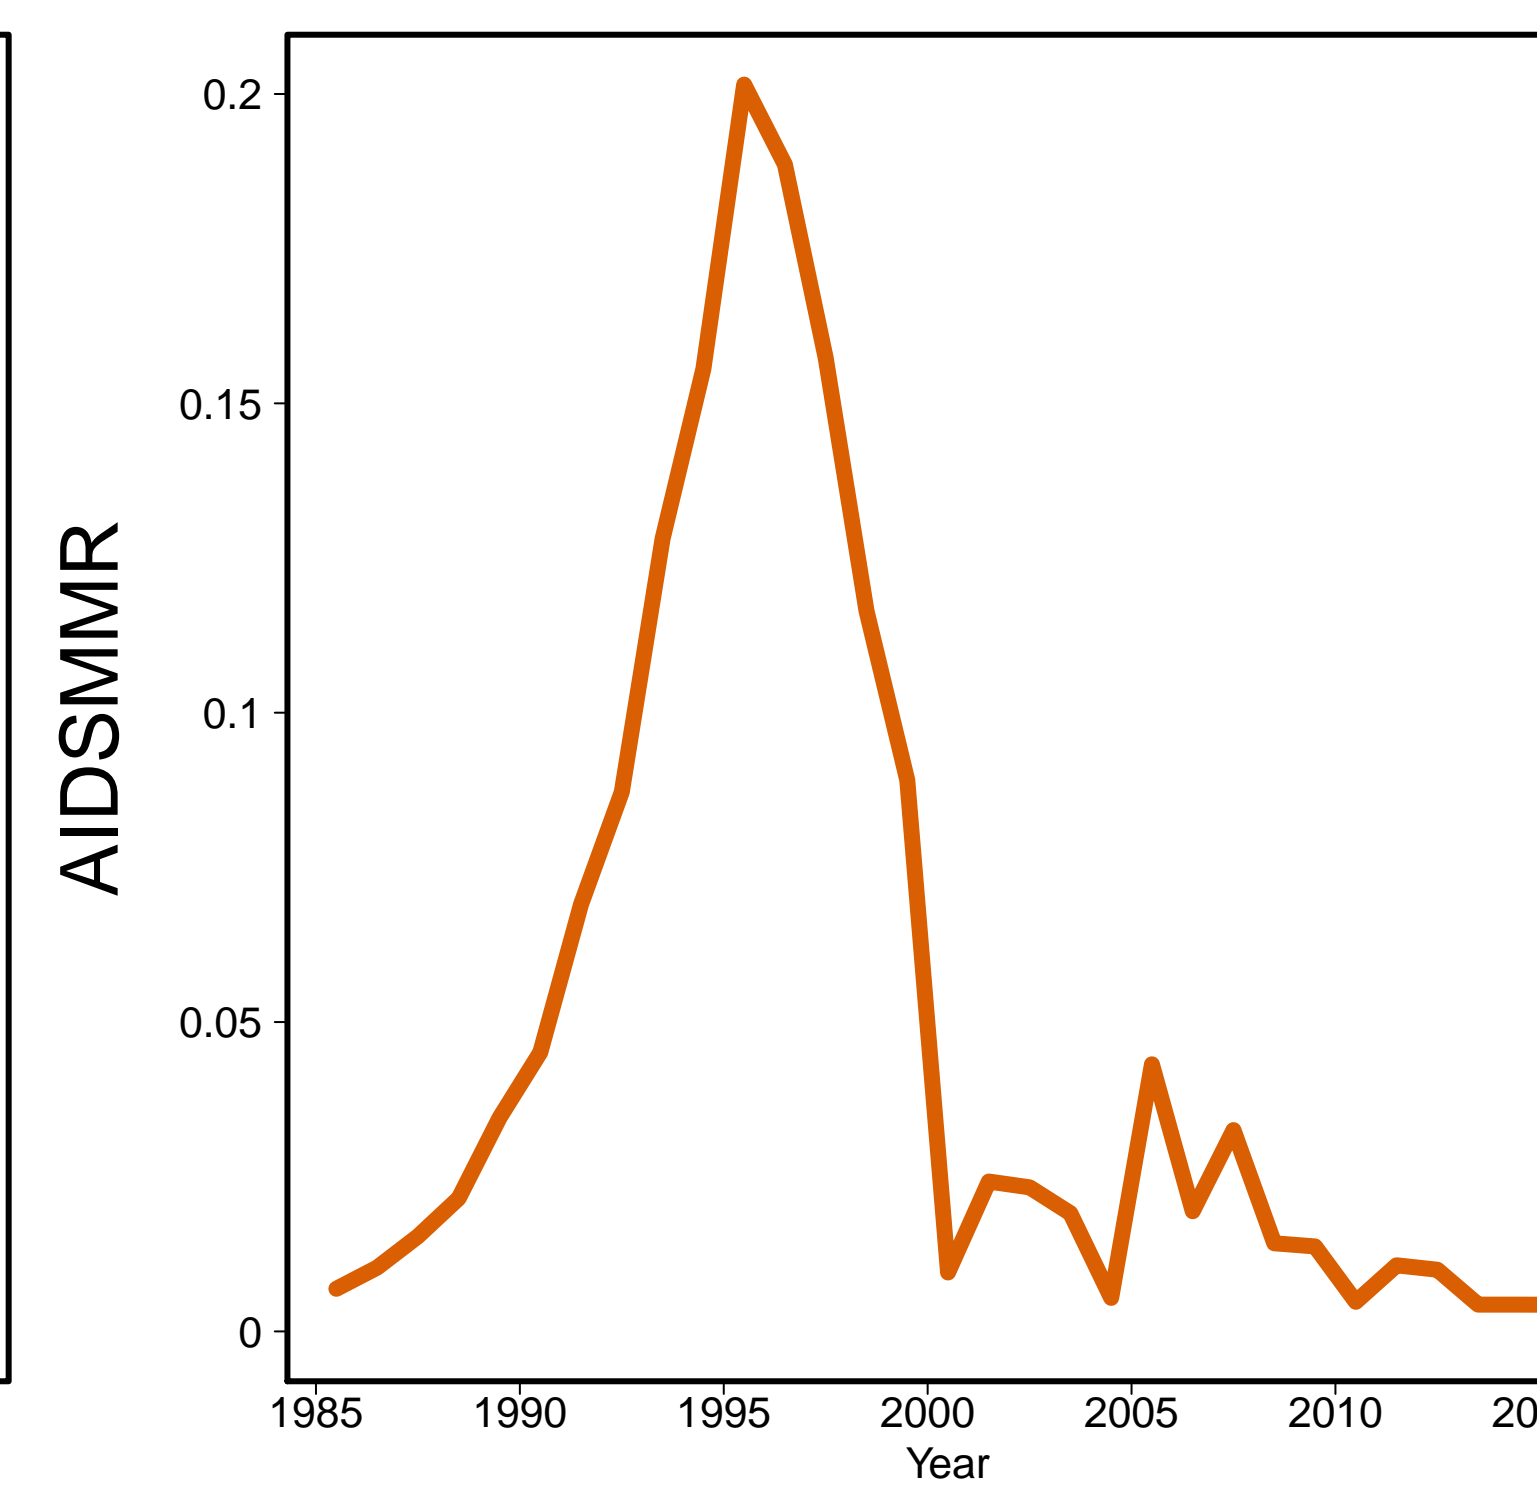

Switzerland [CHE]  
(Developed regions)

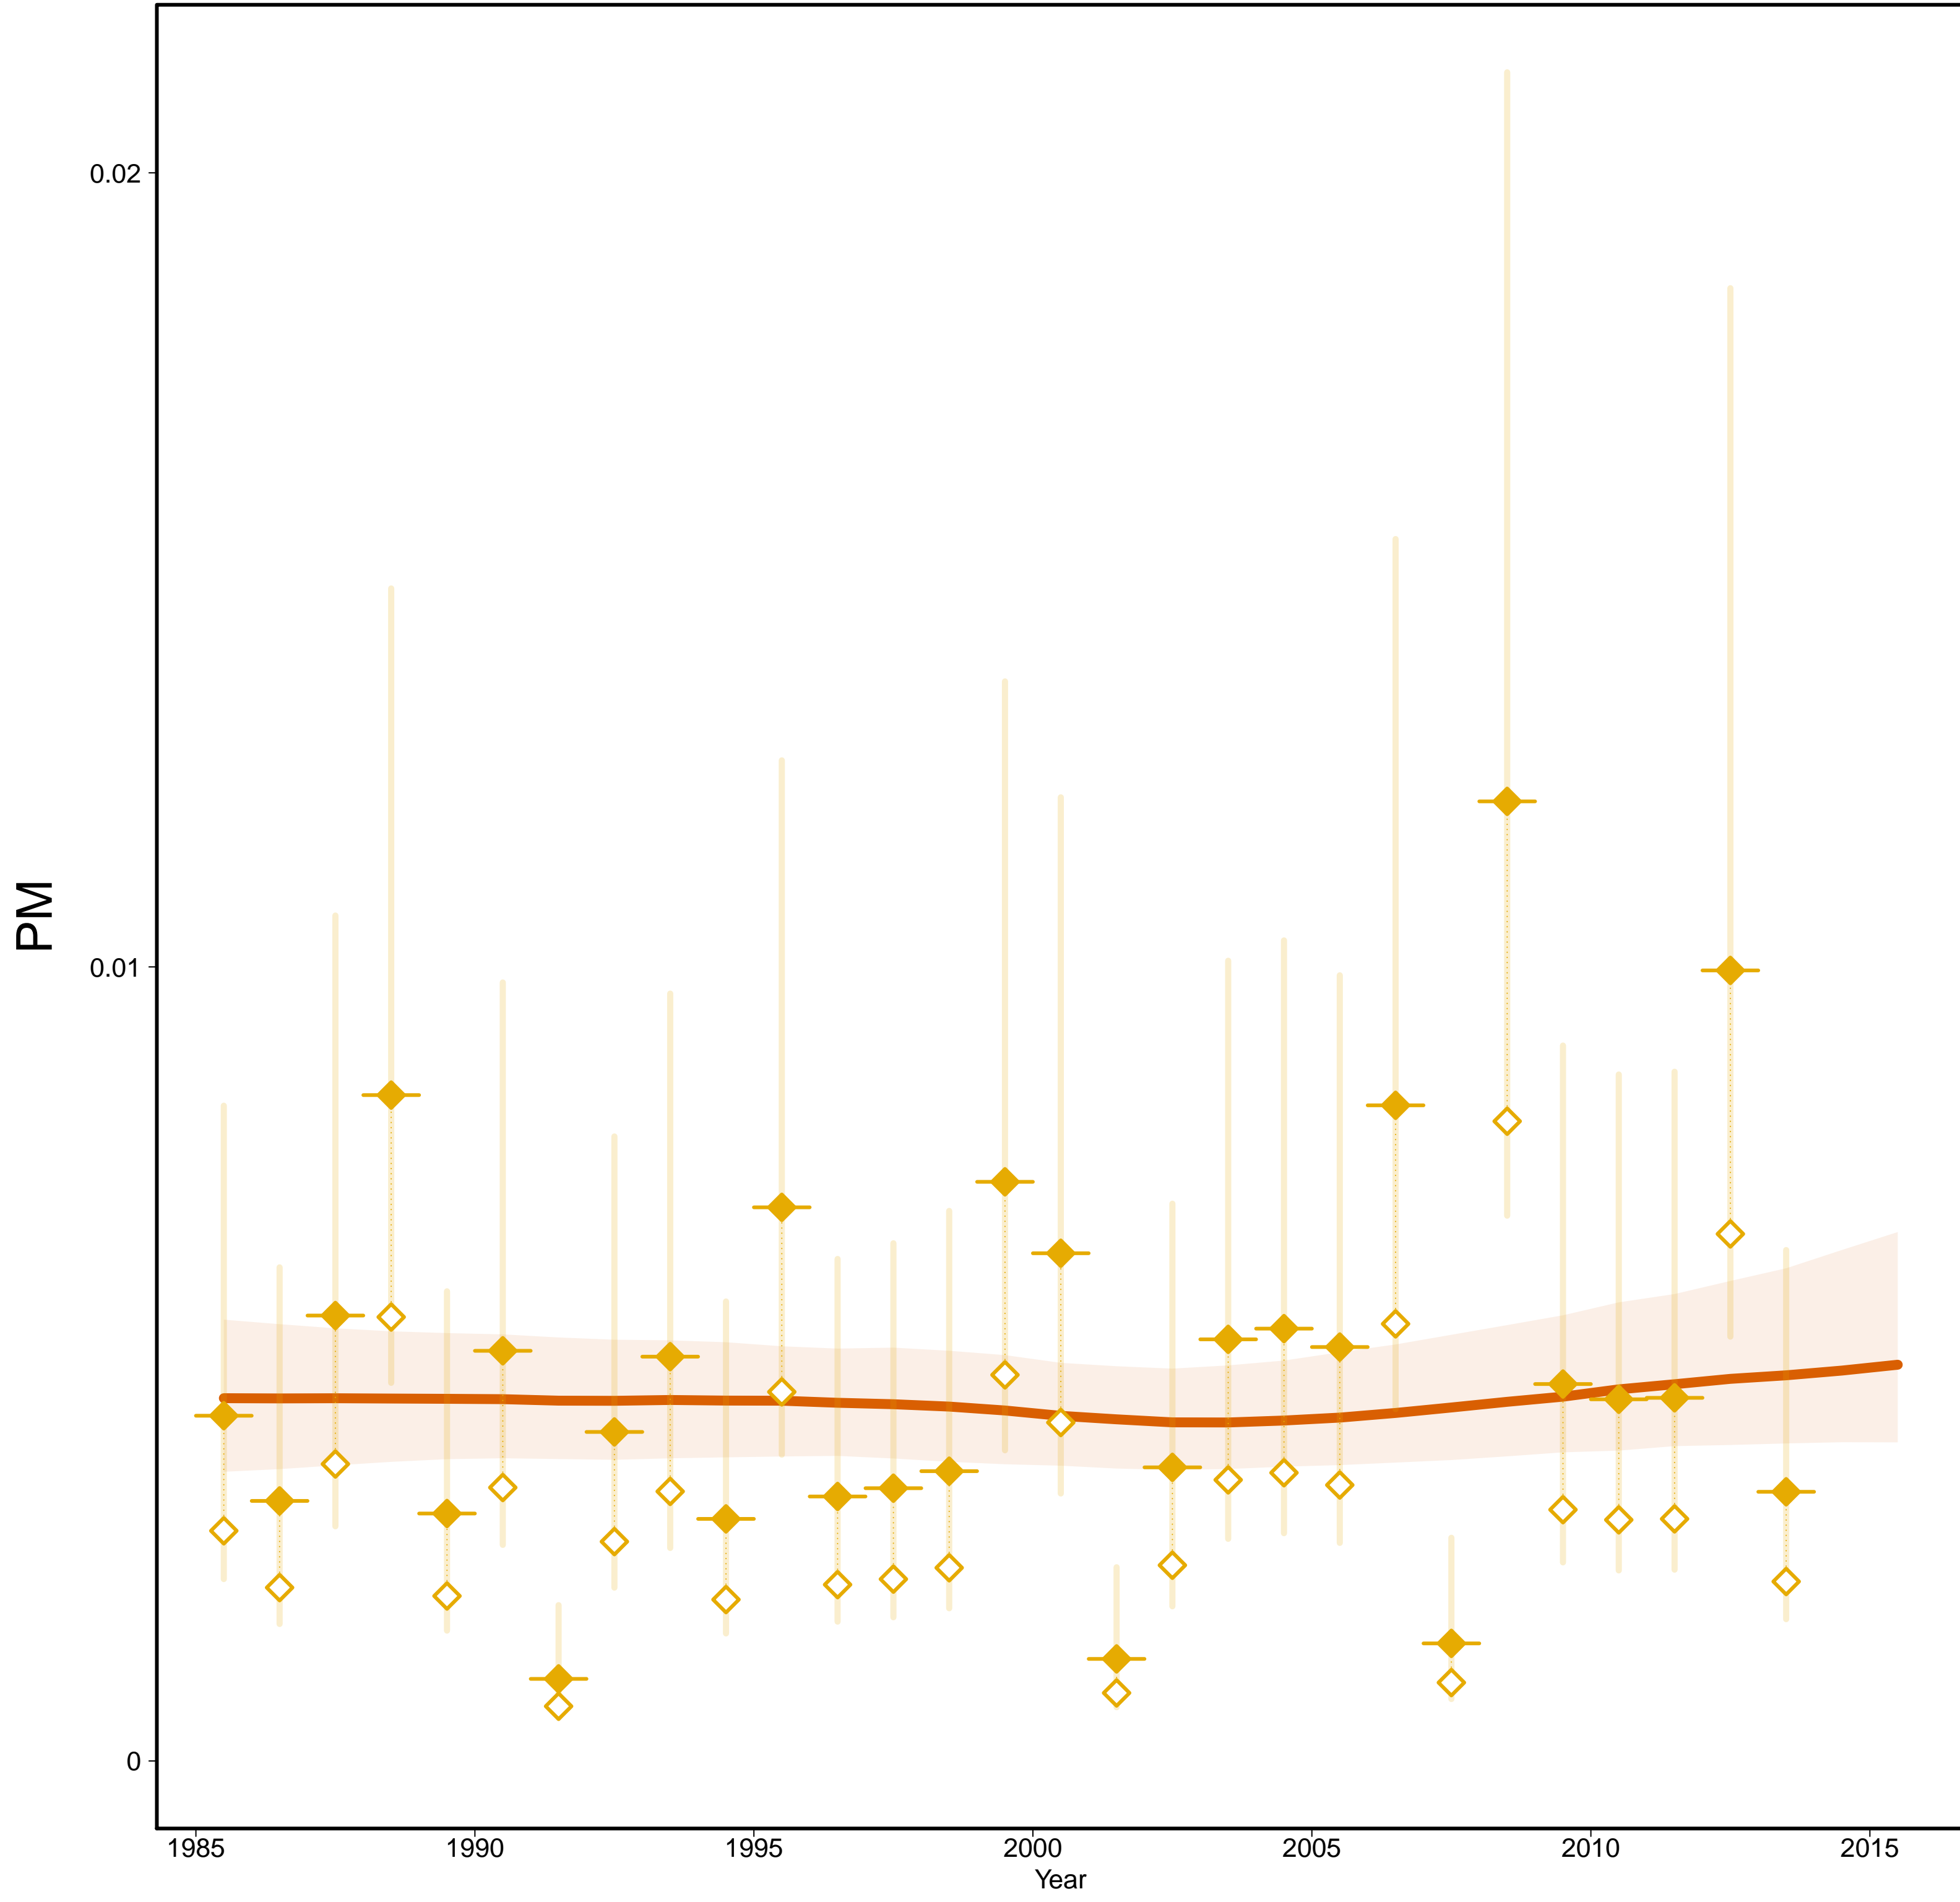

Switzerland [CHE]  
(Developed regions)

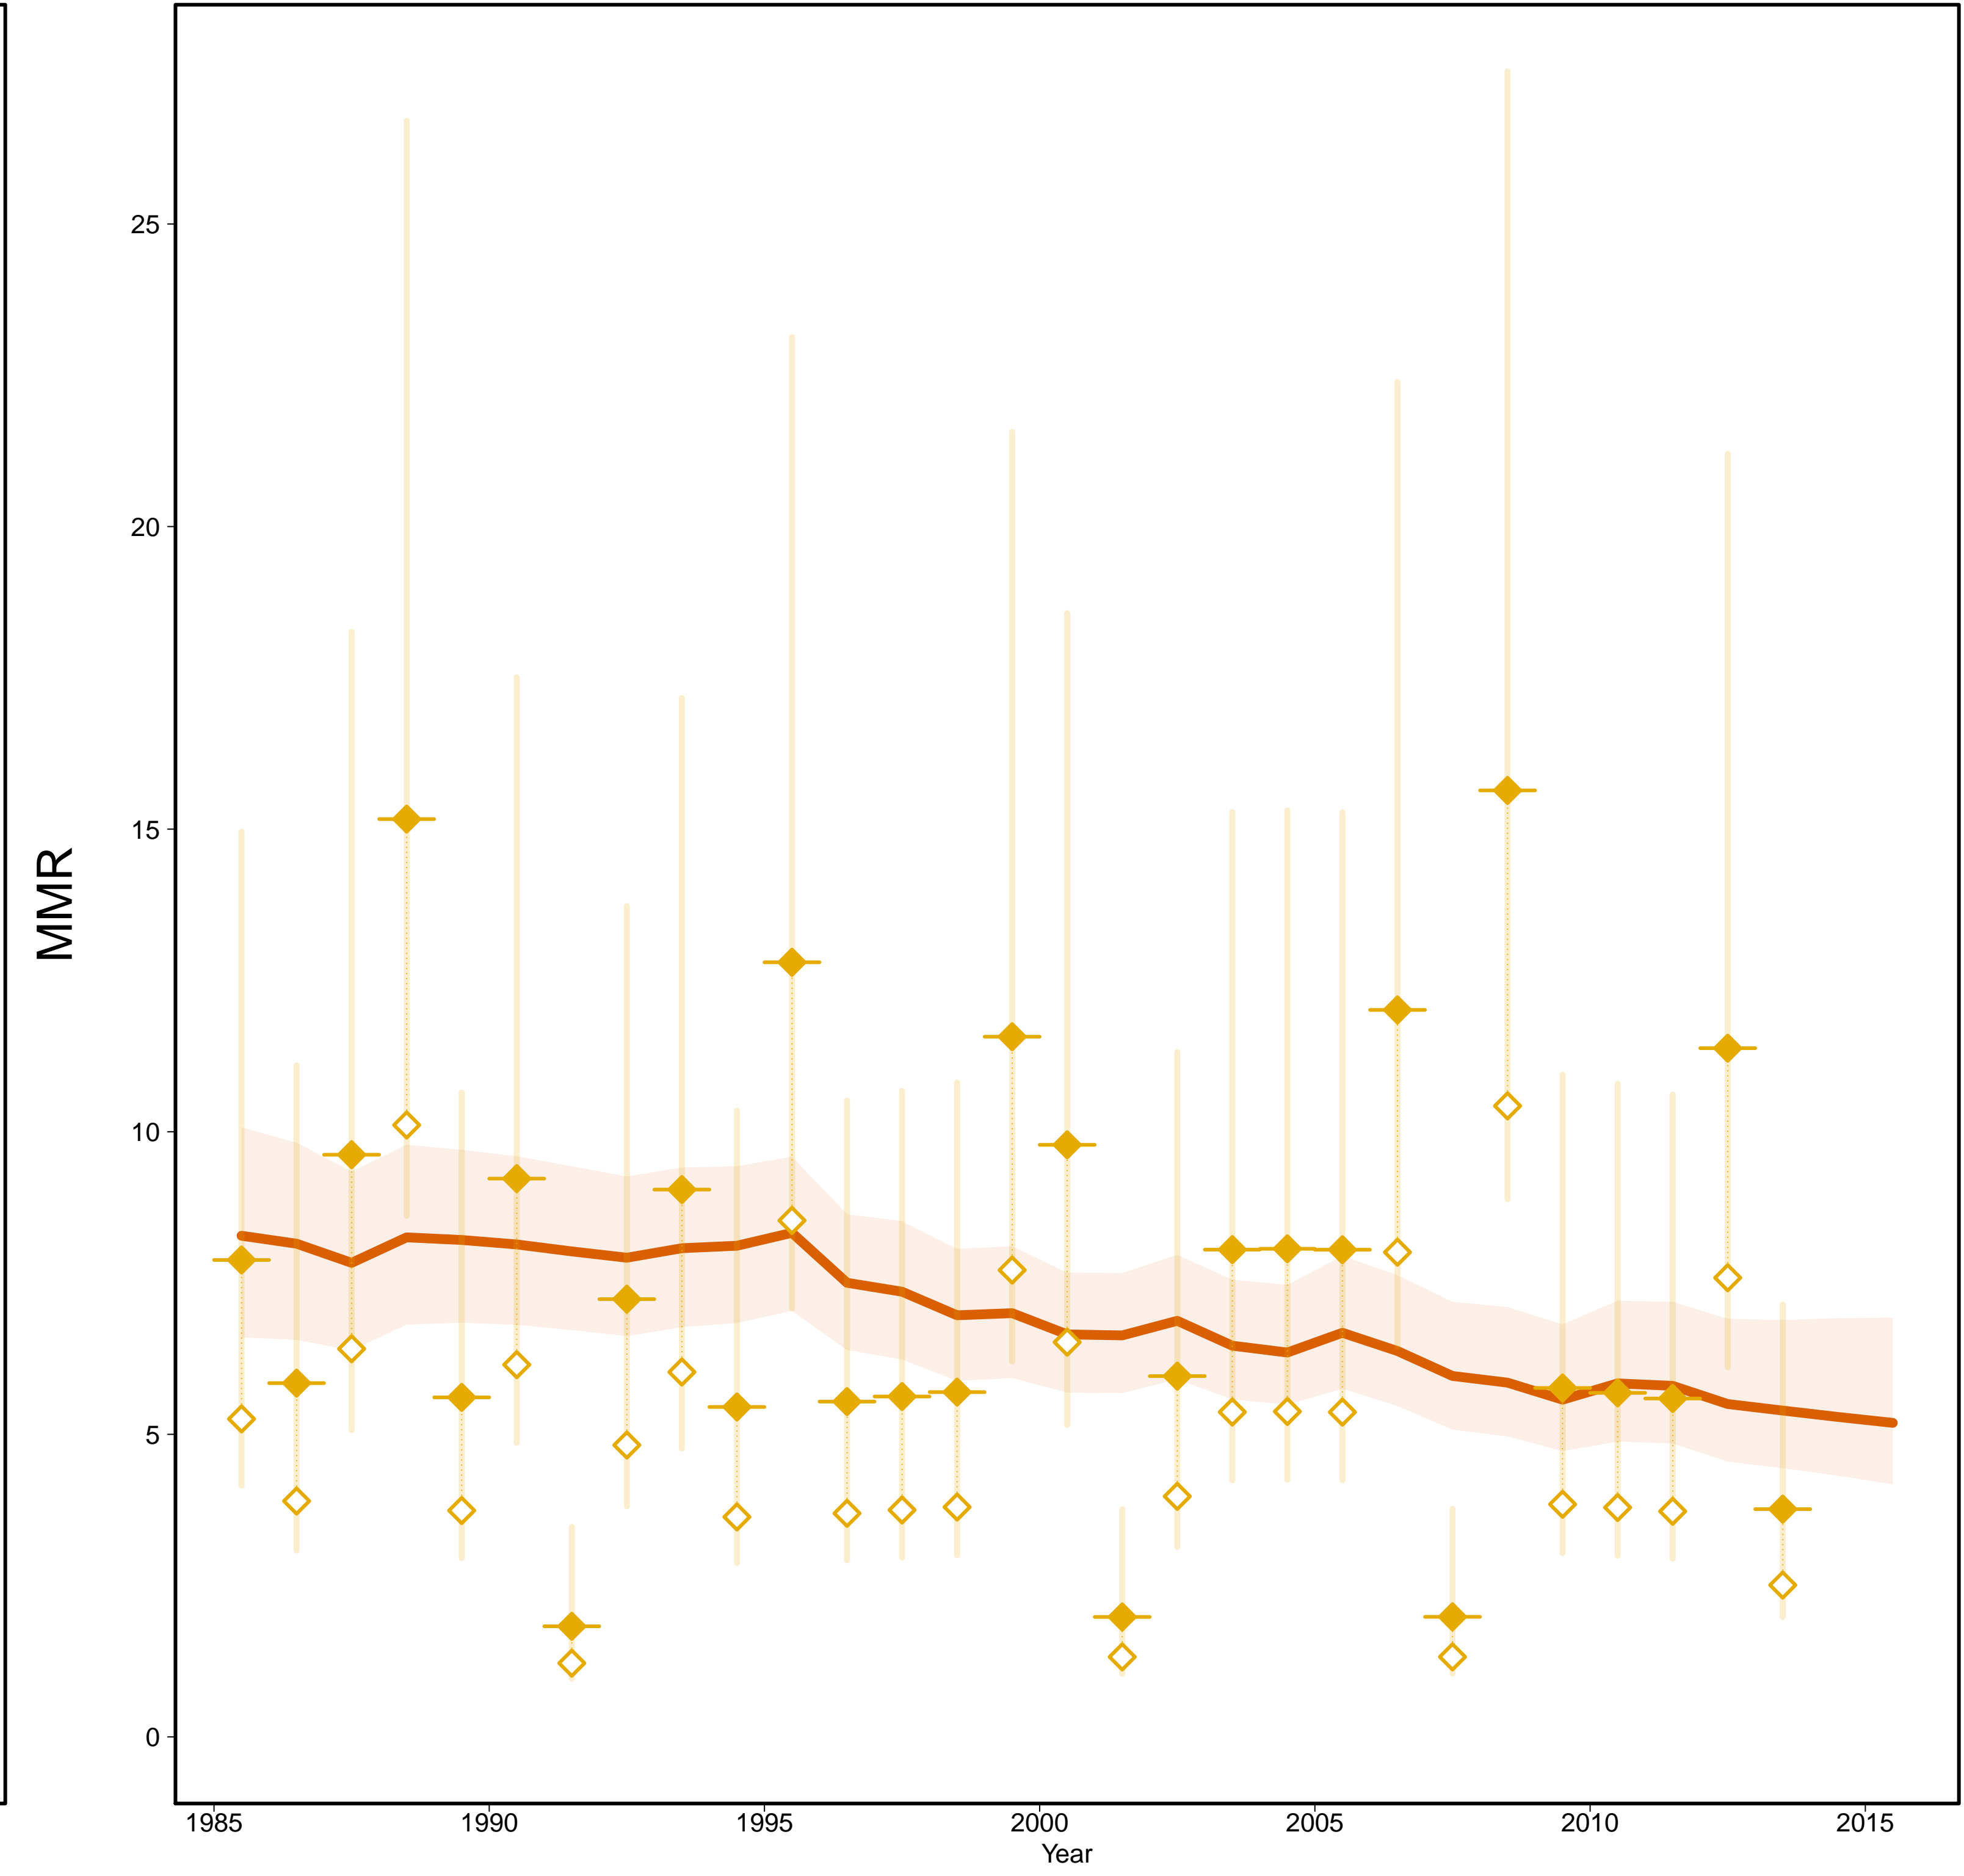

- Estimates —
- MMR Database 2015 —
- ◇ Observed Data
- ◆ Adjusted Data
- Data type —
- ◆ VR

Gross Domestic Product

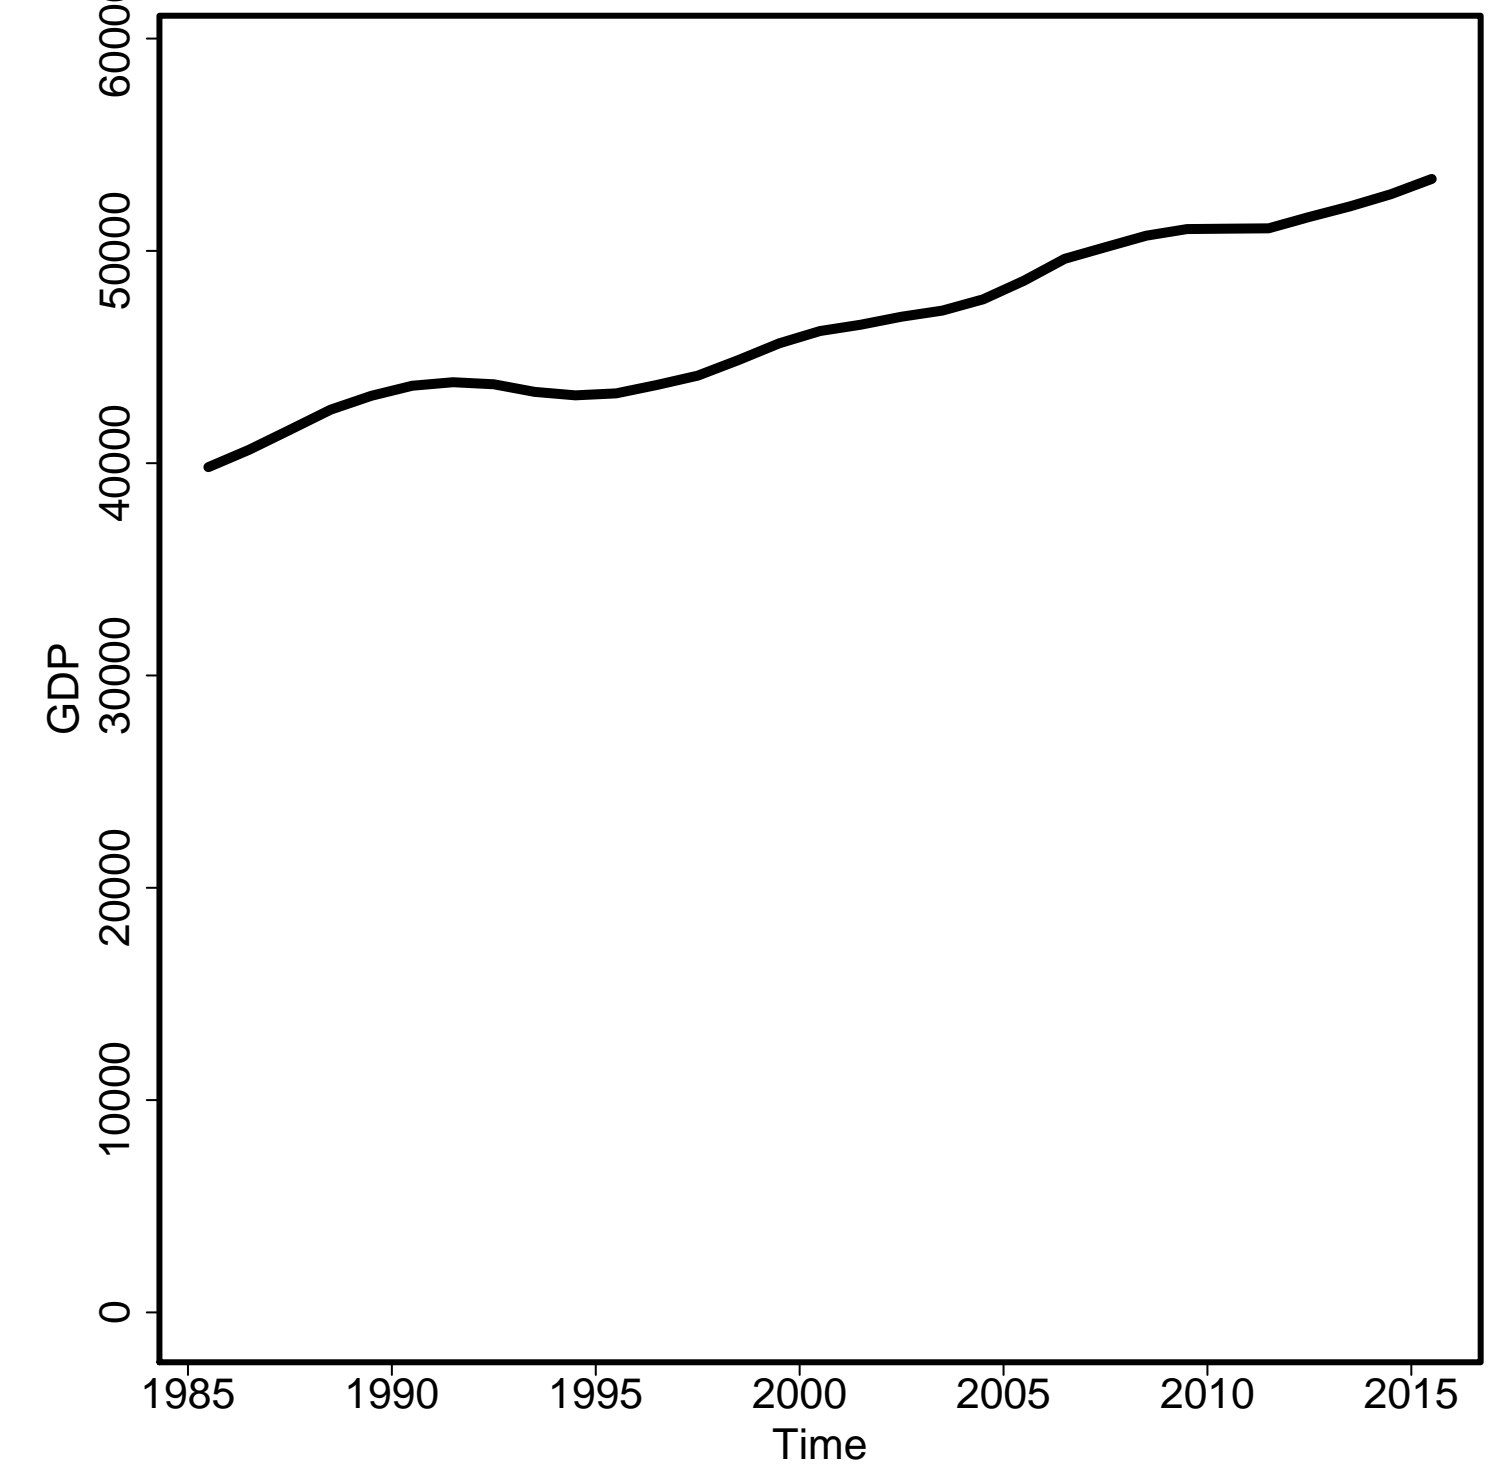

General Fertility Rate

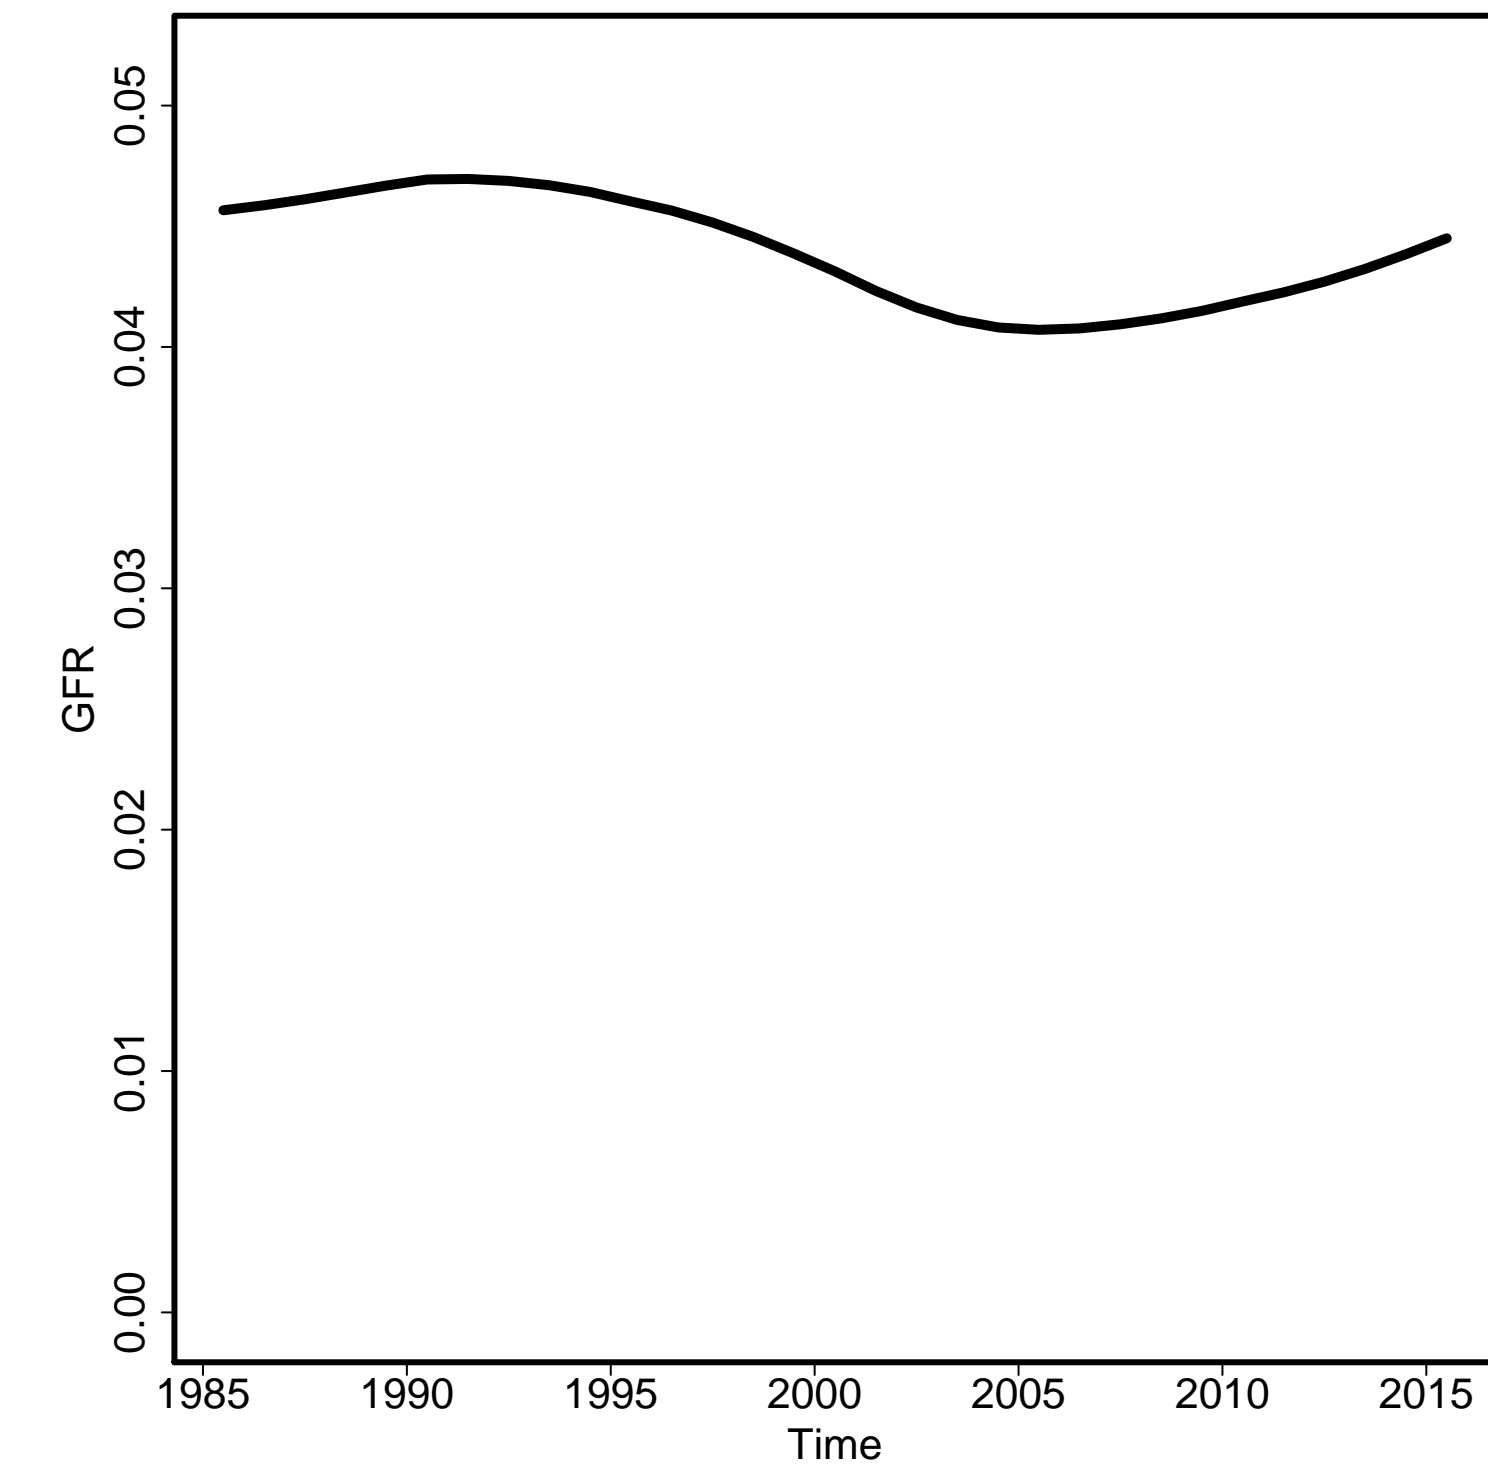

Skilled Attendance to Birth



Envelope/Births

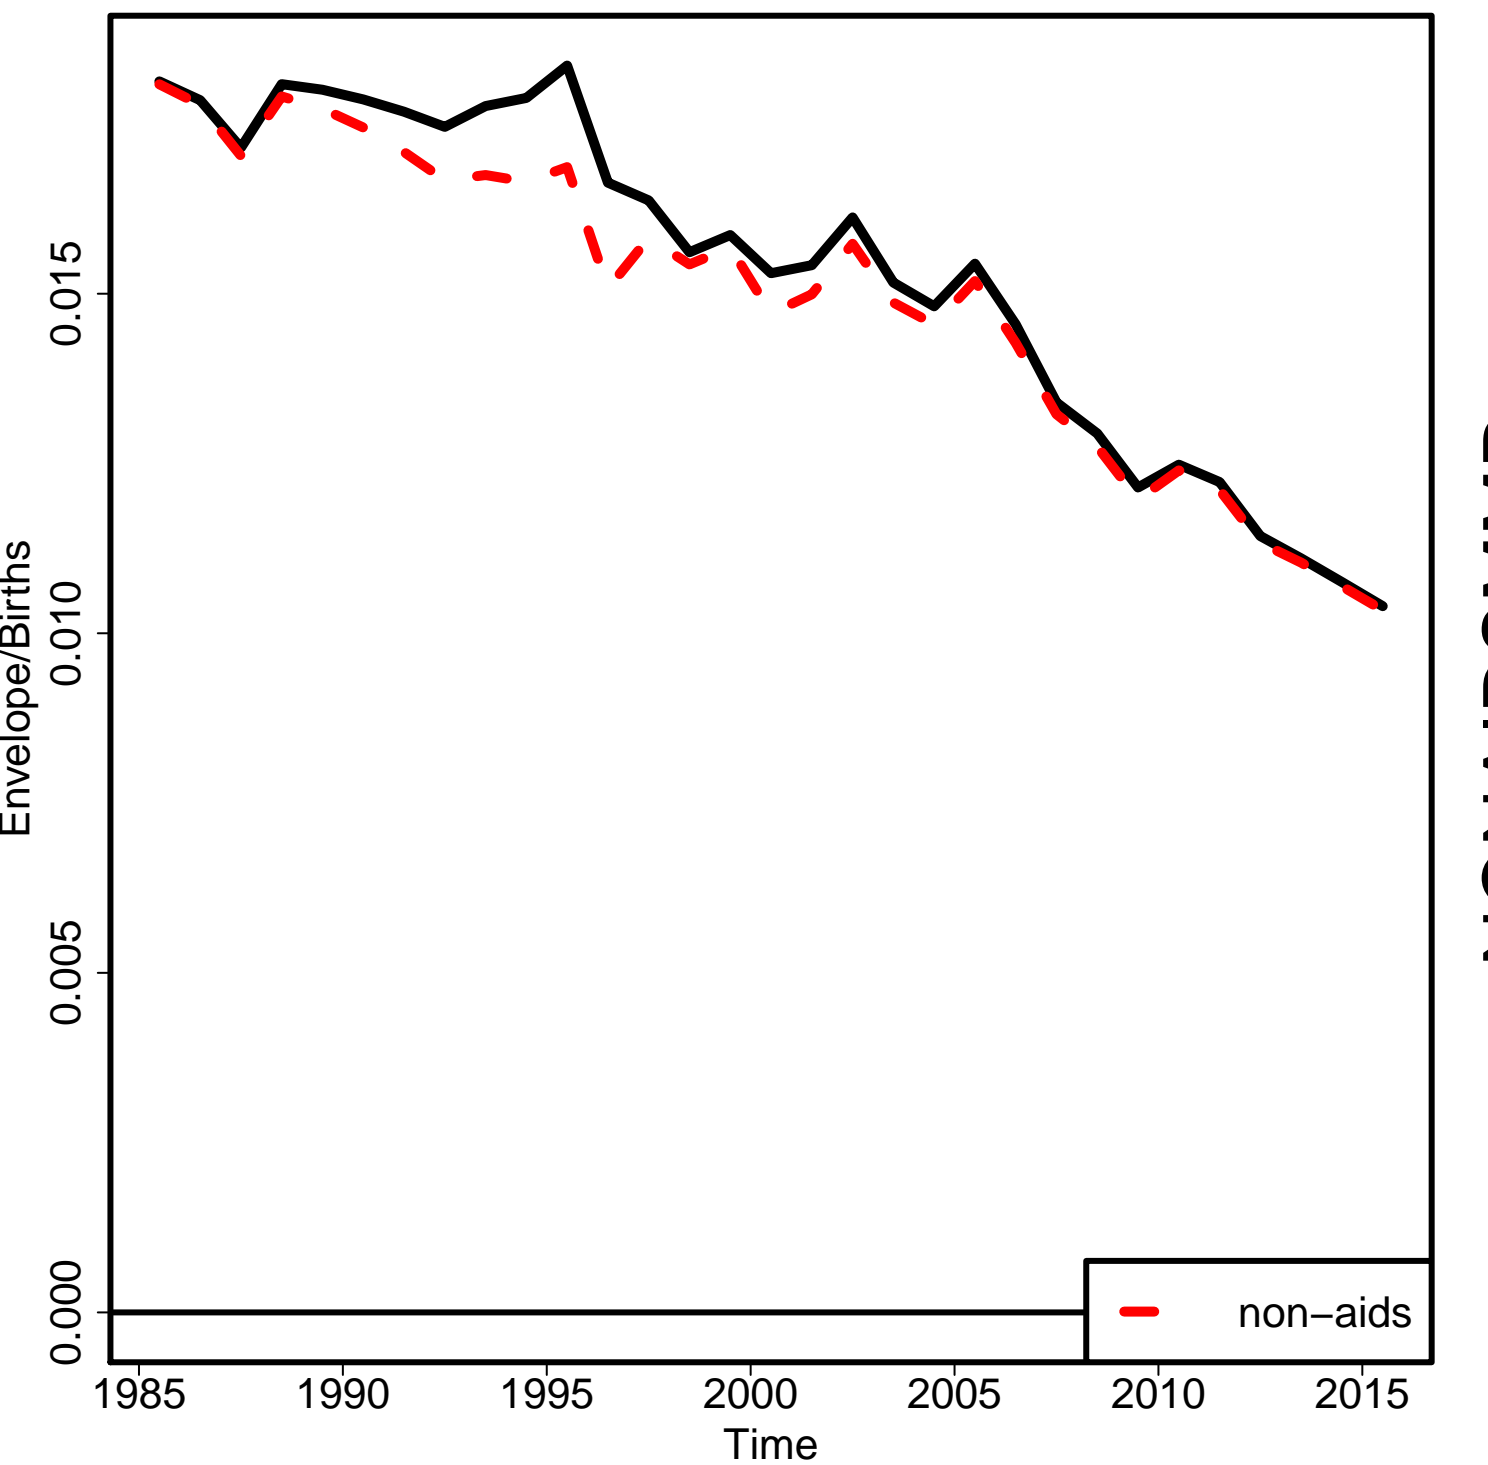

Non-aids MMR

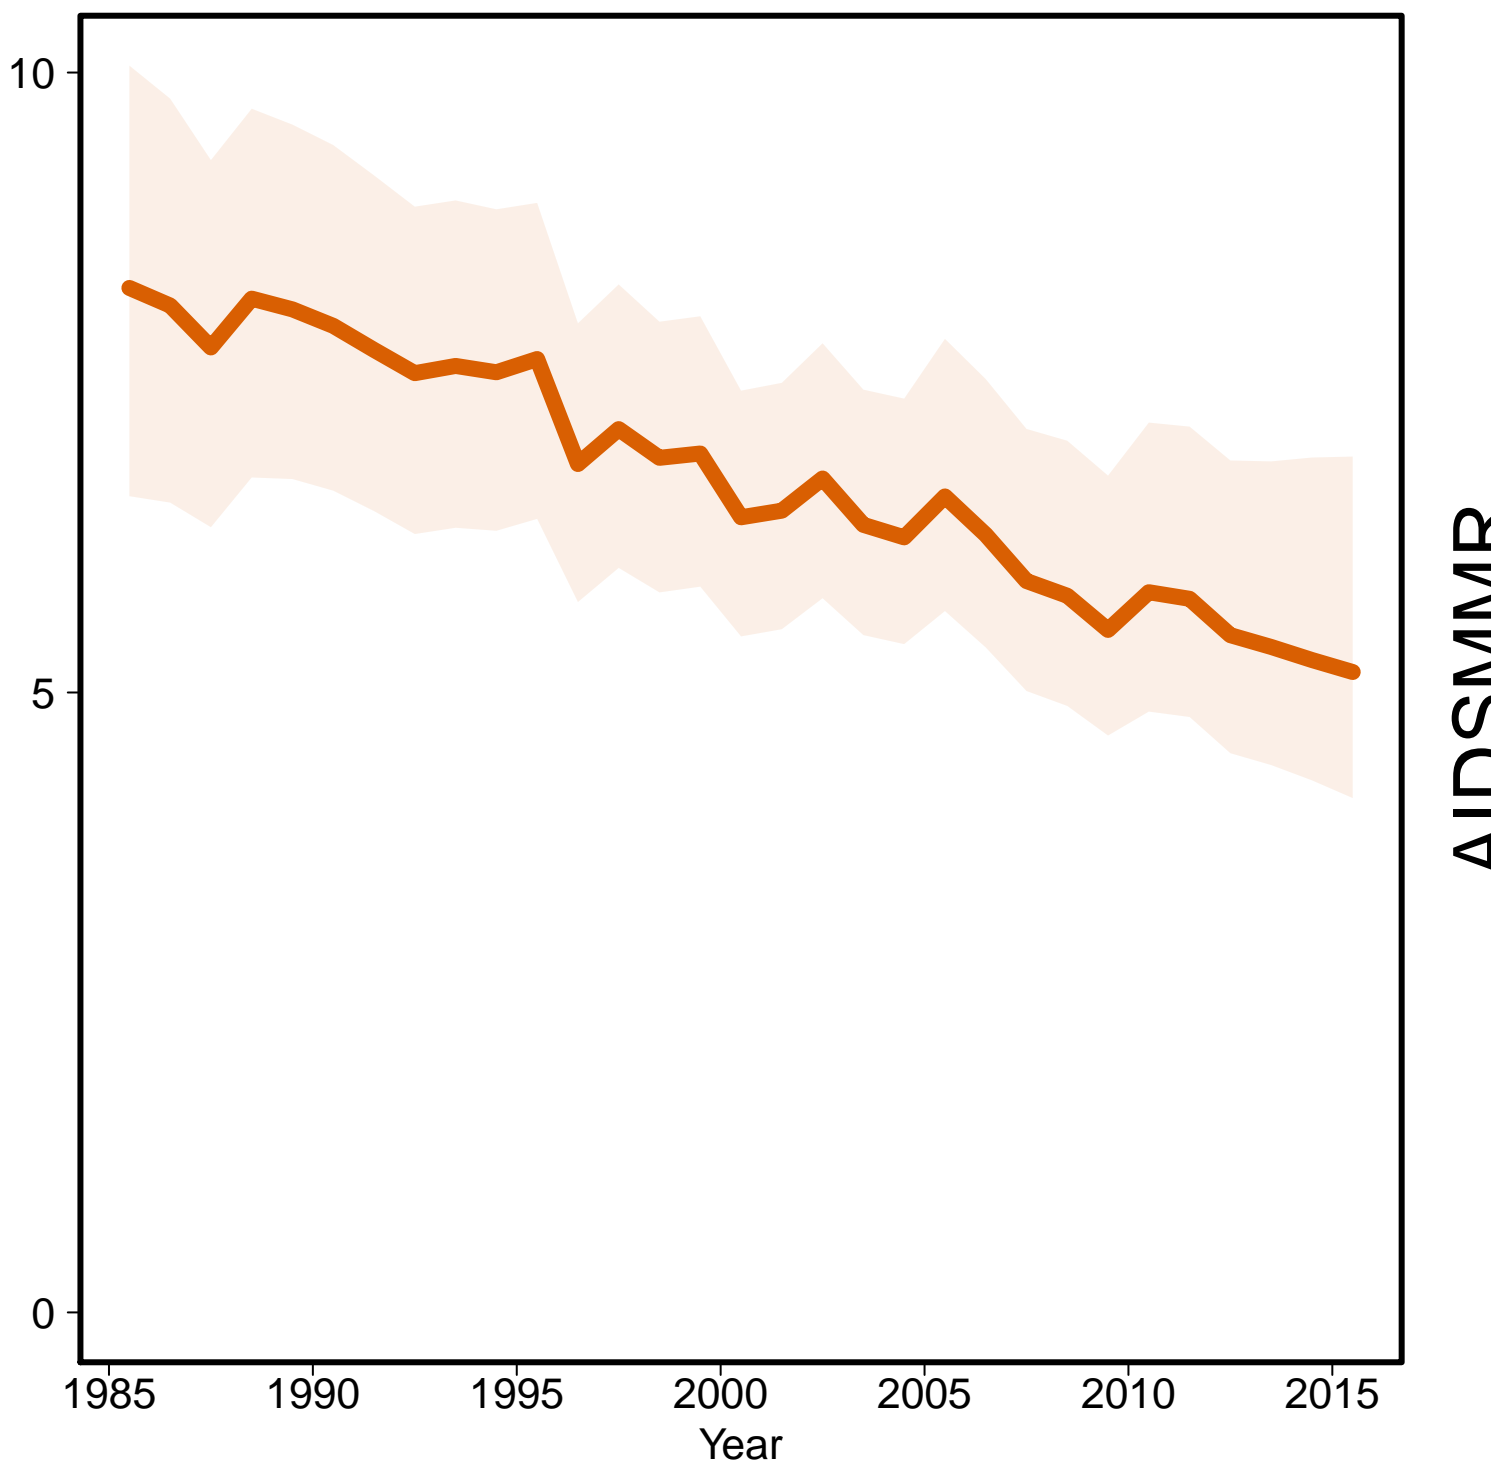

Aids MMR

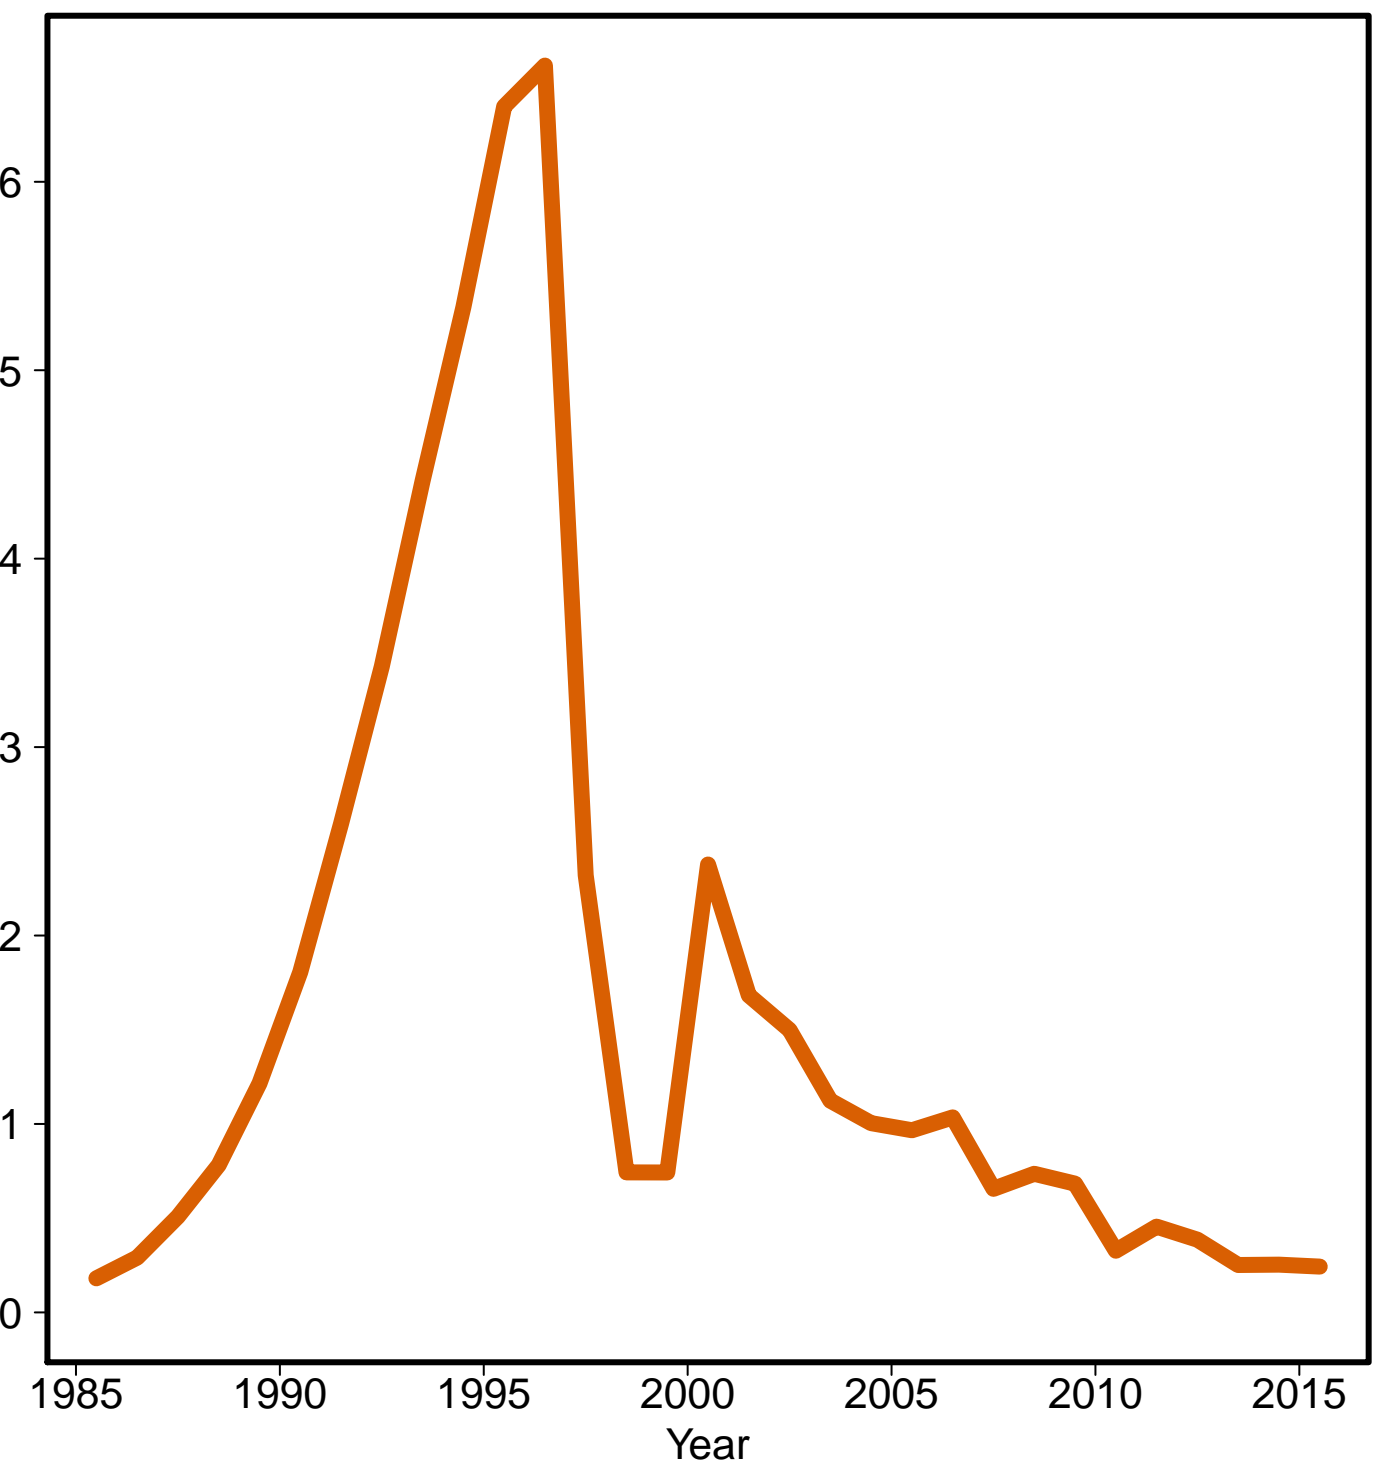

Syrian Arab Republic [SYR]  
(Western Asia)

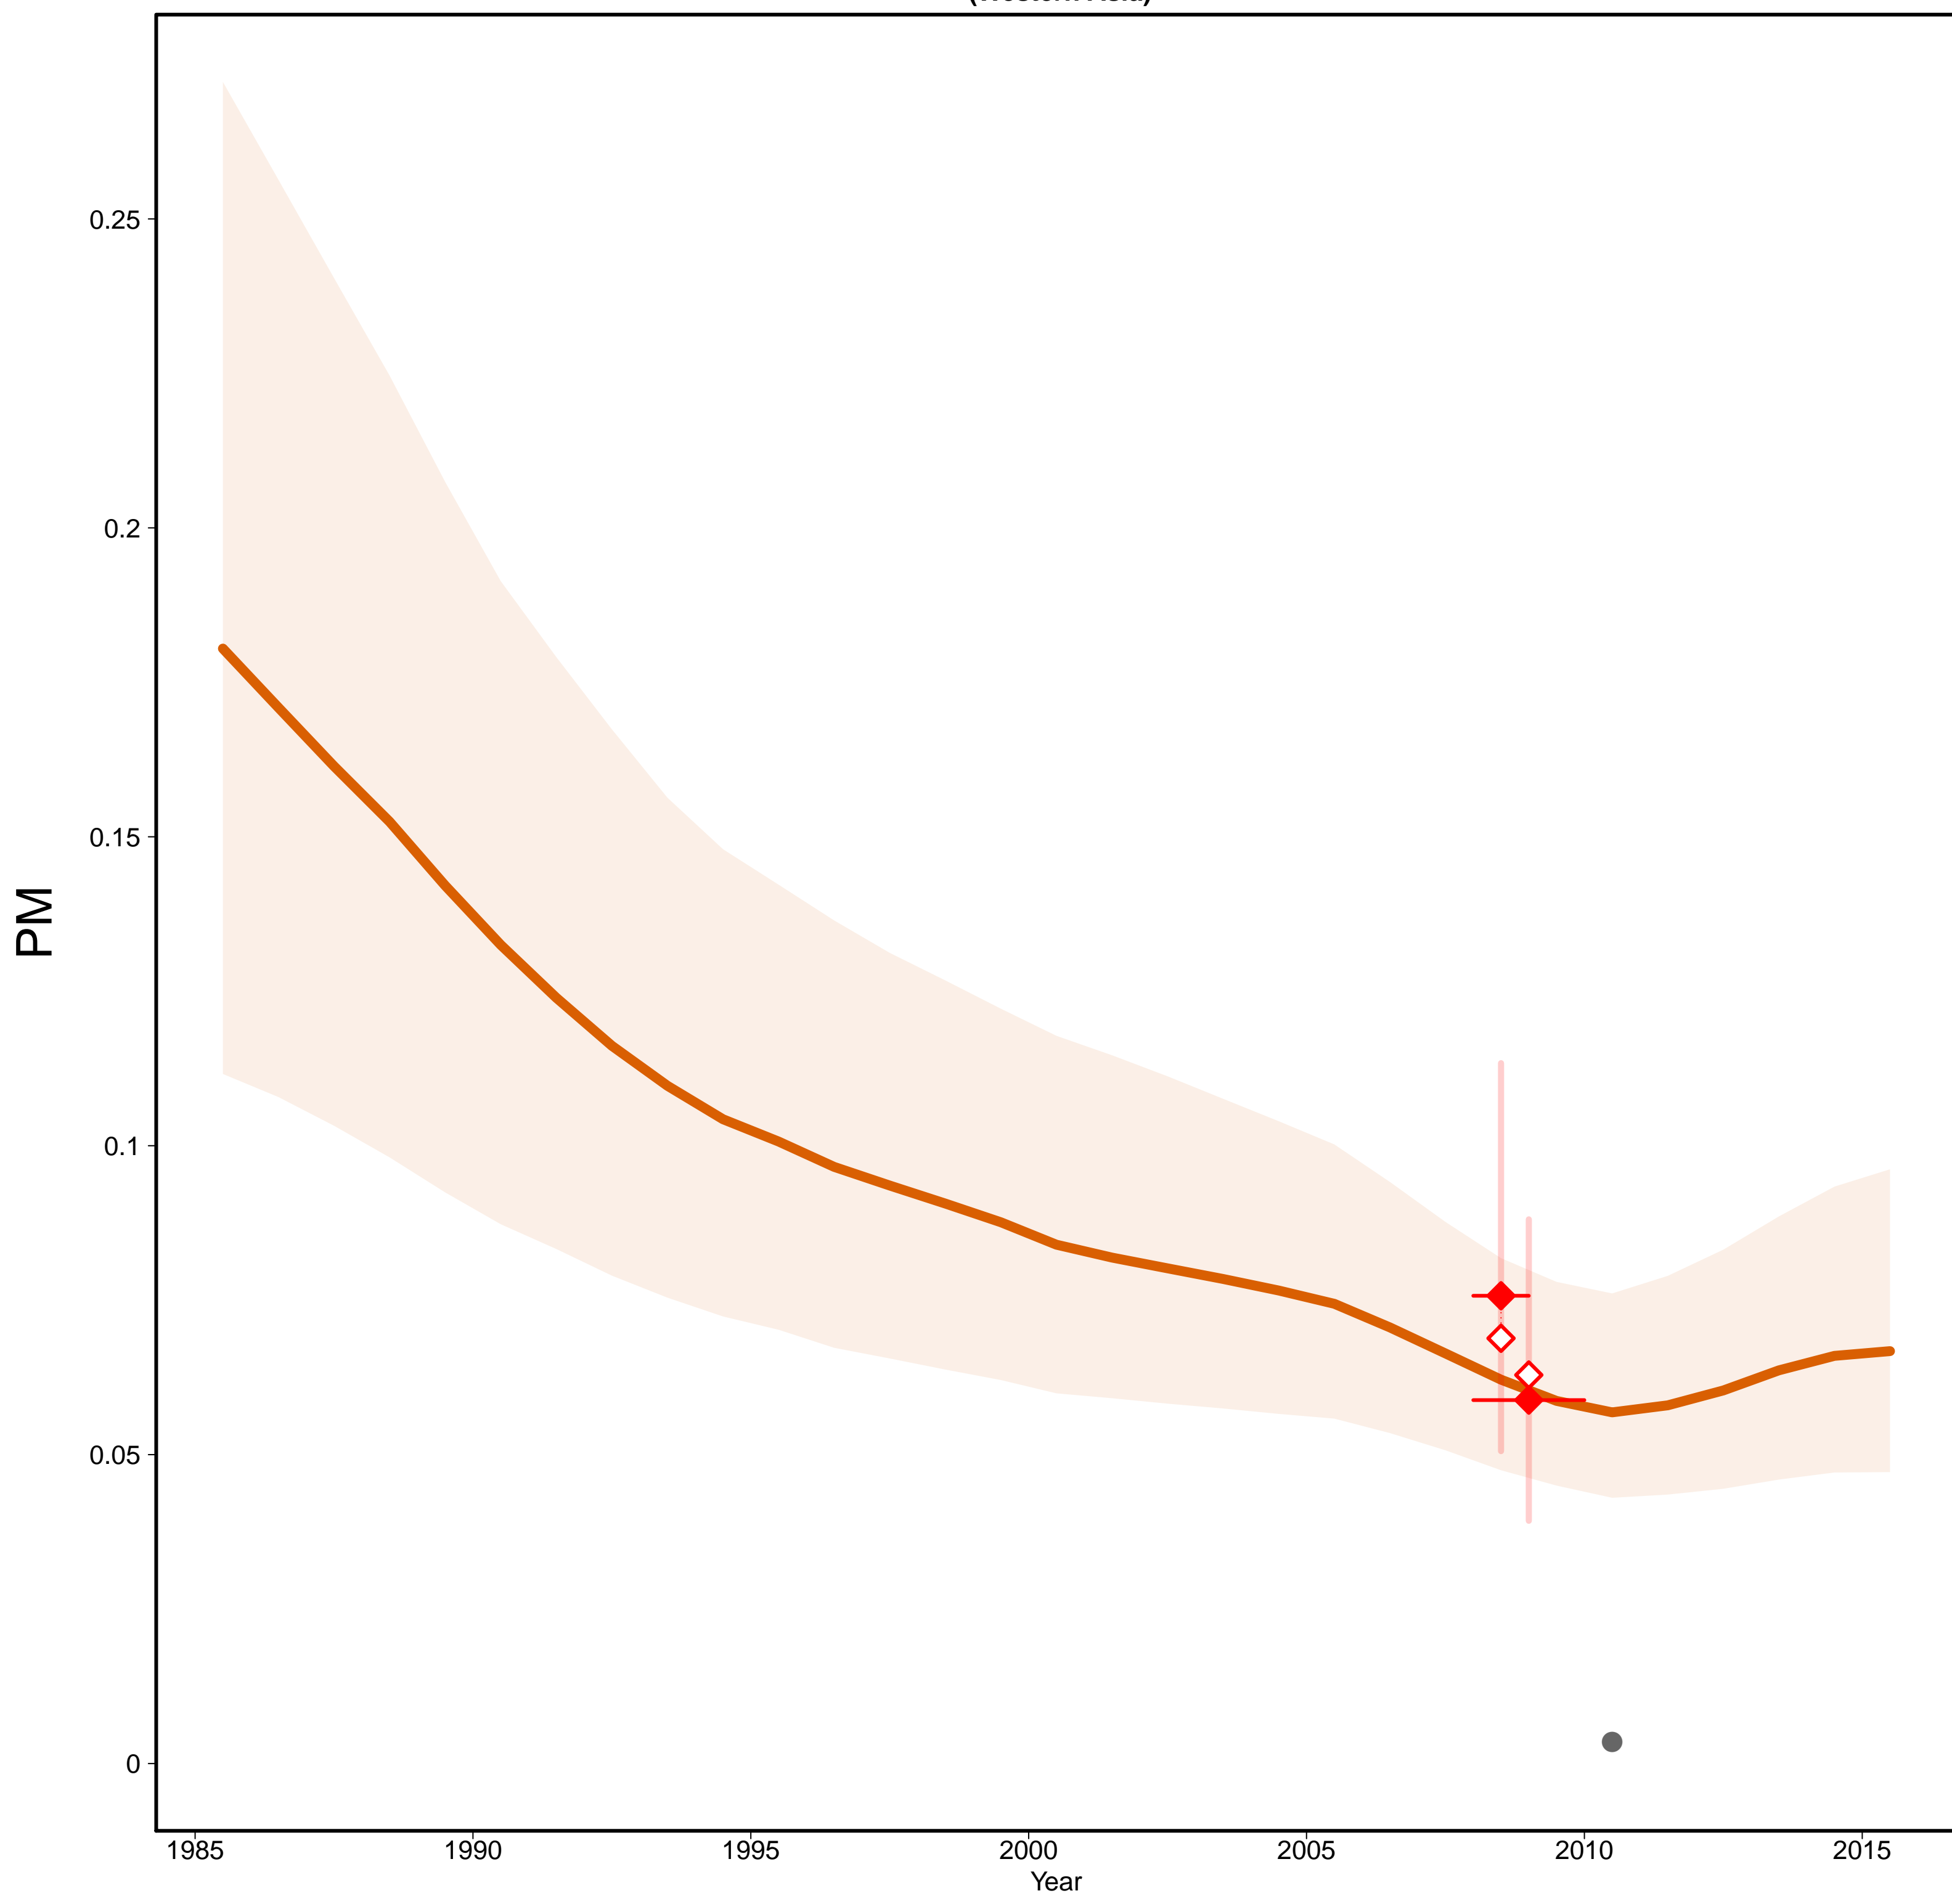

Syrian Arab Republic [SYR]  
(Western Asia)

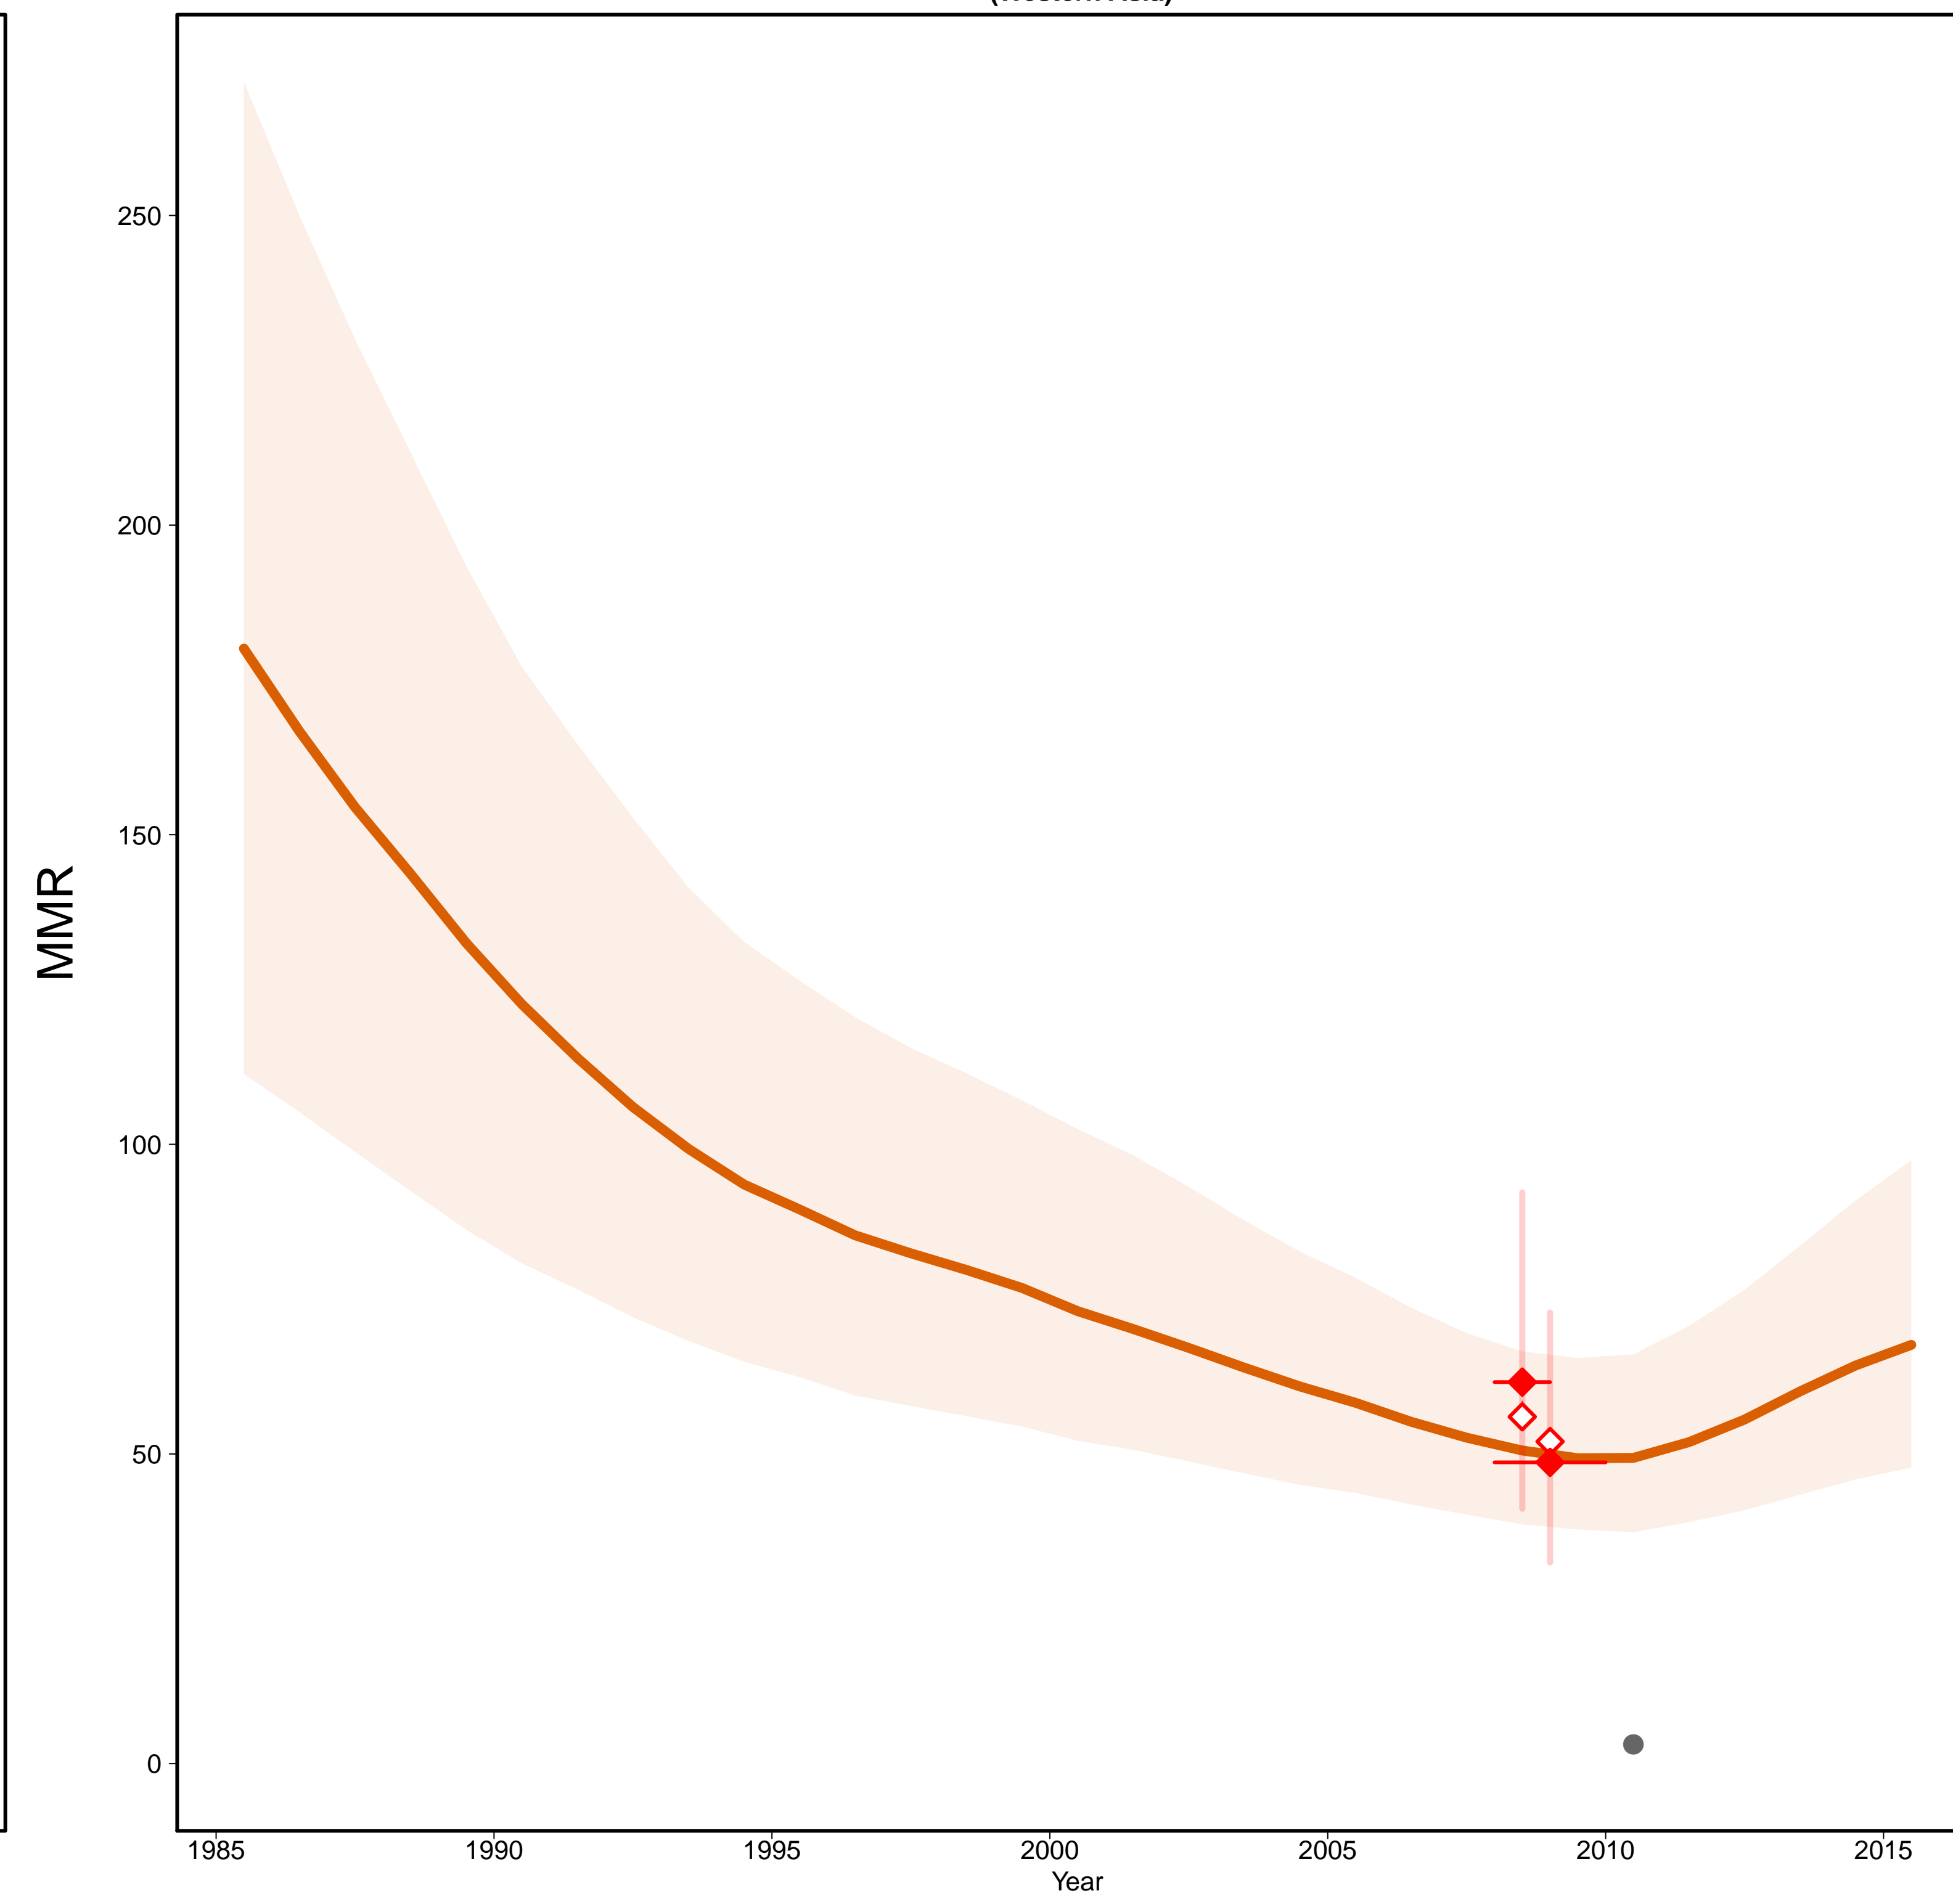

- Estimates –
- Mlate
- MMR Database 2015 –
- ◇ Observed Data
- ◆ Adjusted Data
- Data type –
- ◆ Misc. studies
- Excluded VR data  
(data quality issues)

Gross Domestic Product

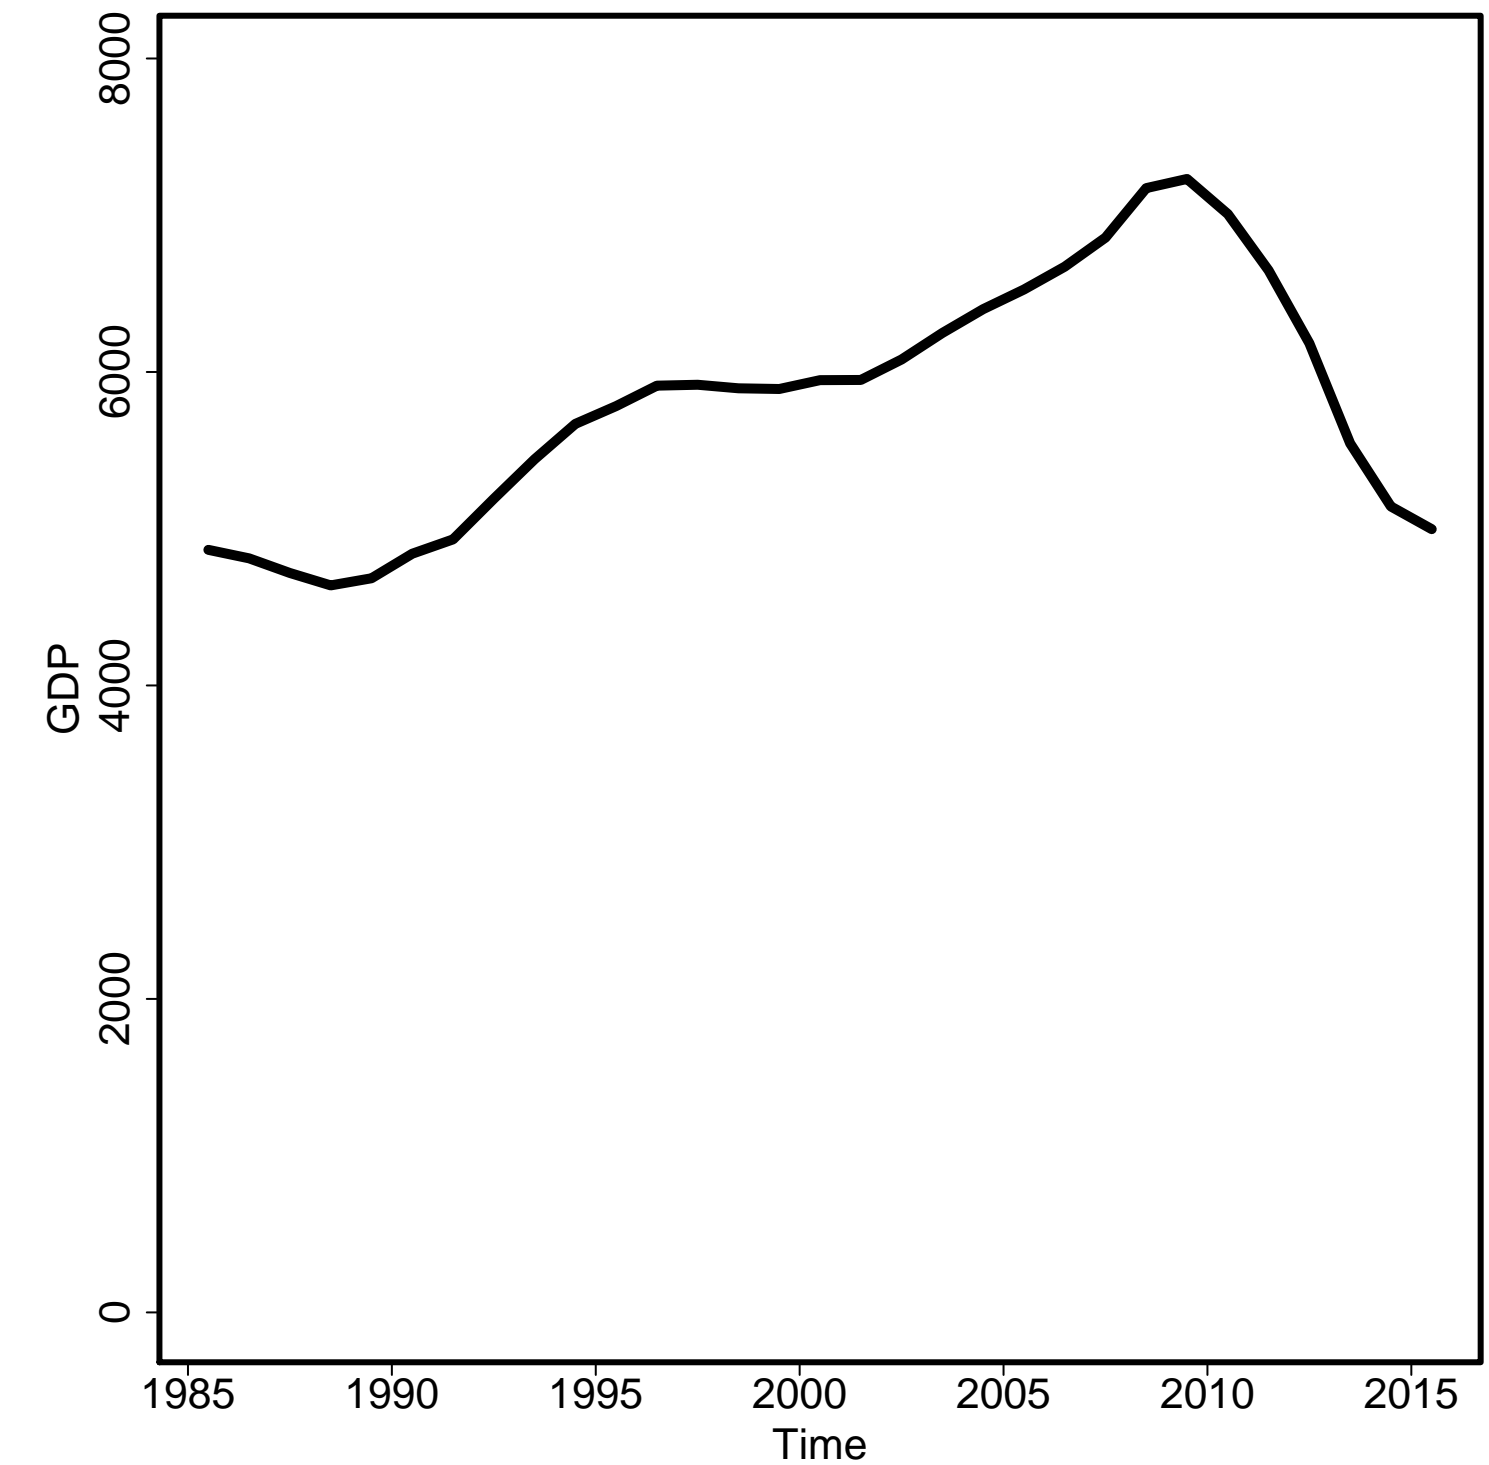

General Fertility Rate

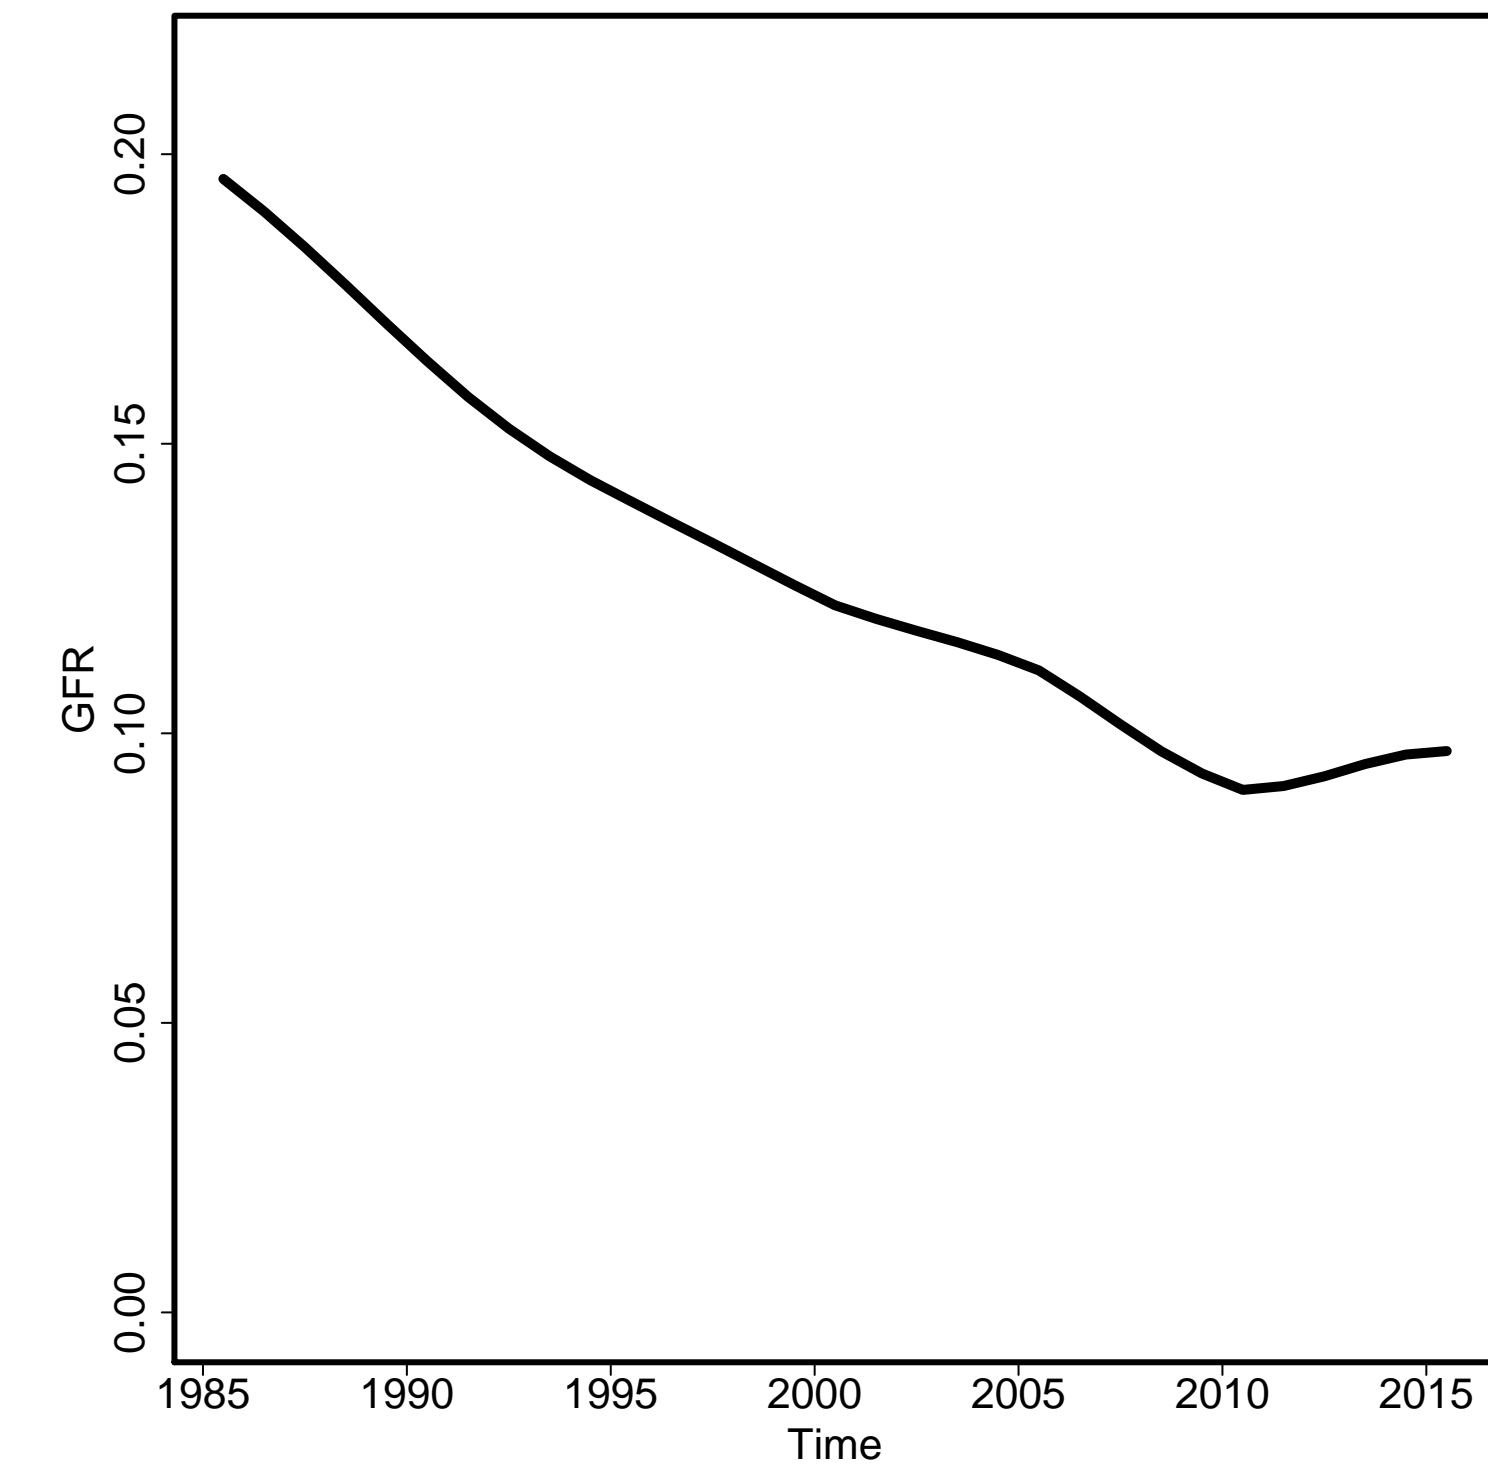

Skilled Attendance to Birth

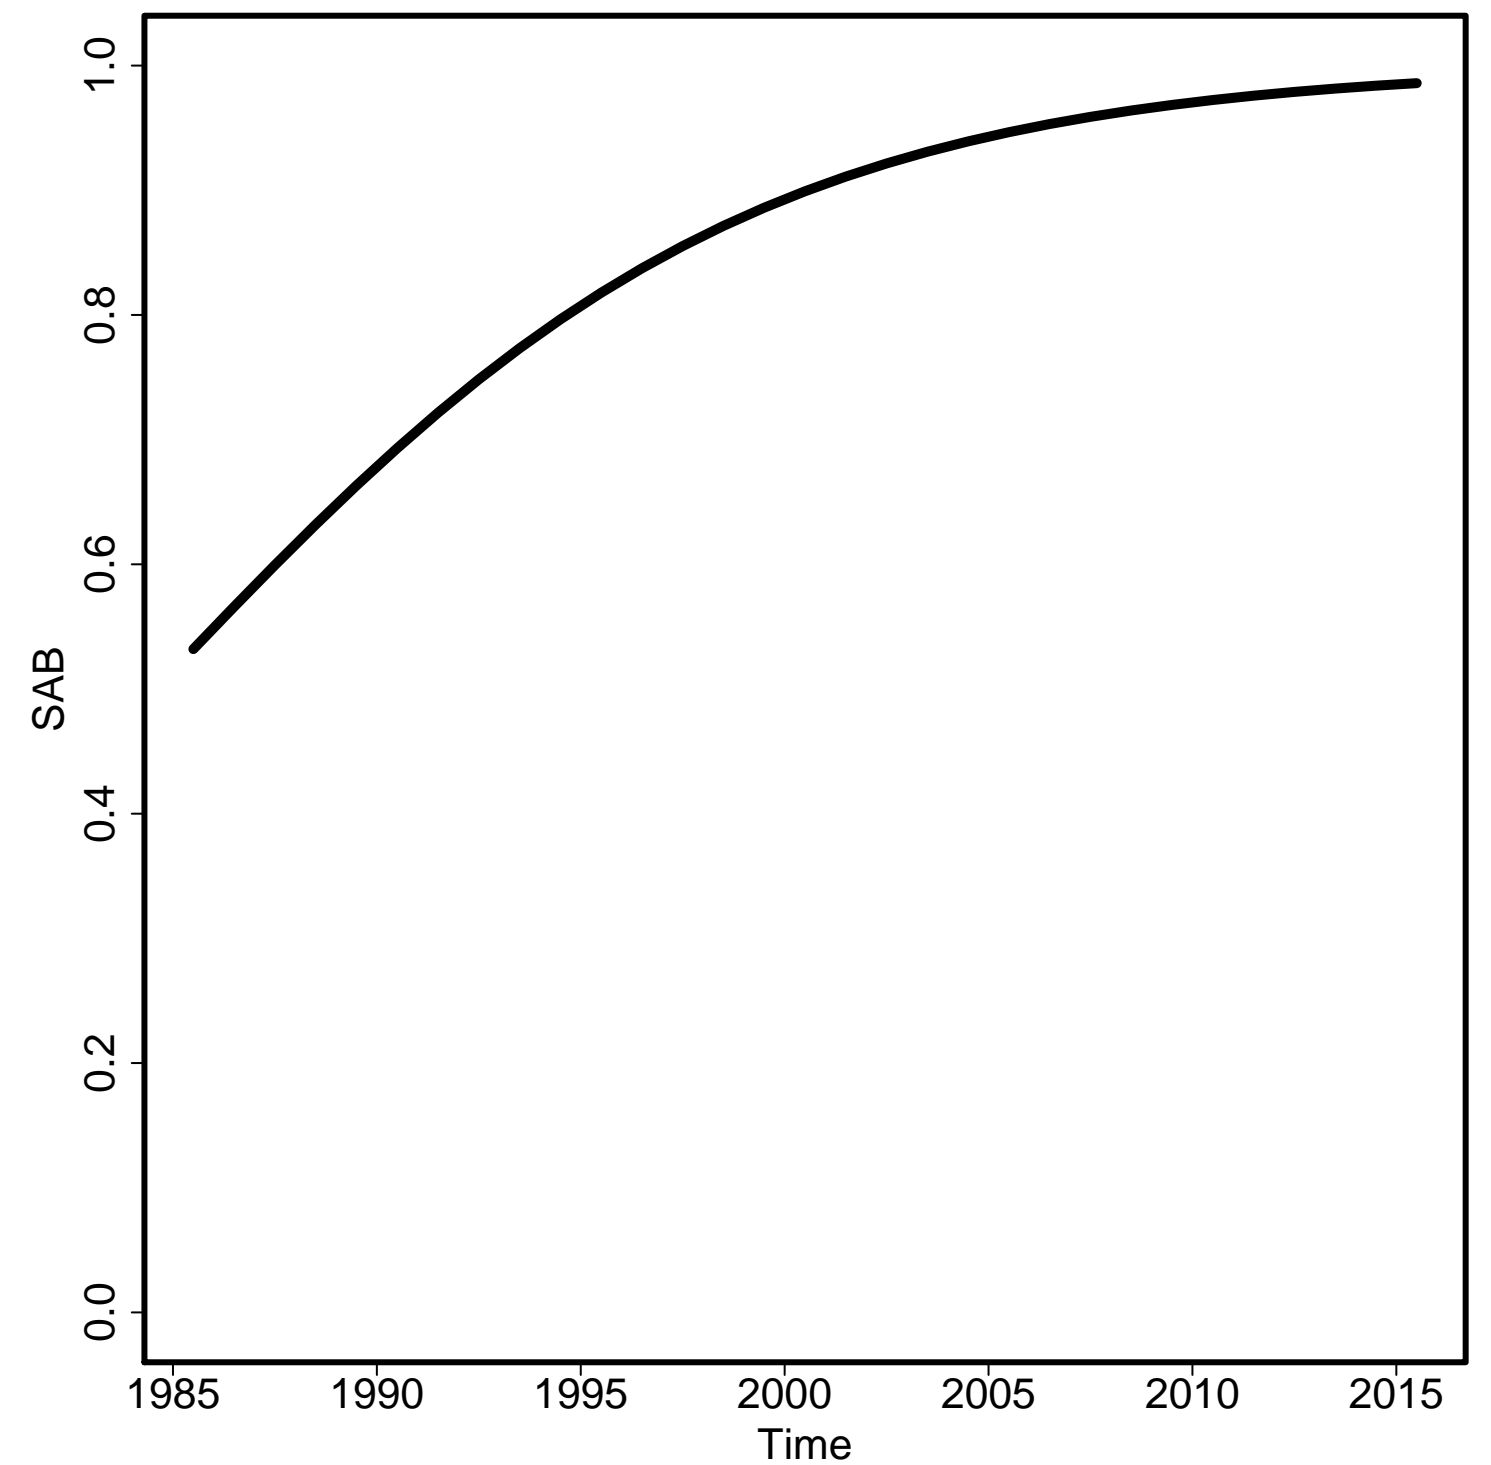

Envelope/Births

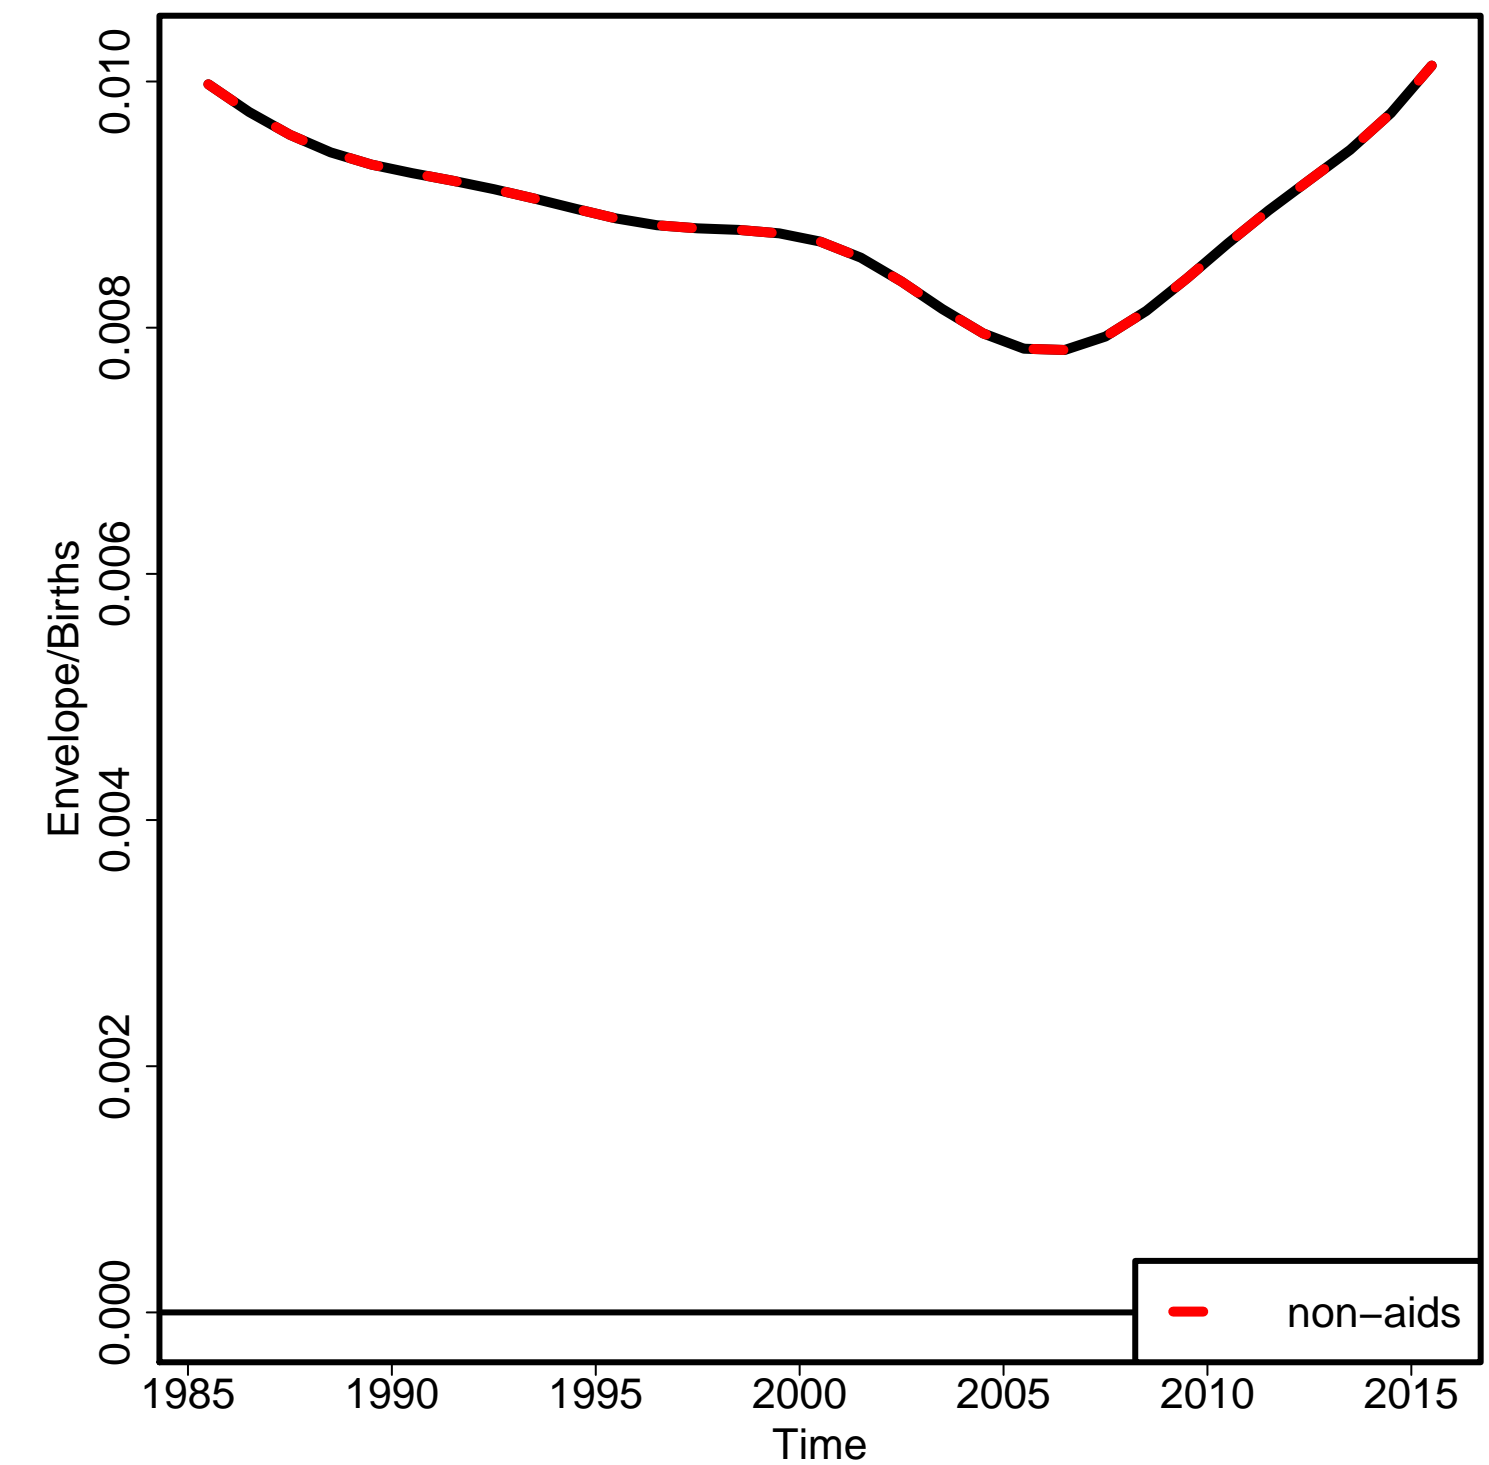

Non-aids MMR

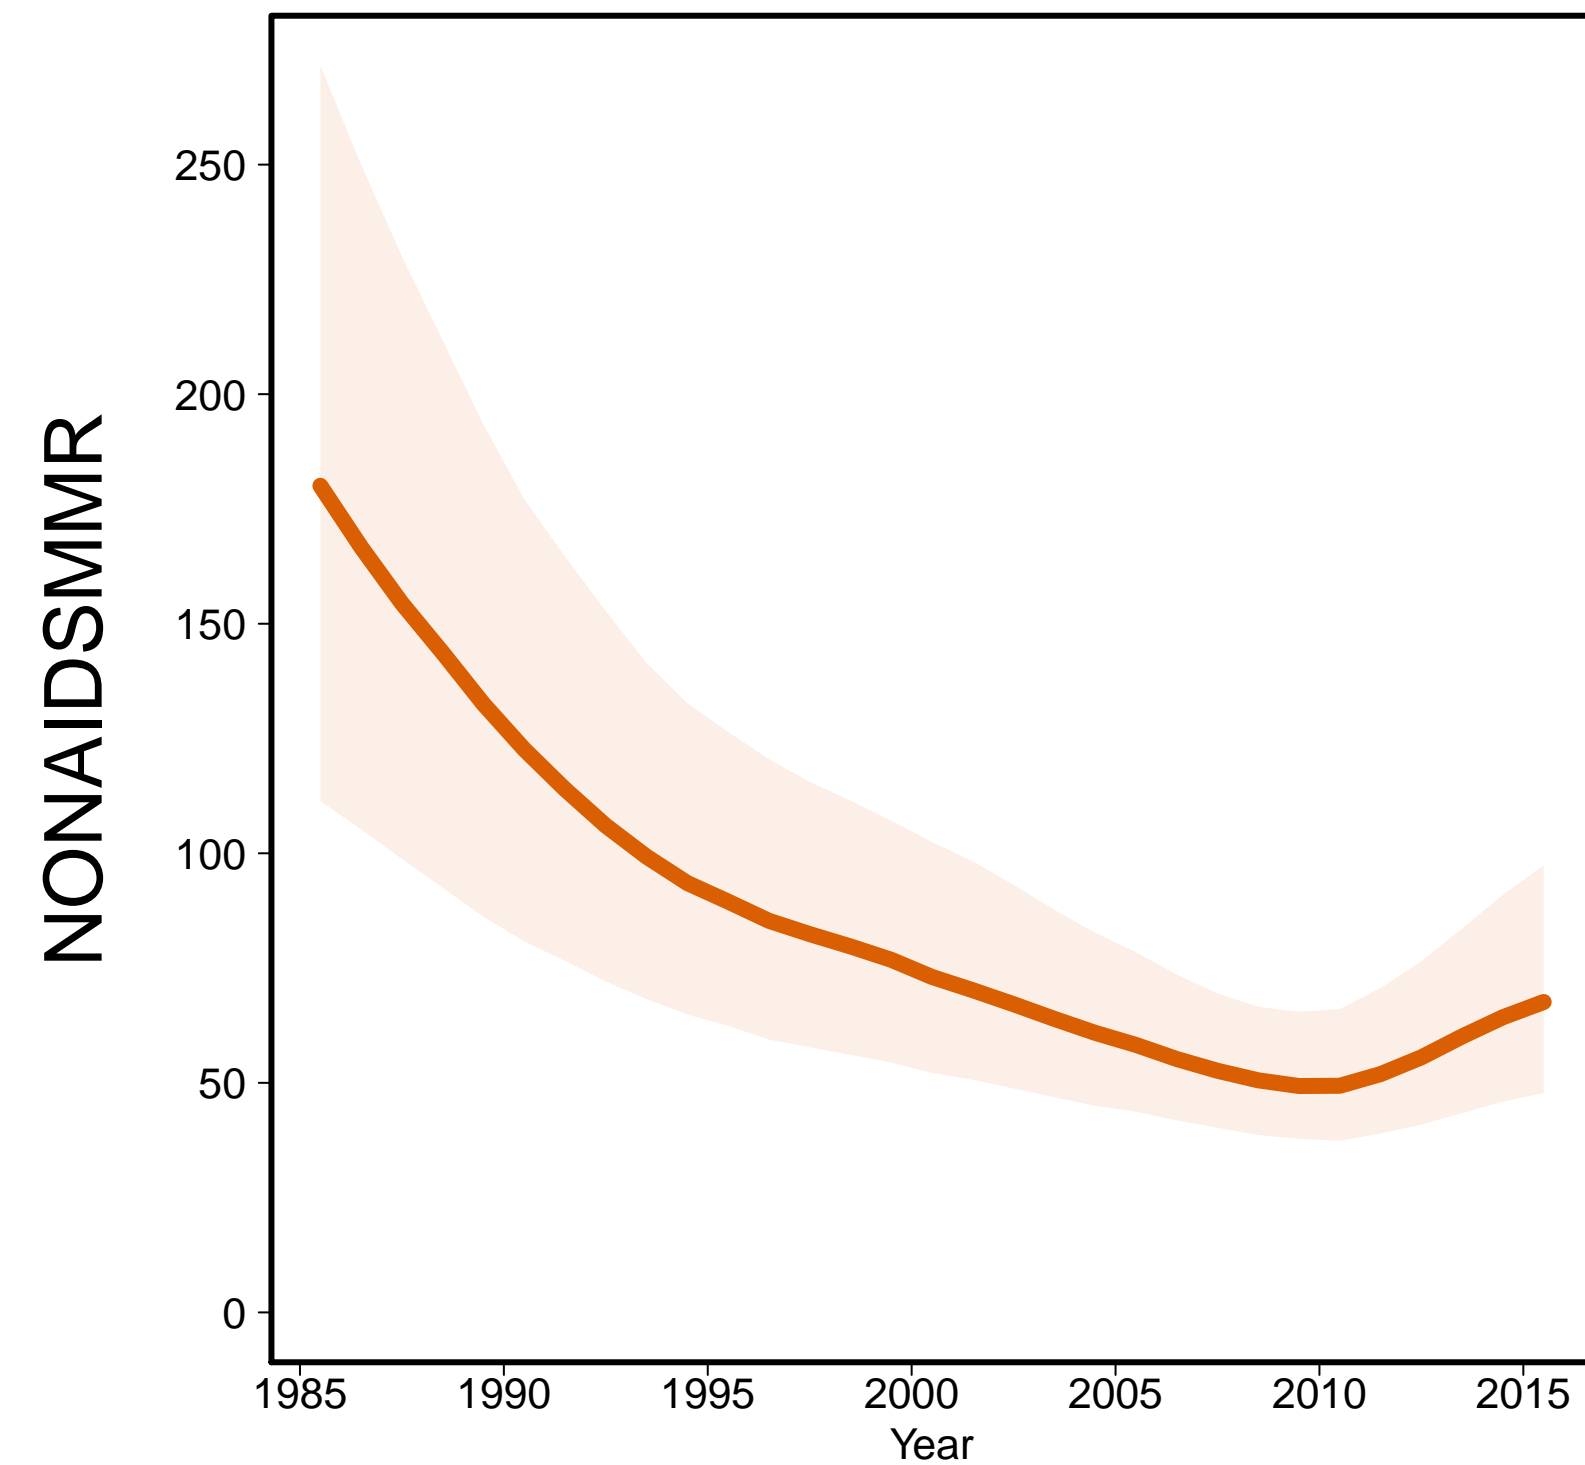

Aids MMR



Tajikistan [TJK]  
(Central Asia)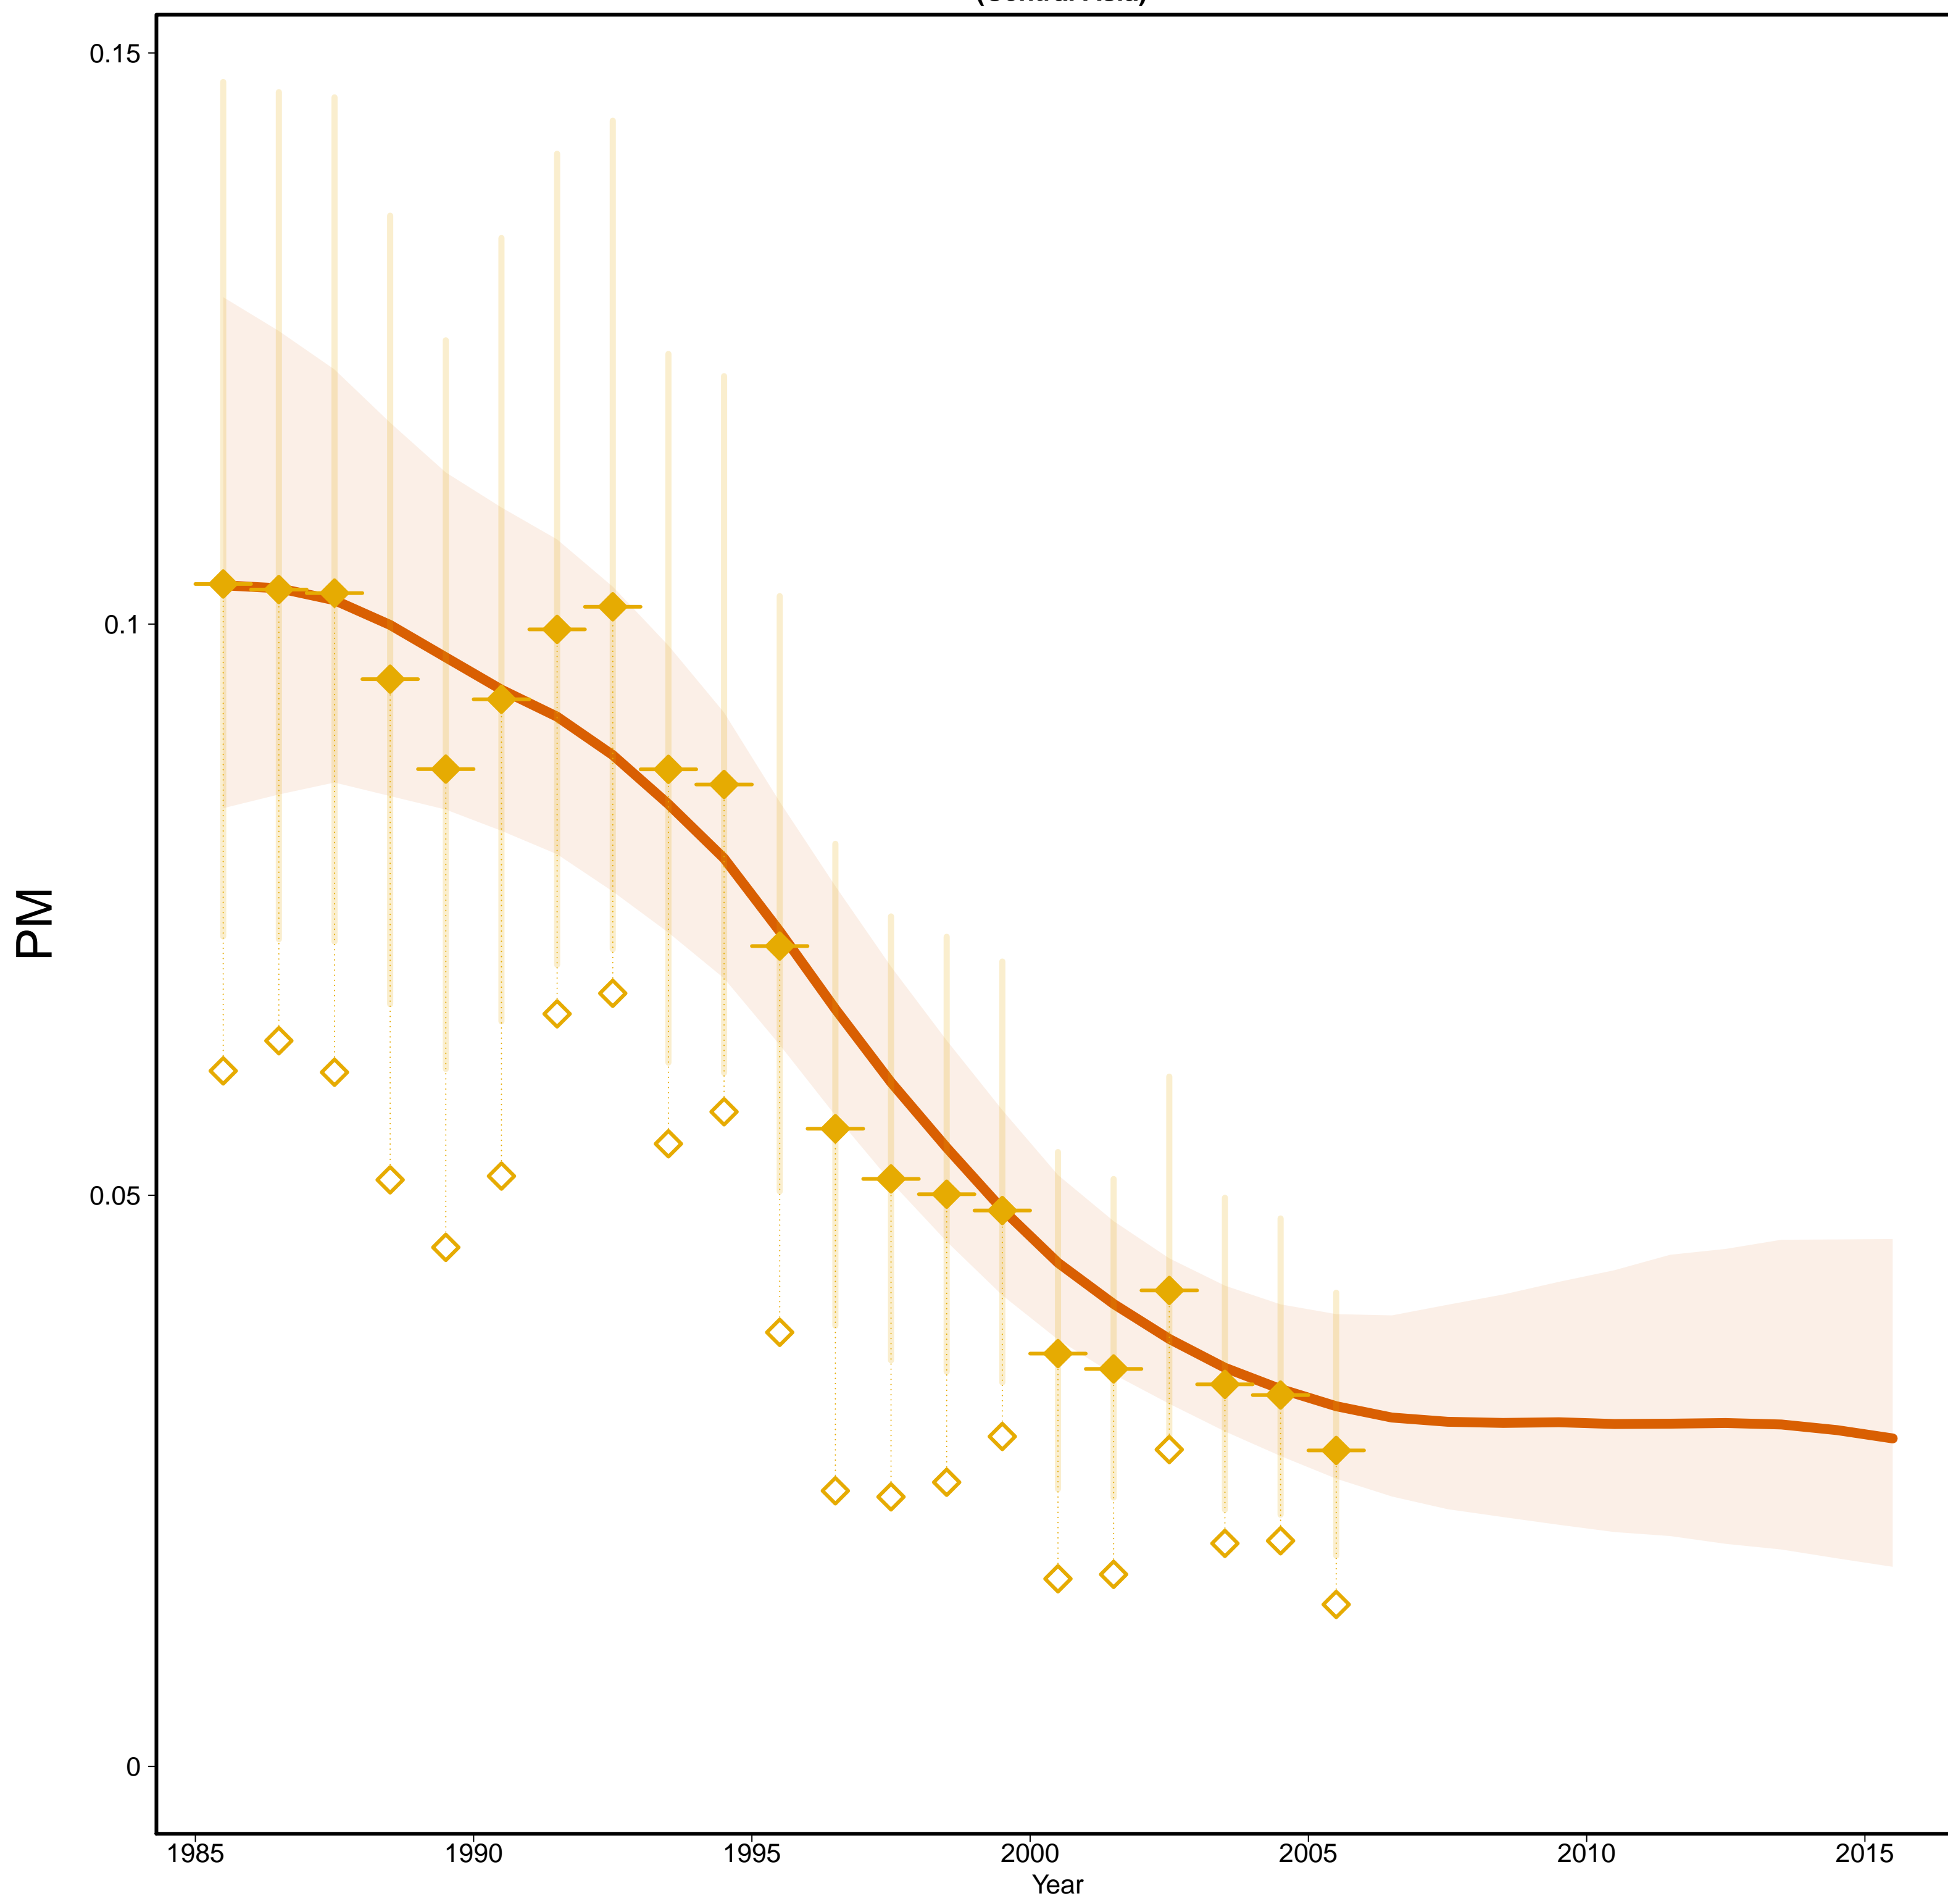Tajikistan [TJK]  
(Central Asia)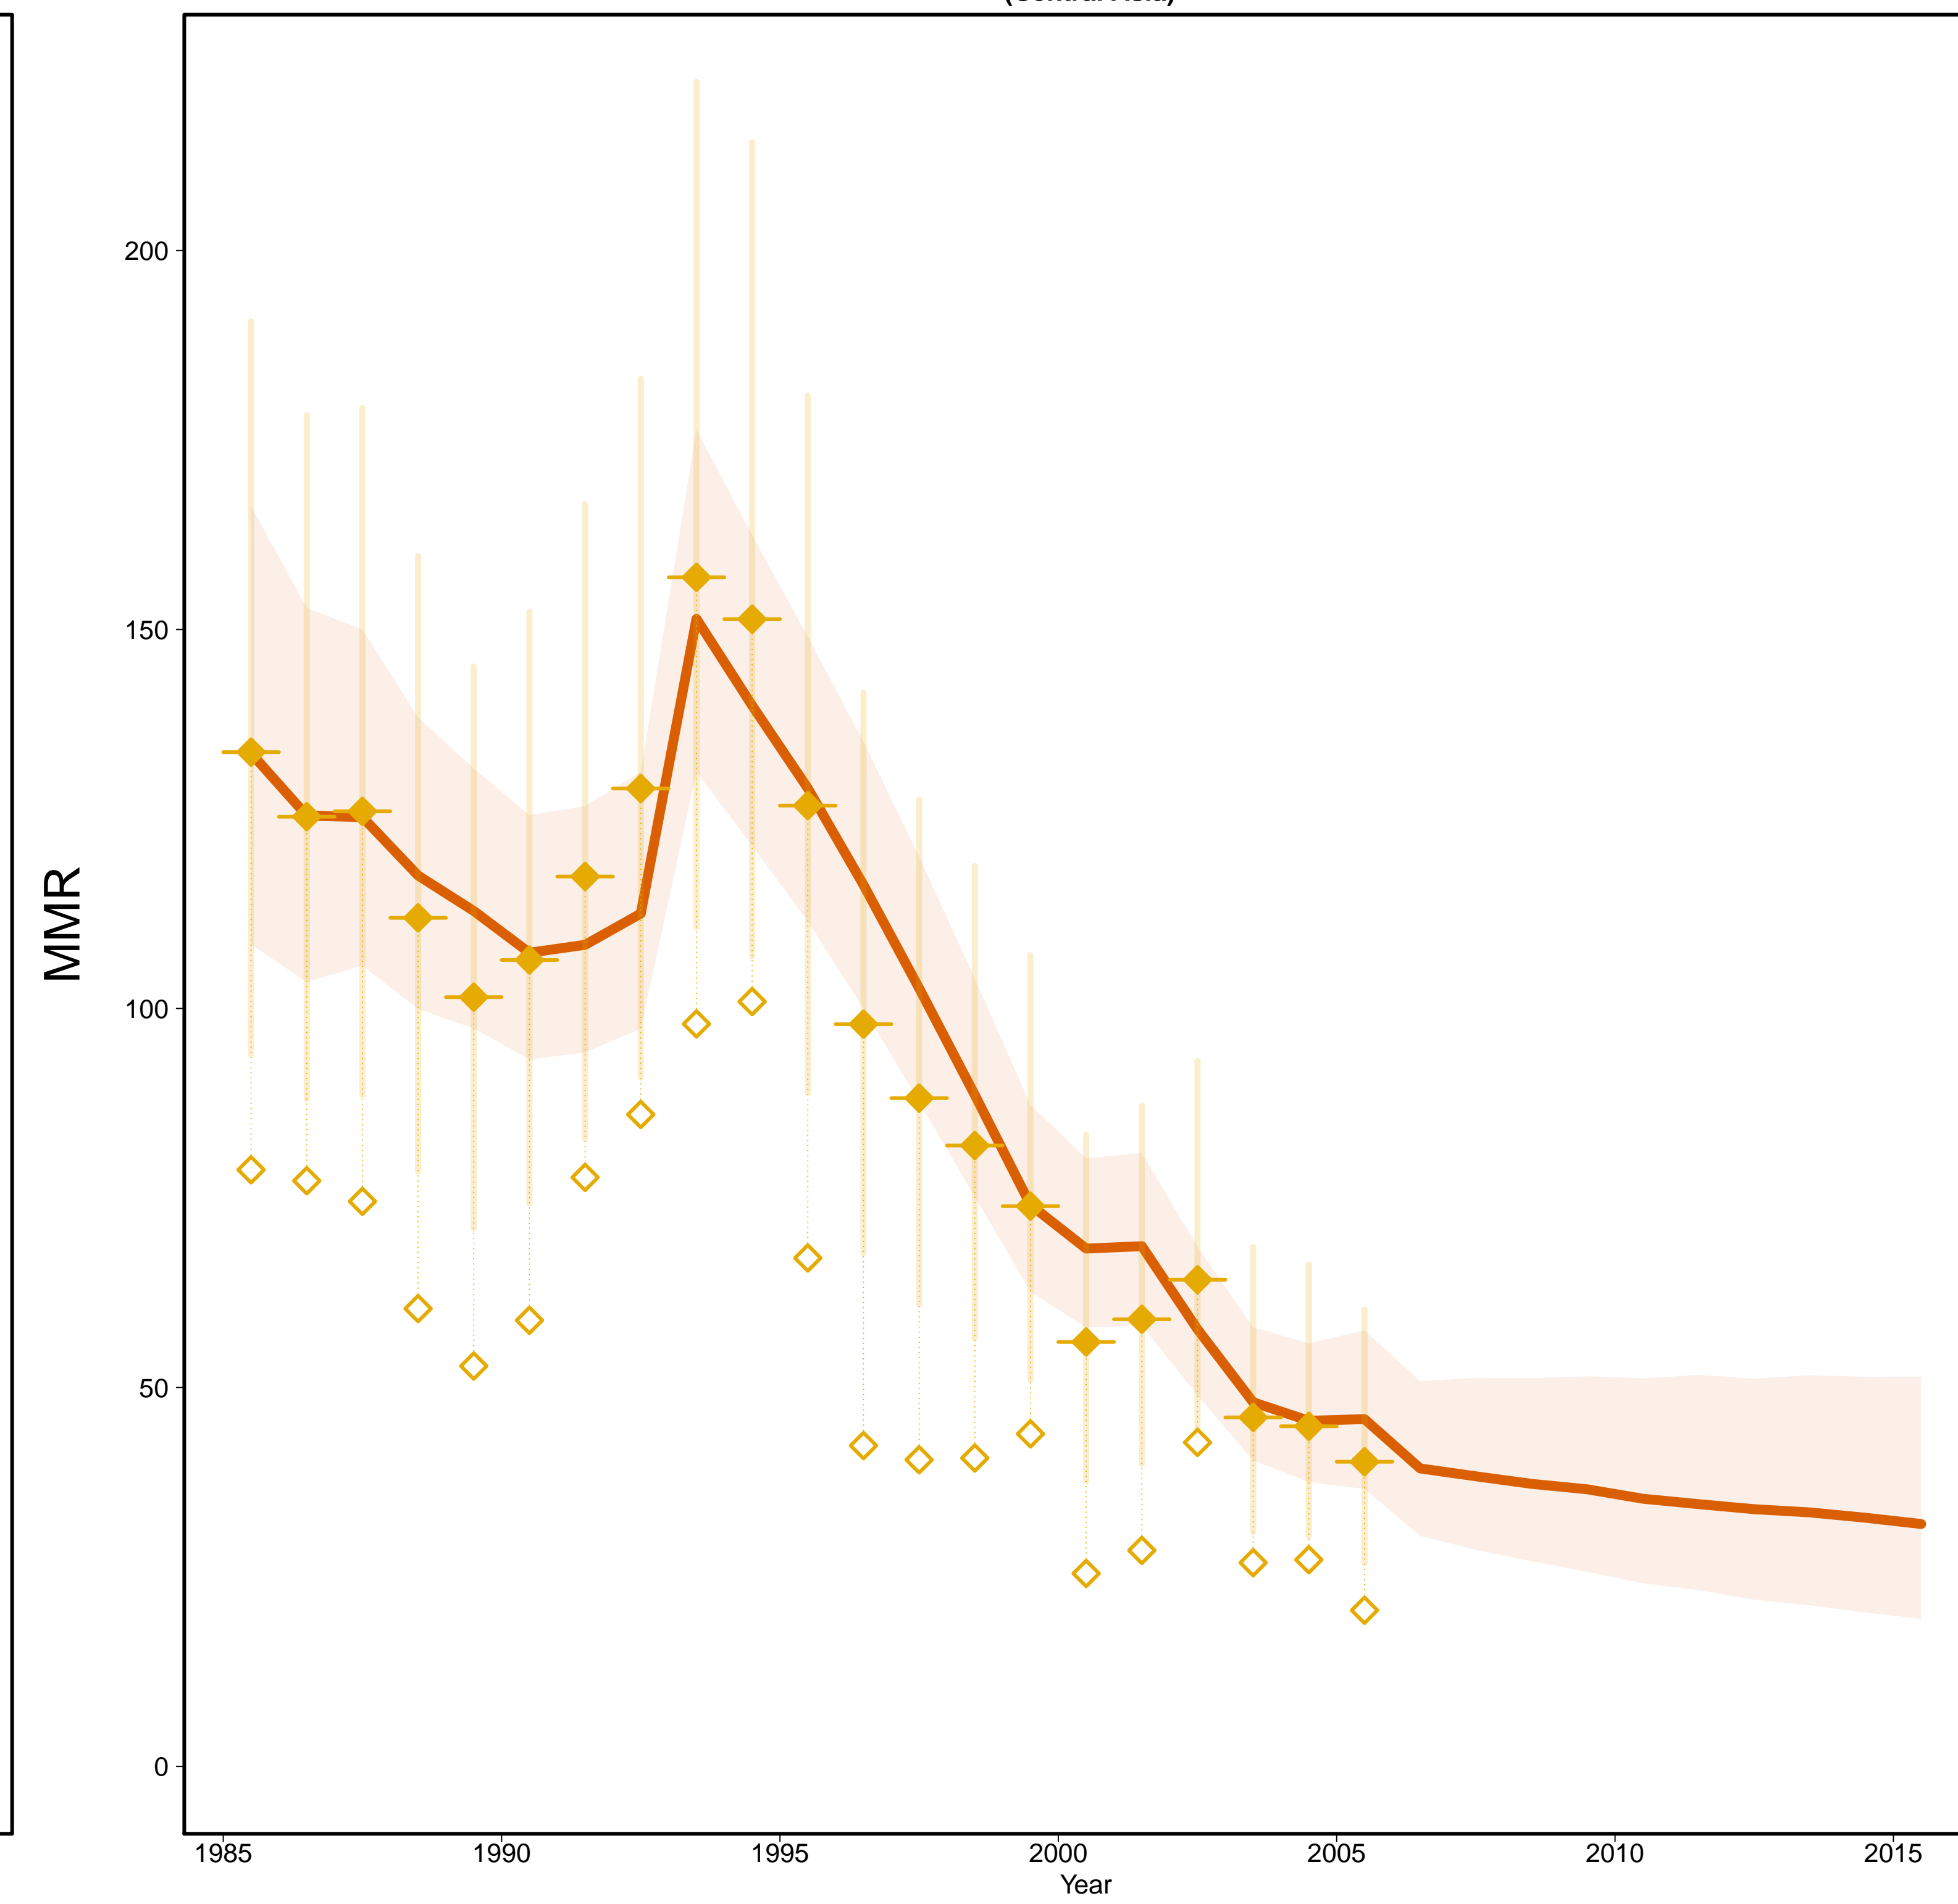

— Estimates —  
 Mlate  
 — MMR Database 2015 —  
 ◊ Observed Data  
 ◆ Adjusted Data  
 — Data type —  
 ◆ VR

Gross Domestic Product

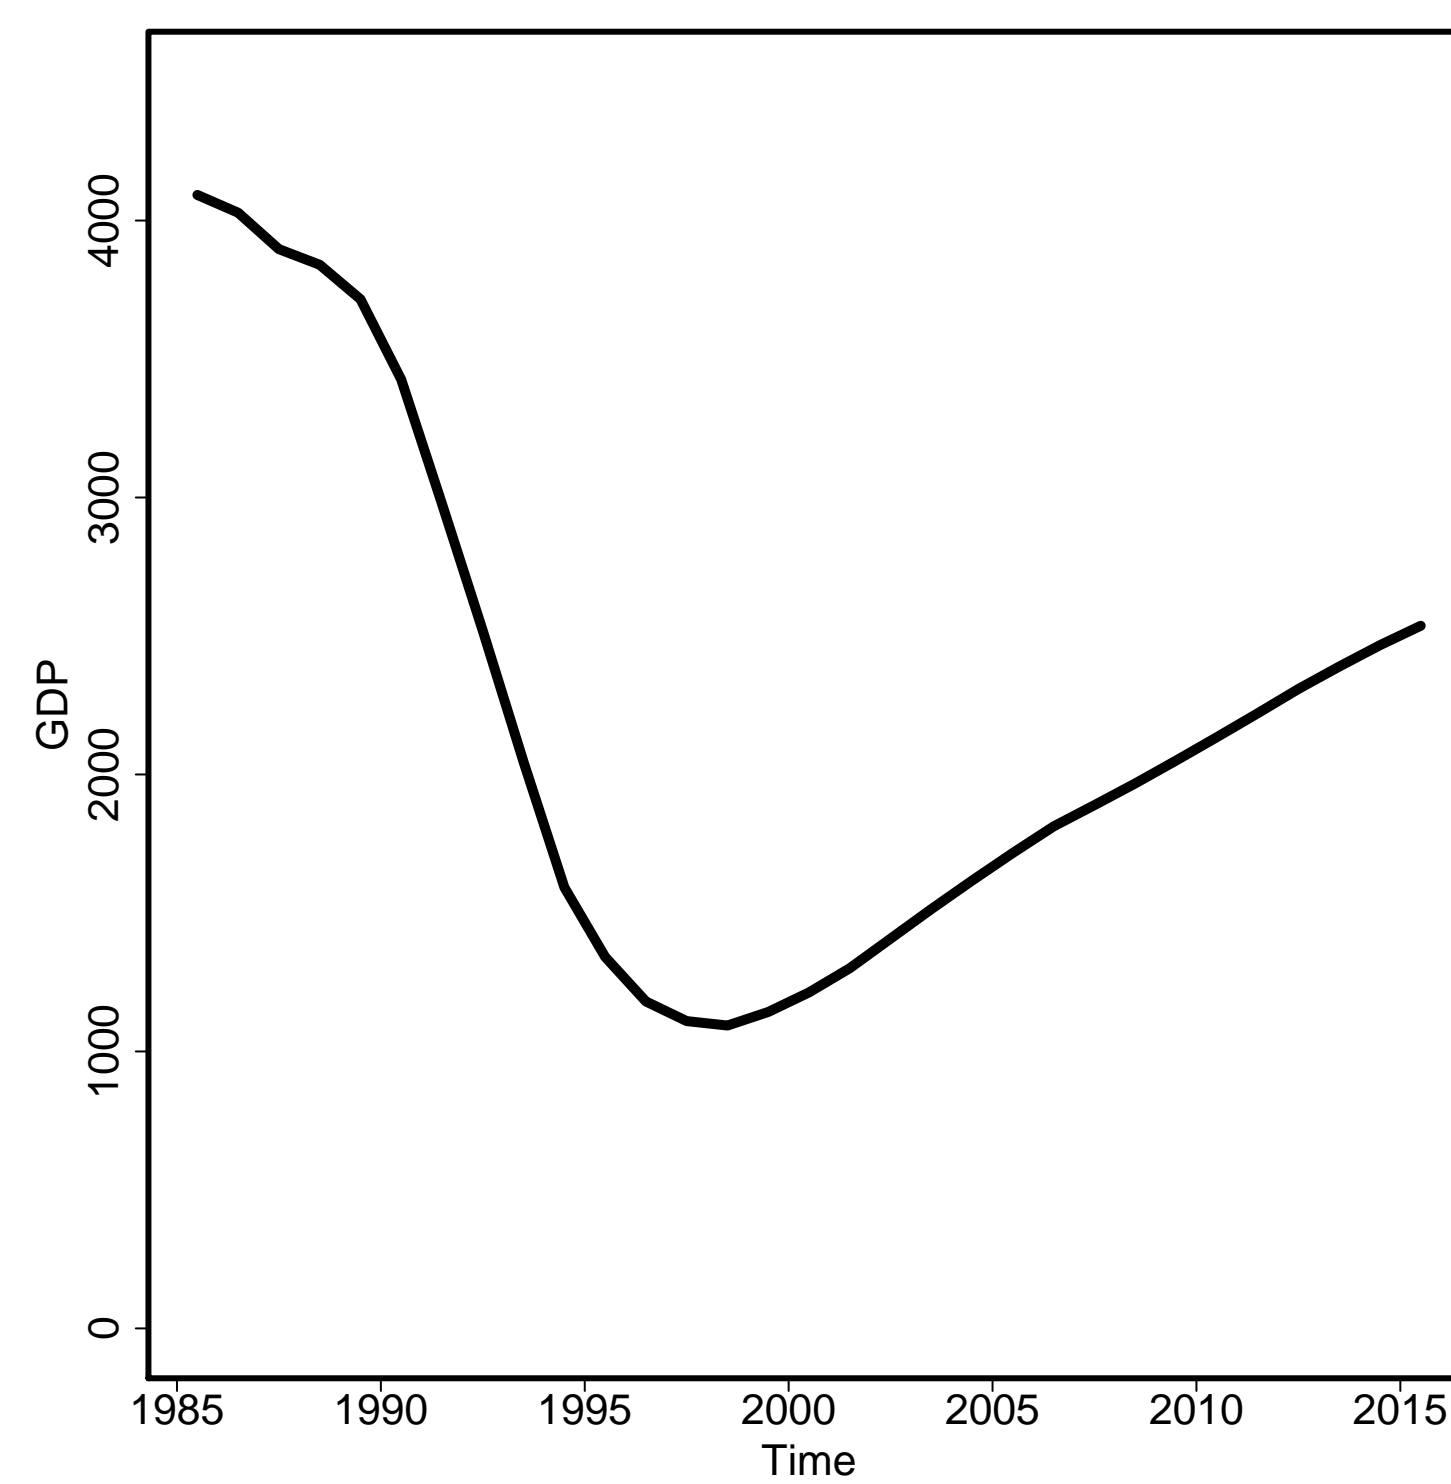

General Fertility Rate

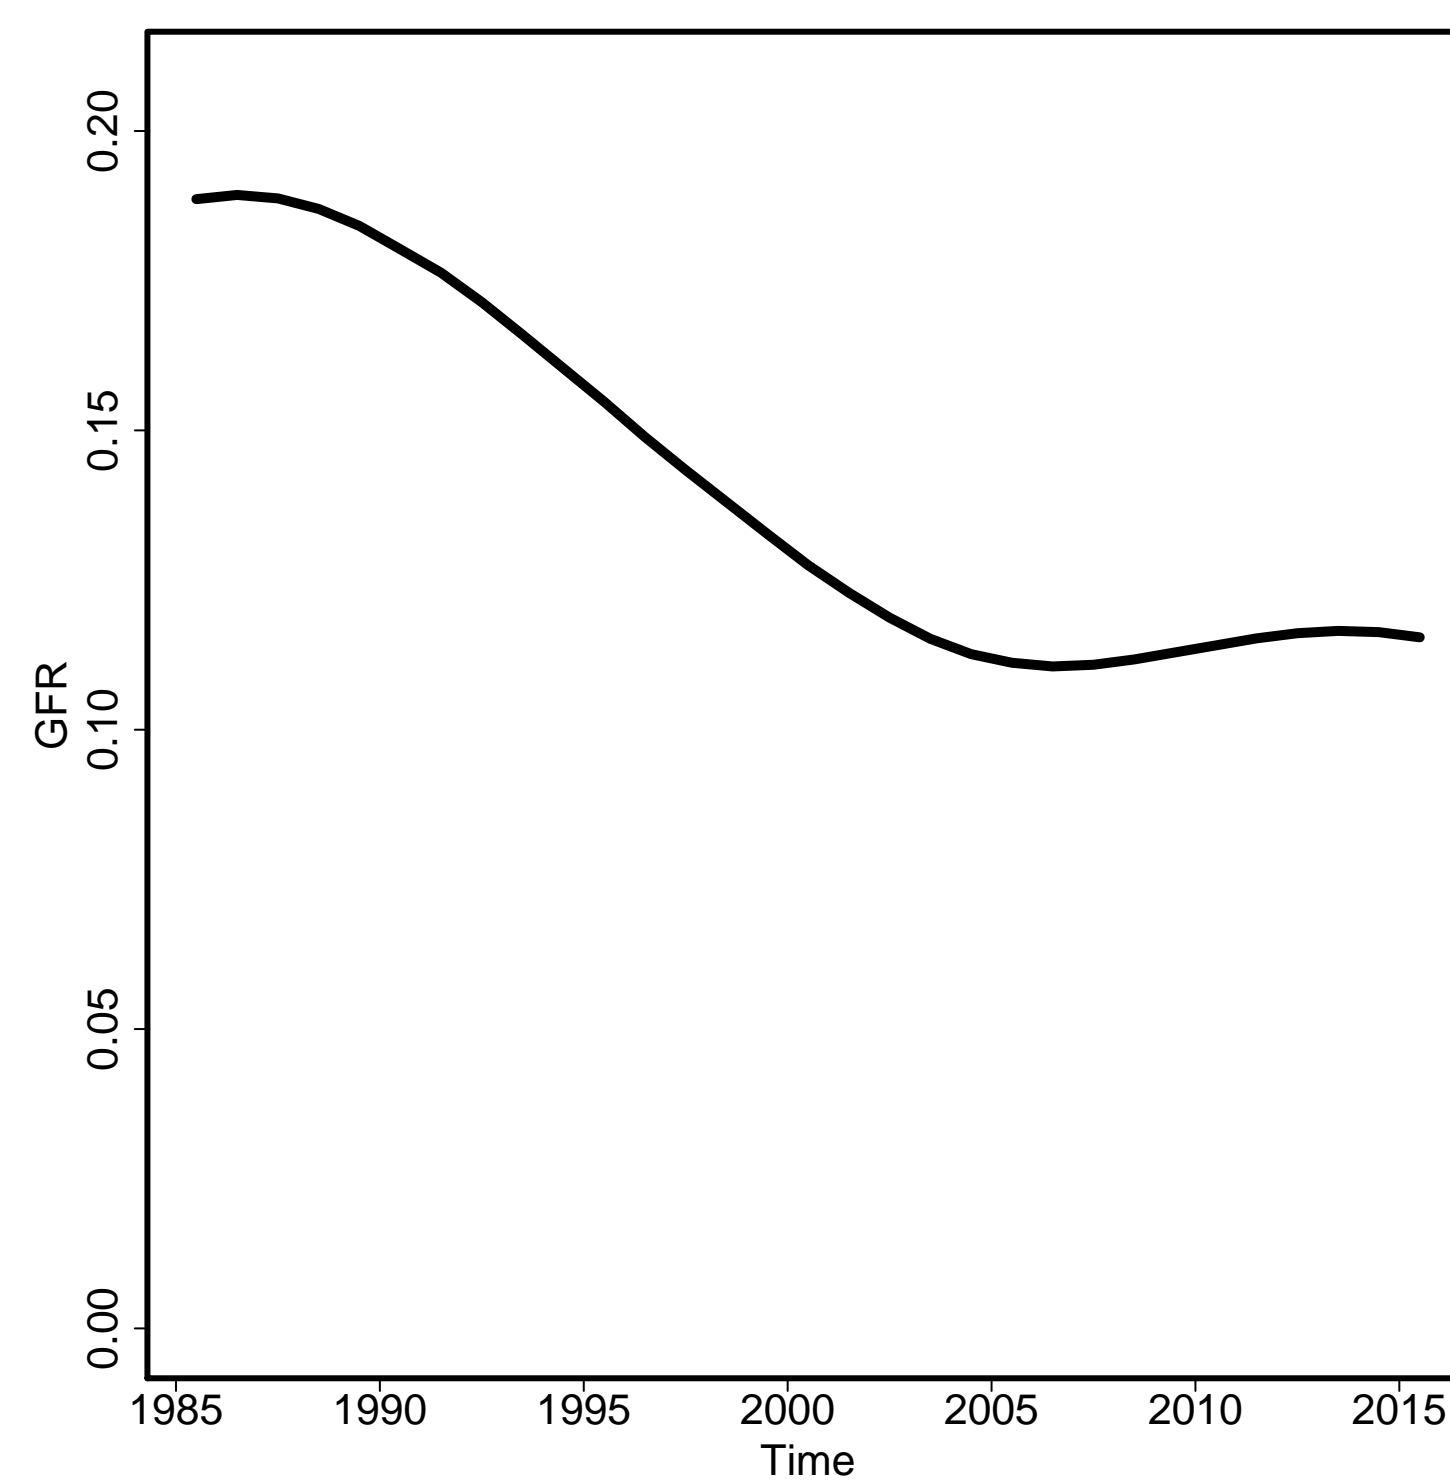

Skilled Attendance to Birth

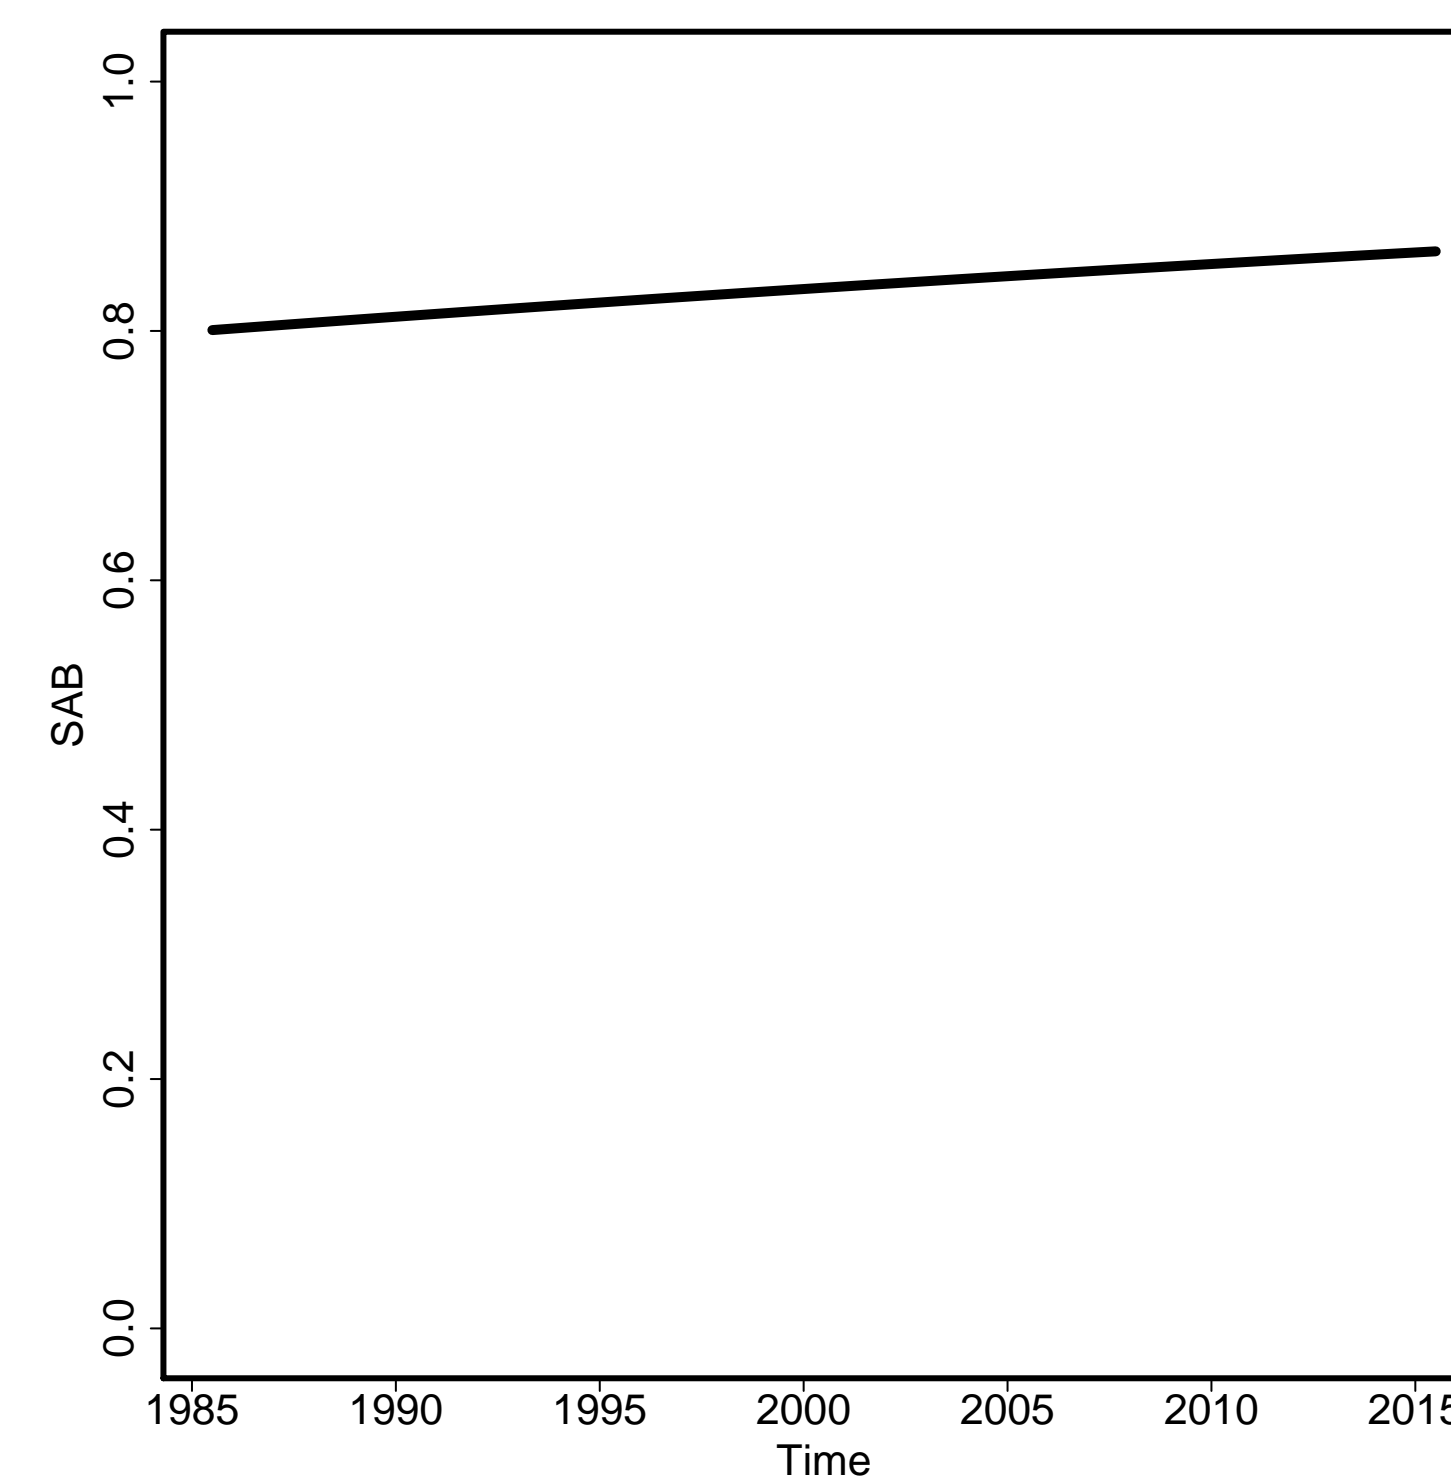

Envelope/Births

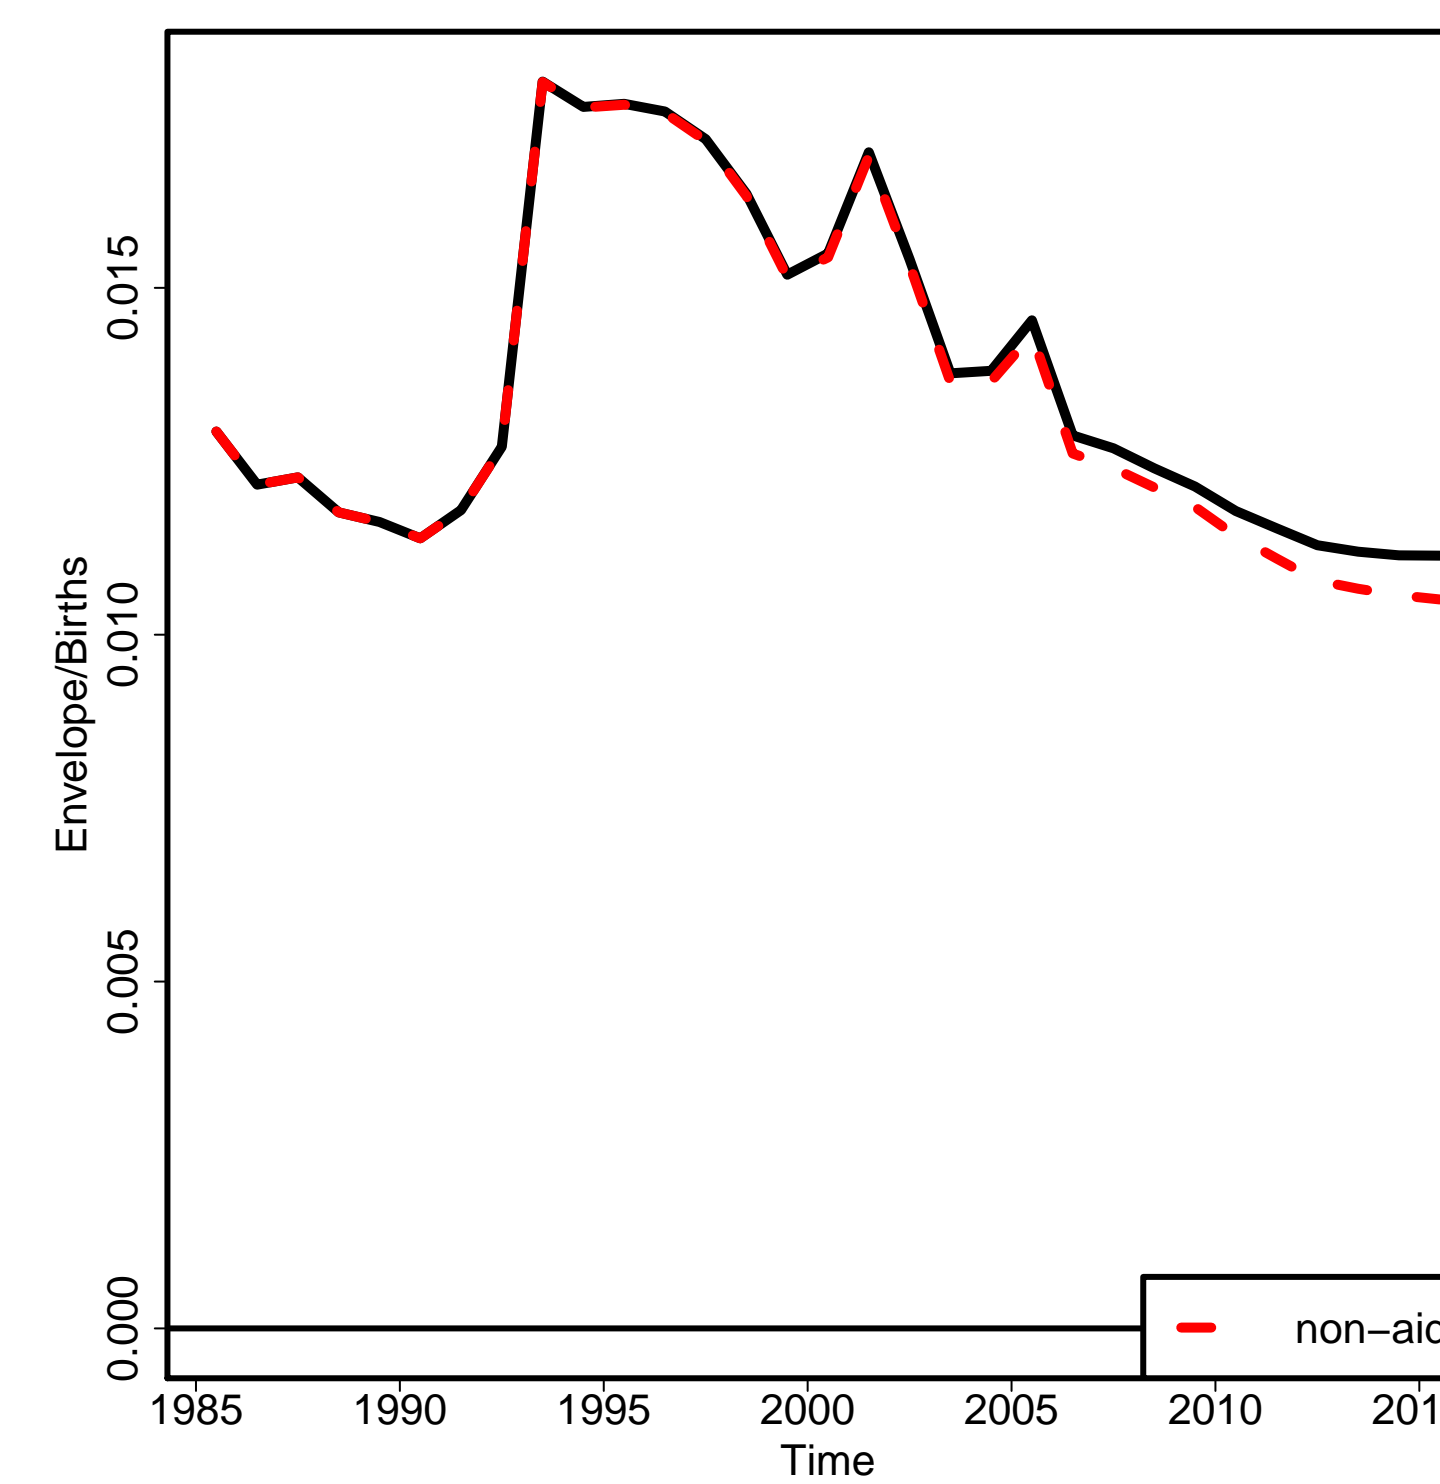

Non-aids MMR

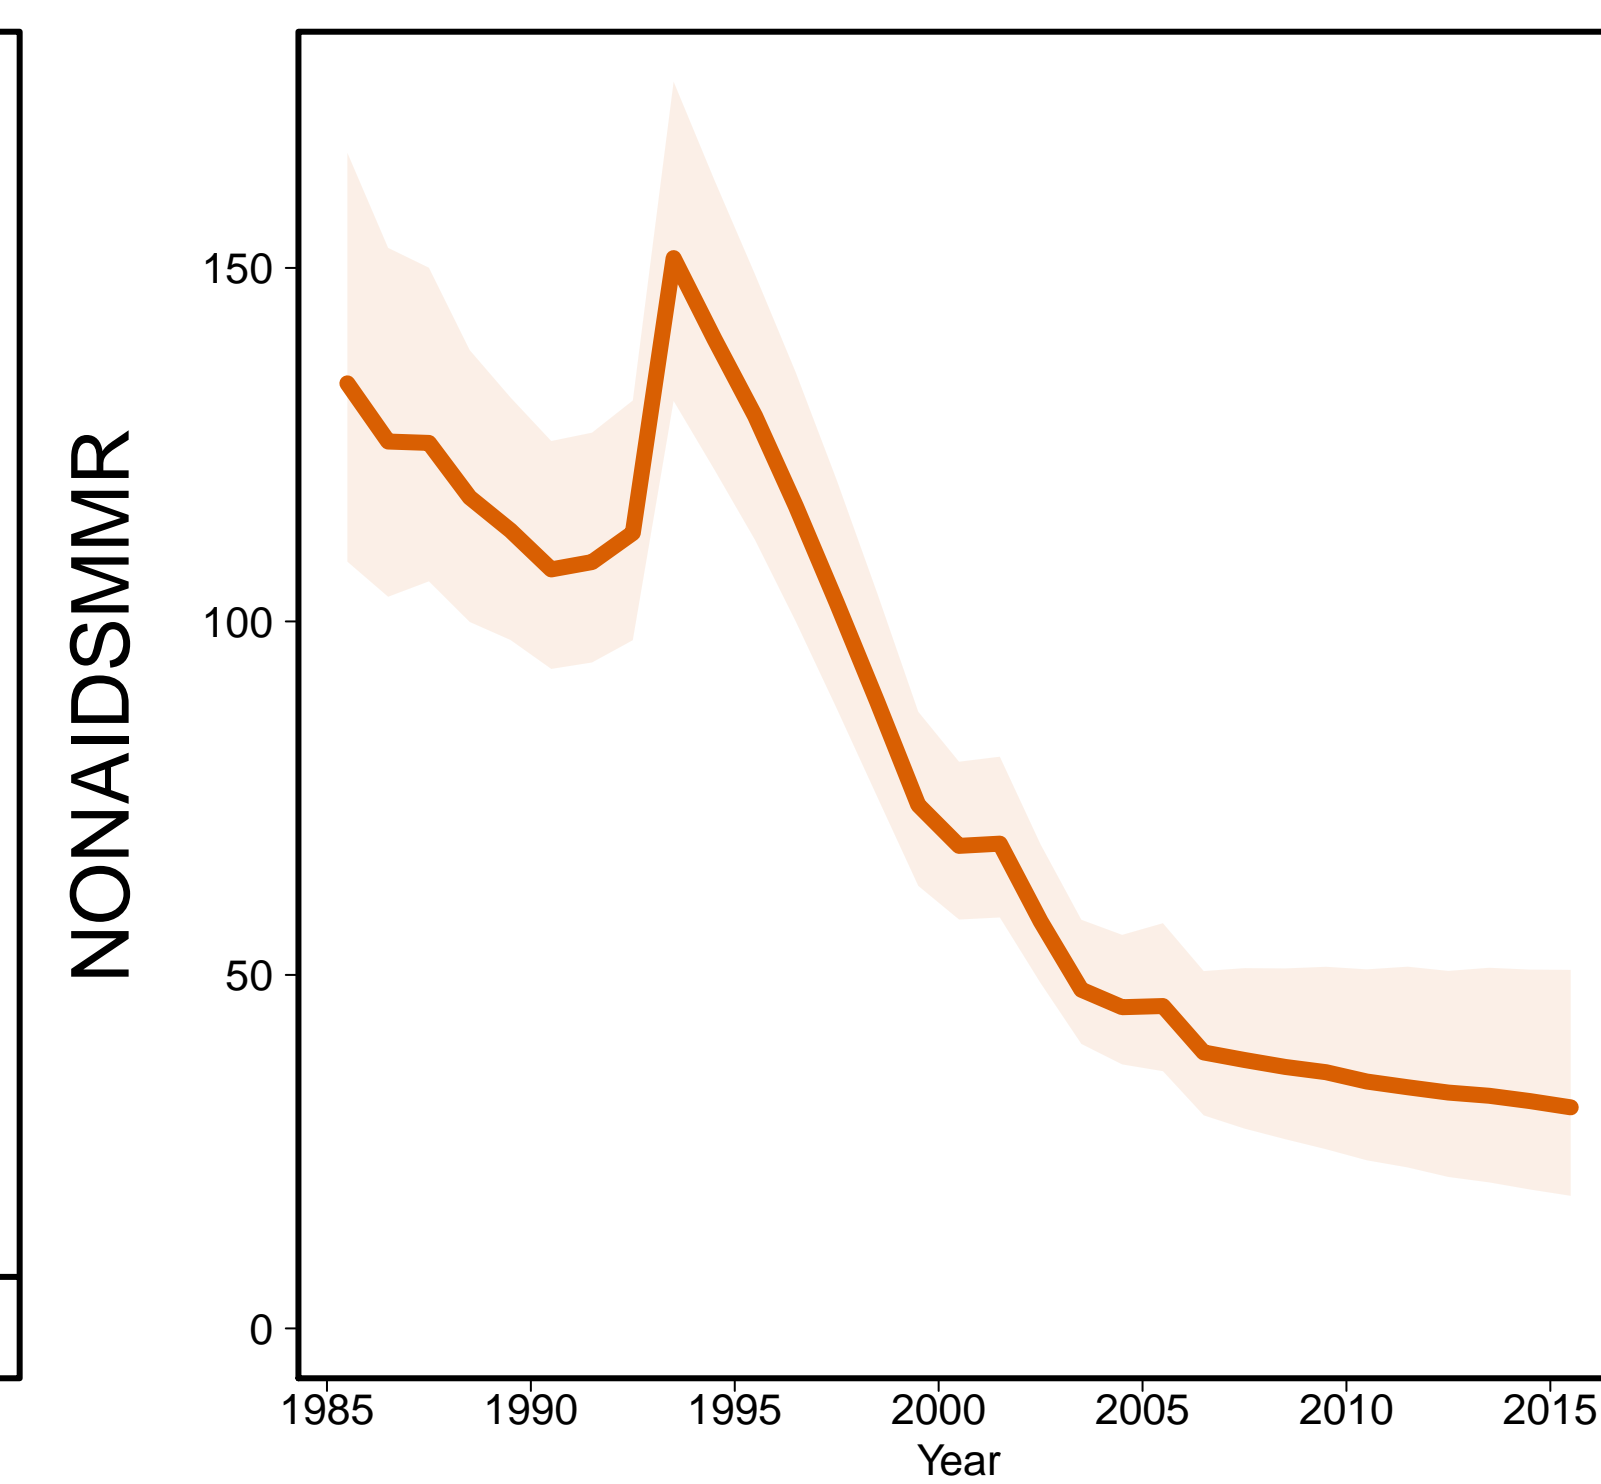

Aids MMR

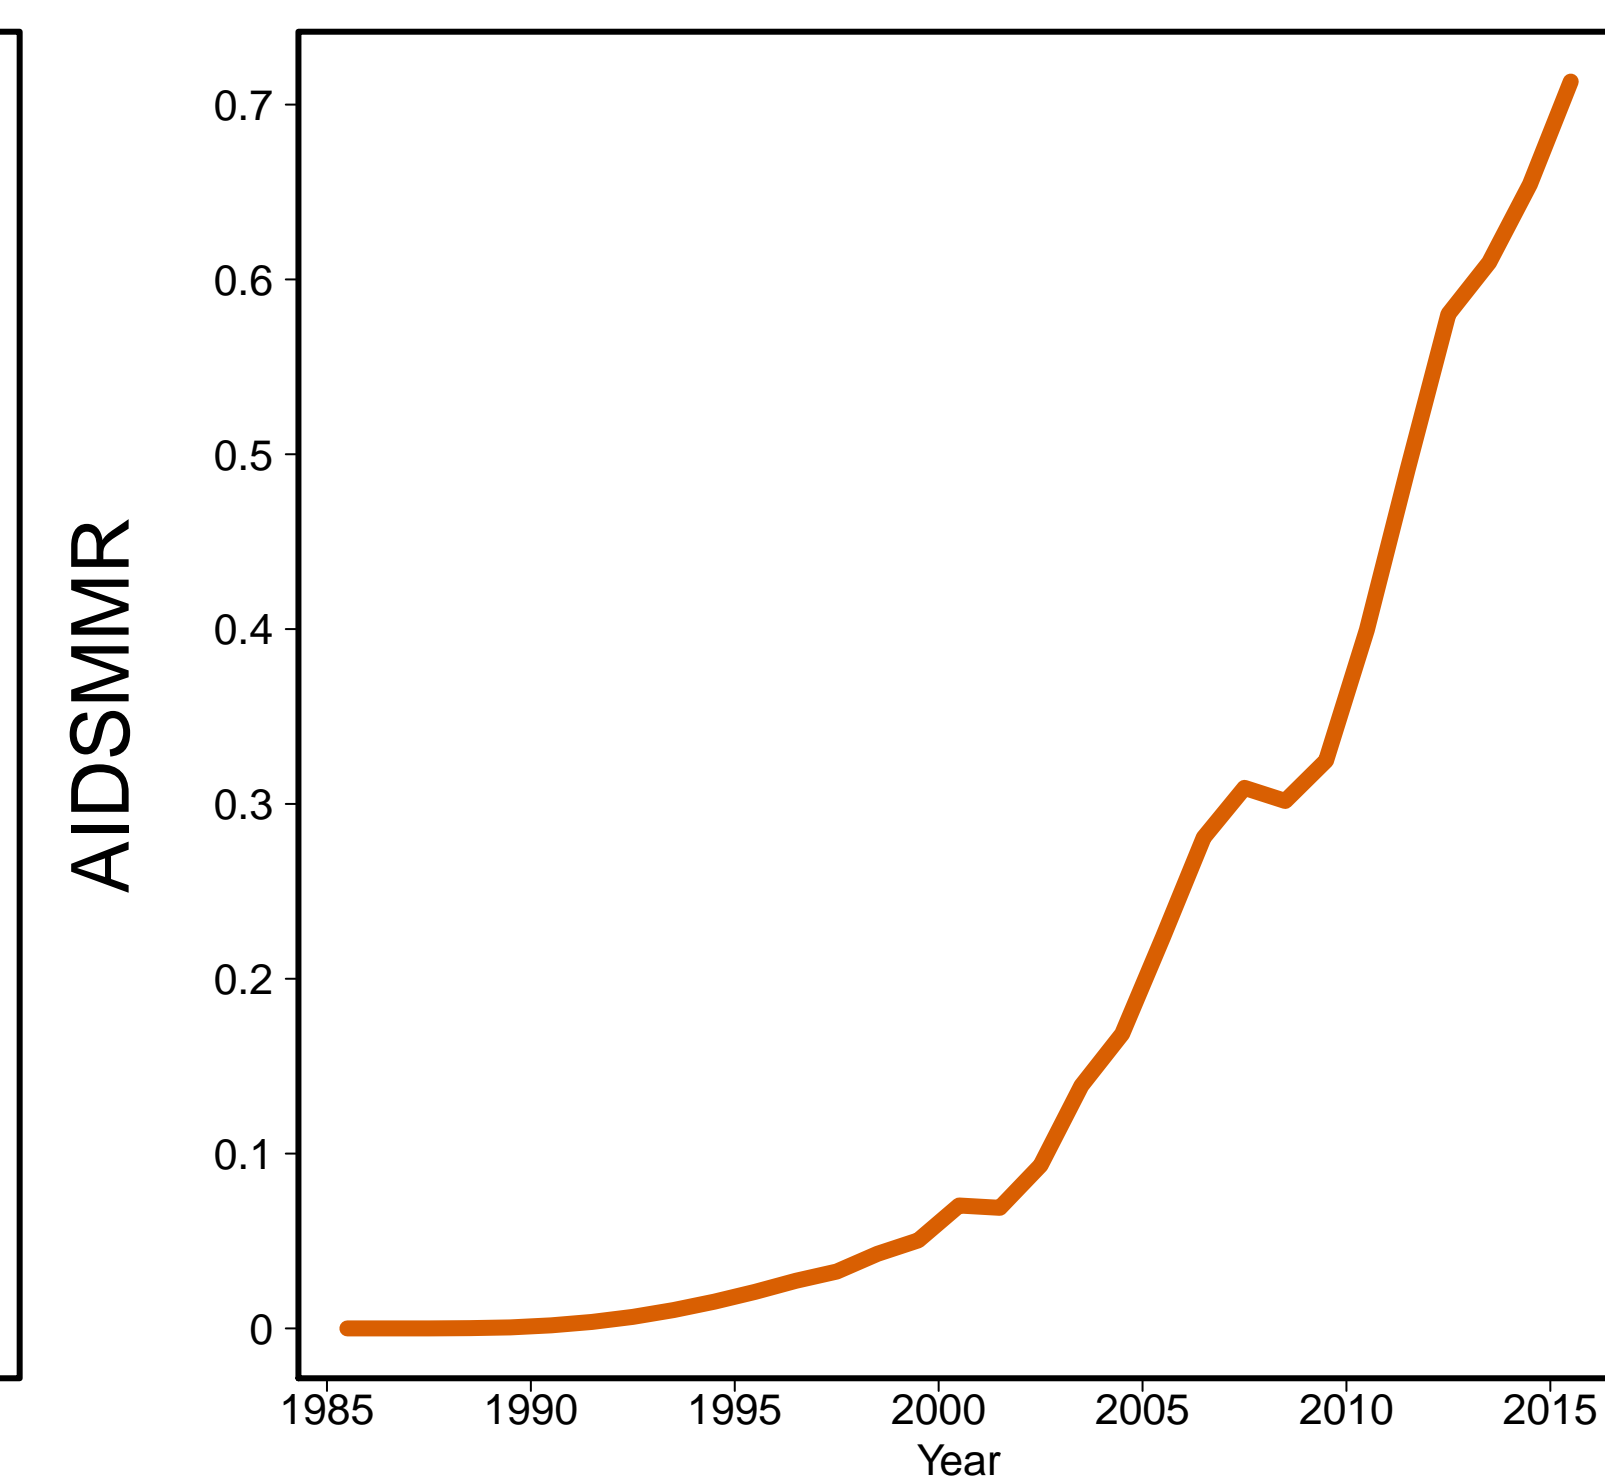



Tanzania [TZA]  
(Eastern Africa)

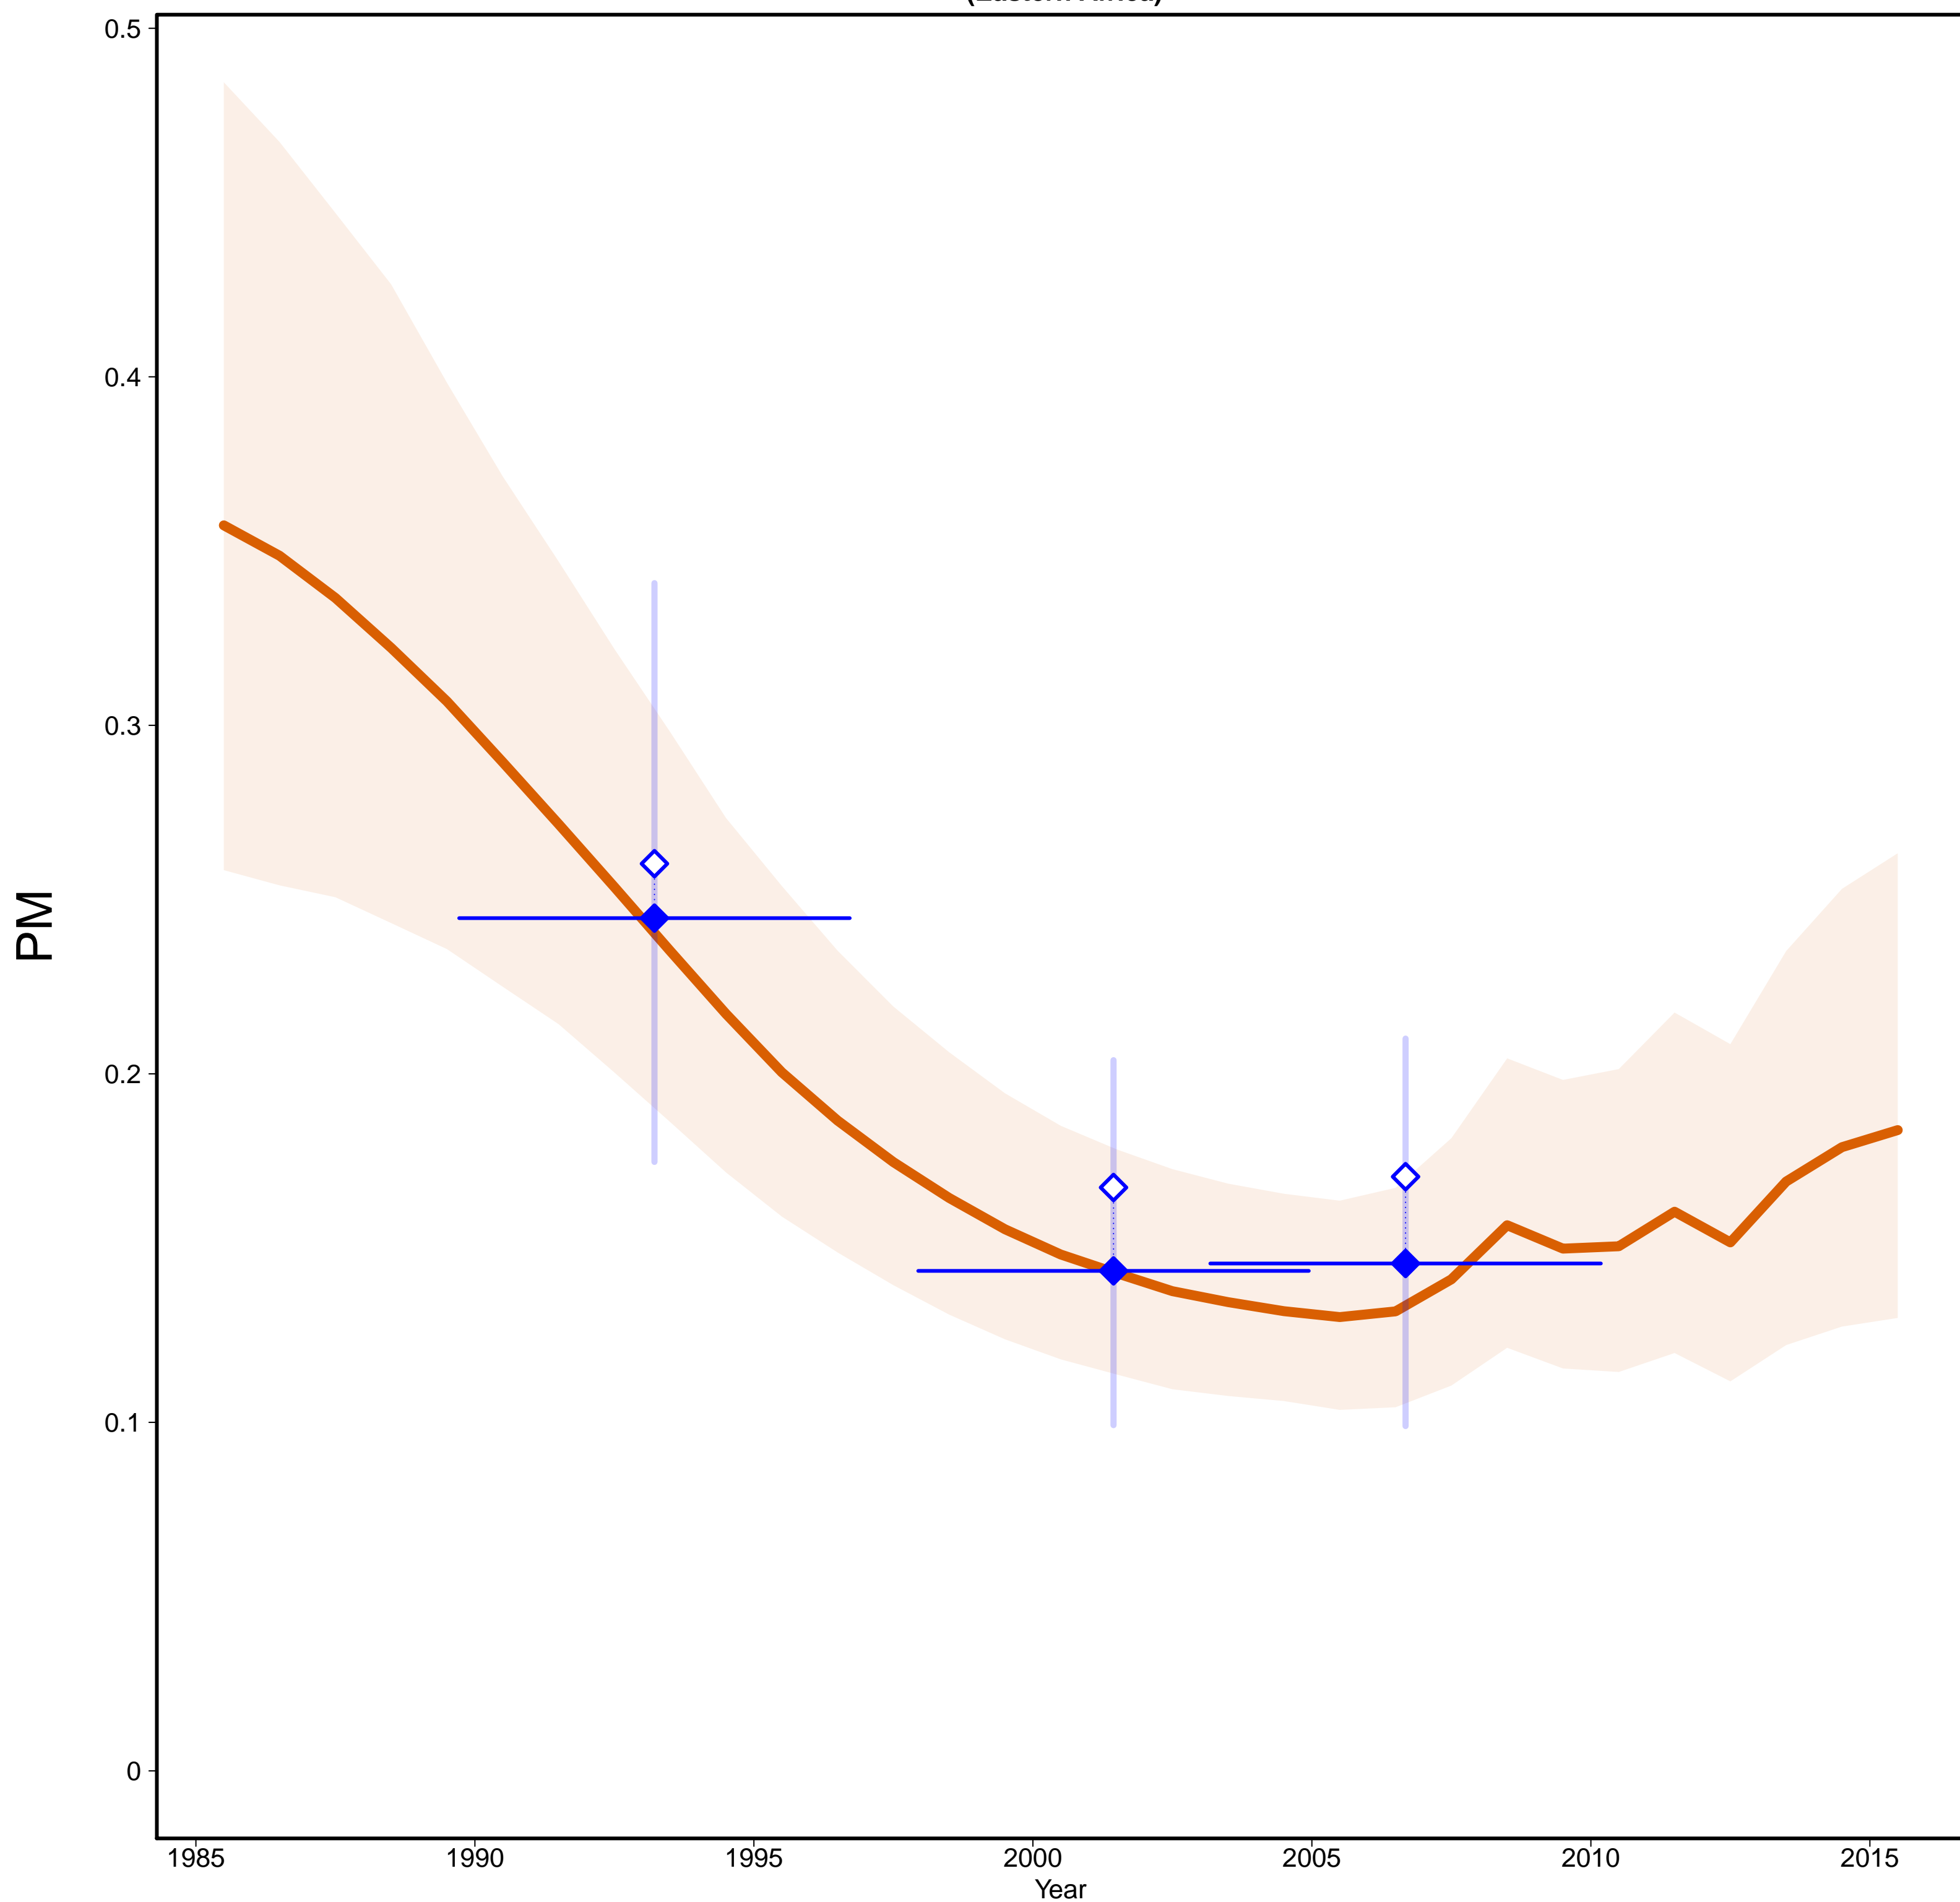

Tanzania [TZA]  
(Eastern Africa)

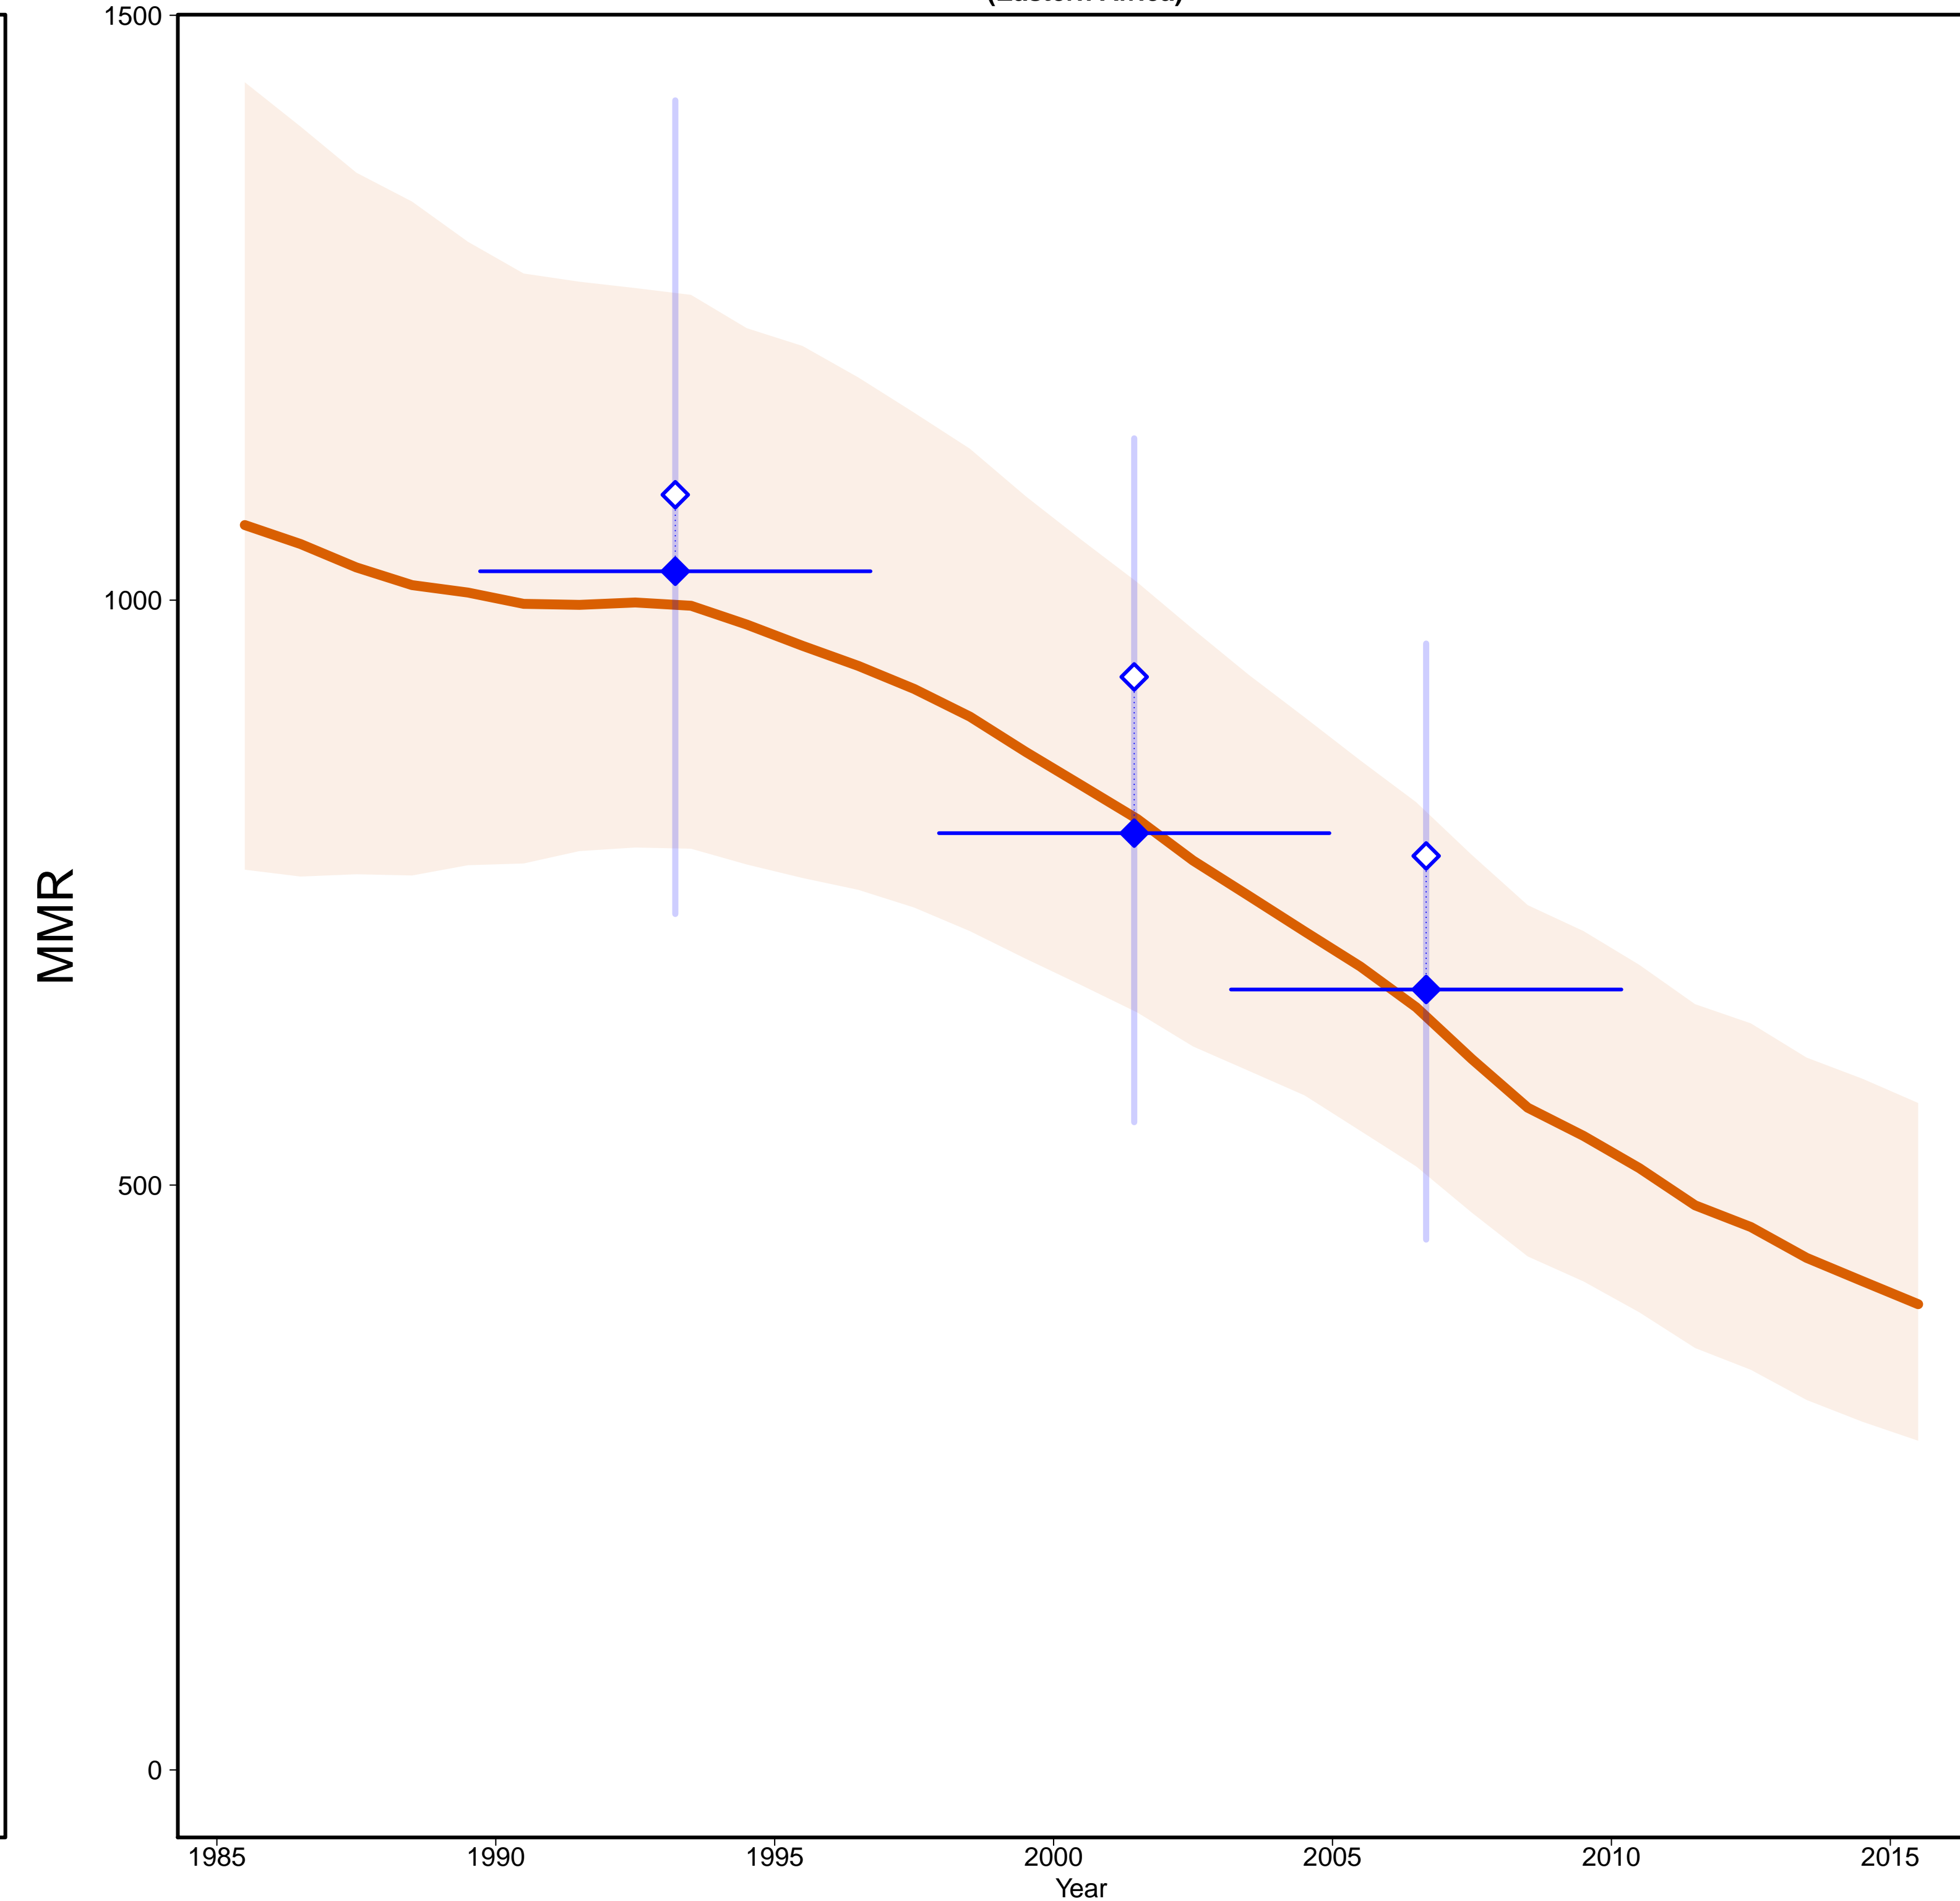

- Estimates —
- MMR Database 2015 —
- ◇ Observed Data
- ◆ Adjusted Data
- Data type —
- ◆ DHS

Gross Domestic Product

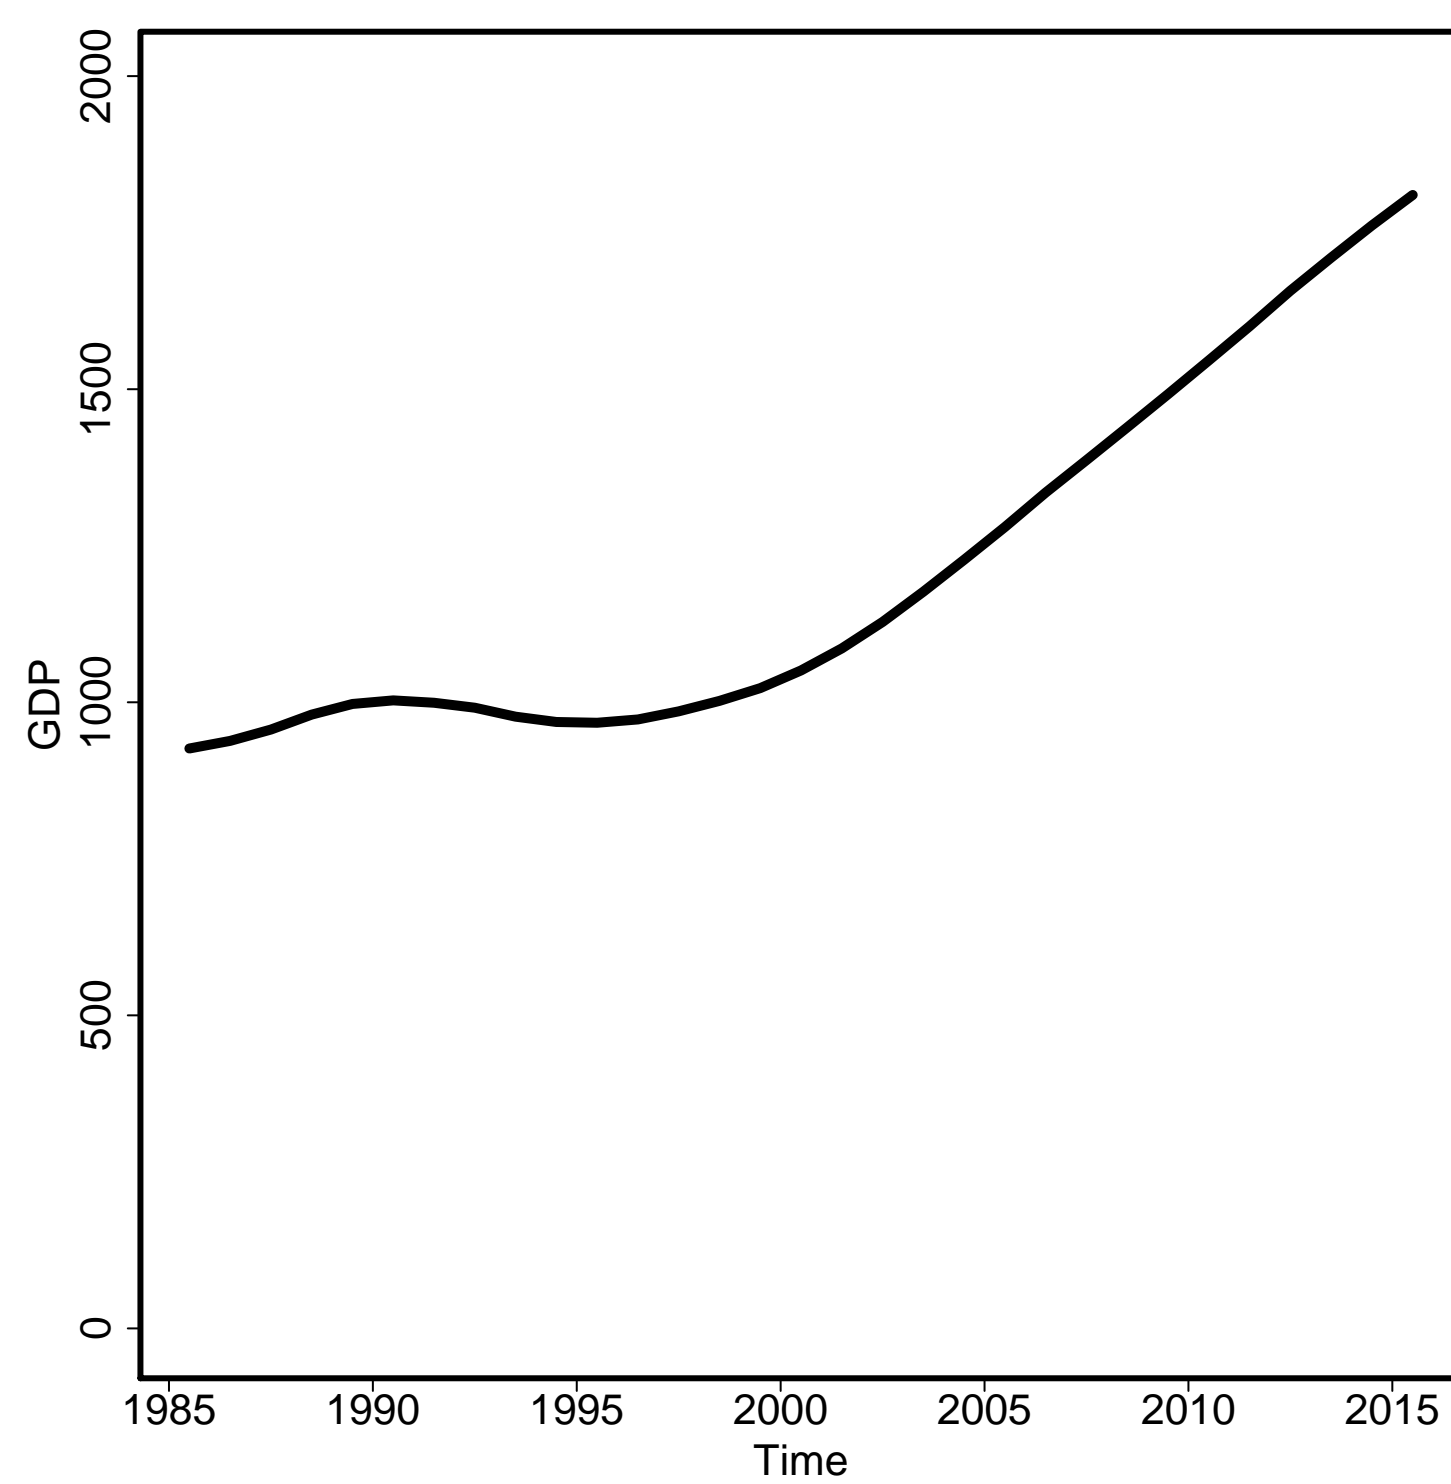

General Fertility Rate

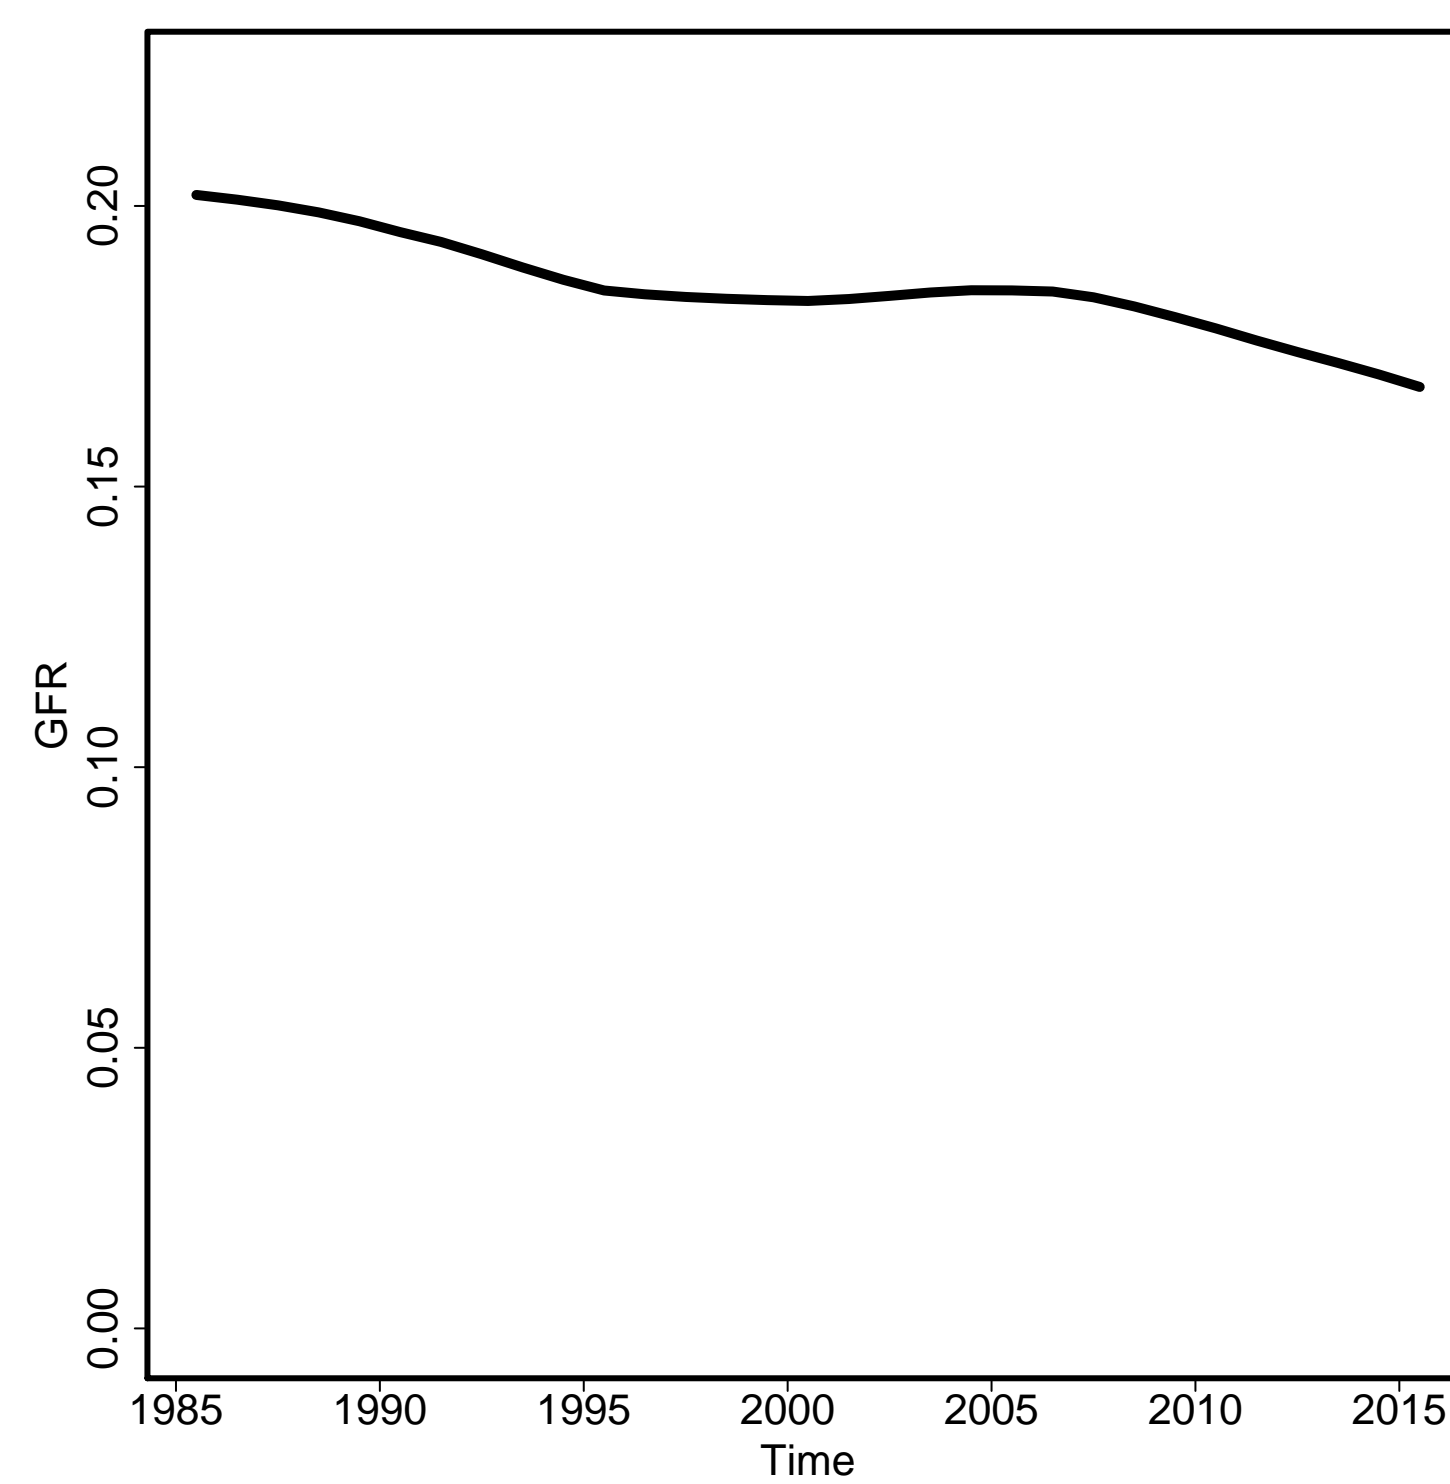

Skilled Attendance to Birth

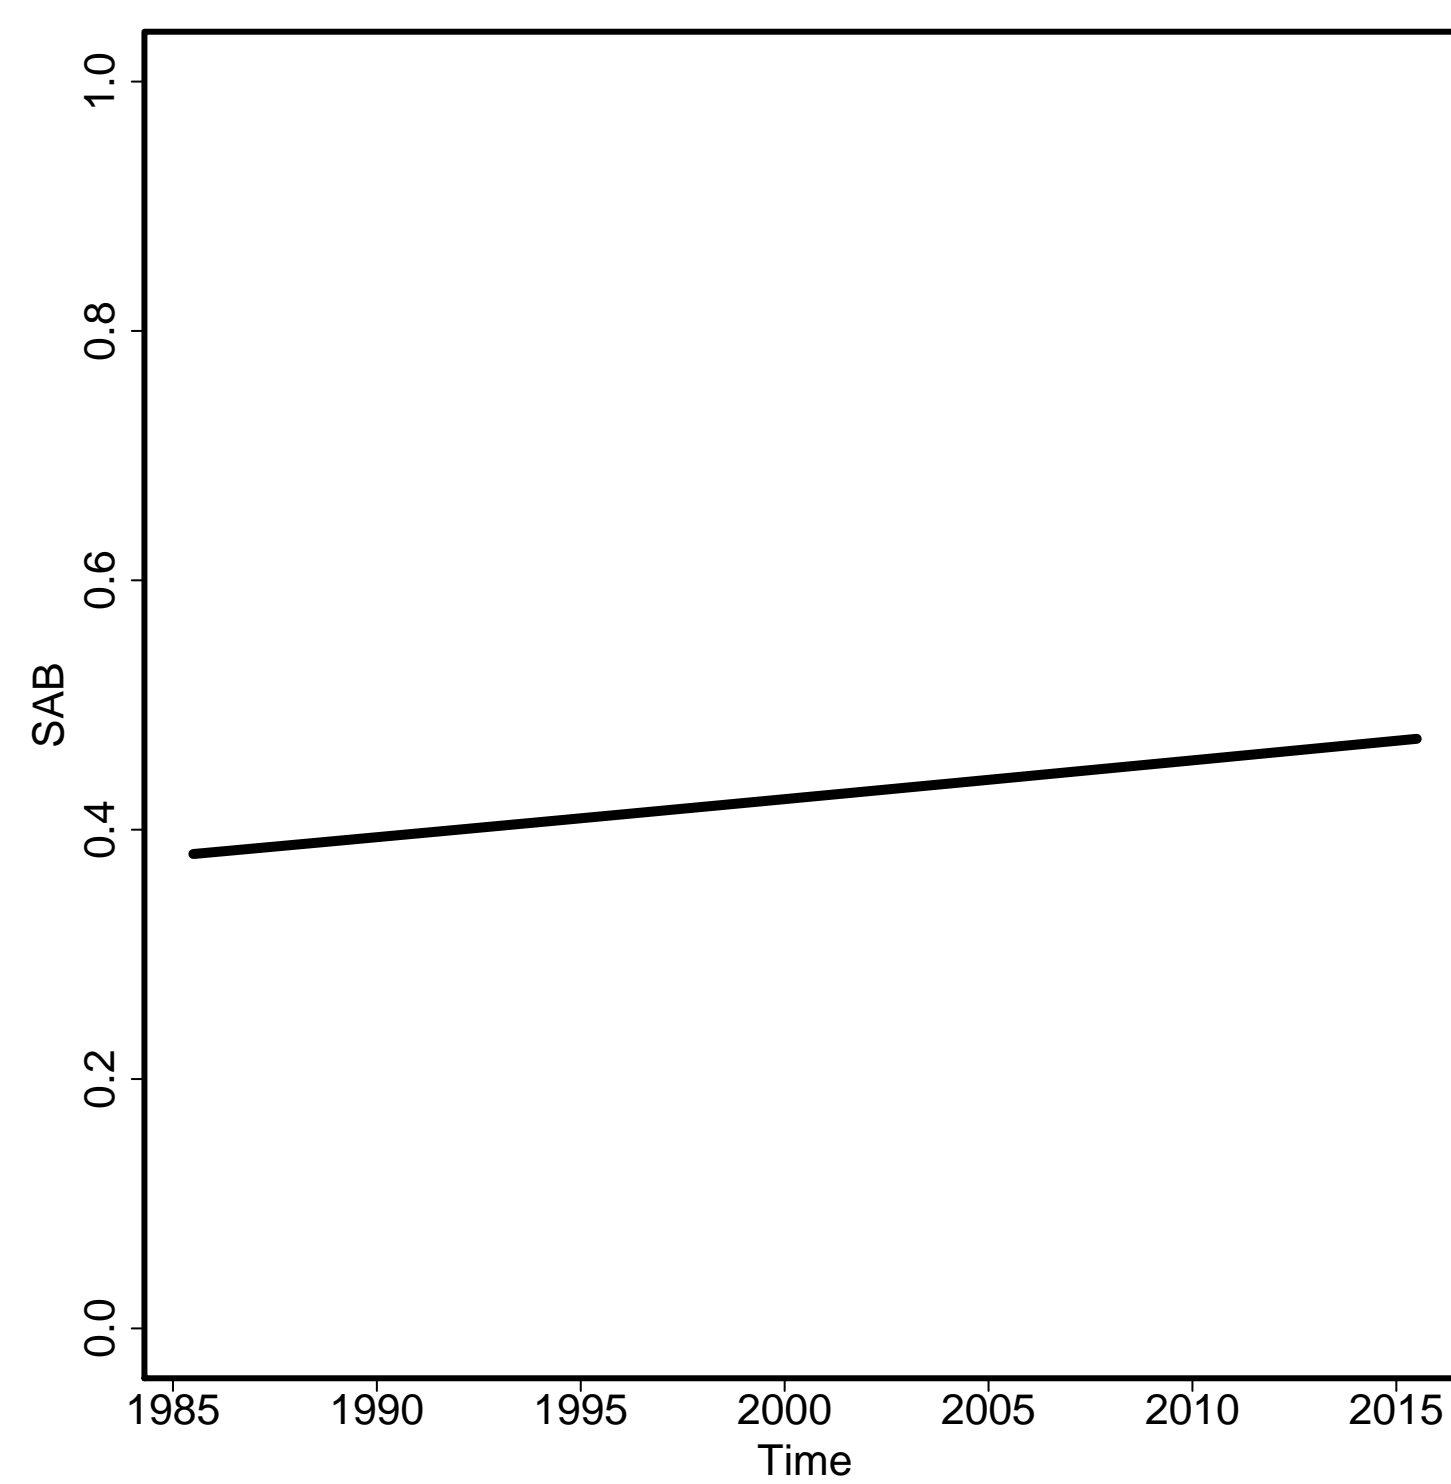

Envelope/Births

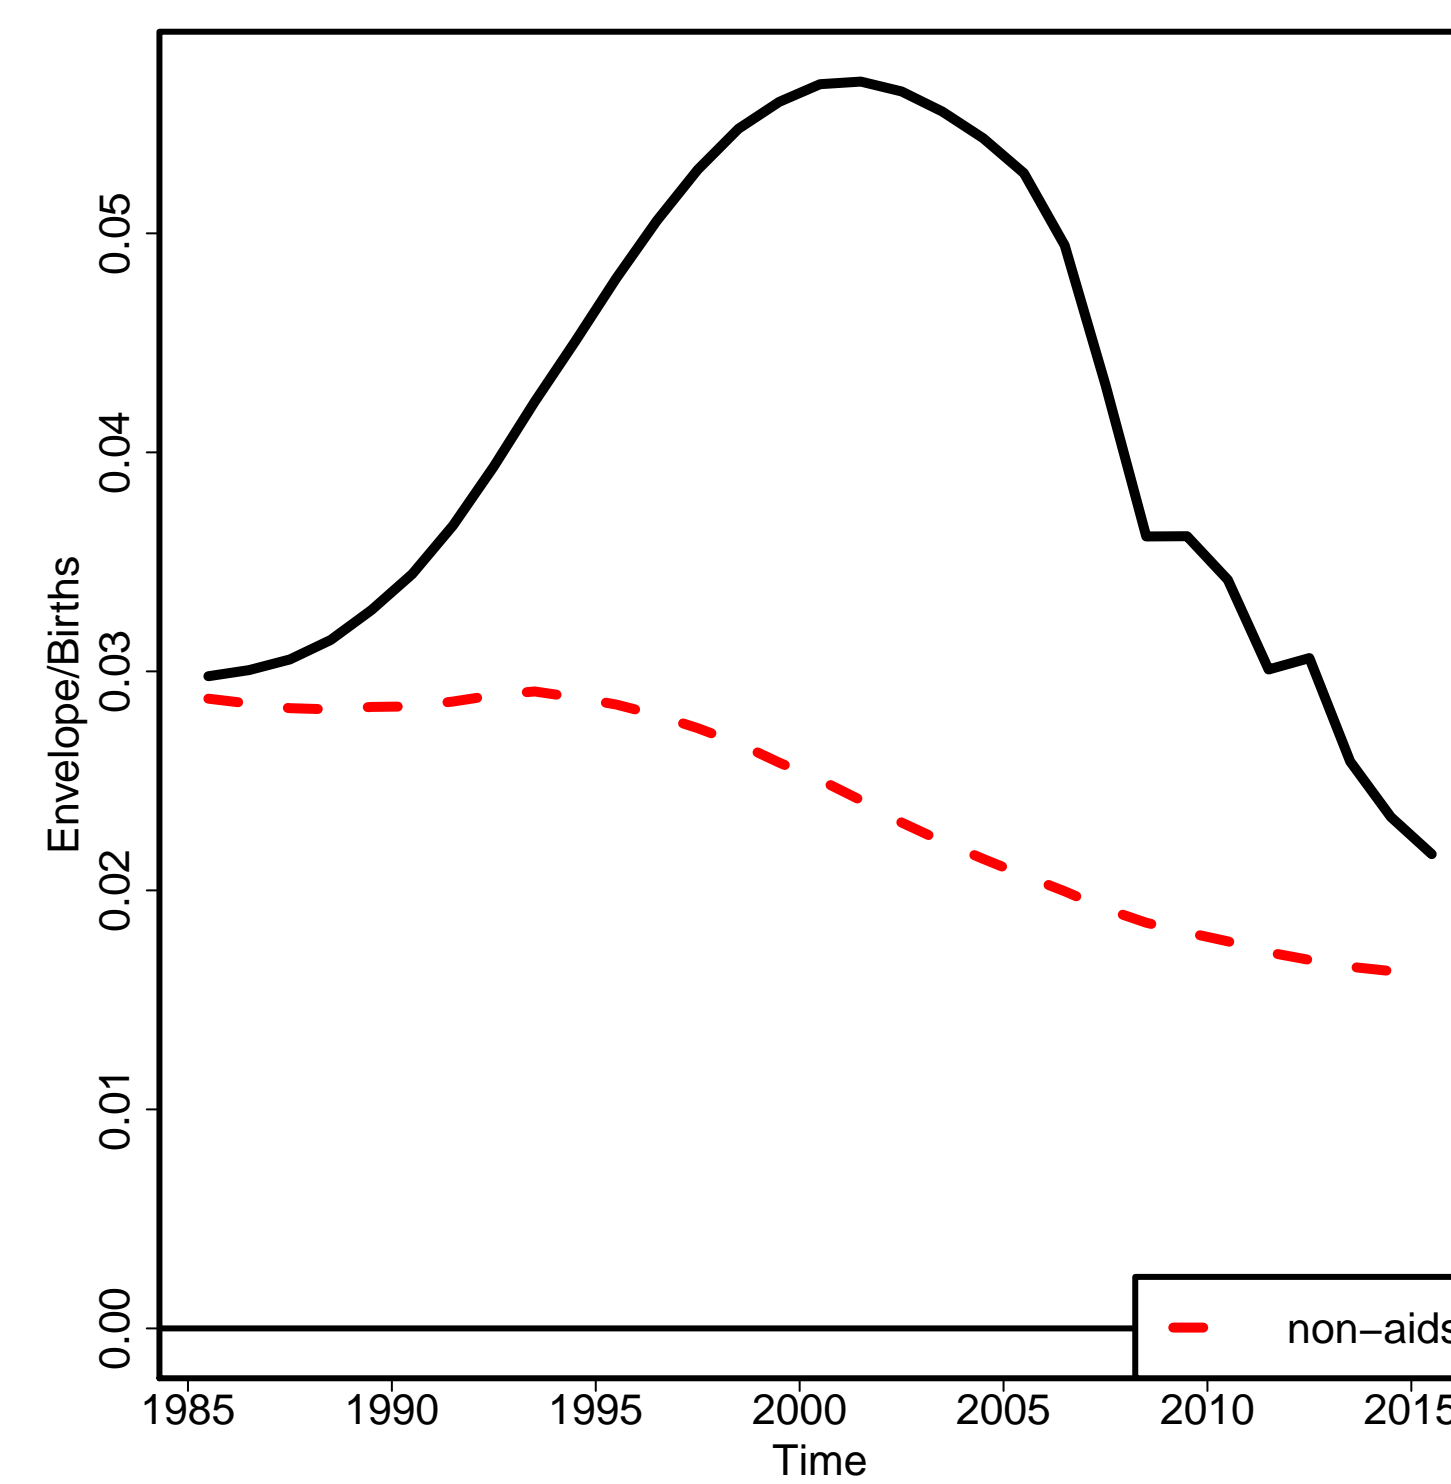

Non-aid MMR

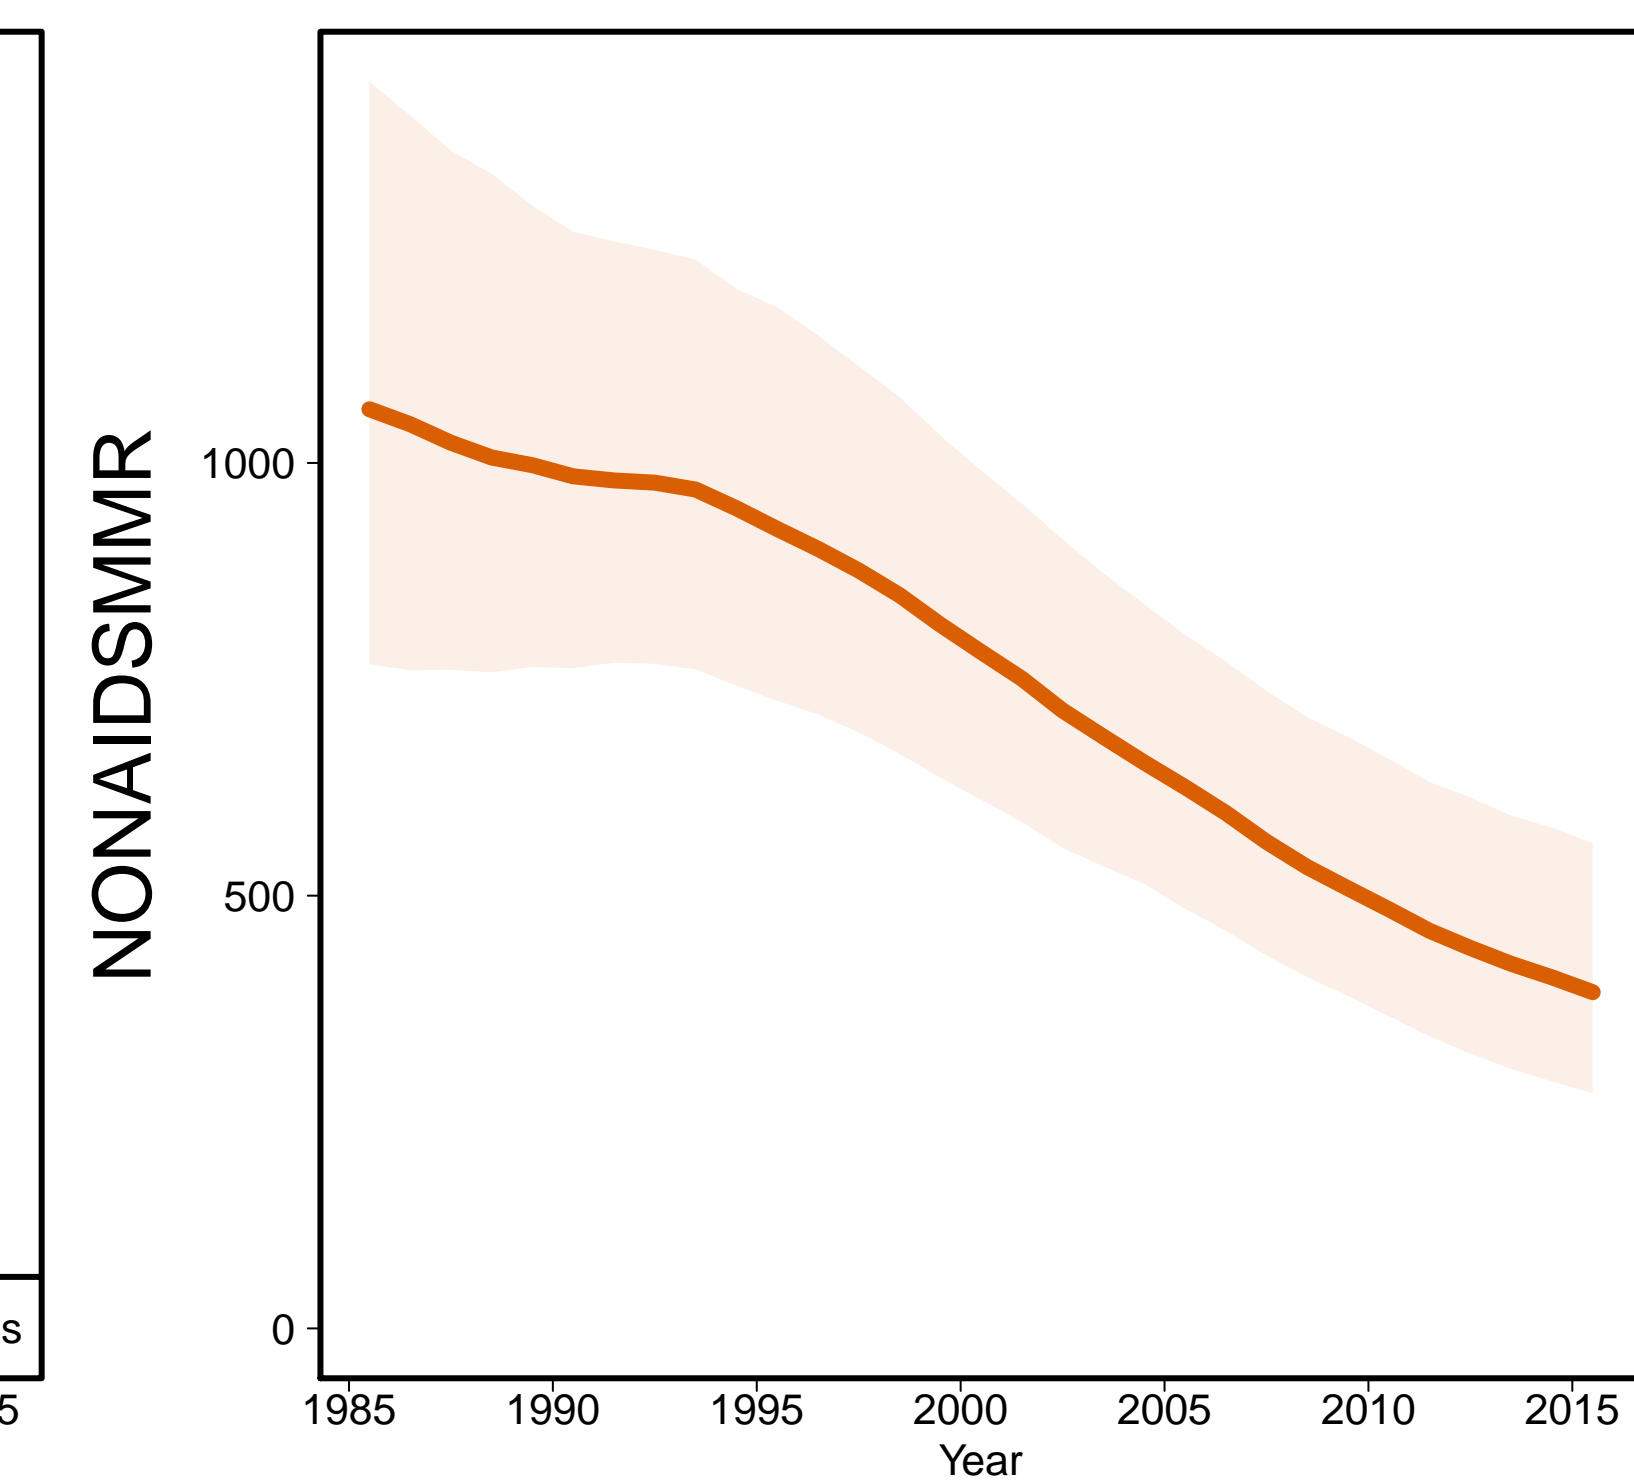

Aids MMR

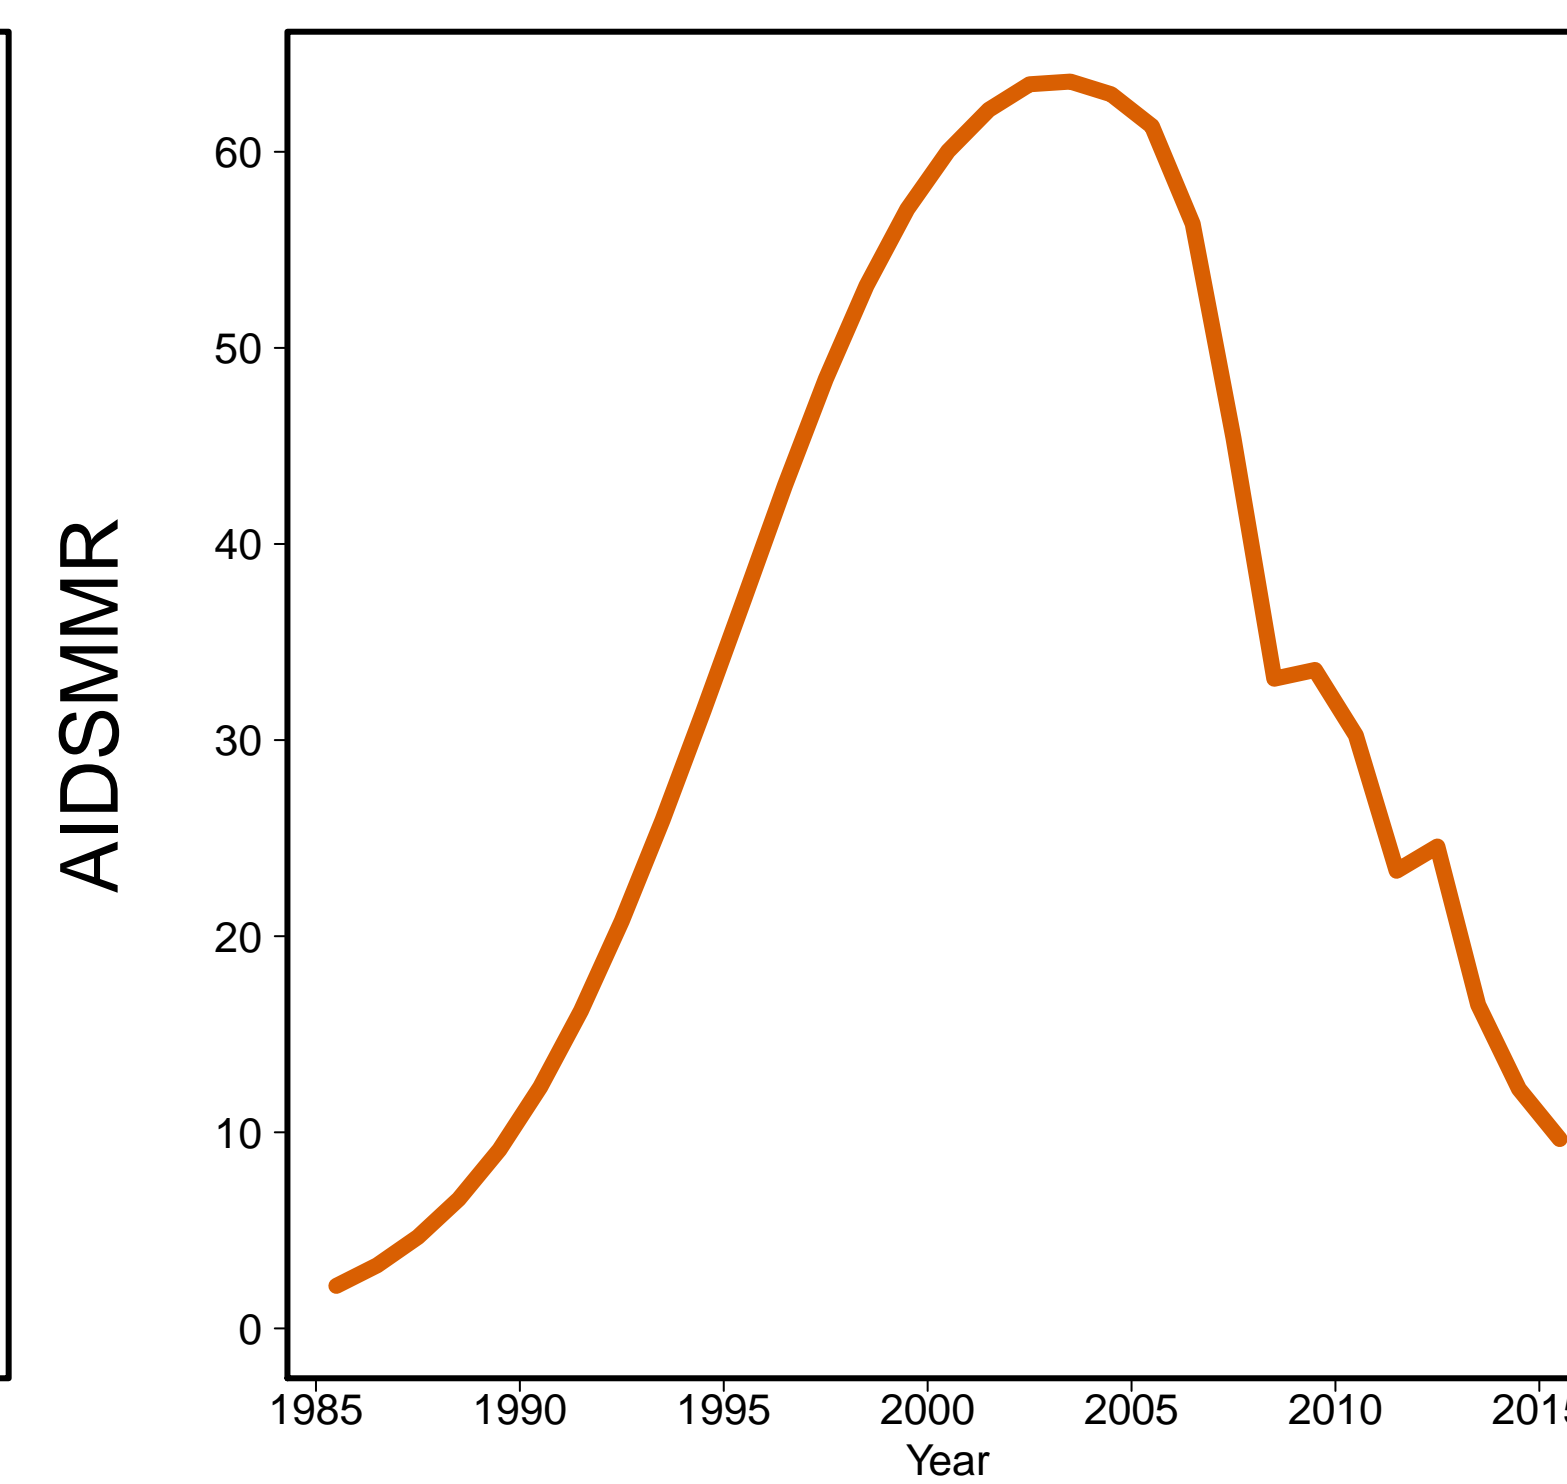

TFYR Macedonia [MKD]  
(Transition countries of South-Eastern Europe)

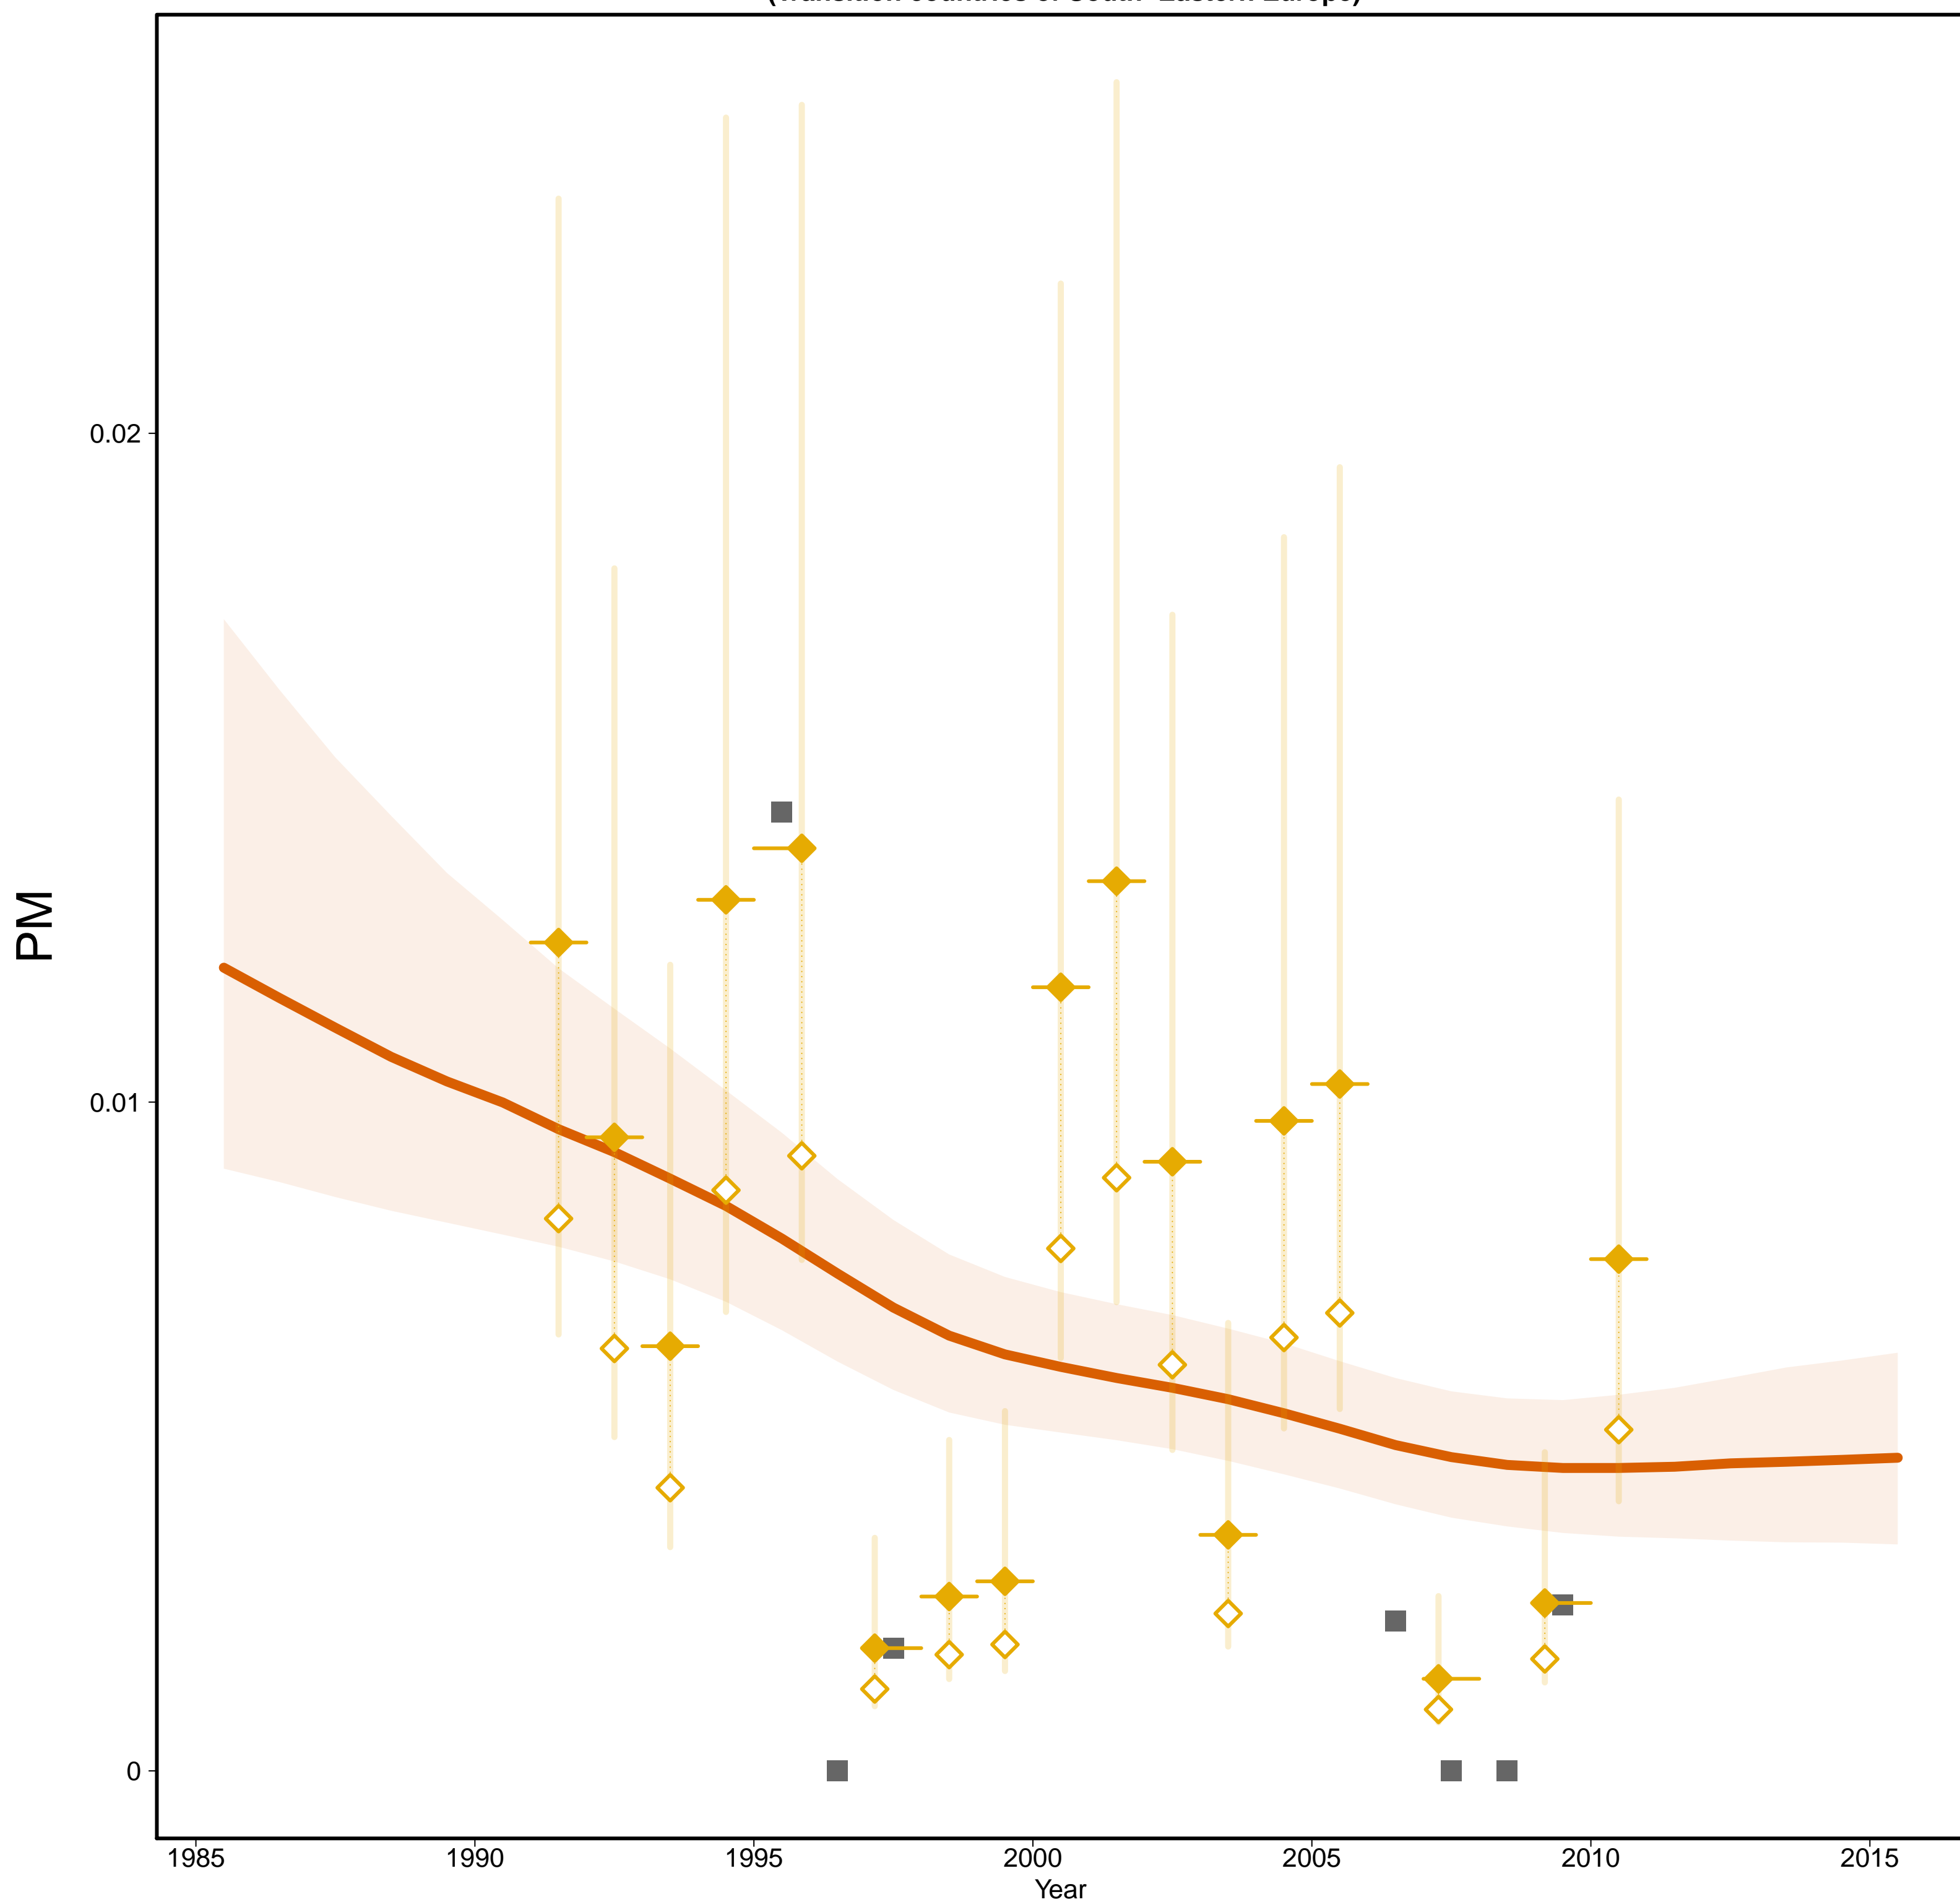

TFYR Macedonia [MKD]  
(Transition countries of South-Eastern Europe)

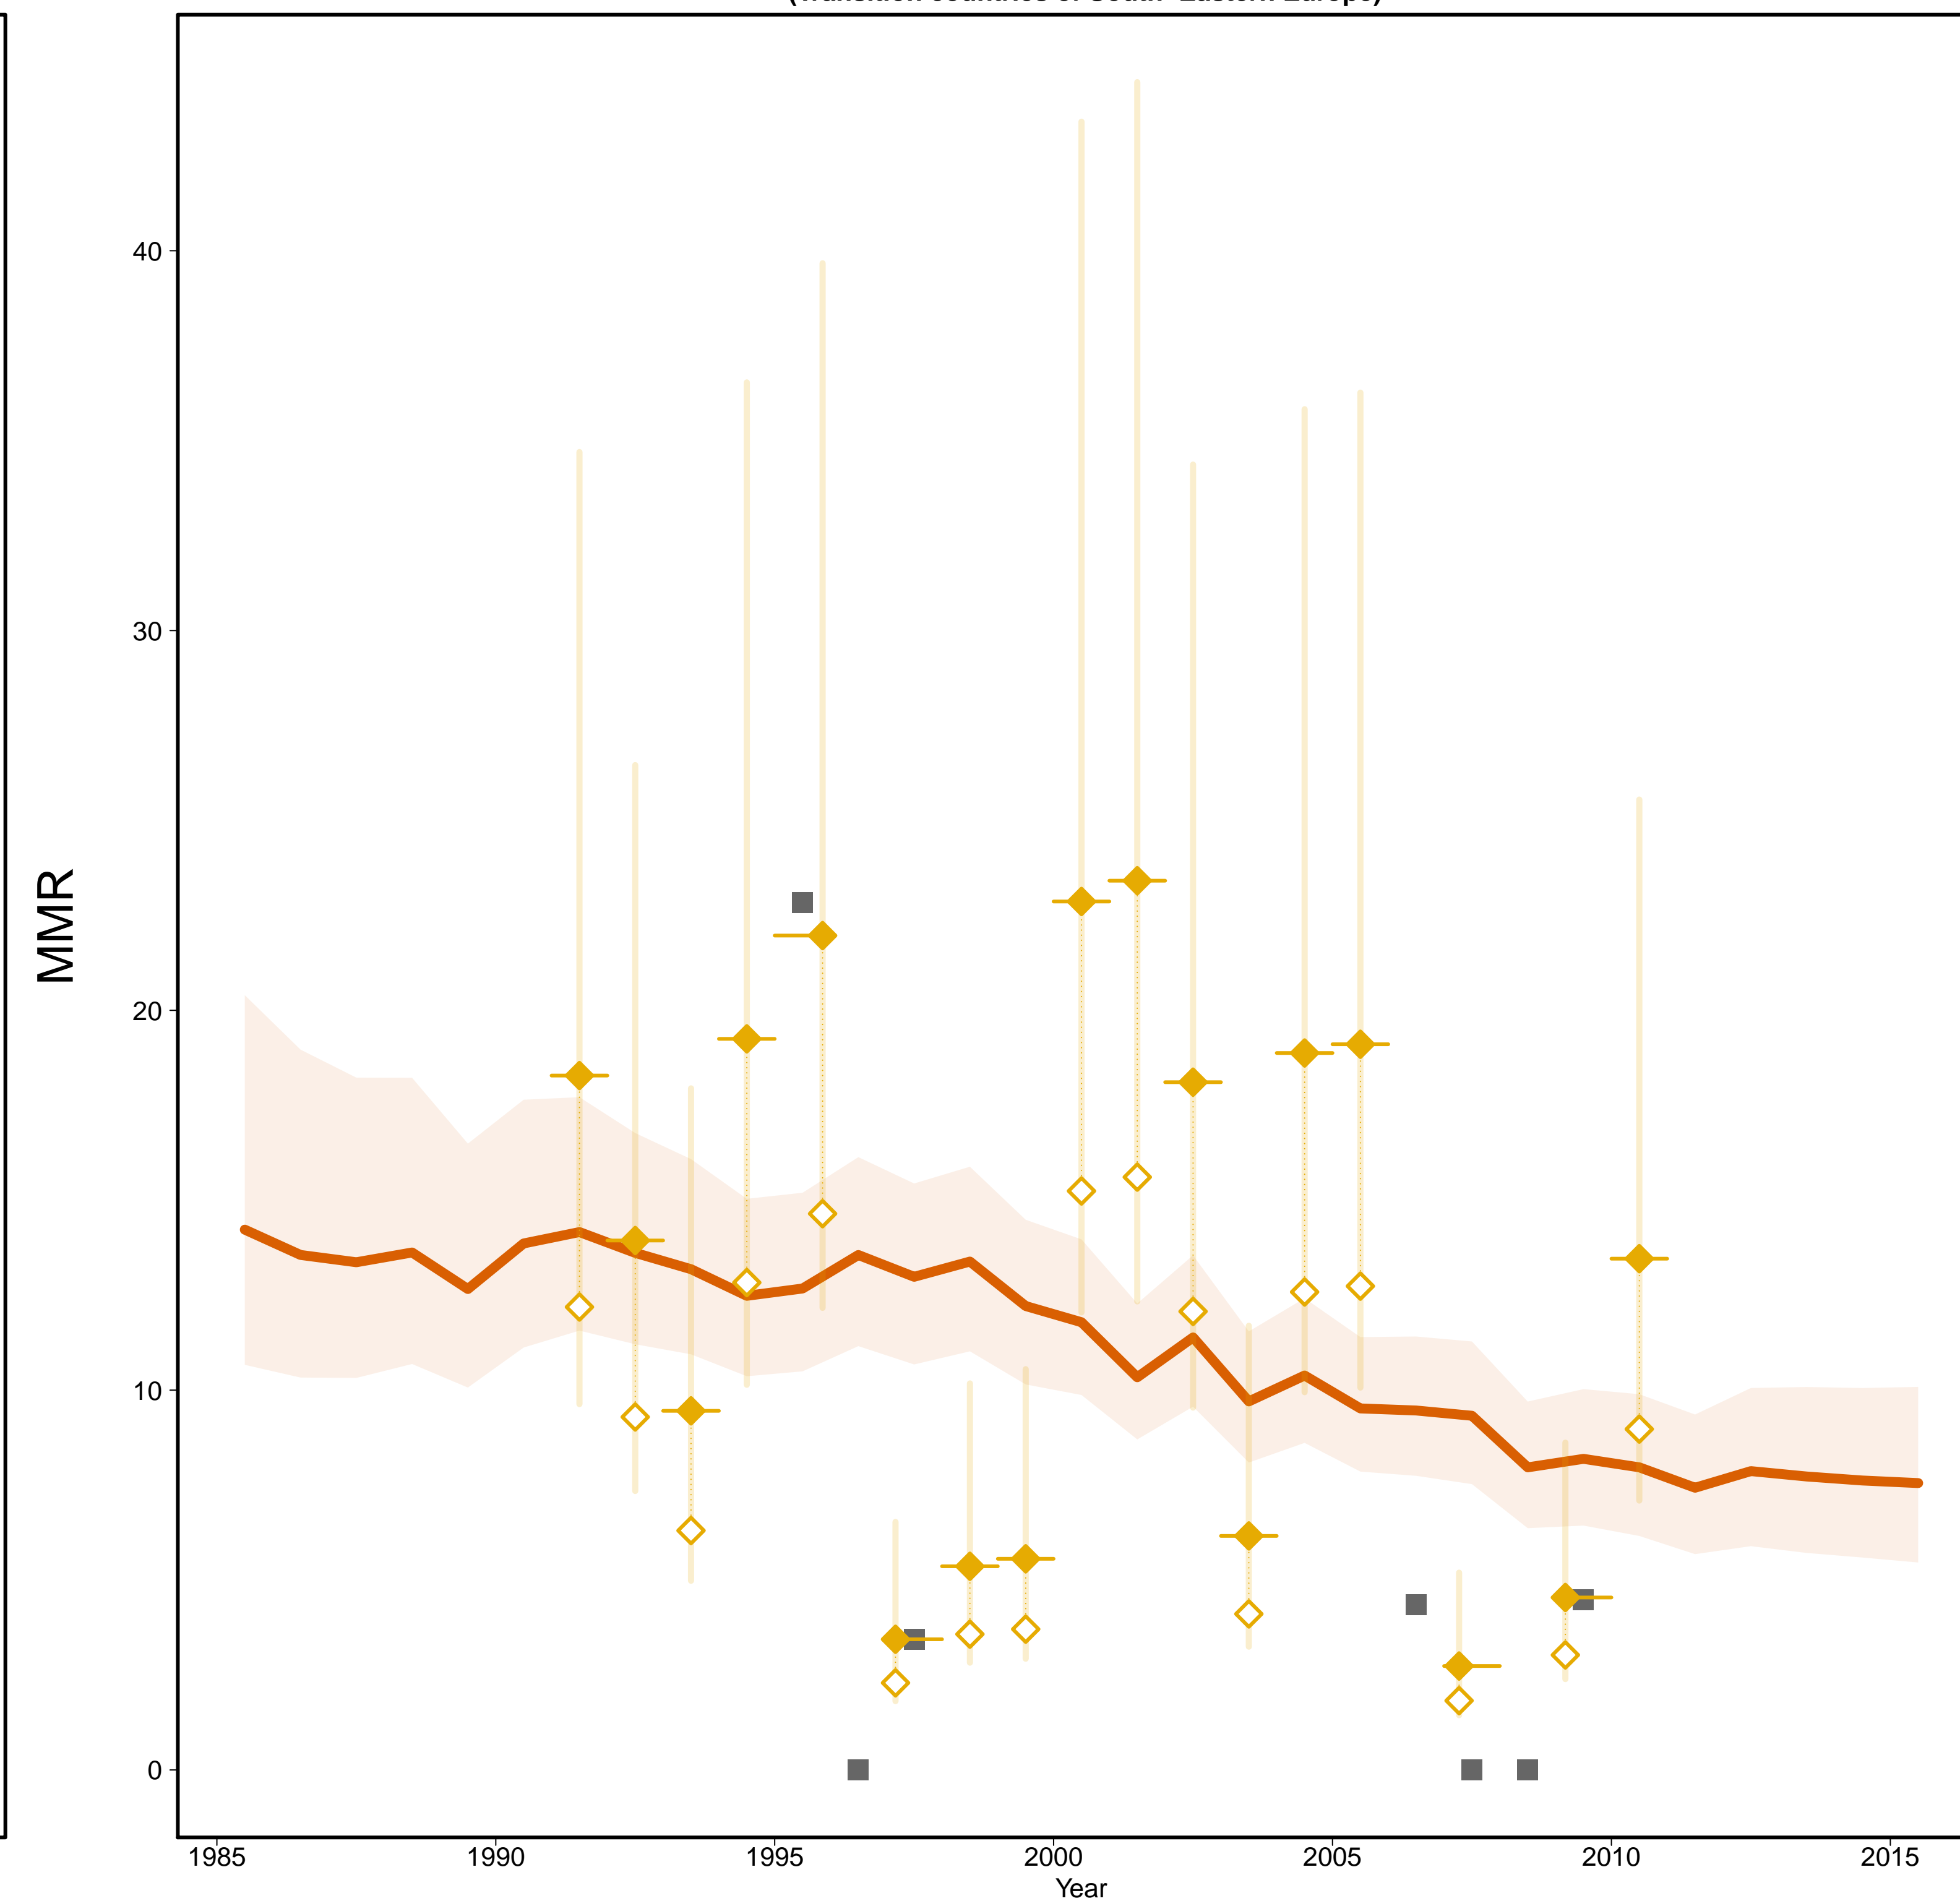

- Estimates —
- MMR Database 2015 —
- ◇ Observed Data
- ◆ Adjusted Data
- Data type —
- ◆ VR
- Reported VR before recalc.  
(related to 0 obs. mat. death)

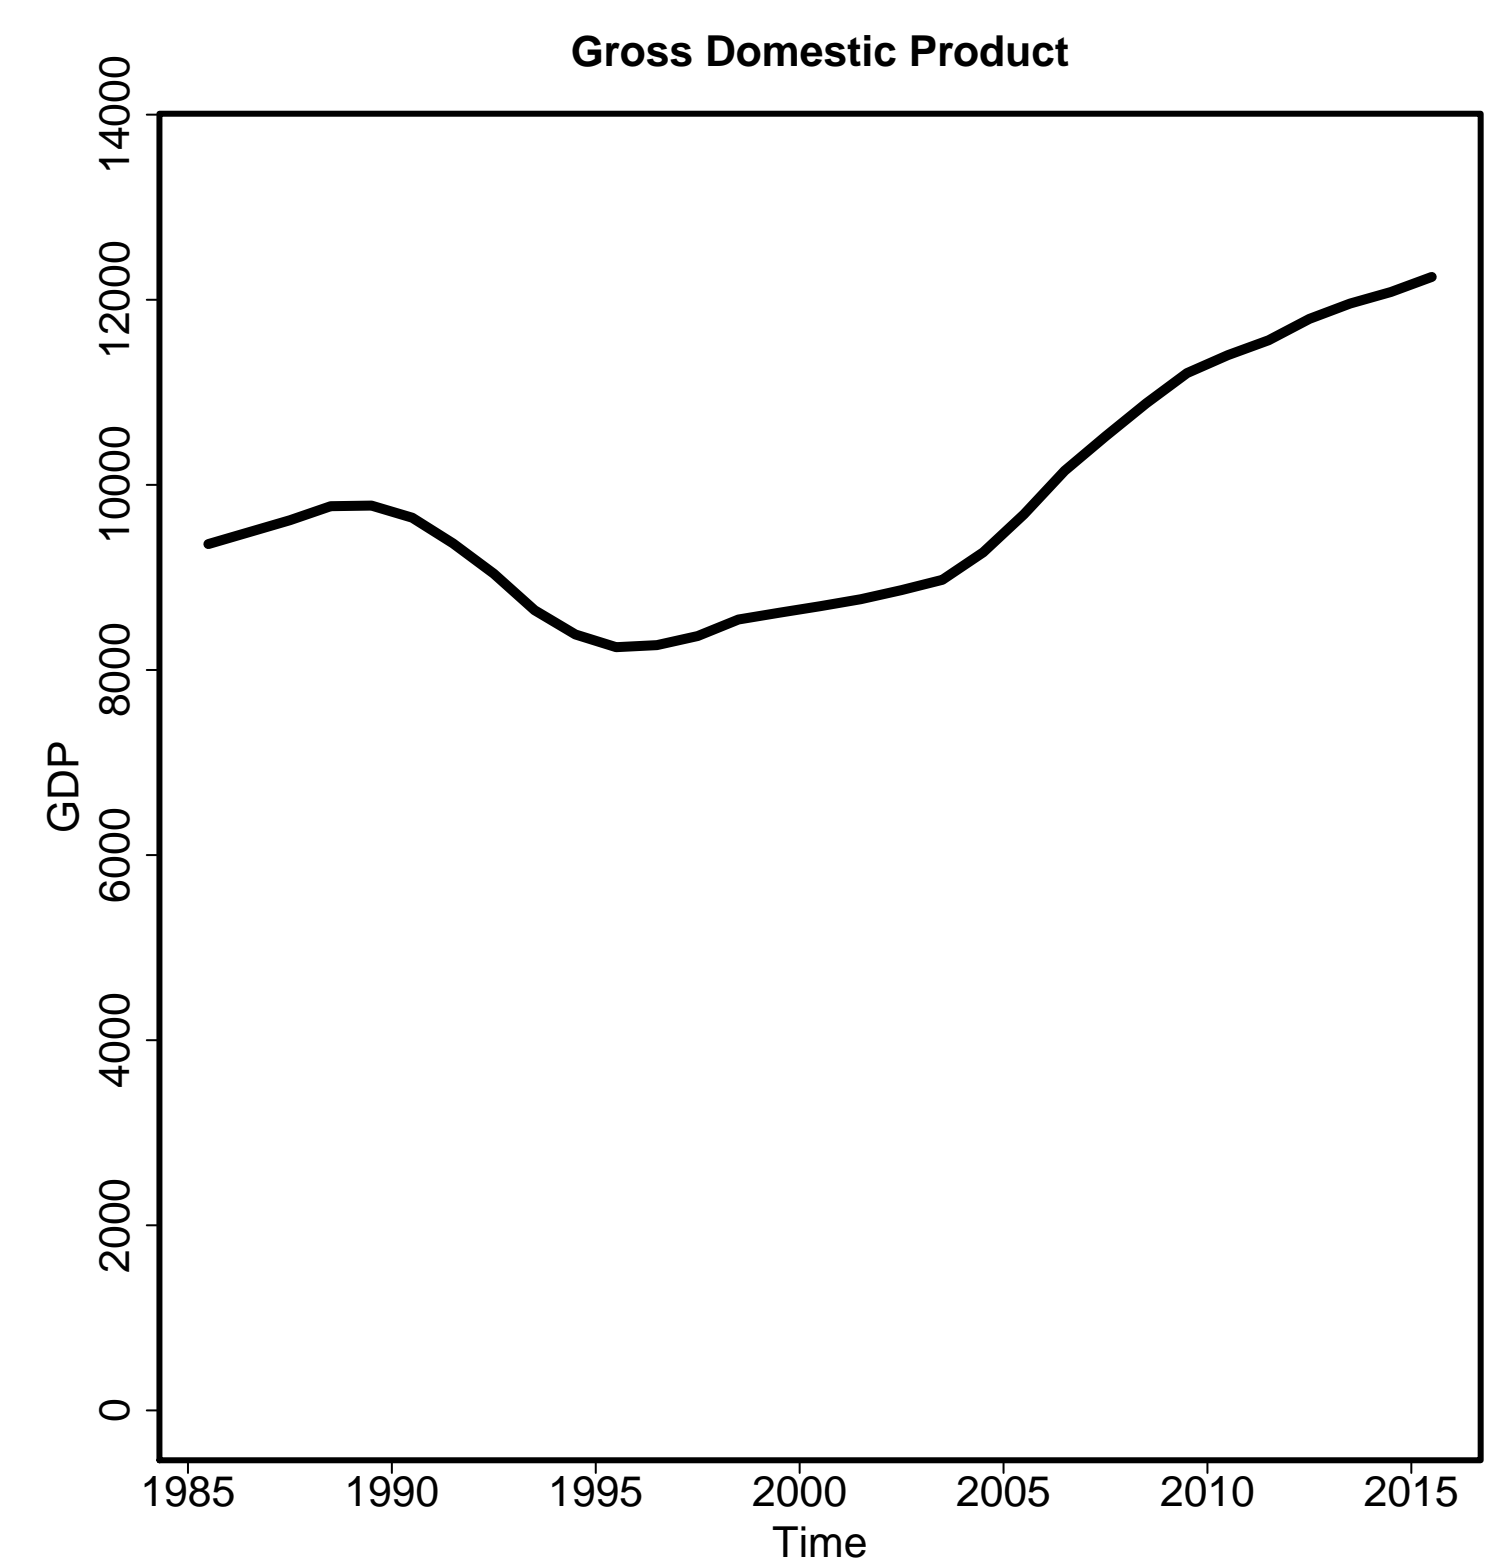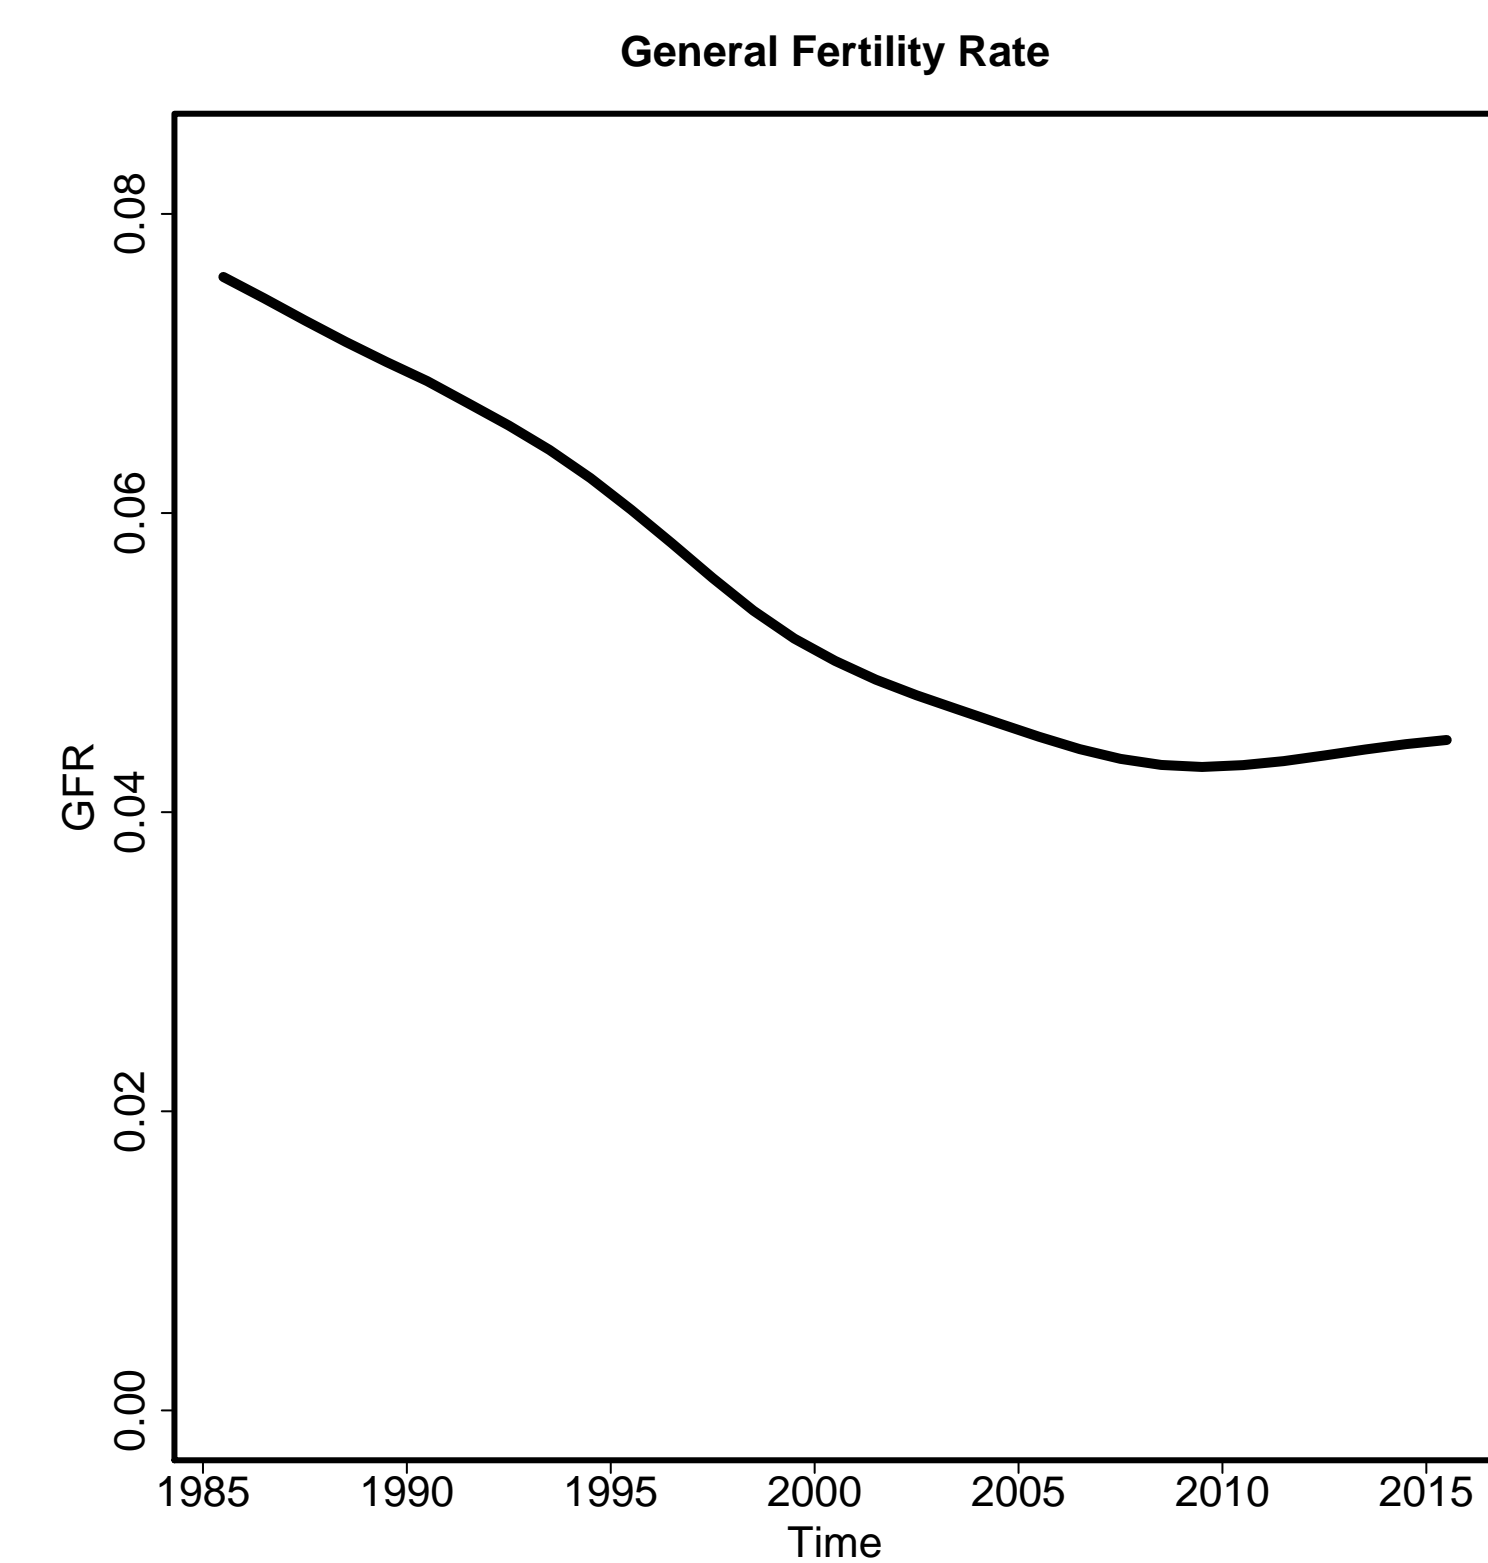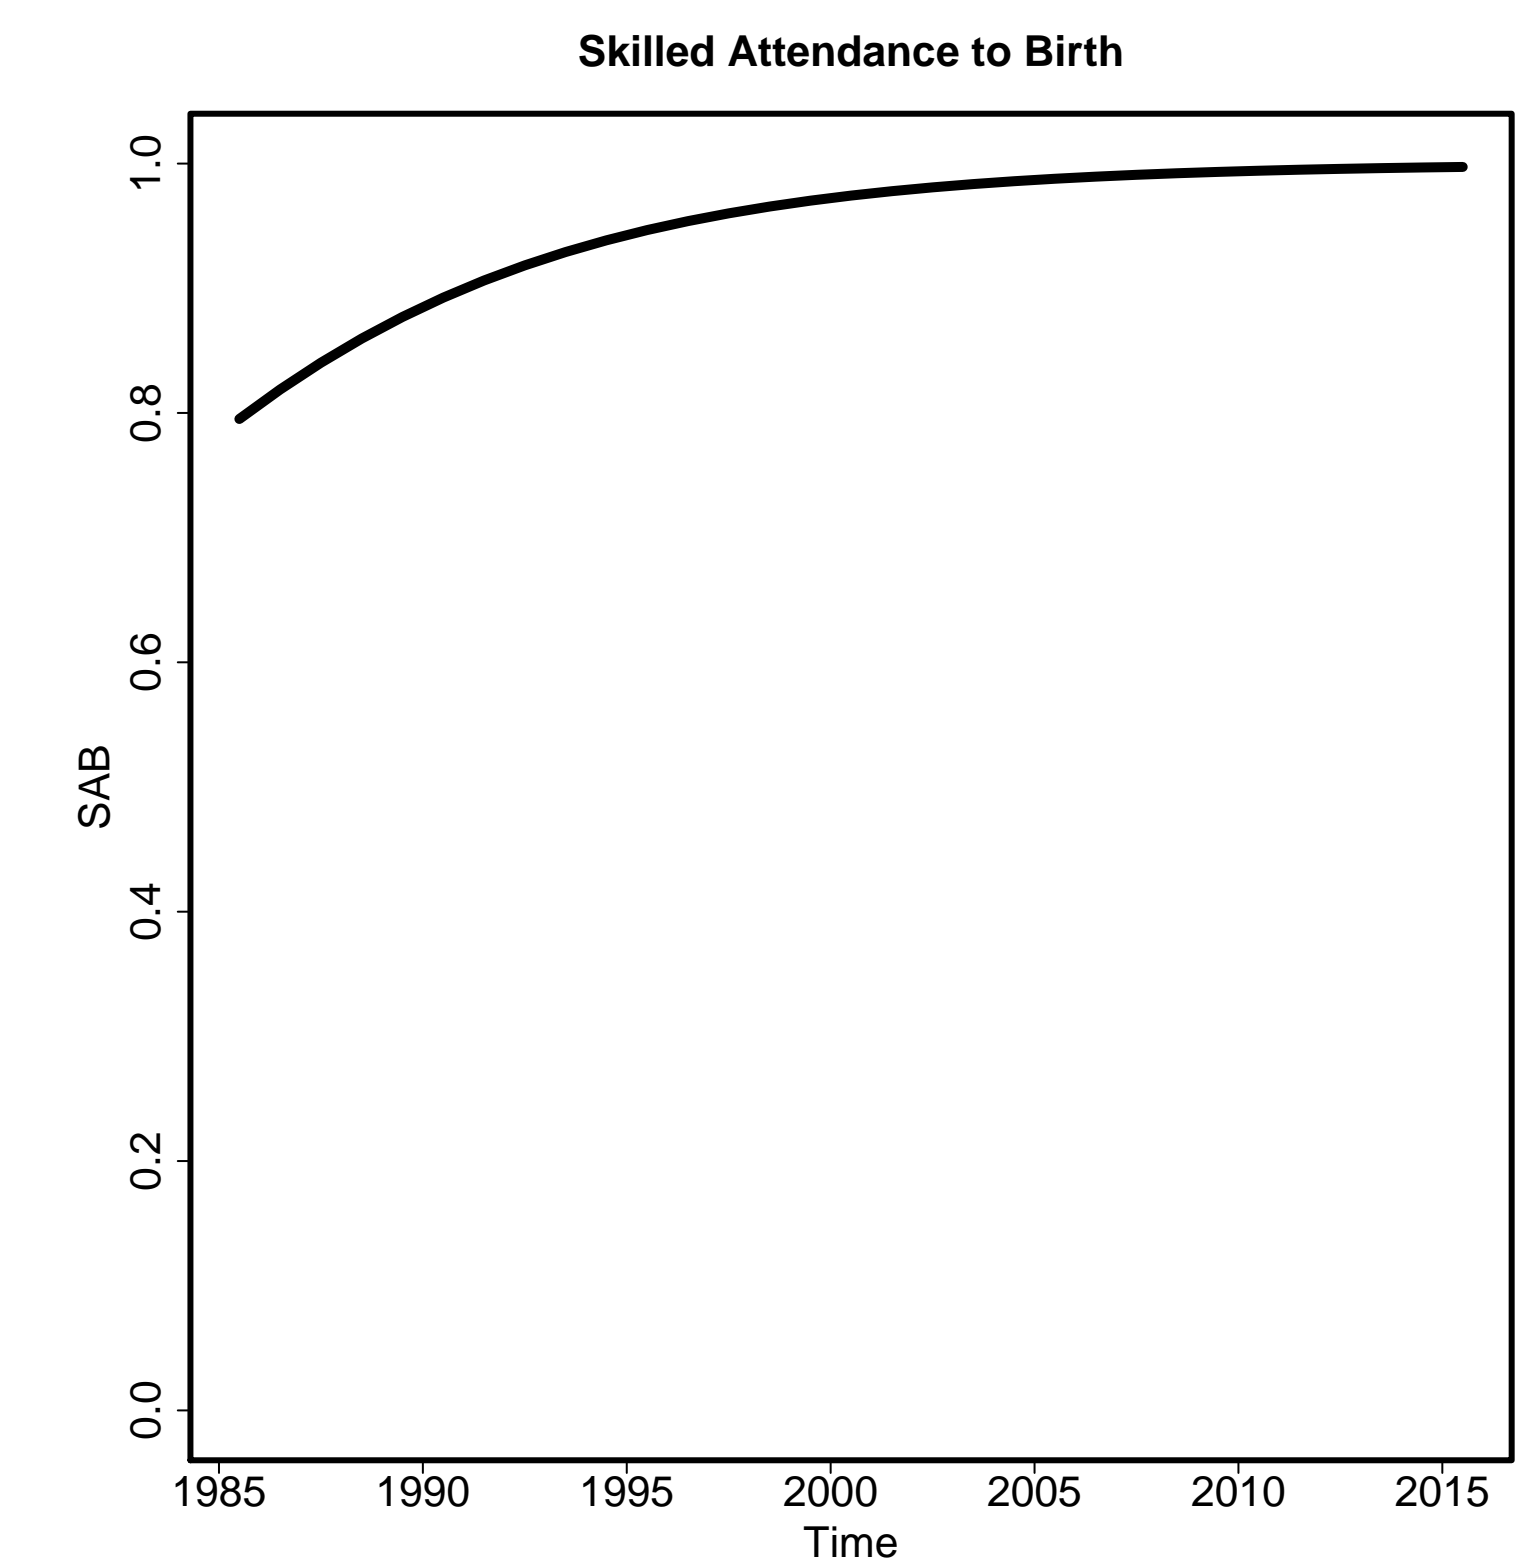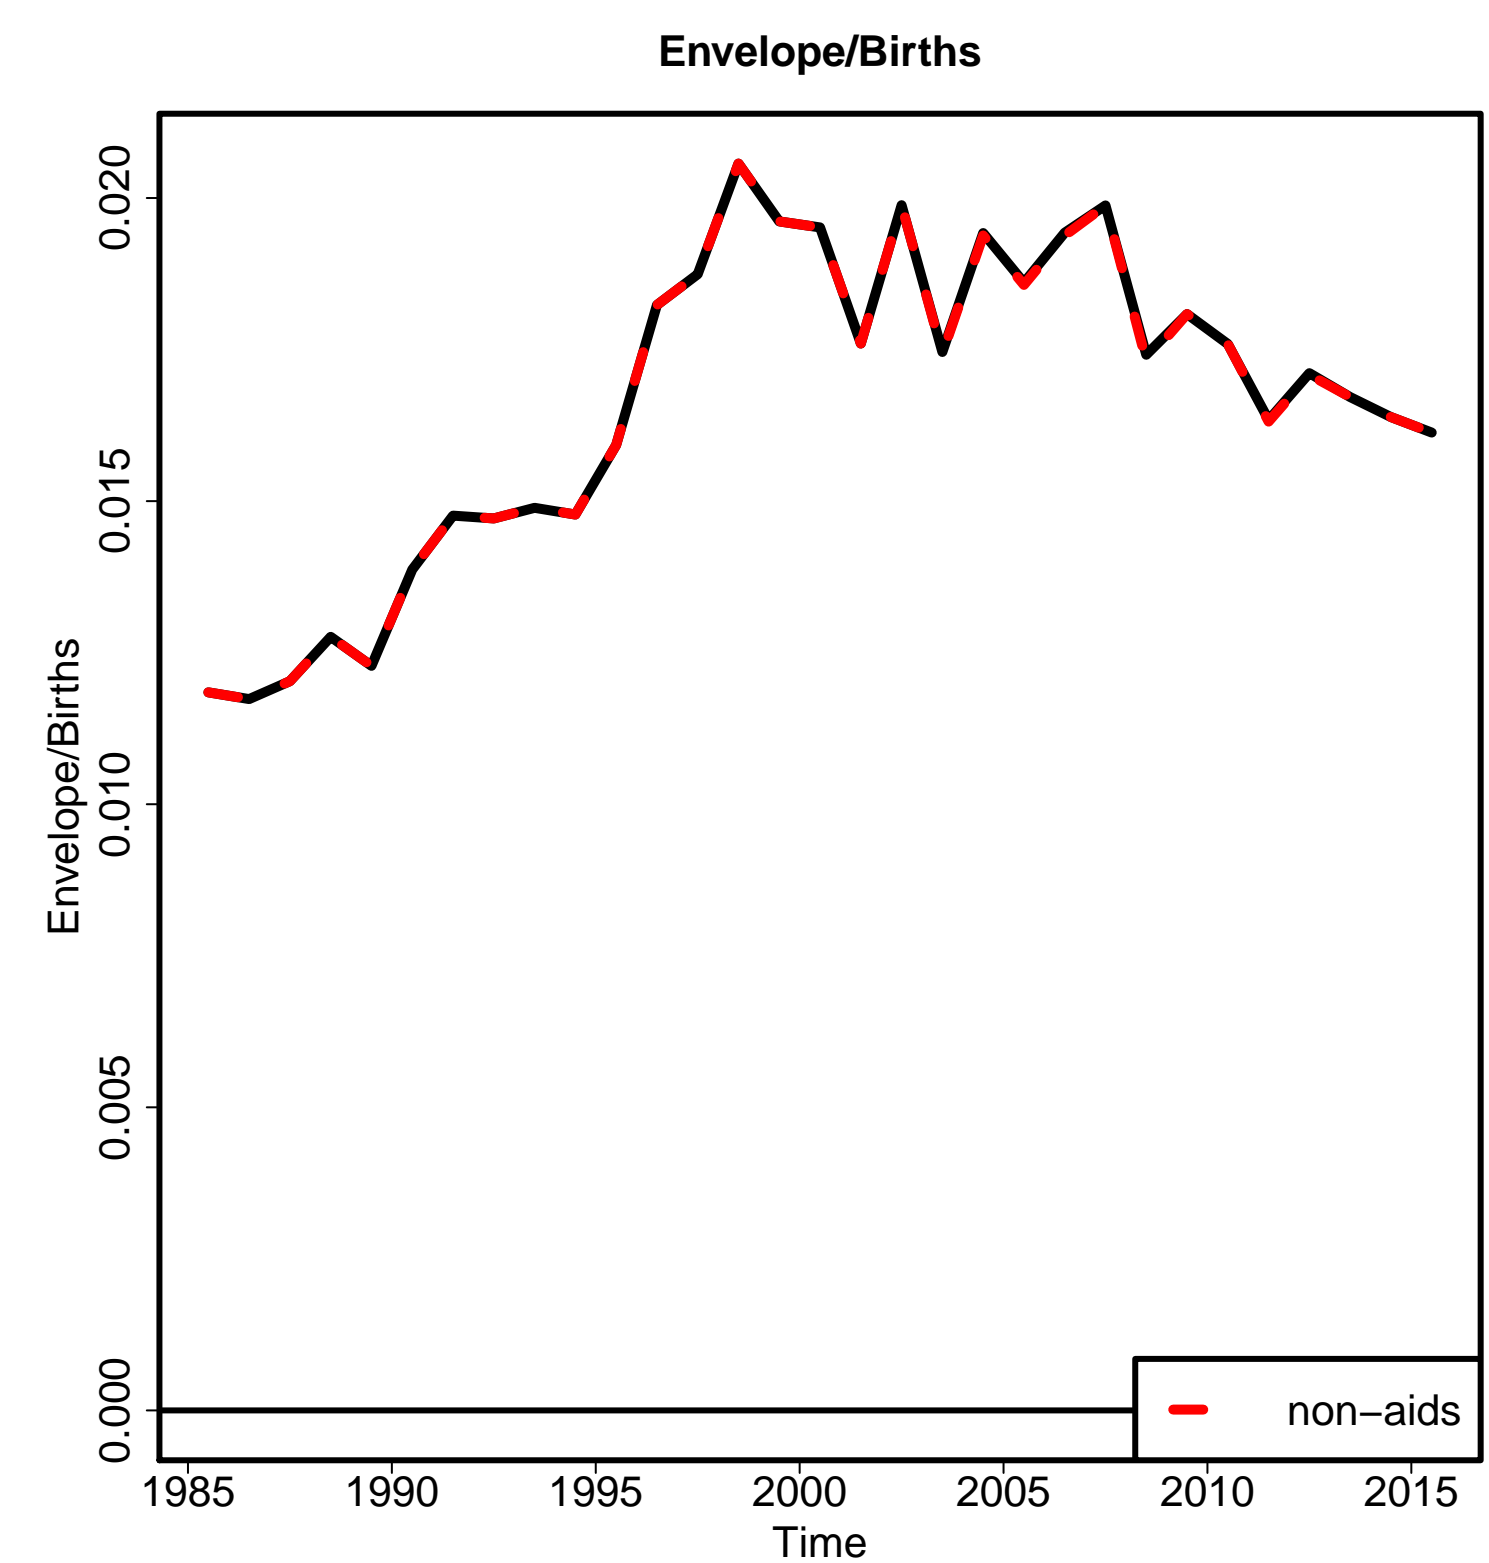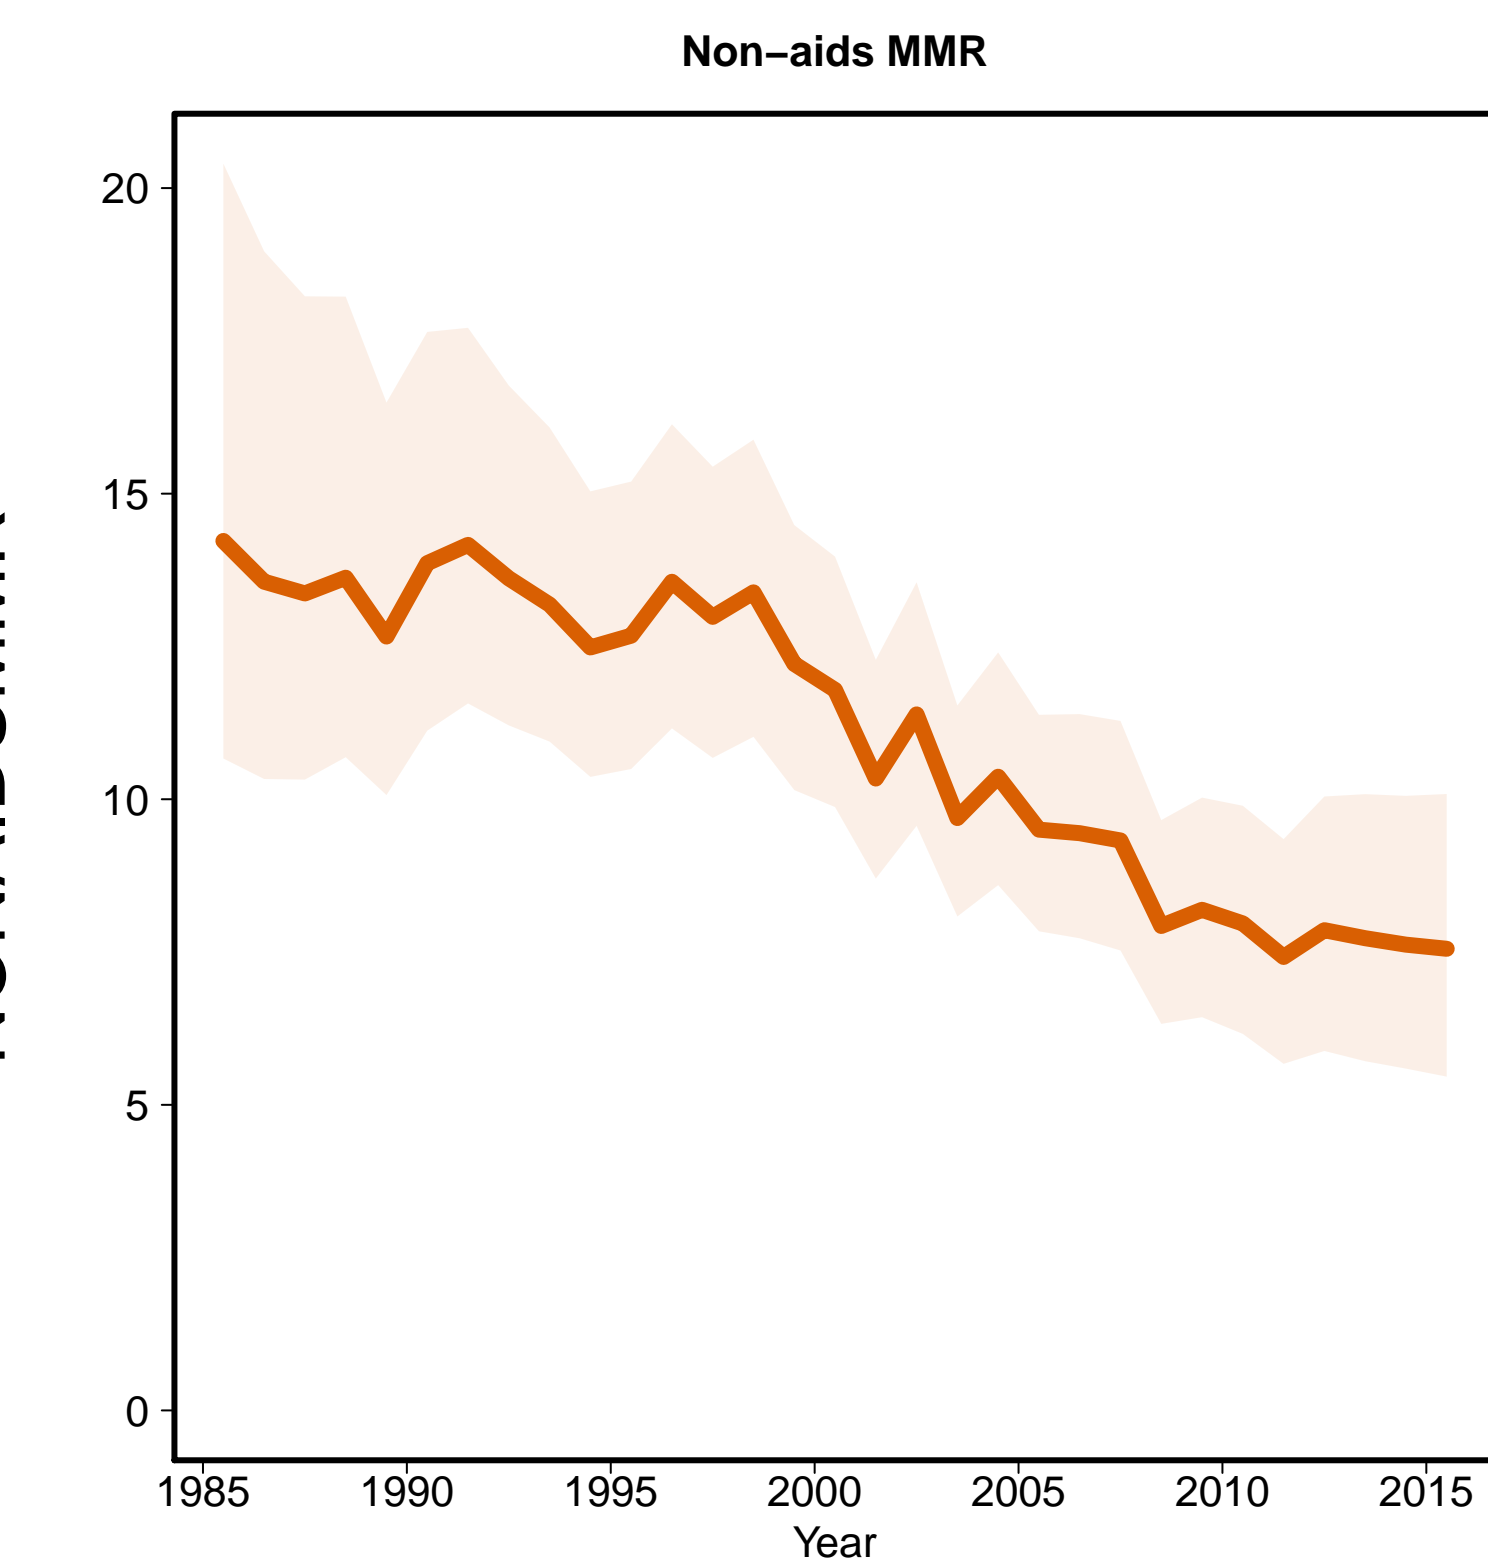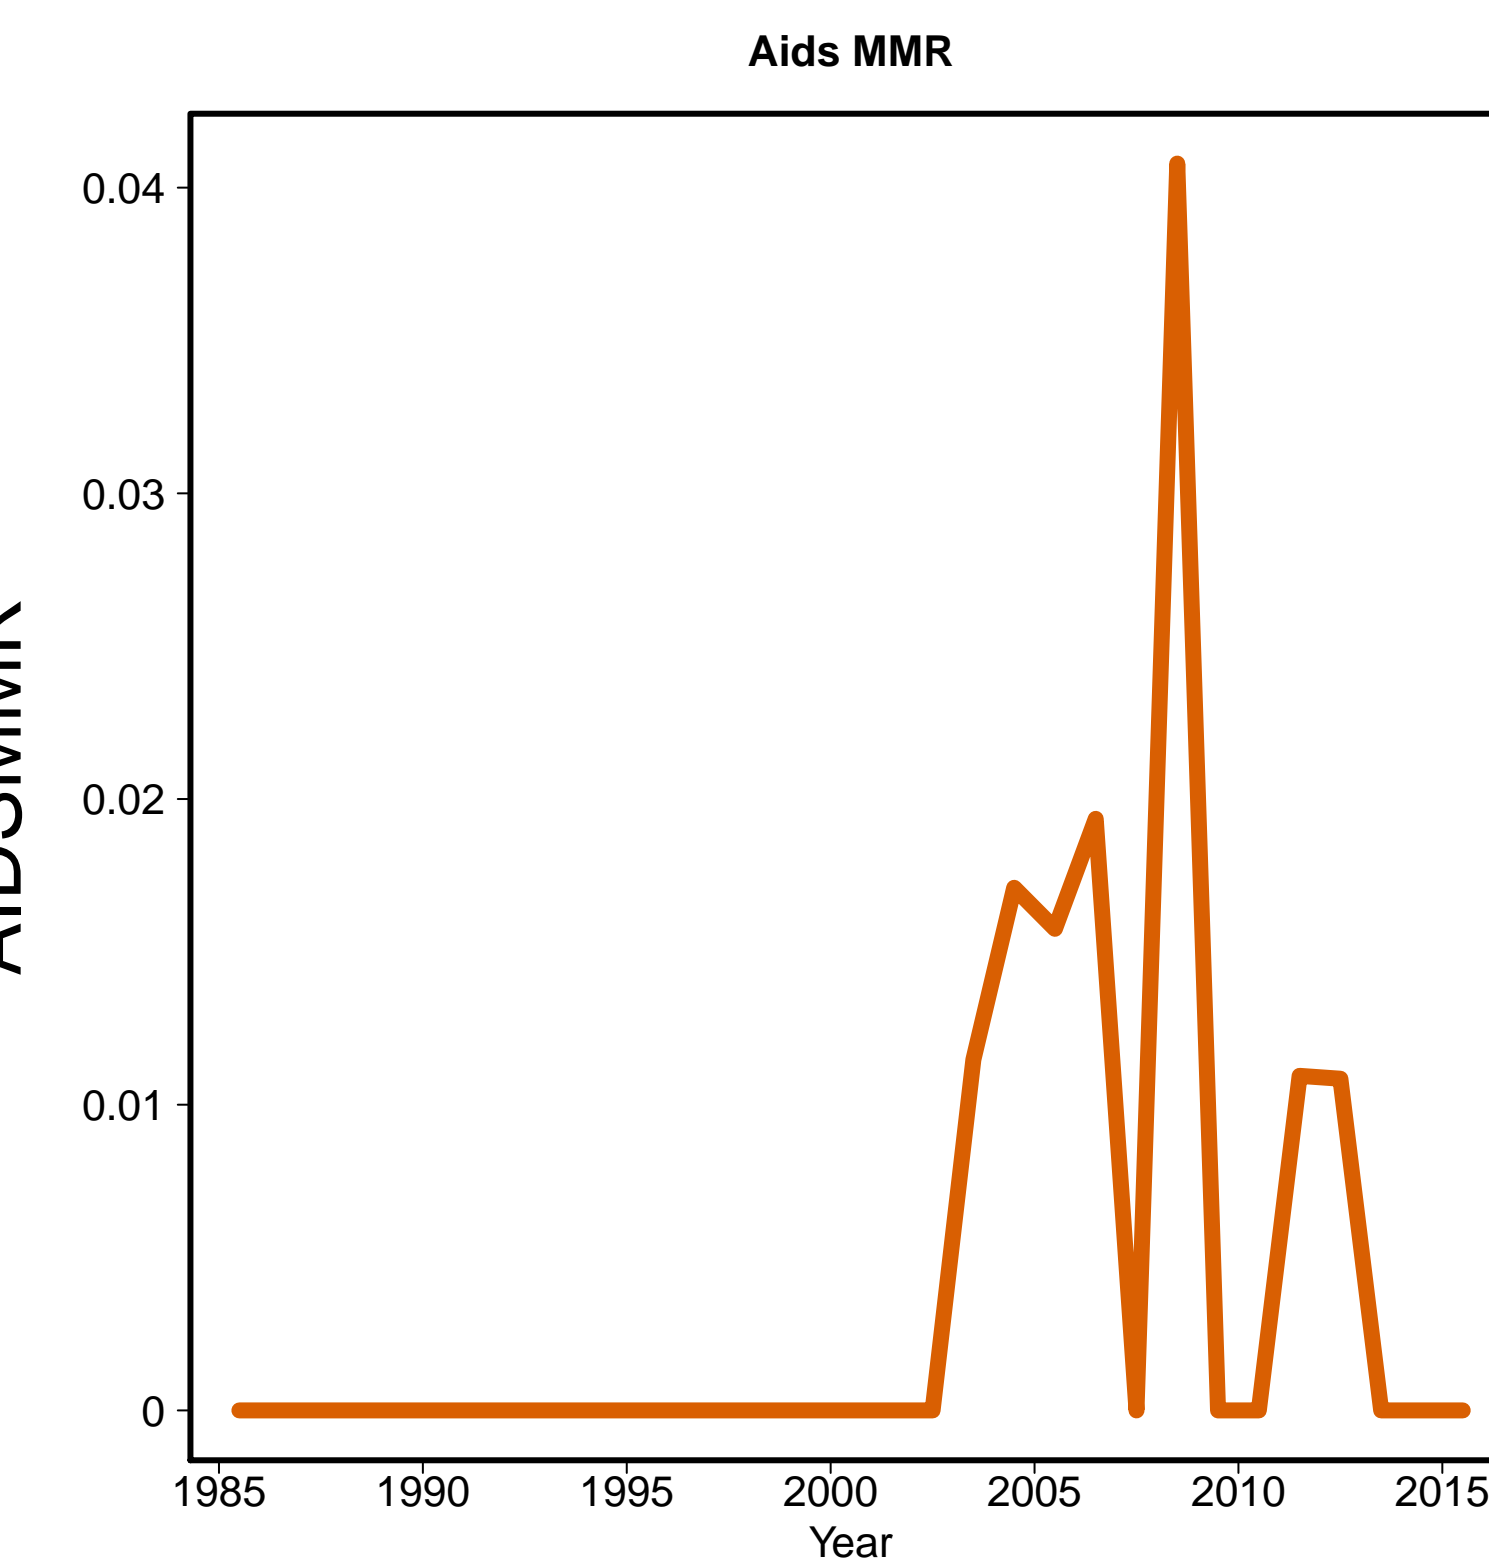

Thailand [THA]  
(South-Eastern Asia / Oceania)

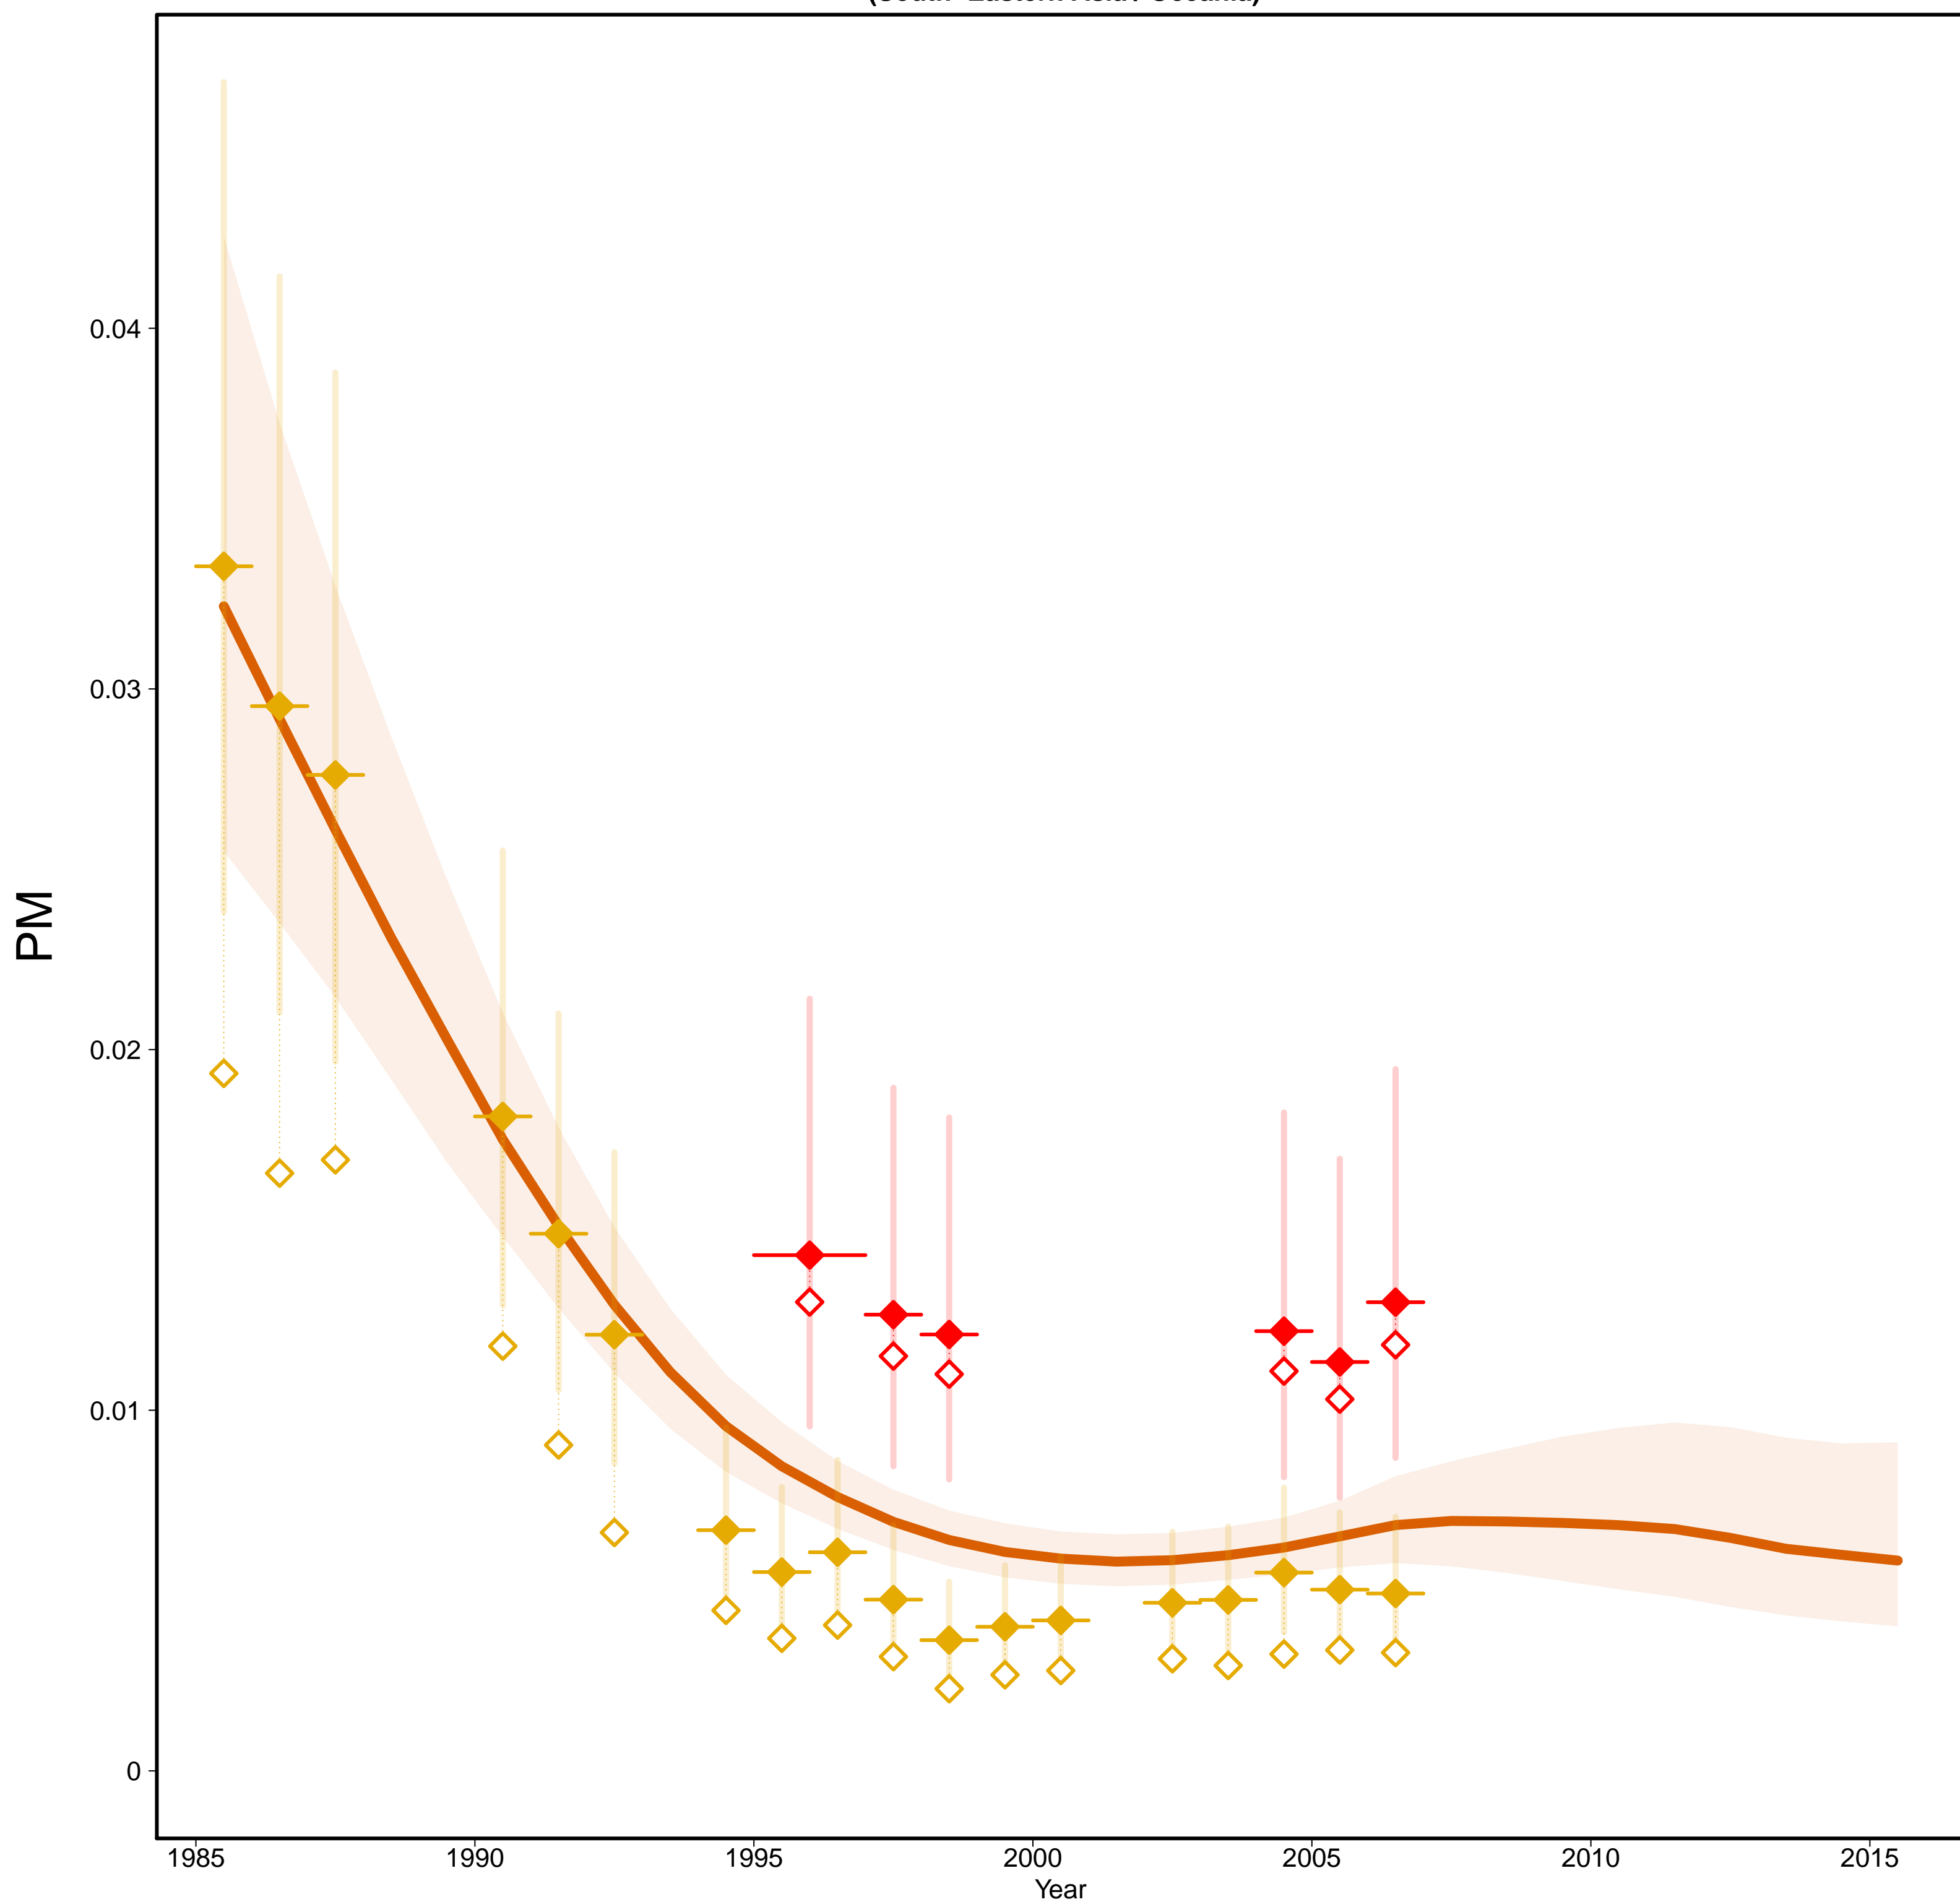

Thailand [THA]  
(South-Eastern Asia / Oceania)

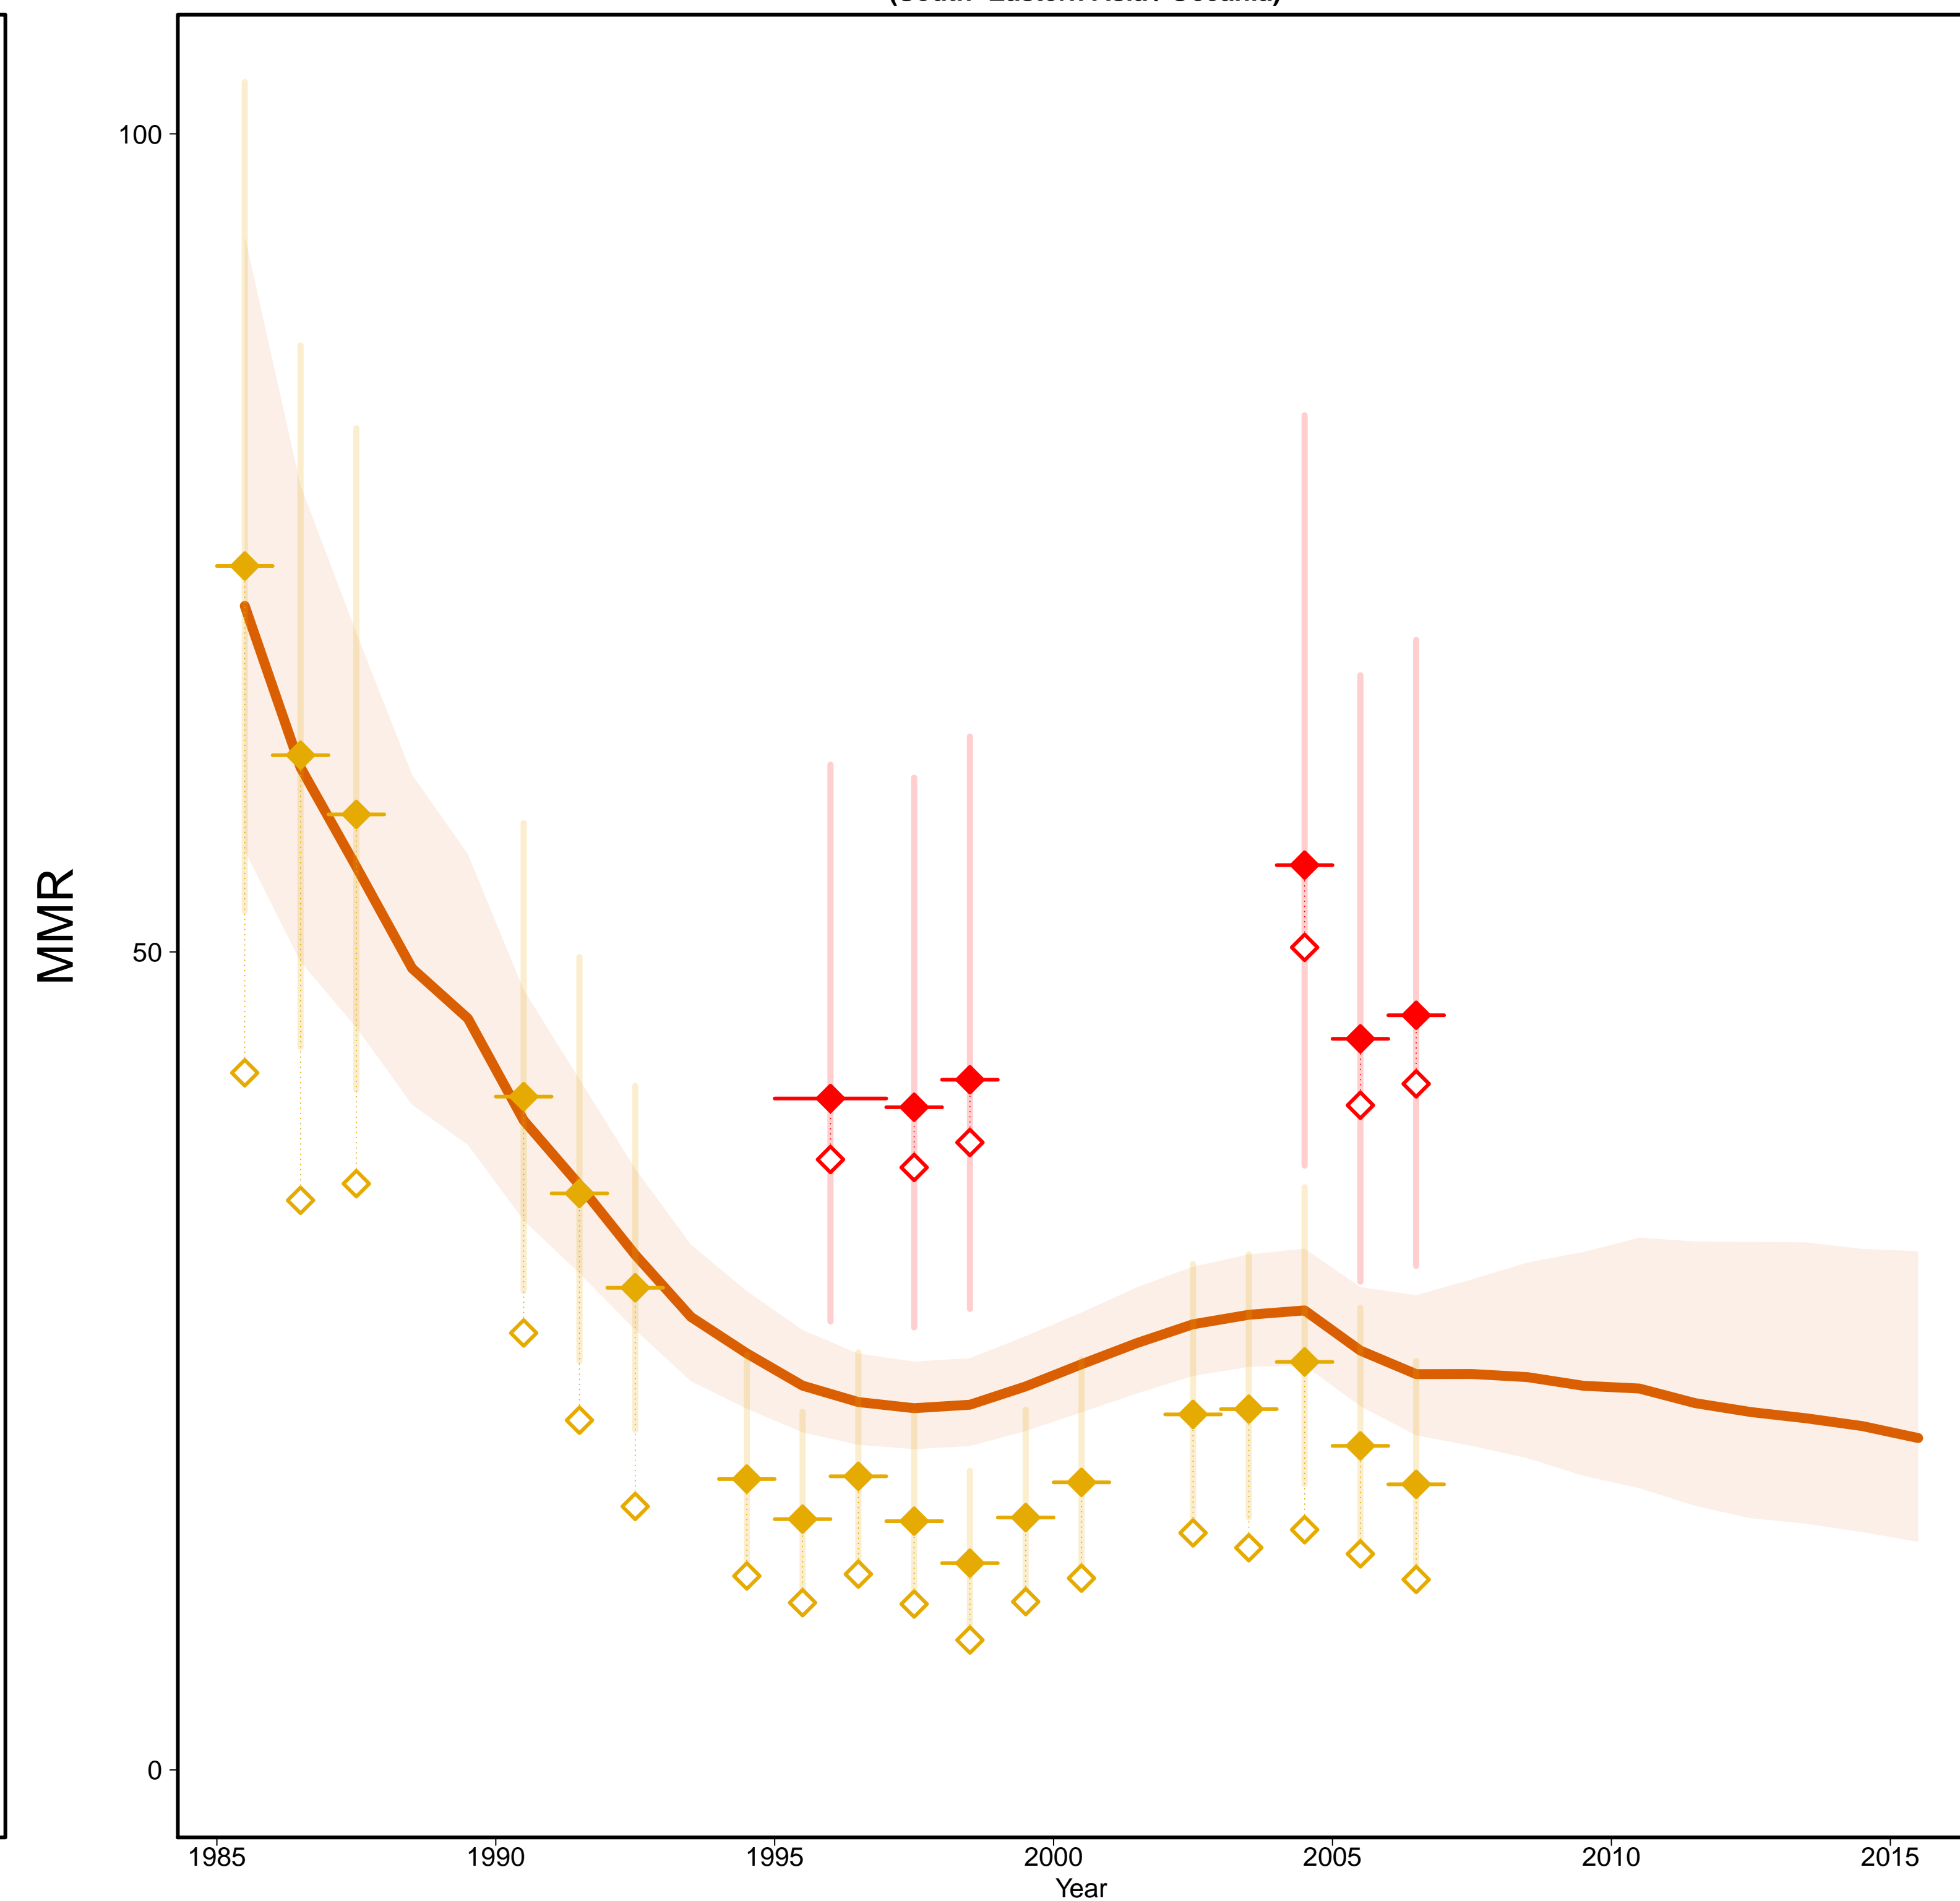

- Estimates —
- MMR Database 2015 —
- ◇ Observed Data
- ◆ Adjusted Data
- Data type —
- ◆ VR
- ◆ Misc. studies

Gross Domestic Product

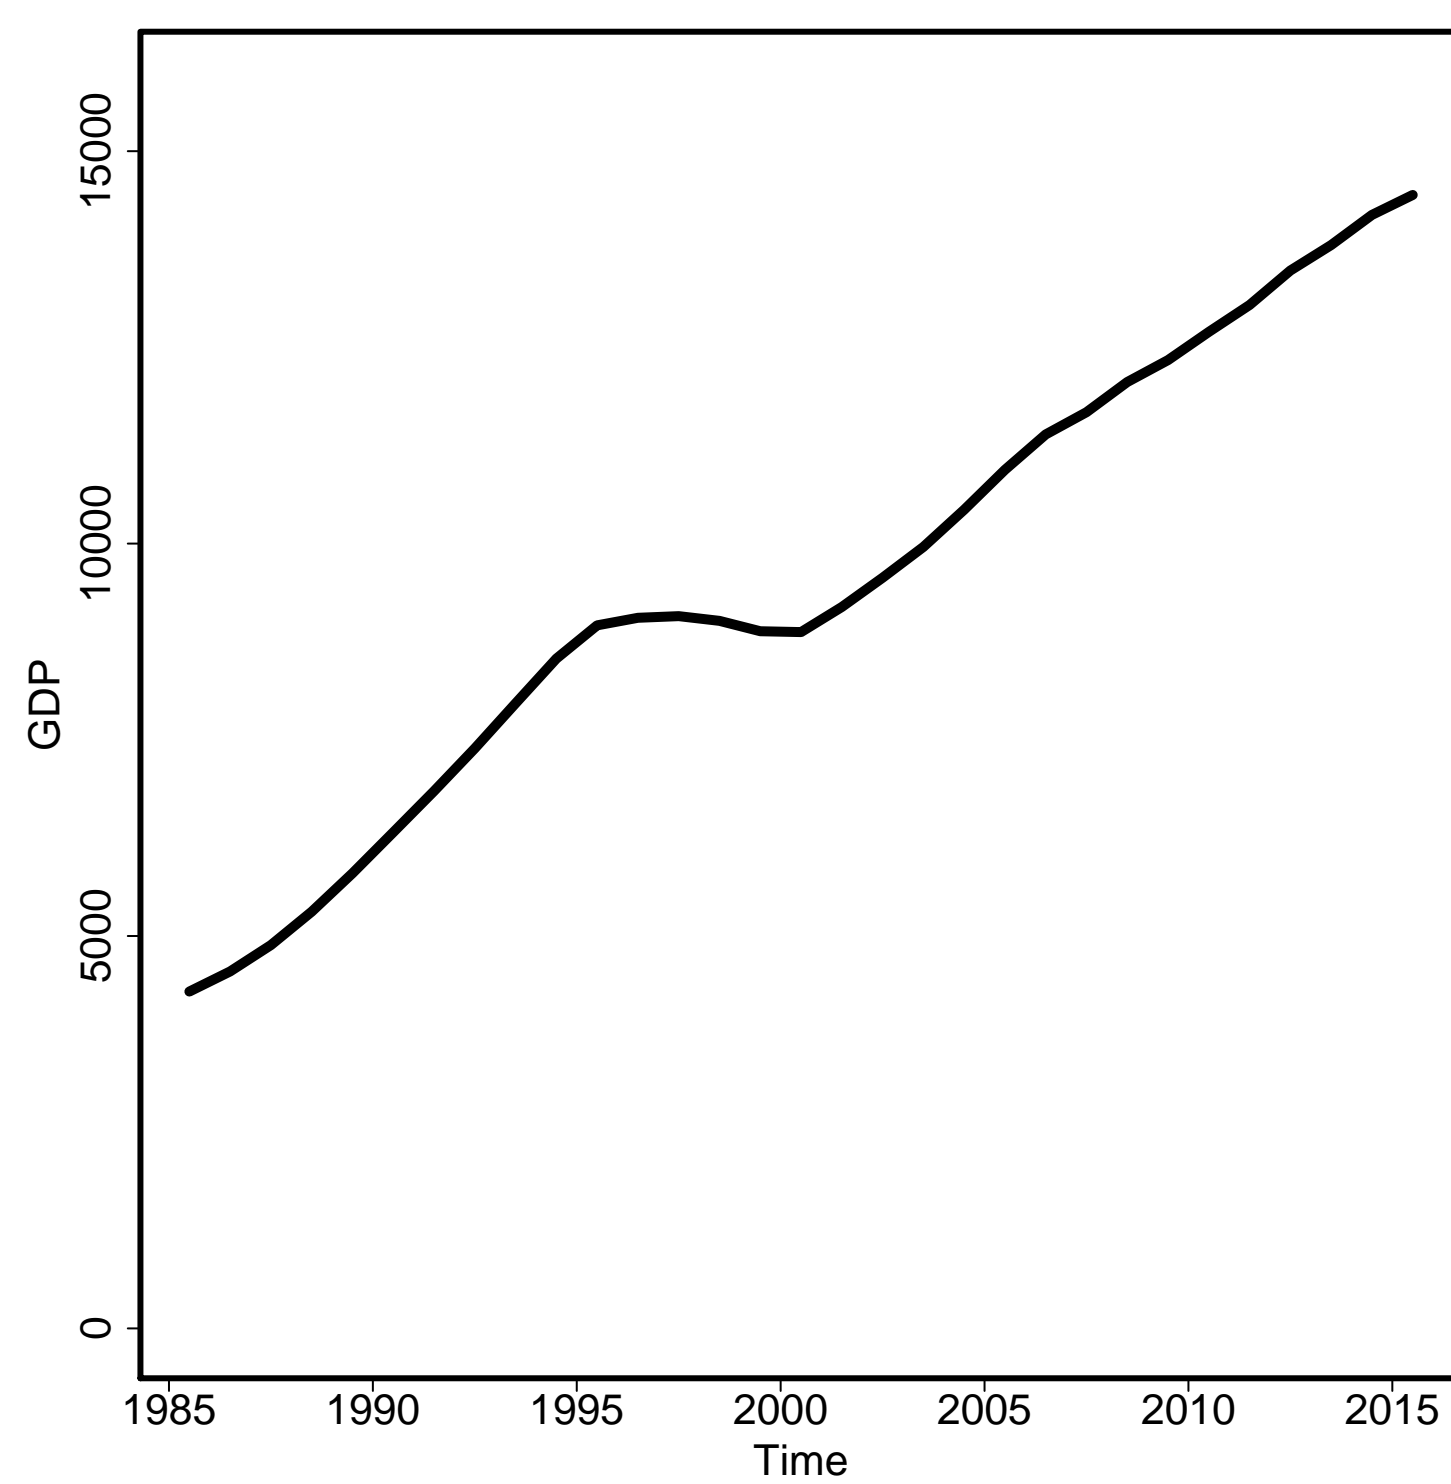

General Fertility Rate

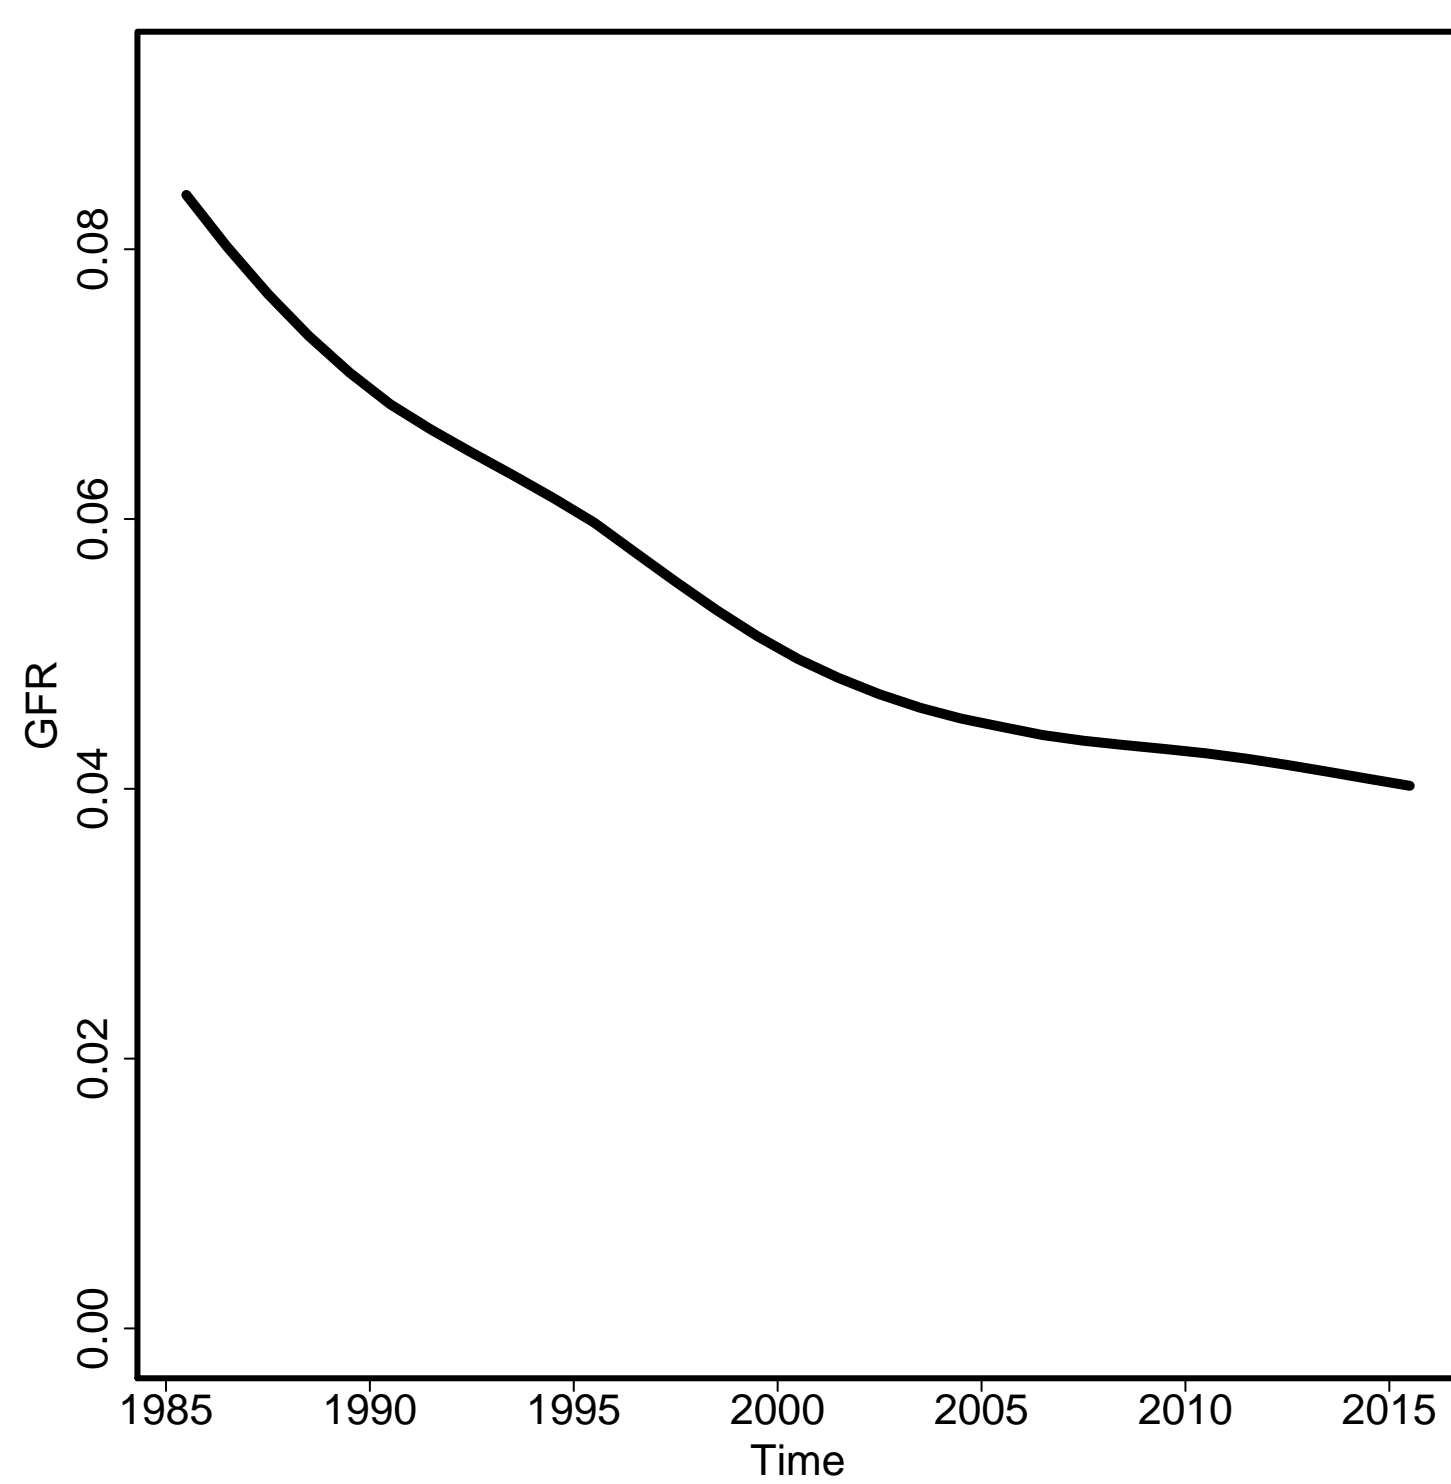

Skilled Attendance to Birth

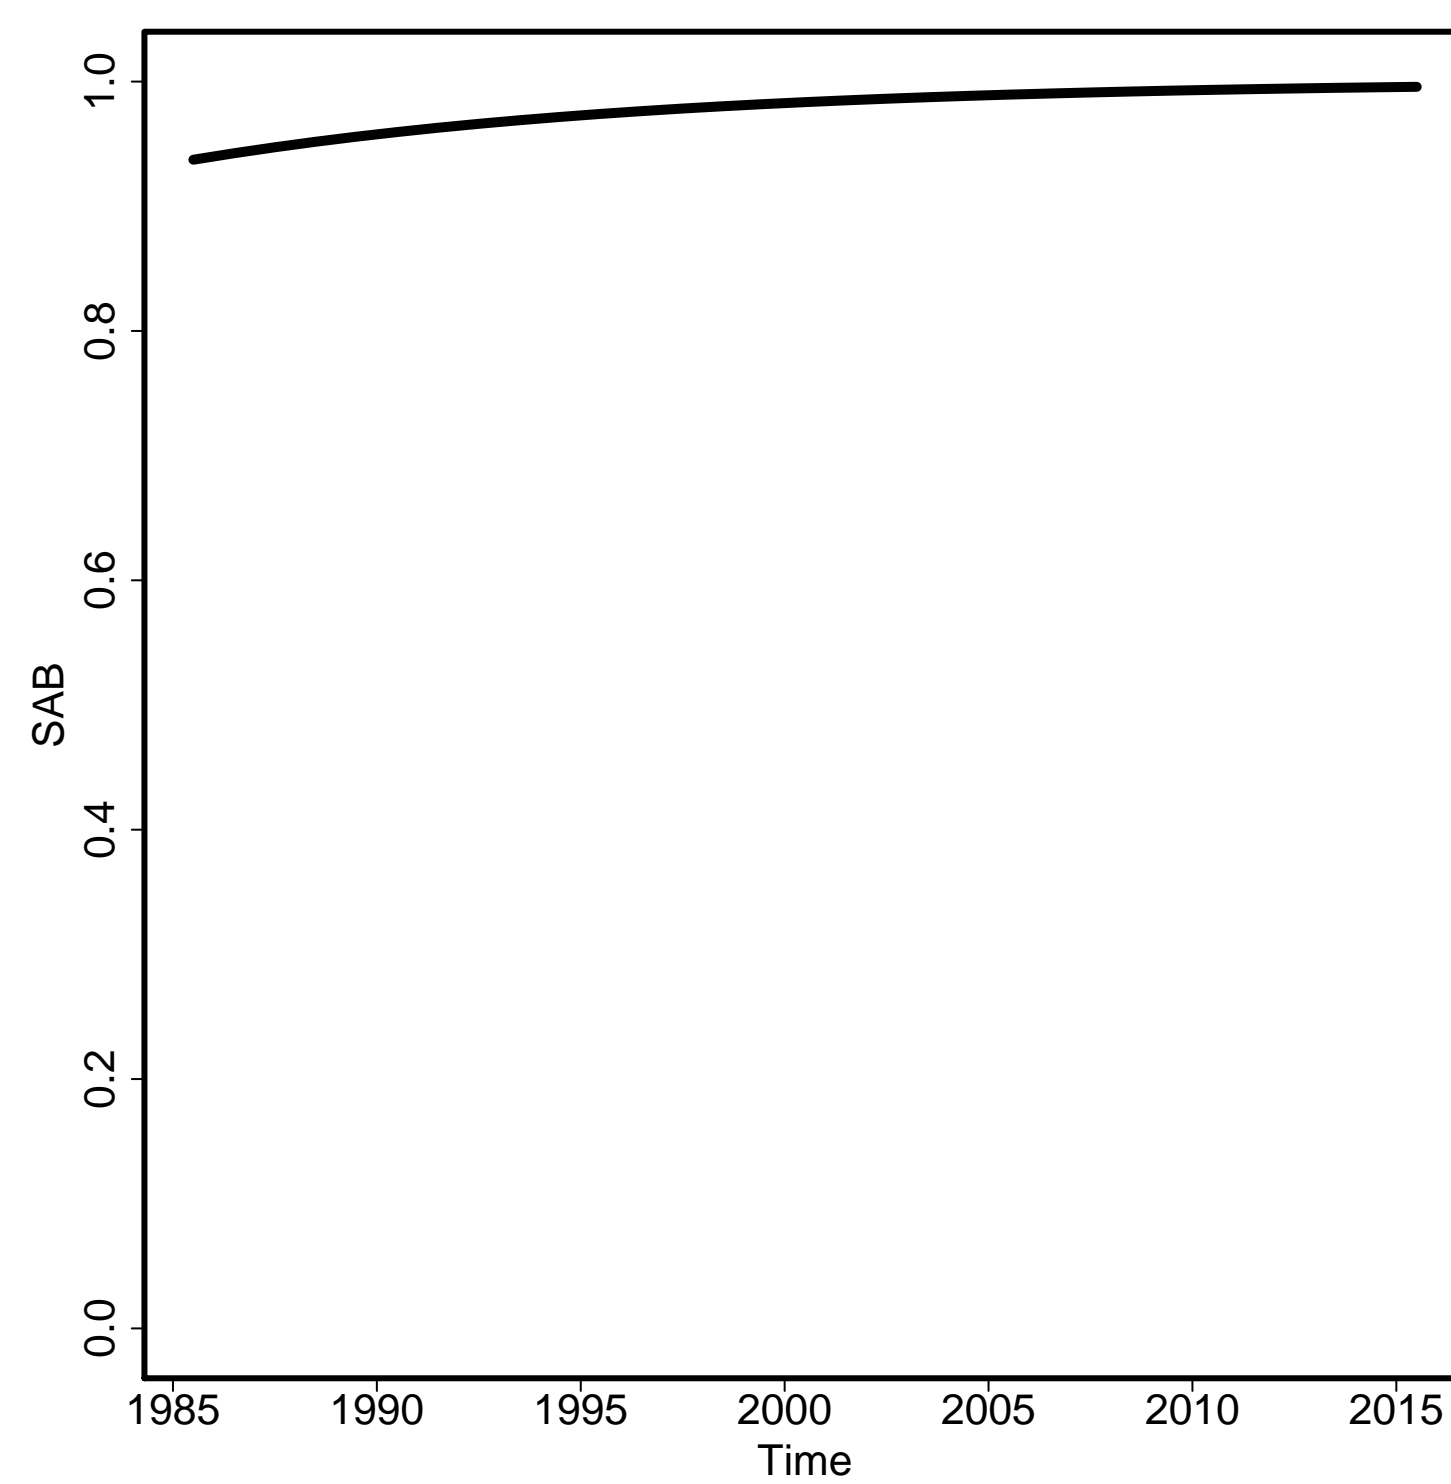

Envelope/Births

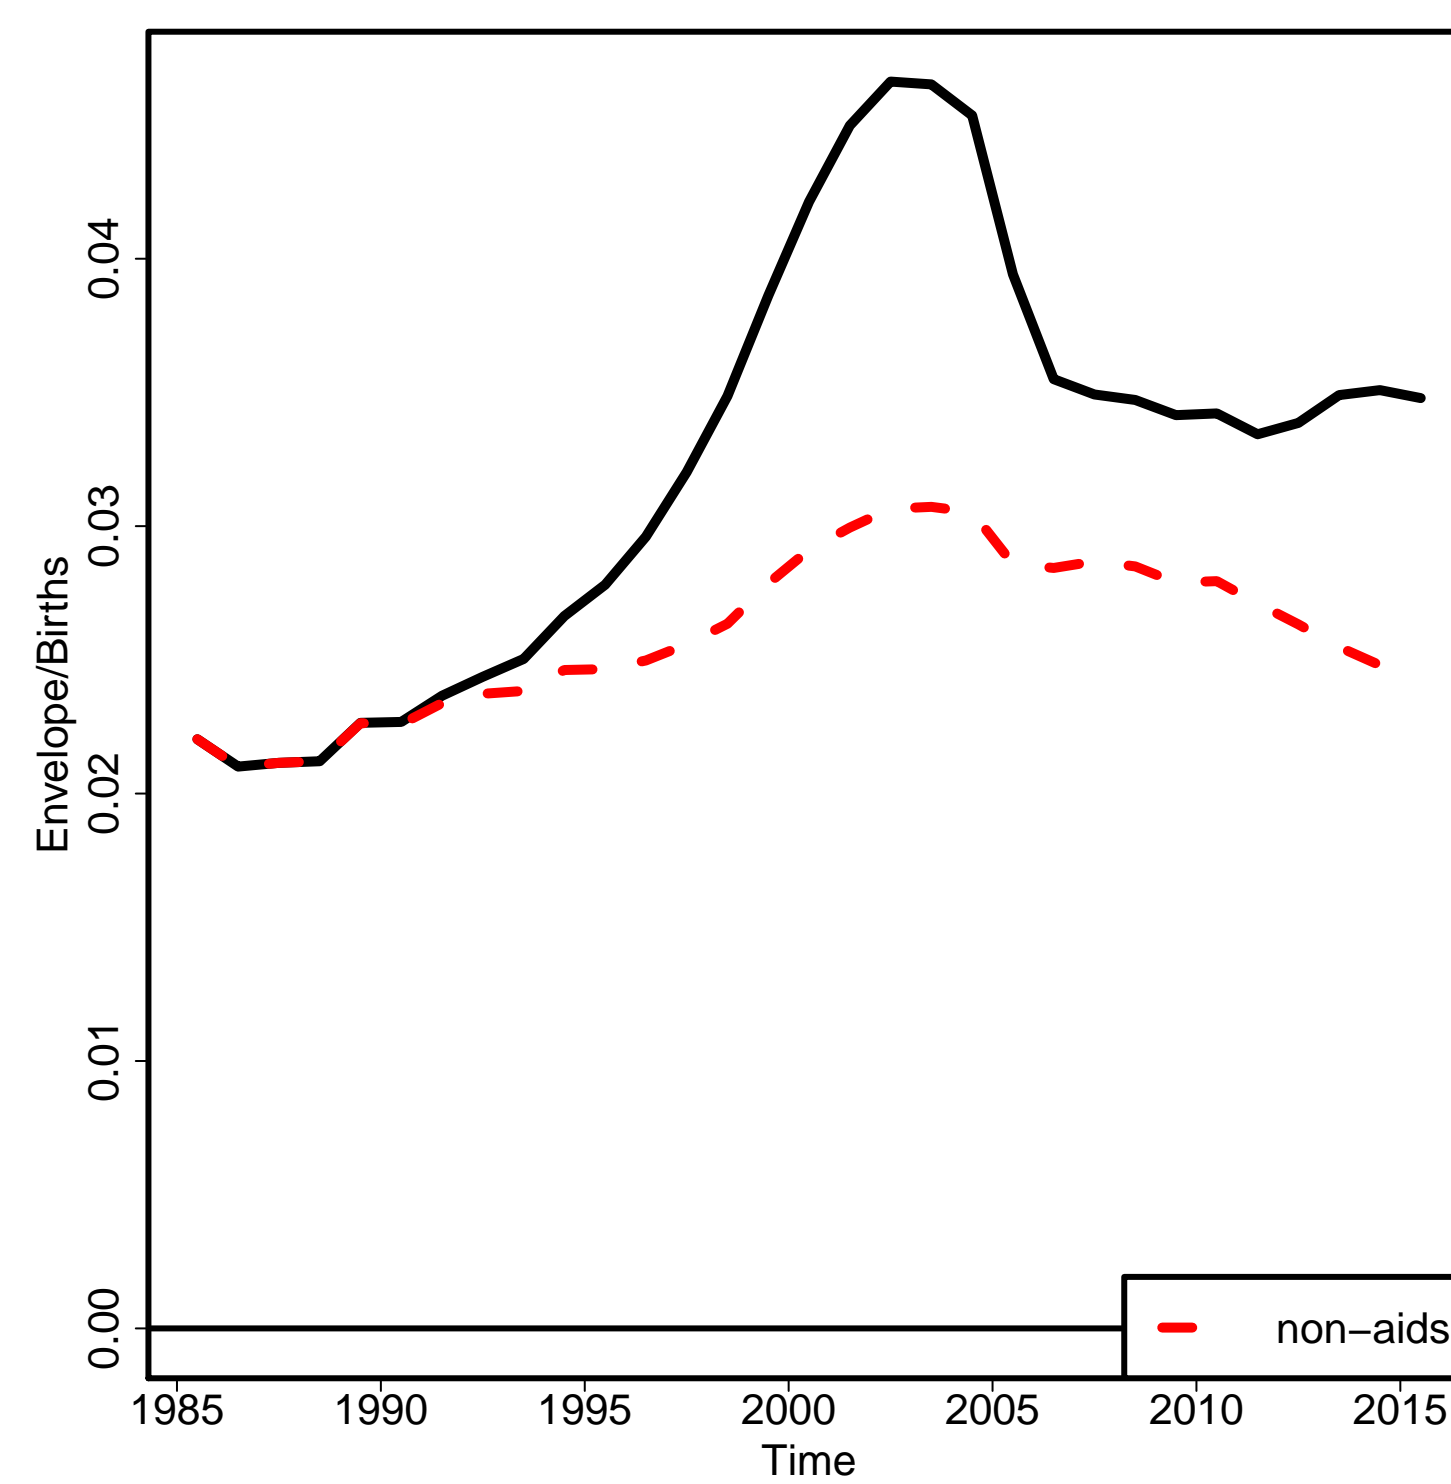

Non-aids MMR

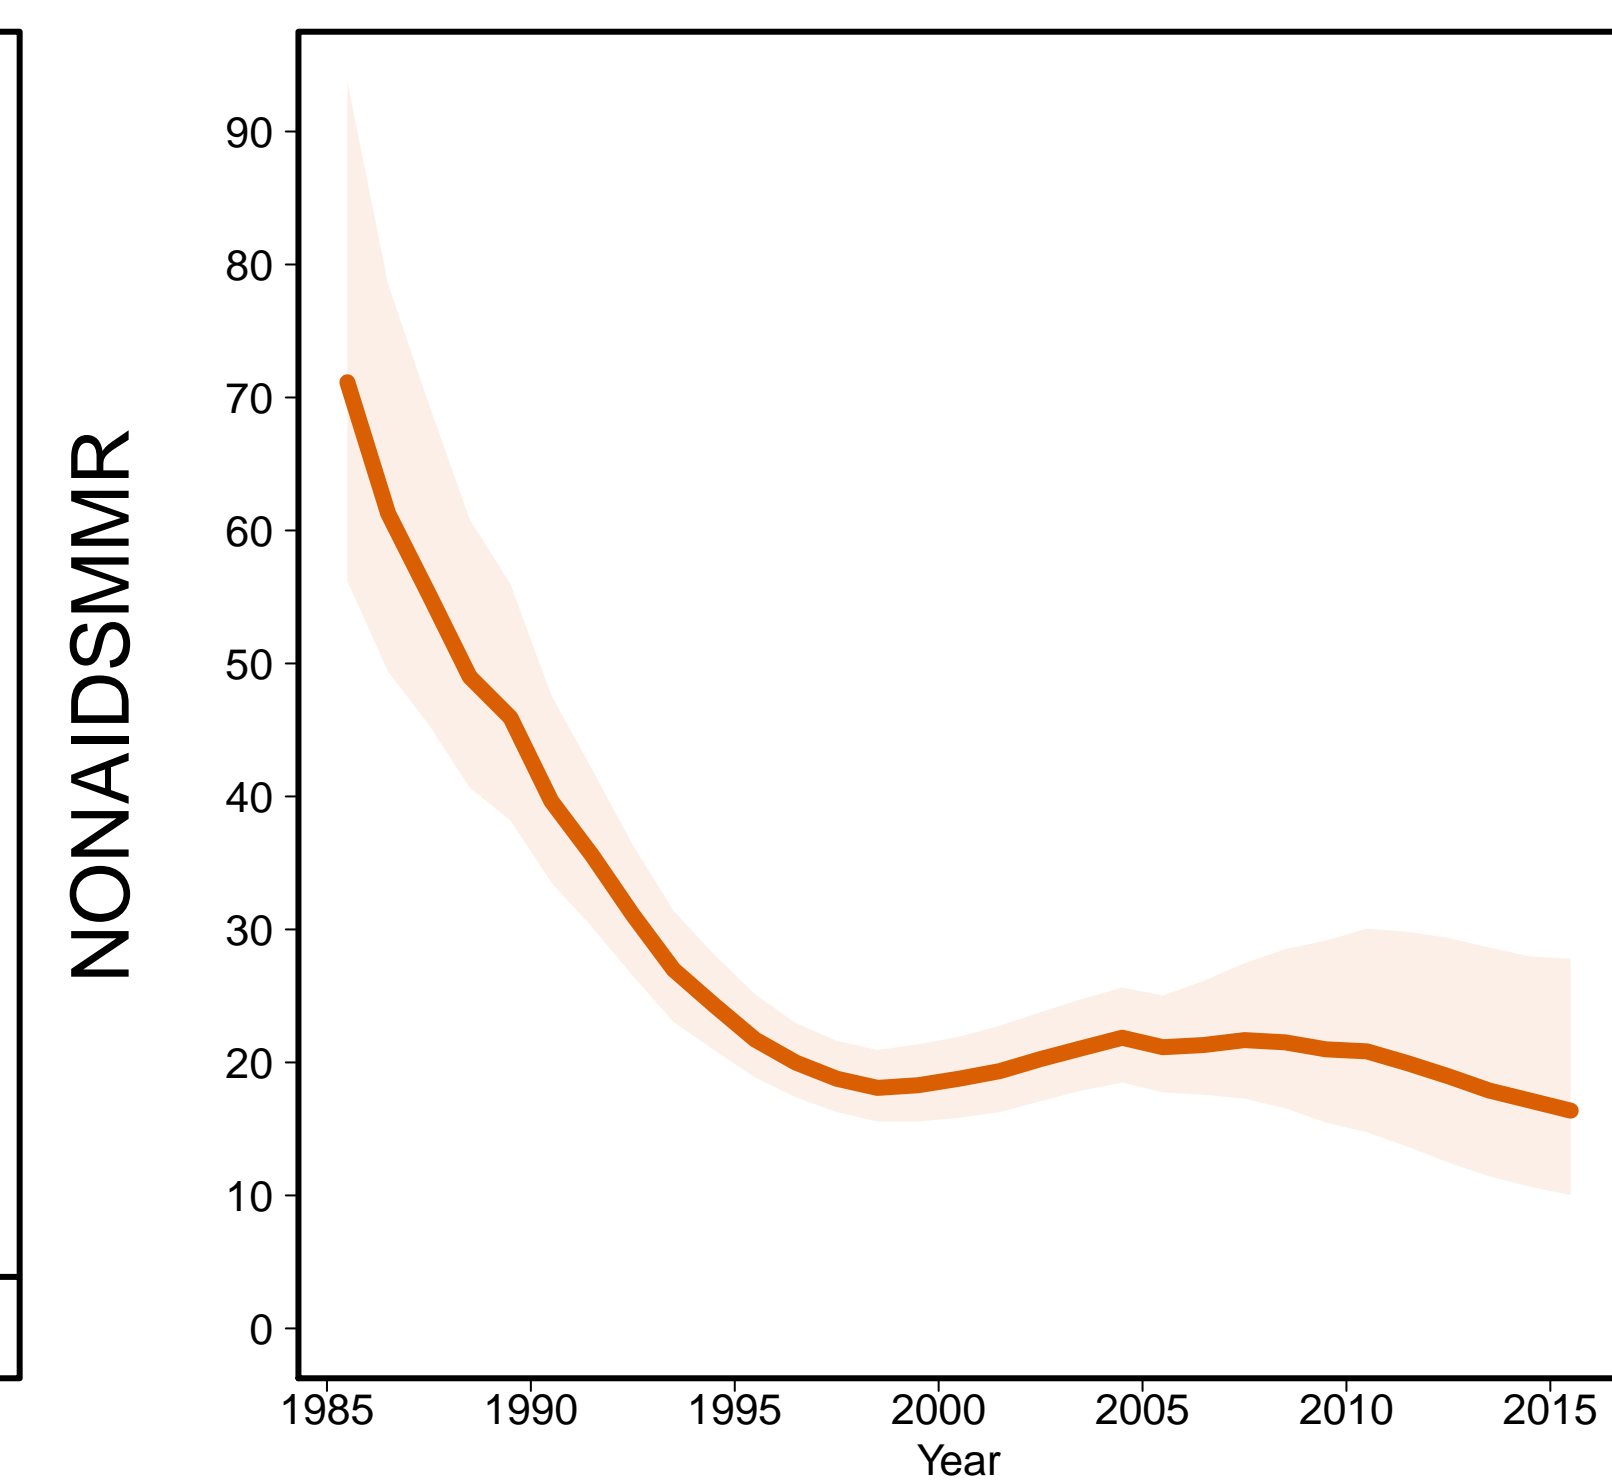

Aids MMR

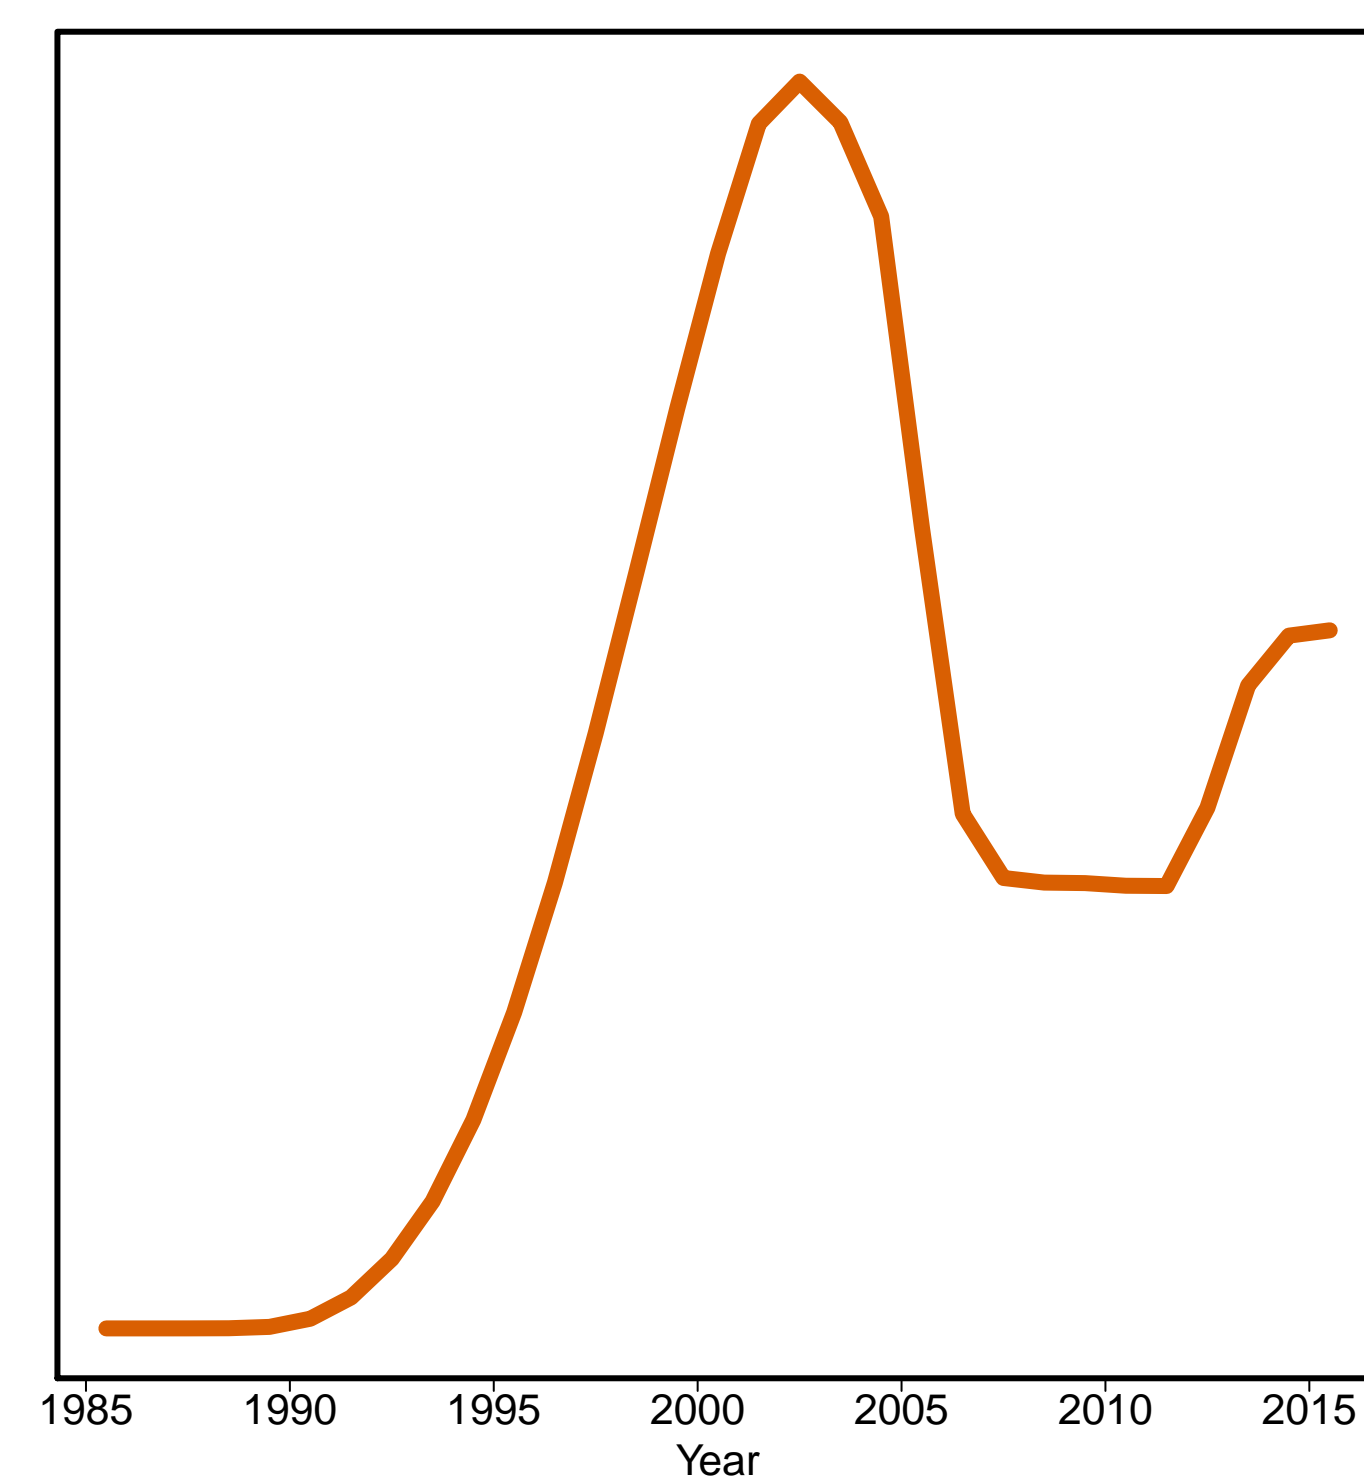

Timor-Leste [TLS]  
(South-Eastern Asia / Oceania)

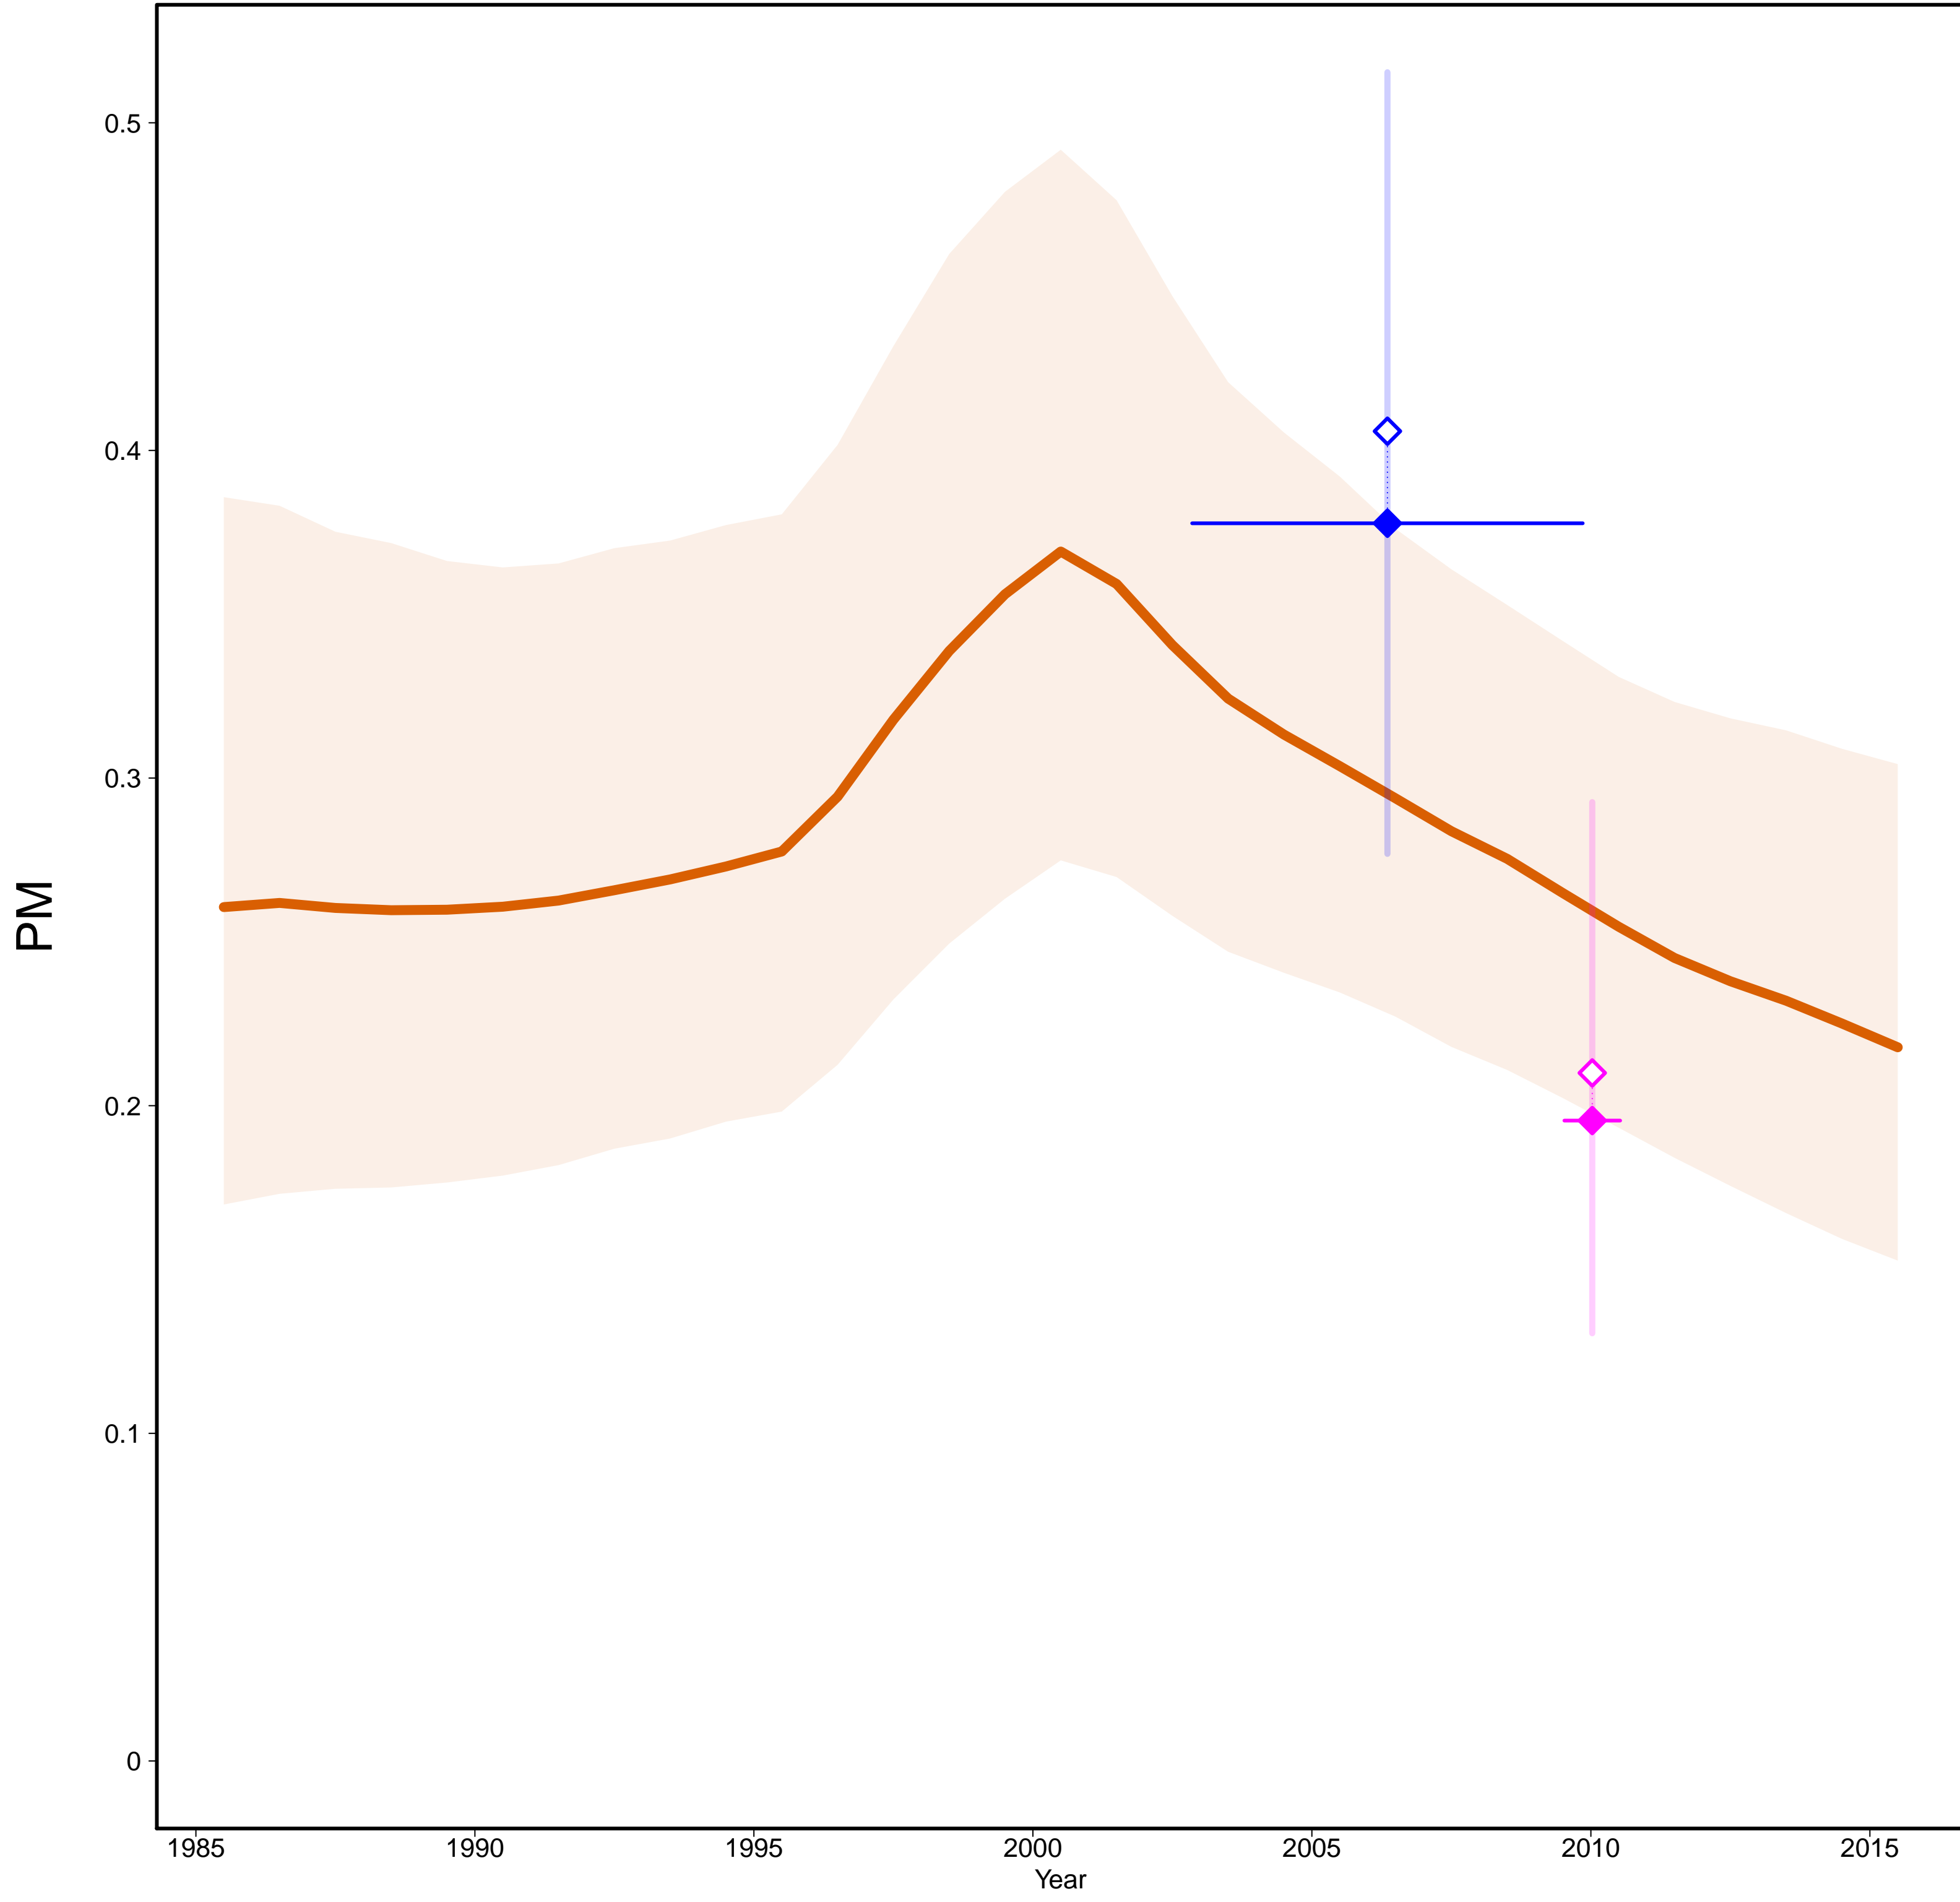

Timor-Leste [TLS]  
(South-Eastern Asia / Oceania)

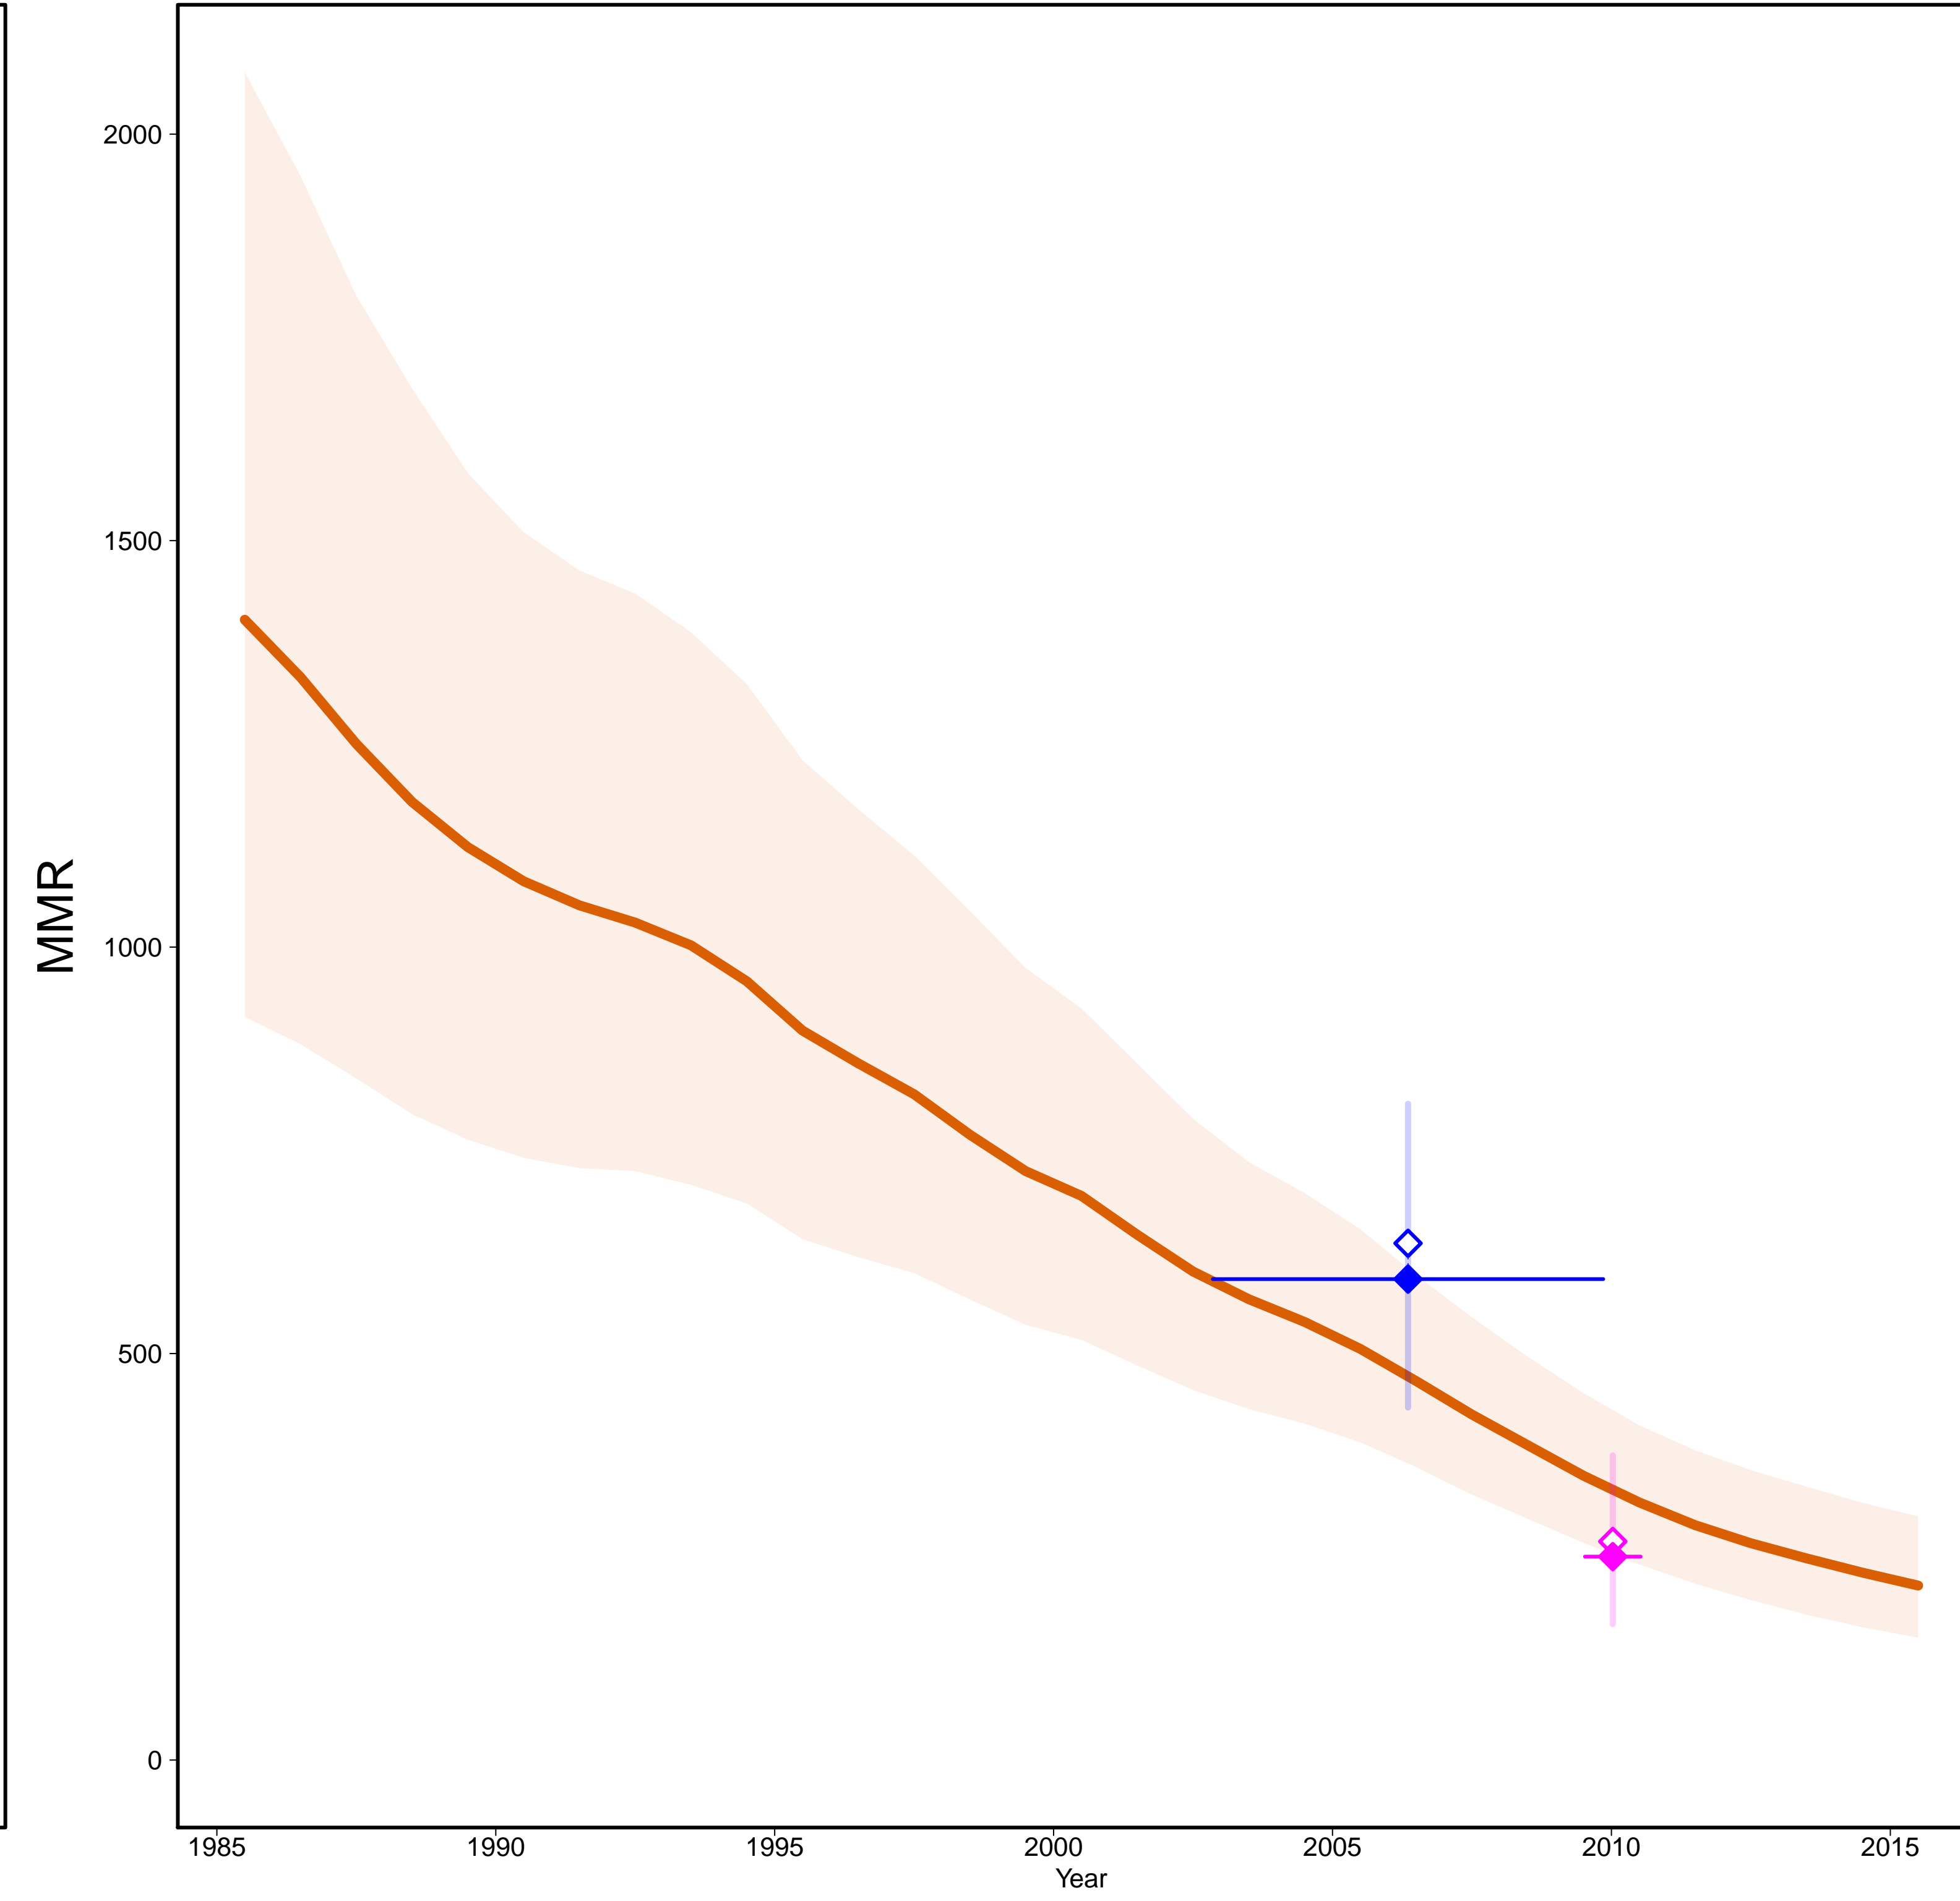

- Estimates —
- MMR Database 2015 —
- ◇ Observed Data
- ◆ Adjusted Data
- Data type —
- ◆ DHS
- ◆ Census

Gross Domestic Product

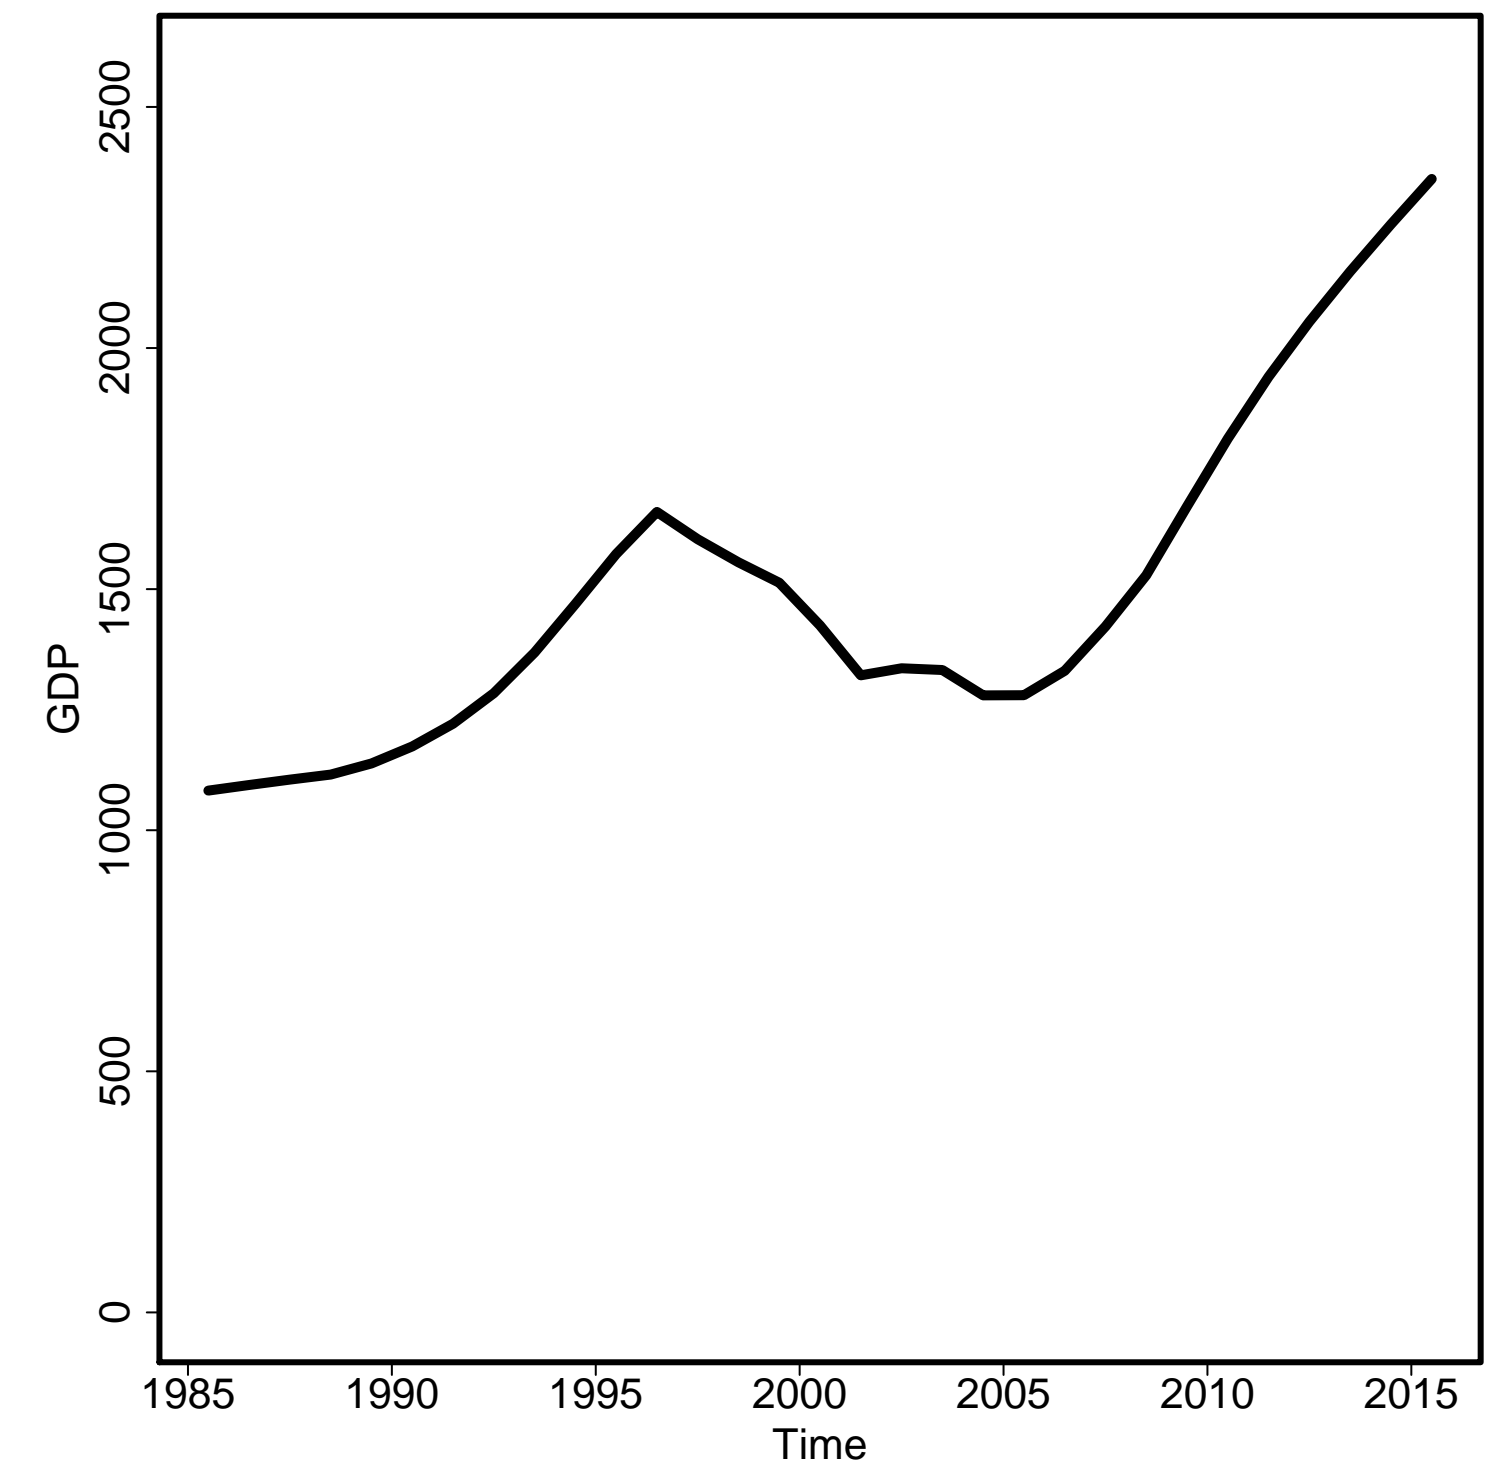

General Fertility Rate

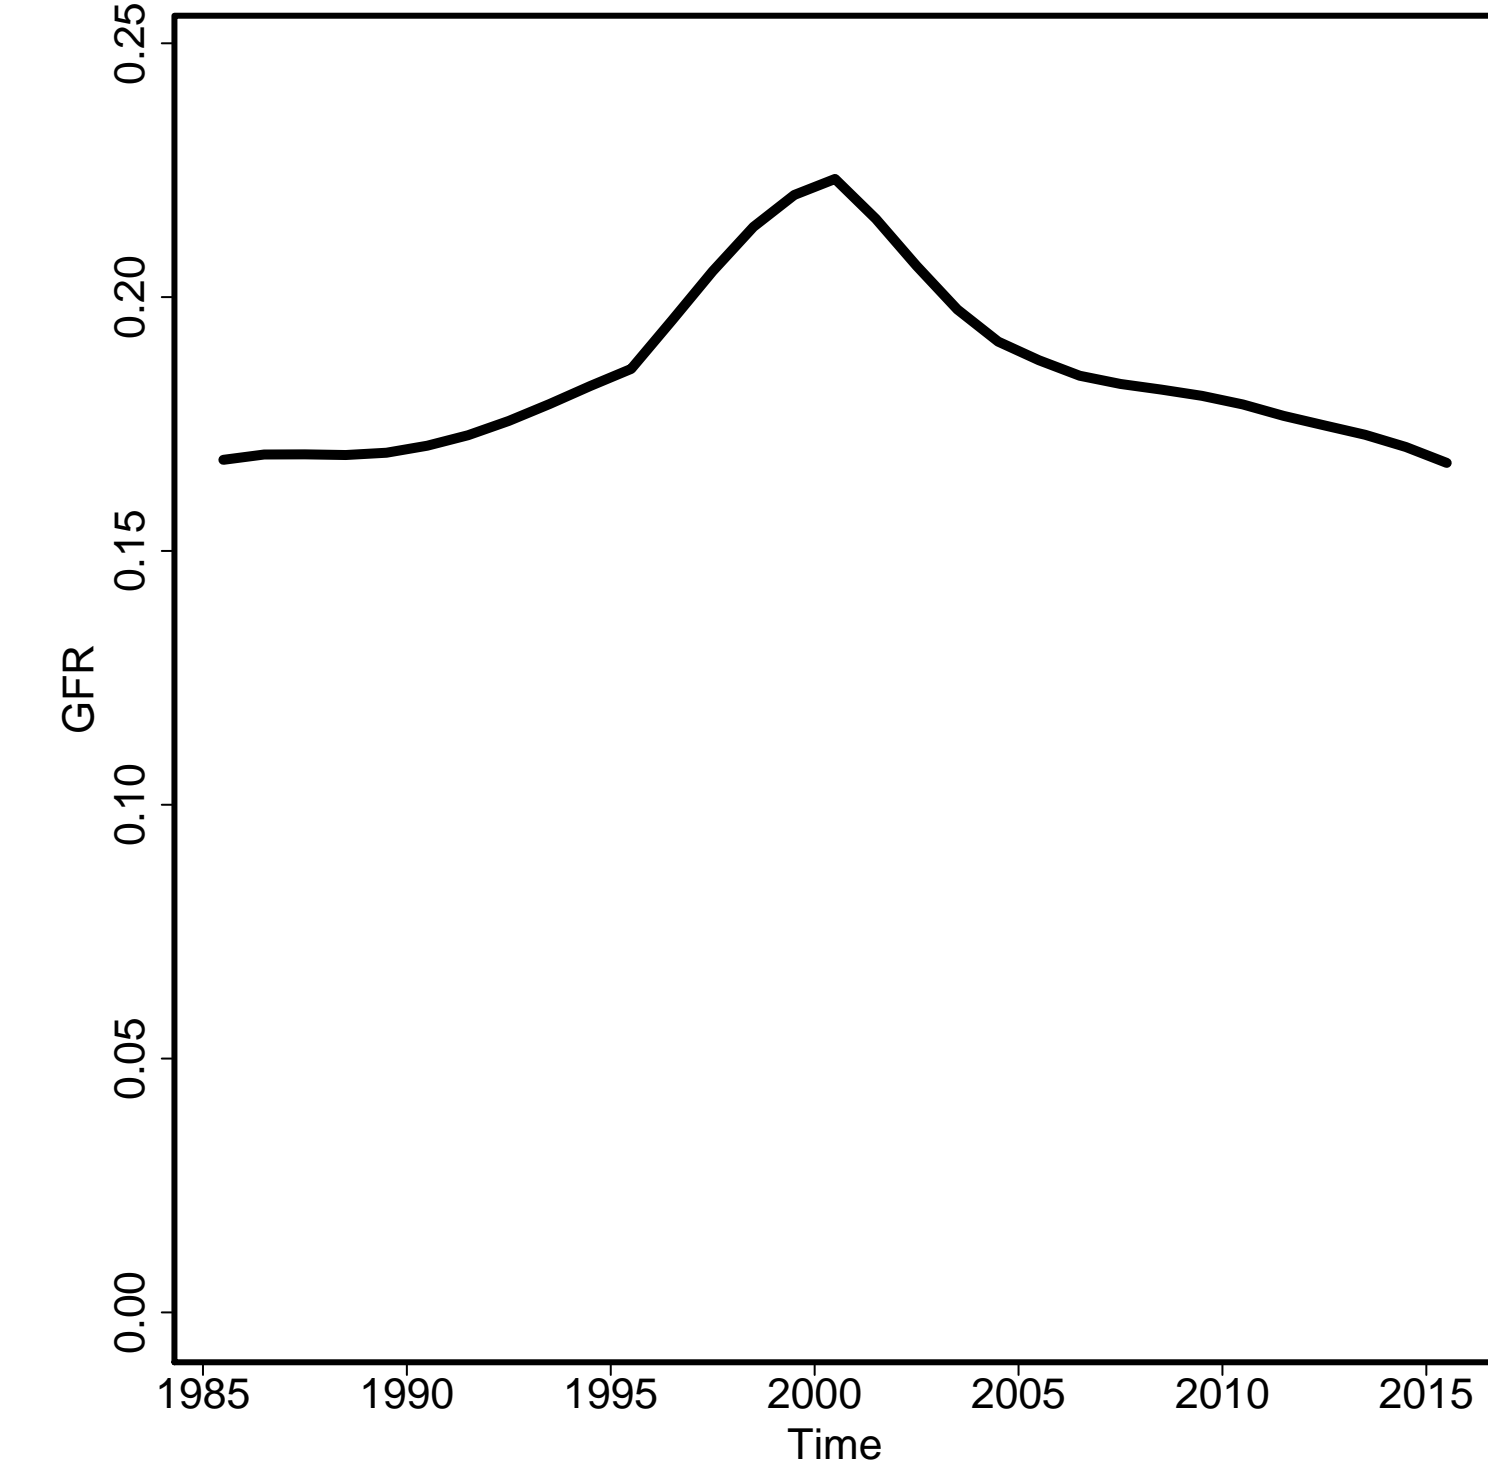

Skilled Attendance to Birth

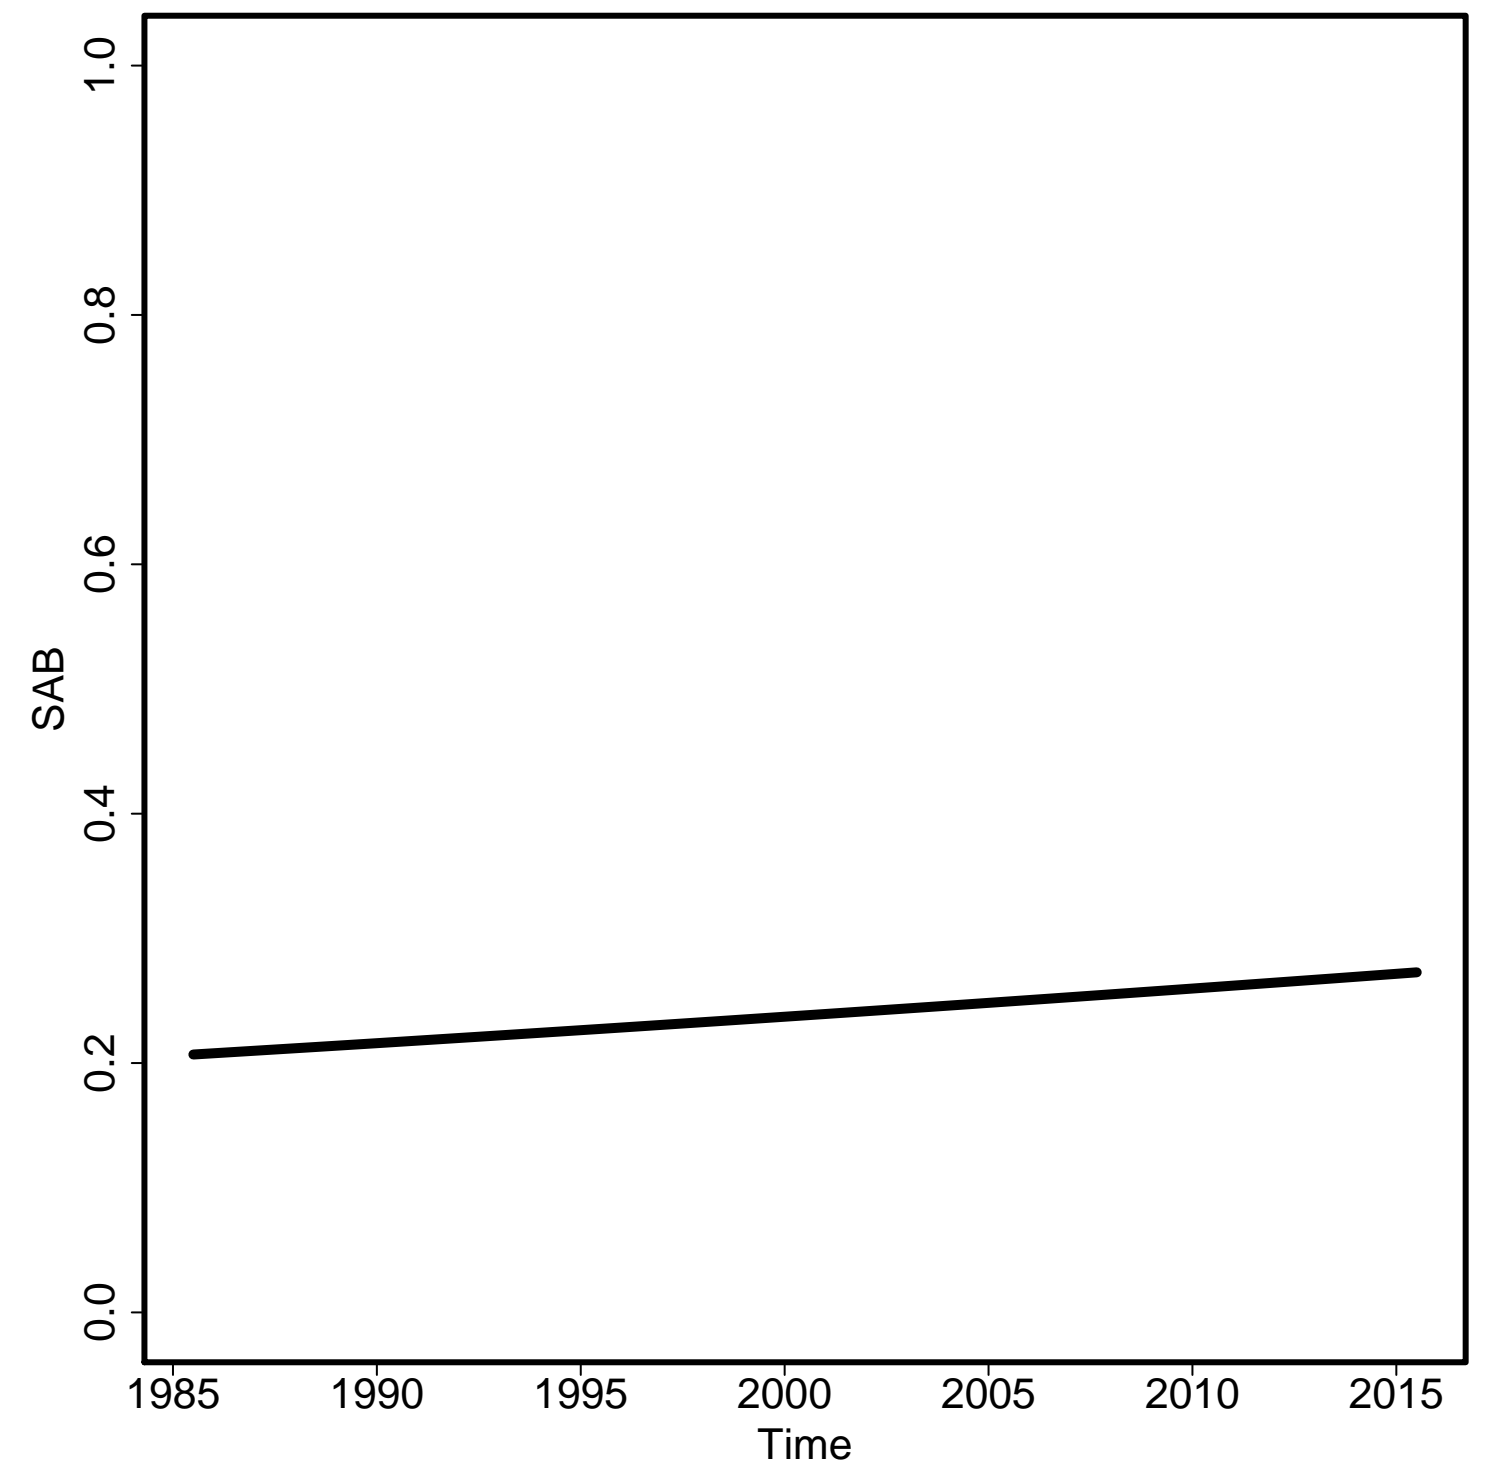

Envelope/Births

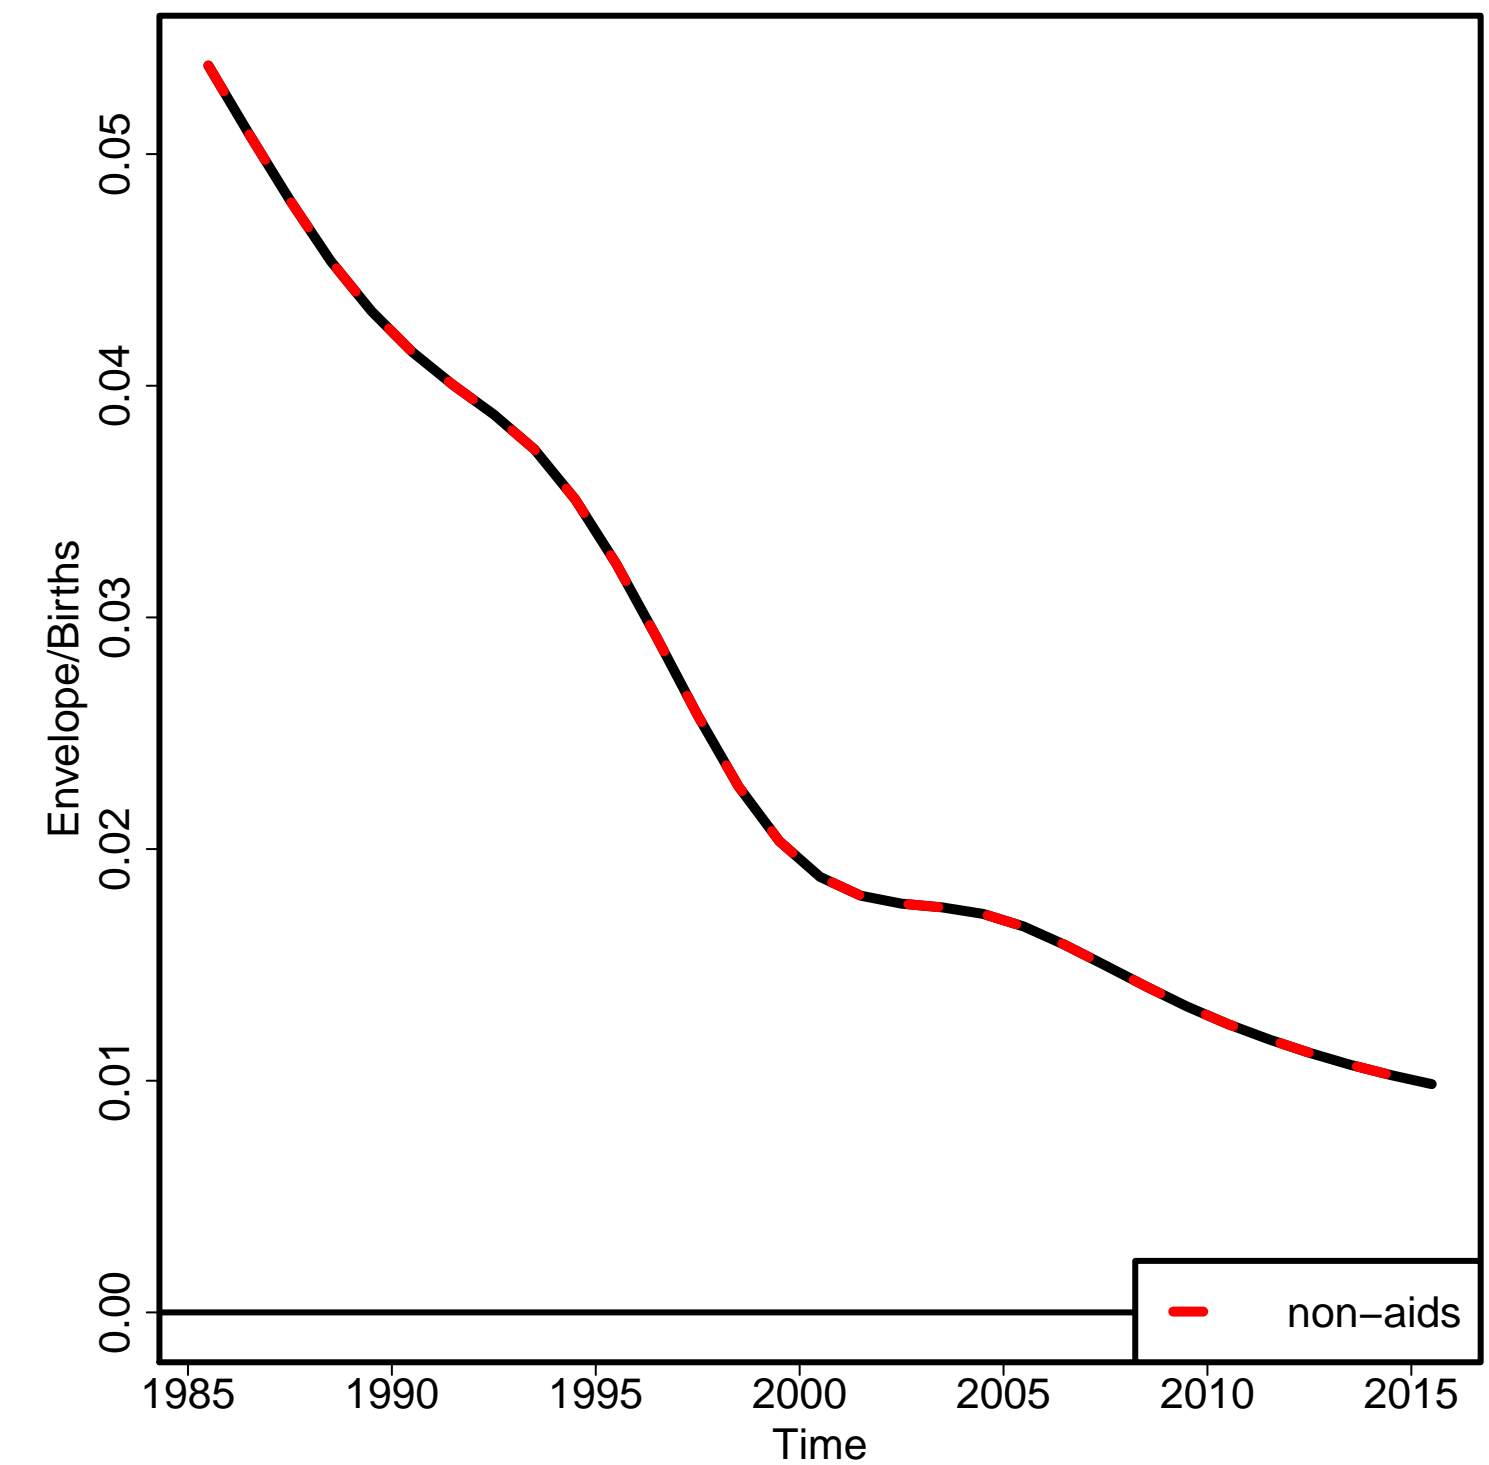

Non-aids MMR

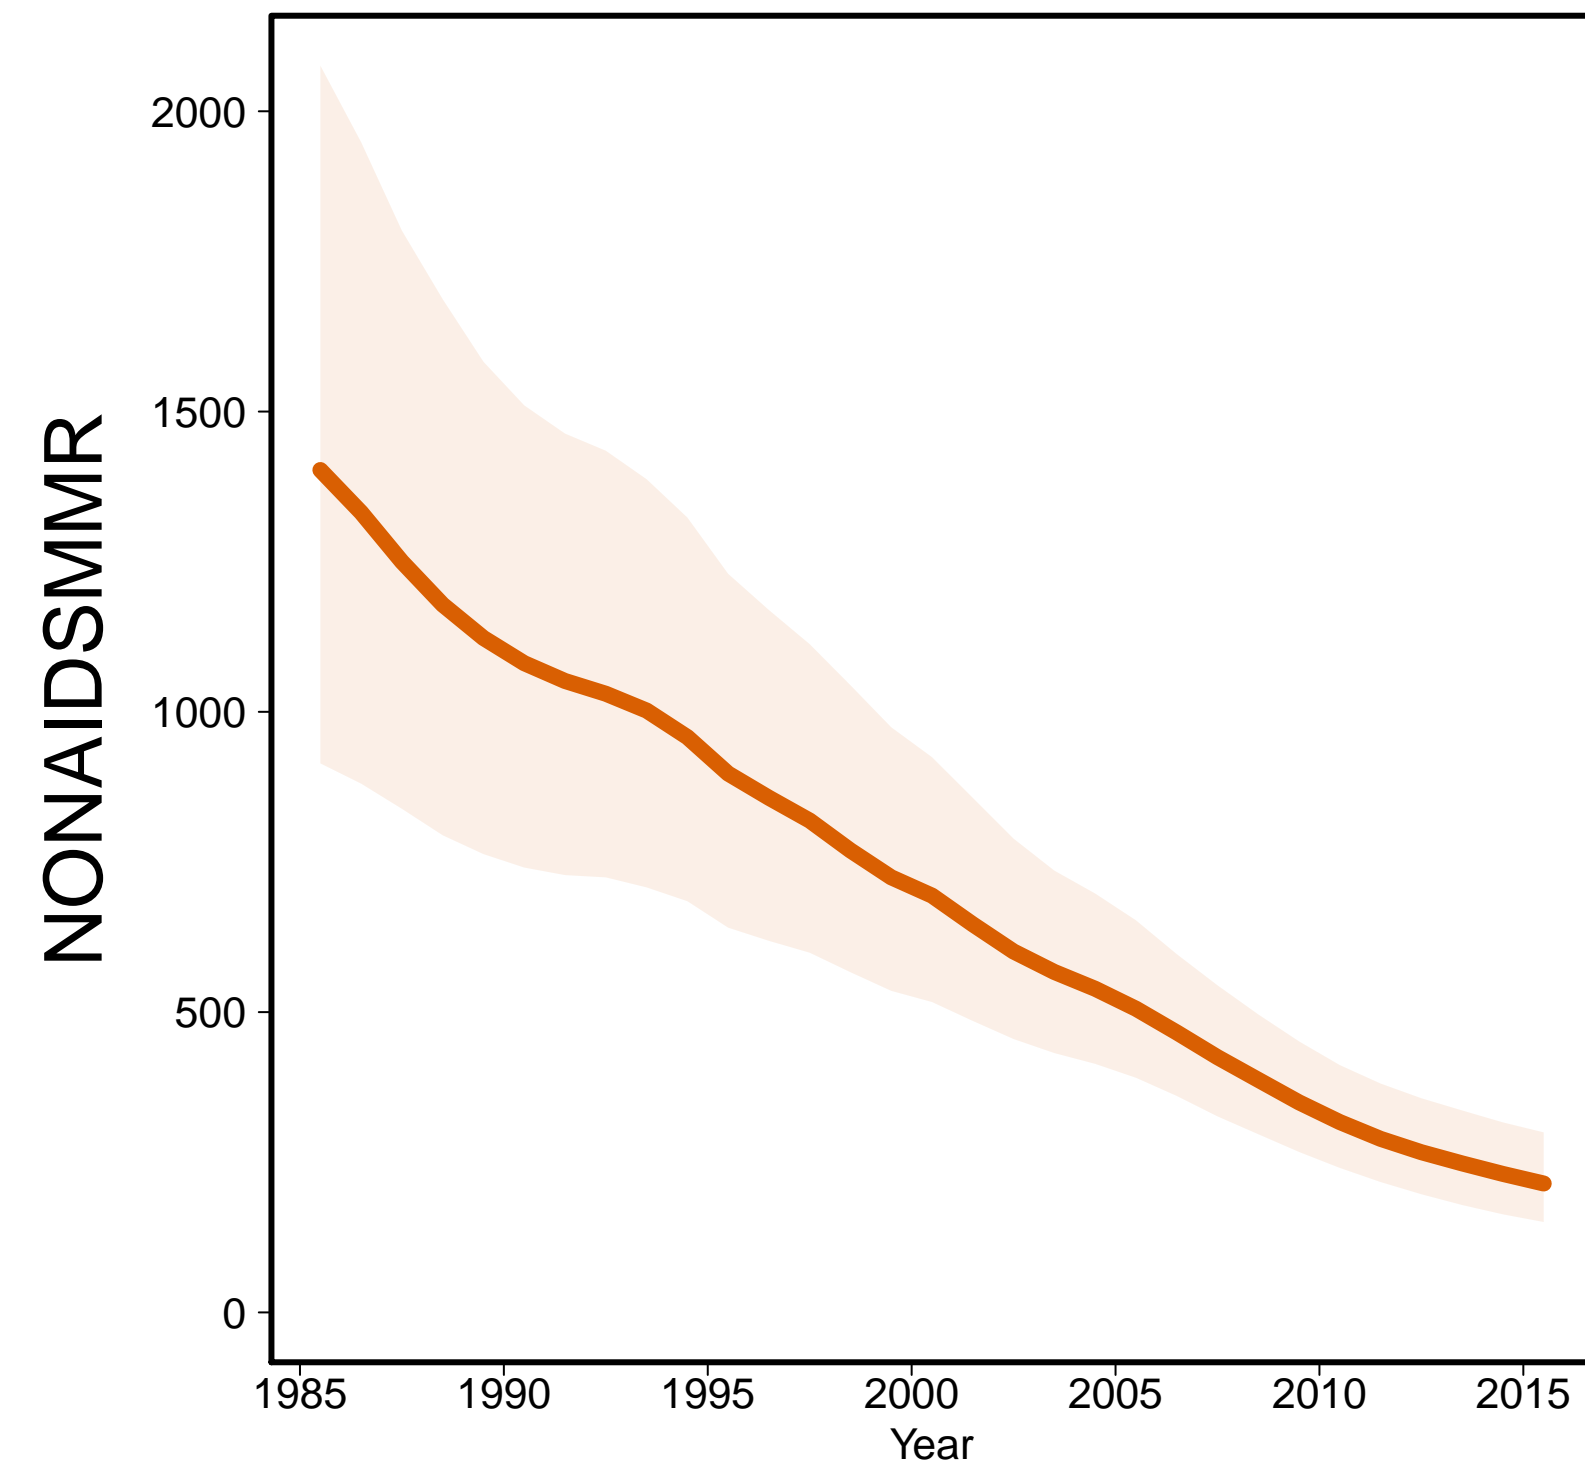

Aids MMR



Togo [TGO]  
(Western Africa)

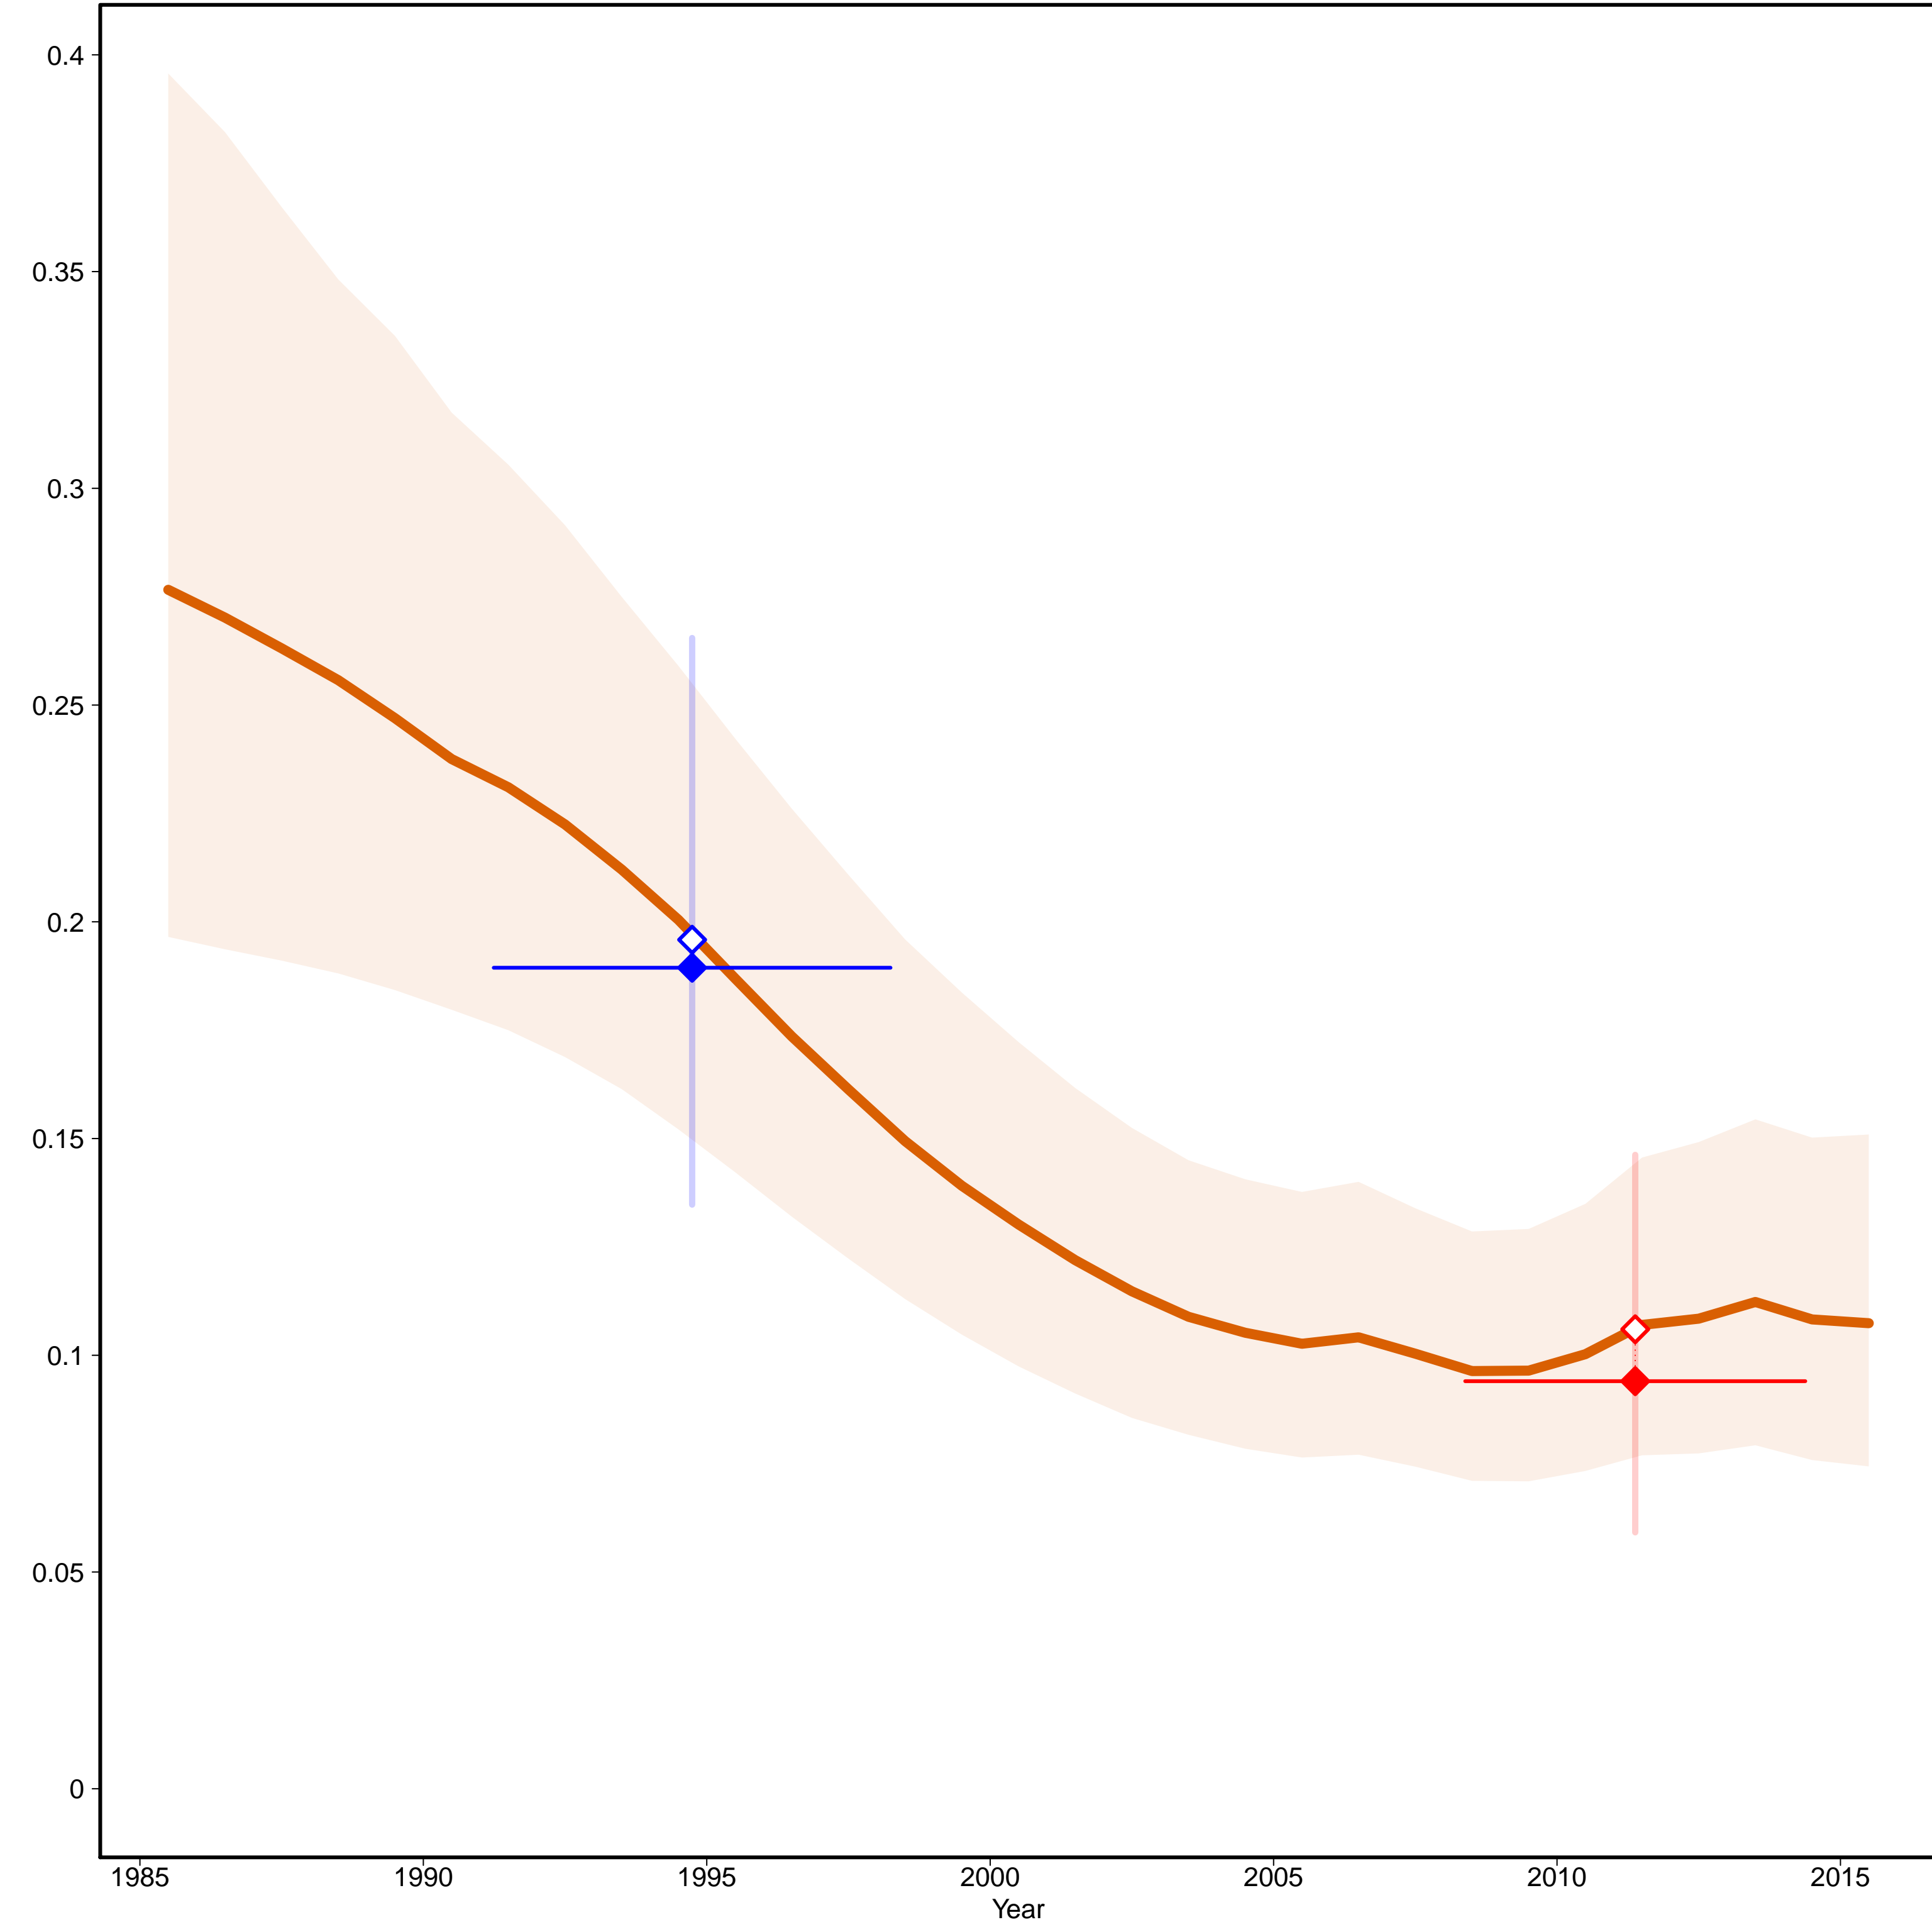

Togo [TGO]  
(Western Africa)

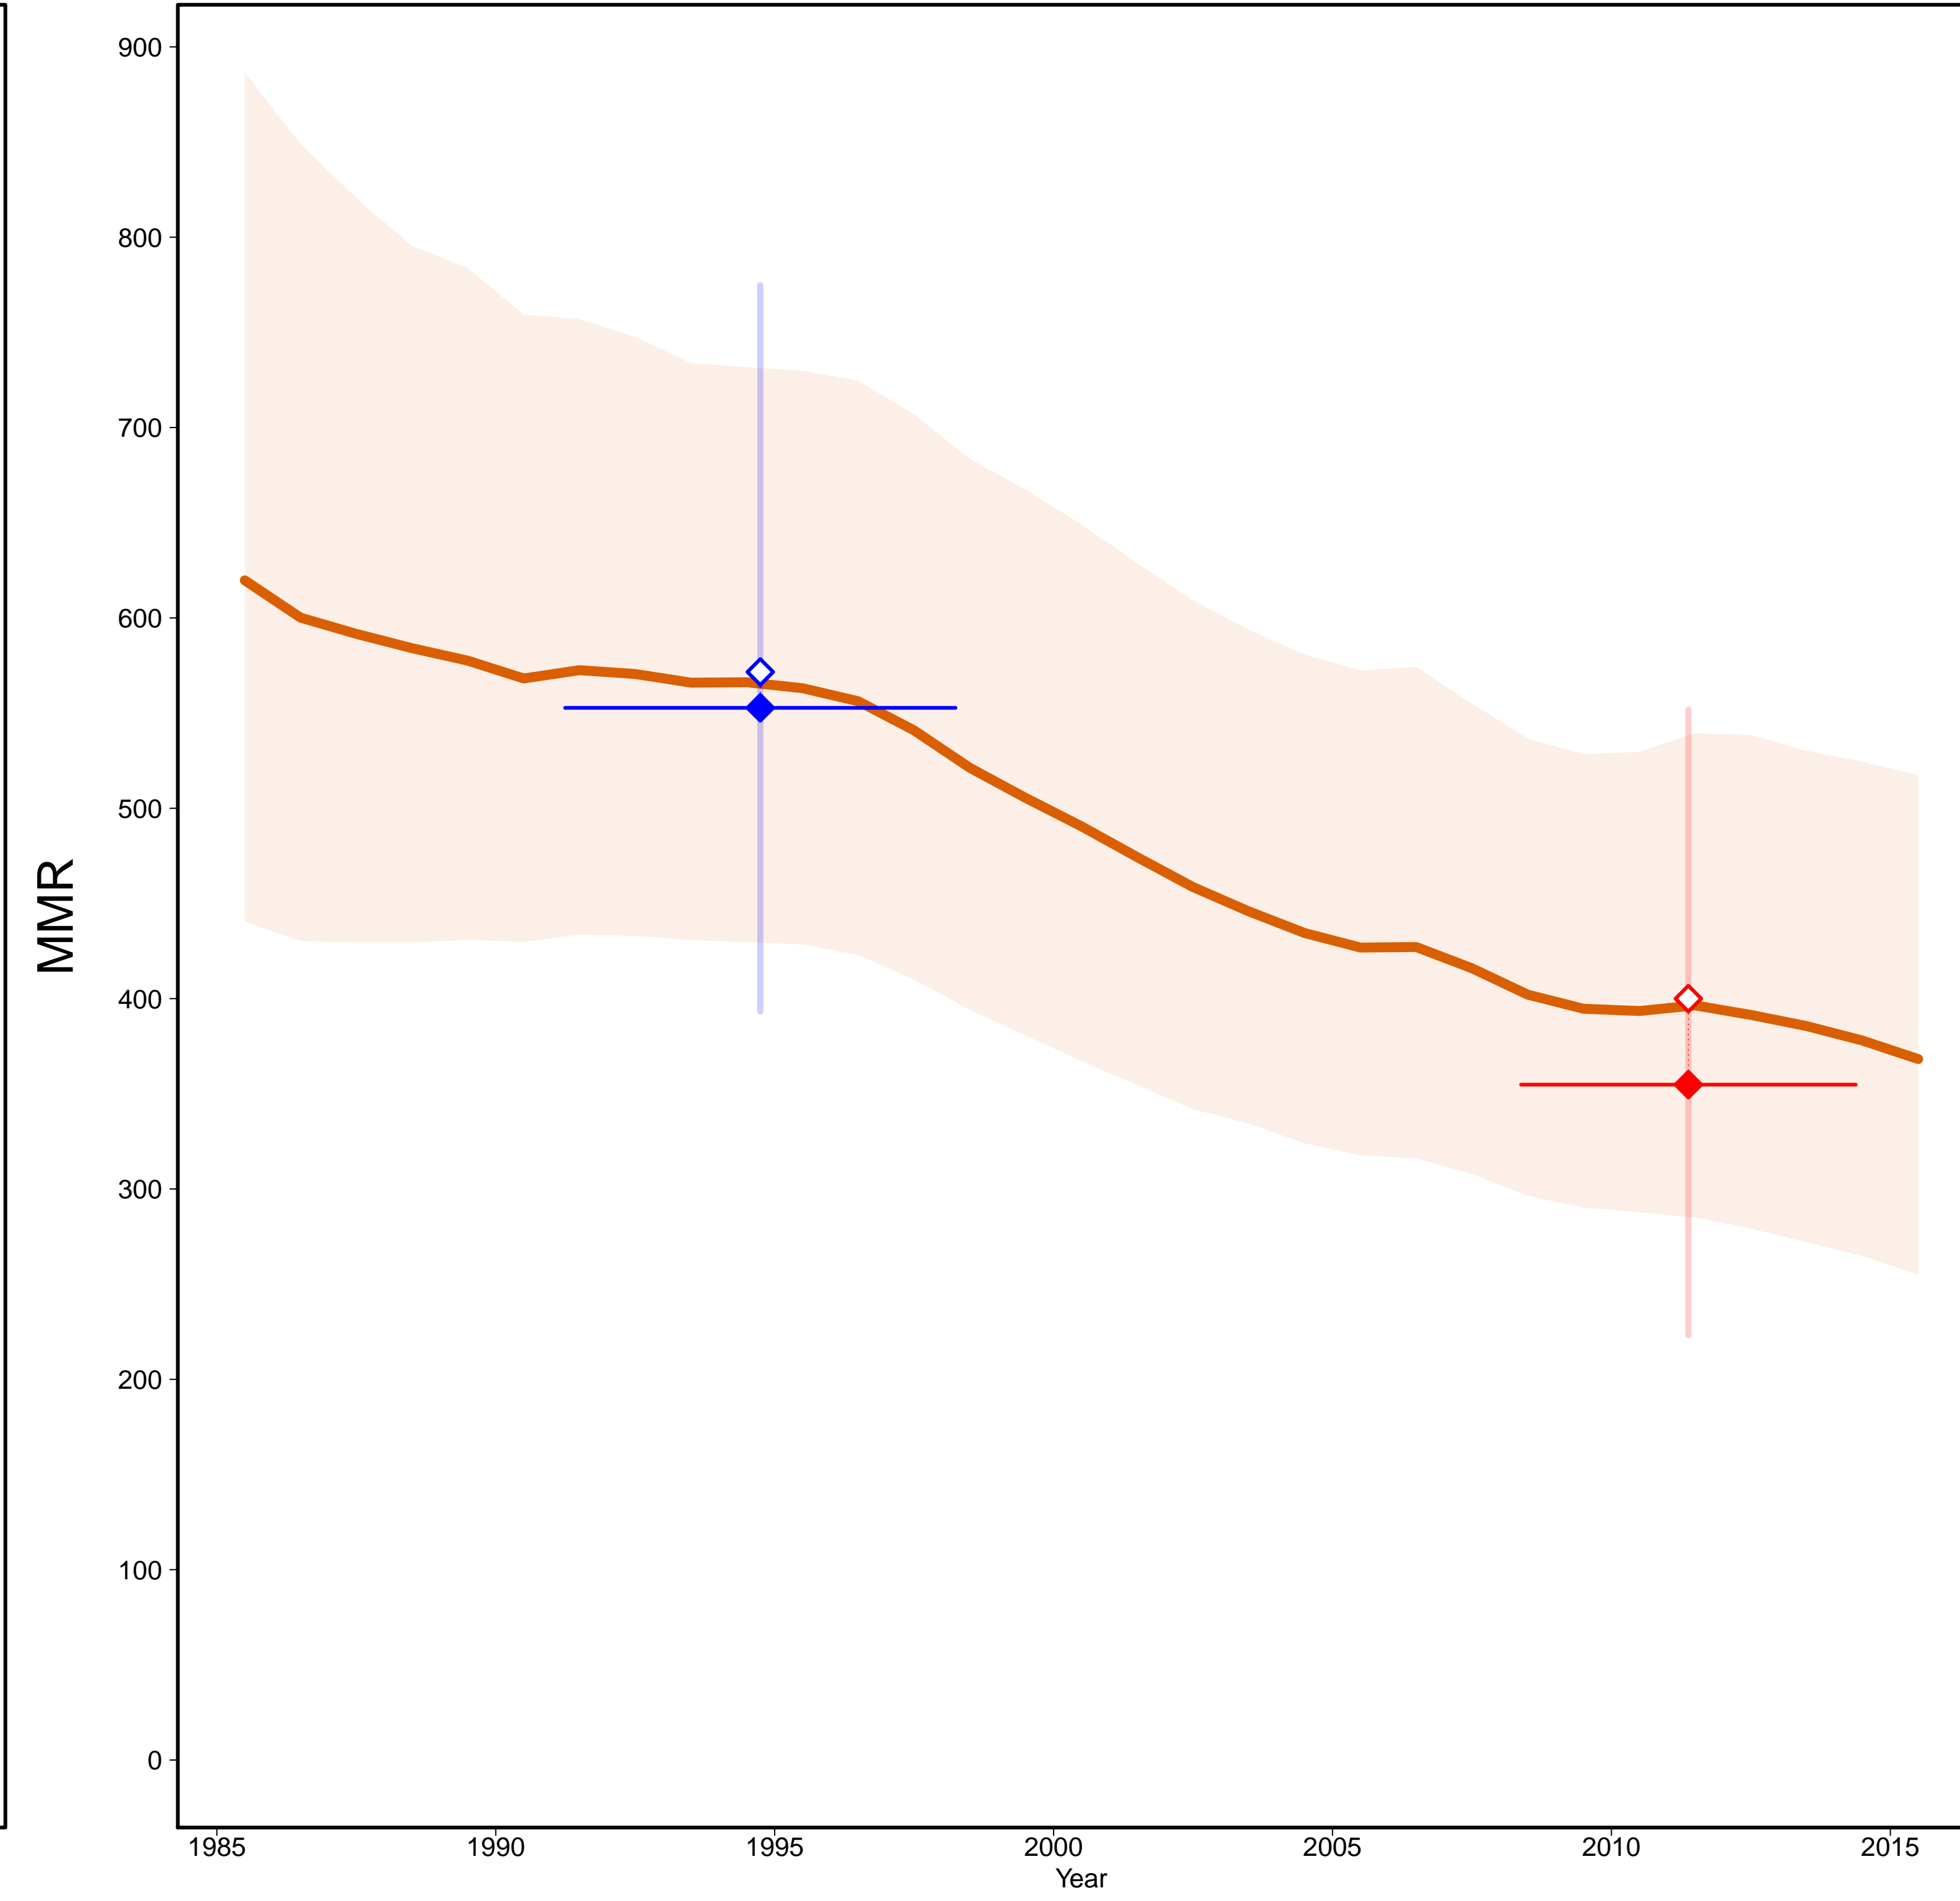

- Estimates —
- MMR Database 2015 —
- ◇ Observed Data
- ◆ Adjusted Data
- Data type —
- ◆ DHS
- ◆ Misc. studies

Gross Domestic Product

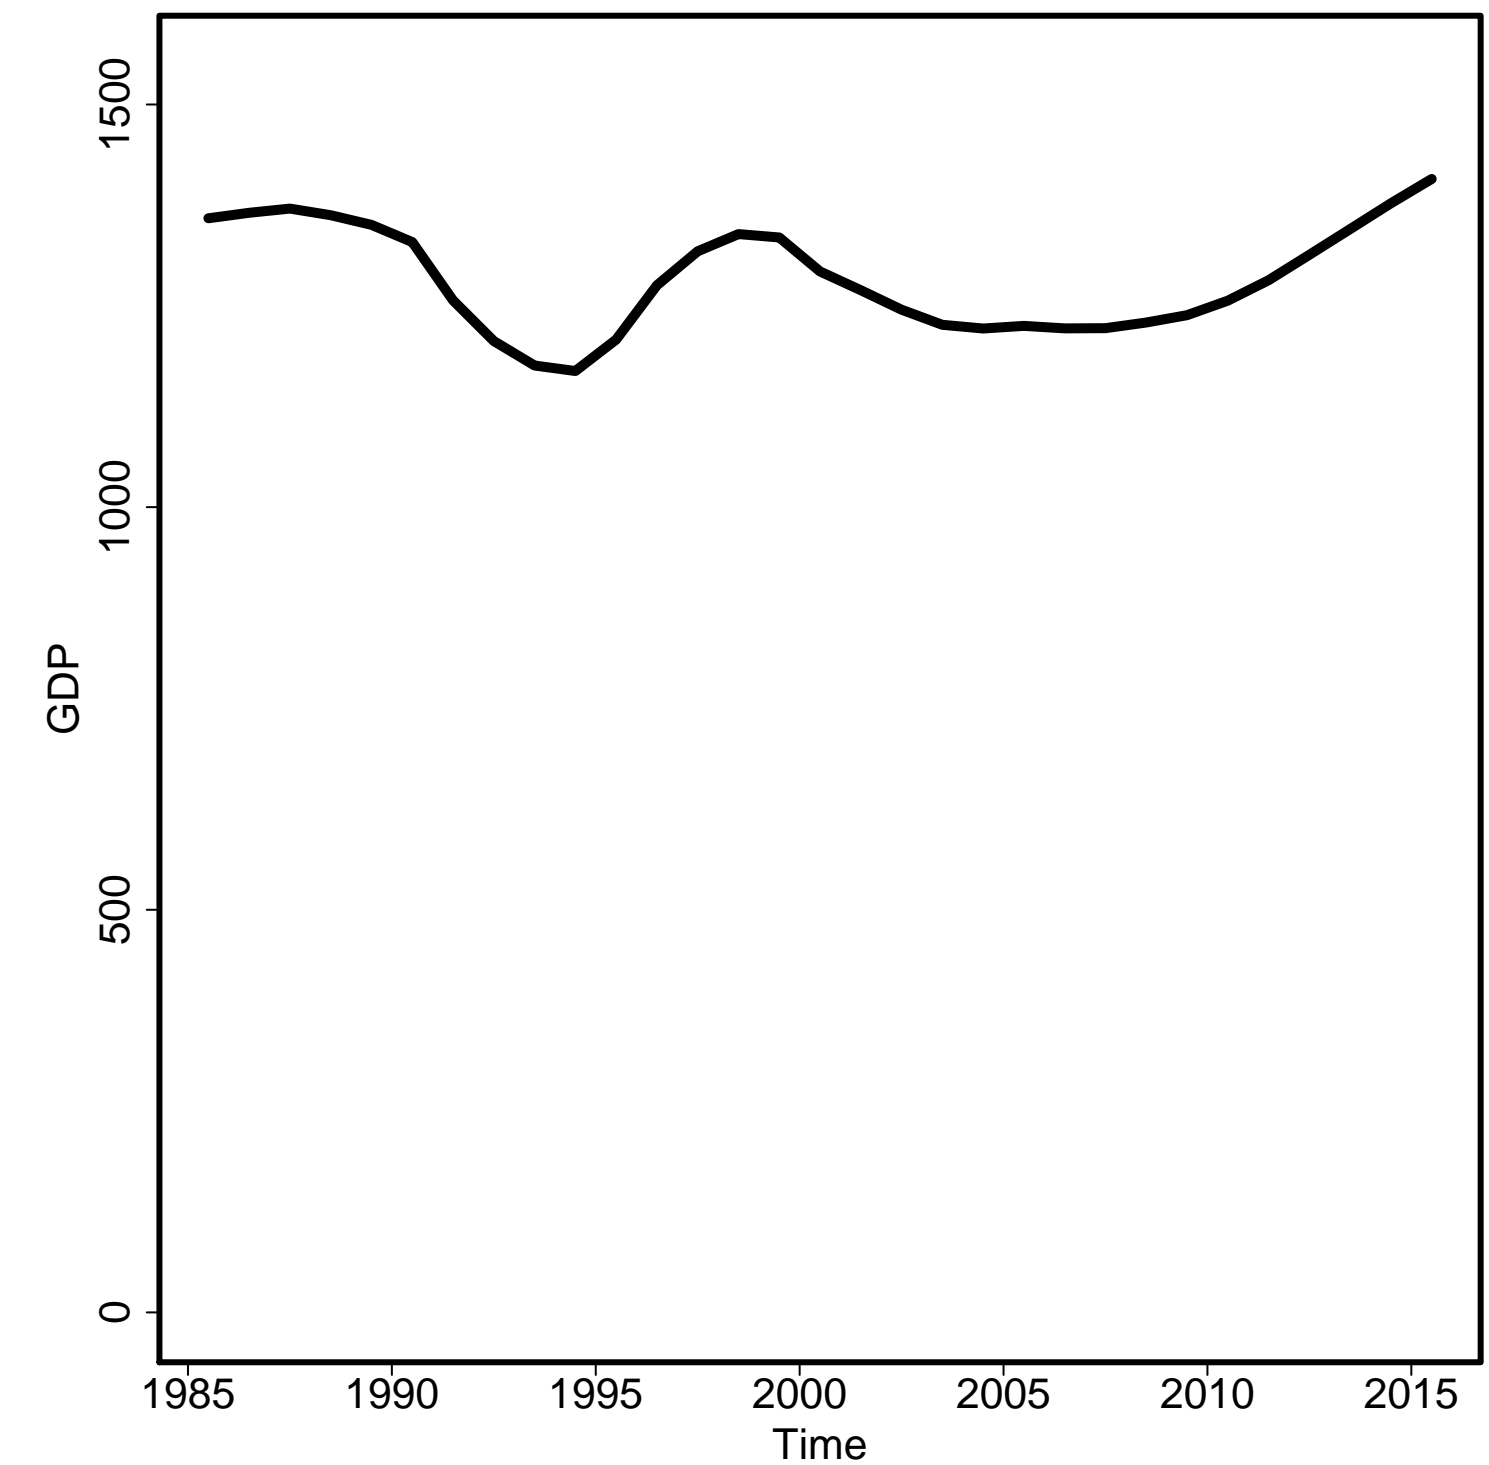

General Fertility Rate

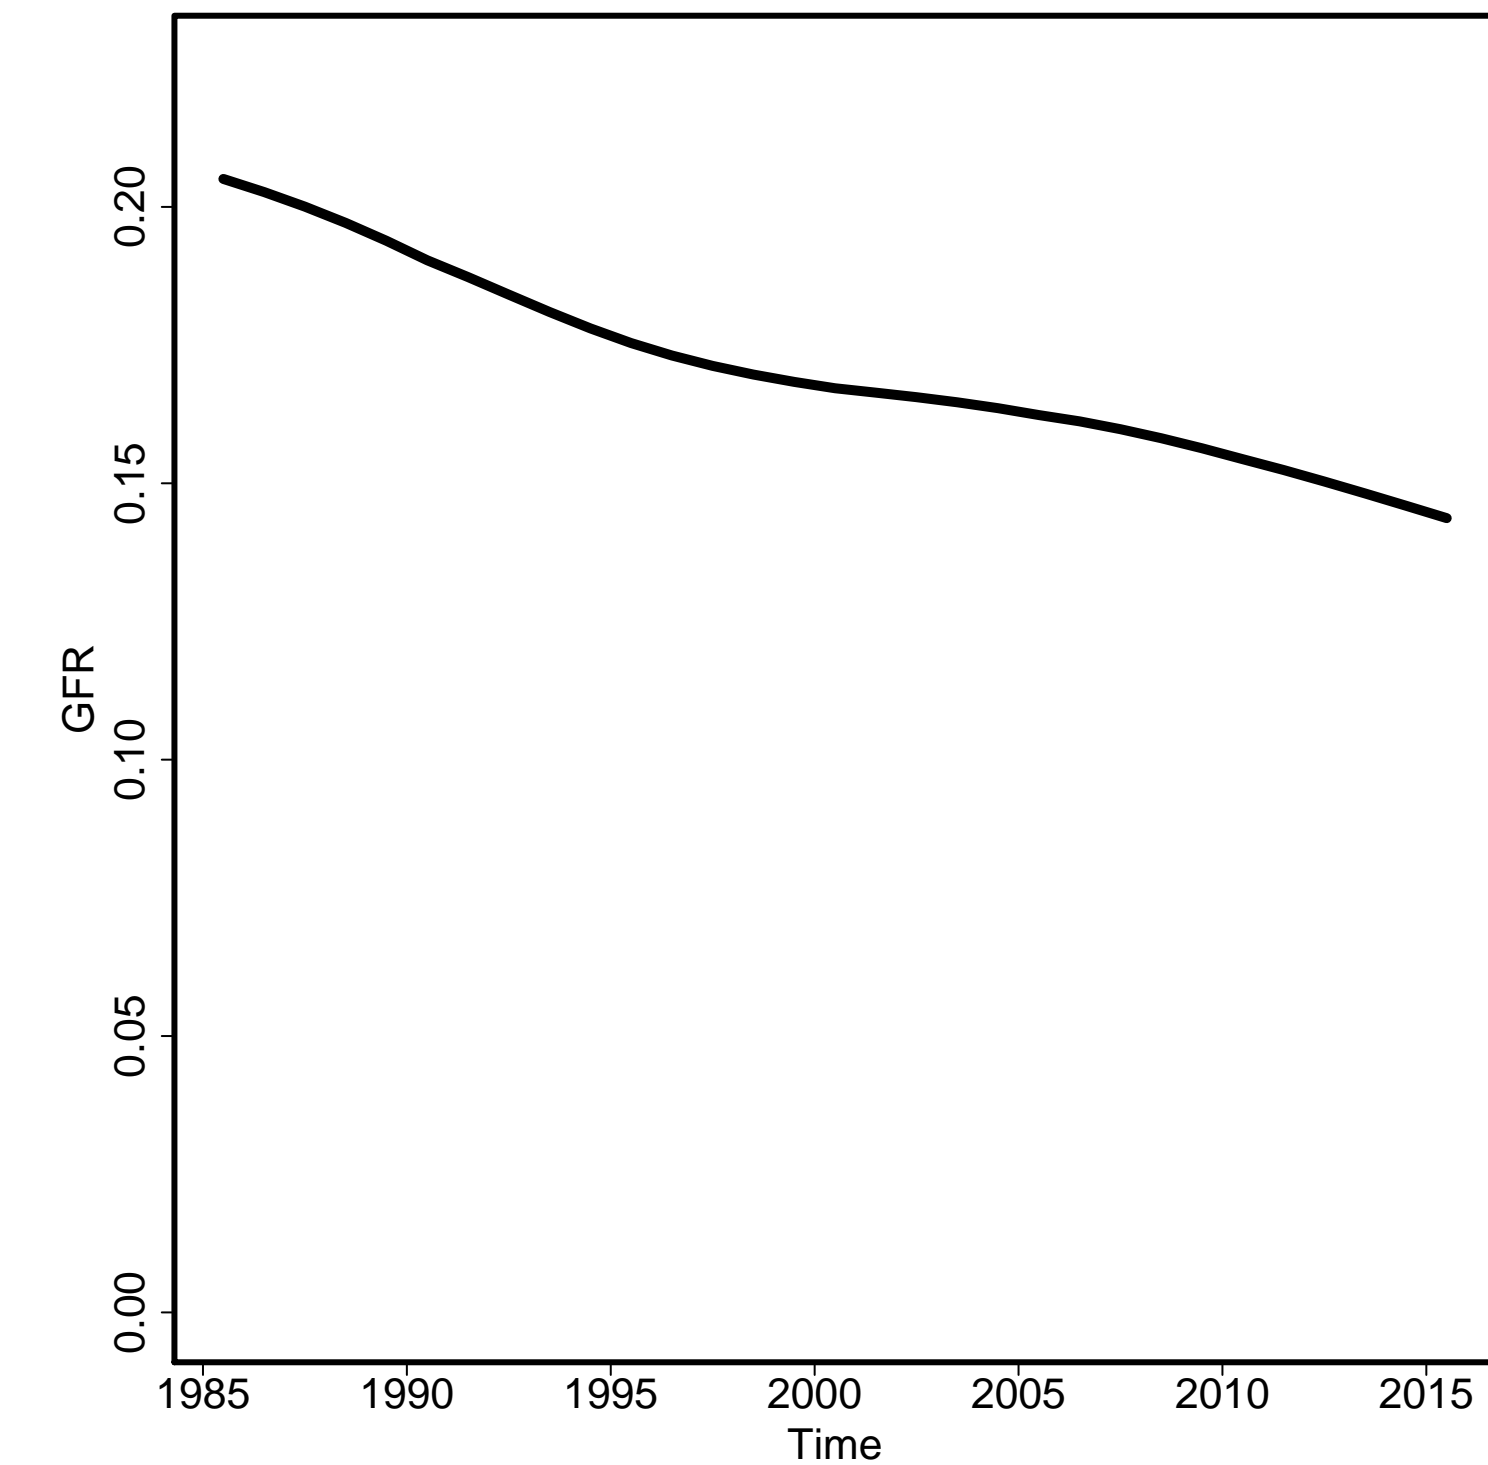

Skilled Attendance to Birth

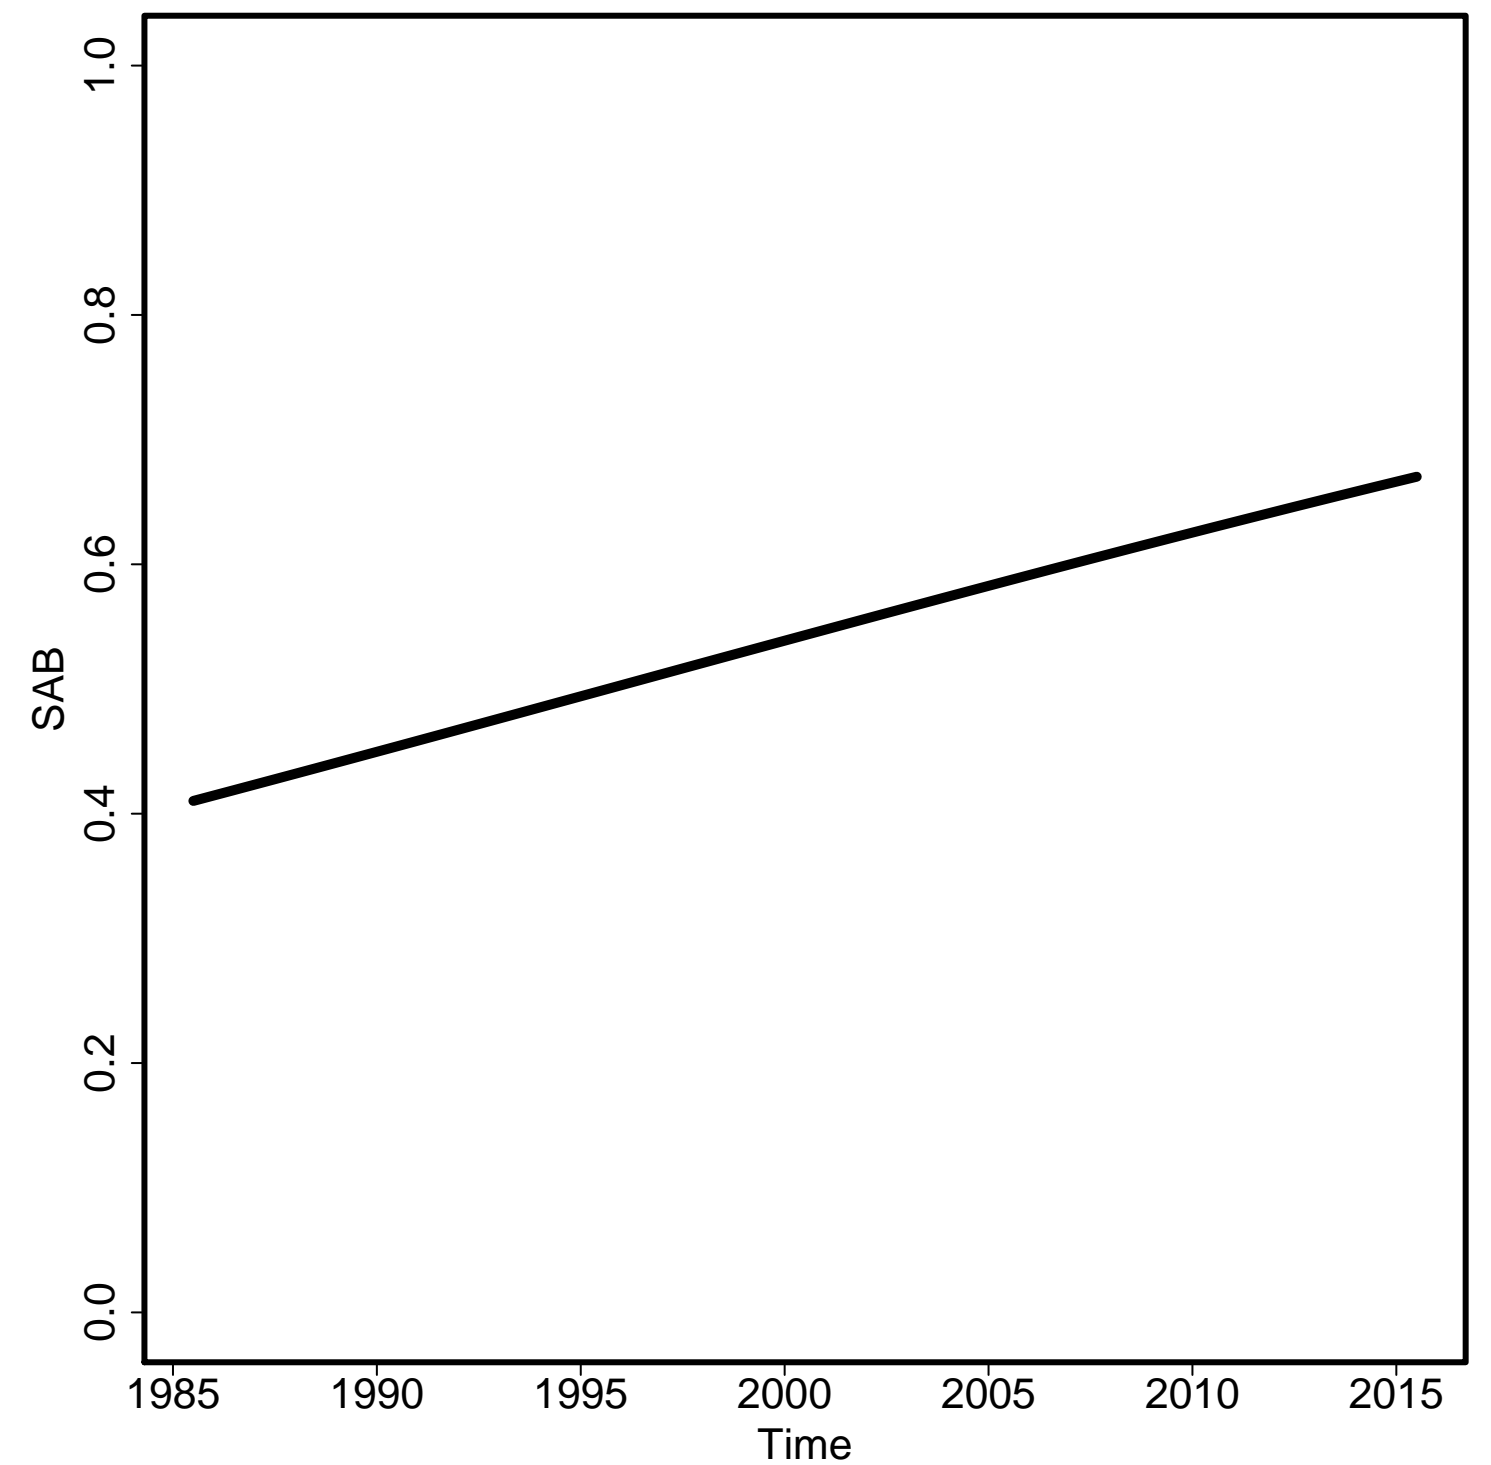

Envelope/Births

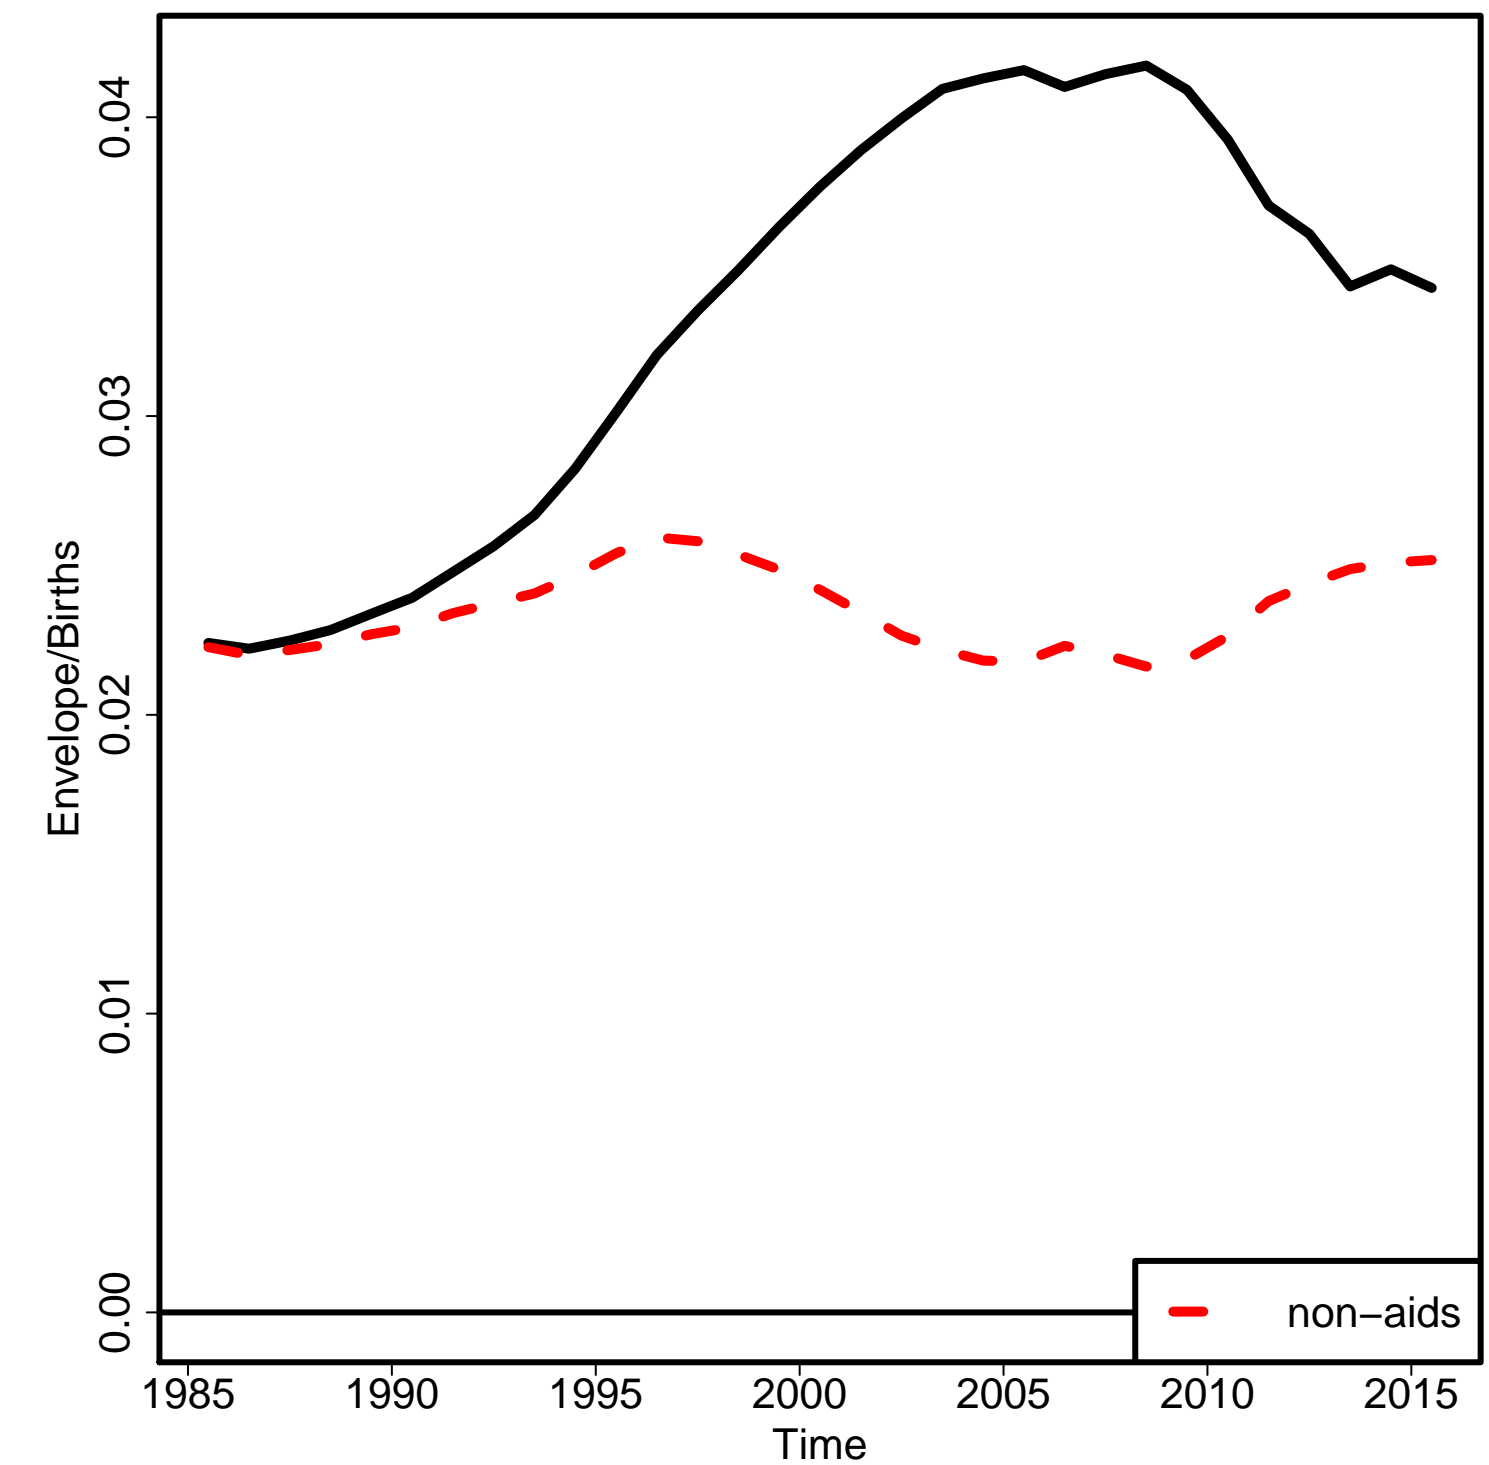

Non-aids MMR

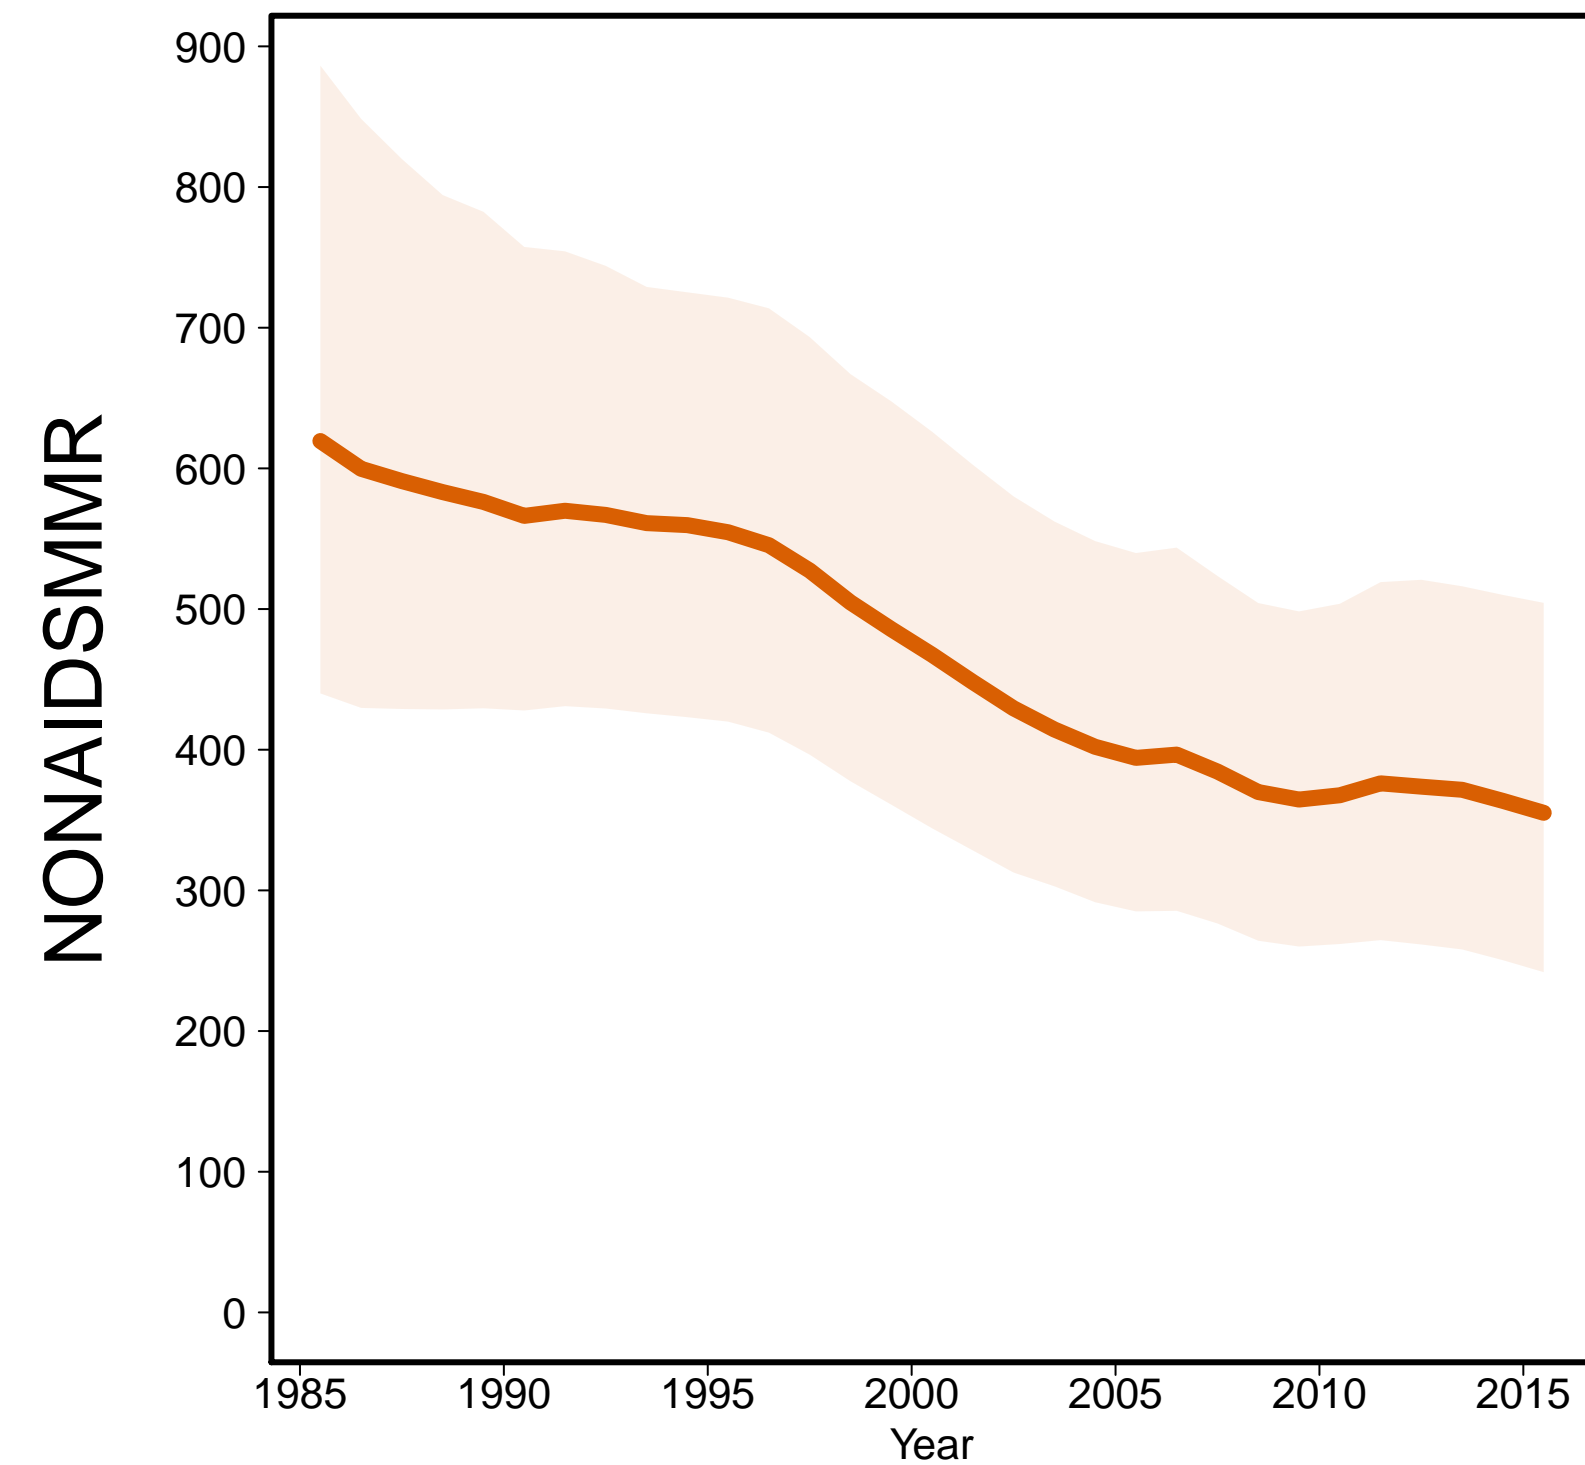

Aids MMR

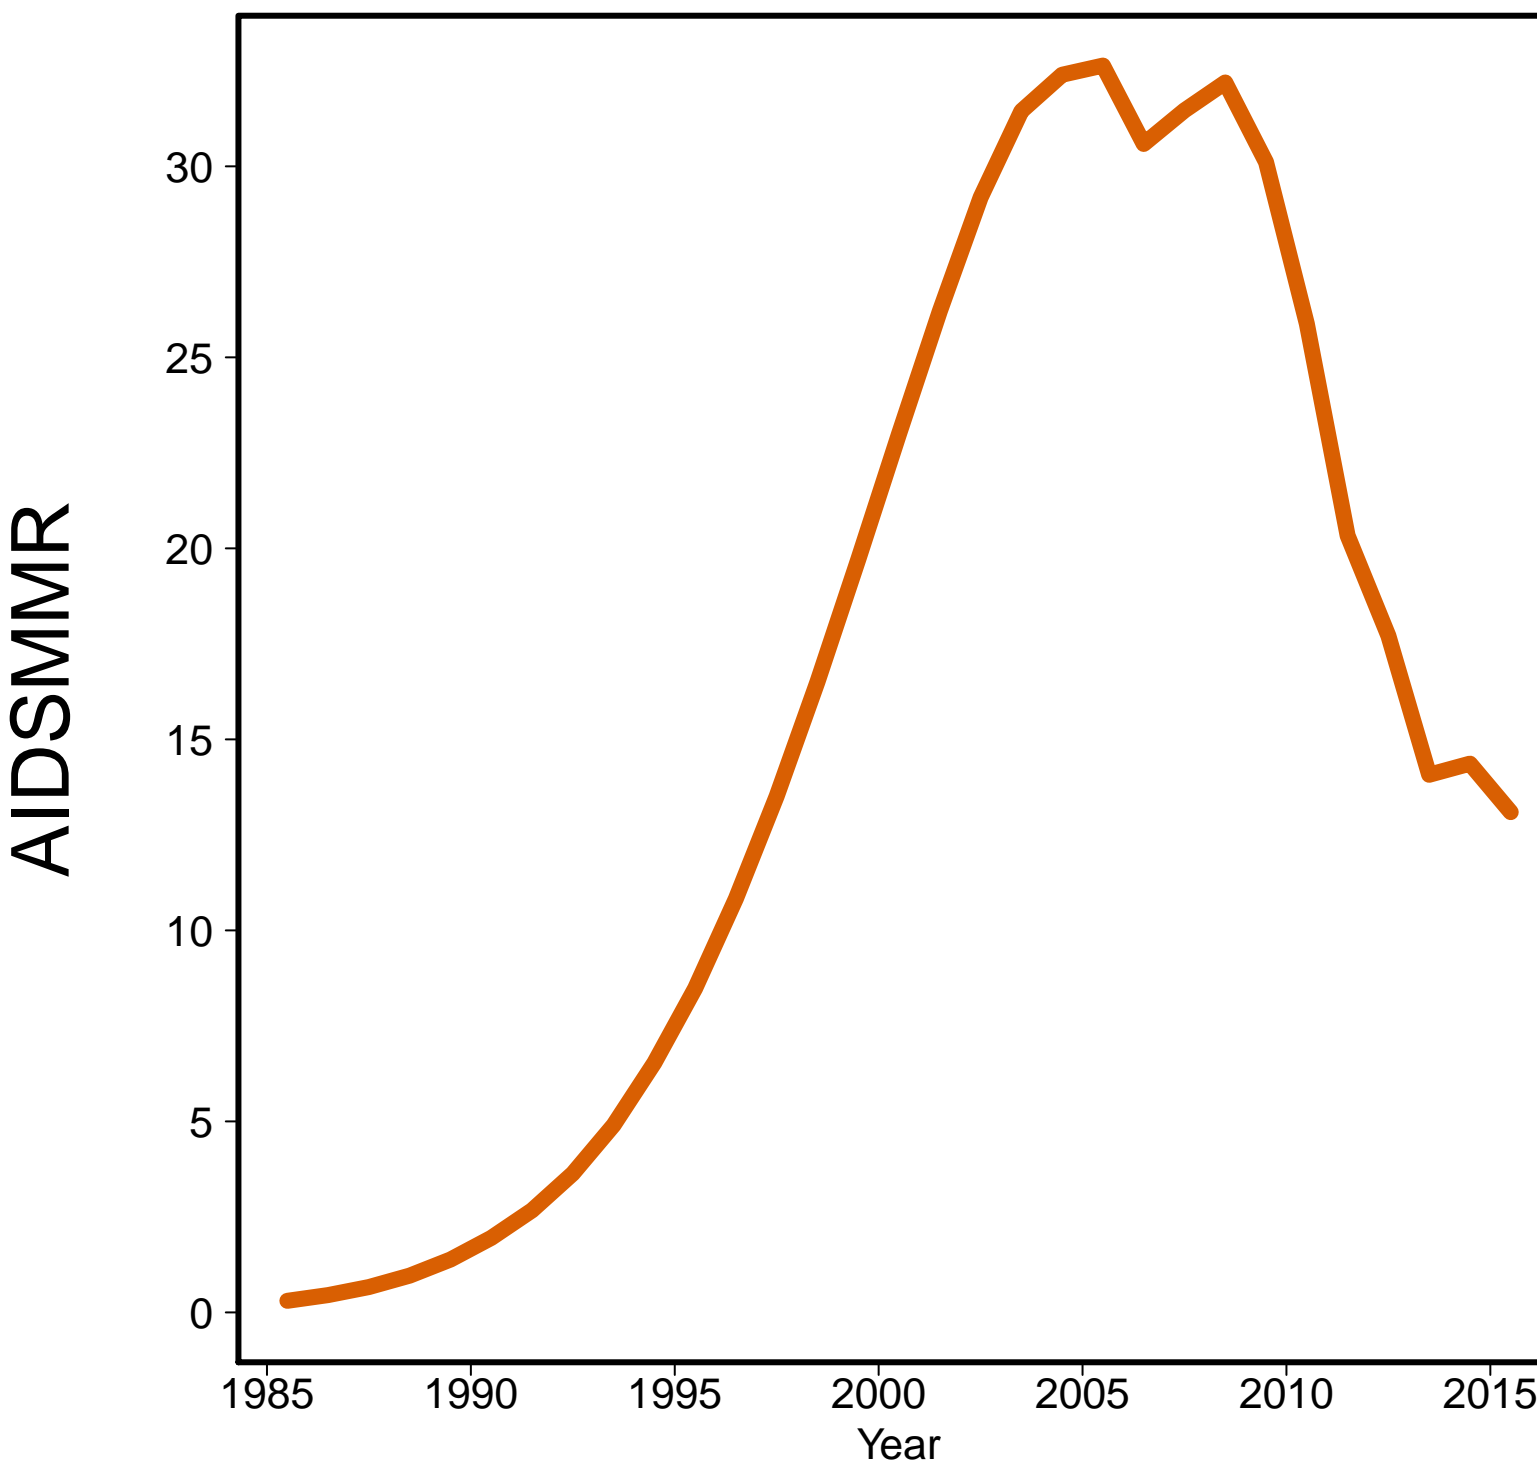

Tonga [TON]  
(South-Eastern Asia / Oceania)

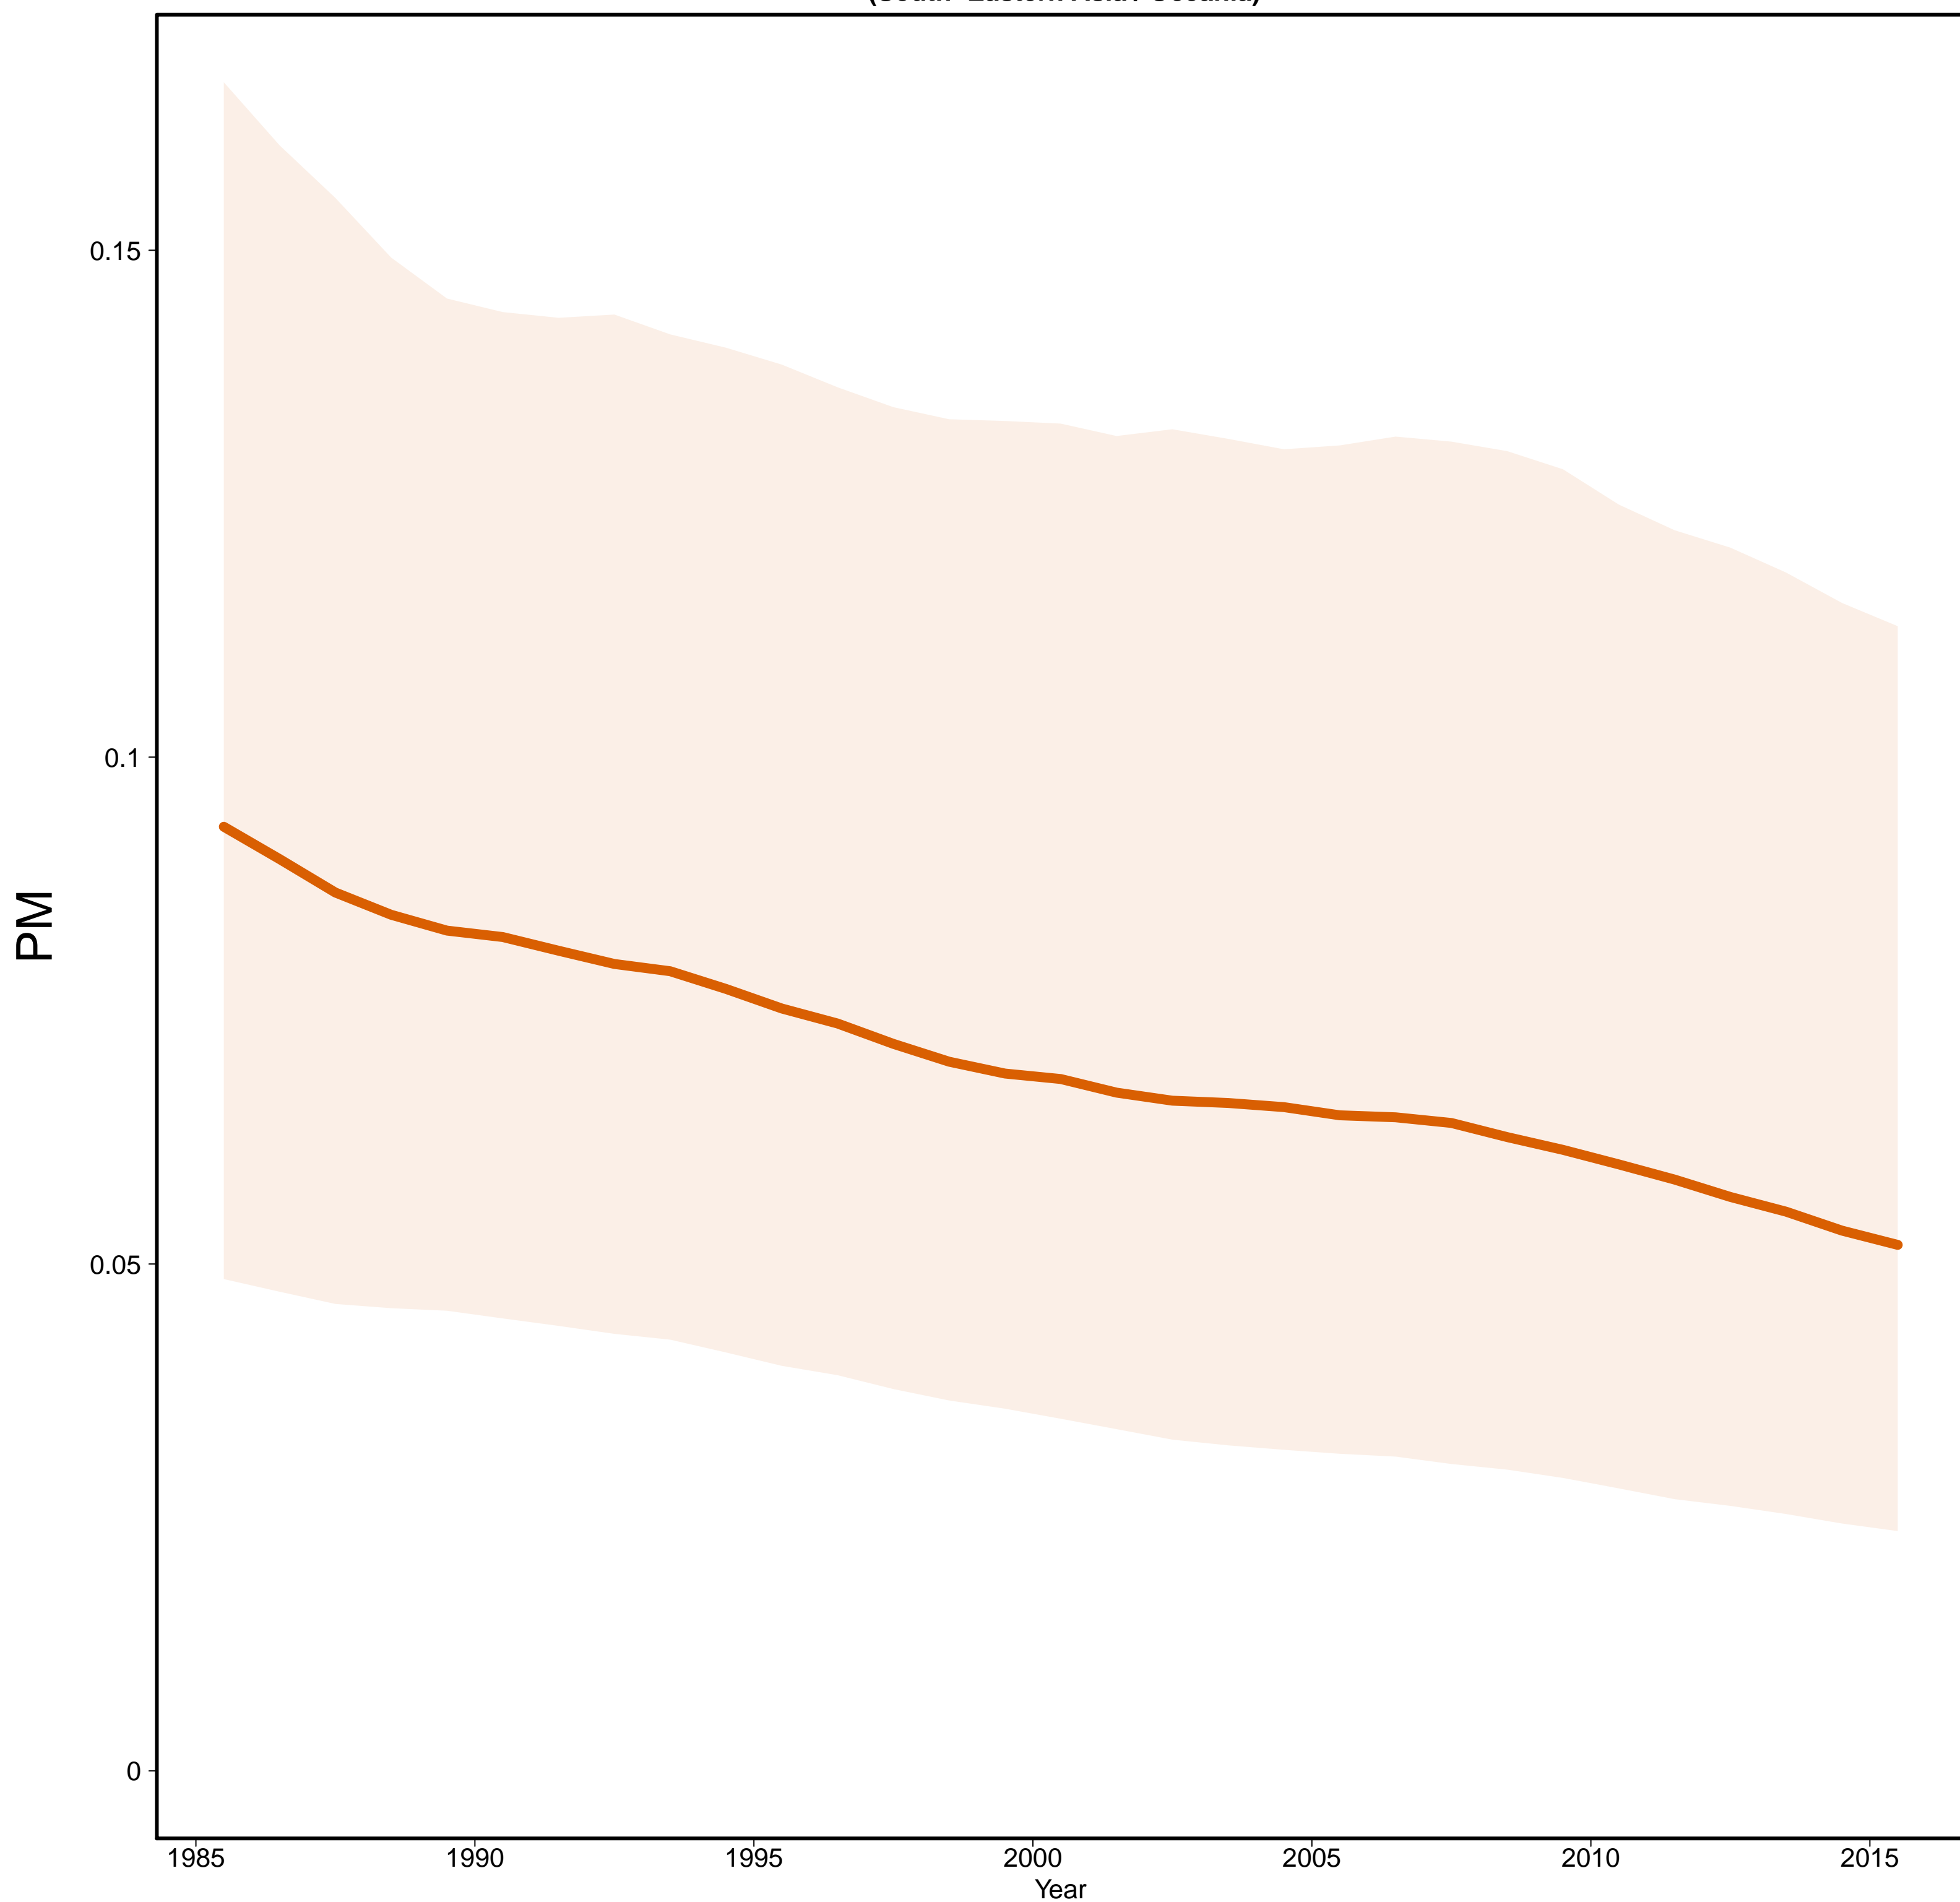

Tonga [TON]  
(South-Eastern Asia / Oceania)

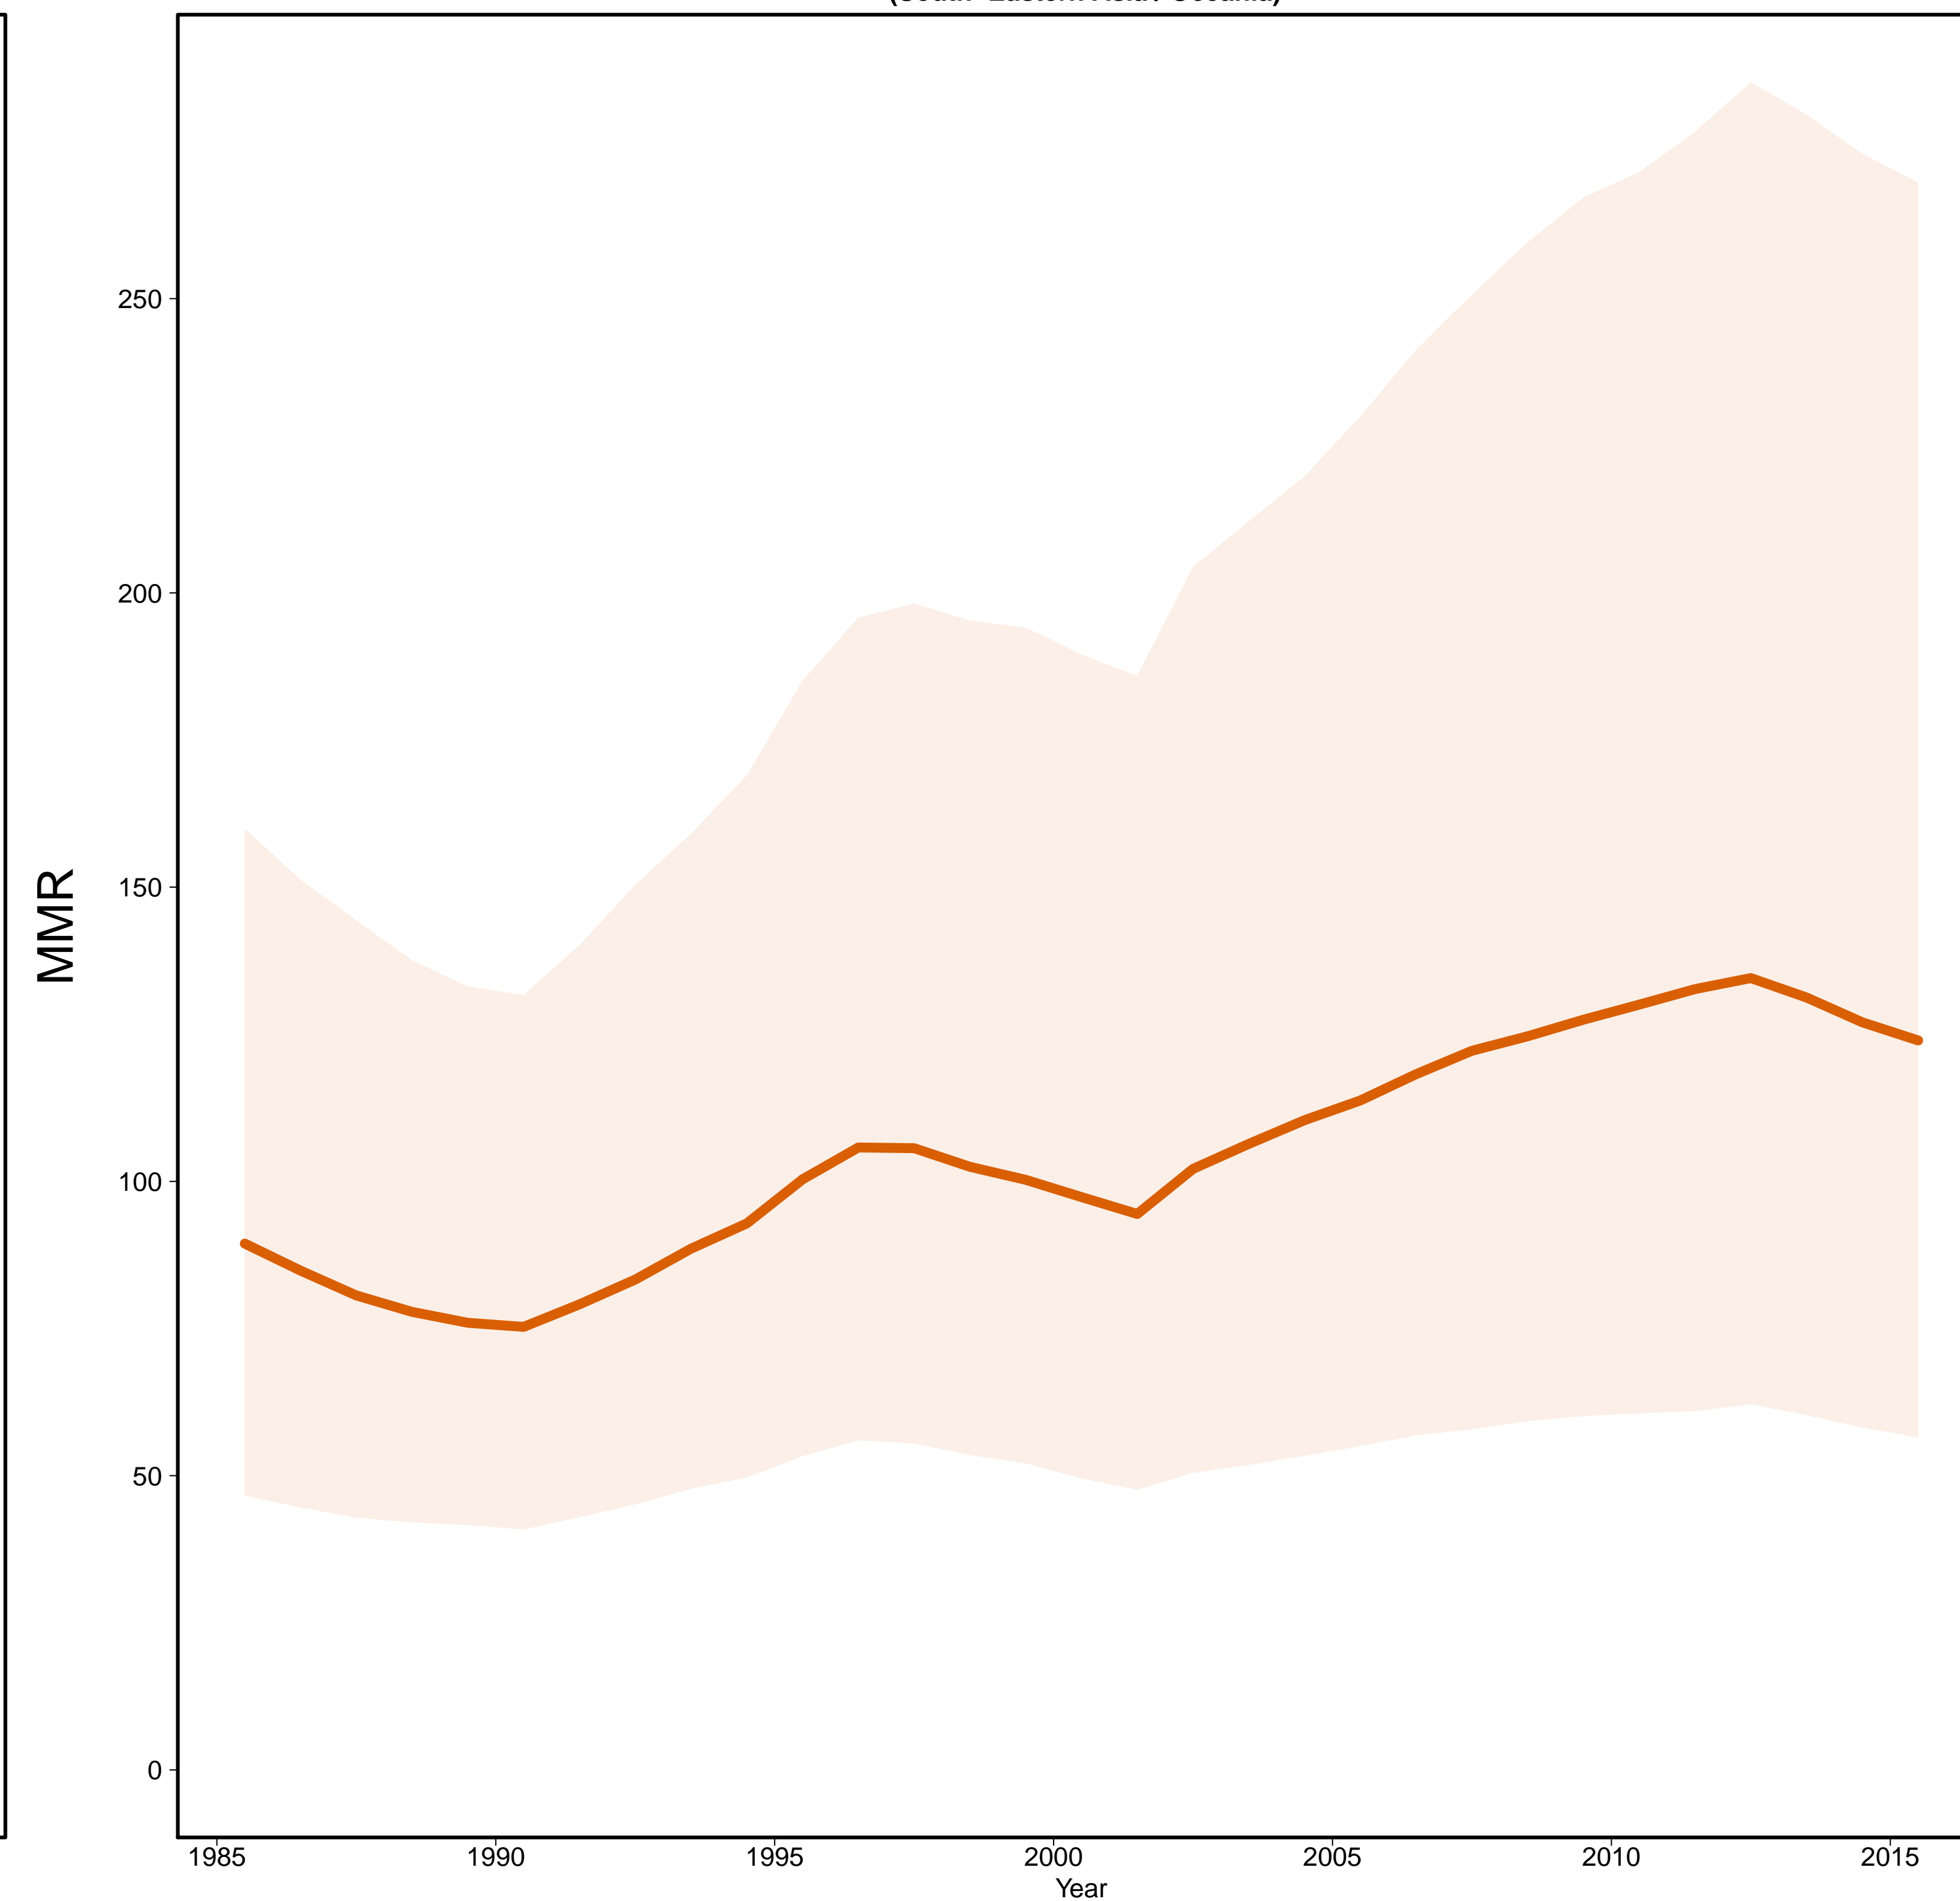

– Estimates –  
Mlate  
– MMR Database 2015 –

Gross Domestic Product

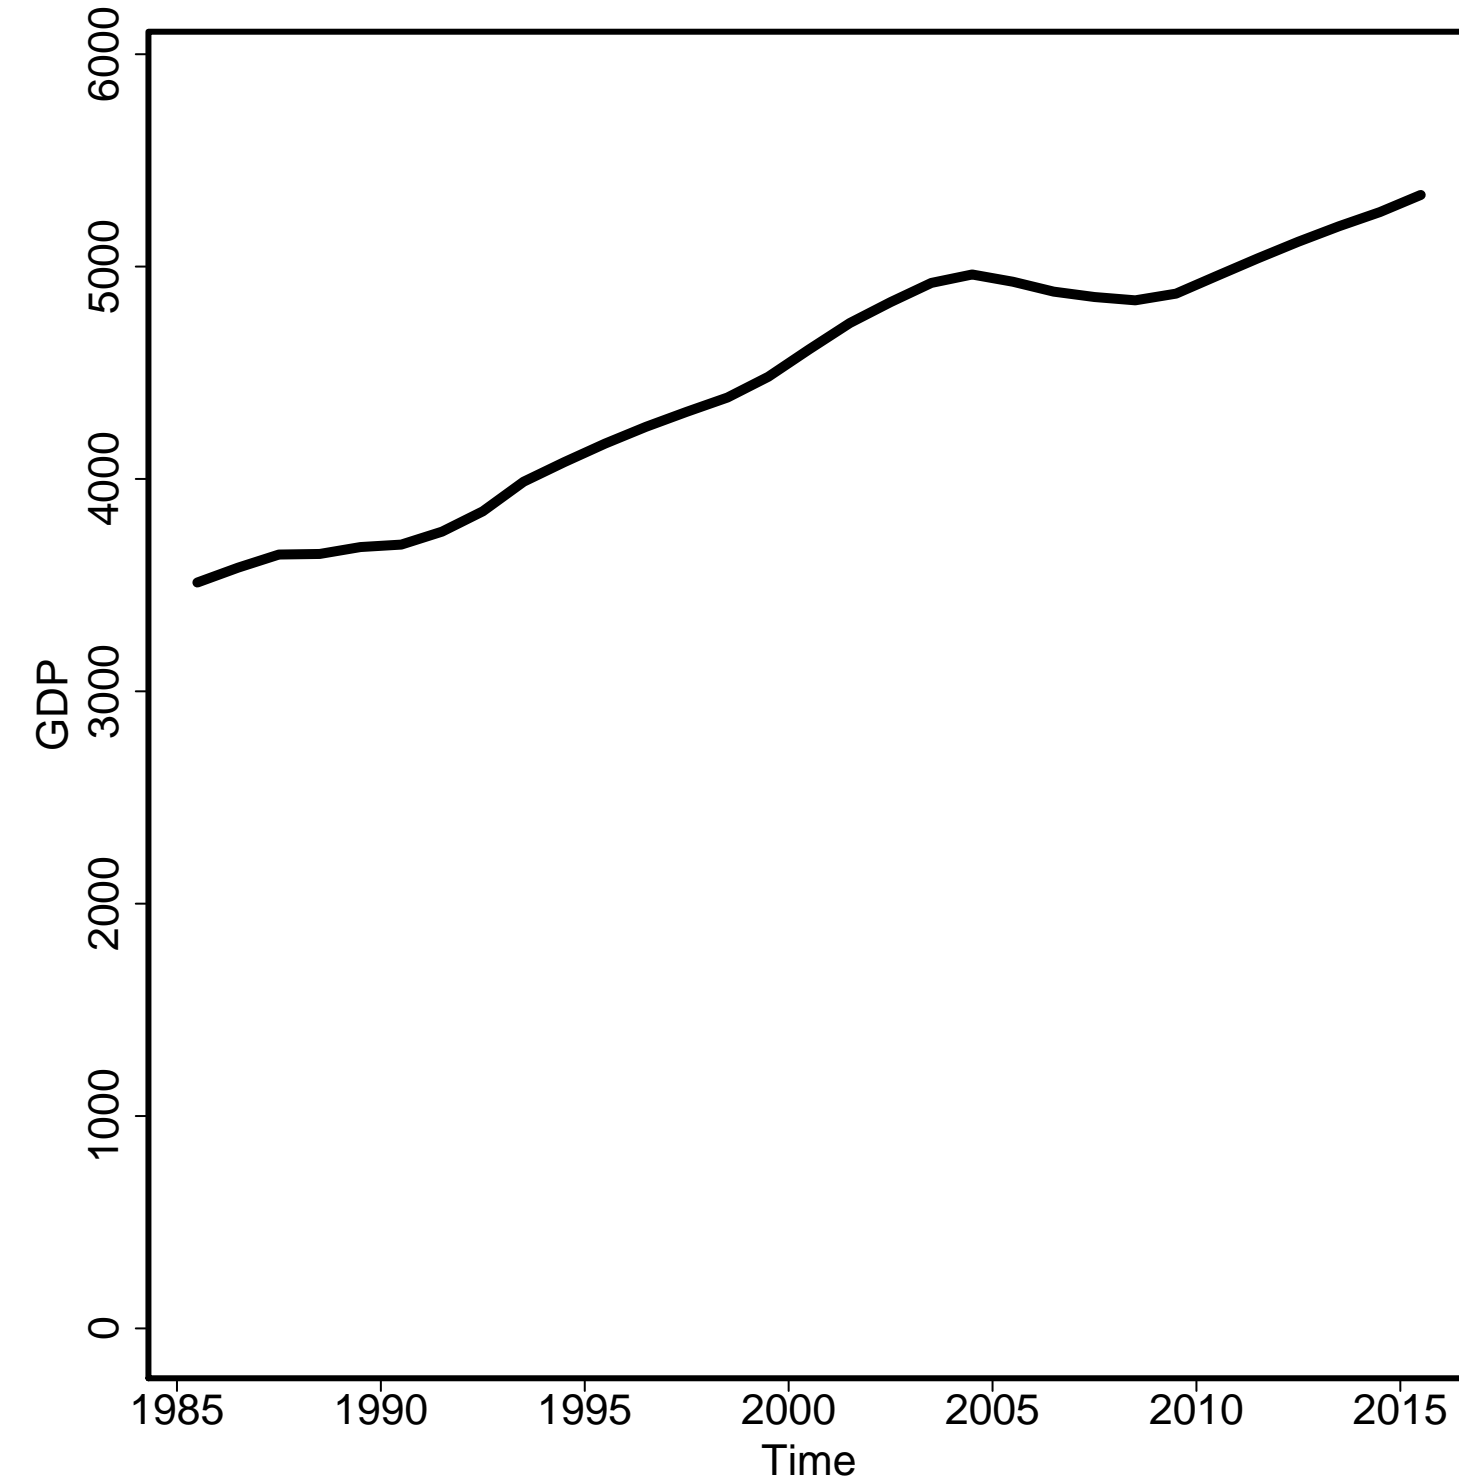

General Fertility Rate

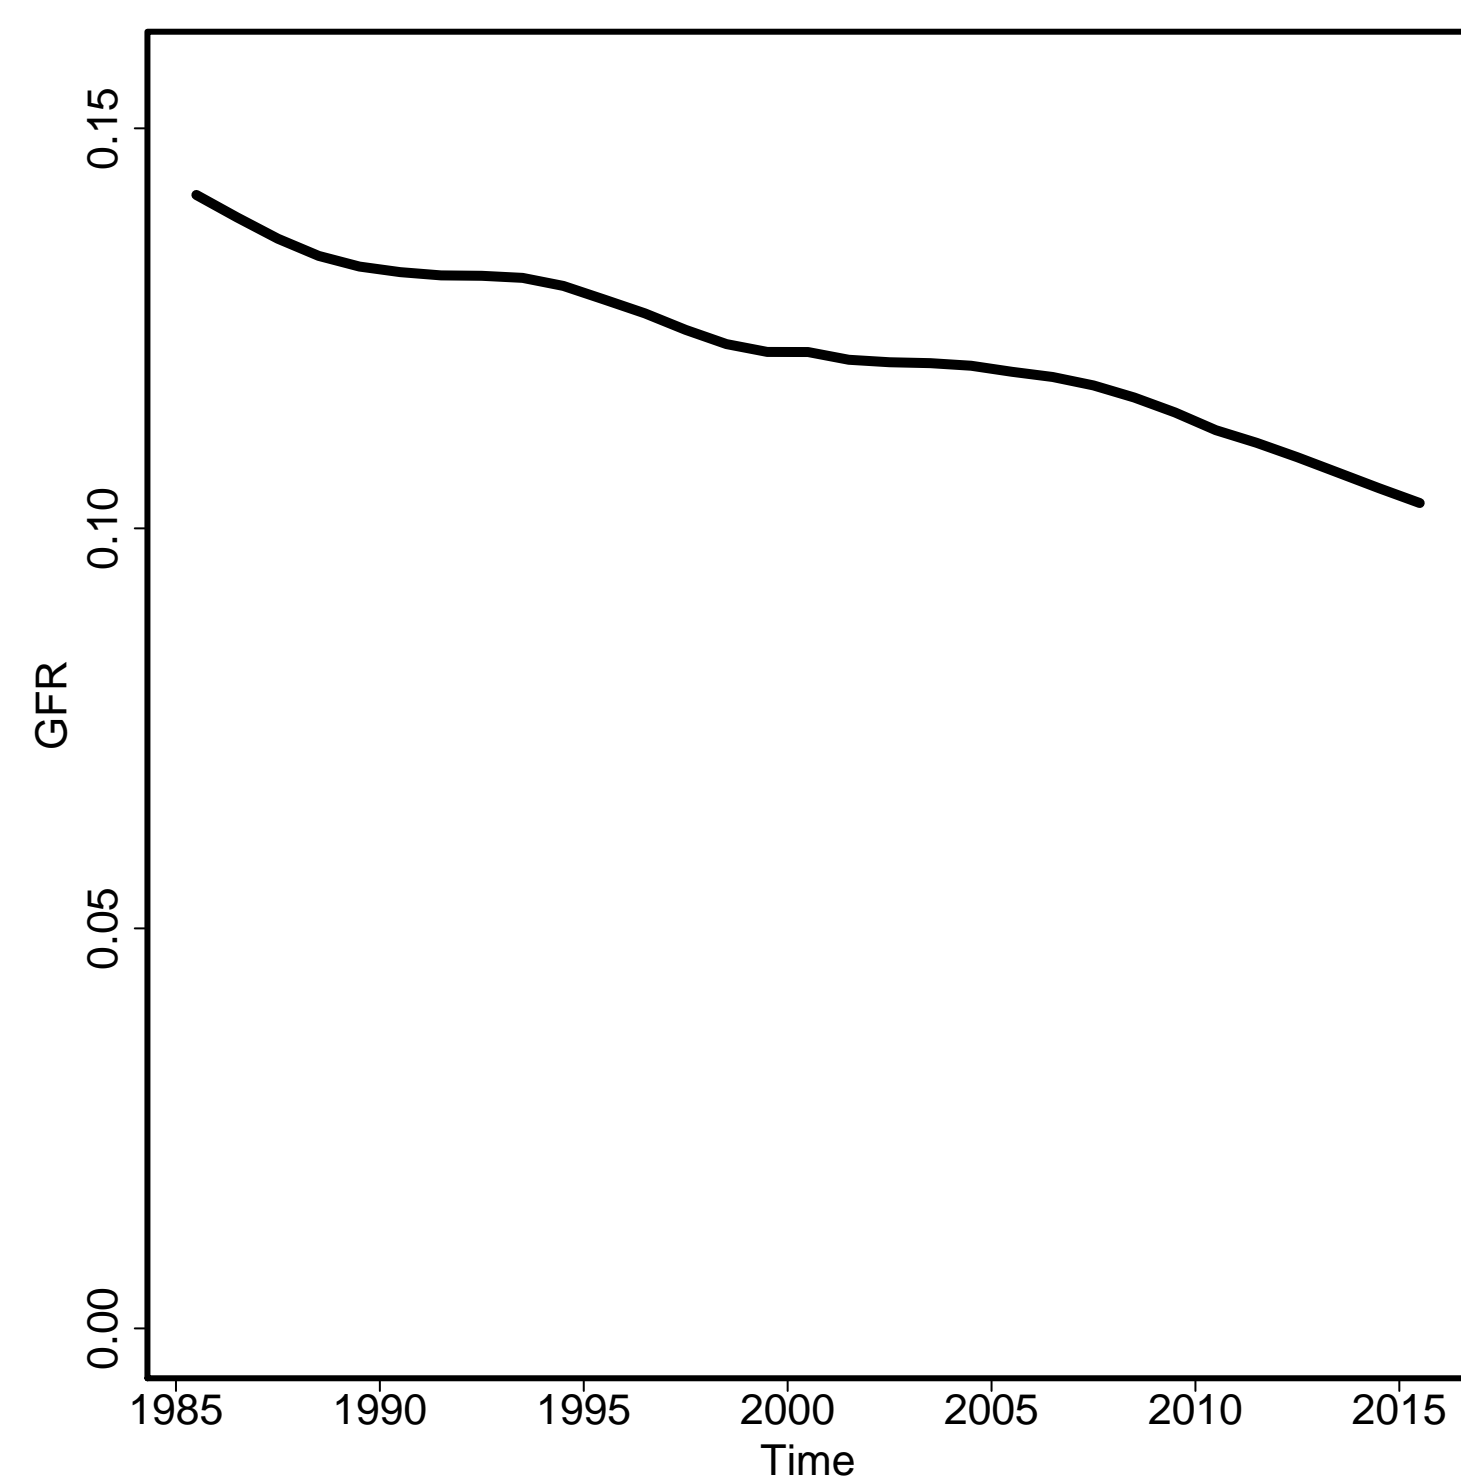

Skilled Attendance to Birth

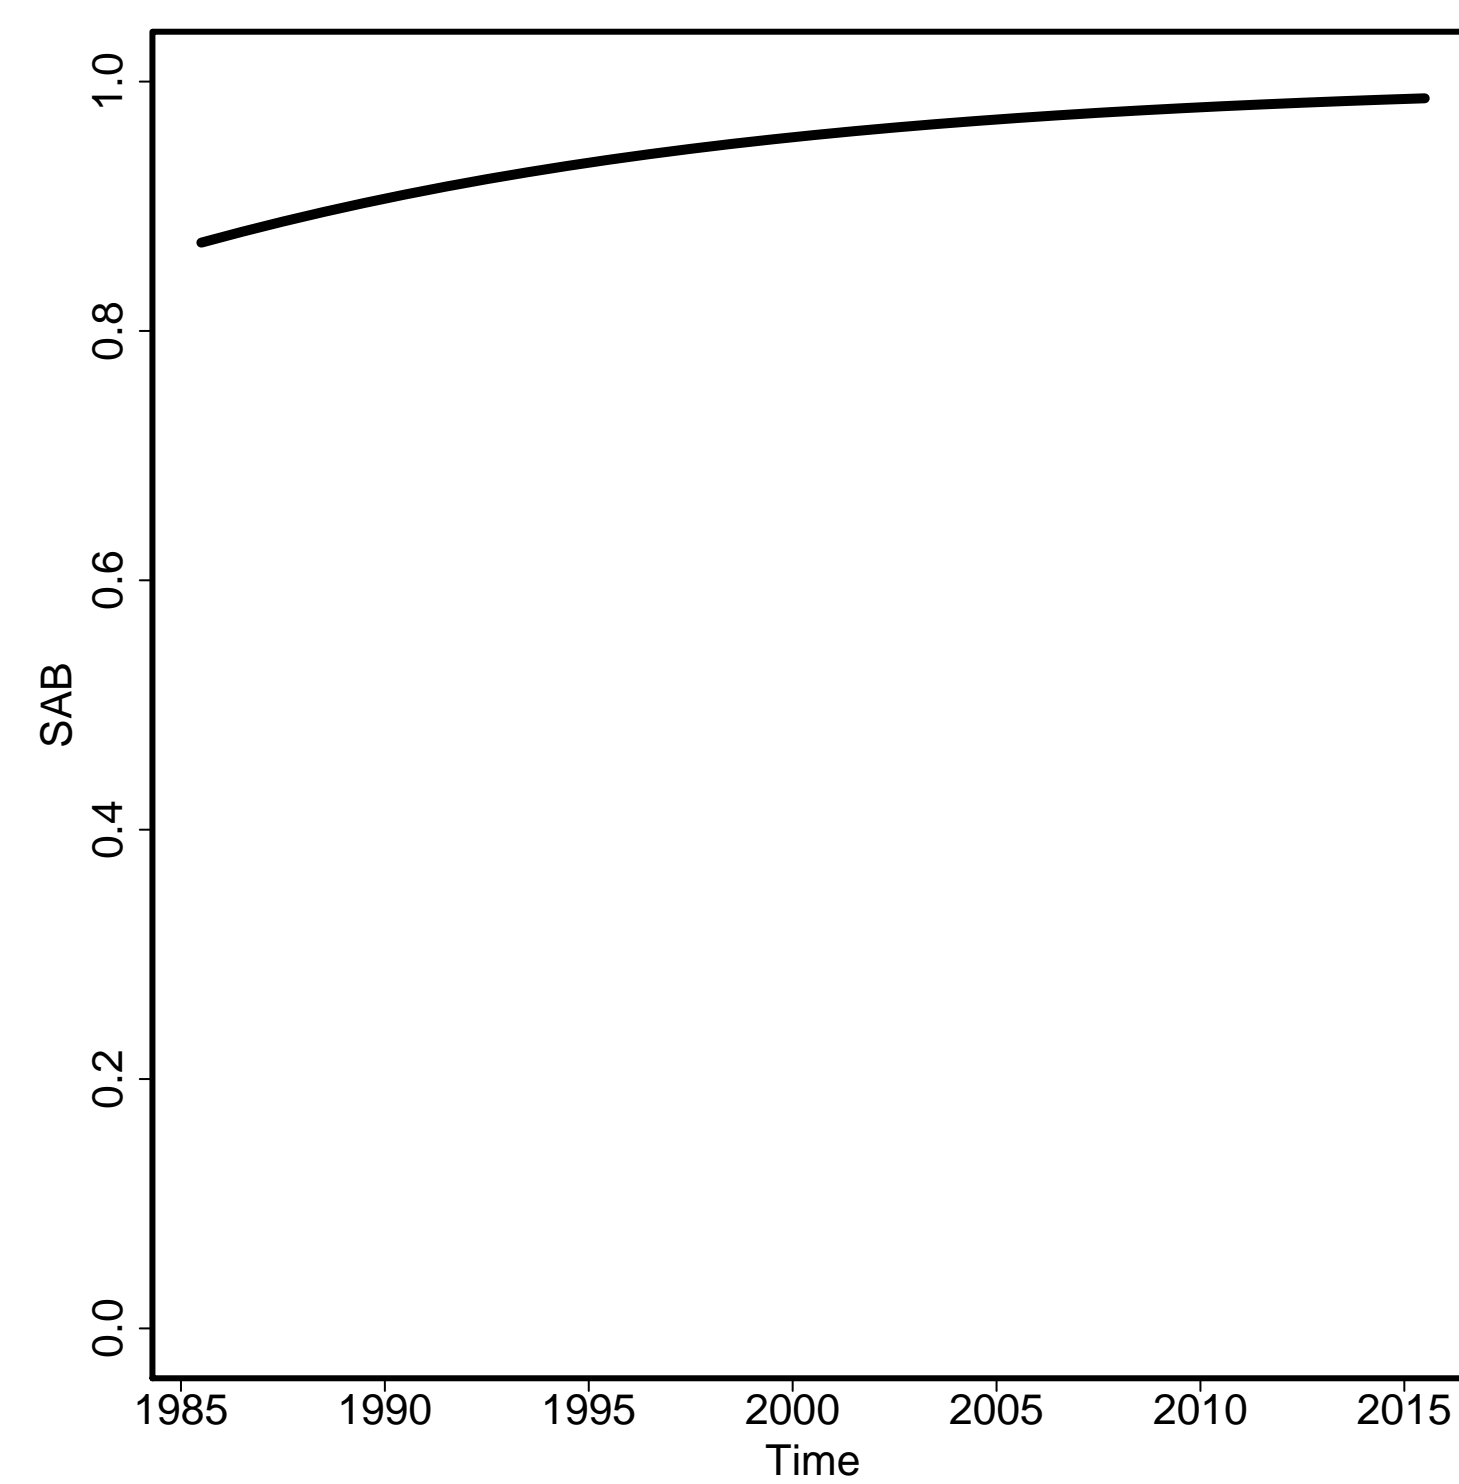

Envelope/Births

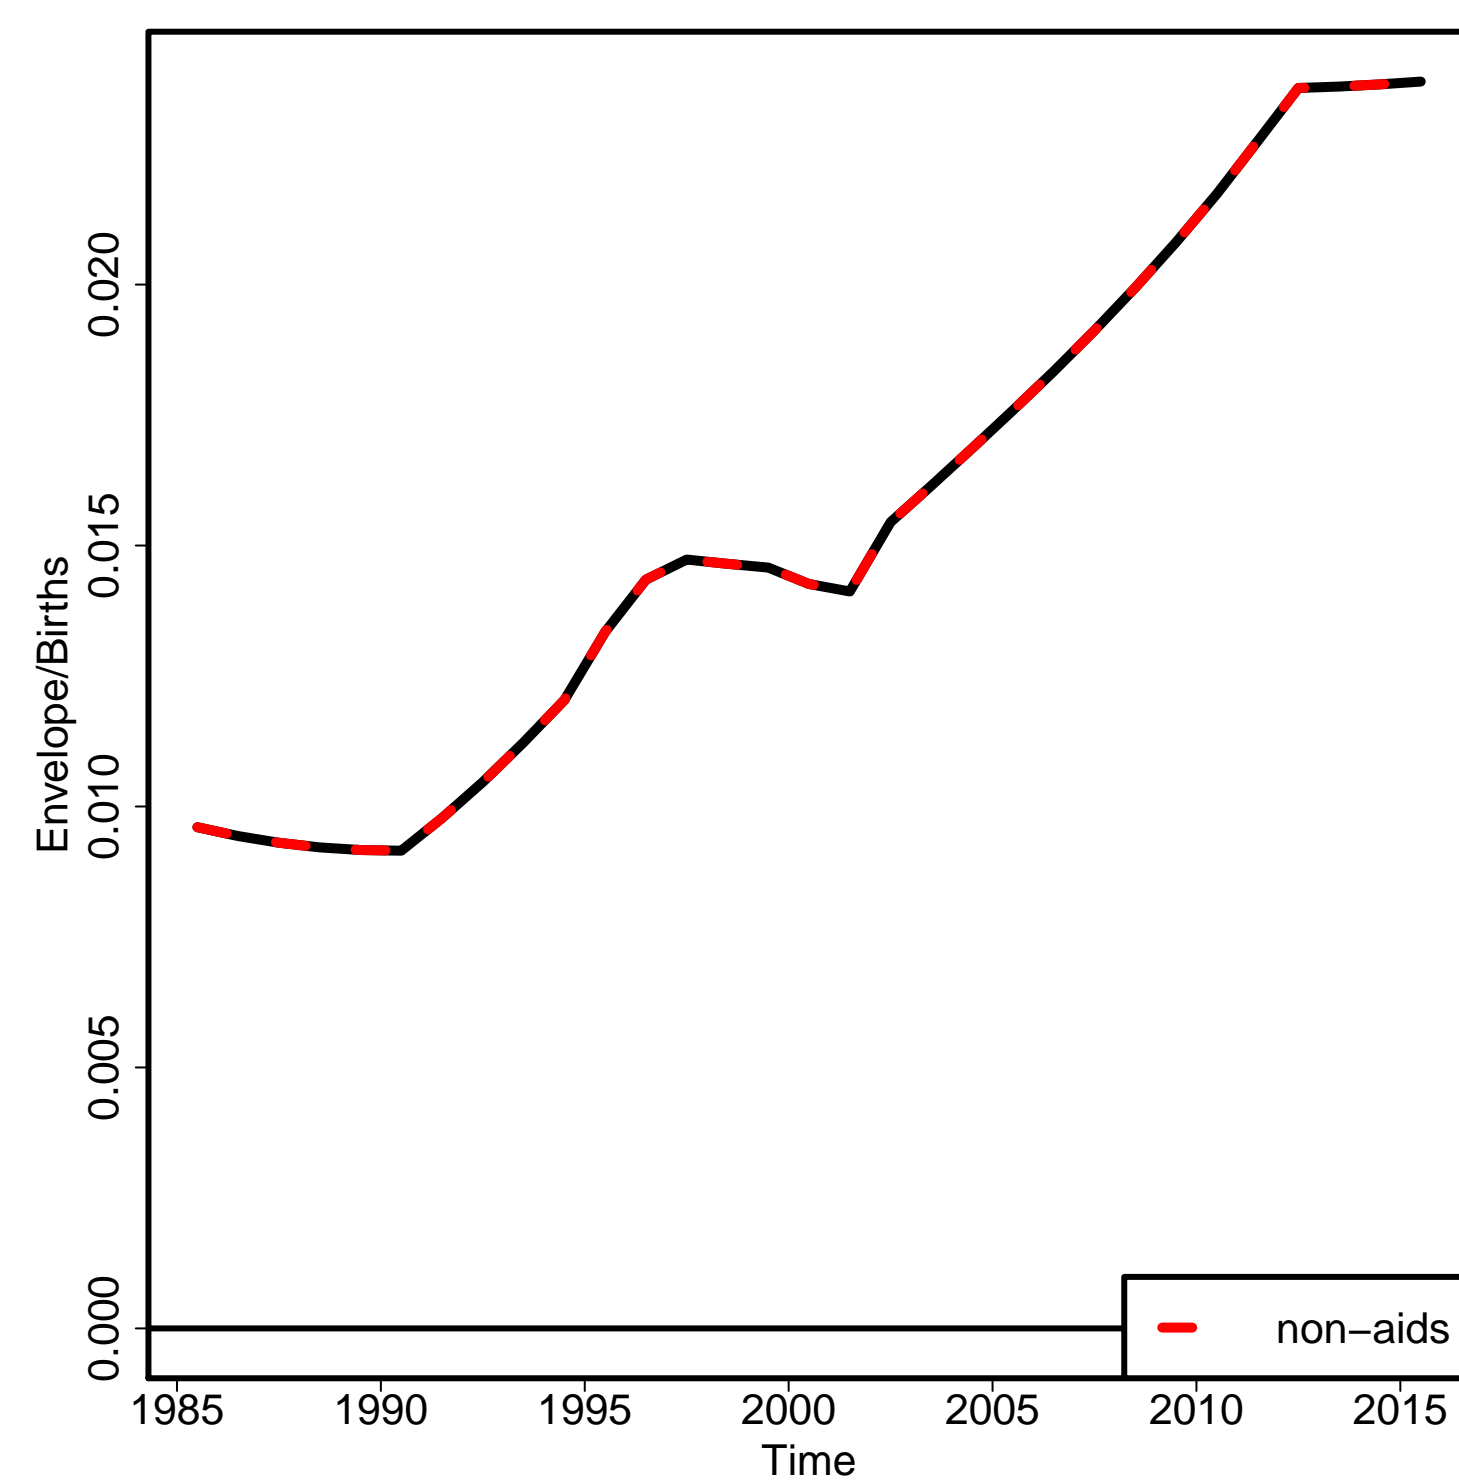

Non-aid MMR

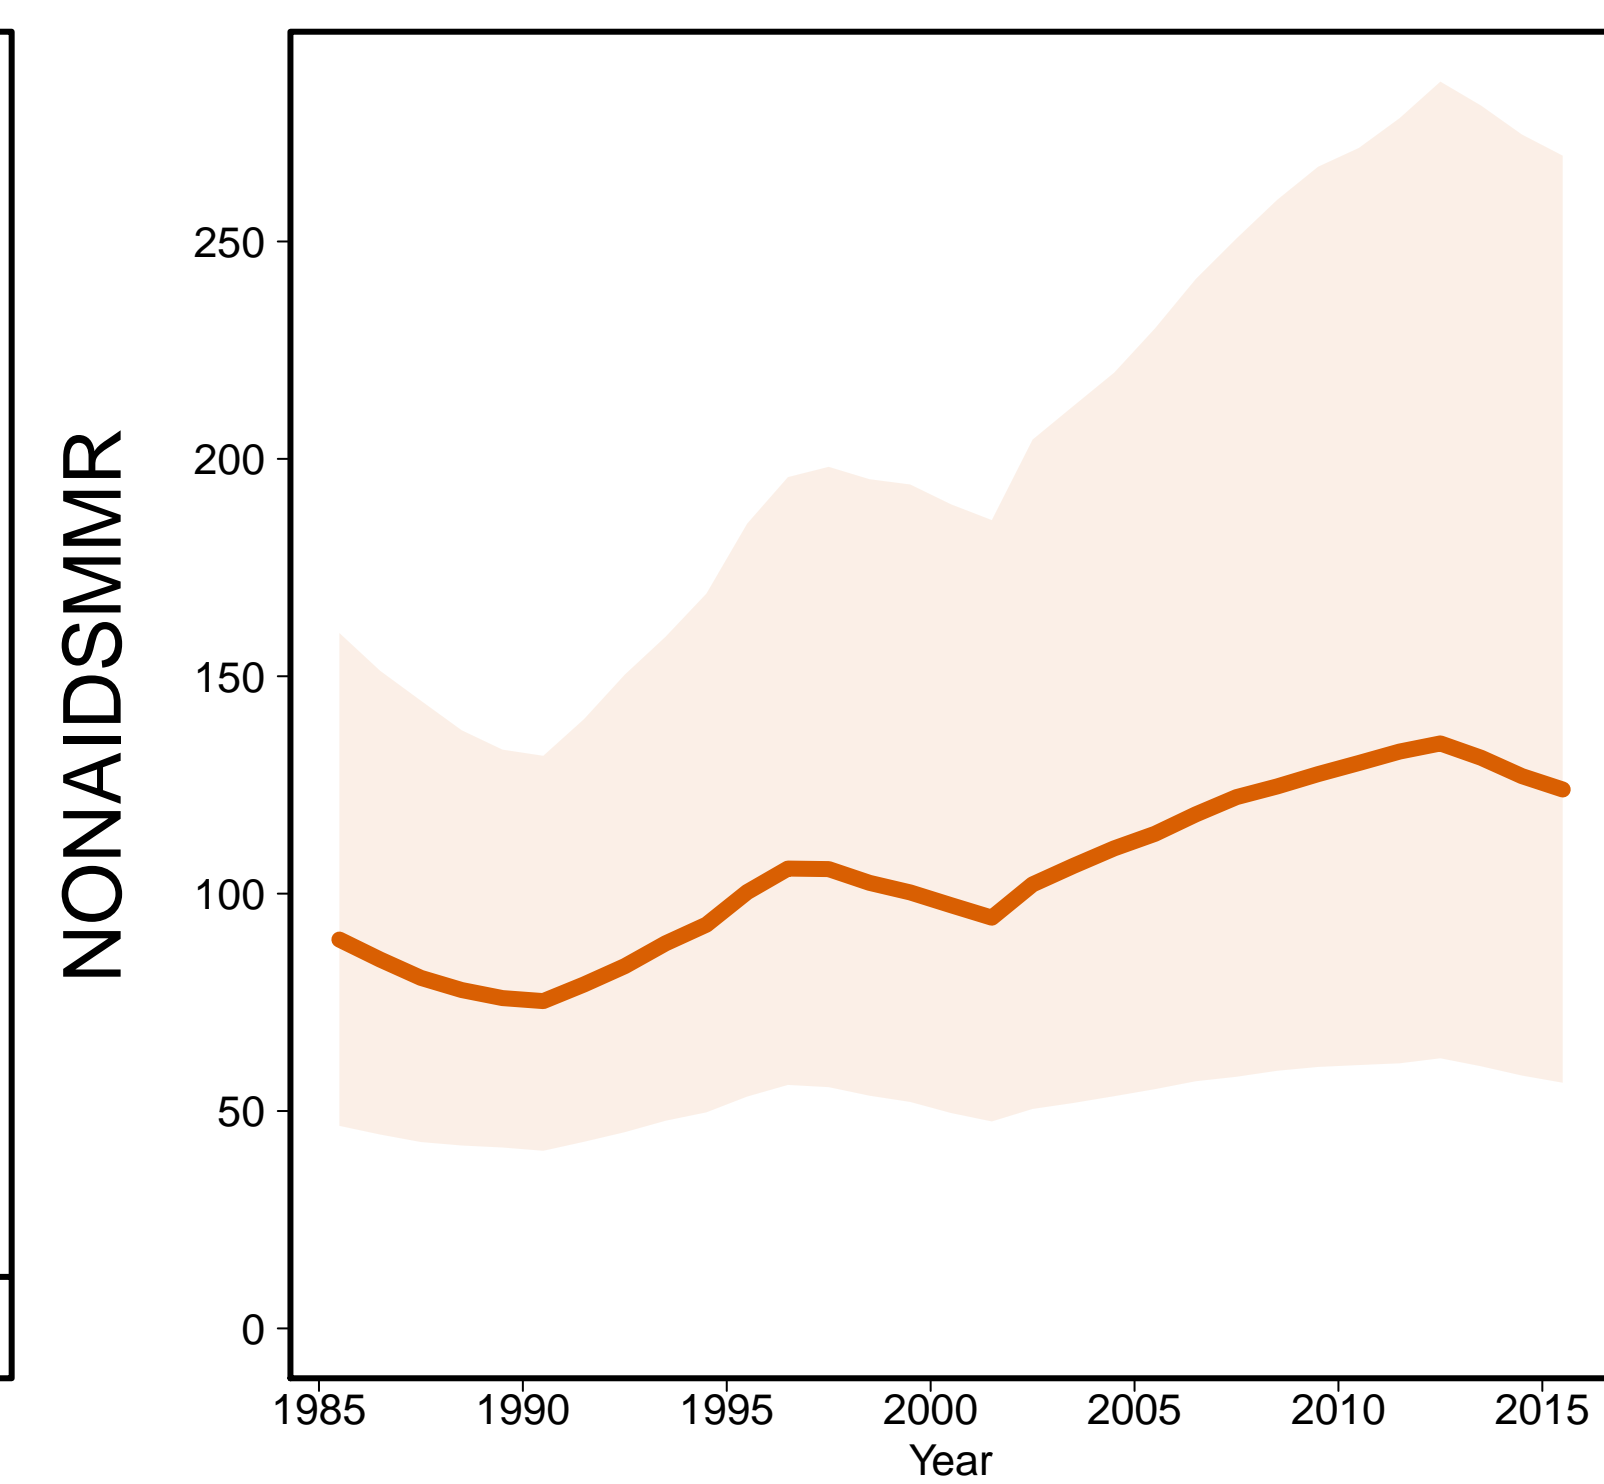

Aids MMR

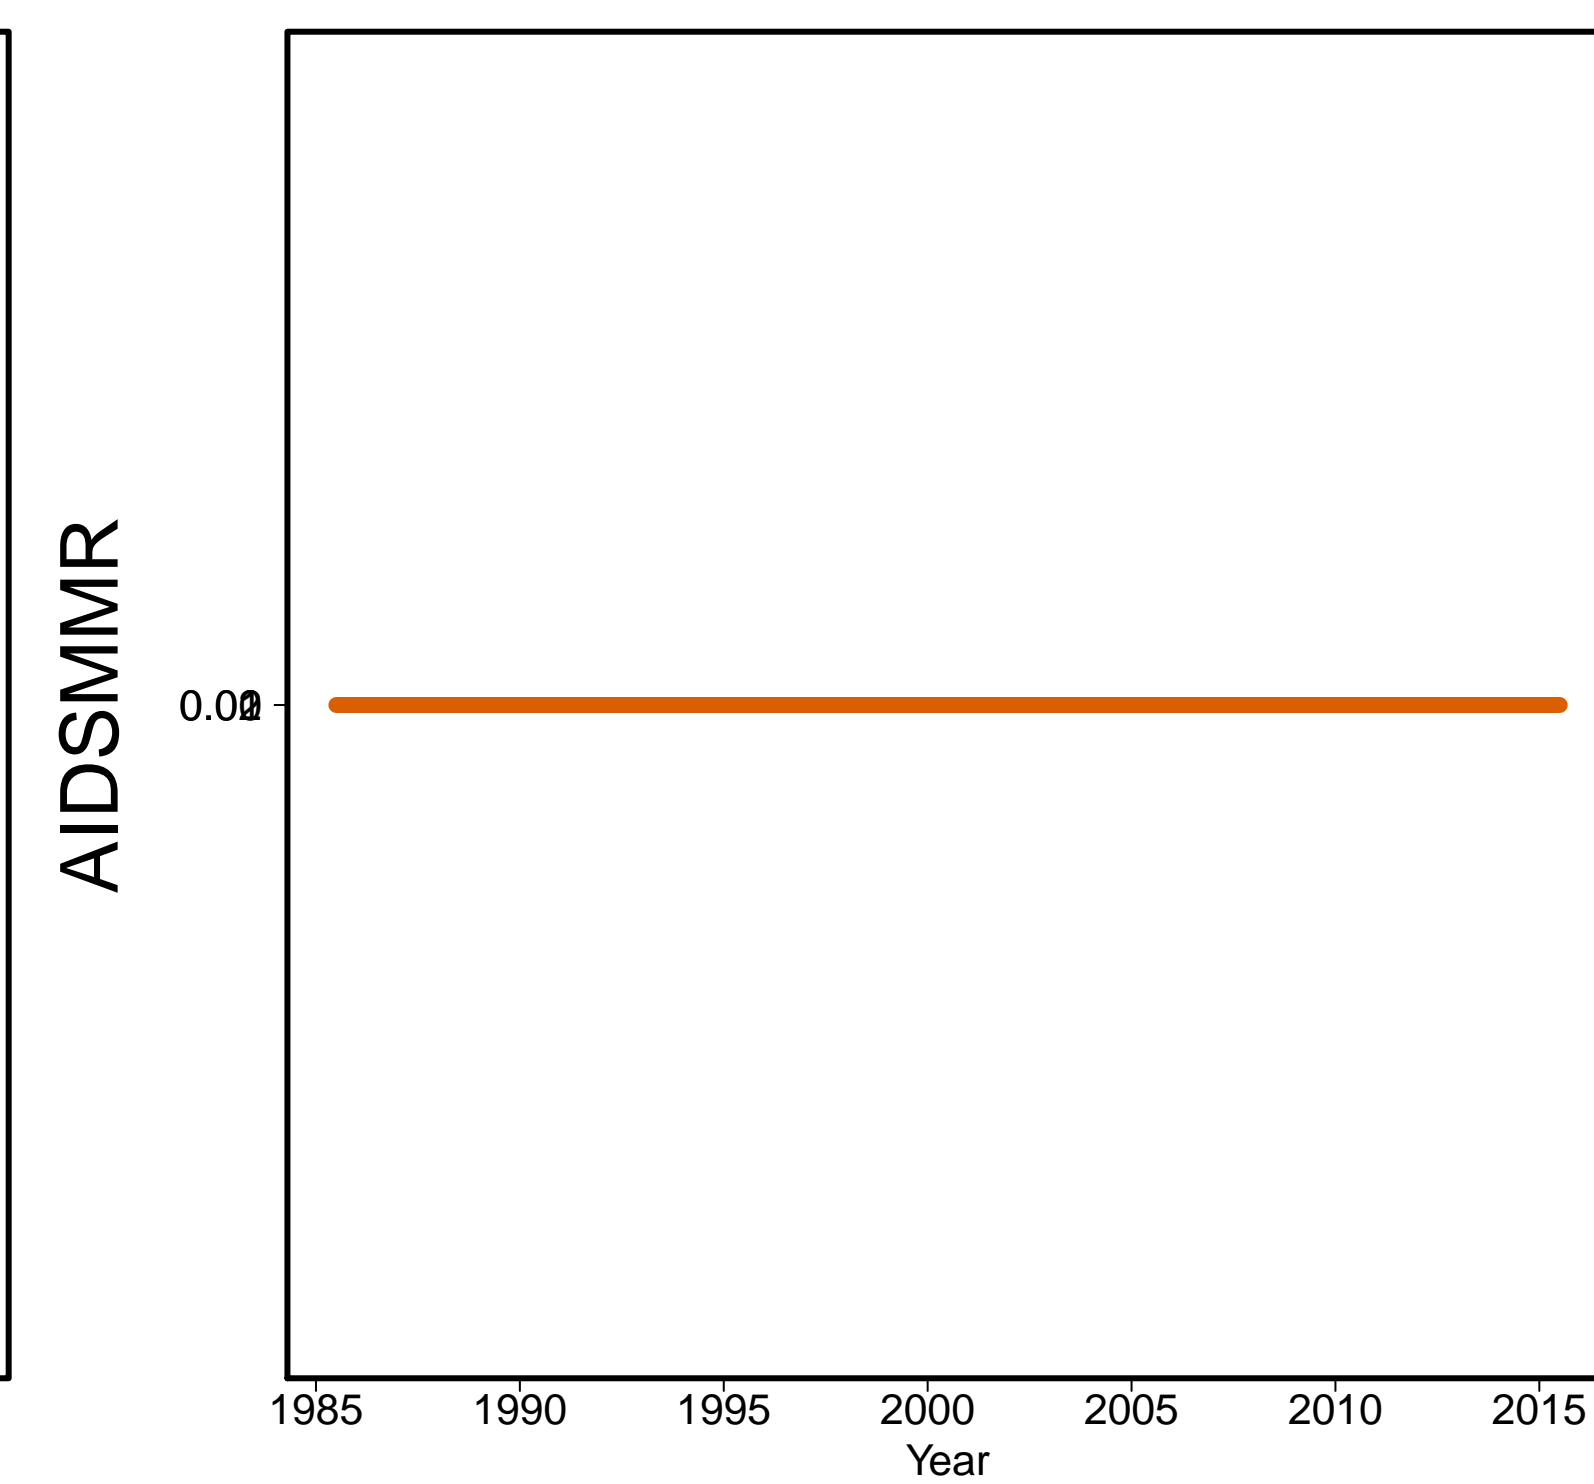

Trinidad and Tobago [TTO]  
(Caribbean)

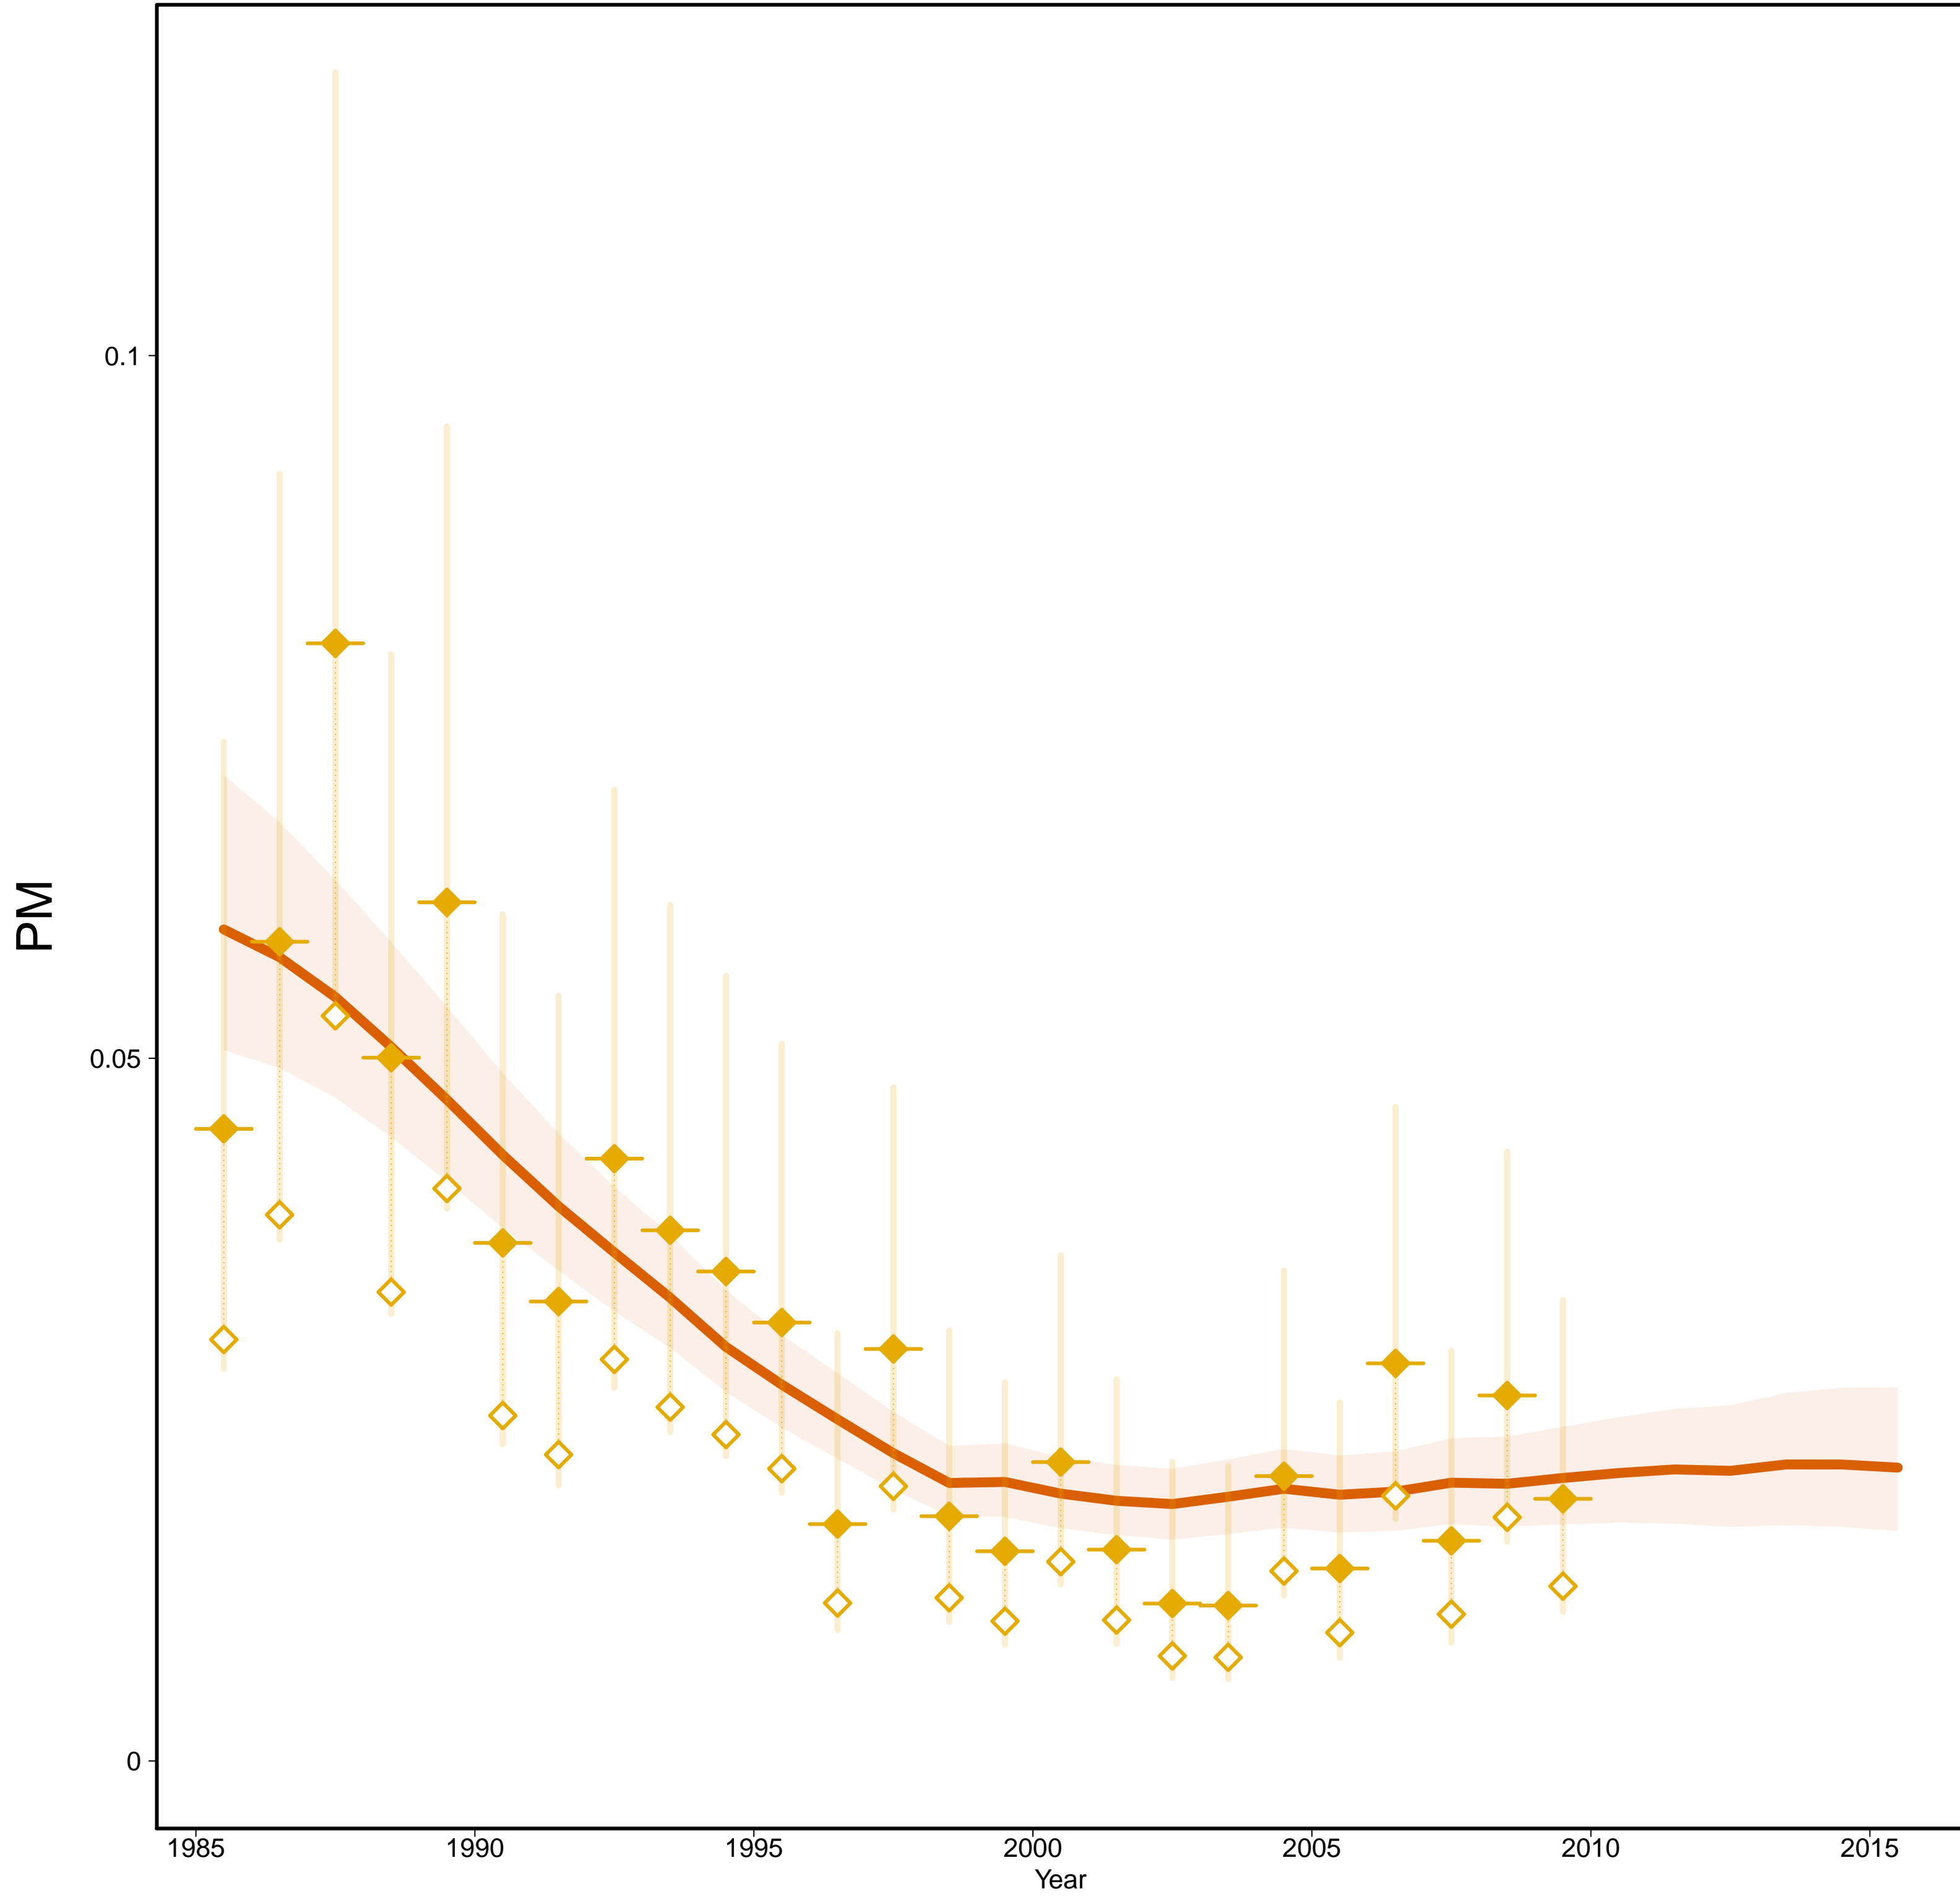

Trinidad and Tobago [TTO]  
(Caribbean)

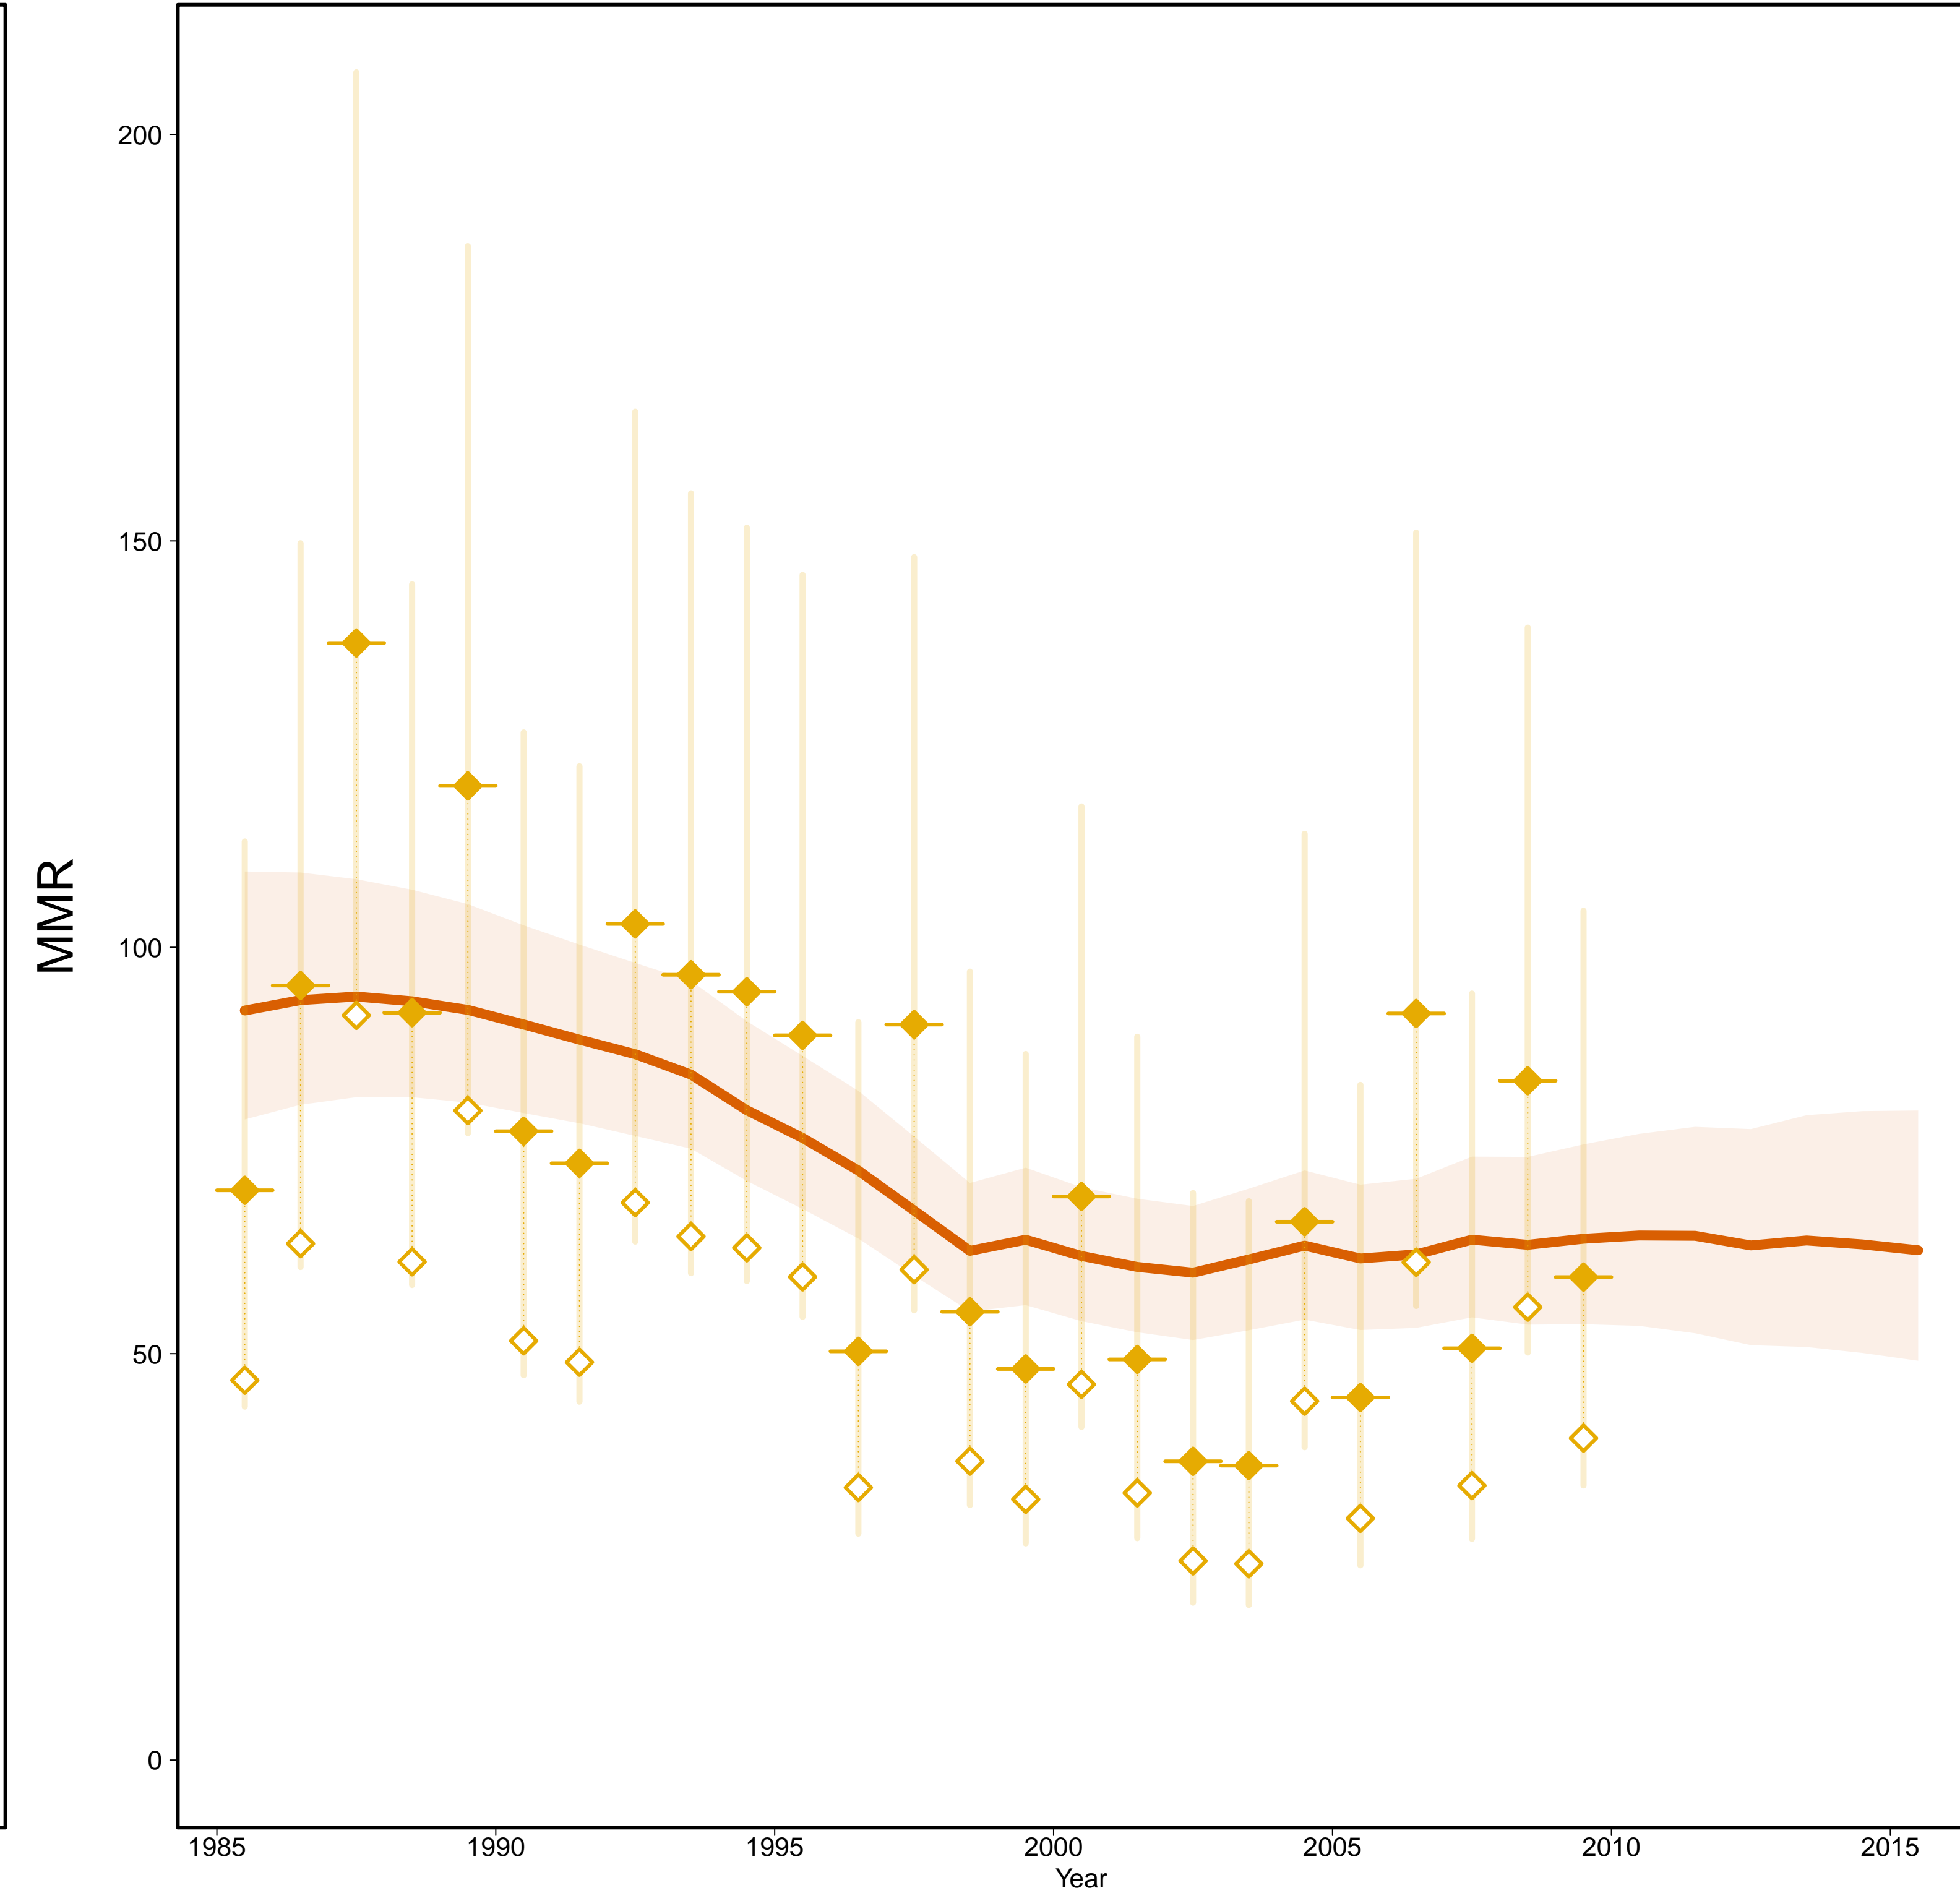

- Estimates —
- MMR Database 2015 —
- ◇ Observed Data
- ◆ Adjusted Data
- Data type —
- ◆ VR

Gross Domestic Product

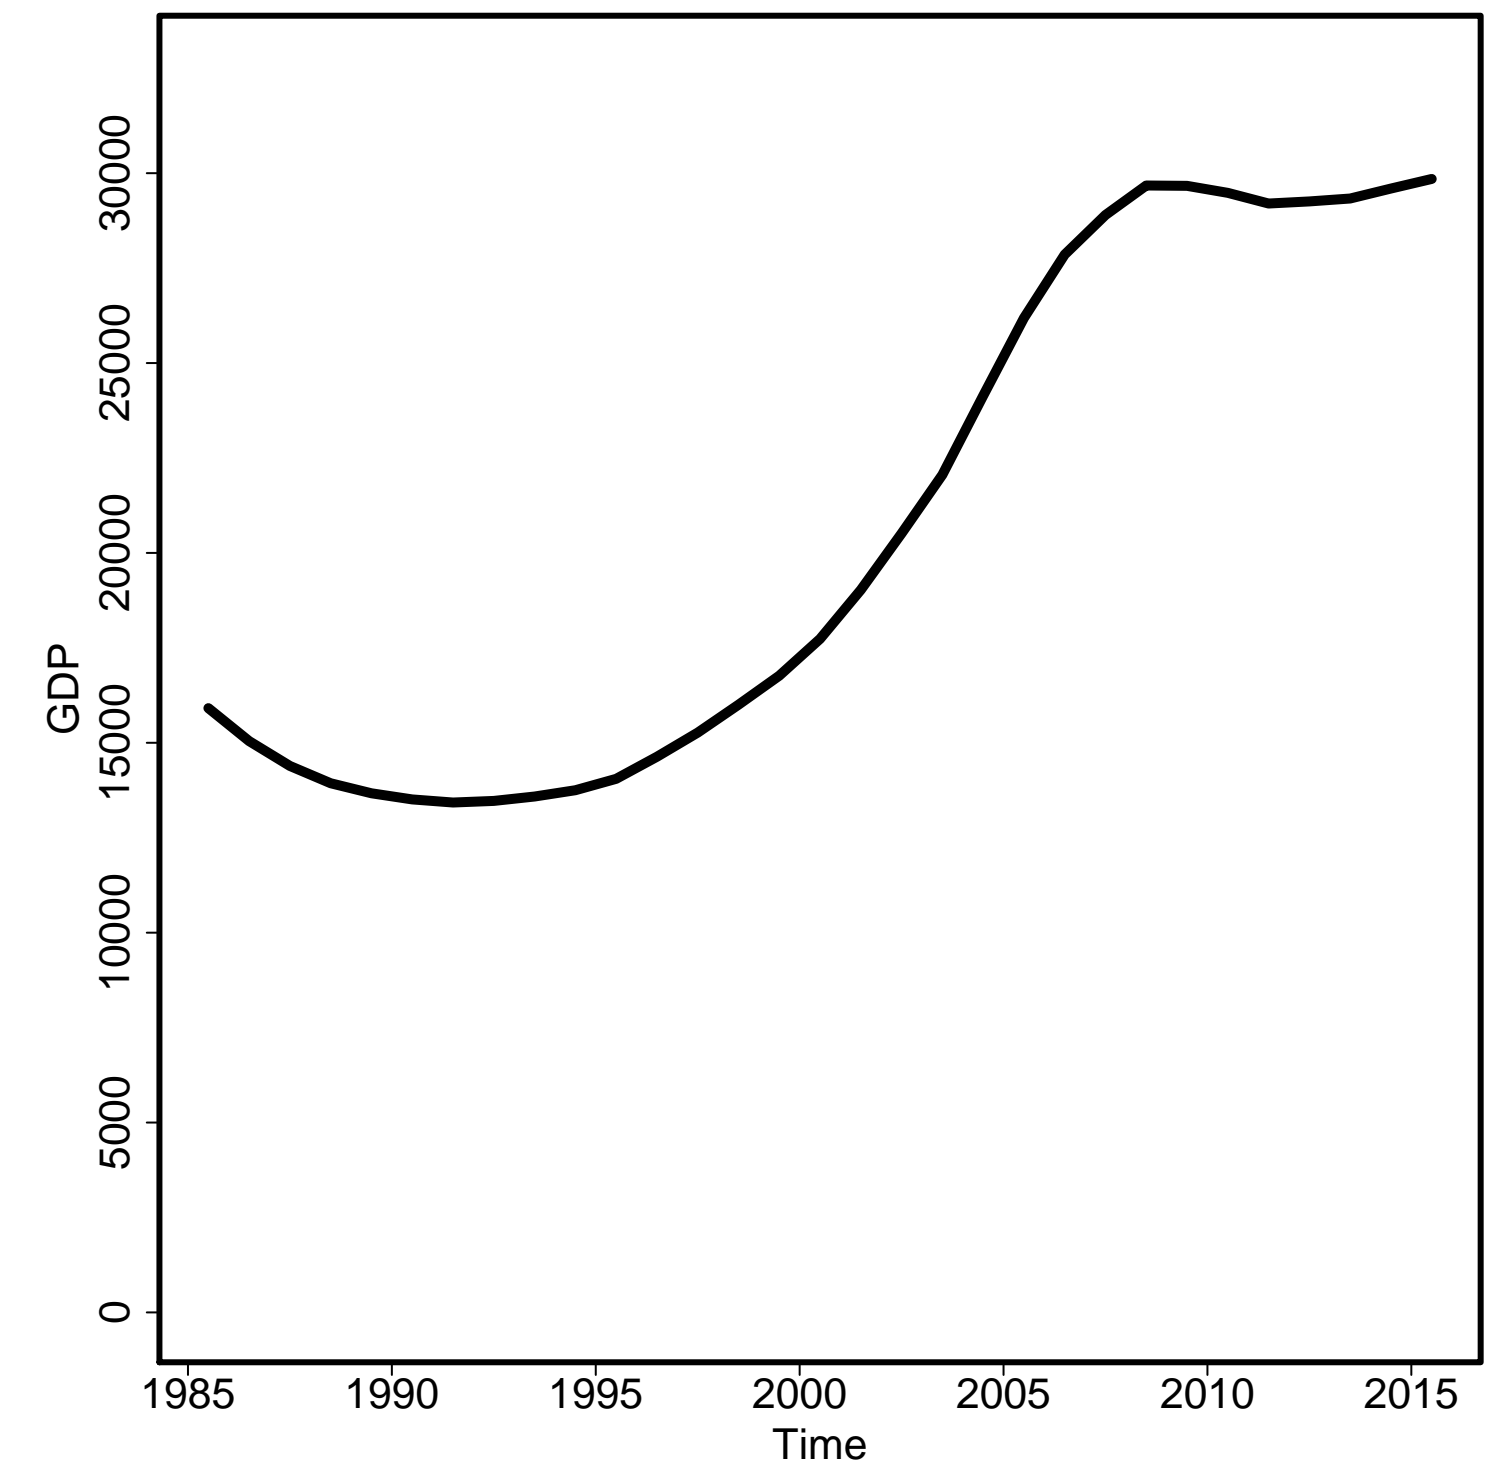

General Fertility Rate

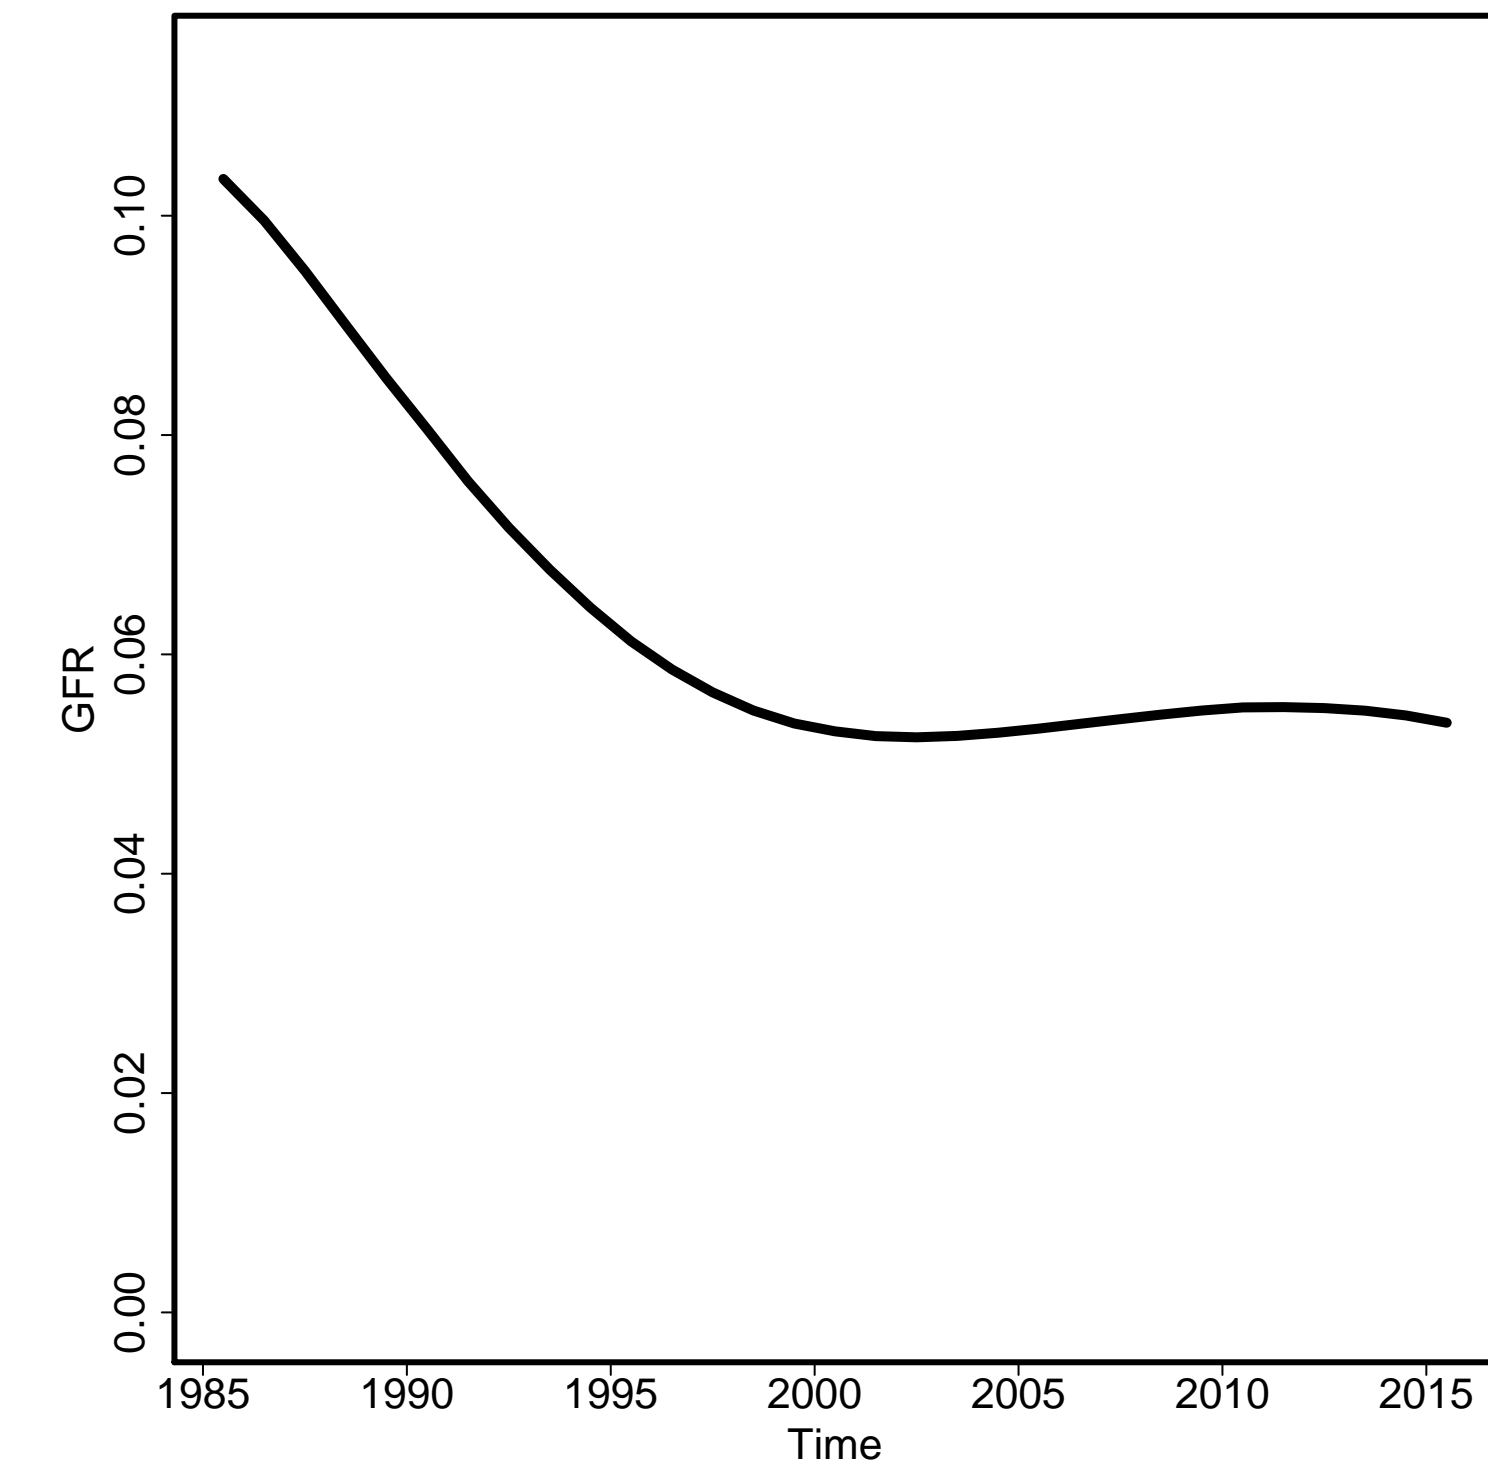

Skilled Attendance to Birth

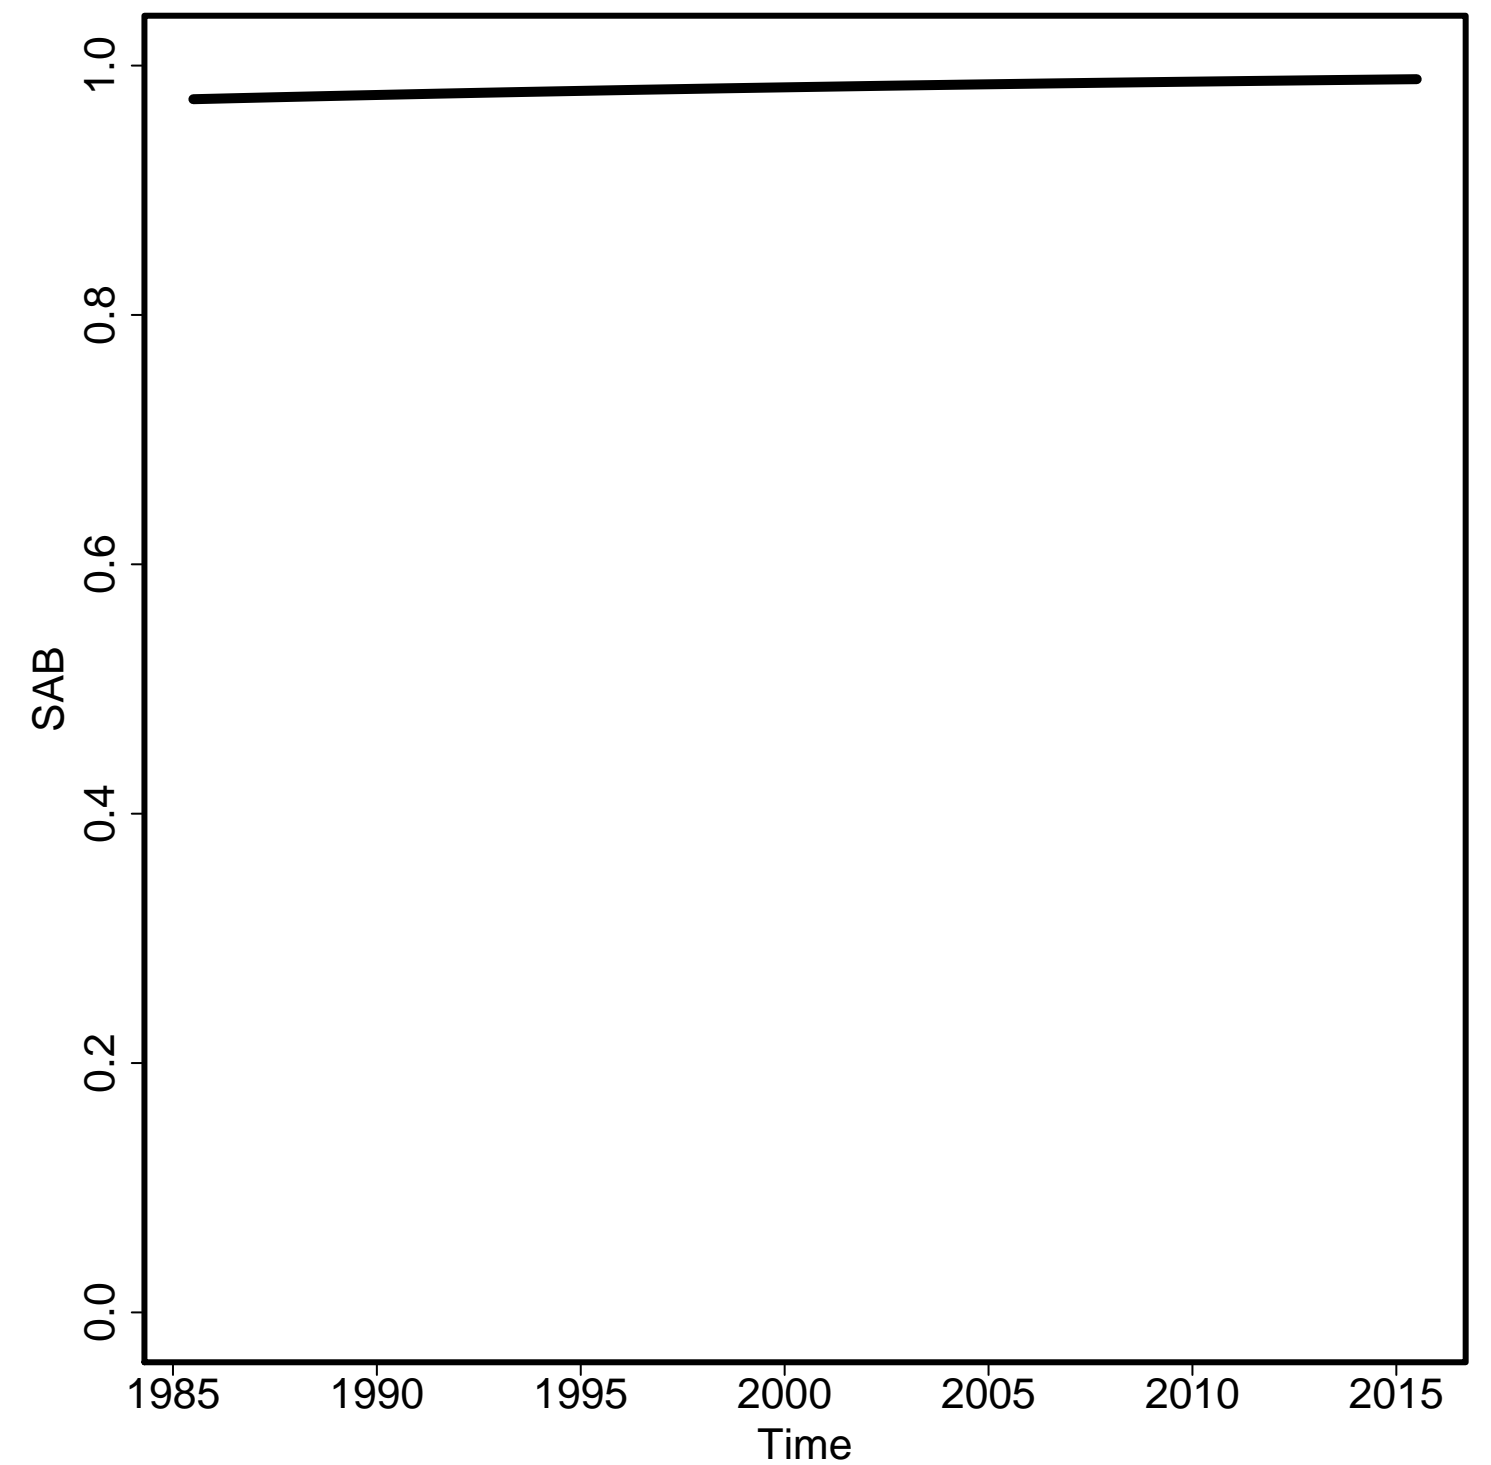

Envelope/Births

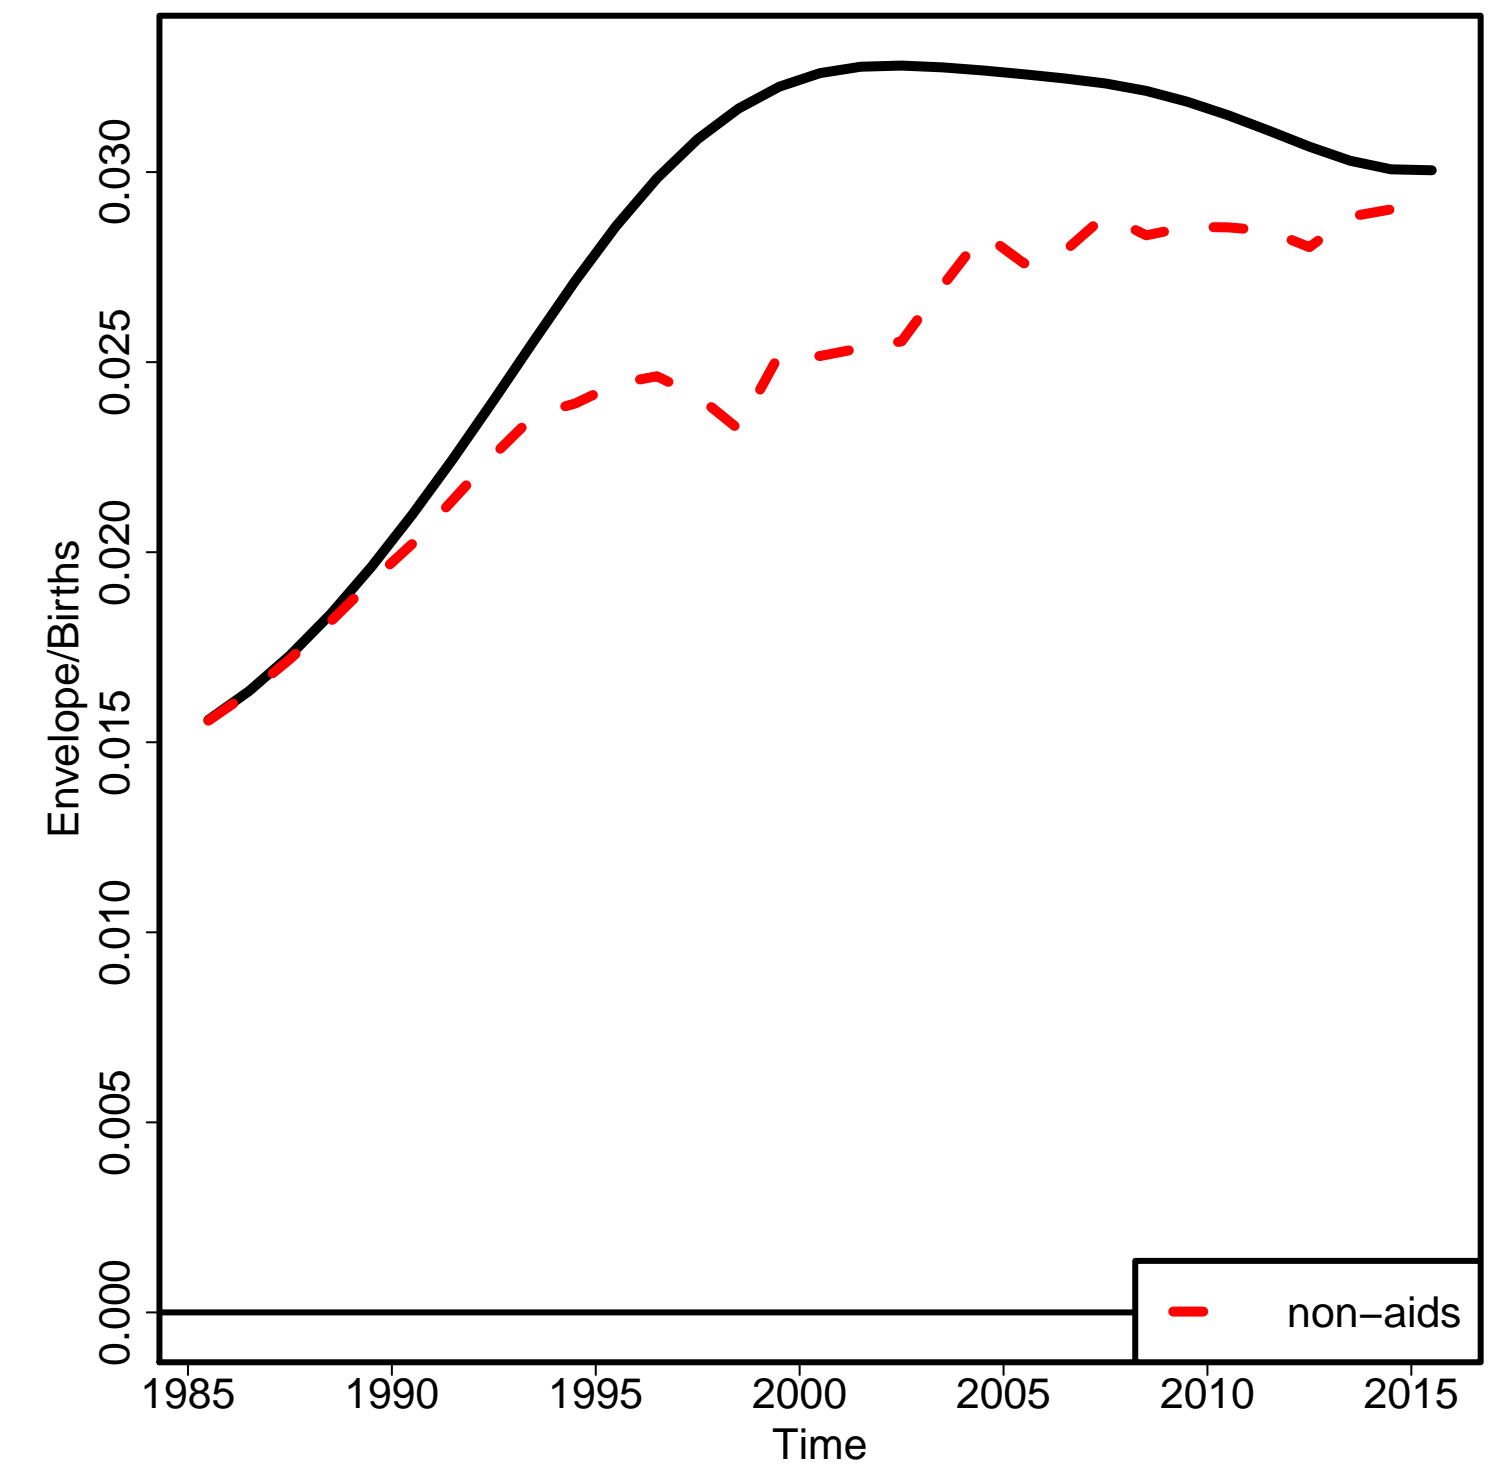

Non-aids MMR

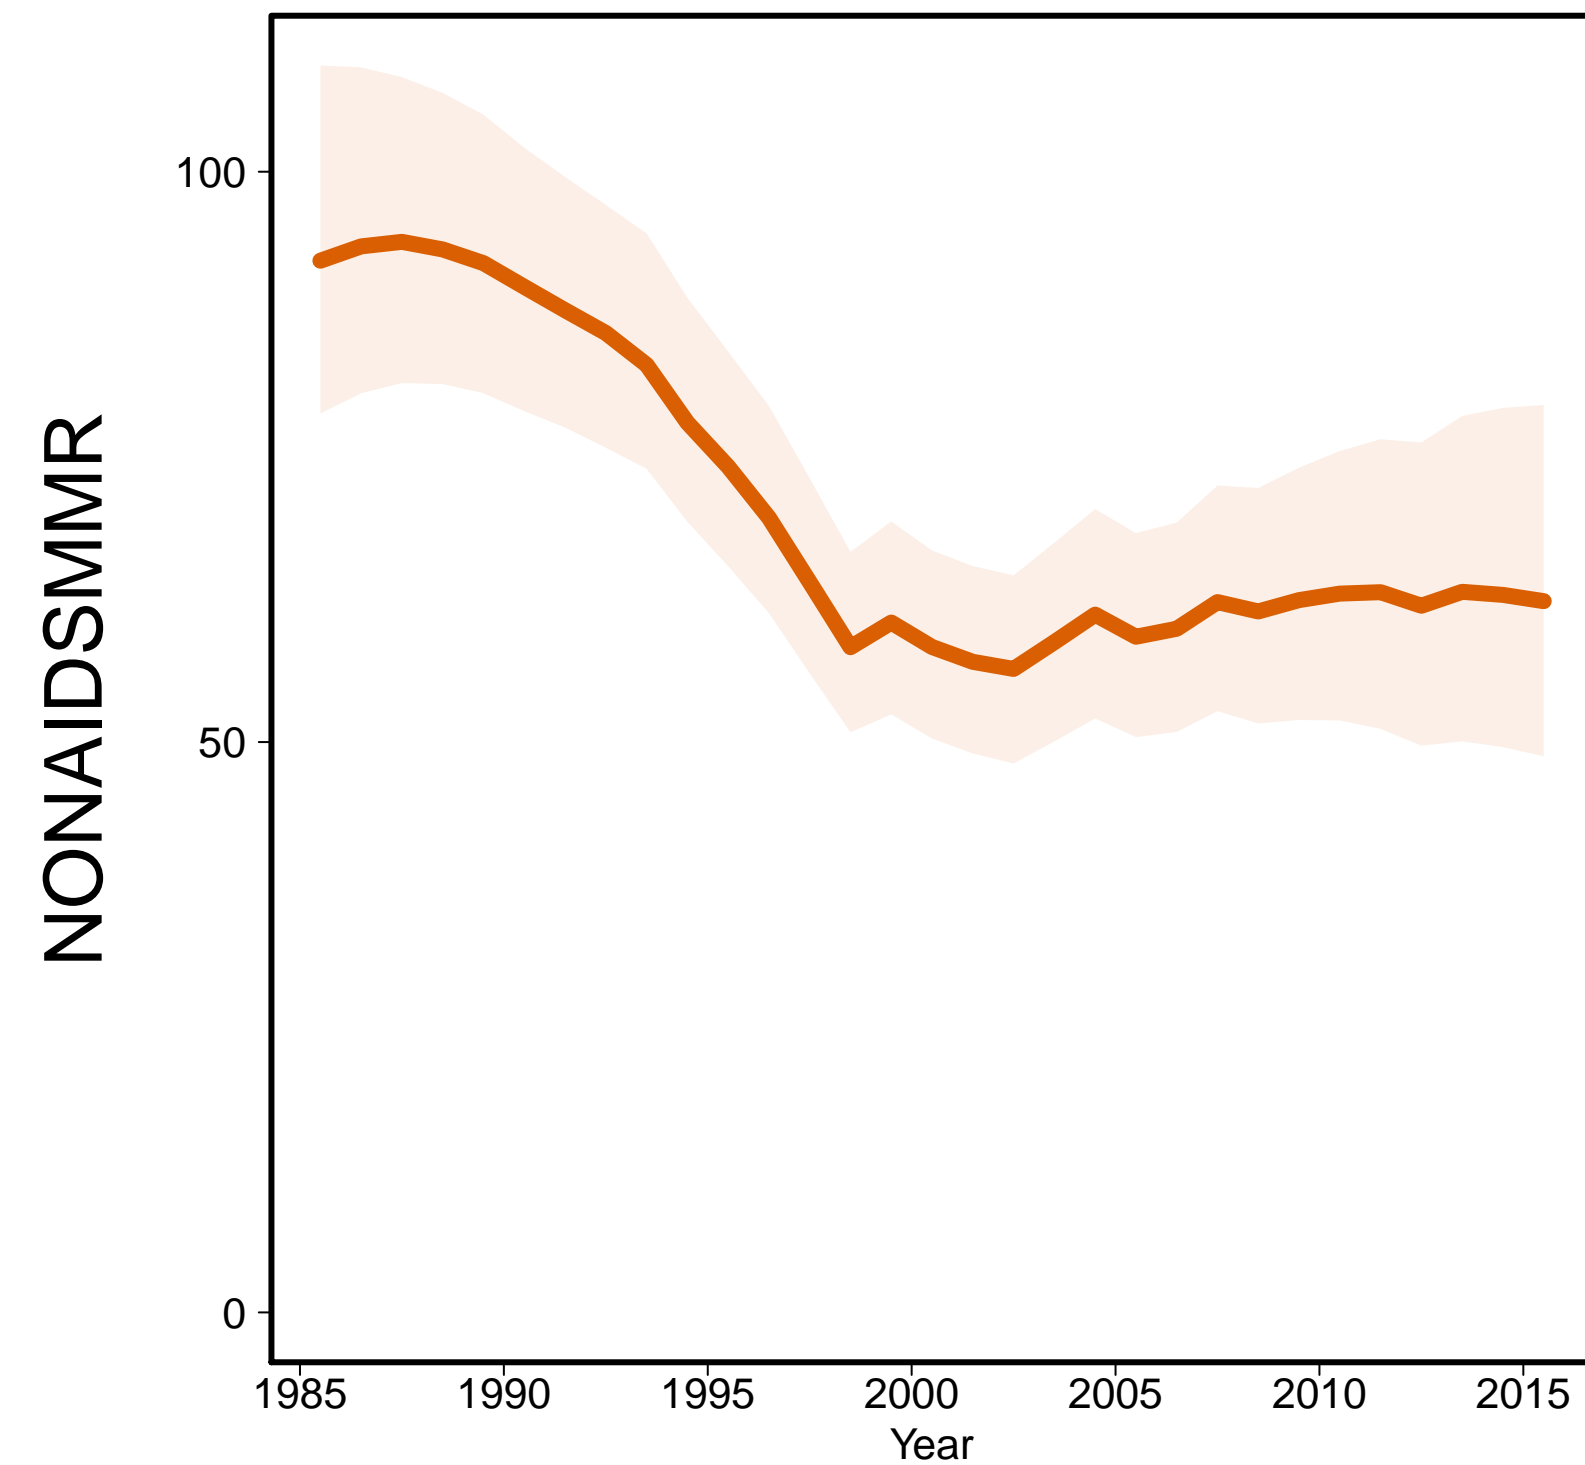

Aids MMR

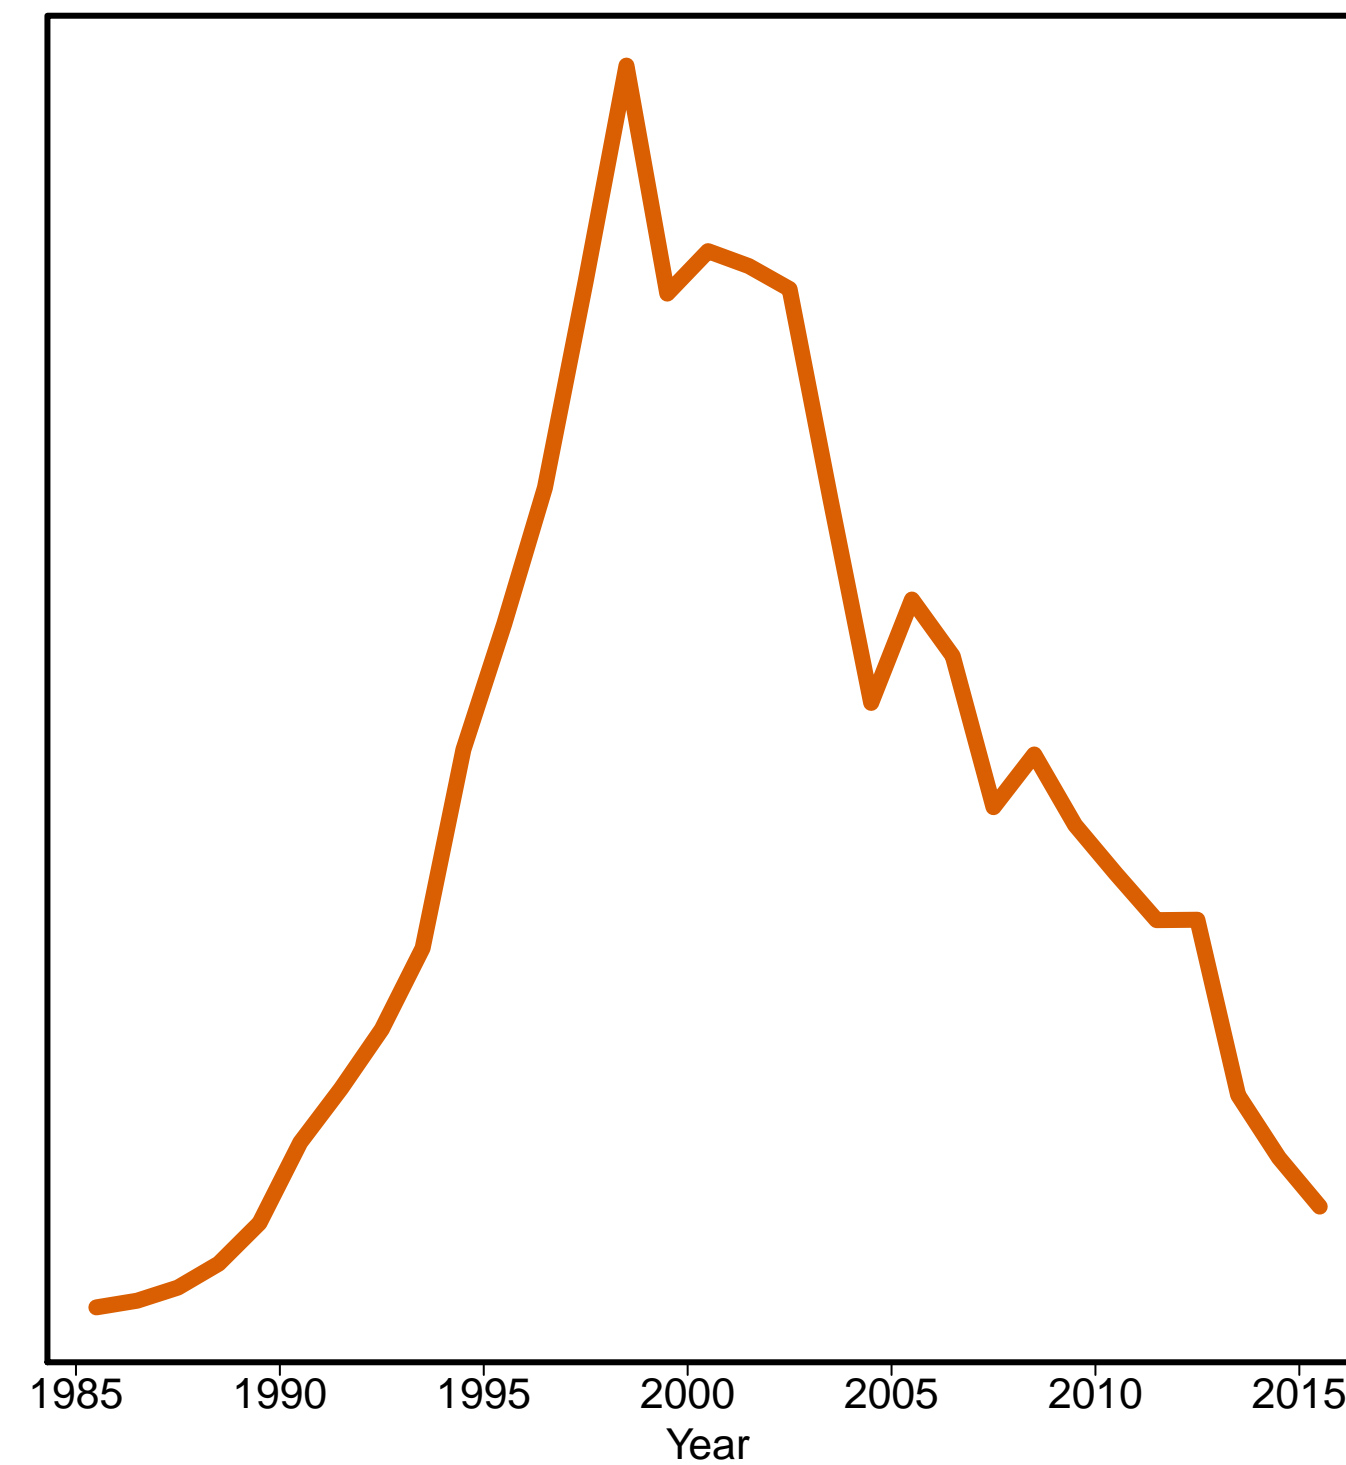

Tunisia [TUN]  
(Northern Africa)

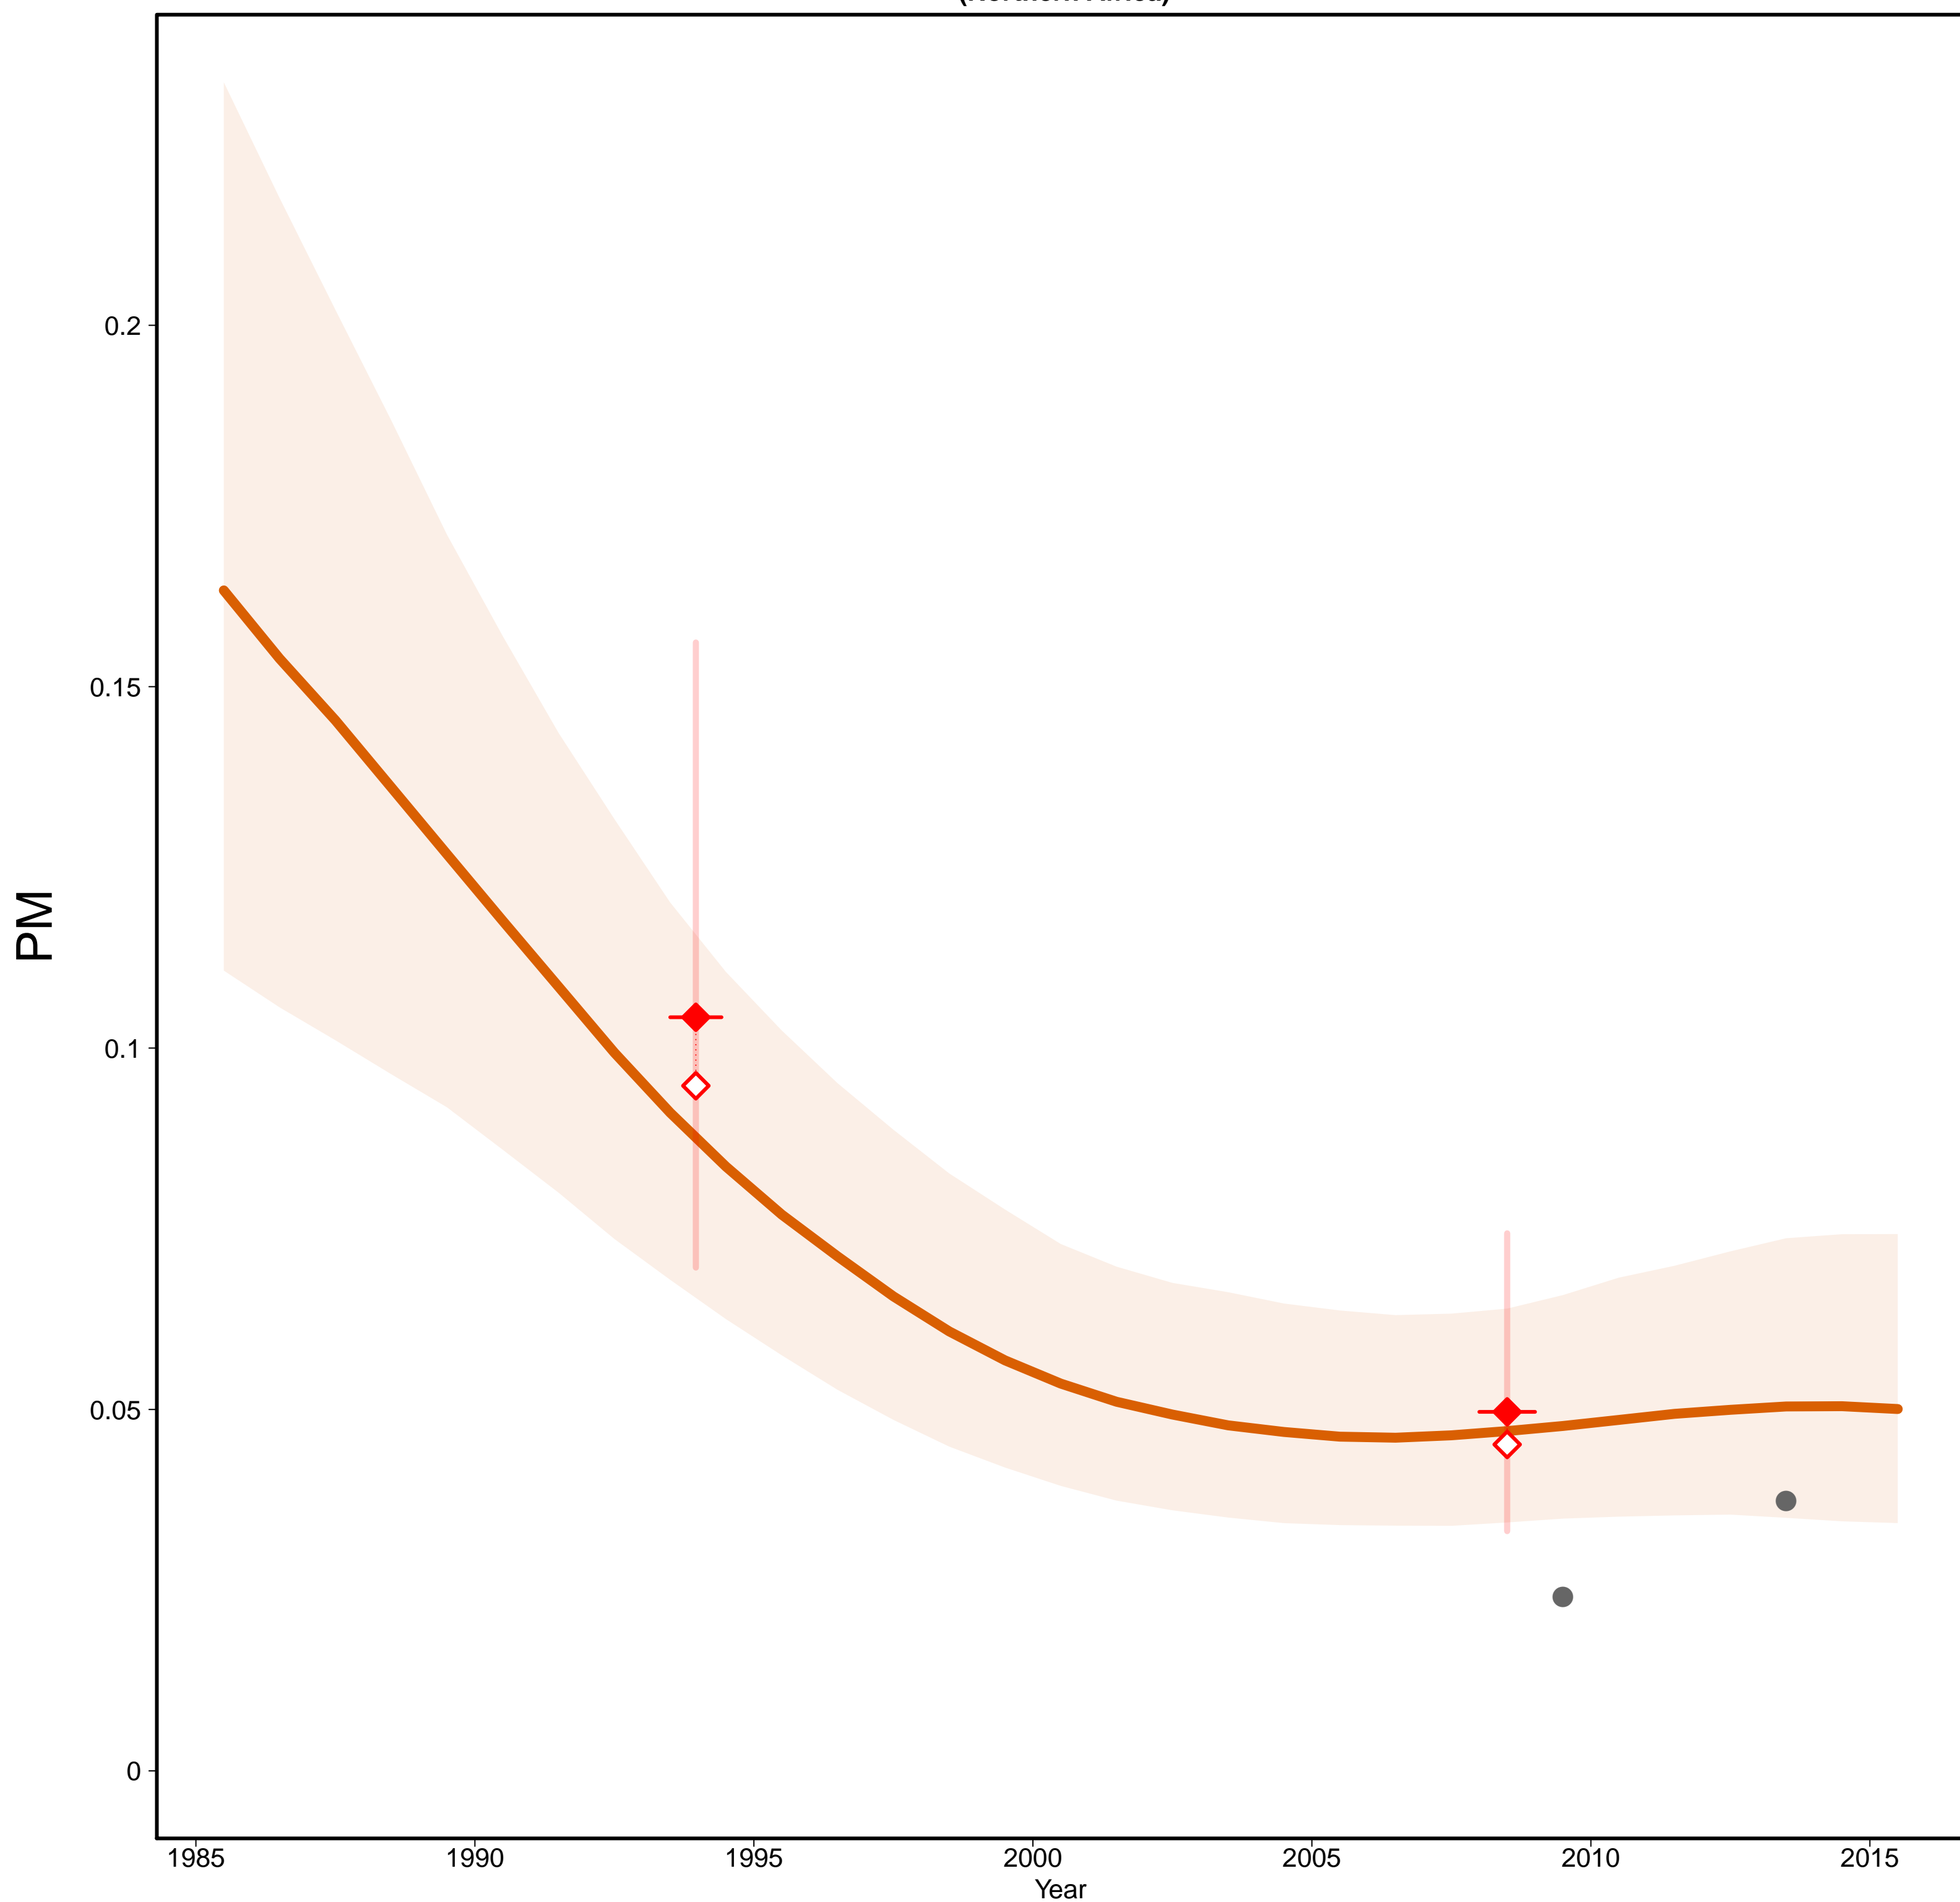

Tunisia [TUN]  
(Northern Africa)

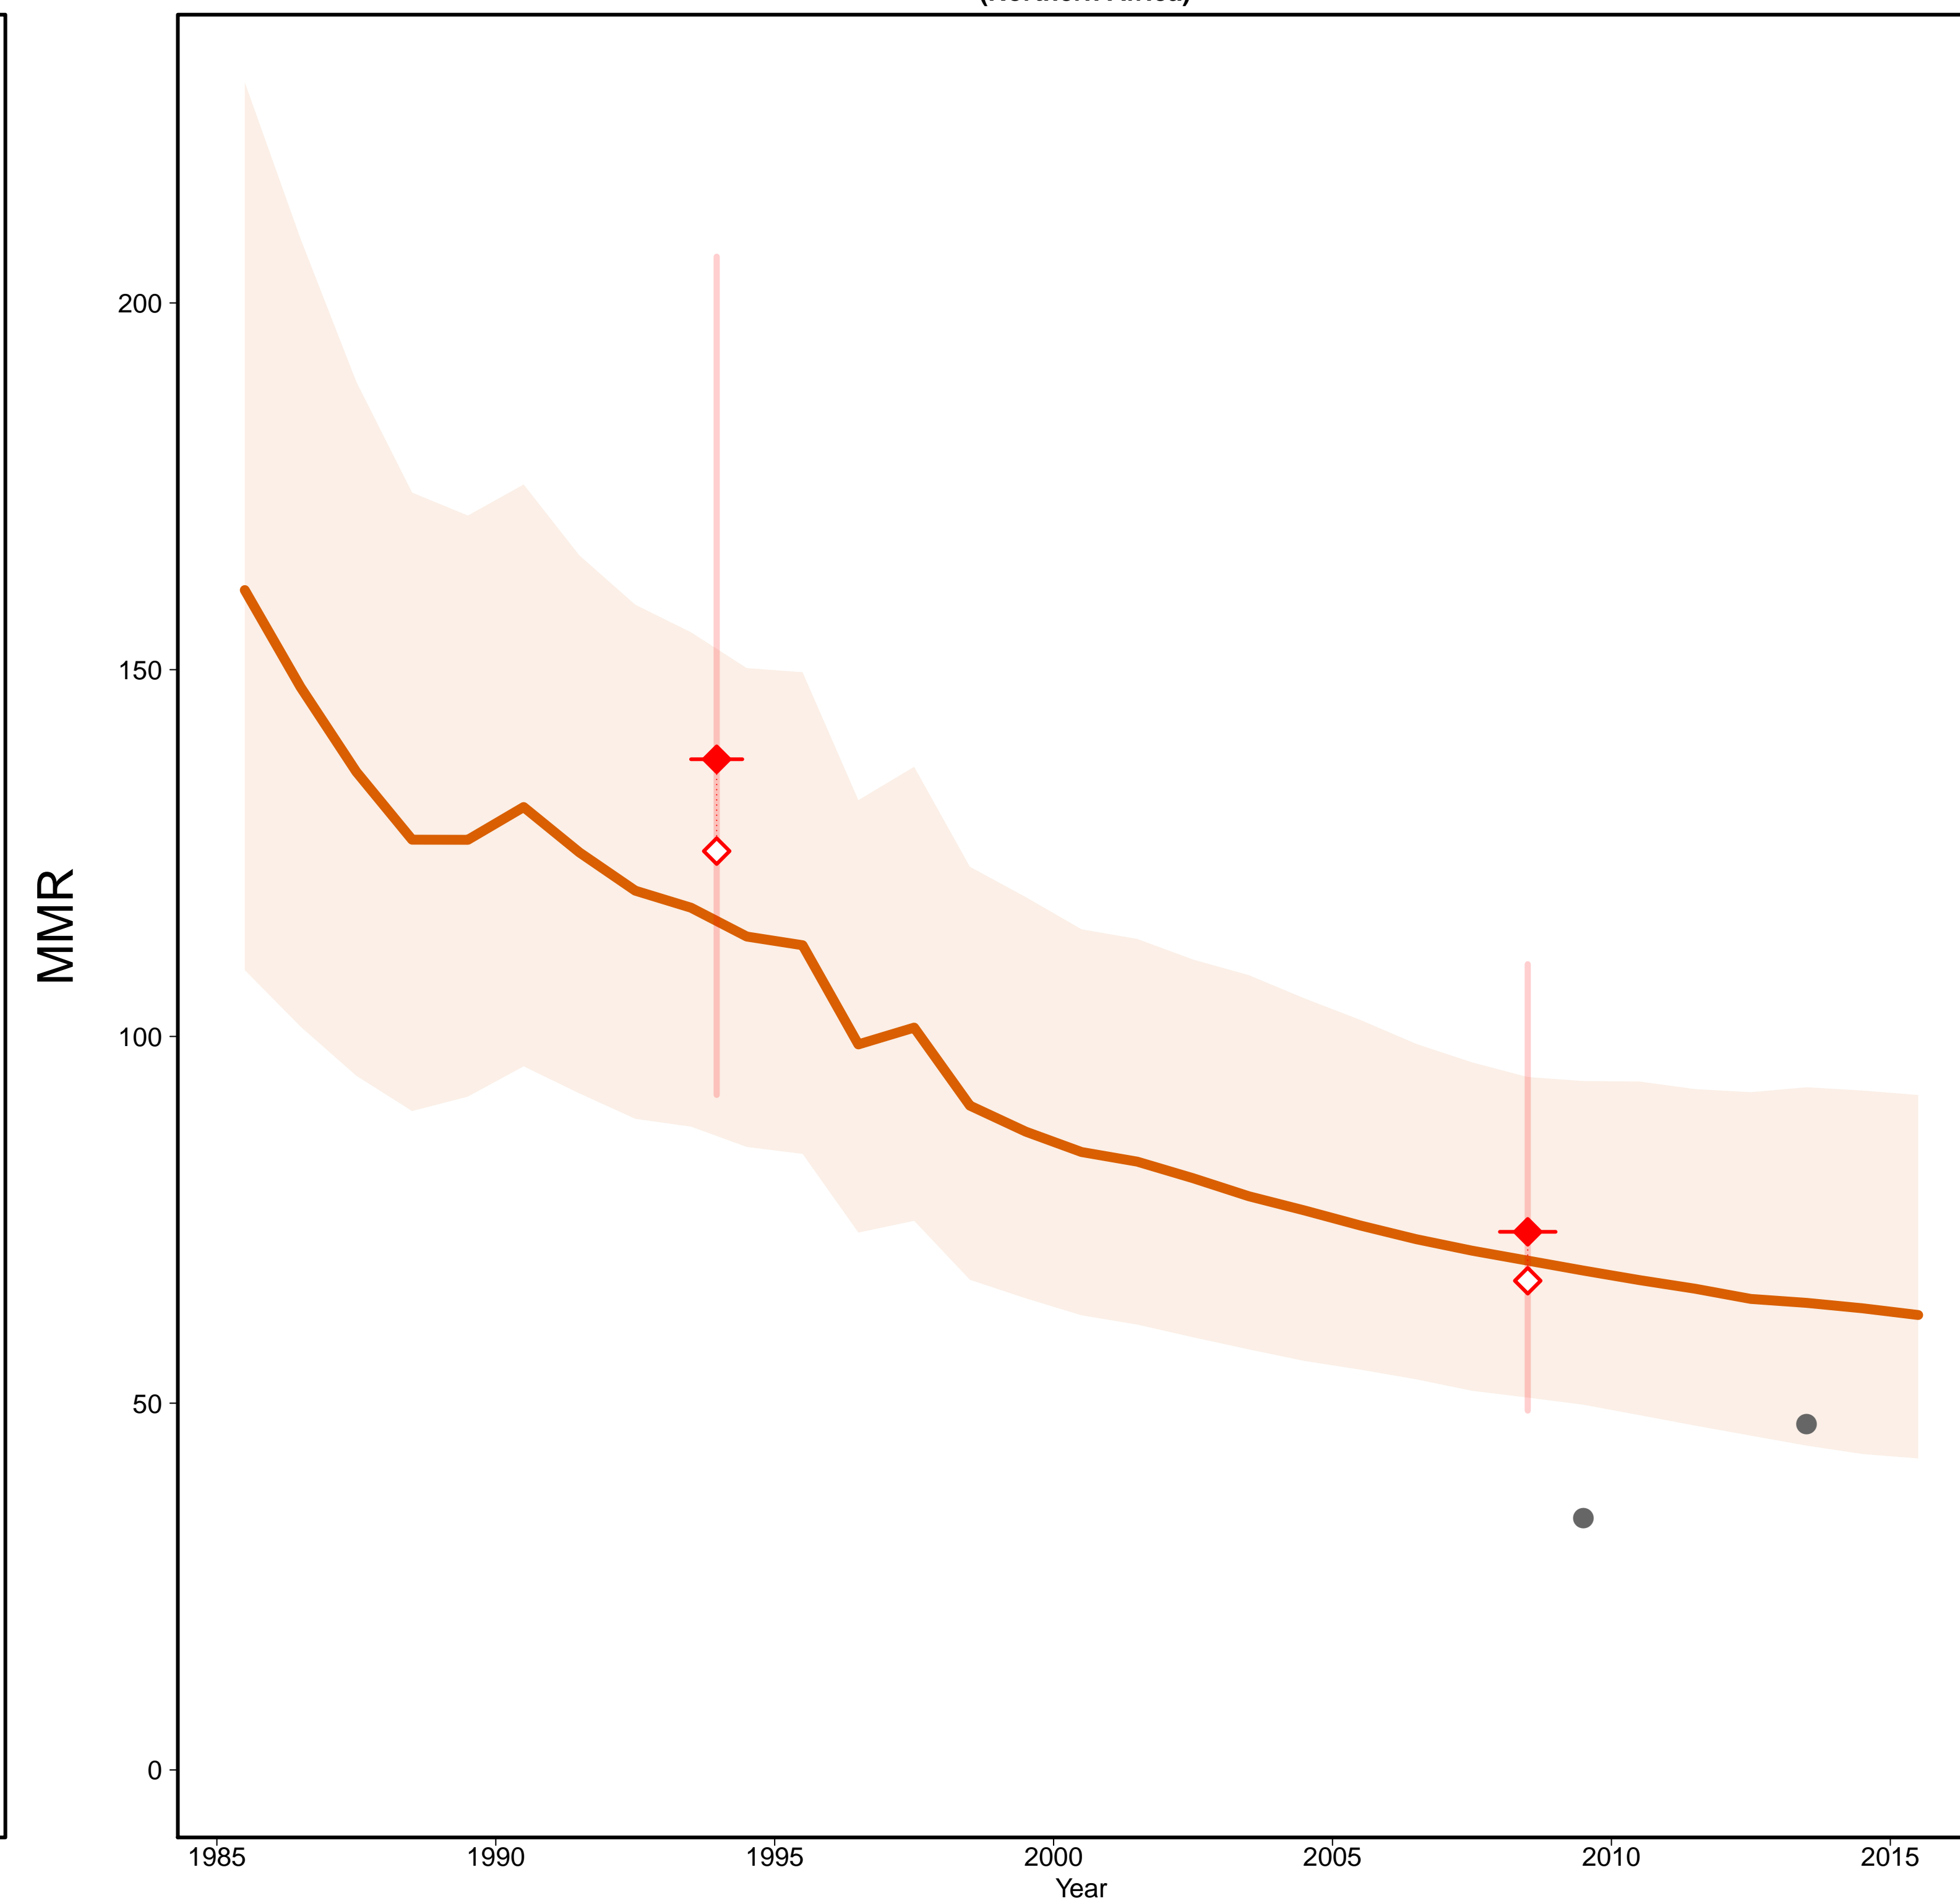

- Estimates –
- Mlate
- MMR Database 2015 –
- ◇ Observed Data
- ◆ Adjusted Data
- Data type –
- ◆ Misc. studies
- Excluded VR data  
(data quality issues)

Gross Domestic Product

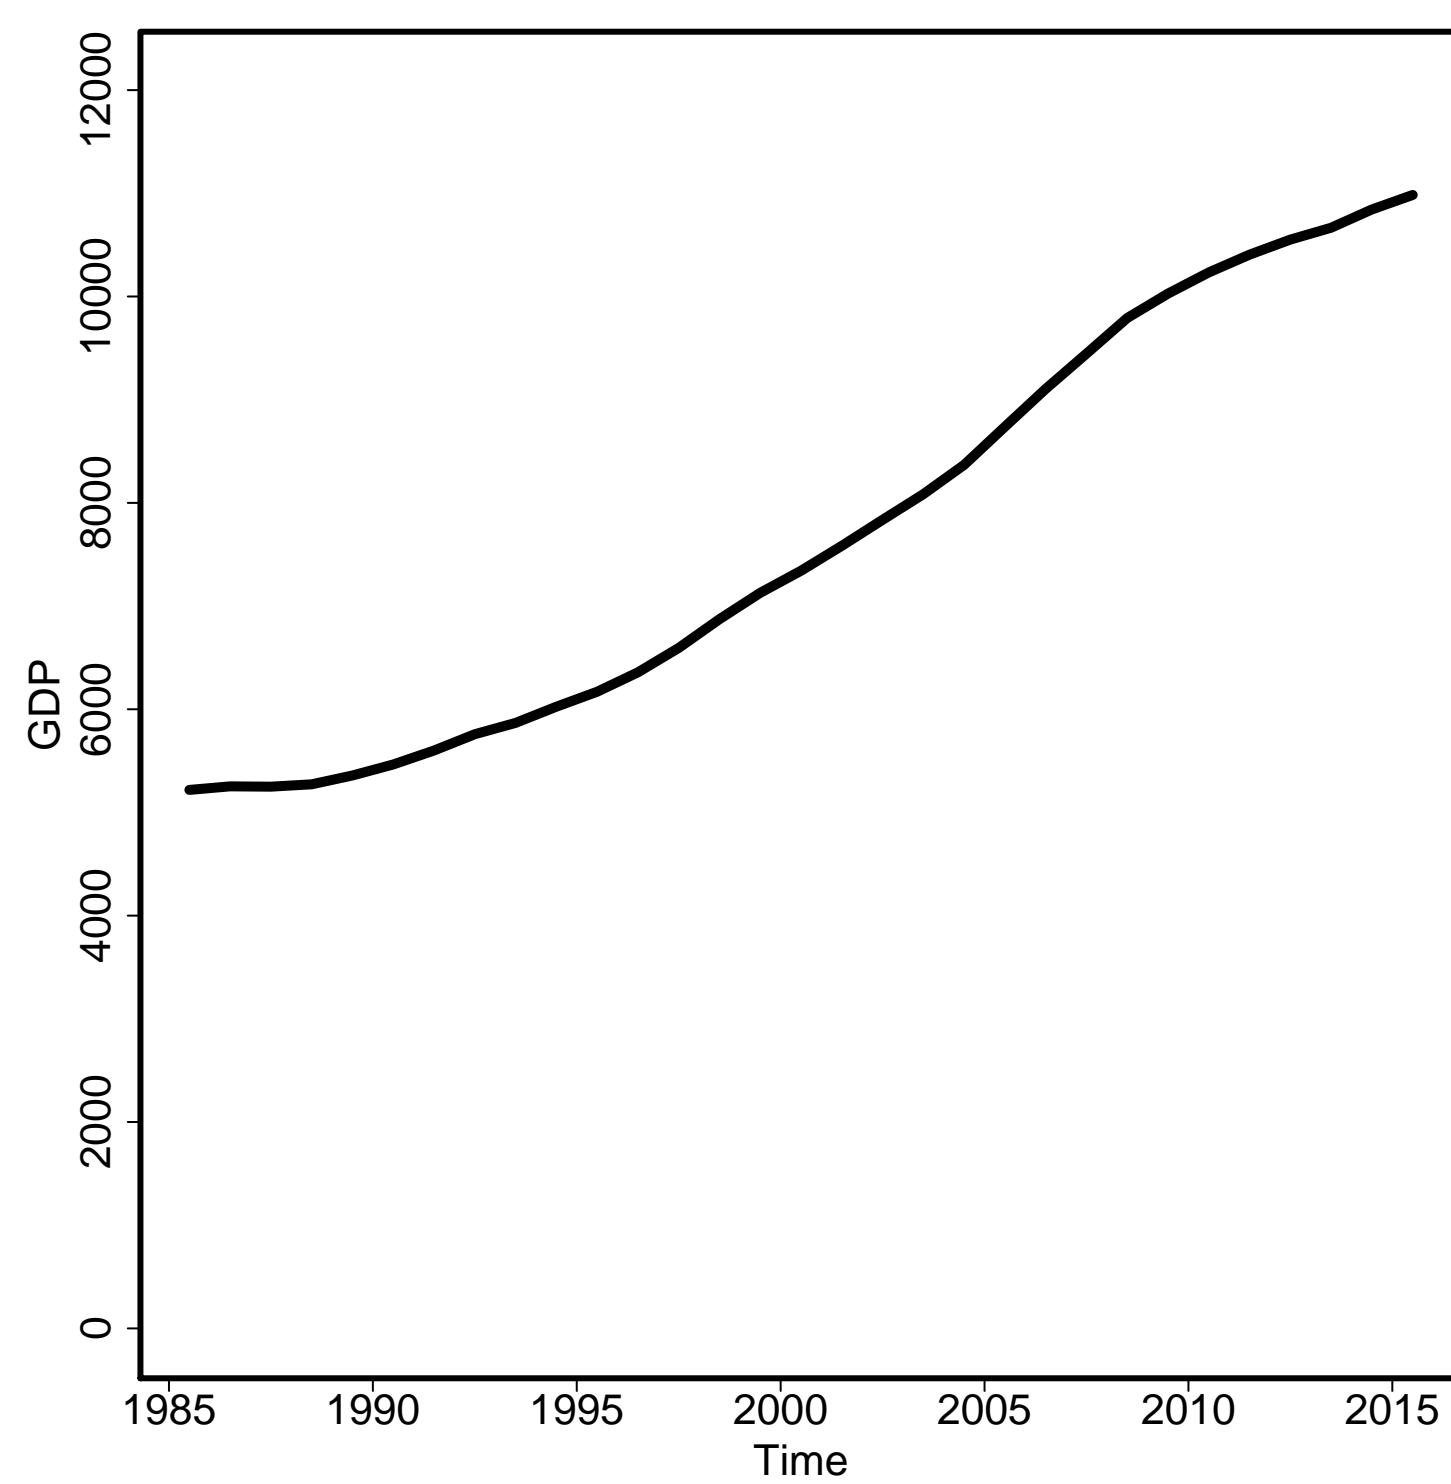

General Fertility Rate

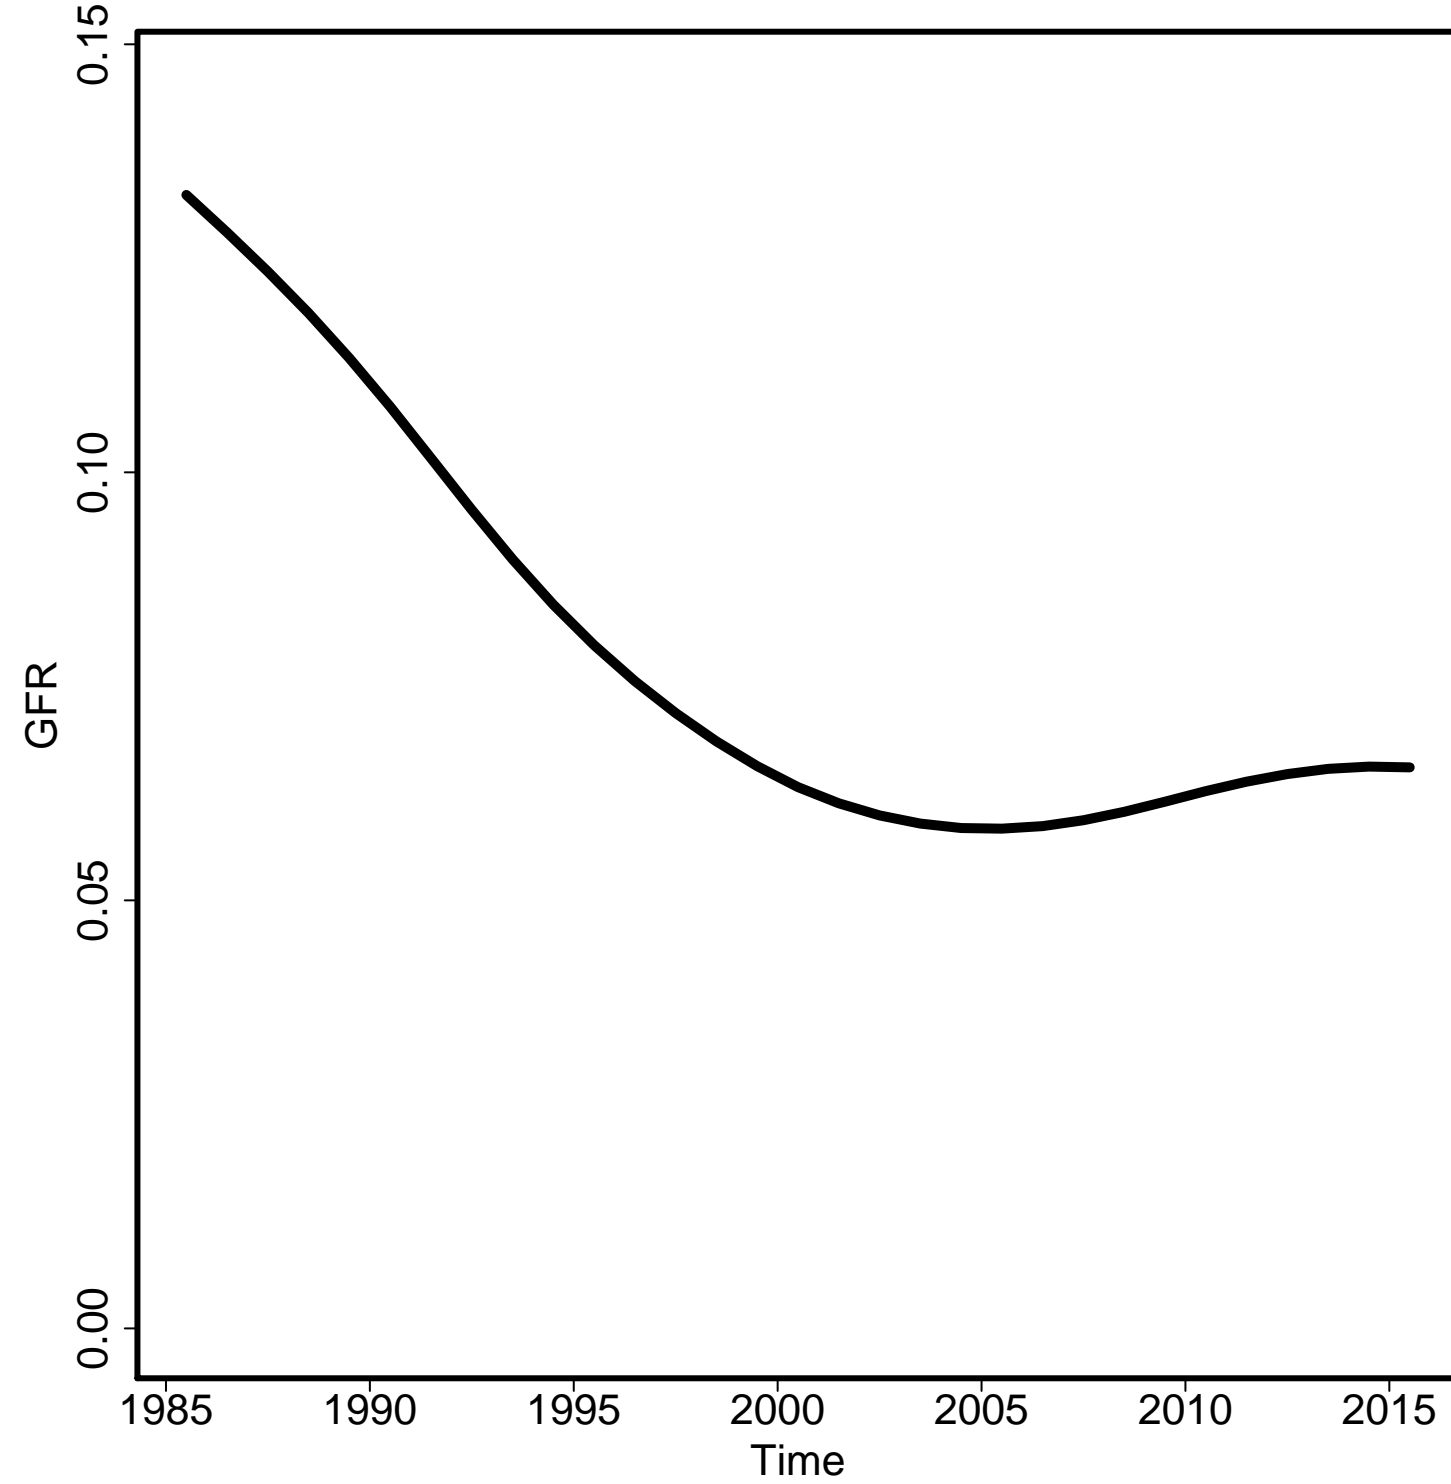

Skilled Attendance to Birth

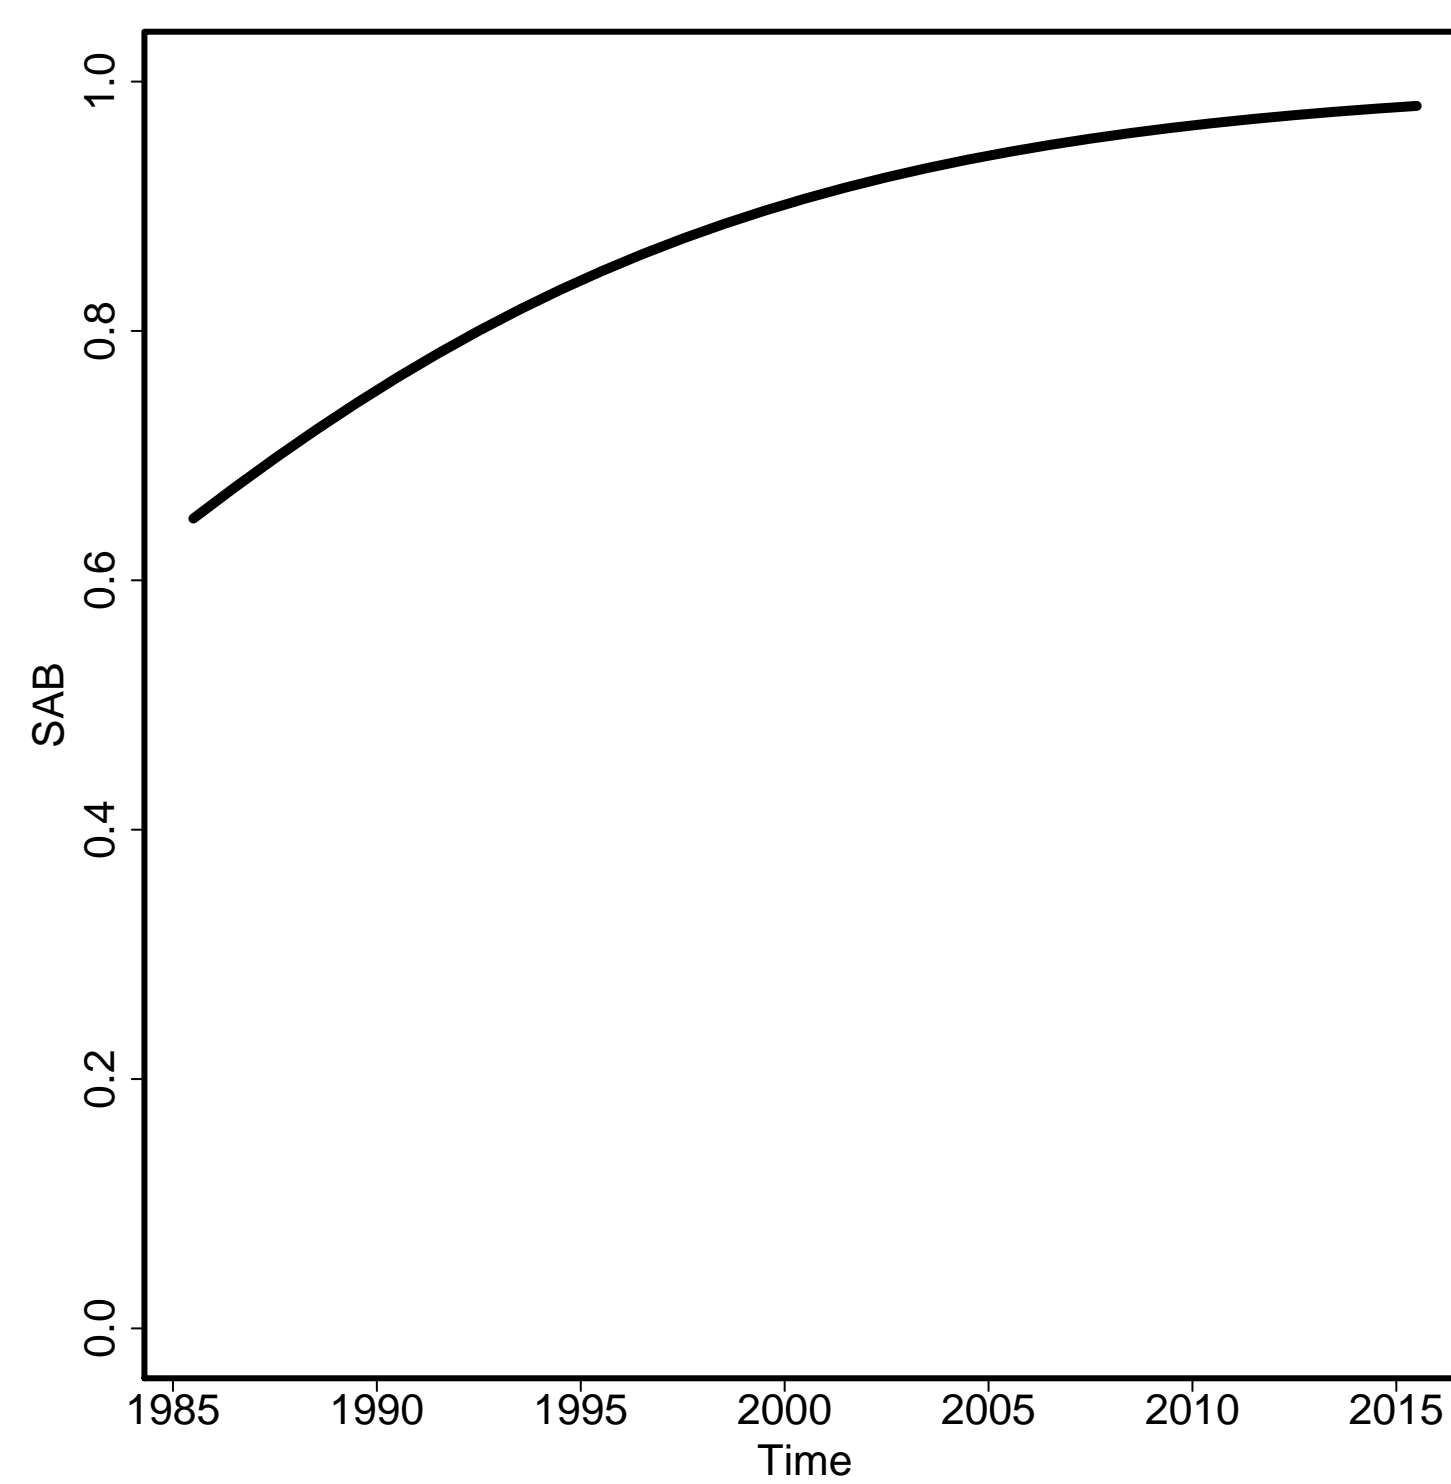

Envelope/Births

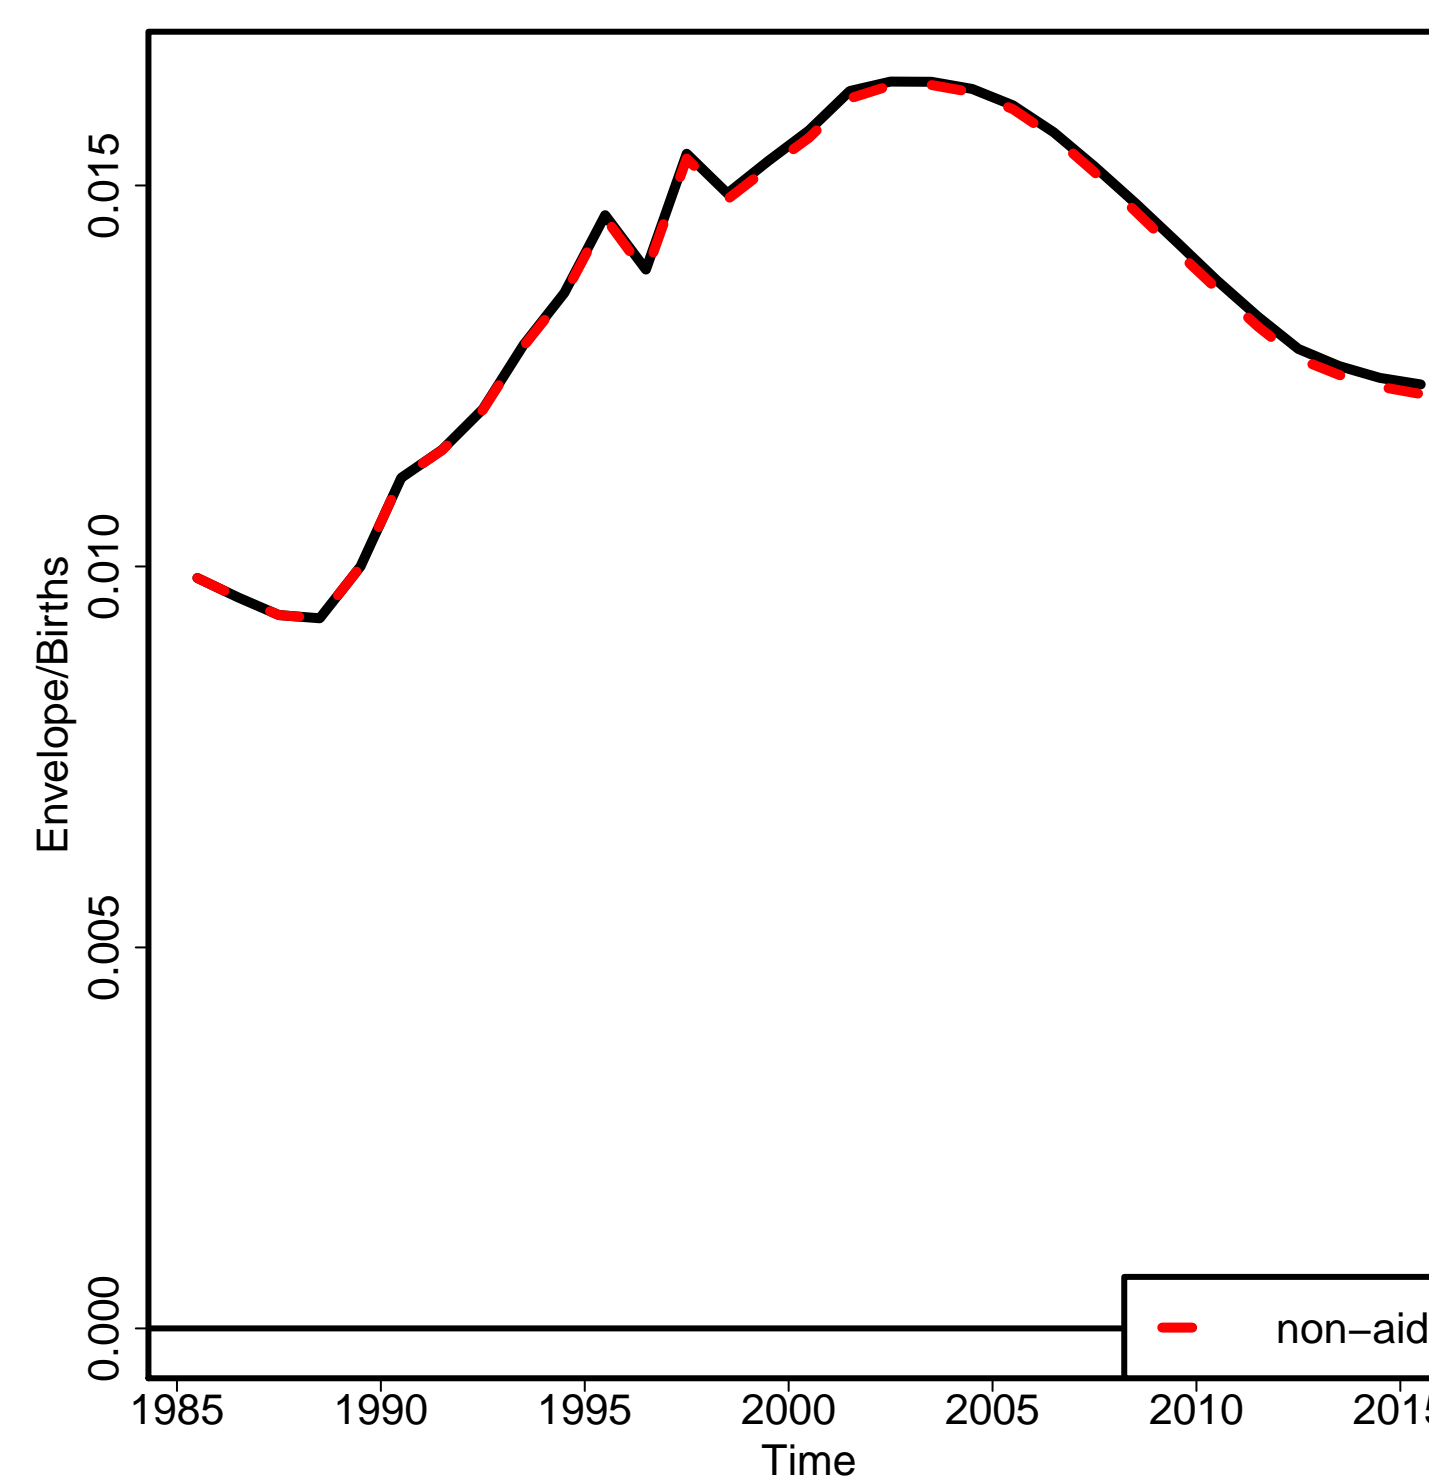

Non-aids MMR

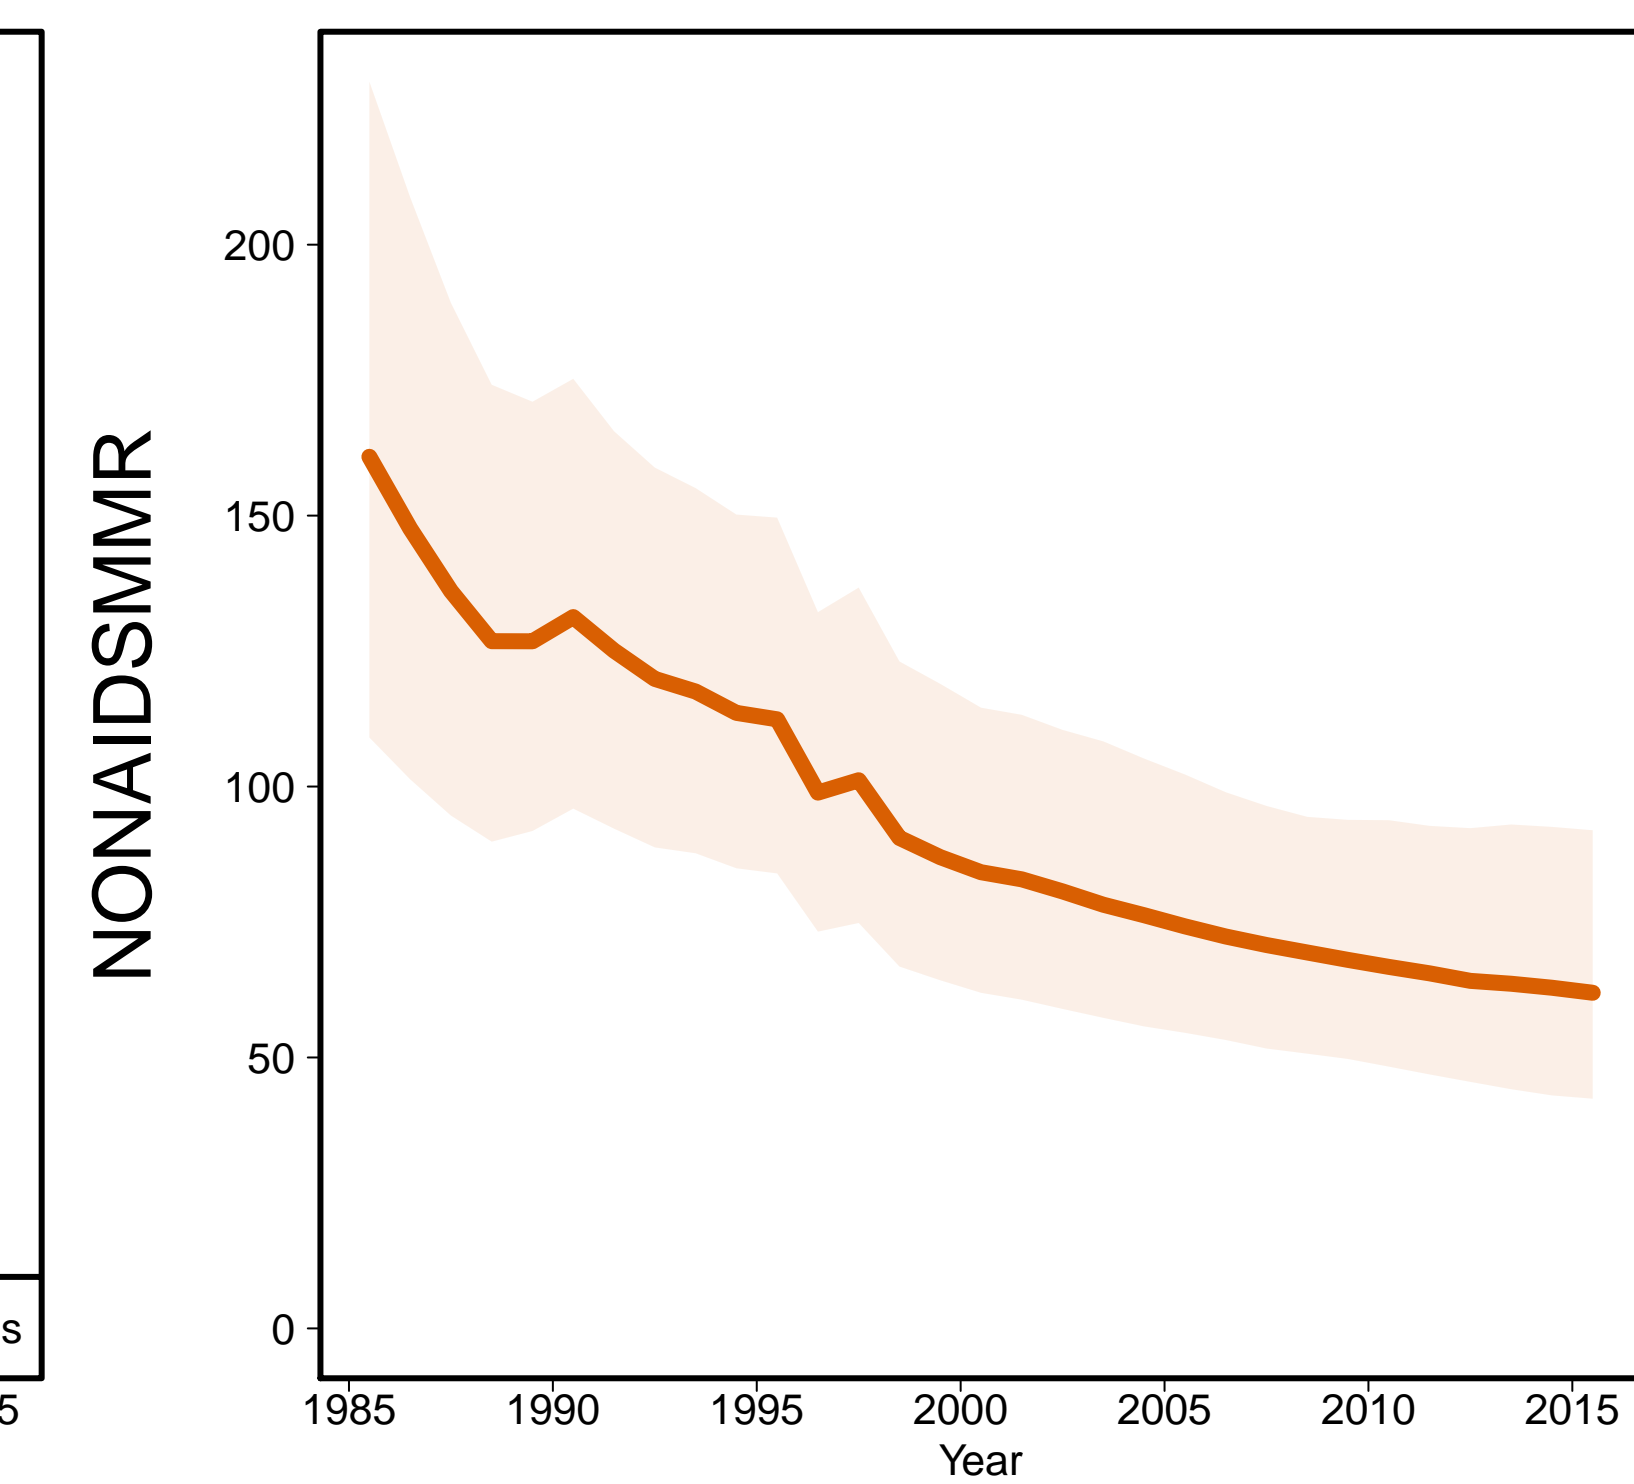

Aids MMR

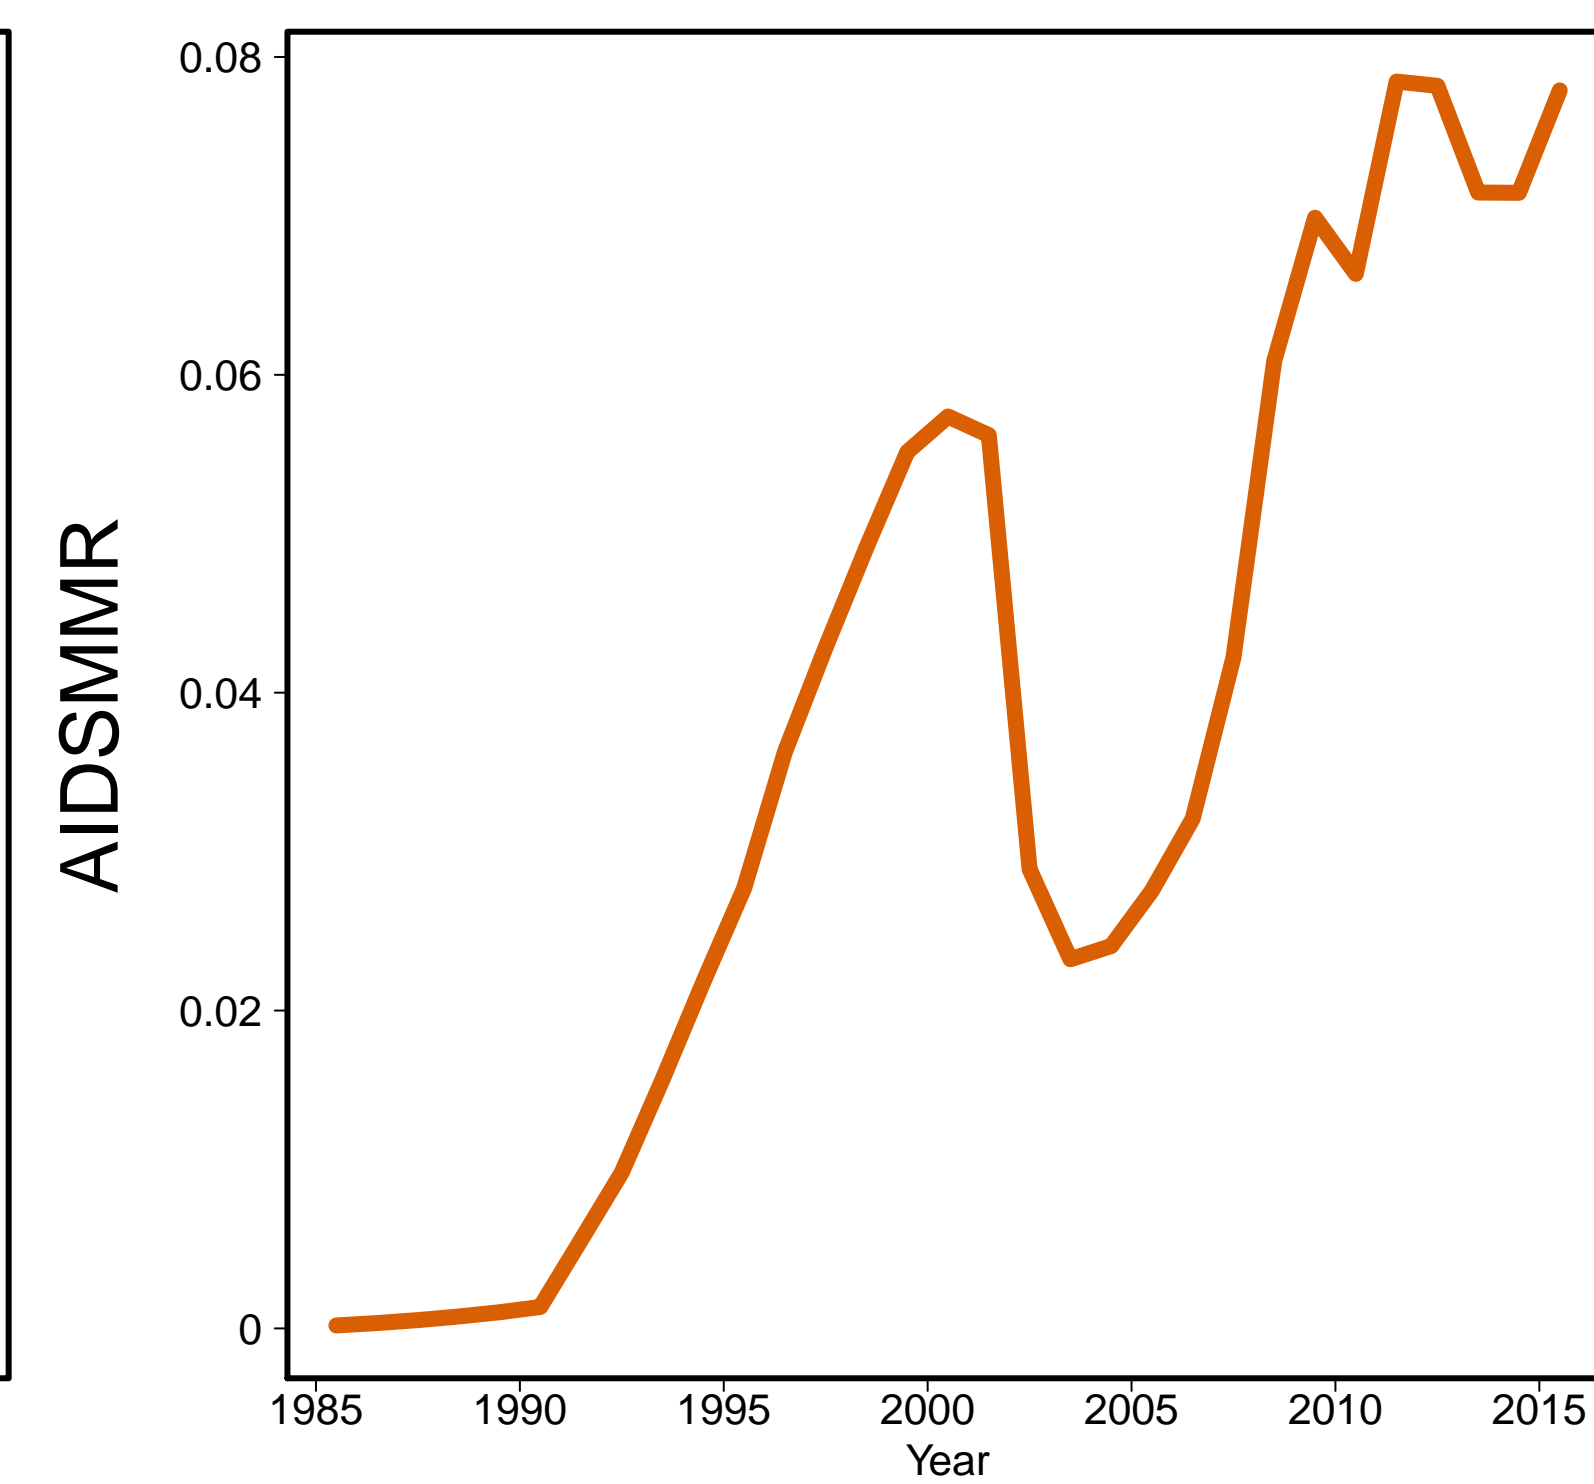



Turkey [TUR]  
(Western Asia)

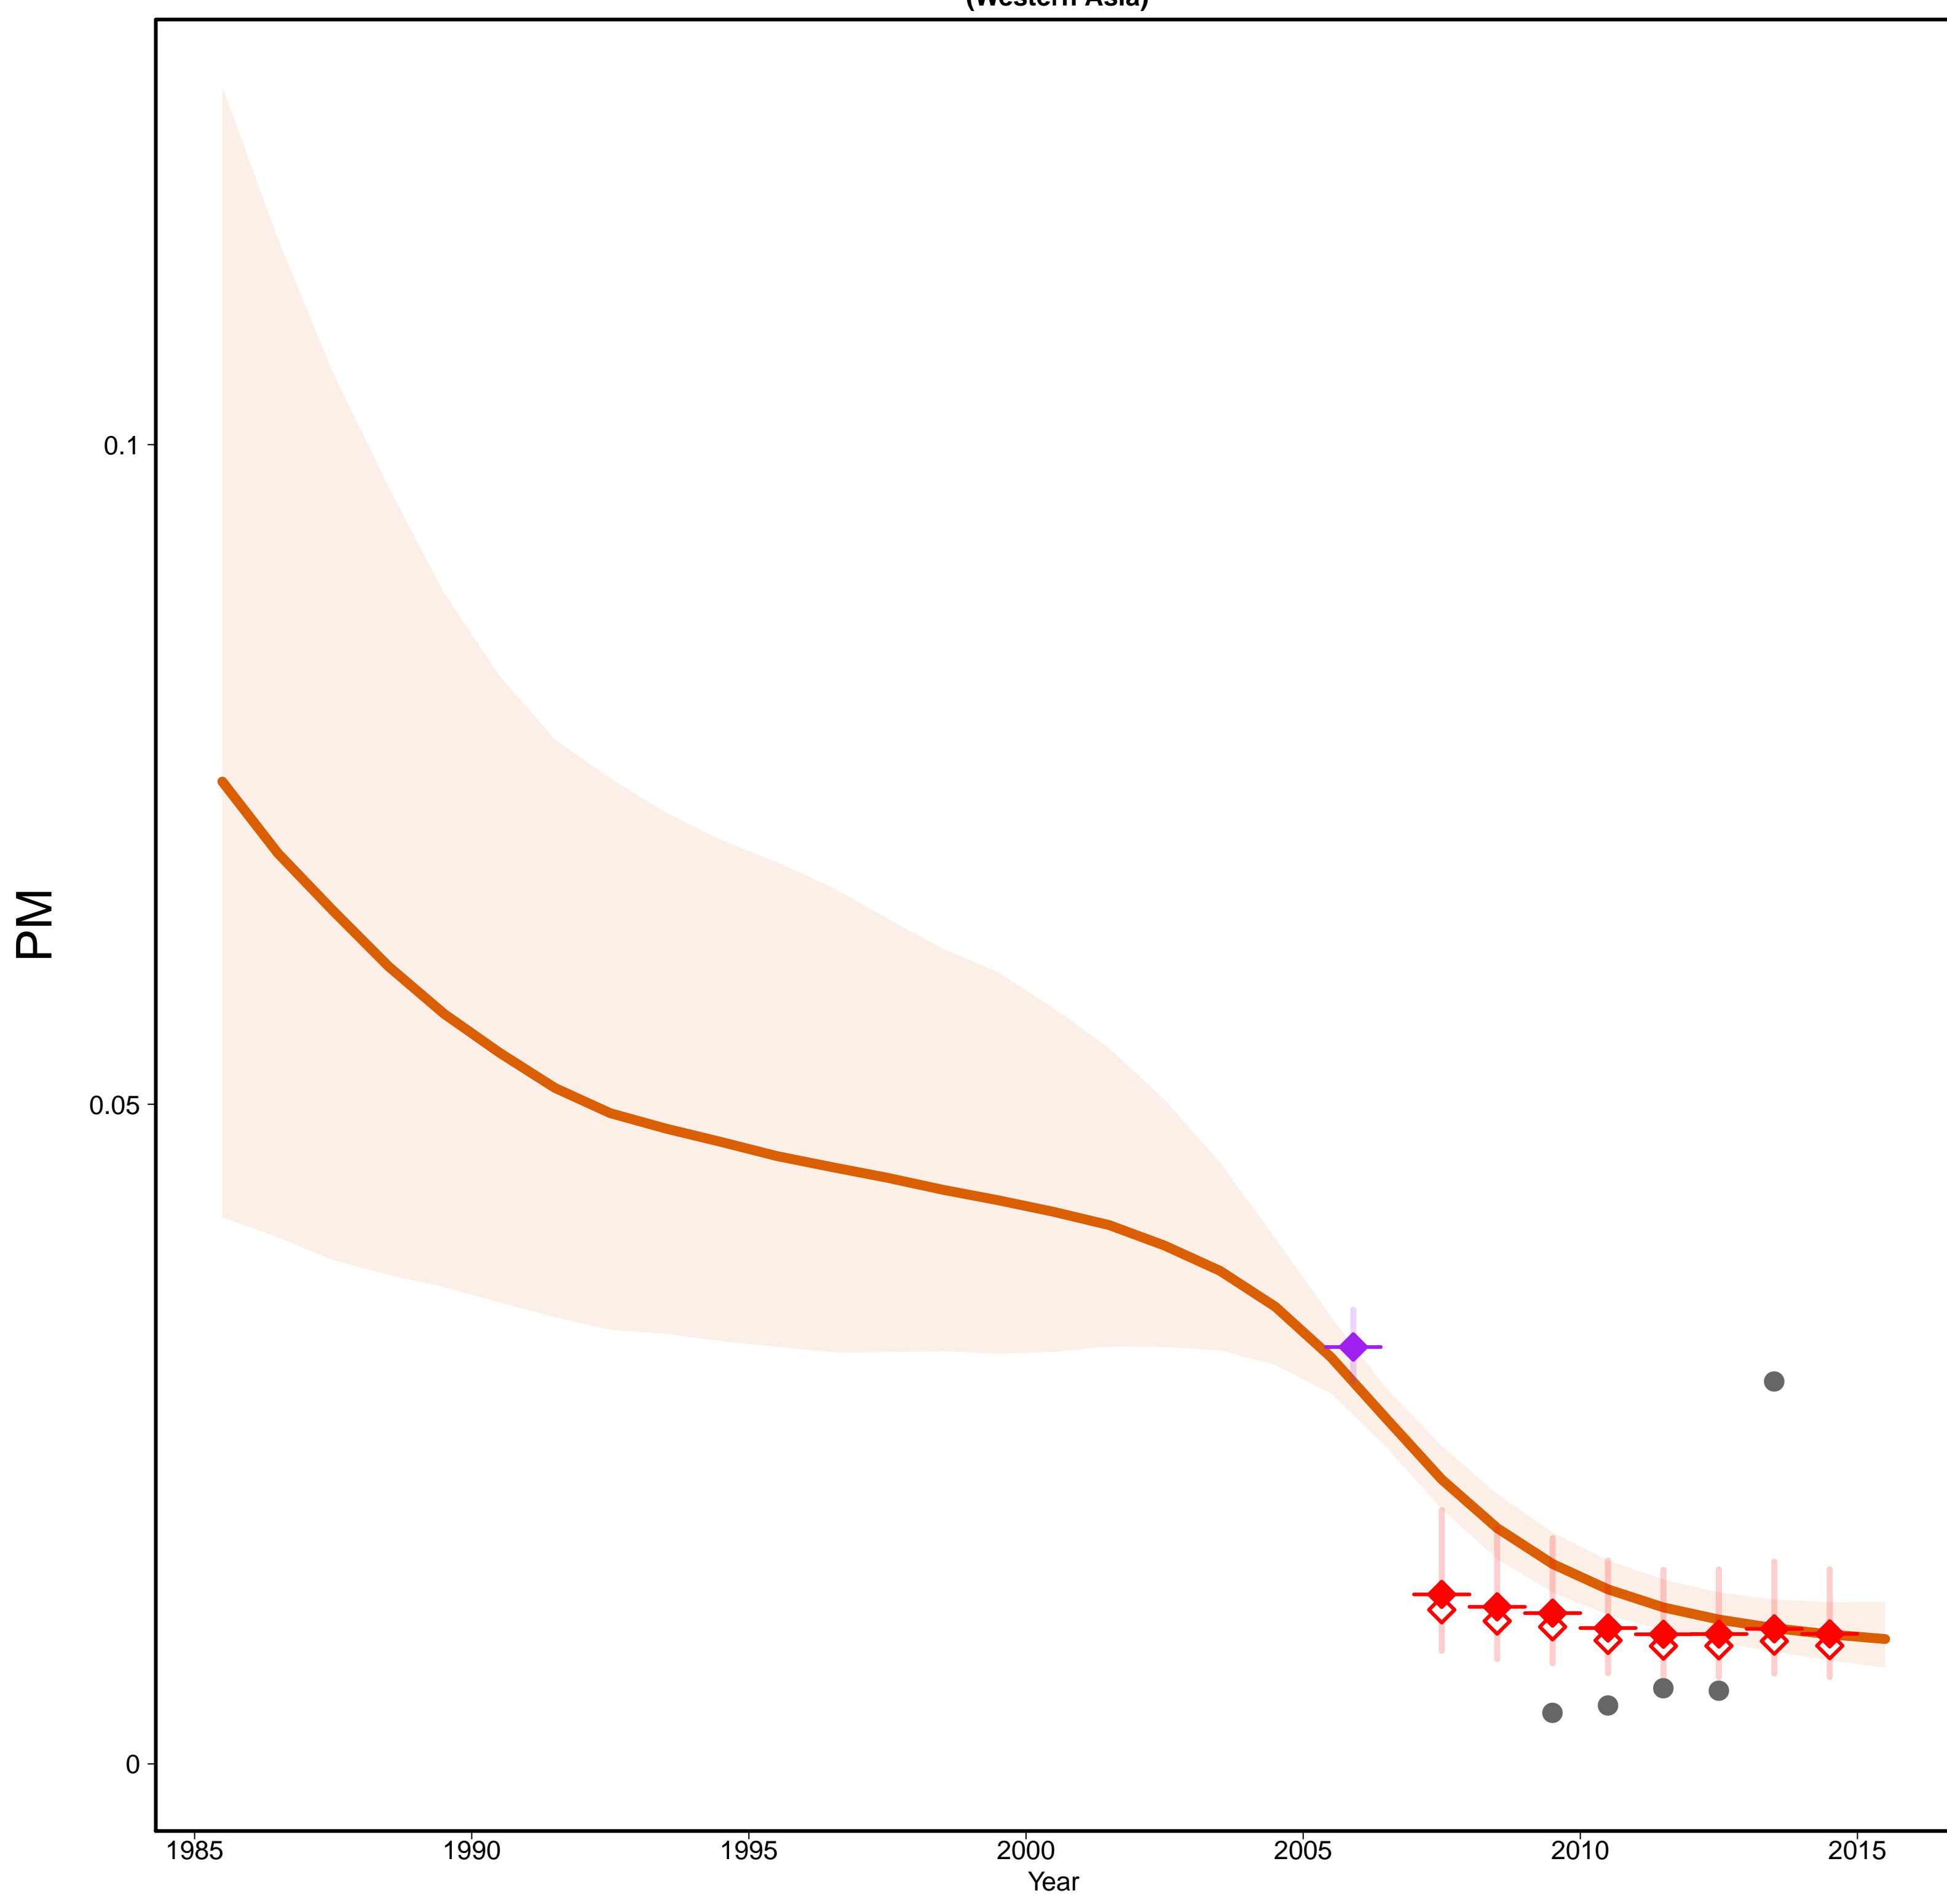

Turkey [TUR]  
(Western Asia)

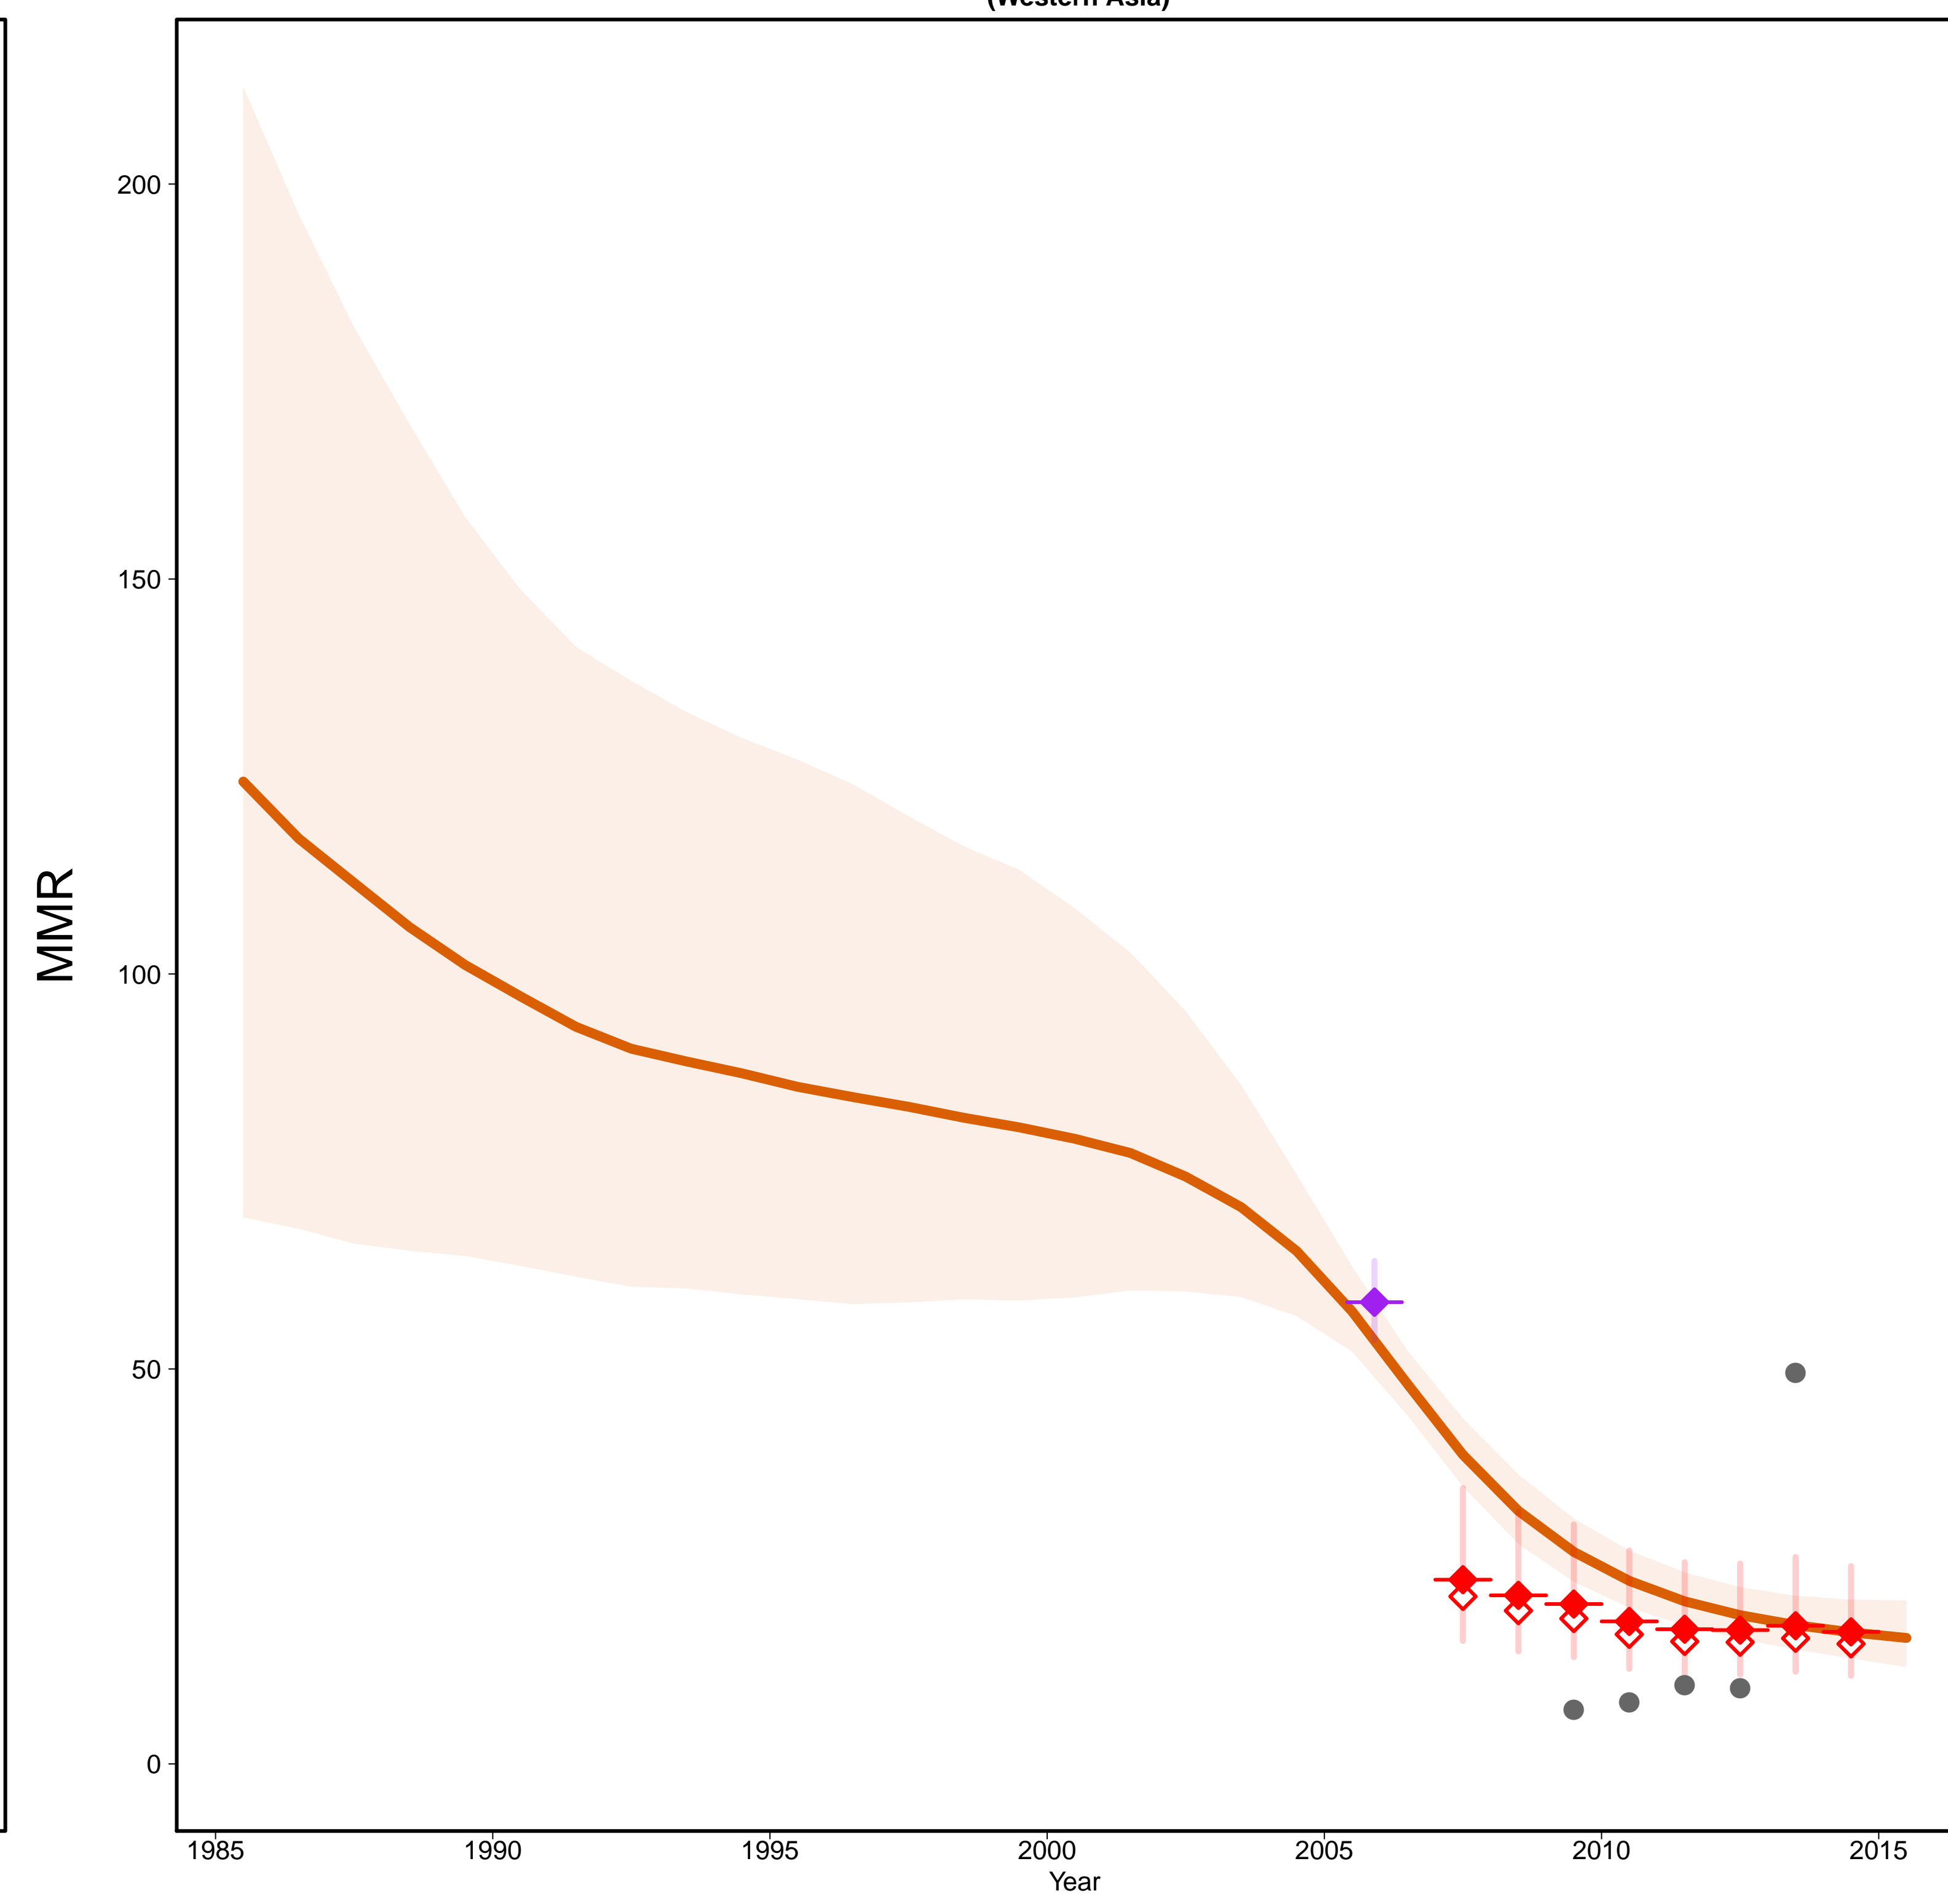

- Estimates –
- Mlate
- MMR Database 2015 –
- ◇ Observed Data
- ◆ Adjusted Data
- Data type –
- ◆ Spec. studies
- ◆ Misc. studies
- Excluded VR data  
(data quality issues)

Gross Domestic Product

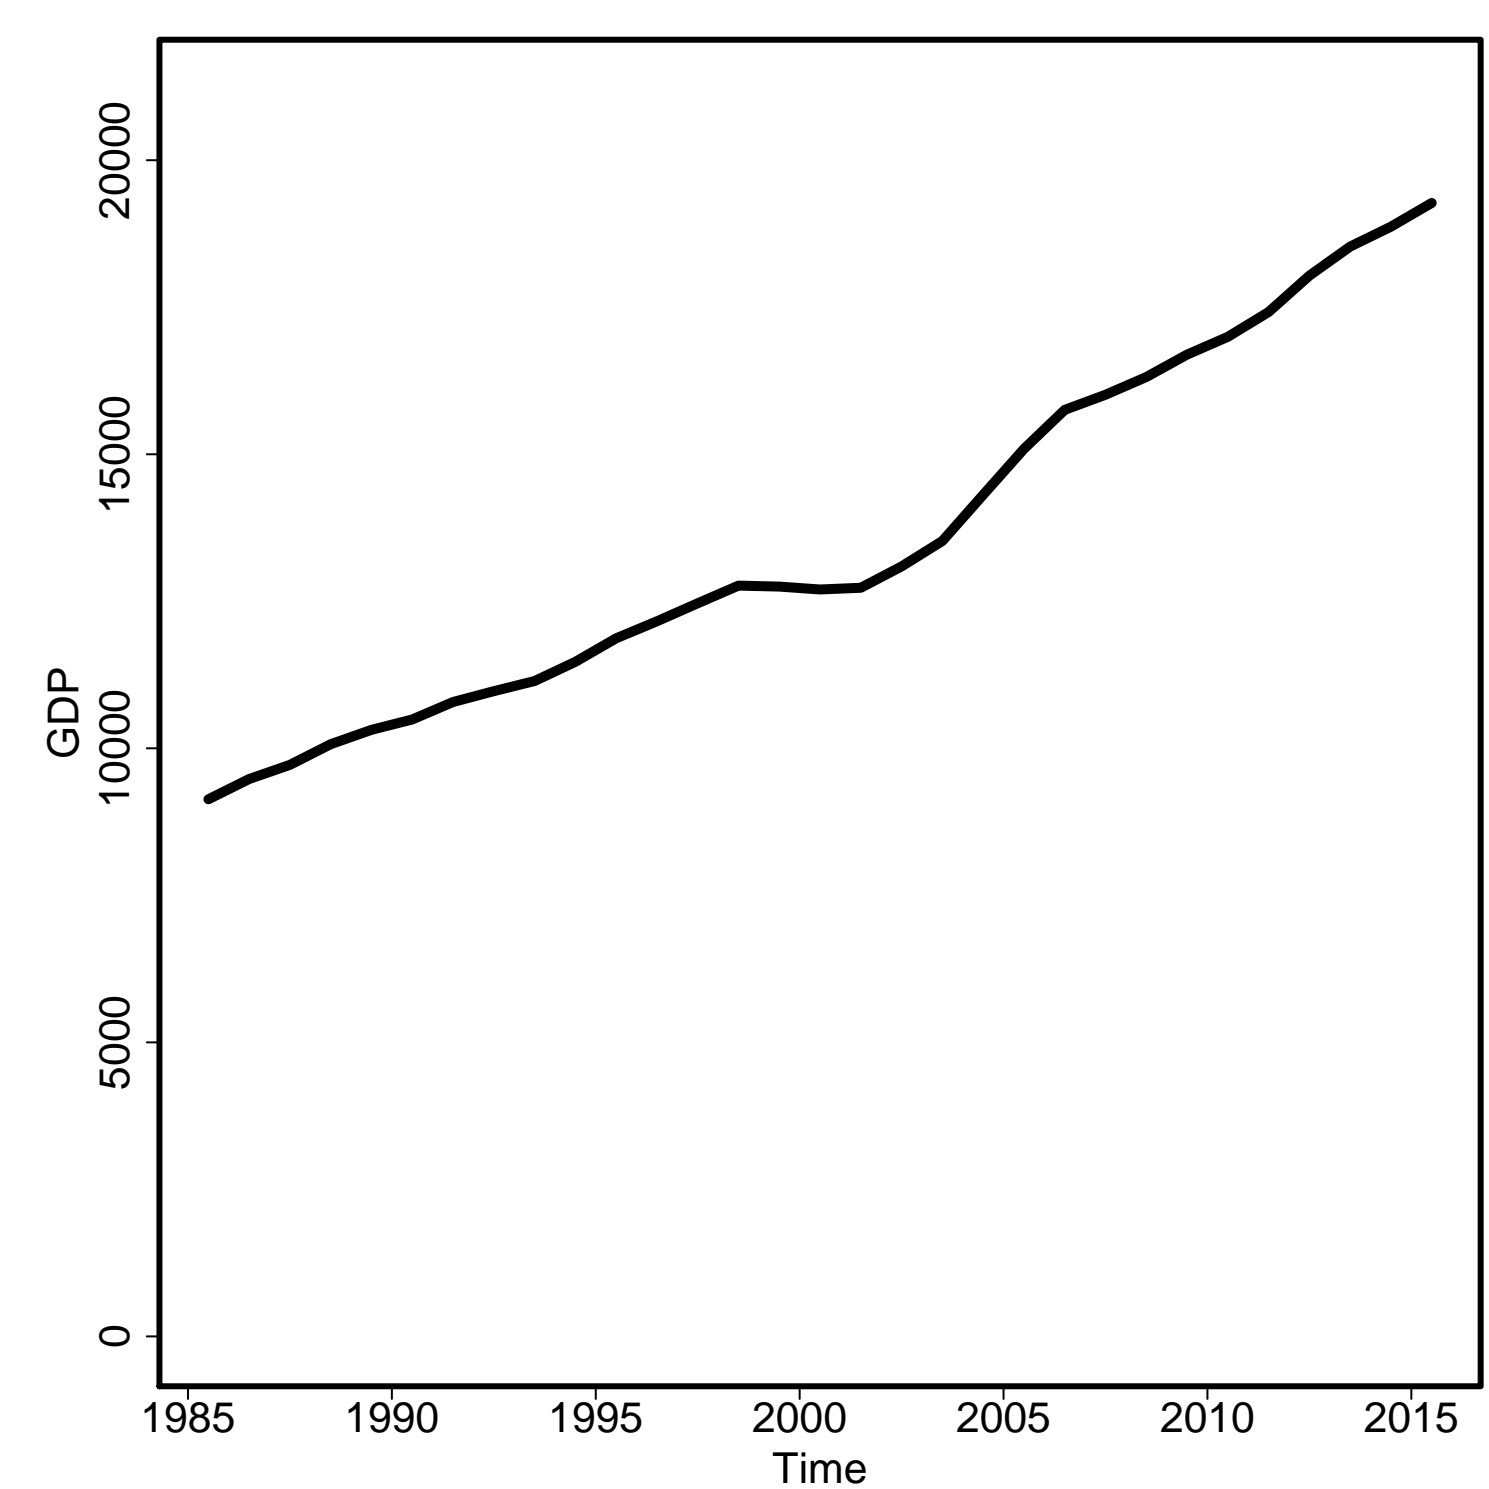

General Fertility Rate

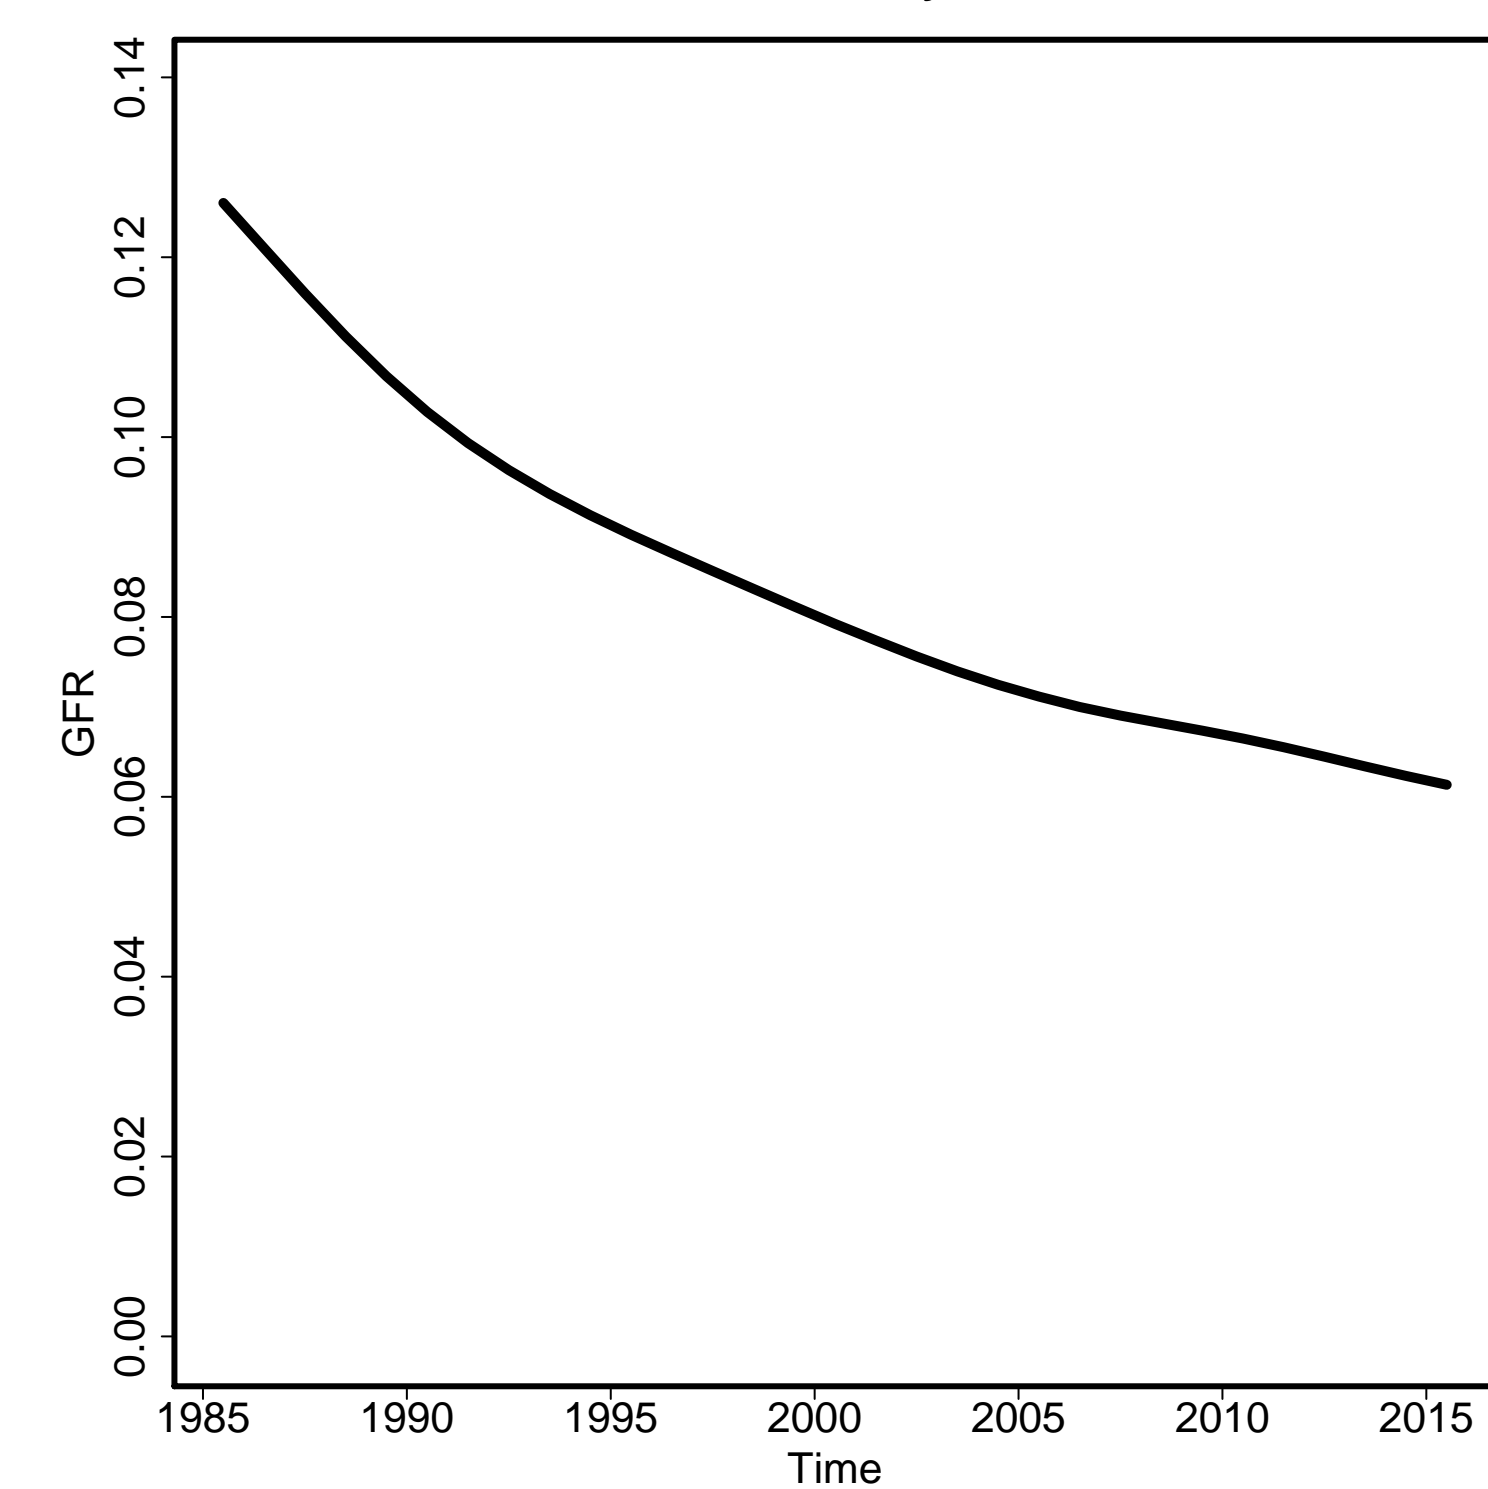

Skilled Attendance to Birth

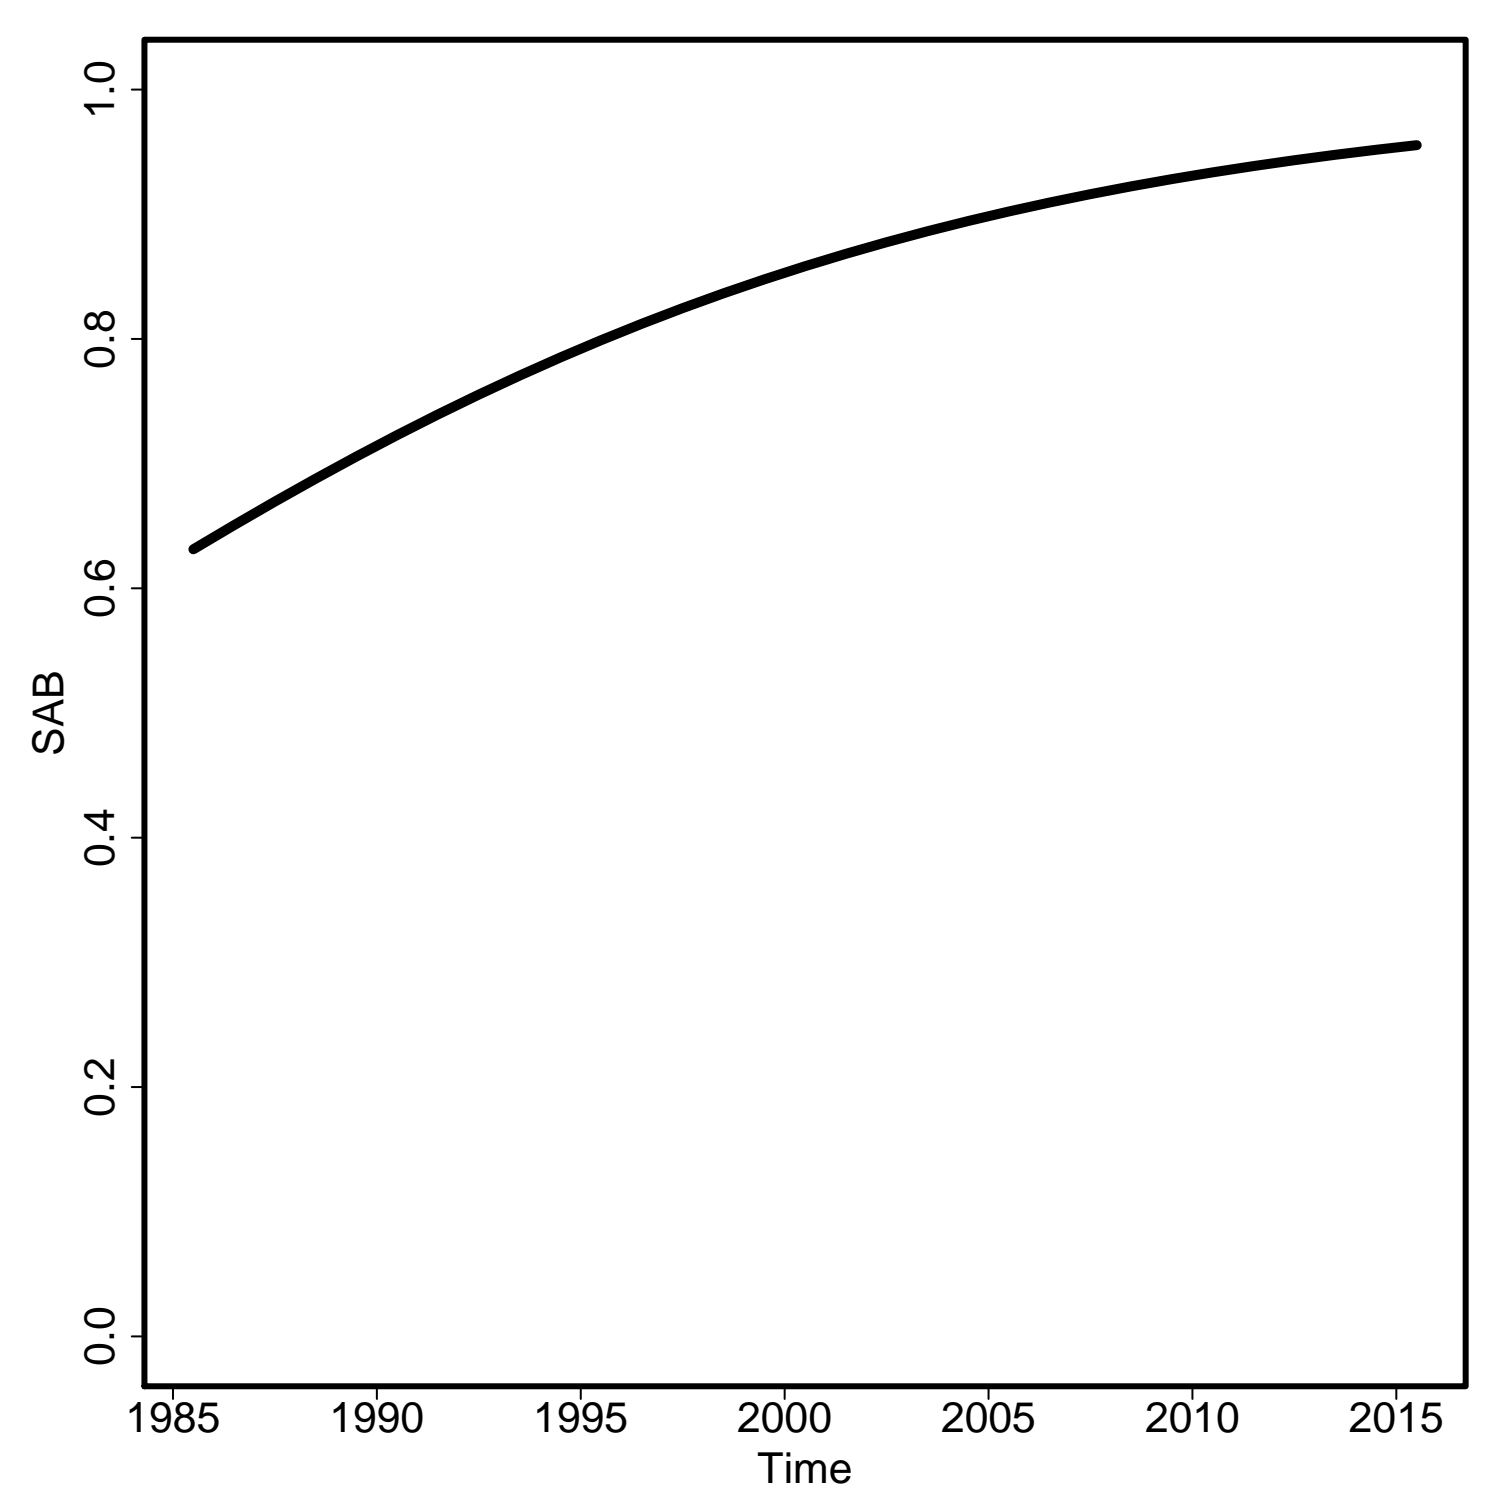

Envelope/Births

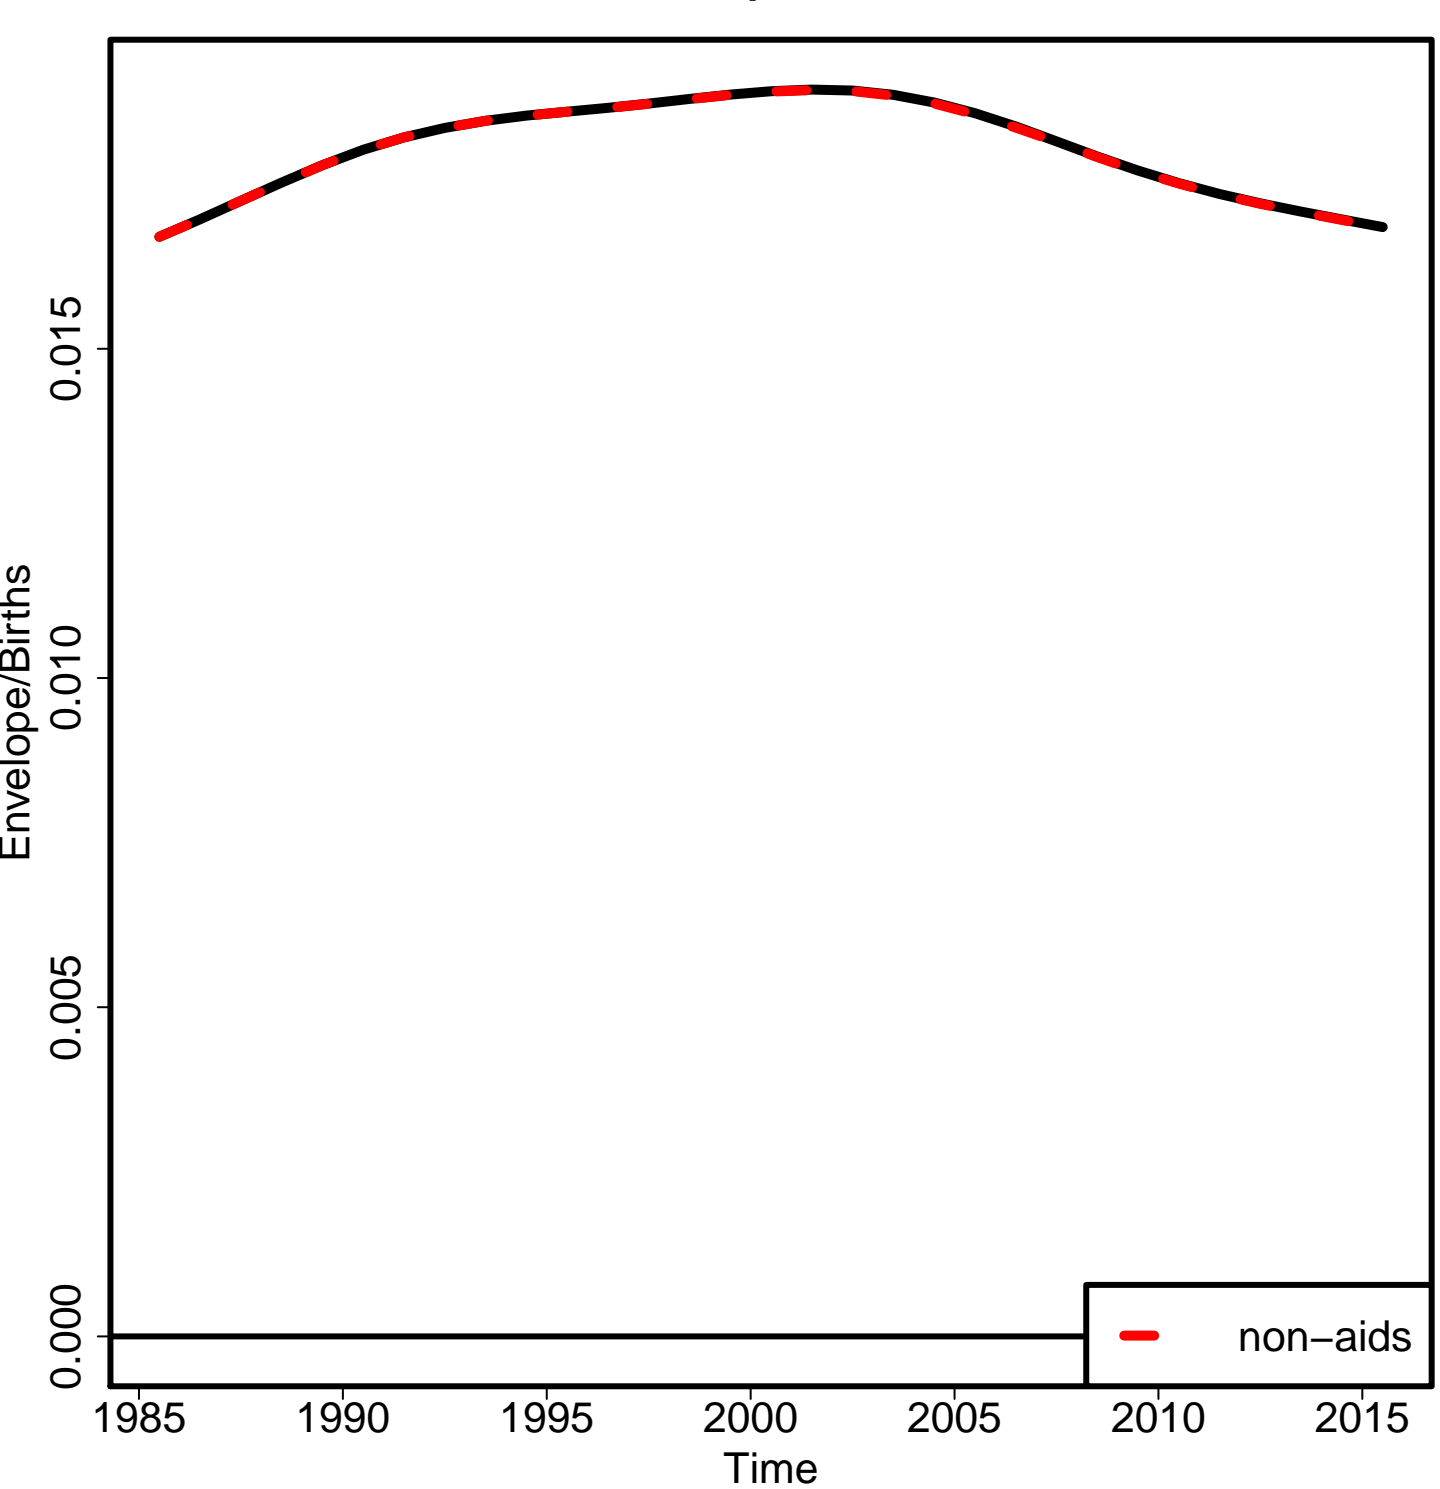

Non-aids MMR

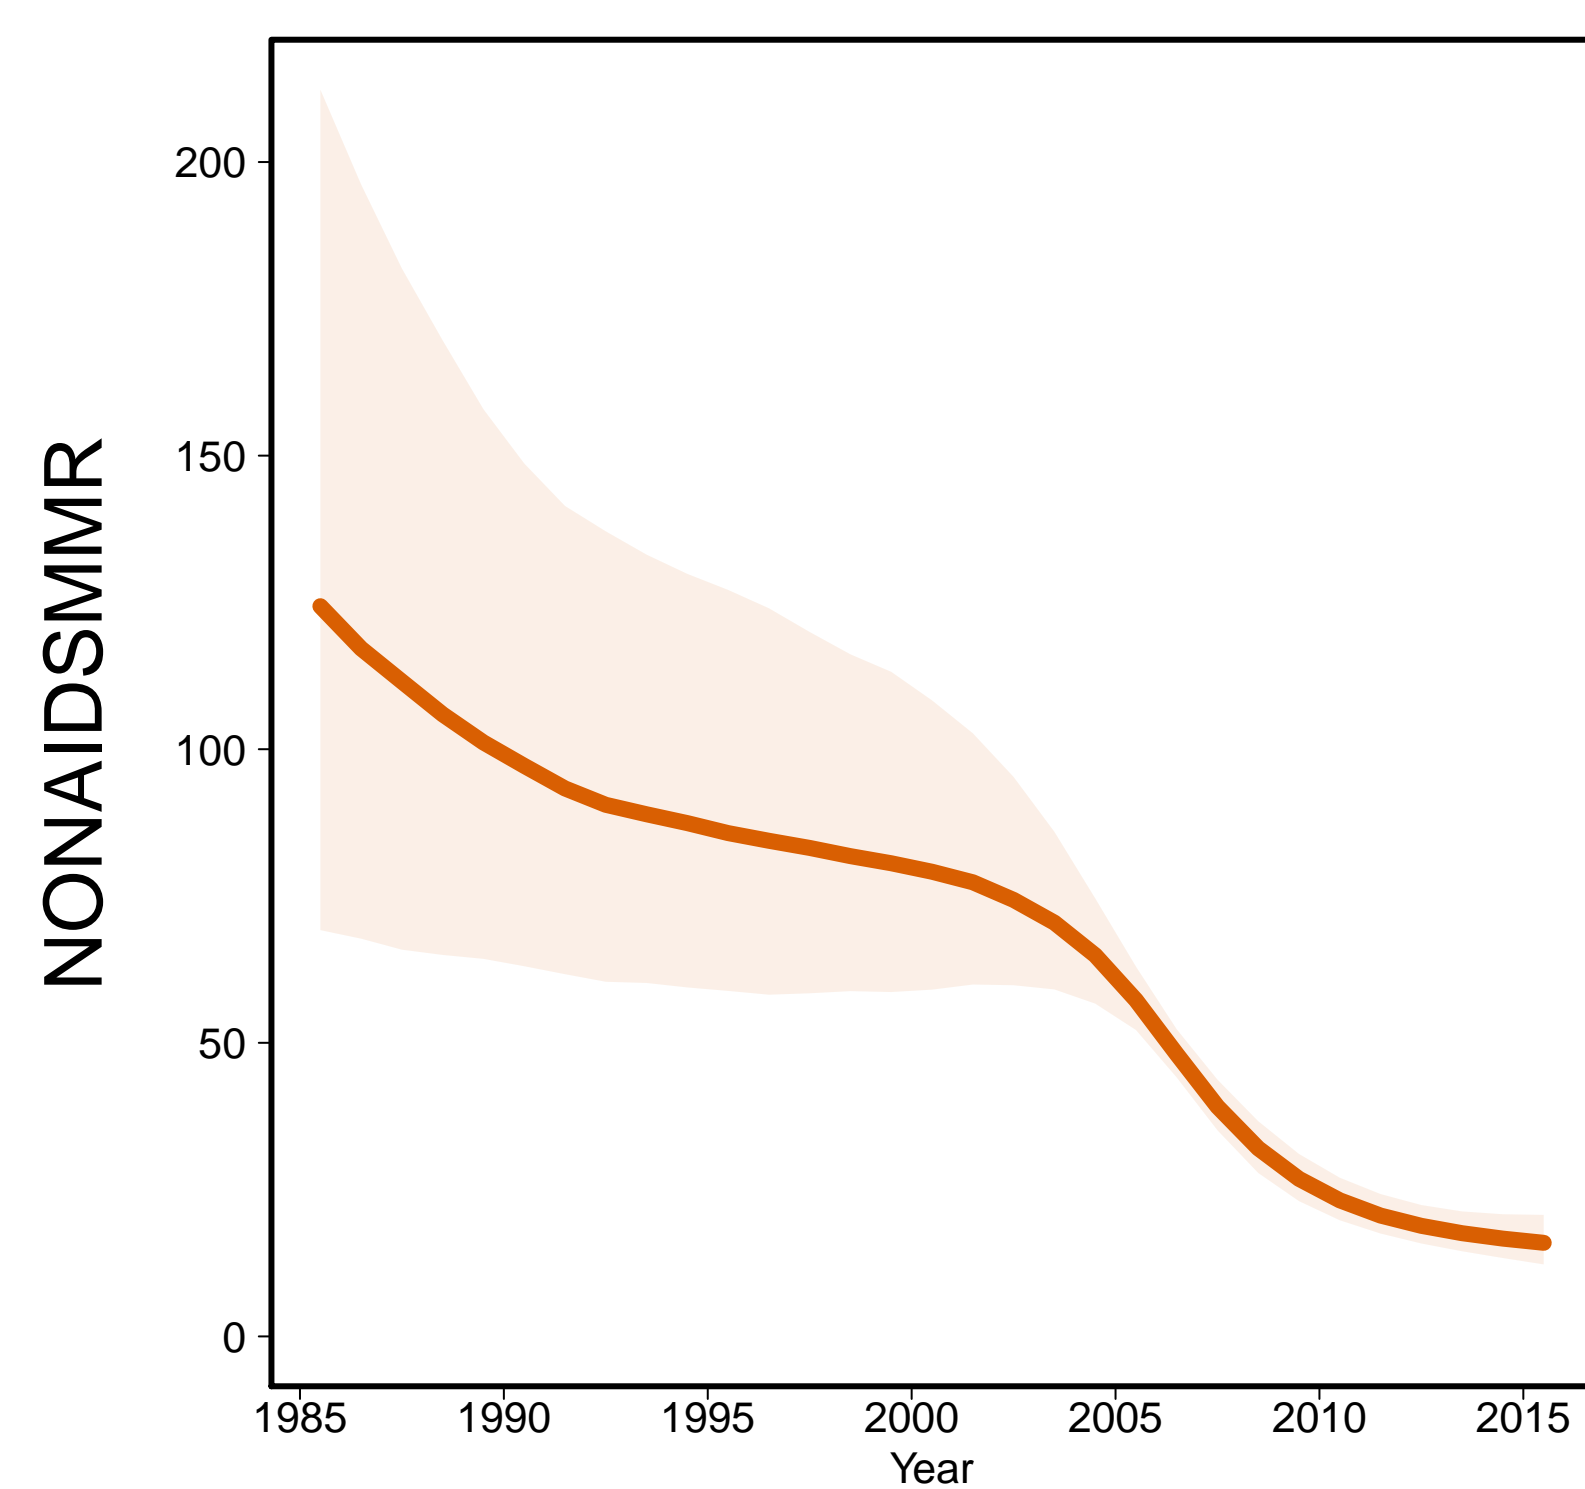

Aids MMR

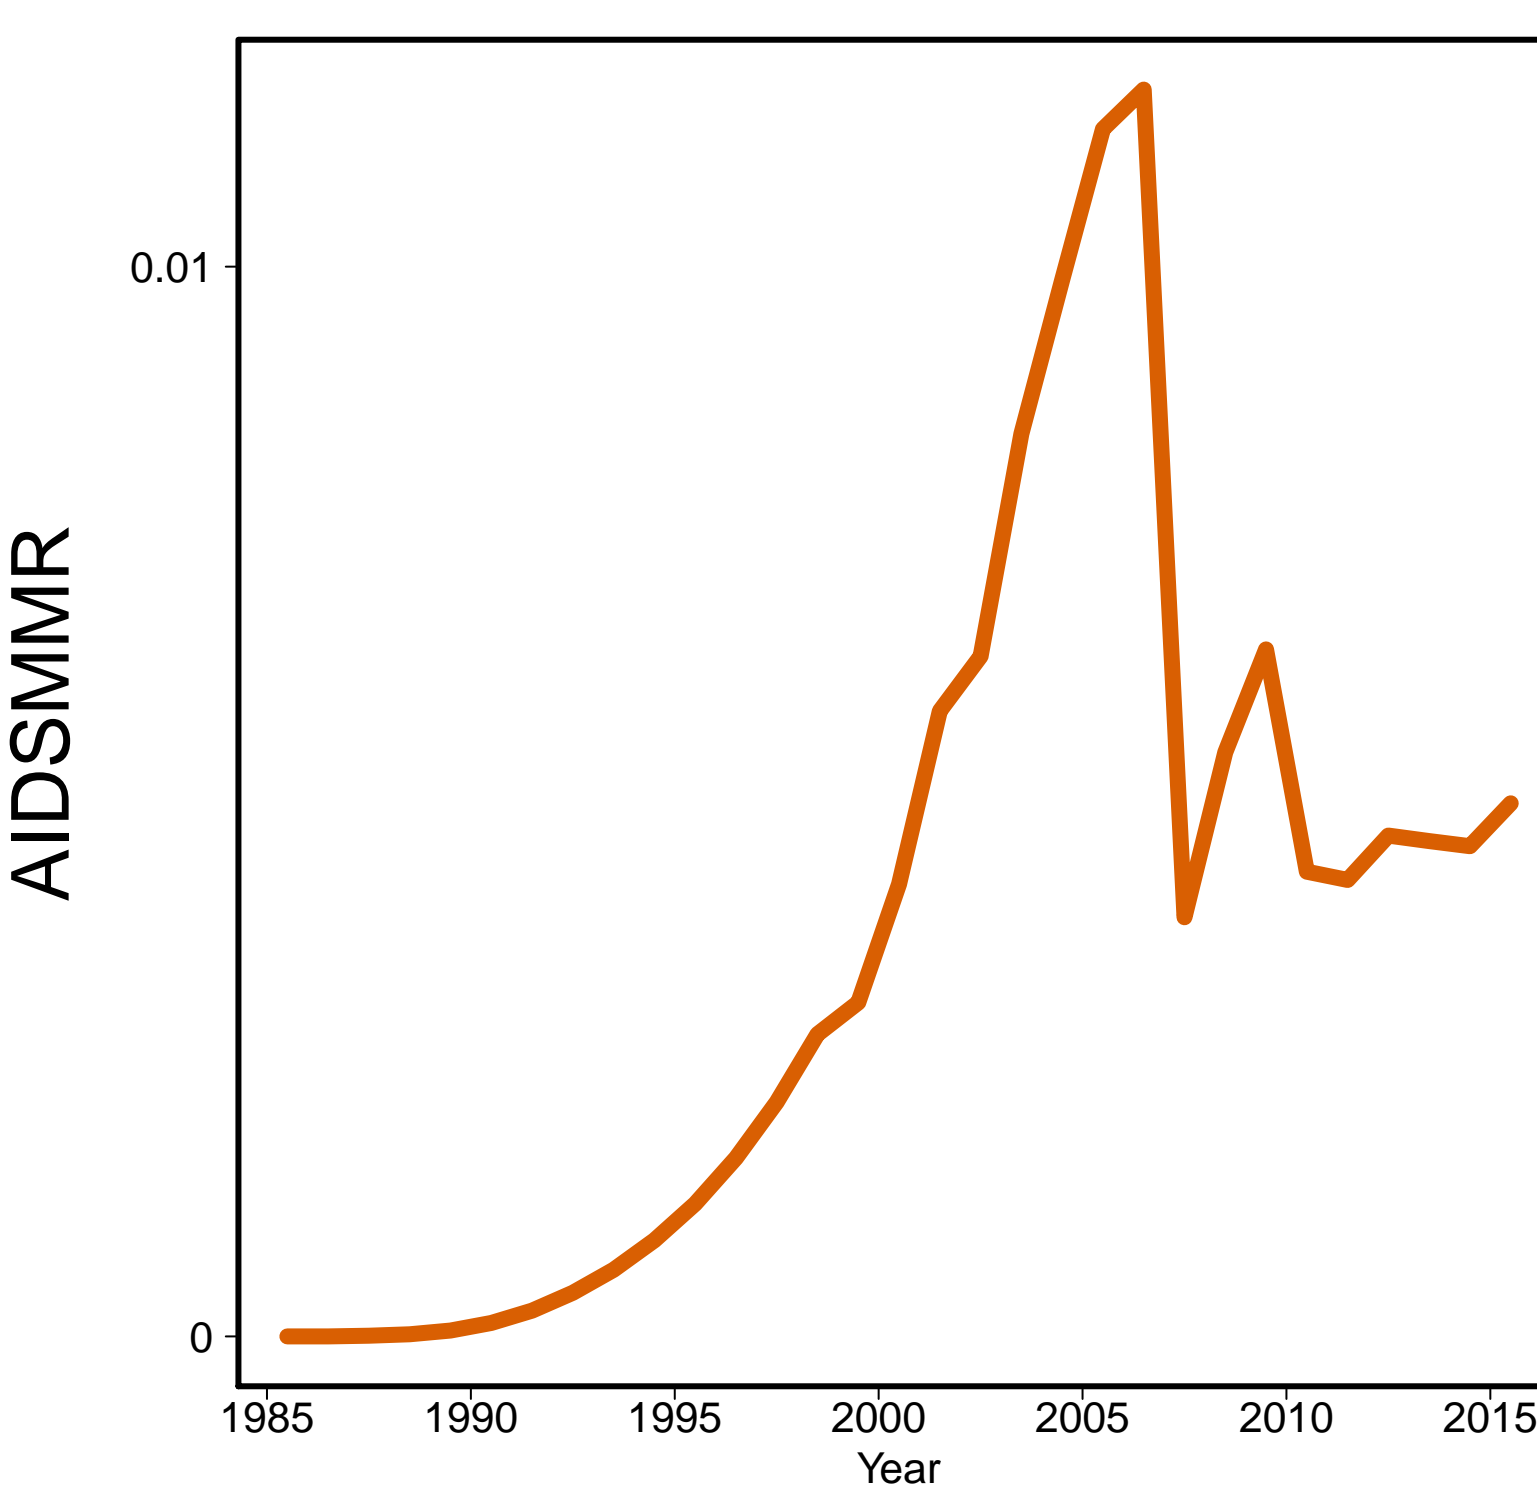

Turkmenistan [TKM]  
(Central Asia)

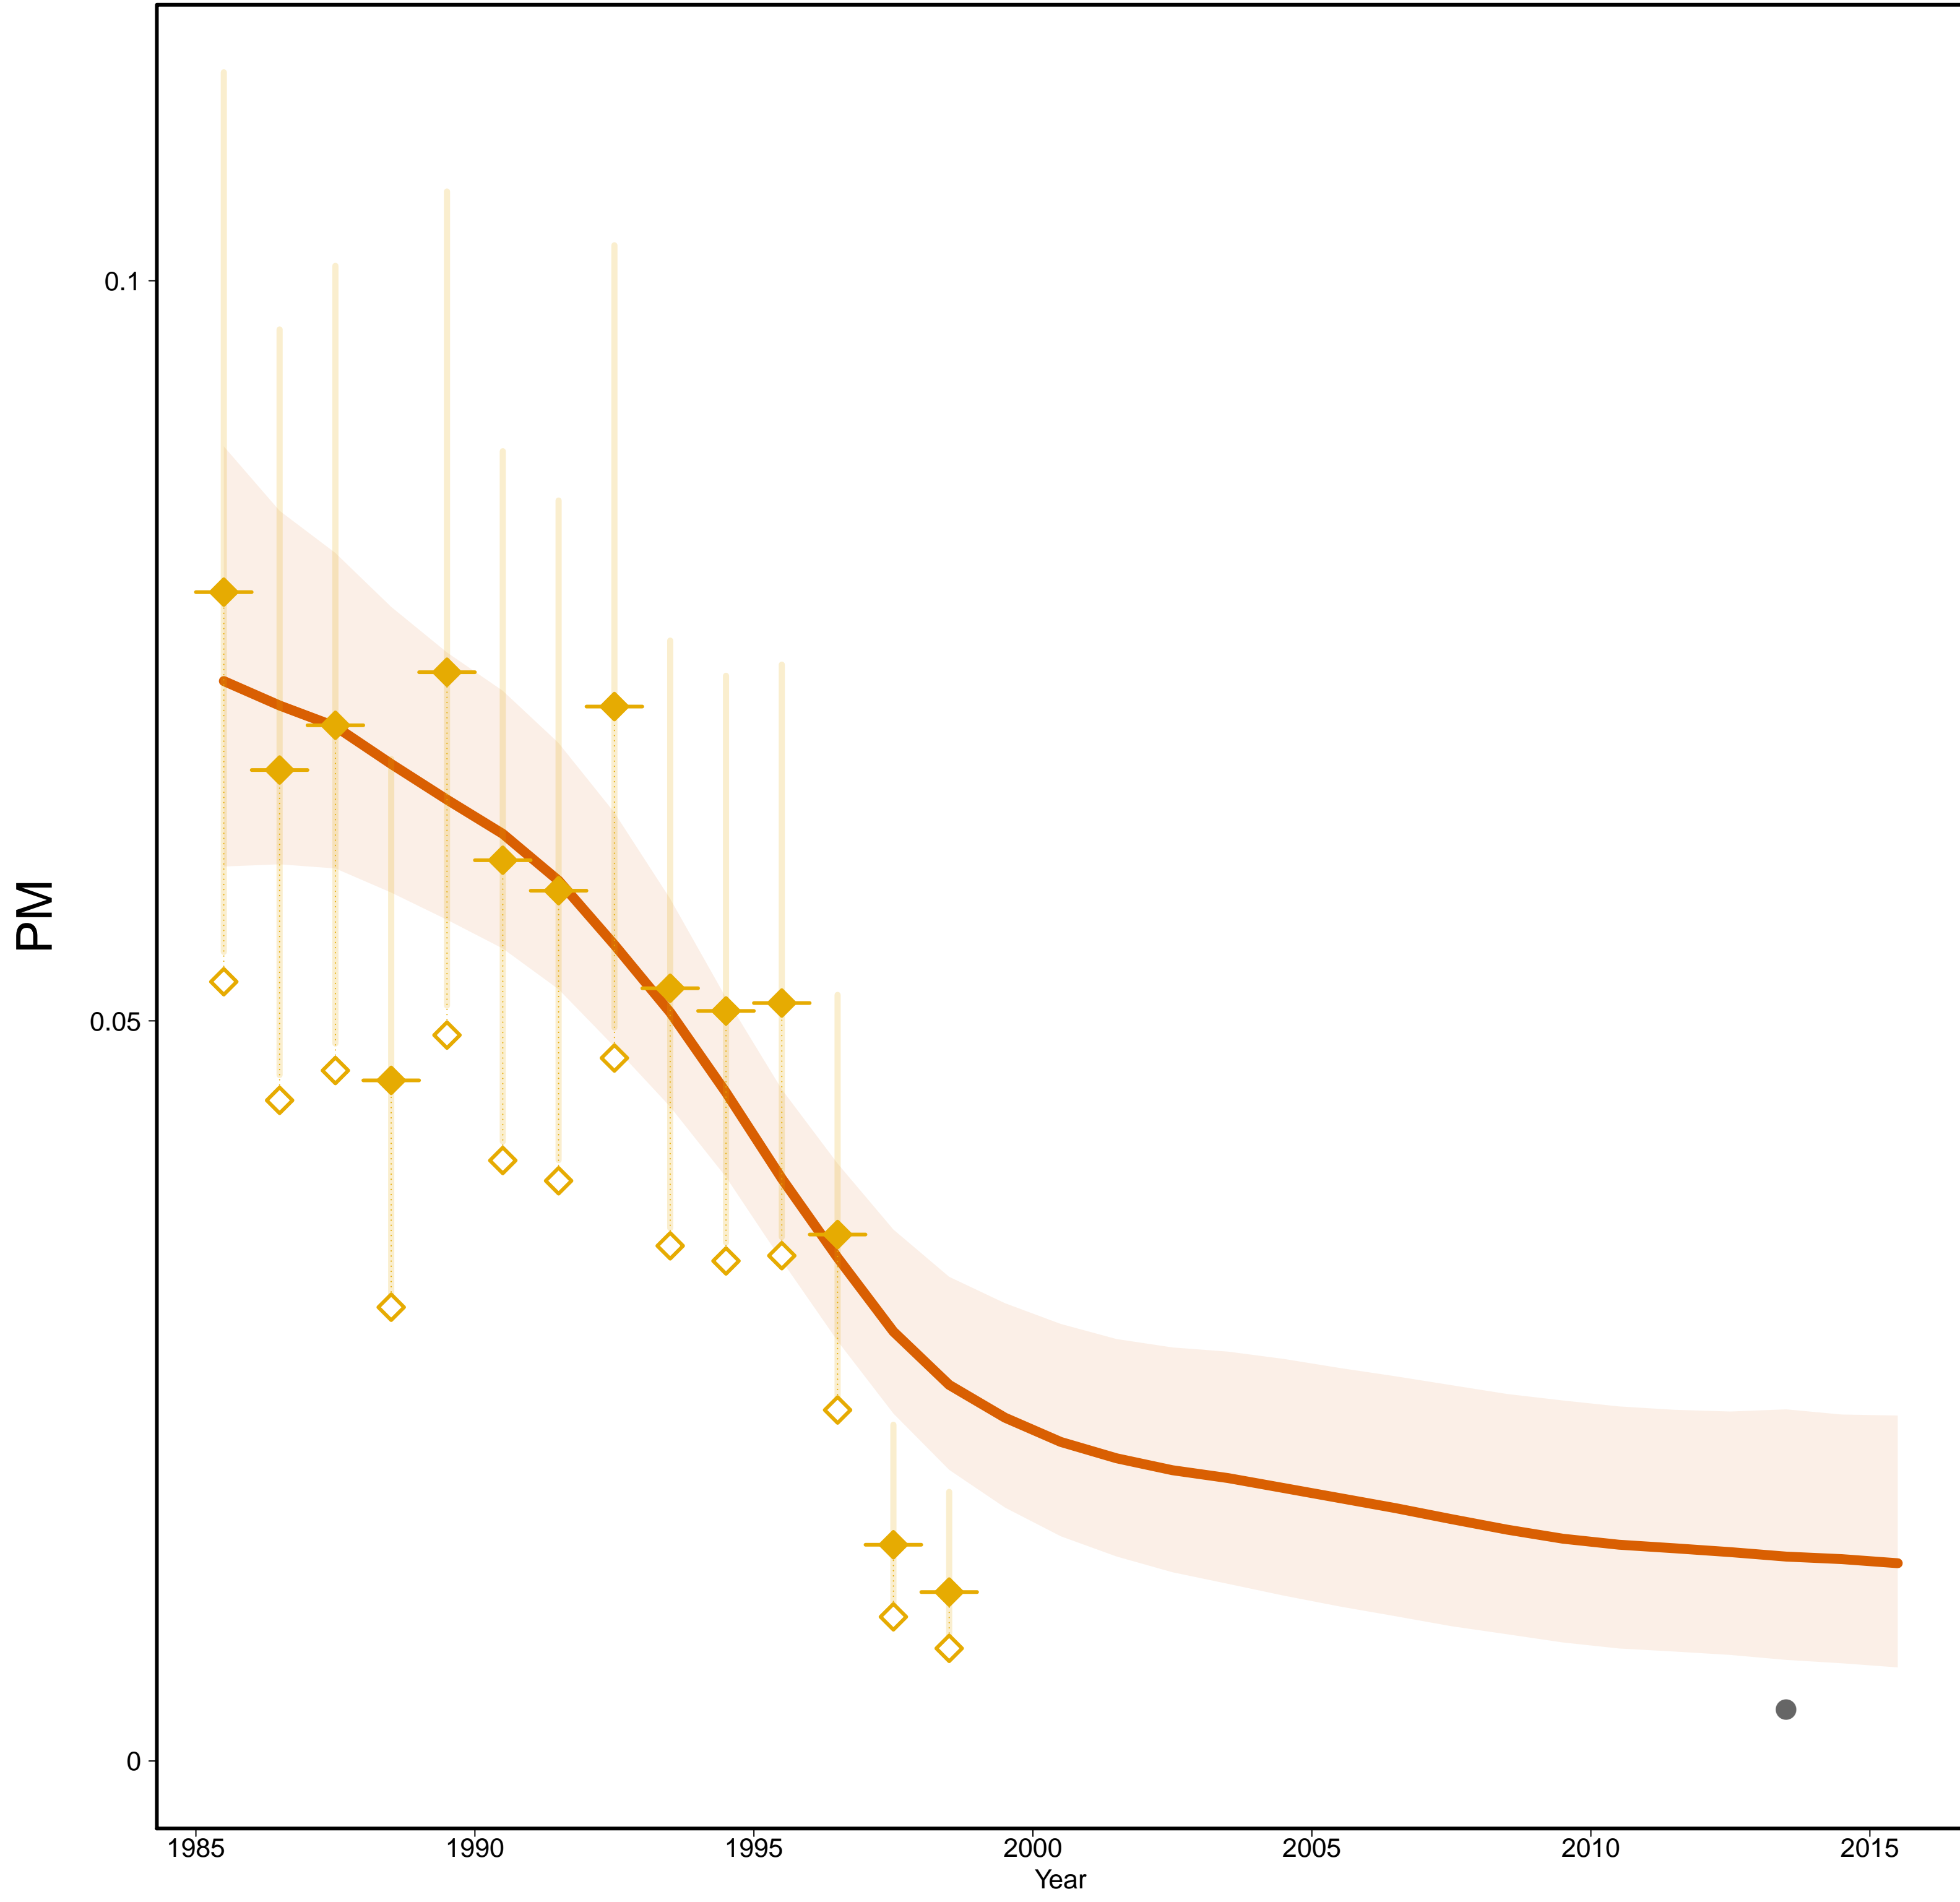

Turkmenistan [TKM]  
(Central Asia)

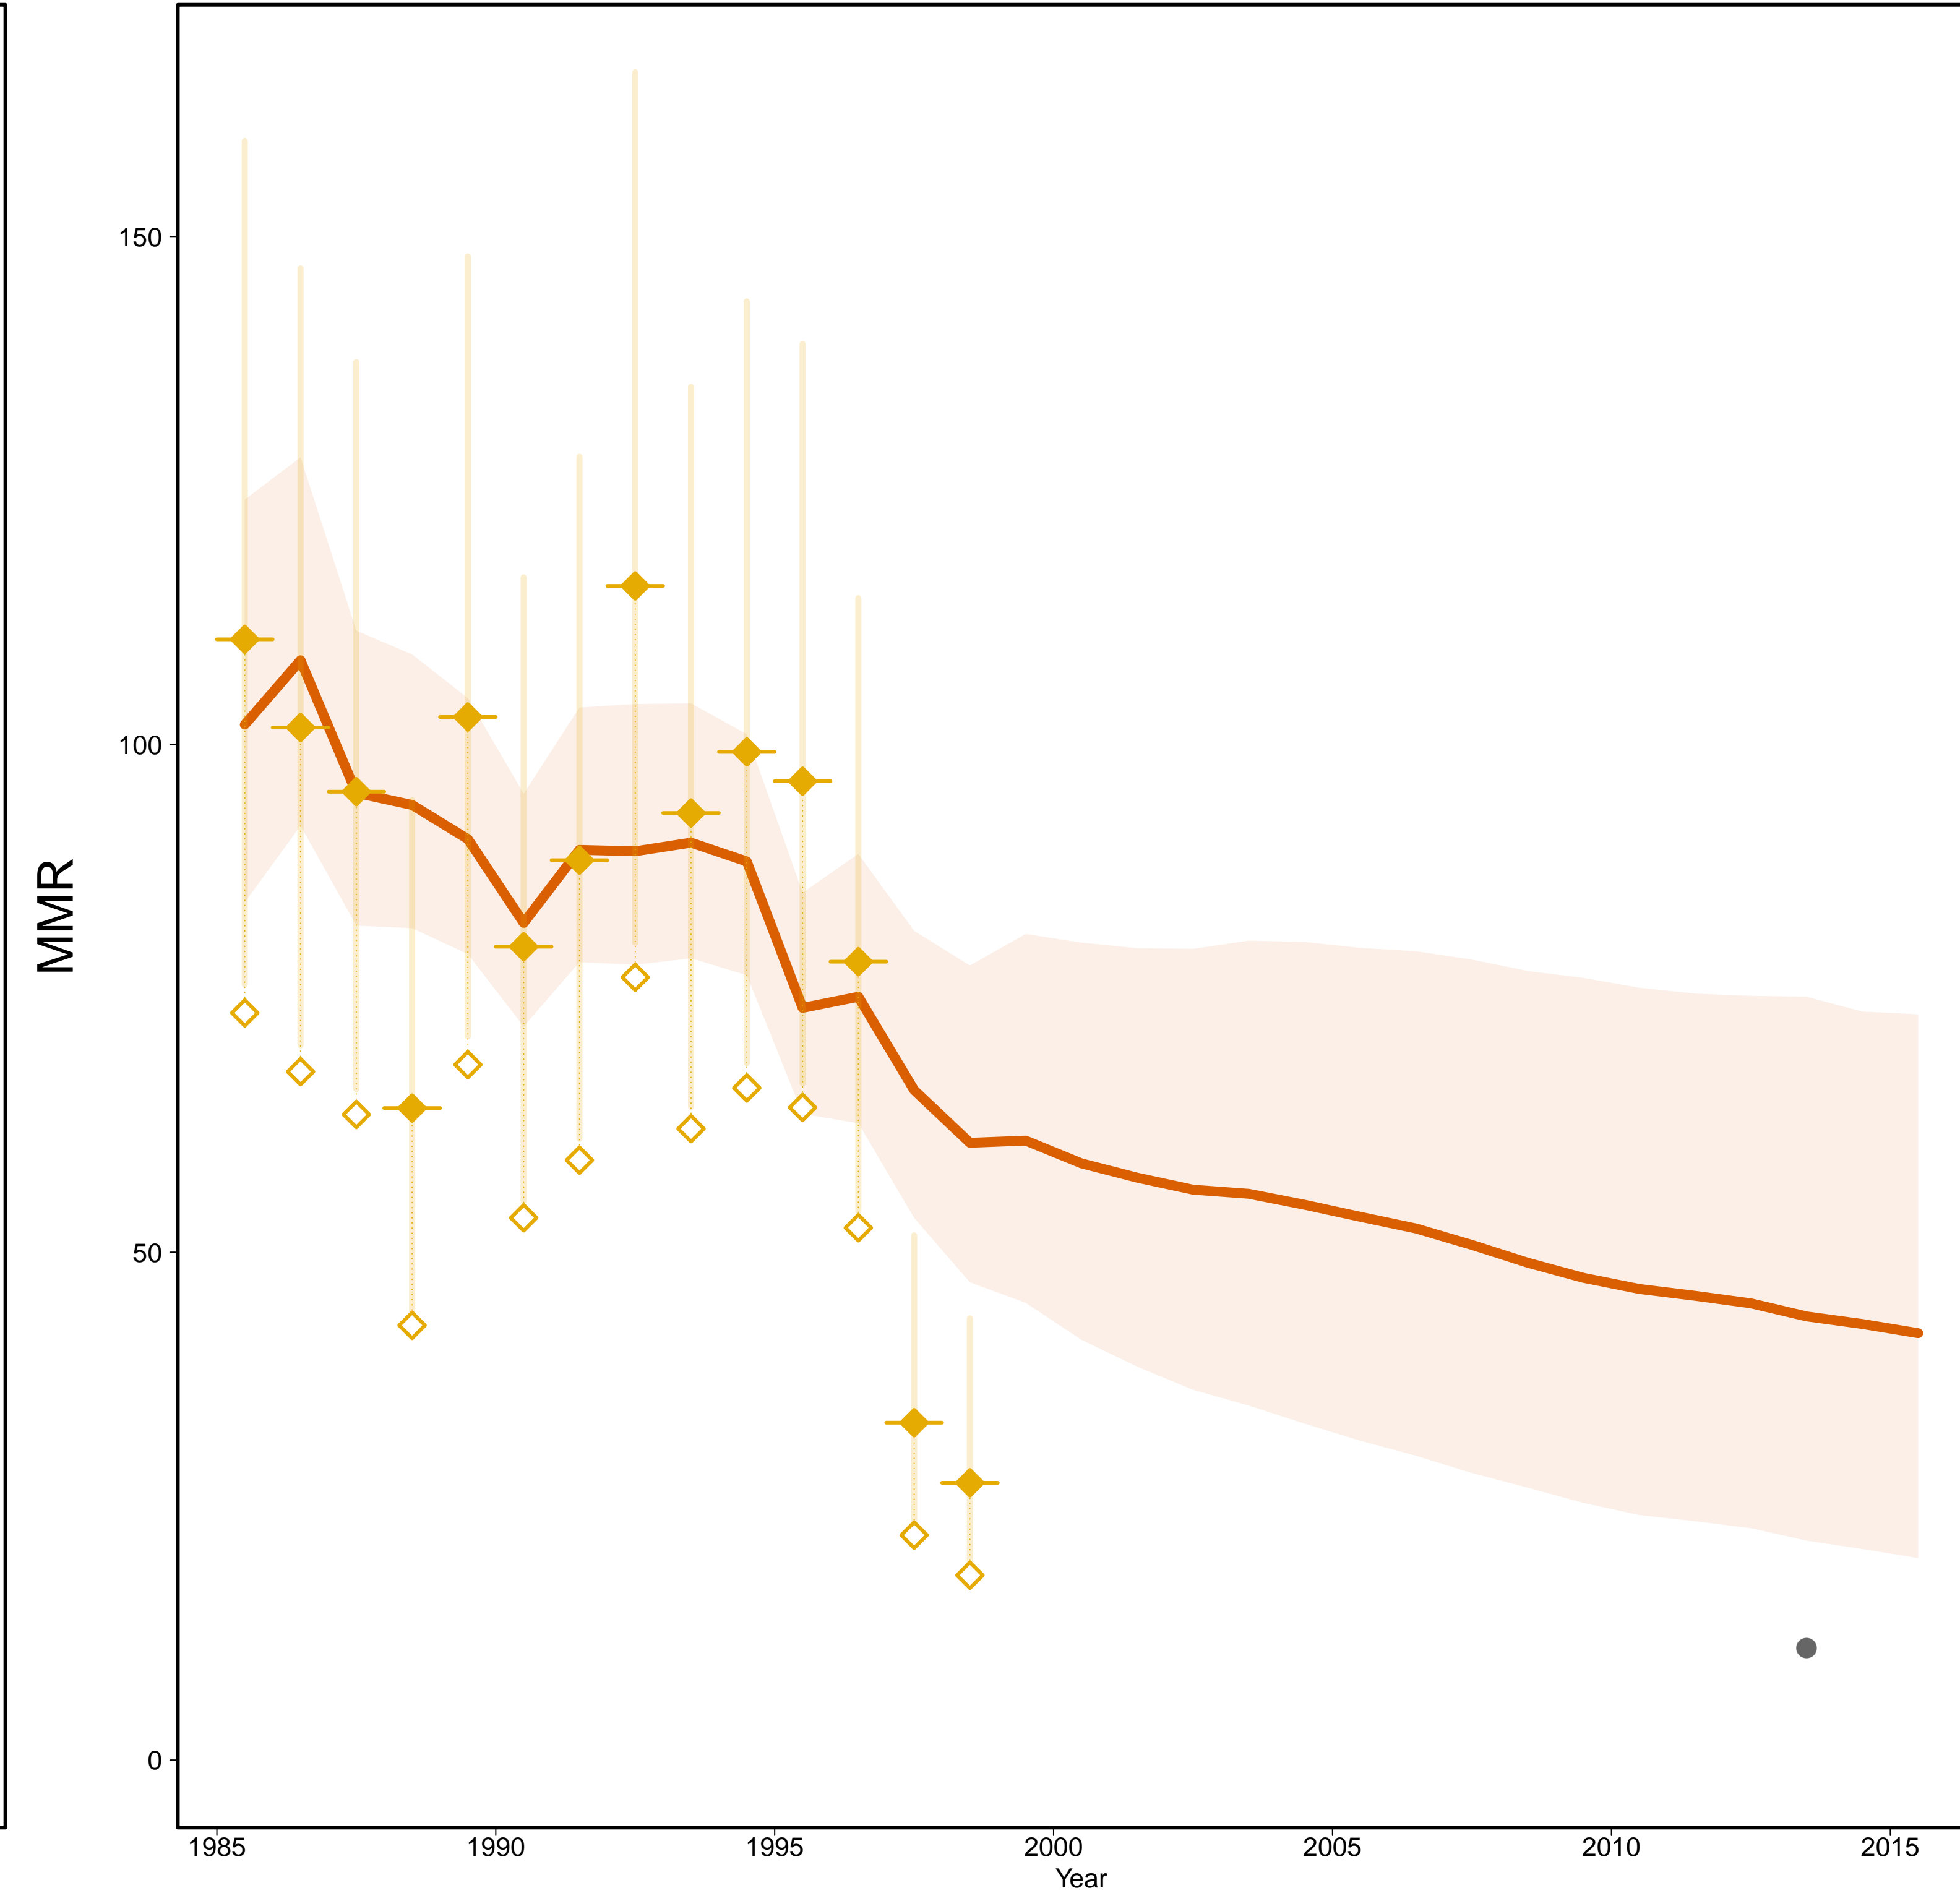

- Estimates –
- Mlate
- MMR Database 2015 –
- ◇ Observed Data
- ◆ Adjusted Data
- Data type –
- ◆ VR
- Excluded VR data (data quality issues)

Gross Domestic Product

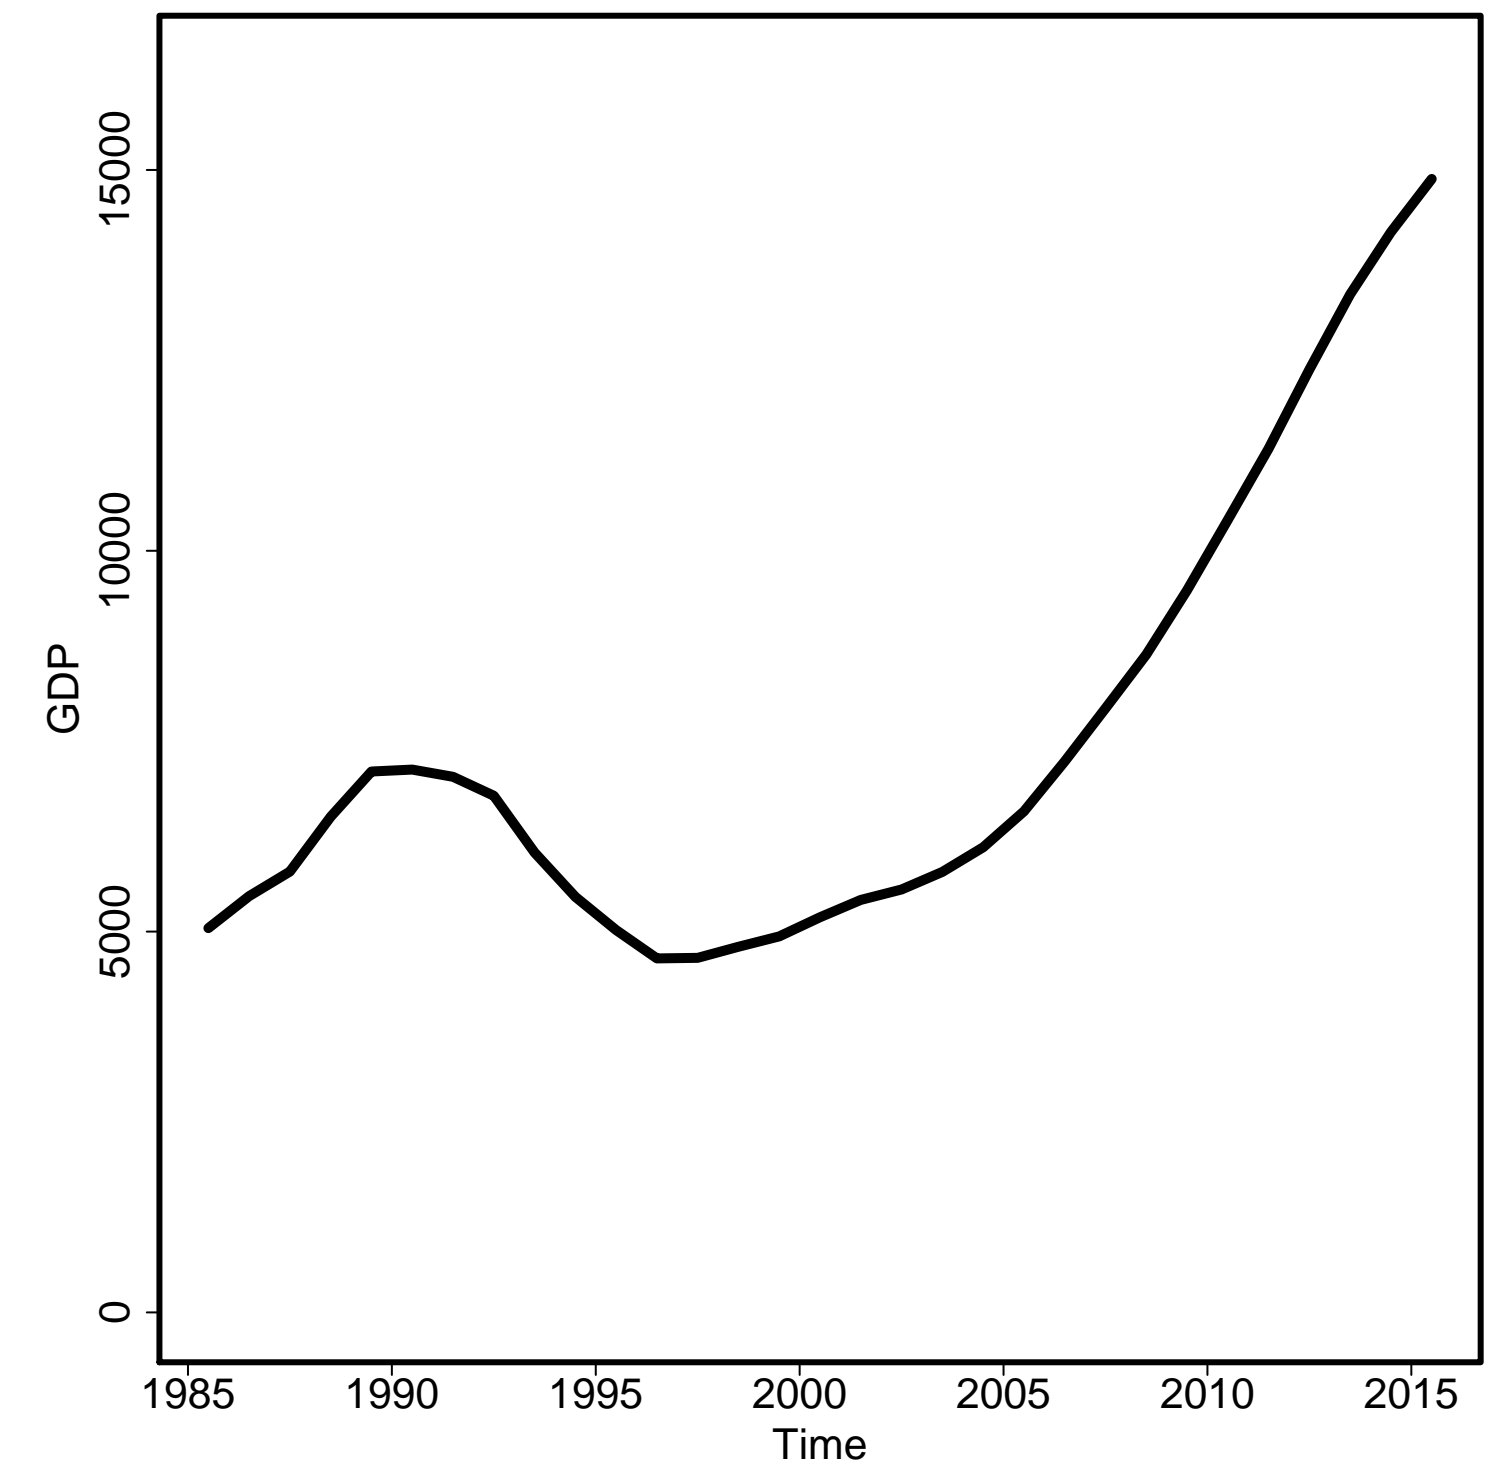

General Fertility Rate

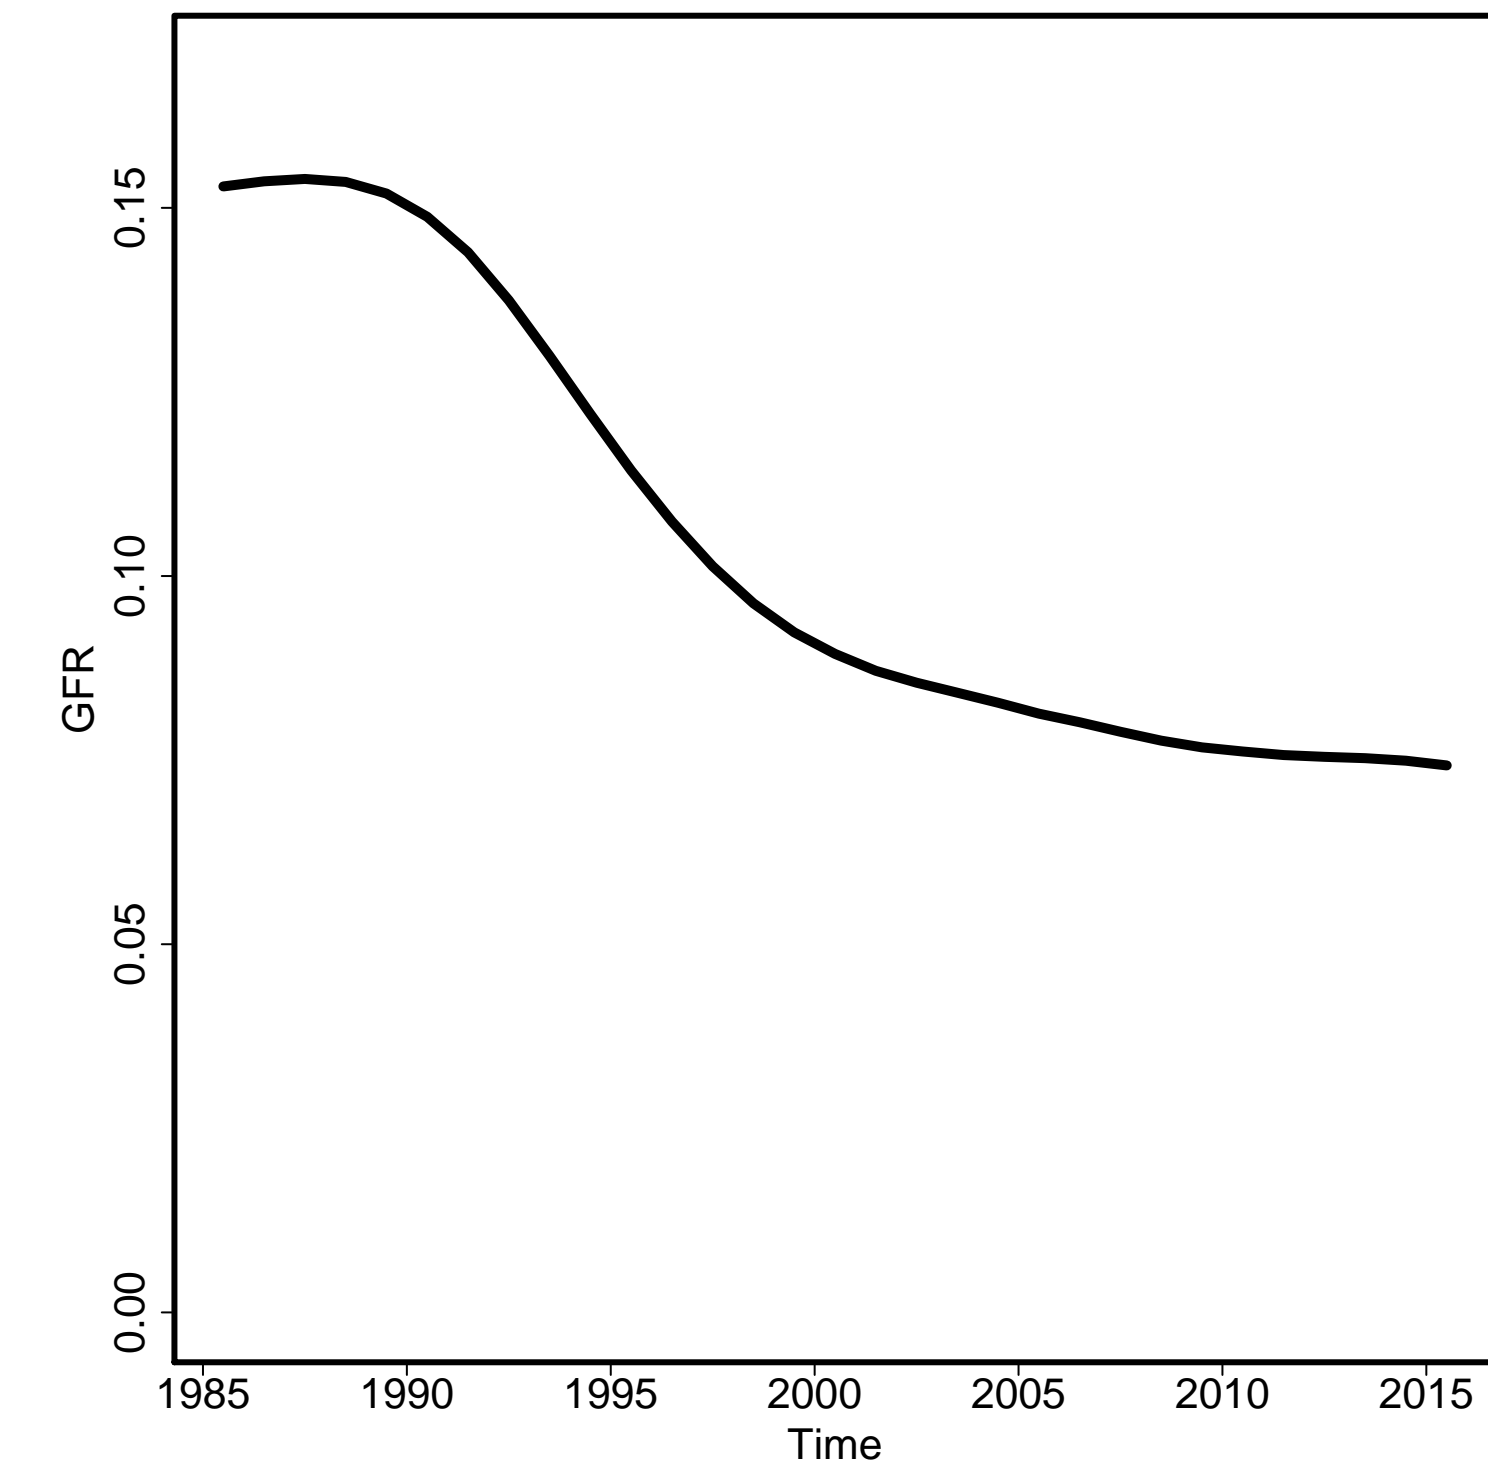

Skilled Attendance to Birth

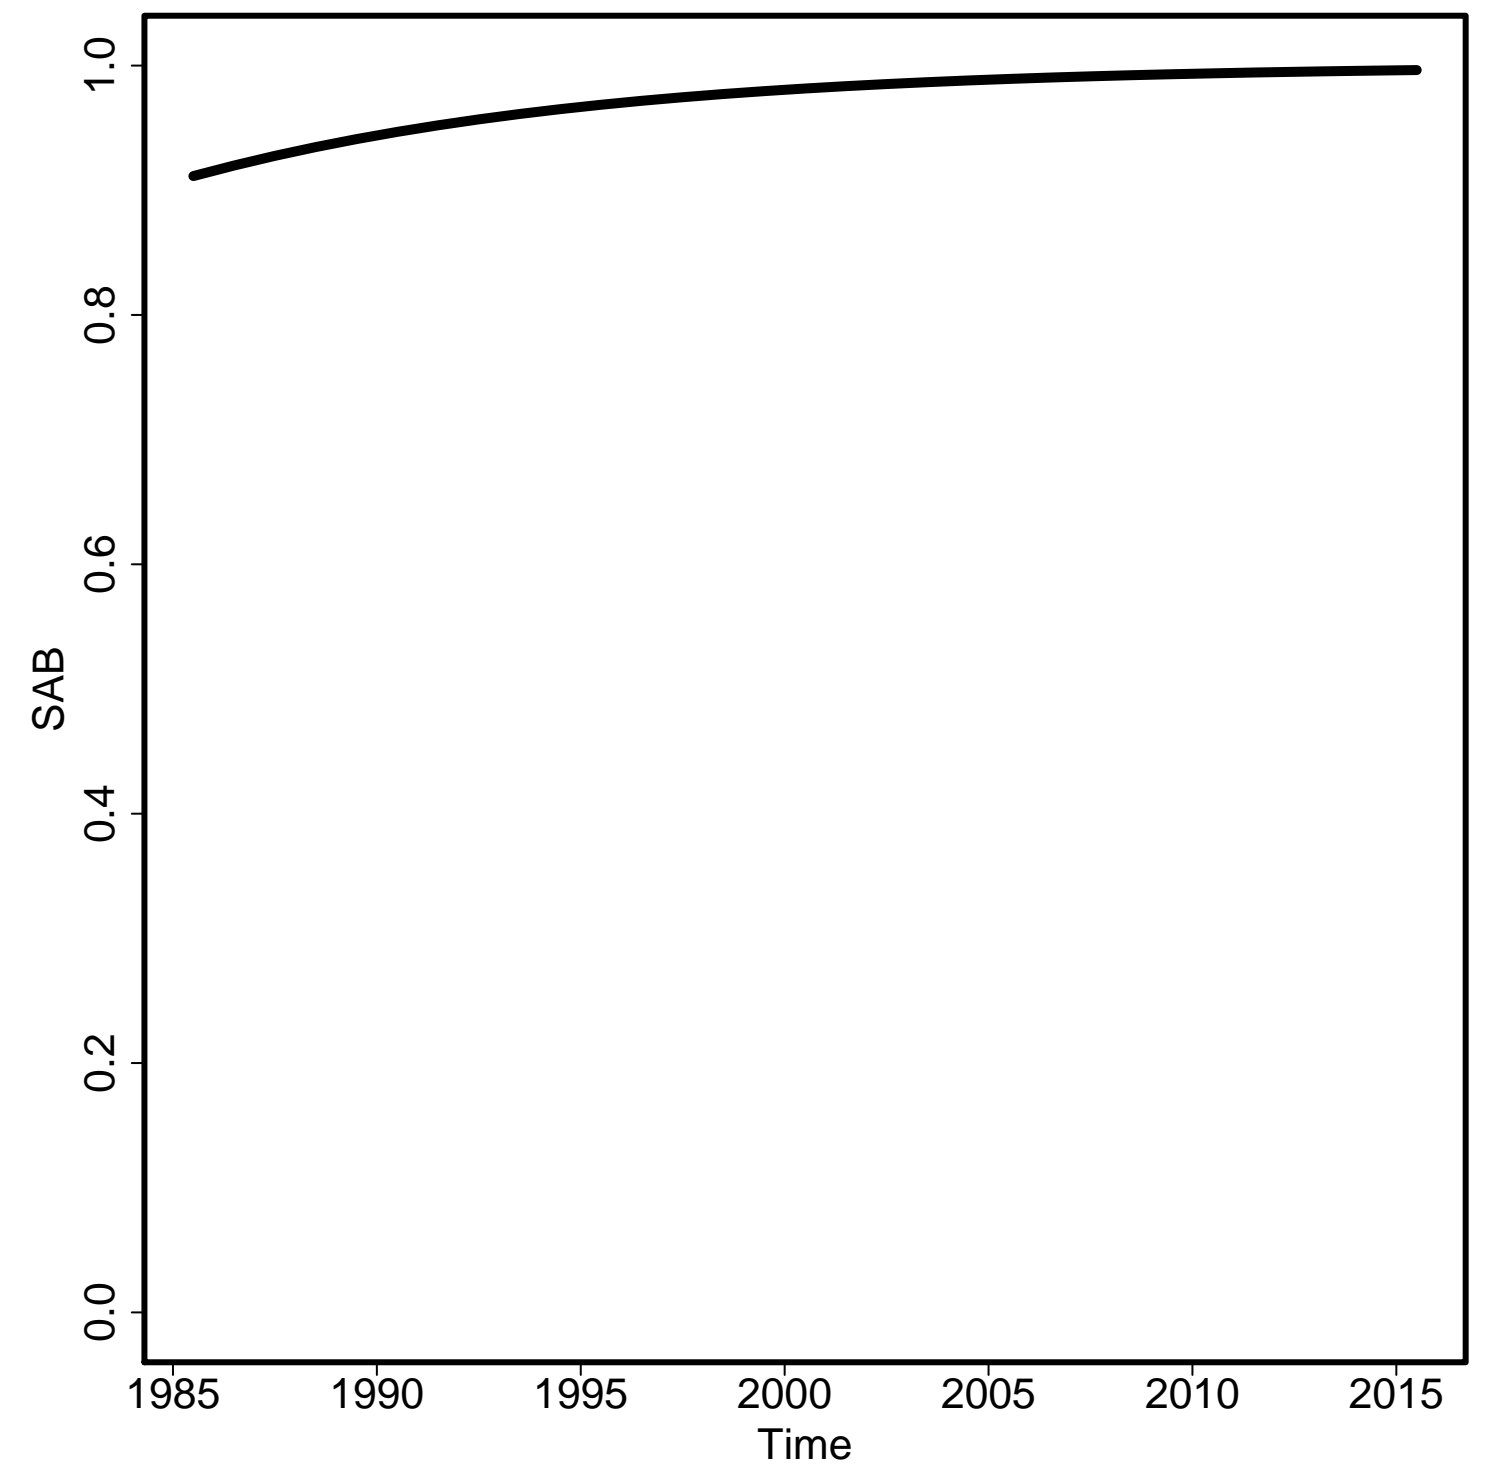

Envelope/Births

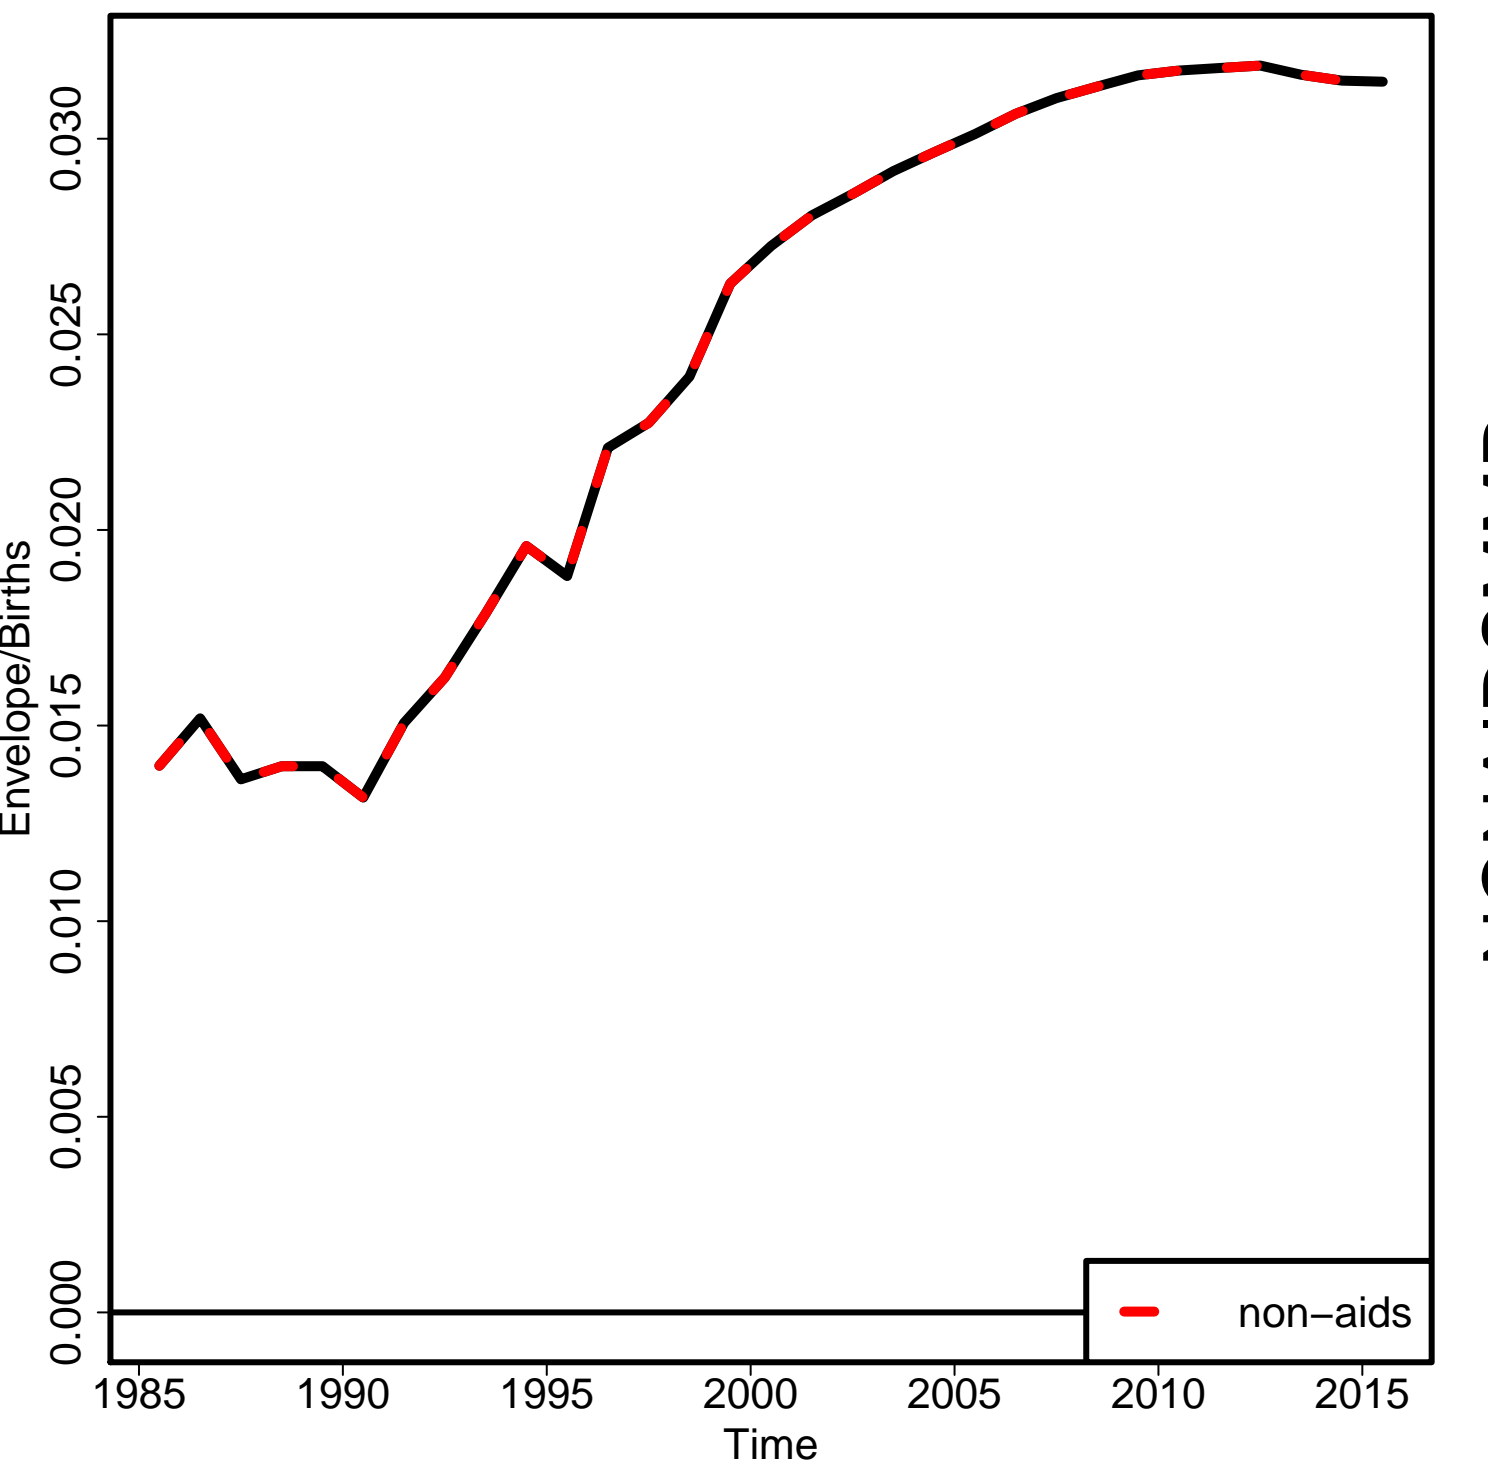

Non-aids MMR

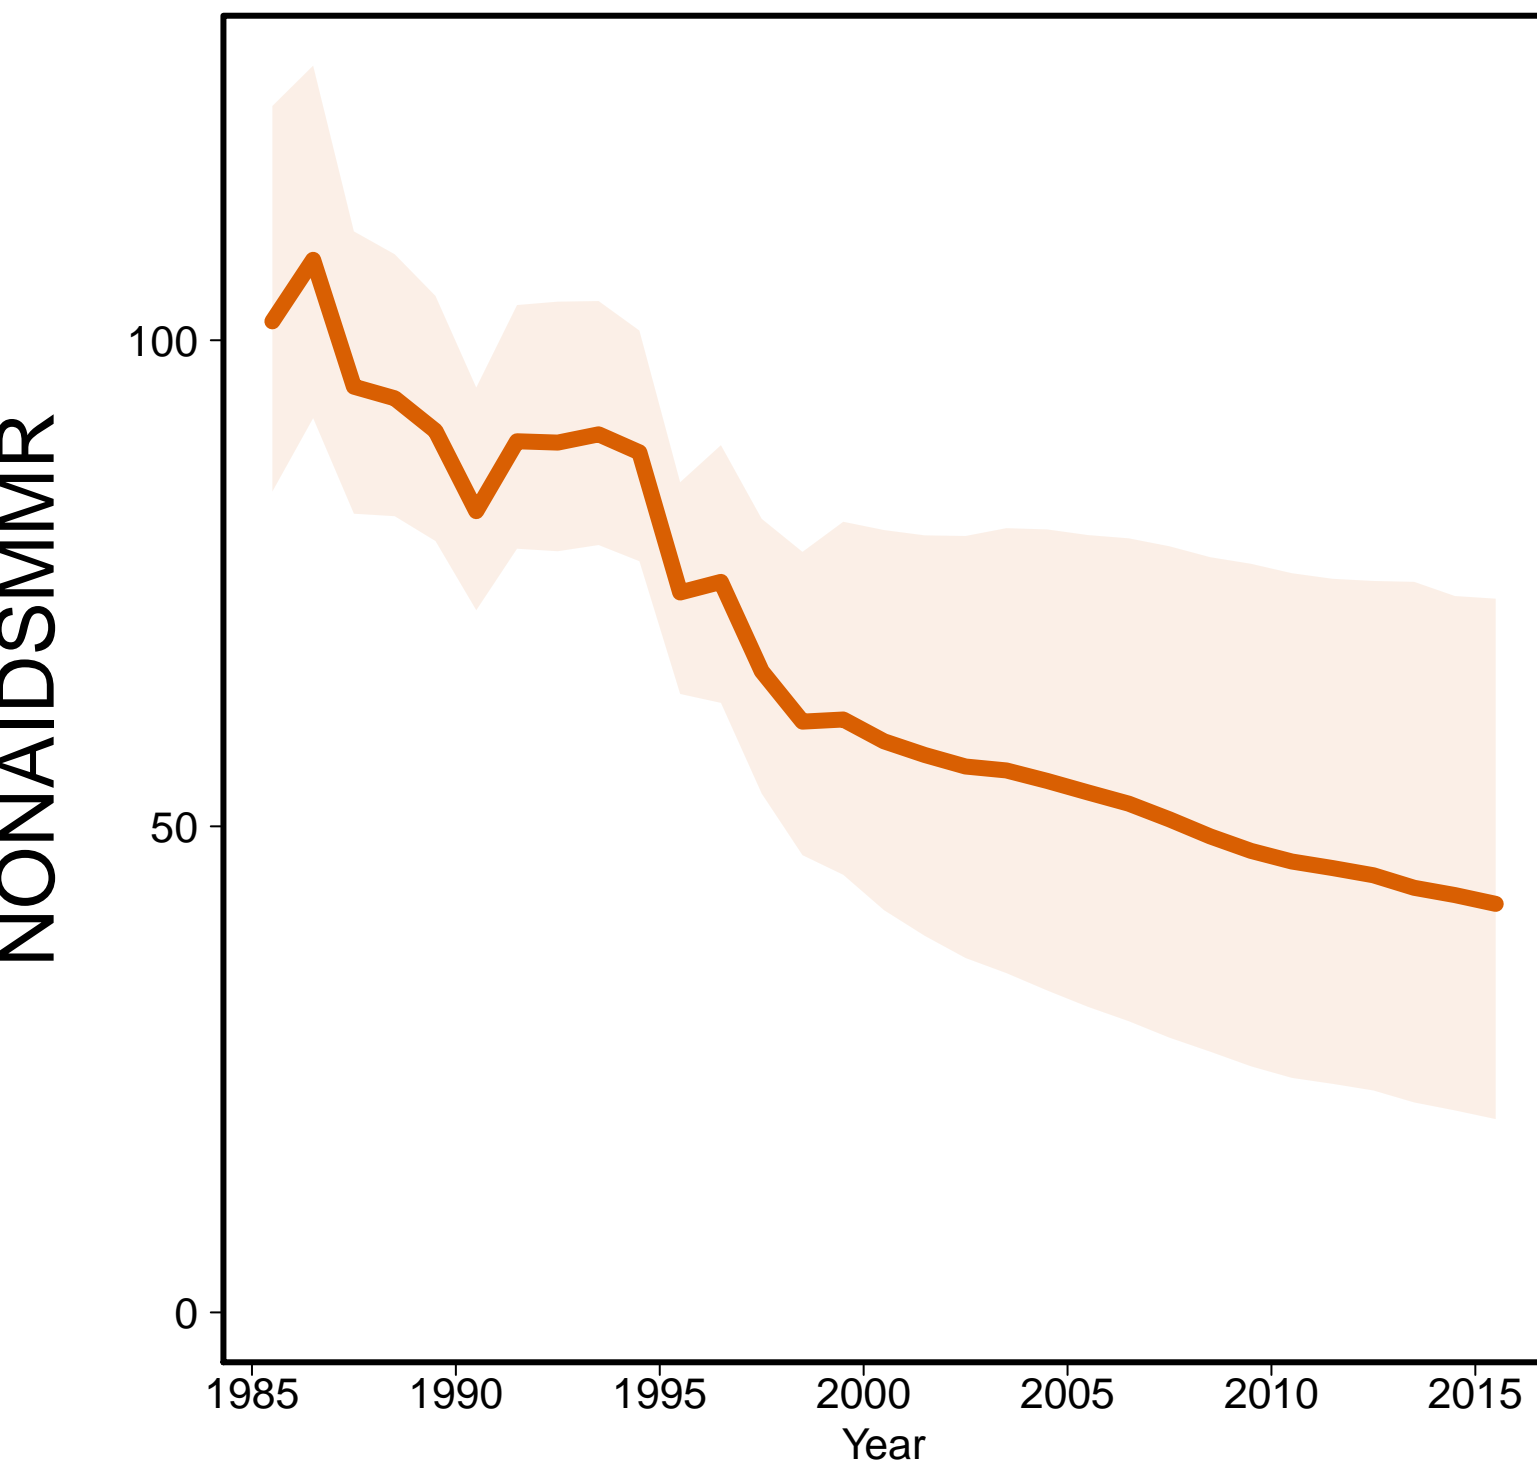

Aids MMR



Uganda [UGA]  
(Eastern Africa)

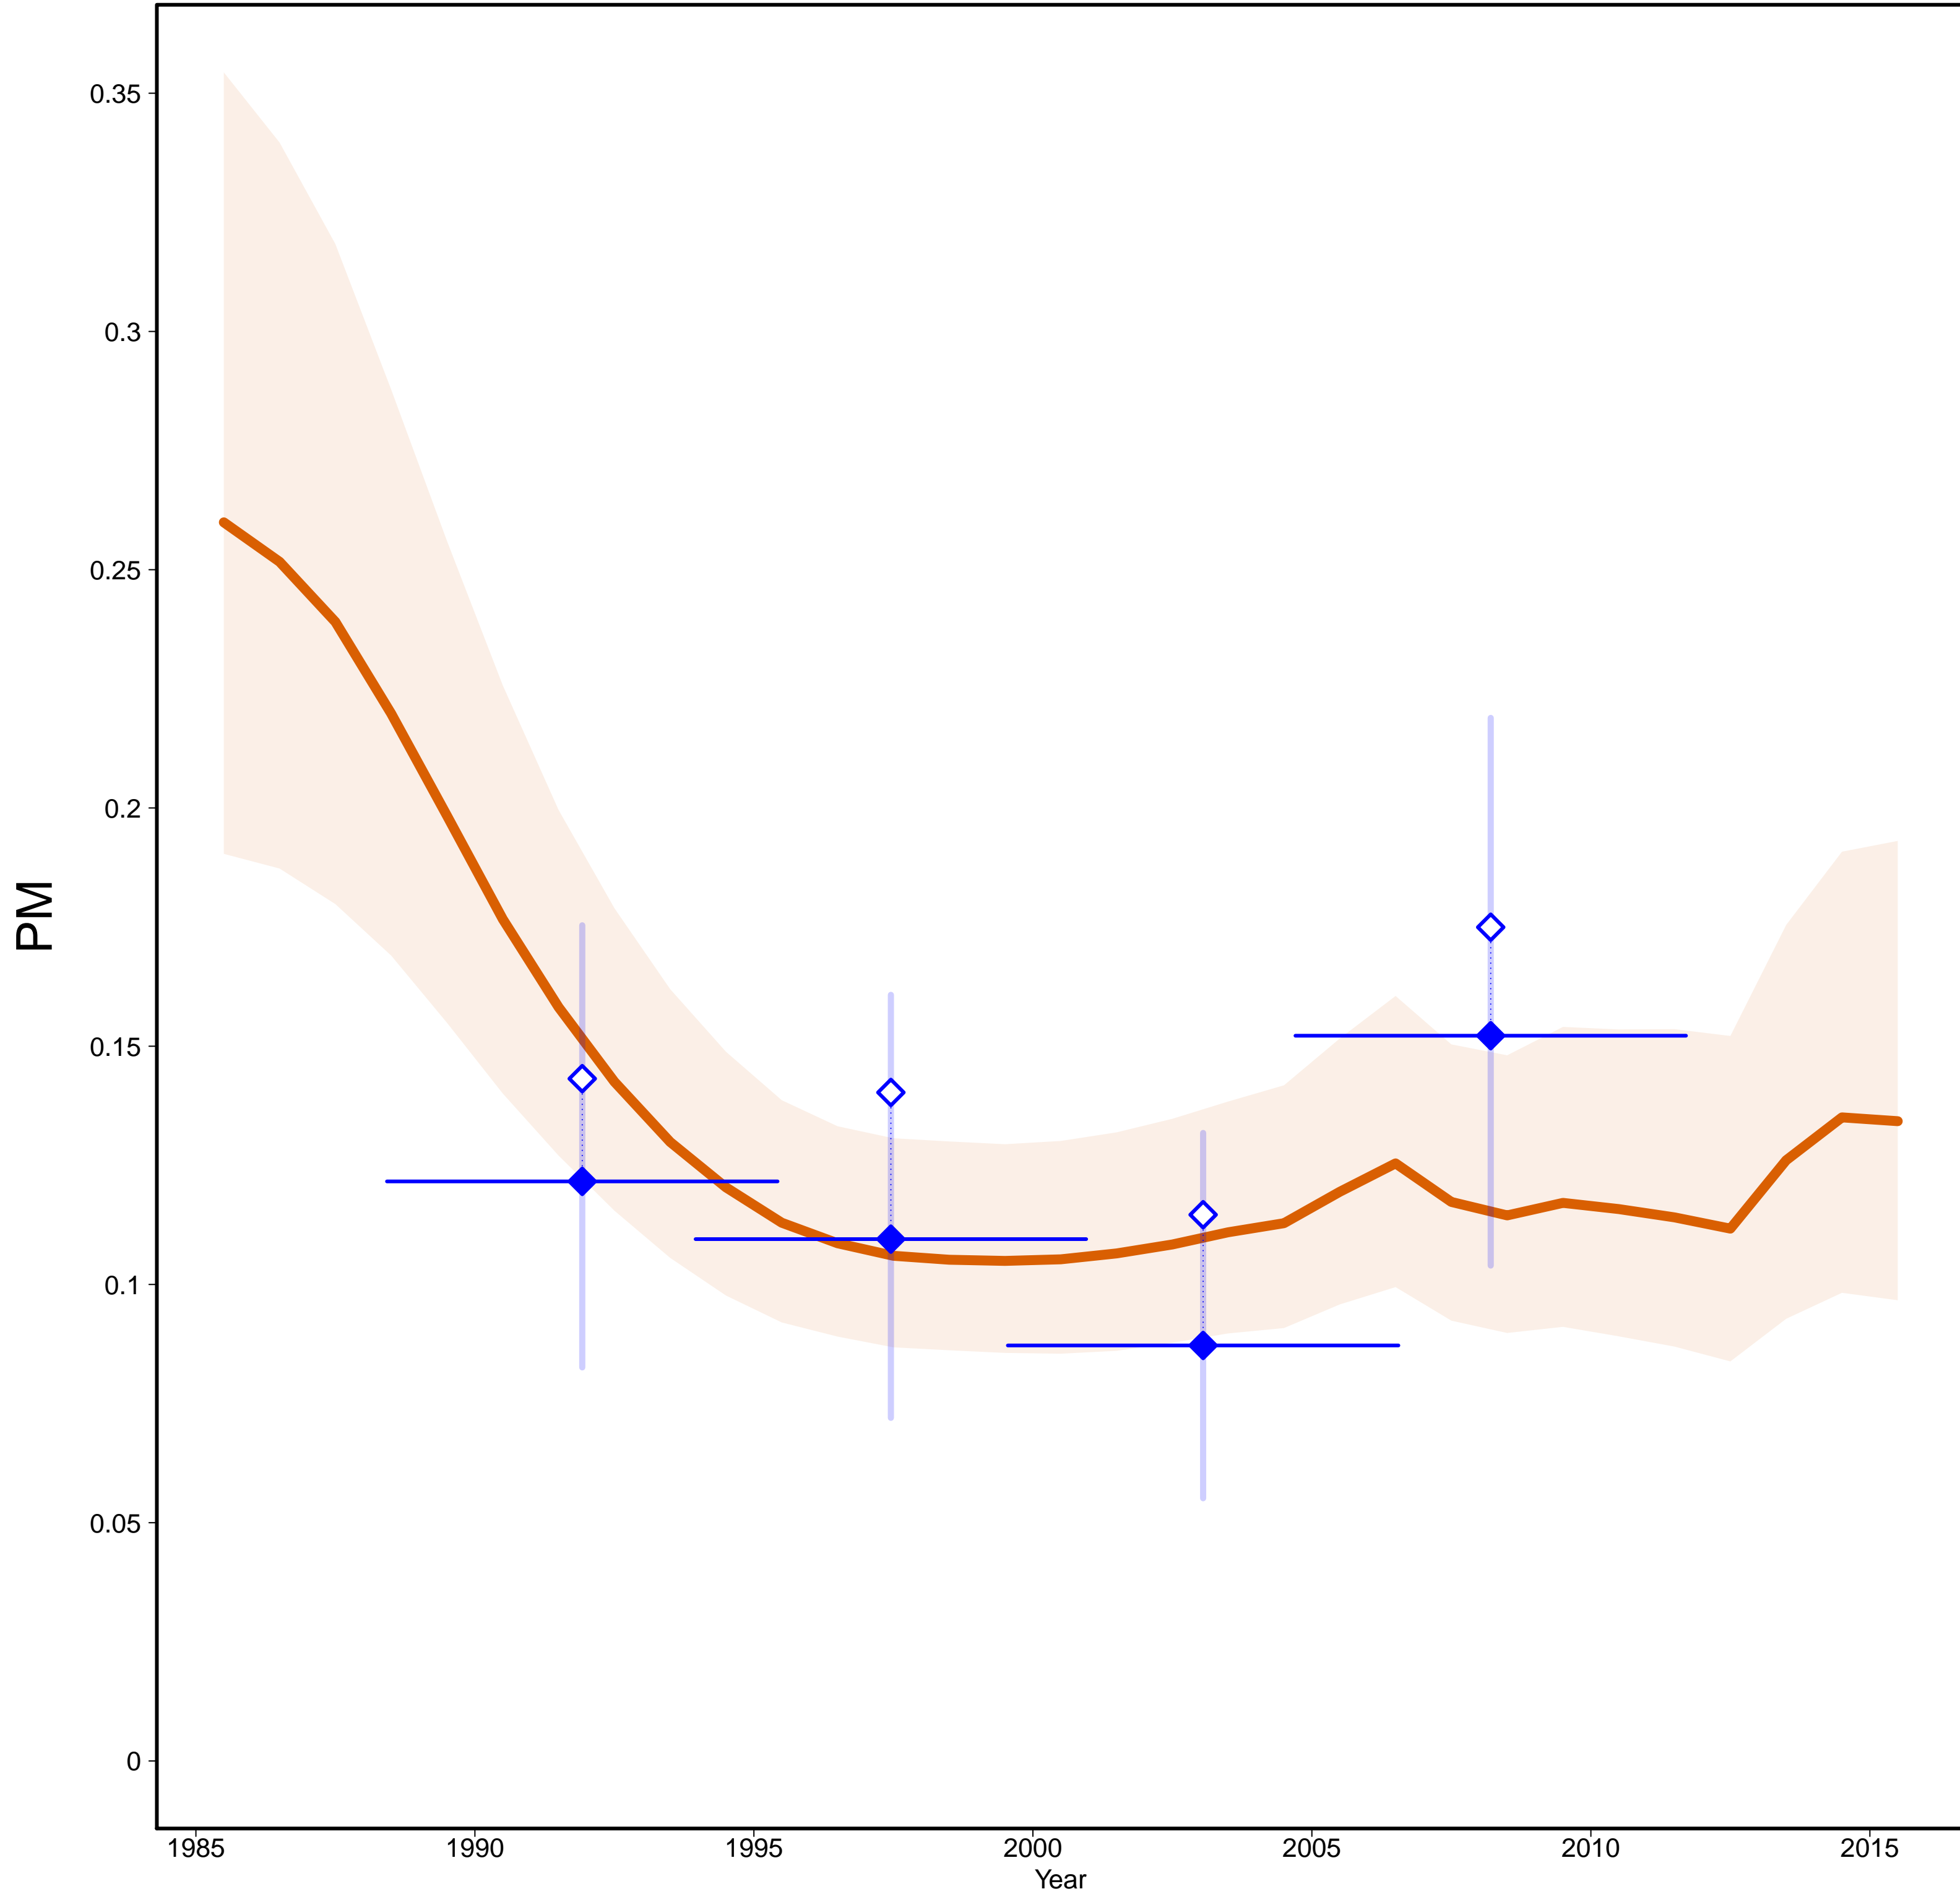

Uganda [UGA]  
(Eastern Africa)

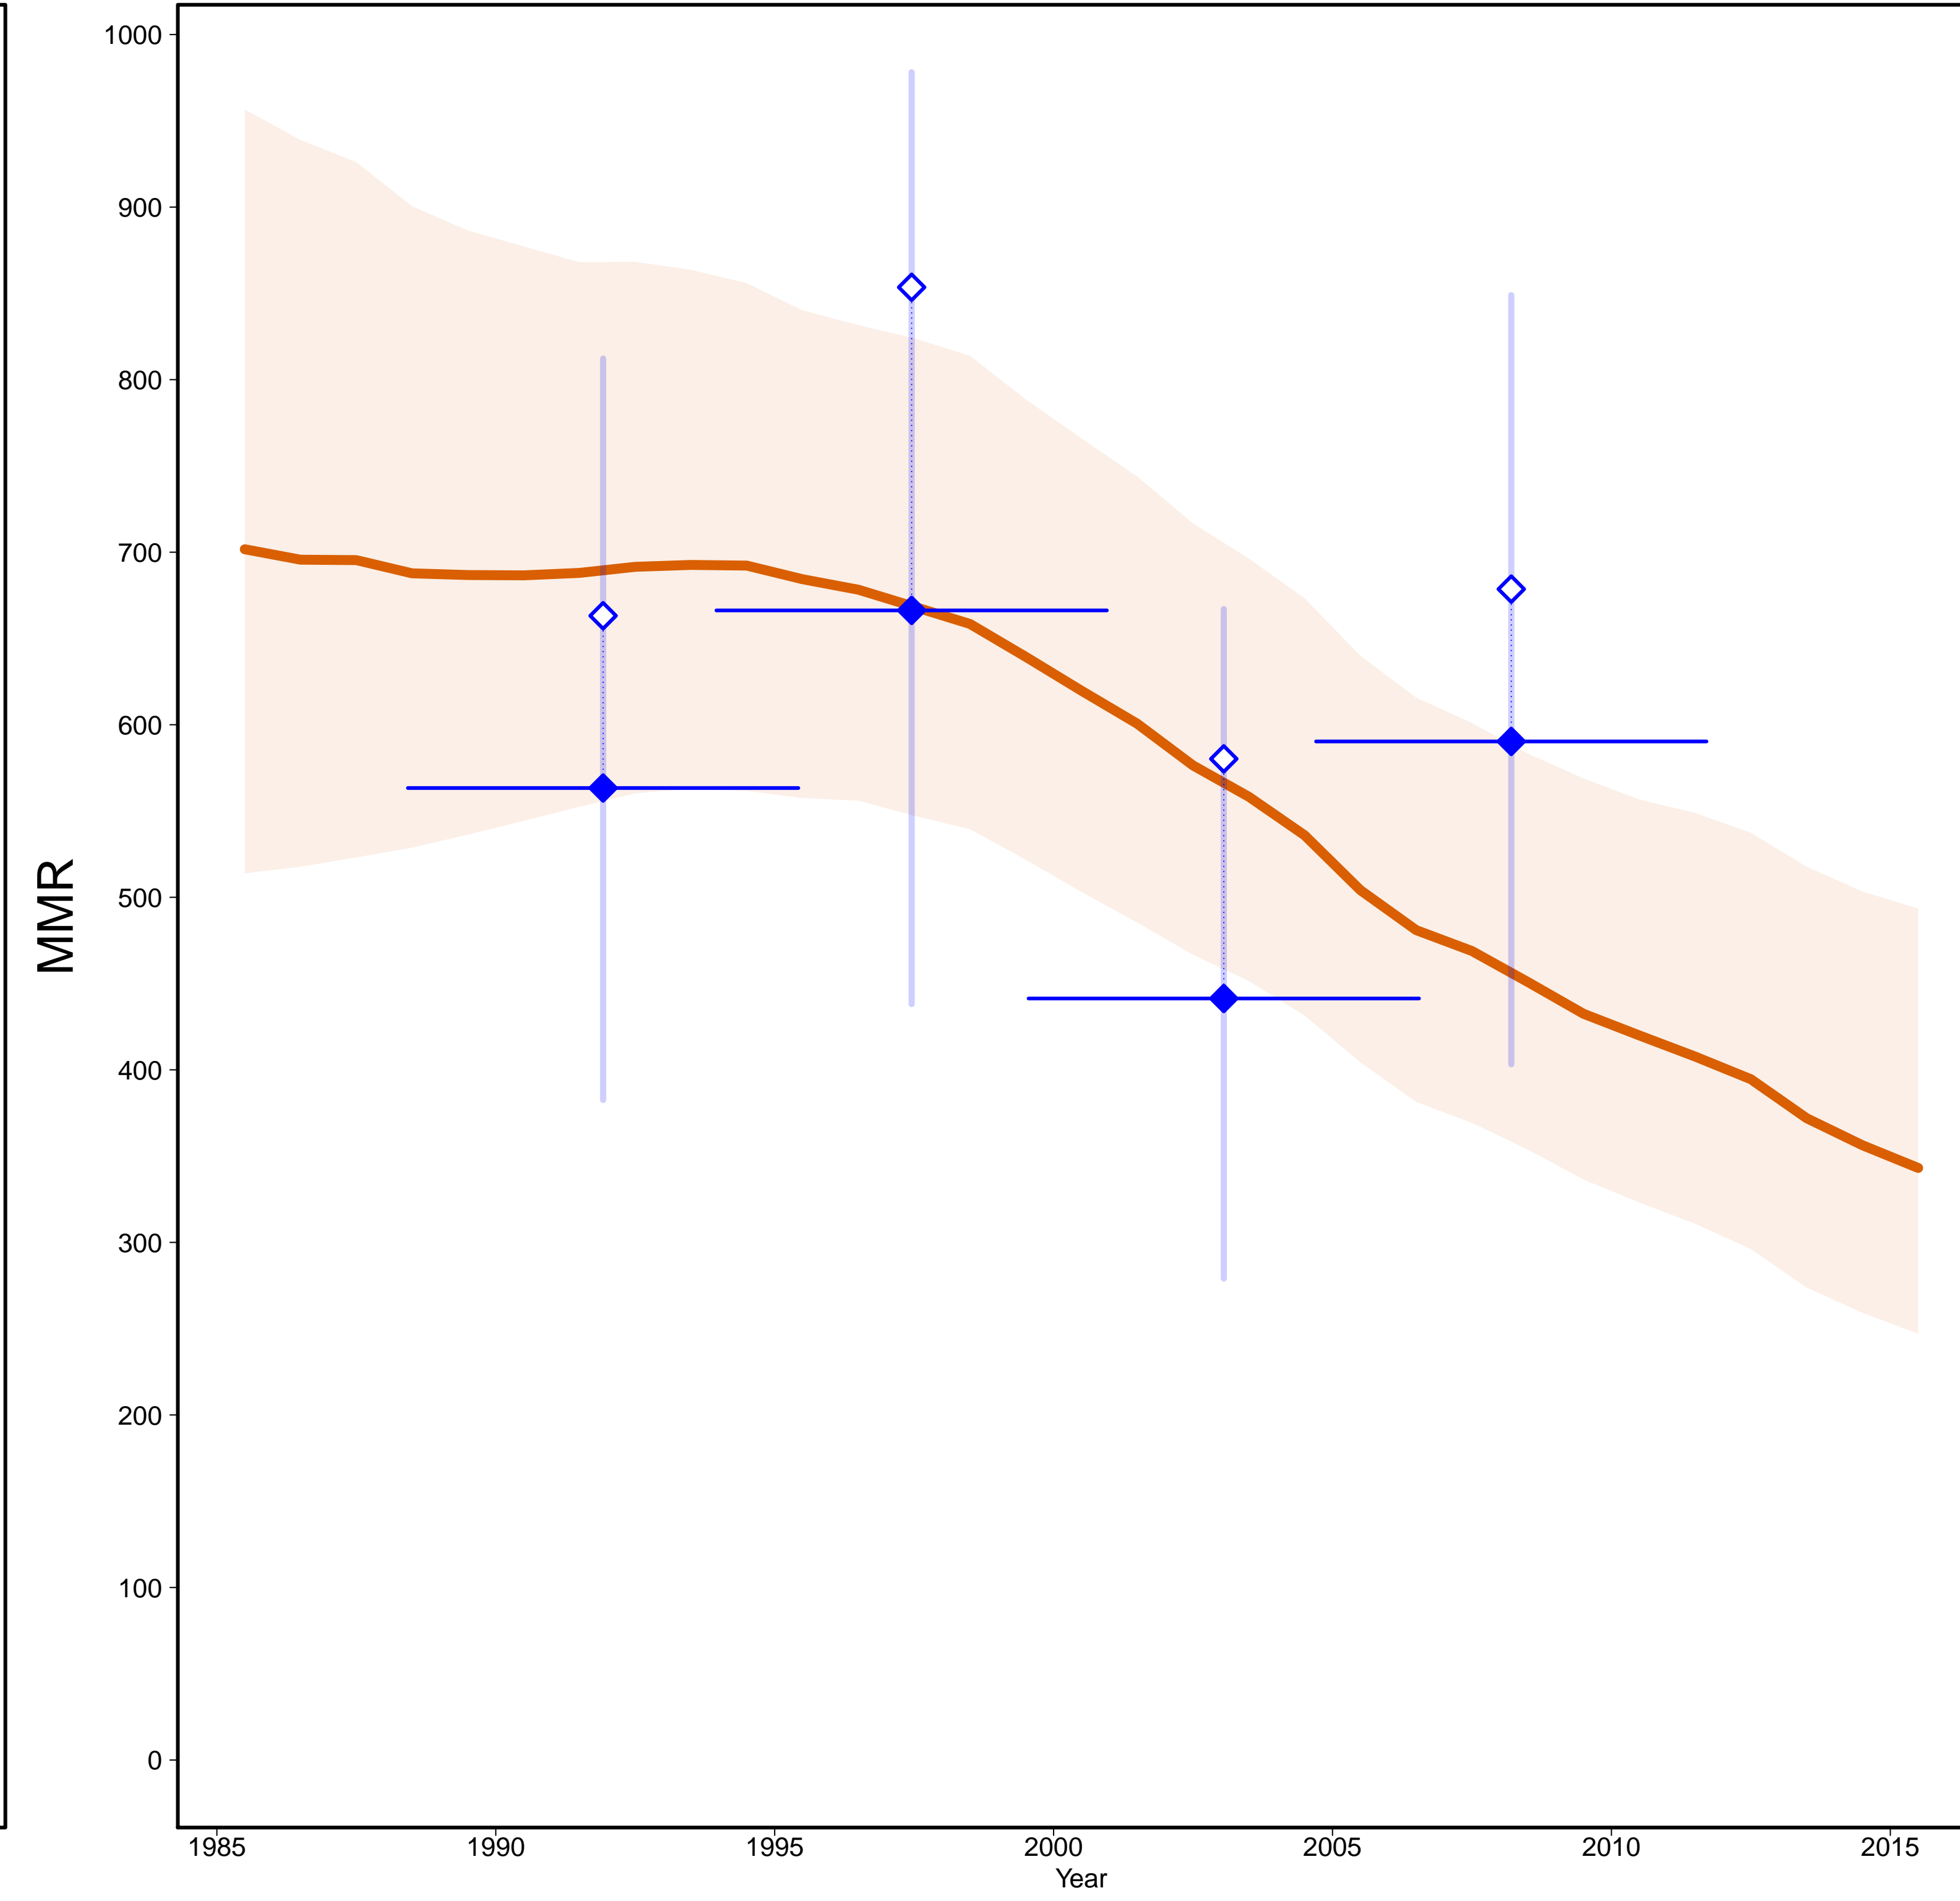

- Estimates —
- MMR Database 2015 —
- ◇ Observed Data
- ◆ Adjusted Data
- Data type —
- ◆ DHS

Gross Domestic Product

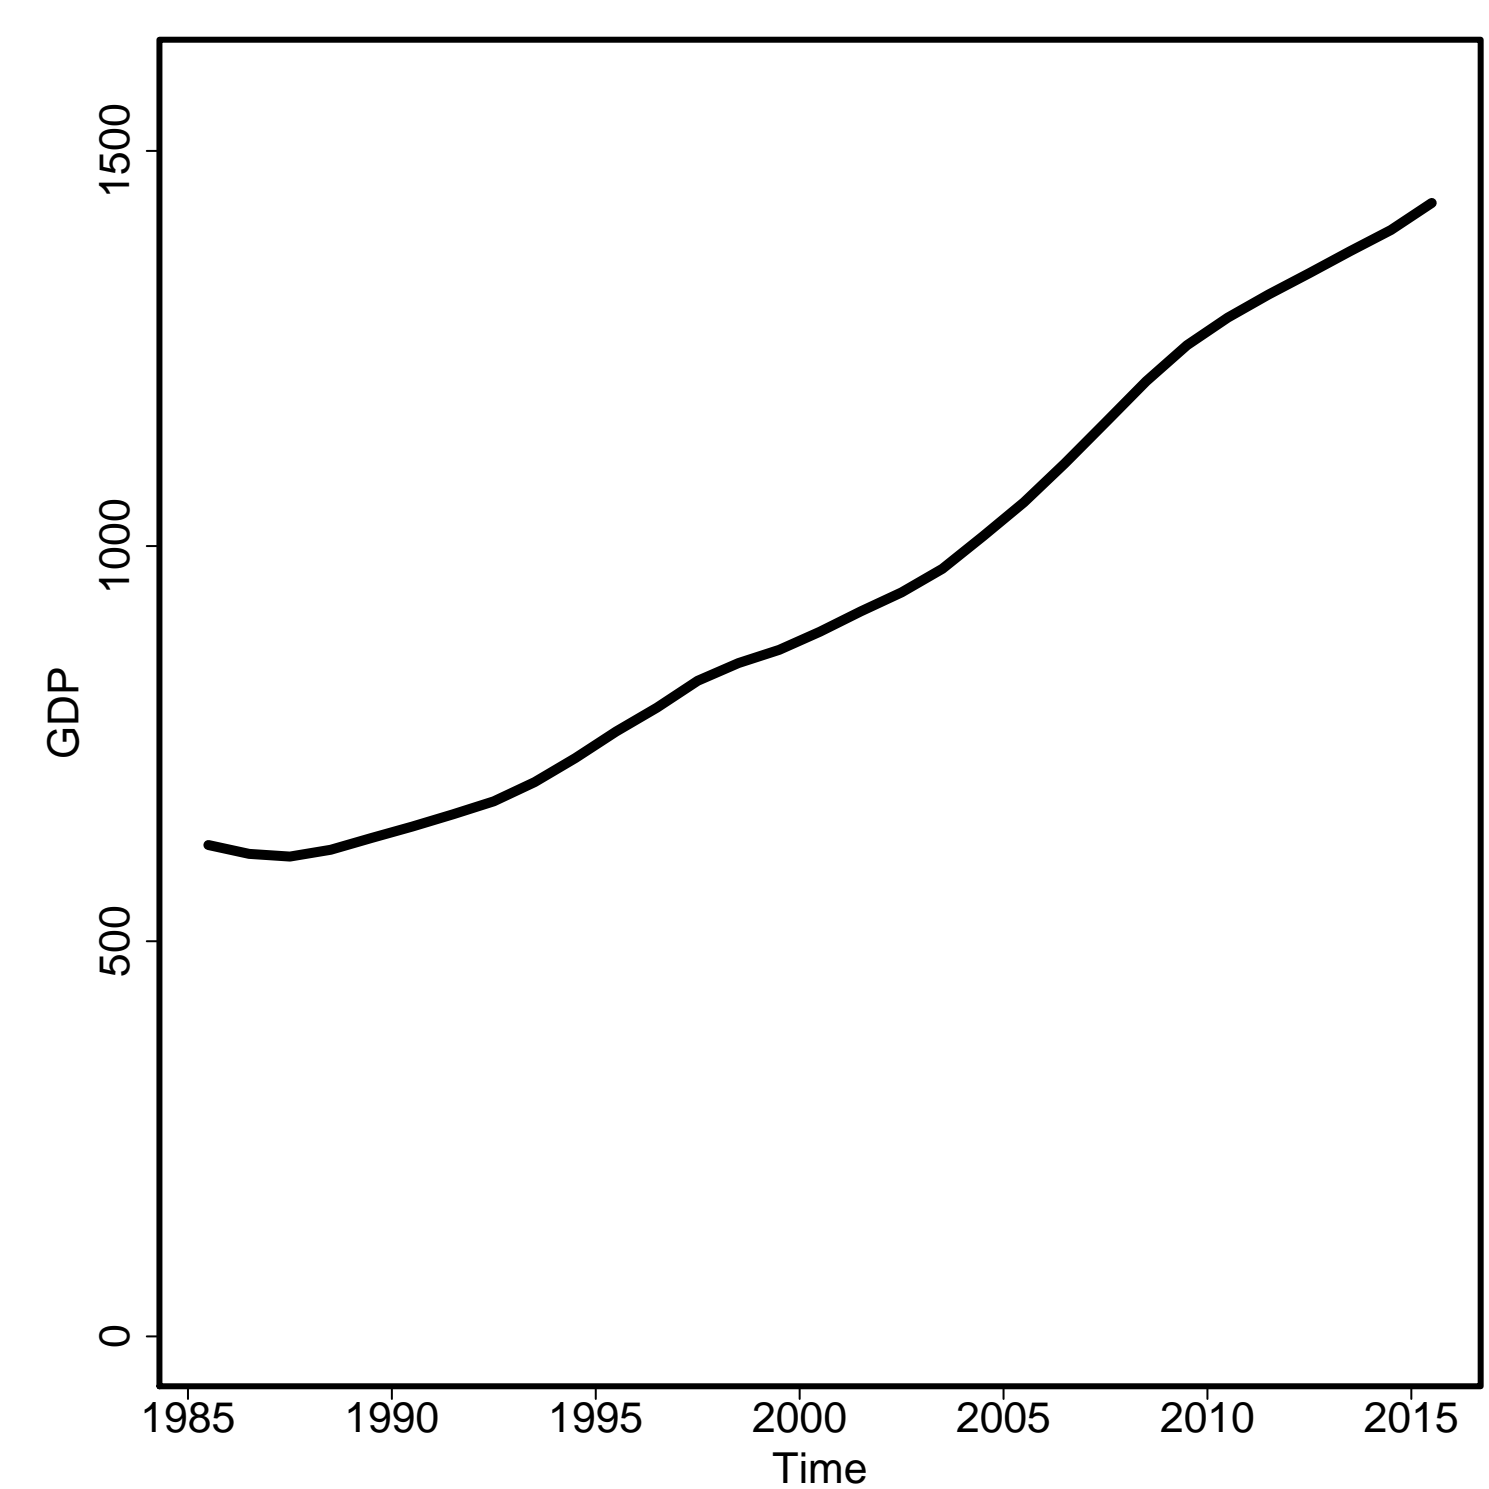

General Fertility Rate

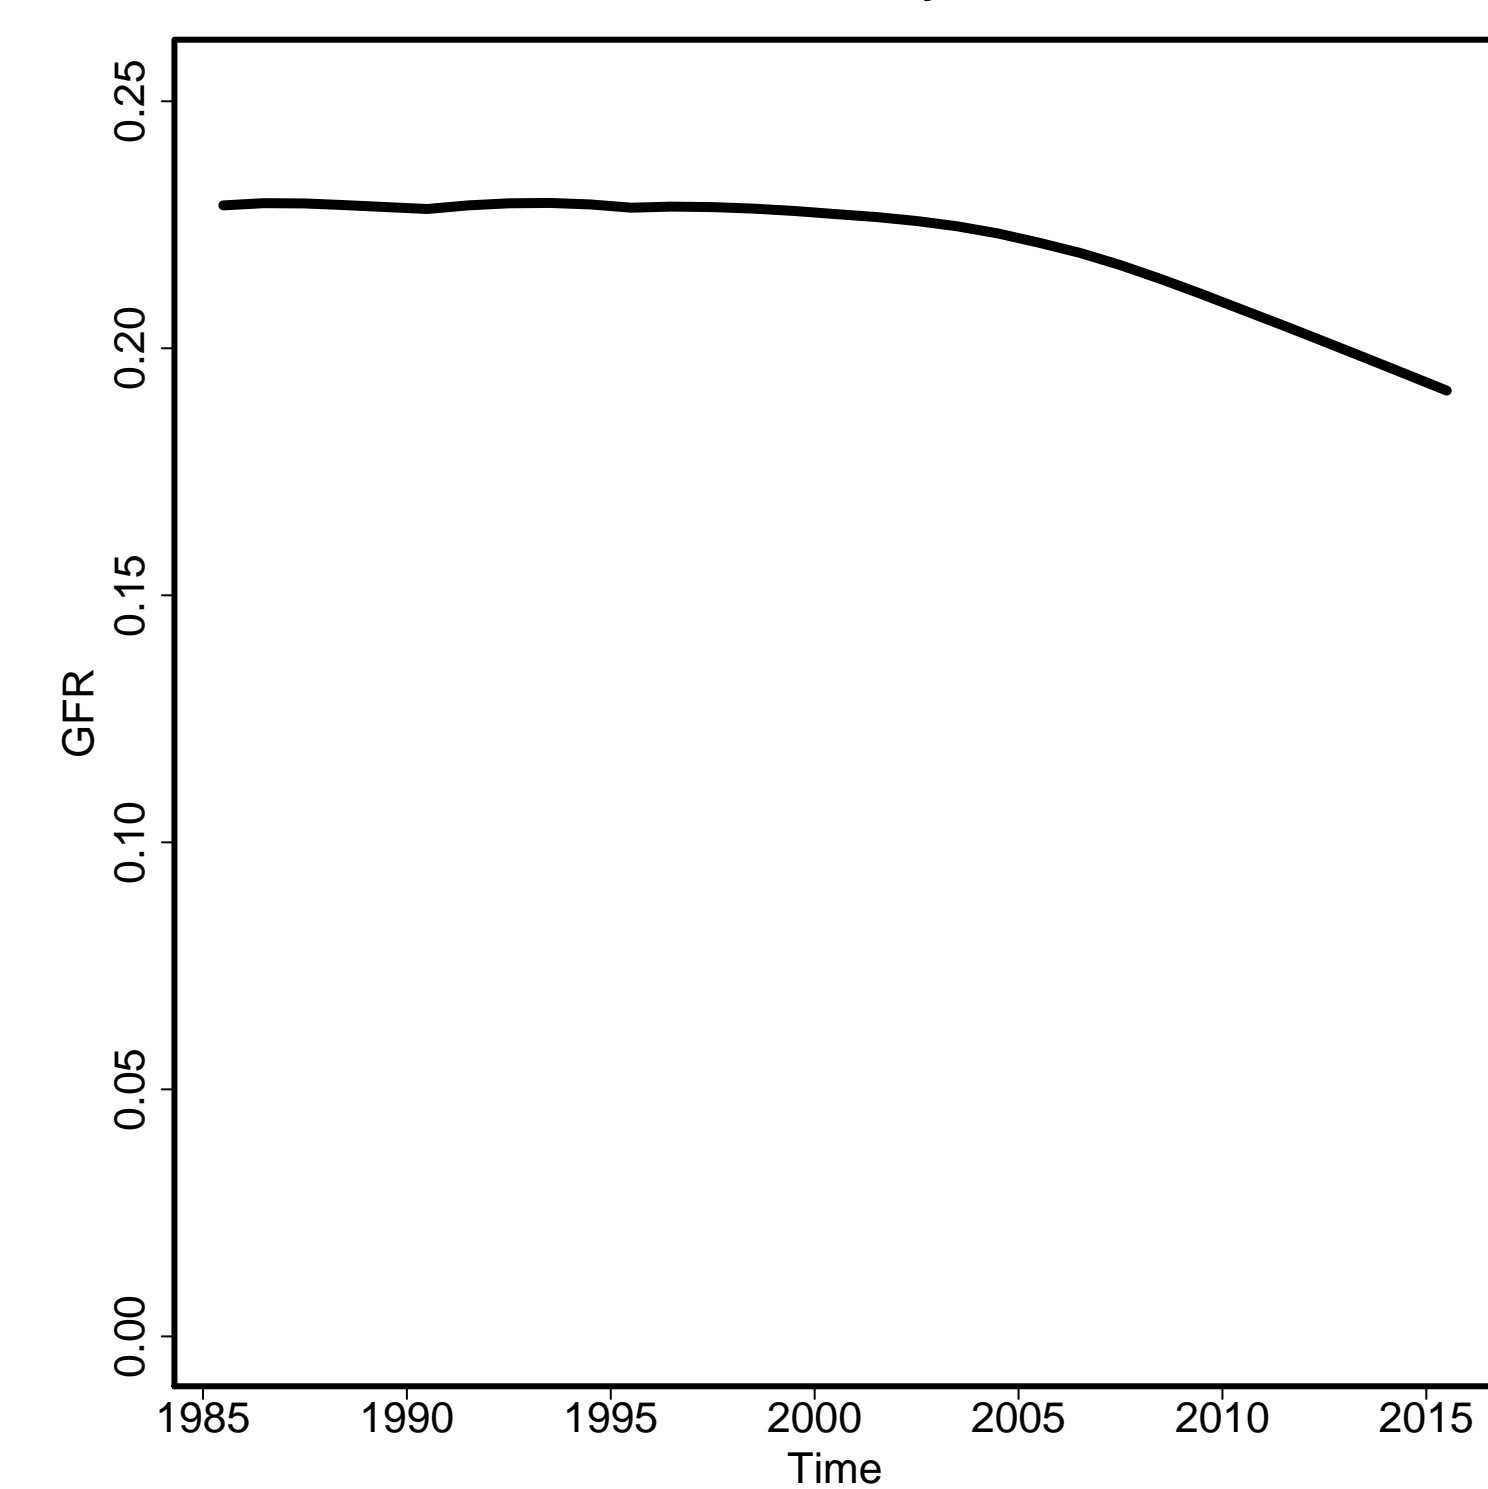

Skilled Attendance to Birth

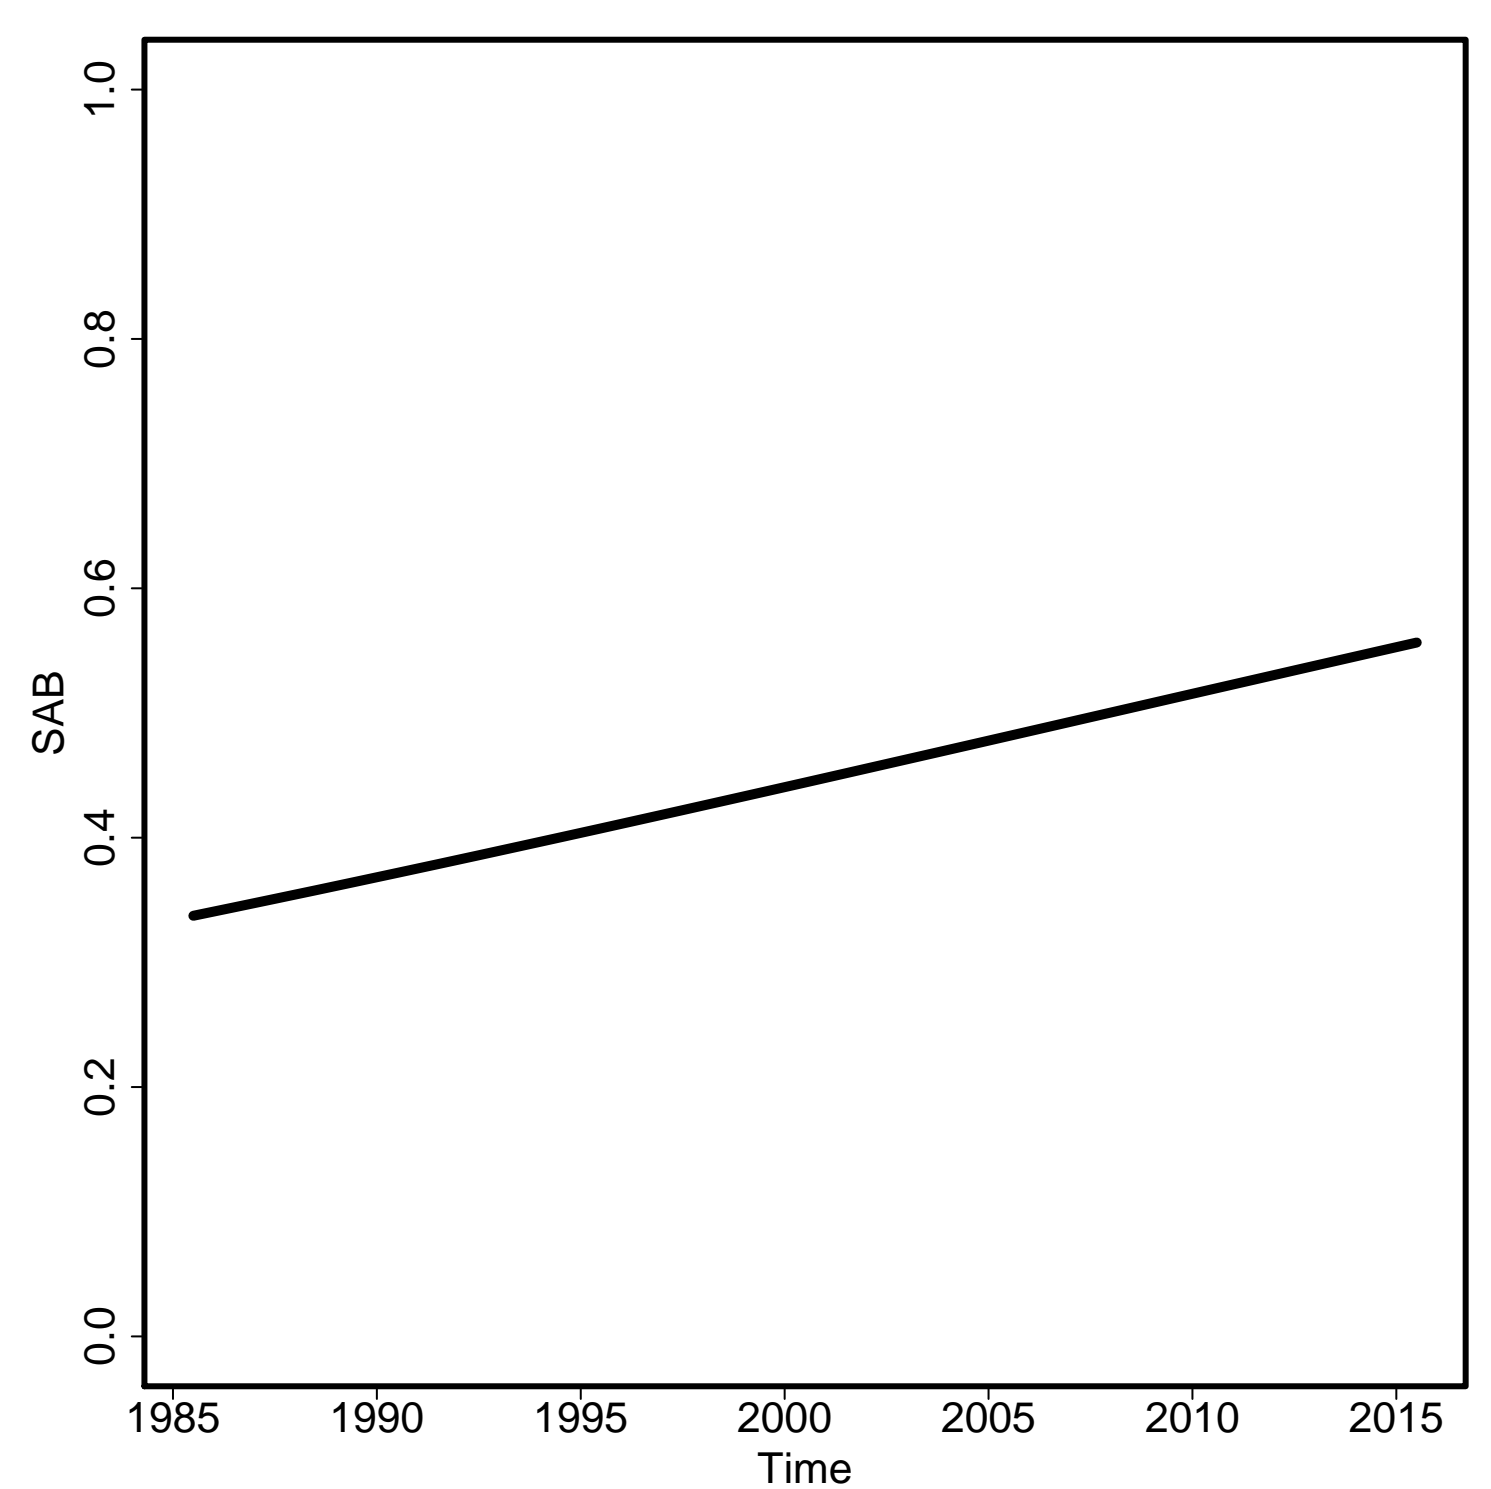

Envelope/Births

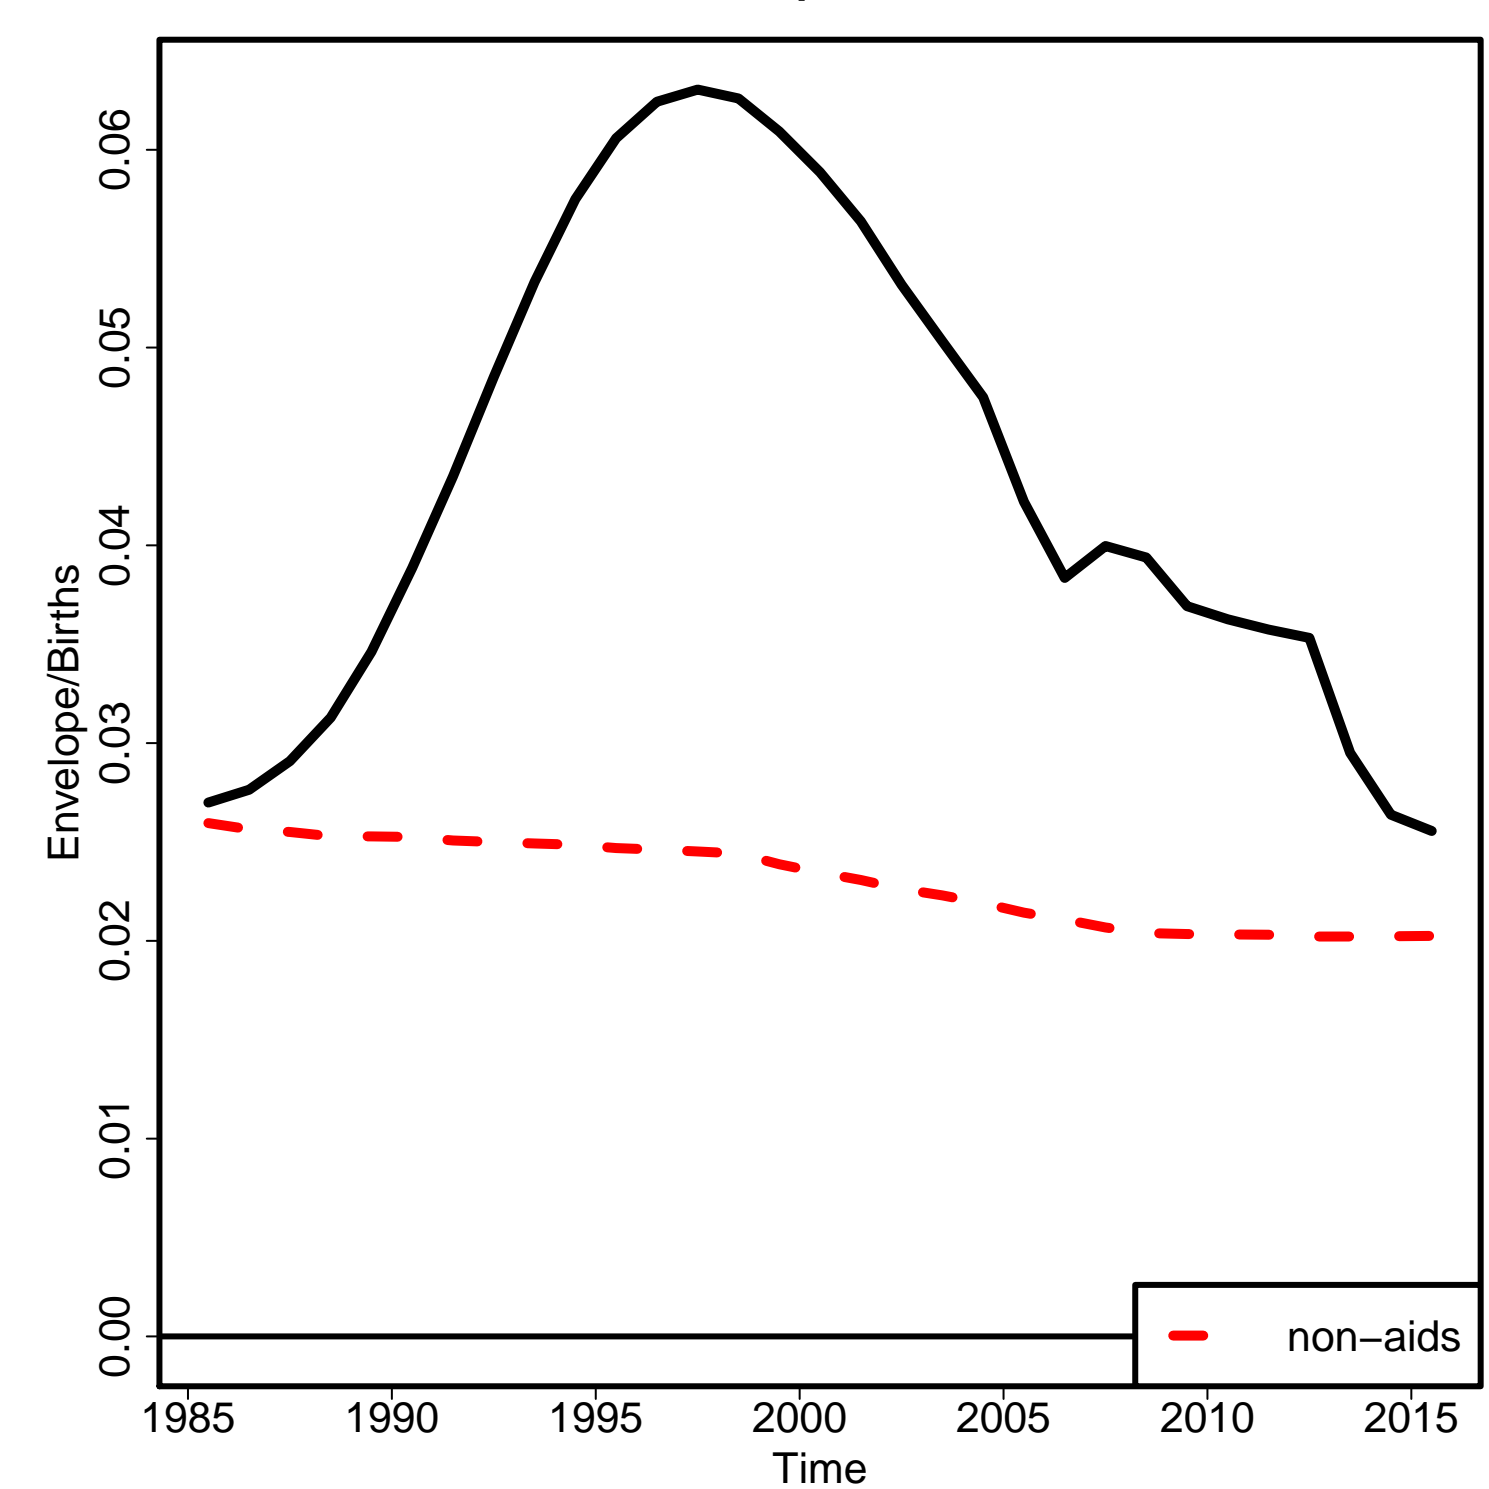

Non-aids MMR

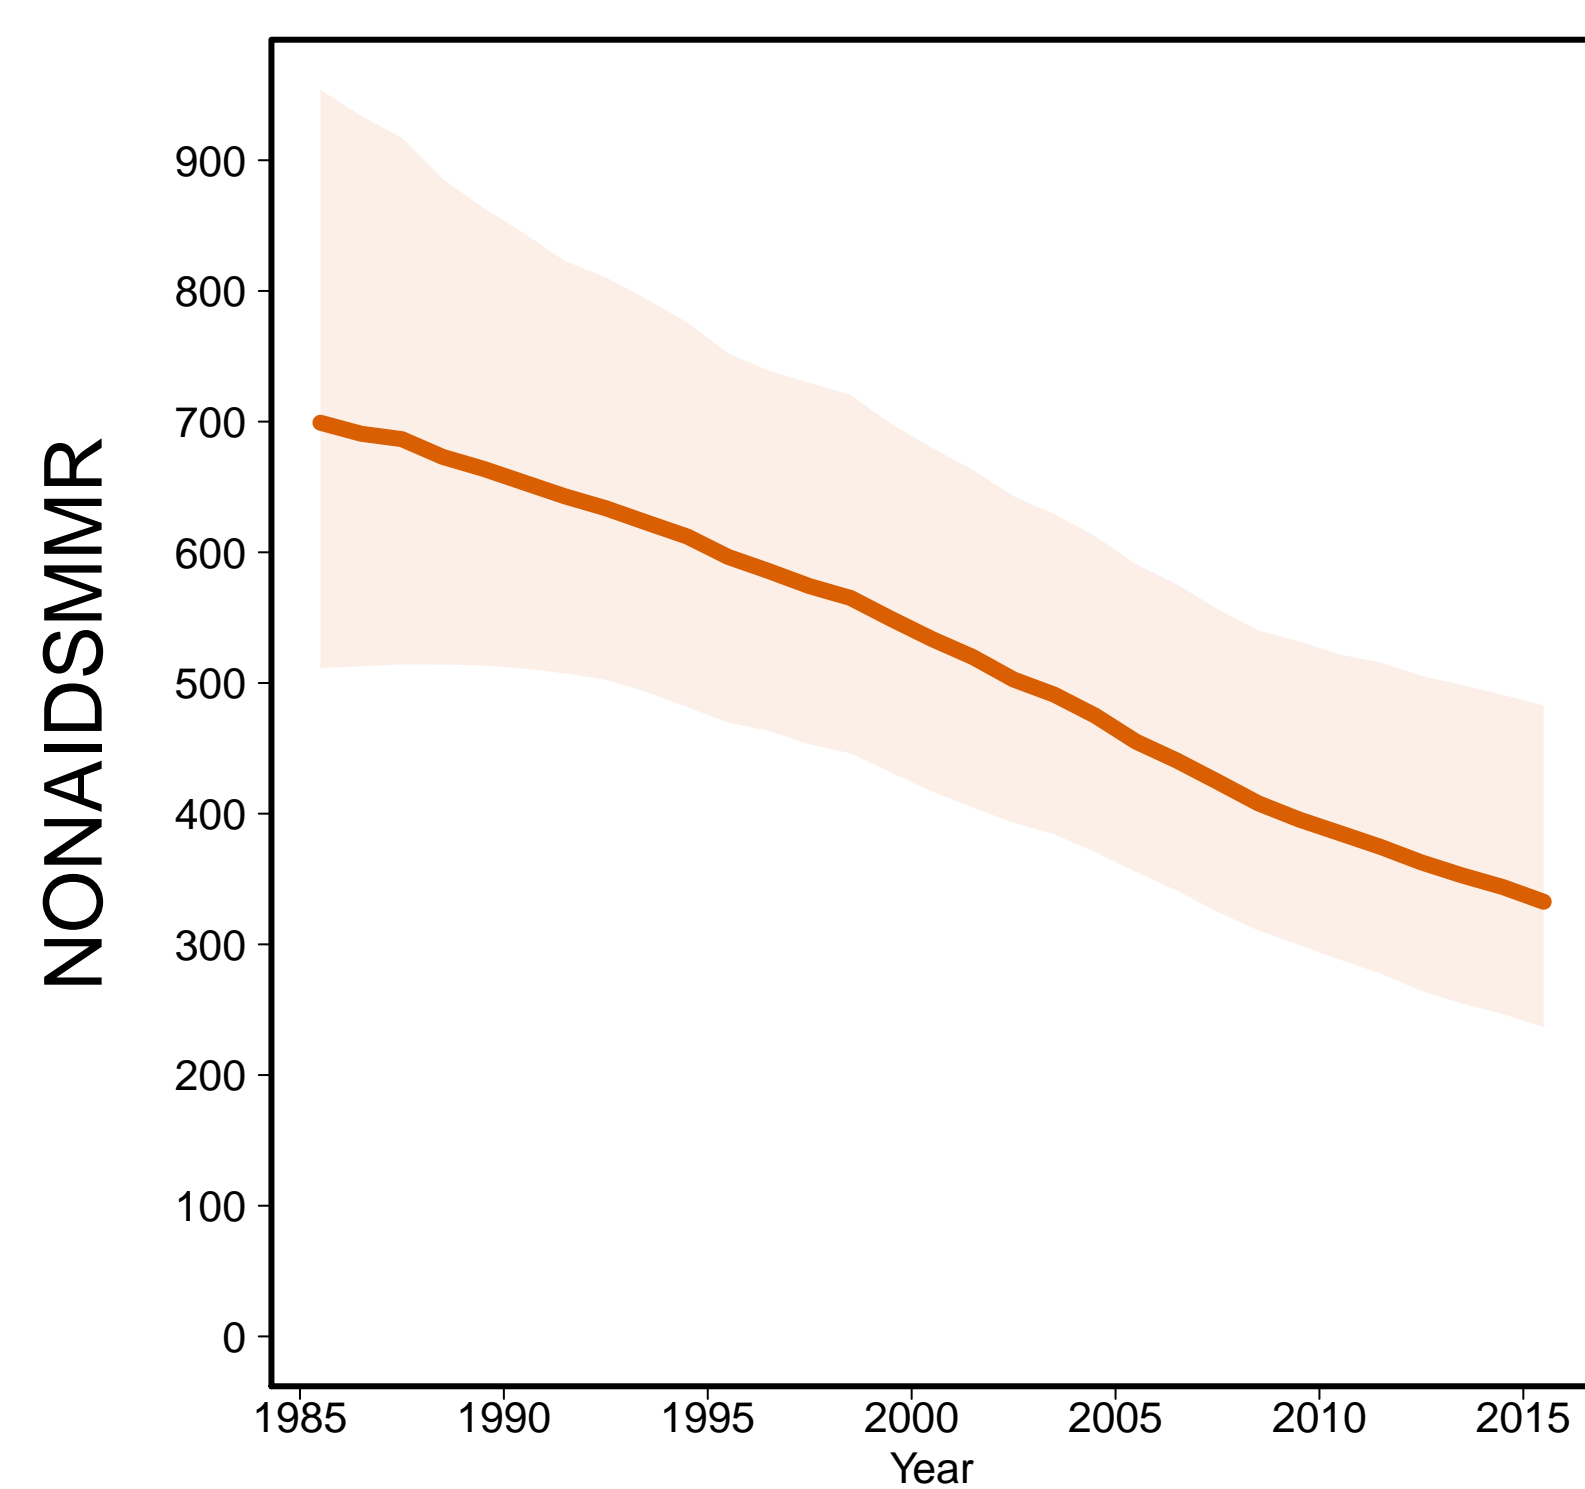

Aids MMR

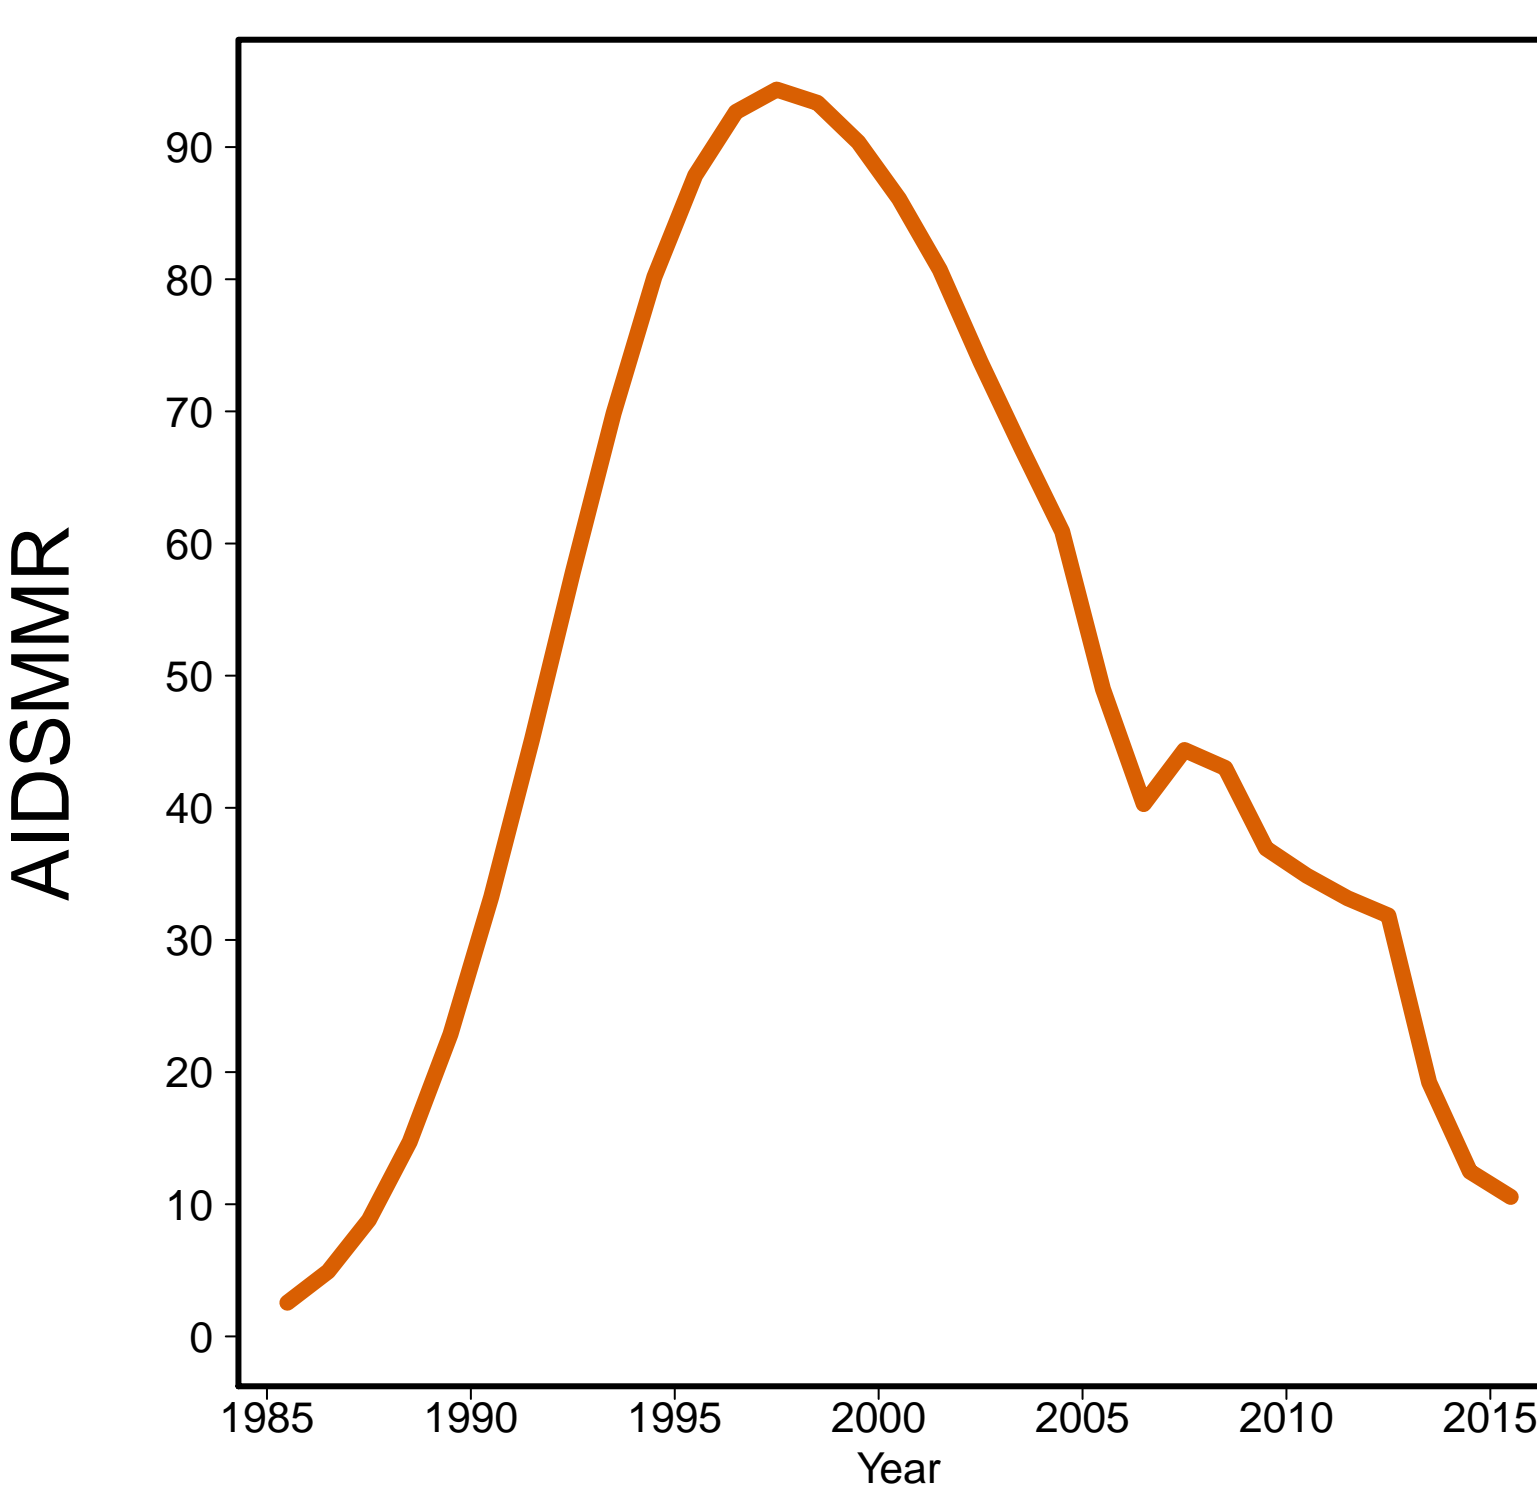

Ukraine [UKR]  
(Developed regions)

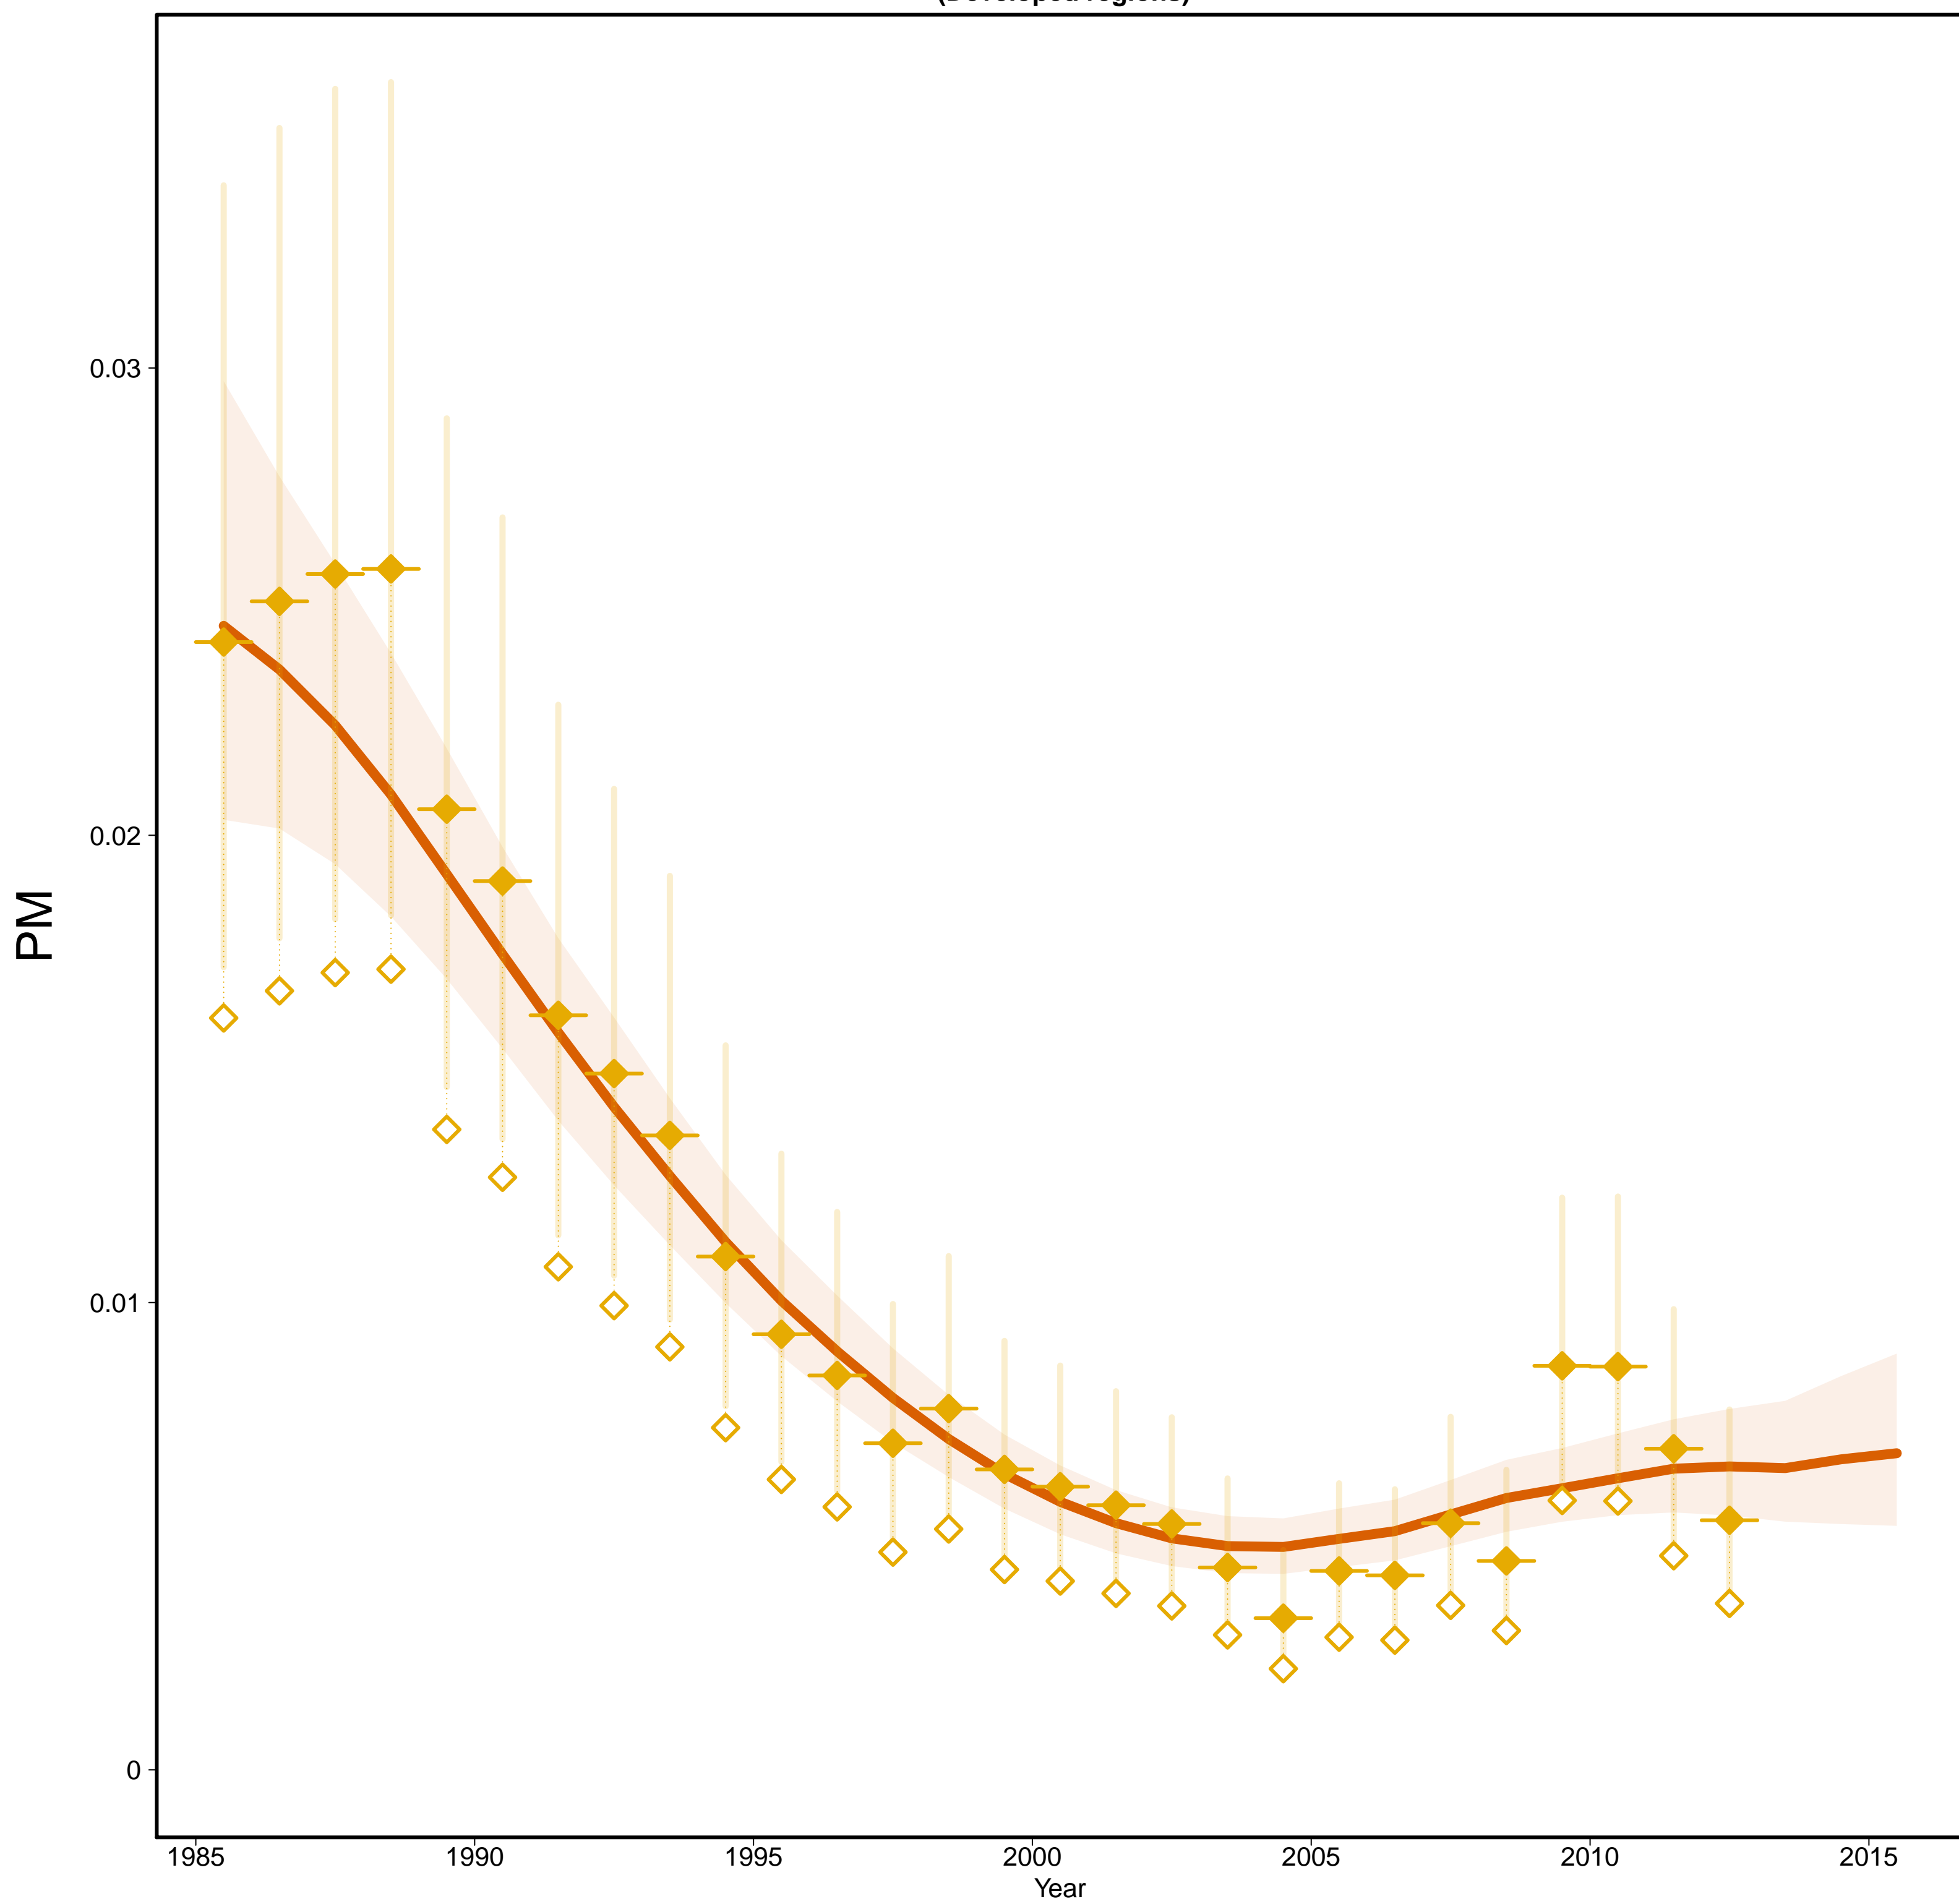

Ukraine [UKR]  
(Developed regions)

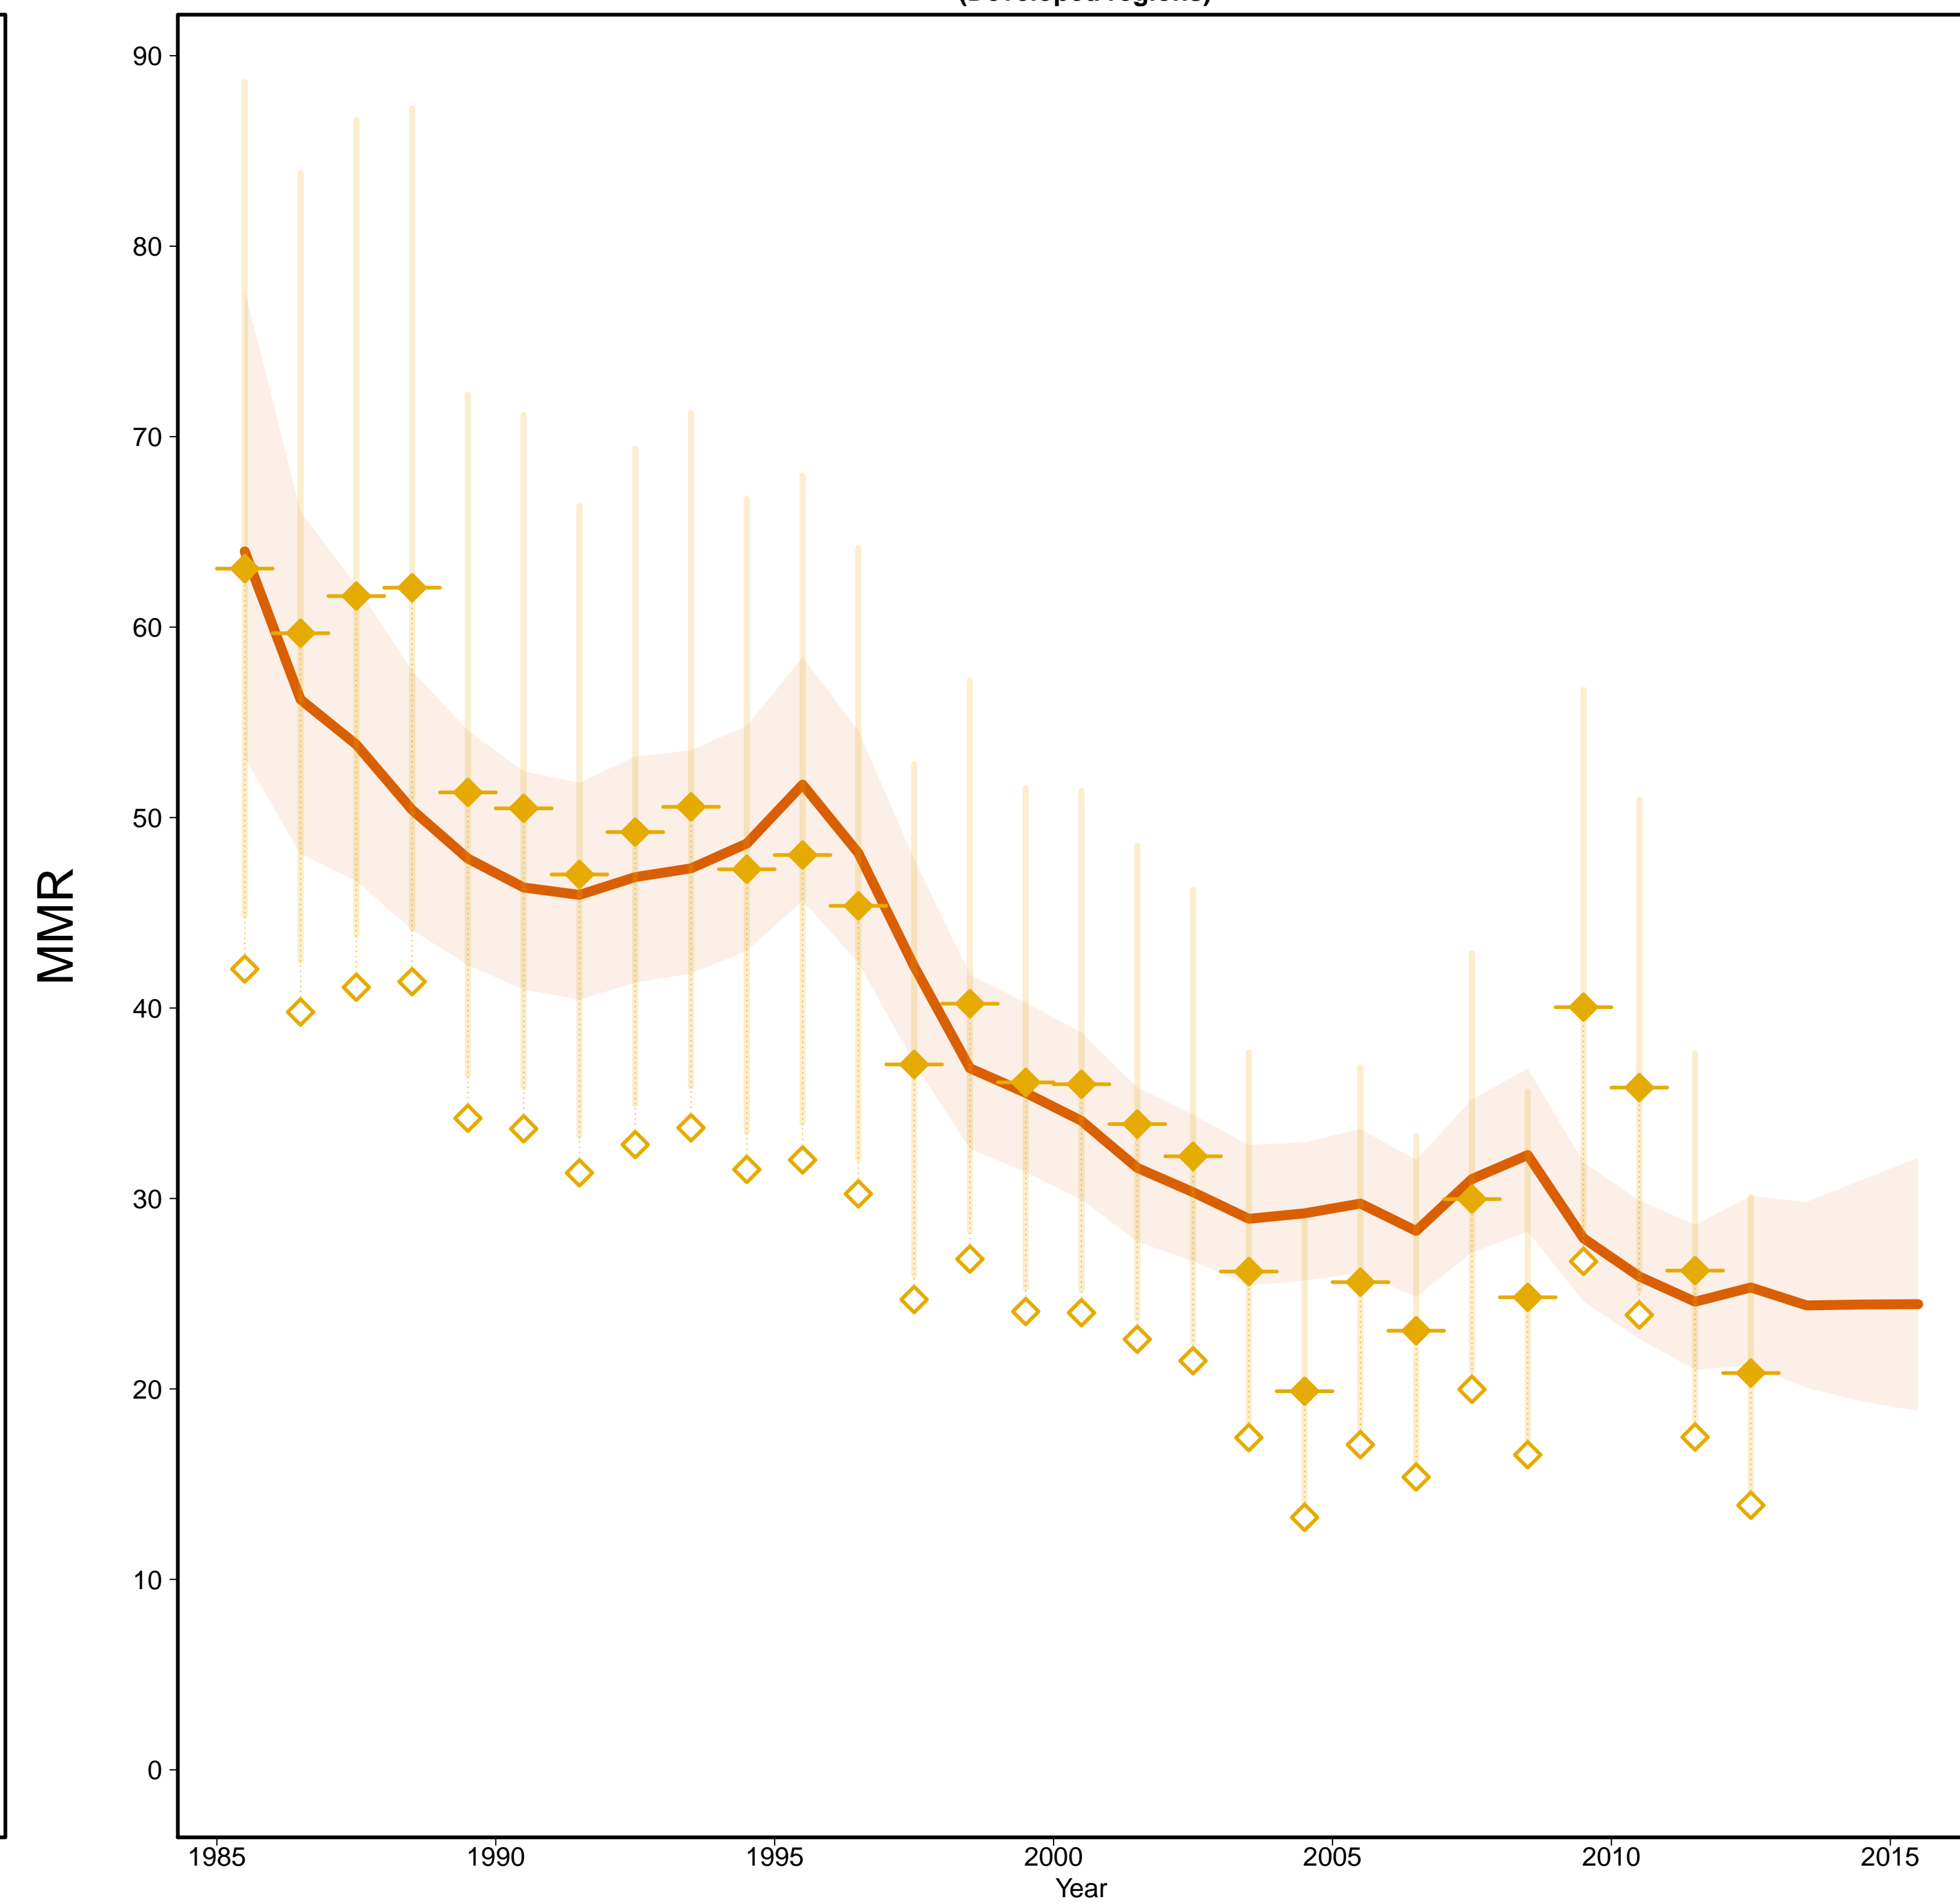

- Estimates —
- MMR Database 2015 —
- ◇ Observed Data
- ◆ Adjusted Data
- Data type —
- ◆ VR

Gross Domestic Product

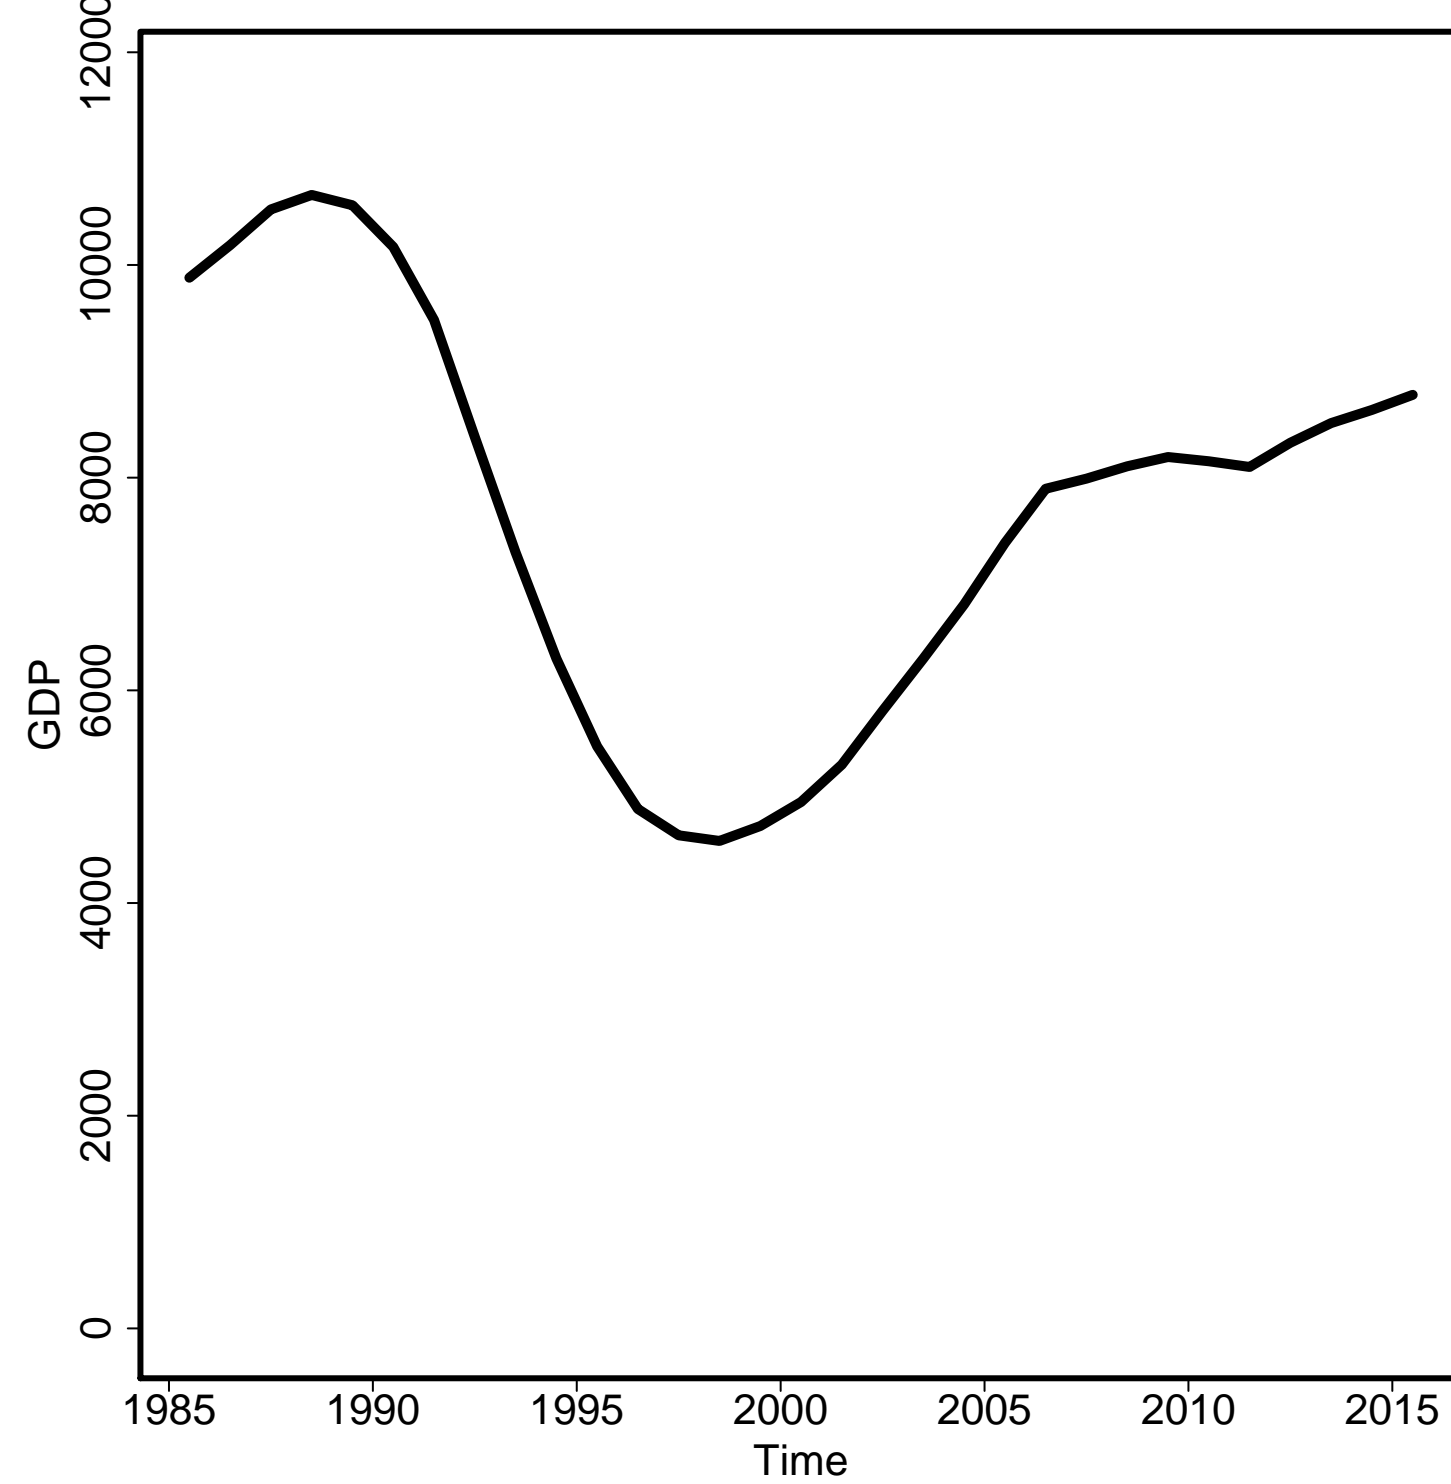

General Fertility Rate

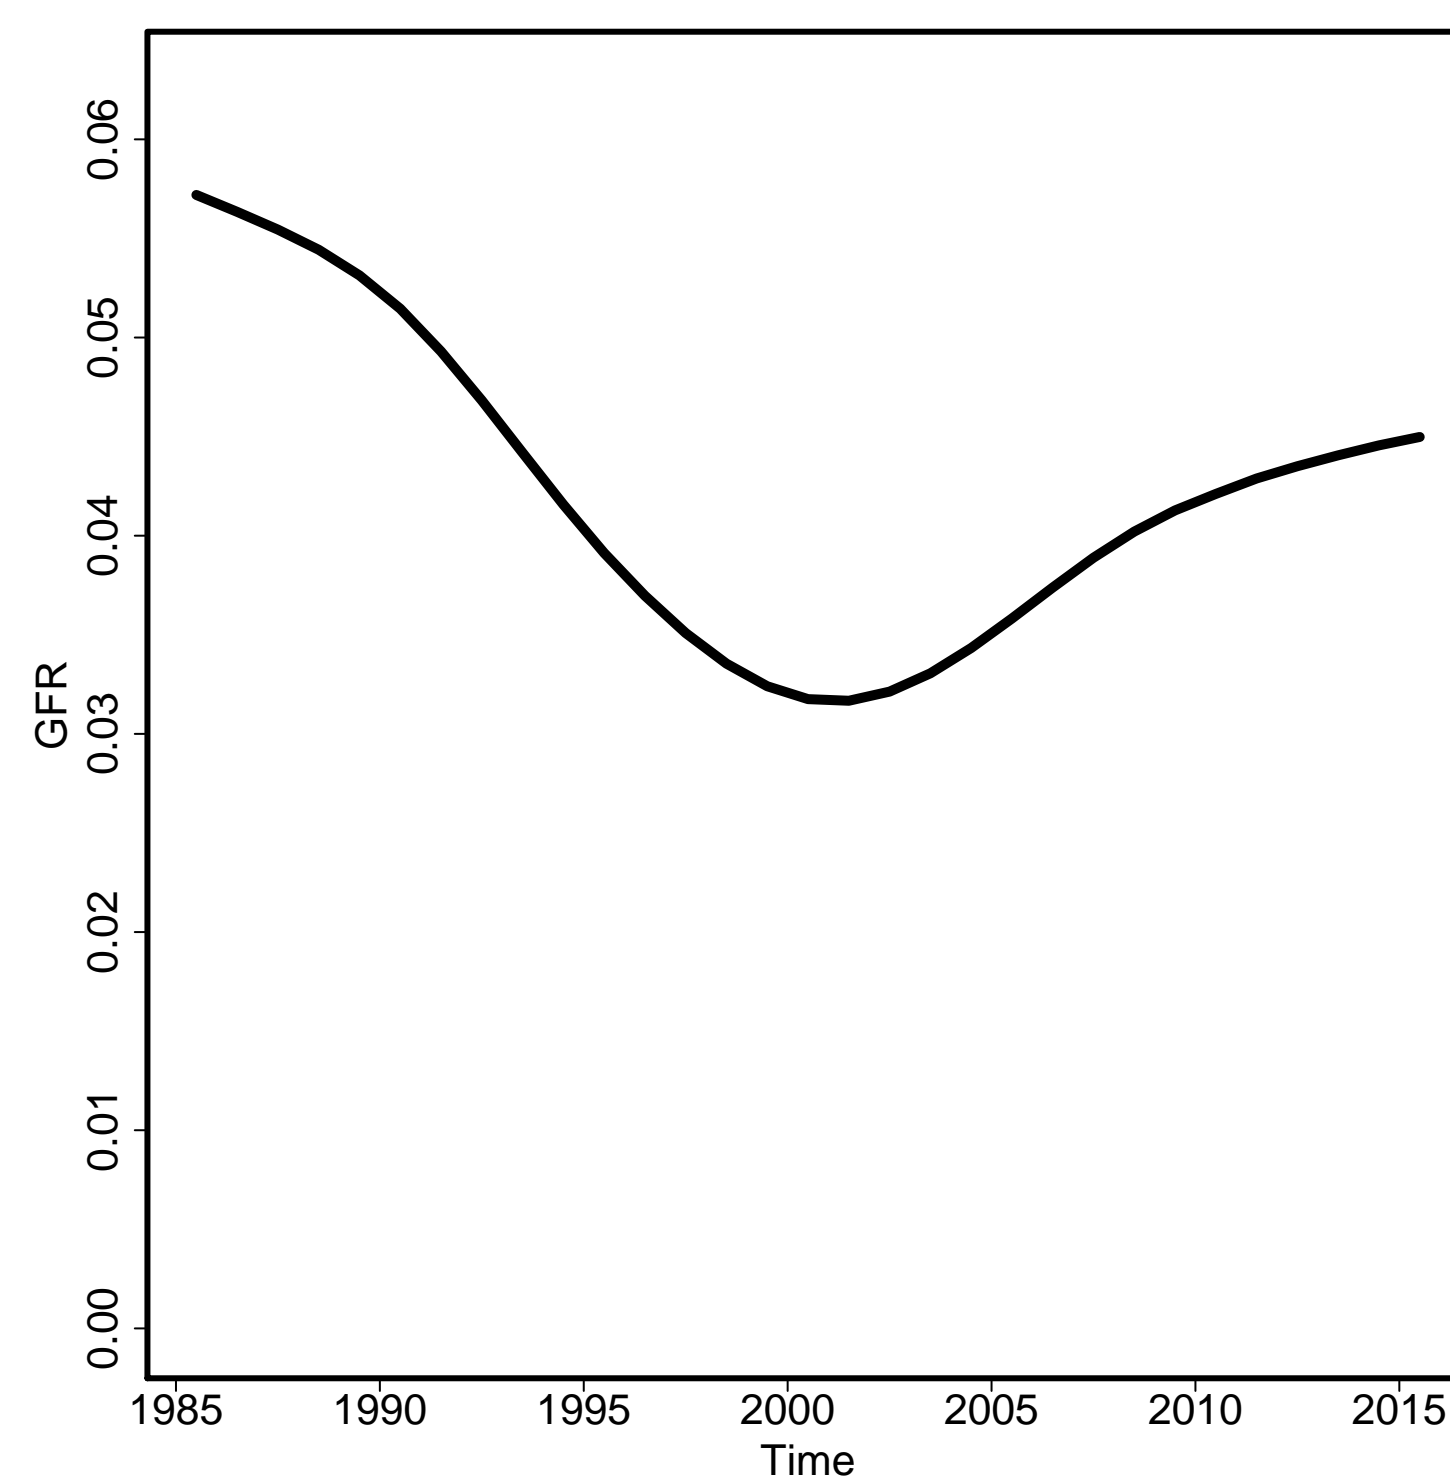

Skilled Attendance to Birth

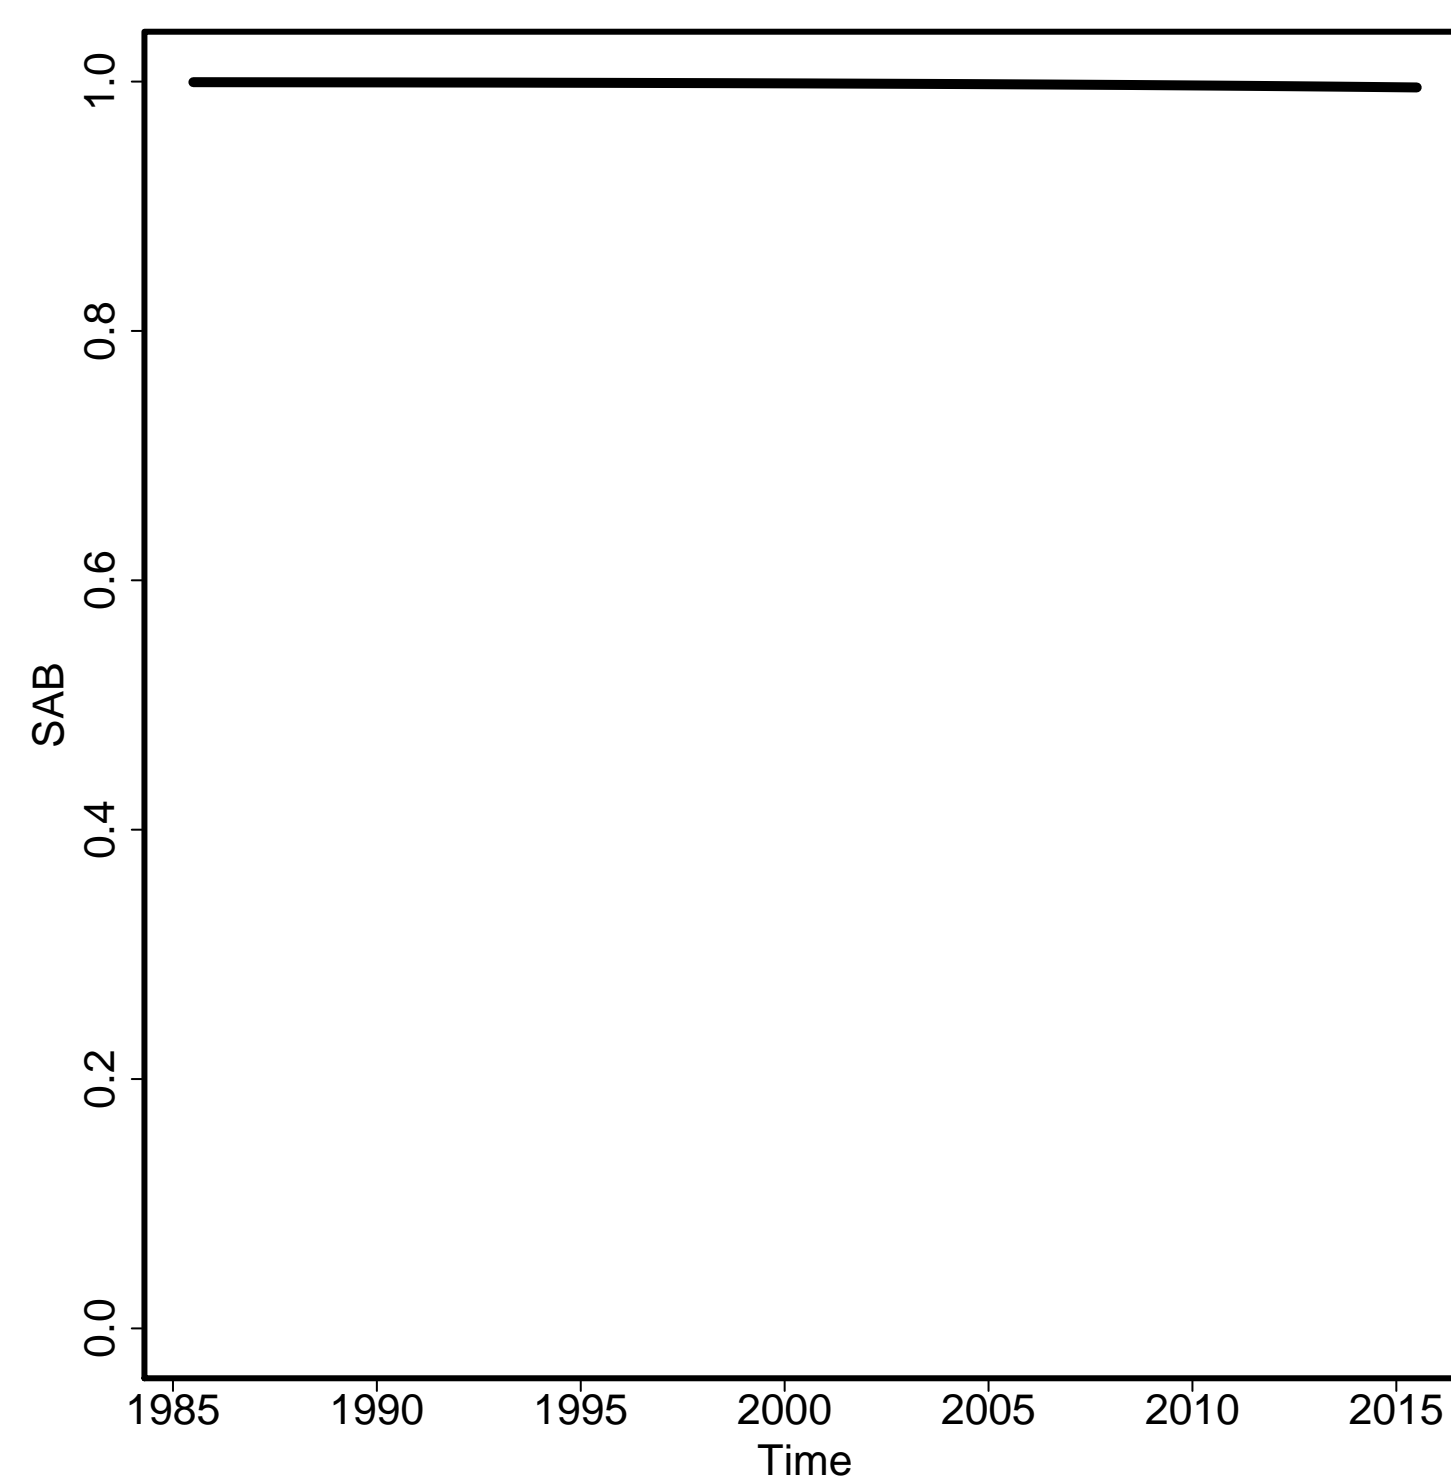

Envelope/Births

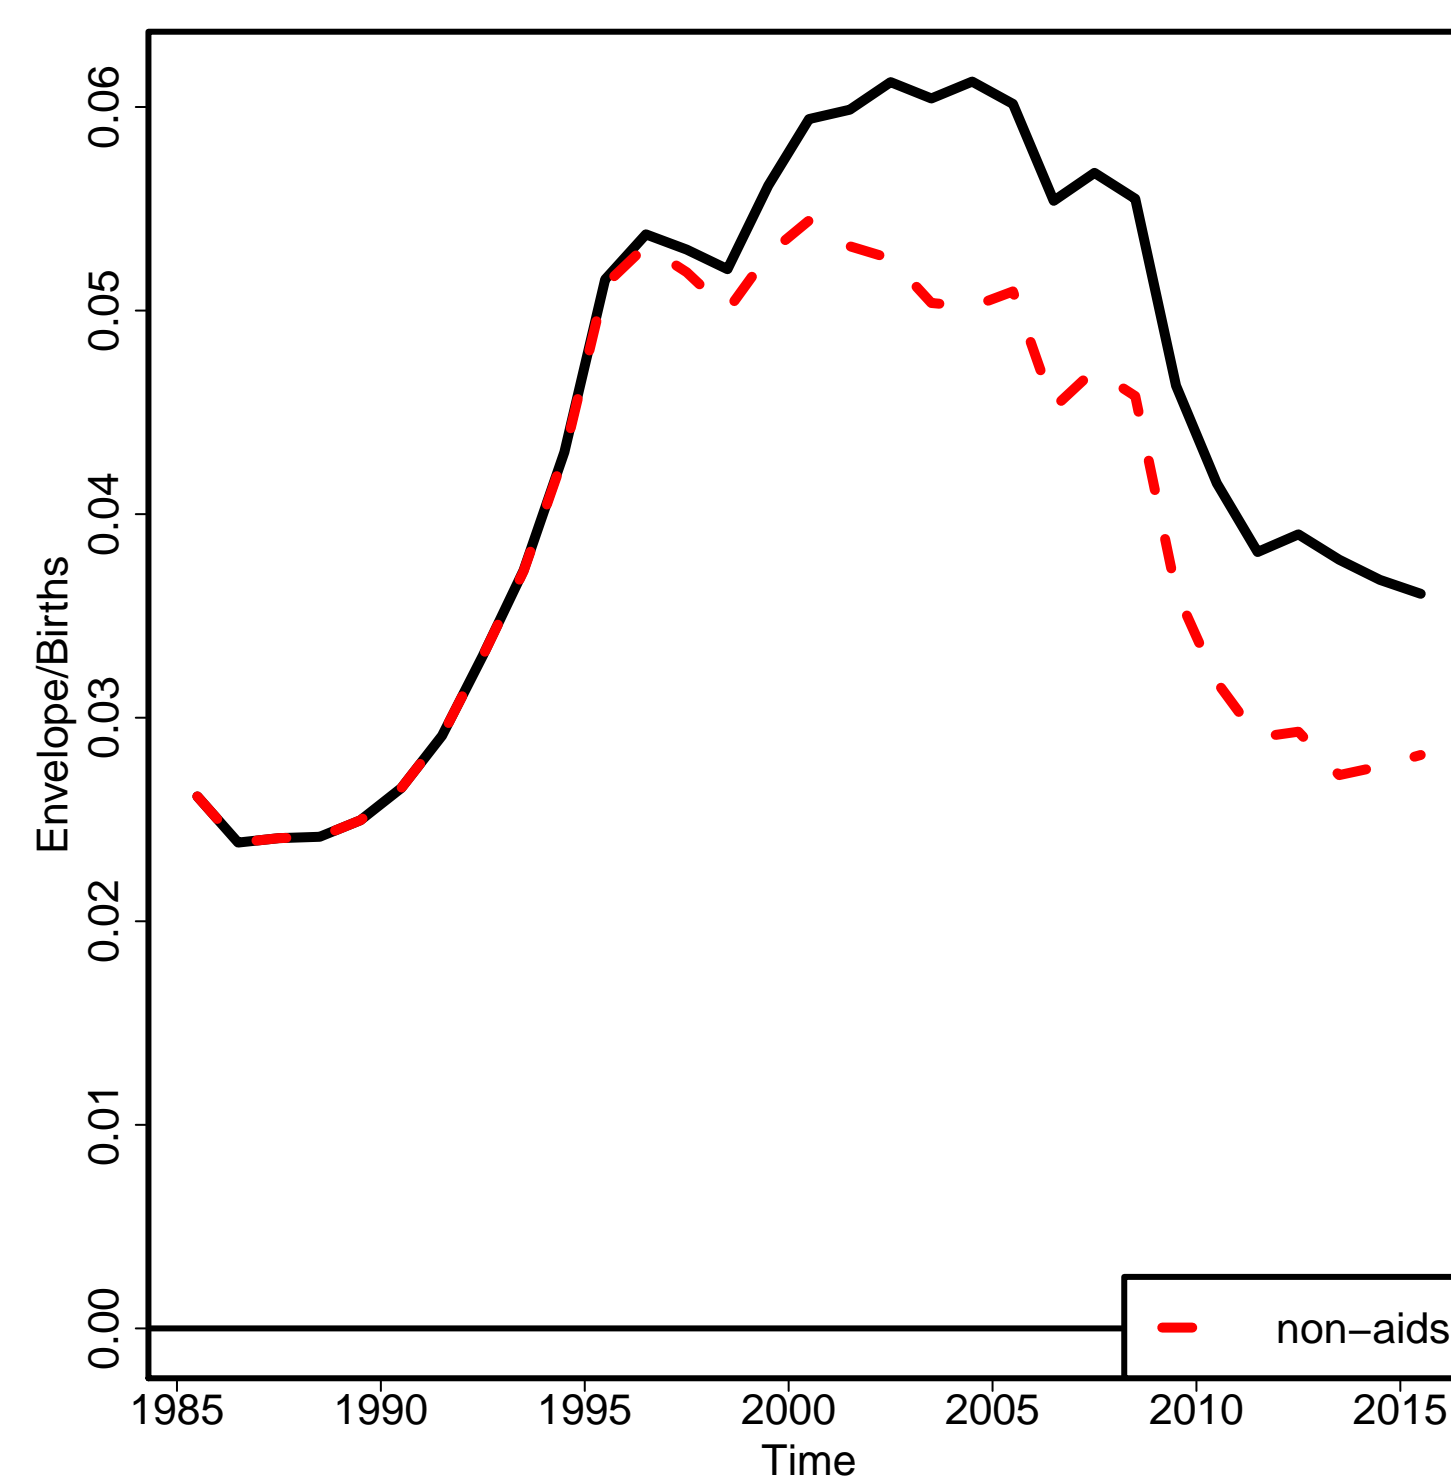

Non-aids MMR

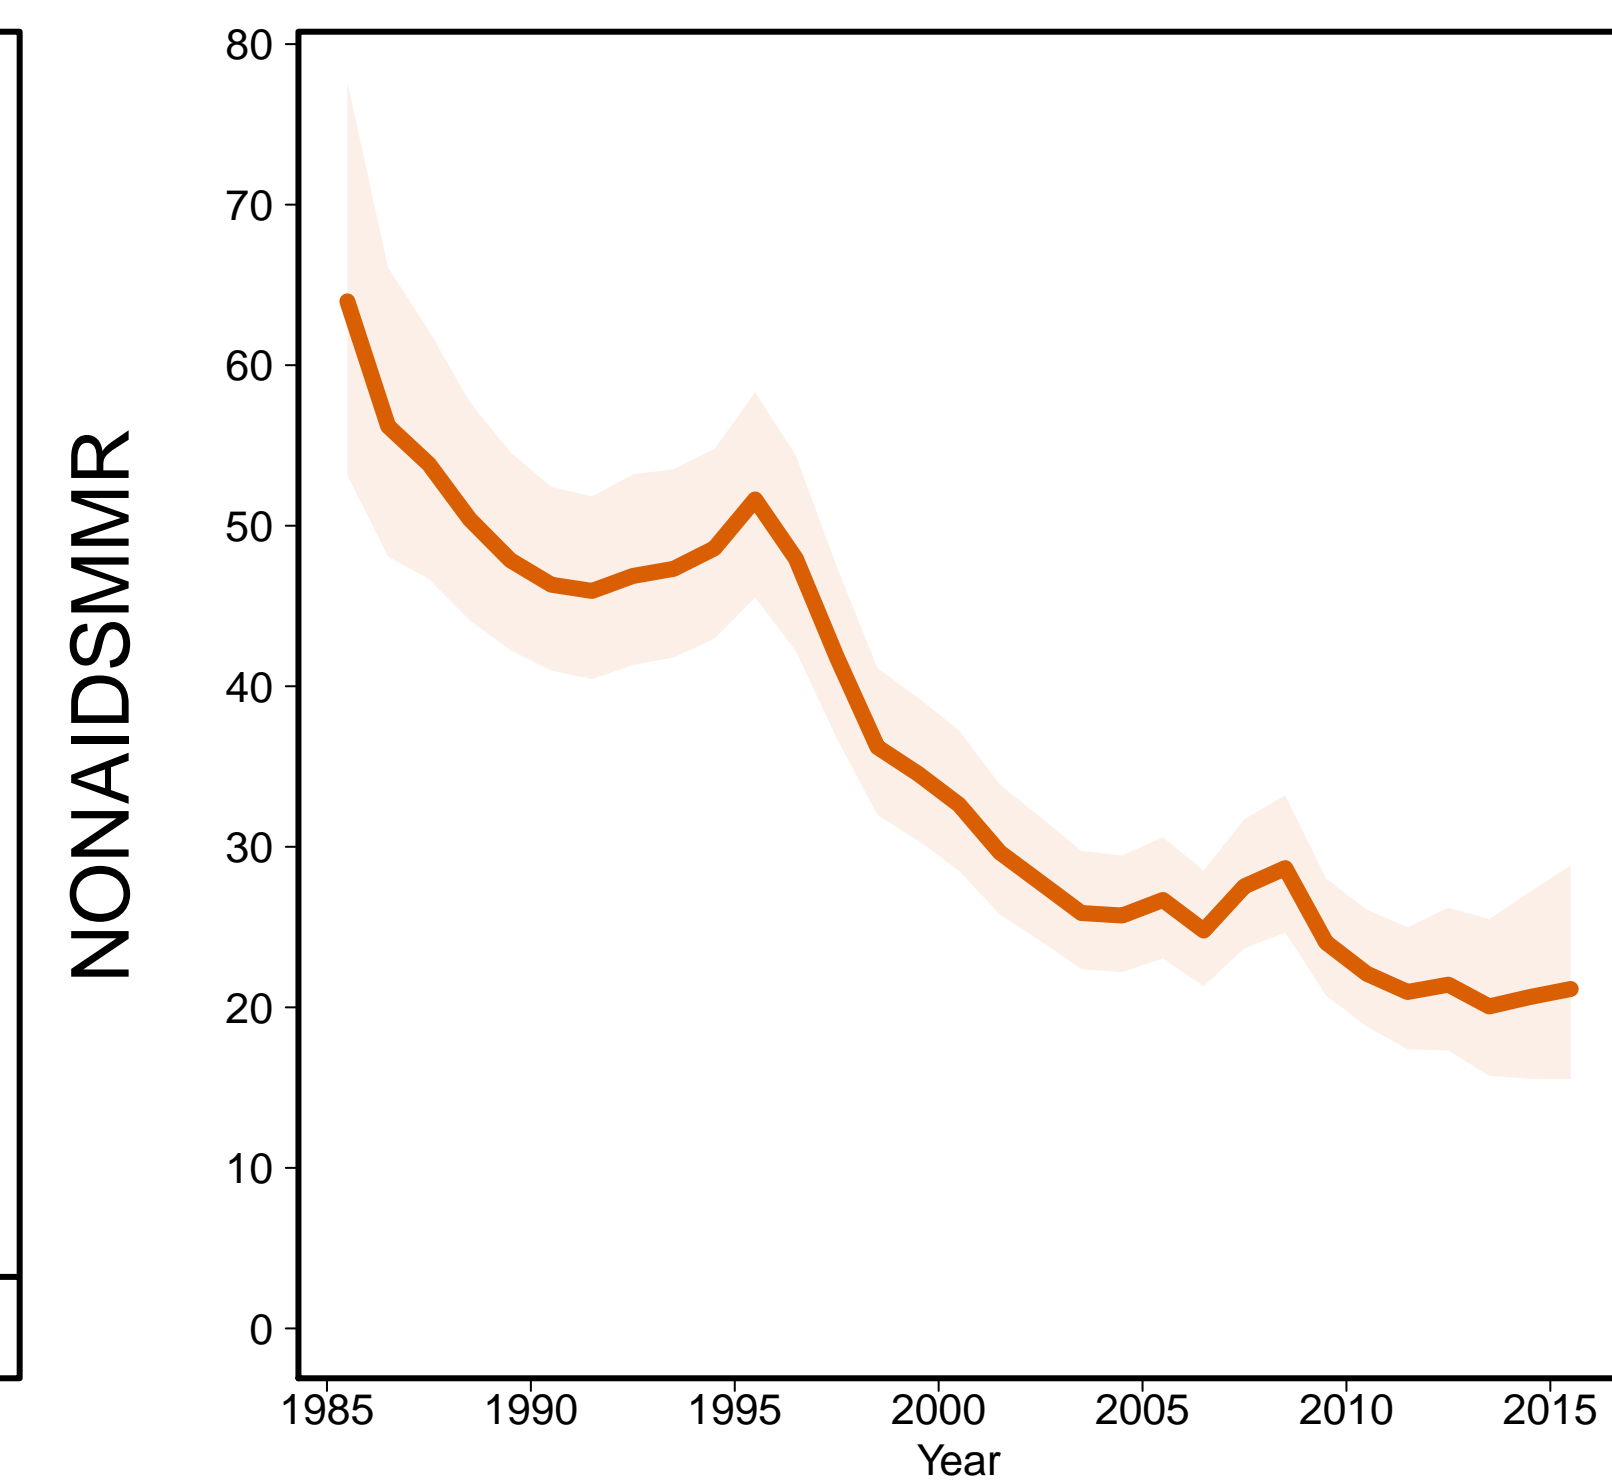

Aids MMR

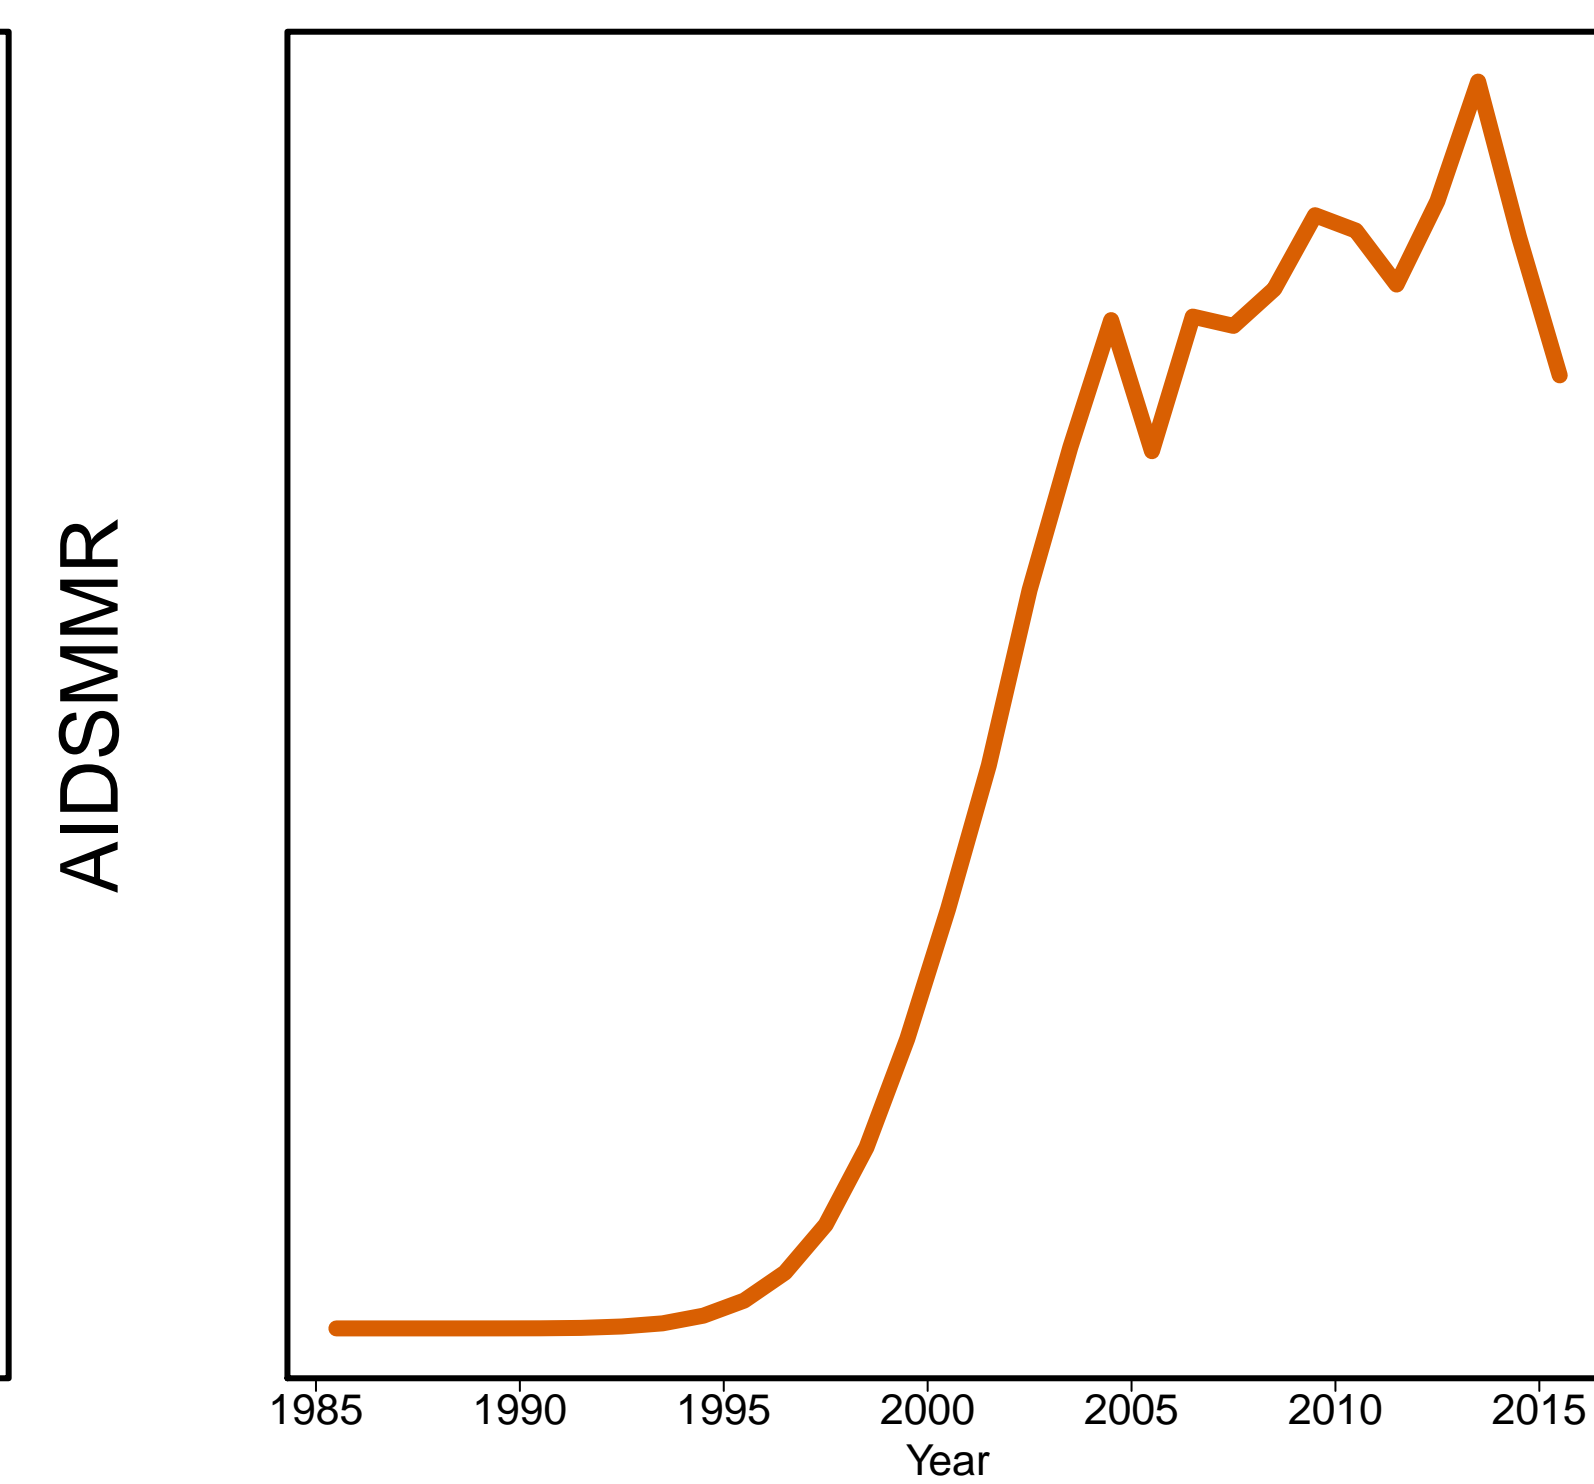

United Arab Emirates [ARE]  
(Western Asia)

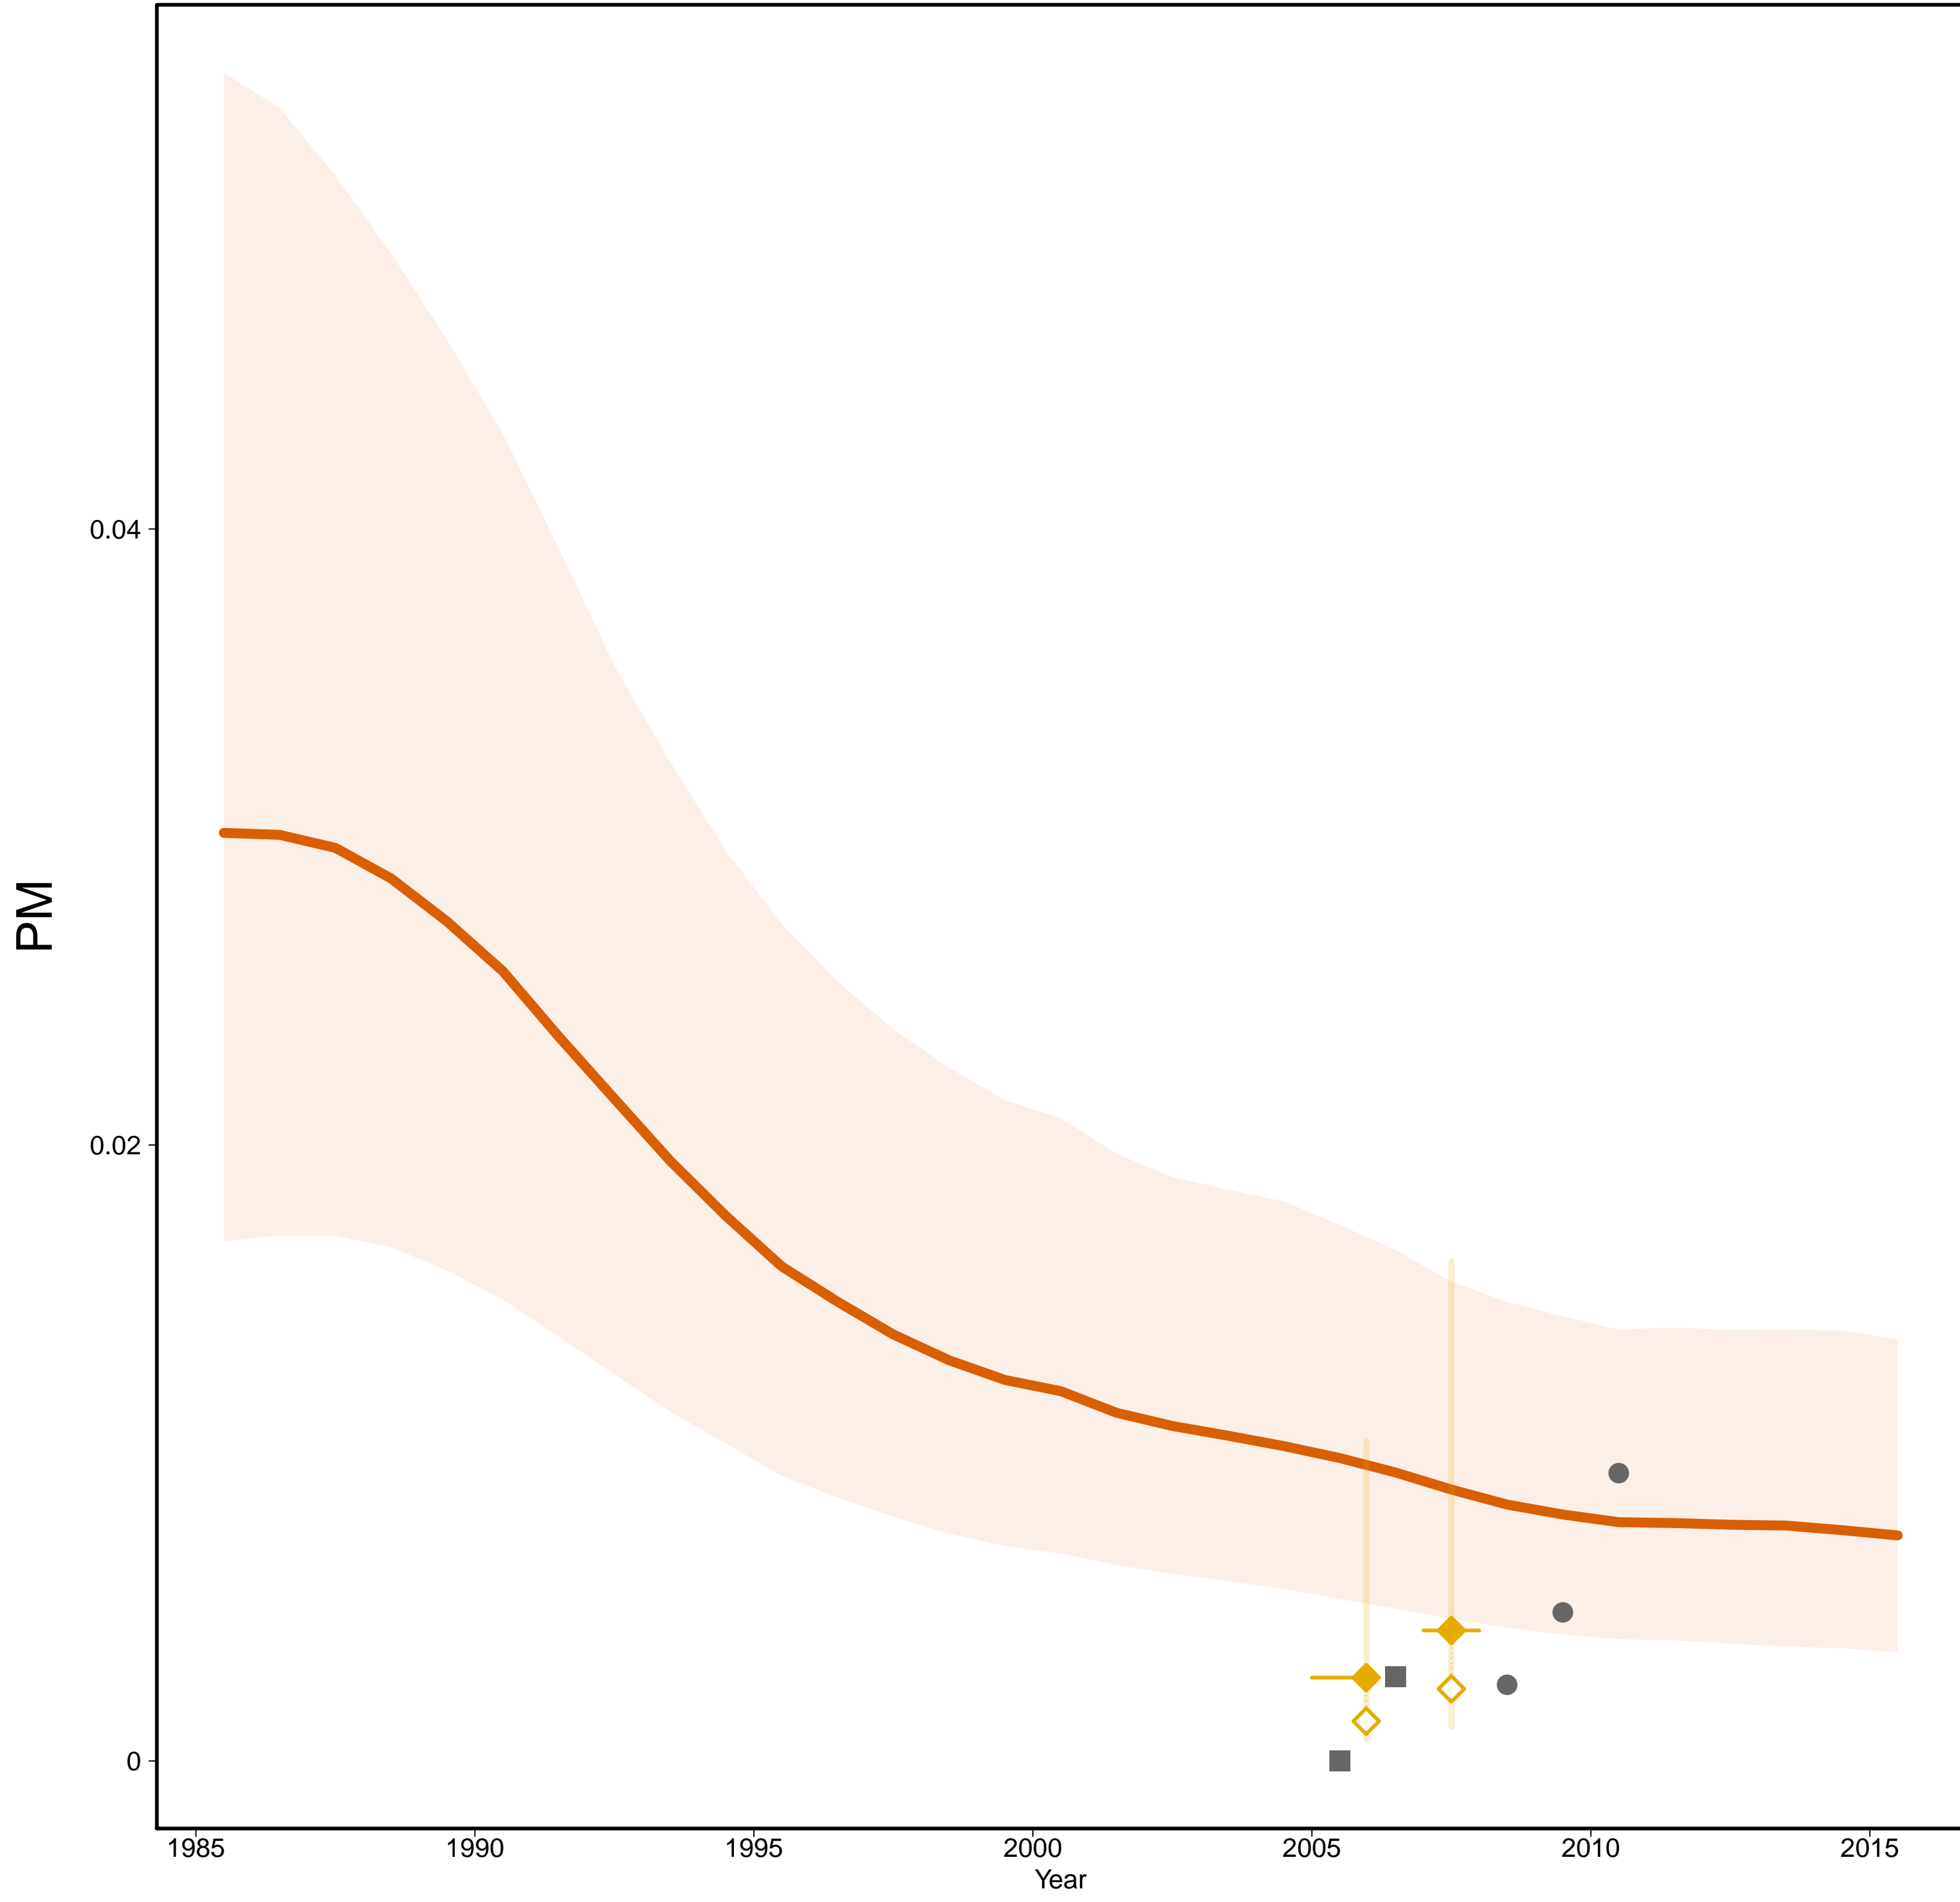

United Arab Emirates [ARE]  
(Western Asia)

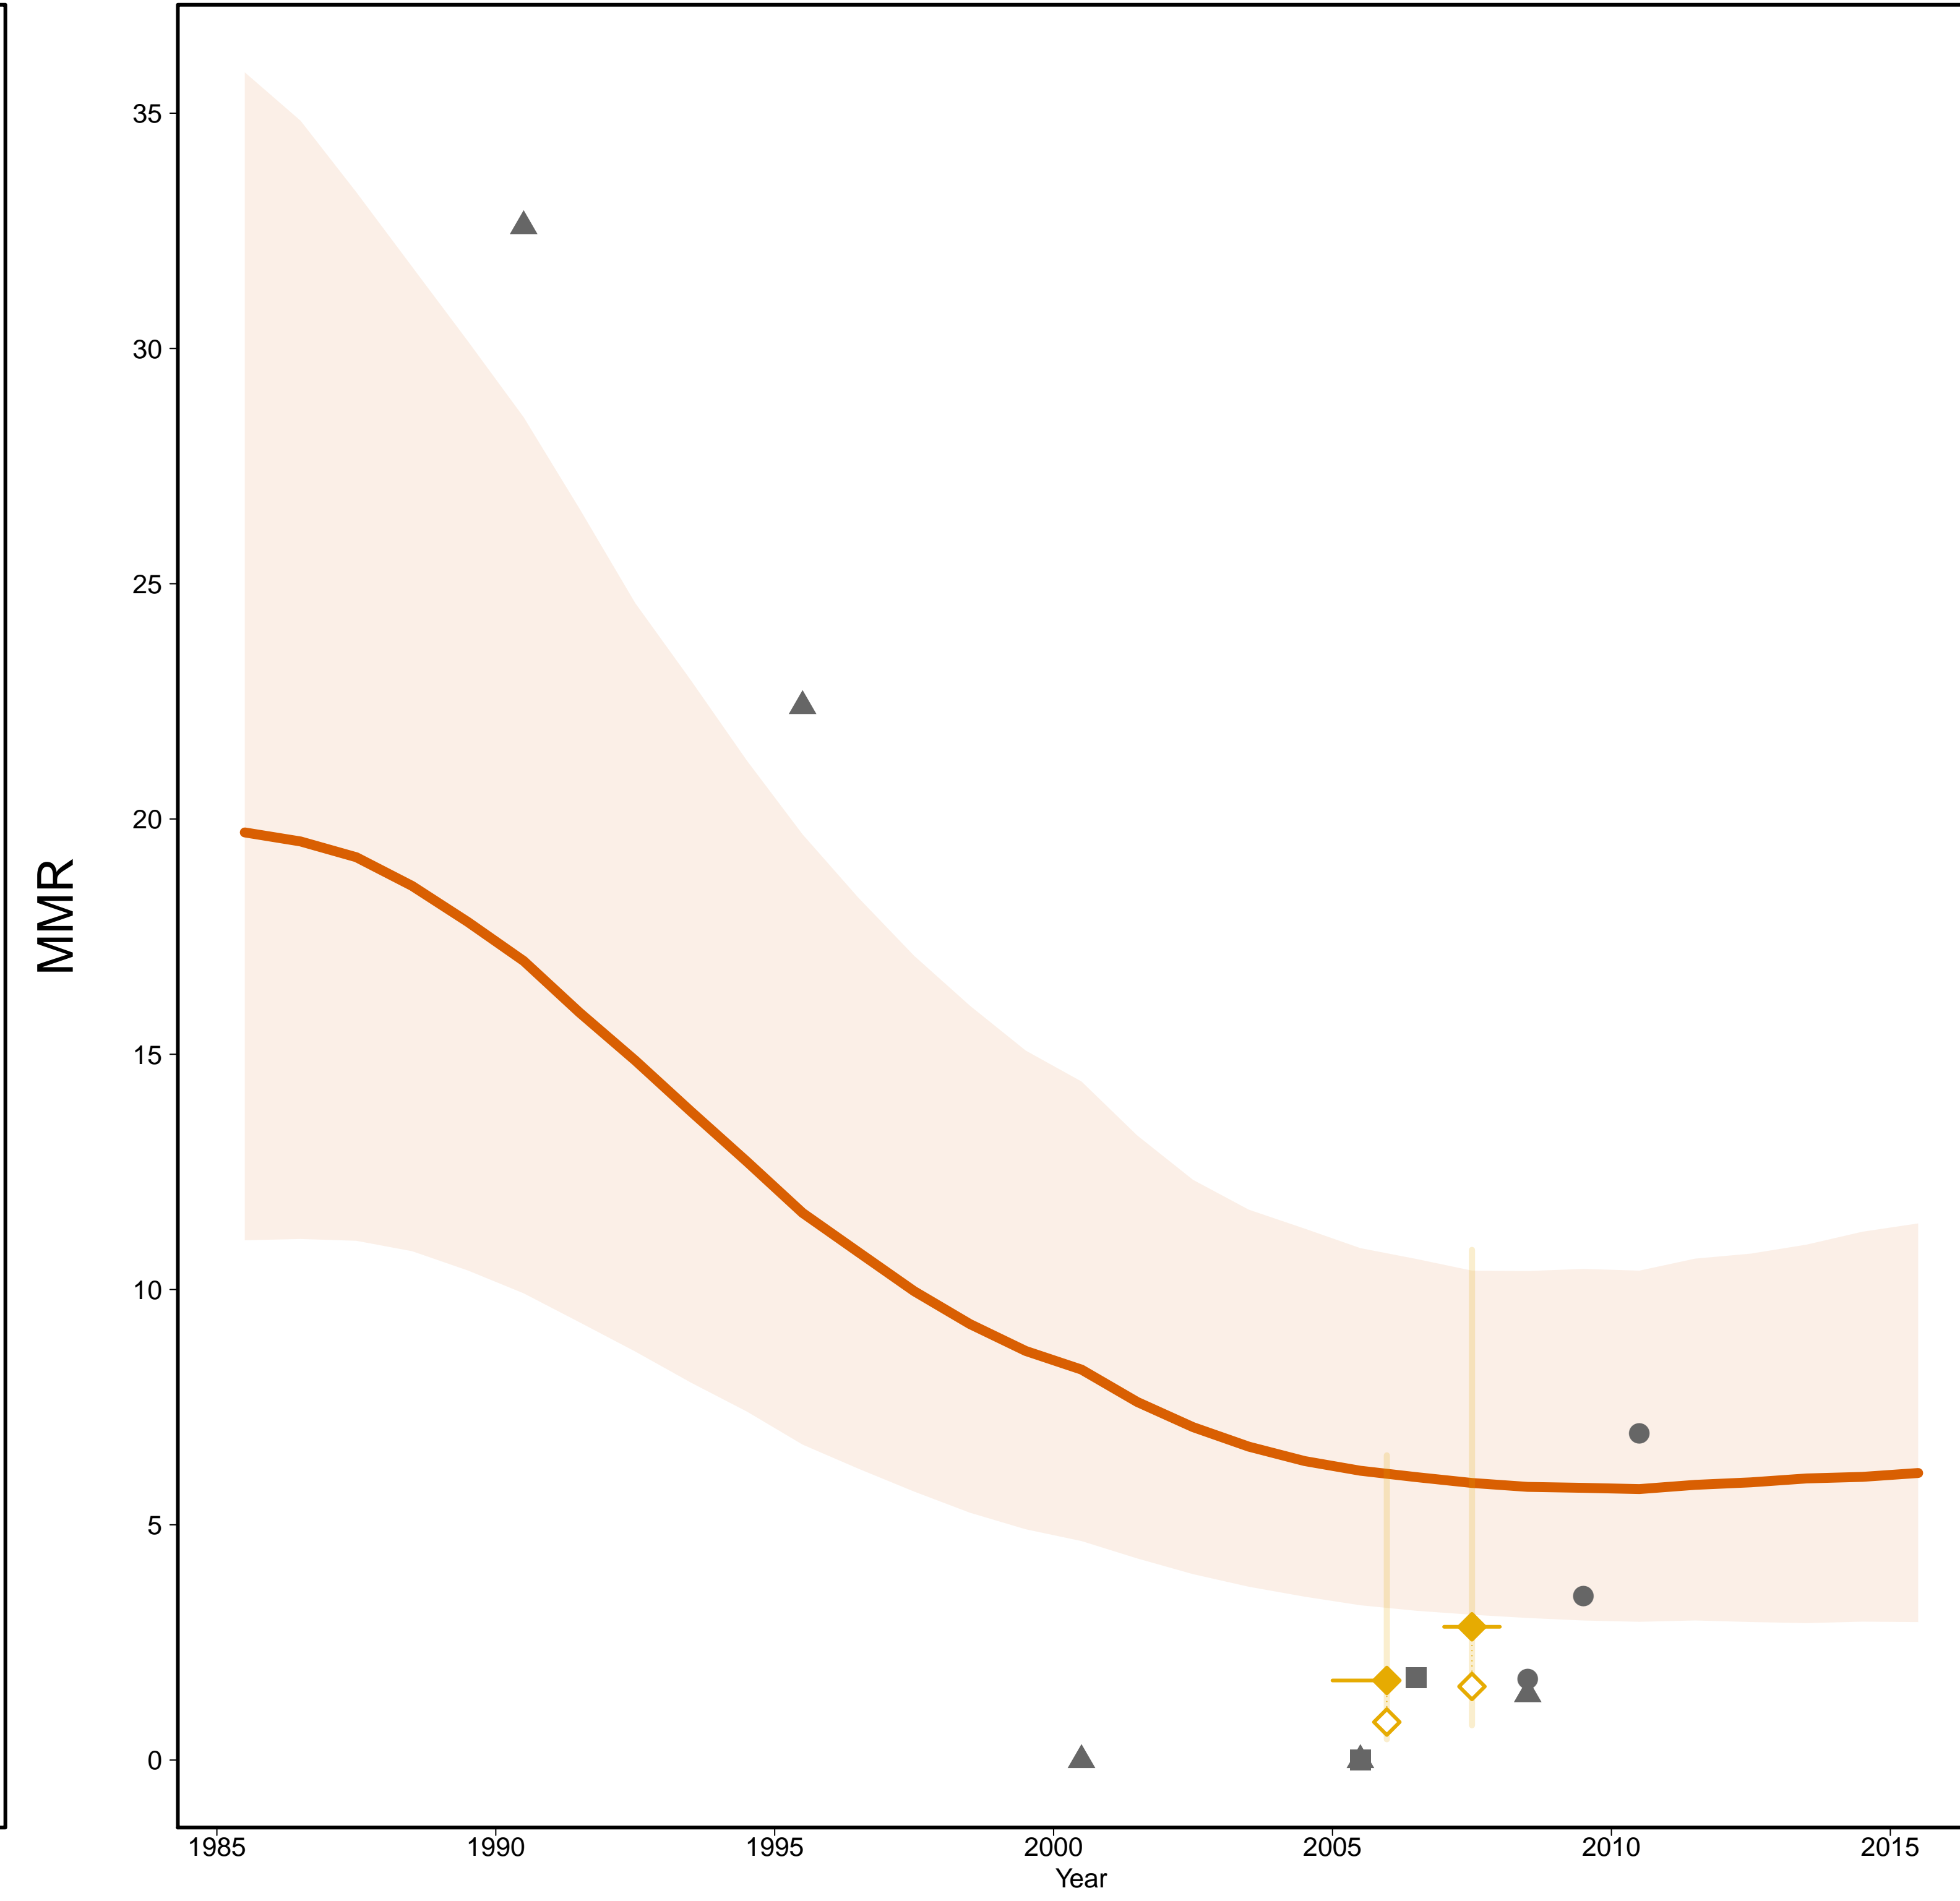

- Estimates –
- Mlate
- MMR Database 2015 –
- ◇ Observed Data
- ◆ Adjusted Data
- Data type –
- ◆ VR
- Reported VR before recal.  
(related to 0 obs. mat. death)
- Excluded VR data  
(data quality issues)
- ▲ Excluded misc. studies

Gross Domestic Product

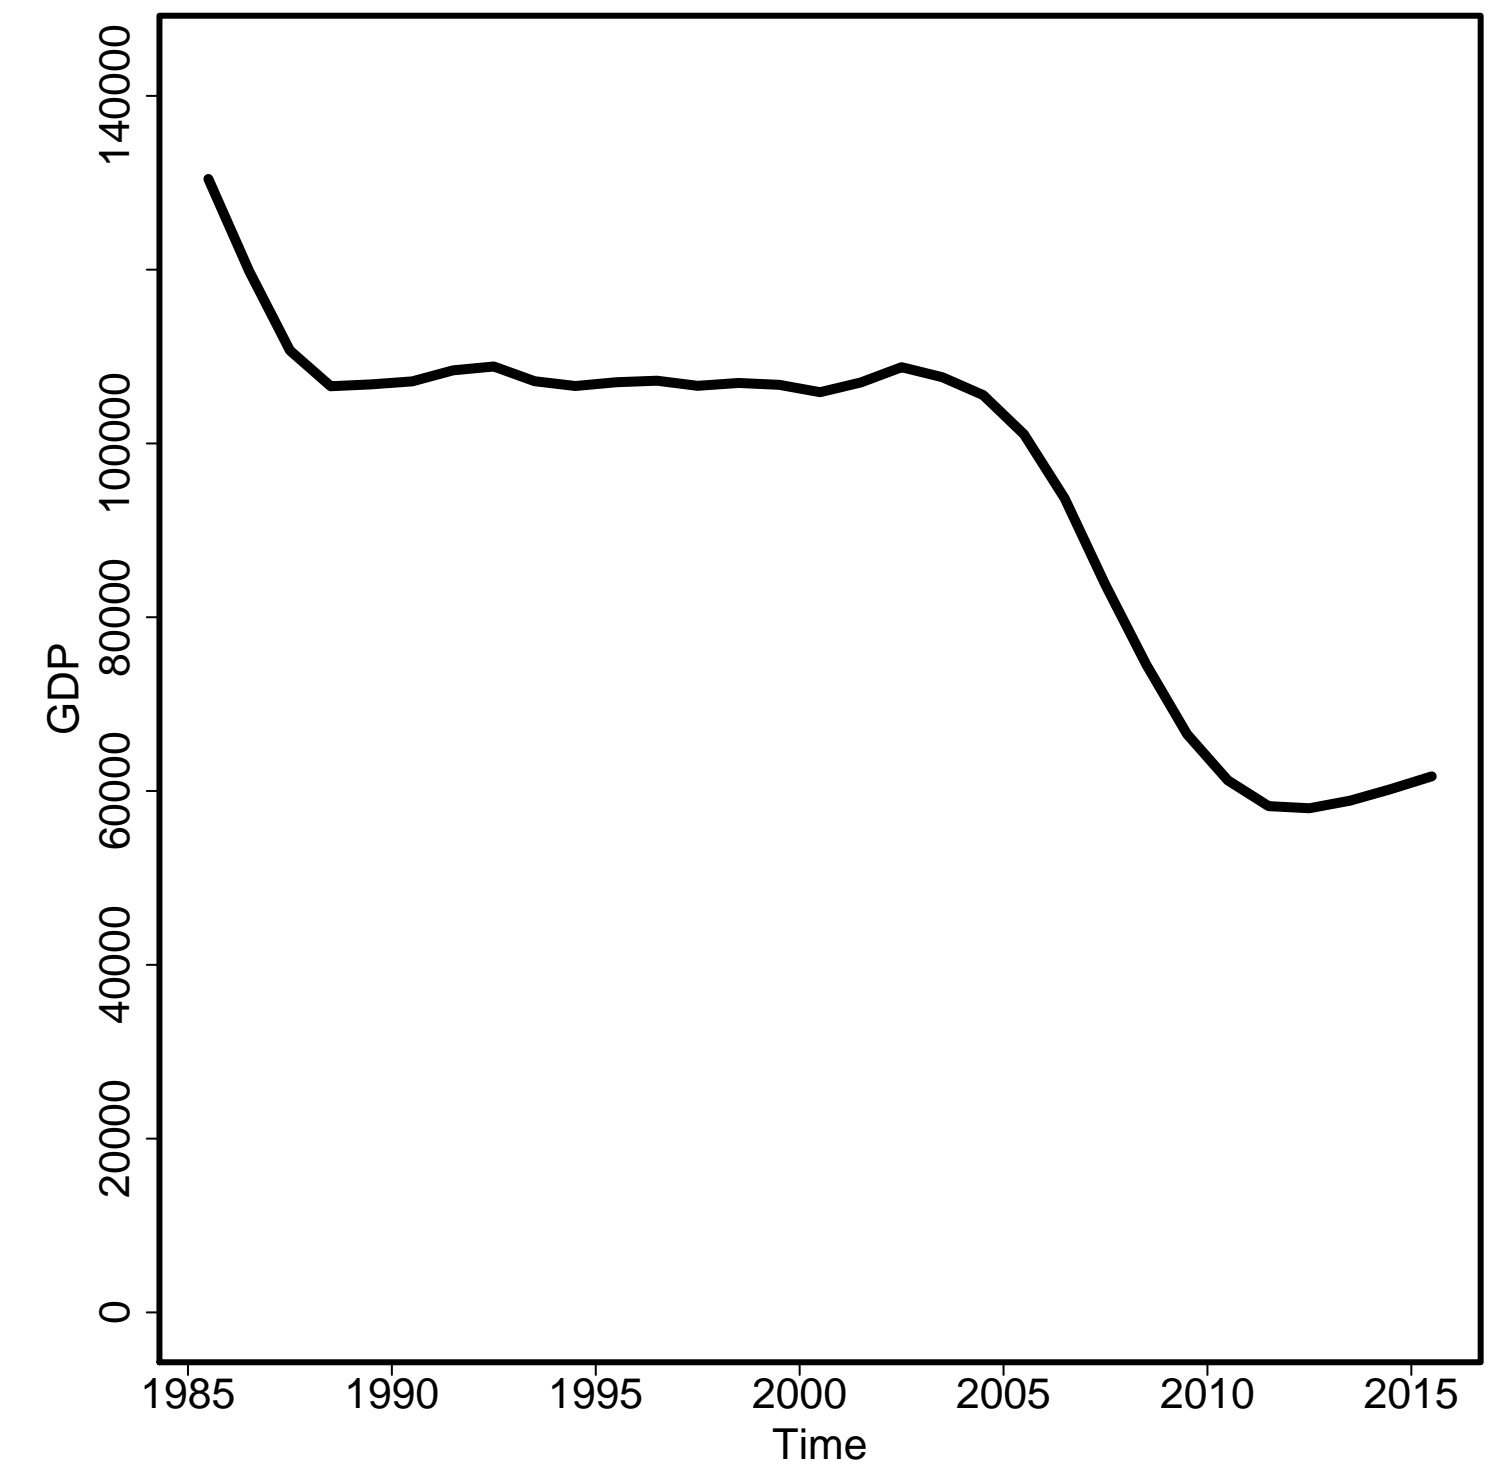

General Fertility Rate

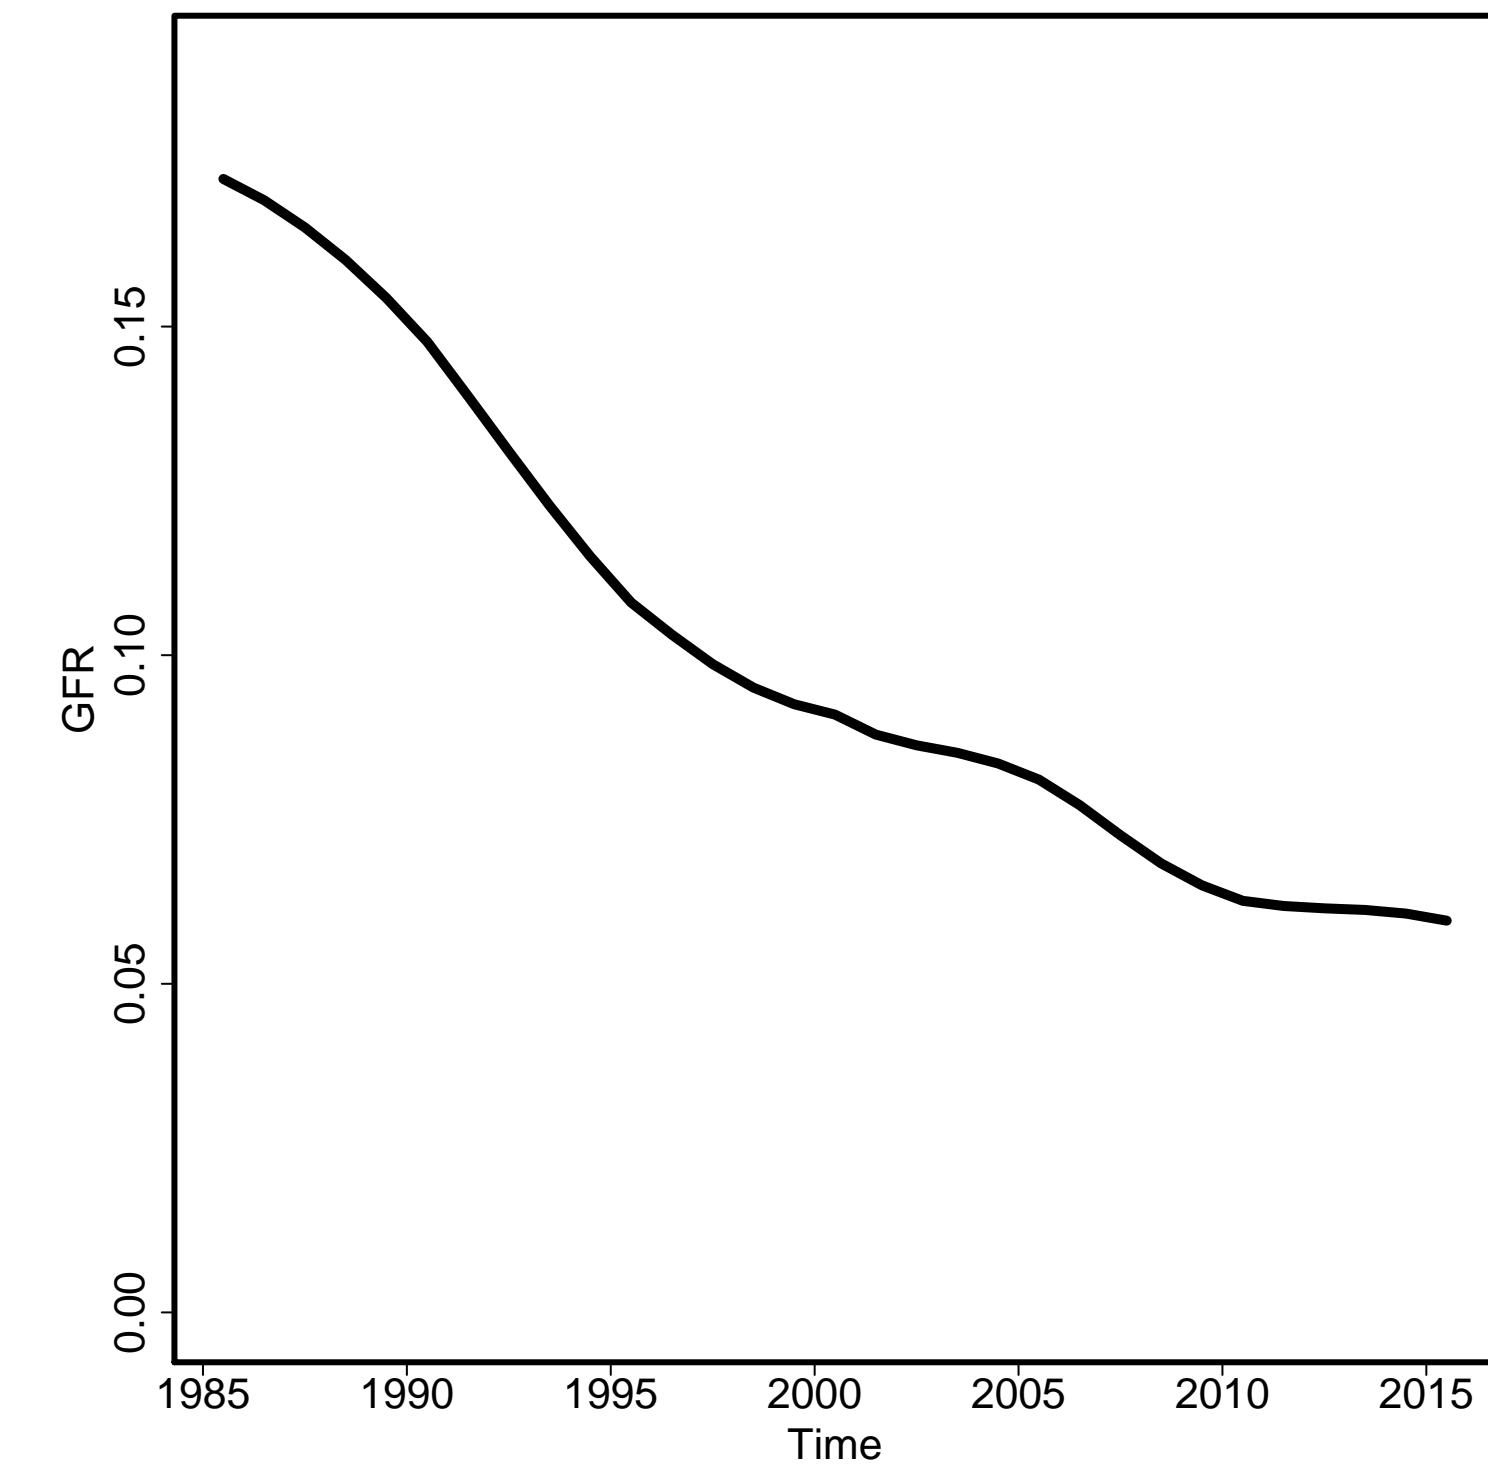

Skilled Attendance to Birth

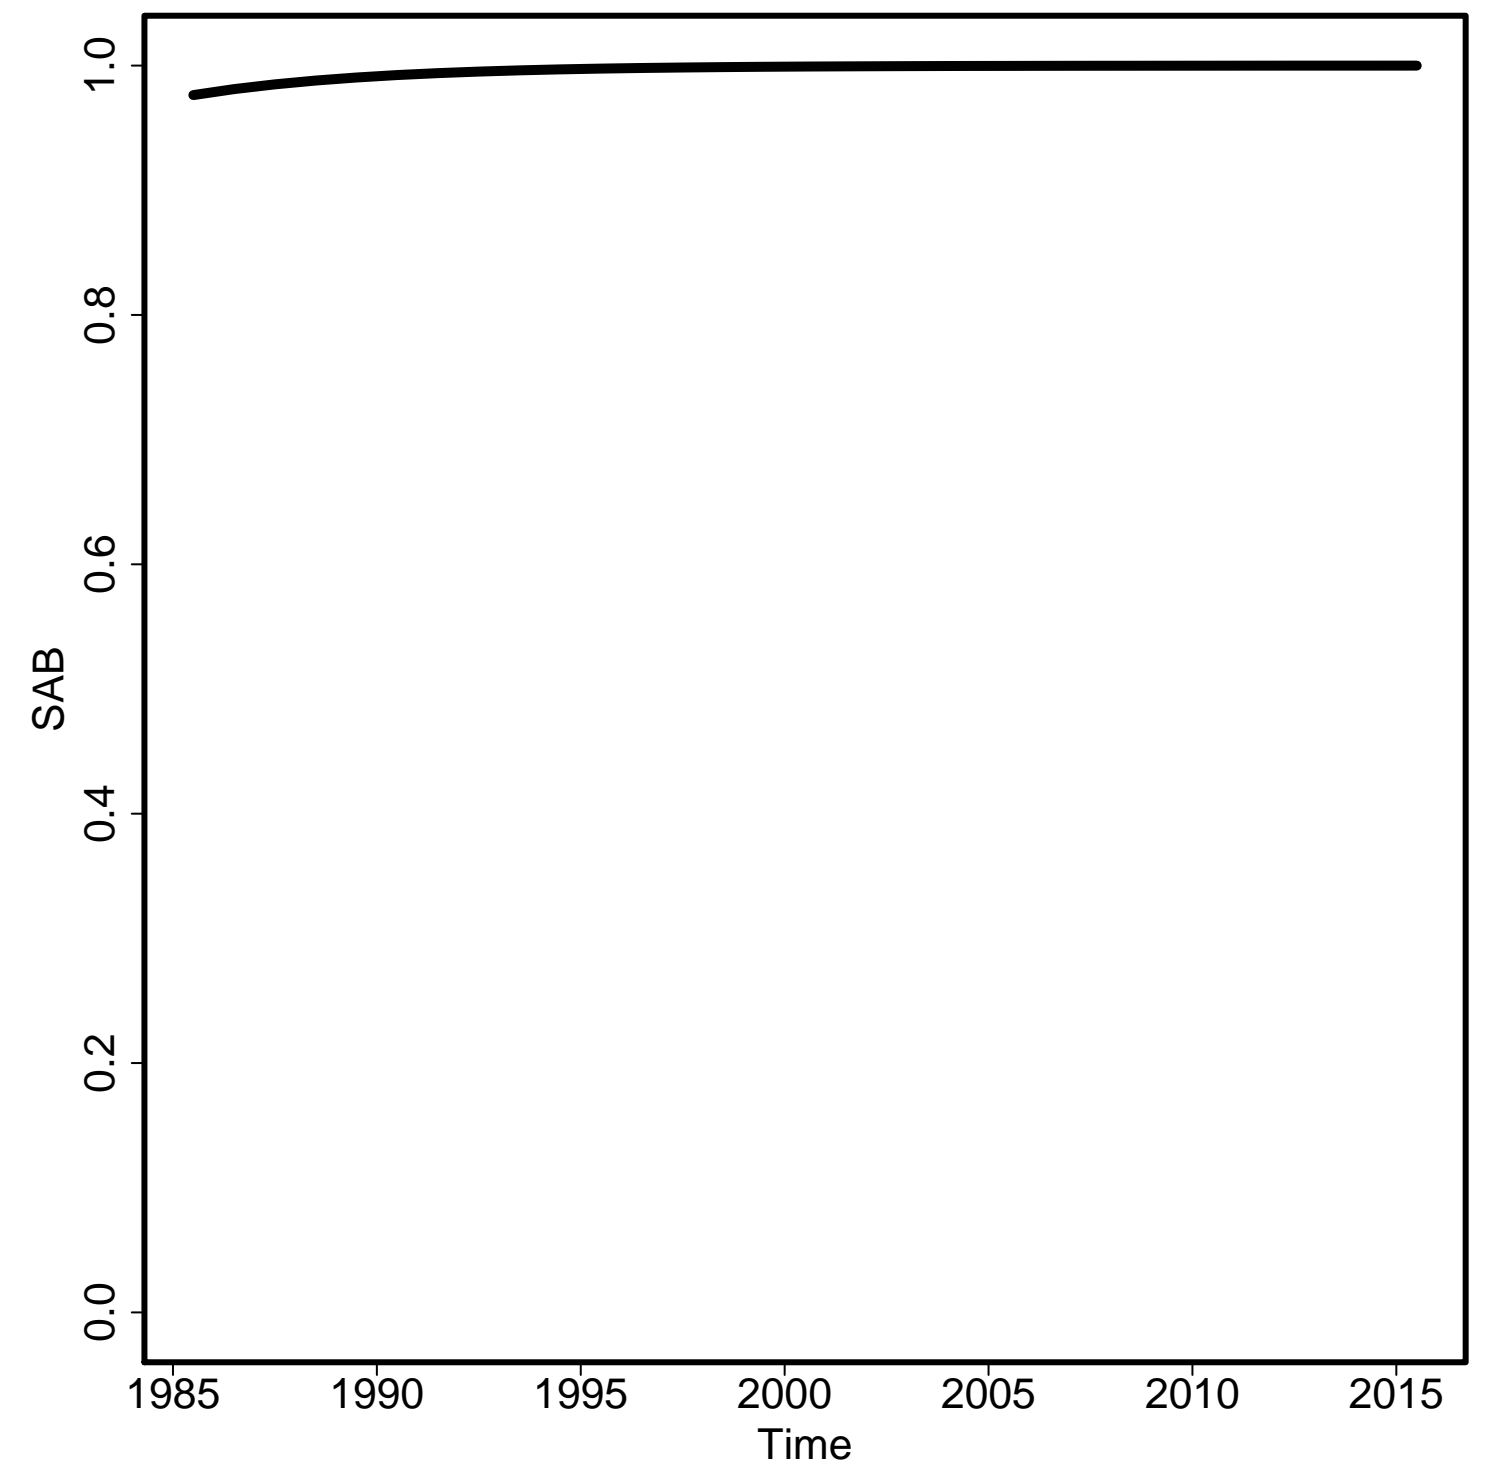

Envelope/Births

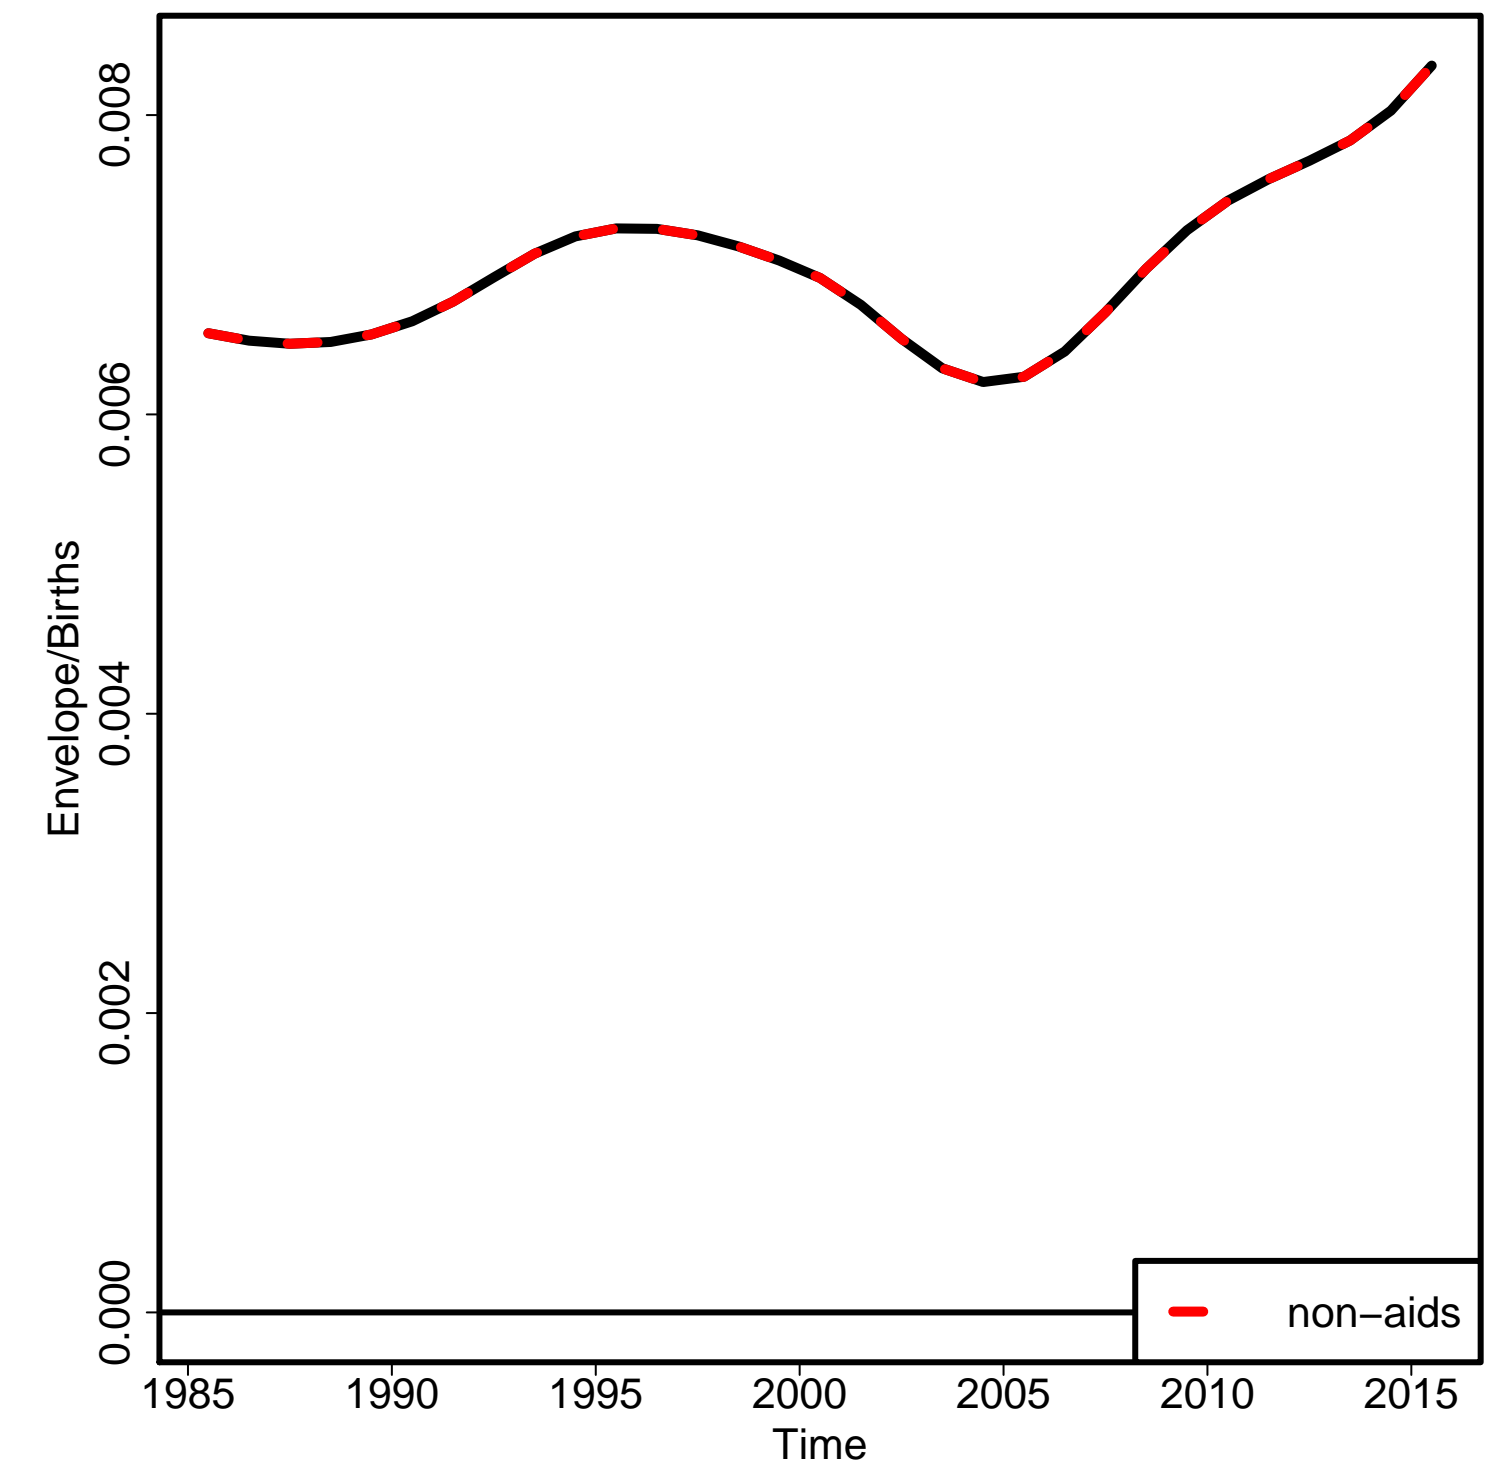

Non-aids MMR

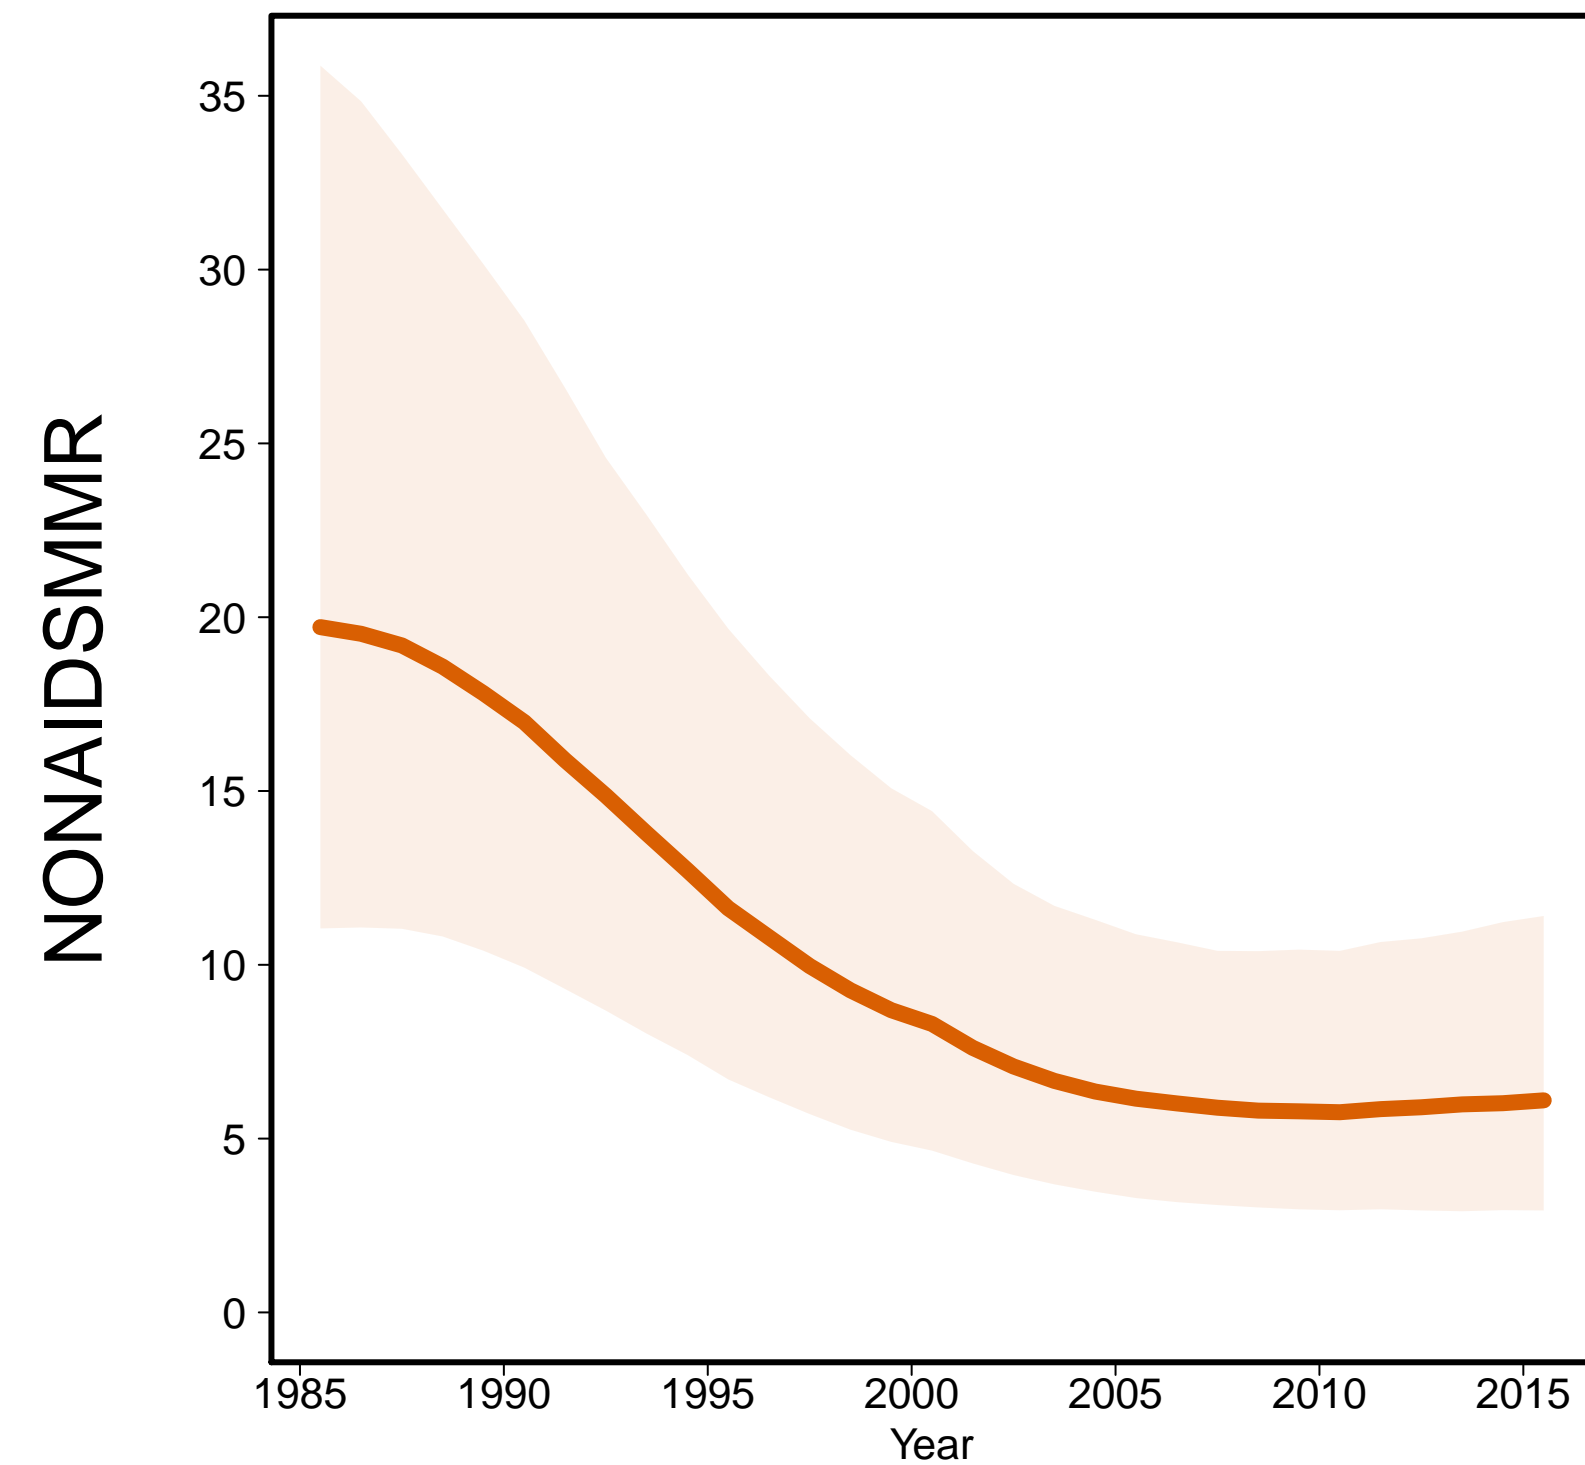

Aids MMR



United Kingdom [GBR]  
(Developed regions)

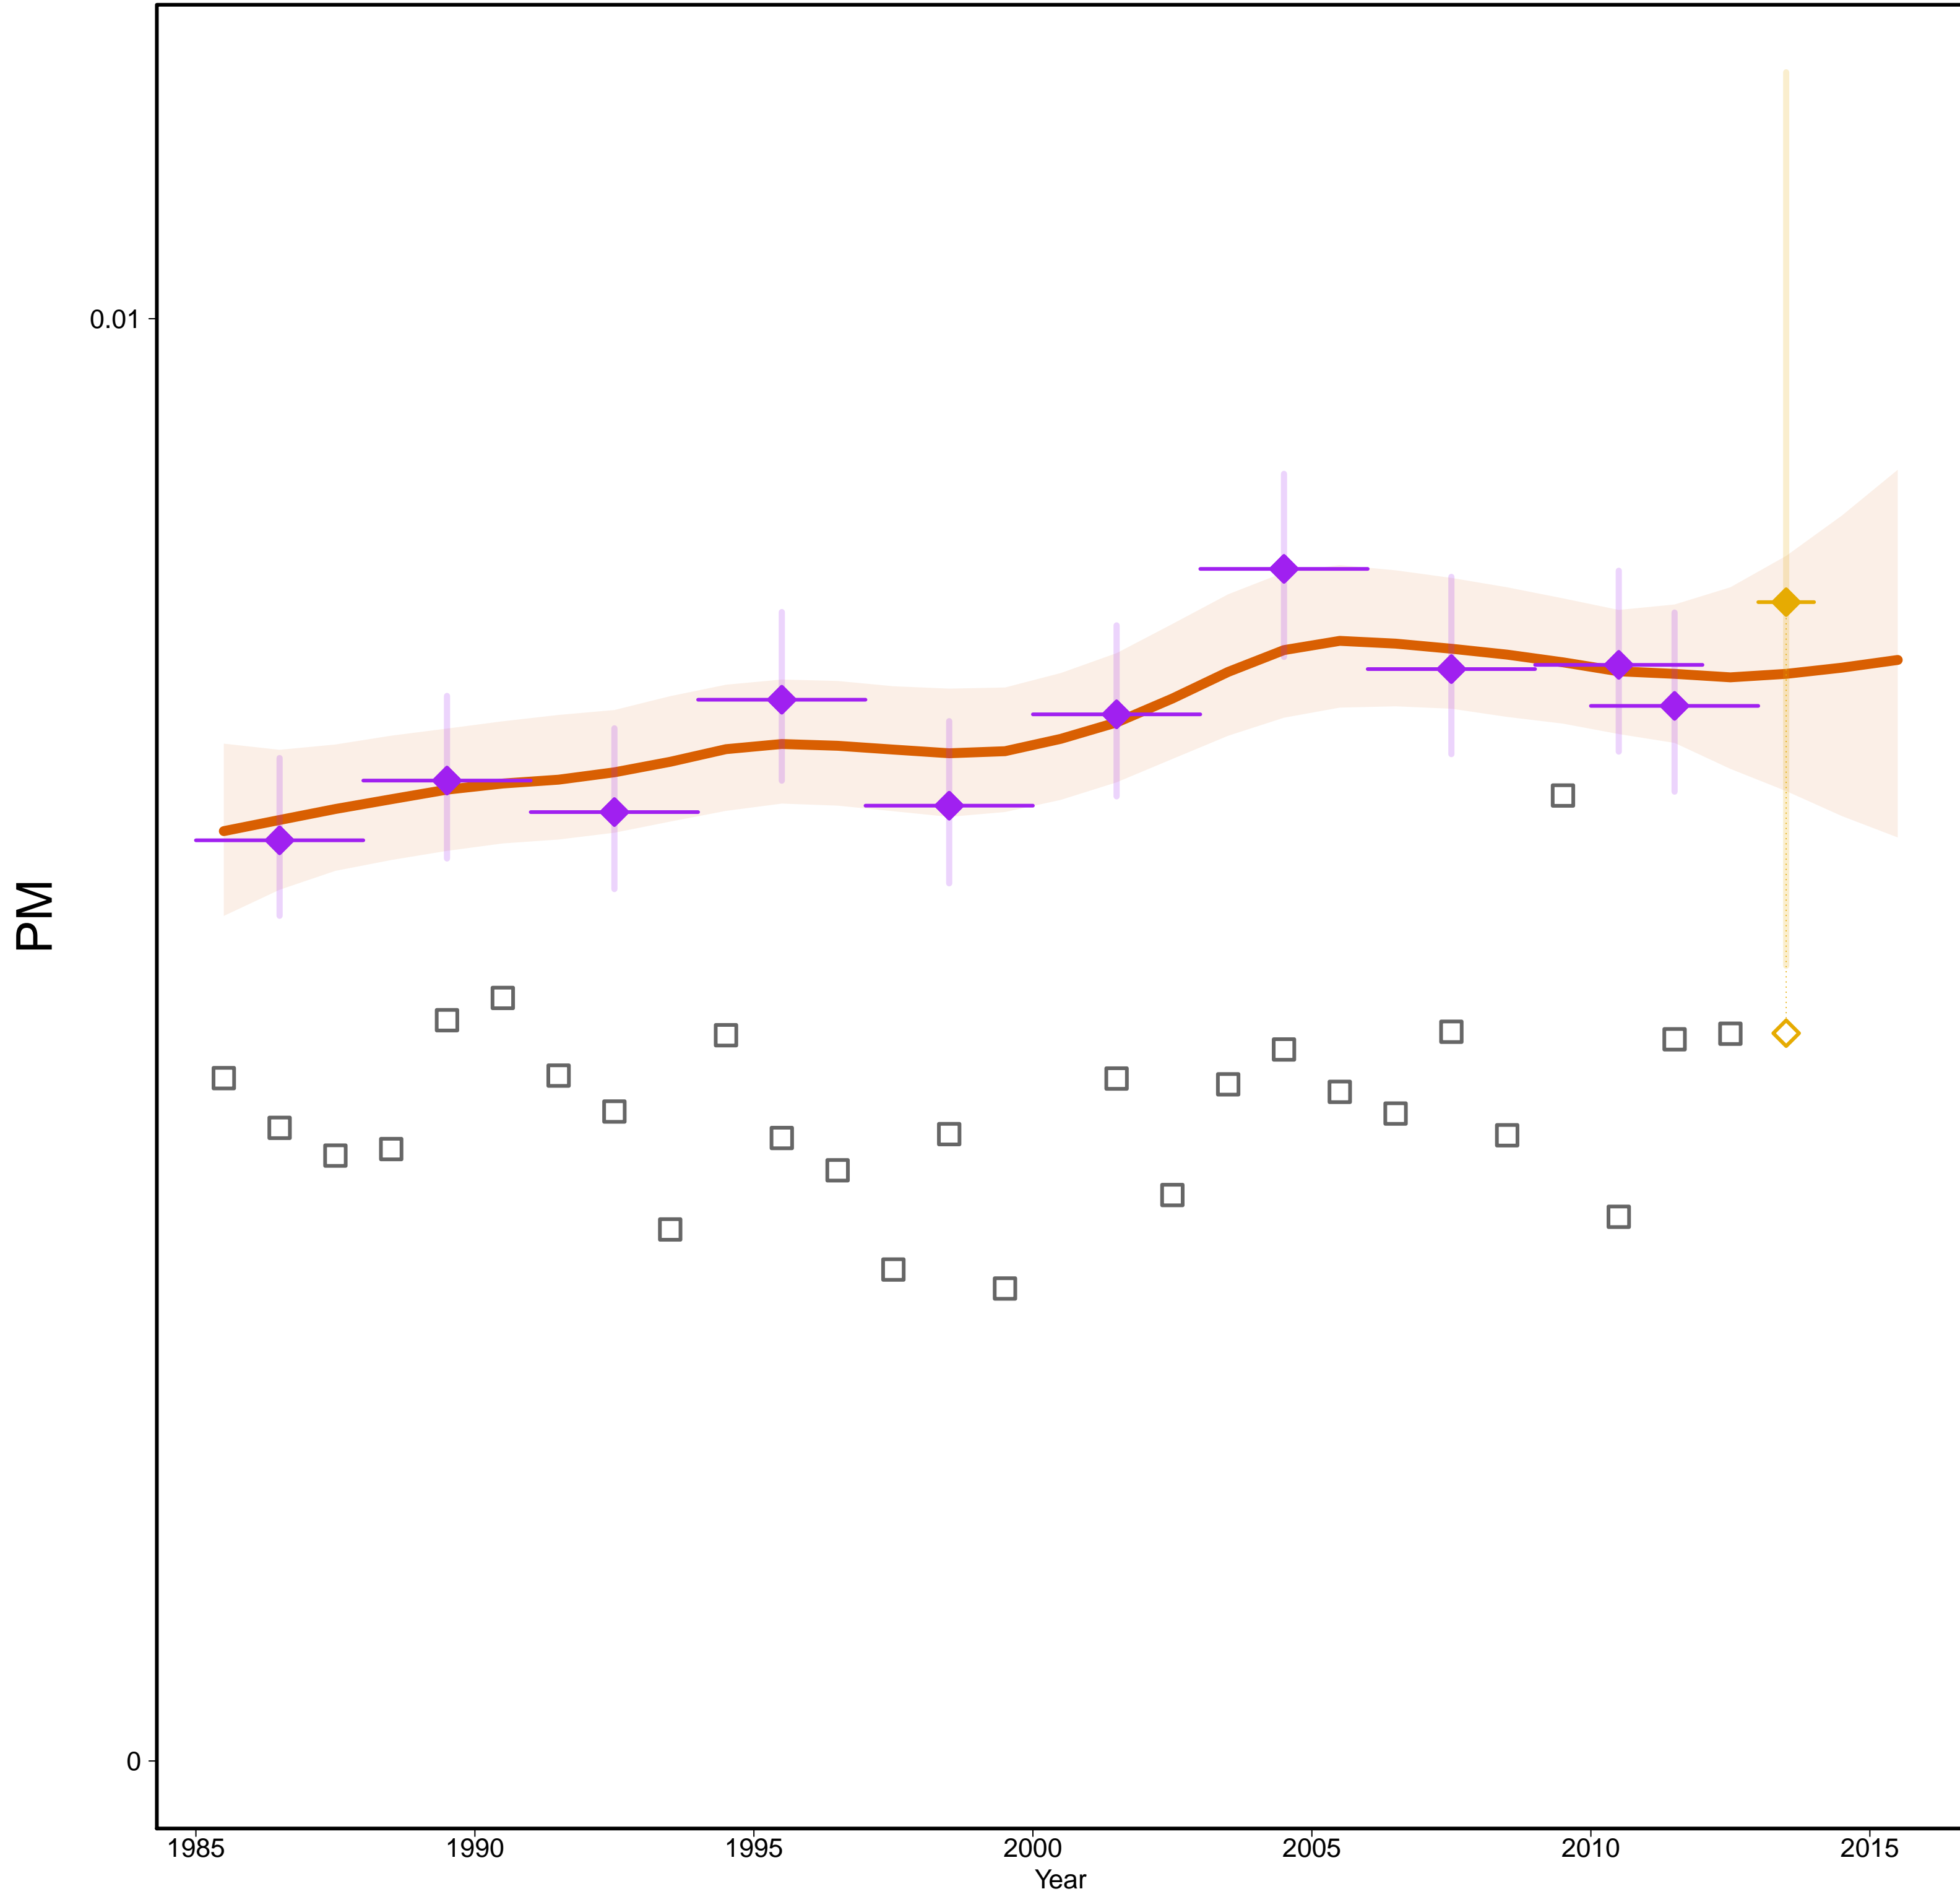

United Kingdom [GBR]  
(Developed regions)

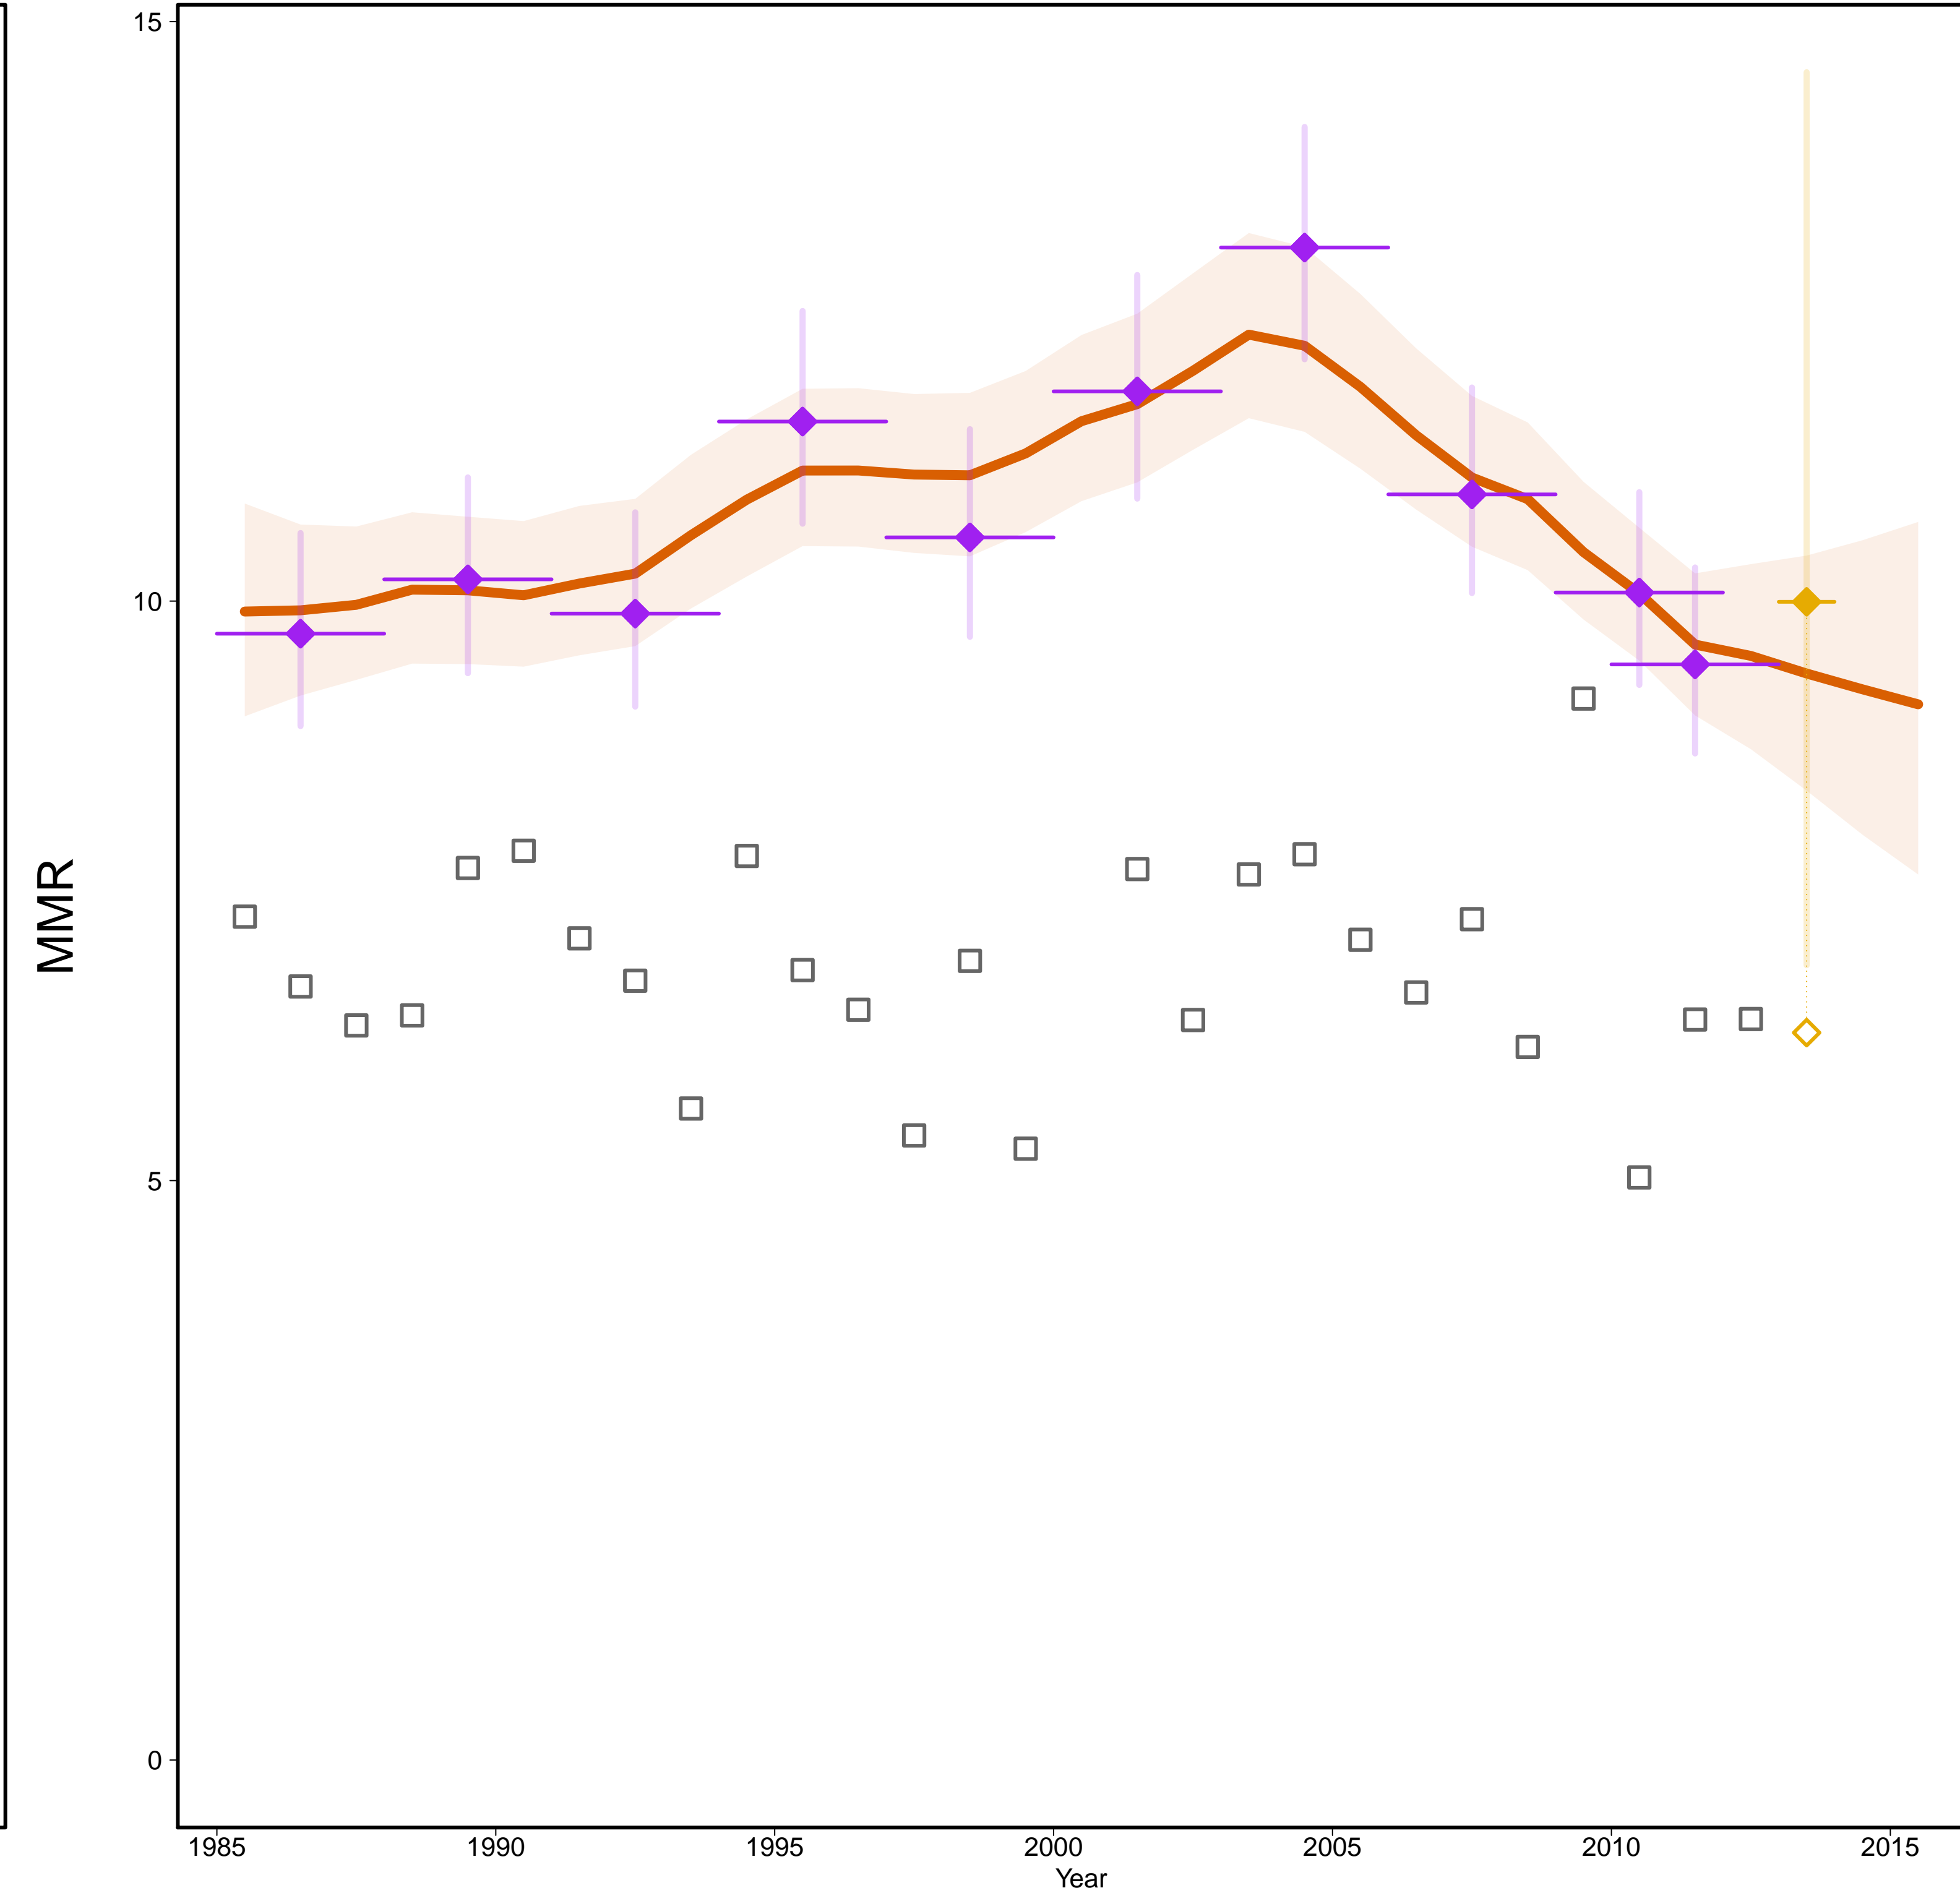

- Estimates –
- Mlate
- MMR Database 2015 –
- ◇ Observed Data
- ◆ Adjusted Data
- Data type –
- ◆ VR
- ◆ Spec. studies
- Excluded VR data  
(overlap with specialized study)

Gross Domestic Product

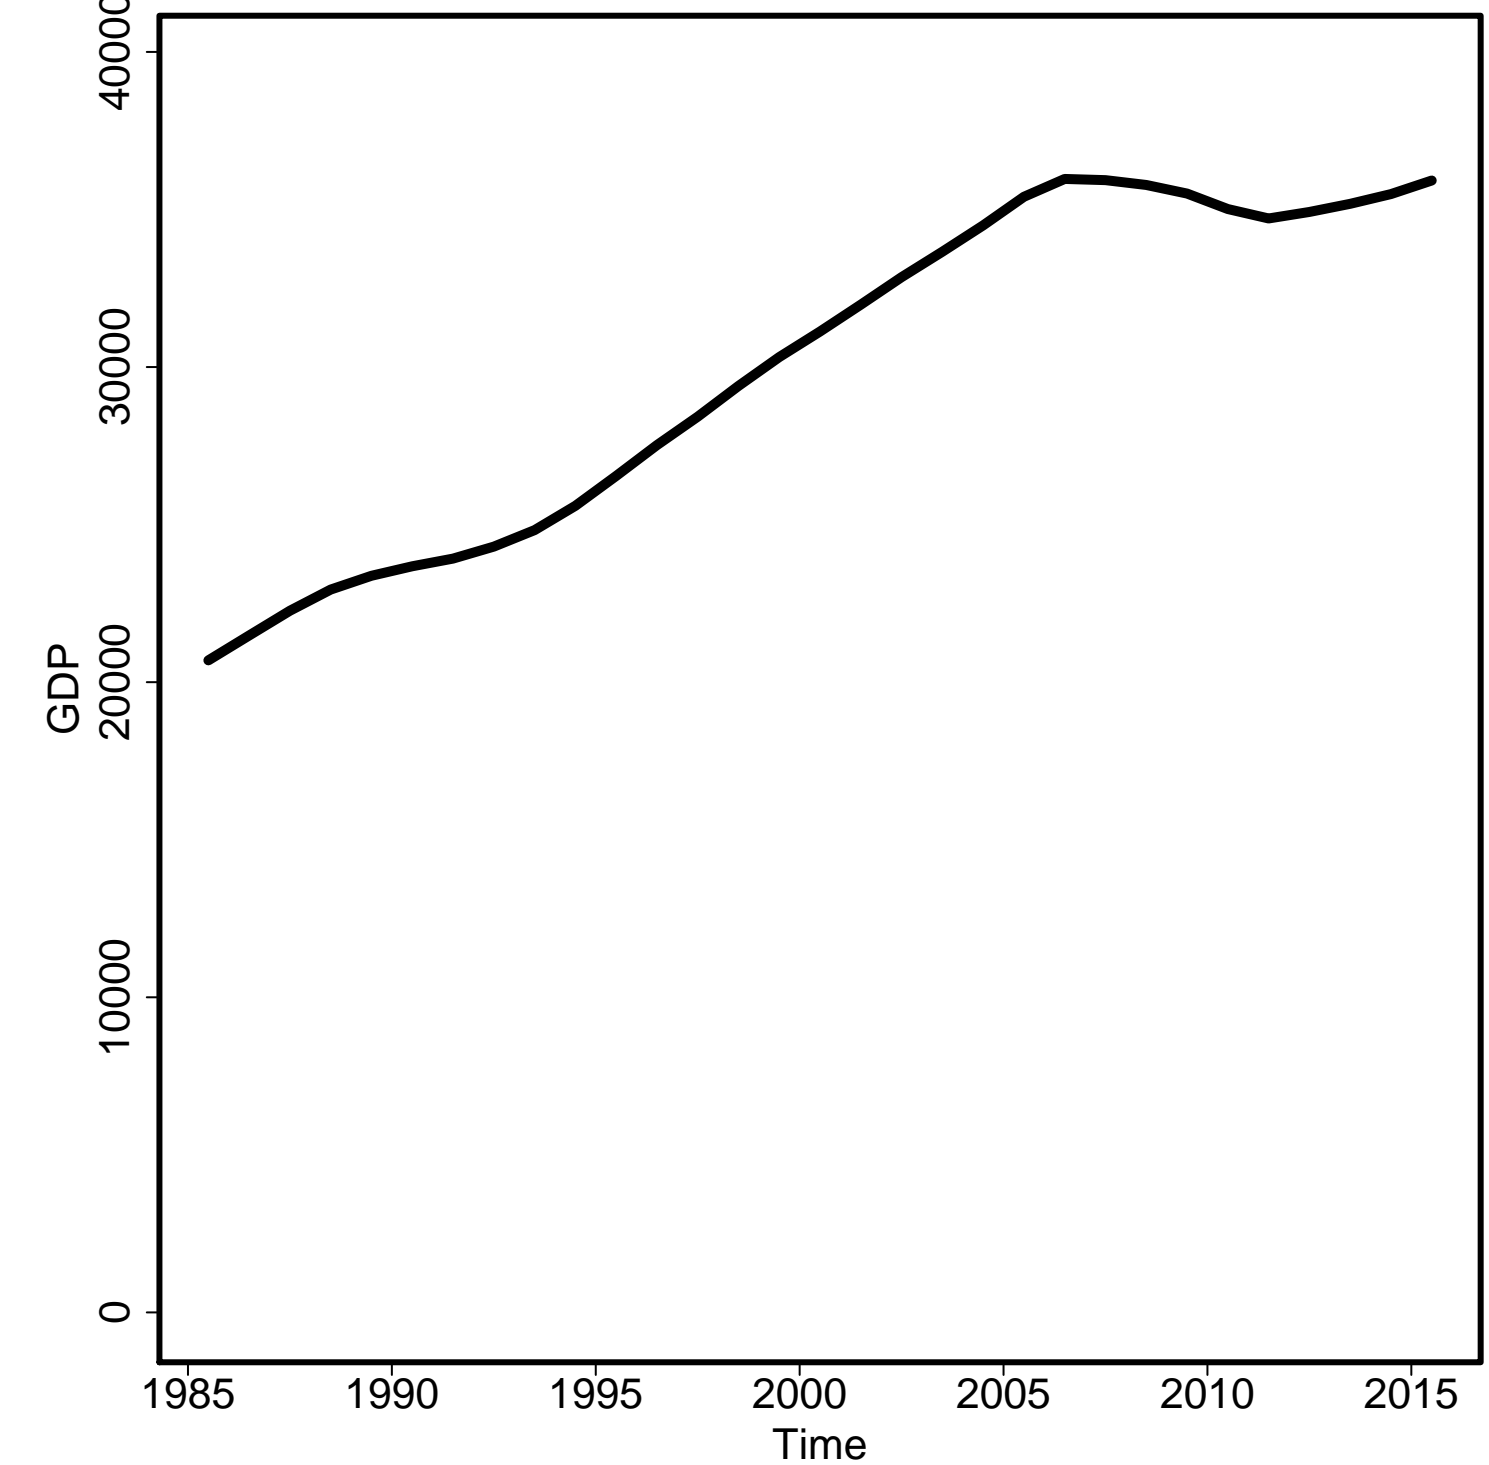

General Fertility Rate

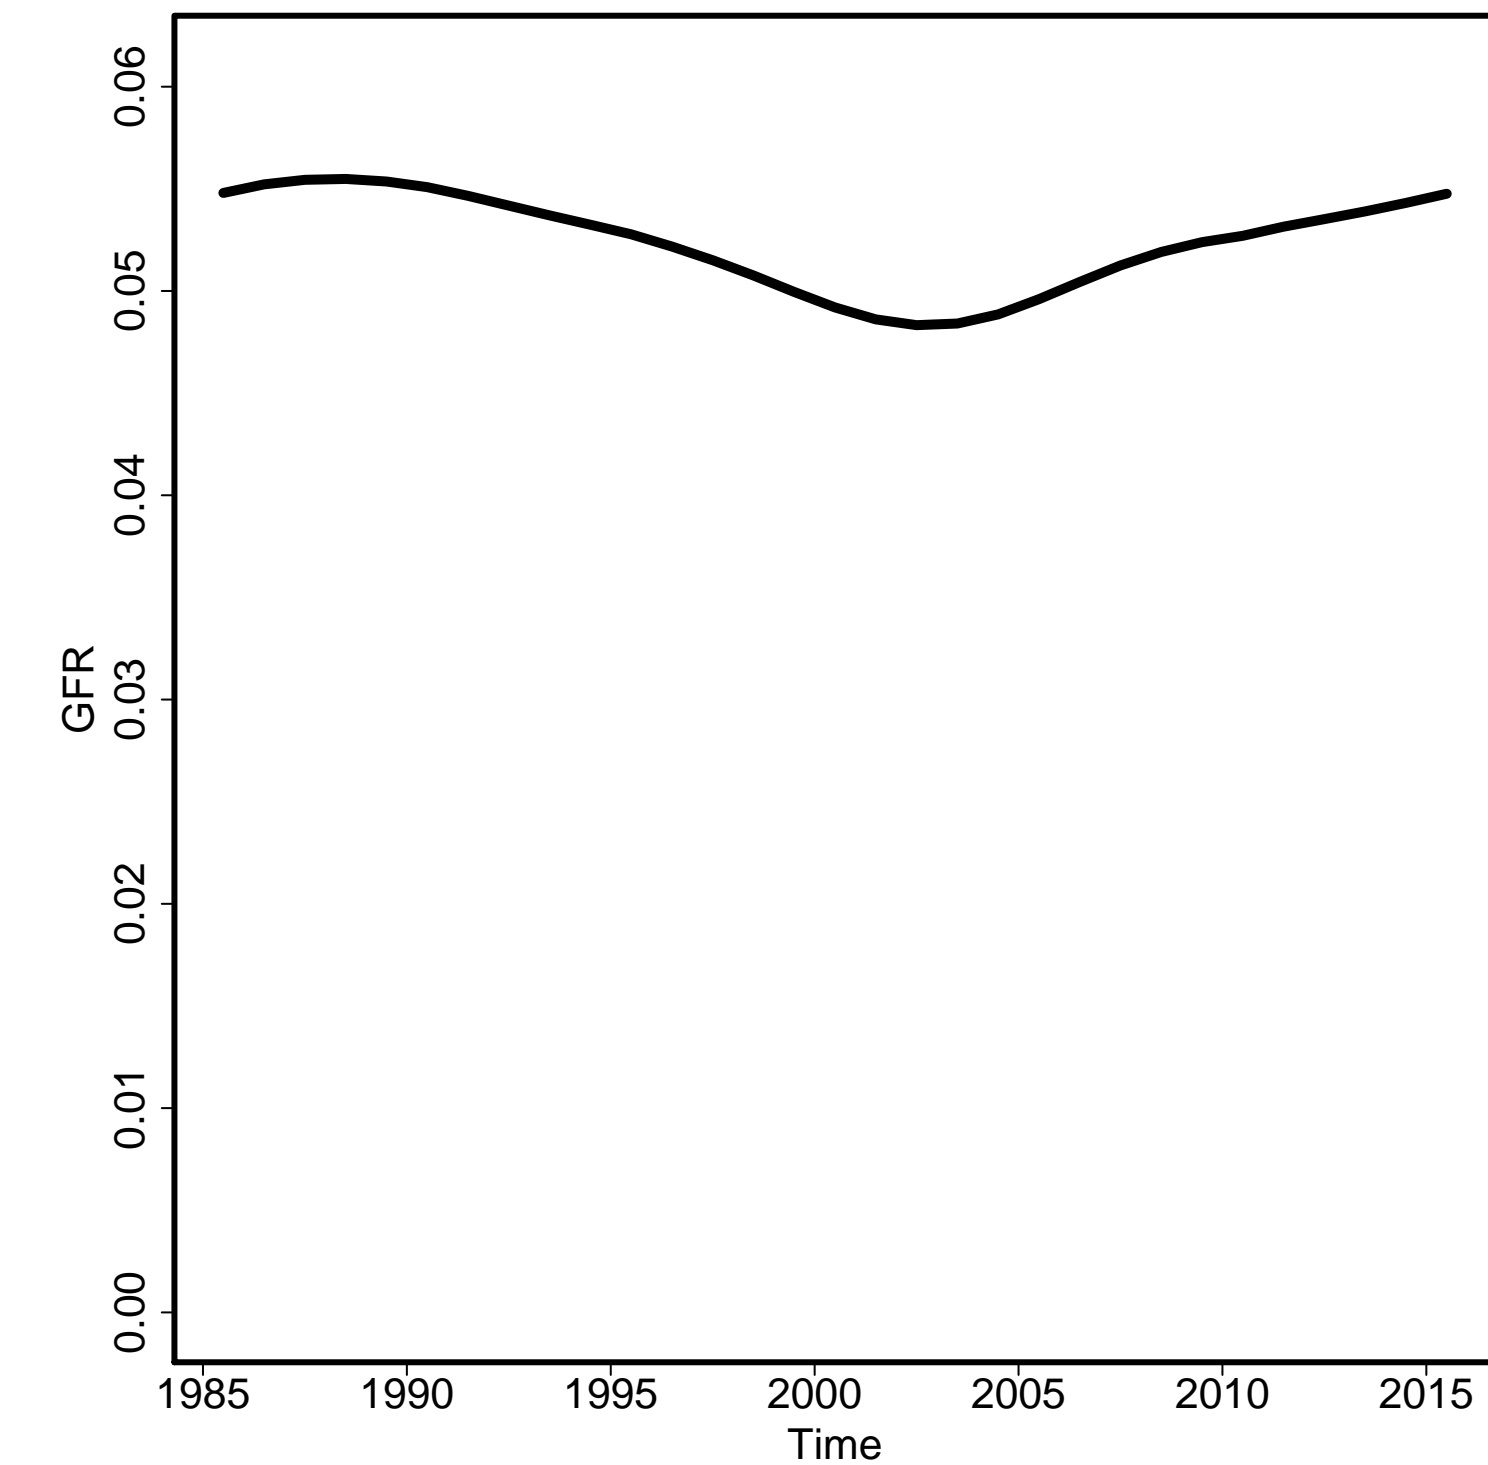

Skilled Attendance to Birth

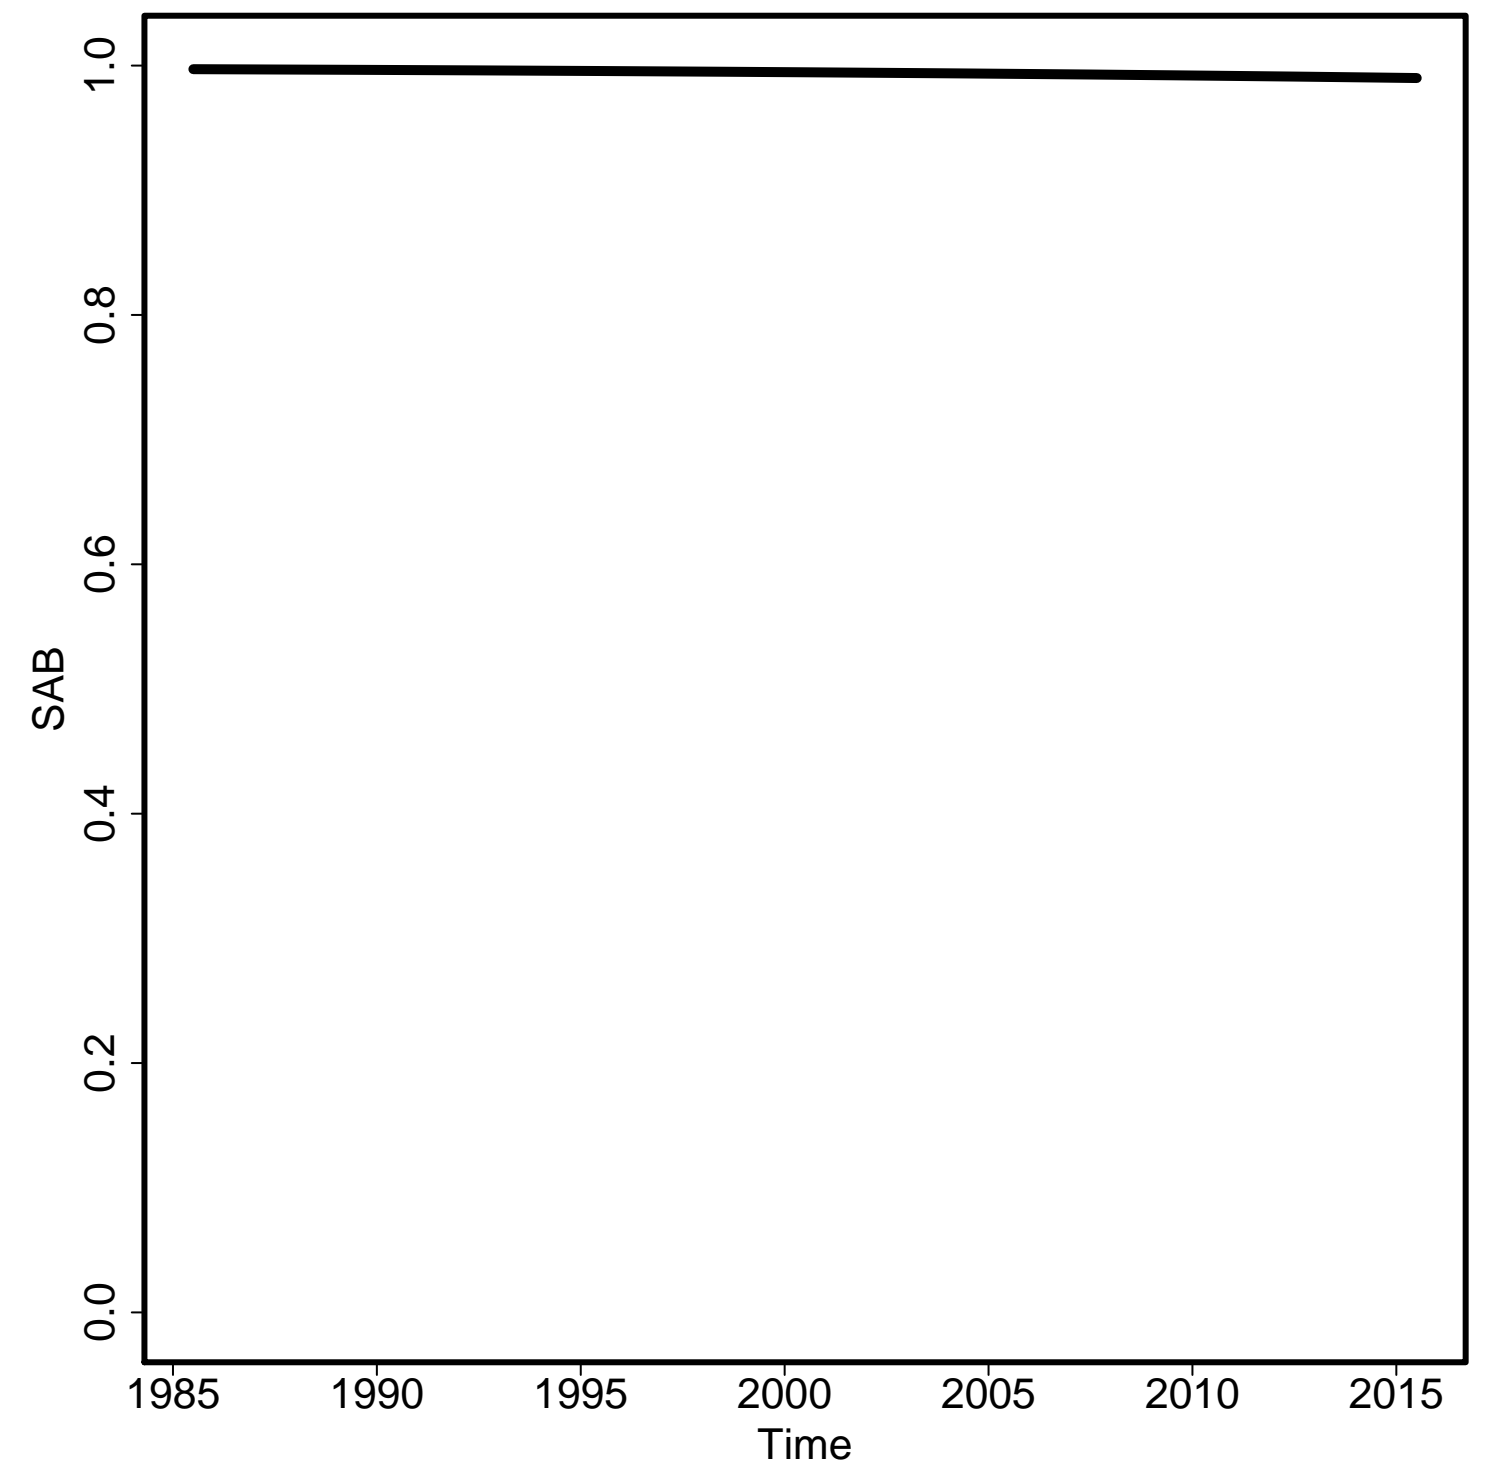

Envelope/Births

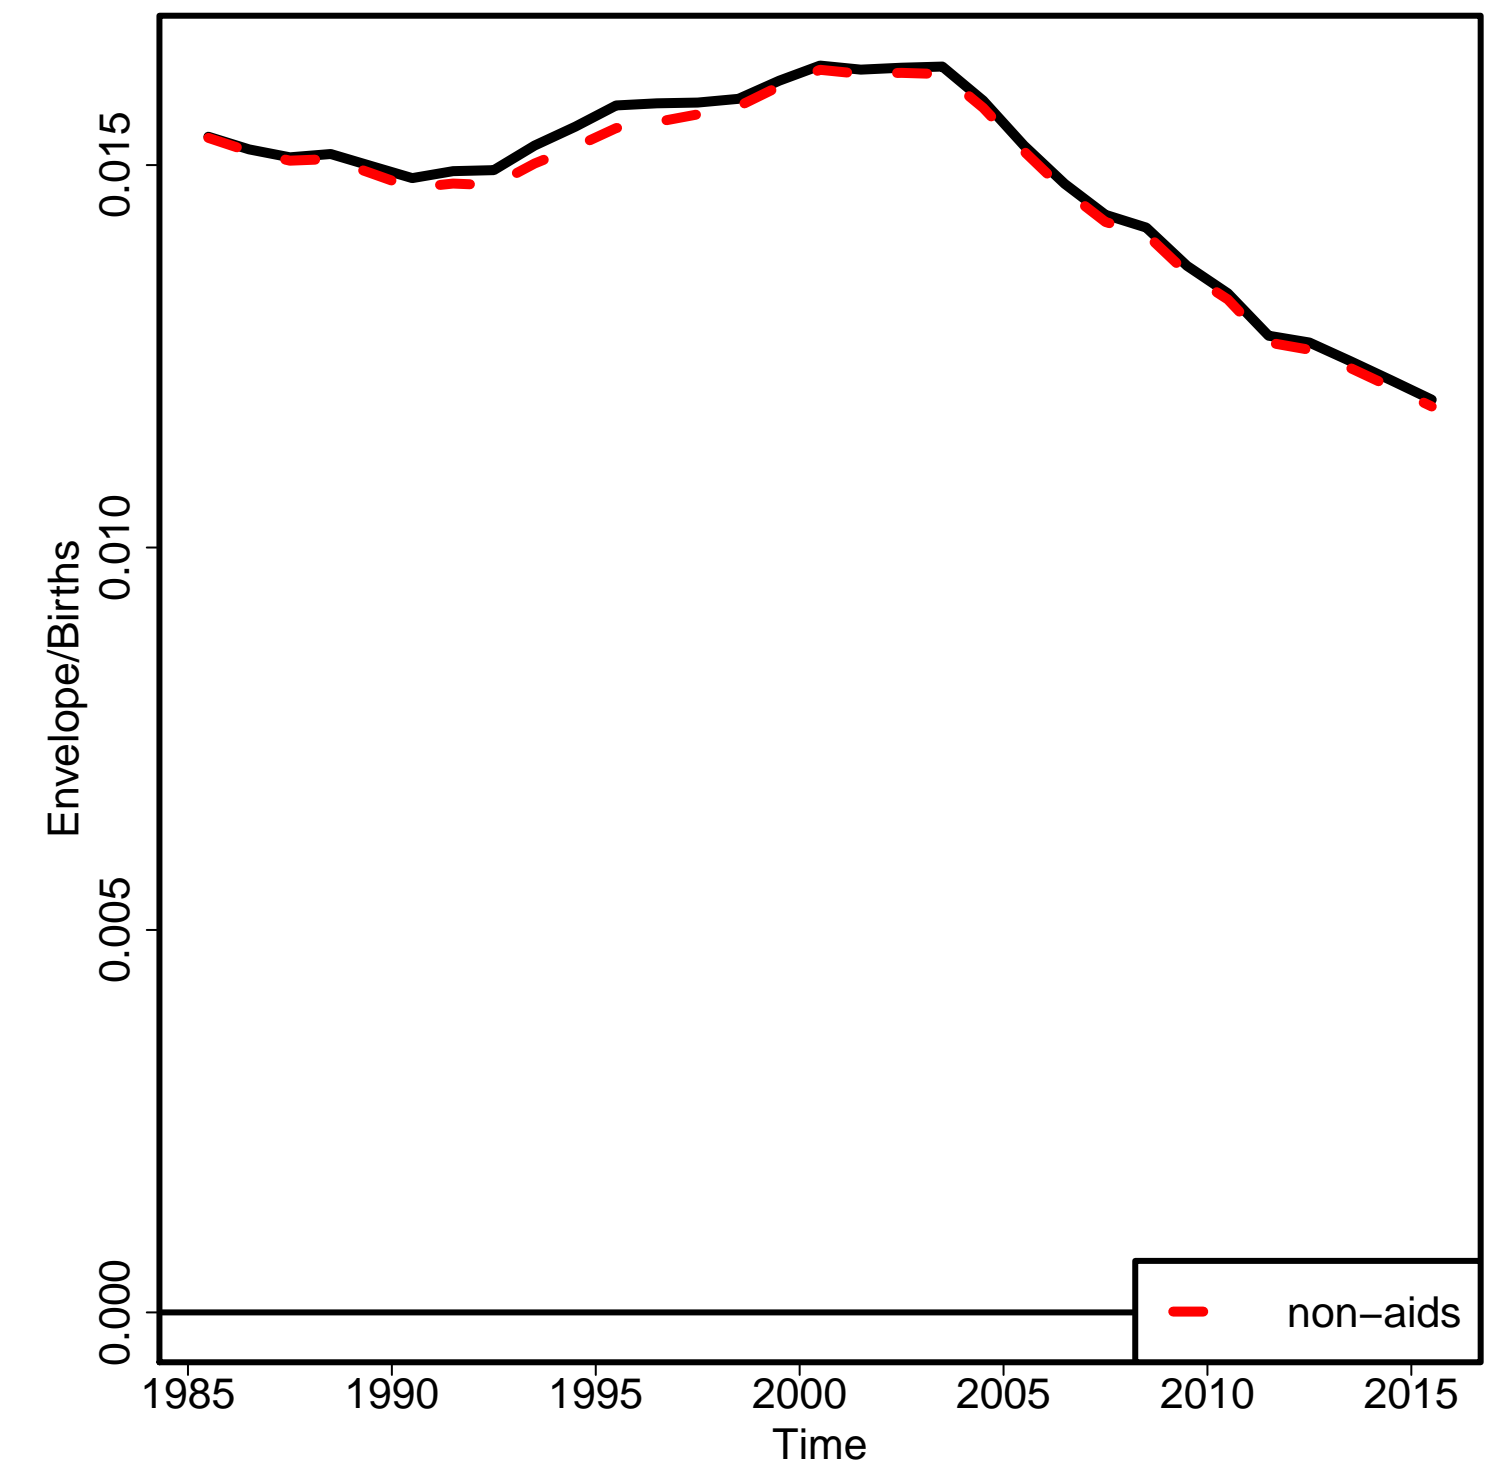

Non-aids MMR

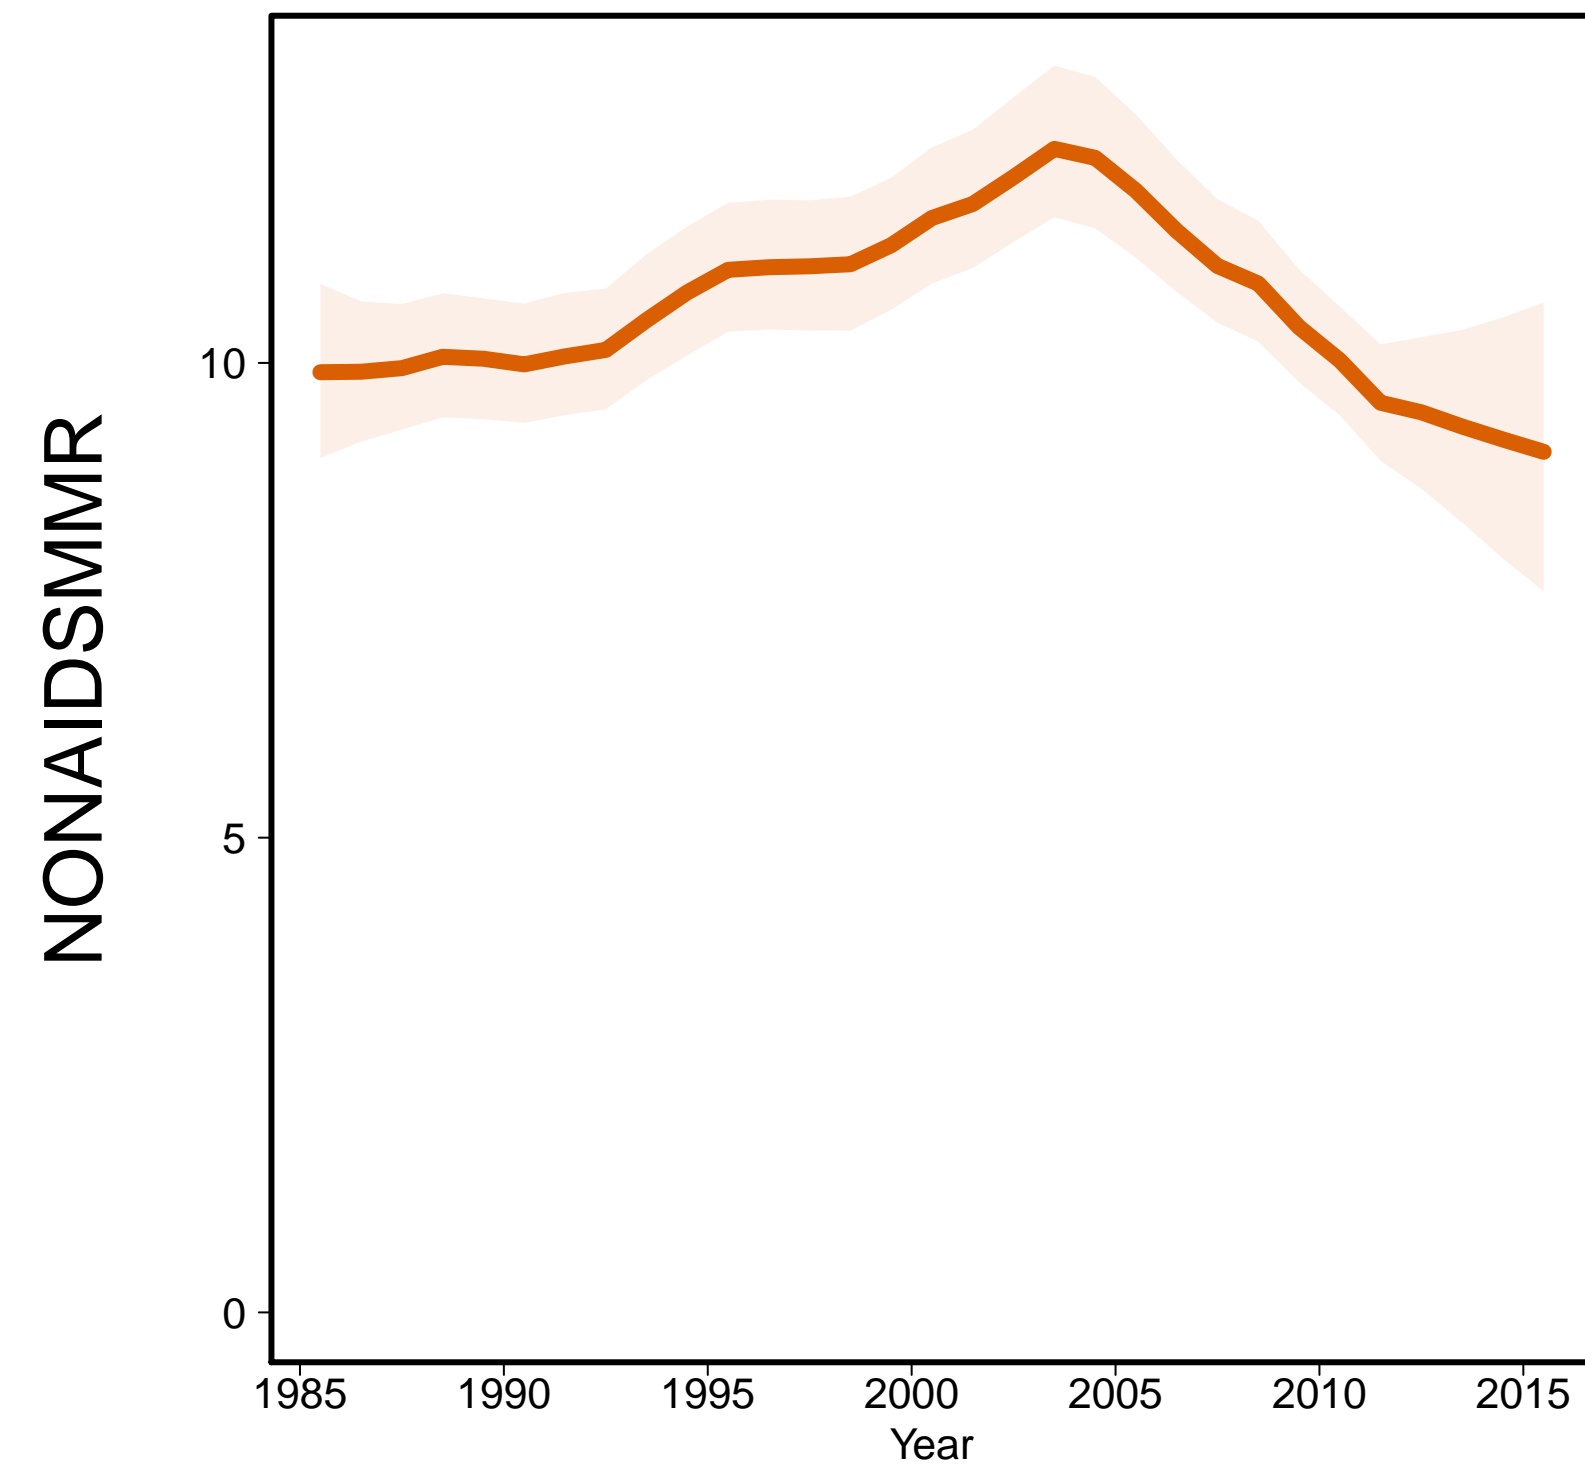

Aids MMR

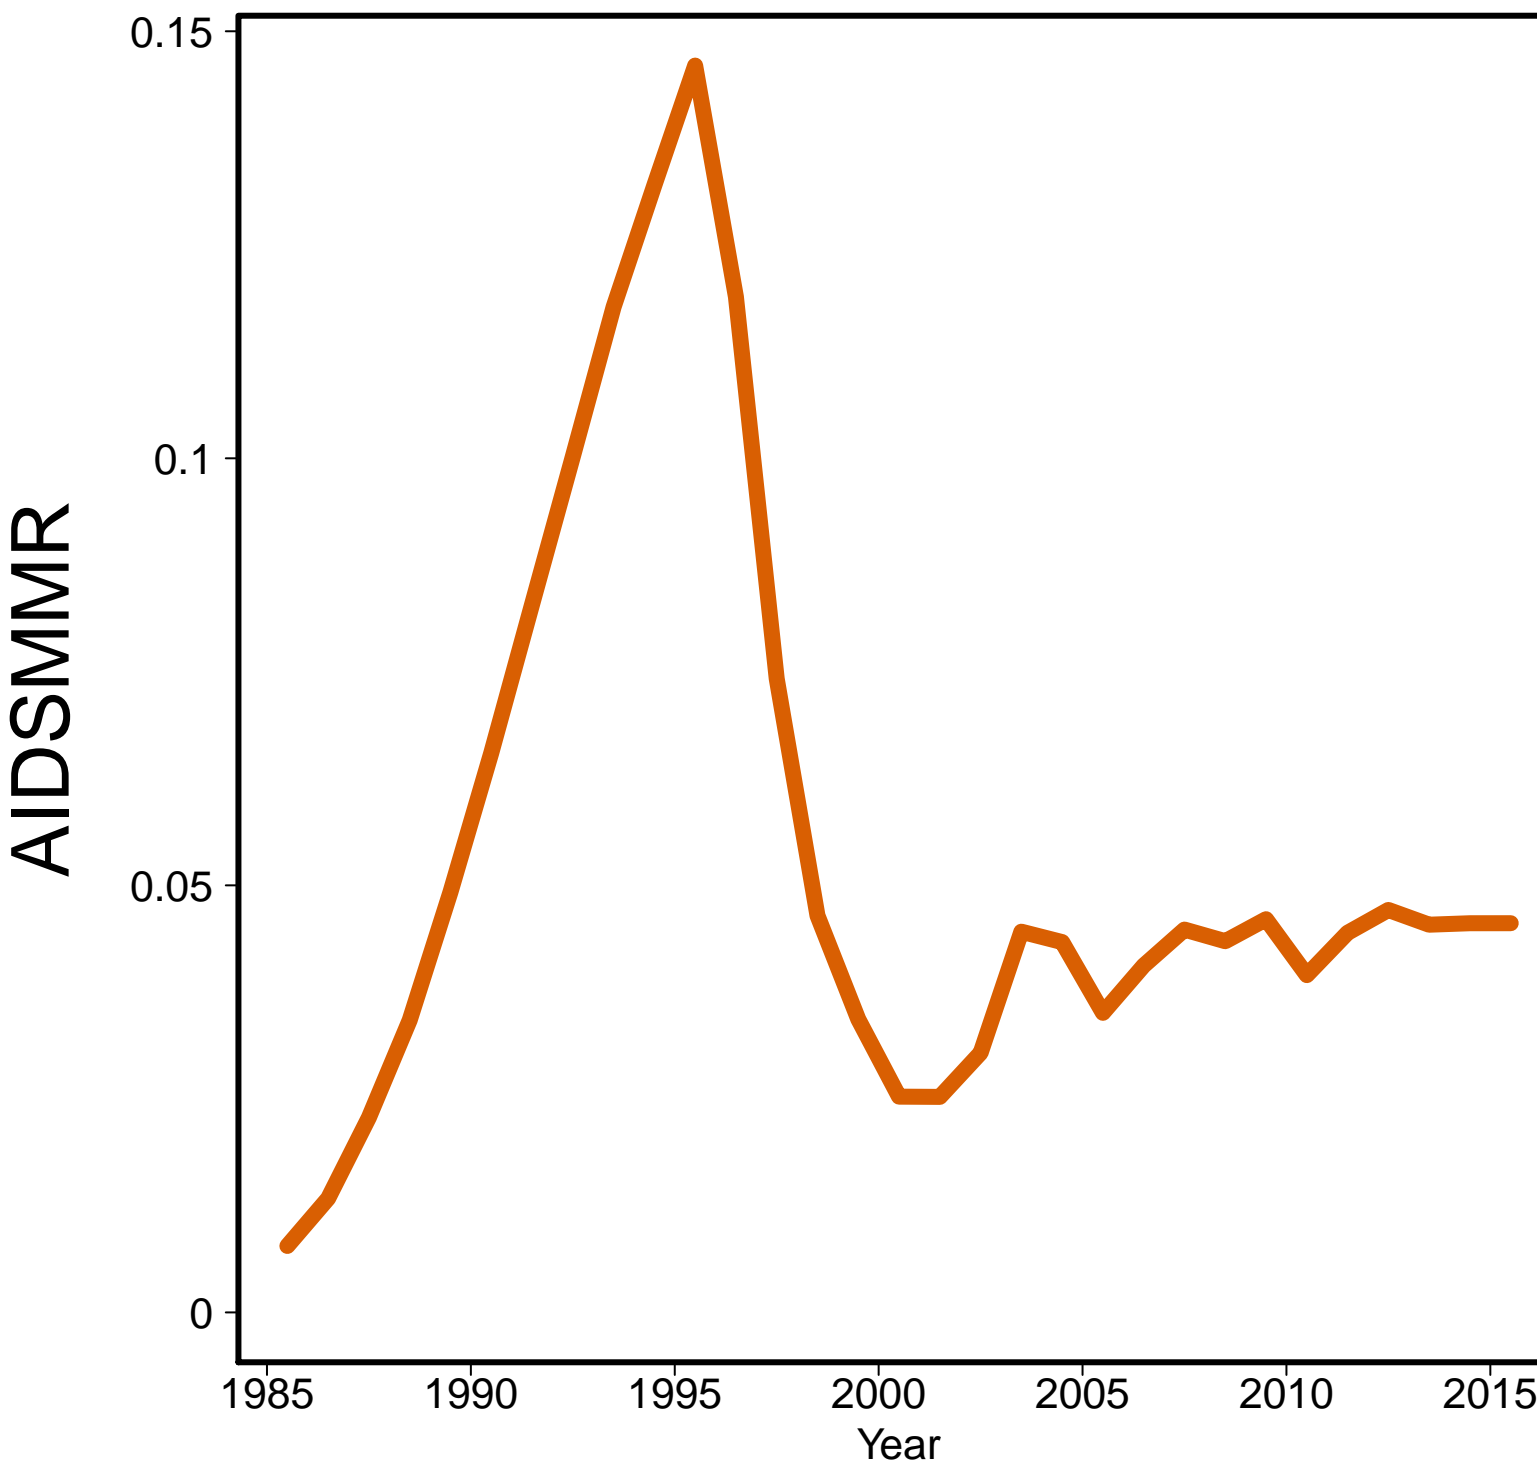

United States of America [USA]  
(Developed regions)

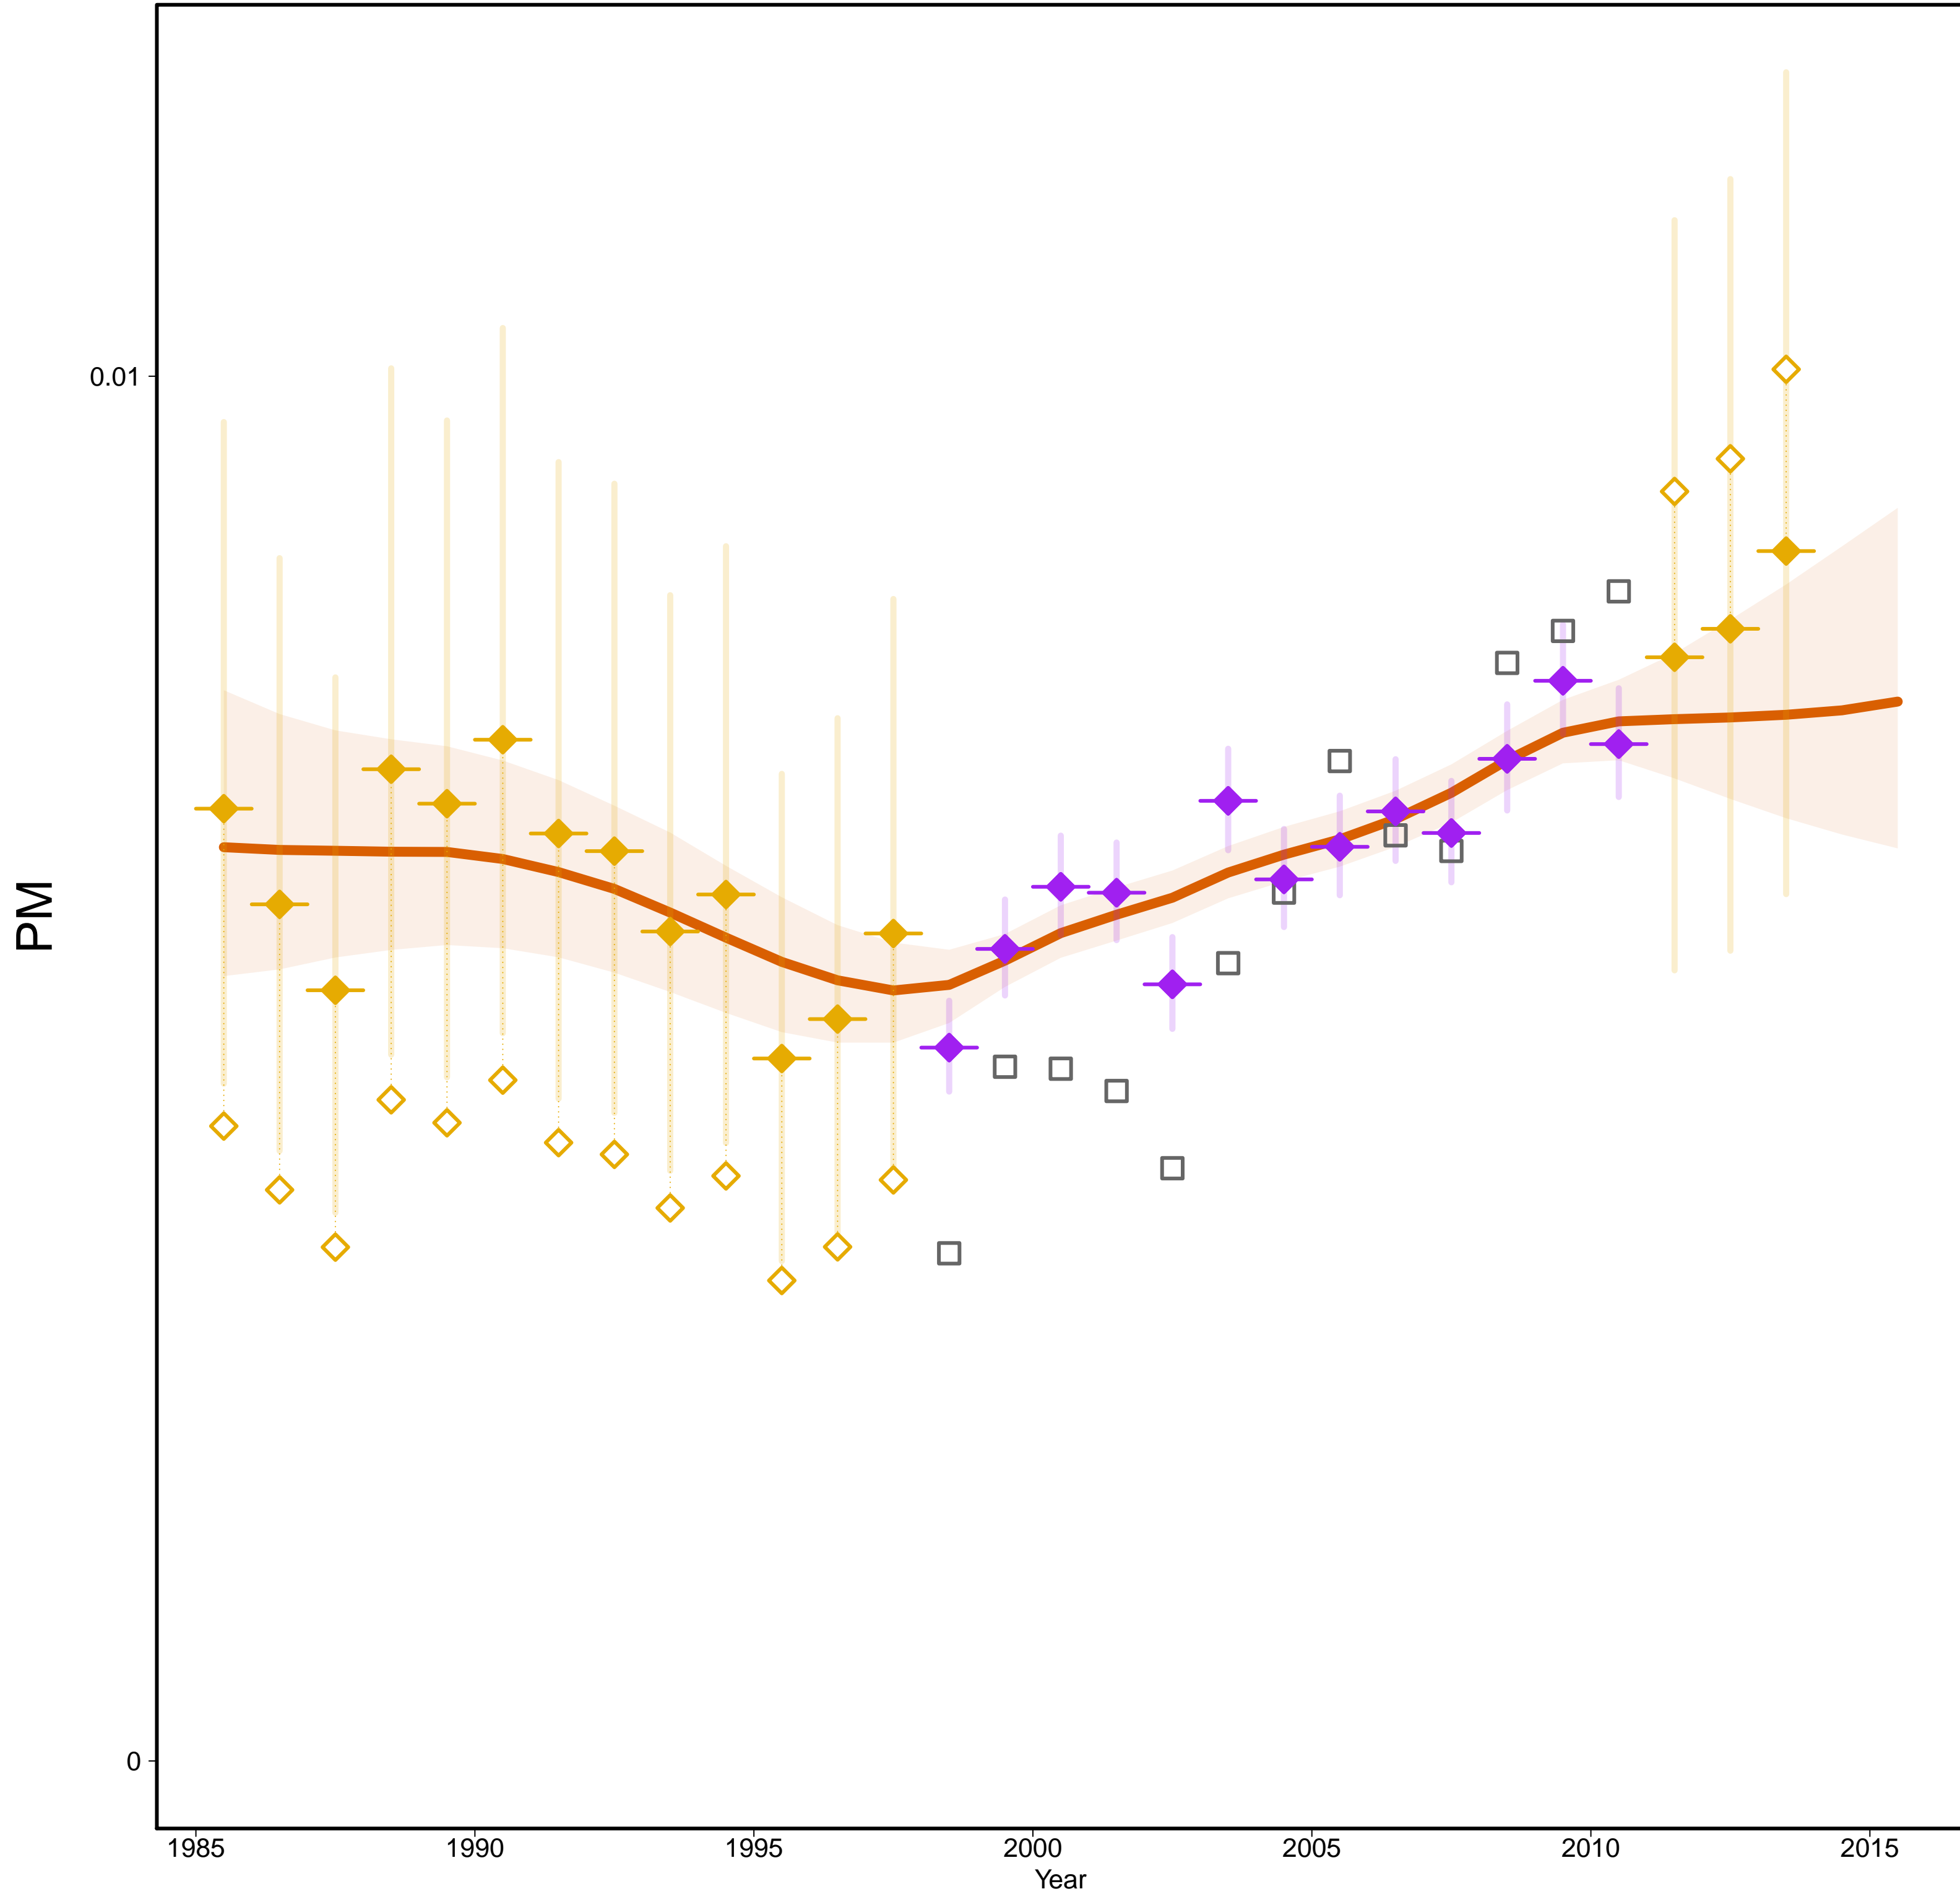

United States of America [USA]  
(Developed regions)

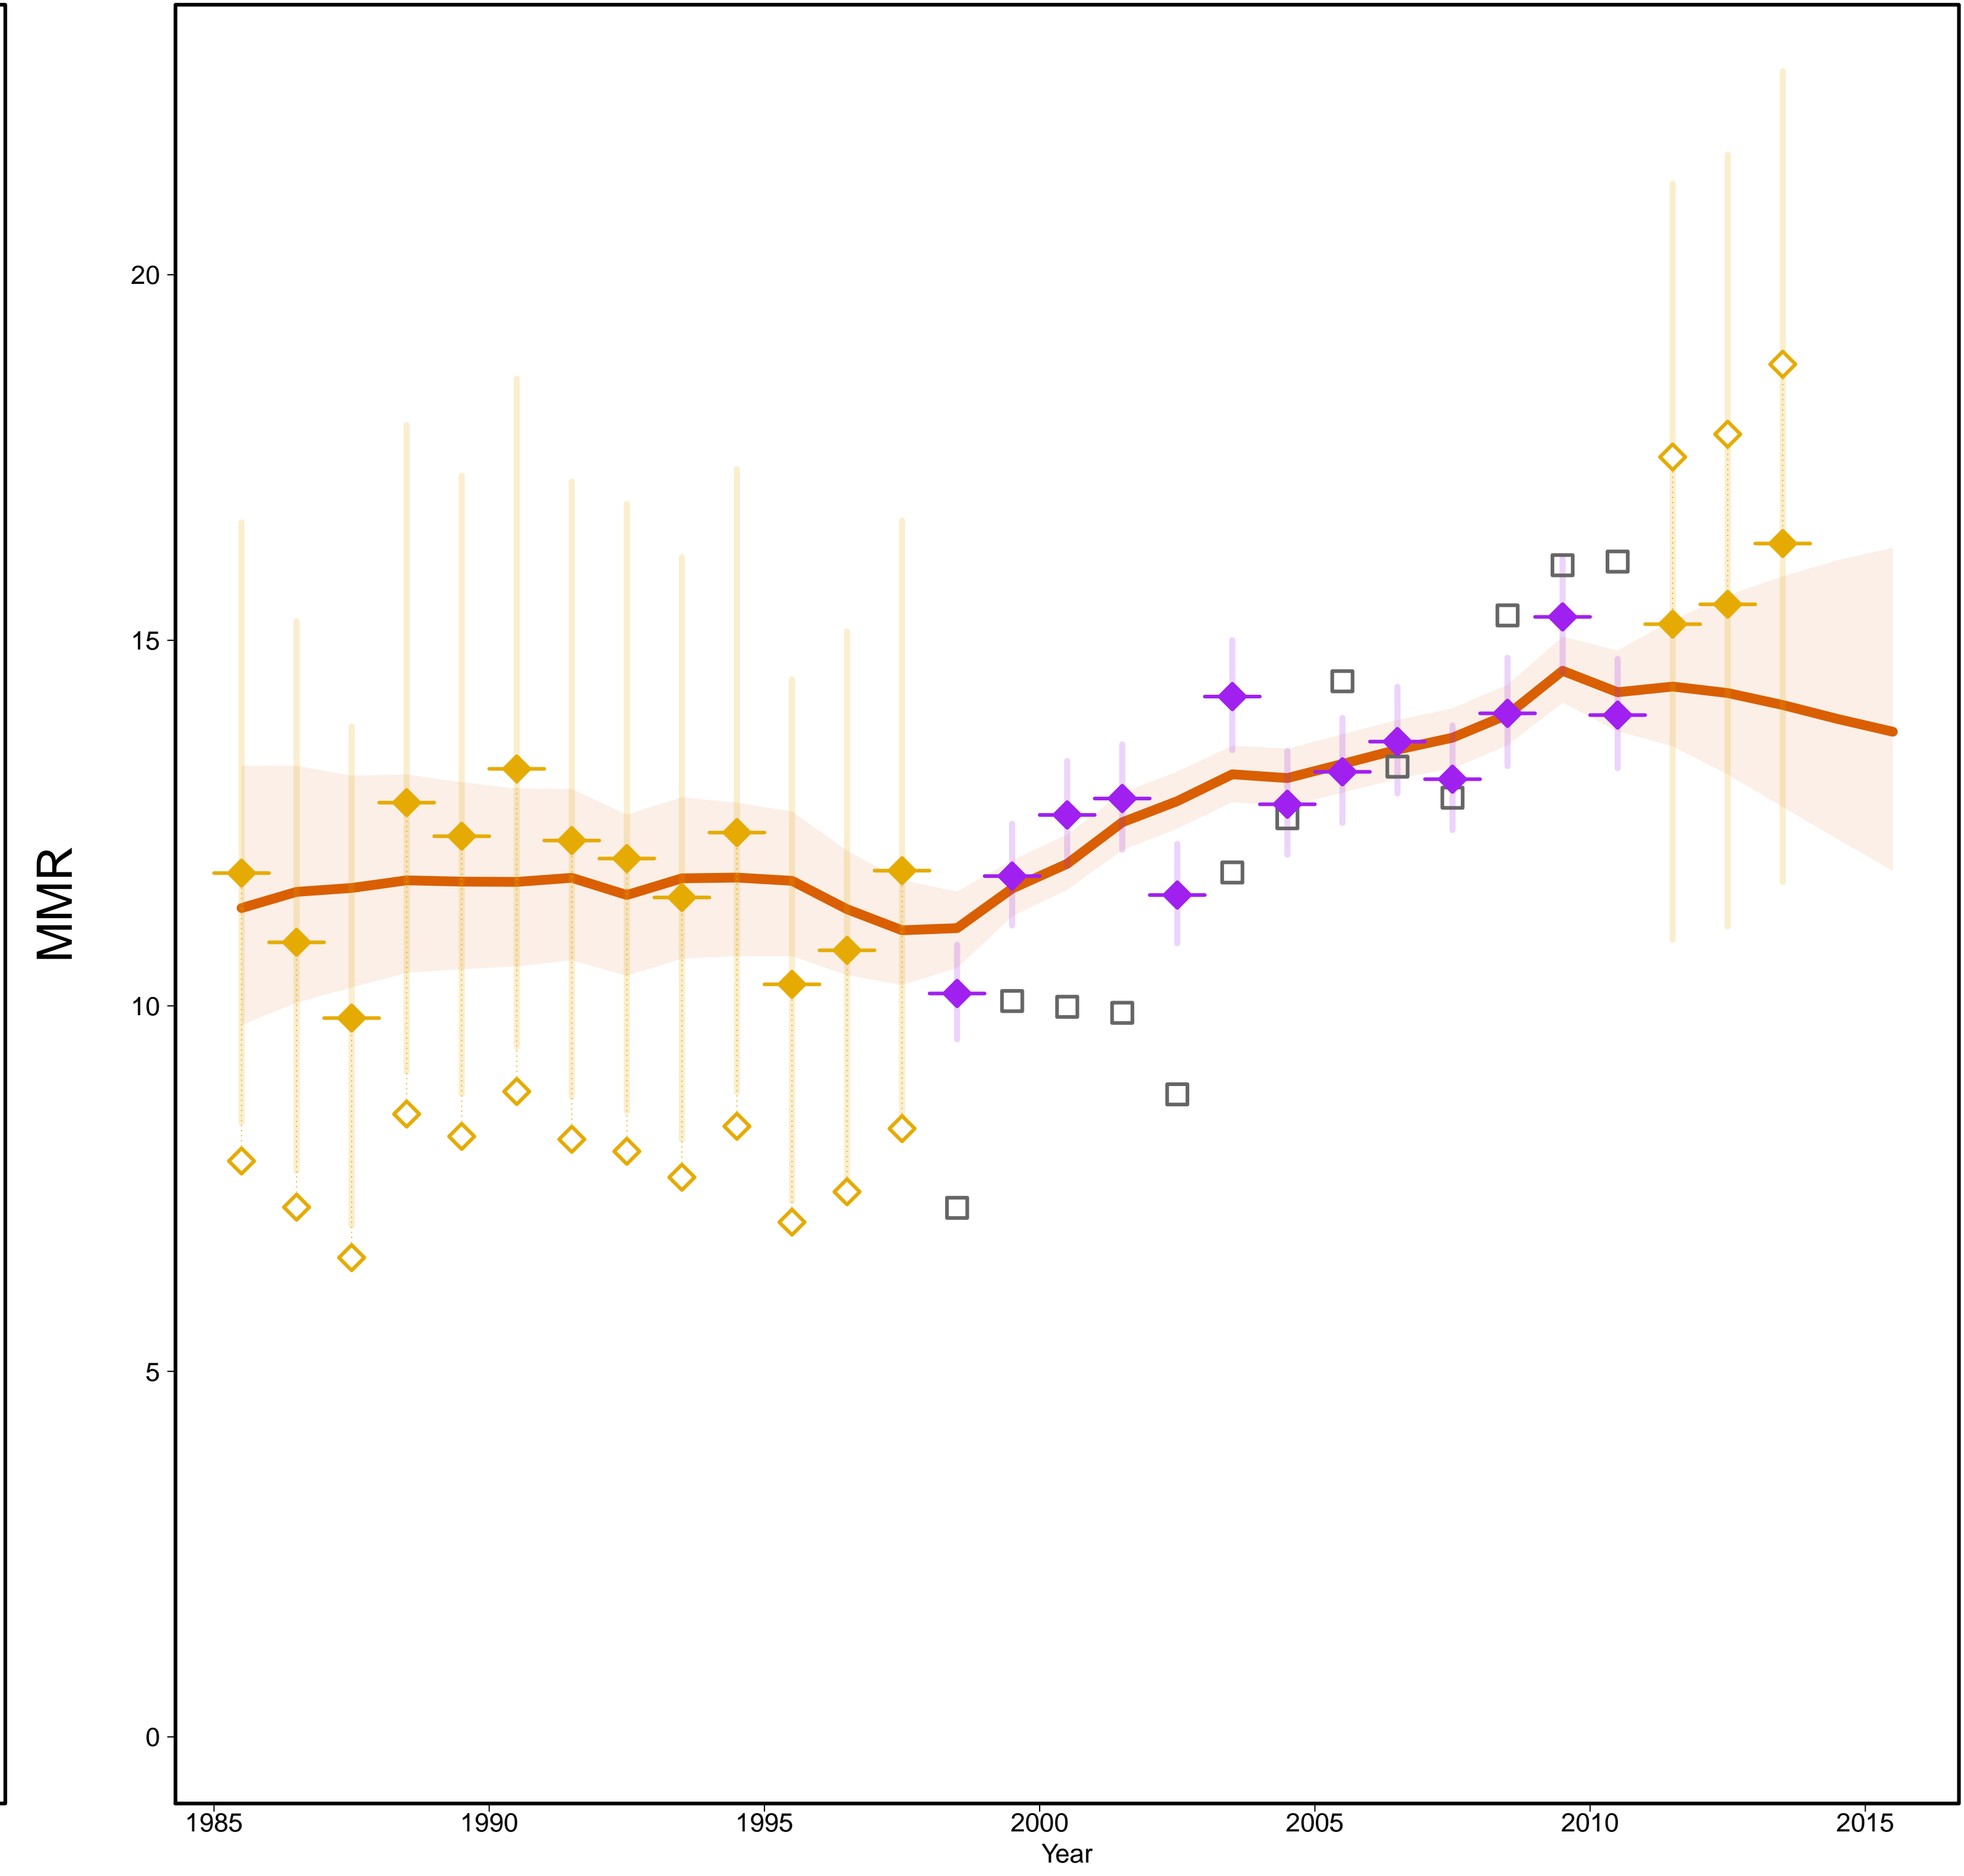

- Estimates —
- MMR Database 2015 —
- ◇ Observed Data
- ◆ Adjusted Data
- Data type —
- ◆ VR
- ◆ Spec. studies
- Excluded VR data  
(overlap with specialized study)

Gross Domestic Product

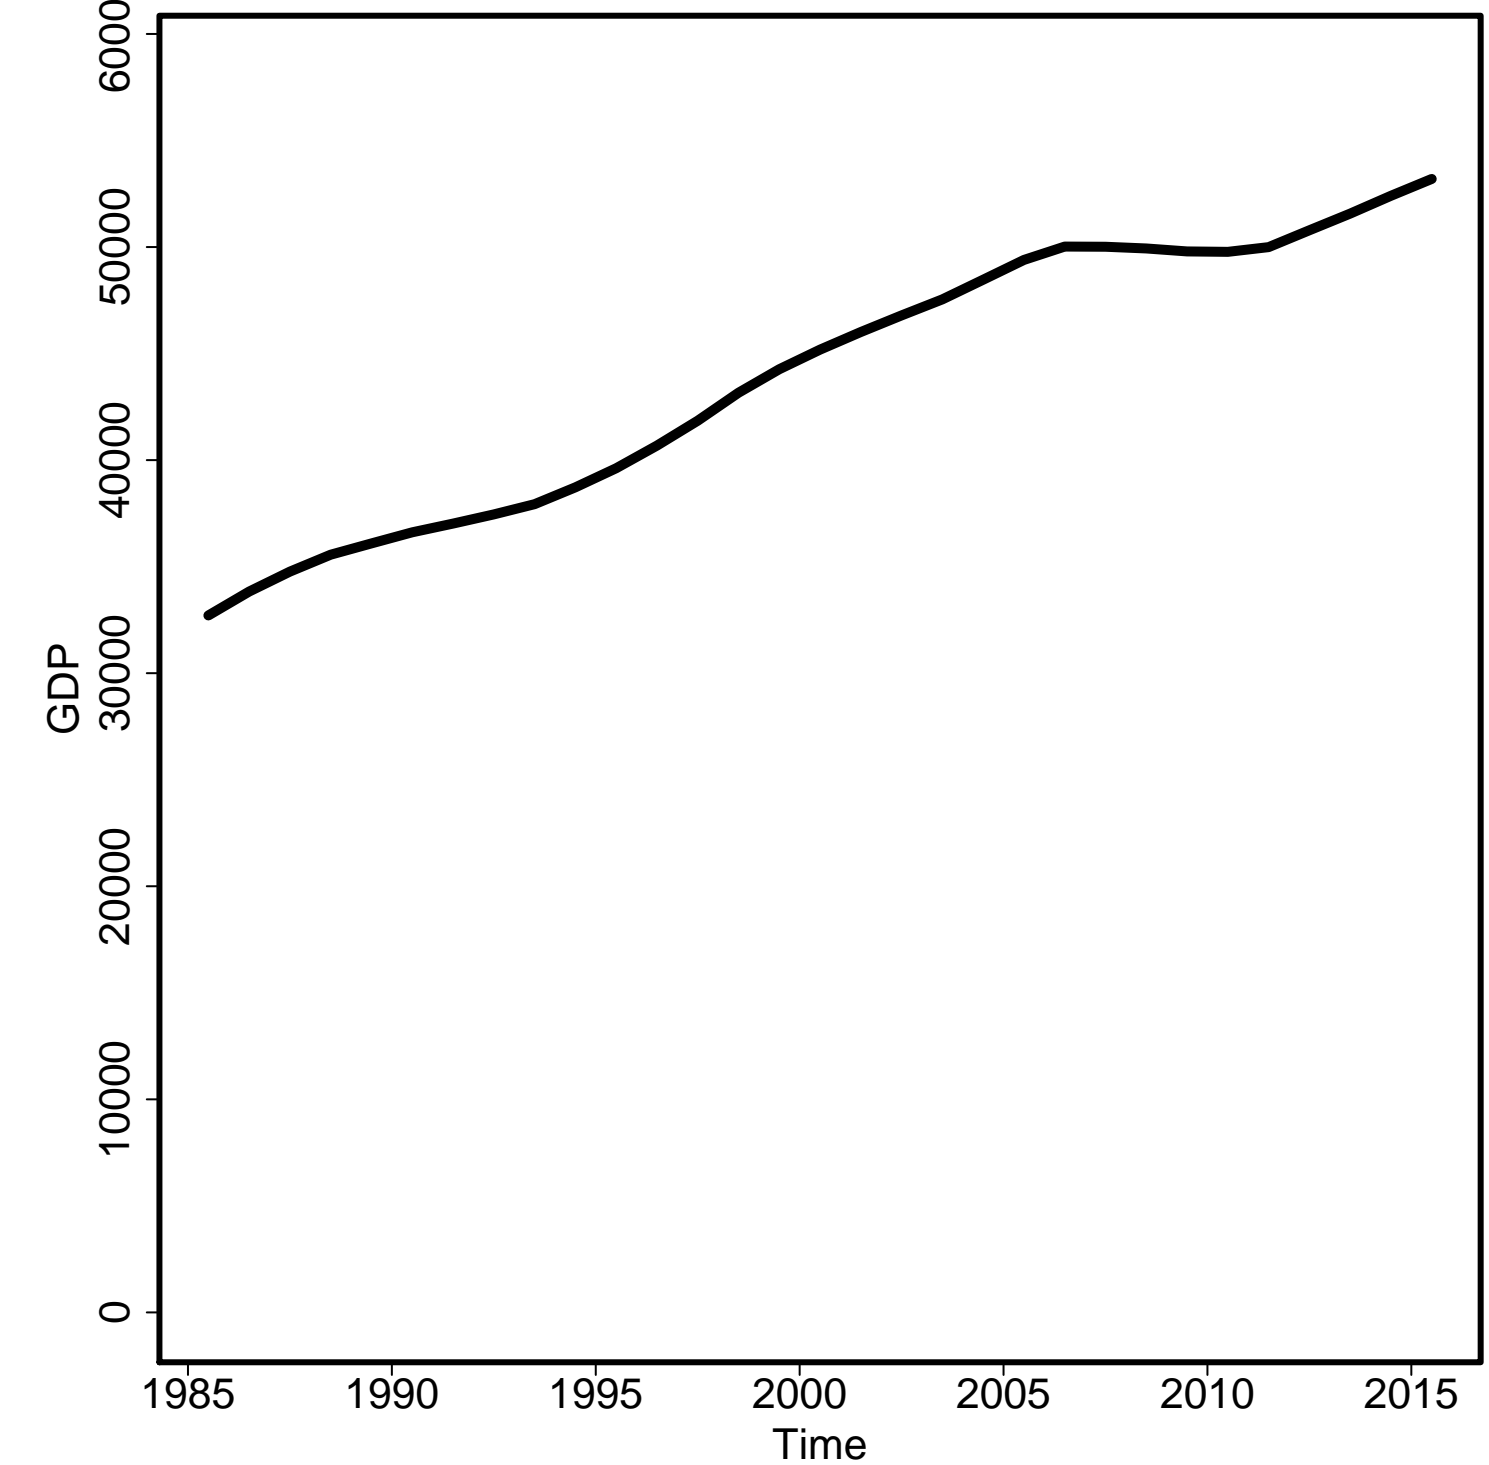

General Fertility Rate

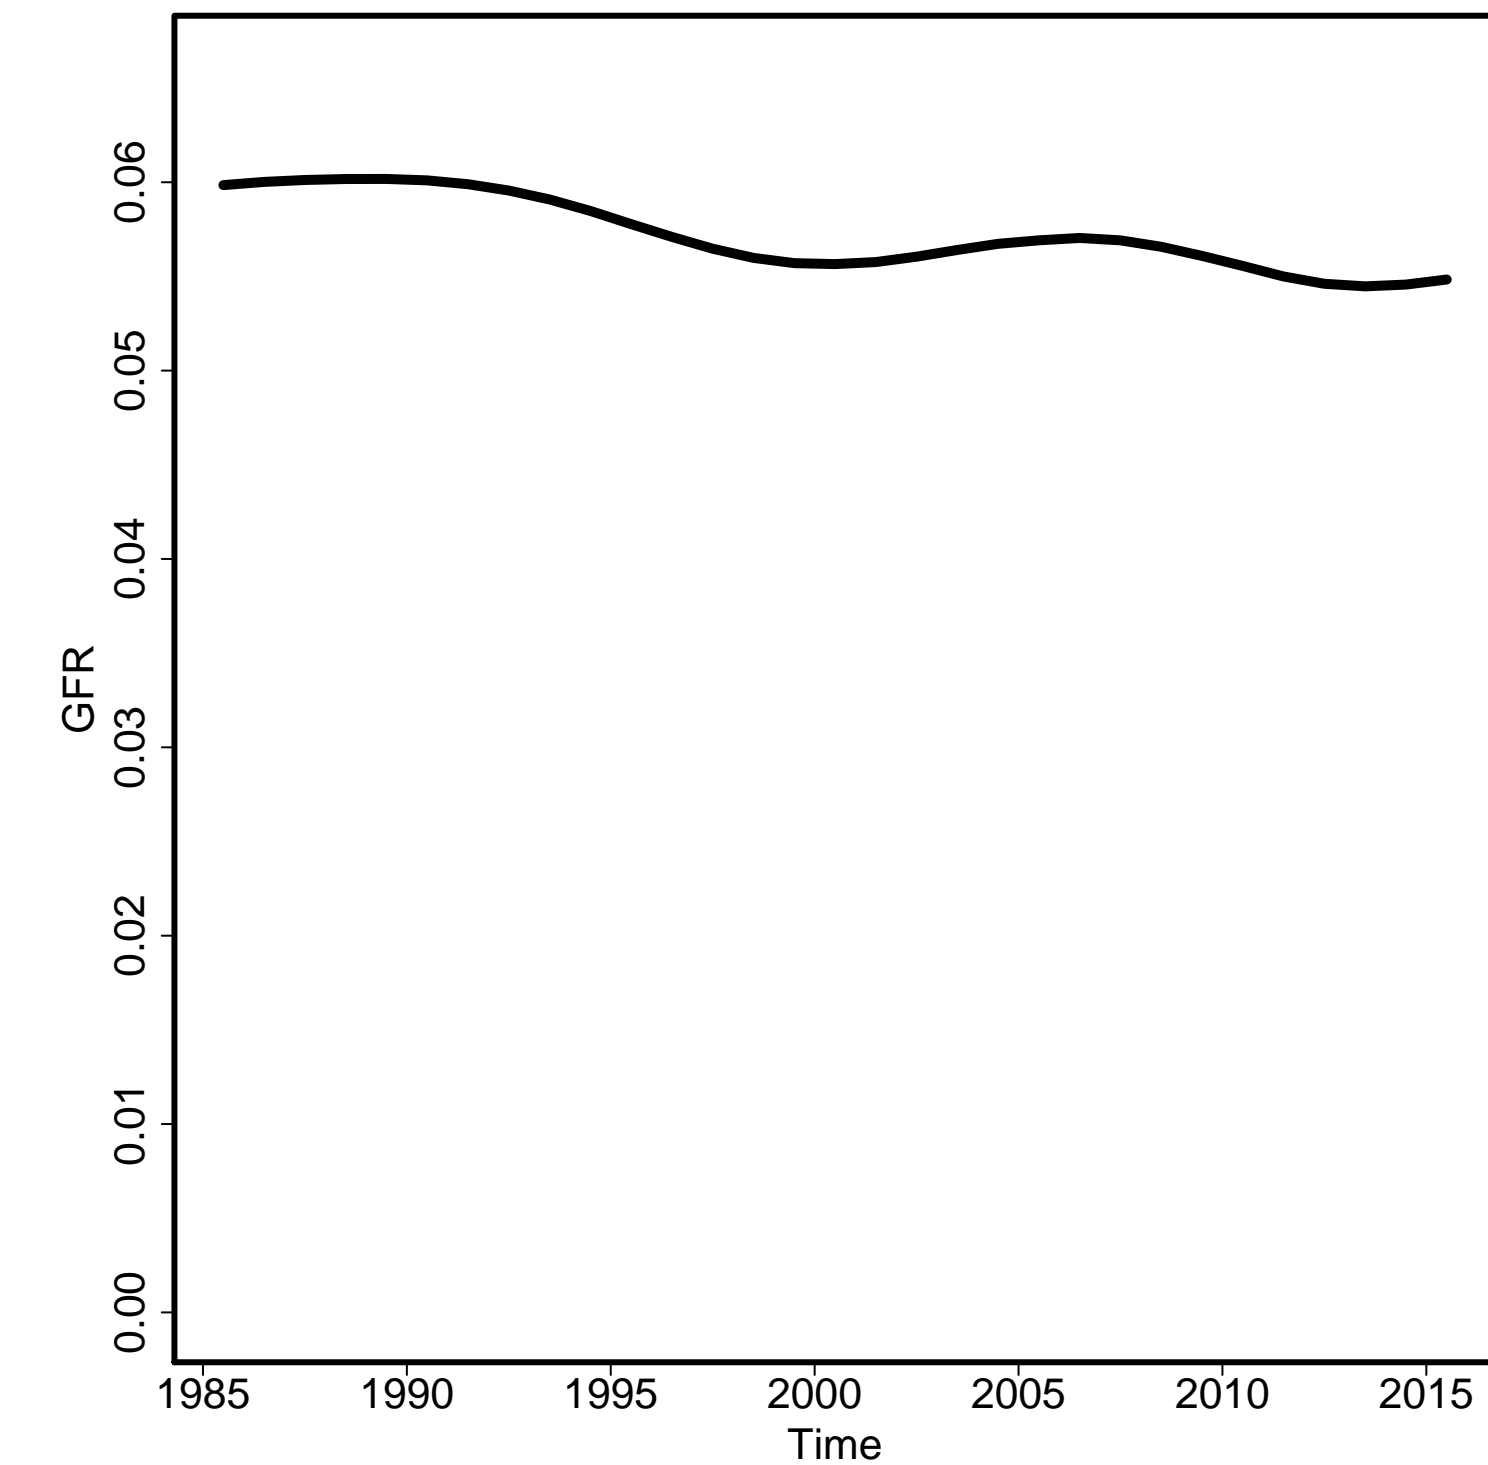

Skilled Attendance to Birth

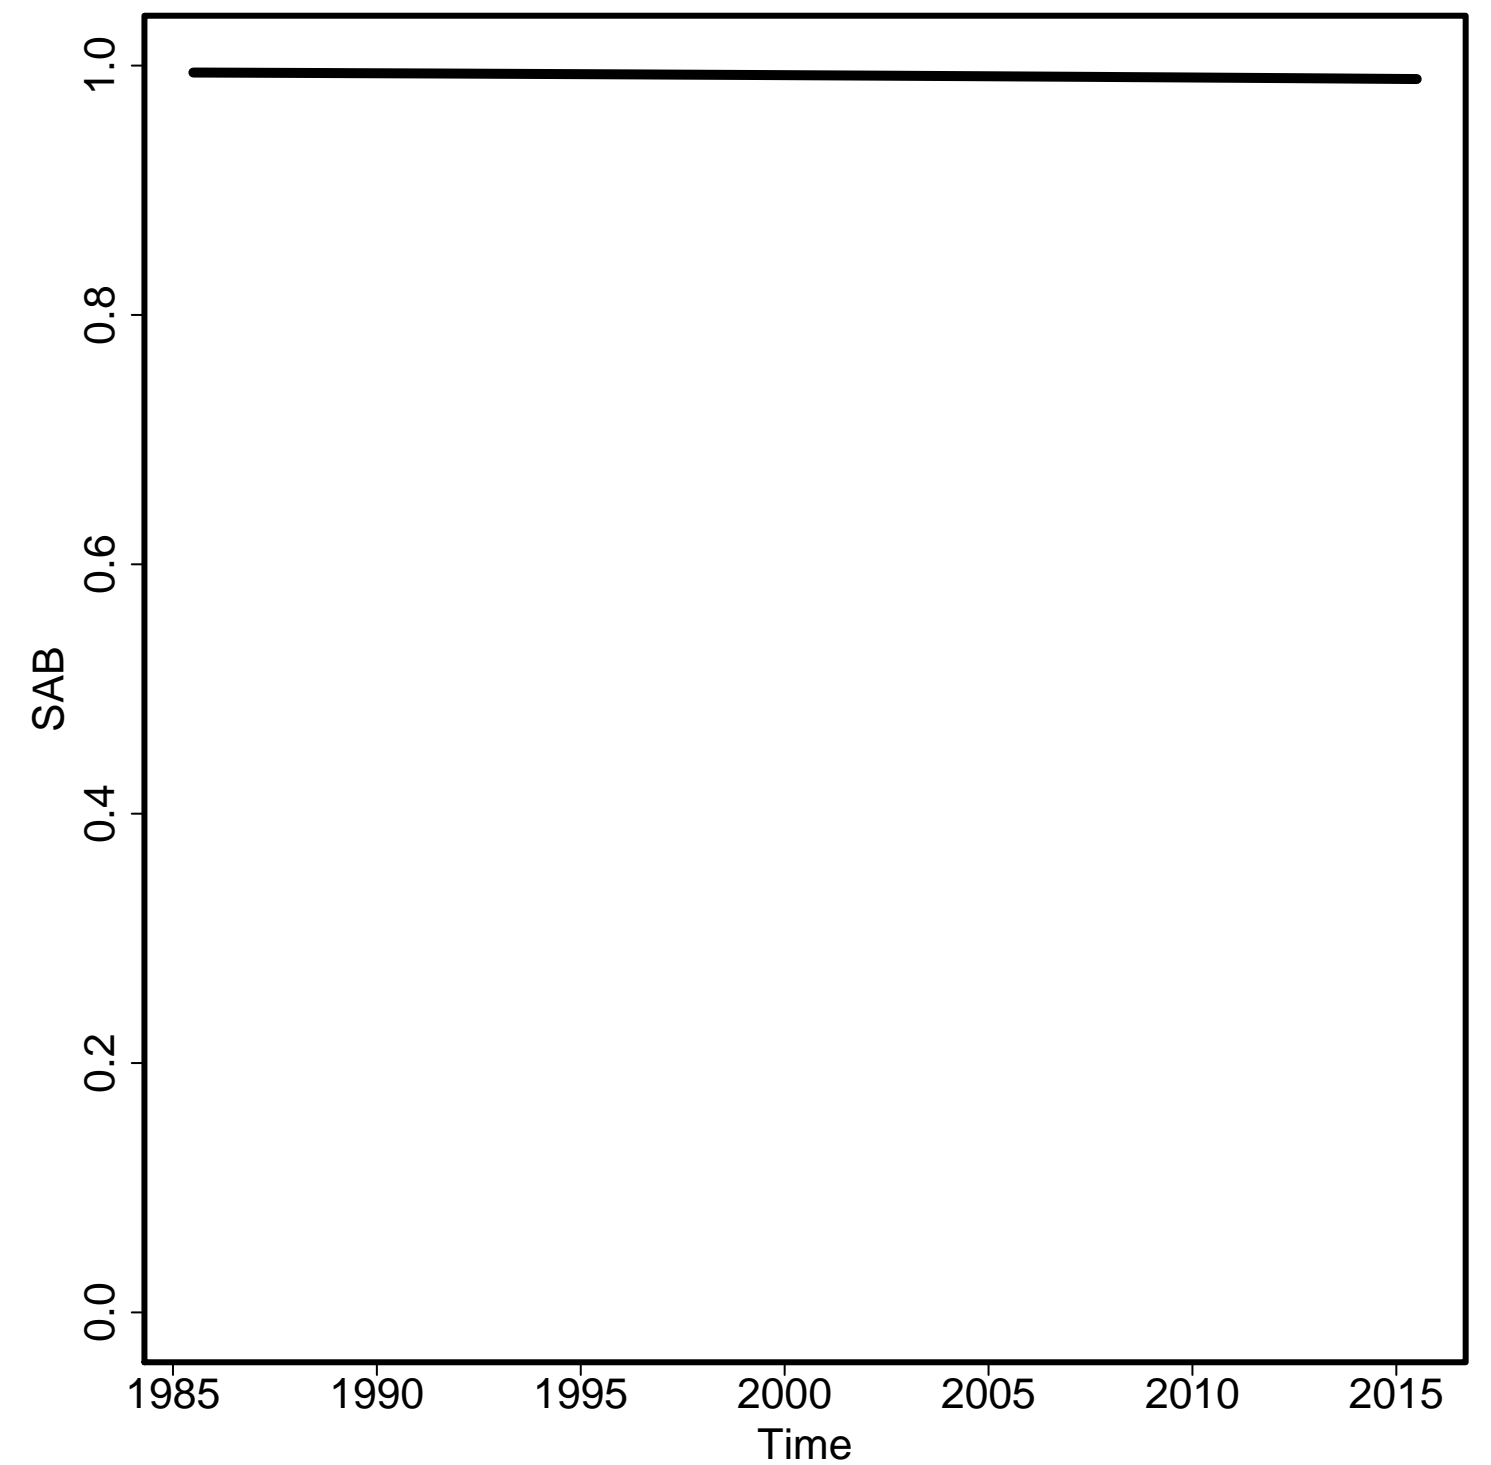

Envelope/Births

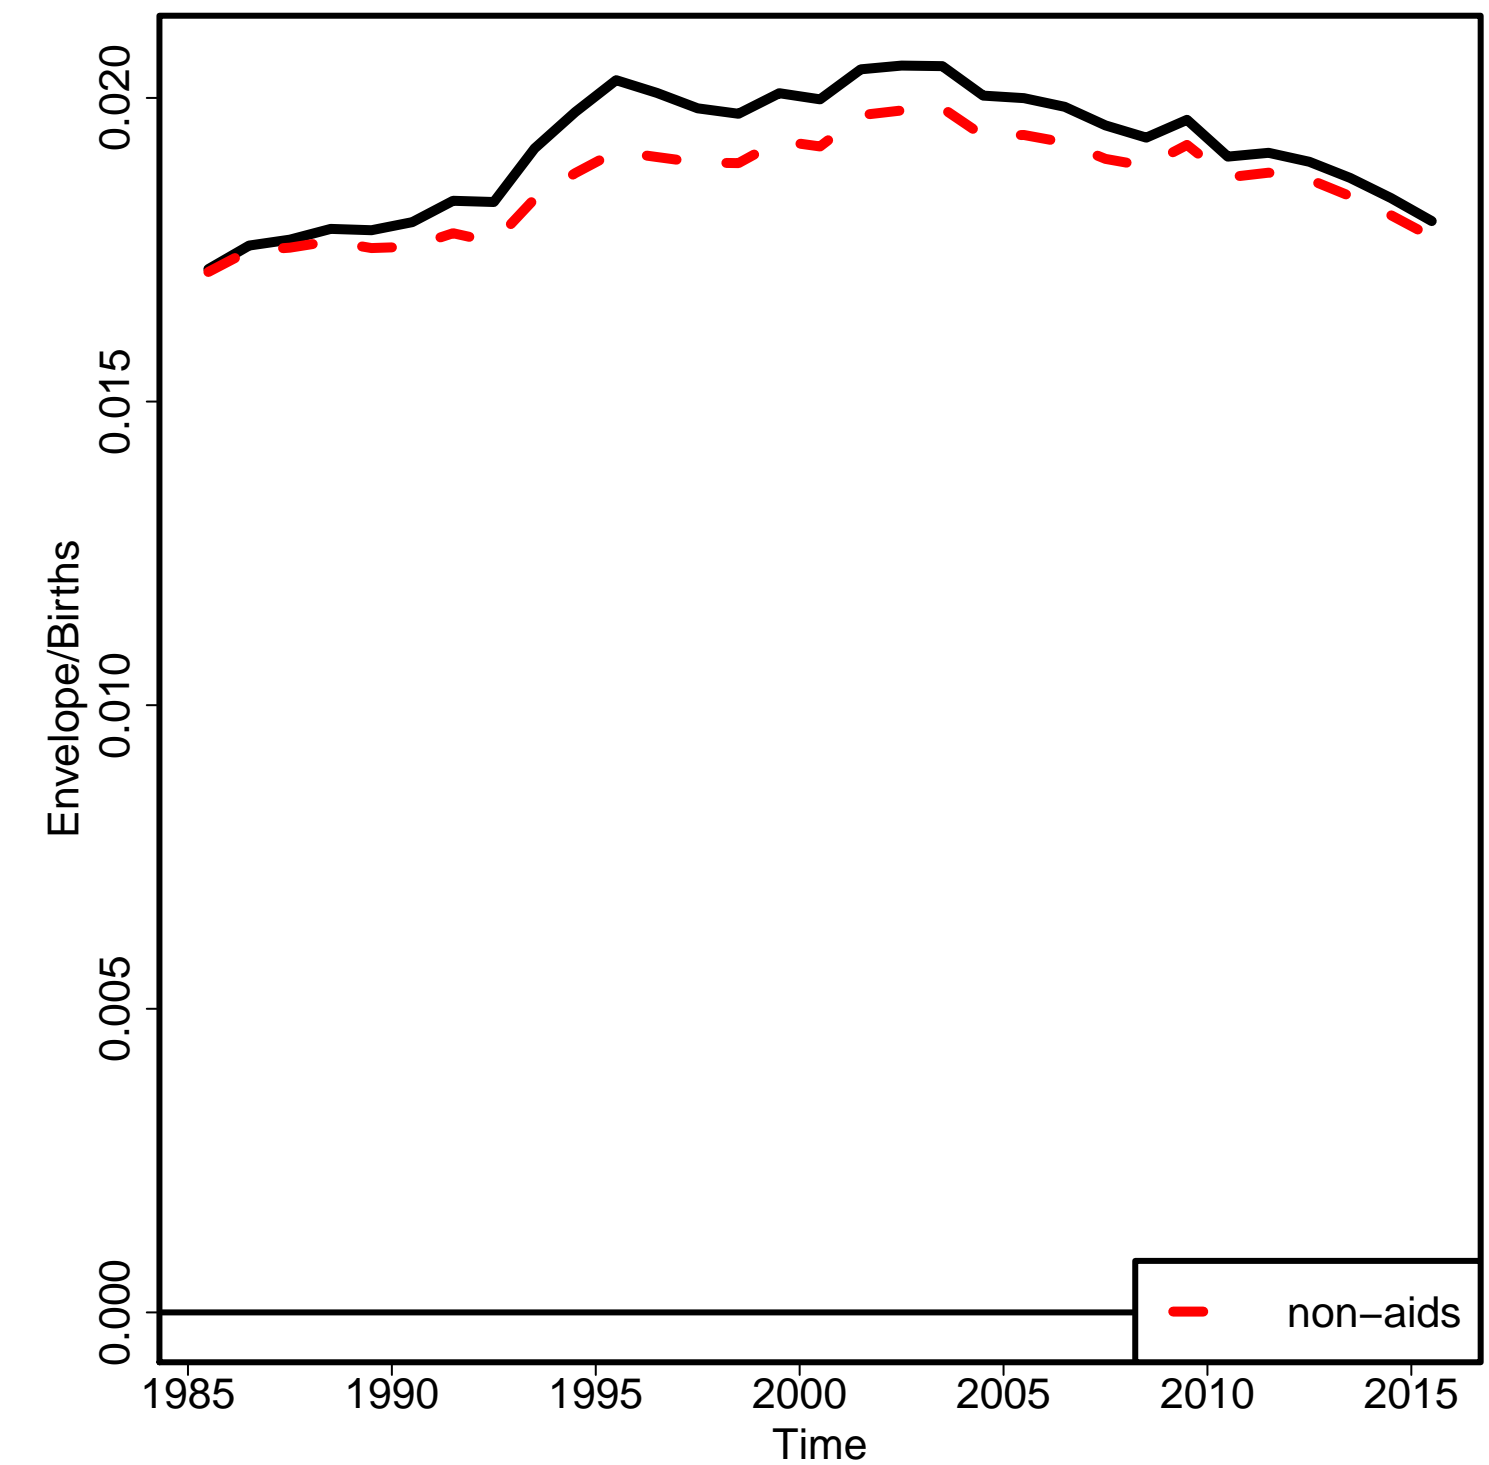

Non-aids MMR

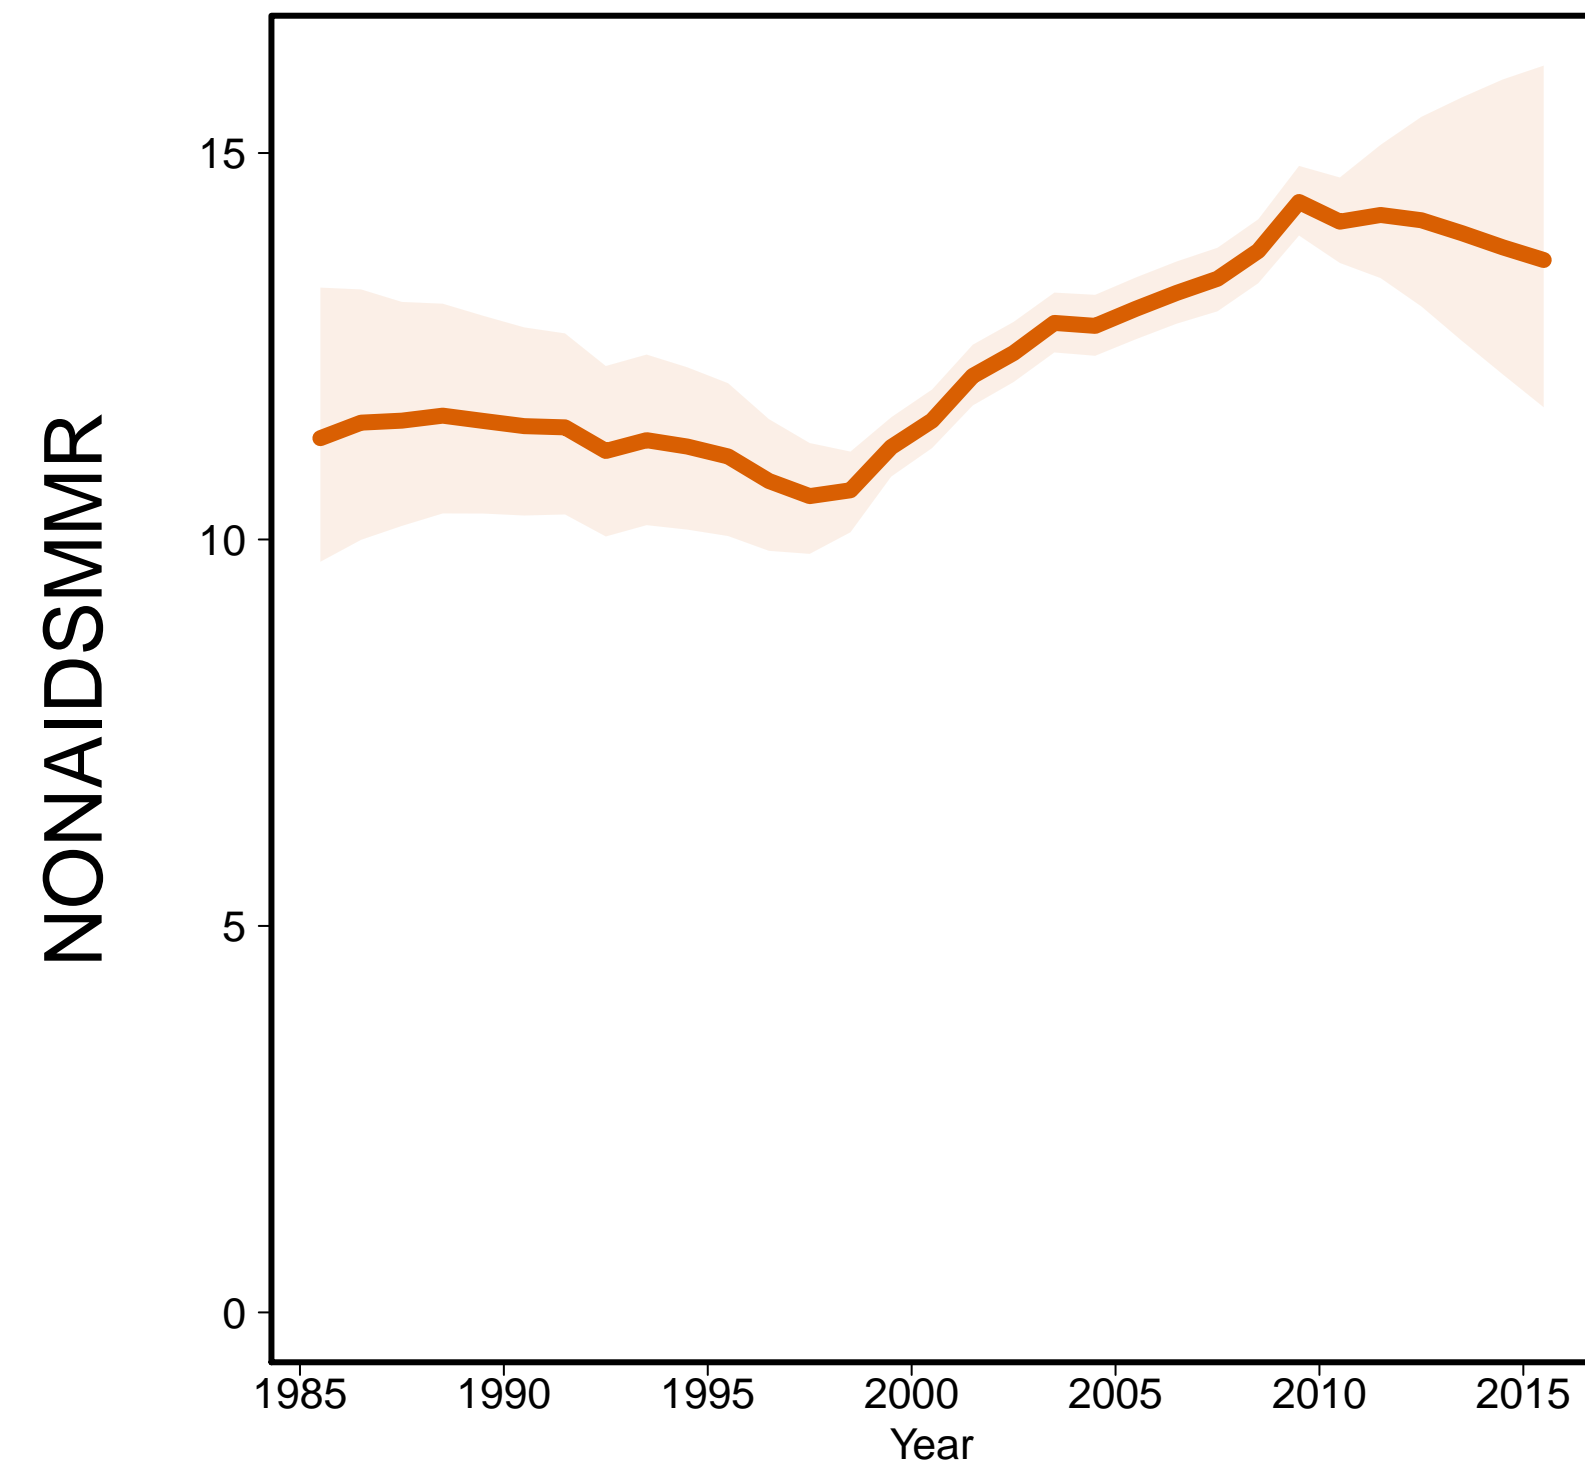

Aids MMR

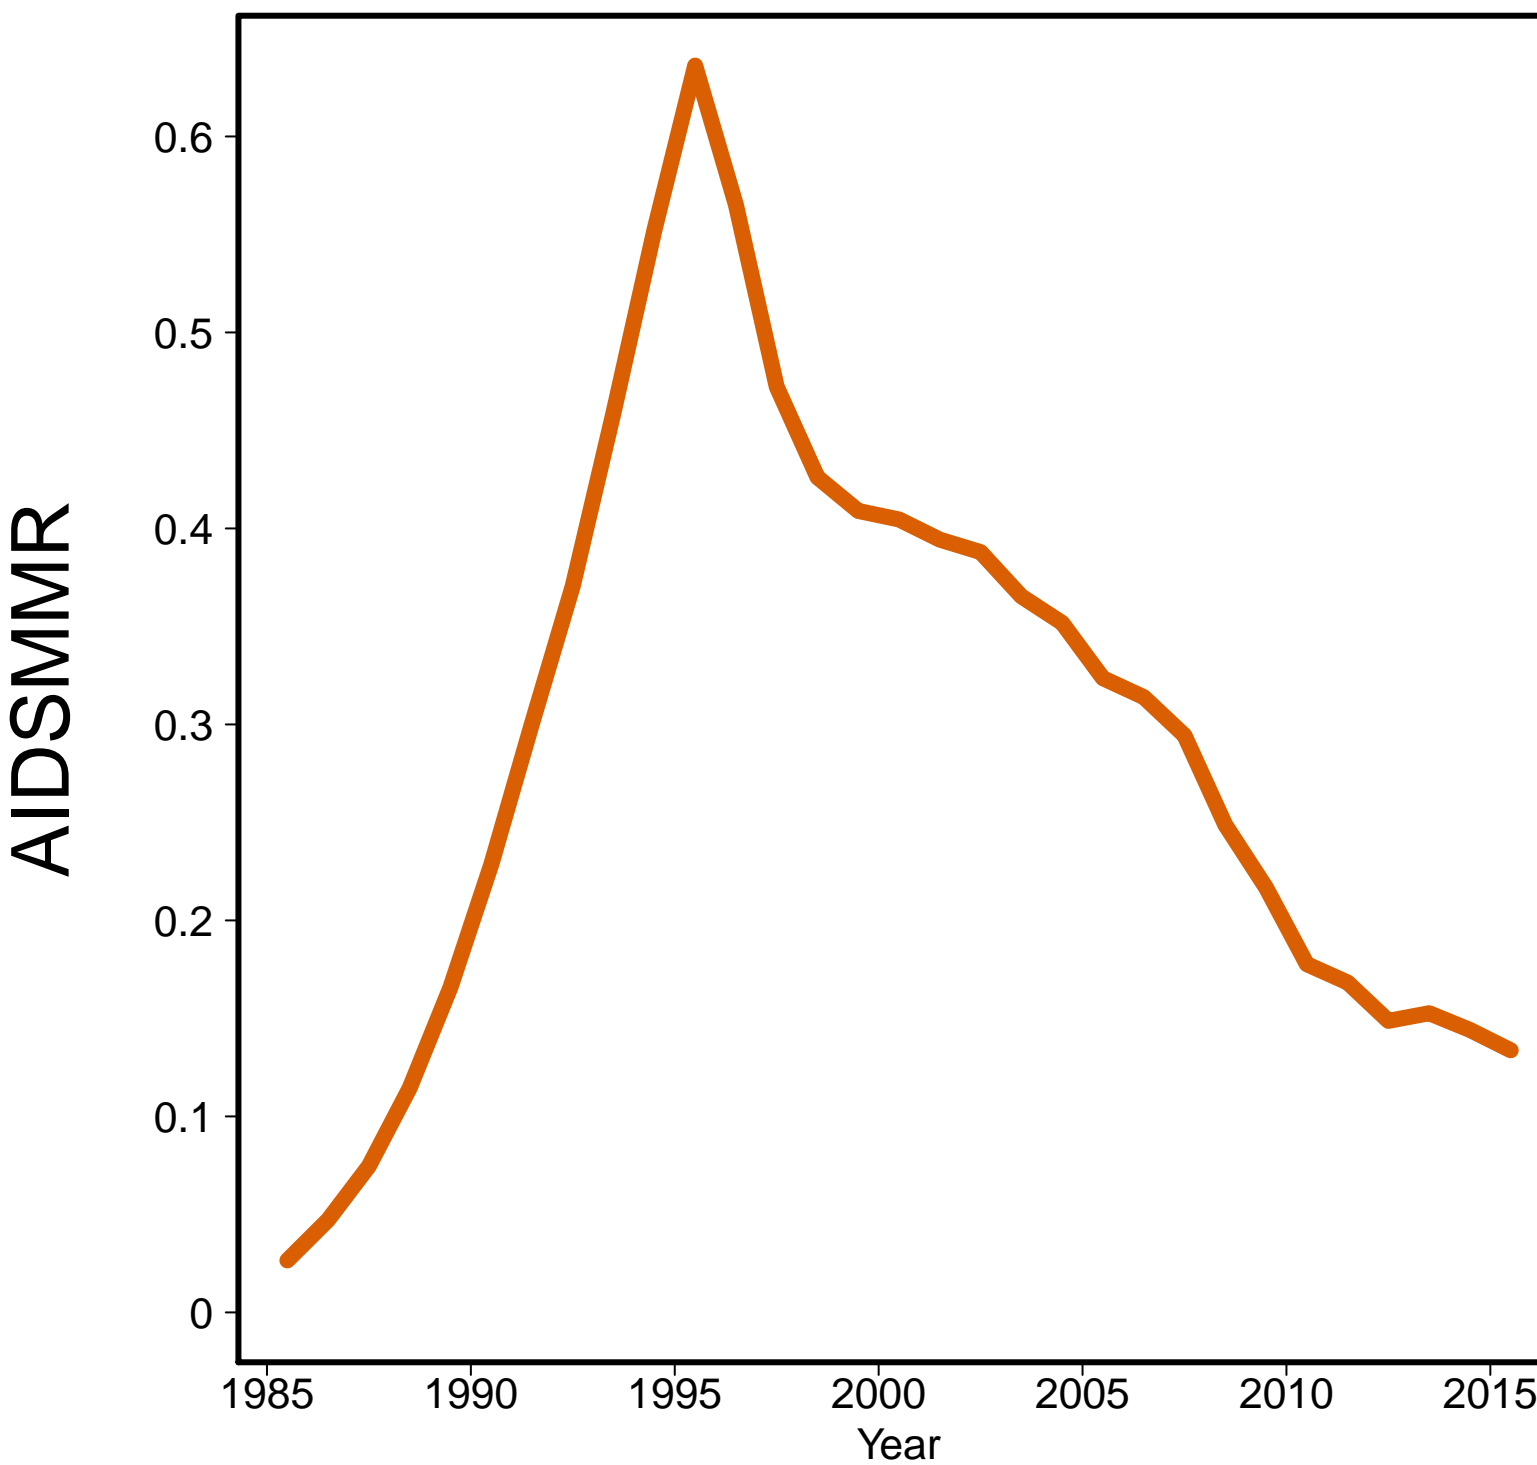

Uruguay [URY]  
(South America)

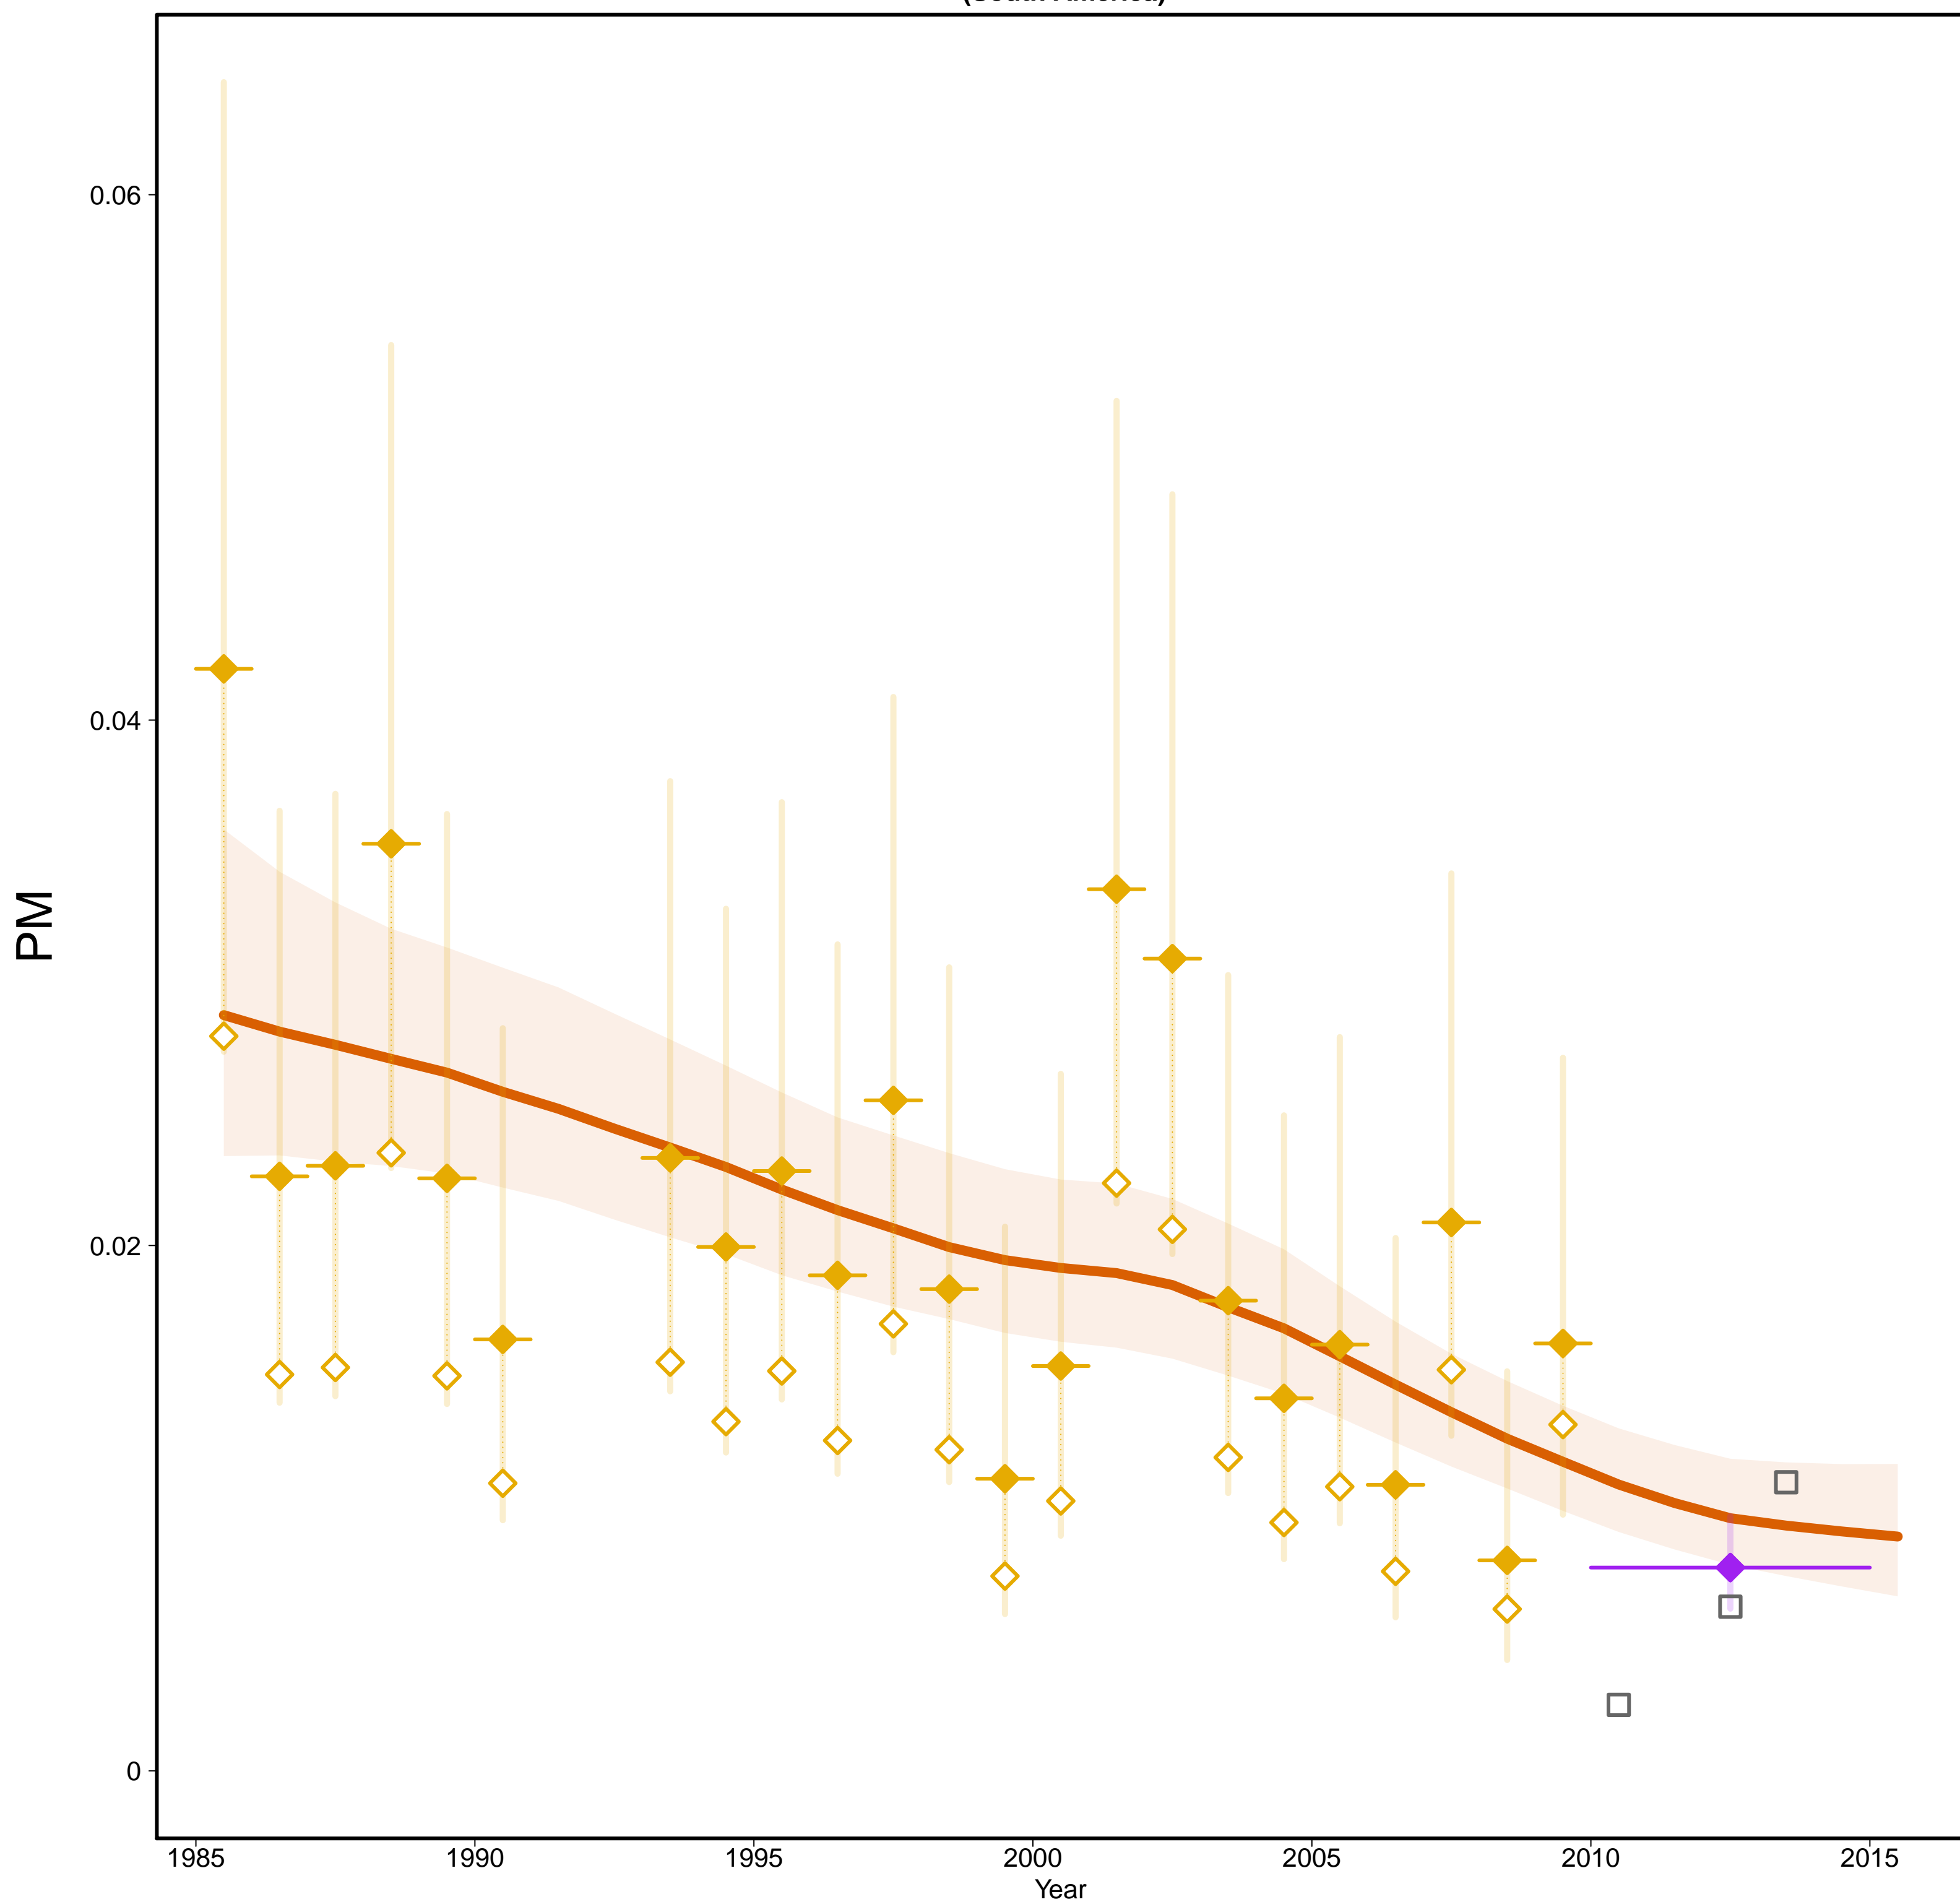

Uruguay [URY]  
(South America)

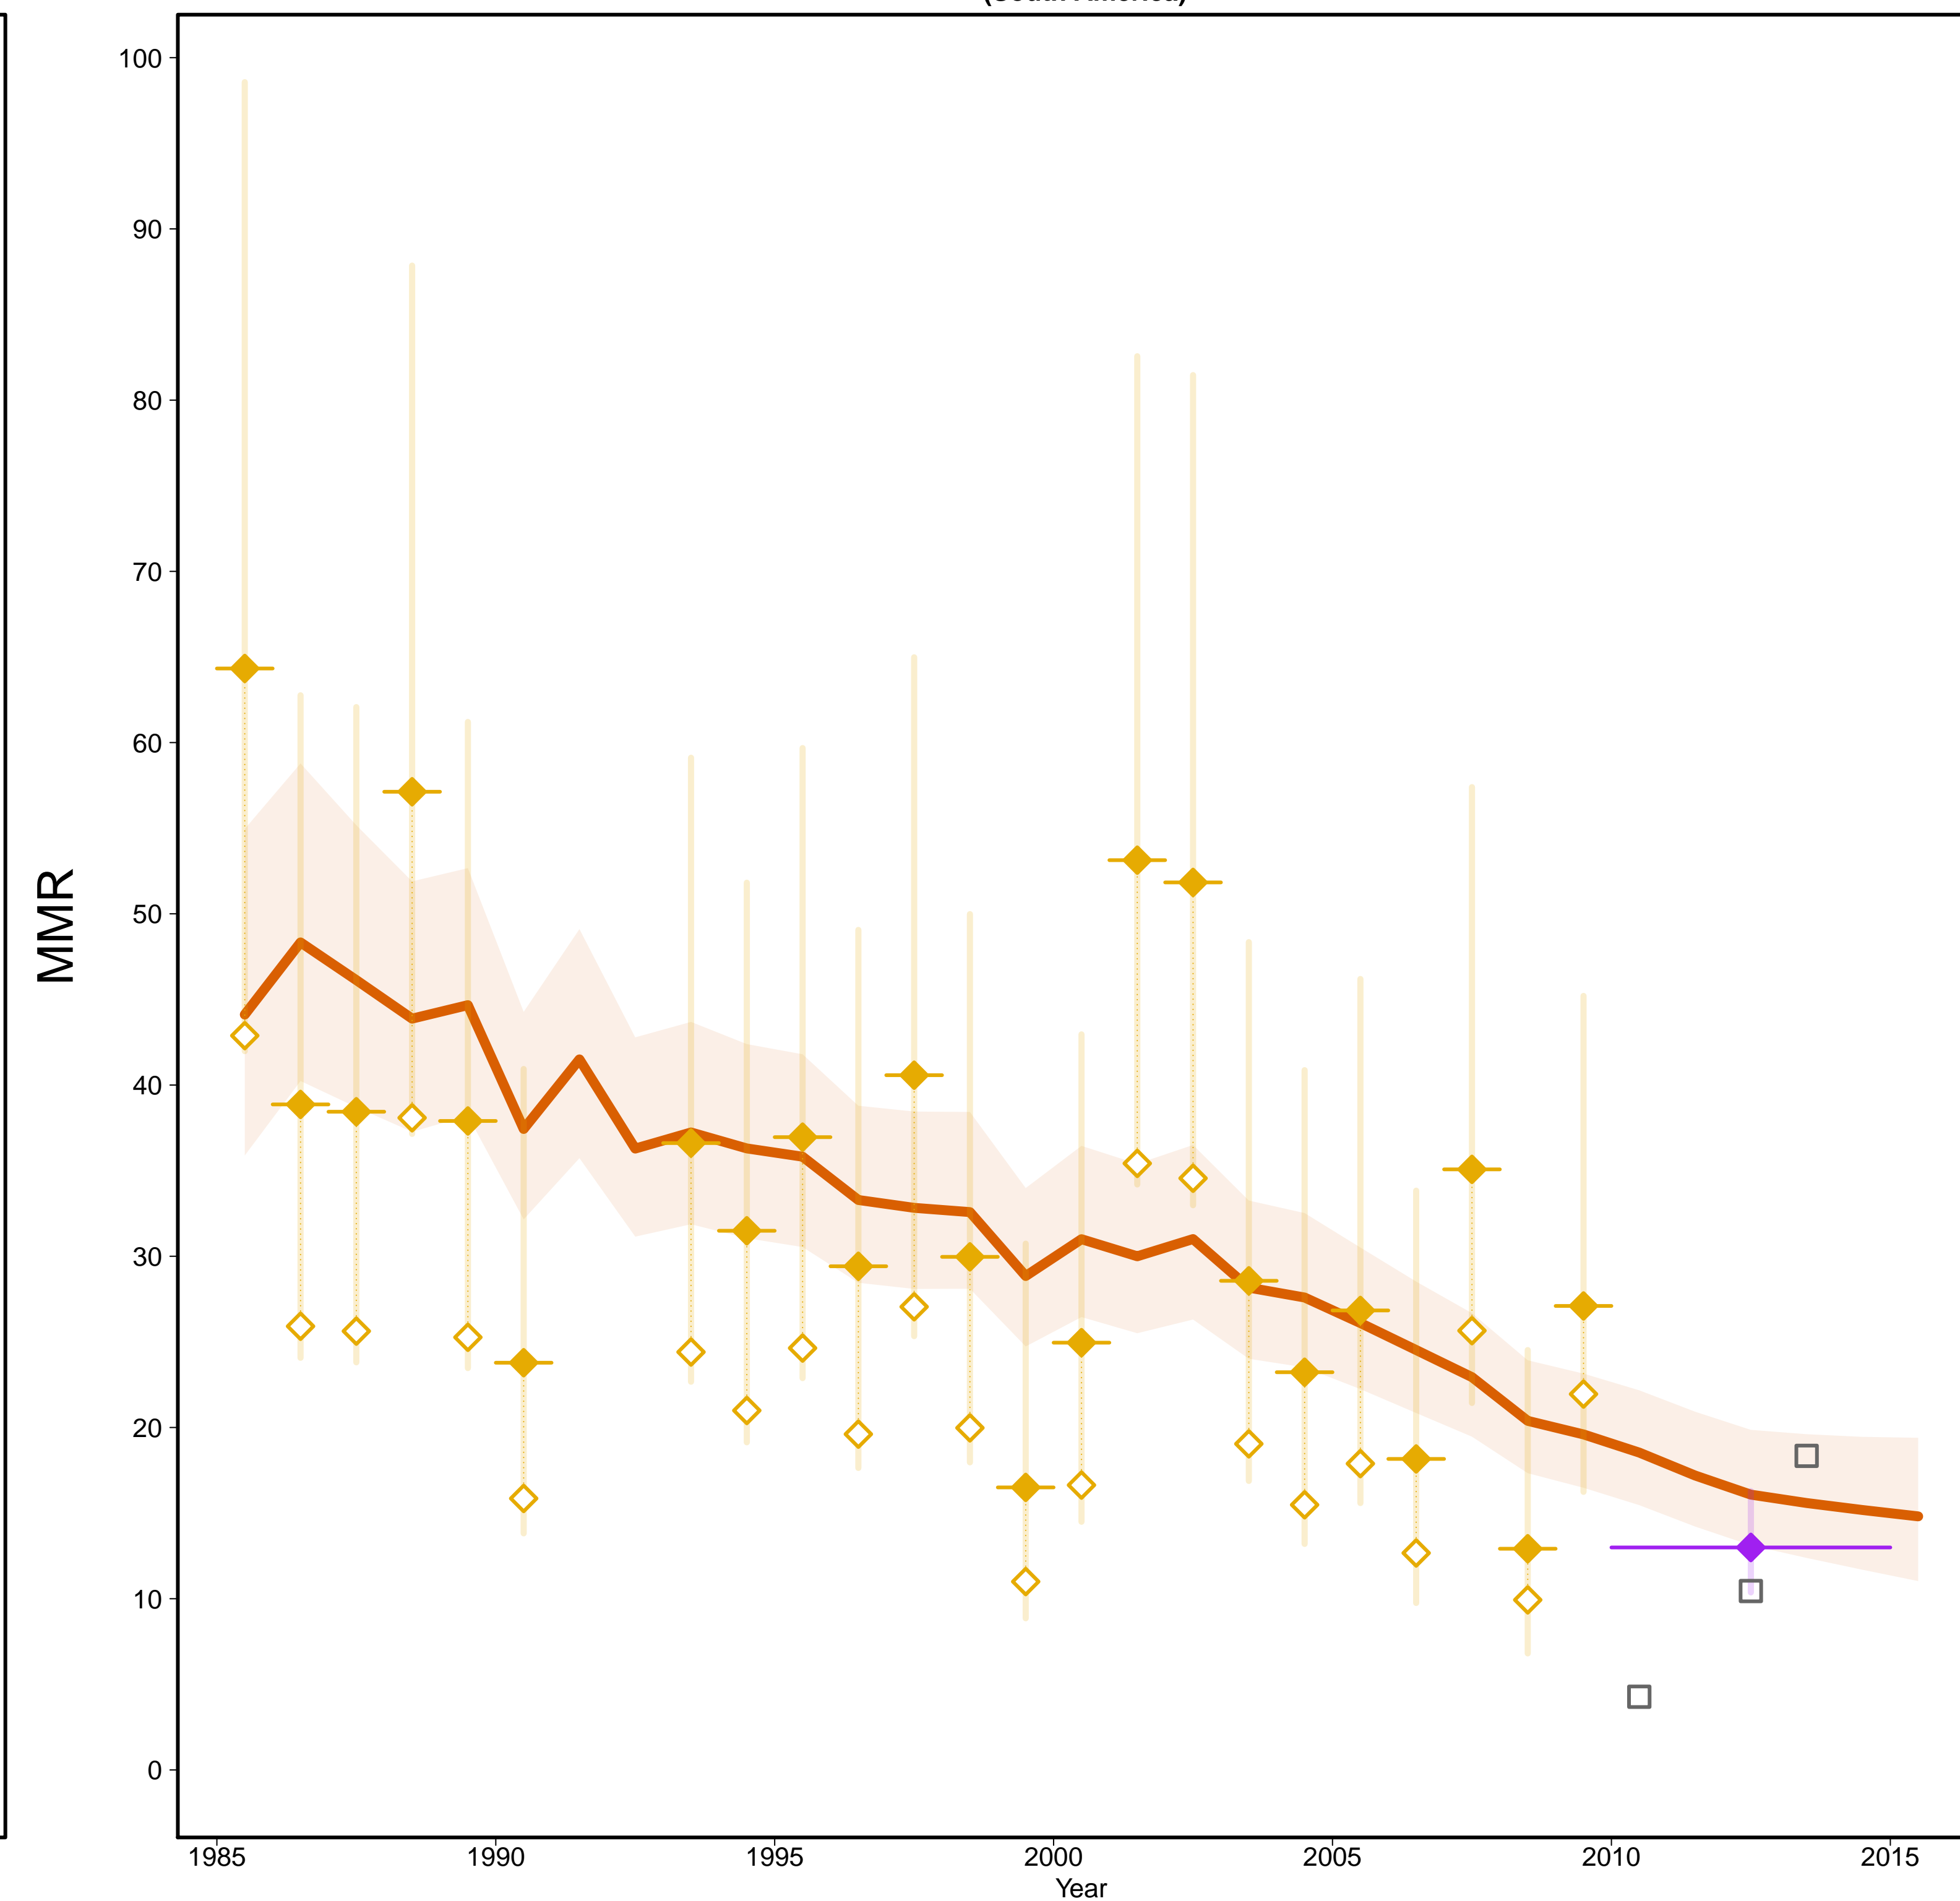

- Estimates —
- MMR Database 2015 —
- ◇ Observed Data
- ◆ Adjusted Data
- Data type —
- ◆ VR
- ◆ Spec. studies
- Excluded VR data  
(overlap with specialized study)

Gross Domestic Product

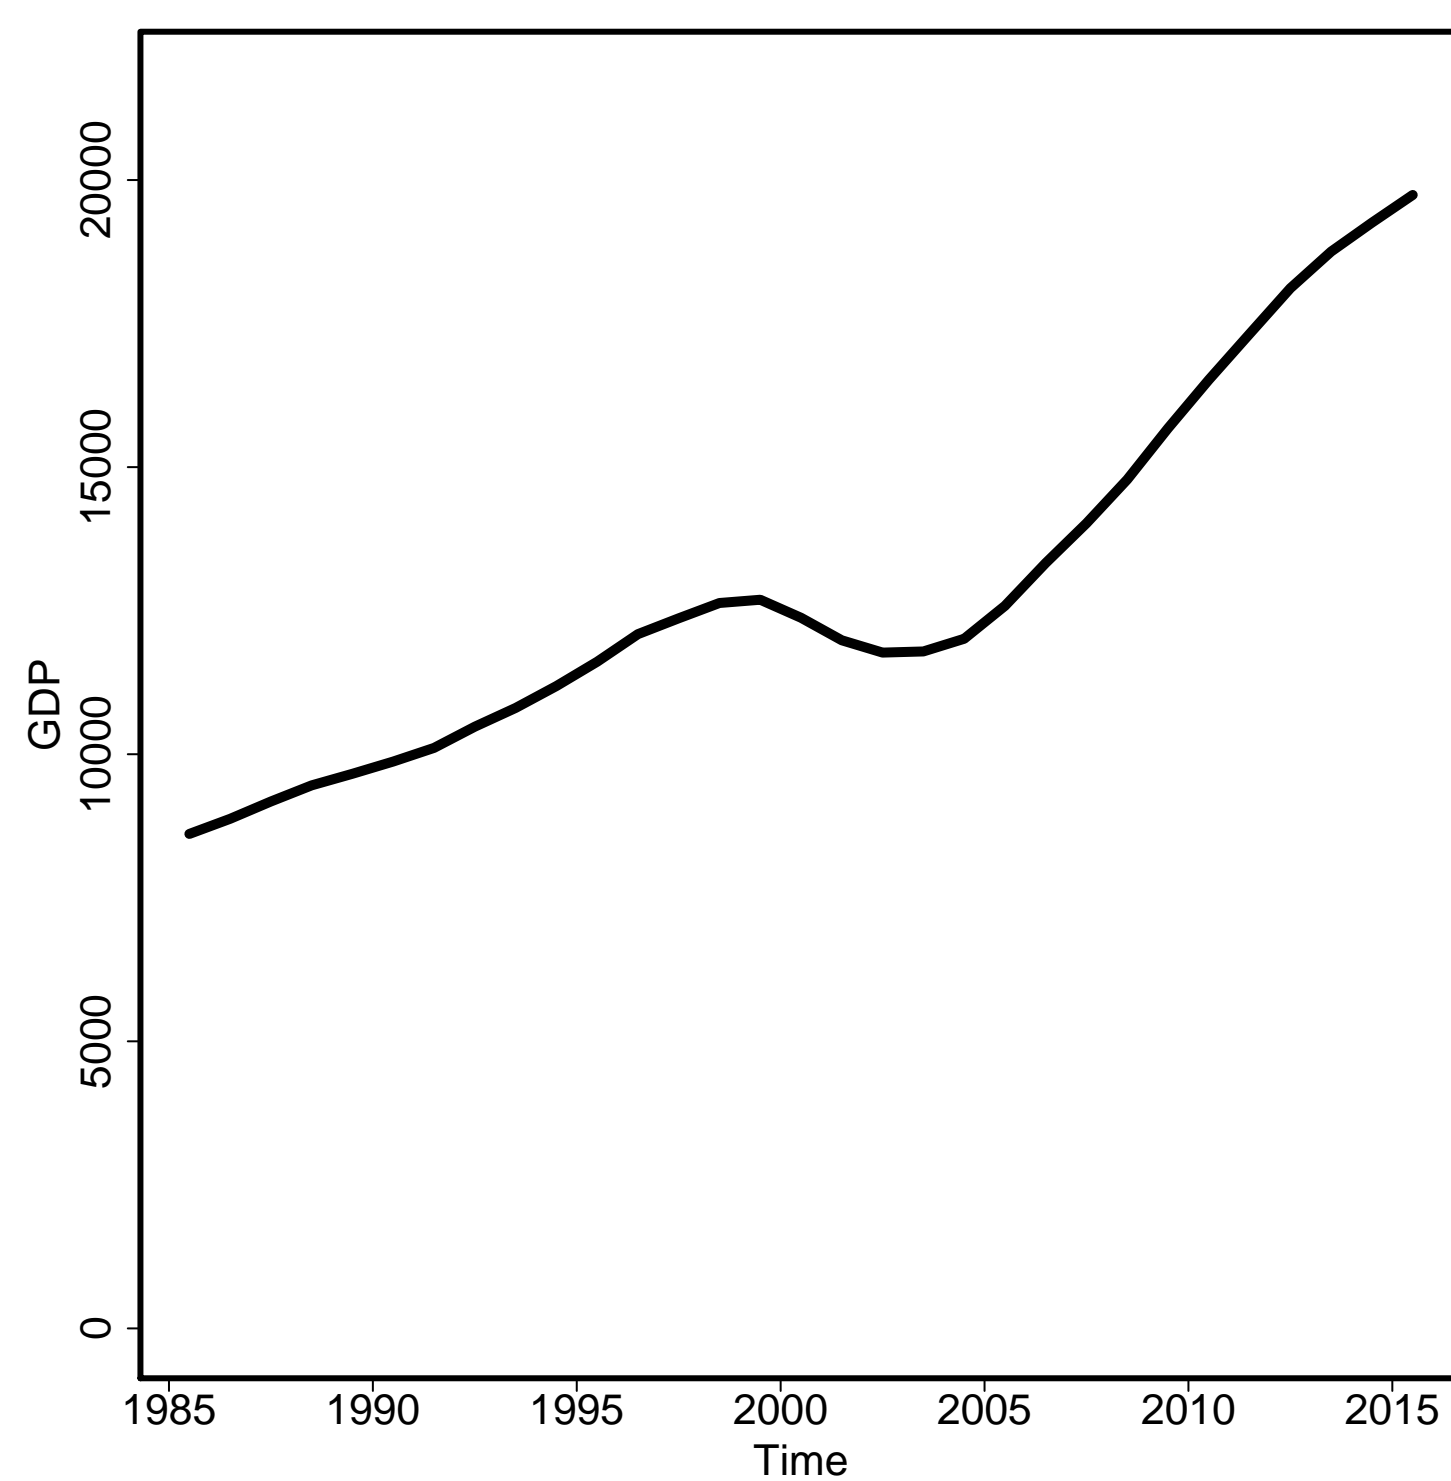

General Fertility Rate

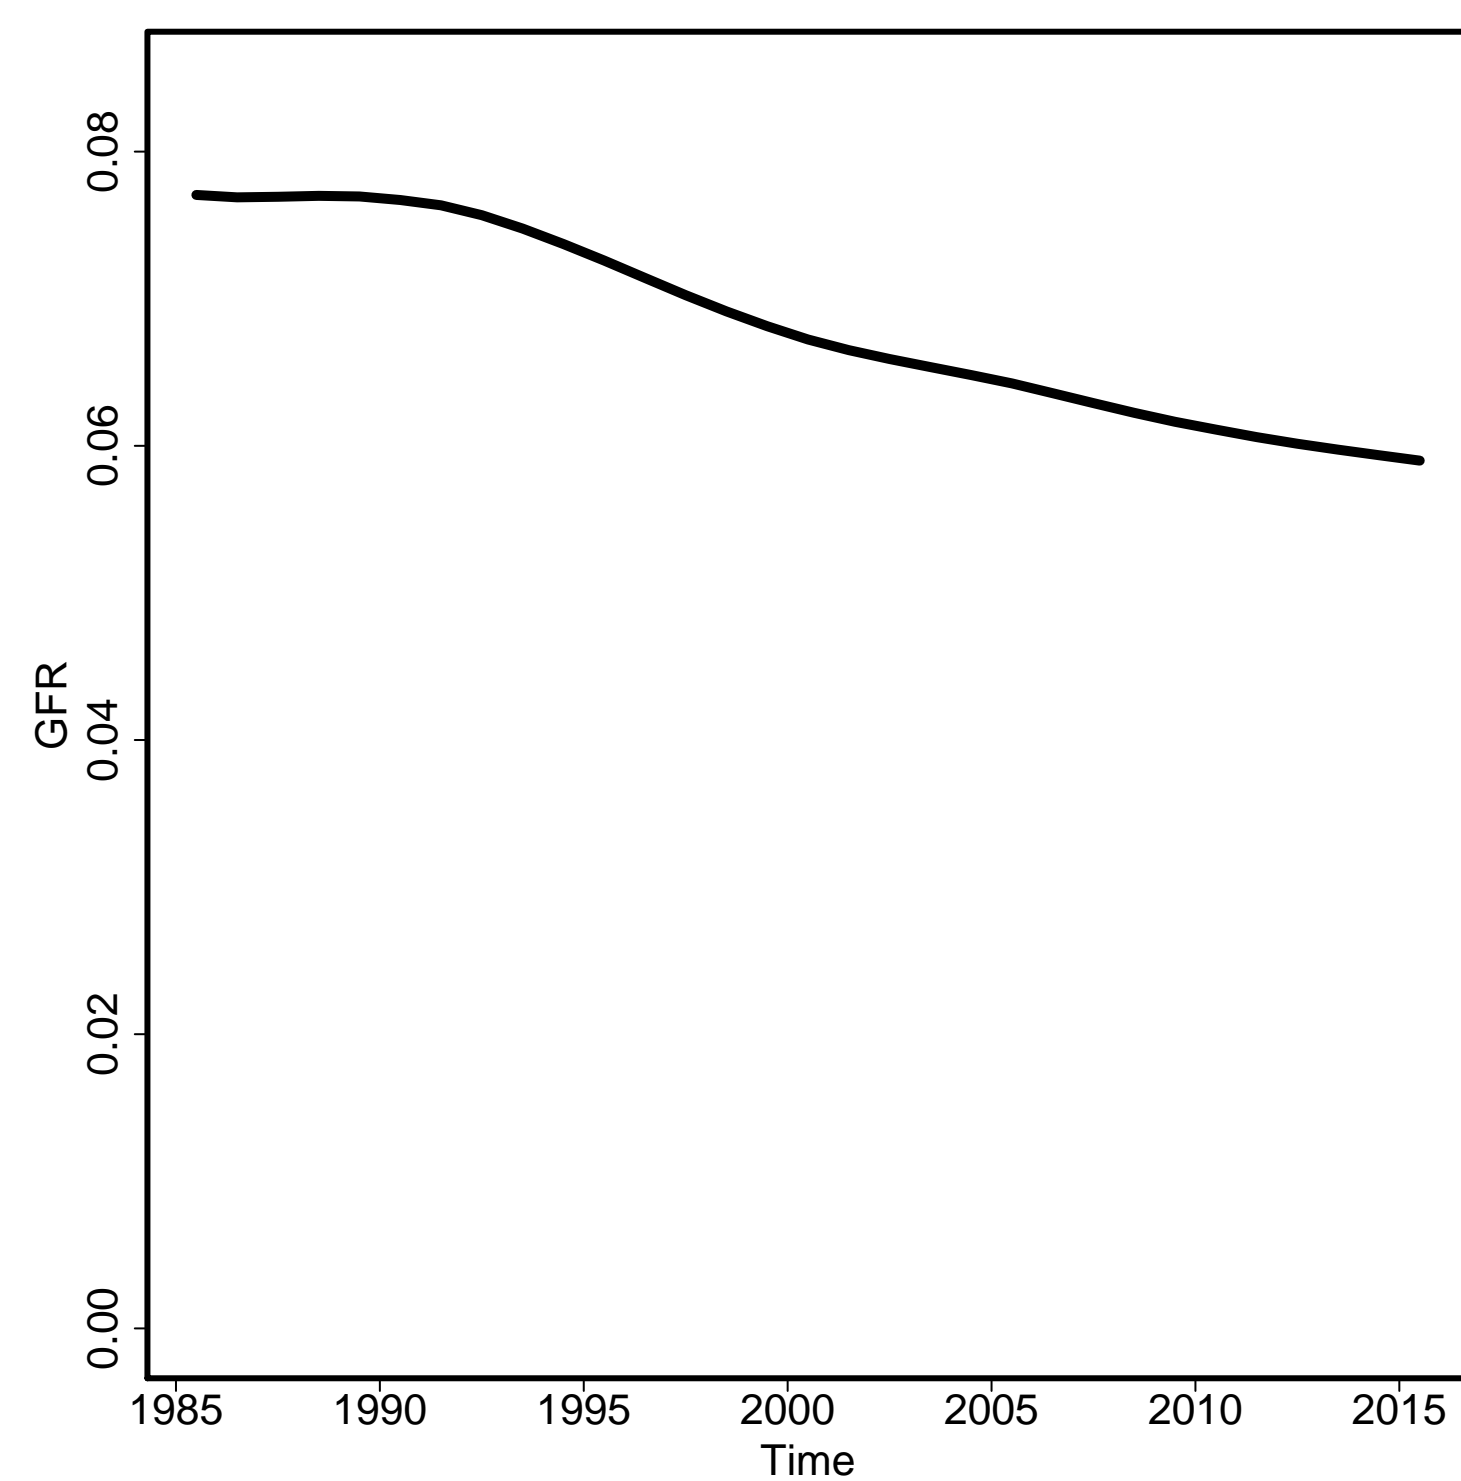

Skilled Attendance to Birth

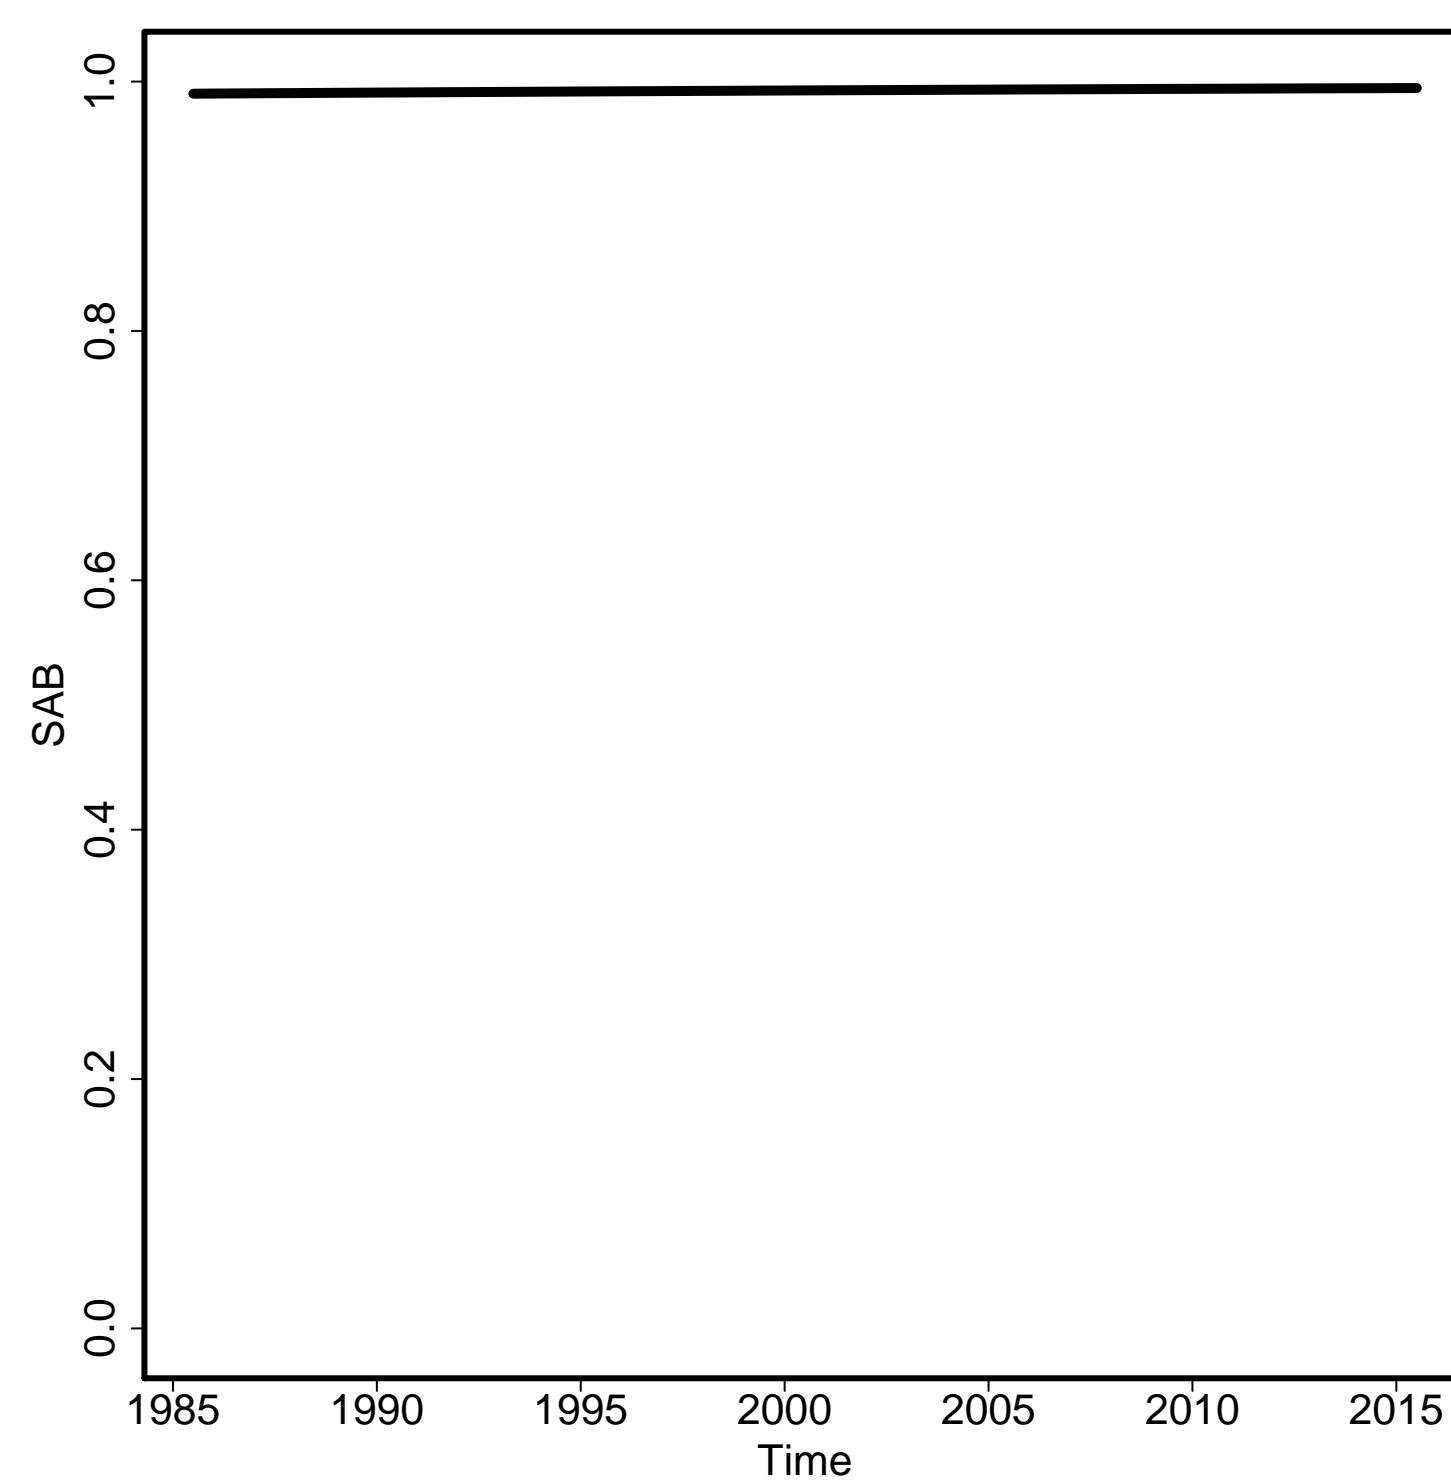

Envelope/Births

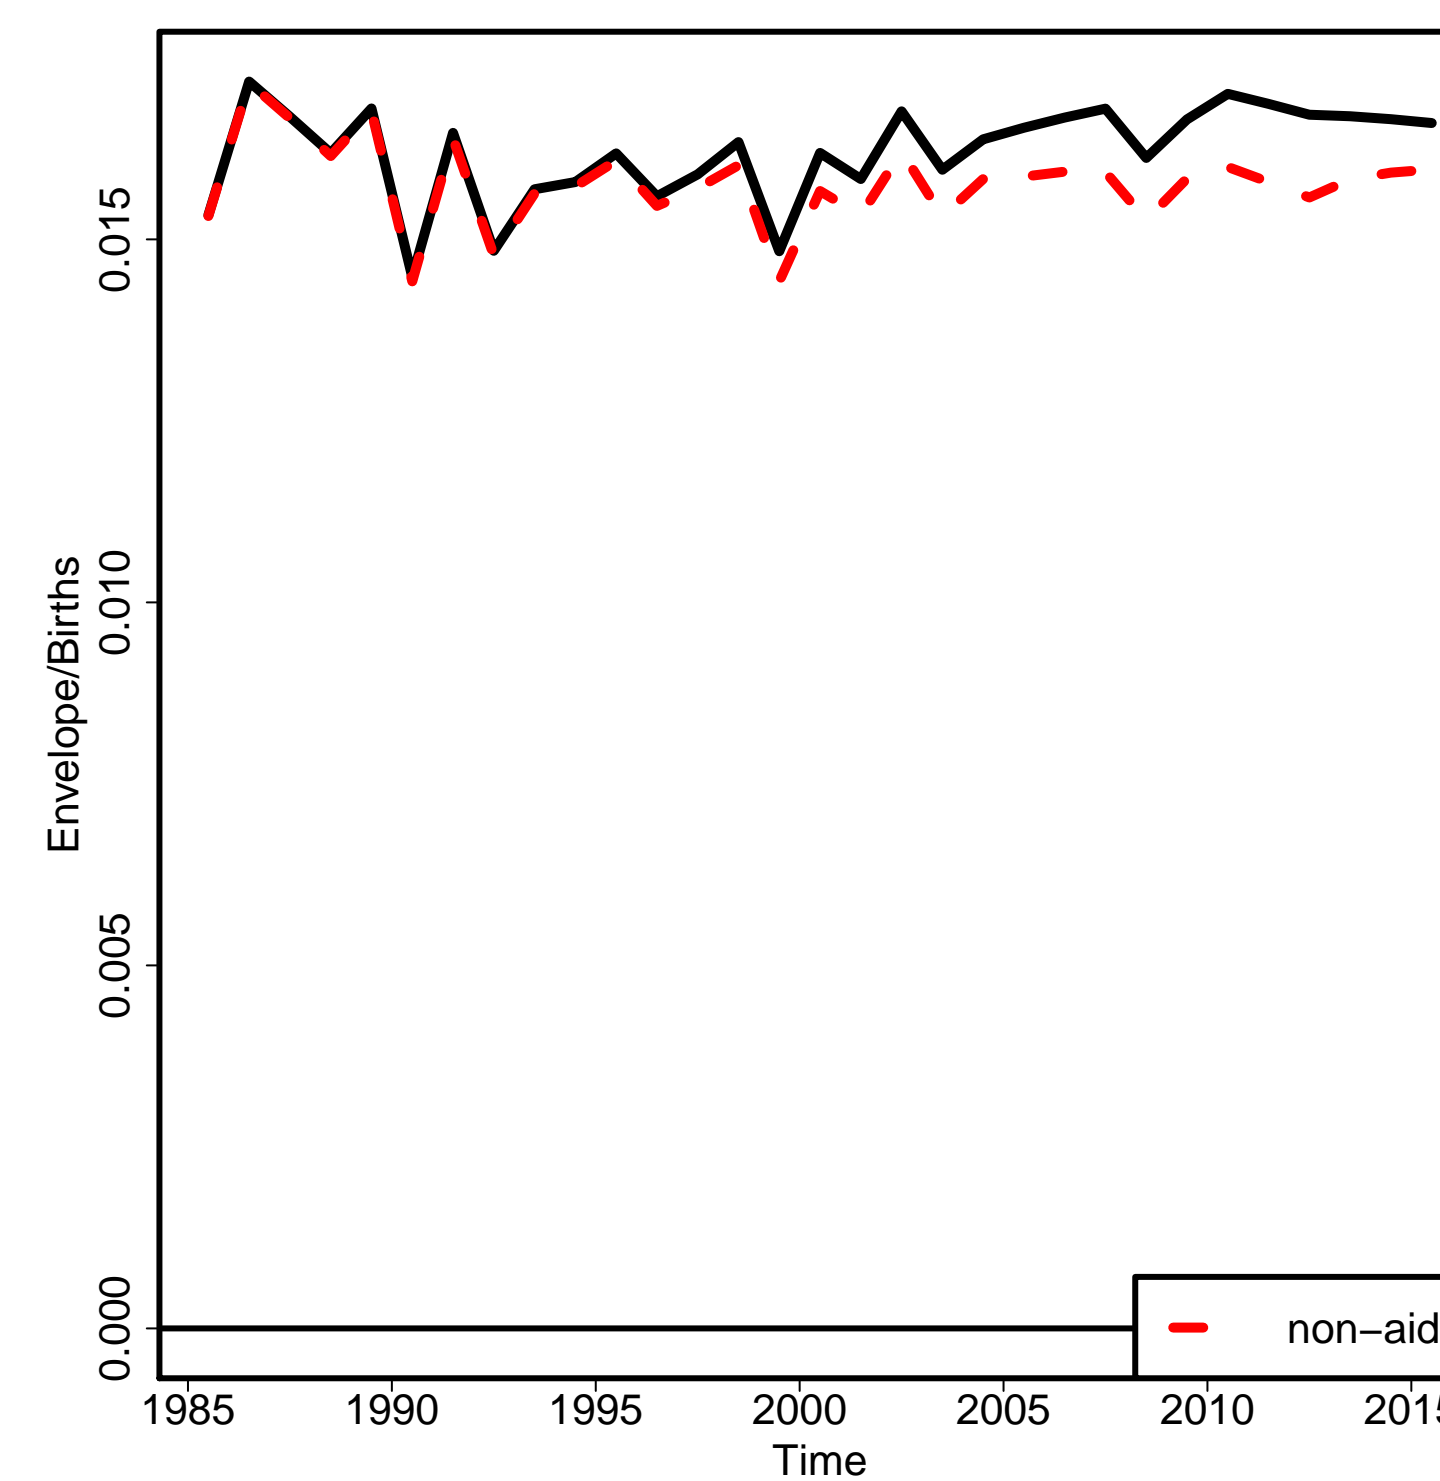

Non-aids MMR

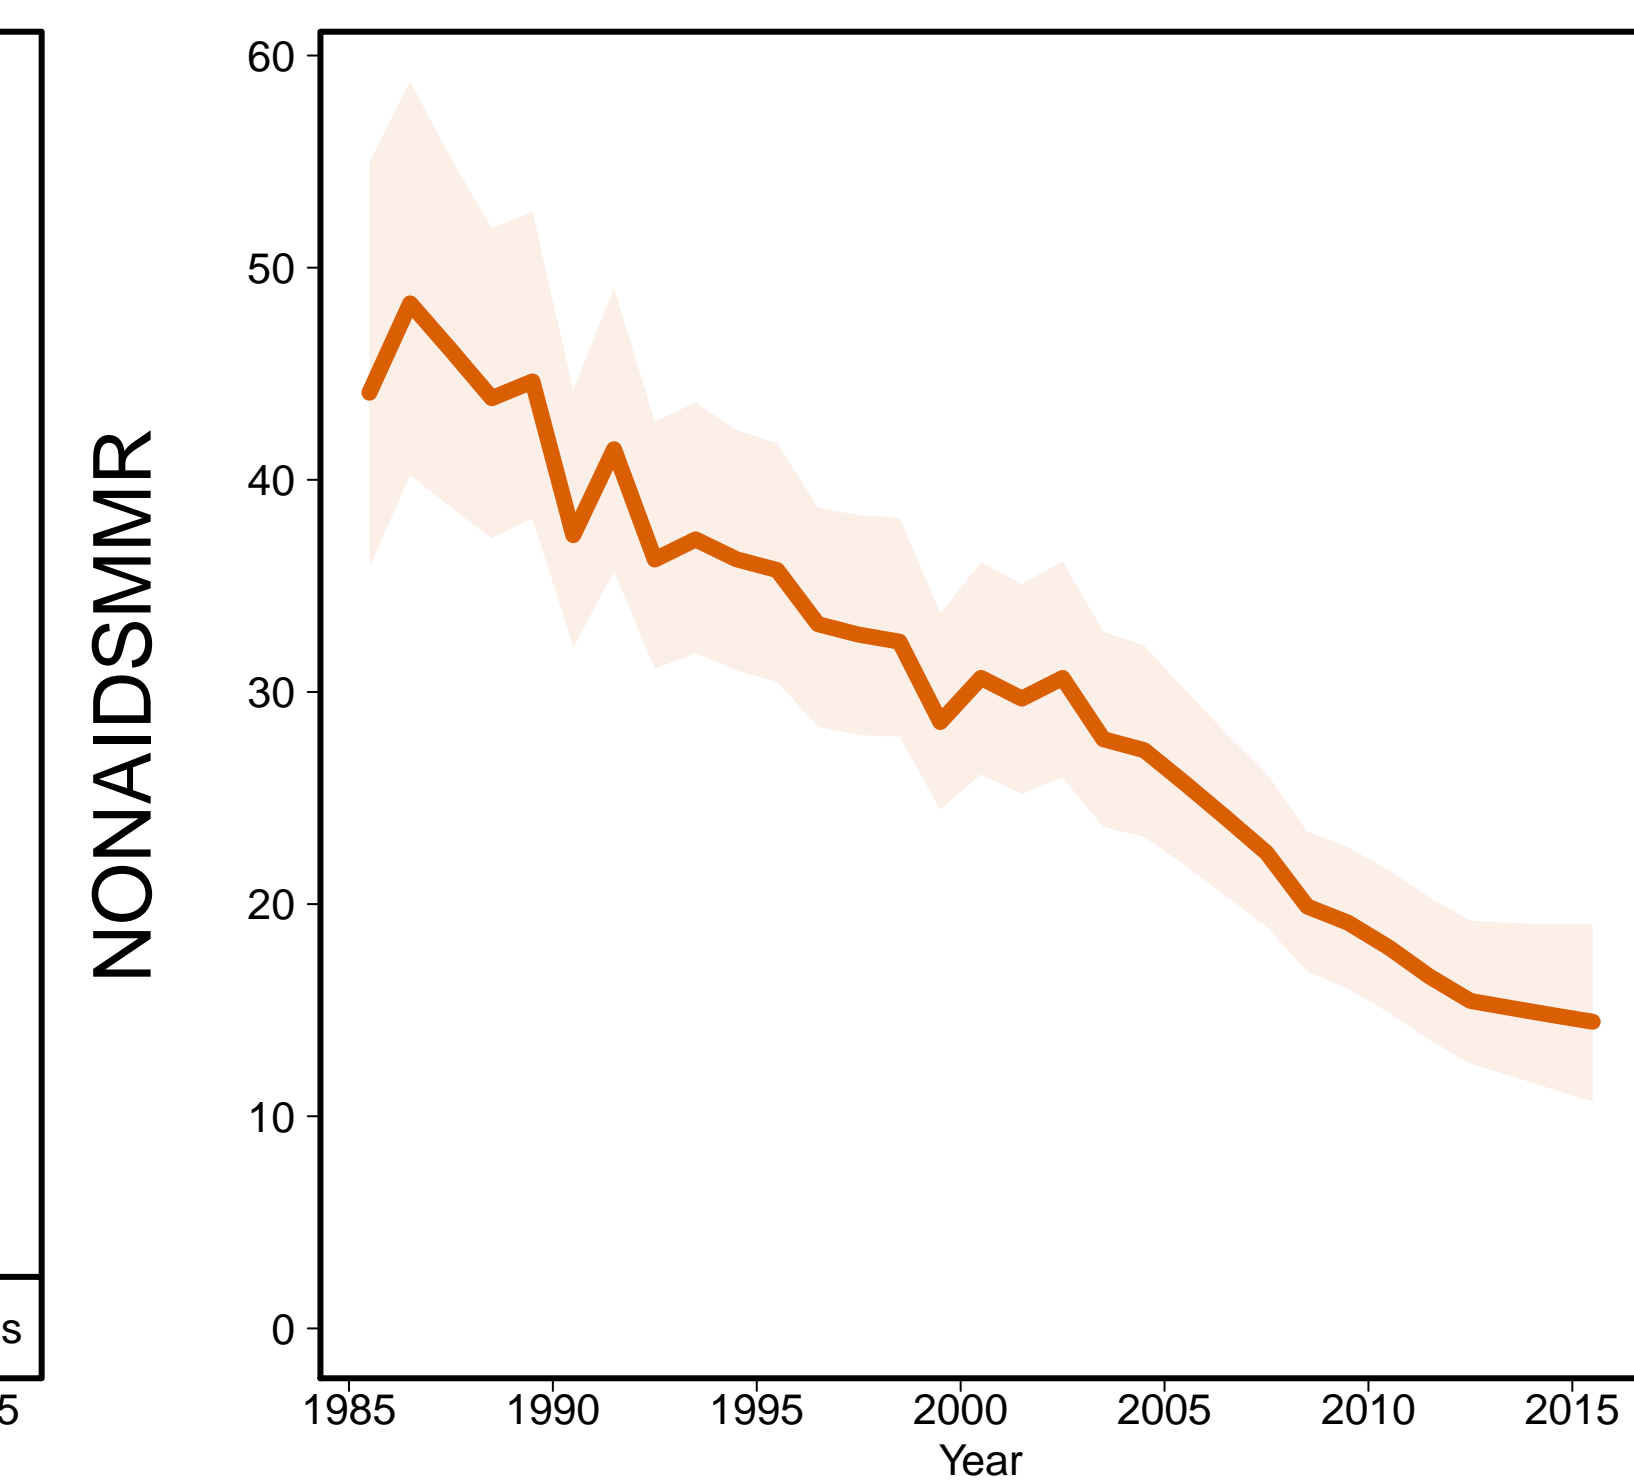

Aids MMR

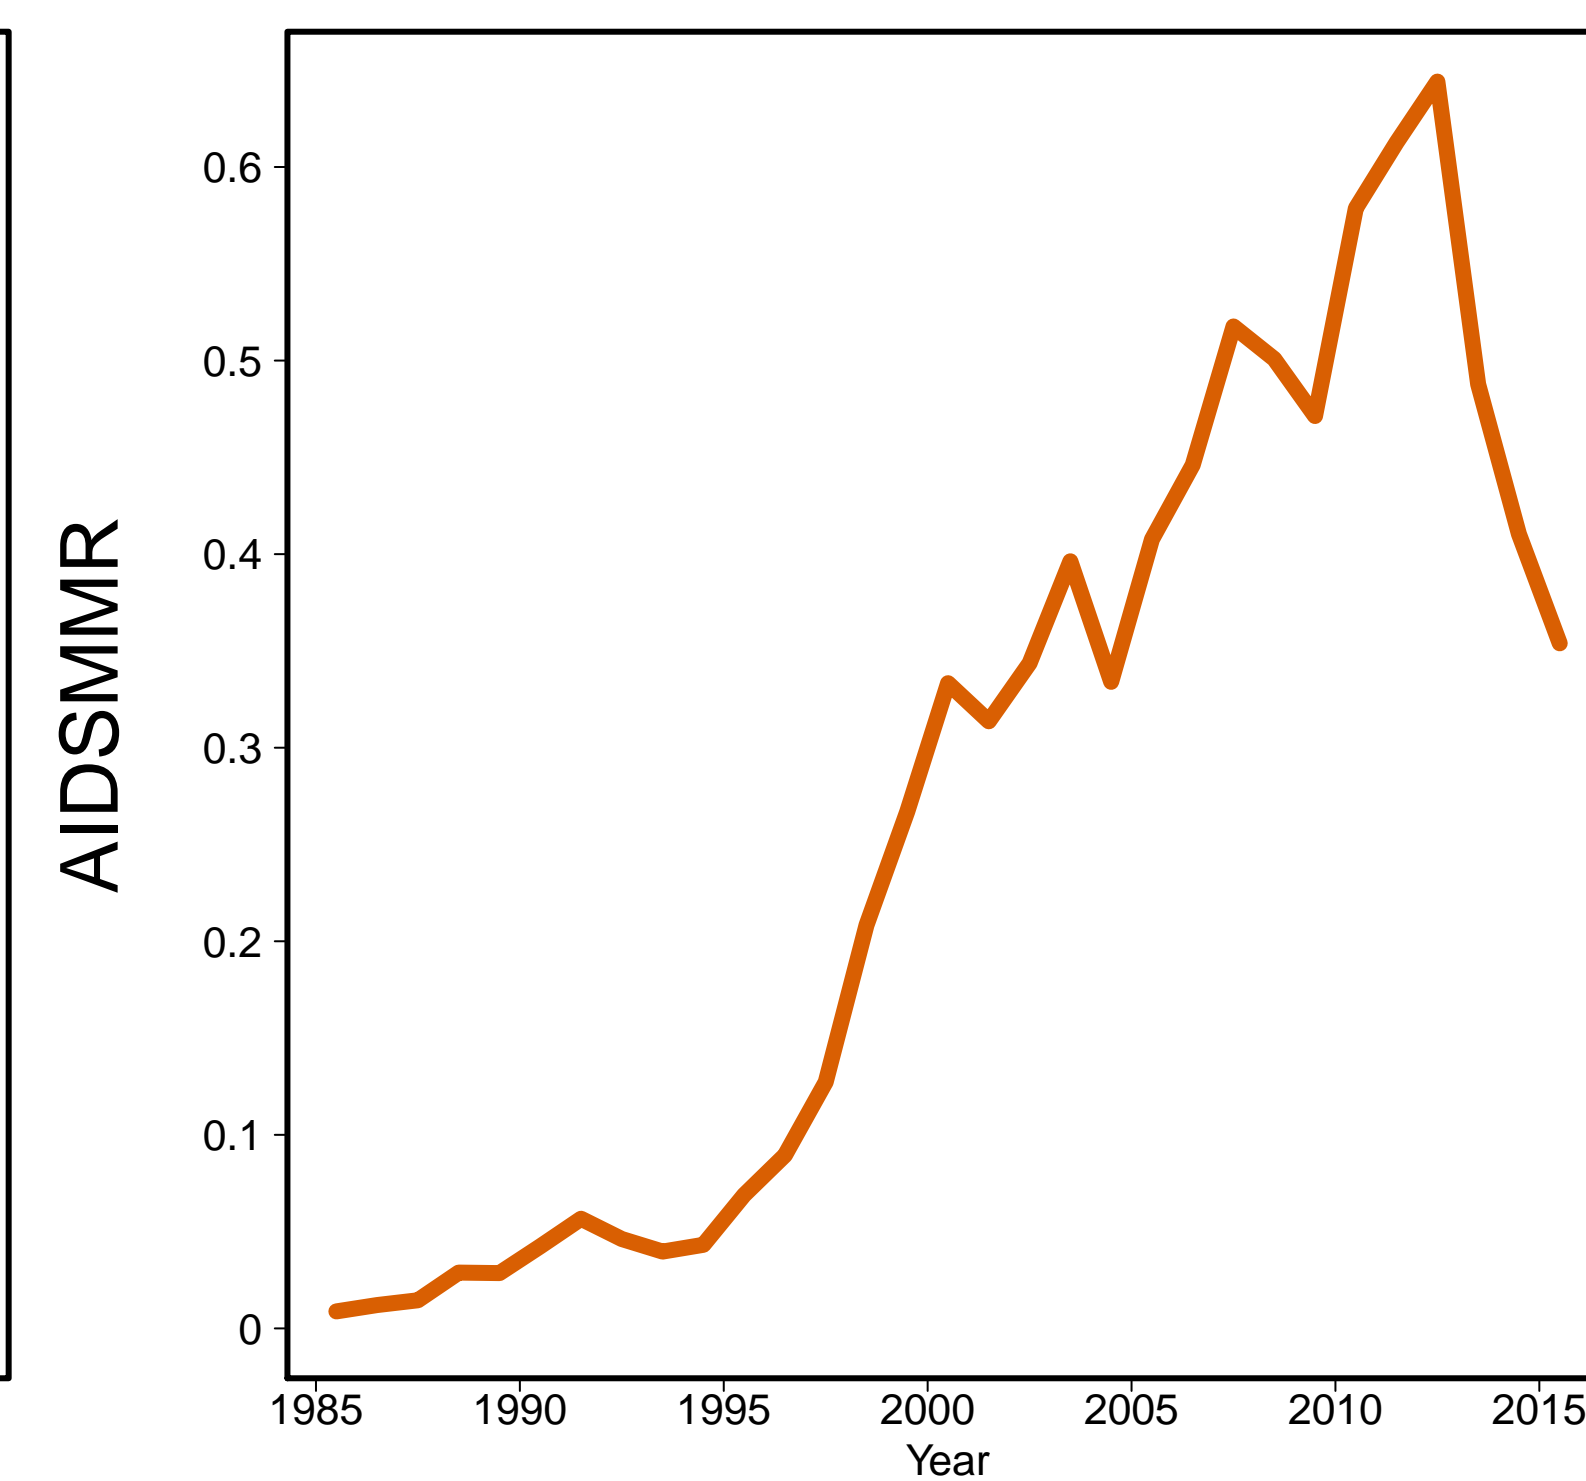



Uzbekistan [UZB]  
(Central Asia)

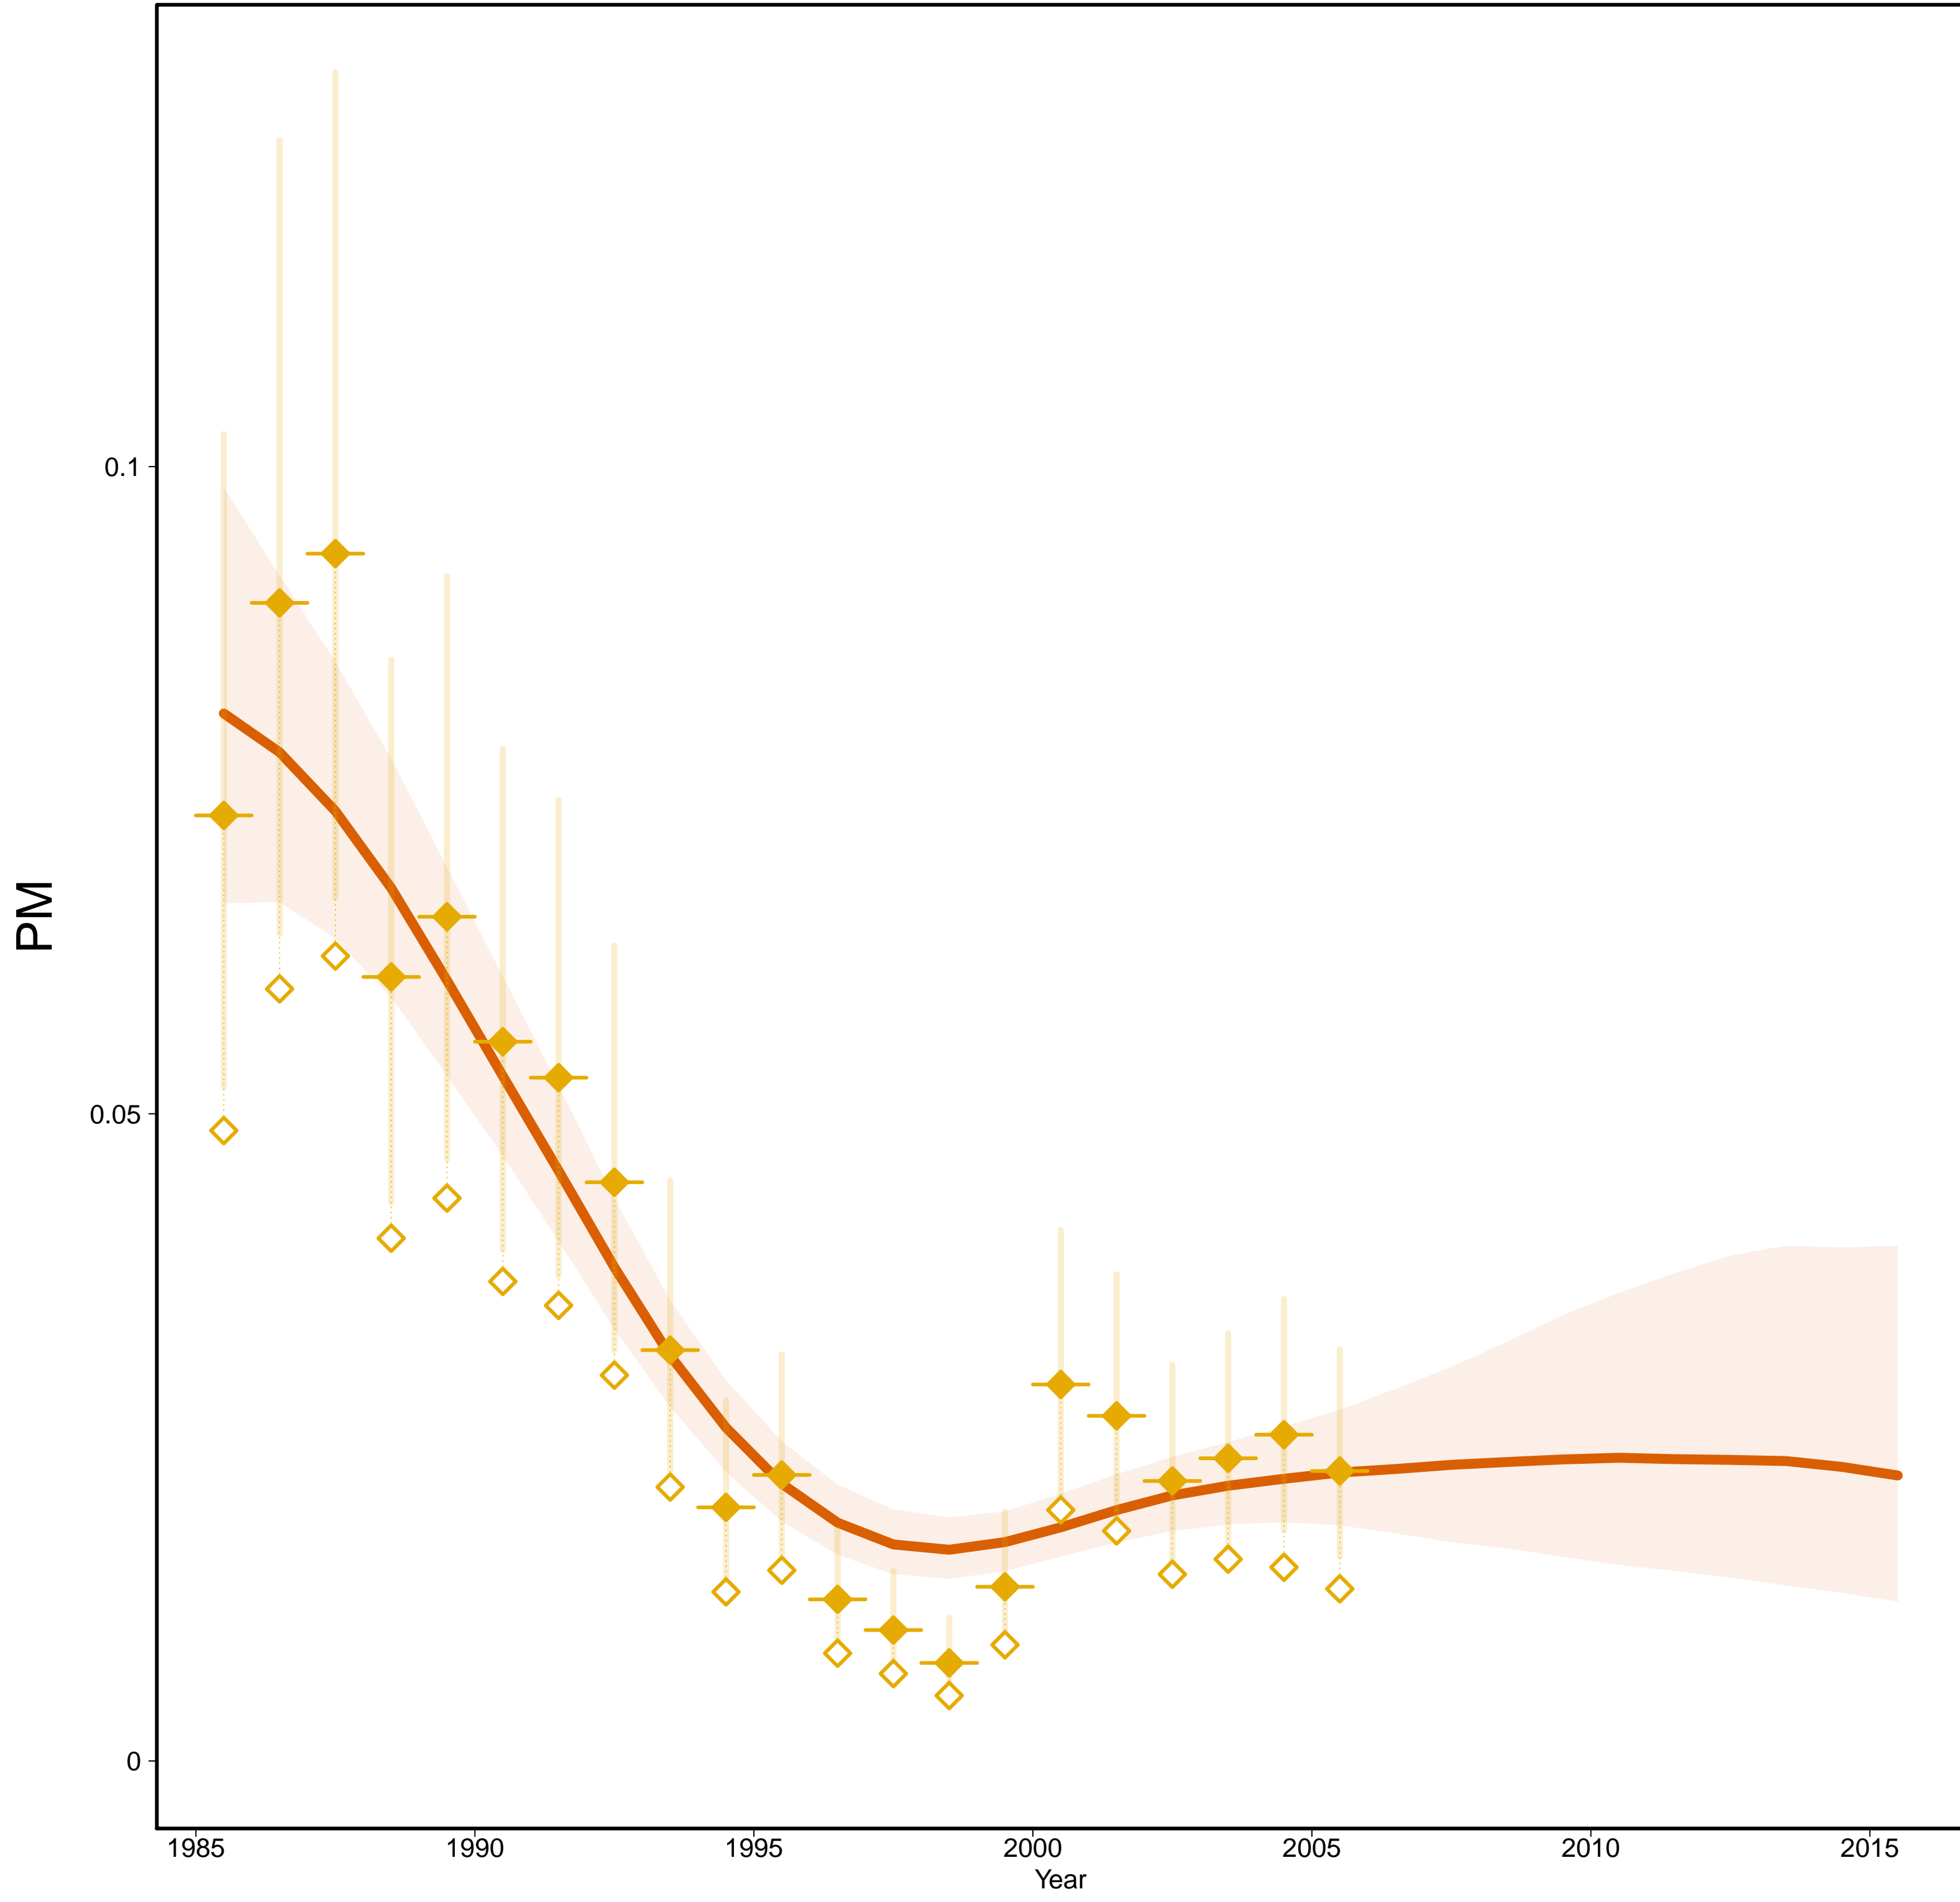

Uzbekistan [UZB]  
(Central Asia)

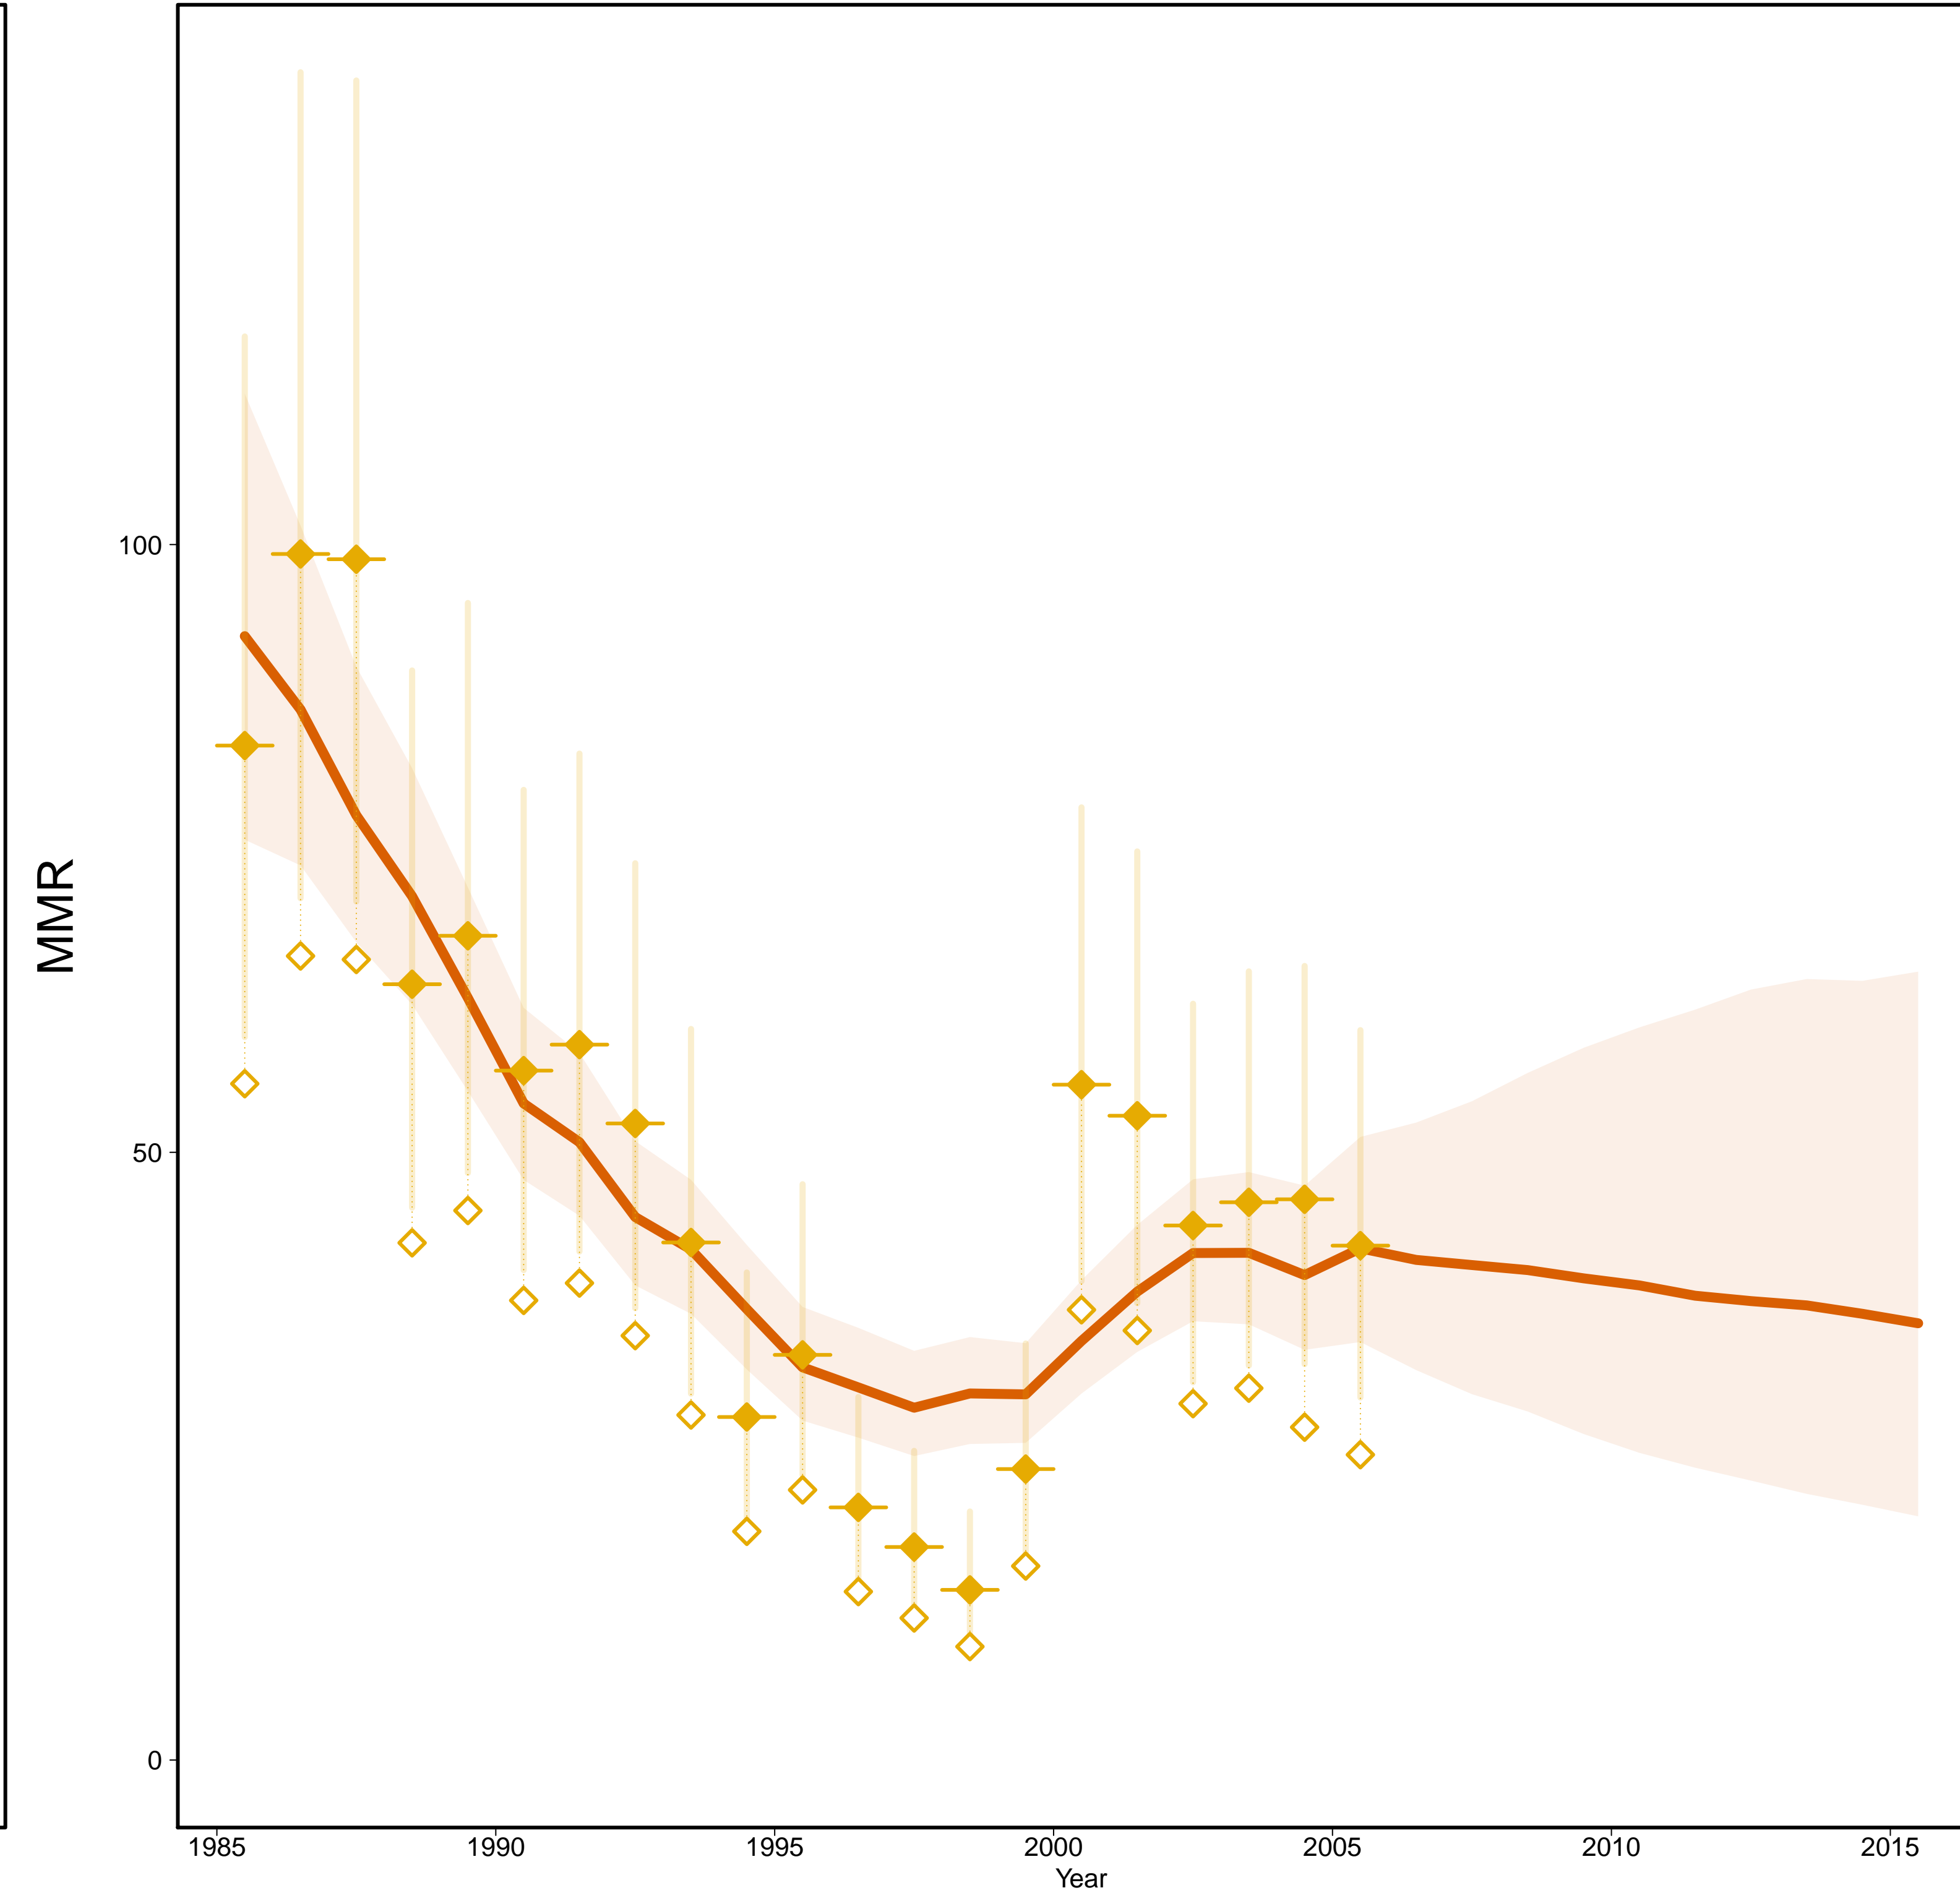

- Estimates —
- Mlate
- MMR Database 2015 —
- ◇ Observed Data
- ◆ Adjusted Data
- Data type —
- ◆ VR

Gross Domestic Product

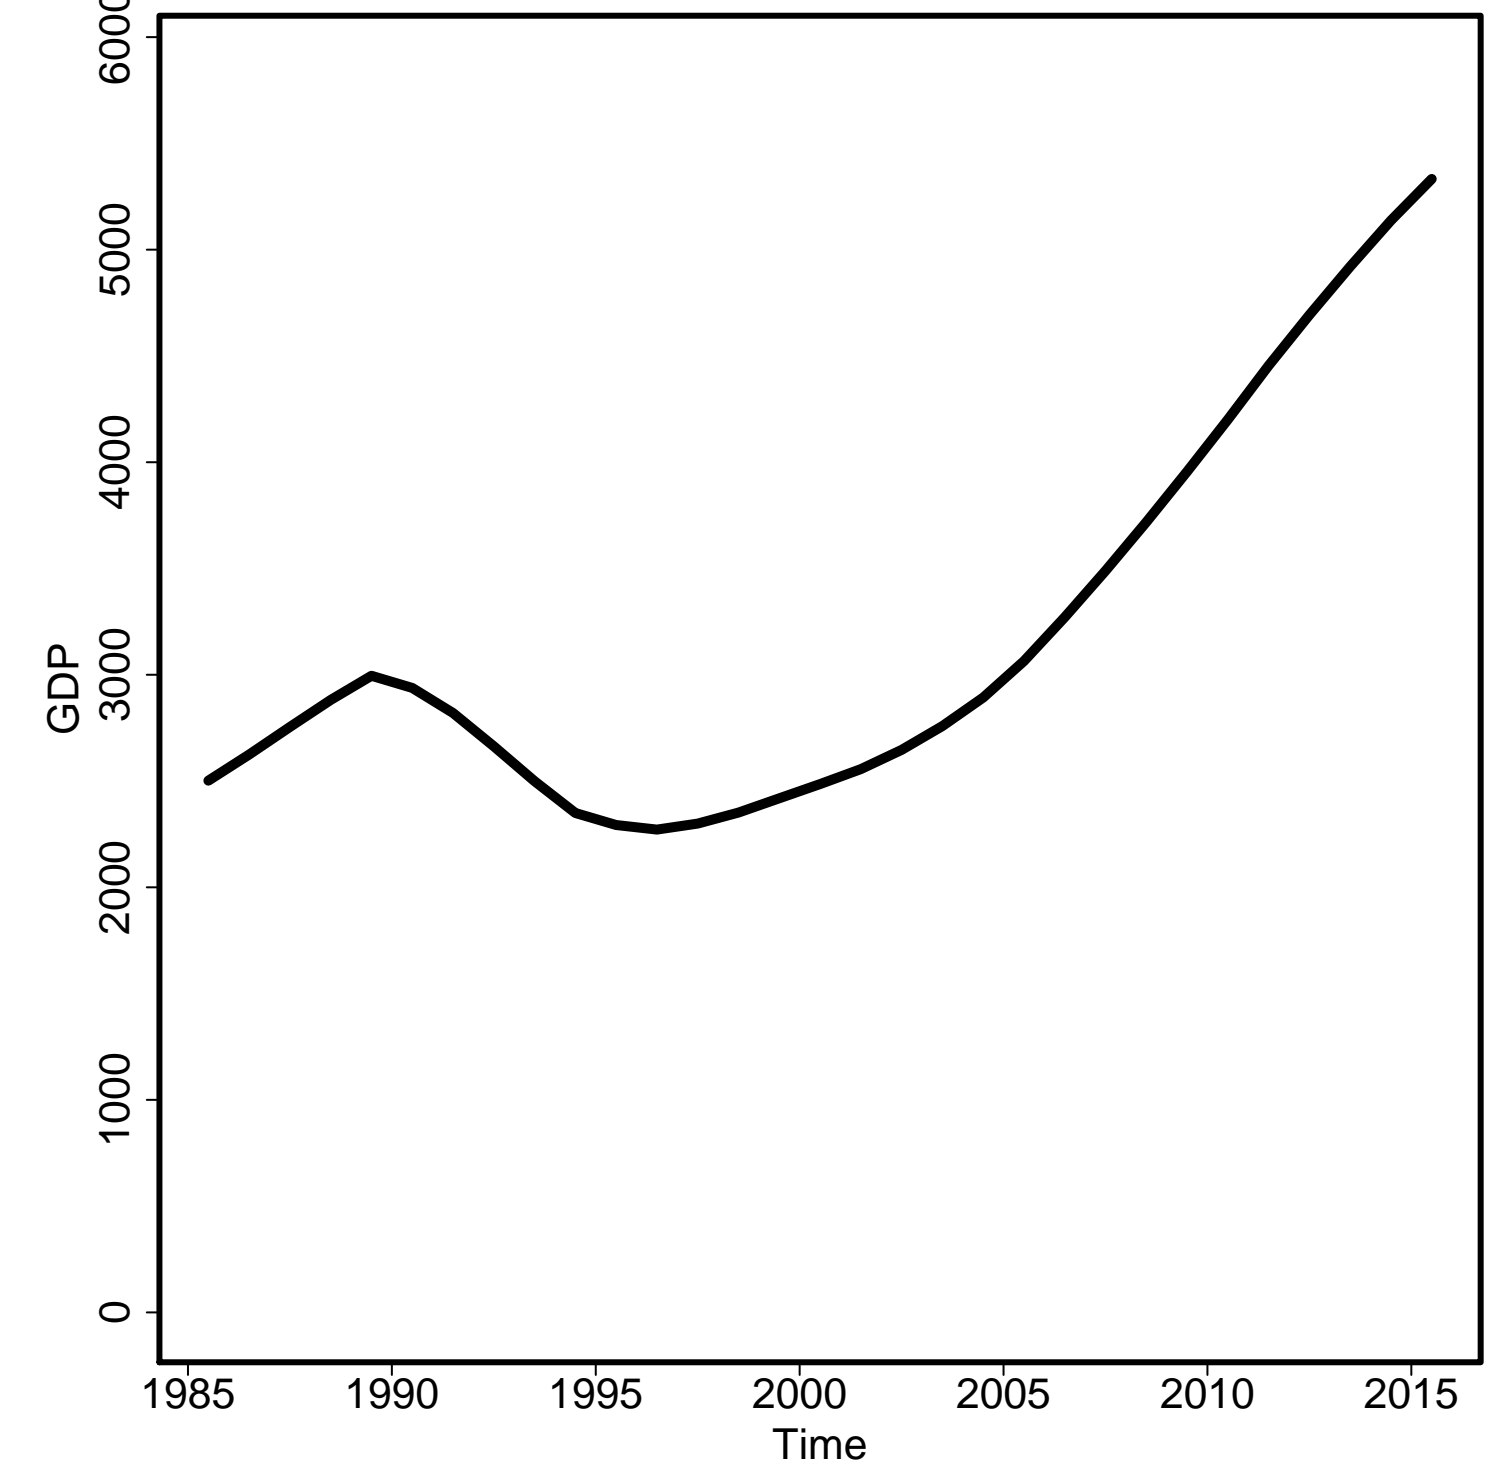

General Fertility Rate

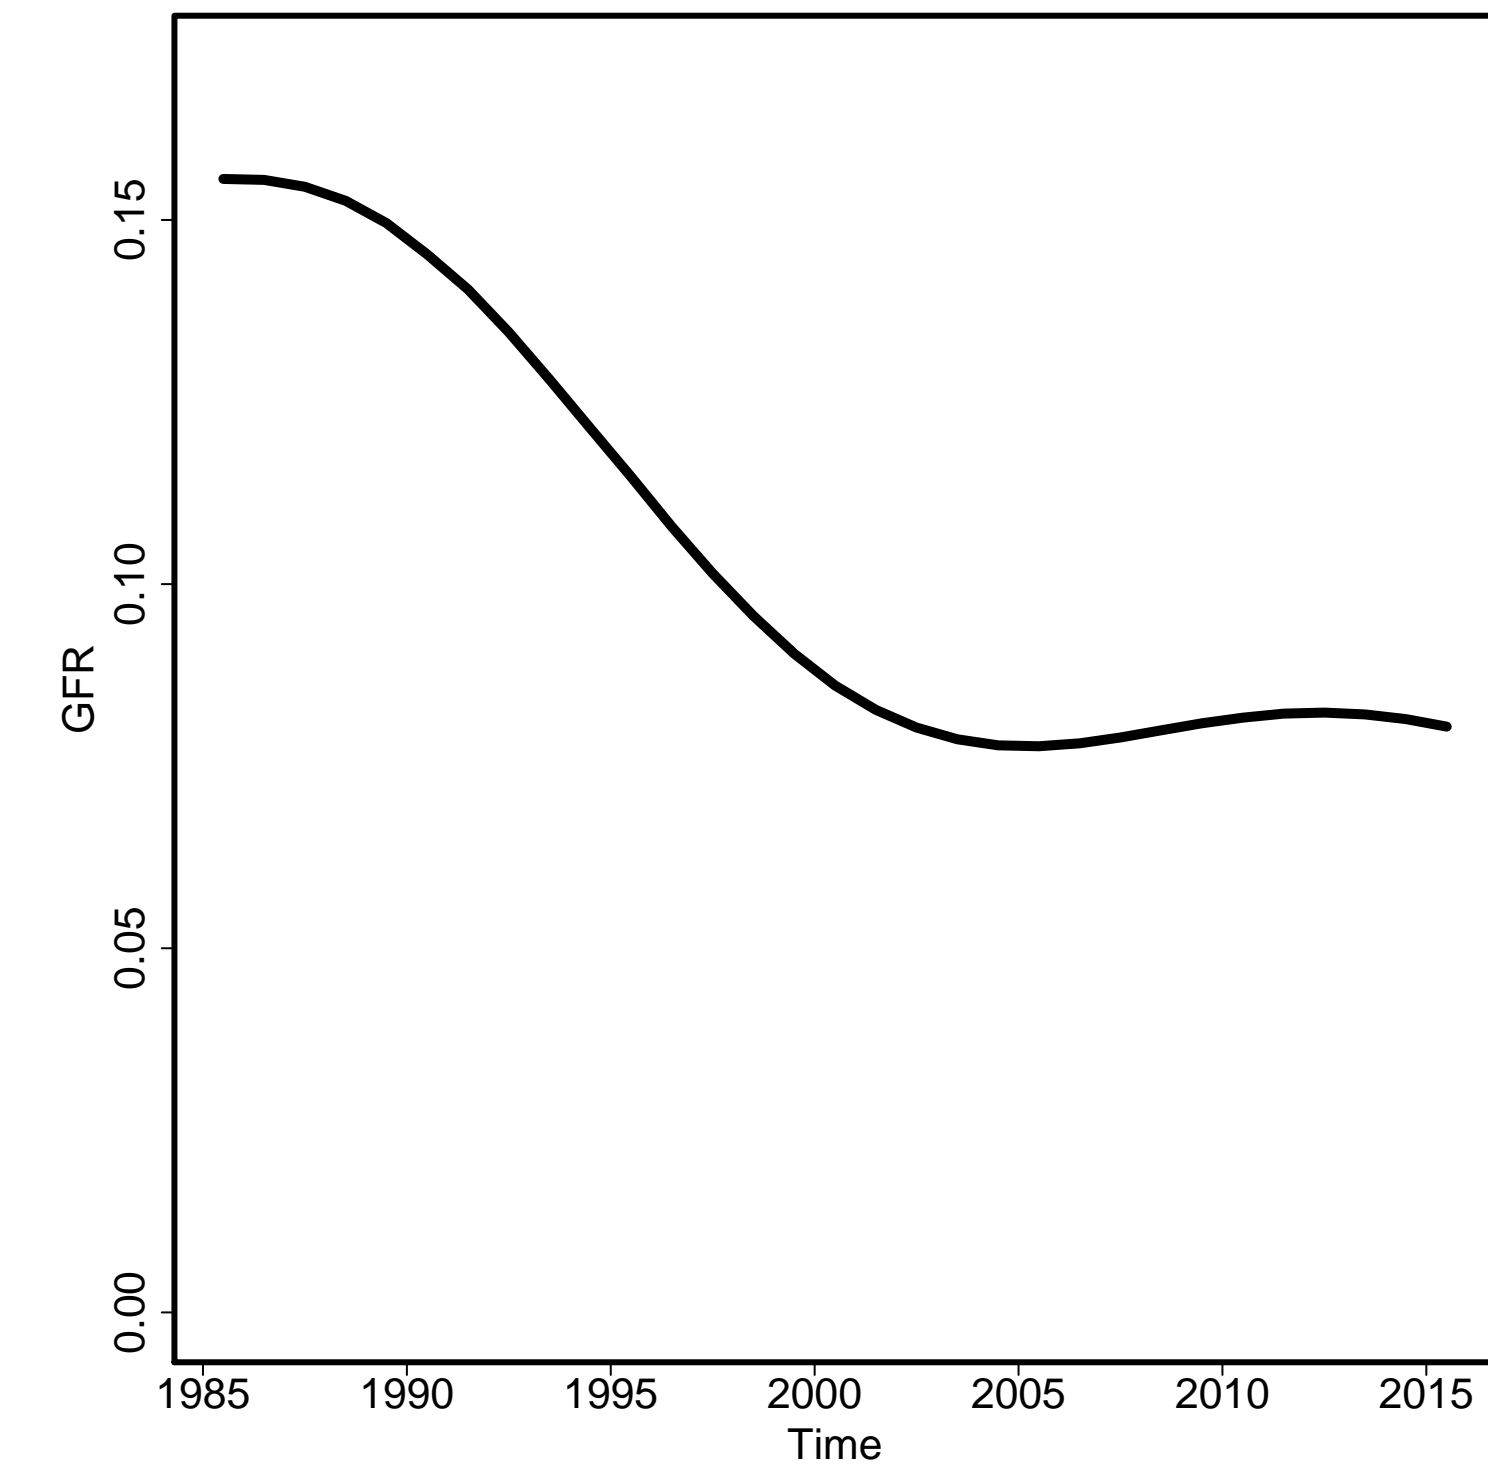

Skilled Attendance to Birth

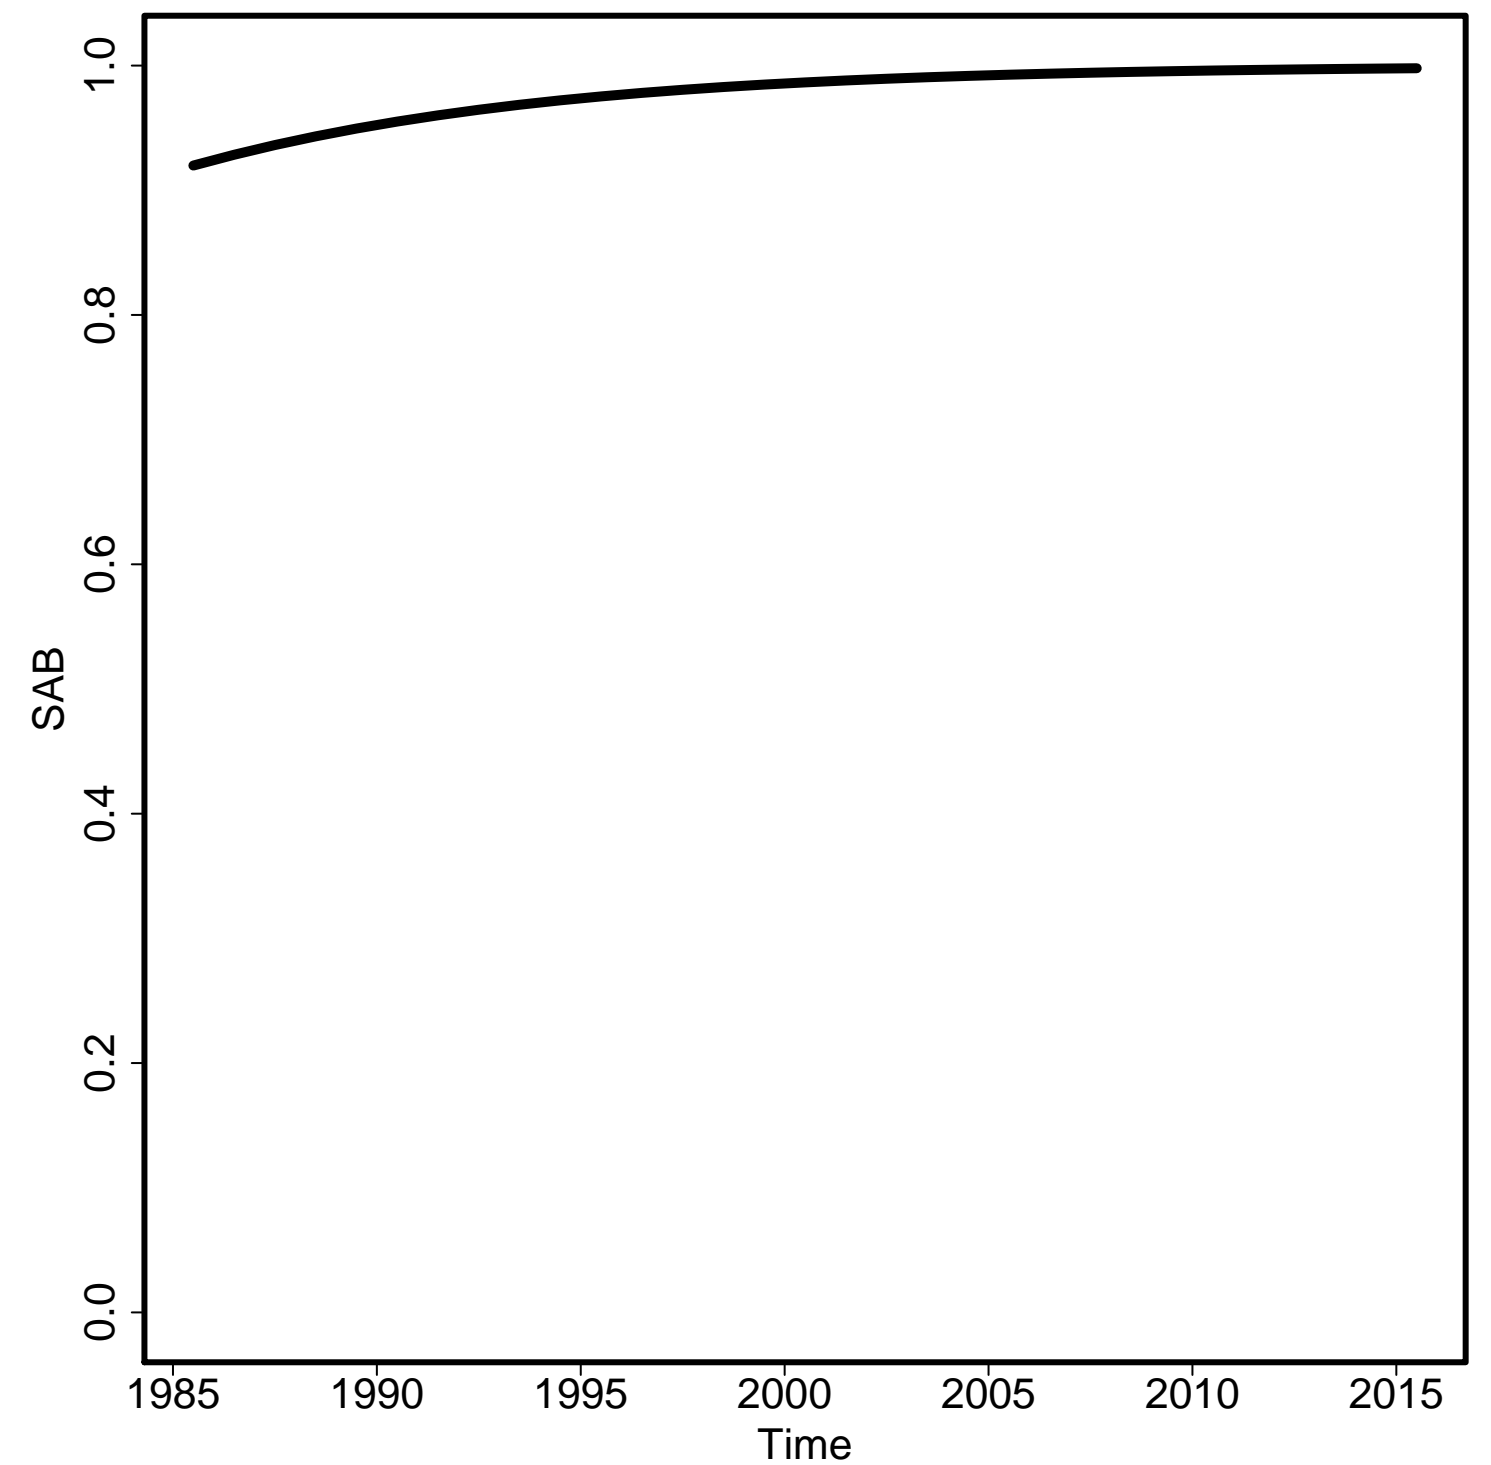

Envelope/Births

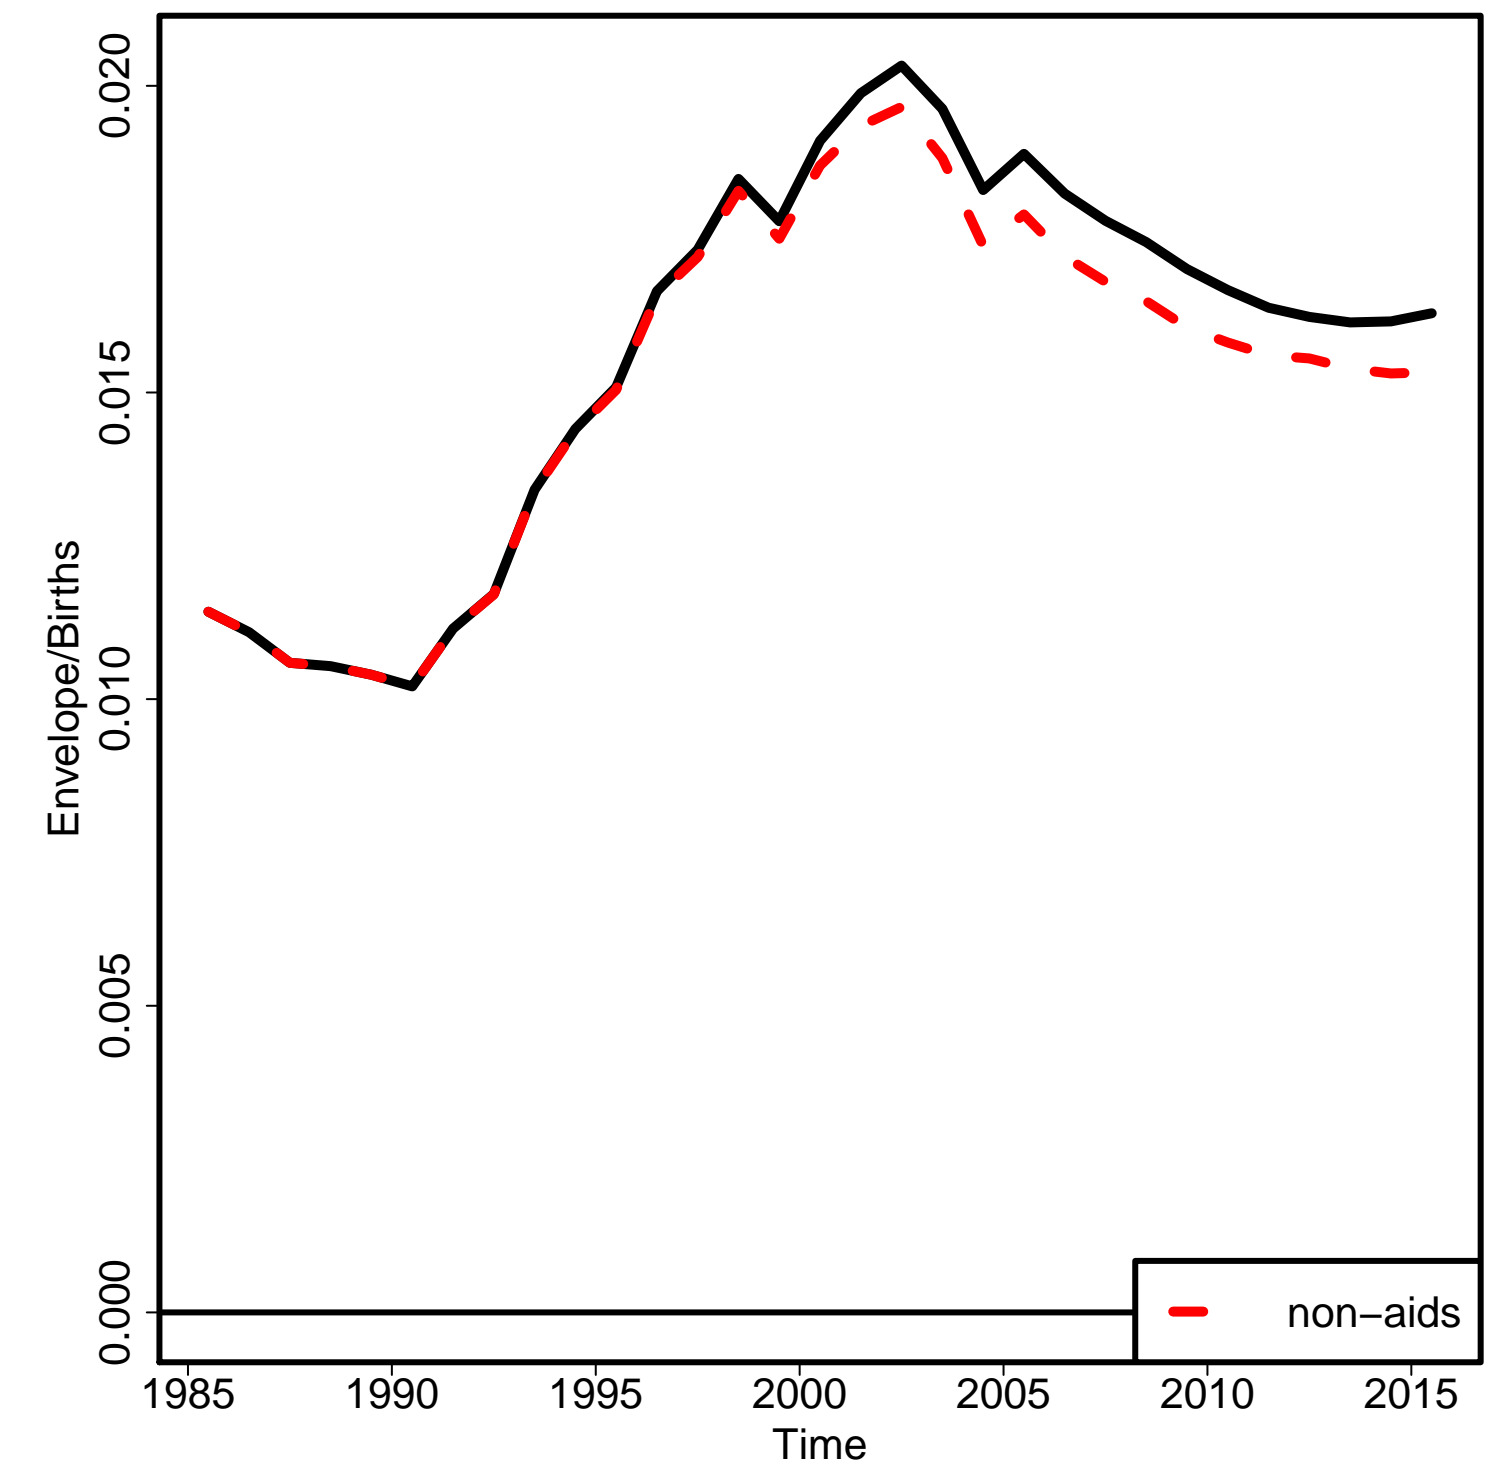

Non-aids MMR

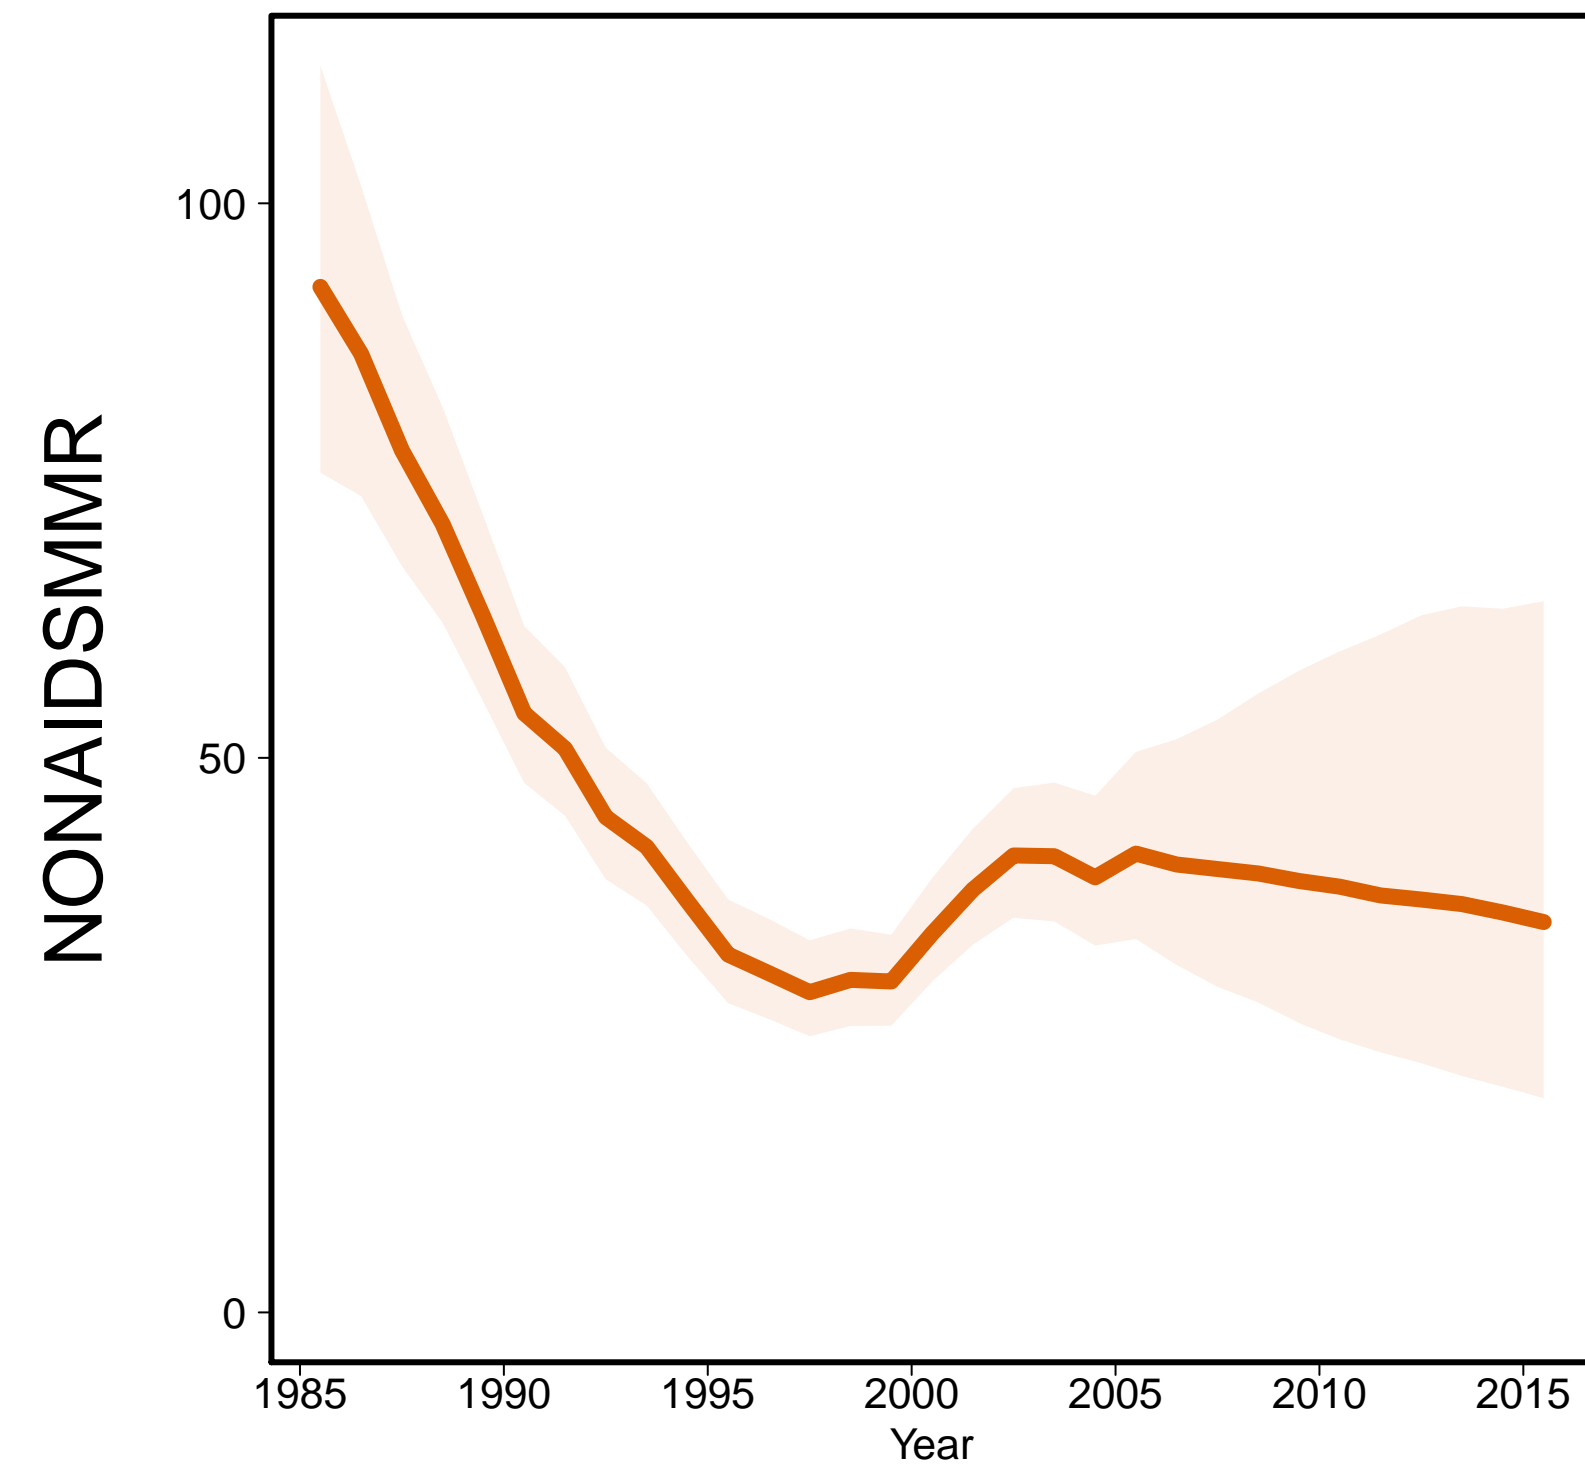

Aids MMR

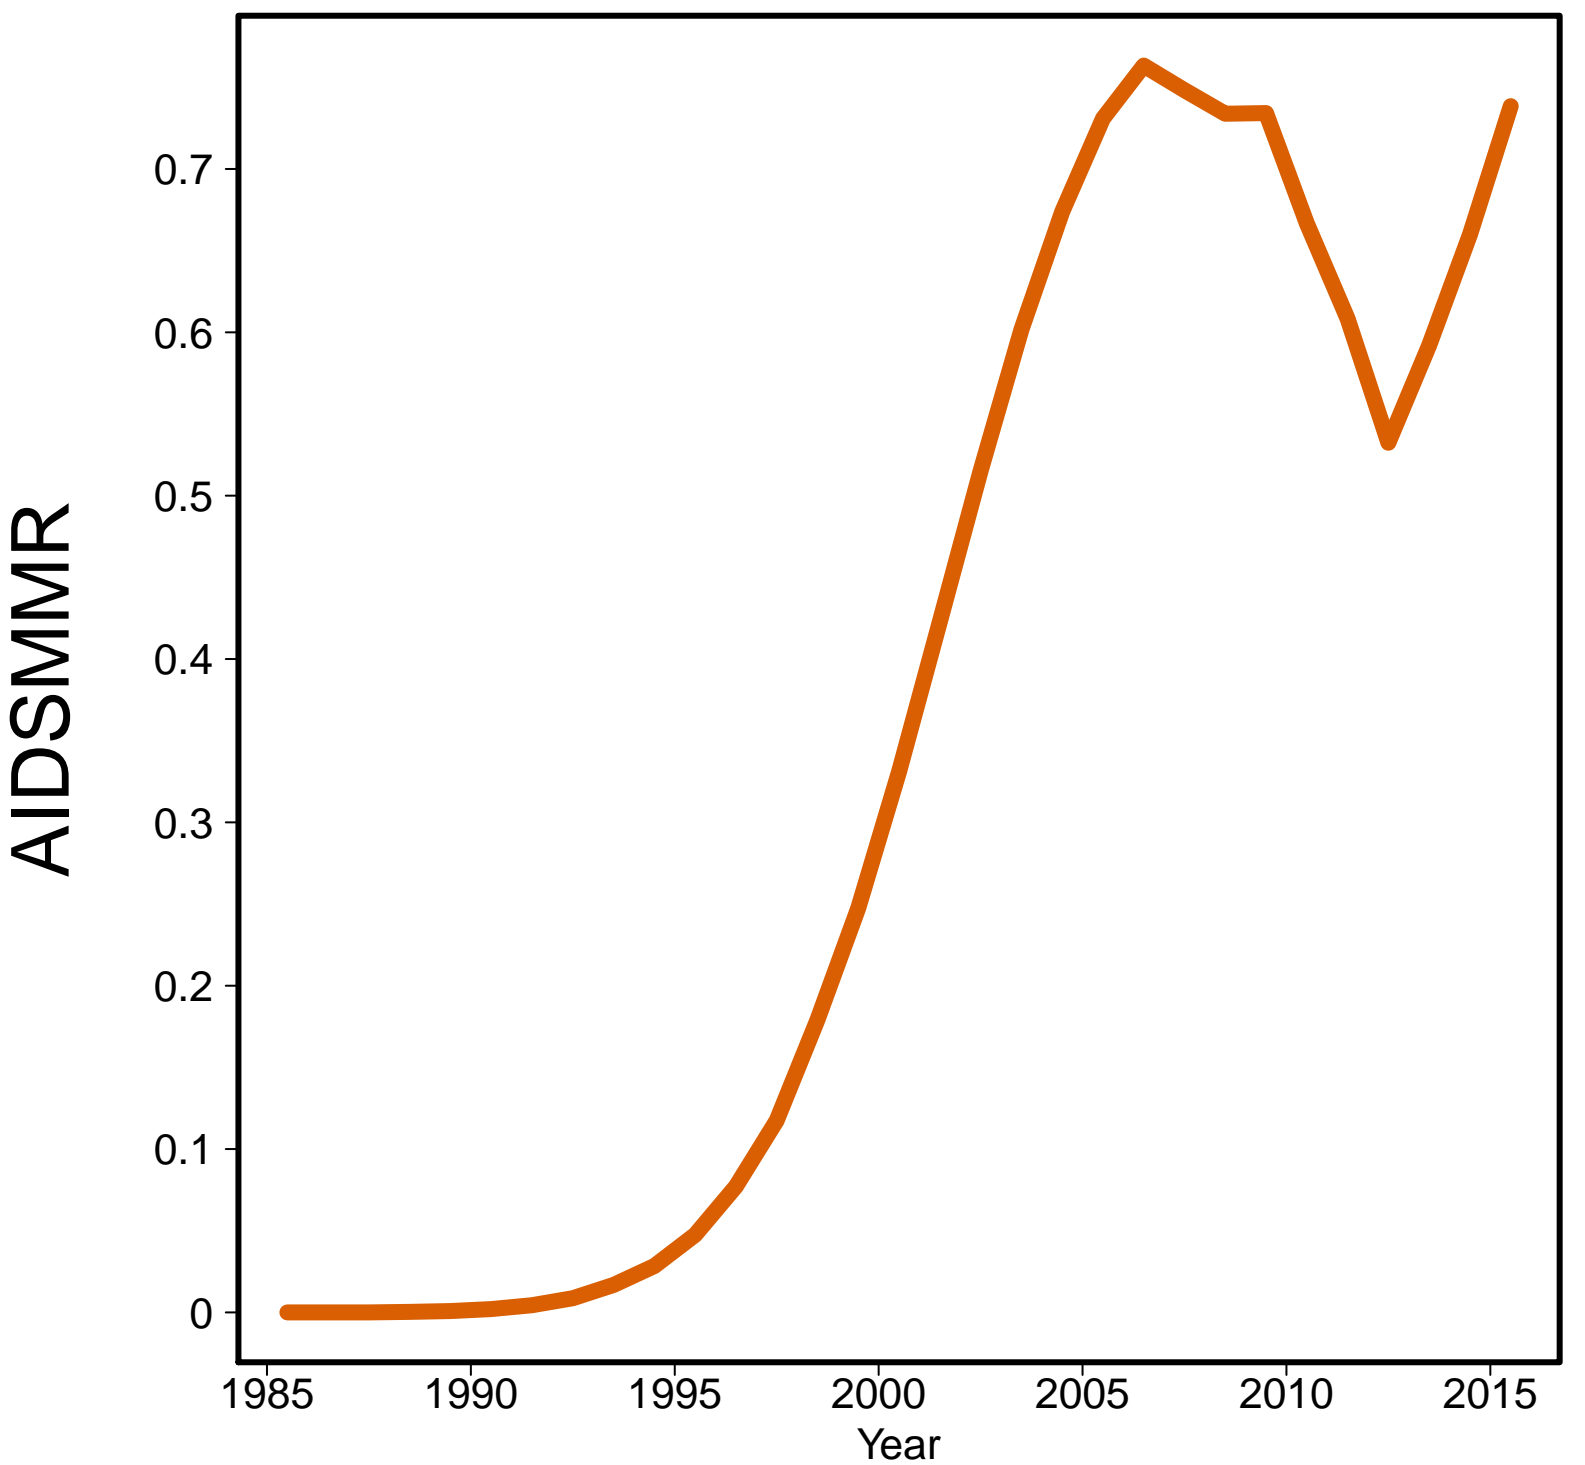

Vanuatu [VUT]  
(South-Eastern Asia / Oceania)

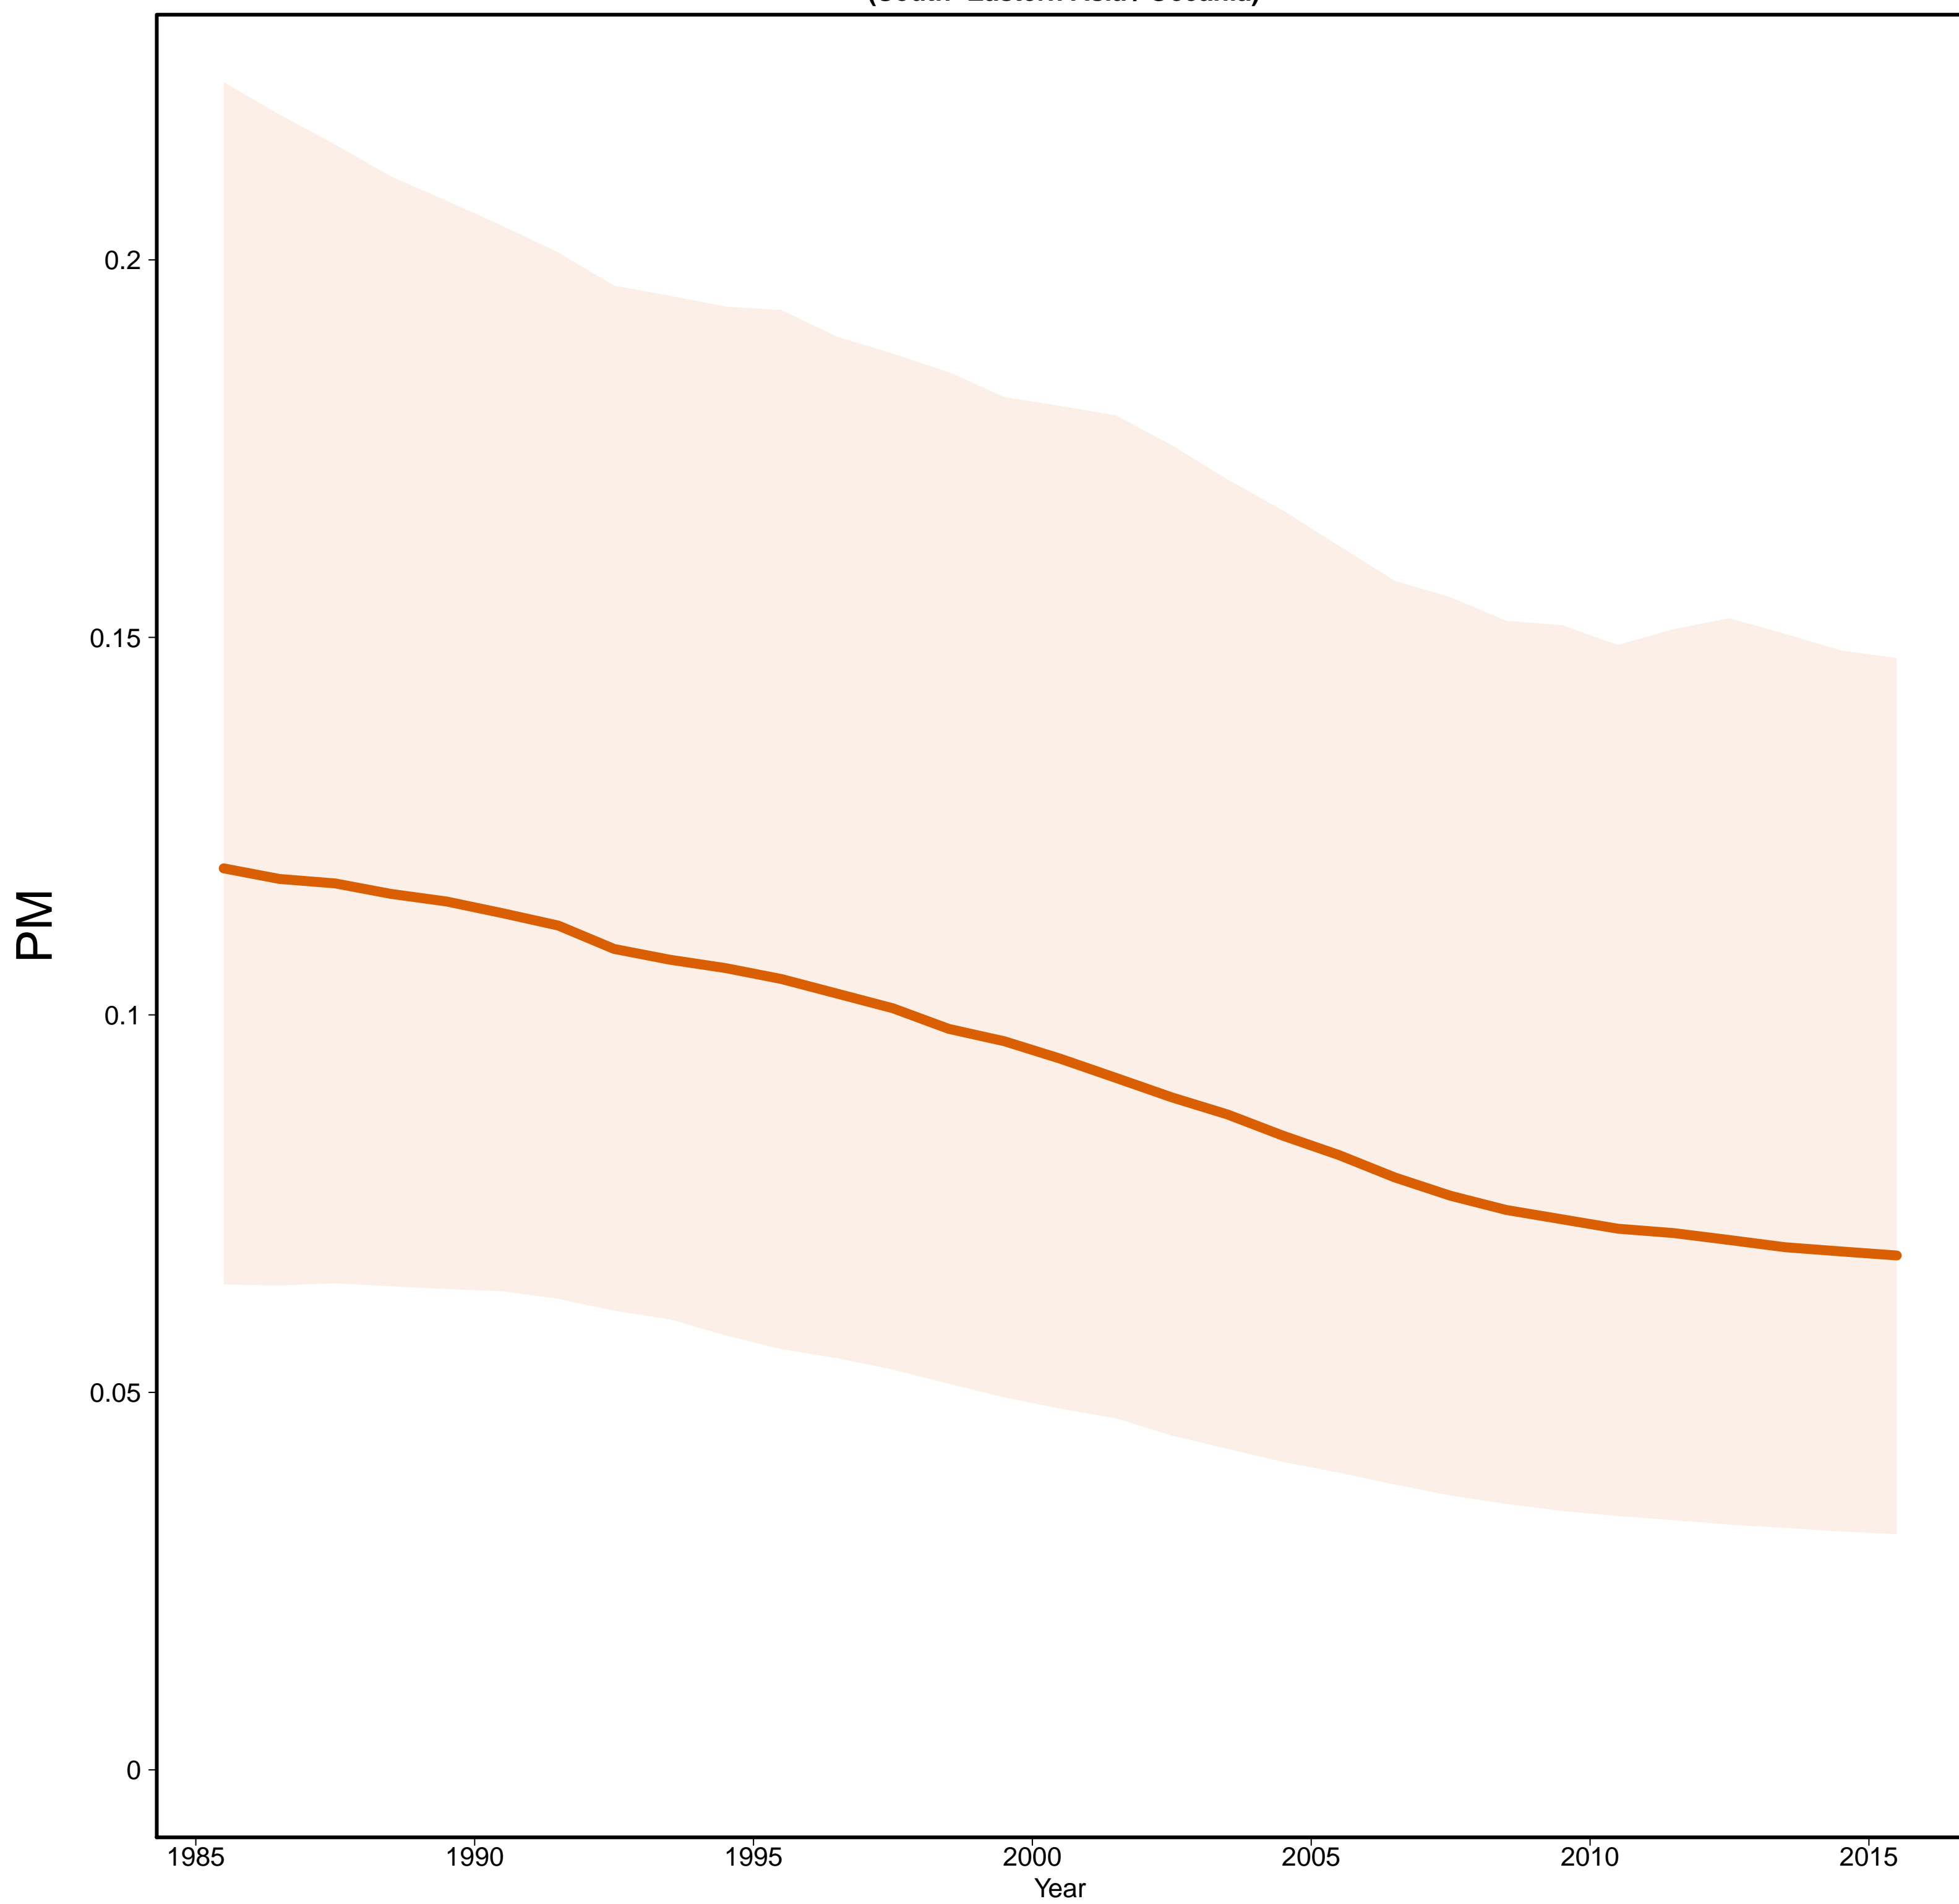

Vanuatu [VUT]  
(South-Eastern Asia / Oceania)

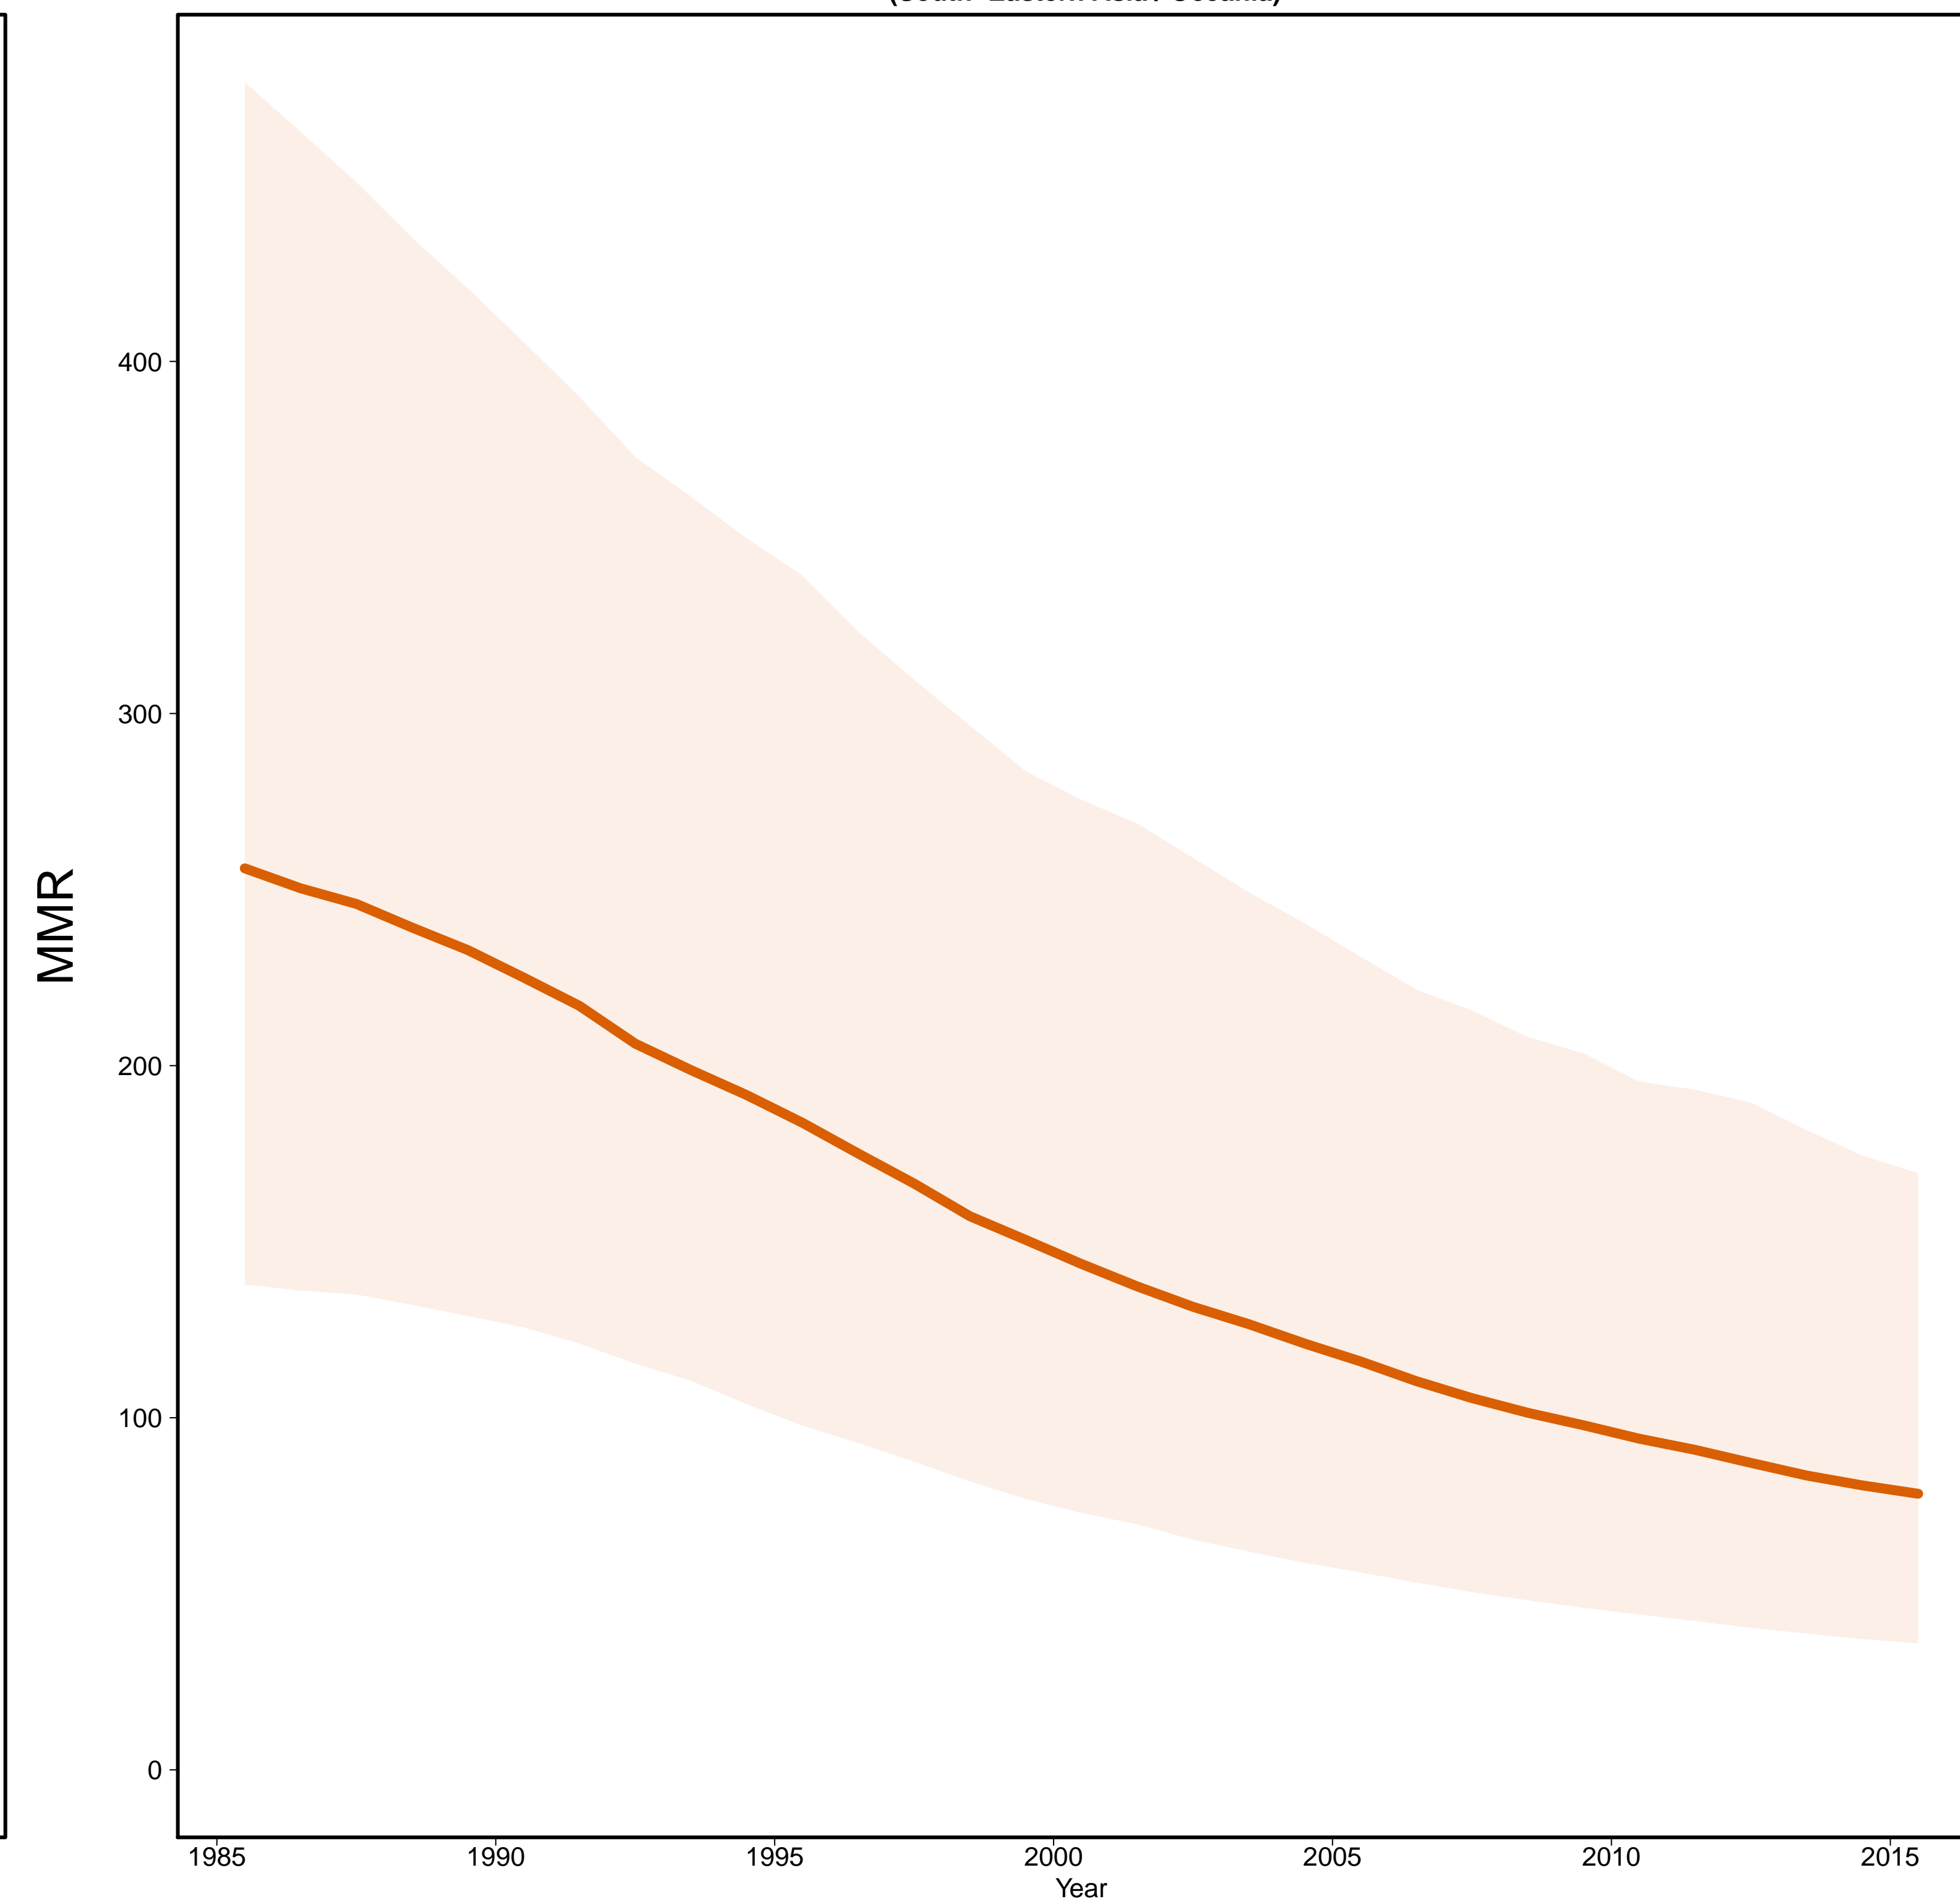

– Estimates –  
Mlate  
– MMR Database 2015 –

Gross Domestic Product

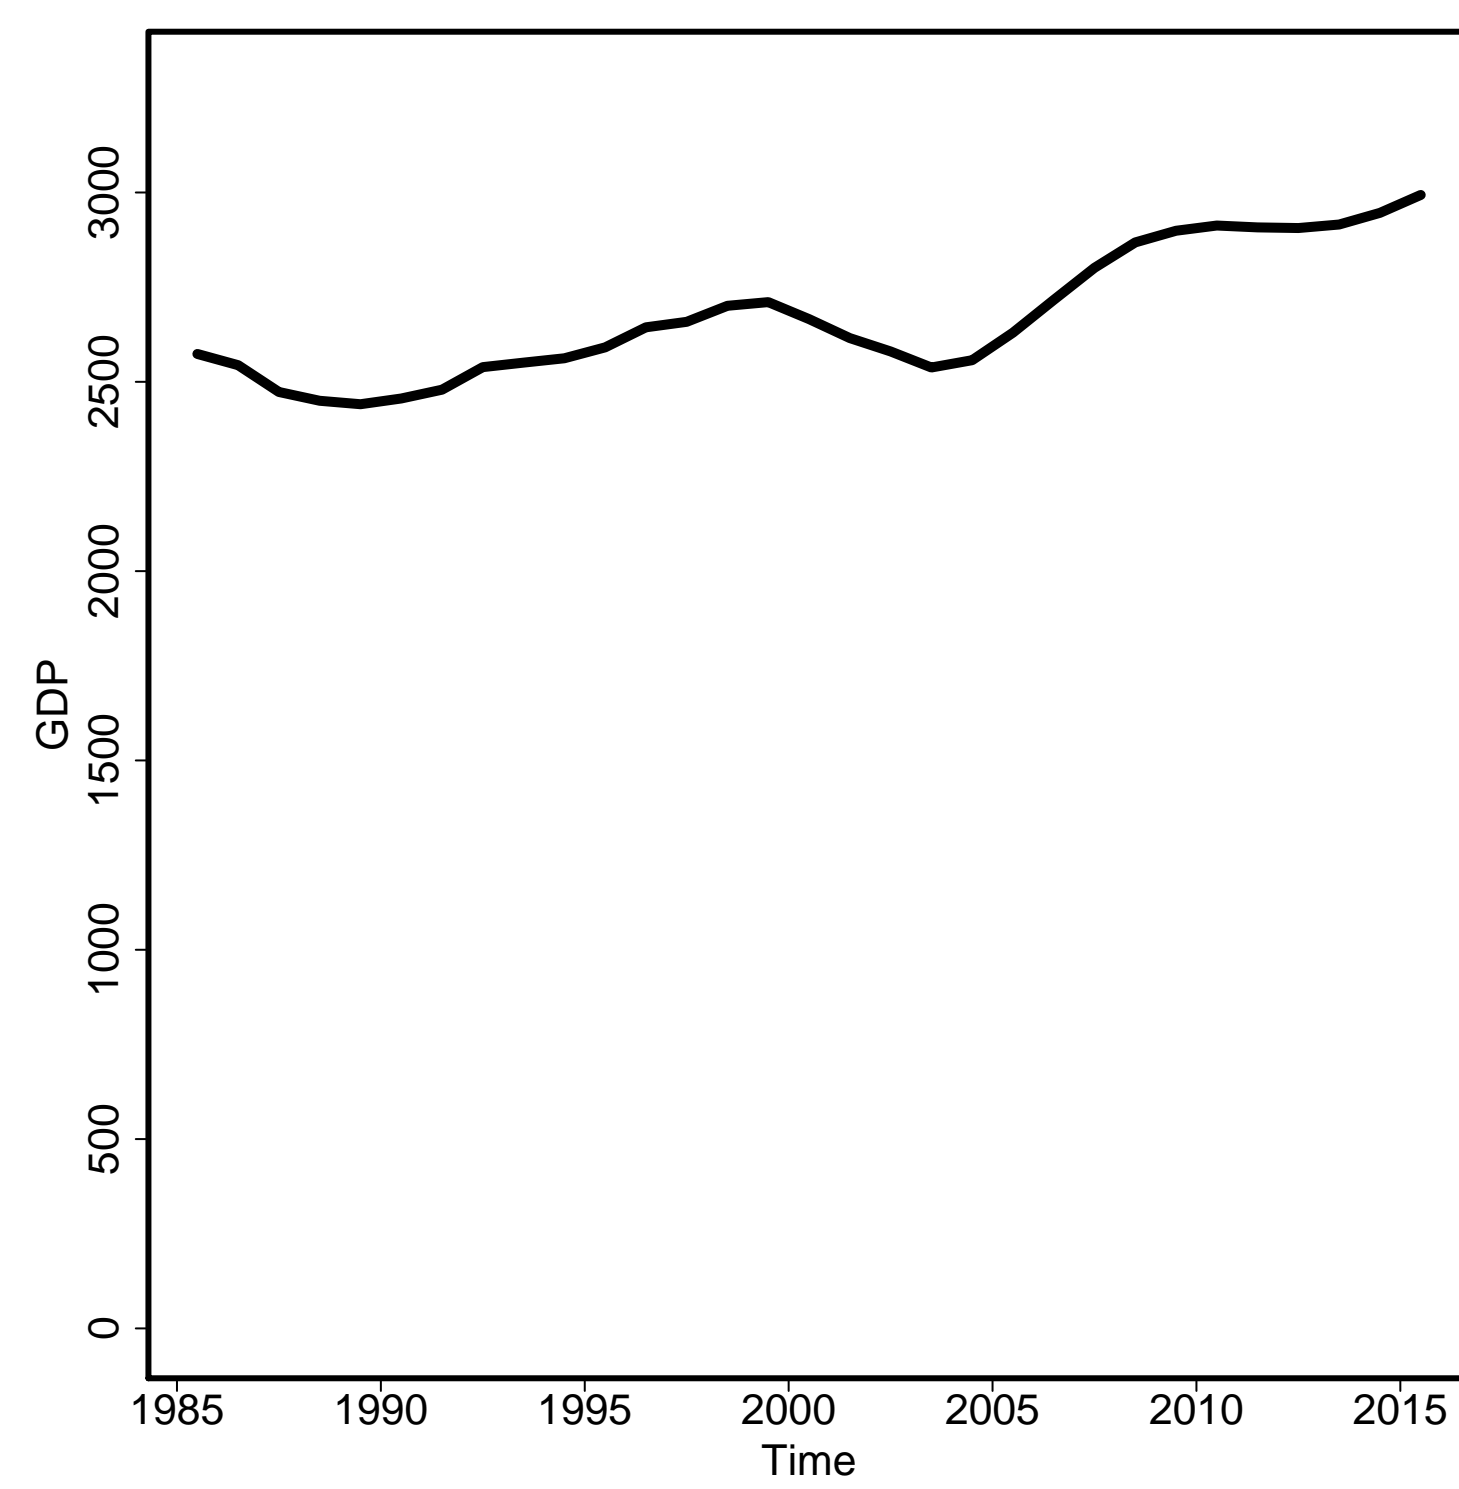

General Fertility Rate

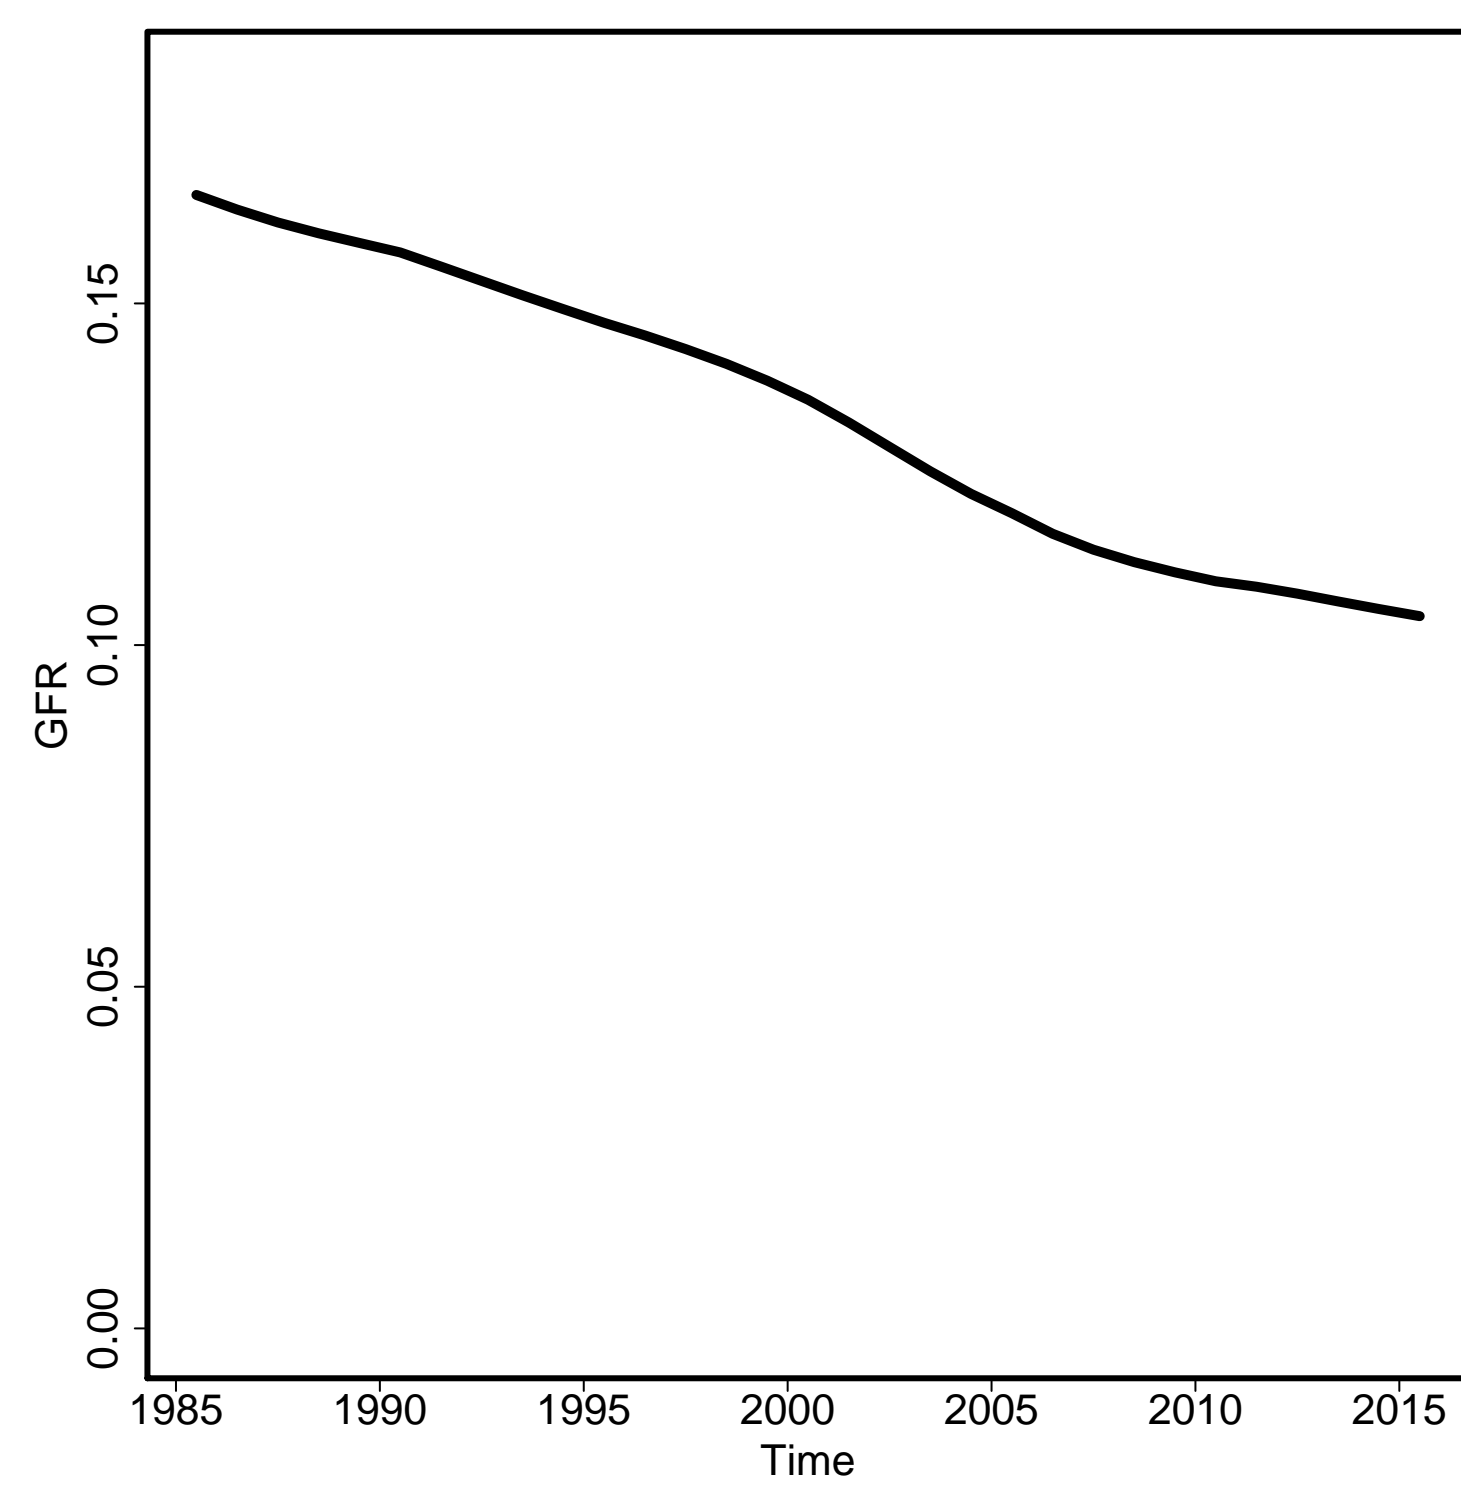

Skilled Attendance to Birth

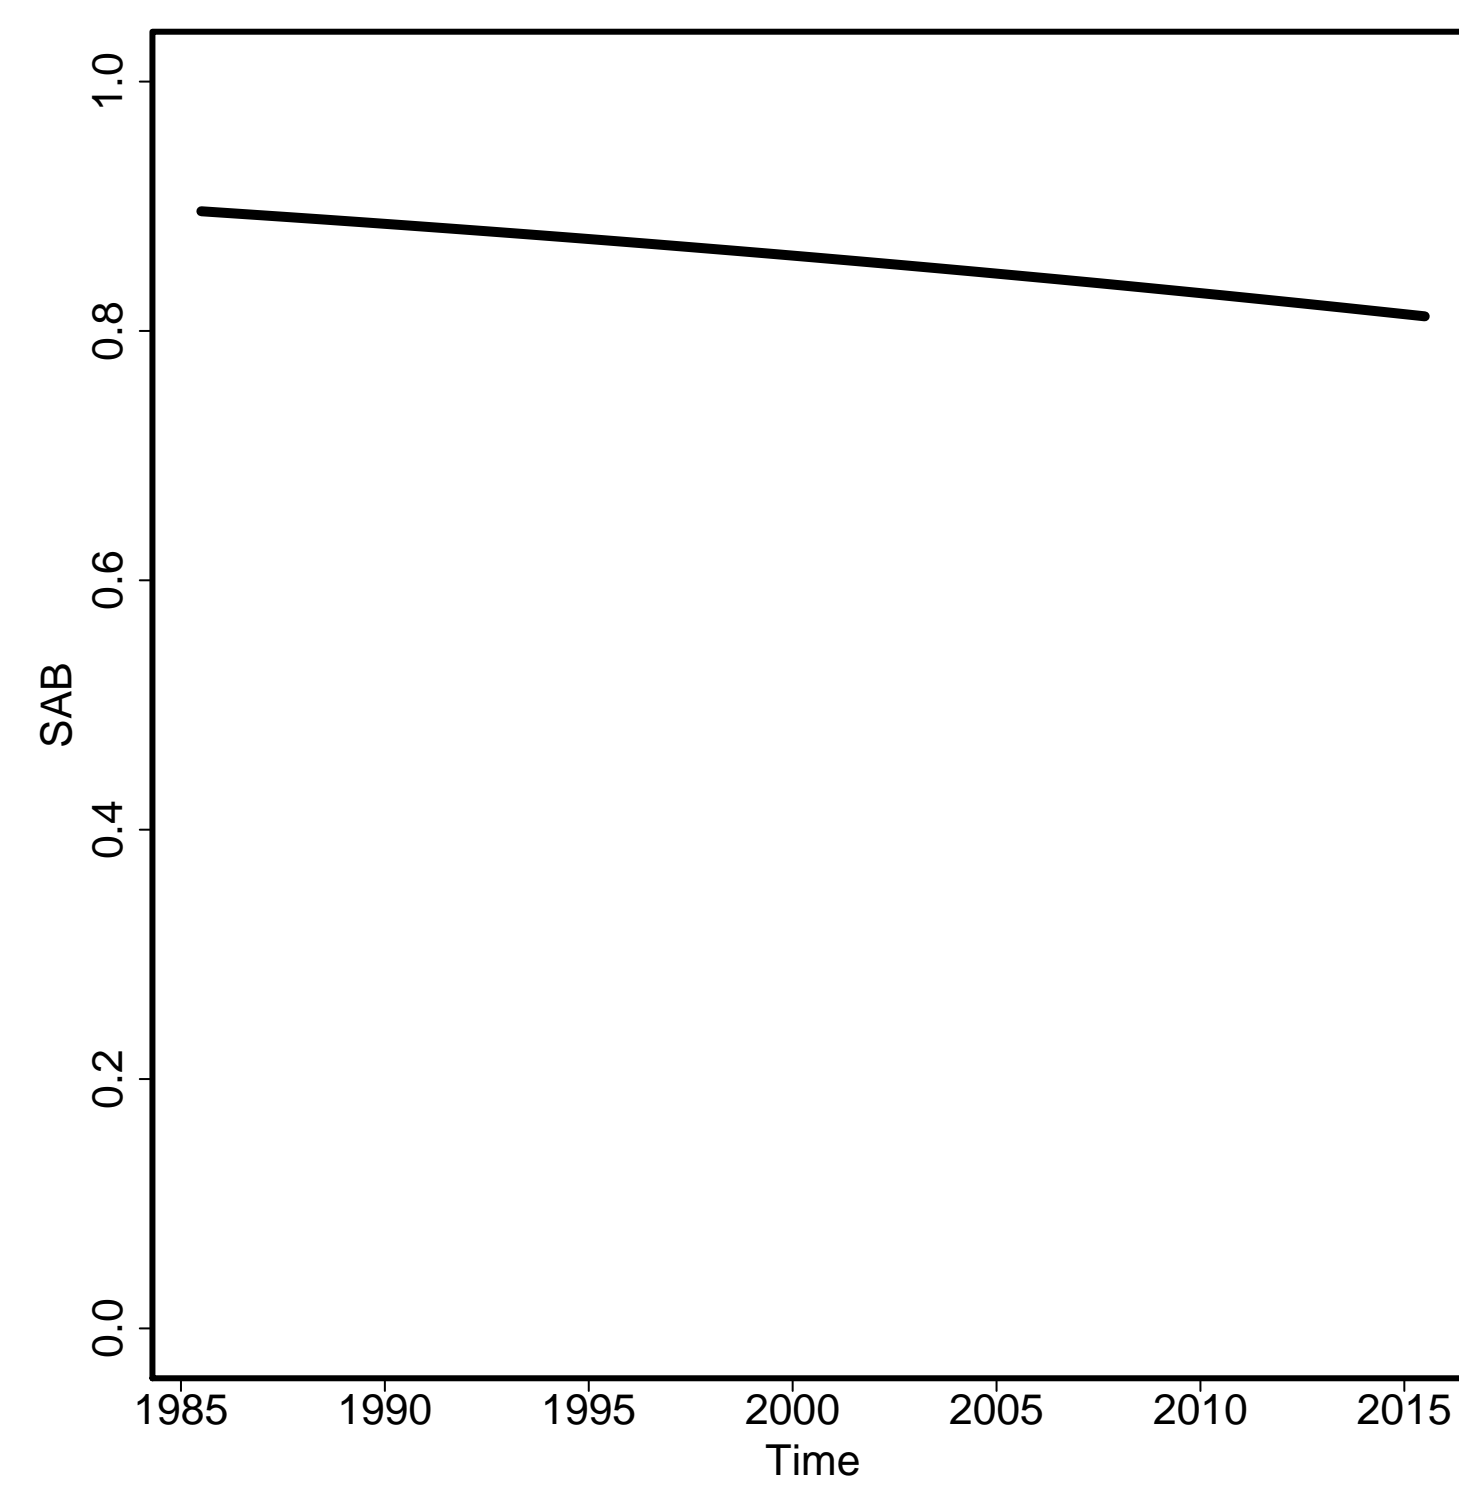

Envelope/Births

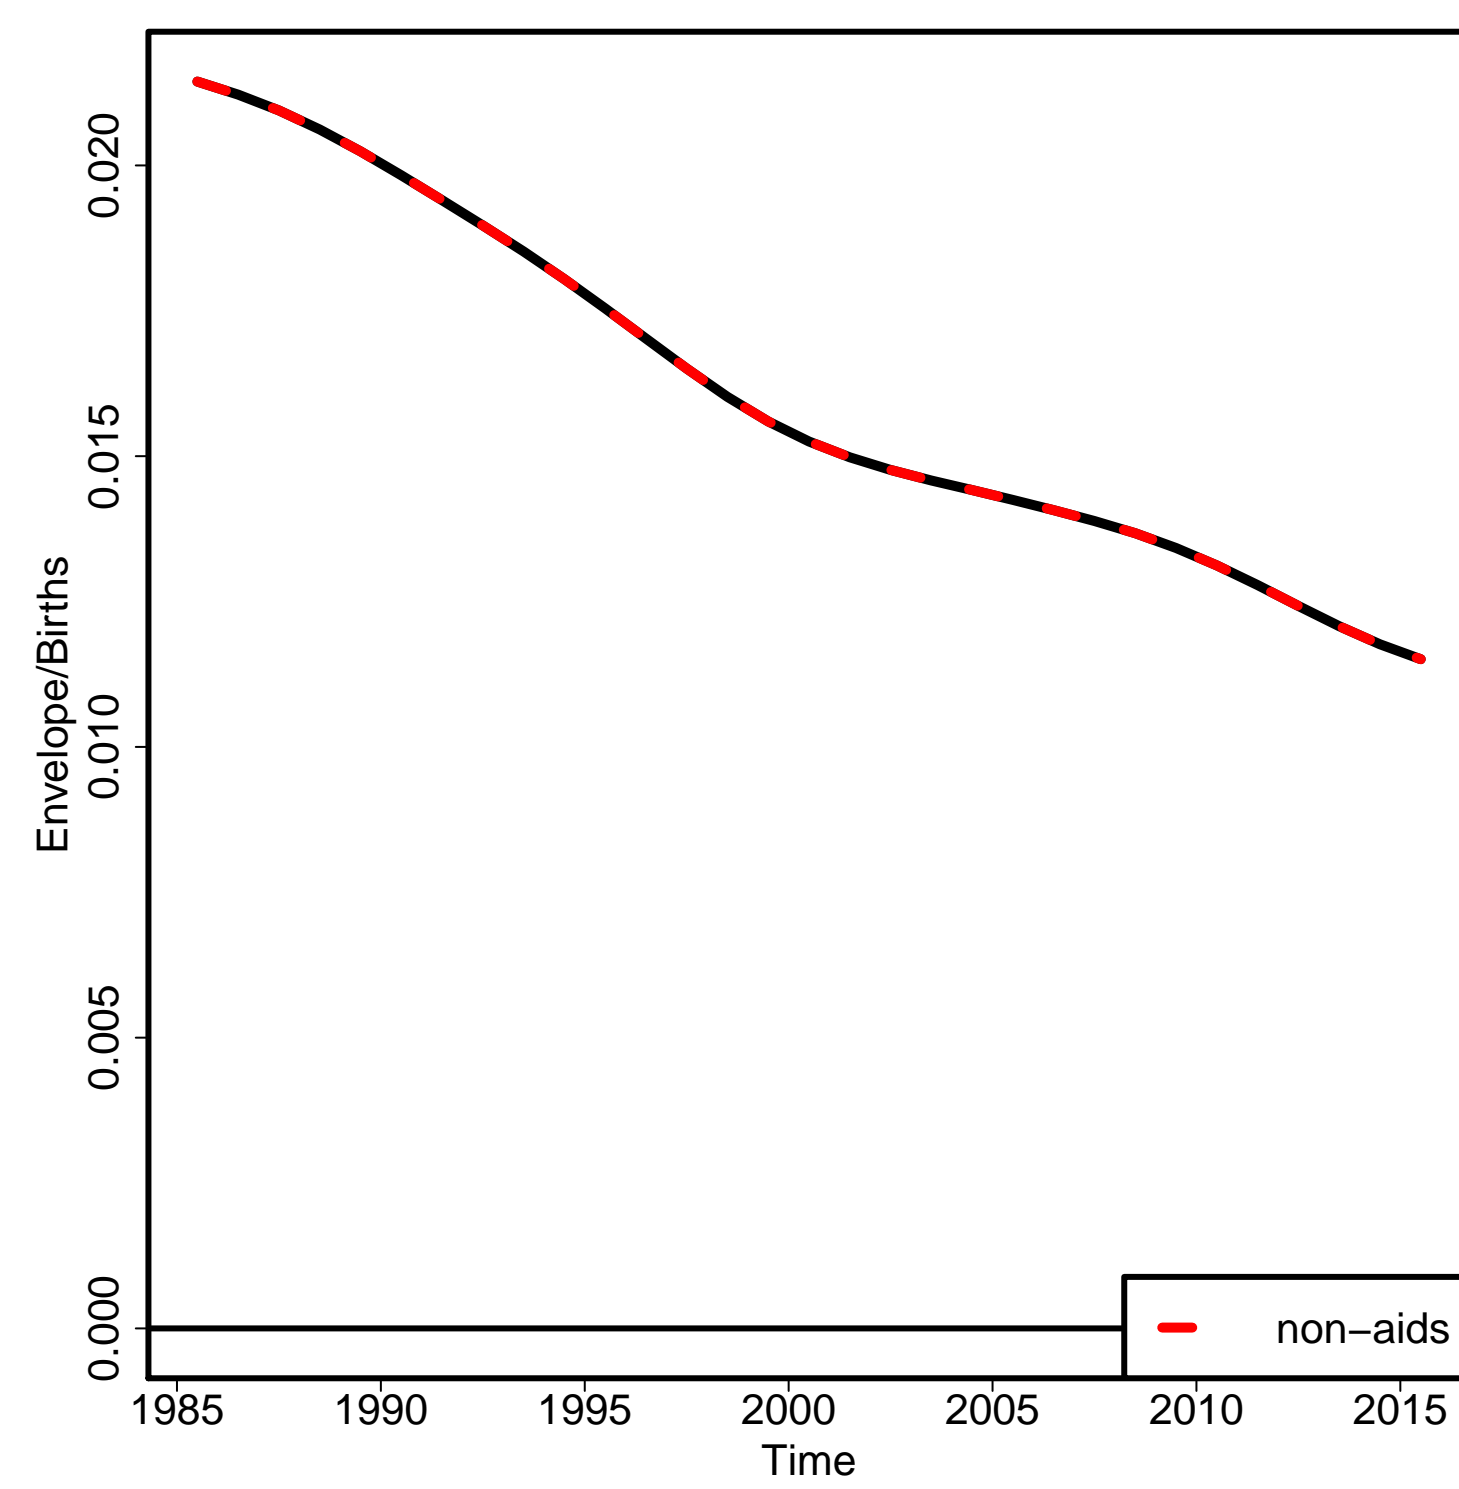

Non-aids MMR

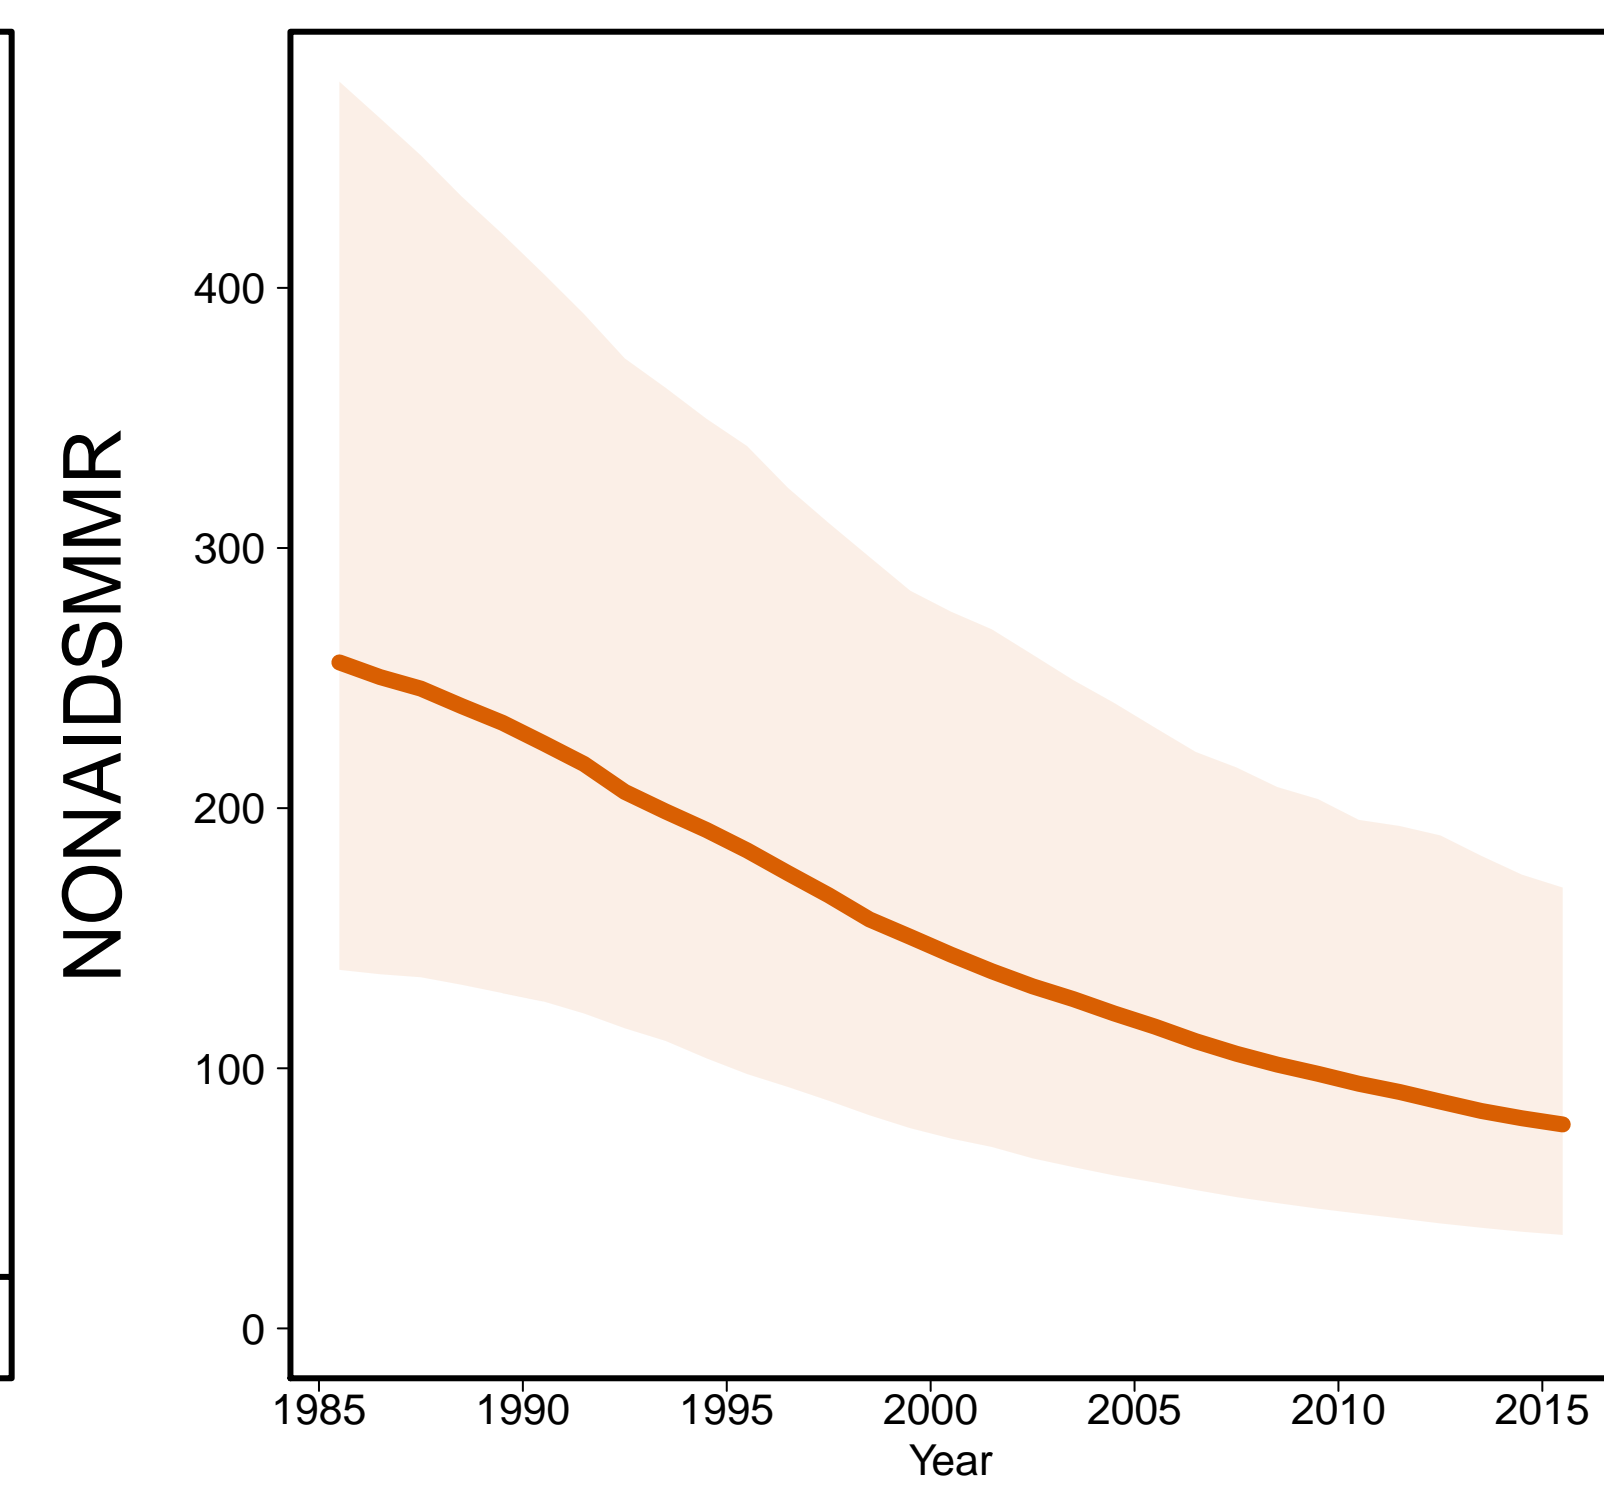

Aids MMR

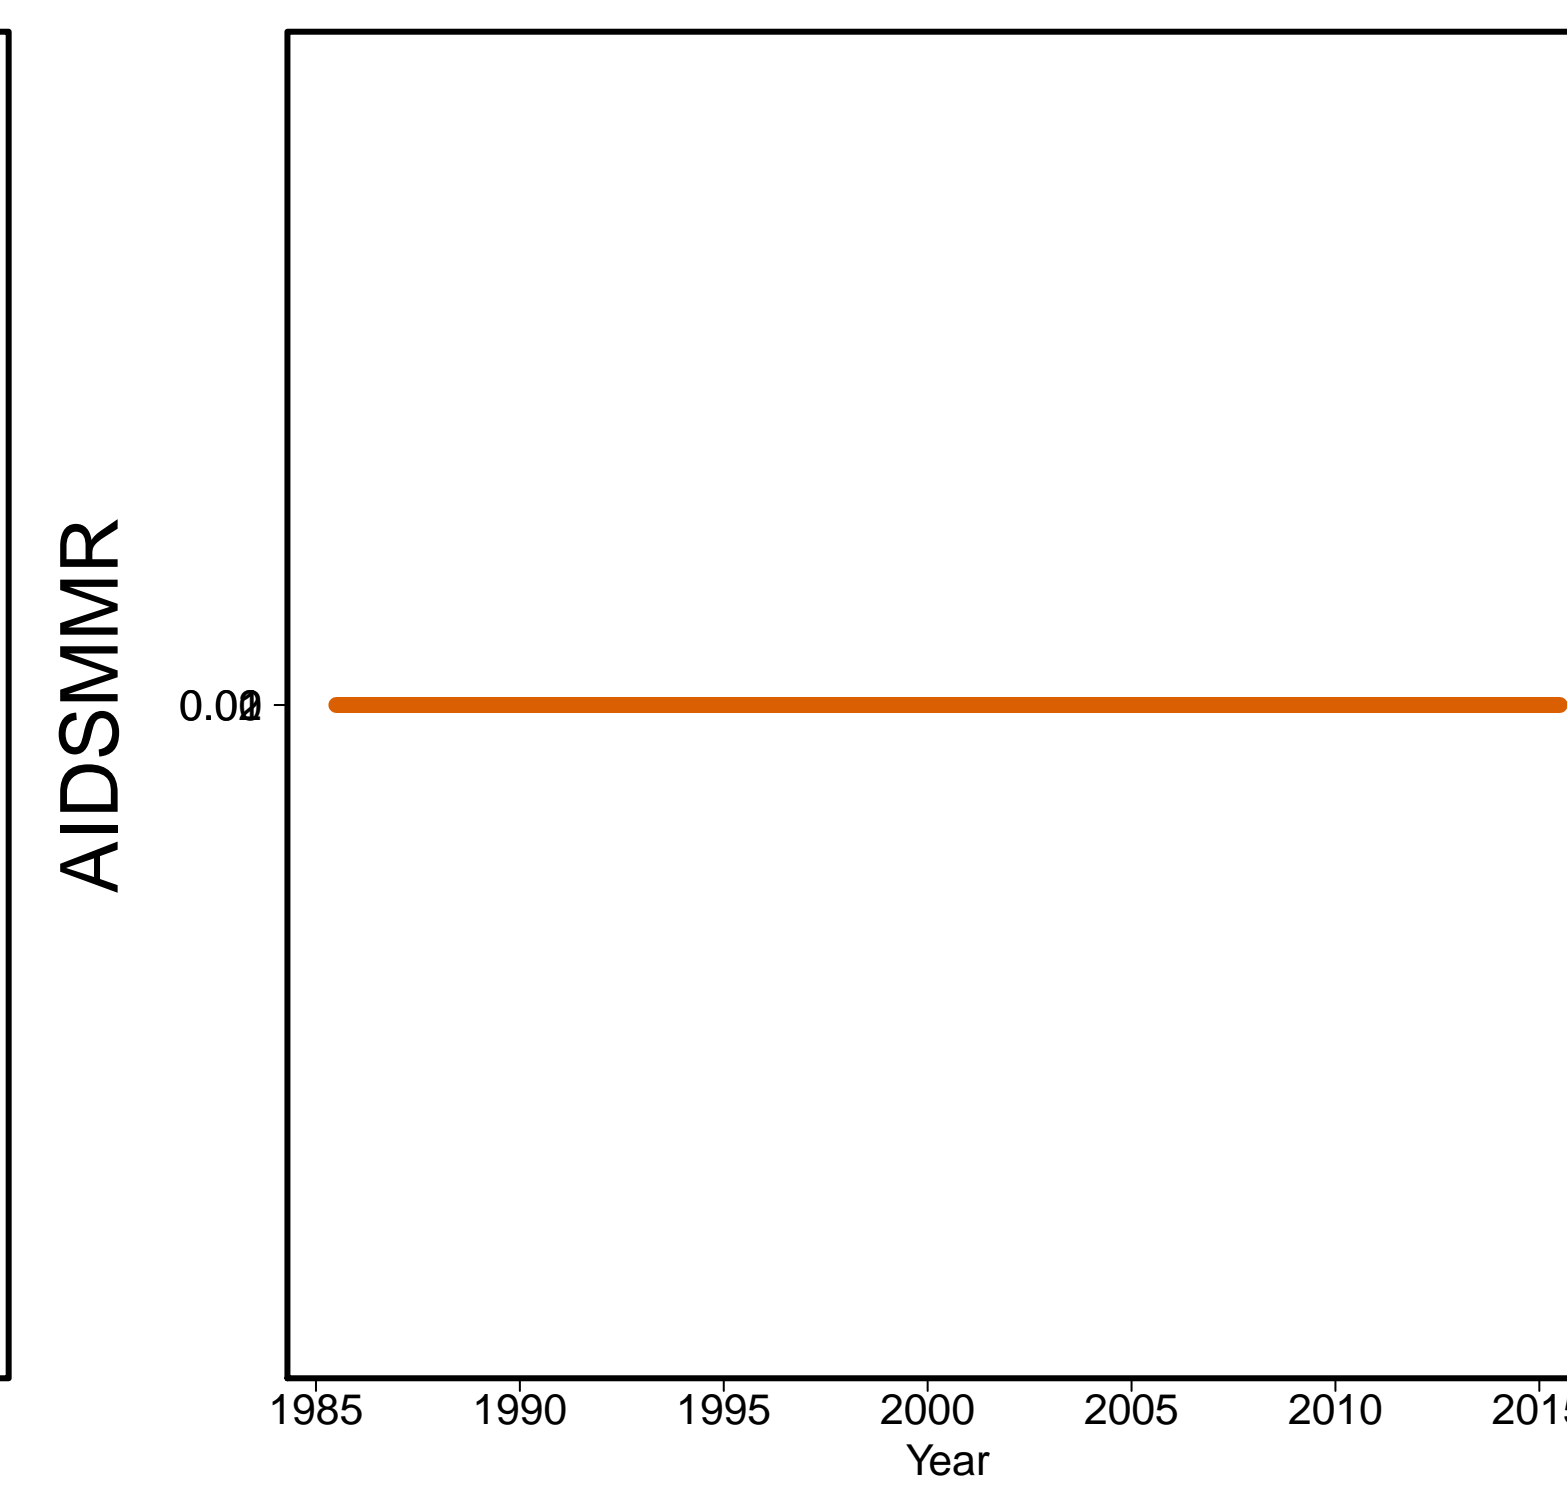

Venezuela [VEN]  
(South America)

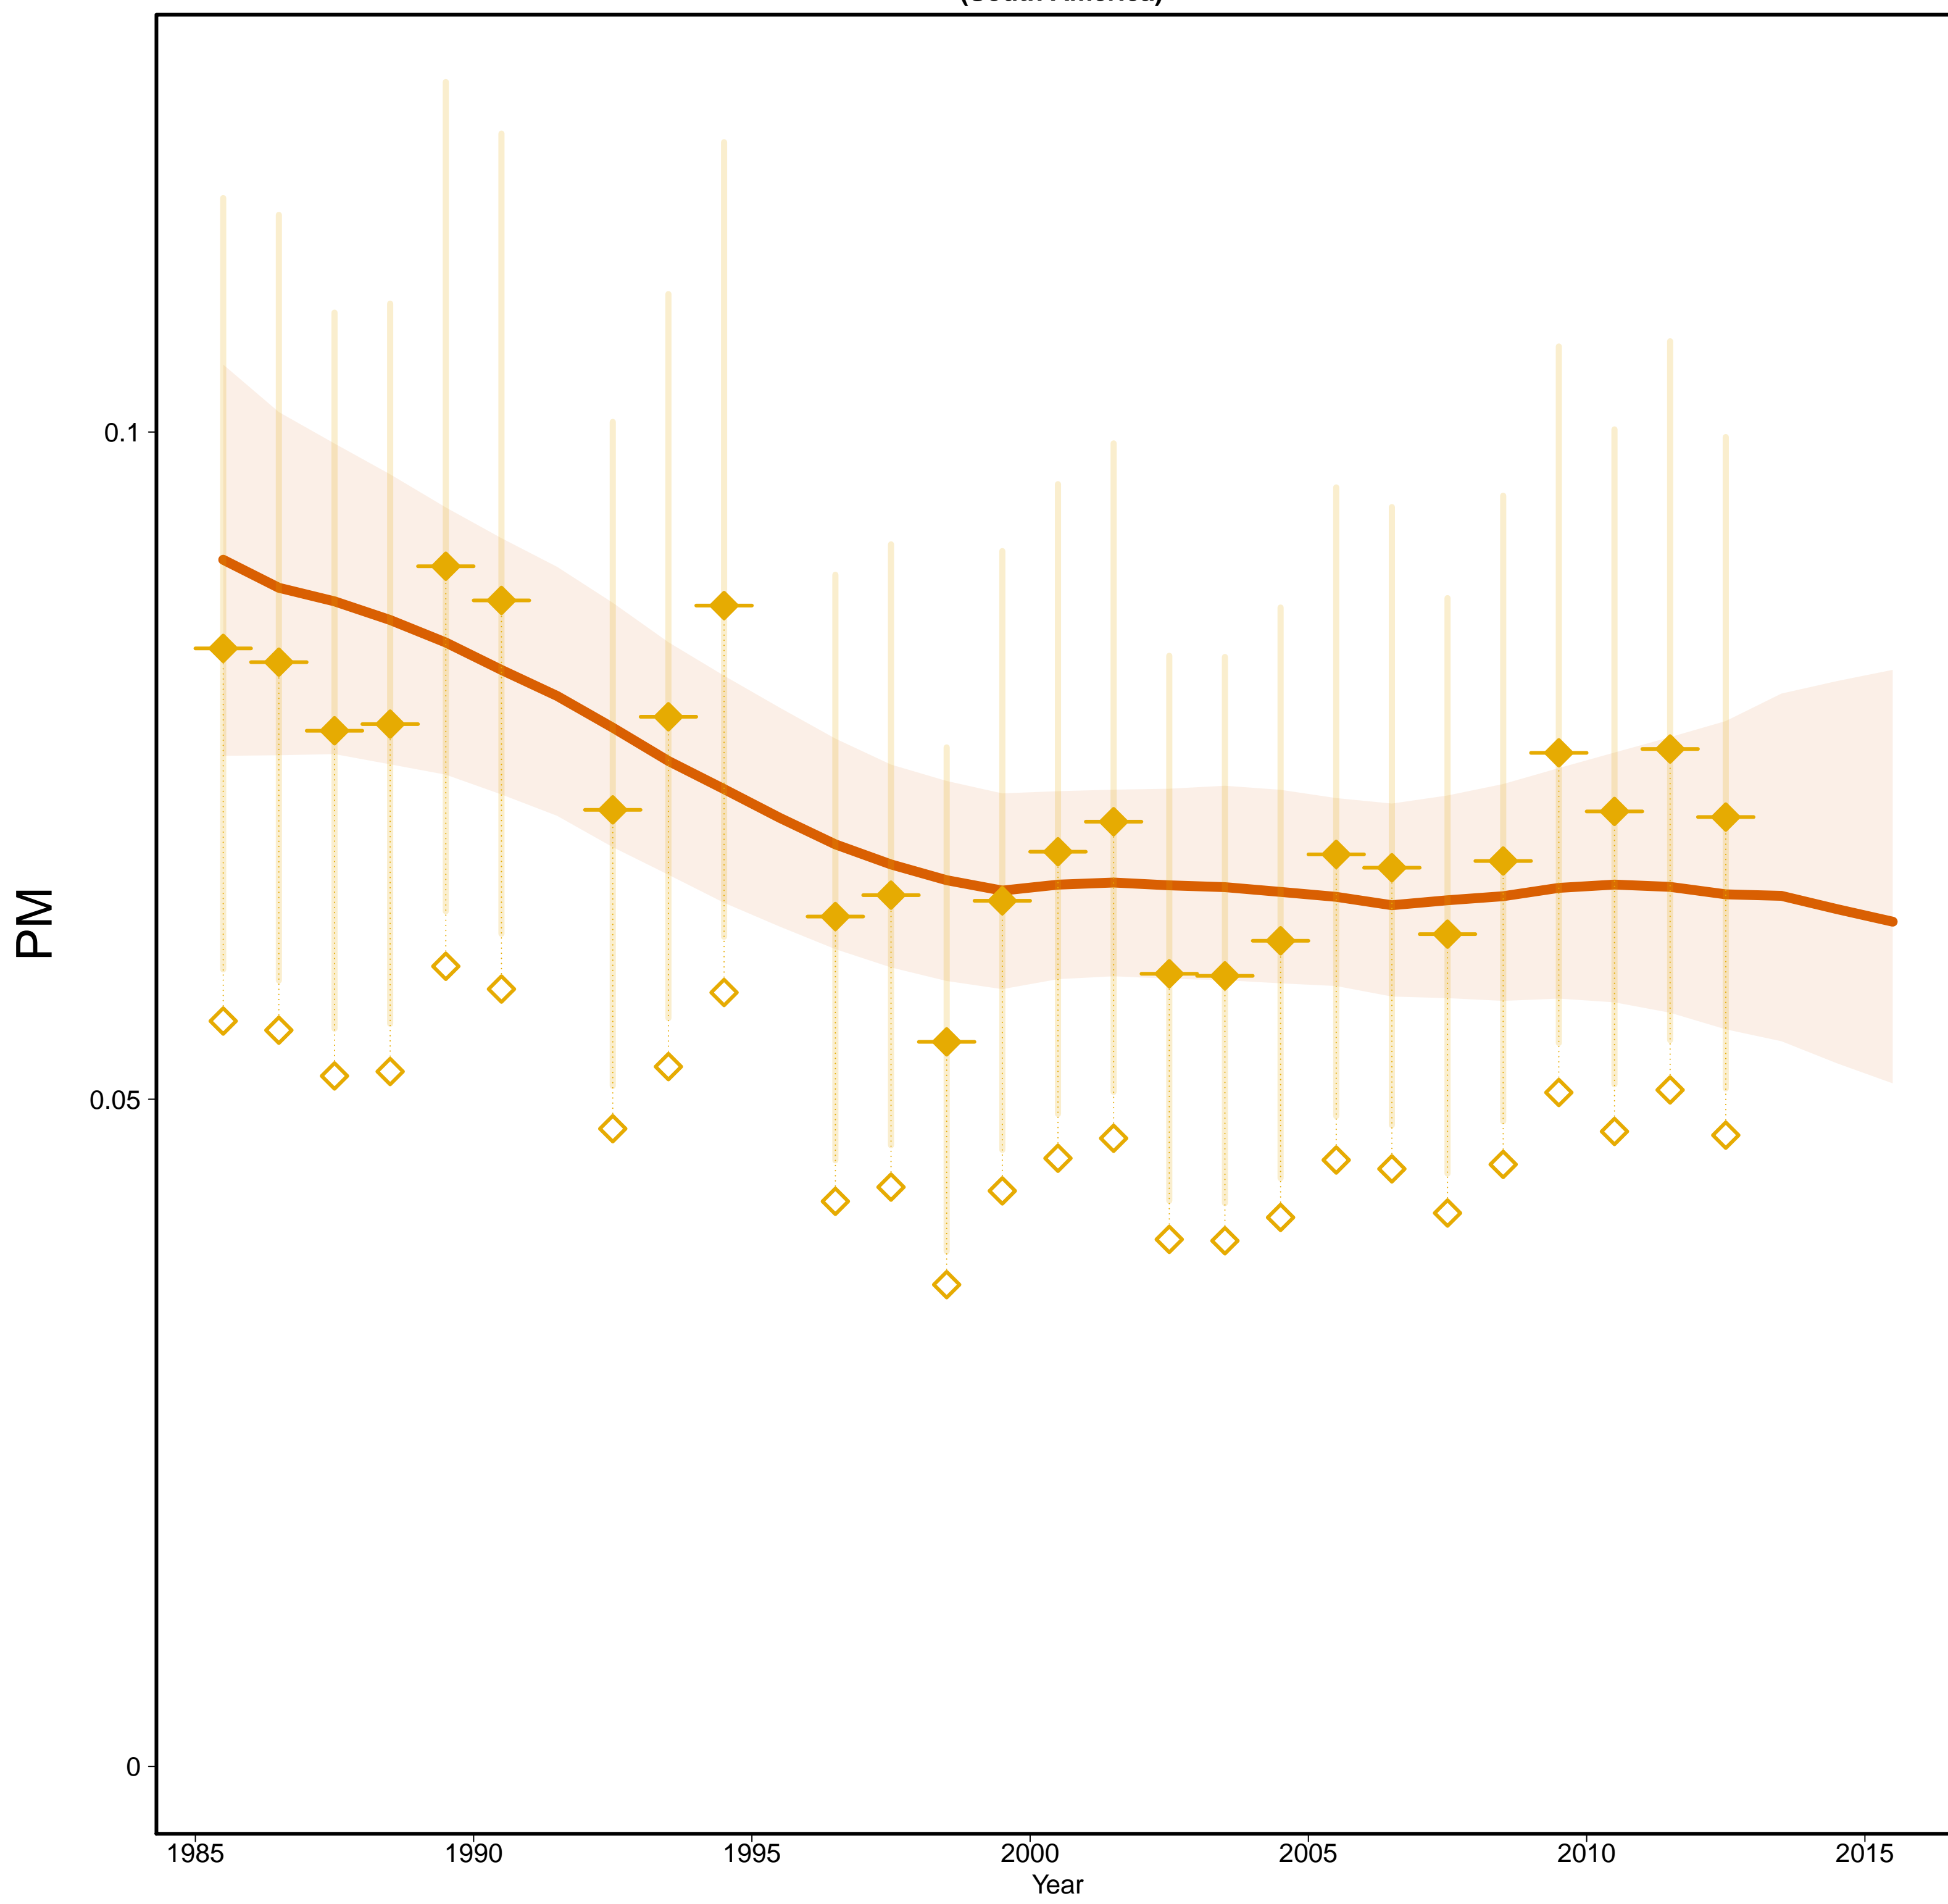

Venezuela [VEN]  
(South America)

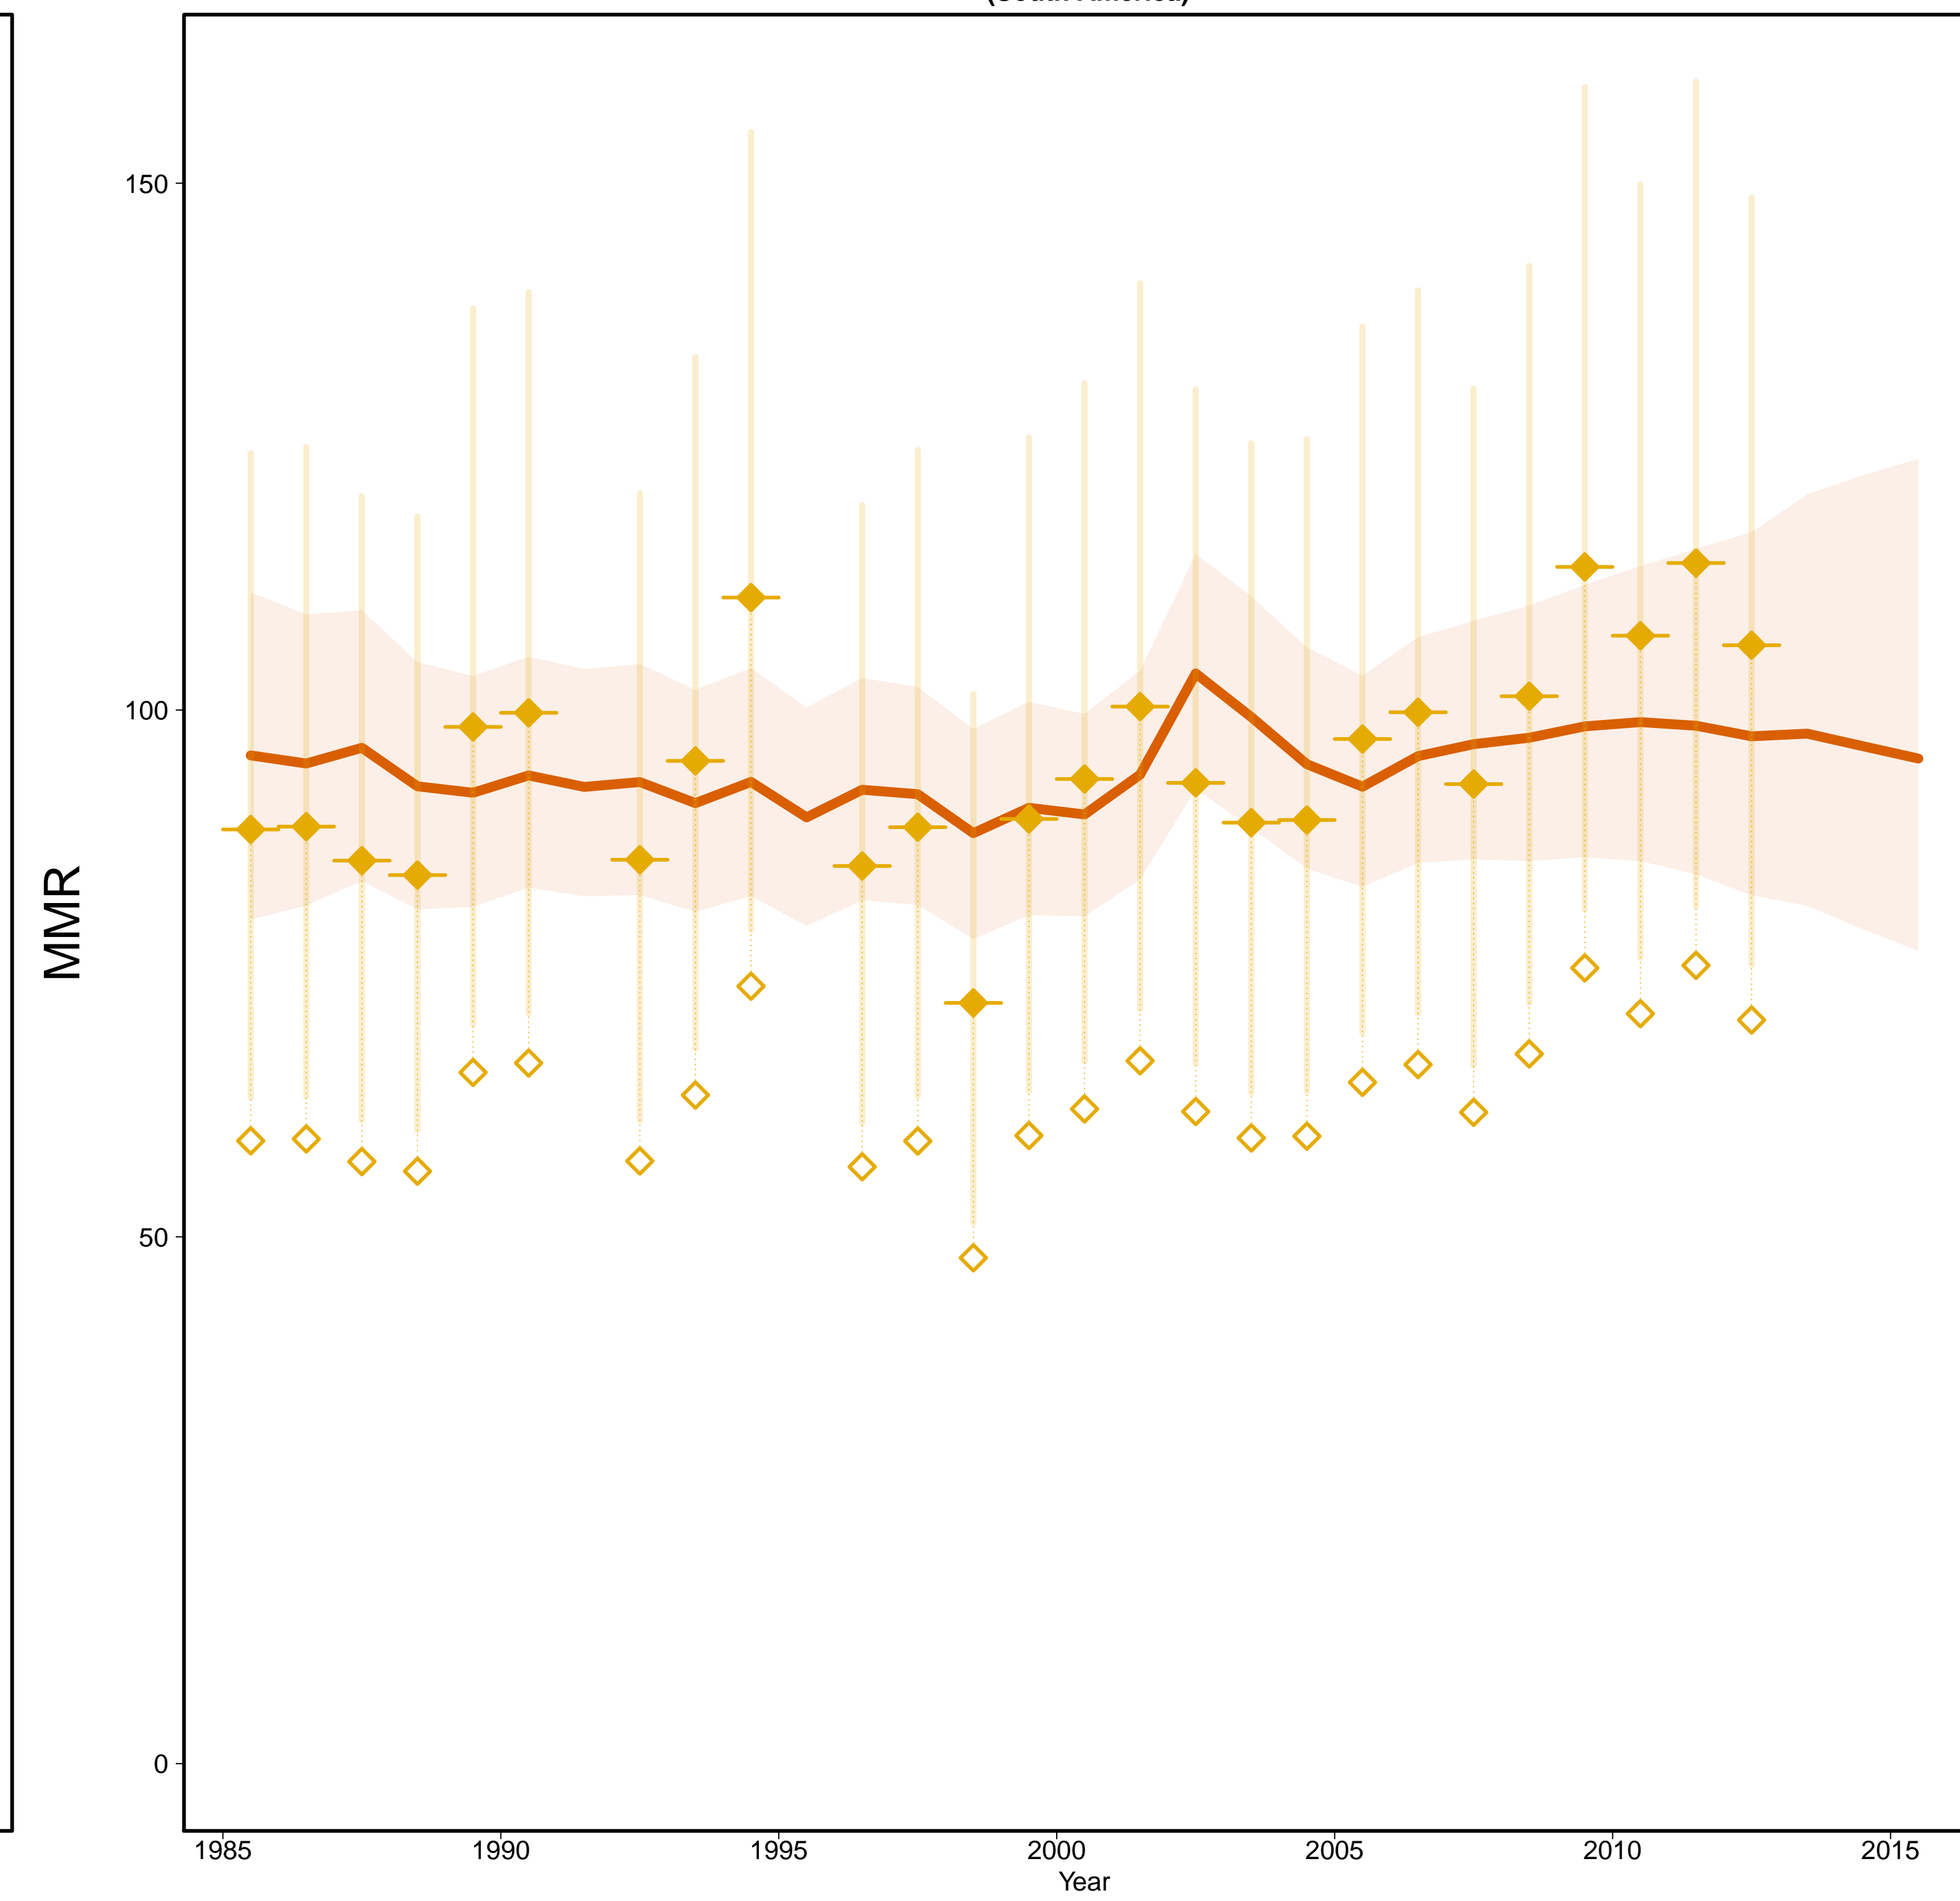

- Estimates —
- MMR Database 2015 —
- ◇ Observed Data
- ◆ Adjusted Data
- Data type —
- ◆ VR

Gross Domestic Product

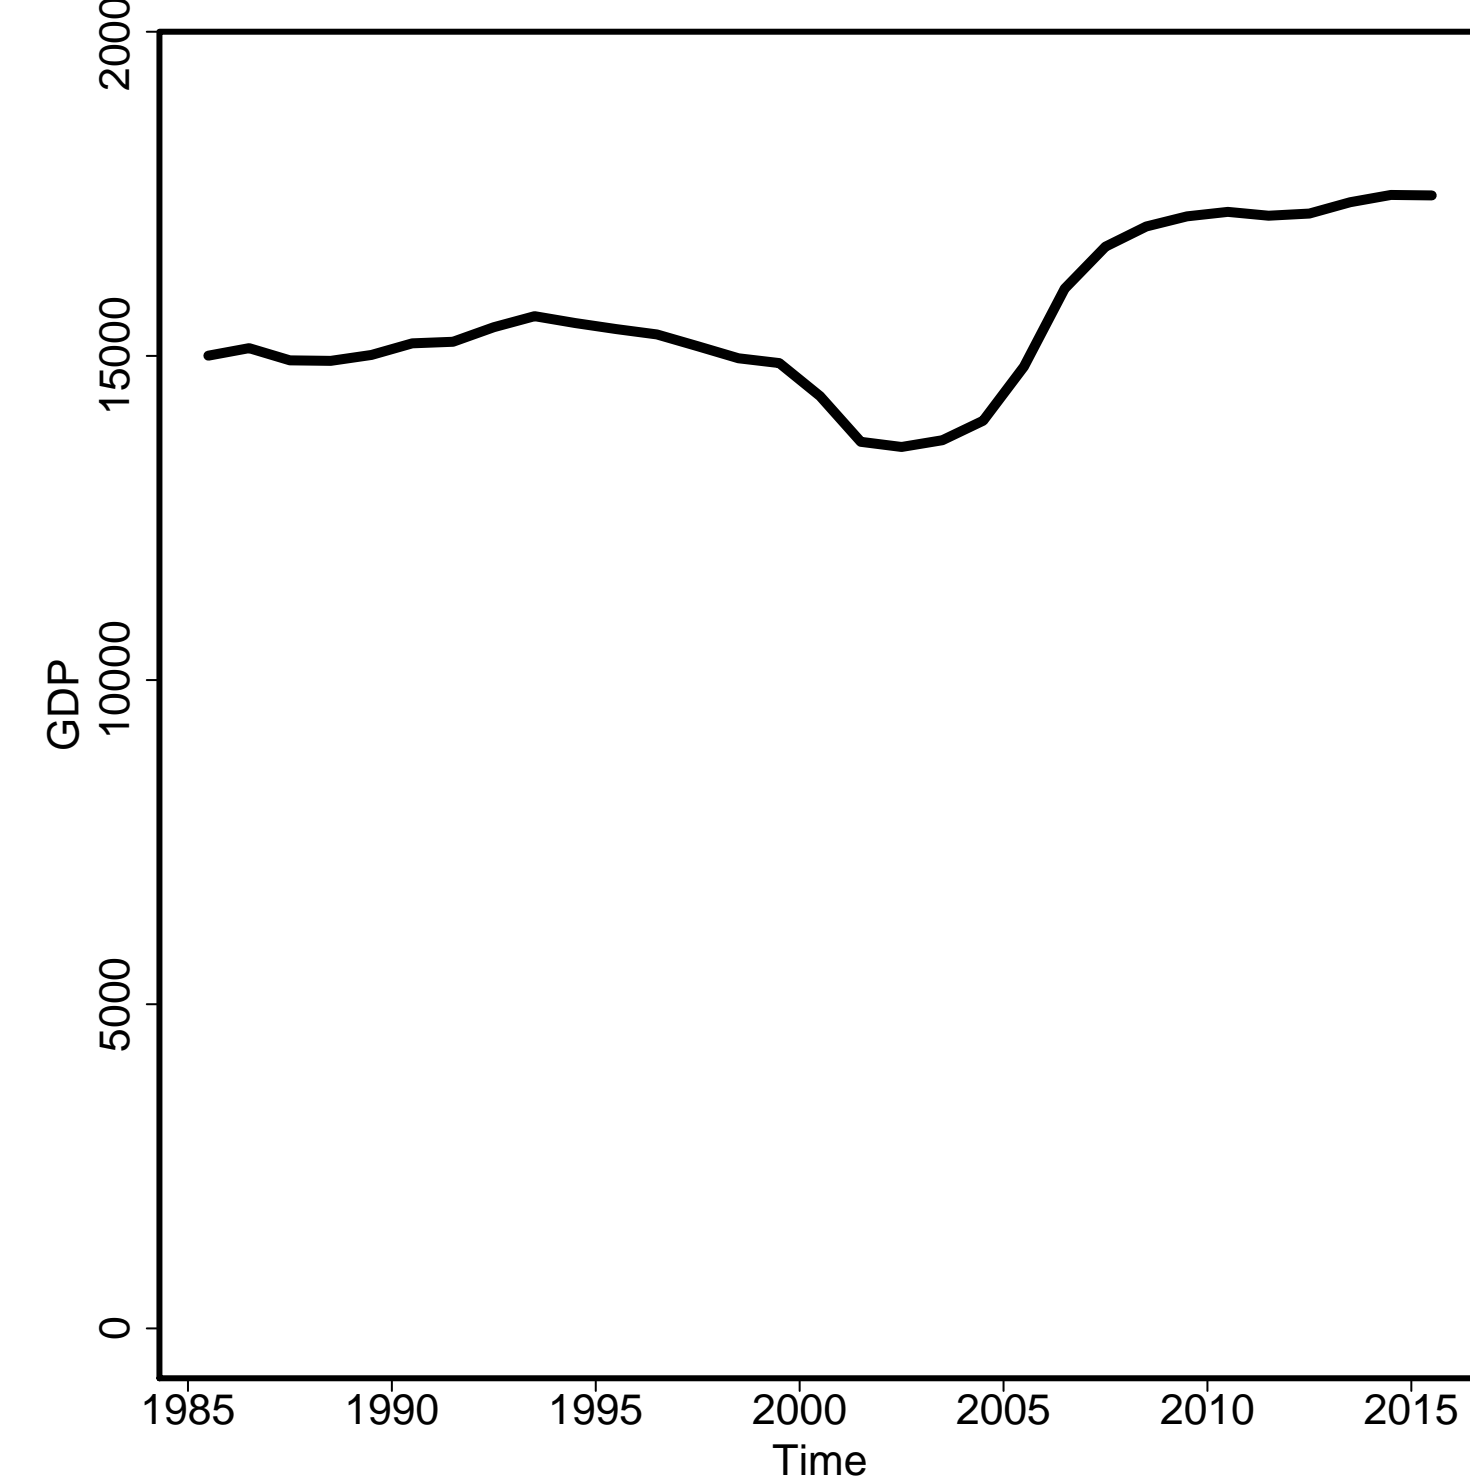

General Fertility Rate

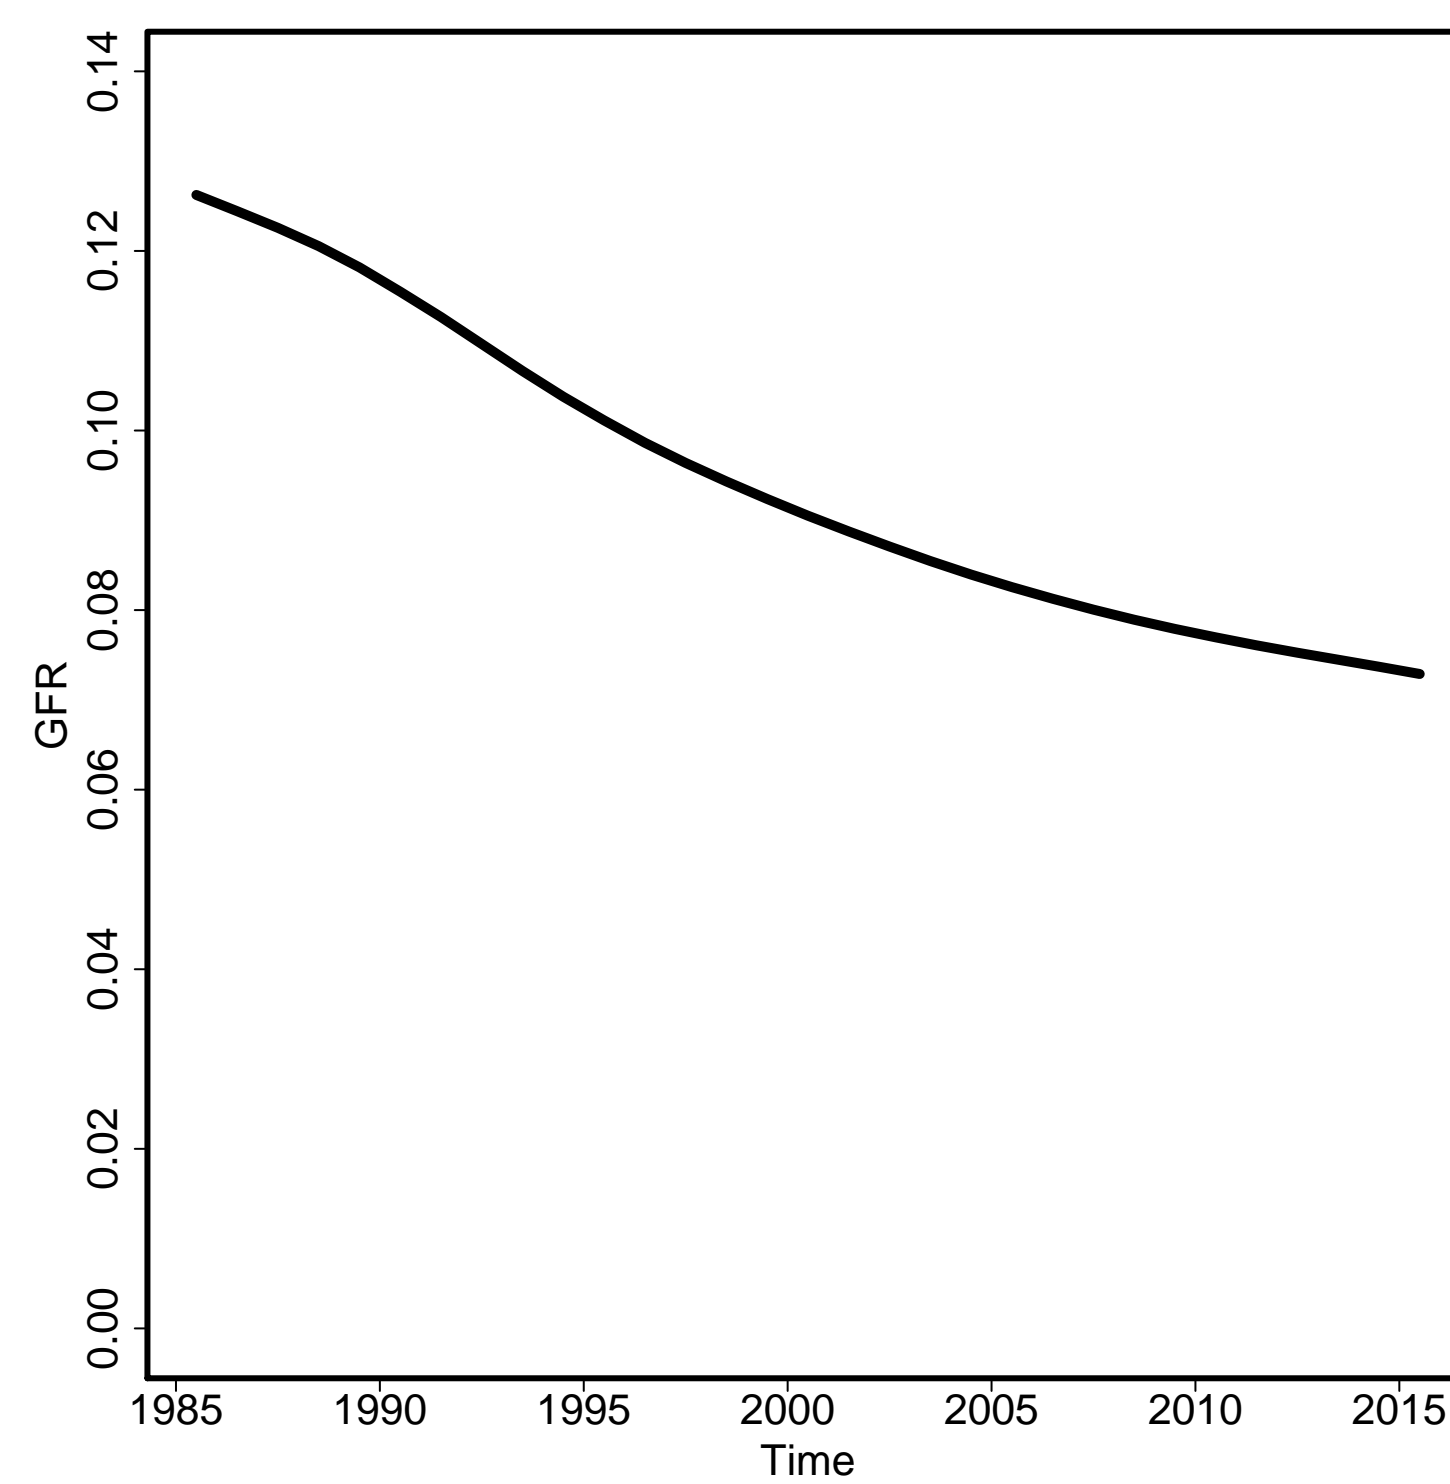

Skilled Attendance to Birth

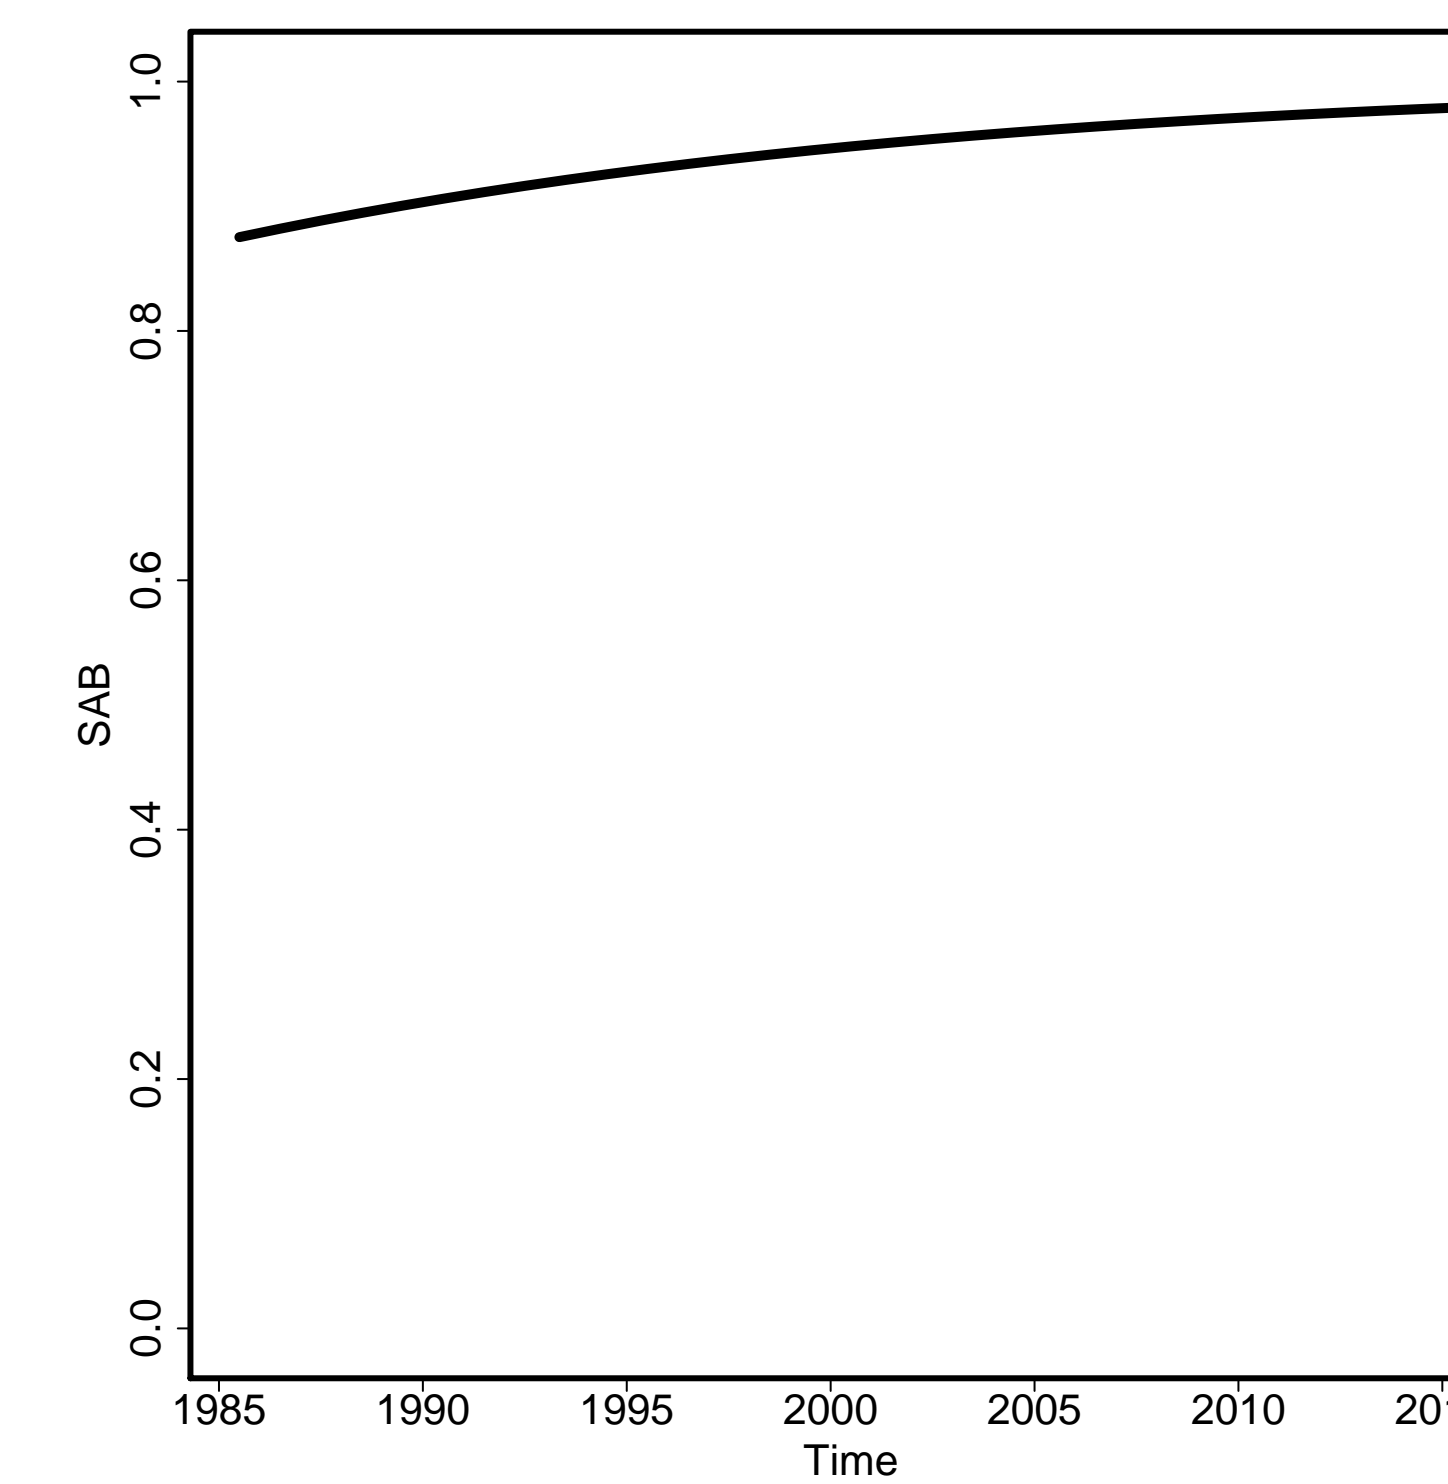

Envelope/Births

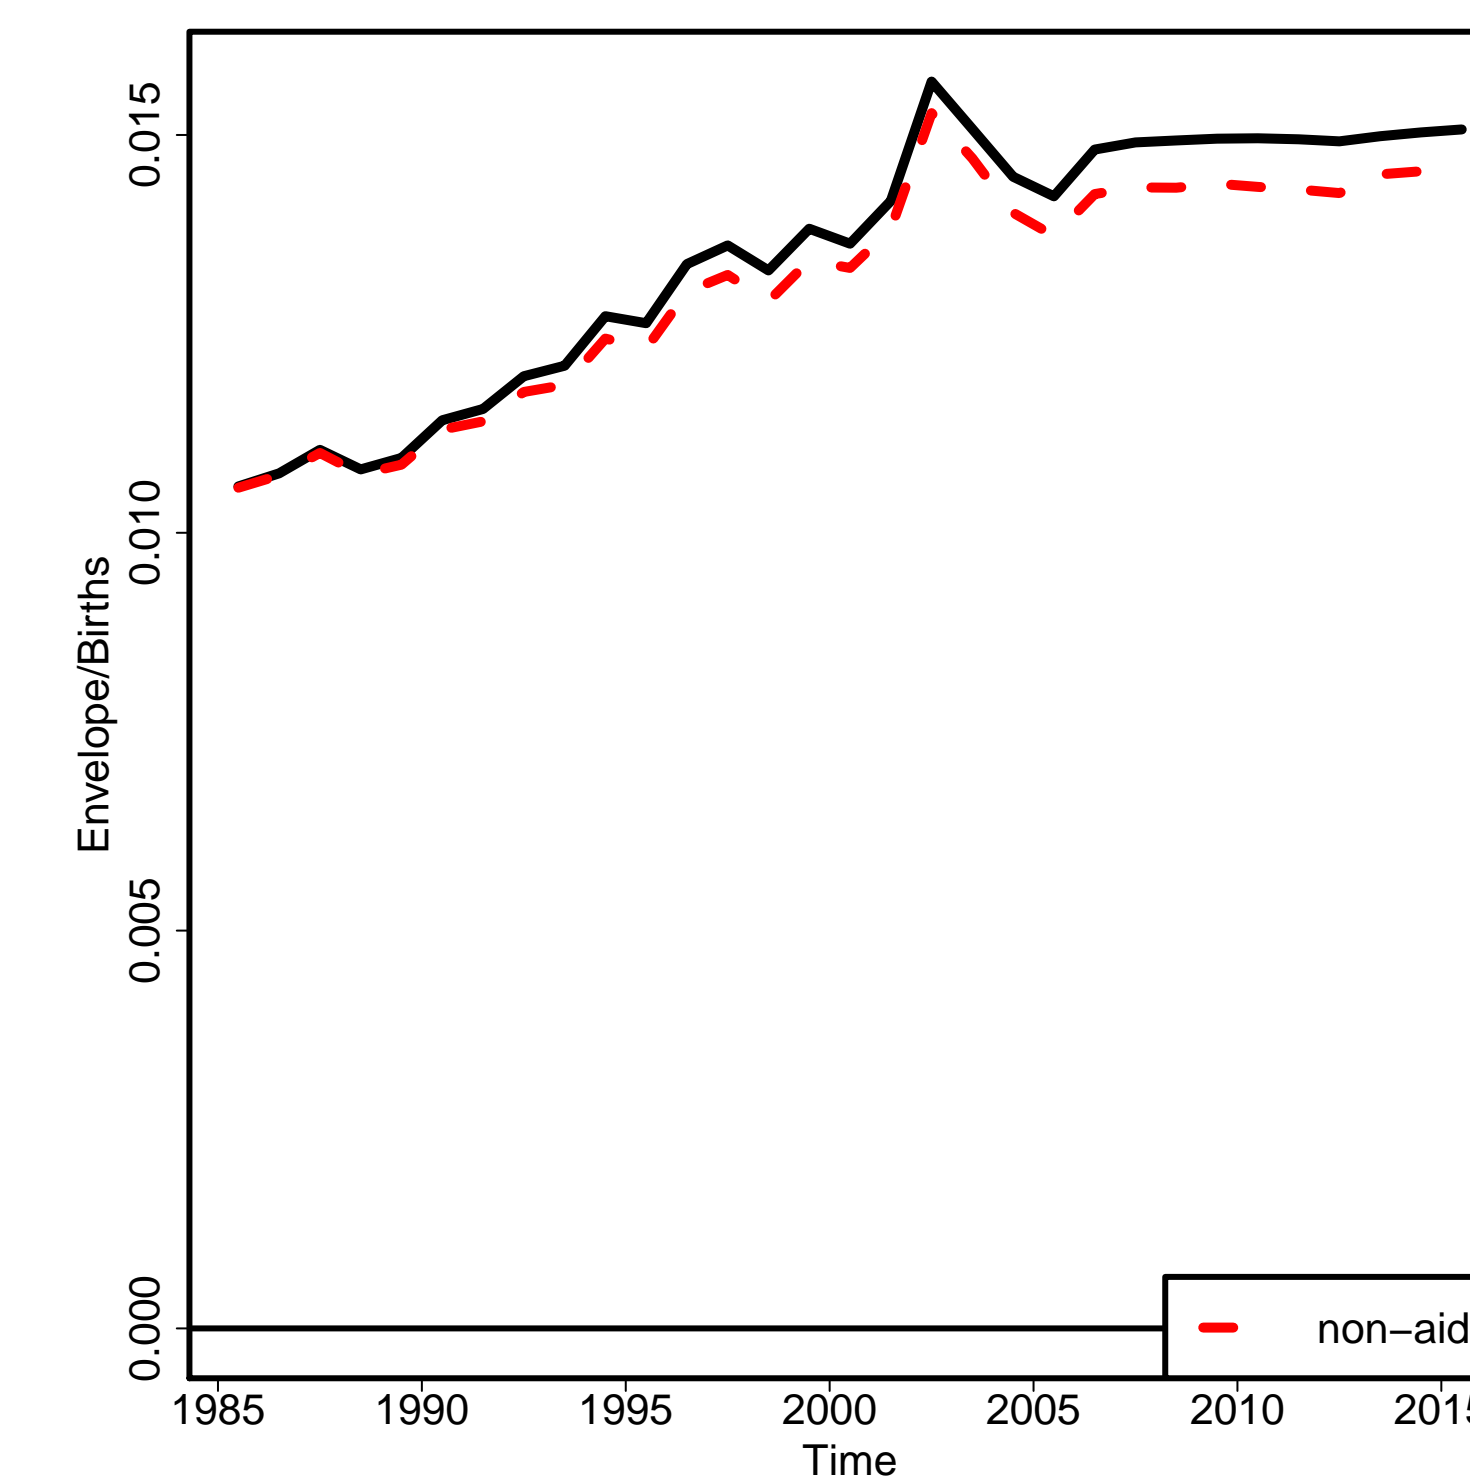

Non-aids MMR

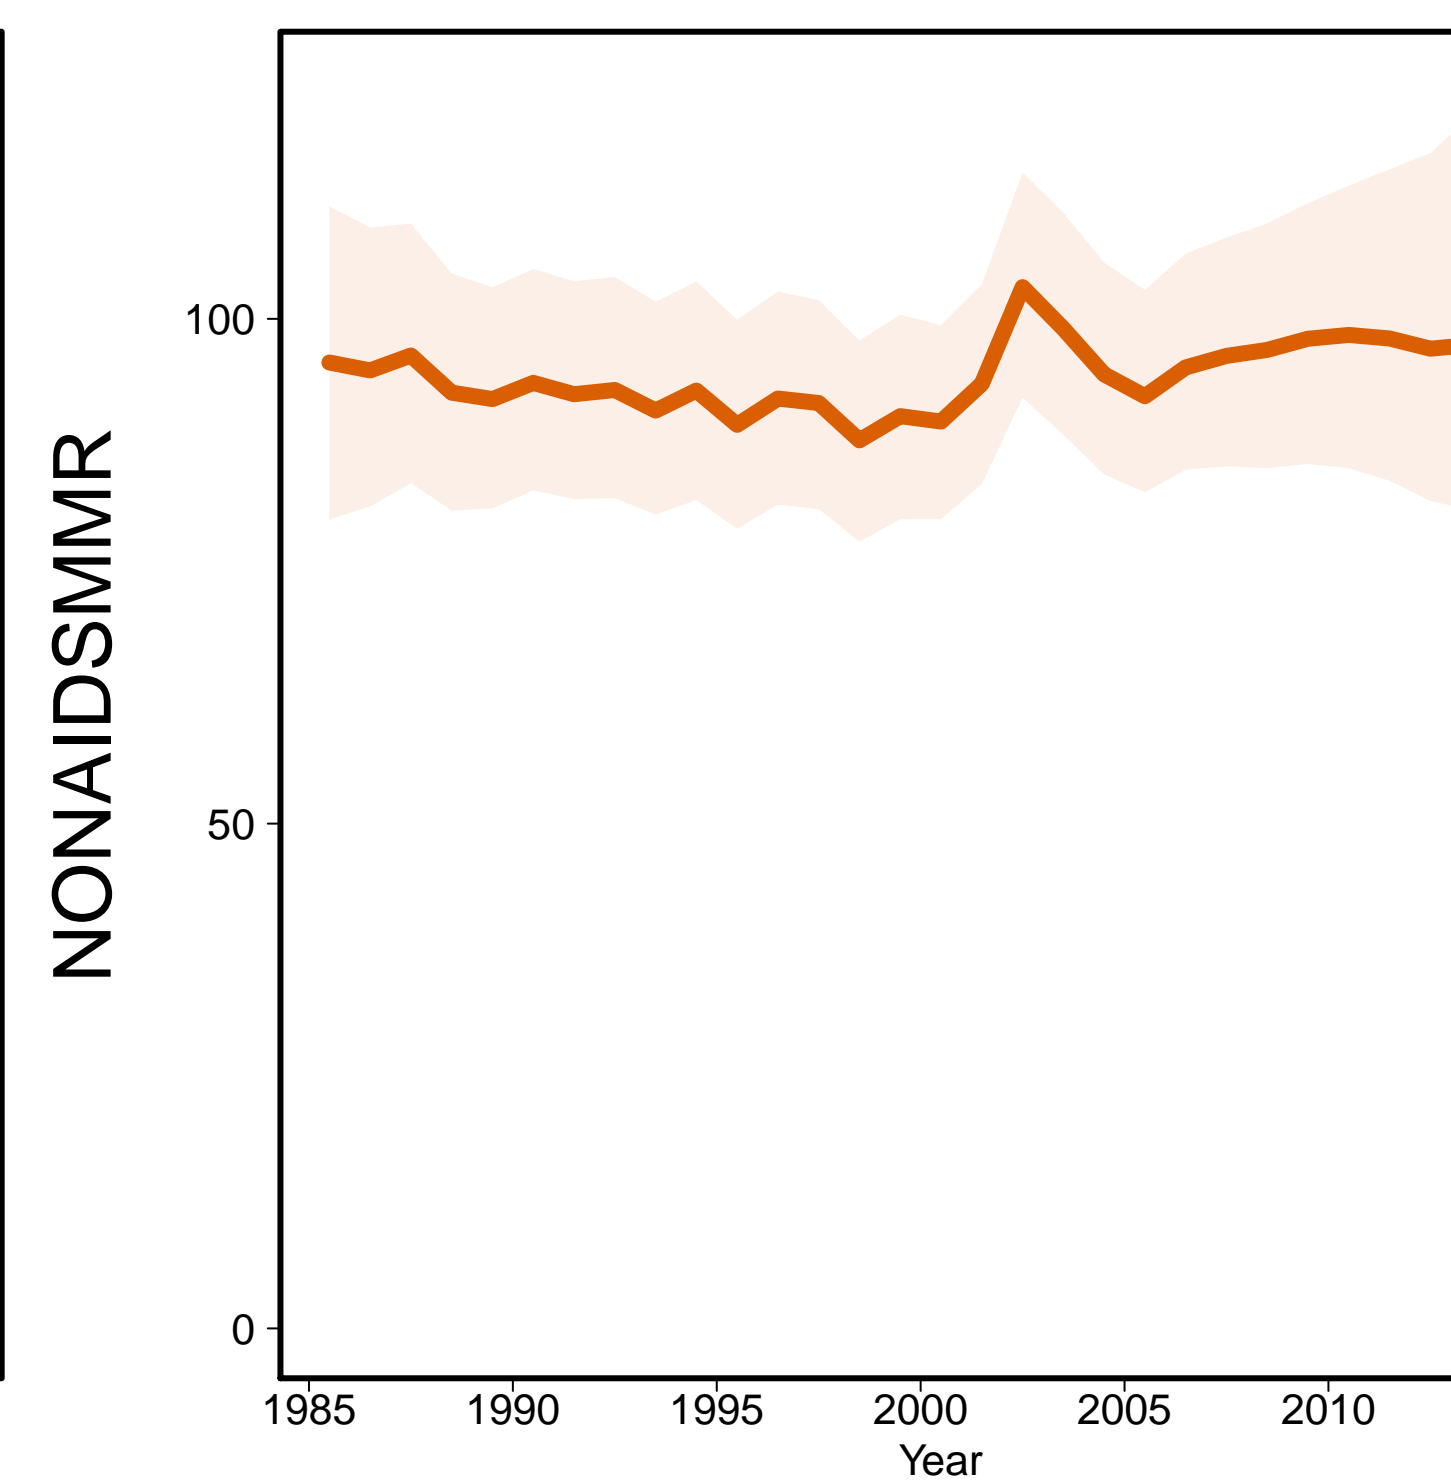

Aids MMR

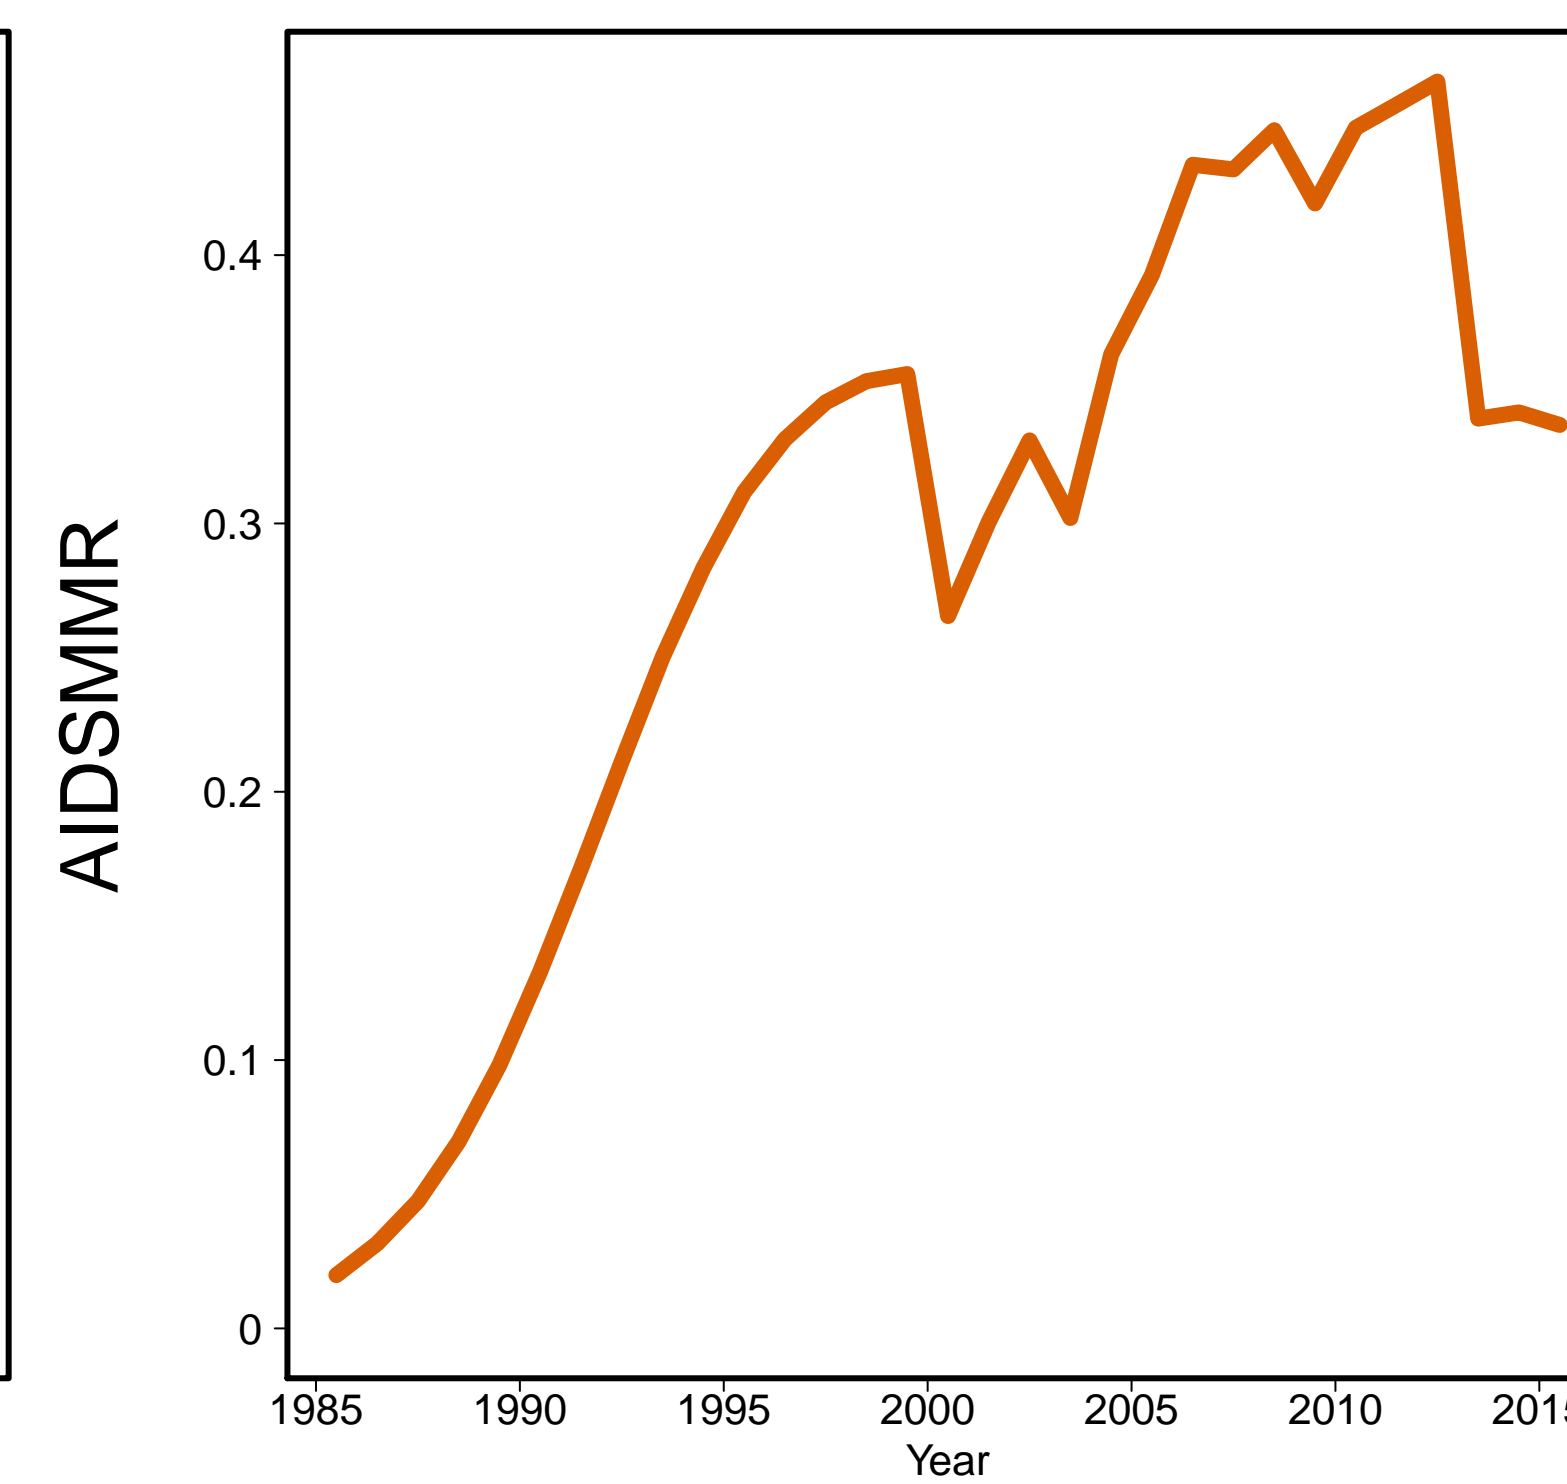

Viet Nam [VNM]  
(South-Eastern Asia / Oceania)

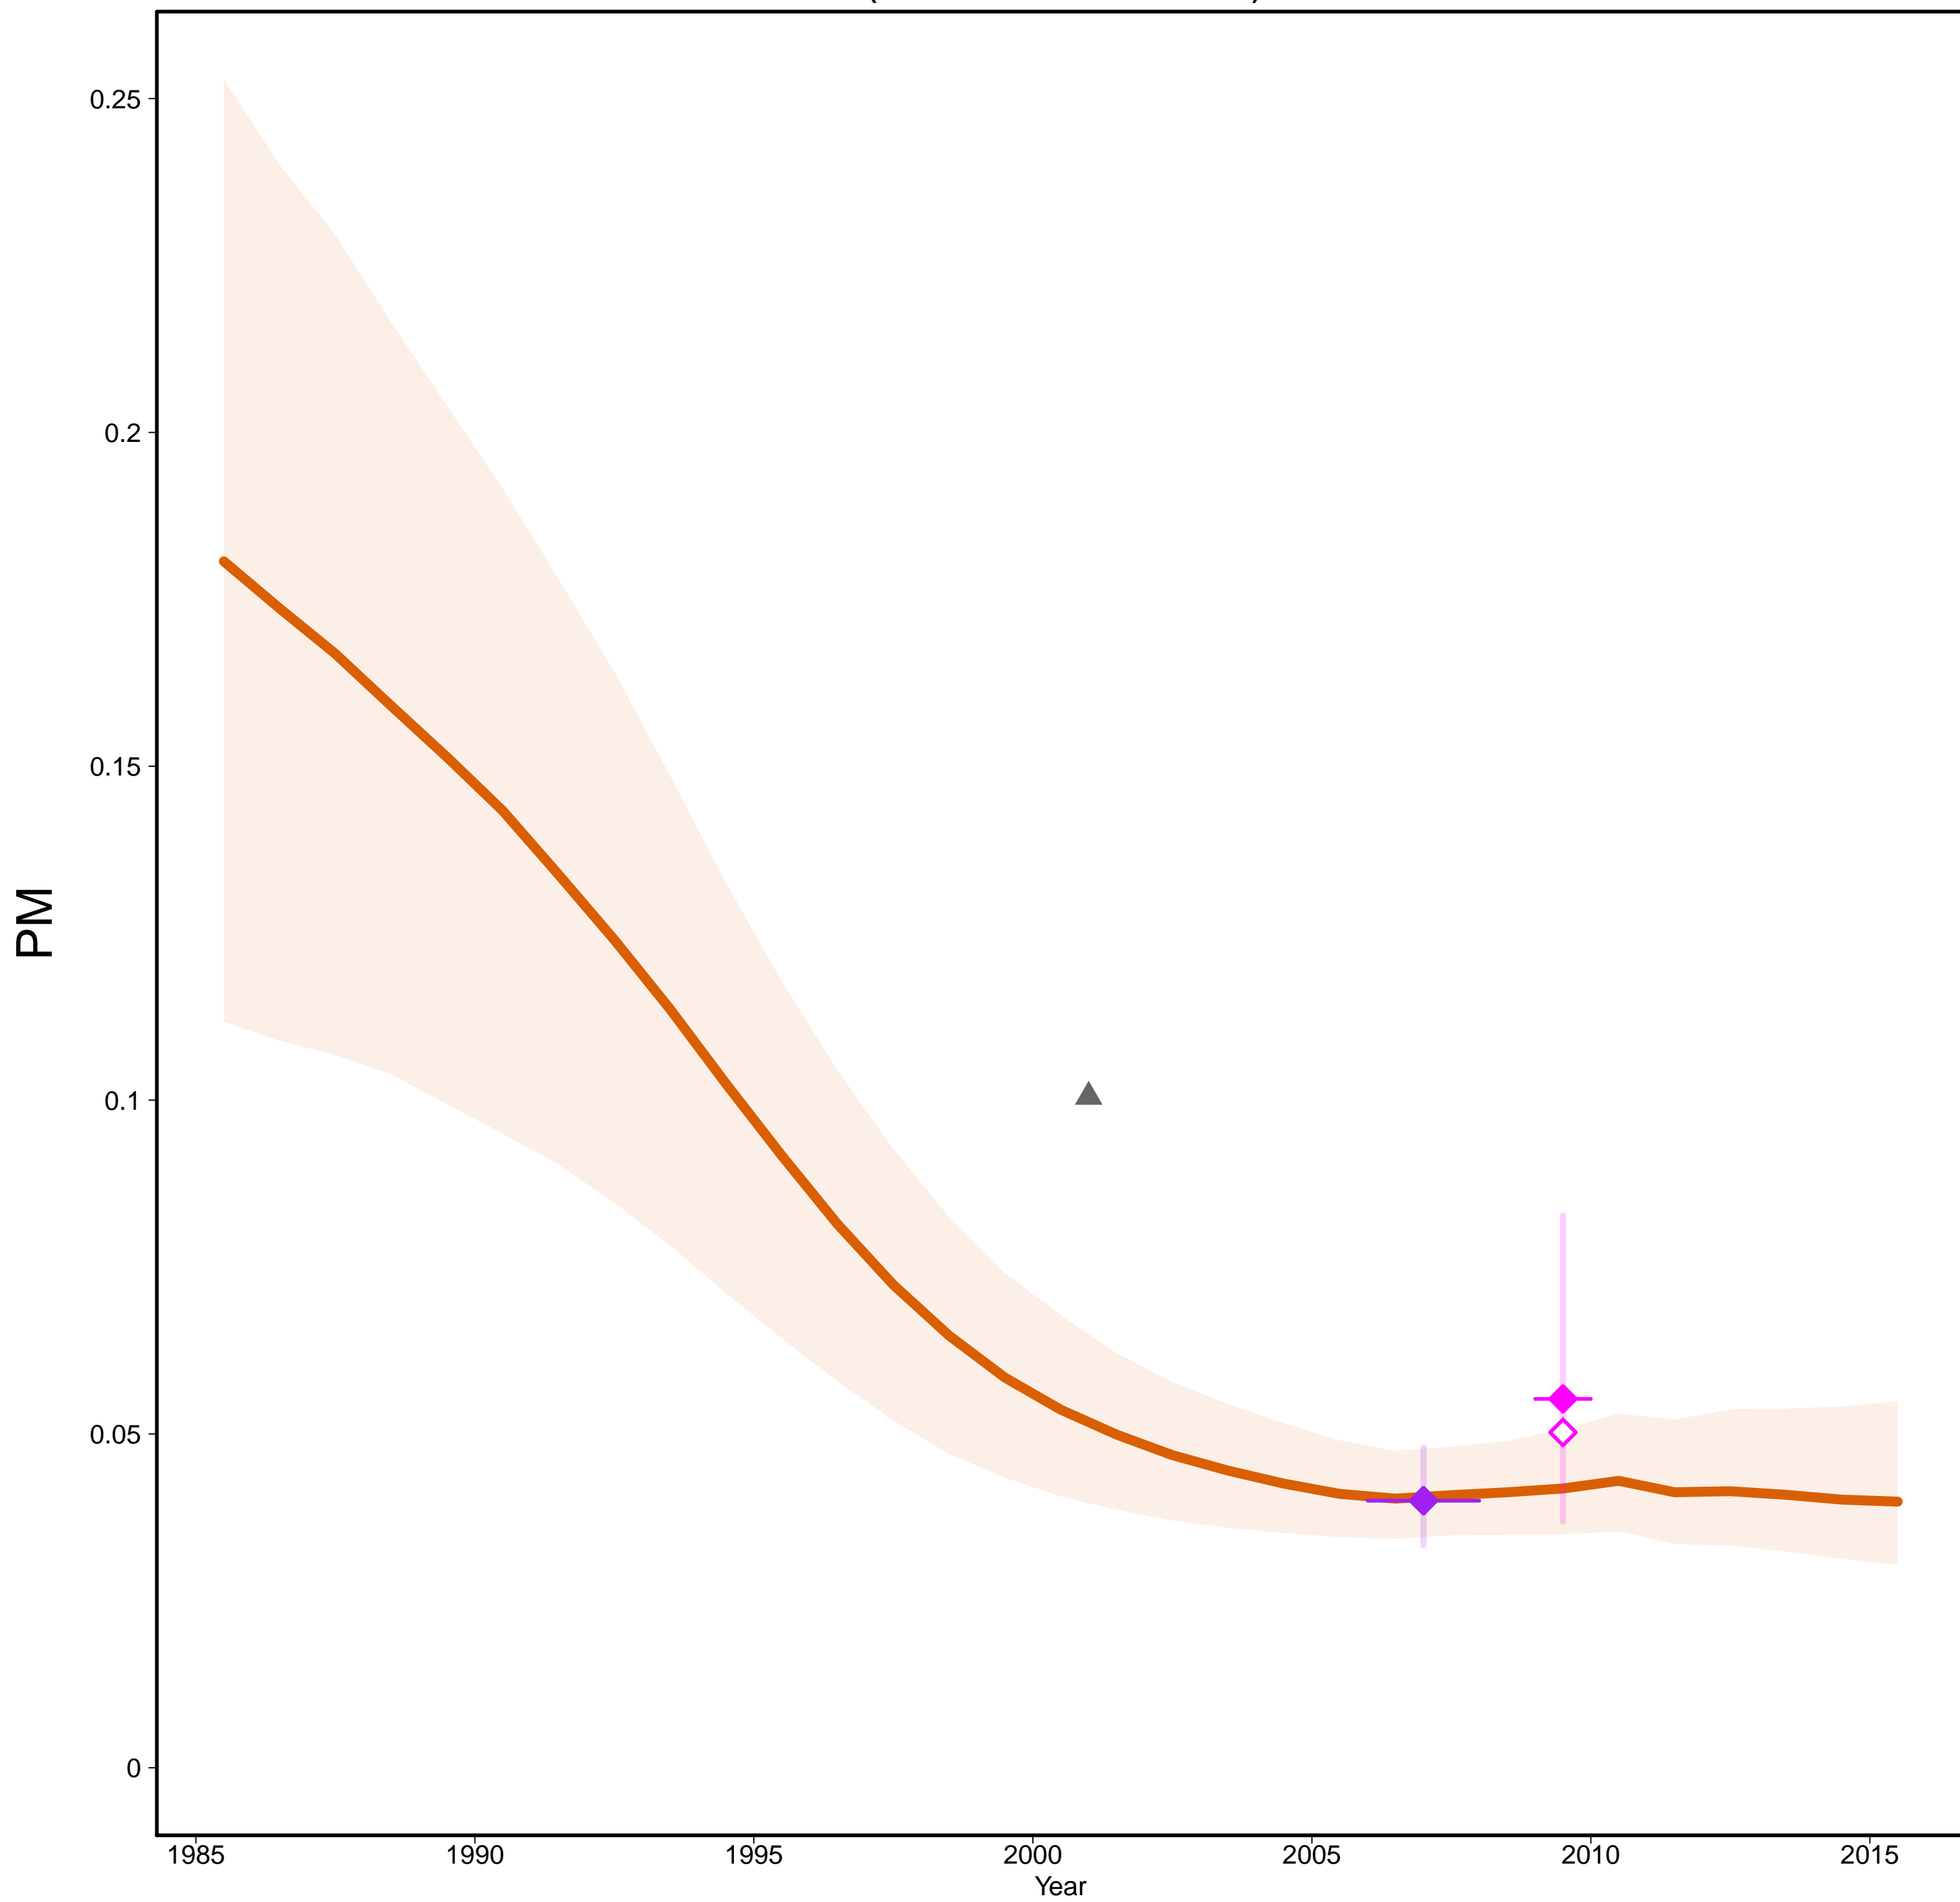

Viet Nam [VNM]  
(South-Eastern Asia / Oceania)

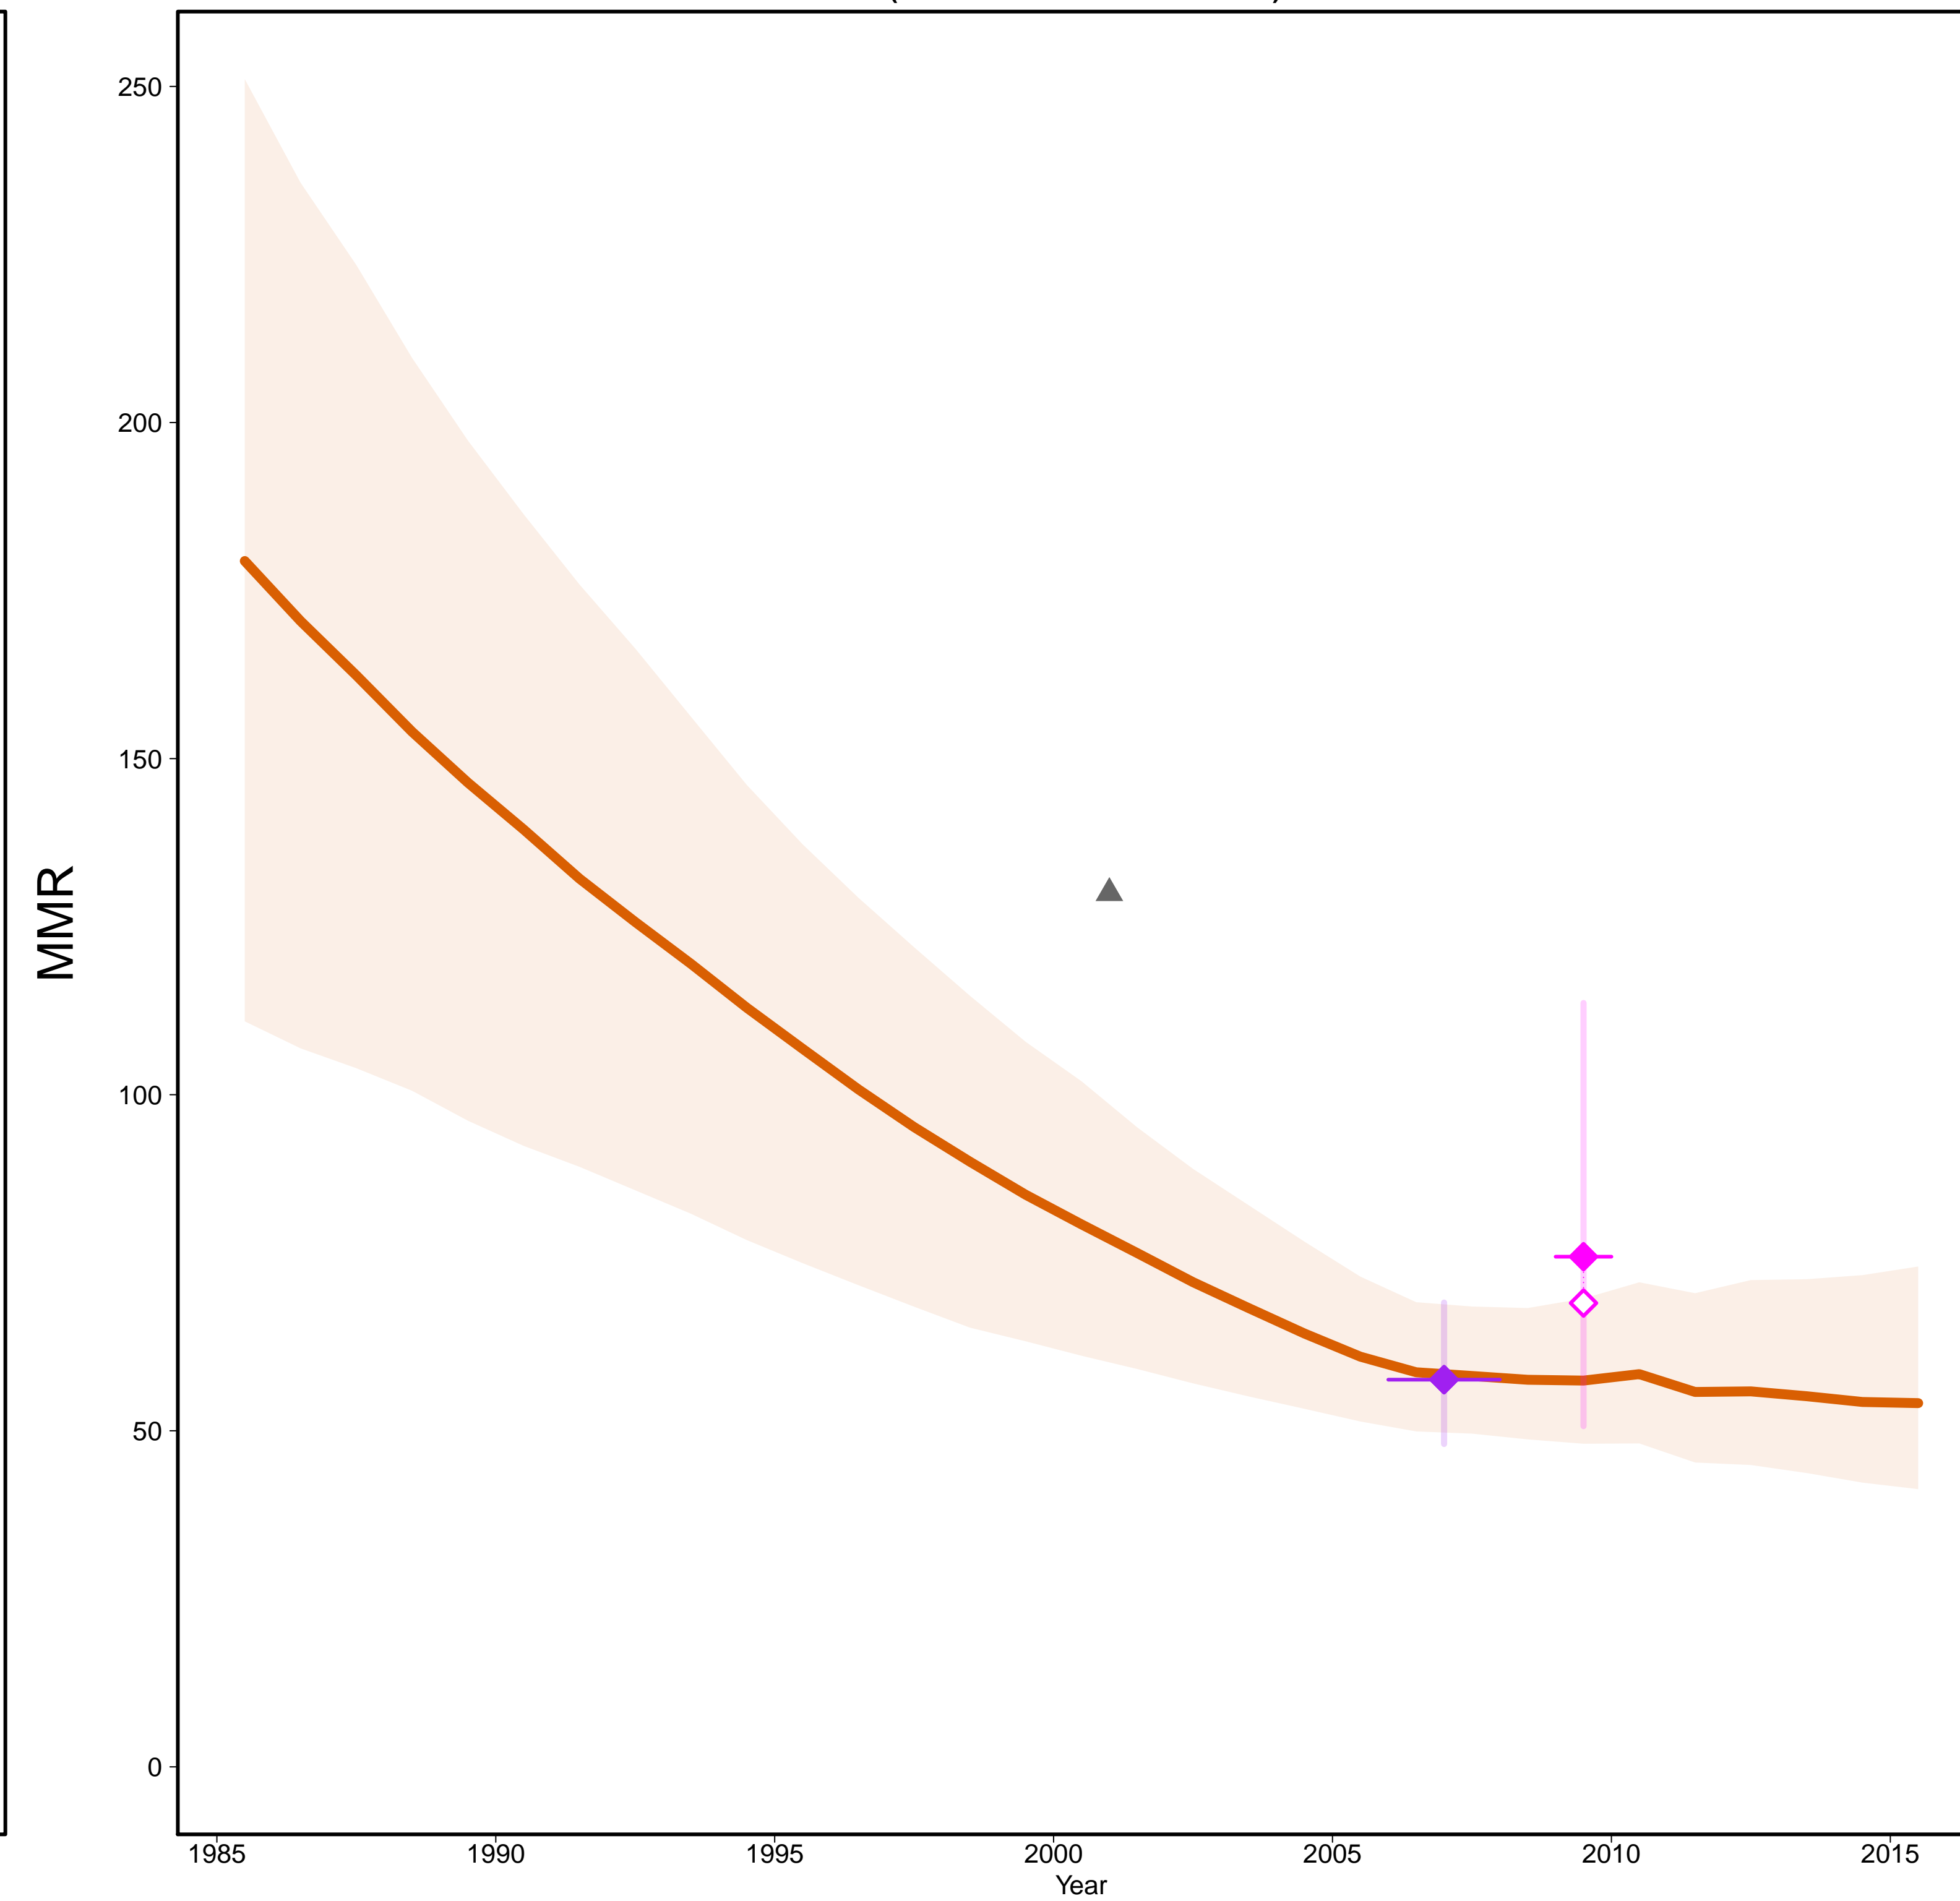

- Estimates —
- MMR Database 2015 —
- ◇ Observed Data
- ◆ Adjusted Data
- Data type —
- ◆ Spec. studies
- ◆ Census
- ▲ Excluded misc. studies

Gross Domestic Product

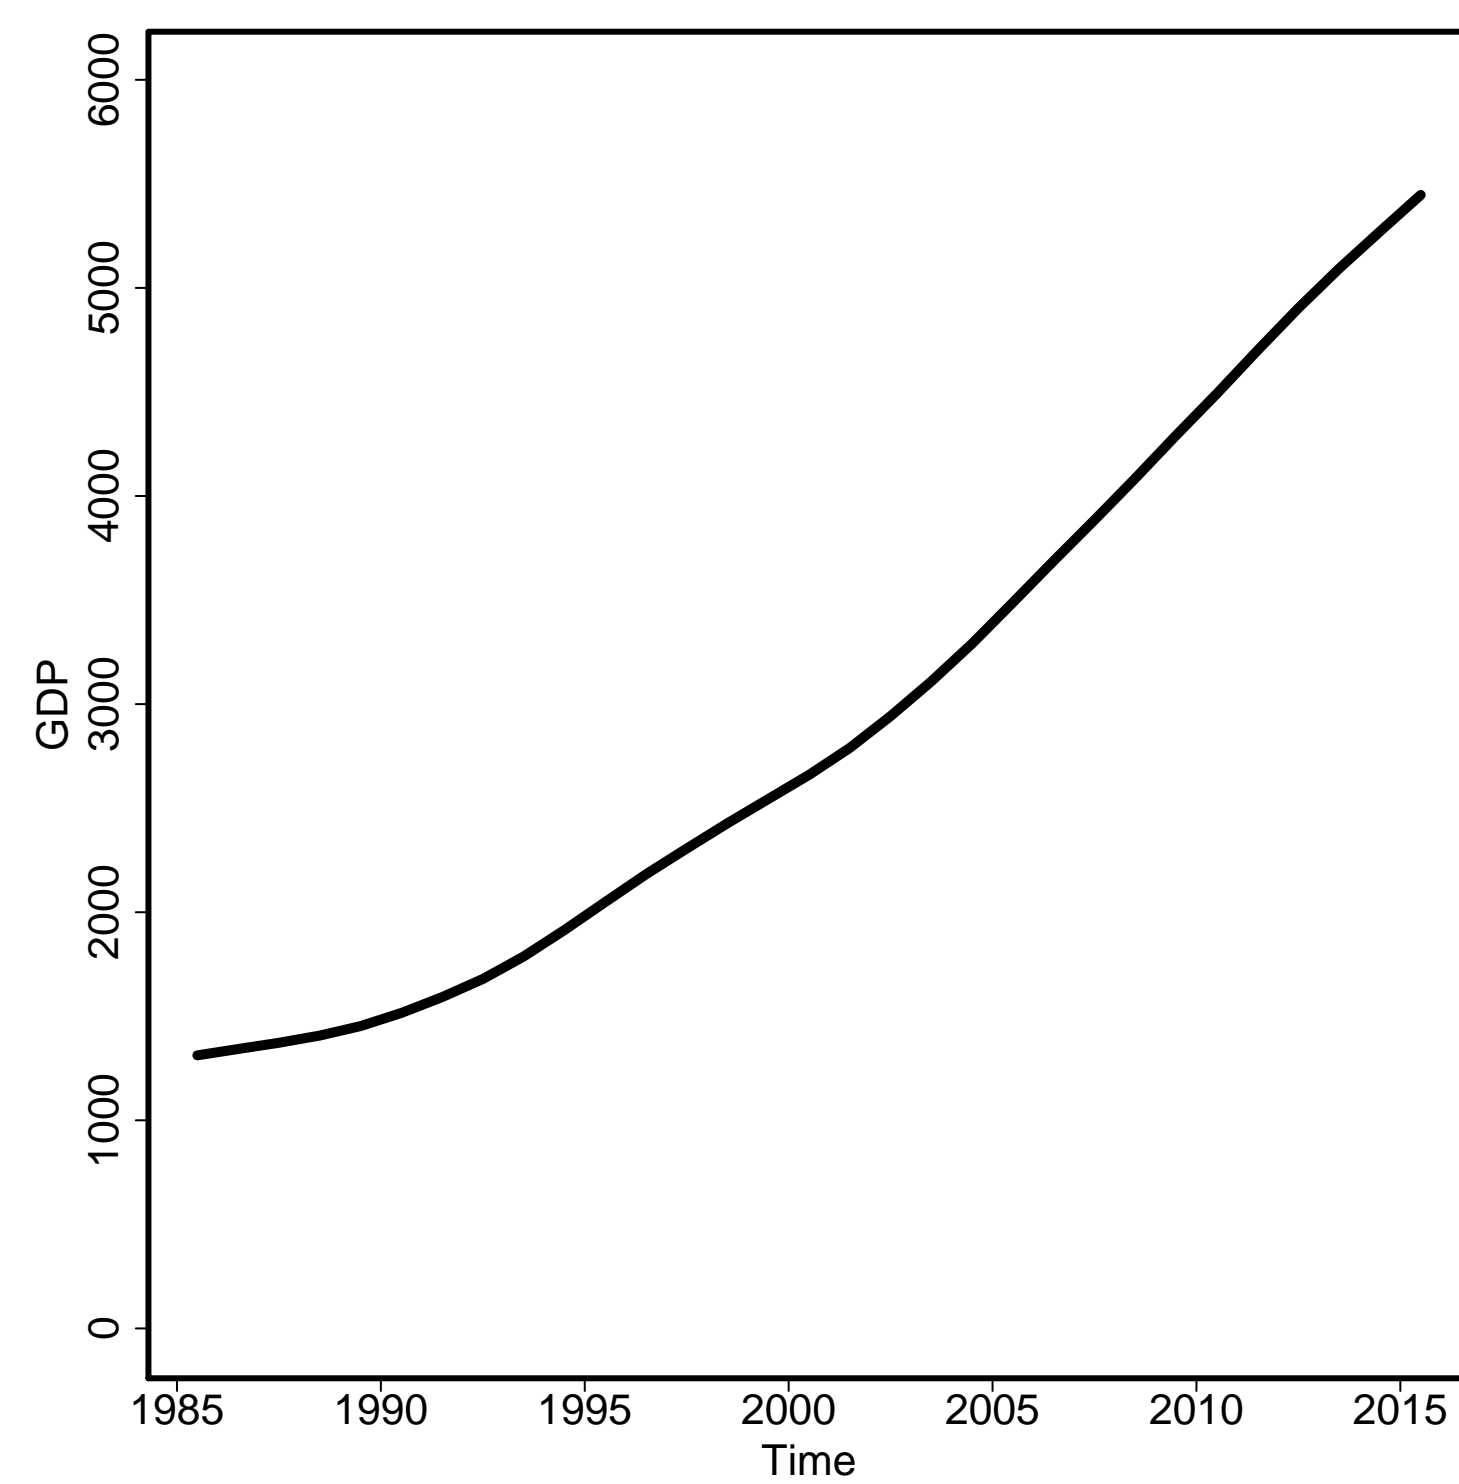

General Fertility Rate

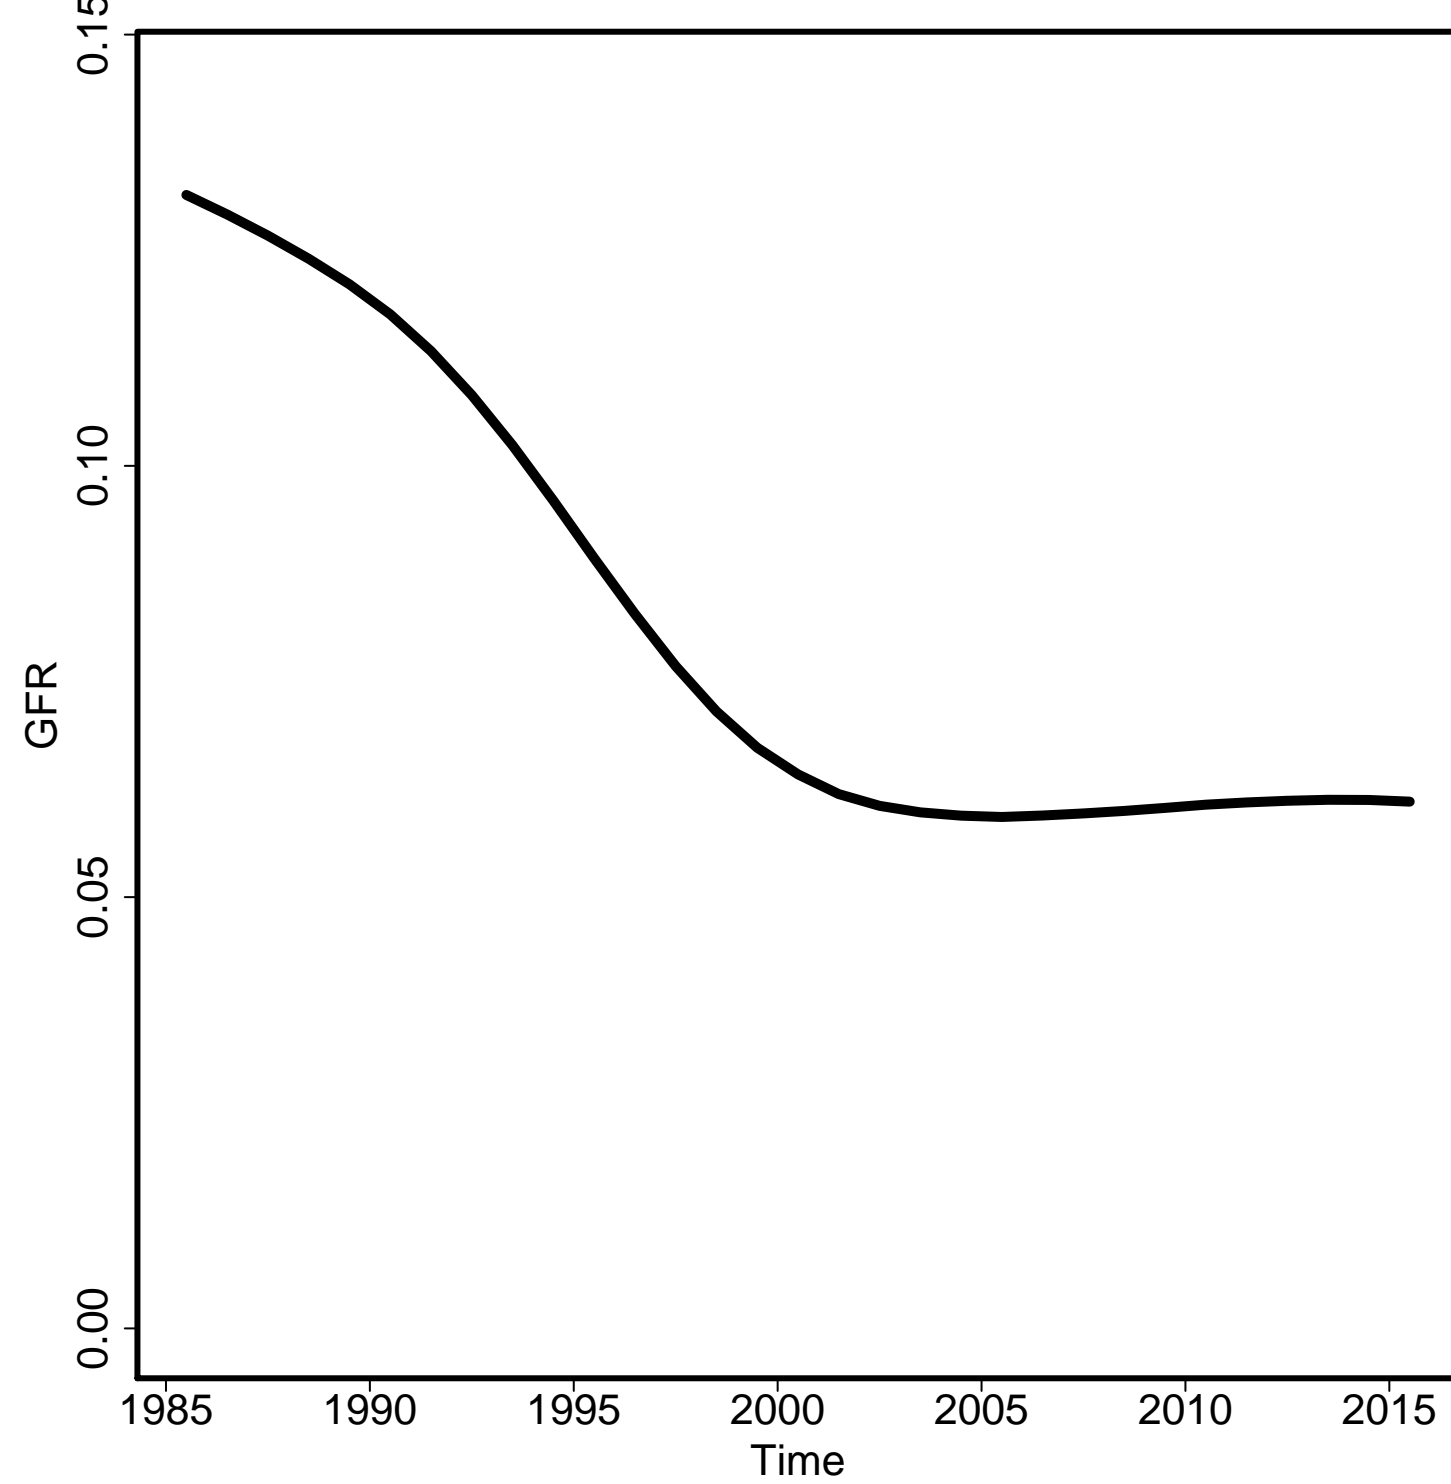

Skilled Attendance to Birth

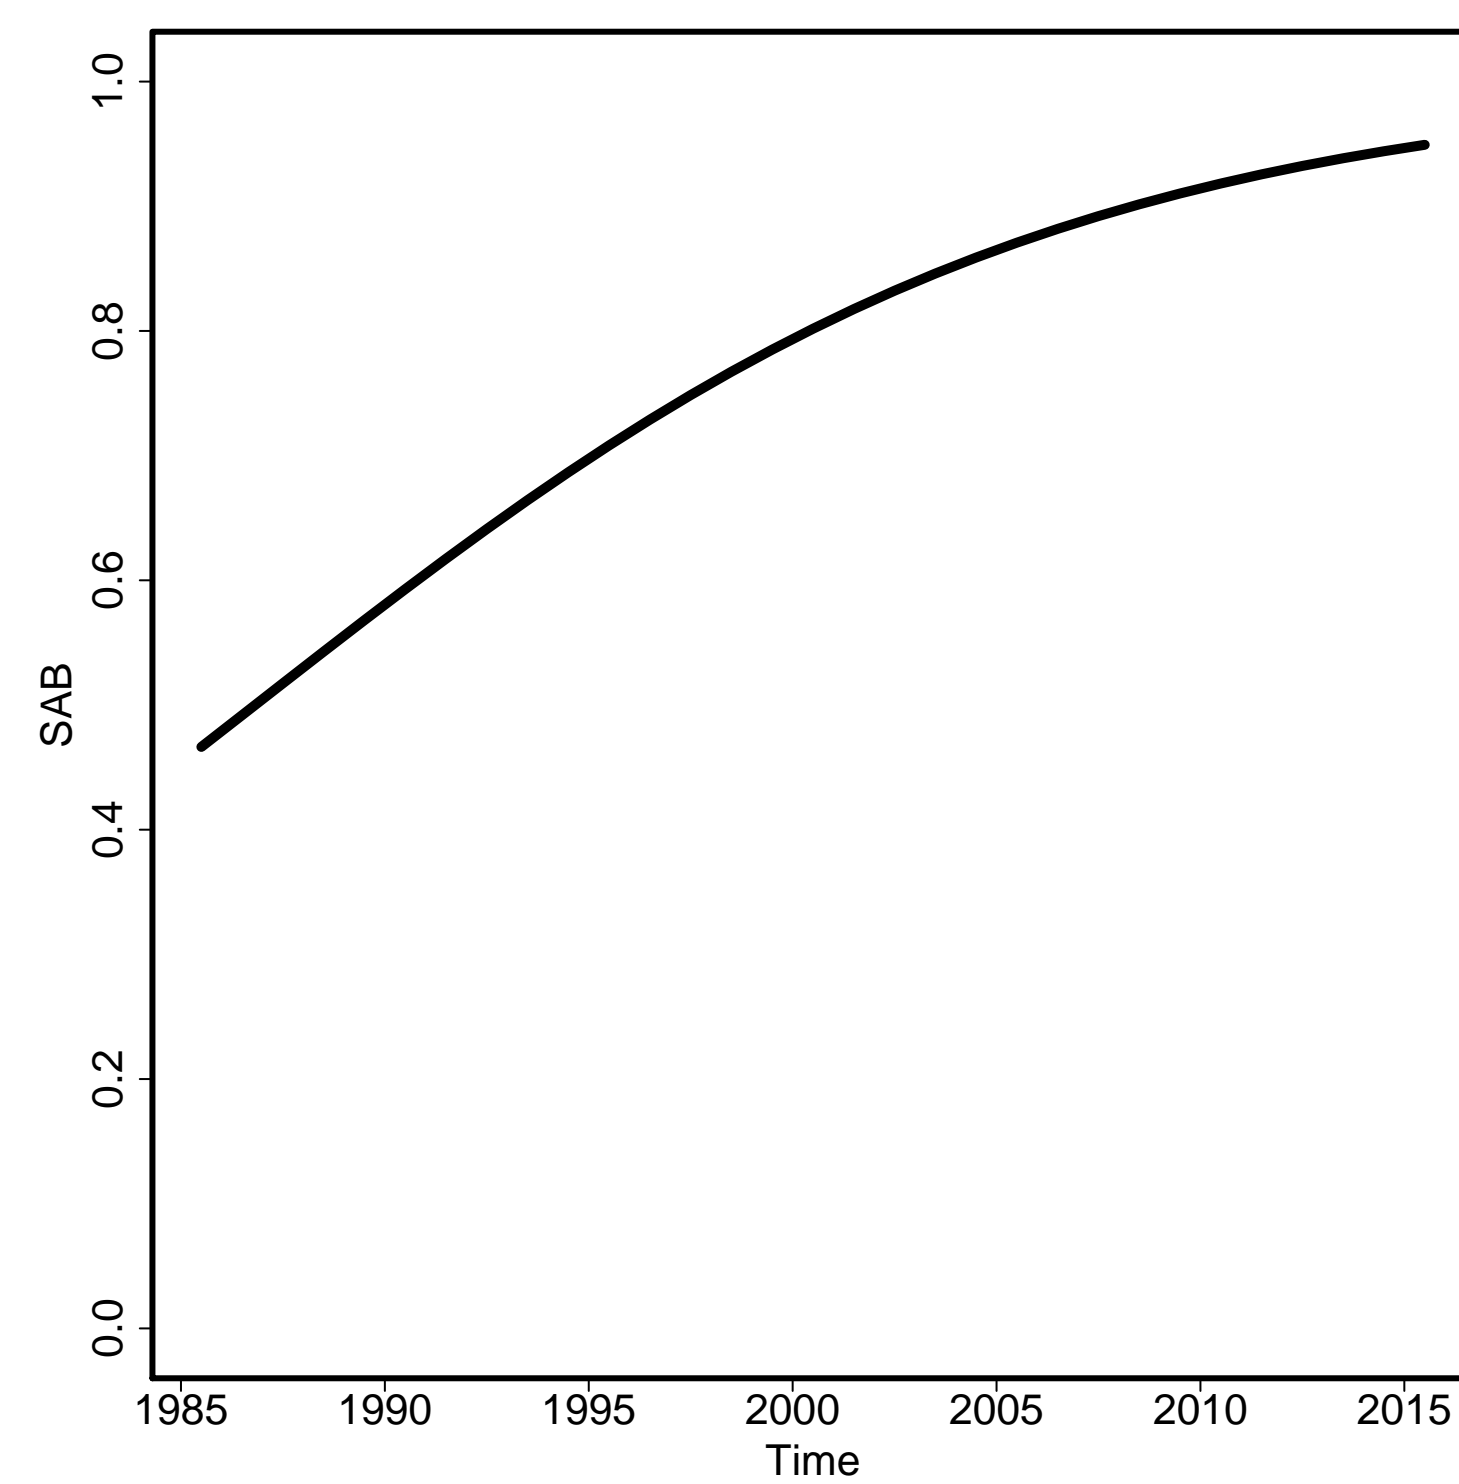

Envelope/Births

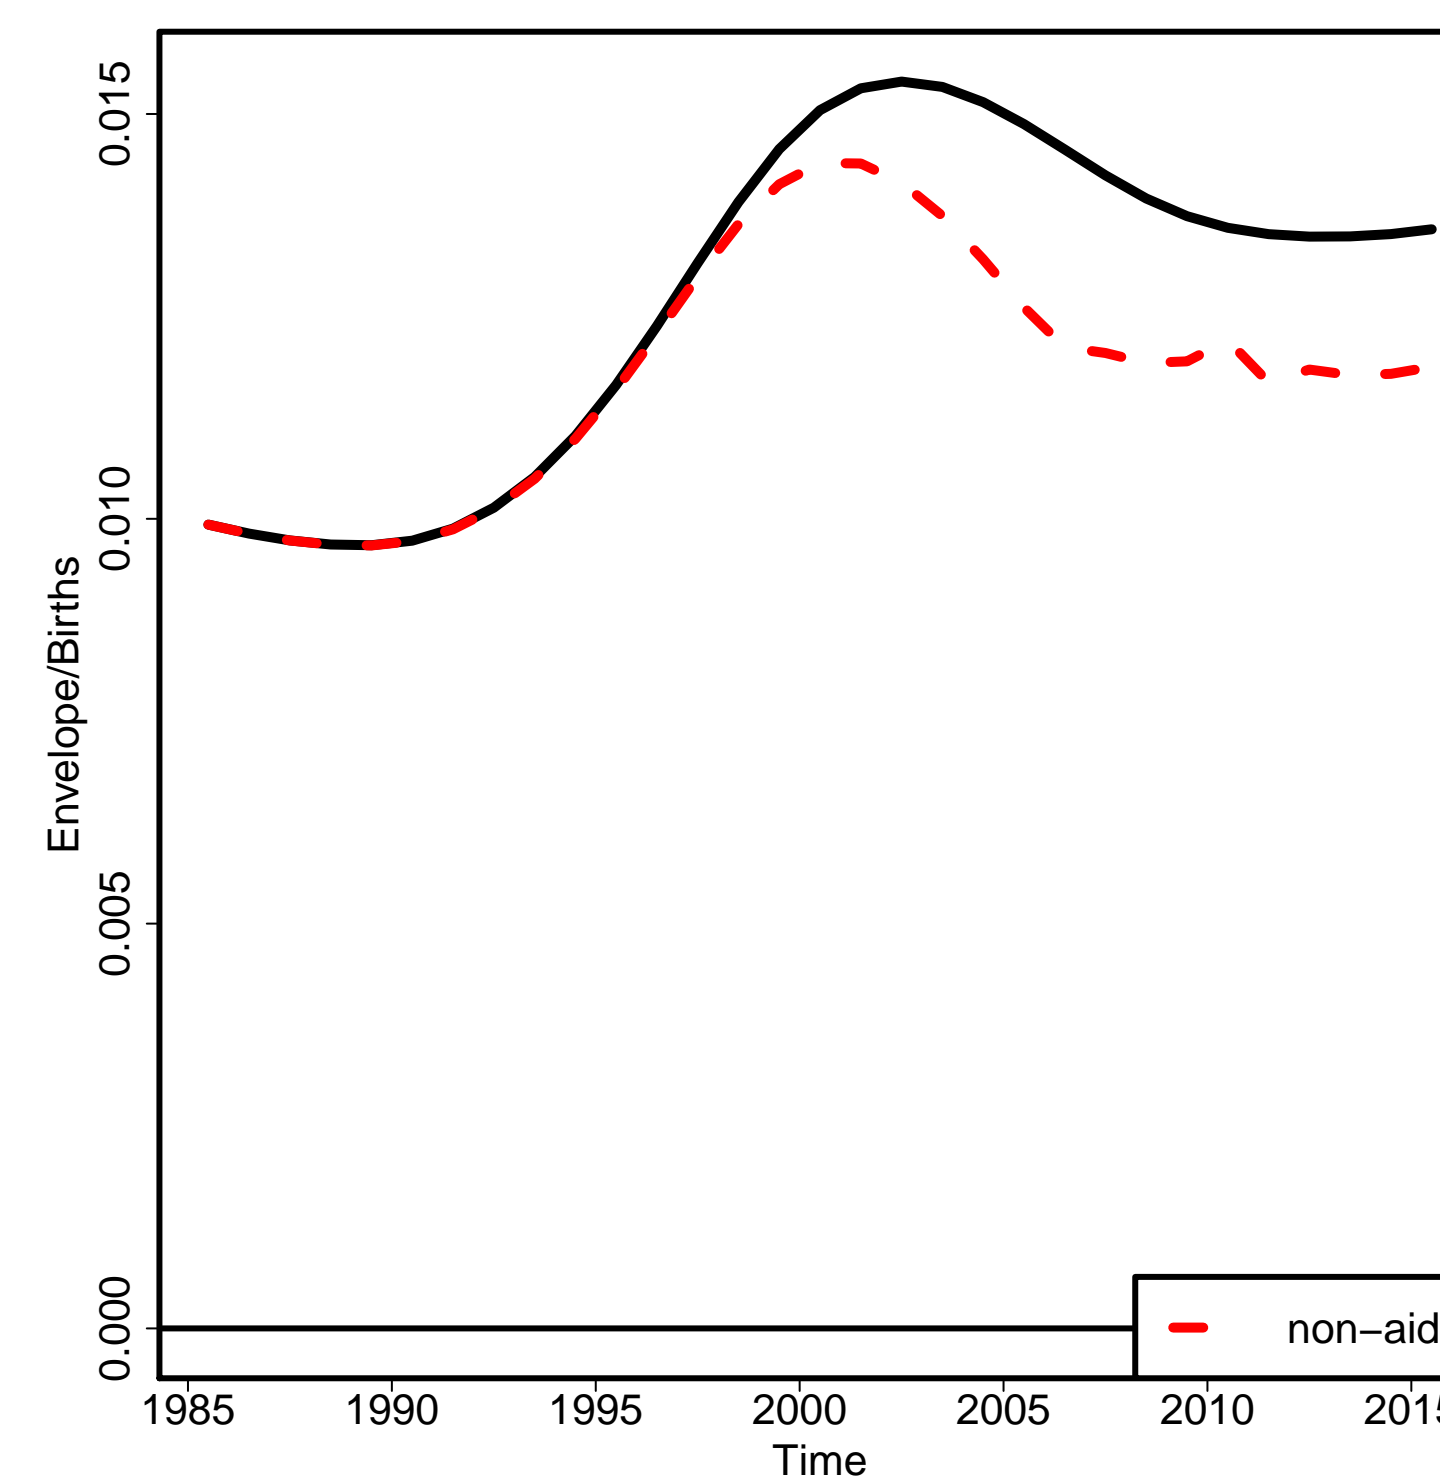

Non-aids MMR

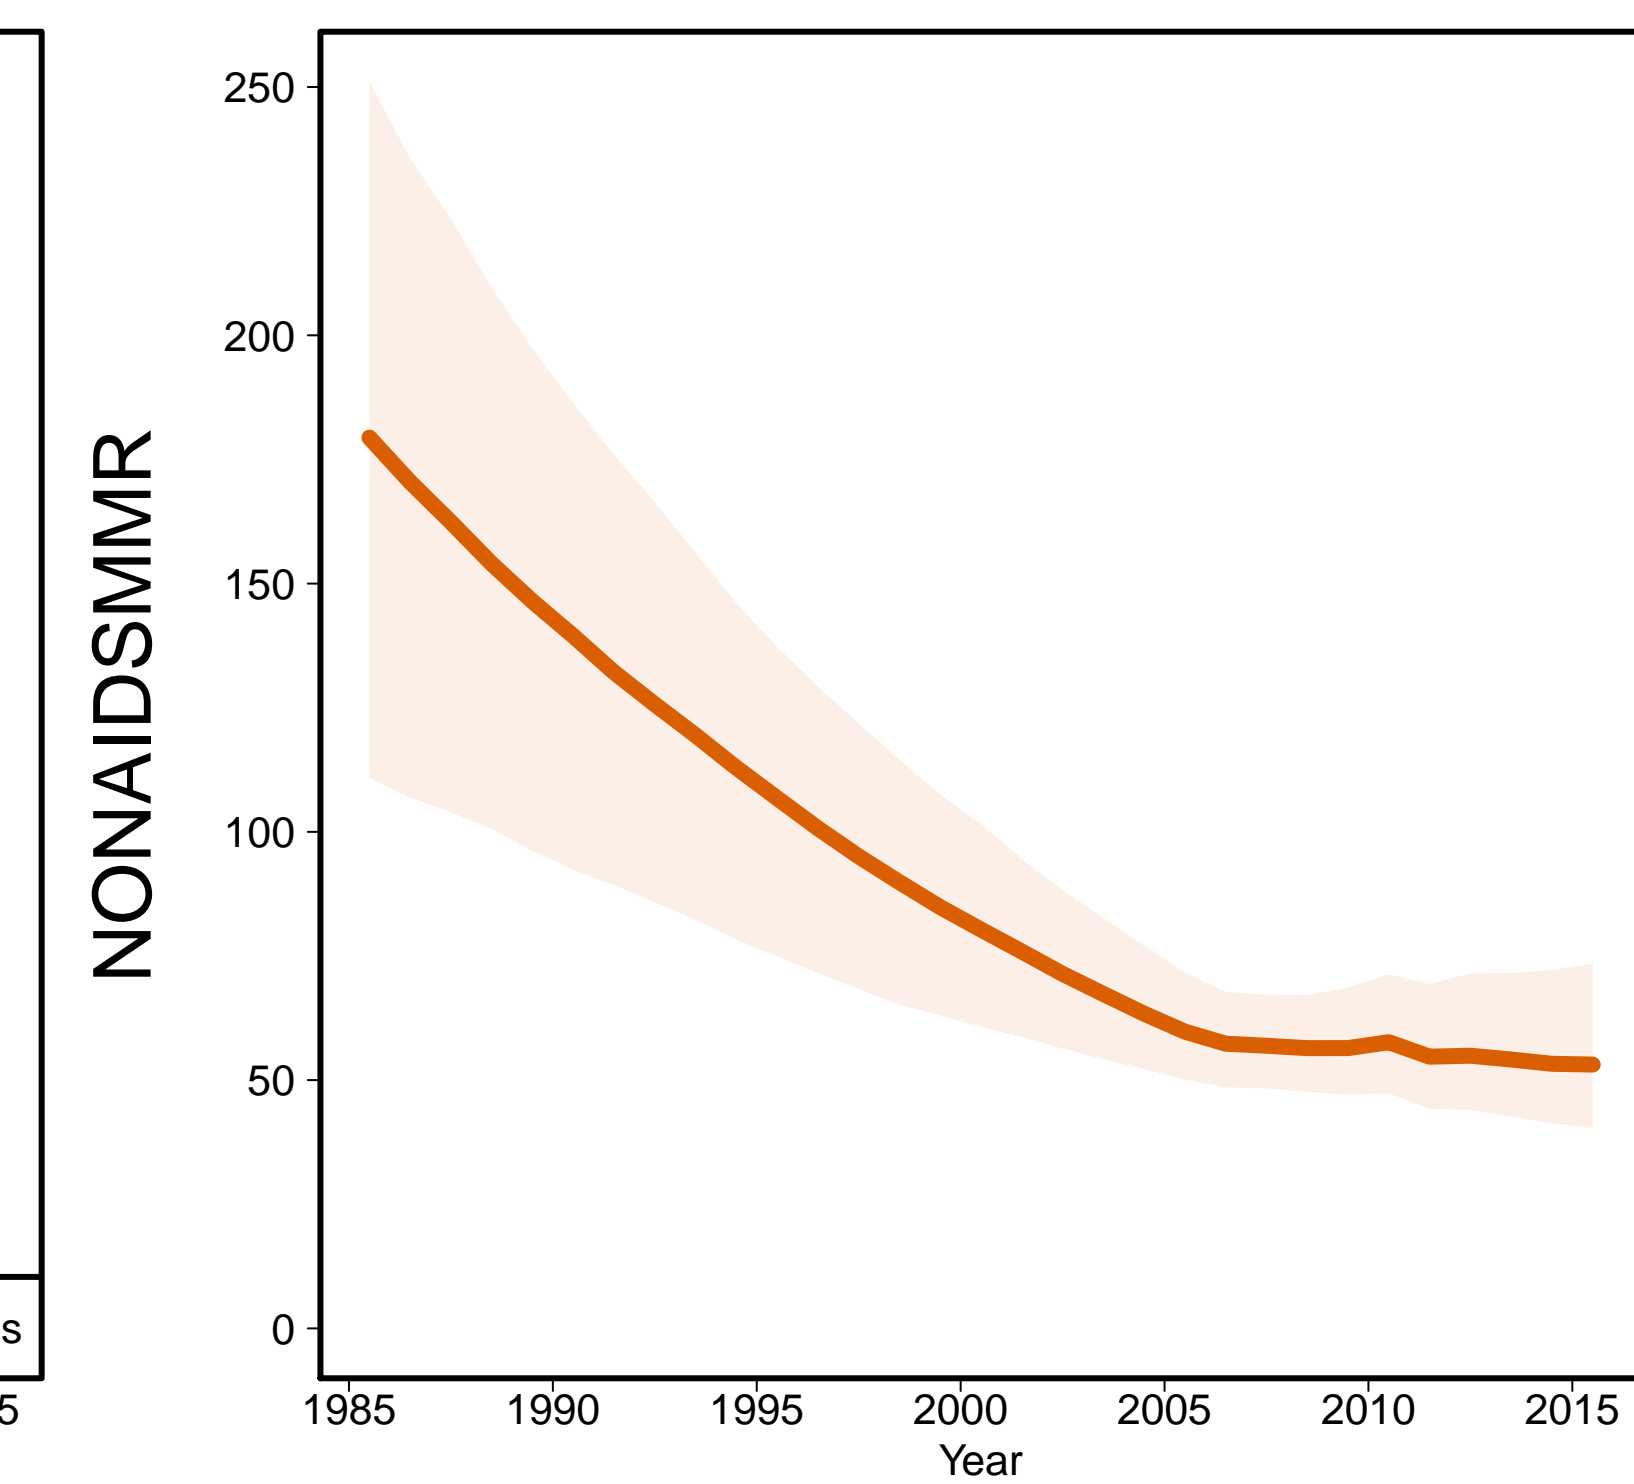

Aids MMR

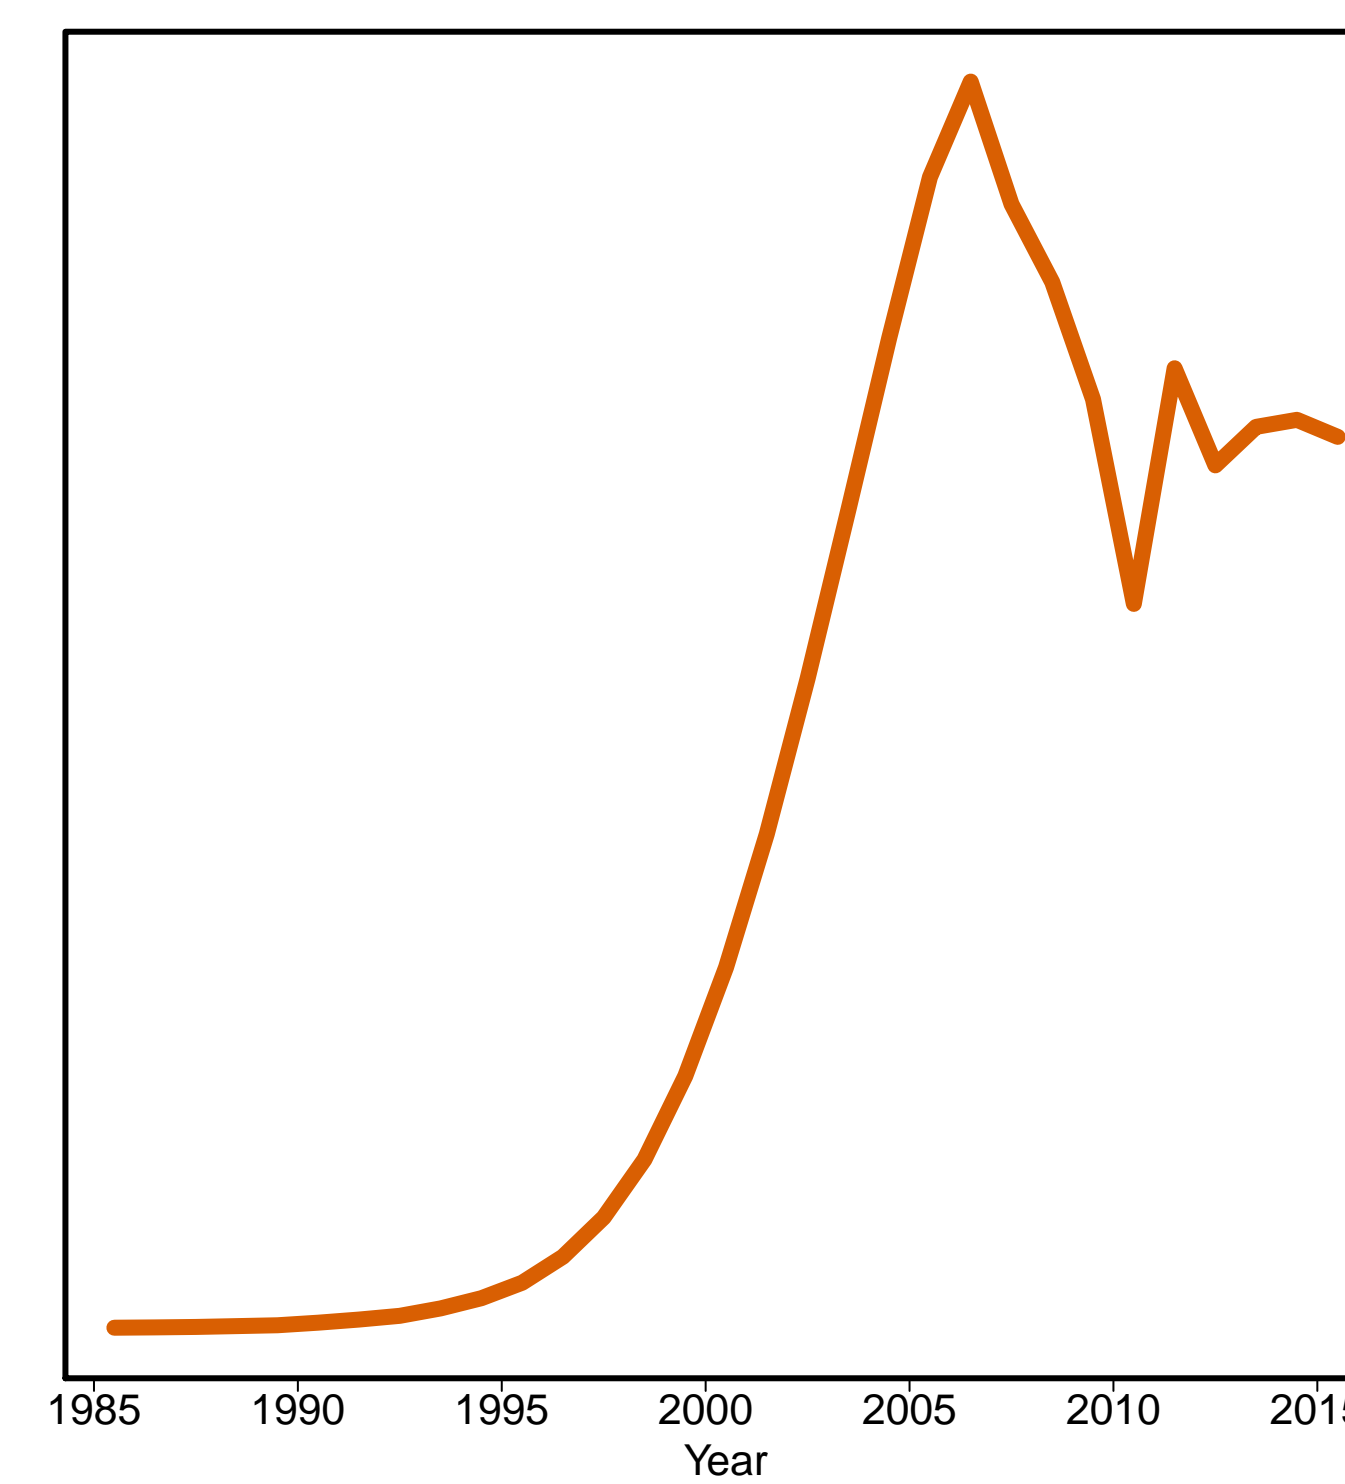

Yemen [YEM]  
(Western Asia)

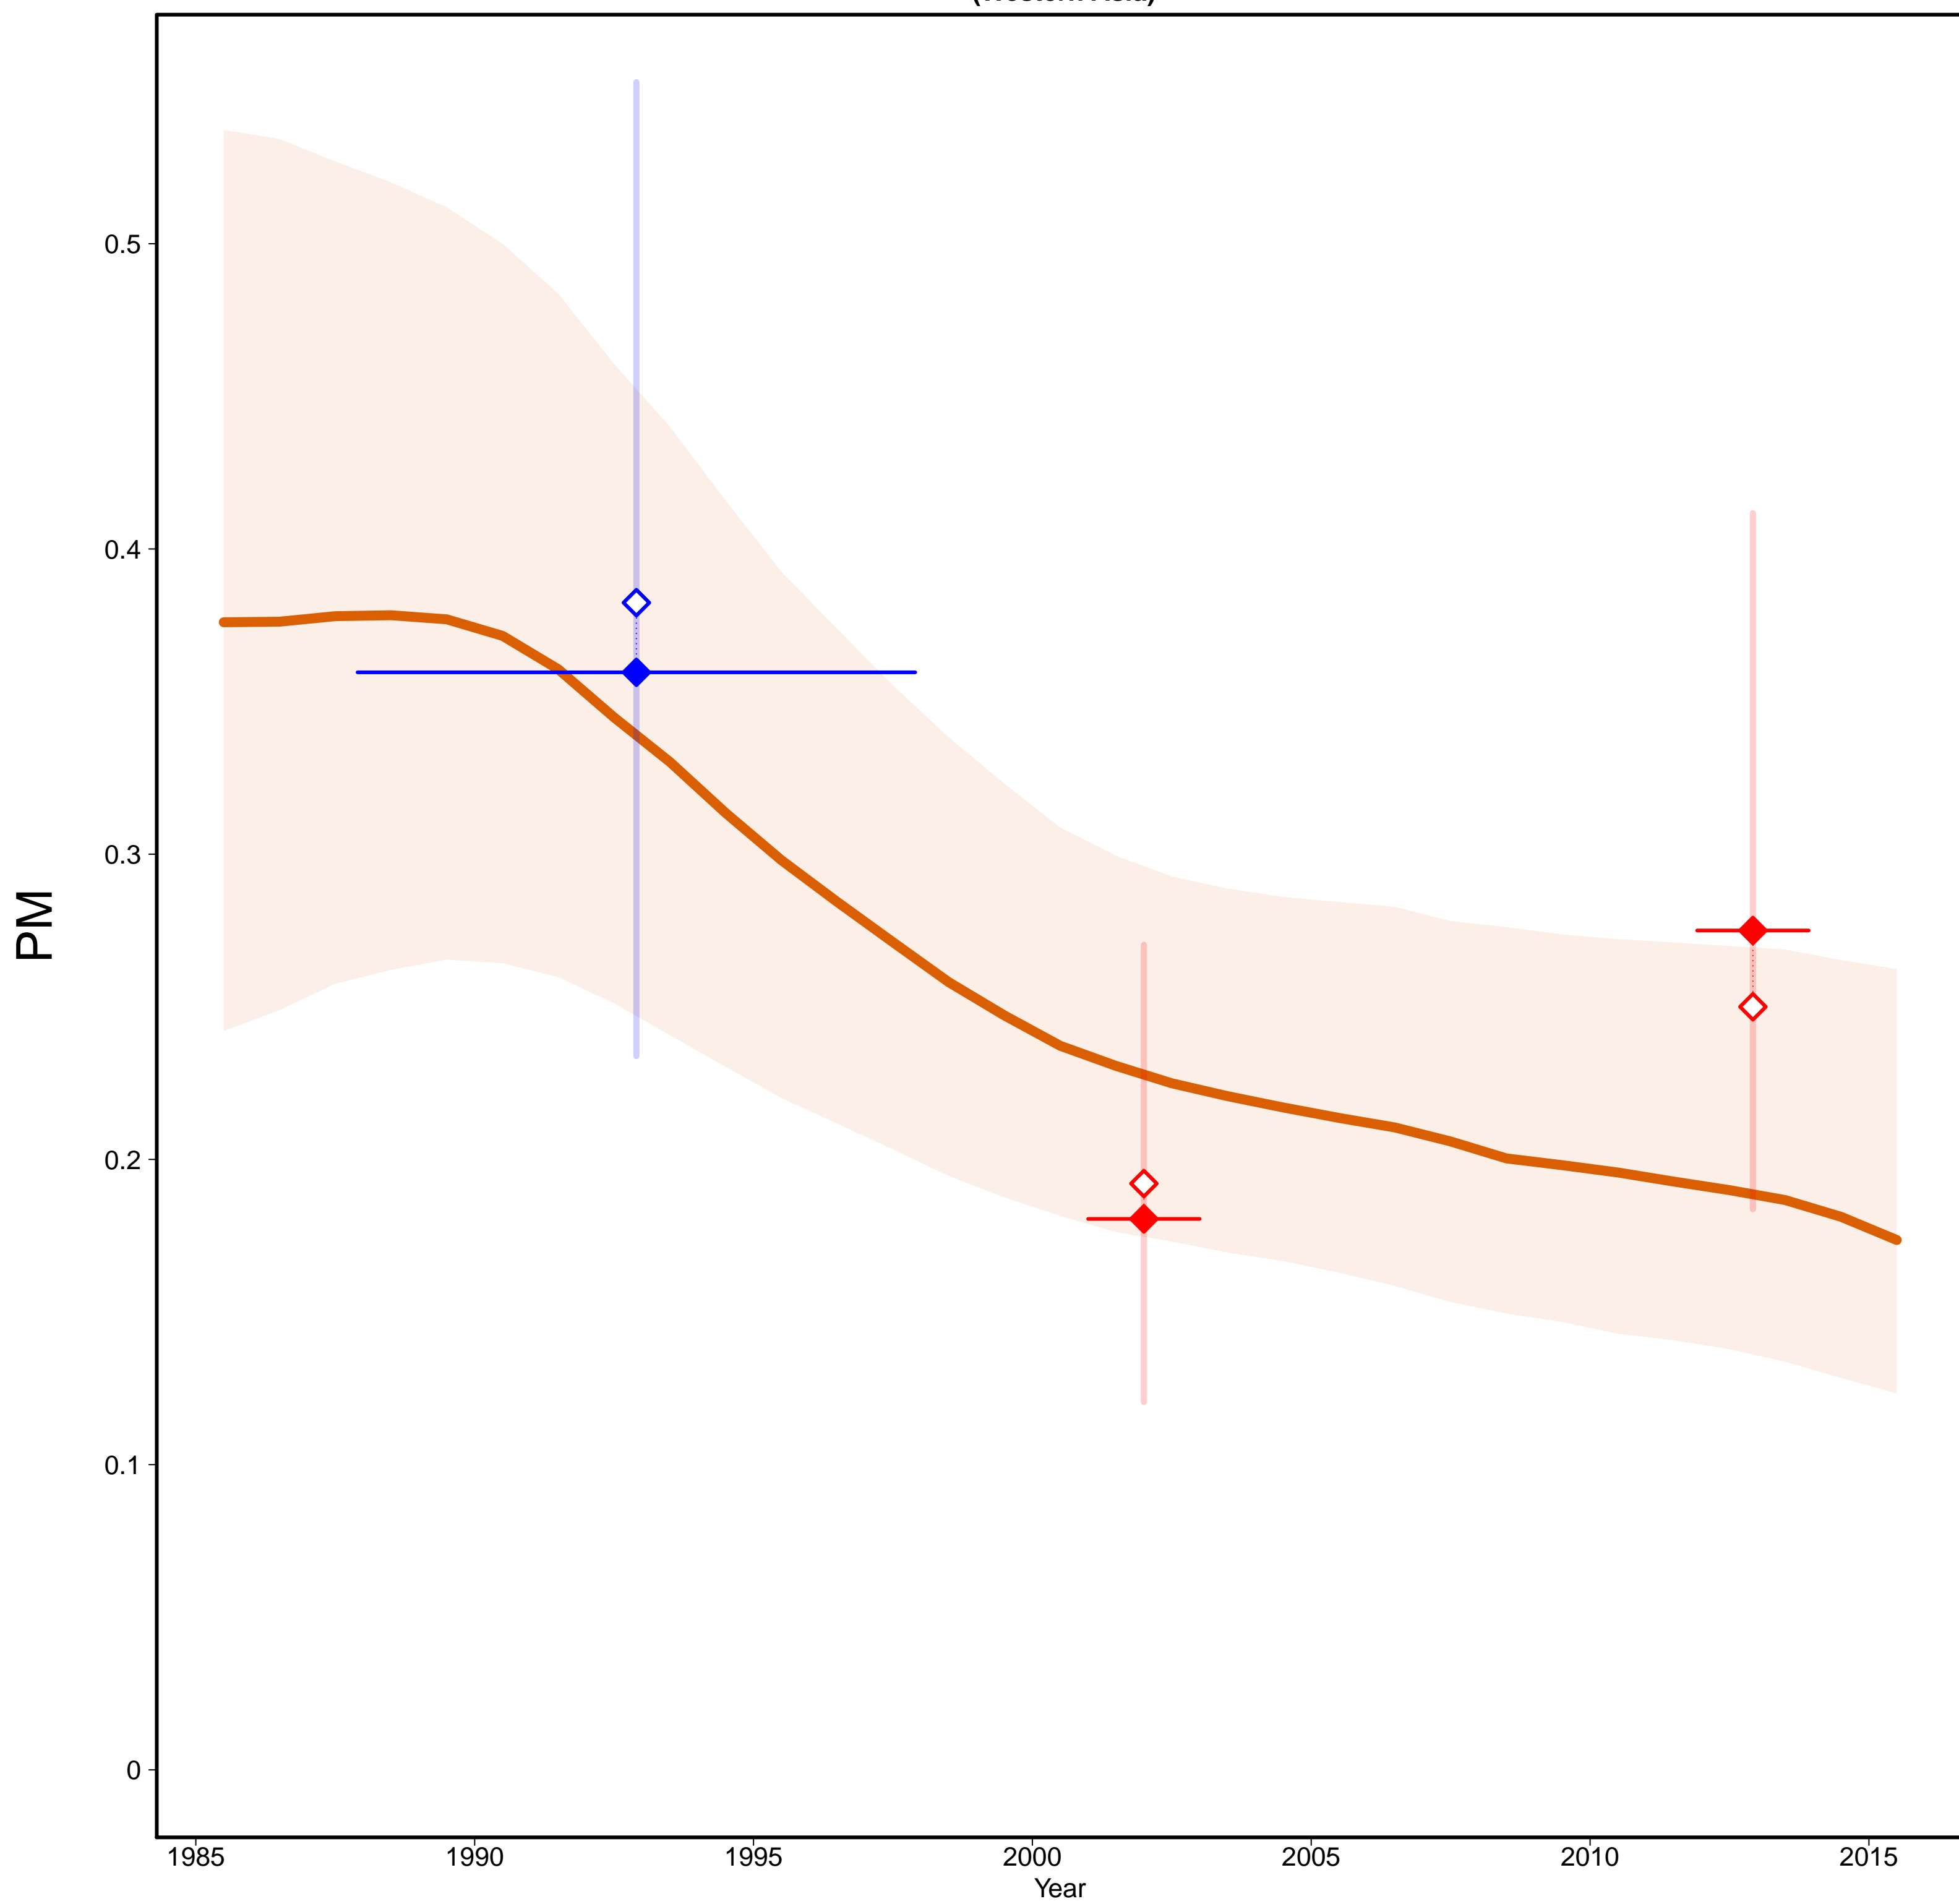

Yemen [YEM]  
(Western Asia)

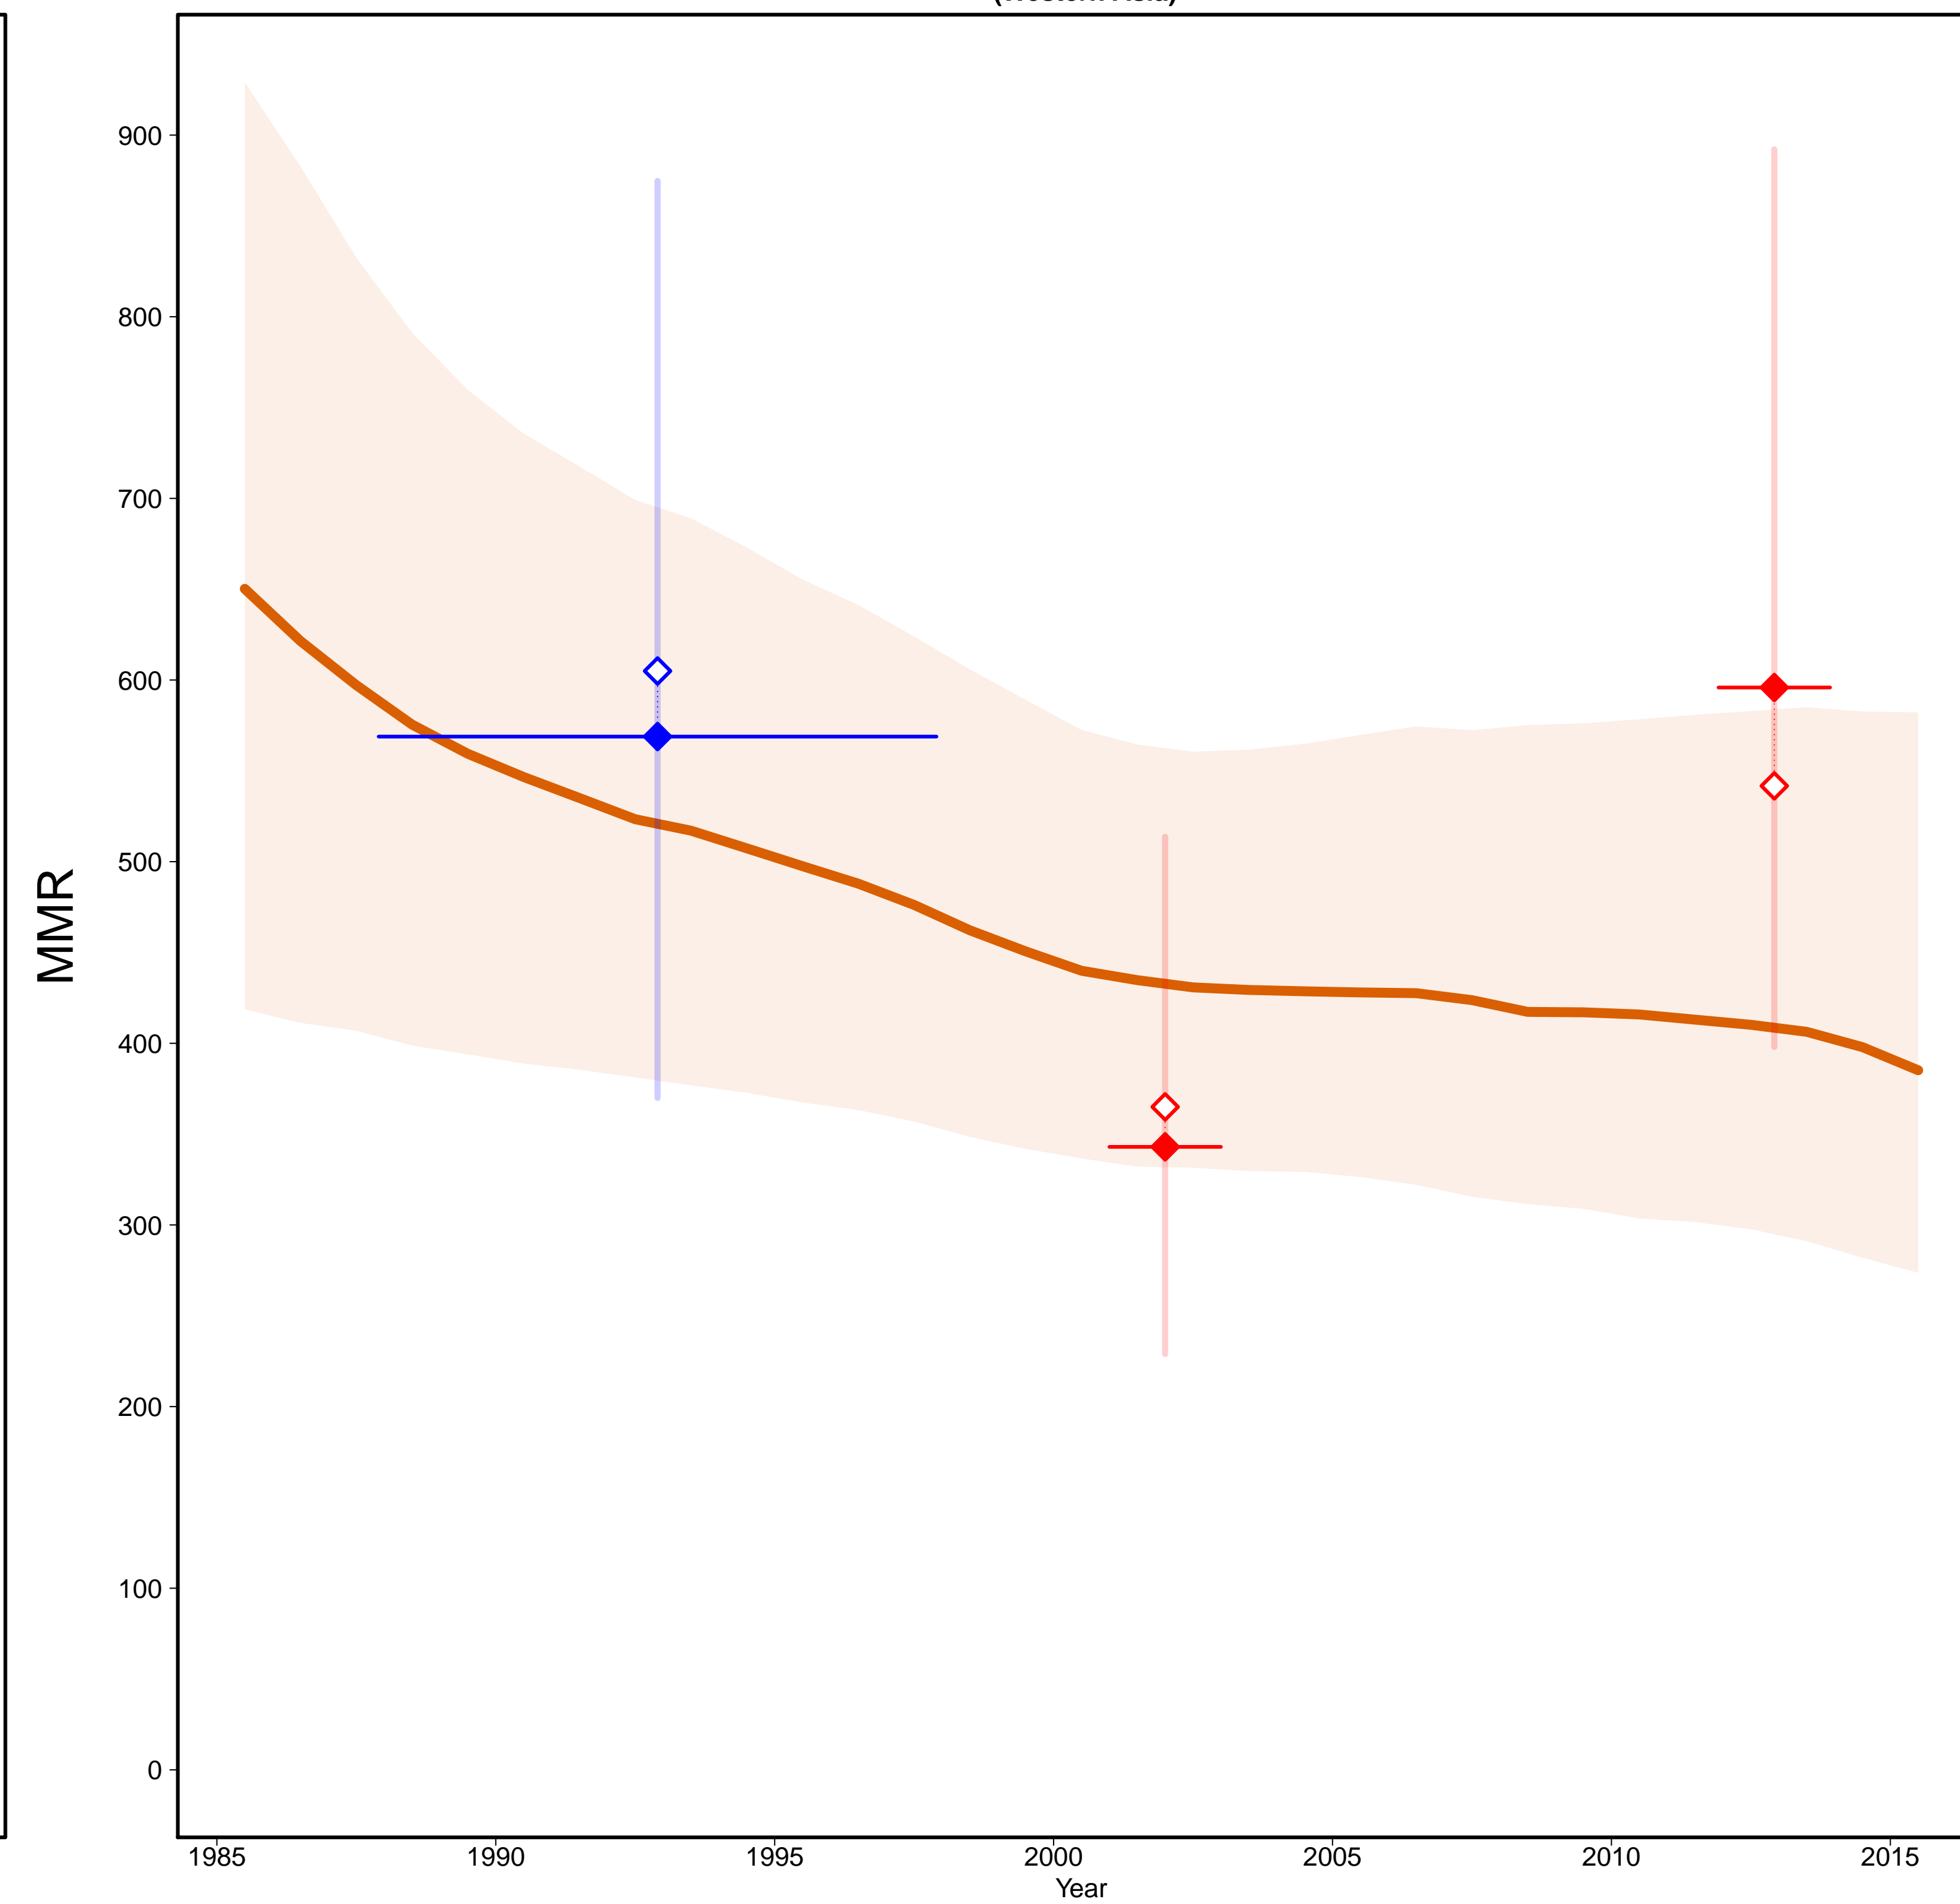

- Estimates —
- MMR Database 2015 —
- ◇ Observed Data
- ◆ Adjusted Data
- Data type —
- ◆ DHS
- ◆ Misc. studies

Gross Domestic Product

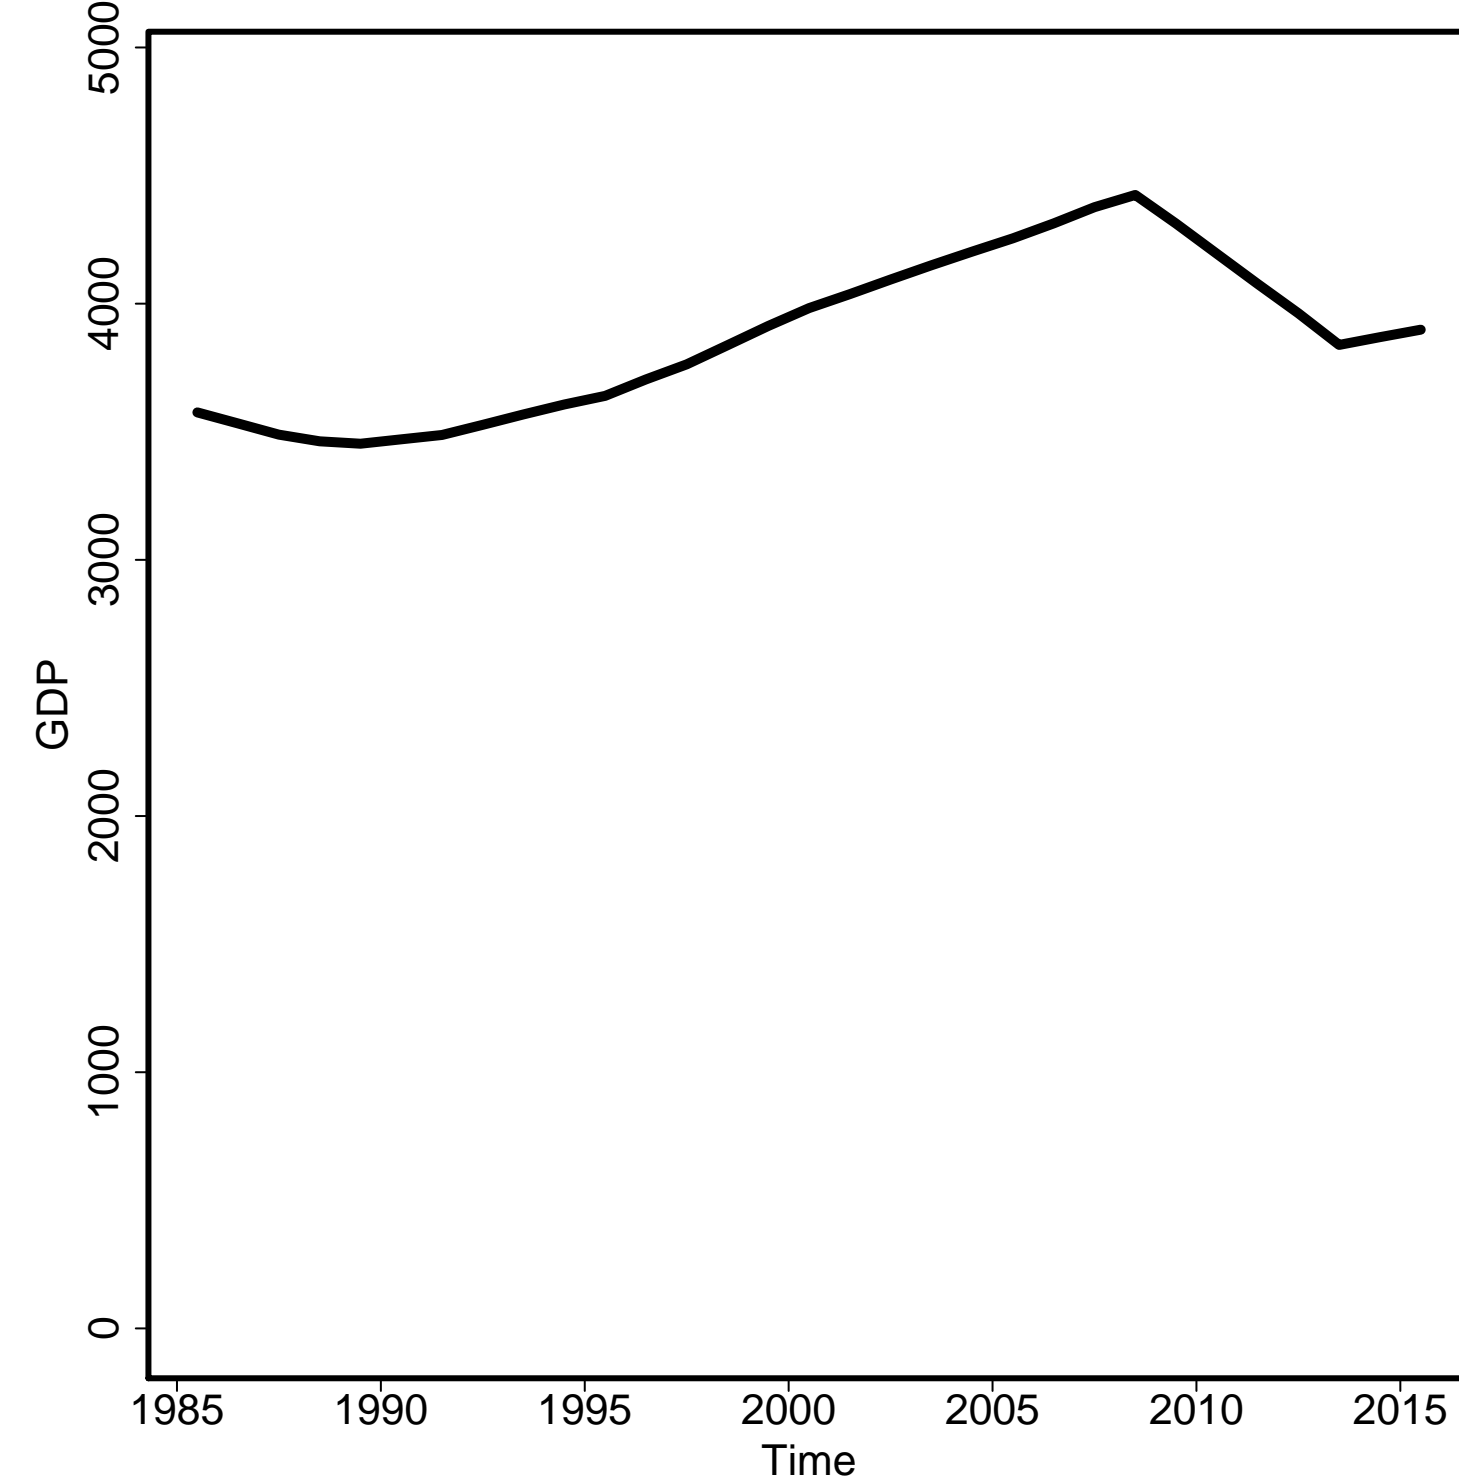

General Fertility Rate

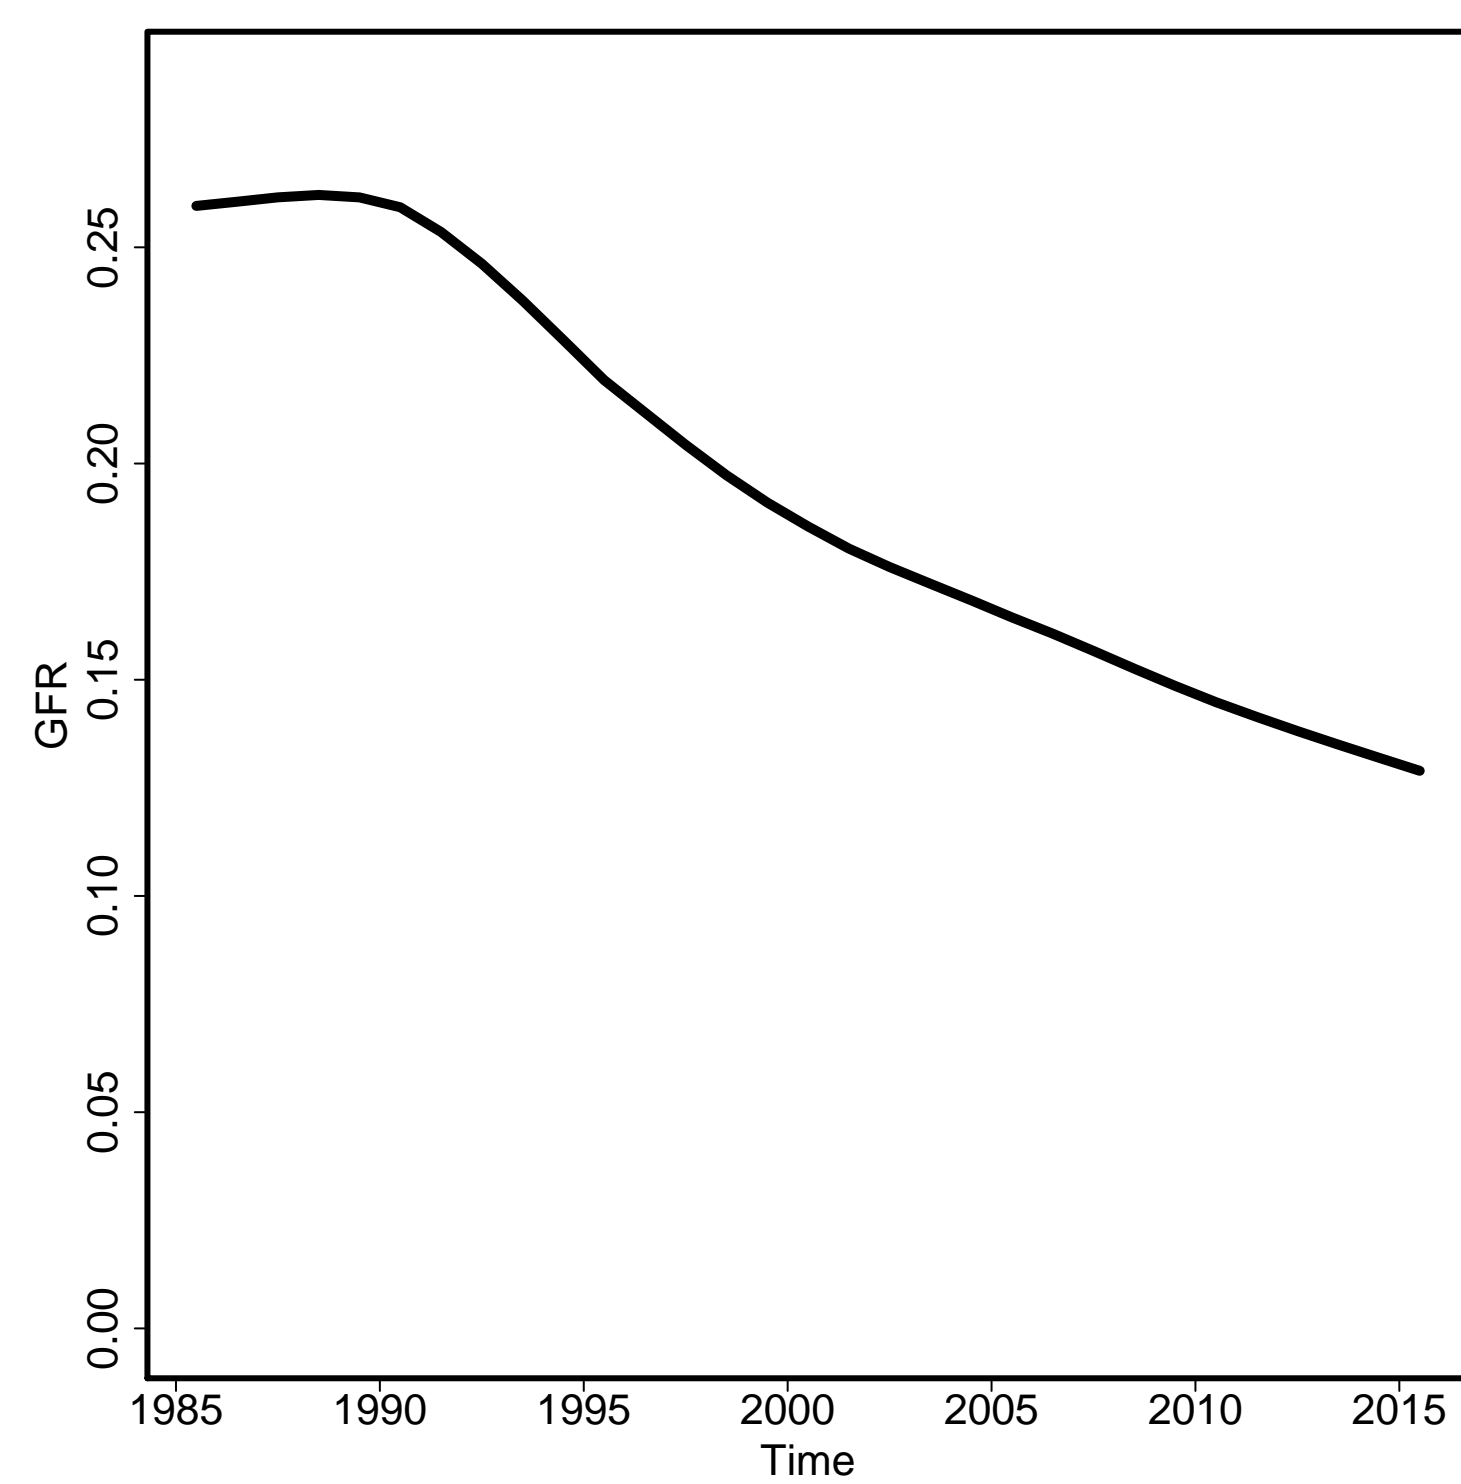

Skilled Attendance to Birth

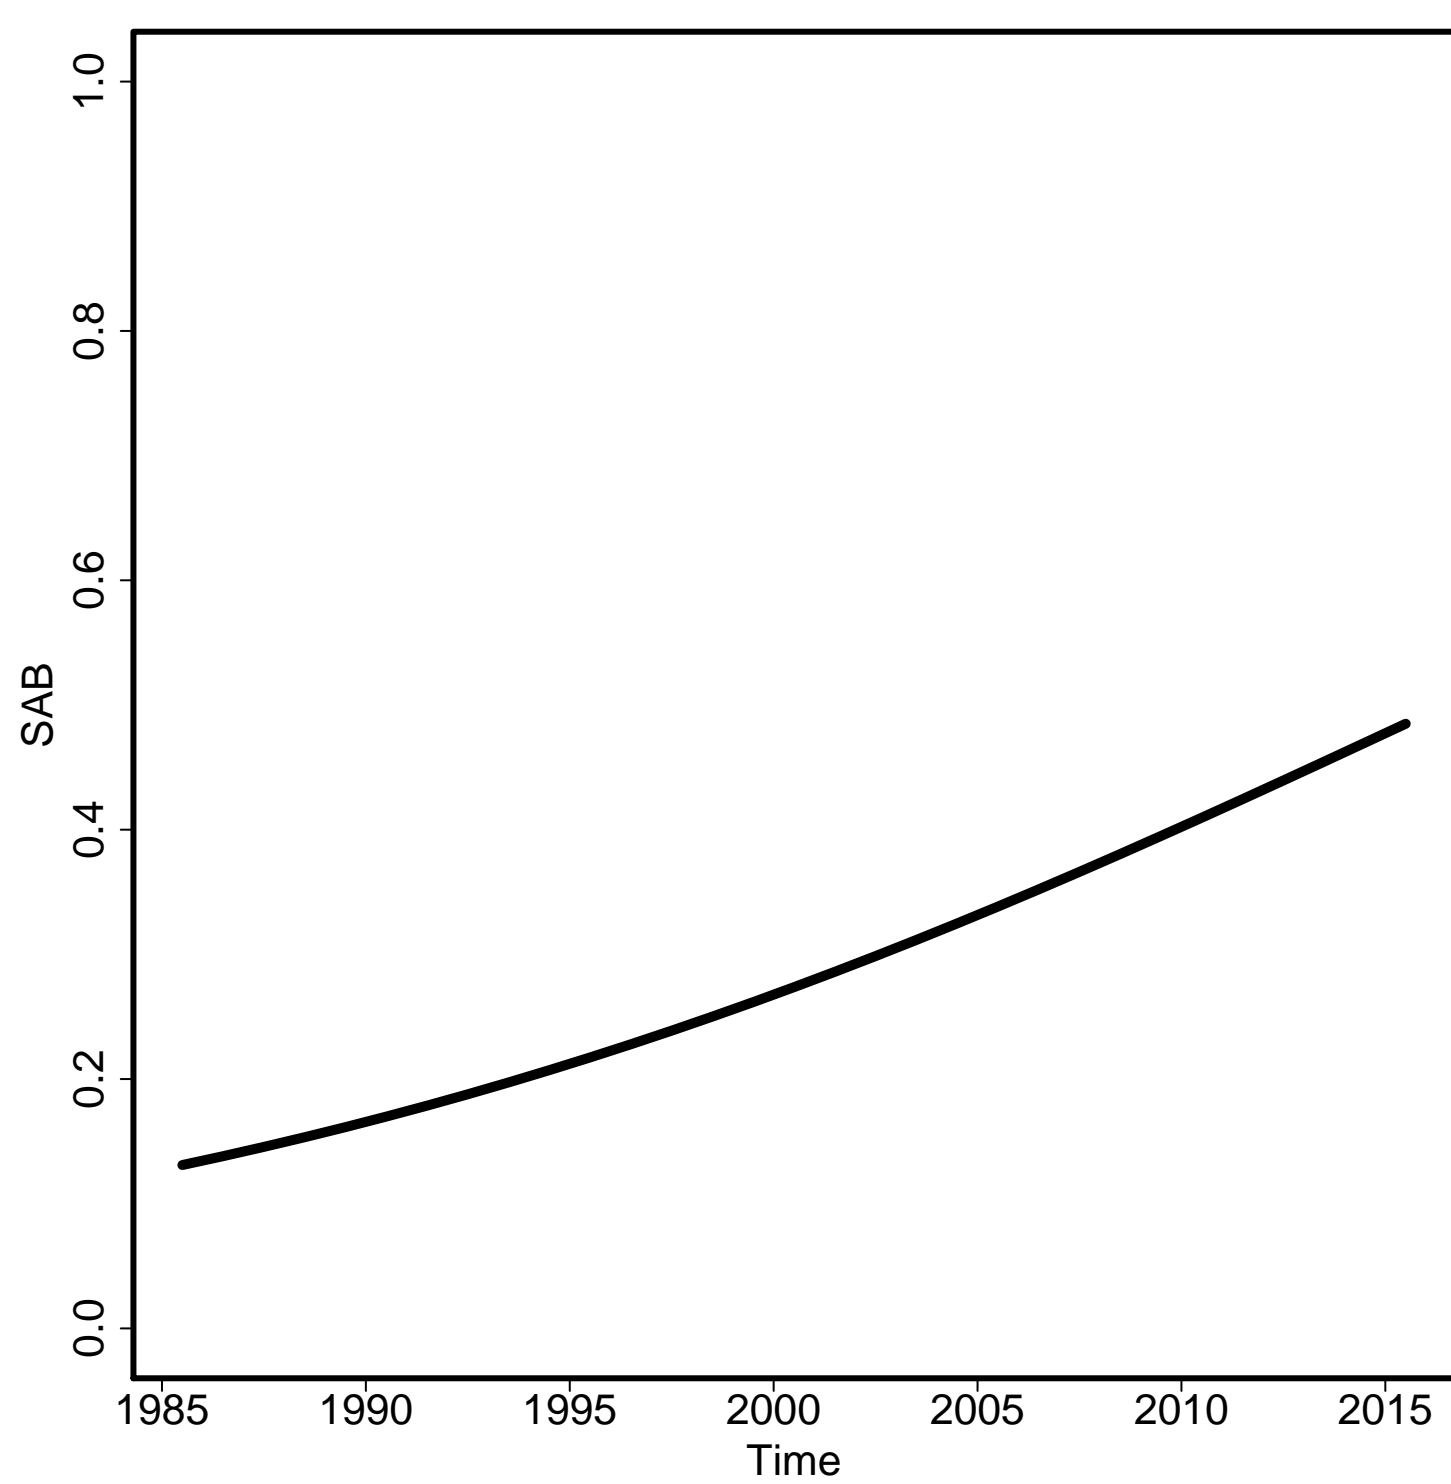

Envelope/Births

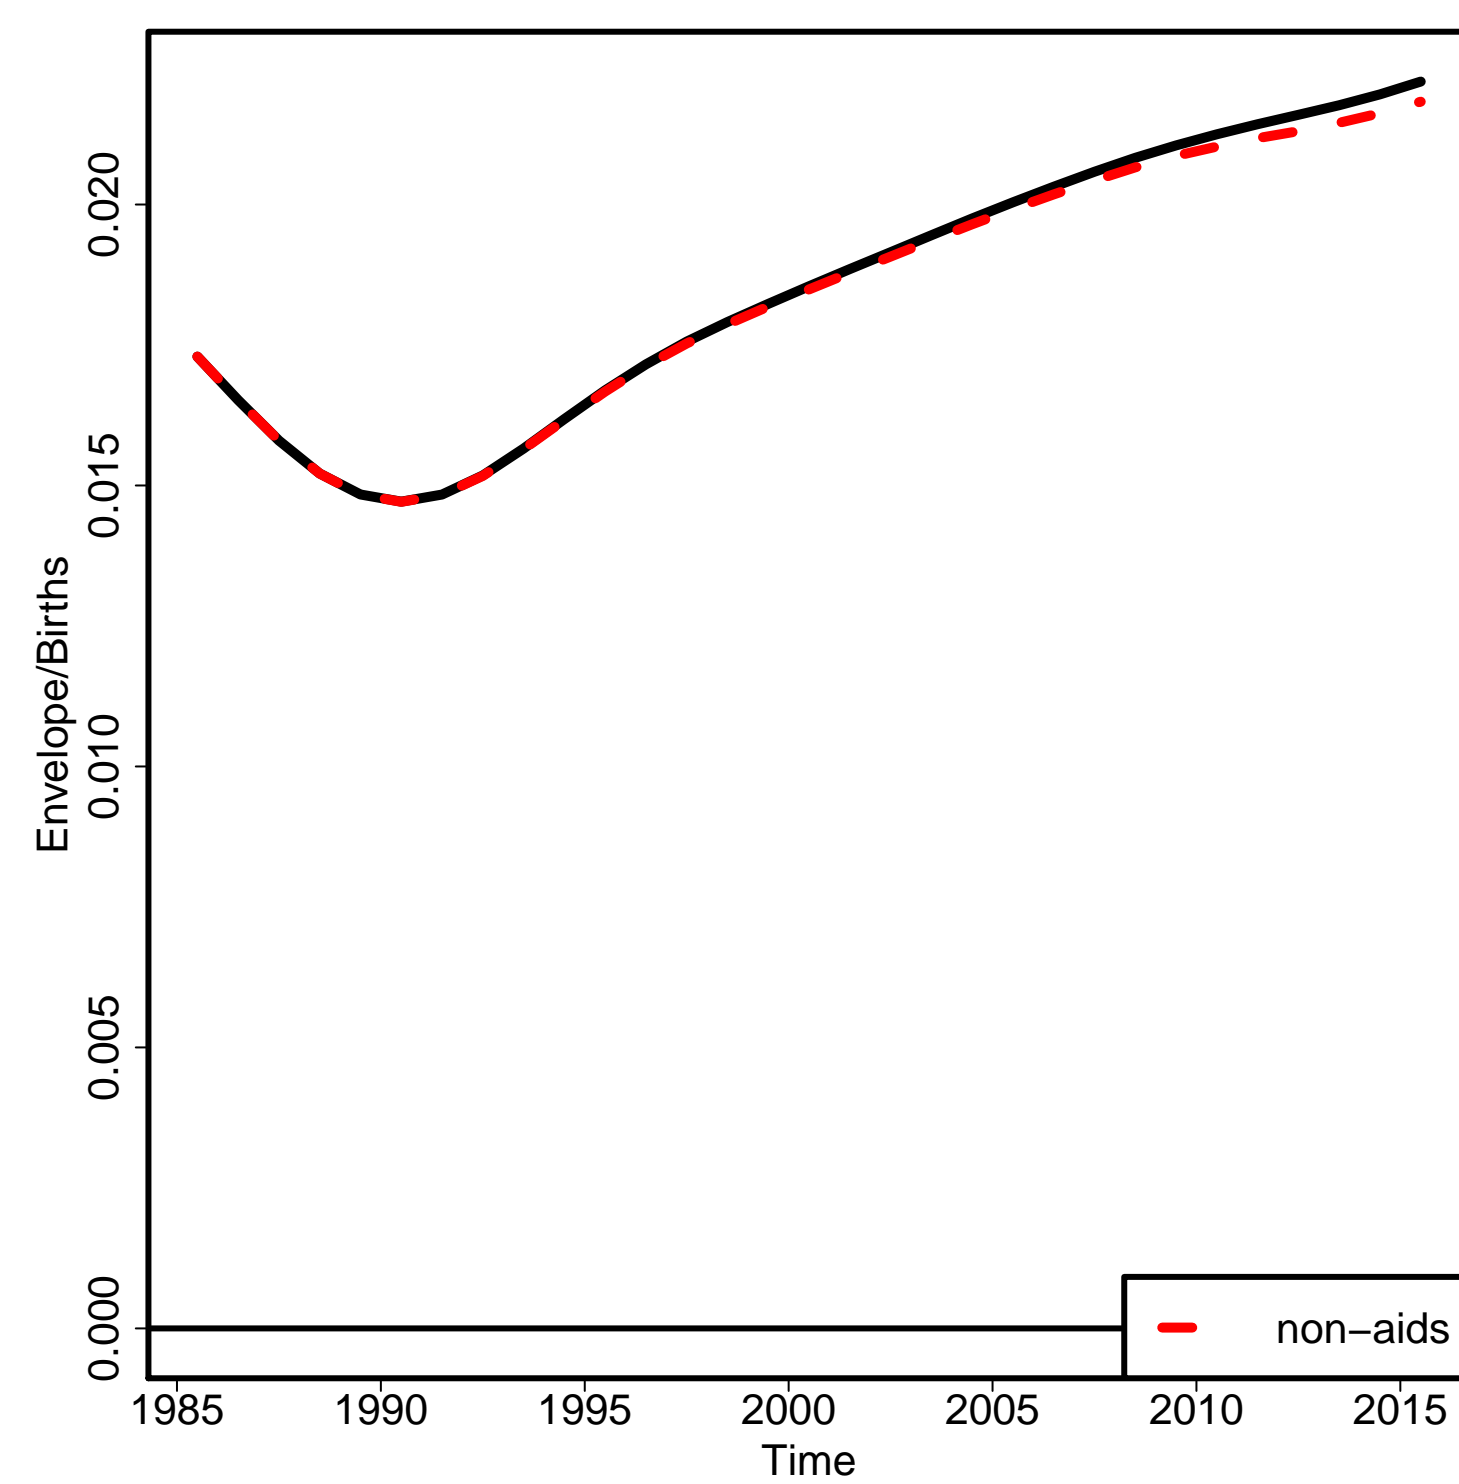

Non-aids MMR

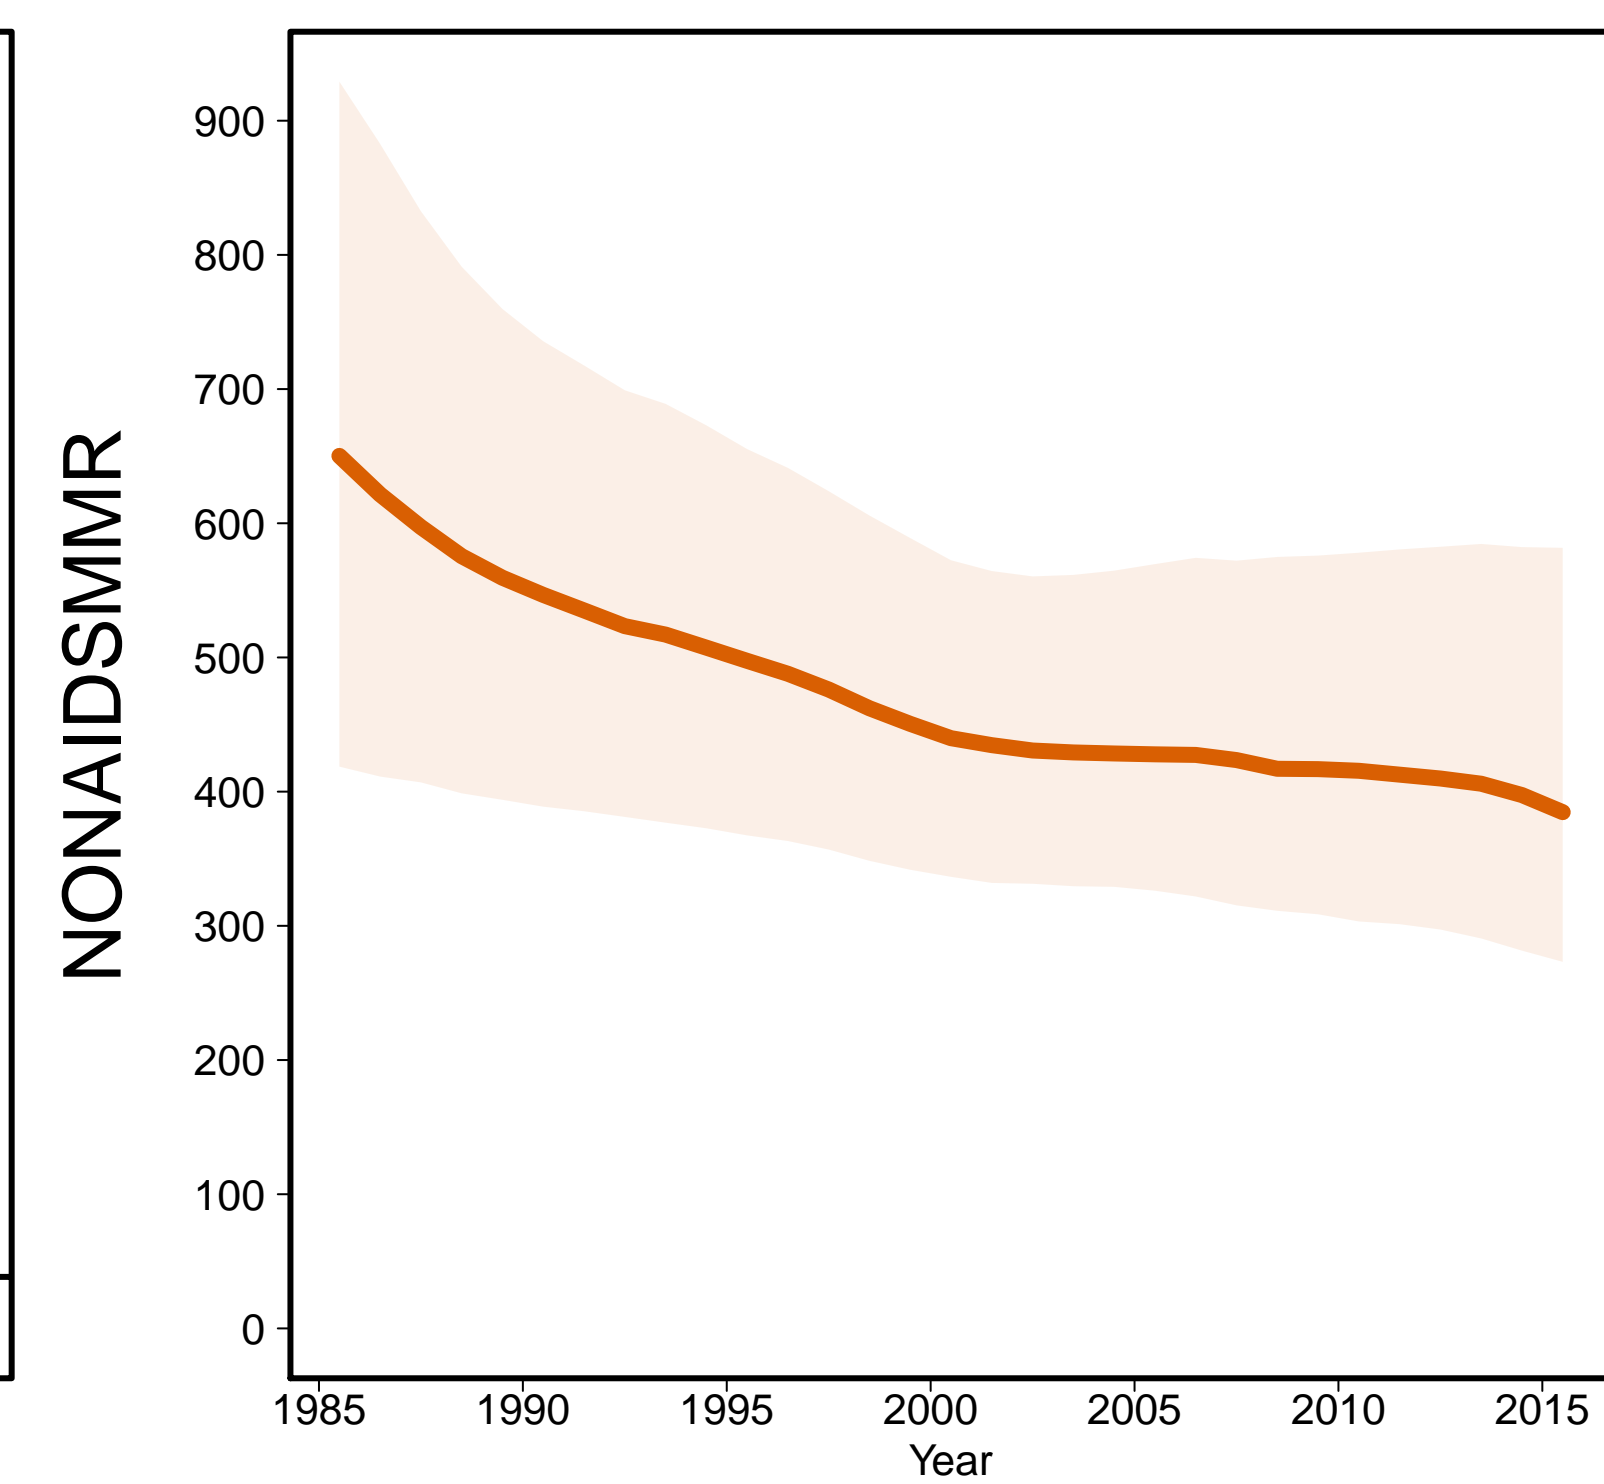

Aids MMR

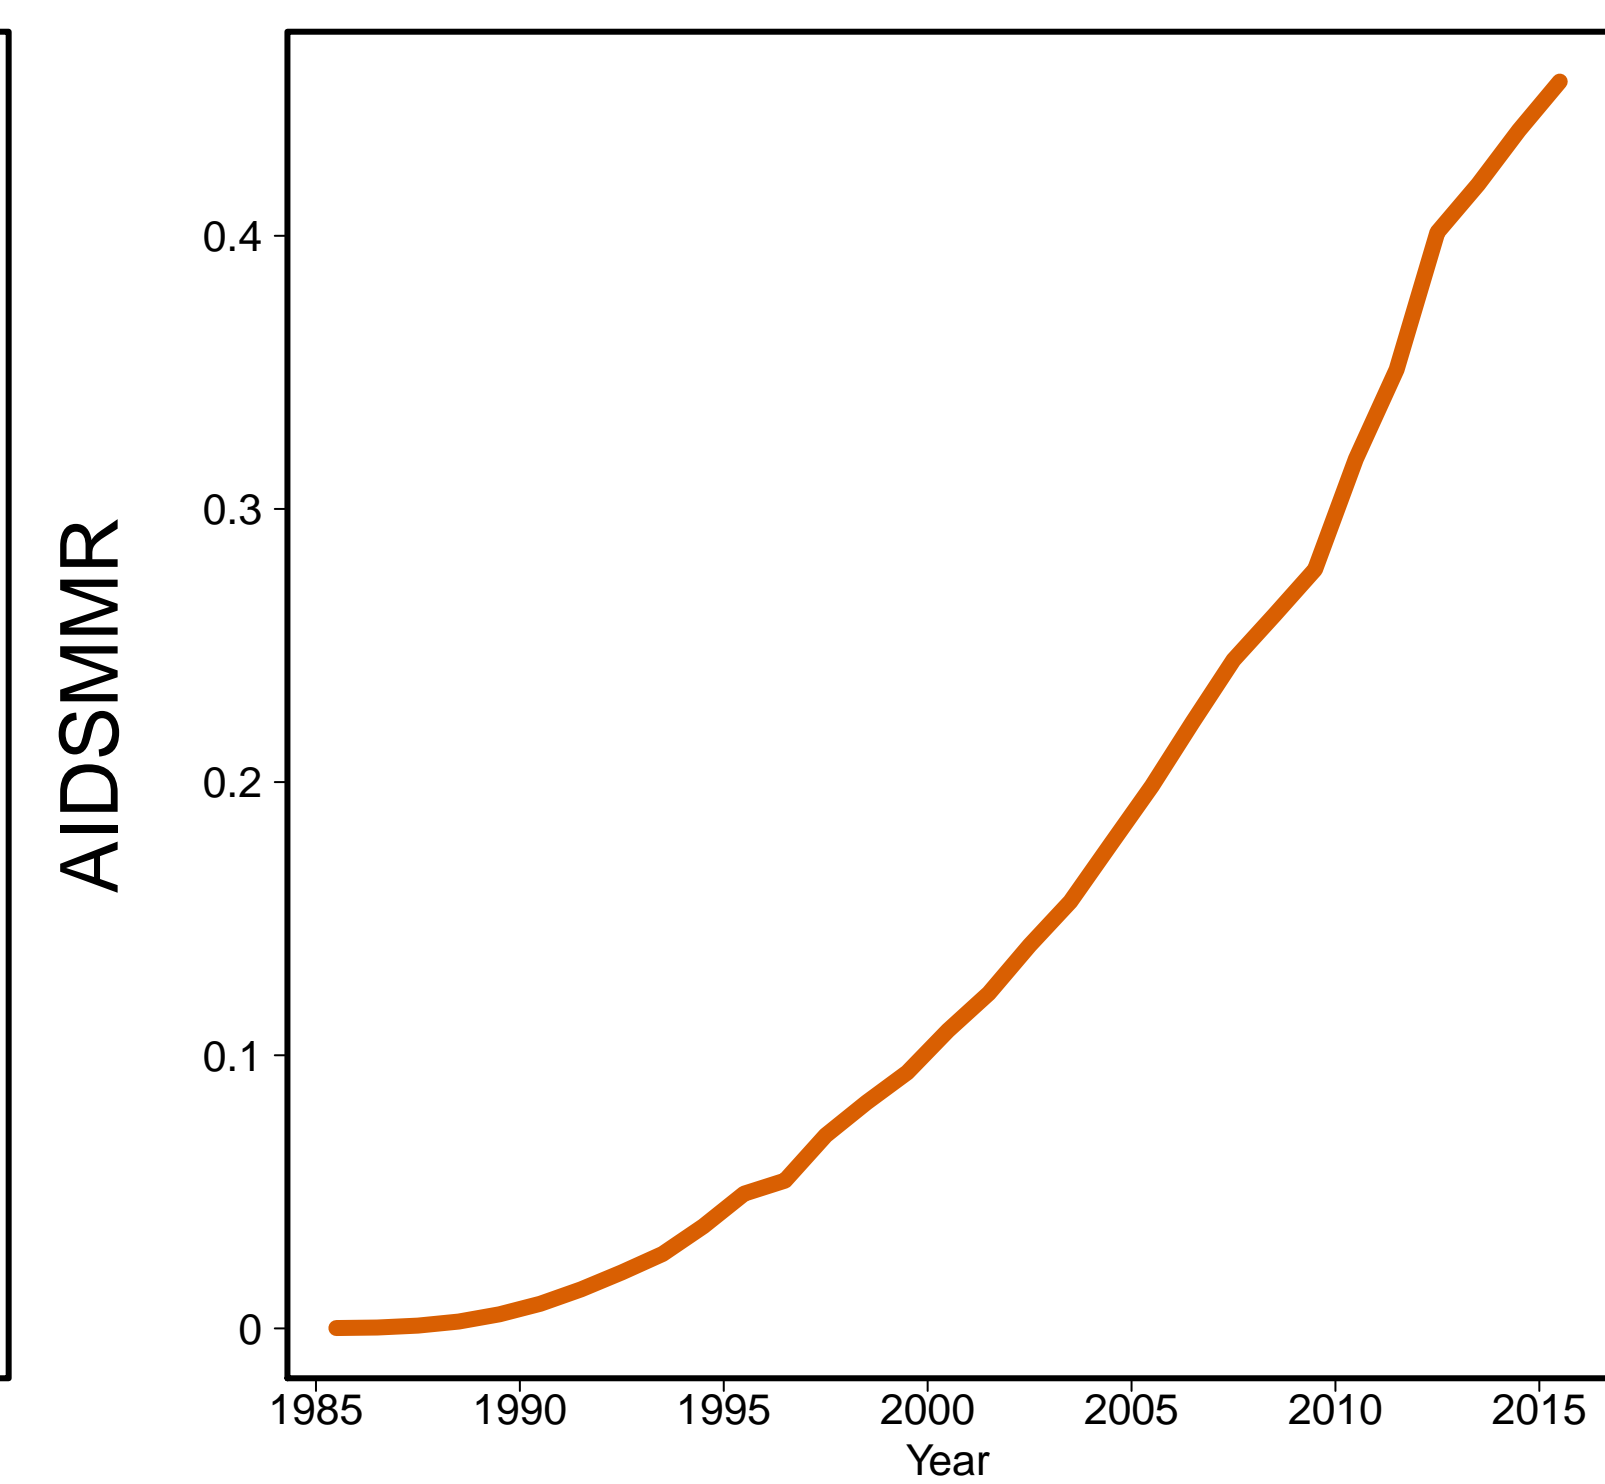

Zambia [ZMB]  
(Eastern Africa)

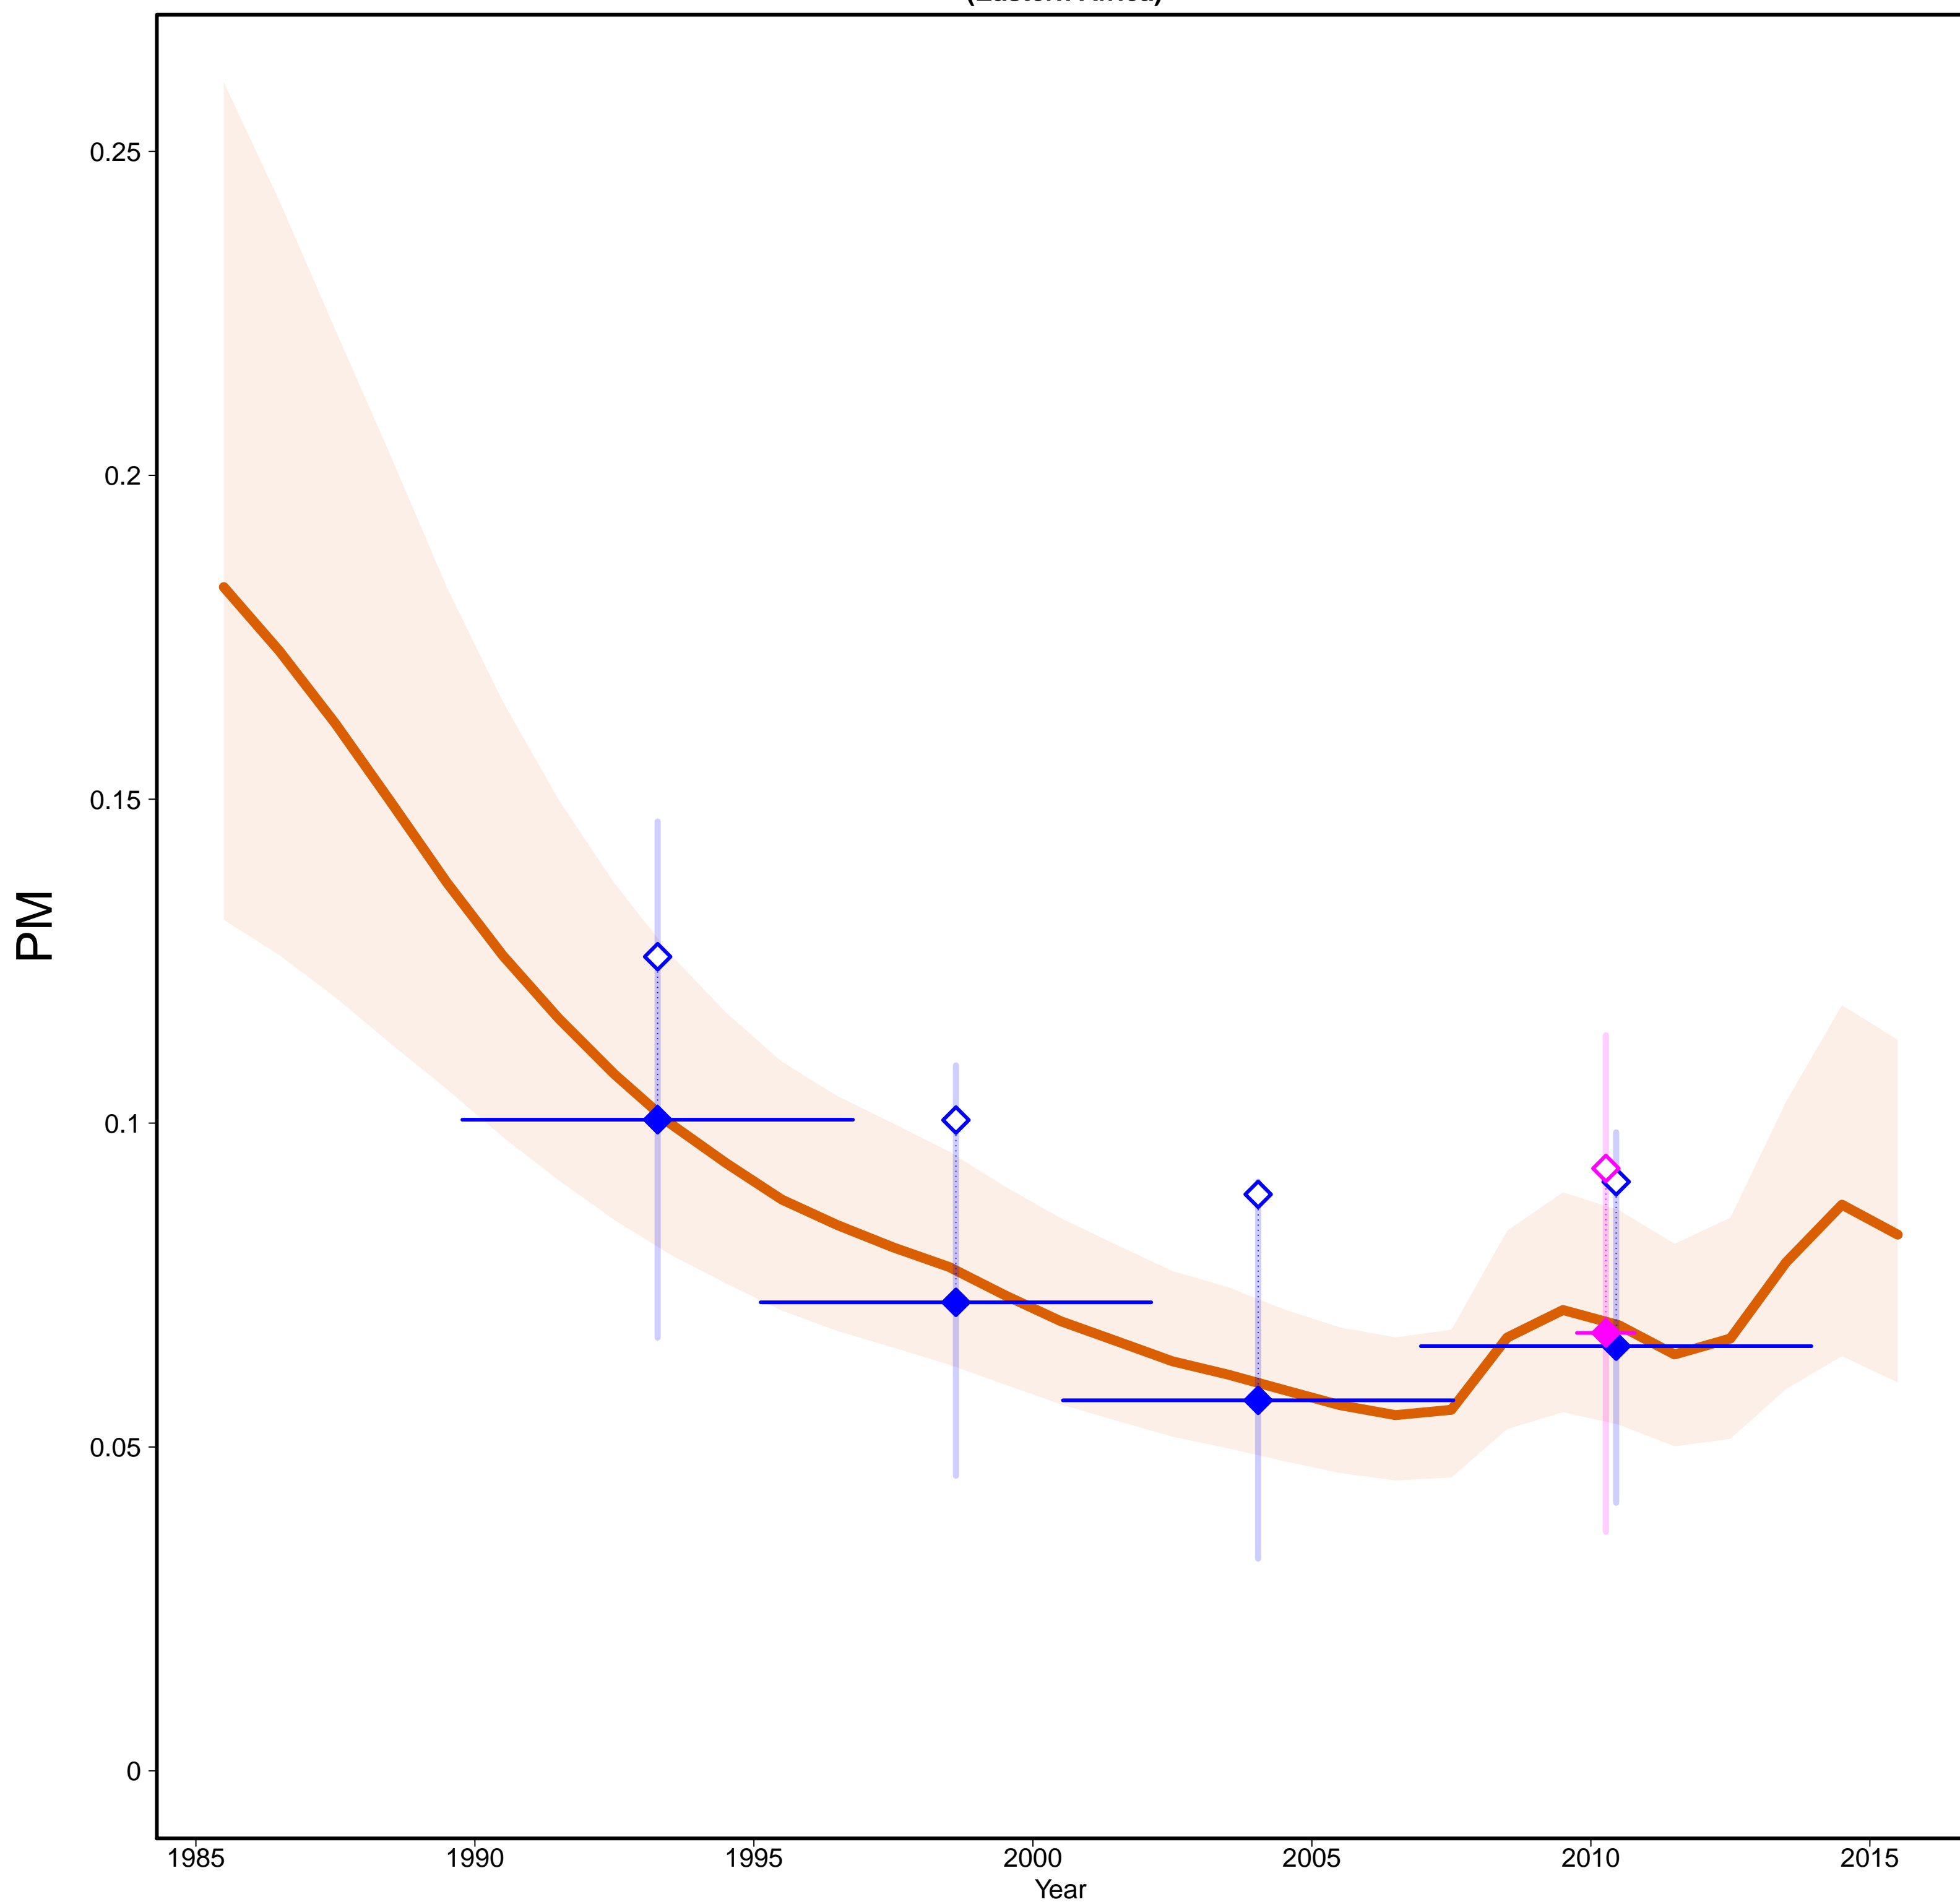

Zambia [ZMB]  
(Eastern Africa)

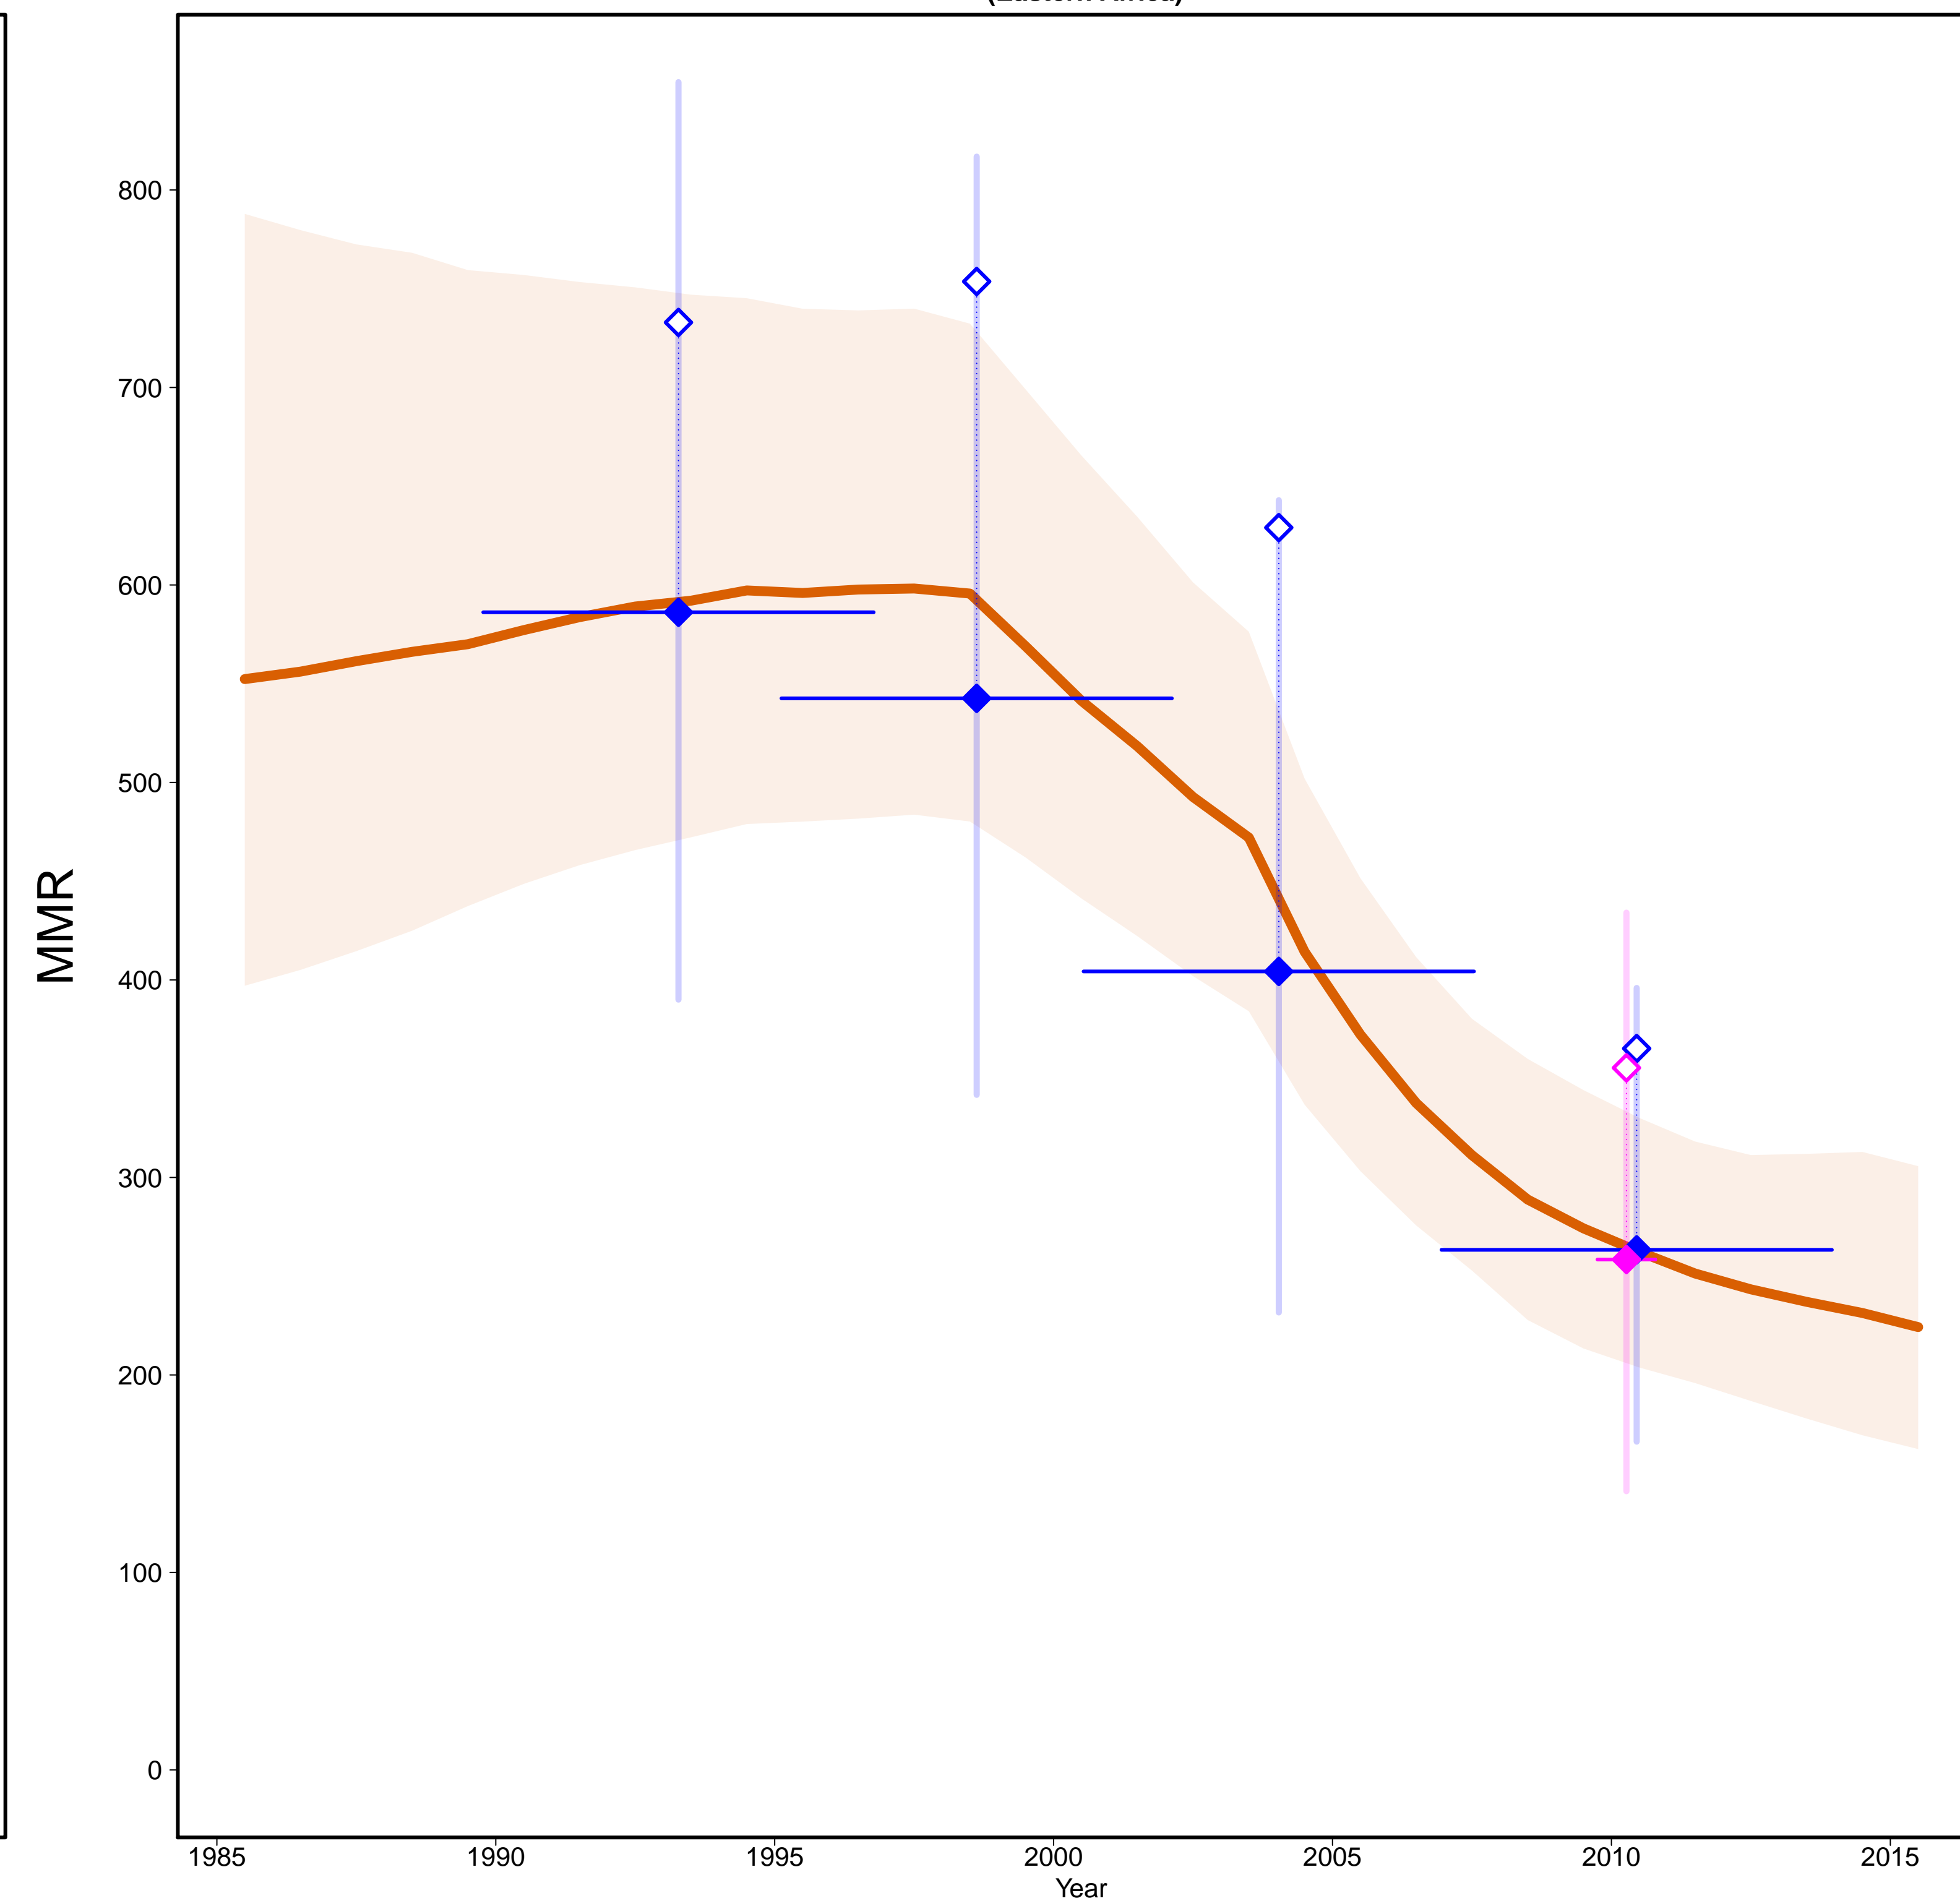

- Estimates —
- MMR Database 2015 —
- ◇ Observed Data
- ◆ Adjusted Data
- Data type —
- ◆ DHS
- ◆ Census

Gross Domestic Product

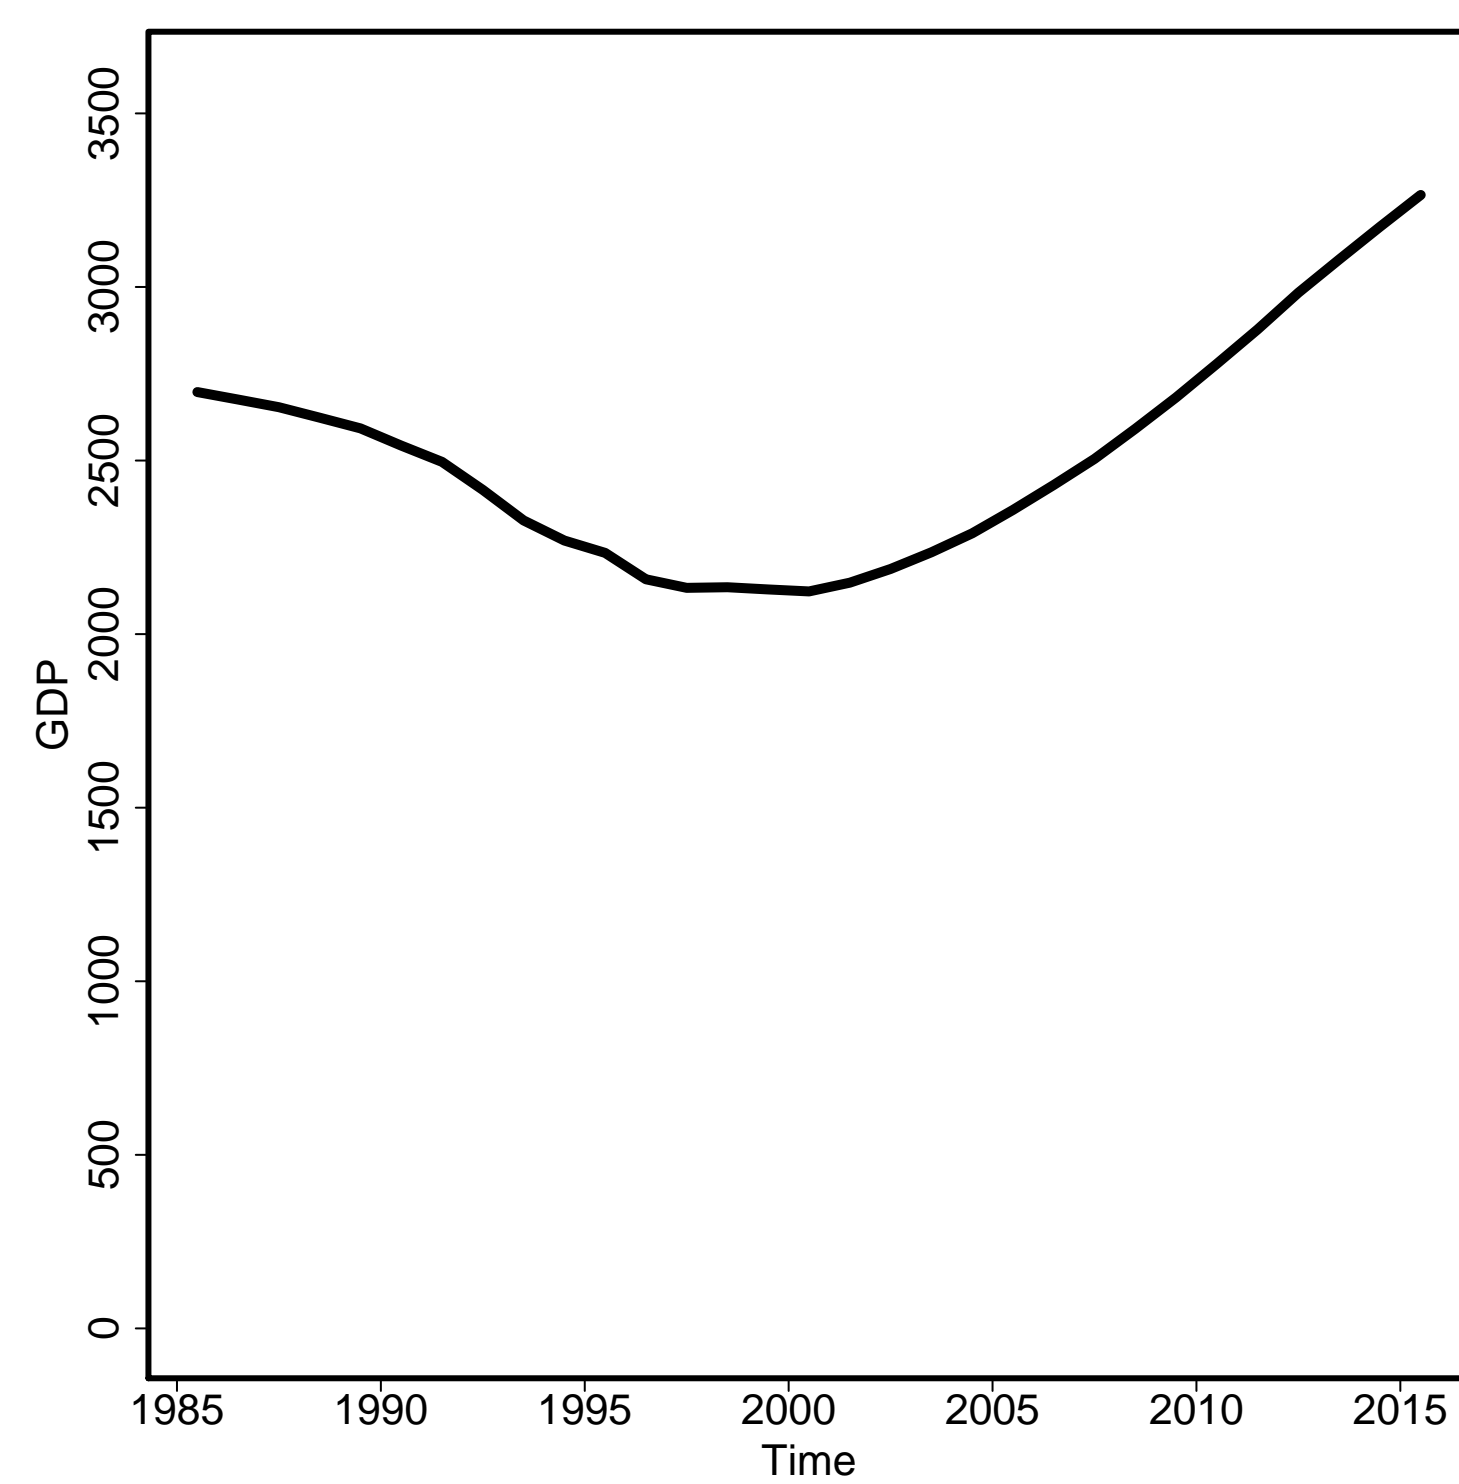

General Fertility Rate

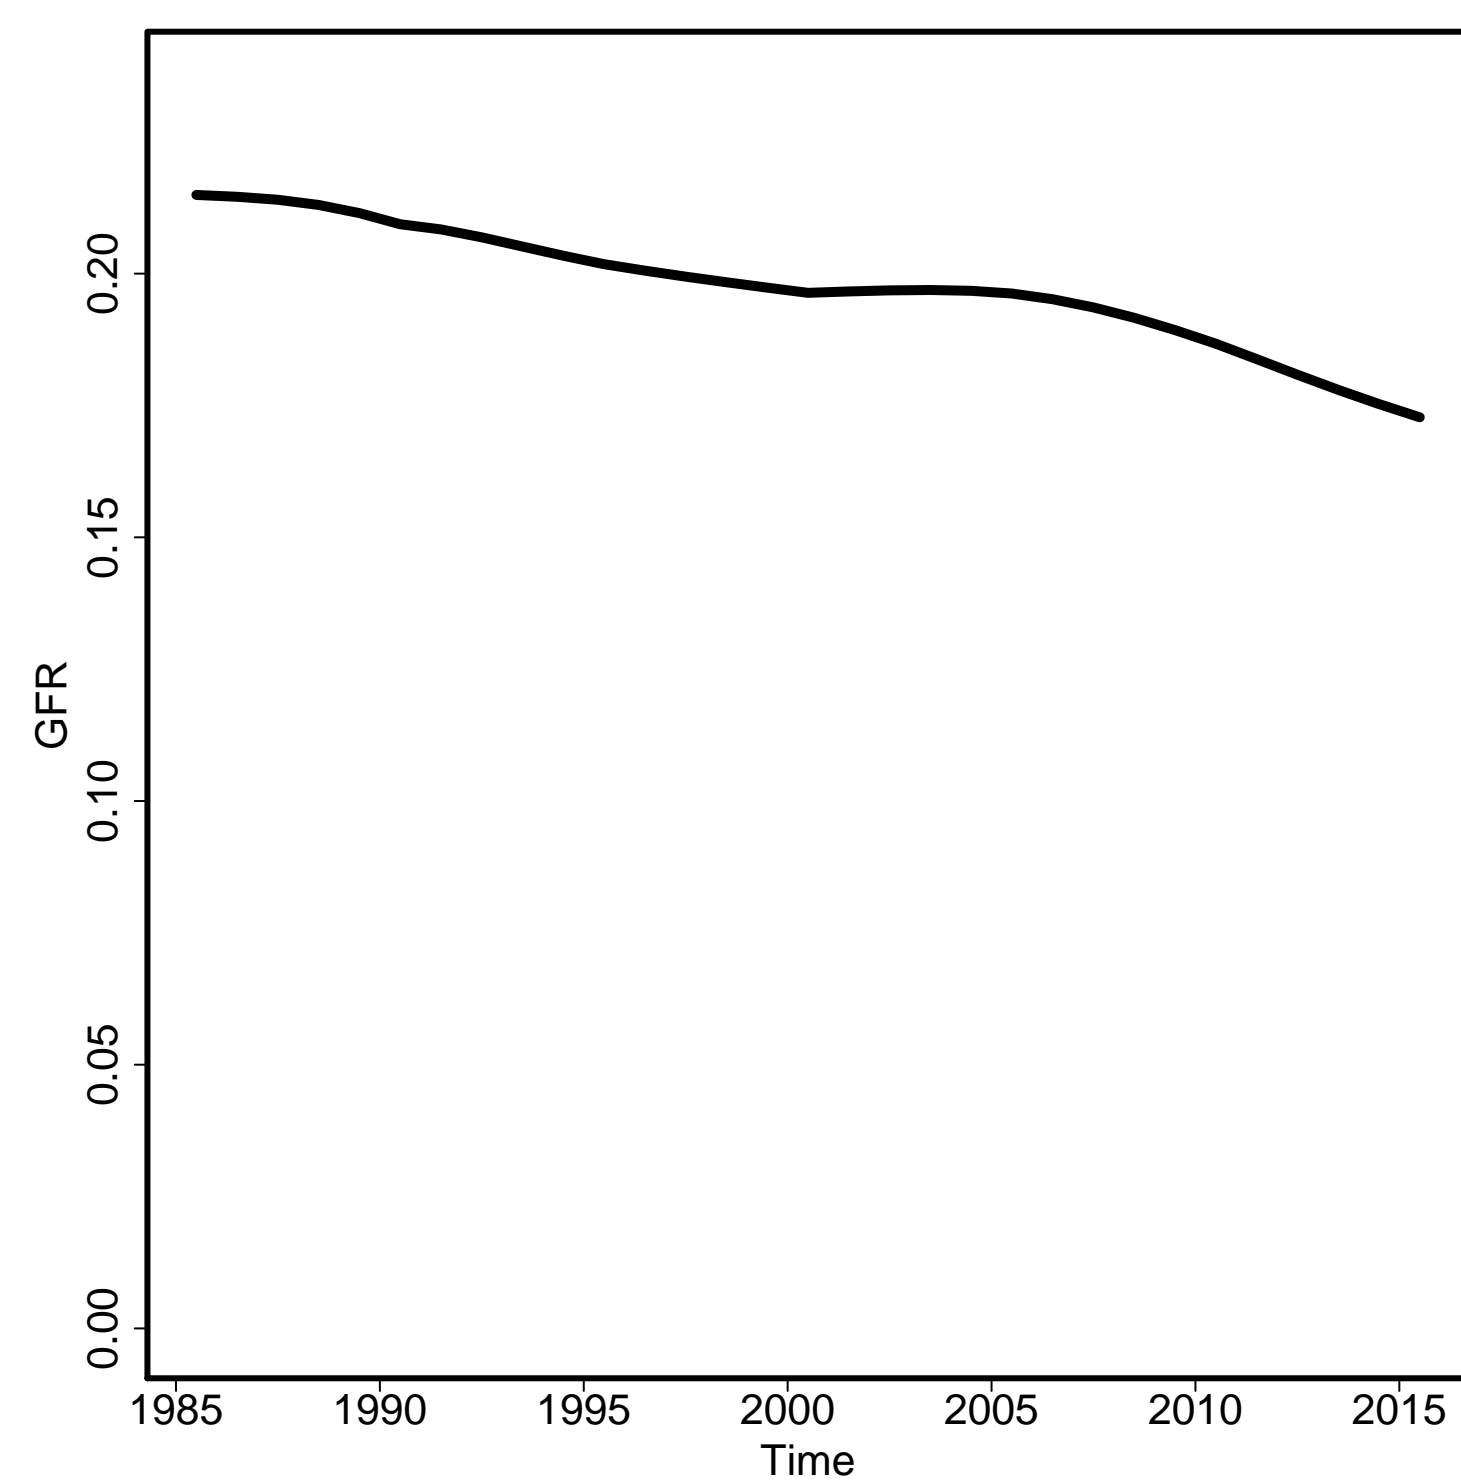

Skilled Attendance to Birth

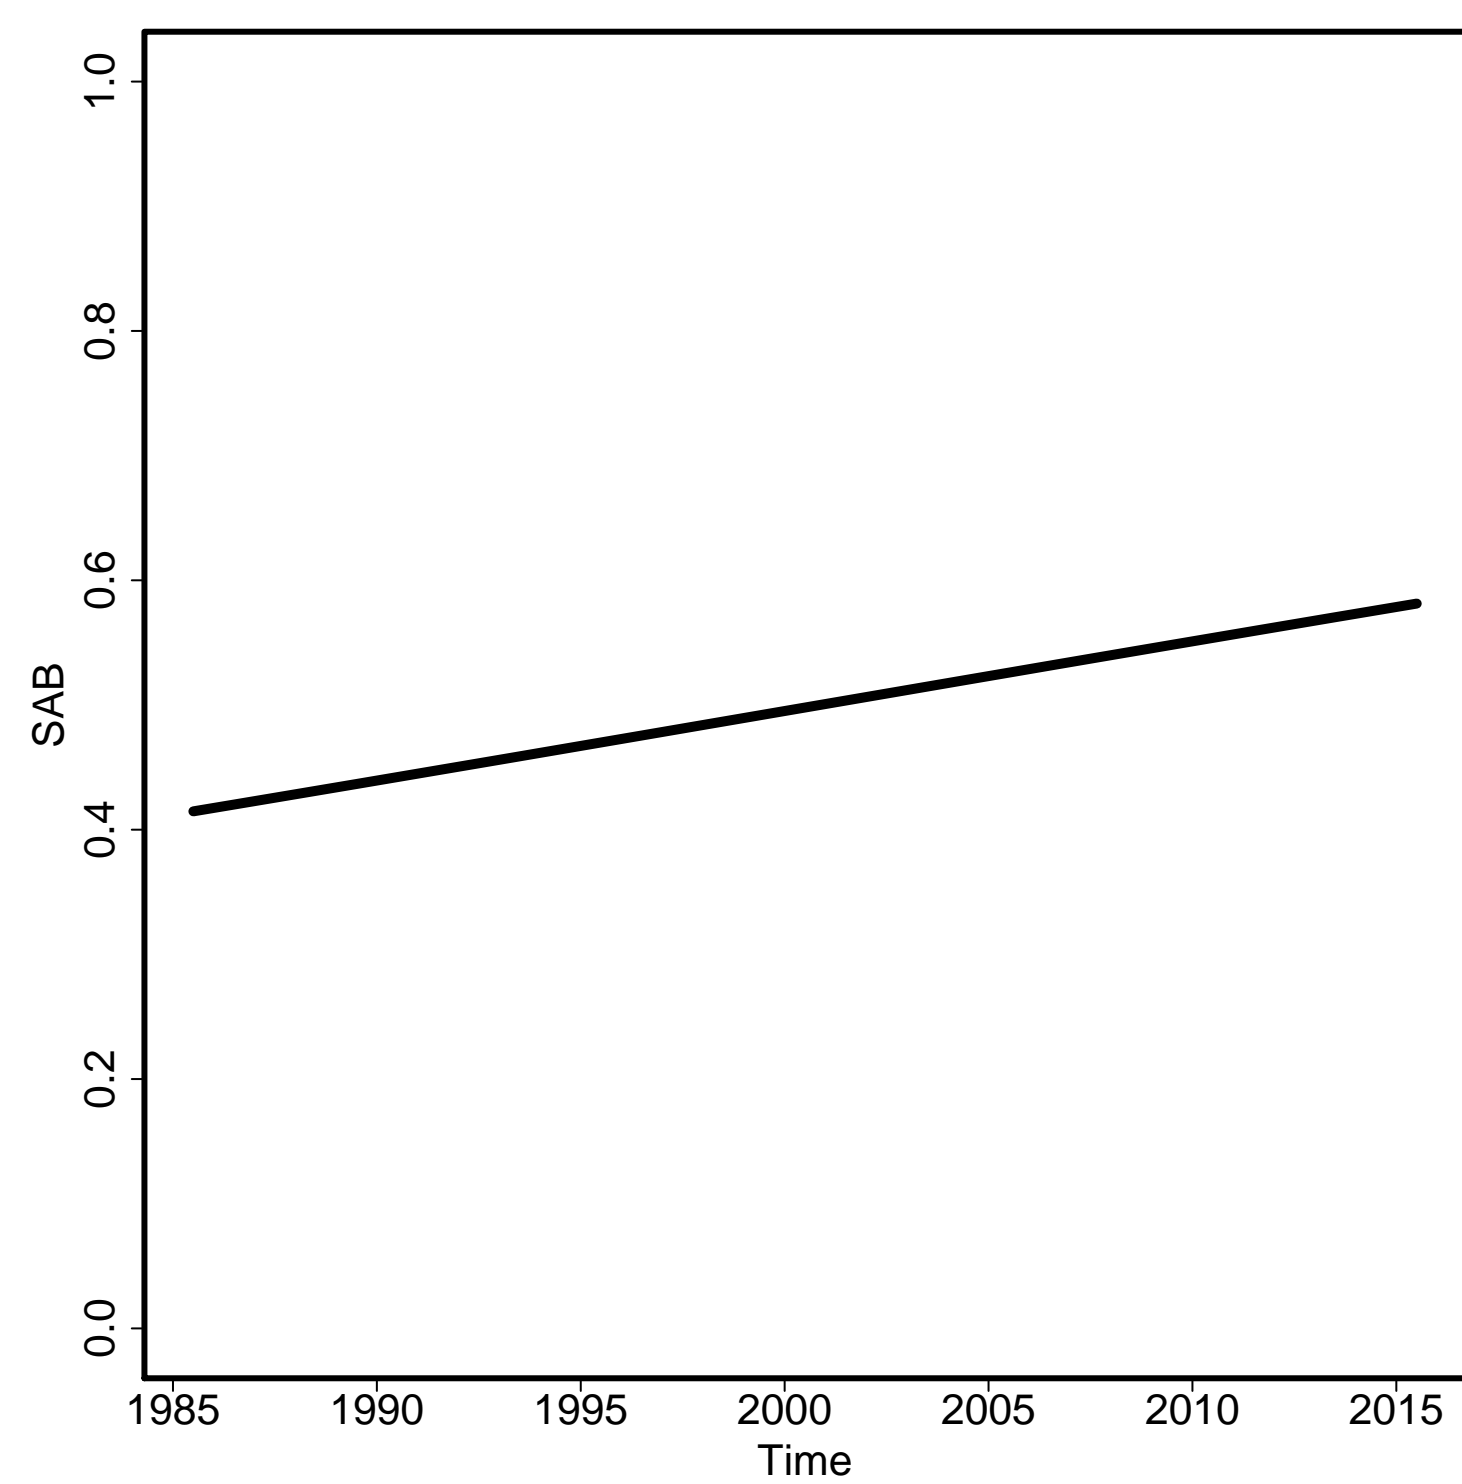

Envelope/Births

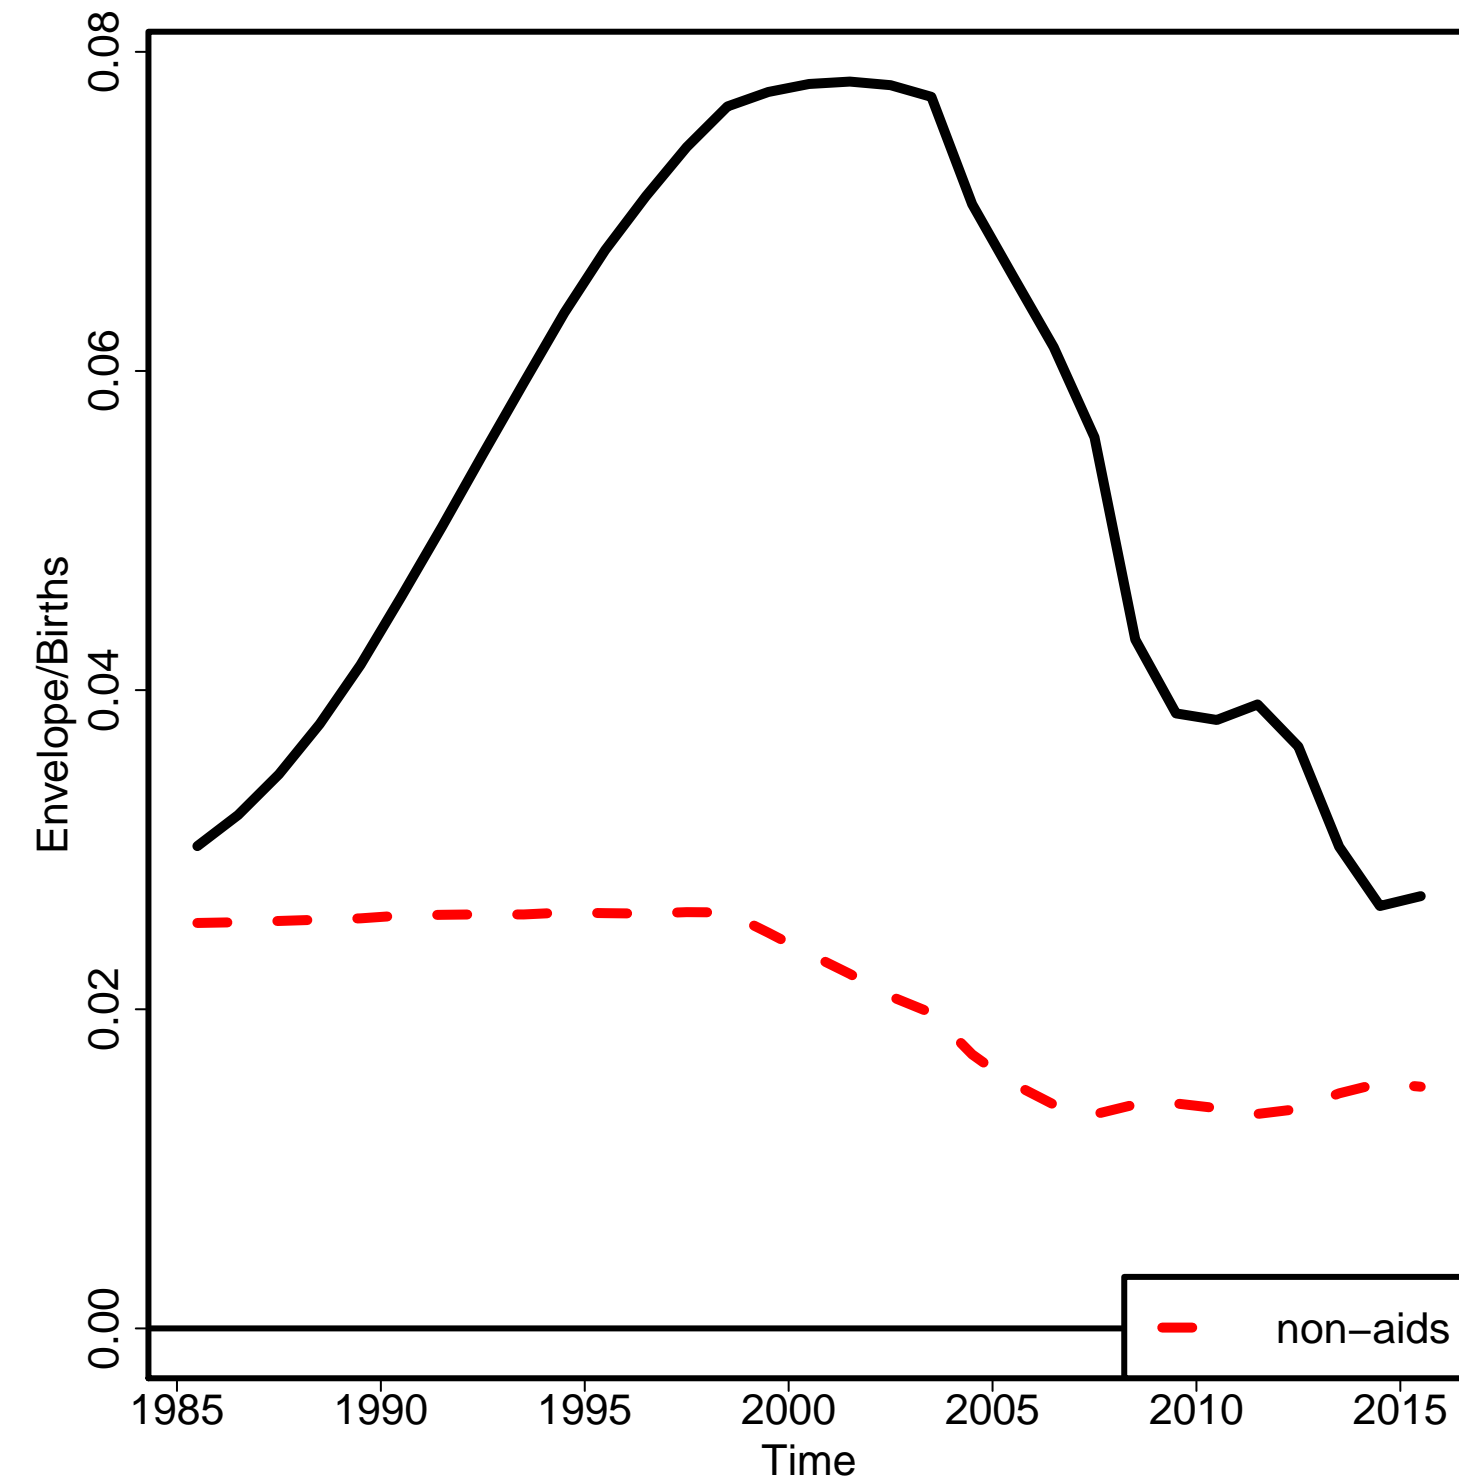

Non-aids MMR

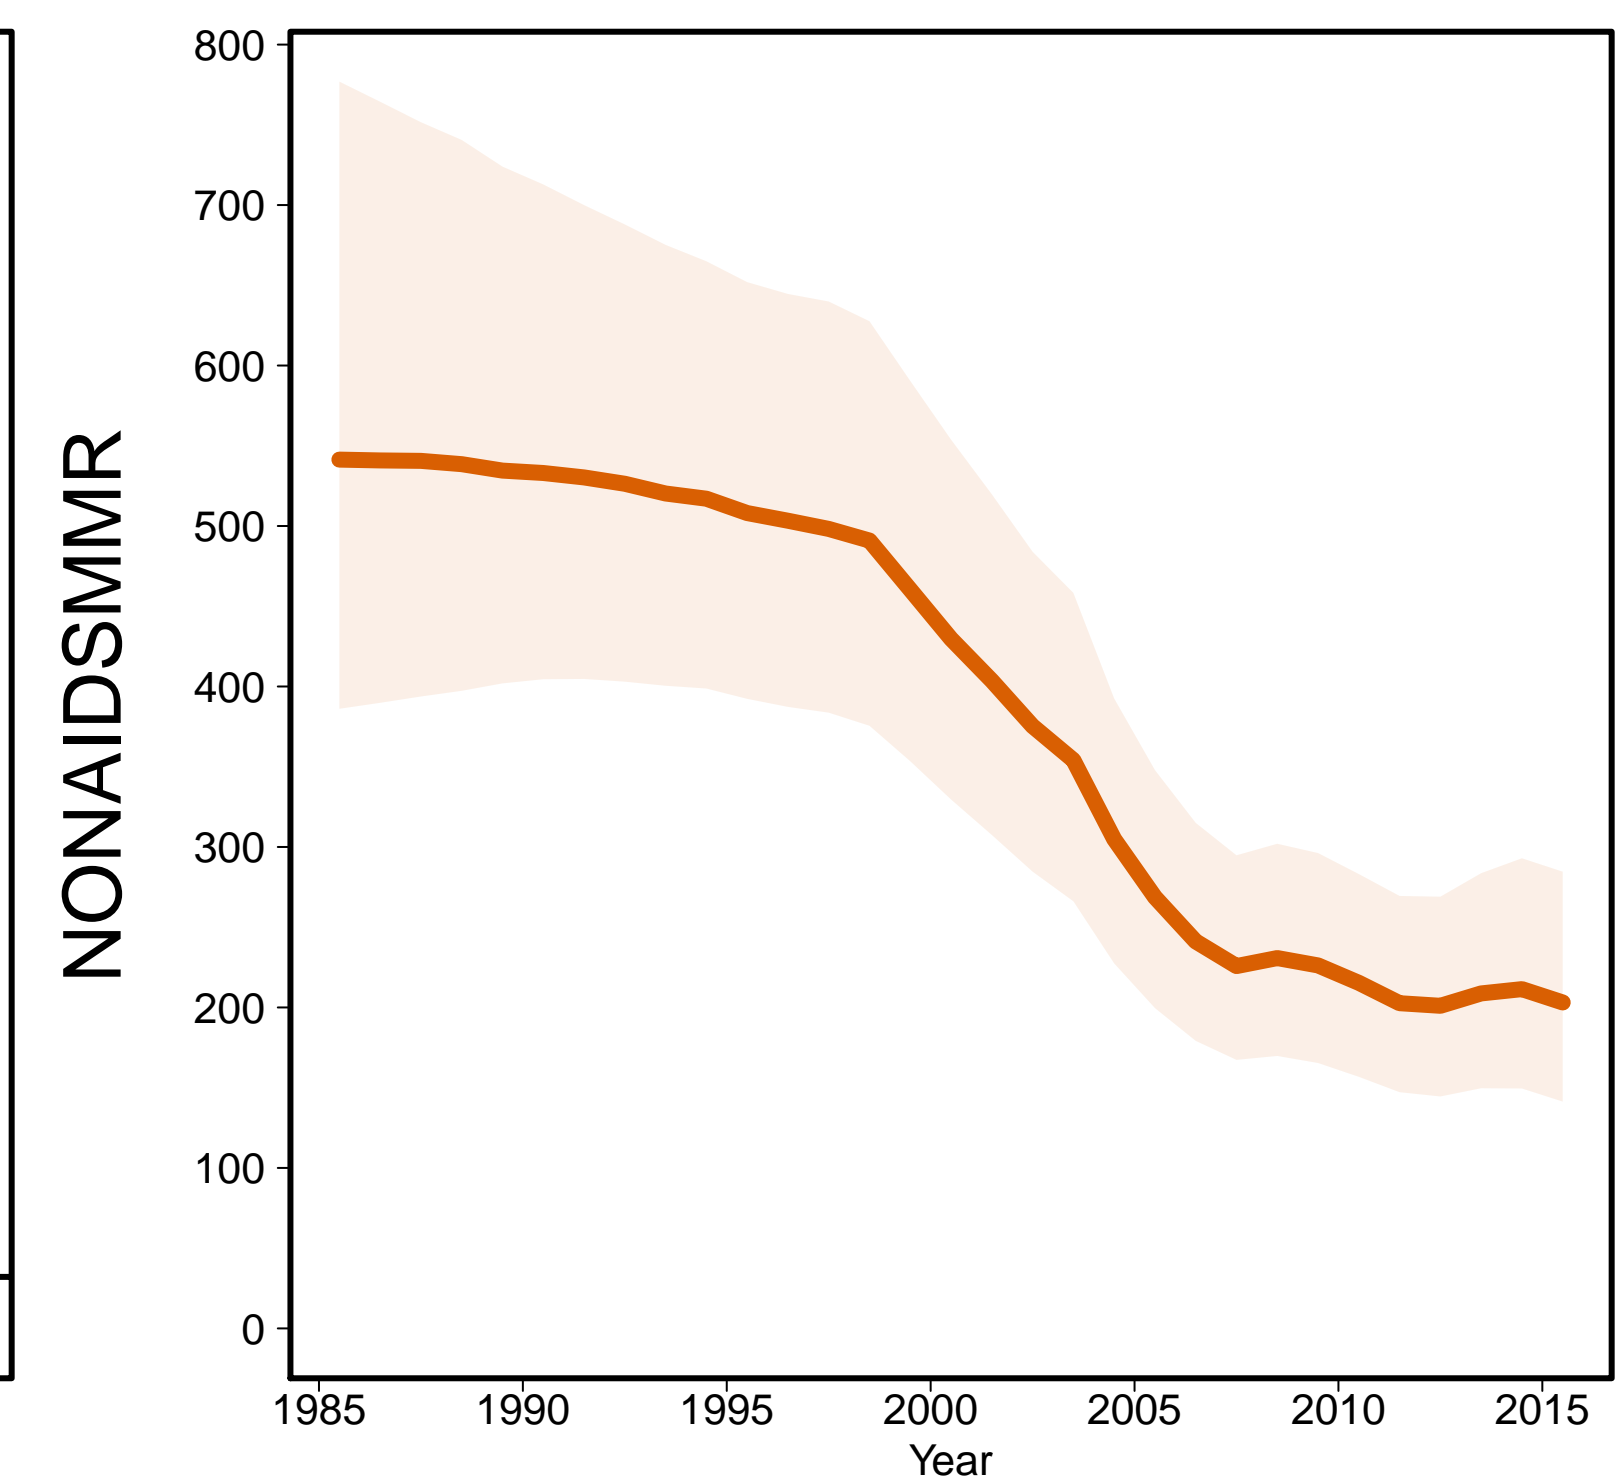

Aids MMR

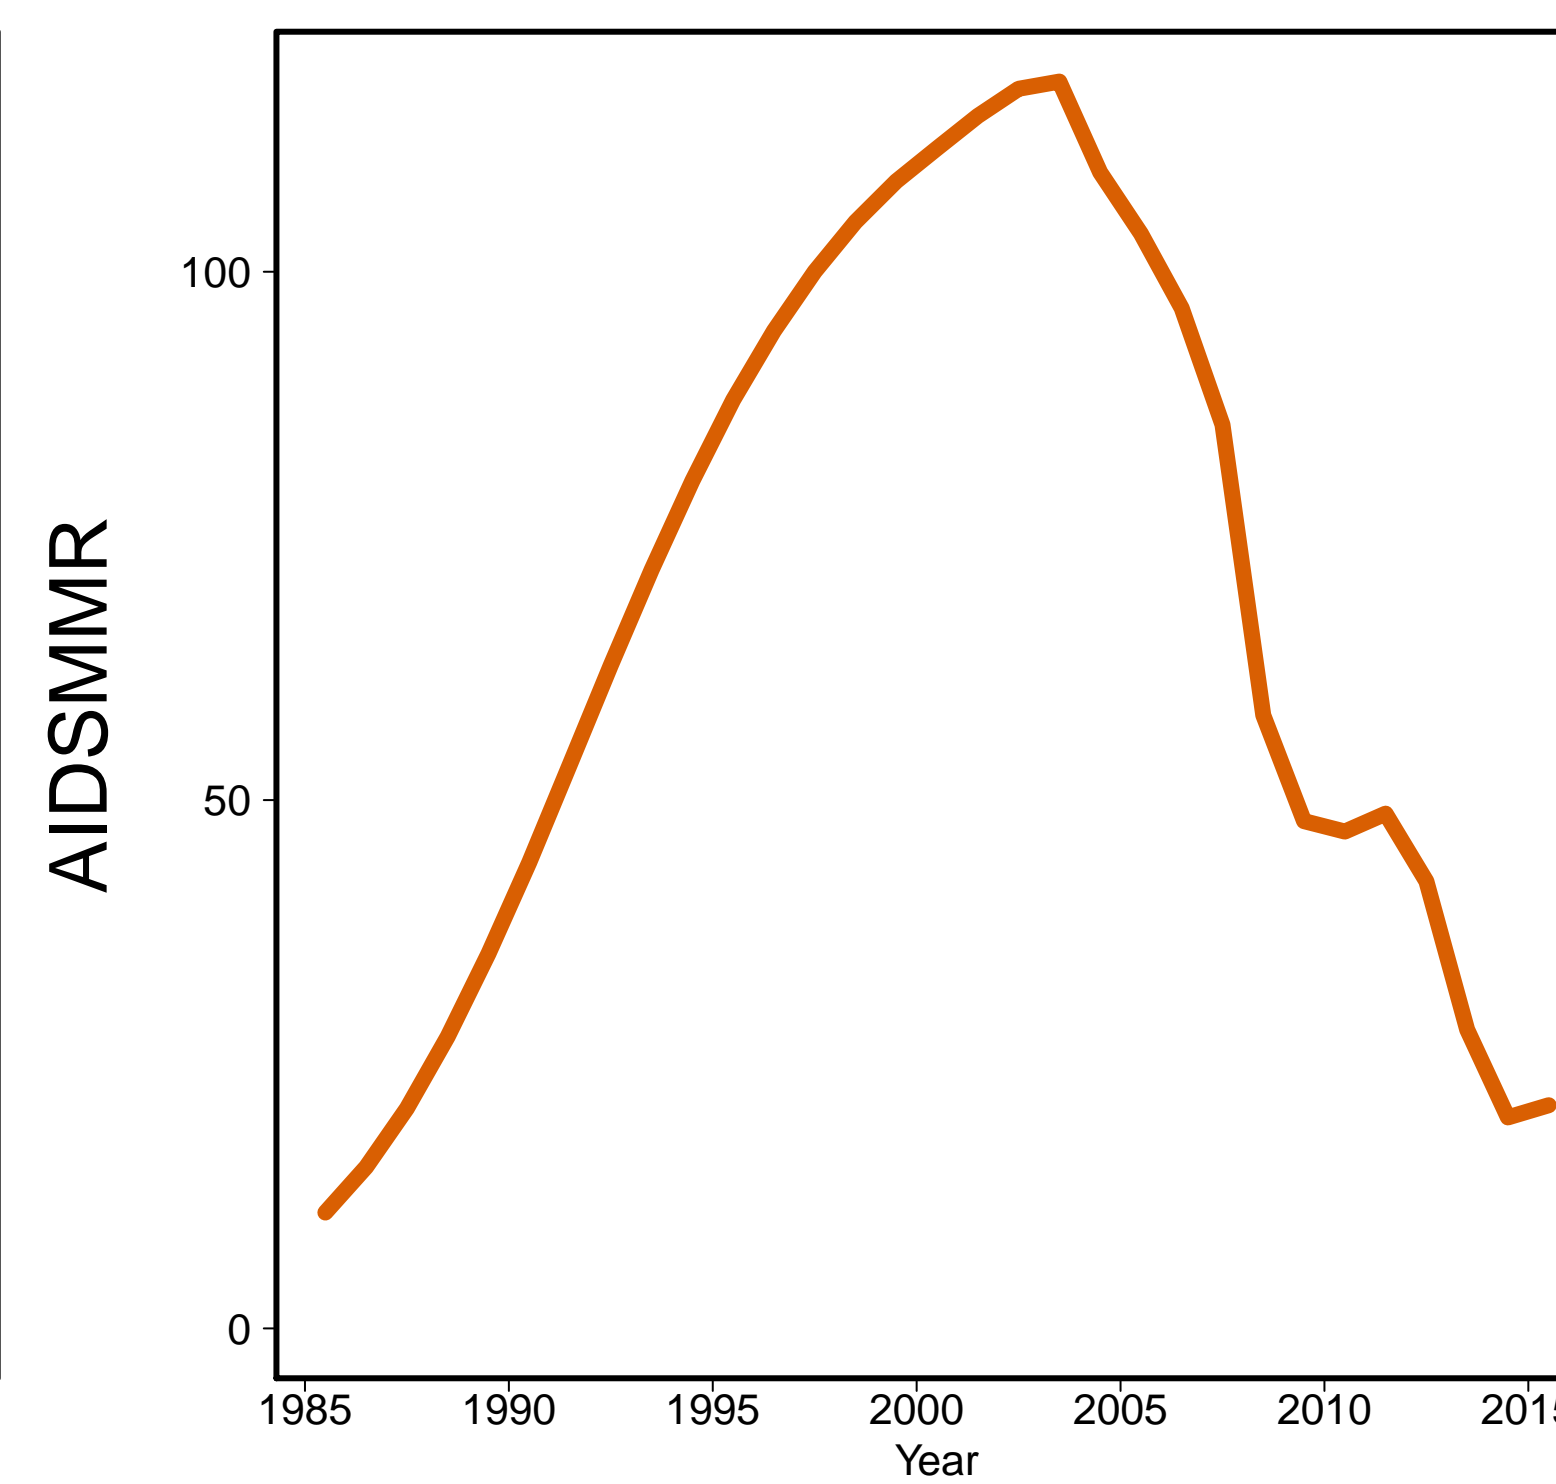

Zimbabwe [ZWE]  
(Eastern Africa)

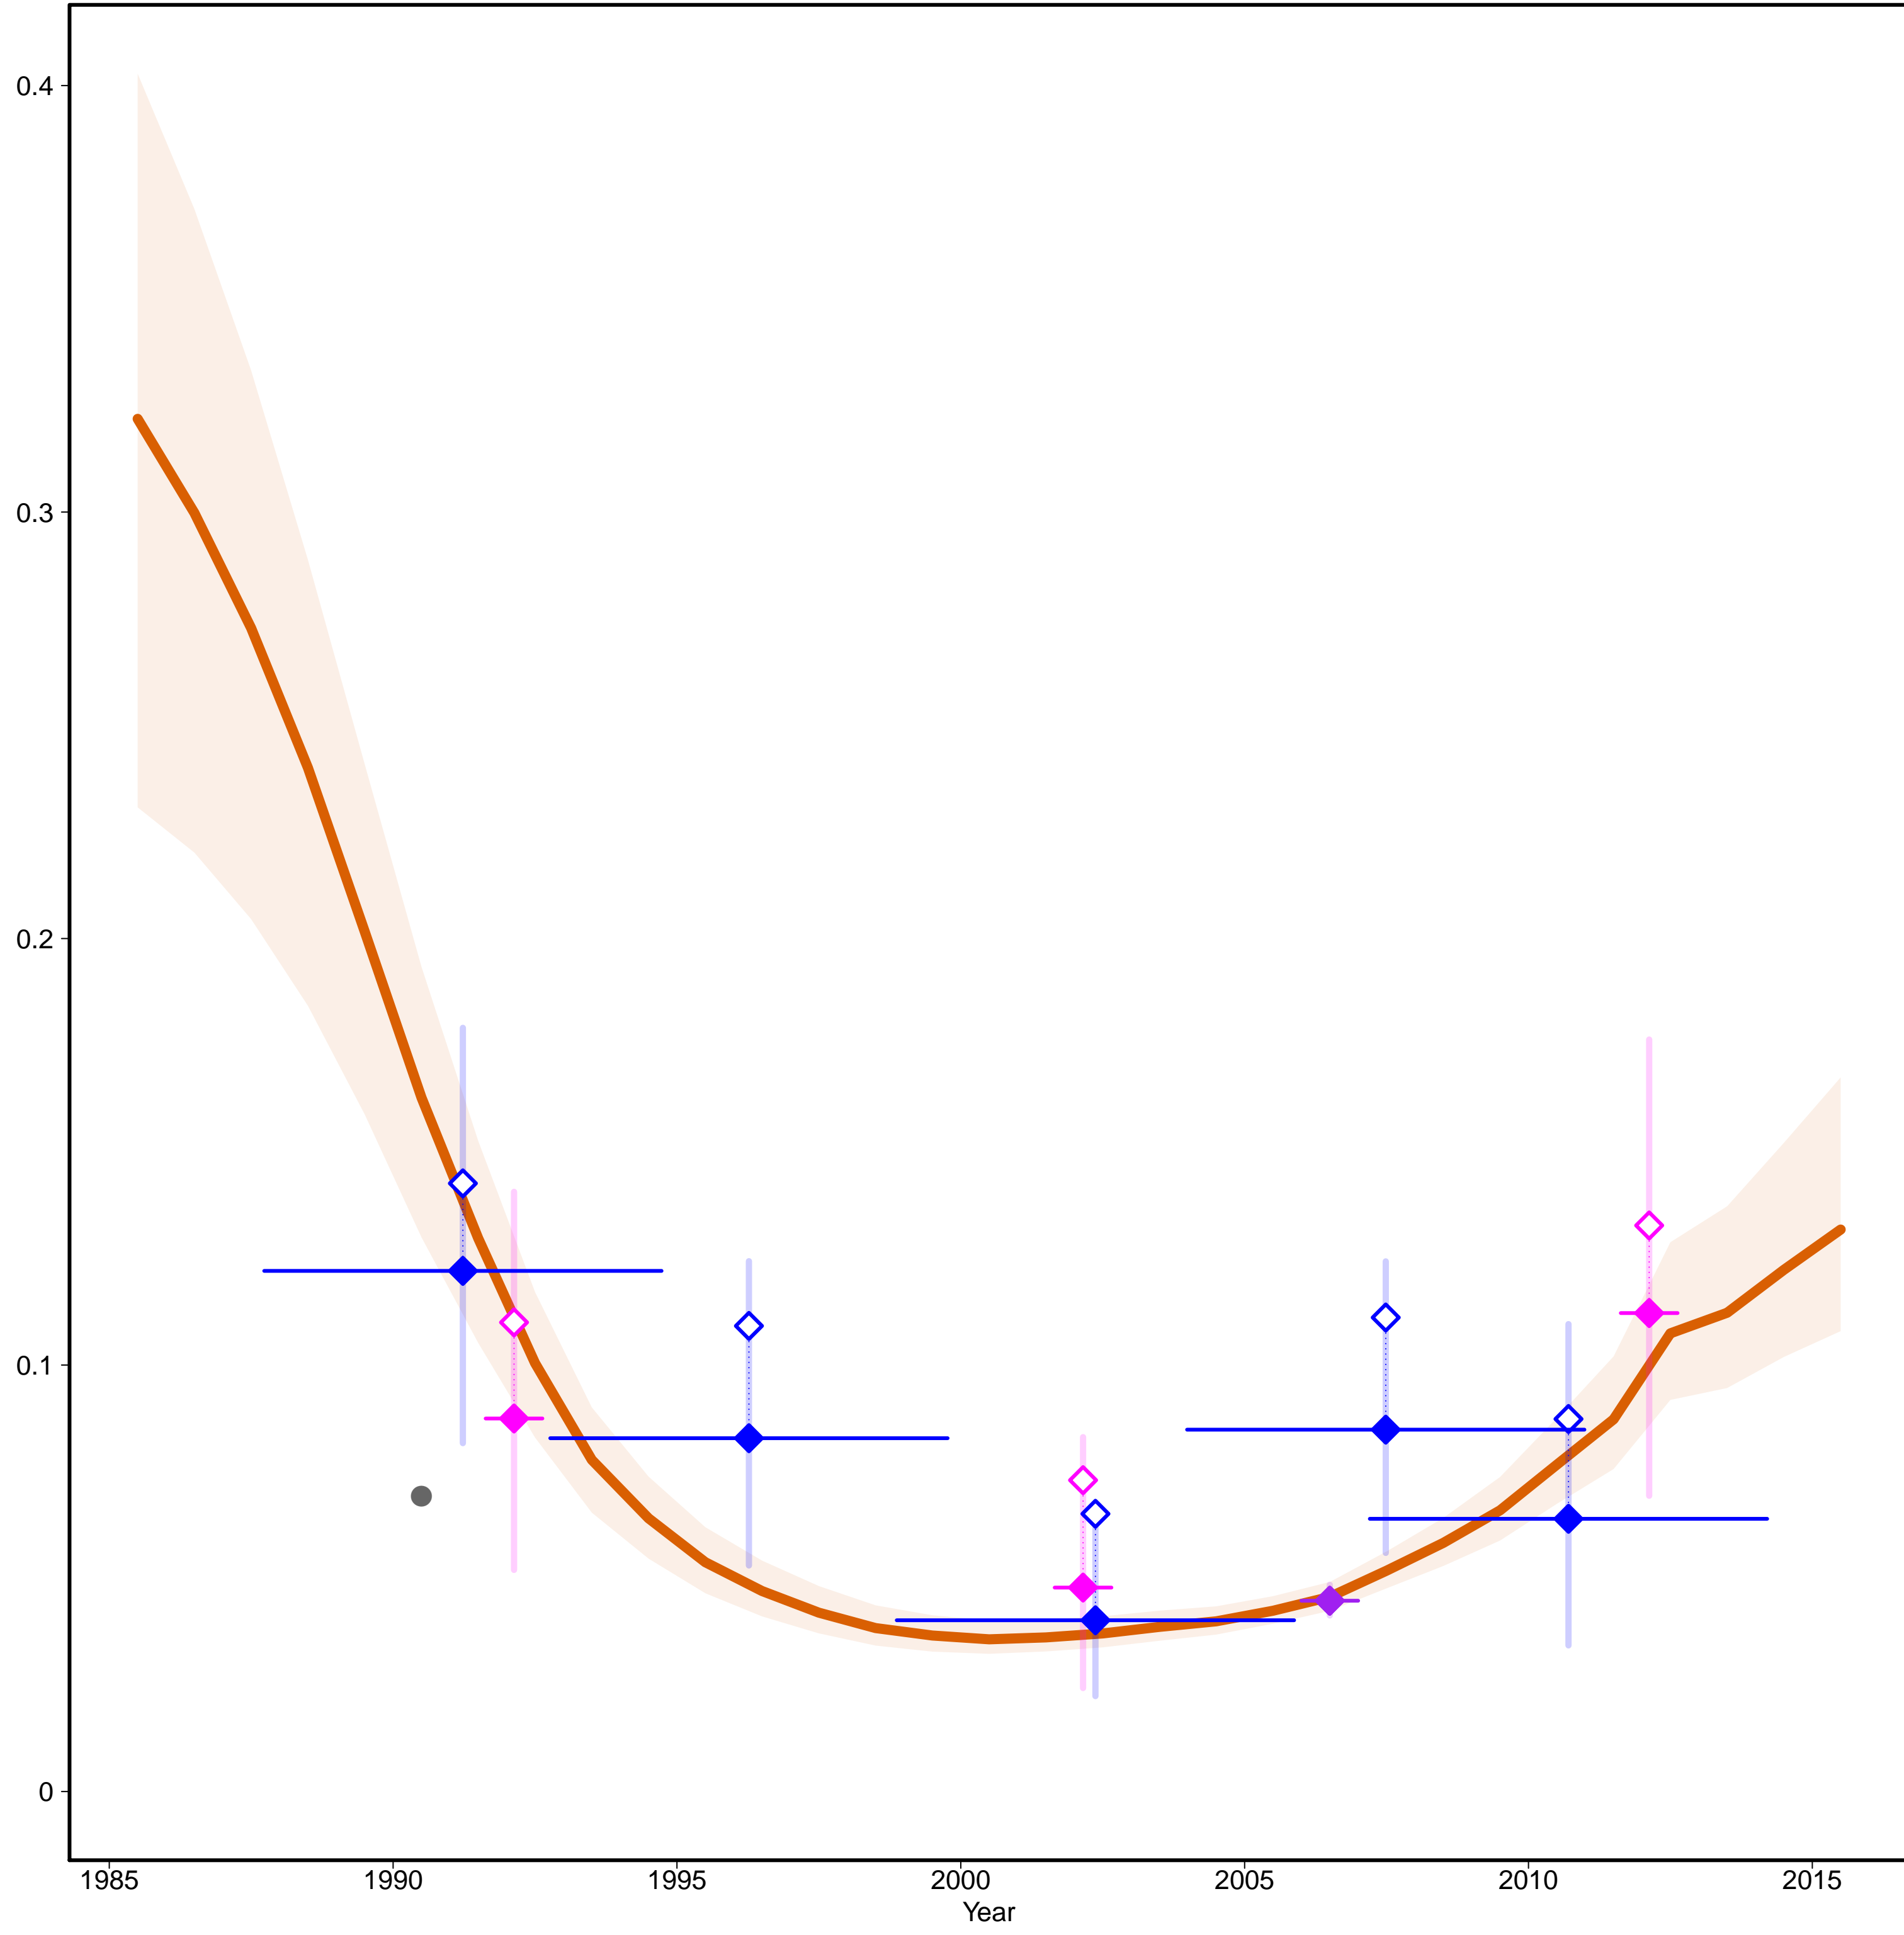

Zimbabwe [ZWE]  
(Eastern Africa)

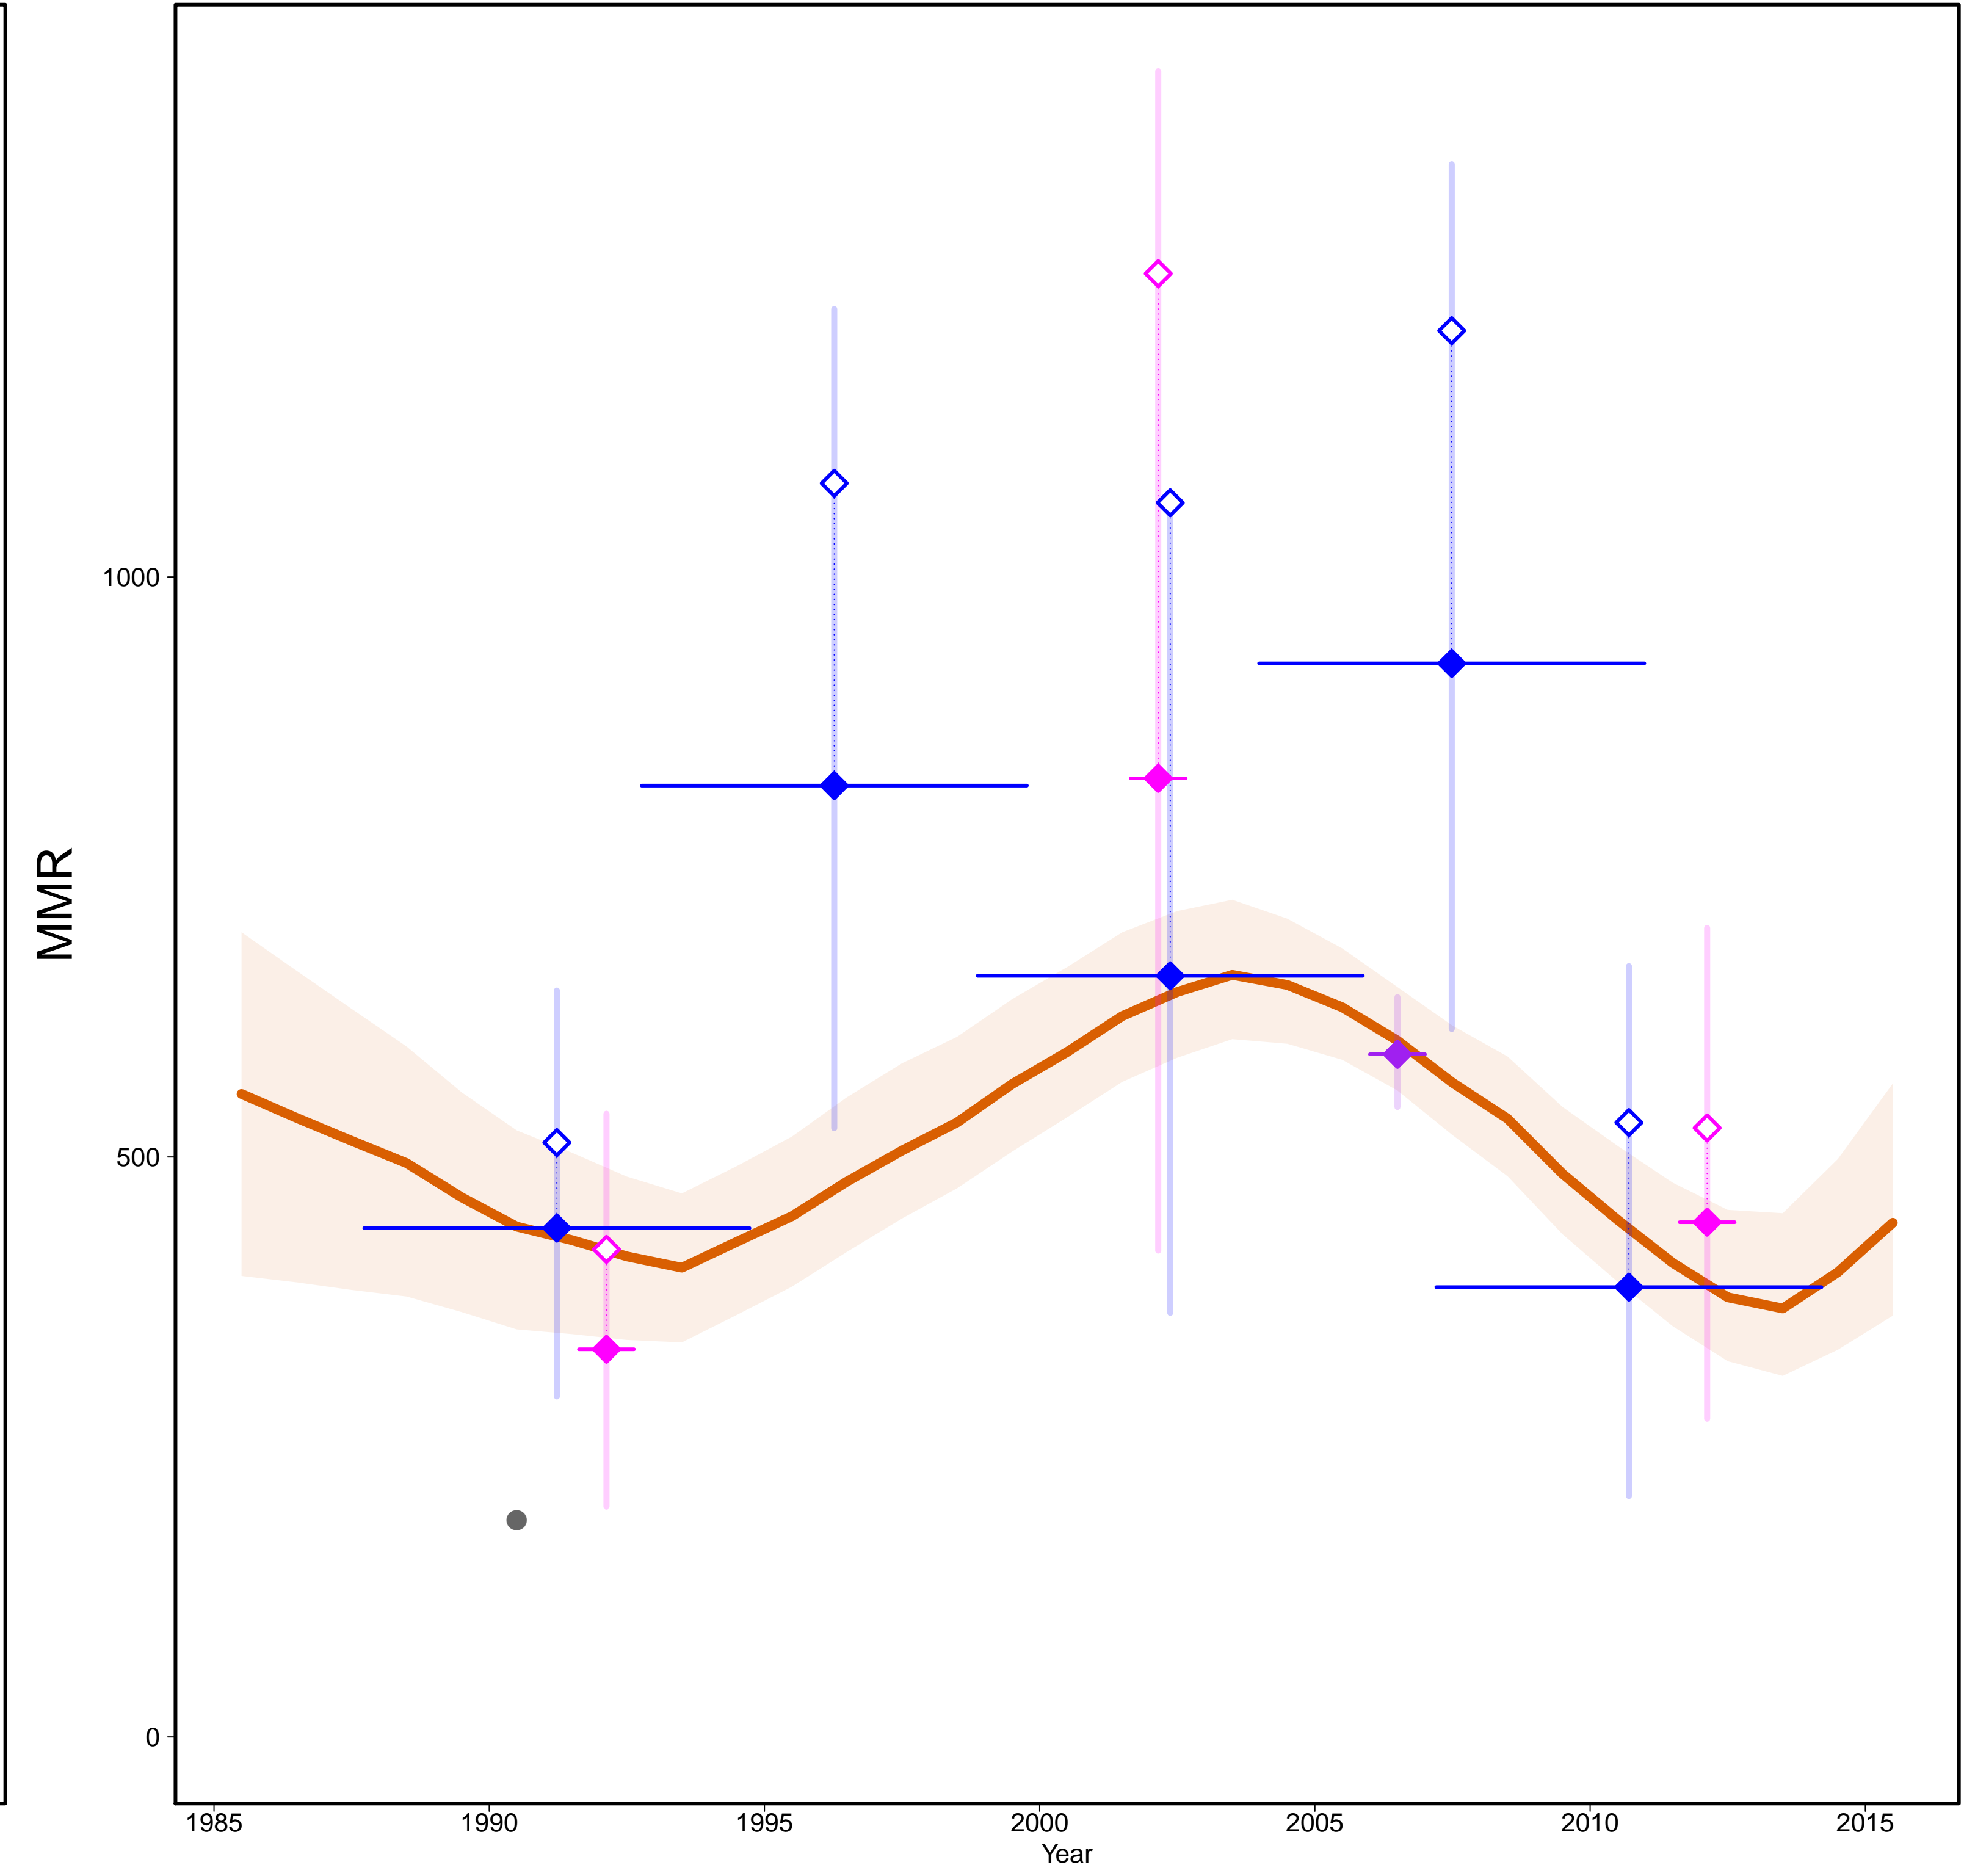

- Estimates —
- MMR Database 2015 —
- ◇ Observed Data
- ◆ Adjusted Data
- Data type —
- ◆ Spec. studies
- ◆ DHS
- ◆ Census
- Excluded VR data  
(data quality issues)

Gross Domestic Product

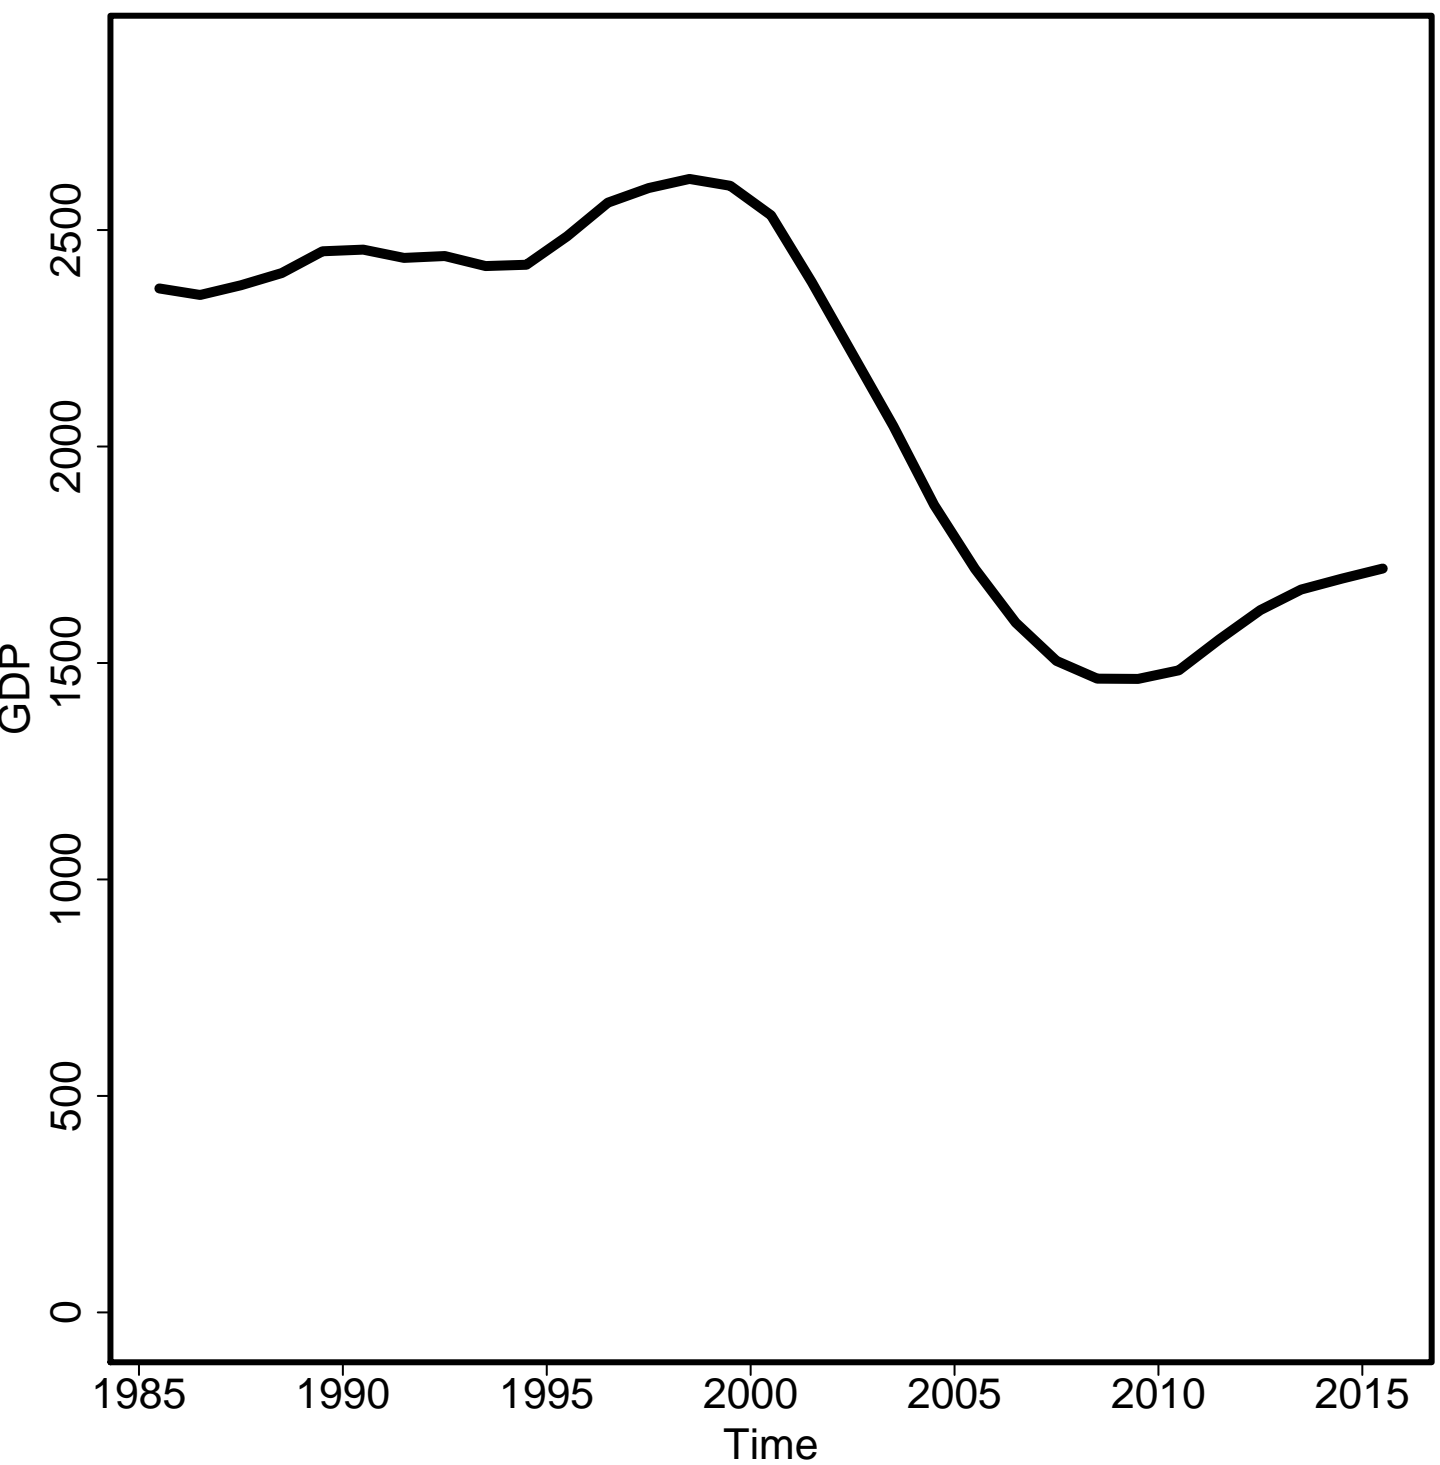

General Fertility Rate

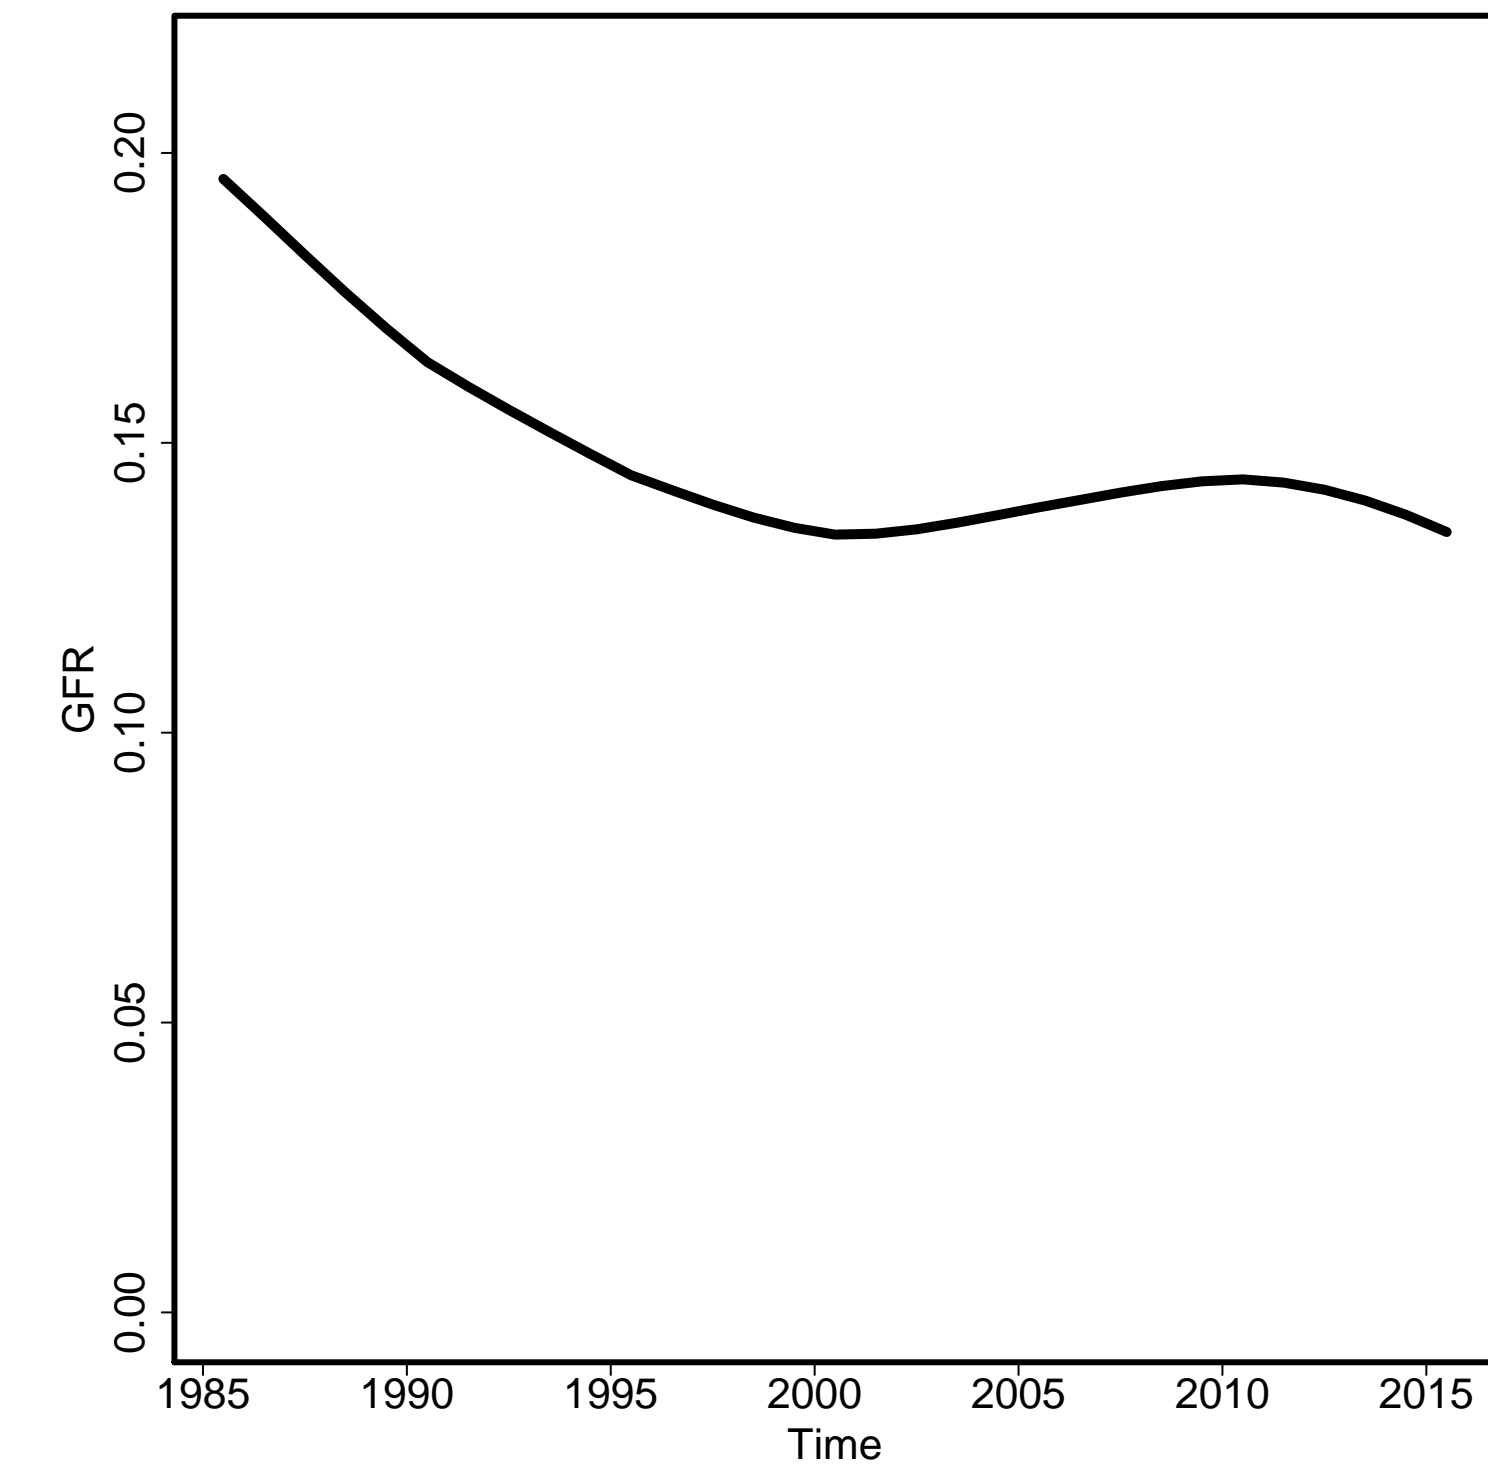

Skilled Attendance to Birth

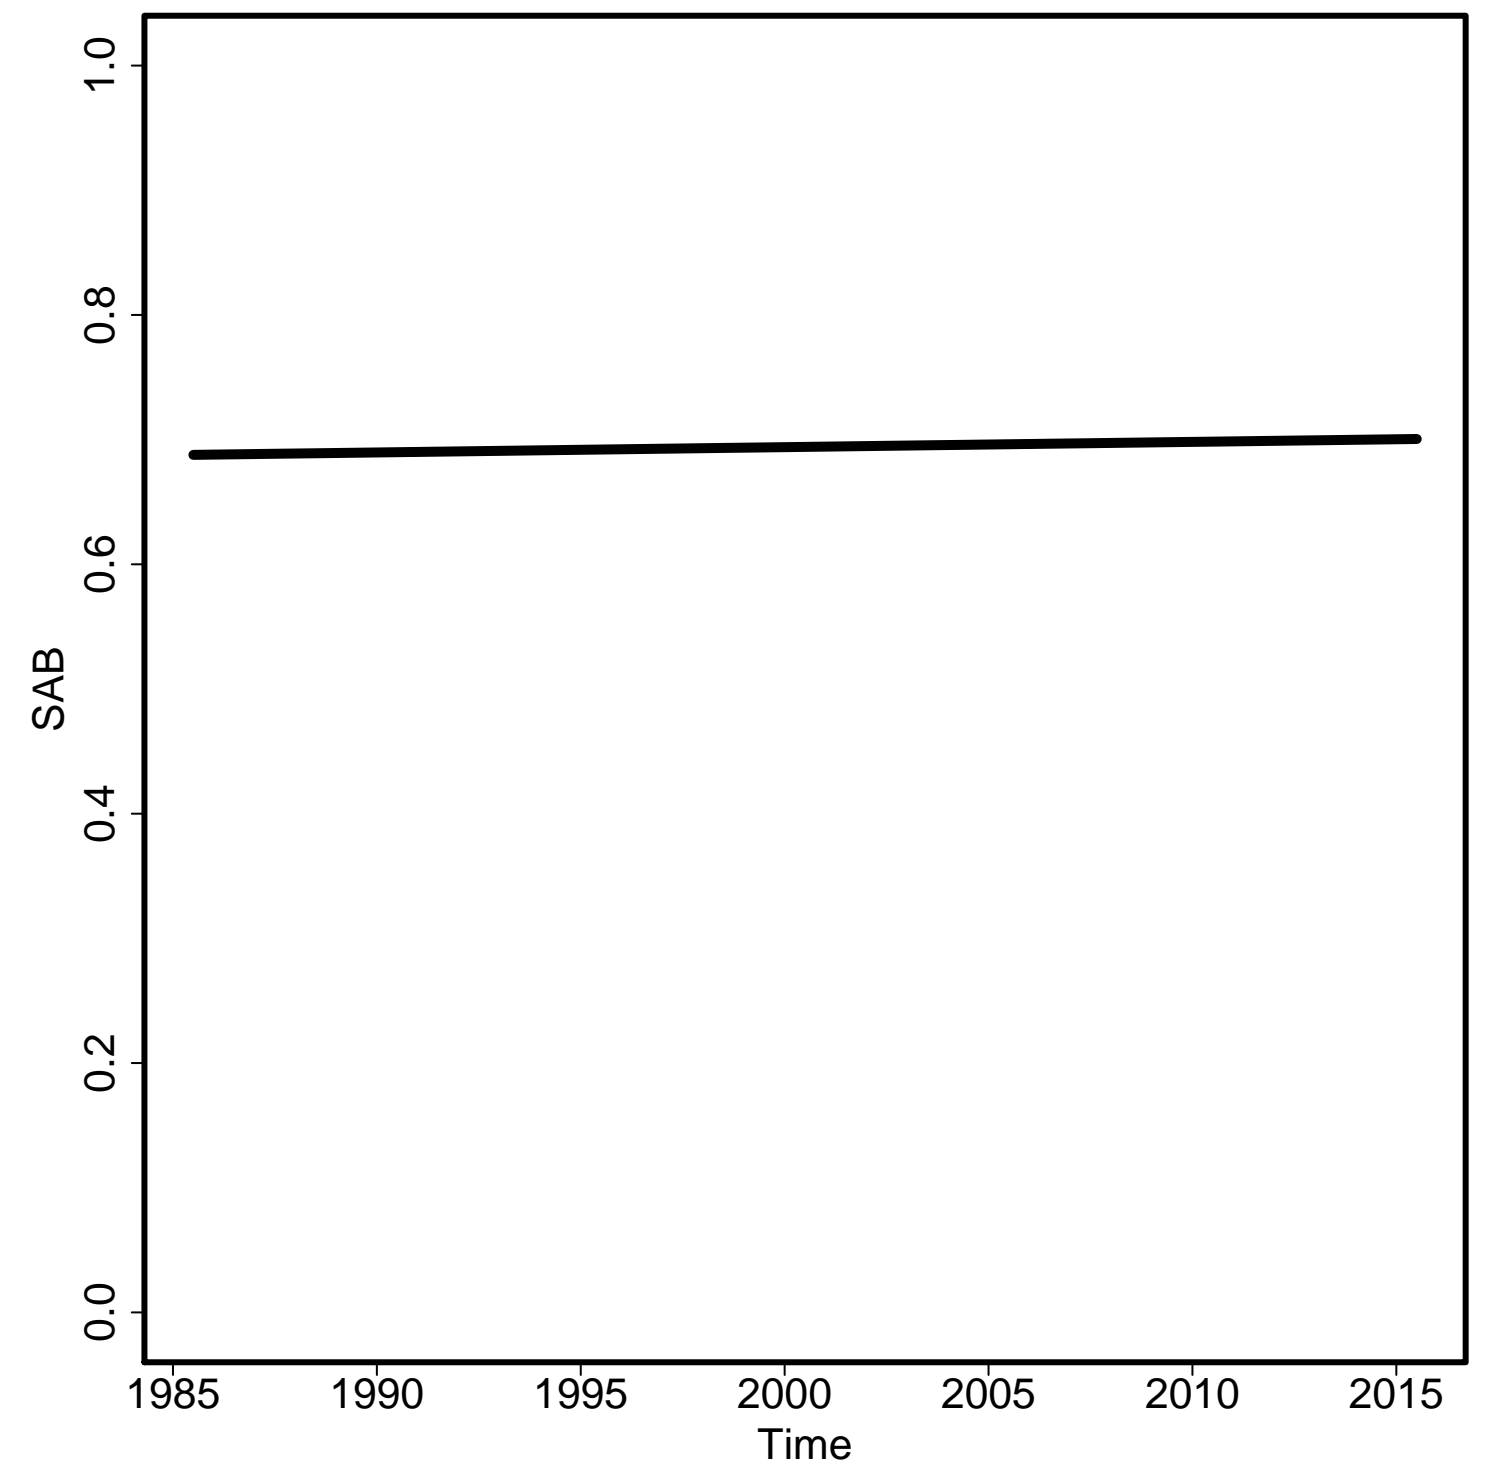

Envelope/Births

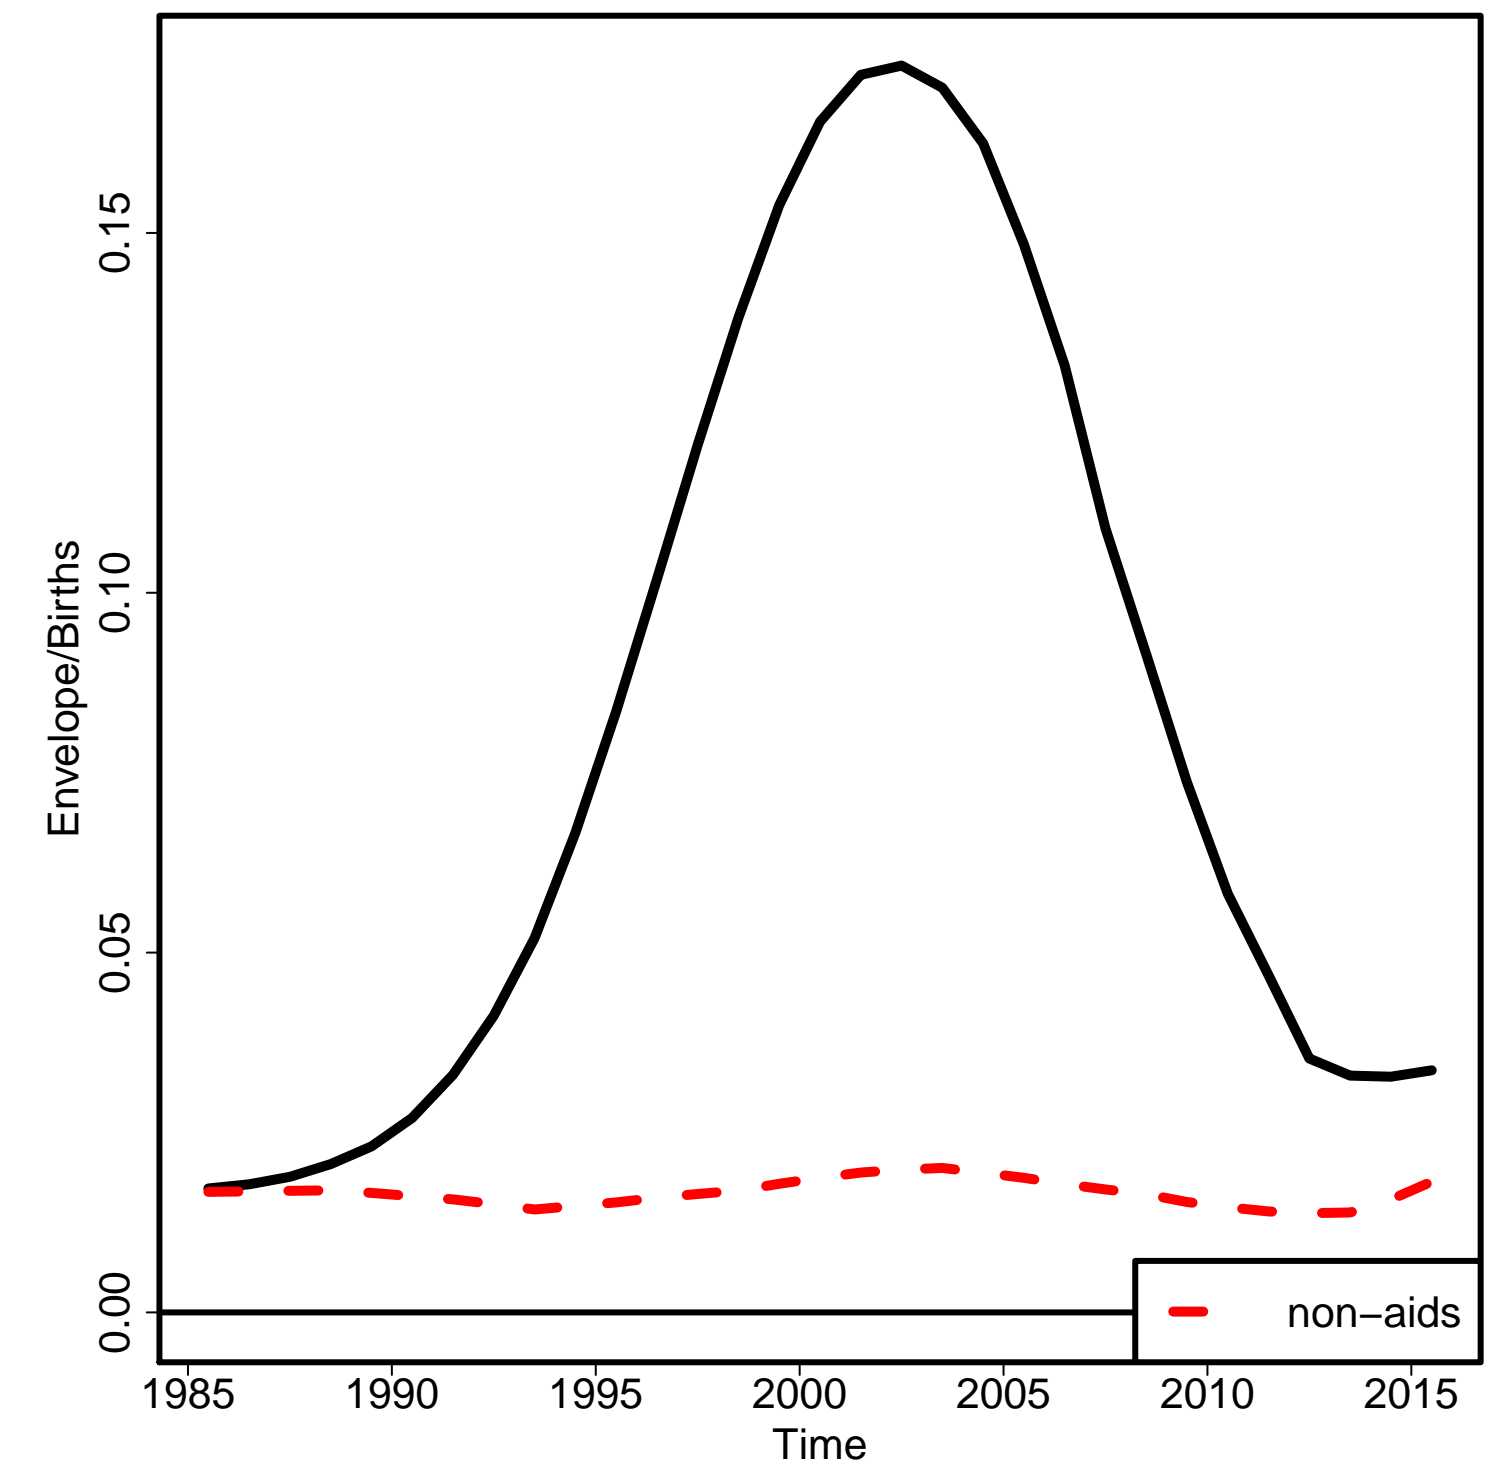

Non-aids MMR

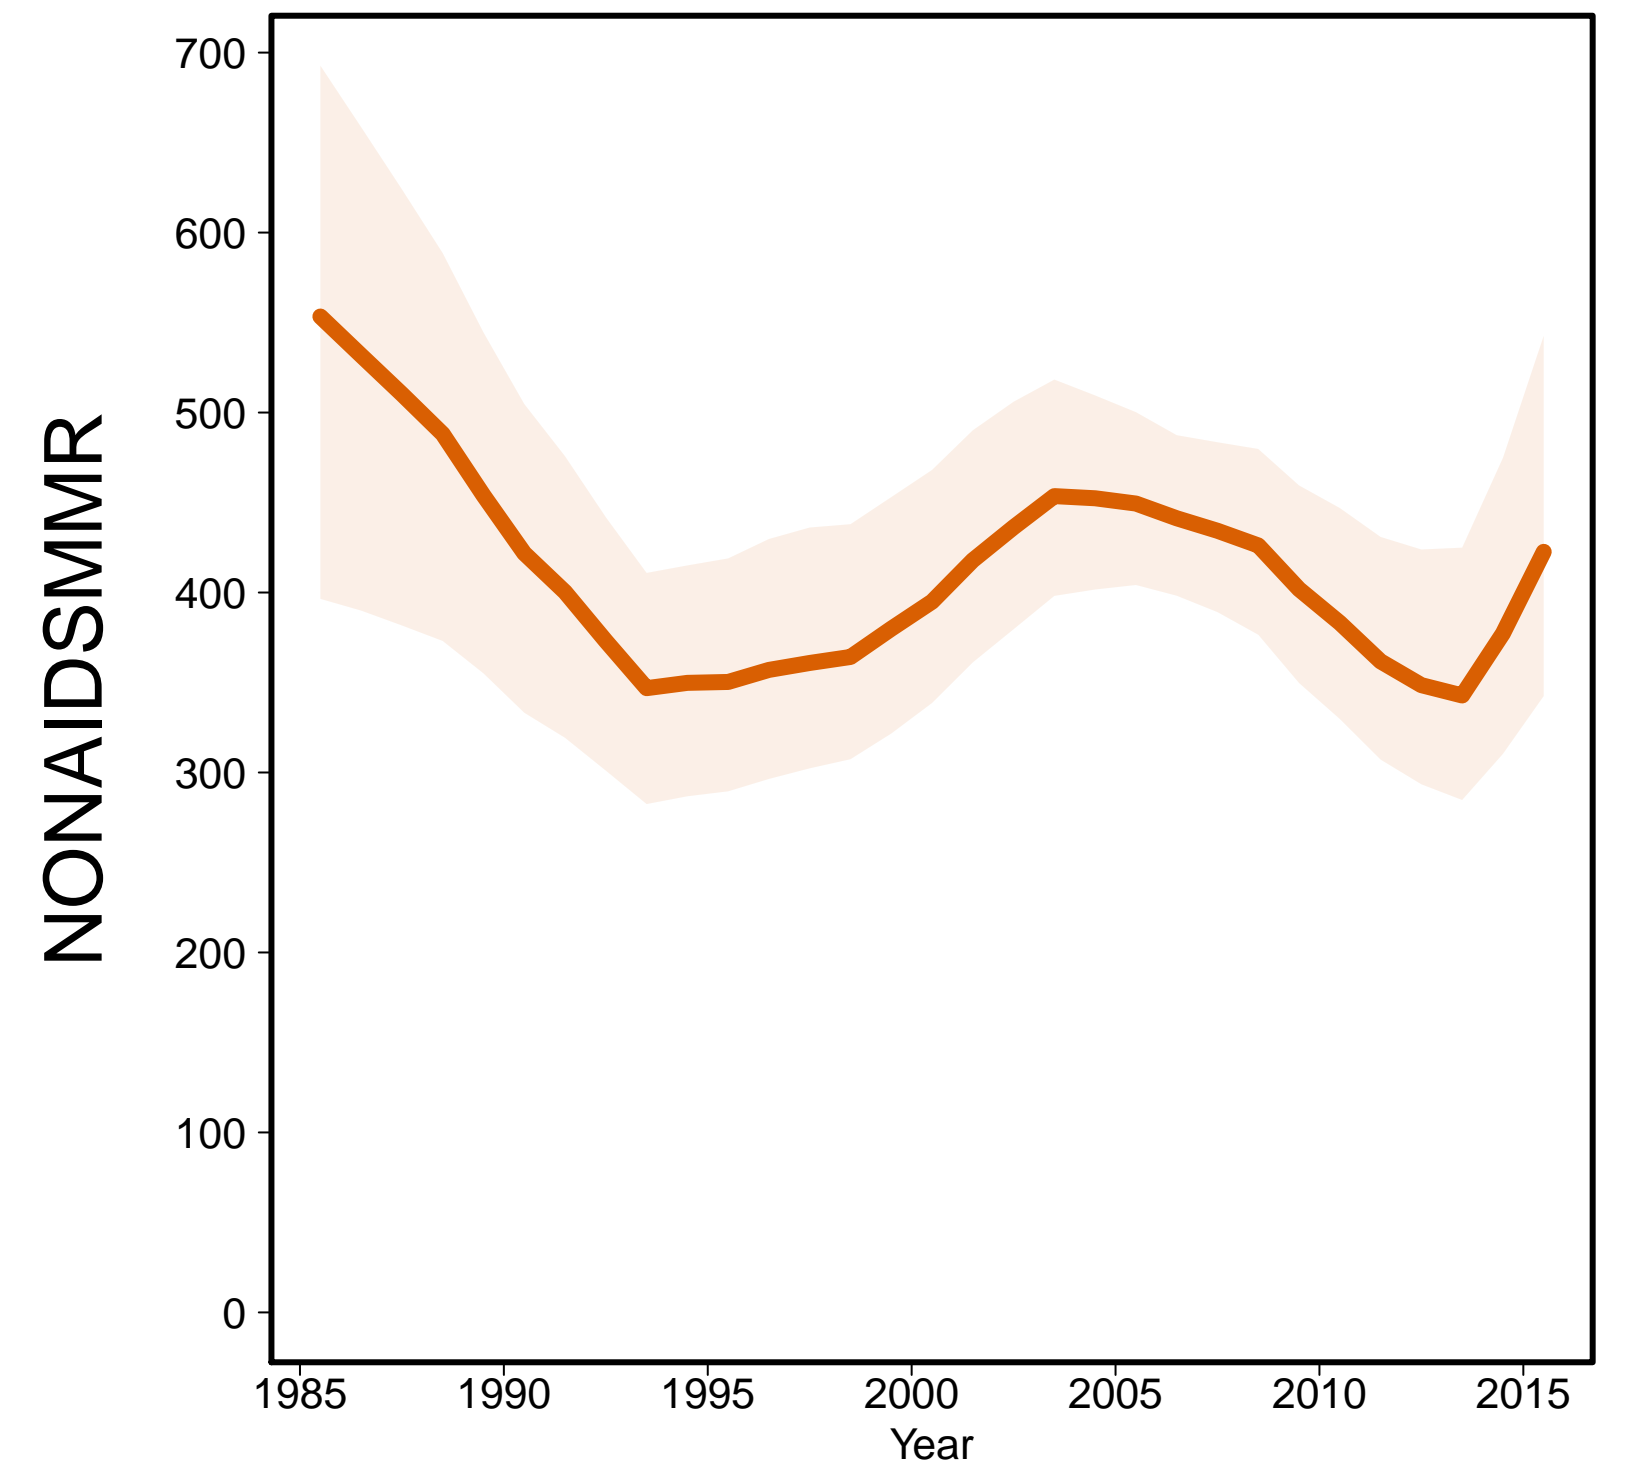

Aids MMR

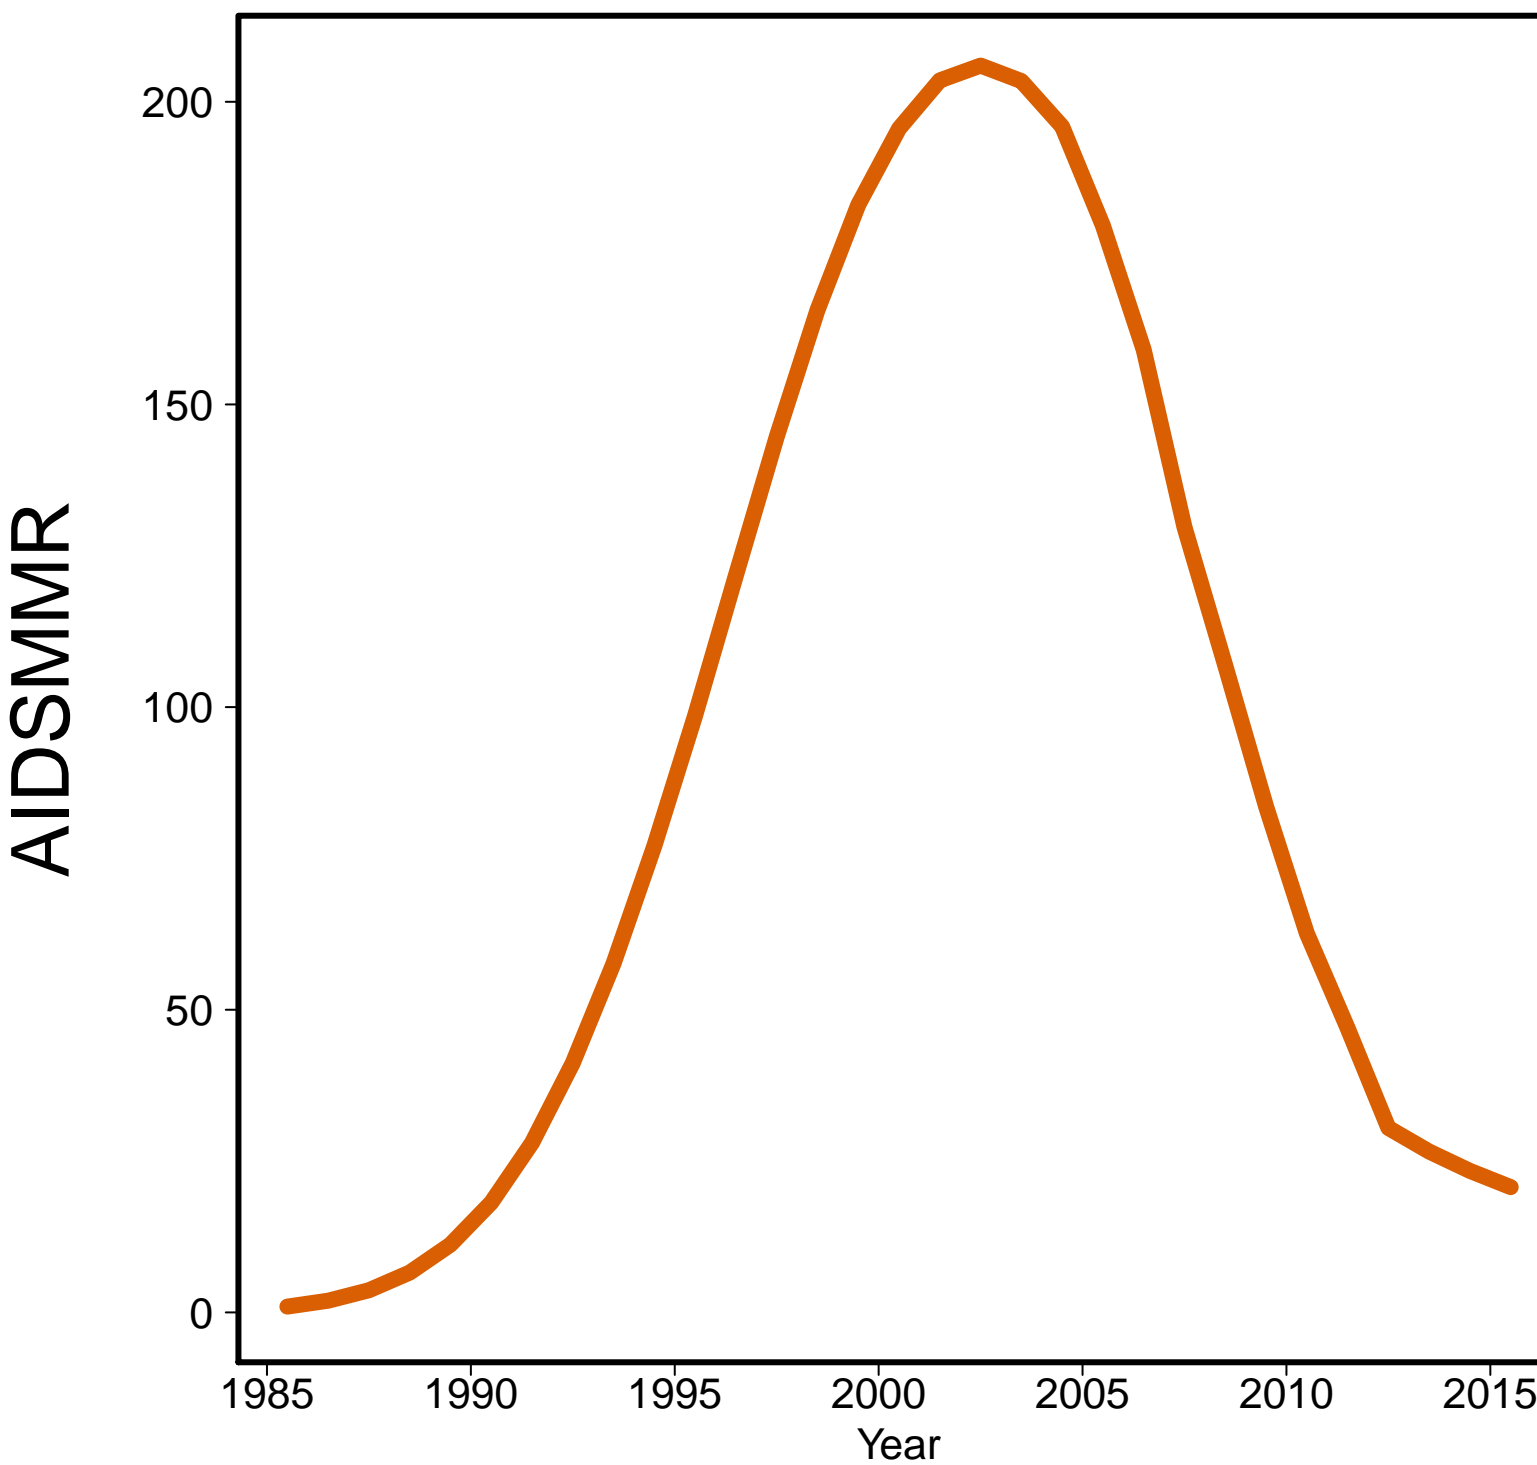

Afghanistan [AFG]  
(Southern Asia)

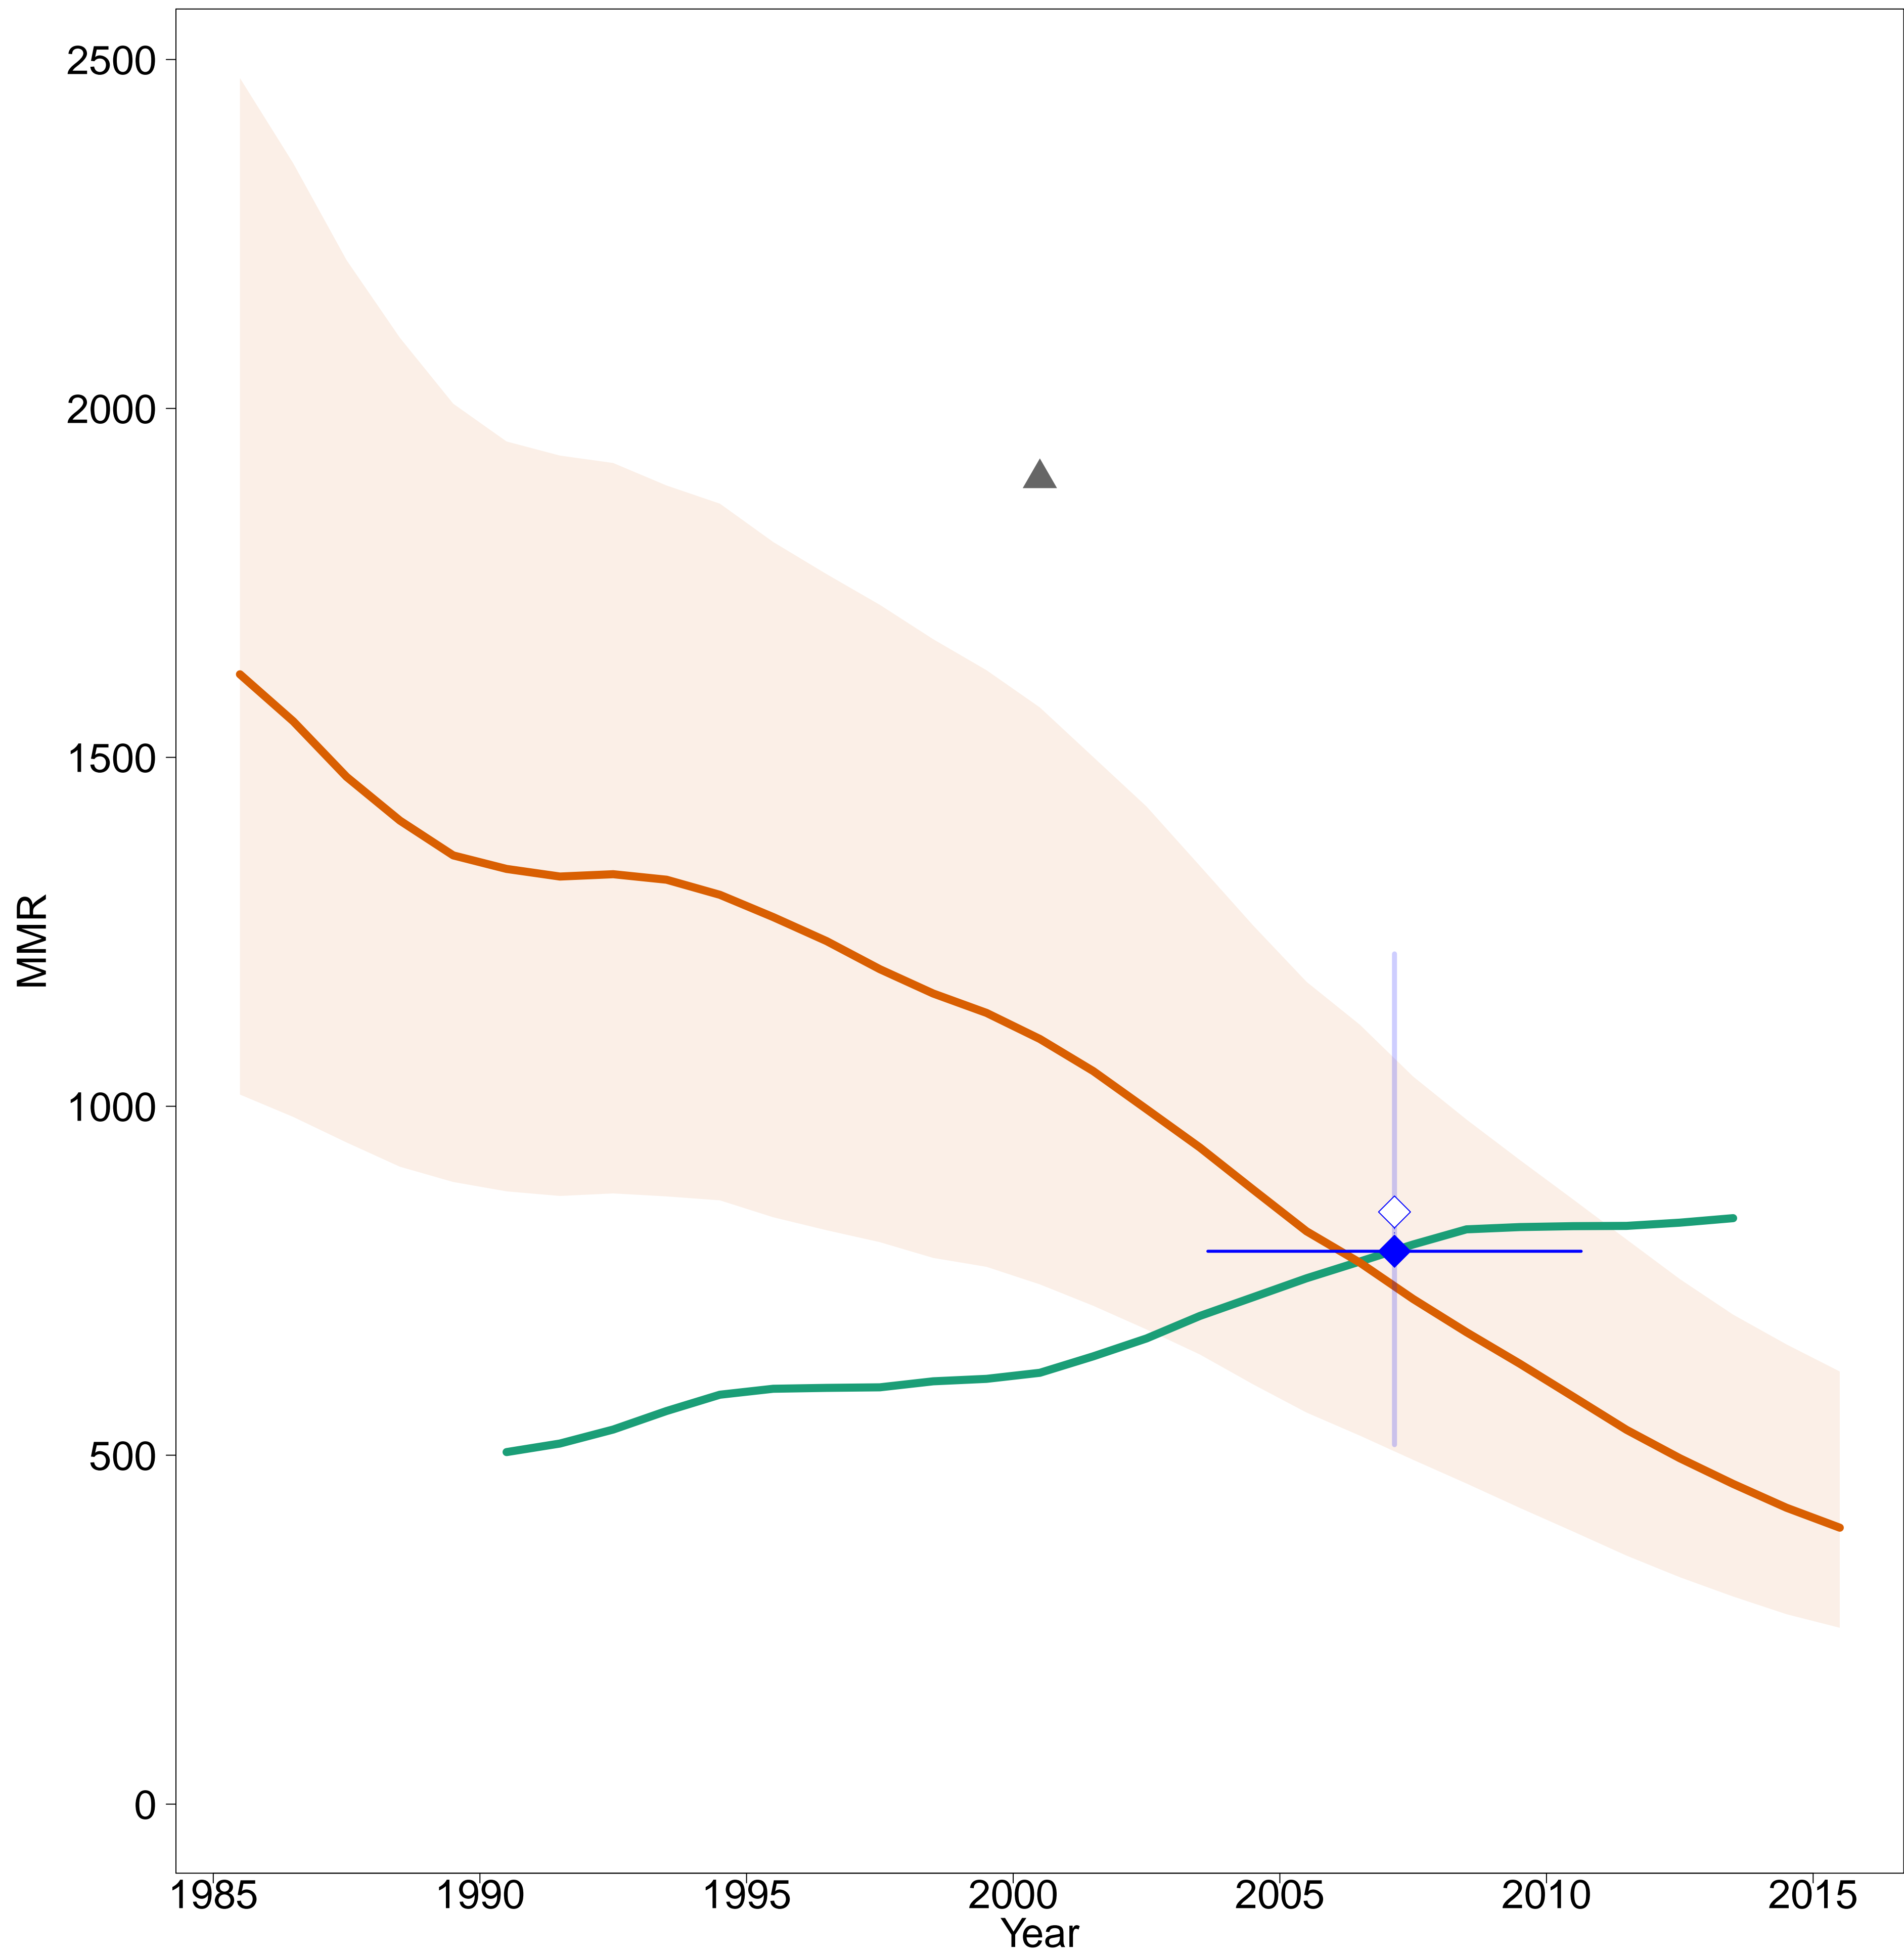

- Estimates -
- MMEIG 2015
- GBD 2013
- MMR Database 2015 -
- Observed Data
- Adjusted Data
- Data type -
- DHS
- Excluded misc. studies



Albania [ALB]  
(Transition countries of South-Eastern Europe)

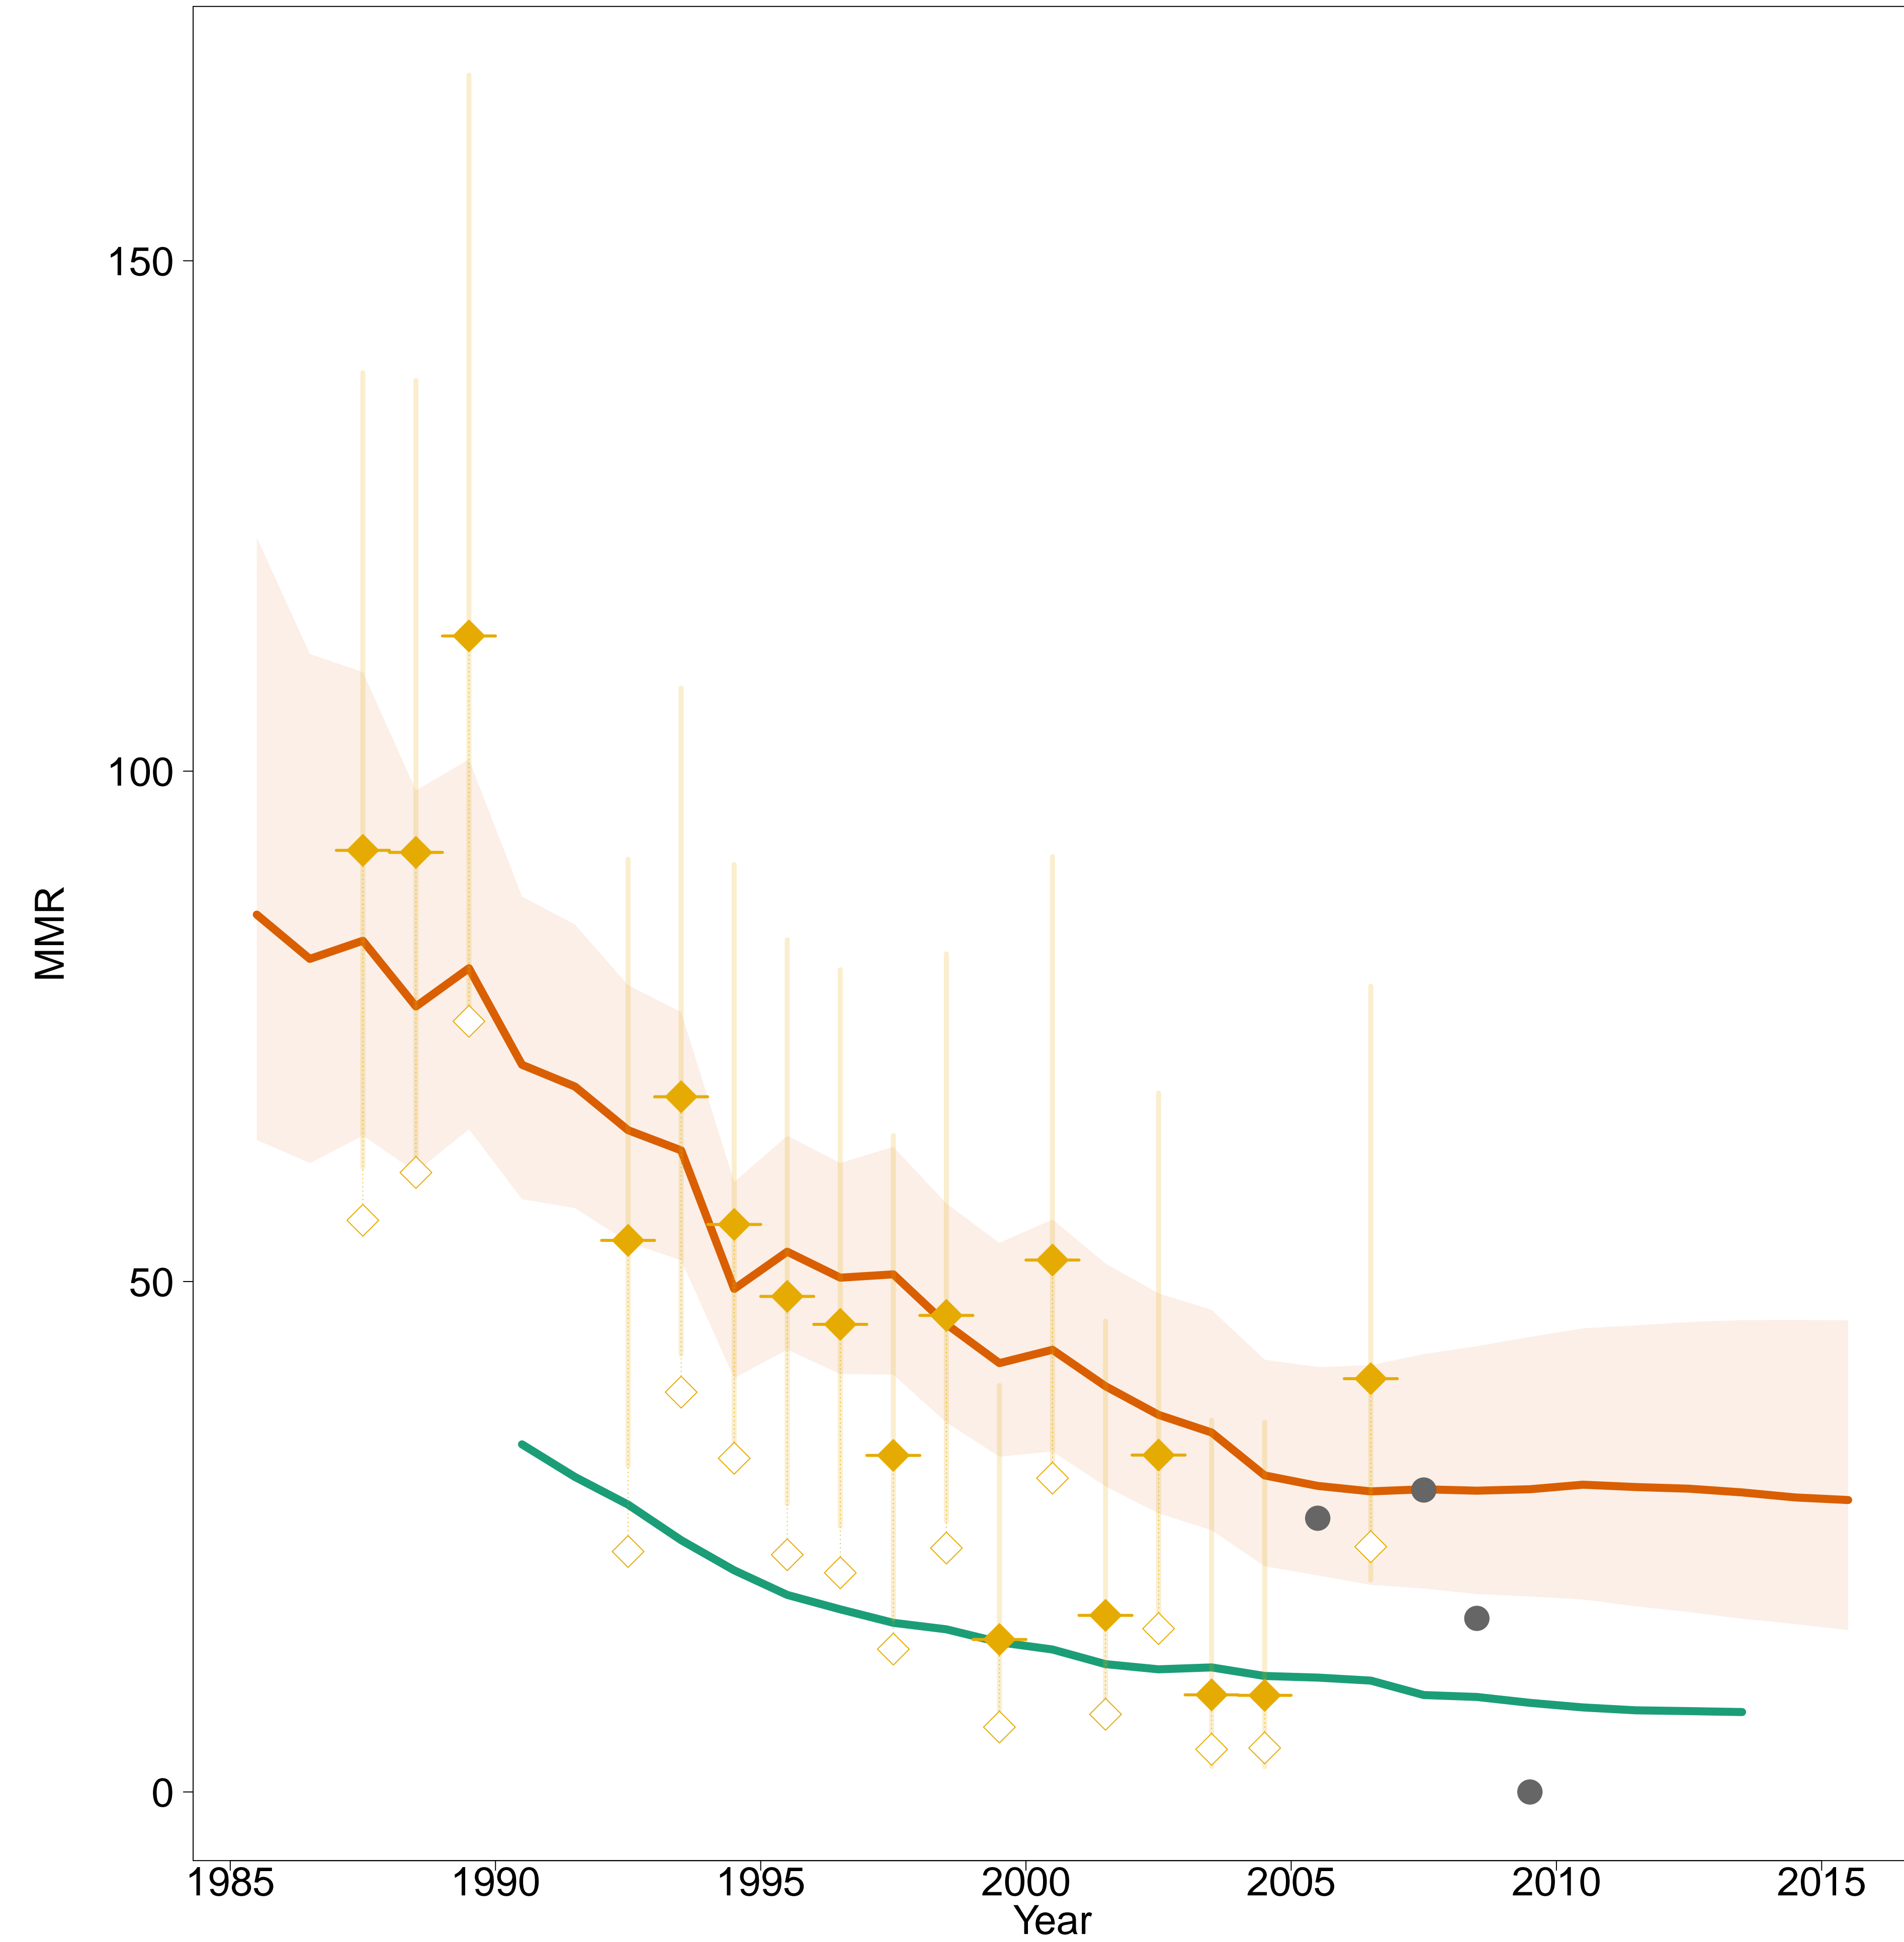

- Estimates –
- MMEIG 2015
- GBD 2013
- MMR Database 2015 –
- ◊ Observed Data
- ◆ Adjusted Data
- Data type –
- ◆ VR
- Excluded VR data (data quality issues)

Algeria [DZA]  
(Northern Africa)

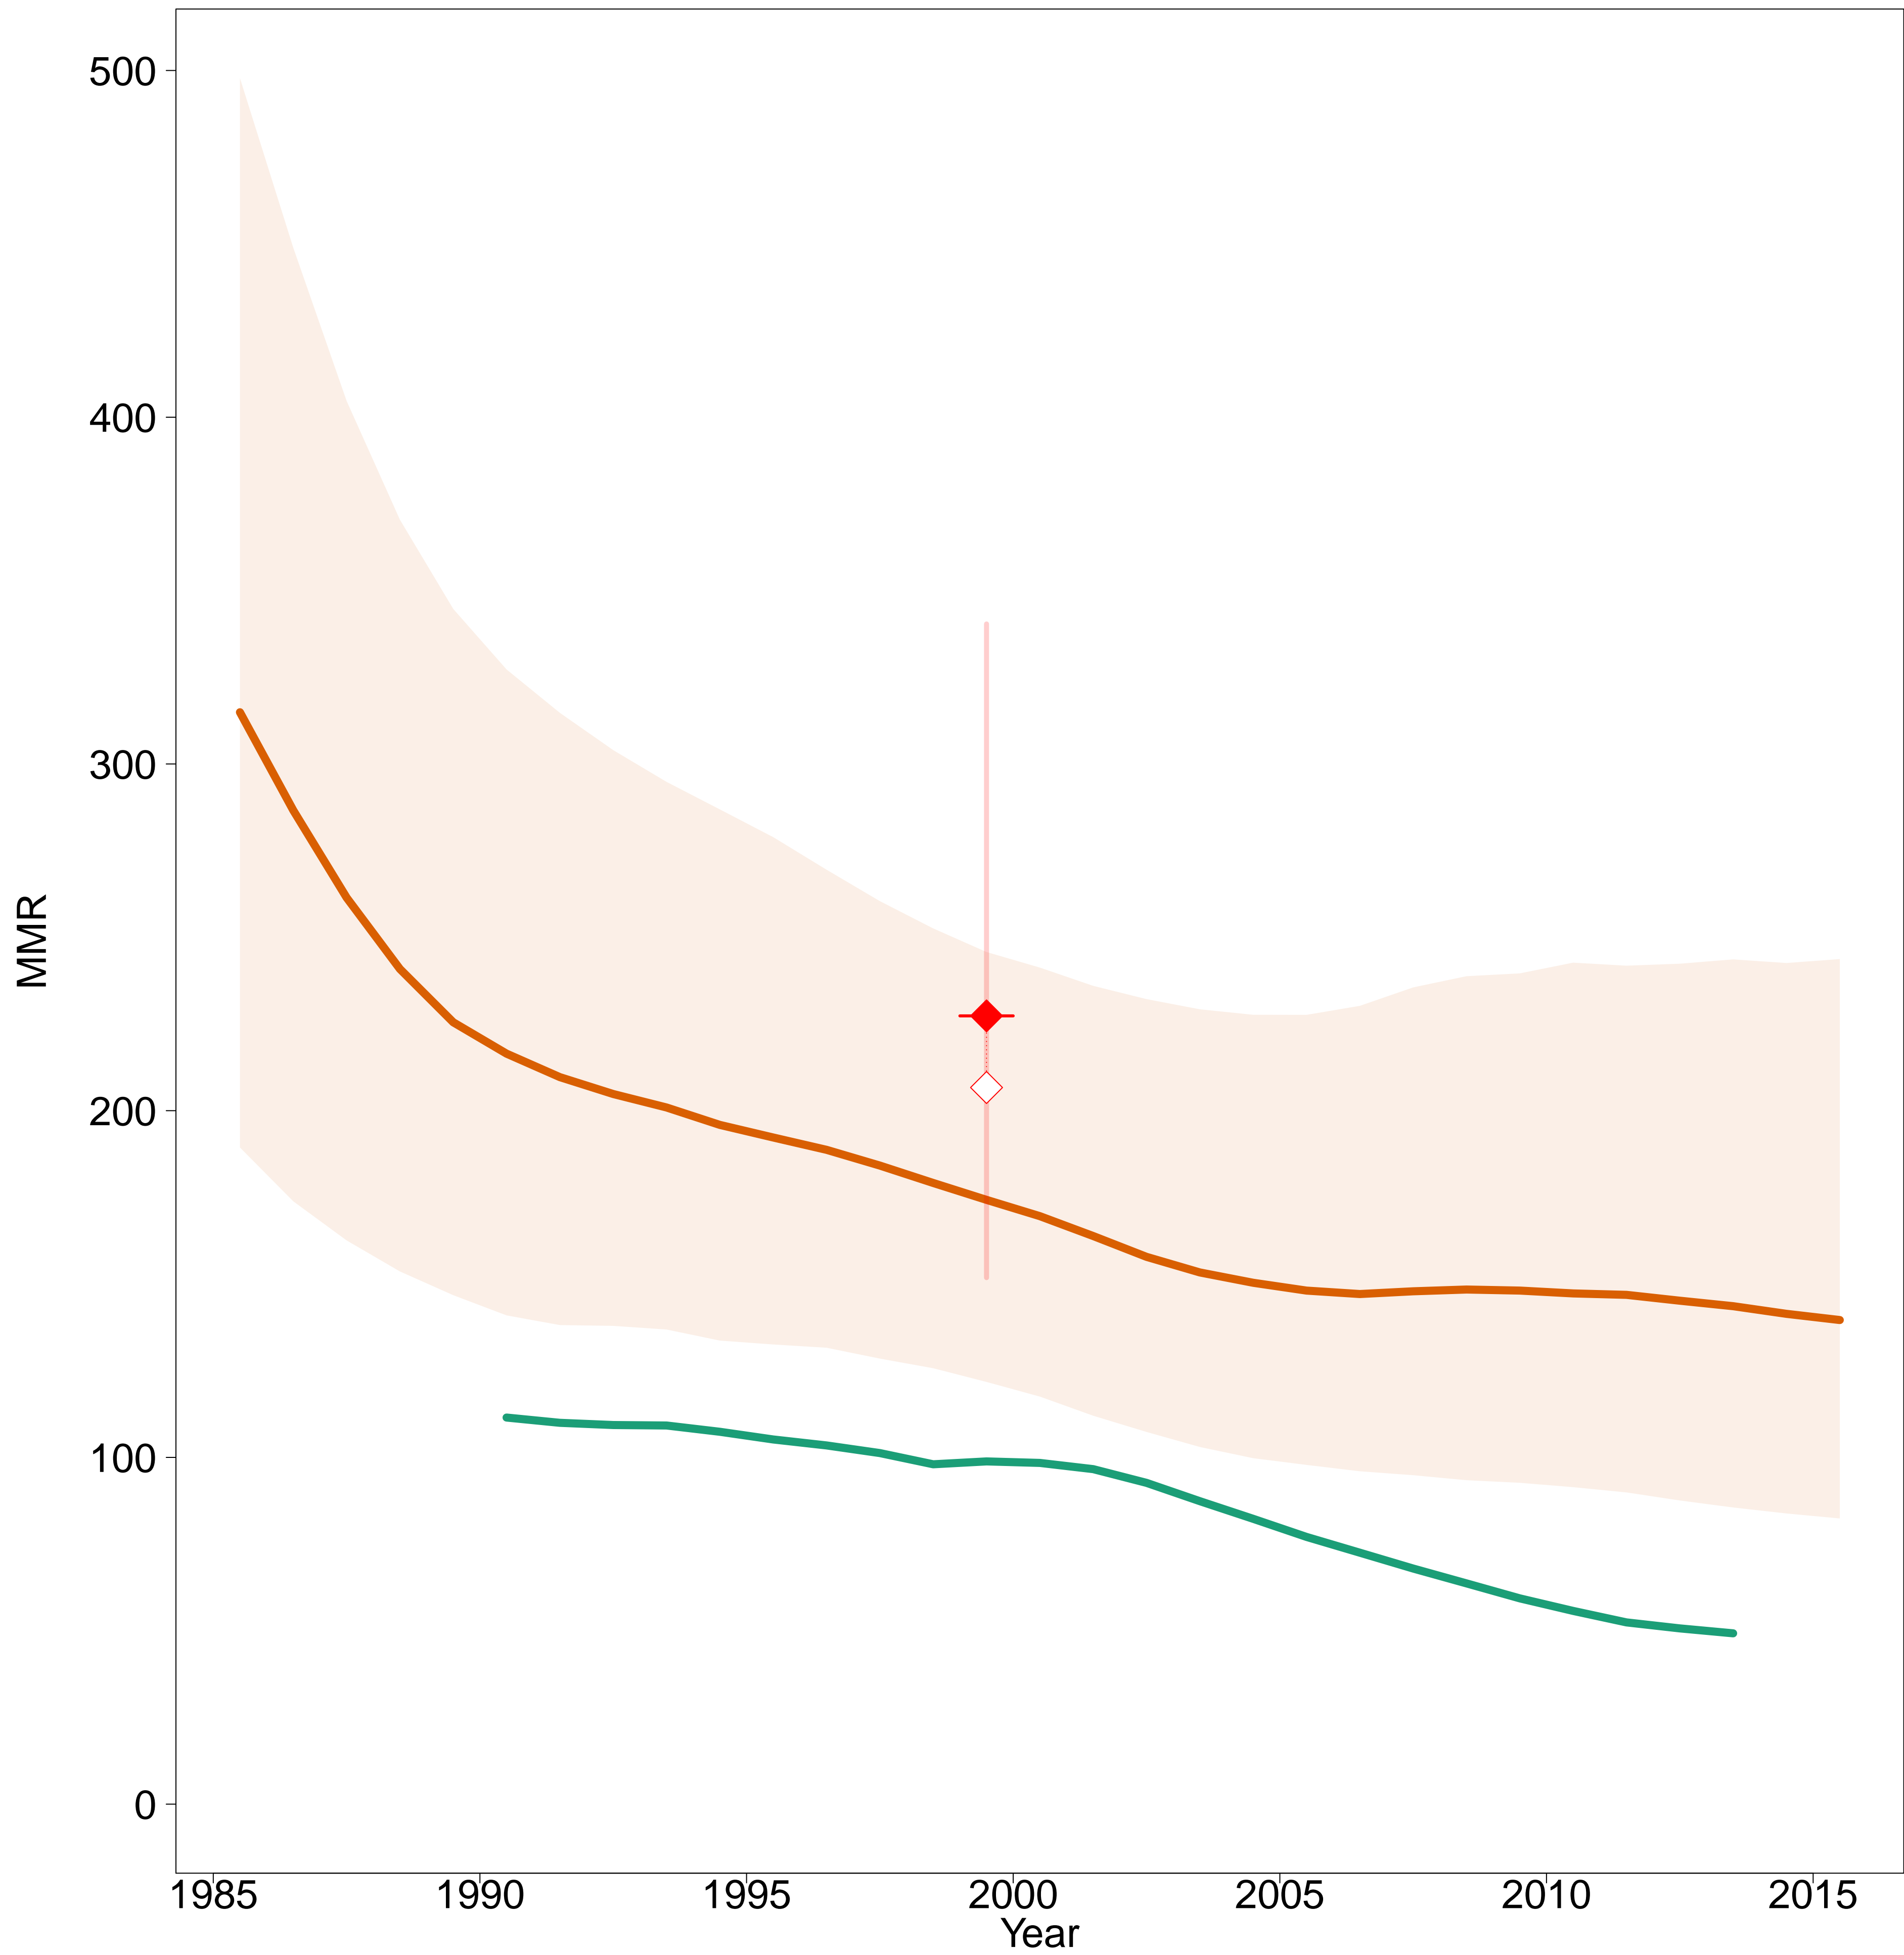

- Estimates -
- MMEIG 2015
- GBD 2013
- MMR Database 2015 -
- Observed Data
- Adjusted Data
- Data type -
- Misc. studies

Angola [AGO]  
(Middle Africa)

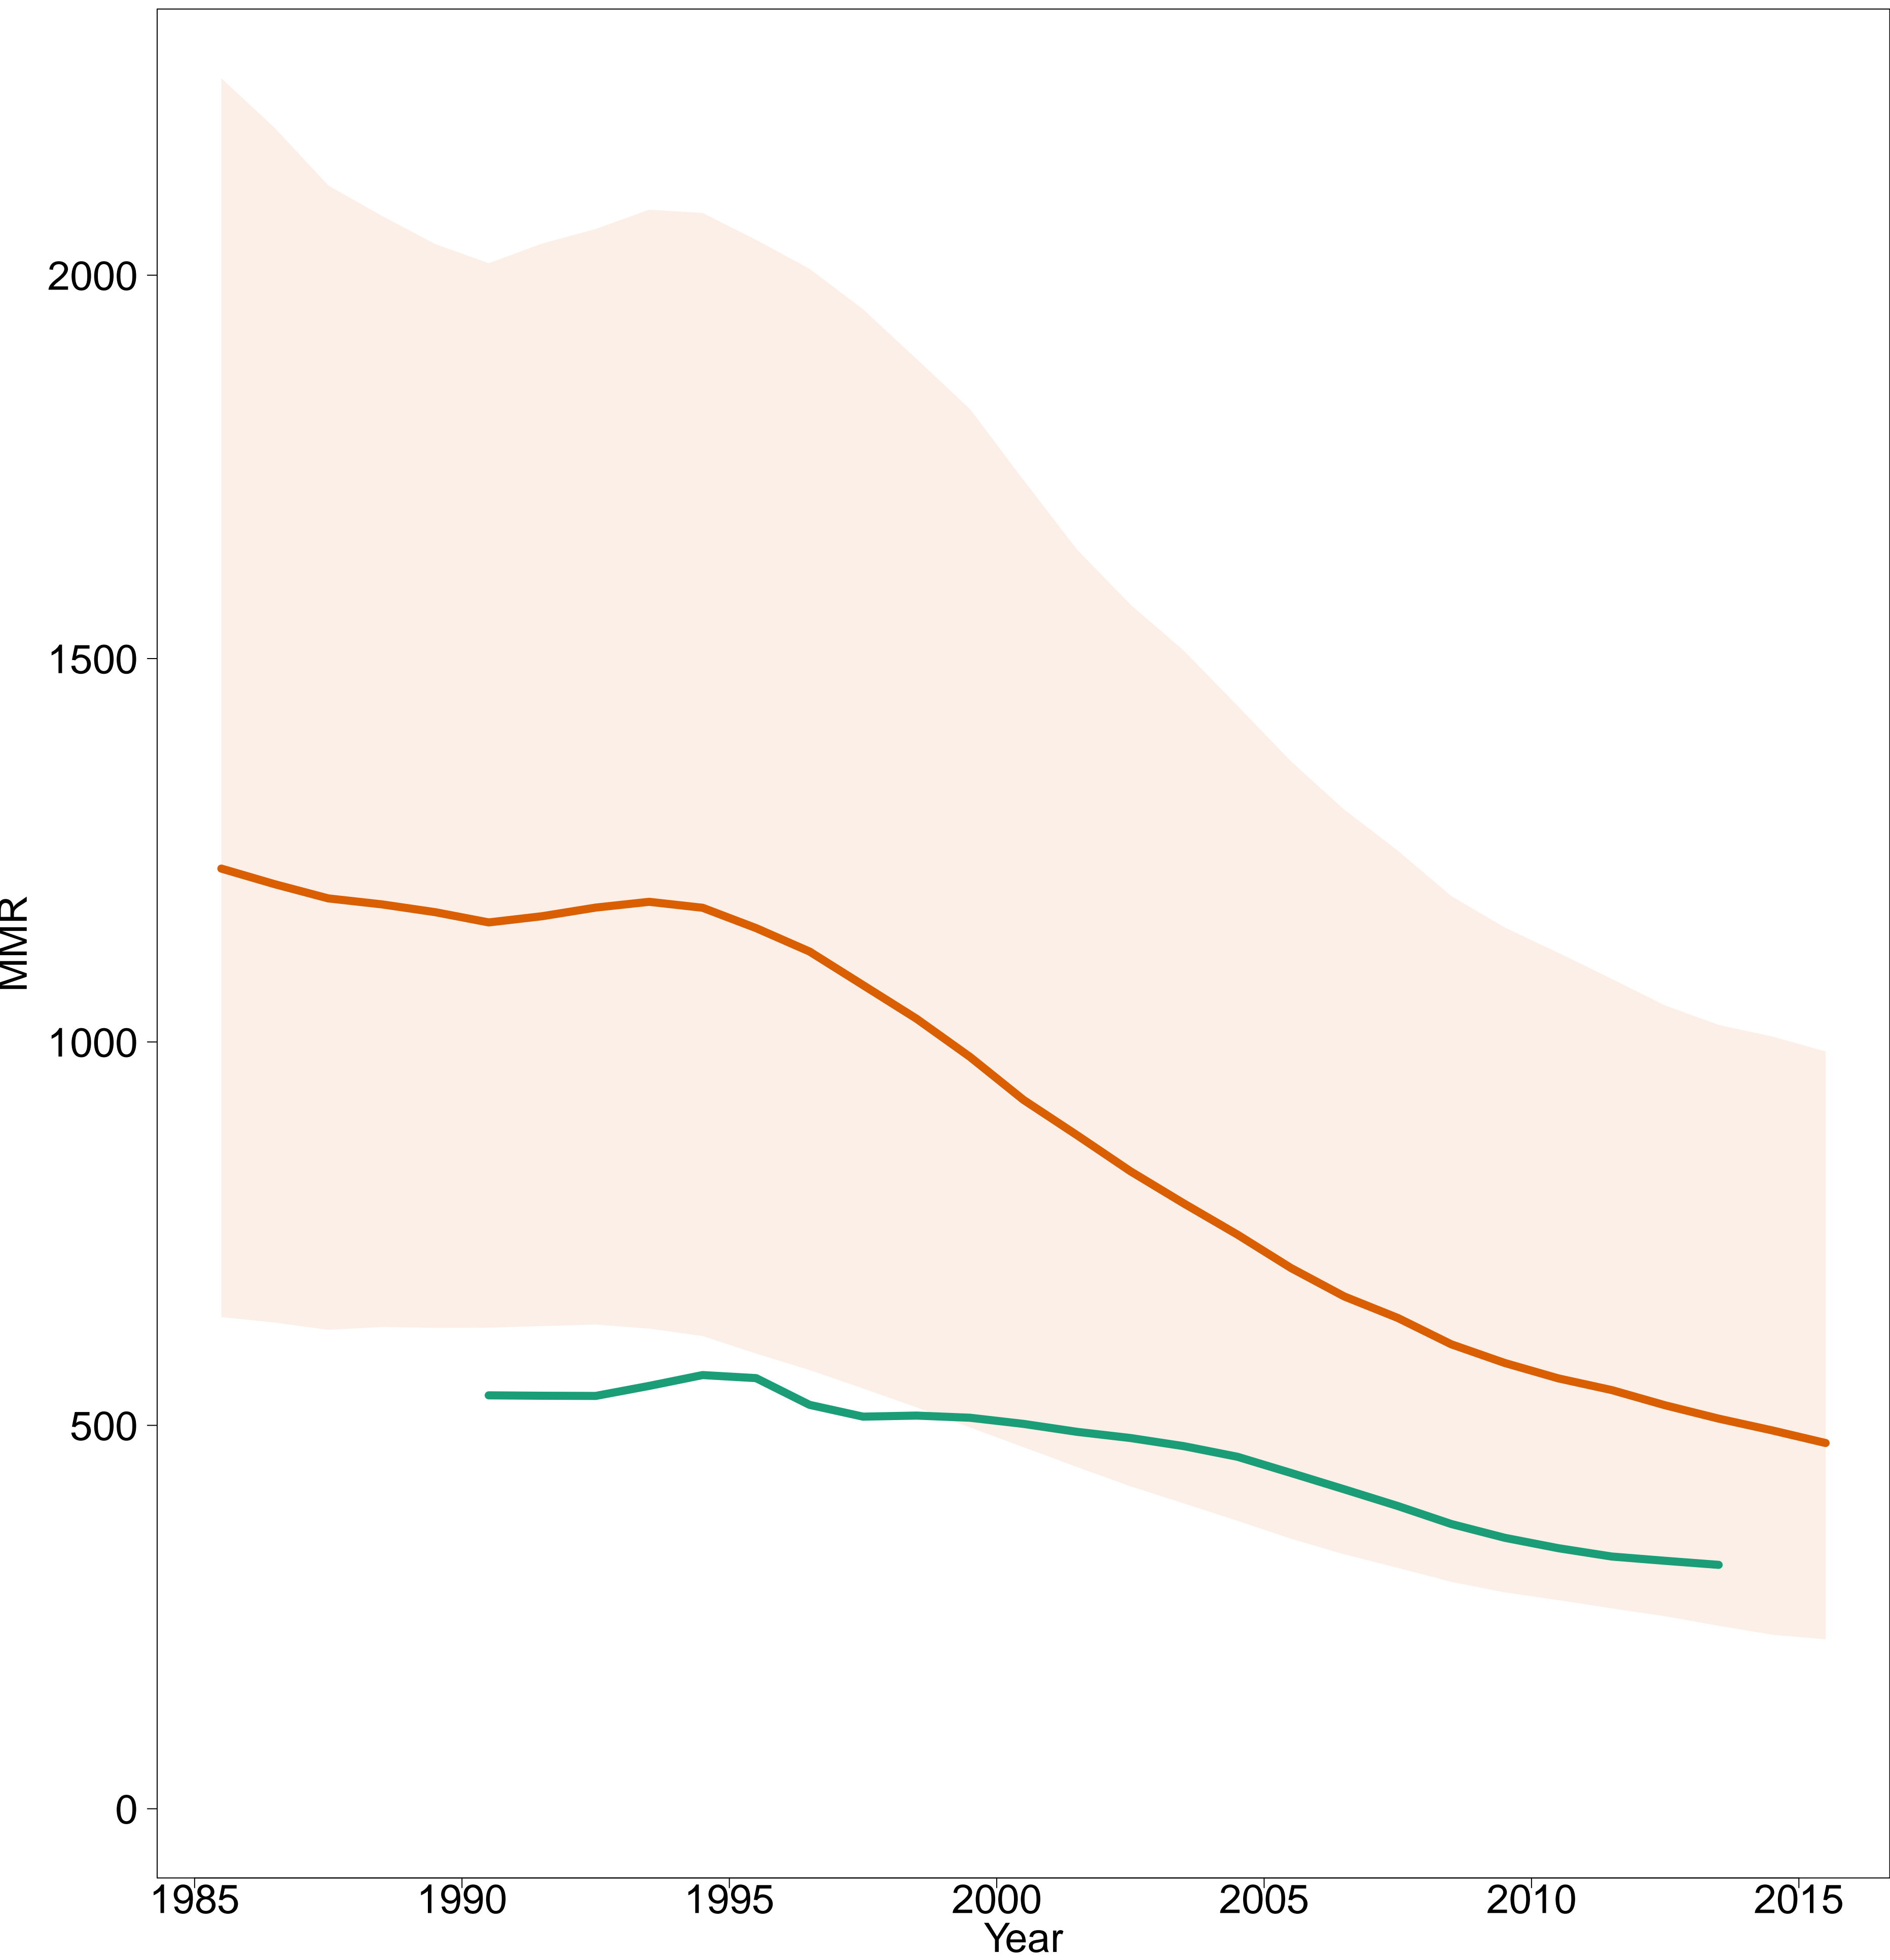

– Estimates –  
MMEIG 2015  
GBD 2013  
– MMR Database 2015 –

Argentina [ARG]  
(South America)

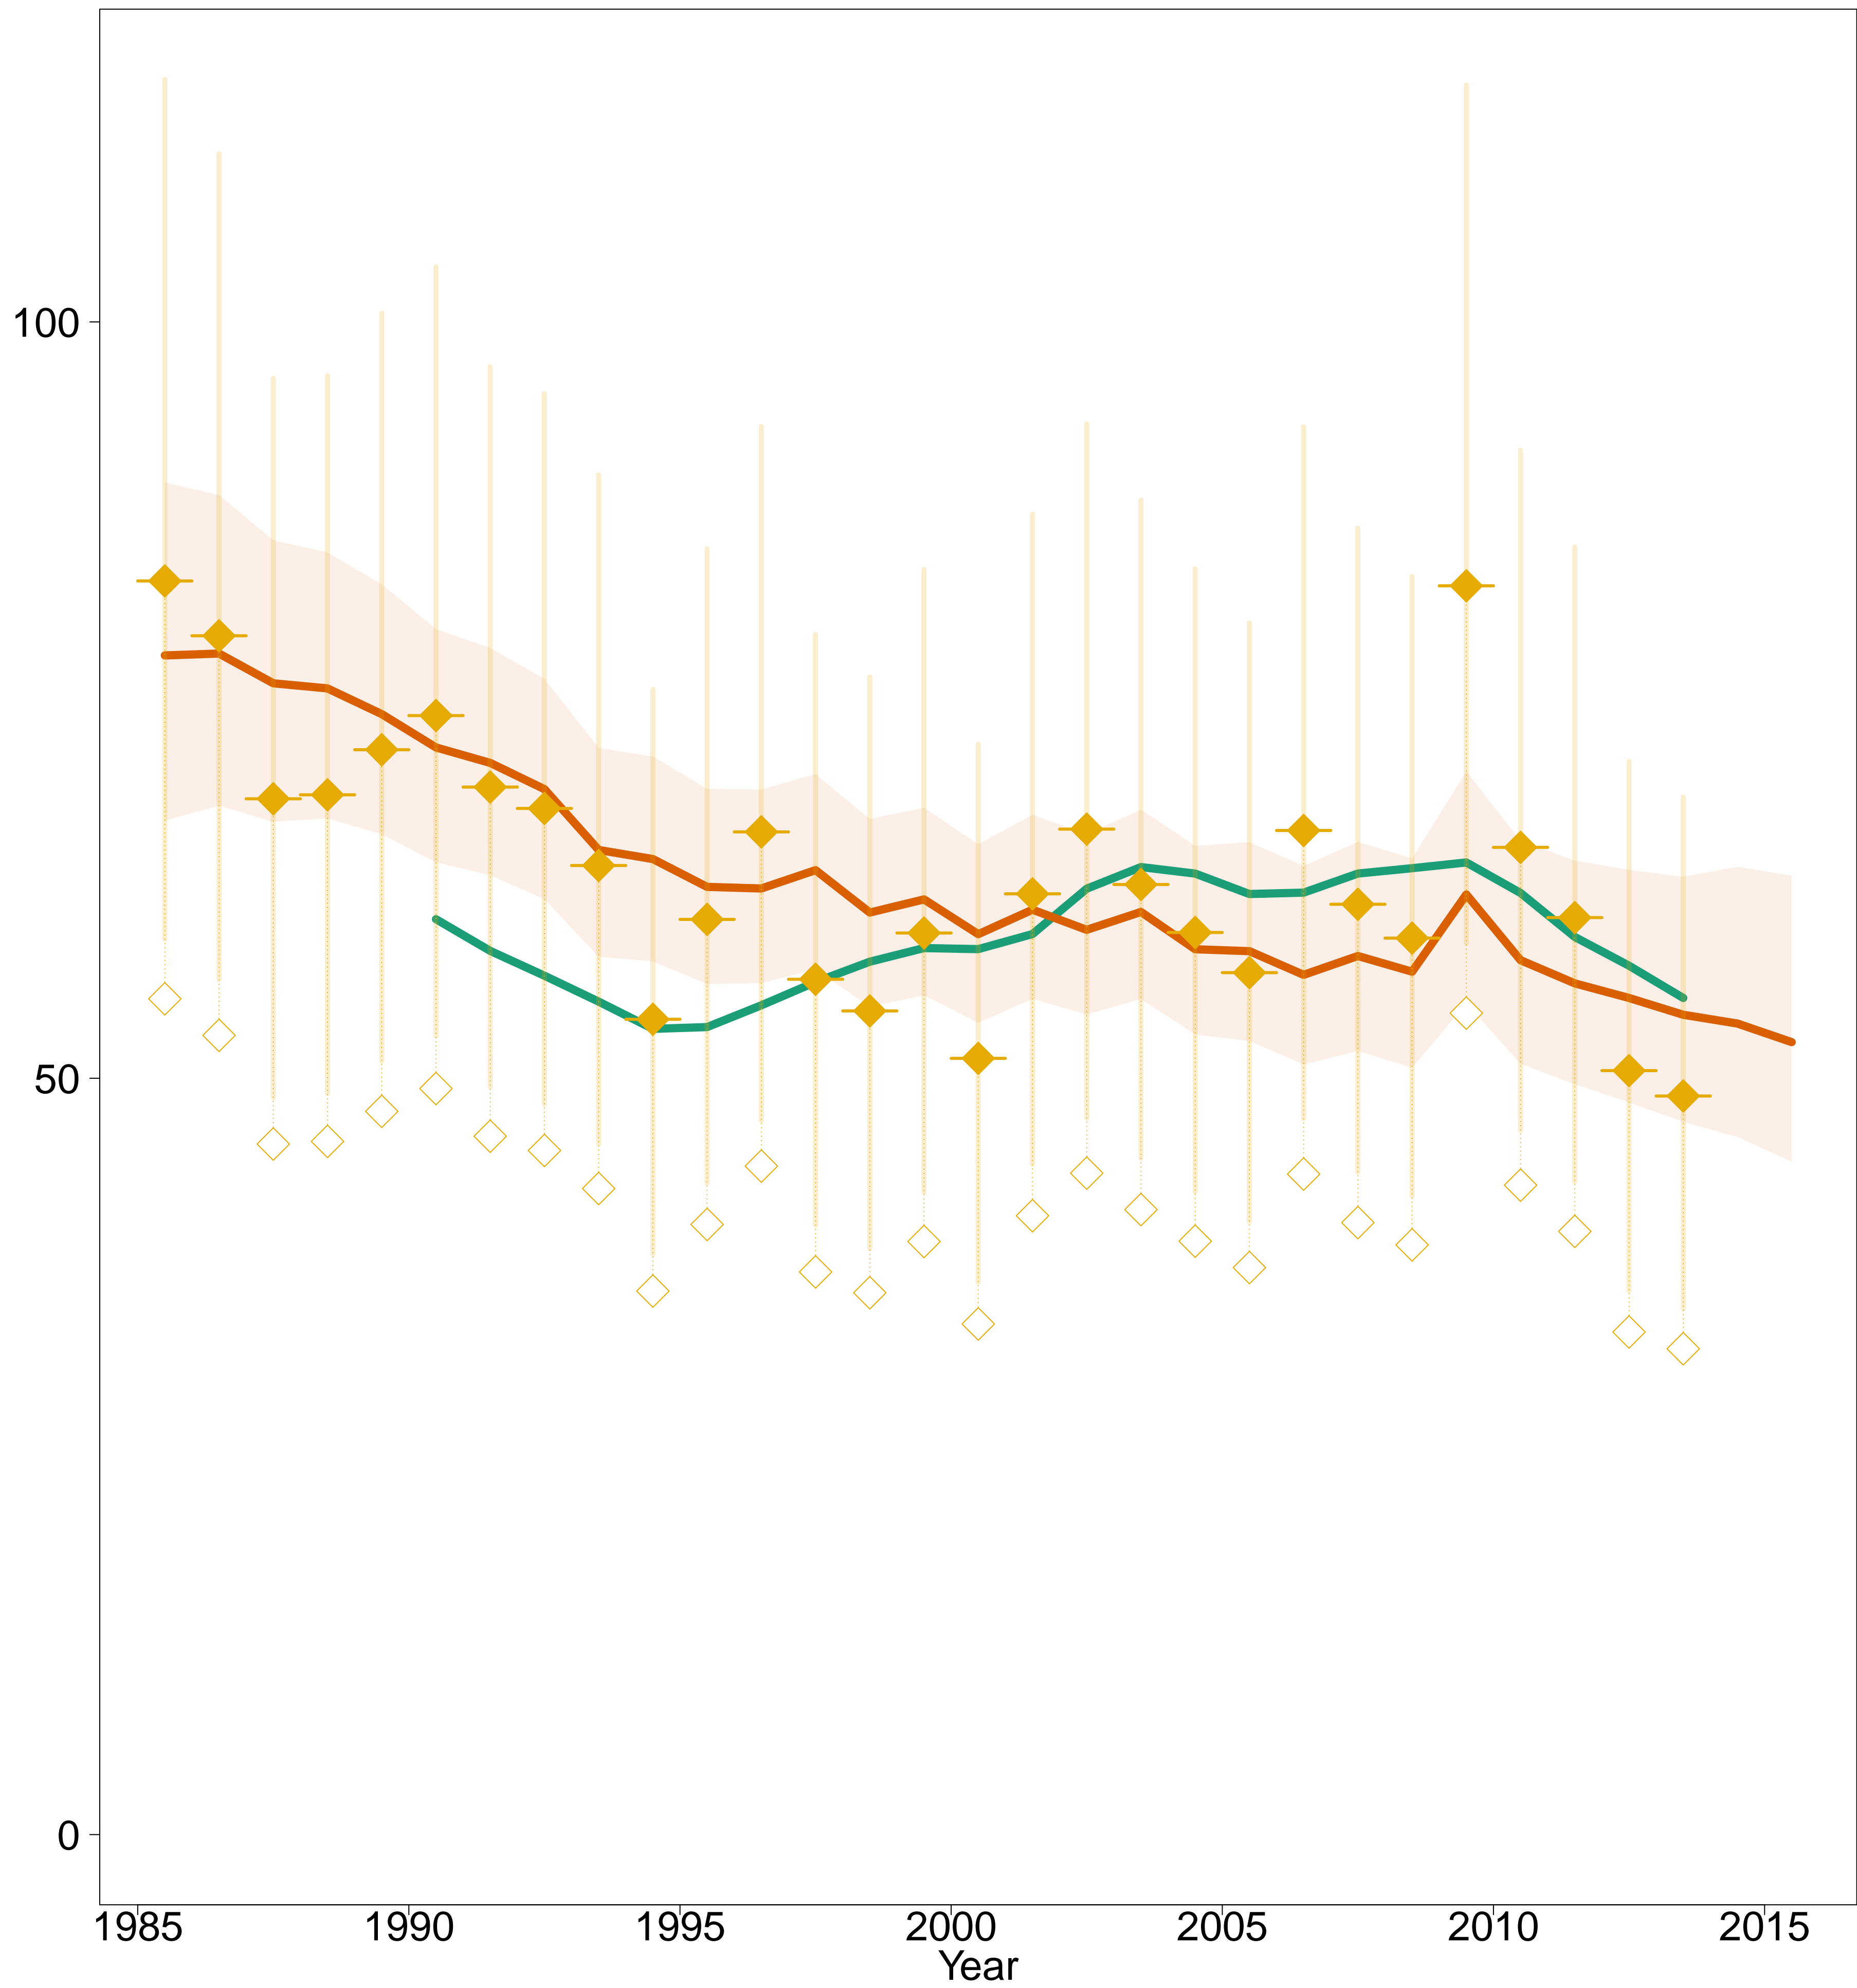

- Estimates -
- MMEIG 2015
- GBD 2013
- MMR Database 2015 -
- Observed Data
- Adjusted Data
- Data type -
- VR

Armenia [ARM]  
(Western Asia)

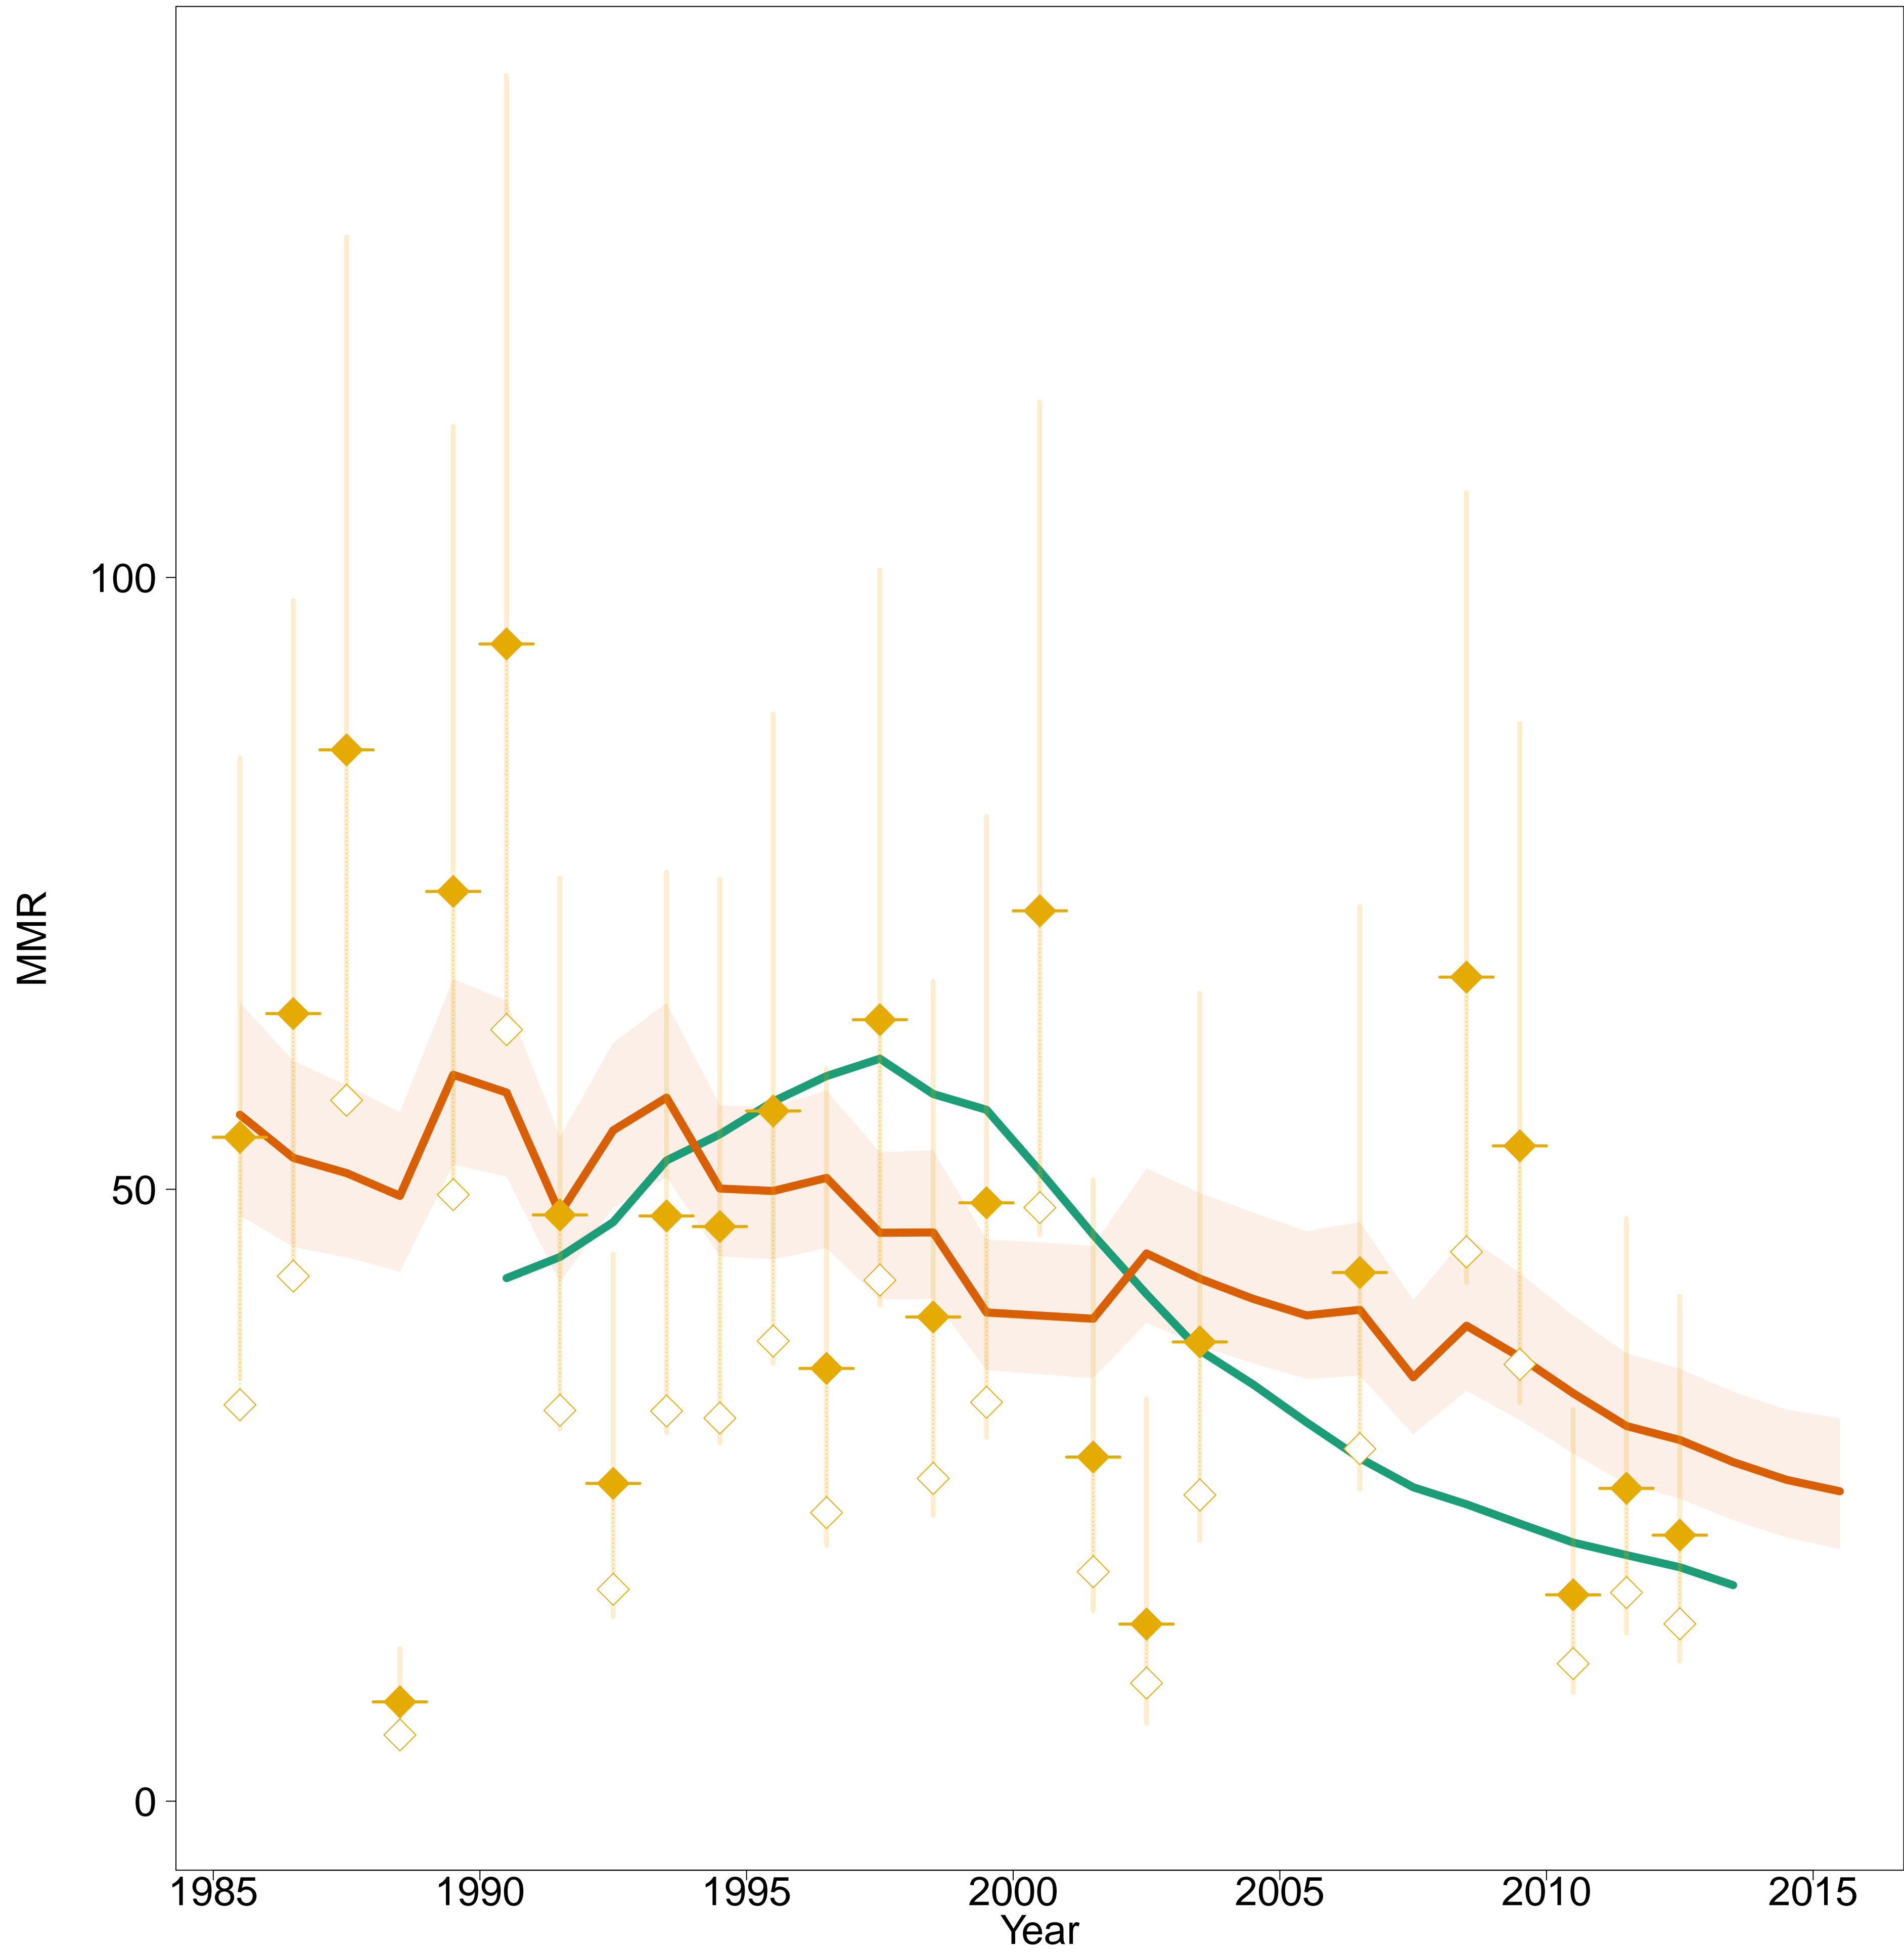

- Estimates –
- MMEIG 2015
- GBD 2013
- MMR Database 2015 –
- Observed Data
- Adjusted Data
- Data type –
- VR

Australia [AUS]  
(Developed regions)

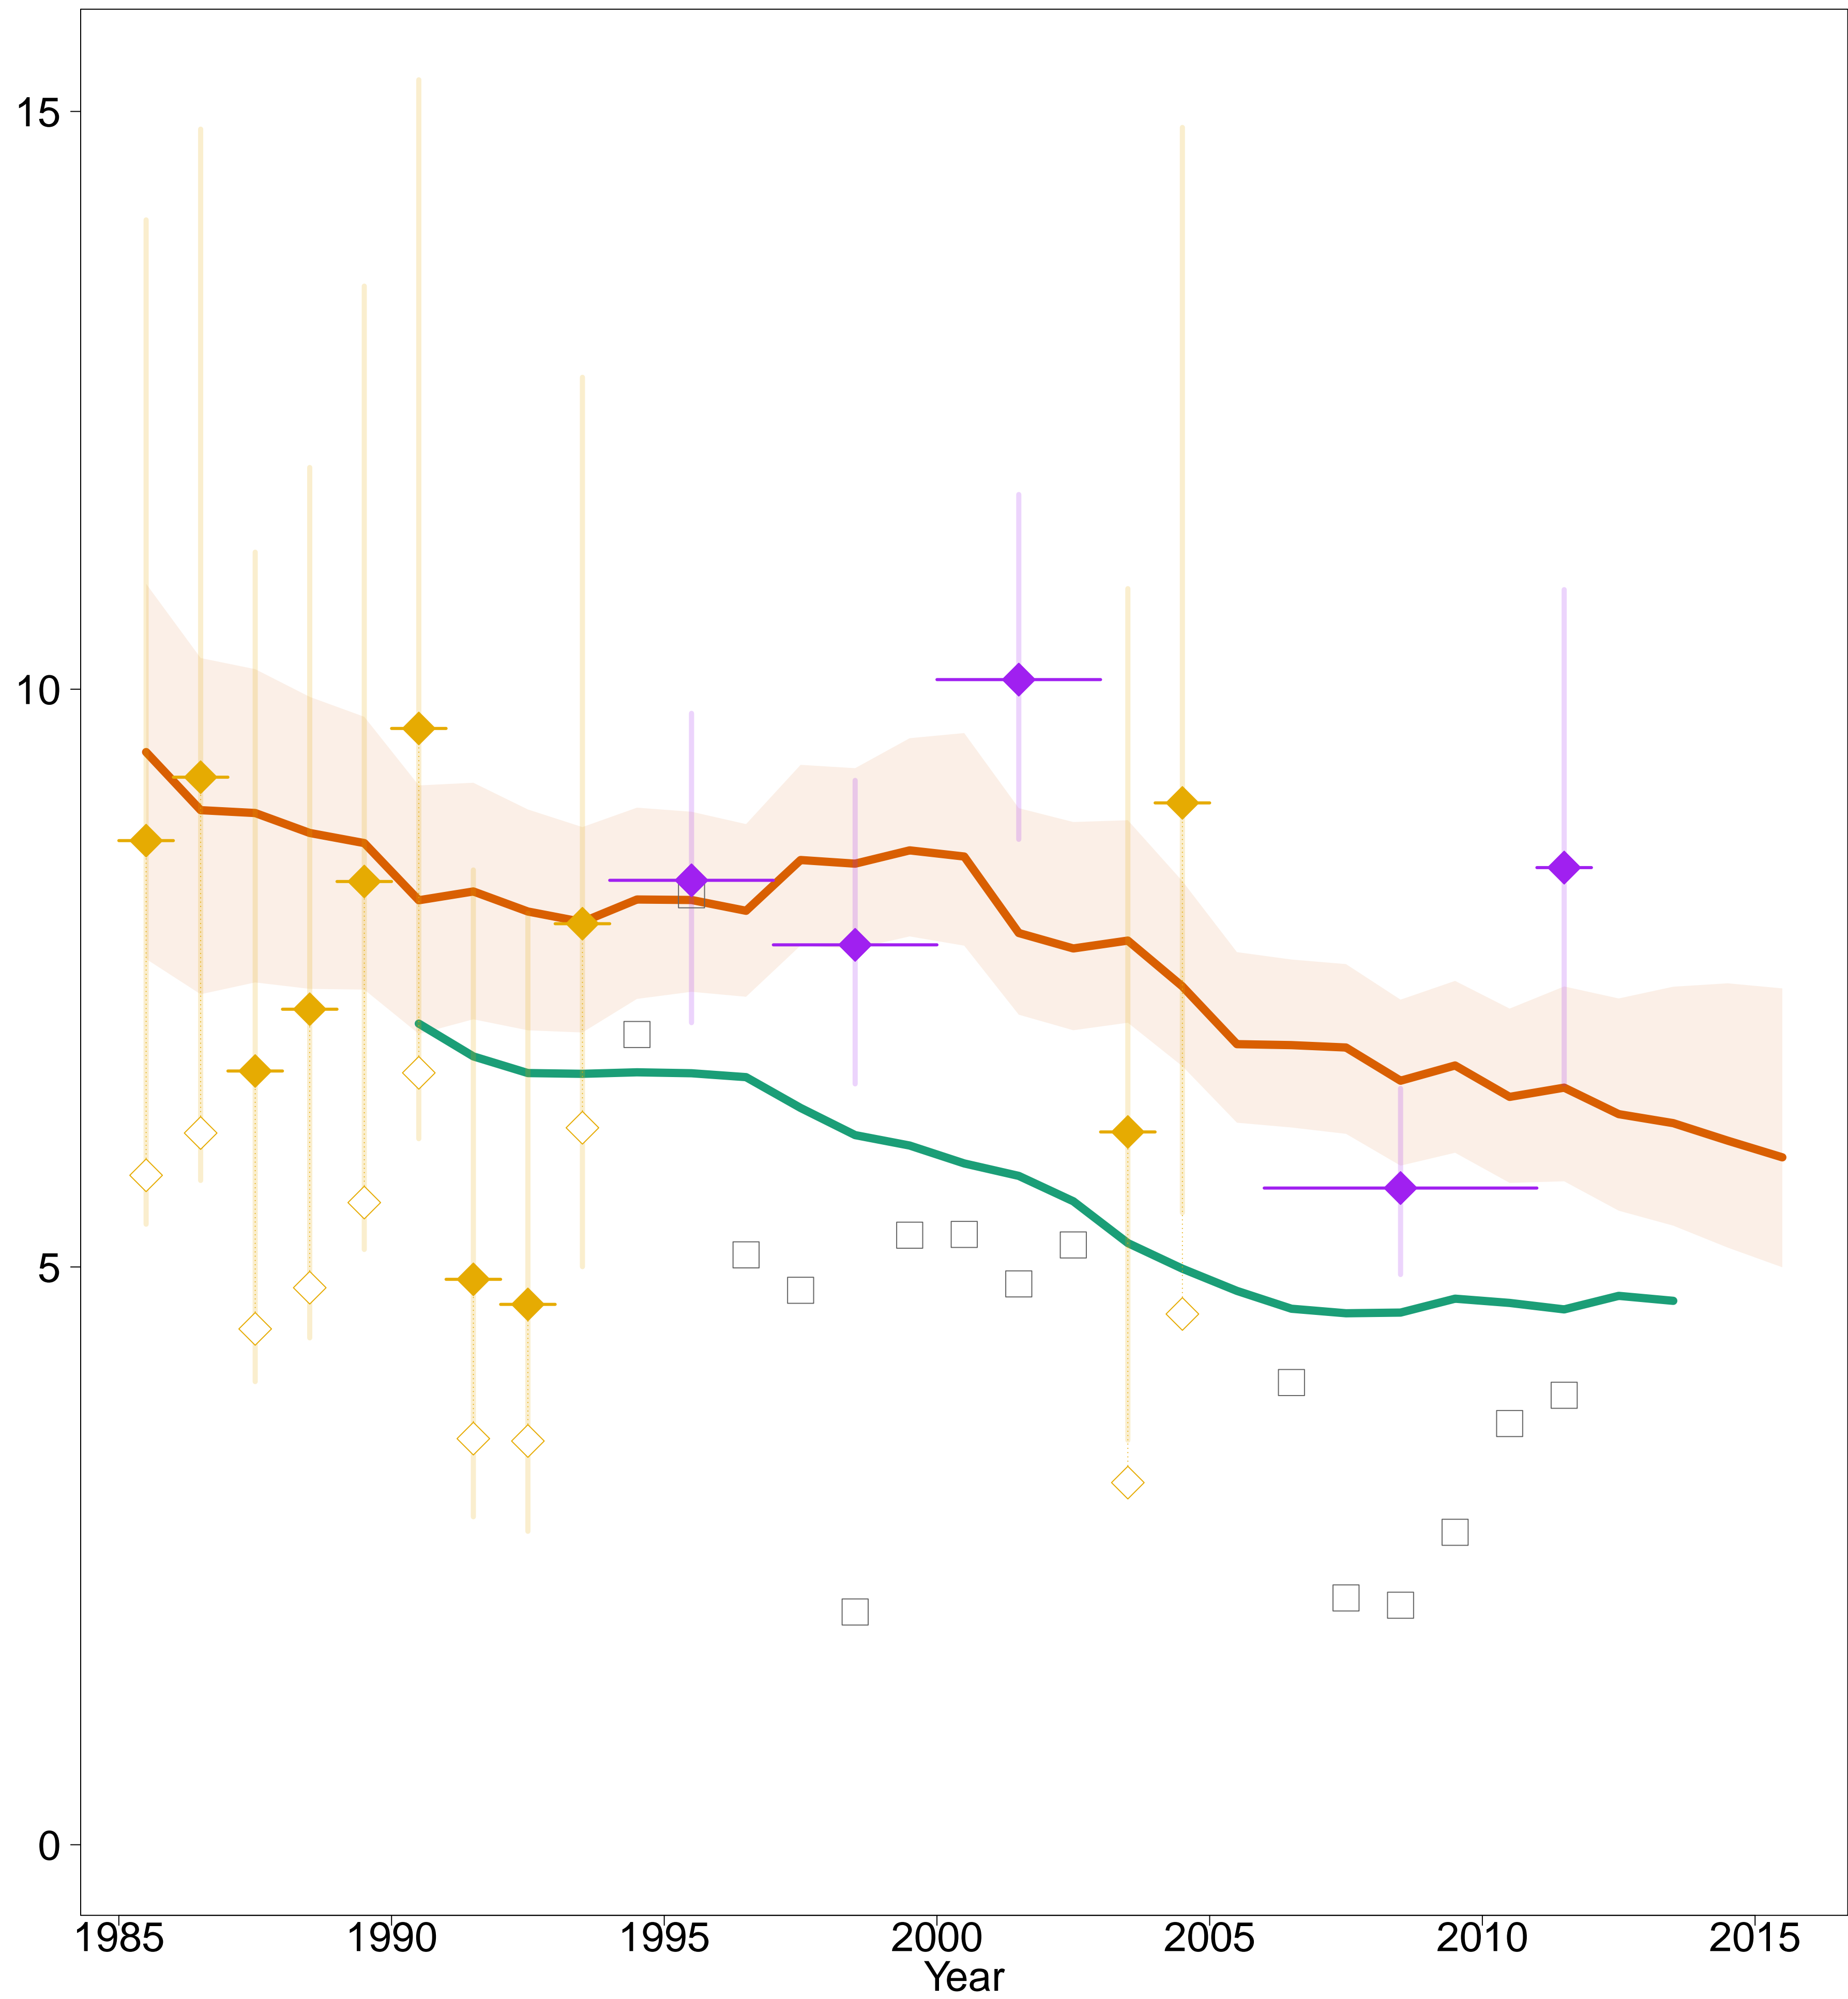

- Estimates –
- MMEIG 2015
- GBD 2013
- MMR Database 2015 –
- Observed Data
- Adjusted Data
- Data type –
- VR
- Spec. studies
- Excluded VR data  
(overlap with specialized study)

Austria [AUT]  
(Developed regions)

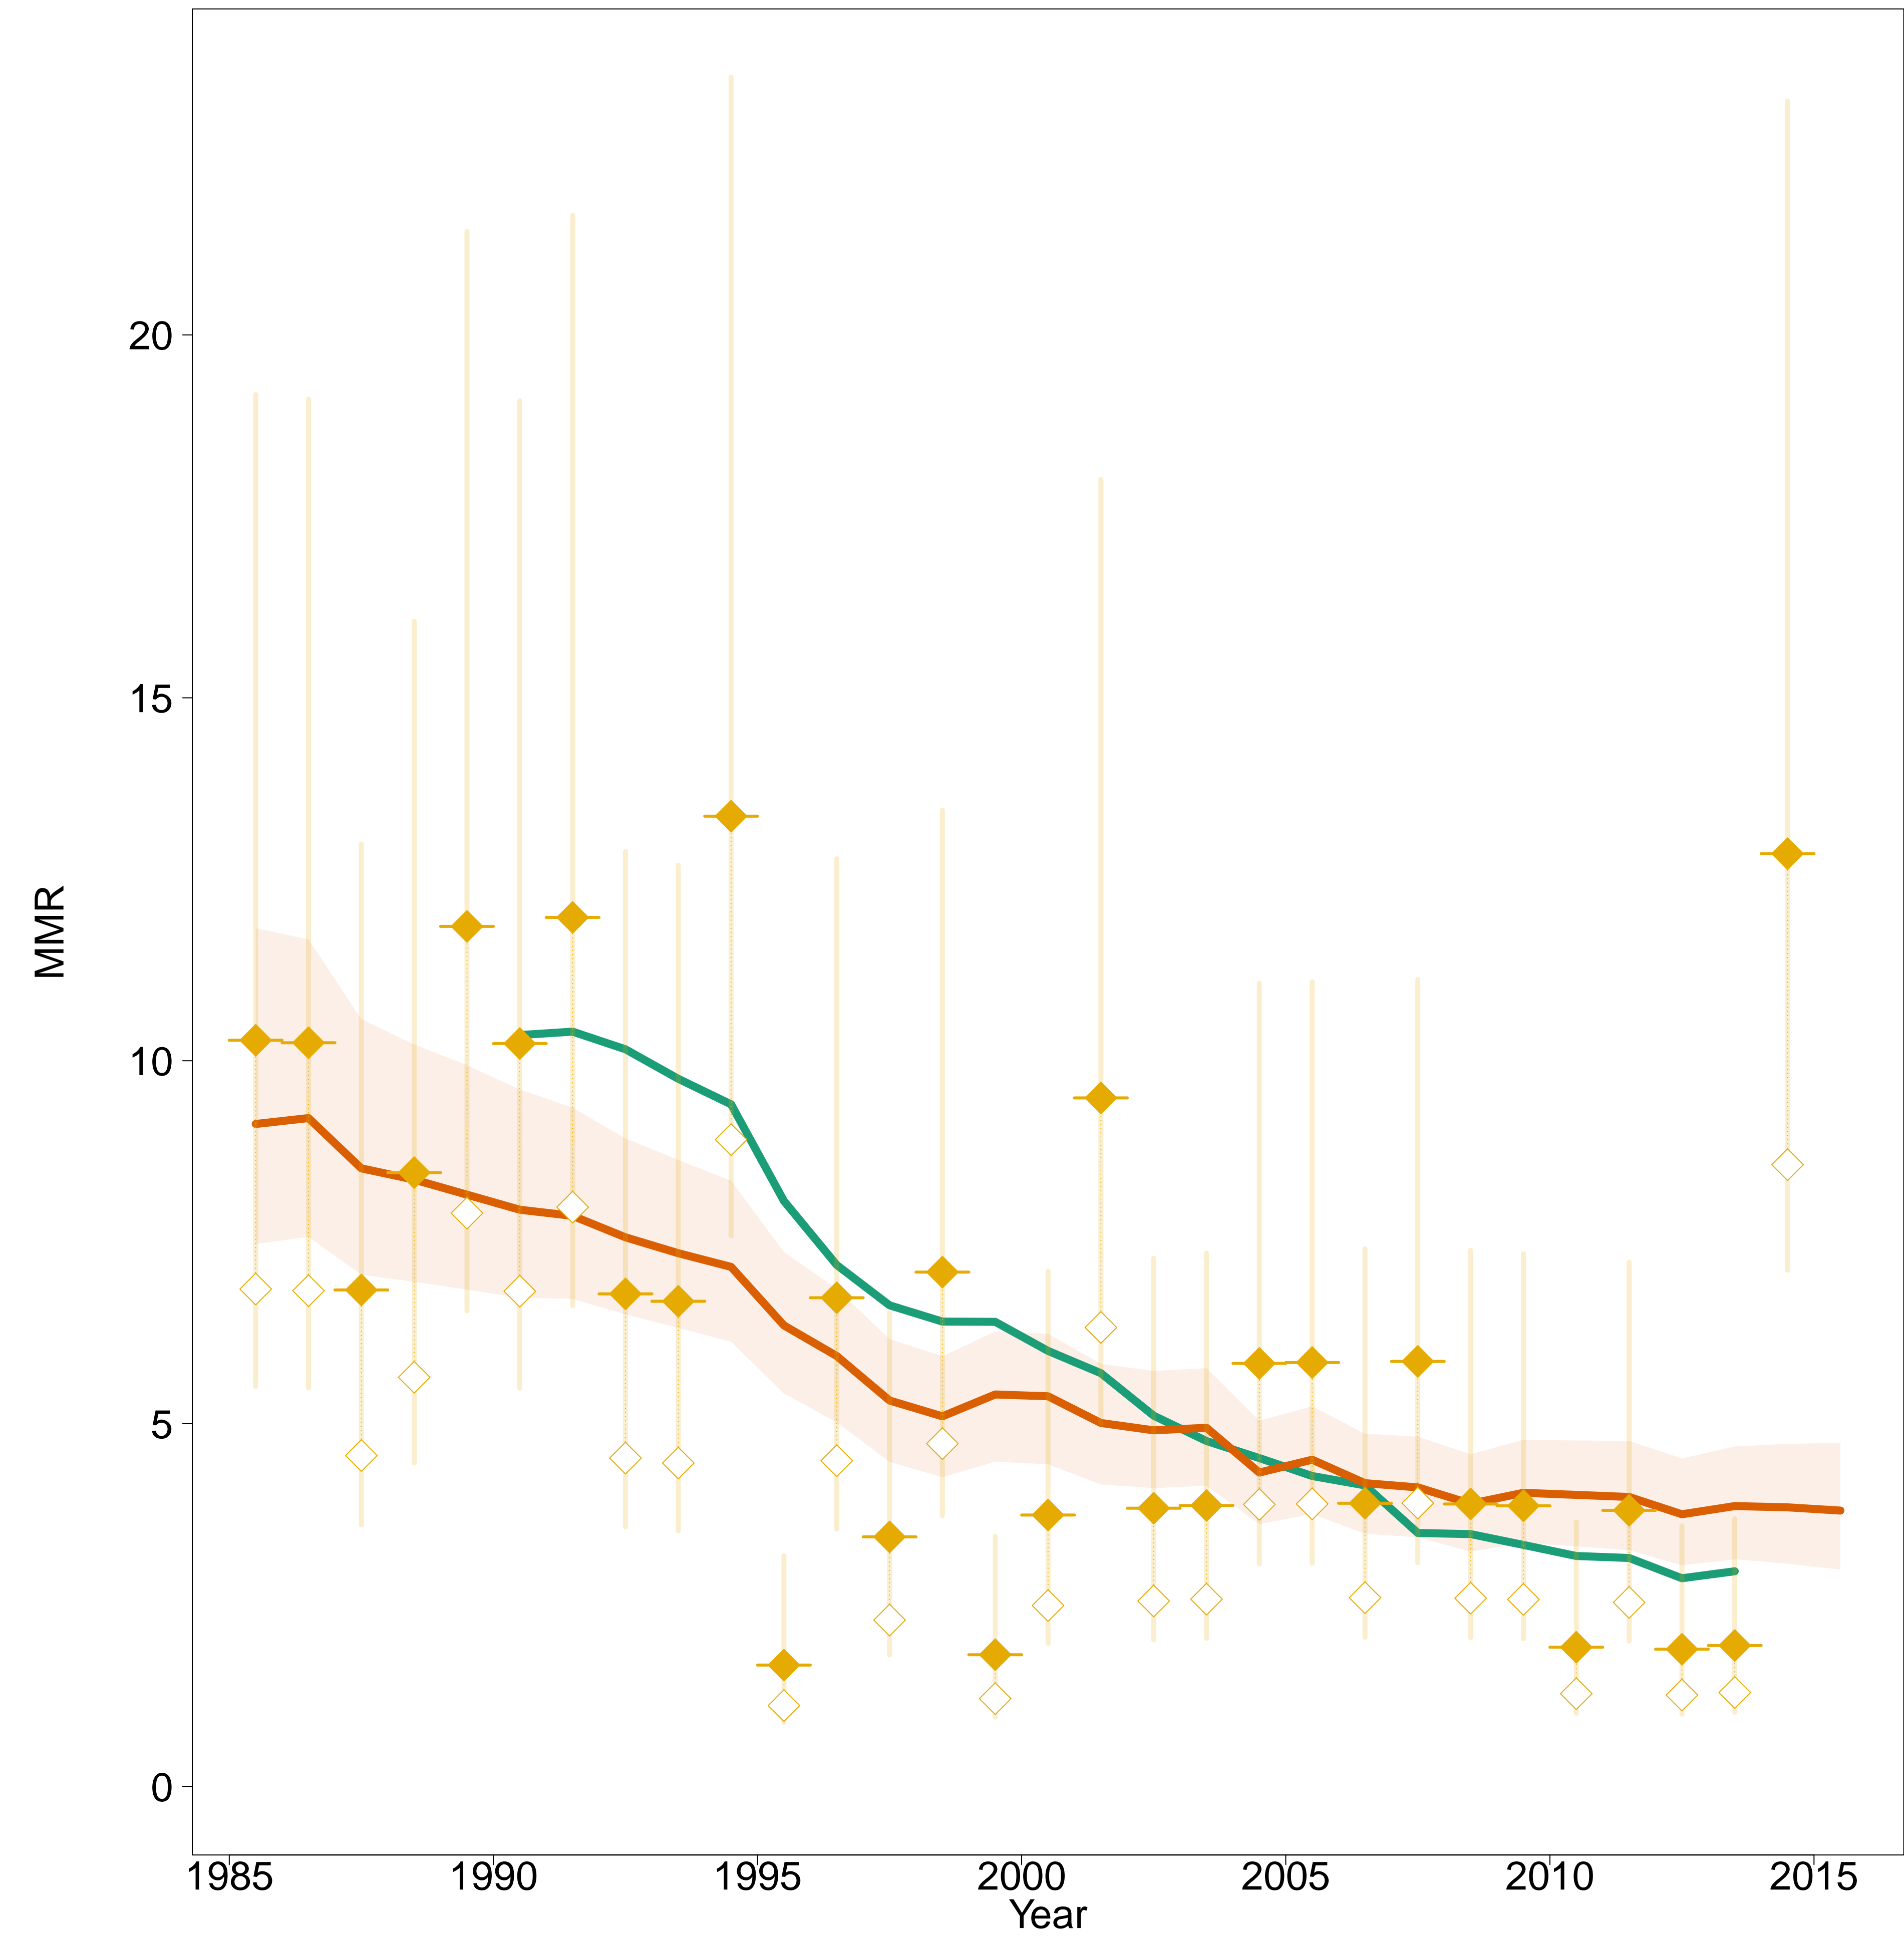

- Estimates –
- MMEIG 2015
- GBD 2013
- MMR Database 2015 –
- ◊ Observed Data
- ◆ Adjusted Data
- Data type –
- ◆ VR

Azerbaijan [AZE]  
(Western Asia)

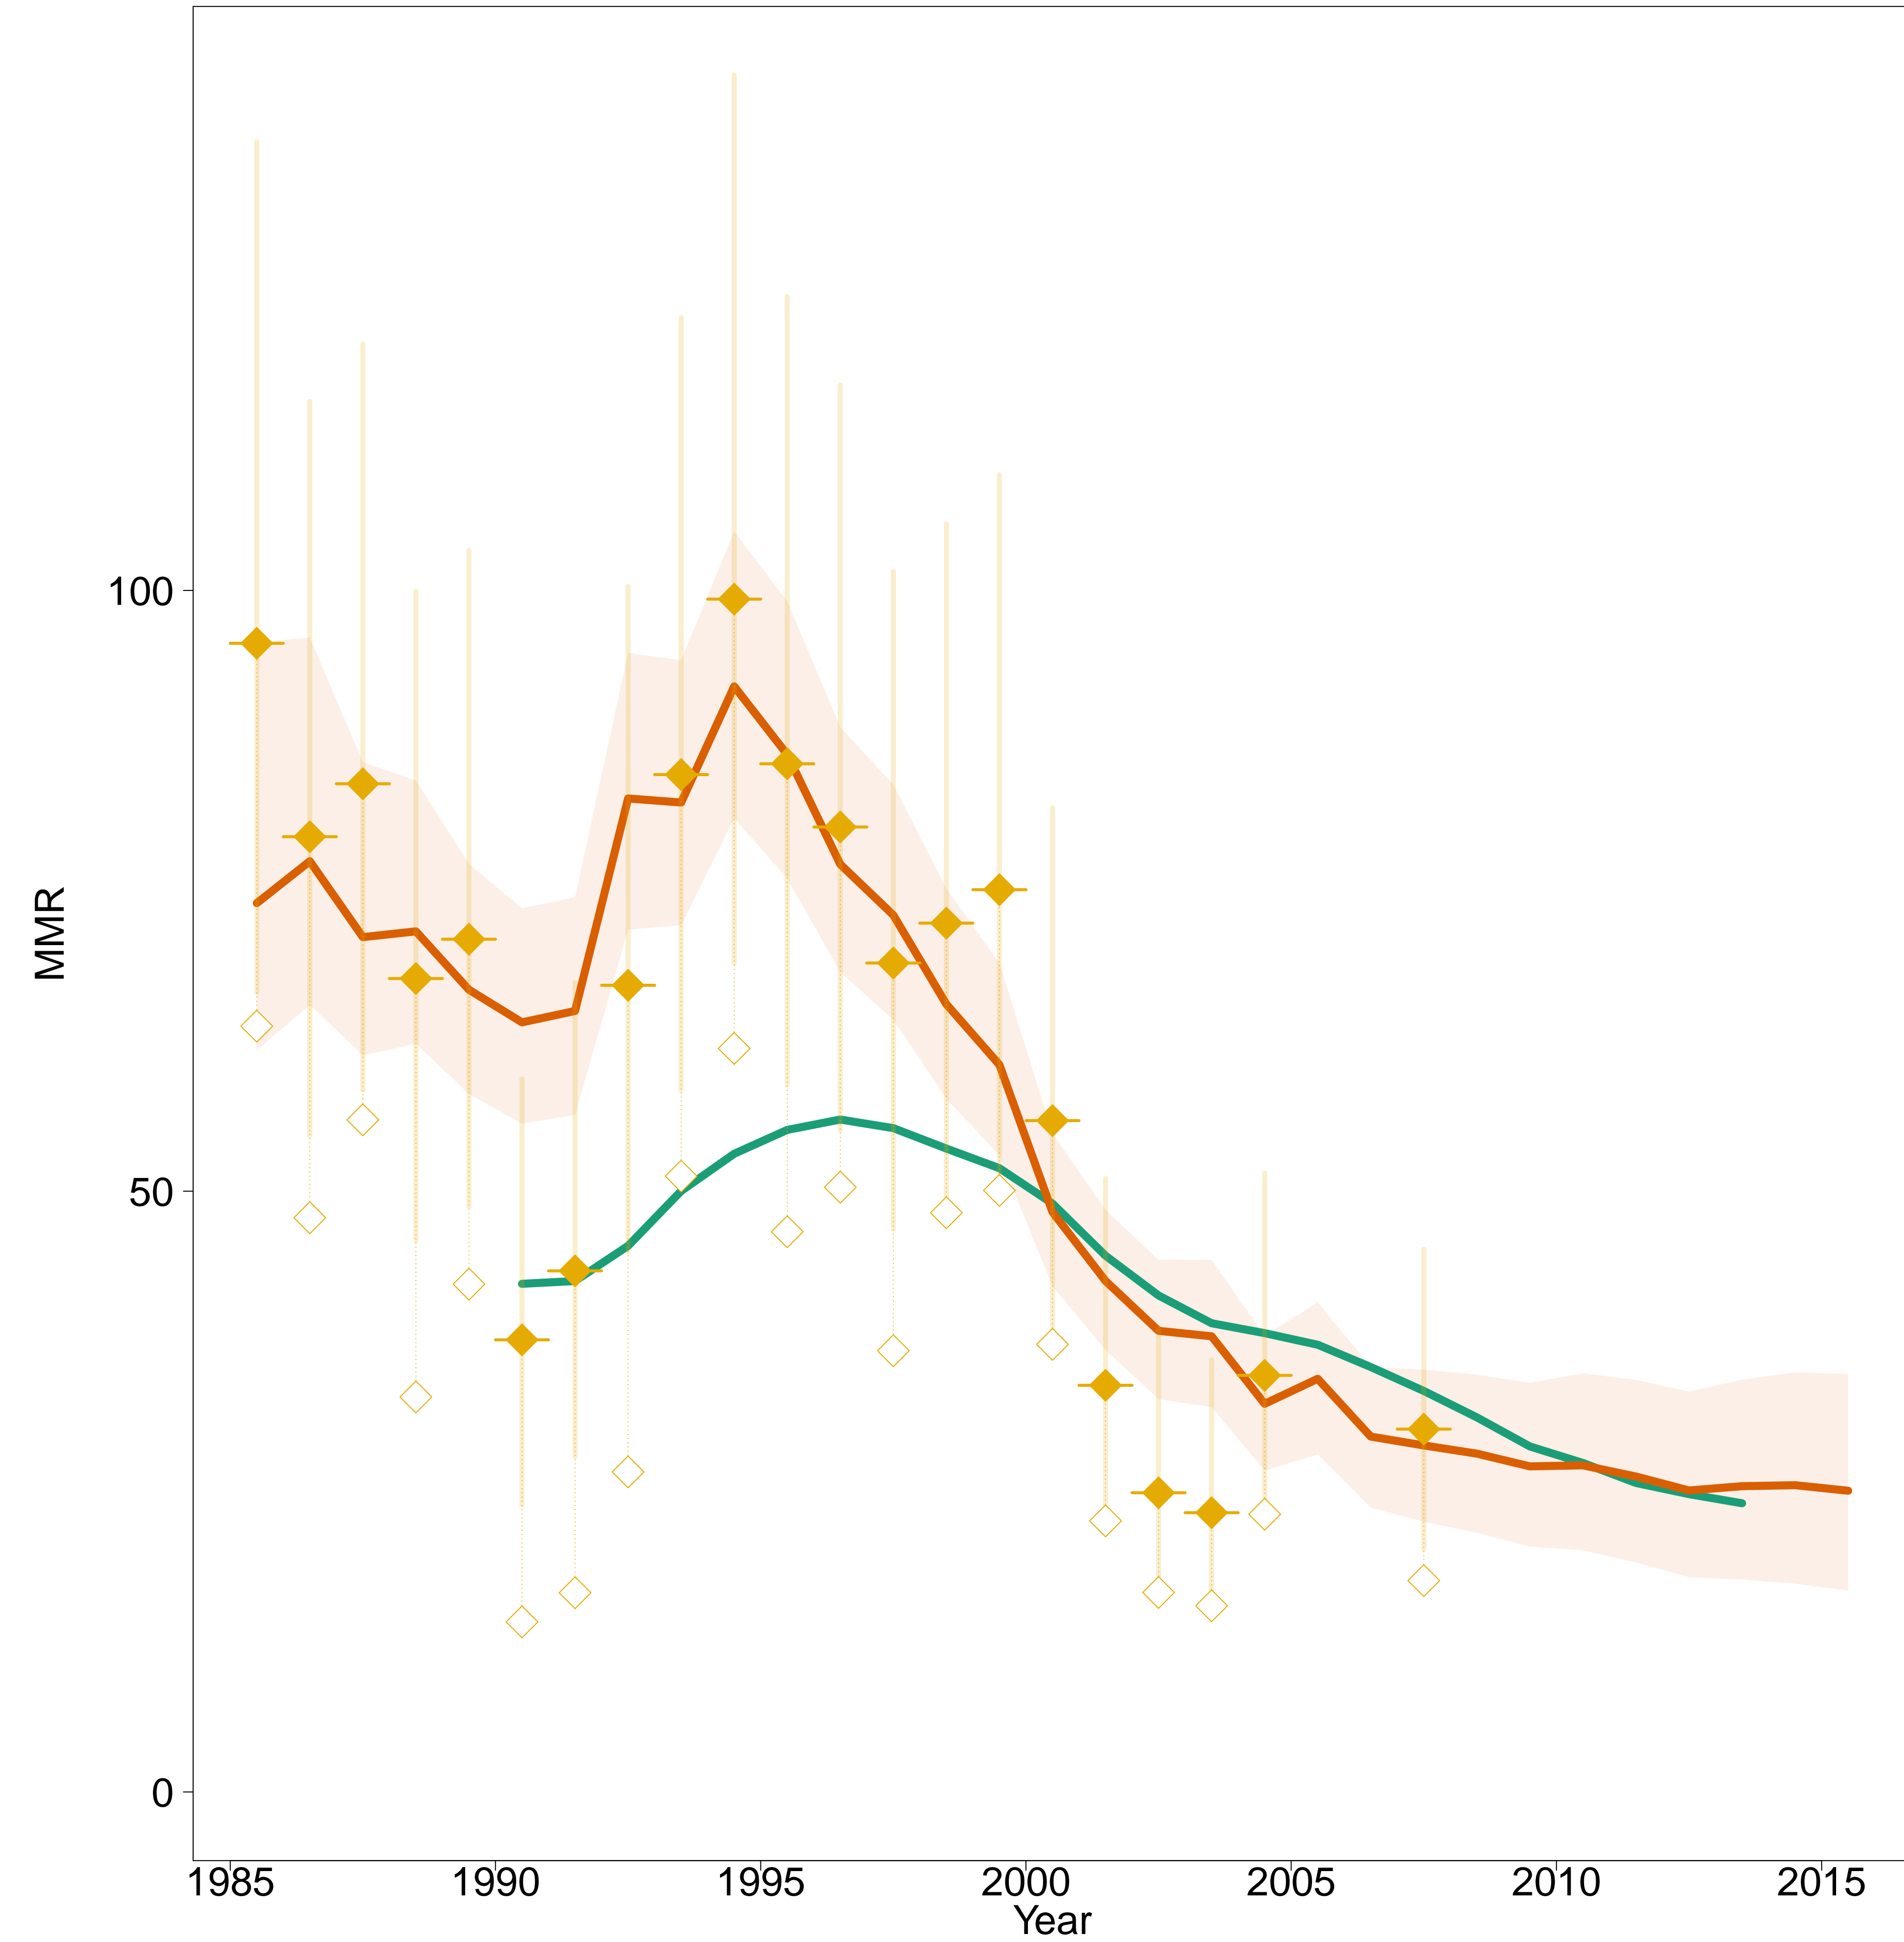

- Estimates –
- MMEIG 2015
- GBD 2013
- MMR Database 2015 –
- Observed Data
- Adjusted Data
- Data type –
- VR



Bahamas [BHS]  
(Caribbean)

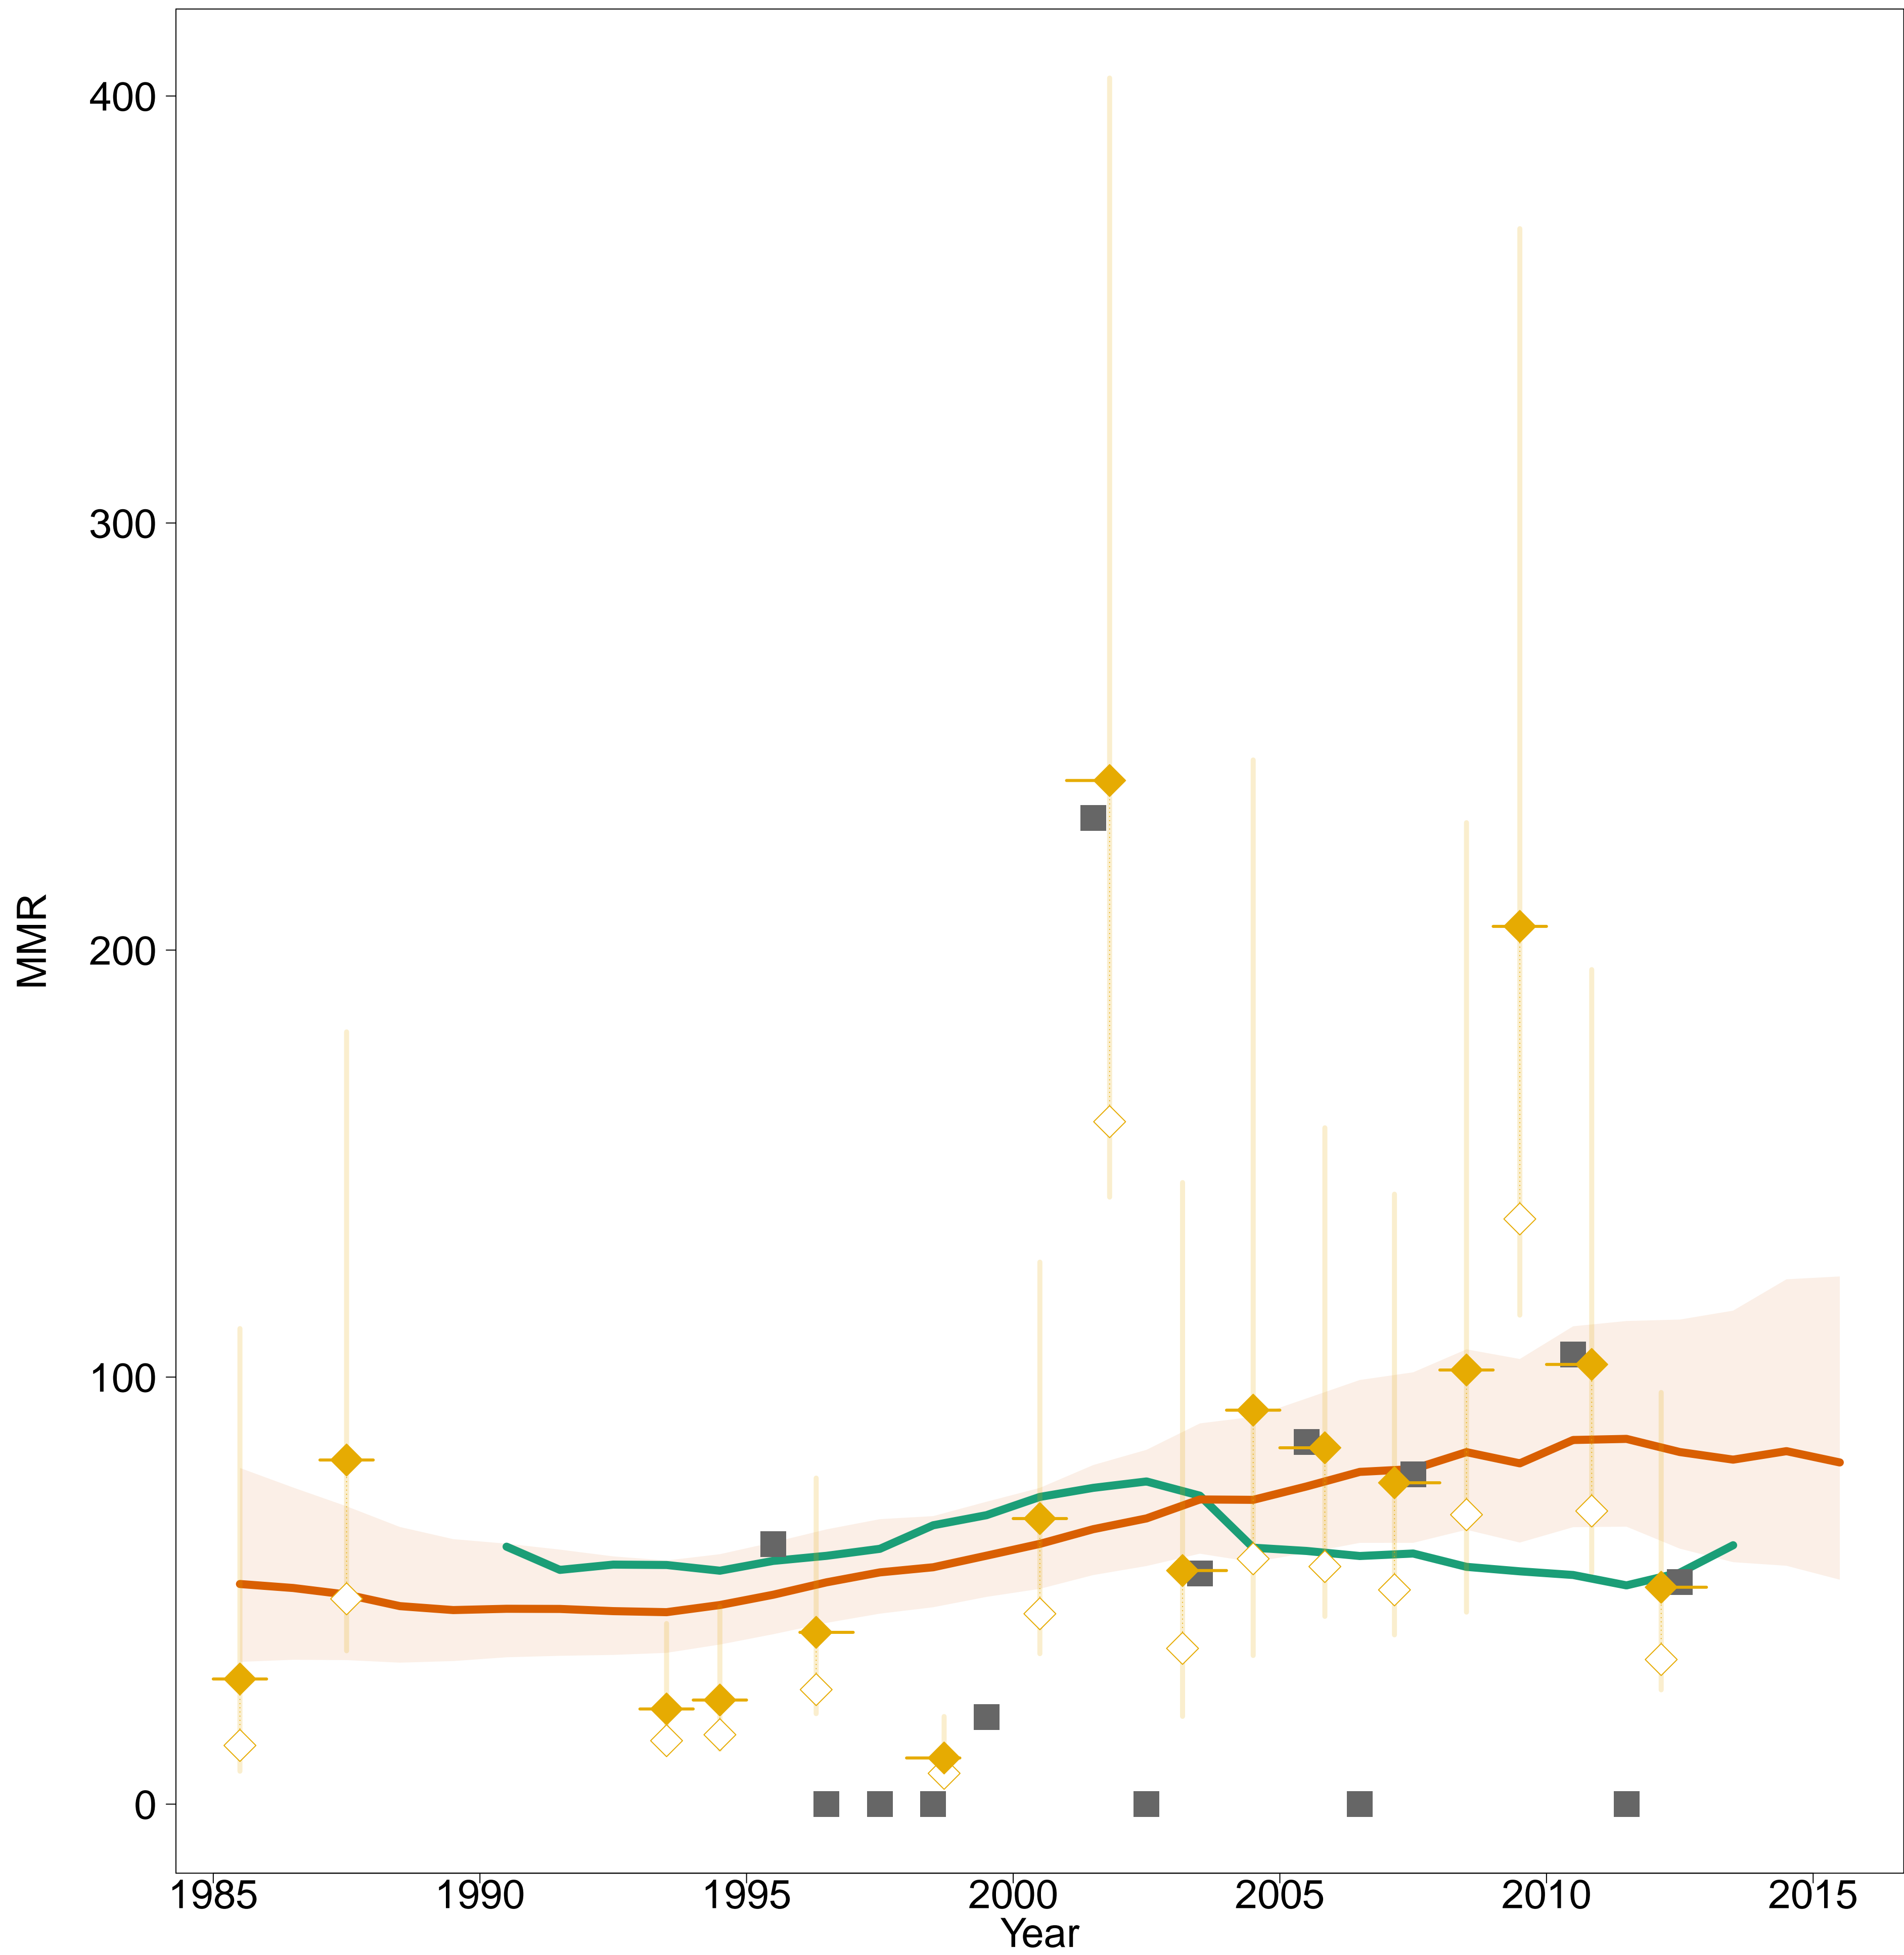

- Estimates –
- MMEIG 2015
- GBD 2013
- MMR Database 2015 –
- ◊ Observed Data
- ◆ Adjusted Data
- Data type –
- ◆ VR
- Reported VR before recalc.  
(related to 0 obs. mat. death)

Bahrain [BHR]  
(Western Asia)

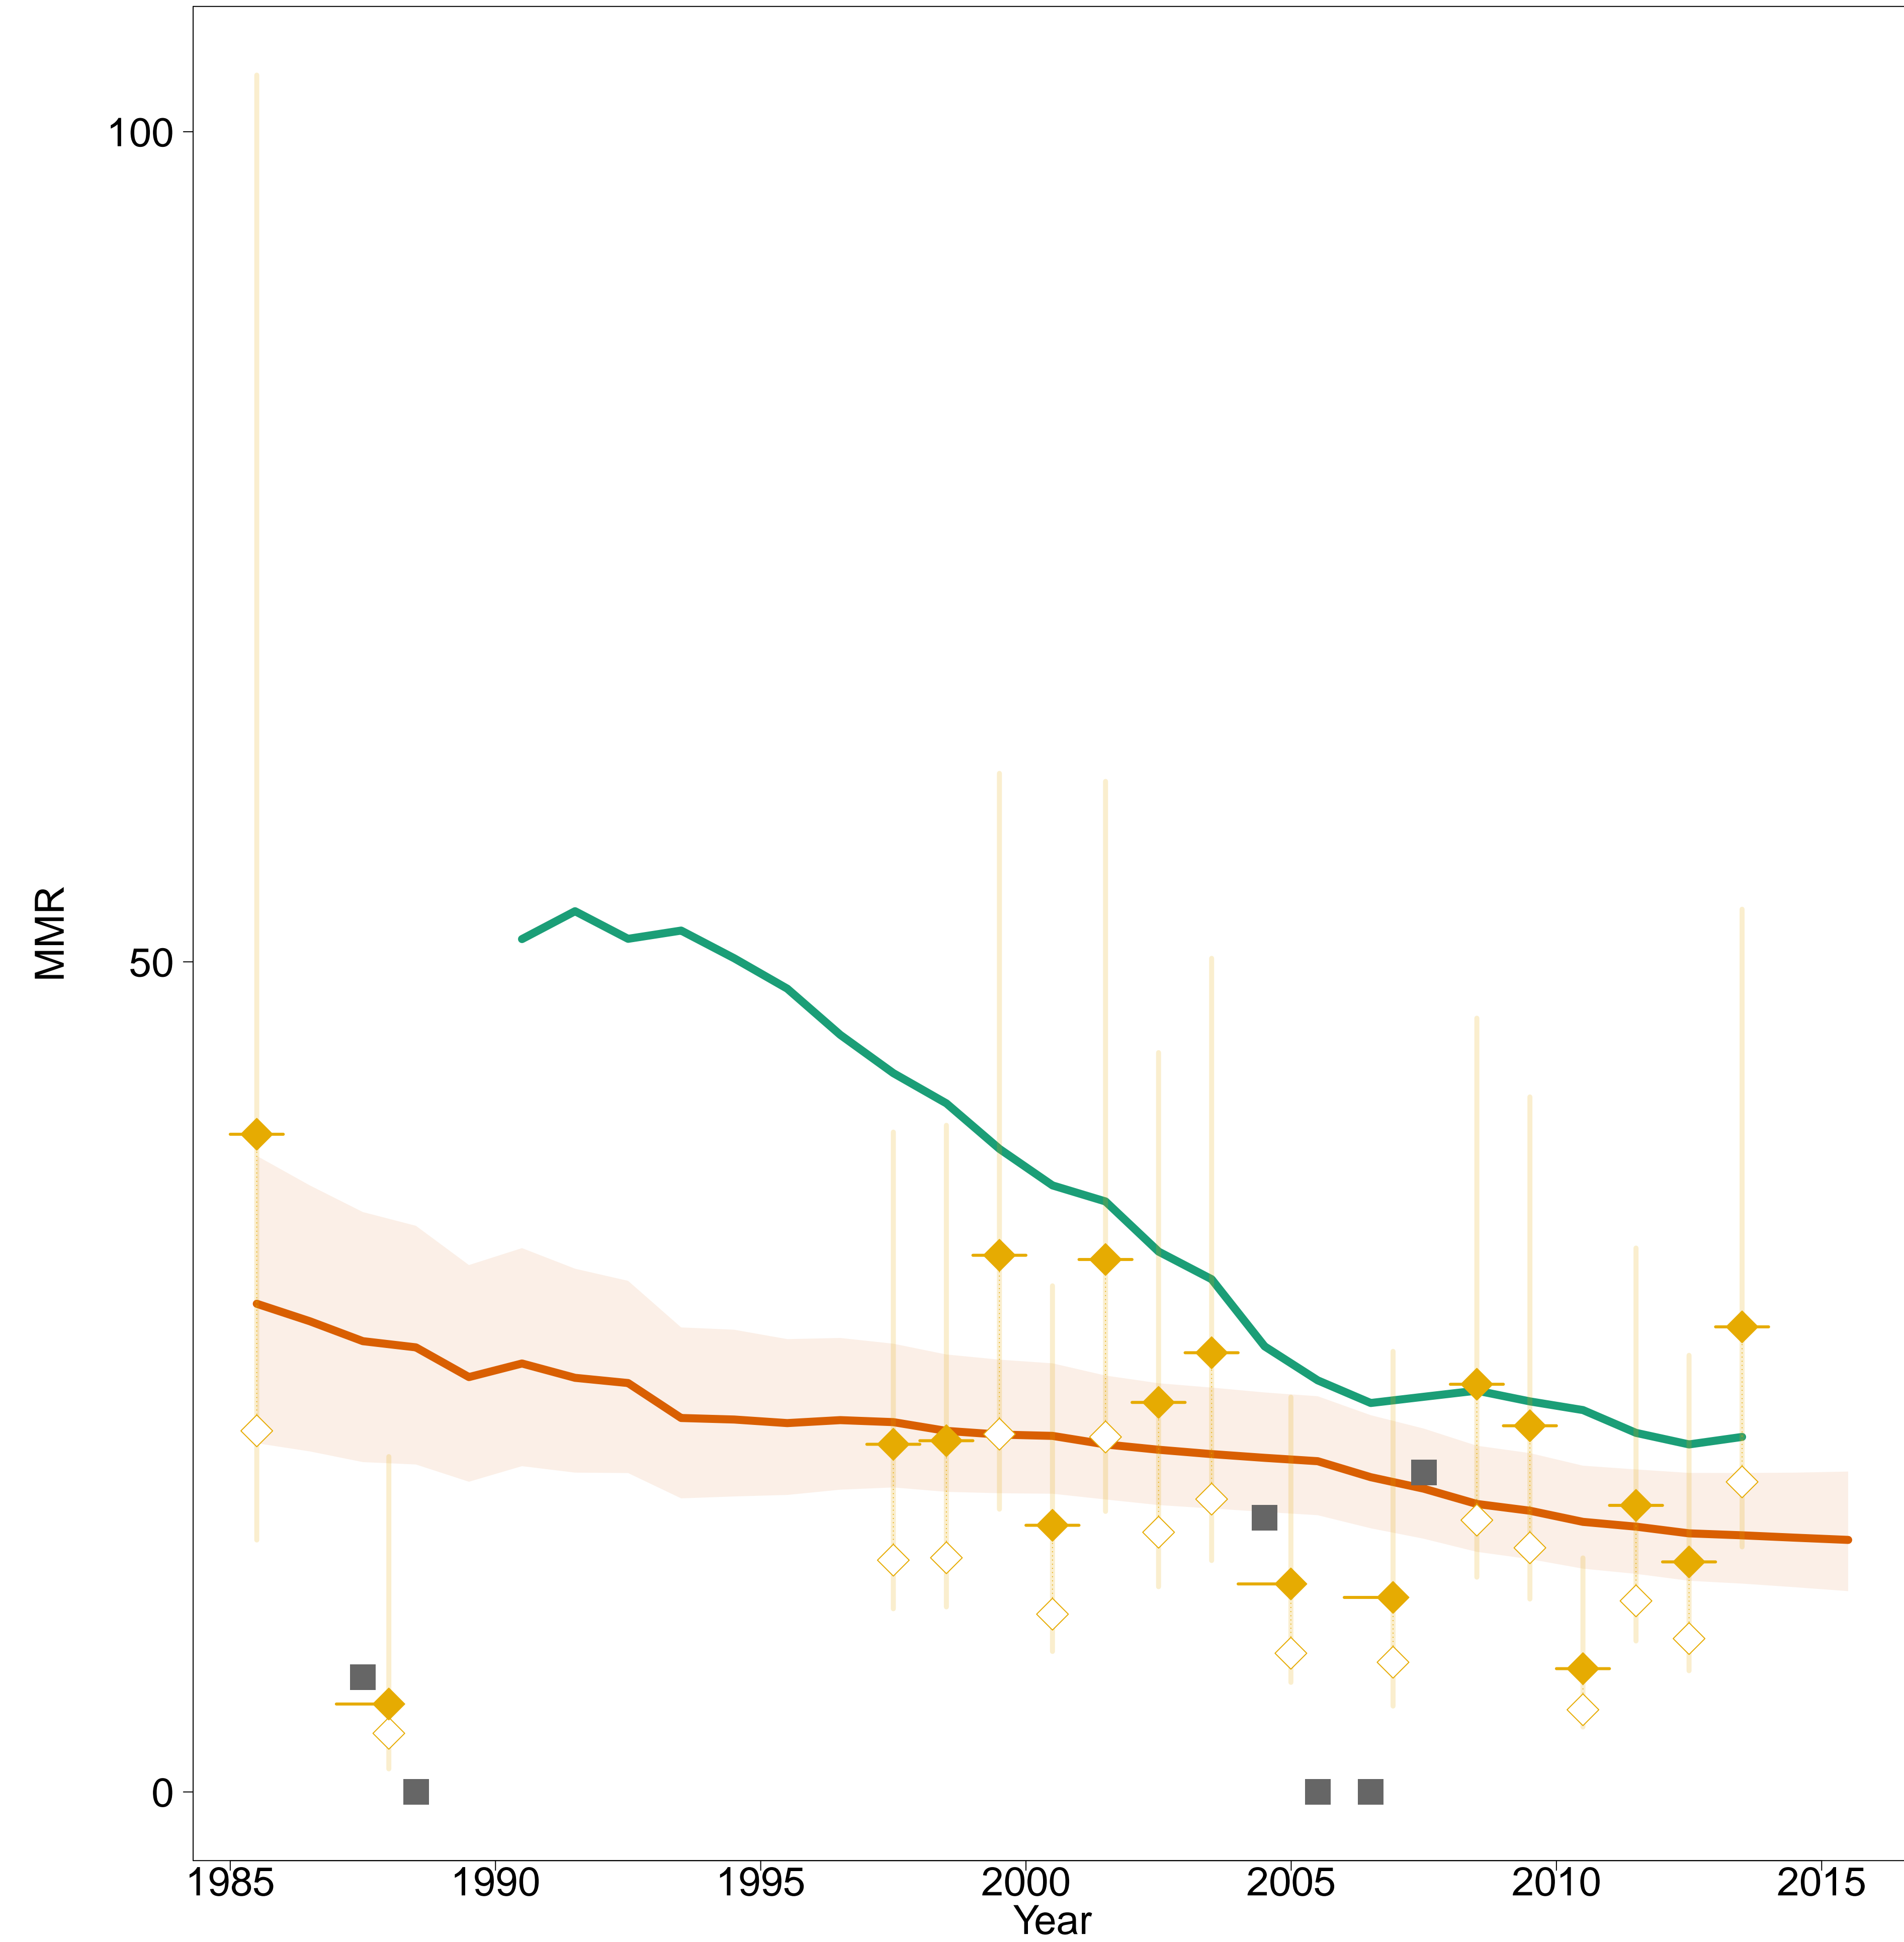

- Estimates –
- MMEIG 2015
- GBD 2013
- MMR Database 2015 –
- Observed Data
- Adjusted Data
- Data type –
- VR
- Reported VR before recalc.  
(related to 0 obs. mat. death)

Bangladesh [BGD]  
(Southern Asia)

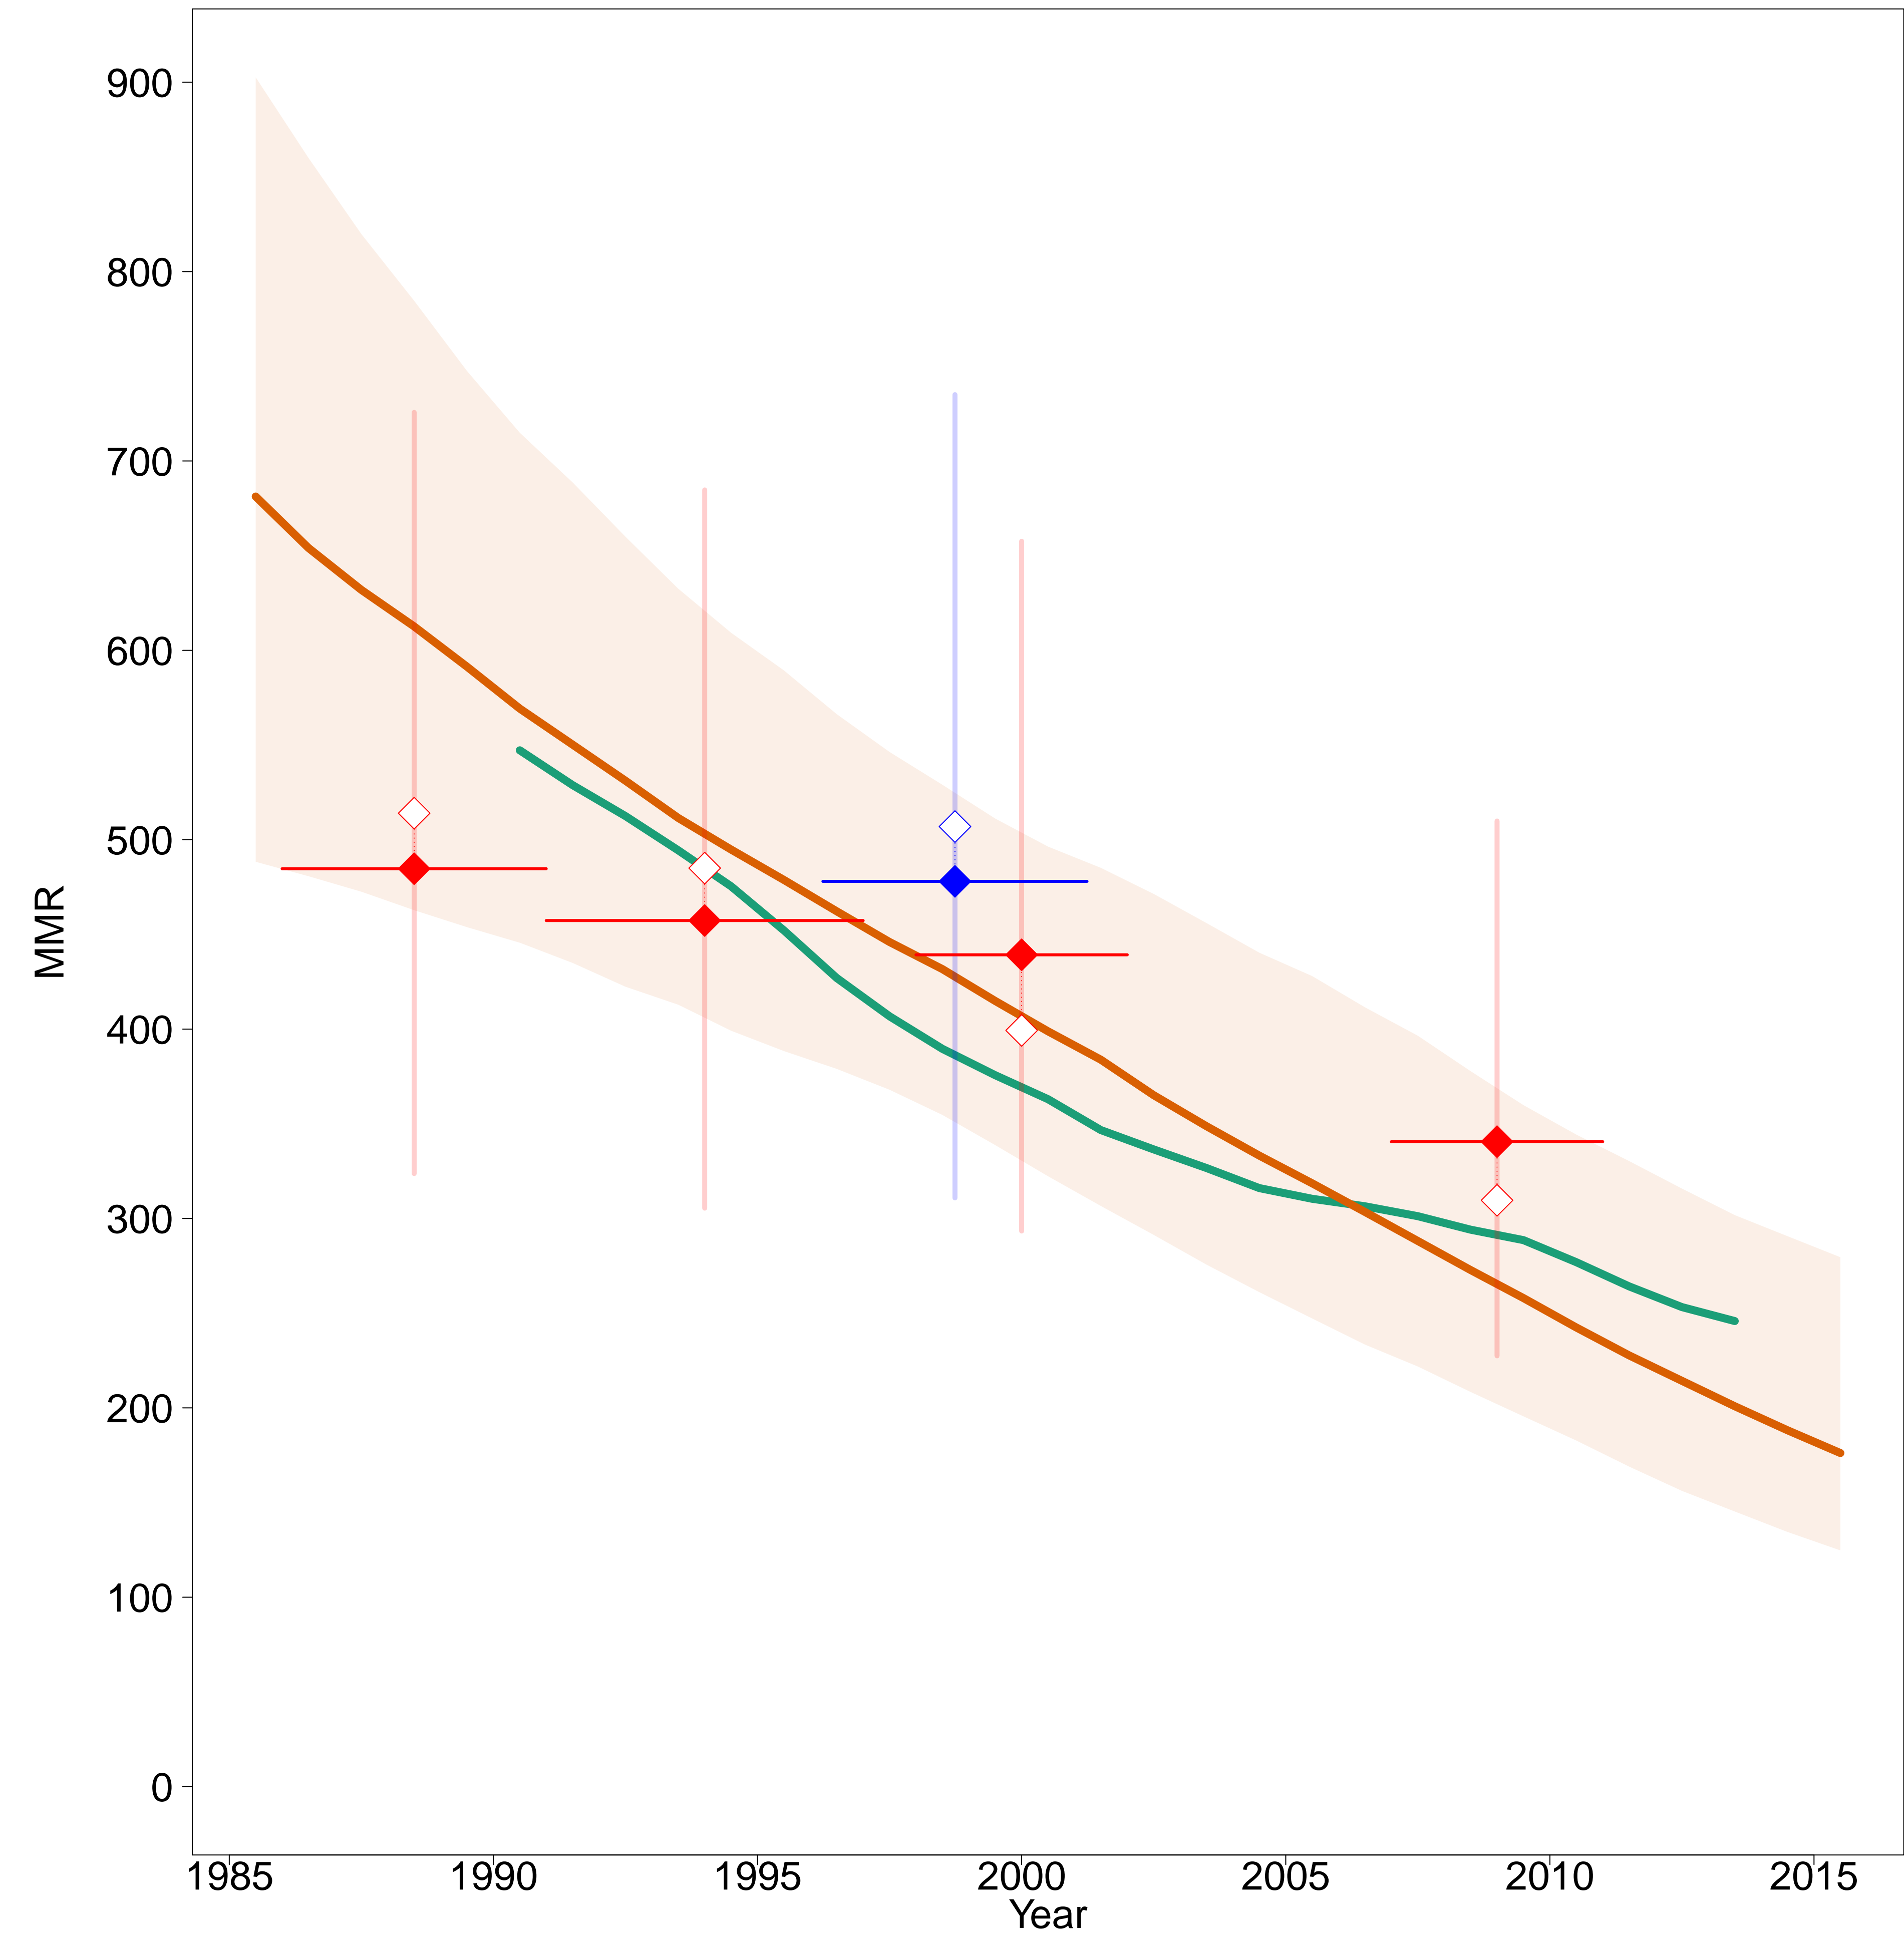

- Estimates –
- MMEIG 2015
- GBD 2013
- MMR Database 2015 –
- Observed Data
- Adjusted Data
- Data type –
- DHS
- Misc. studies

Barbados [BRB]  
(Caribbean)

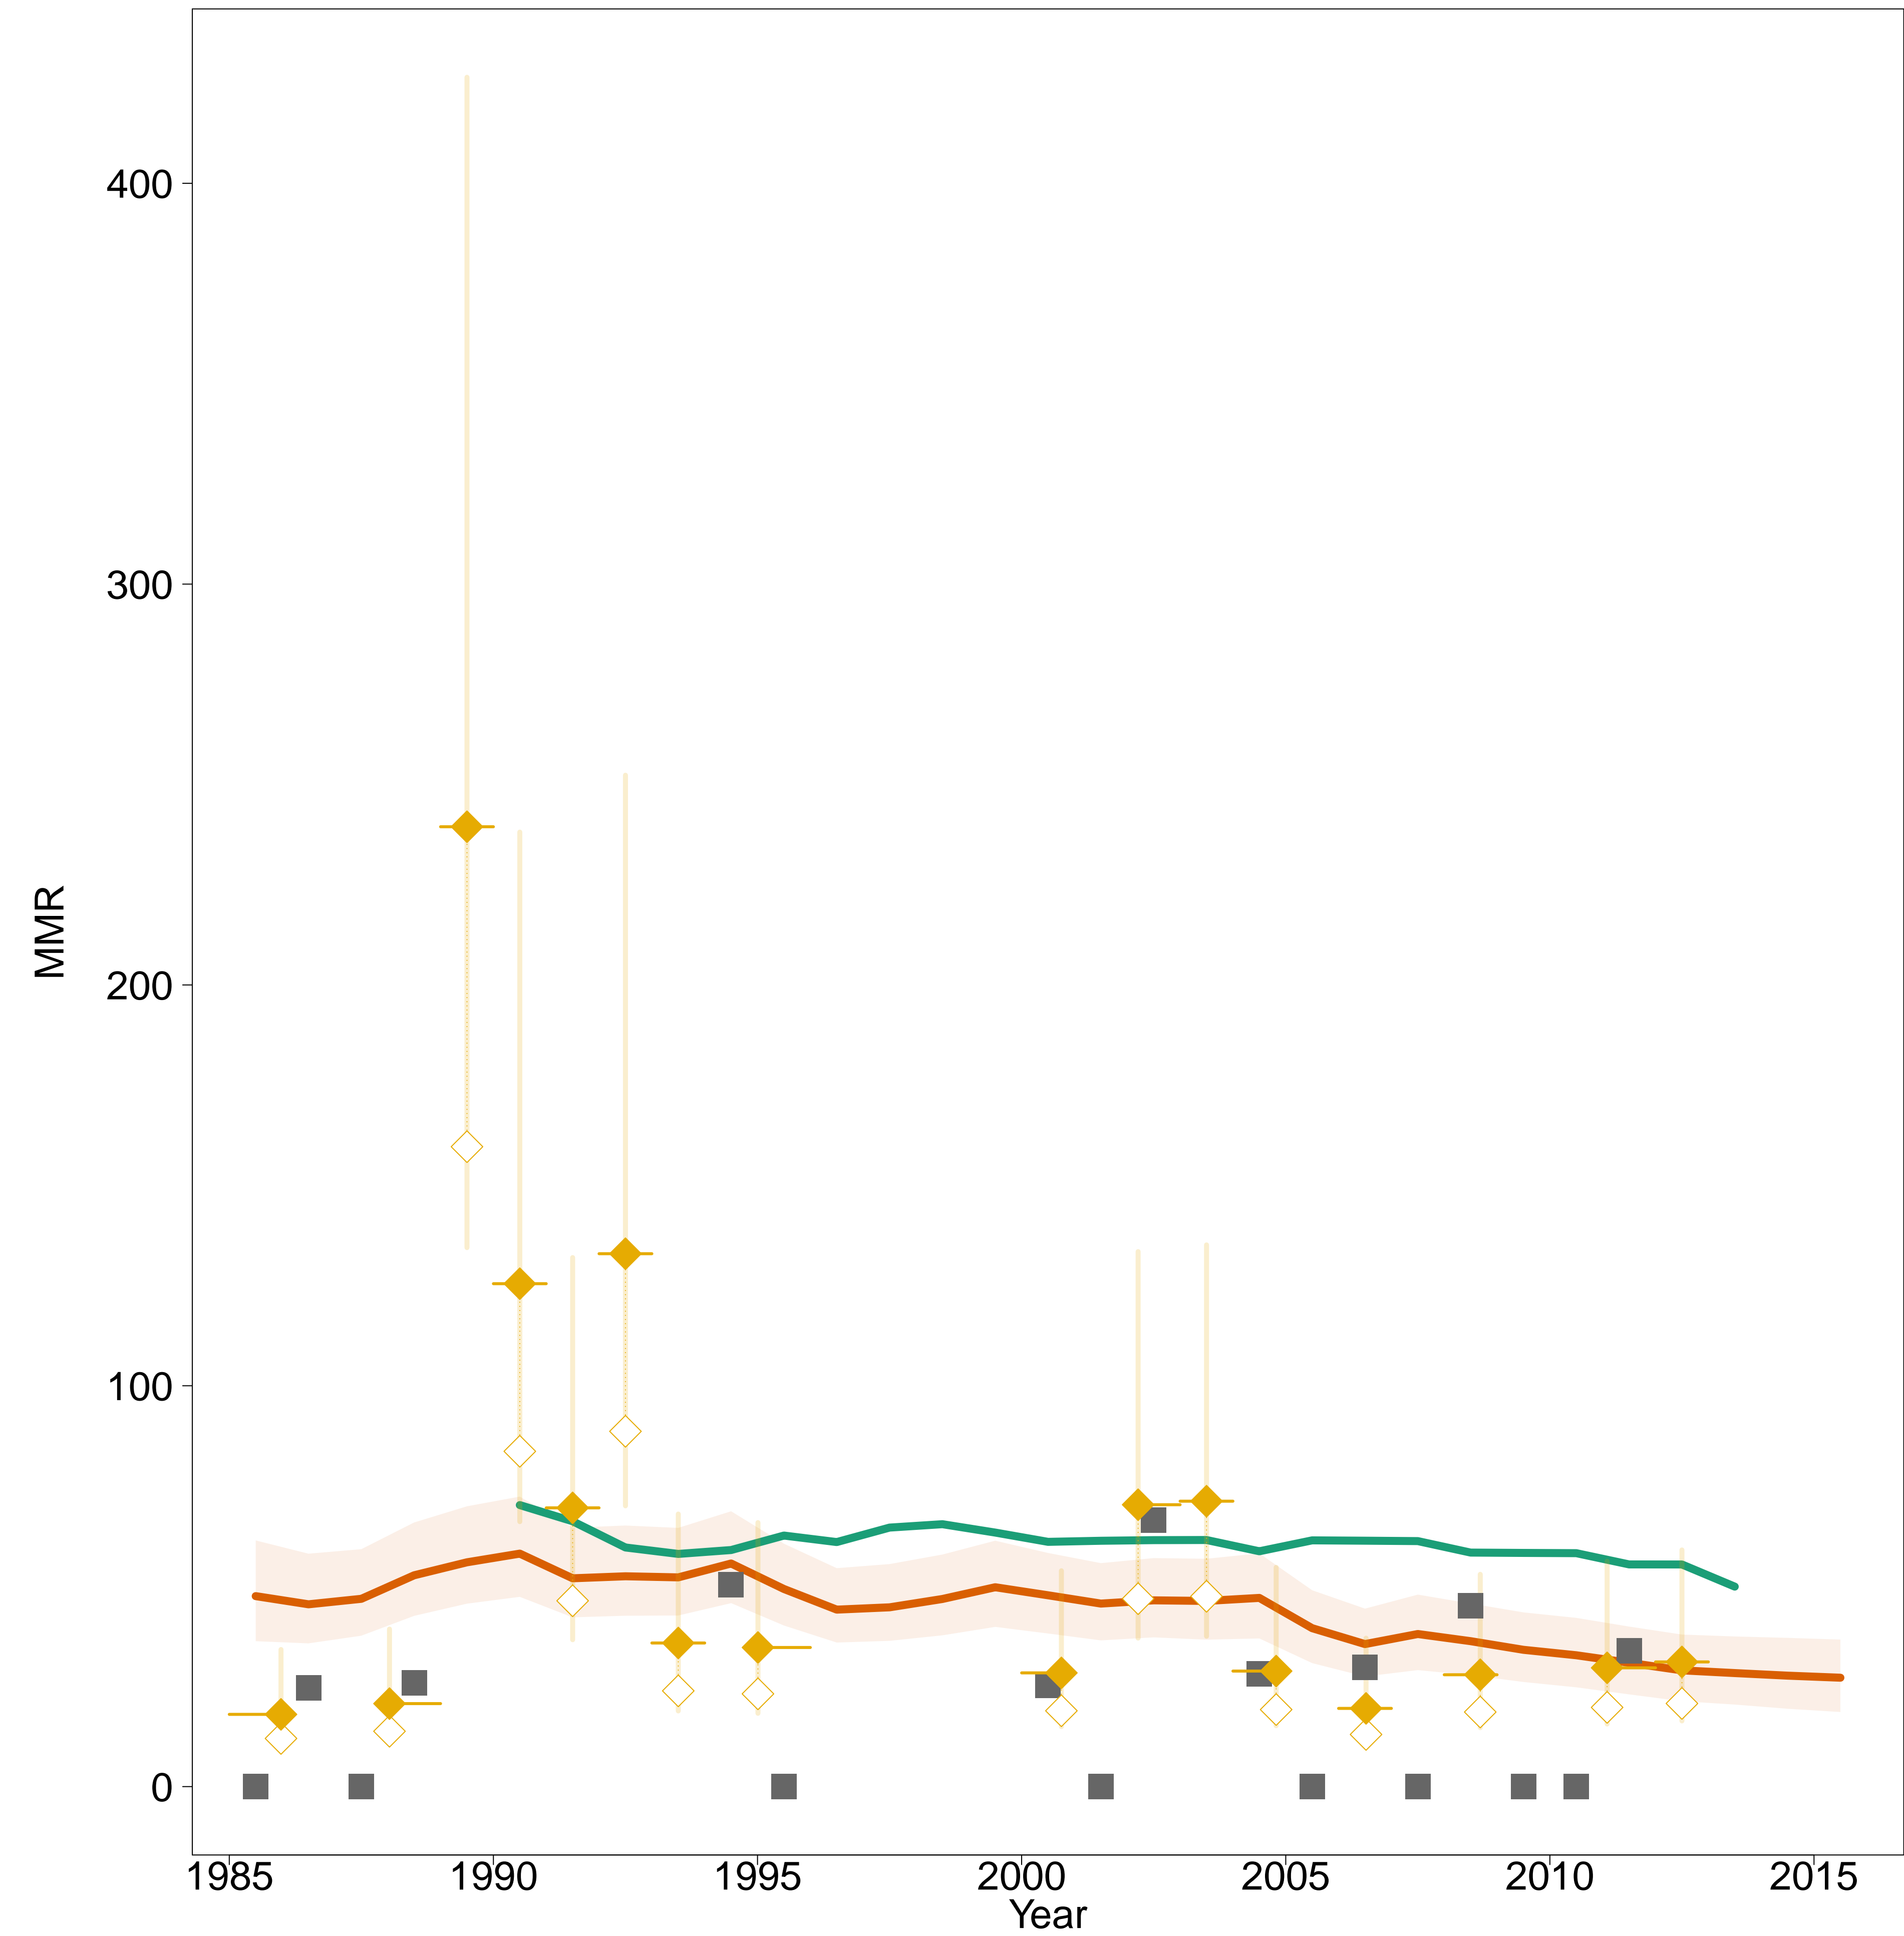

- Estimates –
- MMEIG 2015
- GBD 2013
- MMR Database 2015 –
- ◊ Observed Data
- ◆ Adjusted Data
- Data type –
- ◆ VR
- Reported VR before recal.  
(related to 0 obs. mat. death)

Belarus [BLR]  
(Developed regions)

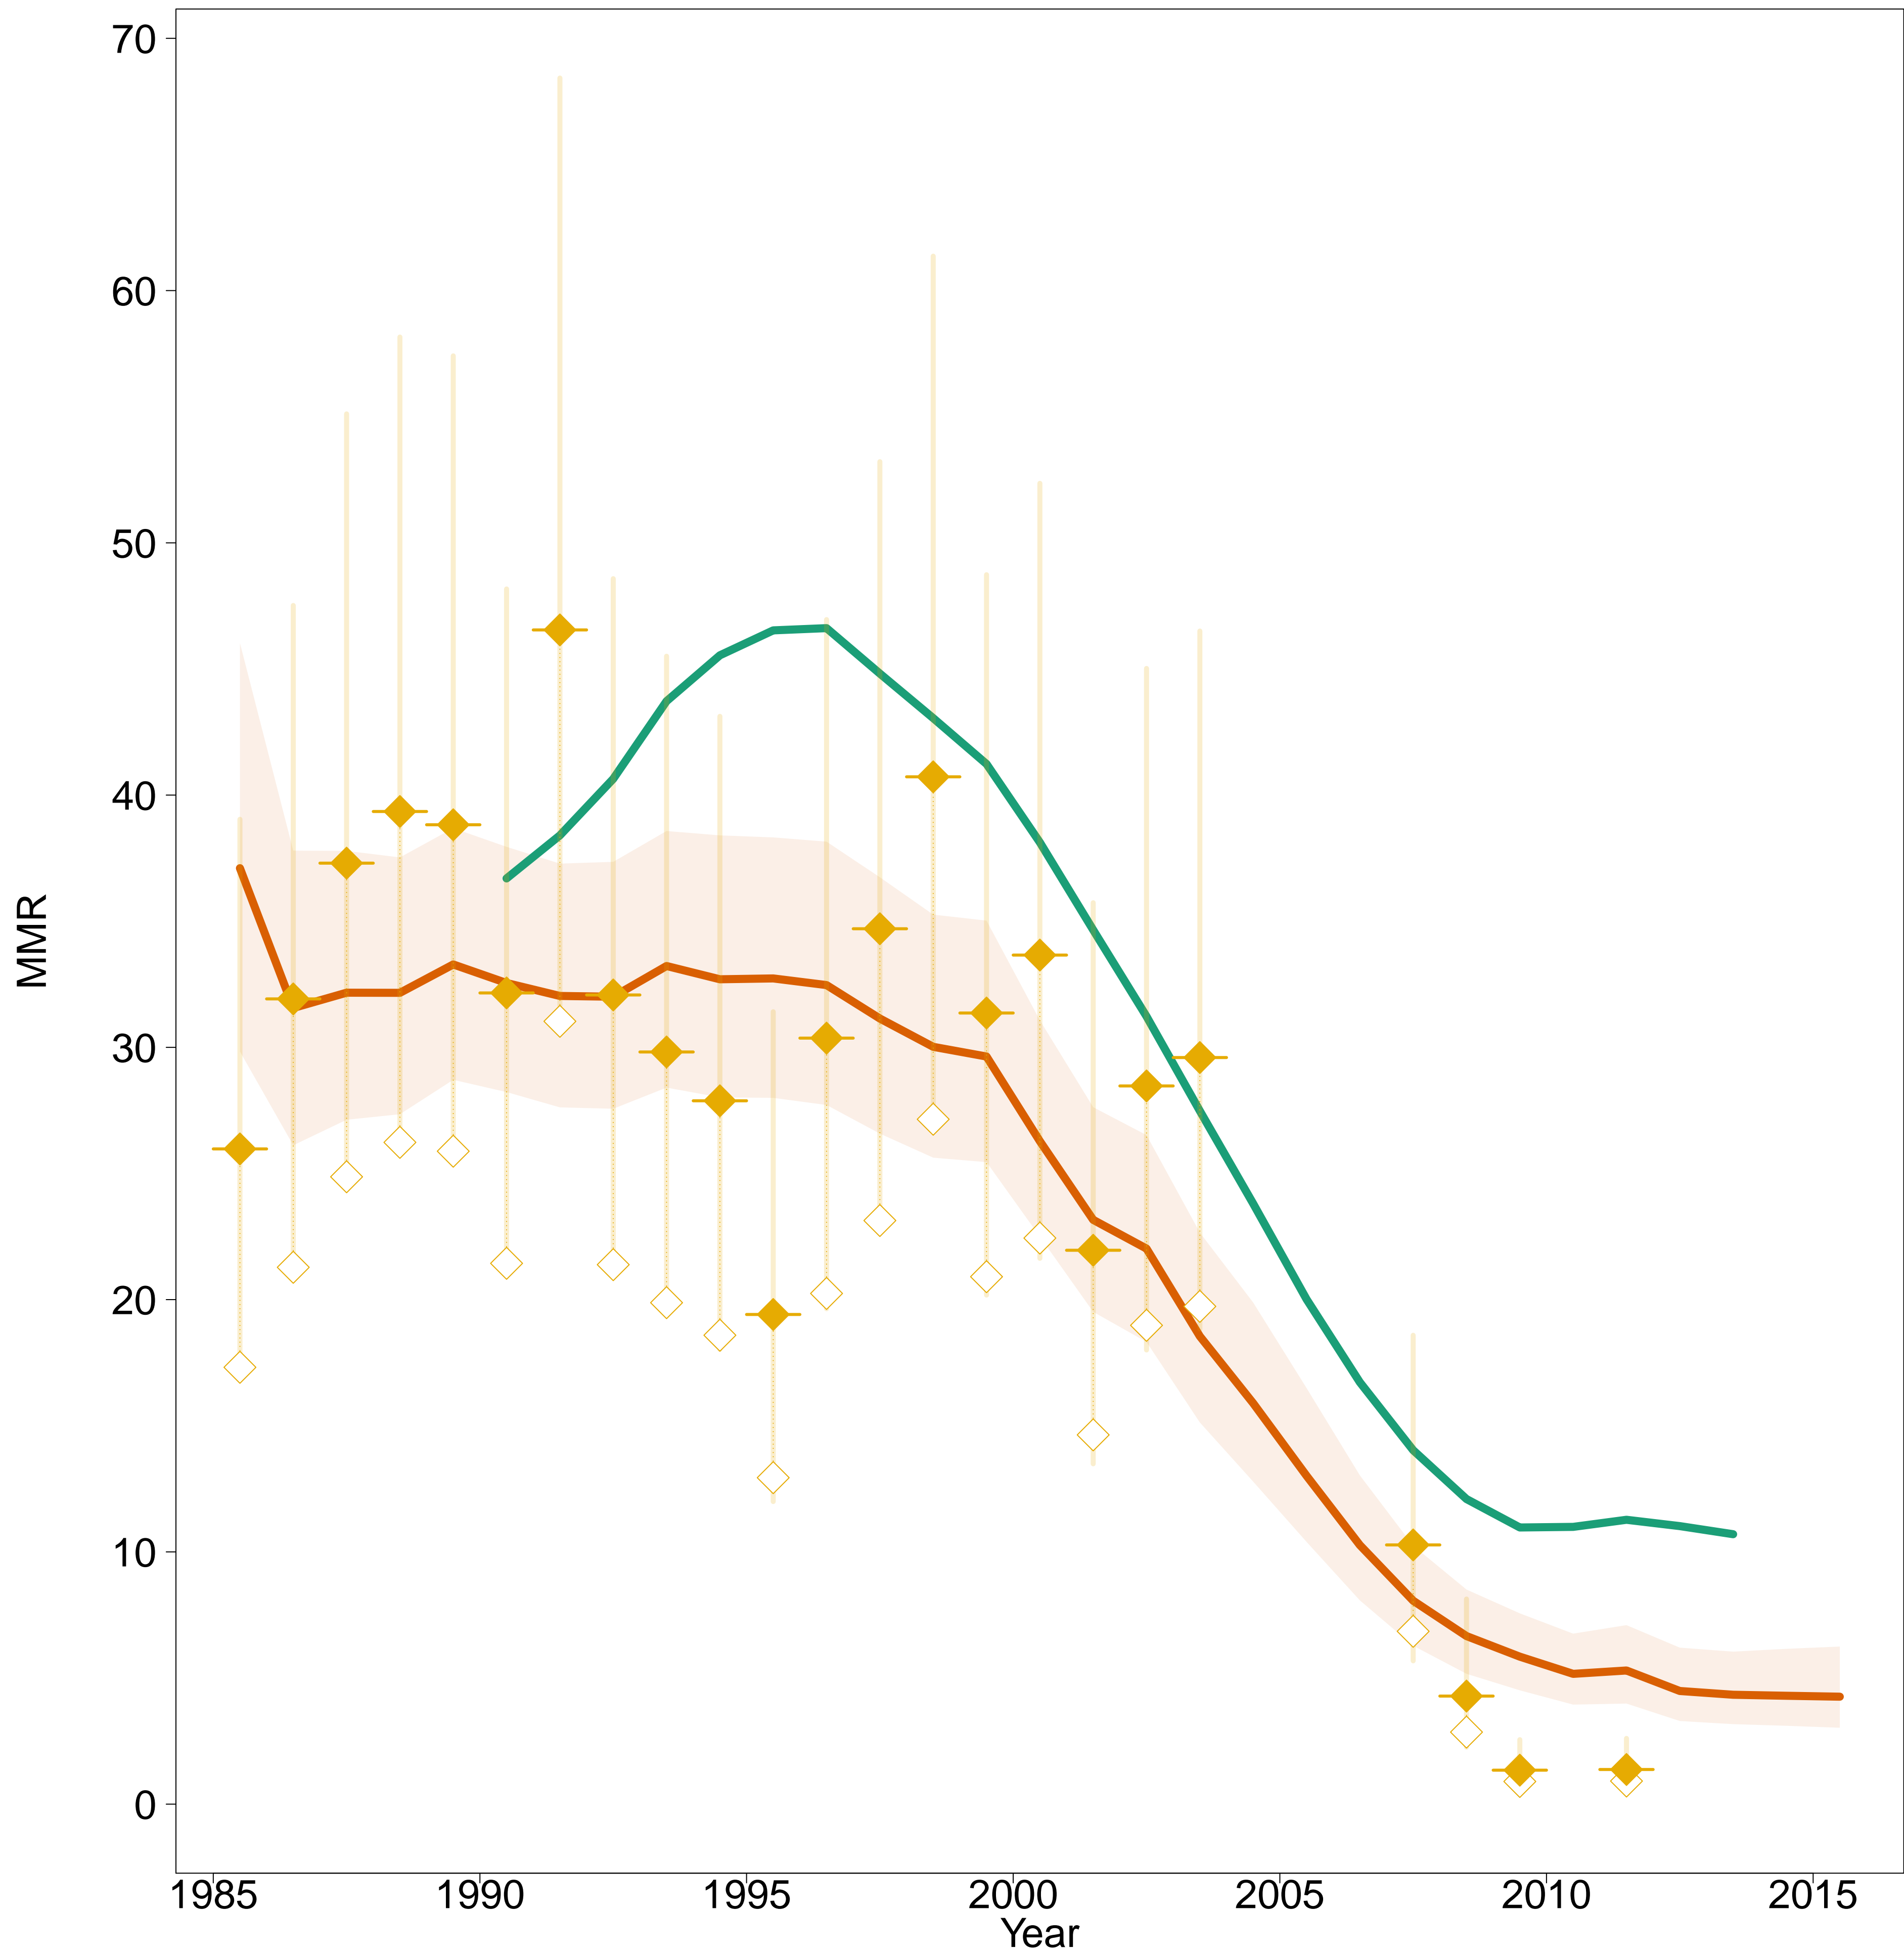

- Estimates –
- MMEIG 2015
- GBD 2013
- MMR Database 2015 –
- ◊ Observed Data
- ◆ Adjusted Data
- Data type –
- ◆ VR

Belgium [BEL]  
(Developed regions)

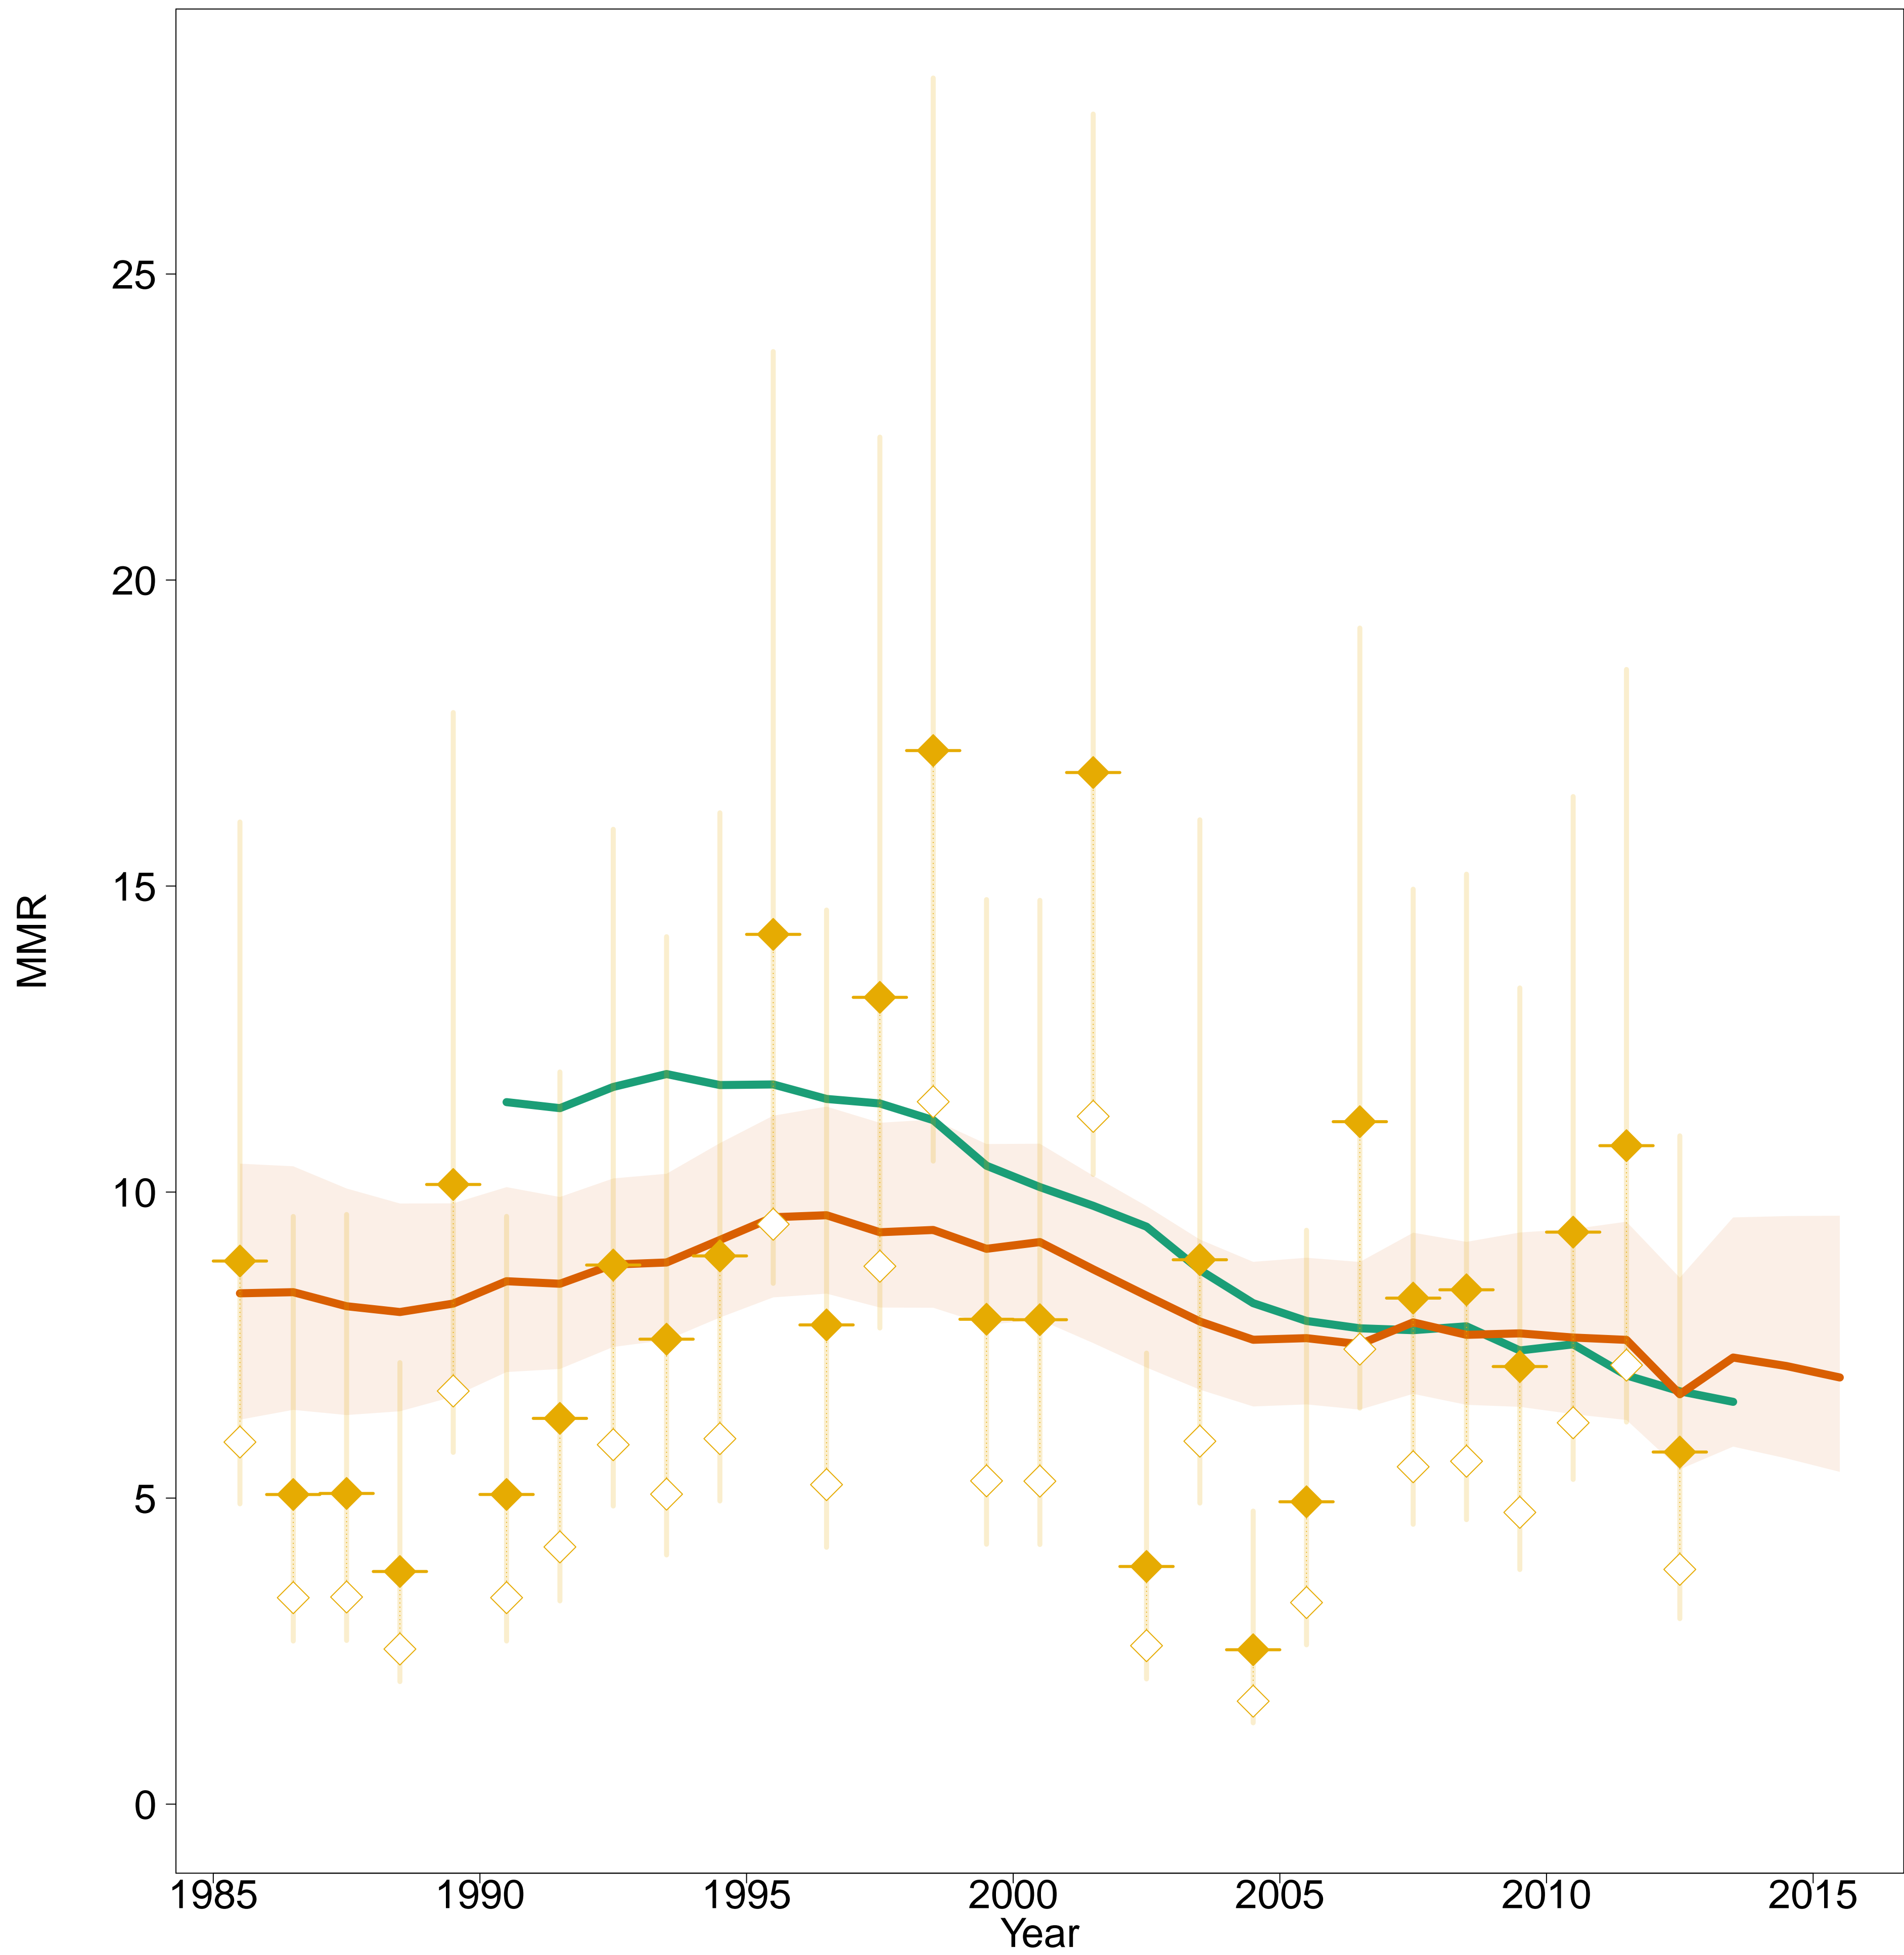

- Estimates –
- MMEIG 2015
- GBD 2013
- MMR Database 2015 –
- ◊ Observed Data
- ◆ Adjusted Data
- Data type –
- ◆ VR

Belize [BLZ]  
(Central America)

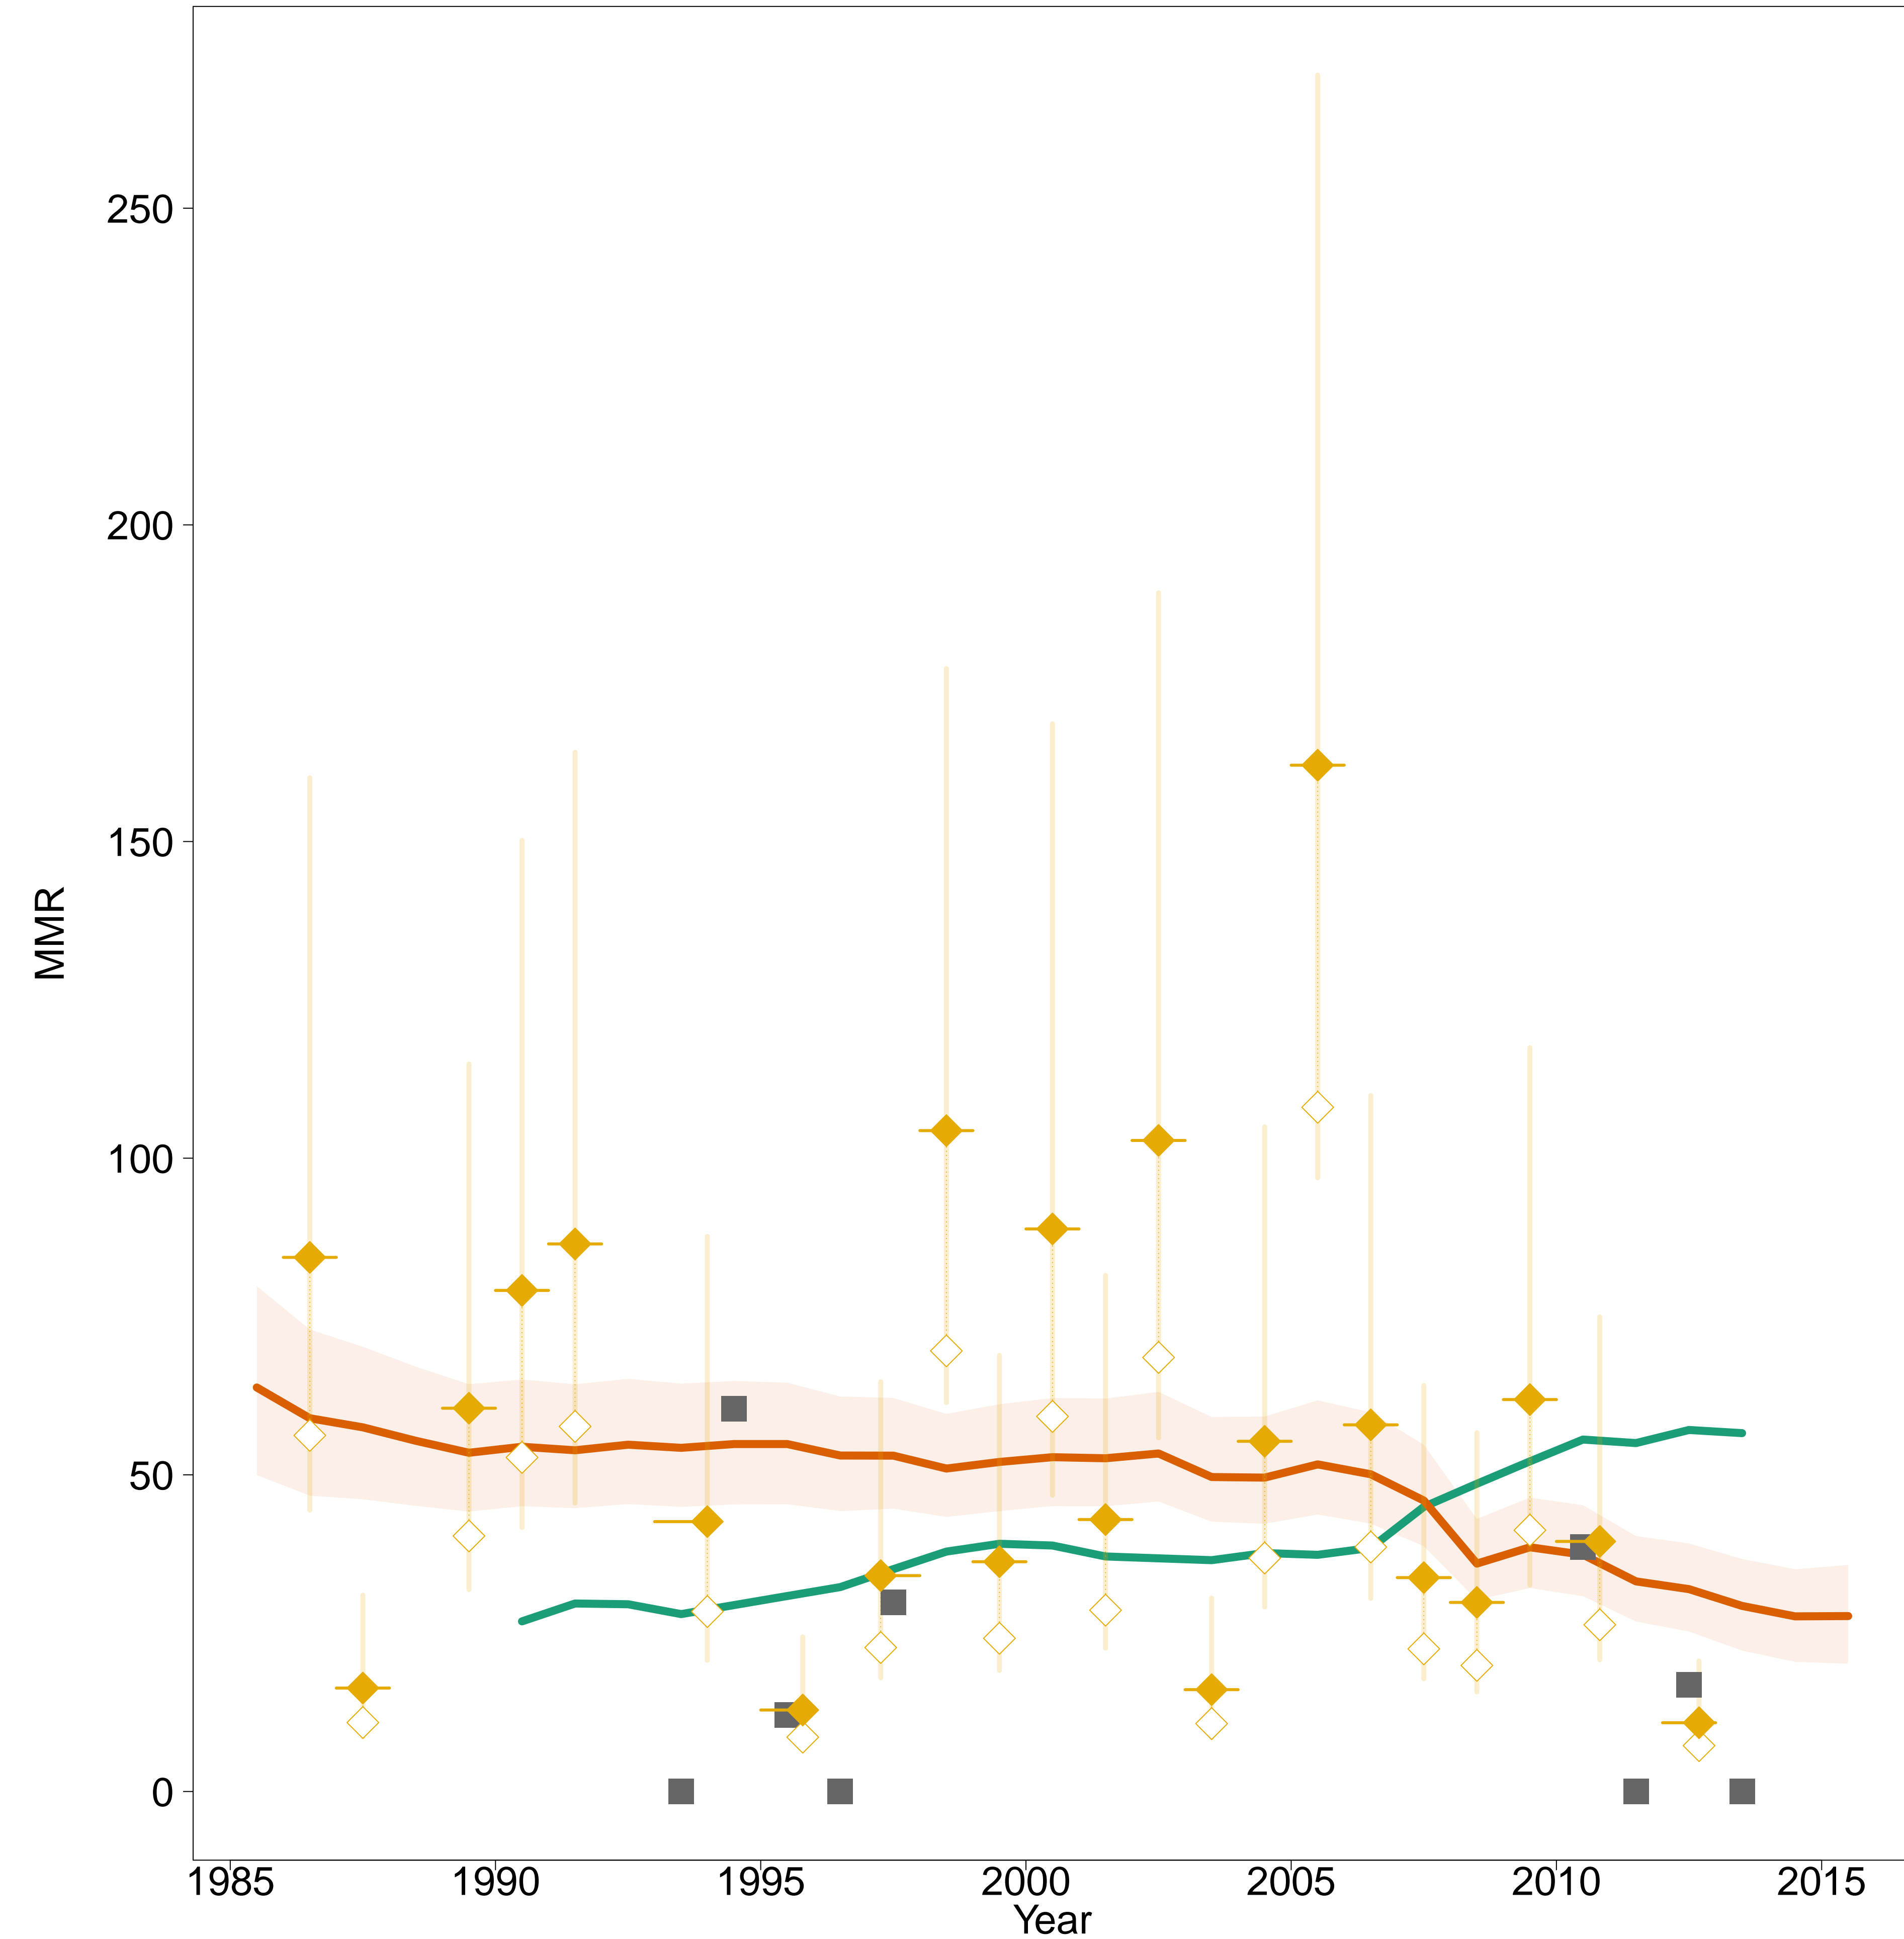

- Estimates –
- MMEIG 2015
- GBD 2013
- MMR Database 2015 –
- ◊ Observed Data
- ◆ Adjusted Data
- Data type –
- ◆ VR
- Reported VR before recalc.  
(related to 0 obs. mat. death)

Benin [BEN]  
(Western Africa)

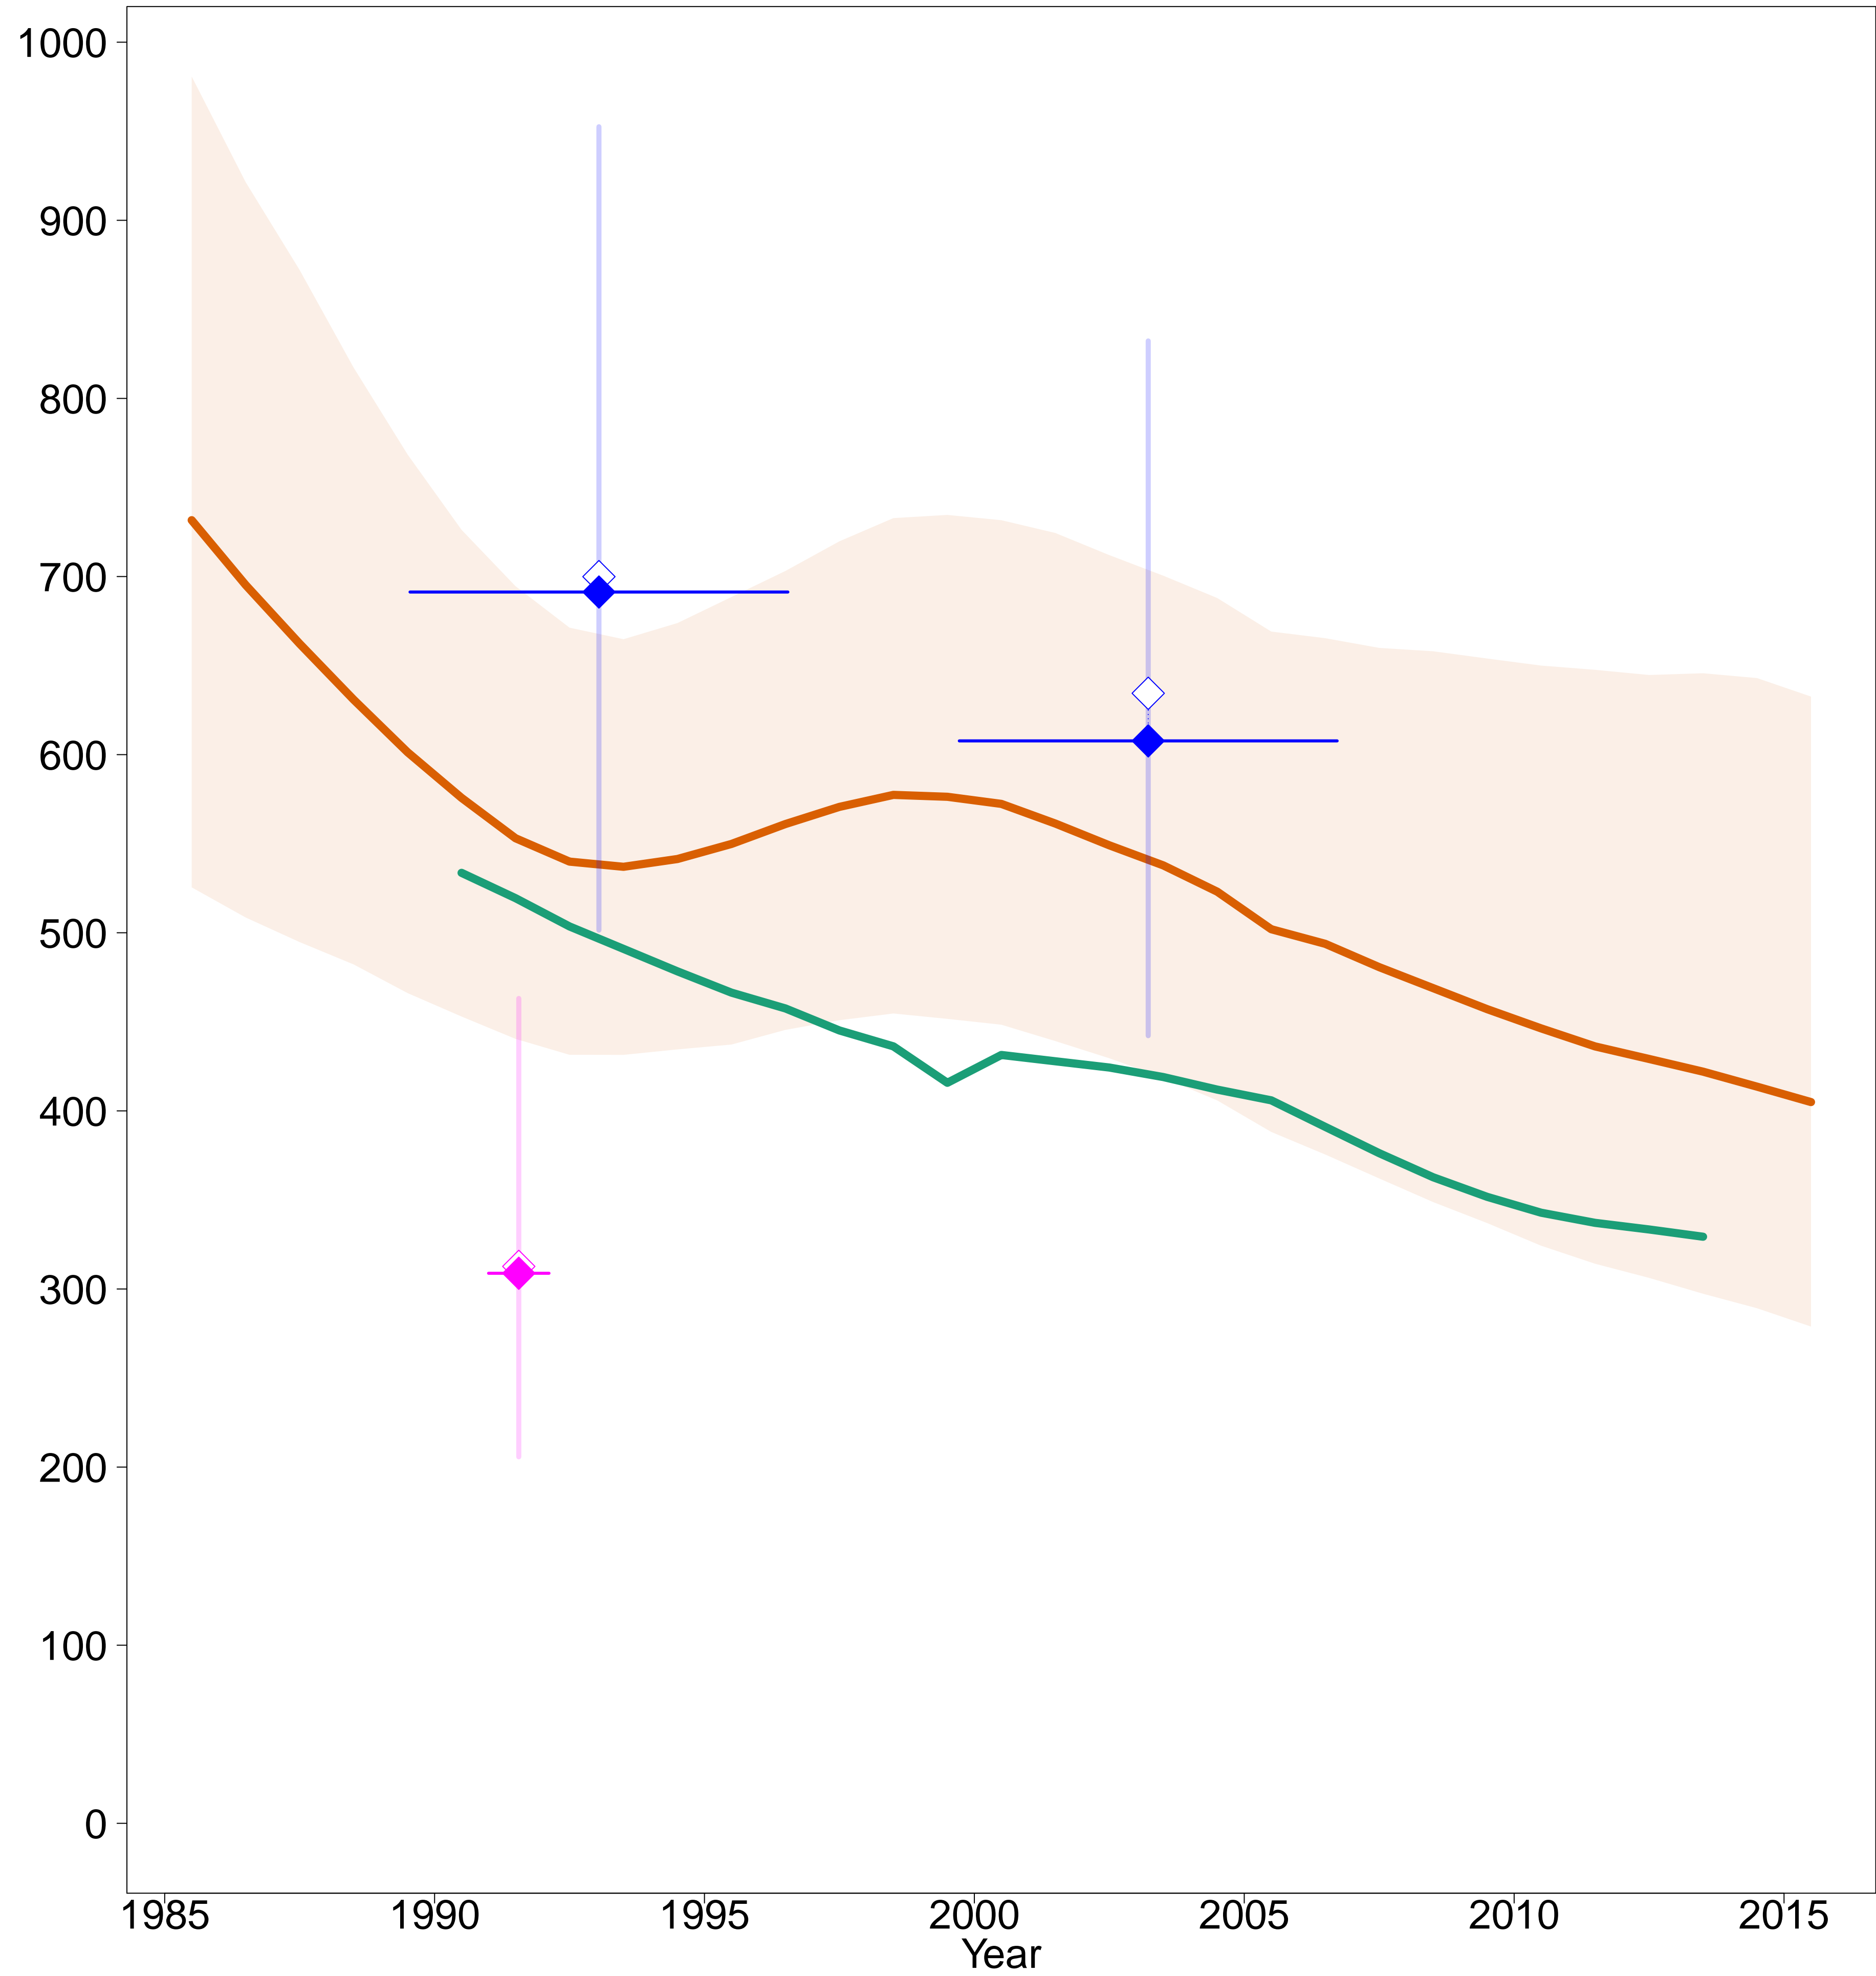

- Estimates –
- MMEIG 2015
- GBD 2013
- MMR Database 2015 –
- Observed Data
- Adjusted Data
- Data type –
- DHS
- Census



Bhutan [BTN]  
(Southern Asia)

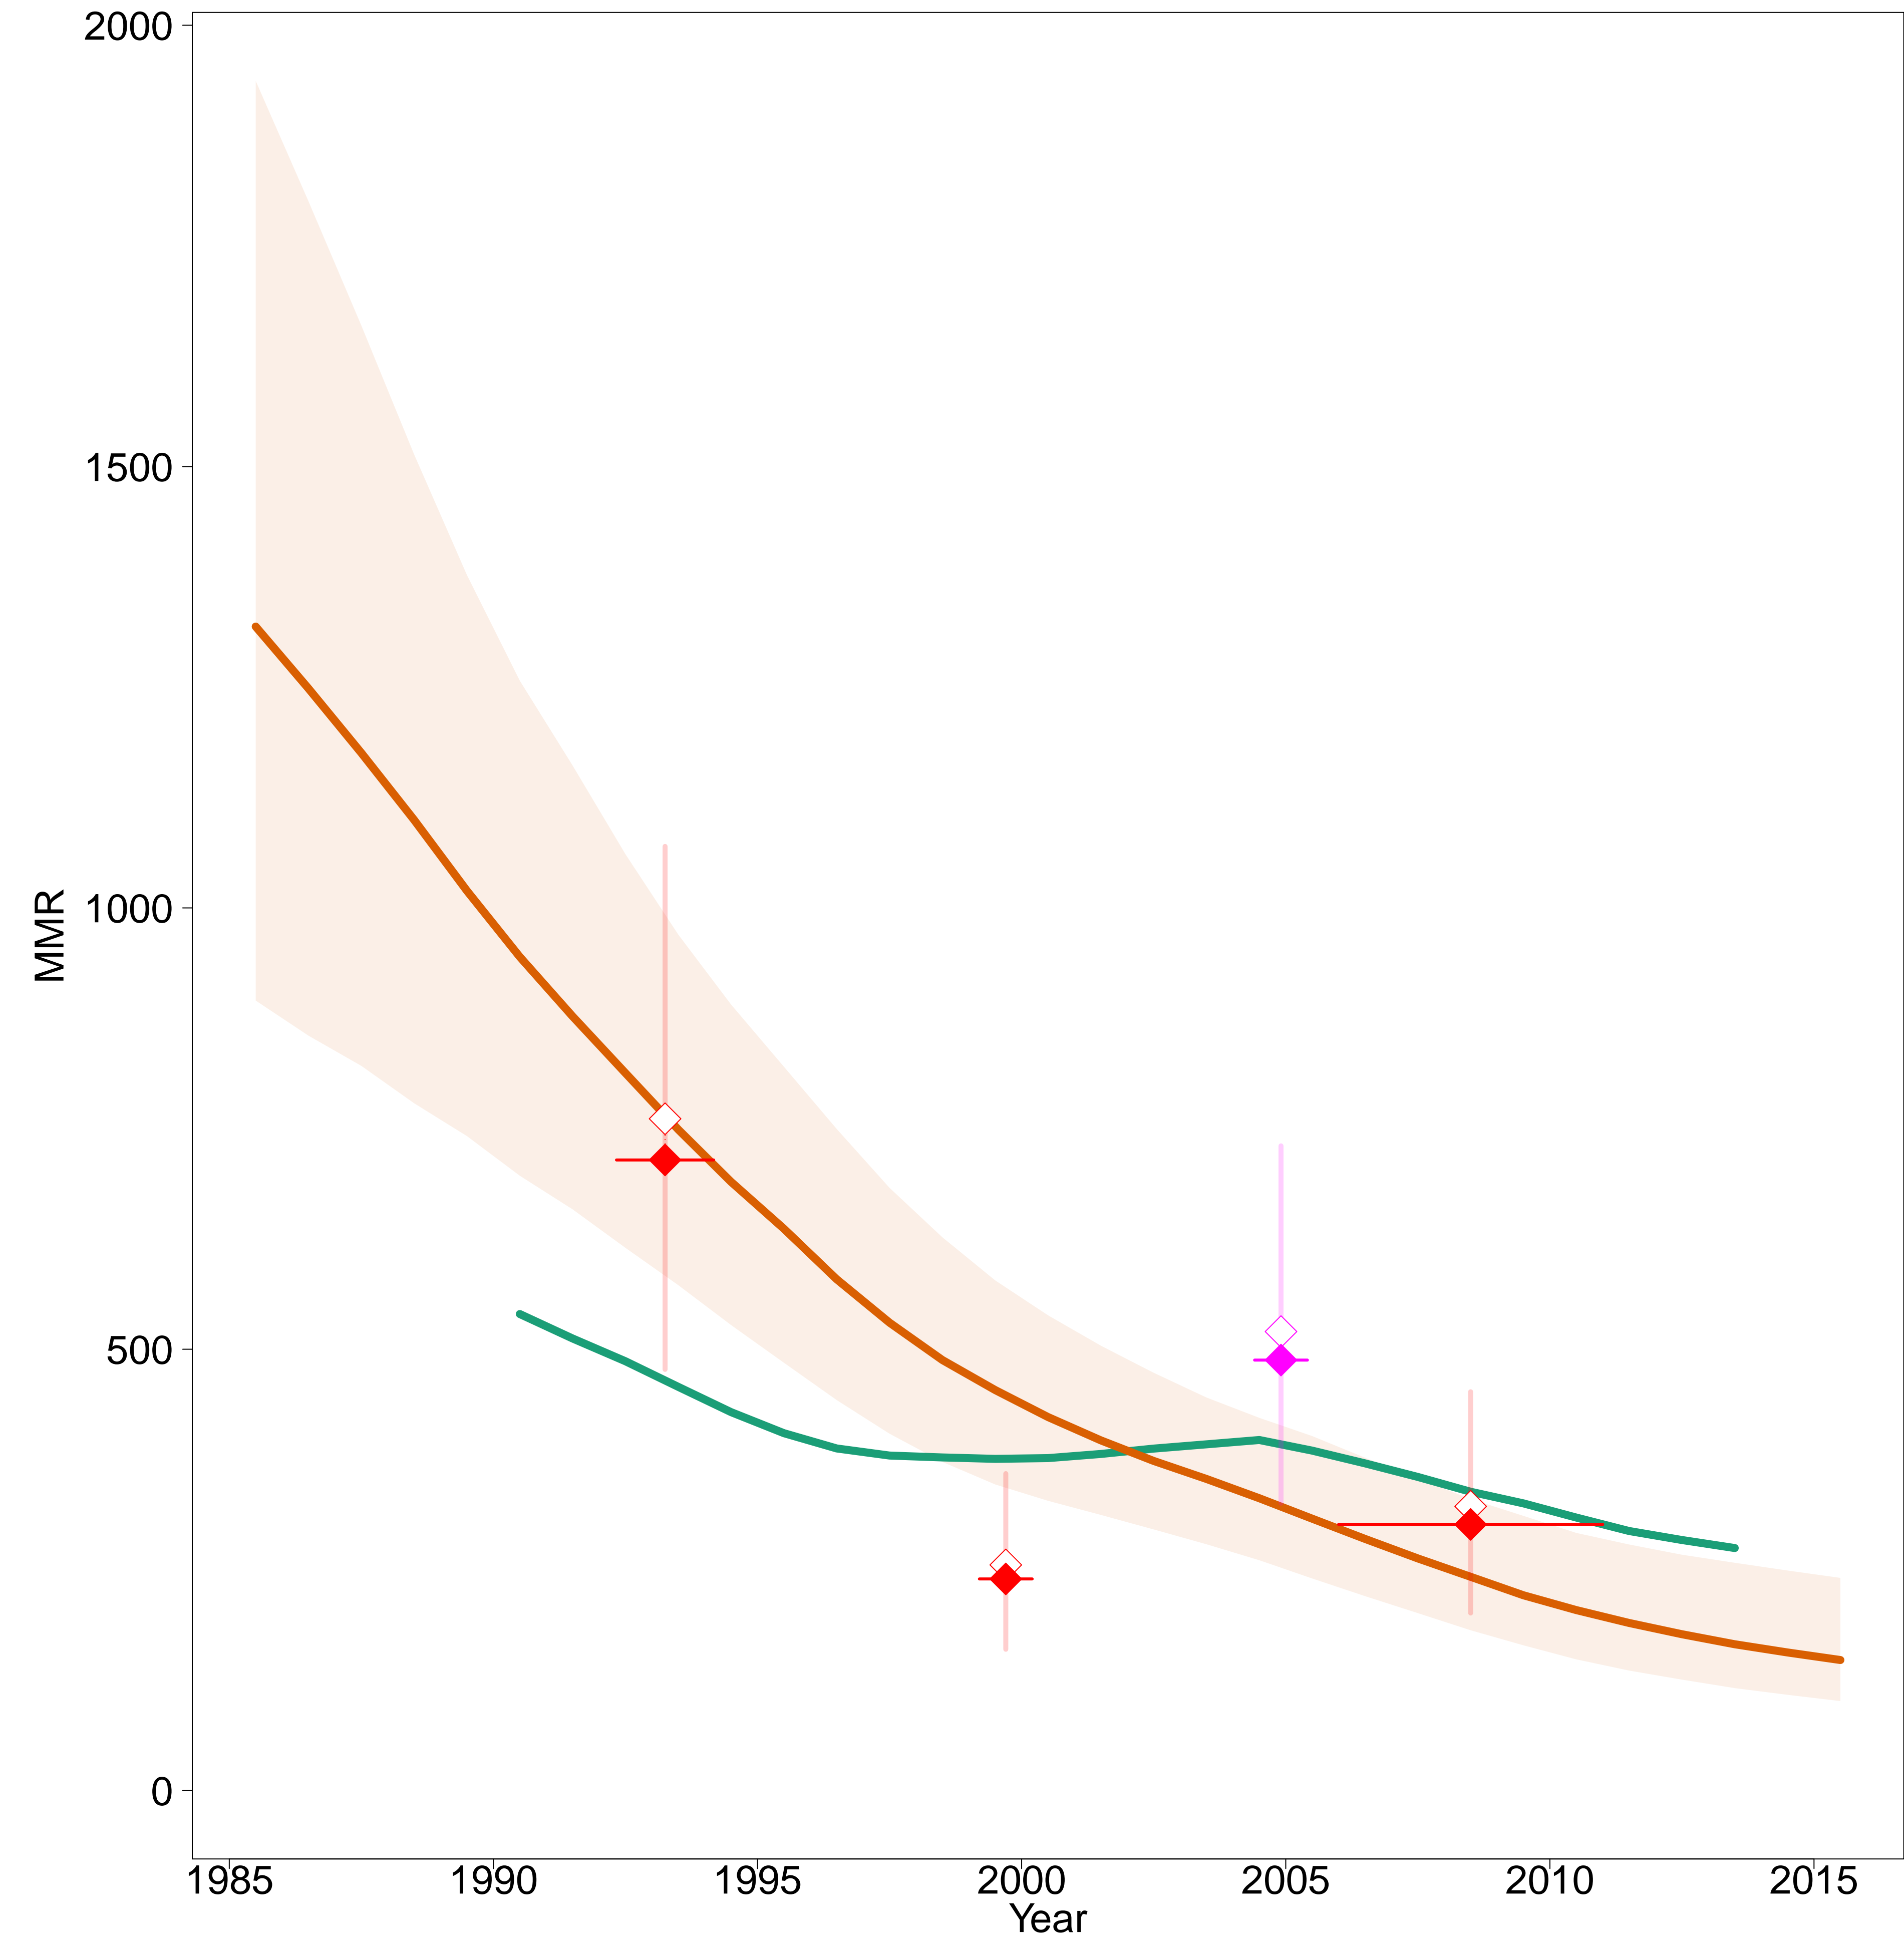

- Estimates -
- MMEIG 2015
- GBD 2013
- MMR Database 2015 -
- Observed Data
- Adjusted Data
- Data type -
- Census
- Misc. studies

Bolivia [BOL]  
(South America)

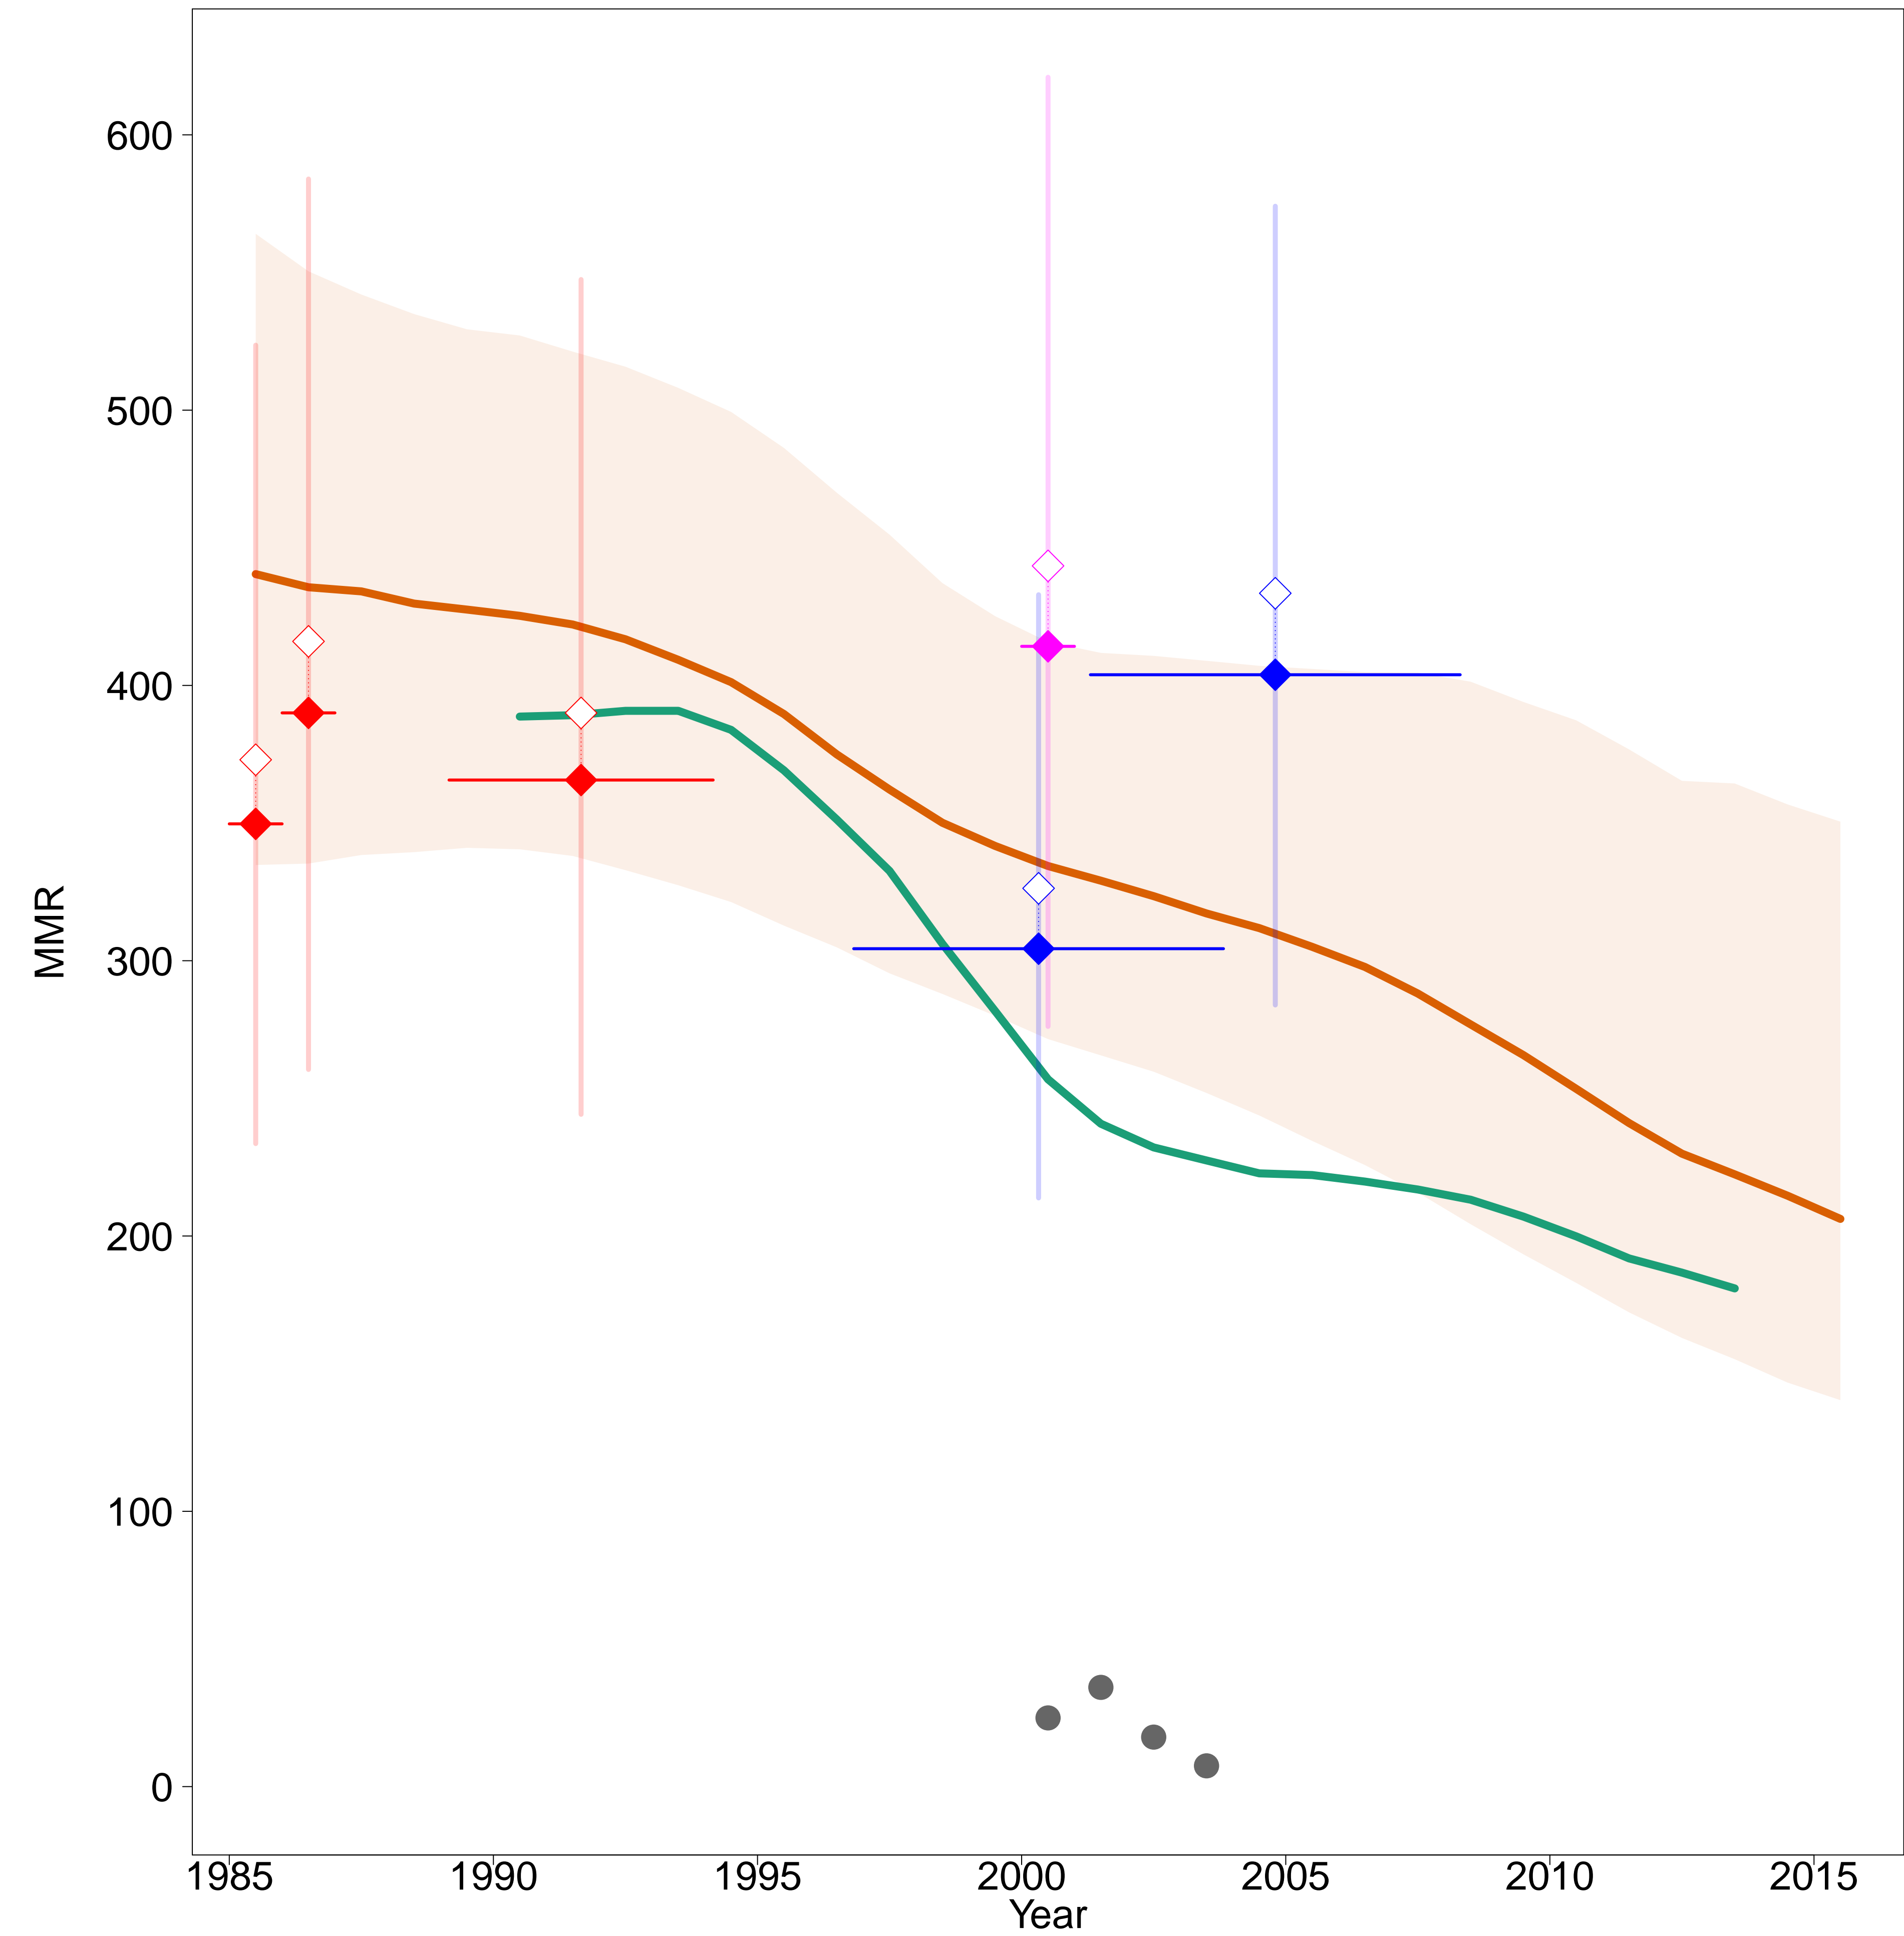

- Estimates –
- MMEIG 2015
- GBD 2013
- MMR Database 2015 –
- ◊ Observed Data
- ◆ Adjusted Data
- Data type –
- ◆ DHS
- ◆ Census
- ◆ Misc. studies
- Excluded VR data (data quality issues)

Bosnia and Herzegovina [BIH]  
(Transition countries of South-Eastern Europe)

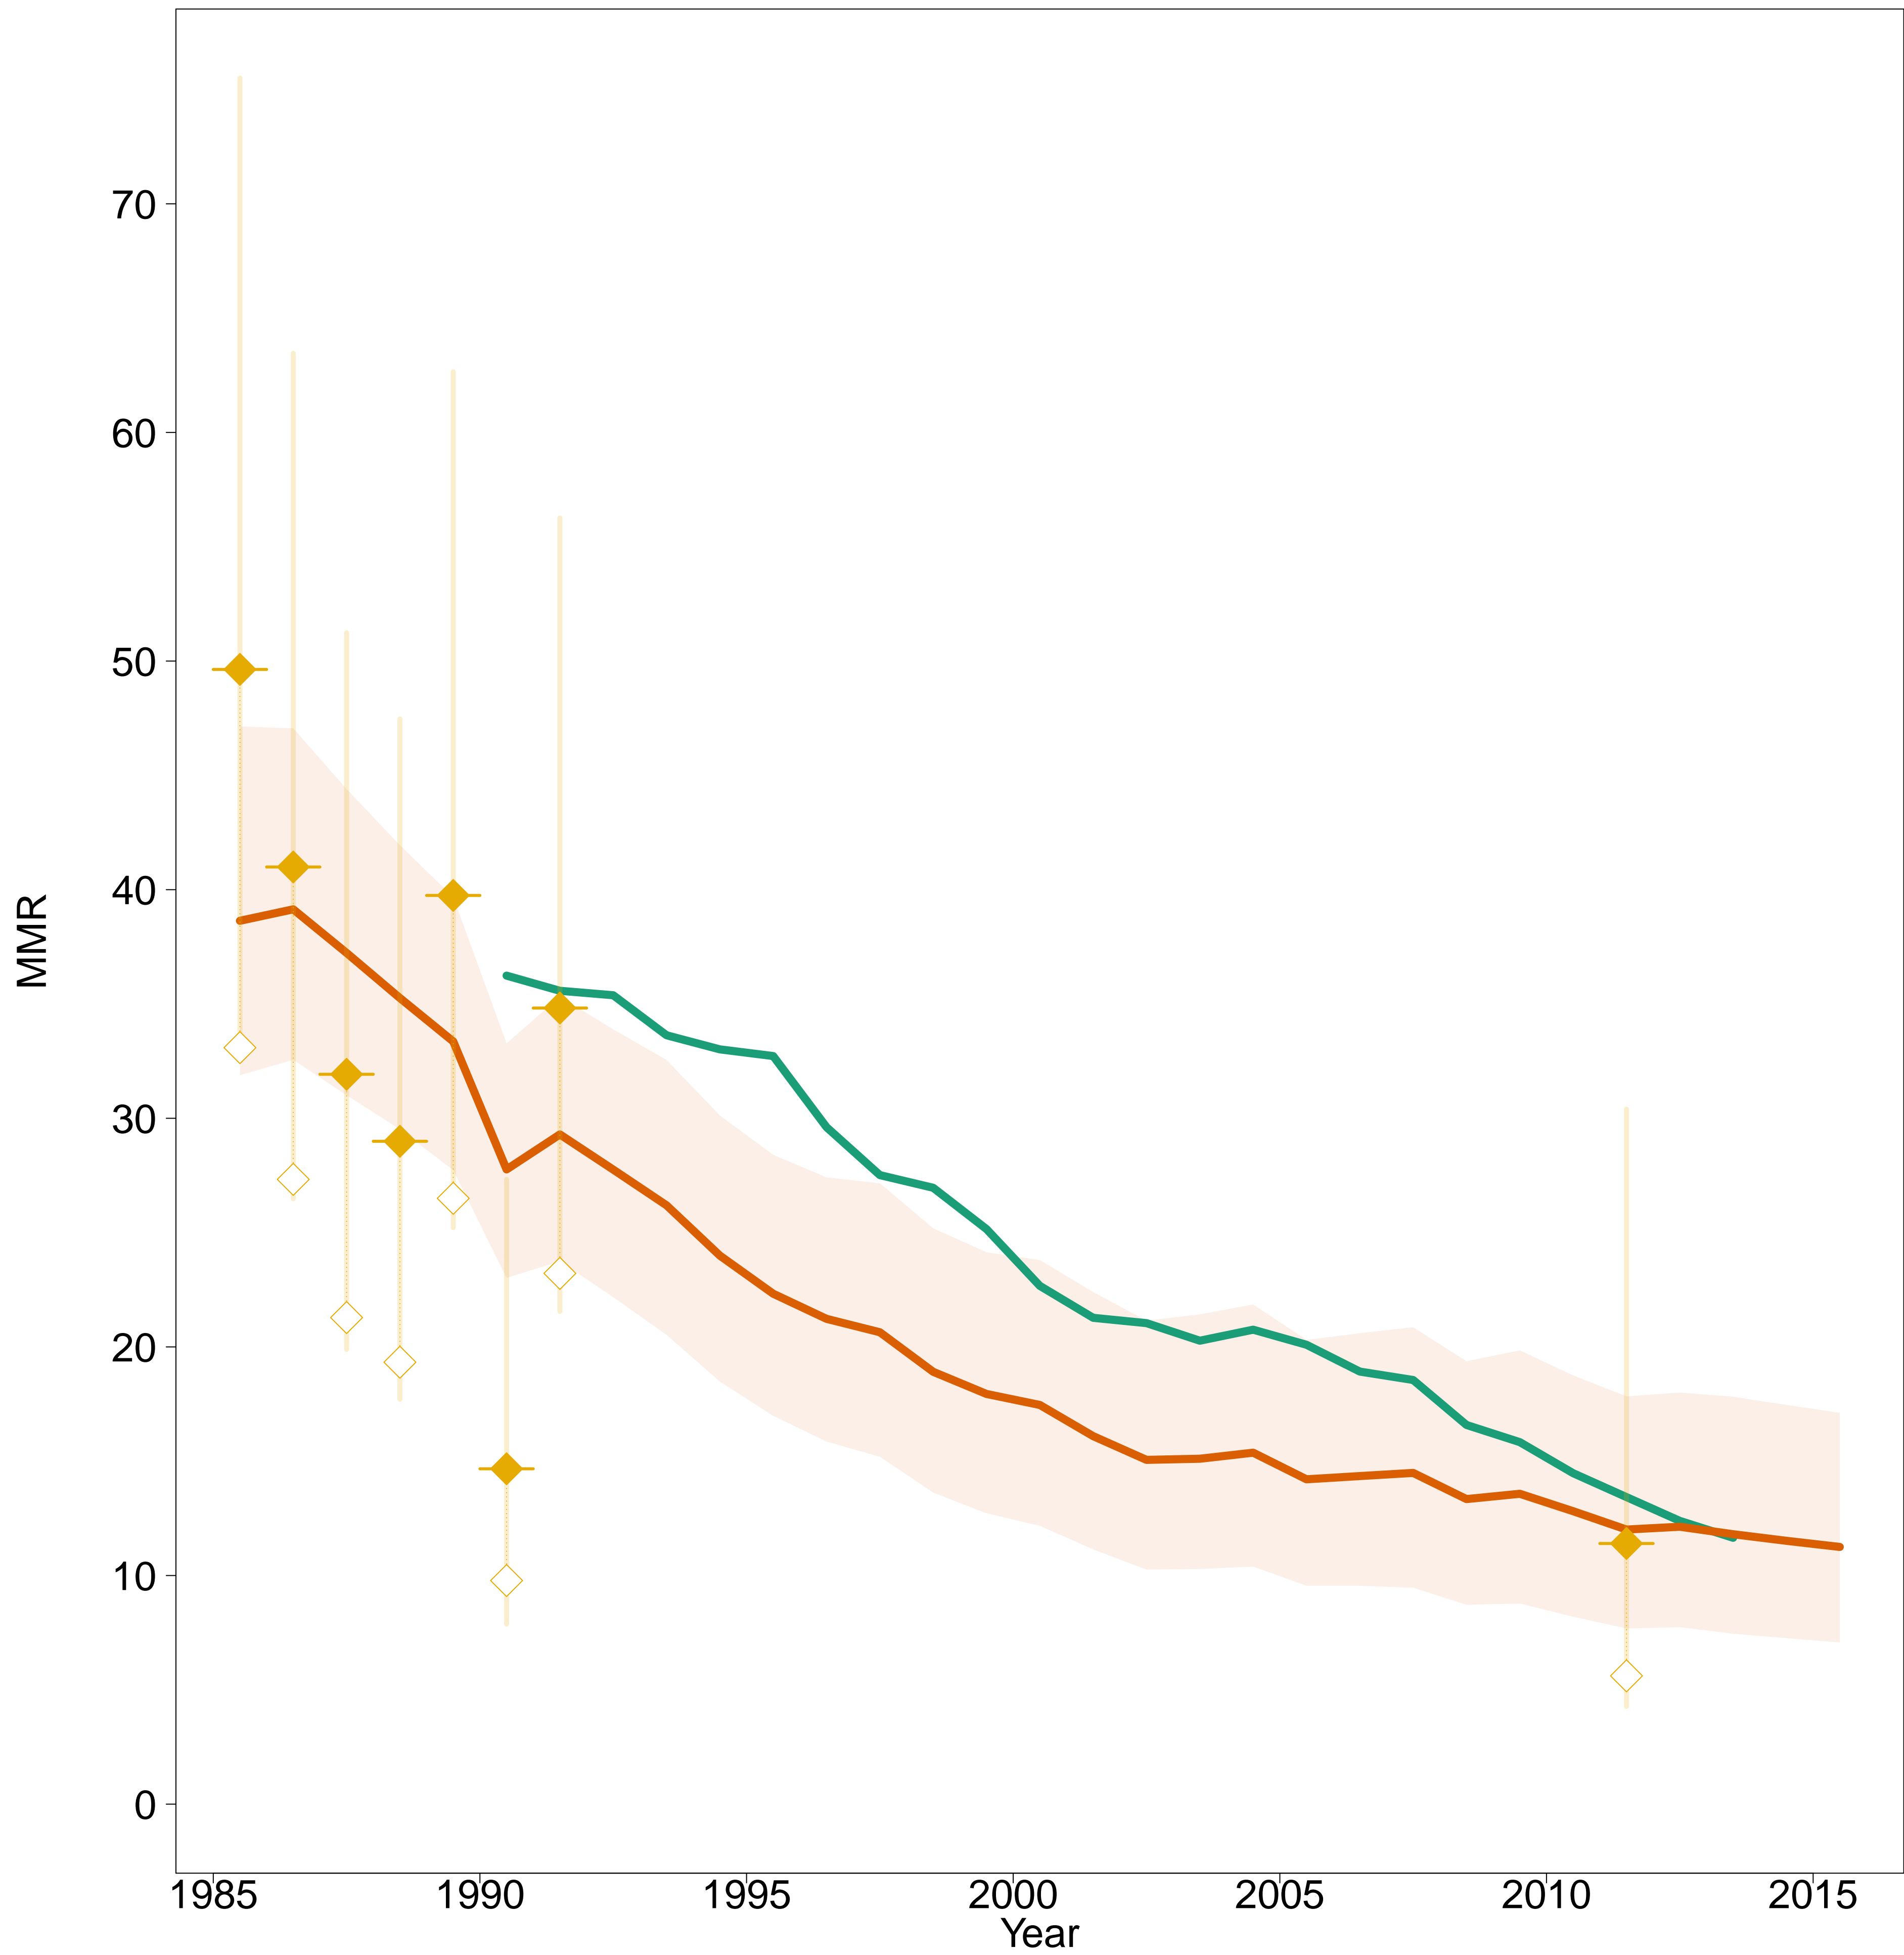

- Estimates –
- MMEIG 2015
- GBD 2013
- MMR Database 2015 –
- Observed Data
- Adjusted Data
- Data type –
- VR

Botswana [BWA]  
(Southern Africa)

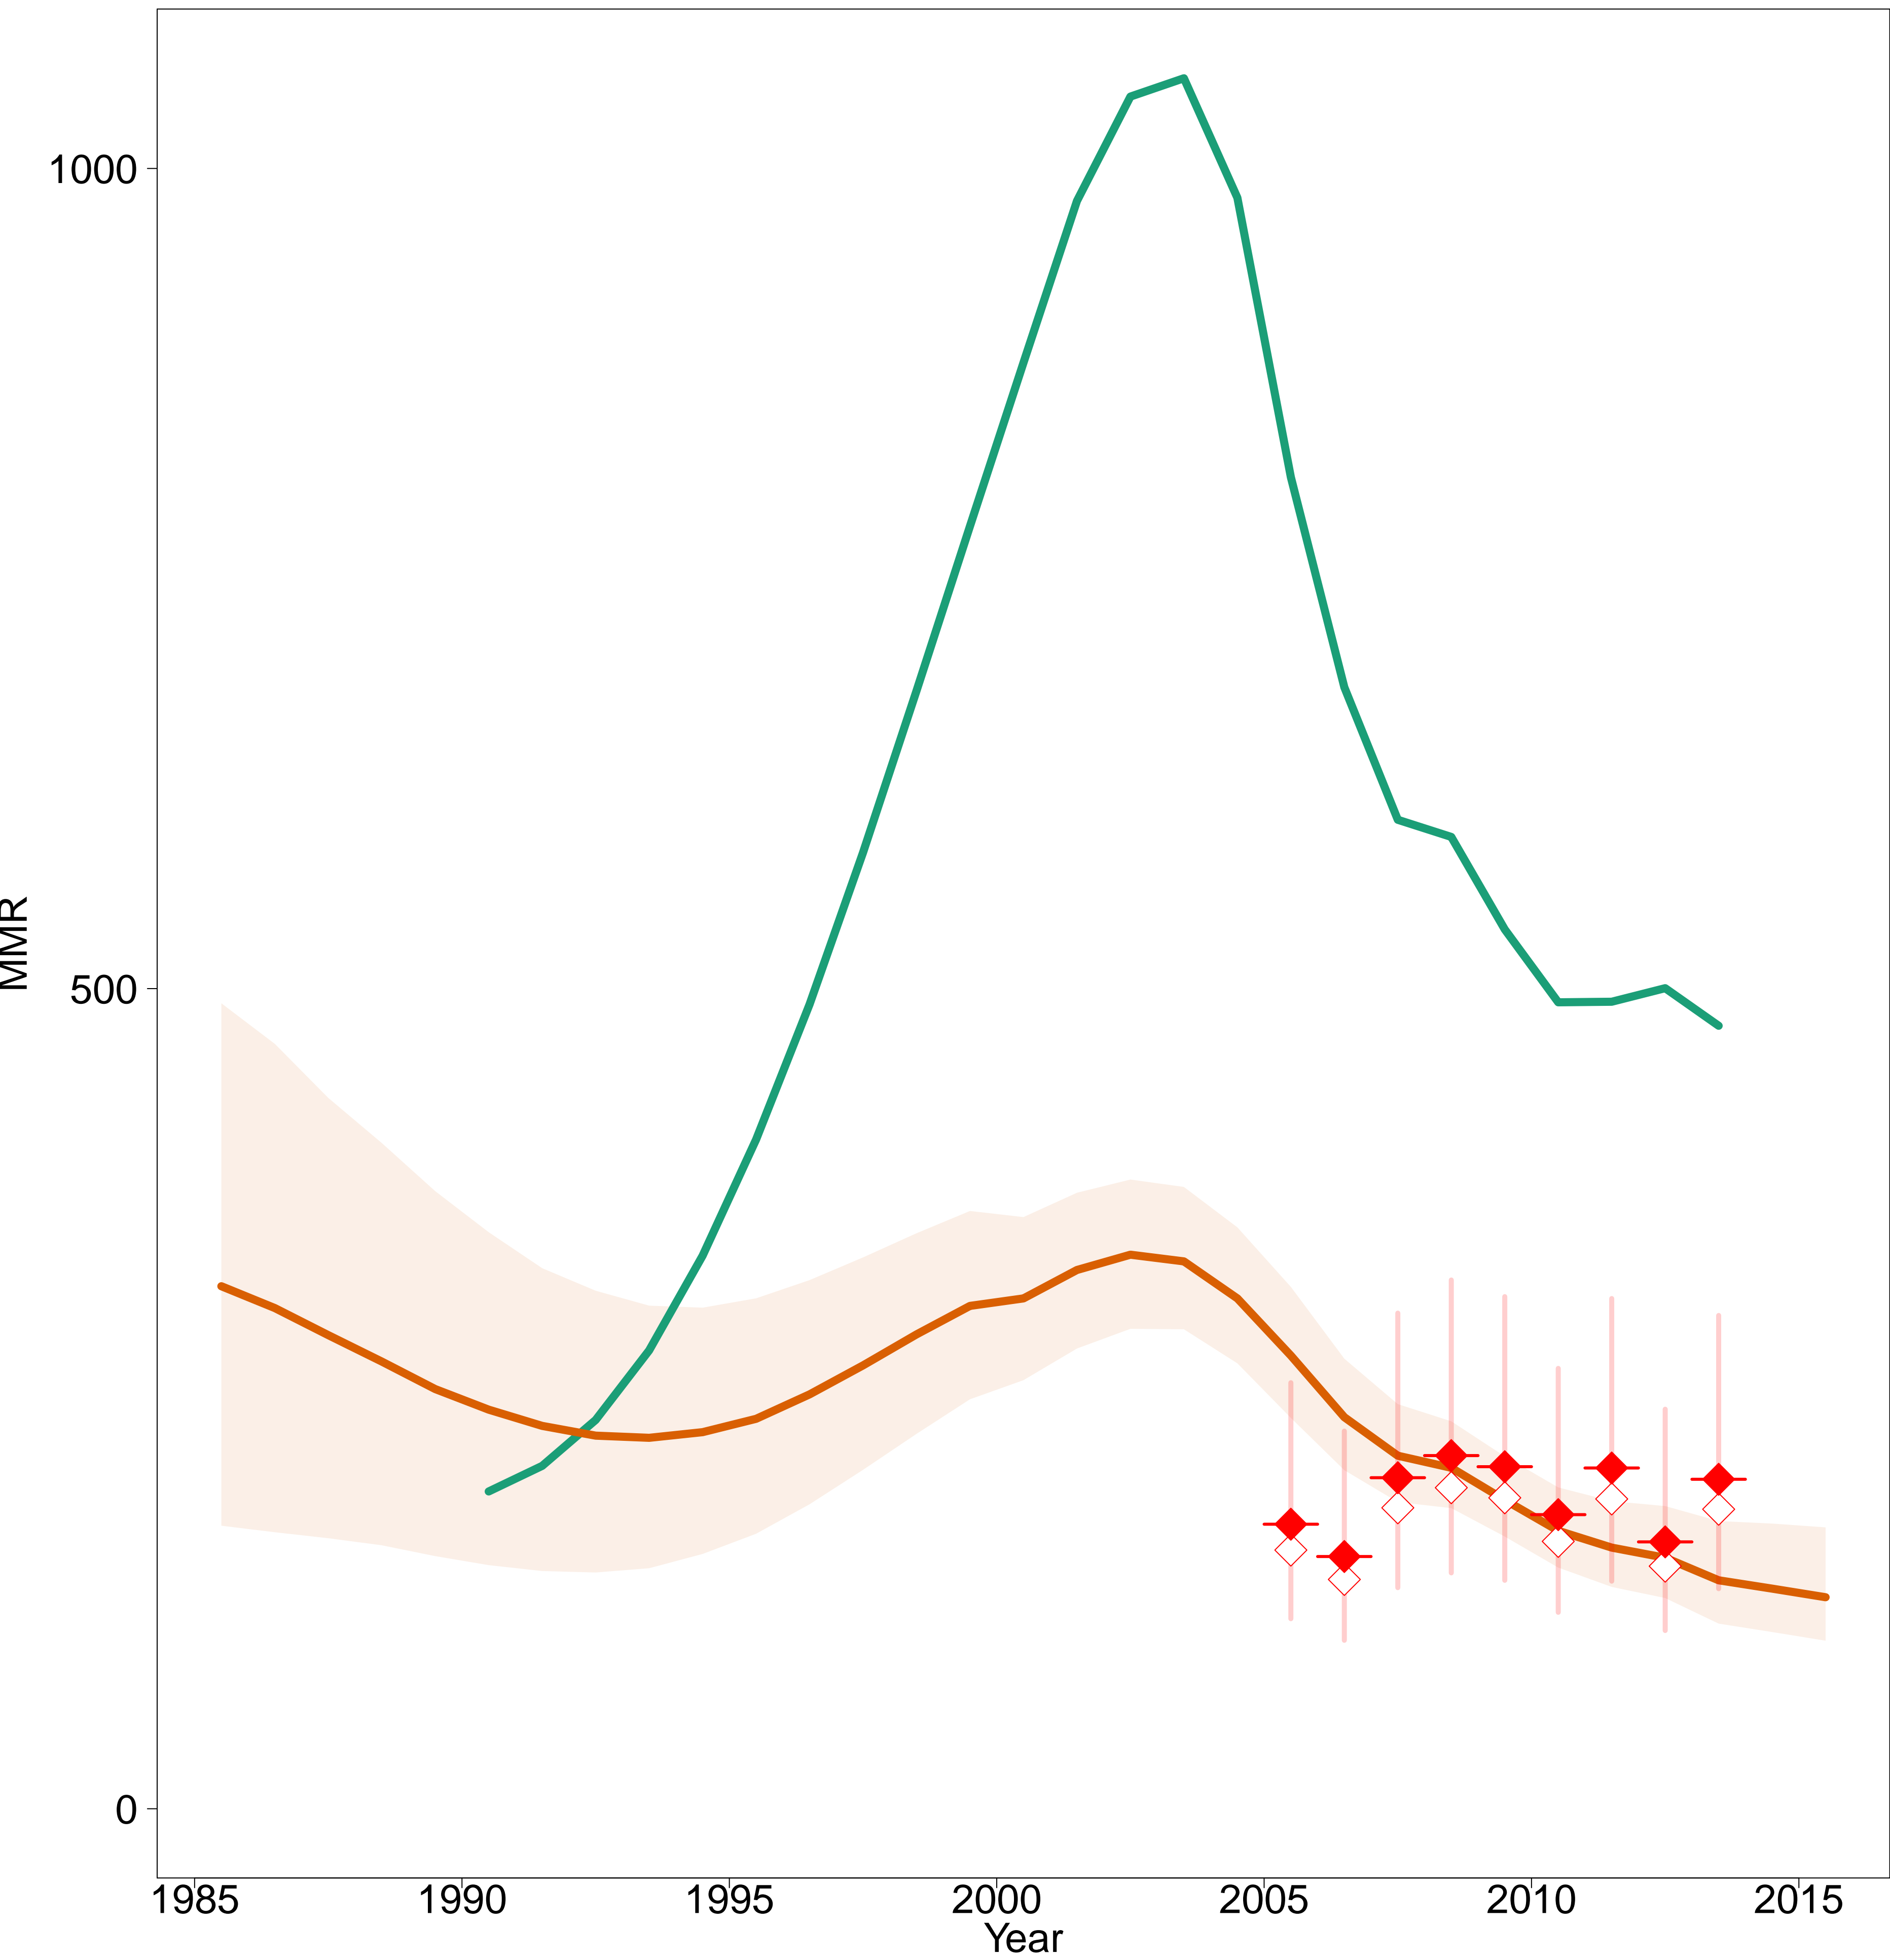

- Estimates -
- MMEIG 2015
- GBD 2013
- MMR Database 2015 -
- Observed Data
- Adjusted Data
- Data type -
- Misc. studies

Brazil [BRA]  
(South America)

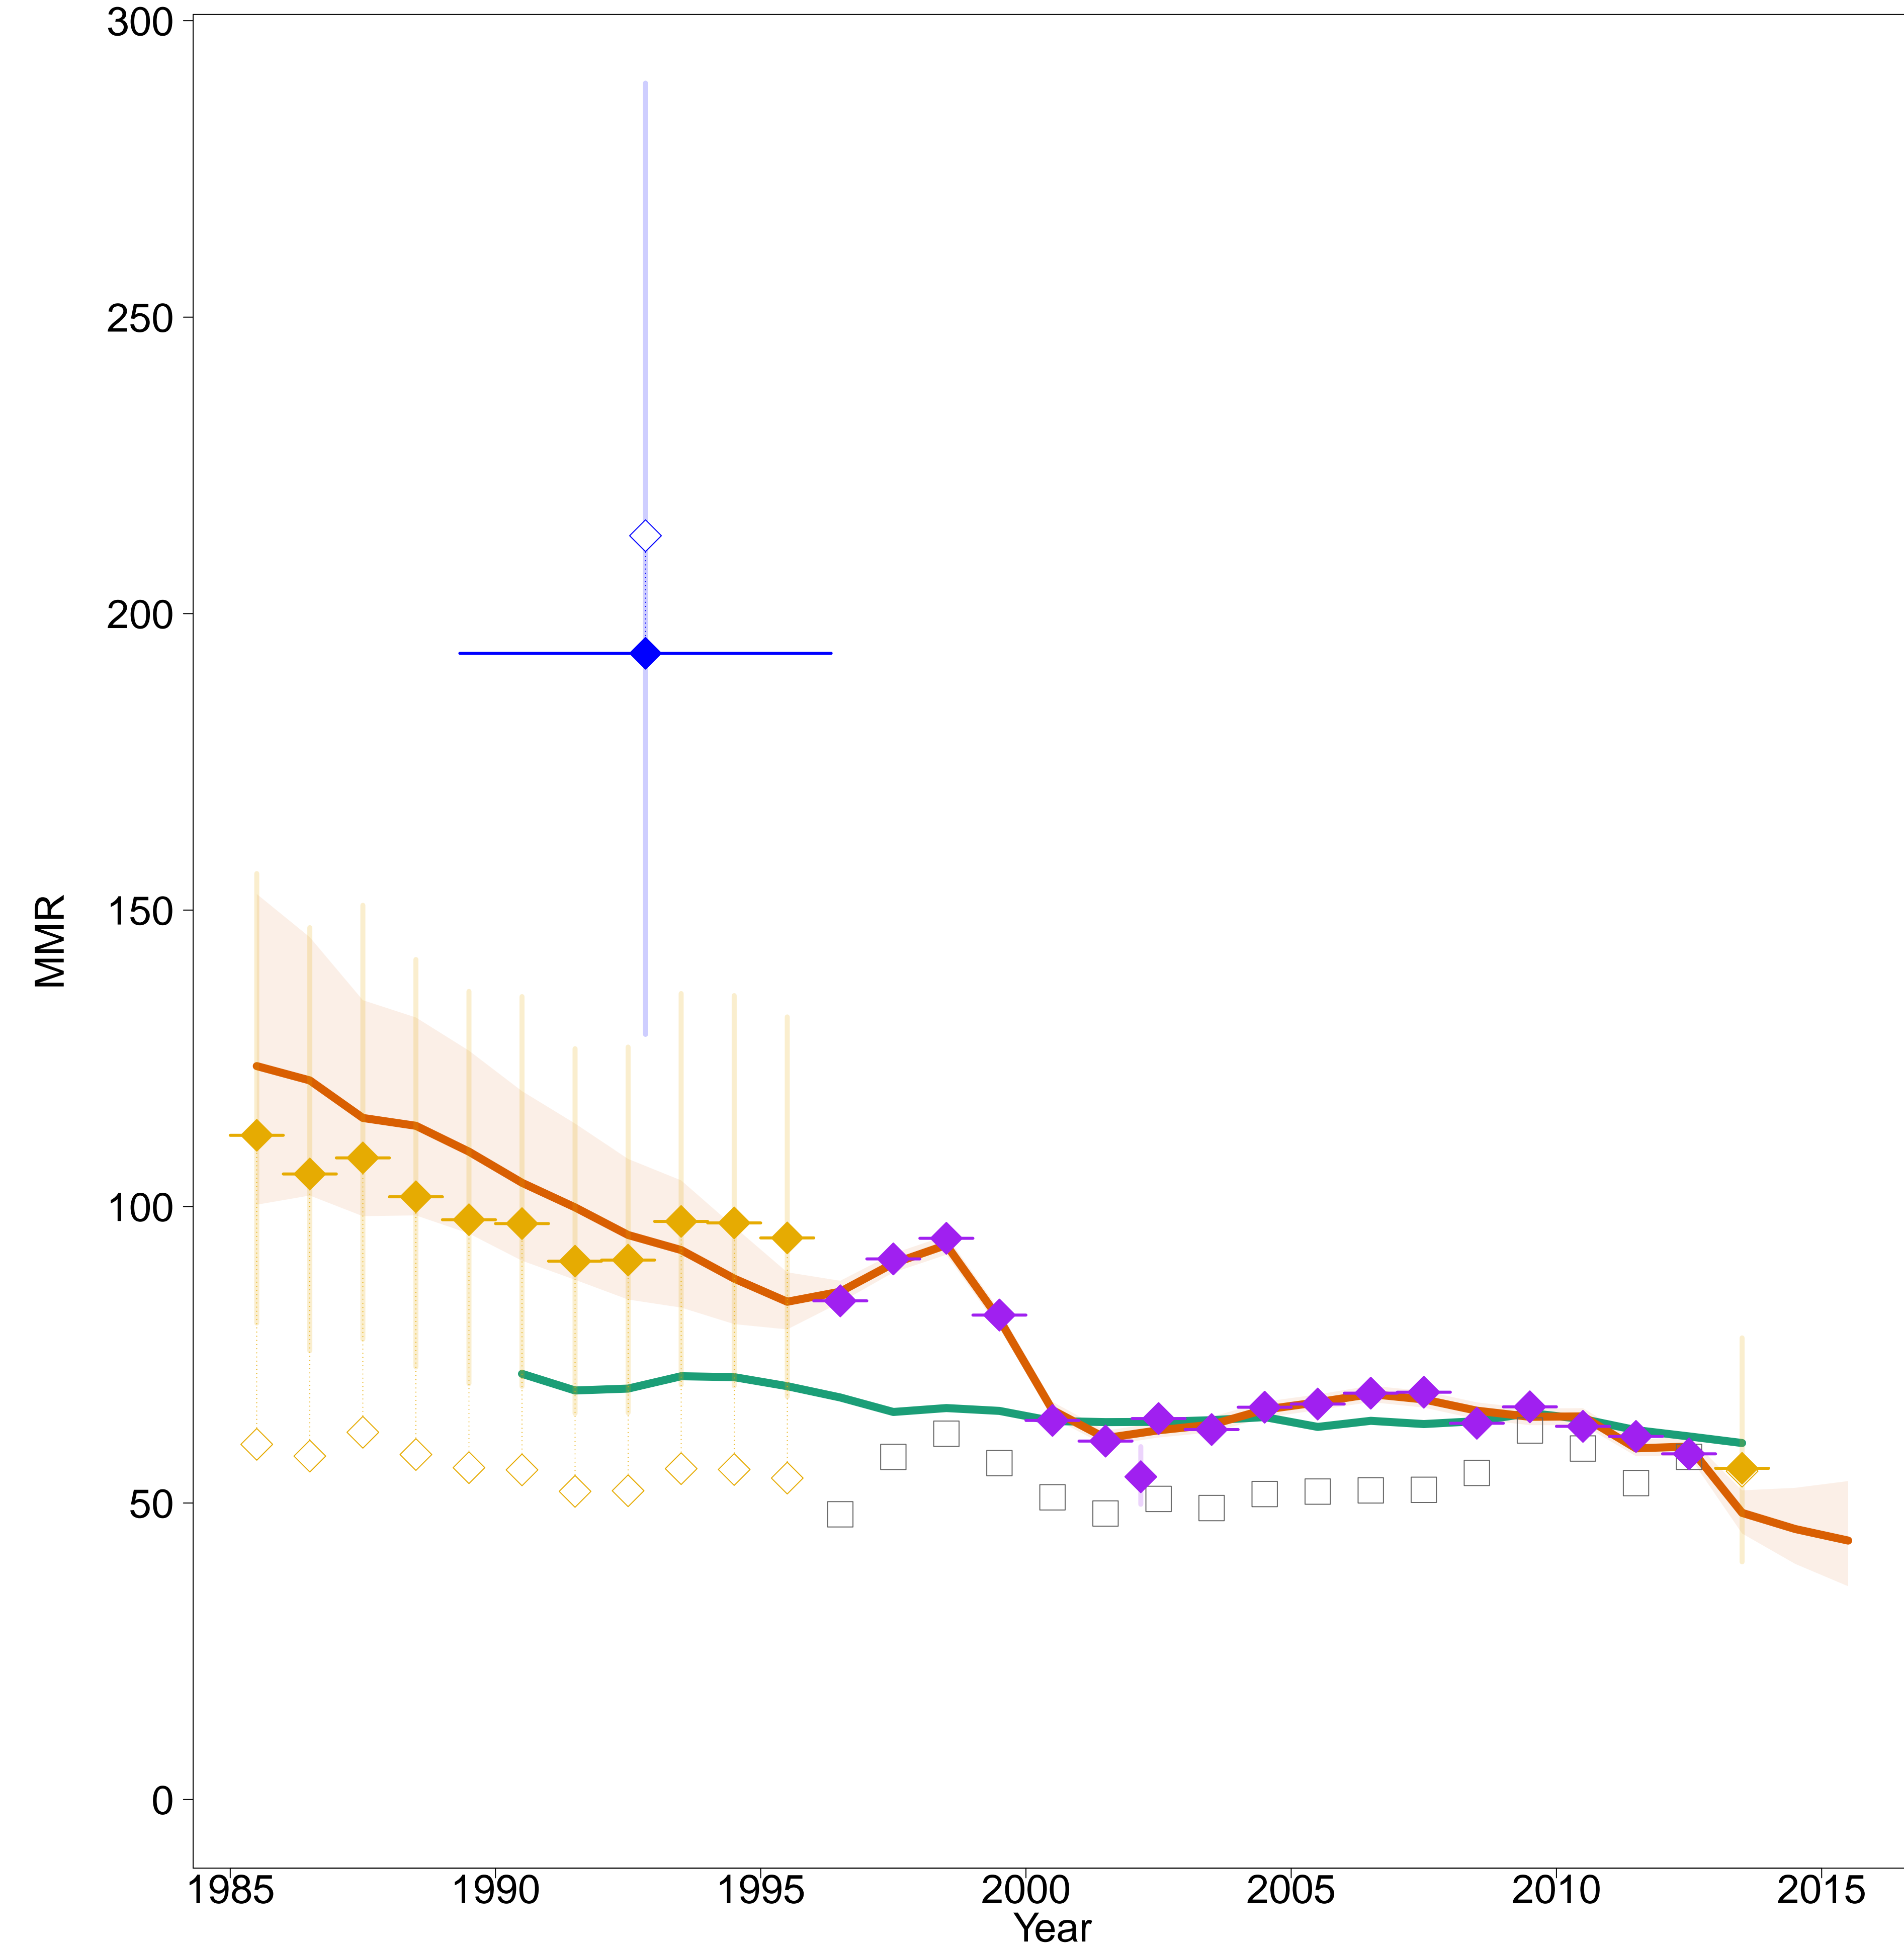

- Estimates –
- MMEIG 2015
- GBD 2013
- MMR Database 2015 –
- Observed Data
- Adjusted Data
- Data type –
- VR
- Spec. studies
- DHS
- Excluded VR data  
(overlap with specialized study)

Brunei Darussalam [BRN]  
(South-Eastern Asia / Oceania)

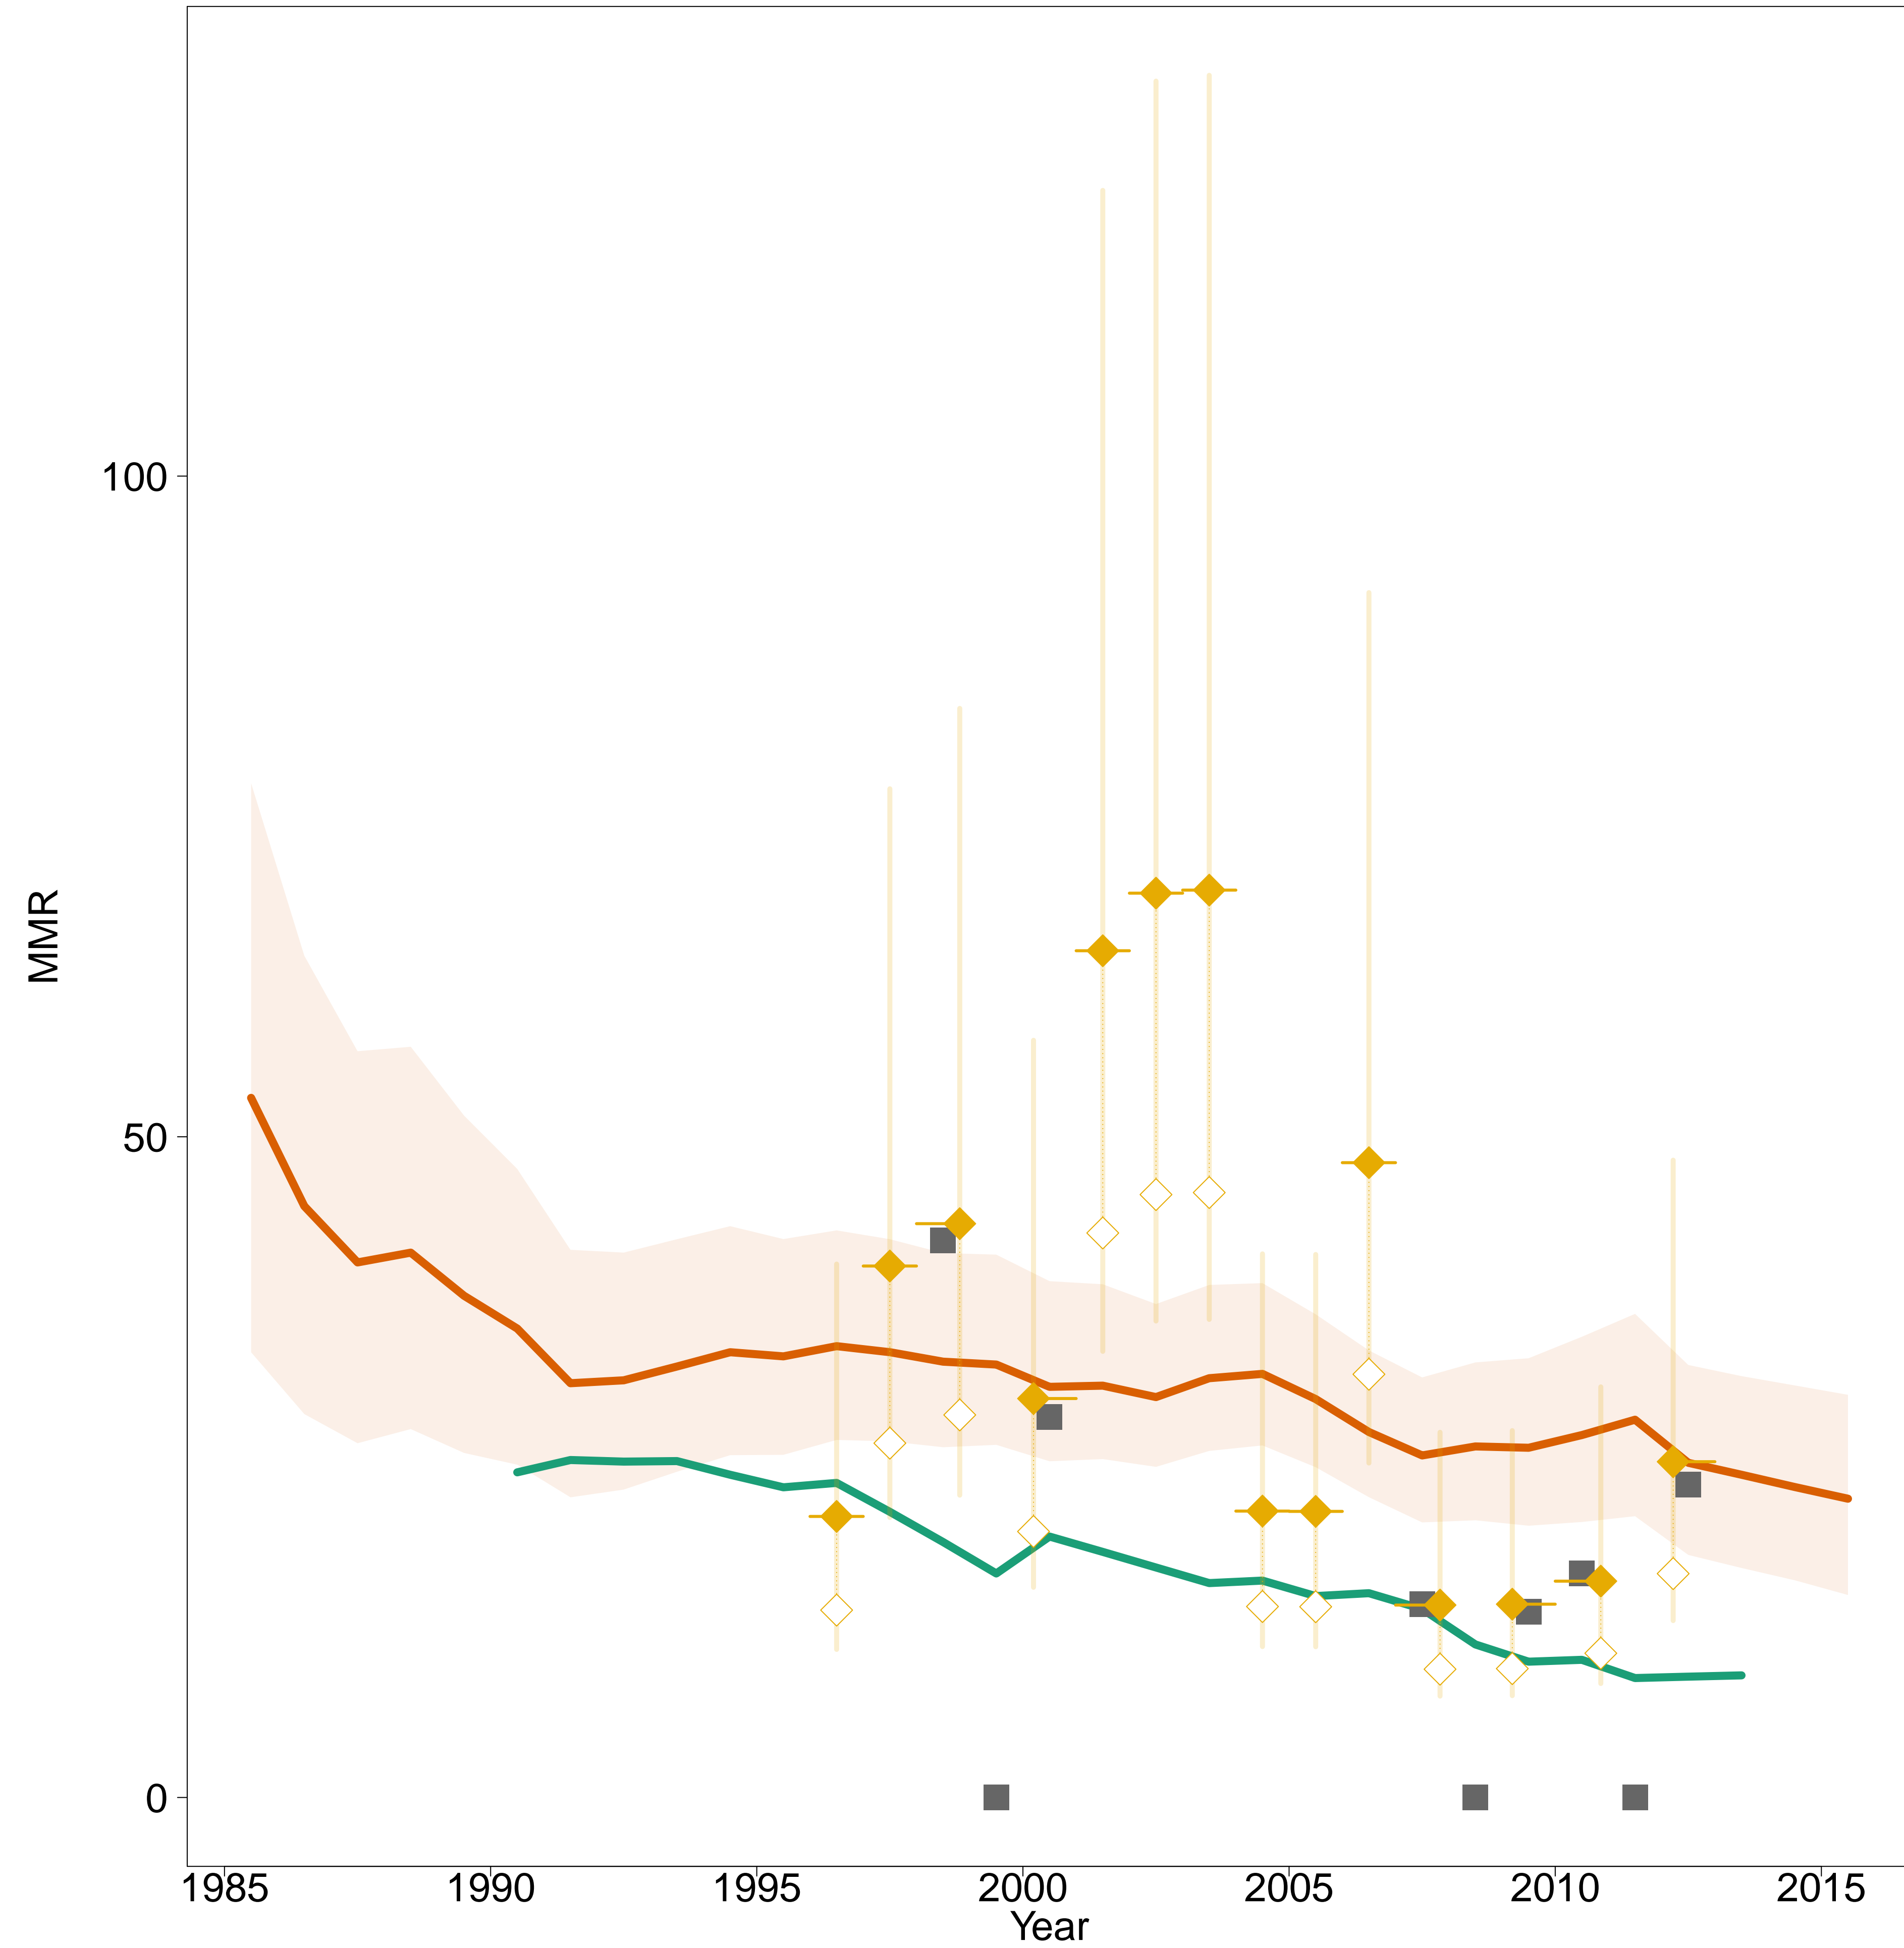

- Estimates -
- MMEIG 2015
- GBD 2013
- MMR Database 2015 -
- Observed Data
- Adjusted Data
- Data type -
- VR
- Reported VR before recalc.  
(related to 0 obs. mat. death)

Bulgaria [BGR]  
(Developed regions)

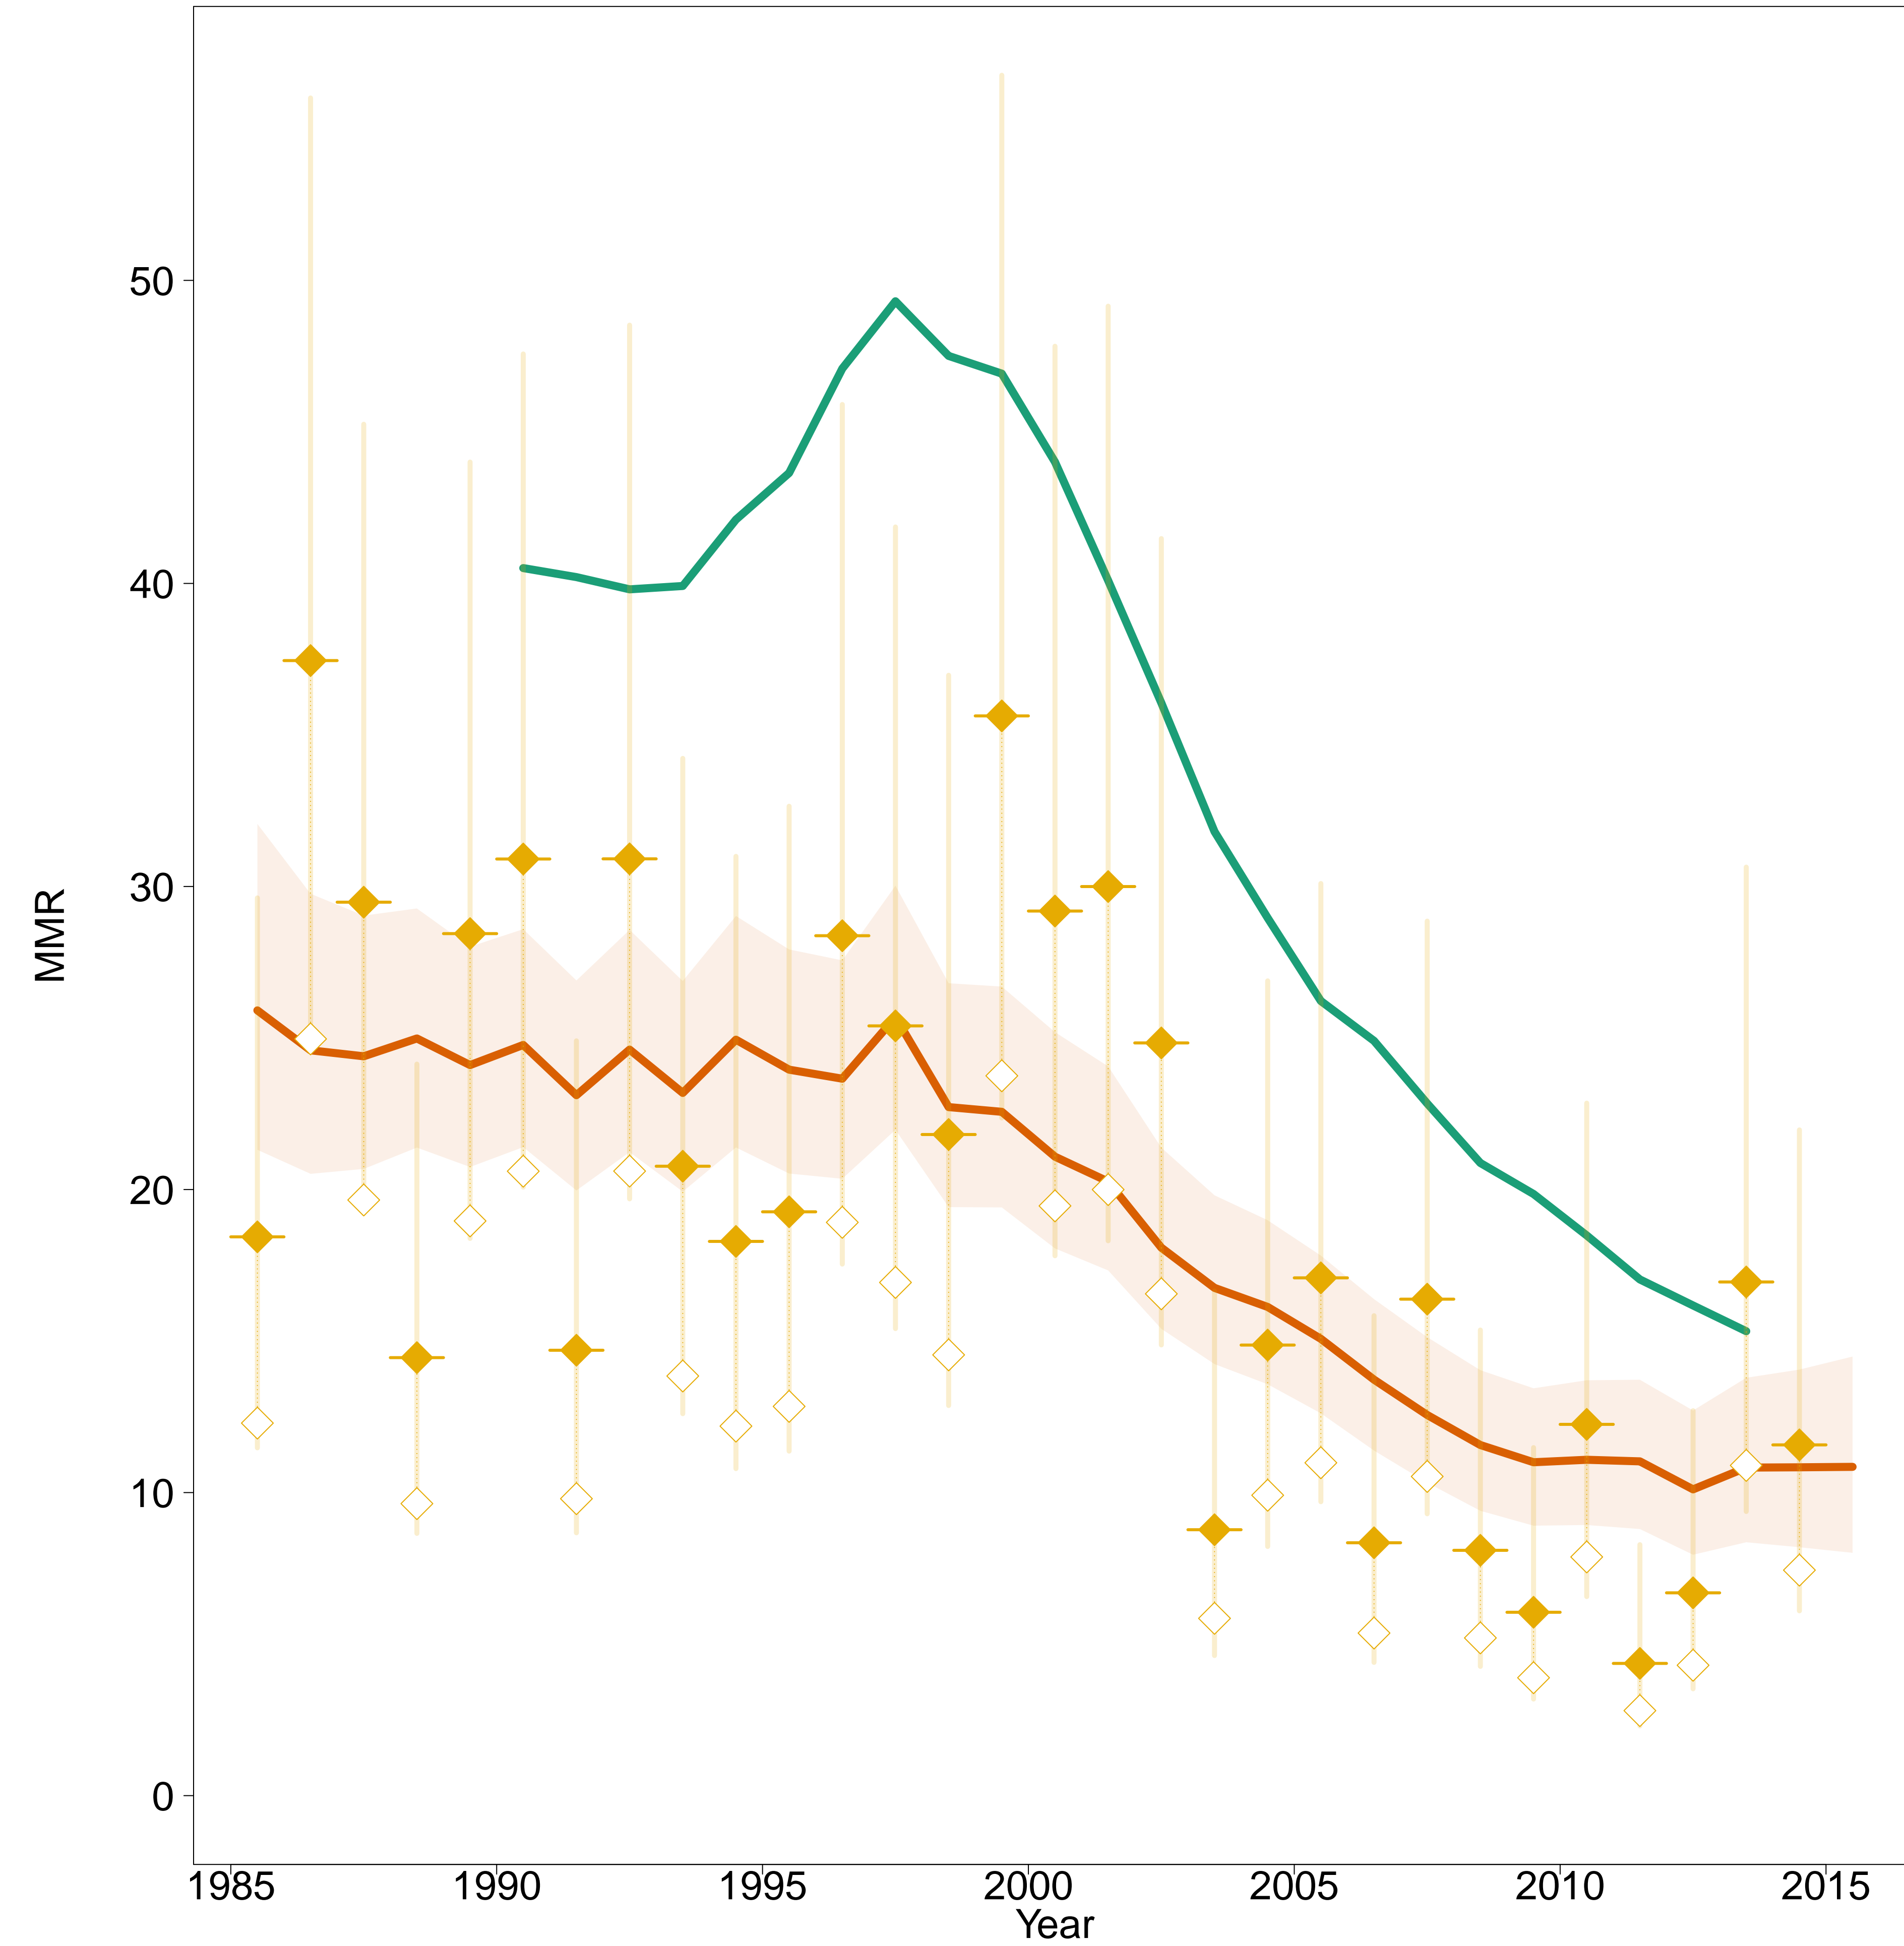

- Estimates –
- MMEIG 2015
- GBD 2013
- MMR Database 2015 –
- Observed Data
- Adjusted Data
- Data type –
- VR

Burkina Faso [BFA]  
(Western Africa)

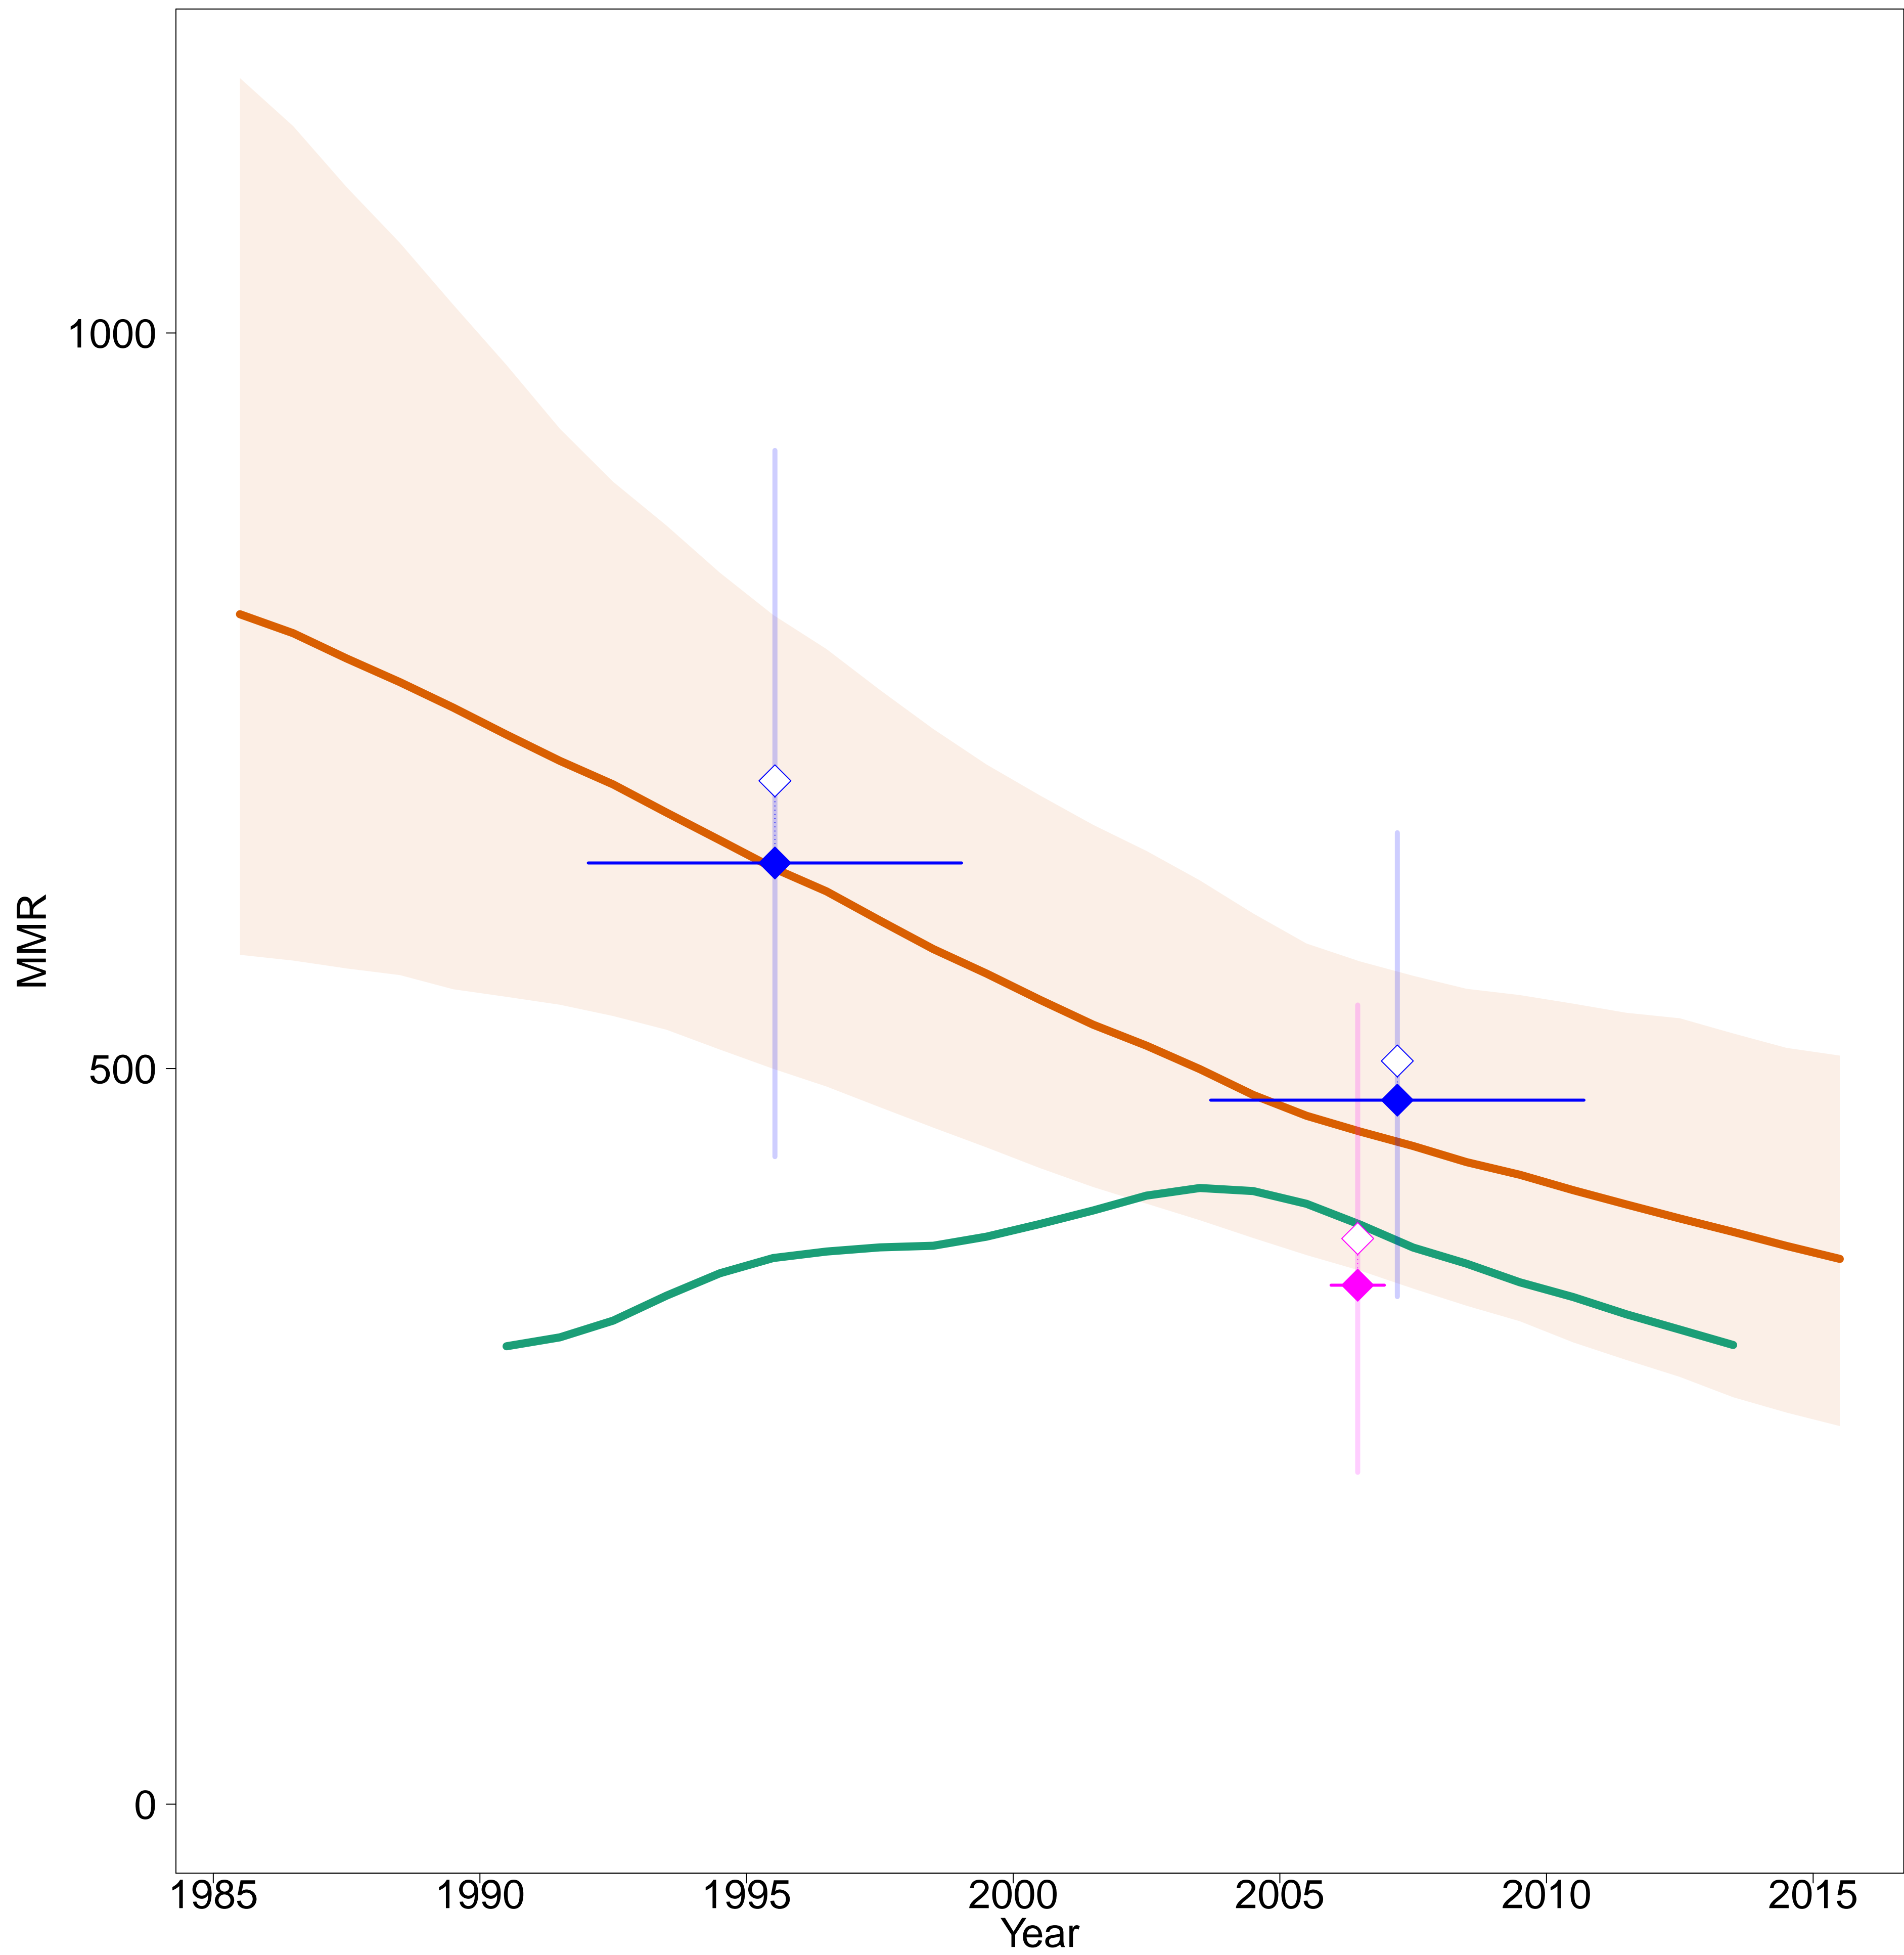

- Estimates -
- MMEIG 2015
- GBD 2013
- MMR Database 2015 -
- Observed Data
- Adjusted Data
- Data type -
- DHS
- Census



Burundi [BDI]  
(Eastern Africa)

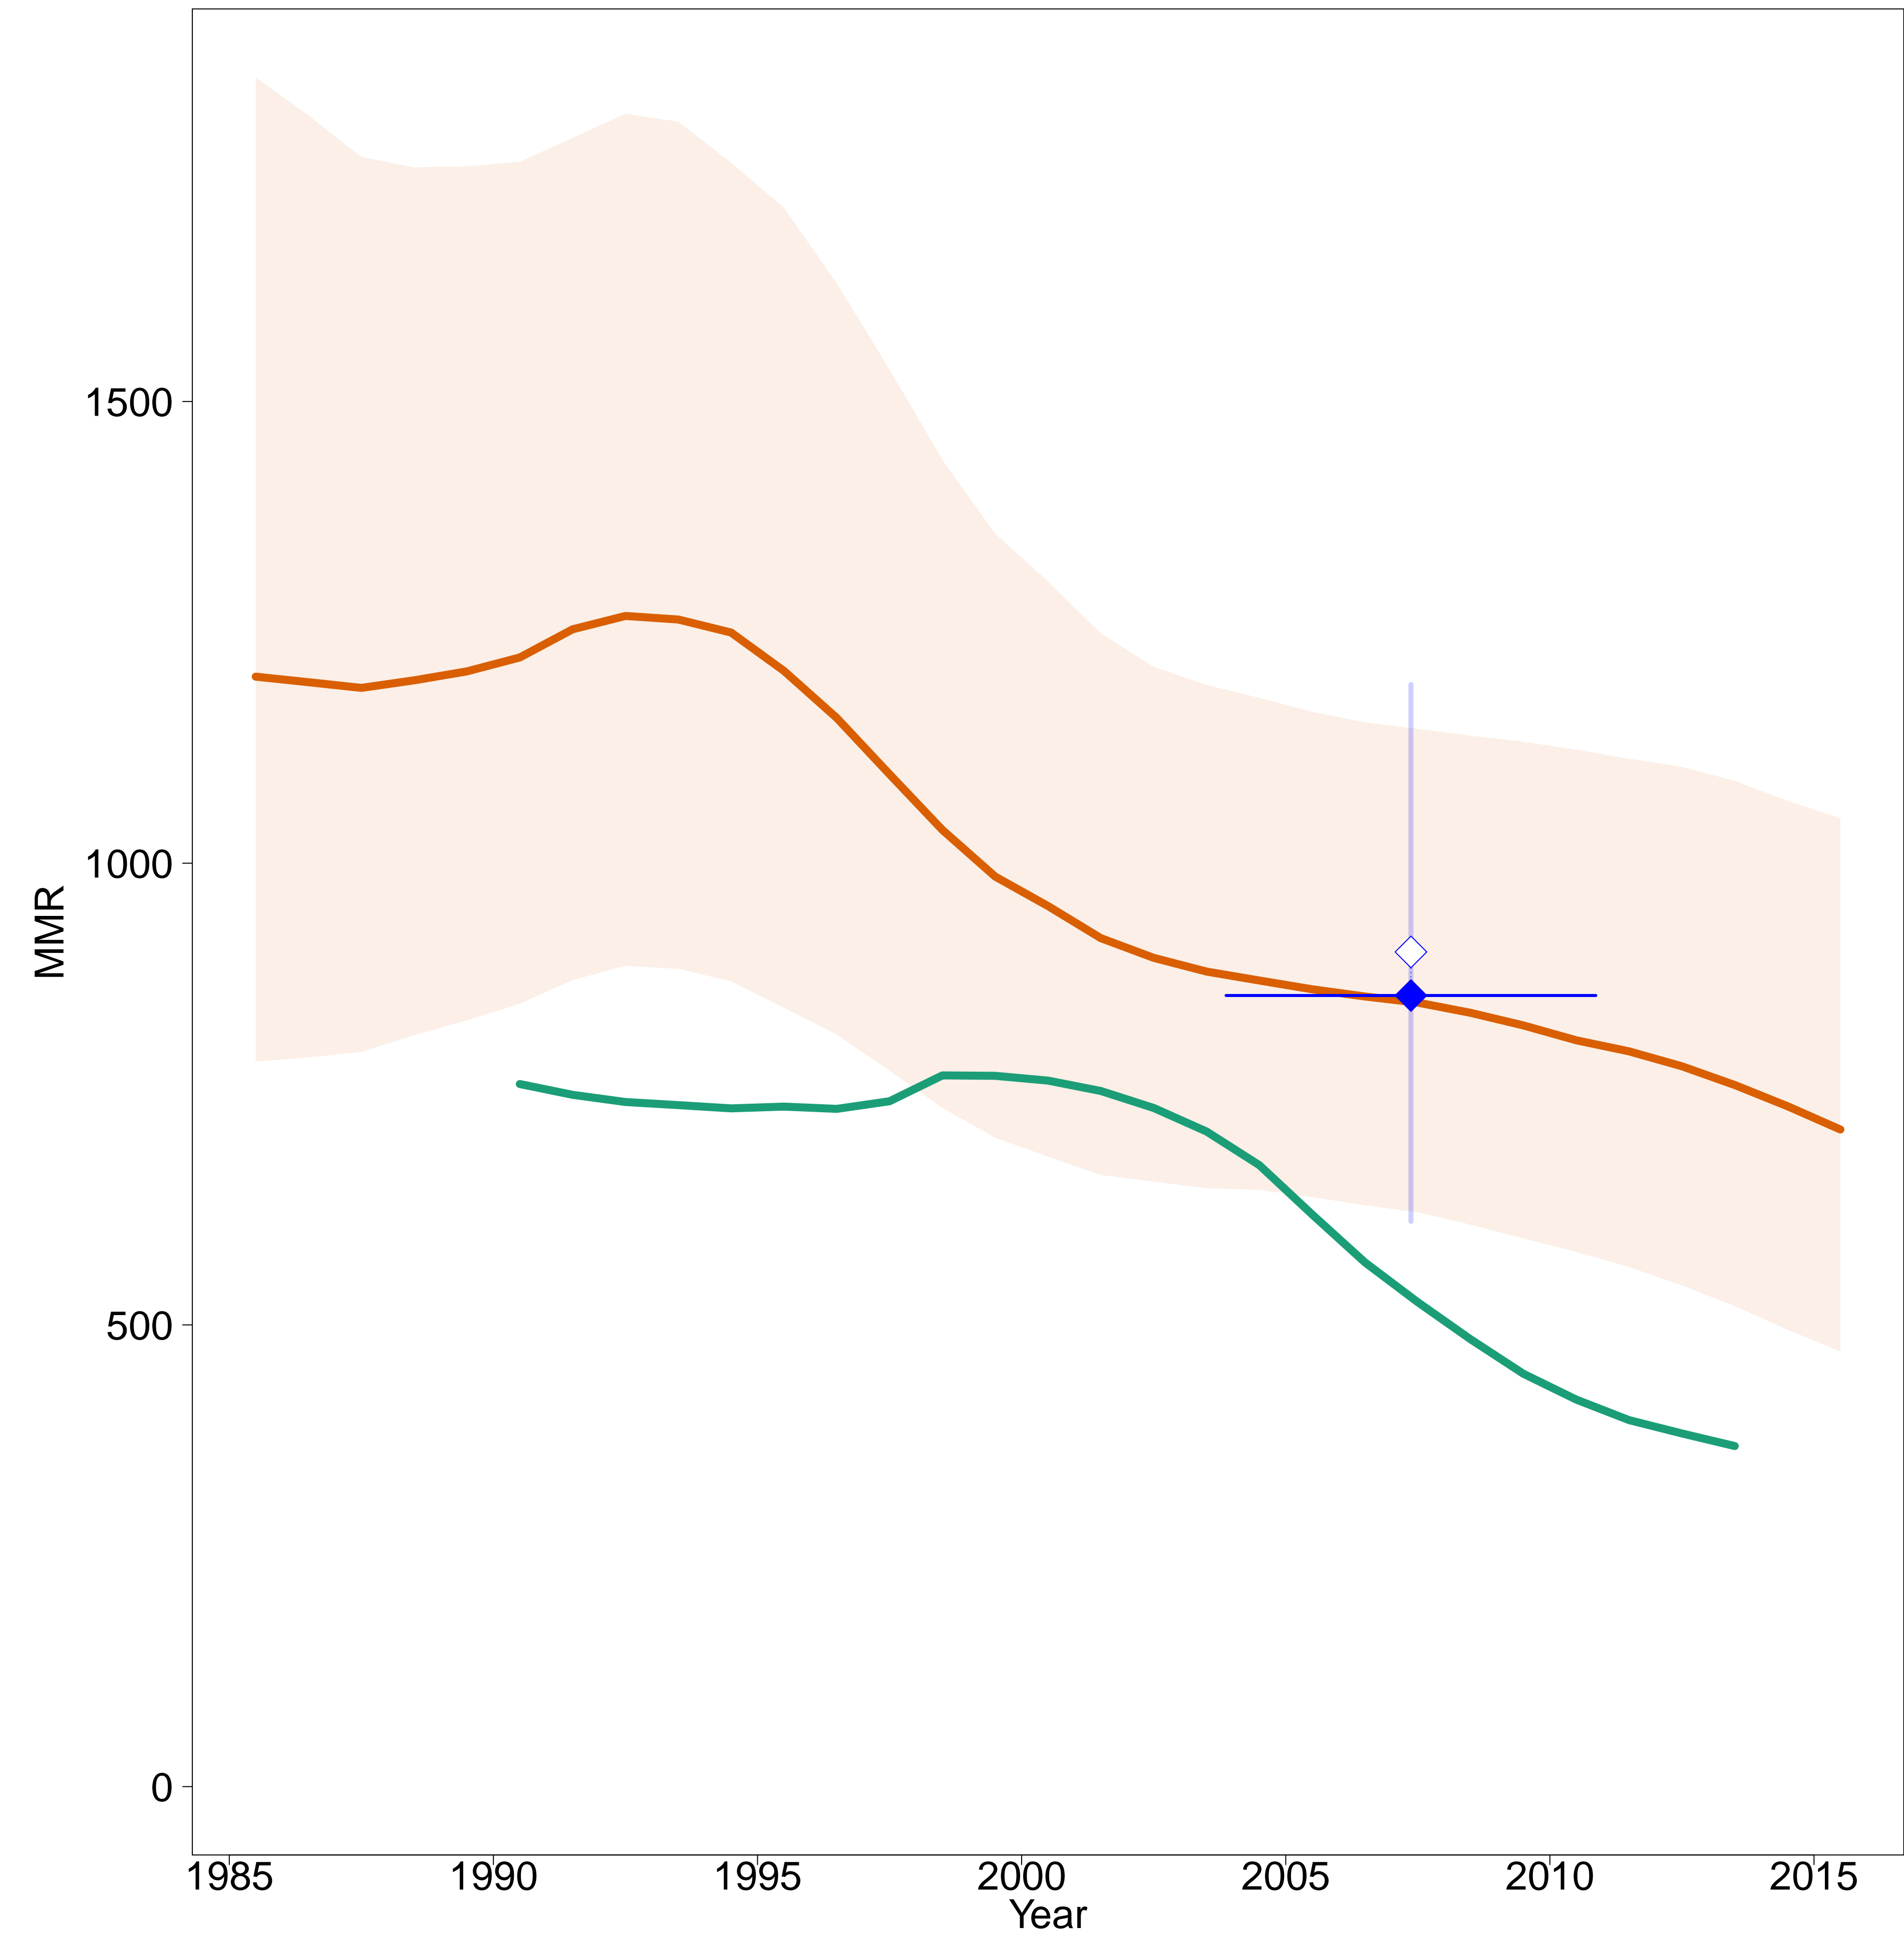

- Estimates -
- MMEIG 2015
- GBD 2013
- MMR Database 2015 -
- Observed Data
- Adjusted Data
- Data type -
- DHS

Cabo Verde [CPV]  
(Western Africa)

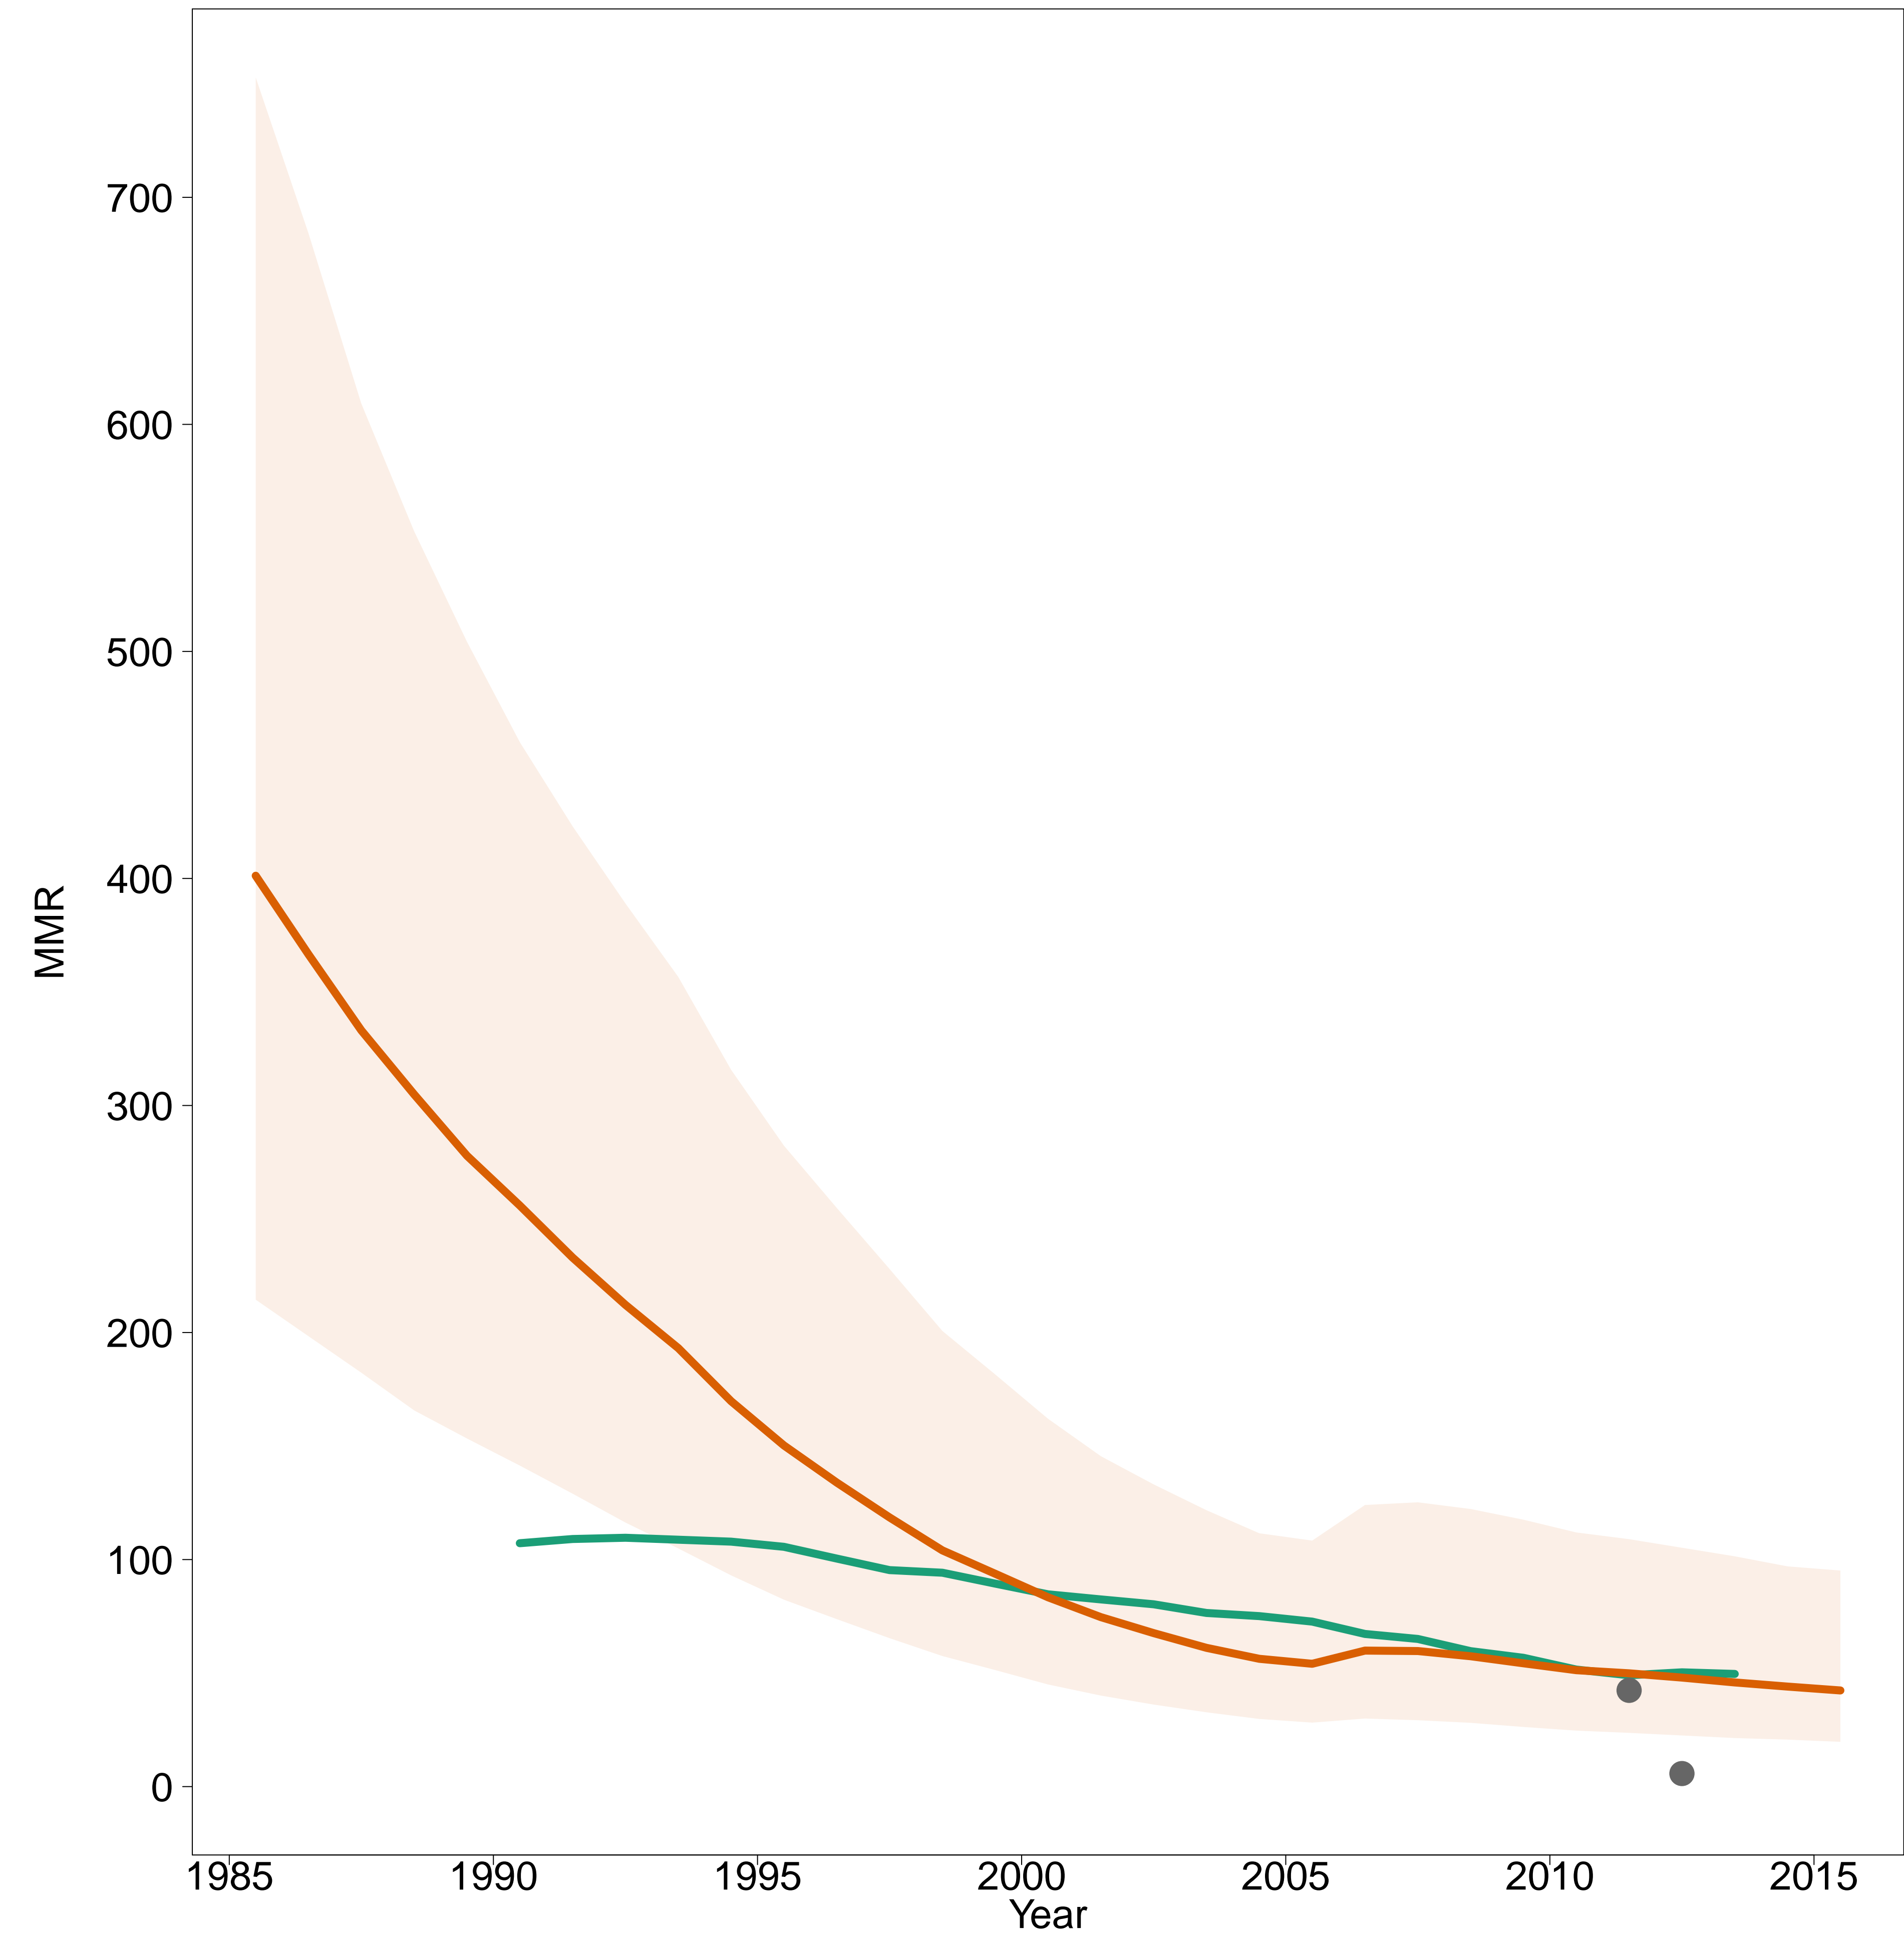

- Estimates -
- MMEIG 2015
- GBD 2013
- MMR Database 2015 -
- Observed Data
- Adjusted Data
- Data type -
- Excluded VR data (data quality issues)

Cambodia [KHM]  
(South-Eastern Asia / Oceania)

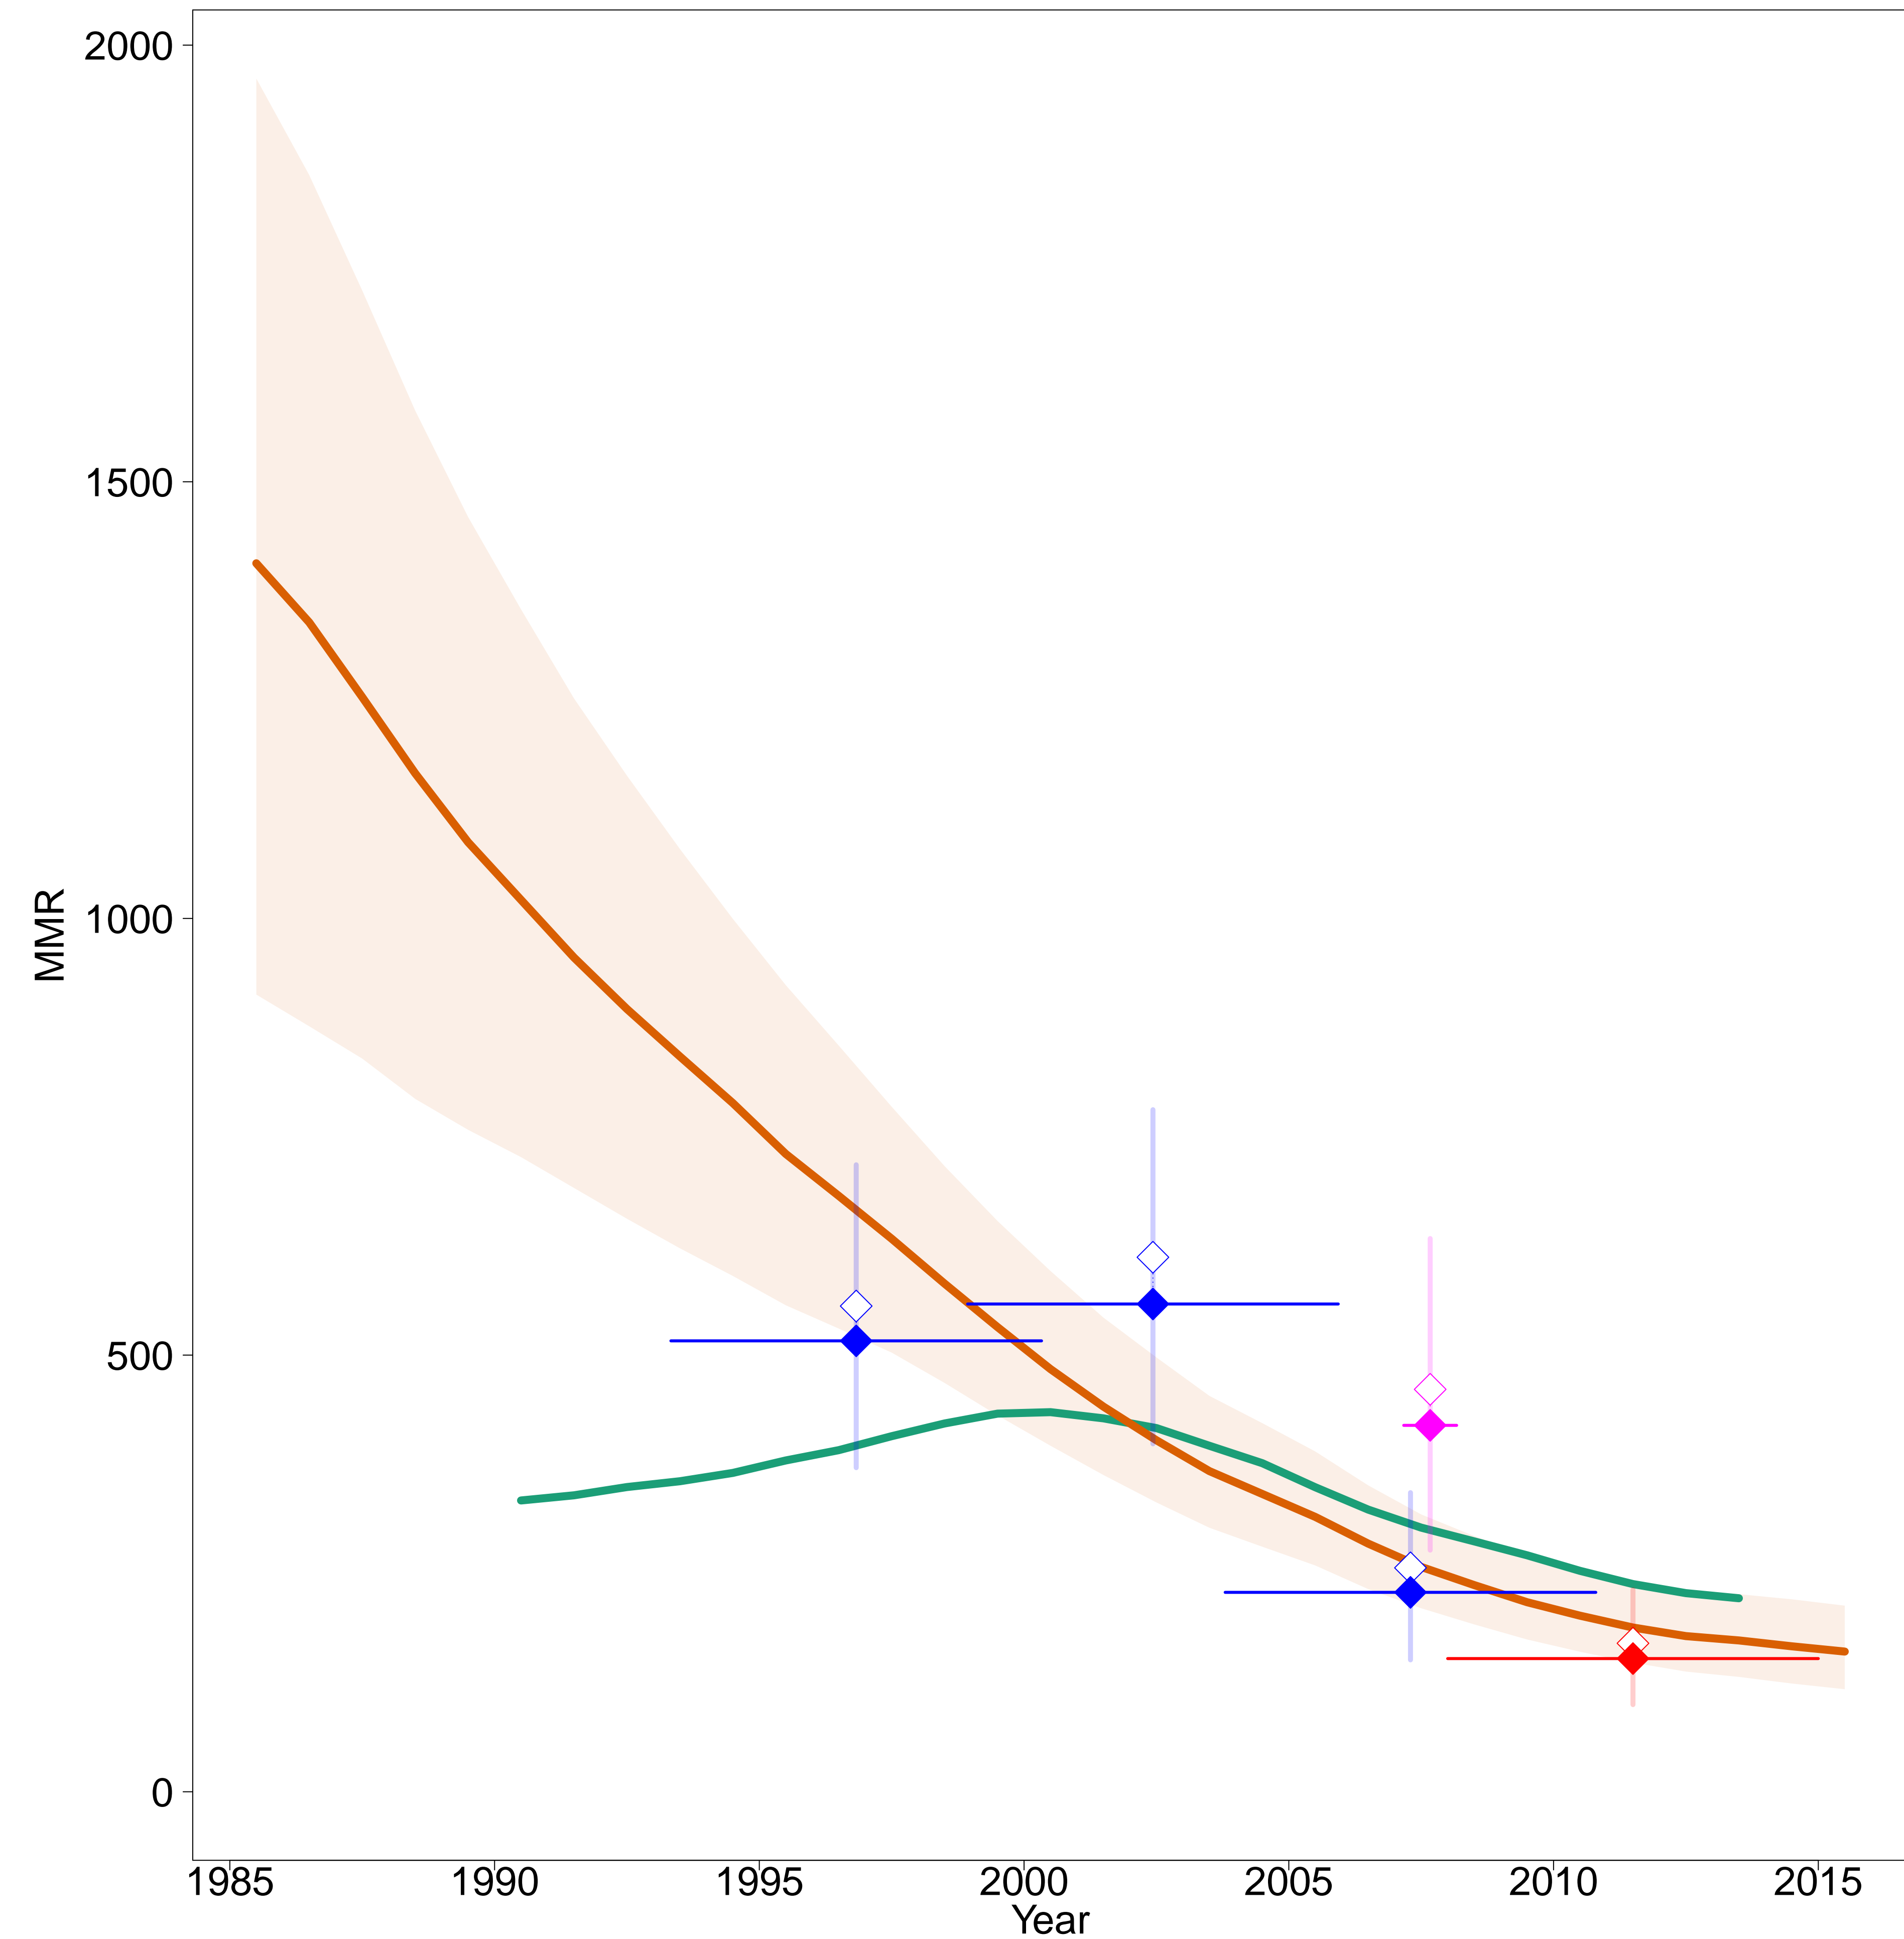

- Estimates -
- MMEIG 2015
- GBD 2013
- MMR Database 2015 -
- Observed Data
- Adjusted Data
- Data type -
- DHS
- Census
- Misc. studies

Cameroon [CMR]  
(Middle Africa)

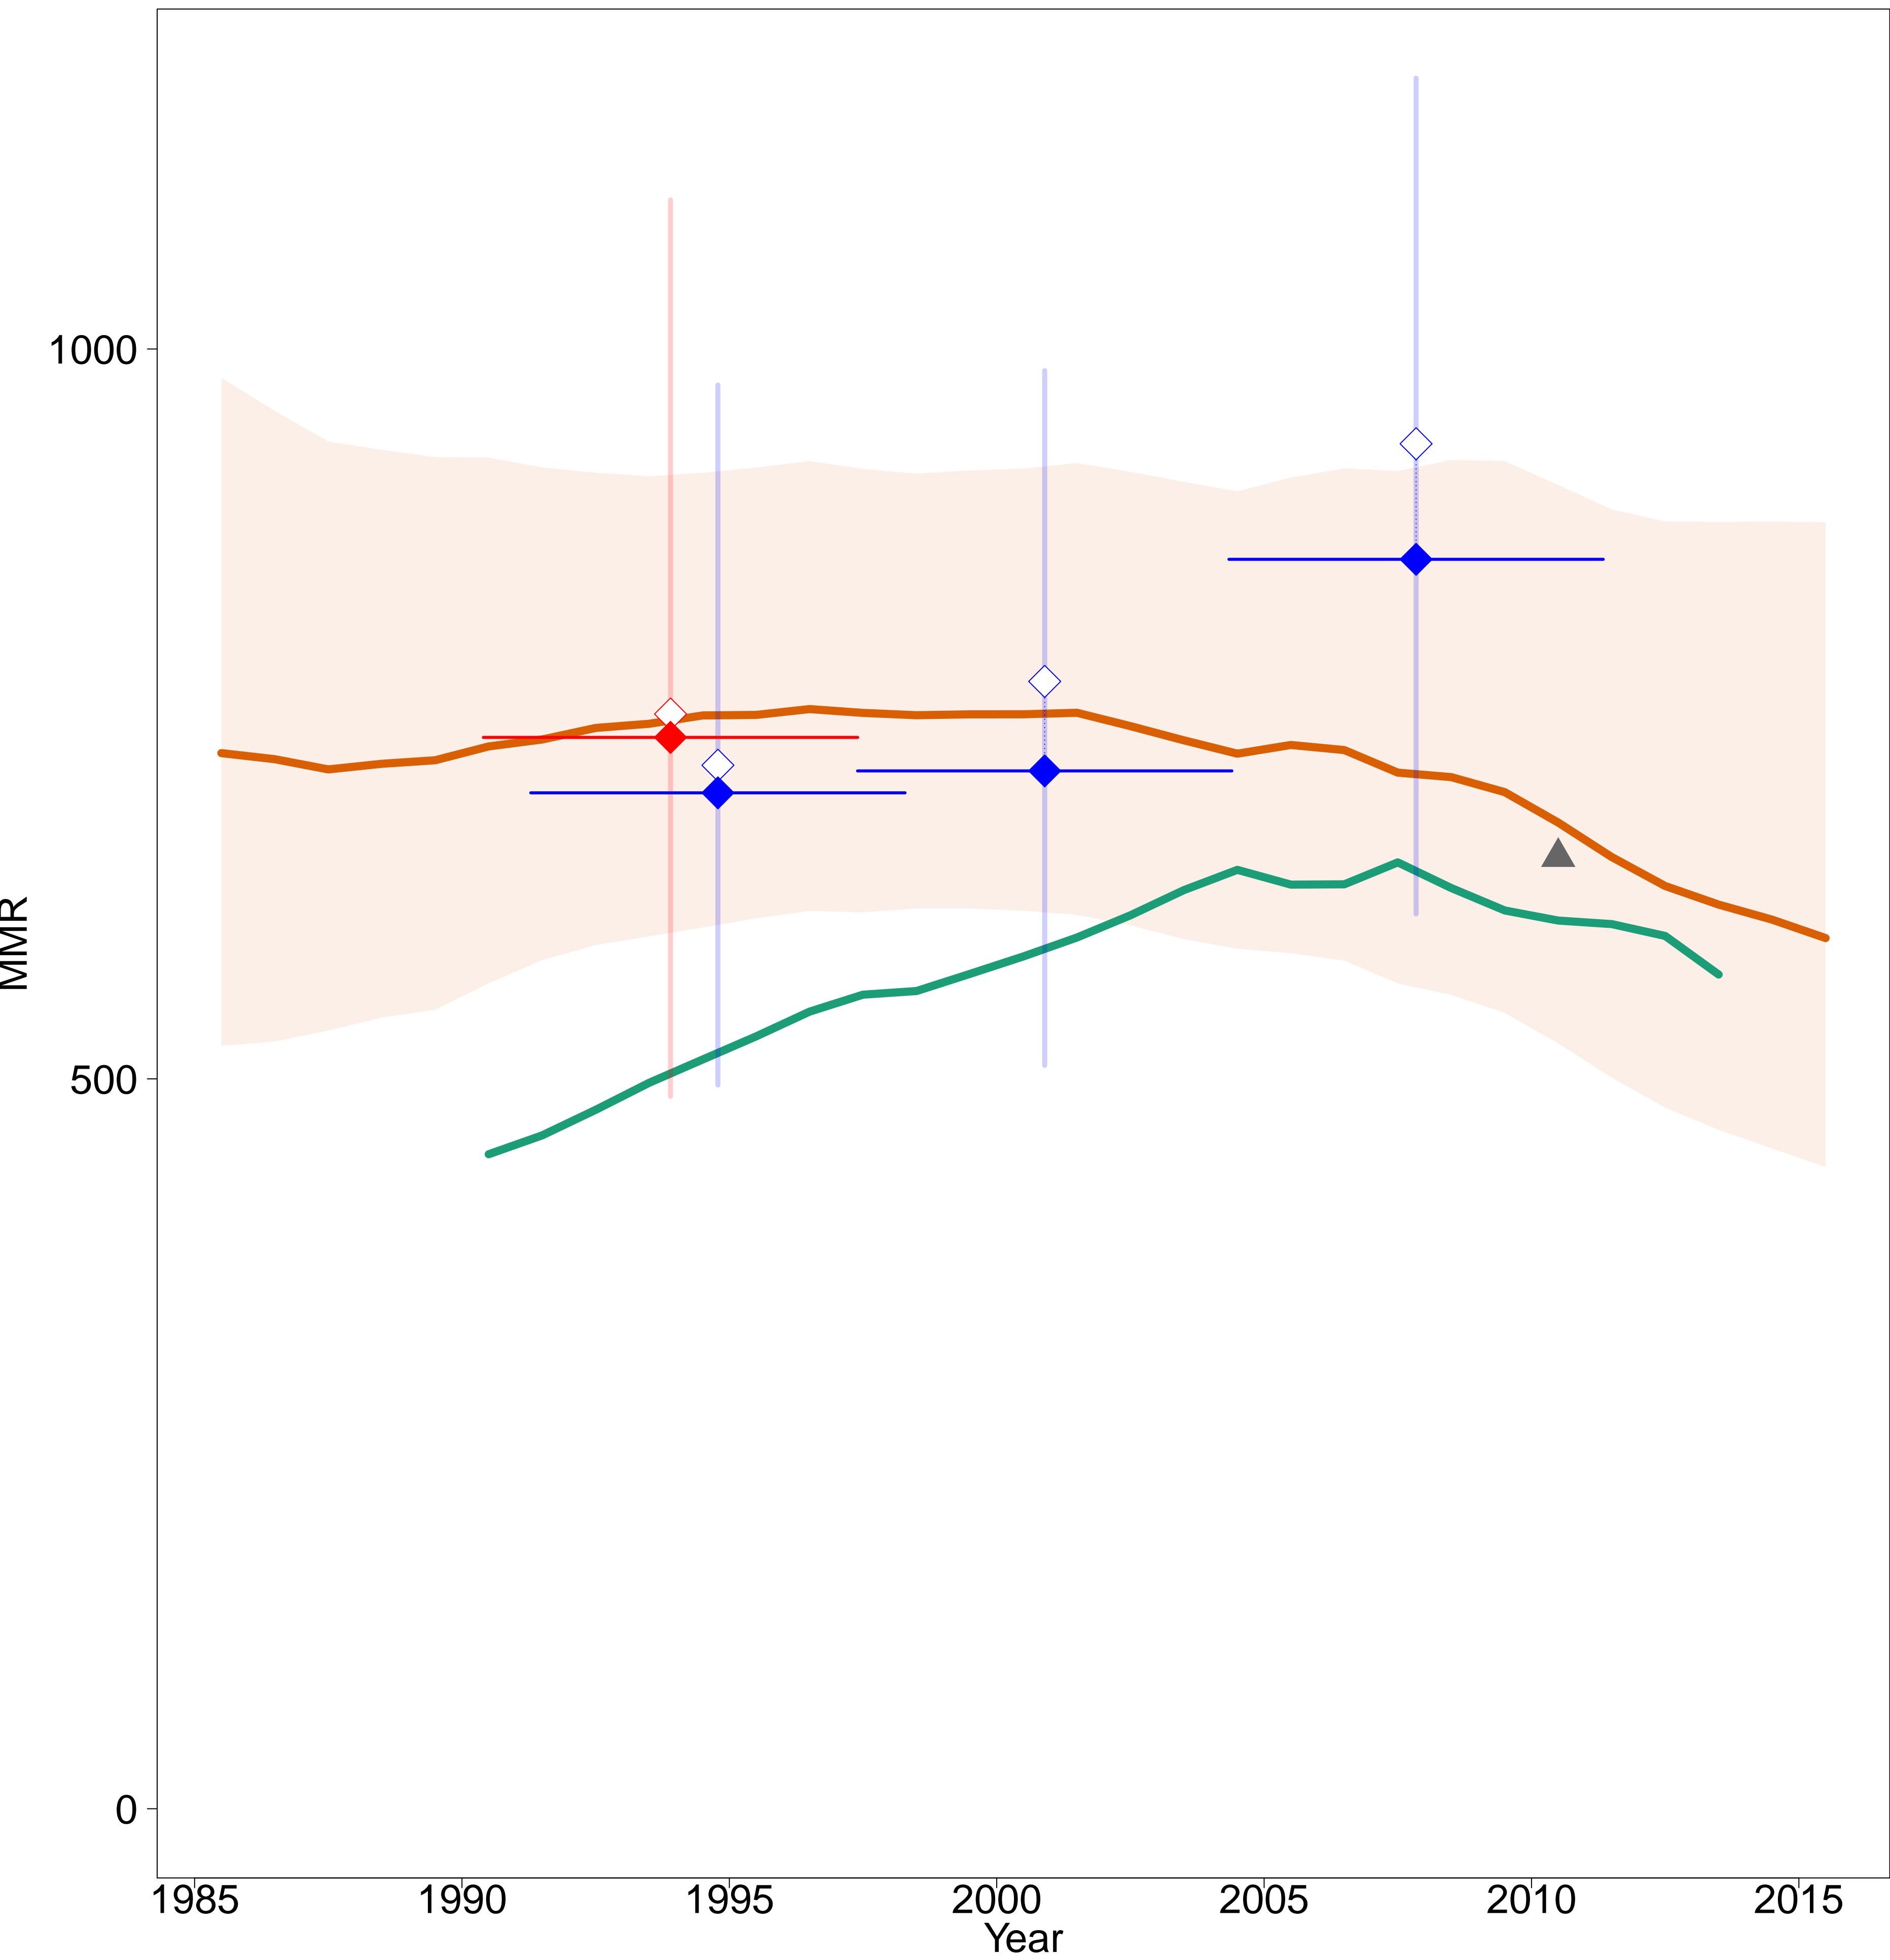

- Estimates –
- MMEIG 2015
- GBD 2013
- MMR Database 2015 –
- ◊ Observed Data
- ◆ Adjusted Data
- Data type –
- ◆ DHS
- ◆ Misc. studies
- ▲ Excluded misc. studies

Canada [CAN]  
(Developed regions)

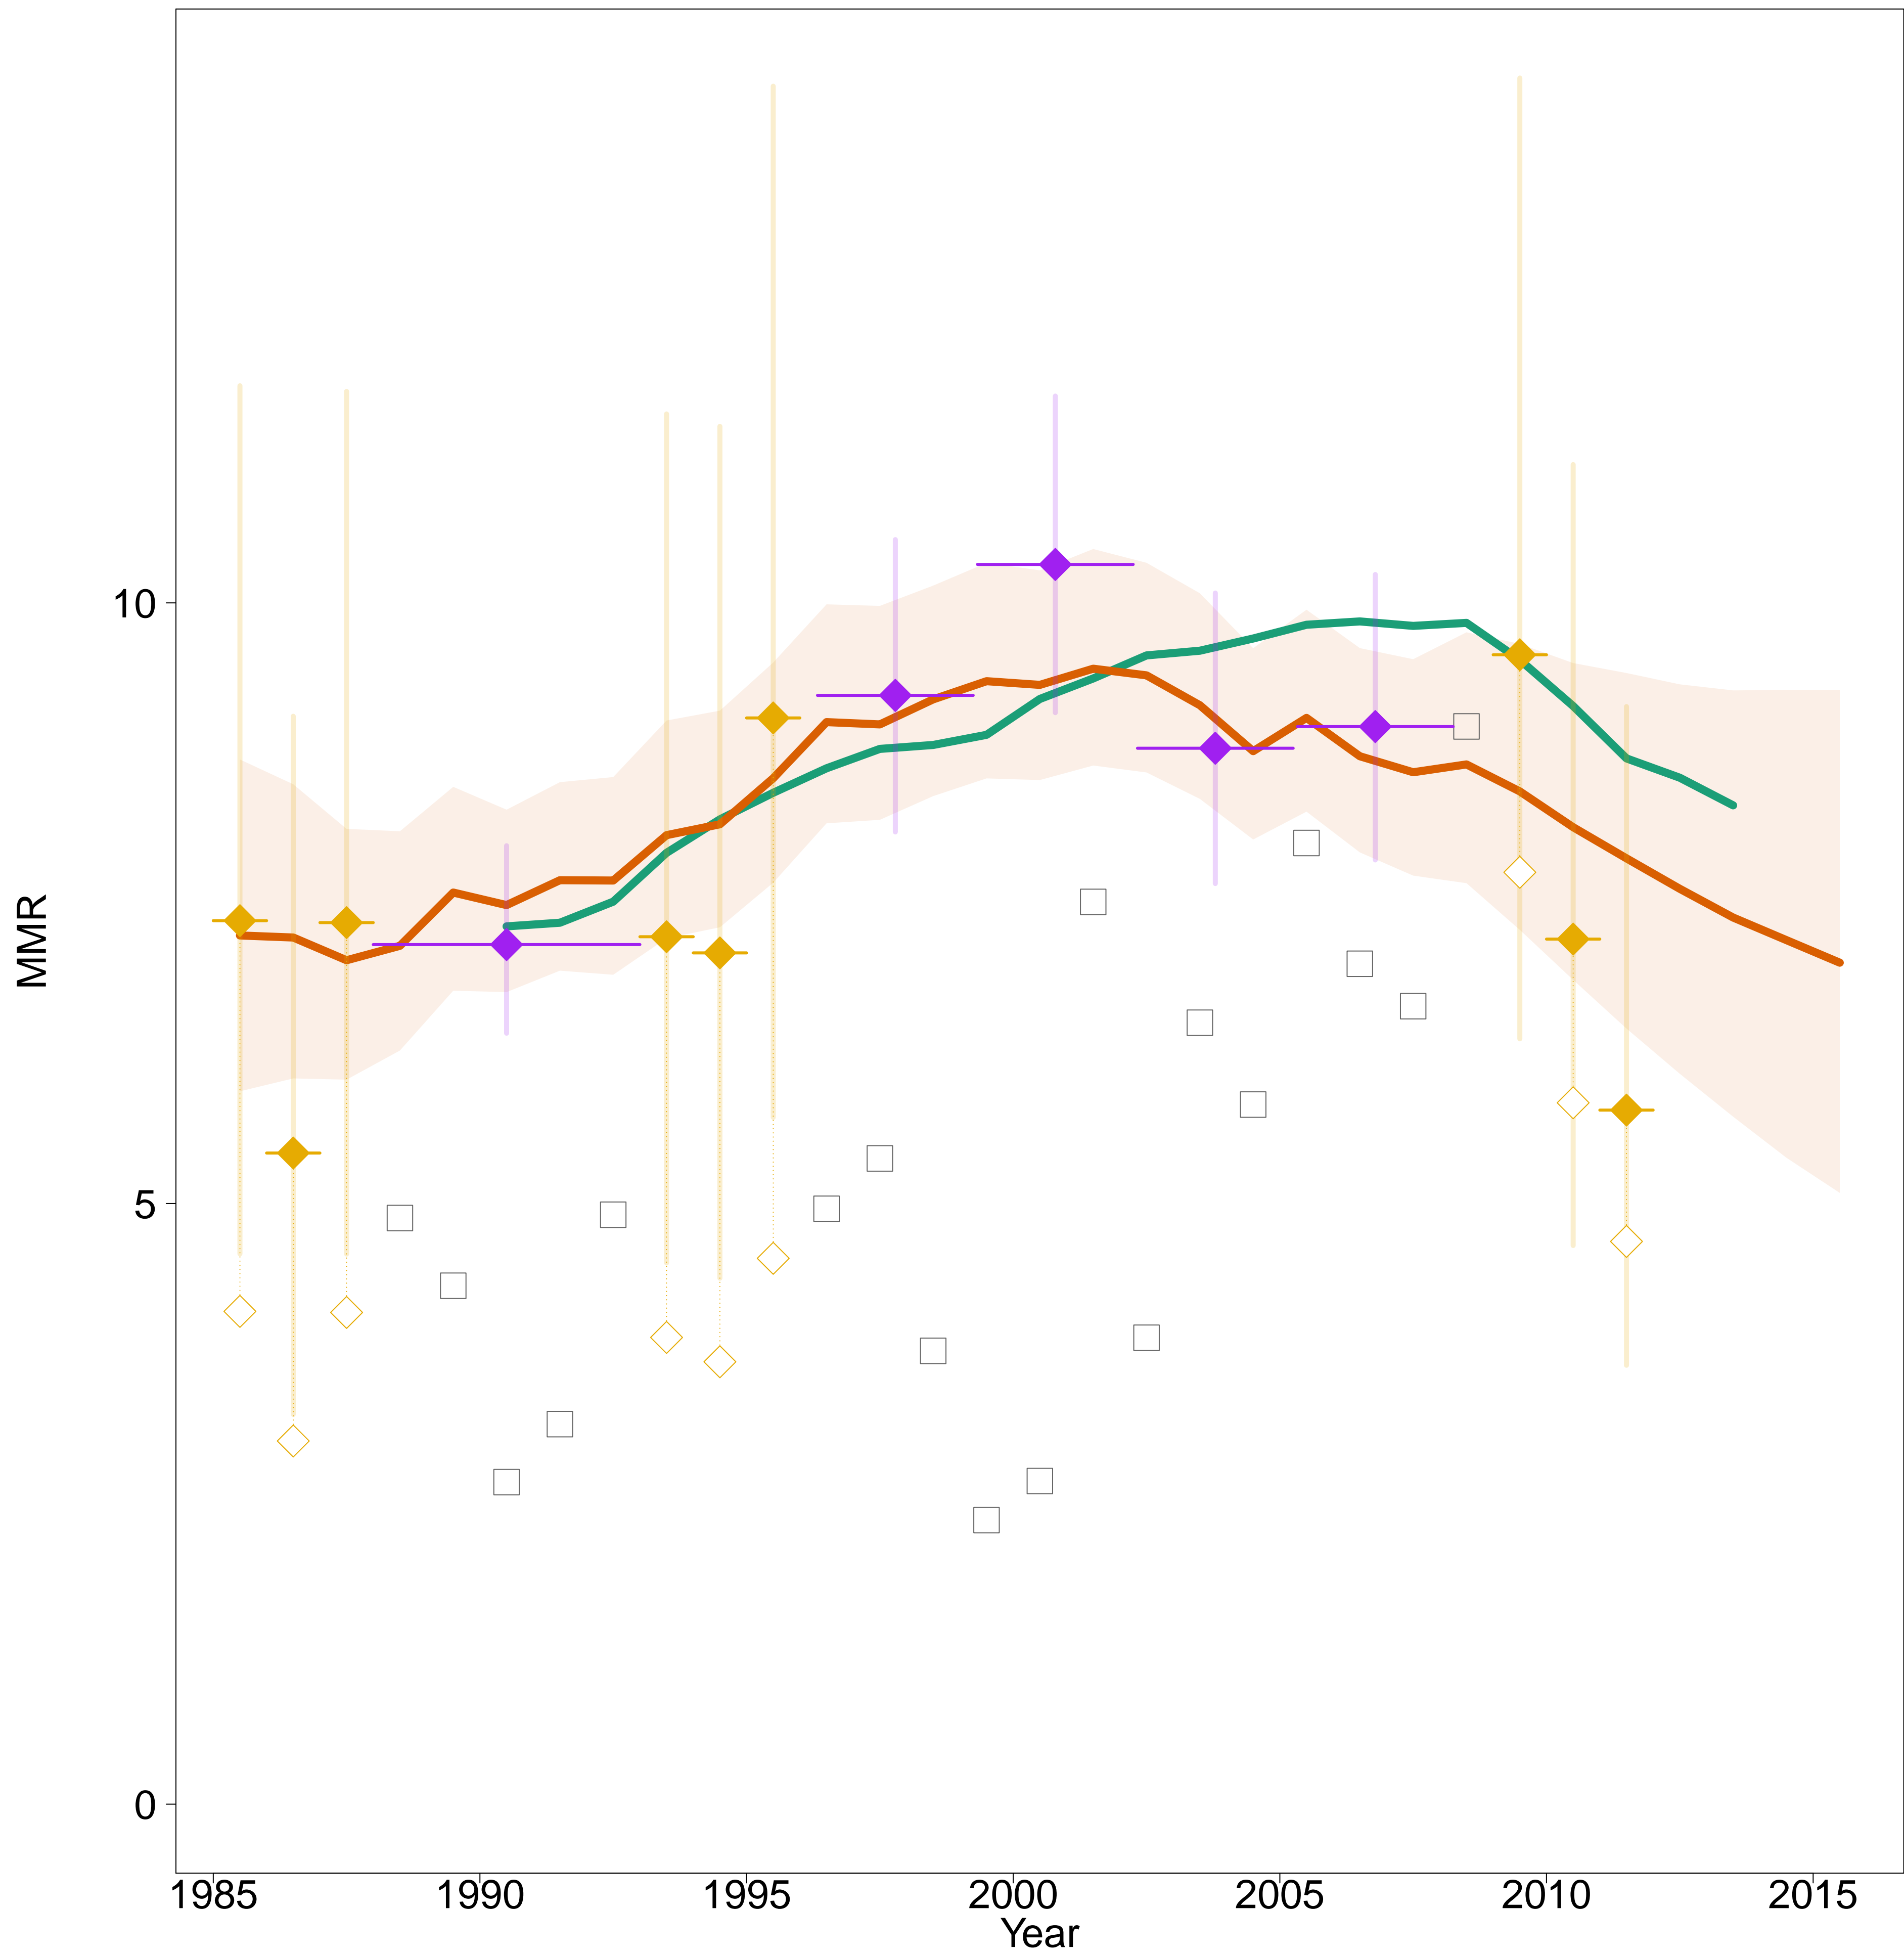

- Estimates –
- MMEIG 2015
- GBD 2013
- MMR Database 2015 –
- ◊ Observed Data
- ◆ Adjusted Data
- Data type –
- ◆ VR
- ◆ Spec. studies
- ◻ Excluded VR data  
(overlap with specialized study)

Central African Republic [CAF]  
(Middle Africa)

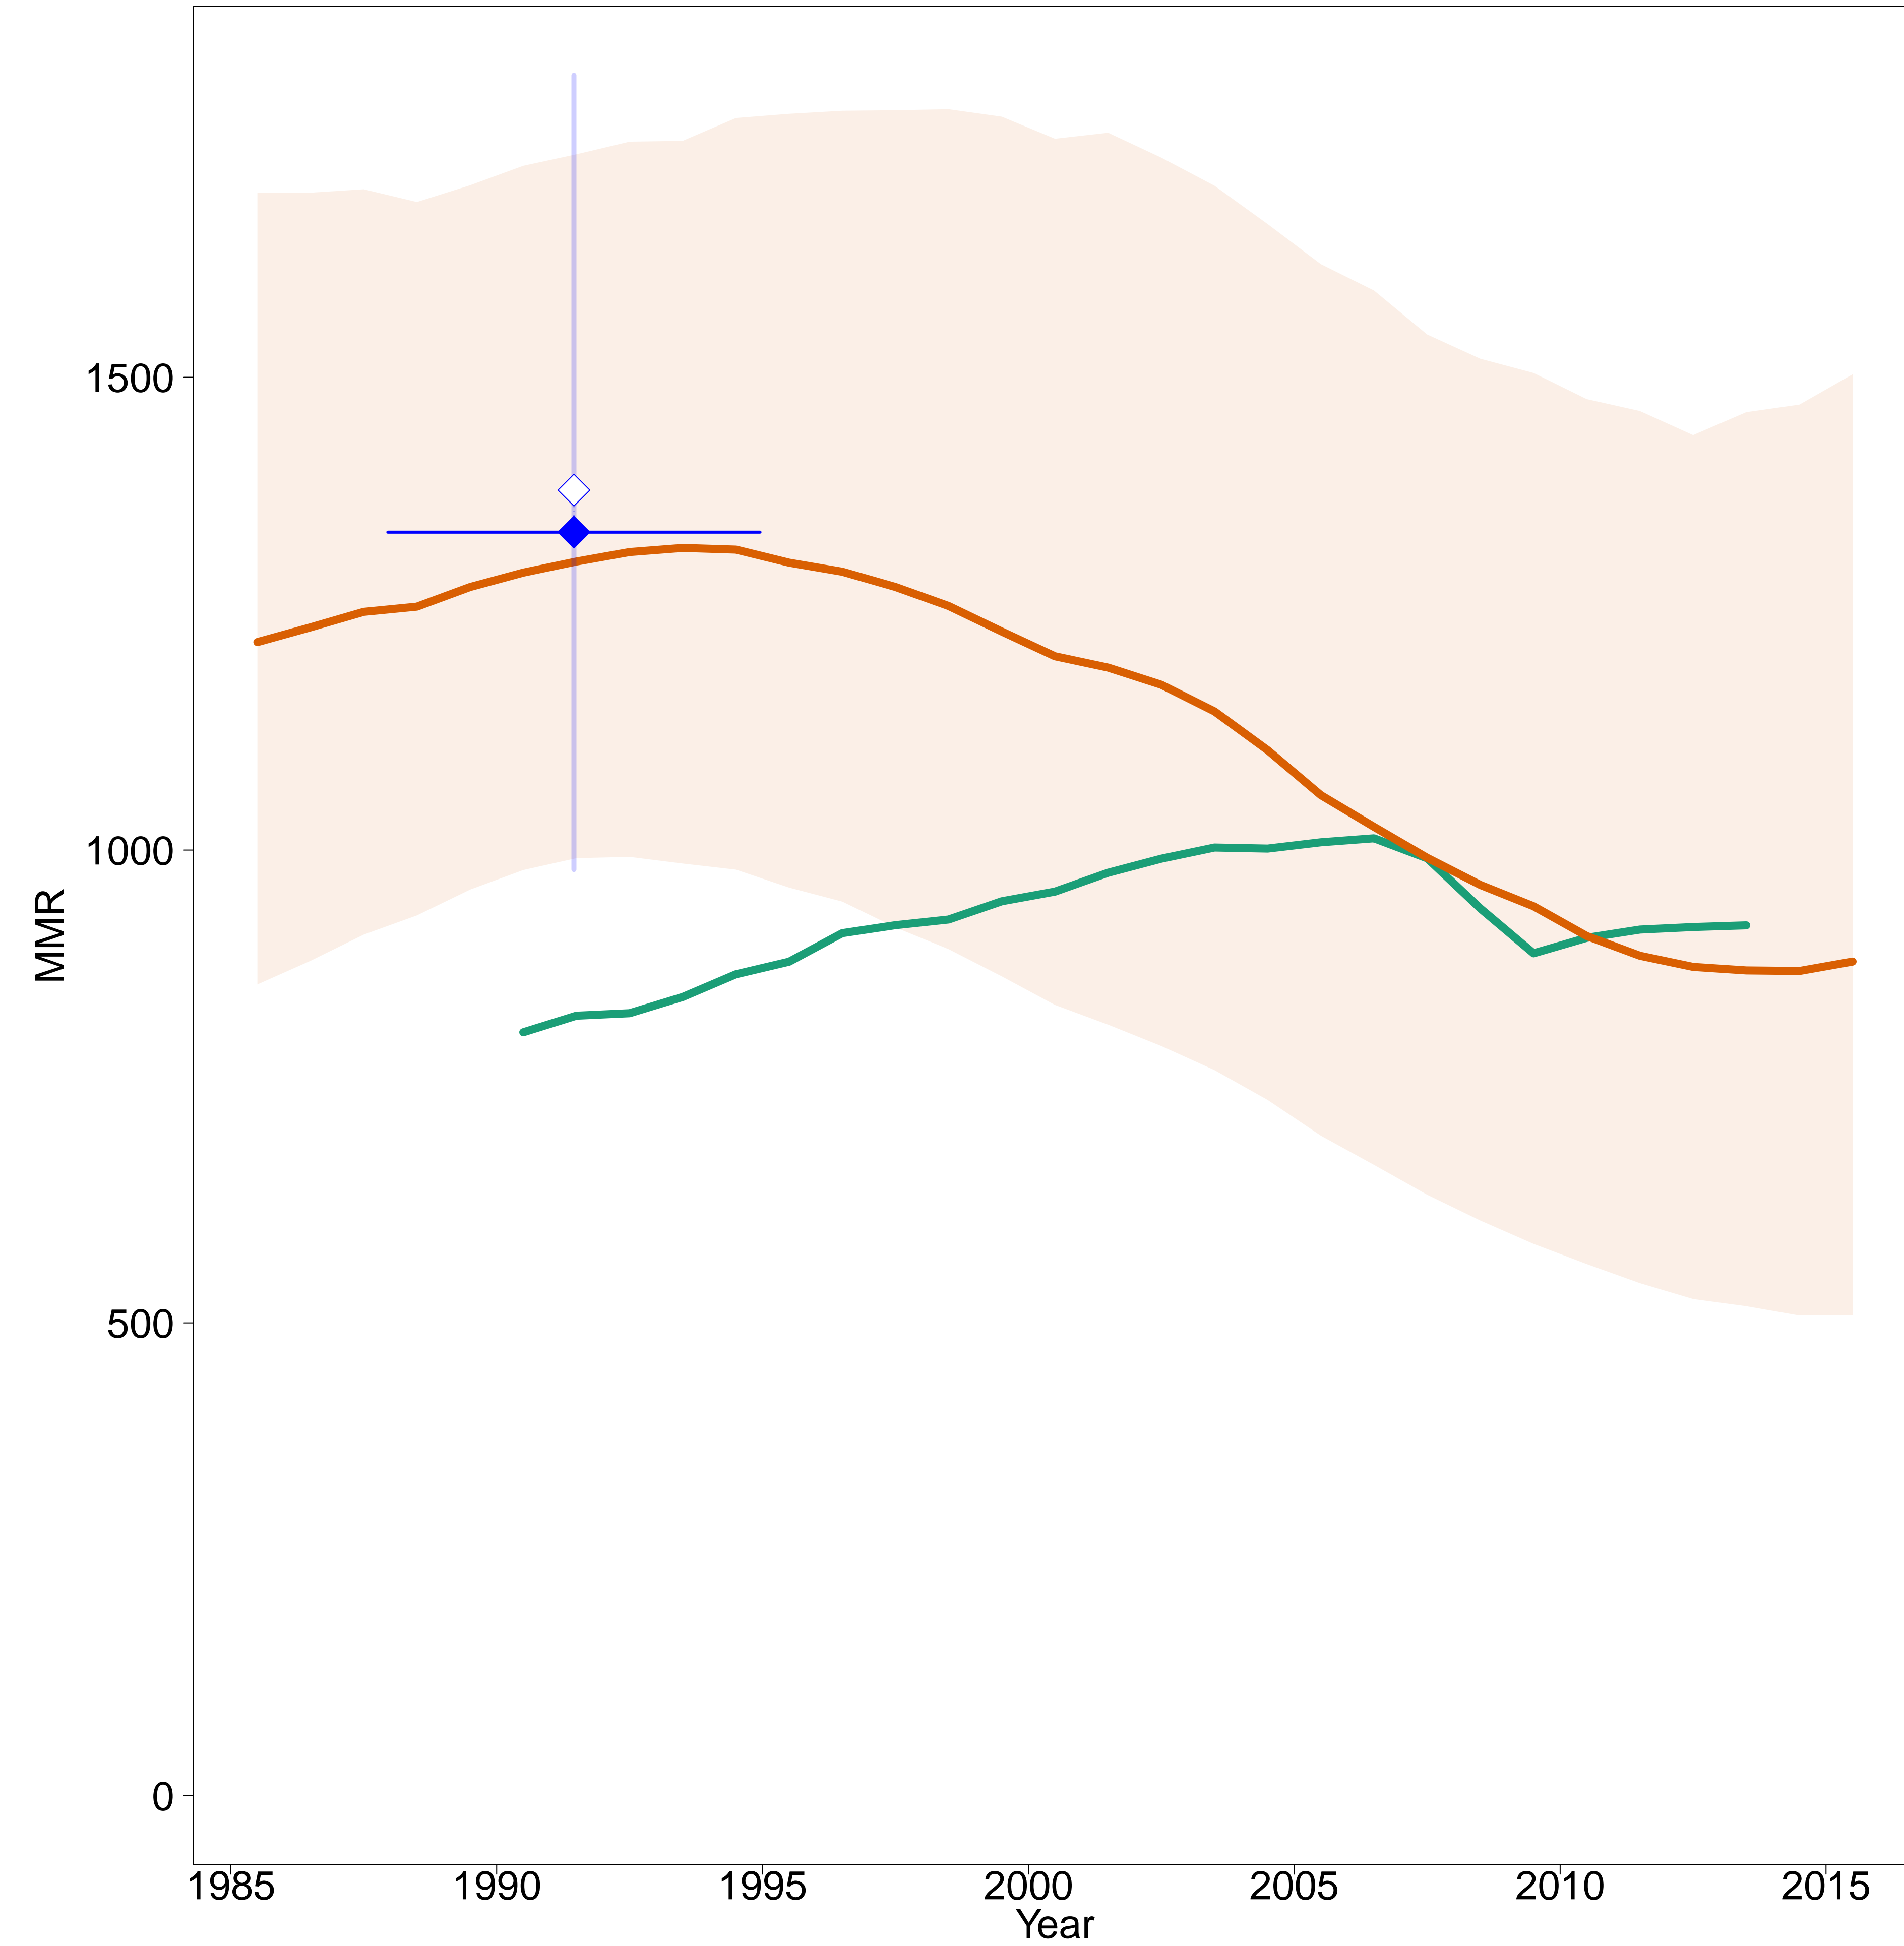

- Estimates -
- MMEIG 2015
- GBD 2013
- MMR Database 2015 -
- Observed Data
- Adjusted Data
- Data type -
- DHS

Chad [TCD]  
(Middle Africa)

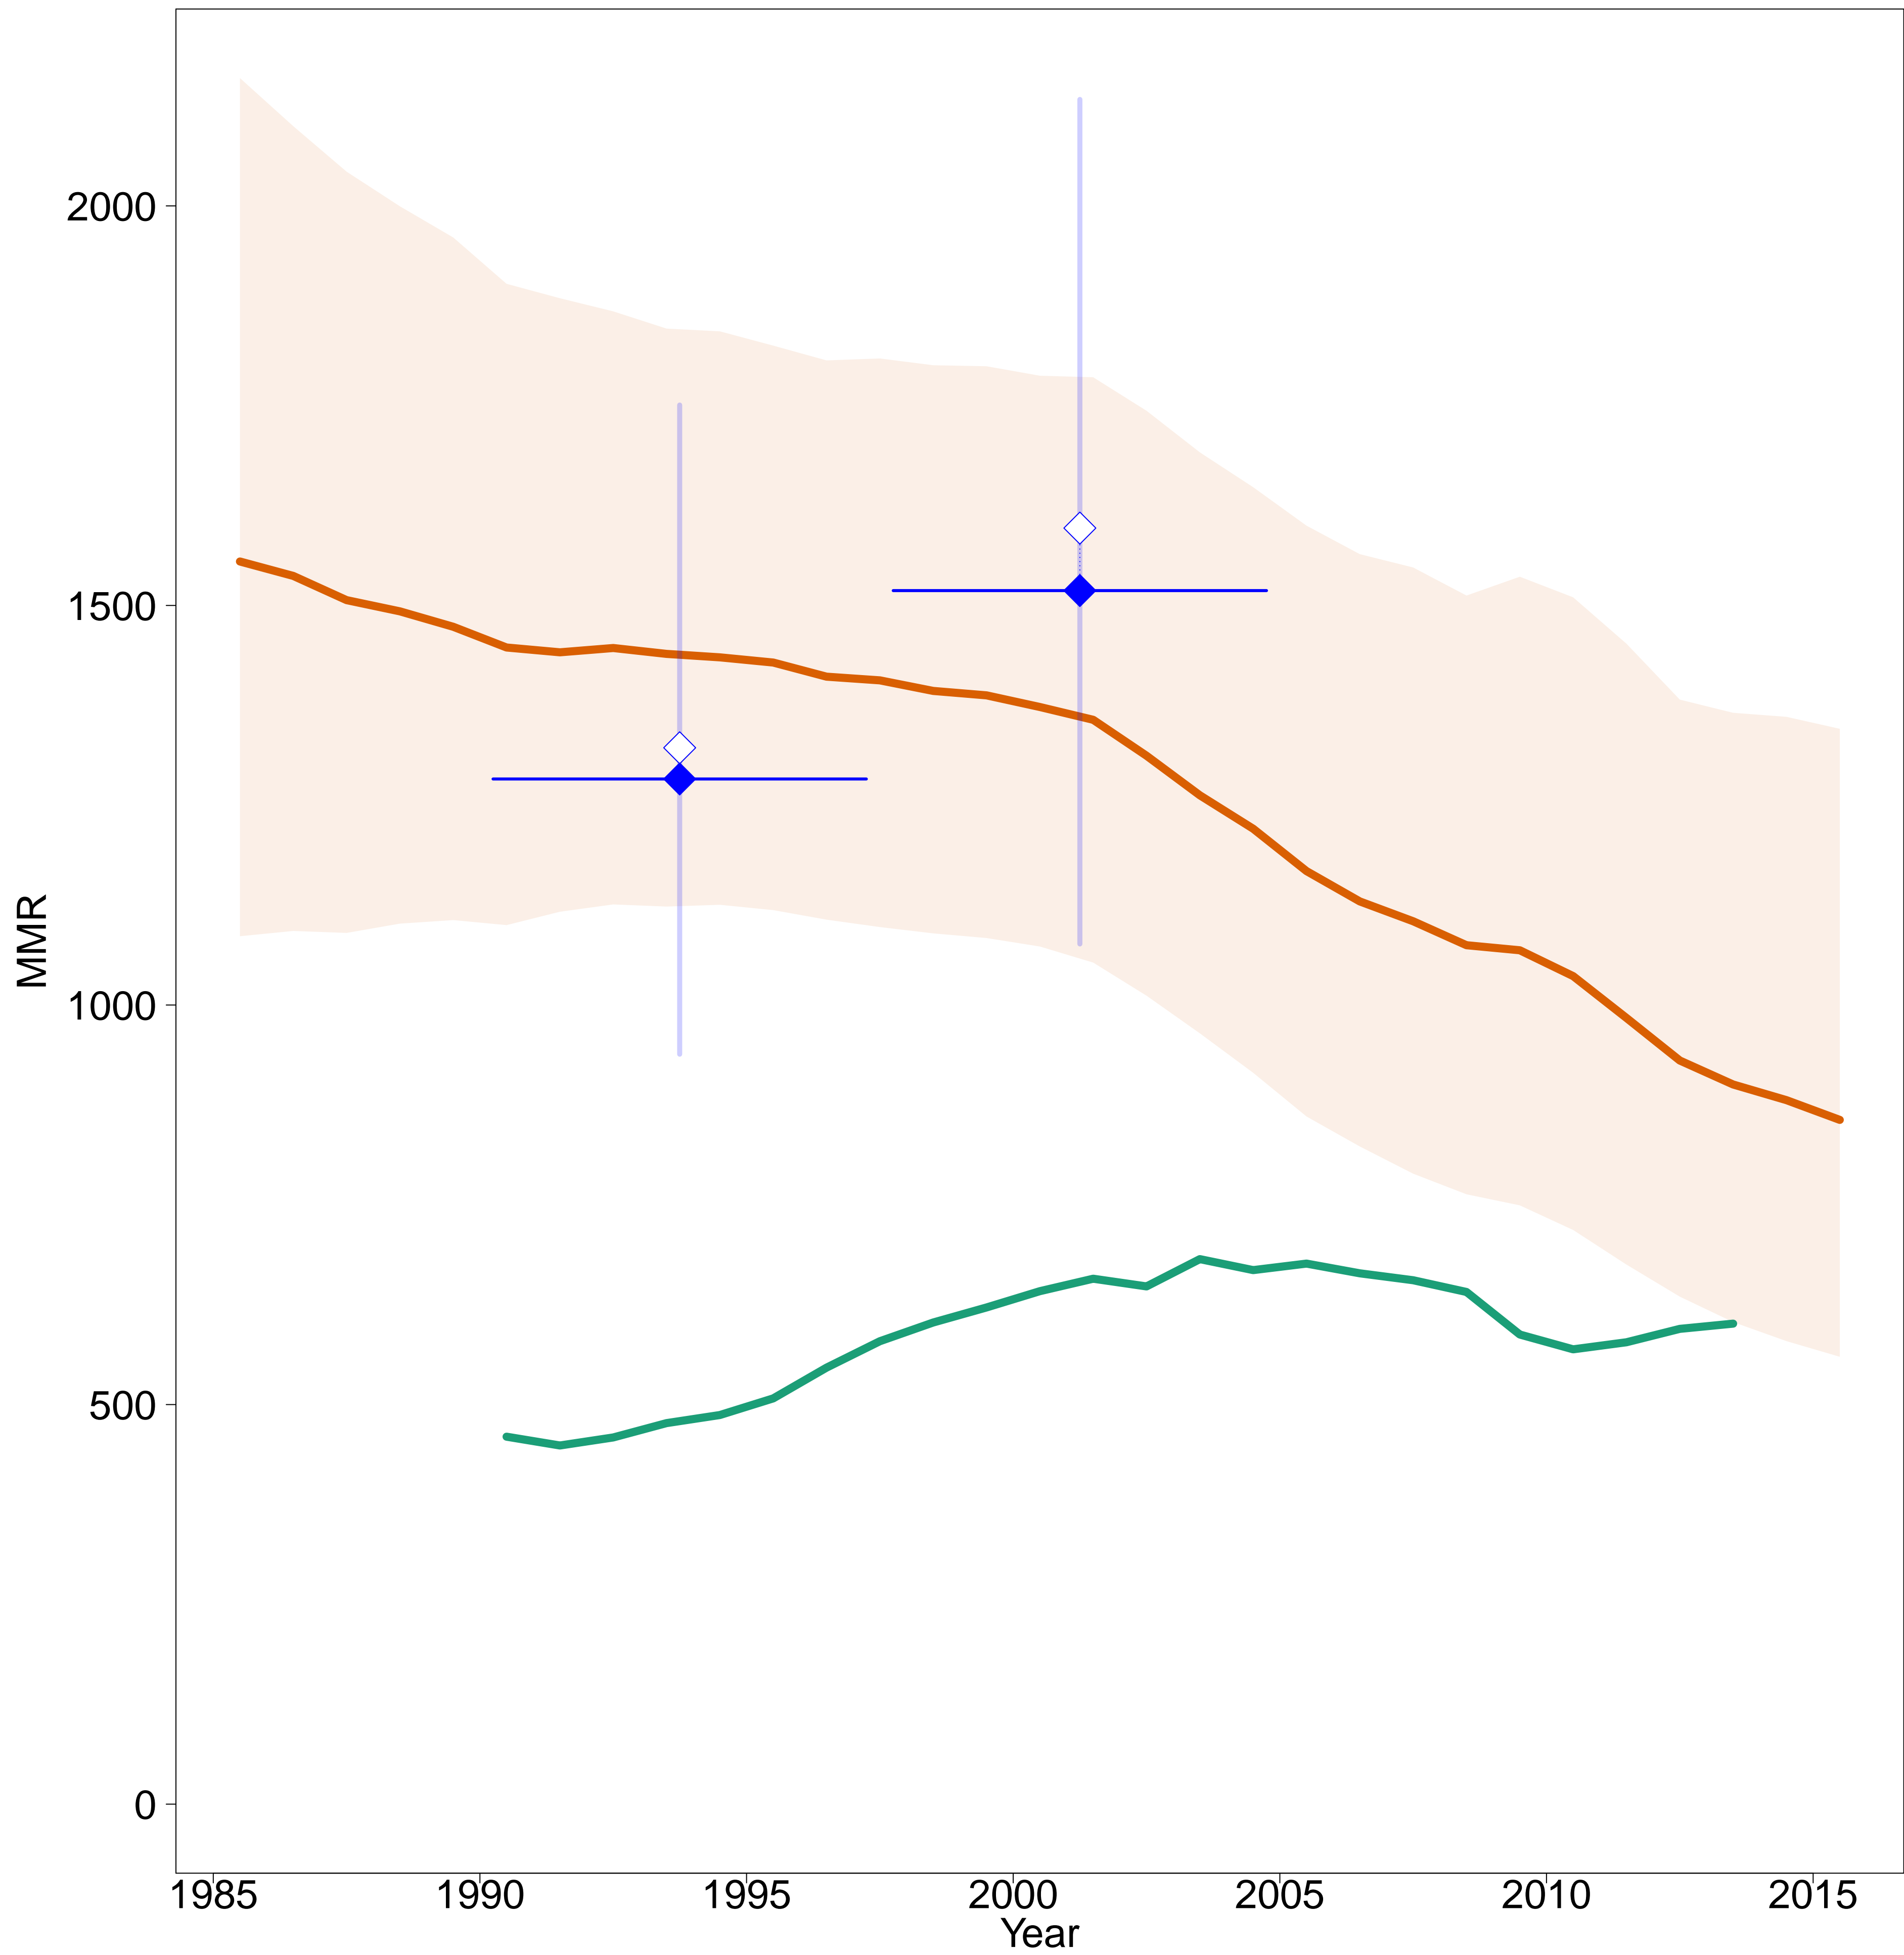

- Estimates -
- MMEIG 2015
- GBD 2013
- MMR Database 2015 -
- Observed Data
- Adjusted Data
- Data type -
- DHS

Chile [CHL]  
(South America)

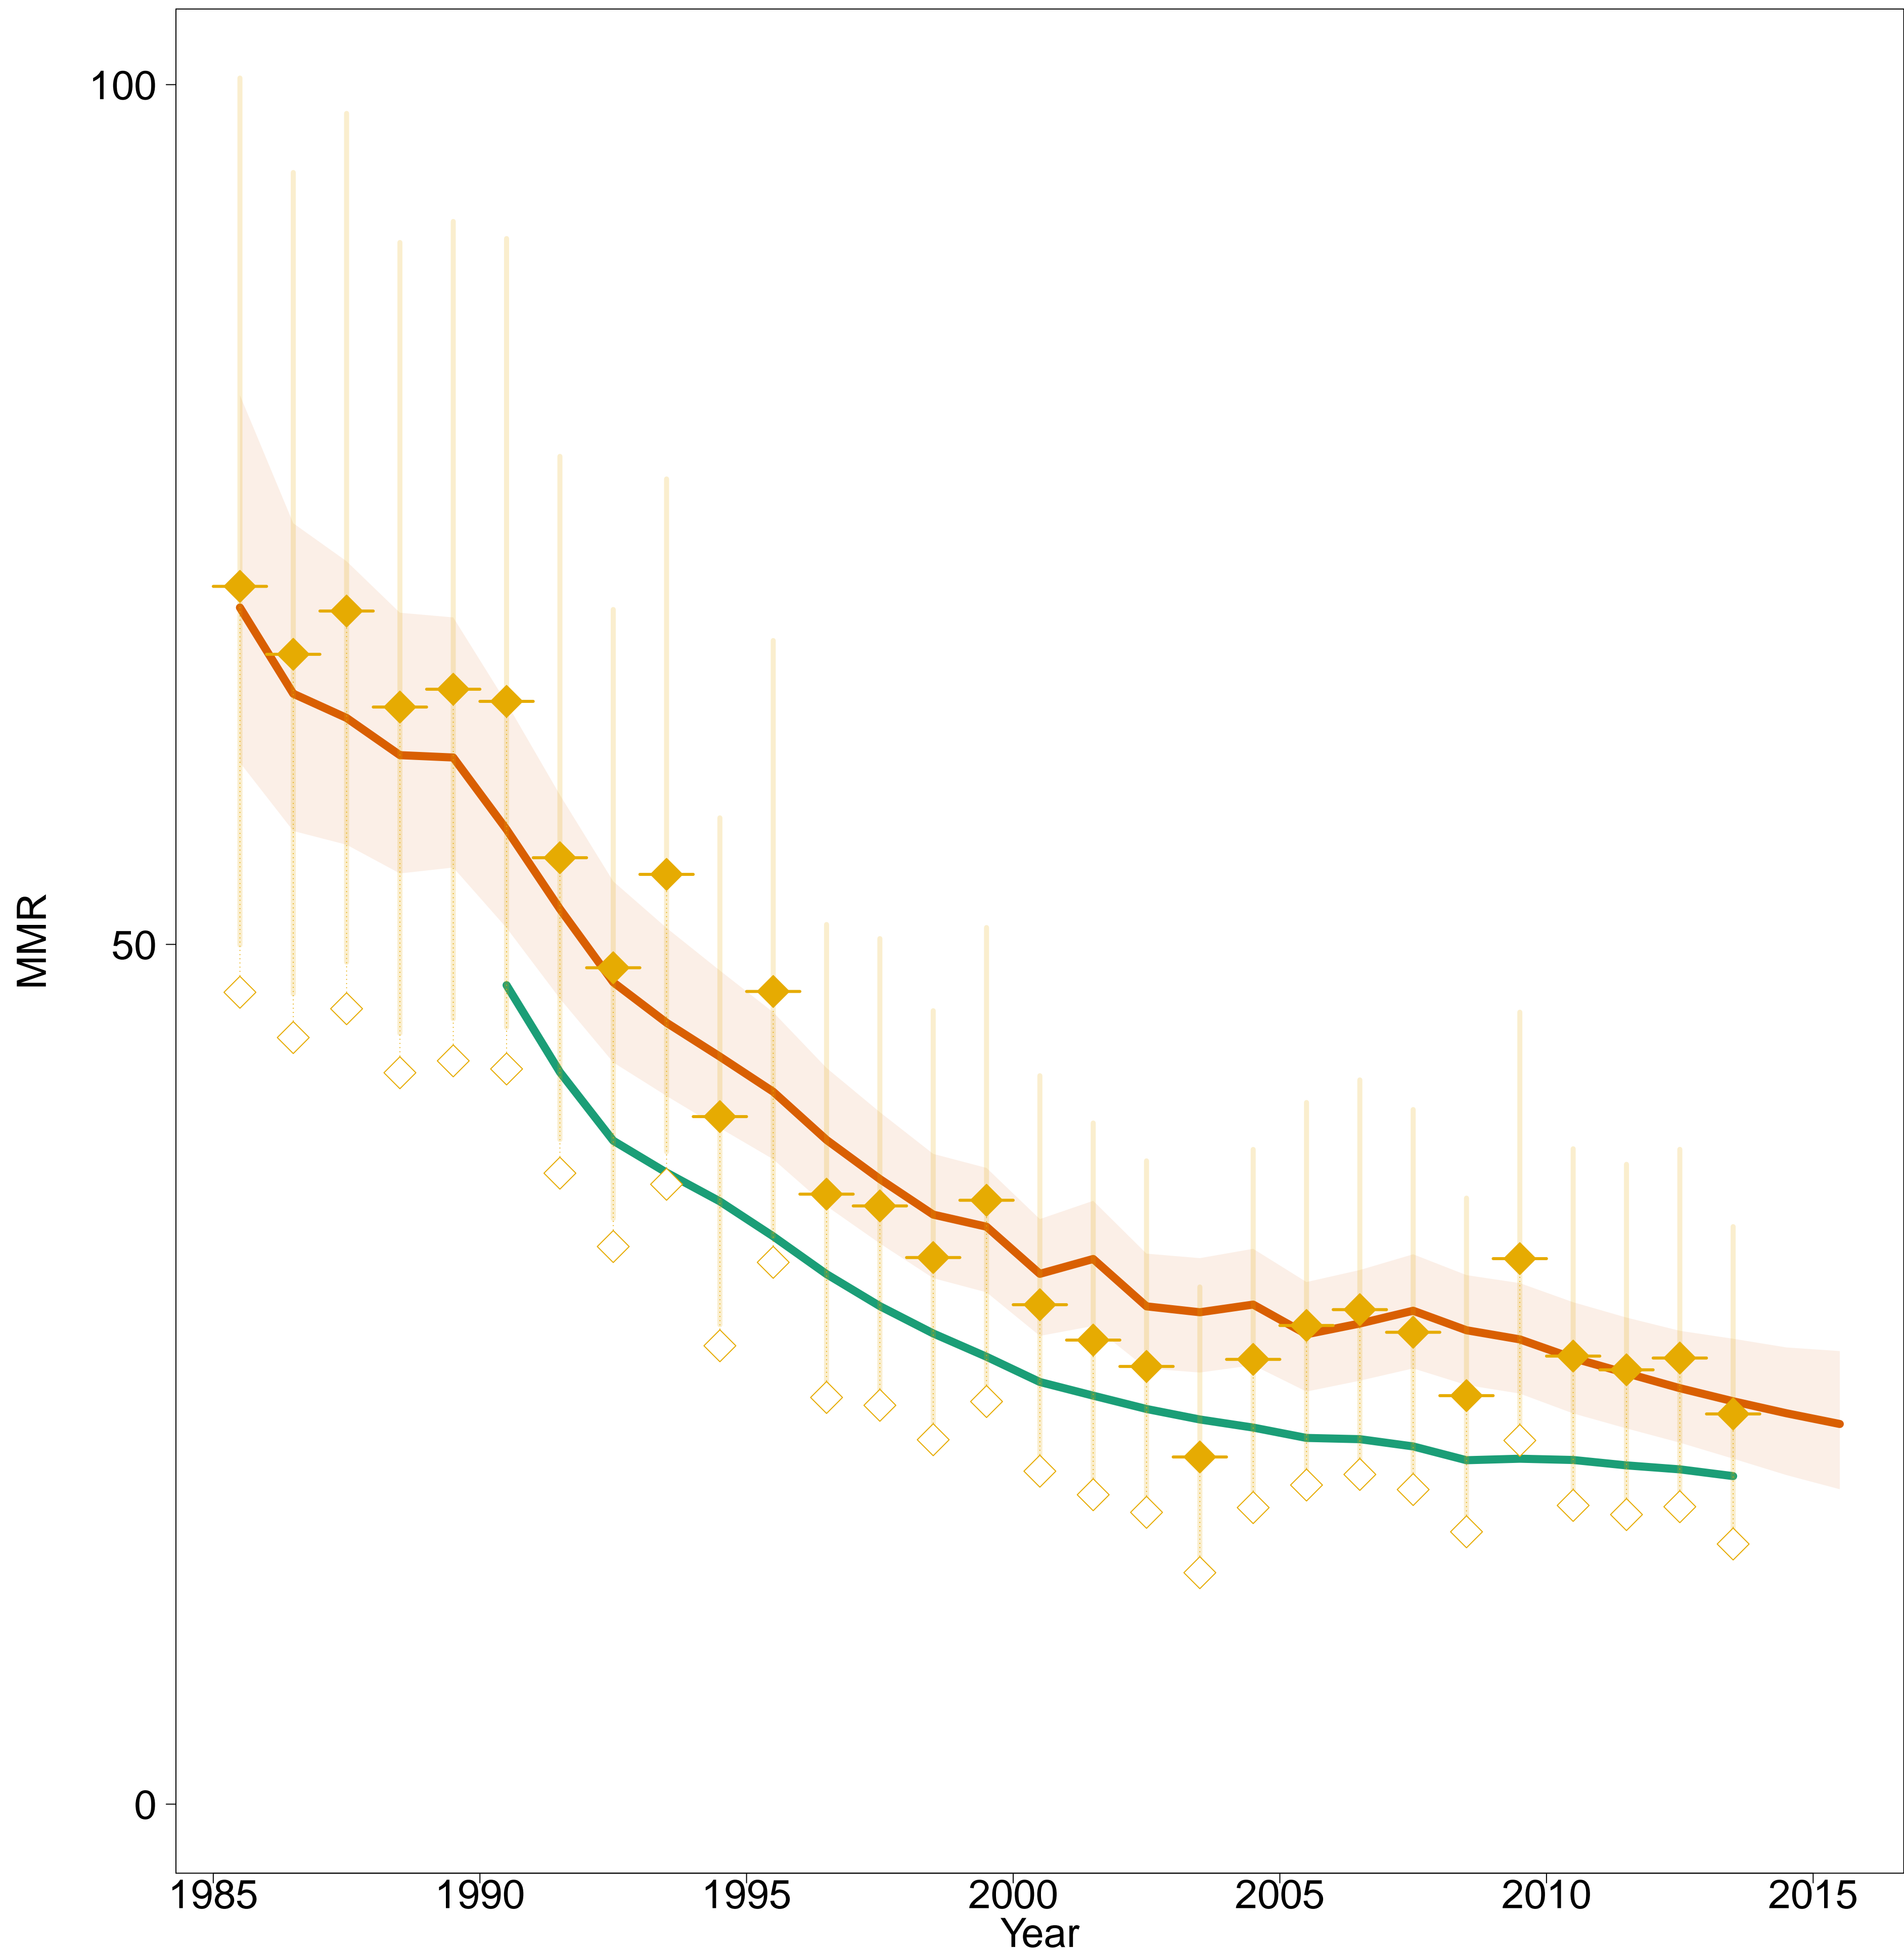

- Estimates -
- MMEIG 2015
- GBD 2013
- MMR Database 2015 -
- Observed Data
- Adjusted Data
- Data type -
- VR



China [CHN]  
(Eastern Asia)

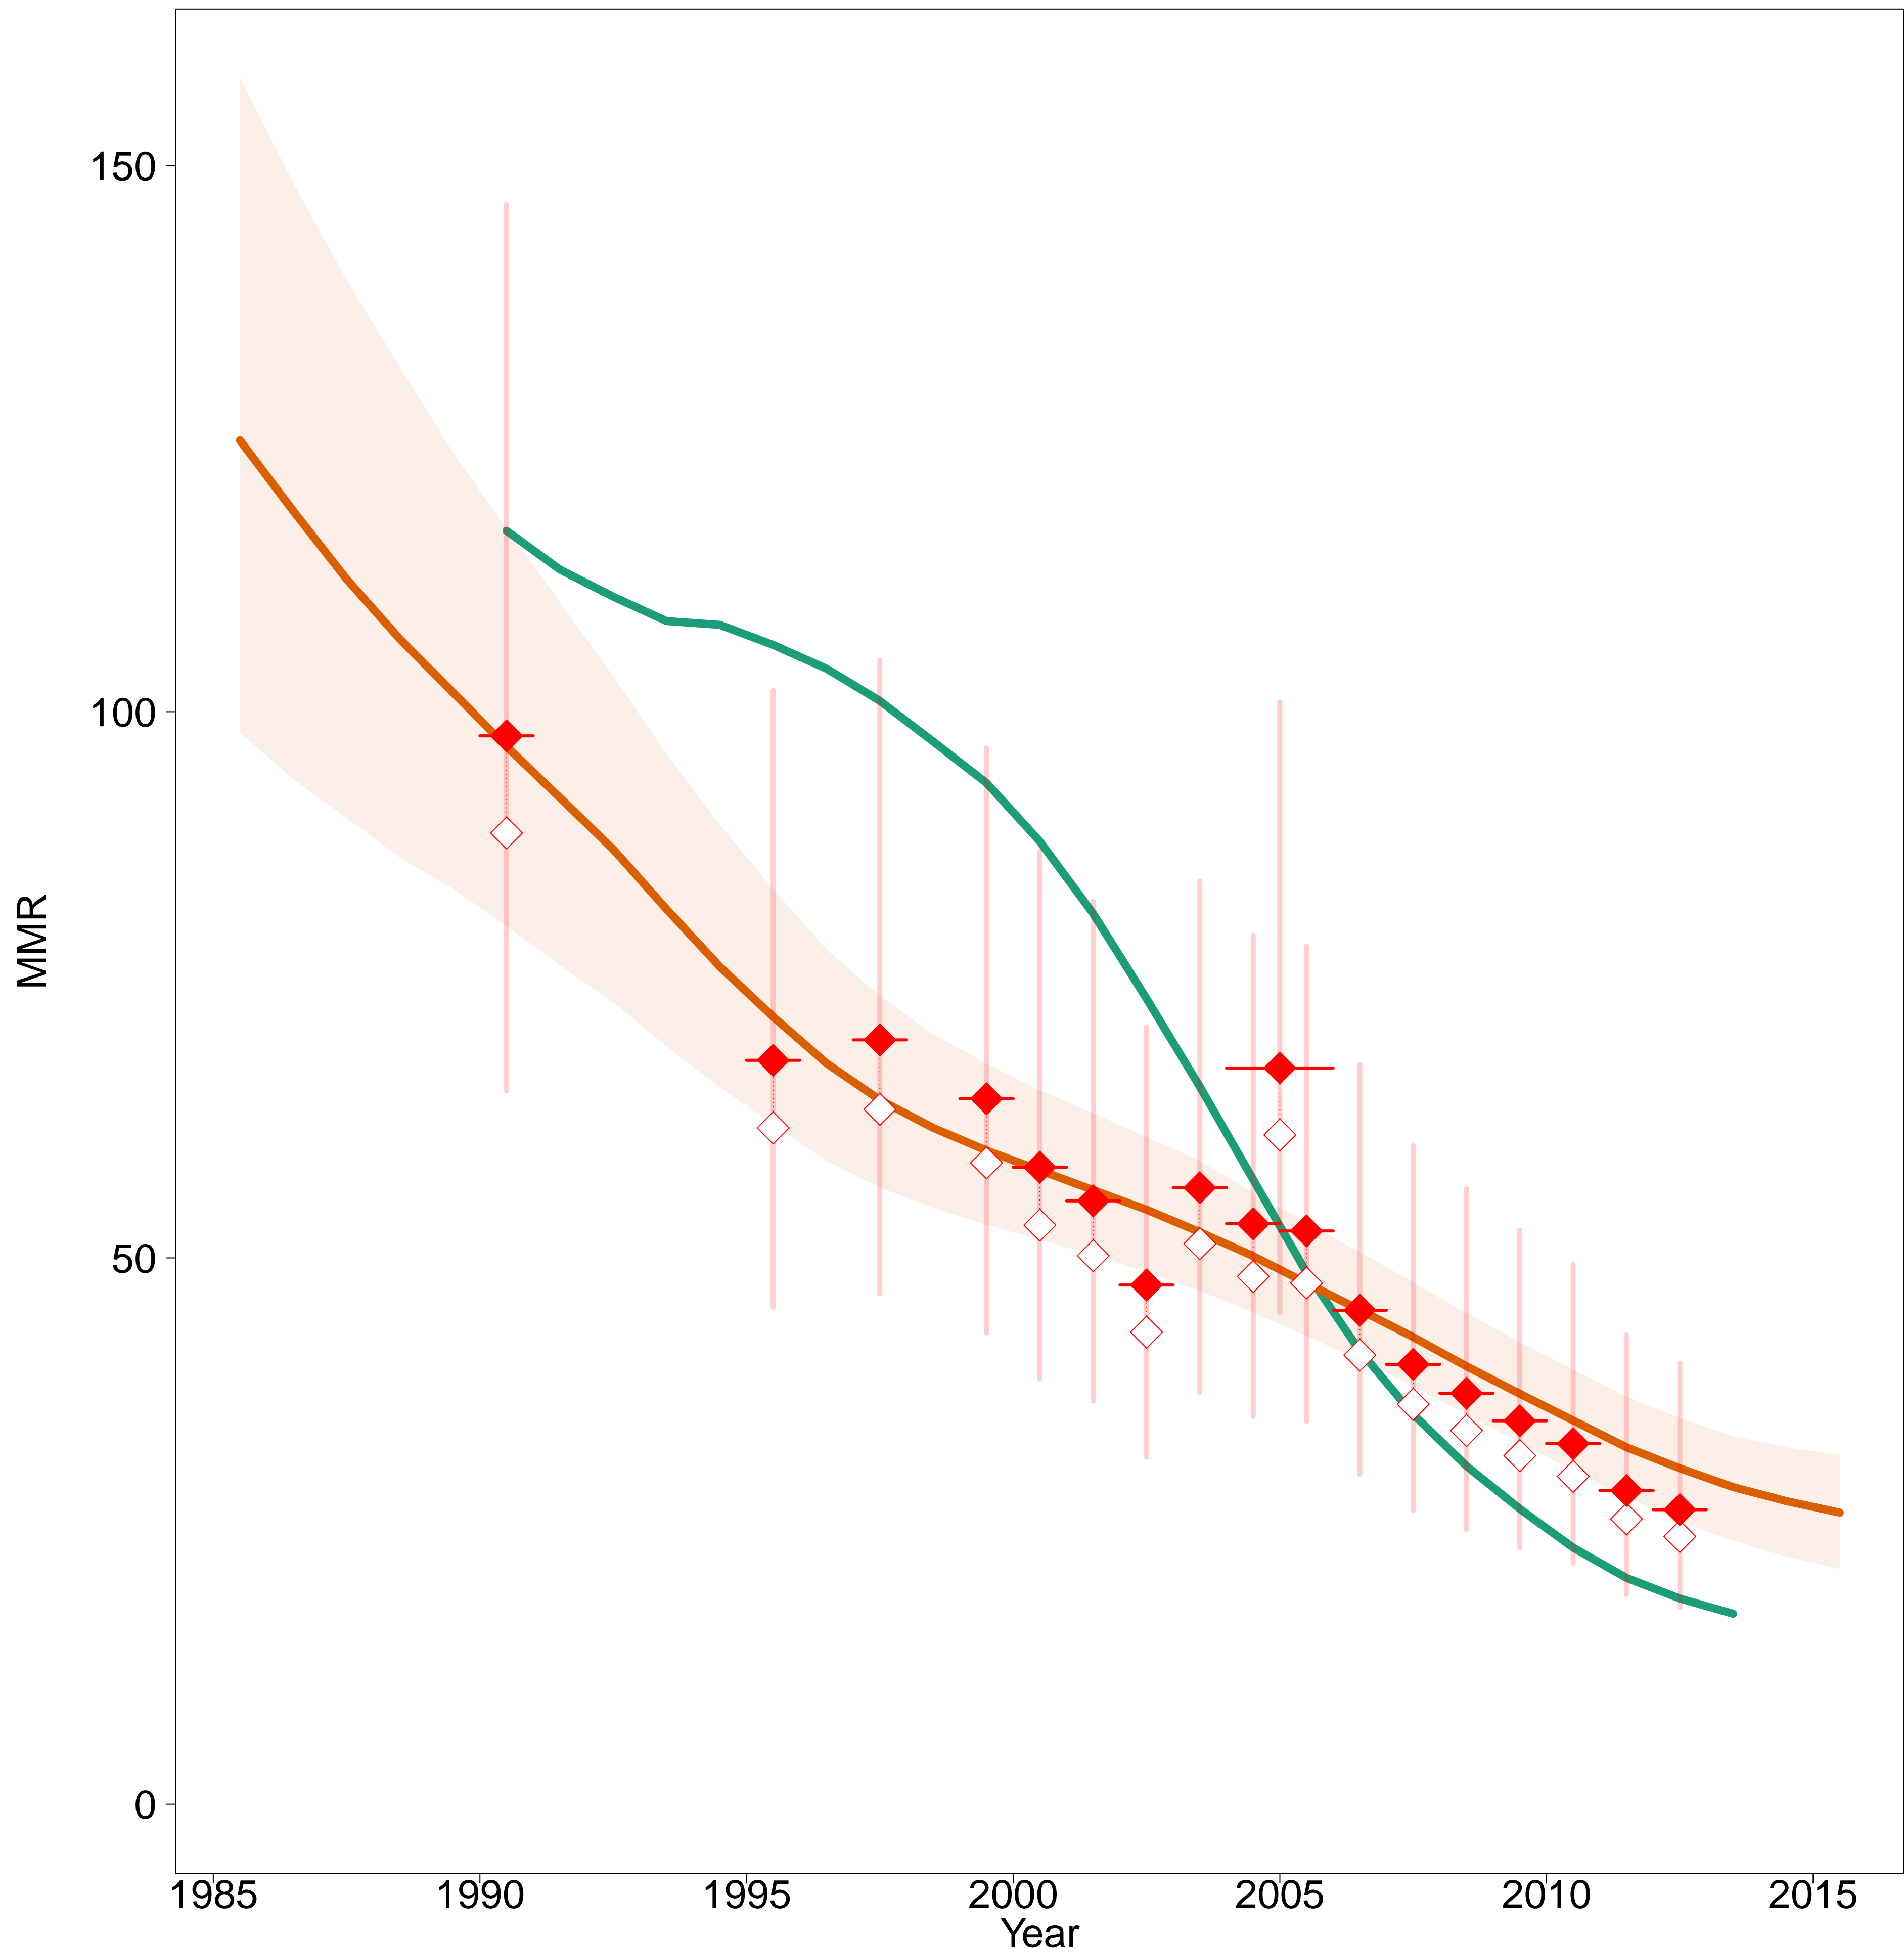

- Estimates -
- MMEIG 2015
- GBD 2013
- MMR Database 2015 -
- Observed Data
- Adjusted Data
- Data type -
- Misc. studies

Colombia [COL]  
(South America)

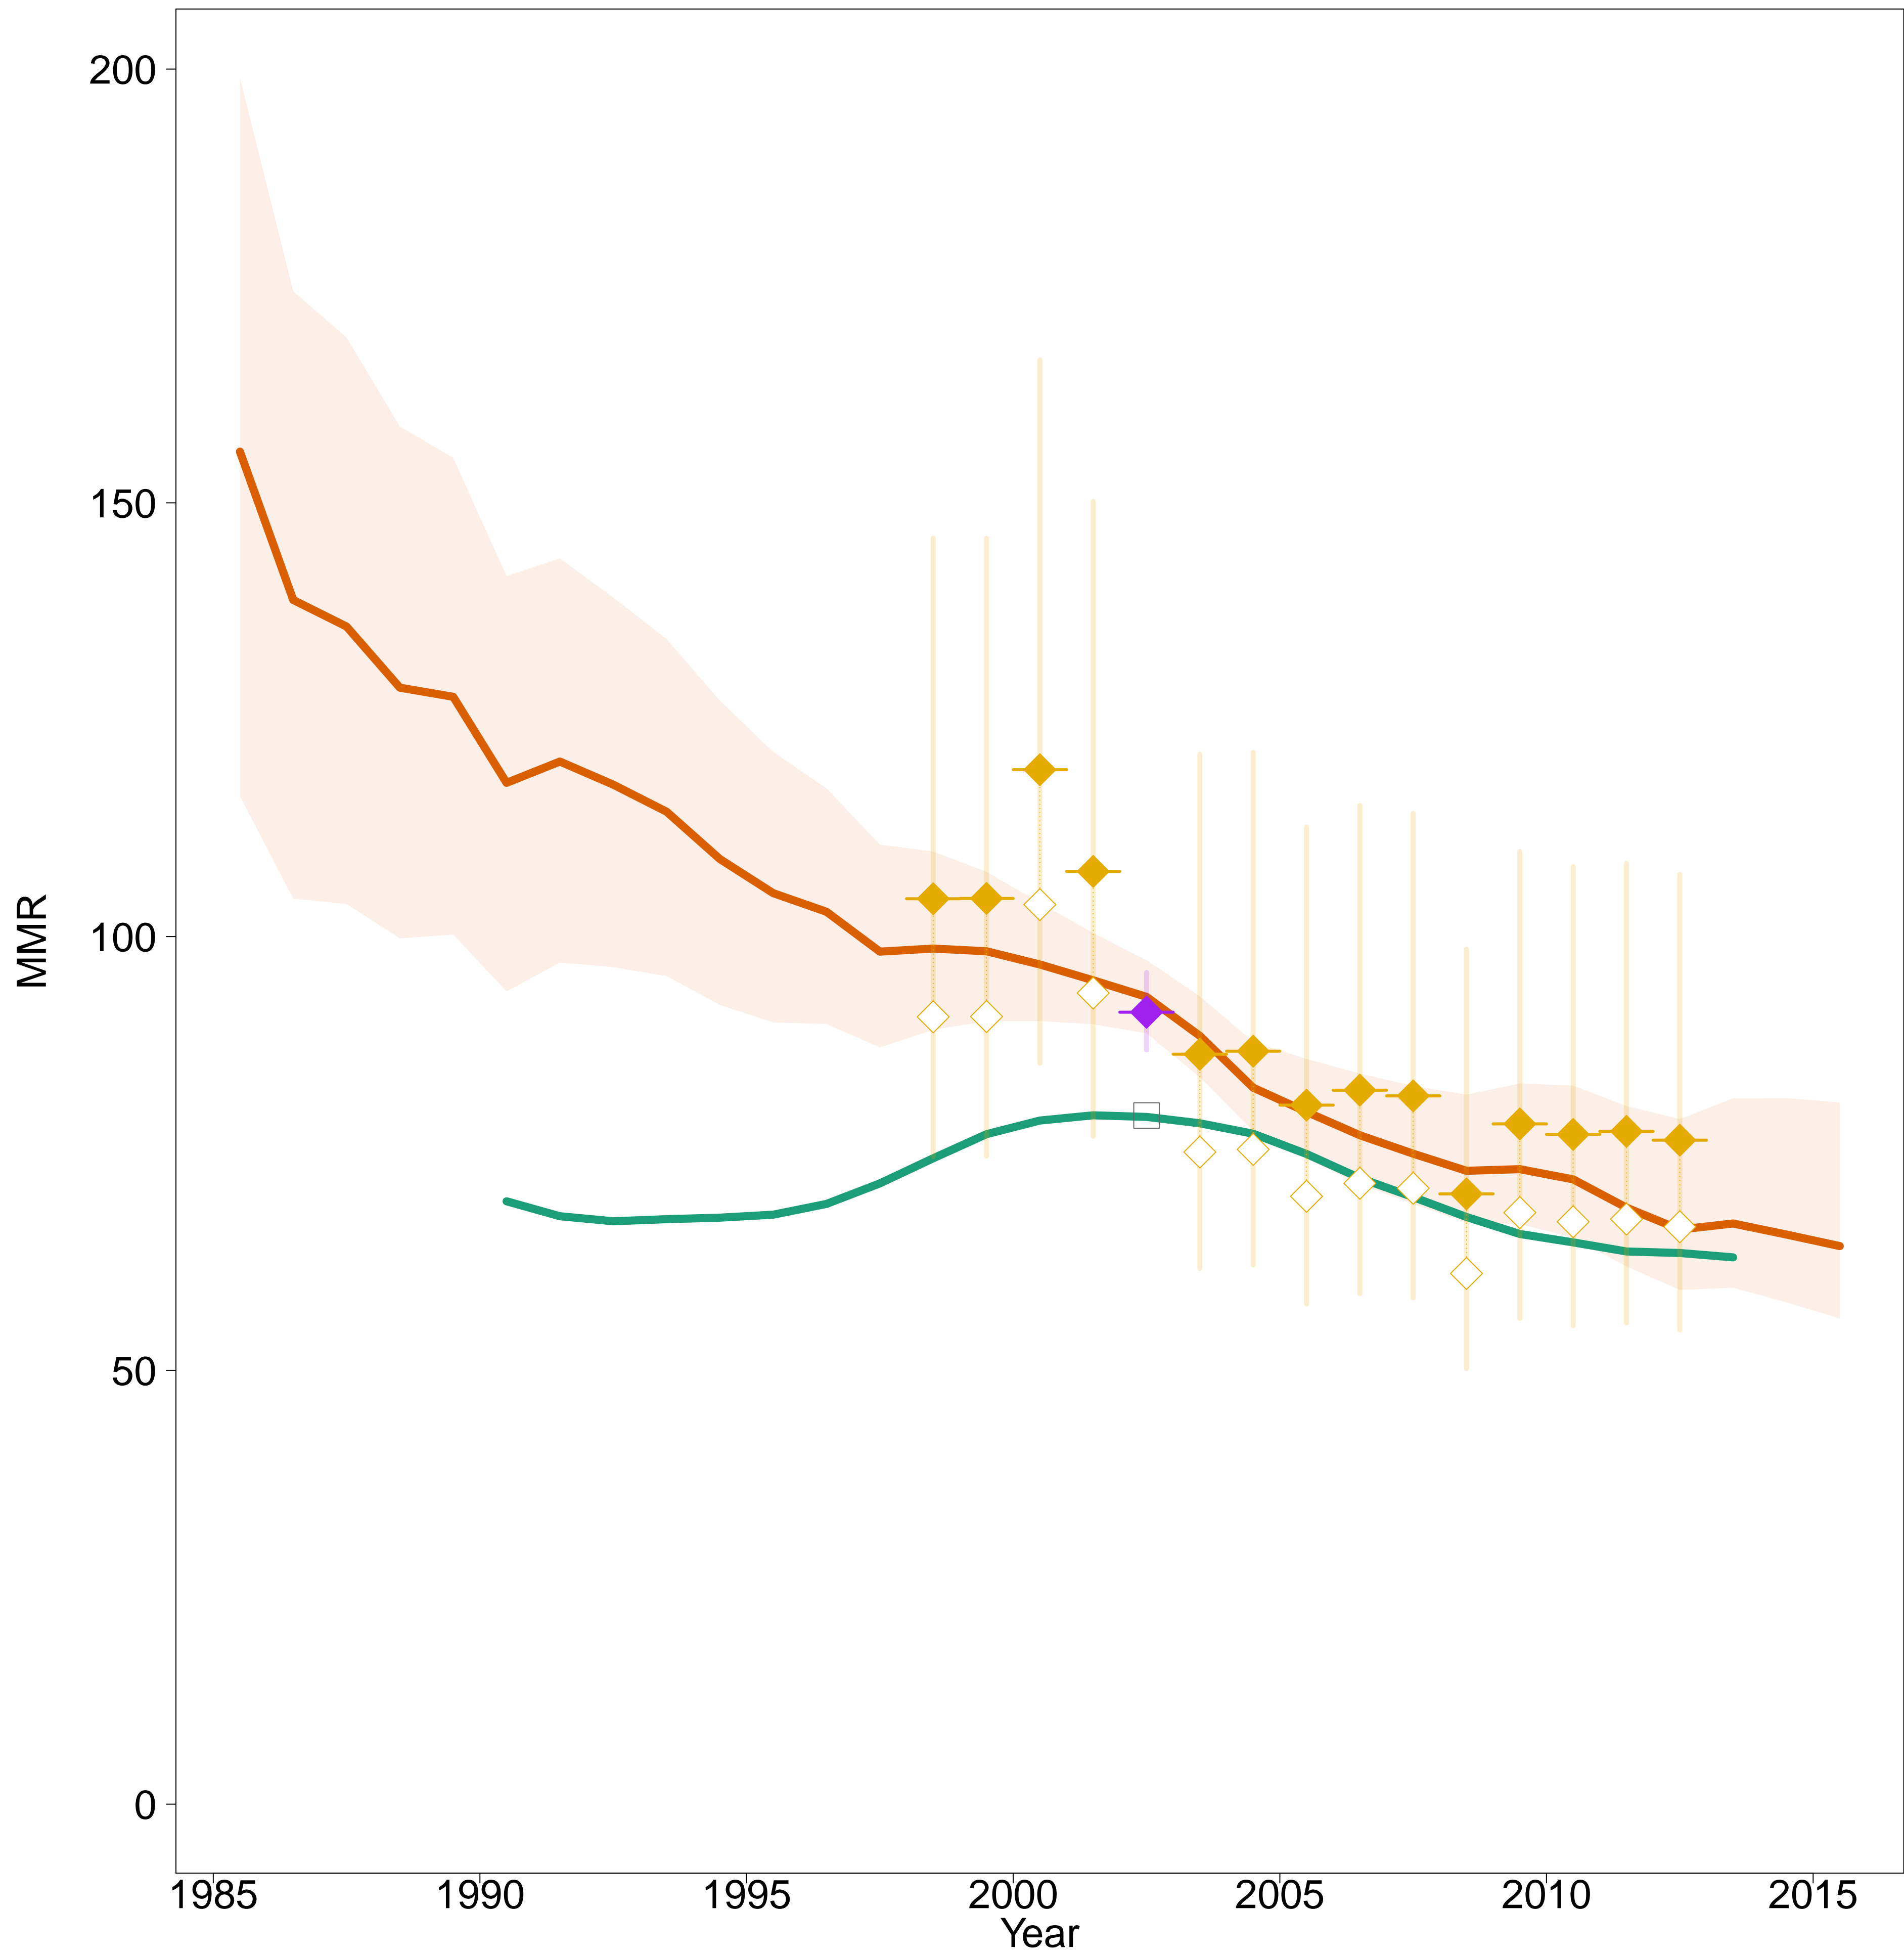

– Estimates –

MMEIG 2015

GBD 2013

– MMR Database 2015 –

◊ Observed Data

◆ Adjusted Data

– Data type –

◆ VR

◆ Spec. studies

● Excluded VR data  
(data quality issues)

◻ Excluded VR data  
(overlap with specialized study)

Comoros [COM]  
(Eastern Africa)

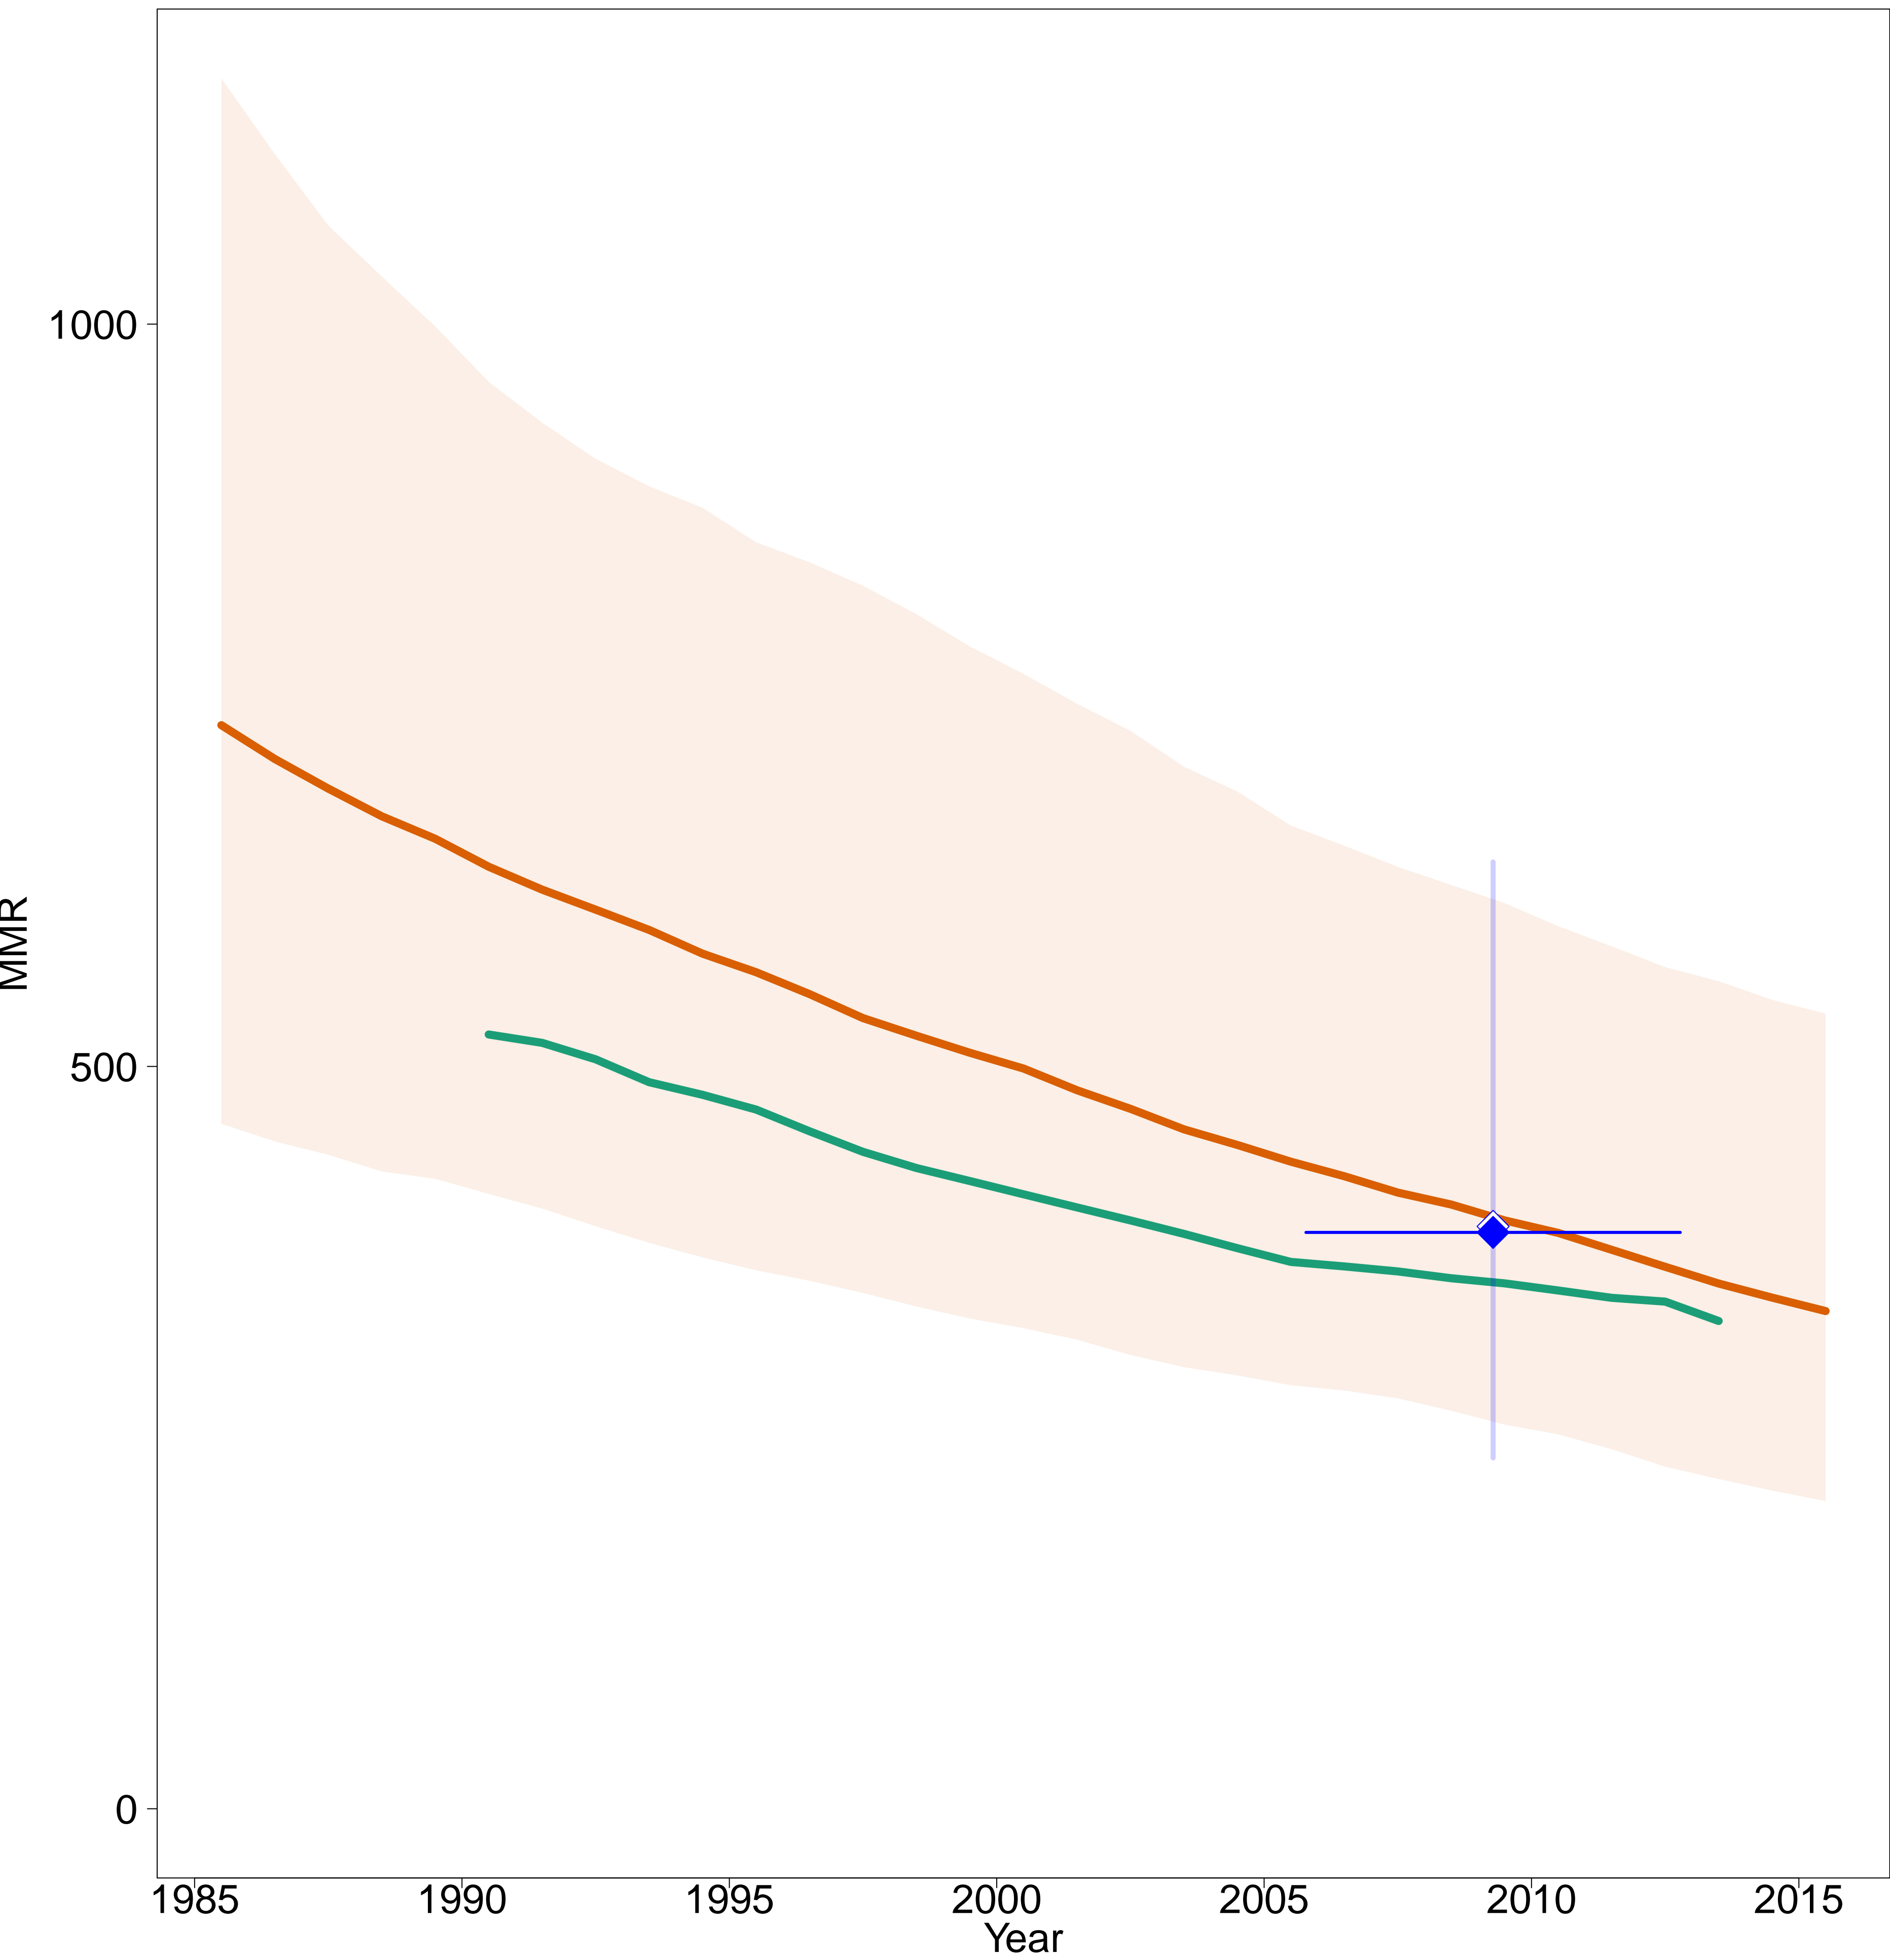

- Estimates -
- MMEIG 2015
- GBD 2013
- MMR Database 2015 -
- Observed Data
- Adjusted Data
- Data type -
- DHS

Congo [COG]  
(Middle Africa)

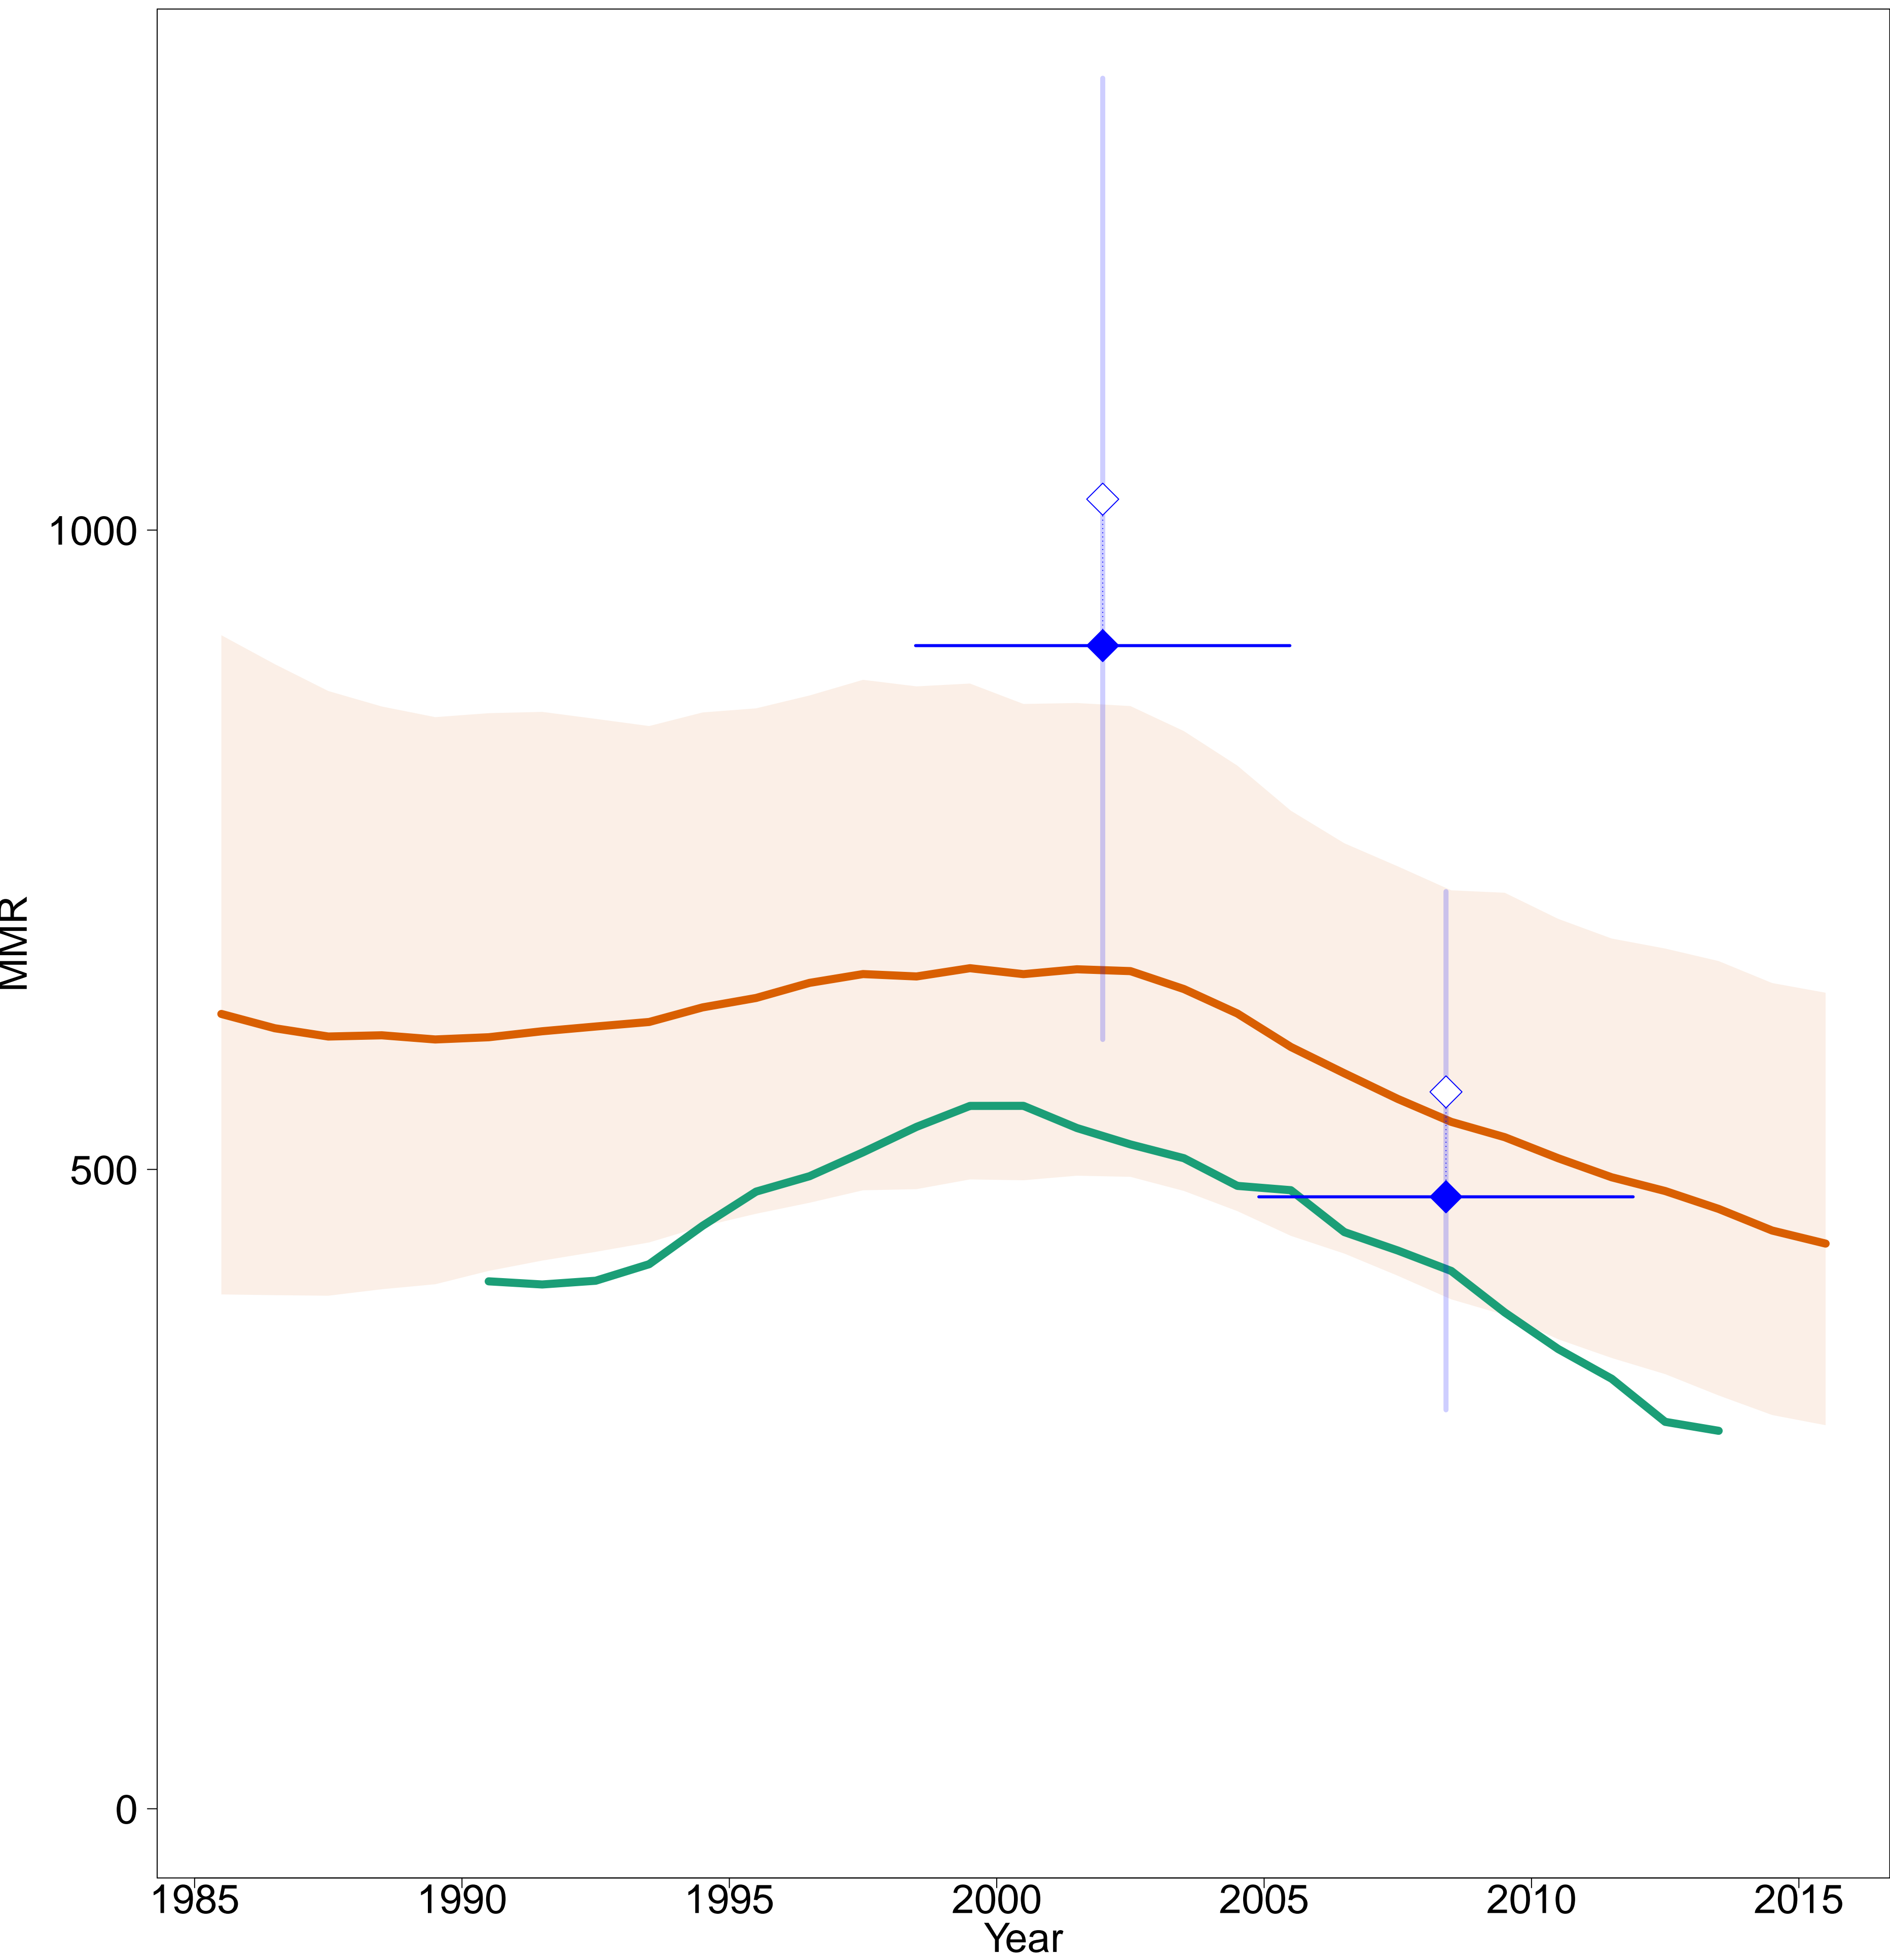

- Estimates -
- MMEIG 2015
- GBD 2013
- MMR Database 2015 -
- Observed Data
- Adjusted Data
- Data type -
- DHS

Costa Rica [CRI]  
(Central America)

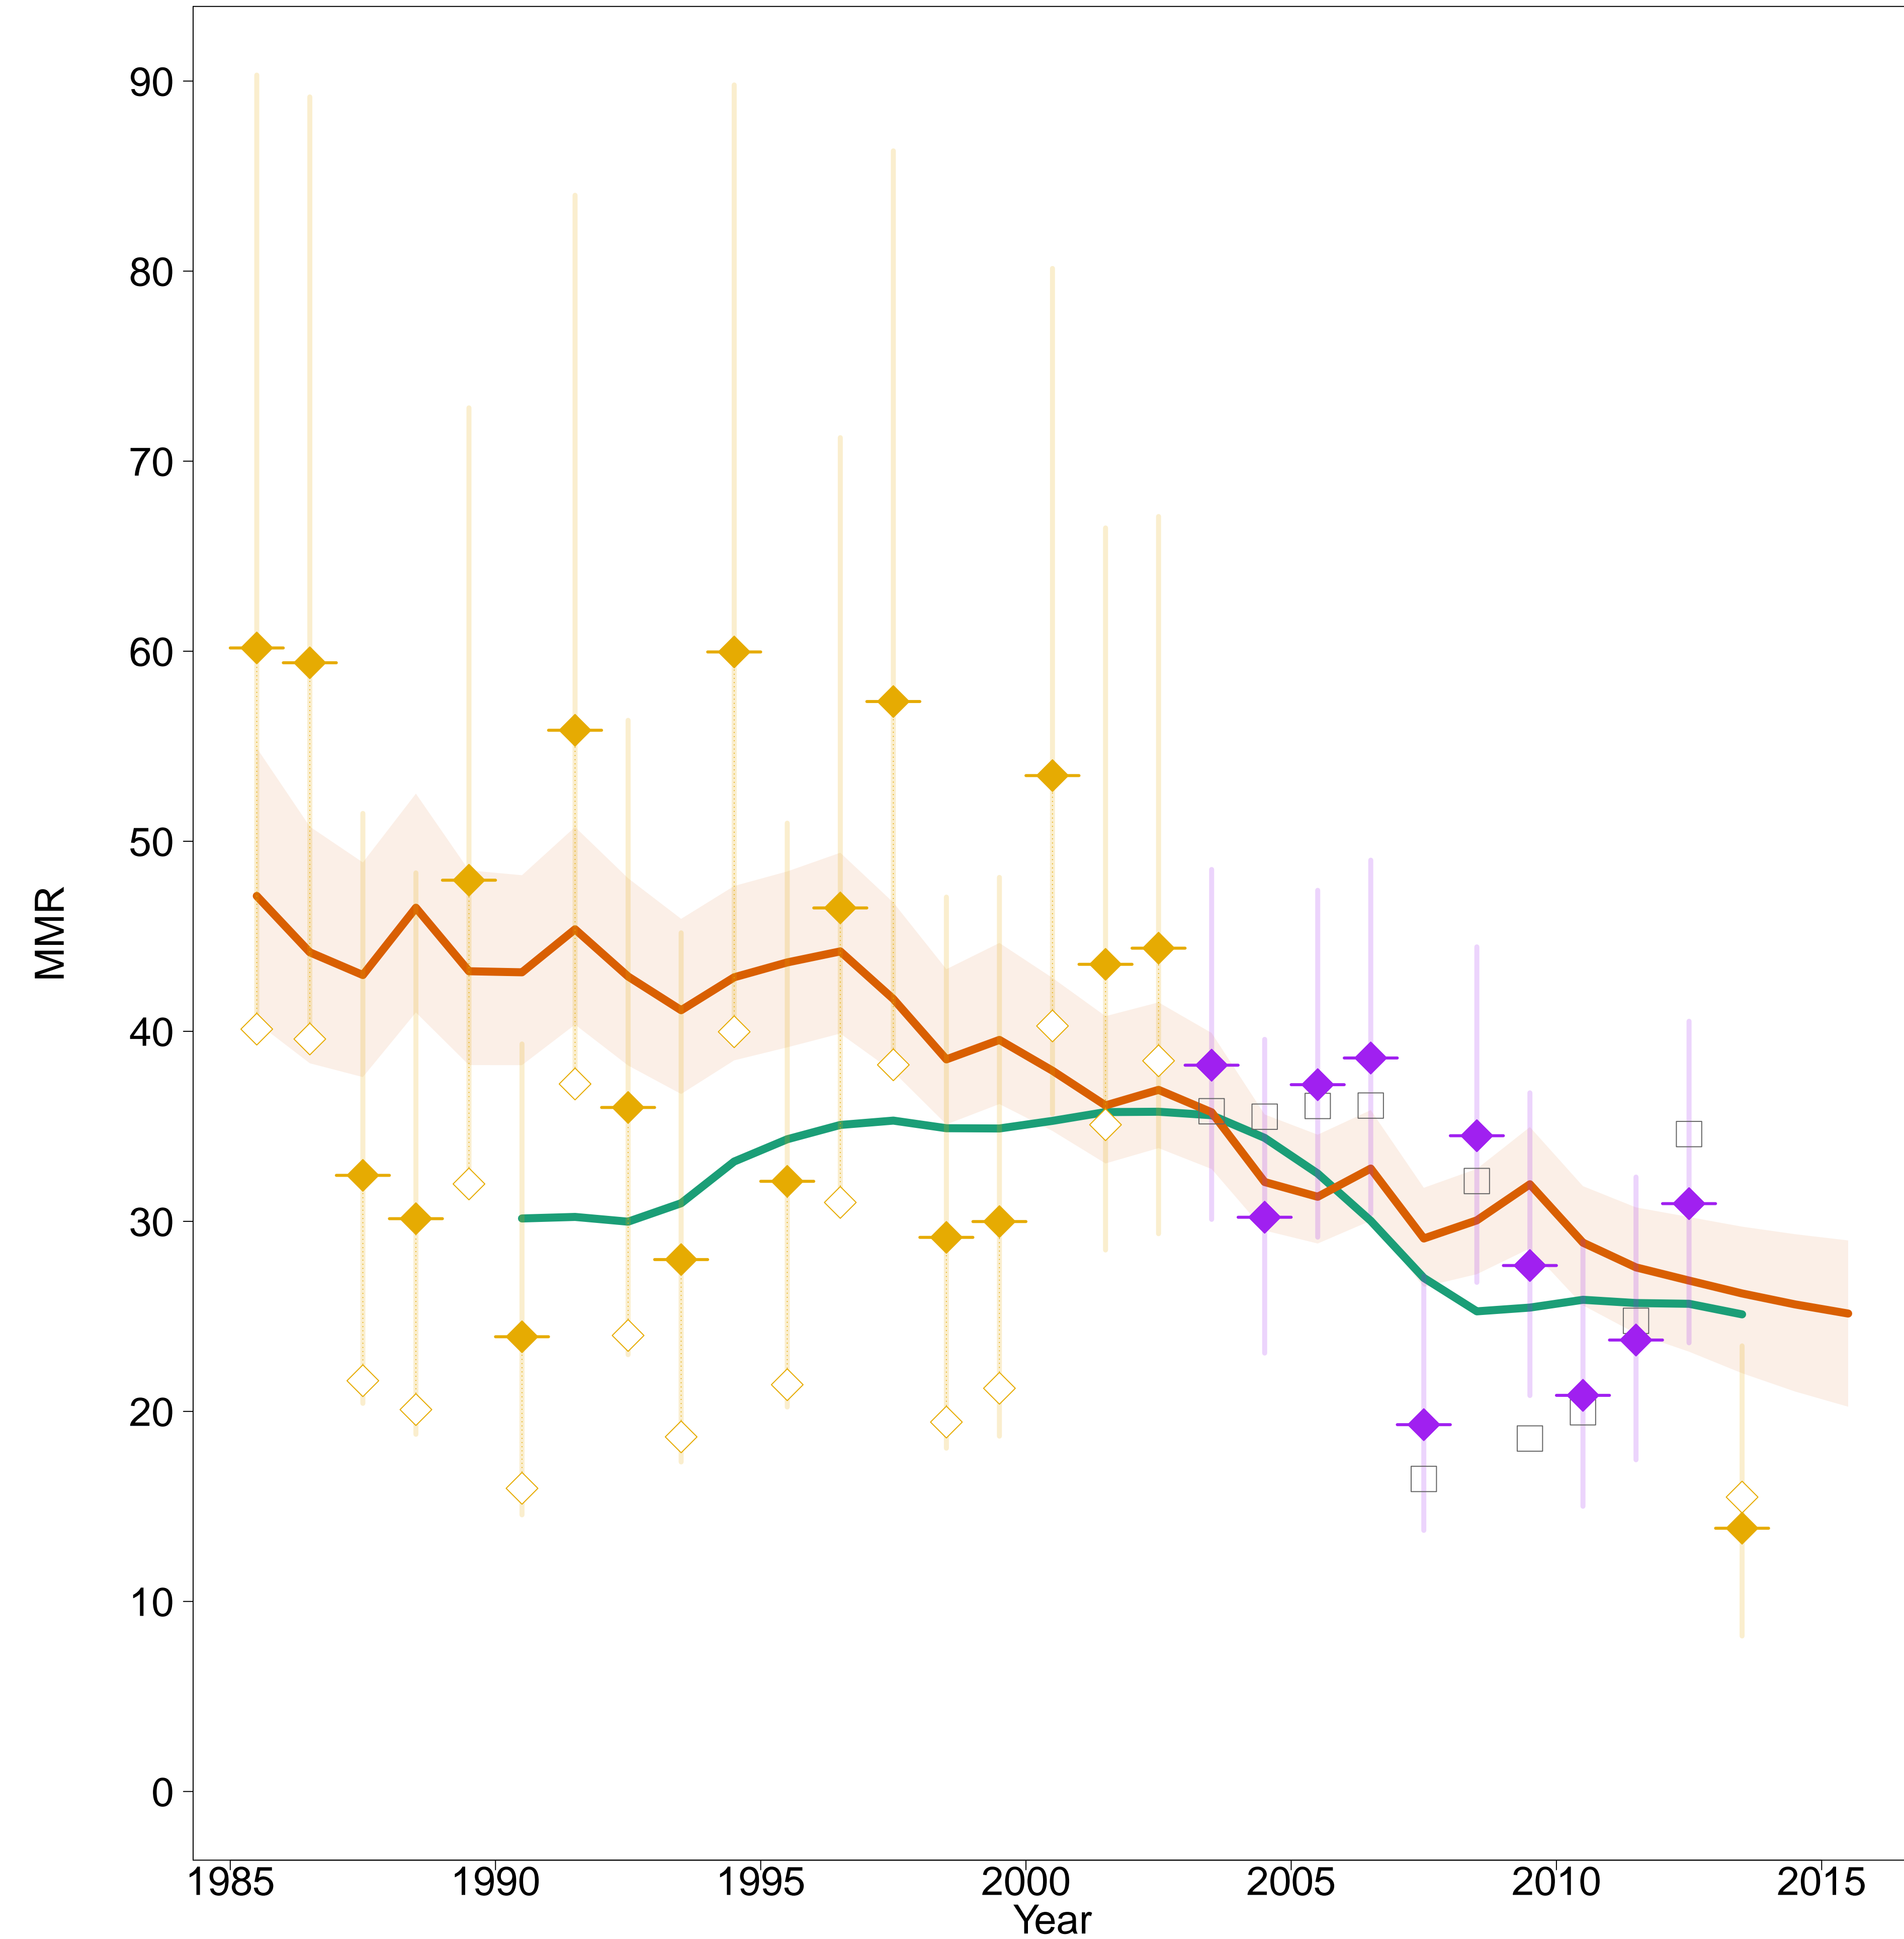

- Estimates –
- MMEIG 2015
- GBD 2013
- MMR Database 2015 –
- ◊ Observed Data
- ◆ Adjusted Data
- Data type –
- ◆ VR
- ◆ Spec. studies
- ◻ Excluded VR data  
(overlap with specialized study)

Cote d'Ivoire [CIV]  
(Western Africa)

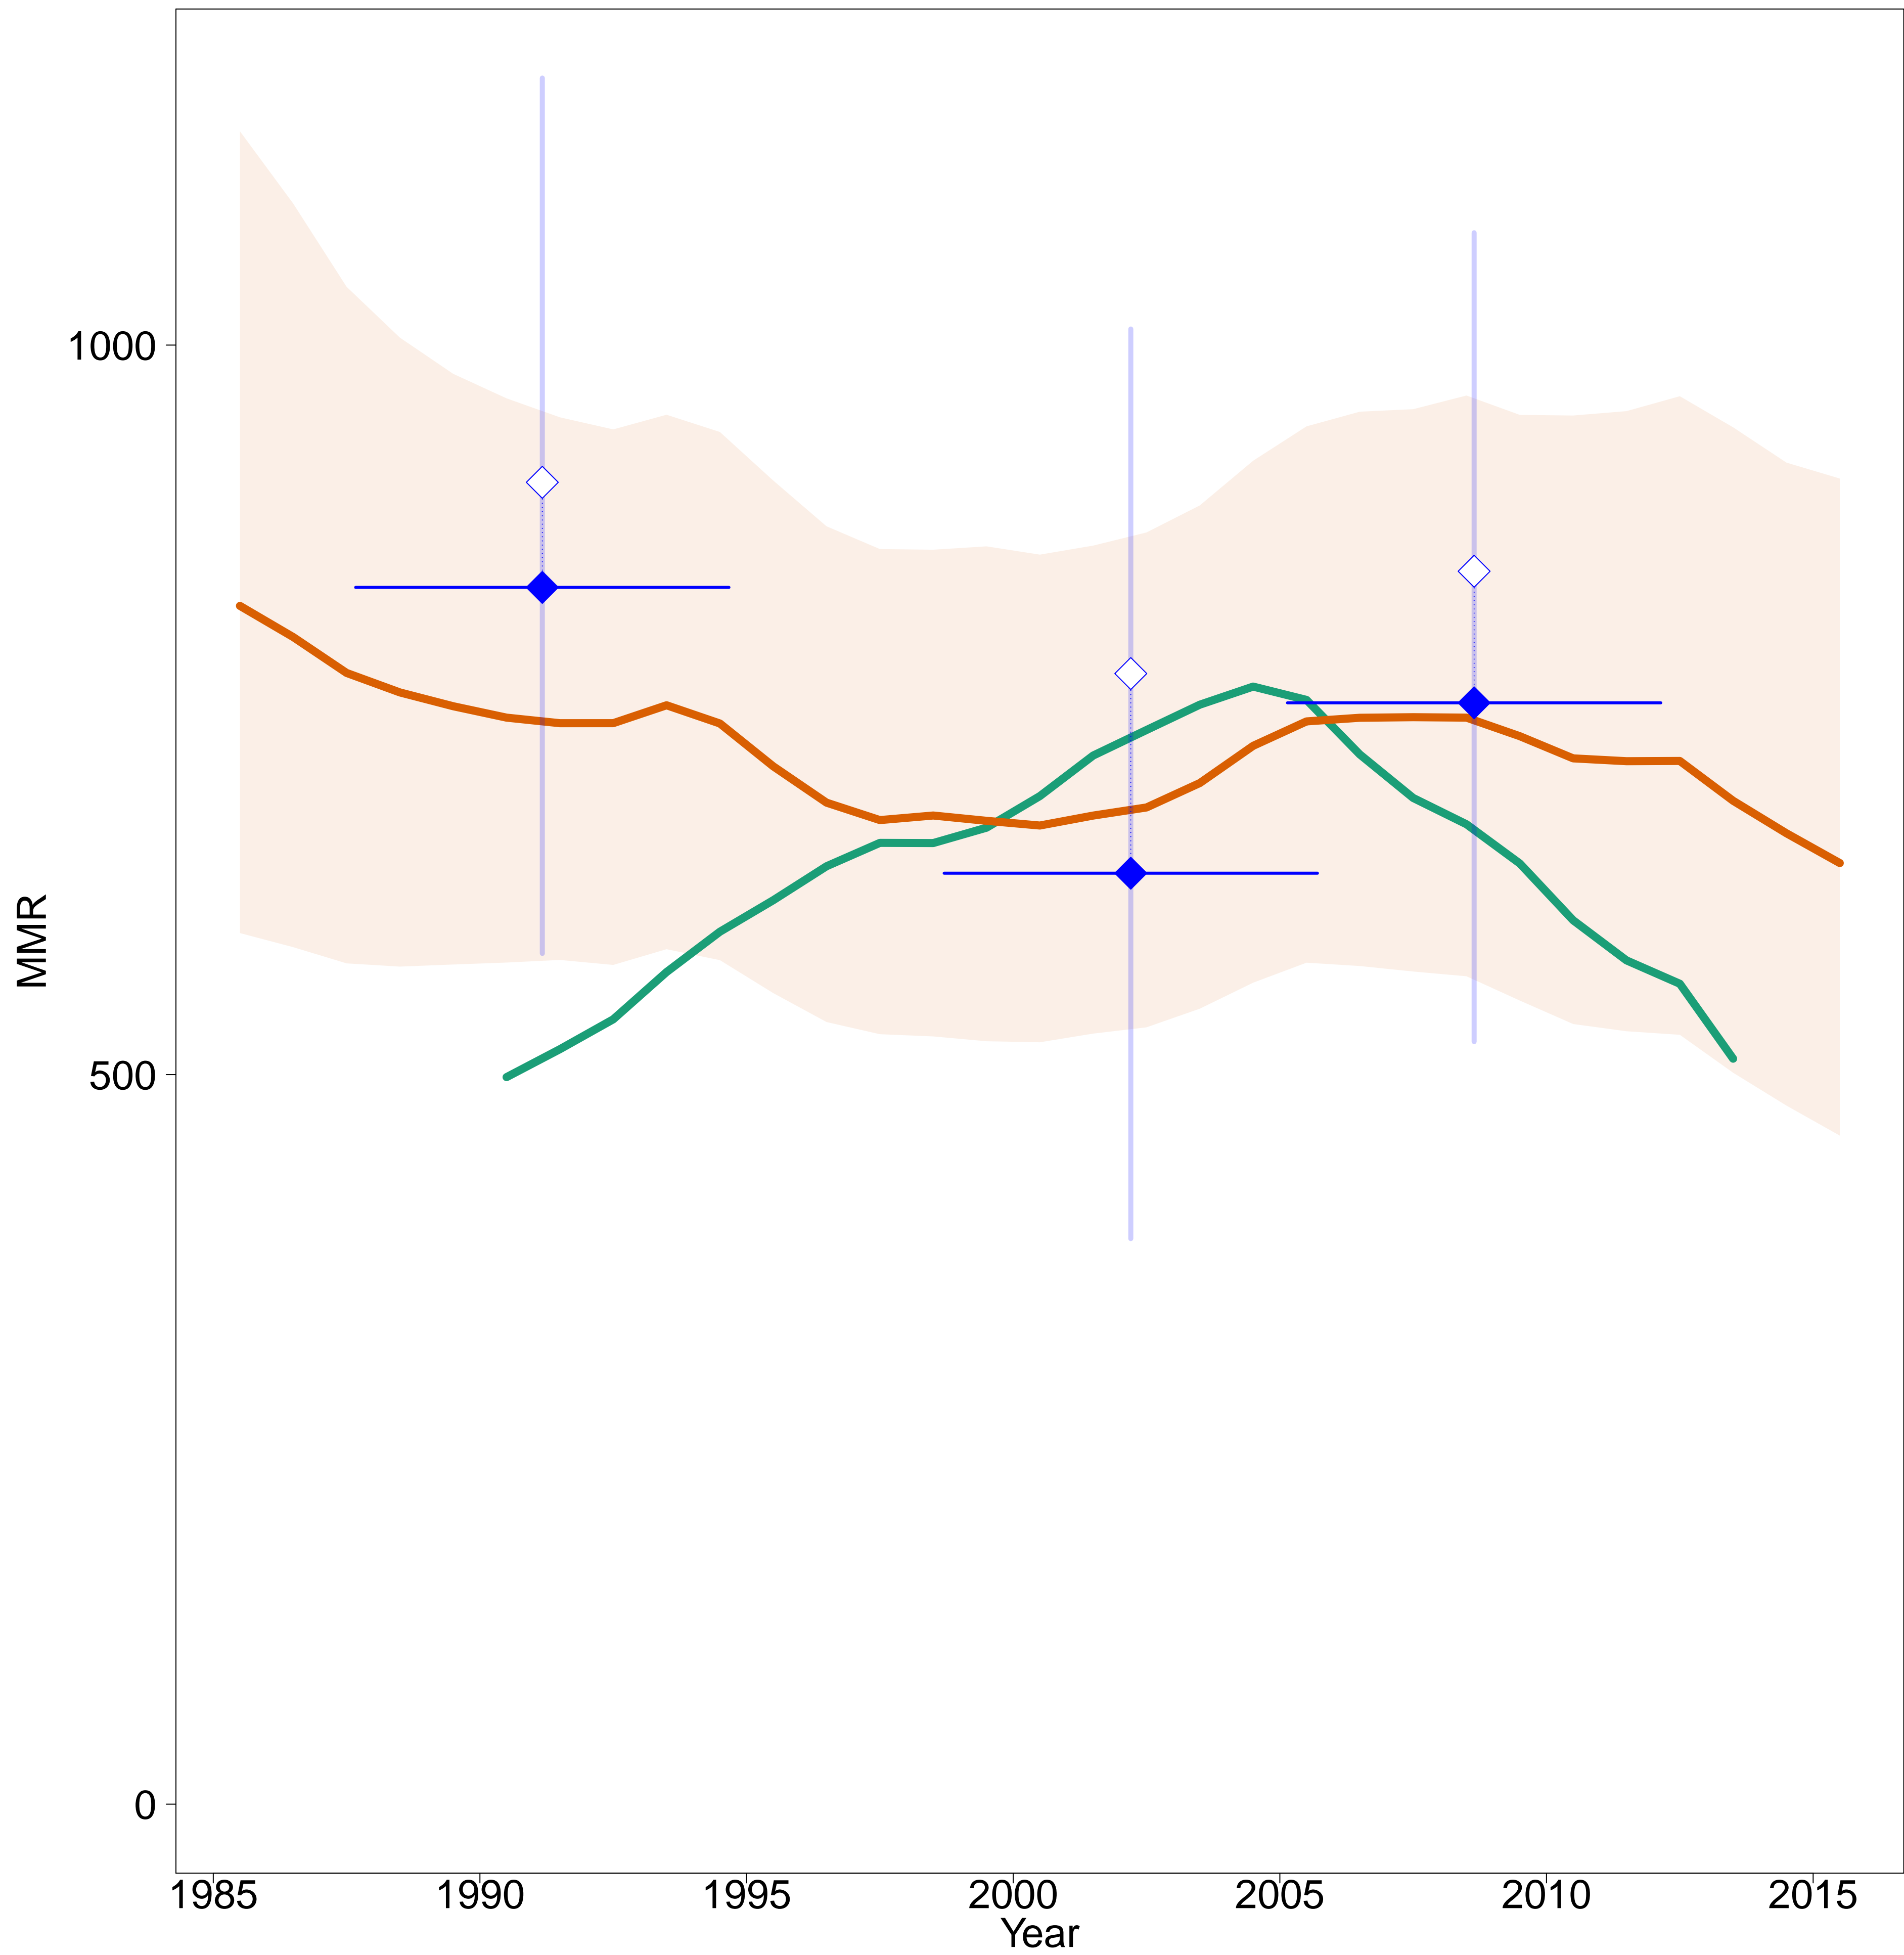

- Estimates -
- MMEIG 2015
- GBD 2013
- MMR Database 2015 -
- Observed Data
- Adjusted Data
- Data type -
- DHS

Croatia [HRV]  
(Transition countries of South-Eastern Europe)

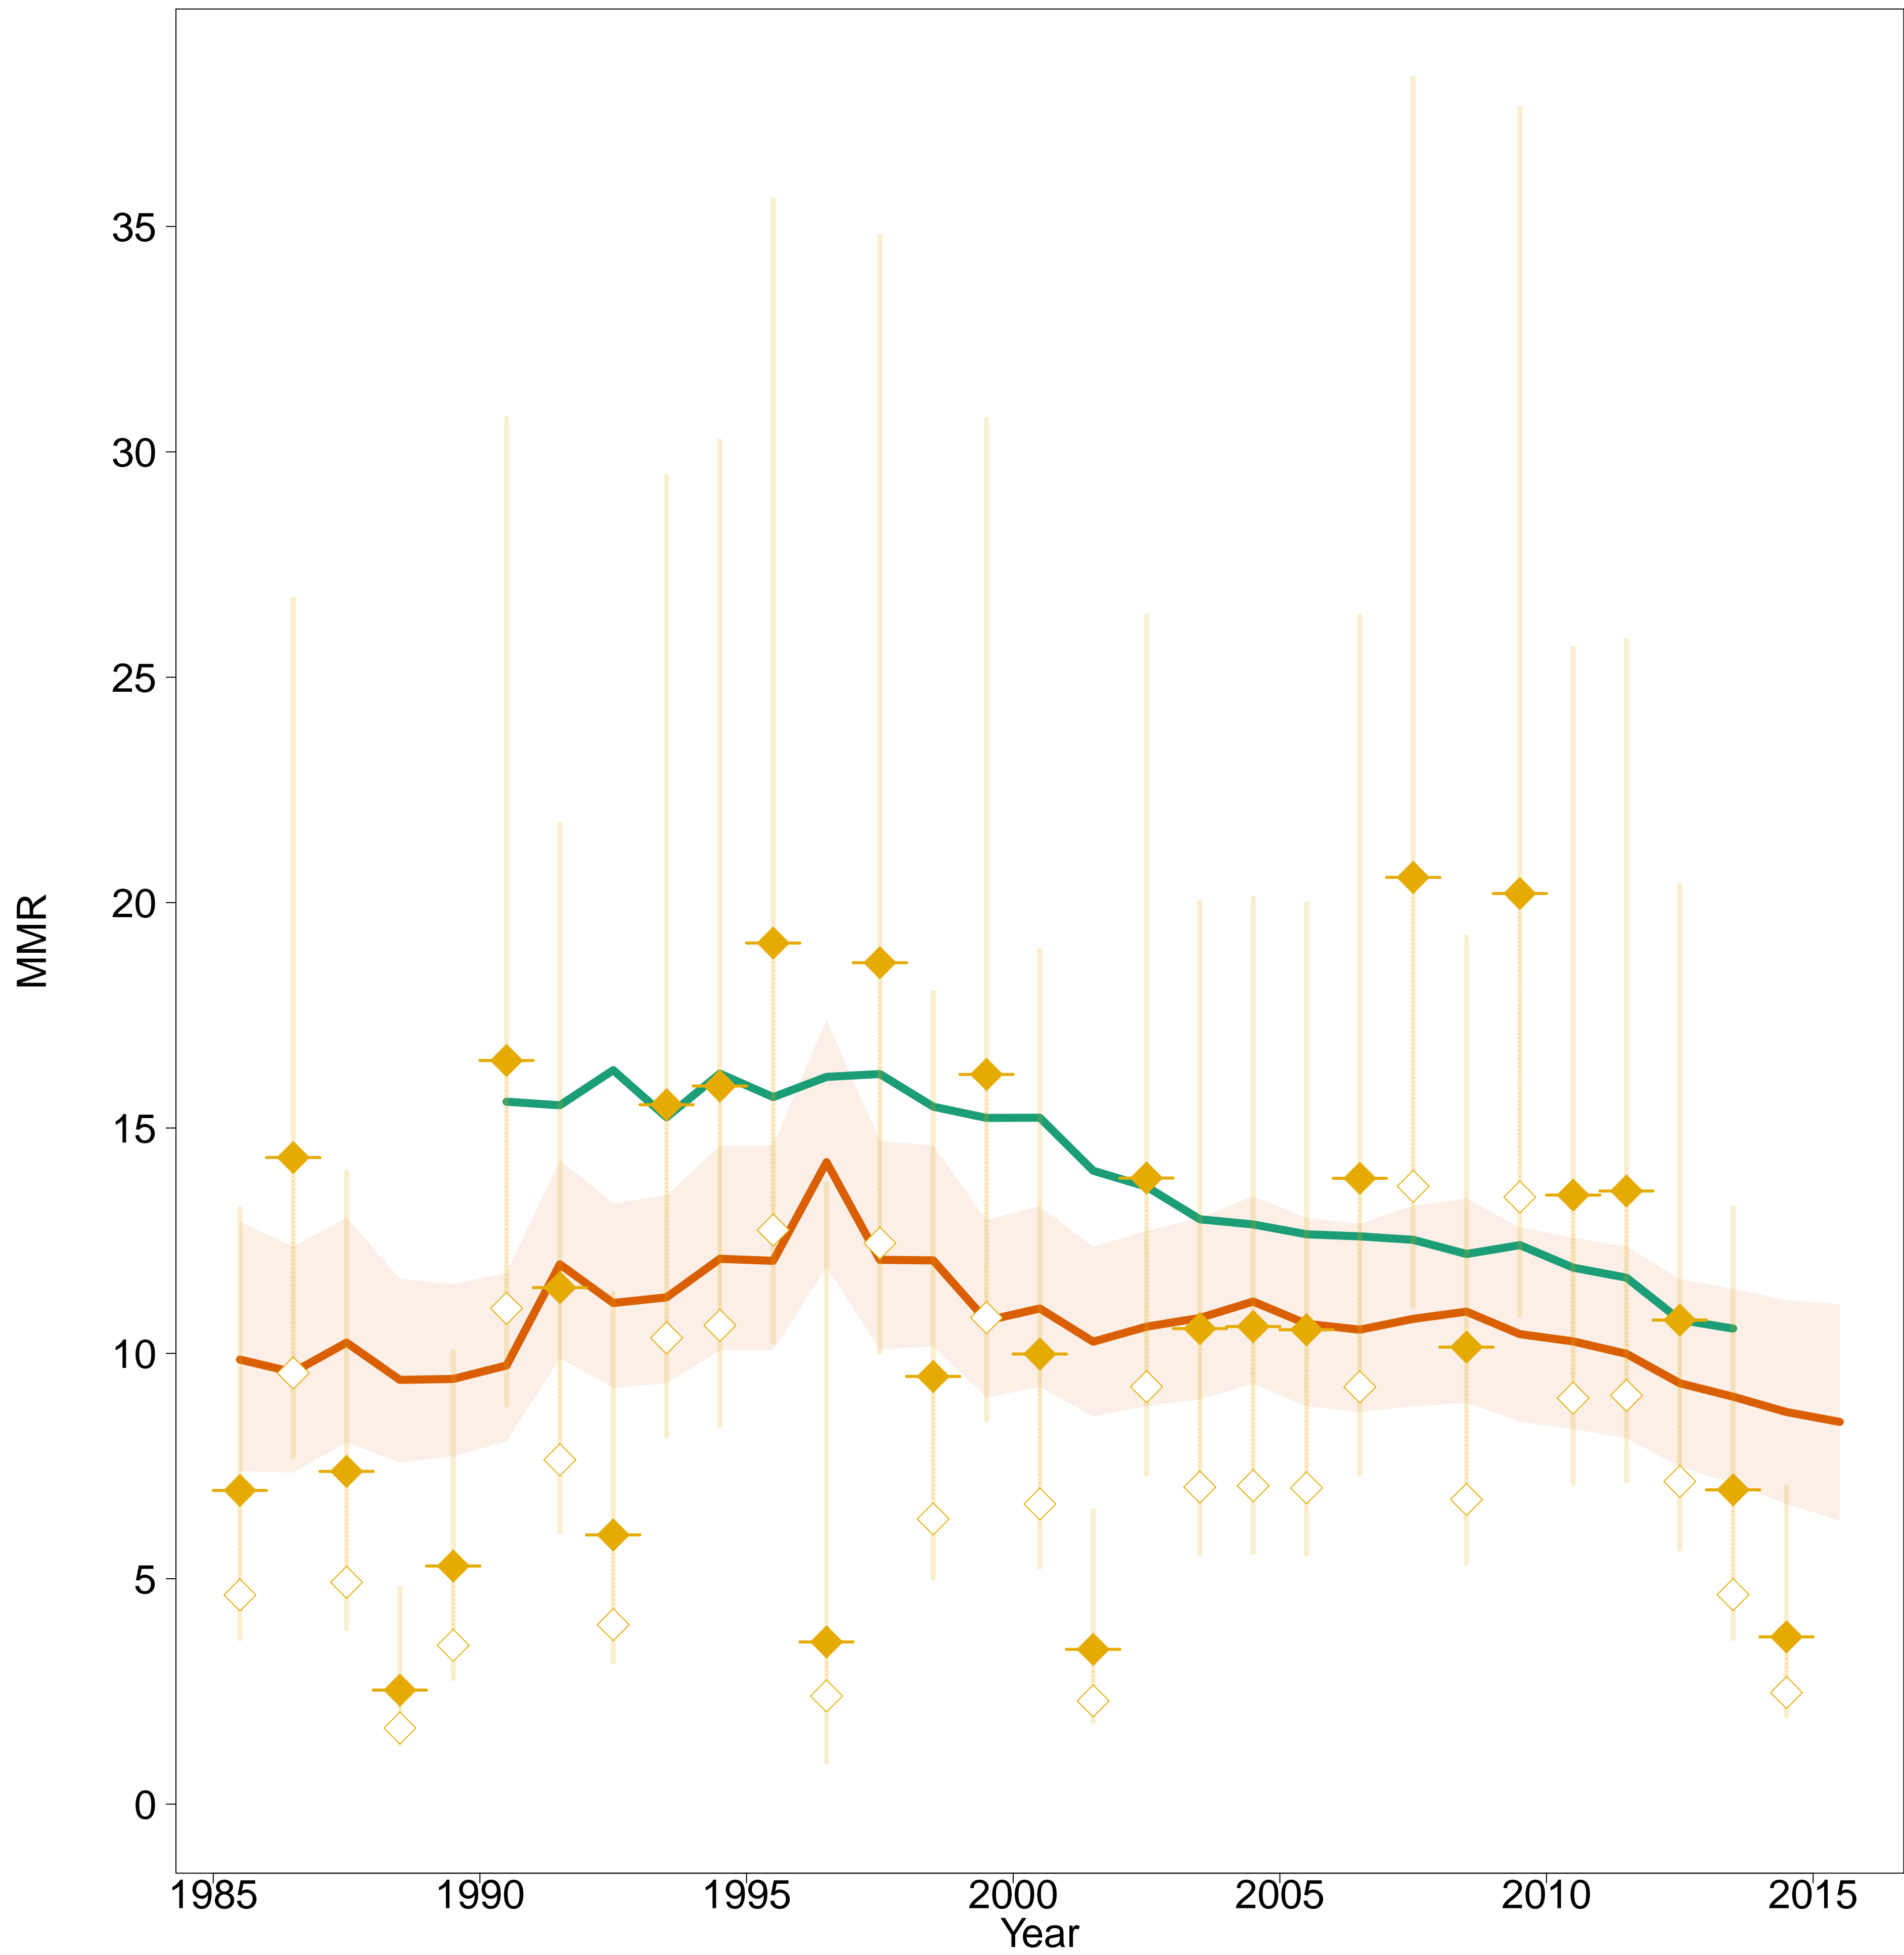

- Estimates –
- MMEIG 2015
- GBD 2013
- MMR Database 2015 –
- Observed Data
- Adjusted Data
- Data type –
- VR

Cuba [CUB]  
(Caribbean)

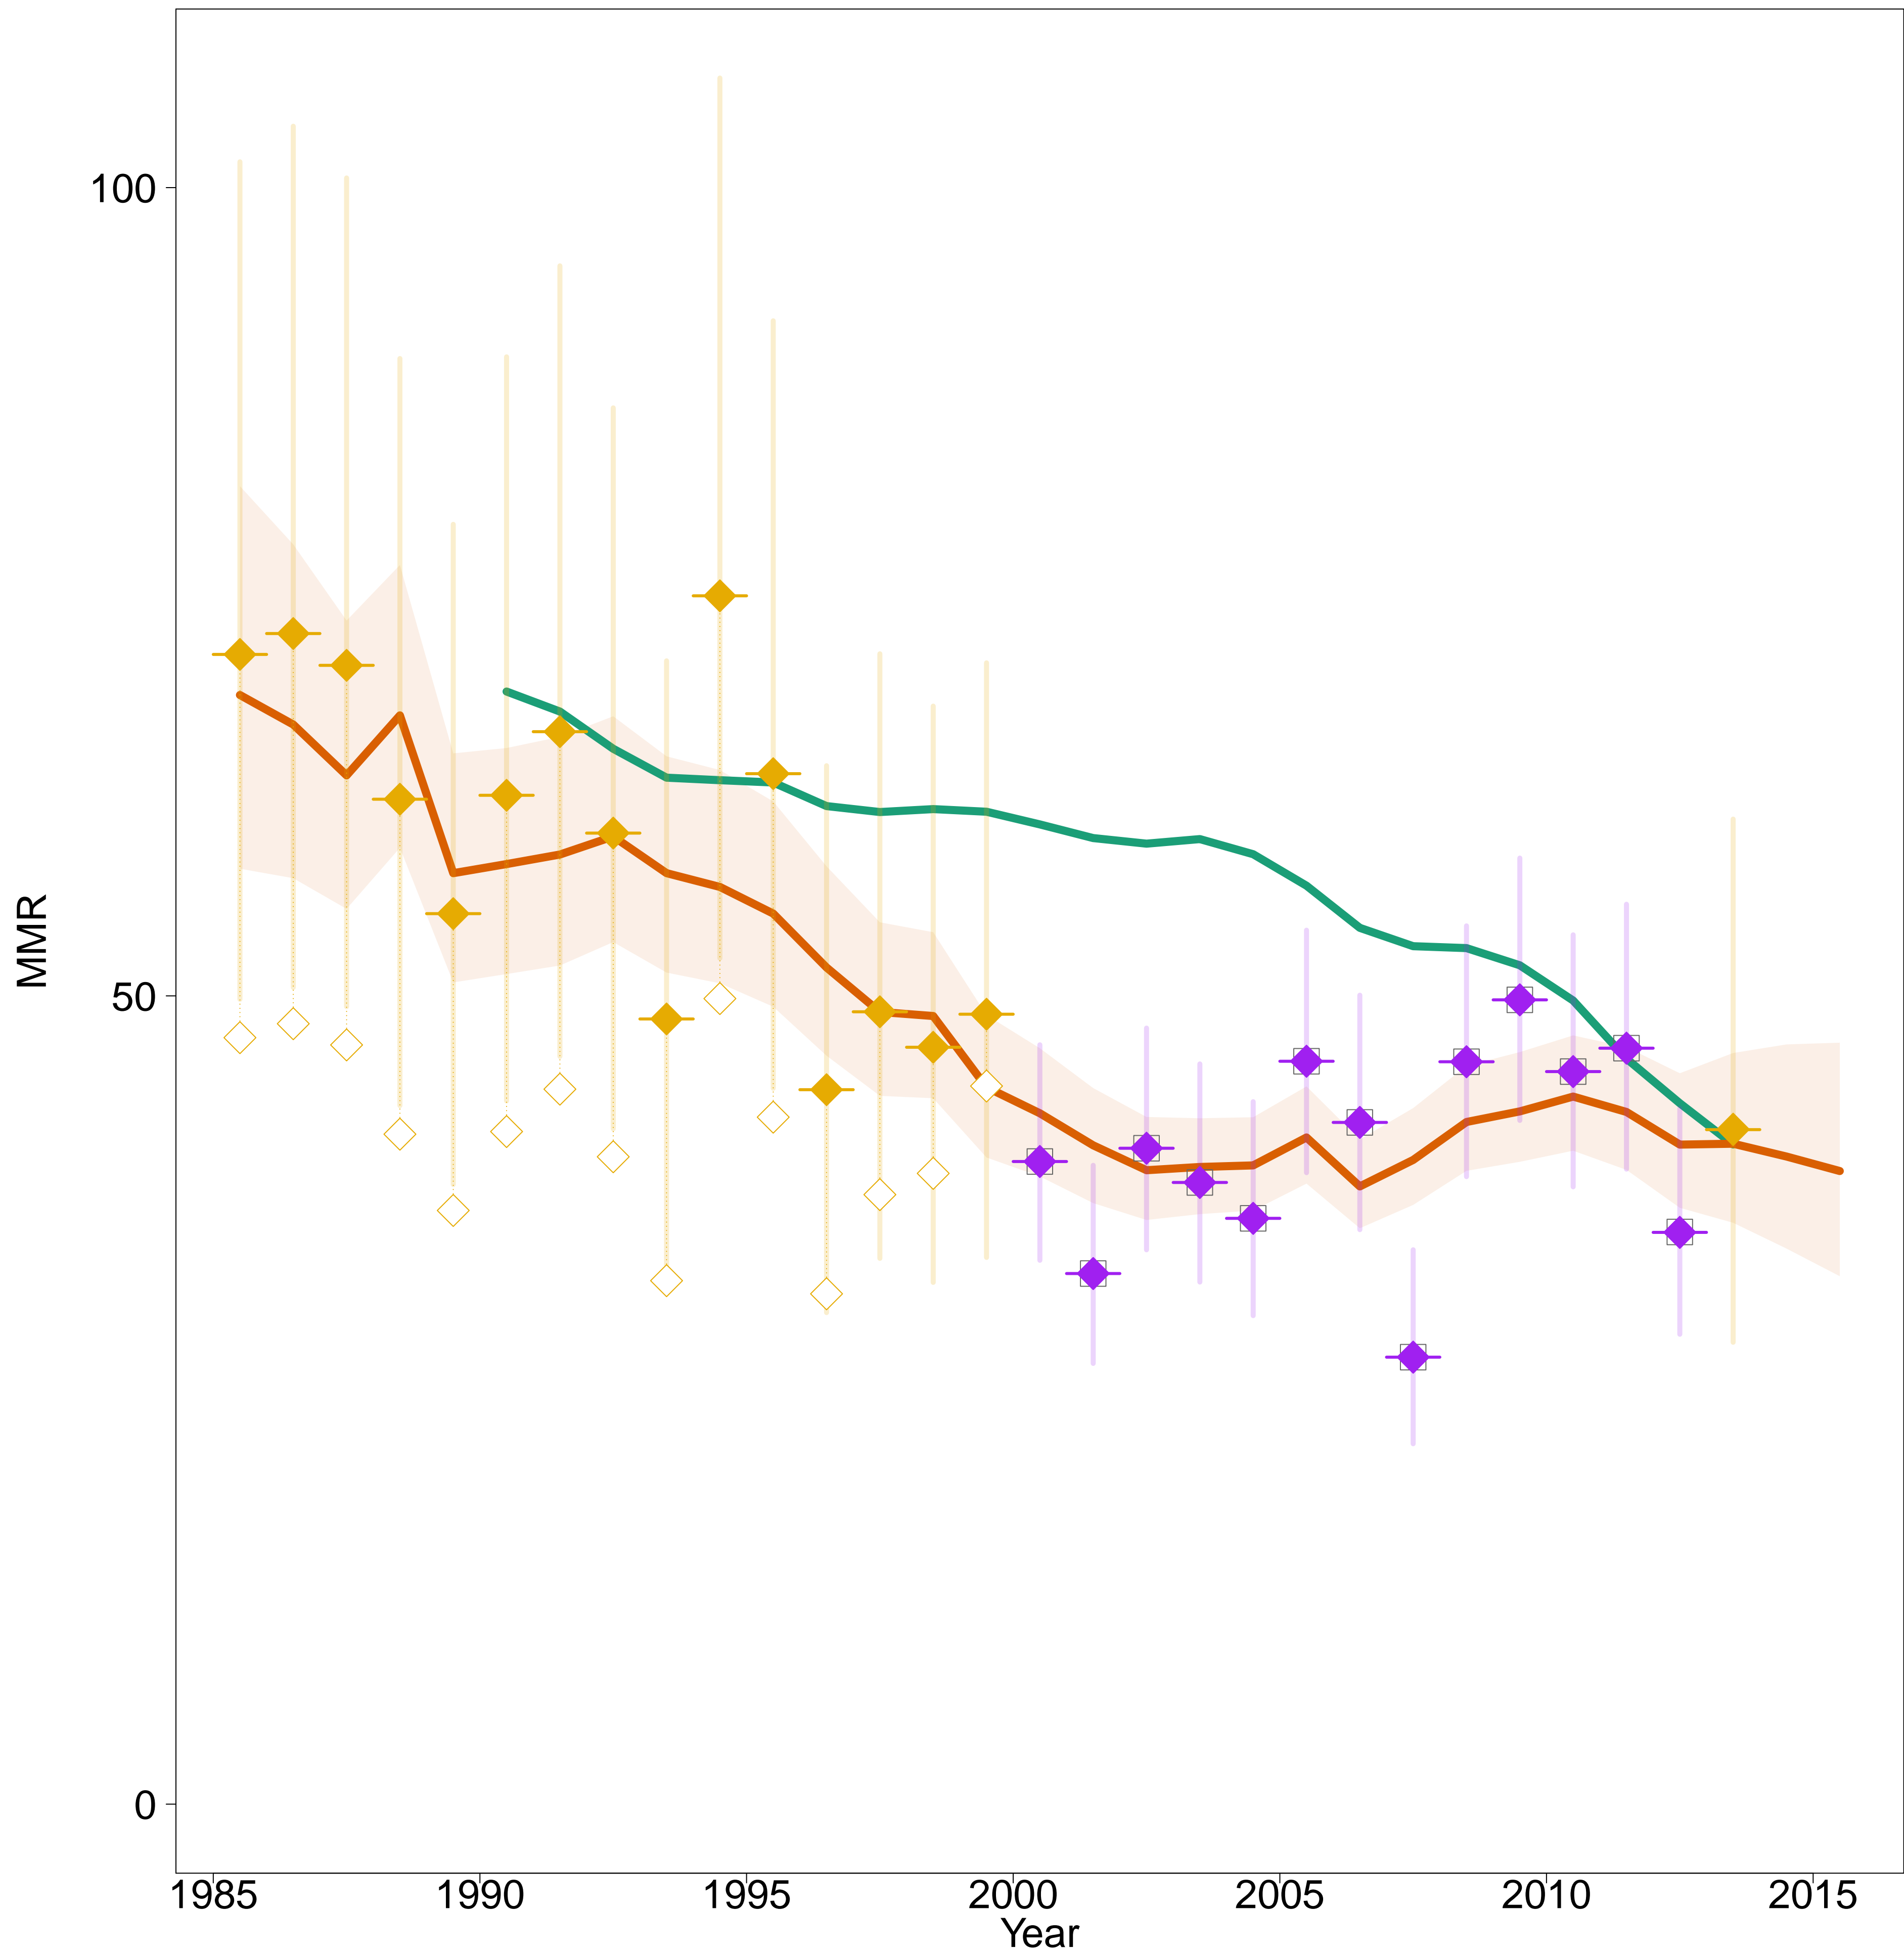

- Estimates –
- MMEIG 2015
- GBD 2013
- MMR Database 2015 –
- ◊ Observed Data
- ◆ Adjusted Data
- Data type –
- ◆ VR
- ◆ Spec. studies
- ◻ Excluded VR data  
(overlap with specialized study)



Cyprus [CYP]  
(Western Asia)

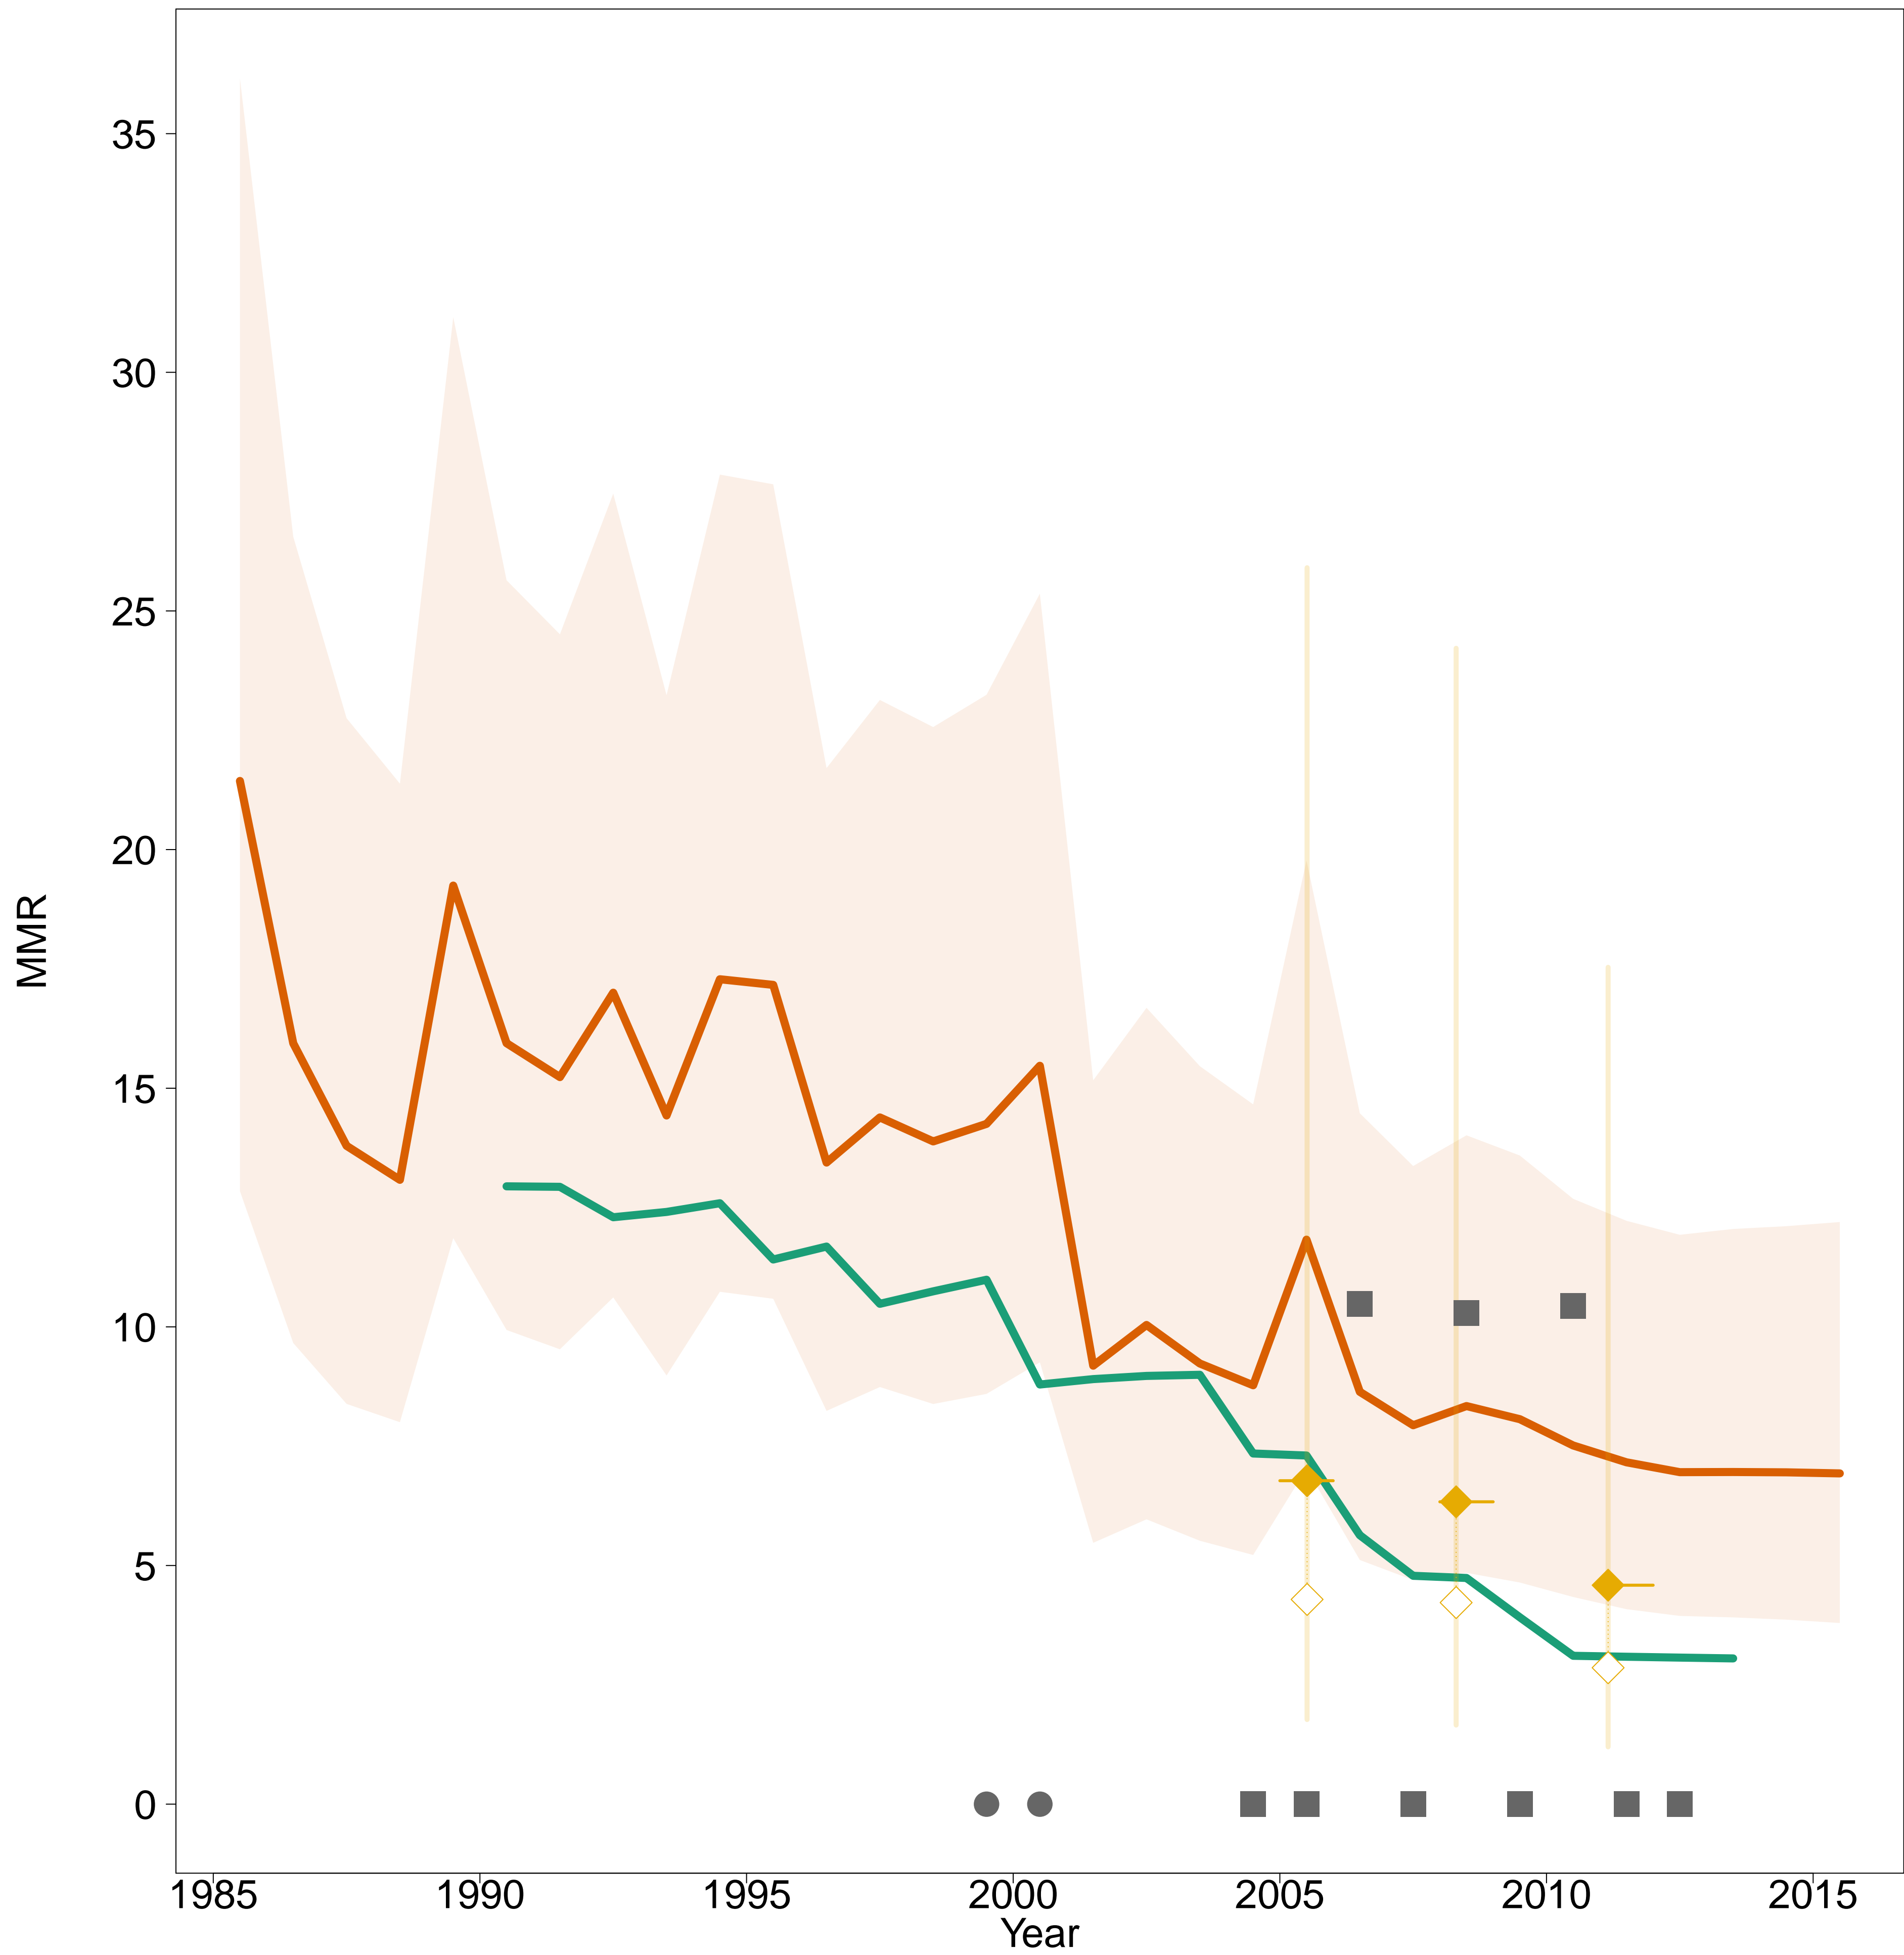

- Estimates –
- MMEIG 2015
- GBD 2013
- MMR Database 2015 –
- ◊ Observed Data
- ◆ Adjusted Data
- Data type –
- ◆ VR
- Reported VR before recalc.  
(related to 0 obs. mat. death)
- Excluded VR data  
(data quality issues)

Czech Republic [CZE]  
(Developed regions)

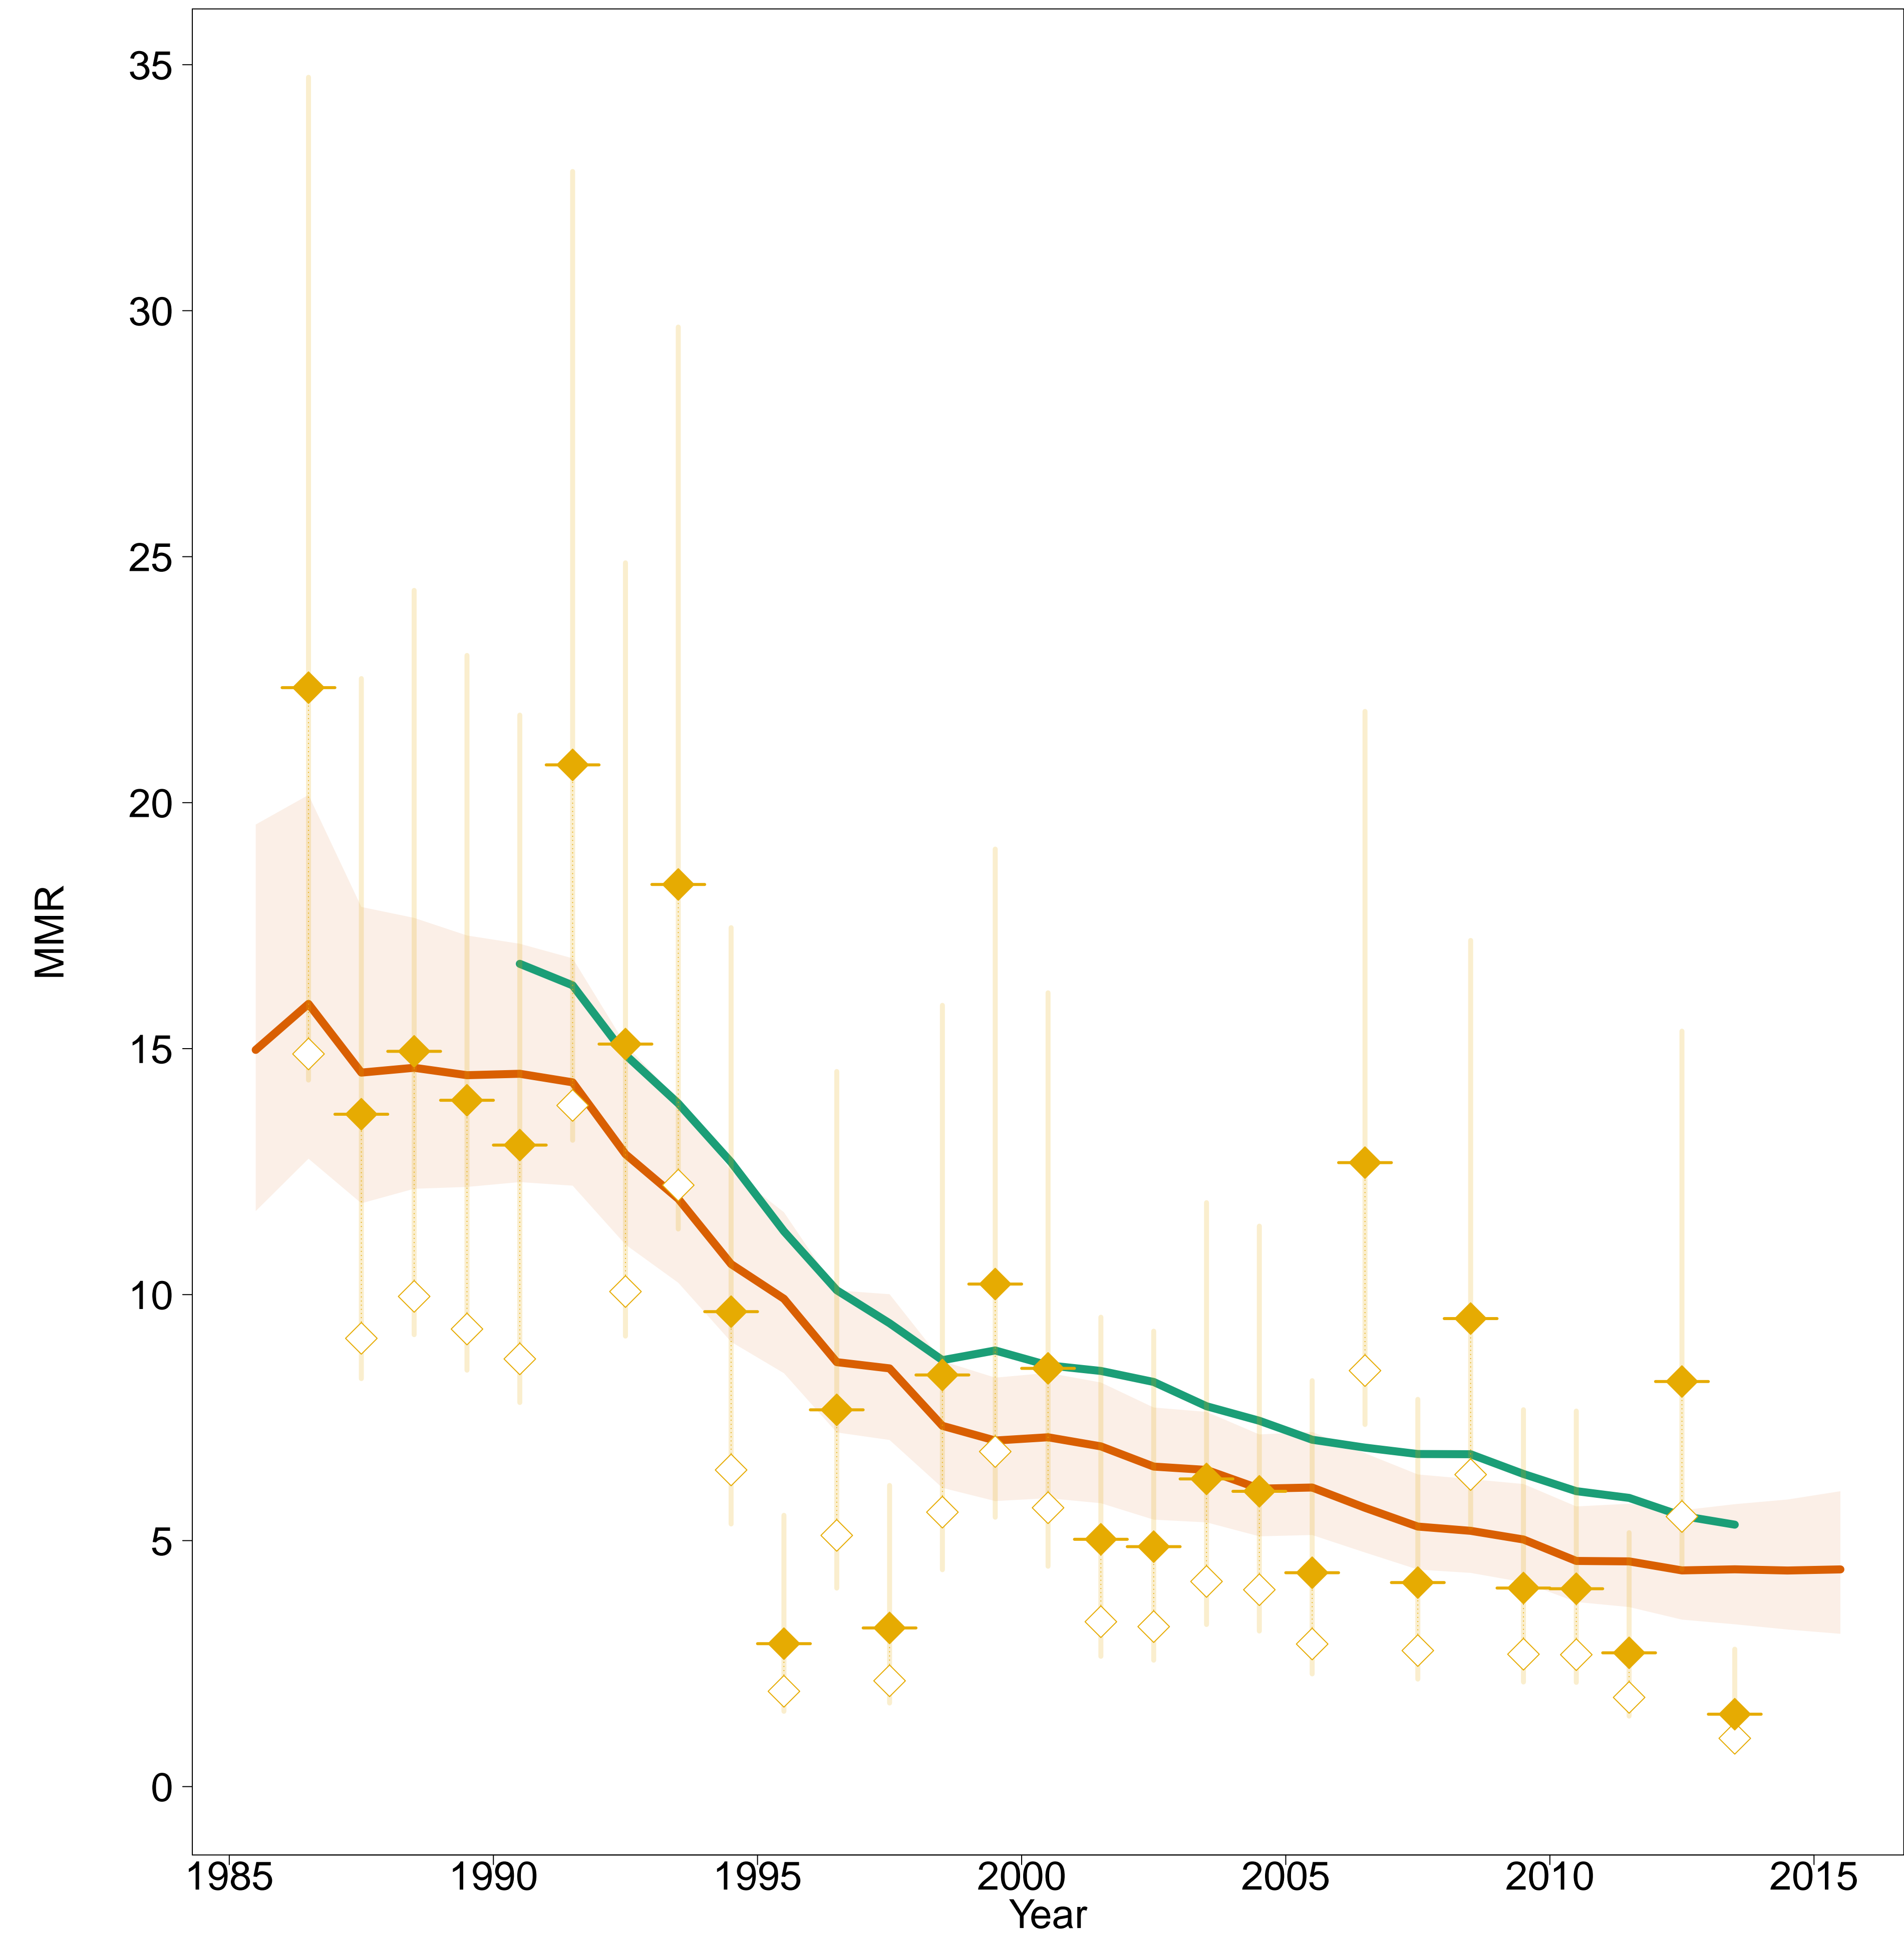

- Estimates –
- MMEIG 2015
- GBD 2013
- MMR Database 2015 –
- ◊ Observed Data
- ◆ Adjusted Data
- Data type –
- ◆ VR

Democratic People's Republic of Korea [PRK]  
(Eastern Asia)

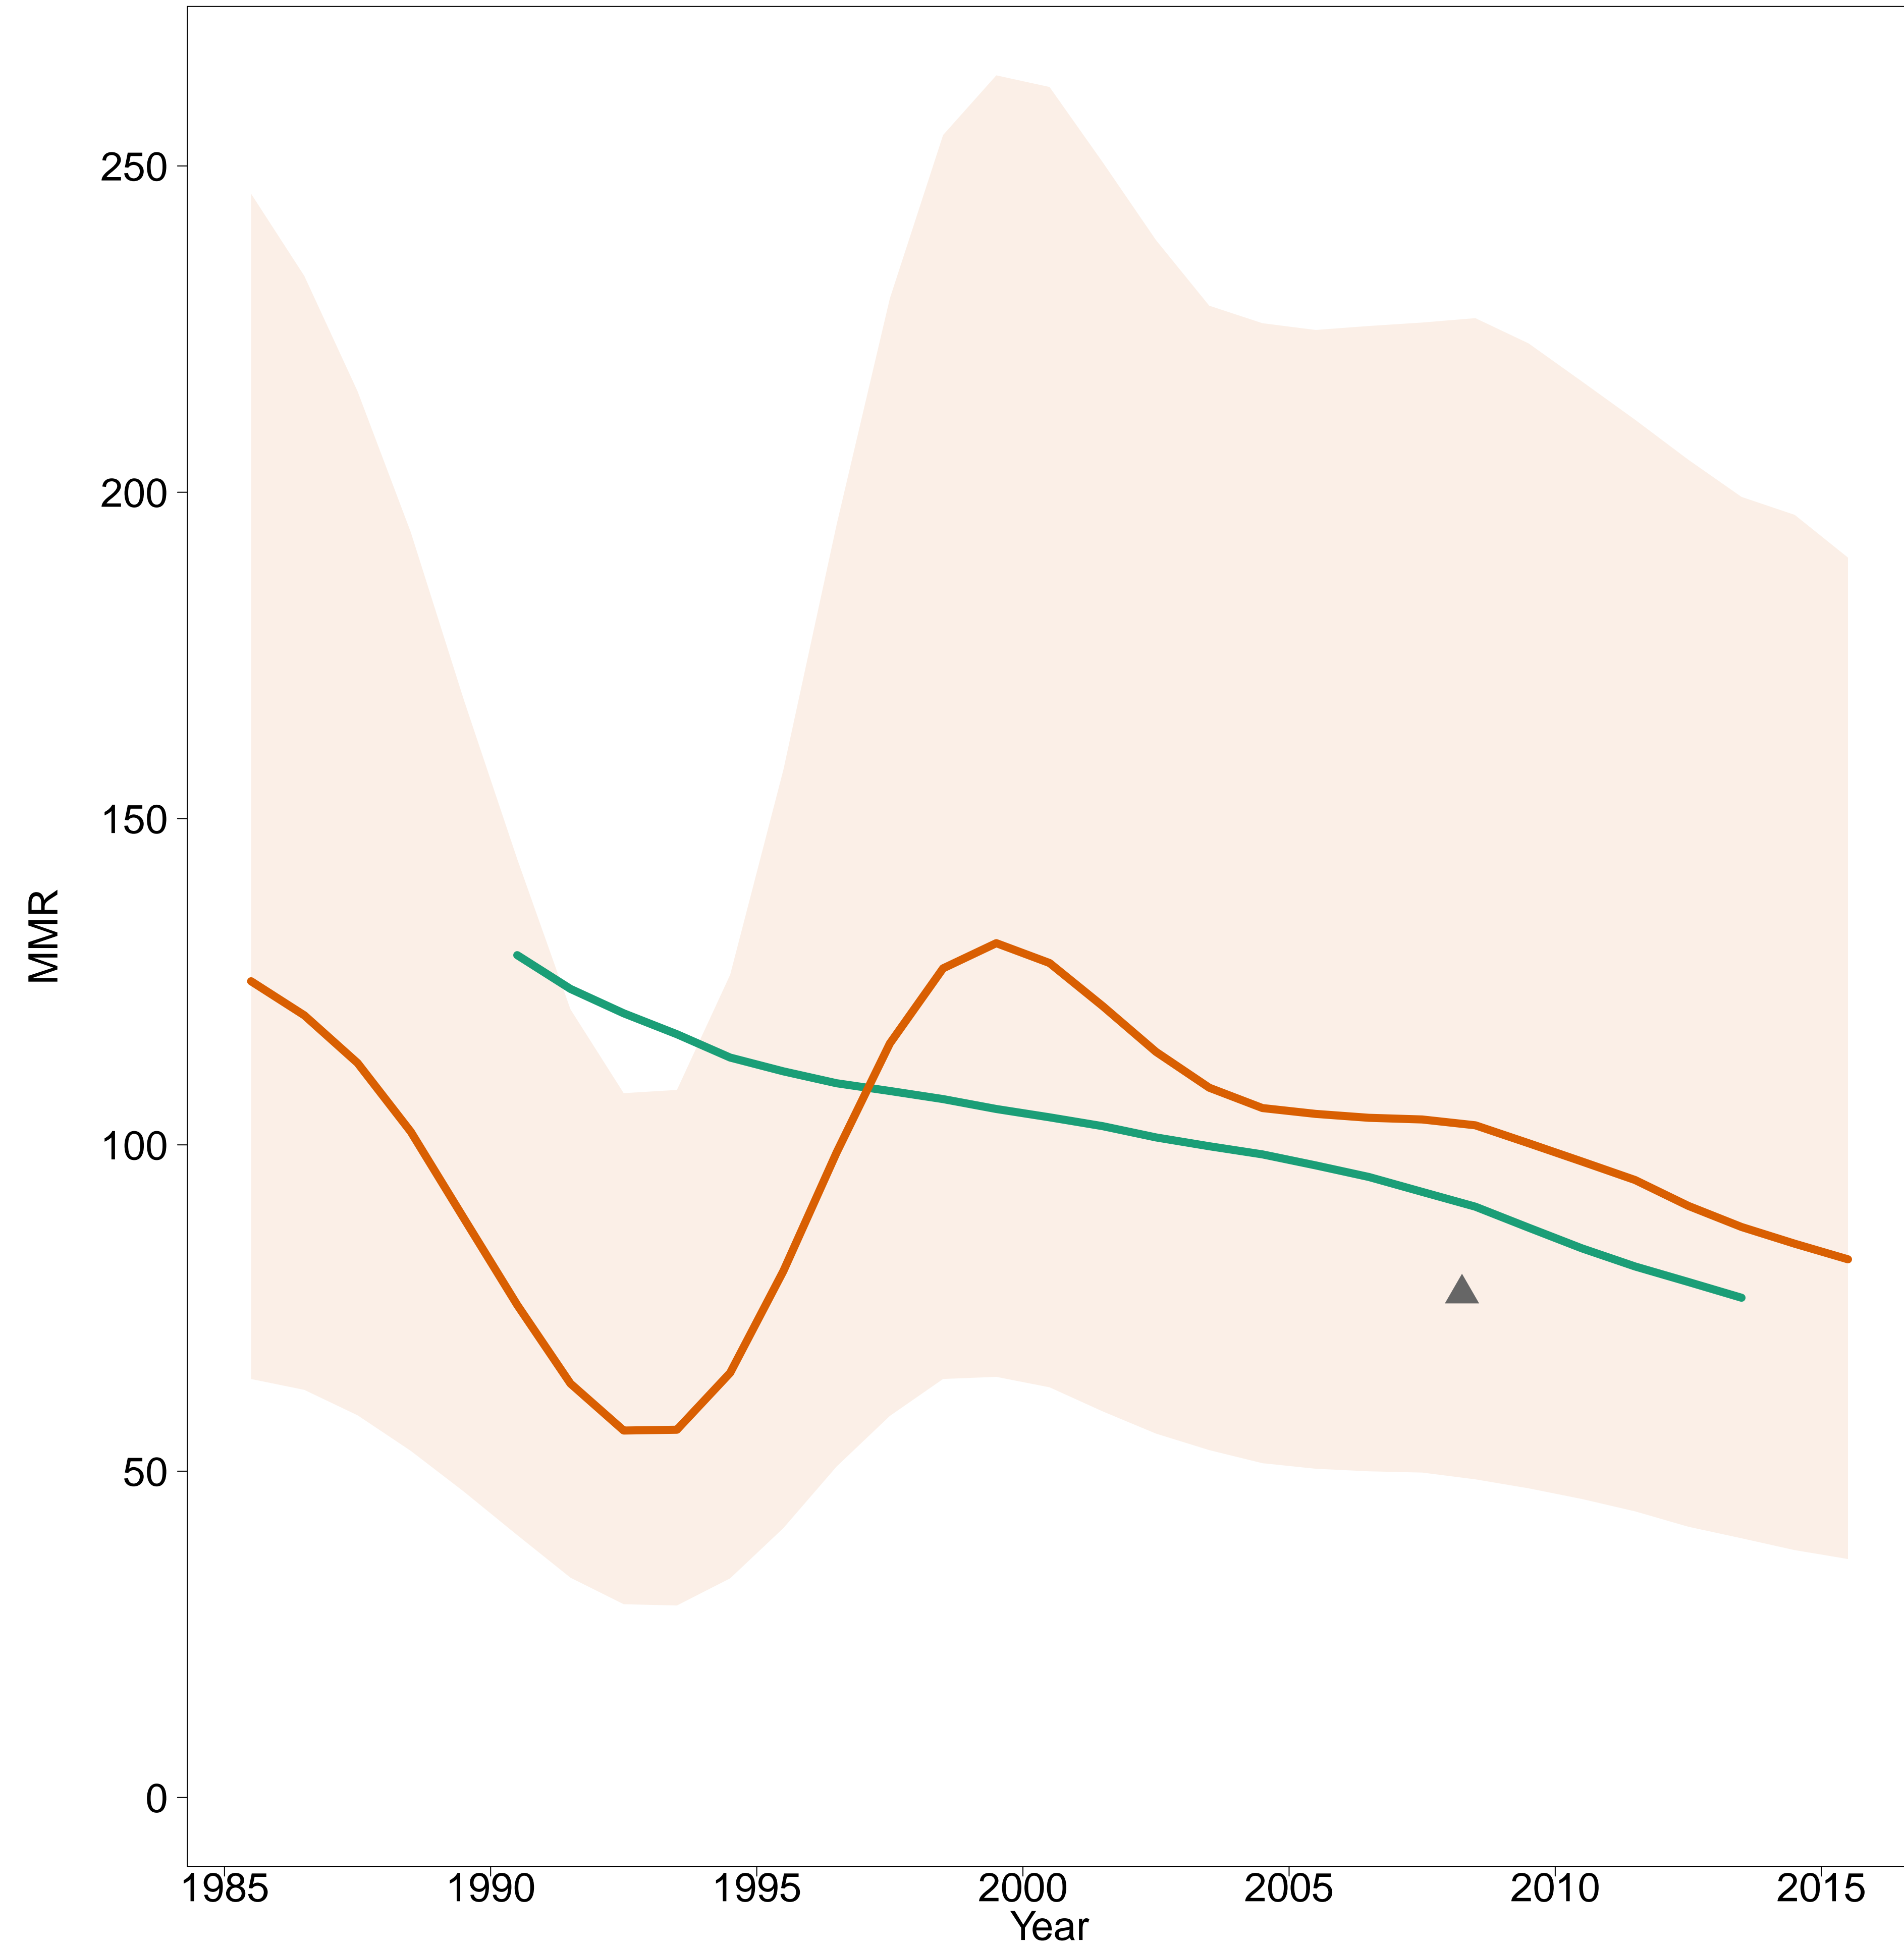

- Estimates -
- MMEIG 2015
- GBD 2013
- MMR Database 2015 -
- Observed Data
- Adjusted Data
- Data type -
- Excluded misc. studies

Democratic Republic of the Congo [COD]  
(Middle Africa)

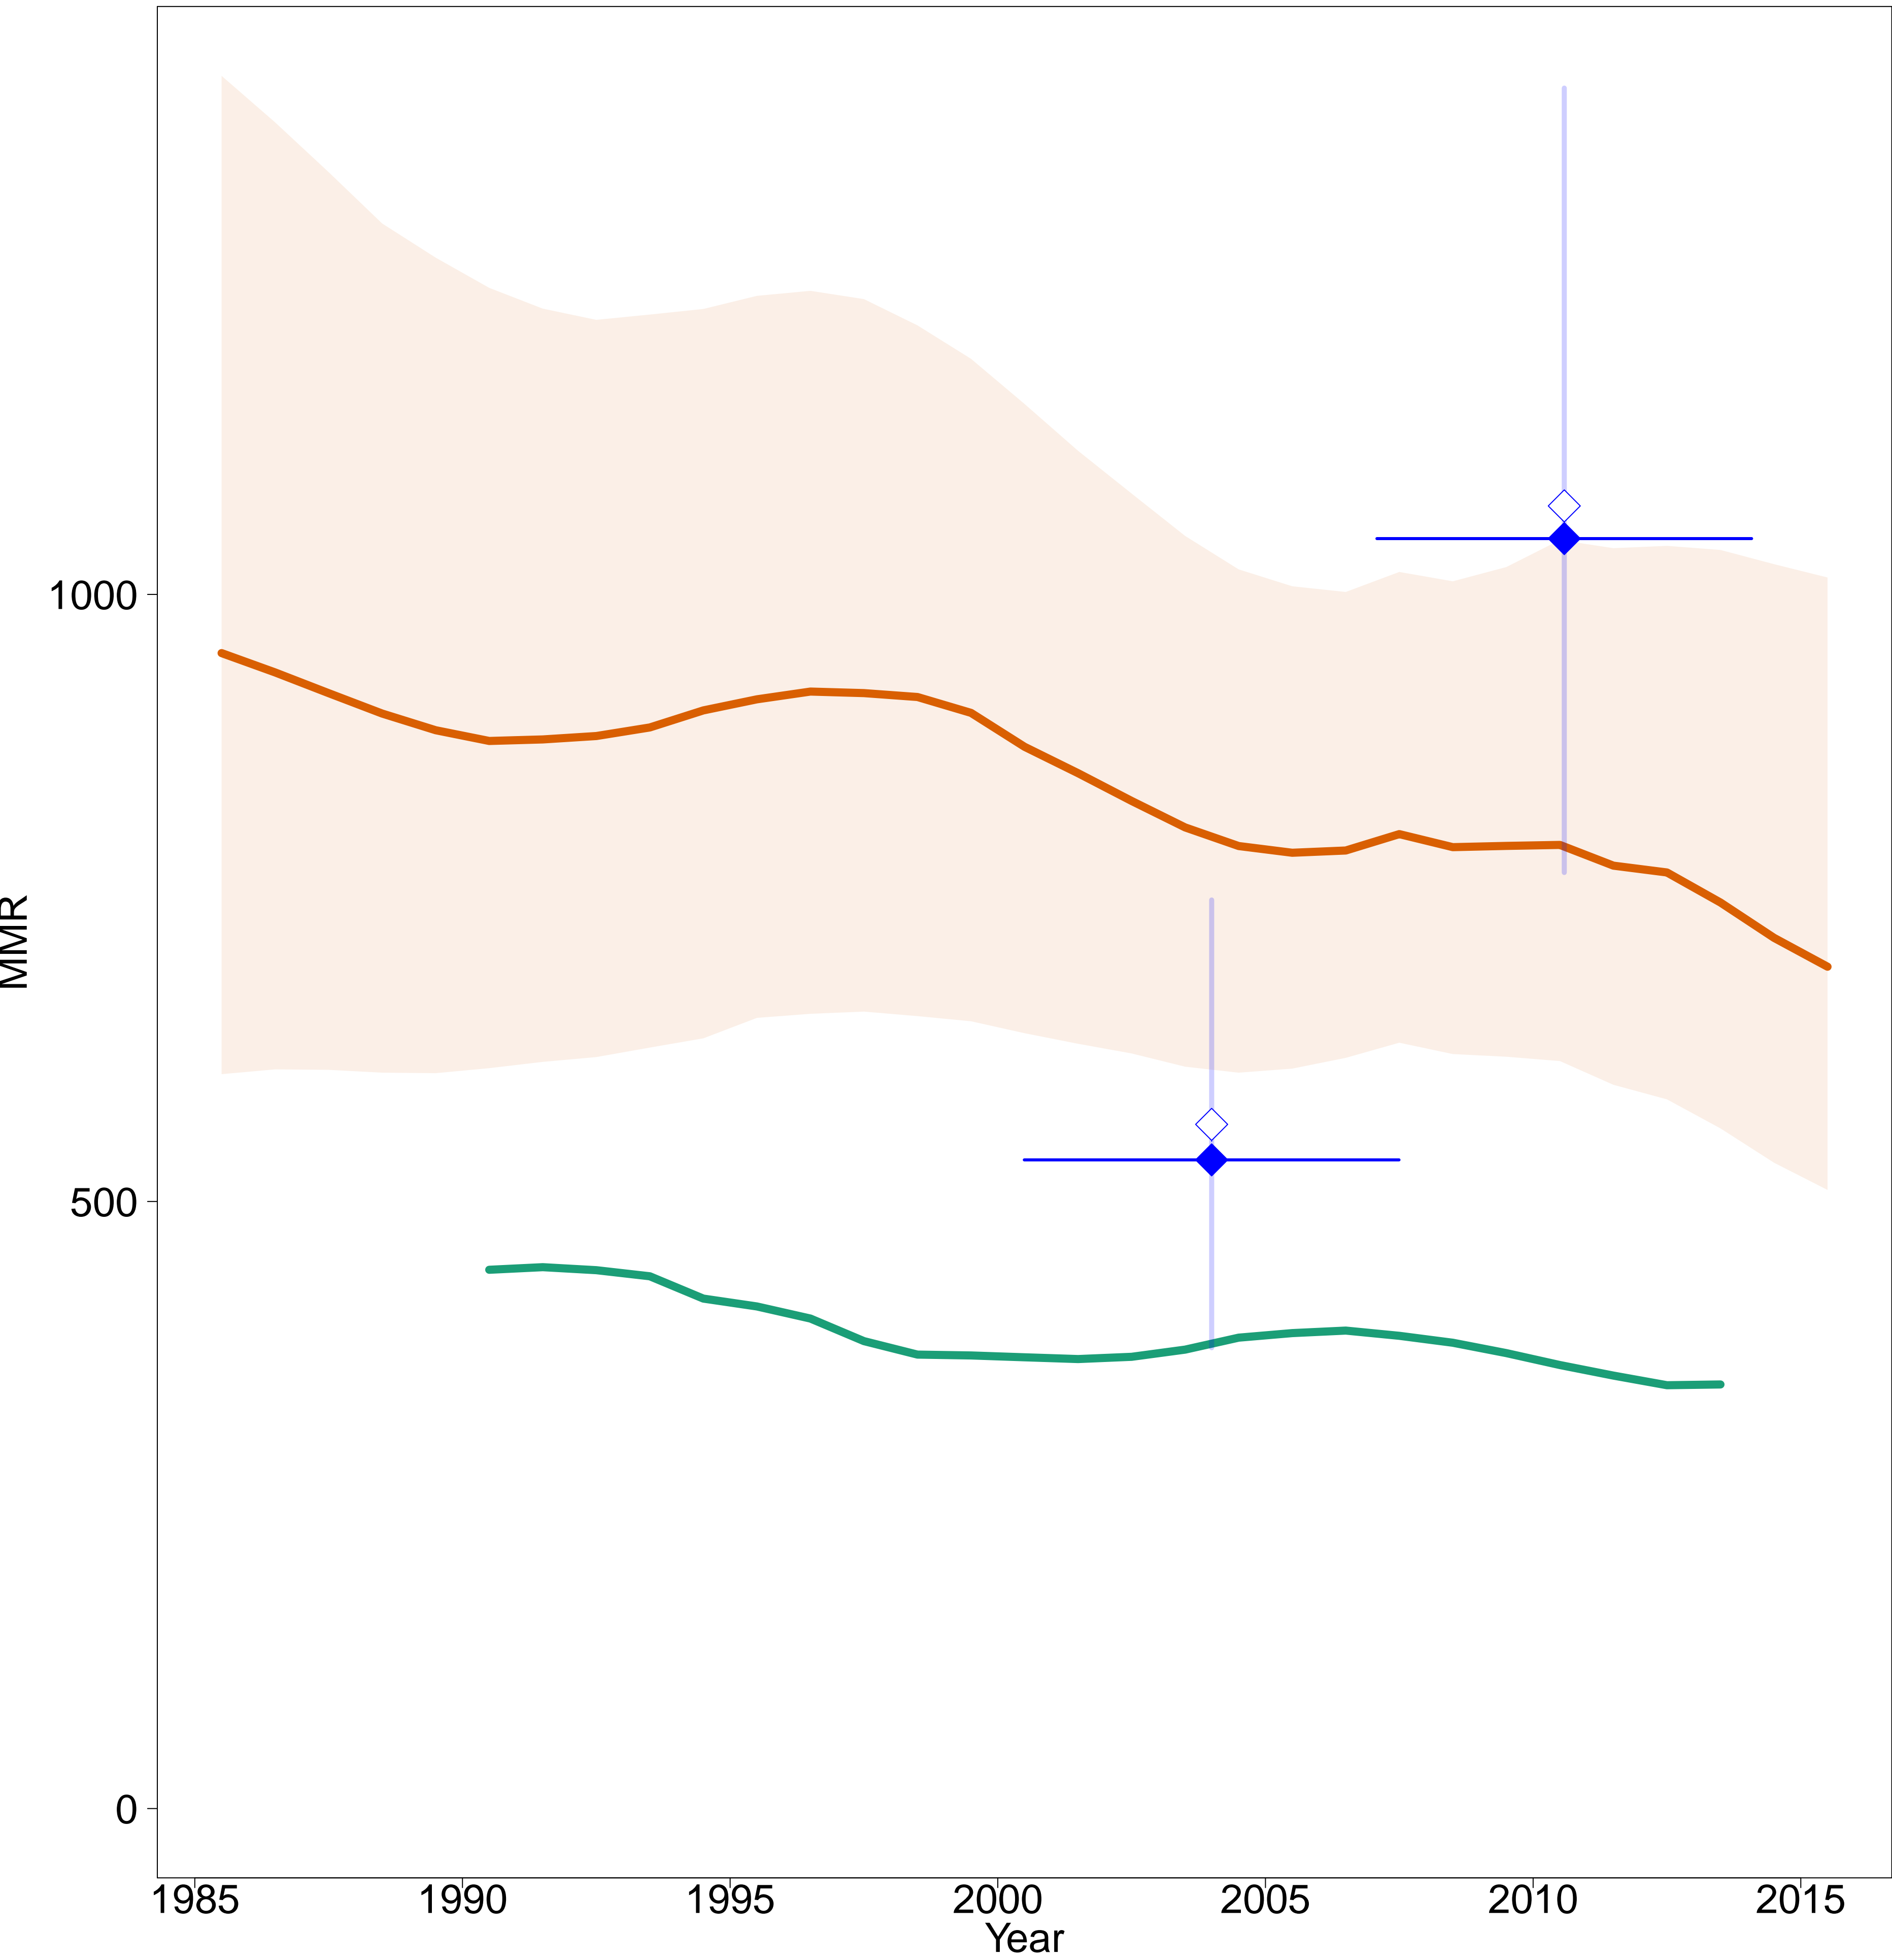

- Estimates -
- MMEIG 2015
- GBD 2013
- MMR Database 2015 -
- Observed Data
- Adjusted Data
- Data type -
- DHS

Denmark [DNK]  
(Developed regions)

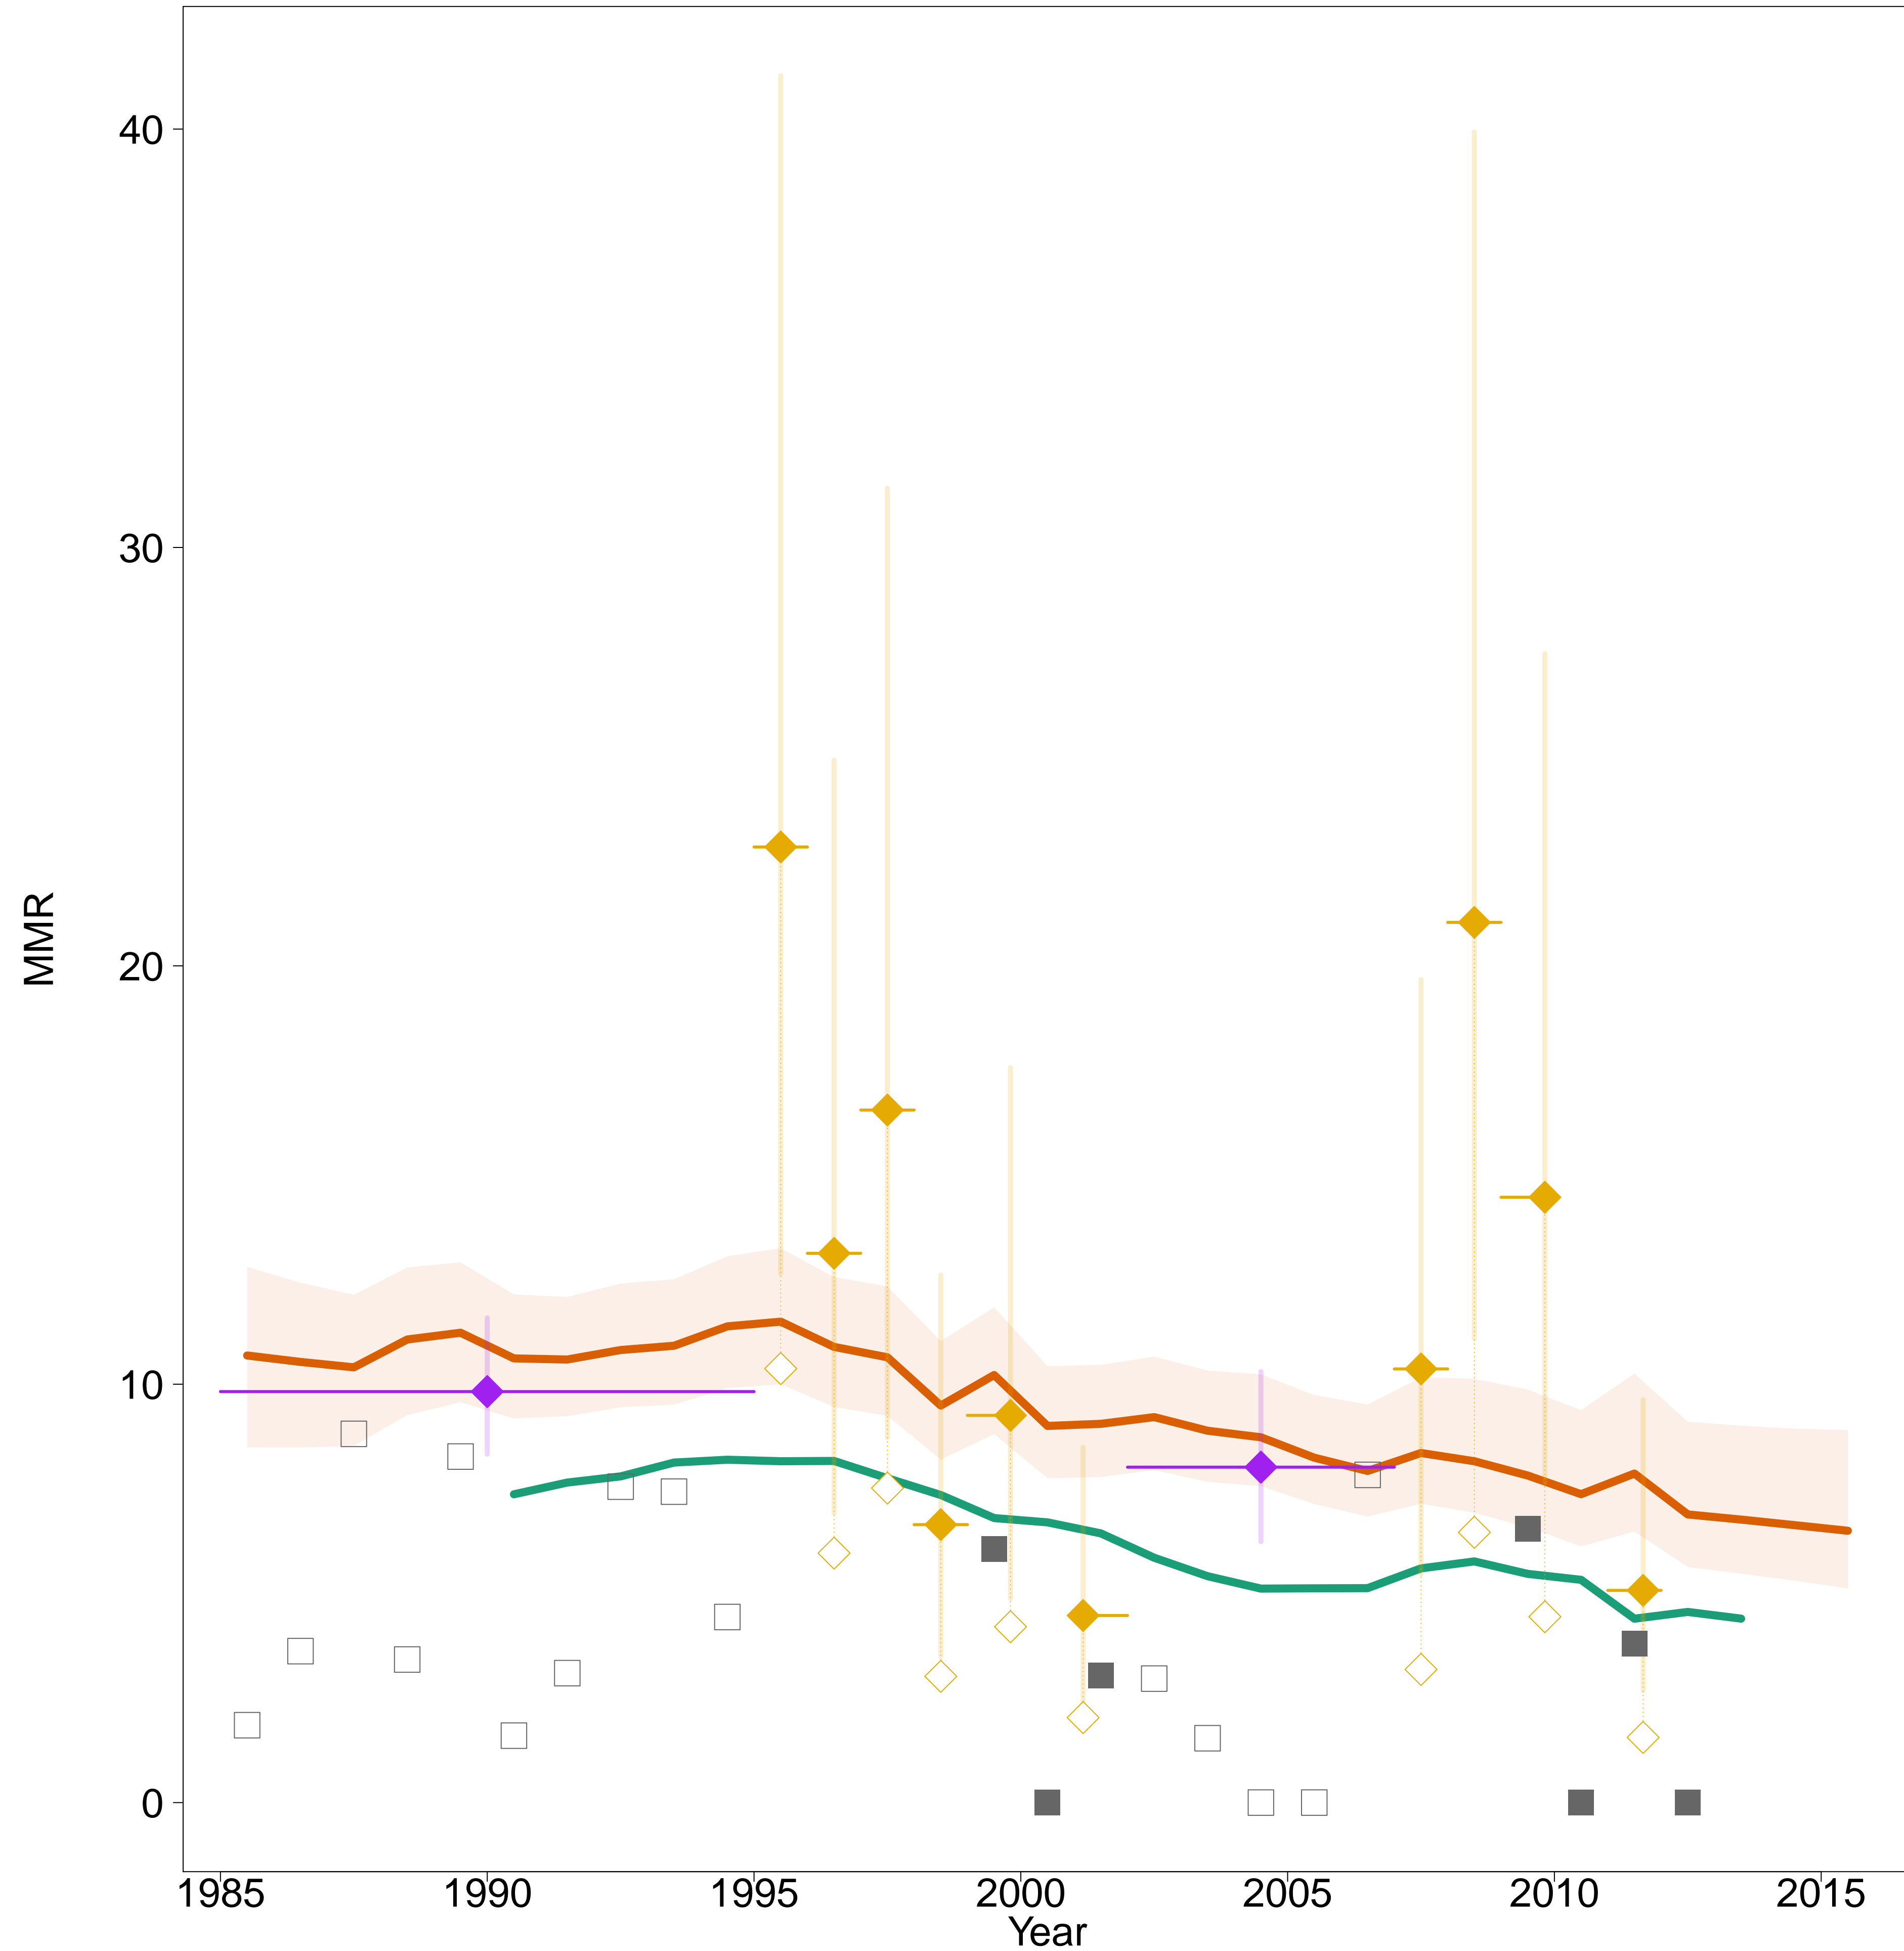

– Estimates –

MMEIG 2015

GBD 2013

– MMR Database 2015 –

◊ Observed Data

◆ Adjusted Data

– Data type –

◆ VR

◆ Spec. studies

■ Reported VR before recalc.

(related to 0 obs. mat. death)

◻ Excluded VR data

(overlap with specialized study)

Djibouti [DJI]  
(Eastern Africa)

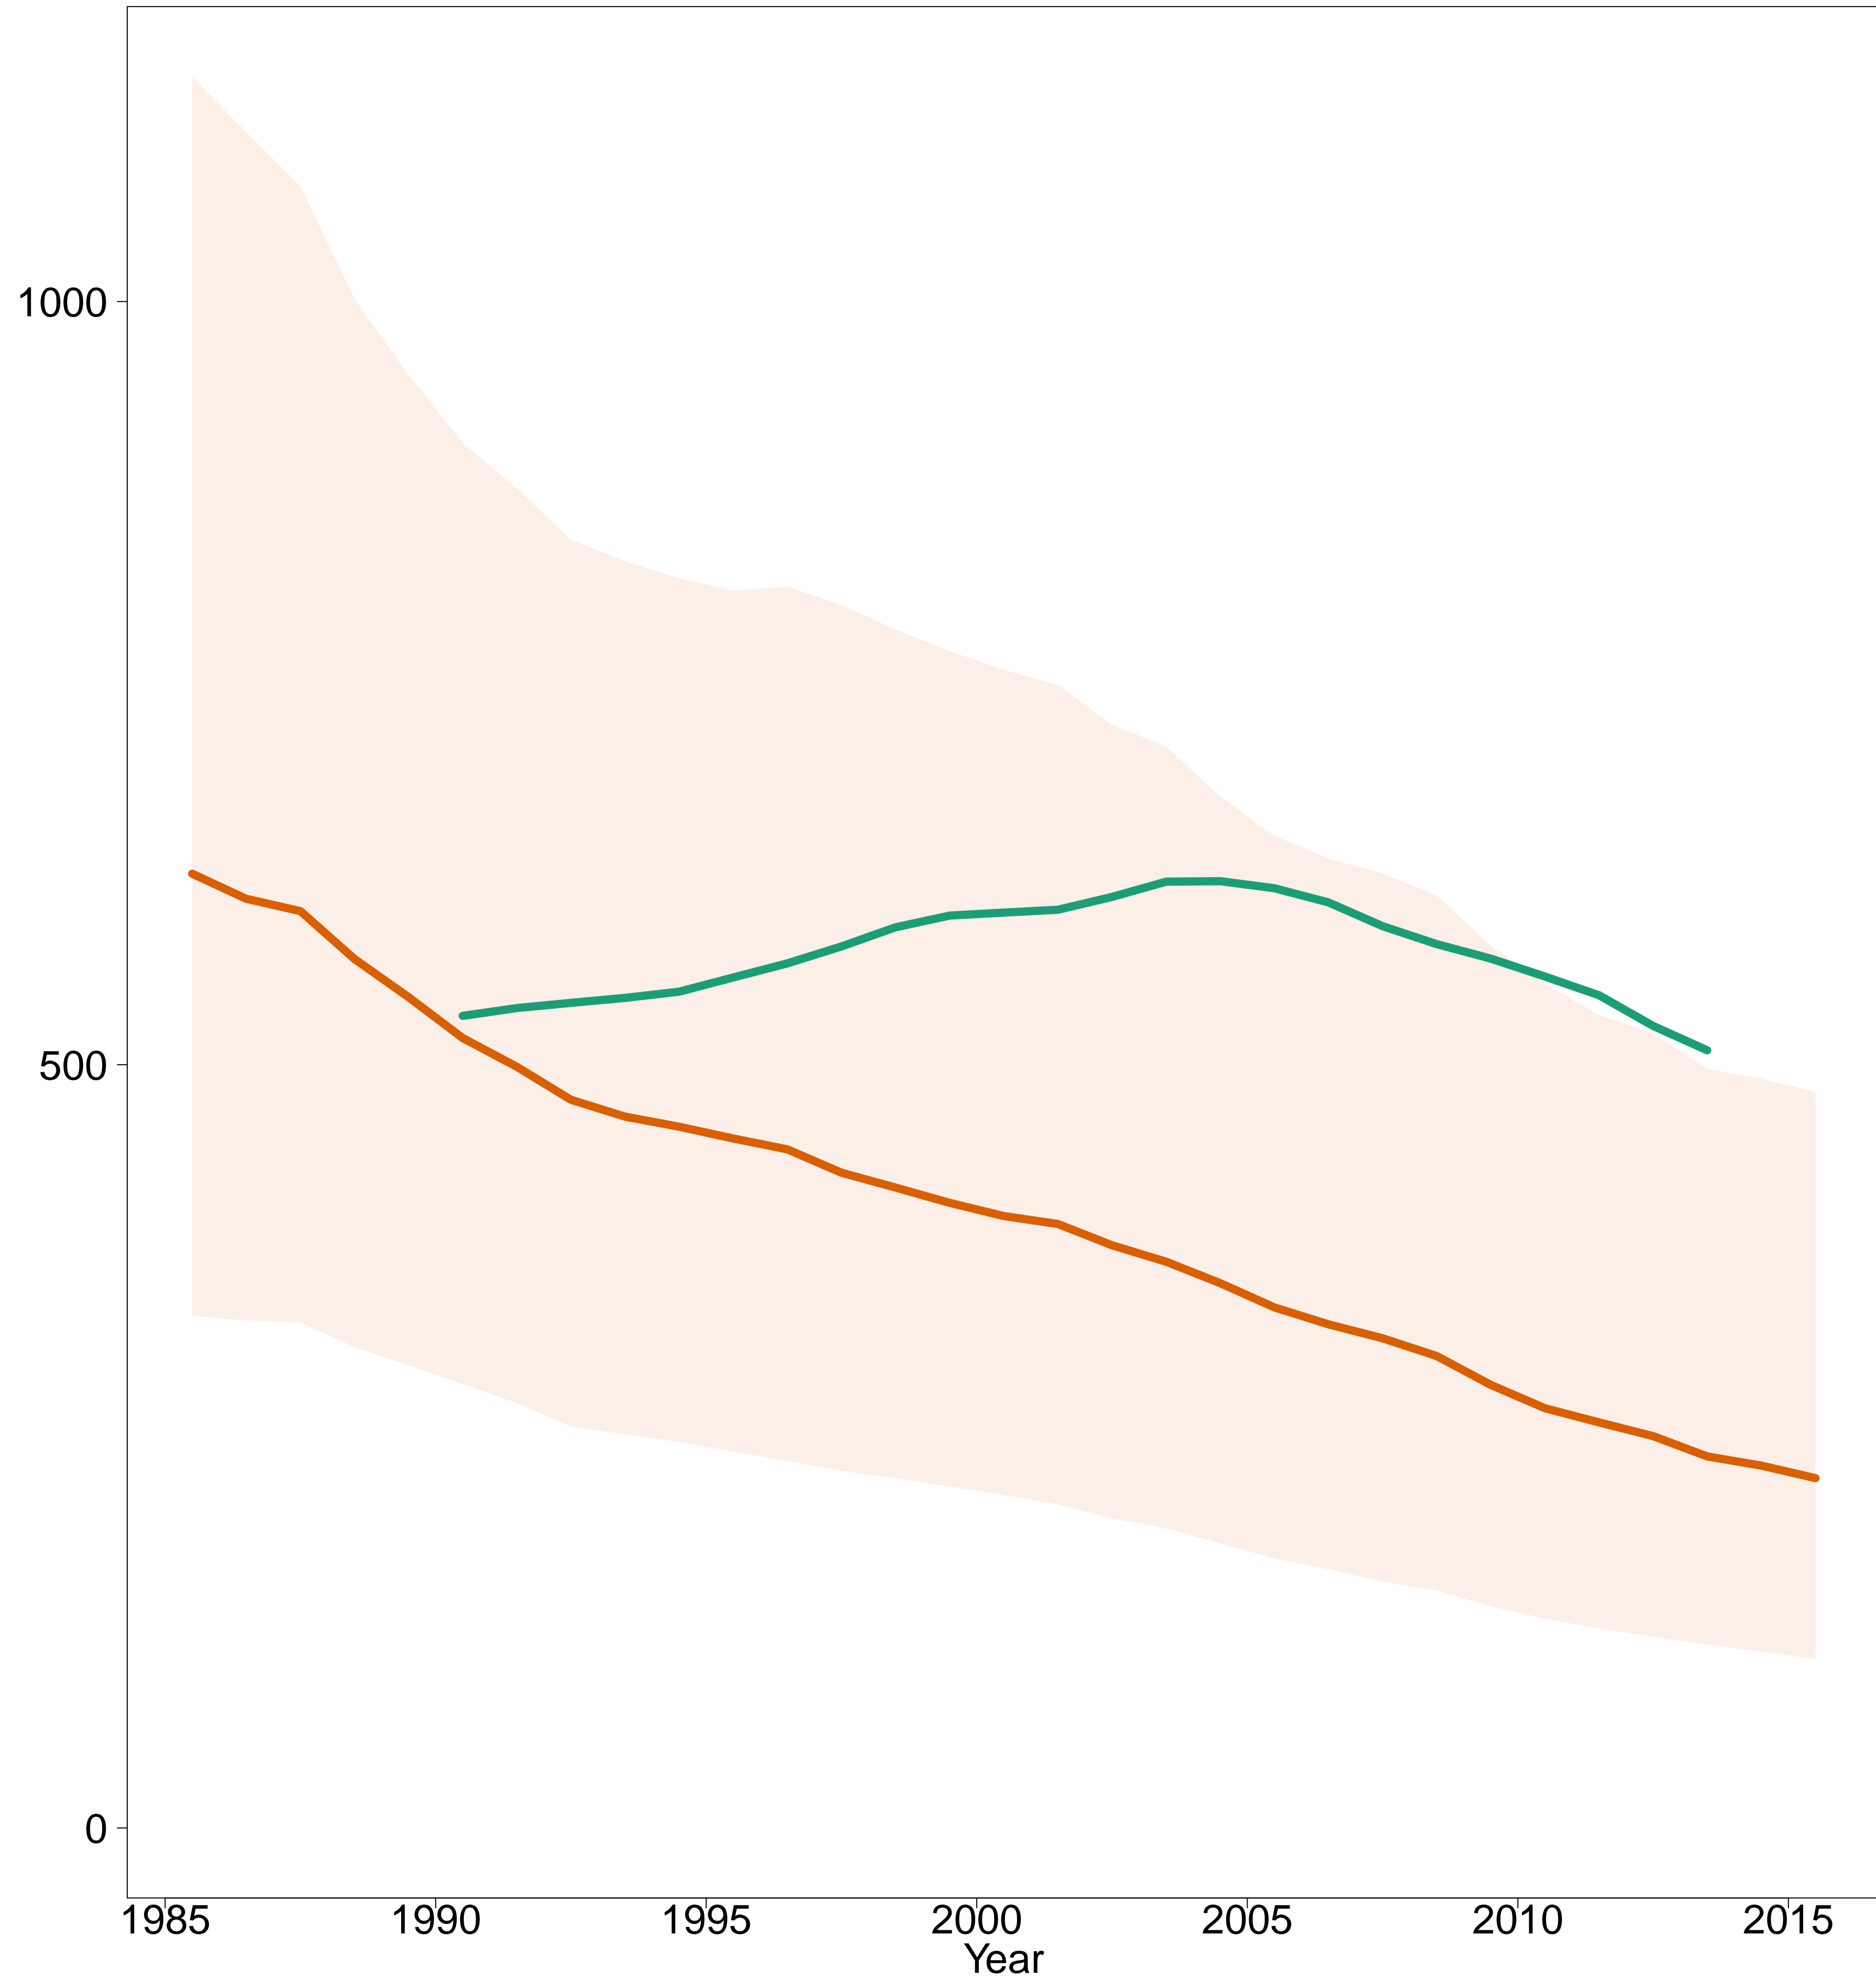

- Estimates –
- MMEIG 2015
- GBD 2013
- MMR Database 2015 –

Dominican Republic [DOM]  
(Caribbean)

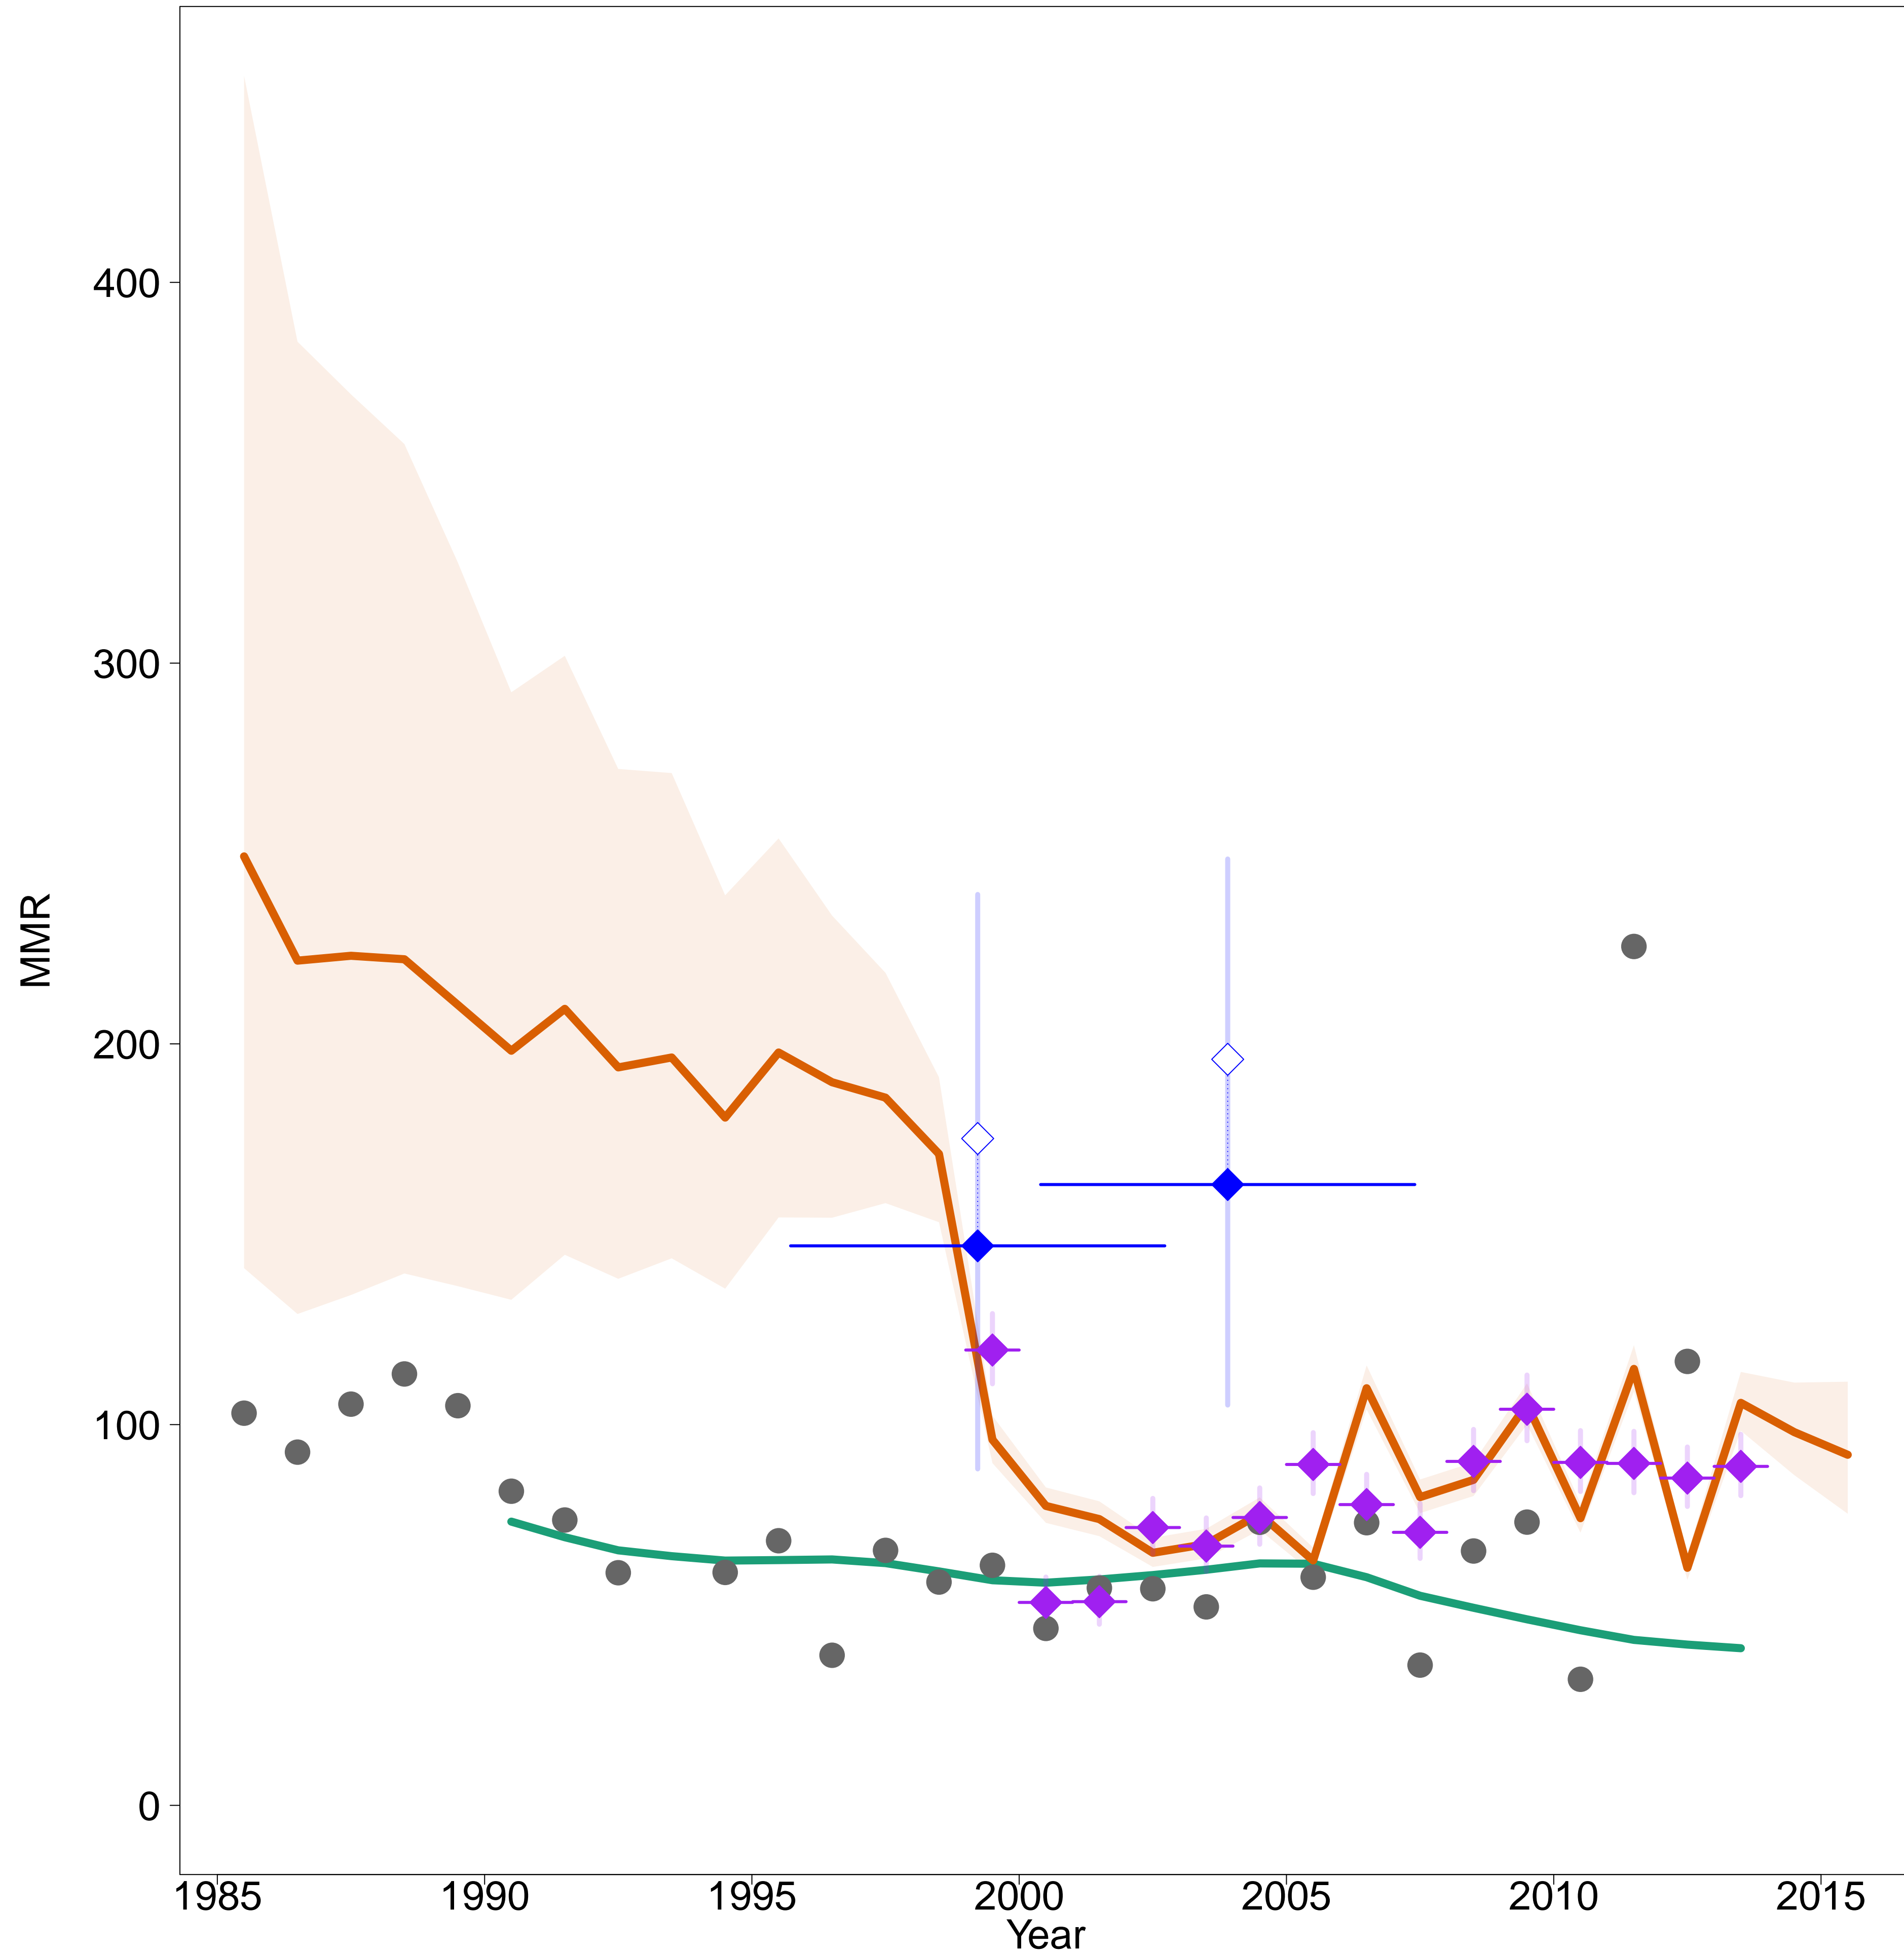

- Estimates –
- MMEIG 2015
- GBD 2013
- MMR Database 2015 –
- ◊ Observed Data
- ◆ Adjusted Data
- Data type –
- ◆ Spec. studies
- ◆ DHS
- Excluded VR data (data quality issues)

Ecuador [ECU]  
(South America)

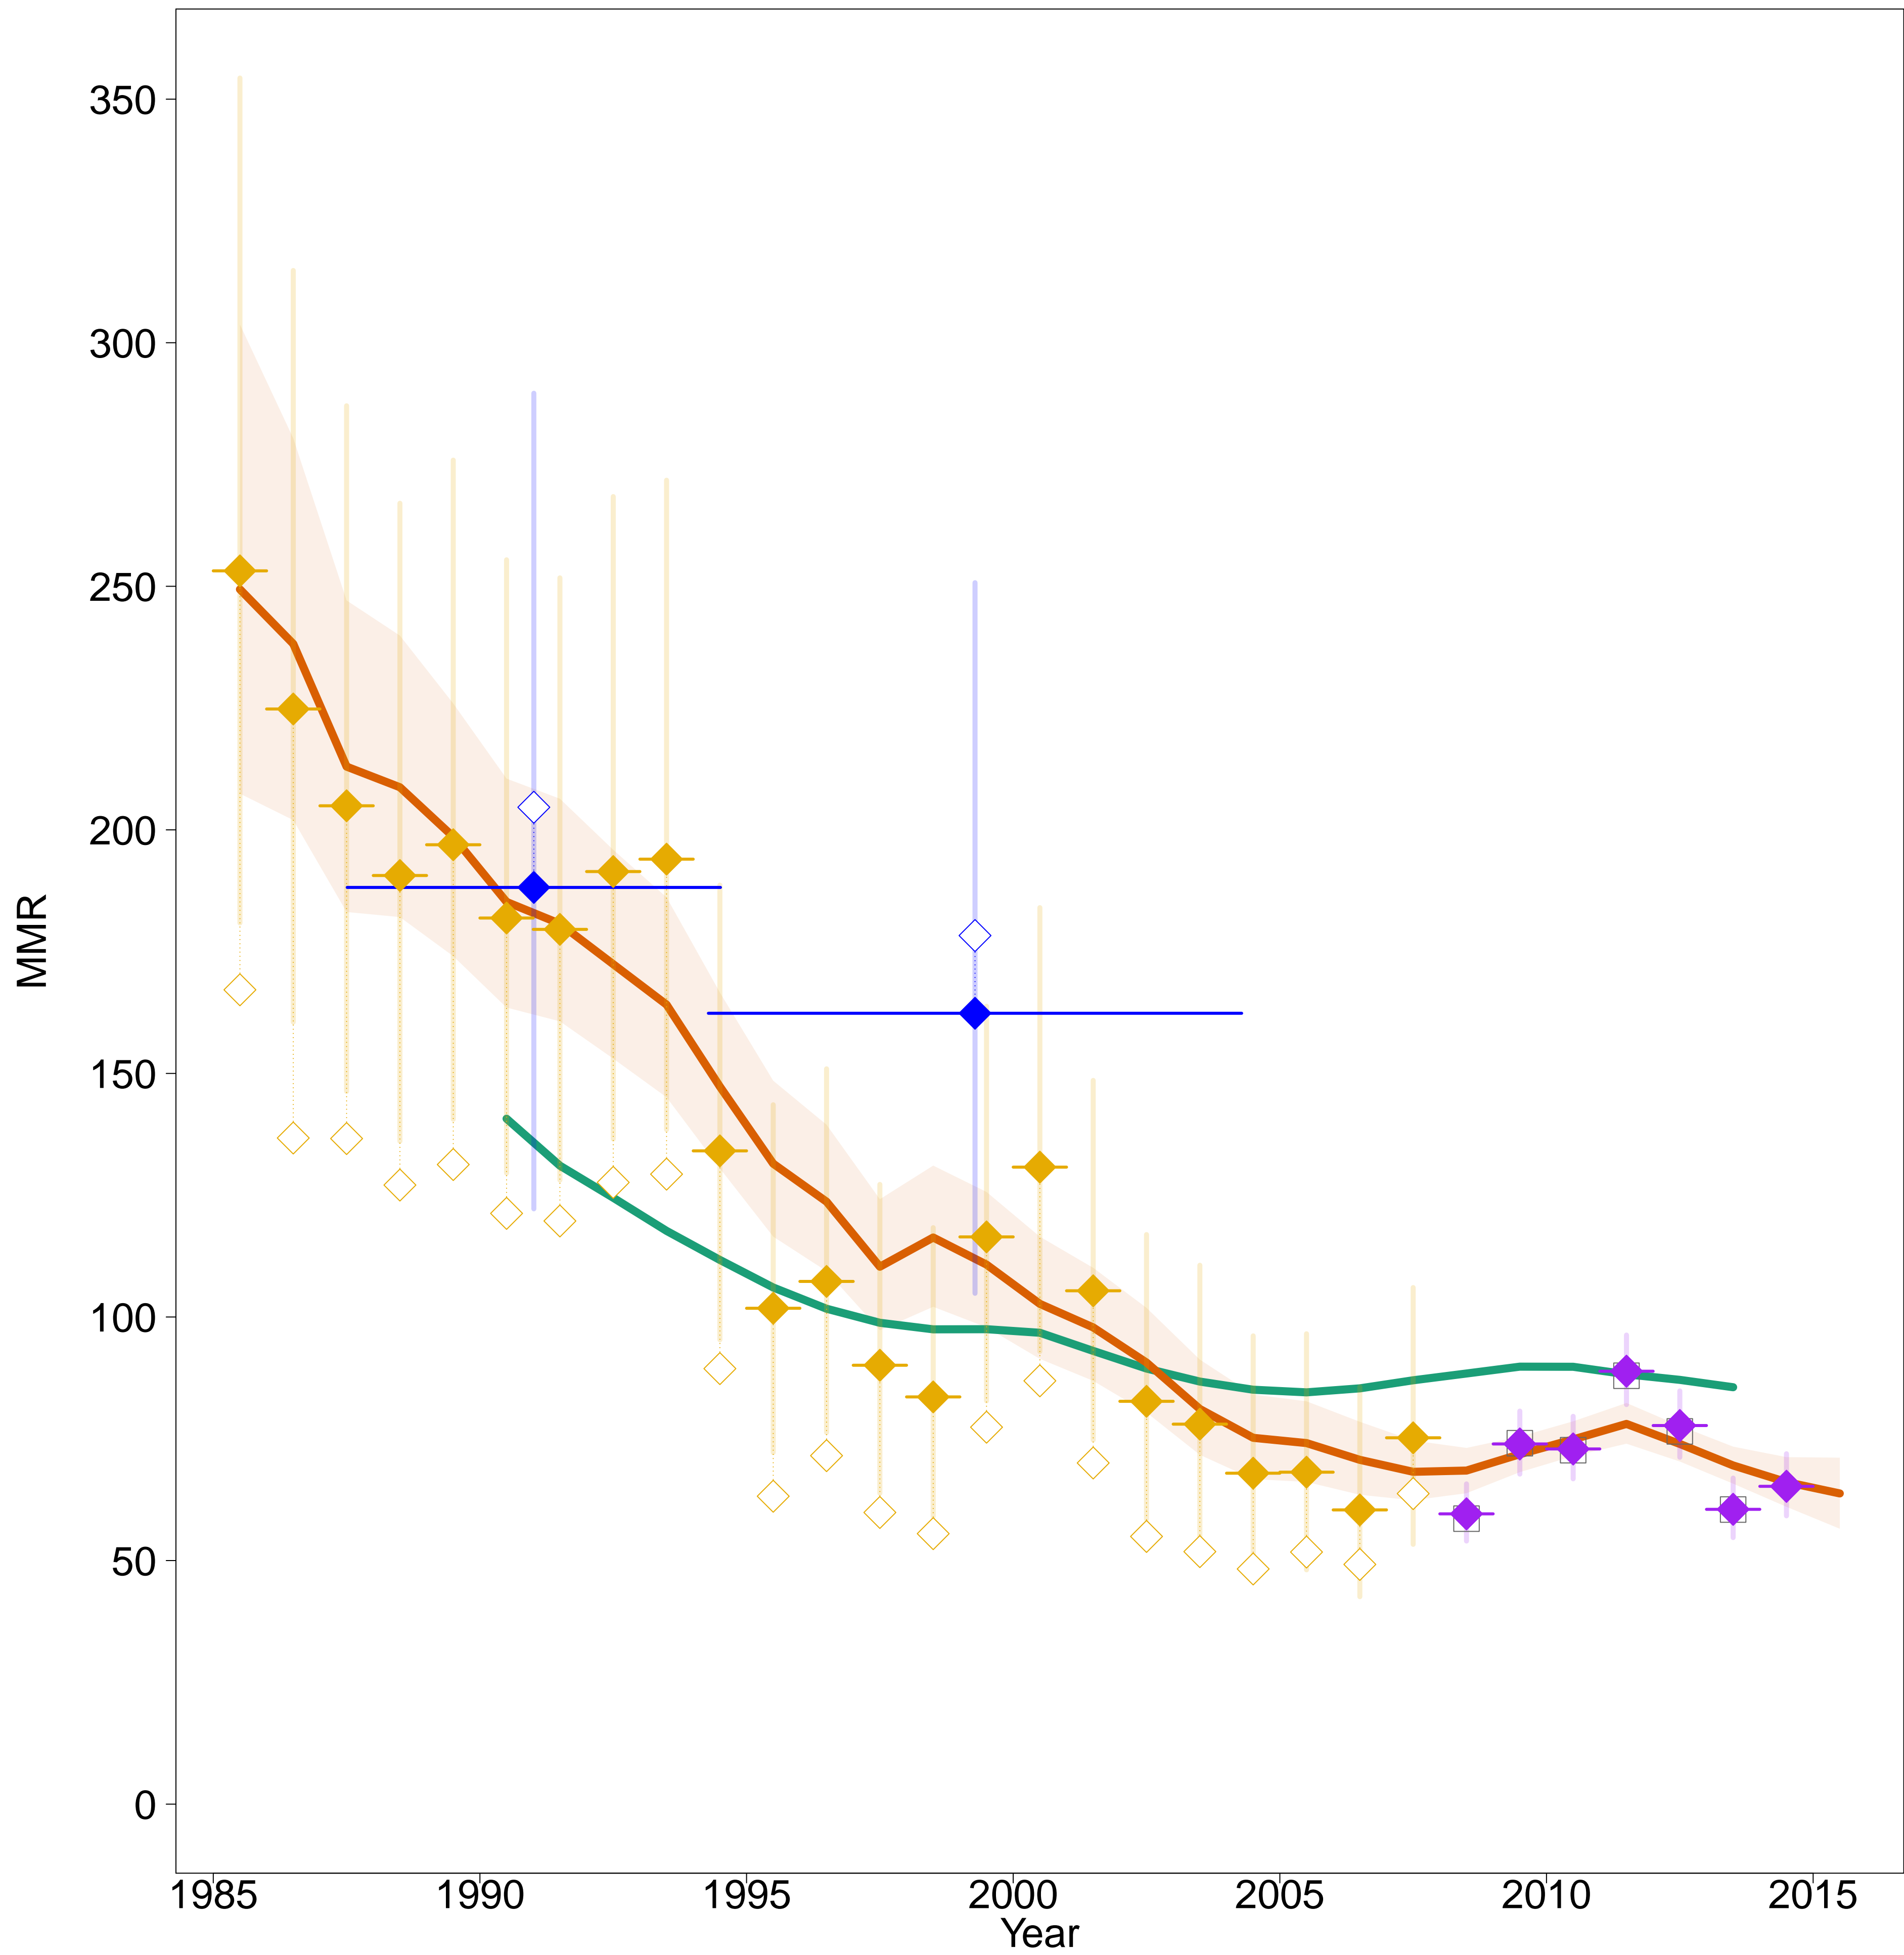

- Estimates –
- MMEIG 2015
- GBD 2013
- MMR Database 2015 –
- Observed Data
- Adjusted Data
- Data type –
- VR
- Spec. studies
- DHS
- Excluded VR data  
(overlap with specialized study)



Egypt [EGY]  
(Northern Africa)

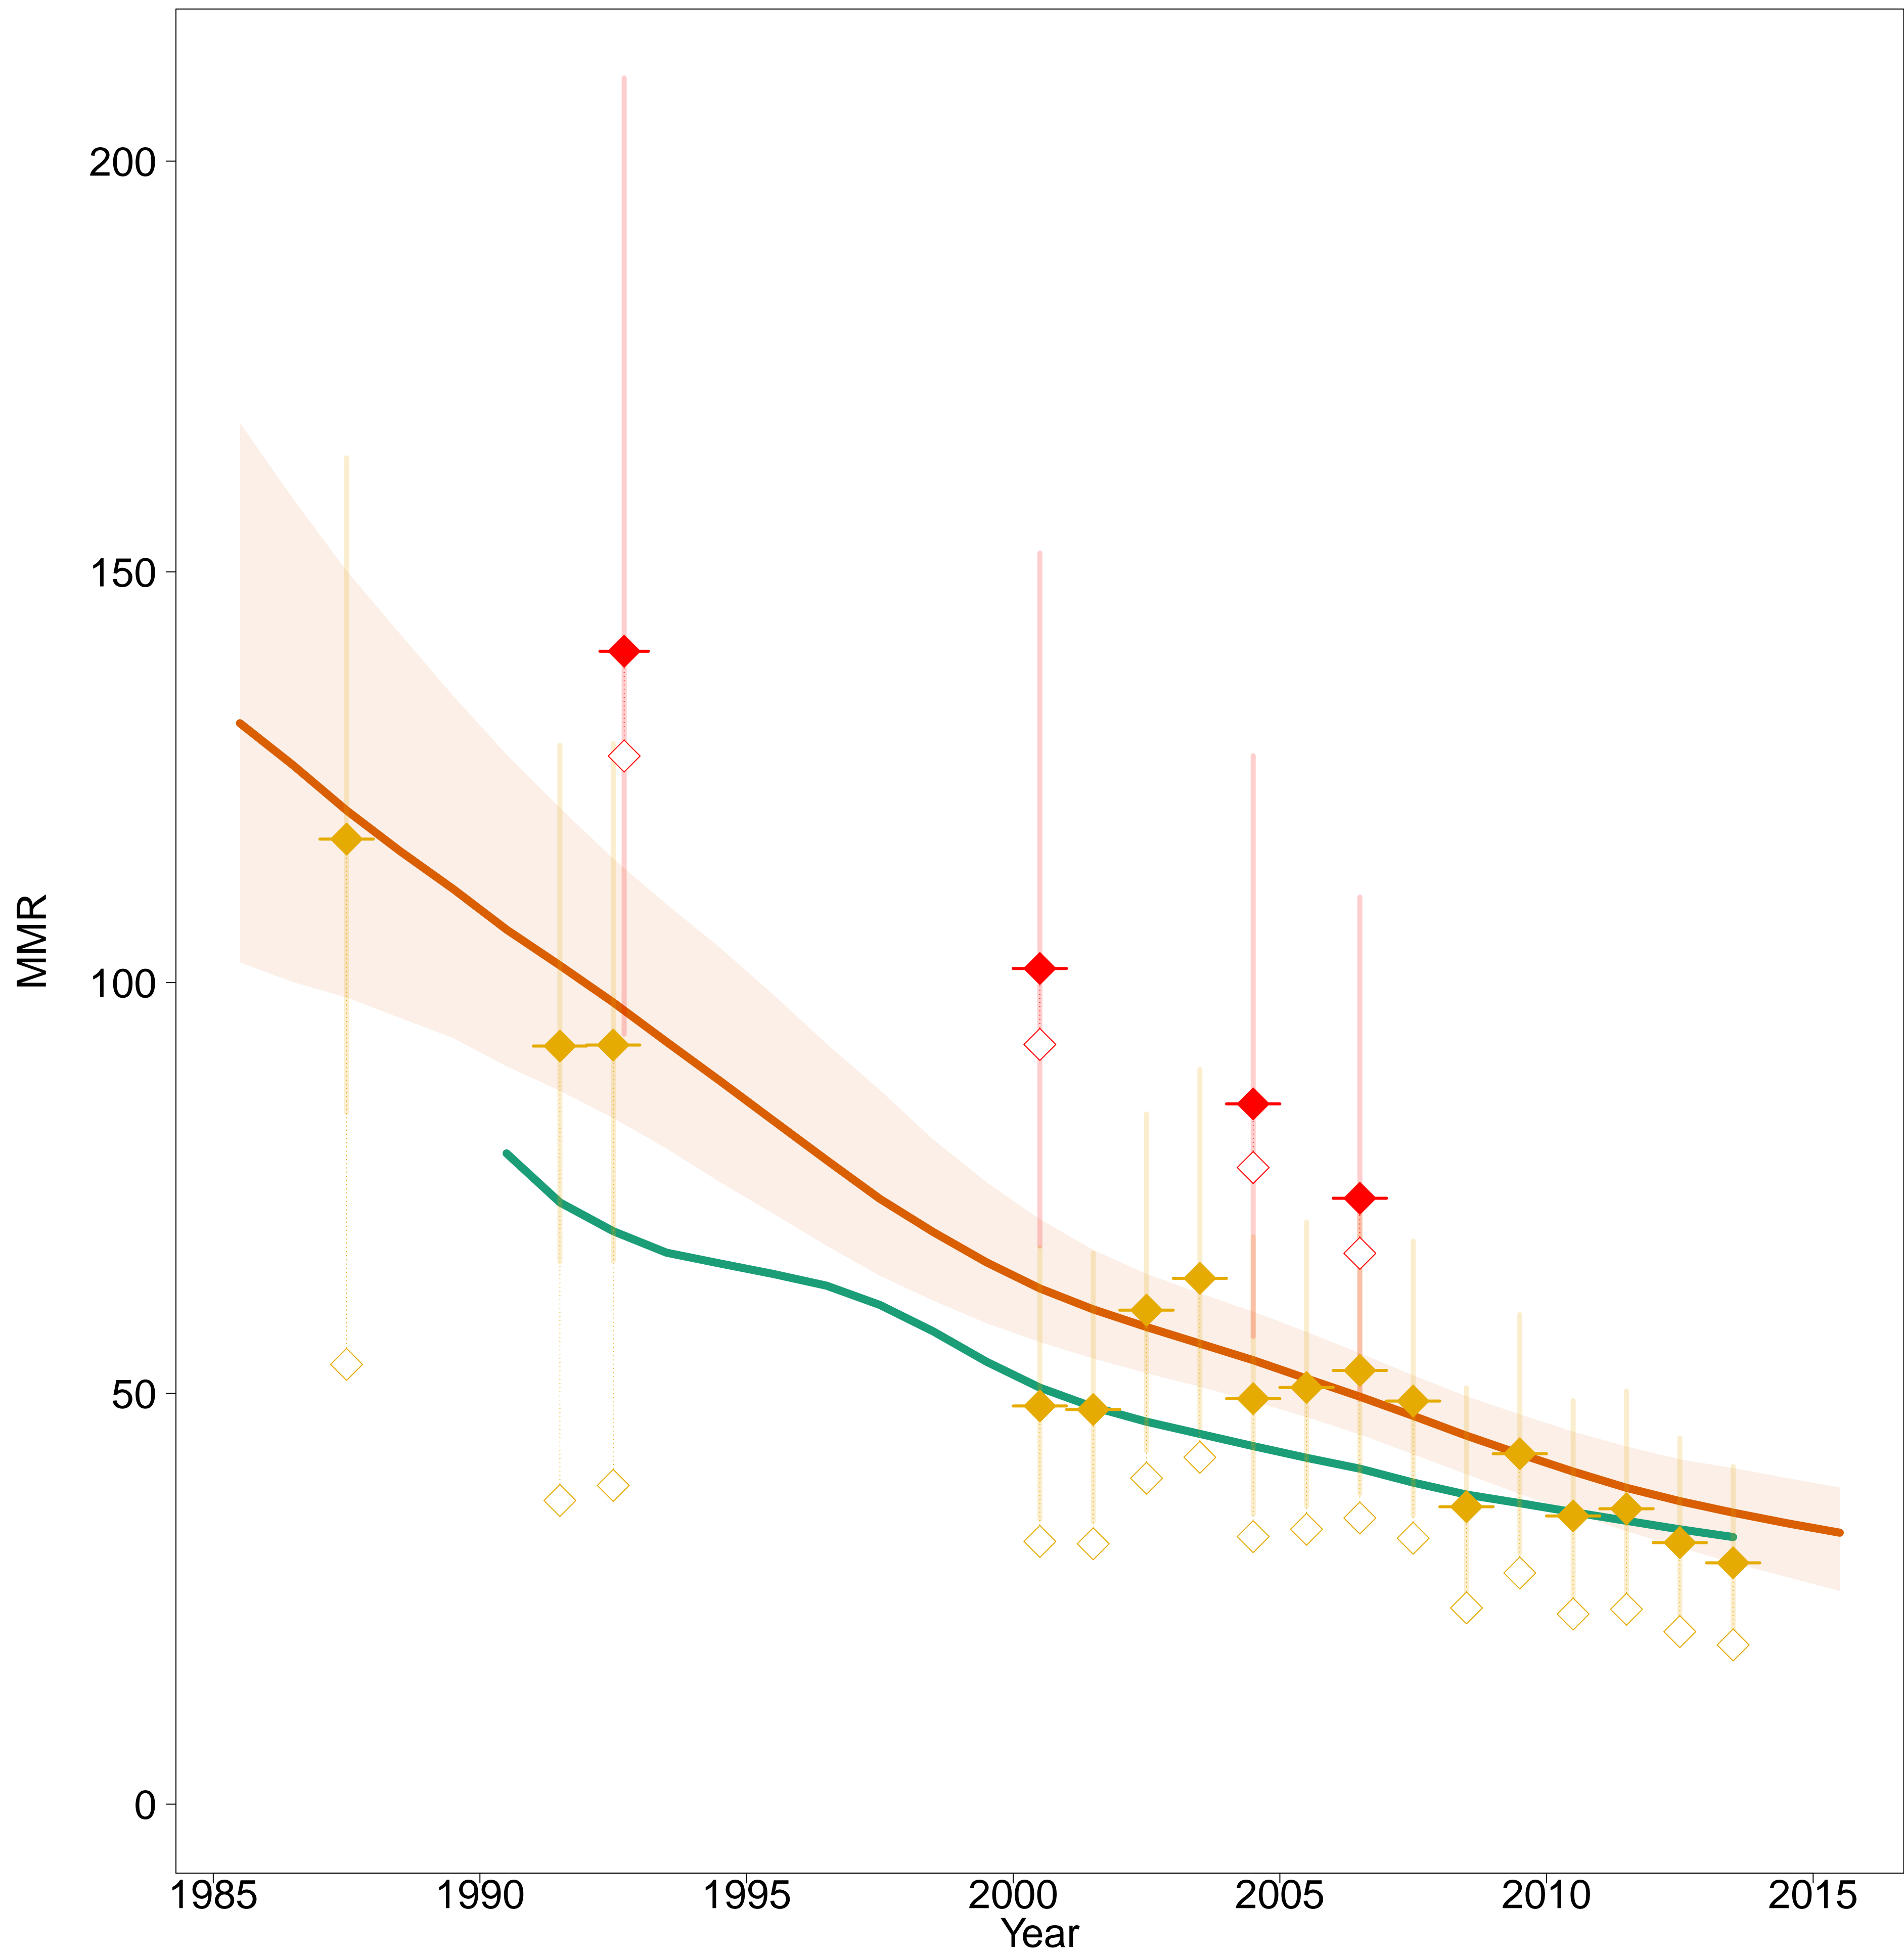

- Estimates –
- MMEIG 2015
- GBD 2013
- MMR Database 2015 –
- ◊ Observed Data
- ◆ Adjusted Data
- Data type –
- ◆ VR
- ◆ Misc. studies

El Salvador [SLV]  
(Central America)

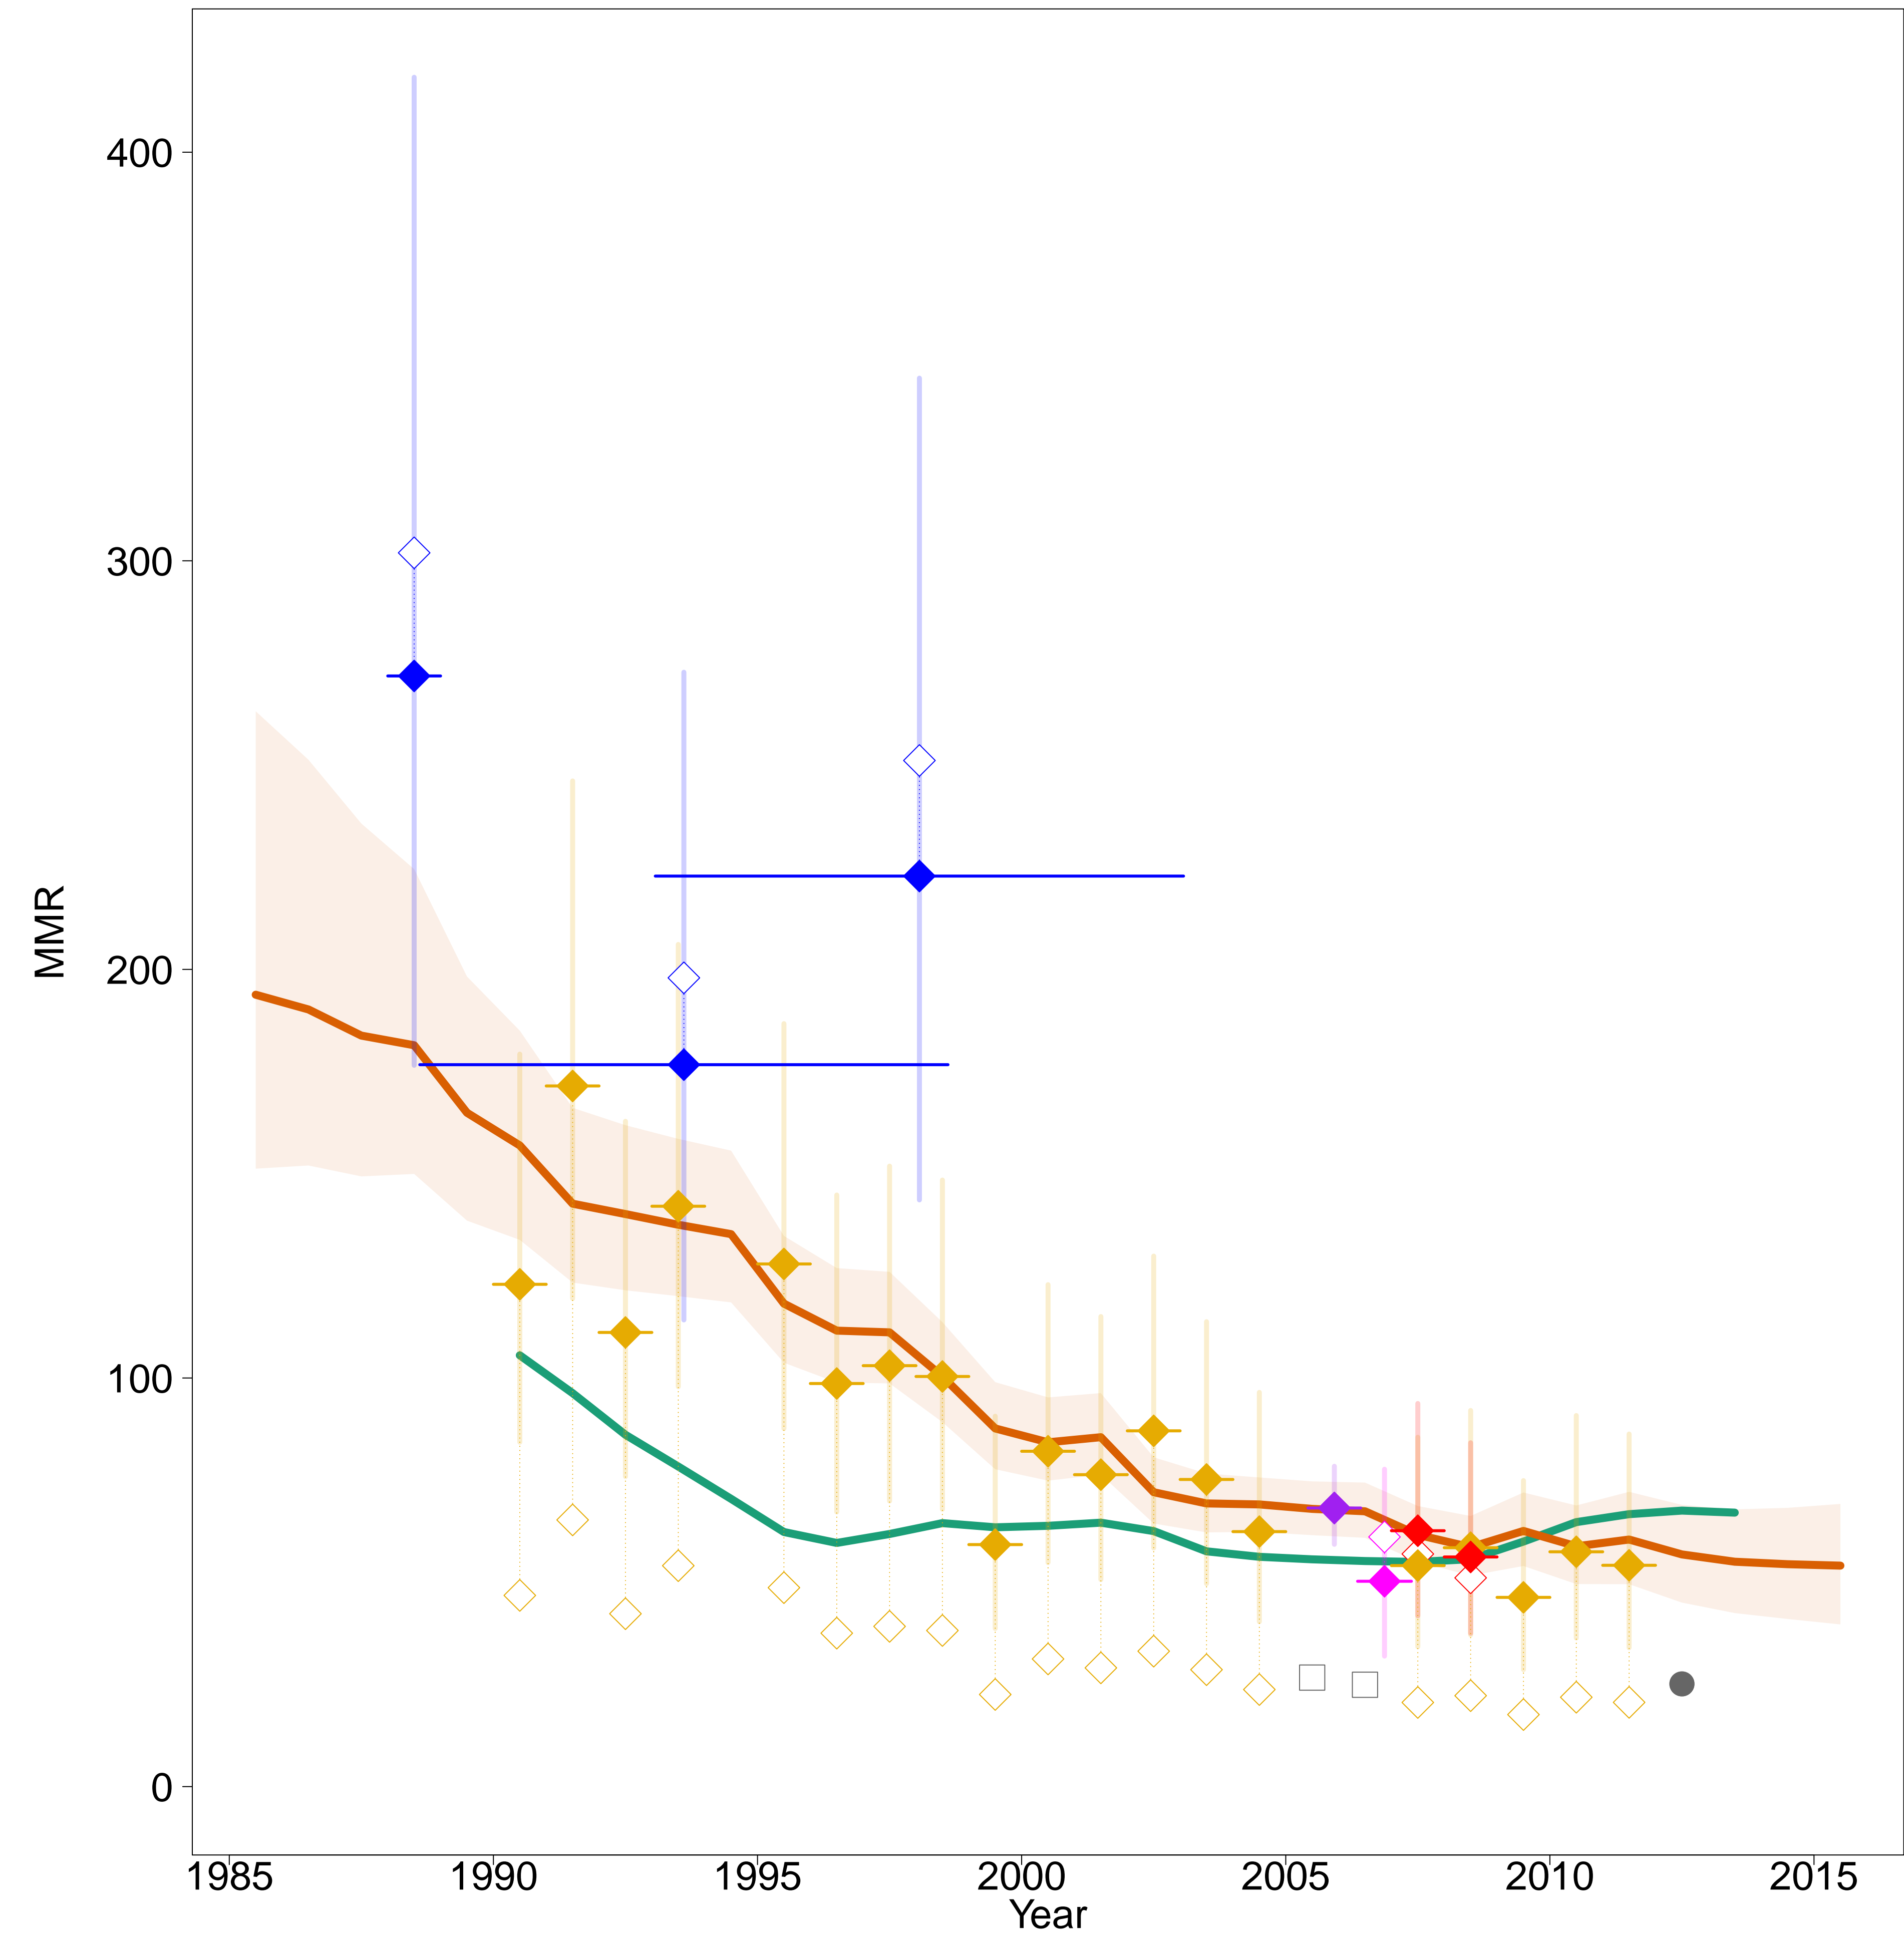

- Estimates –
- MMEIG 2015
- GBD 2013
- MMR Database 2015 –
- ◇ Observed Data
- ◆ Adjusted Data
- Data type –
- ◆ VR
- ◆ Spec. studies
- ◆ DHS
- ◆ Census
- ◆ Misc. studies
- Excluded VR data (data quality issues)
- Excluded VR data (overlap with specialized study)

Equatorial Guinea [GNQ]  
(Middle Africa)

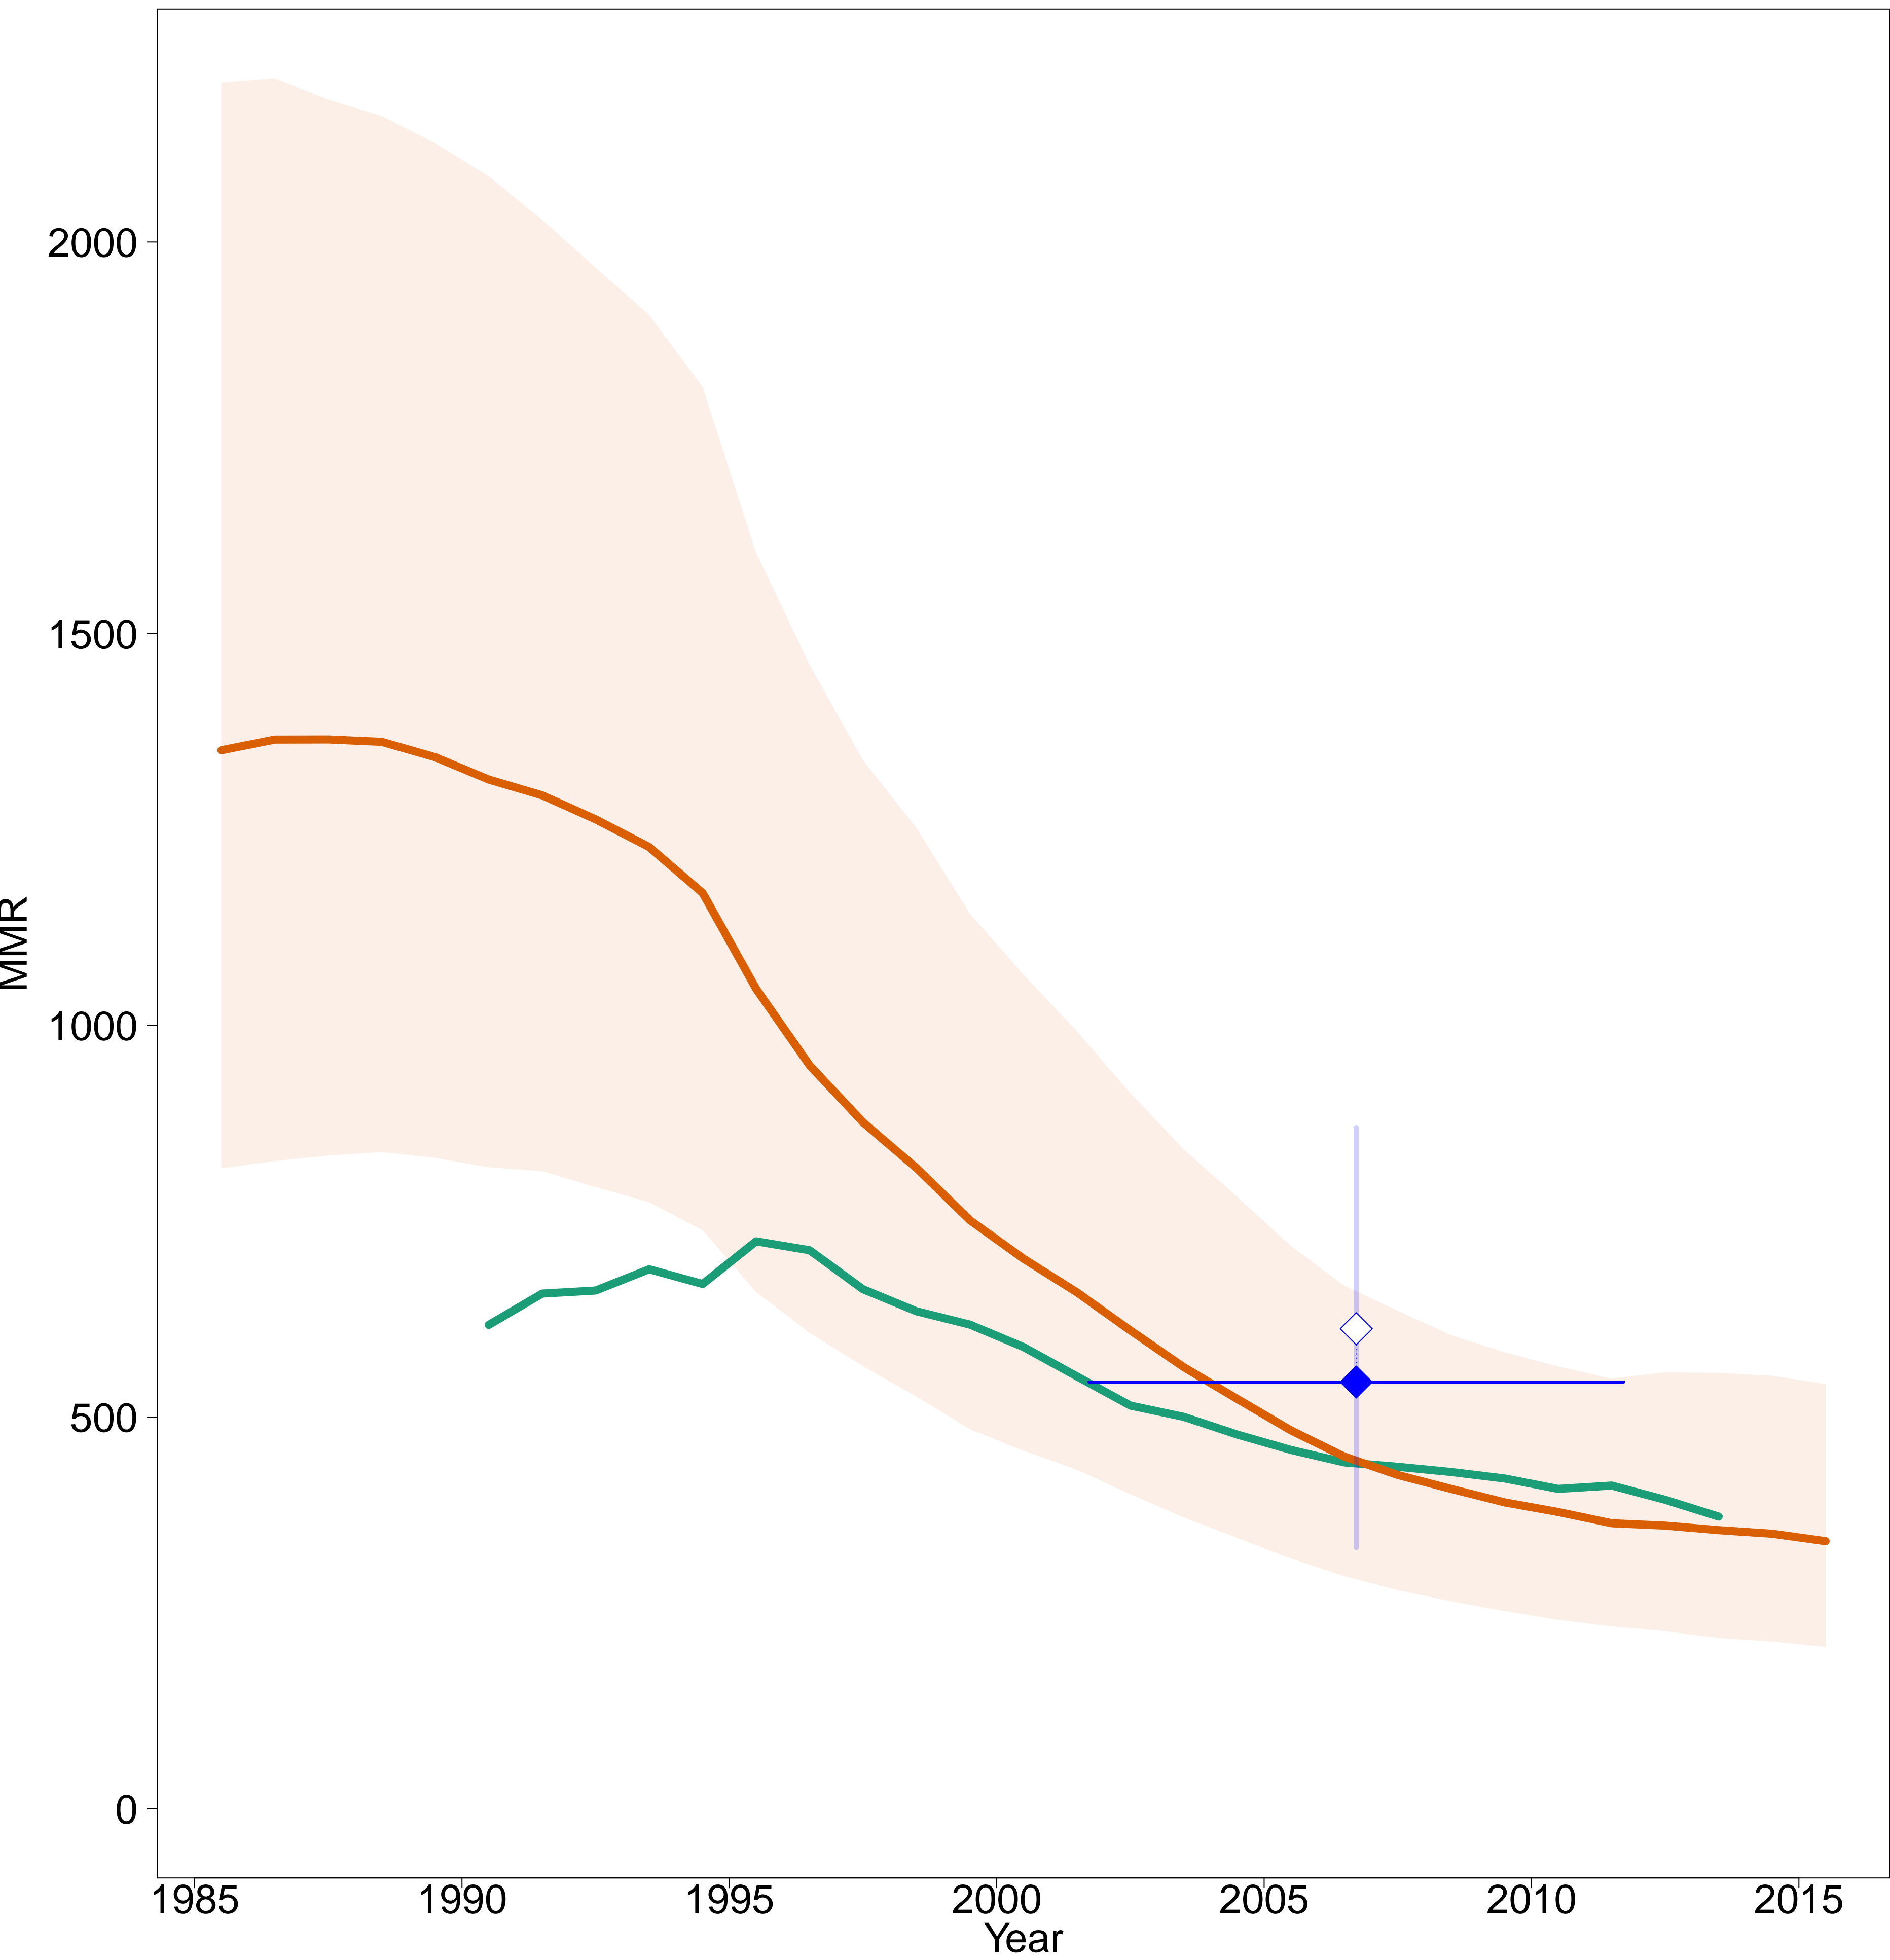

- Estimates -
- MMEIG 2015
- GBD 2013
- MMR Database 2015 -
- Observed Data
- Adjusted Data
- Data type -
- DHS

Eritrea [ERI]  
(Eastern Africa)

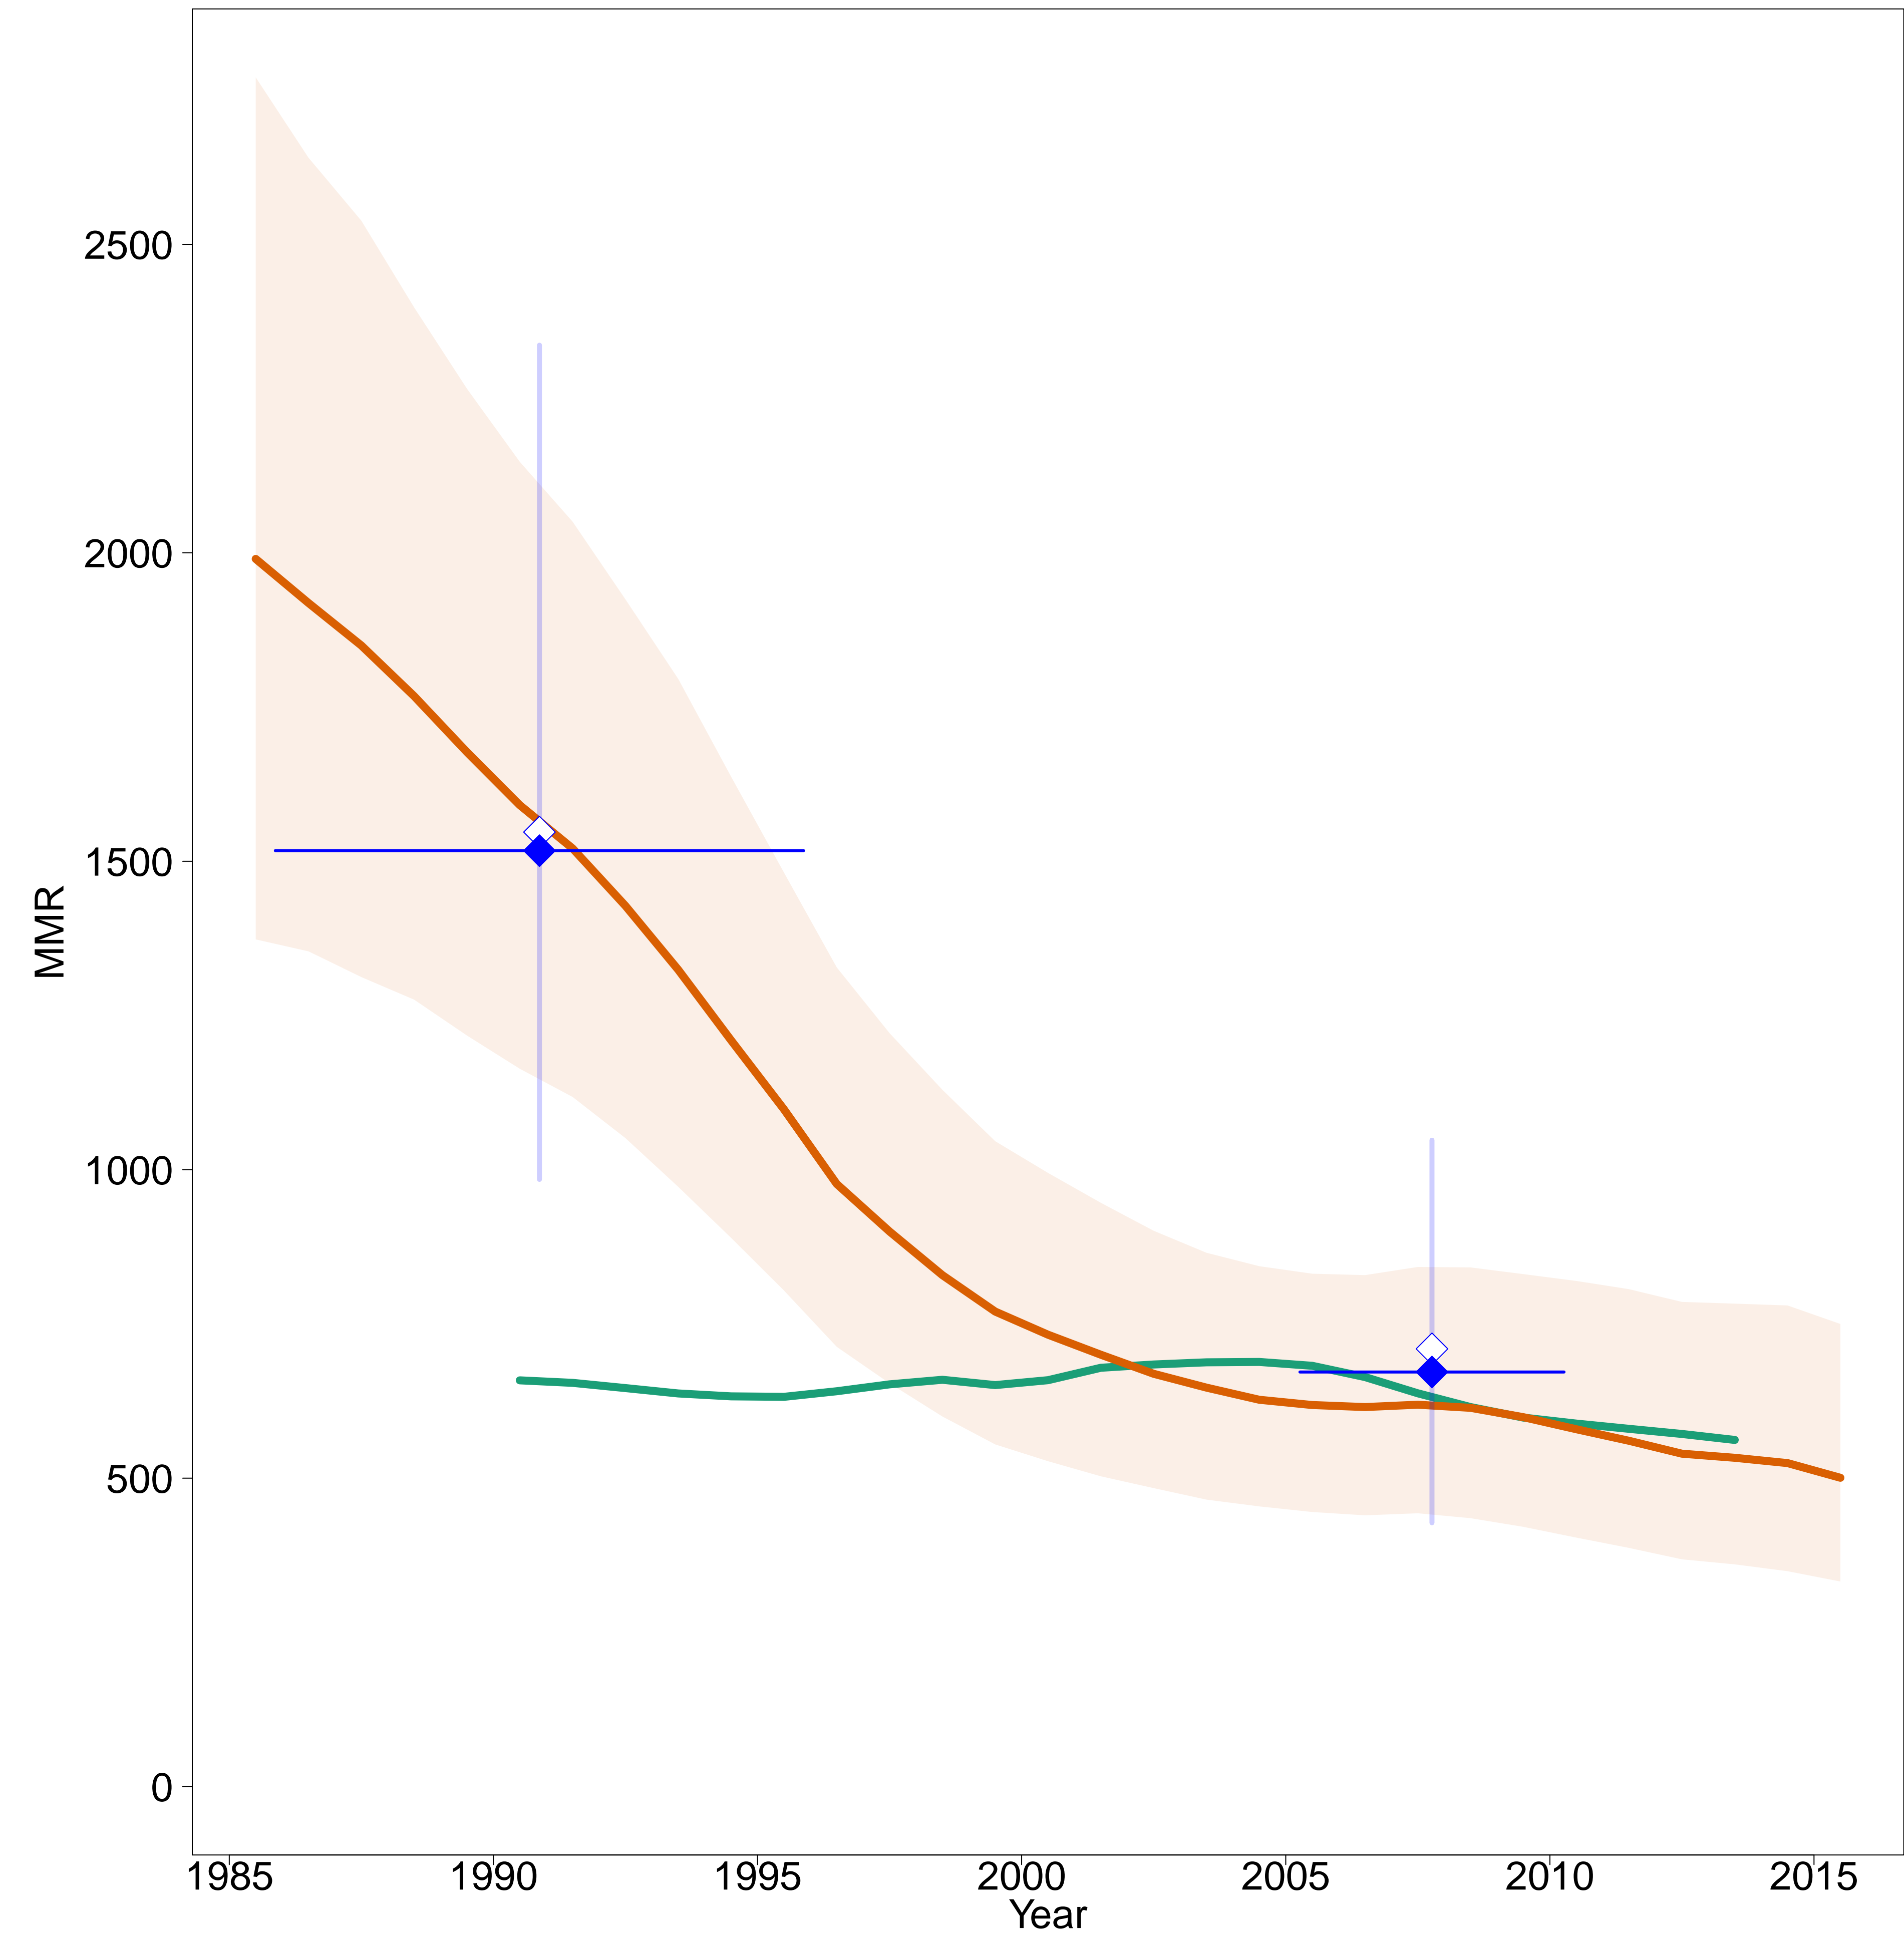

- Estimates -
- MMEIG 2015
- GBD 2013
- MMR Database 2015 -
- Observed Data
- Adjusted Data
- Data type -
- DHS

Estonia [EST]  
(Developed regions)

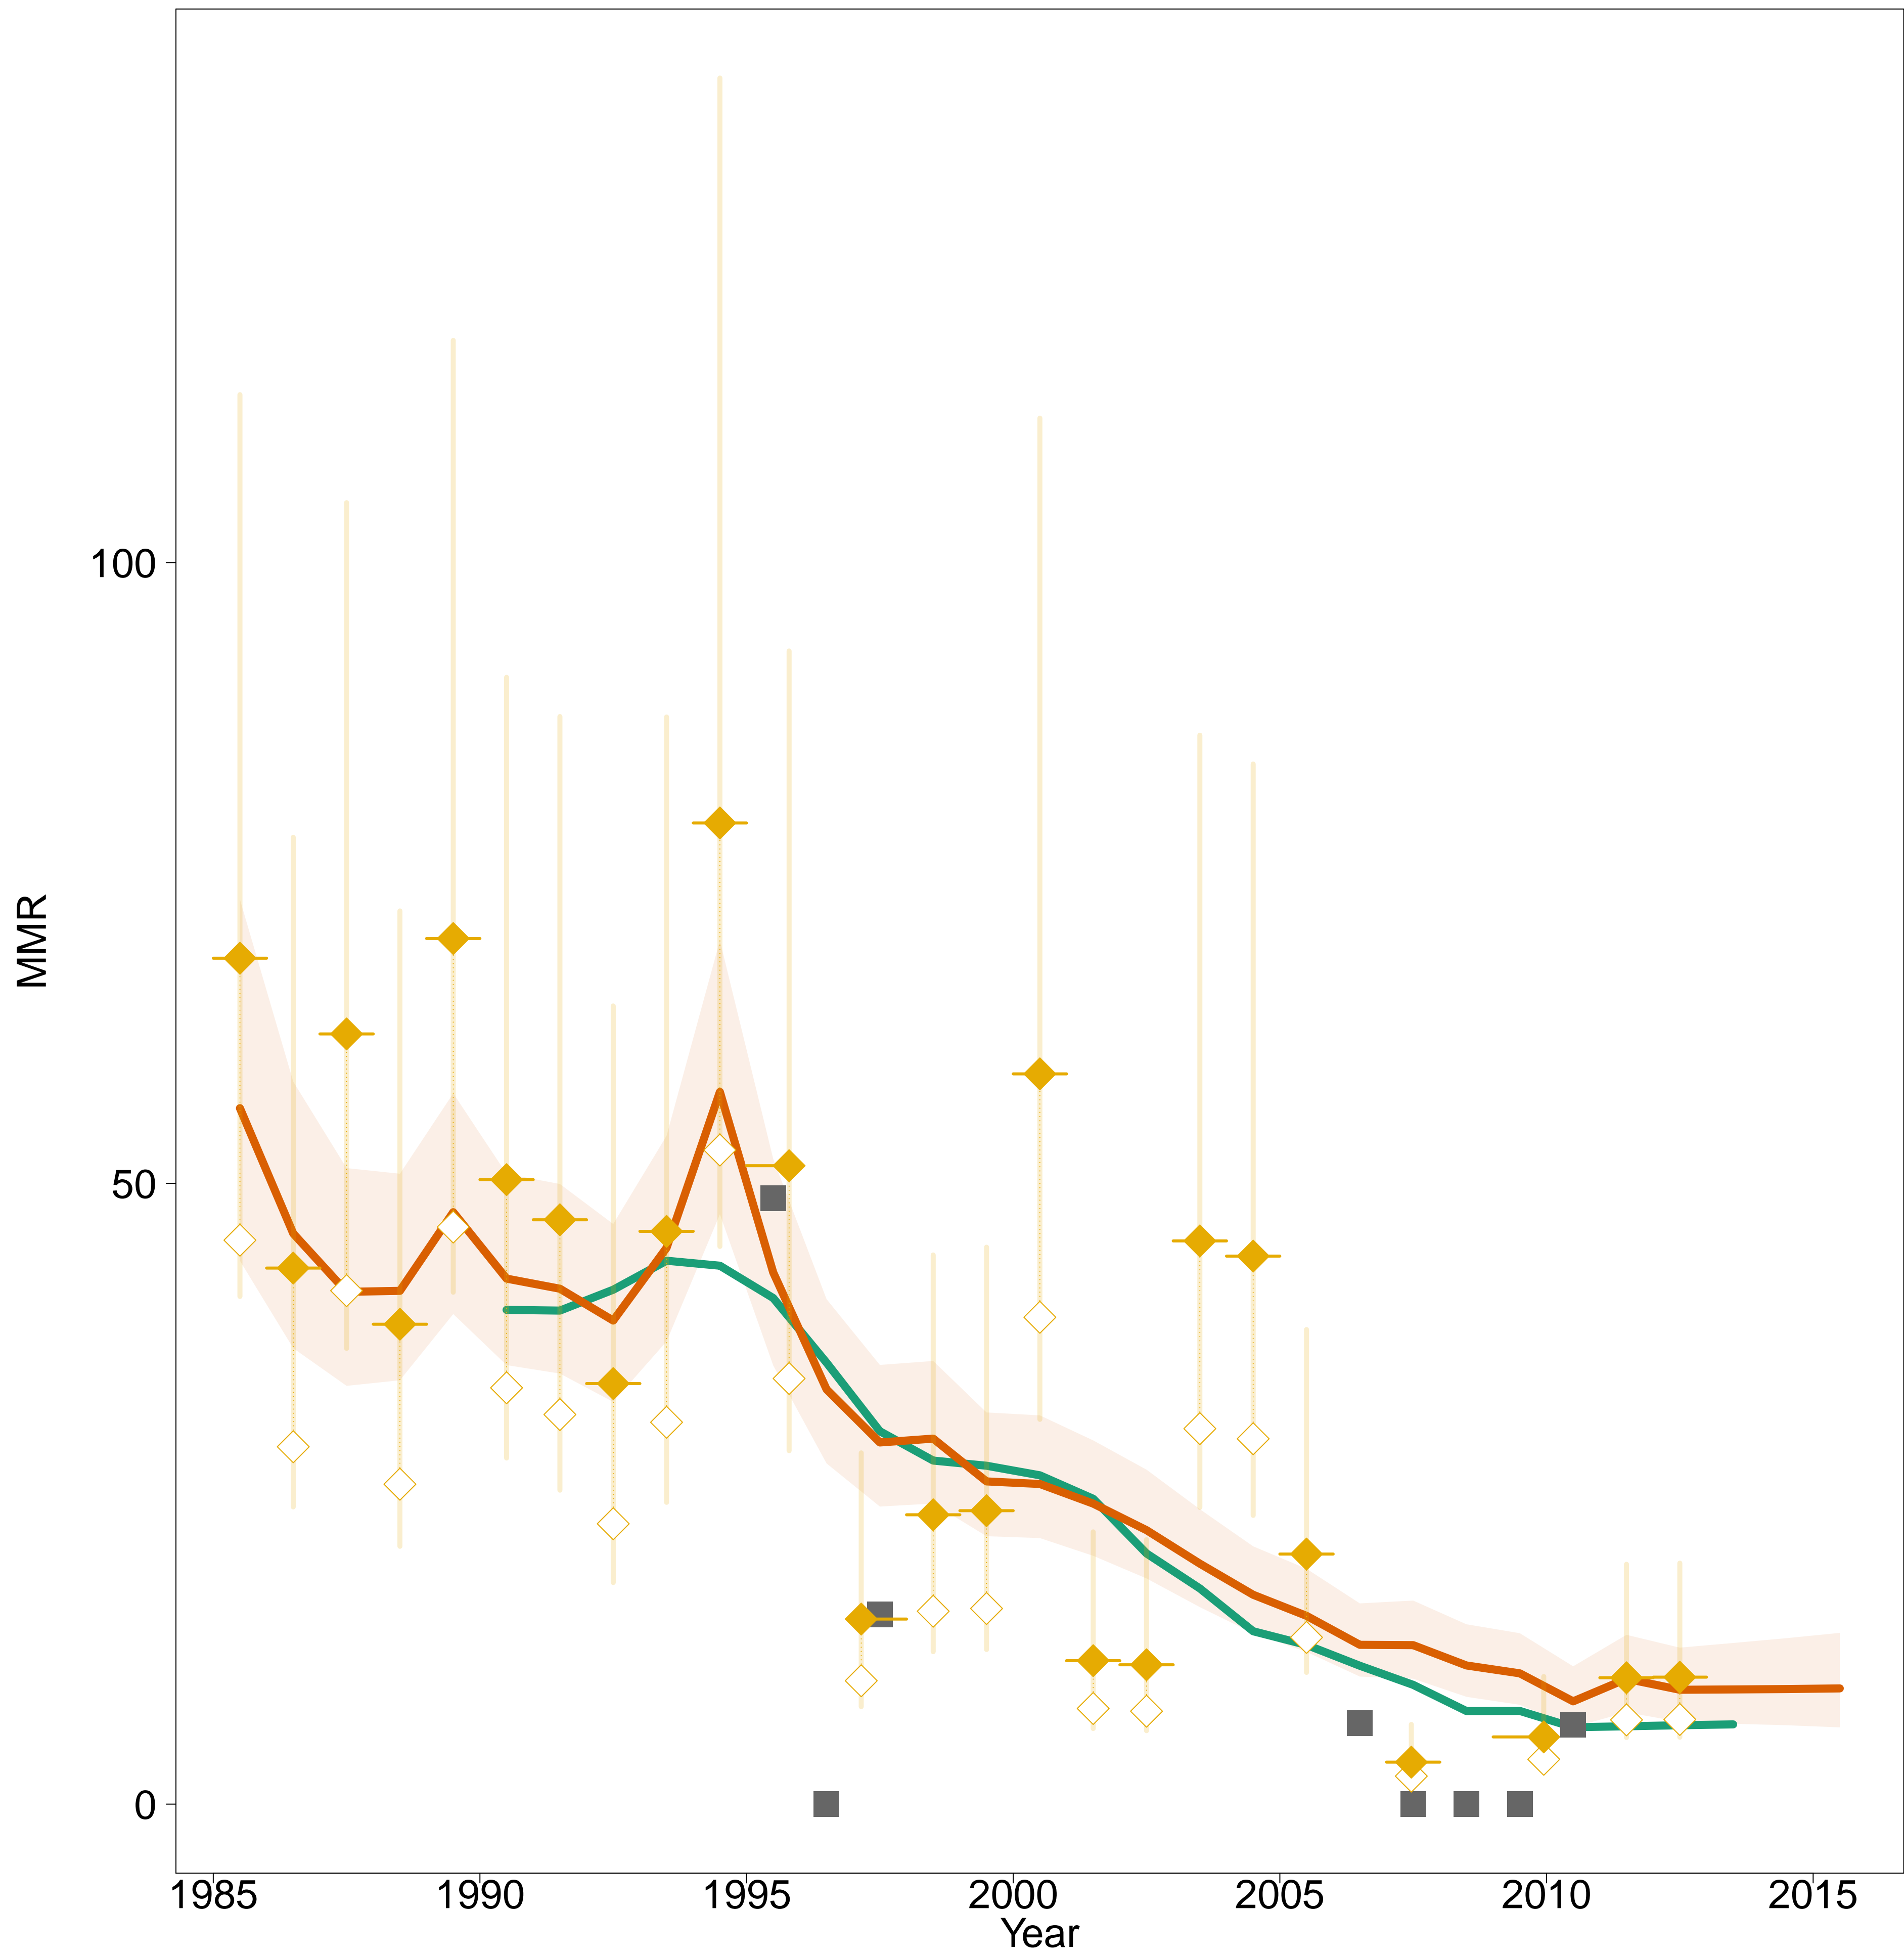

- Estimates –
- MMEIG 2015
- GBD 2013
- MMR Database 2015 –
- Observed Data
- Adjusted Data
- Data type –
- VR
- Reported VR before recalc.  
(related to 0 obs. mat. death)

Ethiopia [ETH]  
(Eastern Africa)

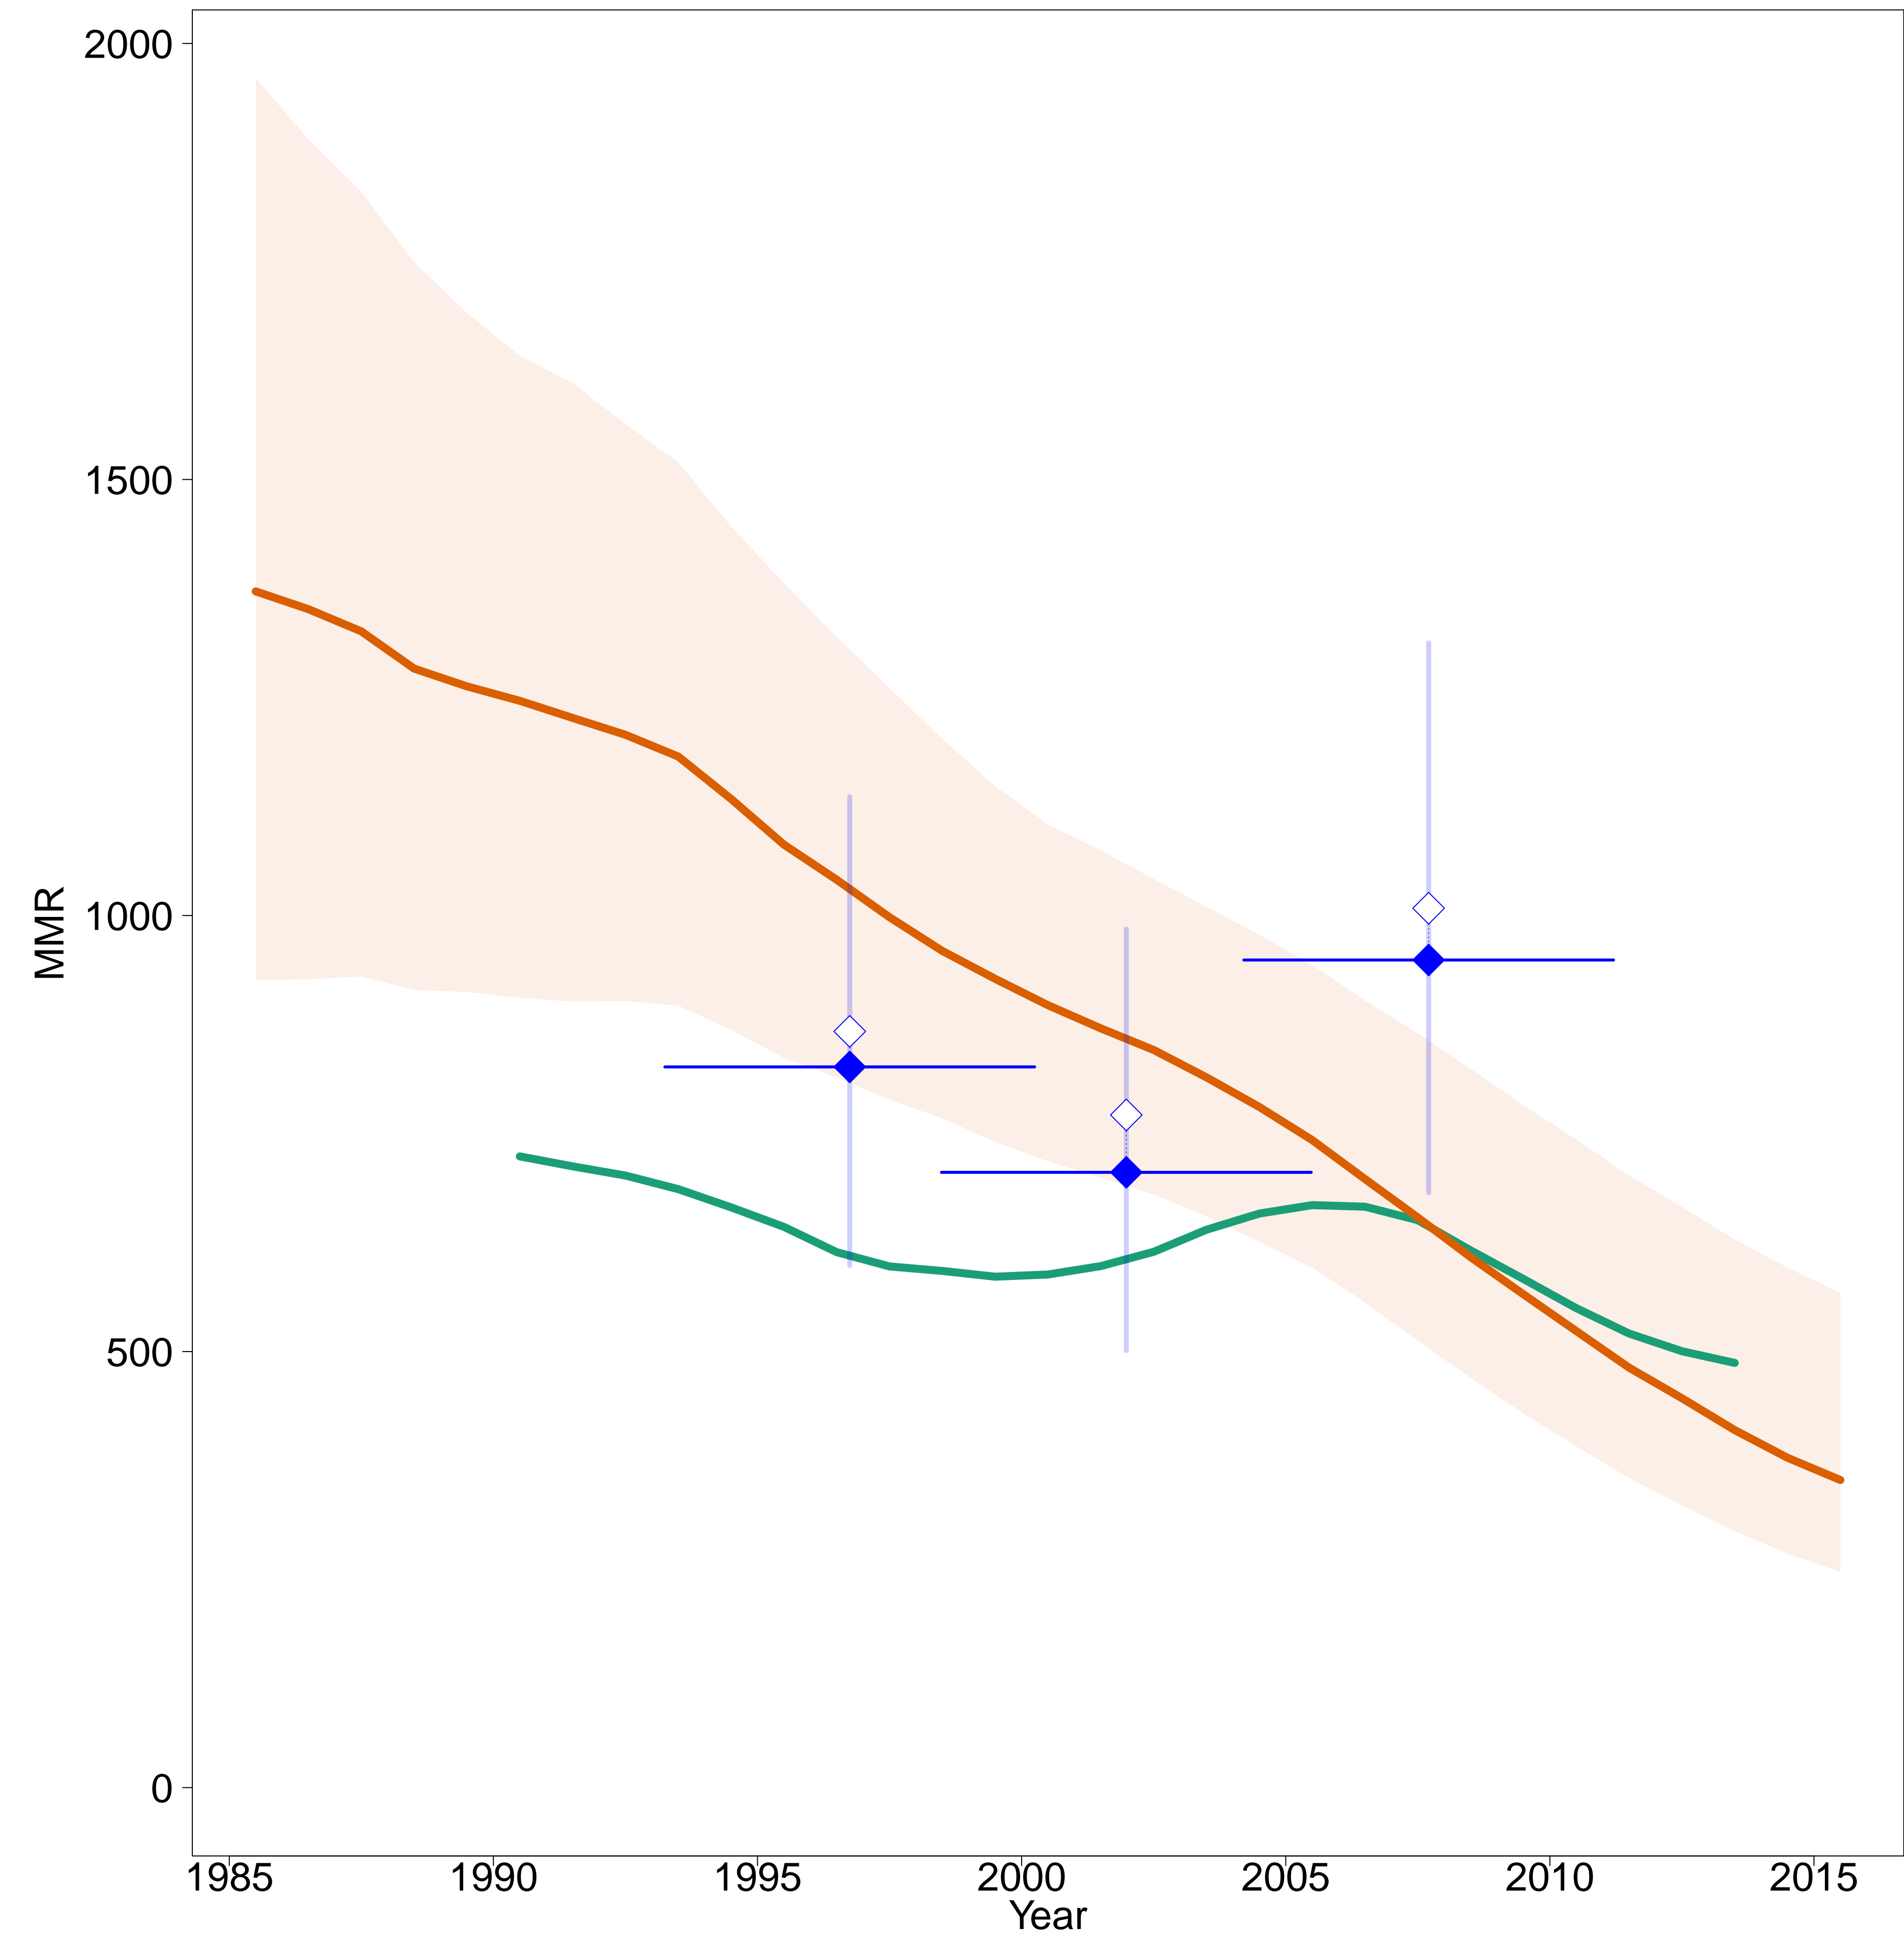

- Estimates –
- MMEIG 2015
- GBD 2013
- MMR Database 2015 –
- ◊ Observed Data
- ◆ Adjusted Data
- Data type –
- ◆ DHS

Fiji [FJI]  
(South-Eastern Asia / Oceania)

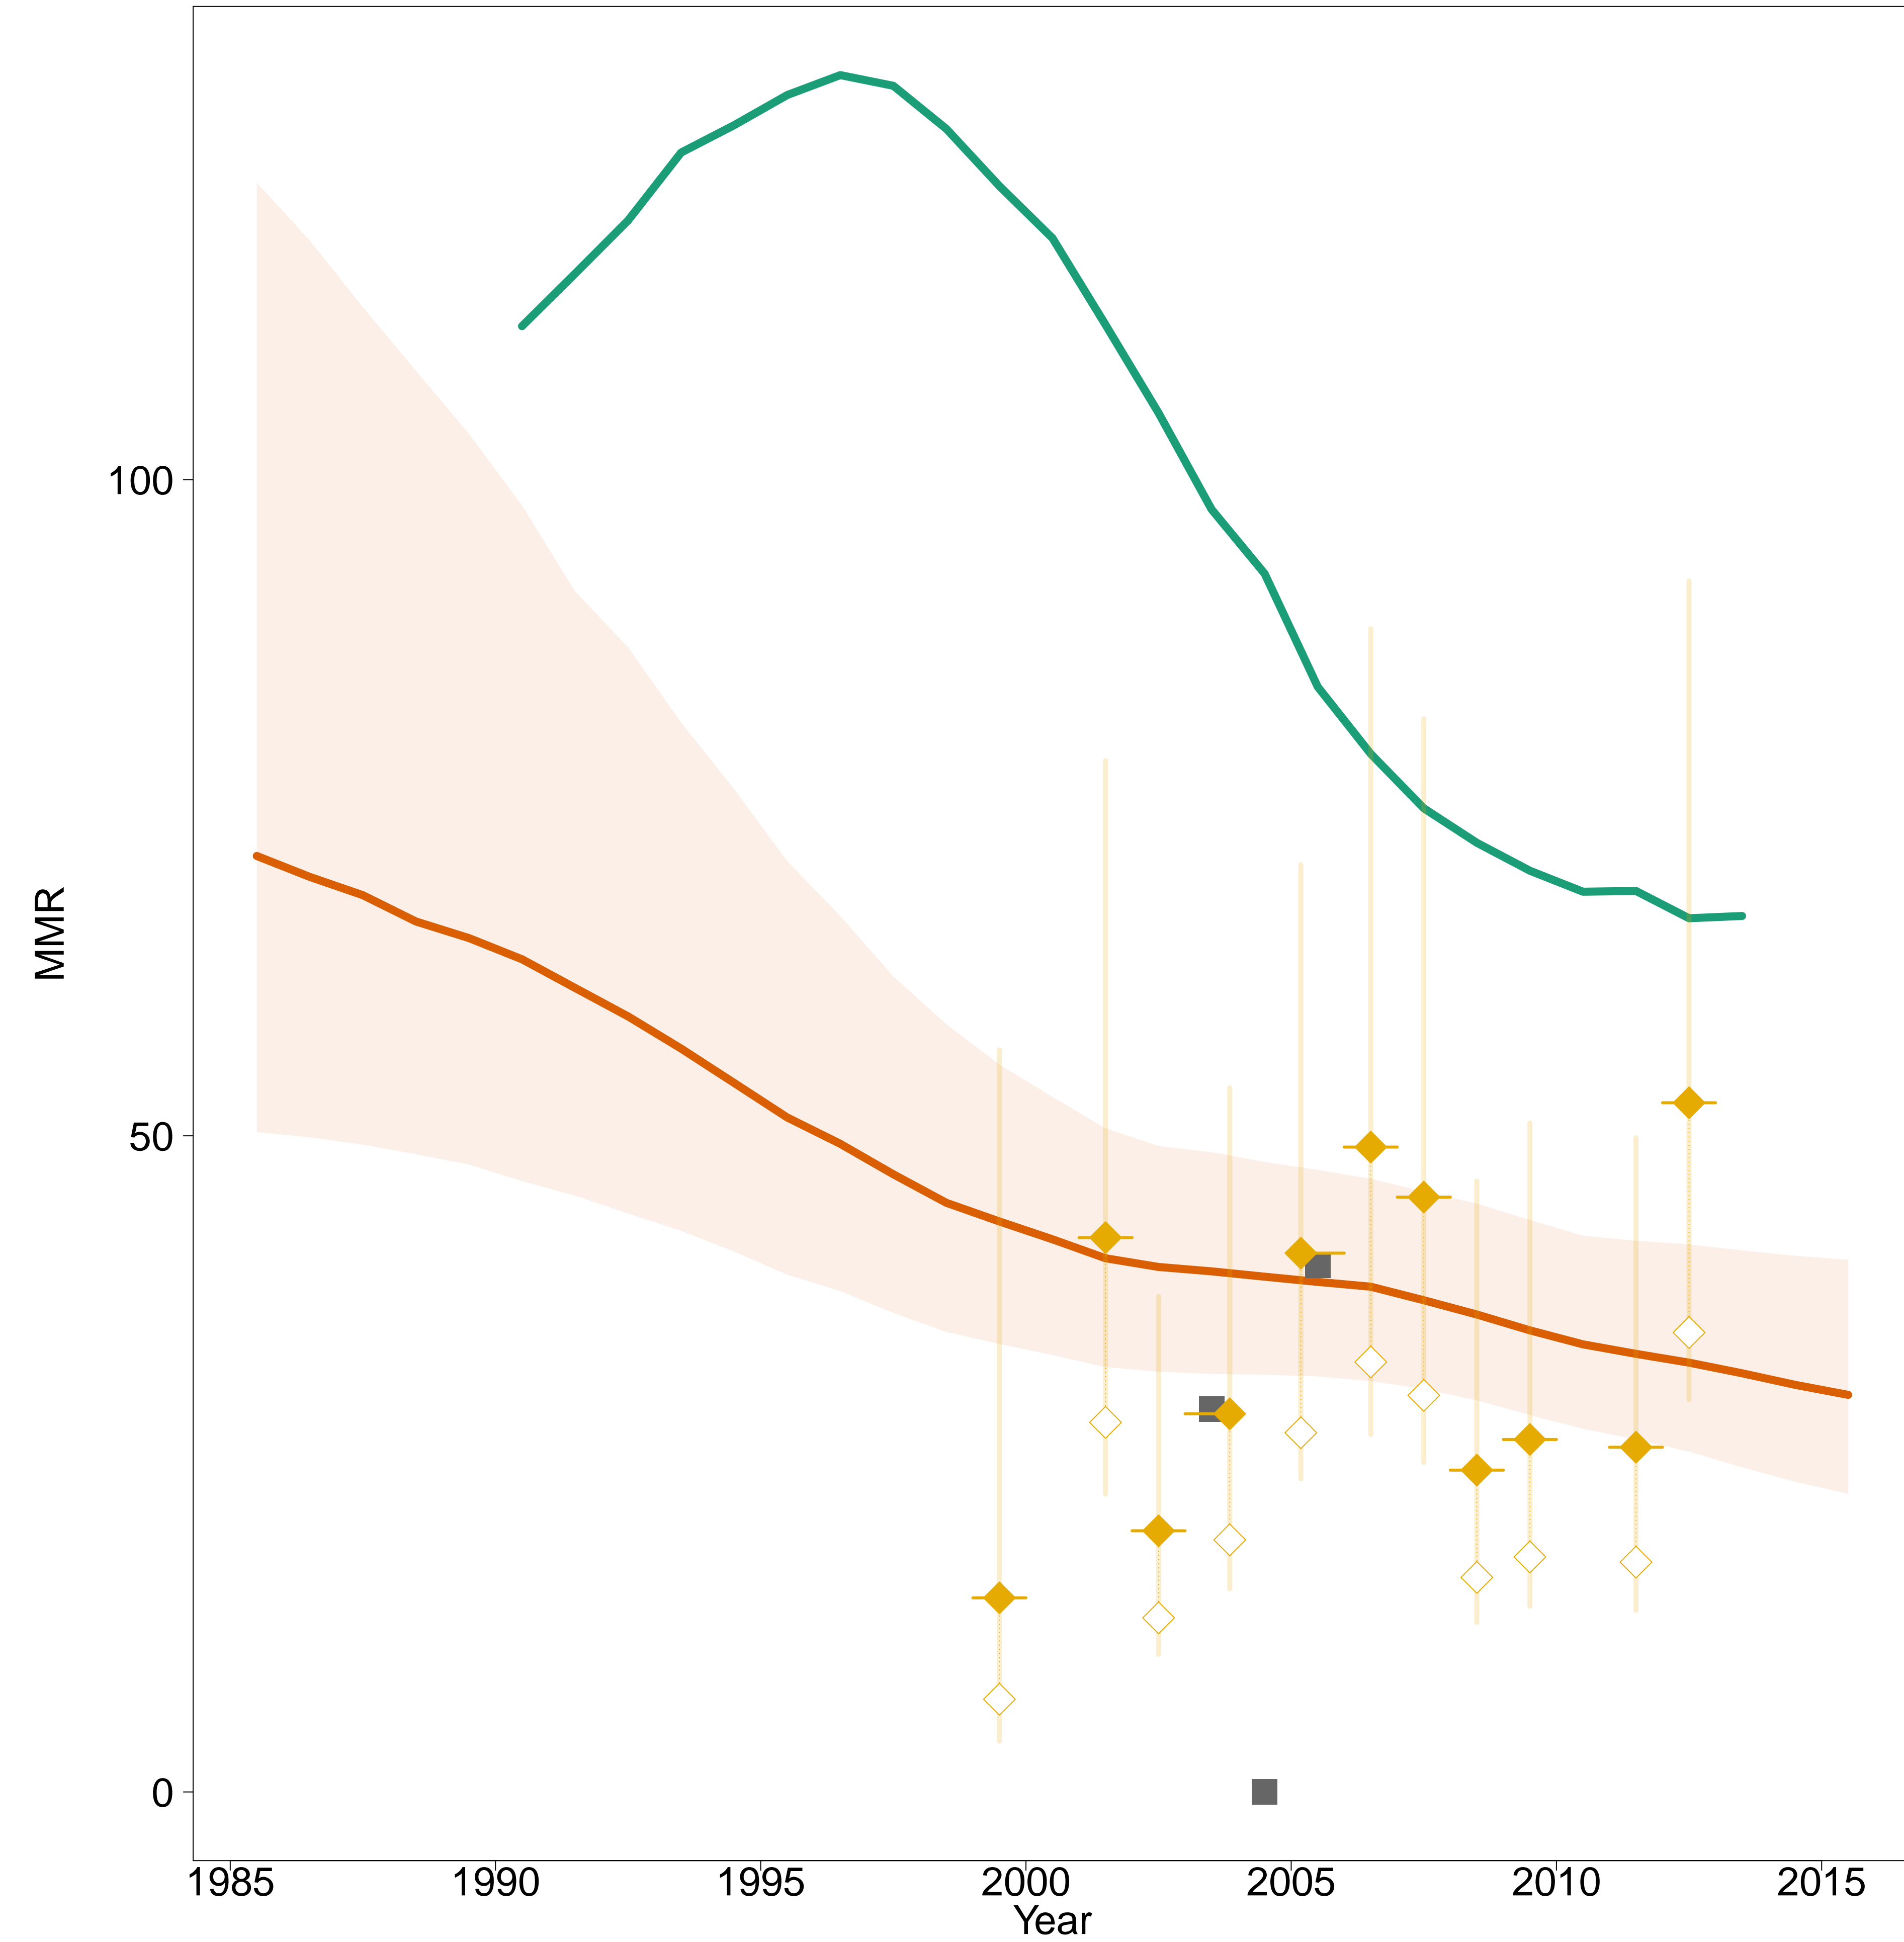

- Estimates –
- MMEIG 2015
- GBD 2013
- MMR Database 2015 –
- Observed Data
- Adjusted Data
- Data type –
- VR
- Reported VR before recalc.  
(related to 0 obs. mat. death)

Finland [FIN]  
(Developed regions)

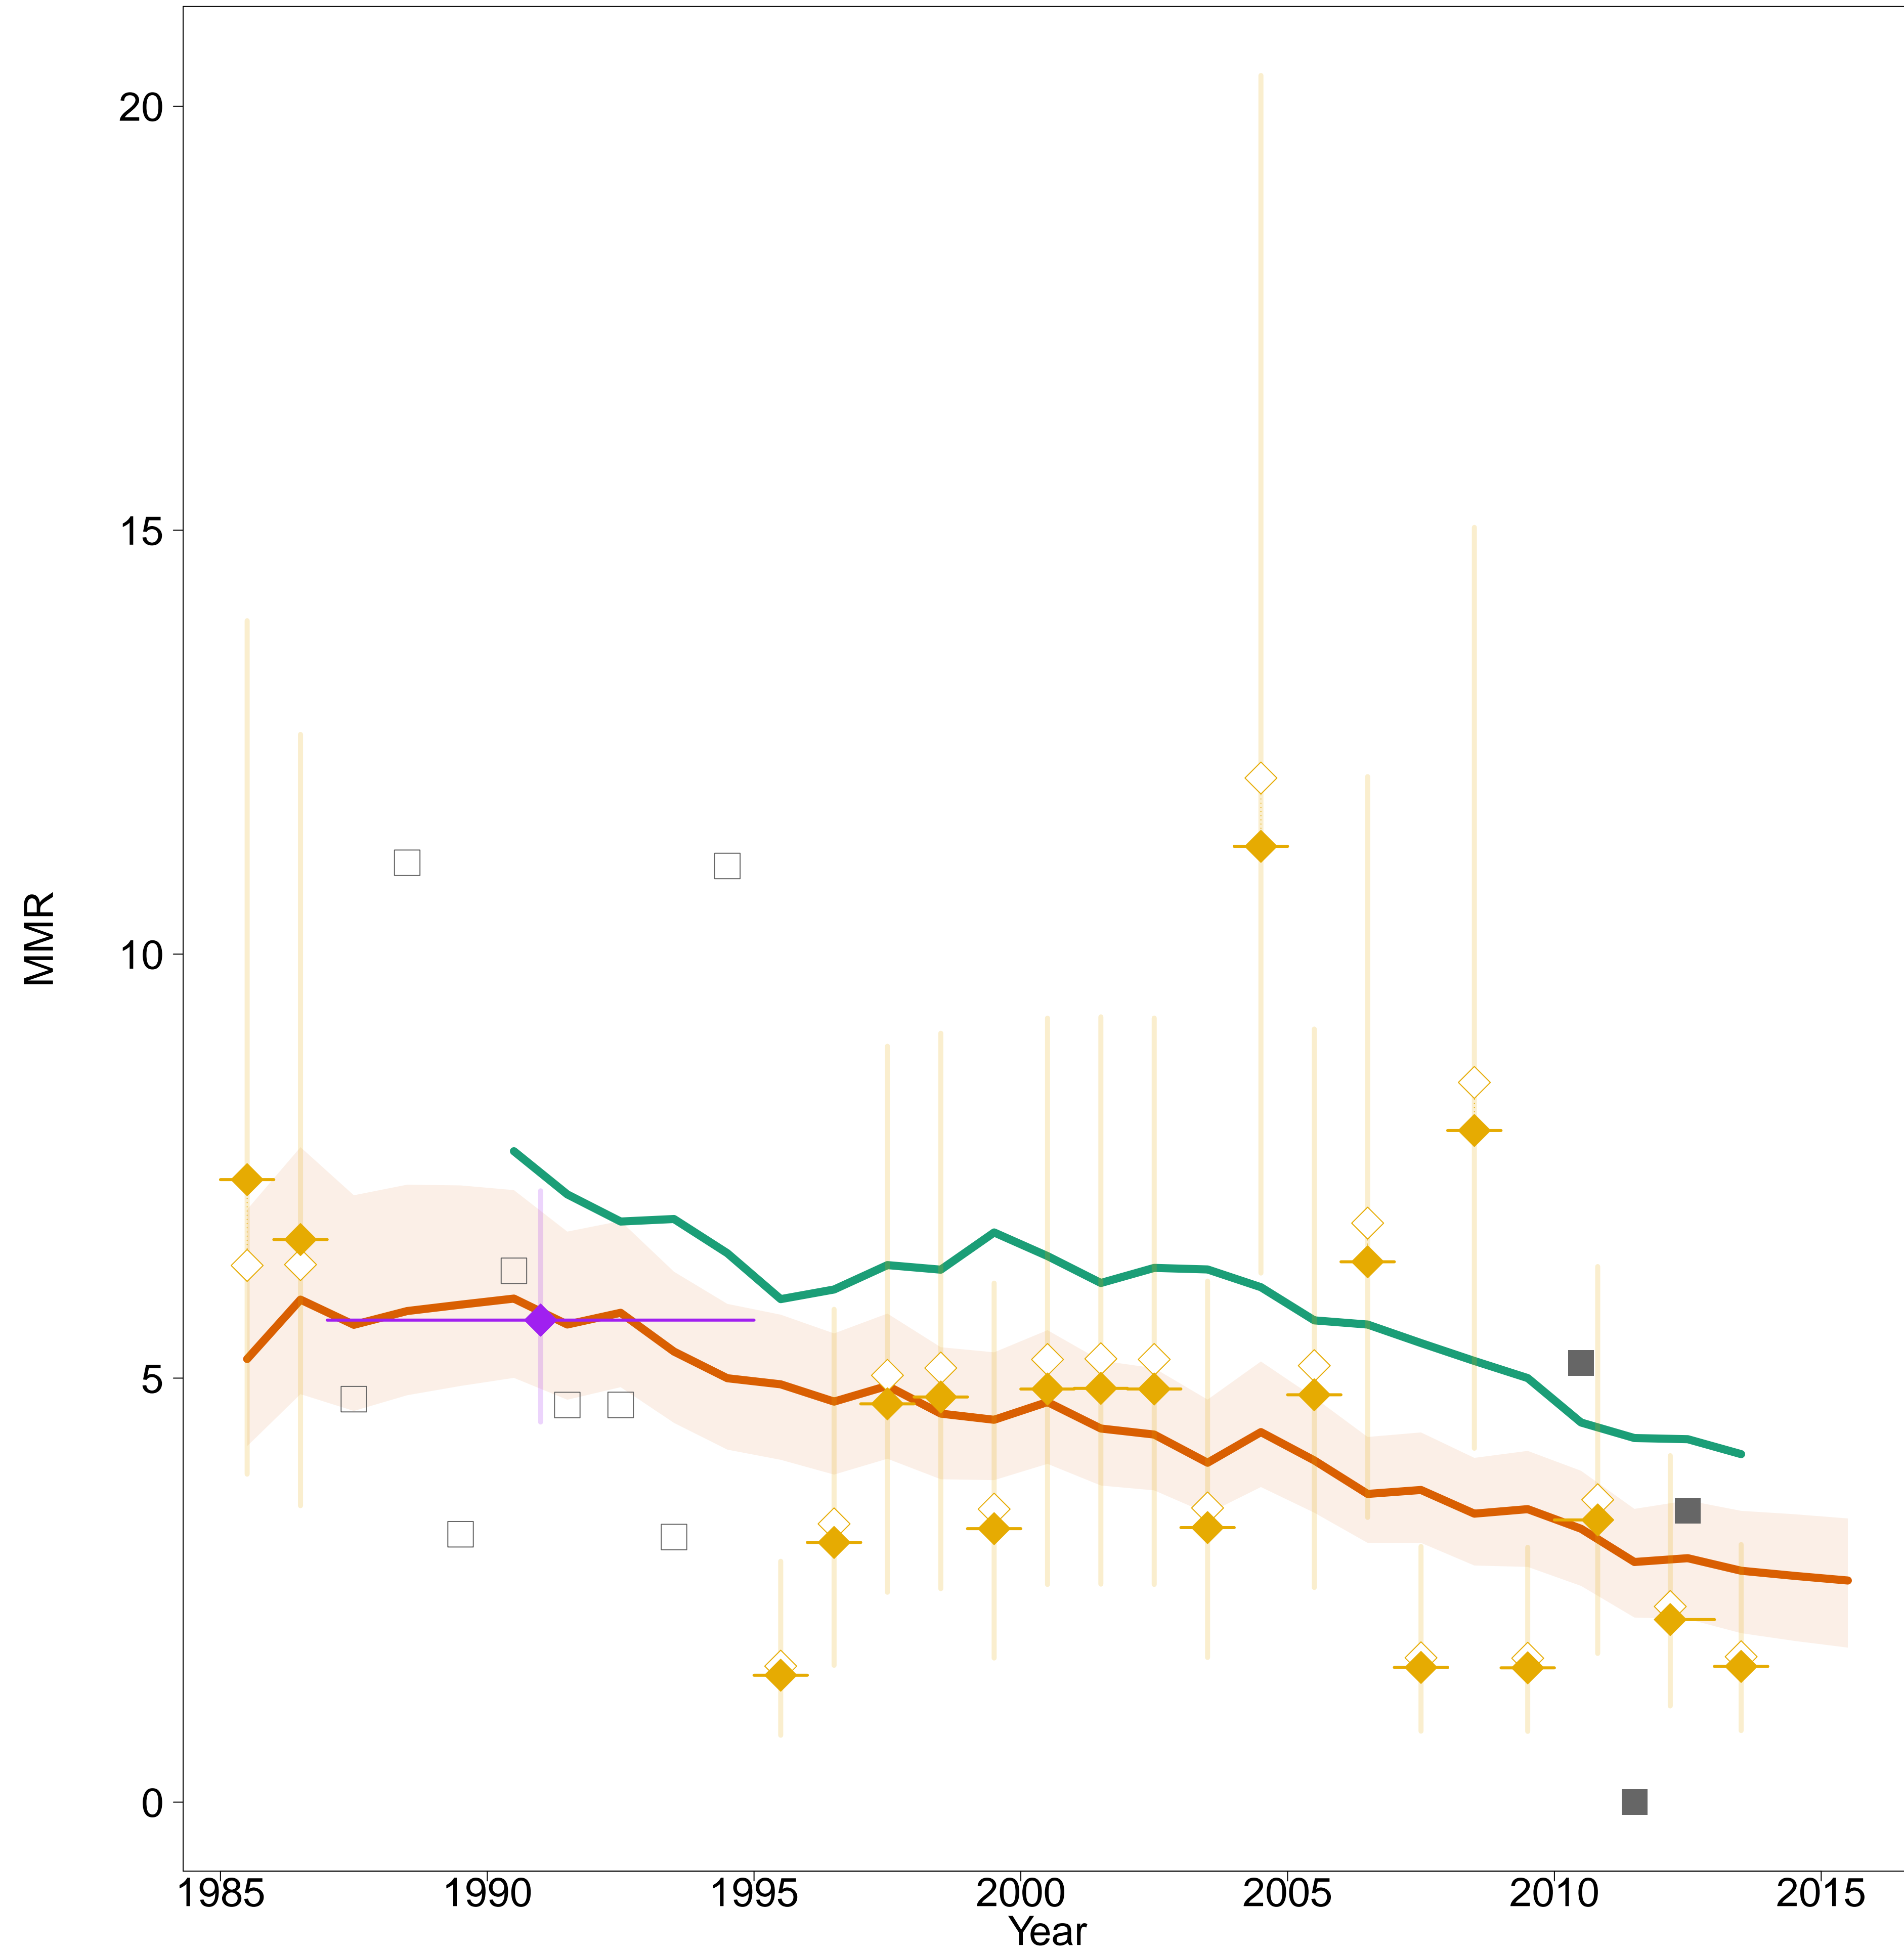

- Estimates –
- MMEIG 2015
- GBD 2013
- MMR Database 2015 –
- Observed Data
- Adjusted Data
- Data type –
- VR
- Spec. studies
- Reported VR before recalc.  
(related to 0 obs. mat. death)
- Excluded VR data  
(overlap with specialized study)



France [FRA]  
(Developed regions)

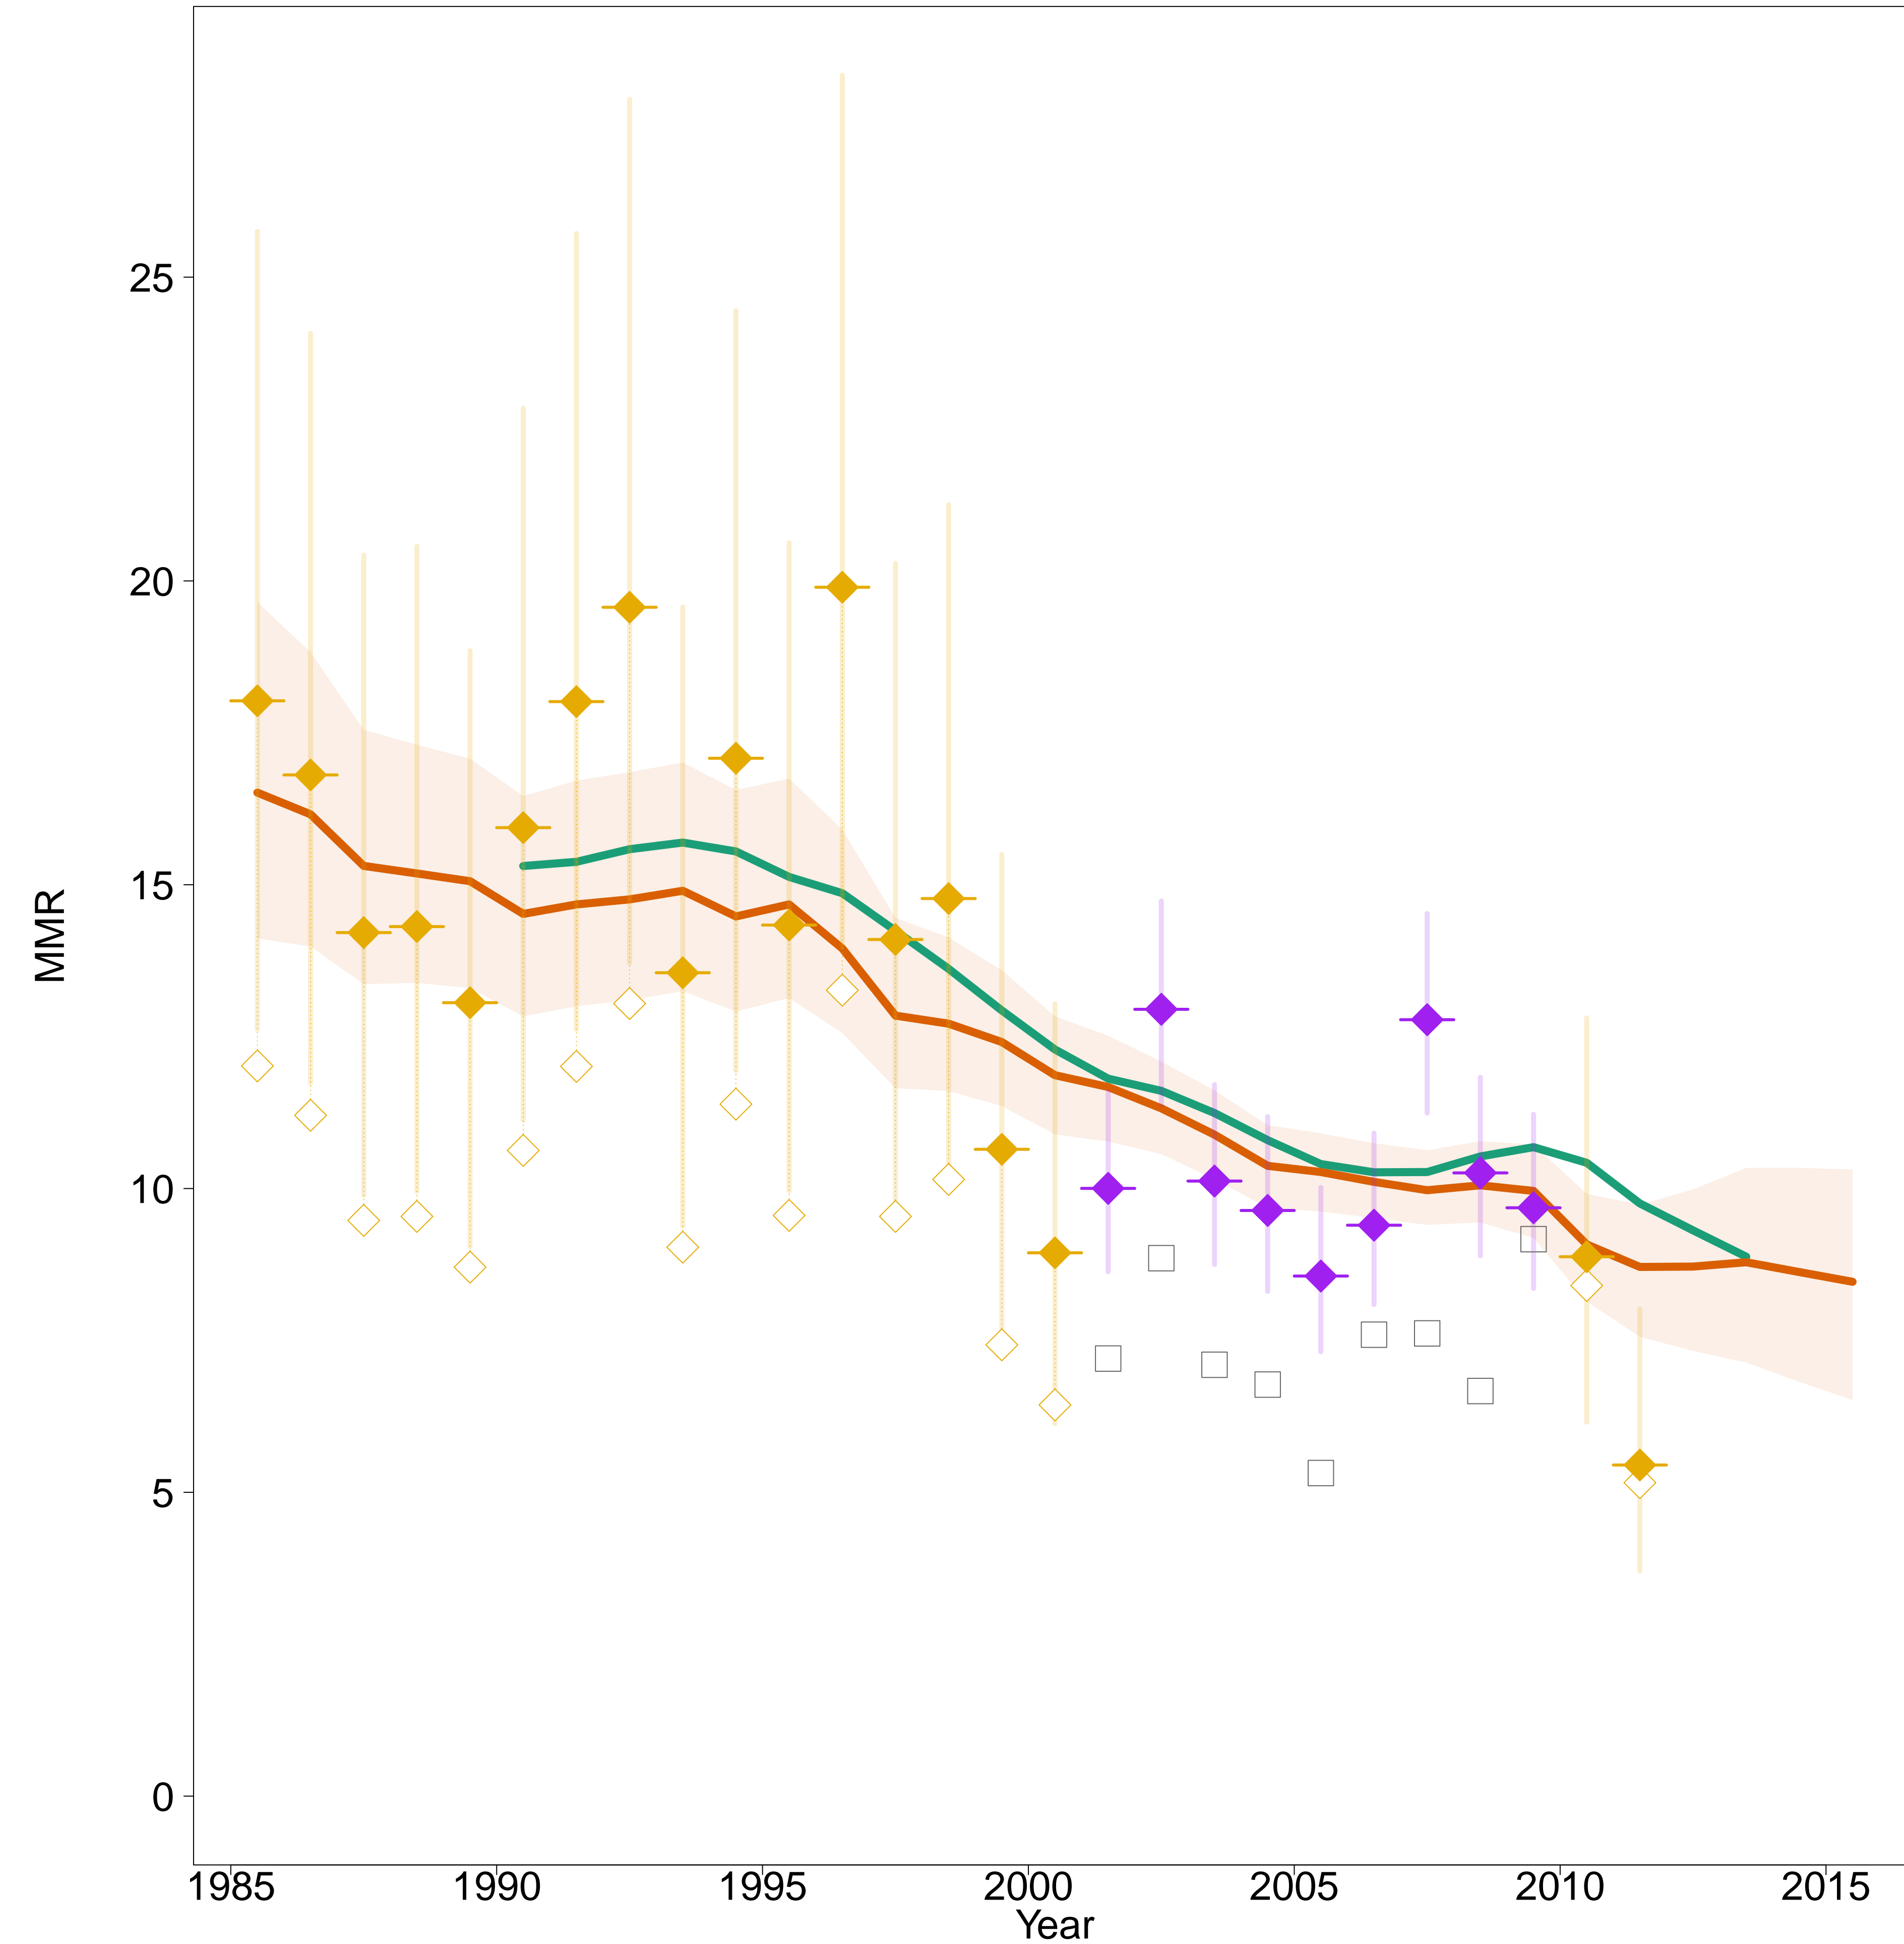

- Estimates –
- MMEIG 2015
- GBD 2013
- MMR Database 2015 –
- ◊ Observed Data
- ◆ Adjusted Data
- Data type –
- ◆ VR
- ◆ Spec. studies
- ◻ Excluded VR data  
(overlap with specialized study)

Gabon [GAB]  
(Middle Africa)

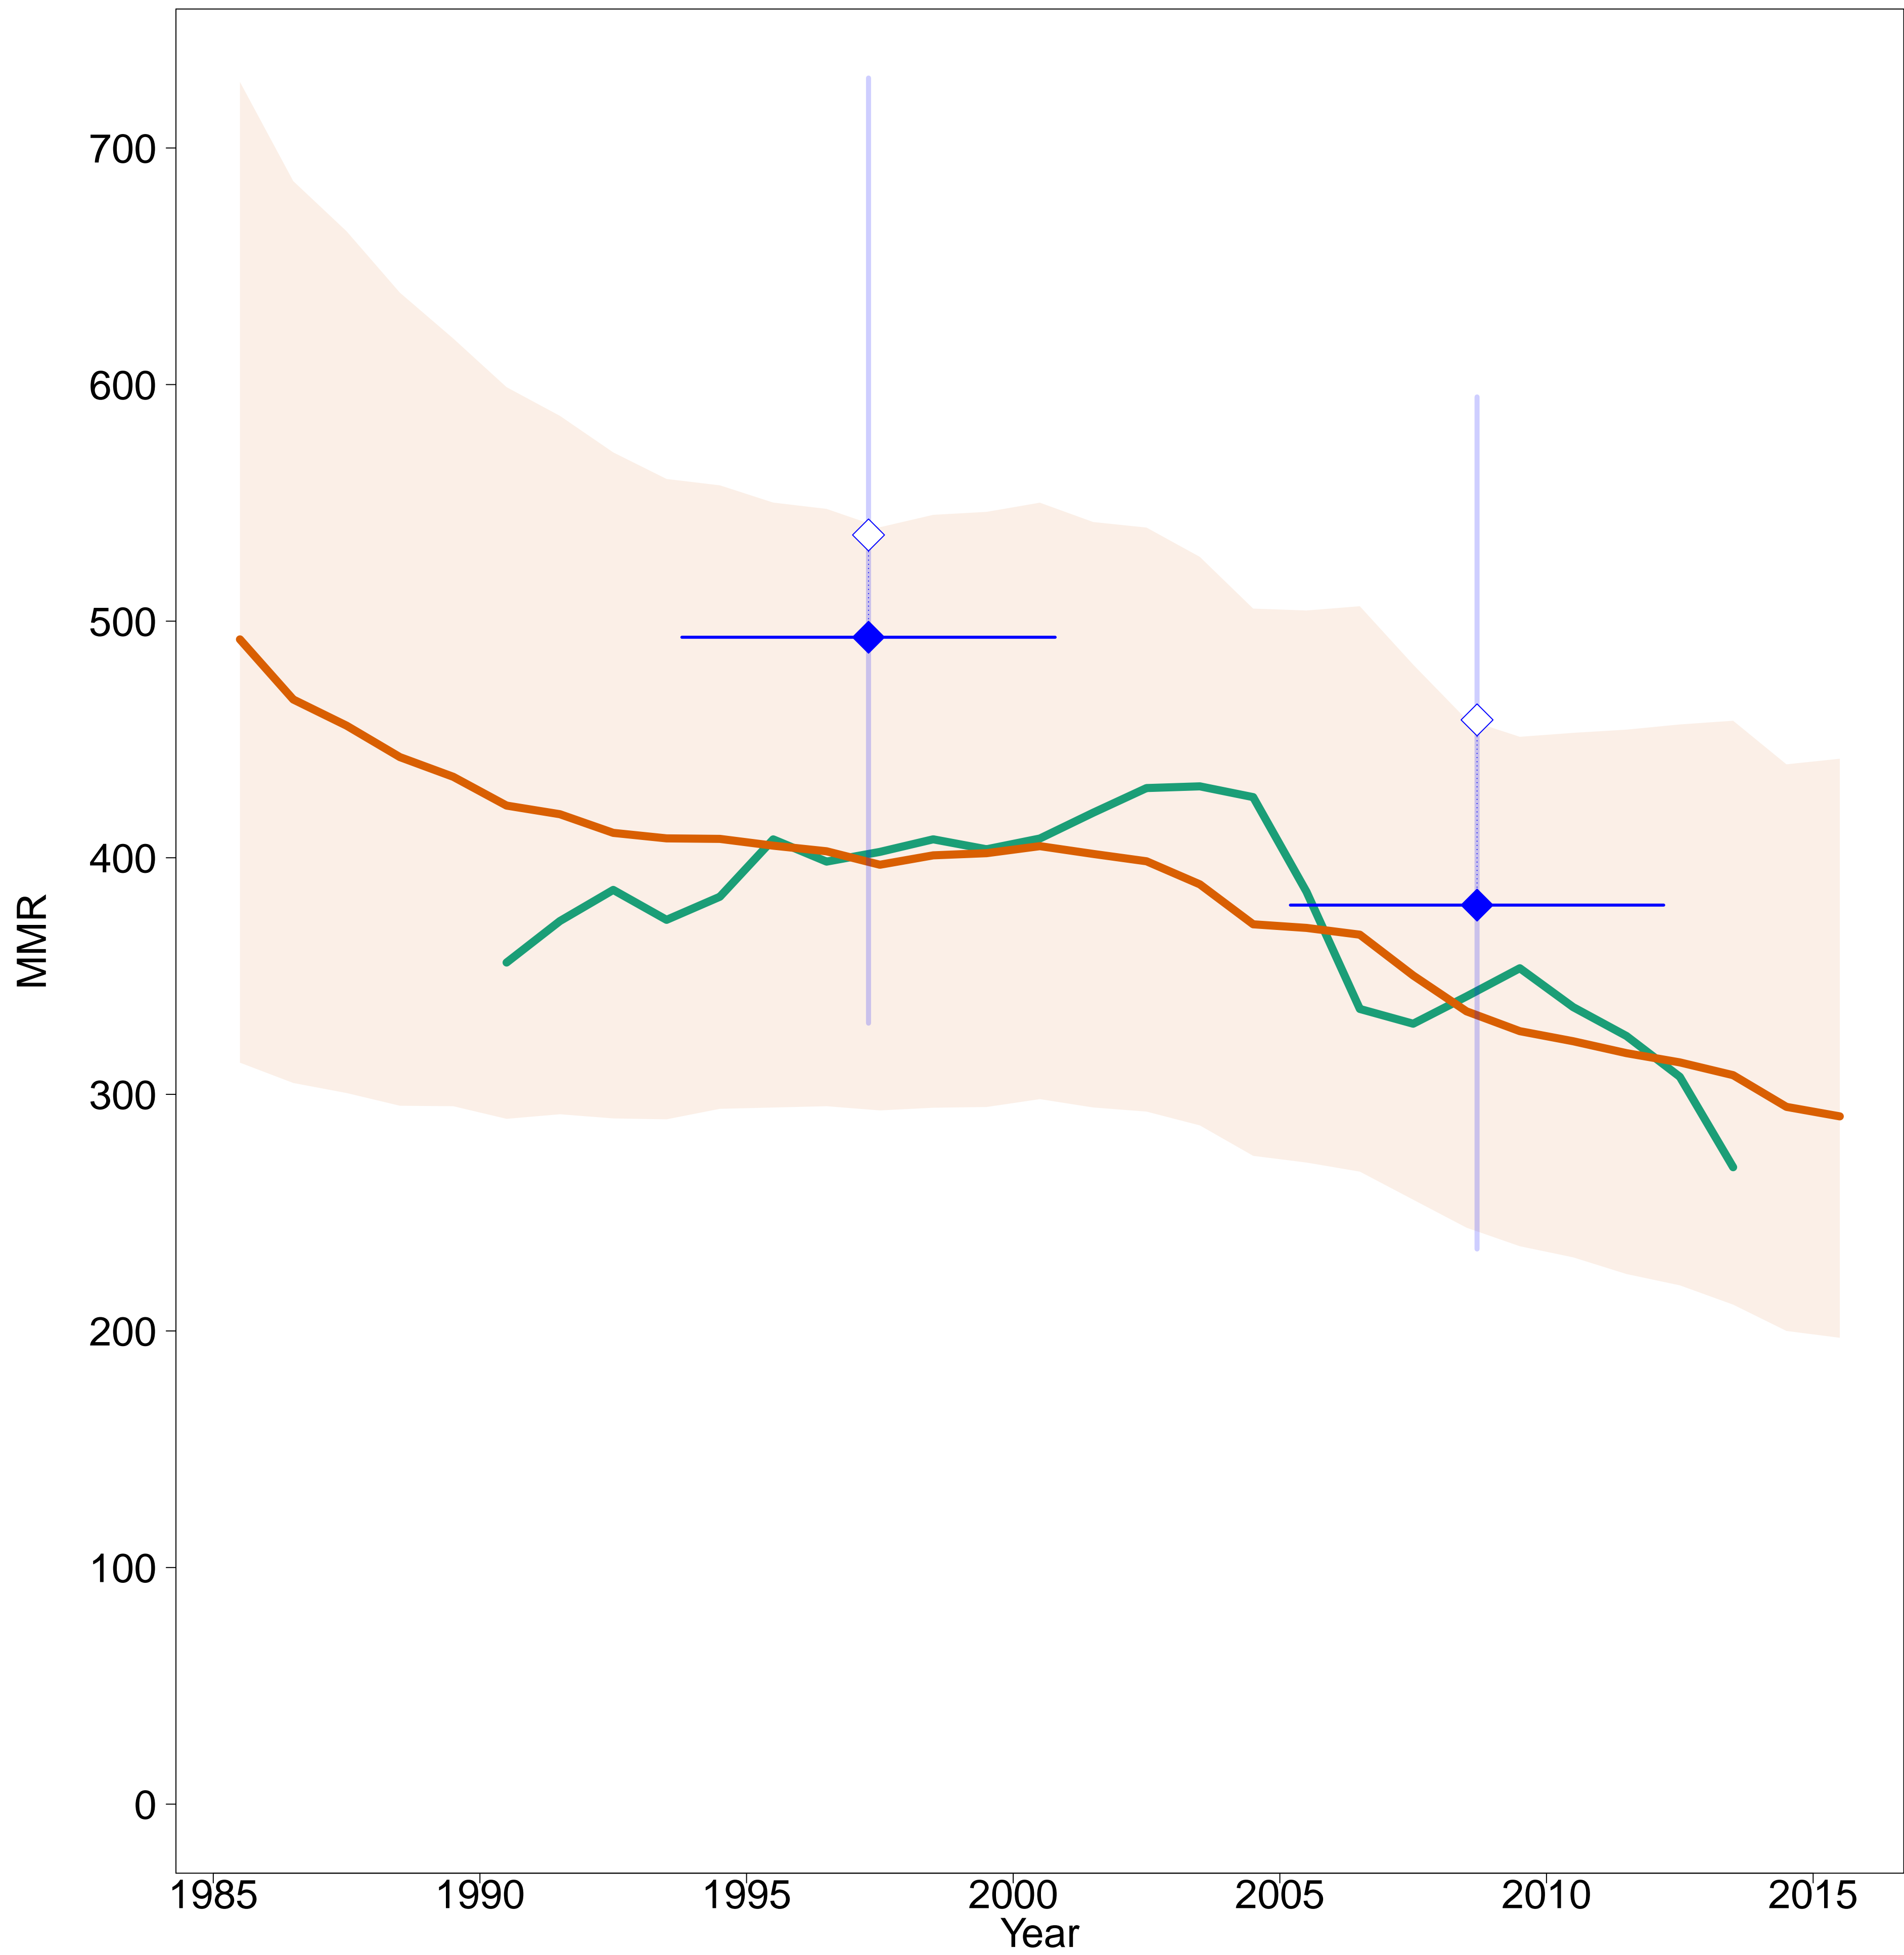

- Estimates -
- MMEIG 2015
- GBD 2013
- MMR Database 2015 -
- Observed Data
- Adjusted Data
- Data type -
- DHS

Gambia [GMB]  
(Western Africa)

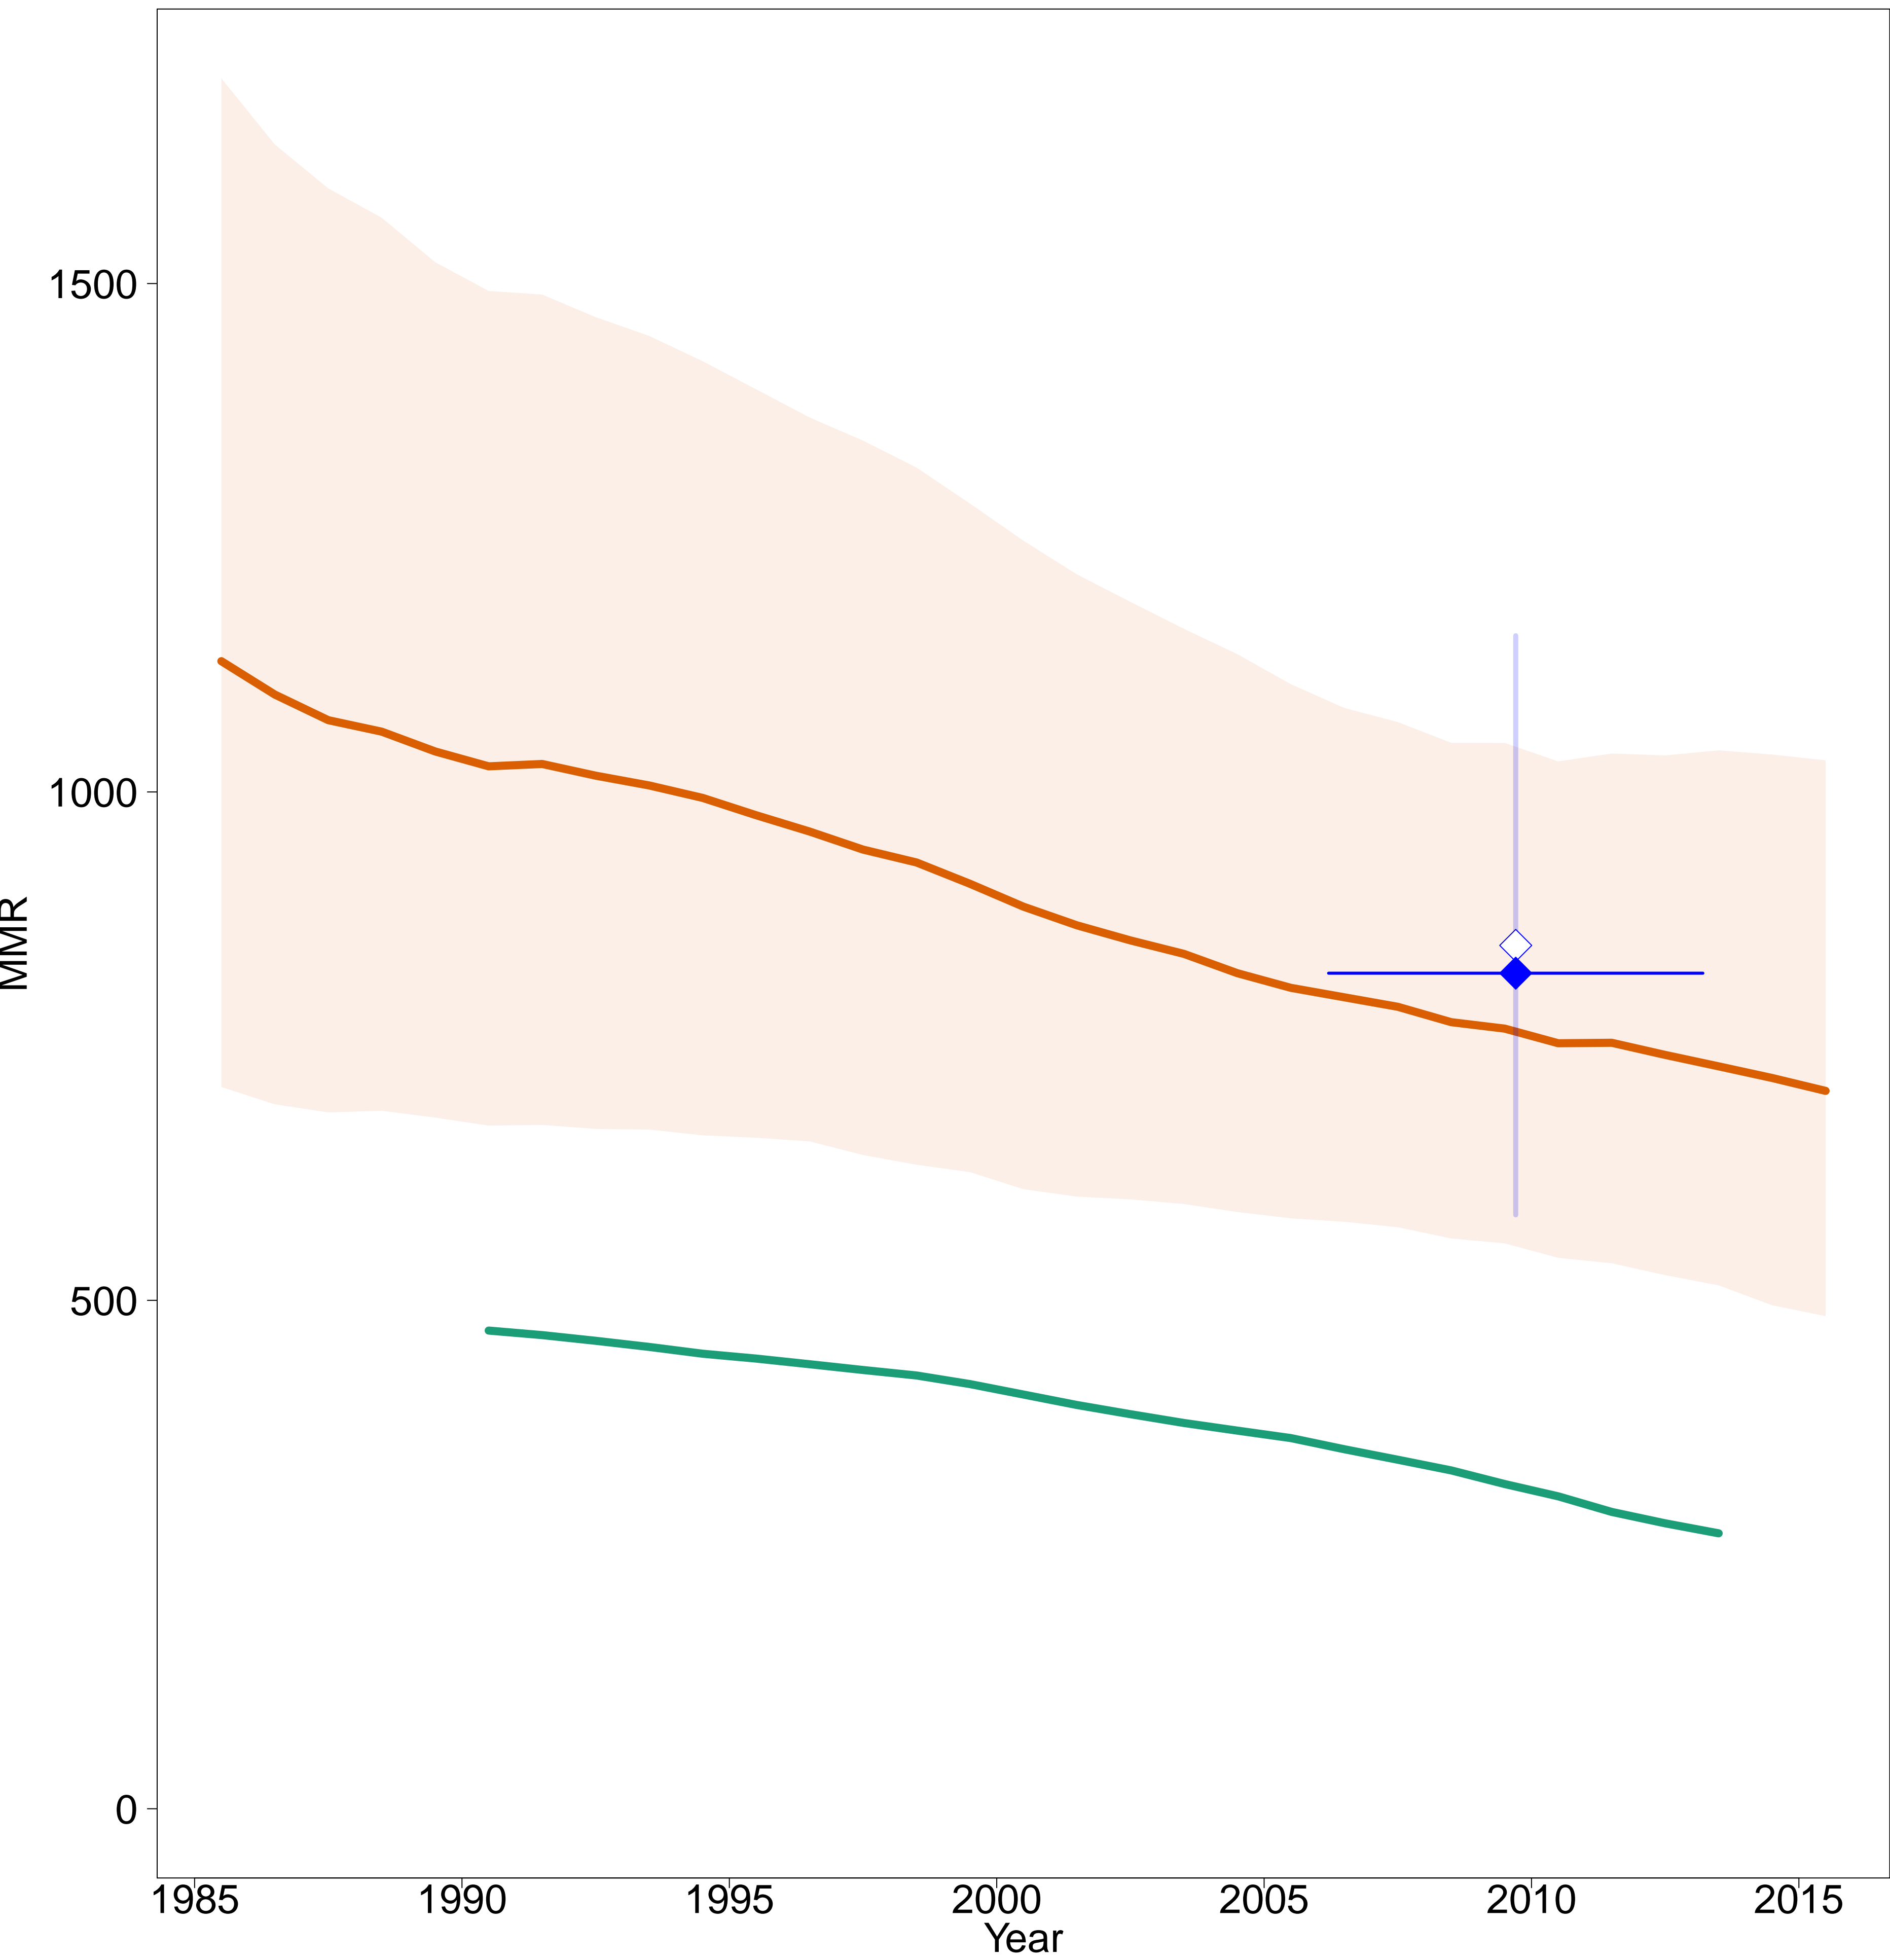

- Estimates -
- MMEIG 2015
- GBD 2013
- MMR Database 2015 -
- Observed Data
- Adjusted Data
- Data type -
- DHS

Georgia [GEO]  
(Western Asia)

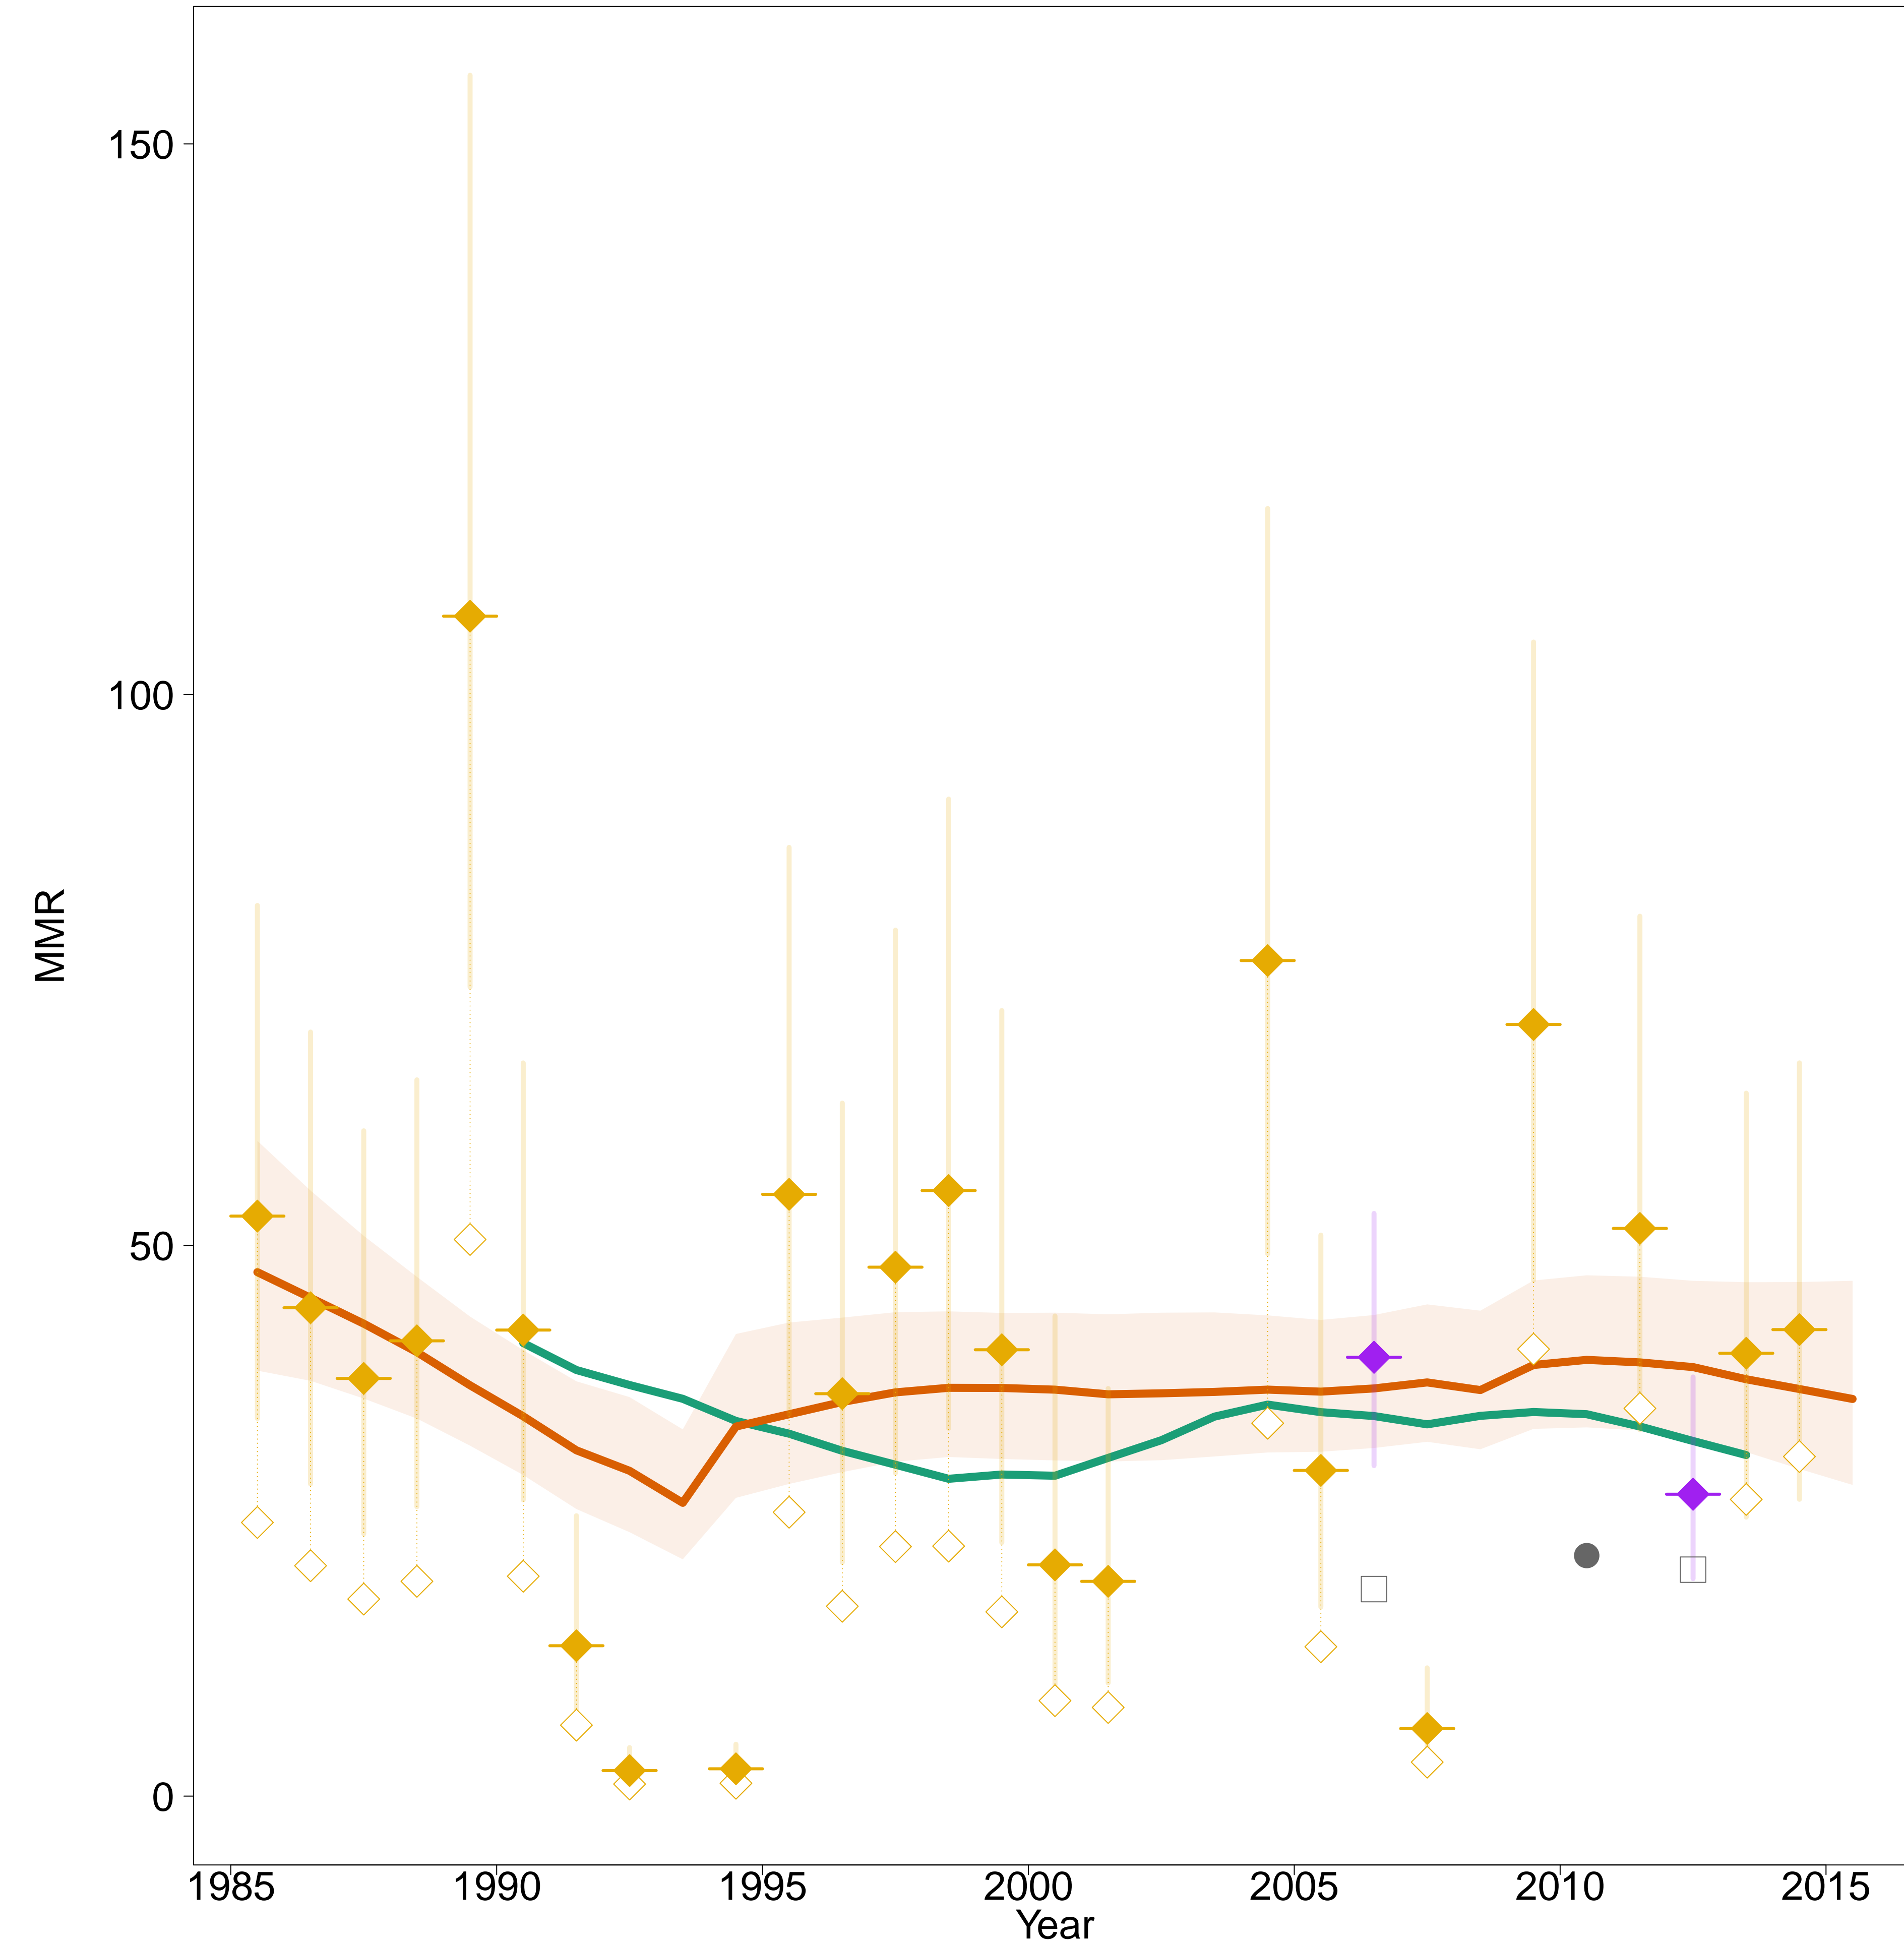

- Estimates –
- MMEIG 2015
- GBD 2013
- MMR Database 2015 –
- Observed Data
- Adjusted Data
- Data type –
- VR
- Spec. studies
- Excluded VR data (data quality issues)
- Excluded VR data (overlap with specialized study)

Germany [DEU]  
(Developed regions)

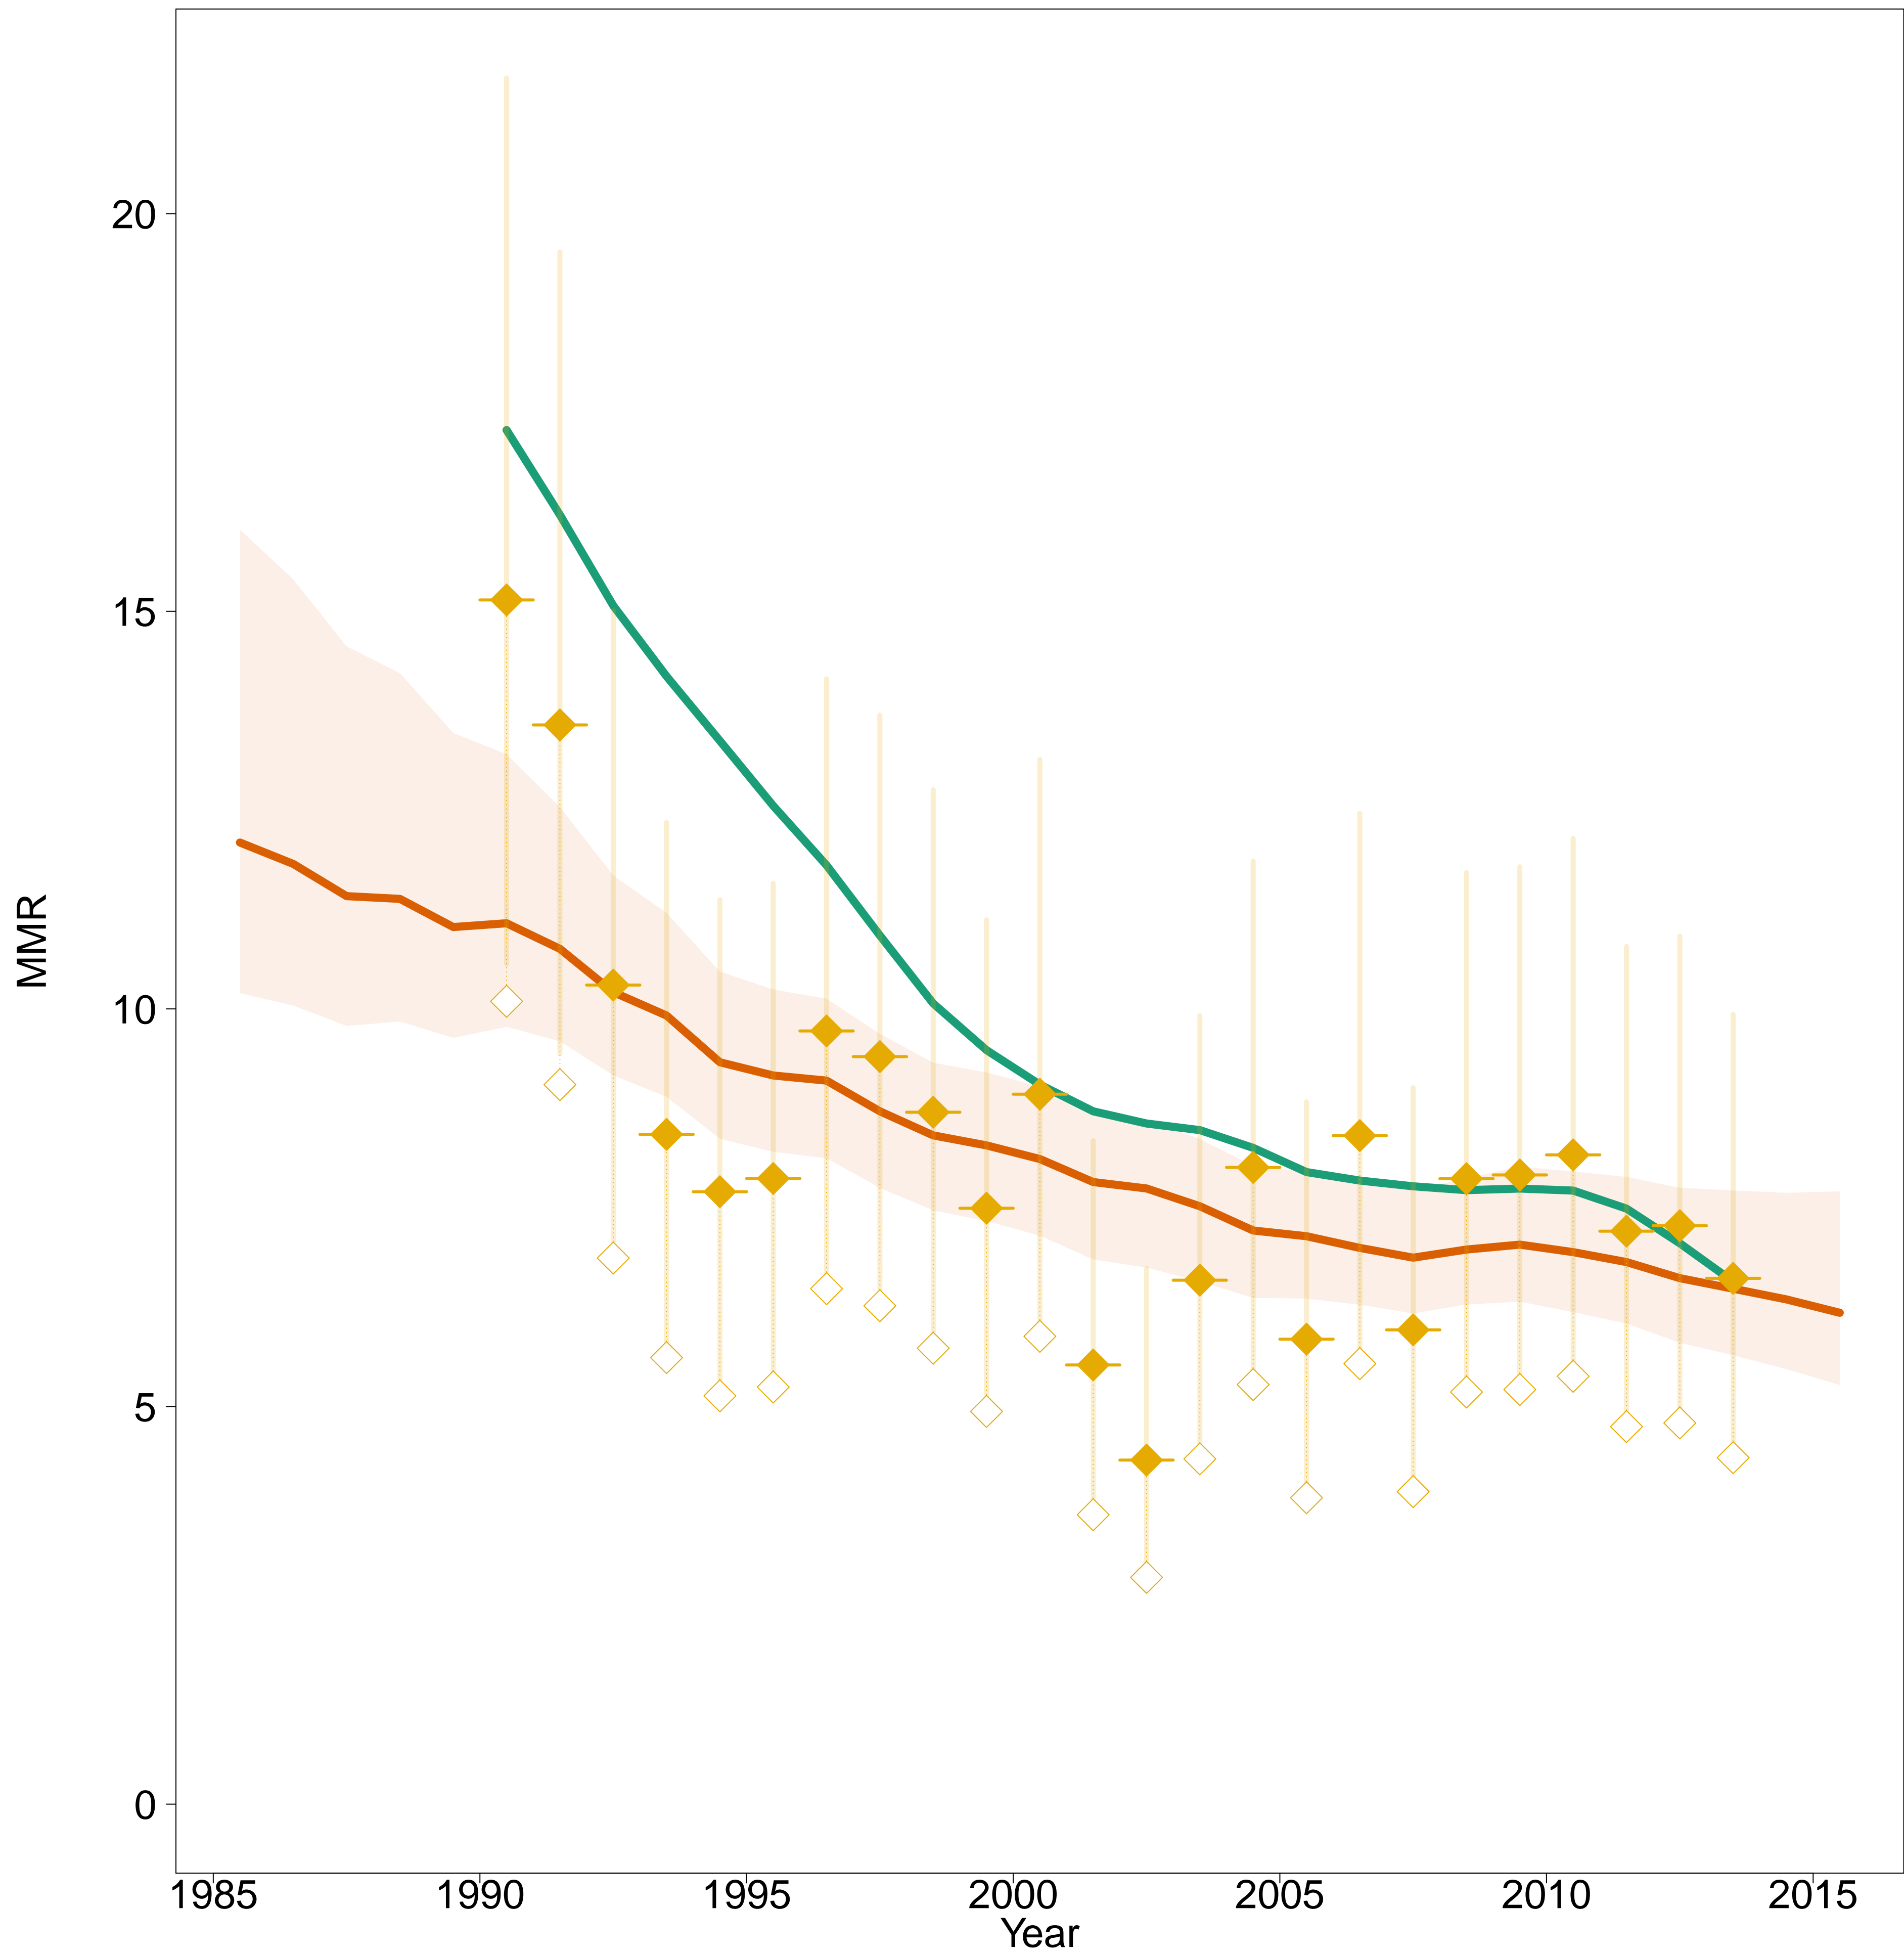

- Estimates –
- MMEIG 2015
- GBD 2013
- MMR Database 2015 –
- ◊ Observed Data
- ◆ Adjusted Data
- Data type –
- ◆ VR

Ghana [GHA]  
(Western Africa)

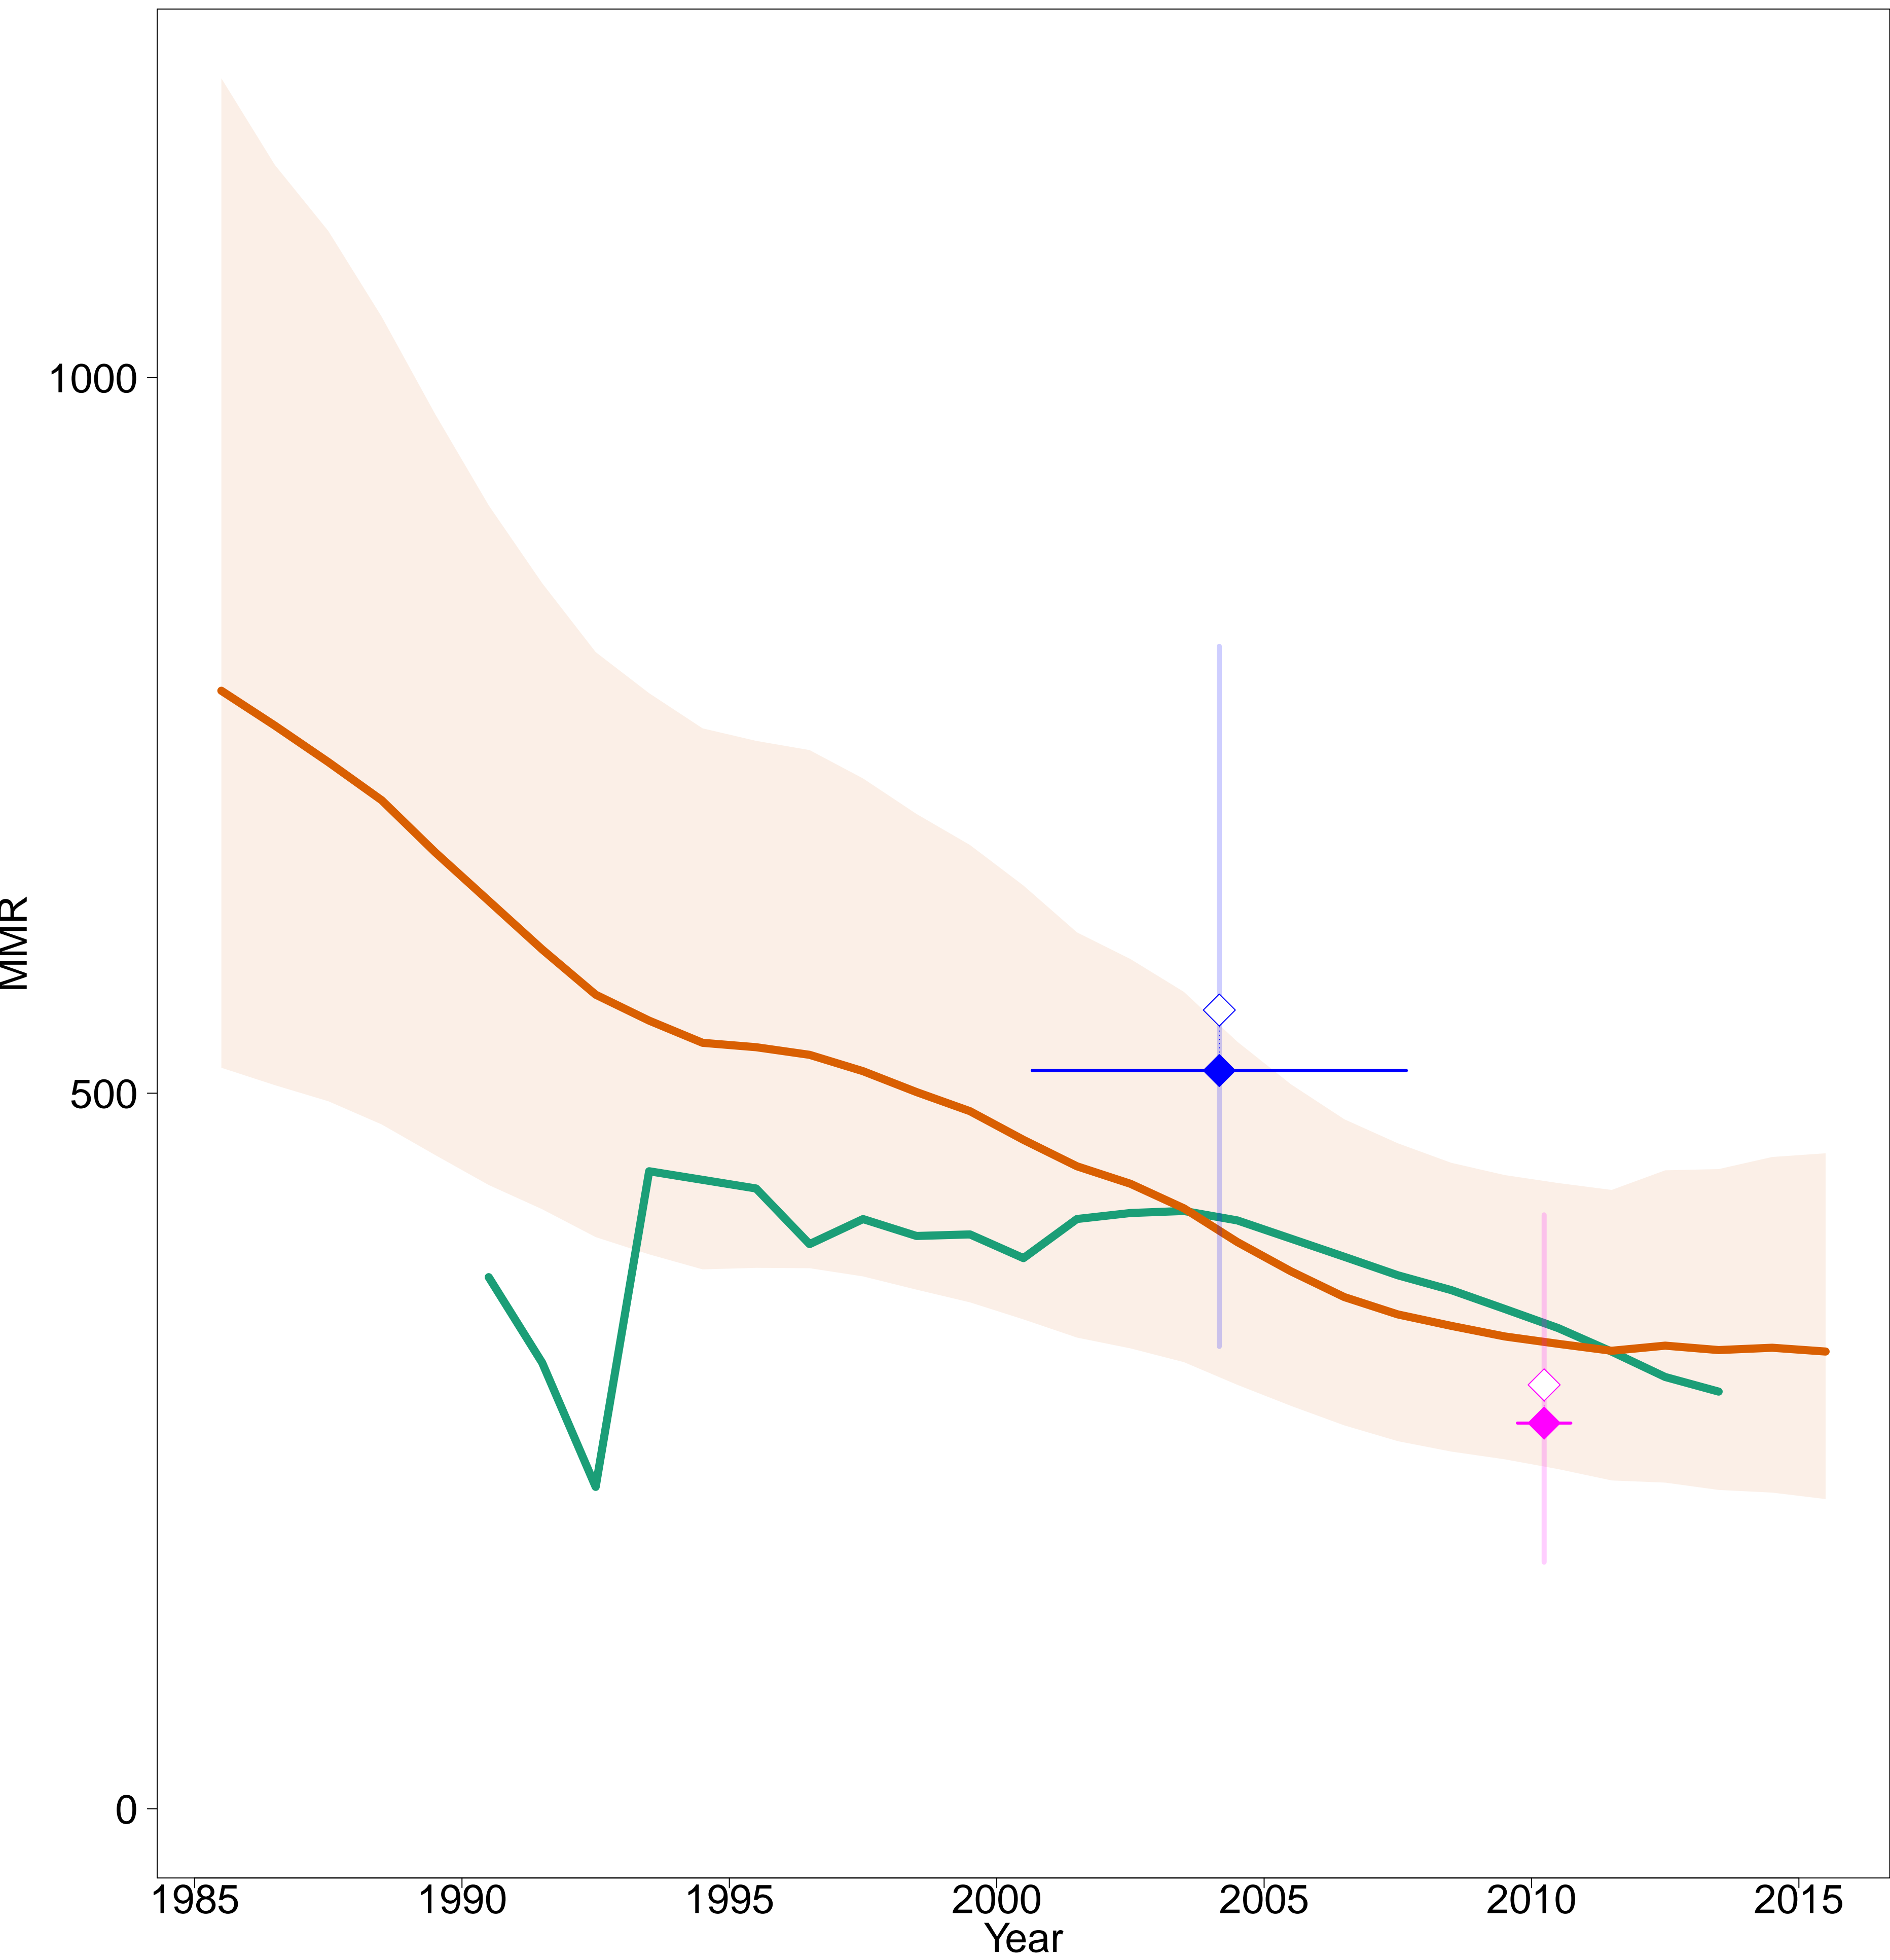

- Estimates -
- MMEIG 2015
- GBD 2013
- MMR Database 2015 -
- Observed Data
- Adjusted Data
- Data type -
- DHS
- Census

Greece [GRC]  
(Developed regions)

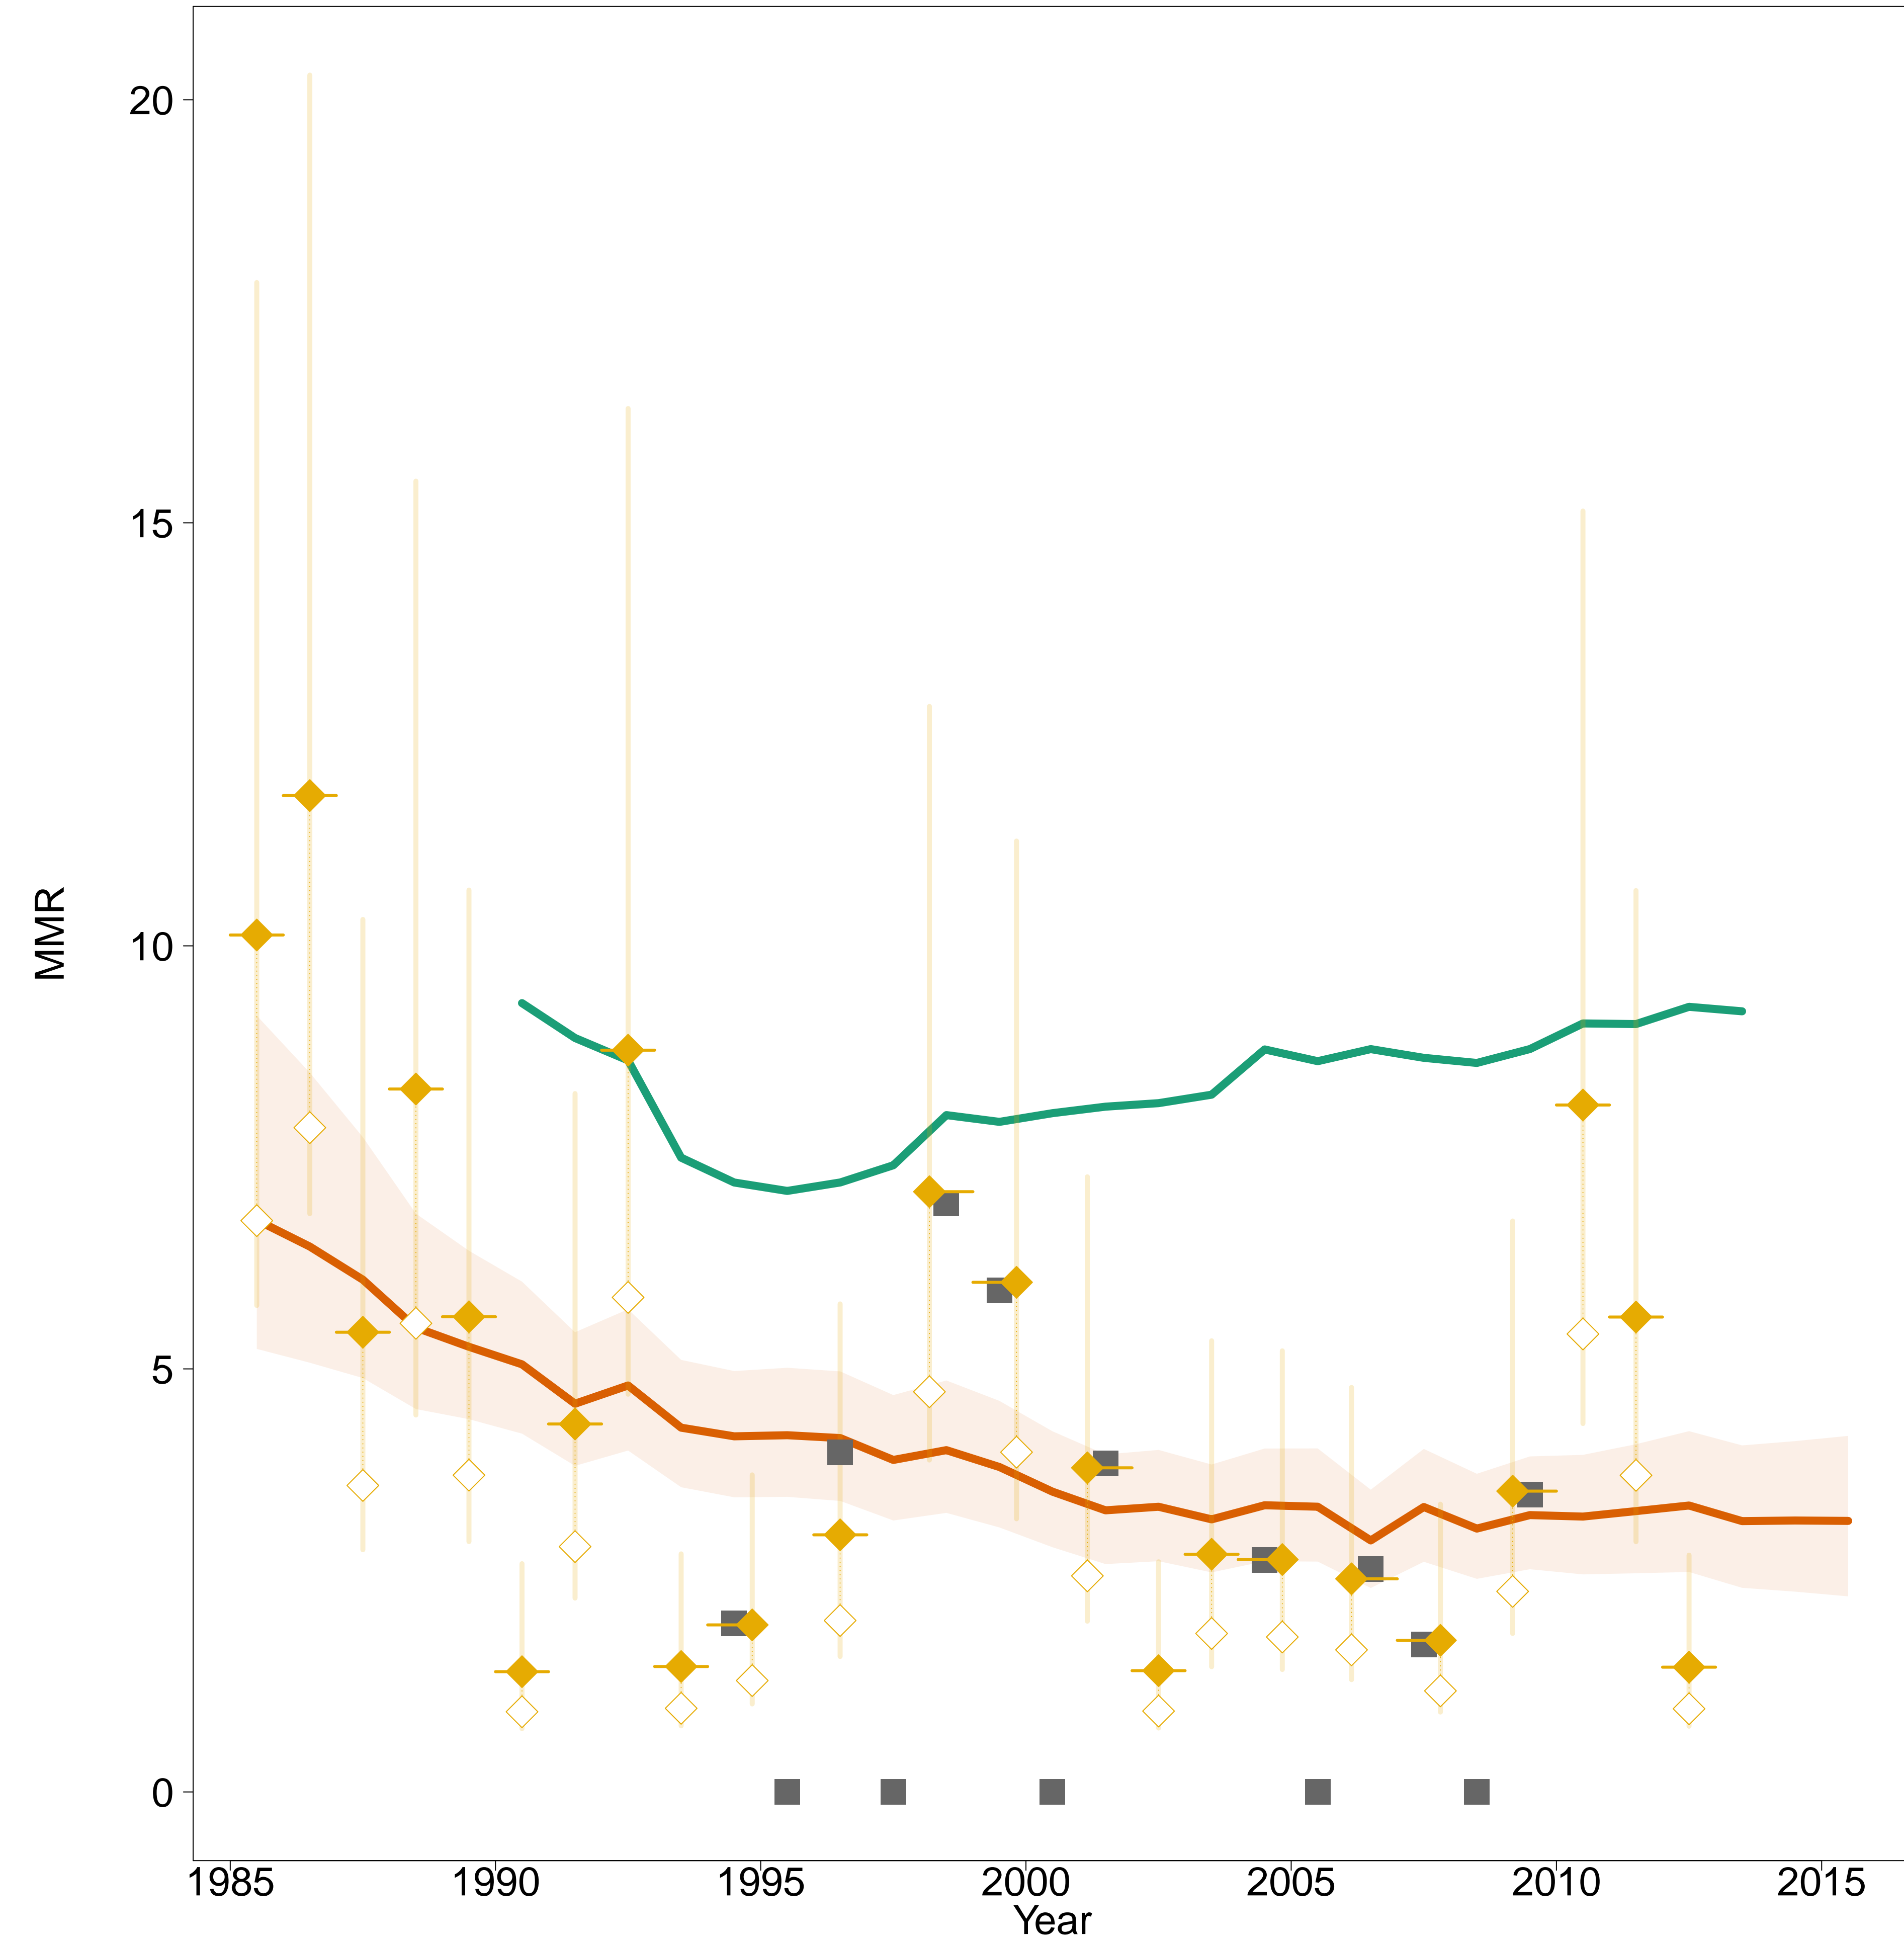

- Estimates –
- MMEIG 2015
- GBD 2013
- MMR Database 2015 –
- Observed Data
- Adjusted Data
- Data type –
- VR
- Reported VR before recalc.  
(related to 0 obs. mat. death)

Grenada [GRD]  
(Caribbean)

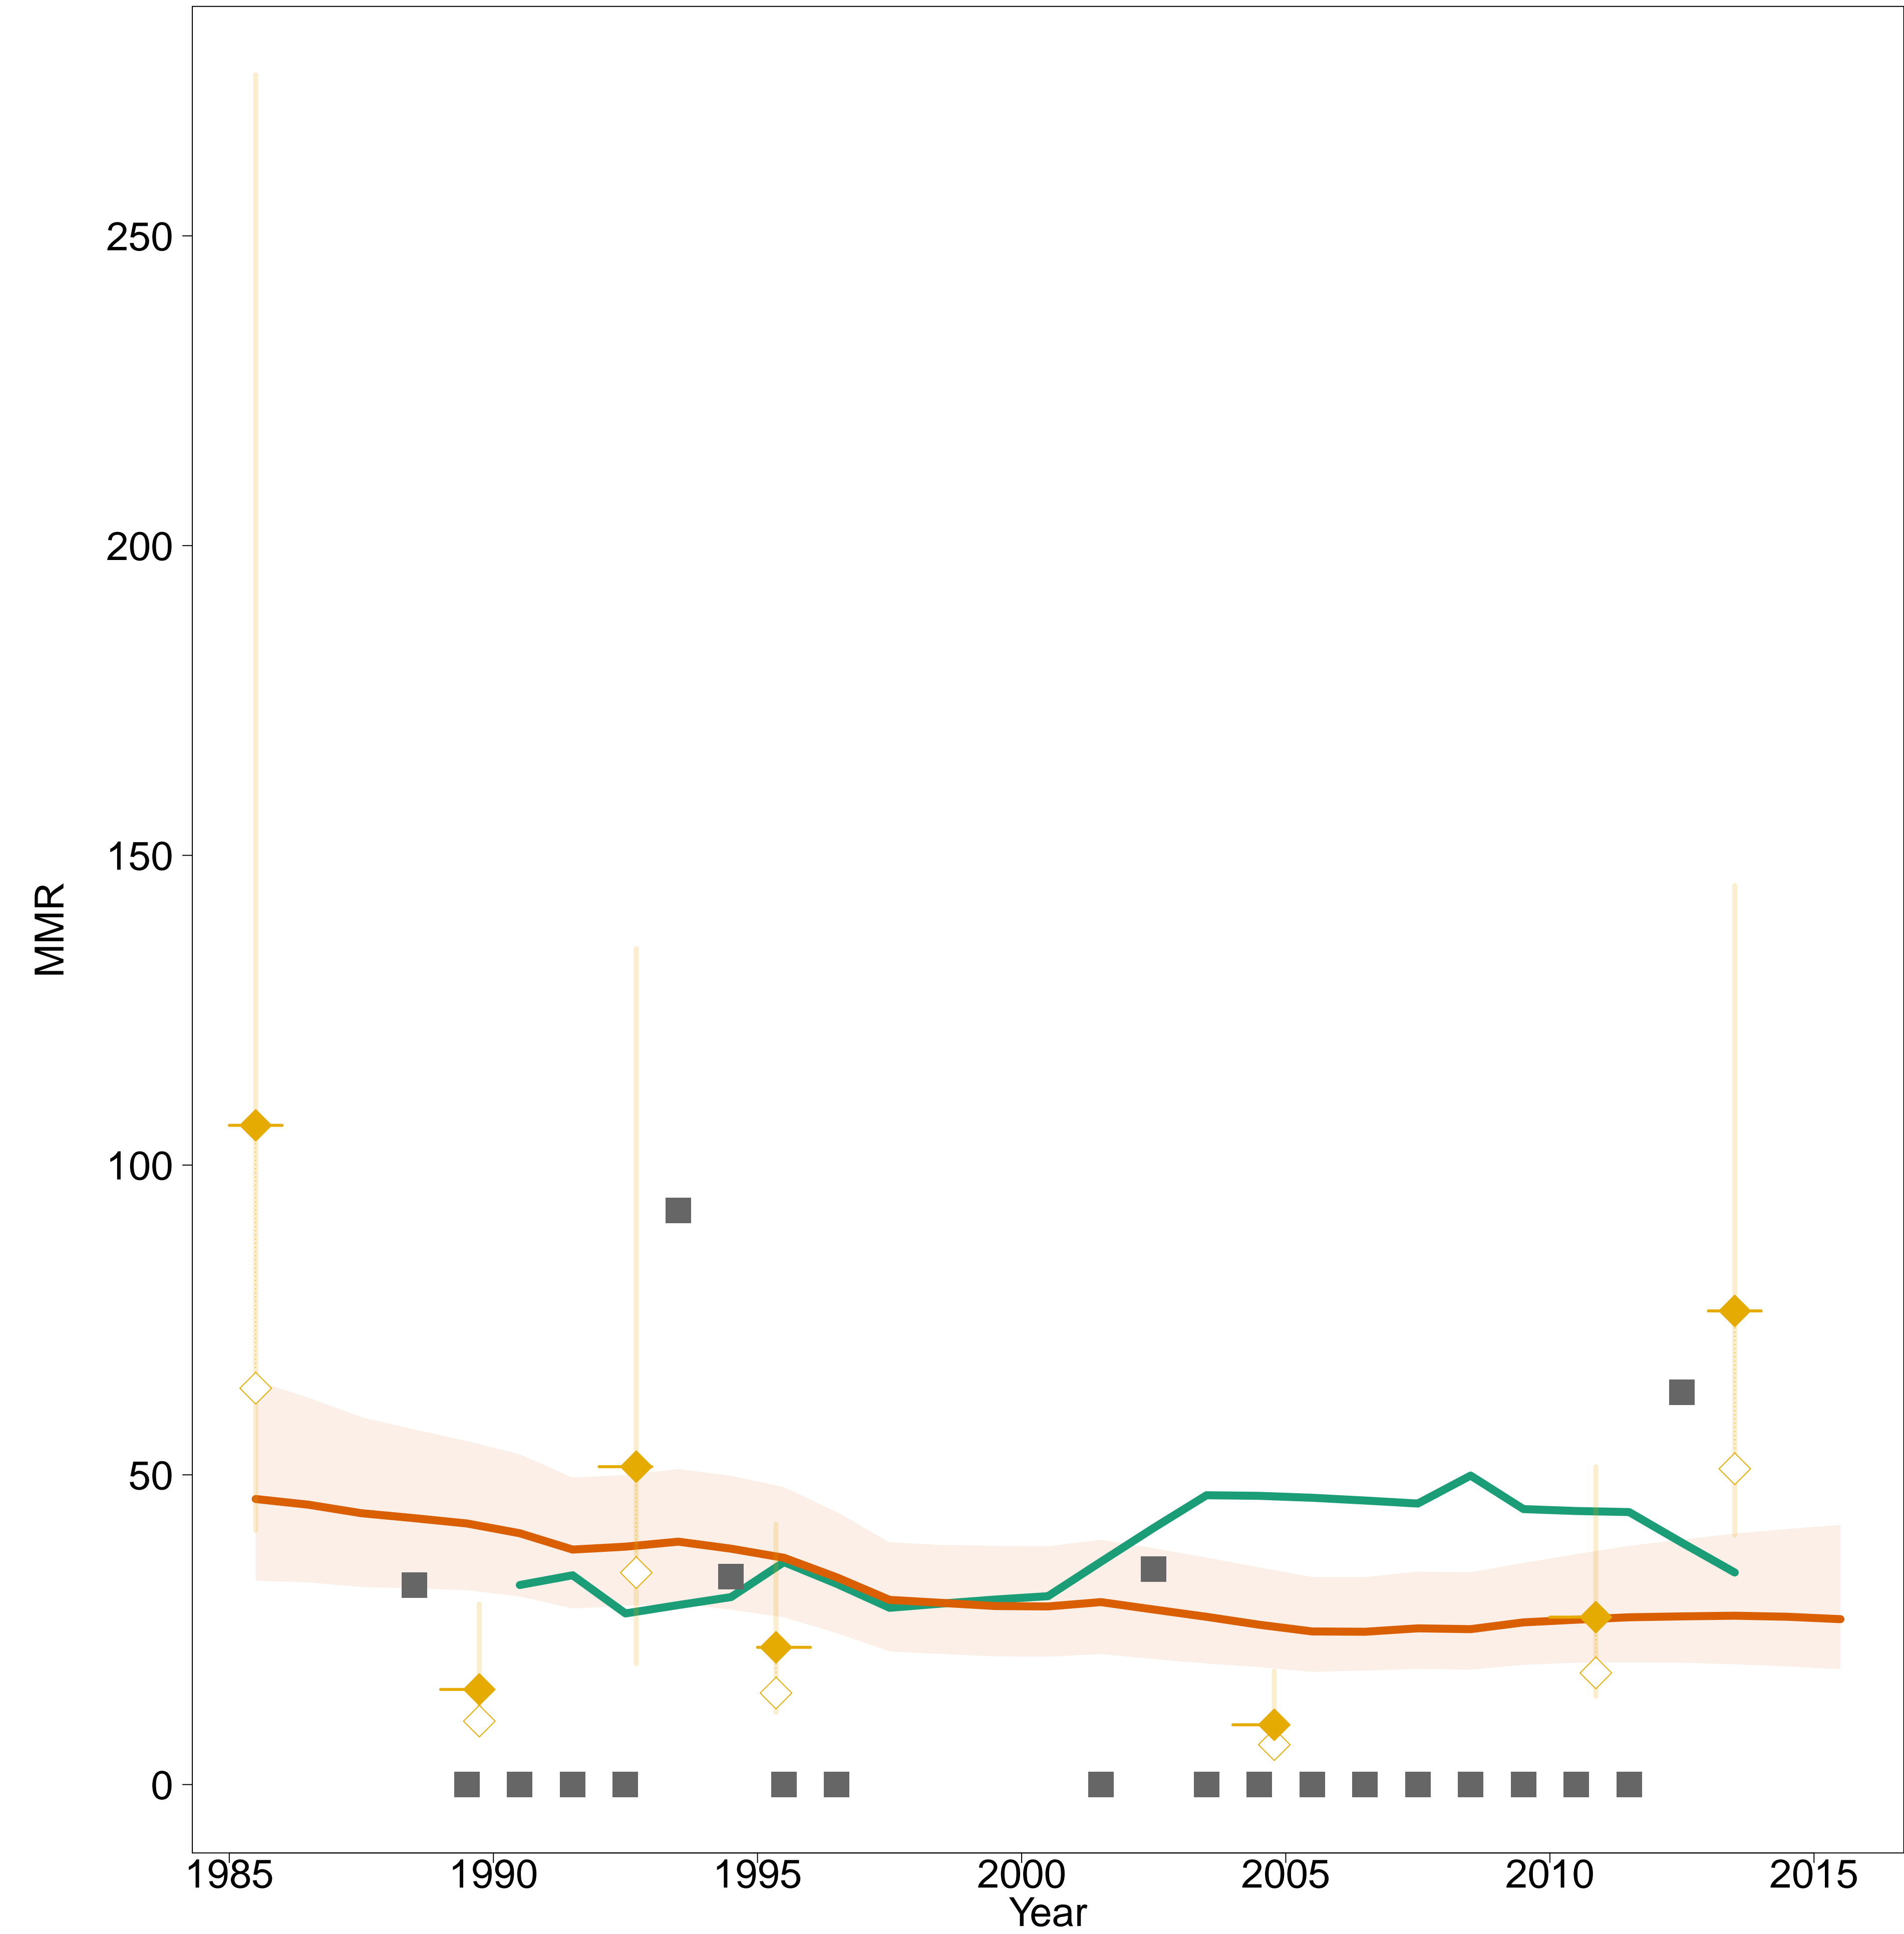

- Estimates –
- MMEIG 2015
- GBD 2013
- MMR Database 2015 –
- Observed Data
- Adjusted Data
- Data type –
- VR
- Reported VR before recalc.  
(related to 0 obs. mat. death)



Guatemala [GTM]  
(Central America)

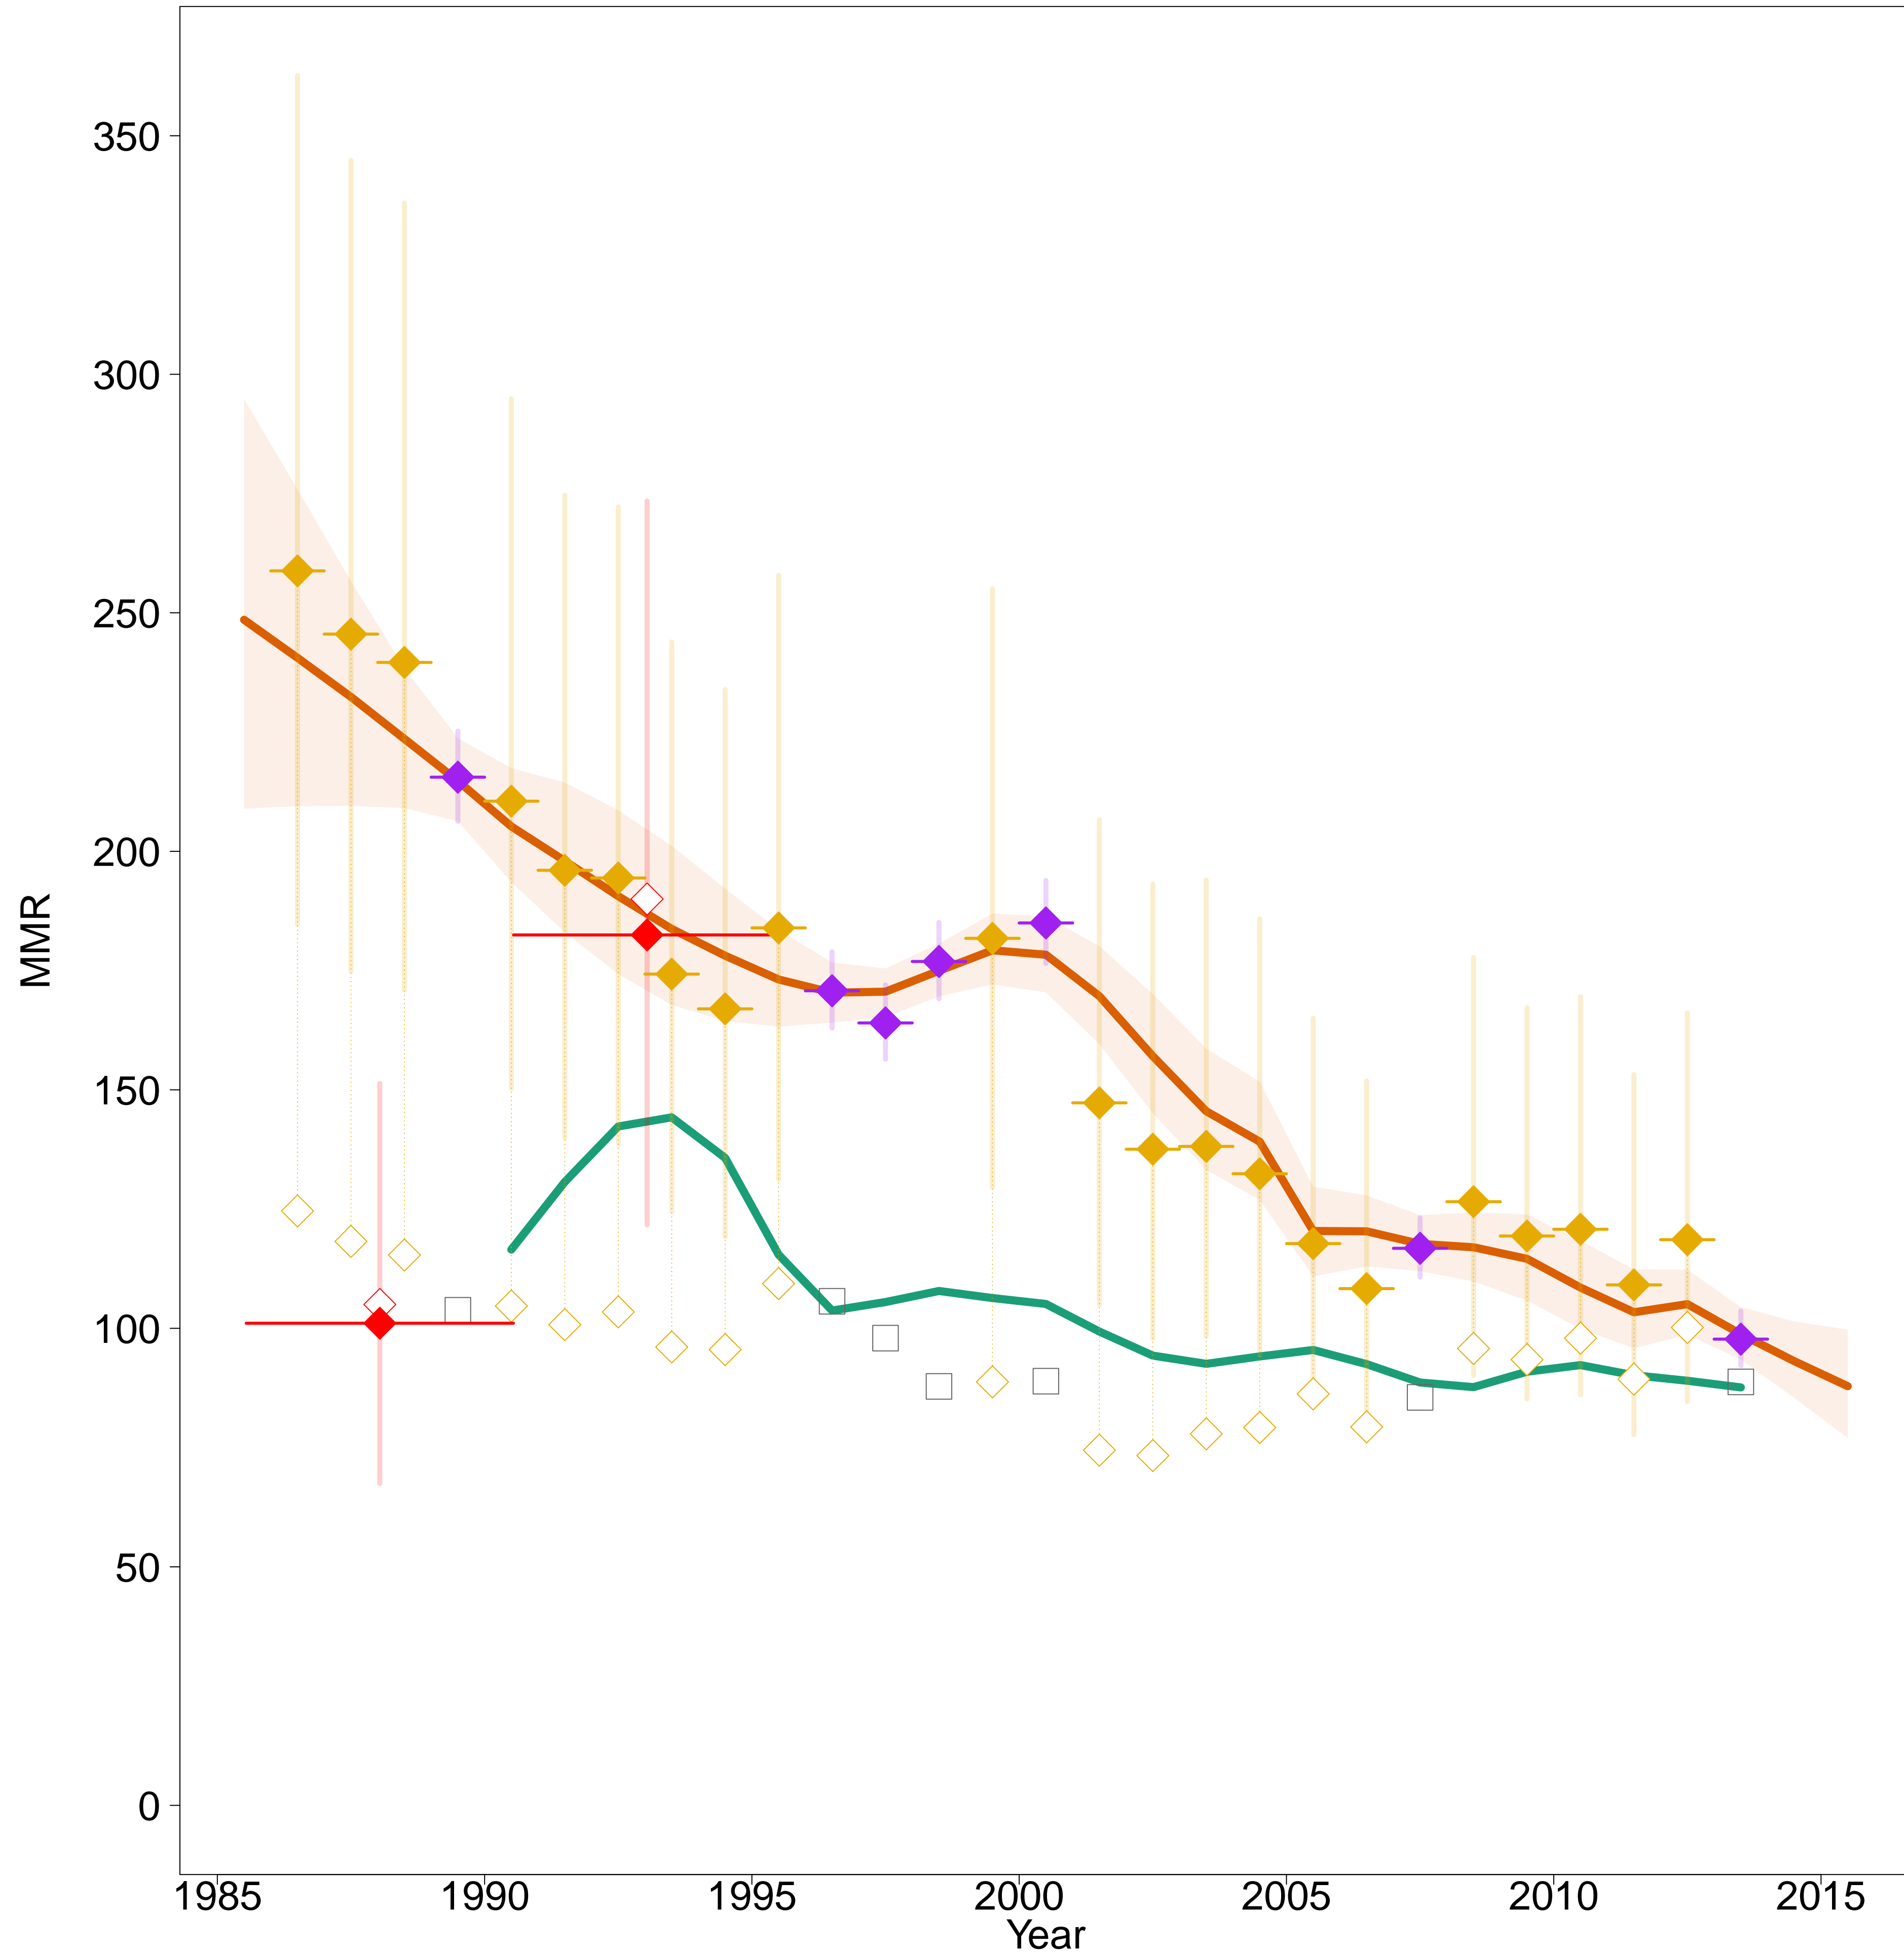

- Estimates –
- MMEIG 2015
- GBD 2013
- MMR Database 2015 –
- Observed Data
- Adjusted Data
- Data type –
- VR
- Spec. studies
- Misc. studies
- Excluded VR data  
(overlap with specialized study)

Guinea [GIN]  
(Western Africa)

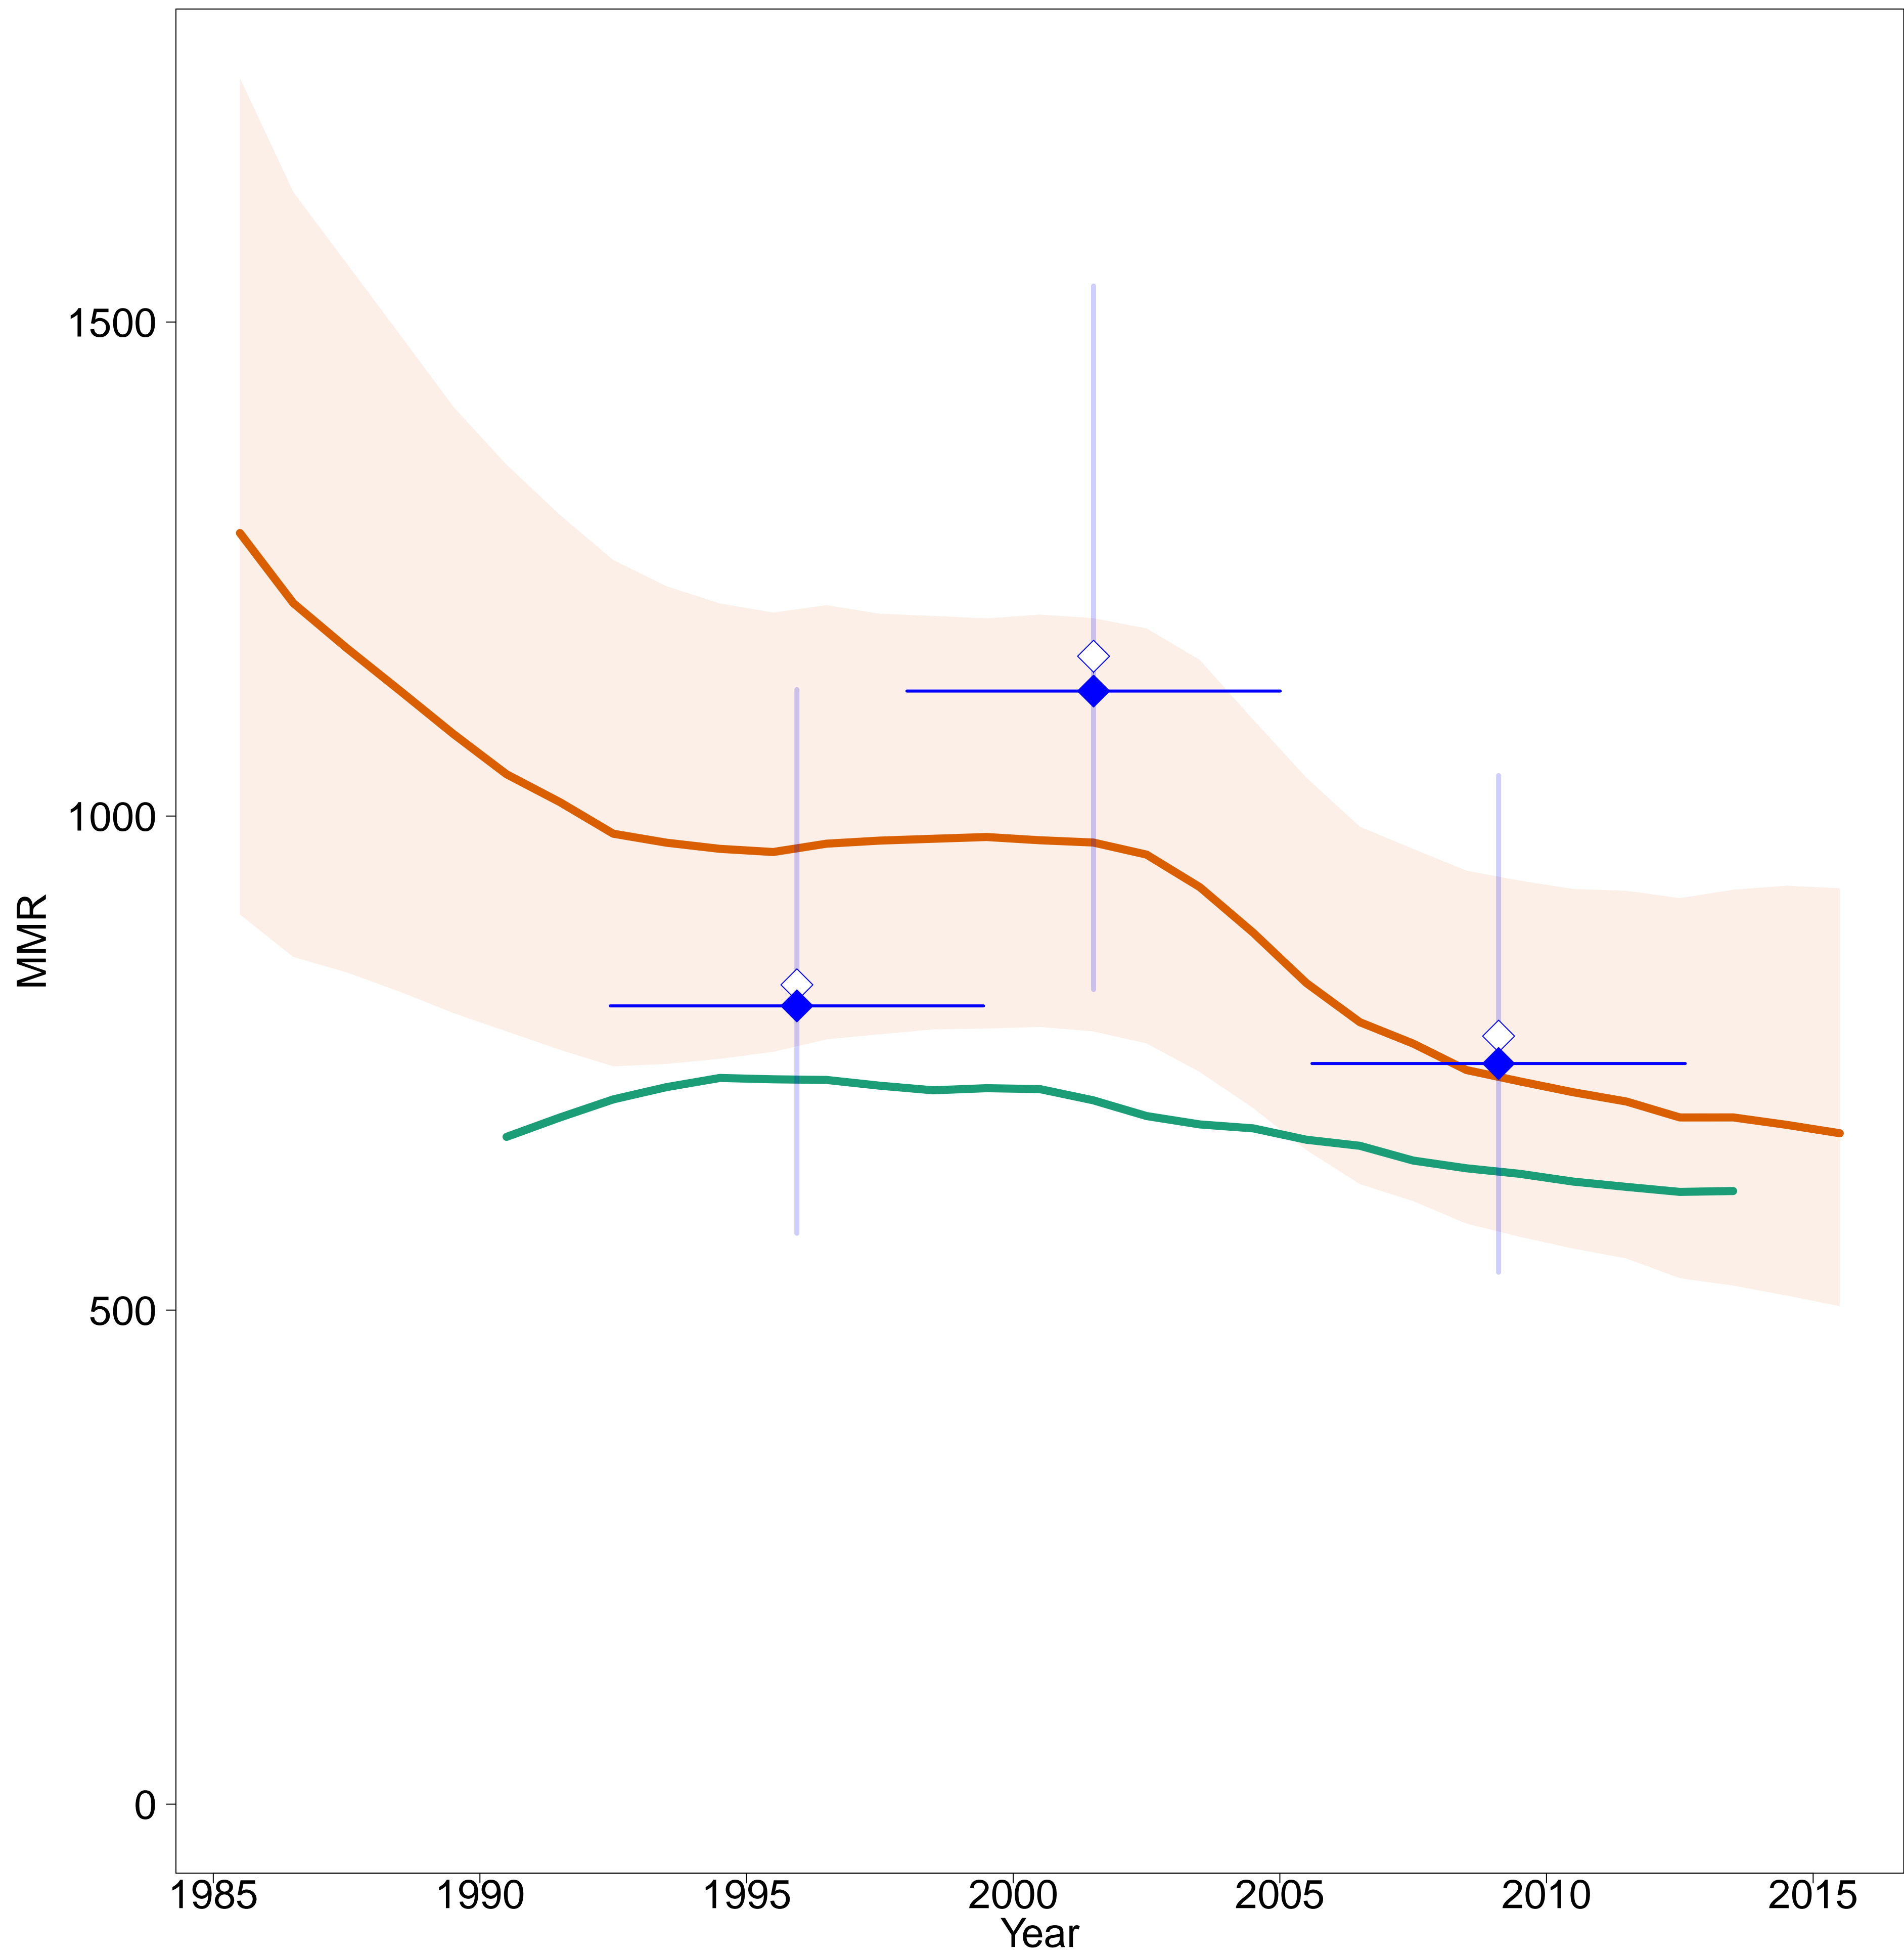

- Estimates -
- MMEIG 2015
- GBD 2013
- MMR Database 2015 -
- Observed Data
- Adjusted Data
- Data type -
- DHS

Guinea-Bissau [GNB]  
(Western Africa)

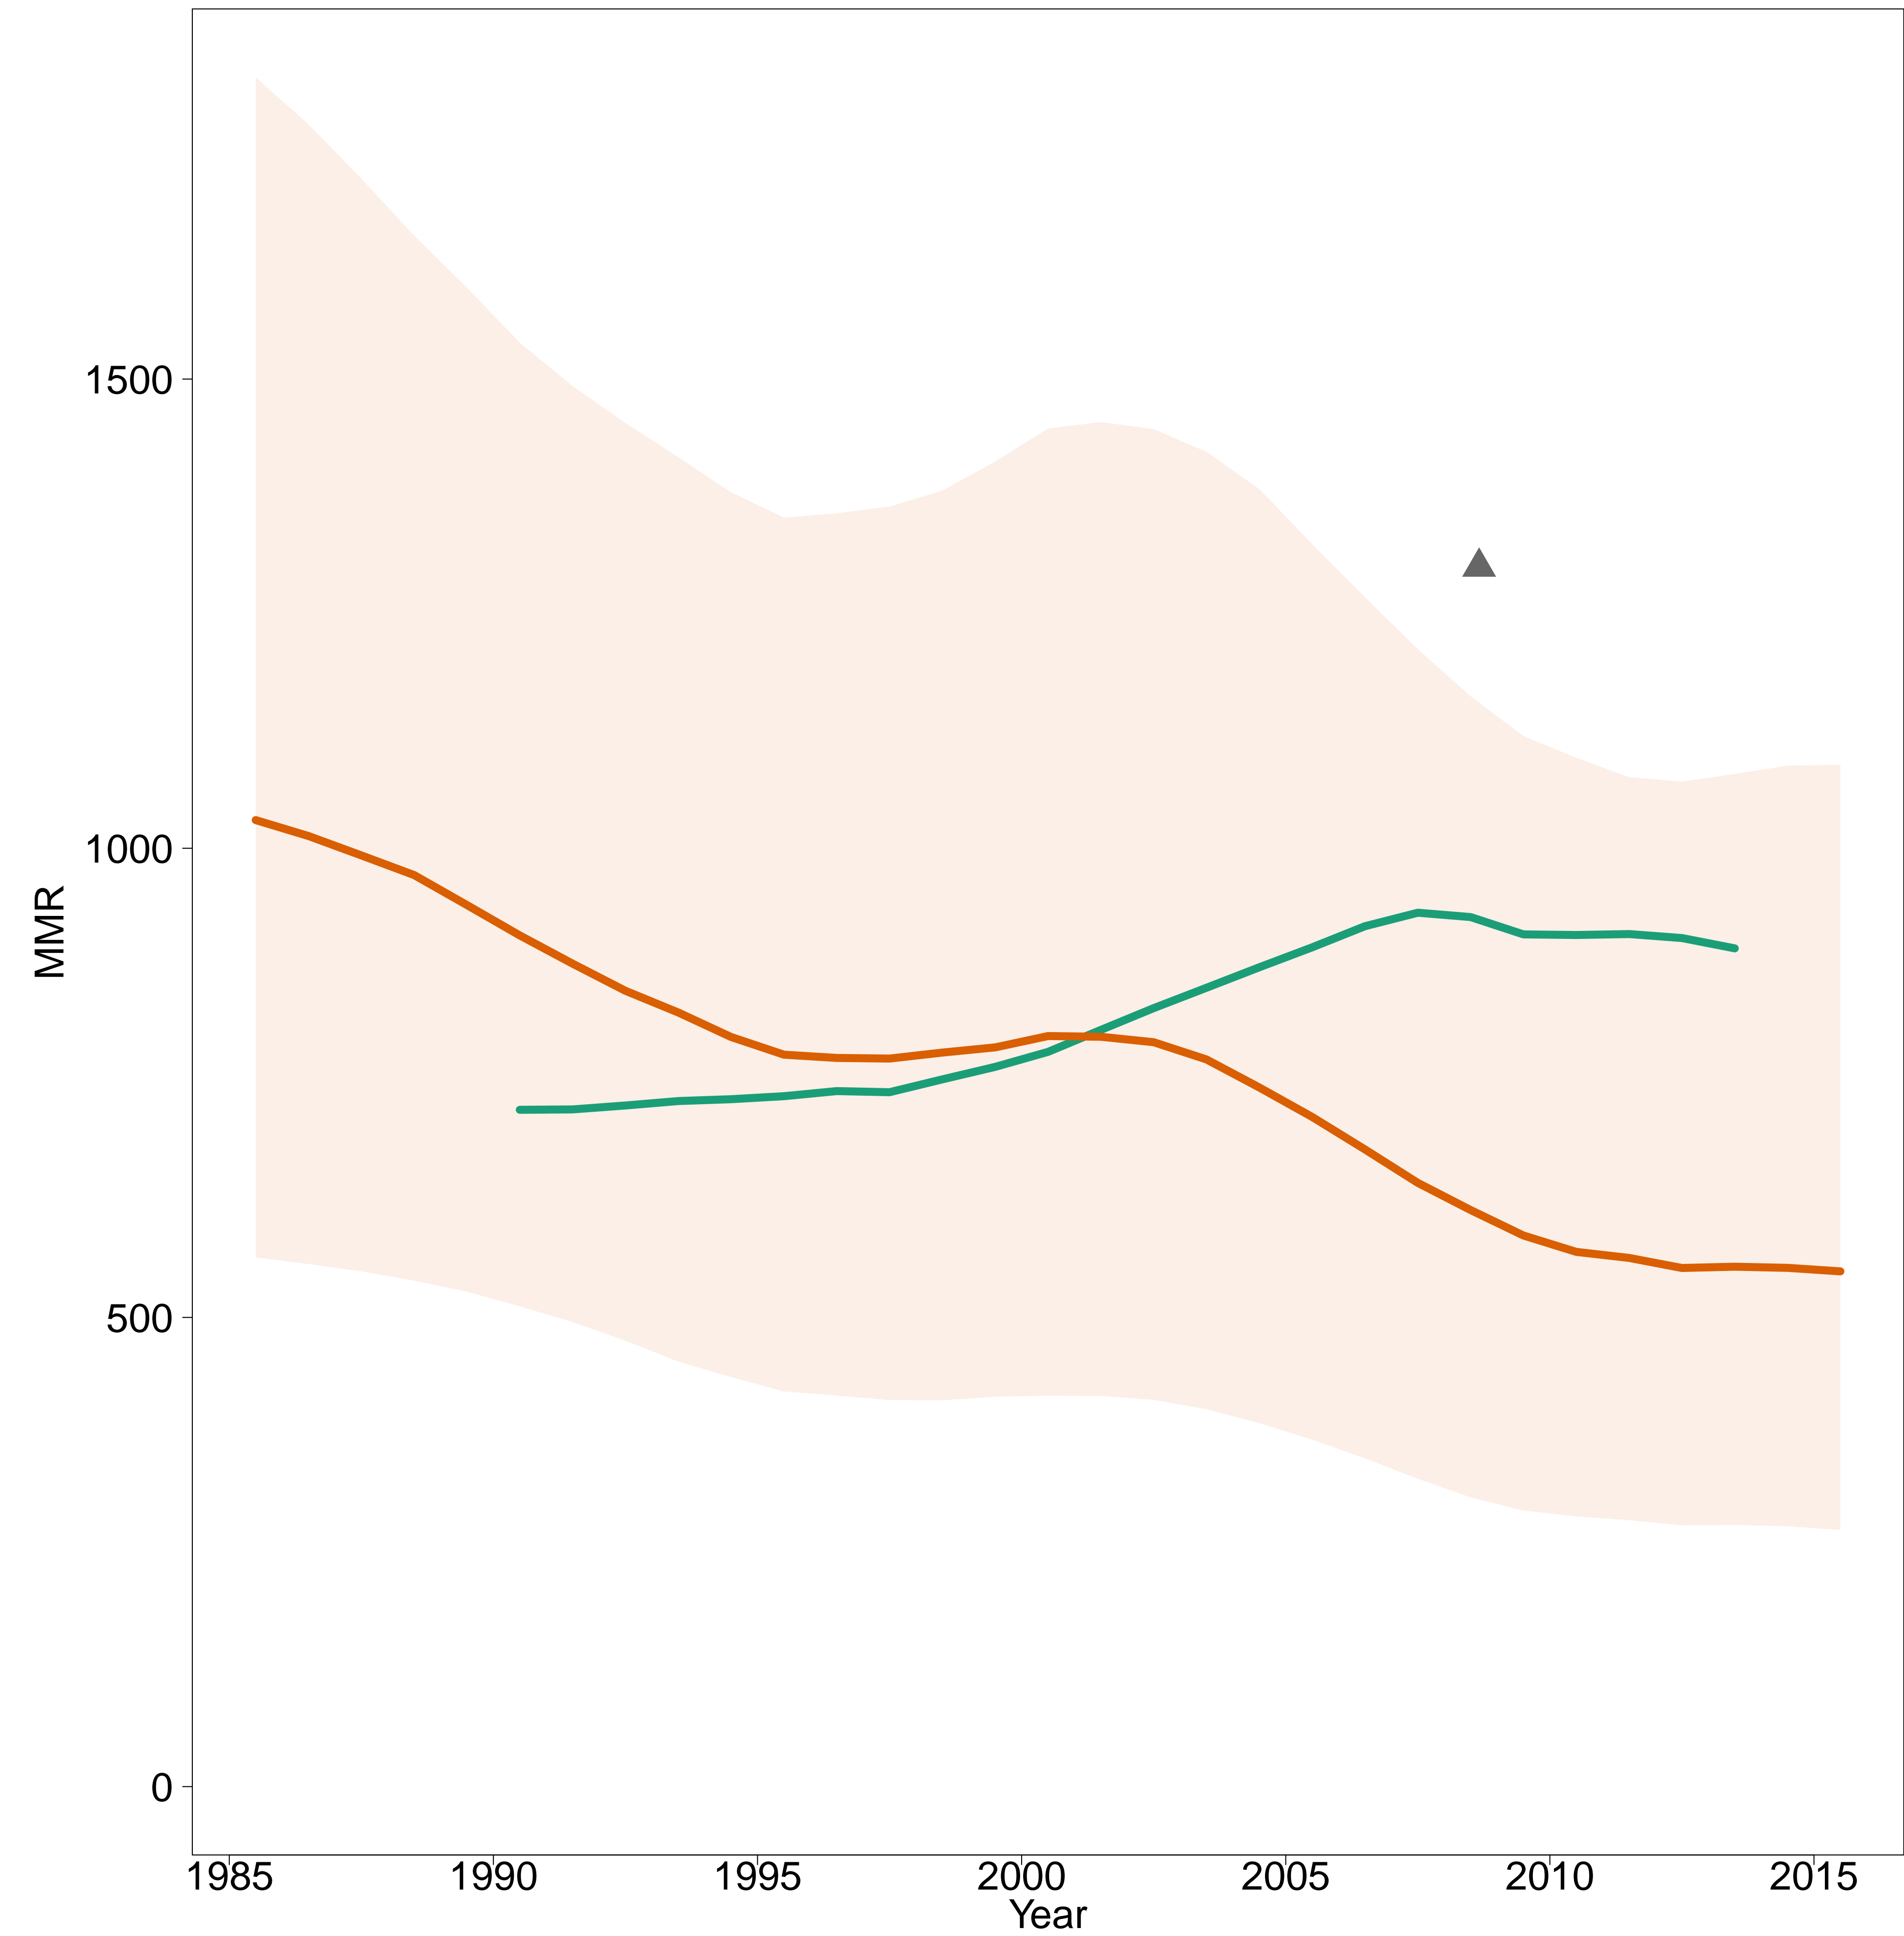

- Estimates -
- MMEIG 2015
- GBD 2013
- MMR Database 2015 -
- ◊ Observed Data
- ◆ Adjusted Data
- Data type -
- ▲ Excluded misc. studies

Guyana [GUY]  
(South America)

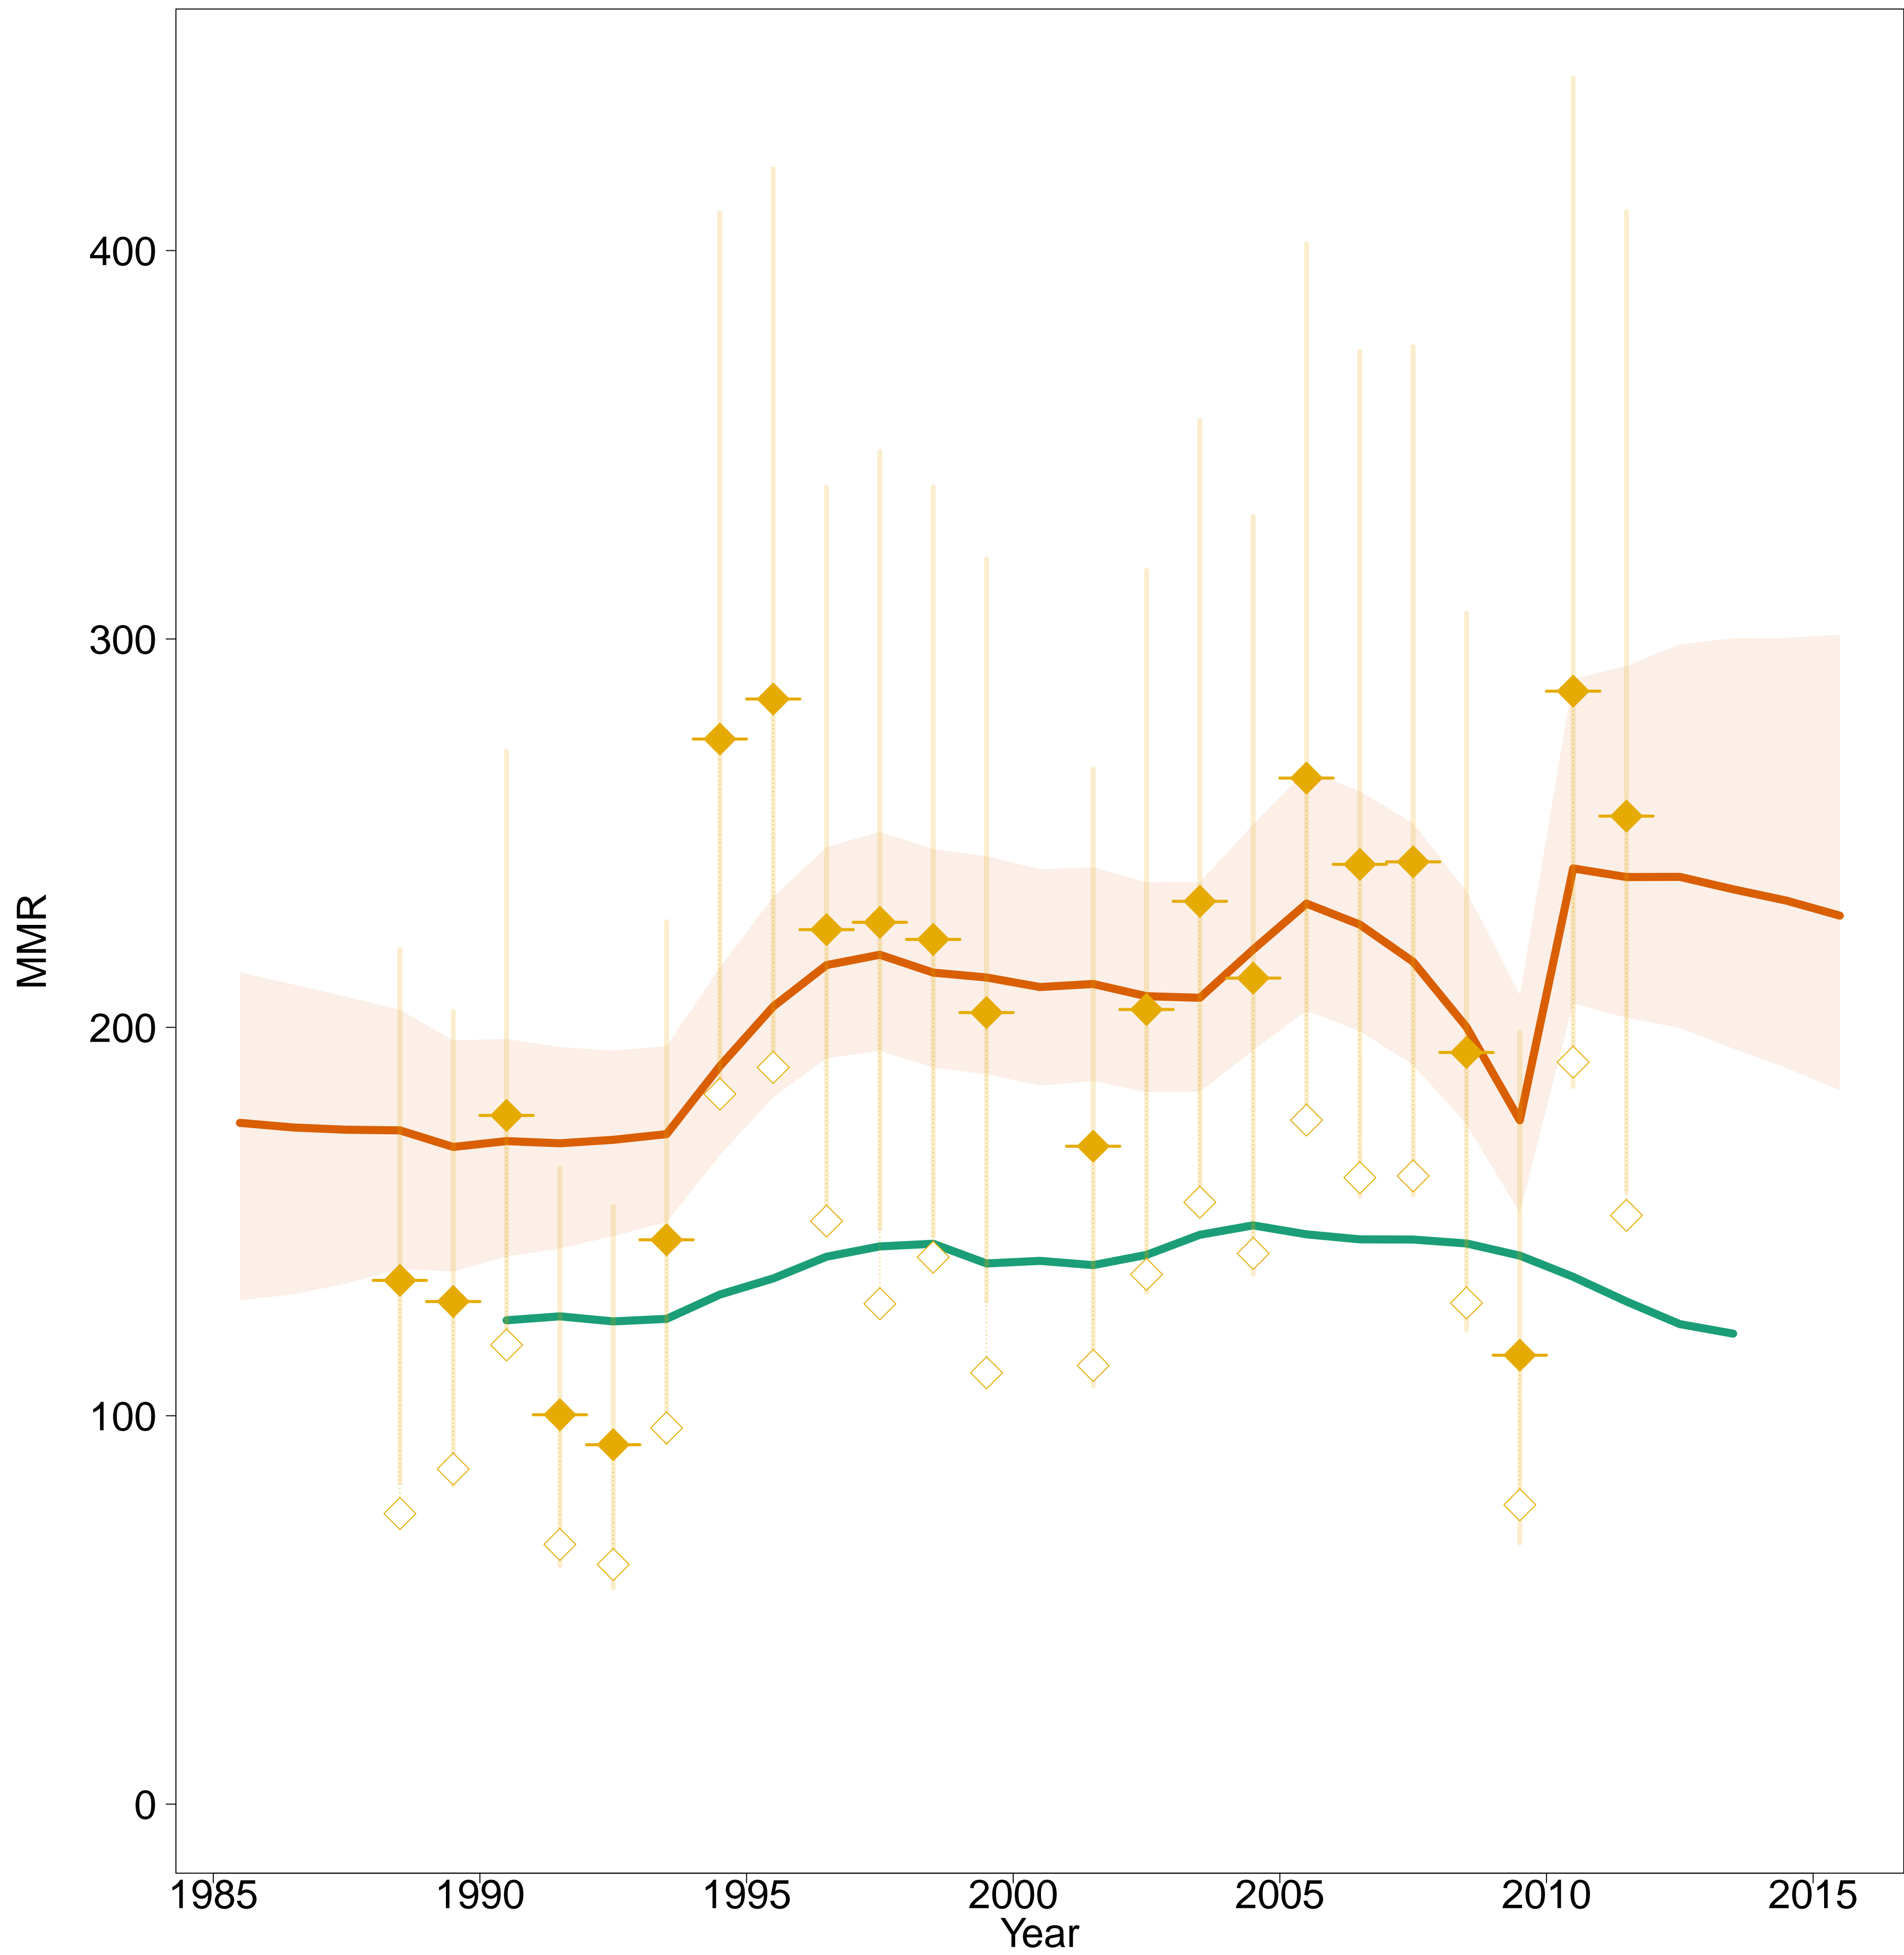

- Estimates –
- MMEIG 2015
- GBD 2013
- MMR Database 2015 –
- ◊ Observed Data
- ◆ Adjusted Data
- Data type –
- ◆ VR

Haiti [HTI]  
(Caribbean)

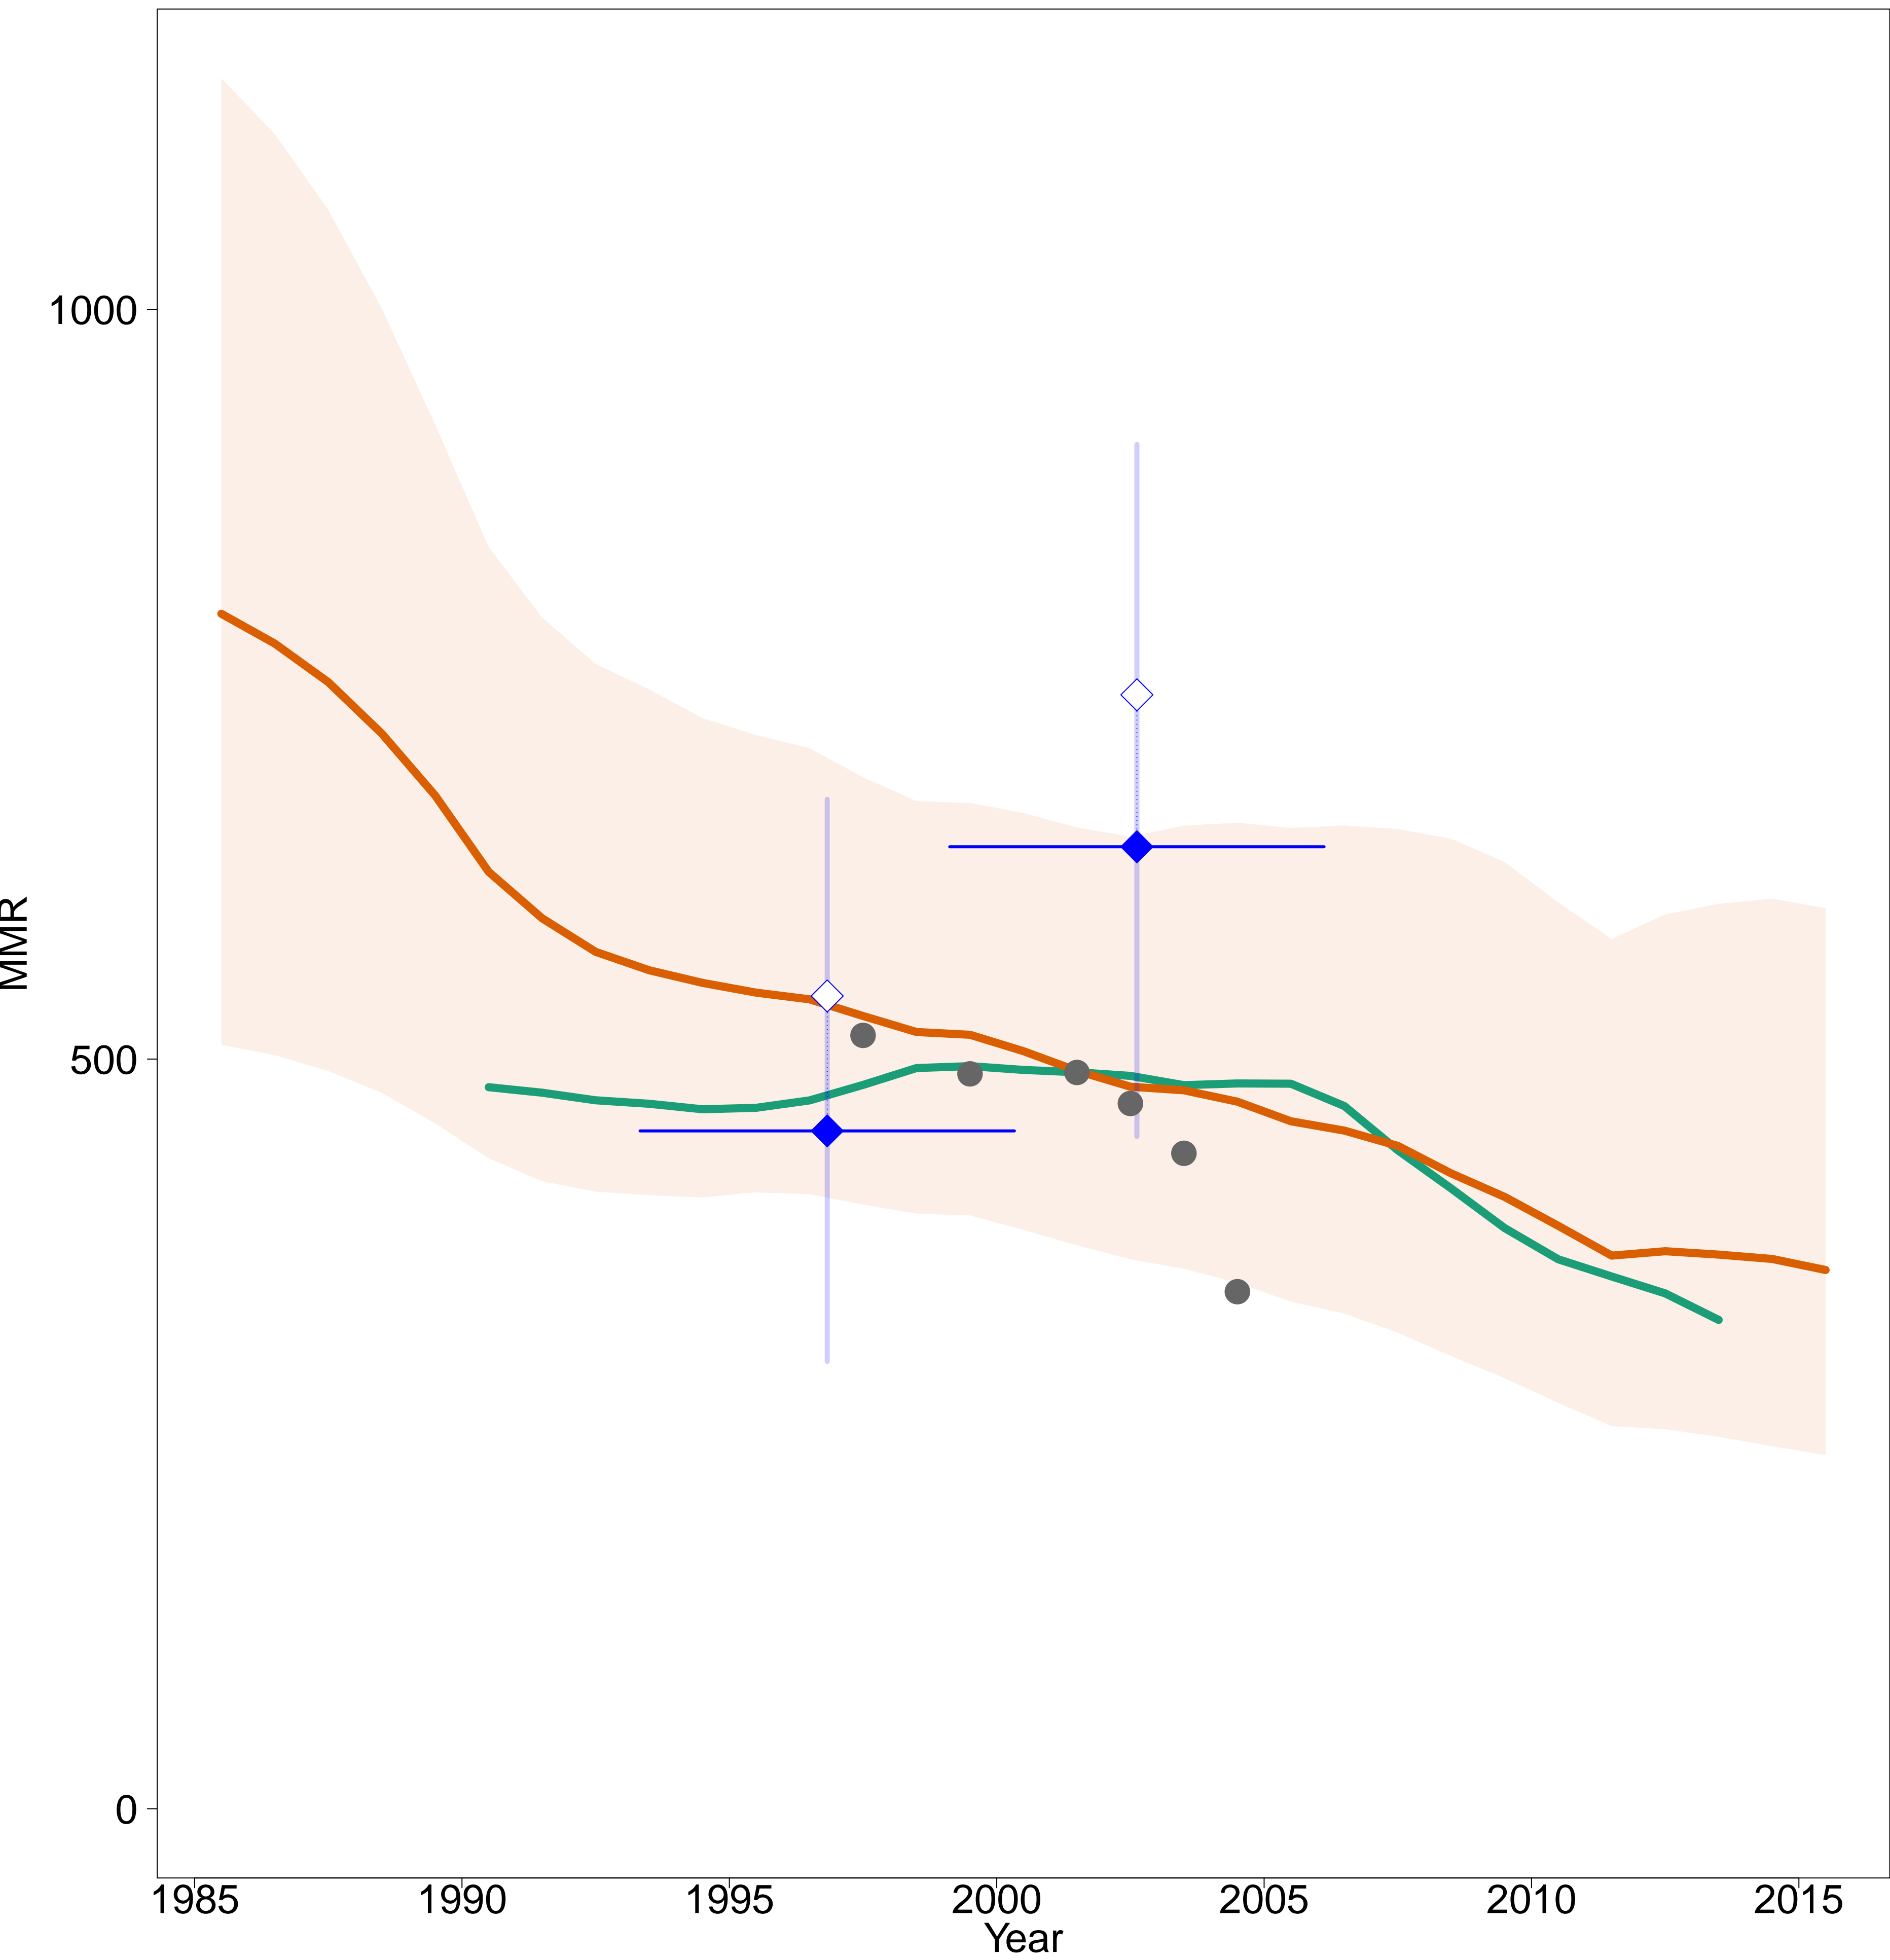

- Estimates -
- MMEIG 2015
- GBD 2013
- MMR Database 2015 -
- Observed Data
- Adjusted Data
- Data type -
- DHS
- Excluded VR data  
(data quality issues)

Honduras [HND]  
(Central America)

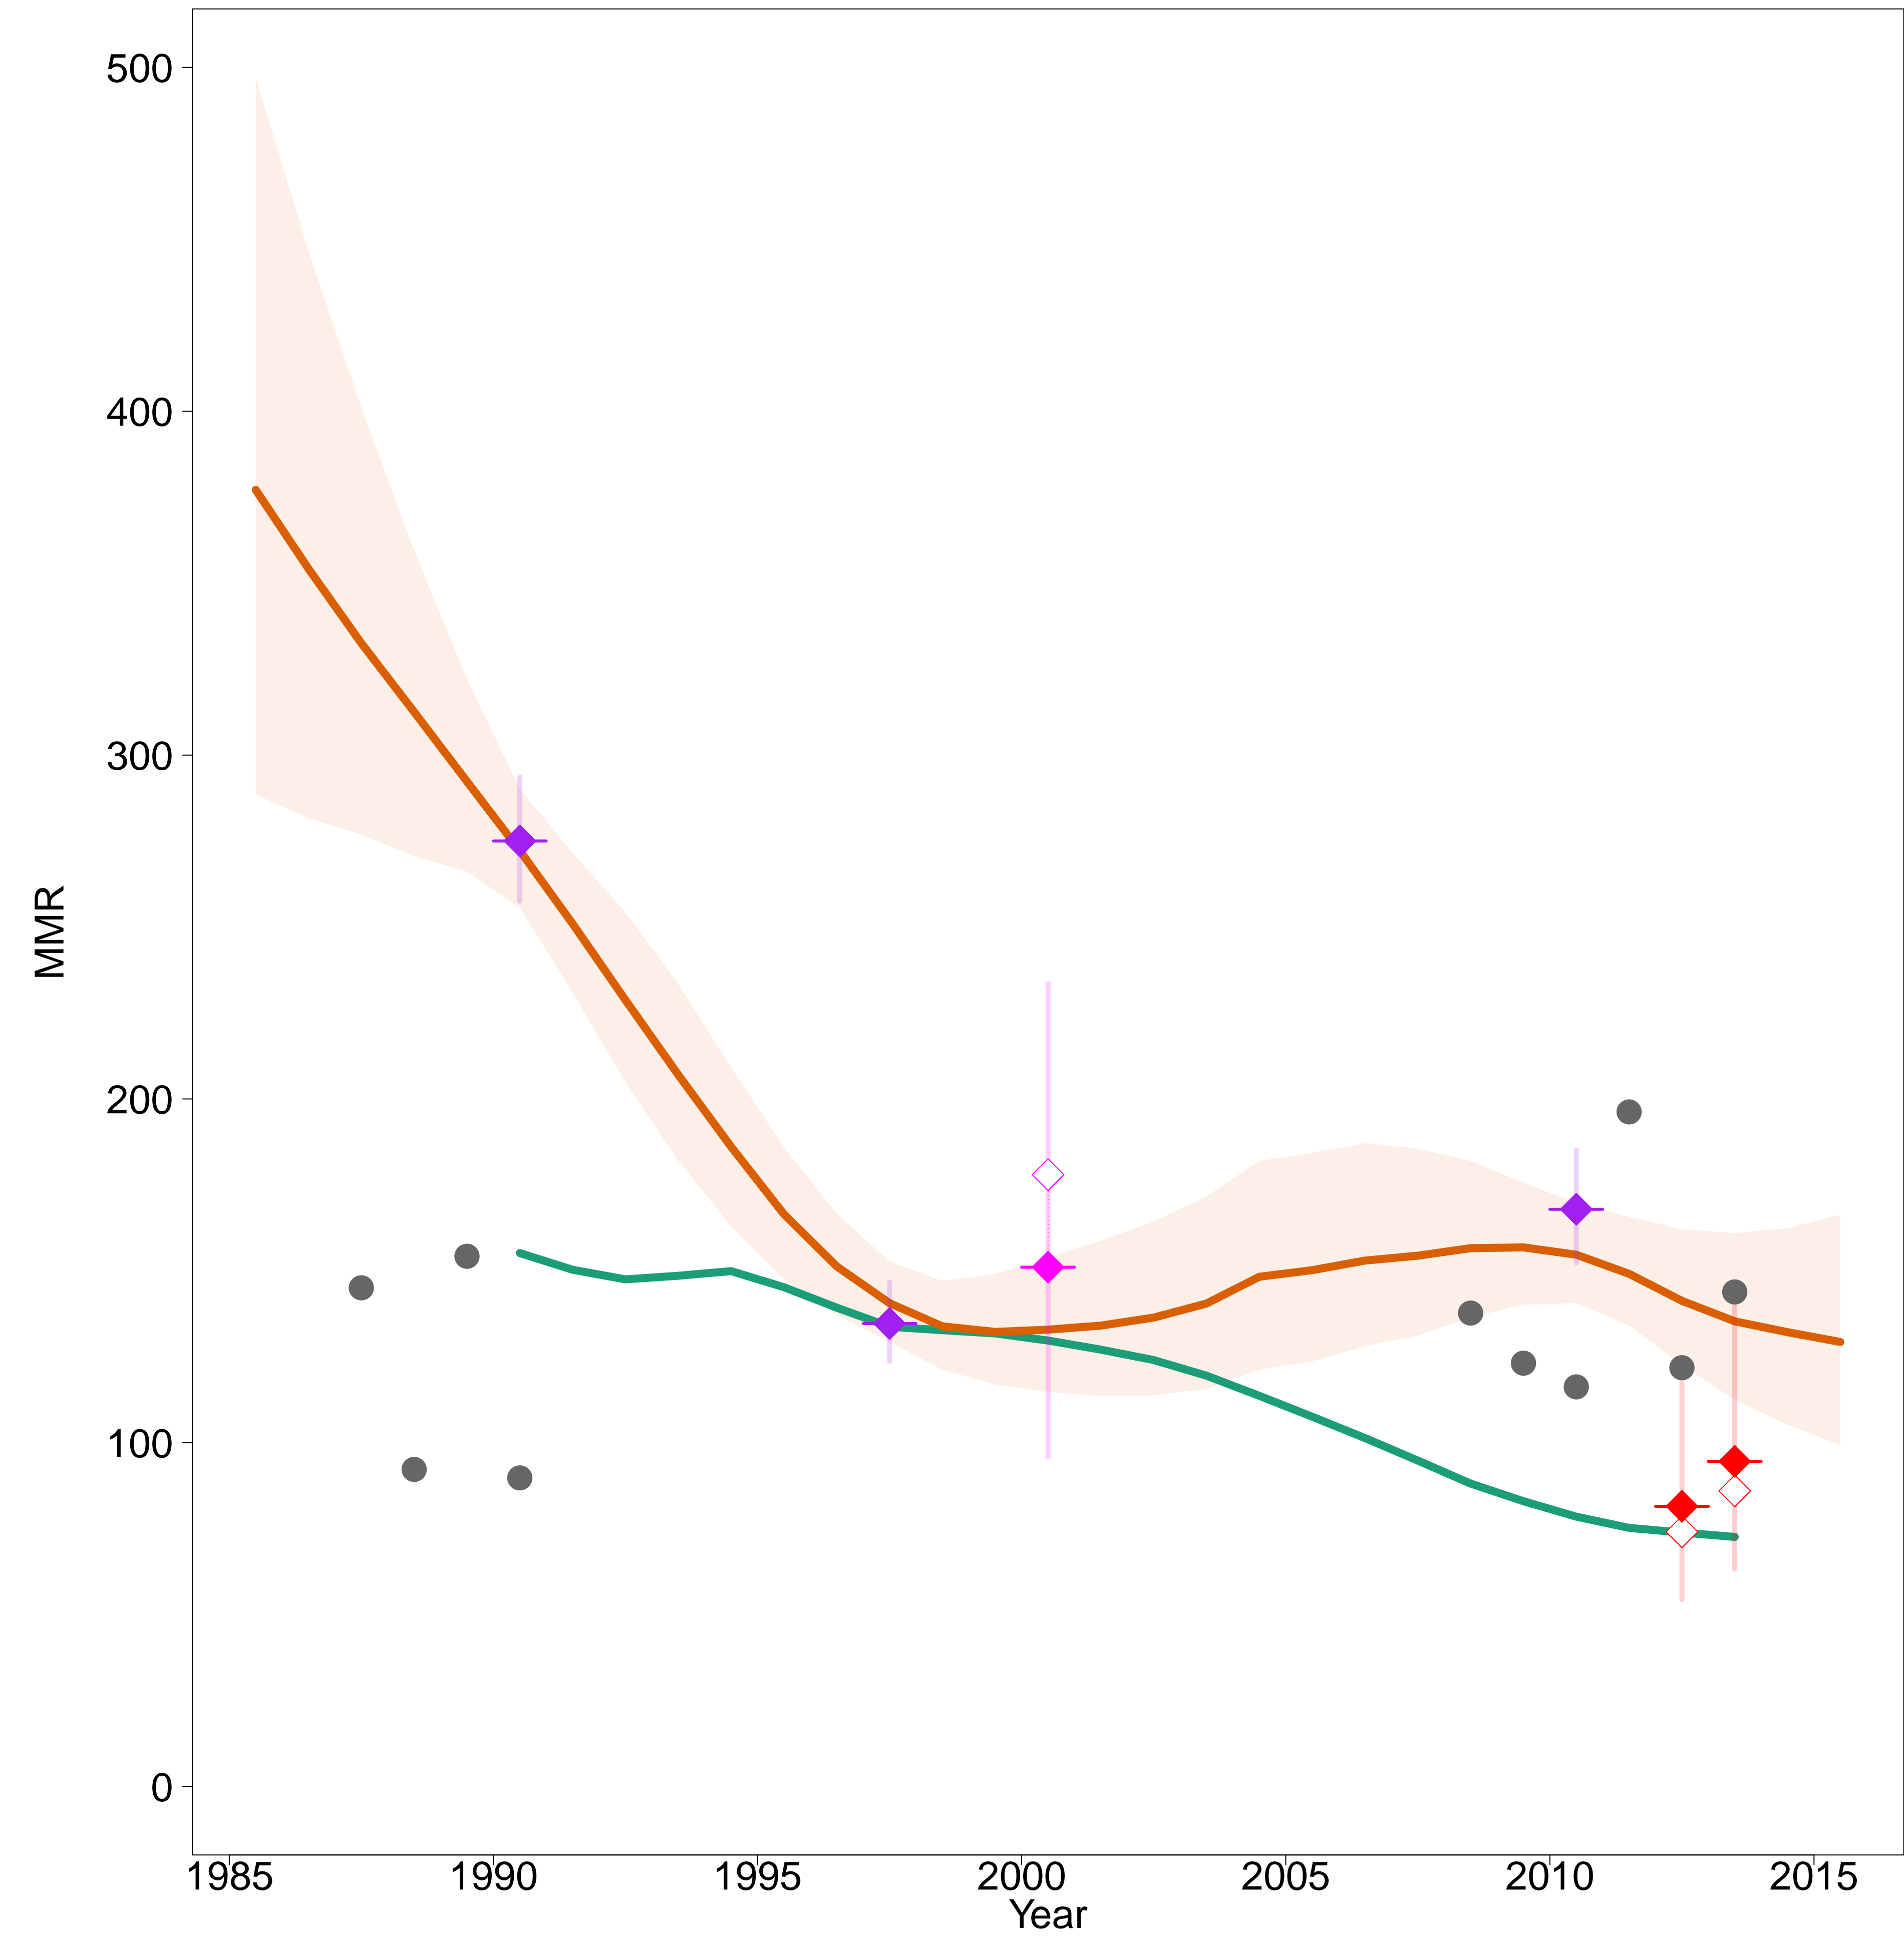

- Estimates -
- MMEIG 2015
- GBD 2013
- MMR Database 2015 -
- Observed Data
- Adjusted Data
- Data type -
- Spec. studies
- Census
- Misc. studies
- Excluded VR data  
(data quality issues)

Hungary [HUN]  
(Developed regions)

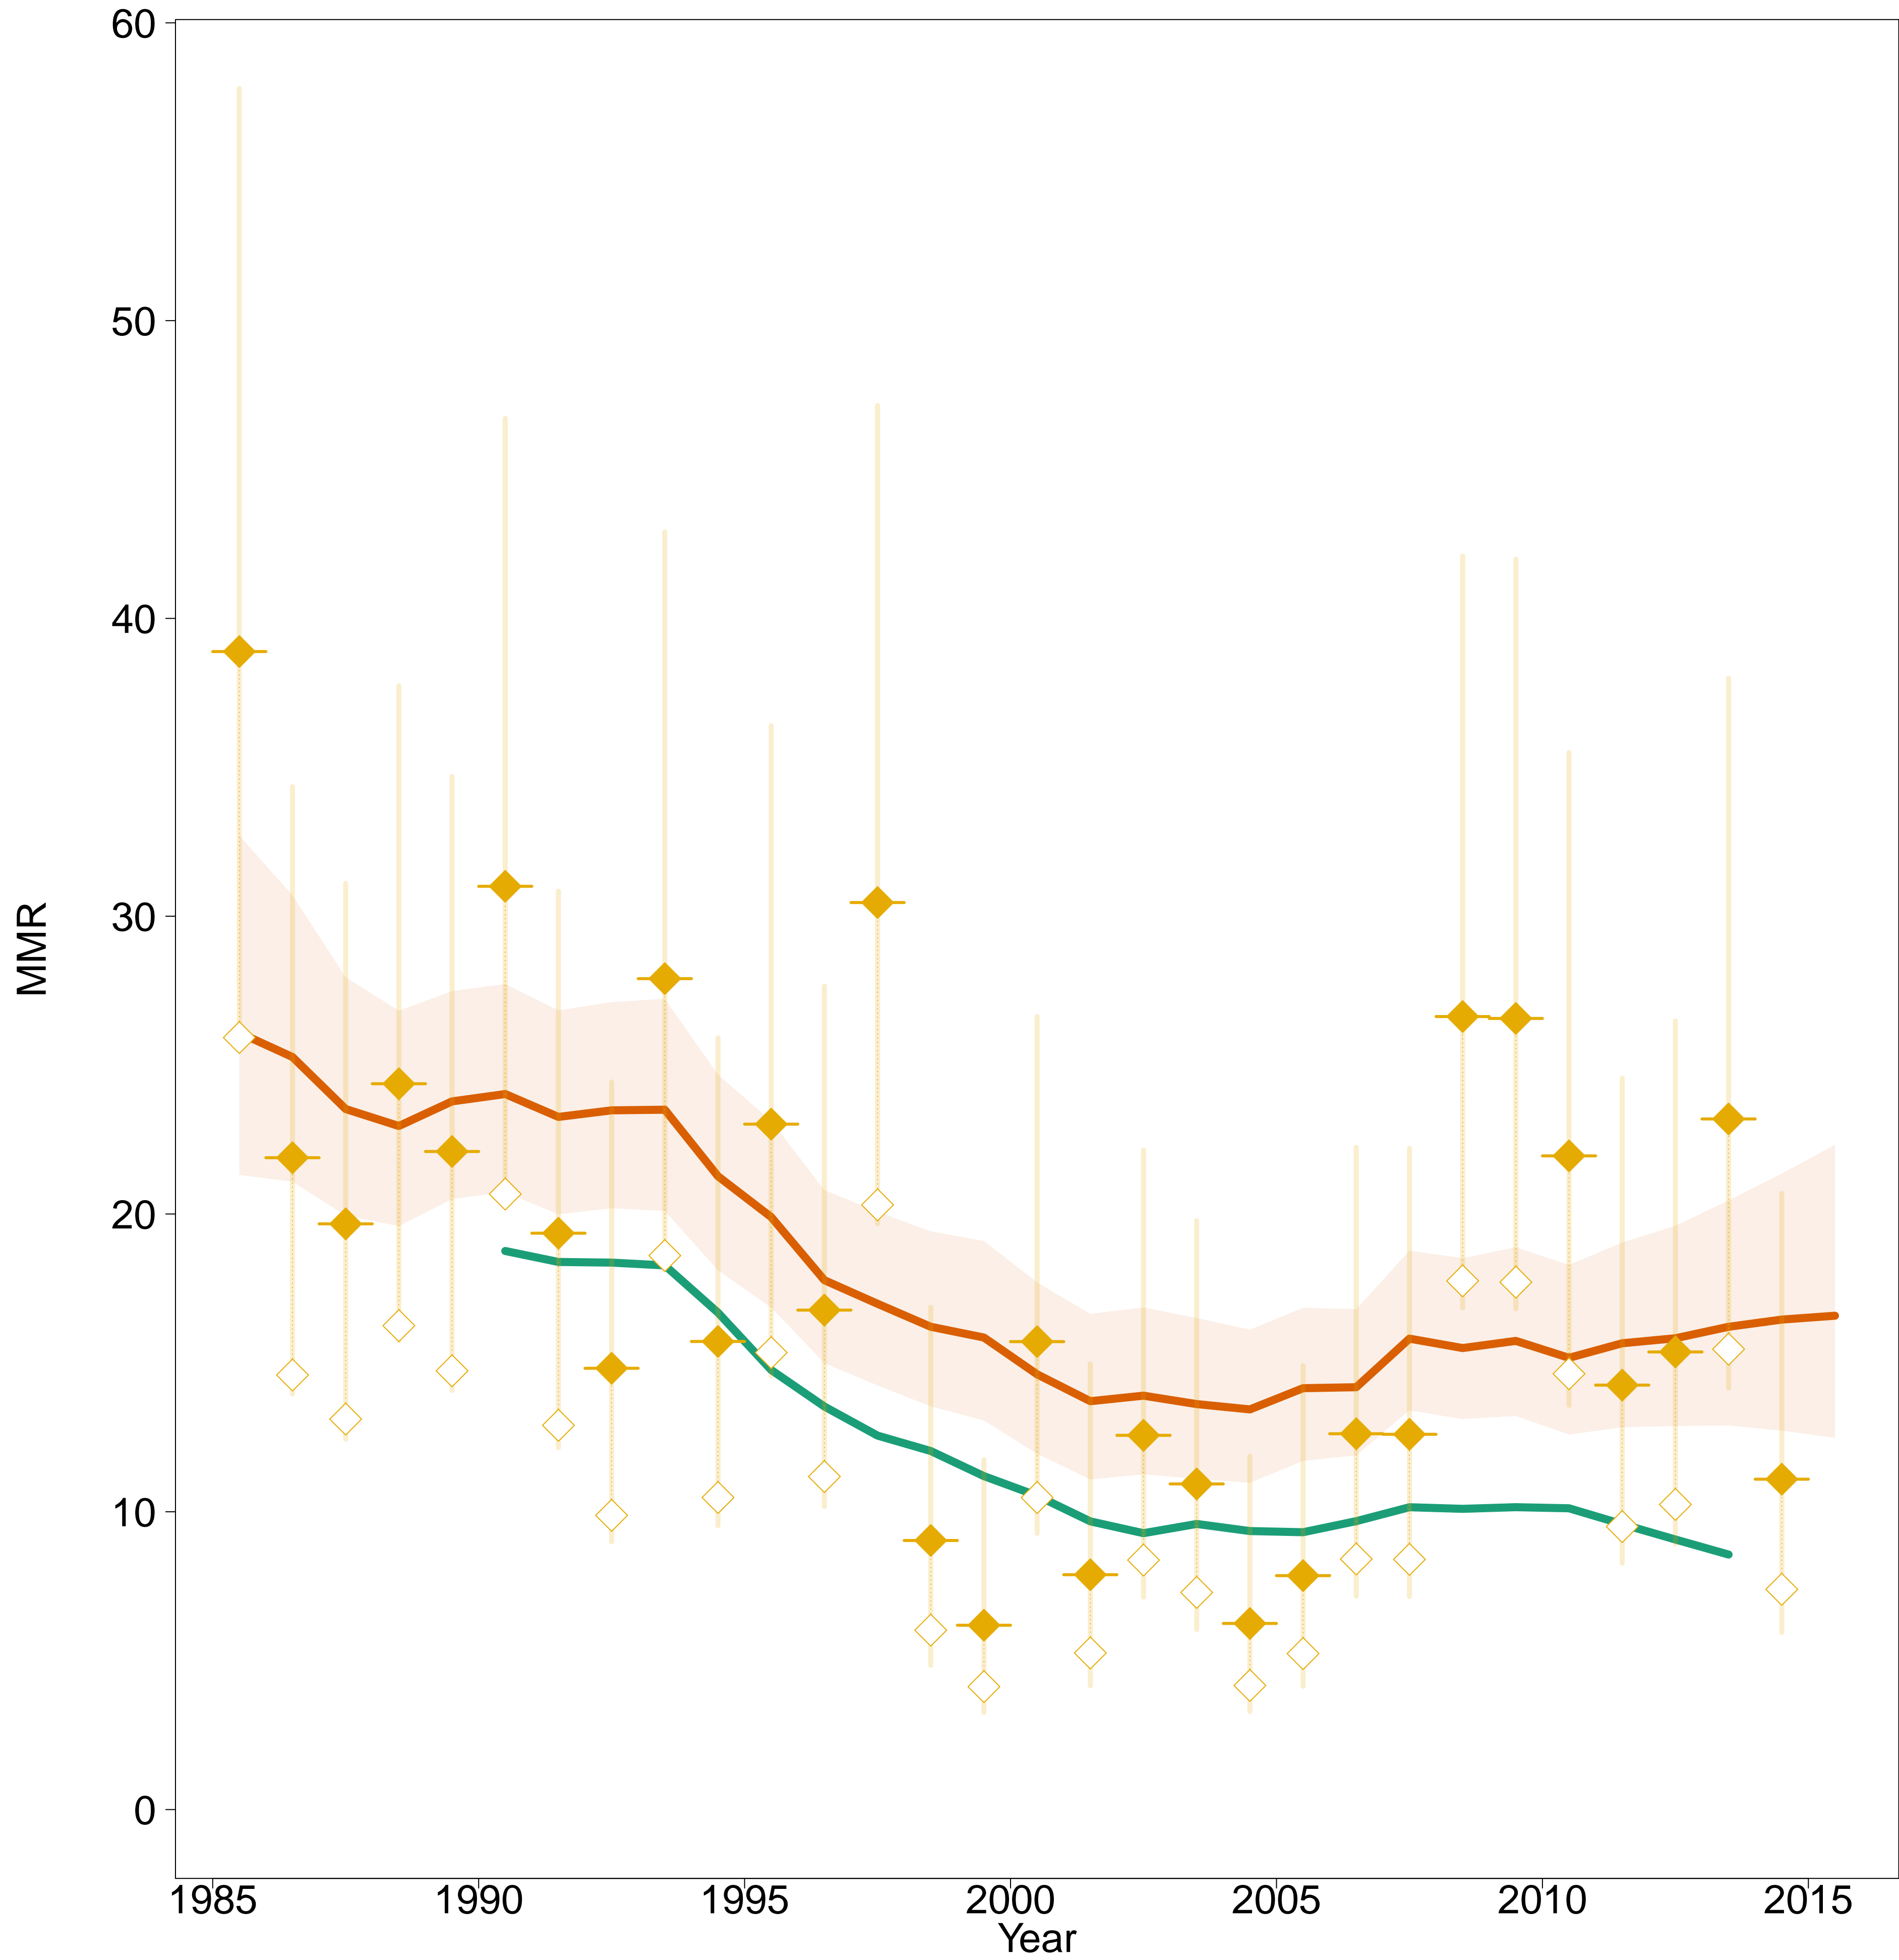

- Estimates -
- MMEIG 2015
- GBD 2013
- MMR Database 2015 -
- Observed Data
- Adjusted Data
- Data type -
- VR

Iceland [ISL]  
(Developed regions)

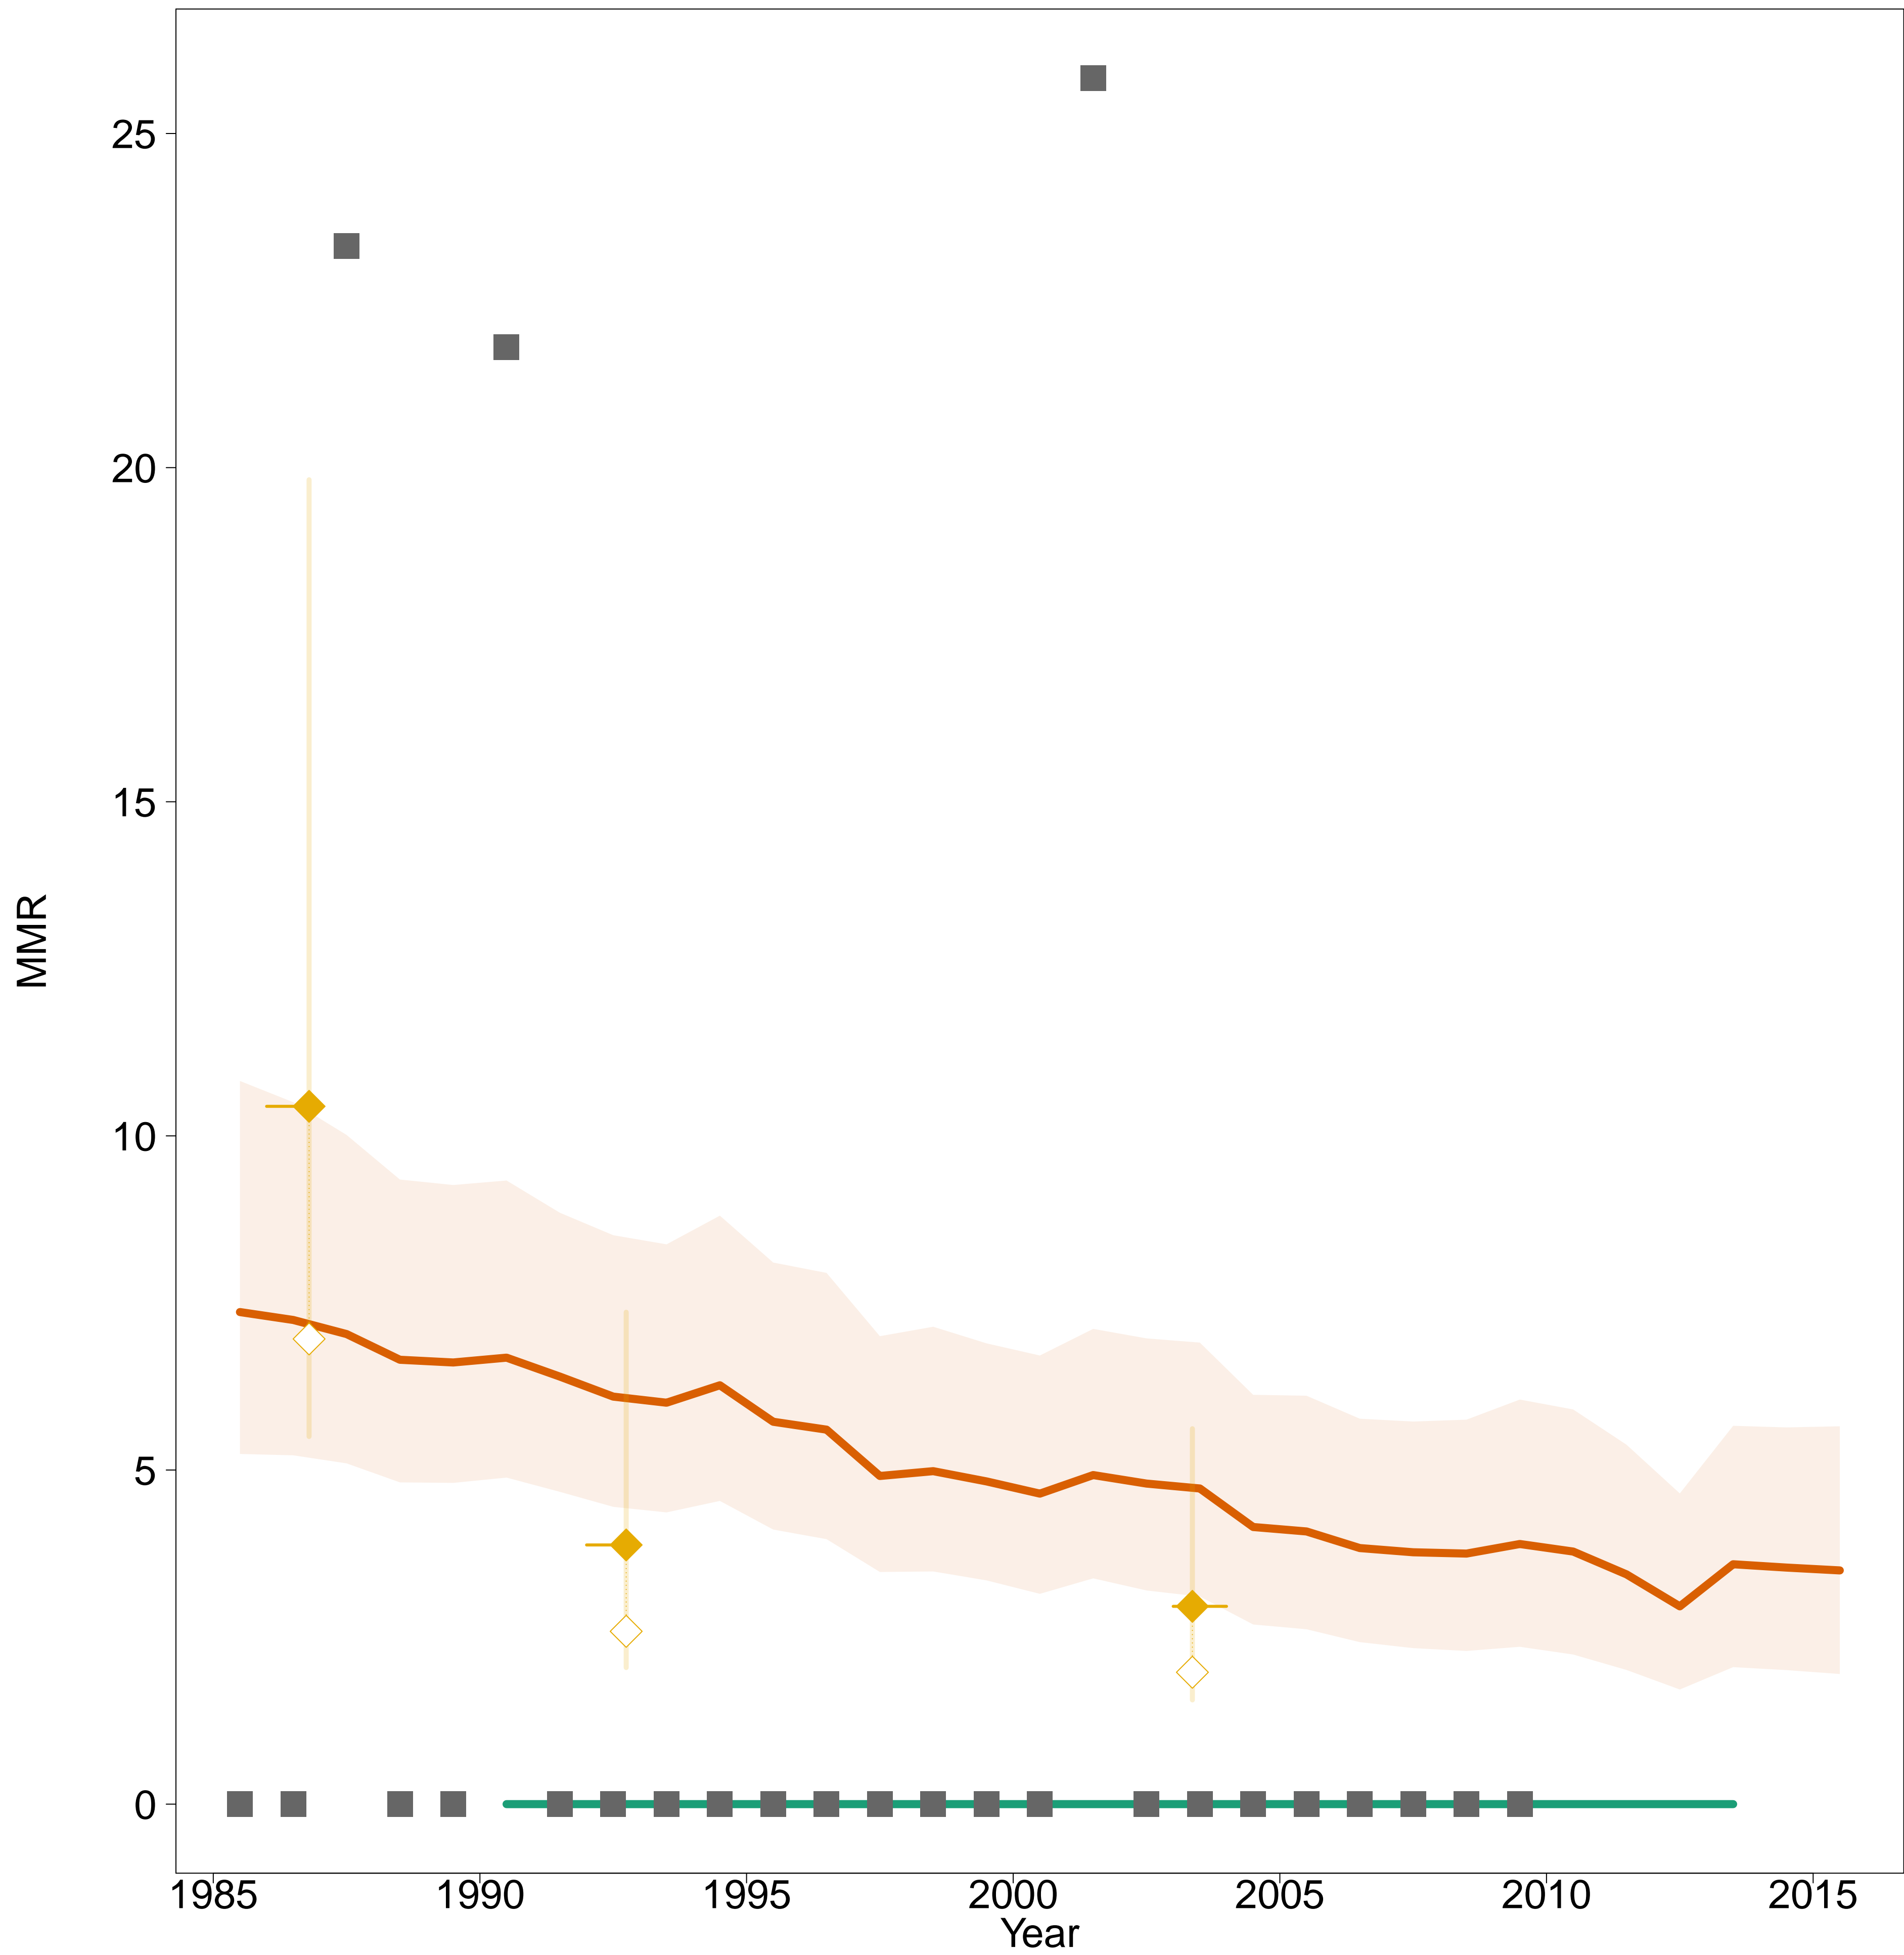

- Estimates –
- MMEIG 2015
- GBD 2013
- MMR Database 2015 –
- Observed Data
- Adjusted Data
- Data type –
- VR
- Reported VR before recalc.  
(related to 0 obs. mat. death)



India [IND]  
(Southern Asia)

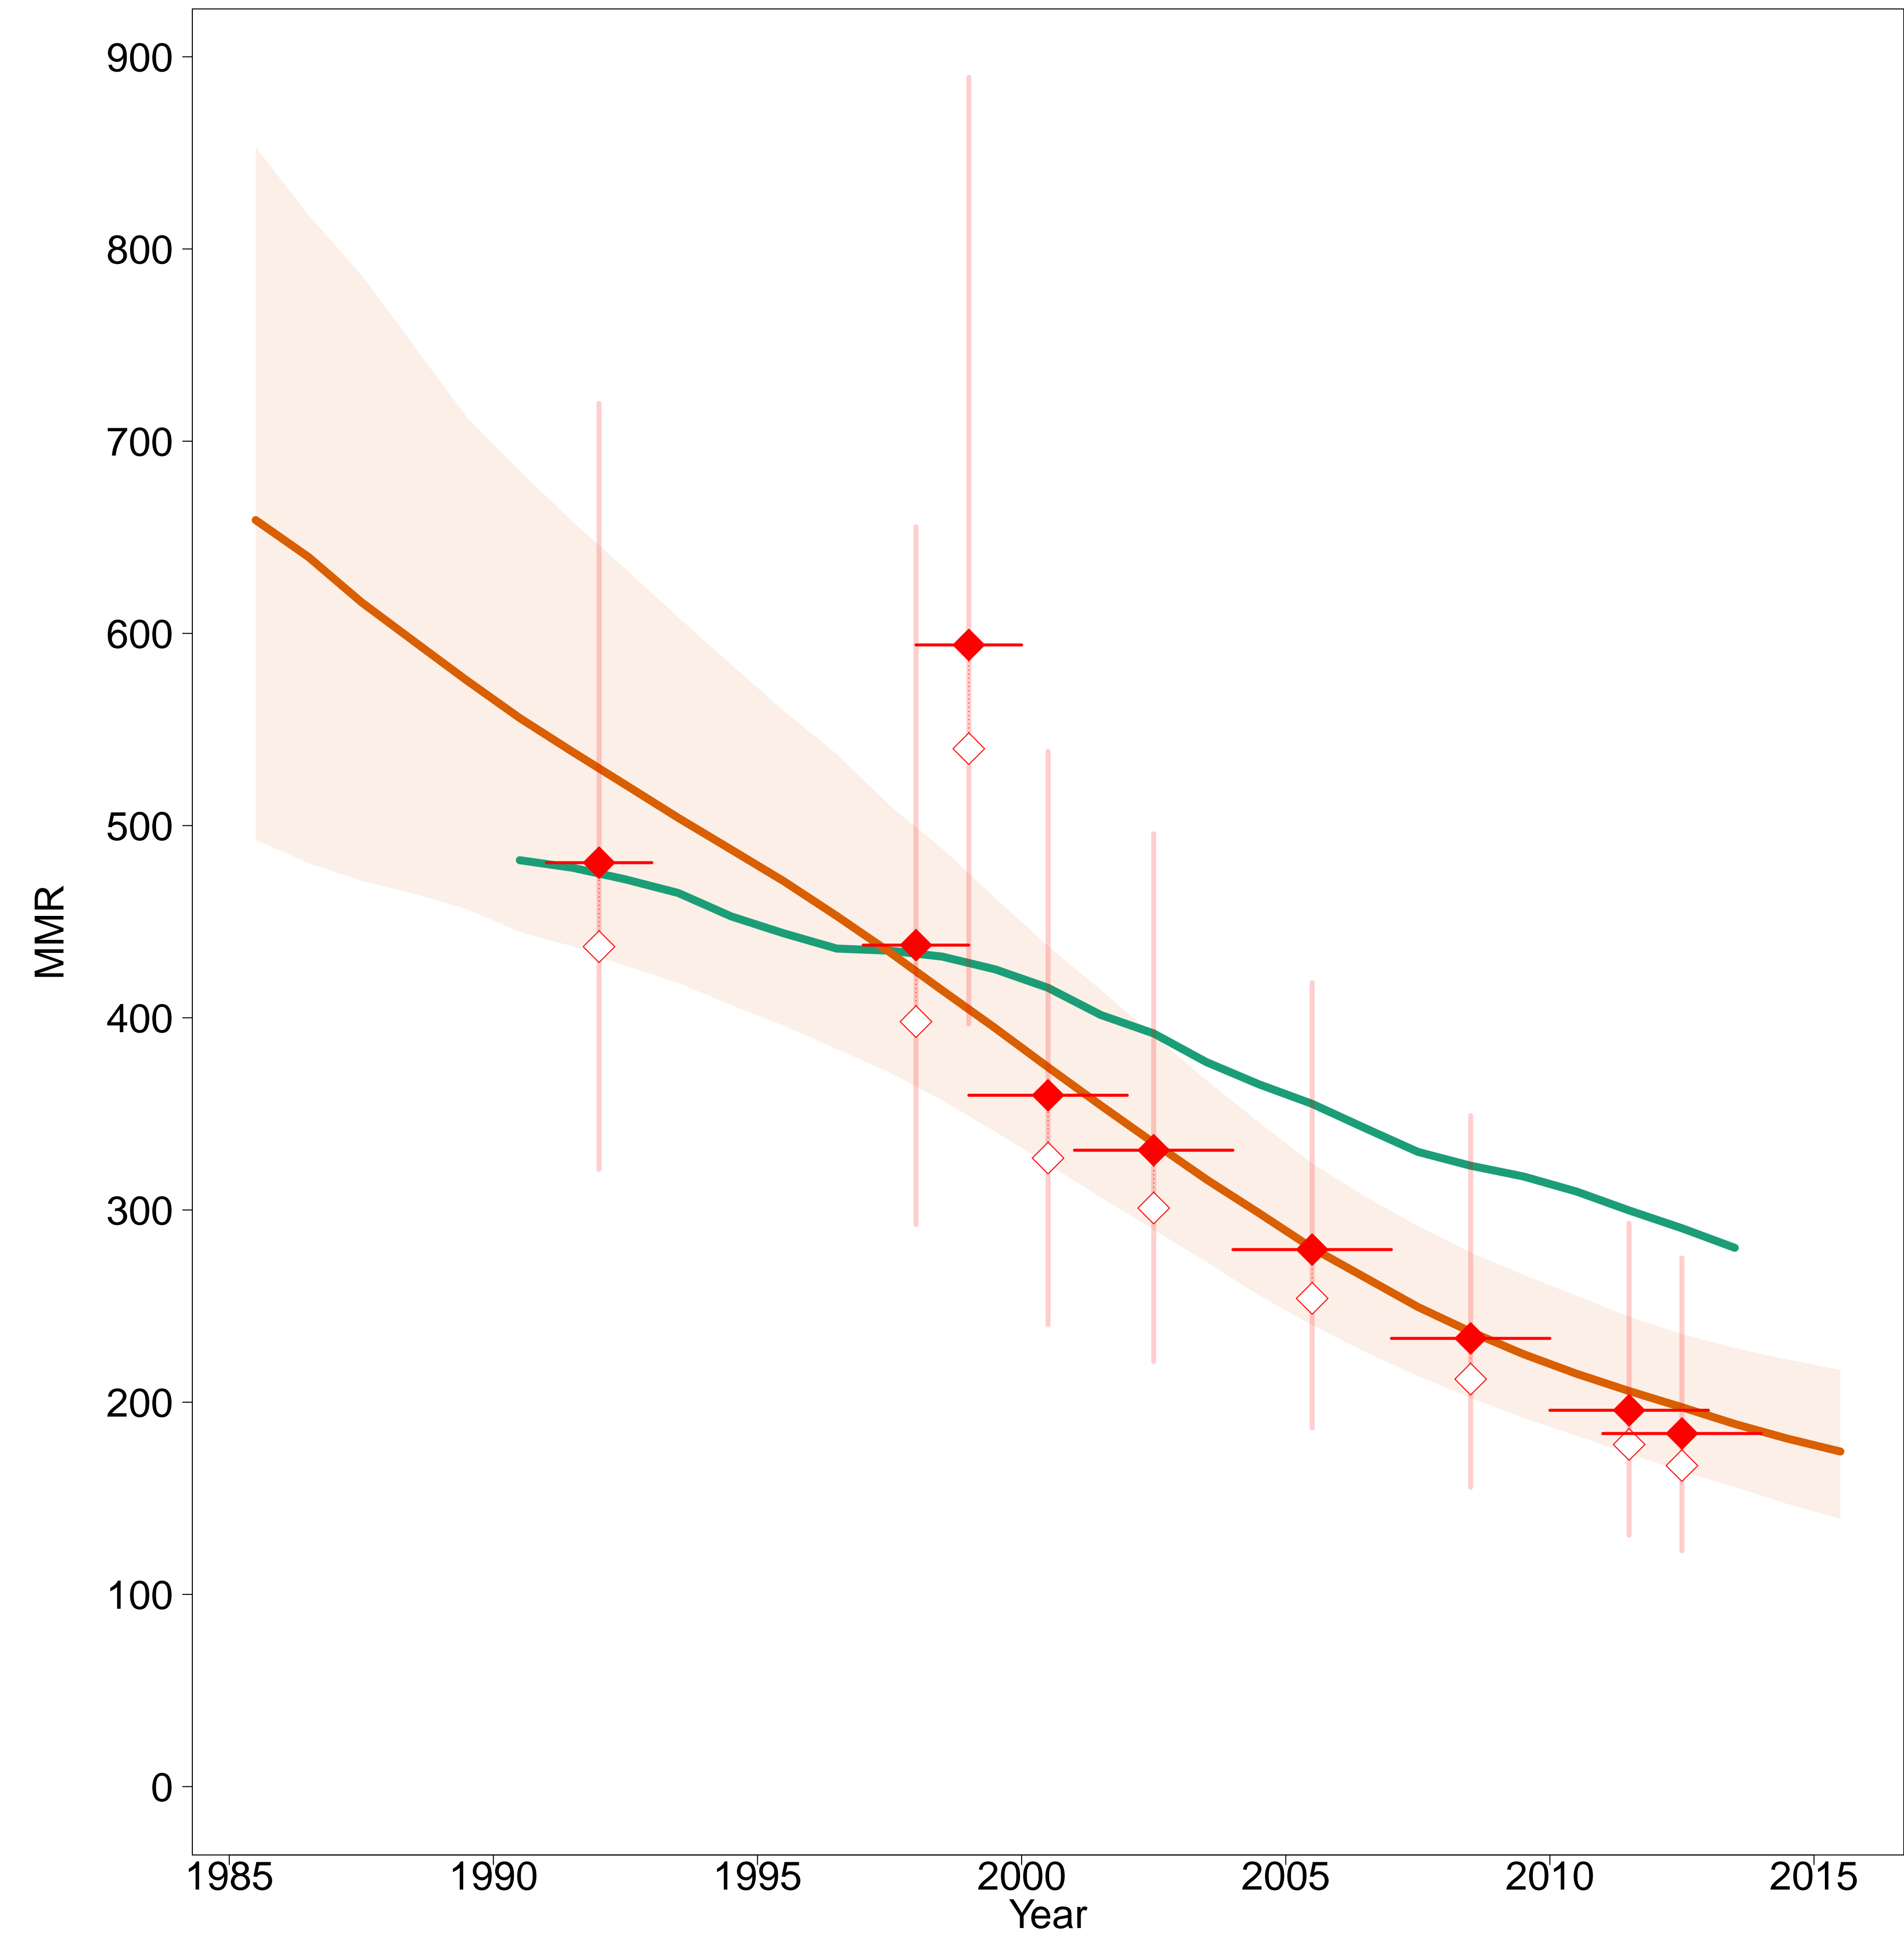

- Estimates -
- MMEIG 2015
- GBD 2013
- MMR Database 2015 -
- Observed Data
- Adjusted Data
- Data type -
- Misc. studies

Indonesia [IDN]  
(South-Eastern Asia / Oceania)

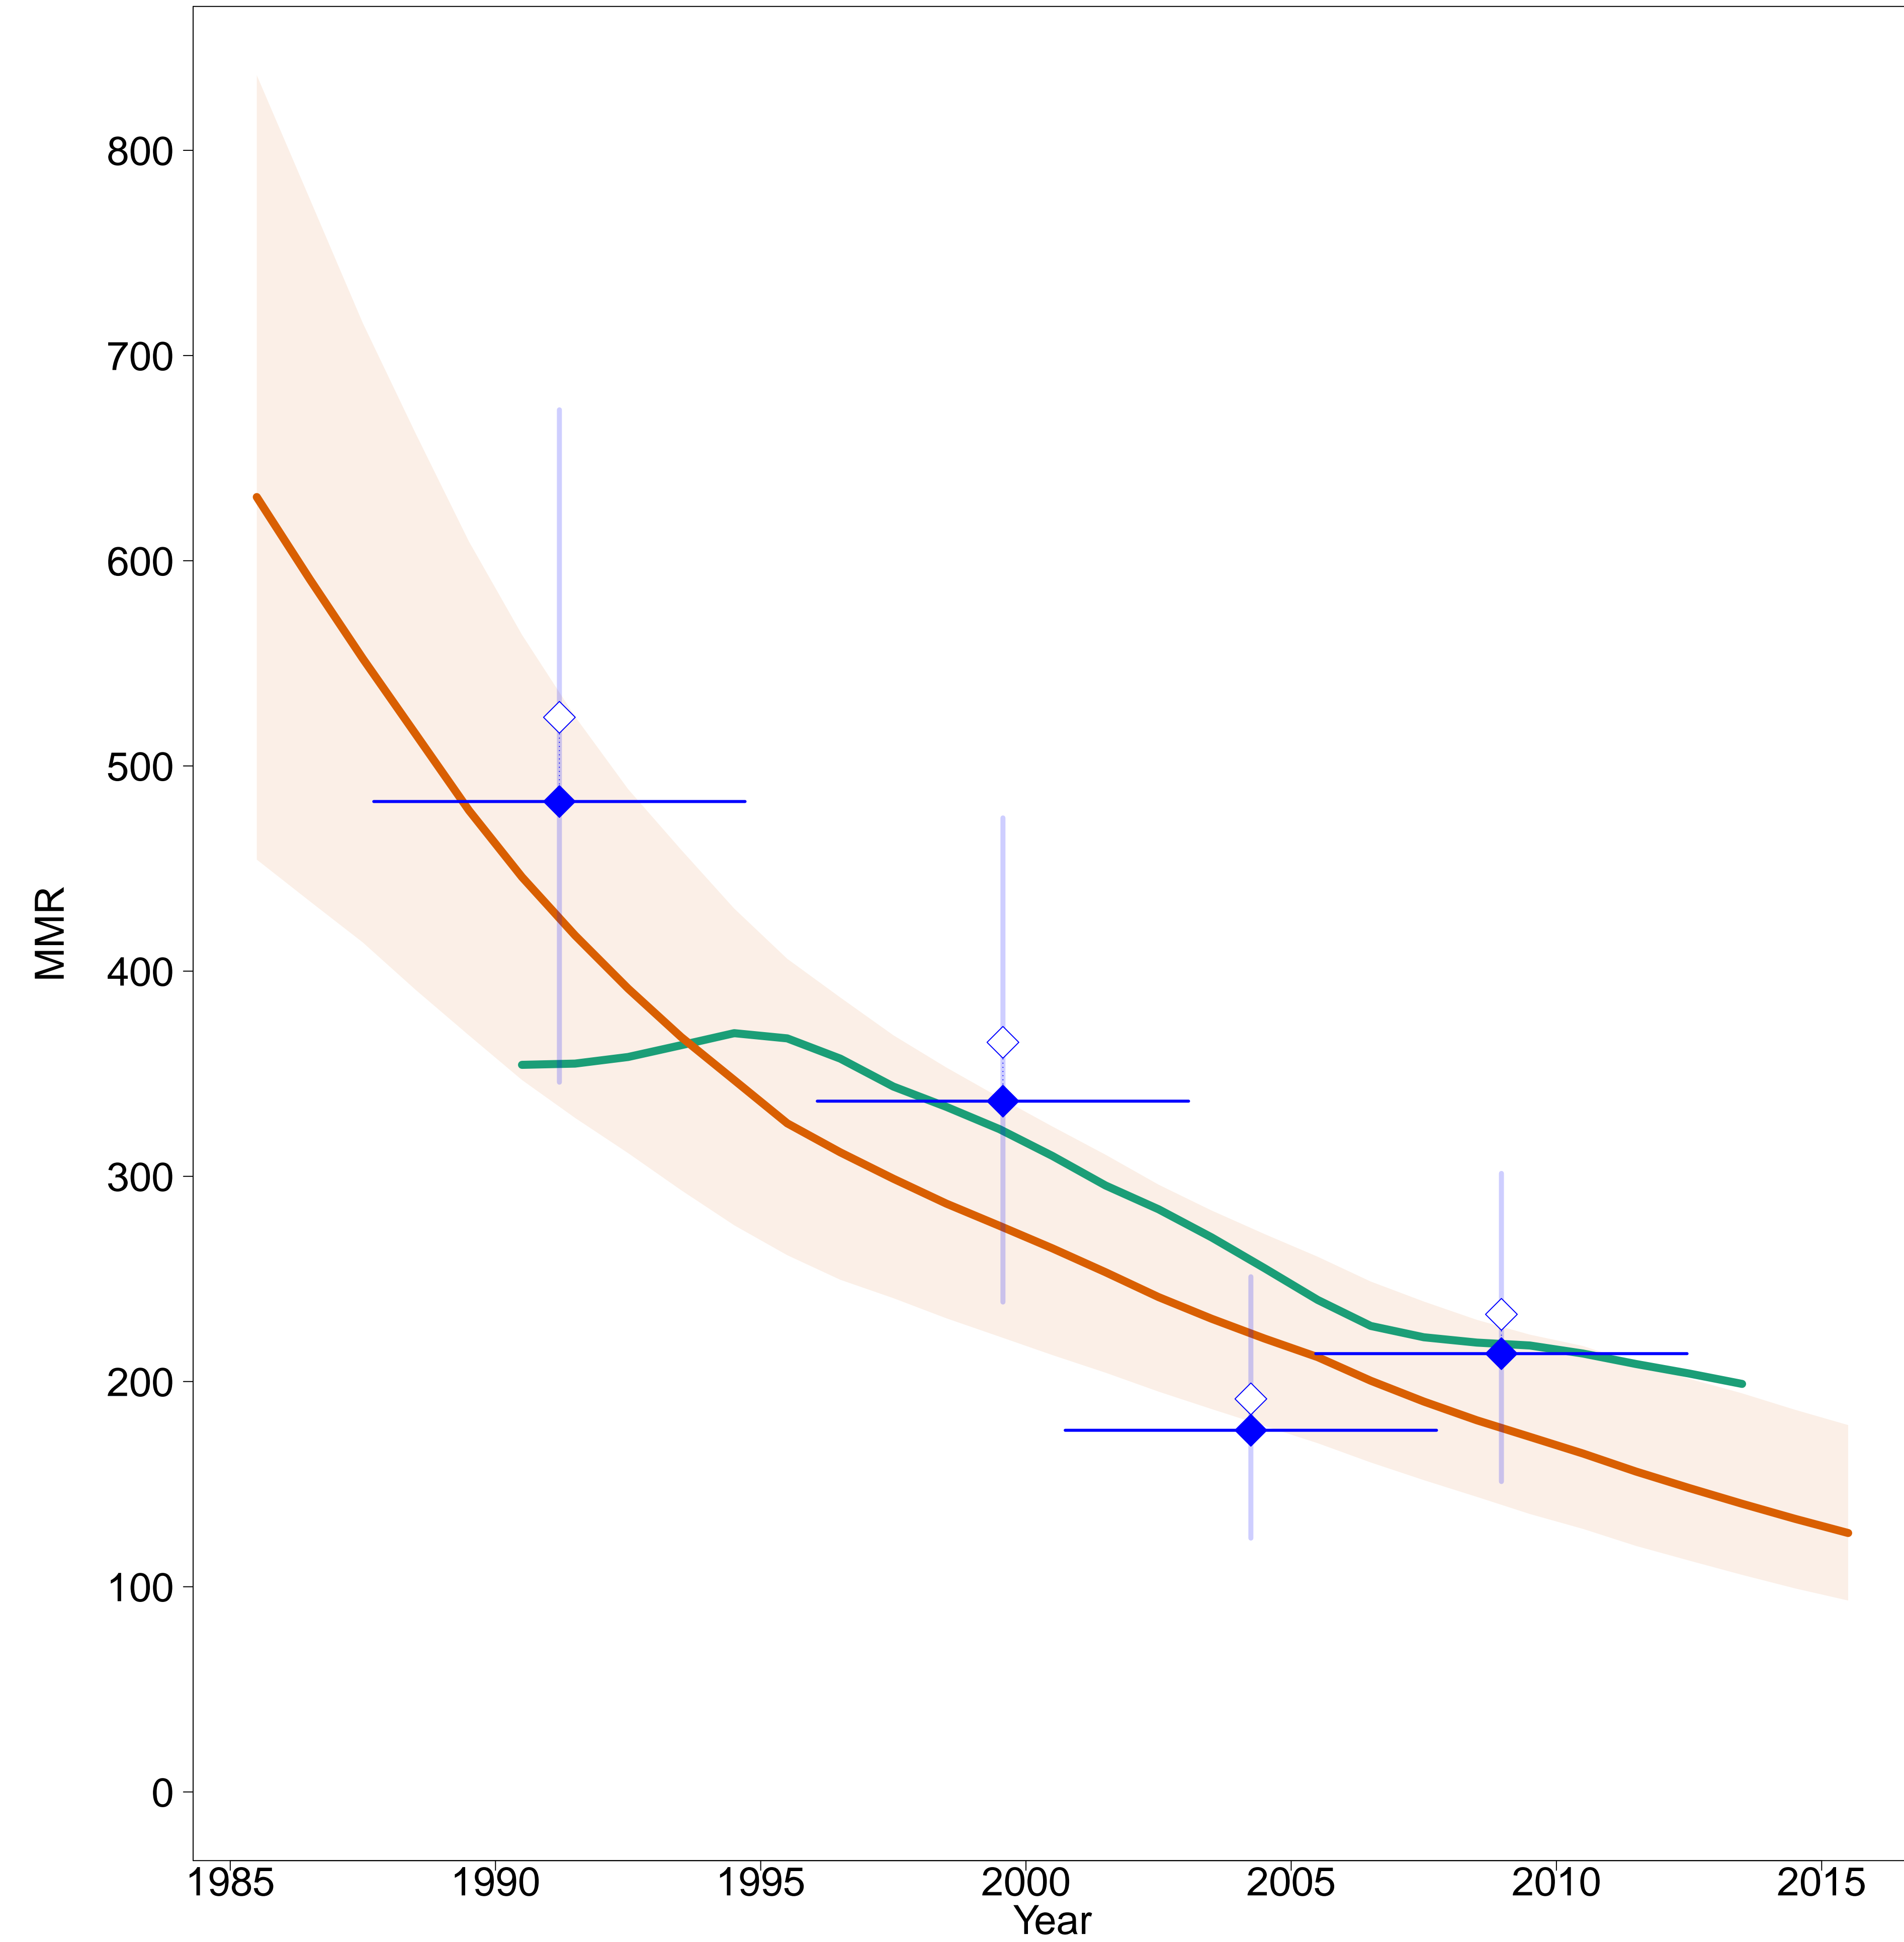

- Estimates –
- MMEIG 2015
- GBD 2013
- MMR Database 2015 –
- ◊ Observed Data
- ◆ Adjusted Data
- Data type –
- ◆ DHS

Iran [IRN]  
(Southern Asia)

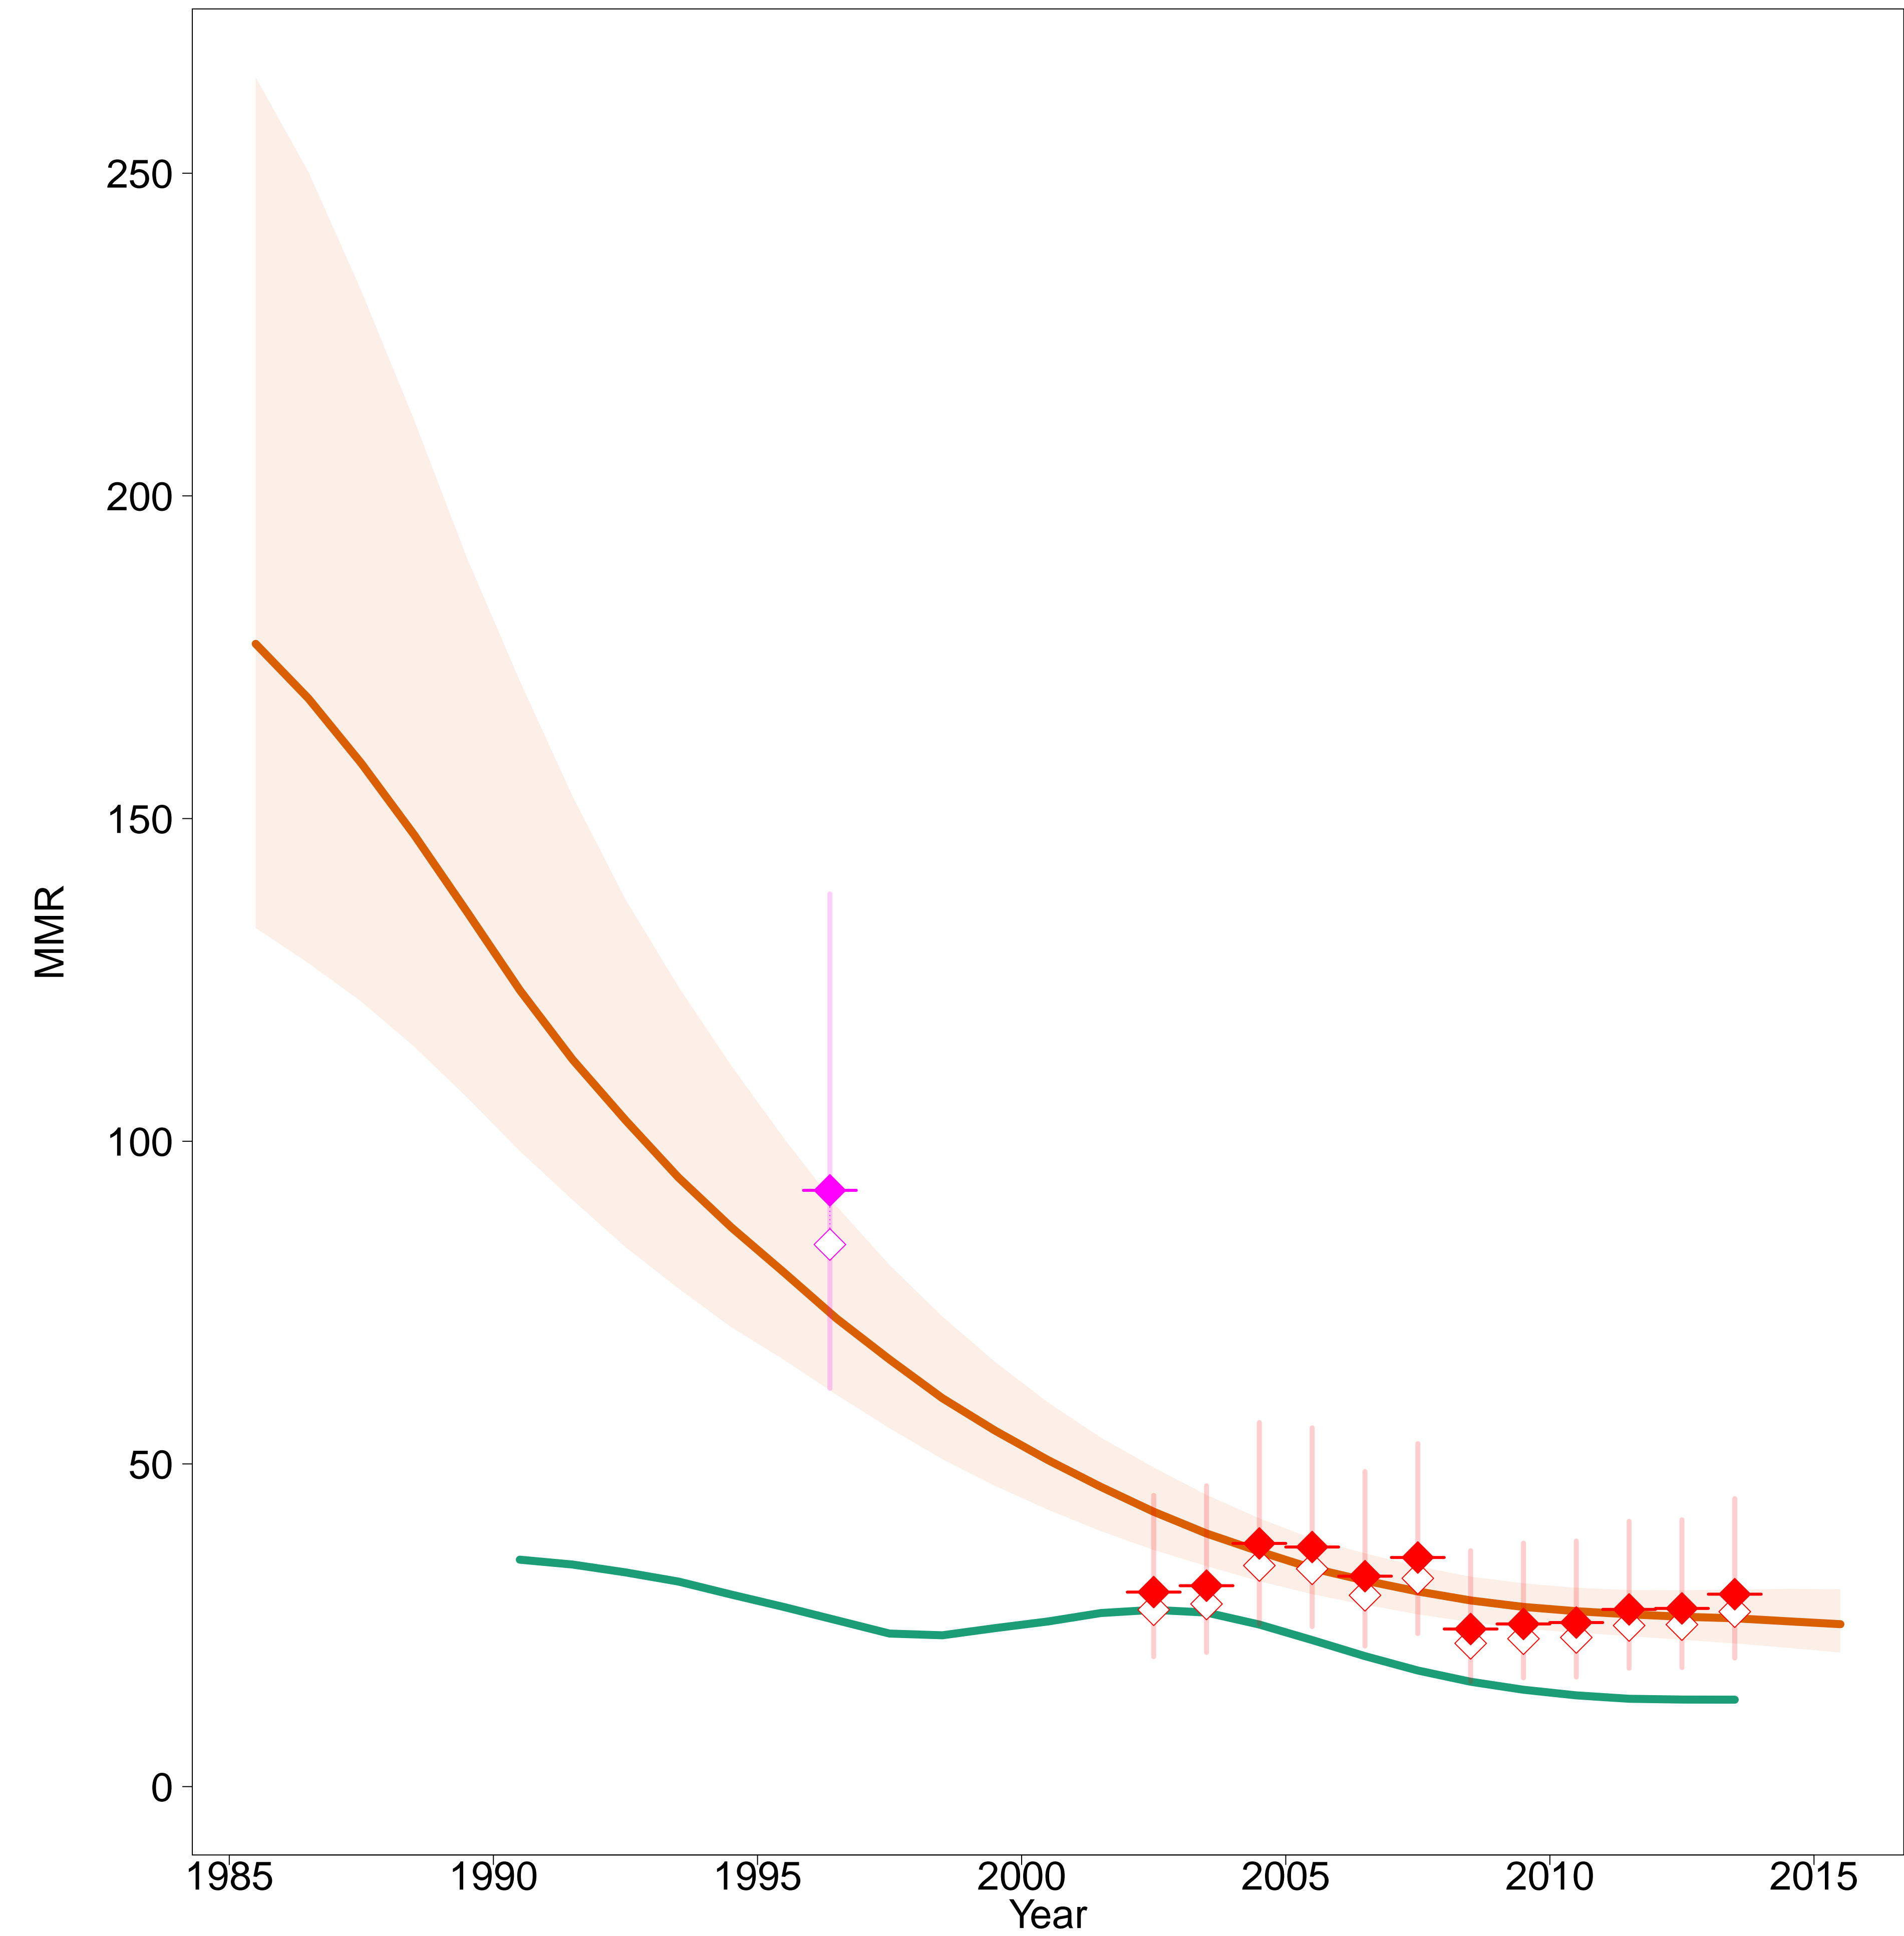

- Estimates –
- MMEIG 2015
- GBD 2013
- MMR Database 2015 –
- Observed Data
- Adjusted Data
- Data type –
- Census
- Misc. studies

Iraq [IRQ]  
(Western Asia)

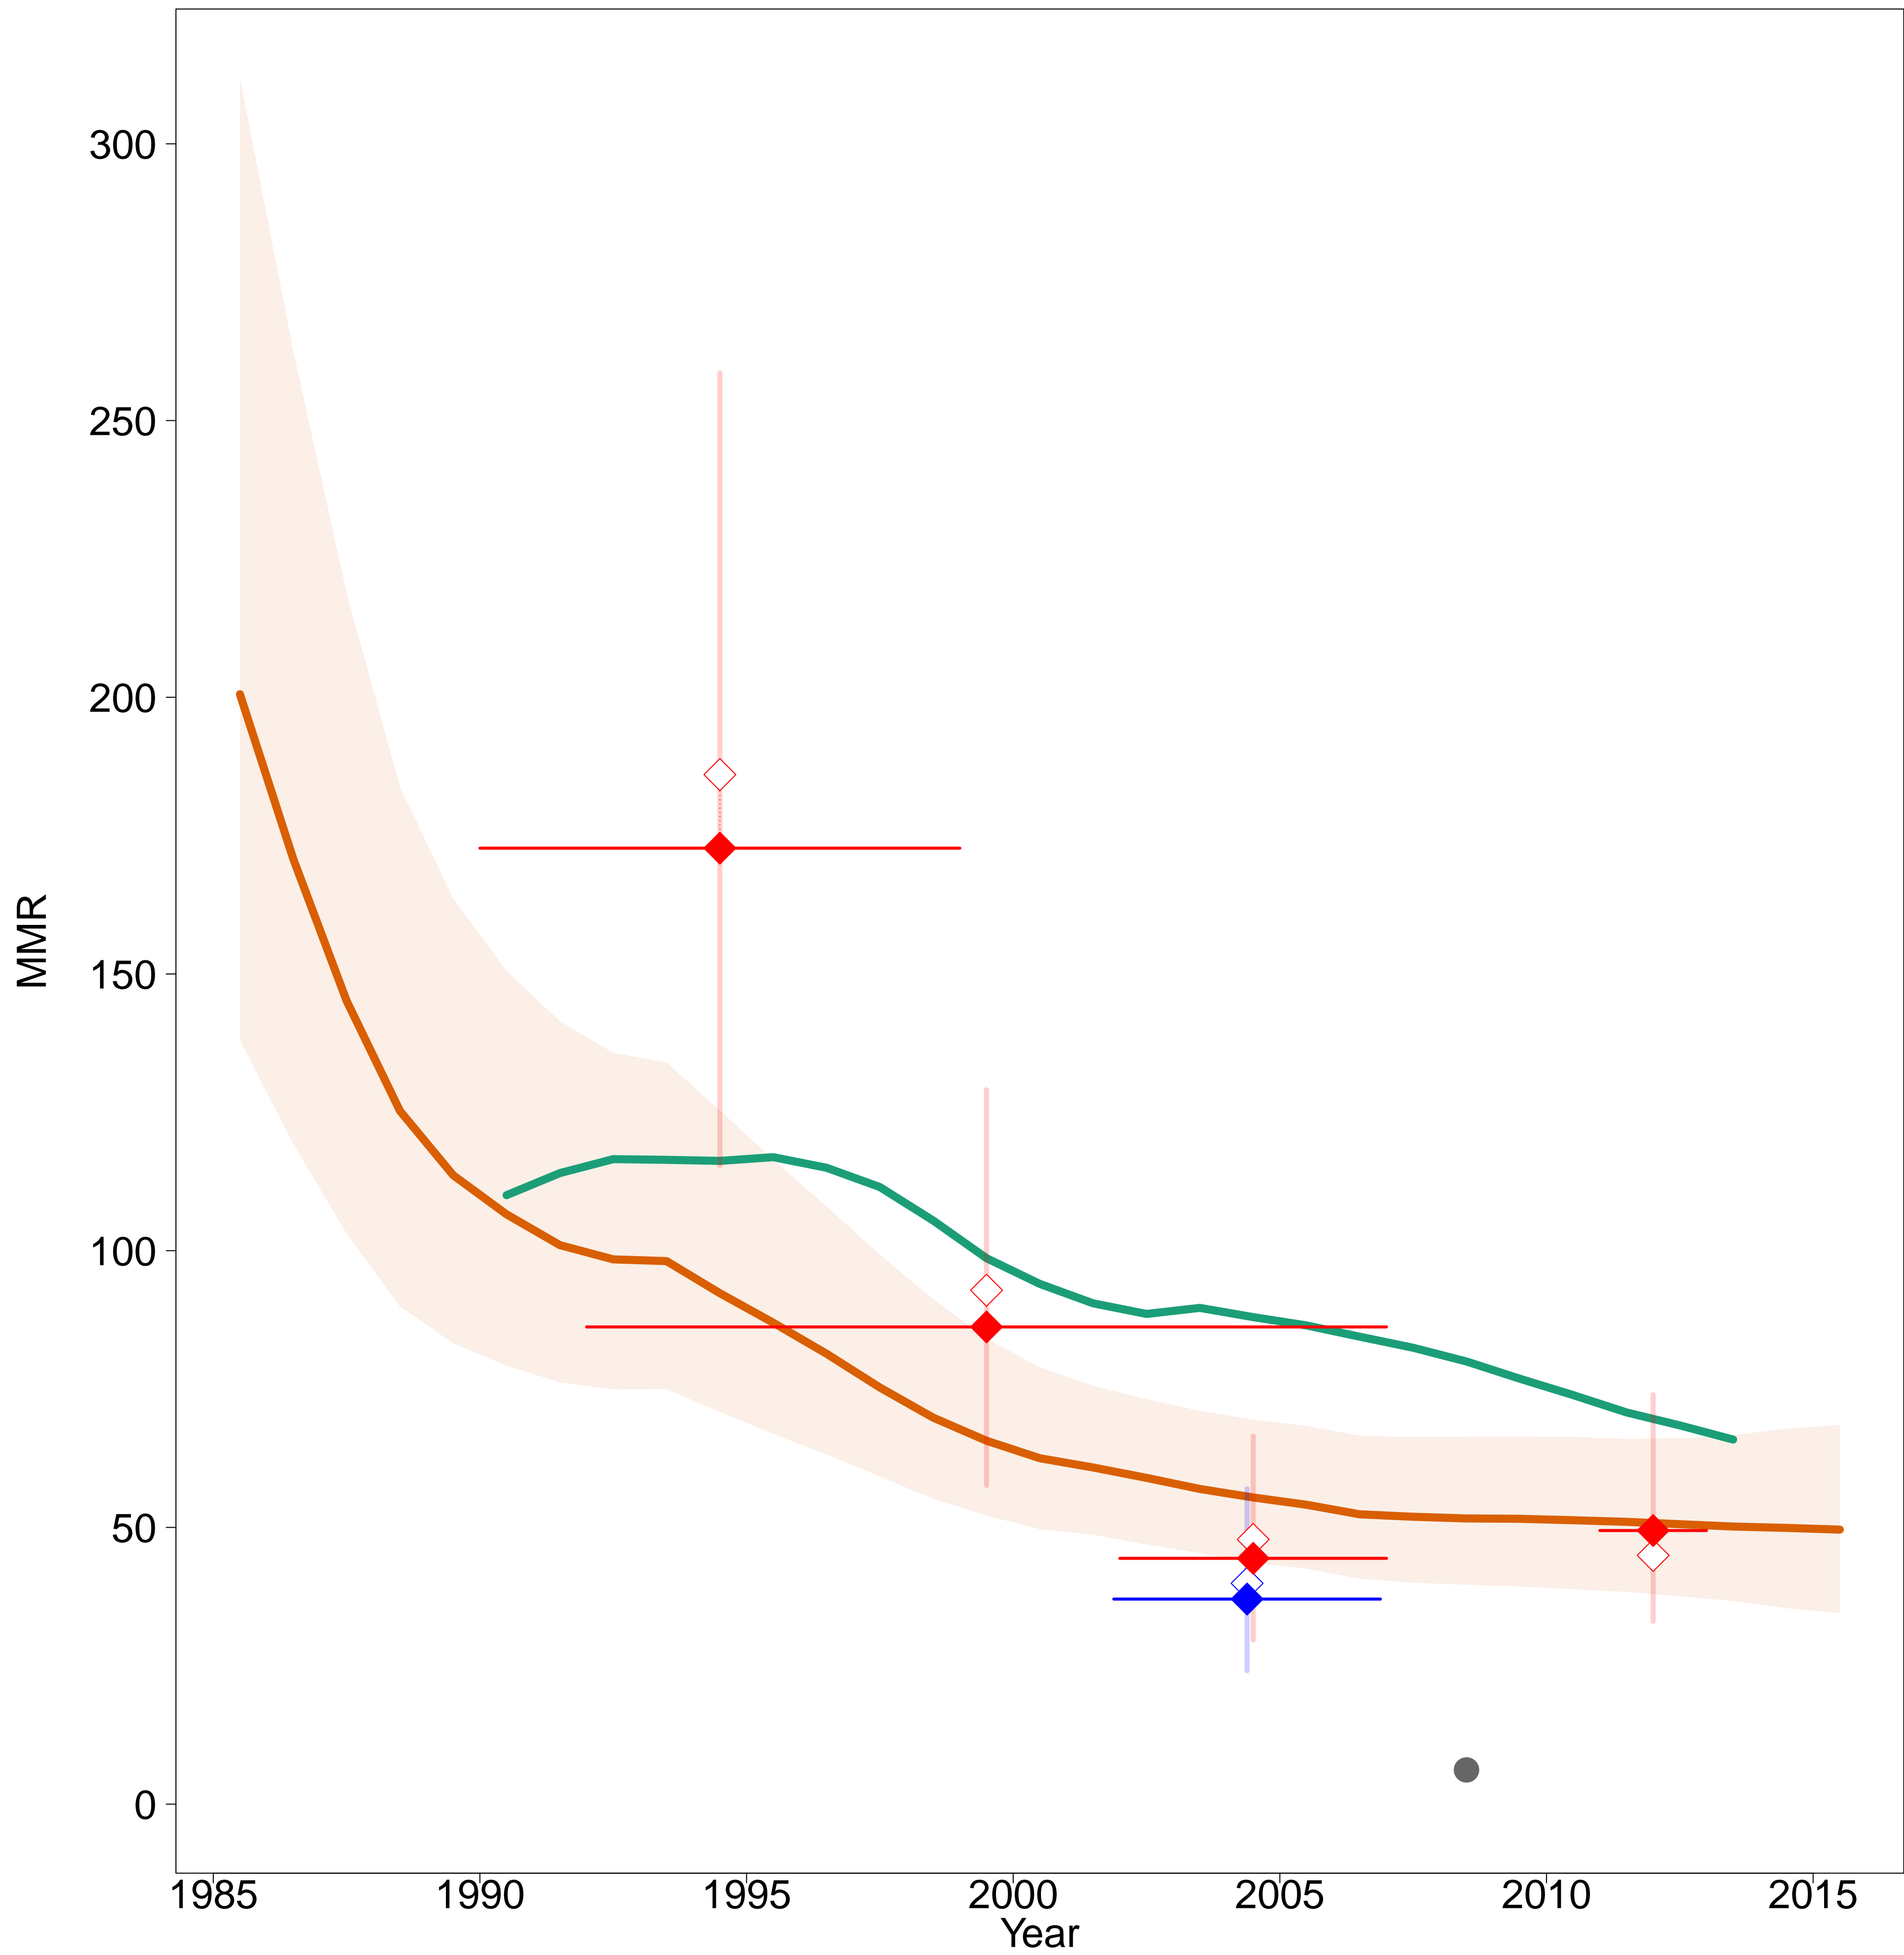

- Estimates –
- MMEIG 2015
- GBD 2013
- MMR Database 2015 –
- ◊ Observed Data
- ◆ Adjusted Data
- Data type –
- ◆ DHS
- ◆ Misc. studies
- Excluded VR data (data quality issues)

Ireland [IRL]  
(Developed regions)

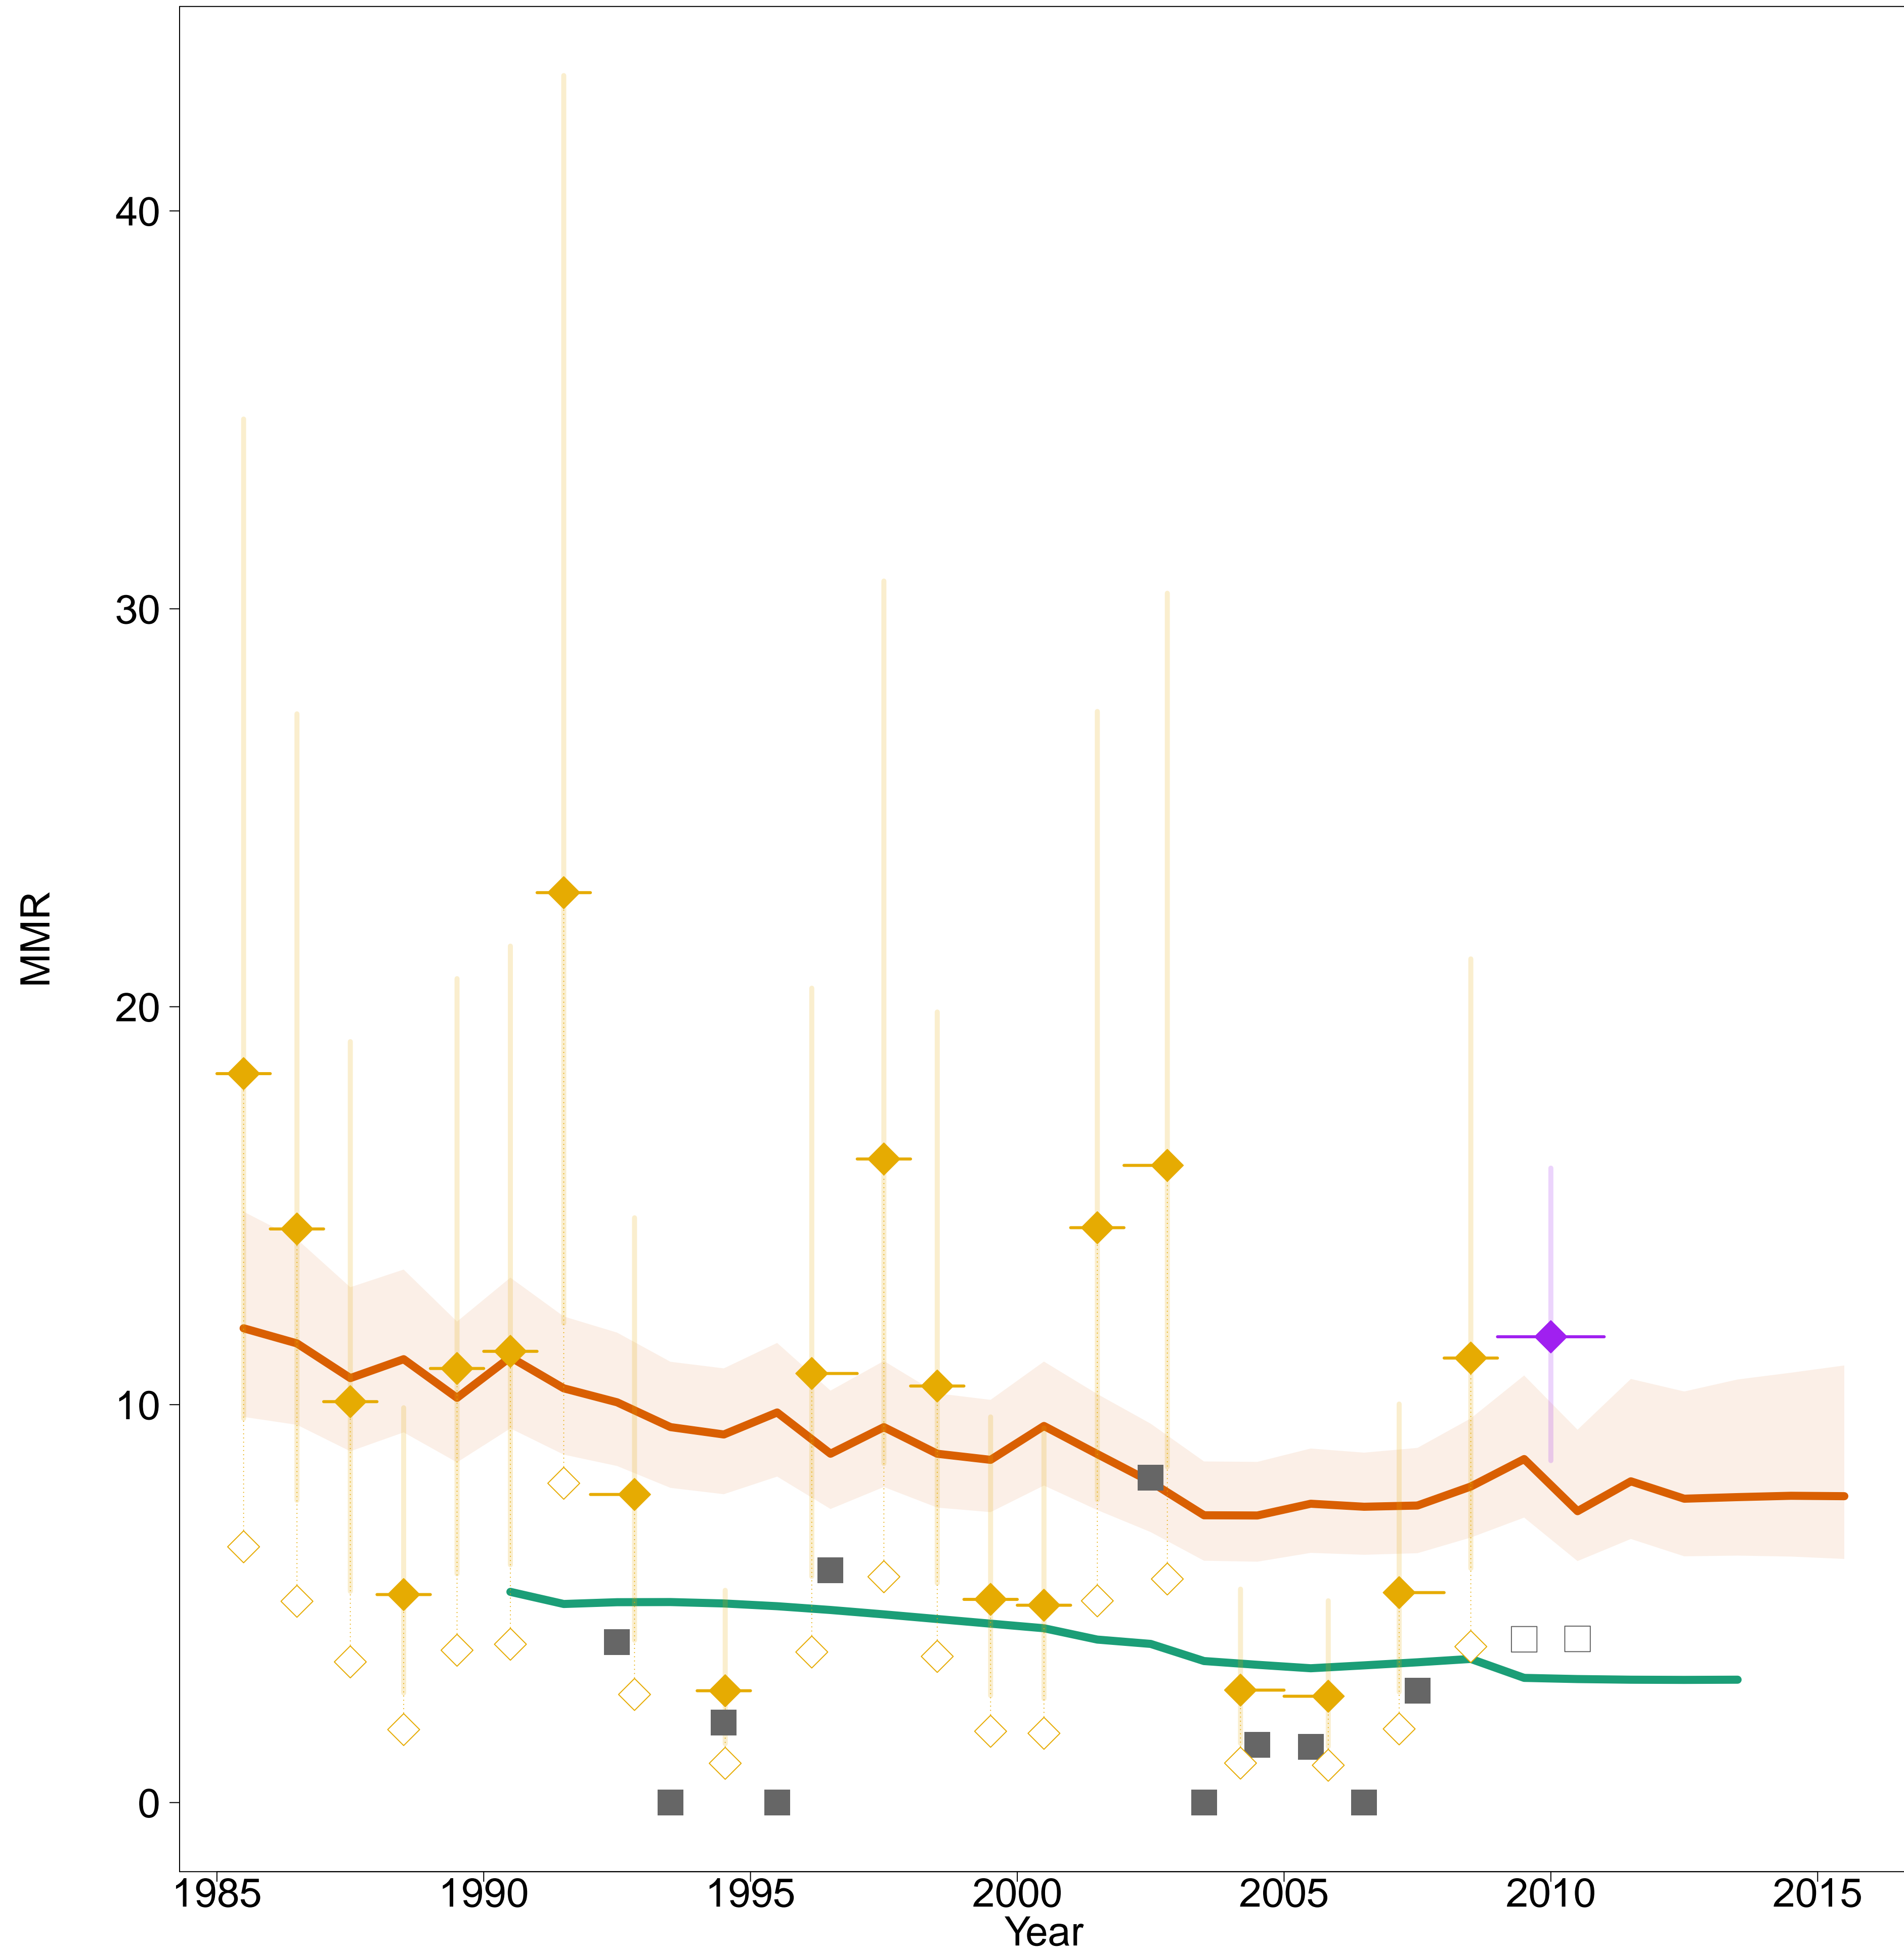

- Estimates -
- MMEIG 2015
- GBD 2013
- MMR Database 2015 -
- Observed Data
- Adjusted Data
- Data type -
- VR
- Spec. studies
- Reported VR before recalc.  
(related to 0 obs. mat. death)
- Excluded VR data  
(overlap with specialized study)

Israel [ISR]  
(Western Asia)

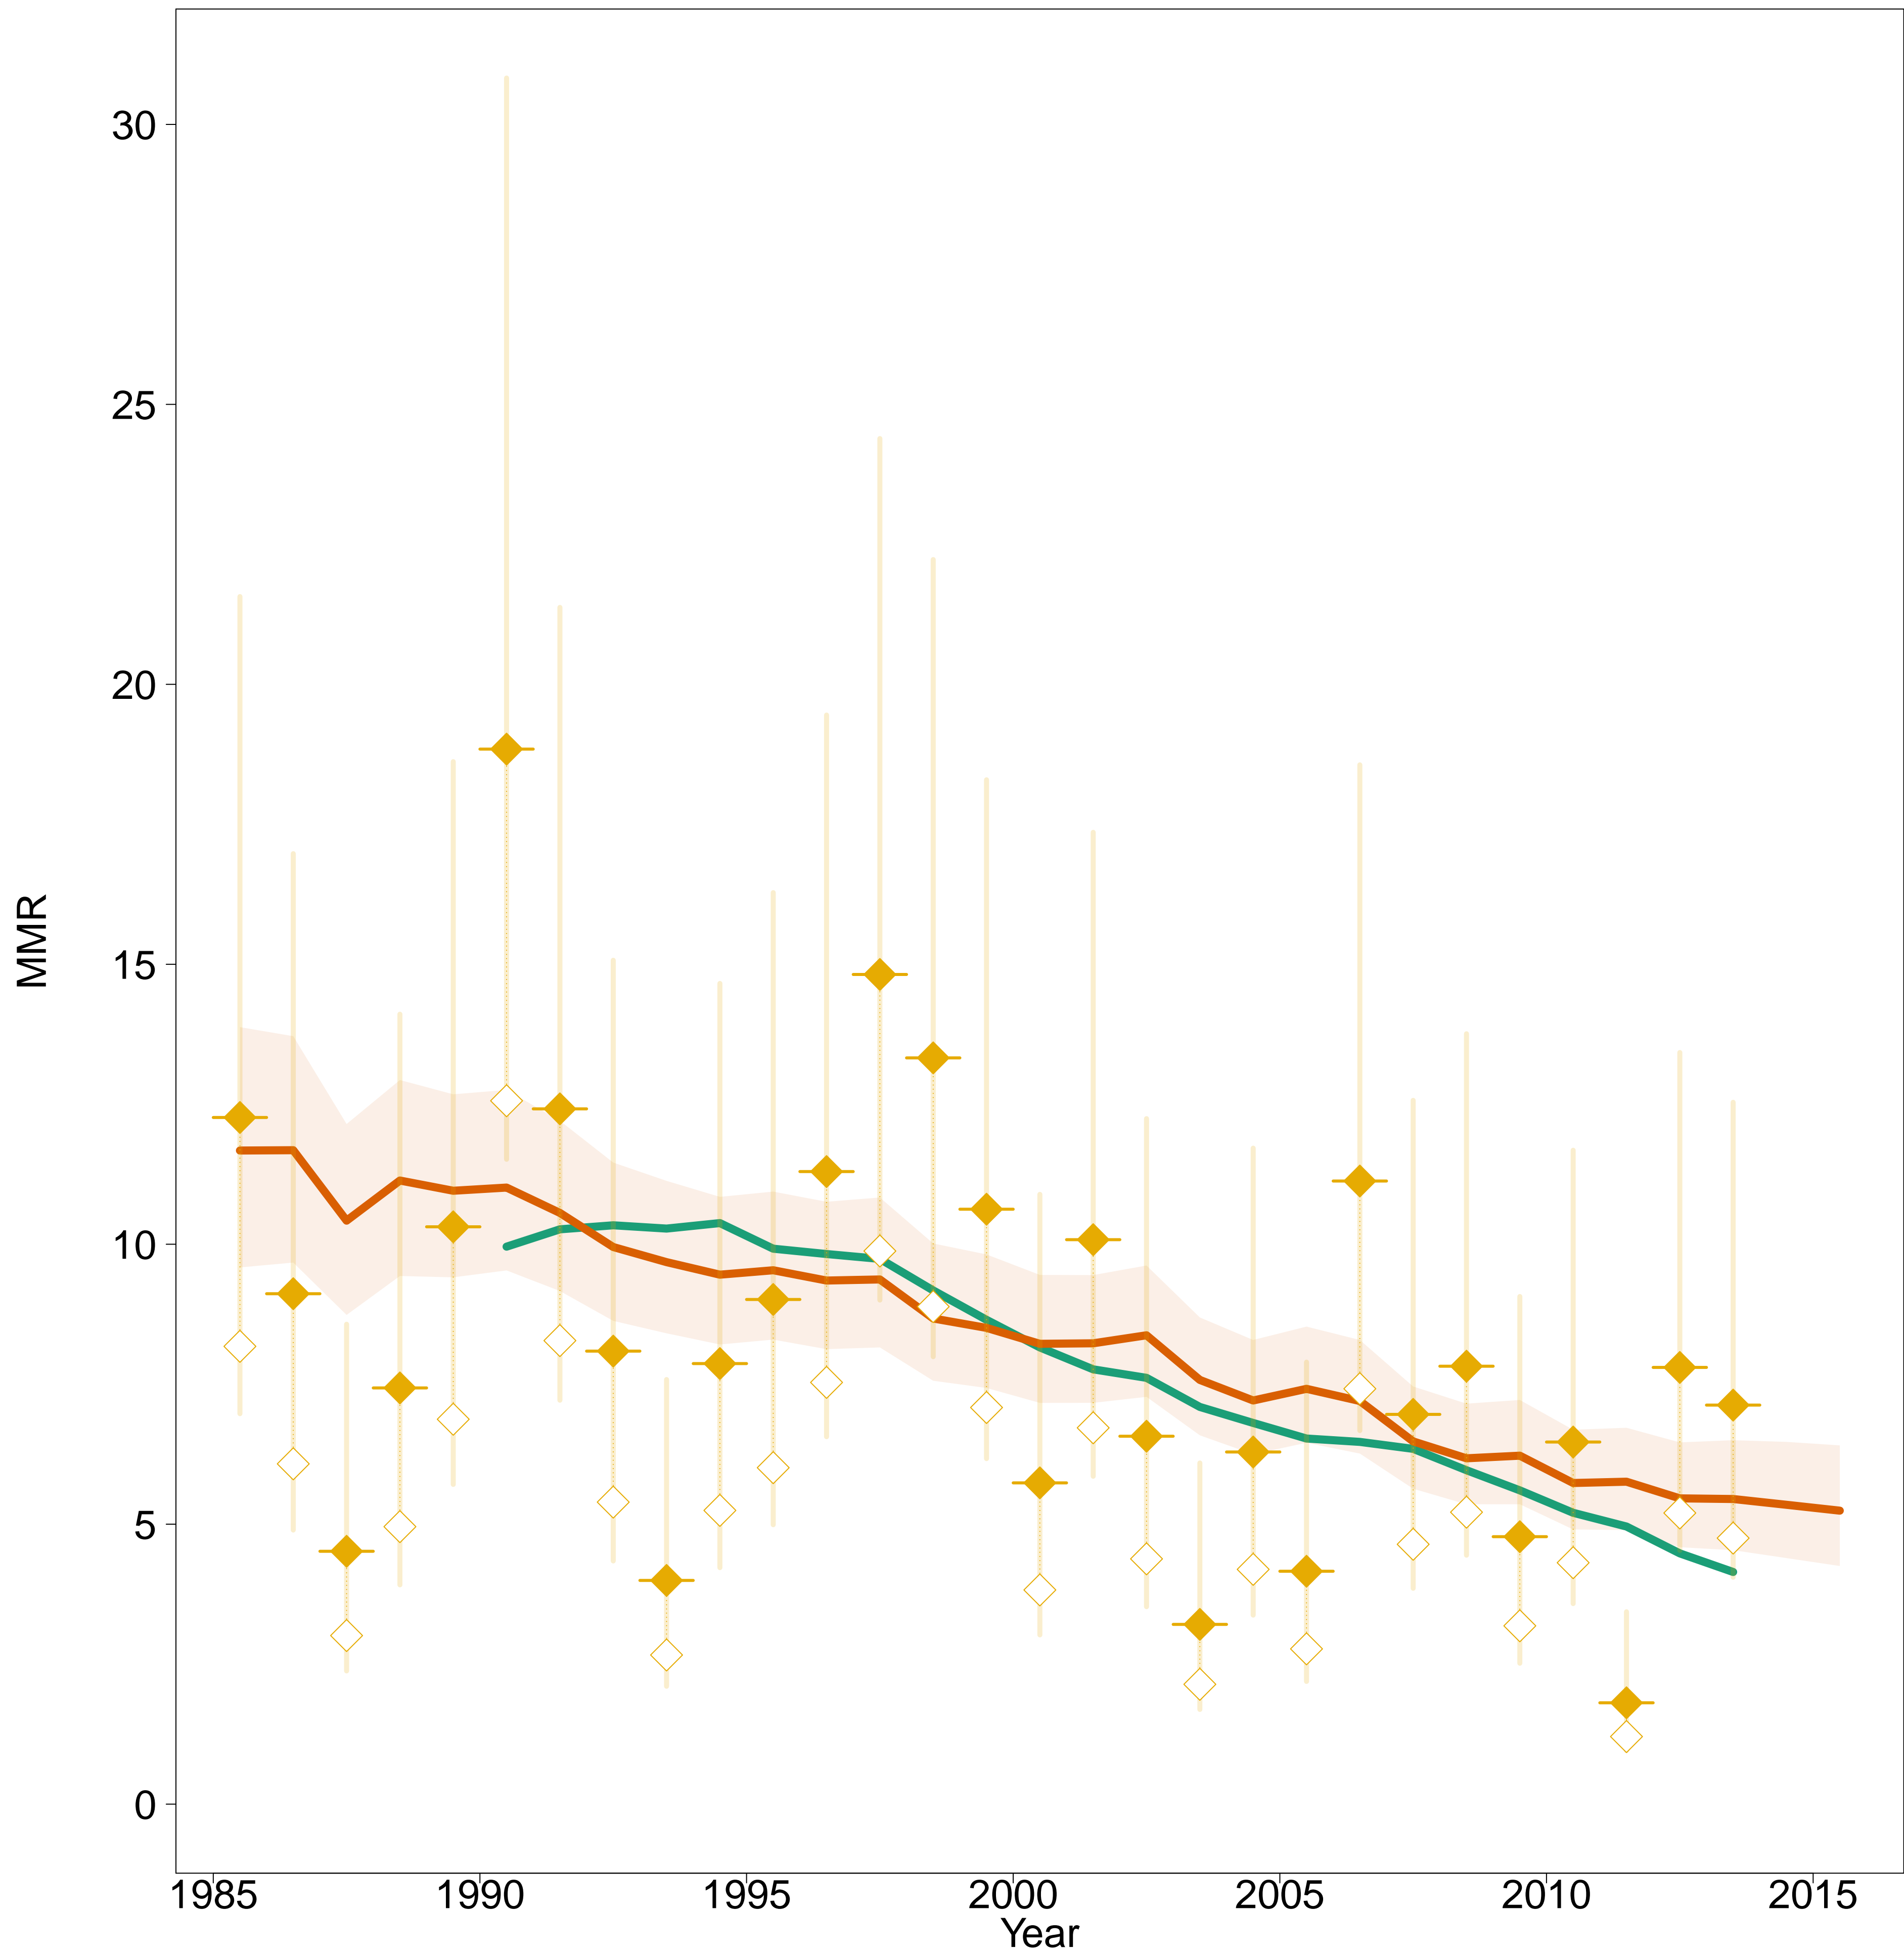

- Estimates –
- MMEIG 2015
- GBD 2013
- MMR Database 2015 –
- Observed Data
- Adjusted Data
- Data type –
- VR

Italy [ITA]  
(Developed regions)

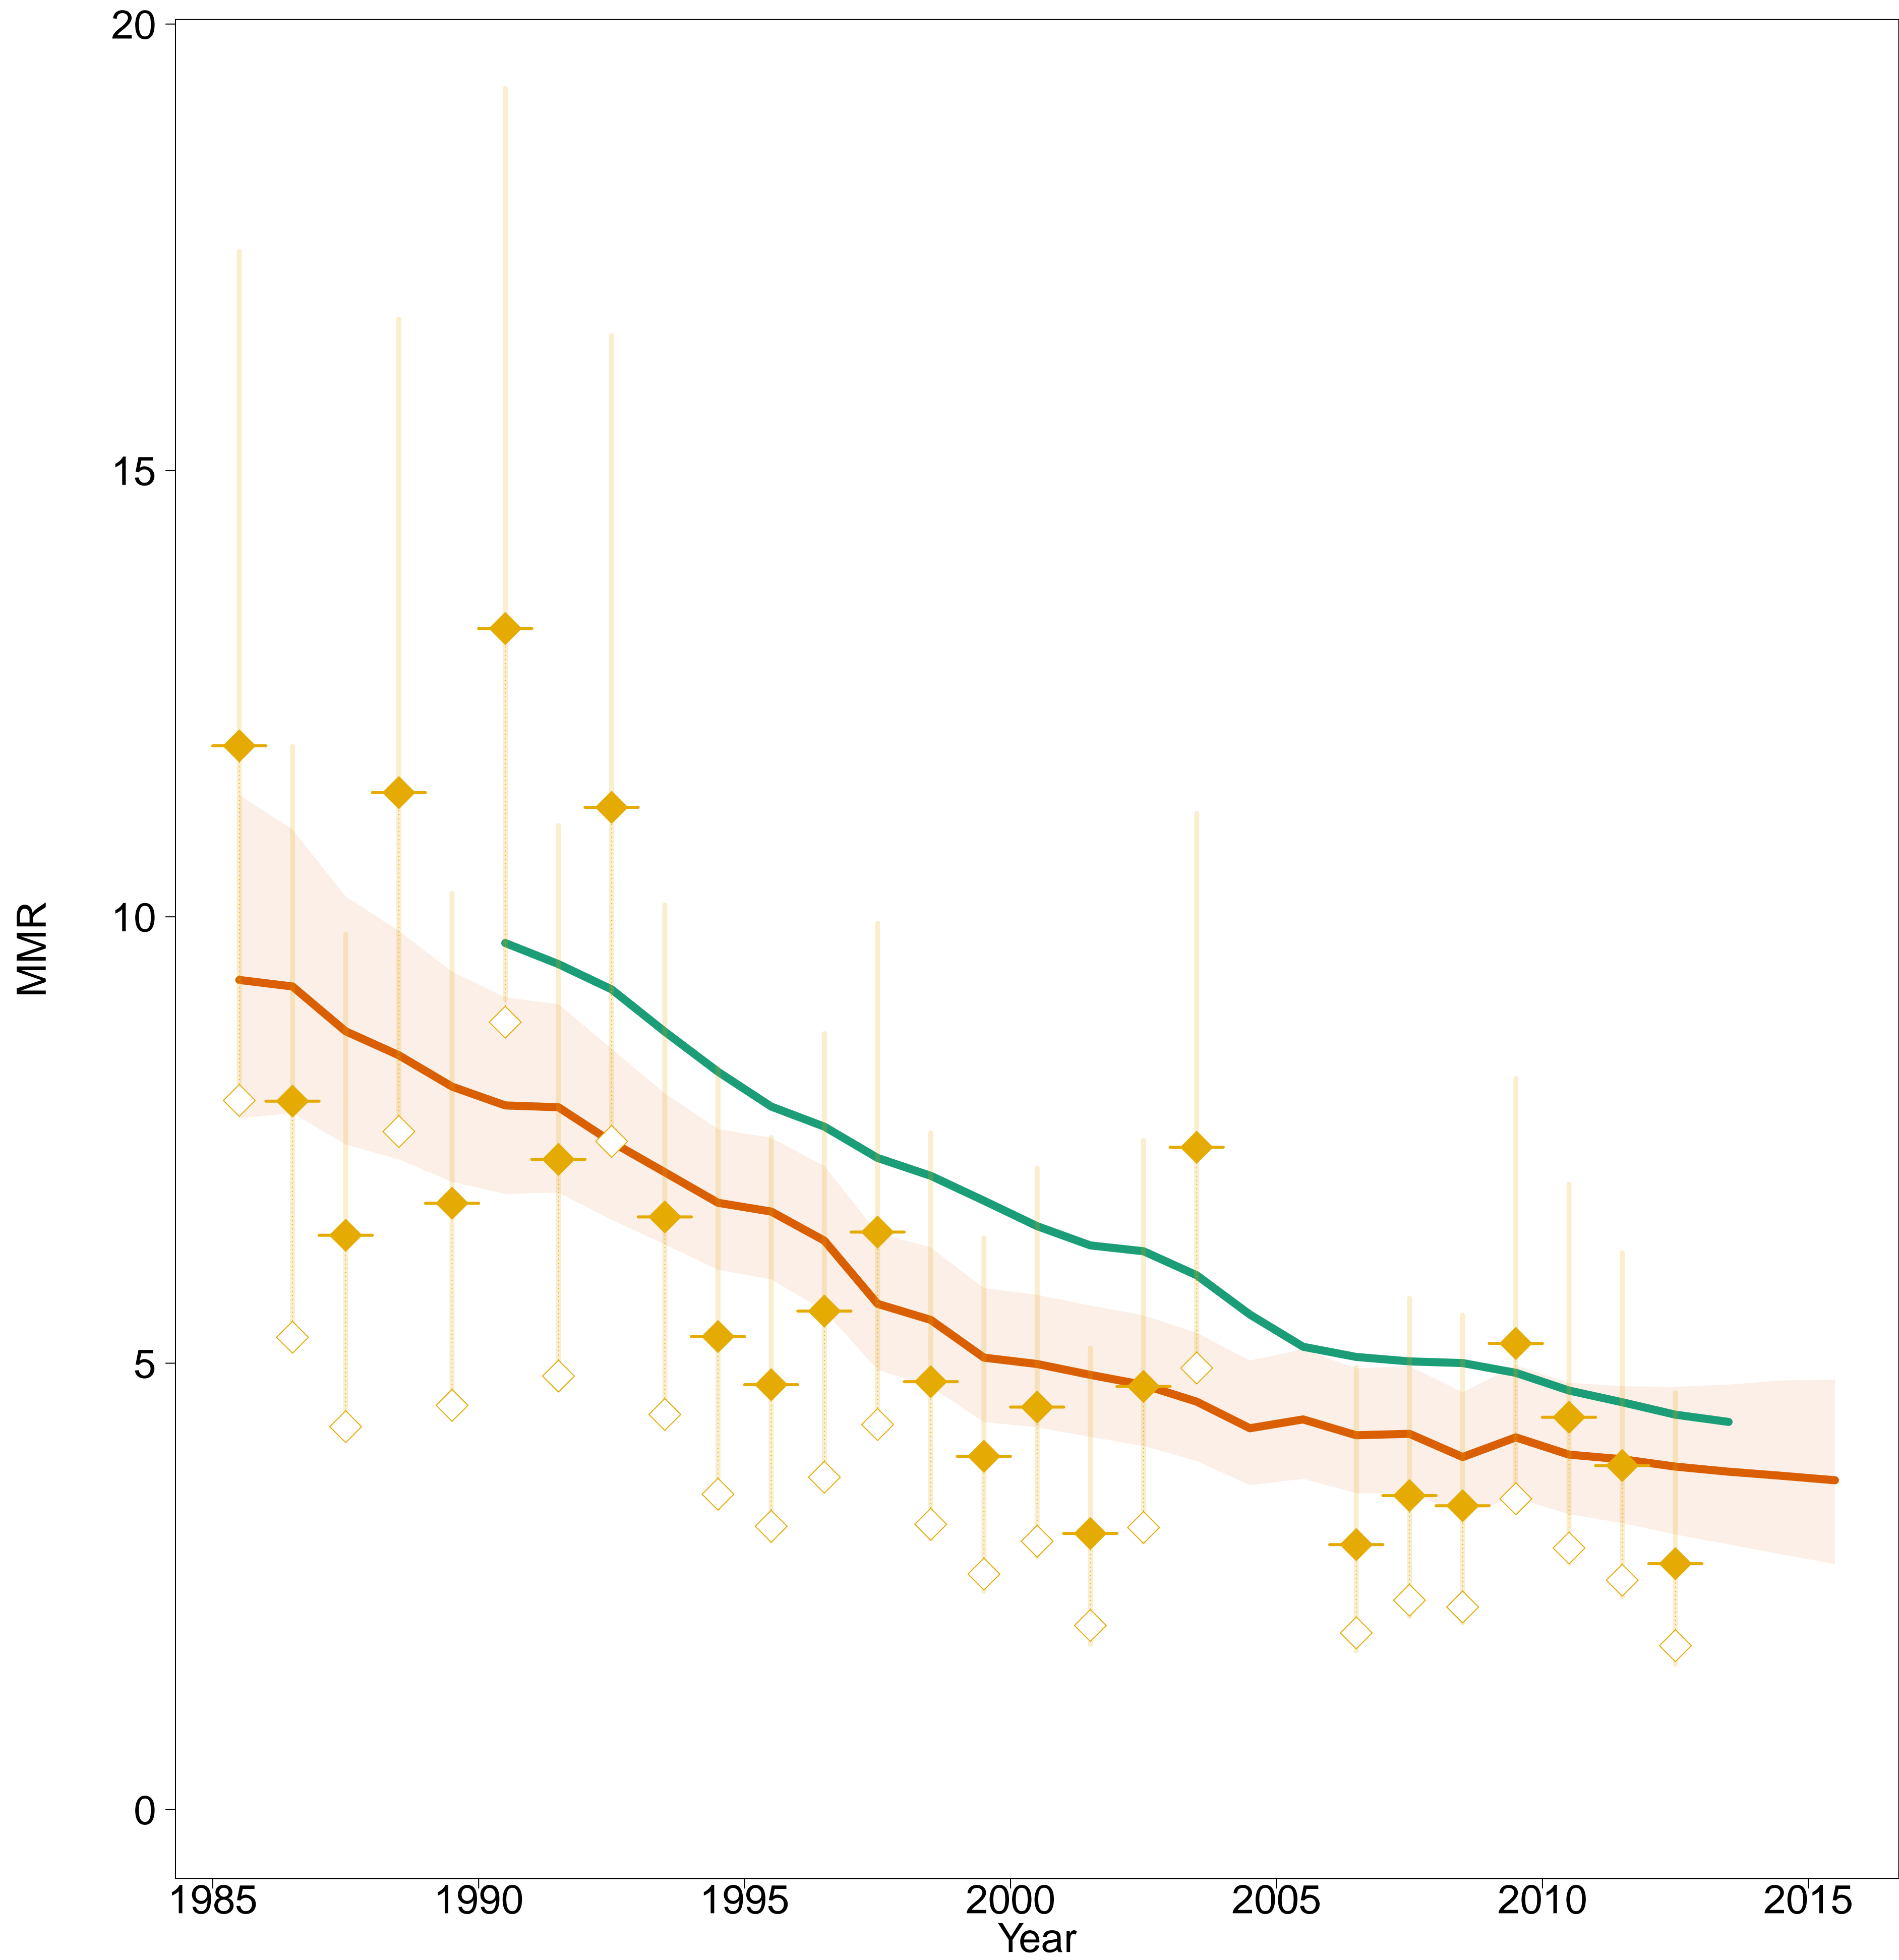

- Estimates -
- MMEIG 2015
- GBD 2013
- MMR Database 2015 -
- Observed Data
- Adjusted Data
- Data type -
- VR

Jamaica [JAM]  
(Caribbean)

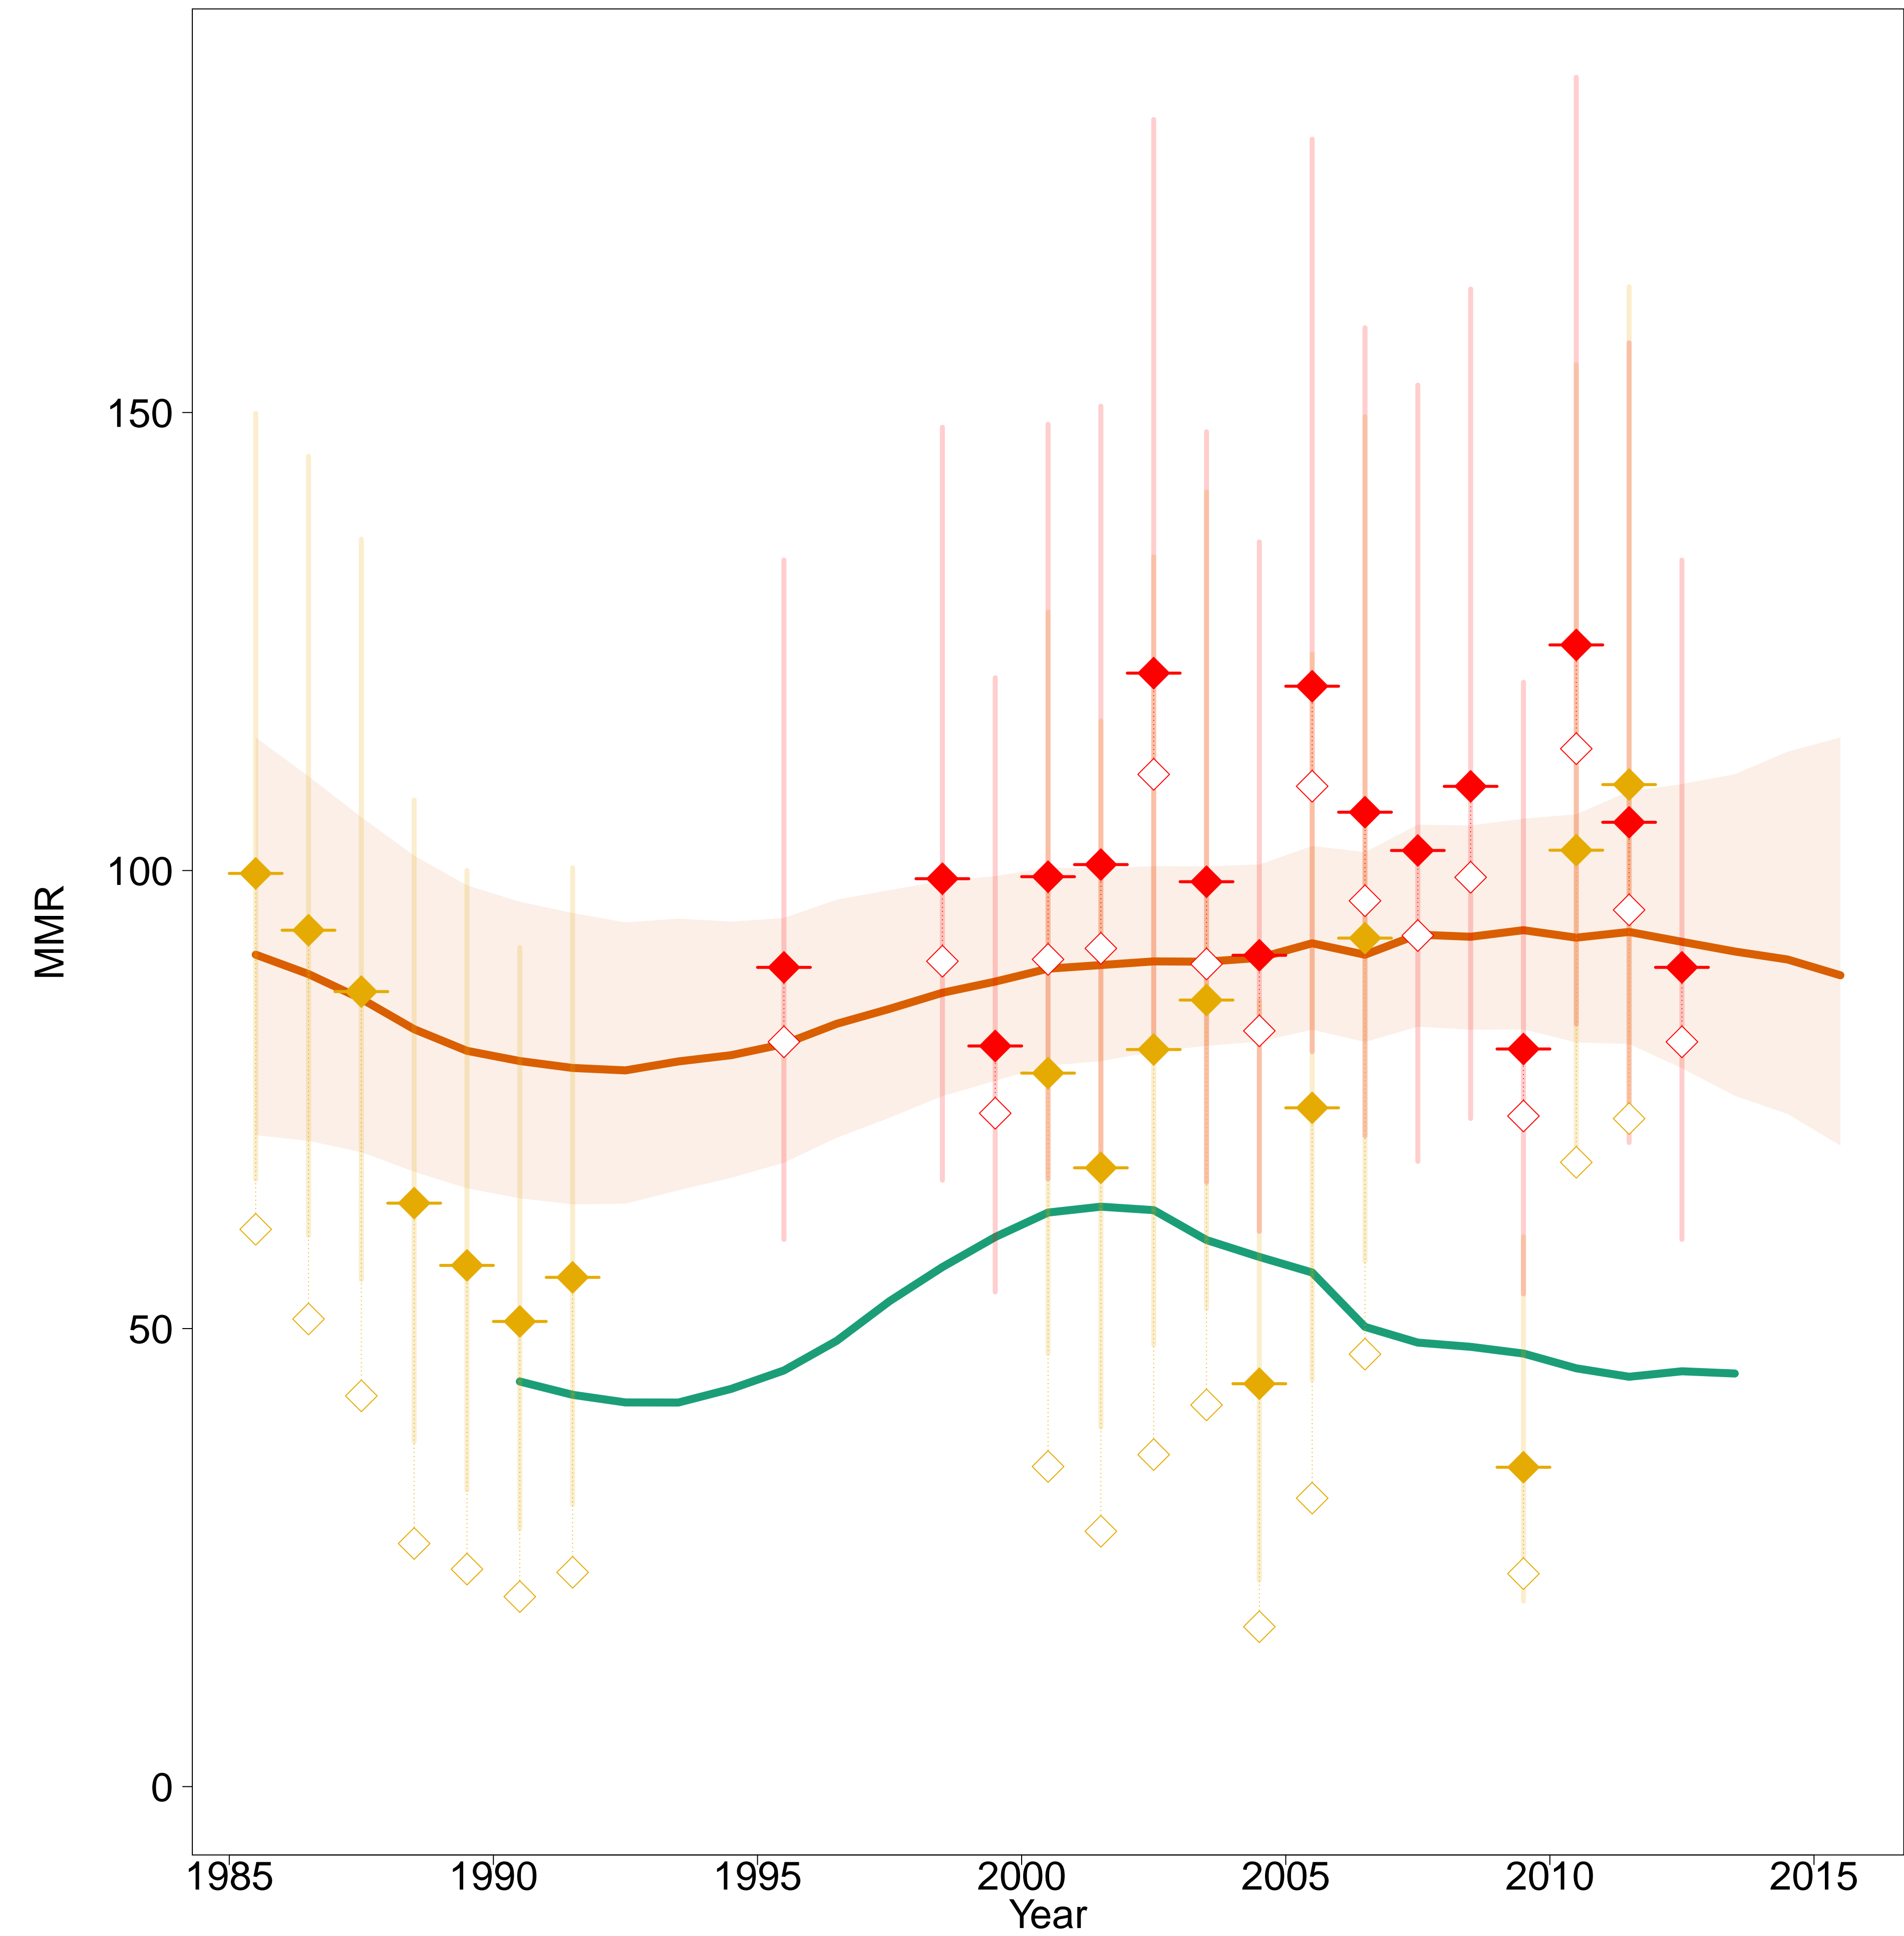

- Estimates –
- MMEIG 2015
- GBD 2013
- MMR Database 2015 –
- Observed Data
- Adjusted Data
- Data type –
- VR
- Misc. studies



Japan [JPN]  
(Developed regions)

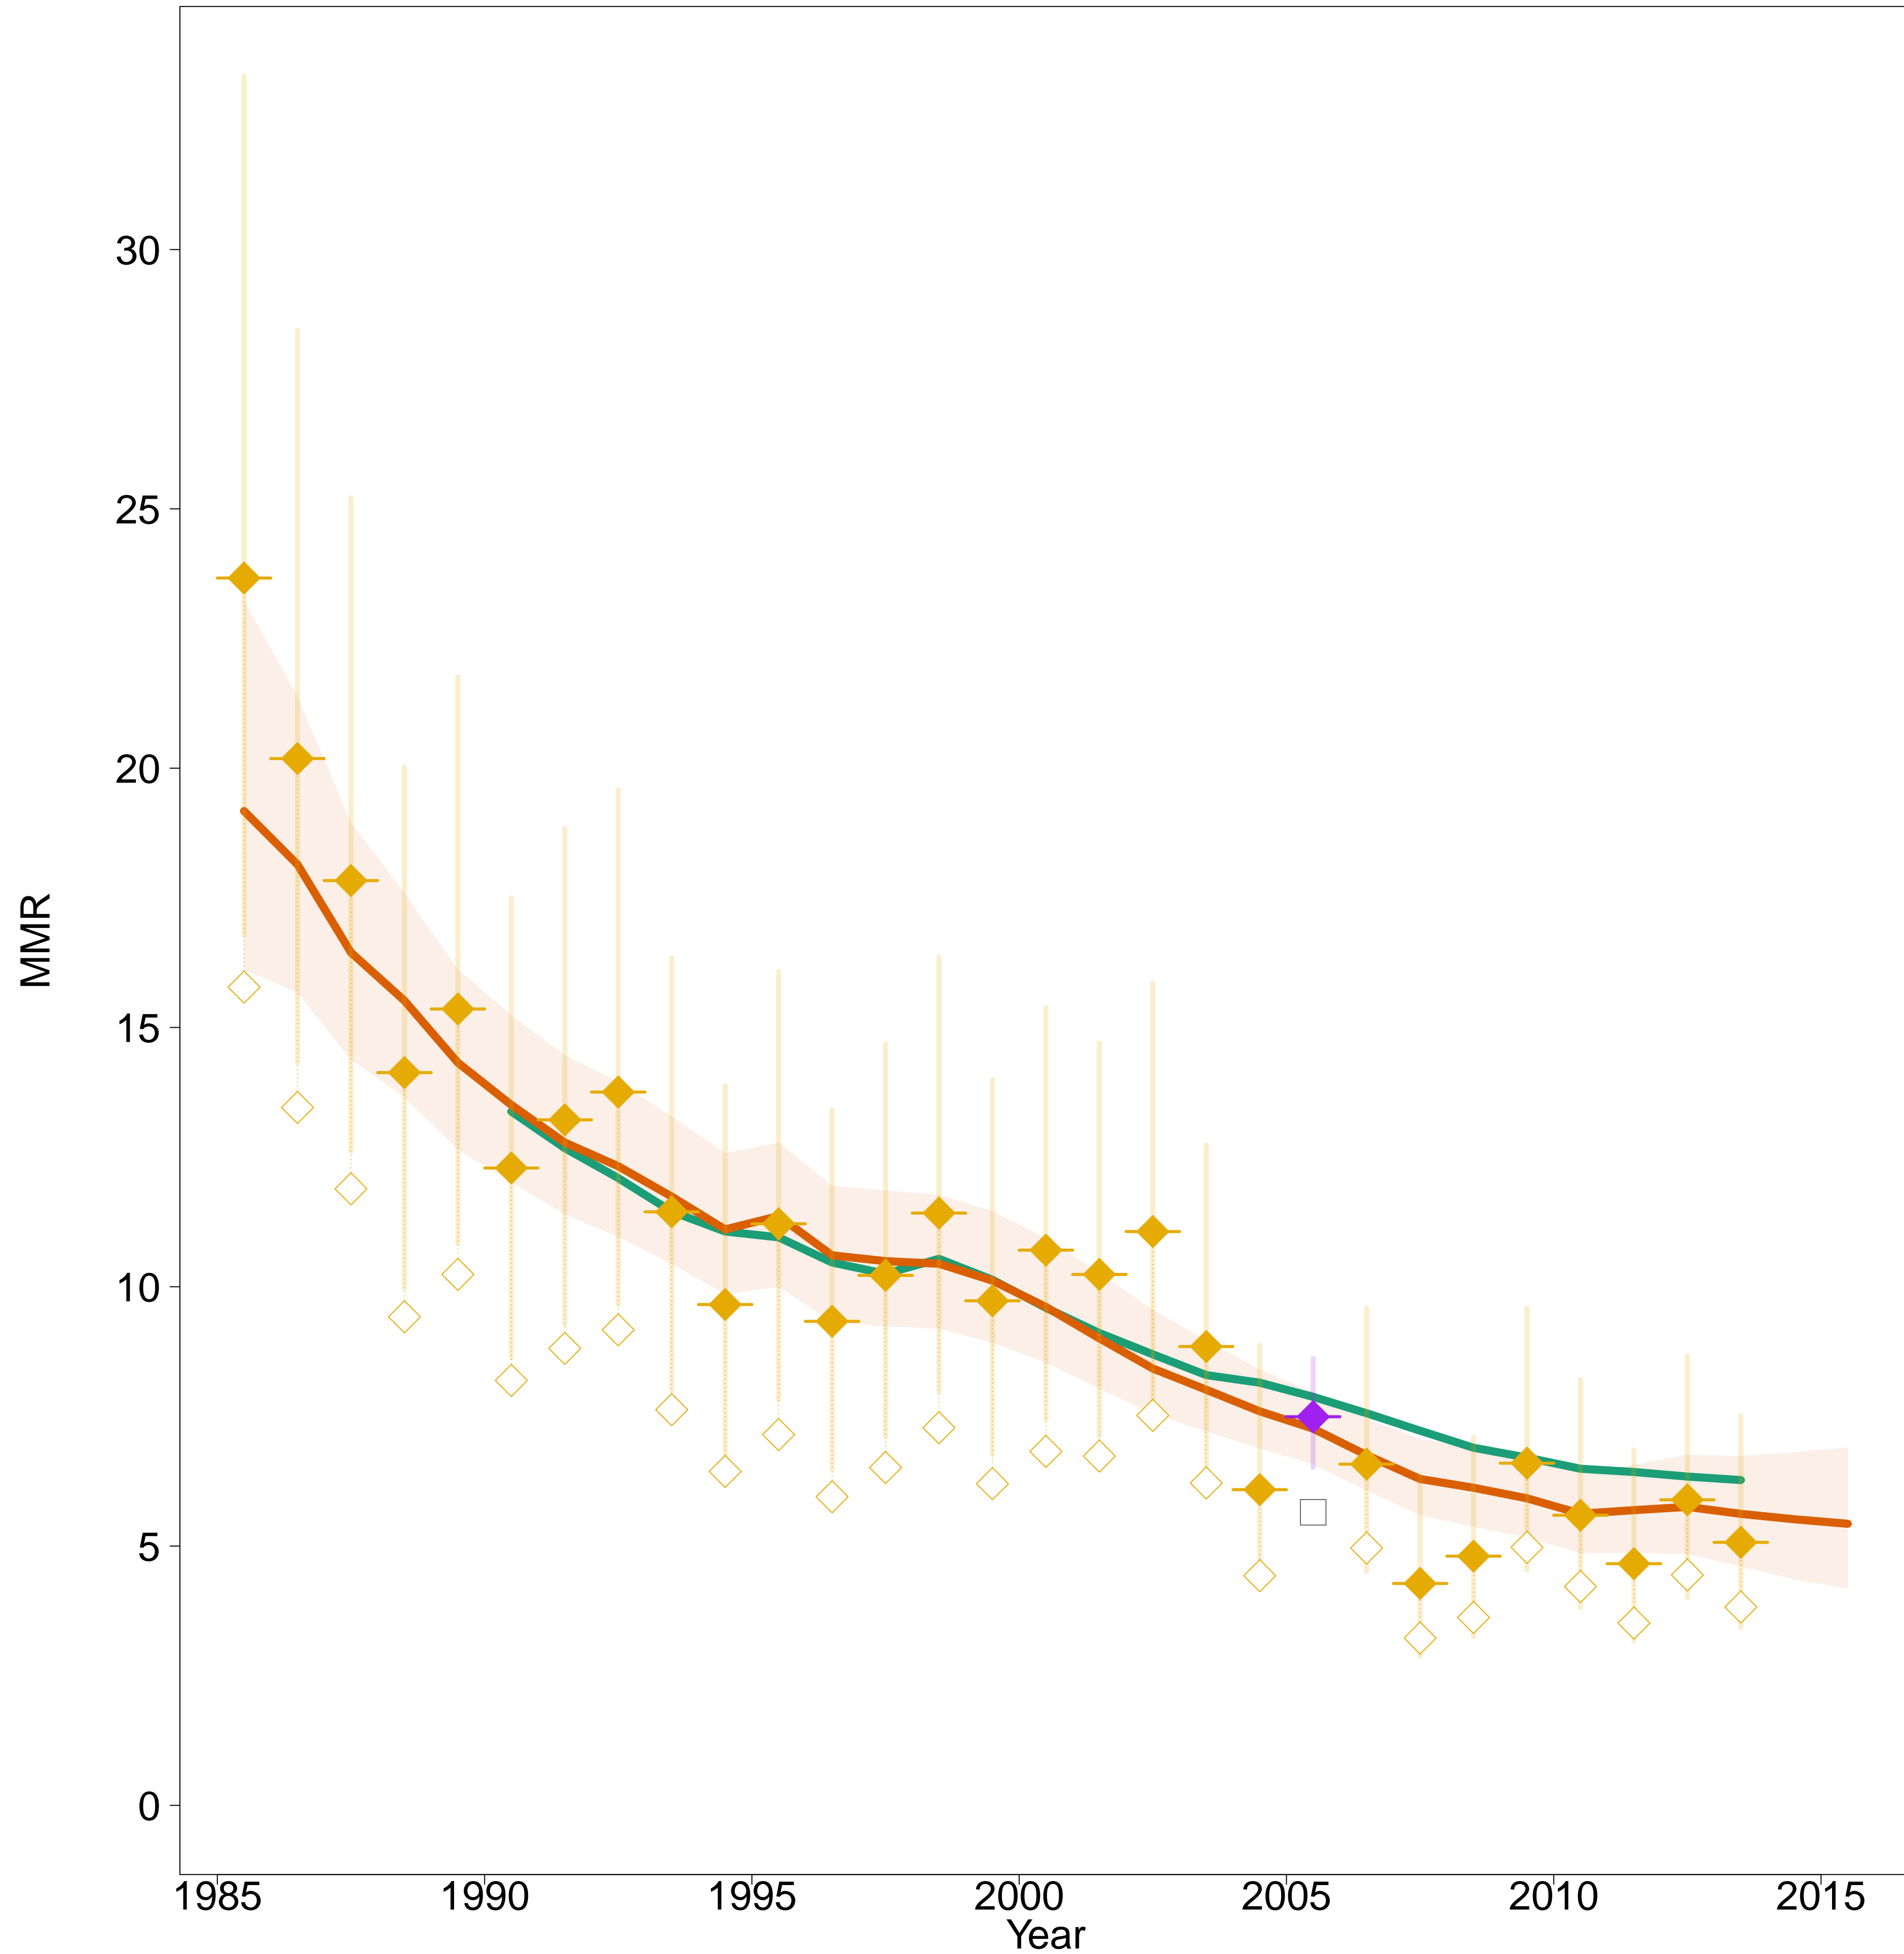

- Estimates –
- MMEIG 2015
- GBD 2013
- MMR Database 2015 –
- ◇ Observed Data
- ◆ Adjusted Data
- Data type –
- ◆ VR
- ◆ Spec. studies
- Excluded VR data  
(overlap with specialized study)

Jordan [JOR]  
(Western Asia)

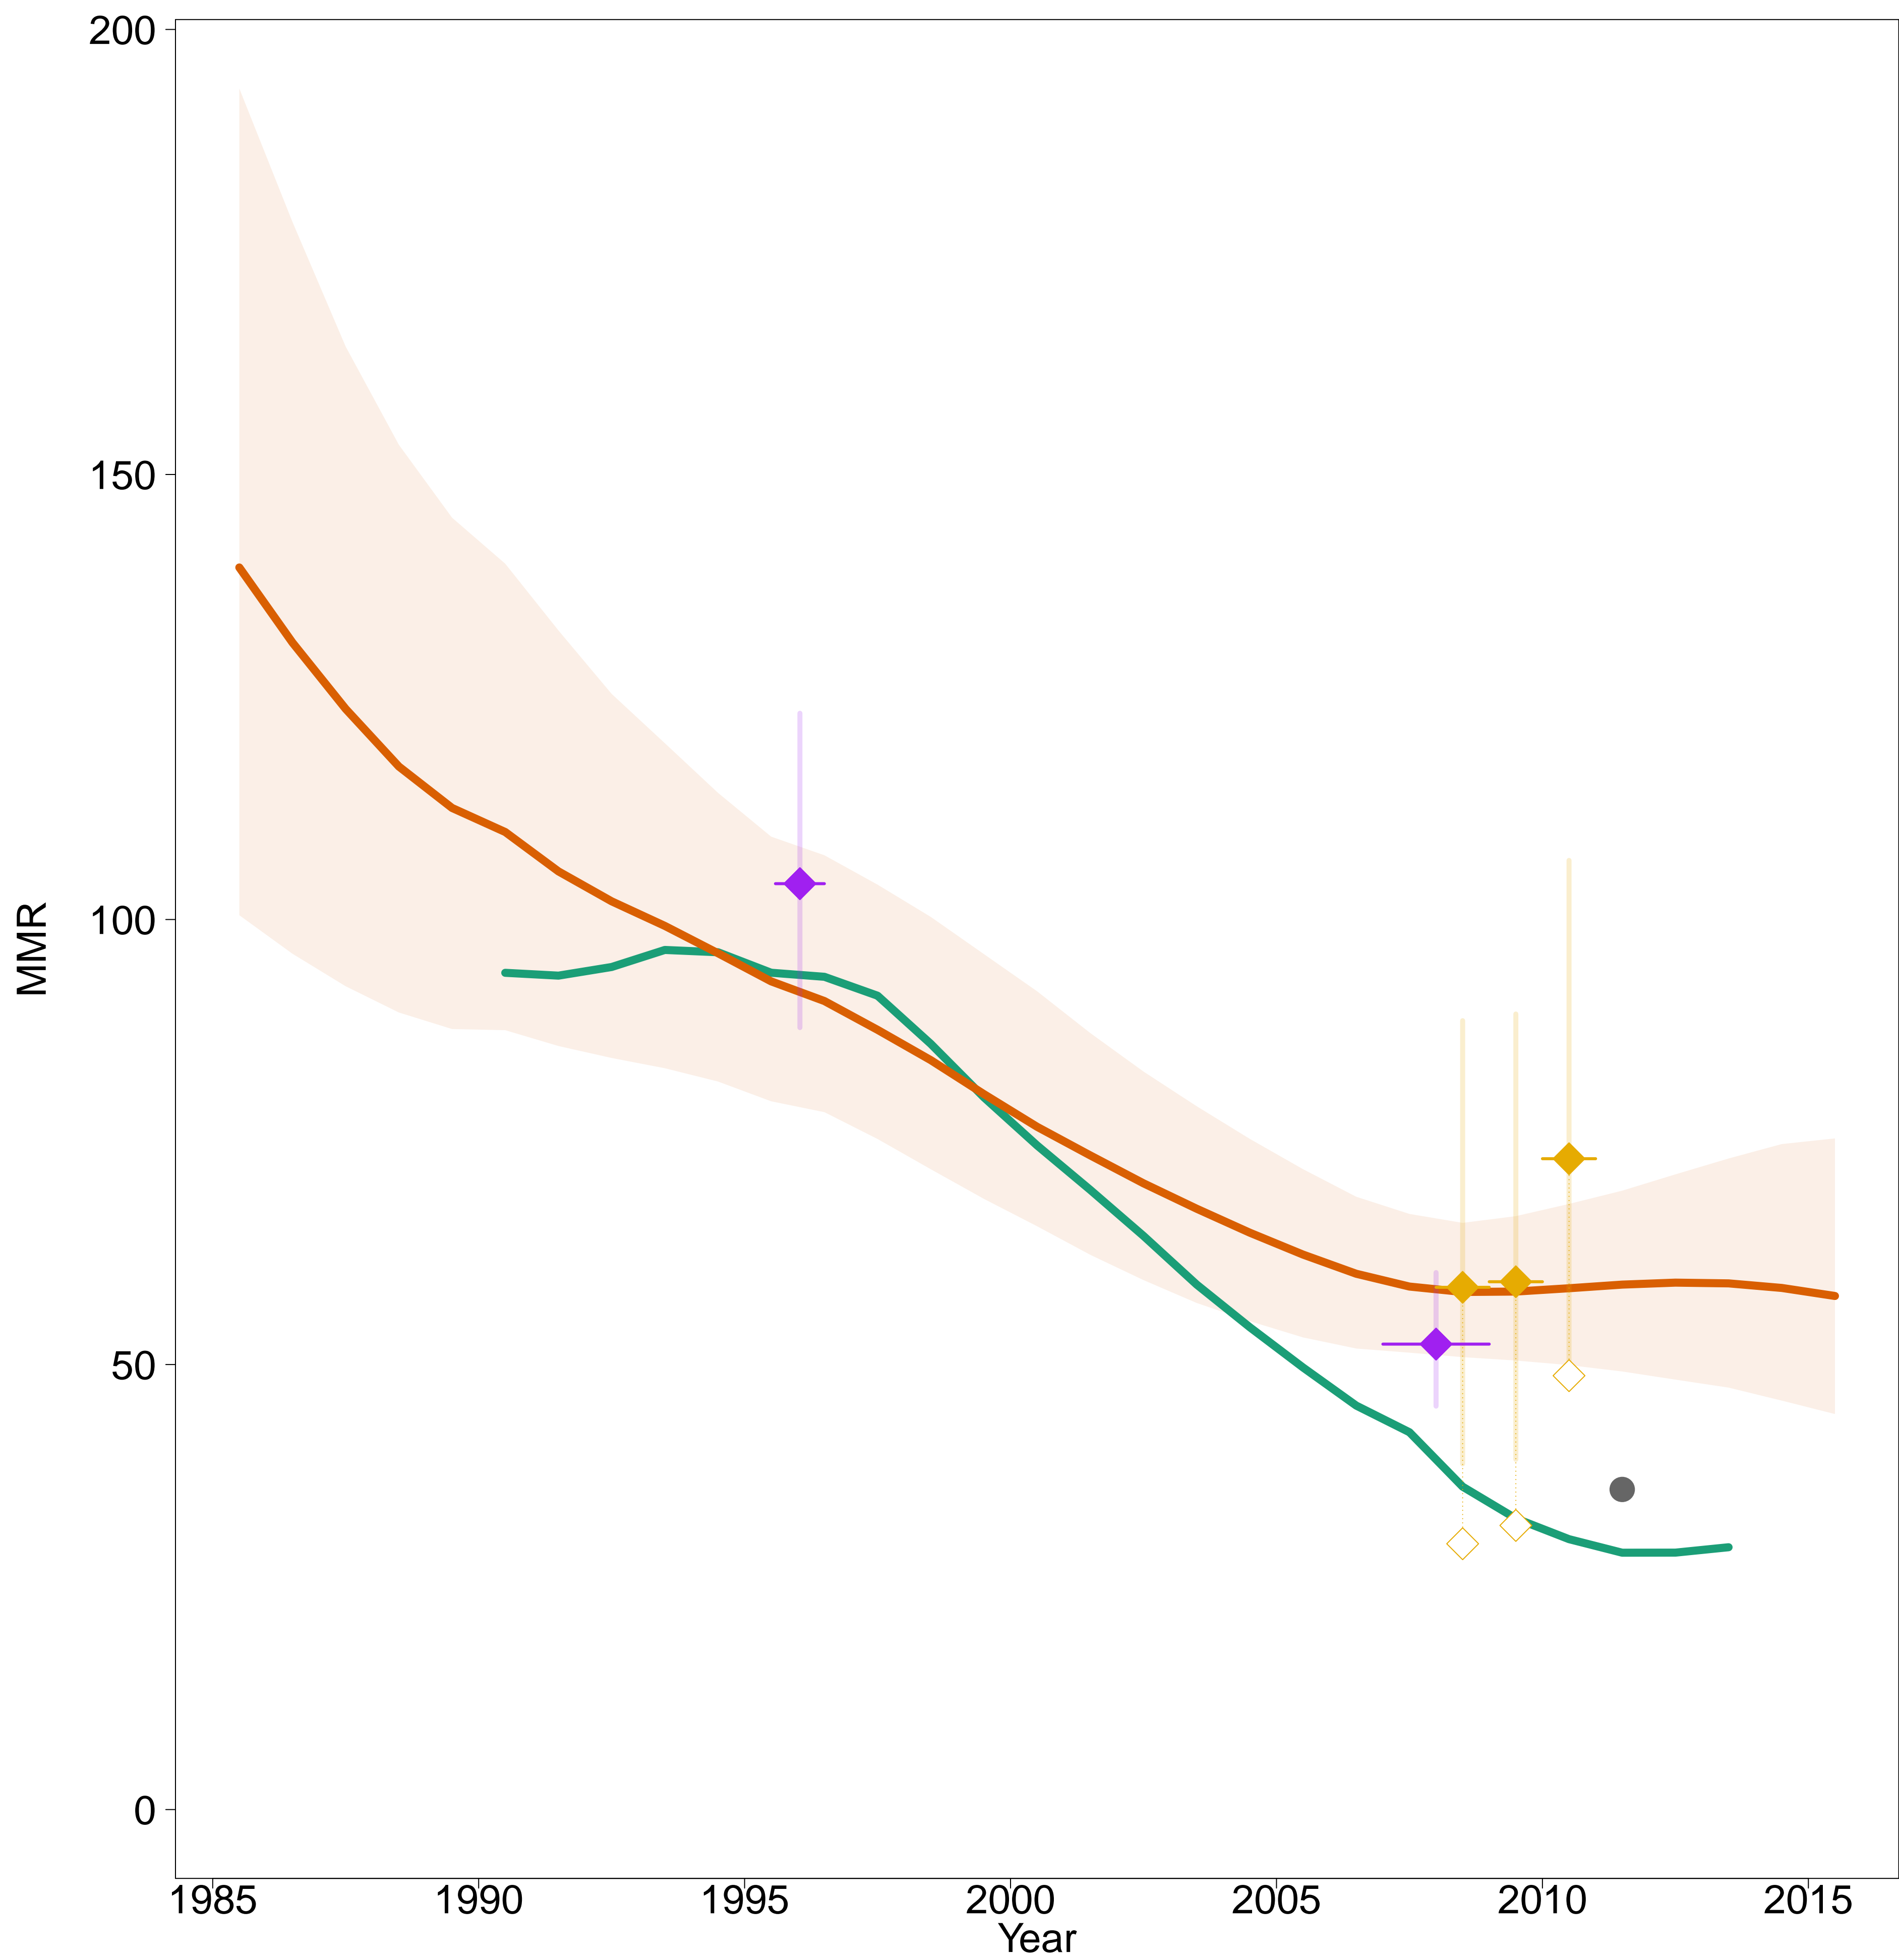

- Estimates -
- MMEIG 2015
- GBD 2013
- MMR Database 2015 -
- Observed Data
- Adjusted Data
- Data type -
- VR
- Spec. studies
- Excluded VR data (data quality issues)

Kazakhstan [KAZ]  
(Central Asia)

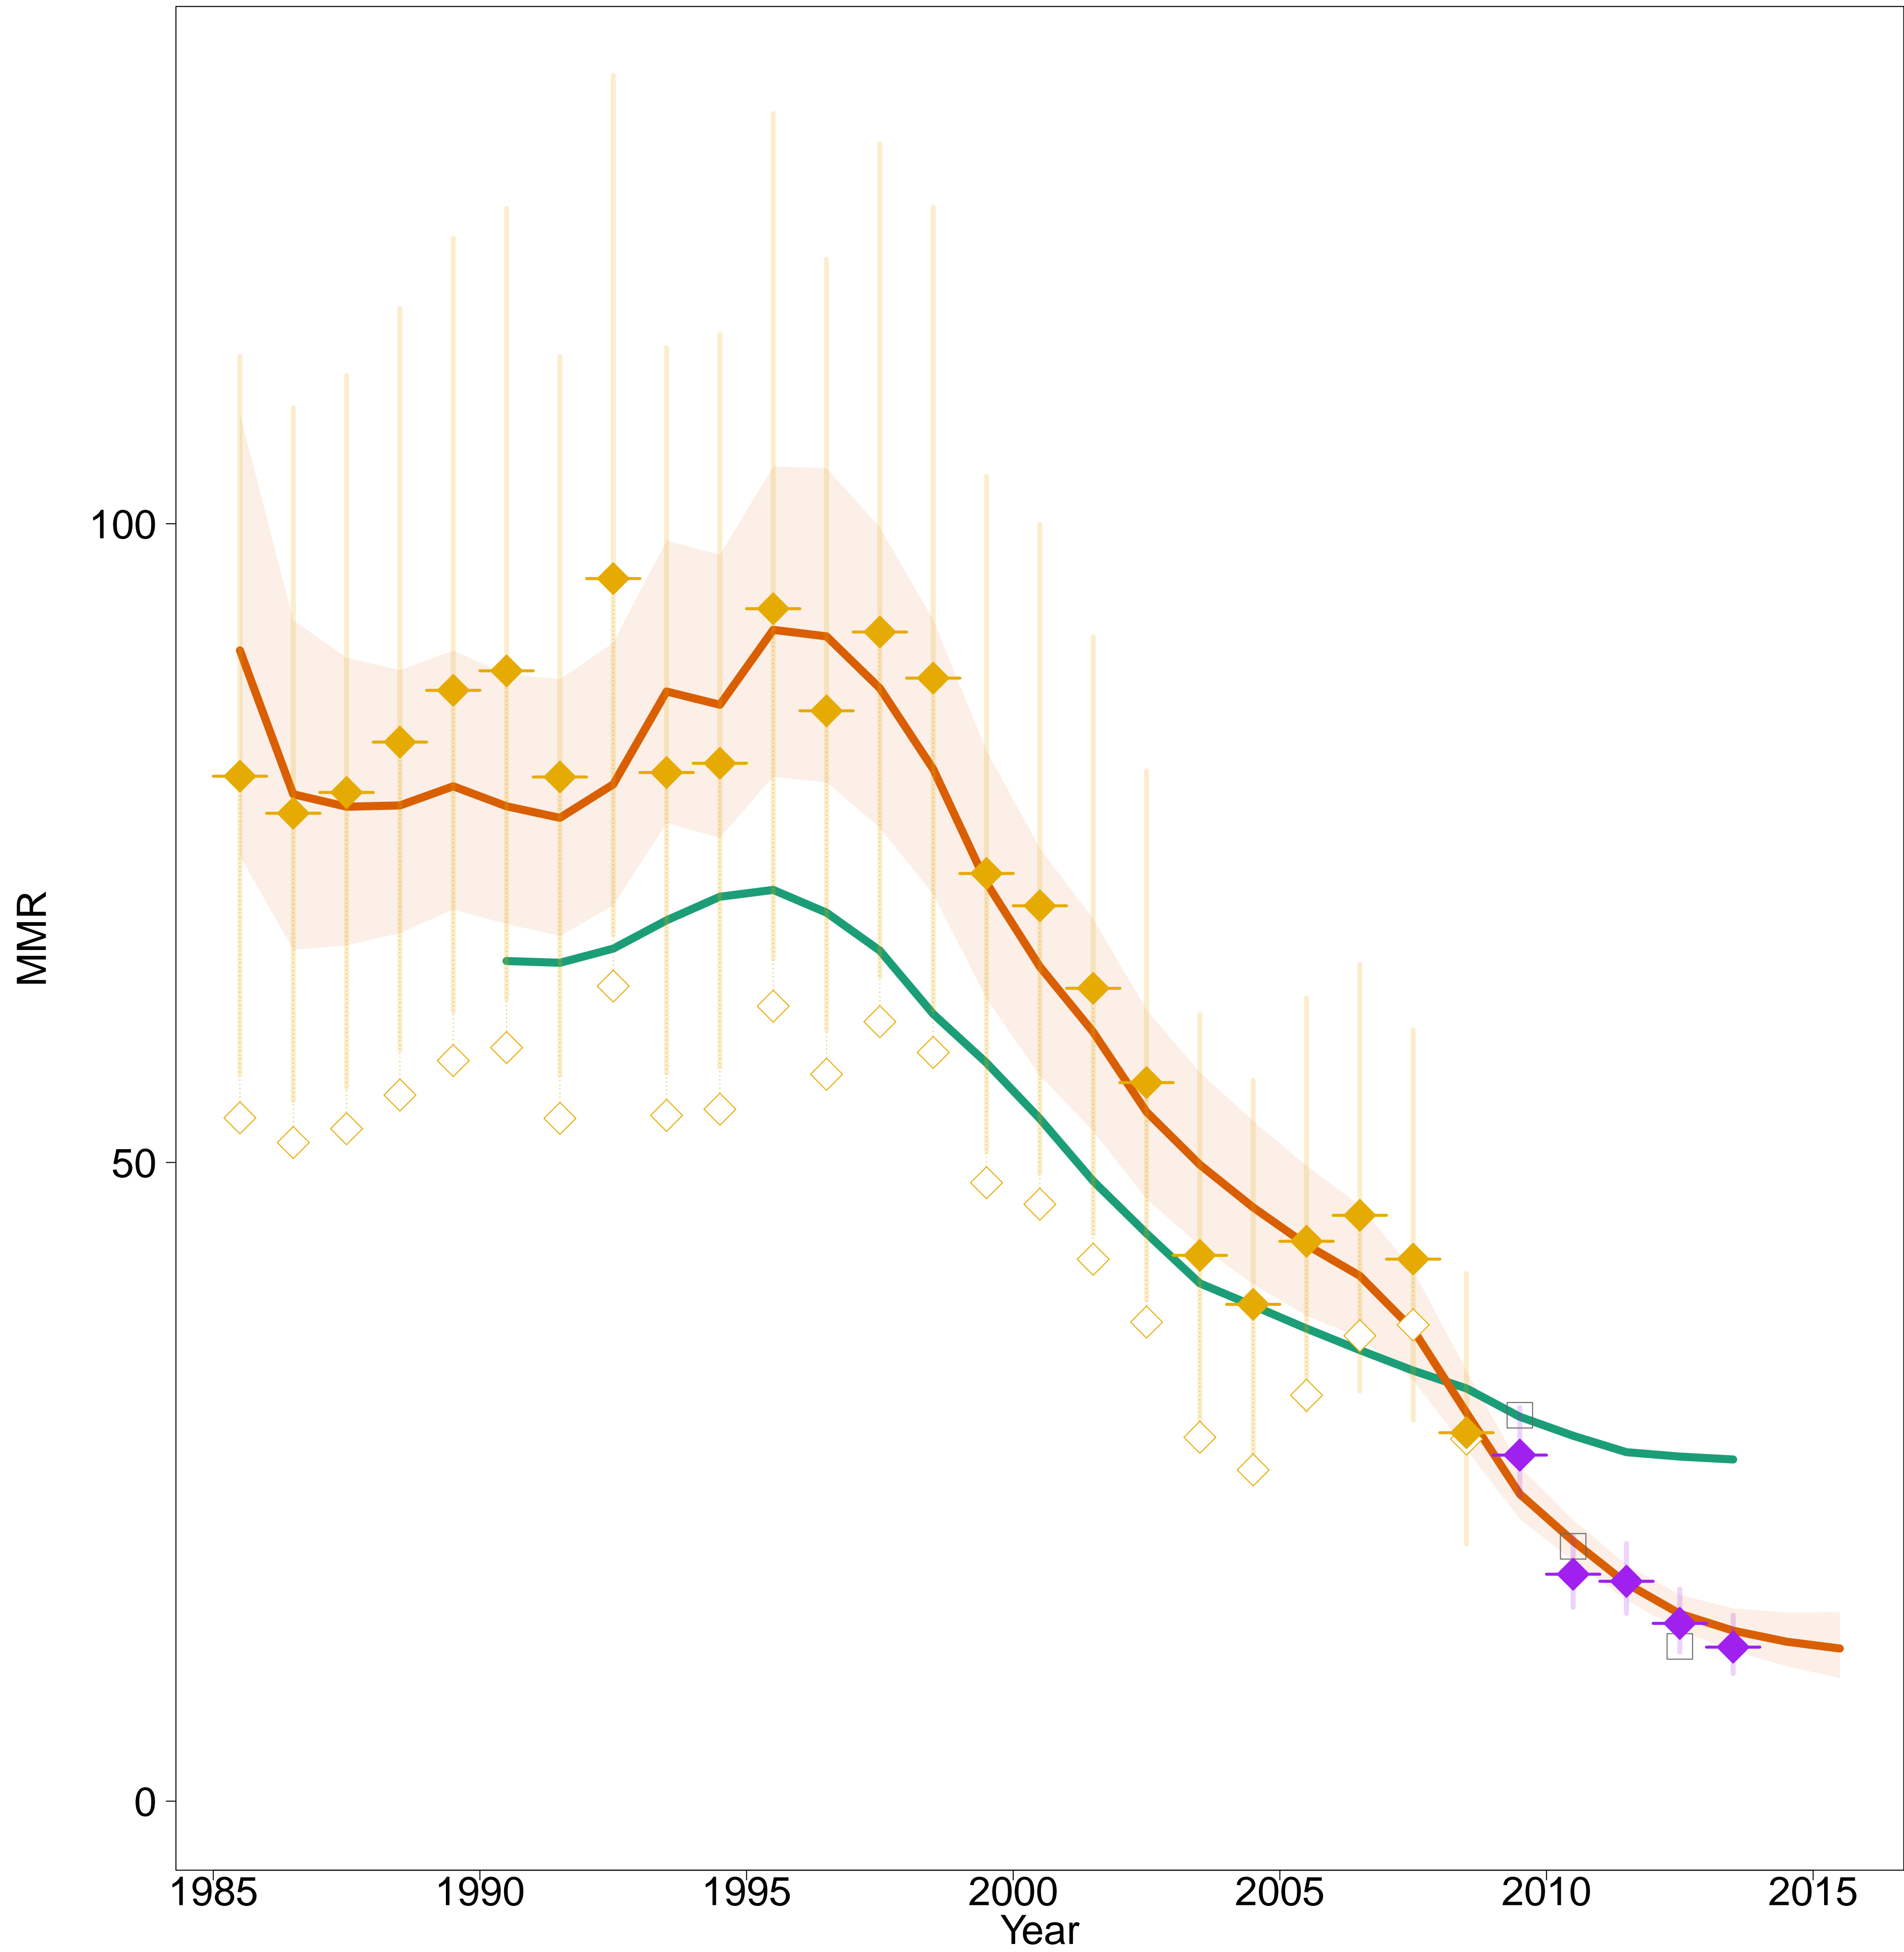

– Estimates –

MMEIG 2015

GBD 2013

– MMR Database 2015 –

◊ Observed Data

◆ Adjusted Data

– Data type –

◆ VR

◆ Spec. studies

◻ Excluded VR data  
(overlap with specialized study)

Kenya [KEN]  
(Eastern Africa)

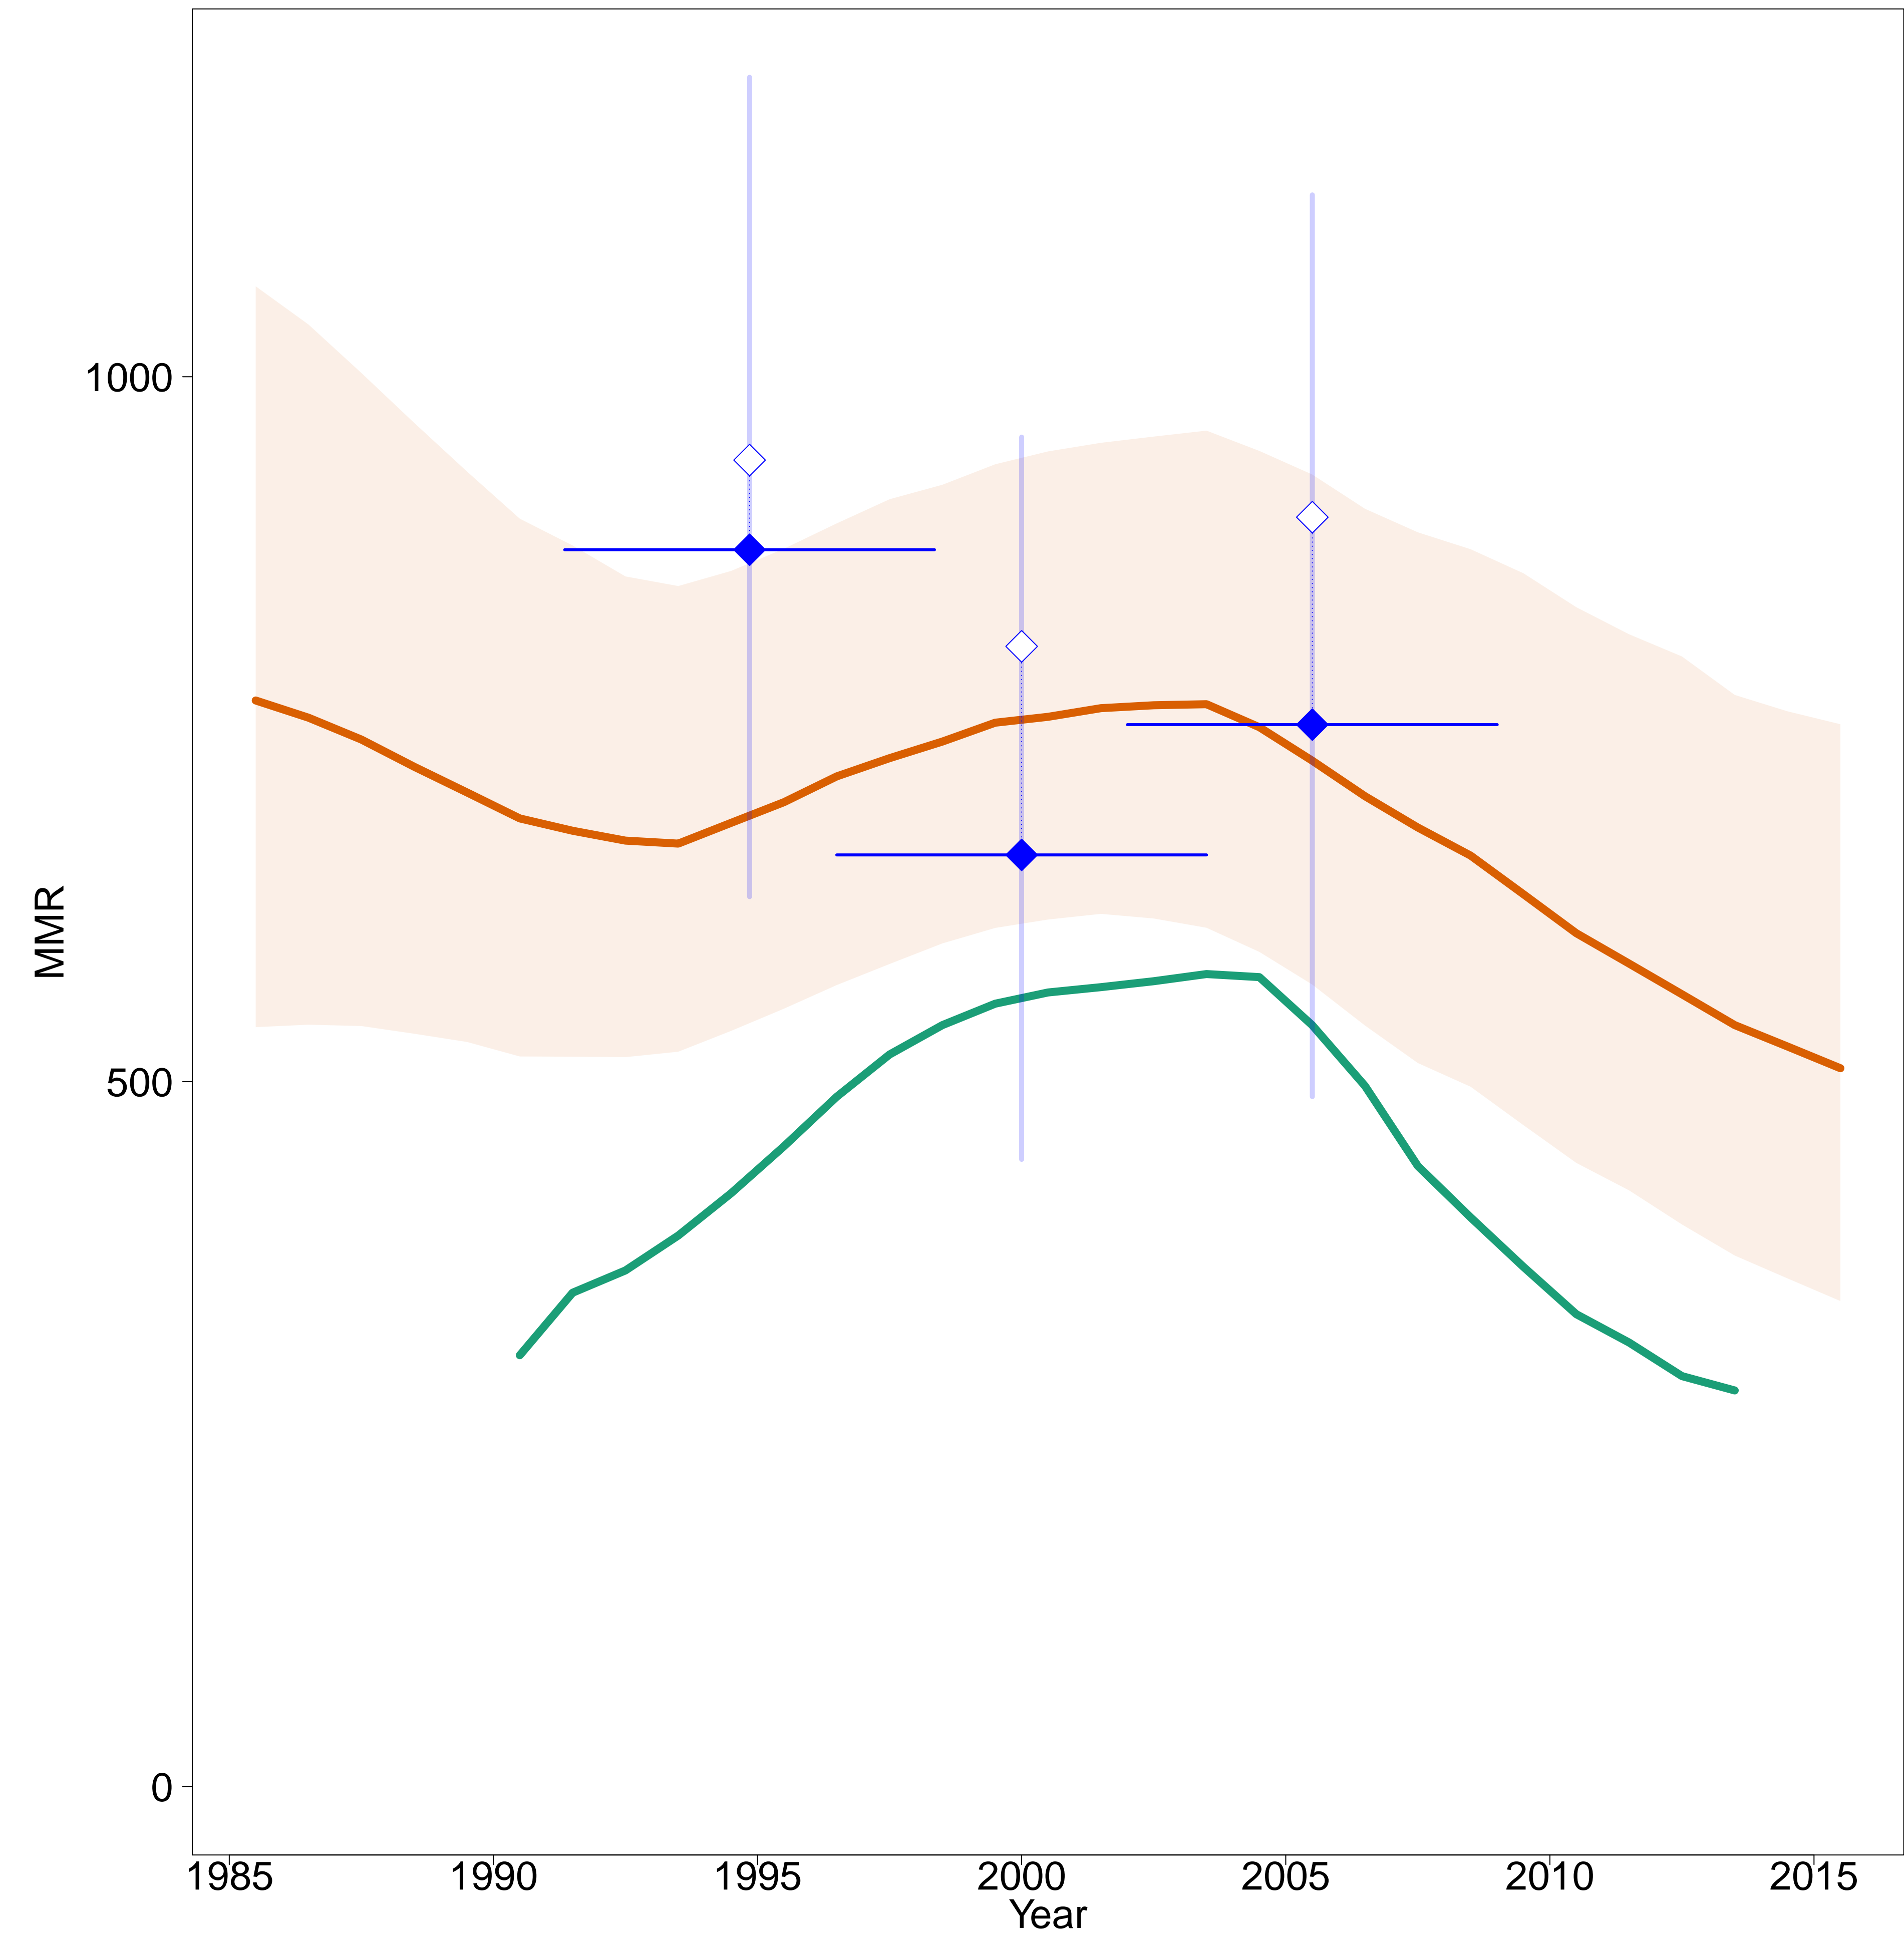

- Estimates -
- MMEIG 2015
- GBD 2013
- MMR Database 2015 -
- Observed Data
- Adjusted Data
- Data type -
- DHS

Kiribati [KIR]  
(South-Eastern Asia / Oceania)

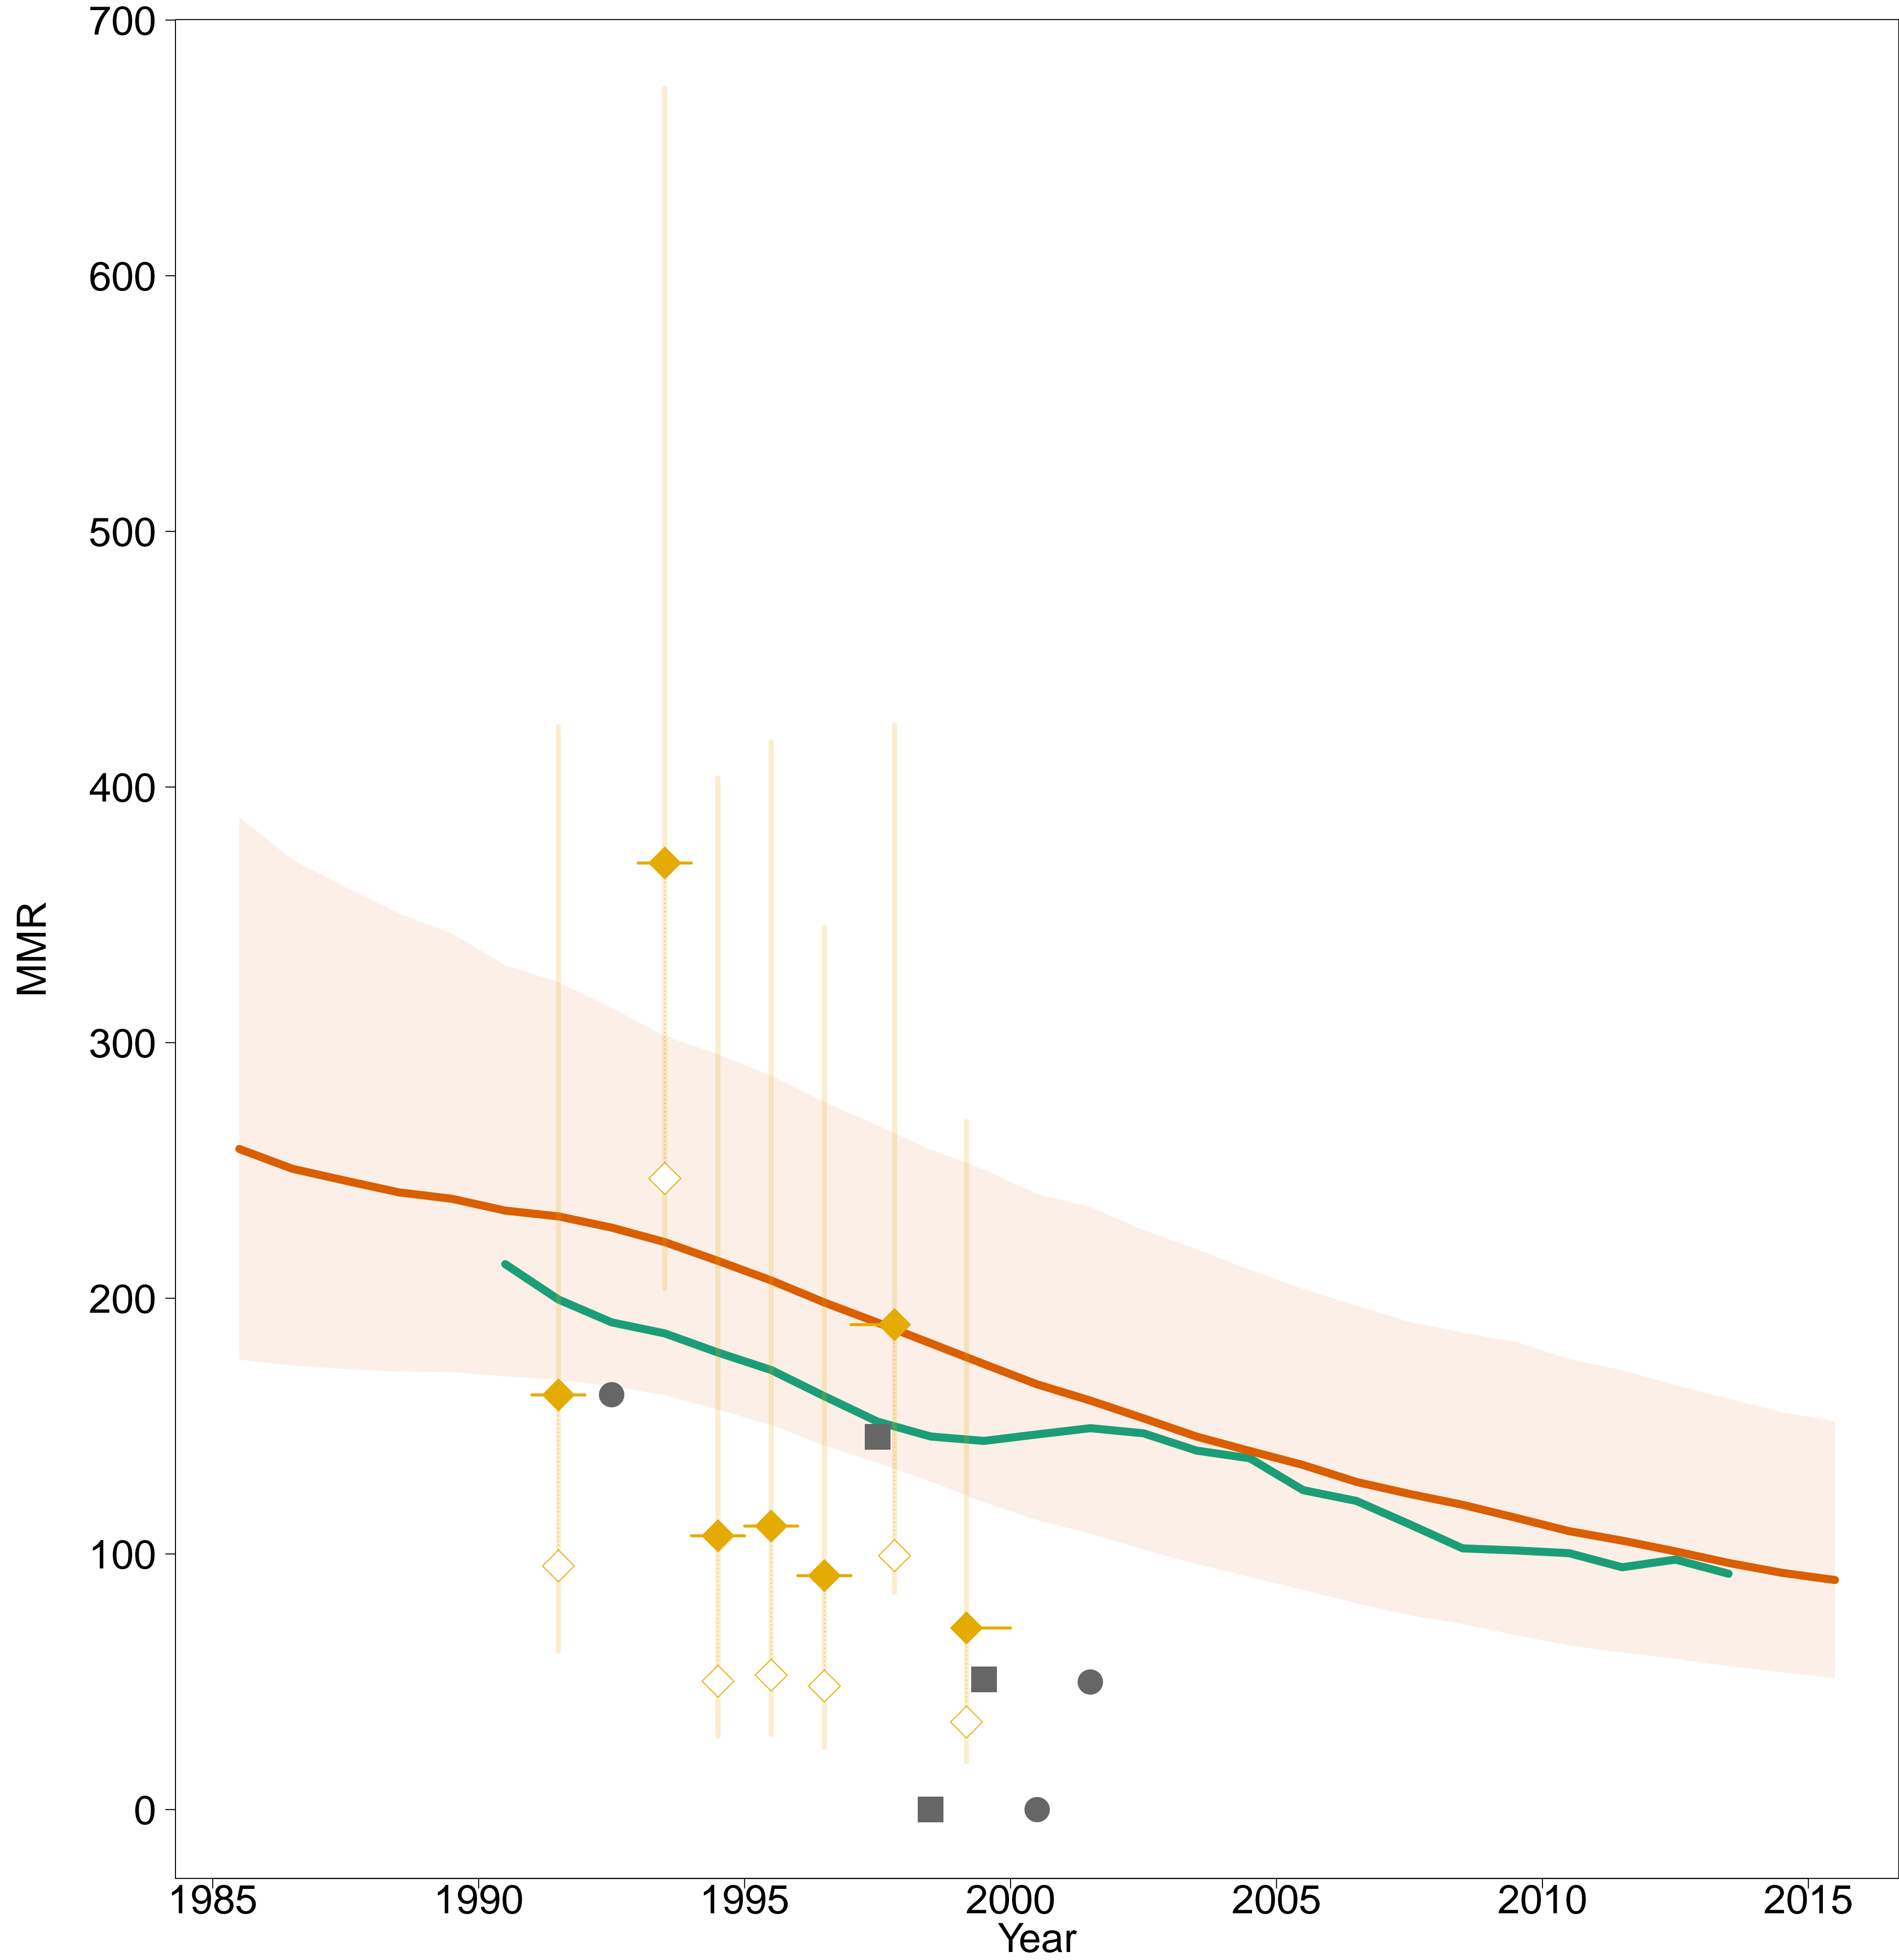

- Estimates –
- MMEIG 2015
- GBD 2013
- MMR Database 2015 –
- ◊ Observed Data
- ◆ Adjusted Data
- Data type –
- ◆ VR
- Reported VR before recalc.  
(related to 0 obs. mat. death)
- Excluded VR data  
(data quality issues)

Kuwait [KWT]  
(Western Asia)

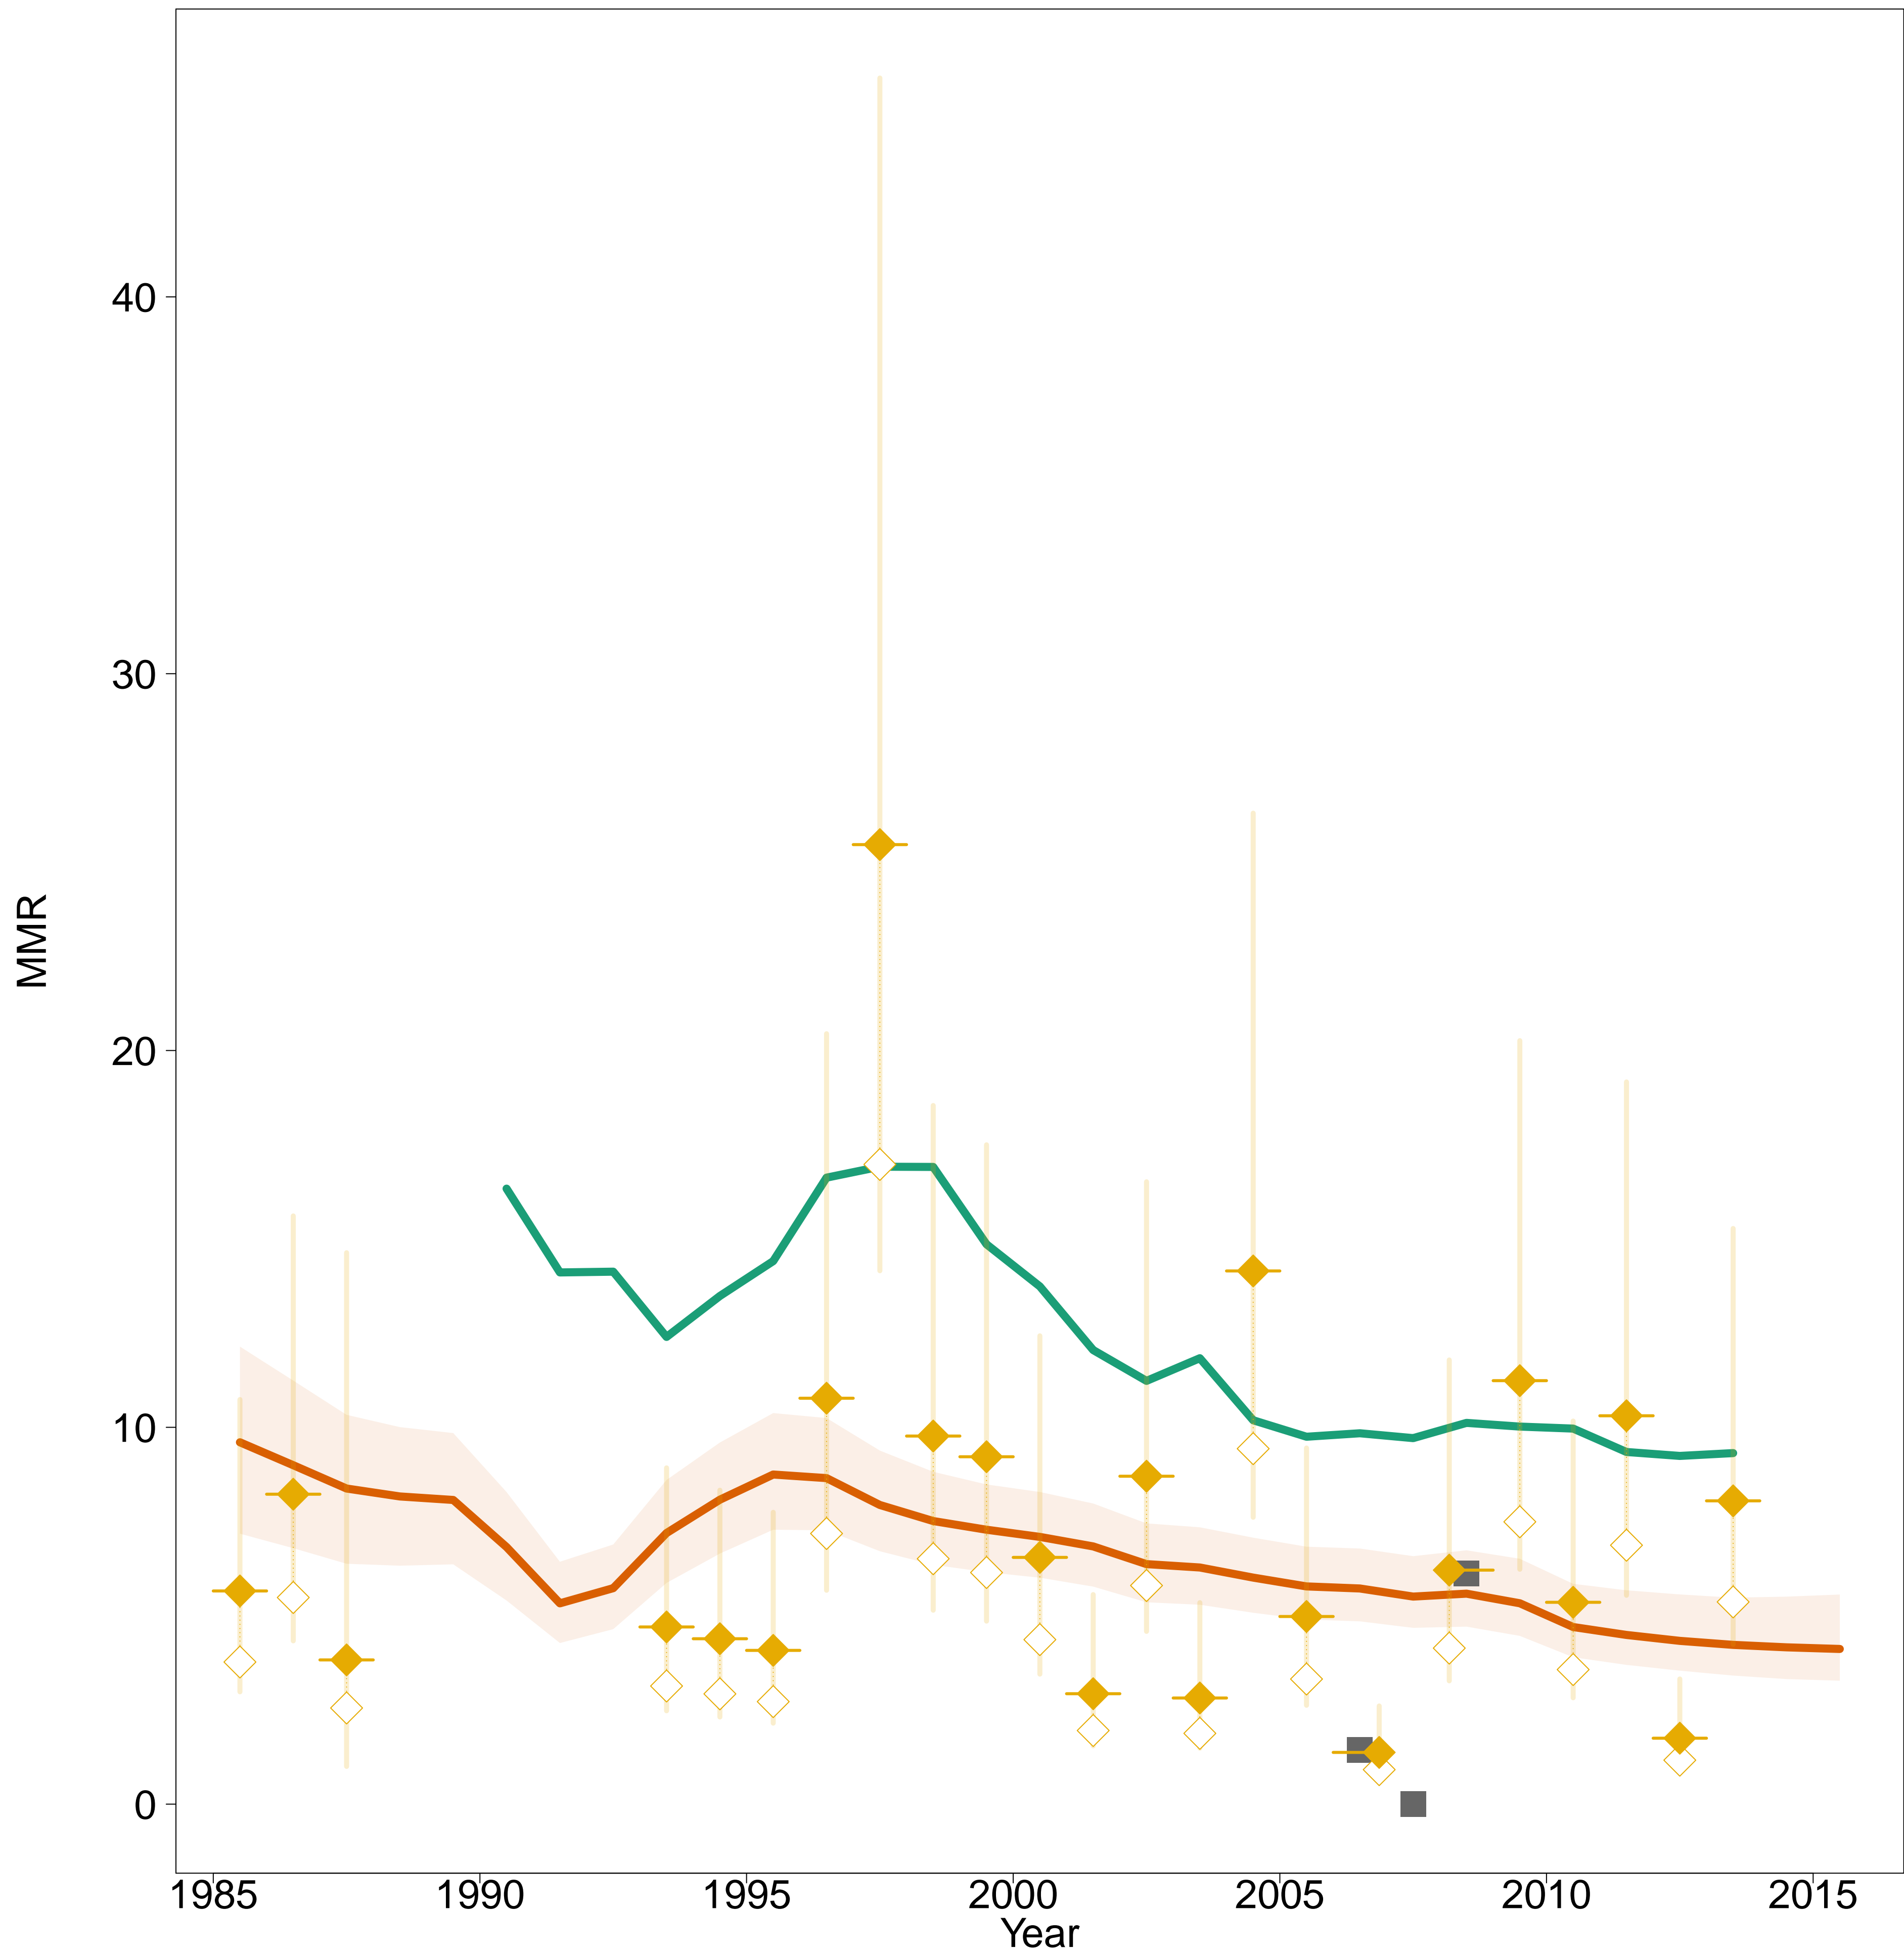

- Estimates –
- MMEIG 2015
- GBD 2013
- MMR Database 2015 –
- ◊ Observed Data
- ◆ Adjusted Data
- Data type –
- ◆ VR
- Reported VR before recalc.  
(related to 0 obs. mat. death)

Kyrgyzstan [KGZ]  
(Central Asia)

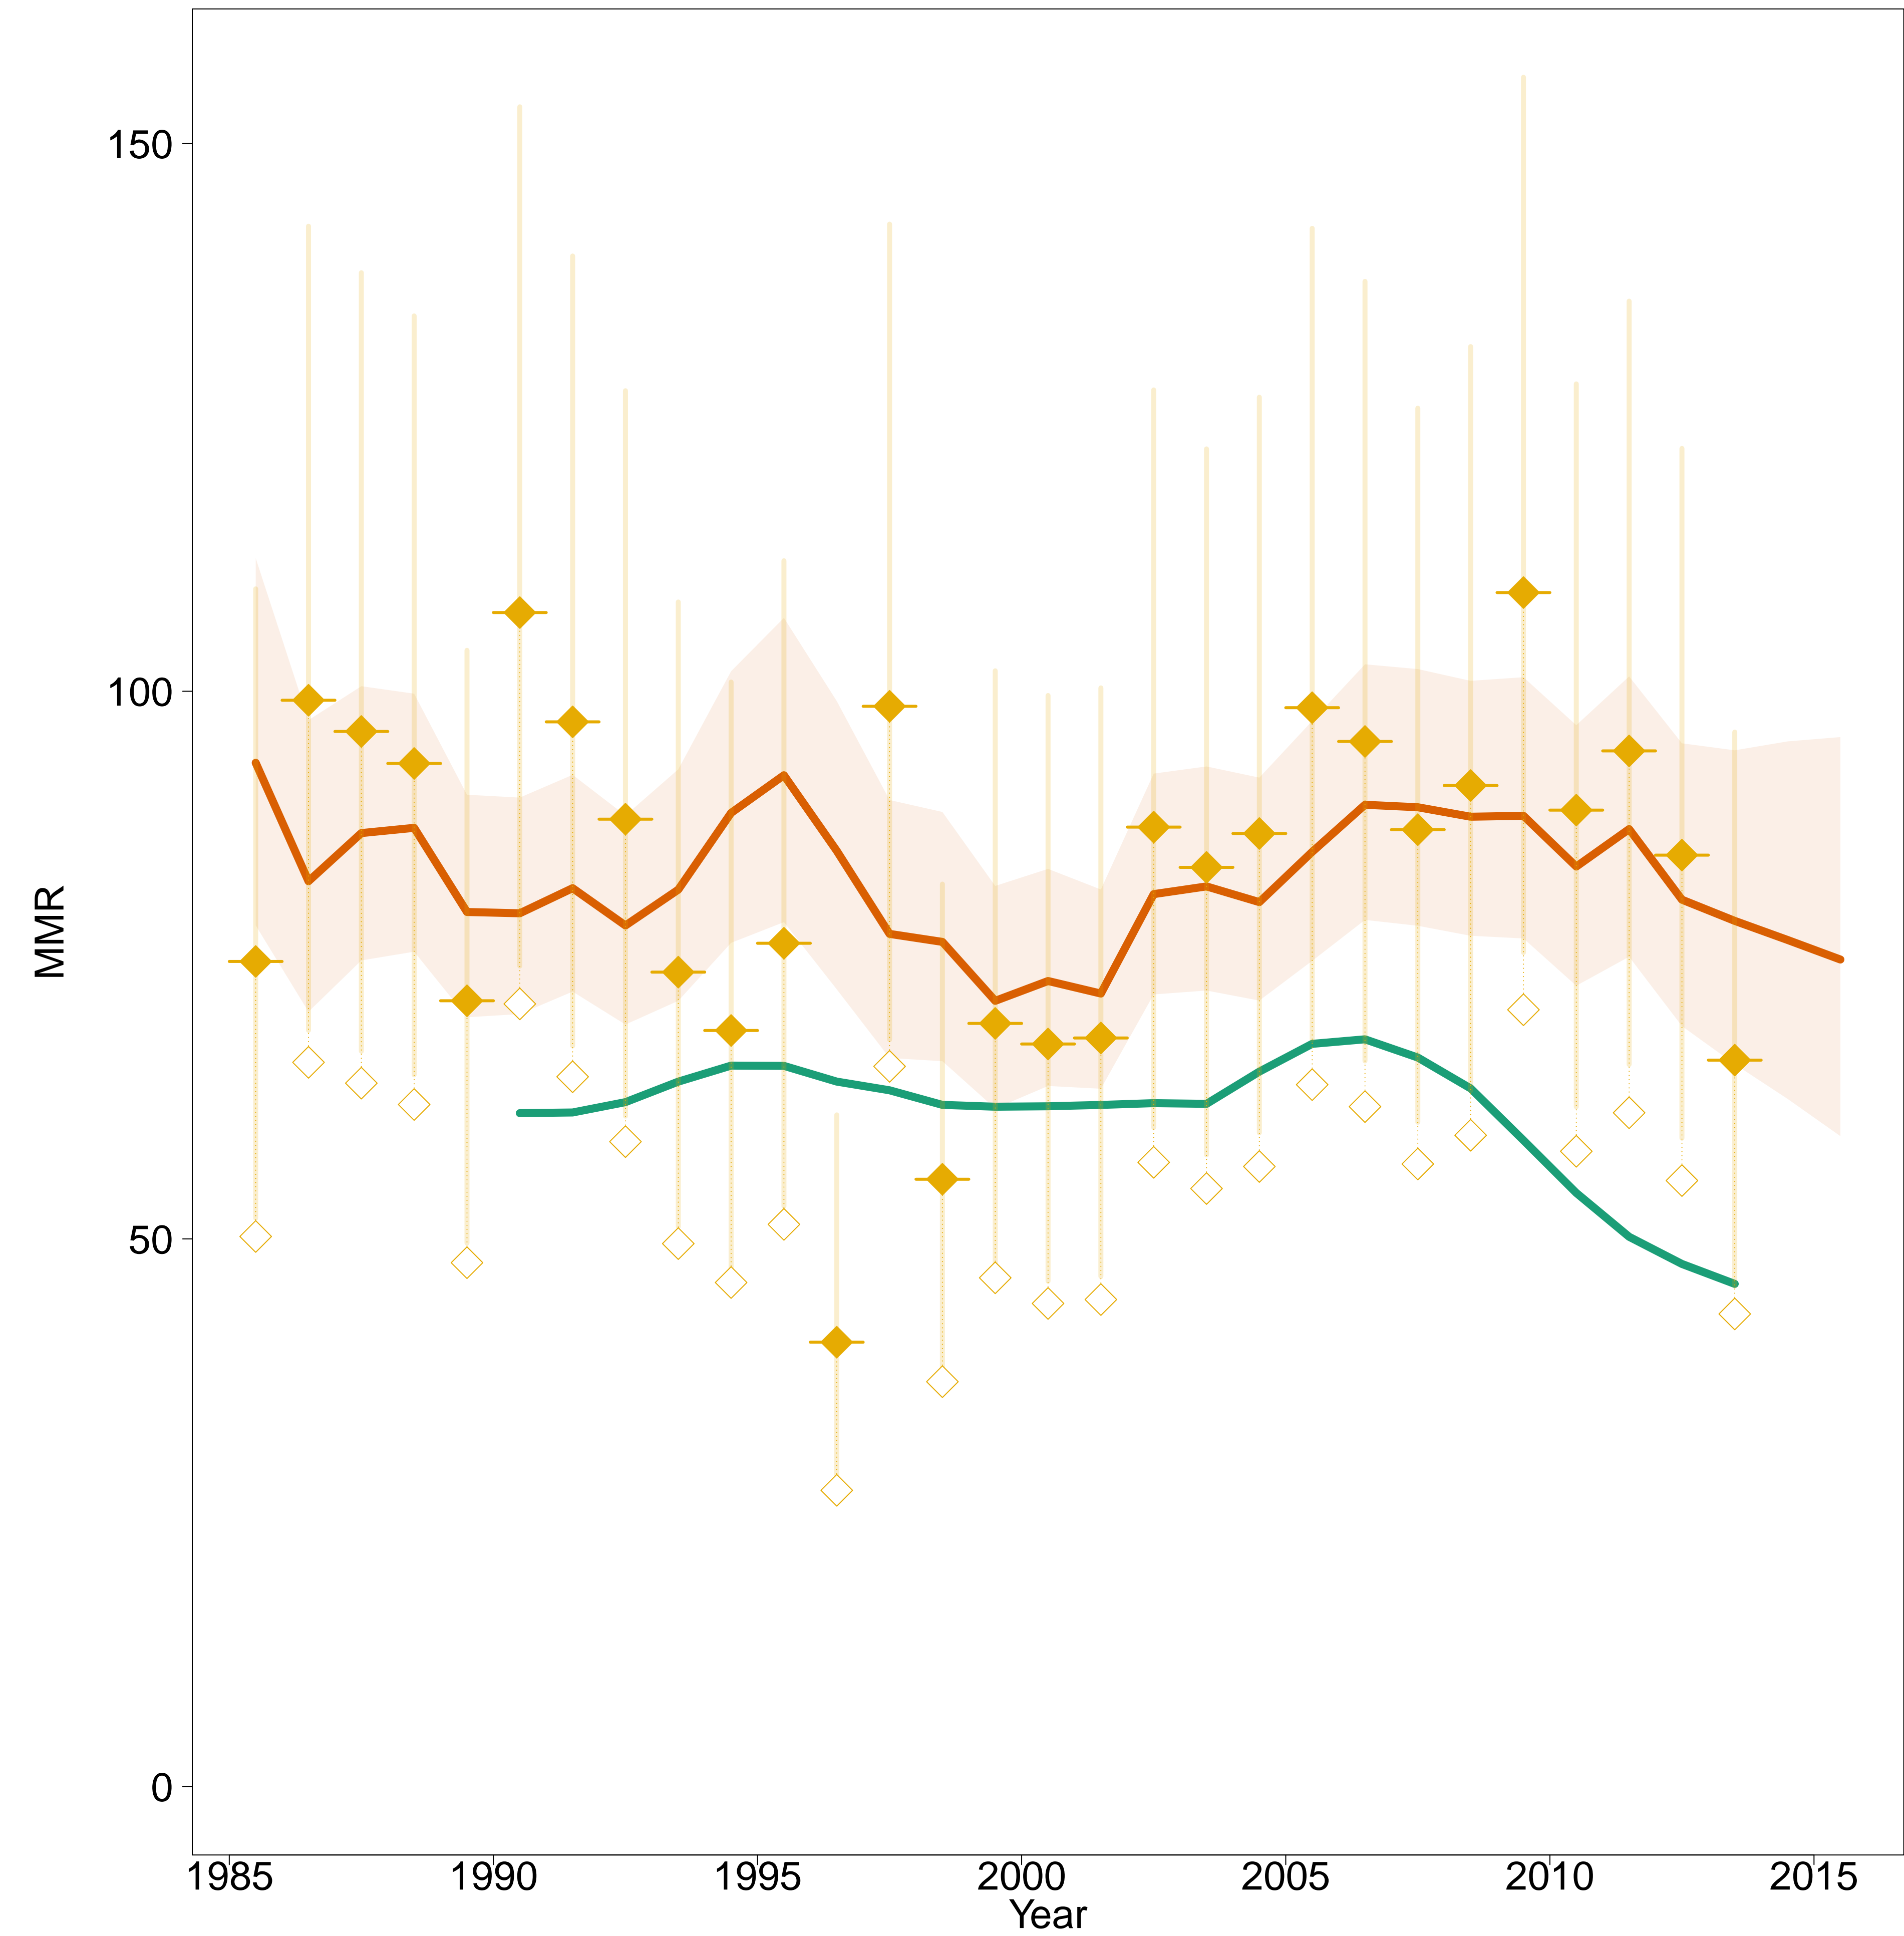

- Estimates –
- MMEIG 2015
- GBD 2013
- MMR Database 2015 –
- Observed Data
- Adjusted Data
- Data type –
- VR

Lao [LAO]  
(South-Eastern Asia / Oceania)

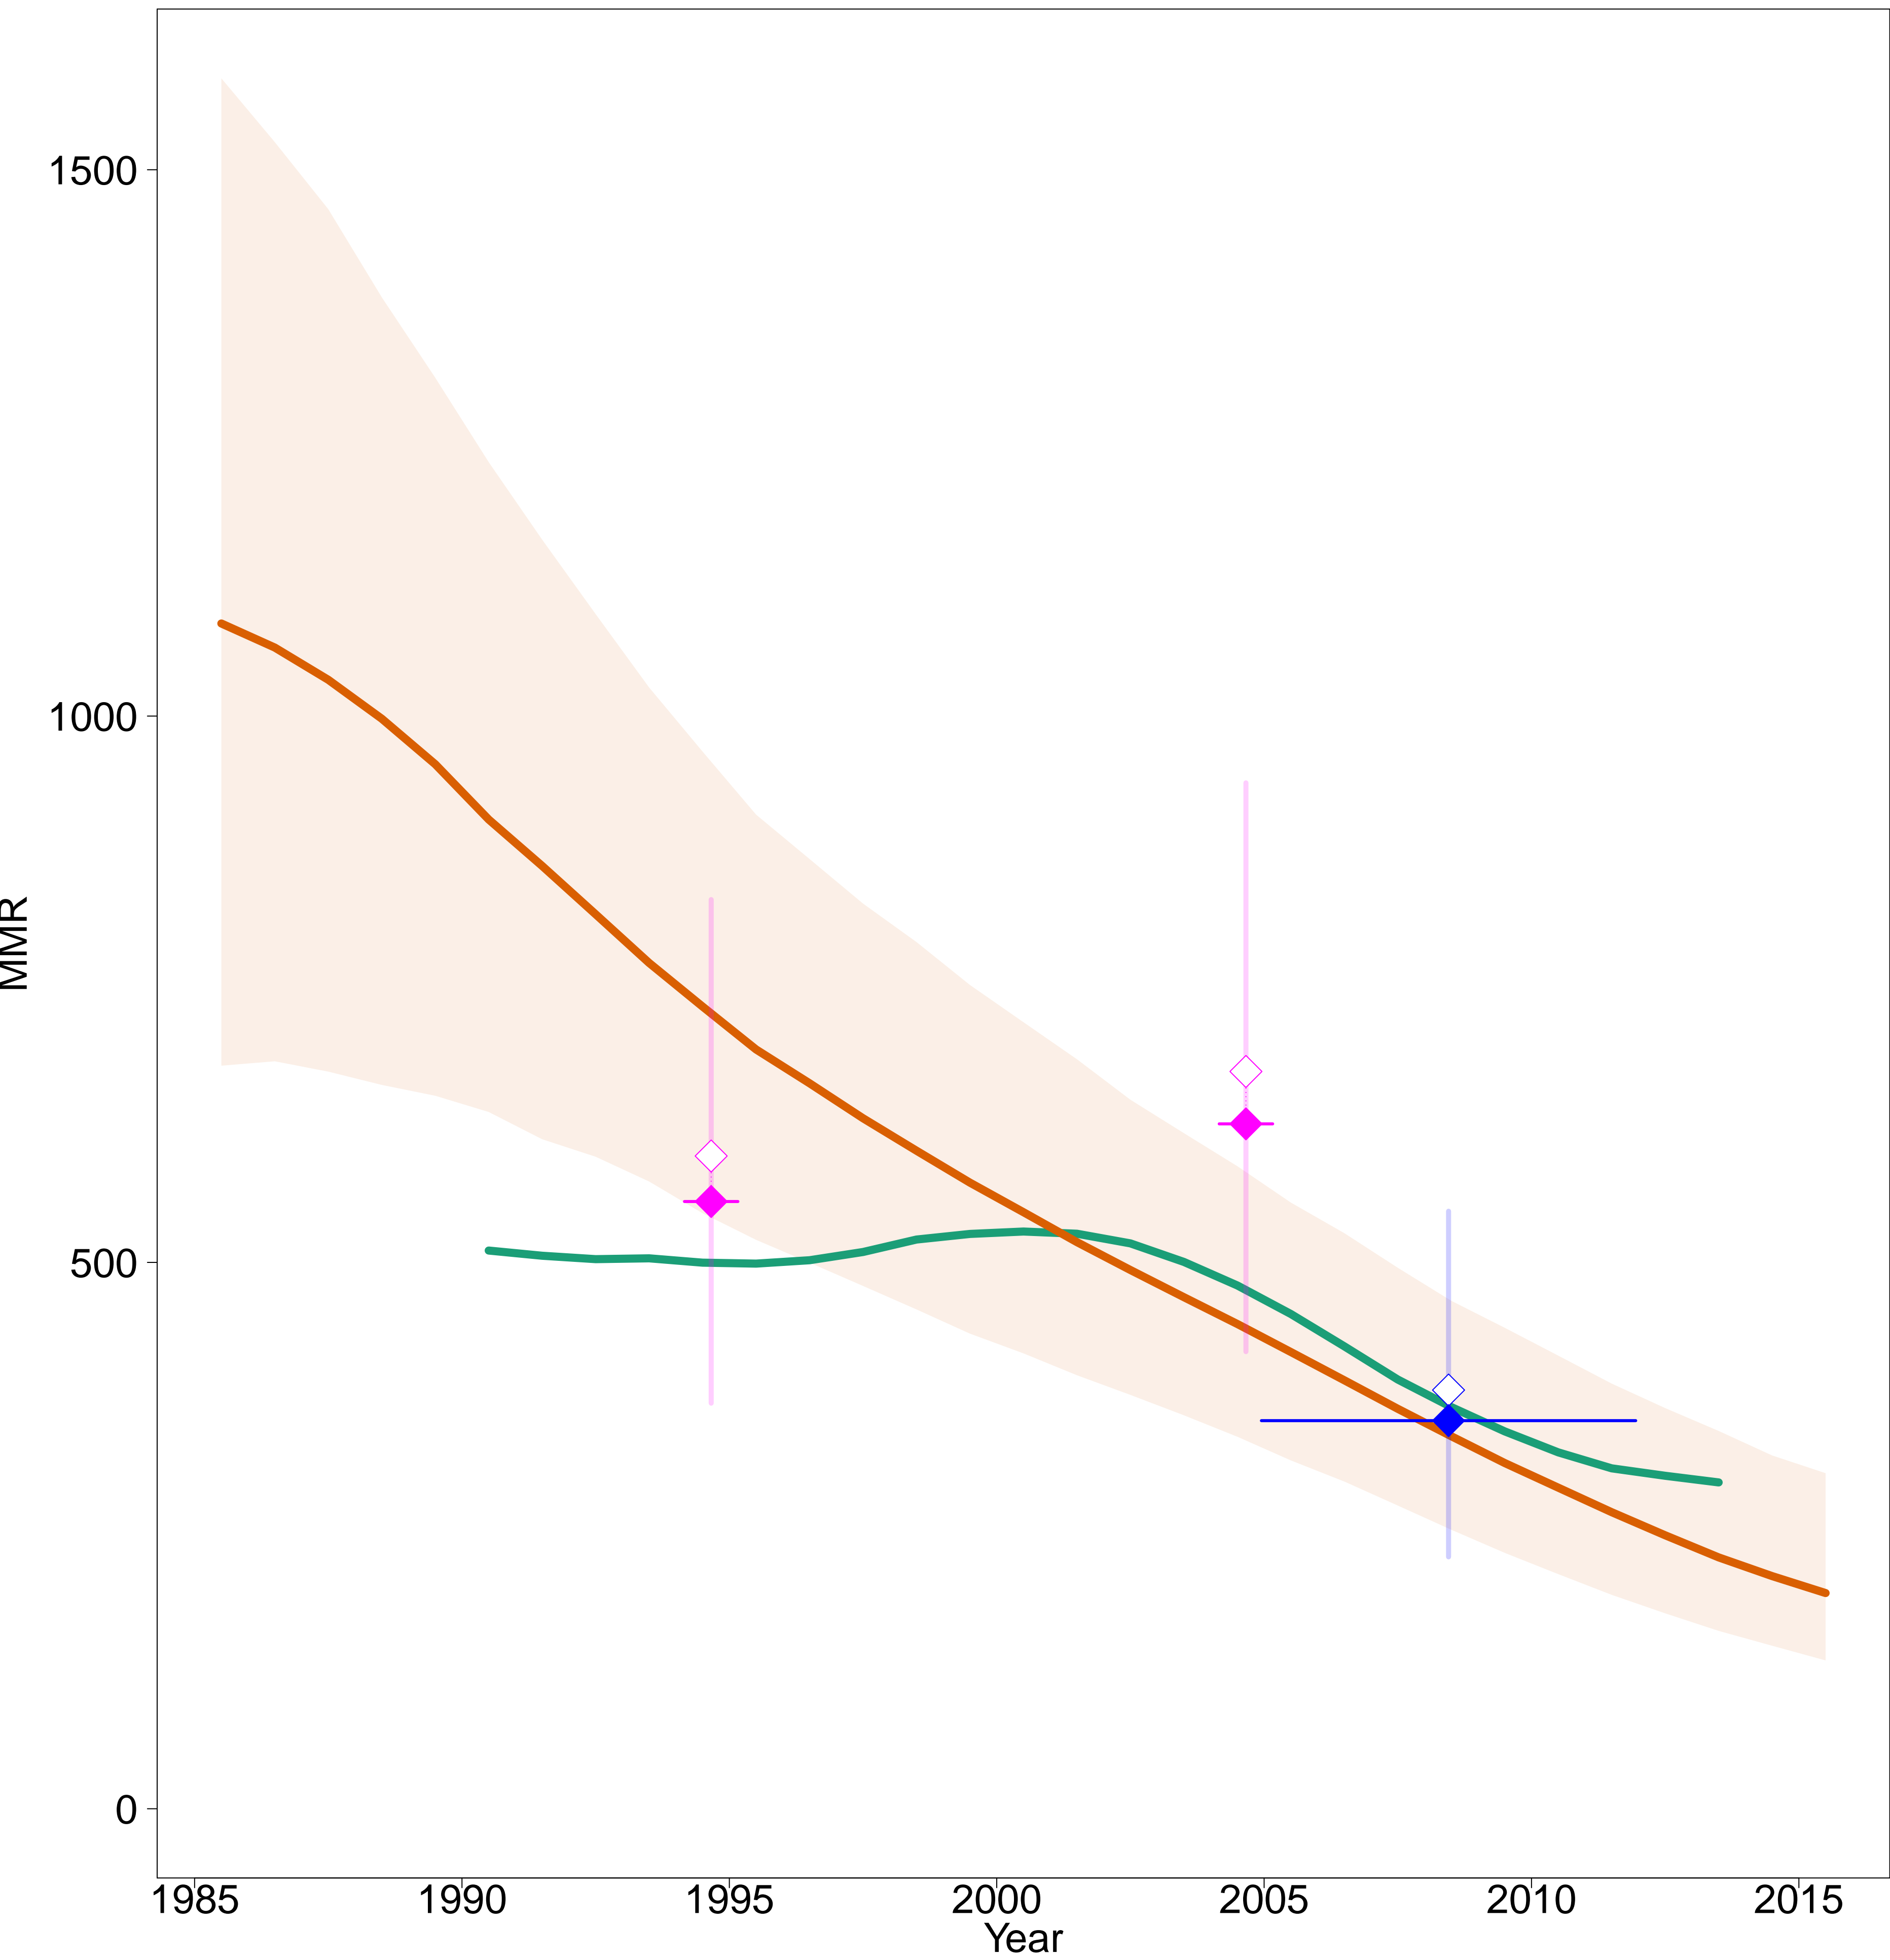

- Estimates -
- MMEIG 2015
- GBD 2013
- MMR Database 2015 -
- Observed Data
- Adjusted Data
- Data type -
- DHS
- Census



Latvia [LVA]  
(Developed regions)

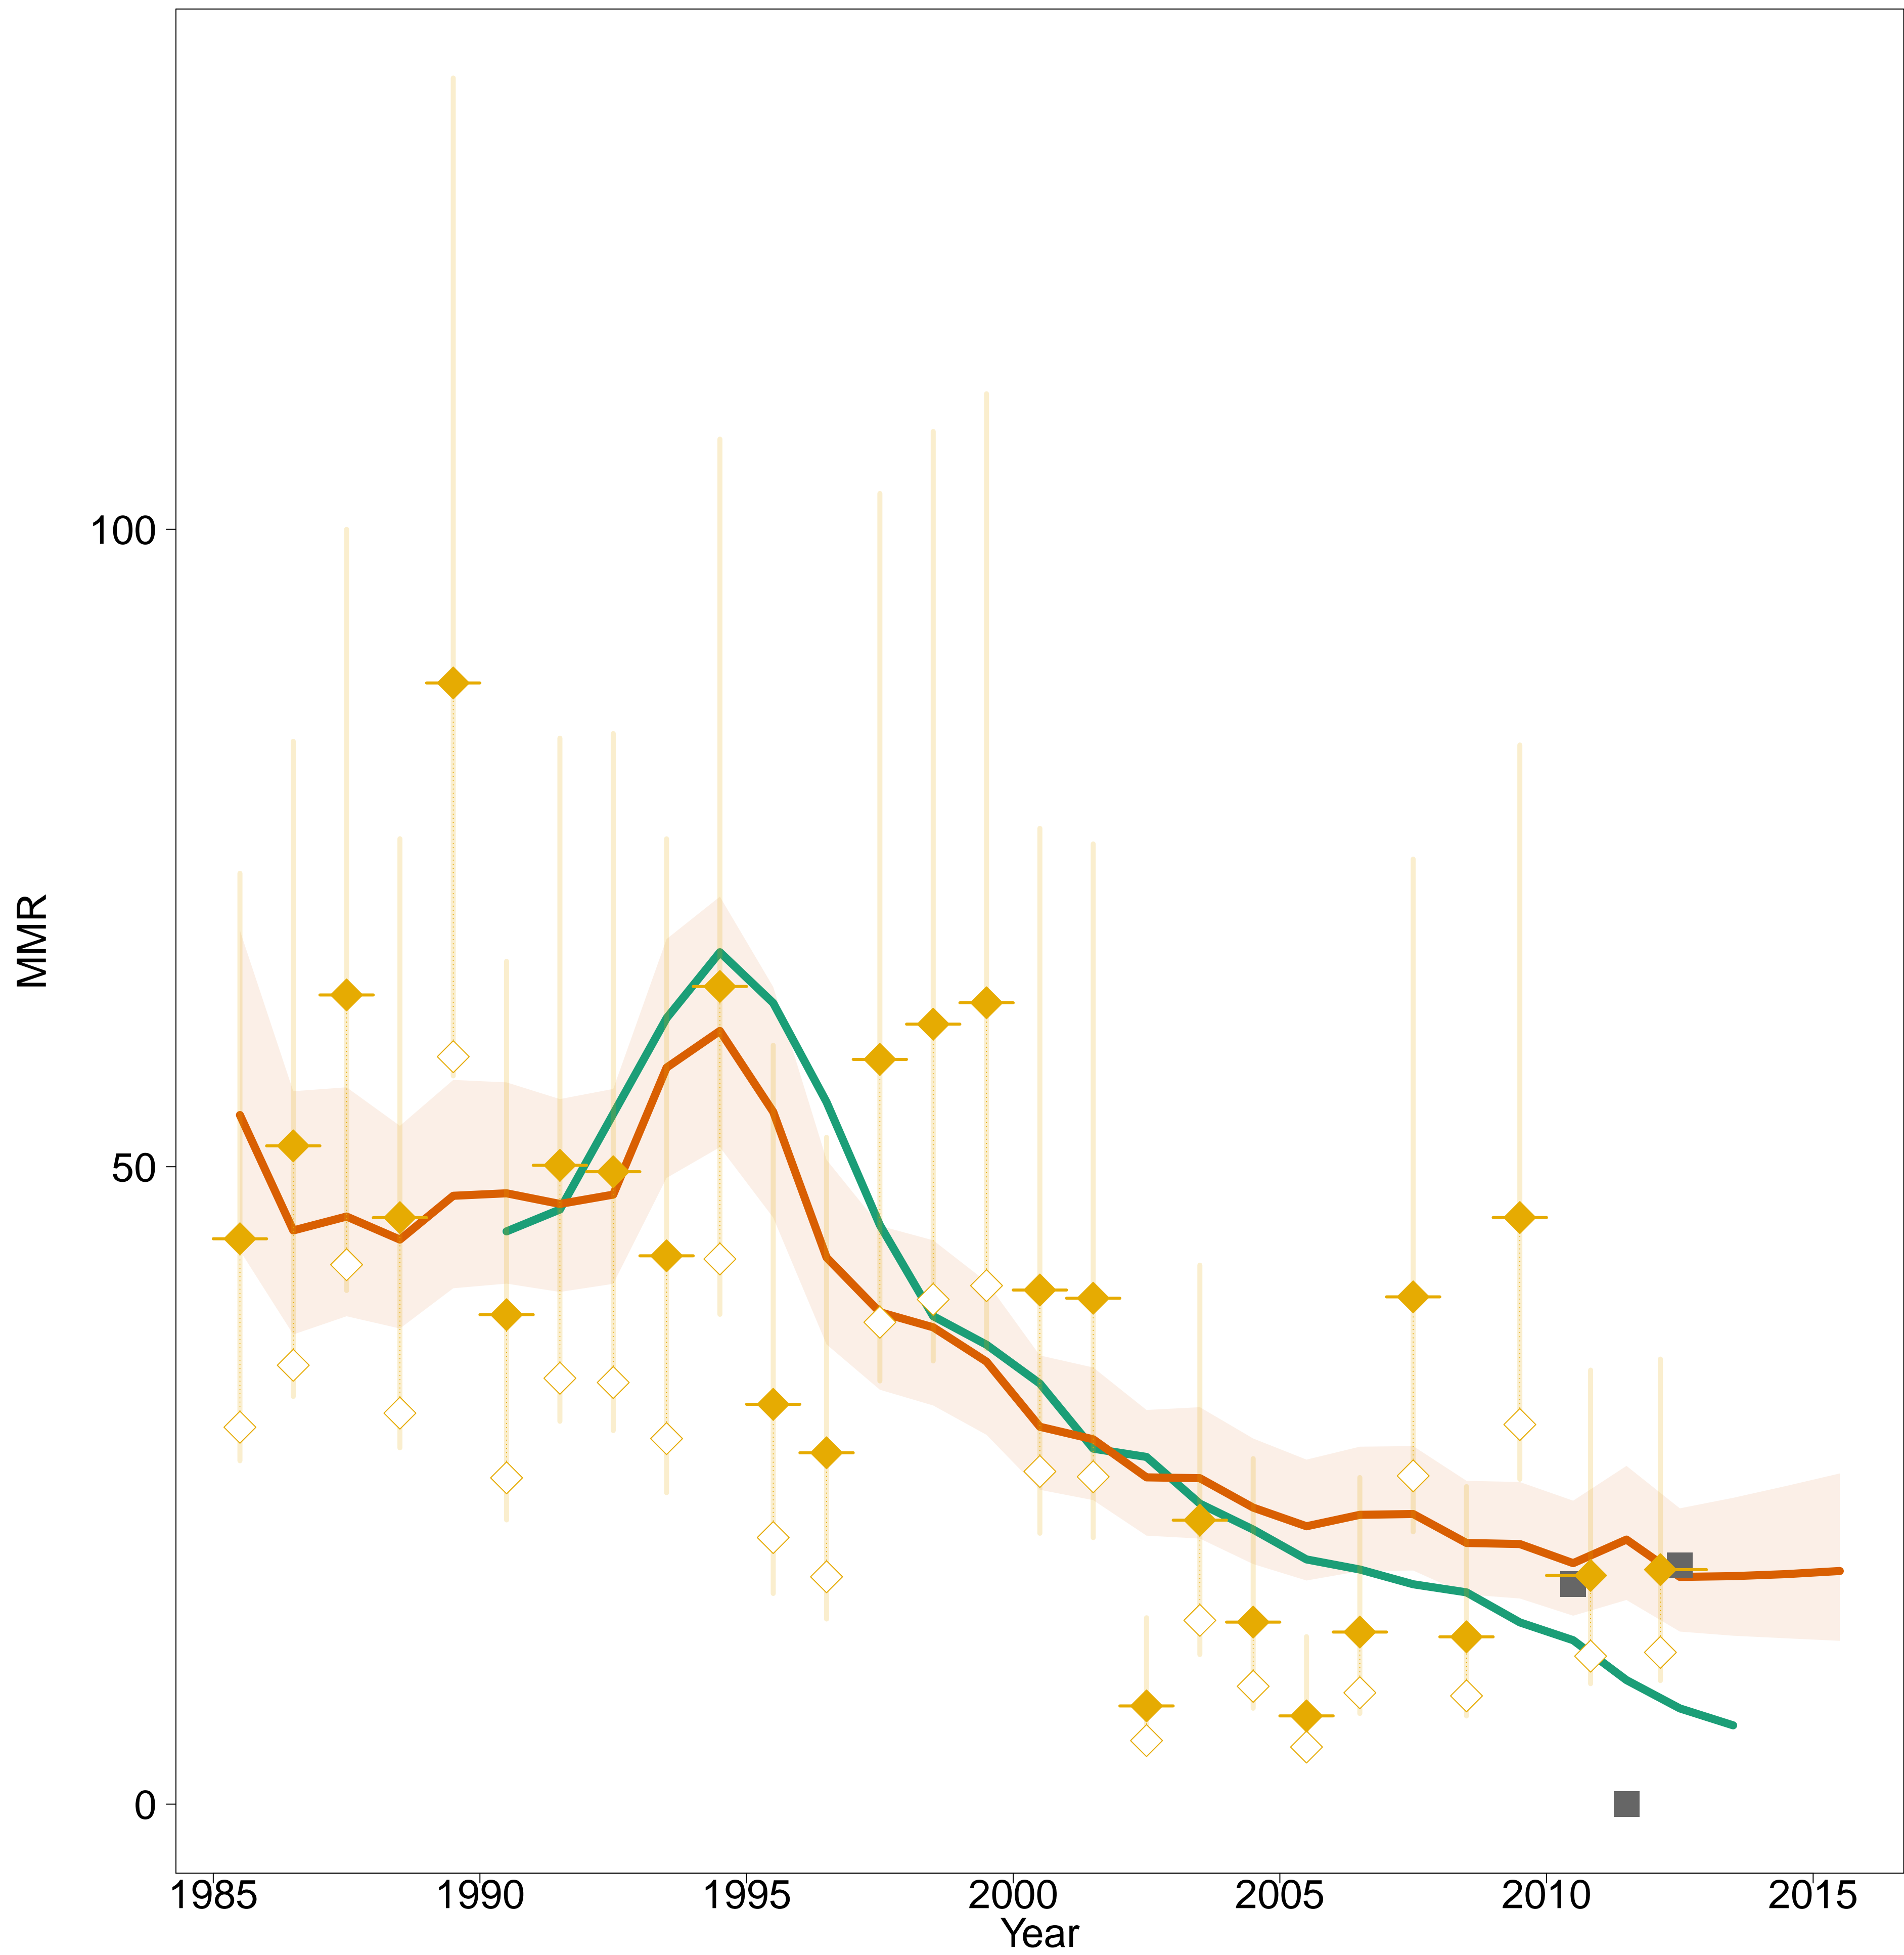

- Estimates –
- MMEIG 2015
- GBD 2013
- MMR Database 2015 –
- ◊ Observed Data
- ◆ Adjusted Data
- Data type –
- ◆ VR
- Reported VR before recalc.  
(related to 0 obs. mat. death)

Lebanon [LBN]  
(Western Asia)

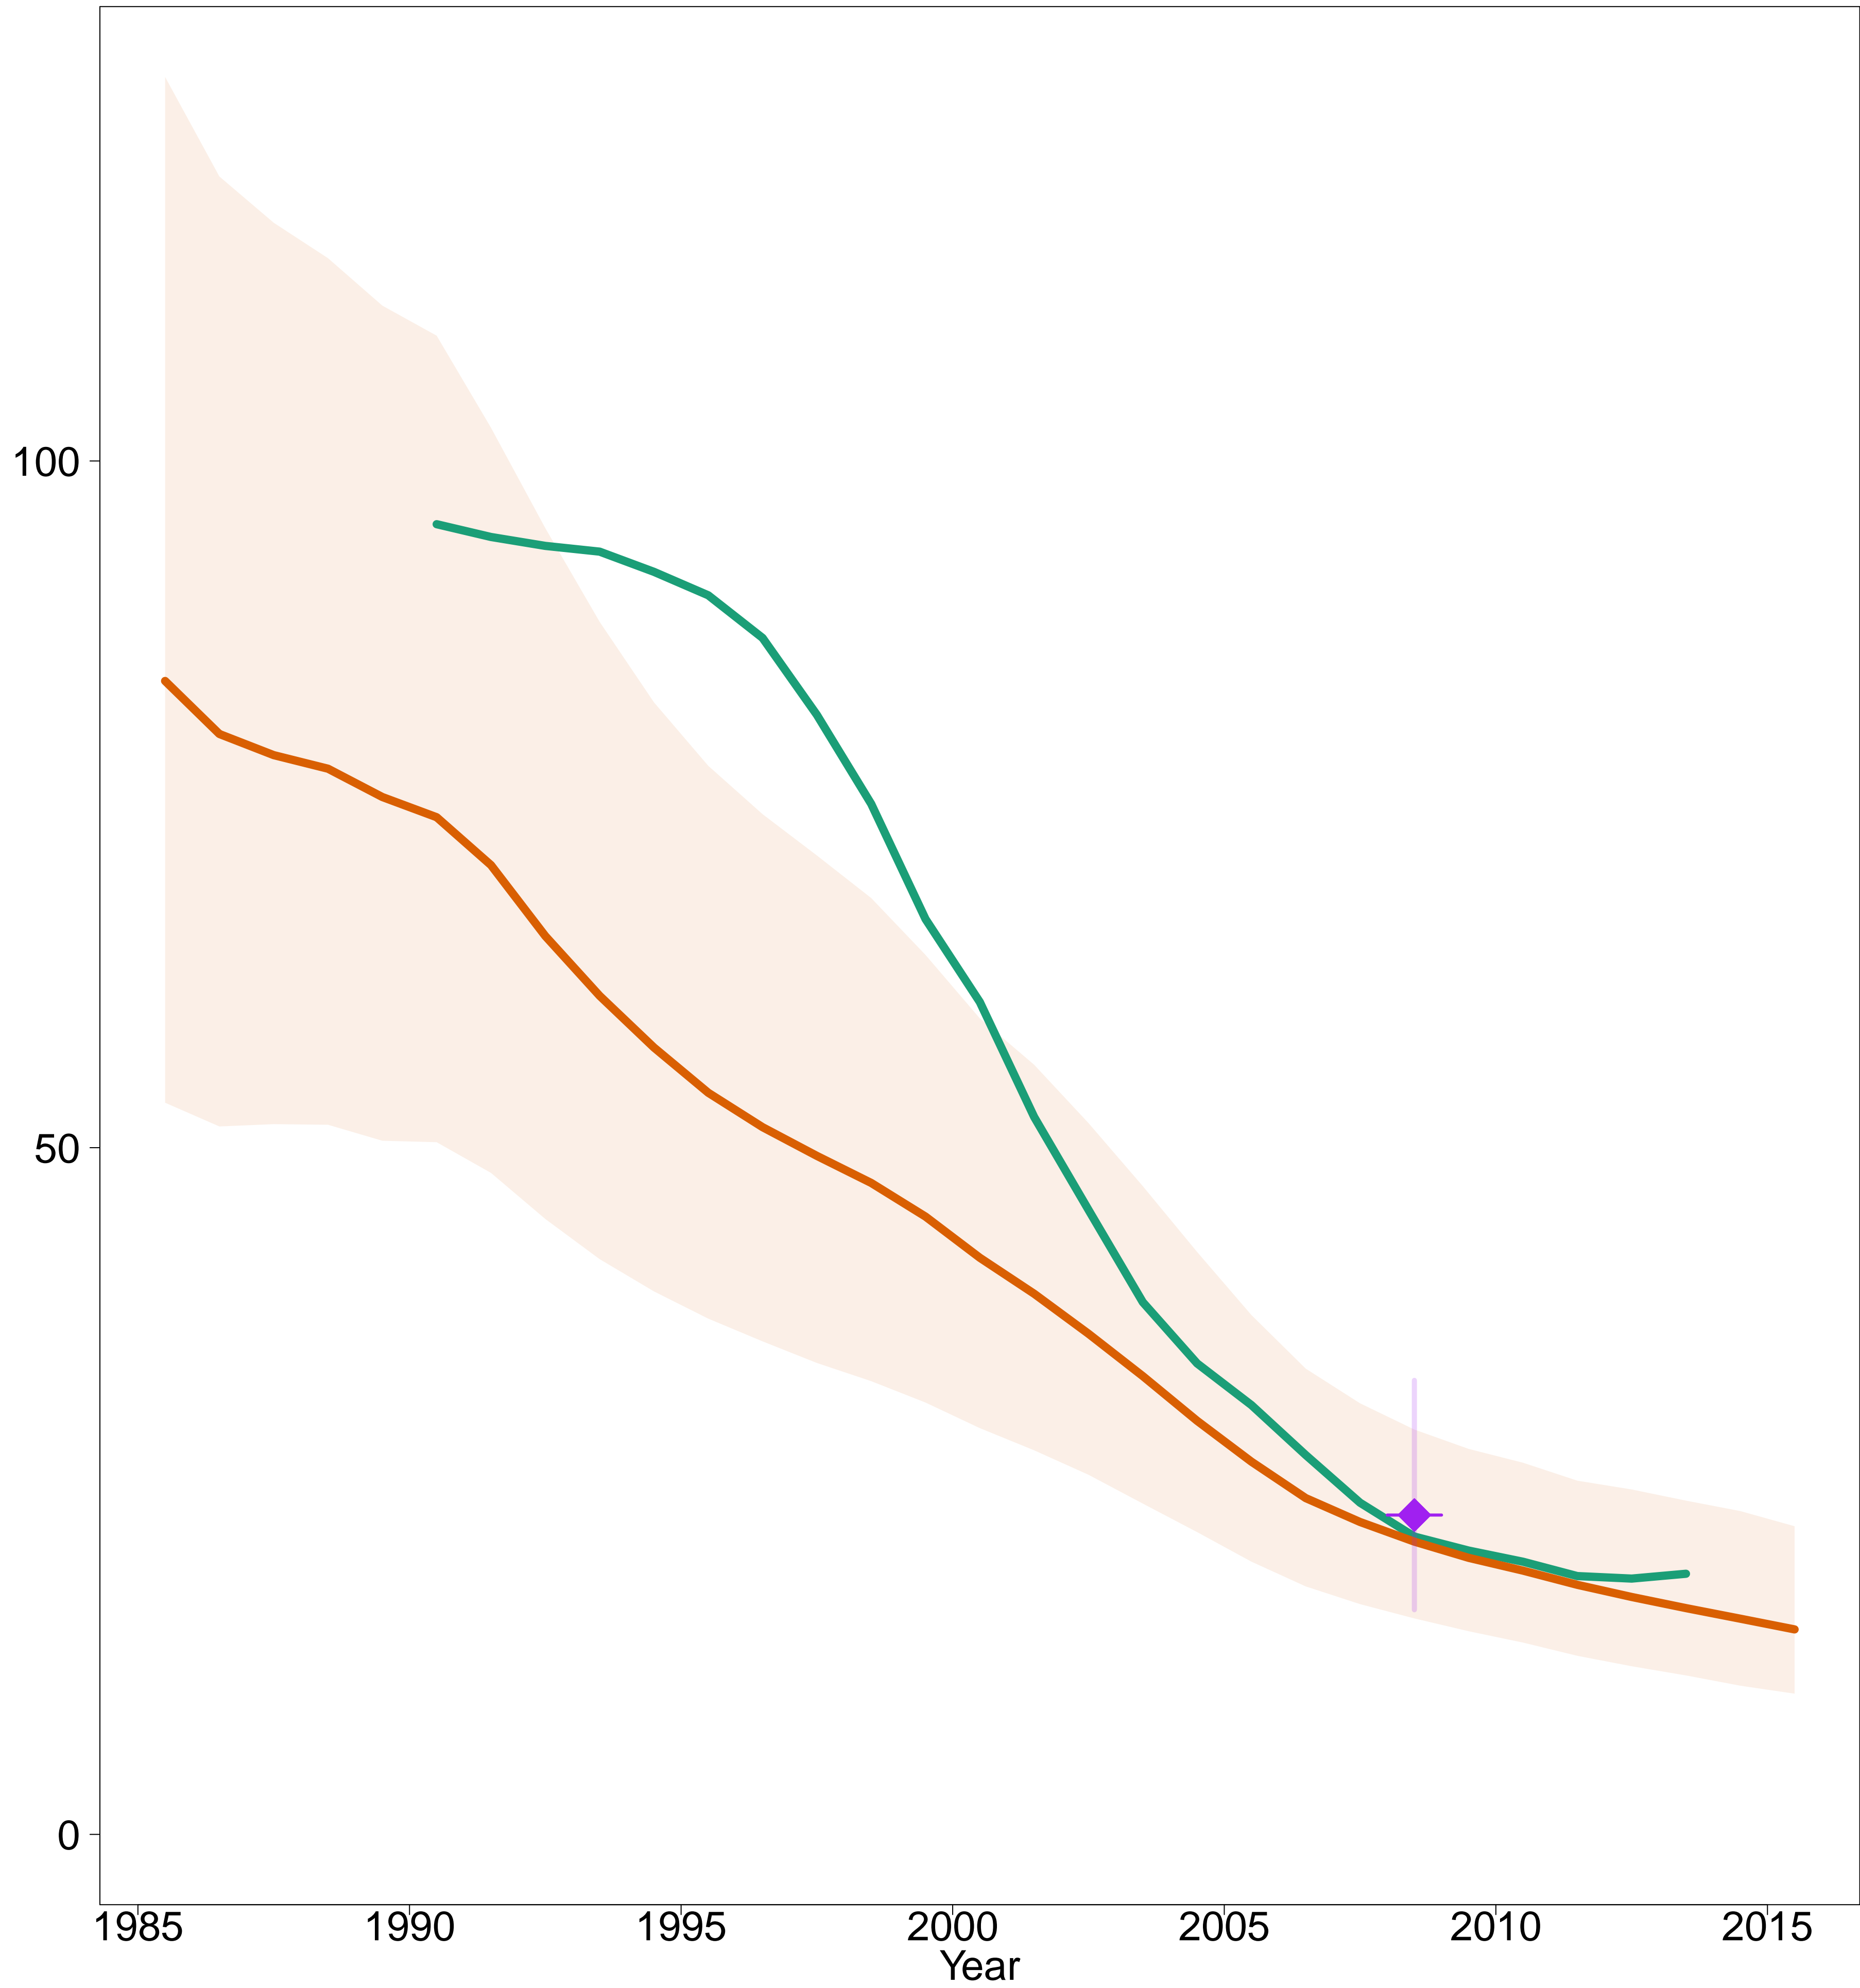

- Estimates -
- MMEIG 2015
- GBD 2013
- MMR Database 2015 -
- Observed Data
- Adjusted Data
- Data type -
- Spec. studies

Lesotho [LSO]  
(Southern Africa)

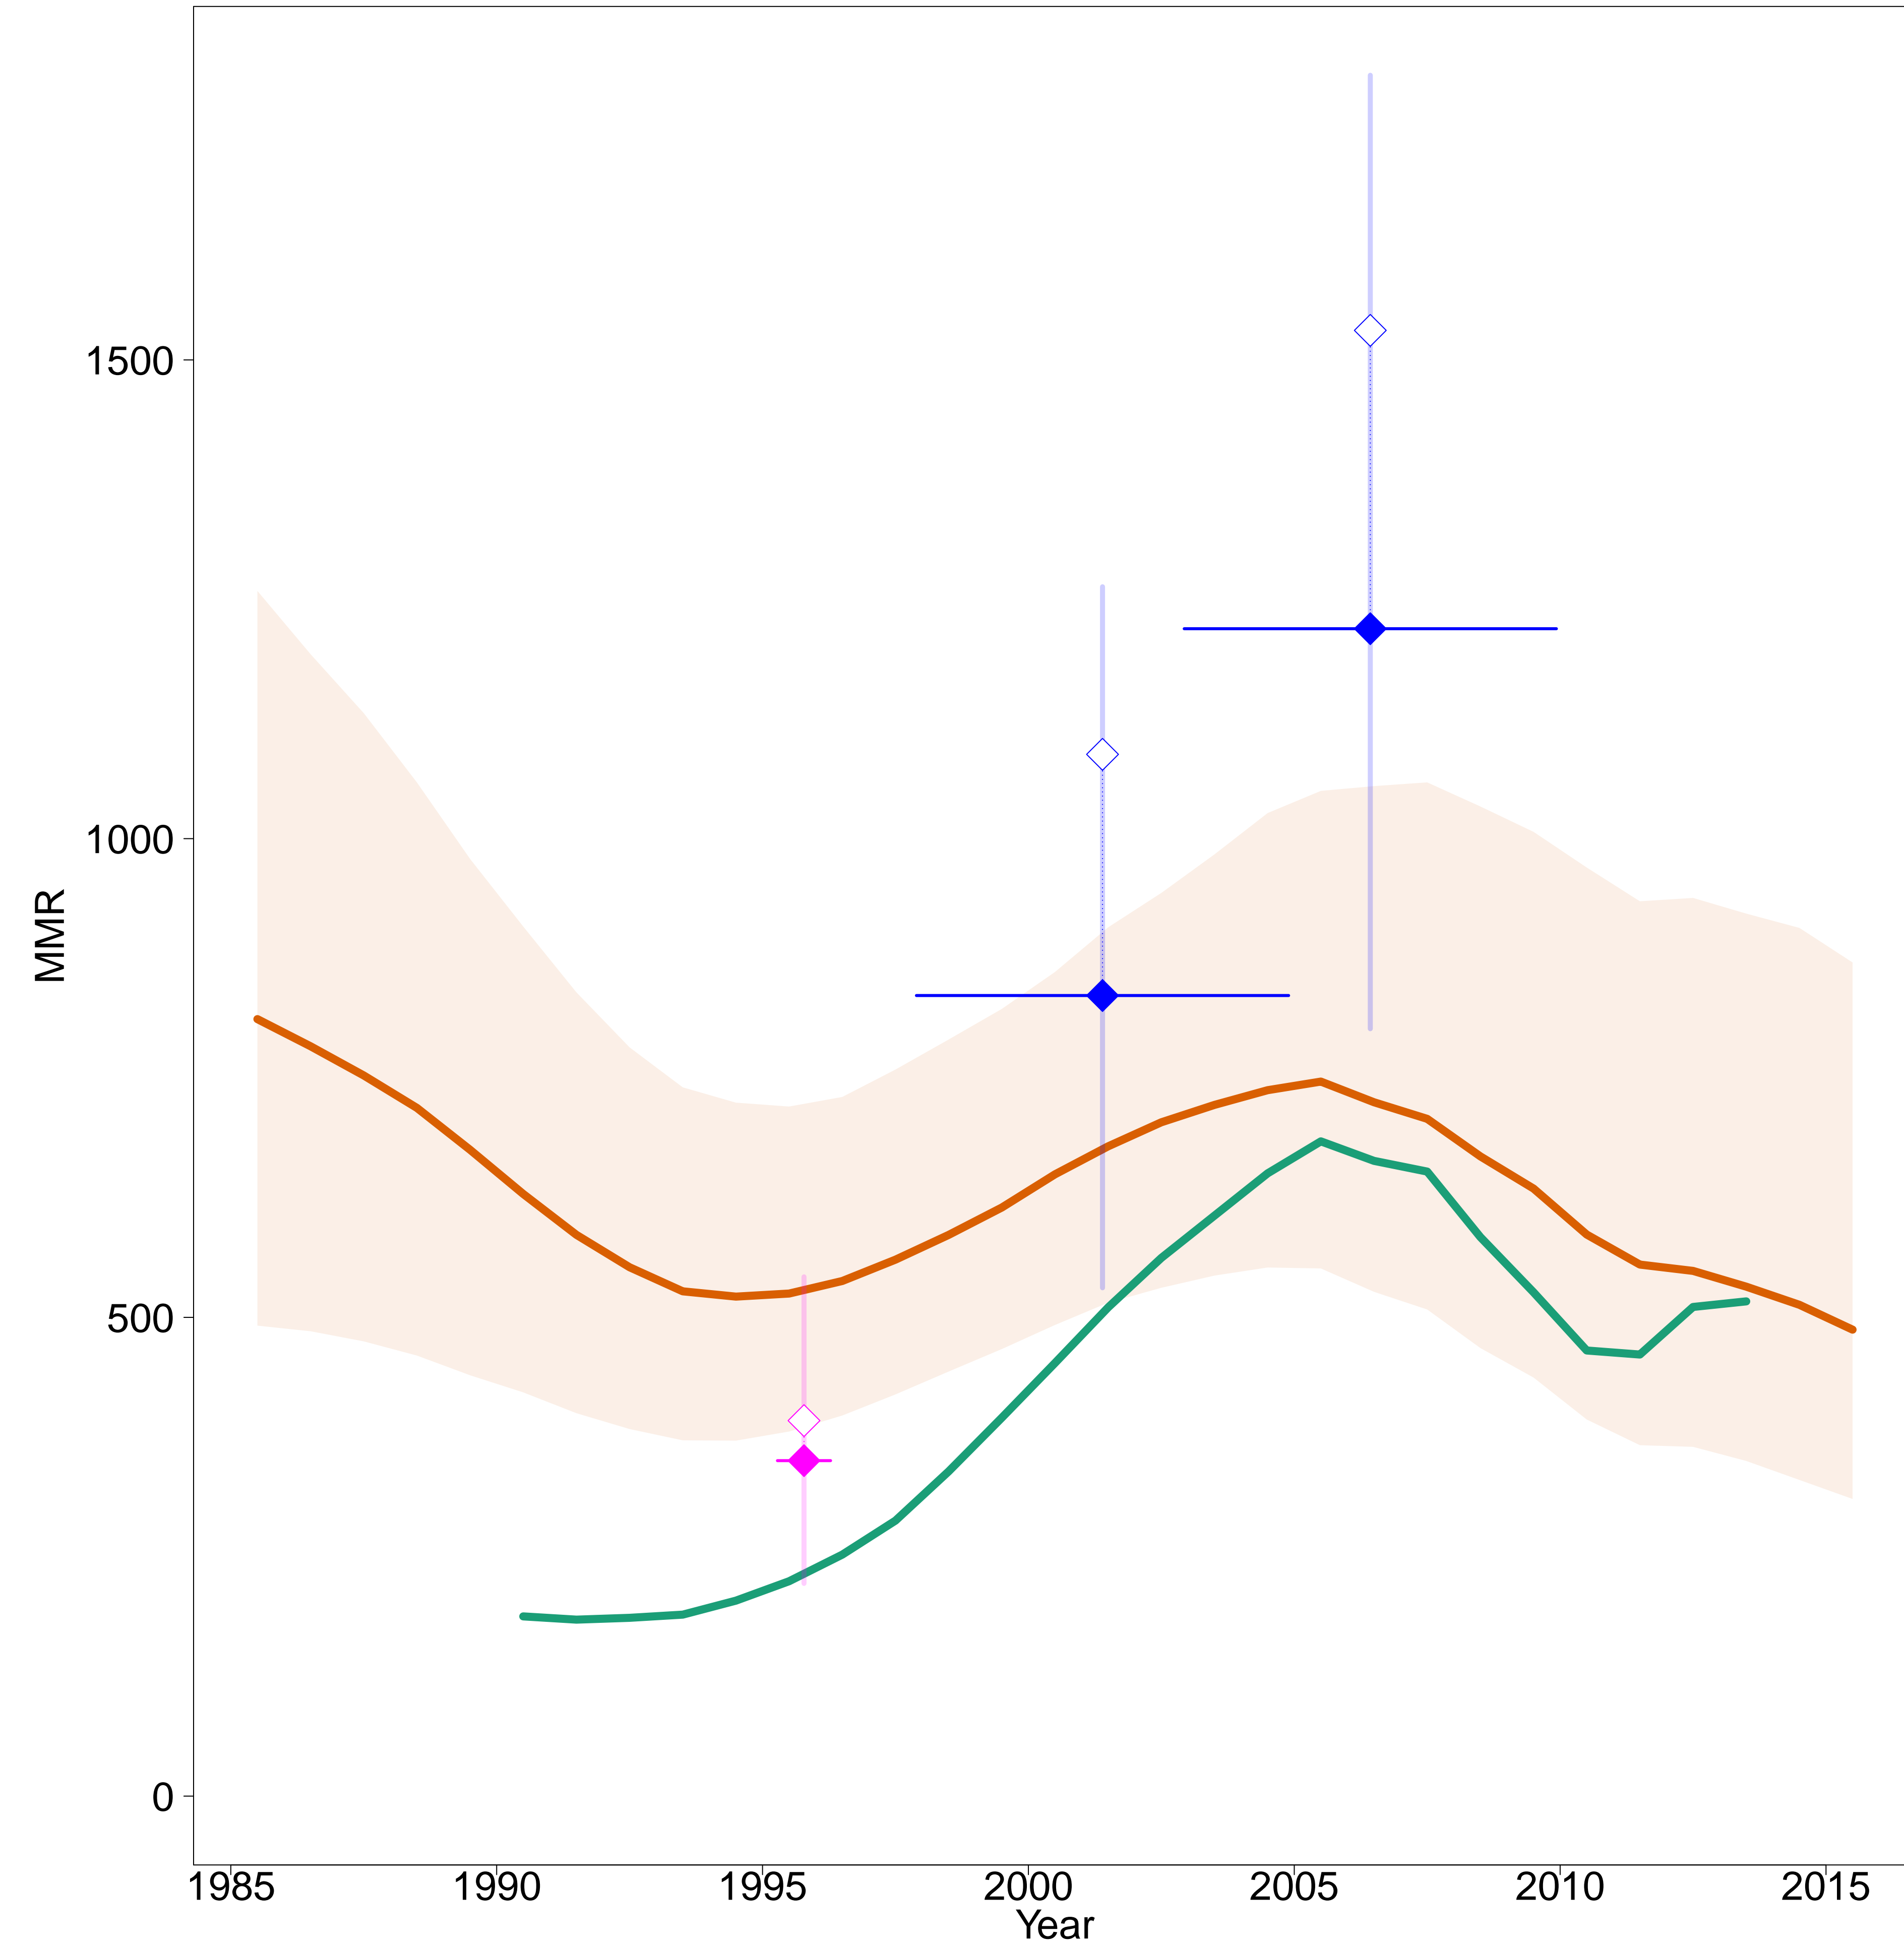

- Estimates -
- MMEIG 2015
- GBD 2013
- MMR Database 2015 -
- Observed Data
- Adjusted Data
- Data type -
- DHS
- Census

Liberia [LBR]  
(Western Africa)

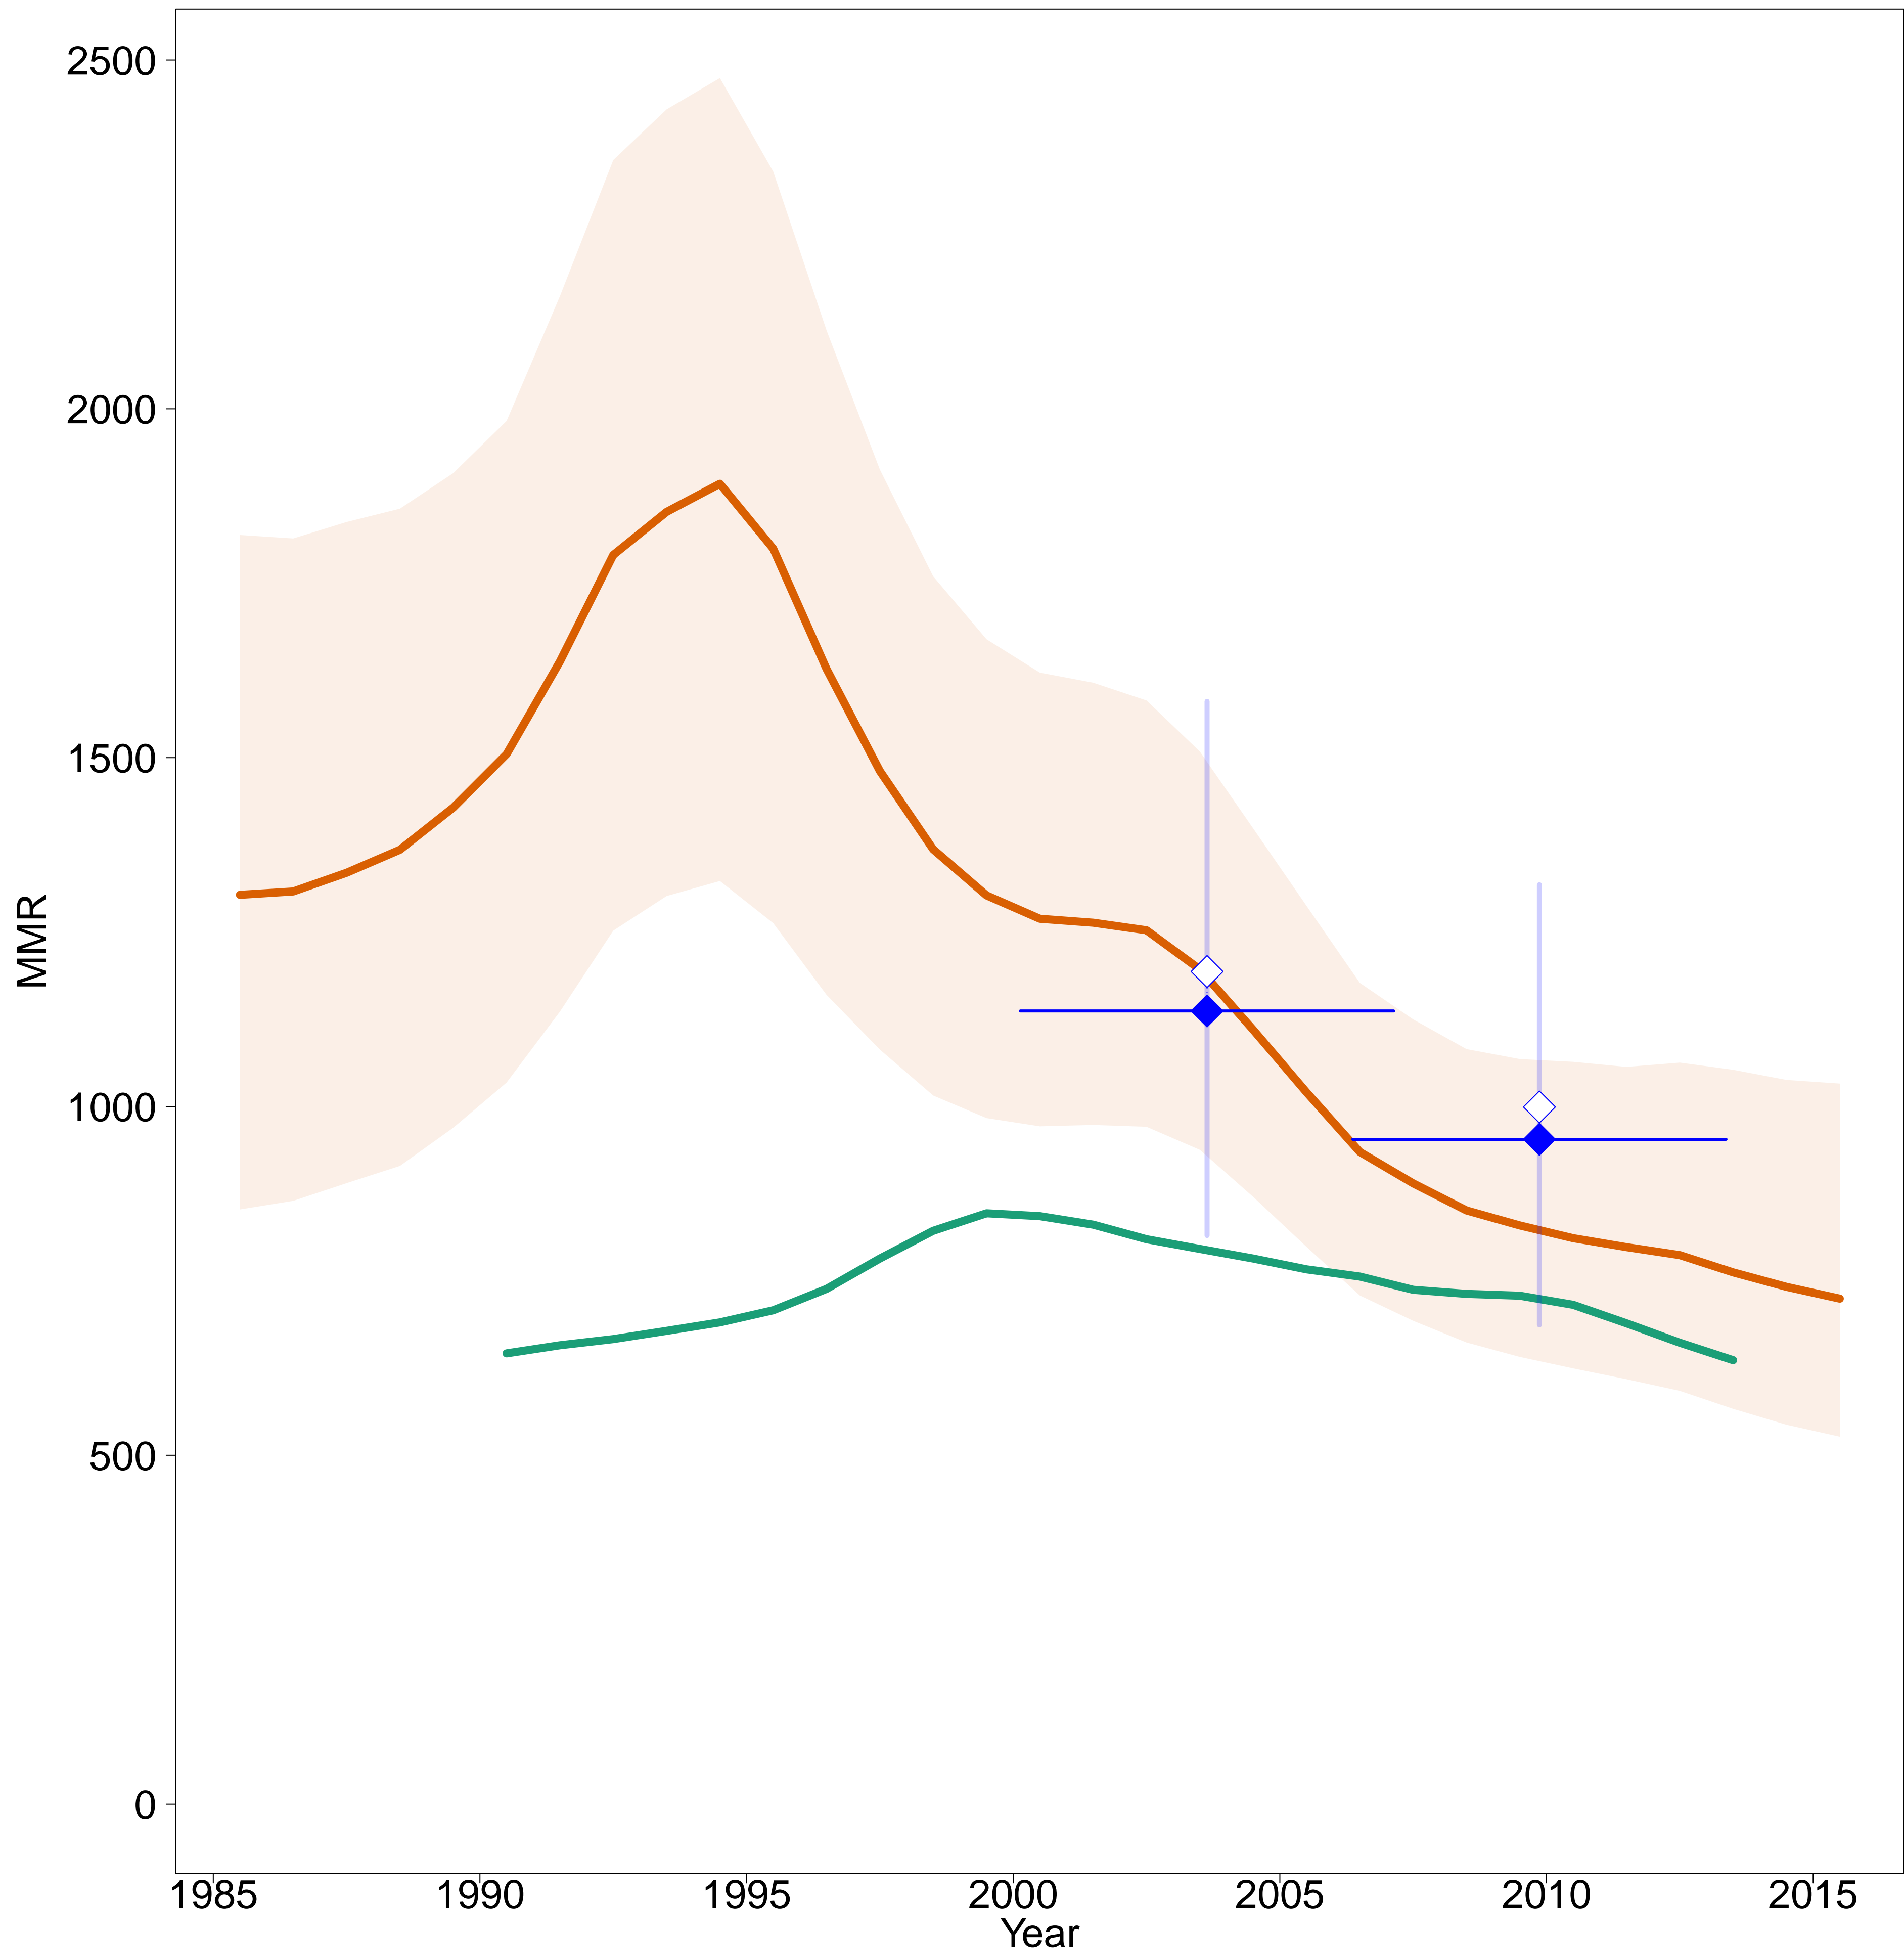

- Estimates -
- MMEIG 2015
- GBD 2013
- MMR Database 2015 -
- Observed Data
- Adjusted Data
- Data type -
- DHS

Libya [LBY]  
(Northern Africa)

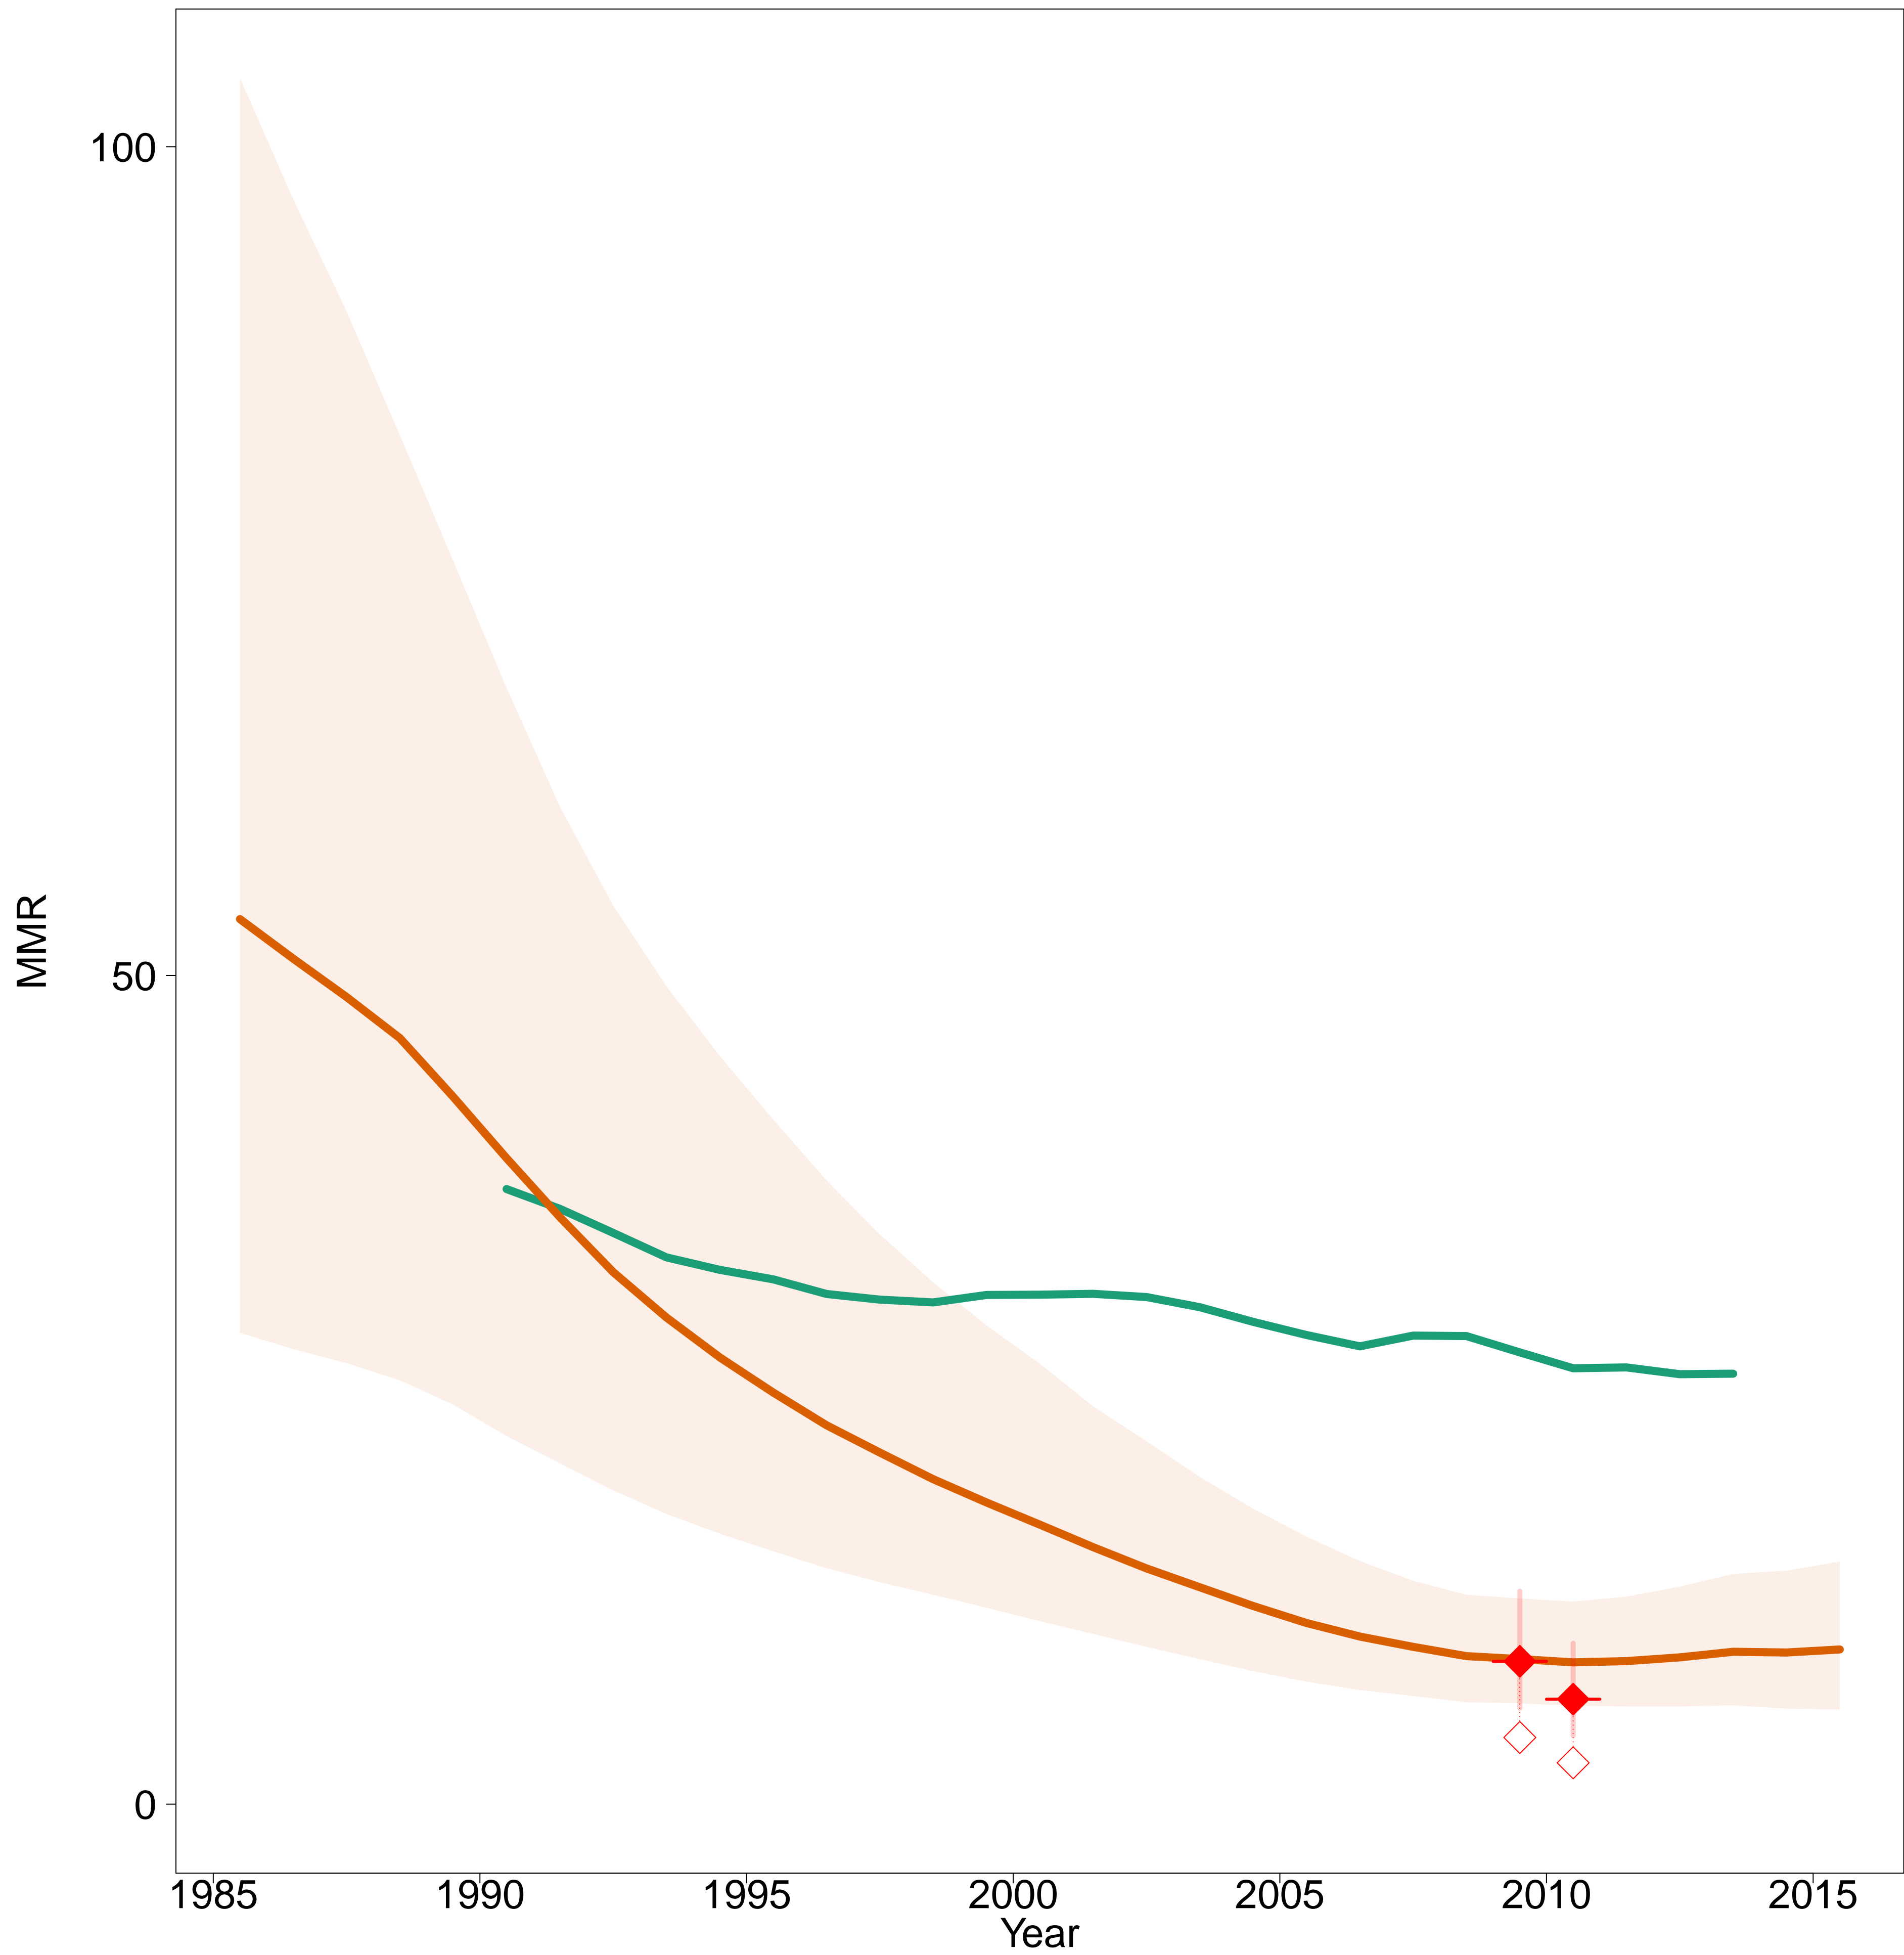

- Estimates –
- MMEIG 2015
- GBD 2013
- MMR Database 2015 –
- ◊ Observed Data
- ◆ Adjusted Data
- Data type –
- ◆ Misc. studies

Lithuania [LTU]  
(Developed regions)

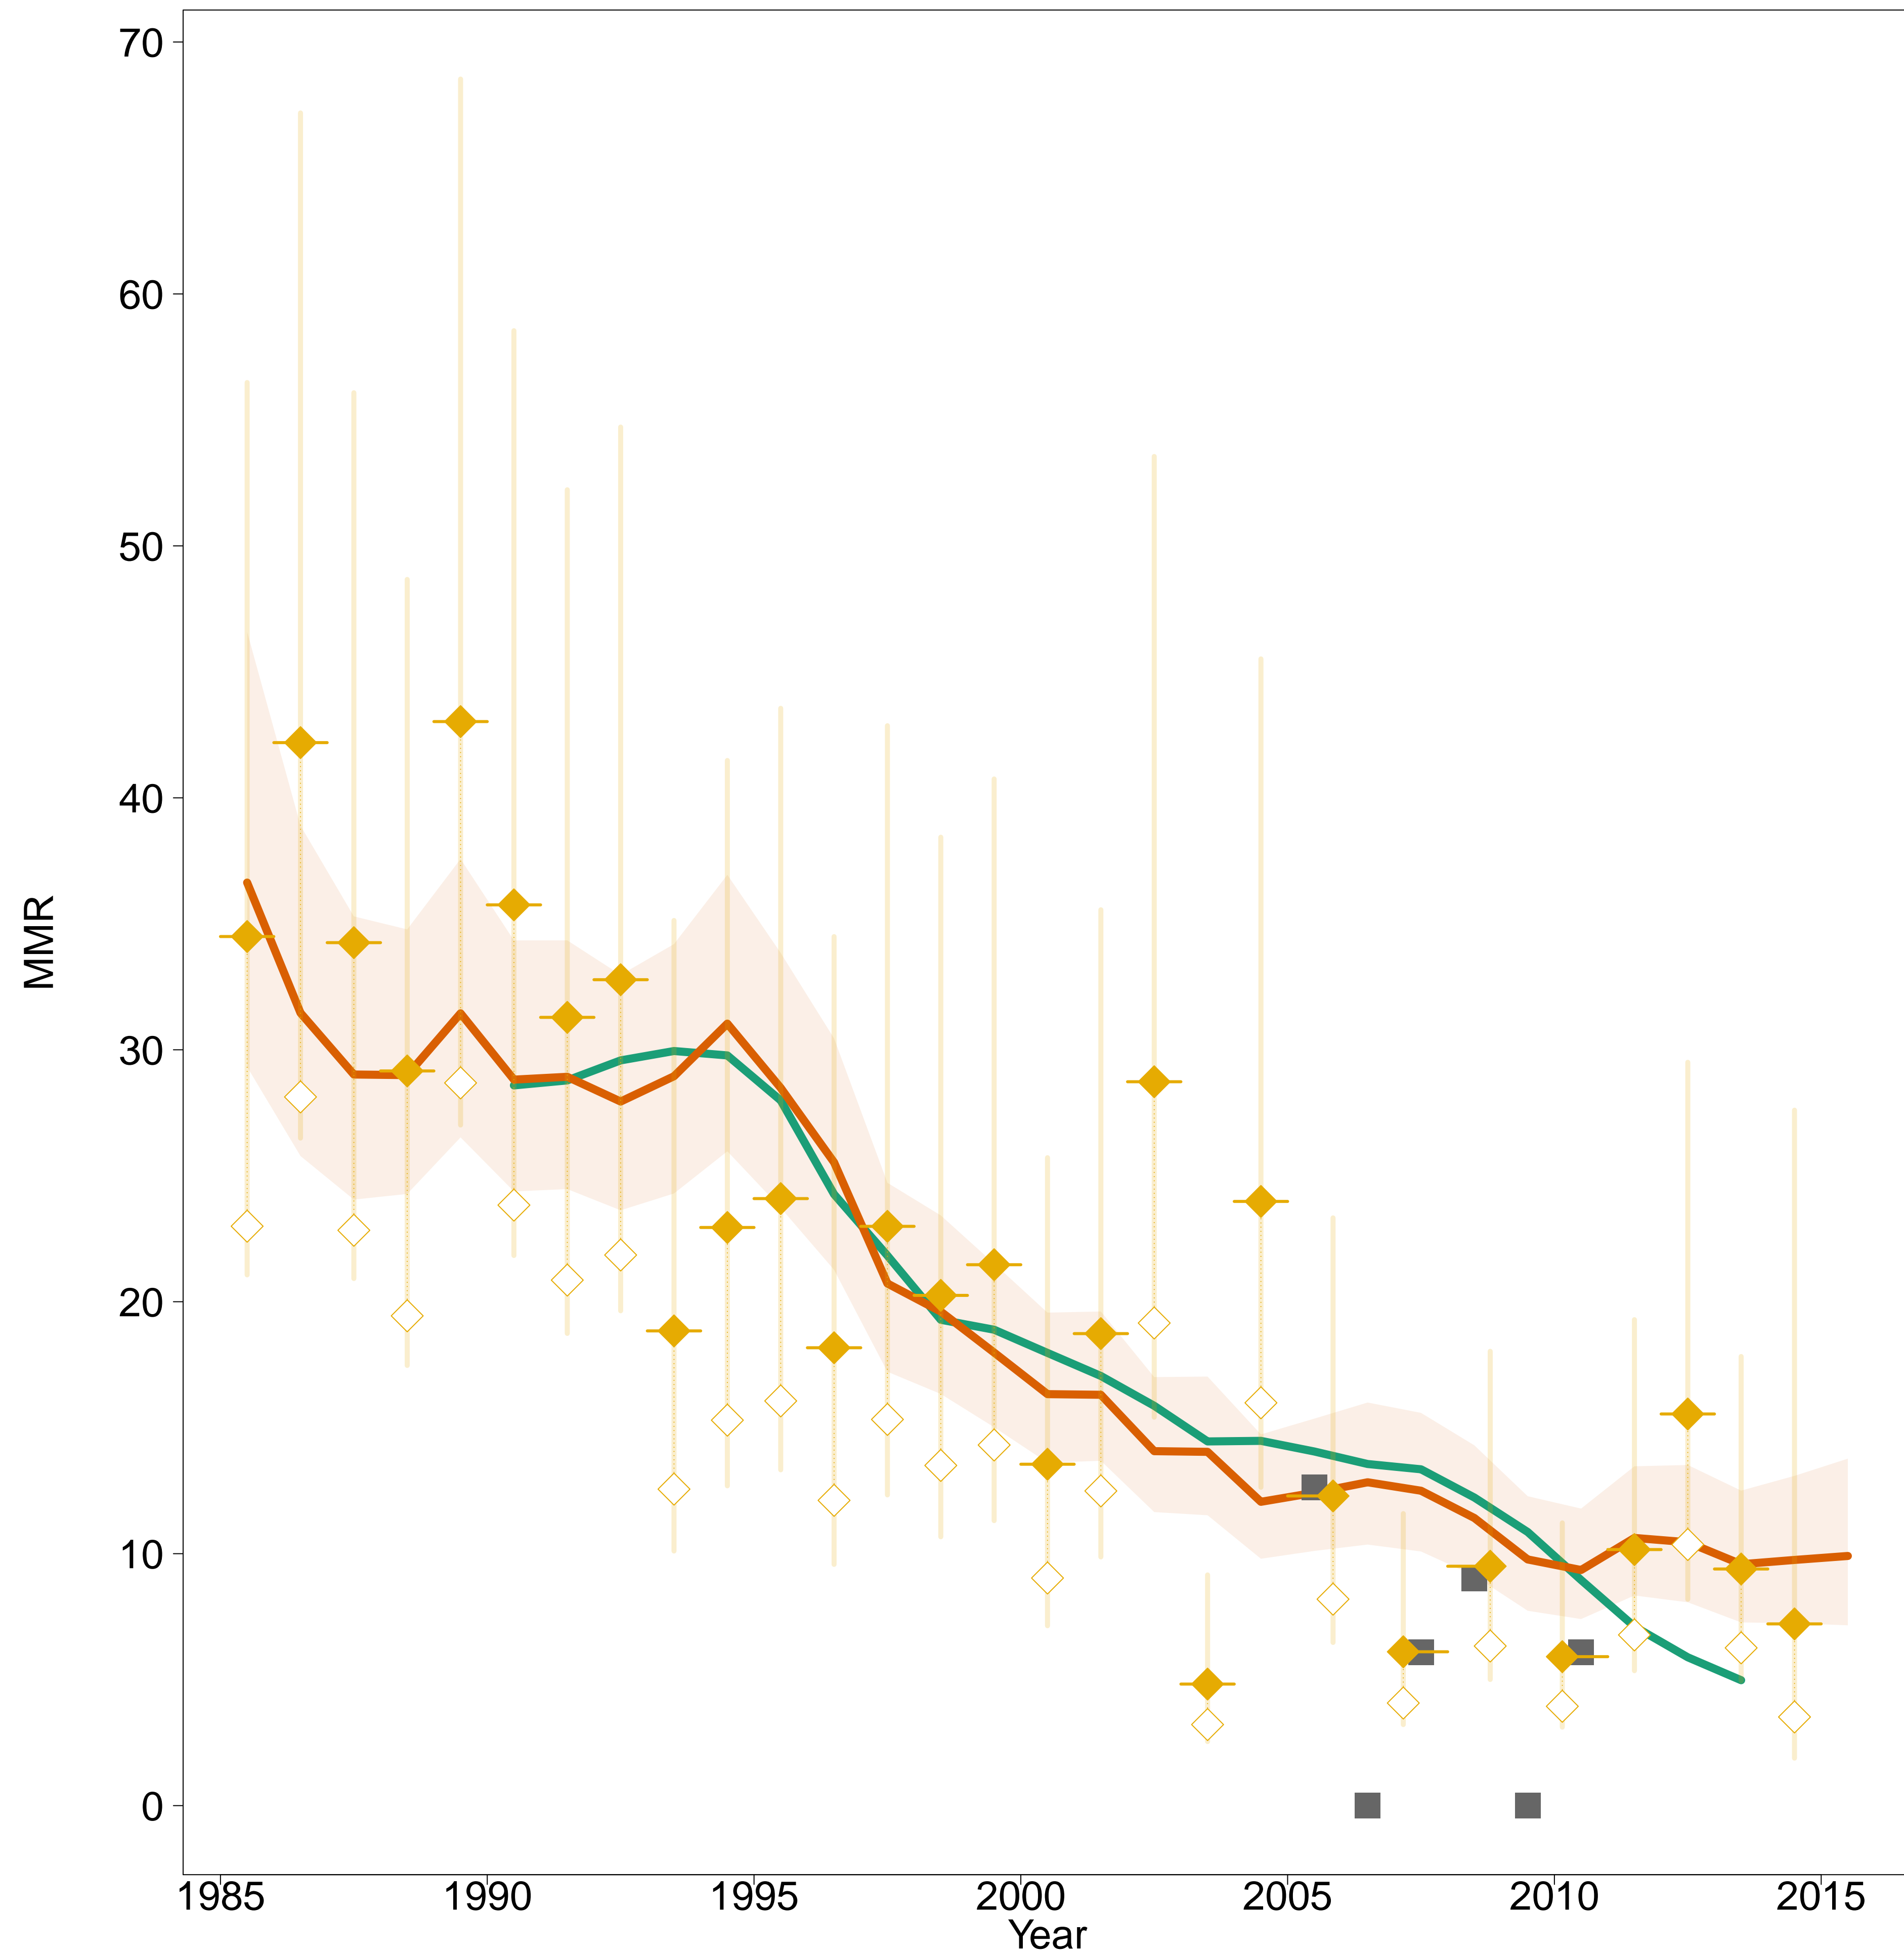

- Estimates –
- MMEIG 2015
- GBD 2013
- MMR Database 2015 –
- Observed Data
- Adjusted Data
- Data type –
- VR
- Reported VR before recalc.  
(related to 0 obs. mat. death)

Luxembourg [LUX]  
(Developed regions)

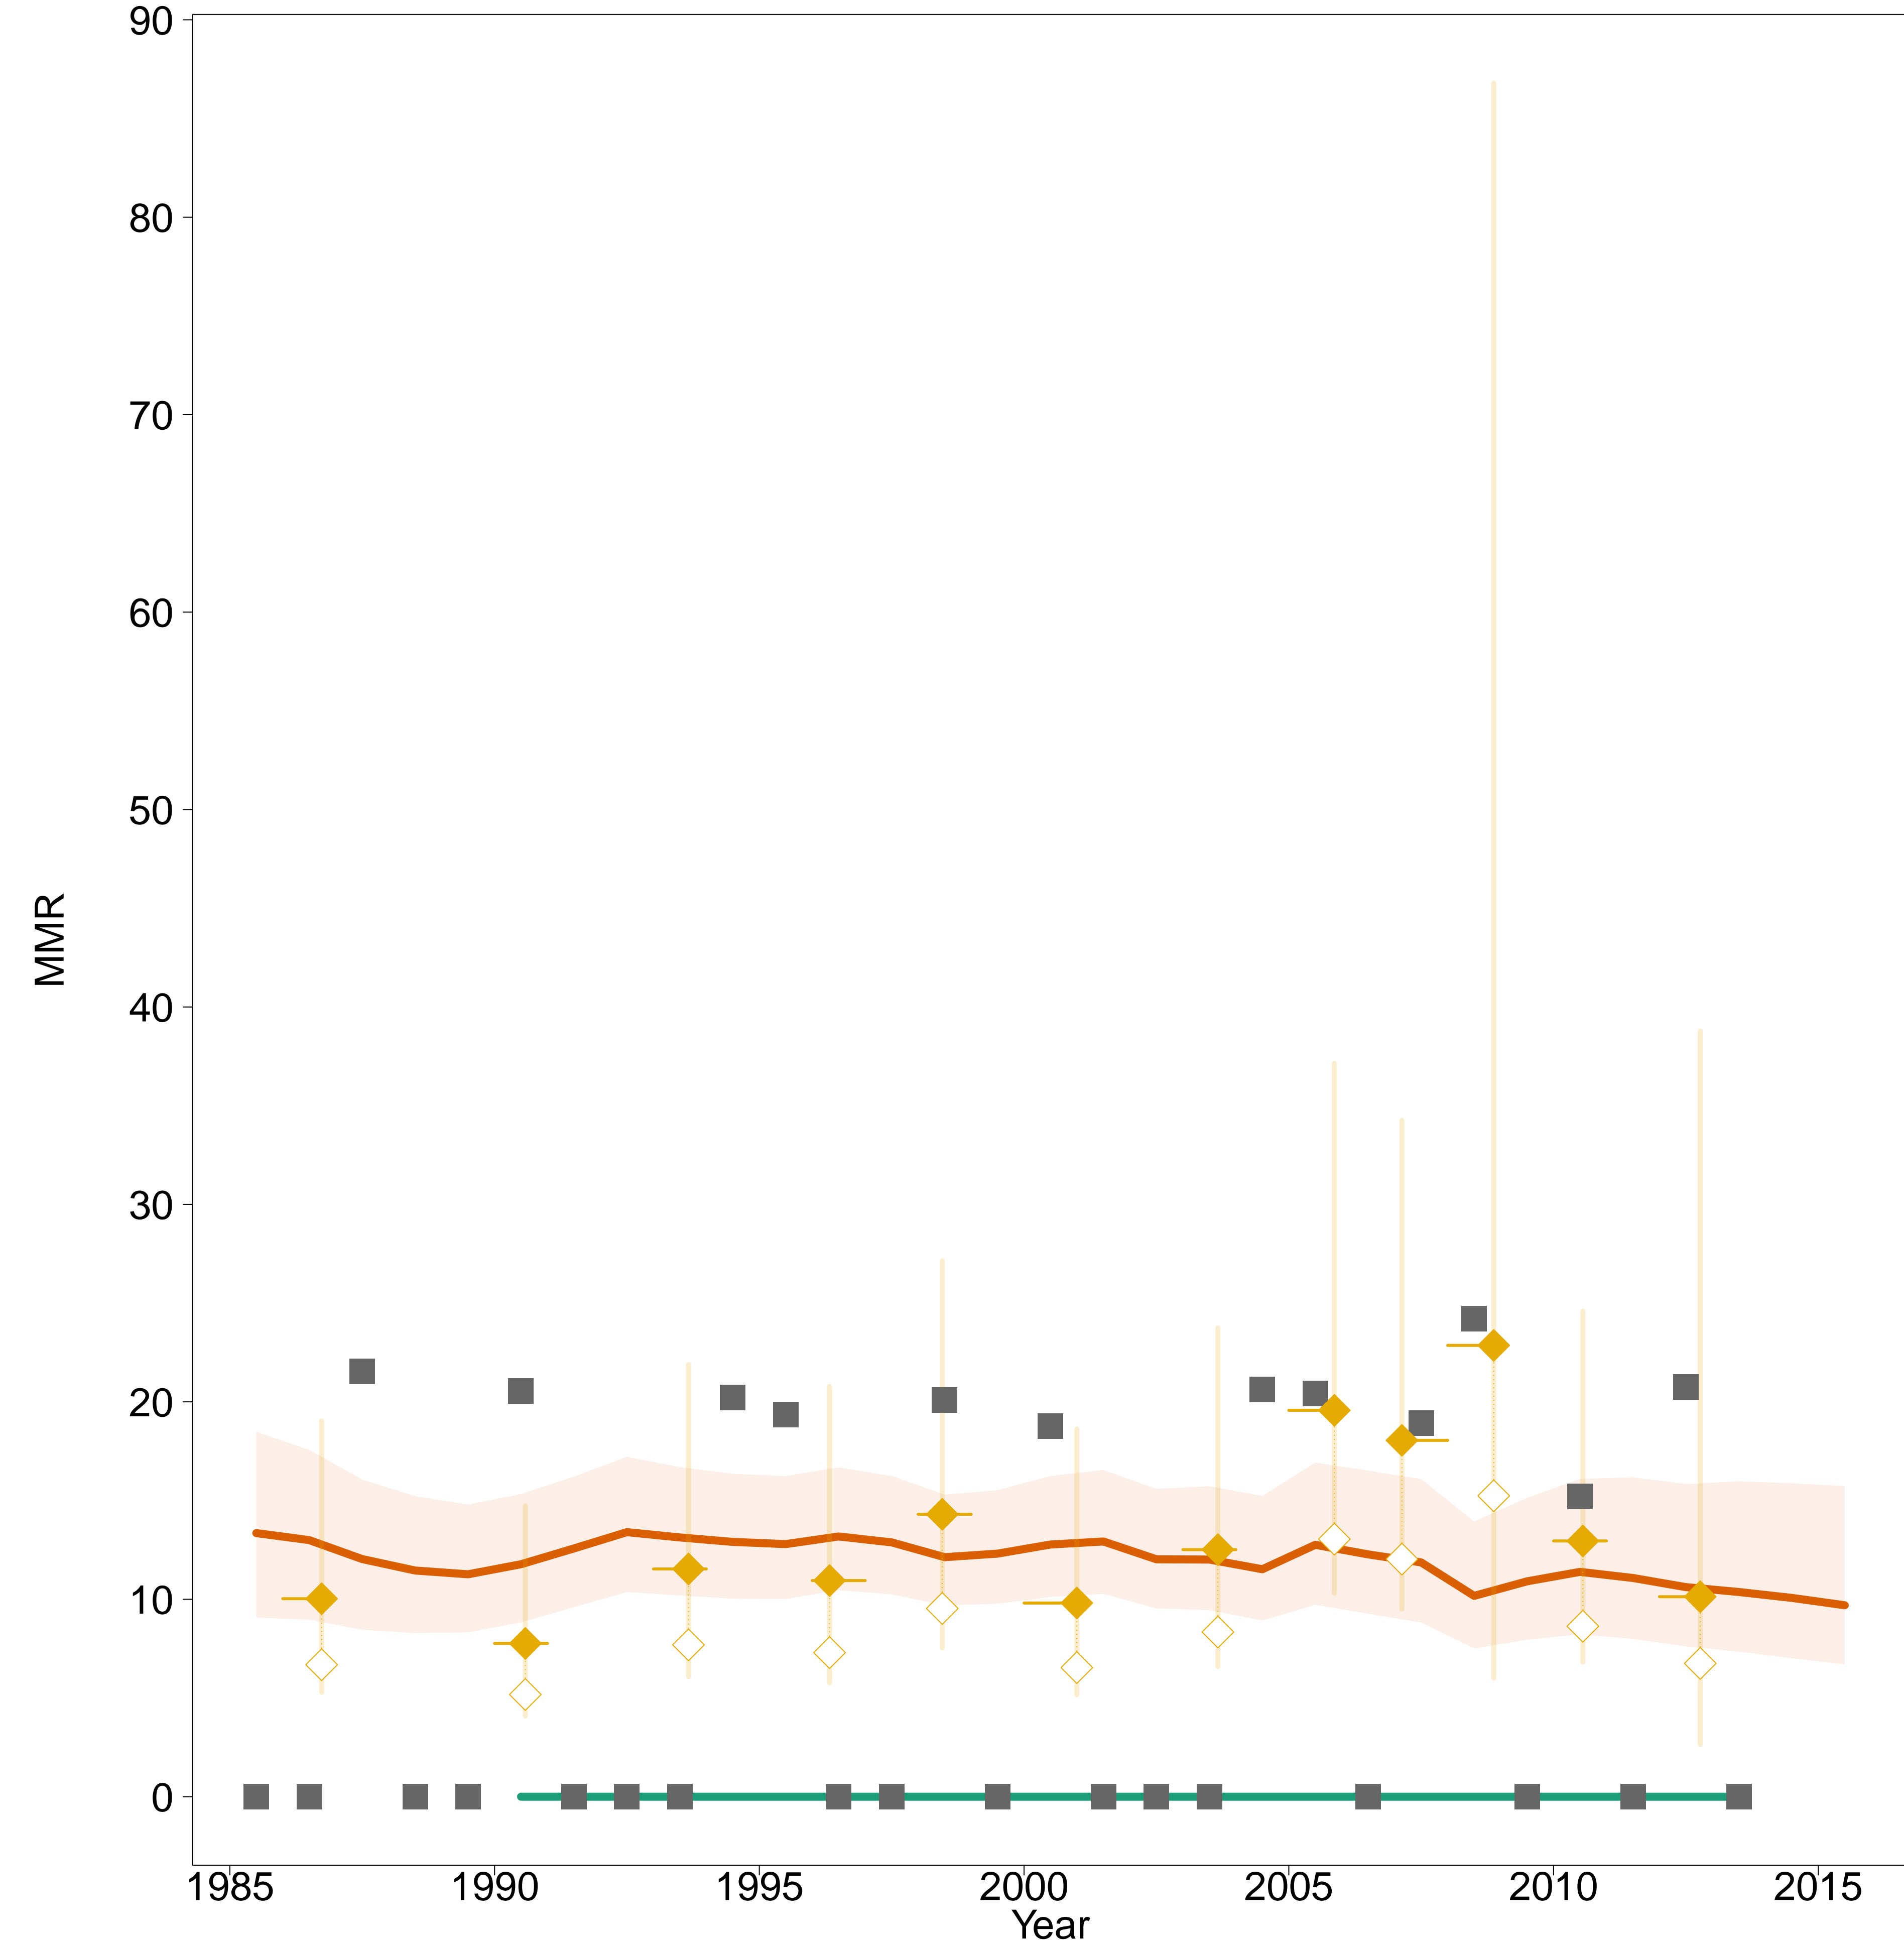

- Estimates –
- MMEIG 2015
- GBD 2013
- MMR Database 2015 –
- ◊ Observed Data
- ◆ Adjusted Data
- Data type –
- ◆ VR
- Reported VR before recalc.  
(related to 0 obs. mat. death)

Madagascar [MDG]  
(Eastern Africa)

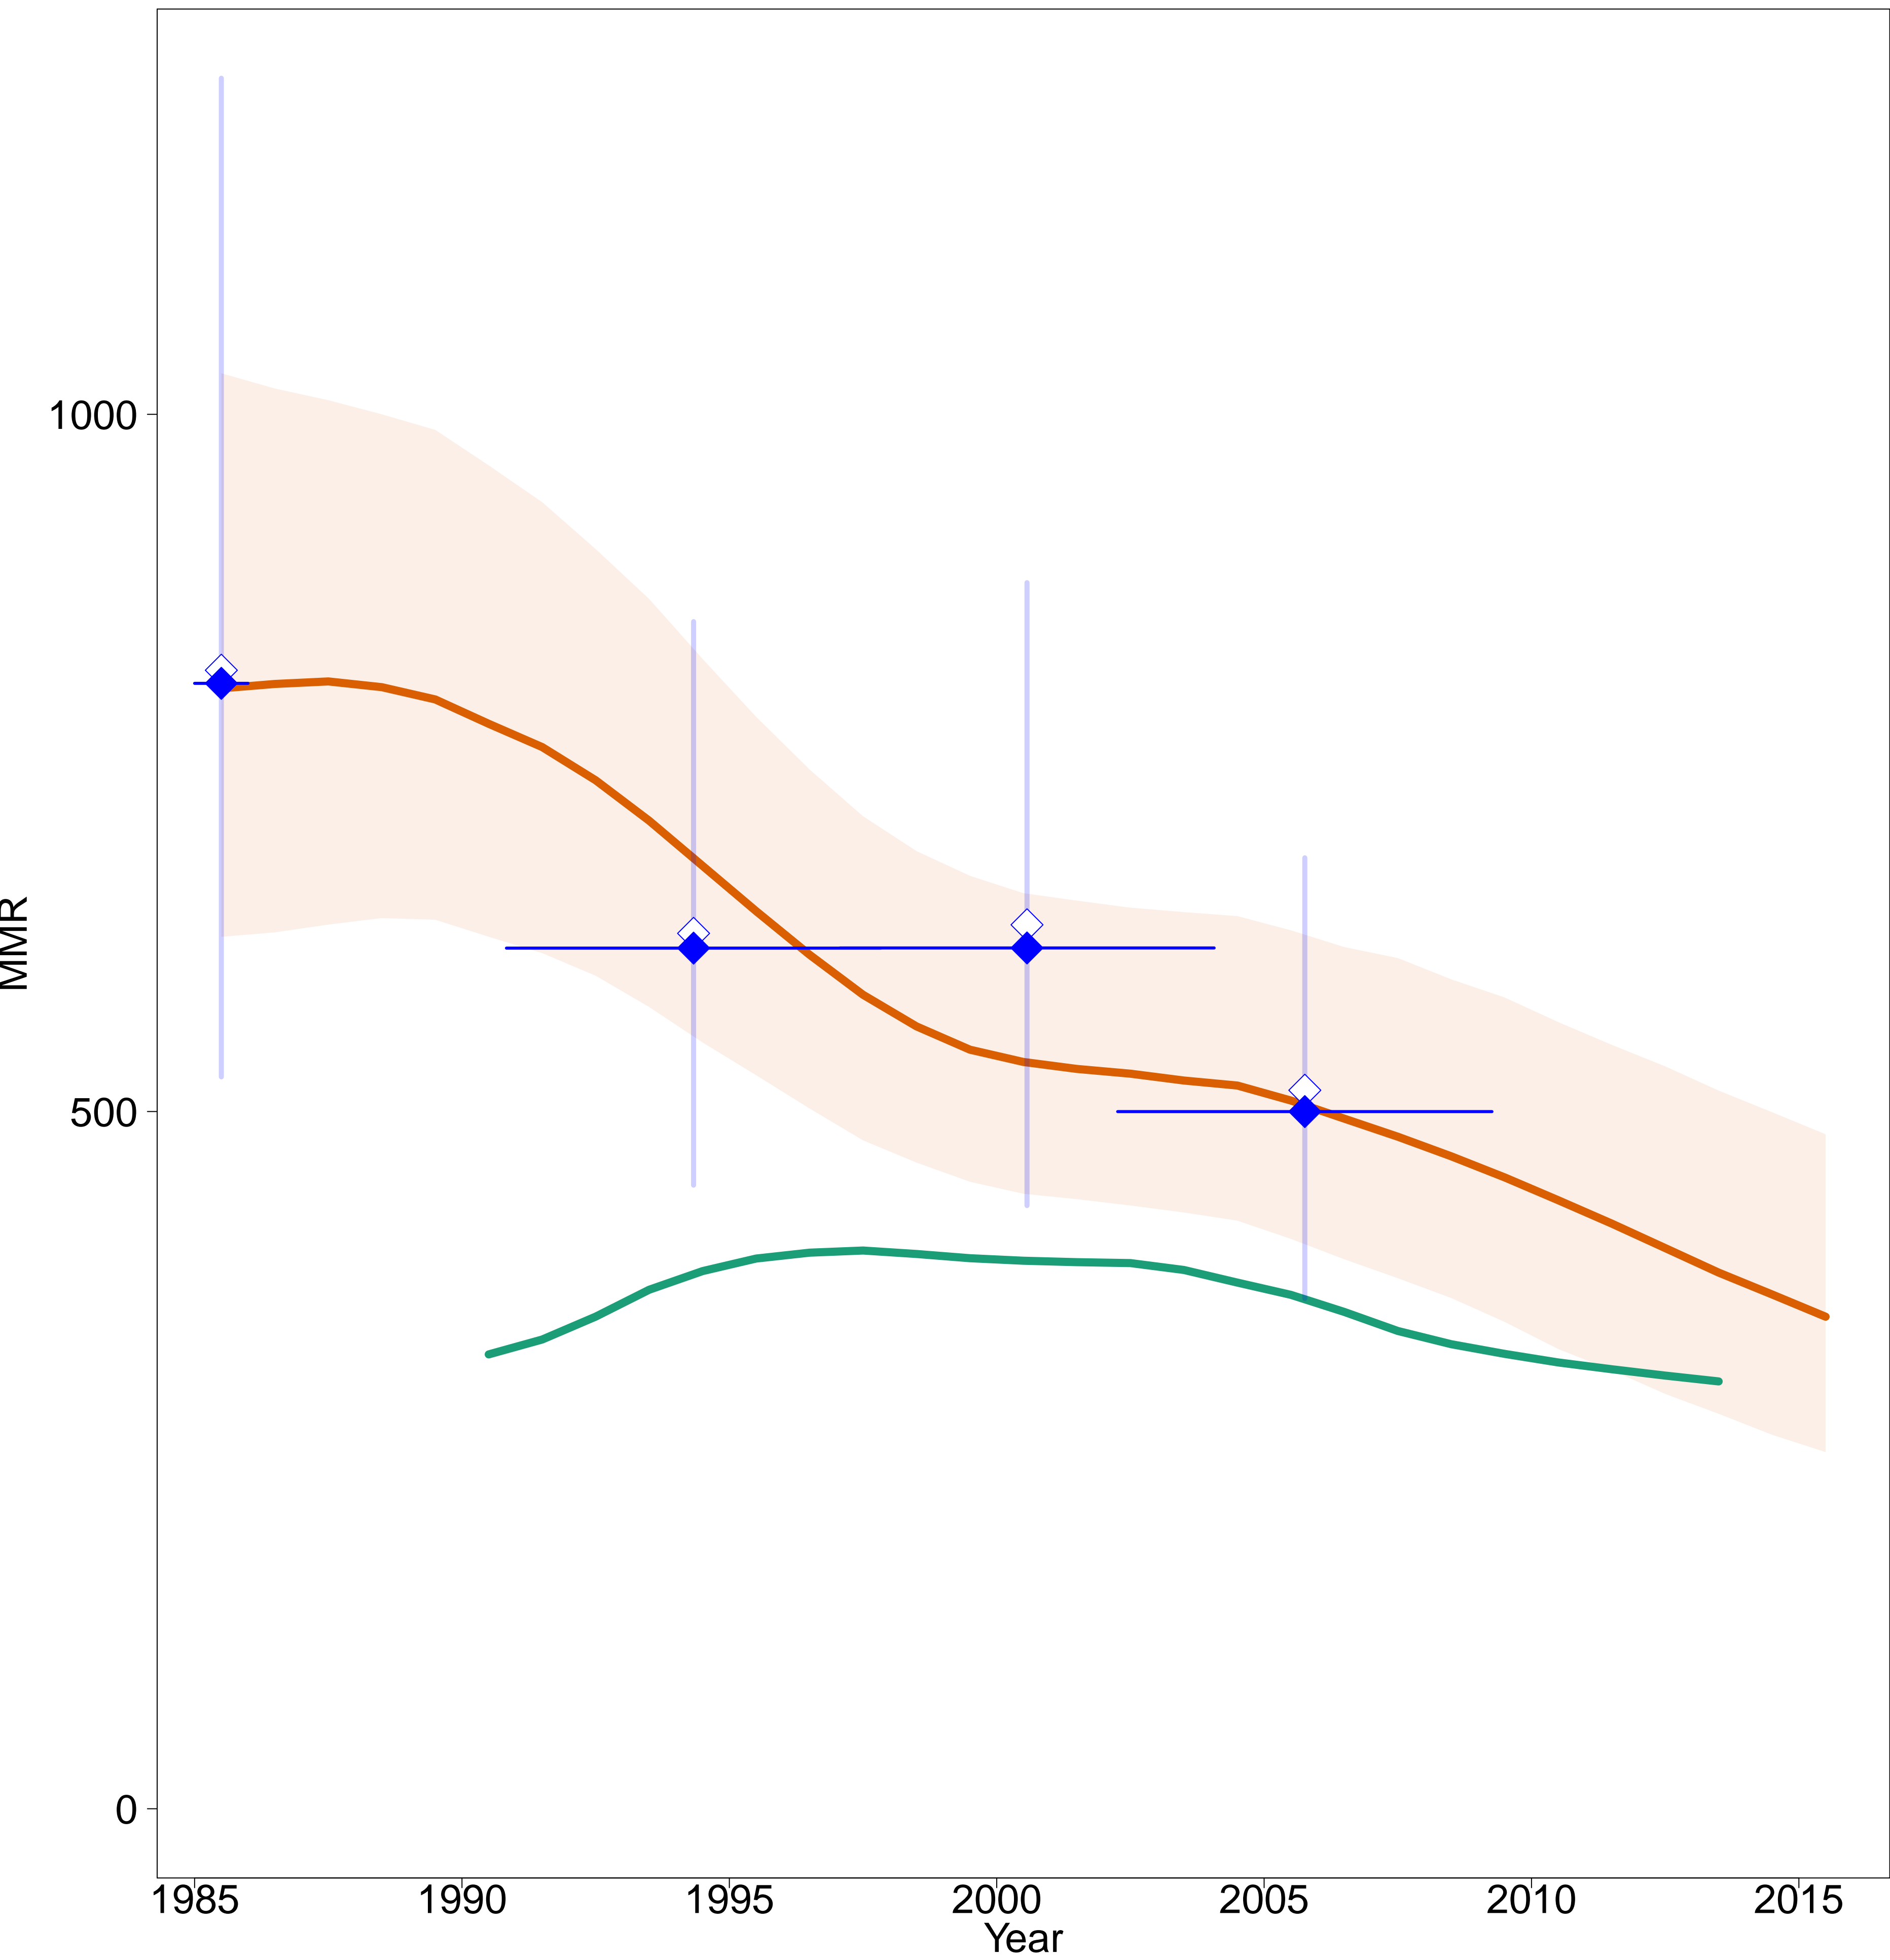

- Estimates -
- MMEIG 2015
- GBD 2013
- MMR Database 2015 -
- Observed Data
- Adjusted Data
- Data type -
- DHS



Malawi [MWI]  
(Eastern Africa)

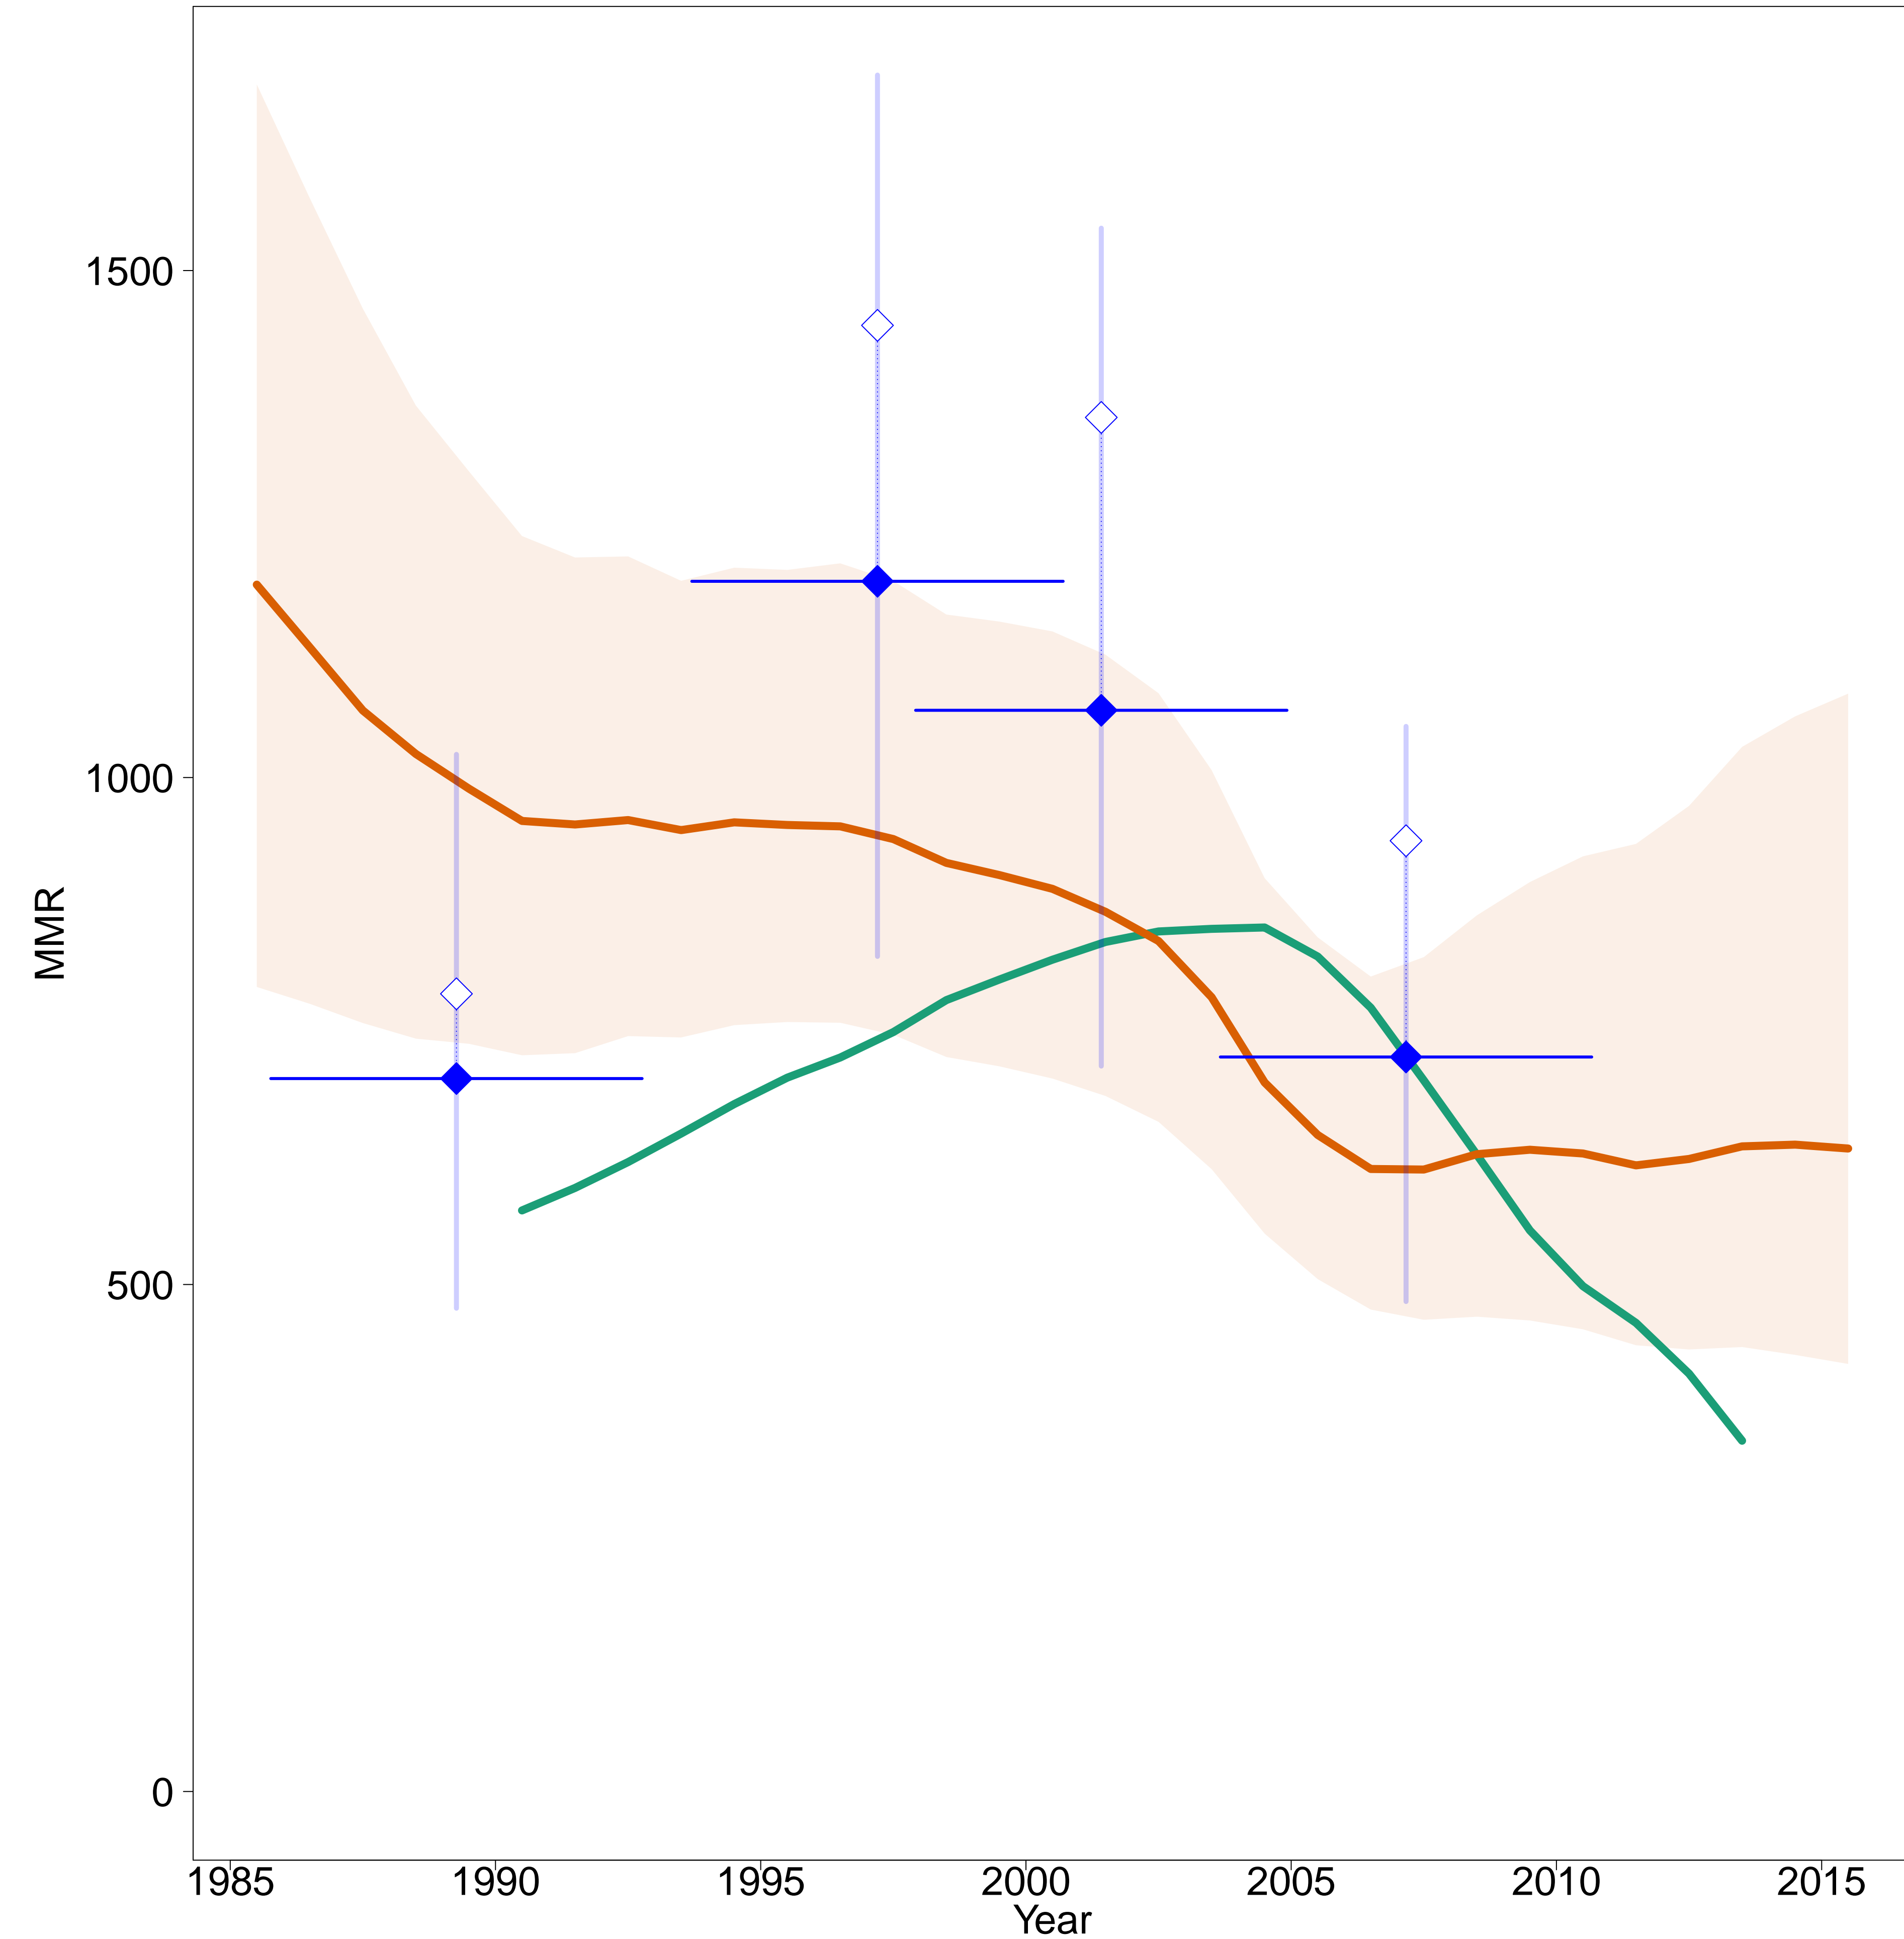

- Estimates -
- MMEIG 2015
- GBD 2013
- MMR Database 2015 -
- Observed Data
- Adjusted Data
- Data type -
- DHS

Malaysia [MYS]  
(South-Eastern Asia / Oceania)

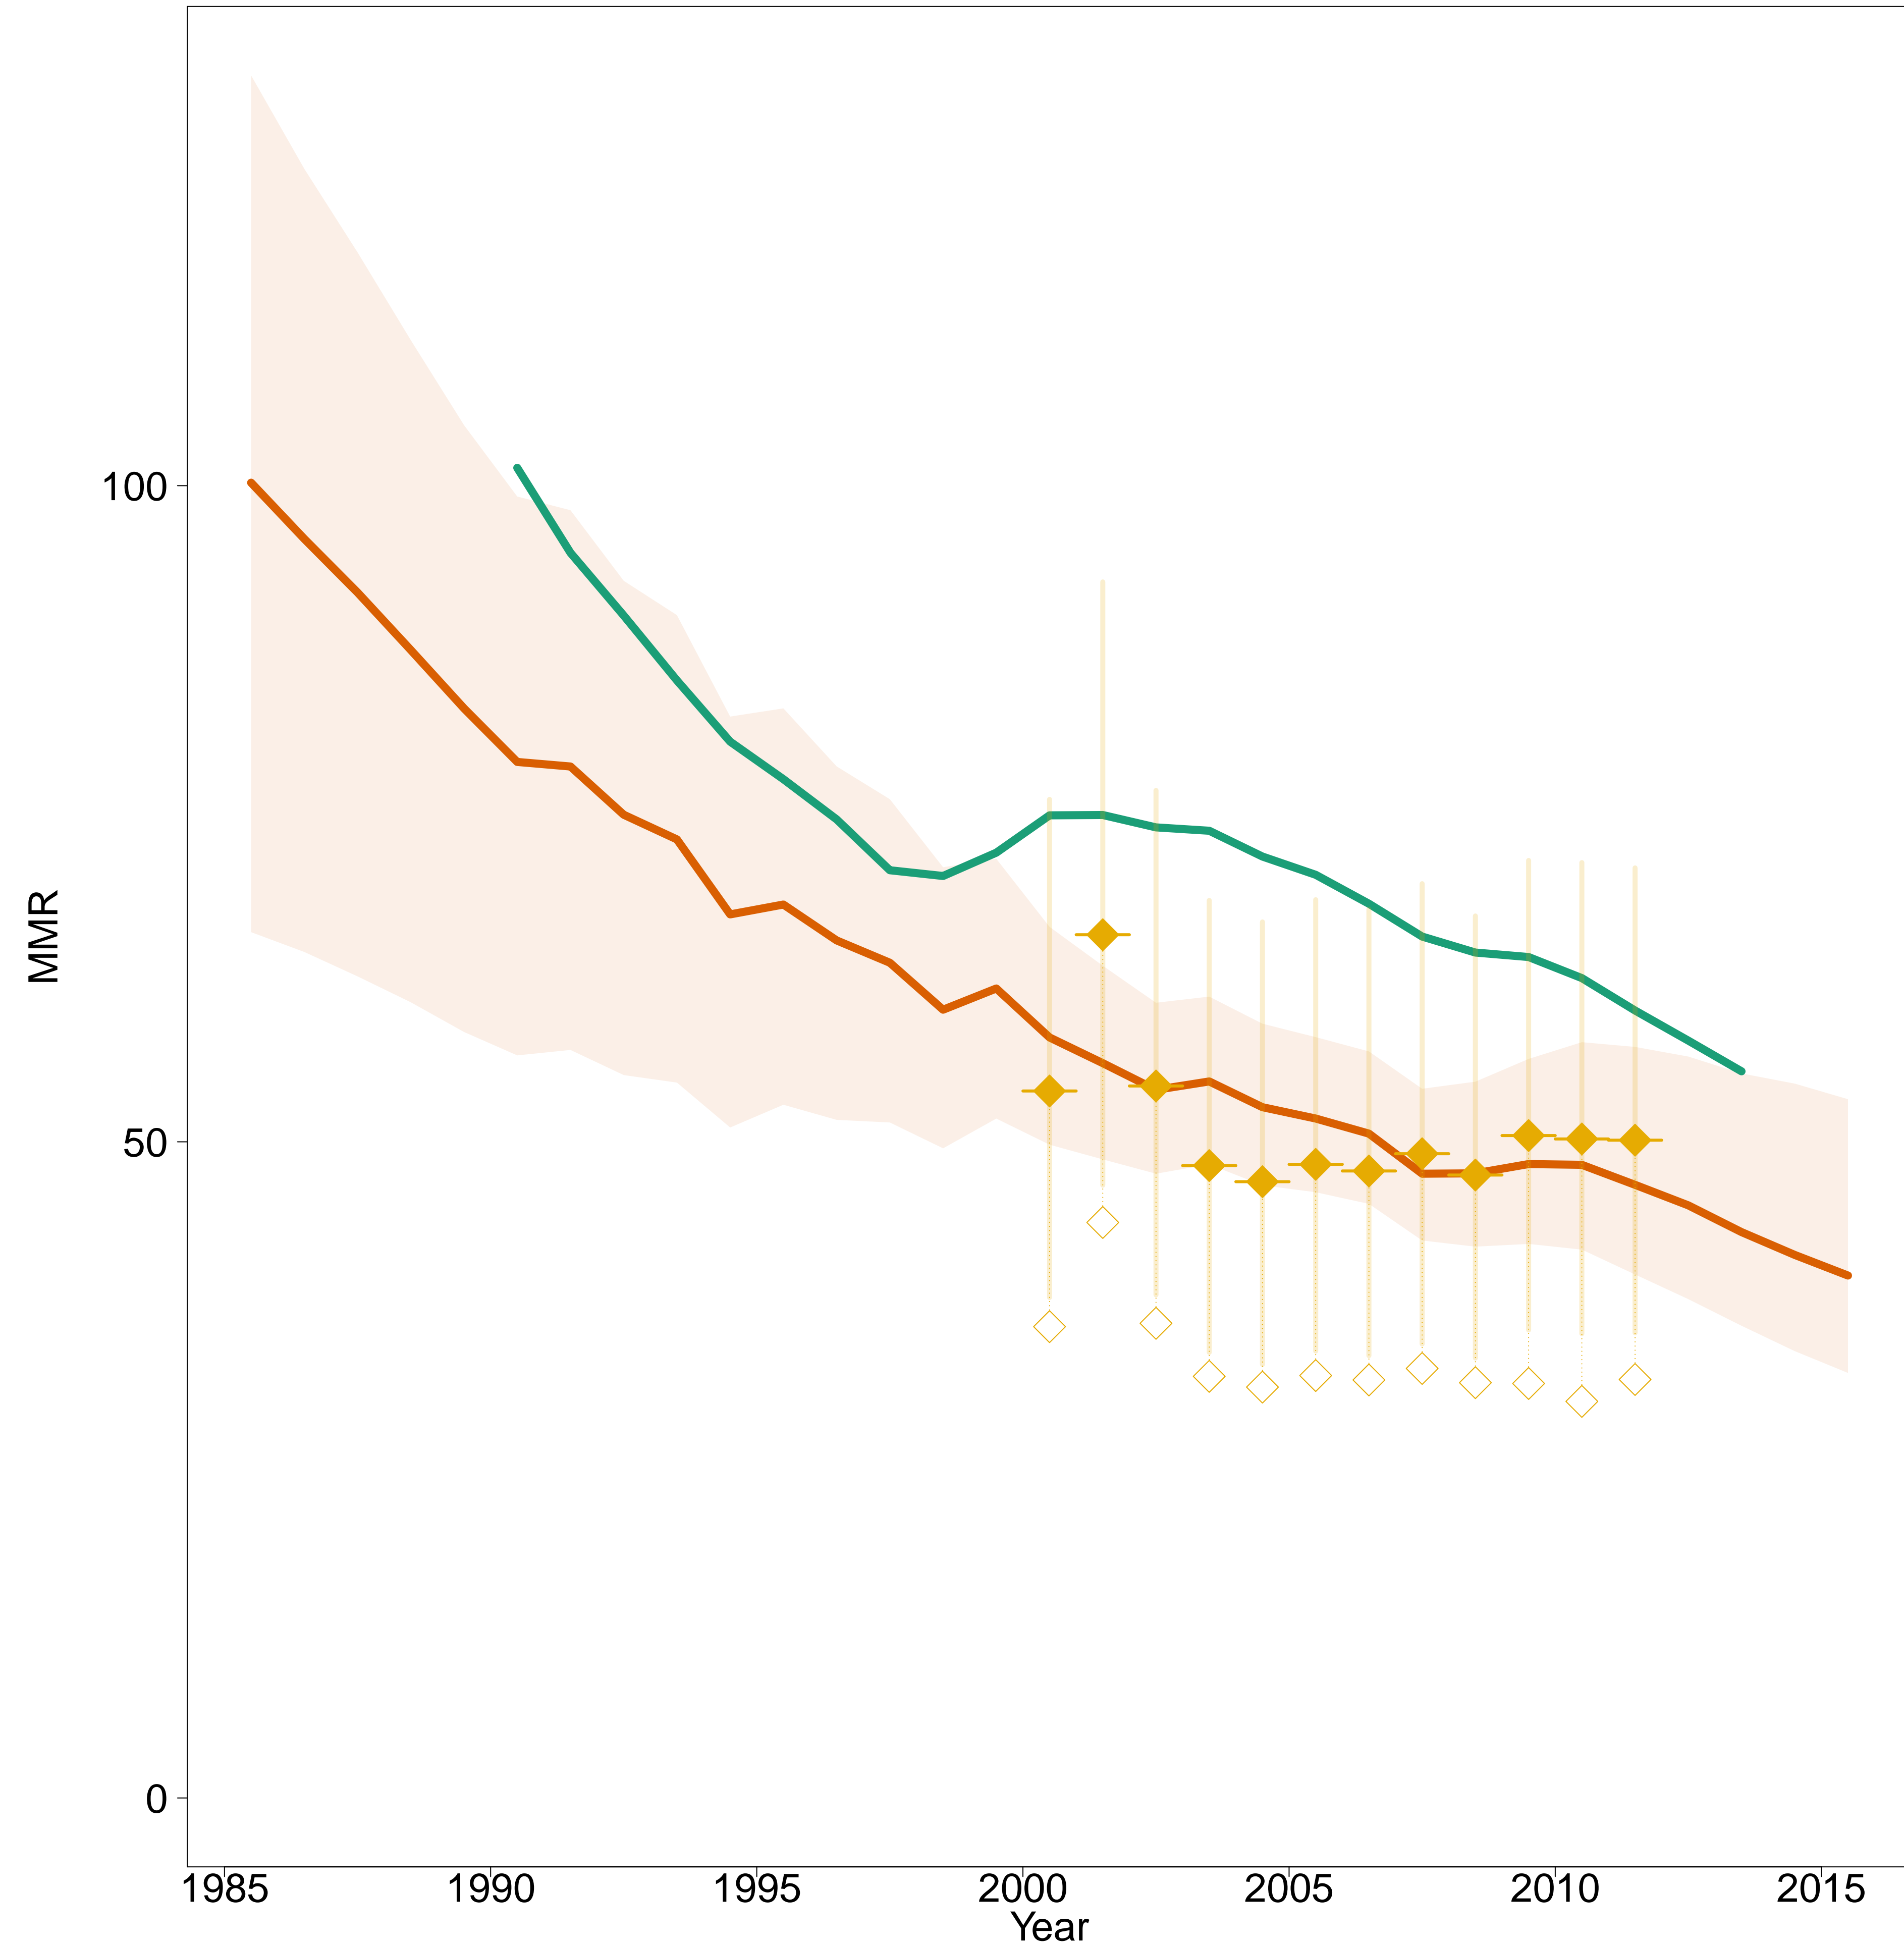

- Estimates -
- MMEIG 2015
- GBD 2013
- MMR Database 2015 -
- Observed Data
- Adjusted Data
- Data type -
- VR

Maldives [MDV]  
(Southern Asia)

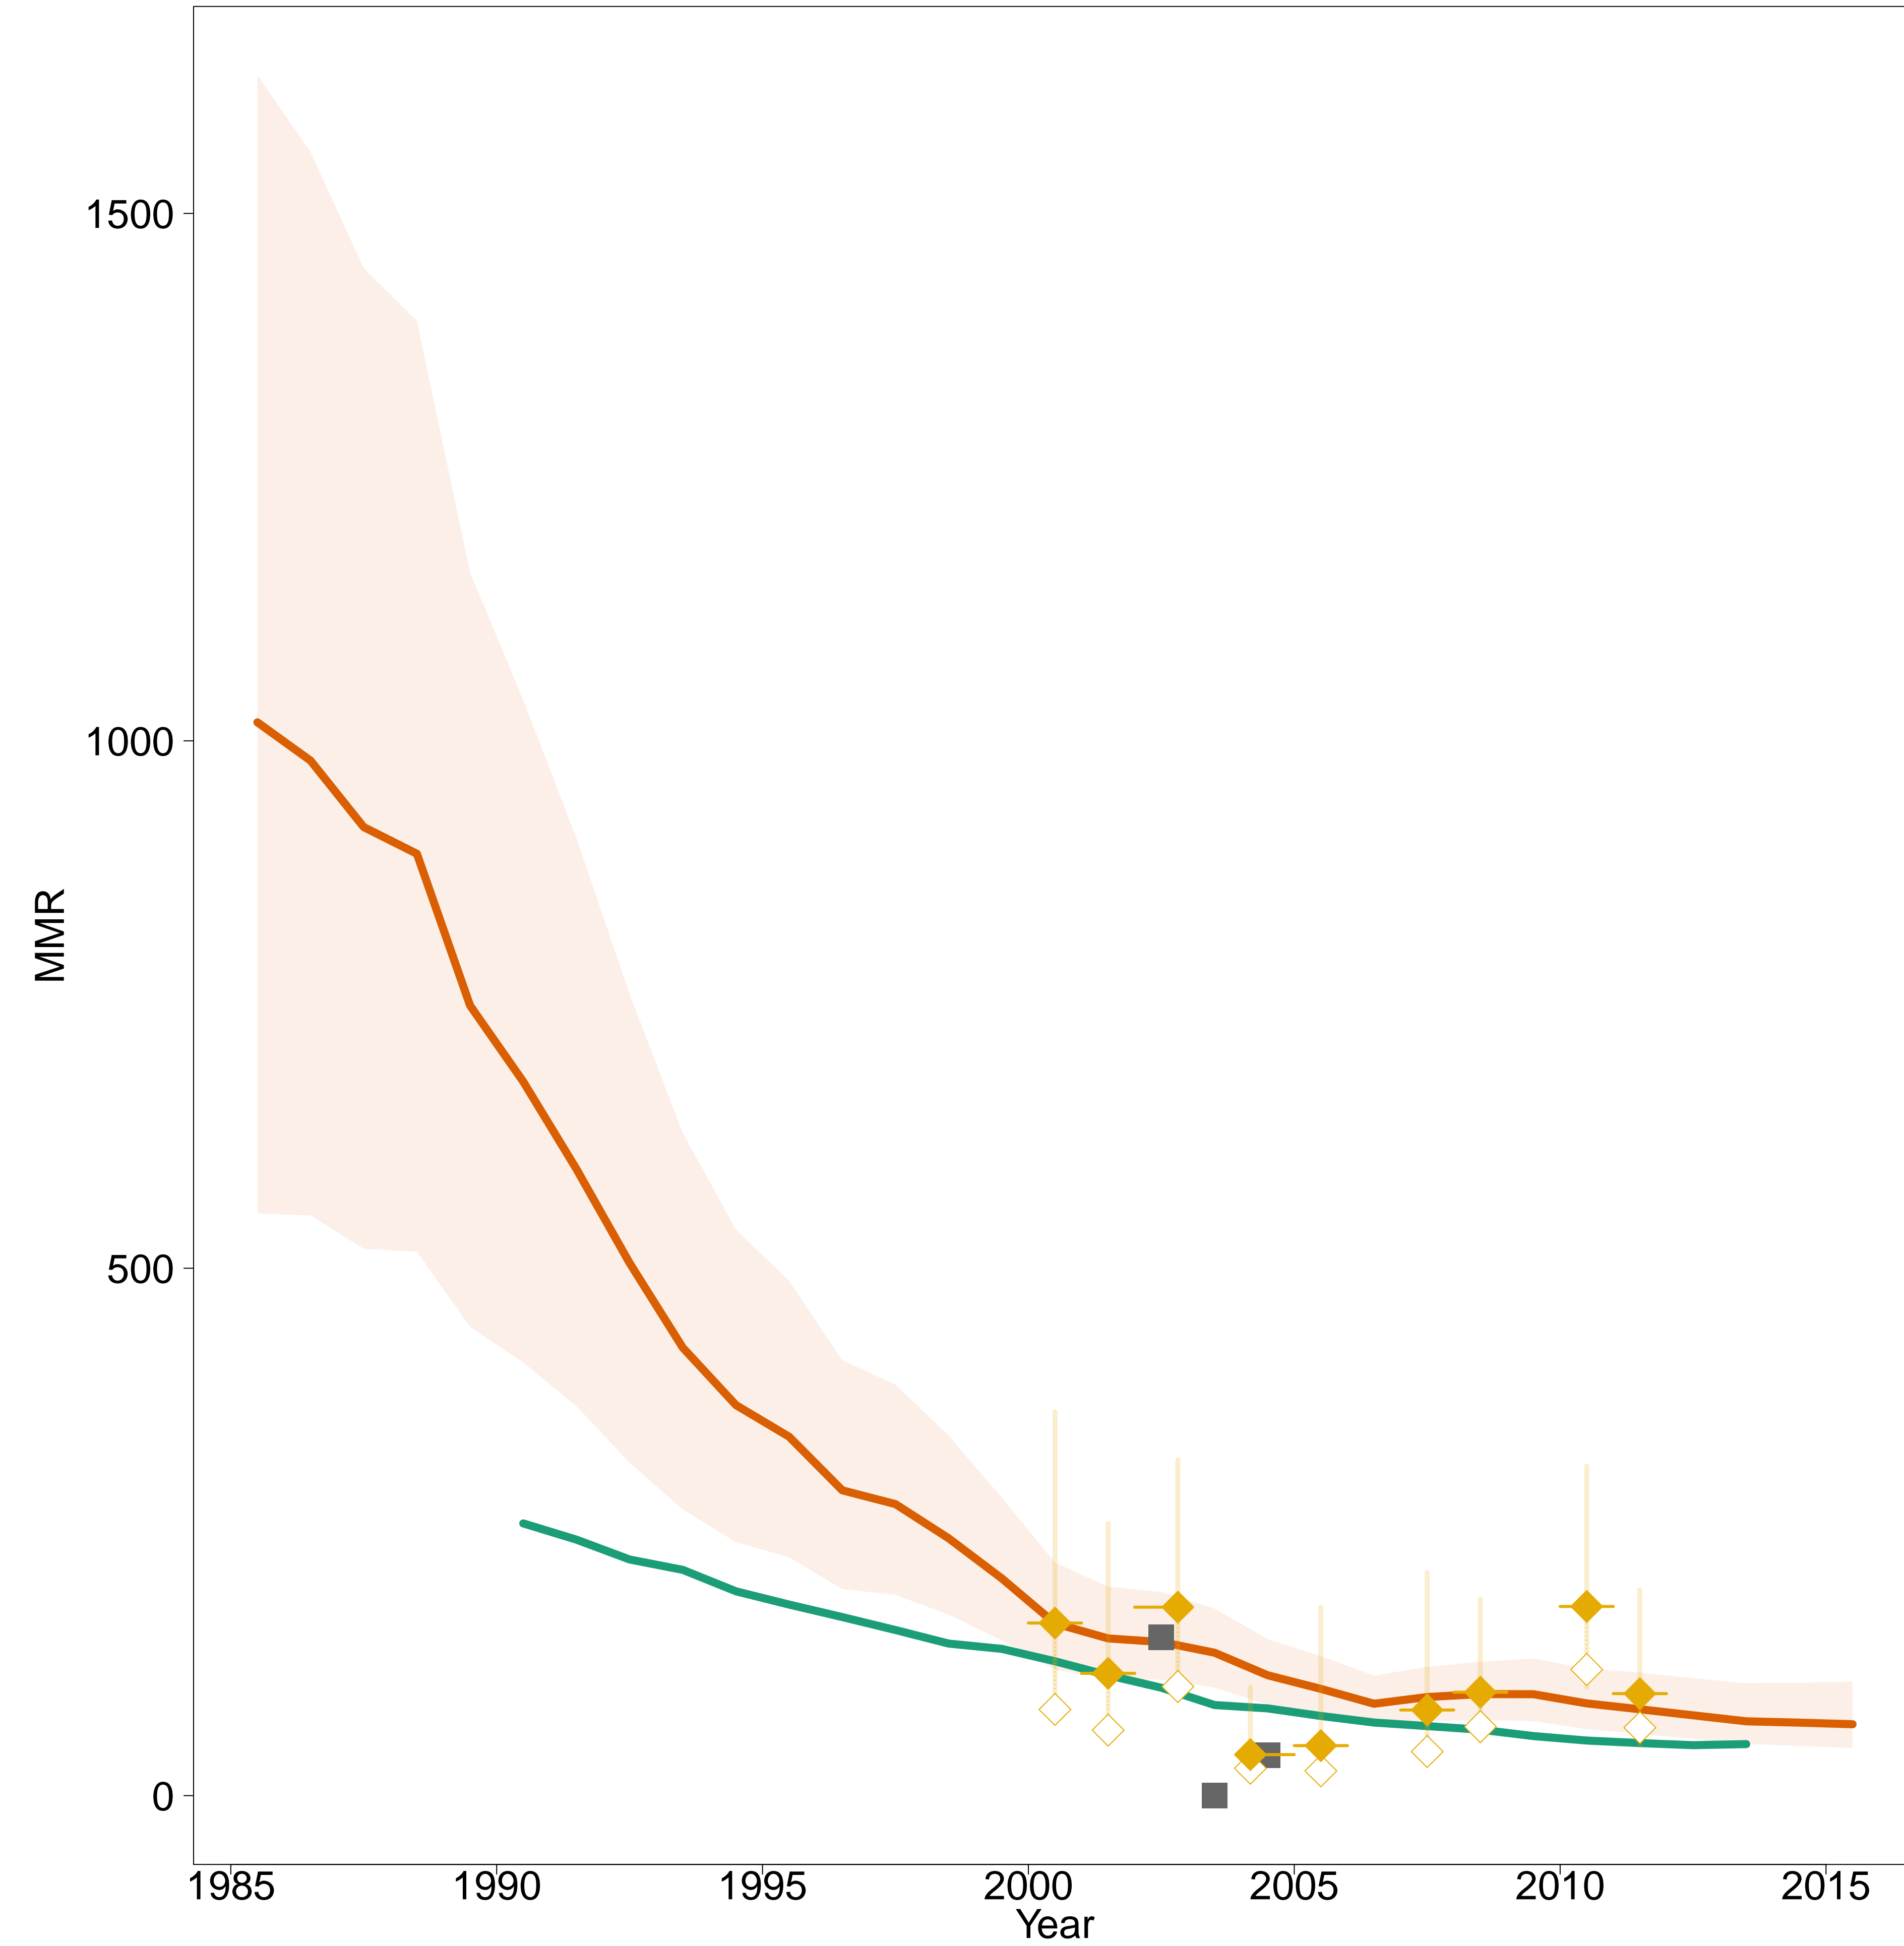

- Estimates -
- MMEIG 2015
- GBD 2013
- MMR Database 2015 -
- Observed Data
- Adjusted Data
- Data type -
- VR
- Reported VR before recalc.  
(related to 0 obs. mat. death)

Mali [MLI]  
(Western Africa)

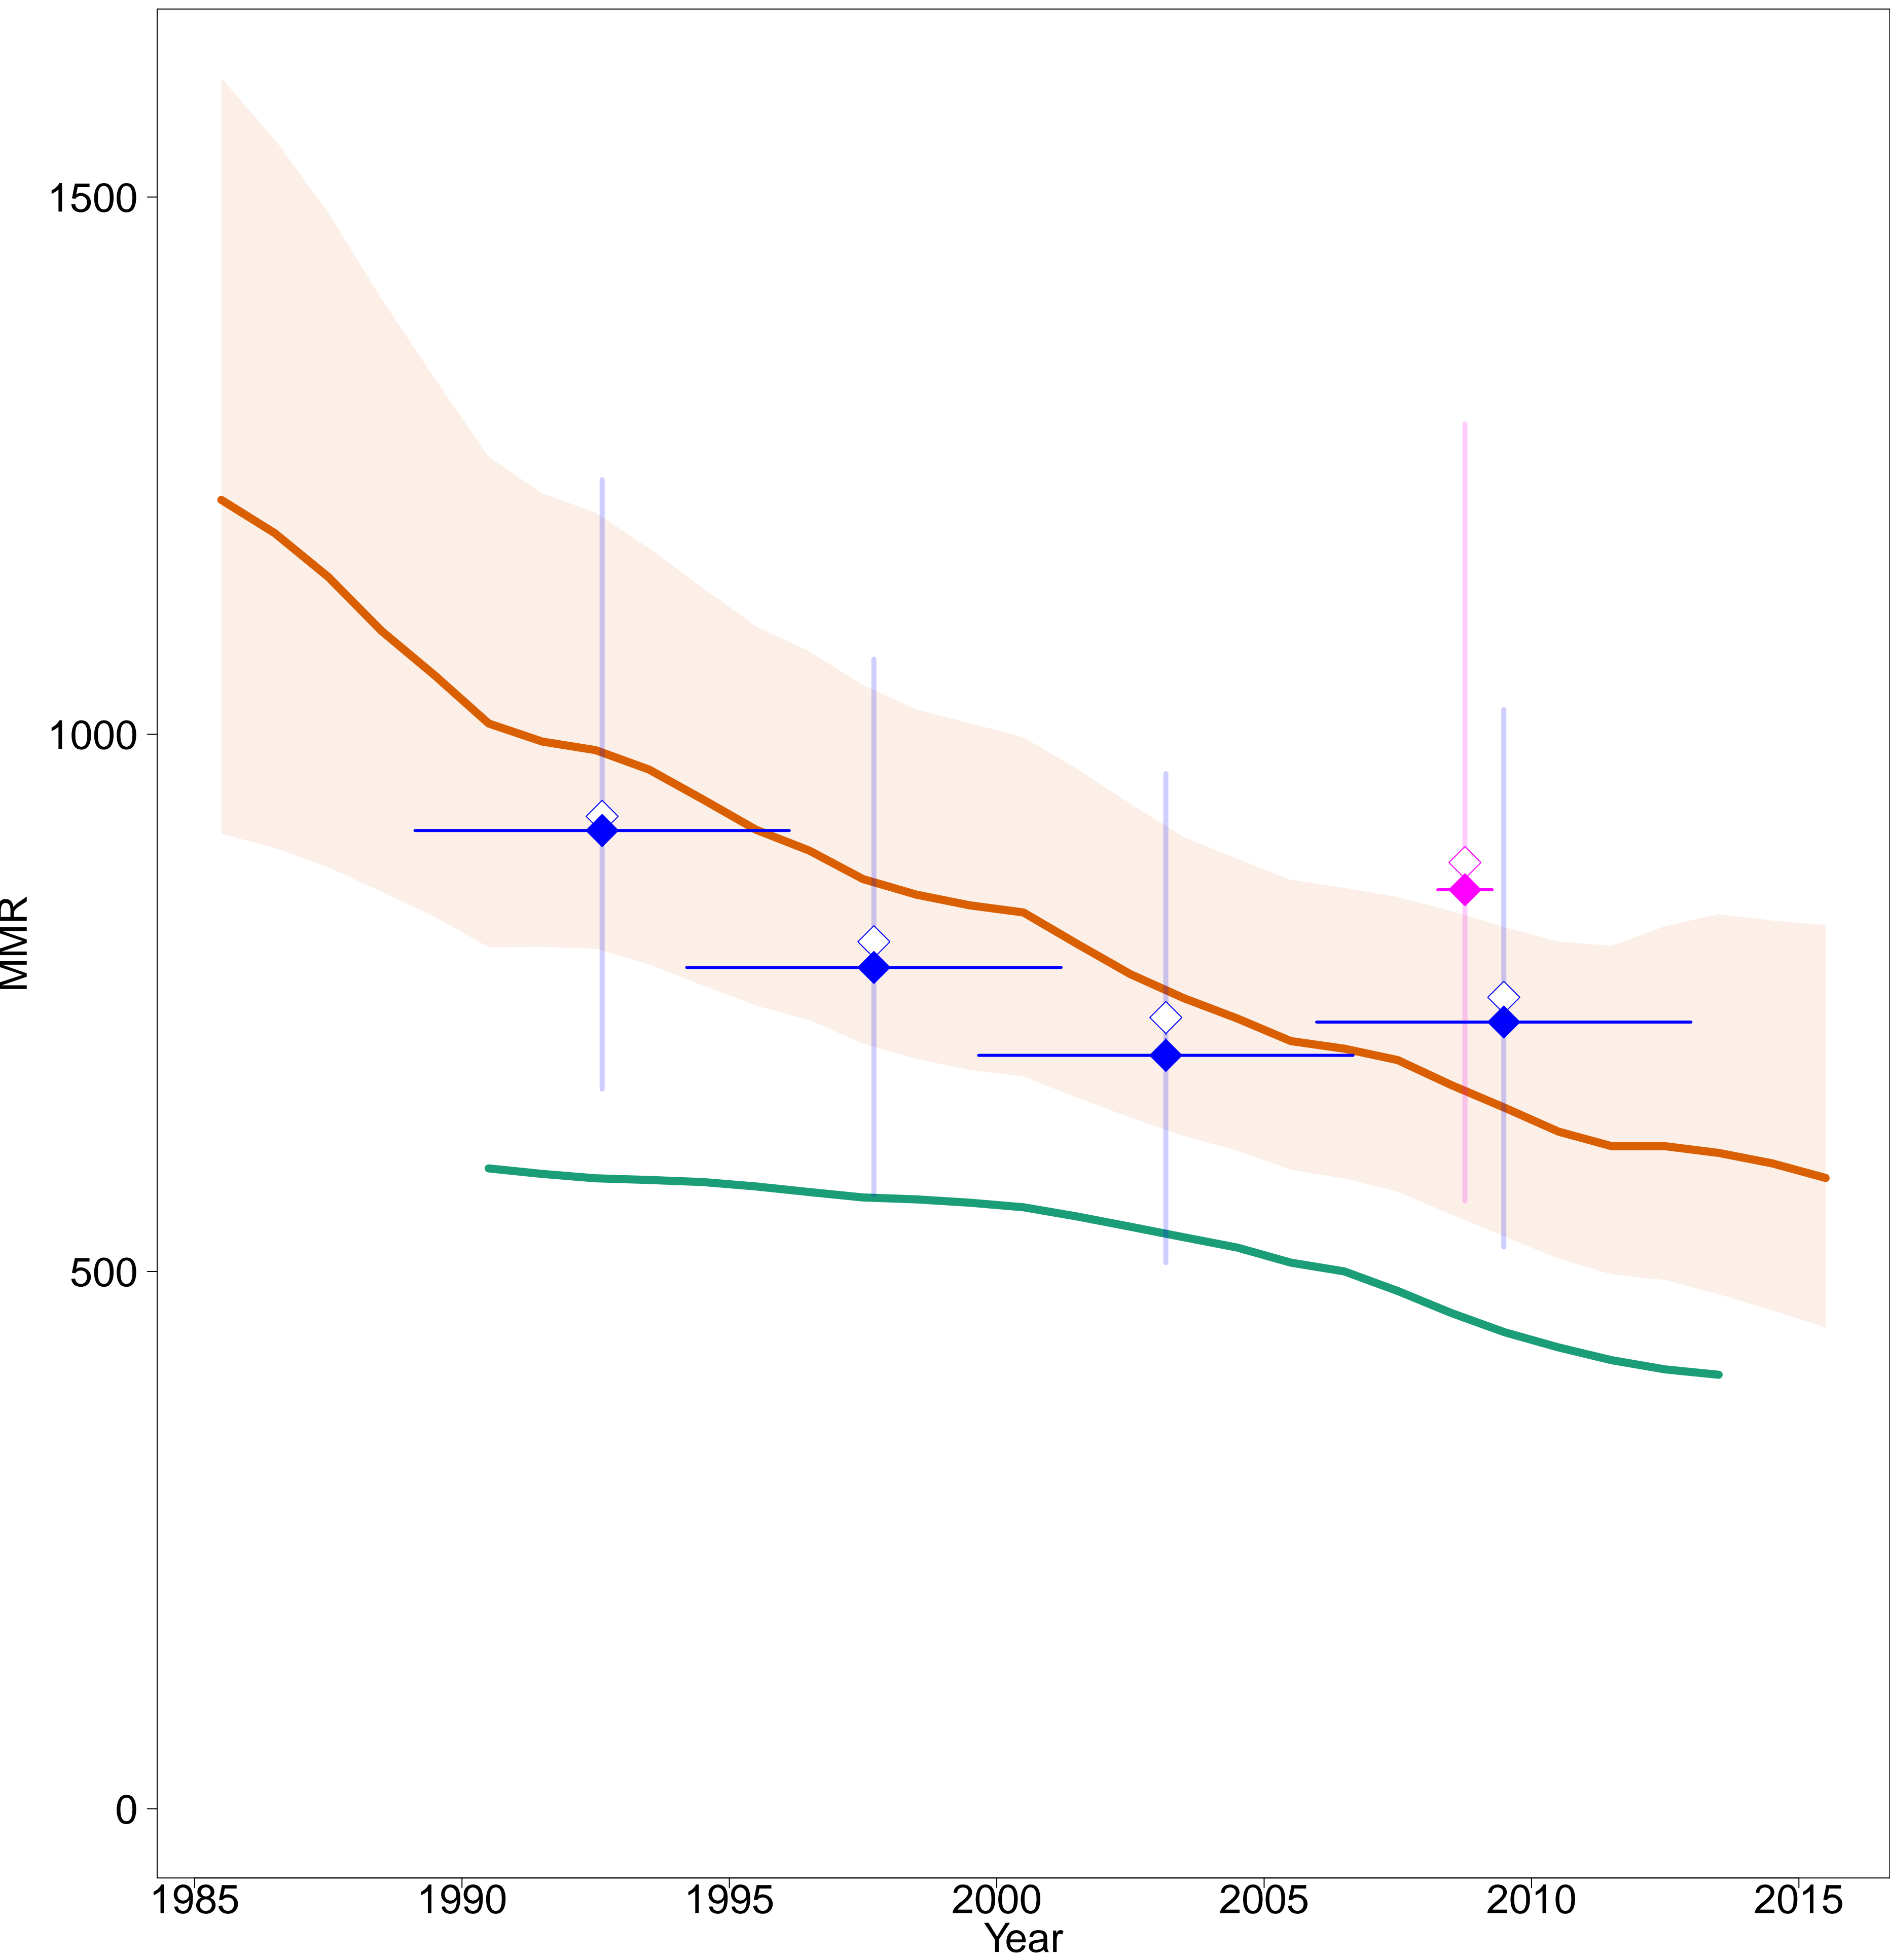

- Estimates -
- MMEIG 2015
- GBD 2013
- MMR Database 2015 -
- Observed Data
- Adjusted Data
- Data type -
- DHS
- Census

Malta [MLT]  
(Developed regions)

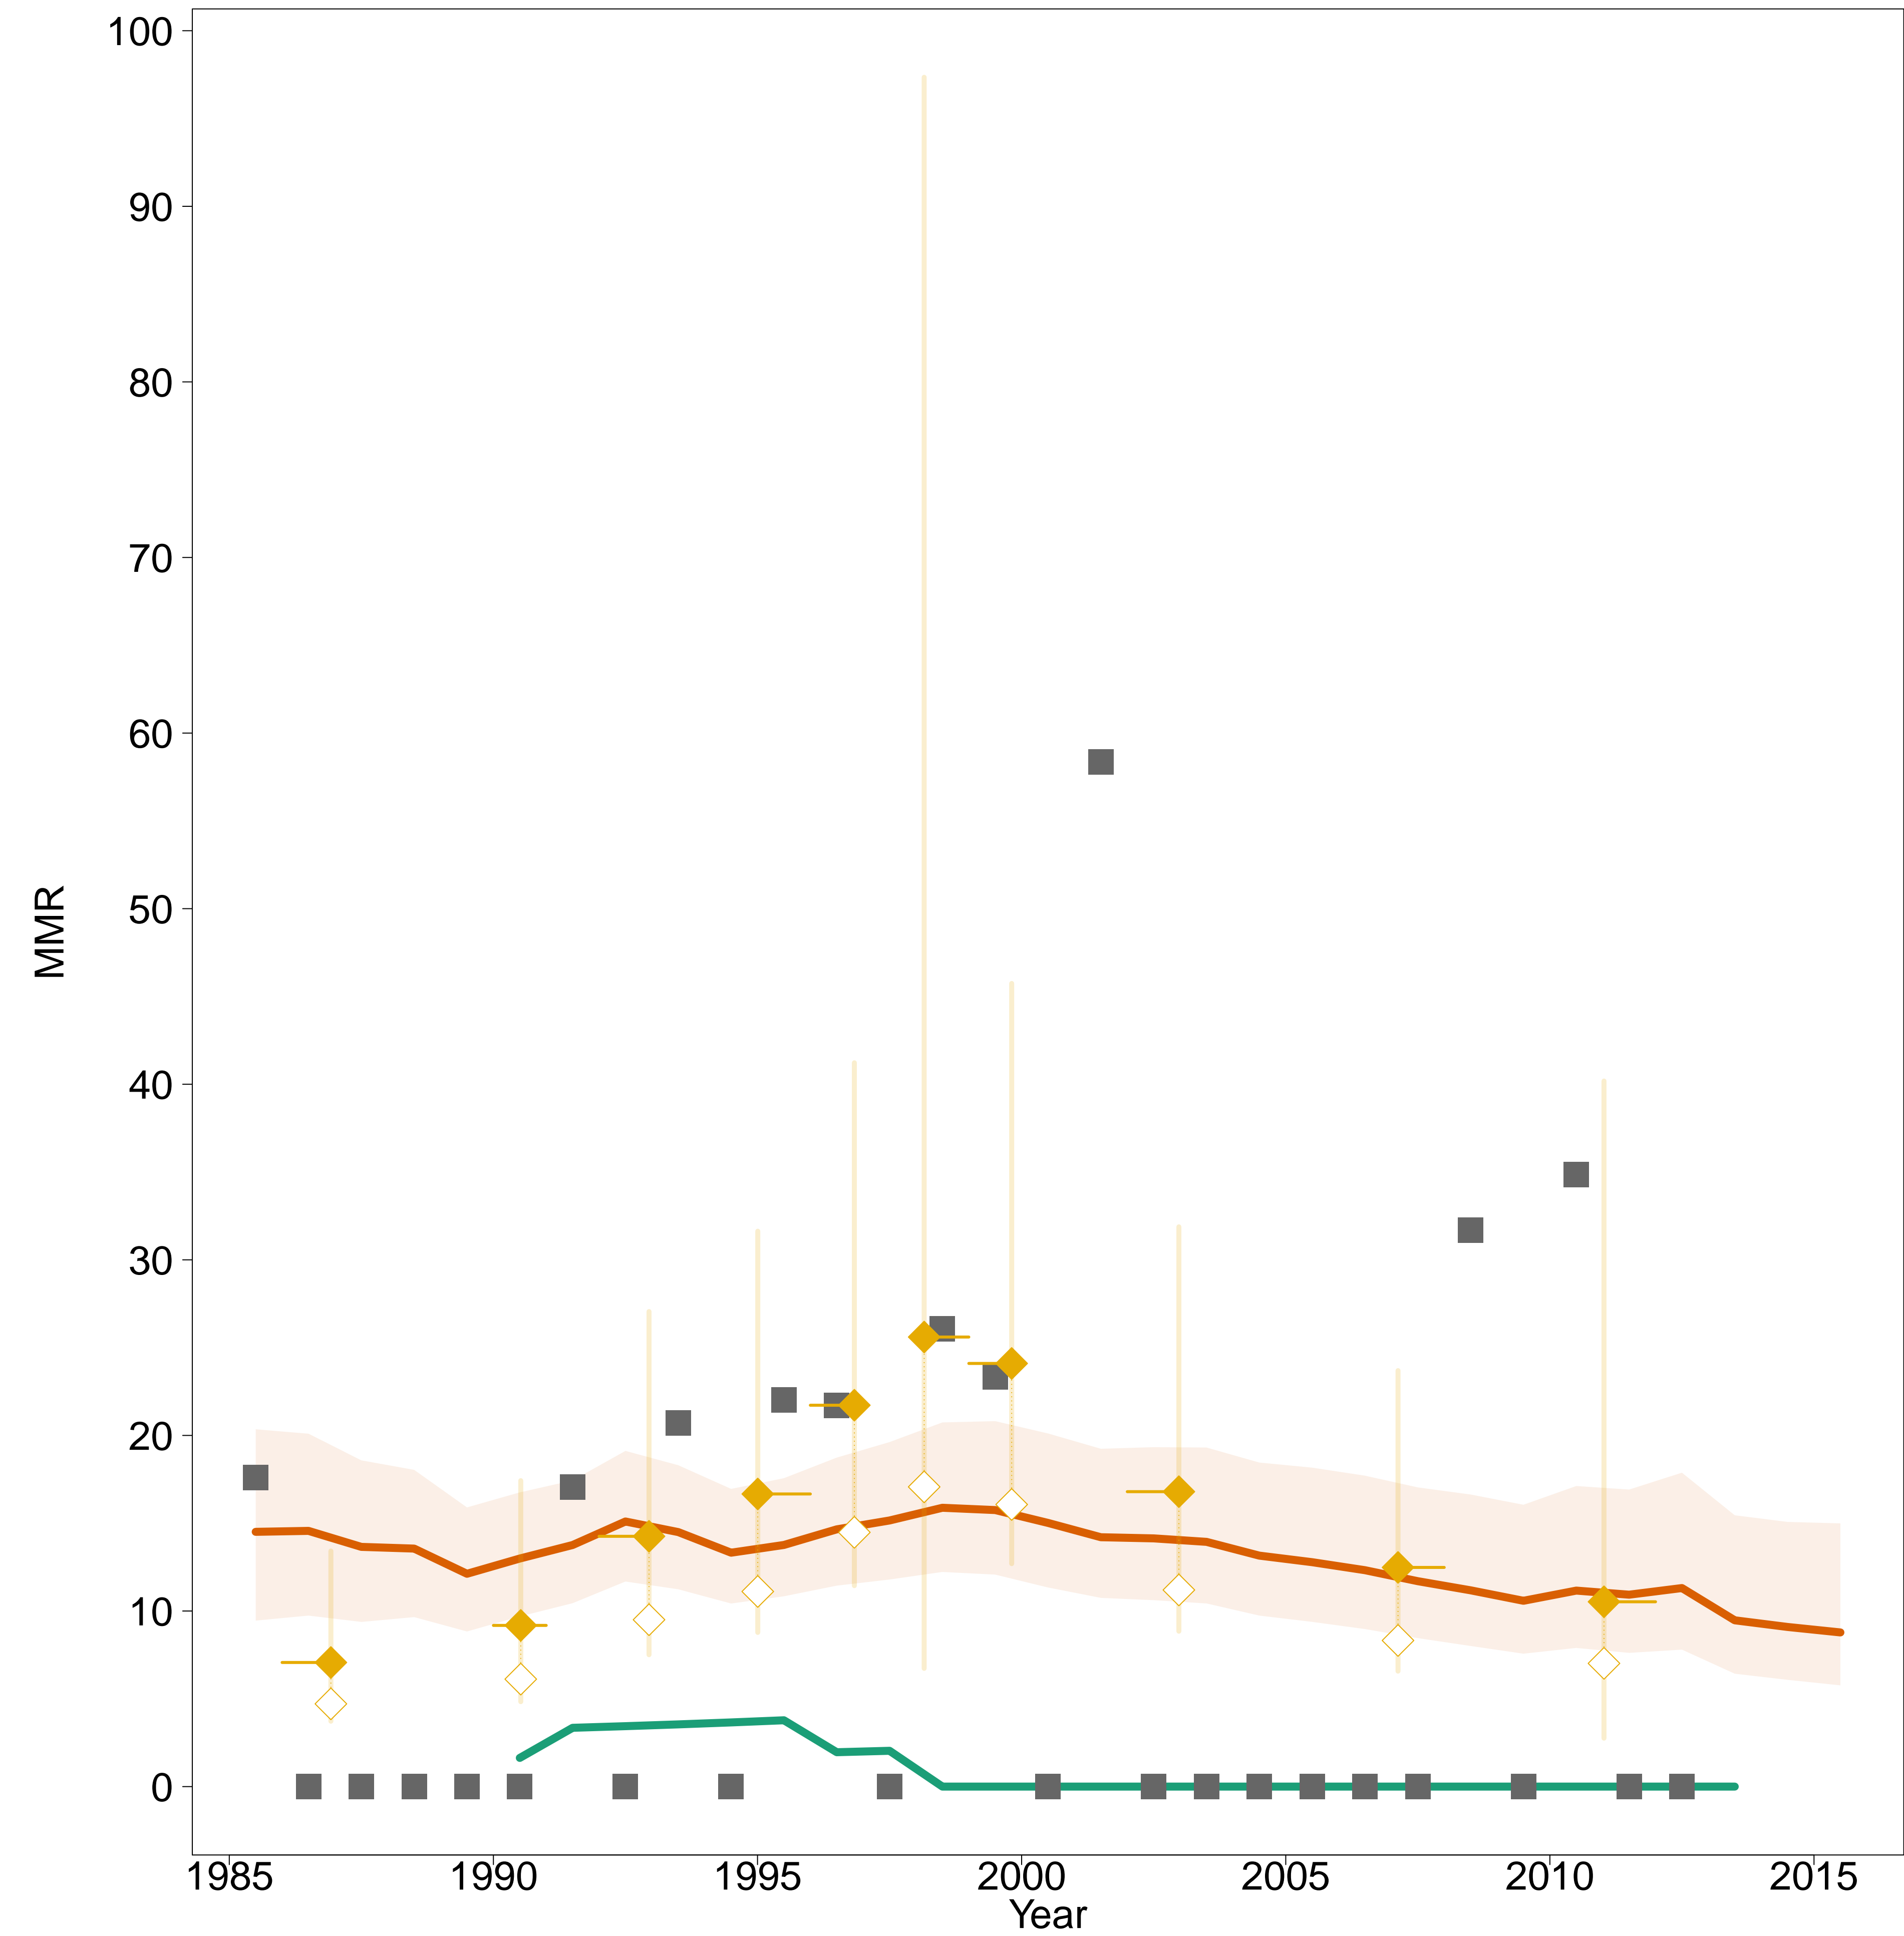

- Estimates –
- MMEIG 2015
- GBD 2013
- MMR Database 2015 –
- Observed Data
- Adjusted Data
- Data type –
- VR
- Reported VR before recalc.  
(related to 0 obs. mat. death)

Mauritania [MRT]  
(Western Africa)

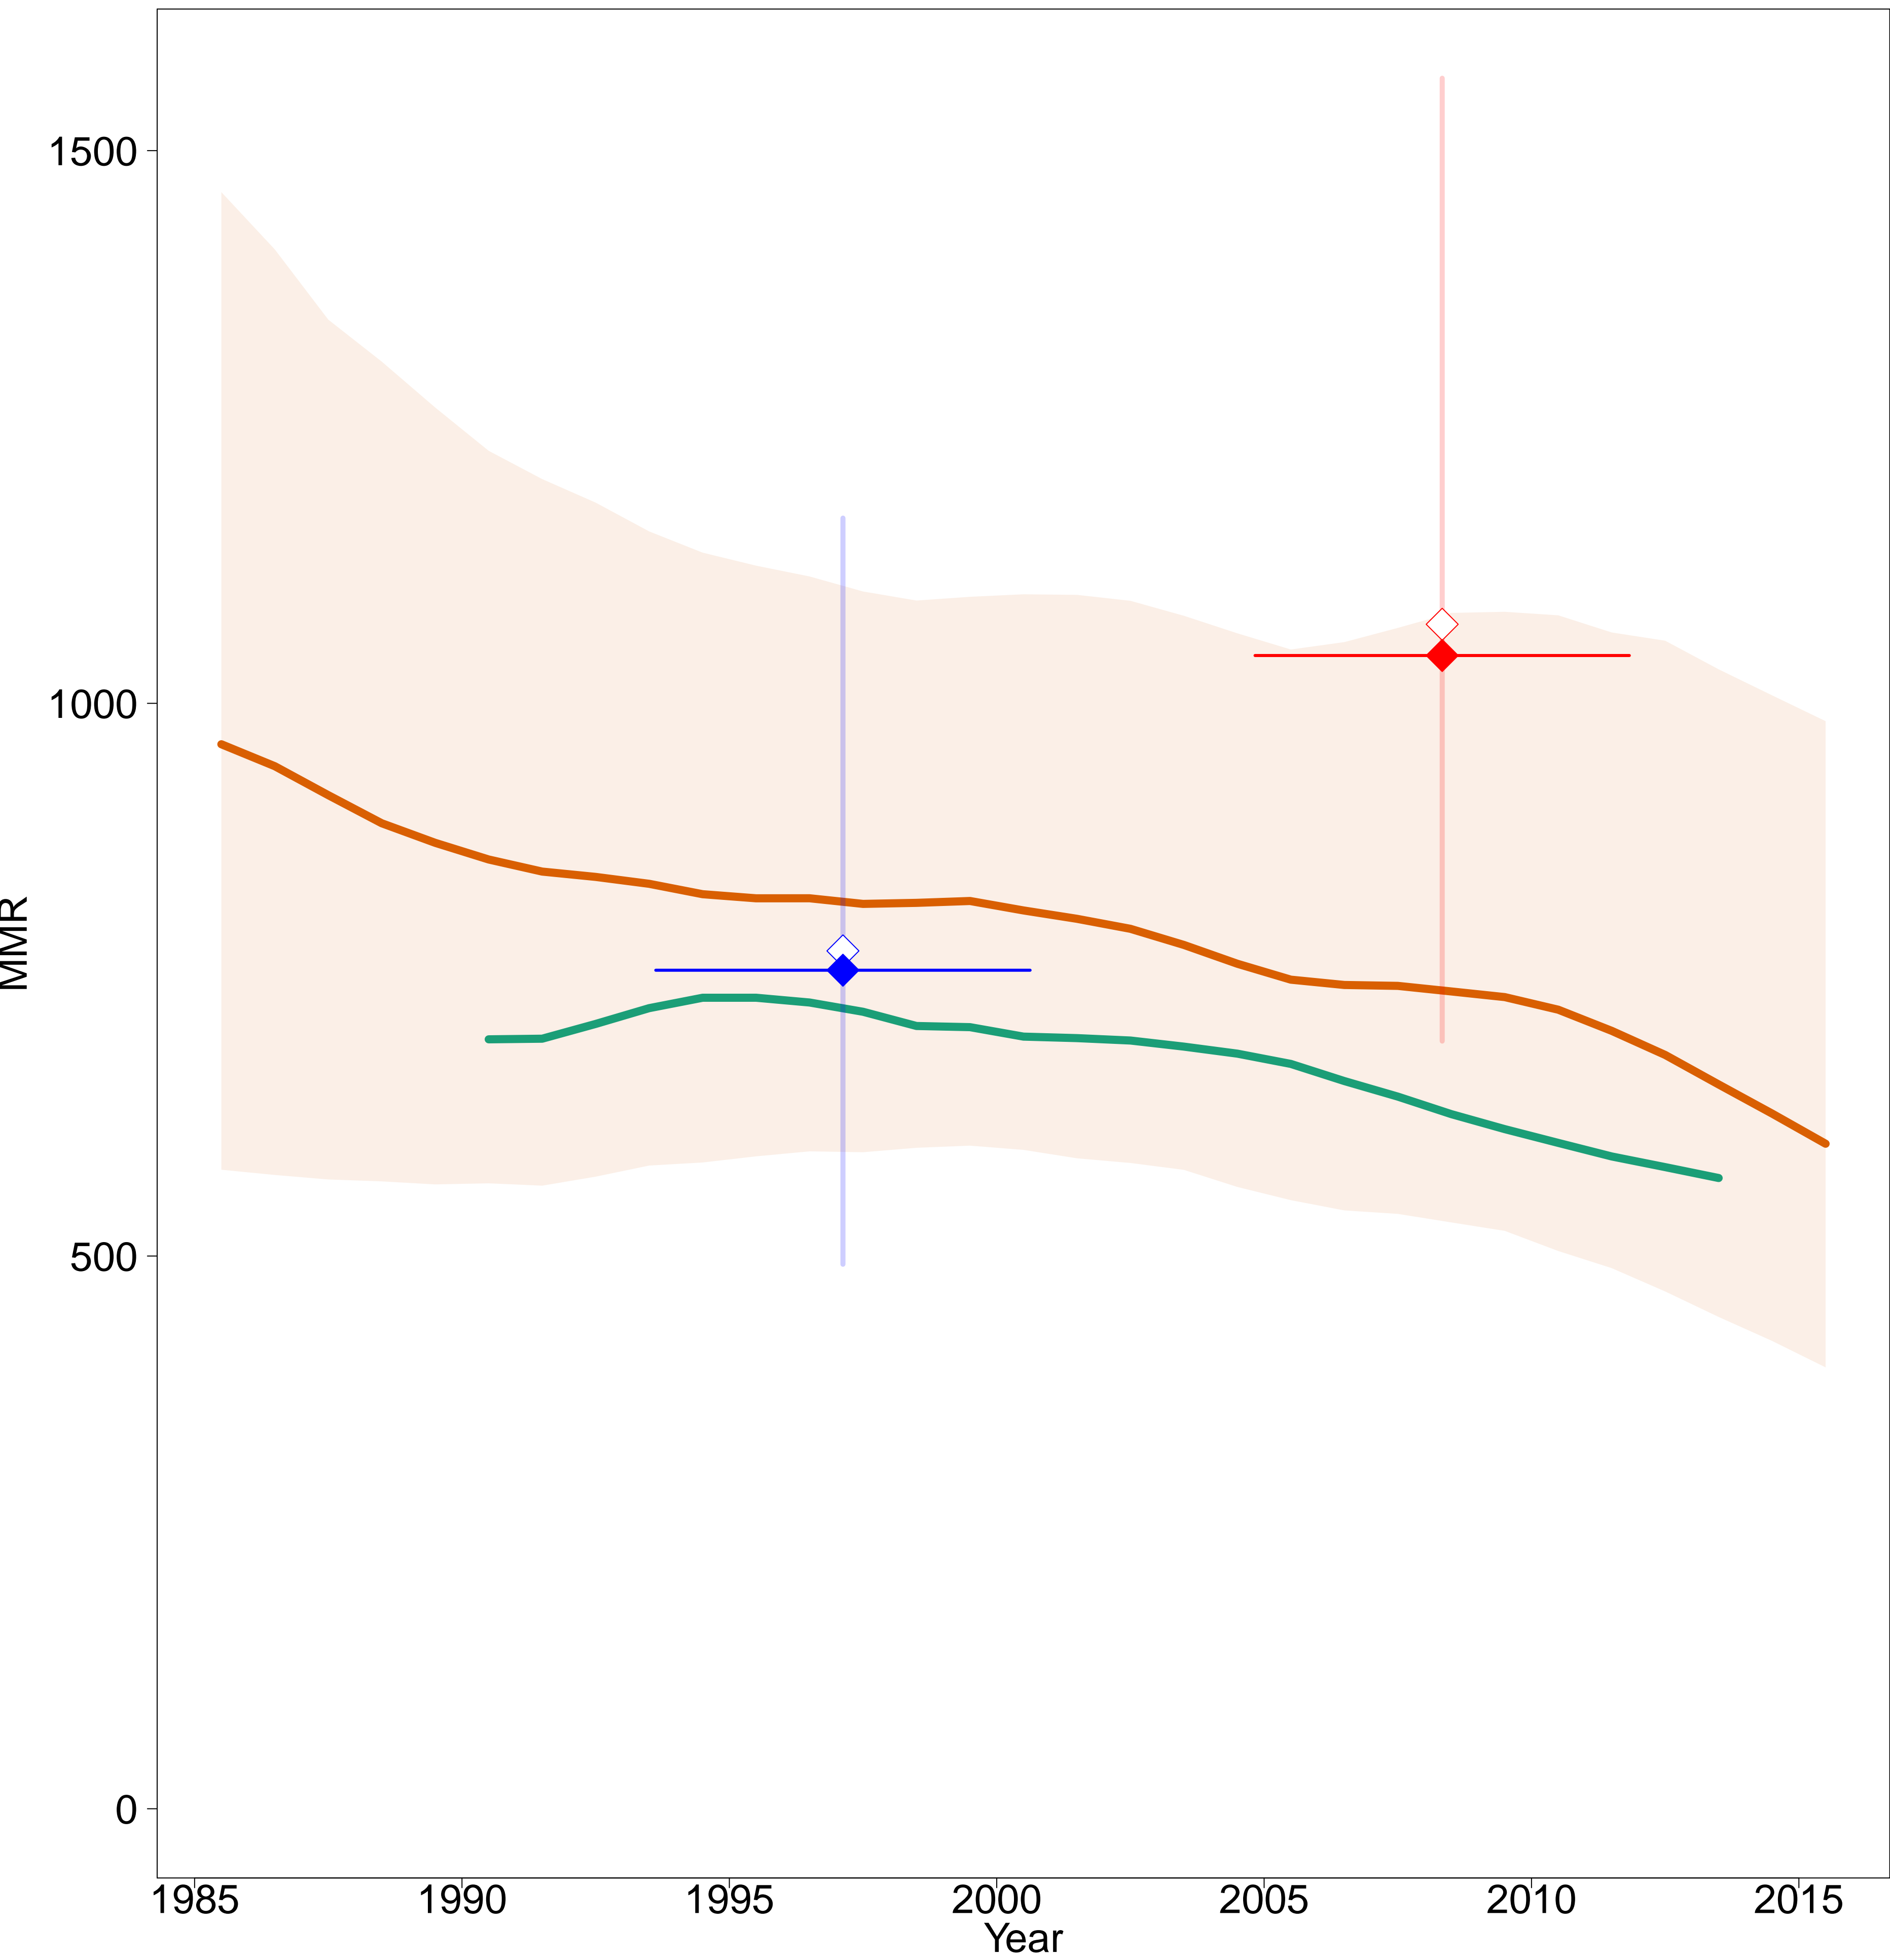

- Estimates -
- MMEIG 2015
- GBD 2013
- MMR Database 2015 -
- Observed Data
- Adjusted Data
- Data type -
- DHS
- Misc. studies

Mauritius [MUS]  
(Eastern Africa)

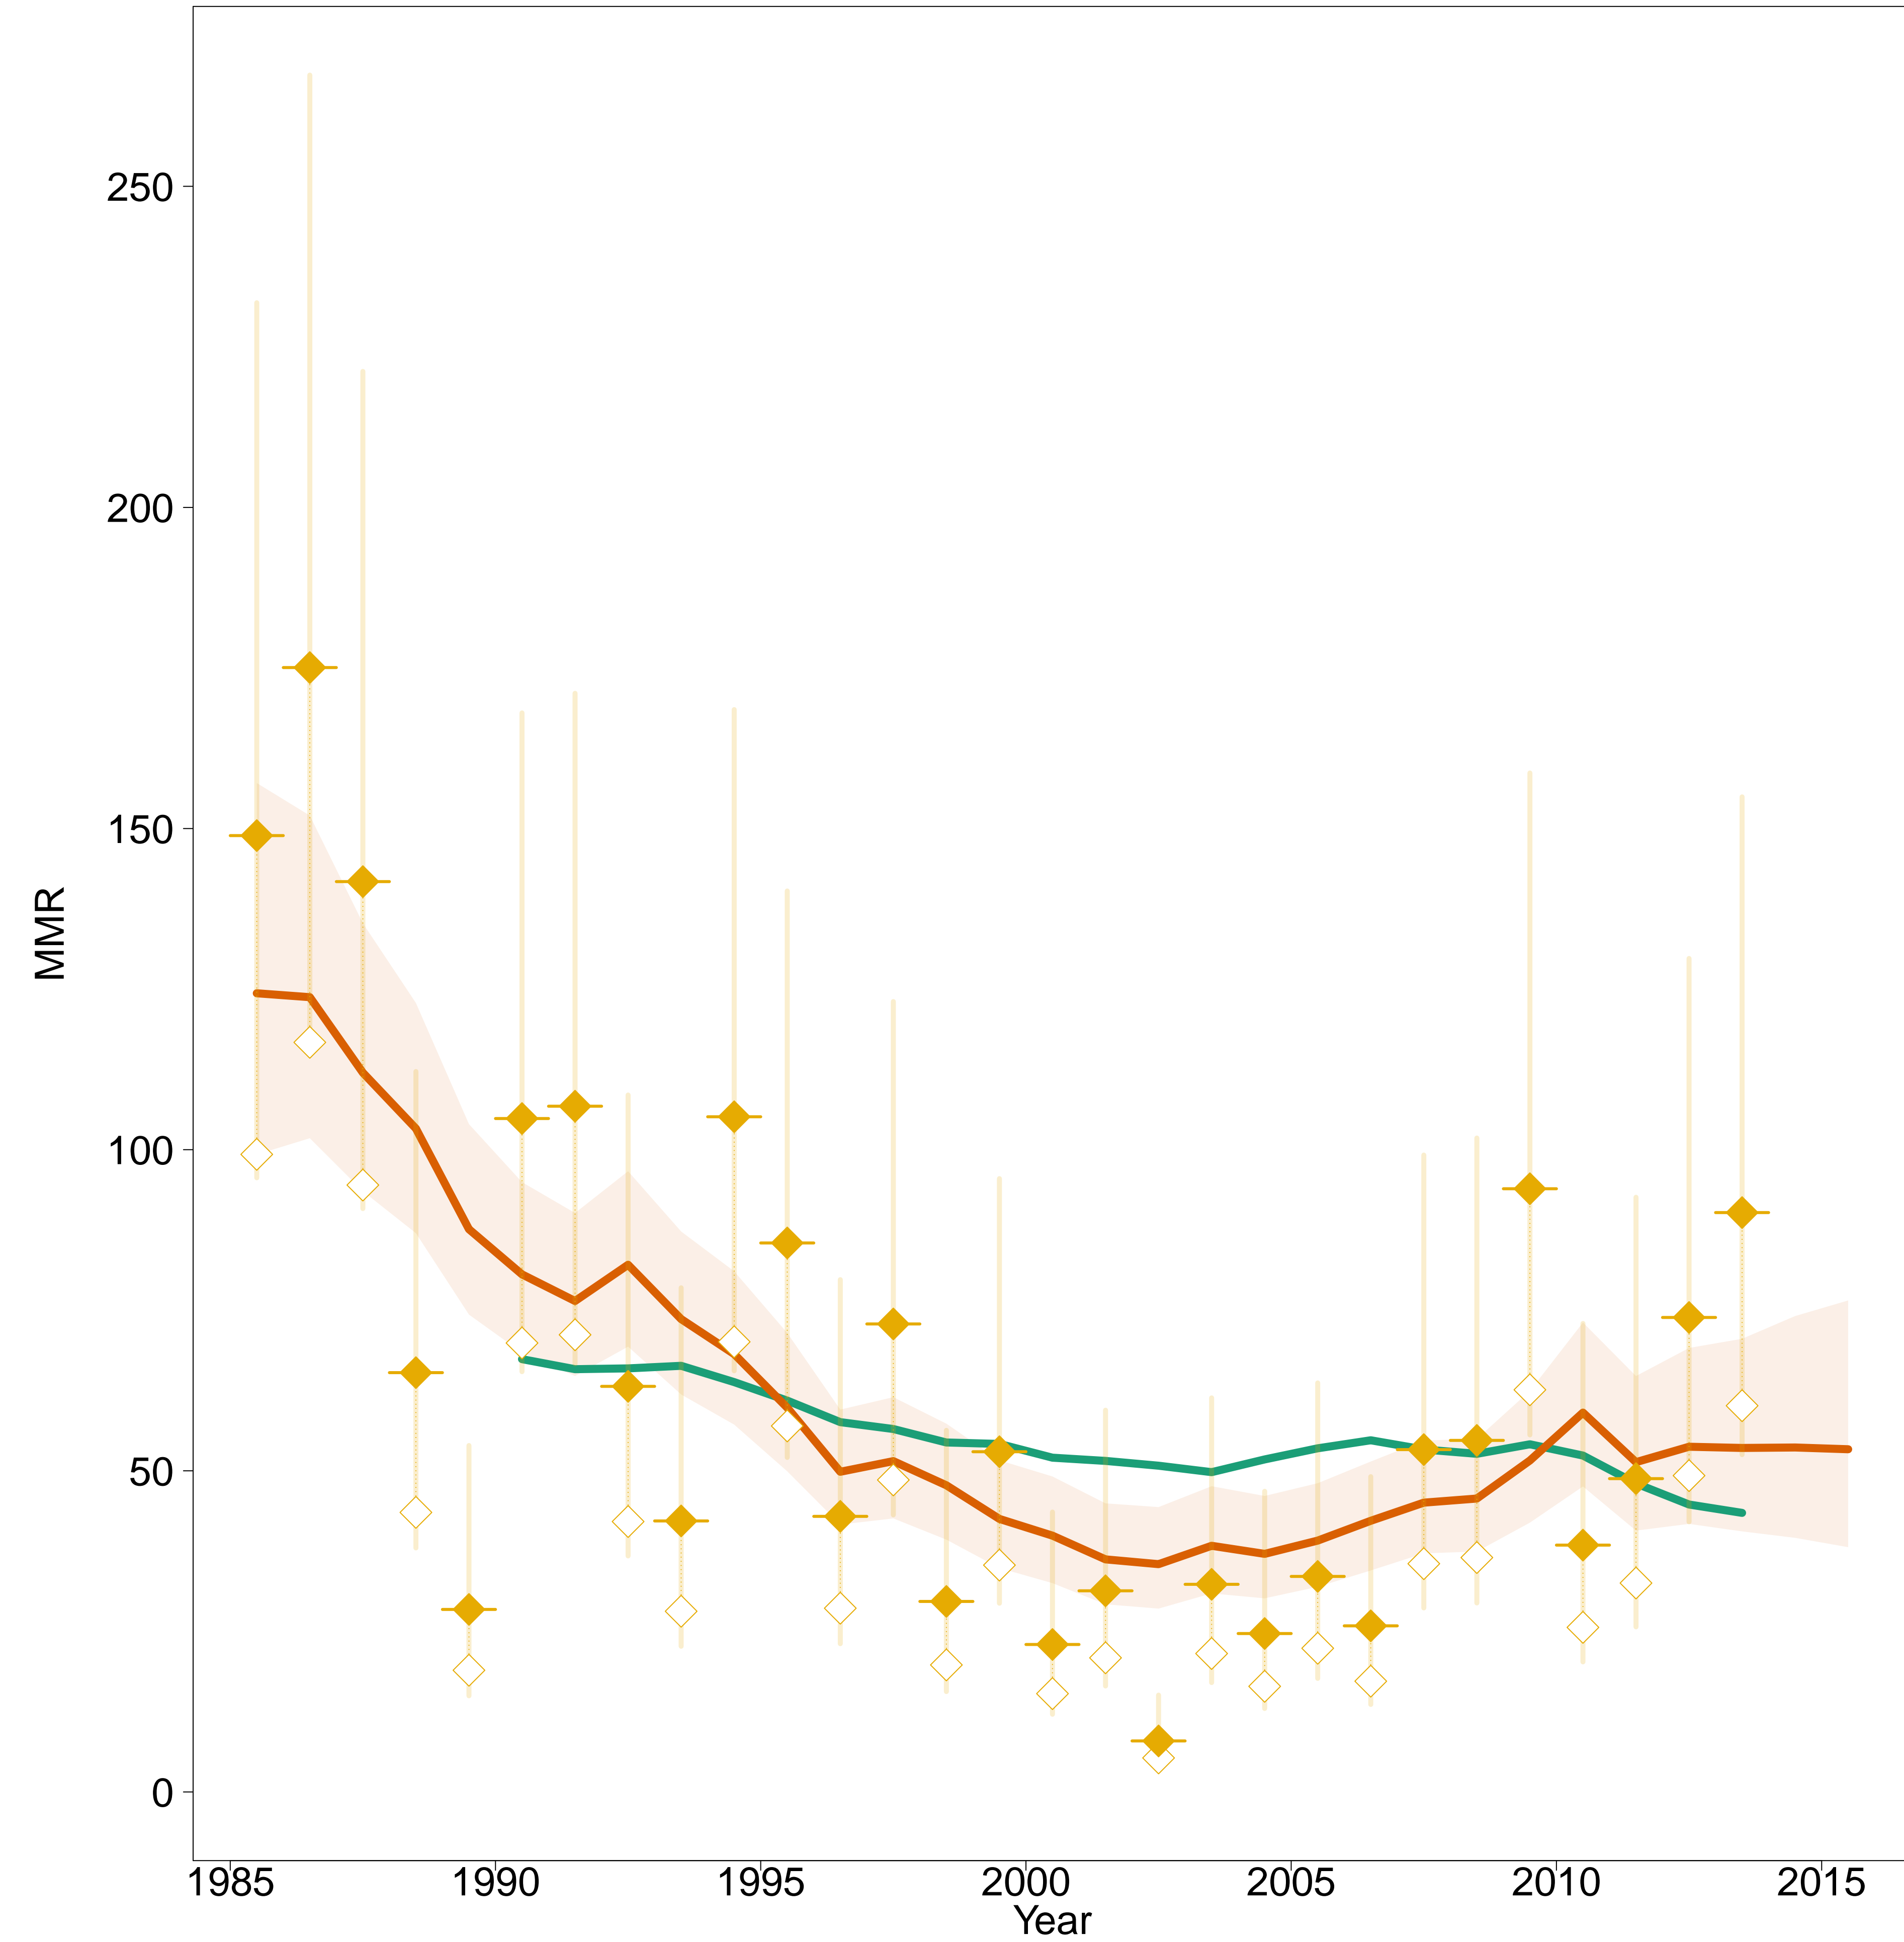

- Estimates –
- MMEIG 2015
- GBD 2013
- MMR Database 2015 –
- Observed Data
- Adjusted Data
- Data type –
- VR

Mexico [MEX]  
(Central America)

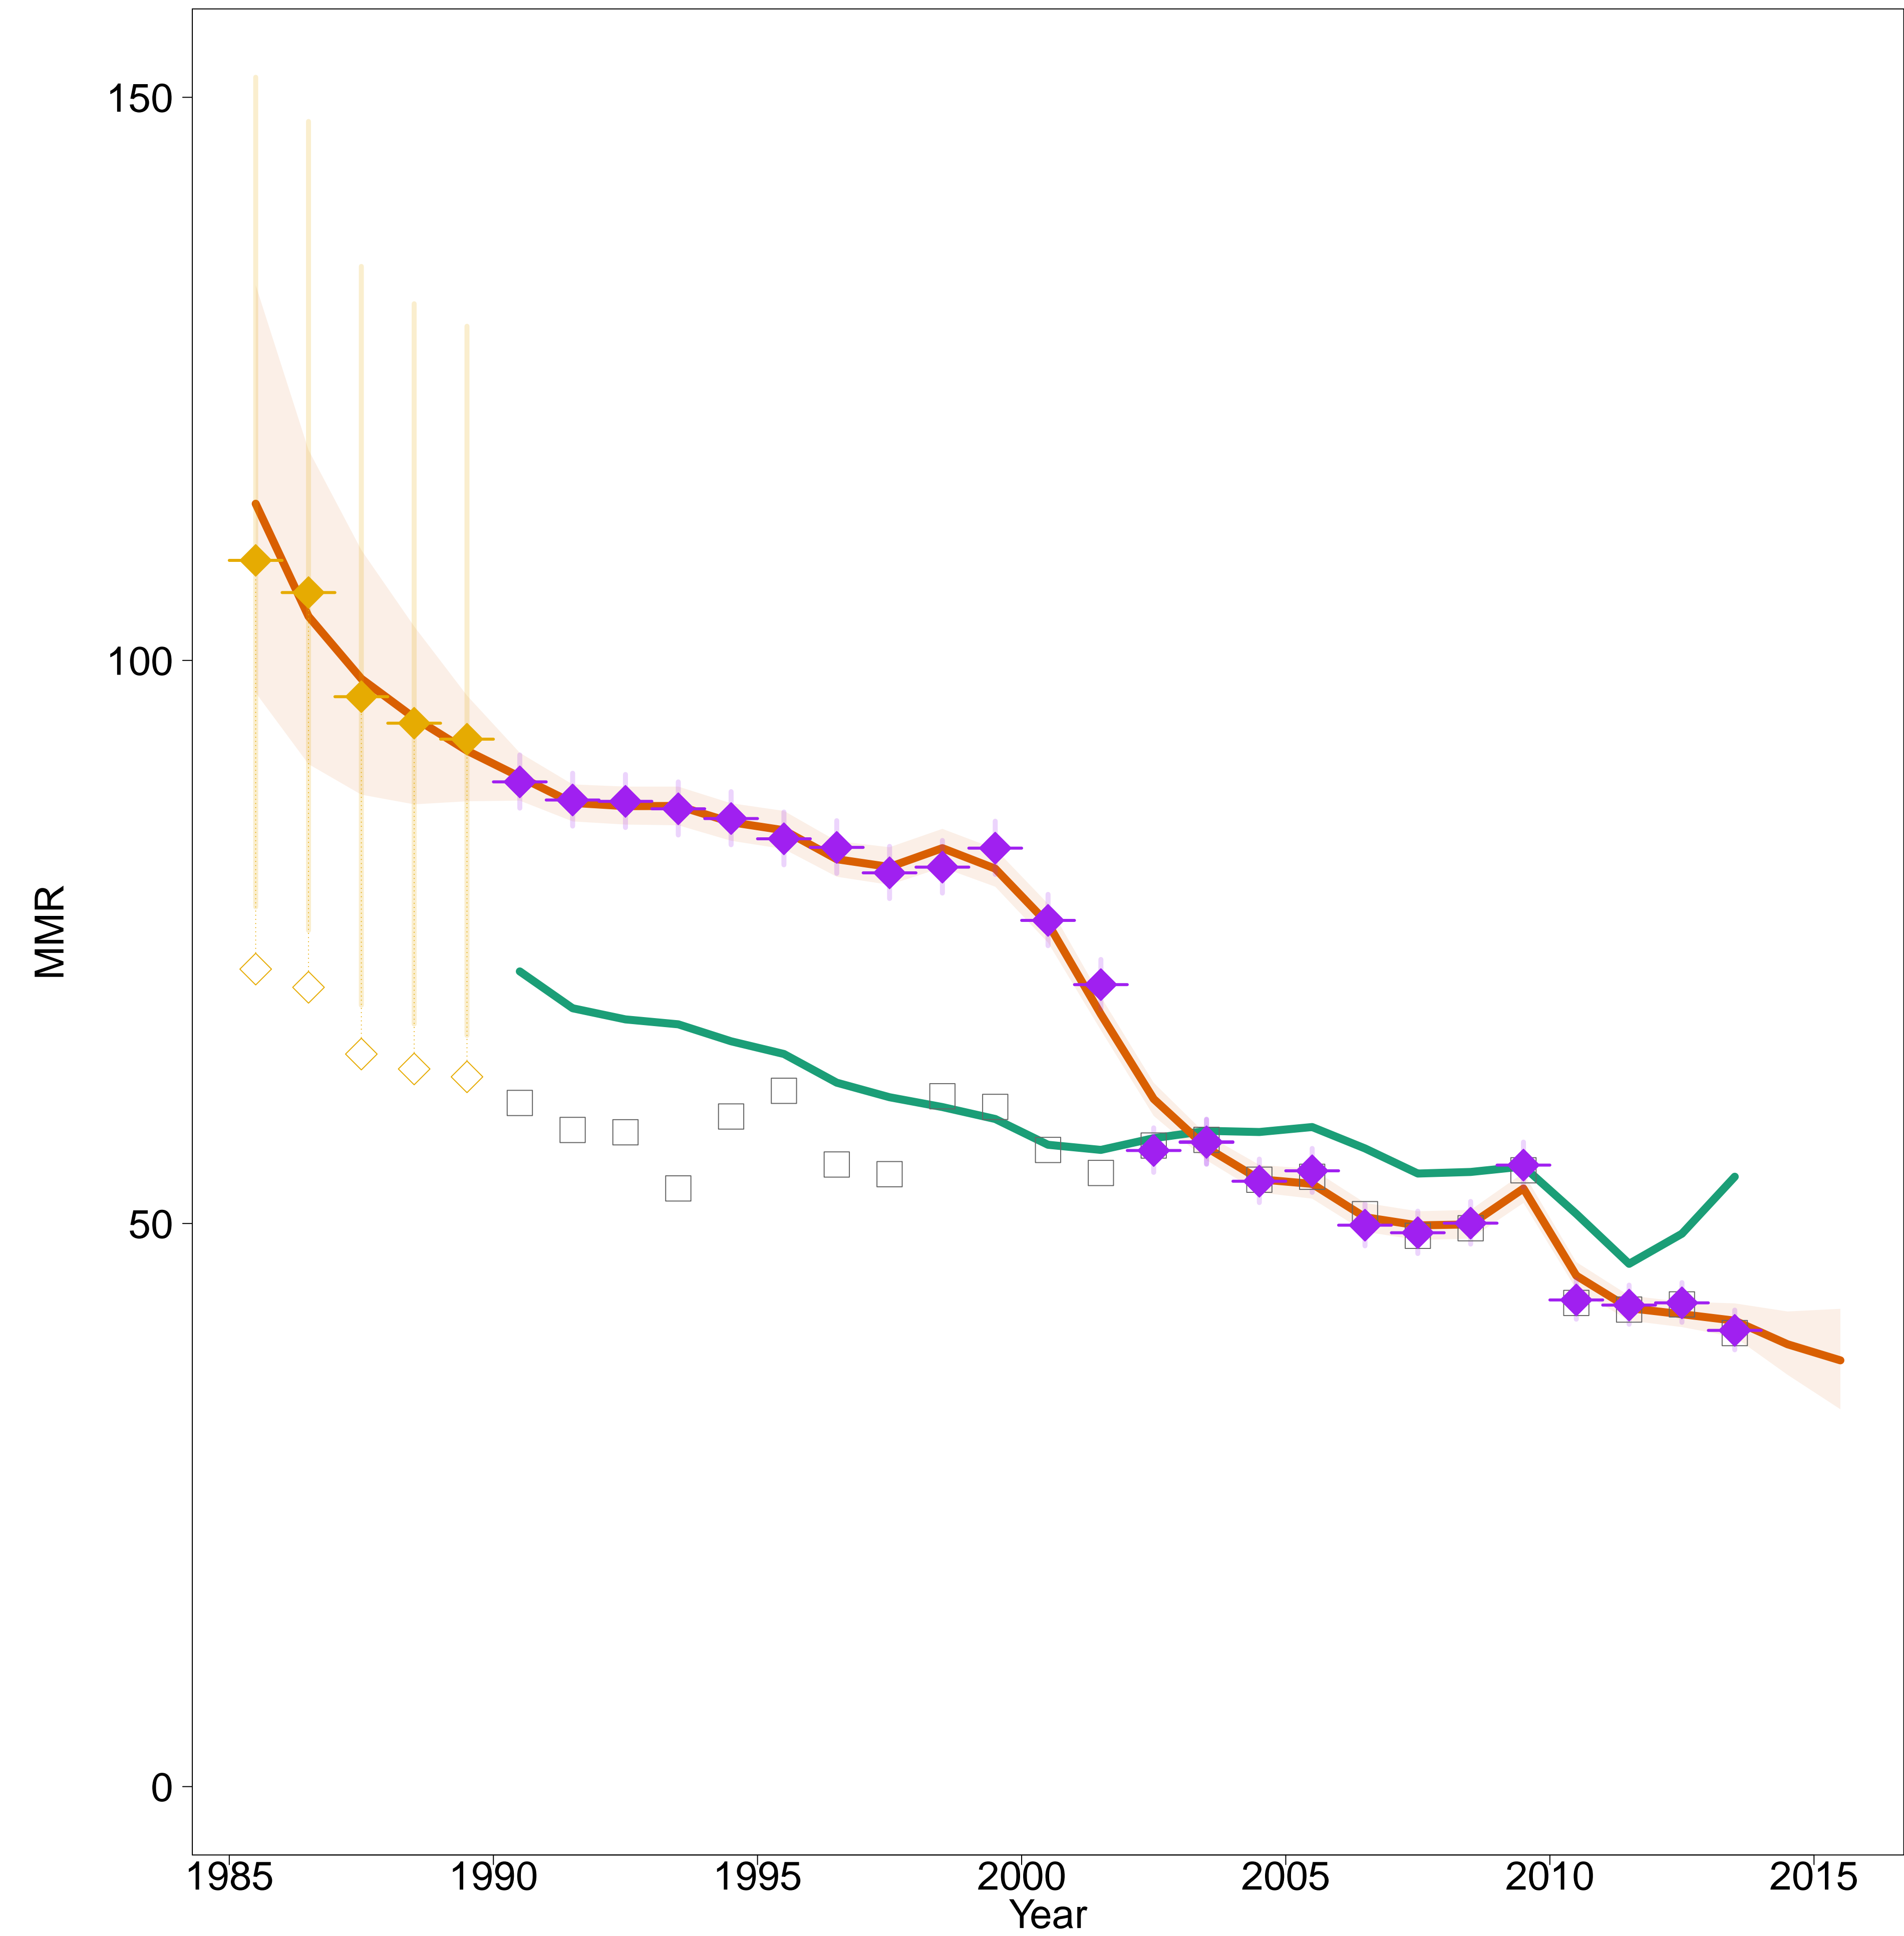

- Estimates –
- MMEIG 2015
- GBD 2013
- MMR Database 2015 –
- ◊ Observed Data
- ◆ Adjusted Data
- Data type –
- ◆ VR
- ◆ Spec. studies
- ◻ Excluded VR data  
(overlap with specialized study)



Micronesia [FSM]  
(South-Eastern Asia / Oceania)

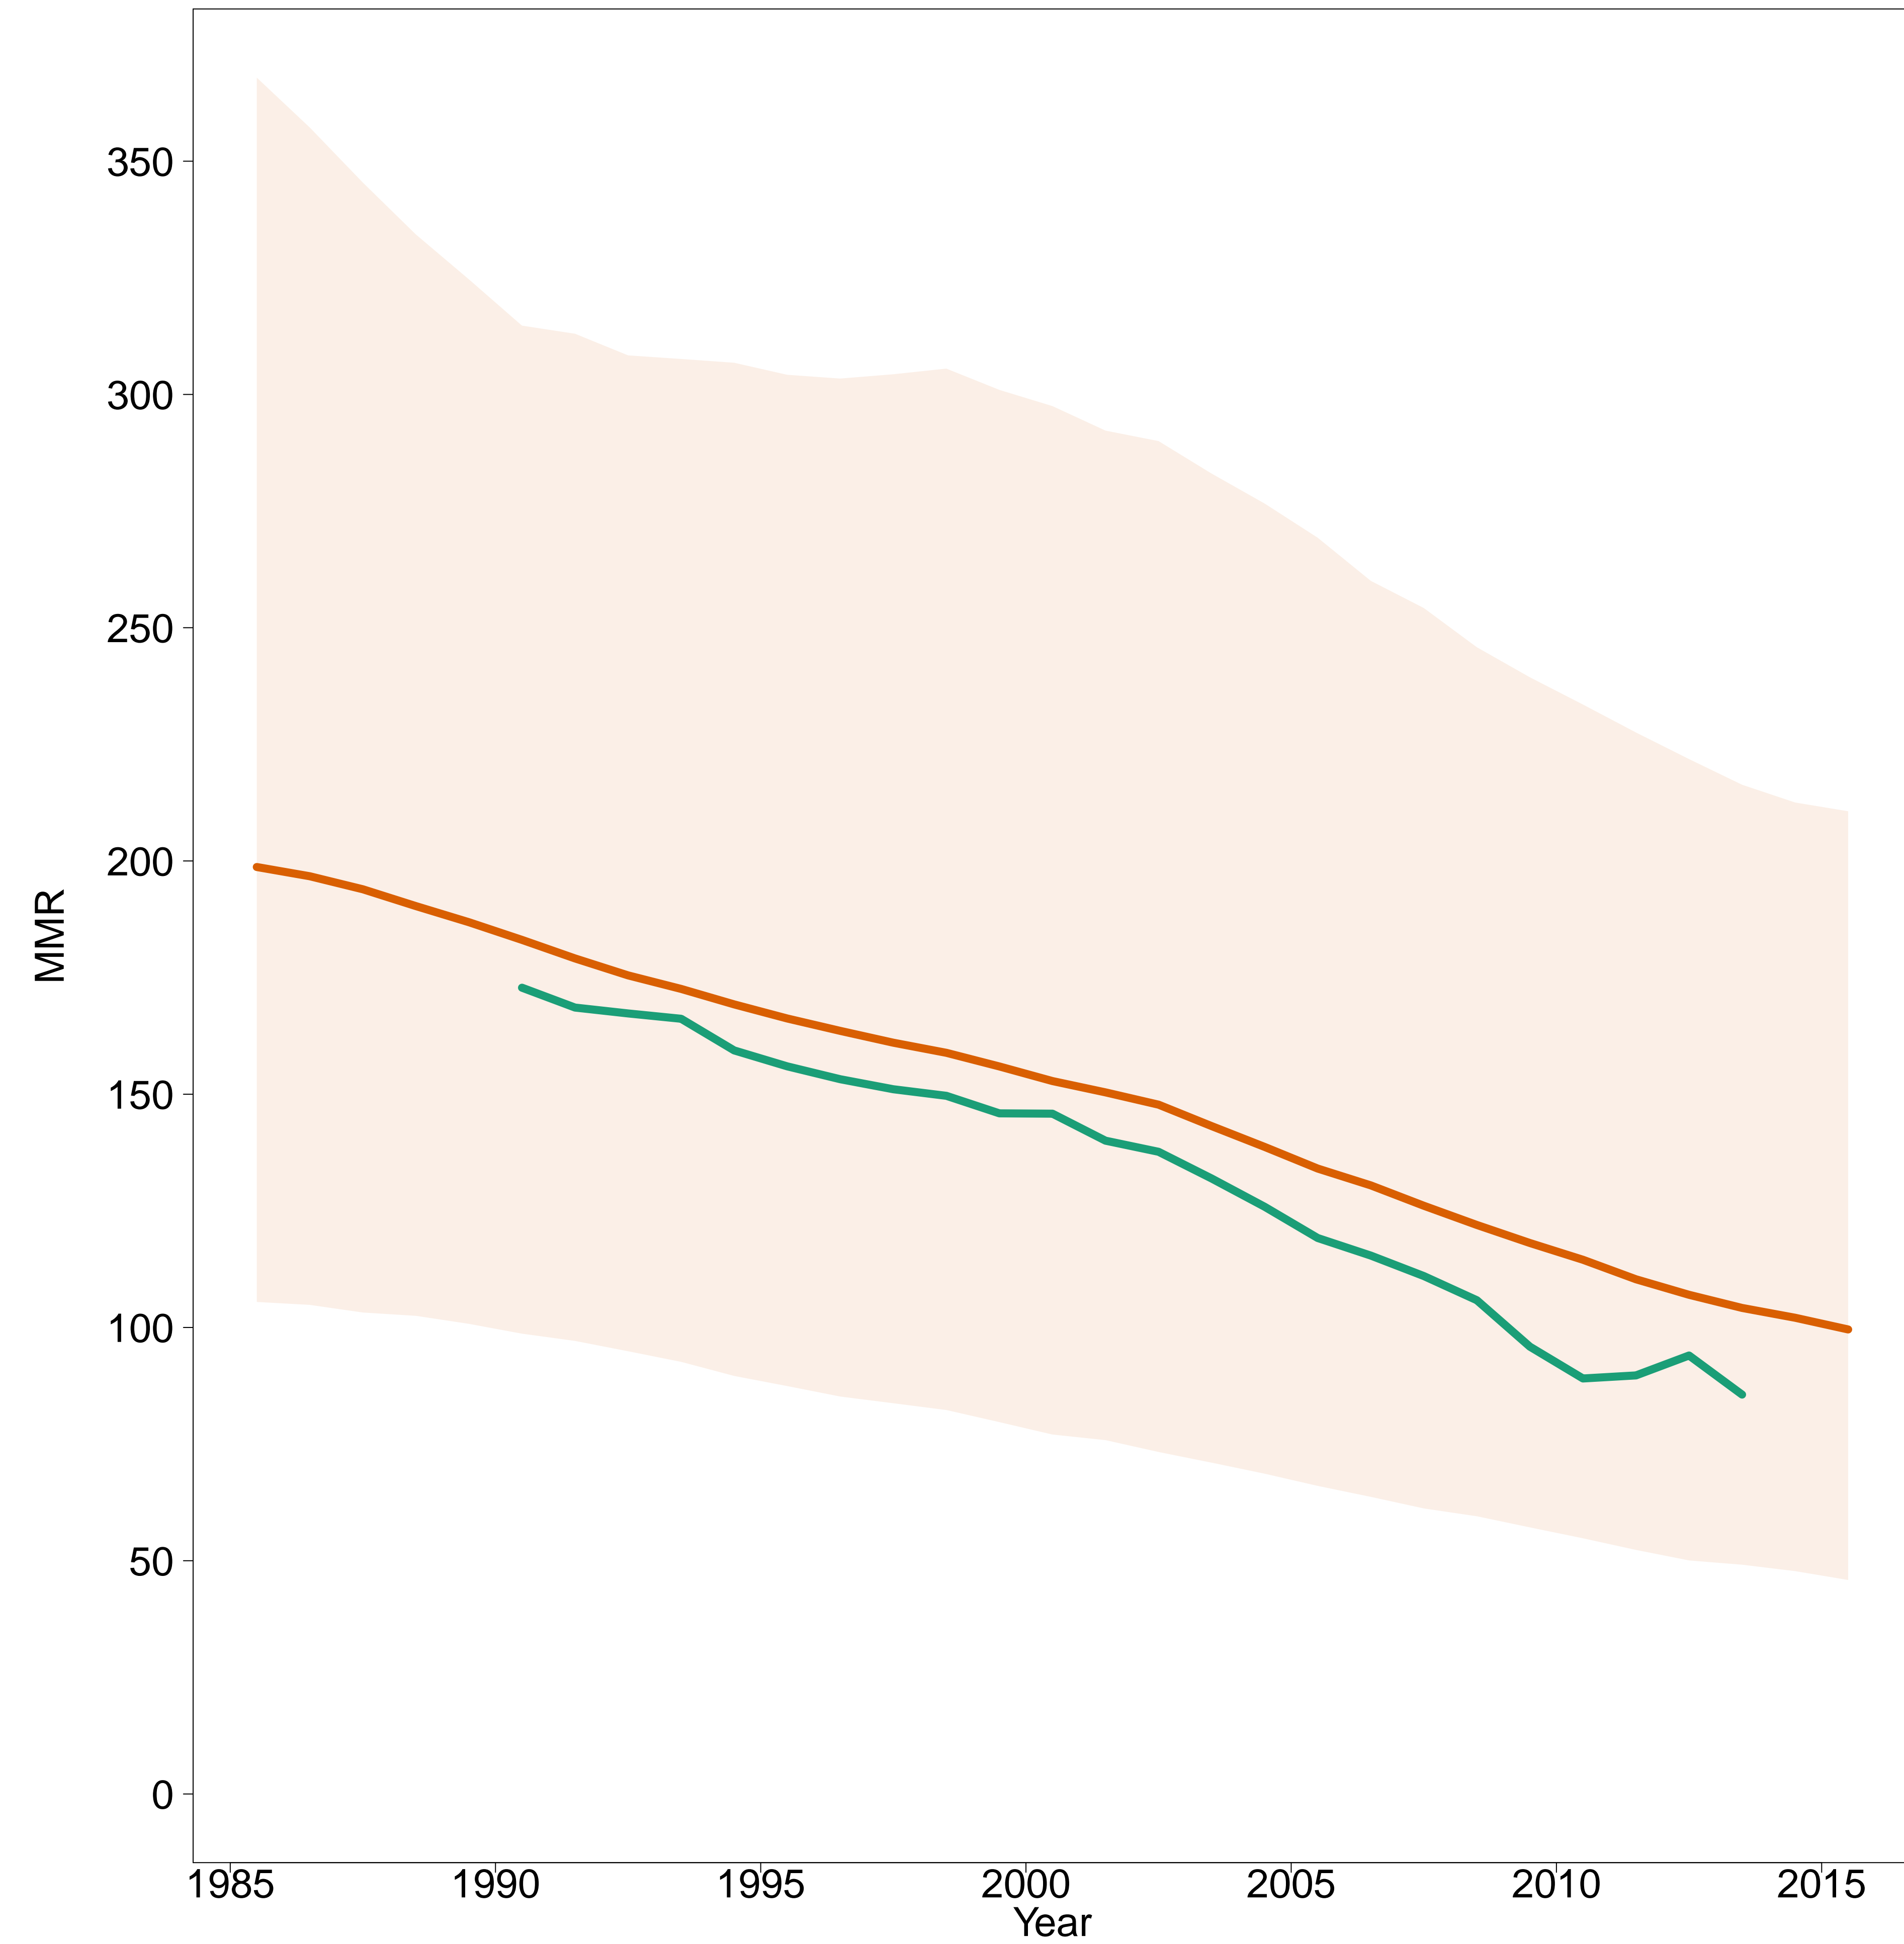

– Estimates –  
MMEIG 2015  
GBD 2013  
– MMR Database 2015 –

Mongolia [MNG]  
(Eastern Asia)

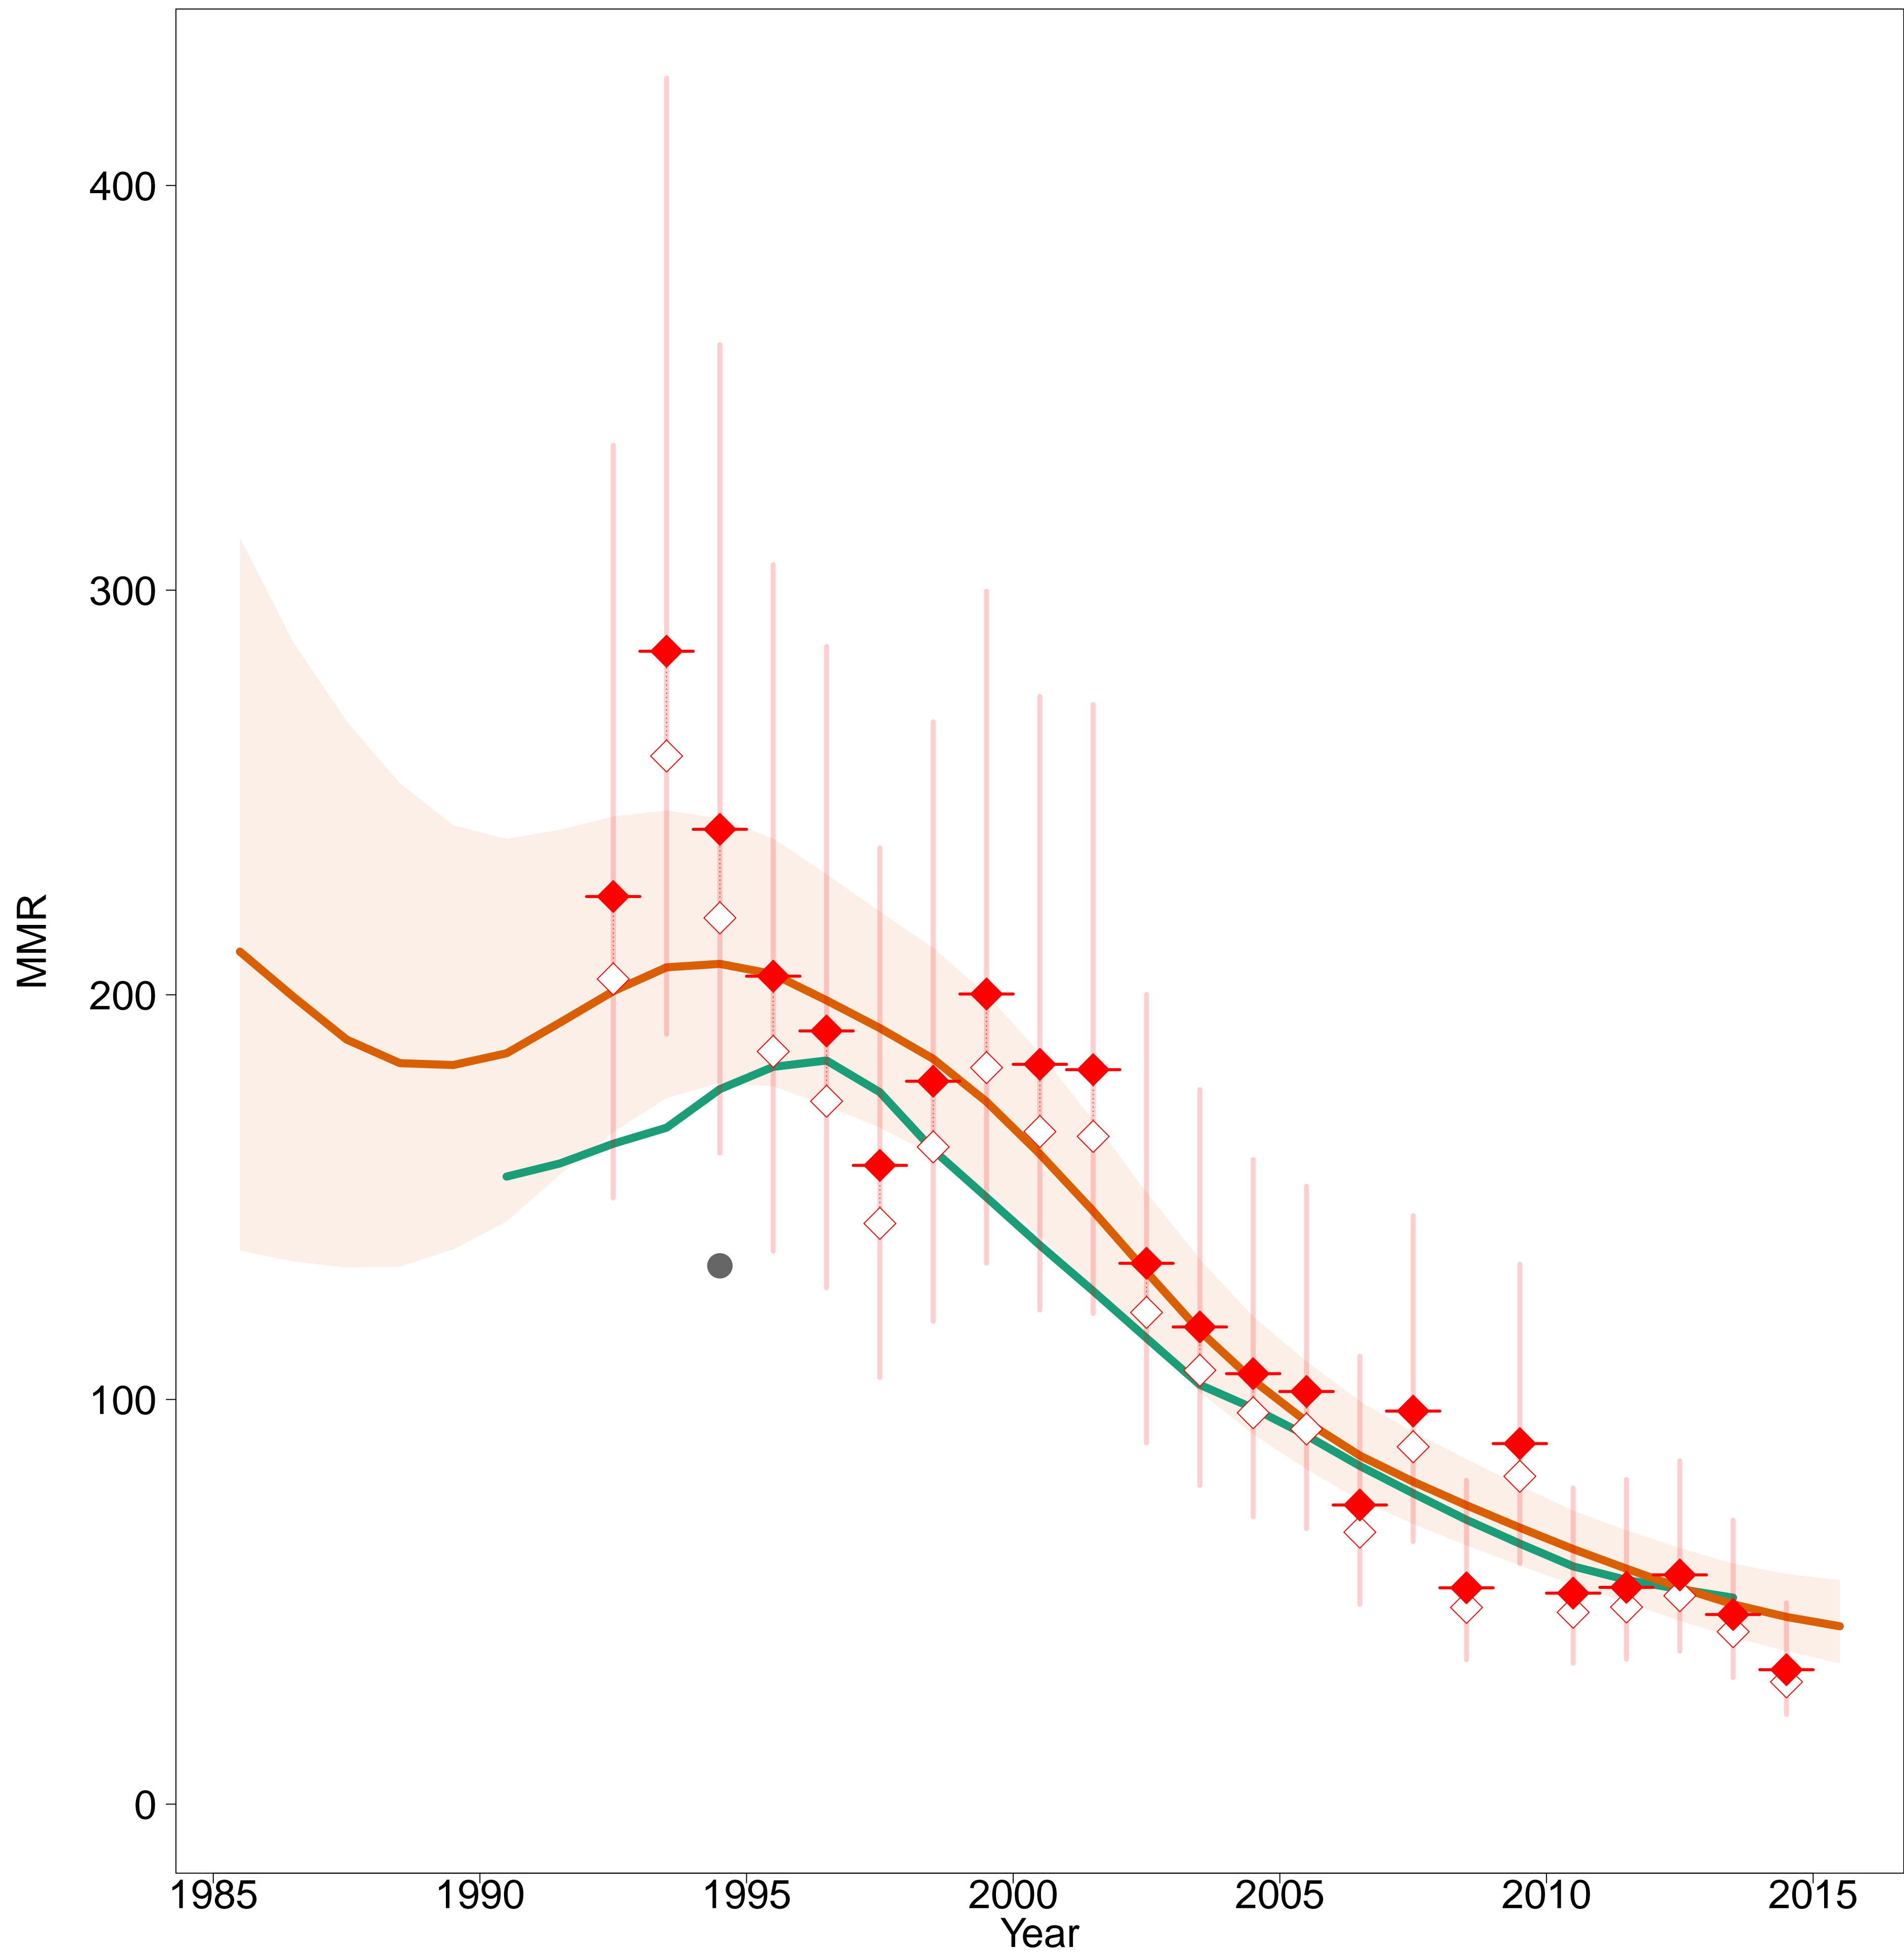

- Estimates -
- MMEIG 2015
- GBD 2013
- MMR Database 2015 -
- Observed Data
- Adjusted Data
- Data type -
- Misc. studies
- Excluded VR data (data quality issues)

Montenegro [MNE]  
(Transition countries of South-Eastern Europe)

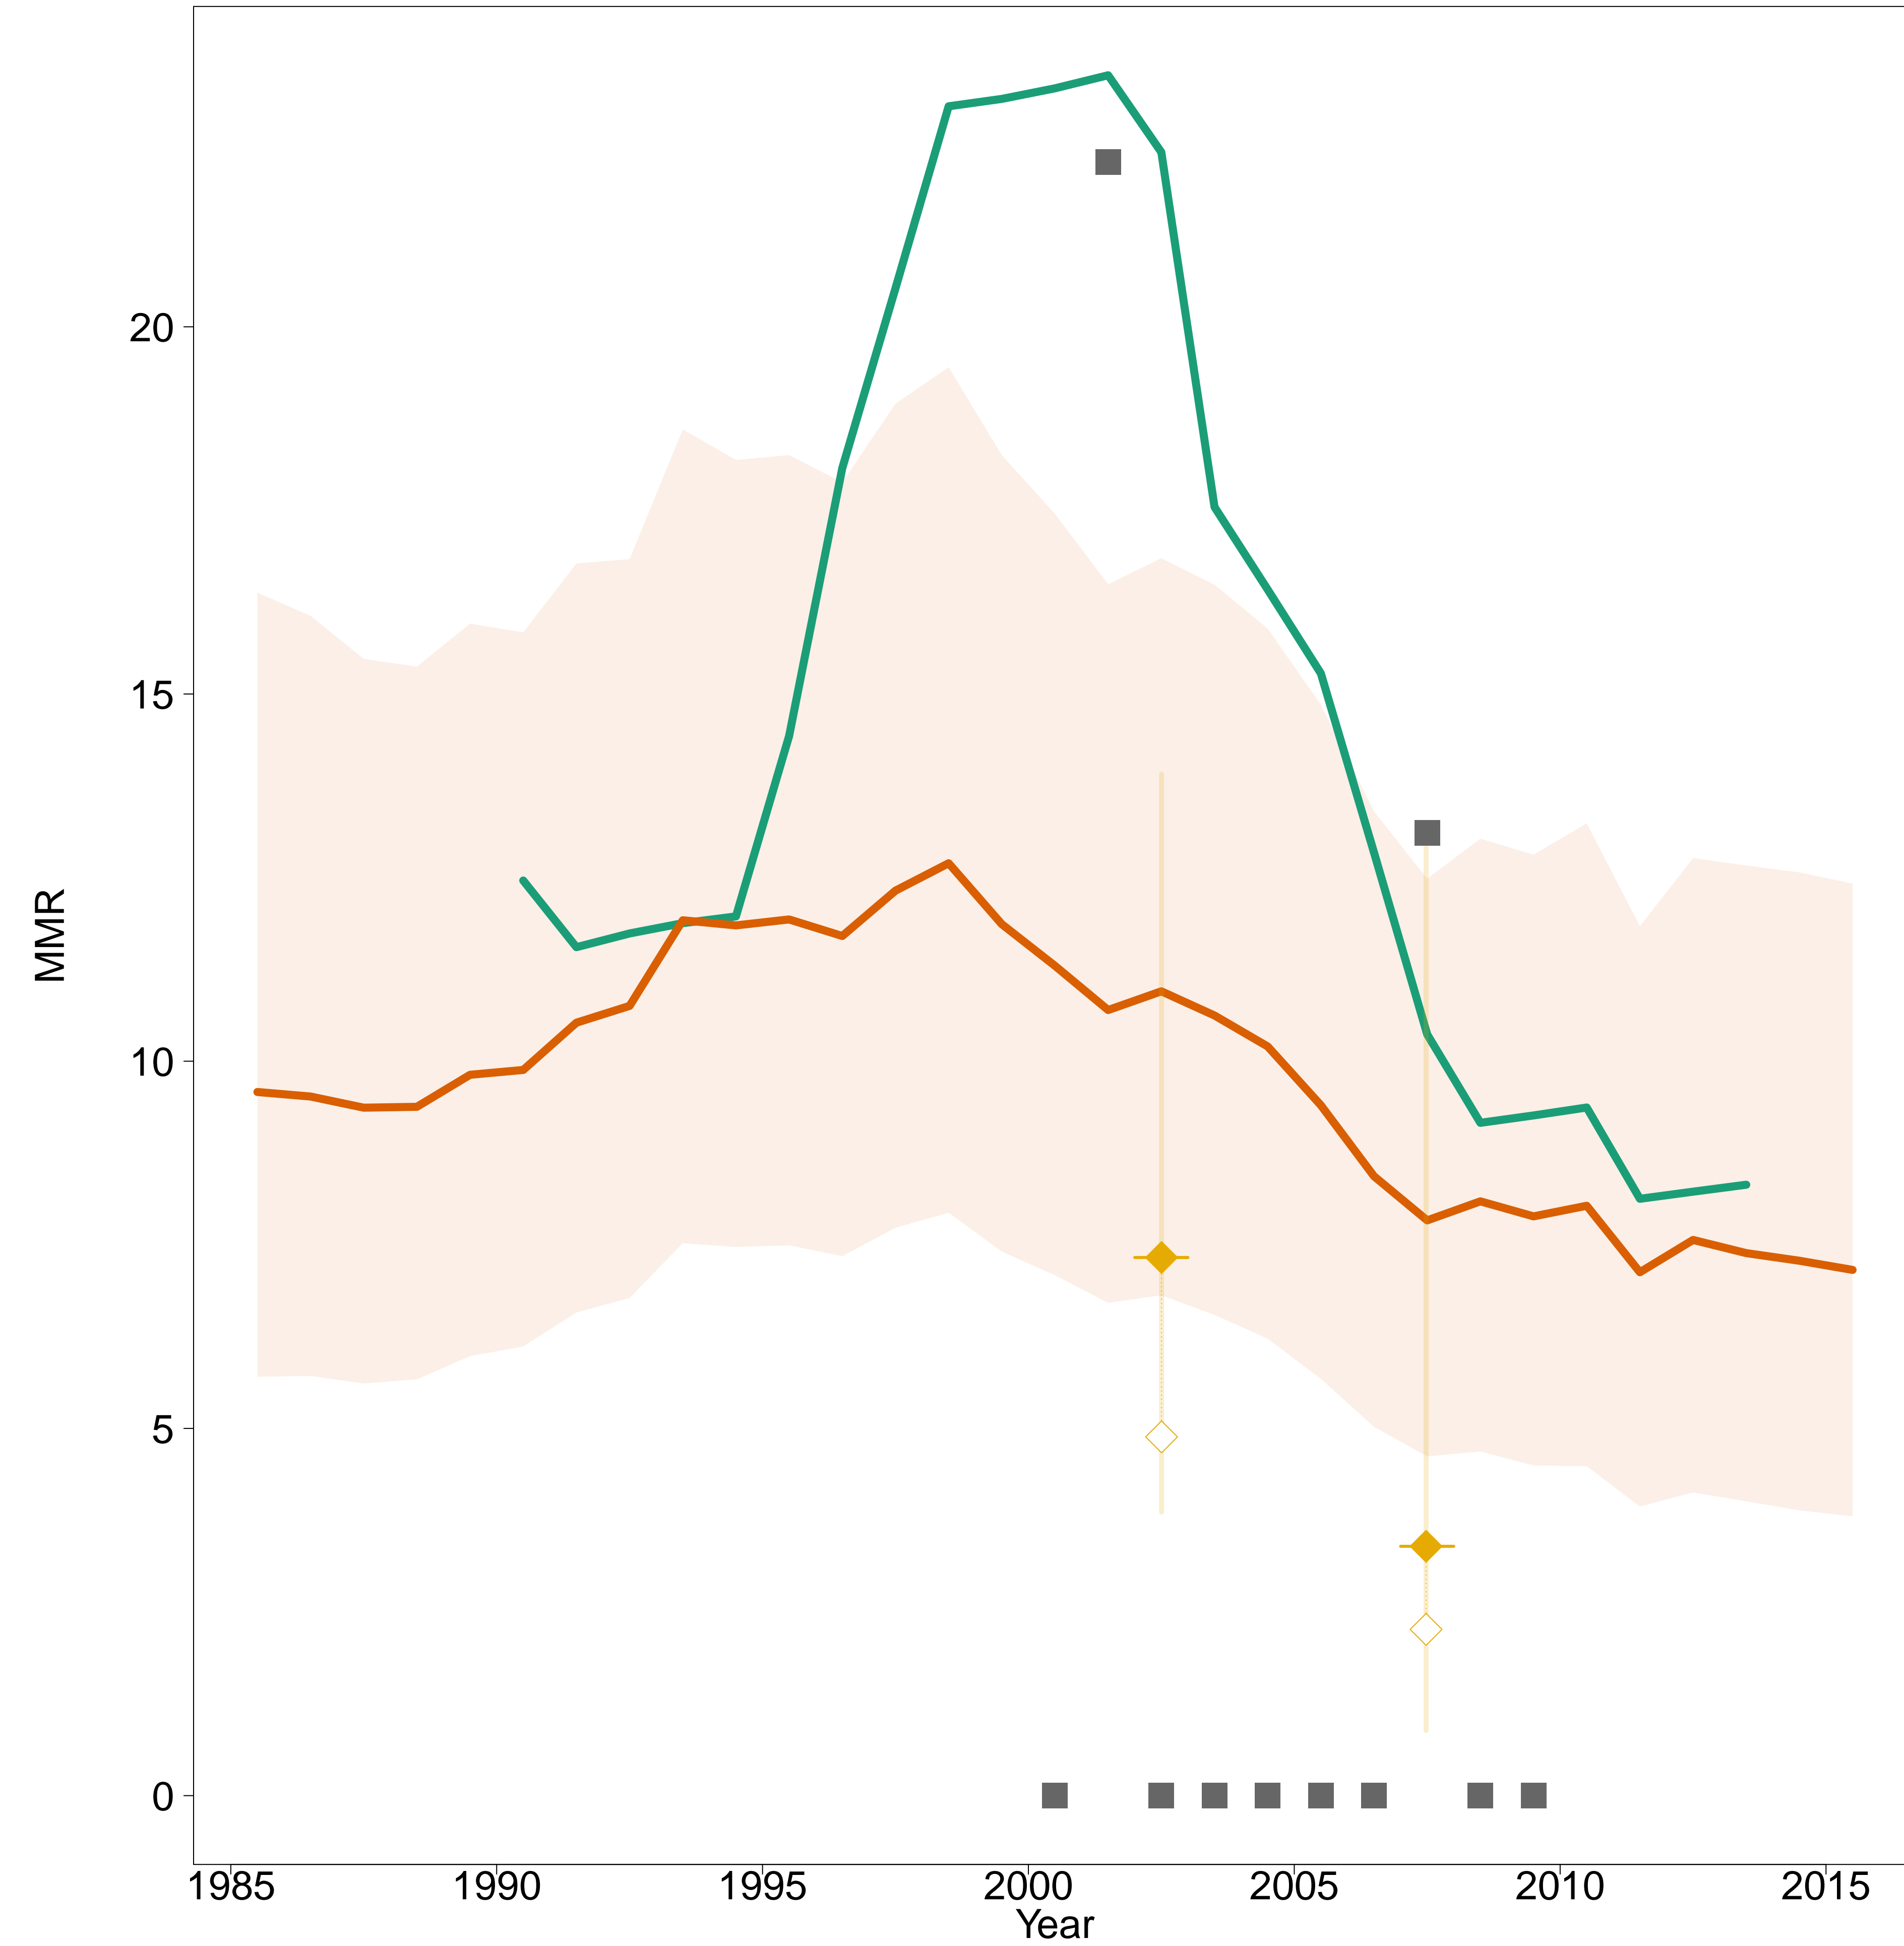

- Estimates –
- MMEIG 2015
- GBD 2013
- MMR Database 2015 –
- ◊ Observed Data
- ◆ Adjusted Data
- Data type –
- ◆ VR
- Reported VR before recal.  
(related to 0 obs. mat. death)

Morocco [MAR]  
(Northern Africa)

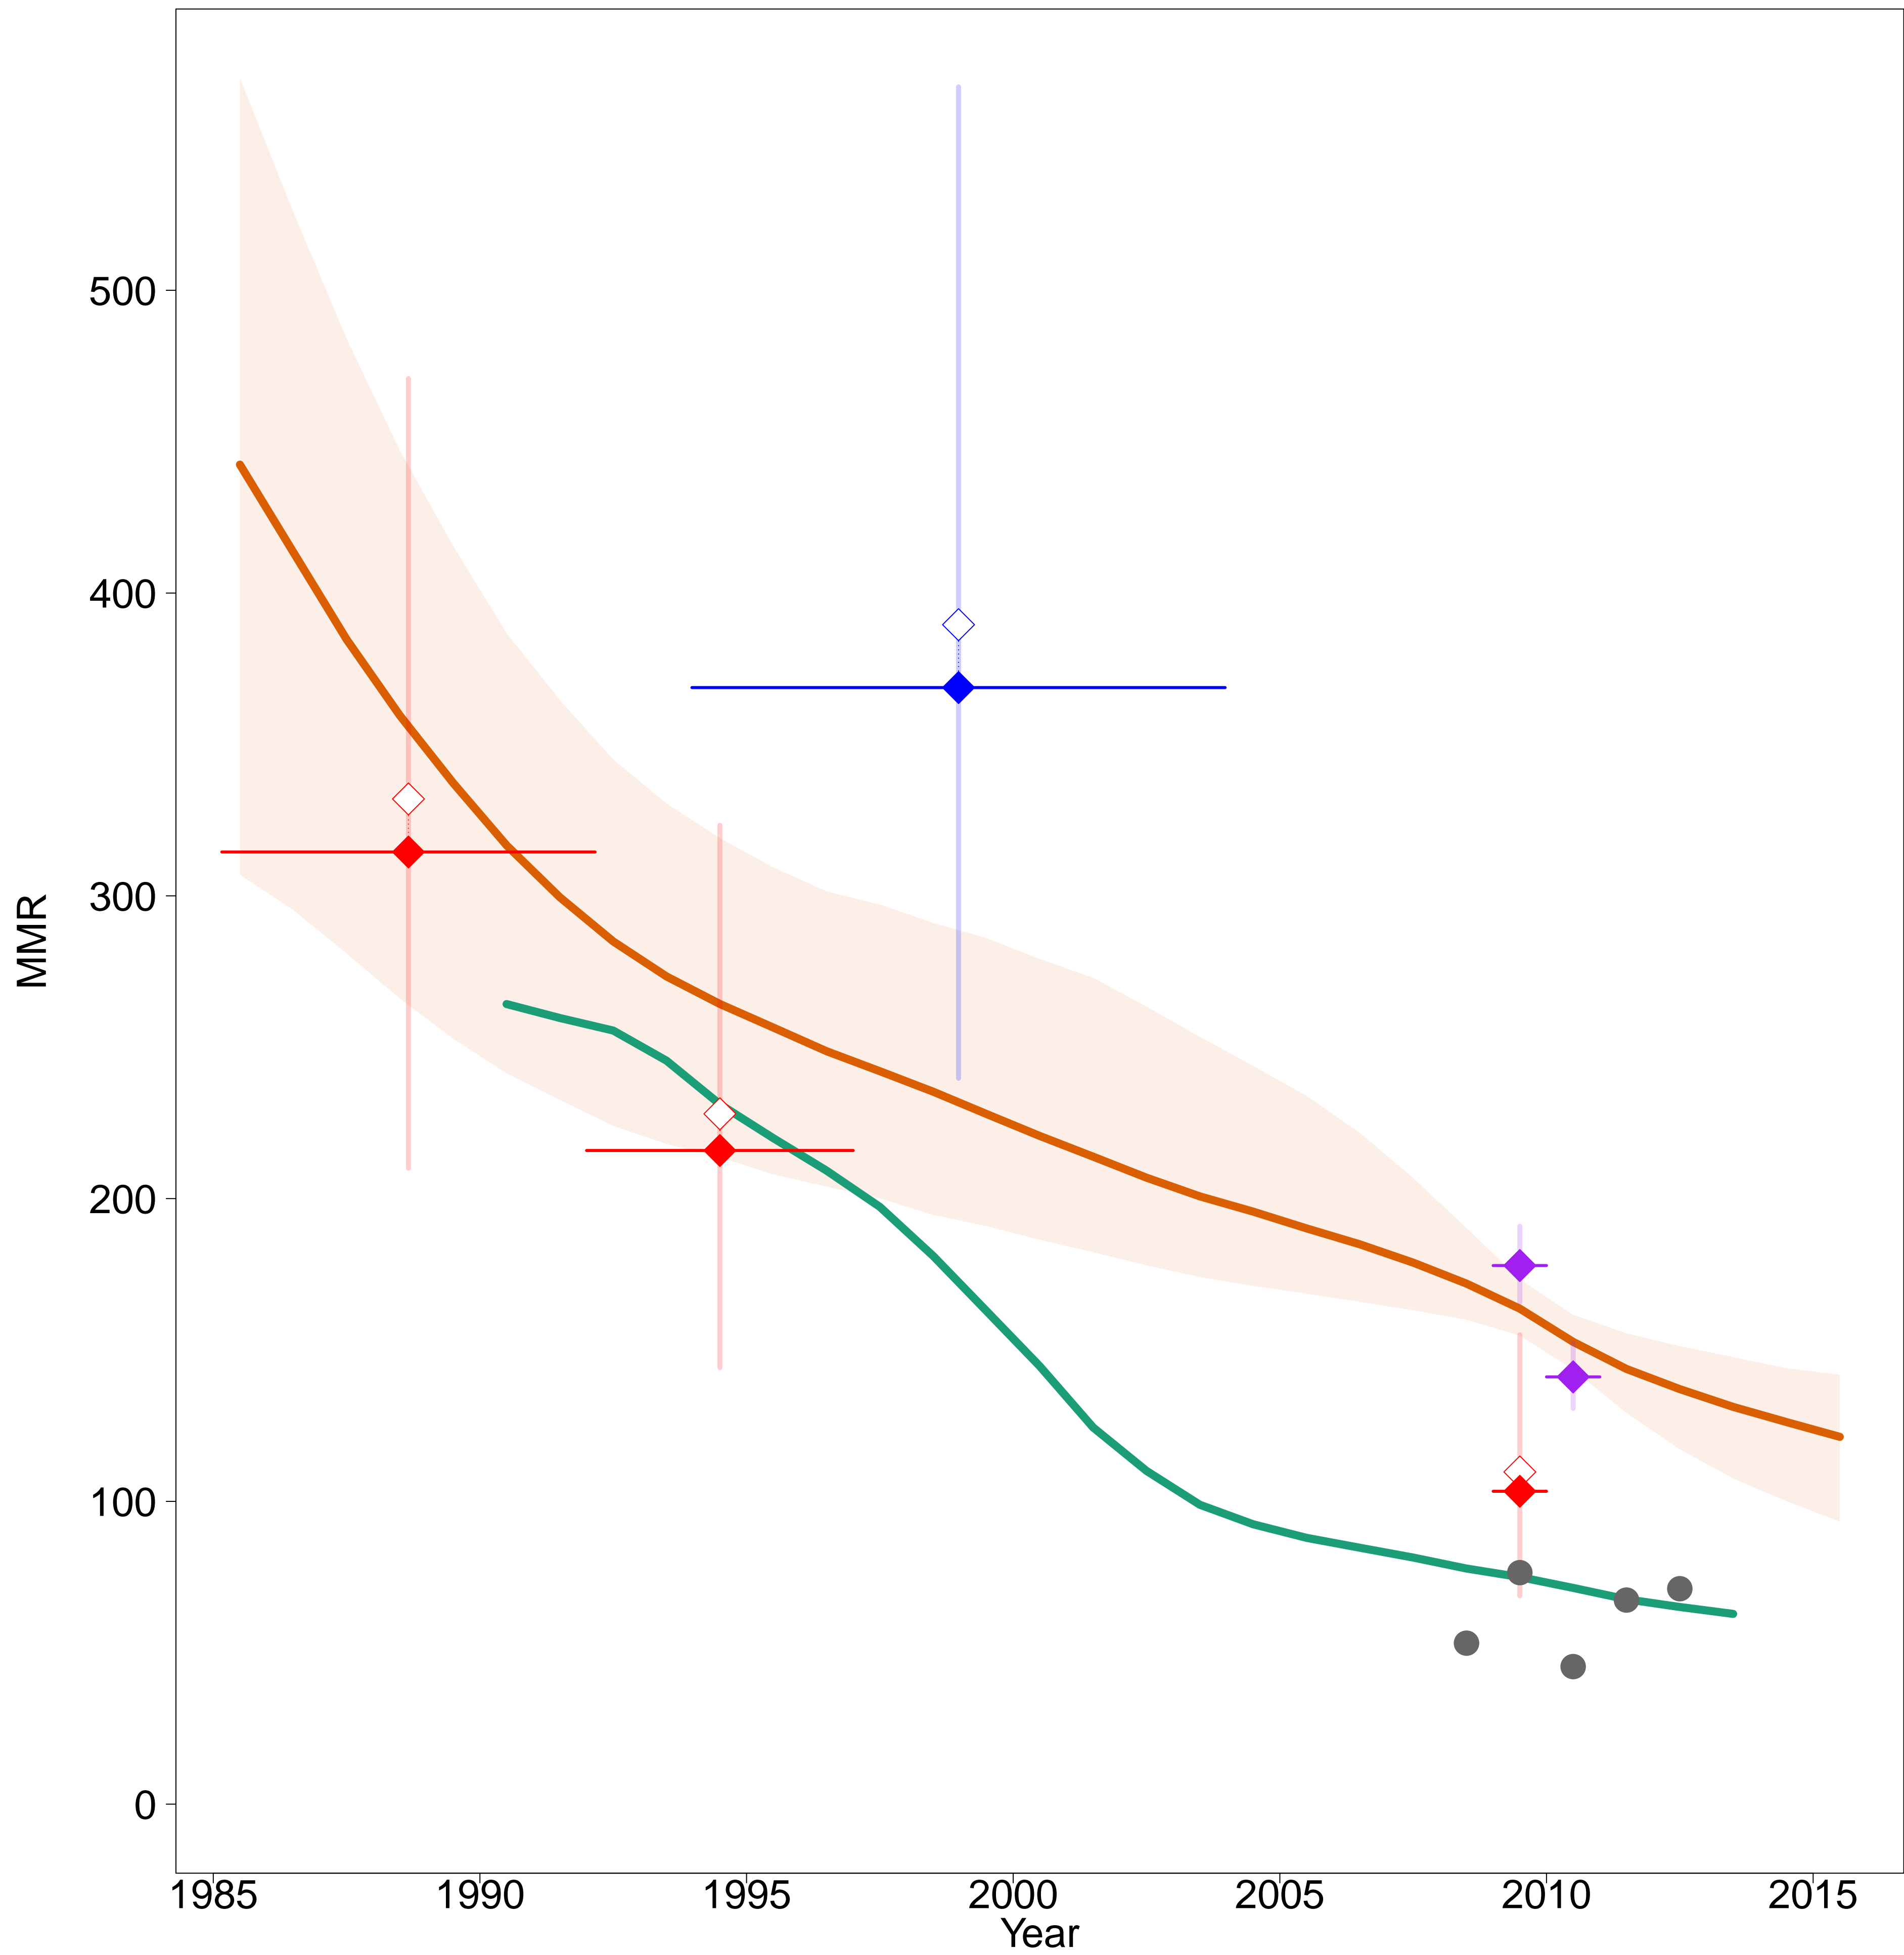

- Estimates –
- MMEIG 2015
- GBD 2013
- MMR Database 2015 –
- ◊ Observed Data
- ◆ Adjusted Data
- Data type –
- ◆ Spec. studies
- ◆ DHS
- ◆ Misc. studies
- Excluded VR data (data quality issues)

Mozambique [MOZ]  
(Eastern Africa)

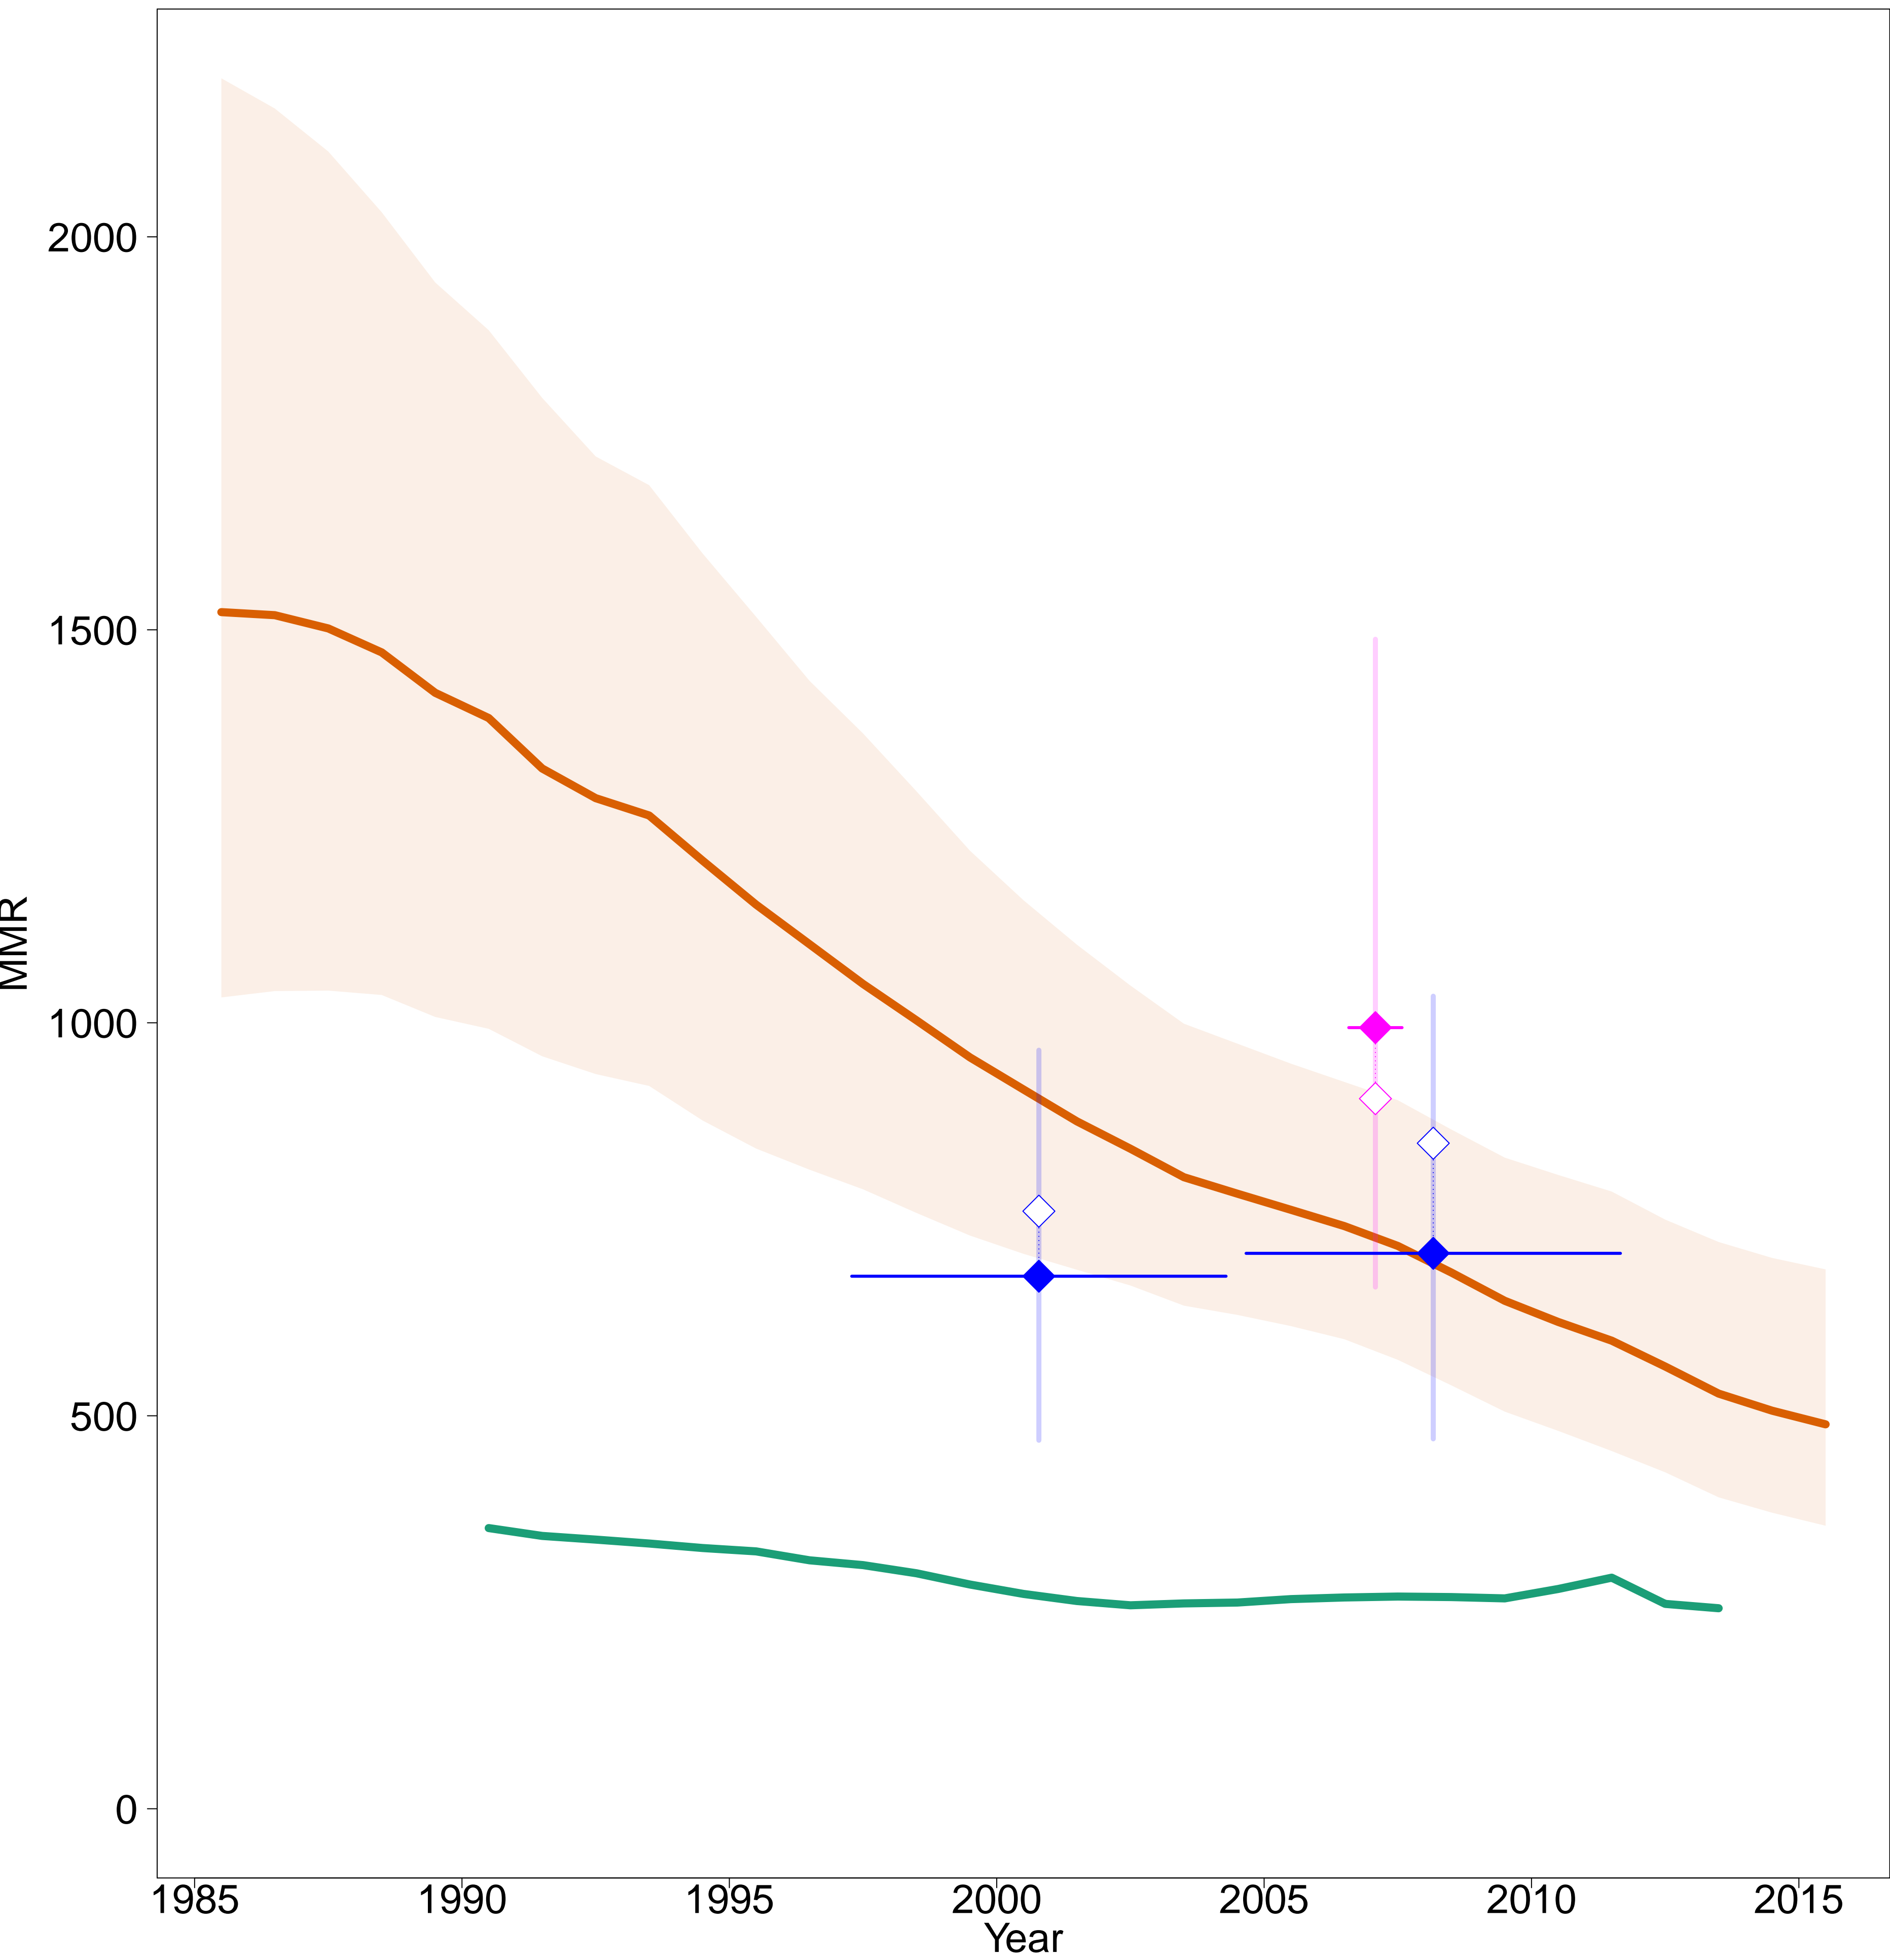

- Estimates –
- MMEIG 2015
- GBD 2013
- MMR Database 2015 –
- Observed Data
- Adjusted Data
- Data type –
- DHS
- Census

Myanmar [MMR]  
(South-Eastern Asia / Oceania)

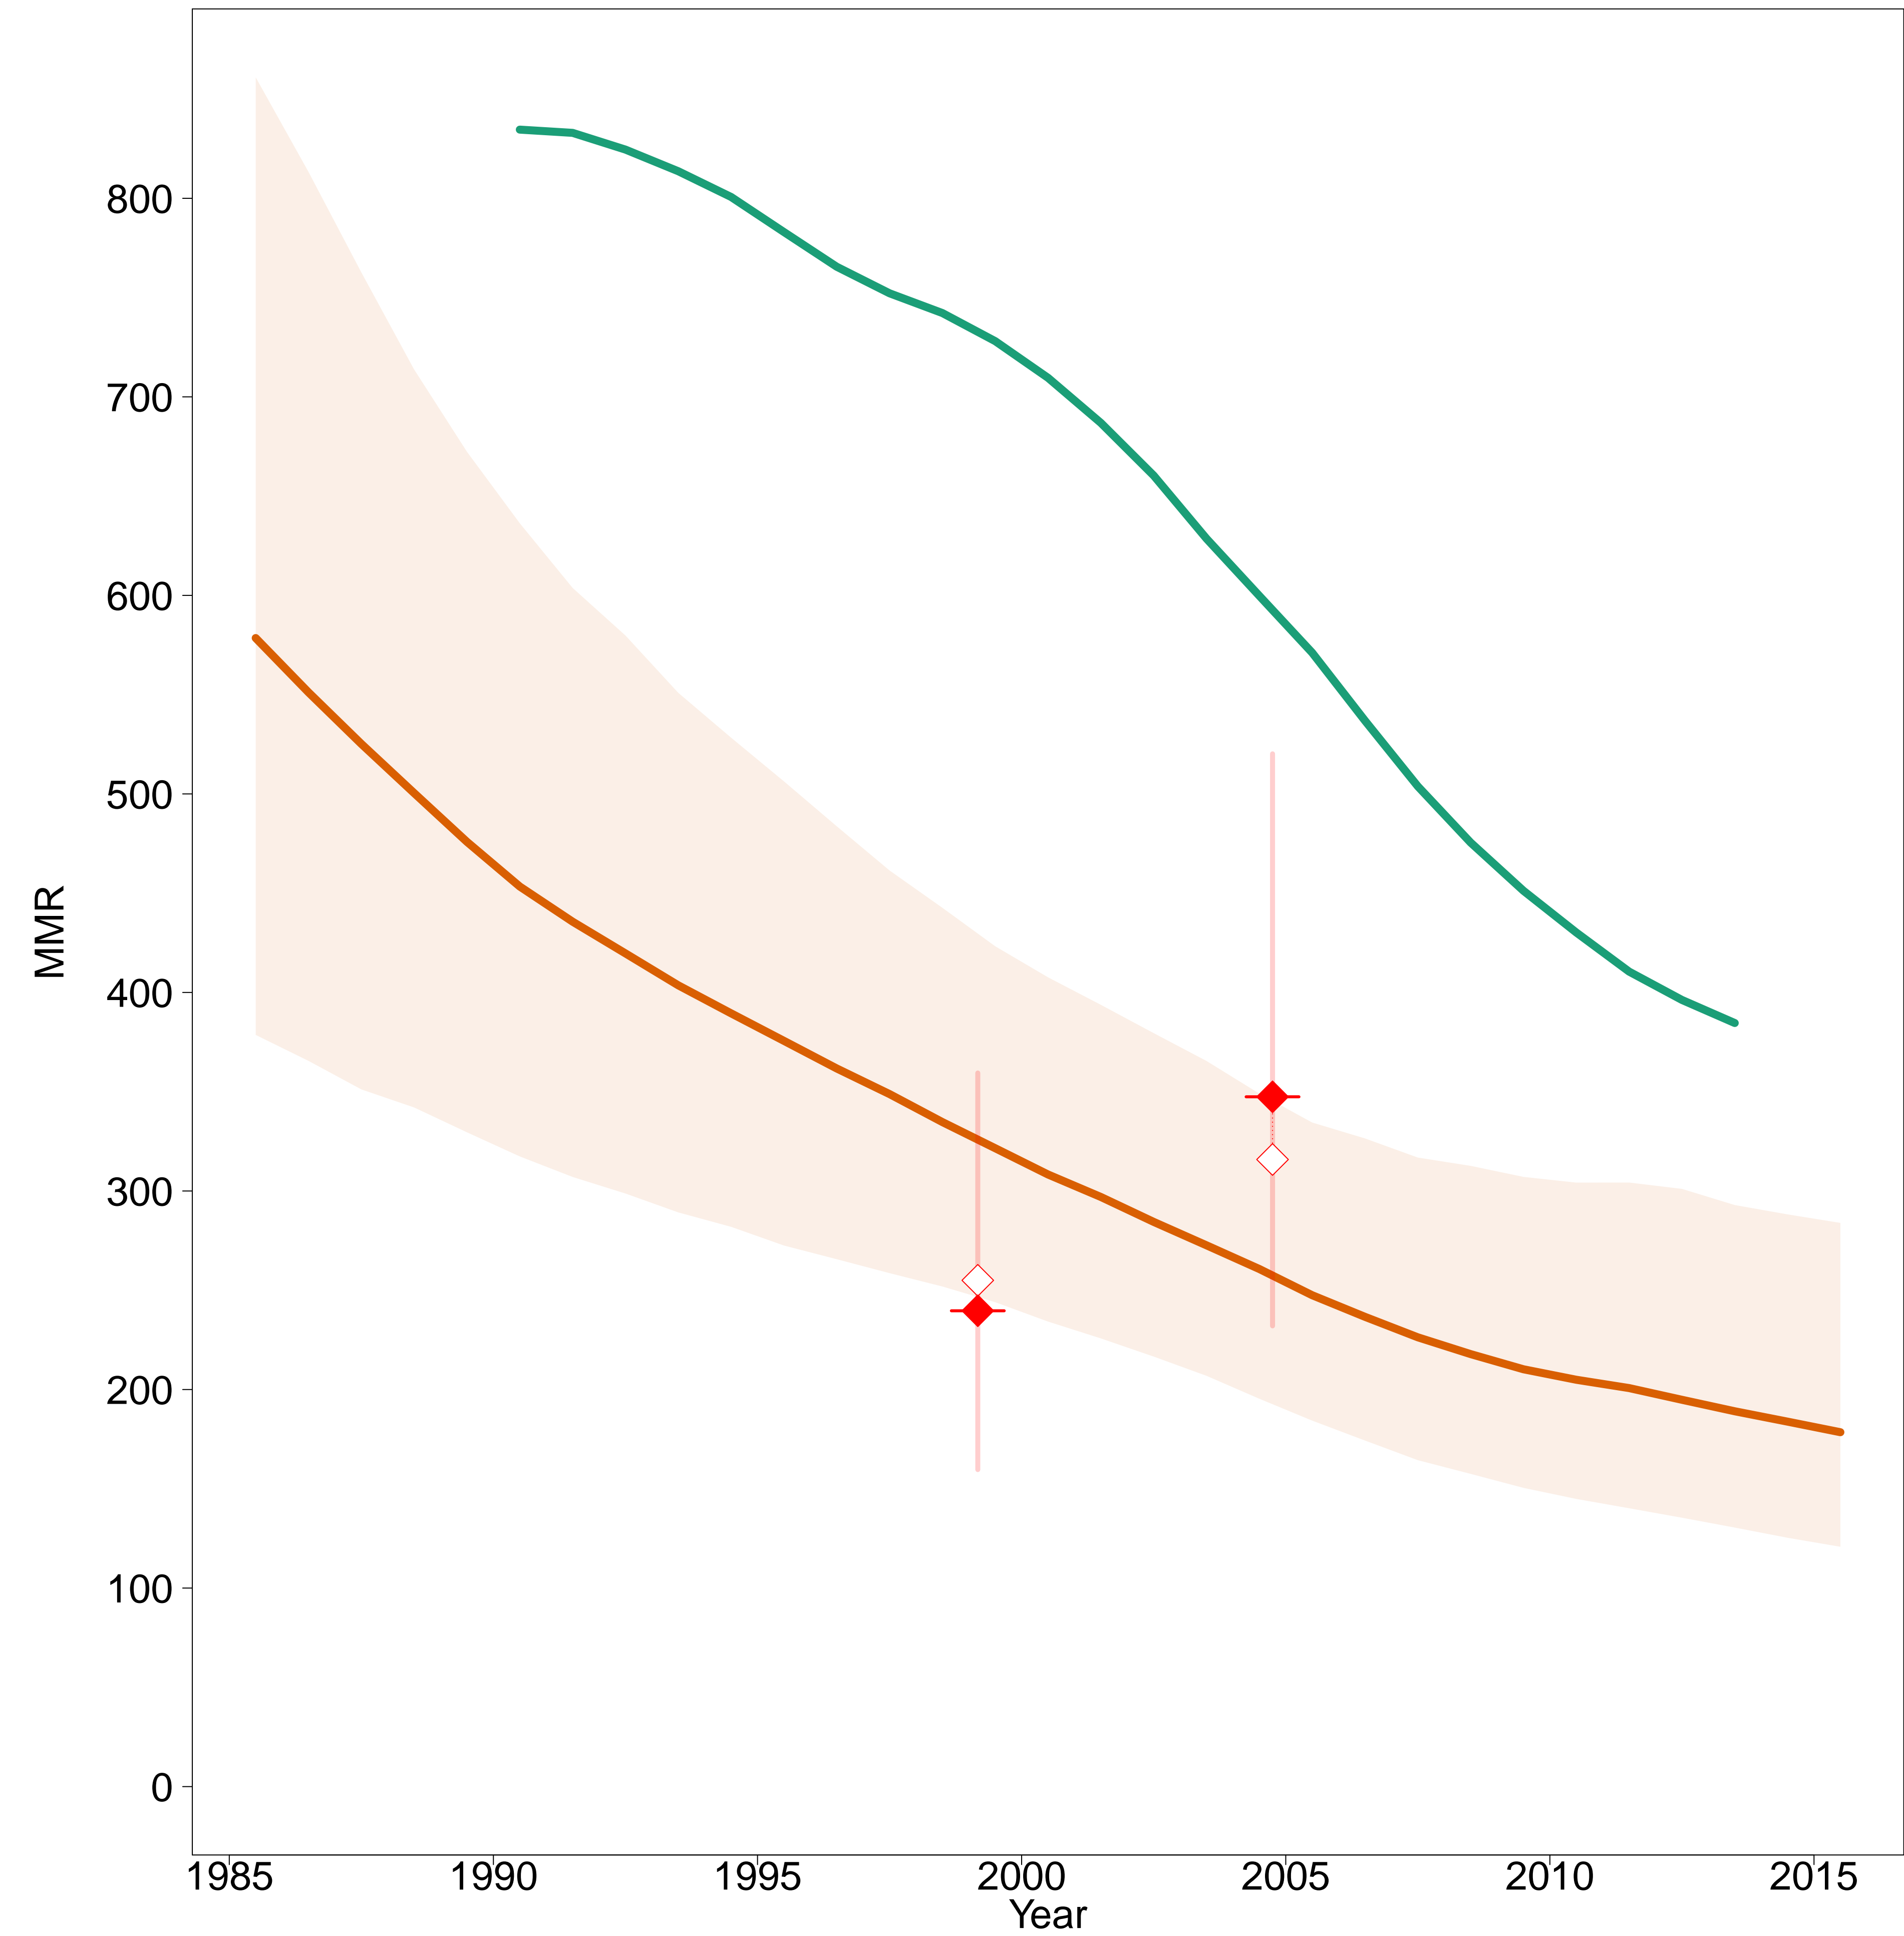

- Estimates -
- MMEIG 2015
- GBD 2013
- MMR Database 2015 -
- Observed Data
- Adjusted Data
- Data type -
- Misc. studies

Namibia [NAM]  
(Southern Africa)

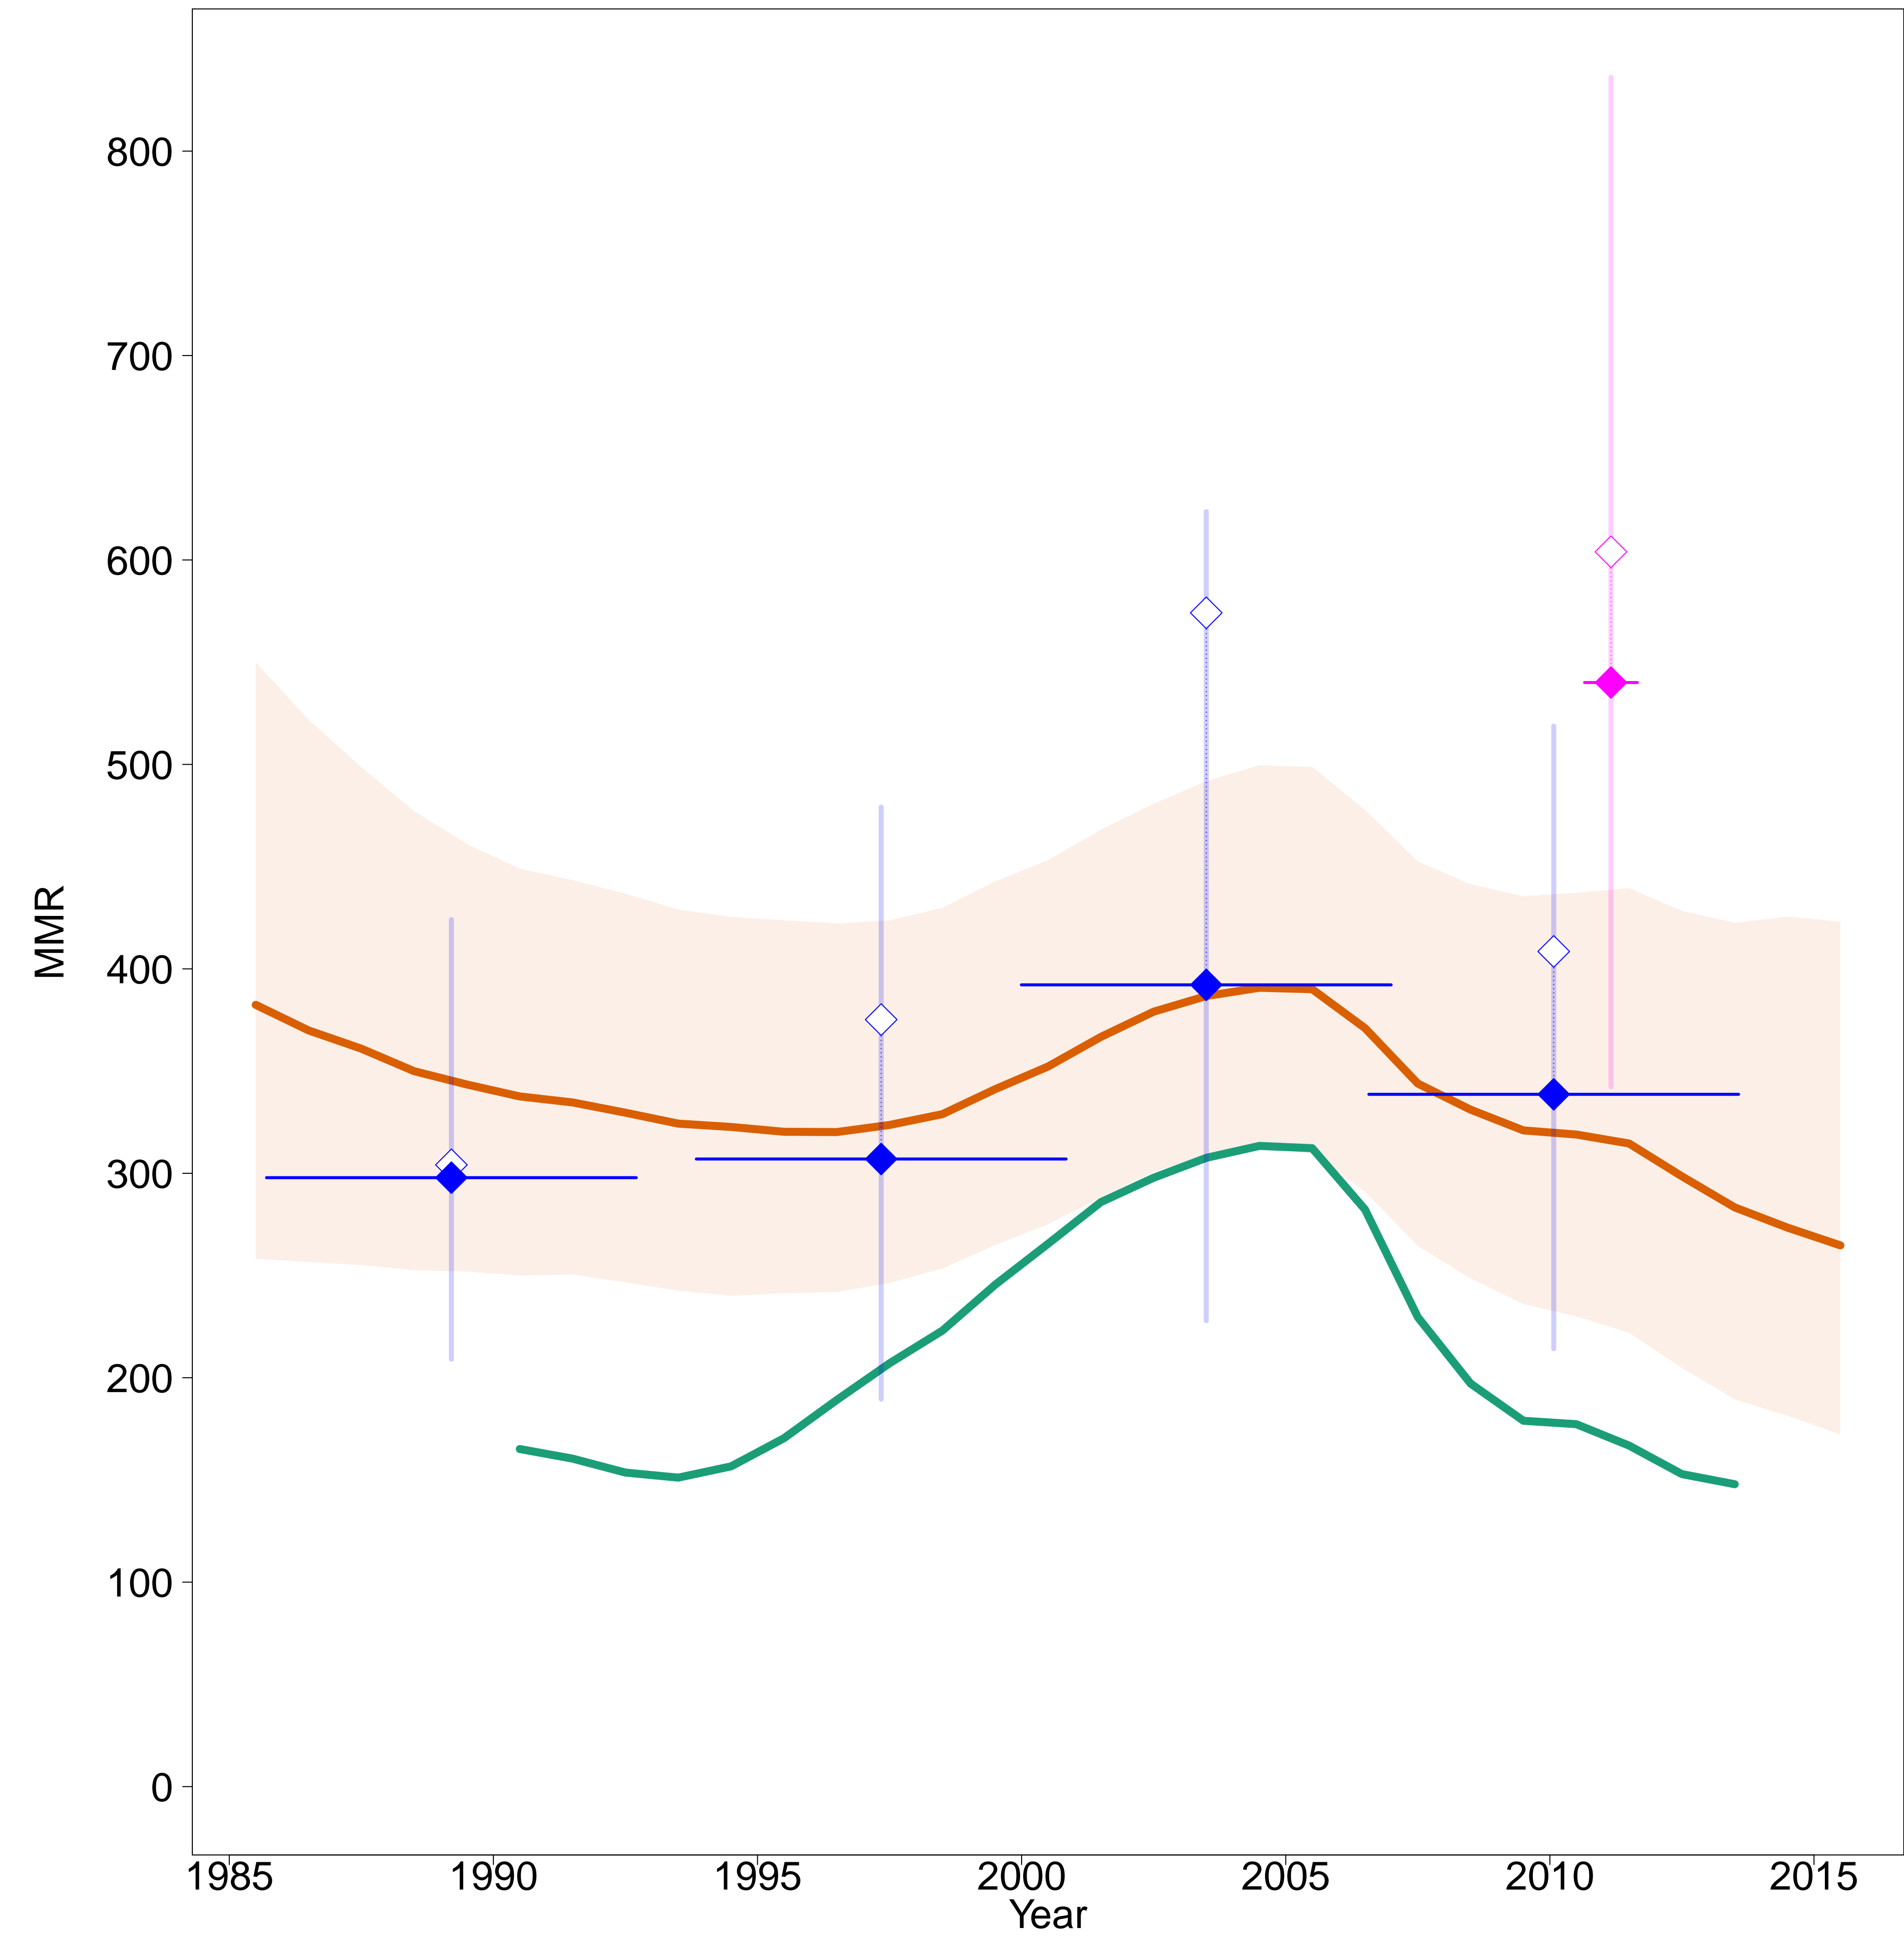

- Estimates -
- MMEIG 2015
- GBD 2013
- MMR Database 2015 -
- Observed Data
- Adjusted Data
- Data type -
- DHS
- Census

Nepal [NPL]  
(Southern Asia)

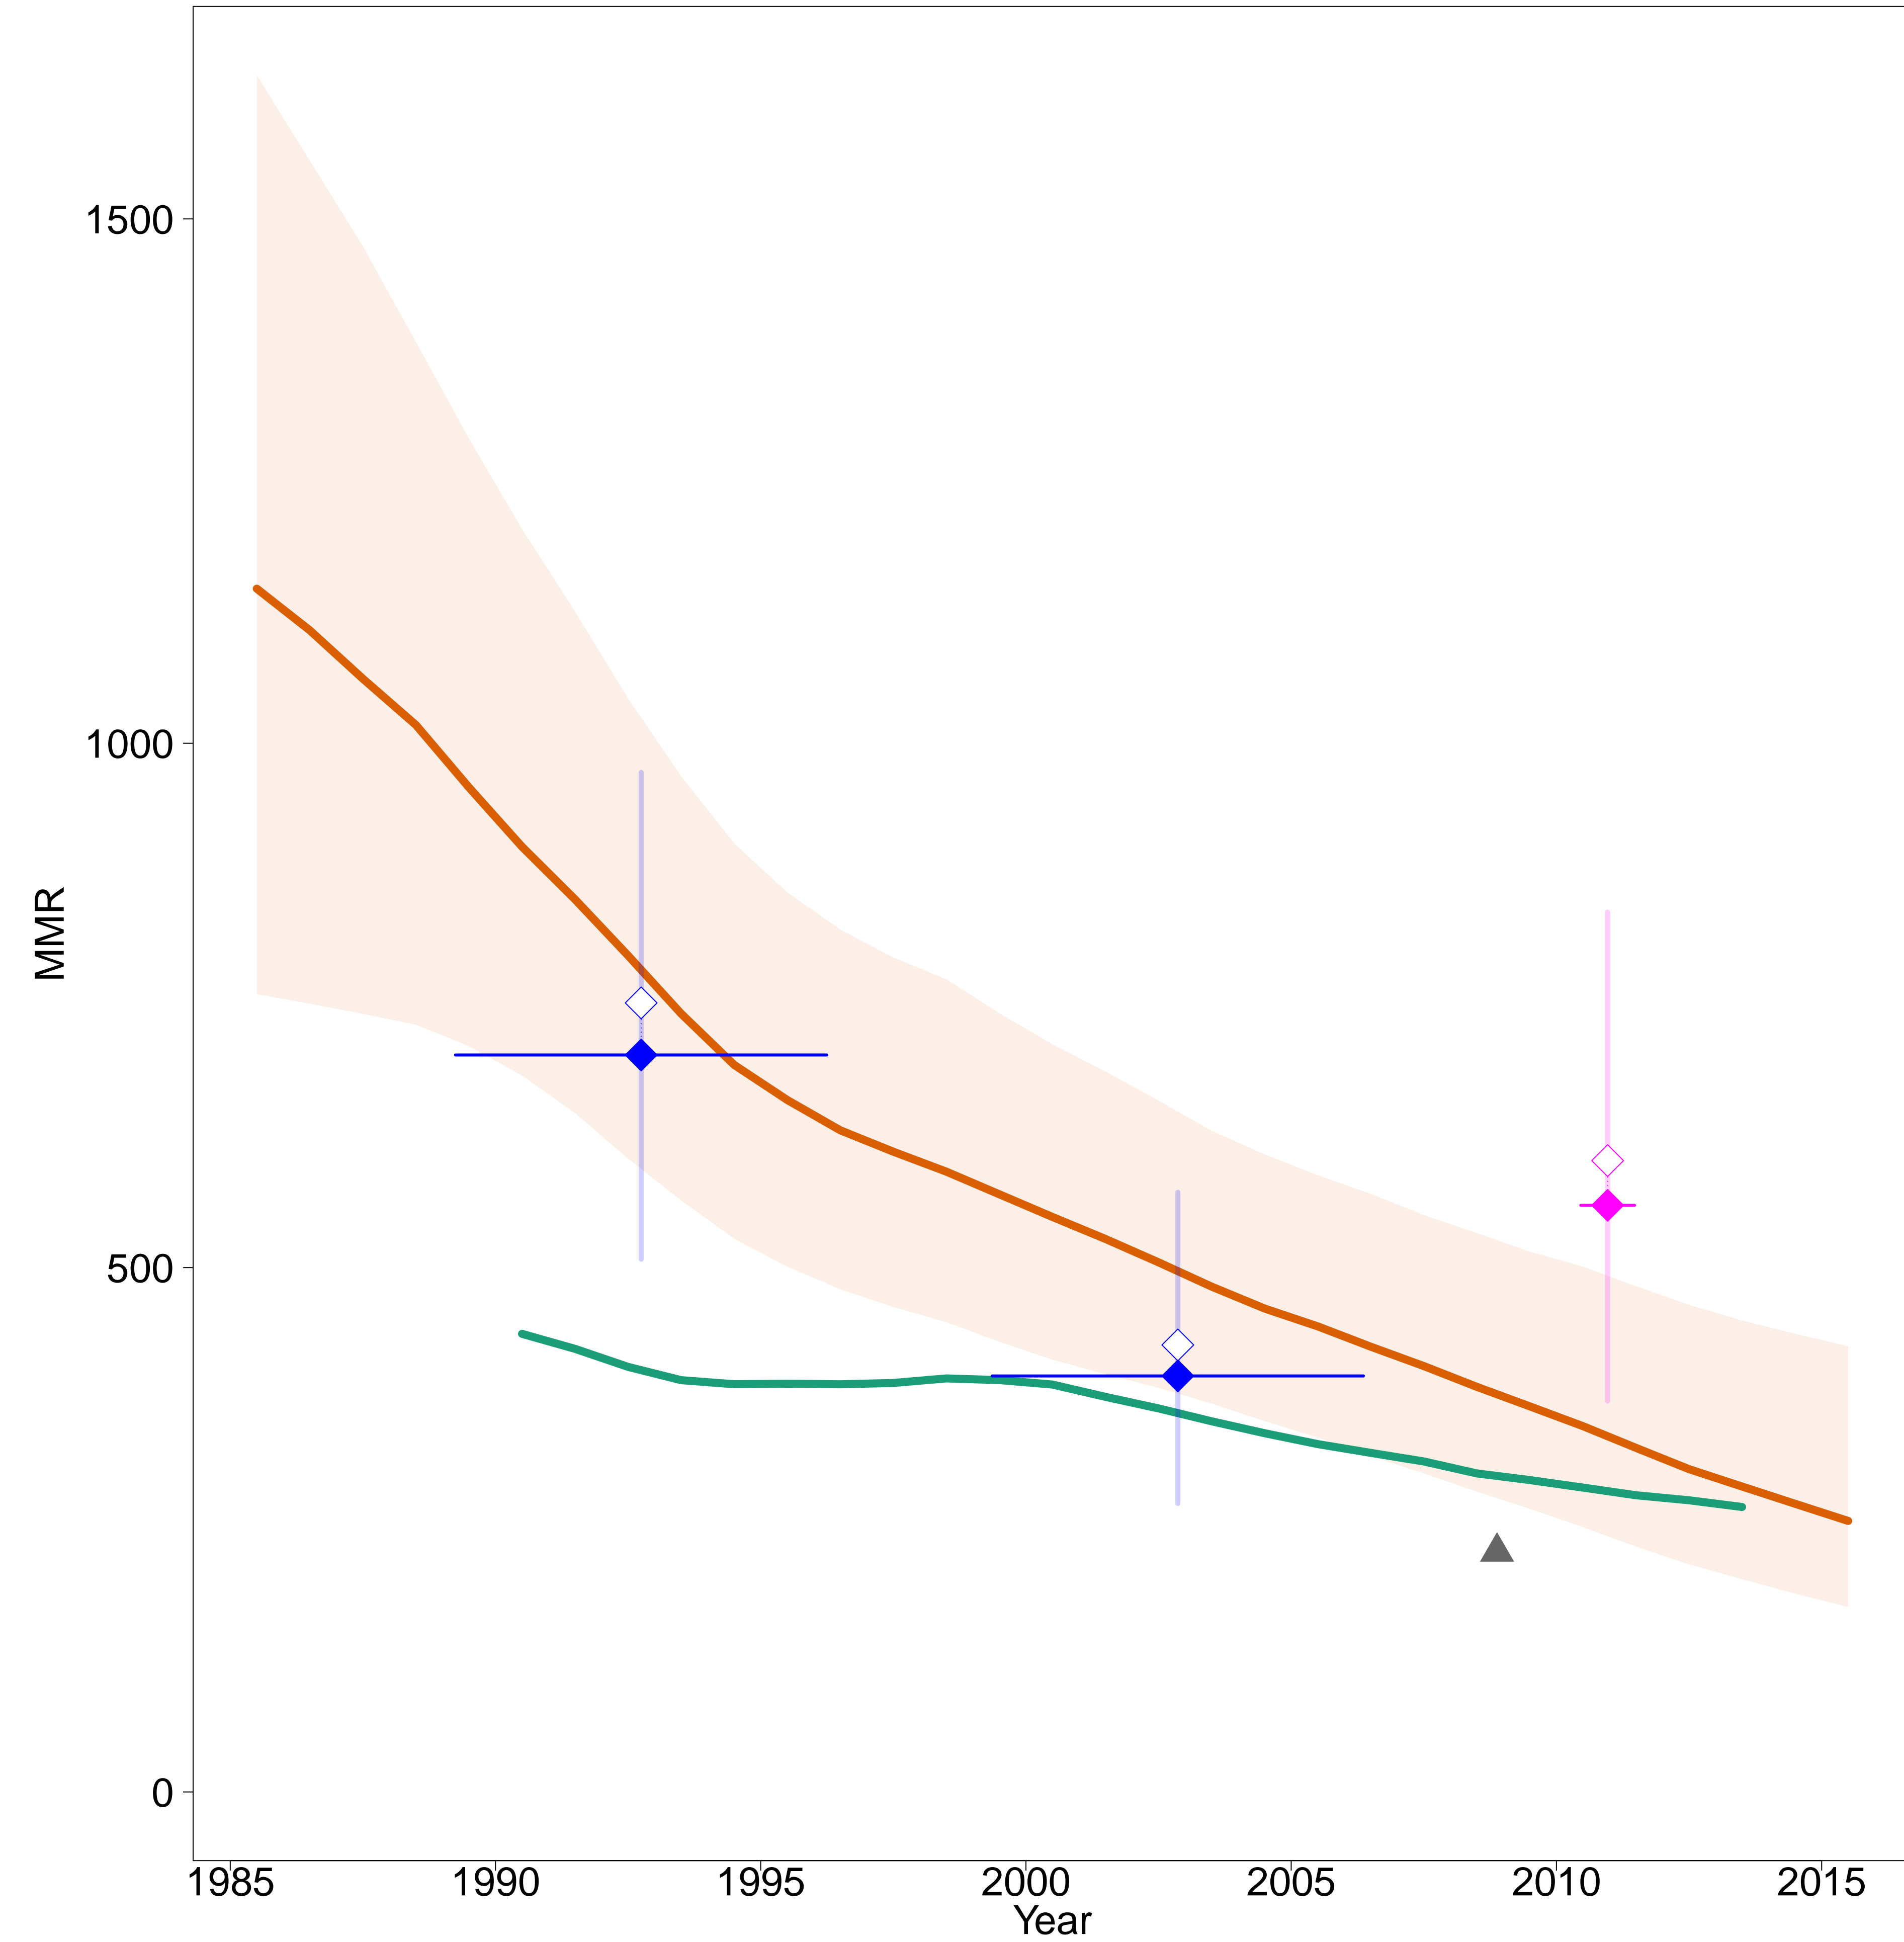

- Estimates -
- MMEIG 2015
- GBD 2013
- MMR Database 2015 -
- Observed Data
- Adjusted Data
- Data type -
- DHS
- Census
- Excluded misc. studies



Netherlands [NLD]  
(Developed regions)

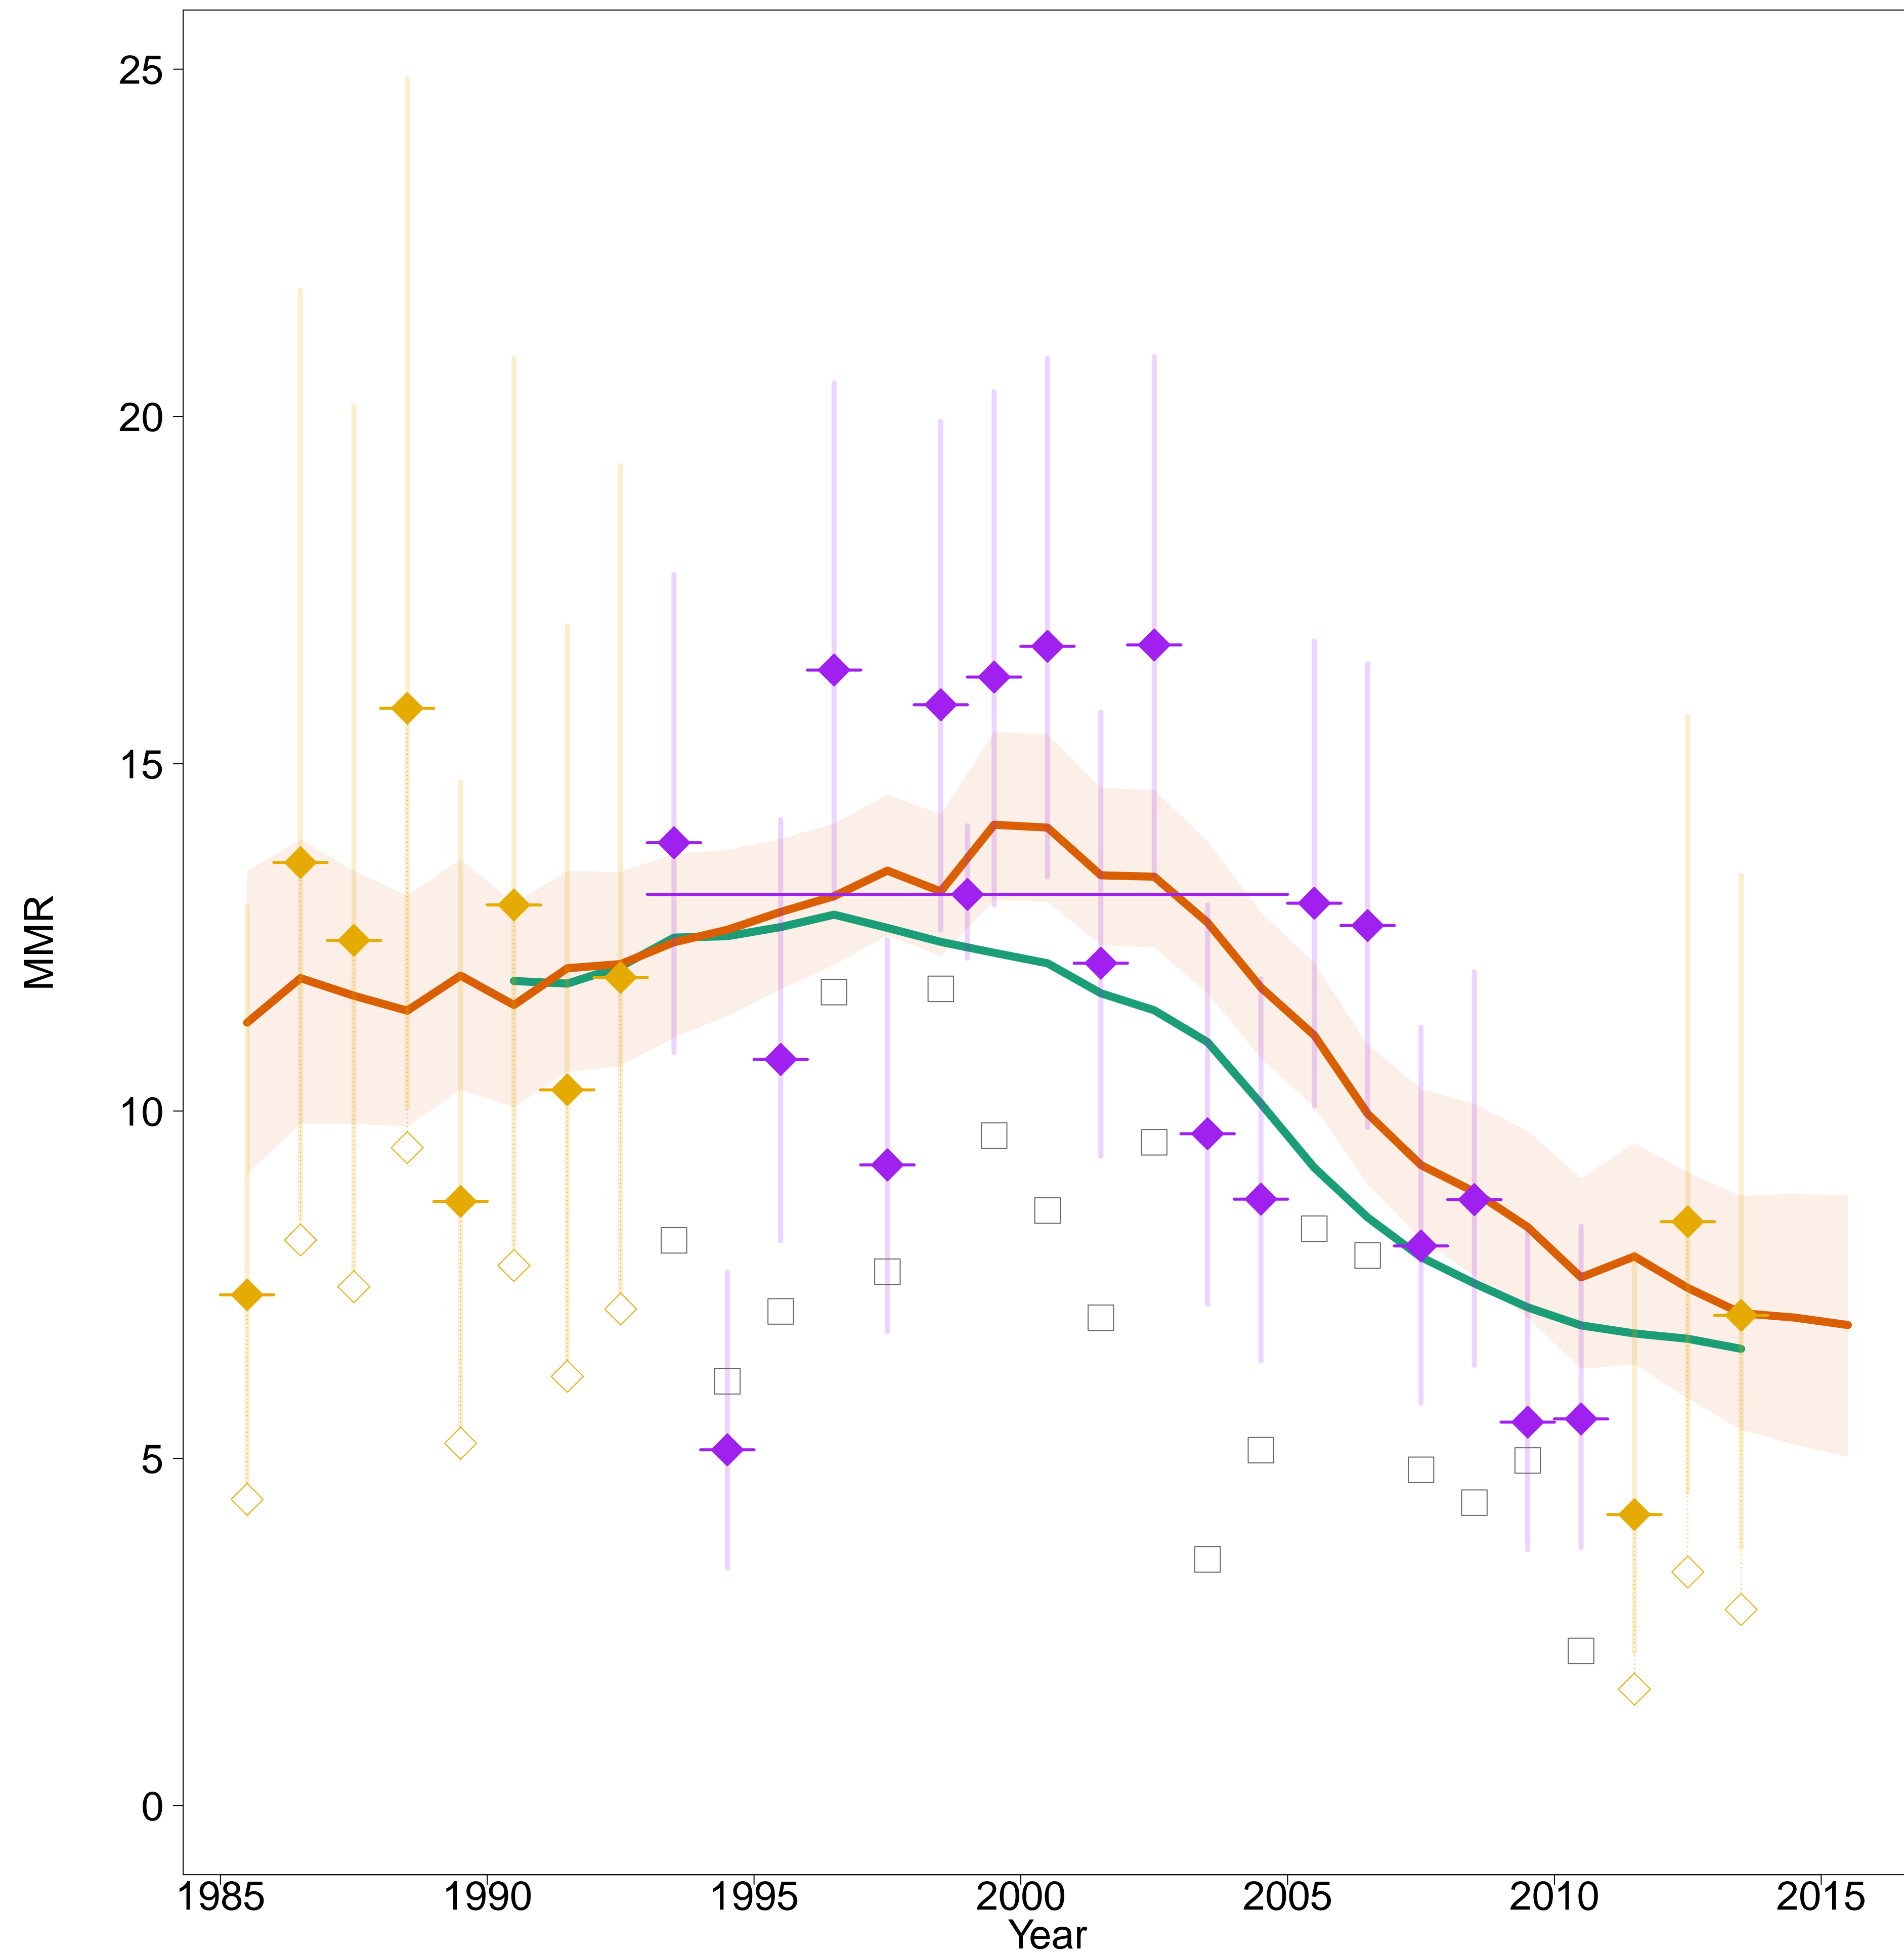

- Estimates –
- MMEIG 2015
- GBD 2013
- MMR Database 2015 –
- ◊ Observed Data
- ◆ Adjusted Data
- Data type –
- ◆ VR
- ◆ Spec. studies
- ◻ Excluded VR data  
(overlap with specialized study)

New Zealand [NZL]  
(Developed regions)

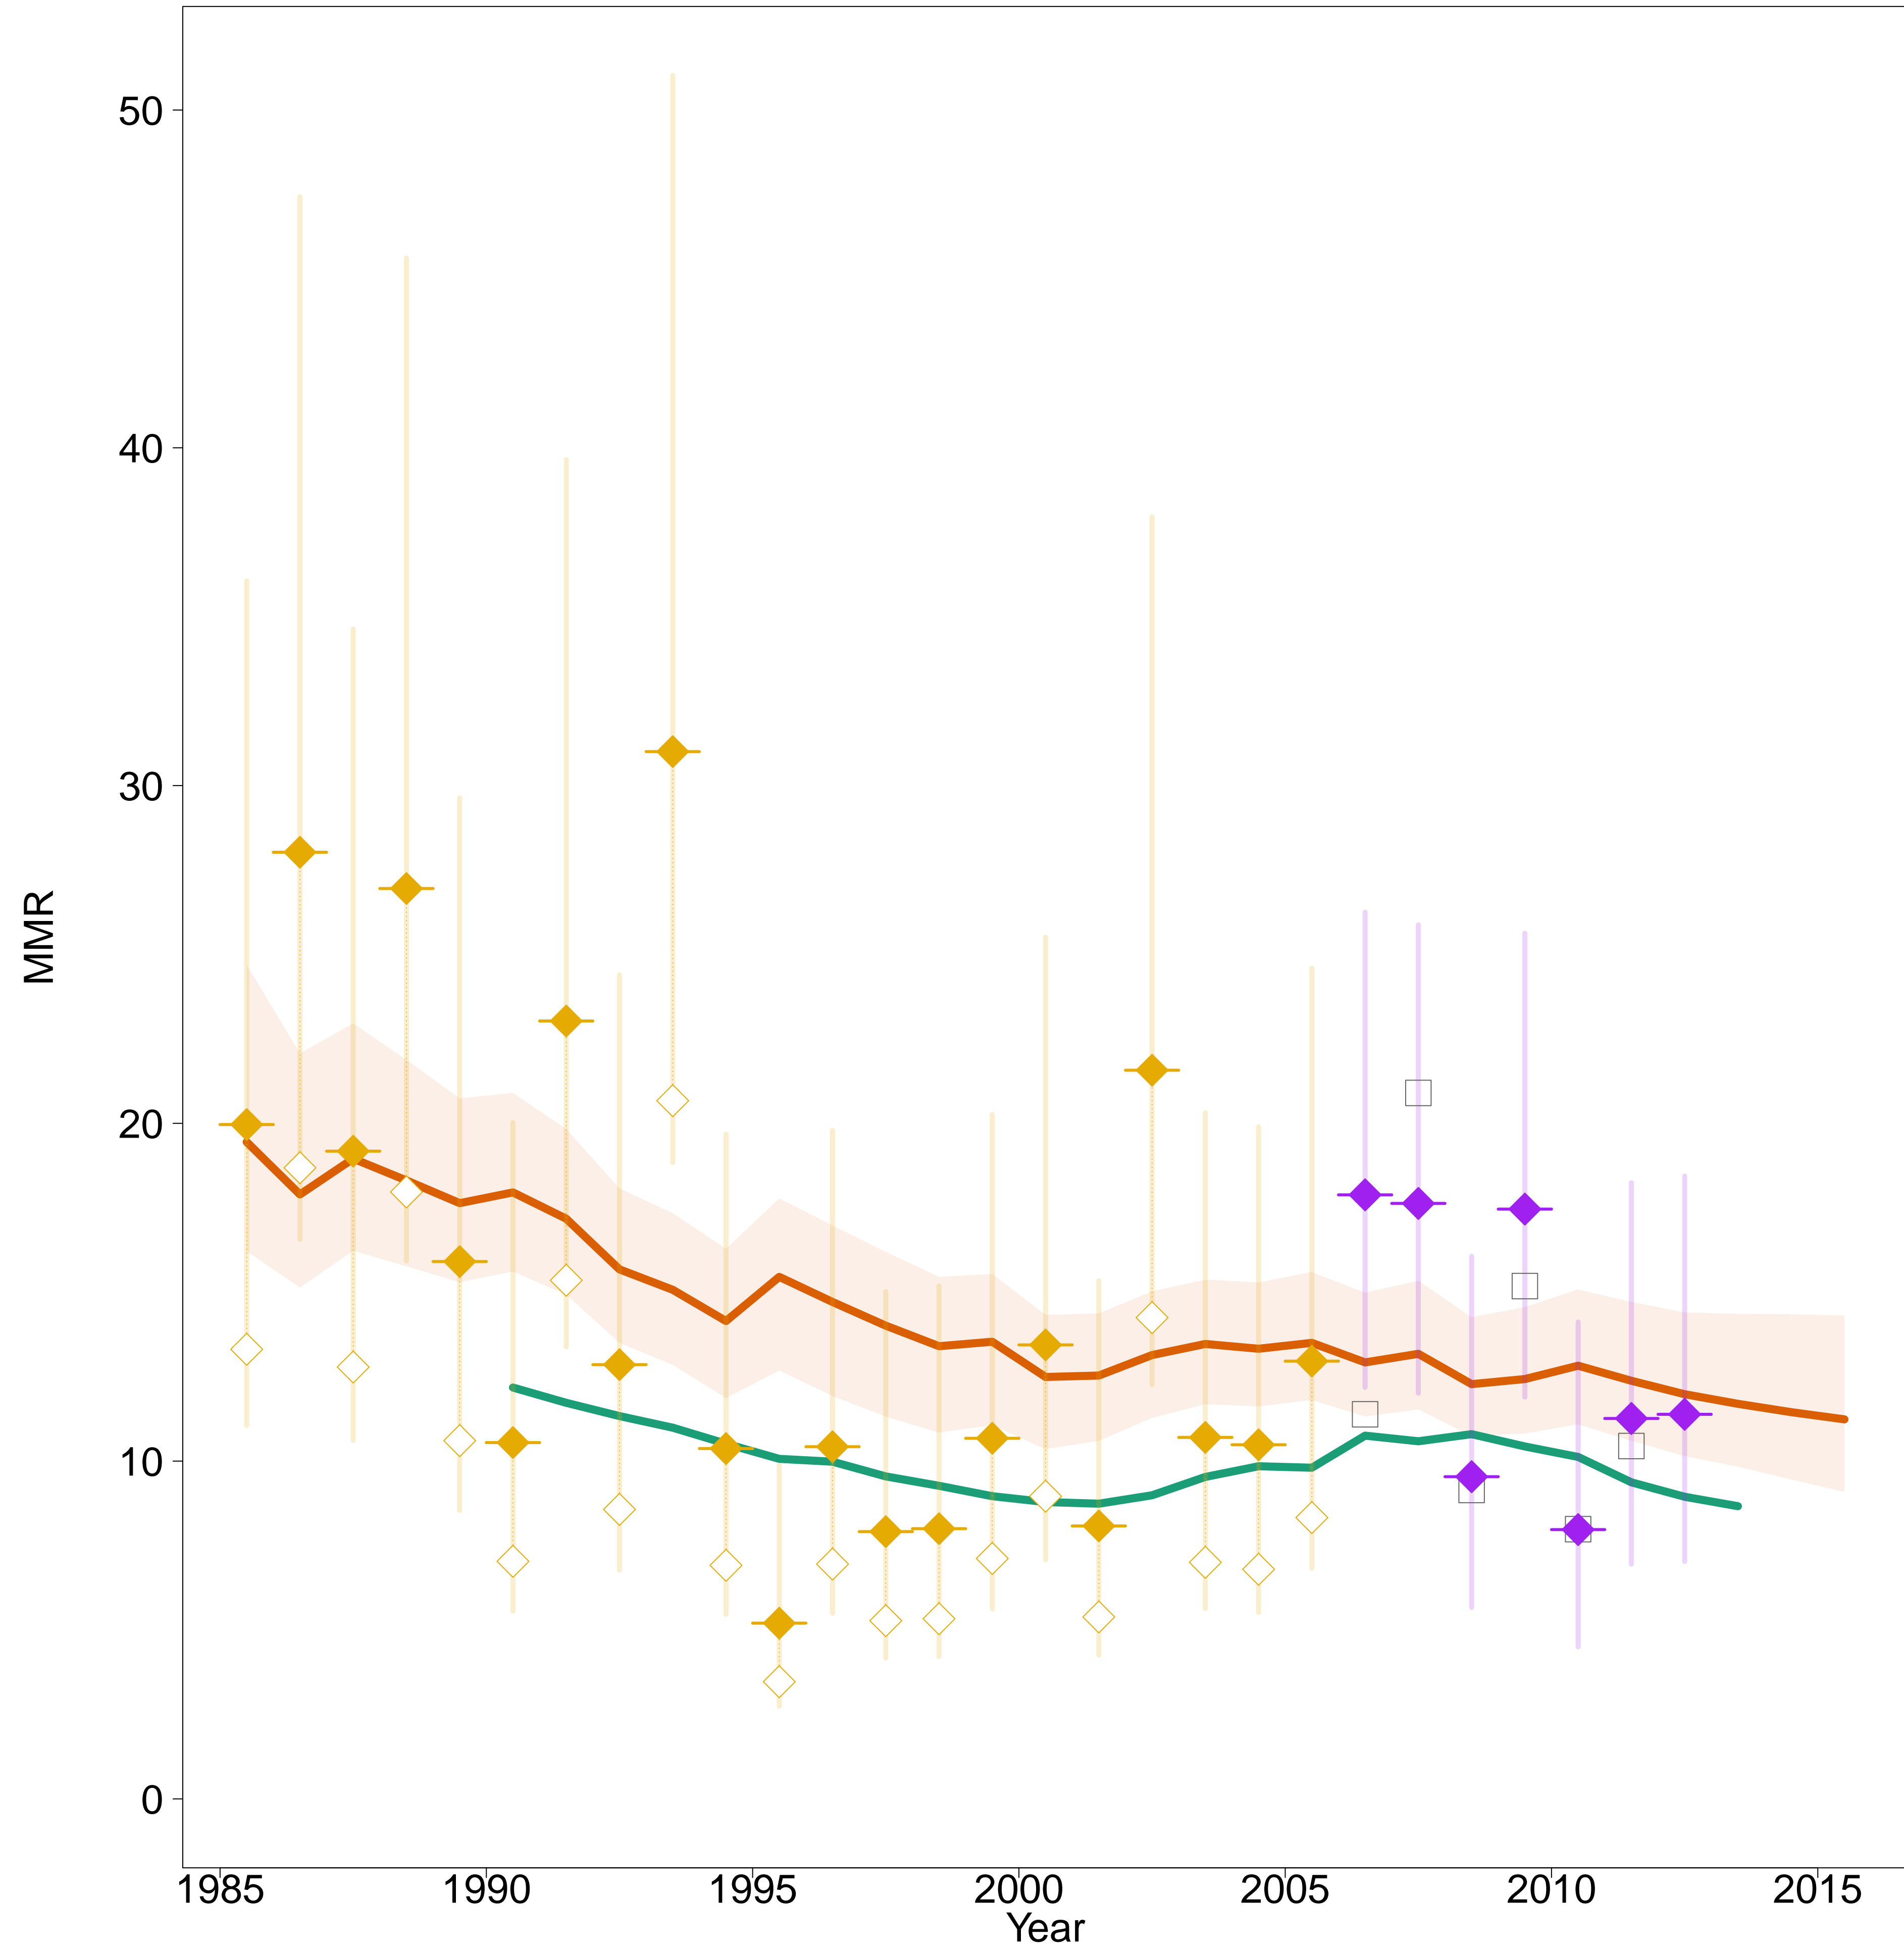

- Estimates –
- MMEIG 2015
- GBD 2013
- MMR Database 2015 –
- ◊ Observed Data
- ◆ Adjusted Data
- Data type –
- ◆ VR
- ◆ Spec. studies
- ◻ Excluded VR data  
(overlap with specialized study)

Nicaragua [NIC]  
(Central America)

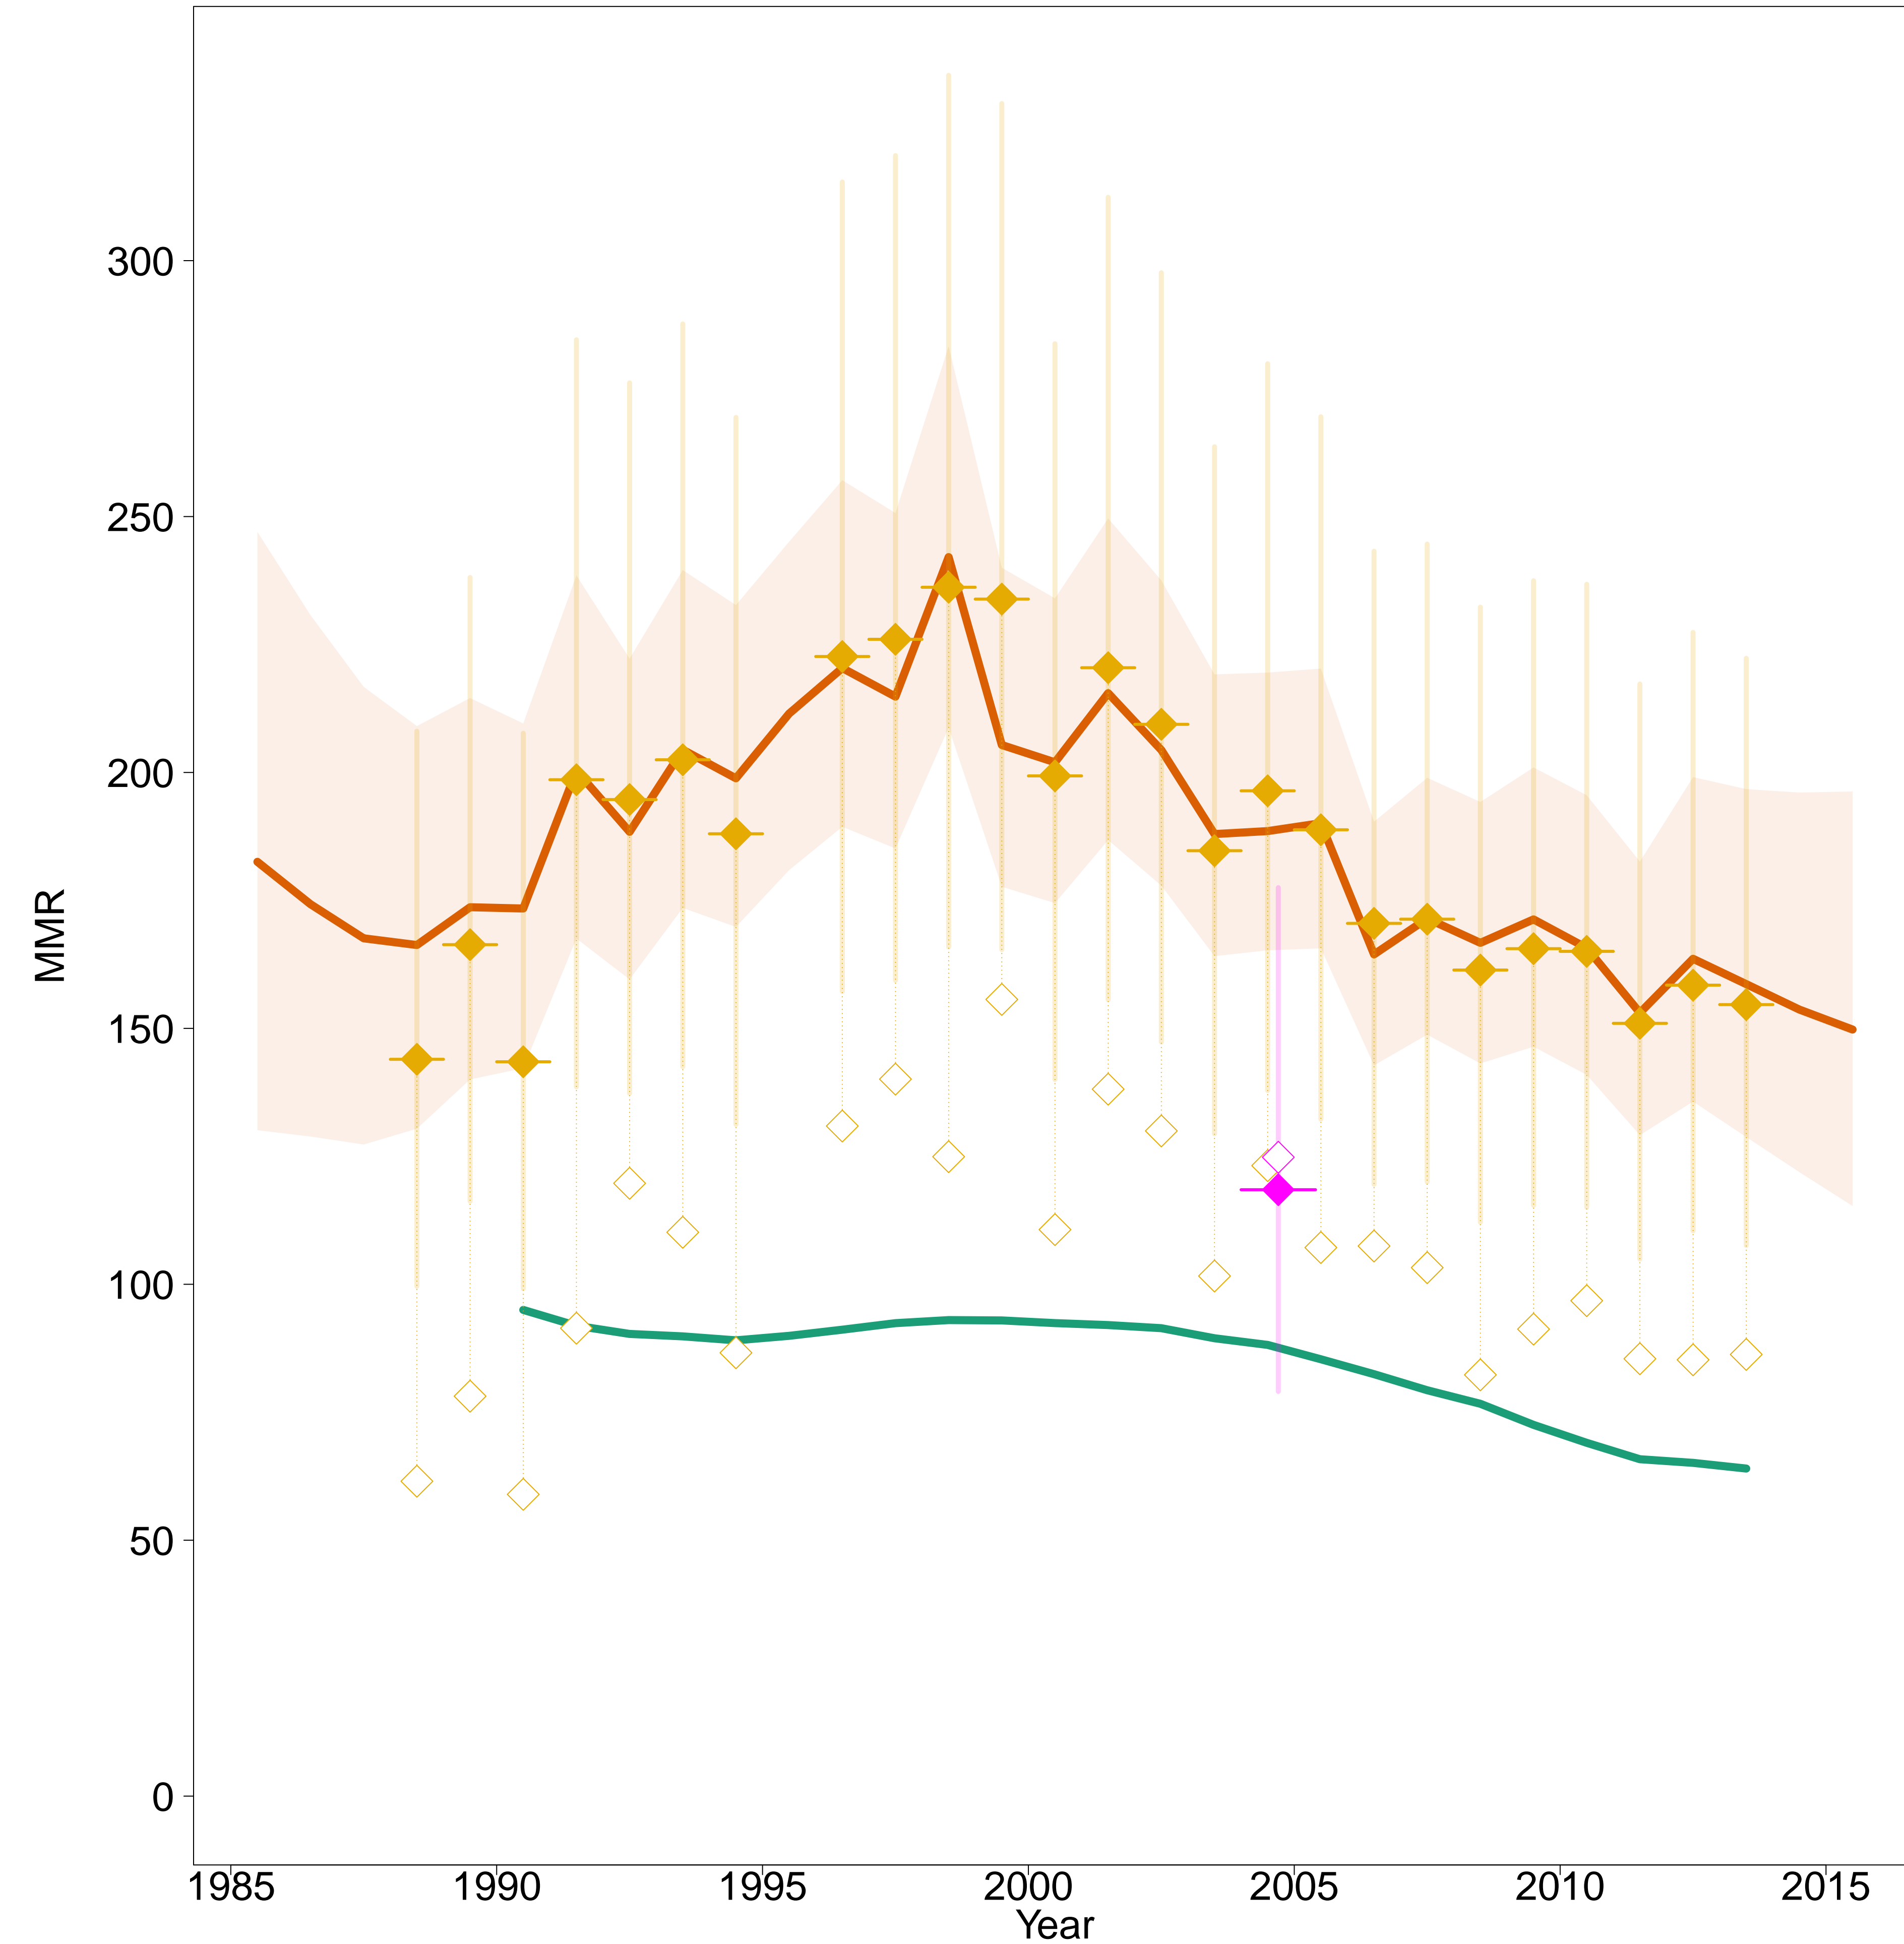

- Estimates –
- MMEIG 2015
- GBD 2013
- MMR Database 2015 –
- Observed Data
- Adjusted Data
- Data type –
- VR
- Census

Niger [NER]  
(Western Africa)

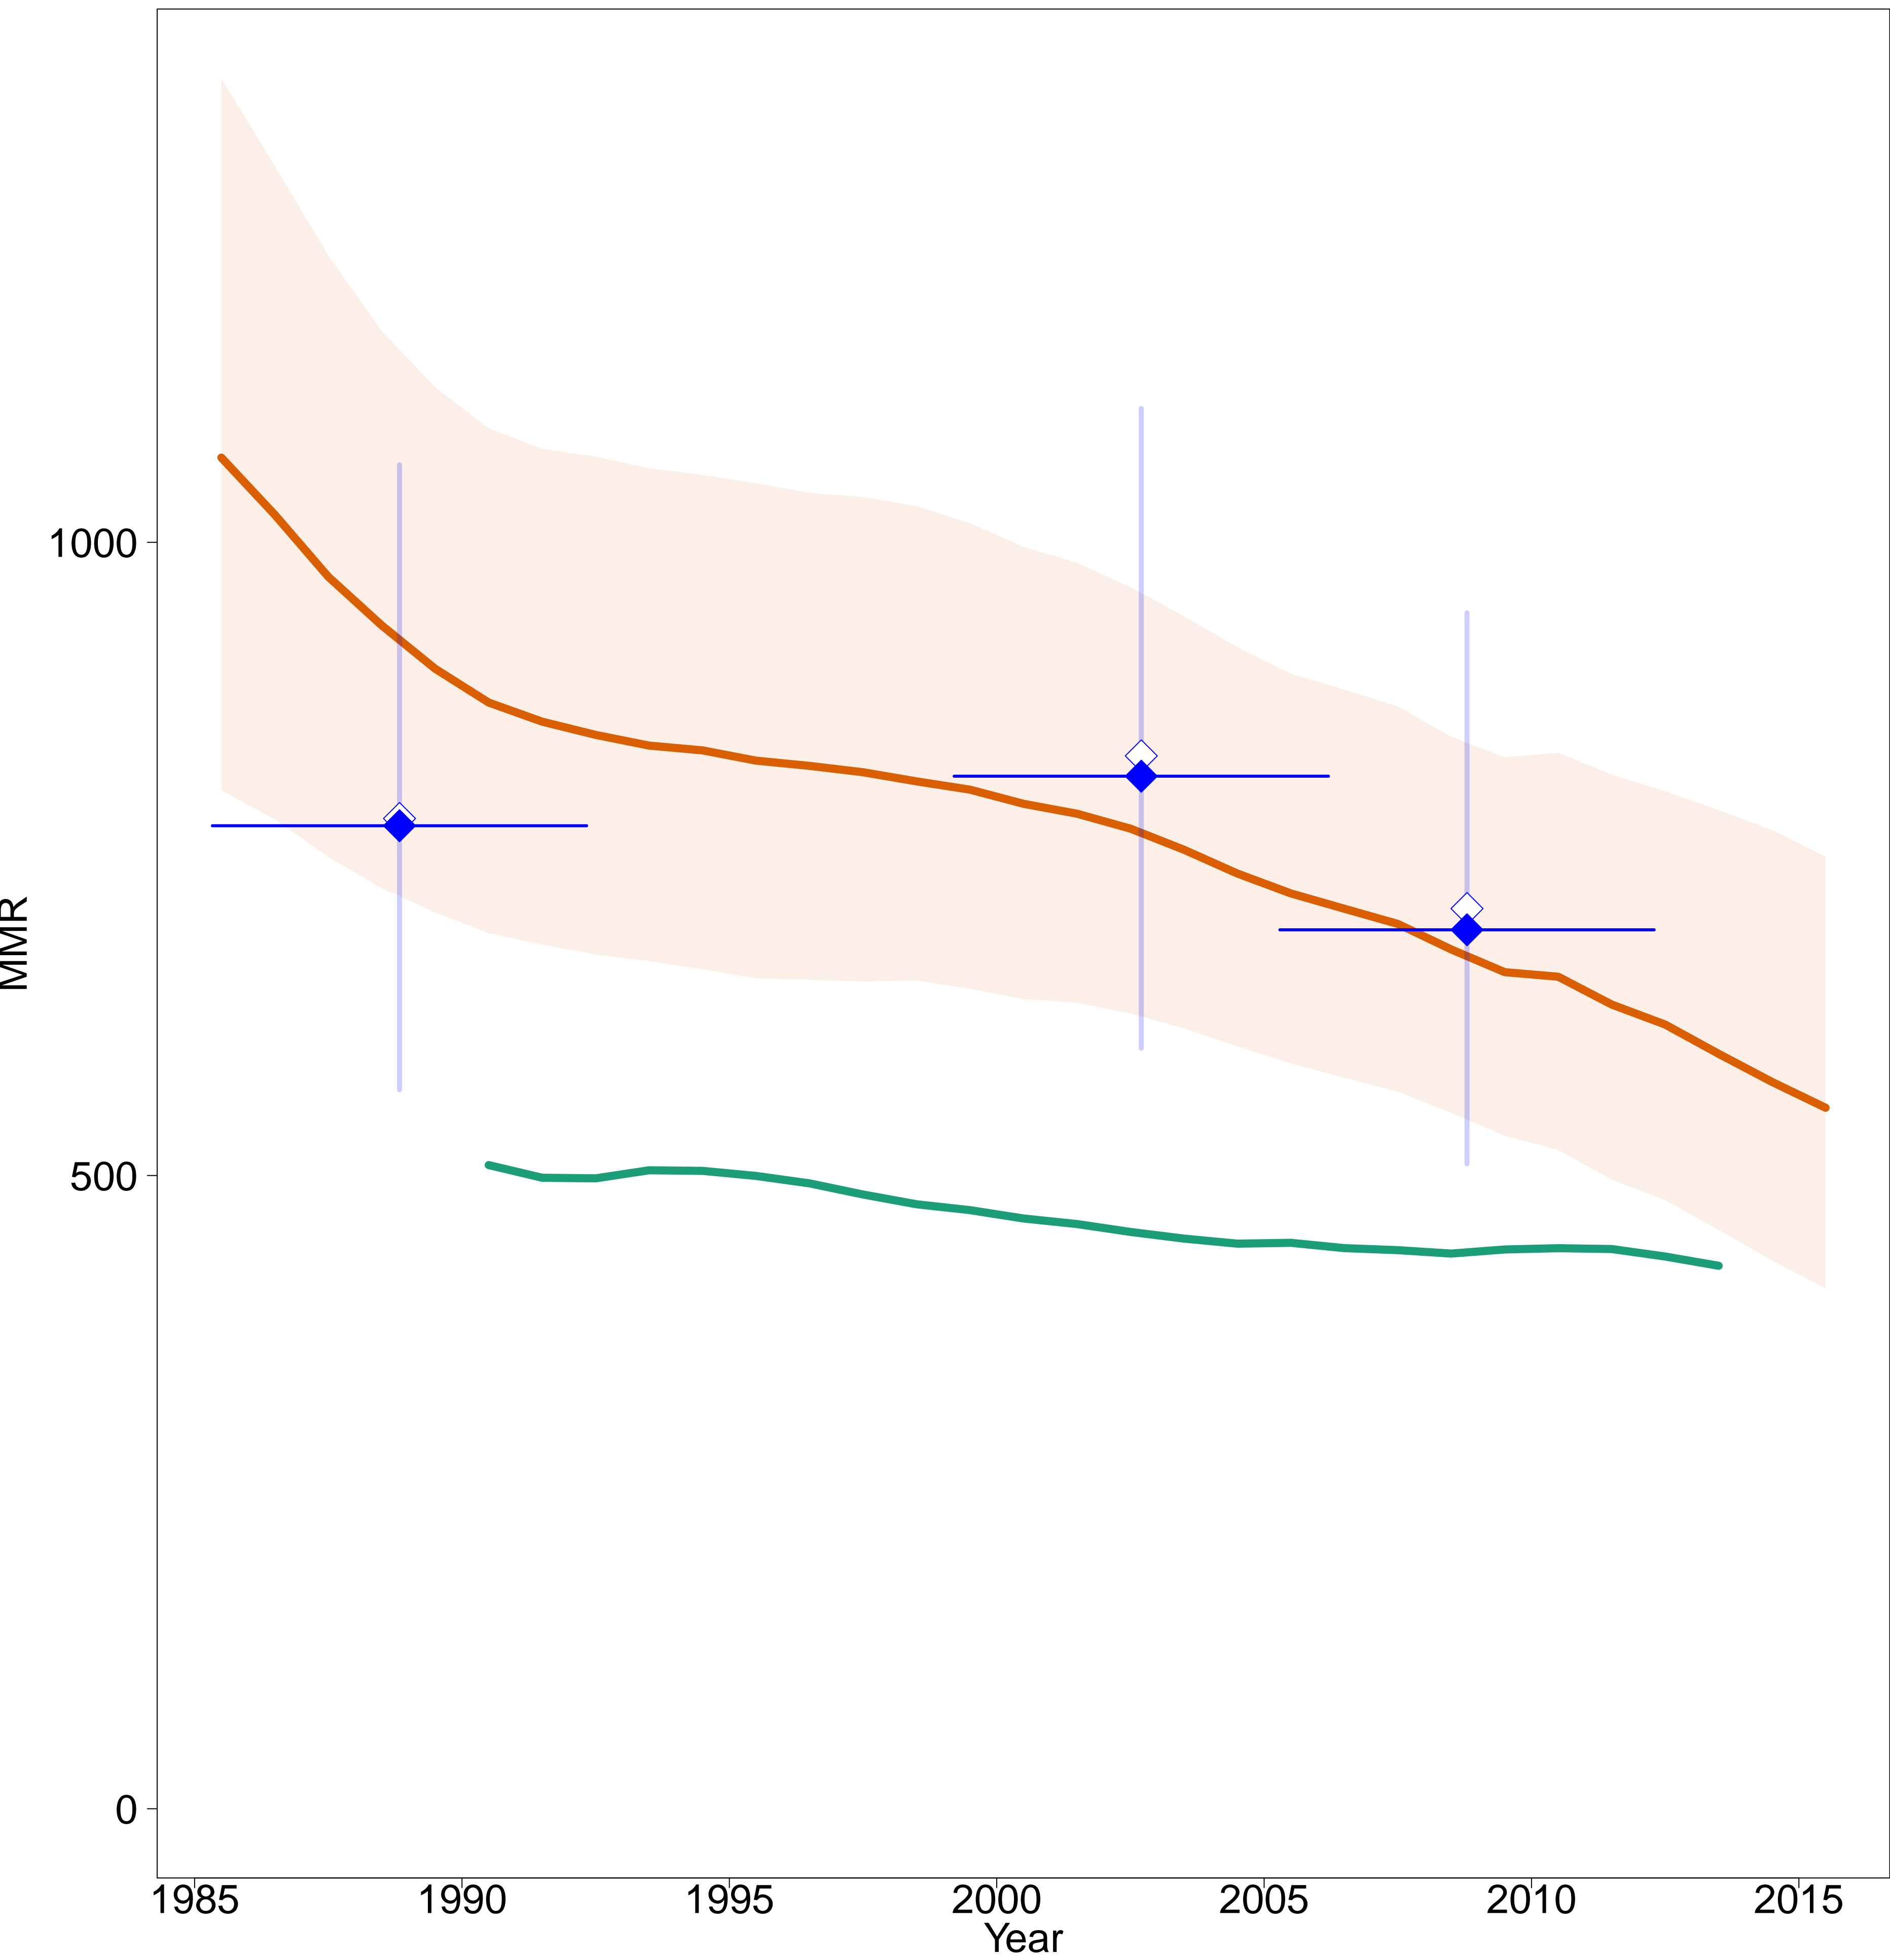

- Estimates -
- MMEIG 2015
- GBD 2013
- MMR Database 2015 -
- Observed Data
- Adjusted Data
- Data type -
- DHS

Nigeria [NGA]  
(Western Africa)

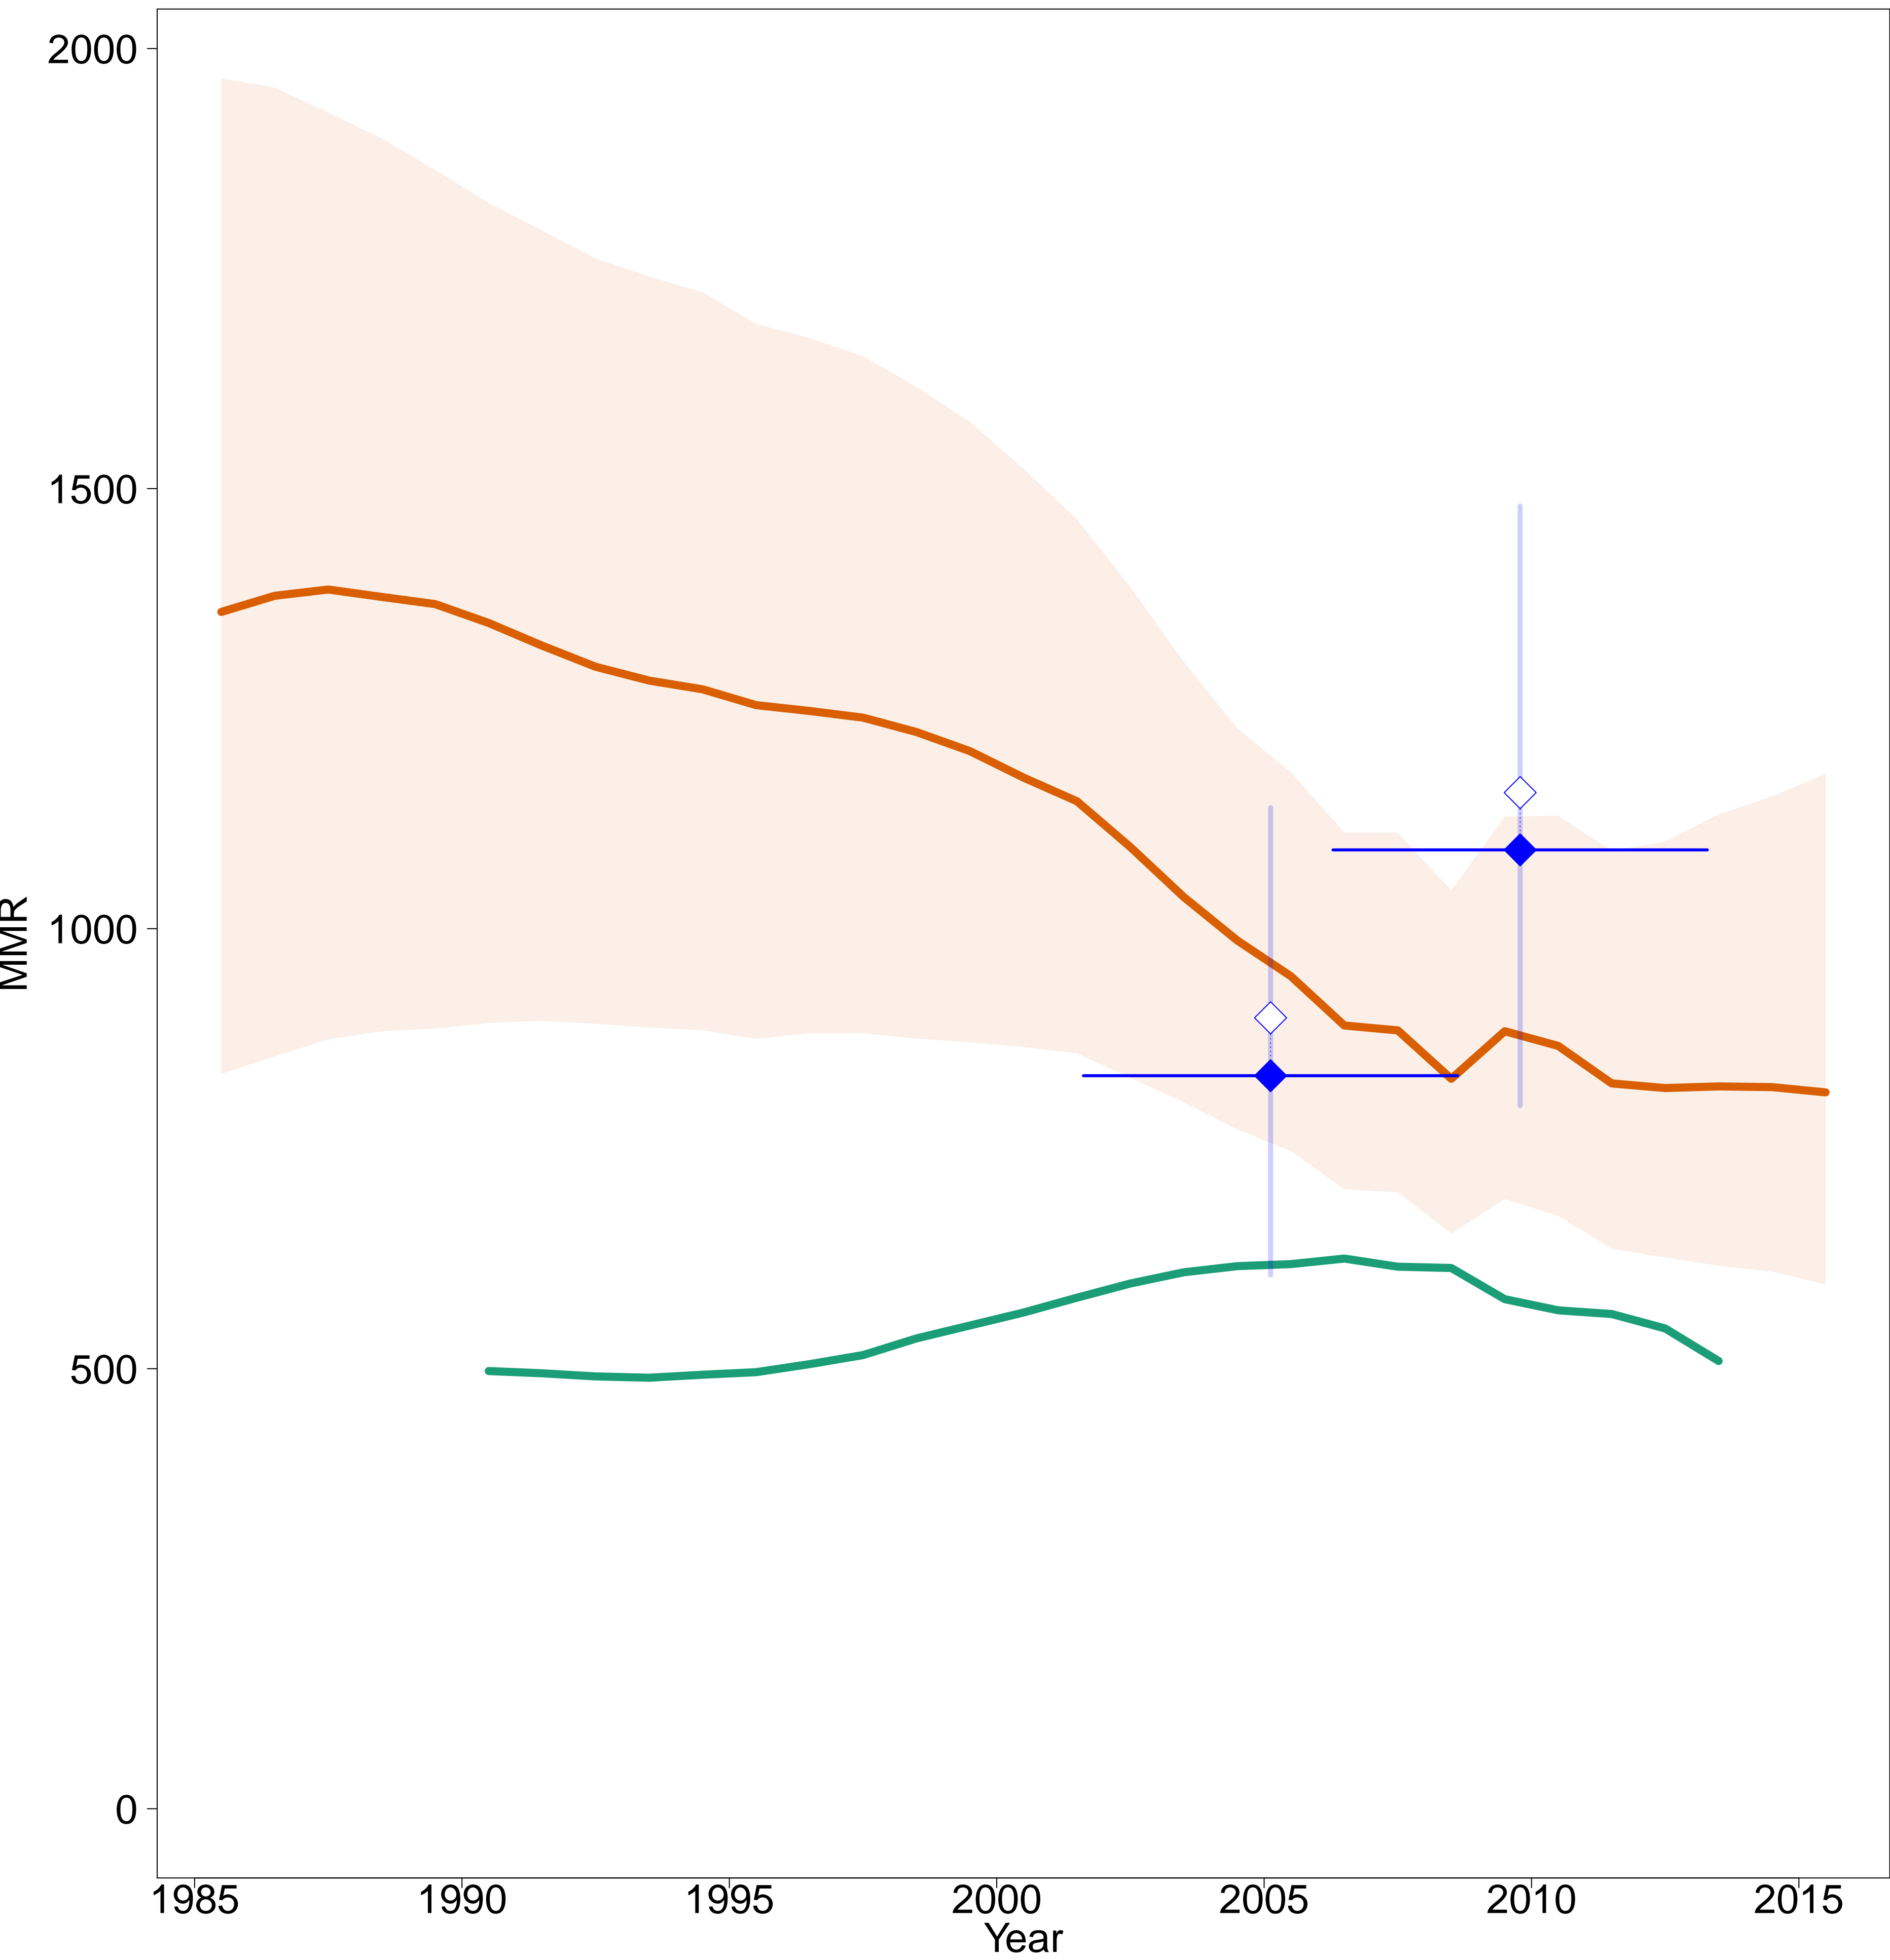

- Estimates -
- MMEIG 2015
- GBD 2013
- MMR Database 2015 -
- Observed Data
- Adjusted Data
- Data type -
- DHS

Norway [NOR]  
(Developed regions)

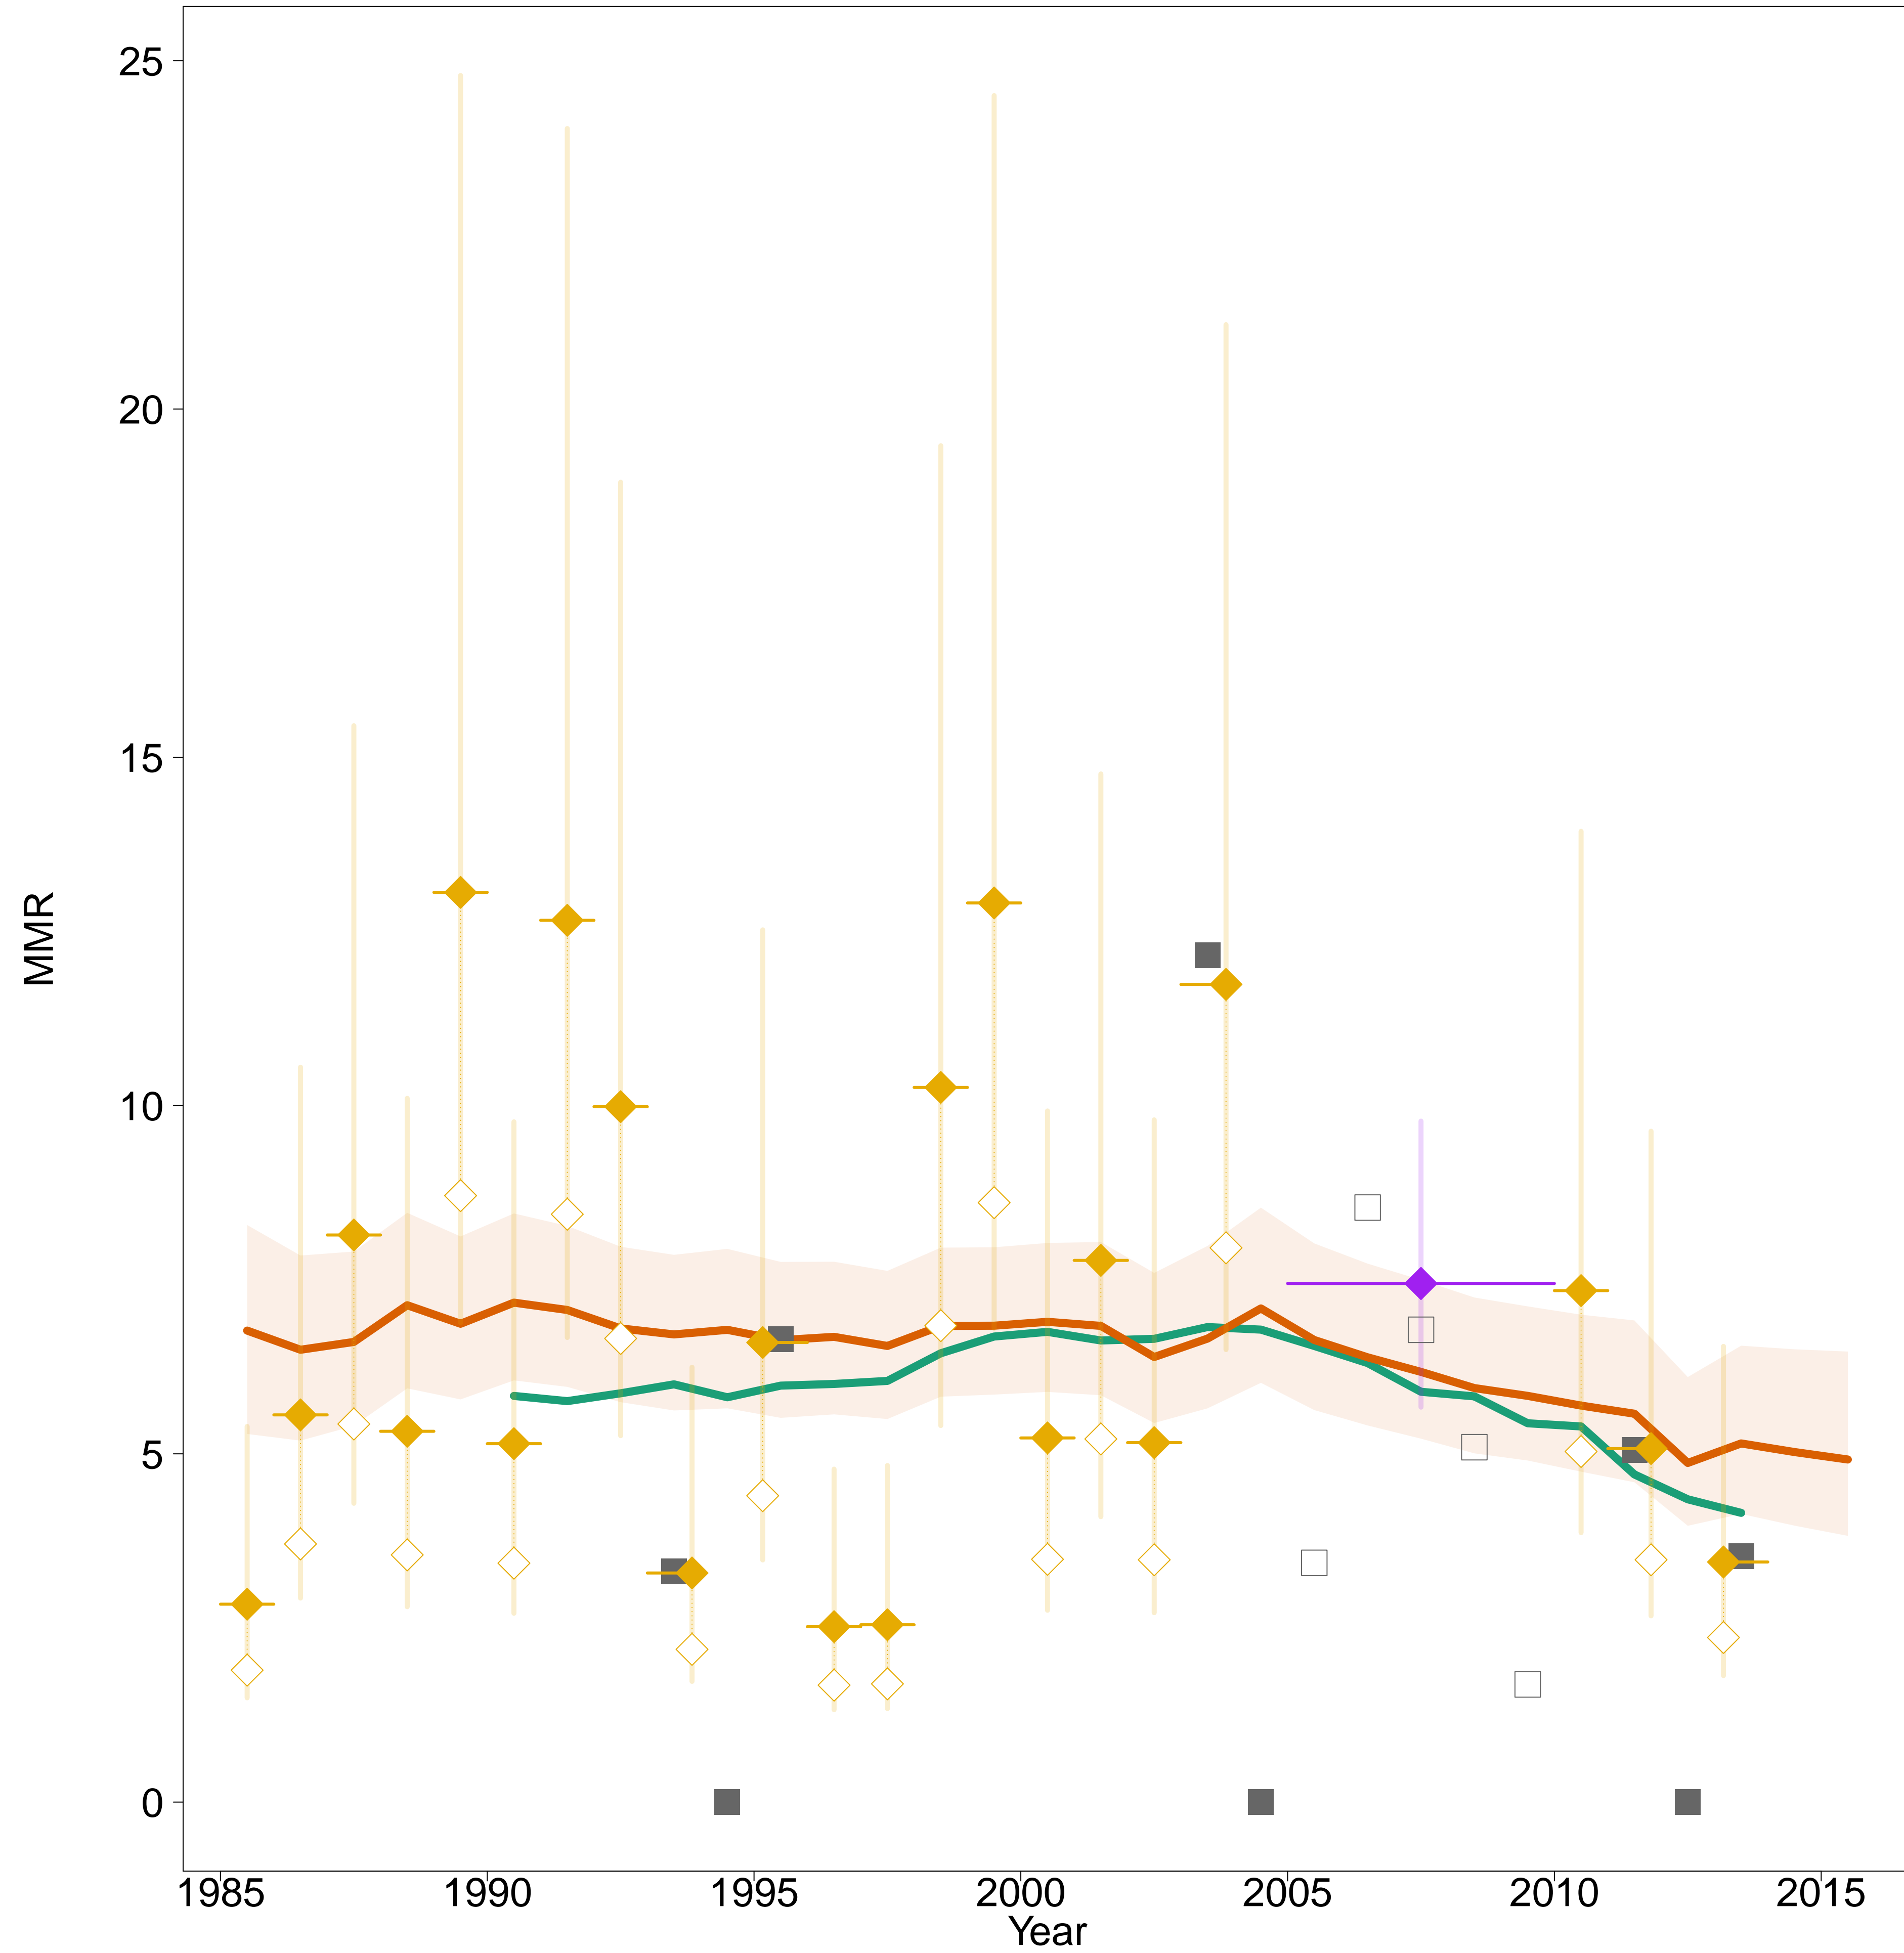

– Estimates –

MMEIG 2015

GBD 2013

– MMR Database 2015 –

◊ Observed Data

◆ Adjusted Data

– Data type –

◆ VR

◆ Spec. studies

■ Reported VR before recalc.

(related to 0 obs. mat. death)

◻ Excluded VR data

(overlap with specialized study)

Occupied Palestinian Territory [PSE]  
(Western Asia)

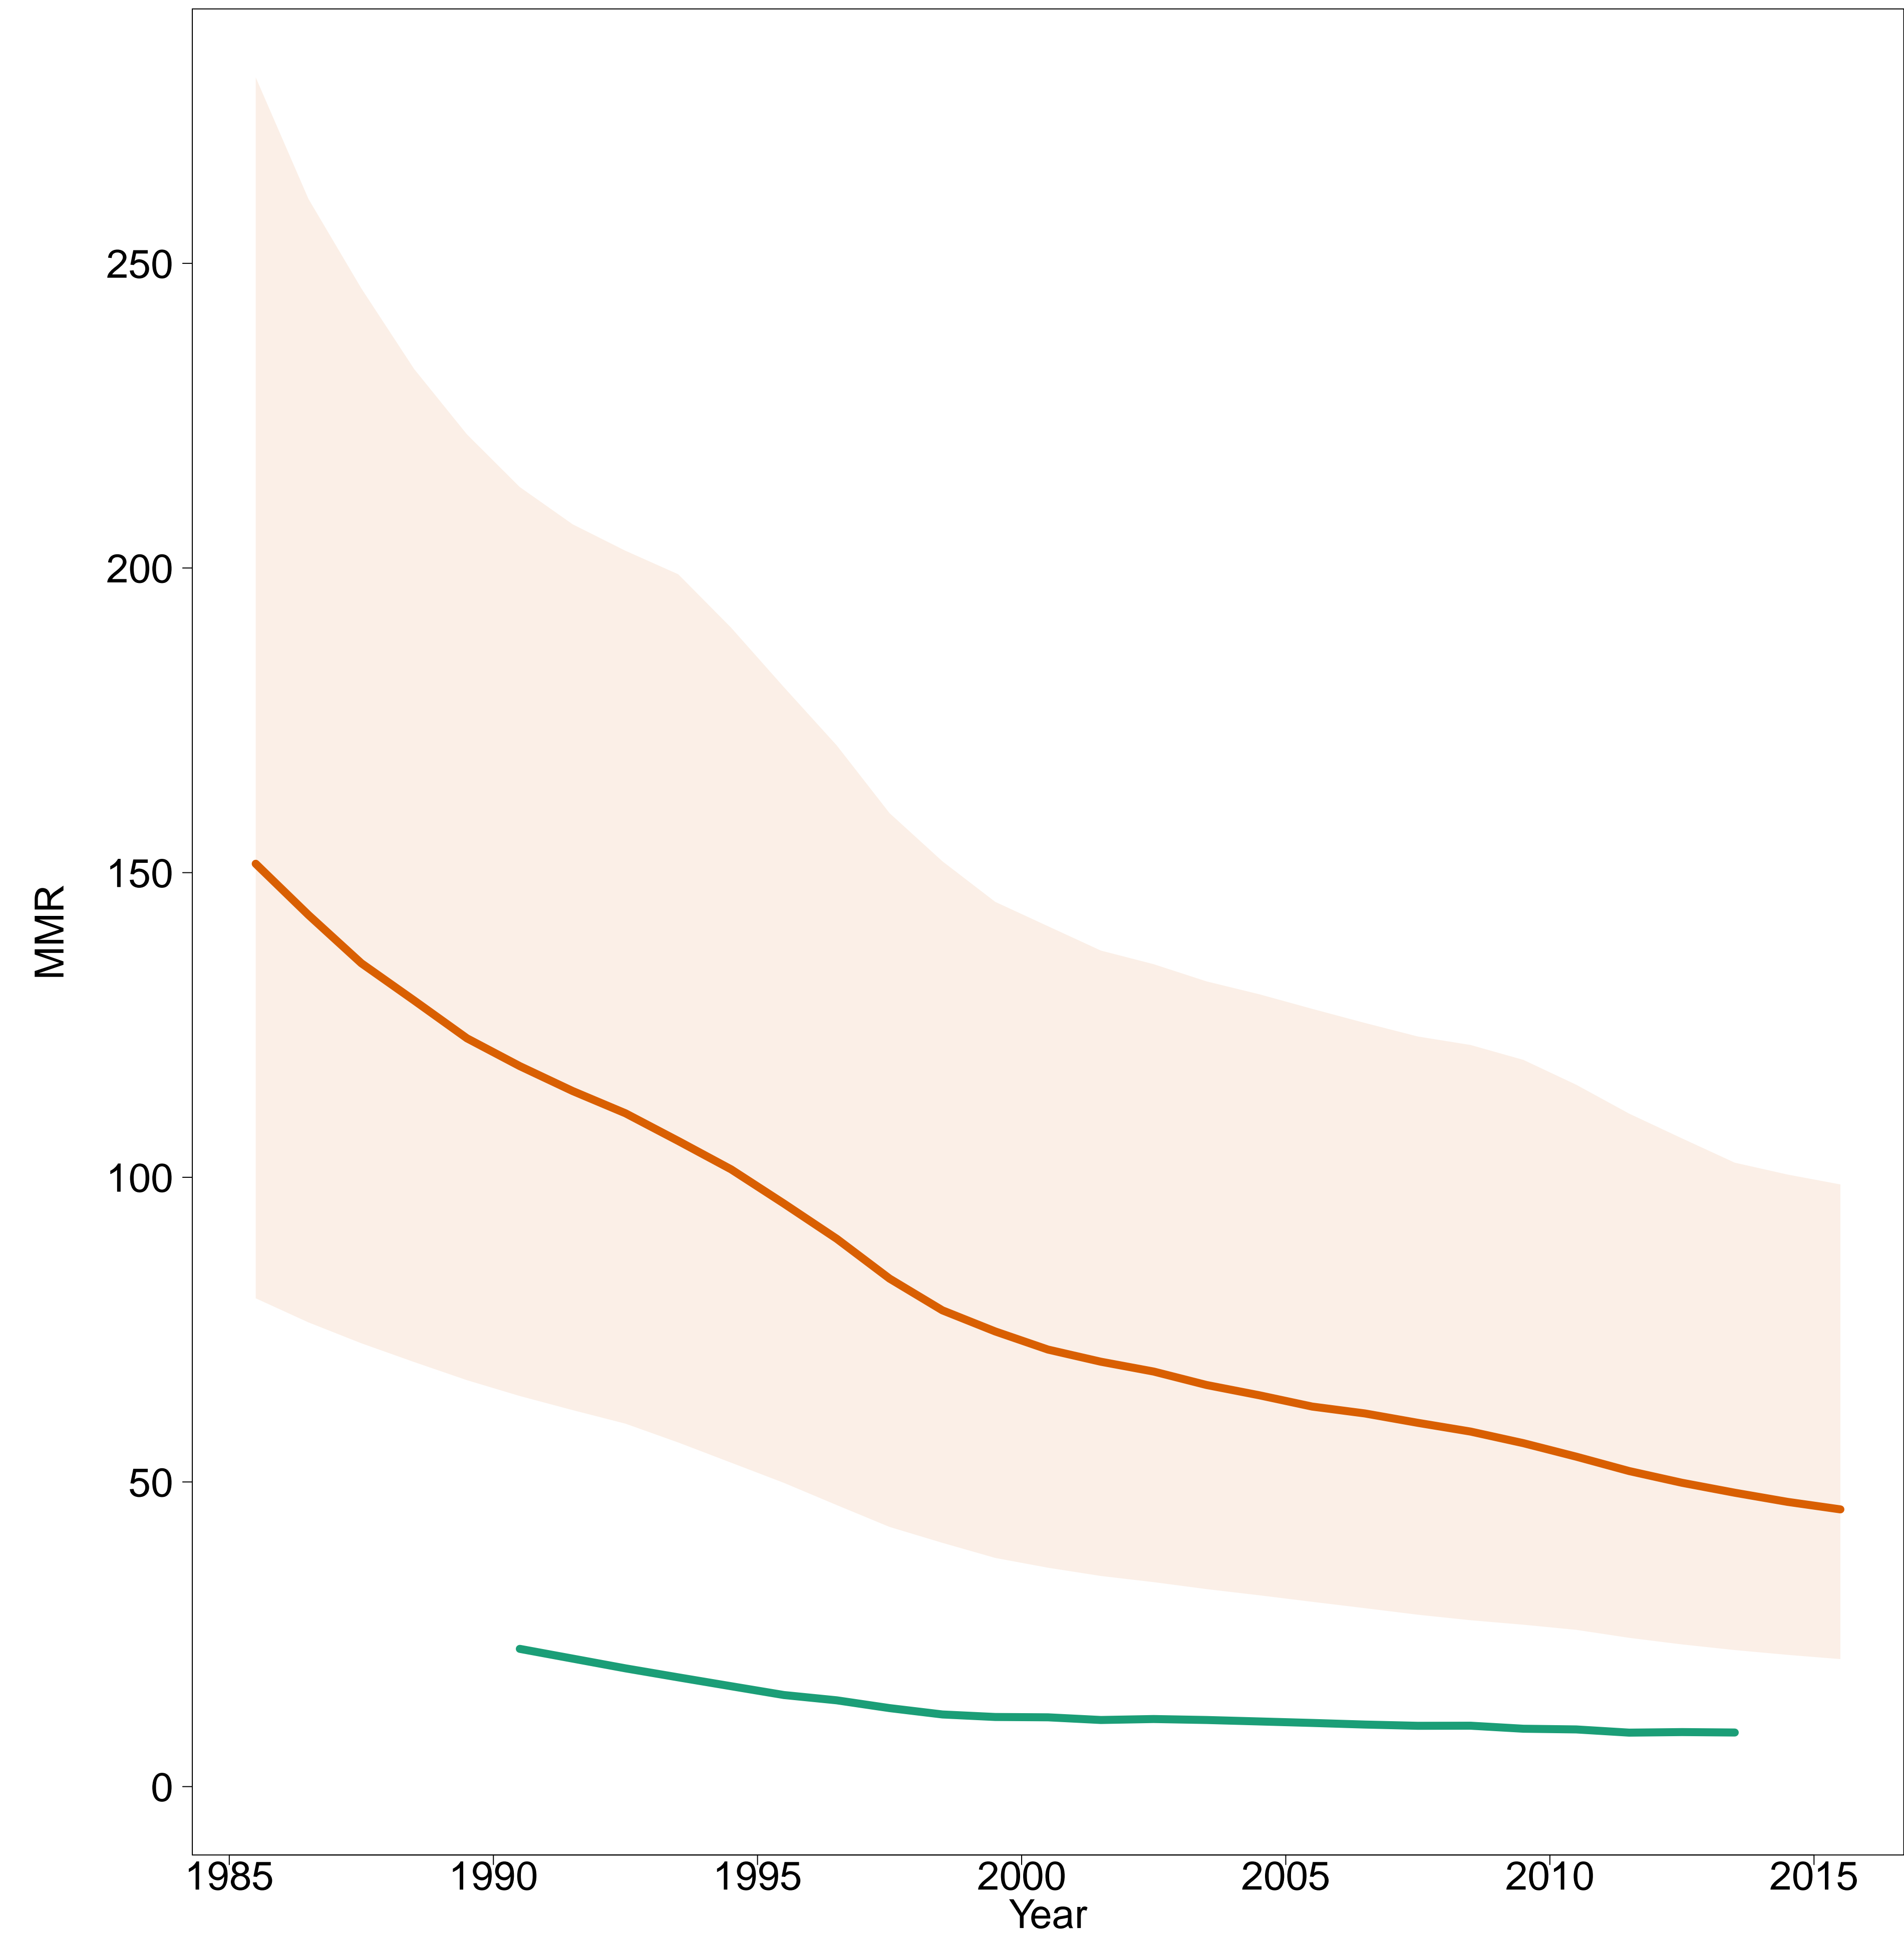

– Estimates –  
MMEIG 2015  
GBD 2013  
– MMR Database 2015 –

Oman [OMN]  
(Western Asia)

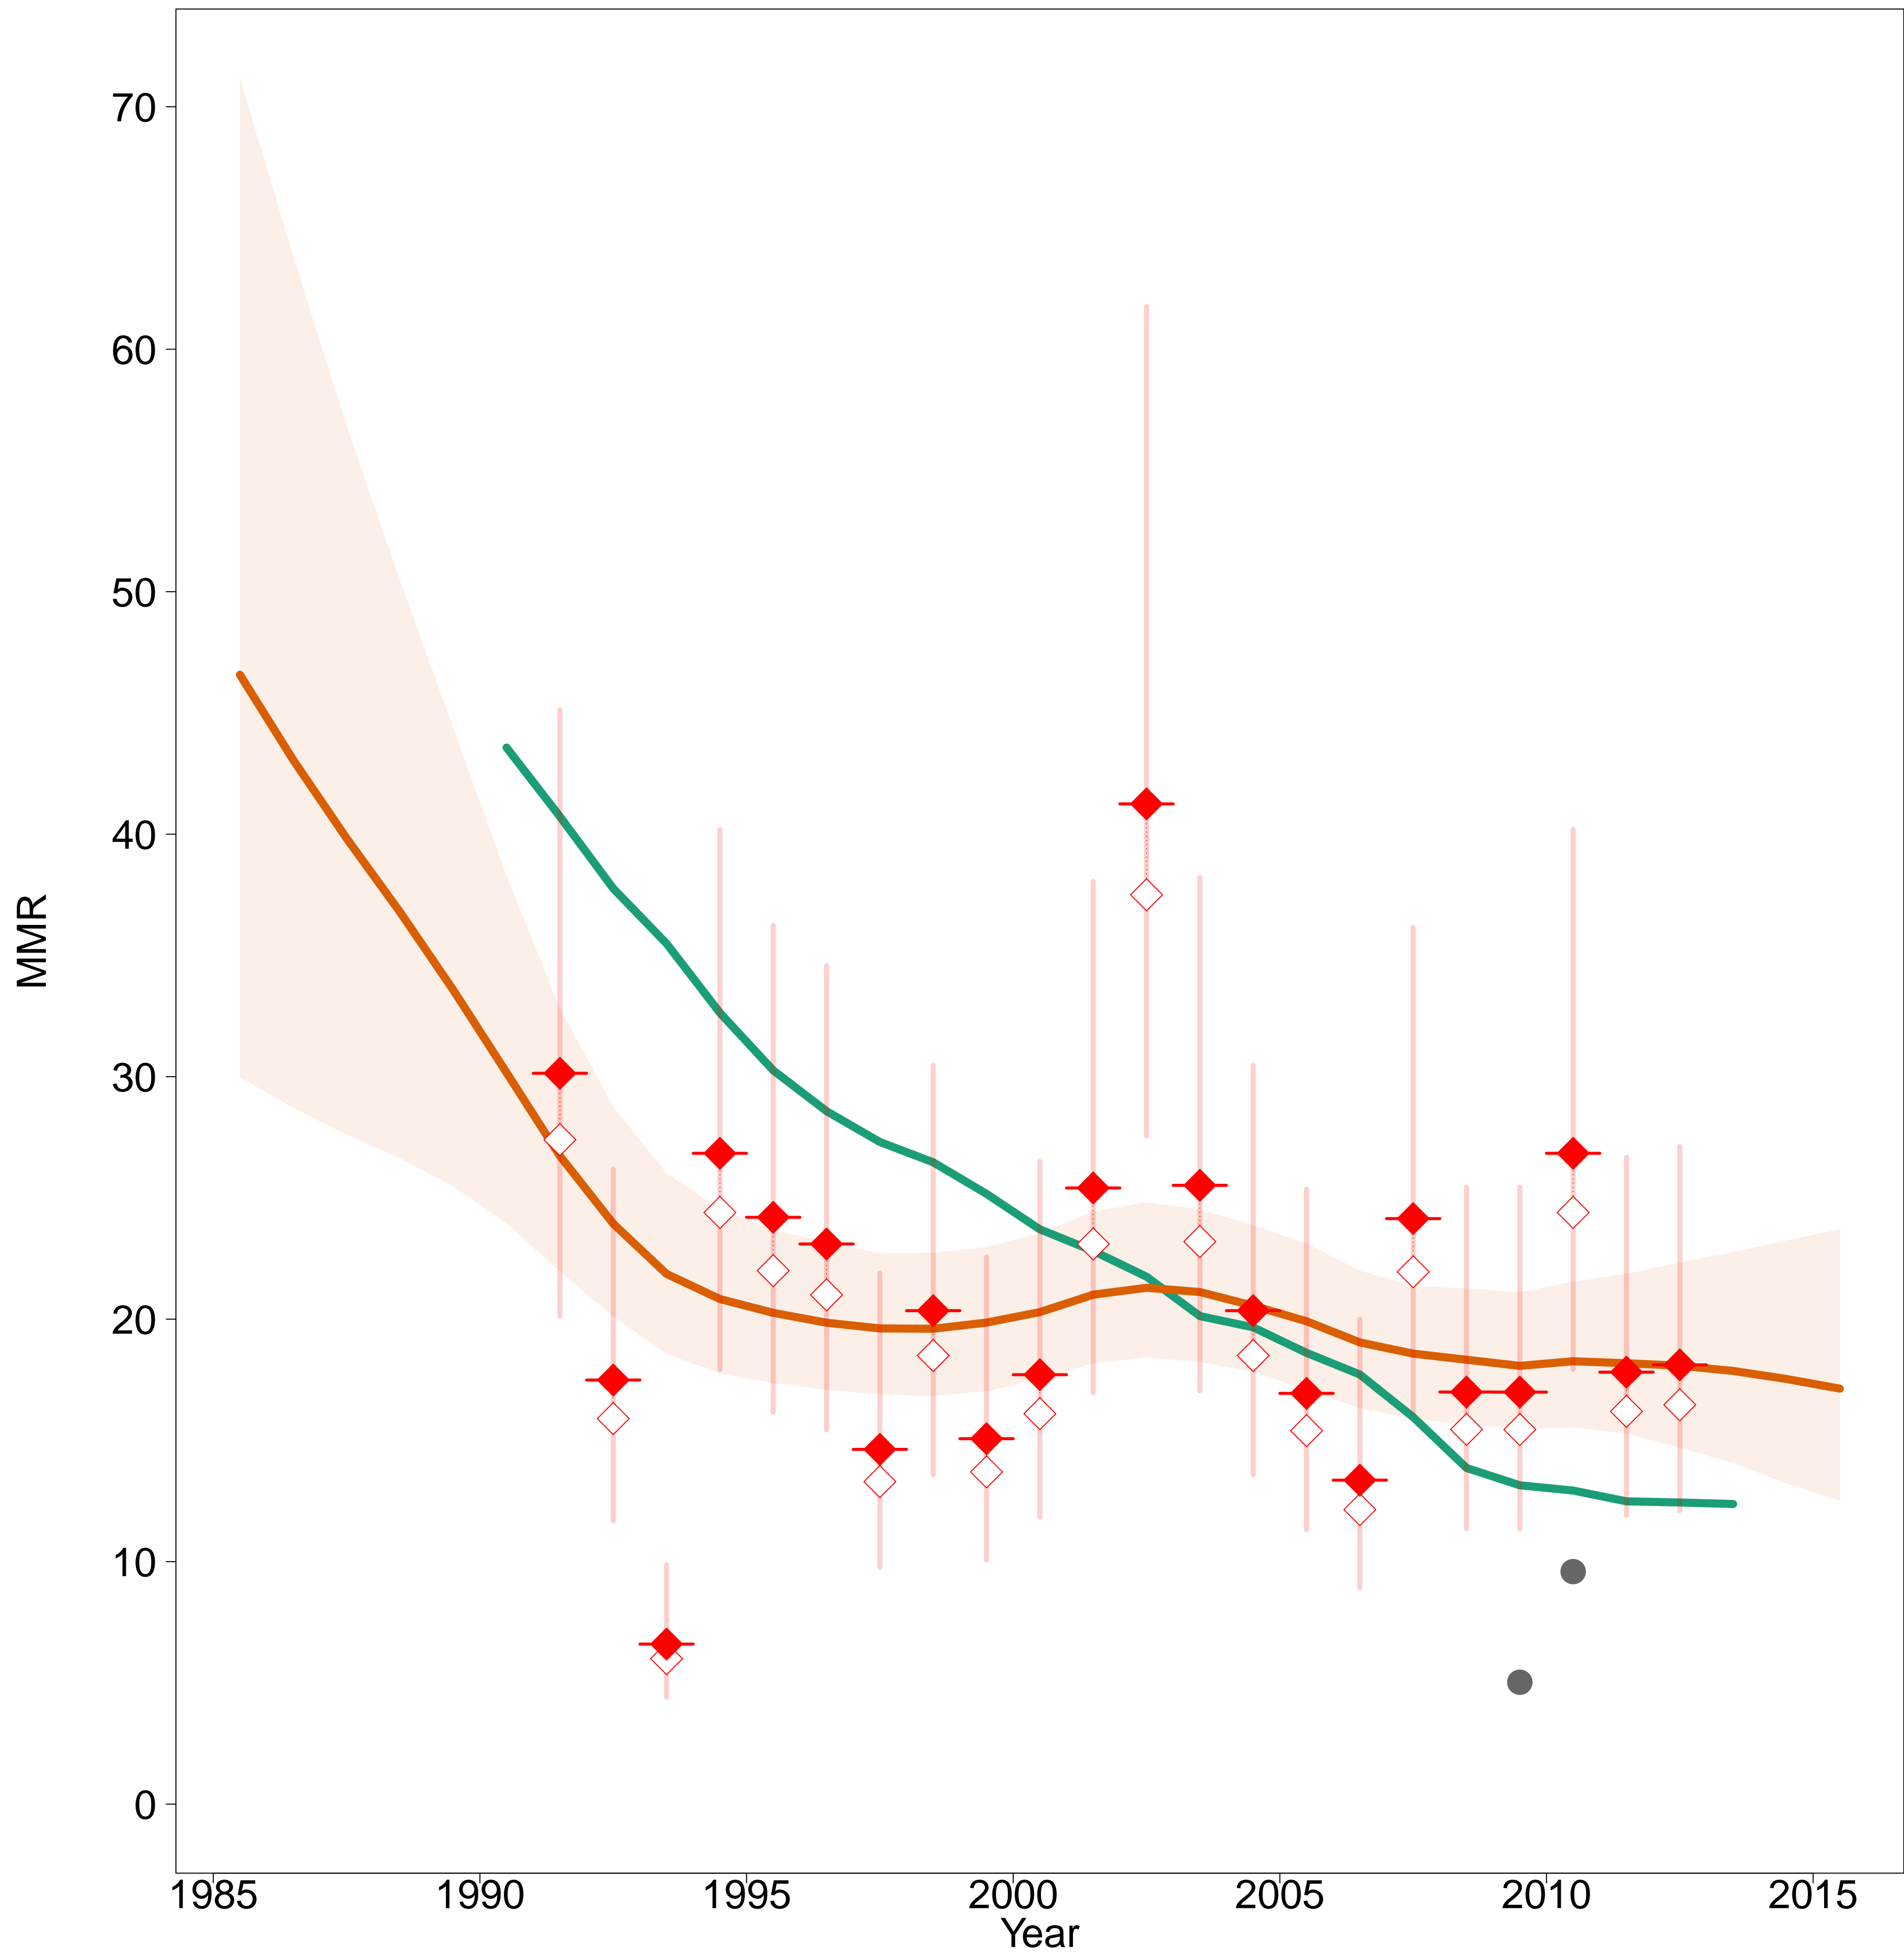

- Estimates -
- MMEIG 2015
- GBD 2013
- MMR Database 2015 -
- Observed Data
- Adjusted Data
- Data type -
- Misc. studies
- Excluded VR data (data quality issues)



Pakistan [PAK]  
(Southern Asia)

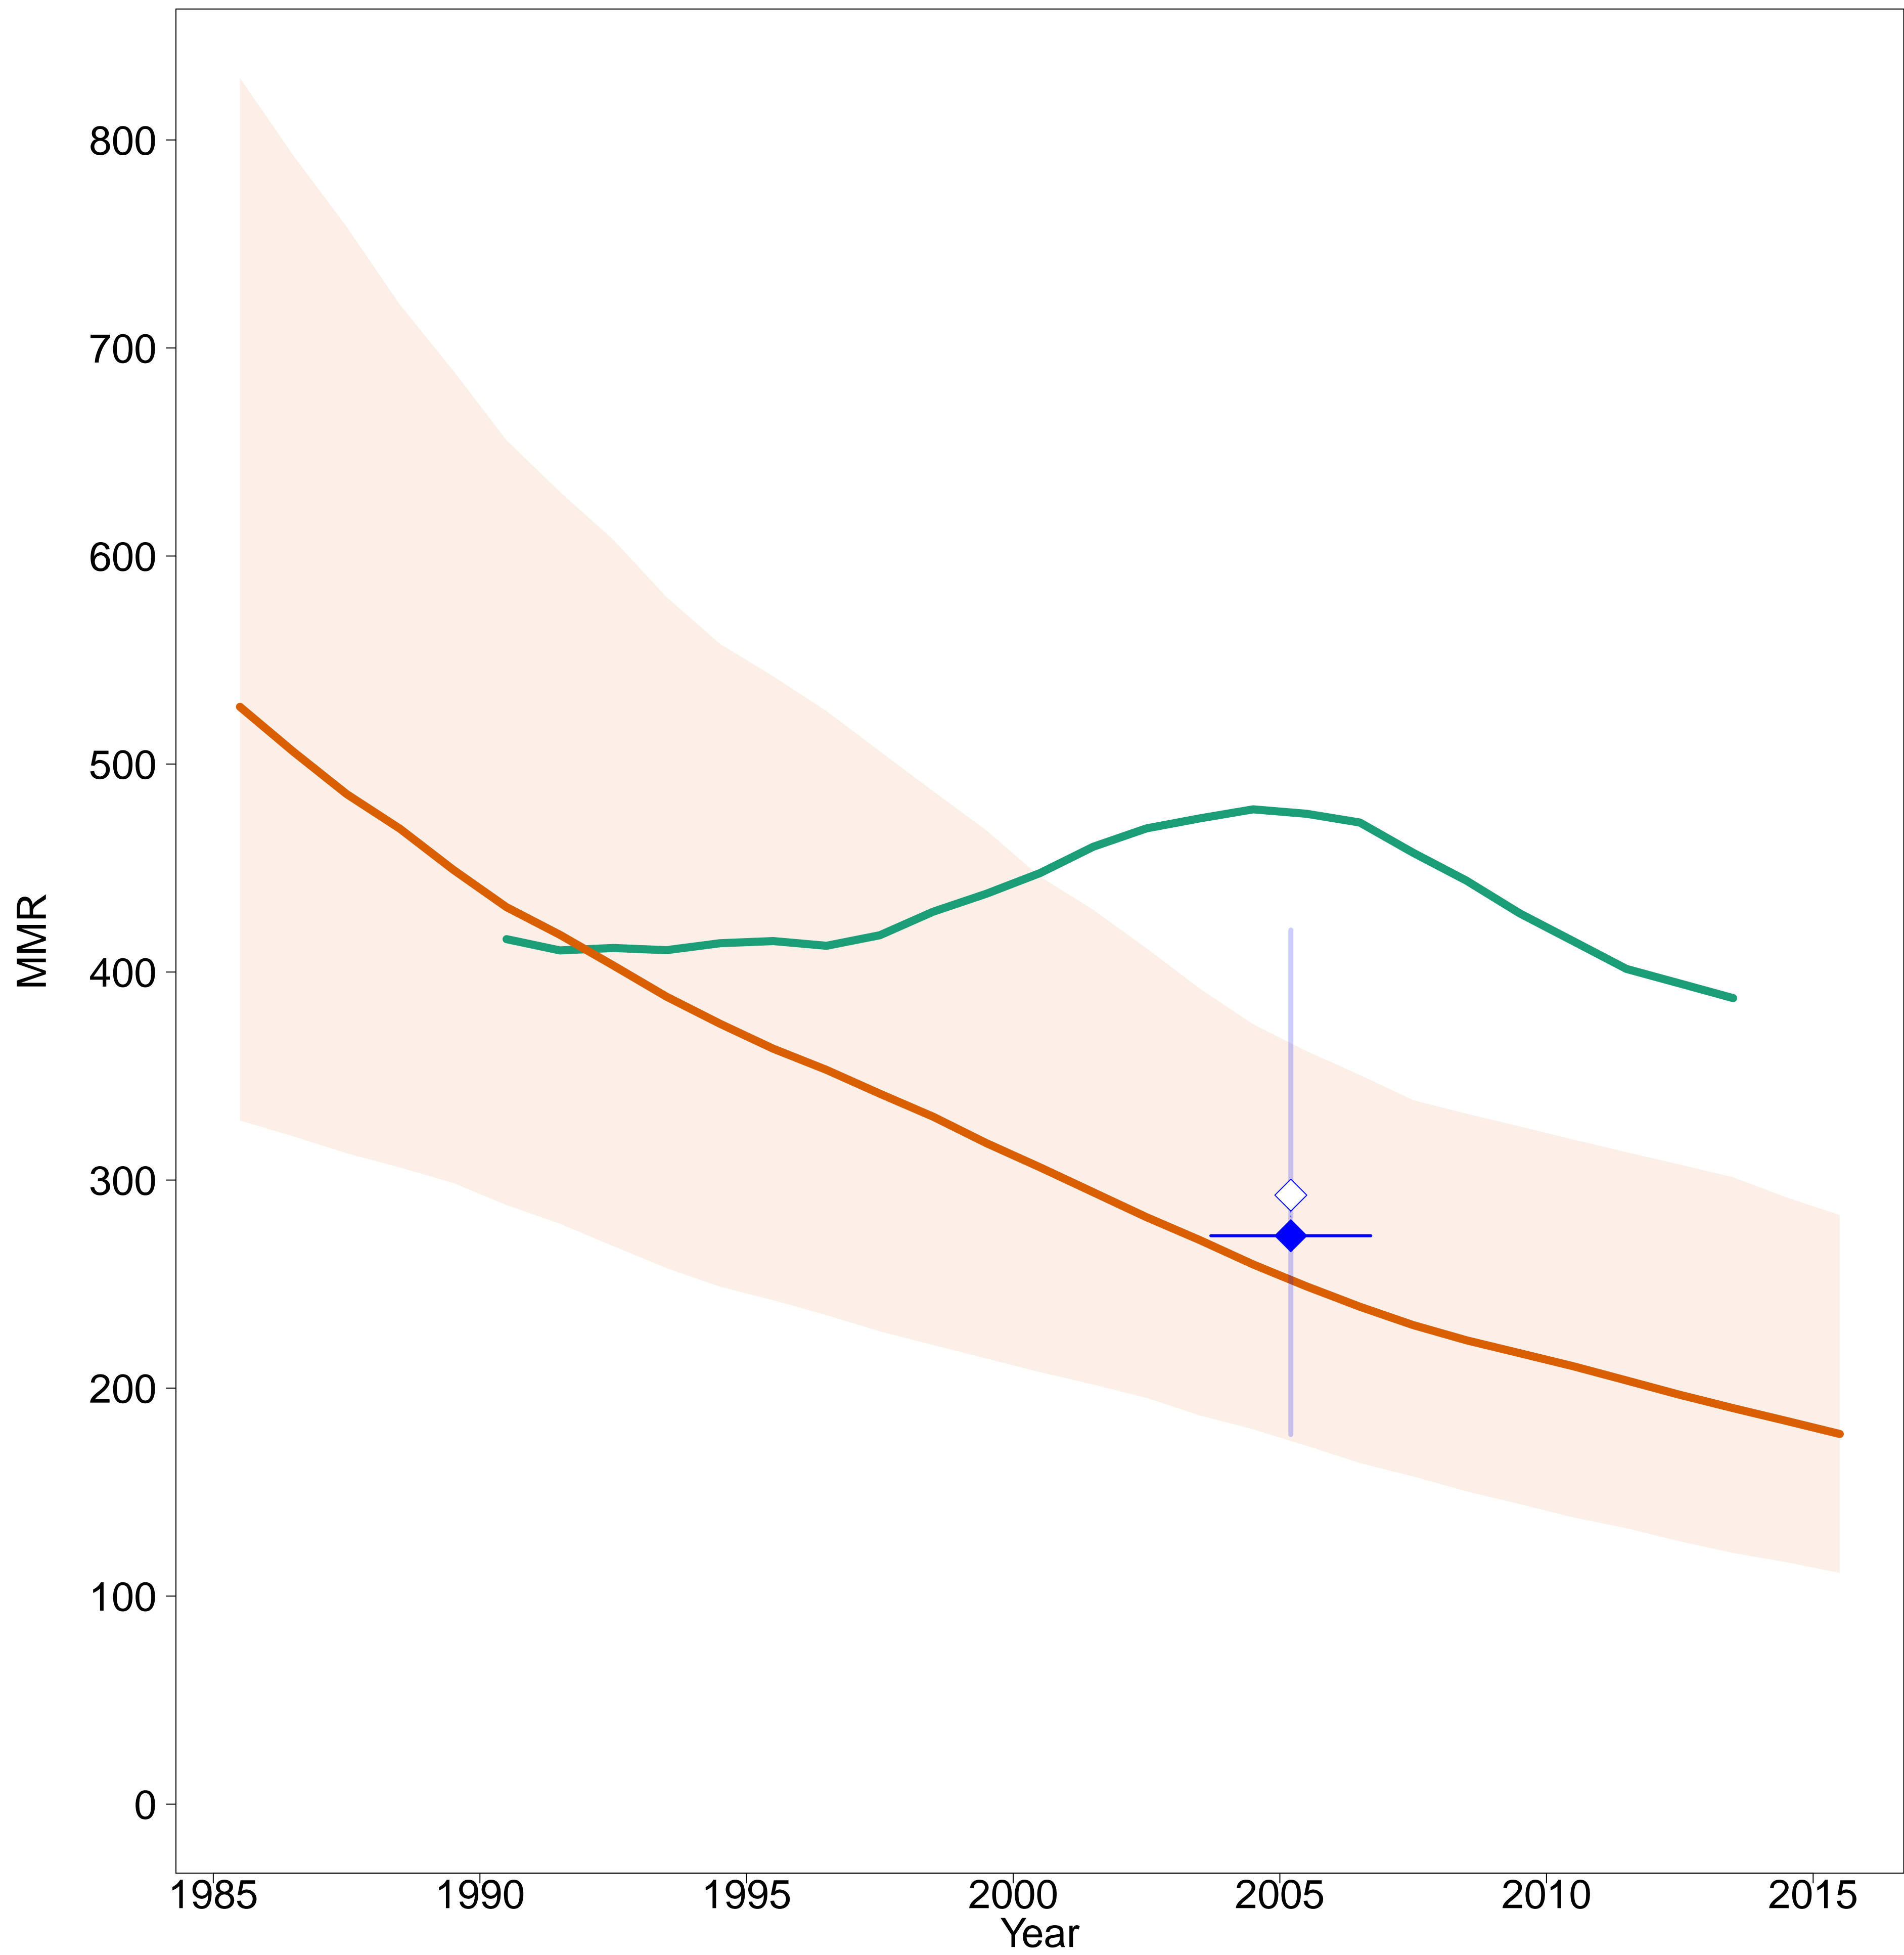

- Estimates -
- MMEIG 2015
- GBD 2013
- MMR Database 2015 -
- Observed Data
- Adjusted Data
- Data type -
- DHS

Panama [PAN]  
(Central America)

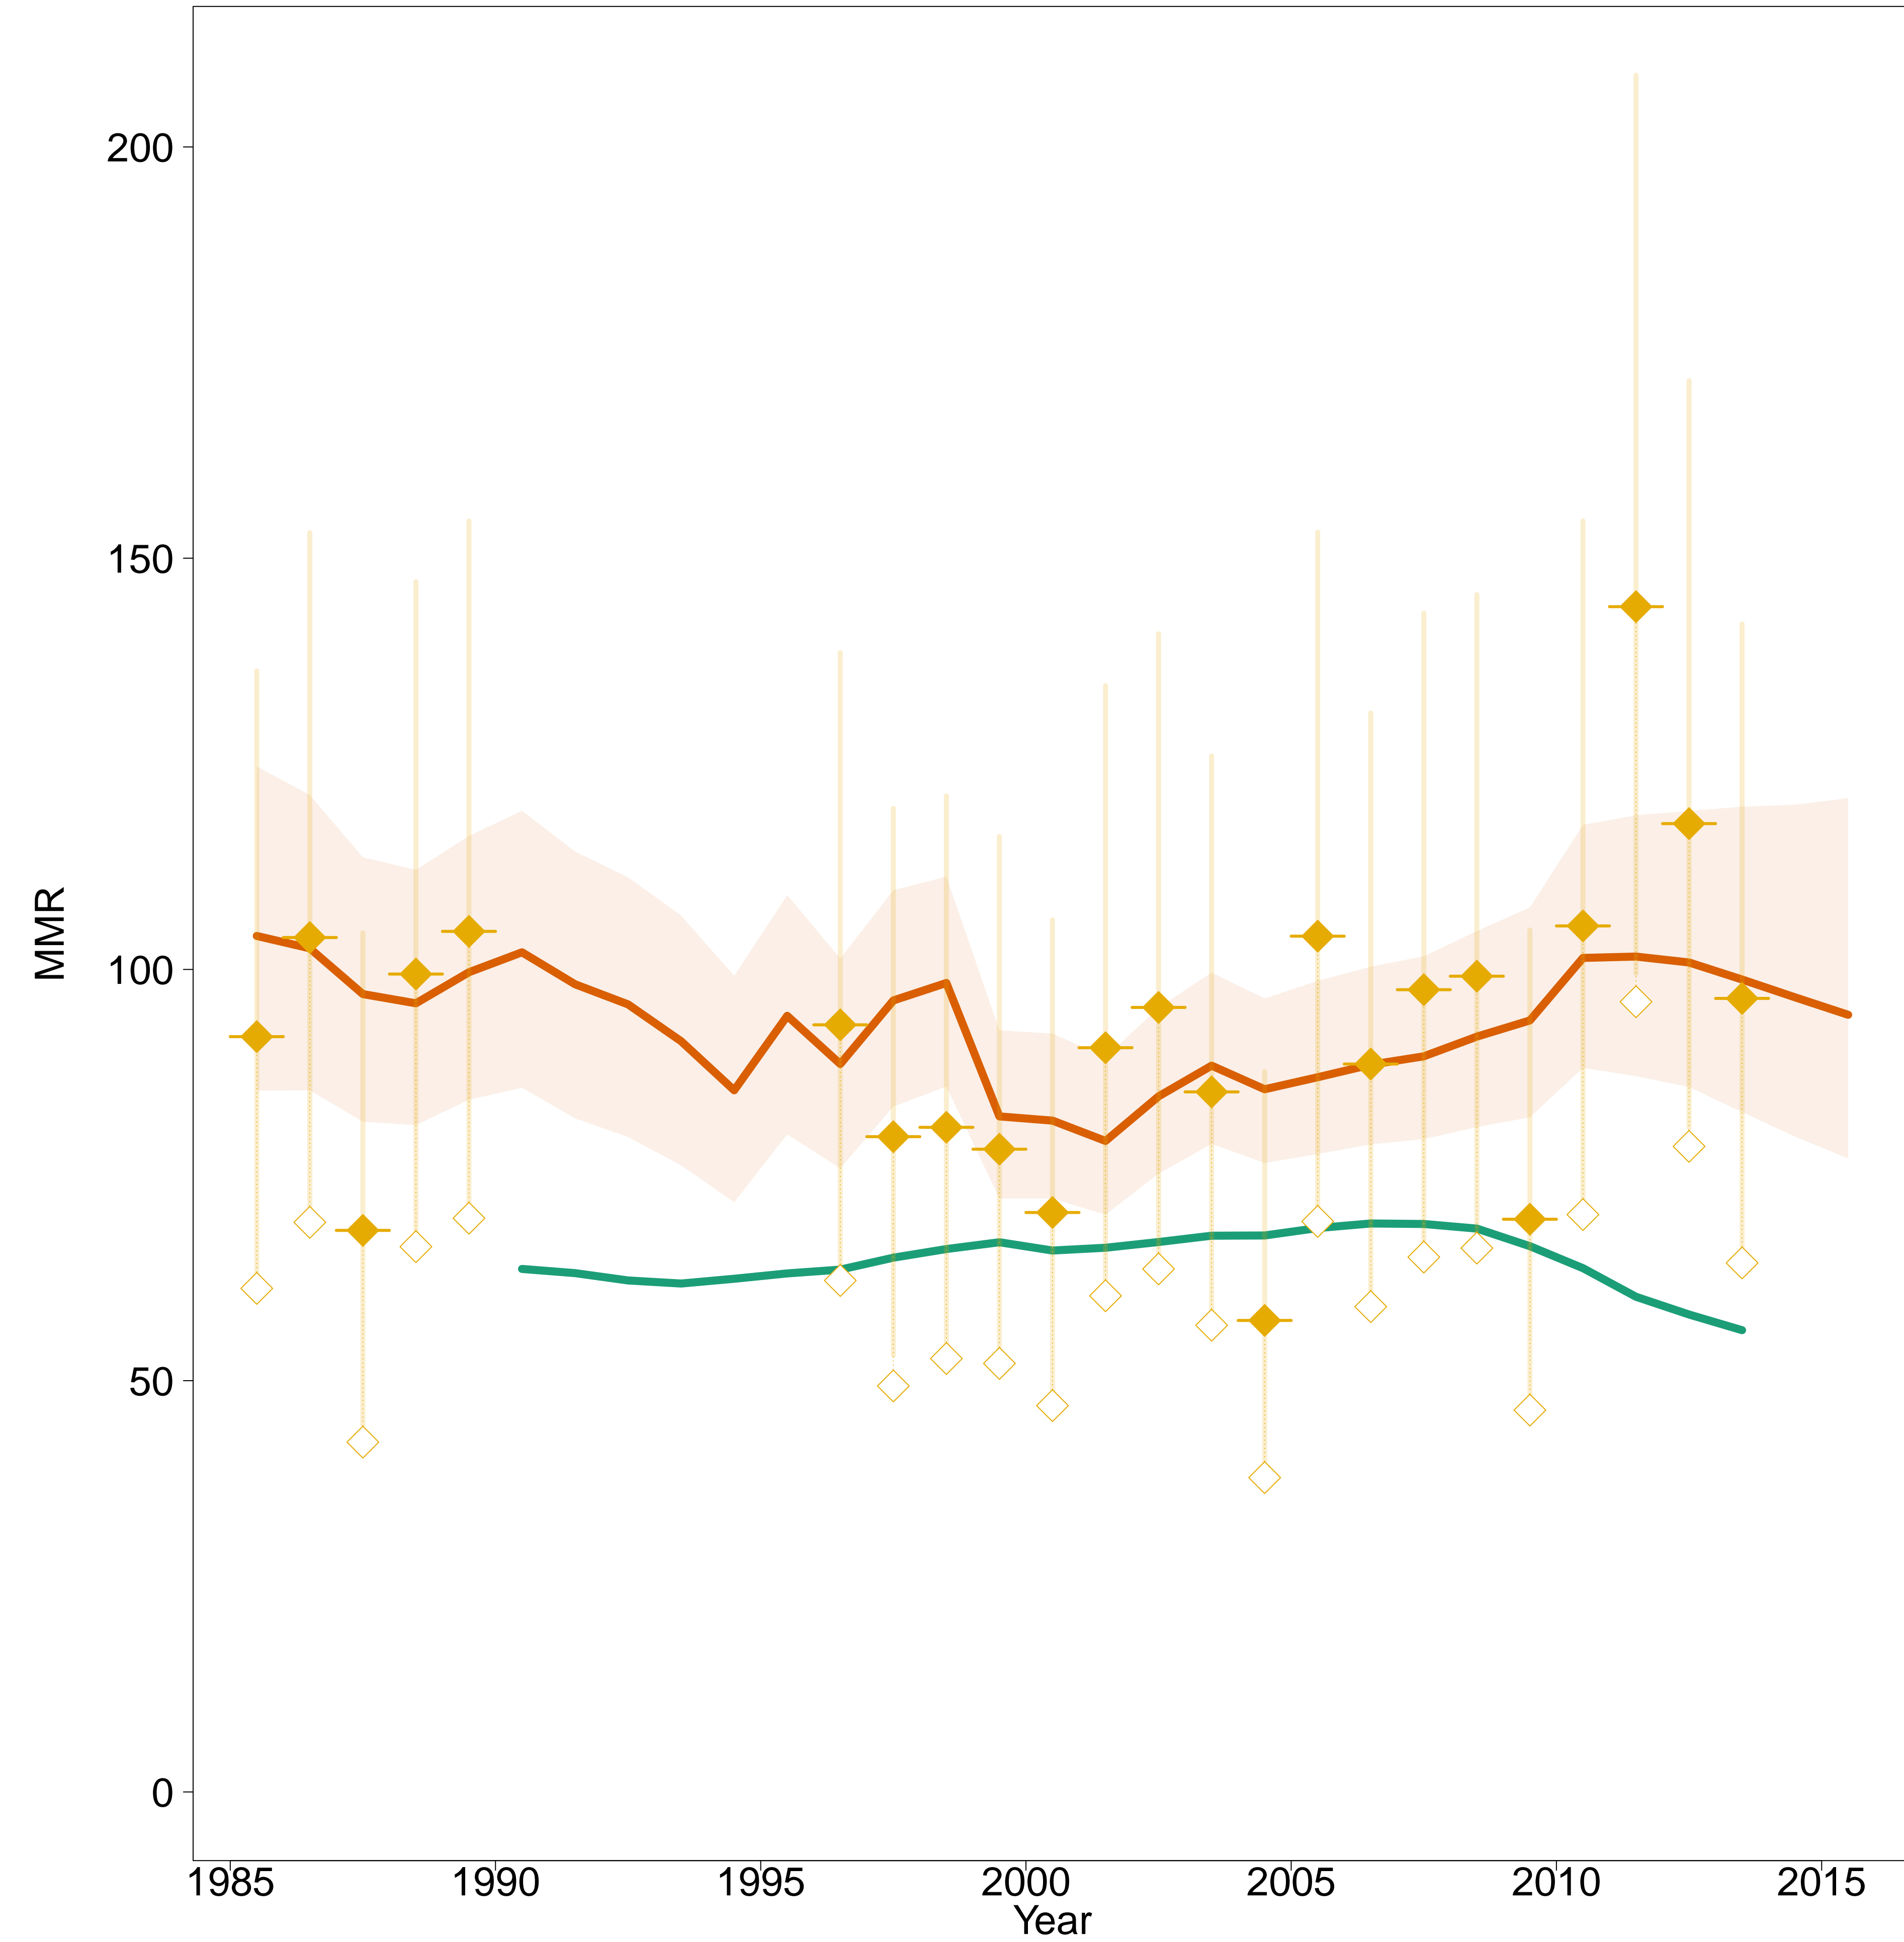

- Estimates –
- MMEIG 2015
- GBD 2013
- MMR Database 2015 –
- Observed Data
- Adjusted Data
- Data type –
- VR

Papua New Guinea [PNG]  
(South-Eastern Asia / Oceania)

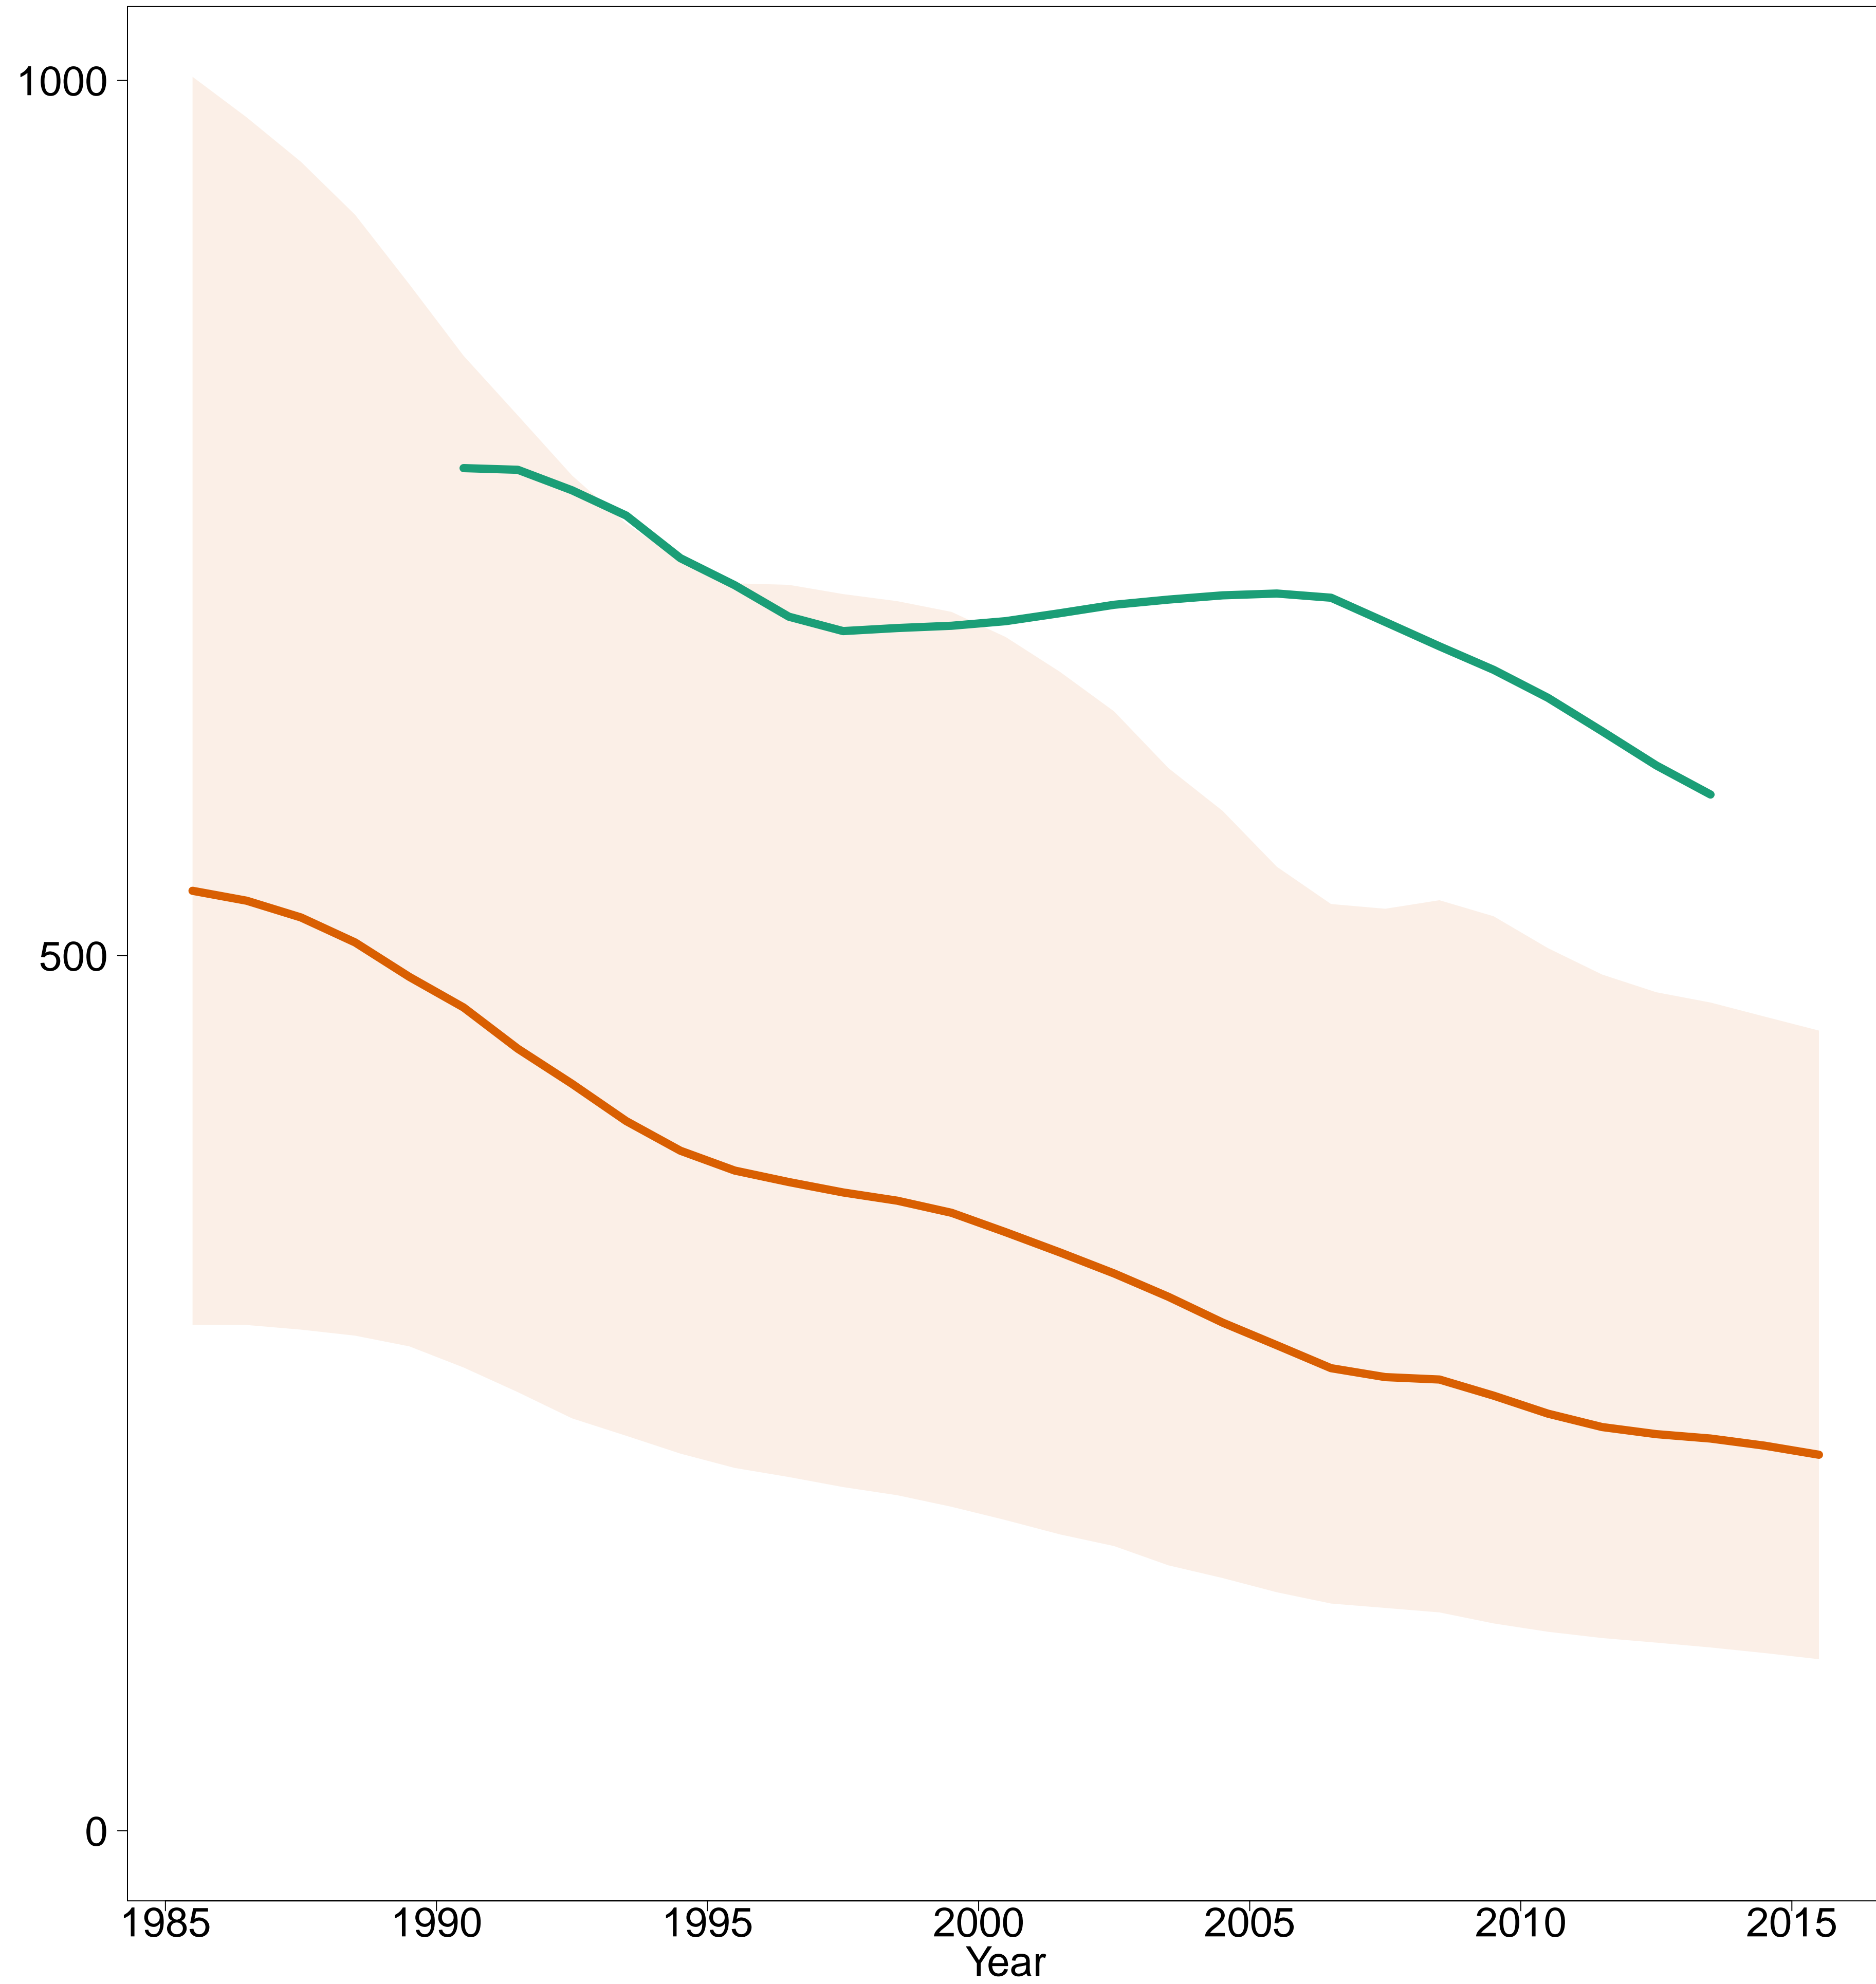

– Estimates –  
MMEIG 2015  
GBD 2013  
– MMR Database 2015 –

Paraguay [PRY]  
(South America)

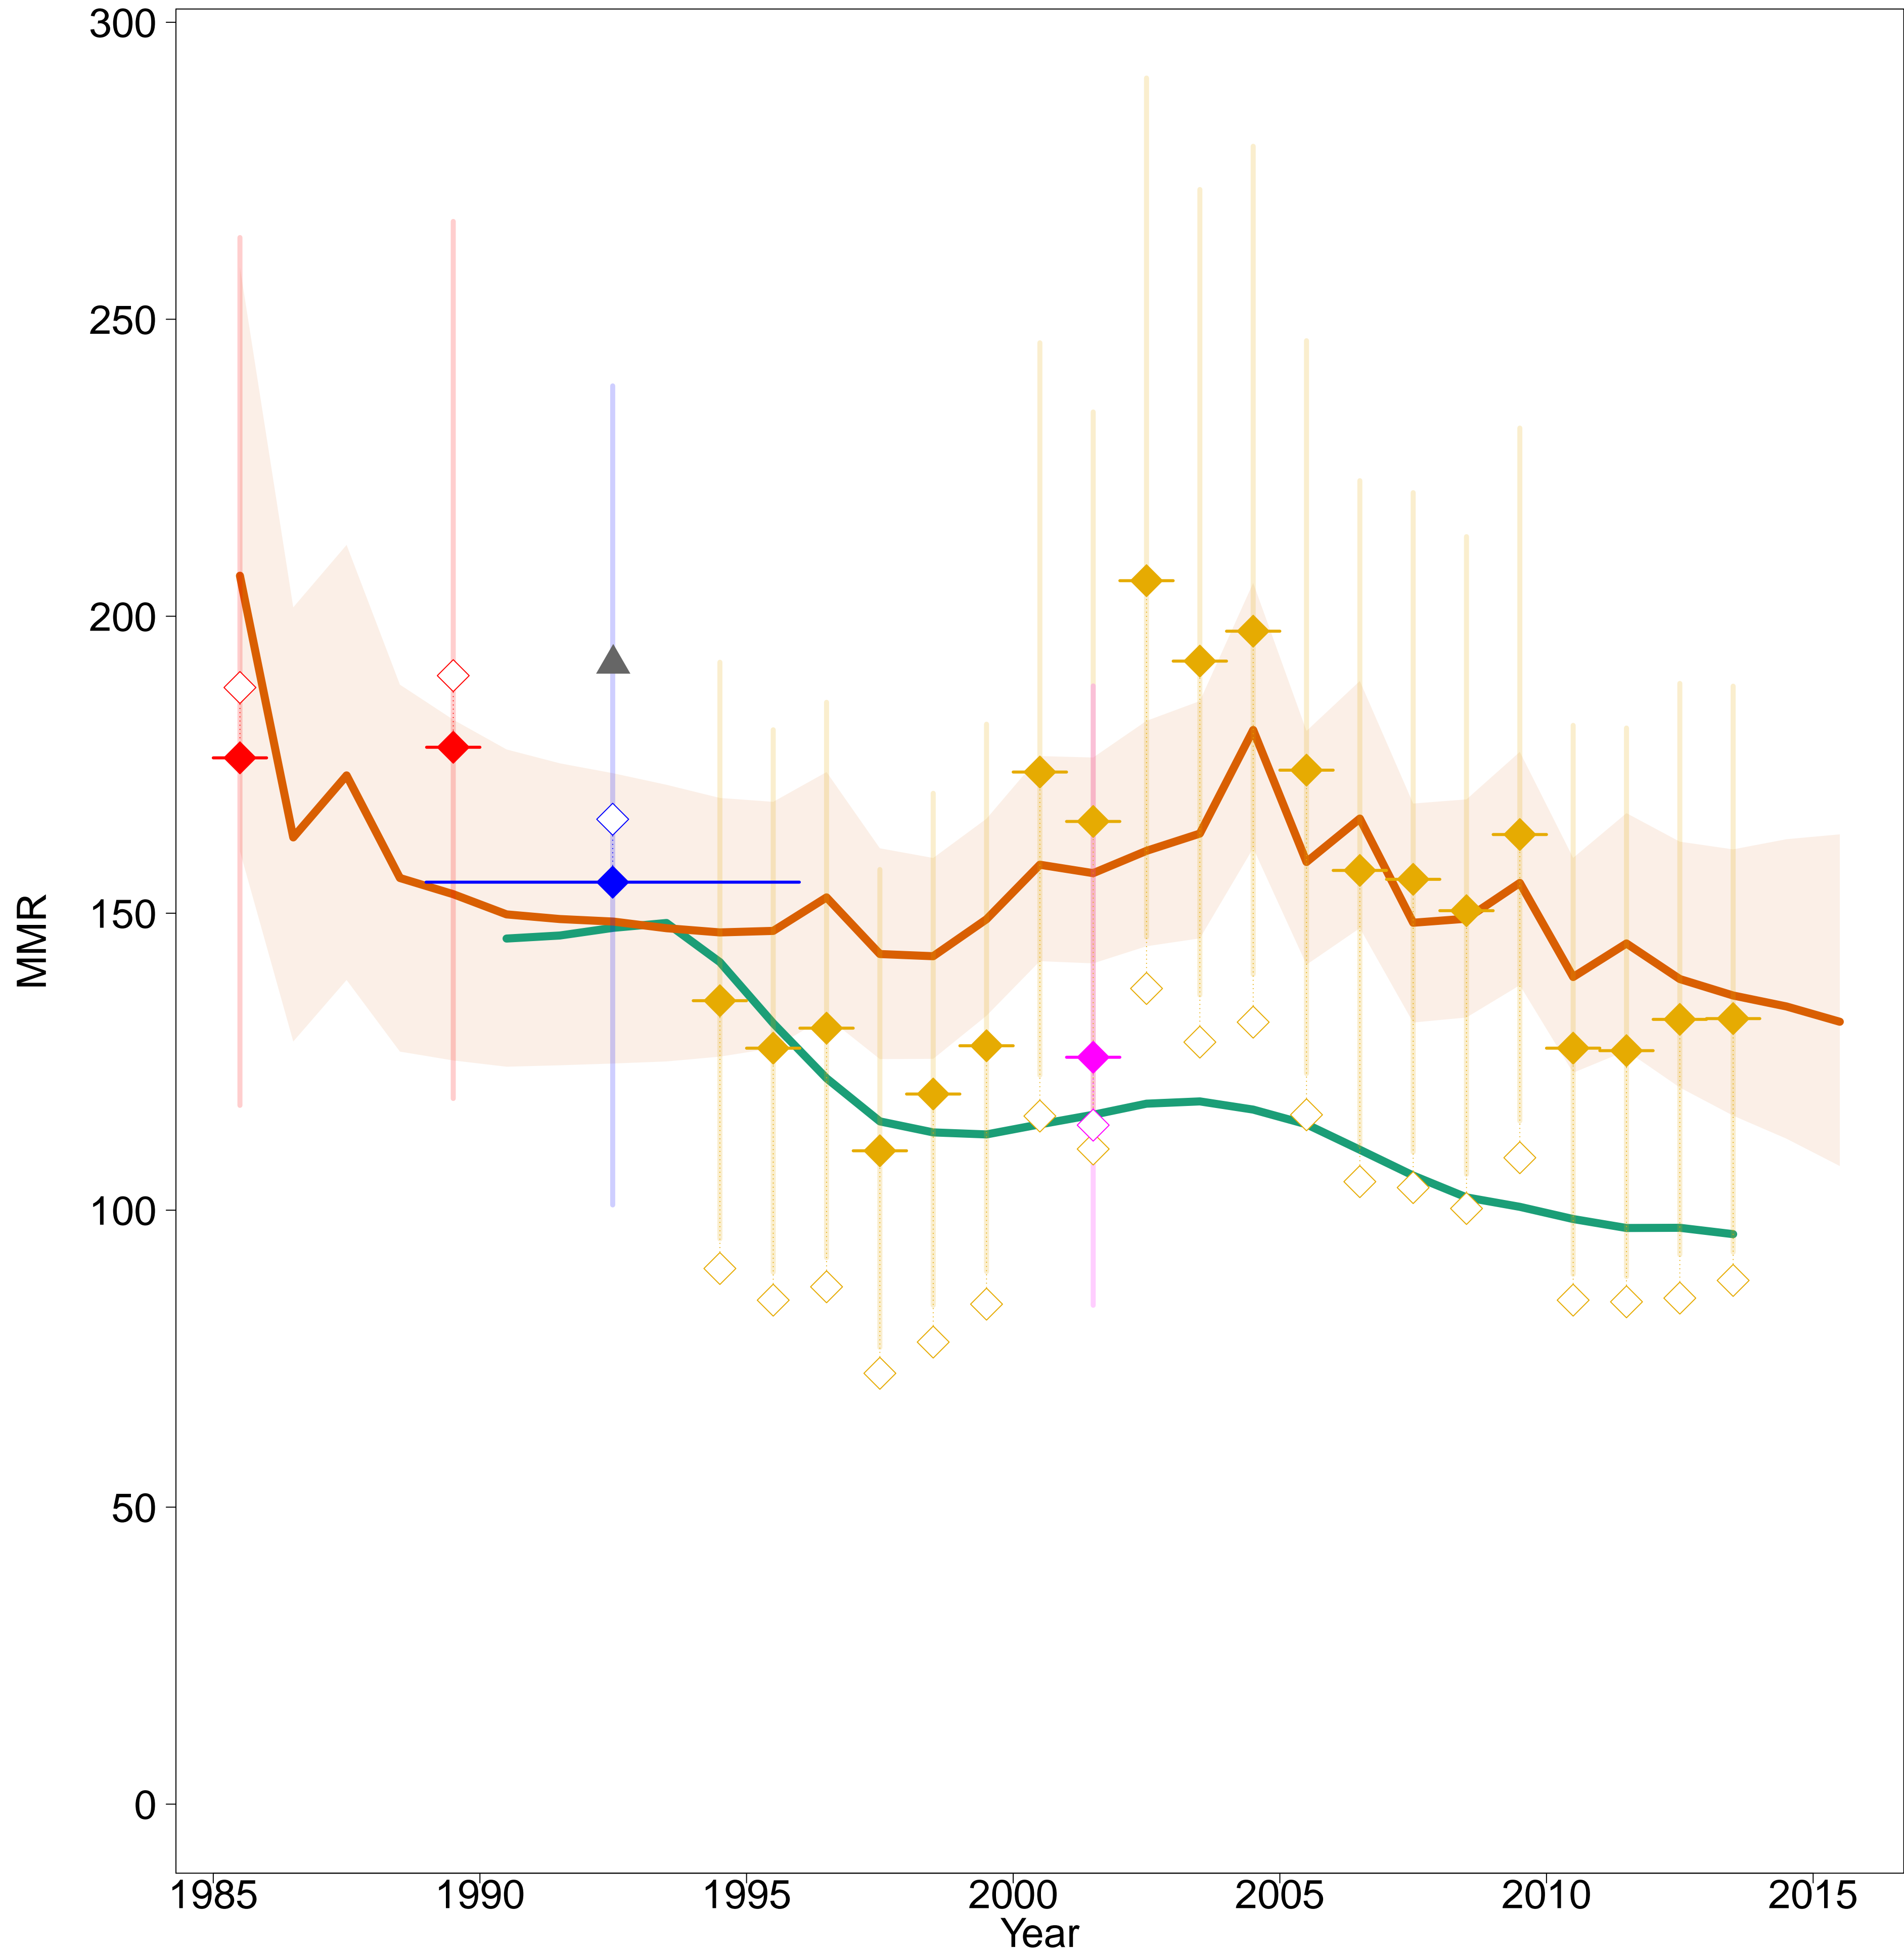

- Estimates -
- MMEIG 2015
- GBD 2013
- MMR Database 2015 -
- Observed Data
- Adjusted Data
- Data type -
- VR
- DHS
- Census
- Misc. studies
- Excluded misc. studies

Peru [PER]  
(South America)

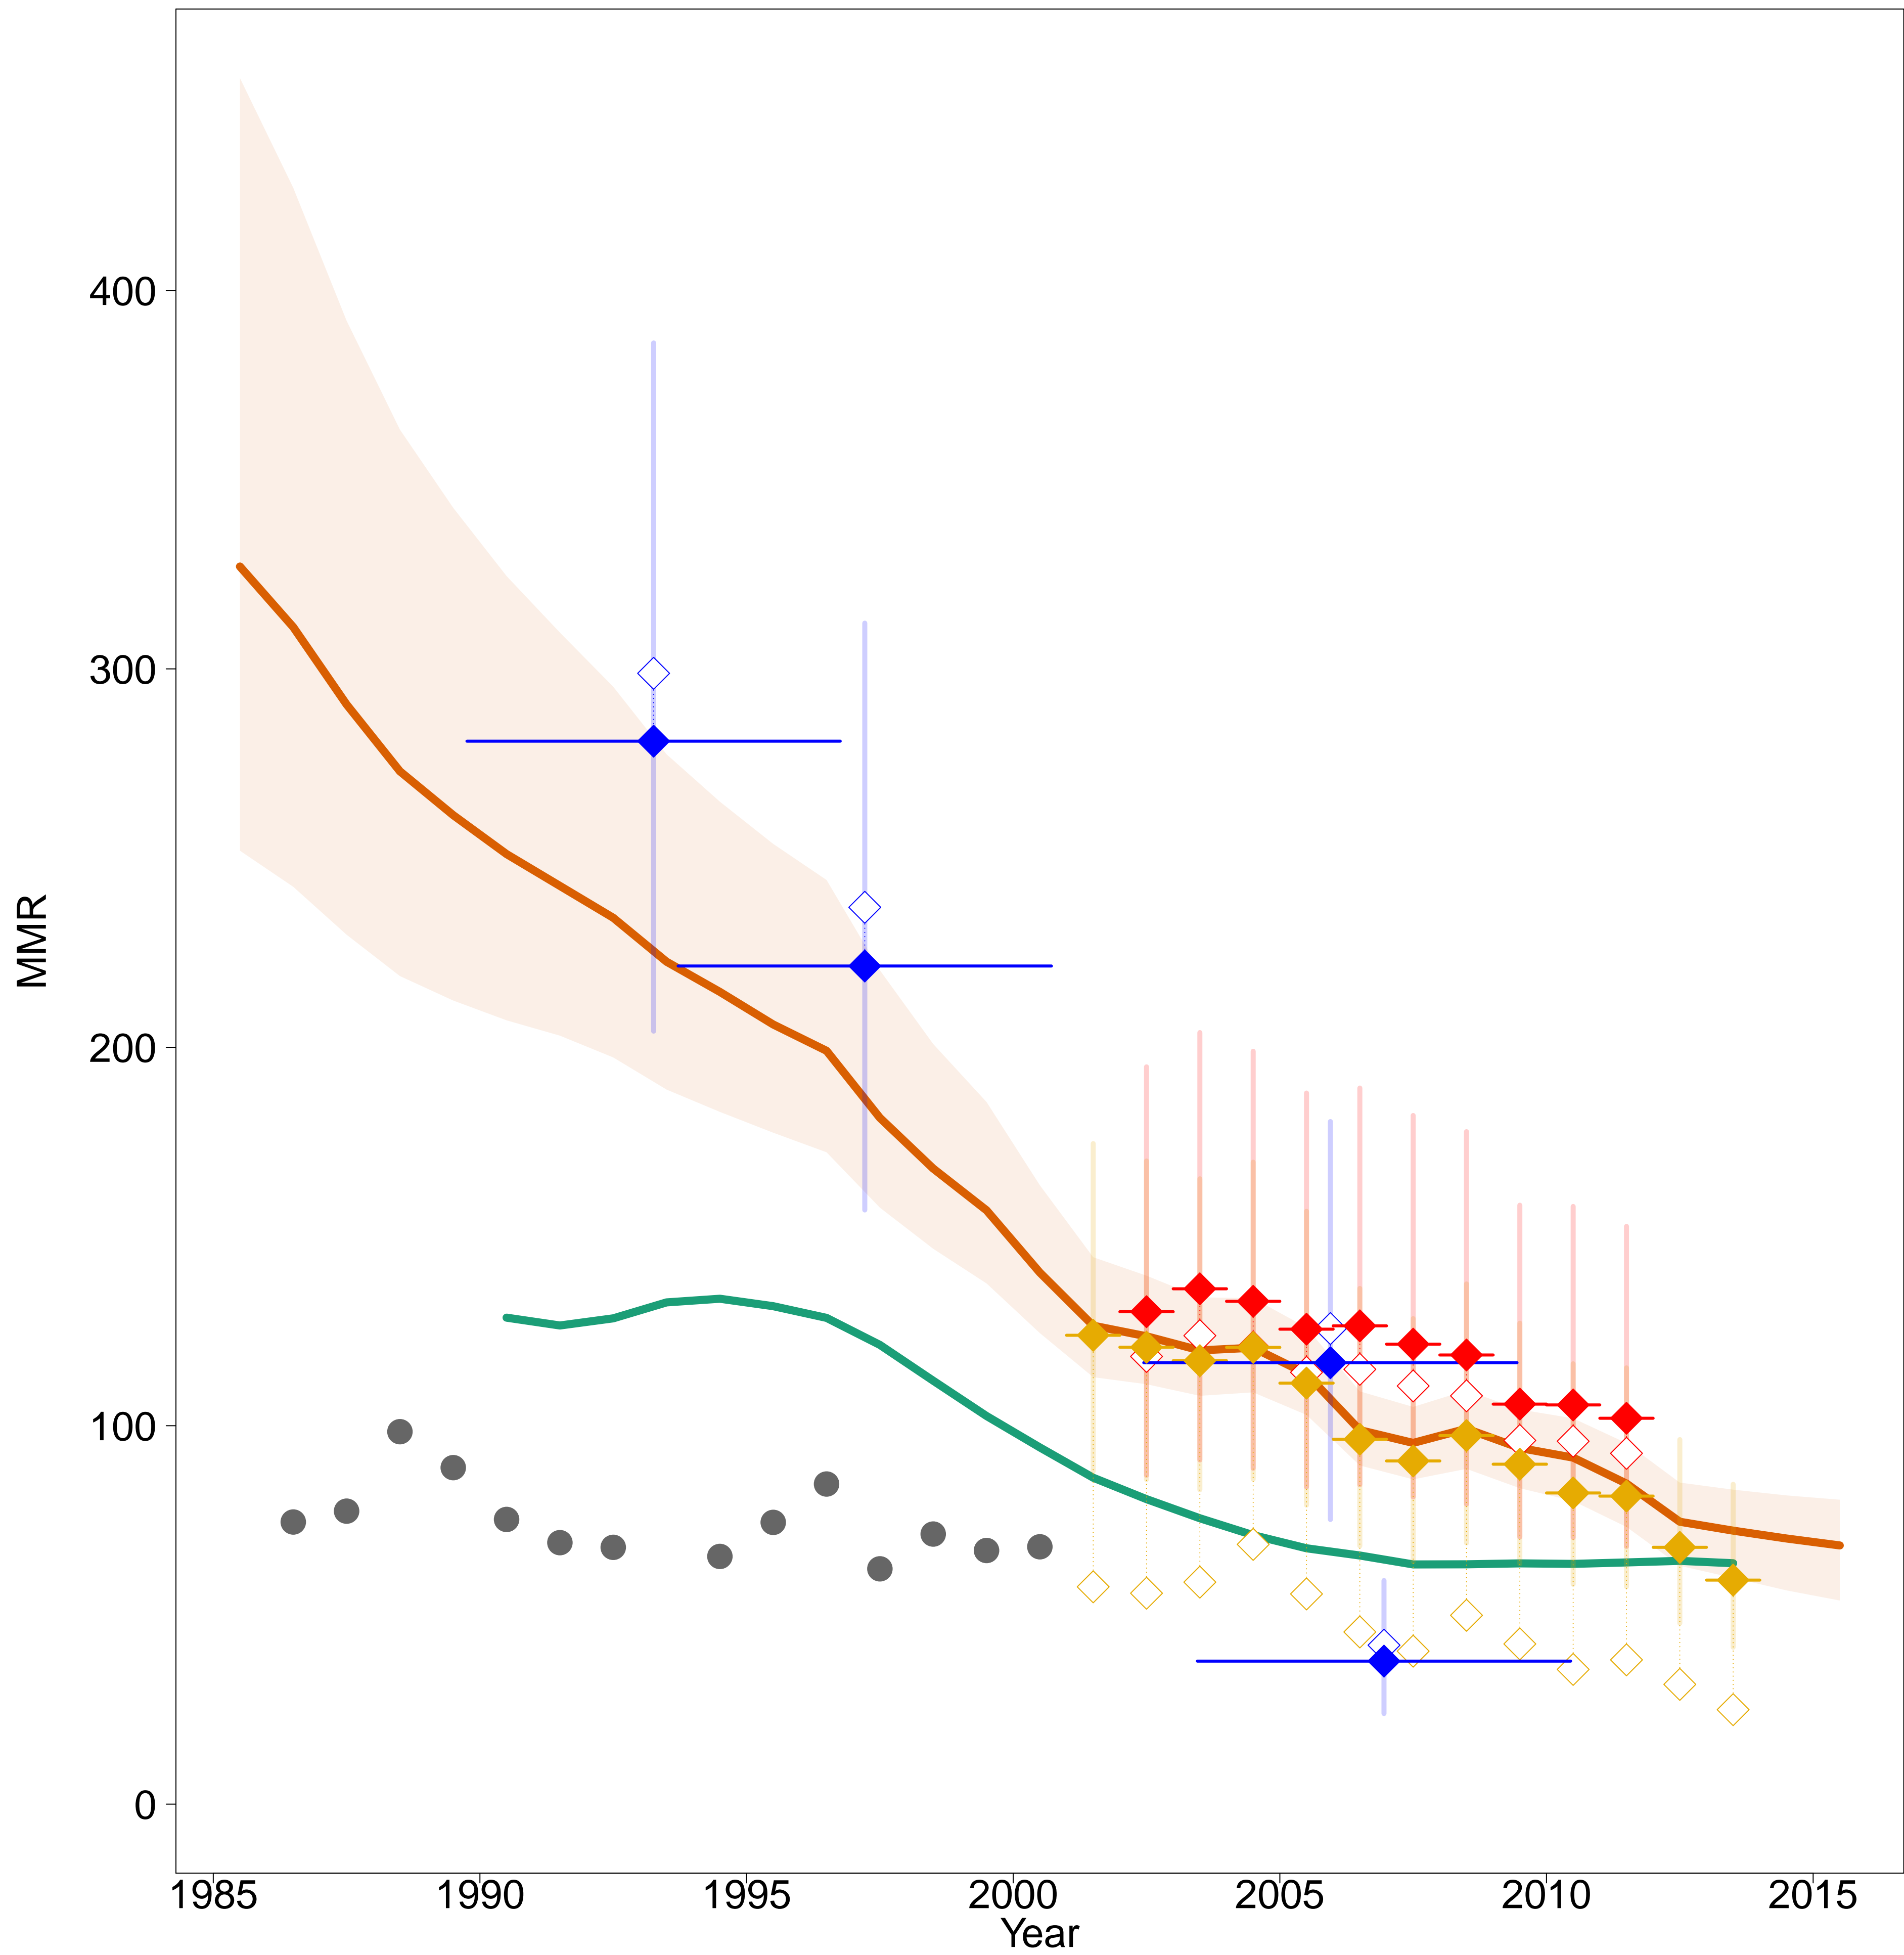

- Estimates -
- MMEIG 2015
- GBD 2013
- MMR Database 2015 -
- Observed Data
- Adjusted Data
- Data type -
- VR
- DHS
- Misc. studies
- Excluded VR data (data quality issues)

Philippines [PHL]  
(South-Eastern Asia / Oceania)

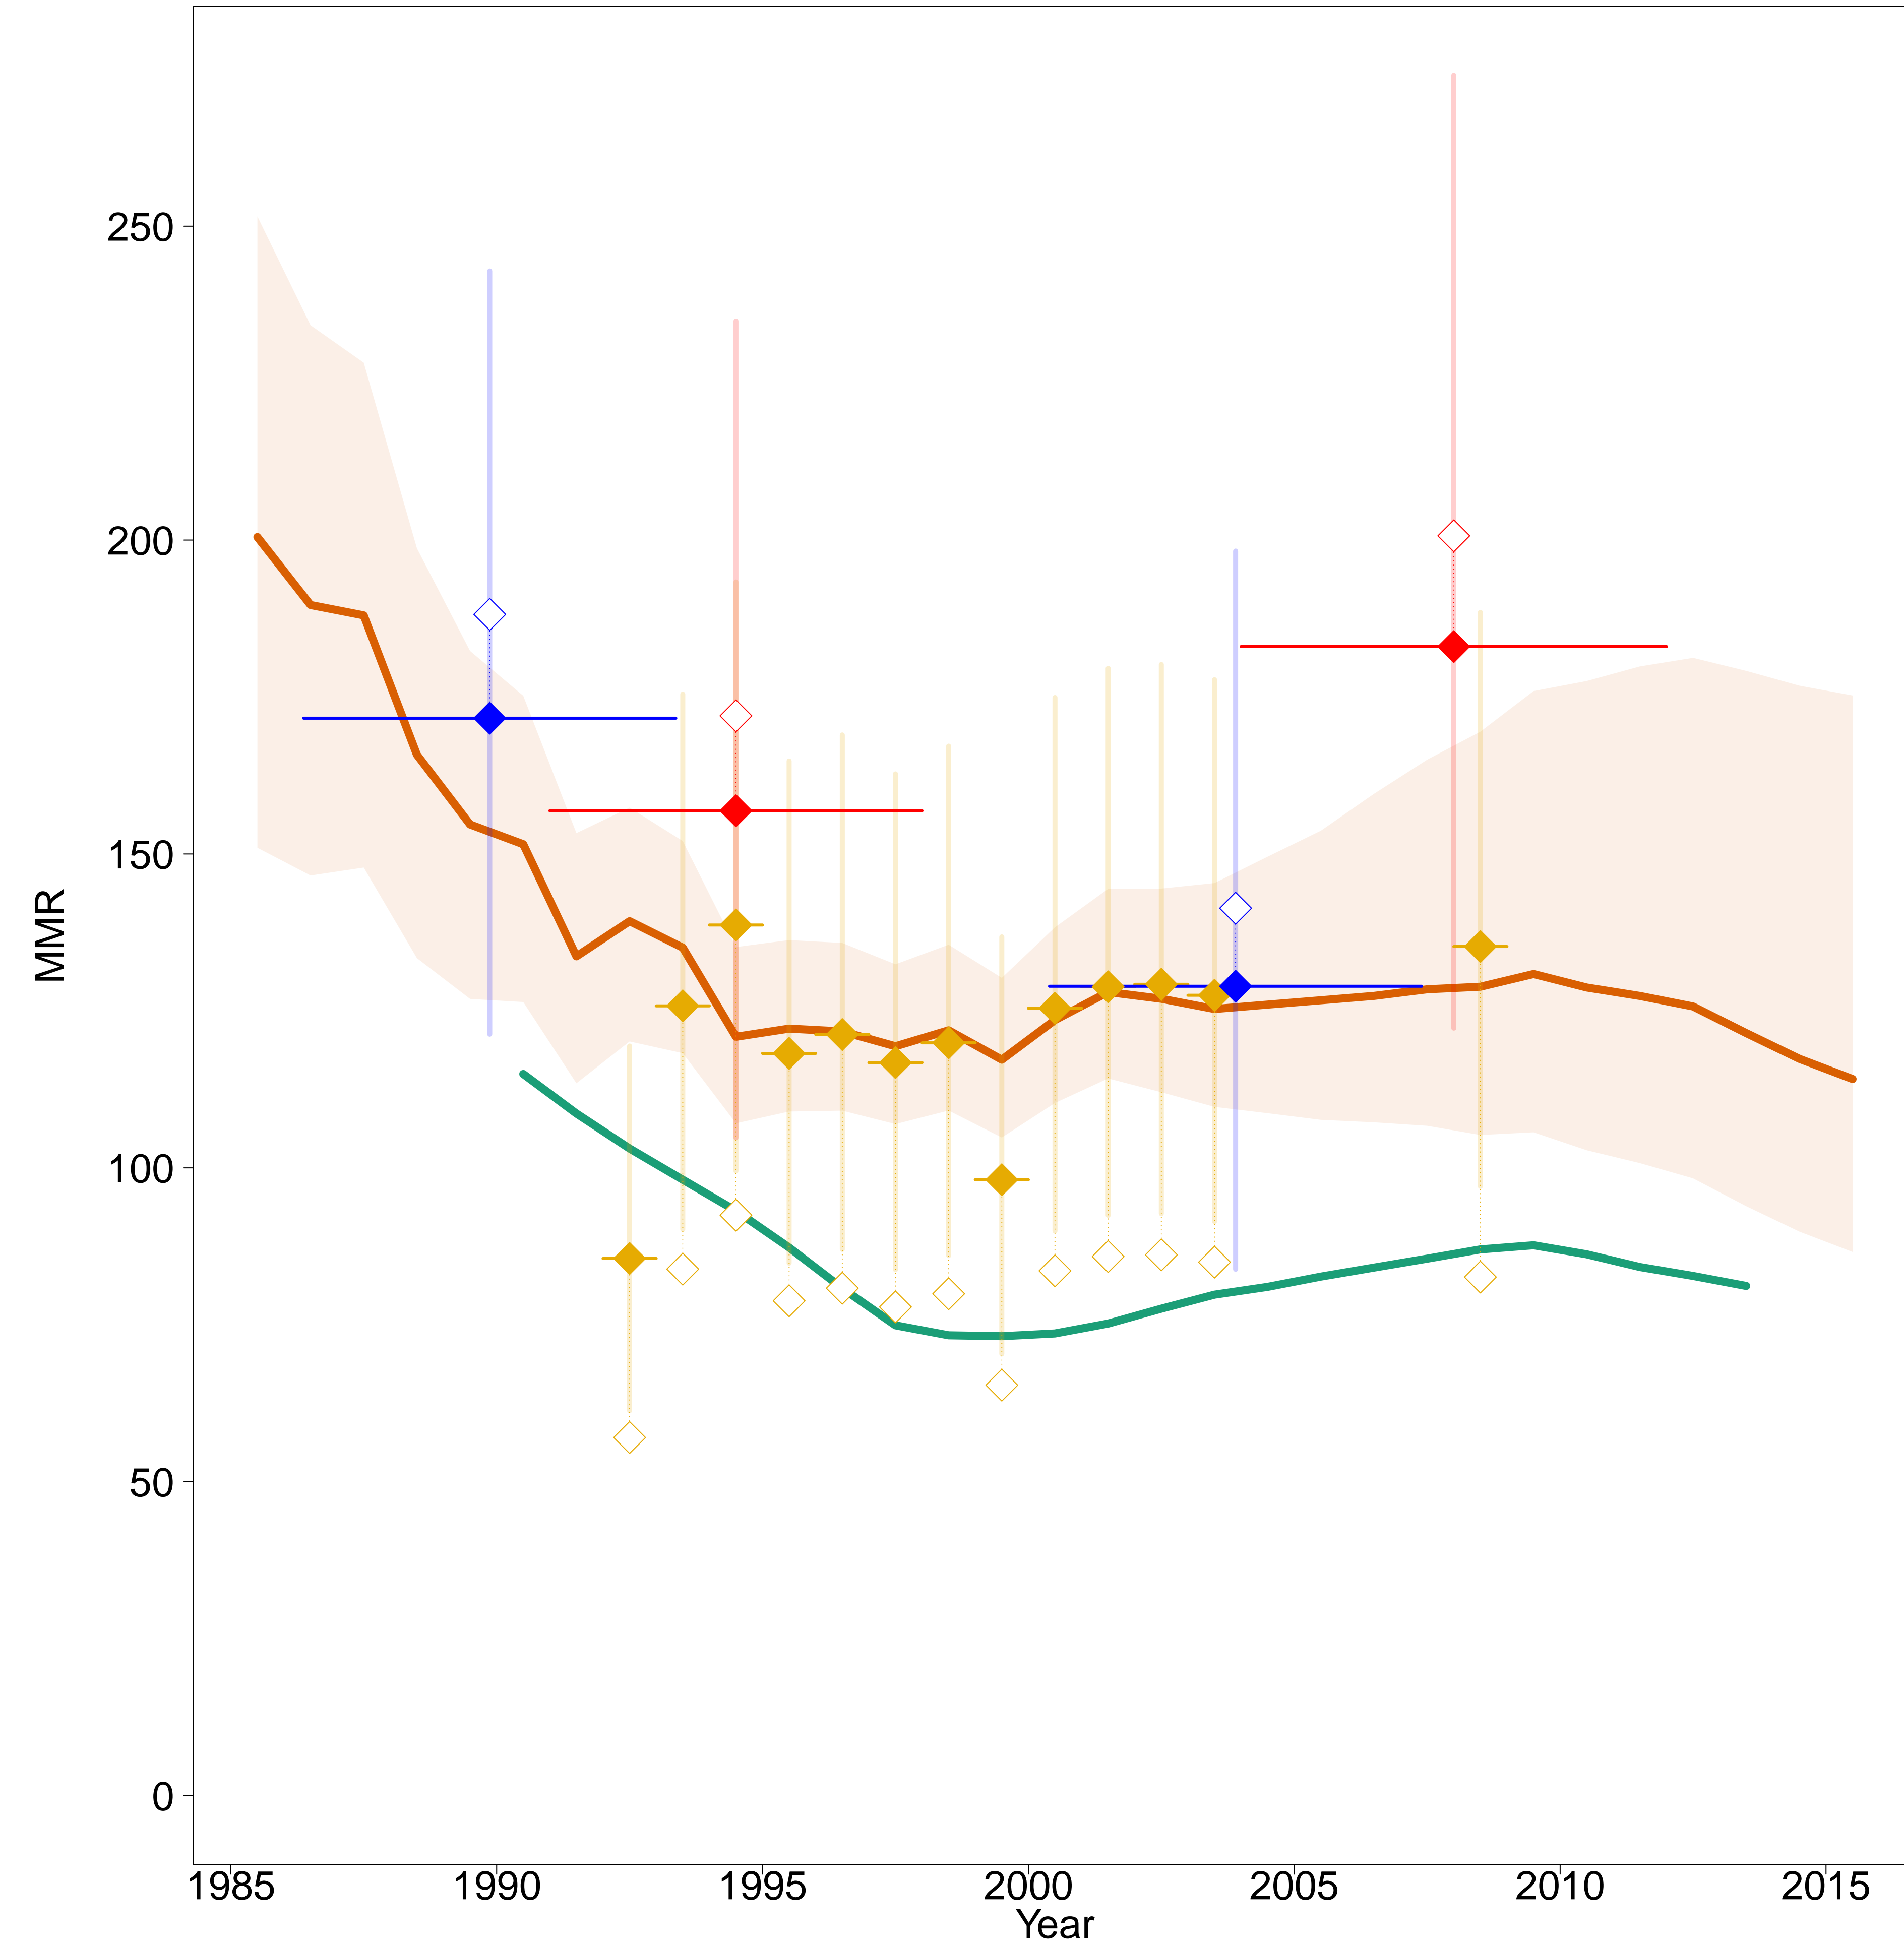

- Estimates -
- MMEIG 2015
- GBD 2013
- MMR Database 2015 -
- Observed Data
- Adjusted Data
- Data type -
- VR
- DHS
- Misc. studies

Poland [POL]  
(Developed regions)

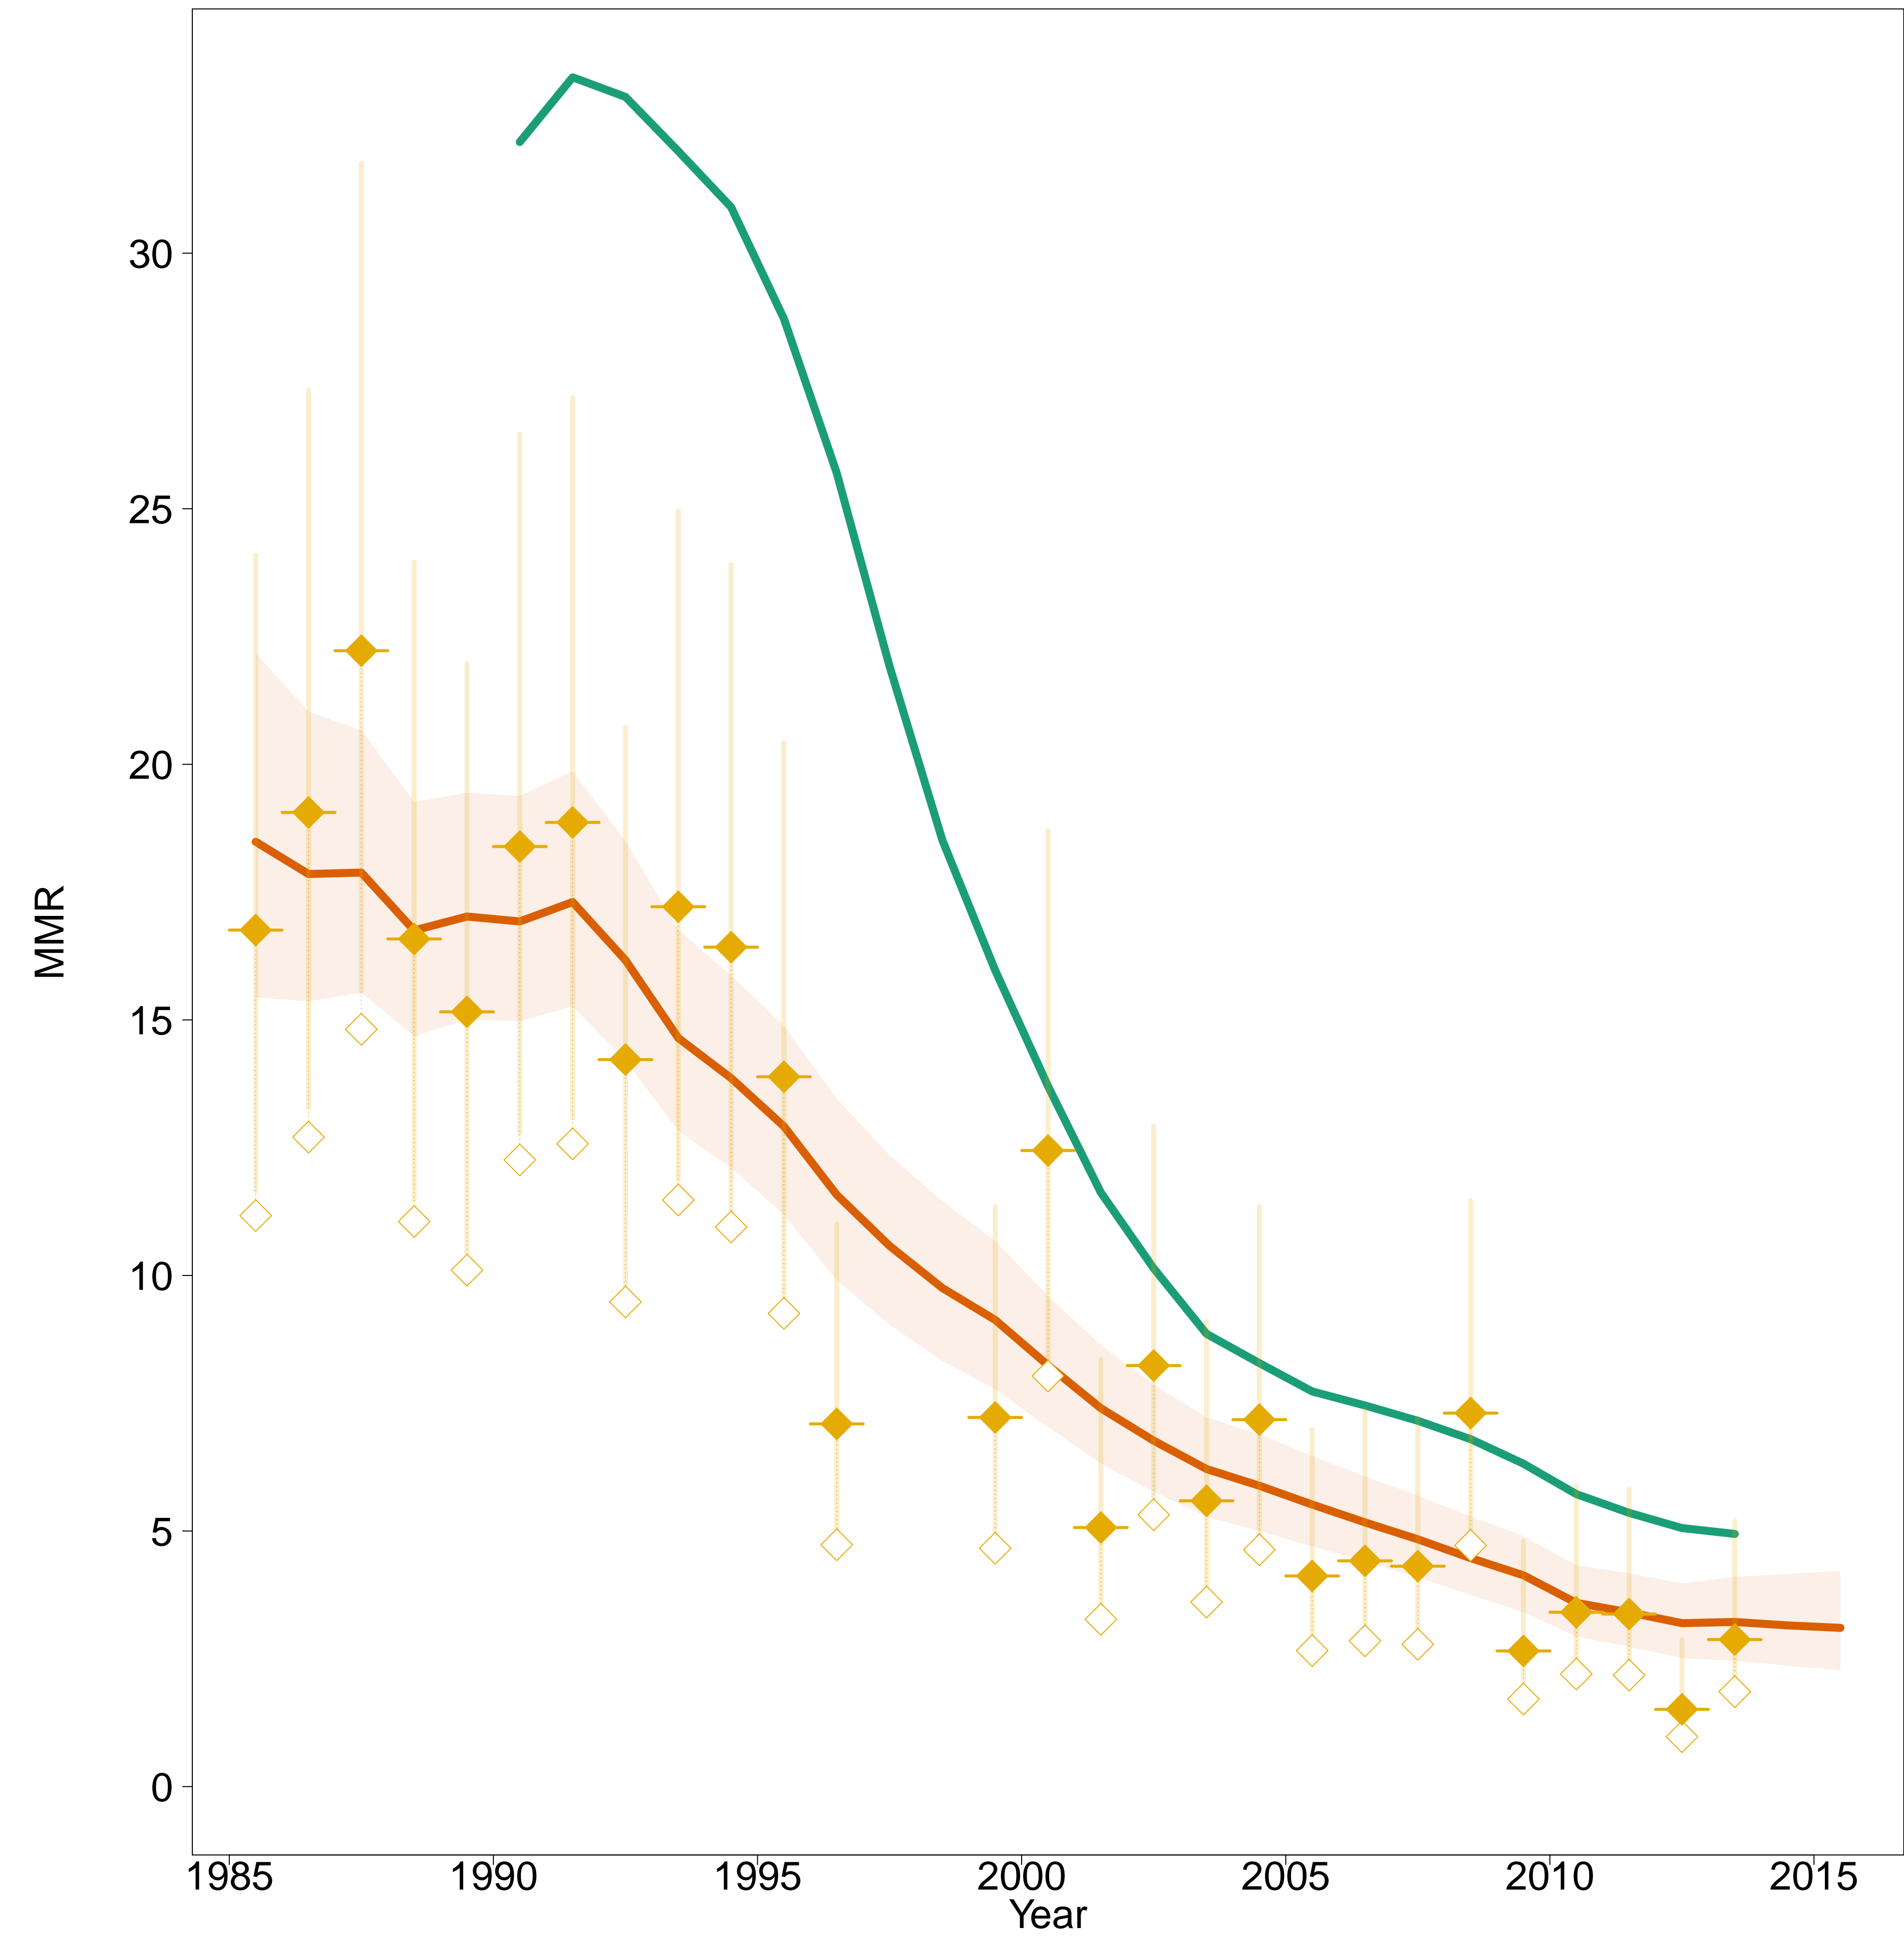

- Estimates –
- MMEIG 2015
- GBD 2013
- MMR Database 2015 –
- ◊ Observed Data
- ◆ Adjusted Data
- Data type –
- ◆ VR

Portugal [PRT]  
(Developed regions)

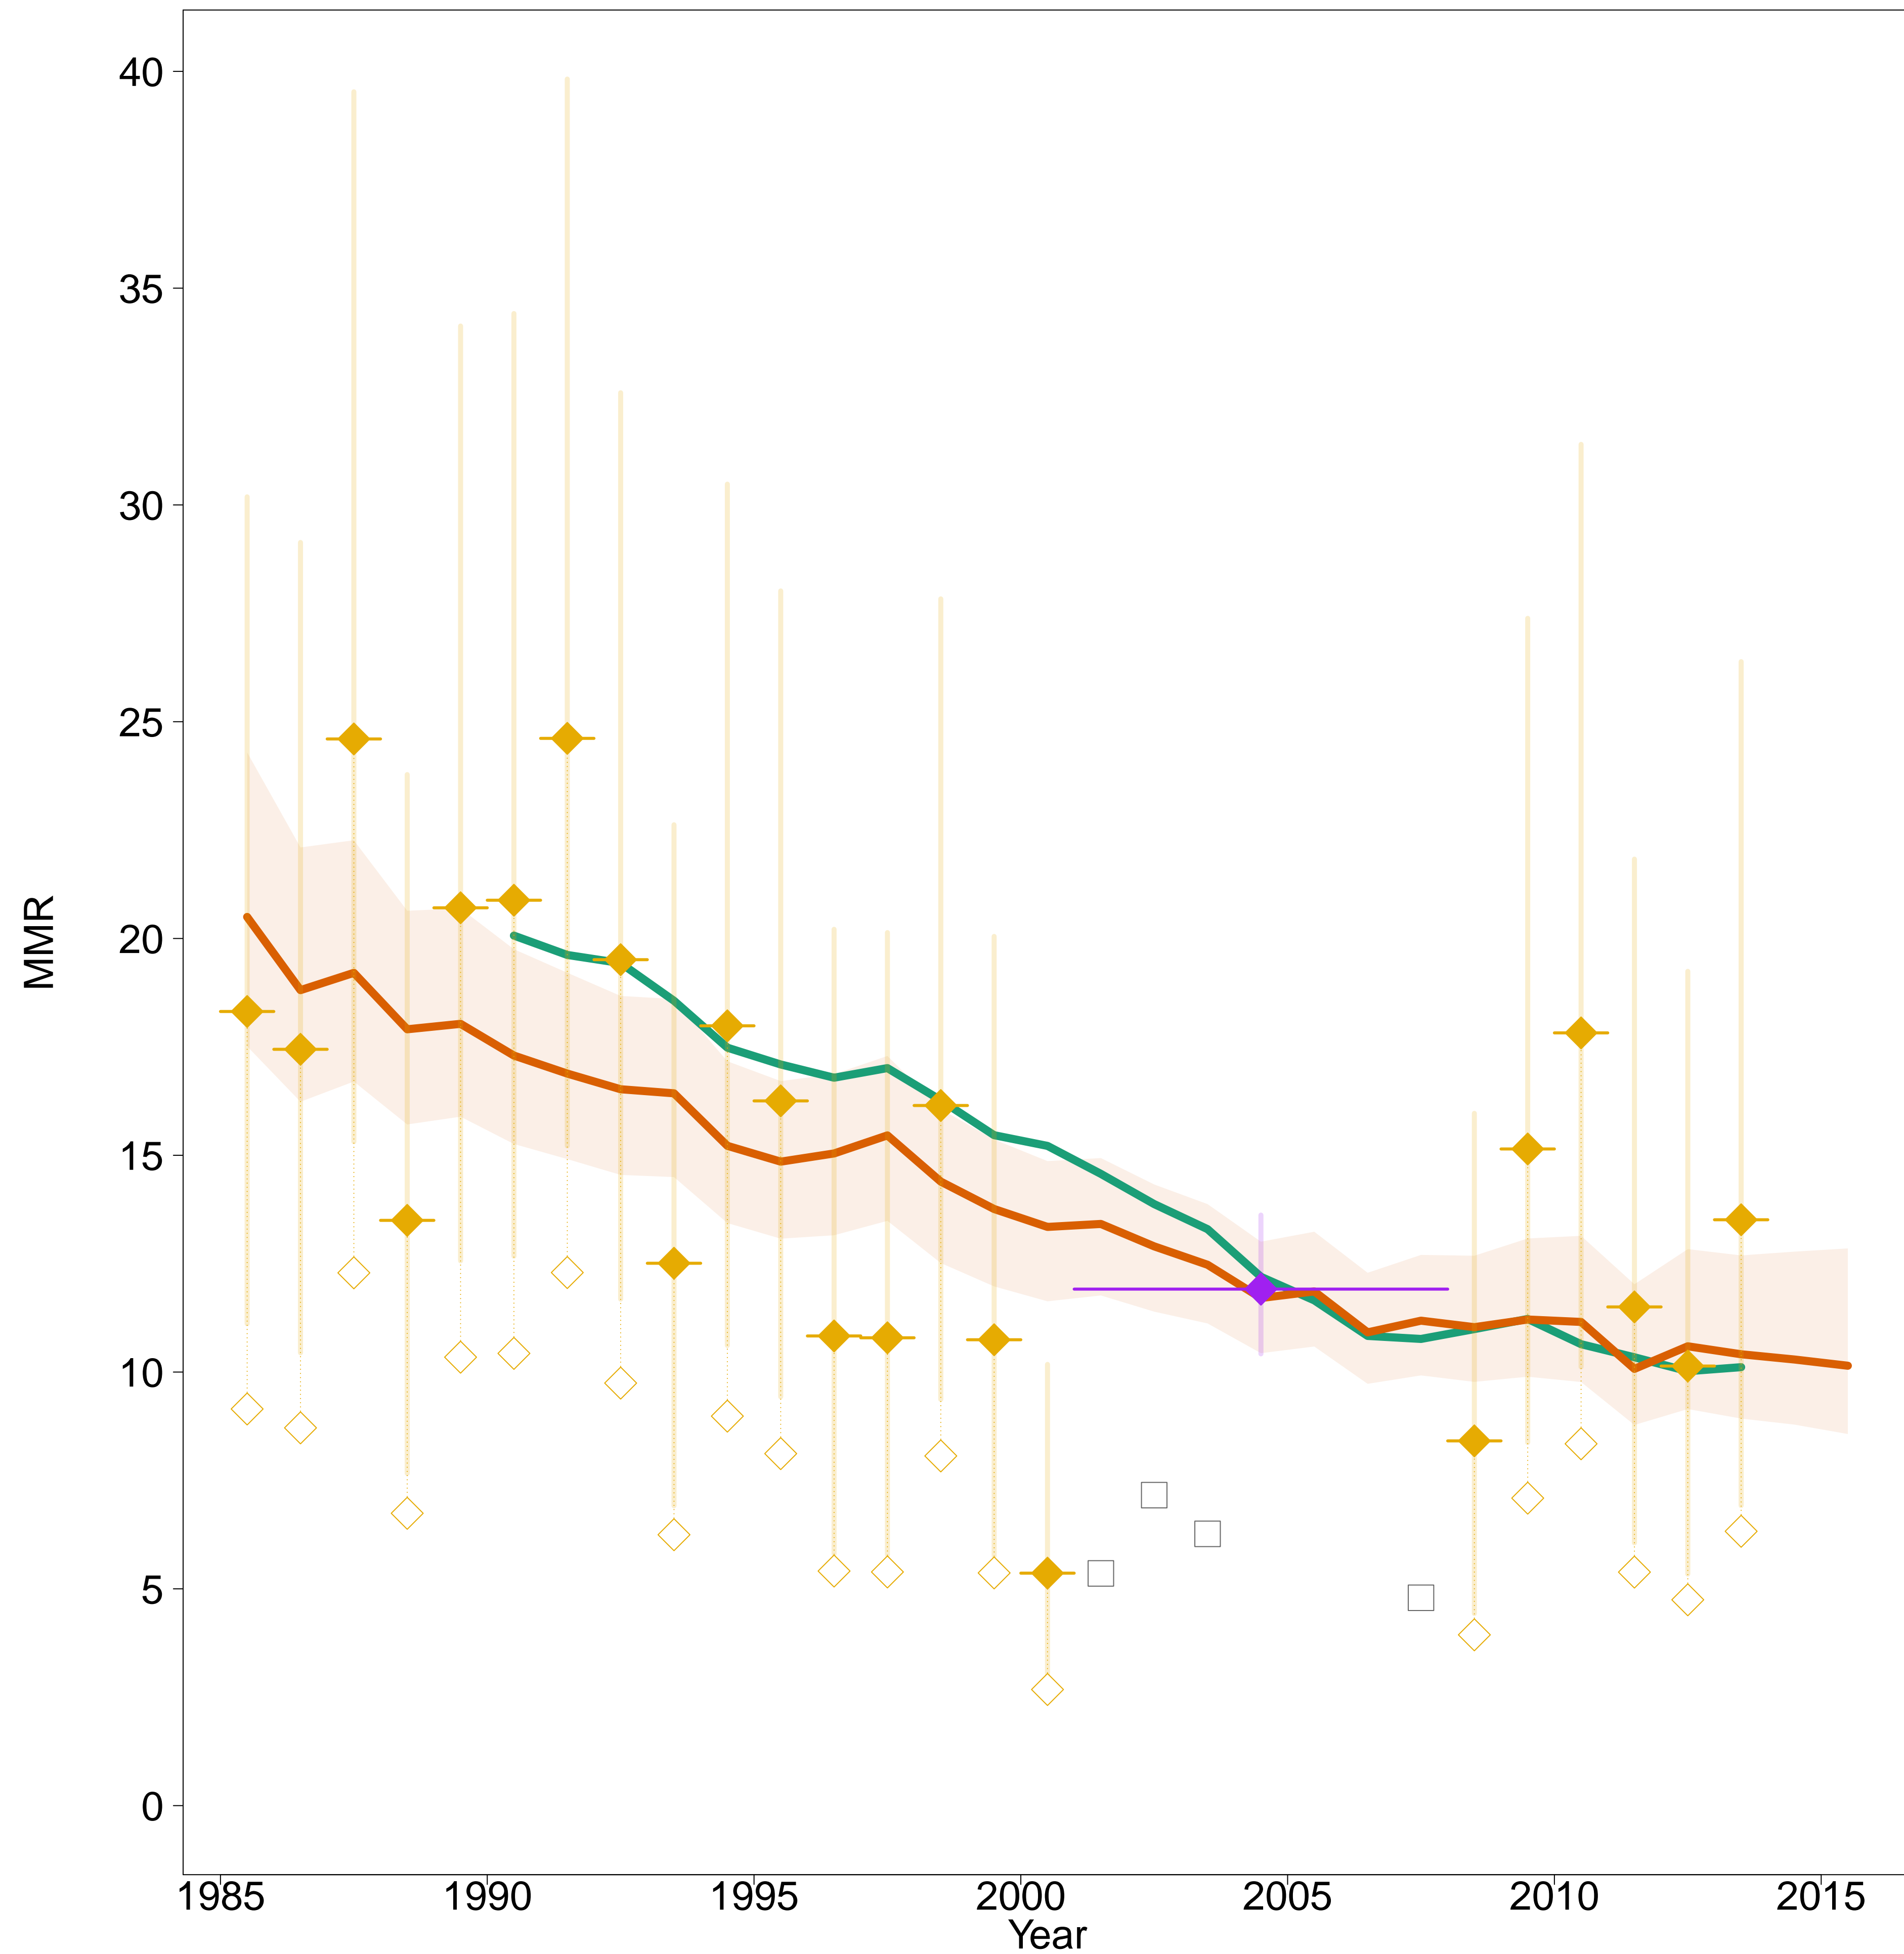

- Estimates –
- MMEIG 2015
- GBD 2013
- MMR Database 2015 –
- ◊ Observed Data
- ◆ Adjusted Data
- Data type –
- ◆ VR
- ◆ Spec. studies
- ◻ Excluded VR data  
(overlap with specialized study)



Puerto Rico [PRI]  
(Caribbean)

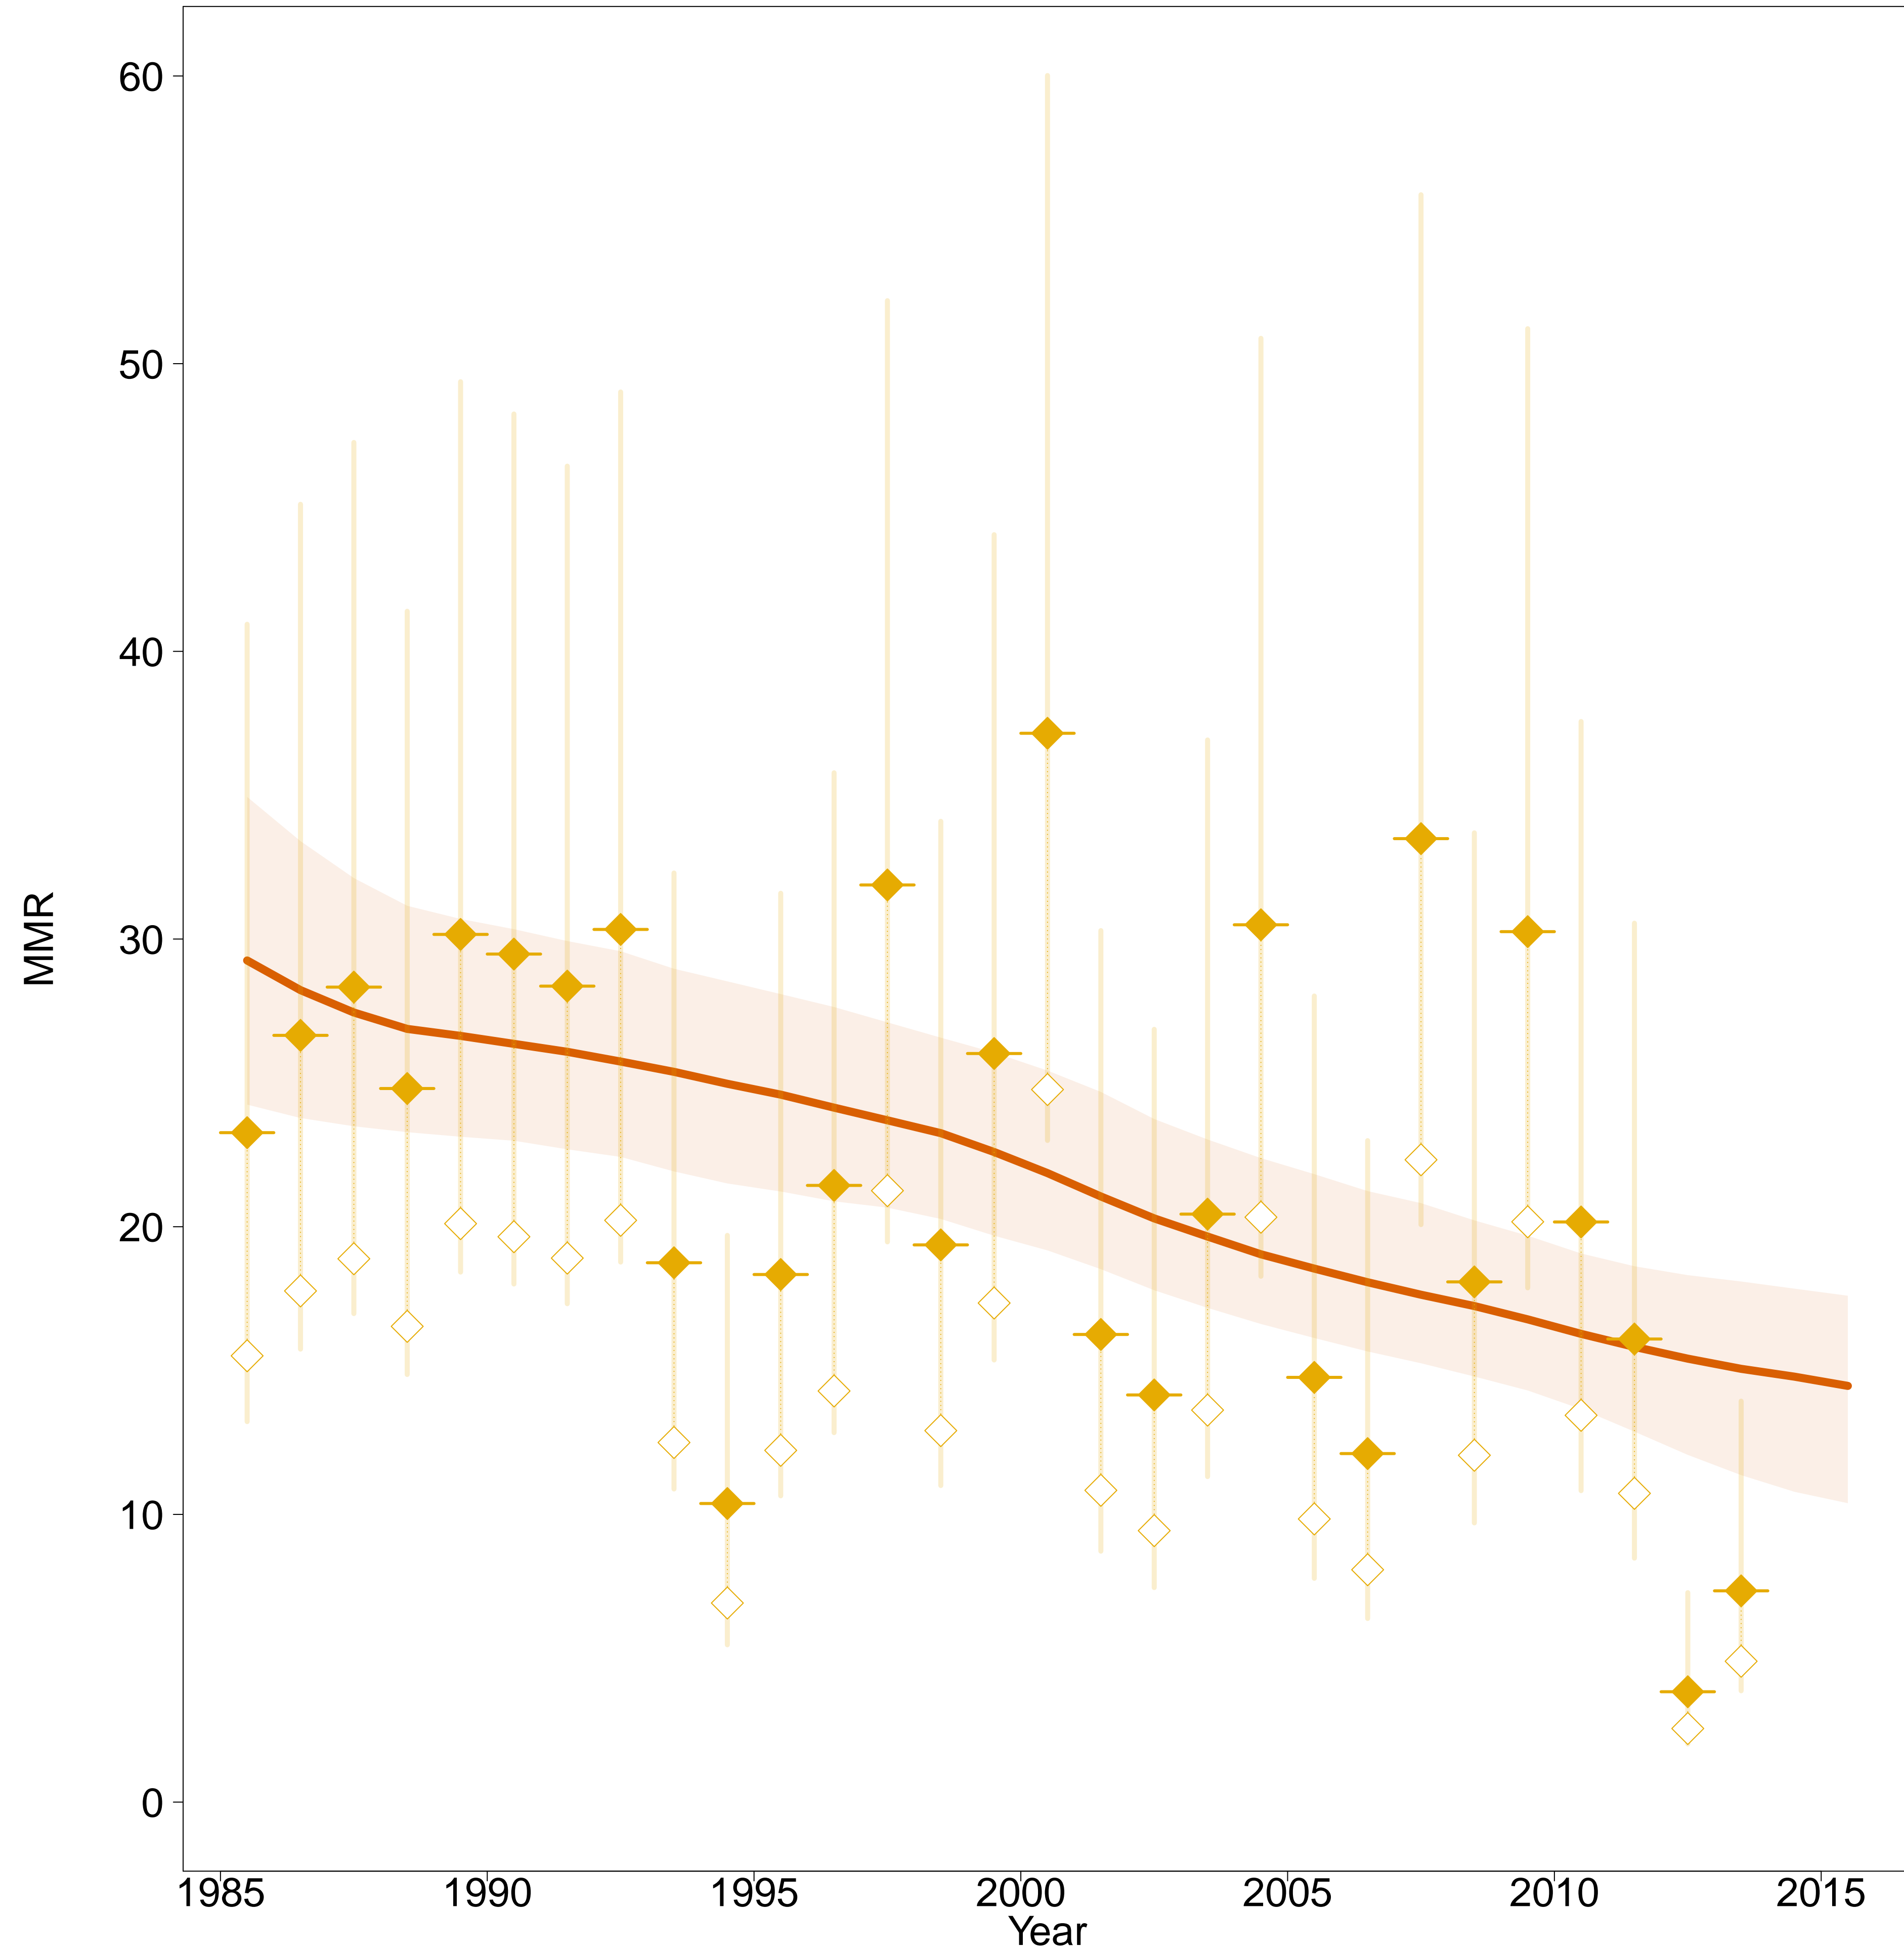

- Estimates –
- MMEIG 2015
- GBD 2013
- MMR Database 2015 –
- ◊ Observed Data
- ◆ Adjusted Data
- Data type –
- ◆ VR

**Qatar [QAT]  
(Western Asia)**

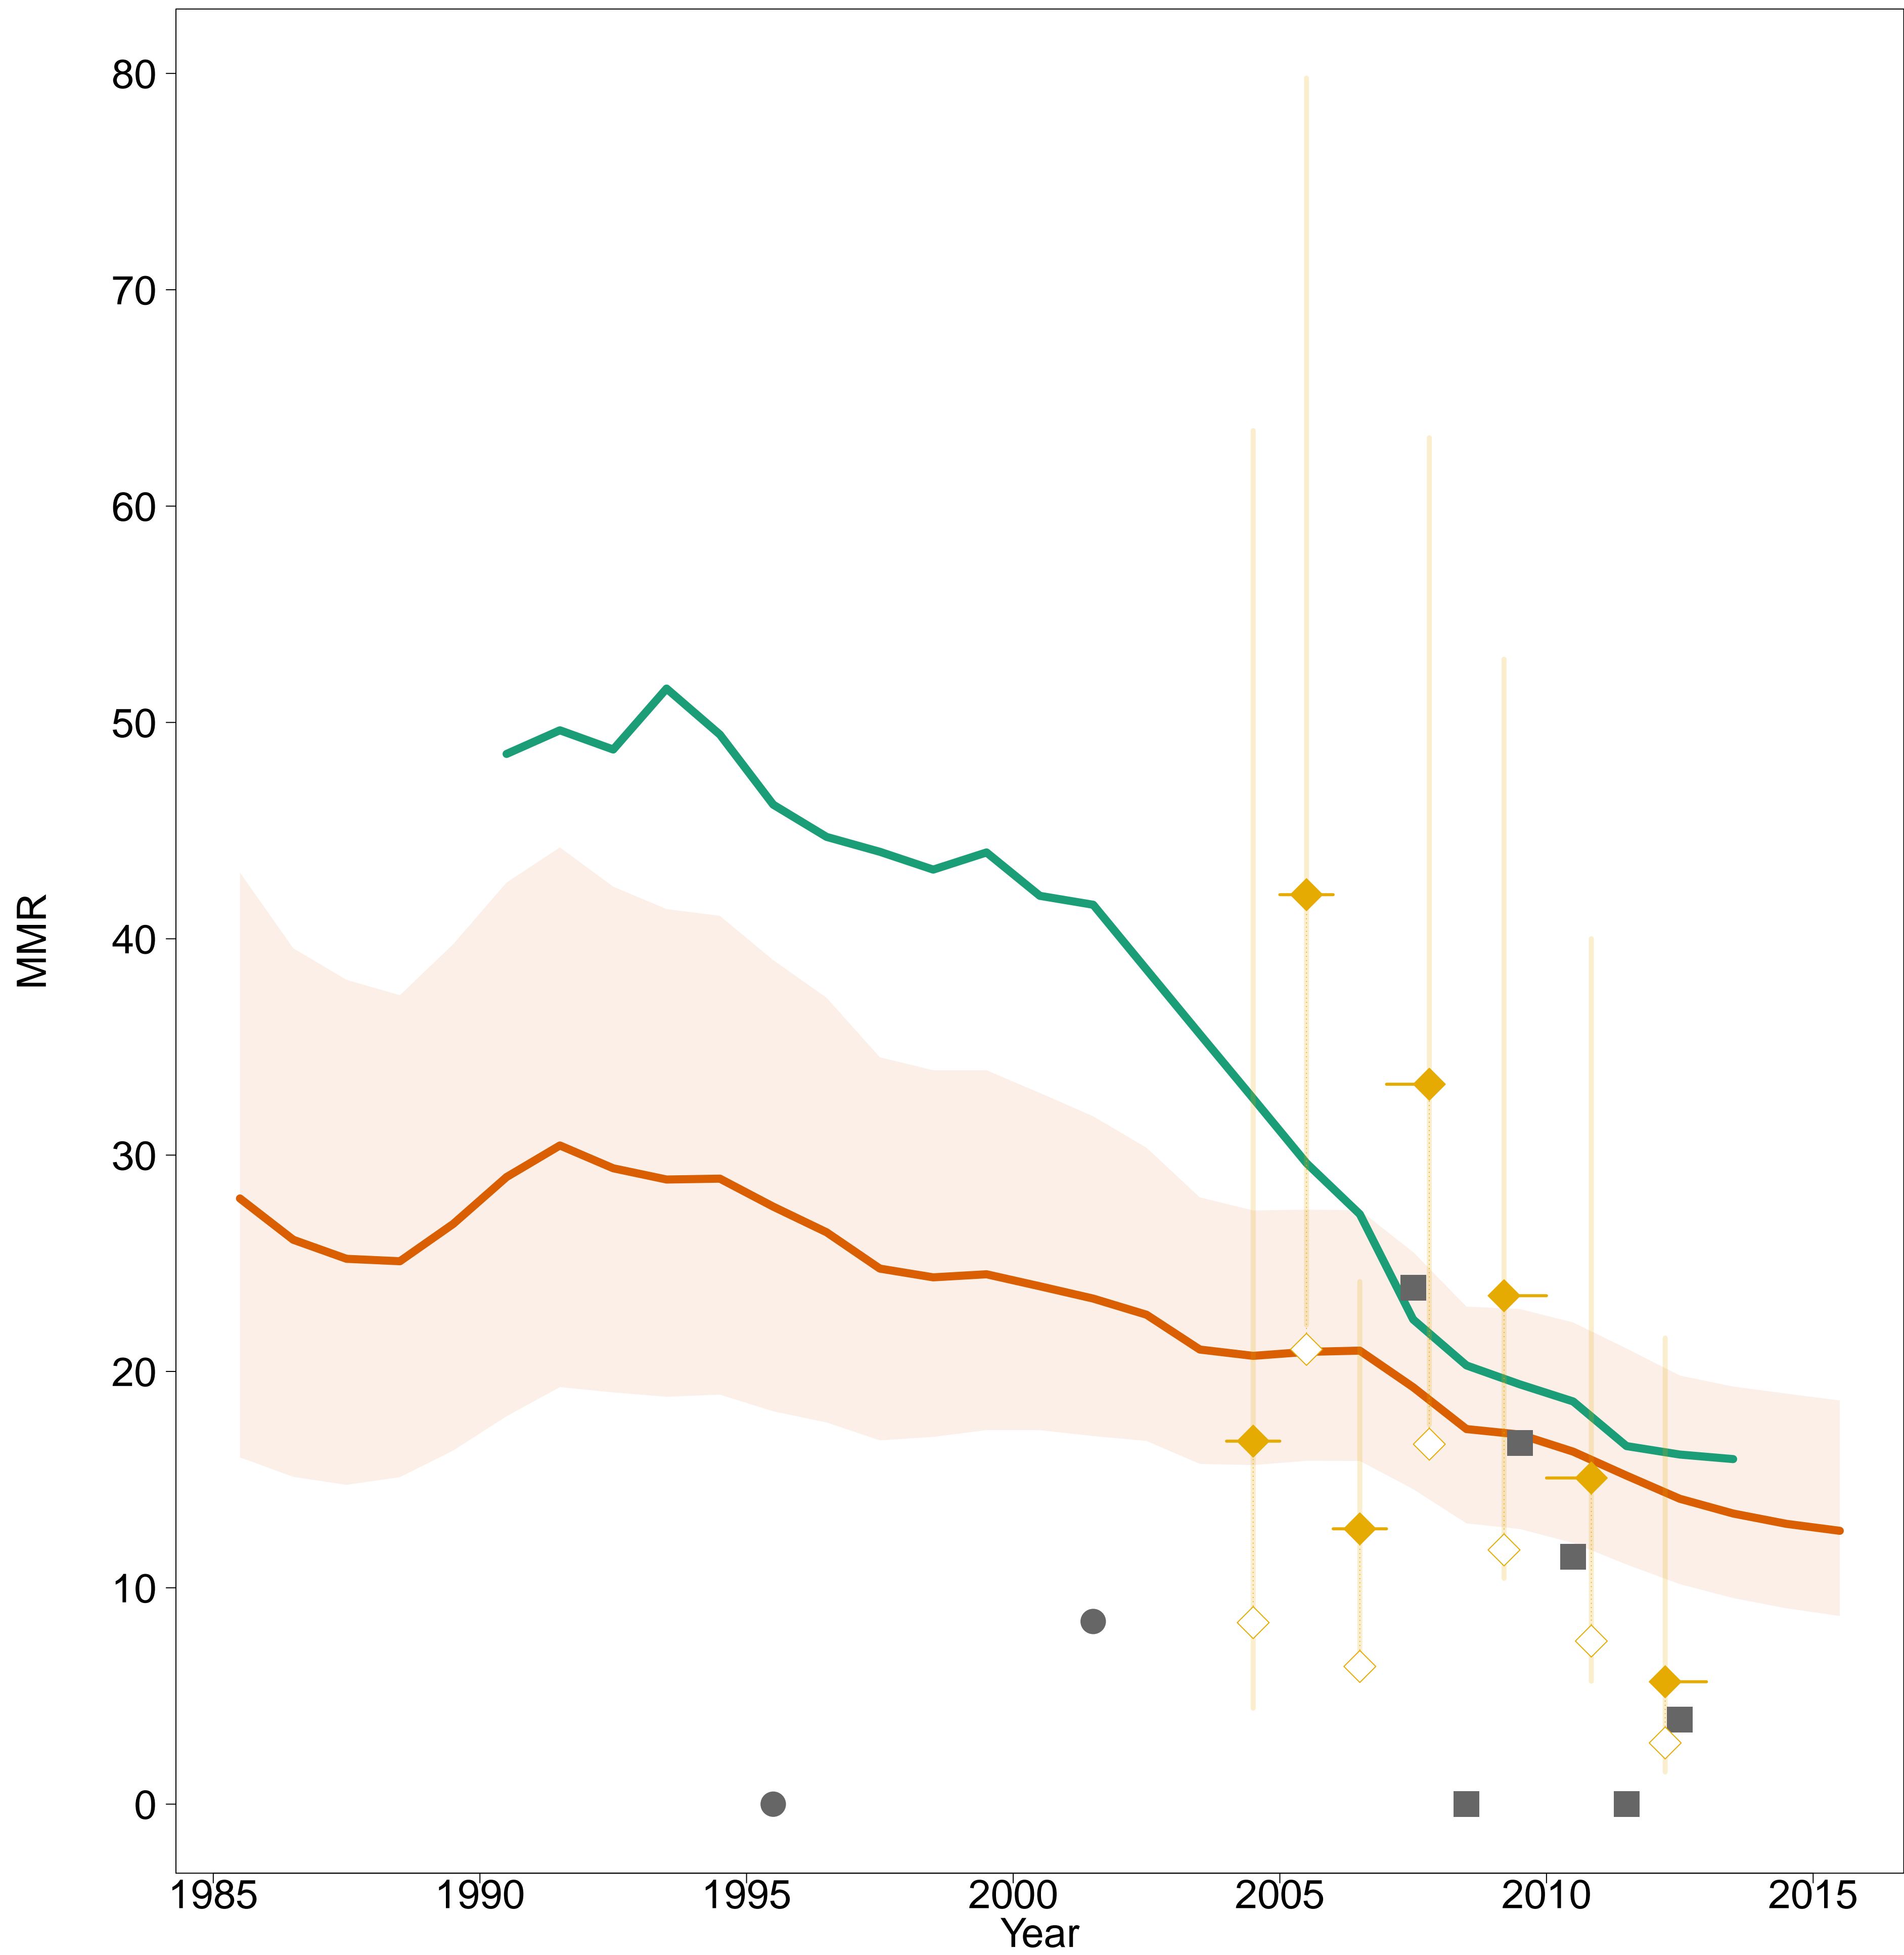

- Estimates -
- MMEIG 2015
- GBD 2013
- MMR Database 2015 -
- Observed Data
- Adjusted Data
- Data type -
- VR
- Reported VR before recalc.  
(related to 0 obs. mat. death)
- Excluded VR data  
(data quality issues)

Republic of Korea [KOR]  
(Eastern Asia)

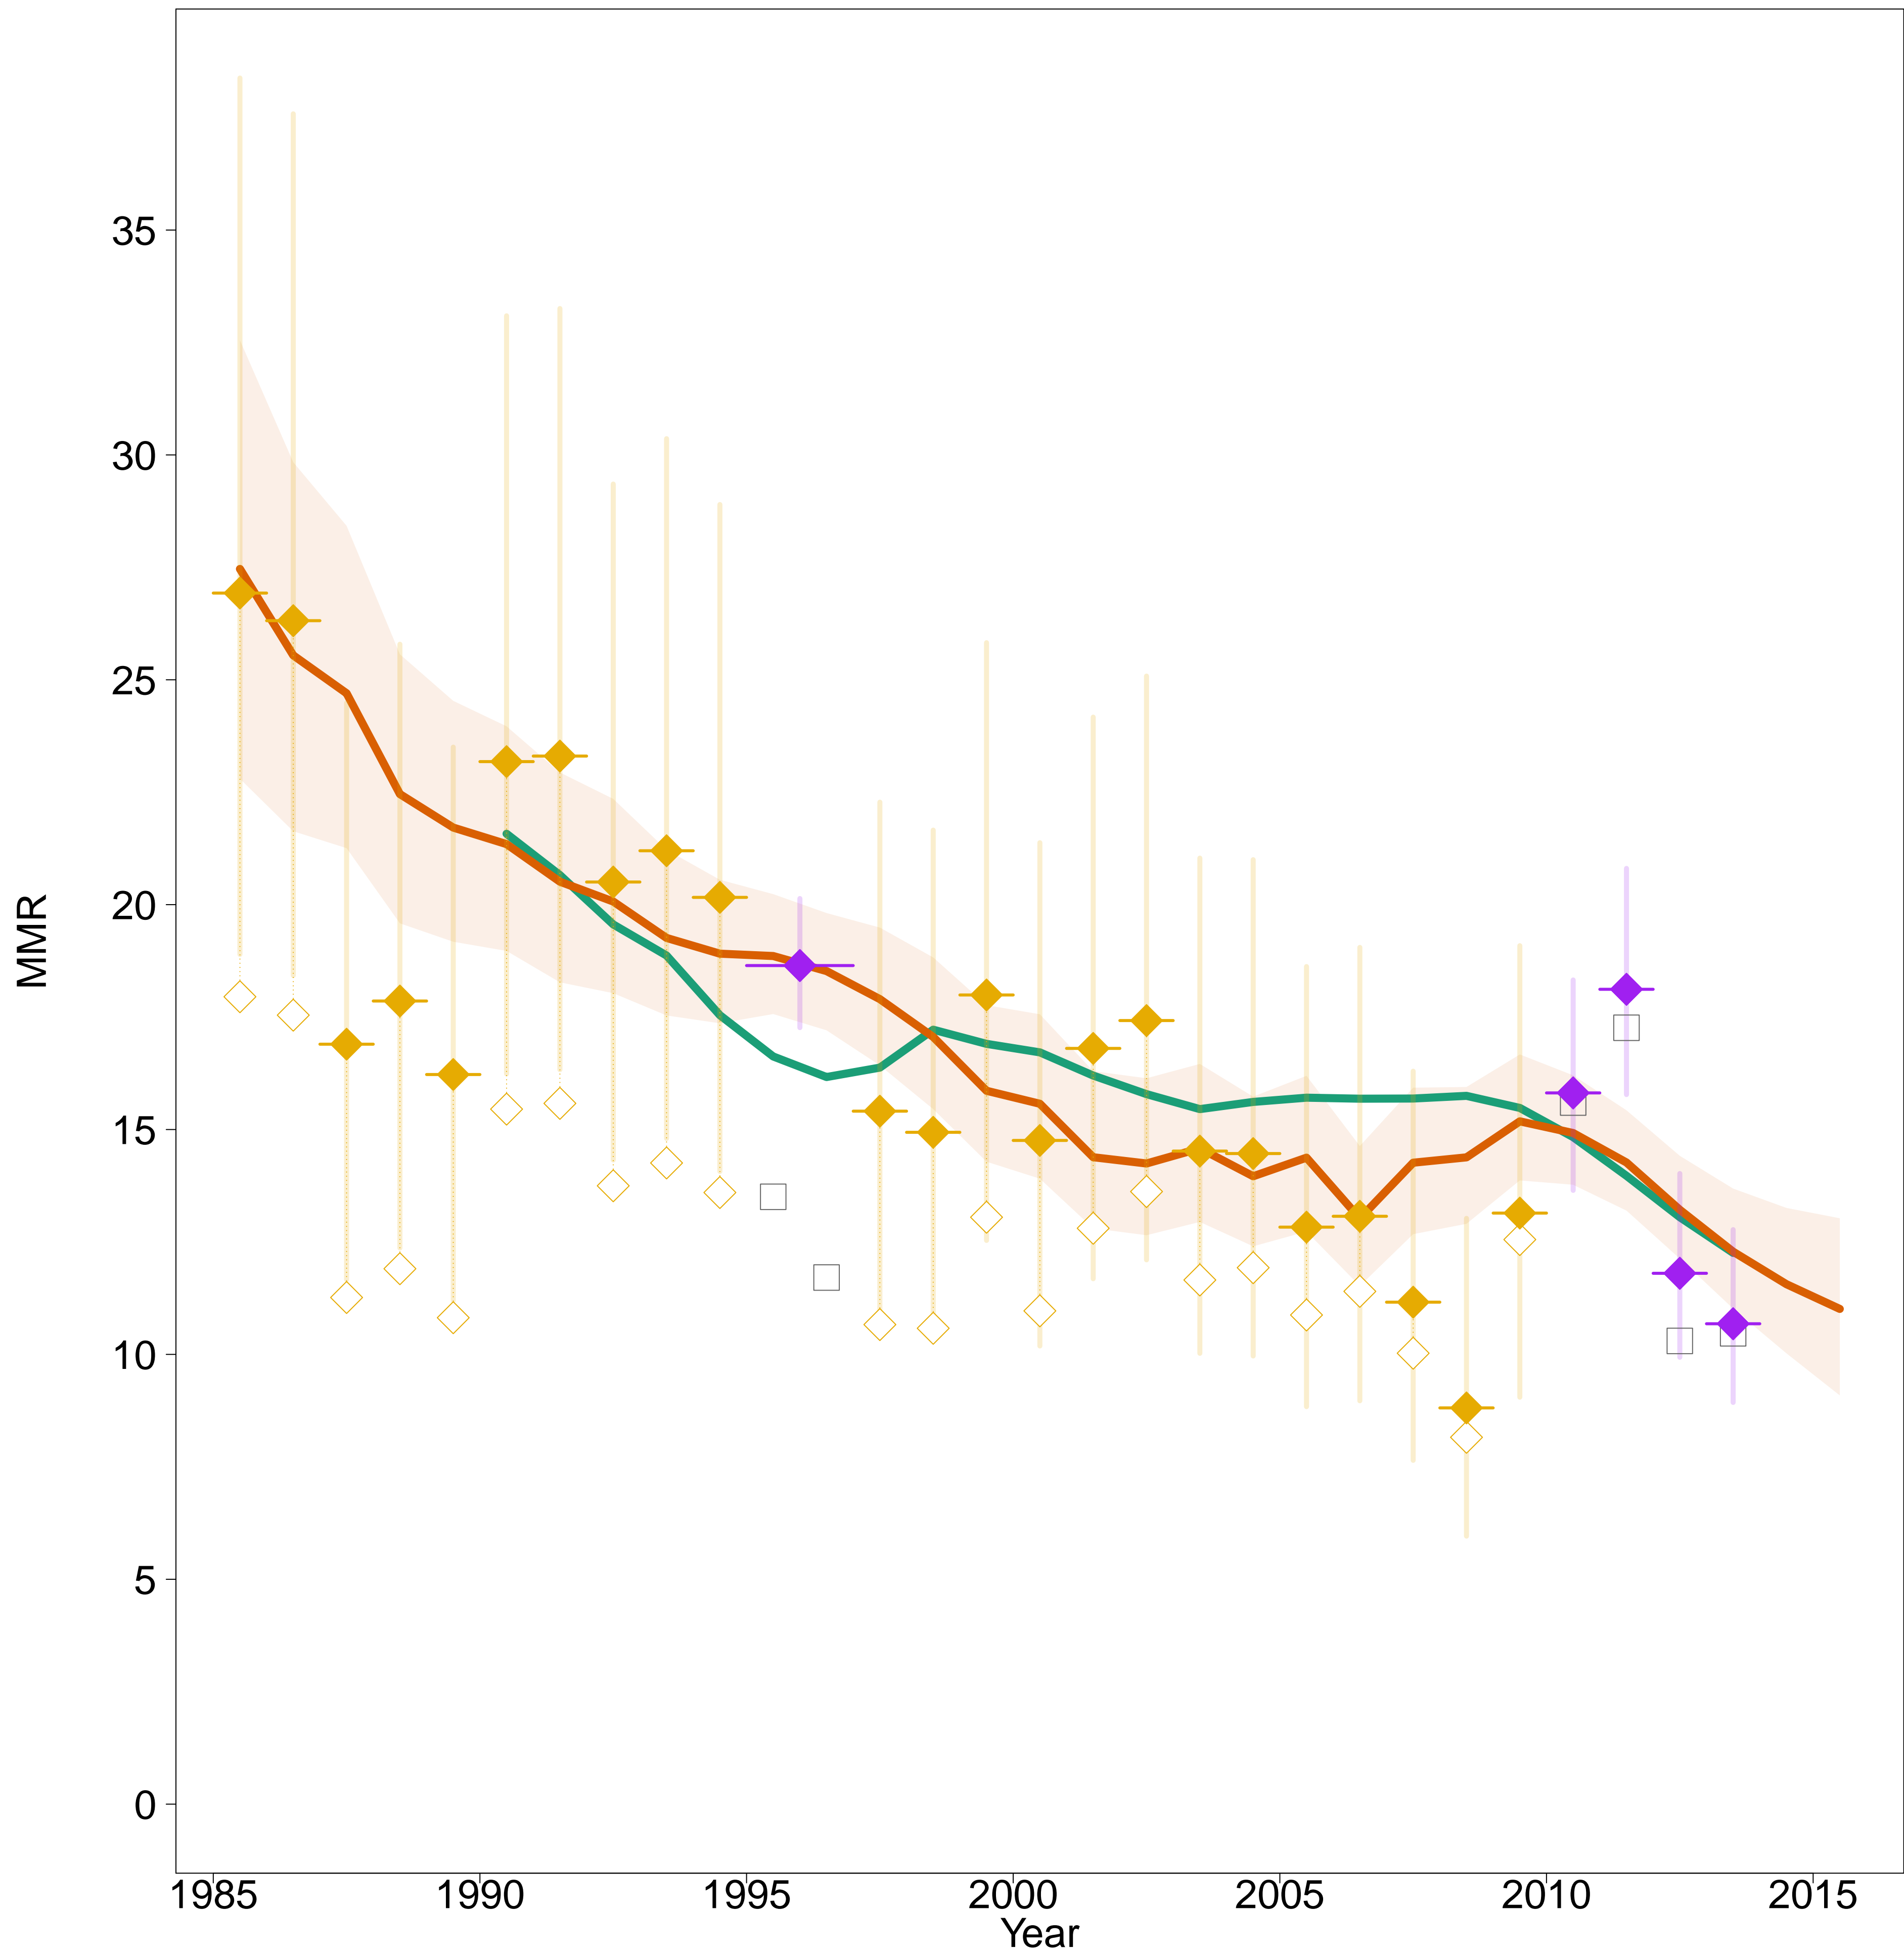

- Estimates –
- MMEIG 2015
- GBD 2013
- MMR Database 2015 –
- ◊ Observed Data
- ◆ Adjusted Data
- Data type –
- ◆ VR
- ◆ Spec. studies
- ◻ Excluded VR data  
(overlap with specialized study)

Republic of Moldova [MDA]  
(Developed regions)

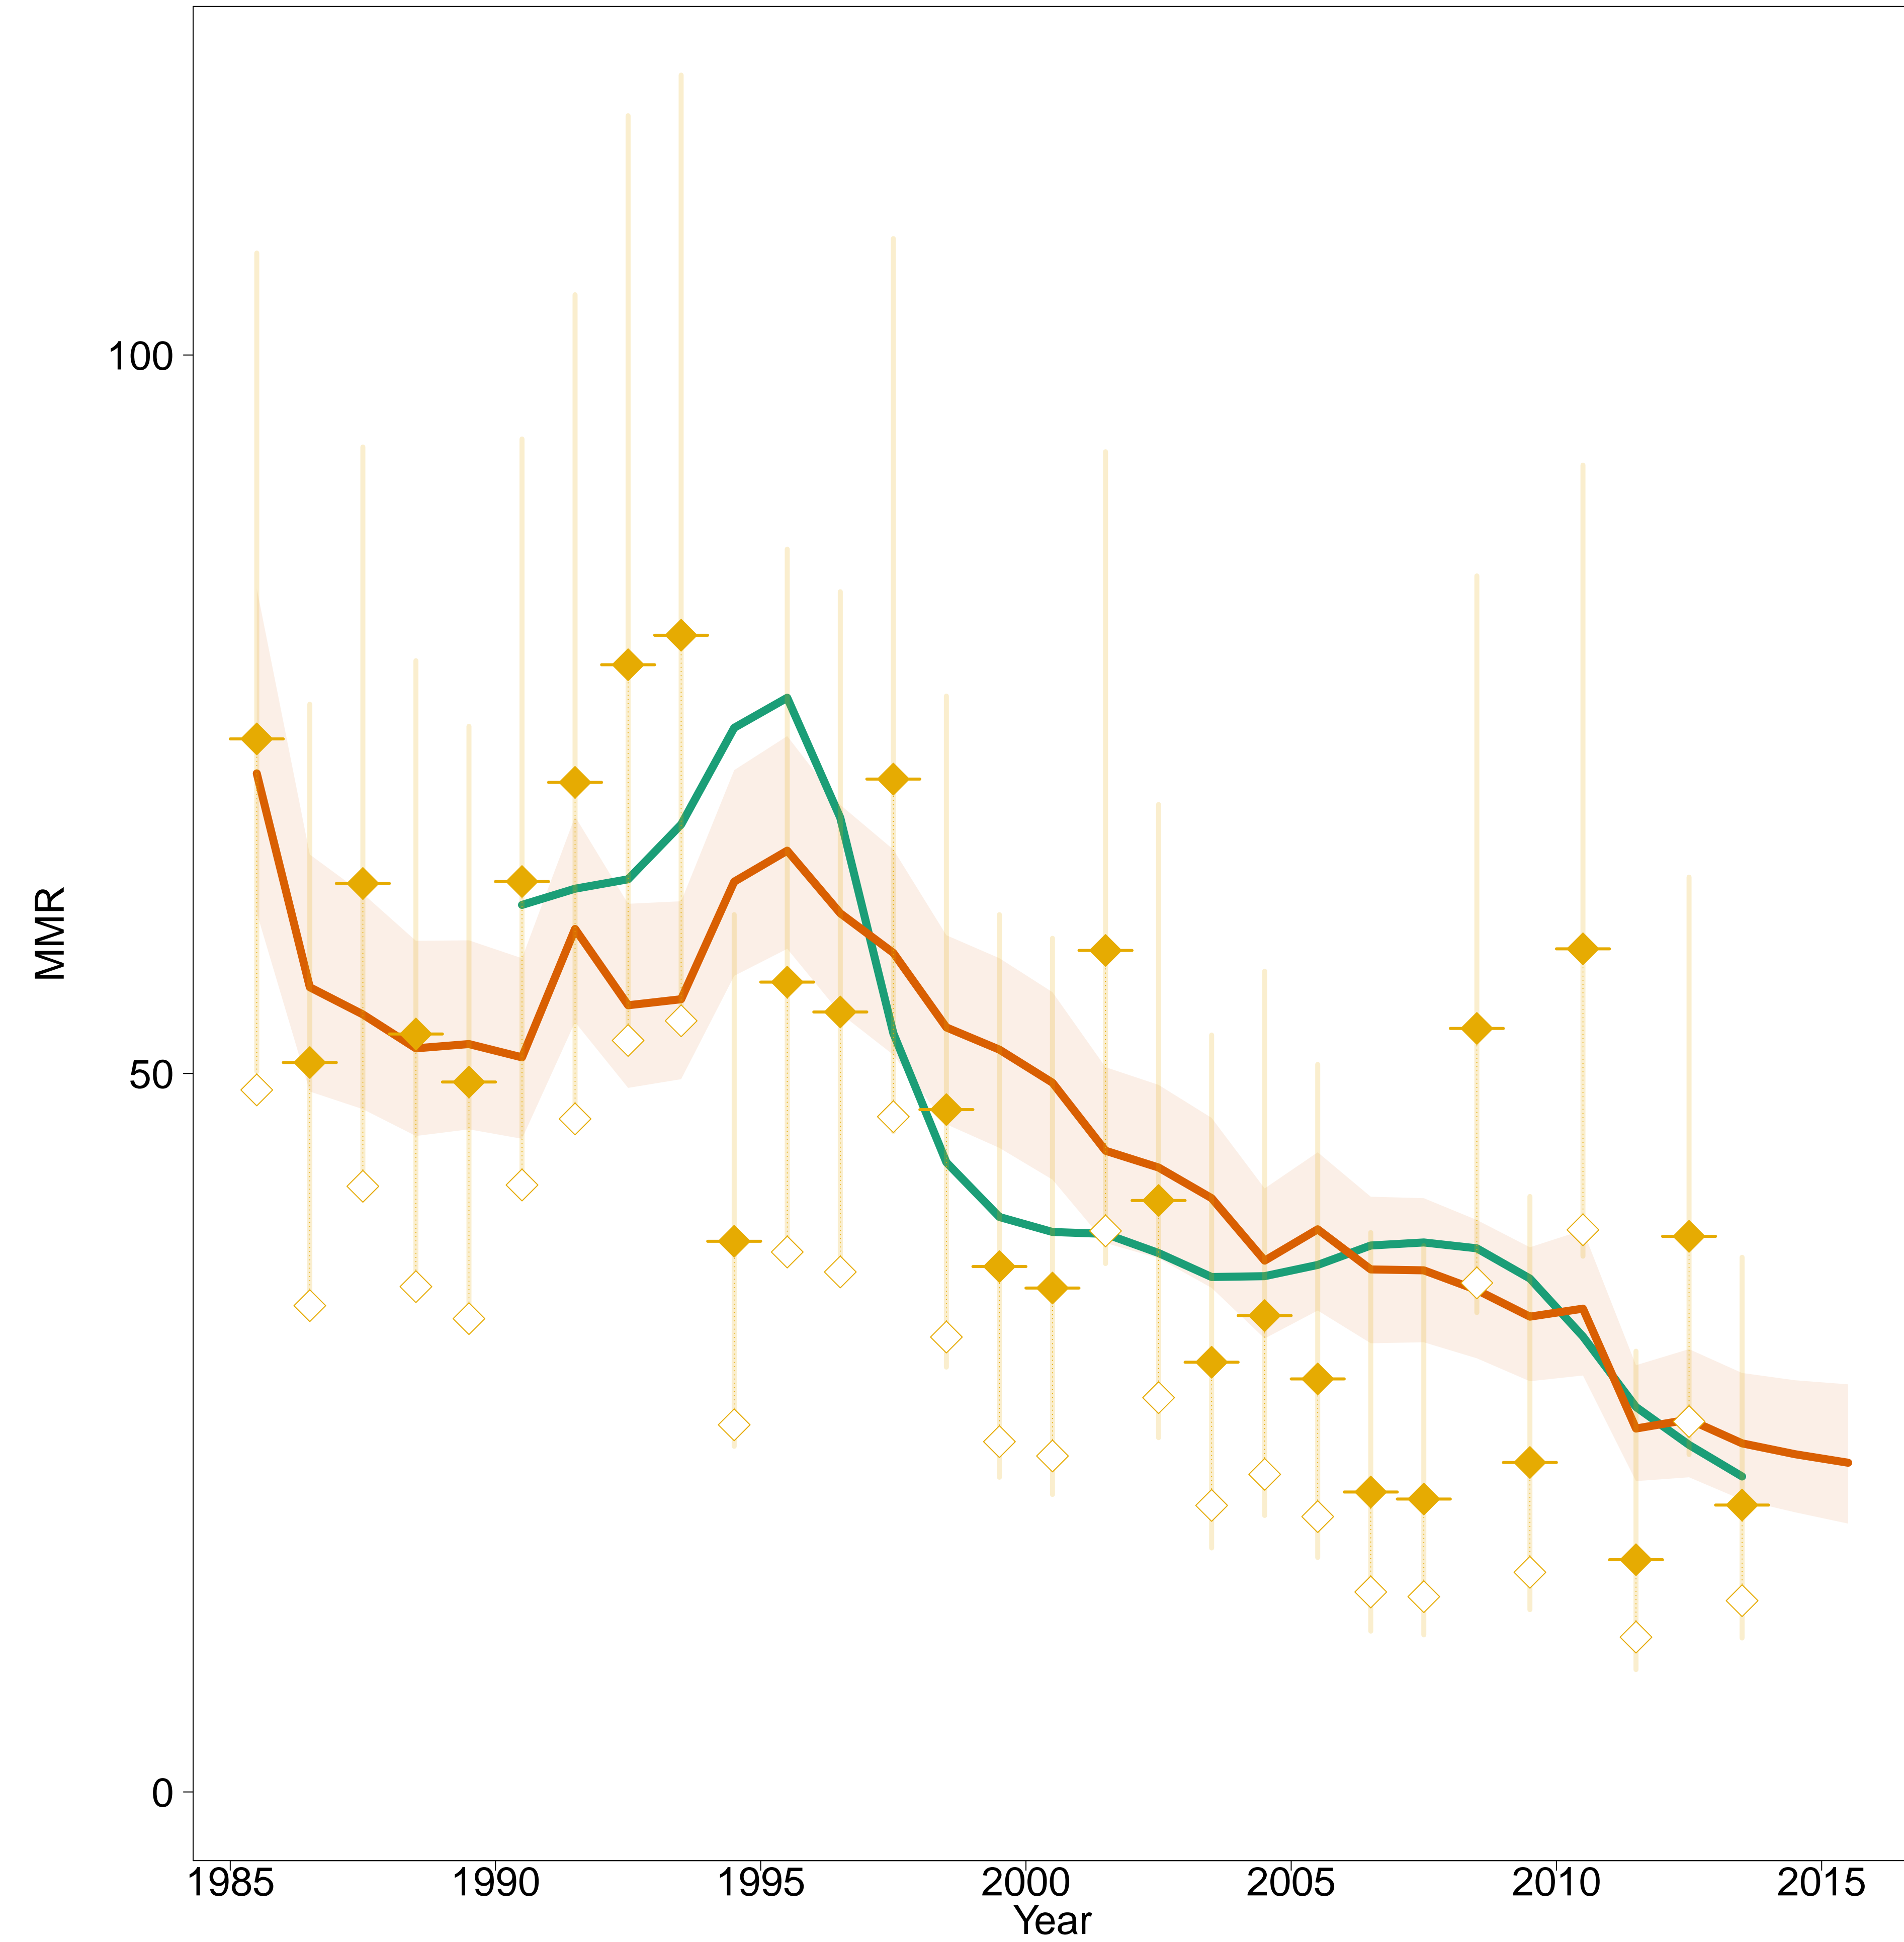

- Estimates –
- MMEIG 2015
- GBD 2013
- MMR Database 2015 –
- ◊ Observed Data
- ◆ Adjusted Data
- Data type –
- ◆ VR

Romania [ROU]  
(Developed regions)

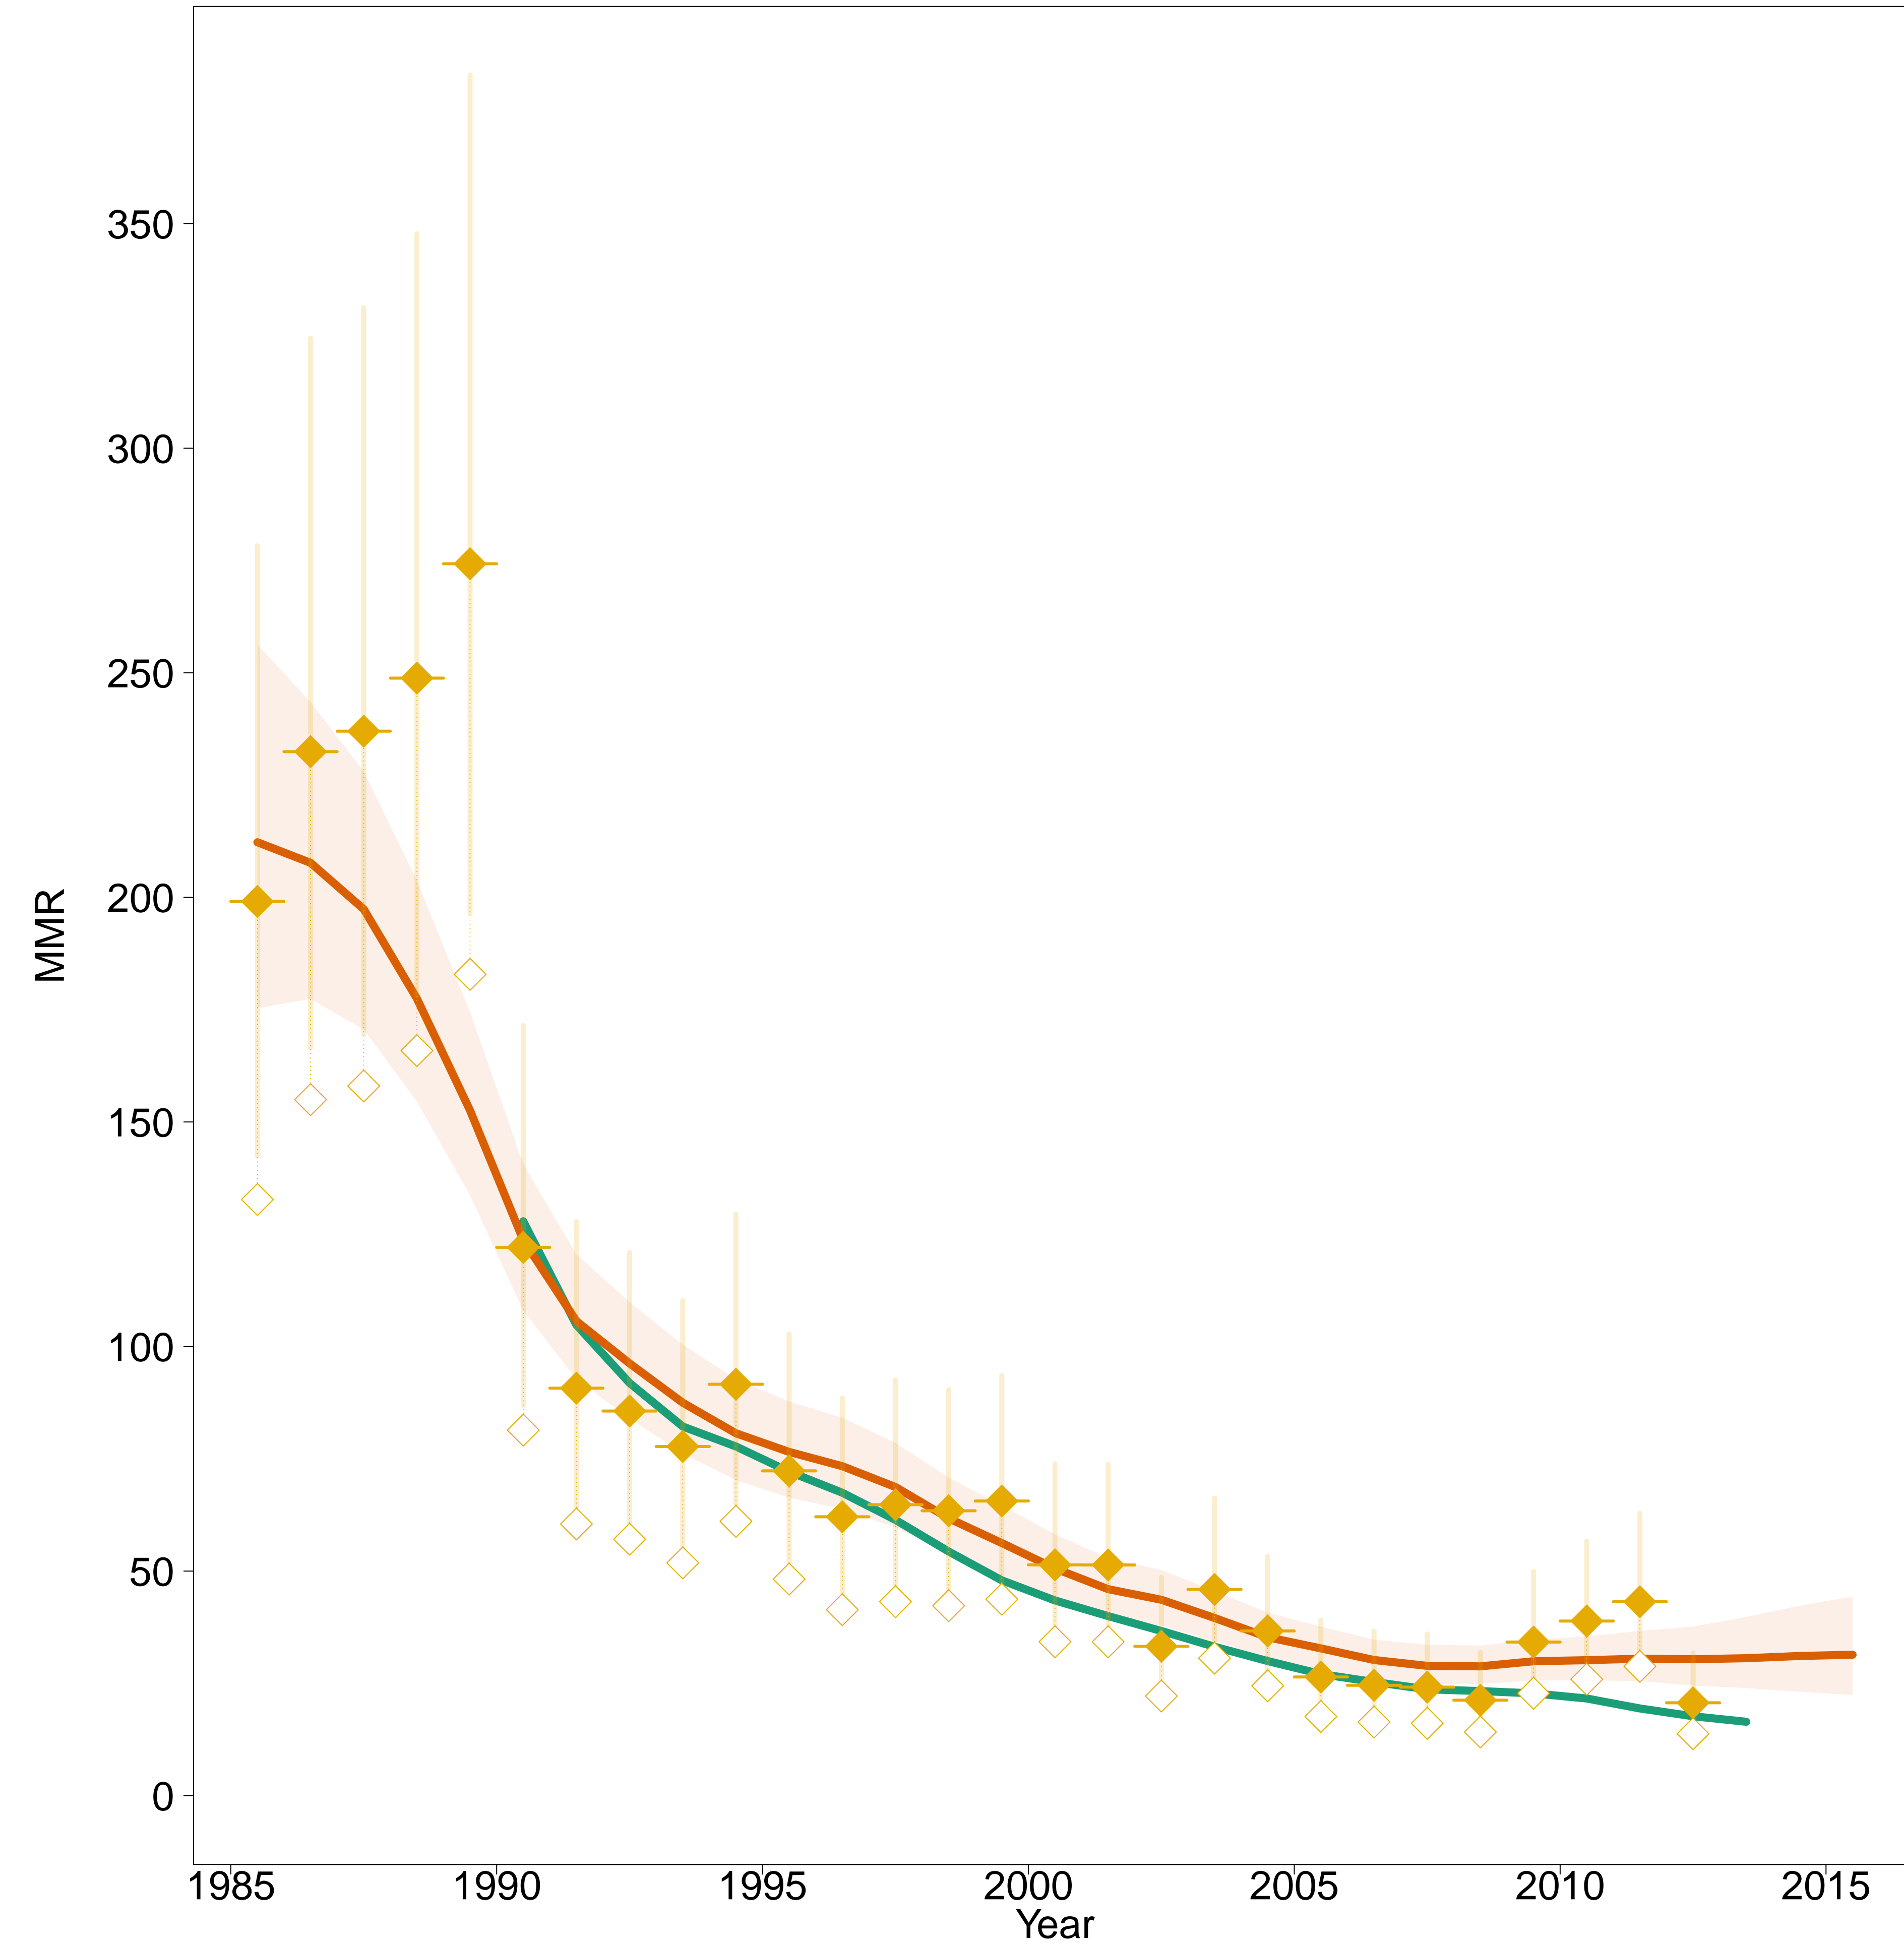

- Estimates –
- MMEIG 2015
- GBD 2013
- MMR Database 2015 –
- Observed Data
- Adjusted Data
- Data type –
- VR

Russian Federation [RUS]  
(Developed regions)

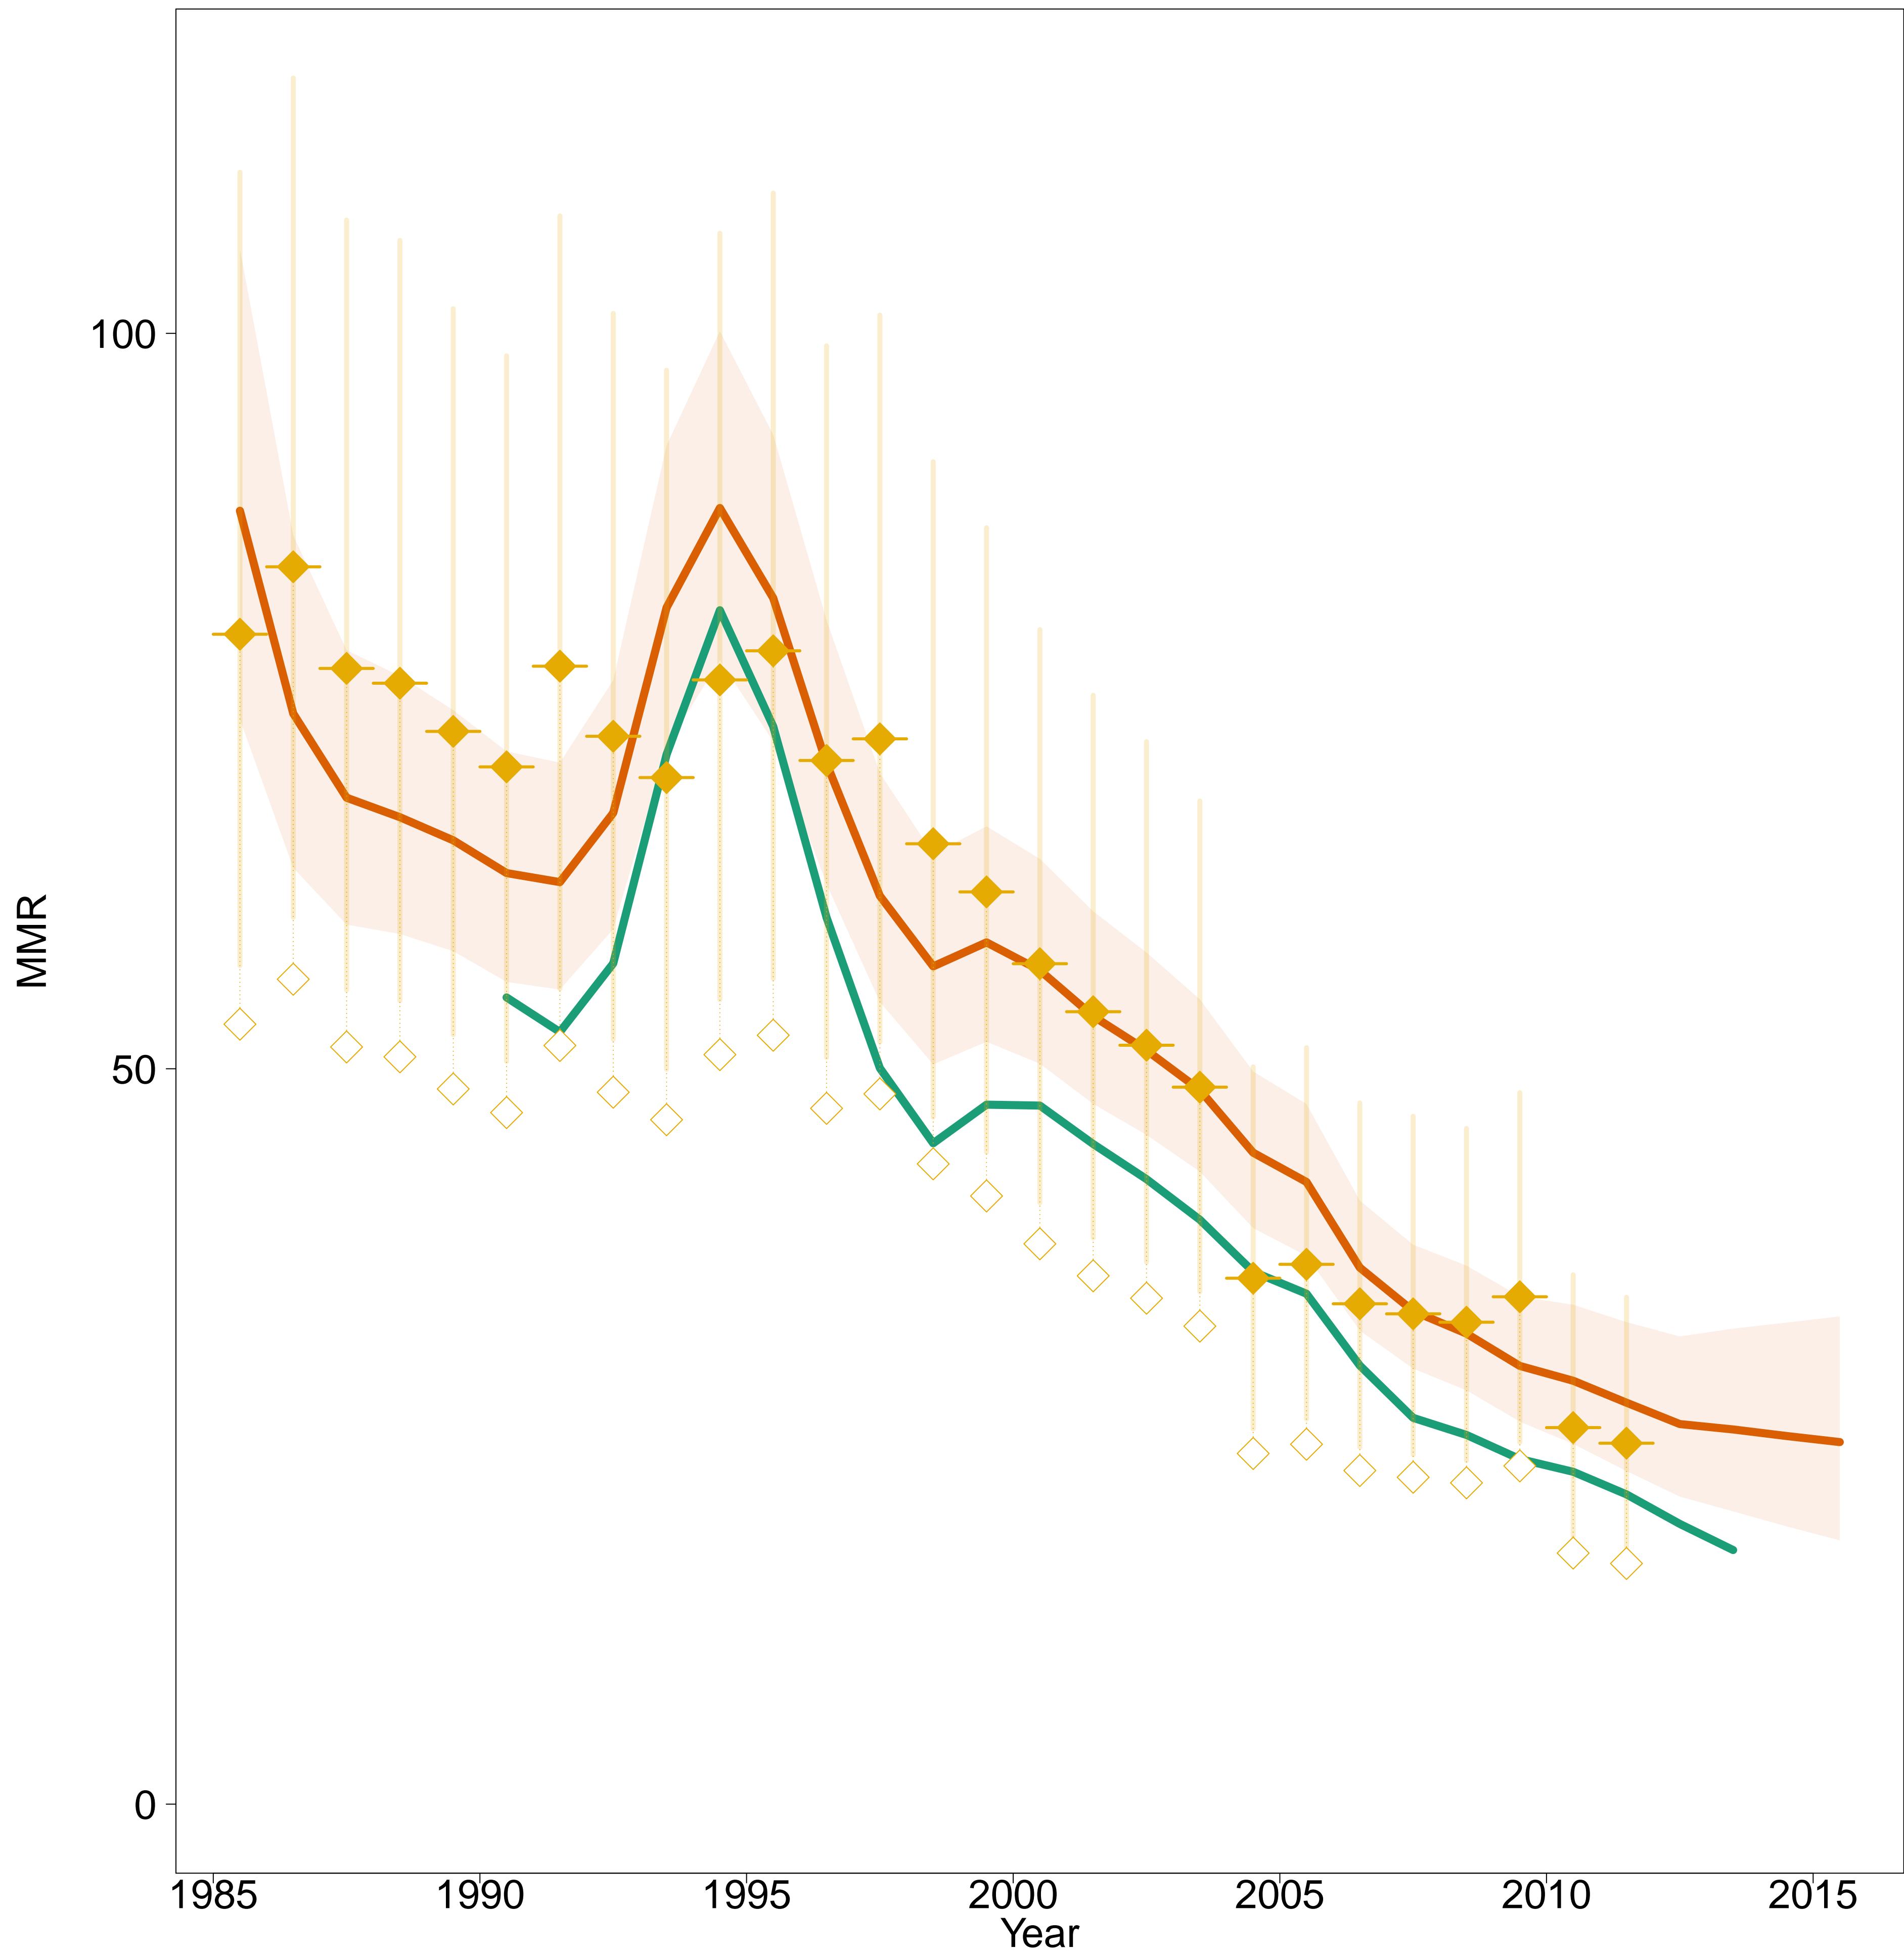

- Estimates -
- MMEIG 2015
- GBD 2013
- MMR Database 2015 -
- Observed Data
- Adjusted Data
- Data type -
- VR

Rwanda [RWA]  
(Eastern Africa)

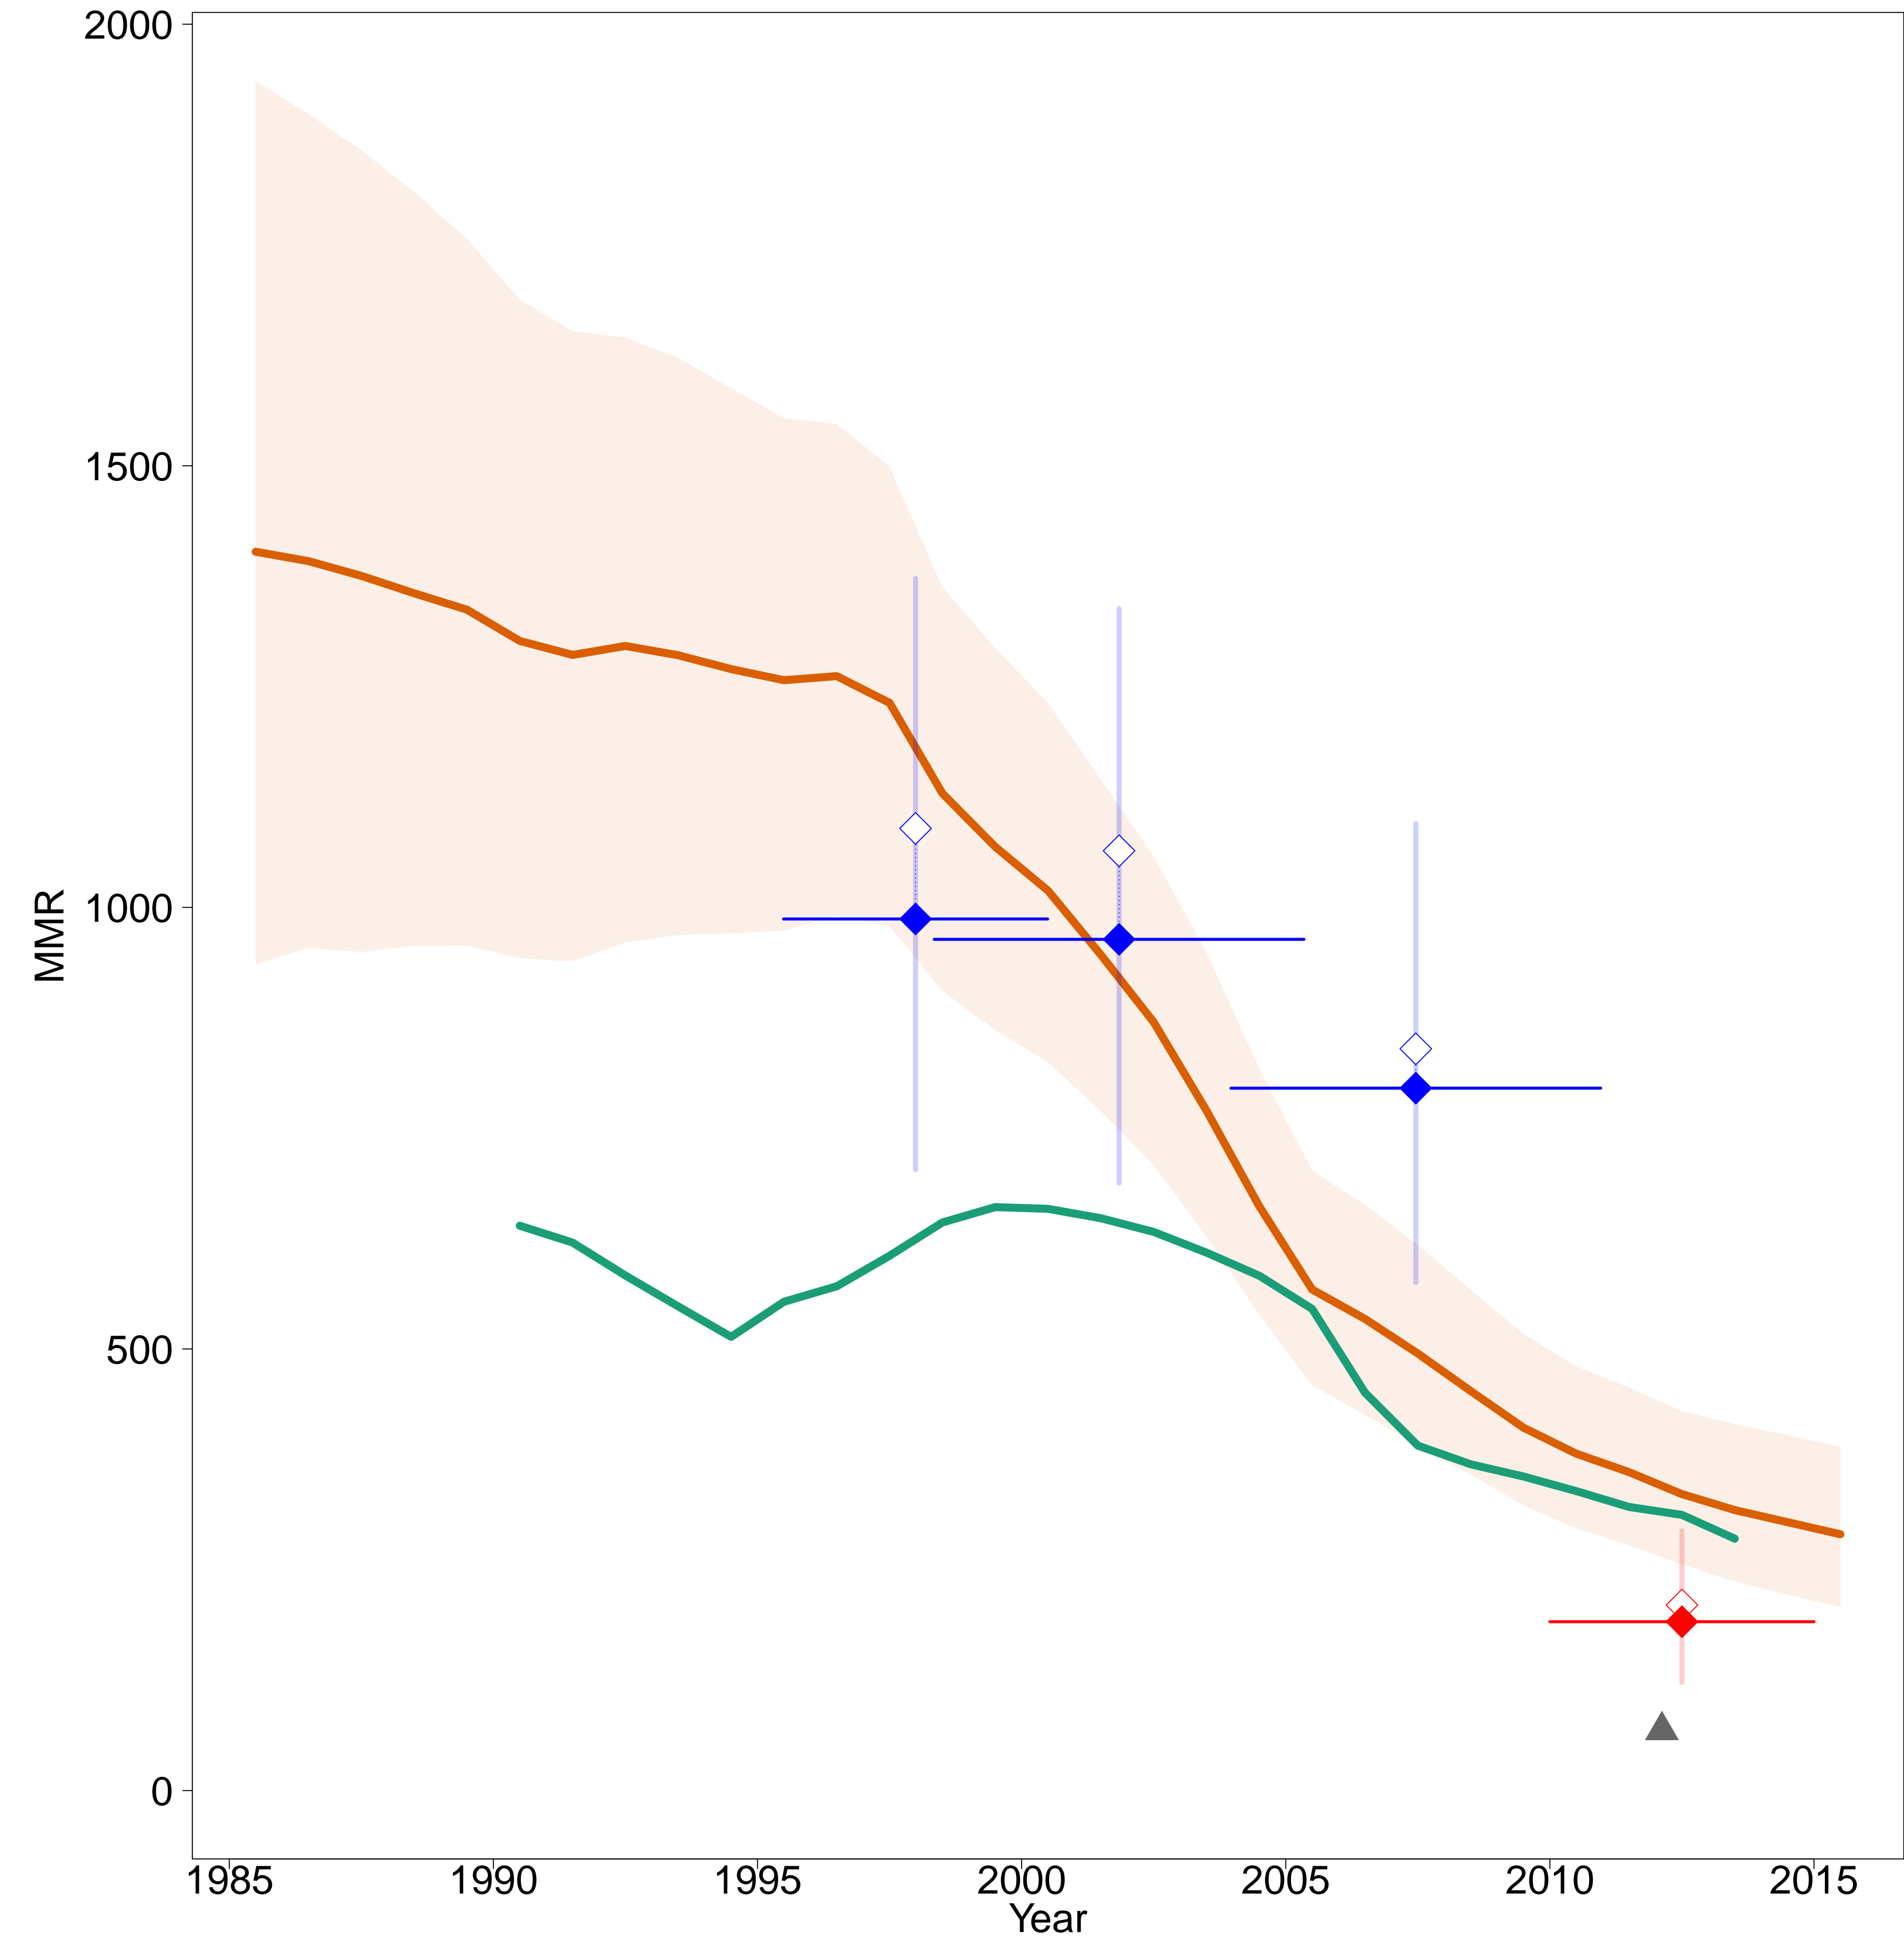

- Estimates -
- MMEIG 2015
- GBD 2013
- MMR Database 2015 -
- Observed Data
- Adjusted Data
- Data type -
- DHS
- Misc. studies
- Excluded misc. studies

Saint Lucia [LCA]  
(Caribbean)

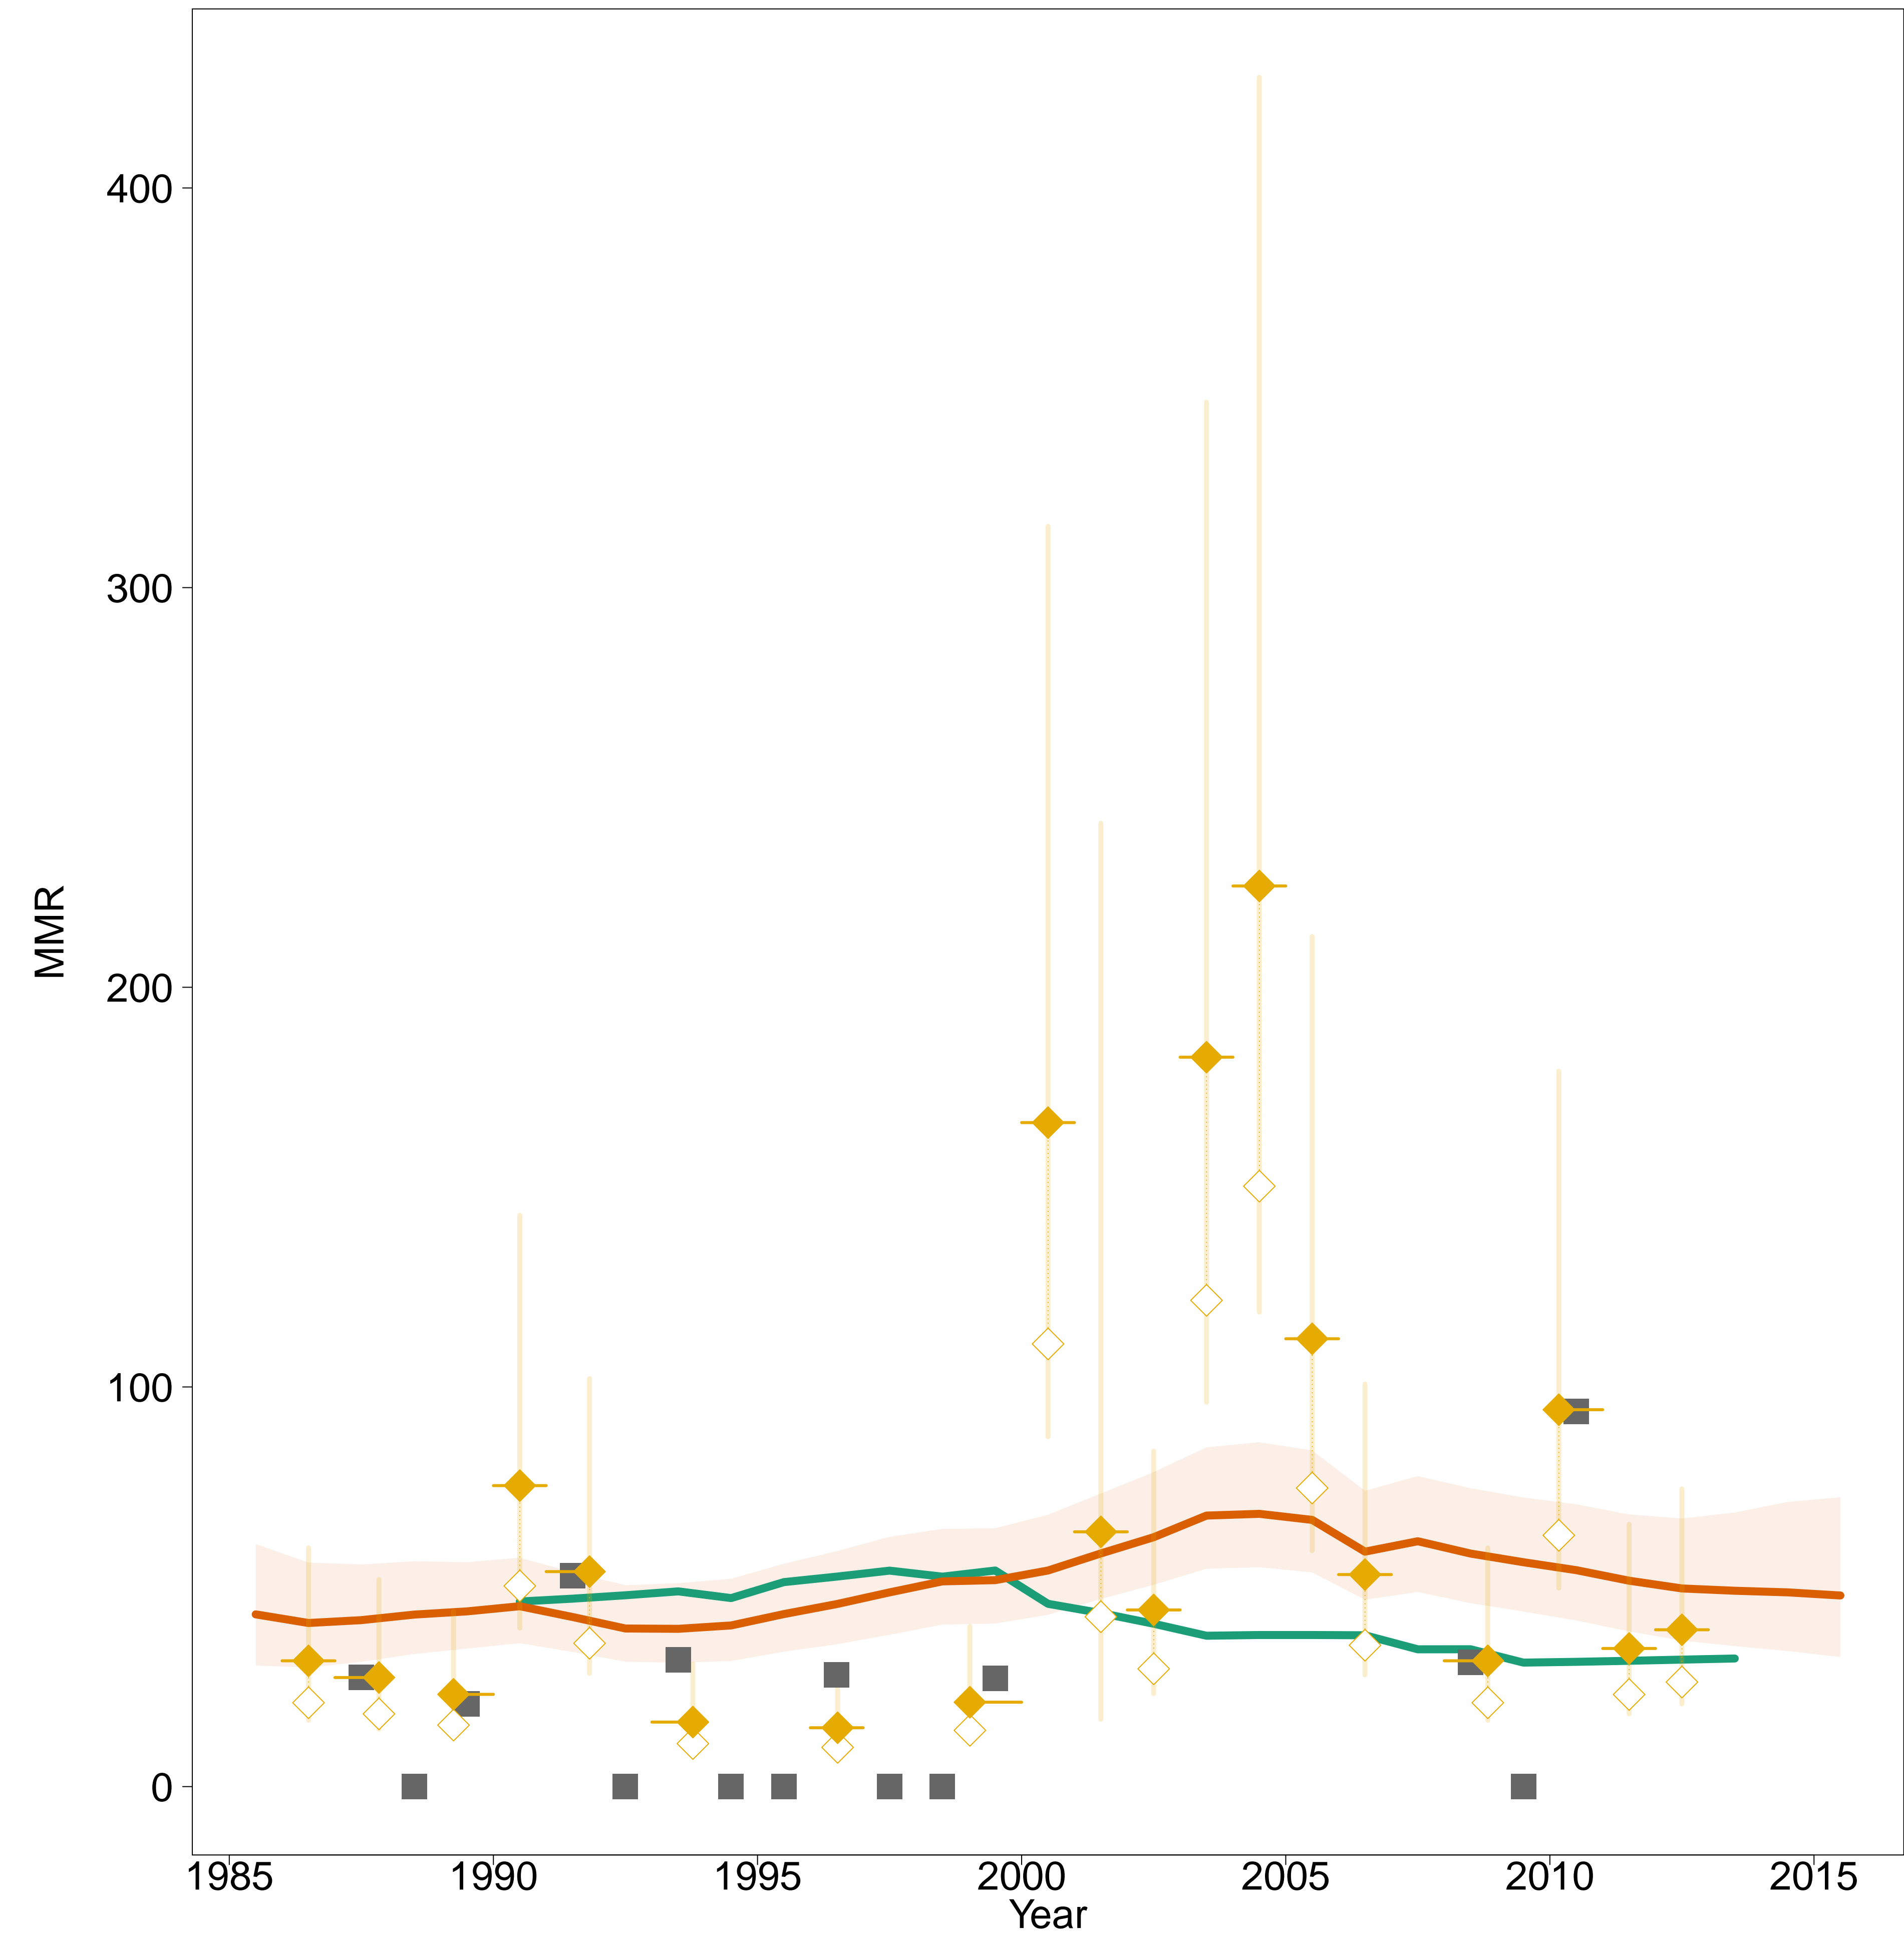

- Estimates –
- MMEIG 2015
- GBD 2013
- MMR Database 2015 –
- Observed Data
- Adjusted Data
- Data type –
- VR
- Reported VR before recalc.  
(related to 0 obs. mat. death)



Samoa [WSM]  
(South-Eastern Asia / Oceania)

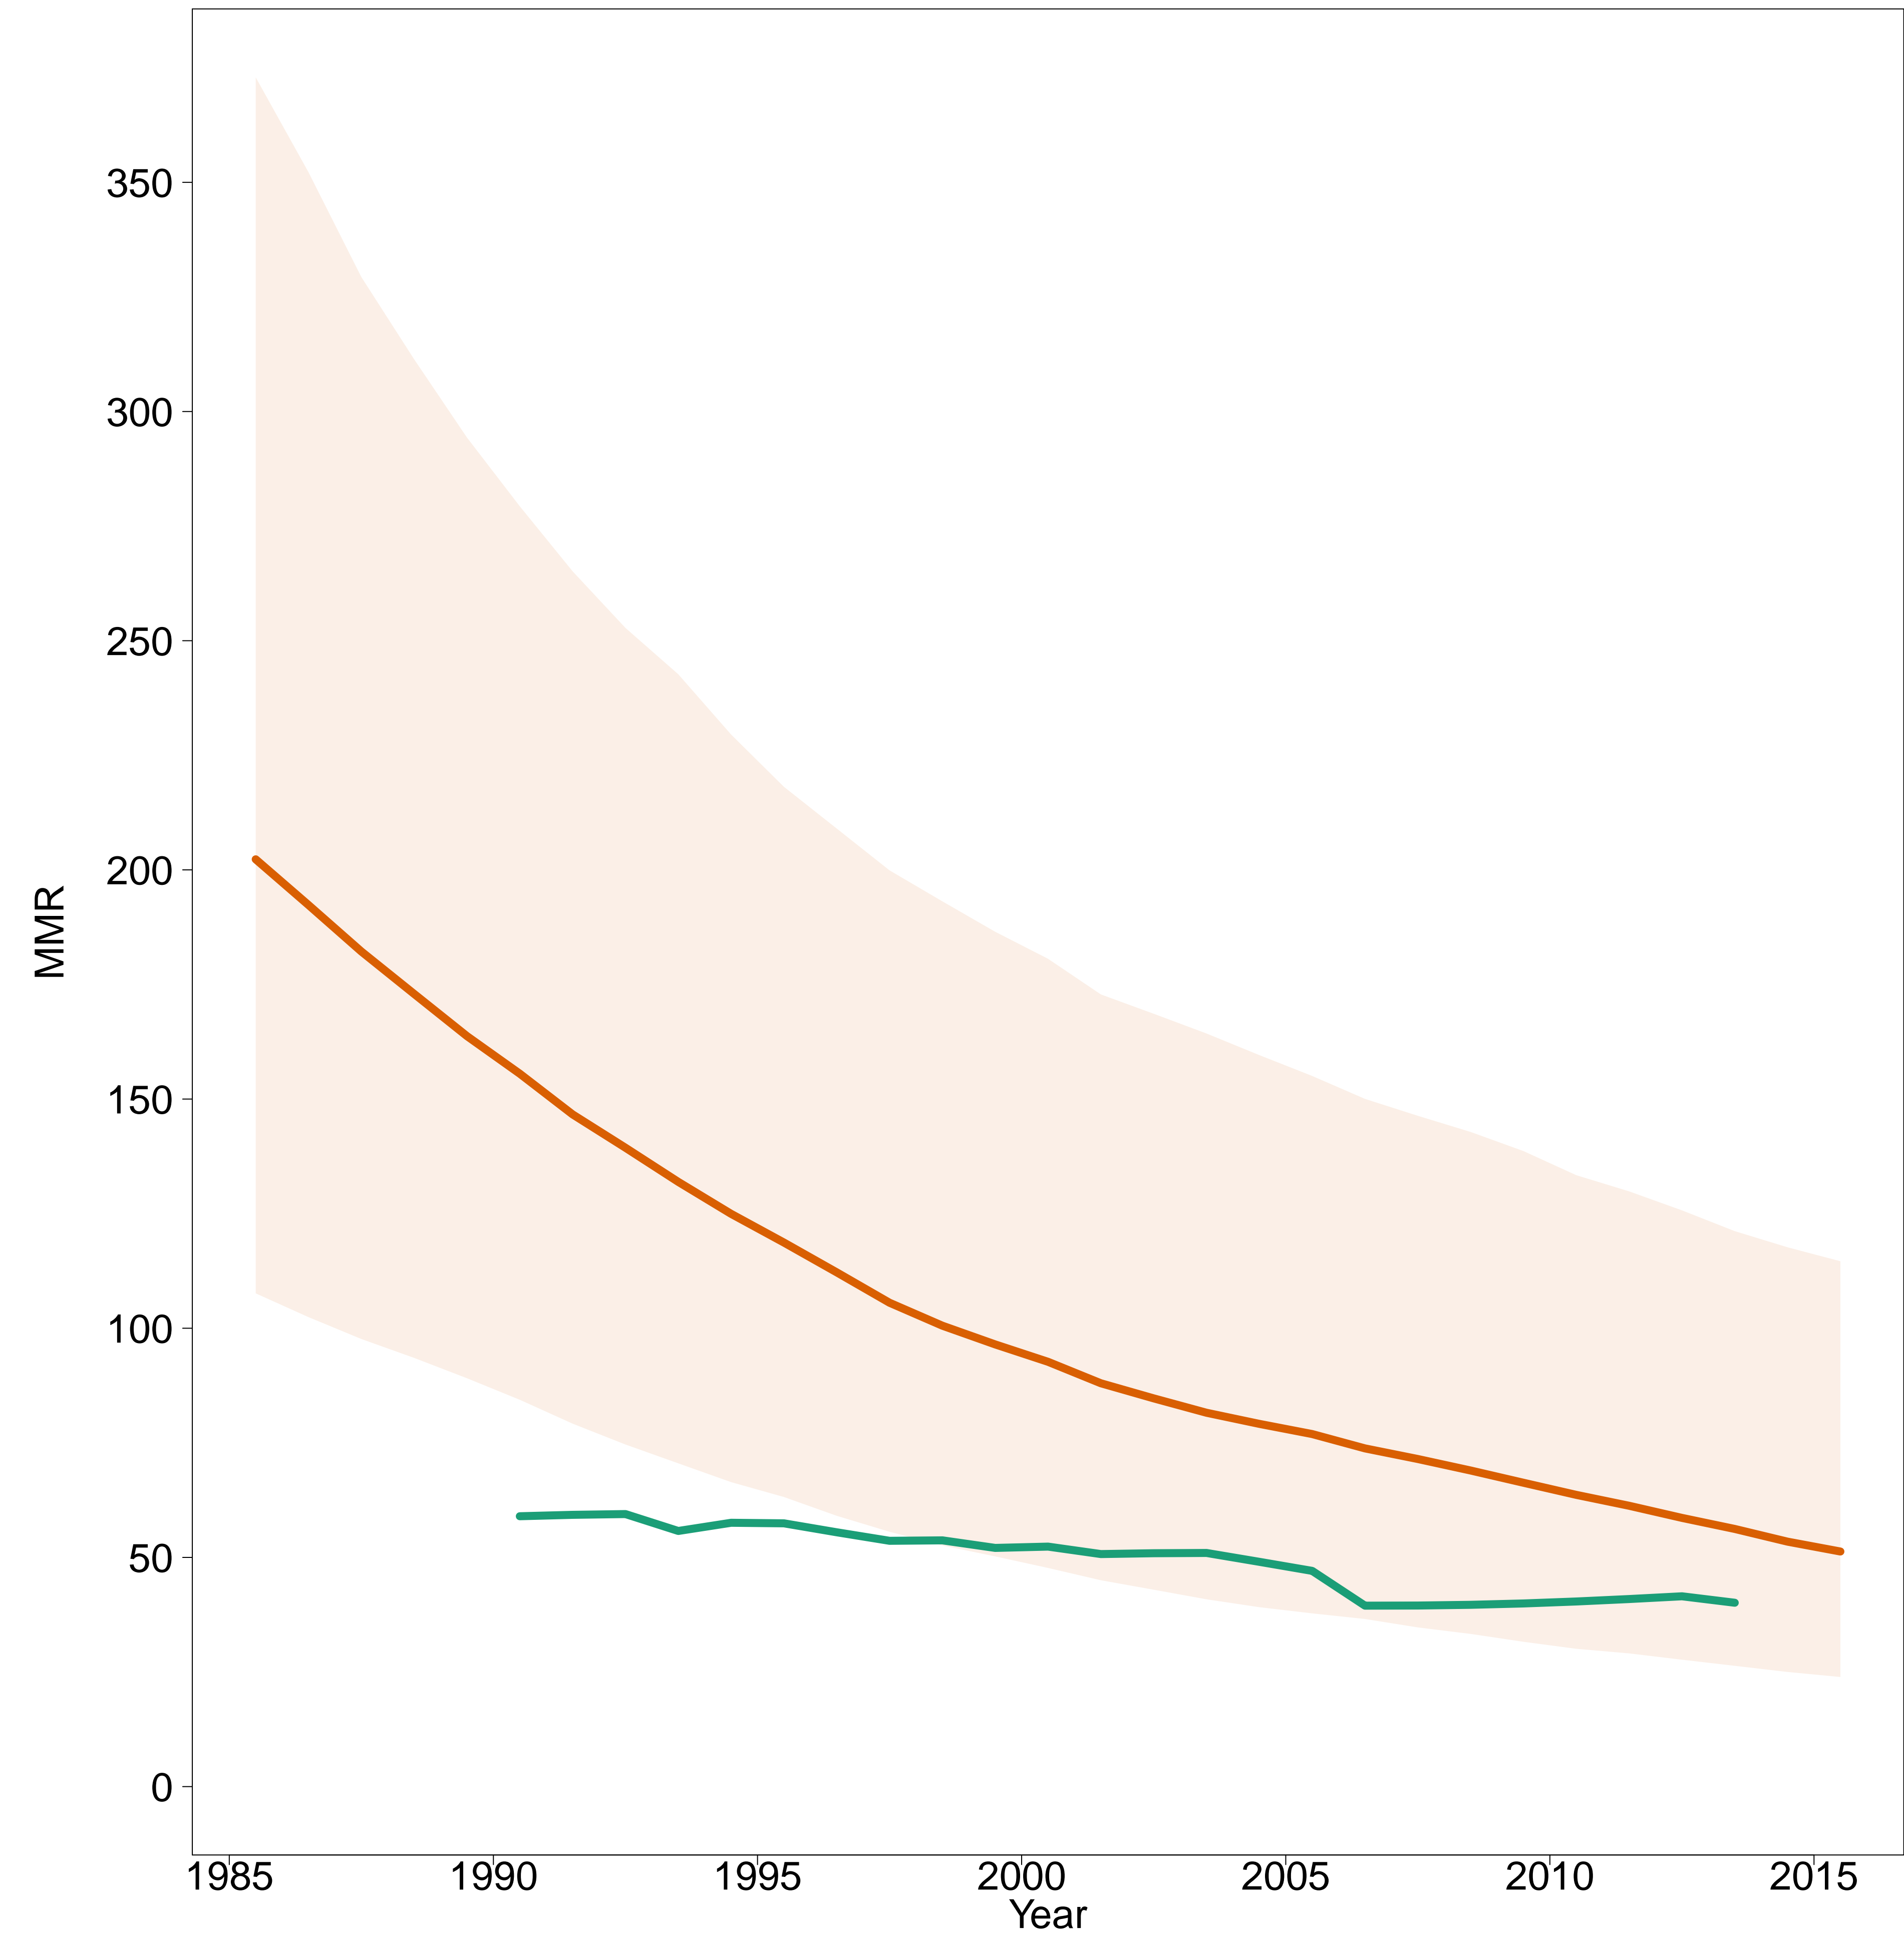

- Estimates -  
MMEIG 2015  
GBD 2013  
- MMR Database 2015 -

Sao Tome and Principe [STP]  
(Middle Africa)

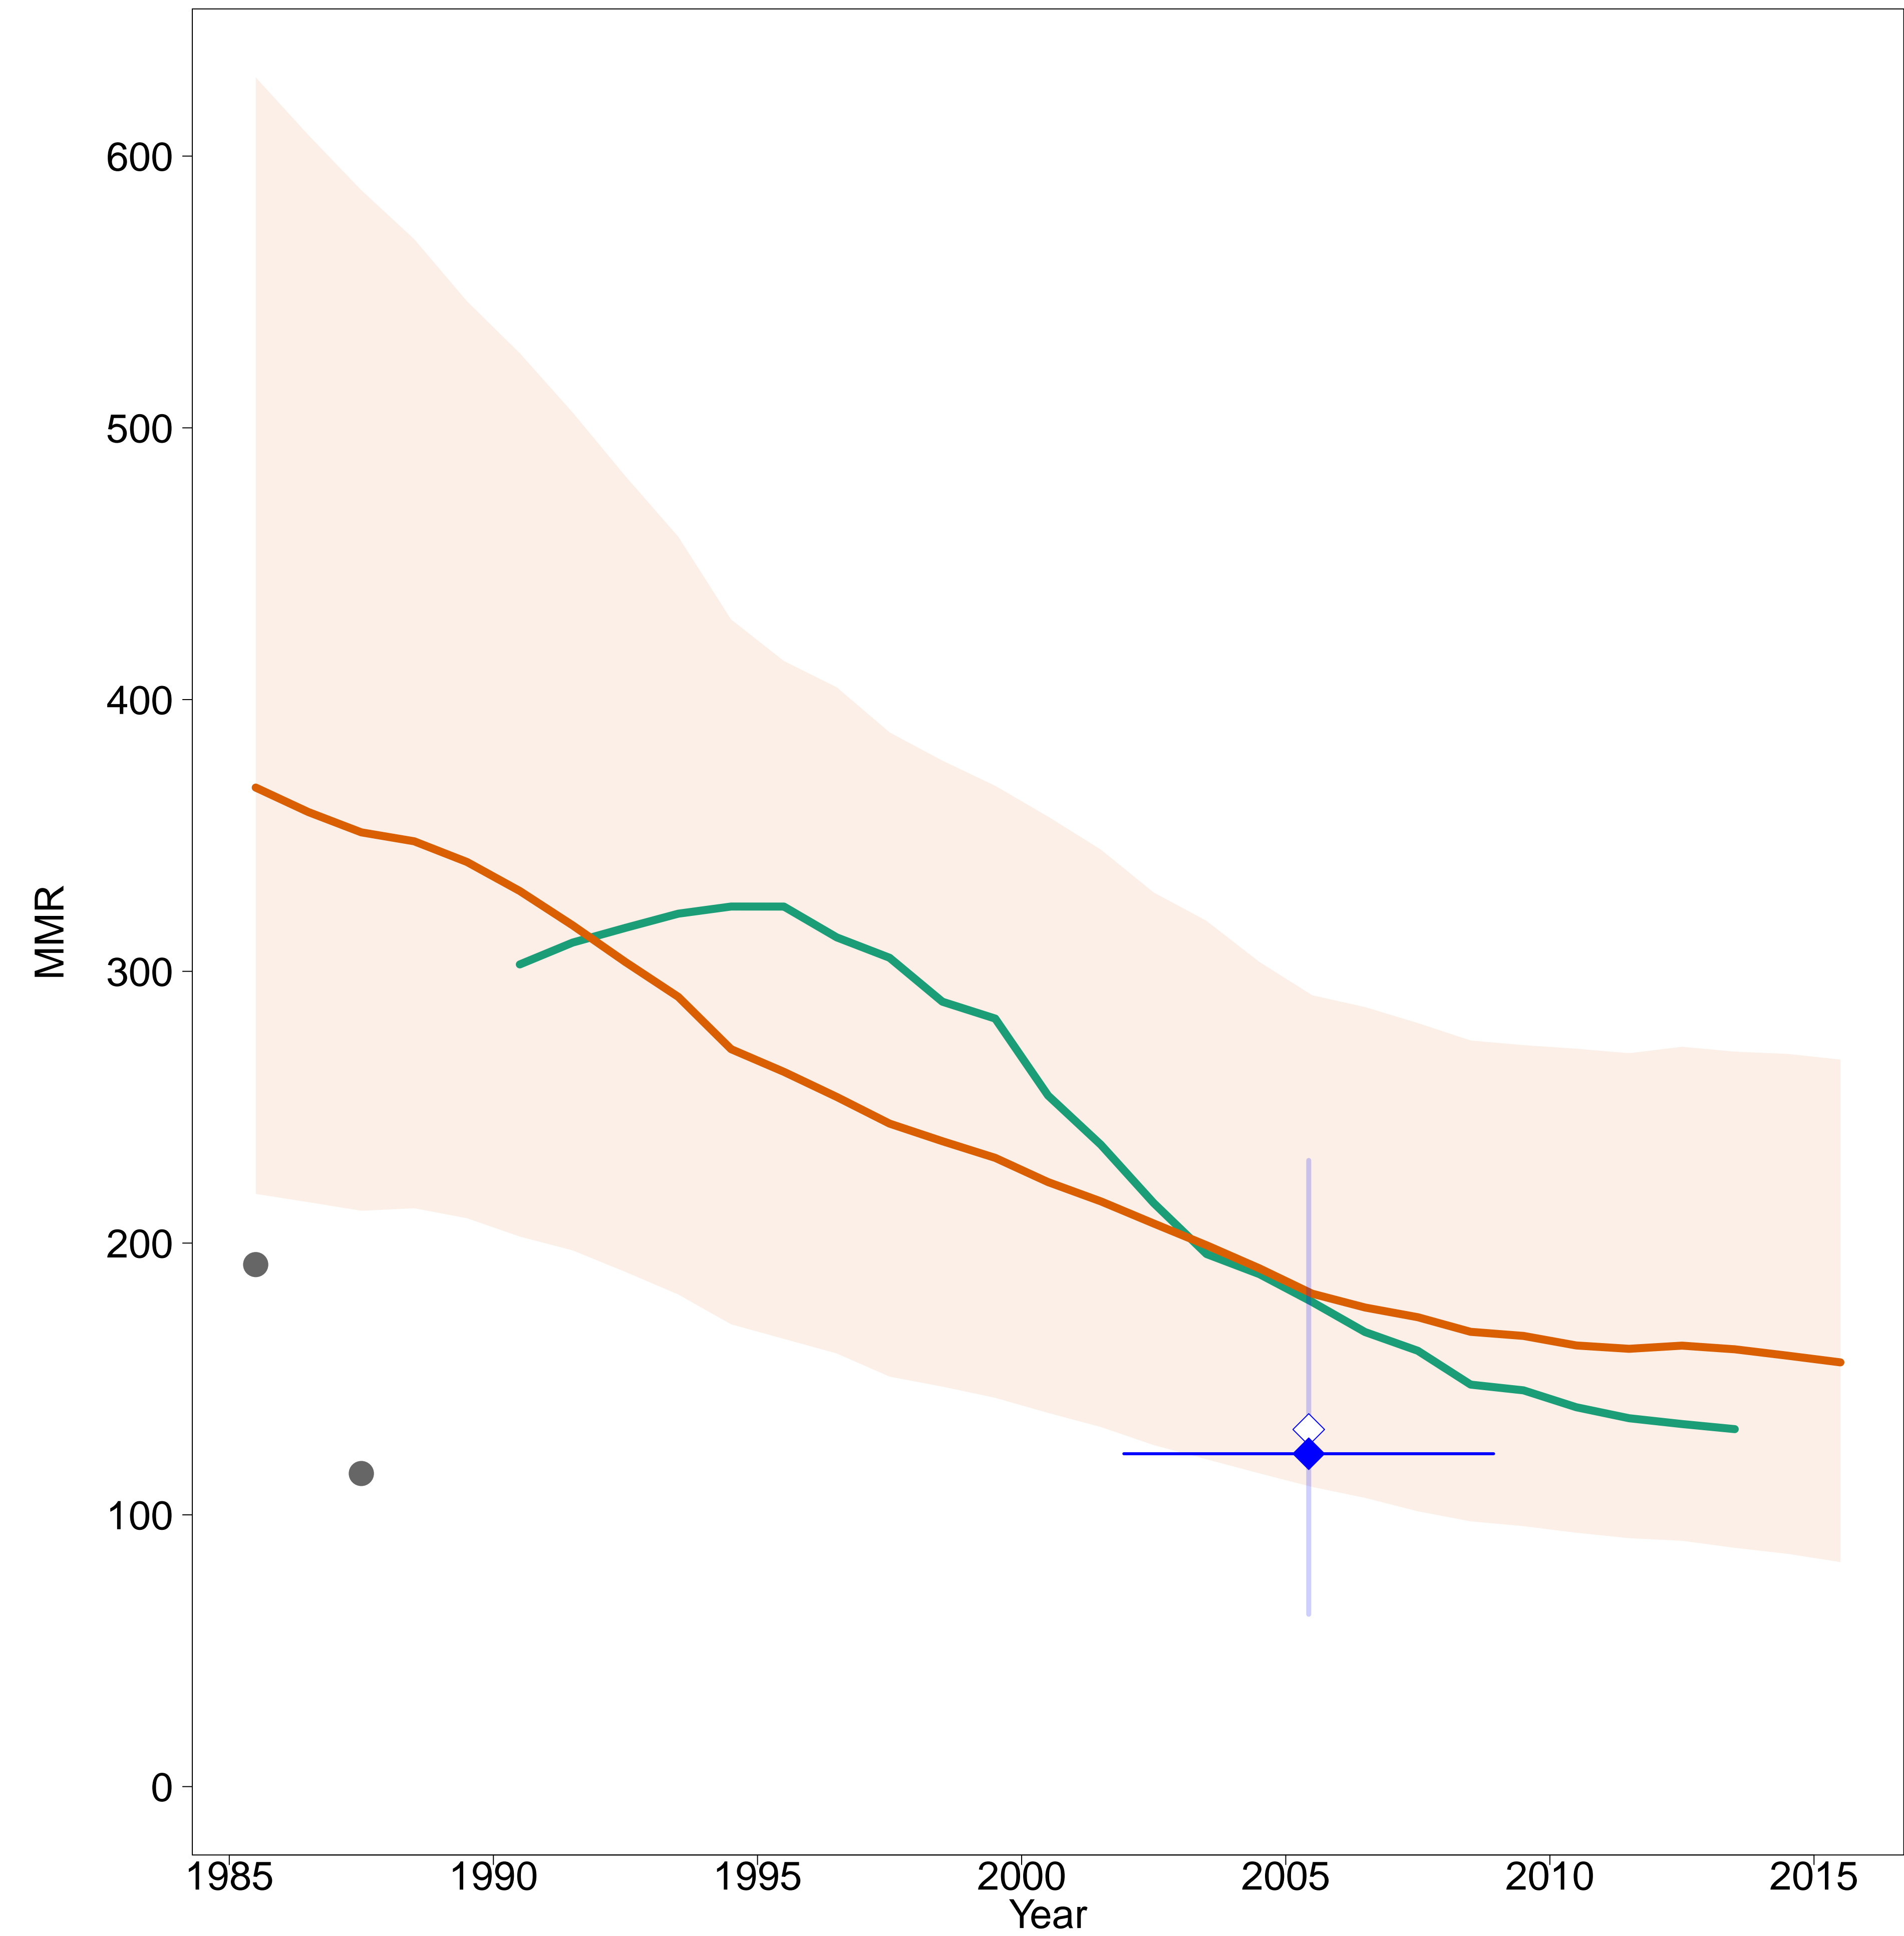

- Estimates –
- MMEIG 2015
- GBD 2013
- MMR Database 2015 –
- ◊ Observed Data
- ◆ Adjusted Data
- Data type –
- ◆ DHS
- Excluded VR data (data quality issues)

Saudi Arabia [SAU]  
(Western Asia)

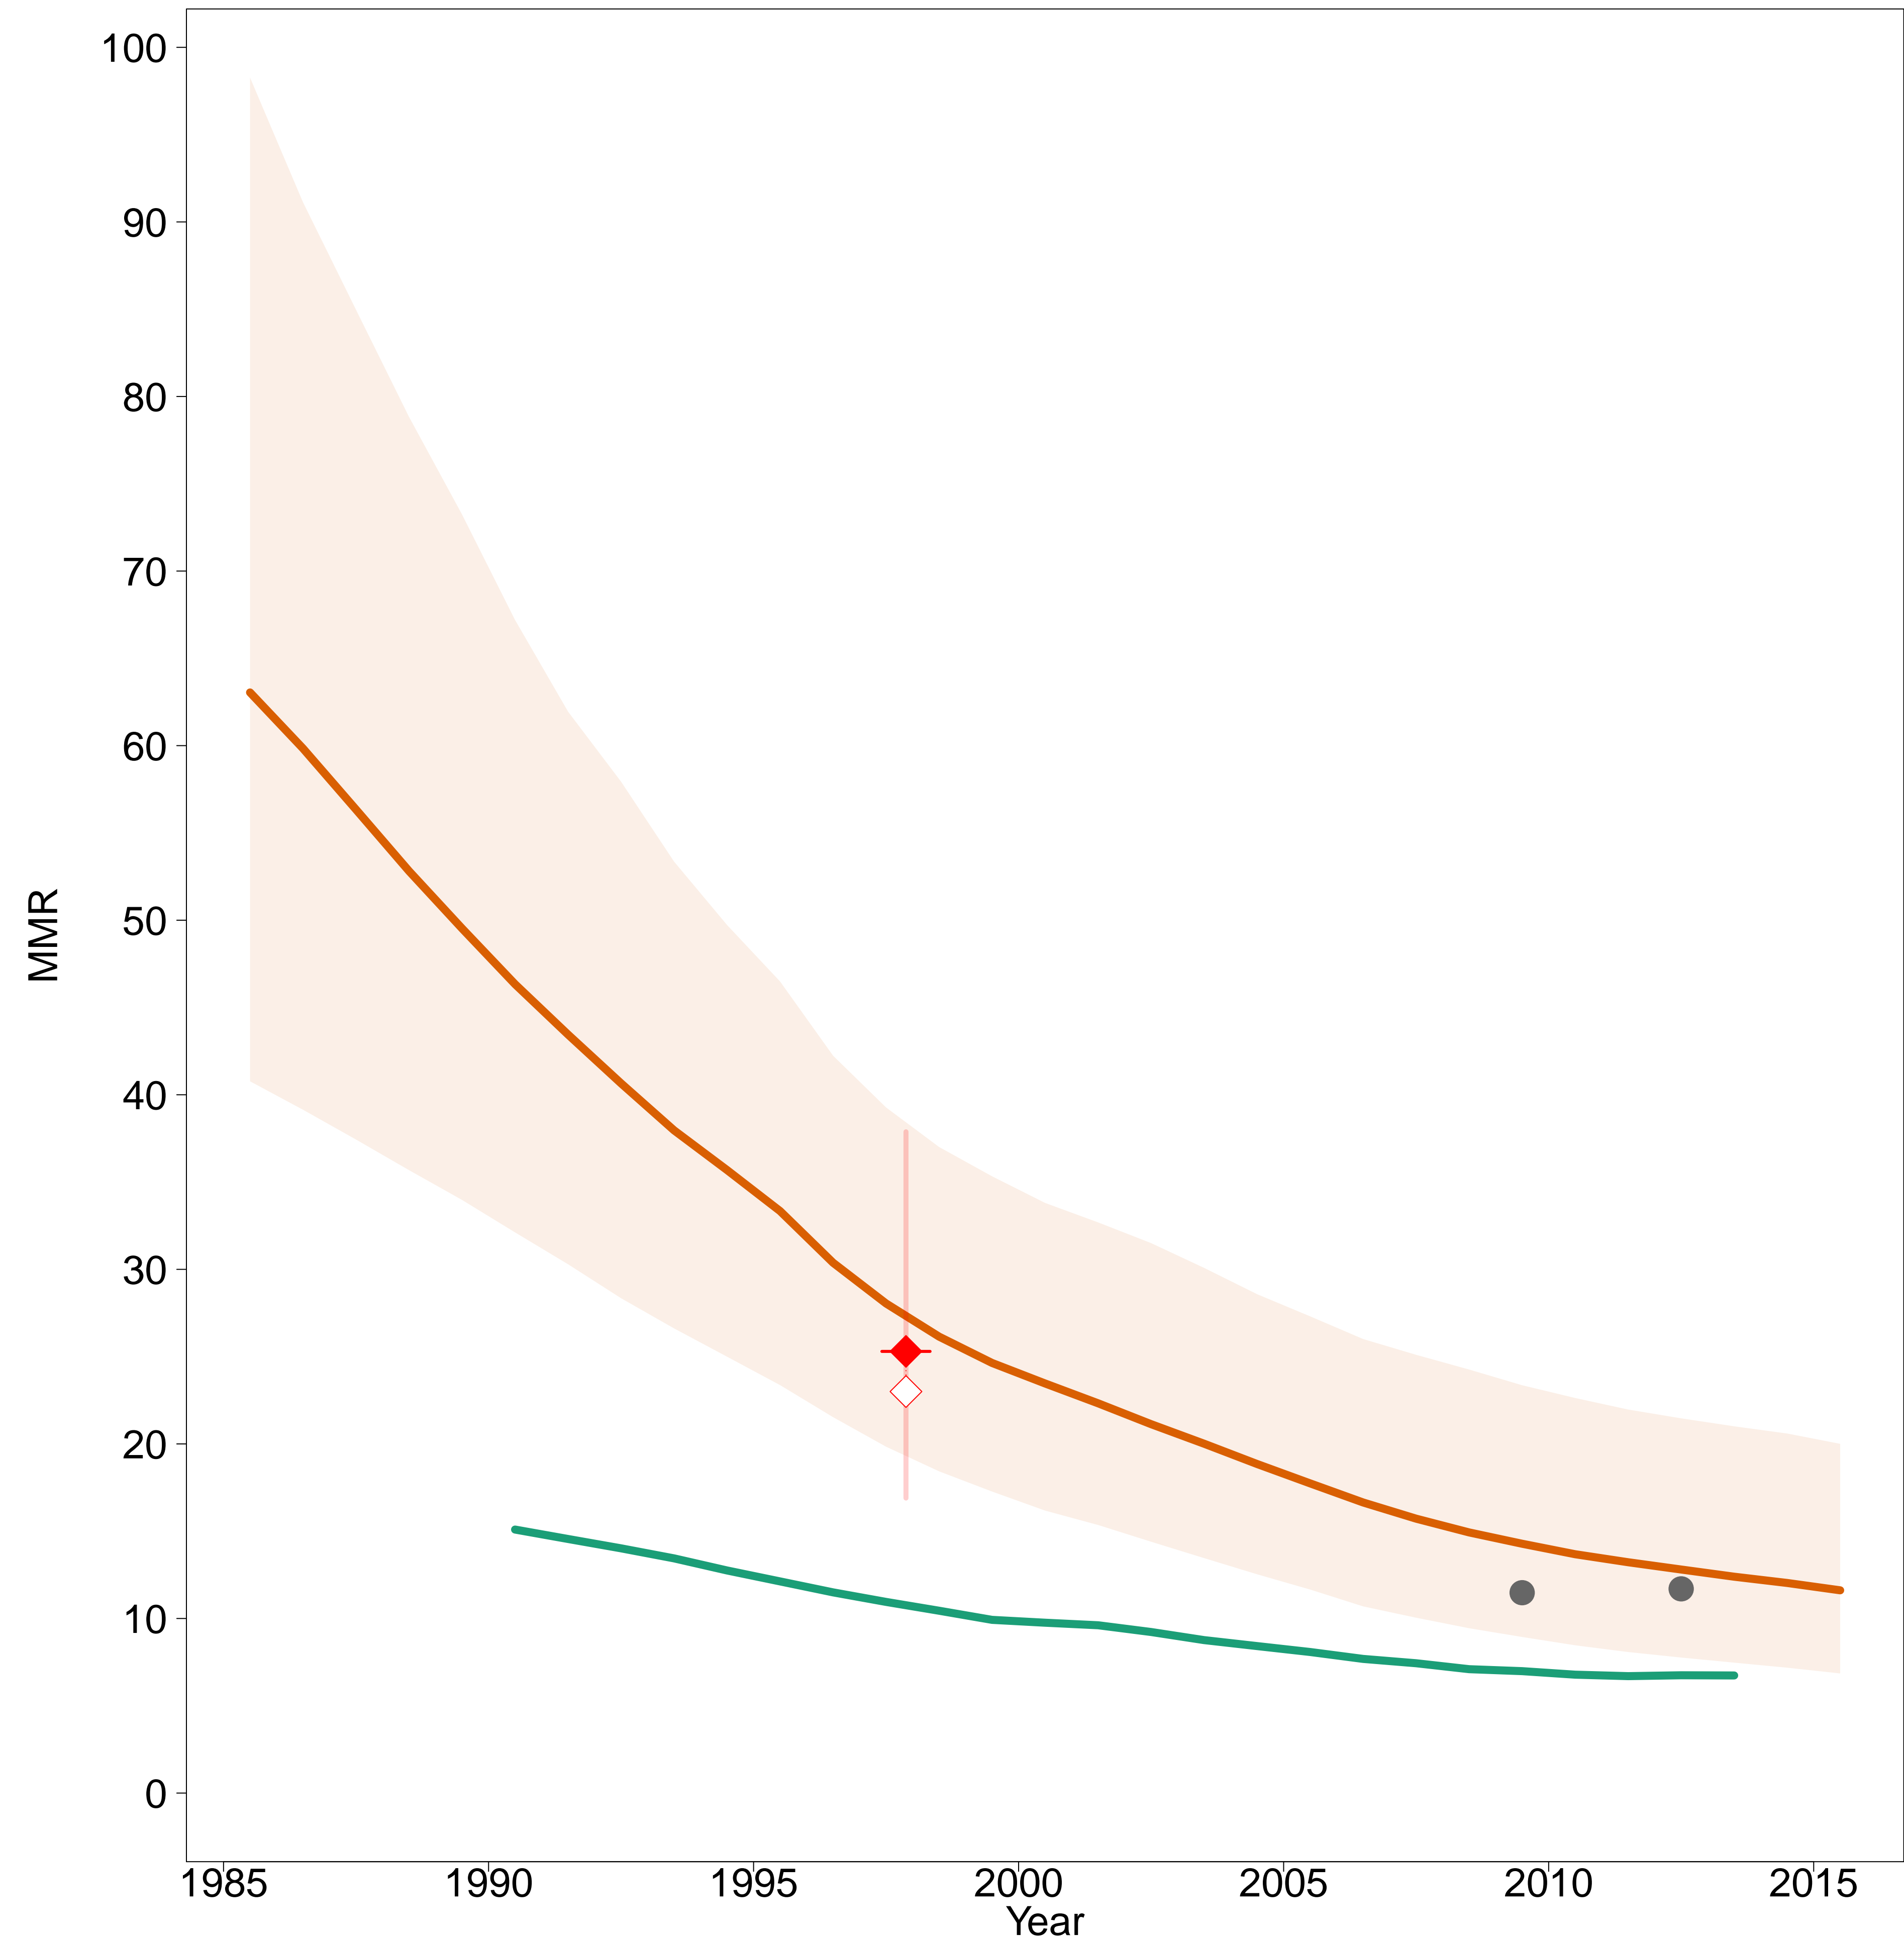

- Estimates -
- MMEIG 2015
- GBD 2013
- MMR Database 2015 -
- Observed Data
- Adjusted Data
- Data type -
- Misc. studies
- Excluded VR data (data quality issues)

Senegal [SEN]  
(Western Africa)

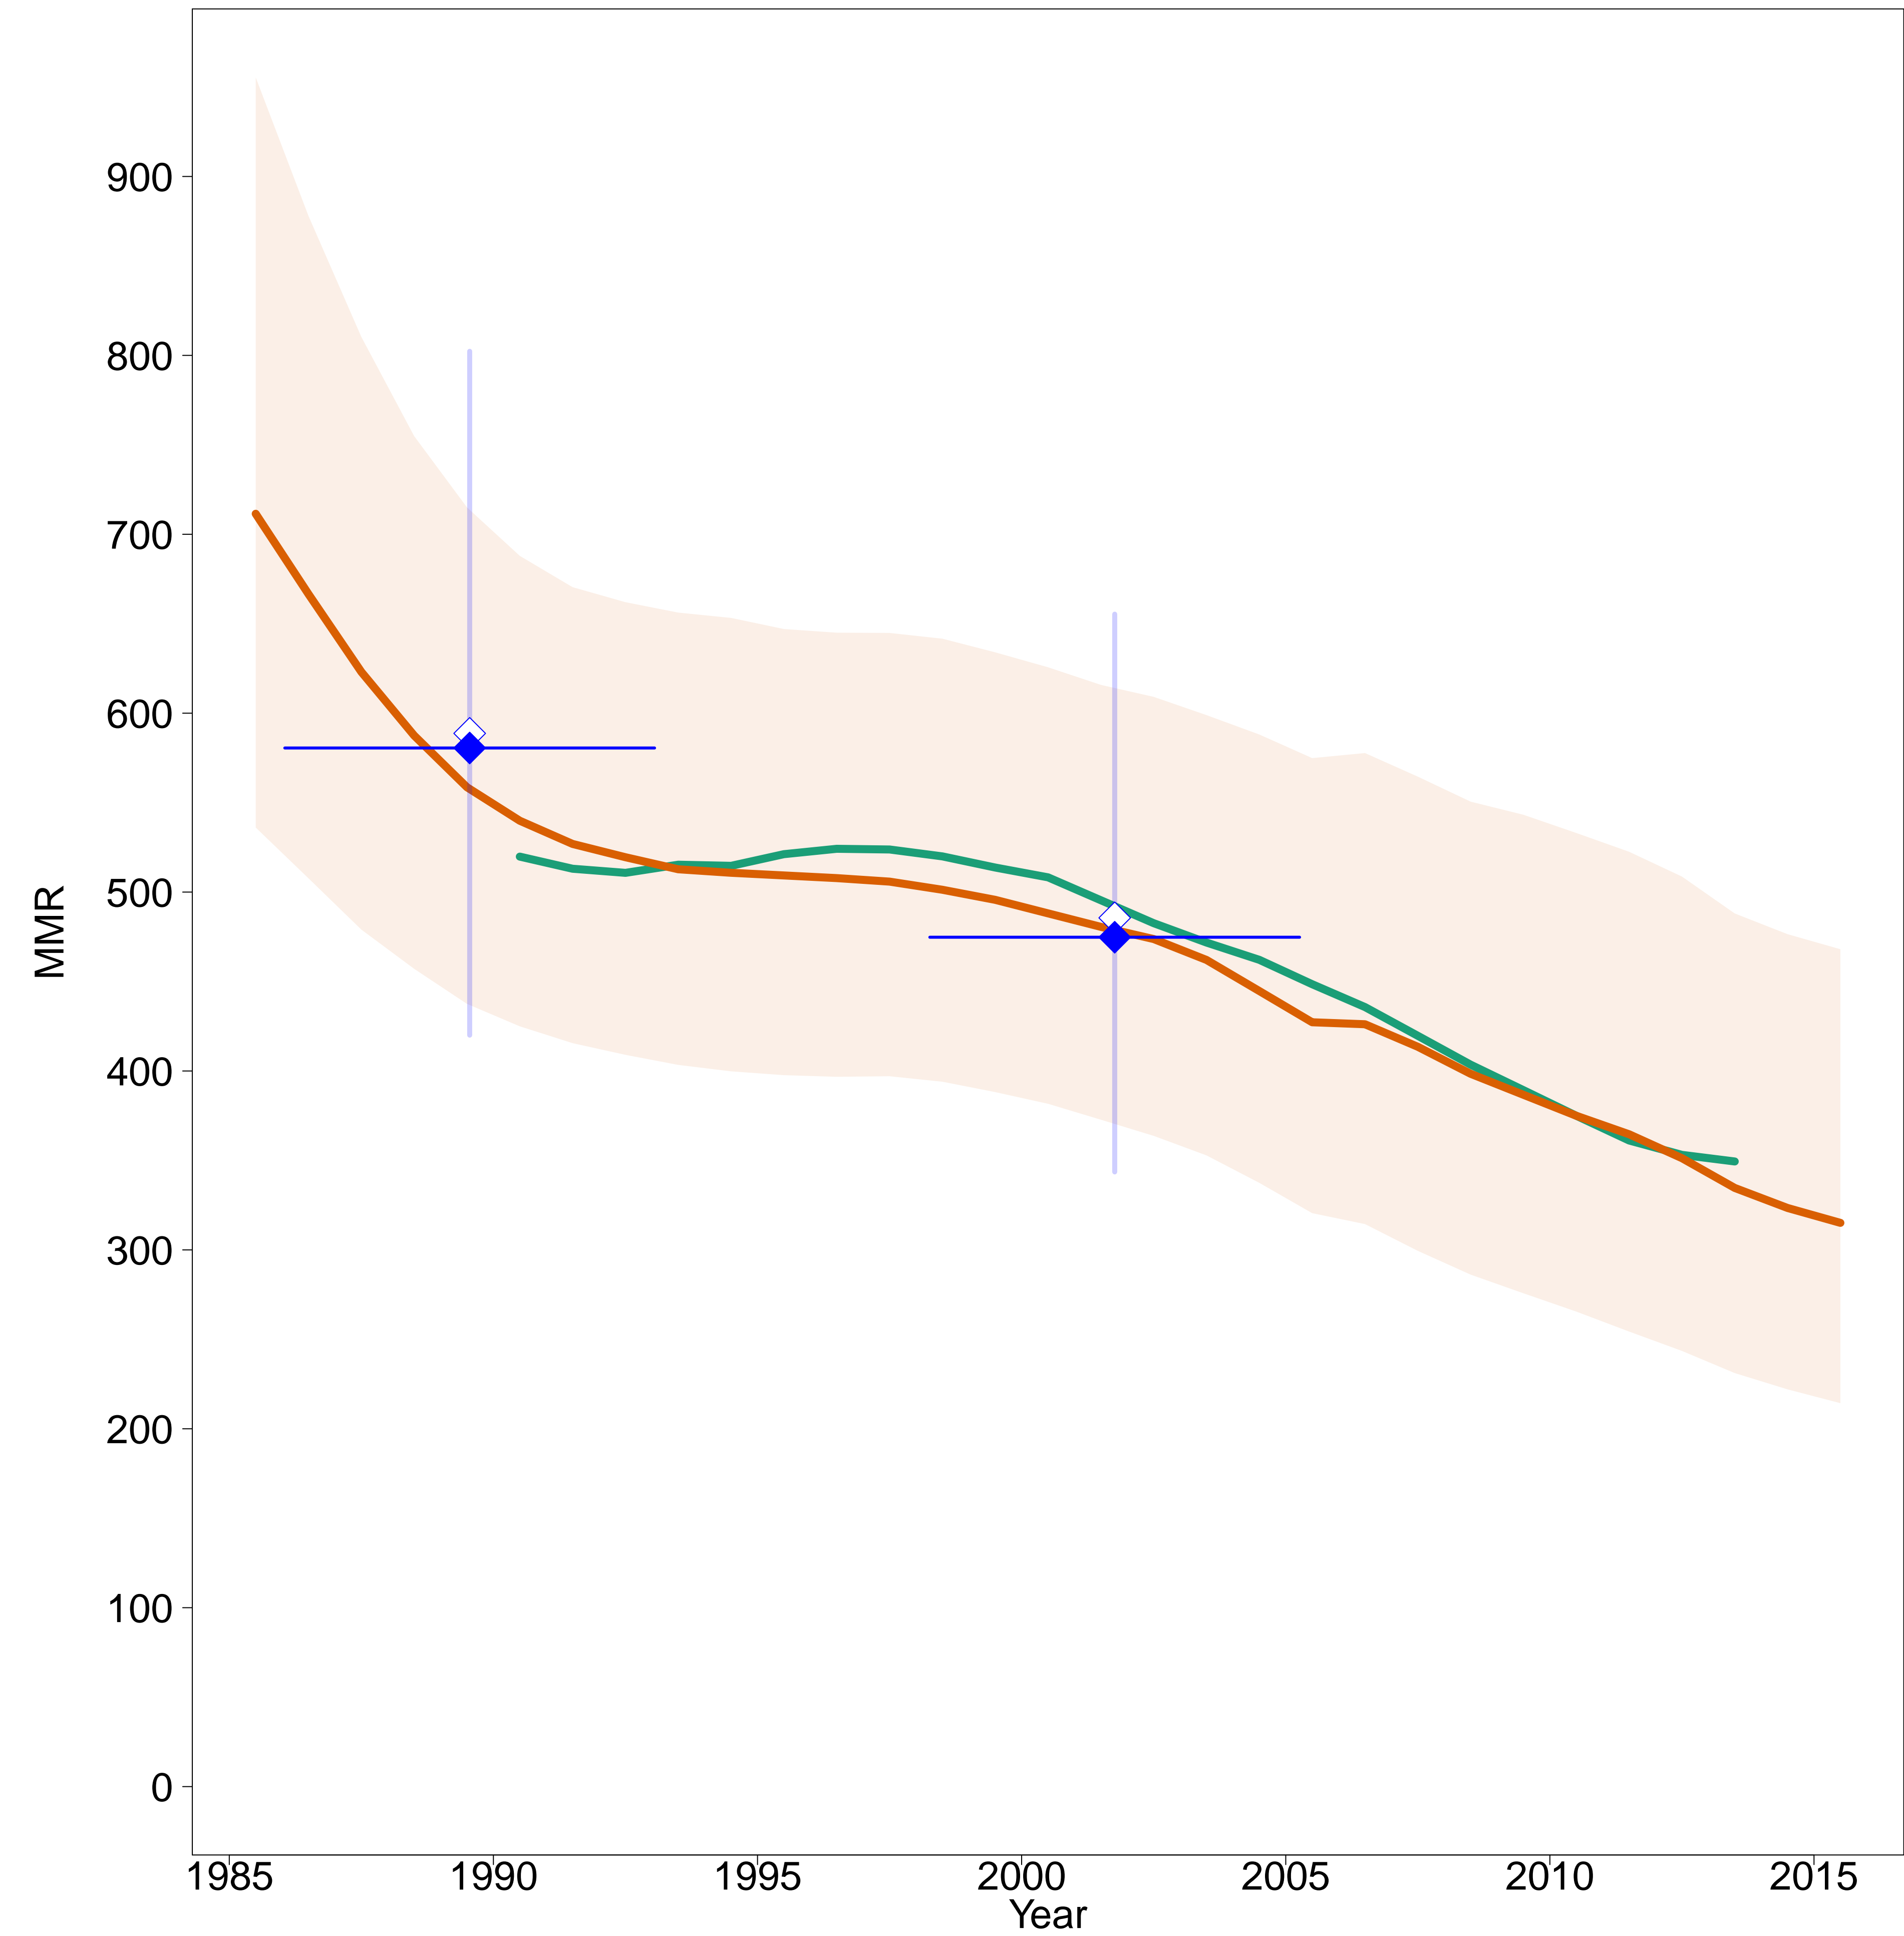

- Estimates -
- MMEIG 2015
- GBD 2013
- MMR Database 2015 -
- Observed Data
- Adjusted Data
- Data type -
- DHS

**Serbia [SRB]**  
 (Transition countries of South-Eastern Europe)

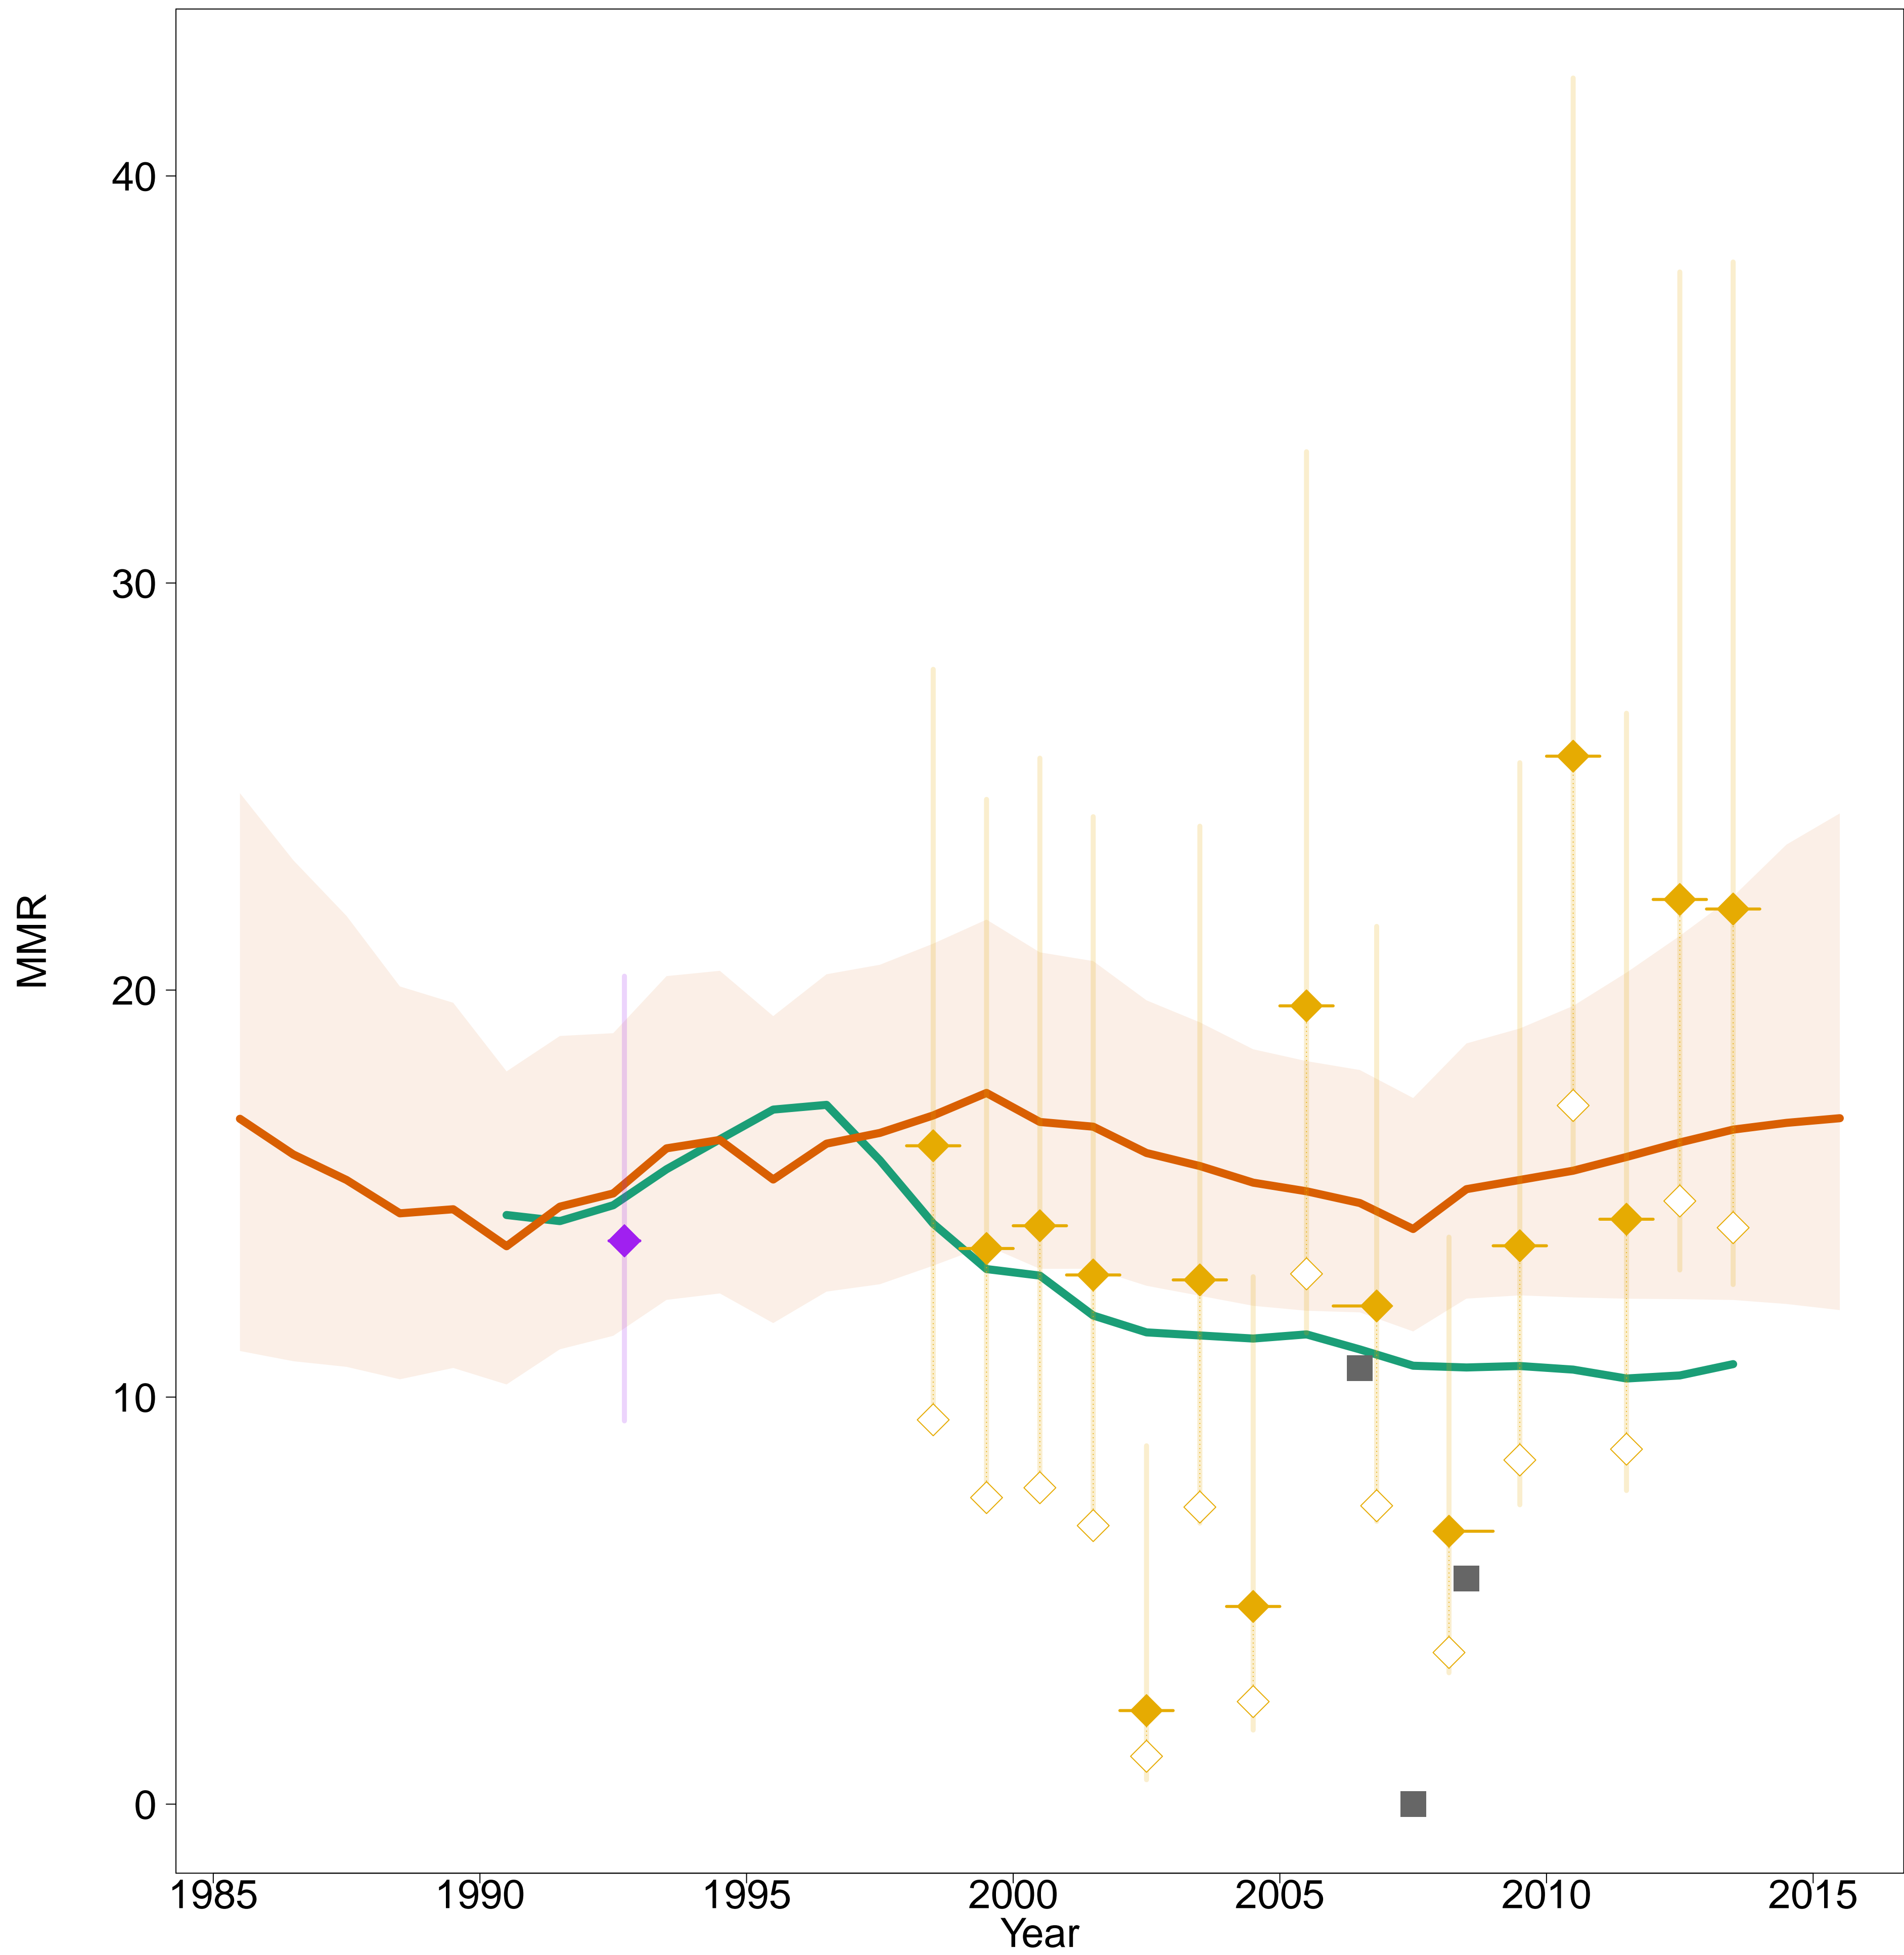

- Estimates -
- MMEIG 2015
- GBD 2013
- MMR Database 2015 -
- Observed Data
- Adjusted Data
- Data type -
- VR
- Spec. studies
- Reported VR before recalc.  
(related to 0 obs. mat. death)

Sierra Leone [SLE]  
(Western Africa)

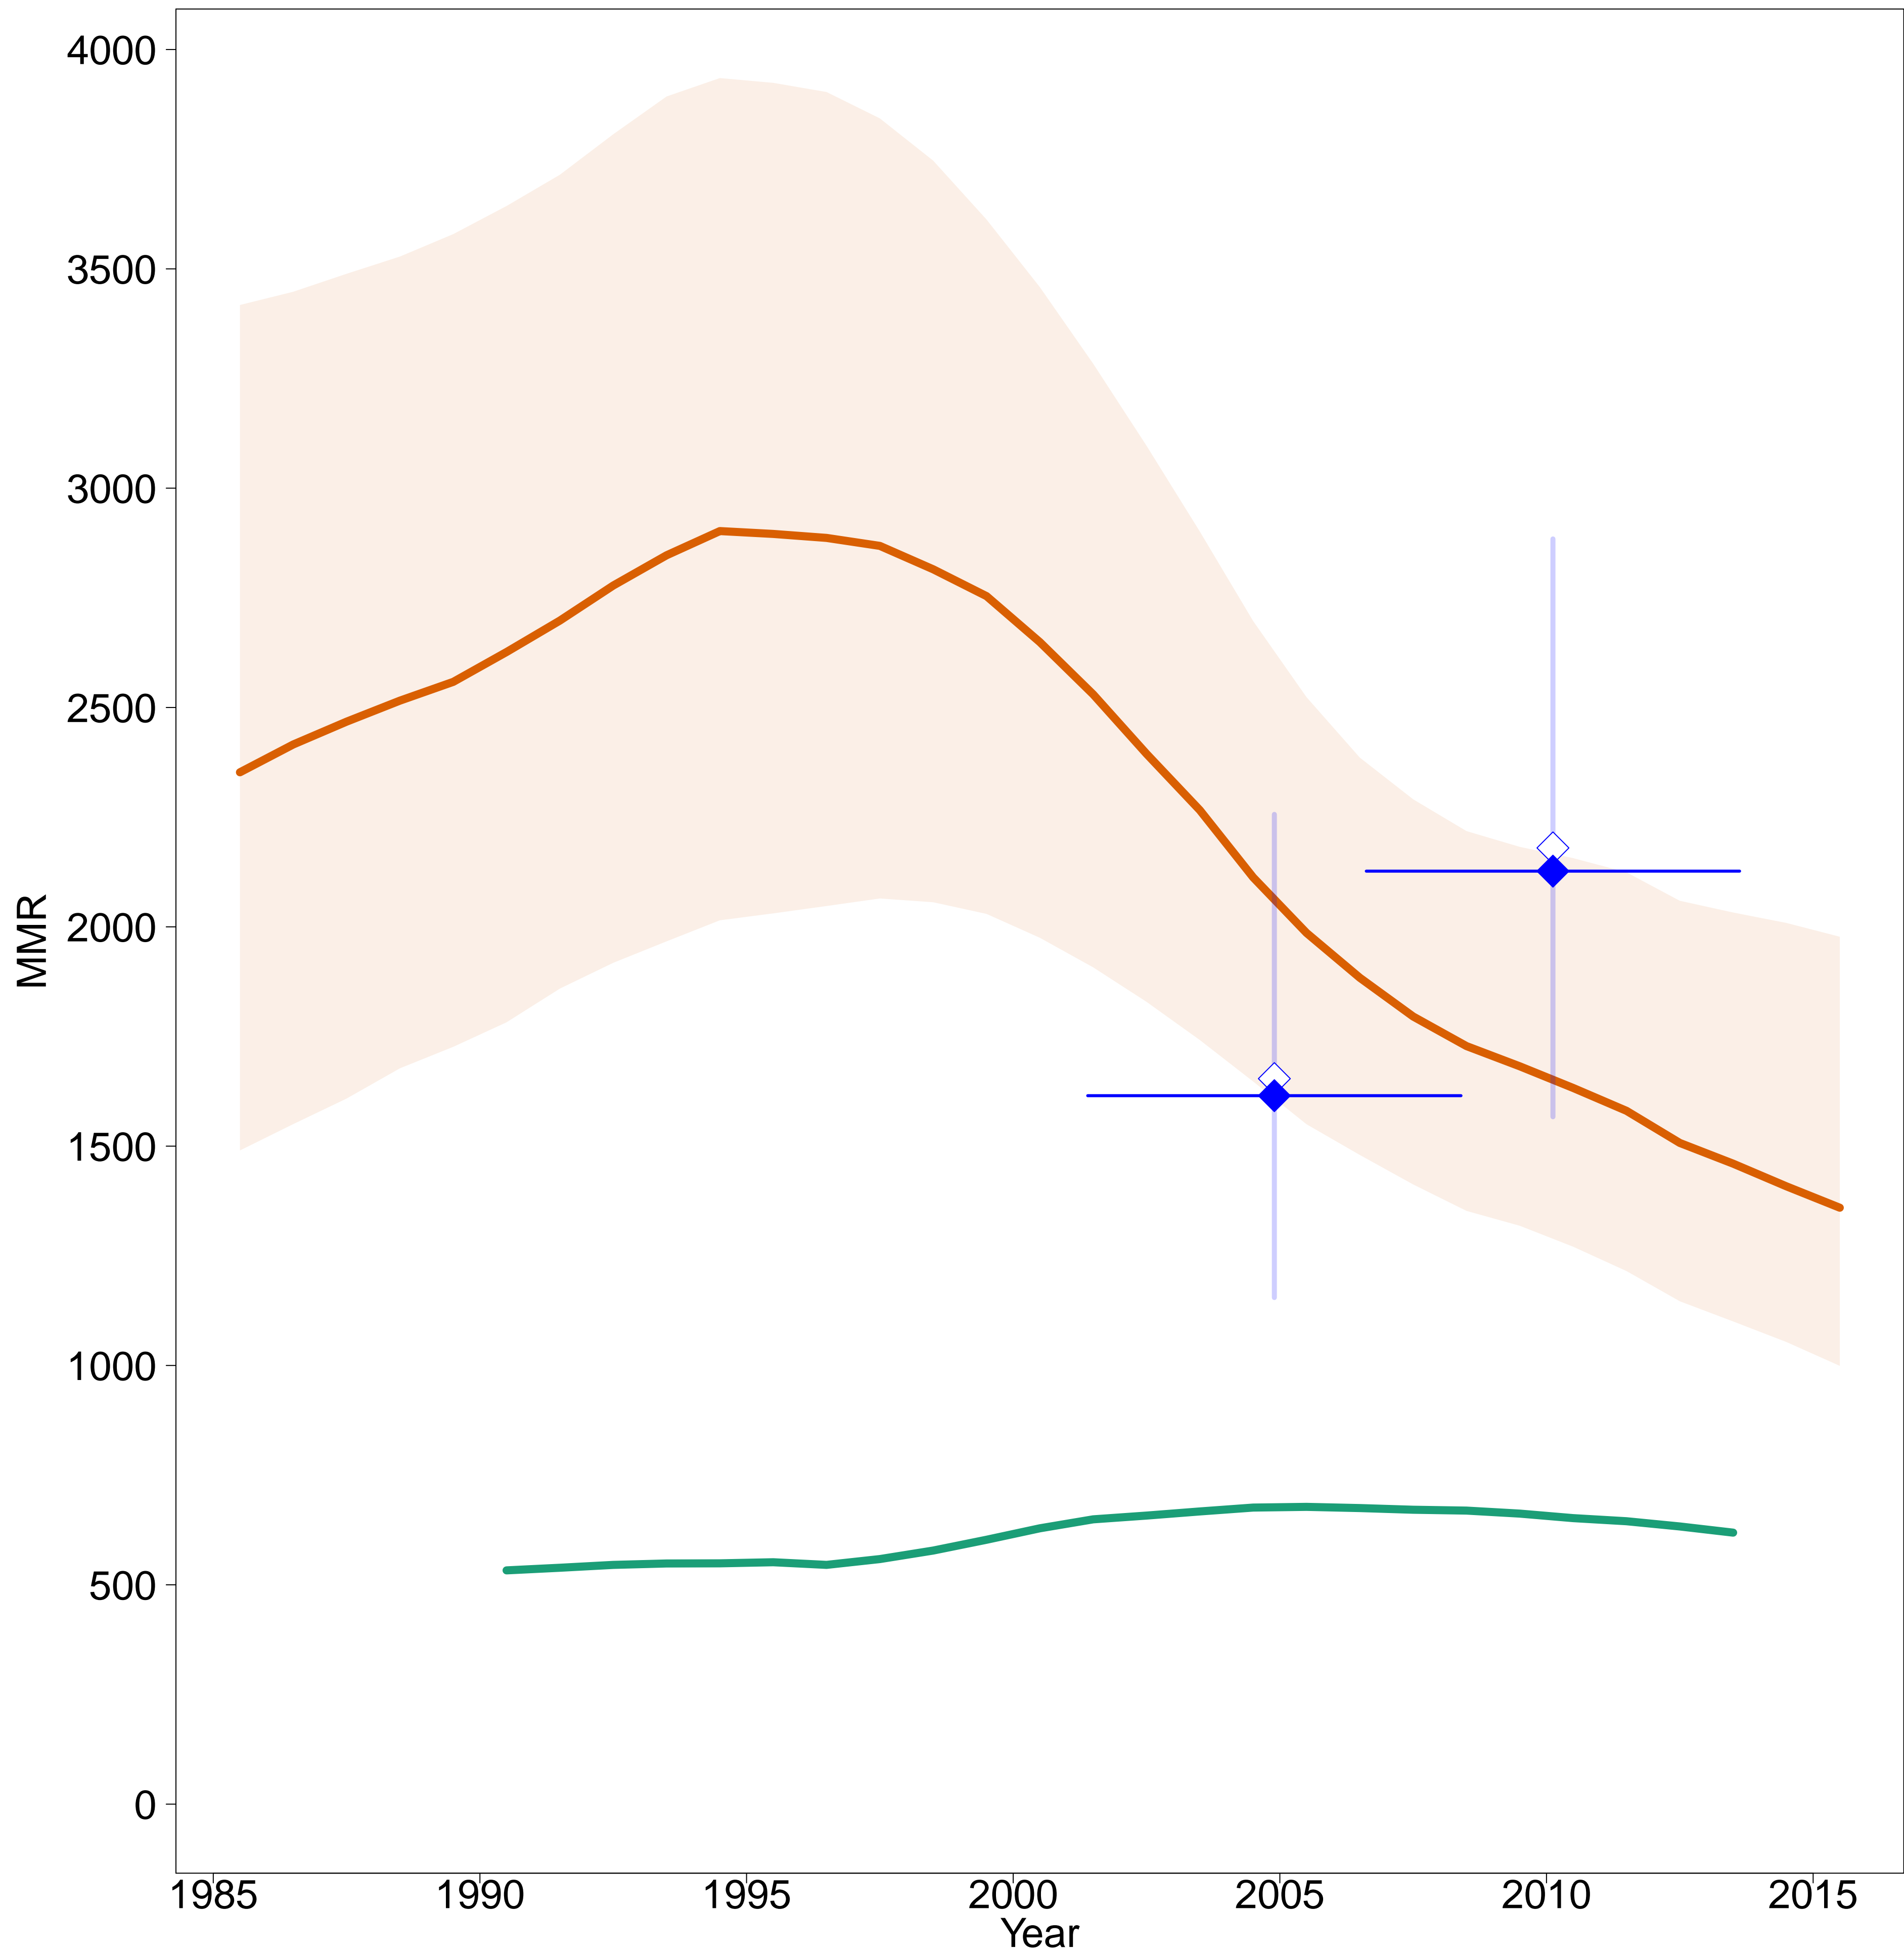

- Estimates –
- MMEIG 2015
- GBD 2013
- MMR Database 2015 –
- Observed Data
- Adjusted Data
- Data type –
- DHS

Singapore [SGP]  
(South-Eastern Asia / Oceania)

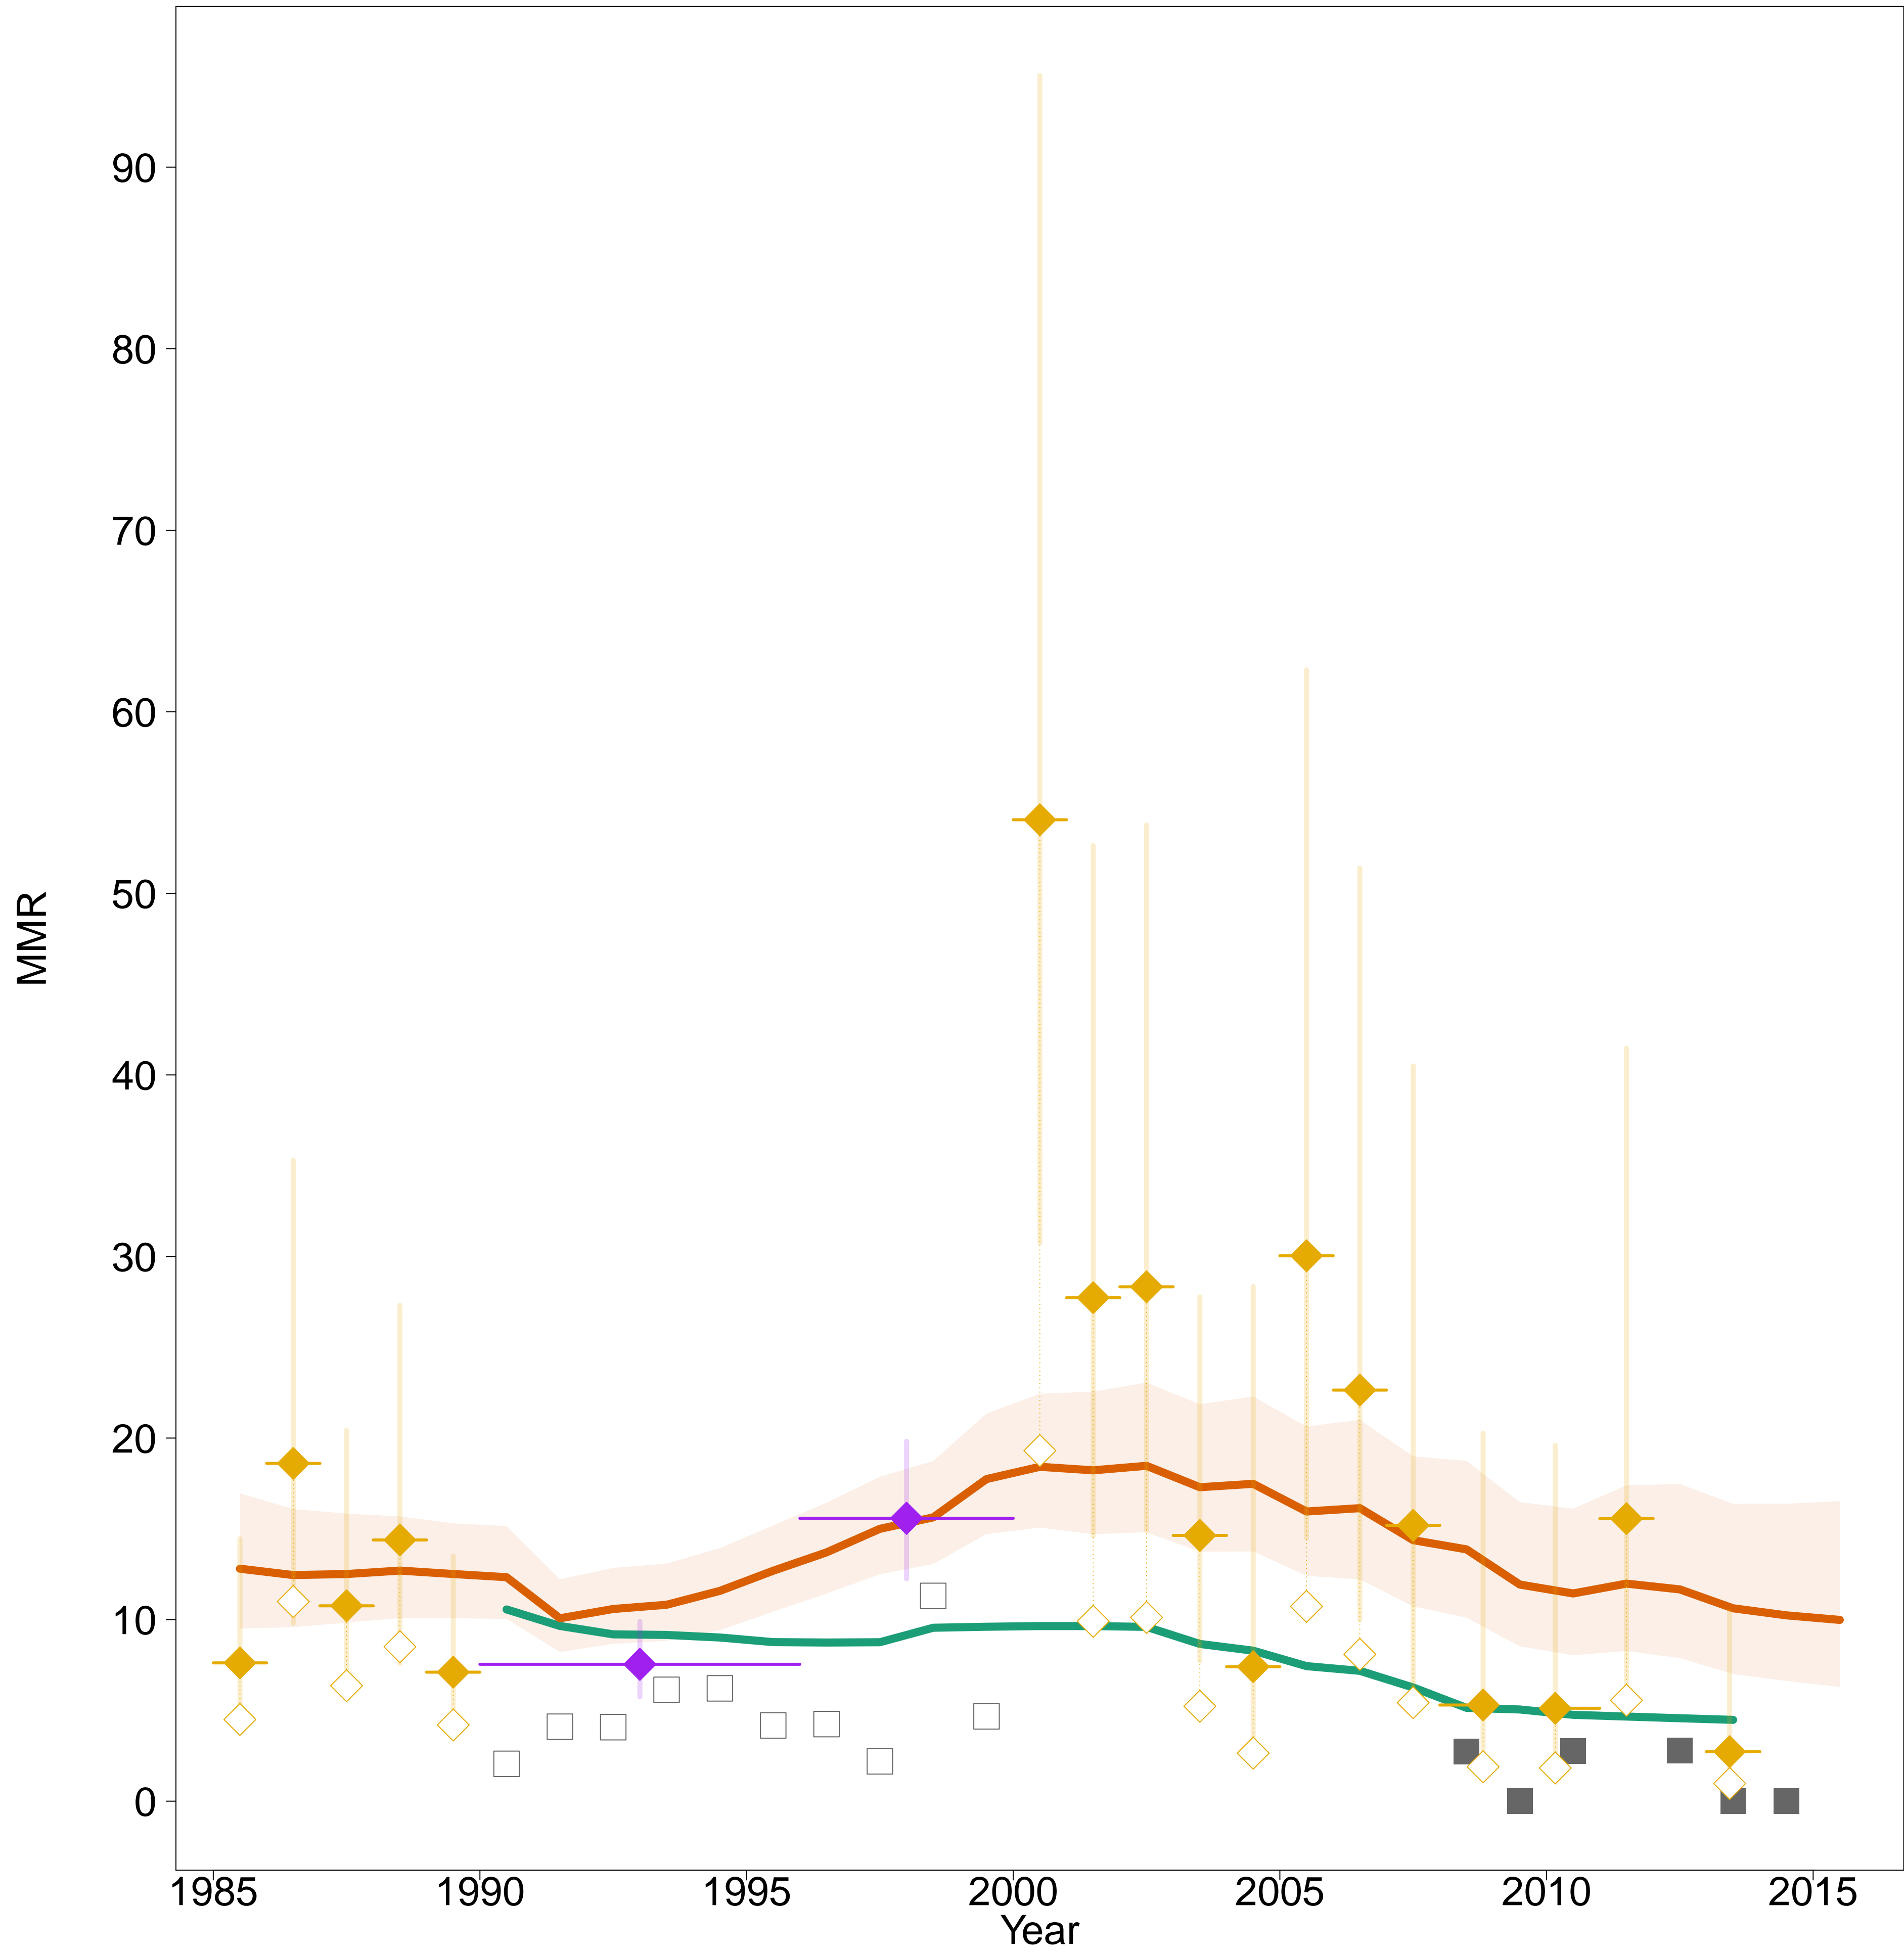

– Estimates –

MMEIG 2015

GBD 2013

– MMR Database 2015 –

◊ Observed Data

◆ Adjusted Data

– Data type –

◆ VR

◆ Spec. studies

■ Reported VR before recalc.

(related to 0 obs. mat. death)

◻ Excluded VR data

(overlap with specialized study)

Slovakia [SVK]  
(Developed regions)

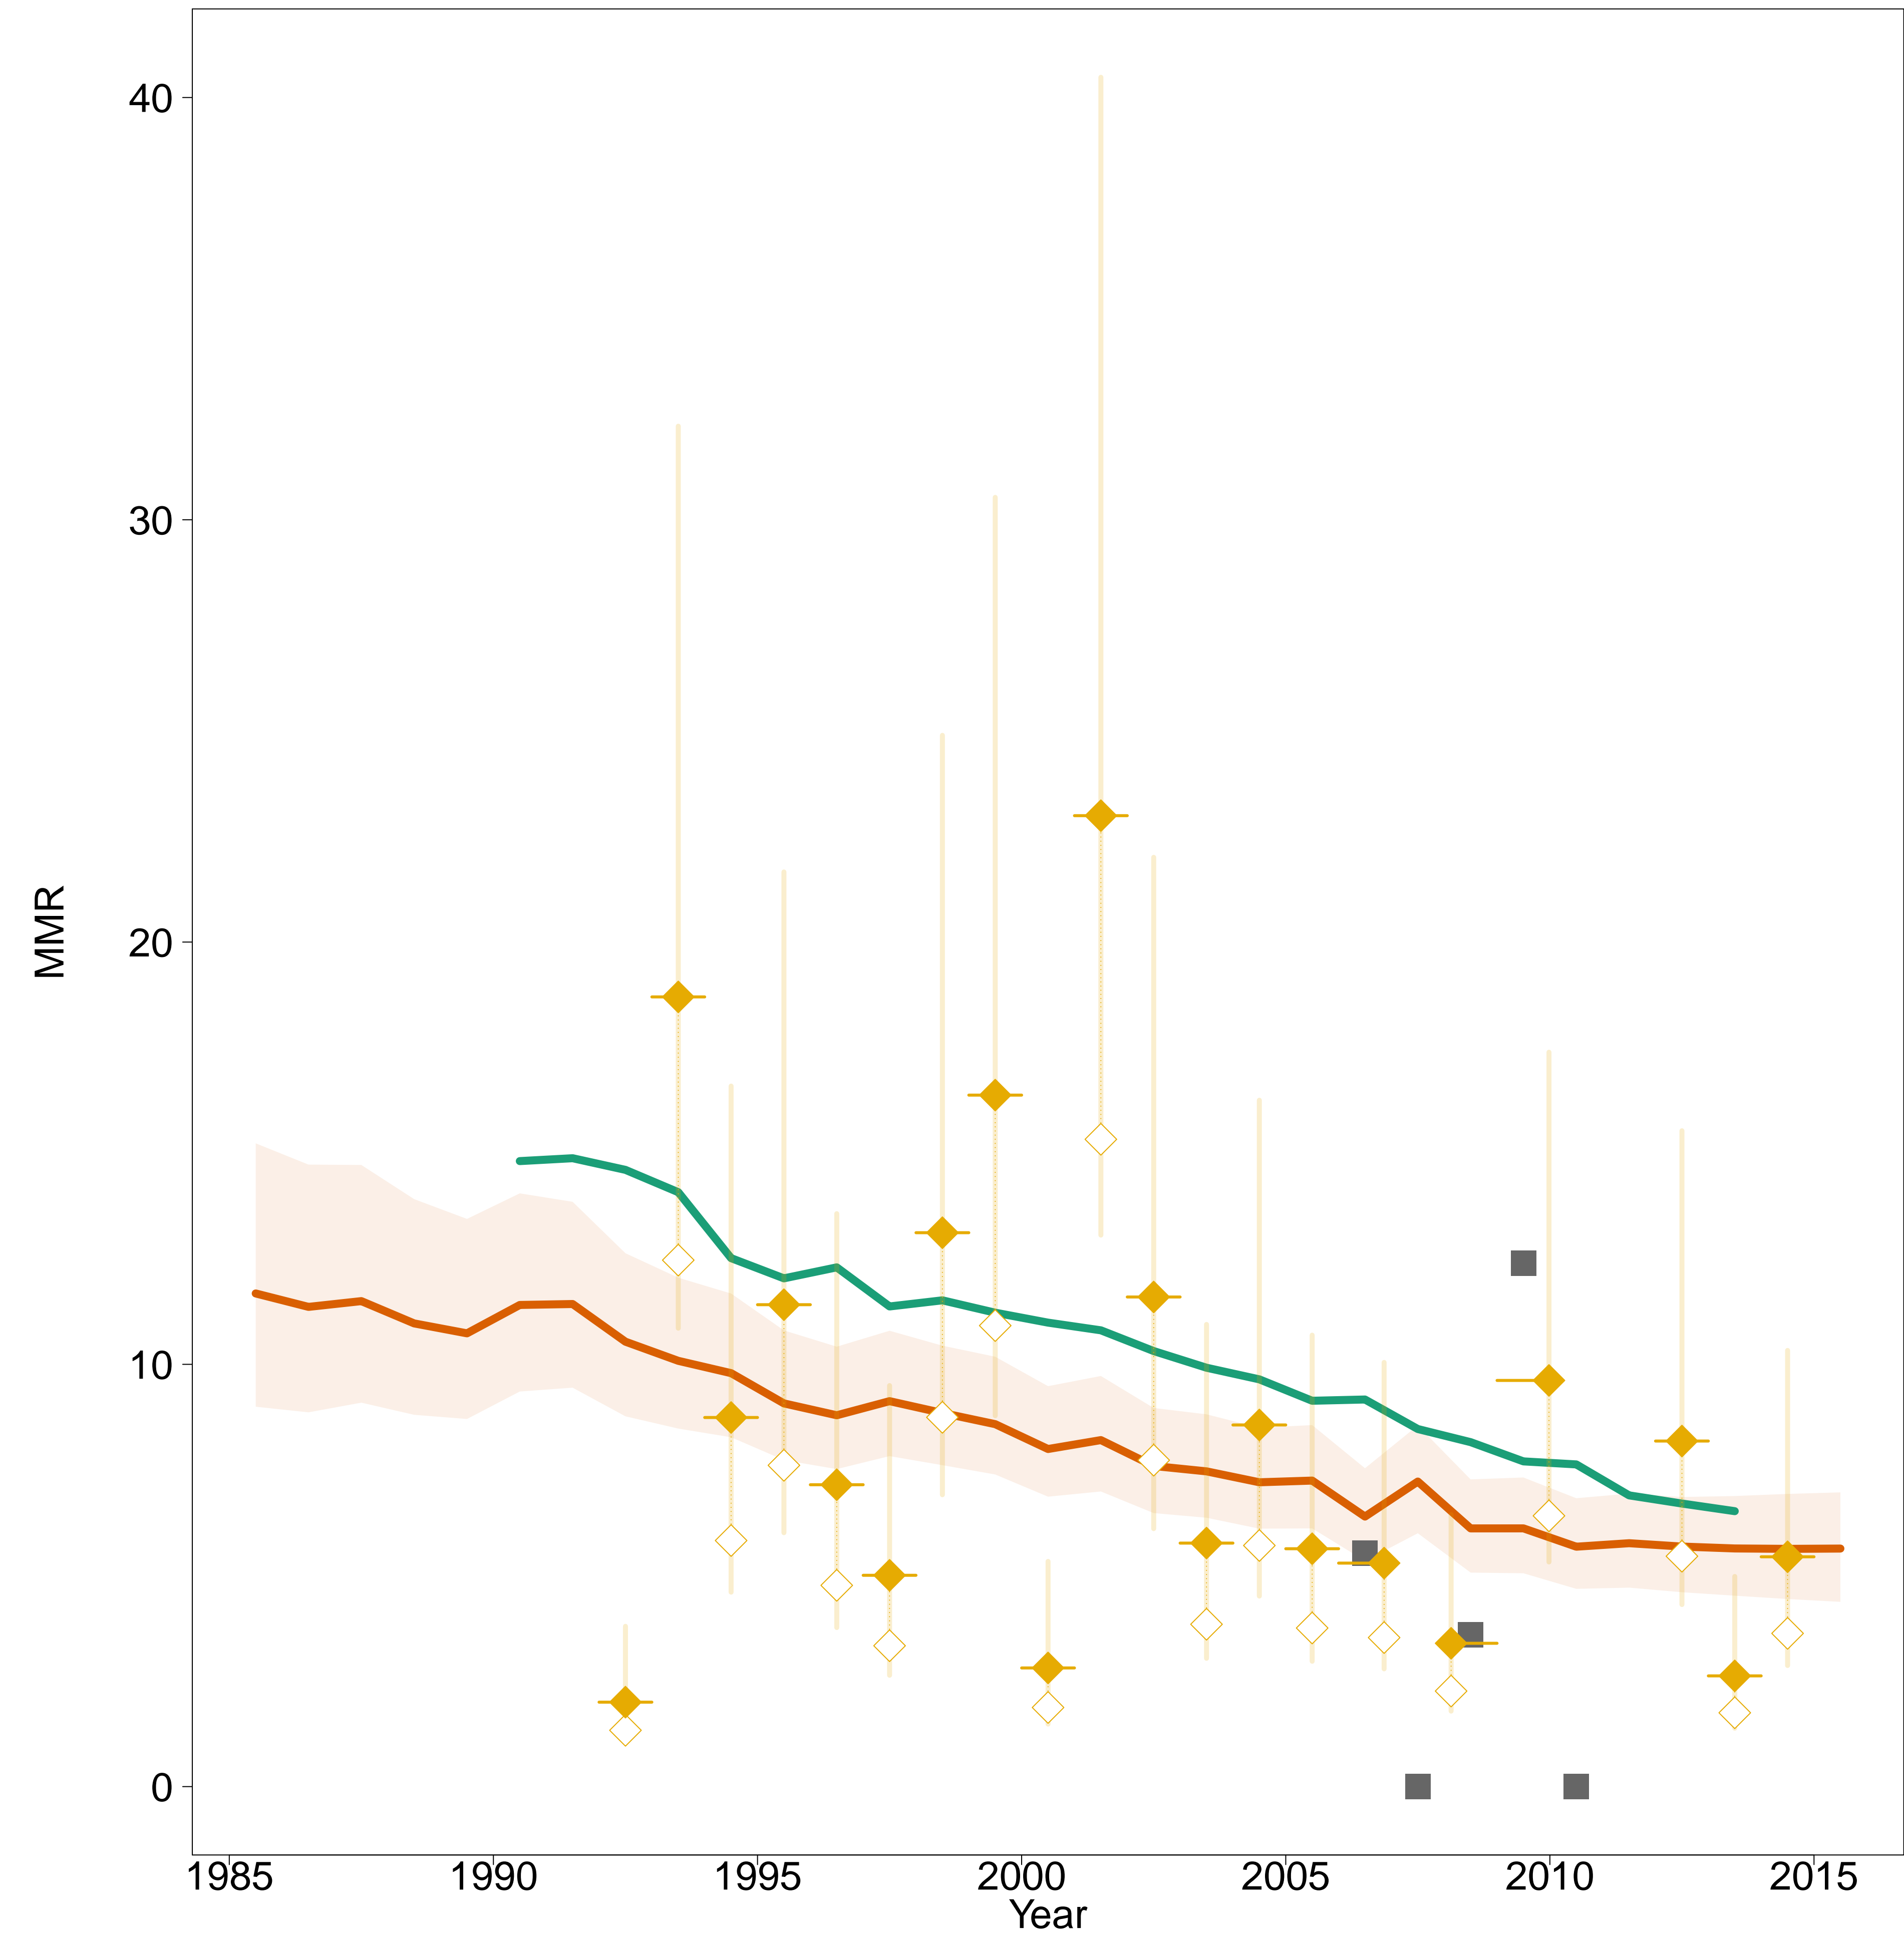

- Estimates –
- MMEIG 2015
- GBD 2013
- MMR Database 2015 –
- Observed Data
- Adjusted Data
- Data type –
- VR
- Reported VR before recalc.  
(related to 0 obs. mat. death)



Slovenia [SVN]  
(Developed regions)

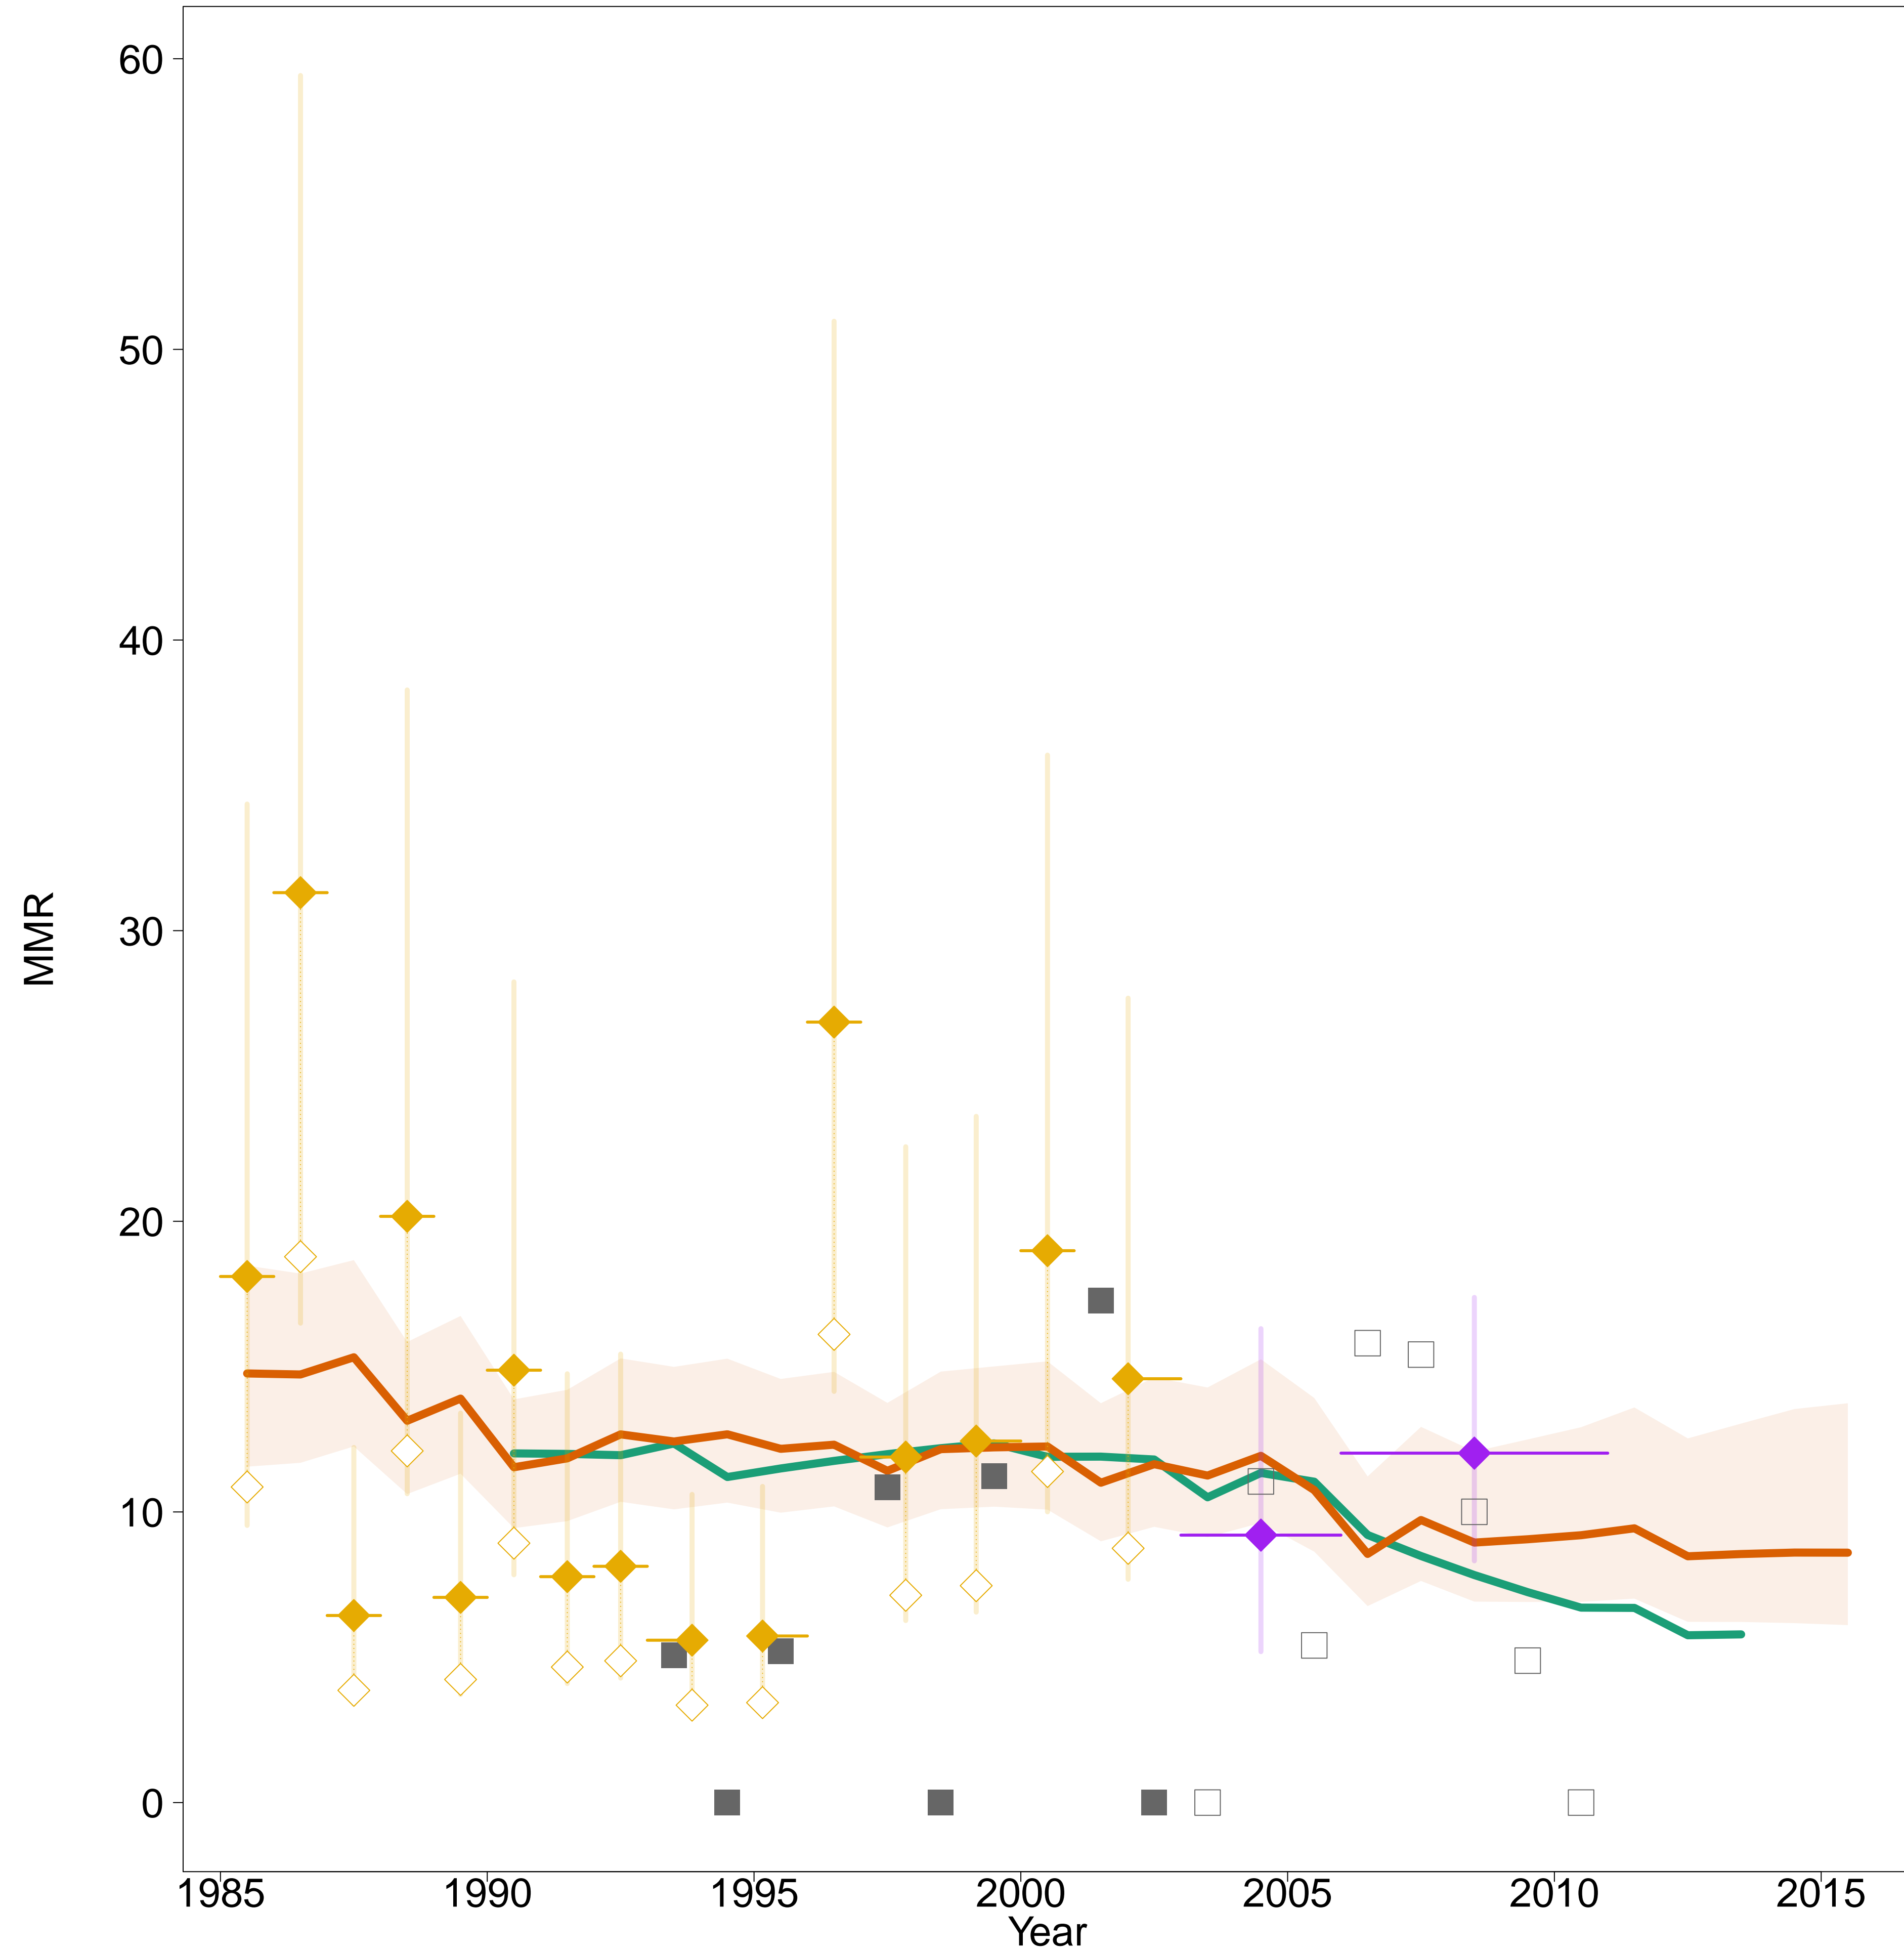

– Estimates –

MMEIG 2015

GBD 2013

– MMR Database 2015 –

◊ Observed Data

◆ Adjusted Data

– Data type –

◆ VR

◆ Spec. studies

■ Reported VR before recalc.

(related to 0 obs. mat. death)

◻ Excluded VR data

(overlap with specialized study)

Solomon Islands [SLB]  
(South-Eastern Asia / Oceania)

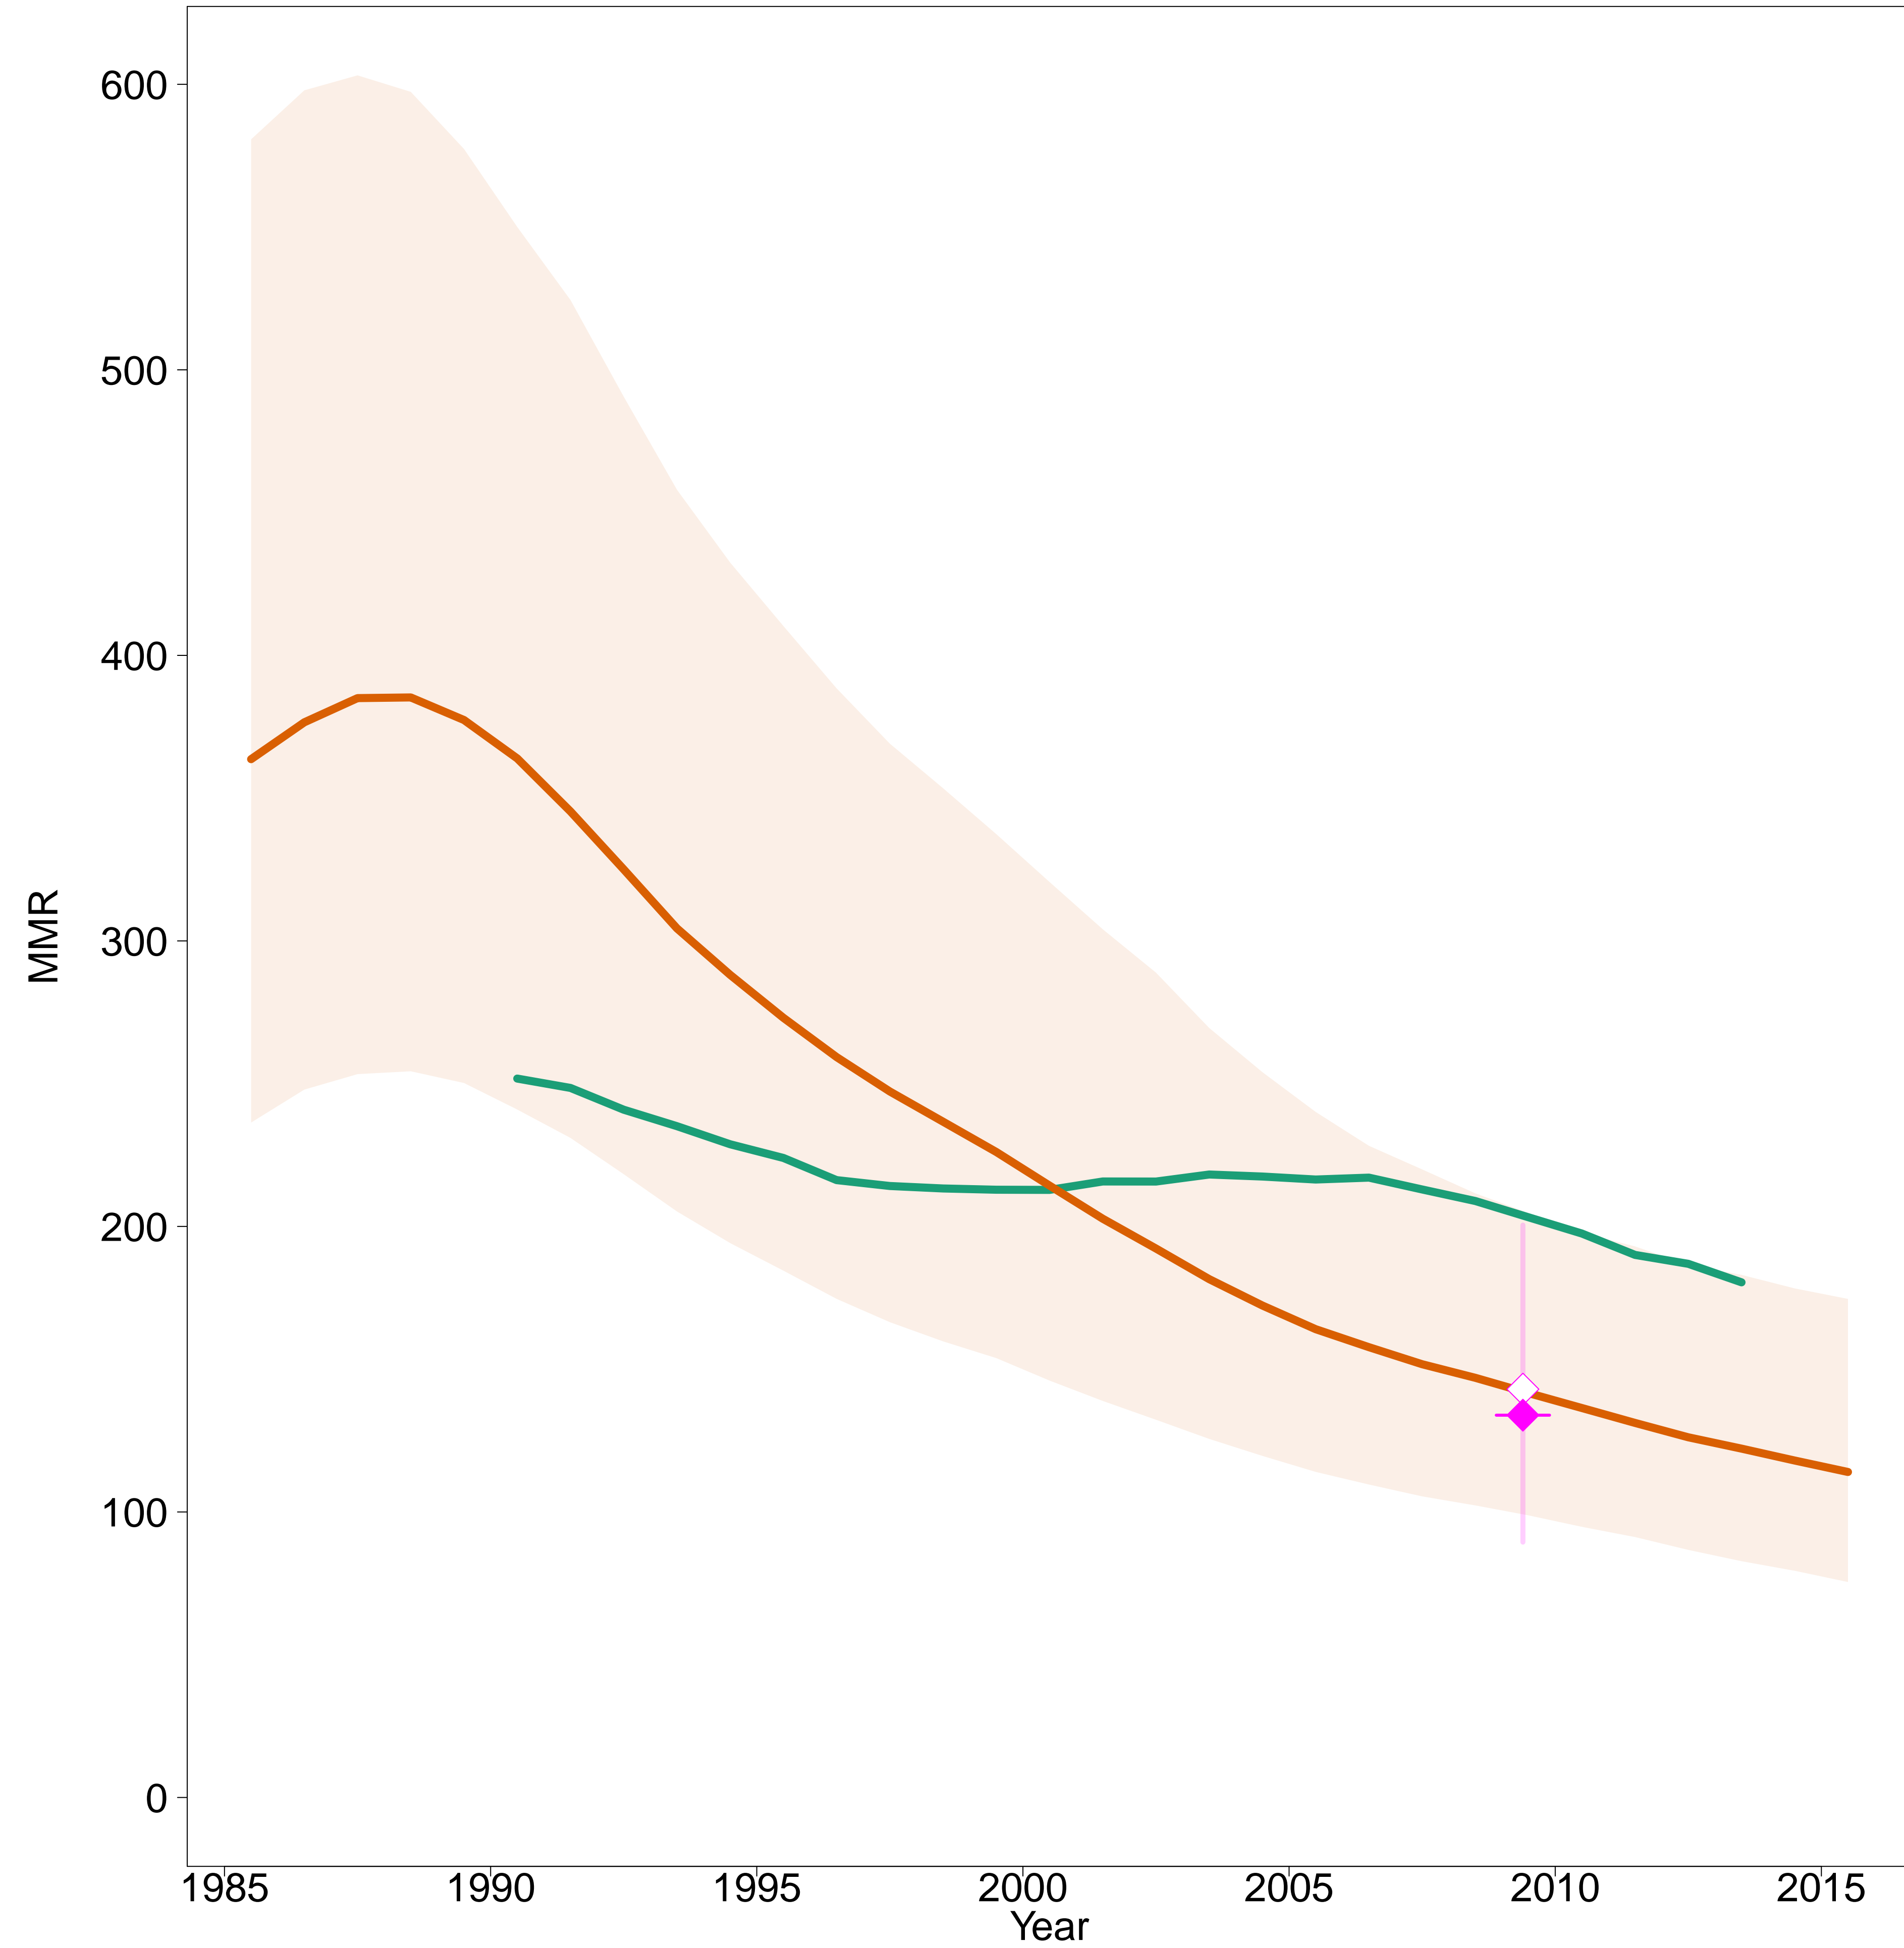

- Estimates –
- MMEIG 2015
- GBD 2013
- MMR Database 2015 –
- ◊ Observed Data
- ◆ Adjusted Data
- Data type –
- ◆ Census

Somalia [SOM]  
(Eastern Africa)

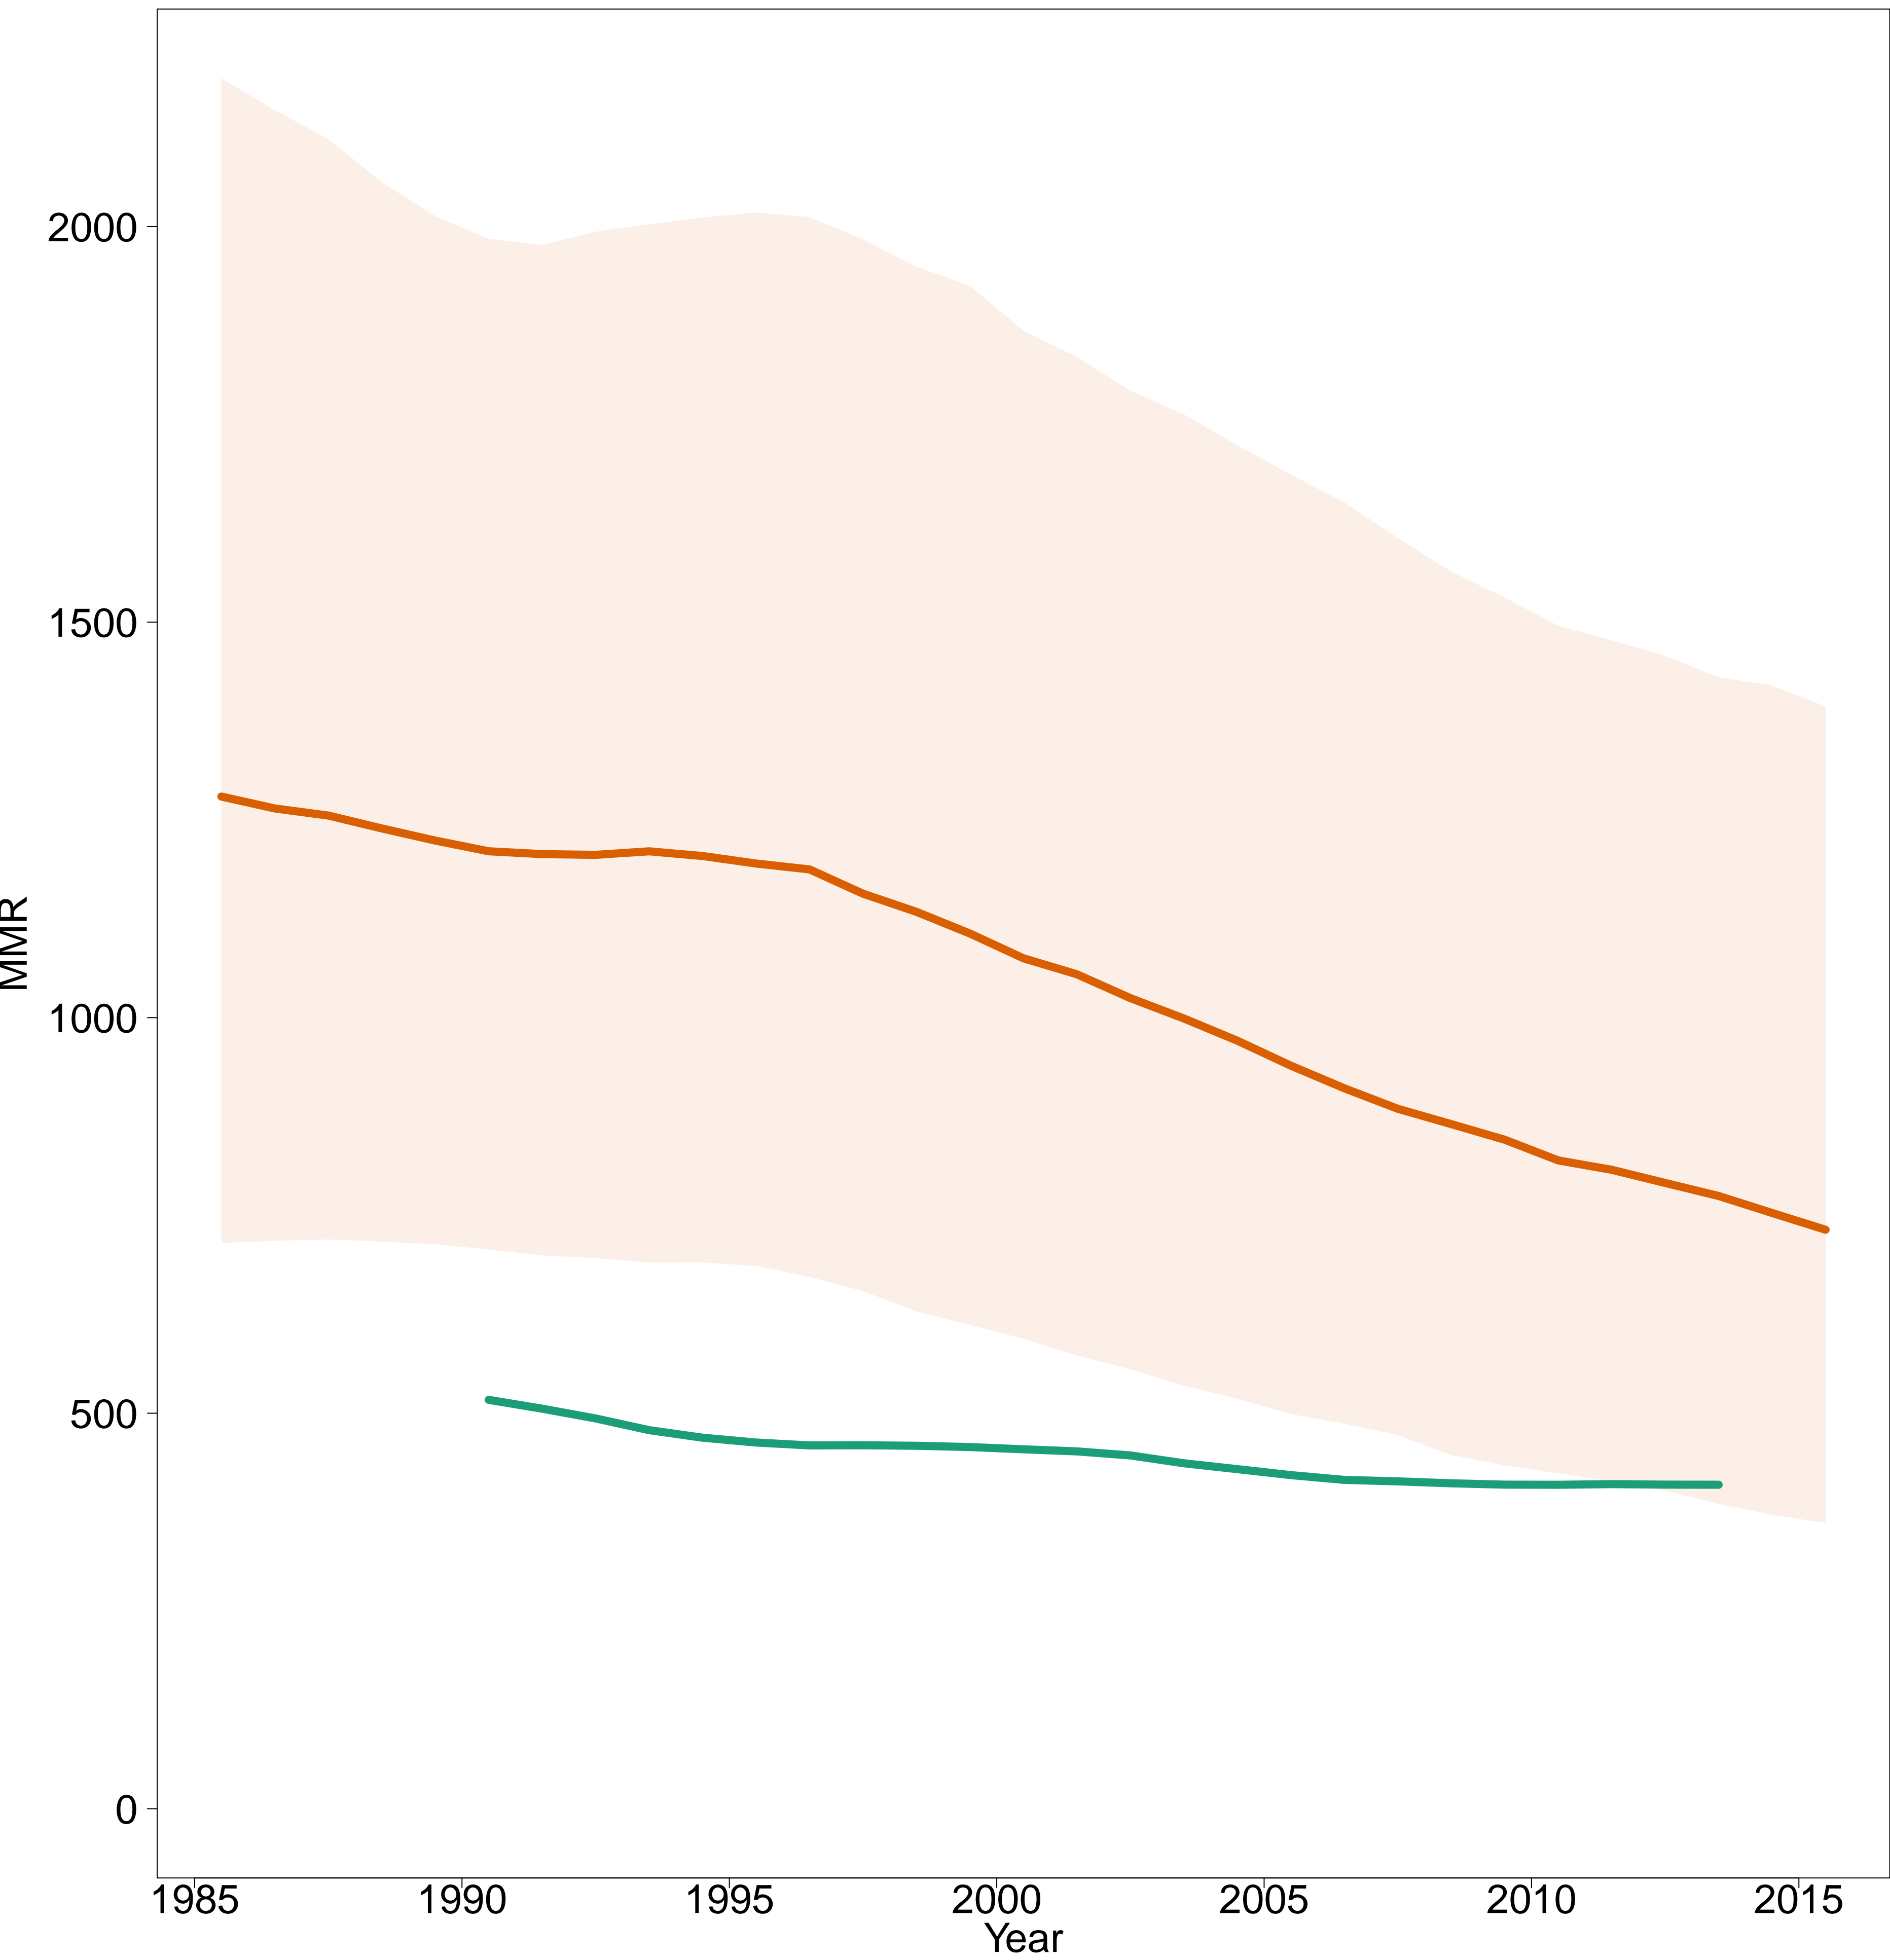

- Estimates -
- MMEIG 2015
- GBD 2013
- MMR Database 2015 -

South Africa [ZAF]  
(Southern Africa)

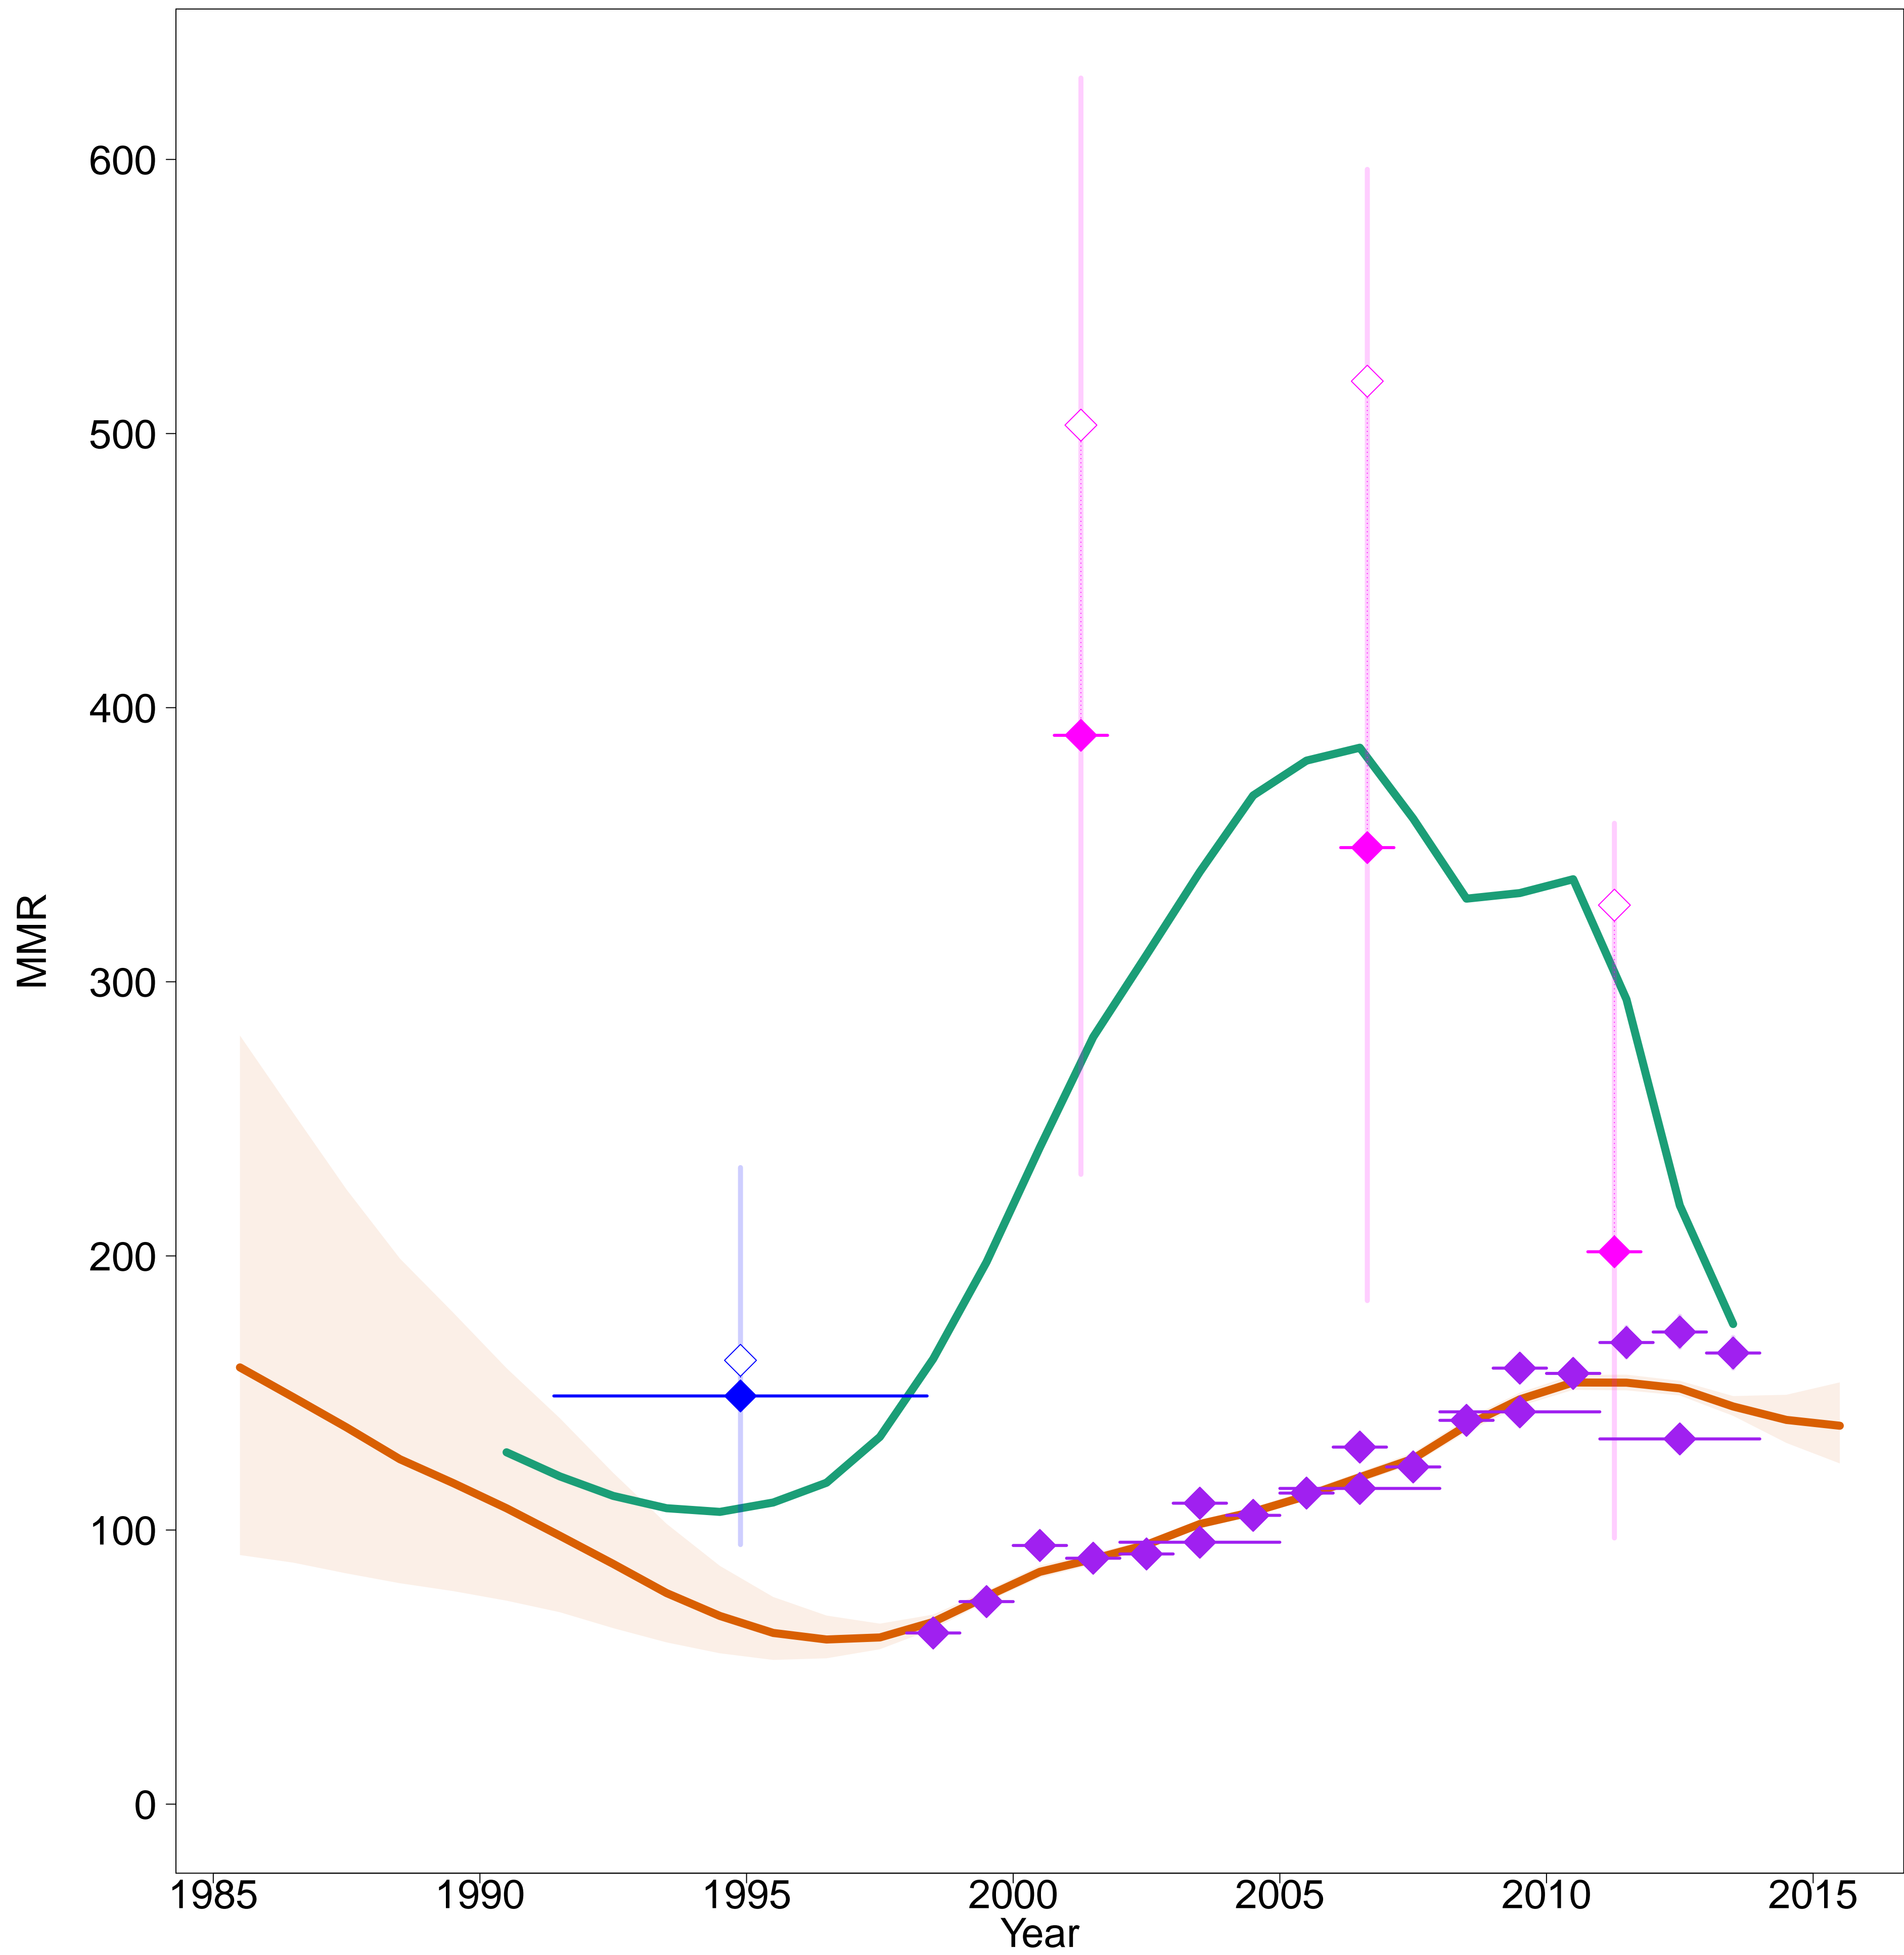

- Estimates -
- MMEIG 2015
- GBD 2013
- MMR Database 2015 -
- Observed Data
- Adjusted Data
- Data type -
- Spec. studies
- DHS
- Census
- Excluded VR data (data quality issues)

South Sudan [SSD]  
(Eastern Africa)

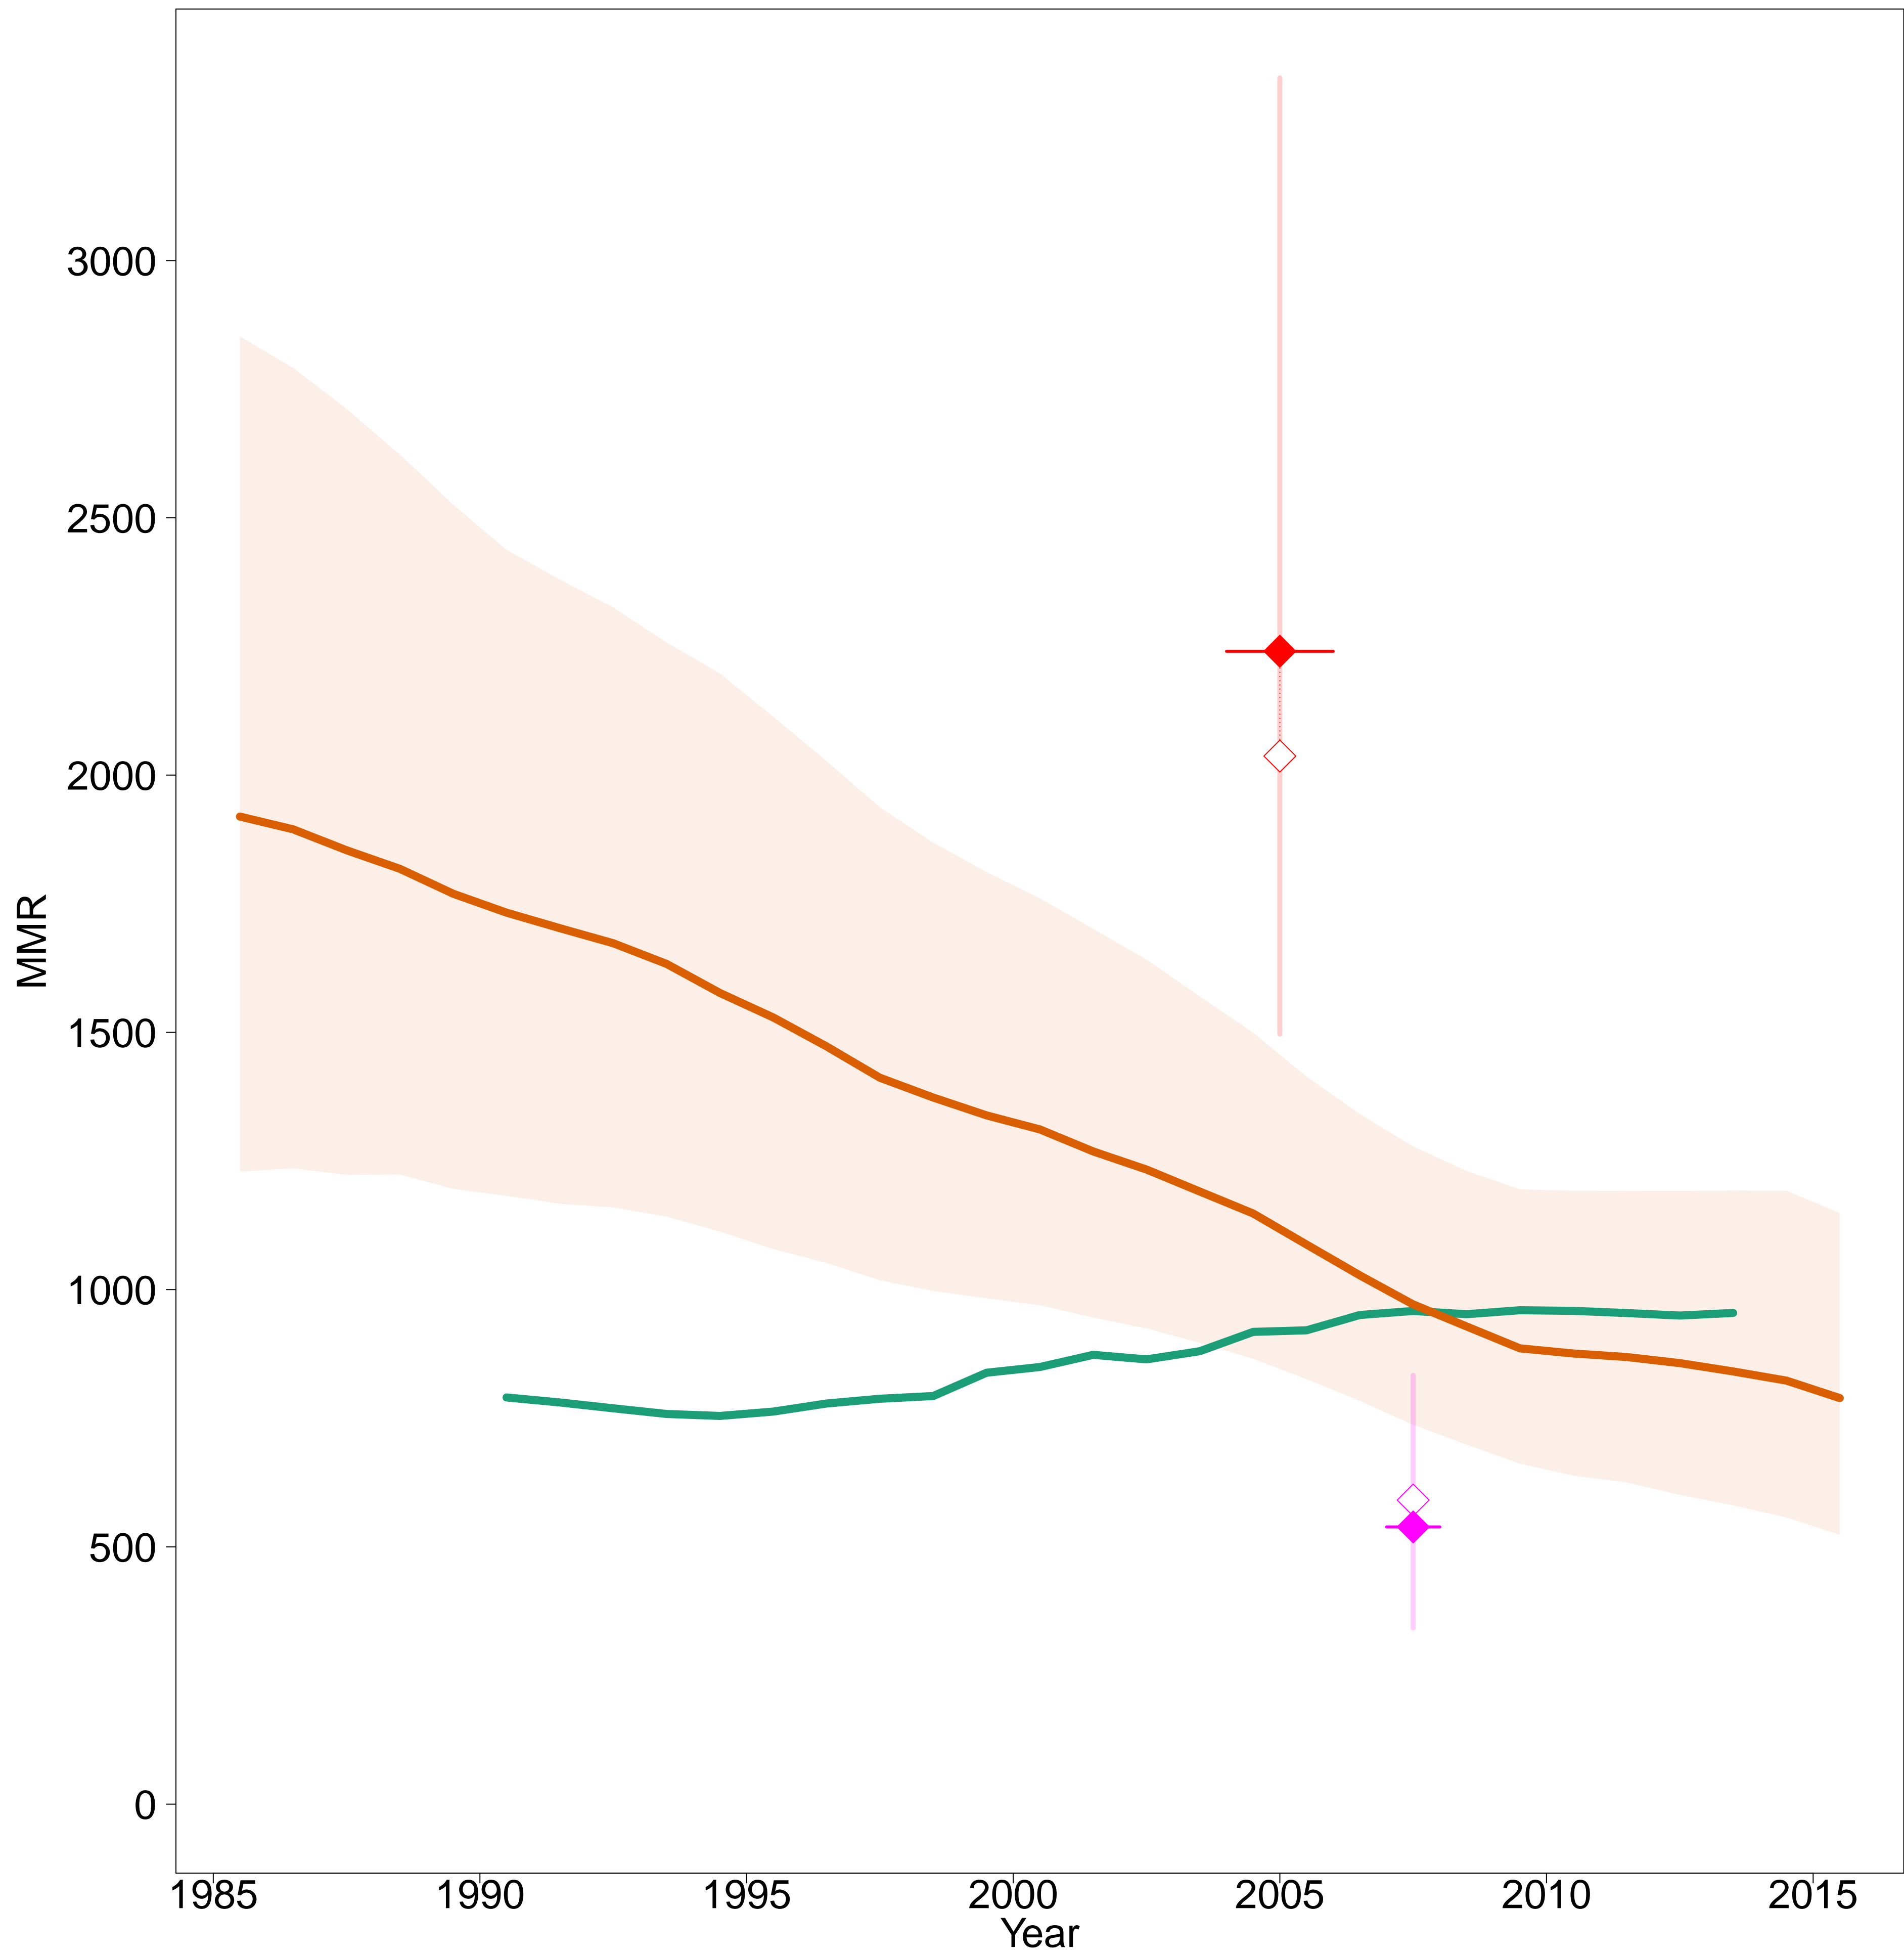

- Estimates –
- MMEIG 2015
- GBD 2013
- MMR Database 2015 –
- ◊ Observed Data
- ◆ Adjusted Data
- Data type –
- ◆ Census
- ◆ Misc. studies

Spain [ESP]  
(Developed regions)

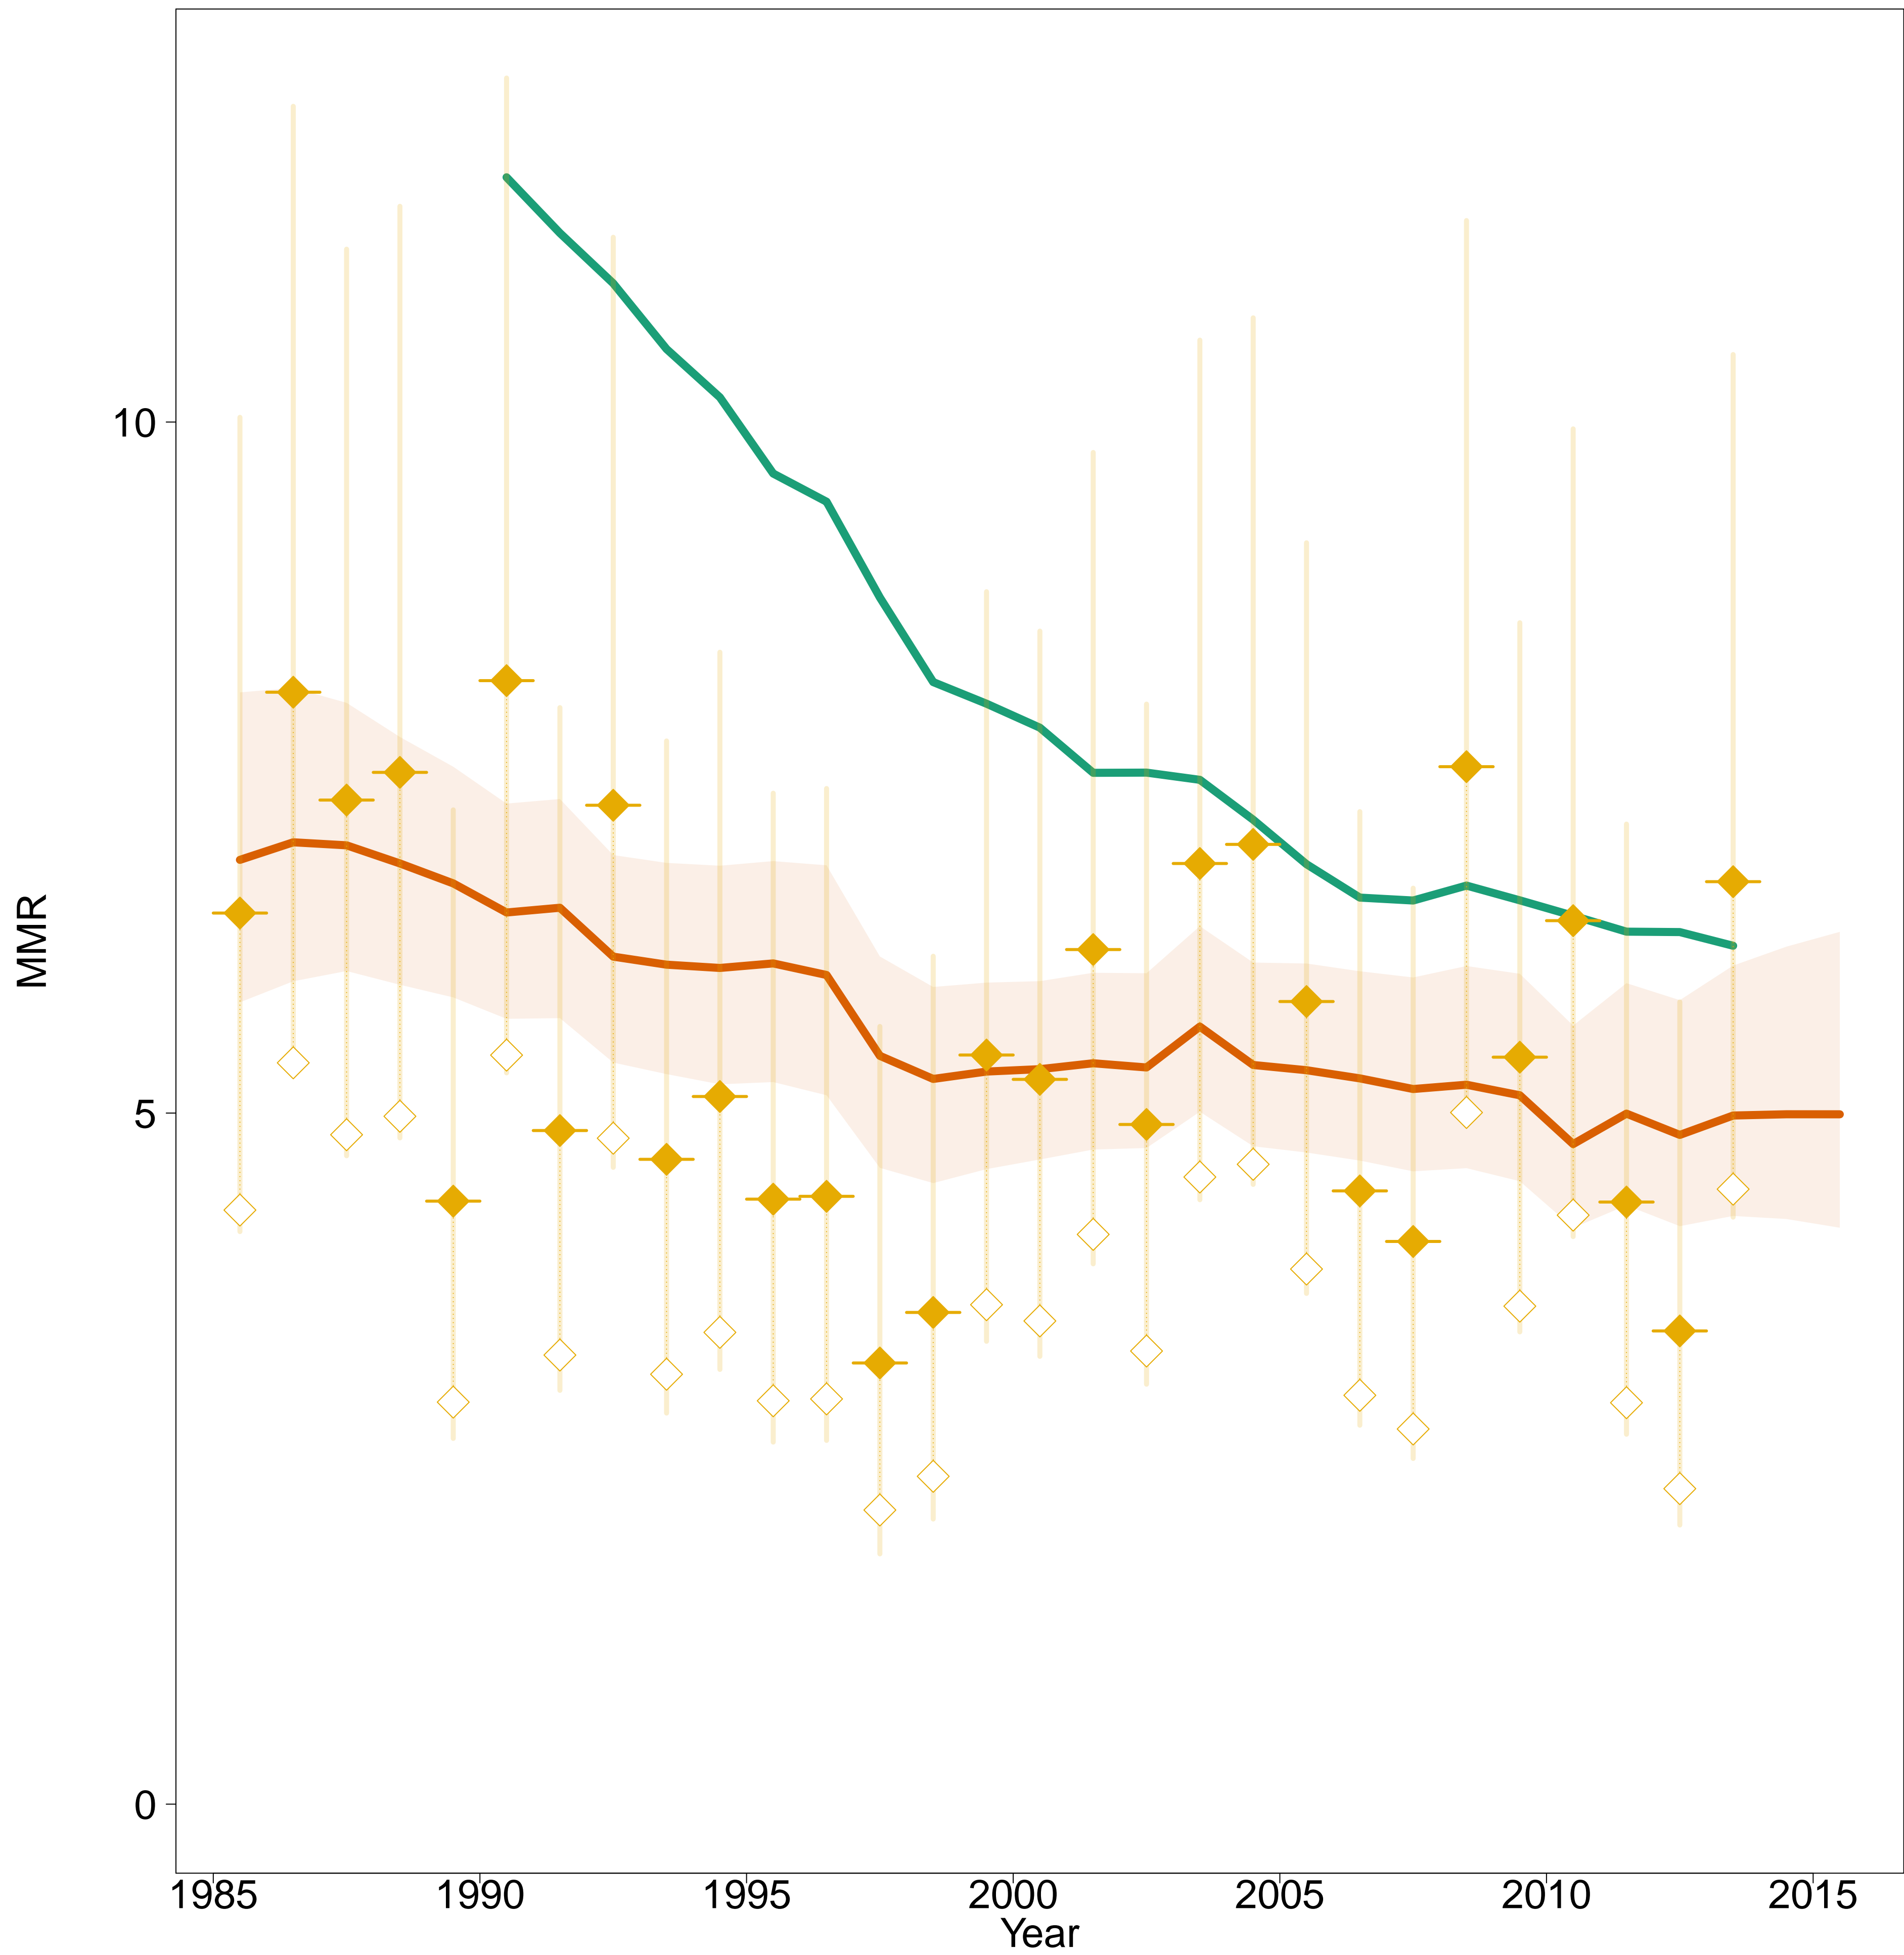

- Estimates –
- MMEIG 2015
- GBD 2013
- MMR Database 2015 –
- Observed Data
- Adjusted Data
- Data type –
- VR

Sri Lanka [LKA]  
(Southern Asia)

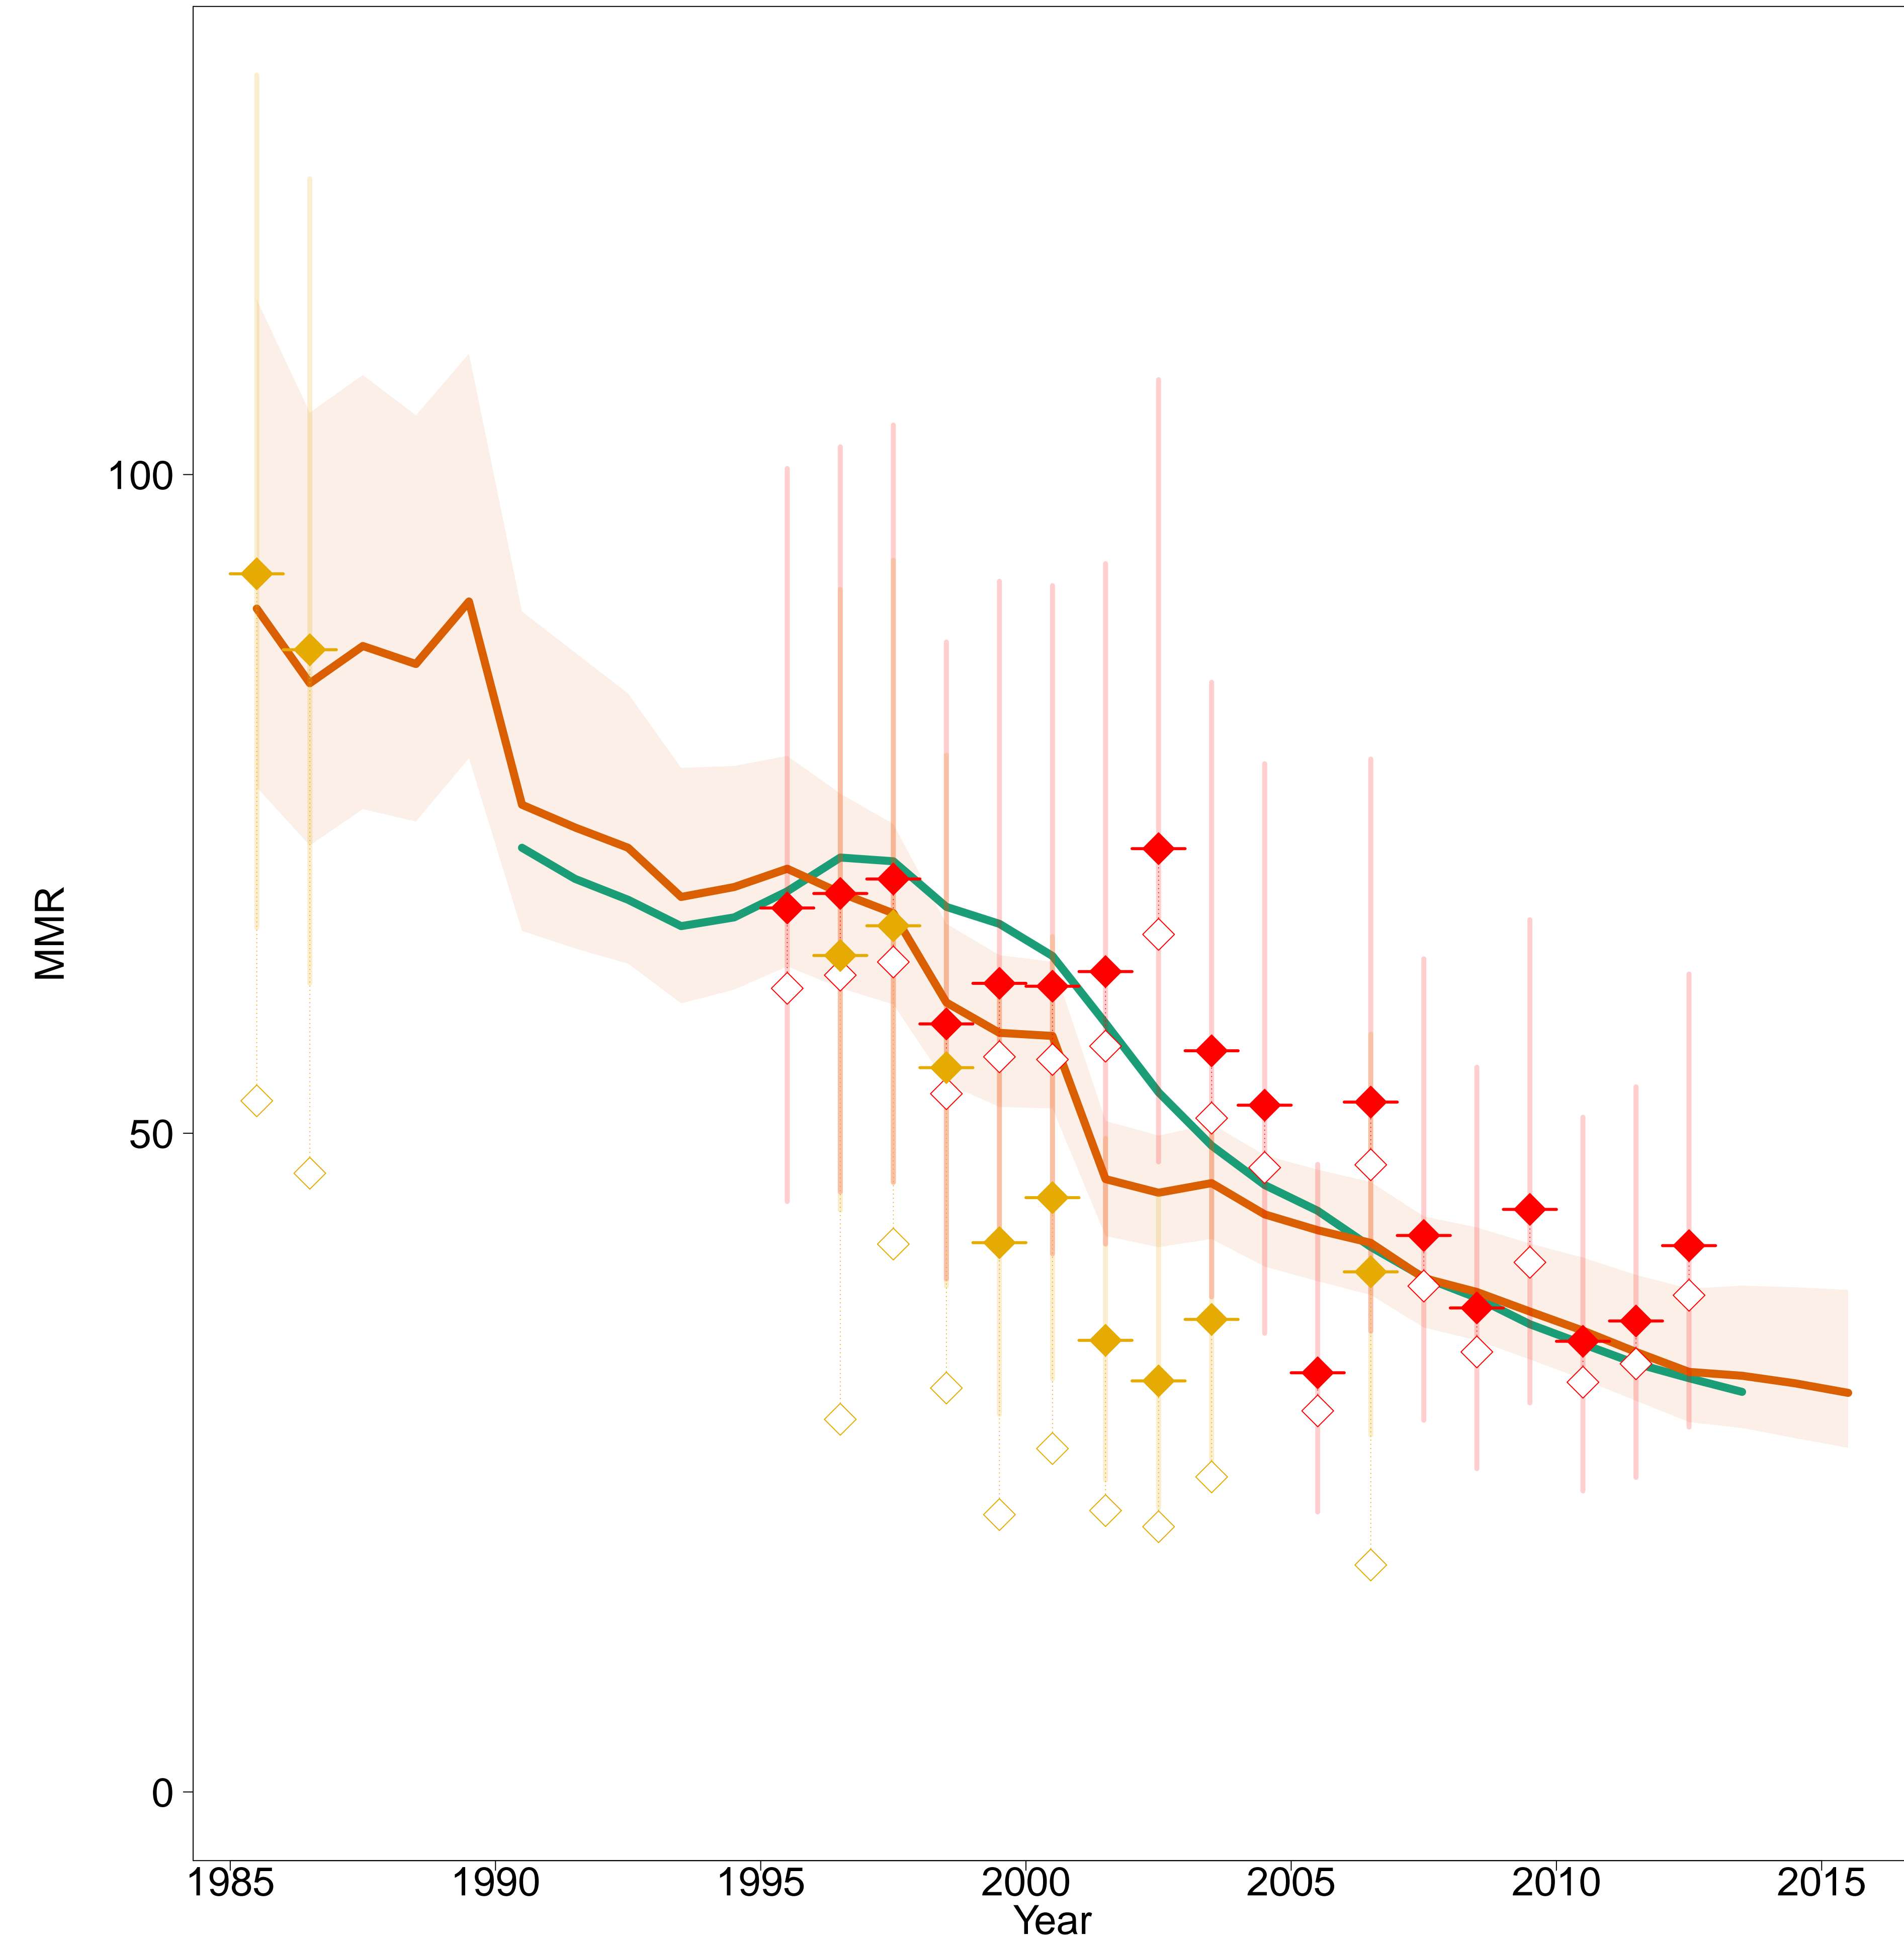

- Estimates –
- MMEIG 2015
- GBD 2013
- MMR Database 2015 –
- Observed Data
- Adjusted Data
- Data type –
- VR
- Misc. studies

St Vincent and the Grenadines [VCT]  
(Caribbean)

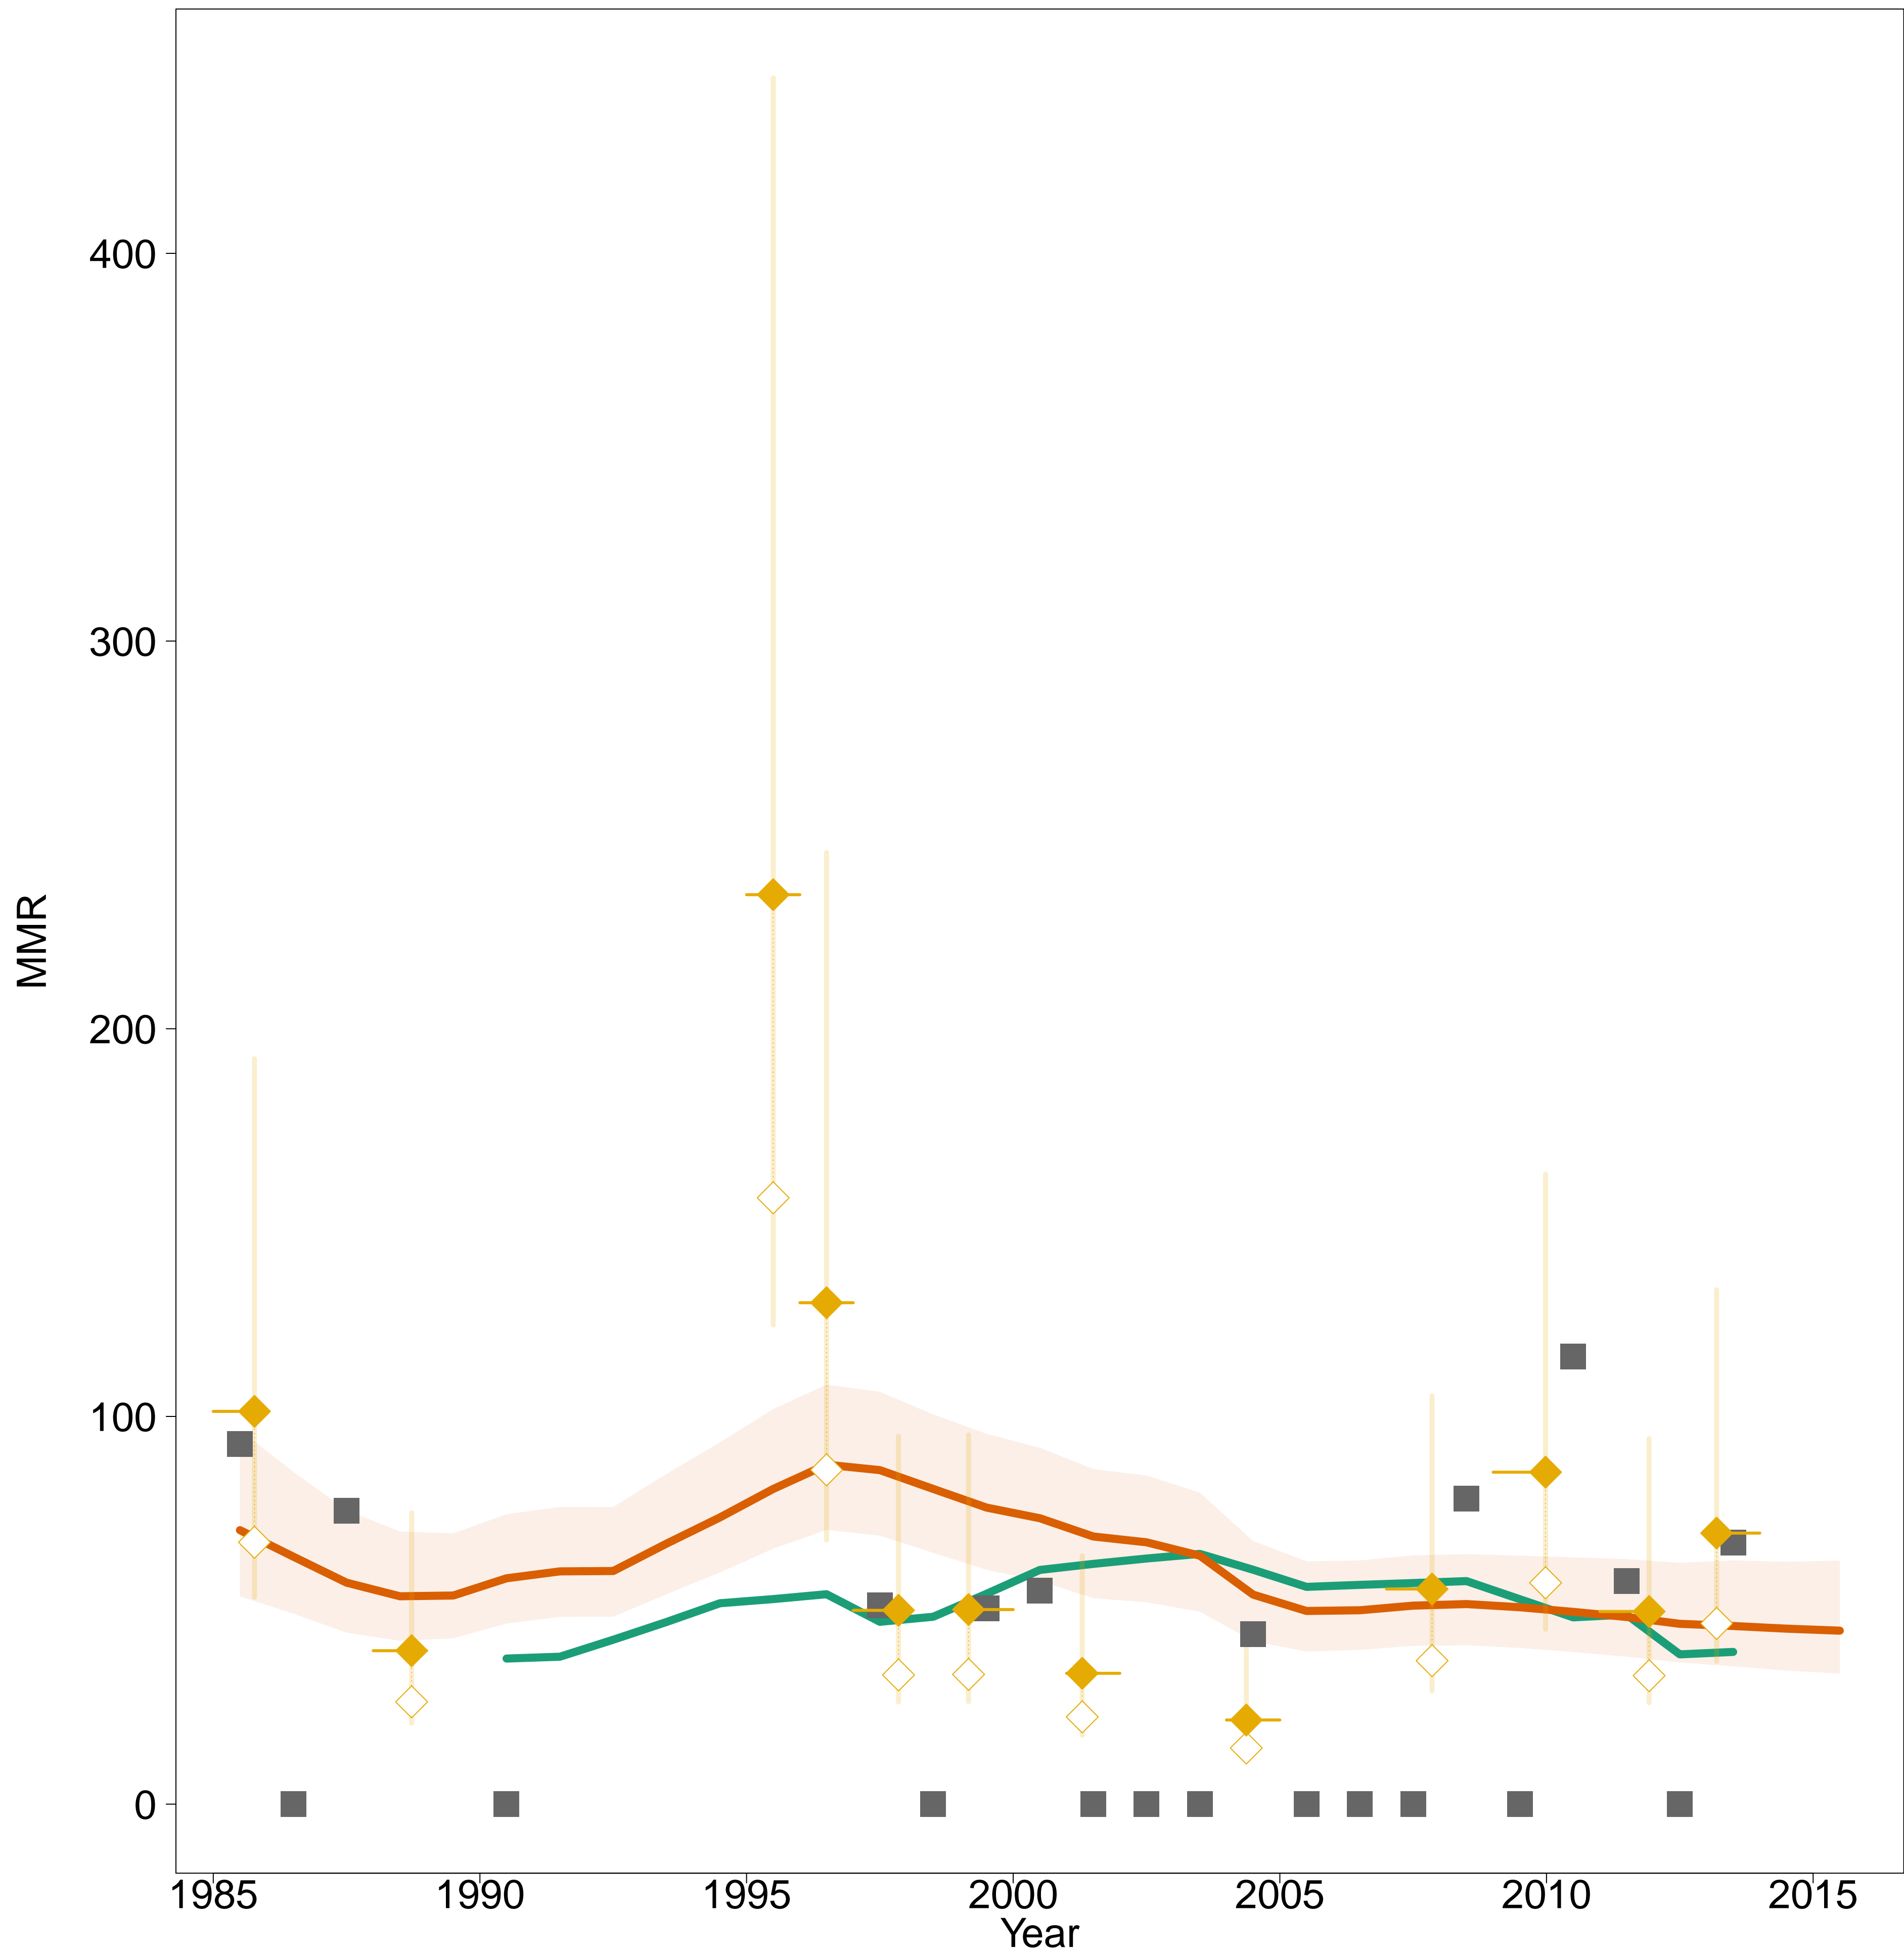

- Estimates –
- MMEIG 2015
- GBD 2013
- MMR Database 2015 –
- ◊ Observed Data
- ◆ Adjusted Data
- Data type –
- ◆ VR
- Reported VR before recalc.  
(related to 0 obs. mat. death)



Sudan [SDN]  
(Eastern Africa)

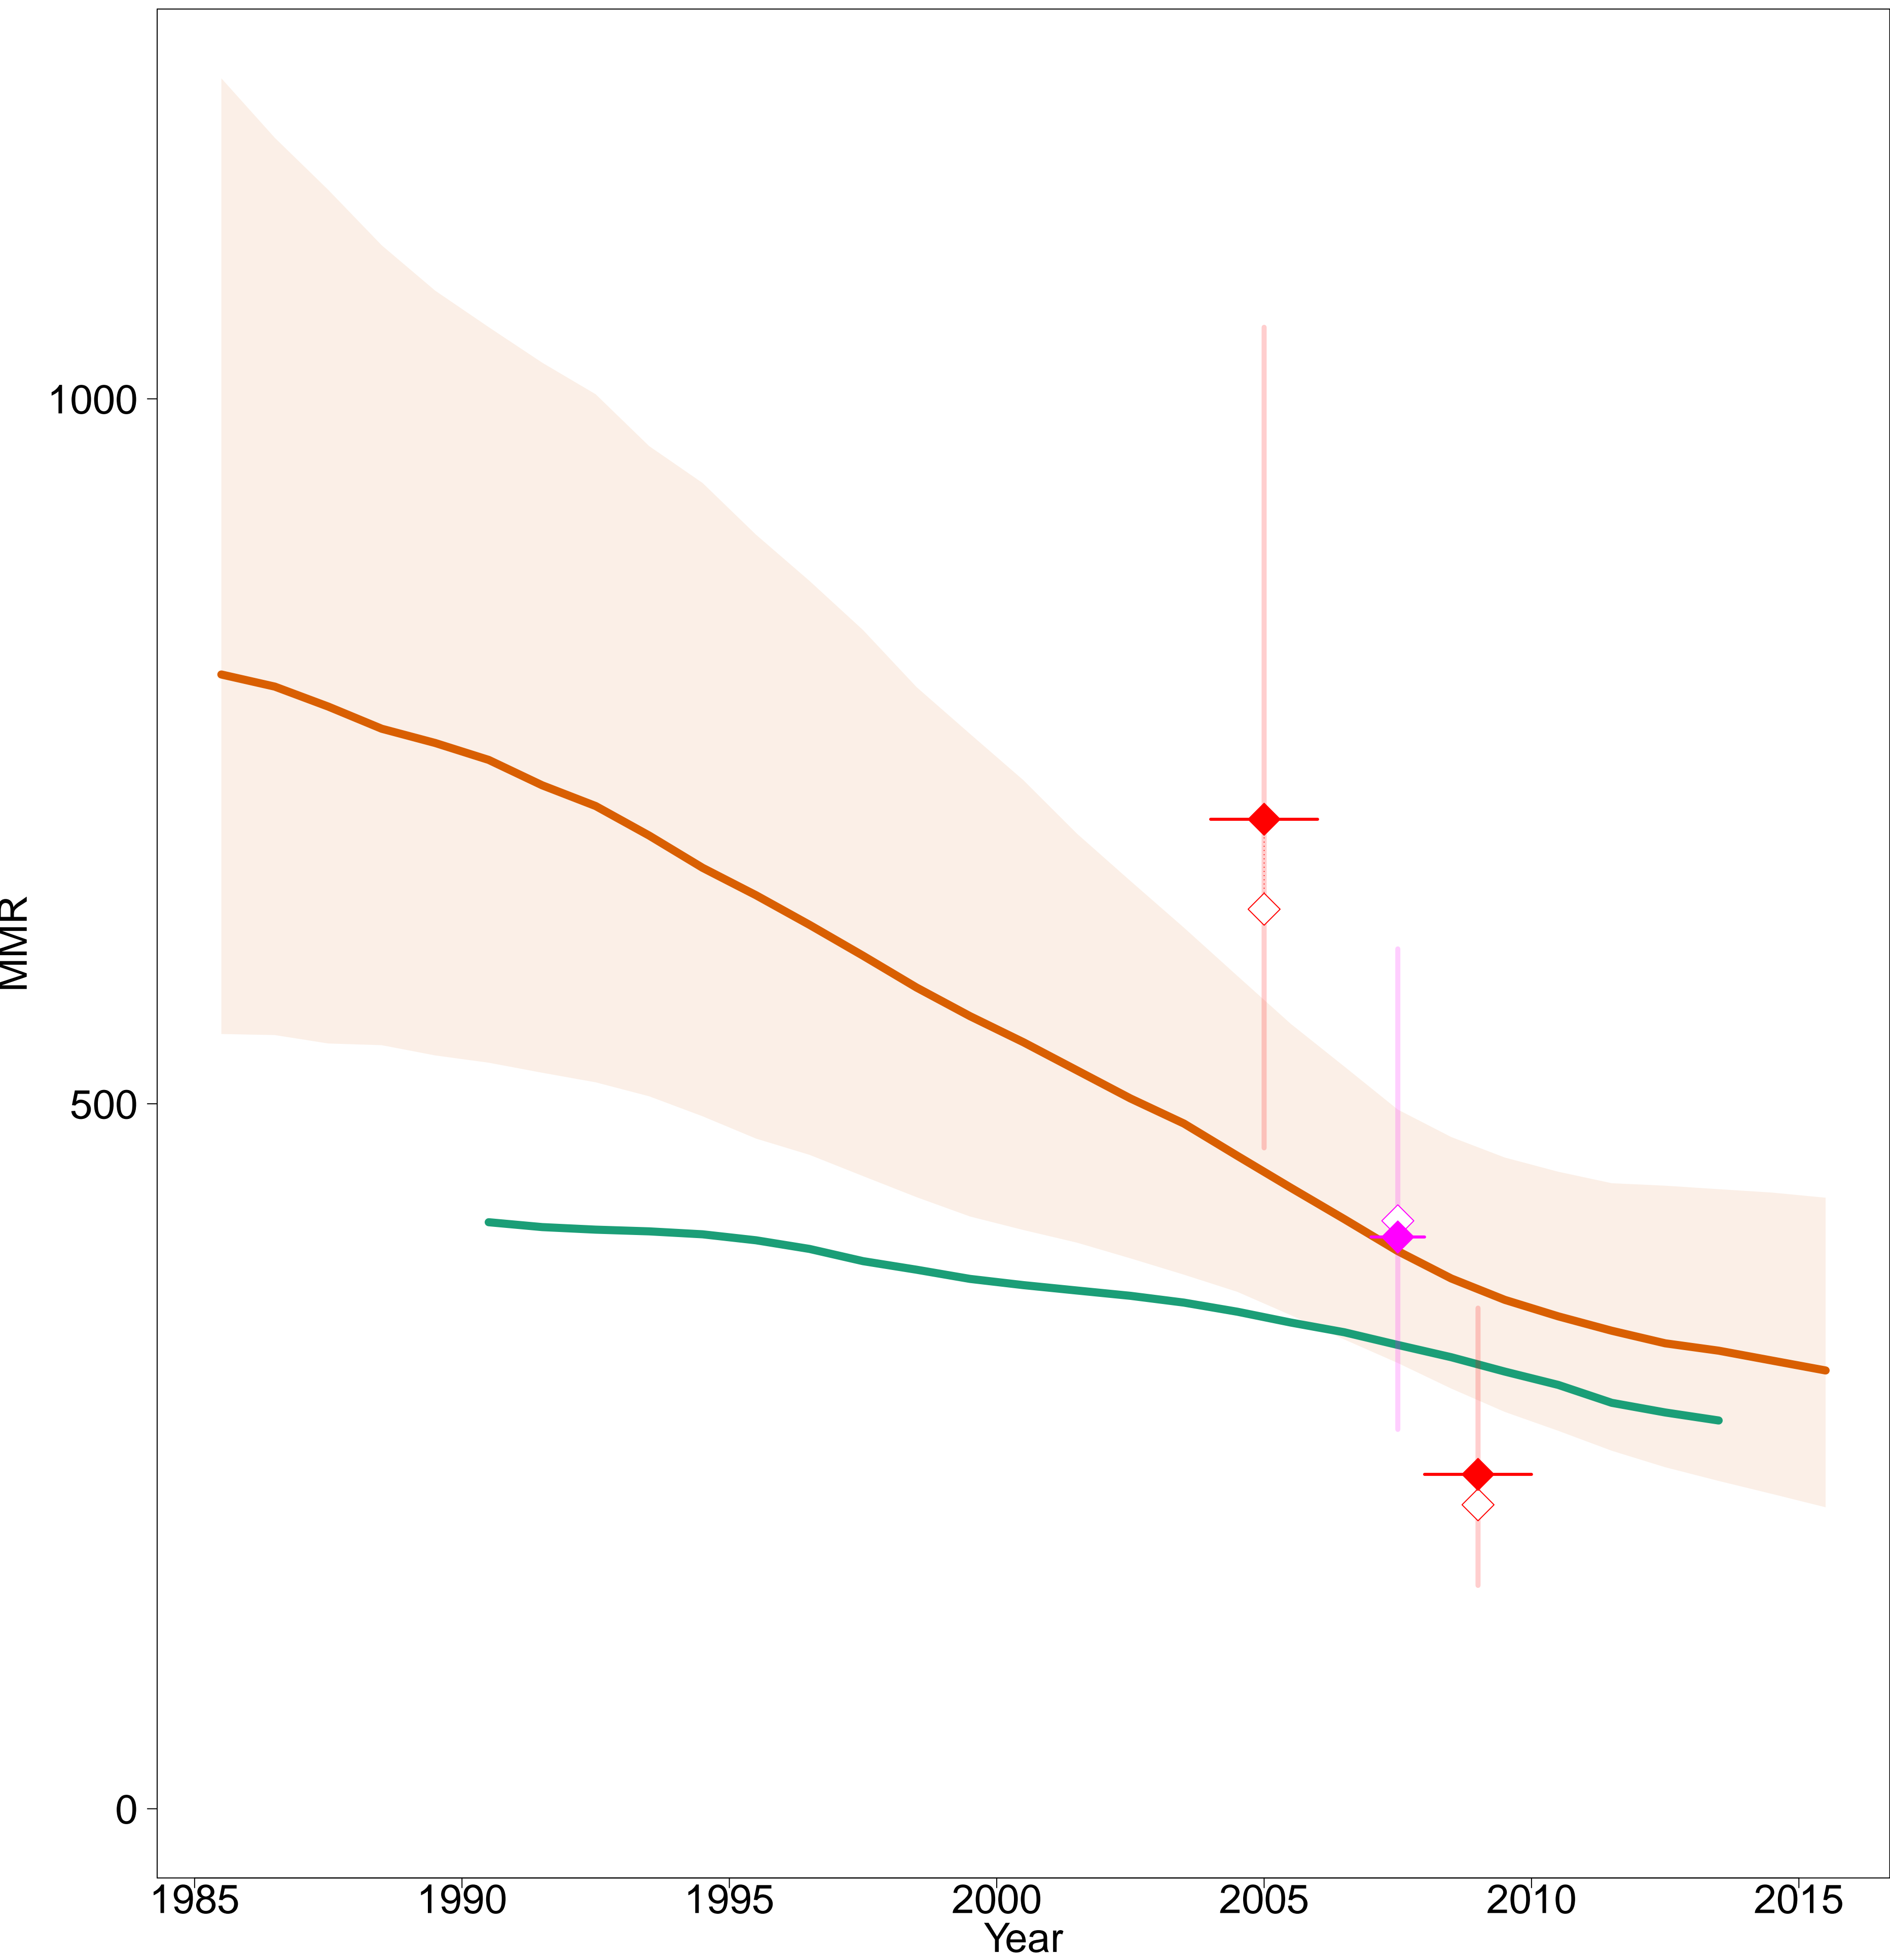

- Estimates -
- MMEIG 2015
- GBD 2013
- MMR Database 2015 -
- Observed Data
- Adjusted Data
- Data type -
- Census
- Misc. studies

Suriname [SUR]  
(South America)

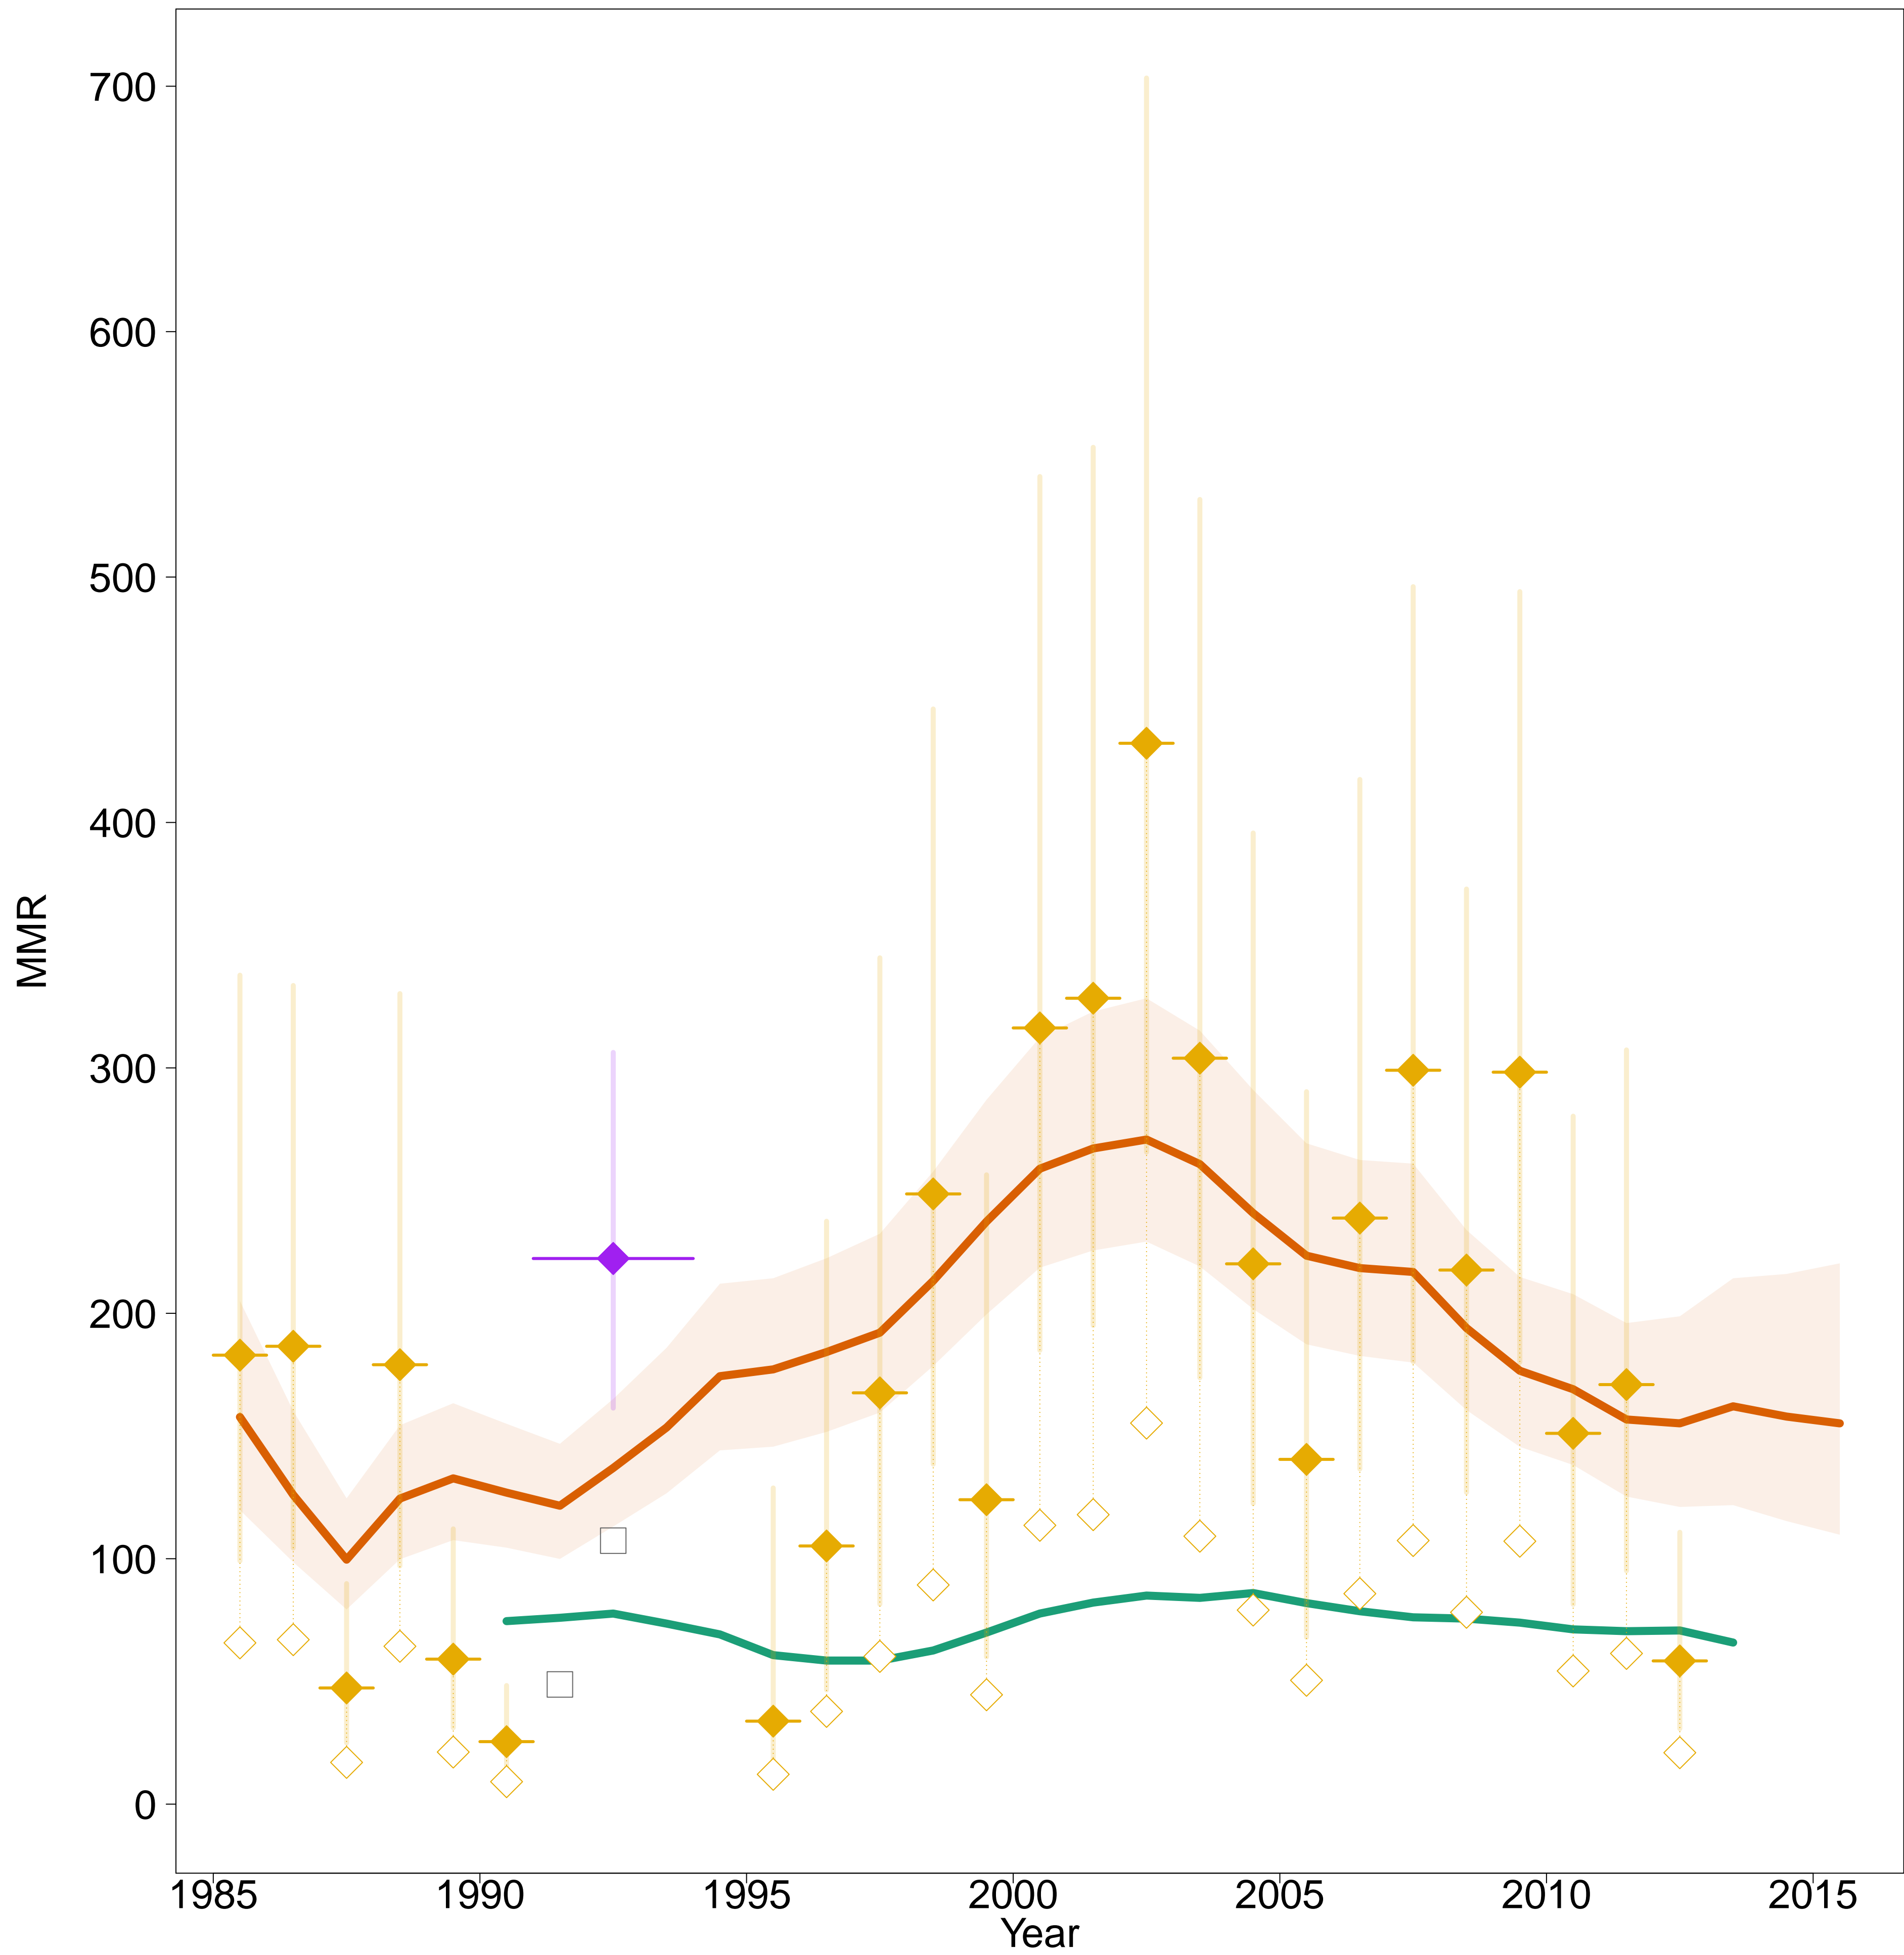

- Estimates –
- MMEIG 2015
- GBD 2013
- MMR Database 2015 –
- ◊ Observed Data
- ◆ Adjusted Data
- Data type –
- ◆ VR
- ◆ Spec. studies
- ◻ Excluded VR data  
(overlap with specialized study)

Swaziland [SWZ]  
(Southern Africa)

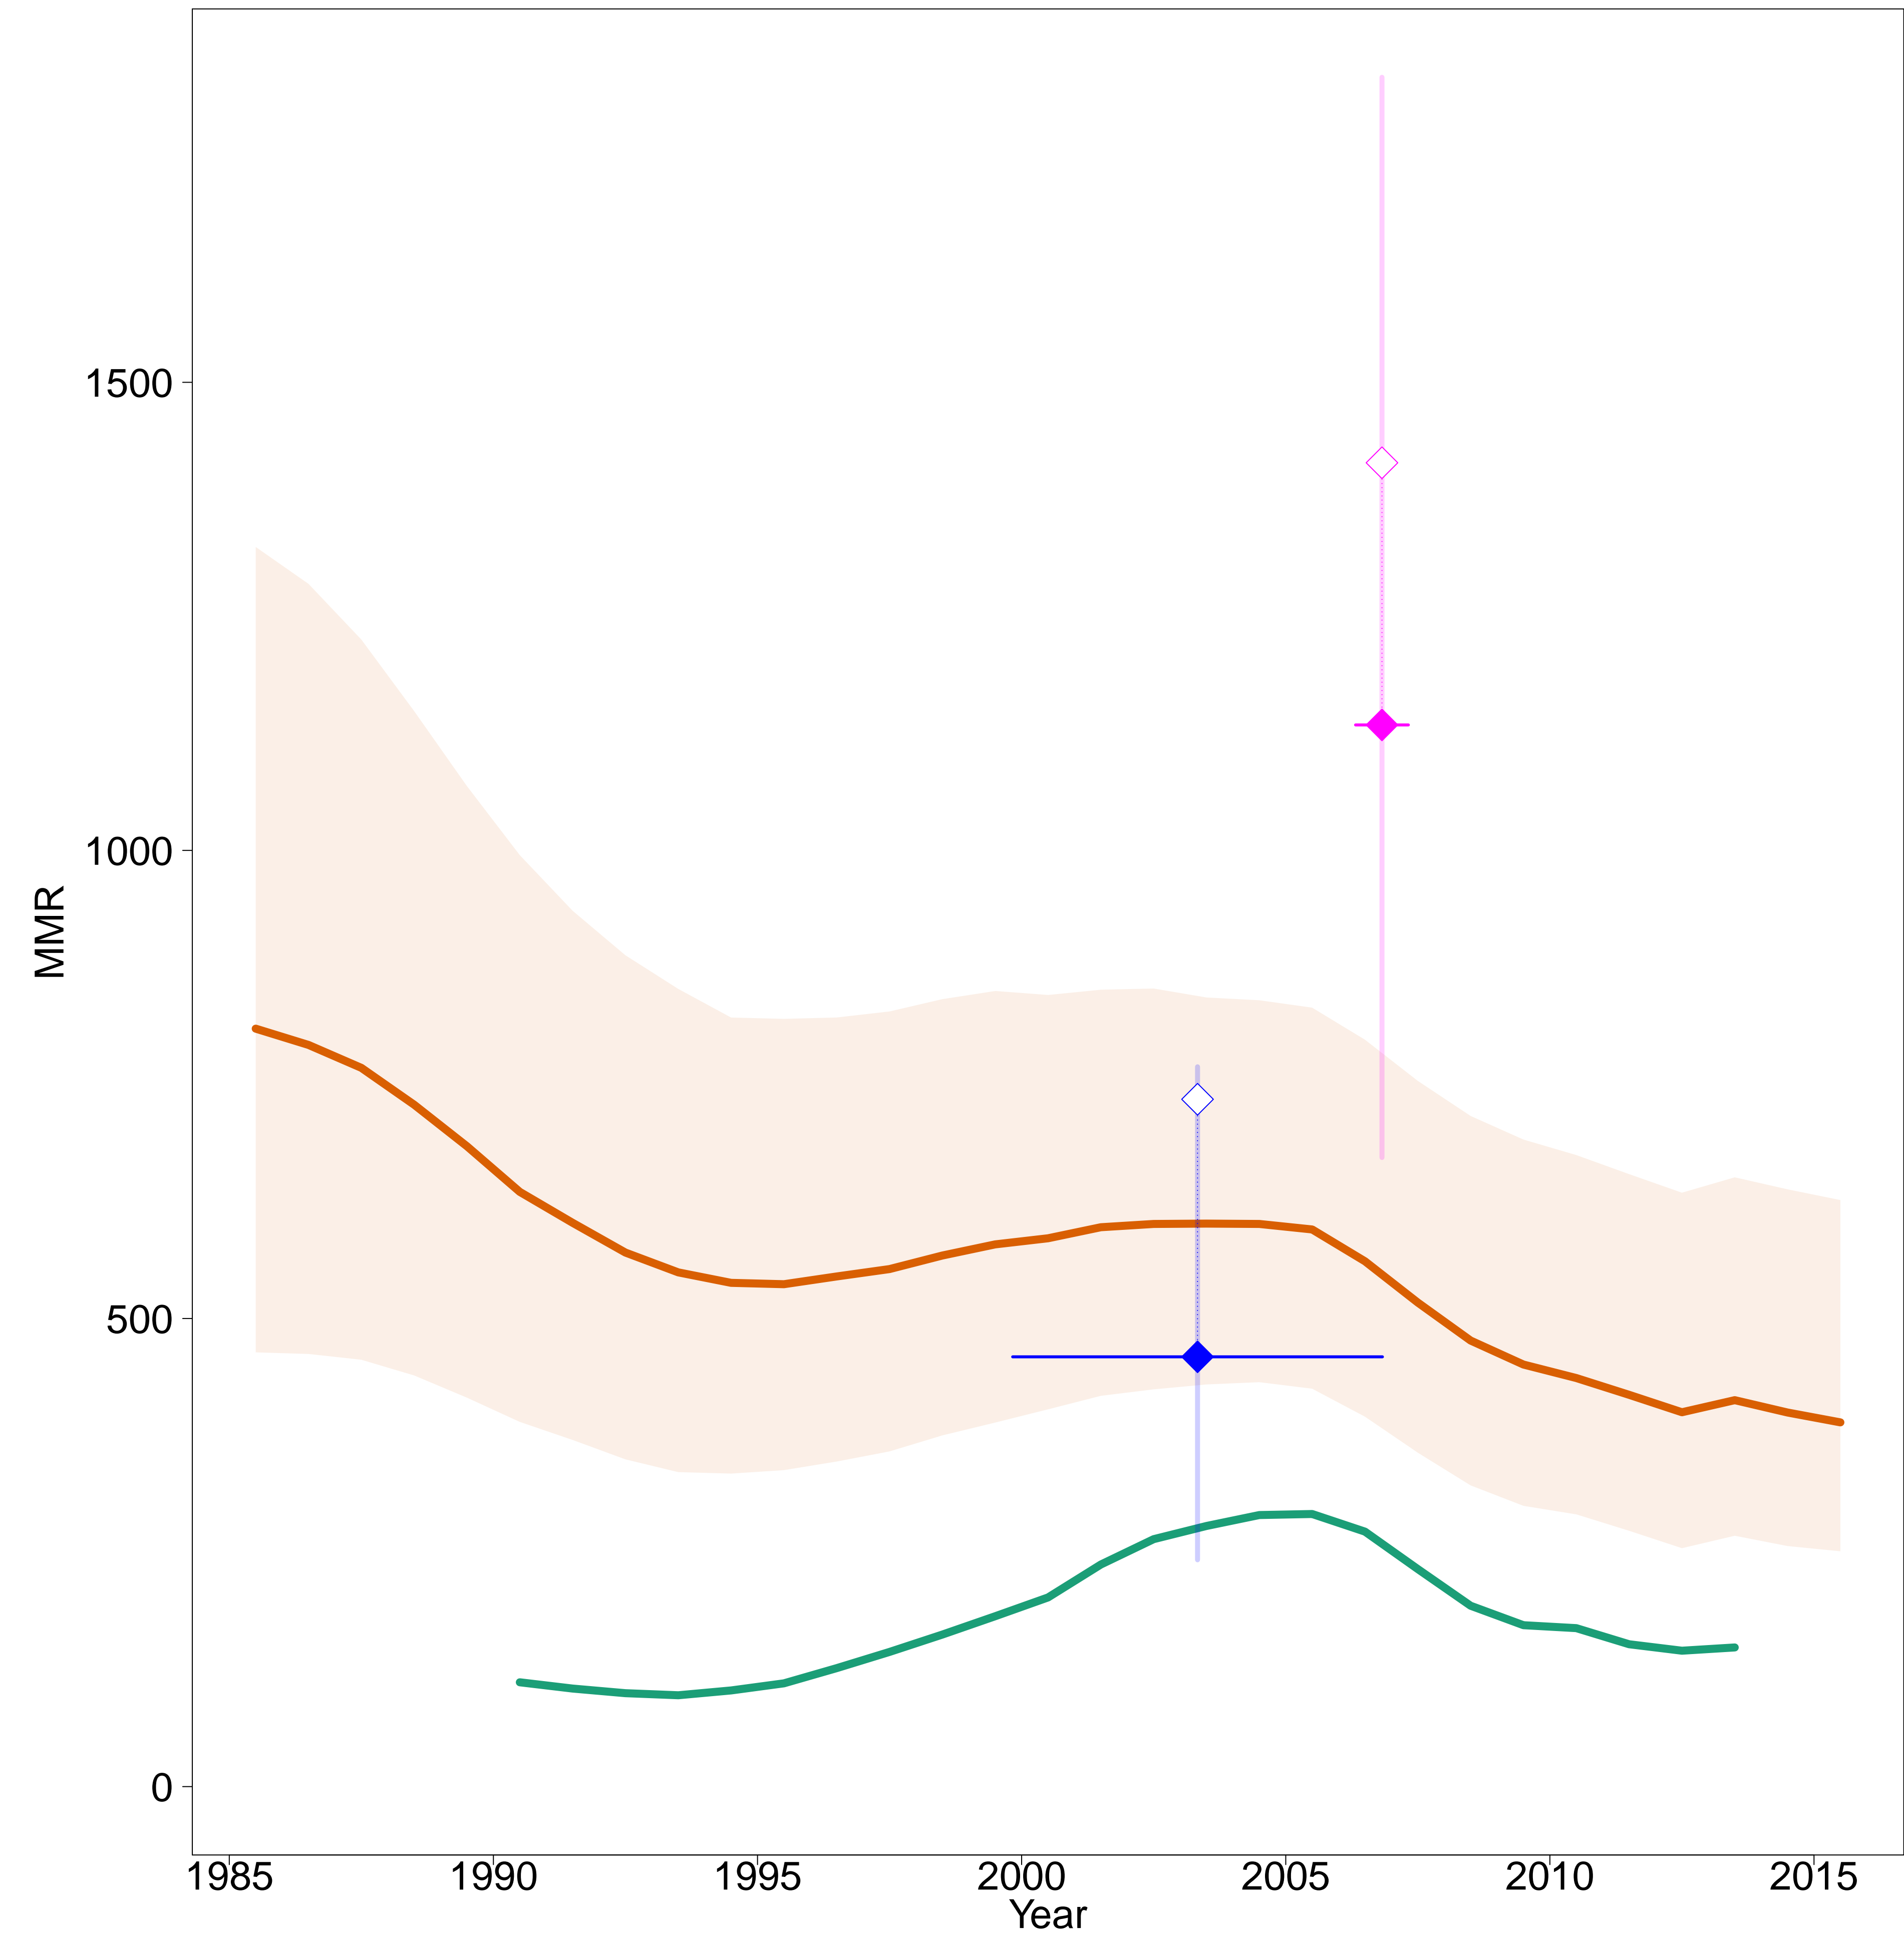

- Estimates -
- MMEIG 2015
- GBD 2013
- MMR Database 2015 -
- Observed Data
- Adjusted Data
- Data type -
- DHS
- Census

Sweden [SWE]  
(Developed regions)

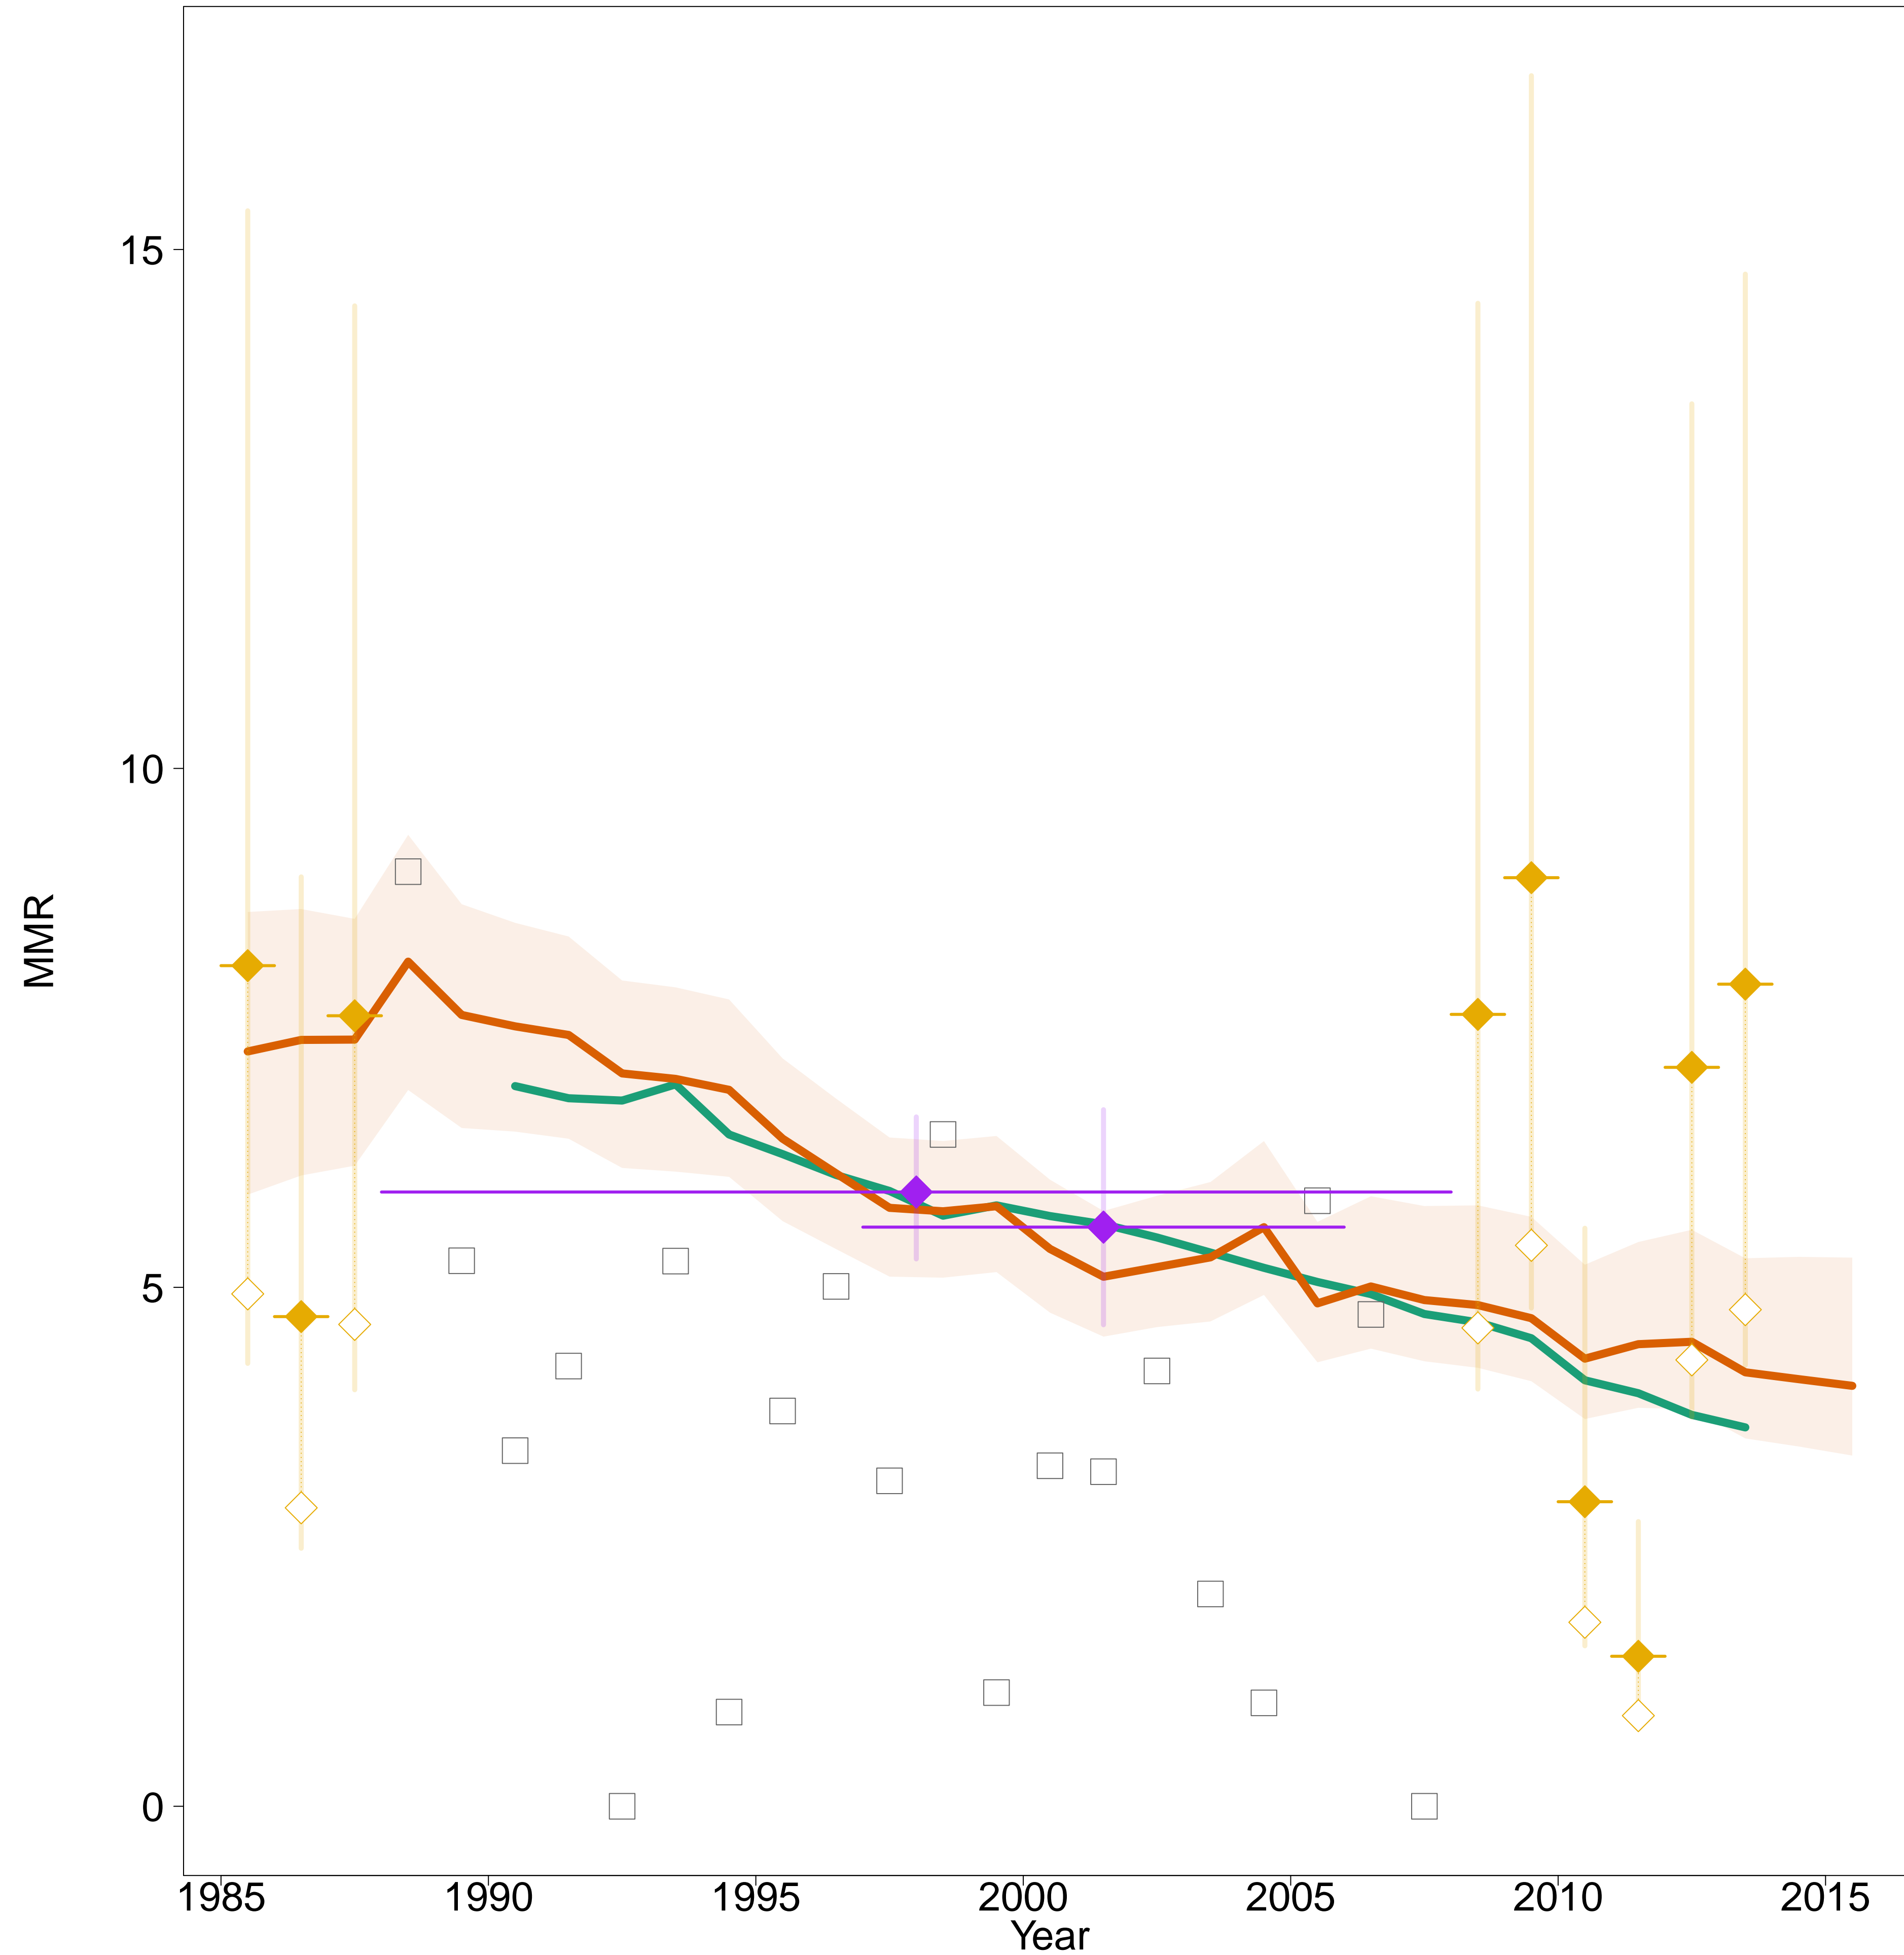

- Estimates –
- MMEIG 2015
- GBD 2013
- MMR Database 2015 –
- Observed Data
- Adjusted Data
- Data type –
- VR
- Spec. studies
- Excluded VR data  
(overlap with specialized study)

Switzerland [CHE]  
(Developed regions)

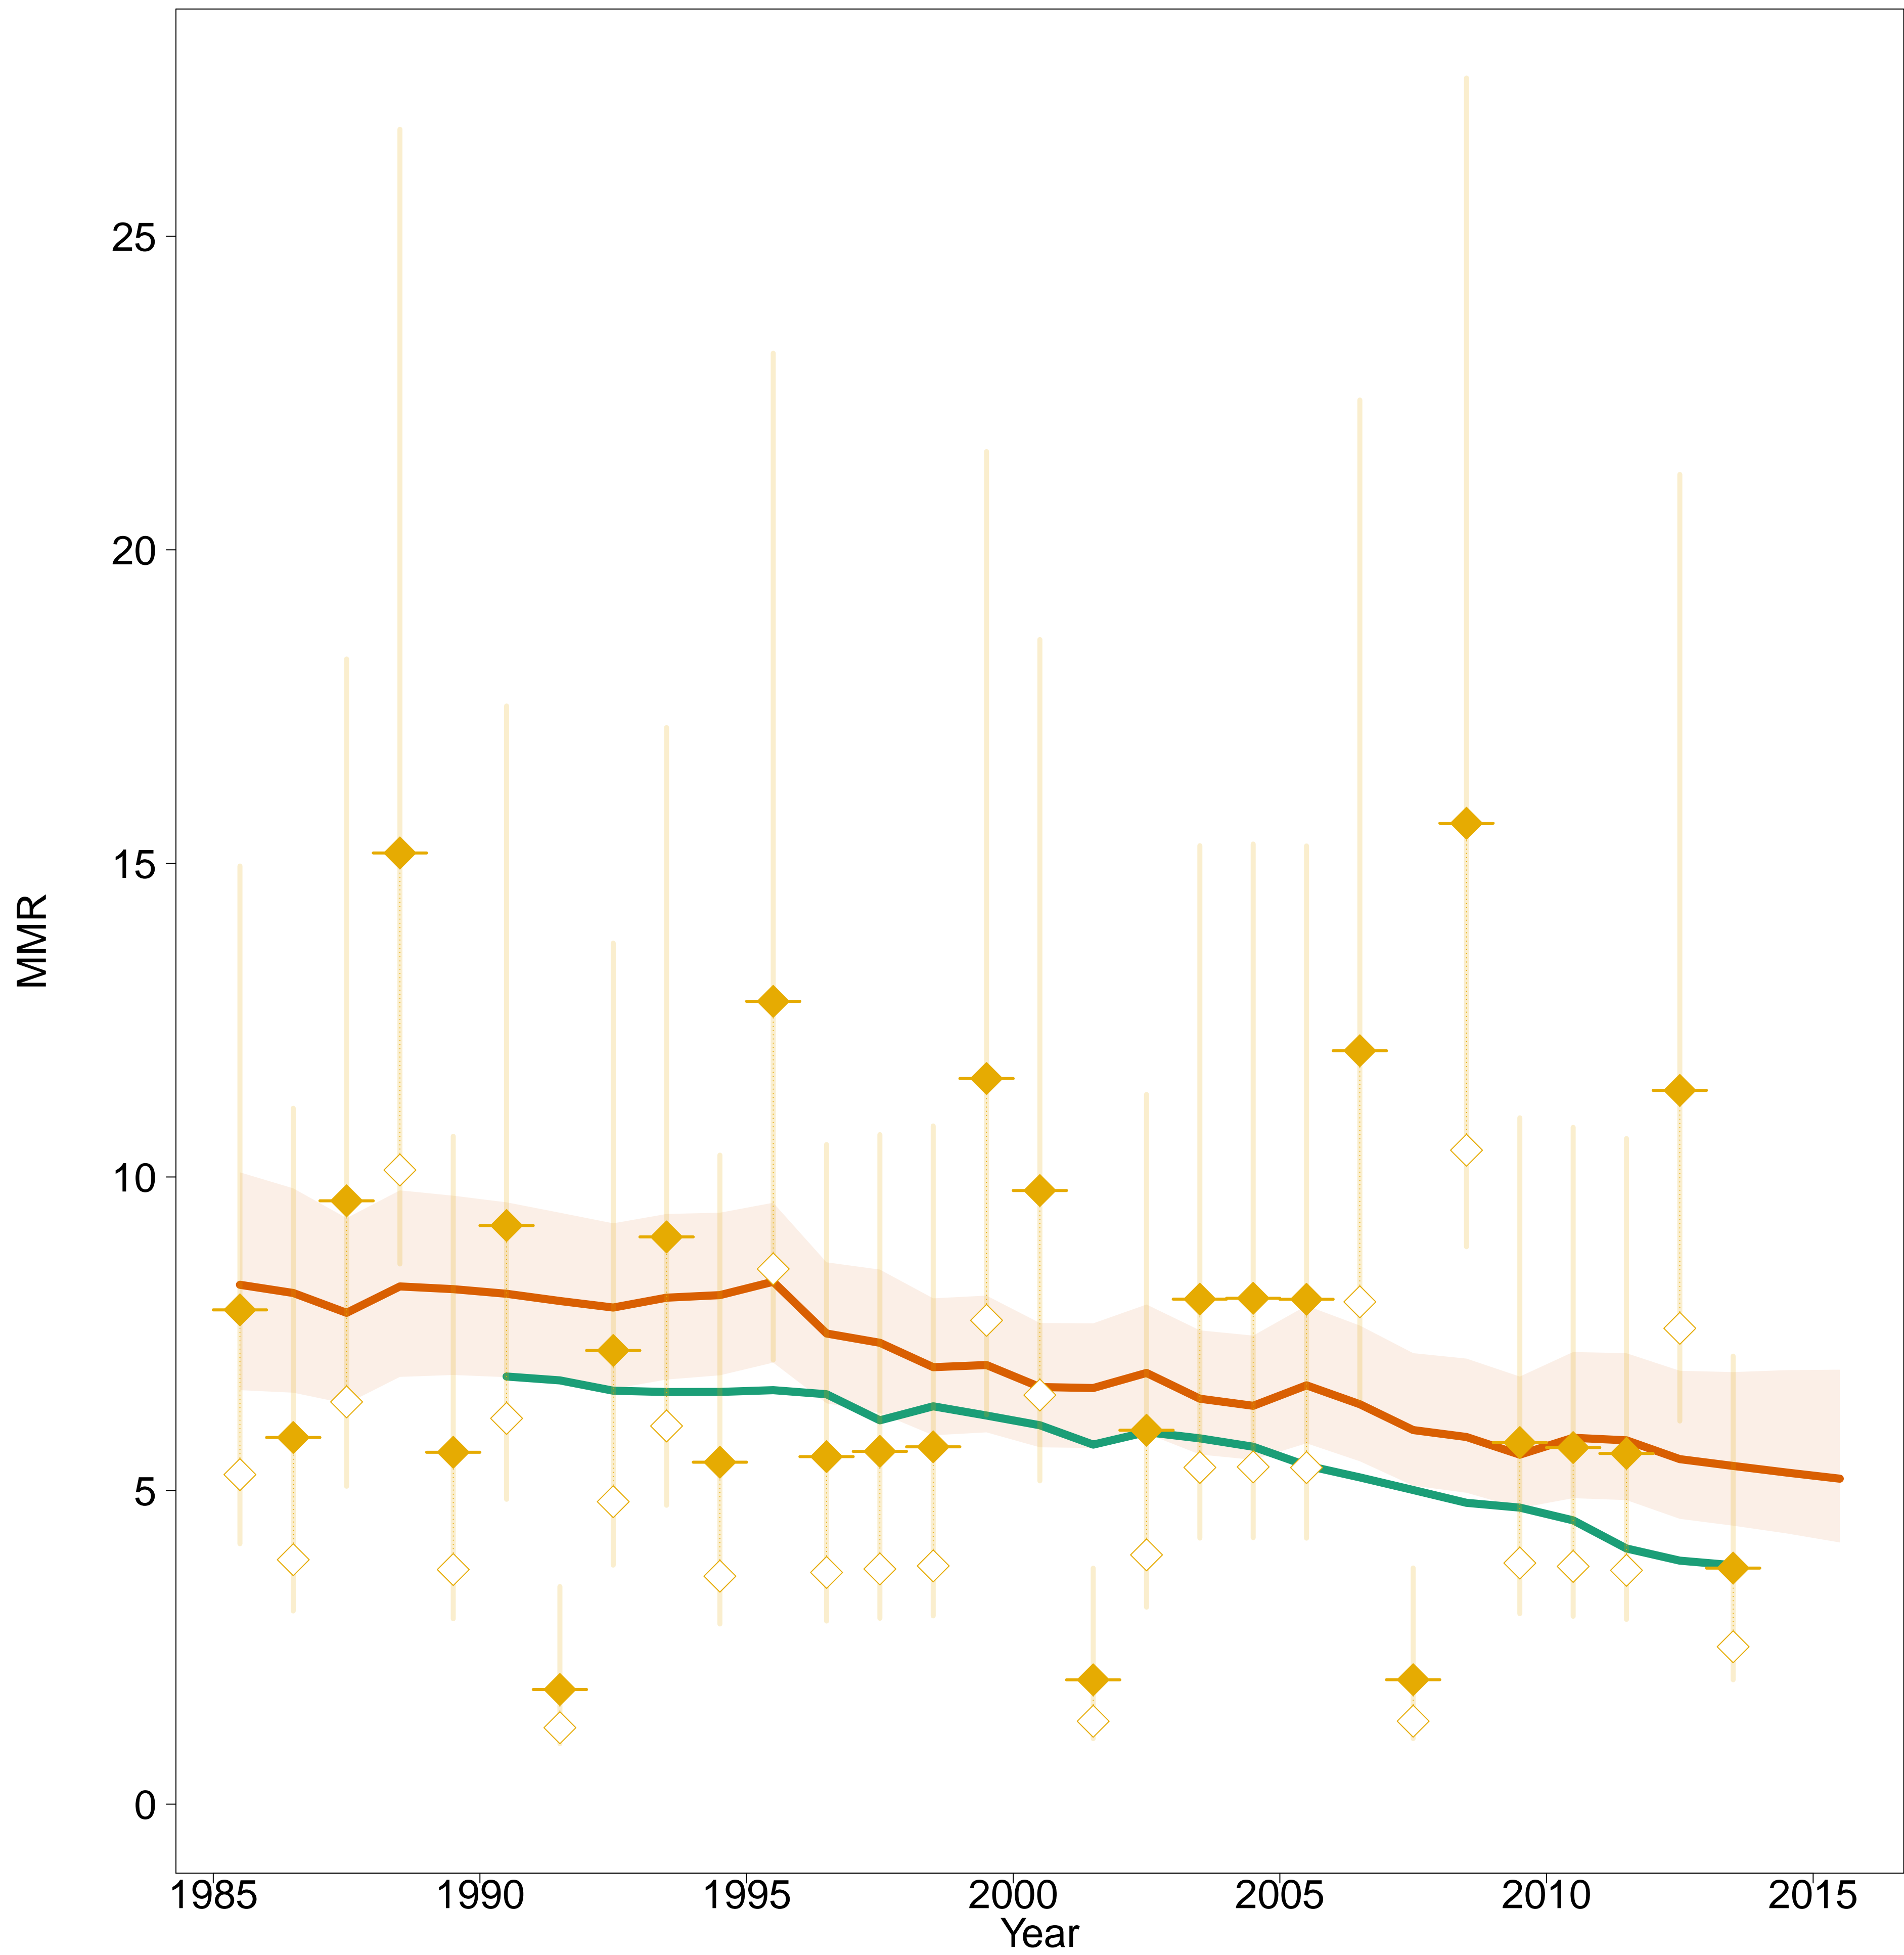

- Estimates -
- MMEIG 2015
- GBD 2013
- MMR Database 2015 -
- Observed Data
- Adjusted Data
- Data type -
- VR

Syrian Arab Republic [SYR]  
(Western Asia)

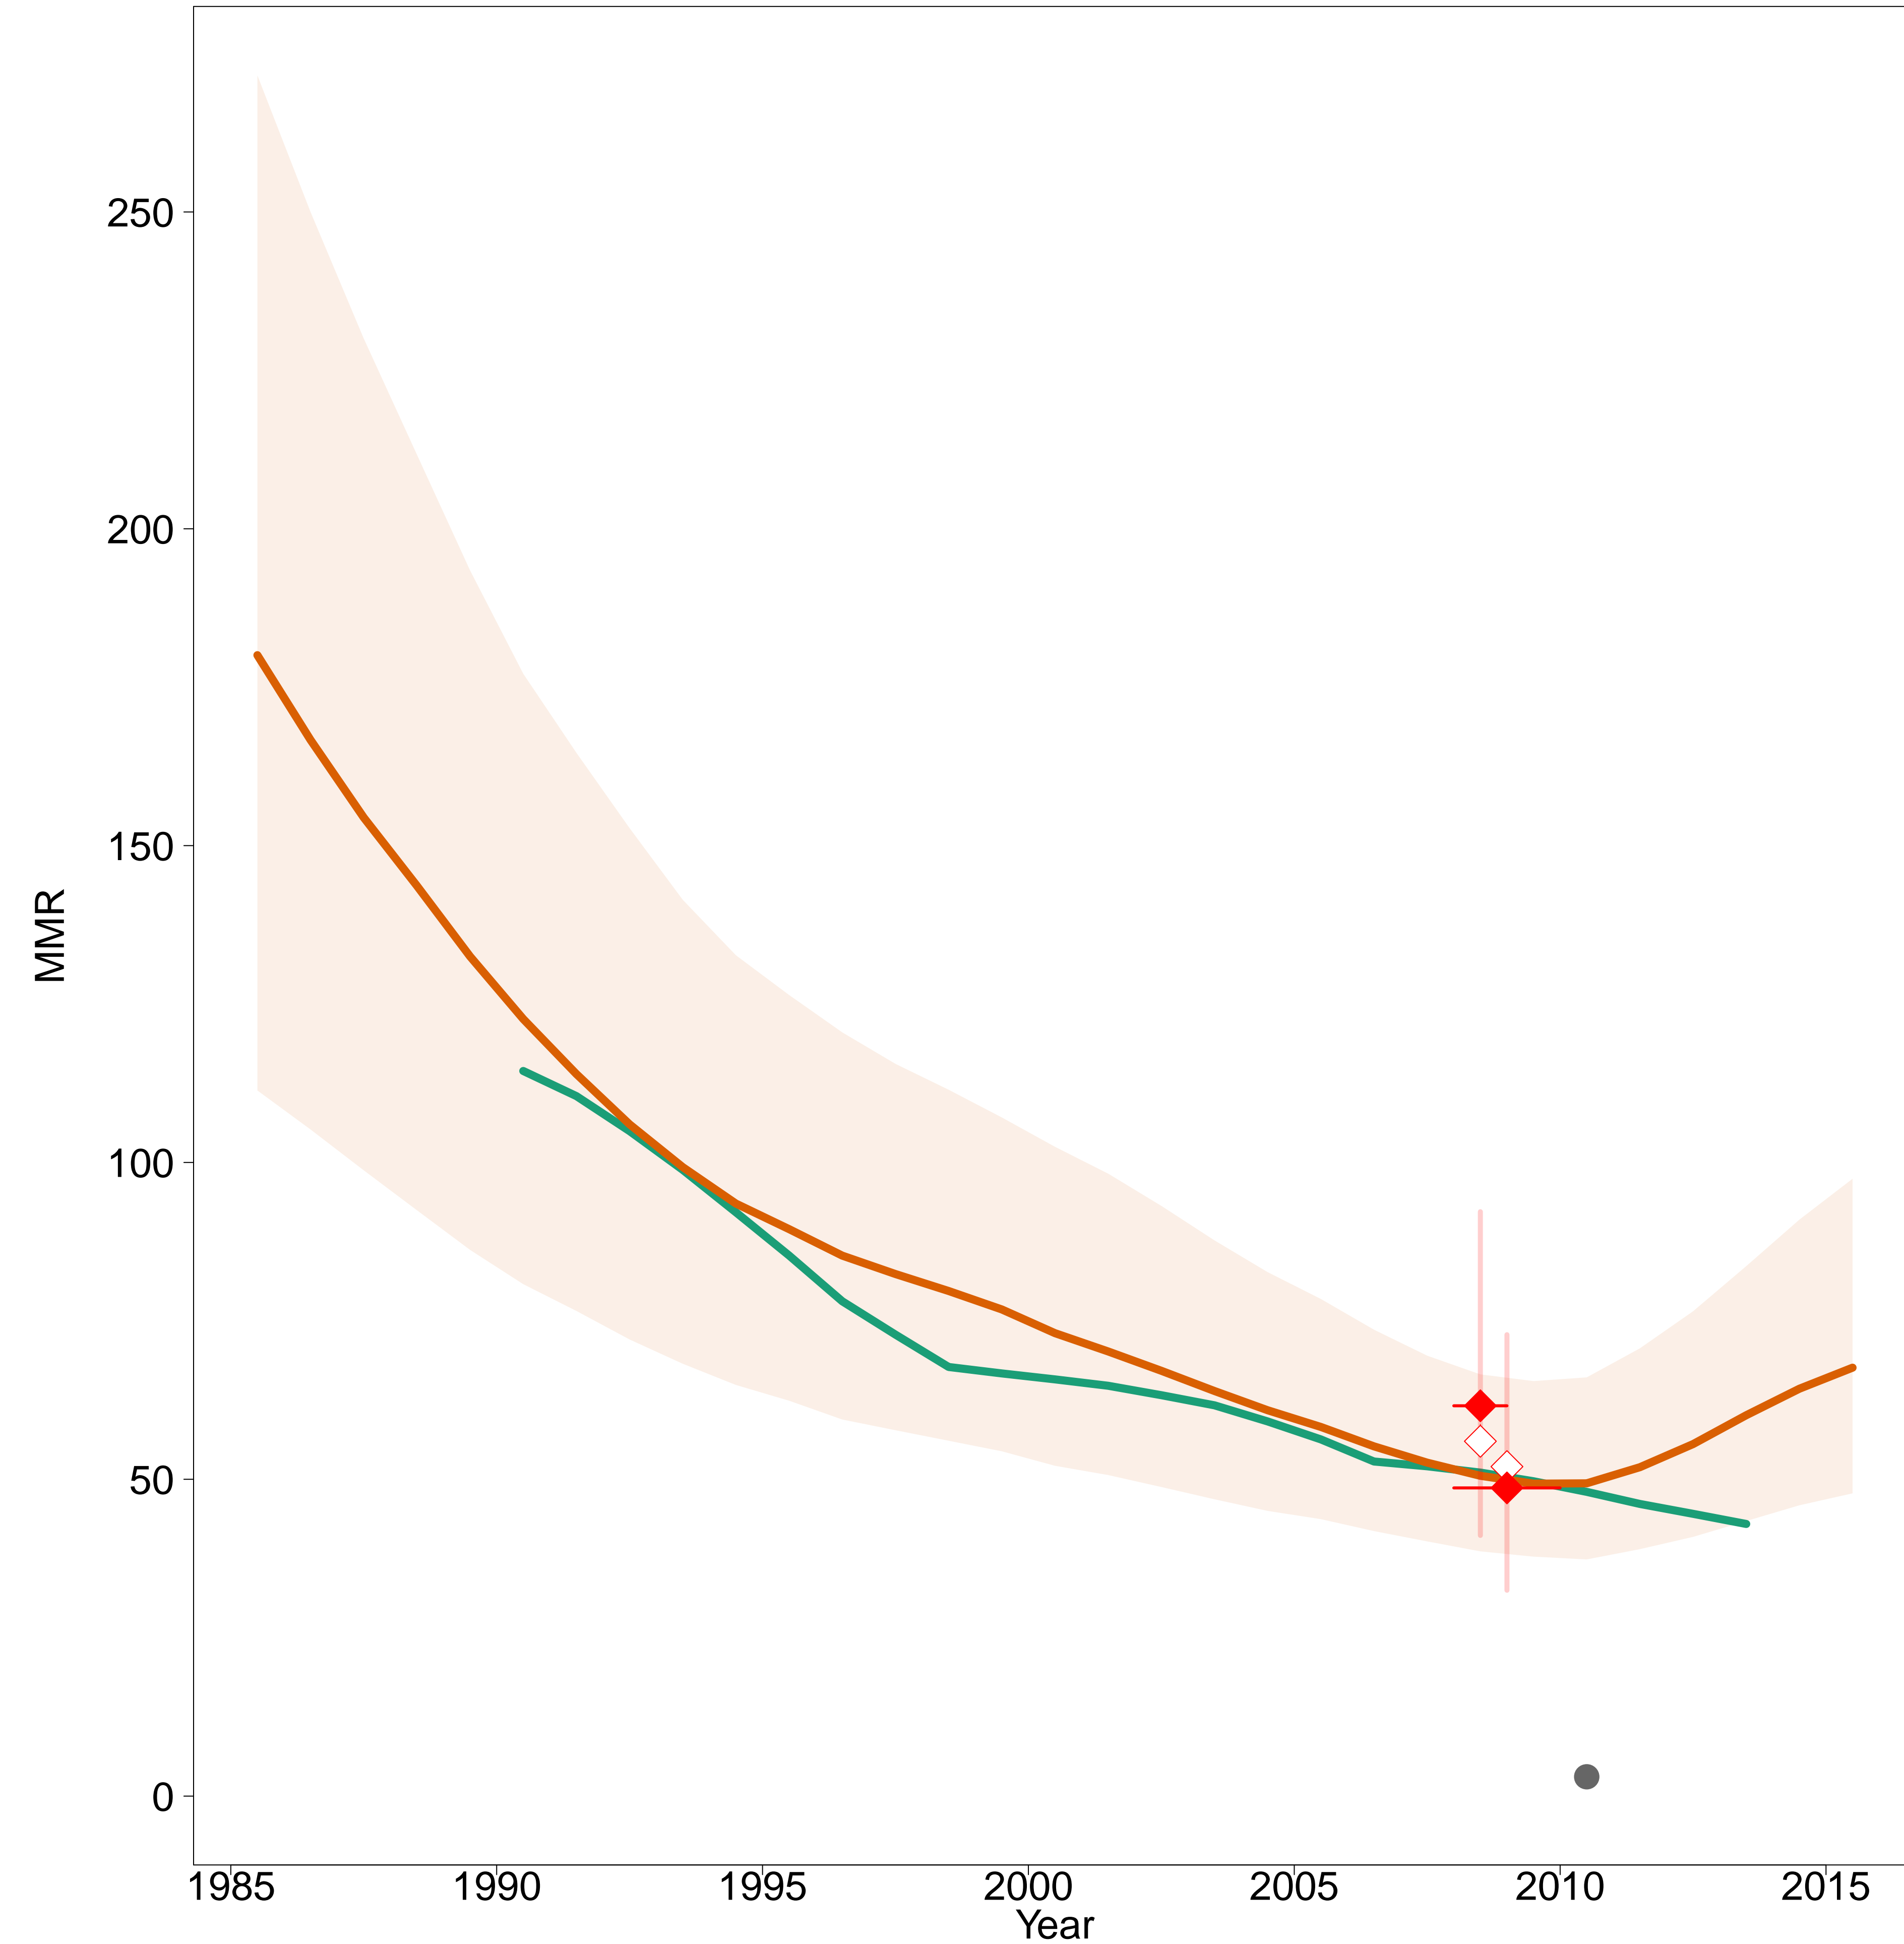

- Estimates -
- MMEIG 2015
- GBD 2013
- MMR Database 2015 -
- Observed Data
- Adjusted Data
- Data type -
- Misc. studies
- Excluded VR data (data quality issues)

Tajikistan [TJK]  
(Central Asia)

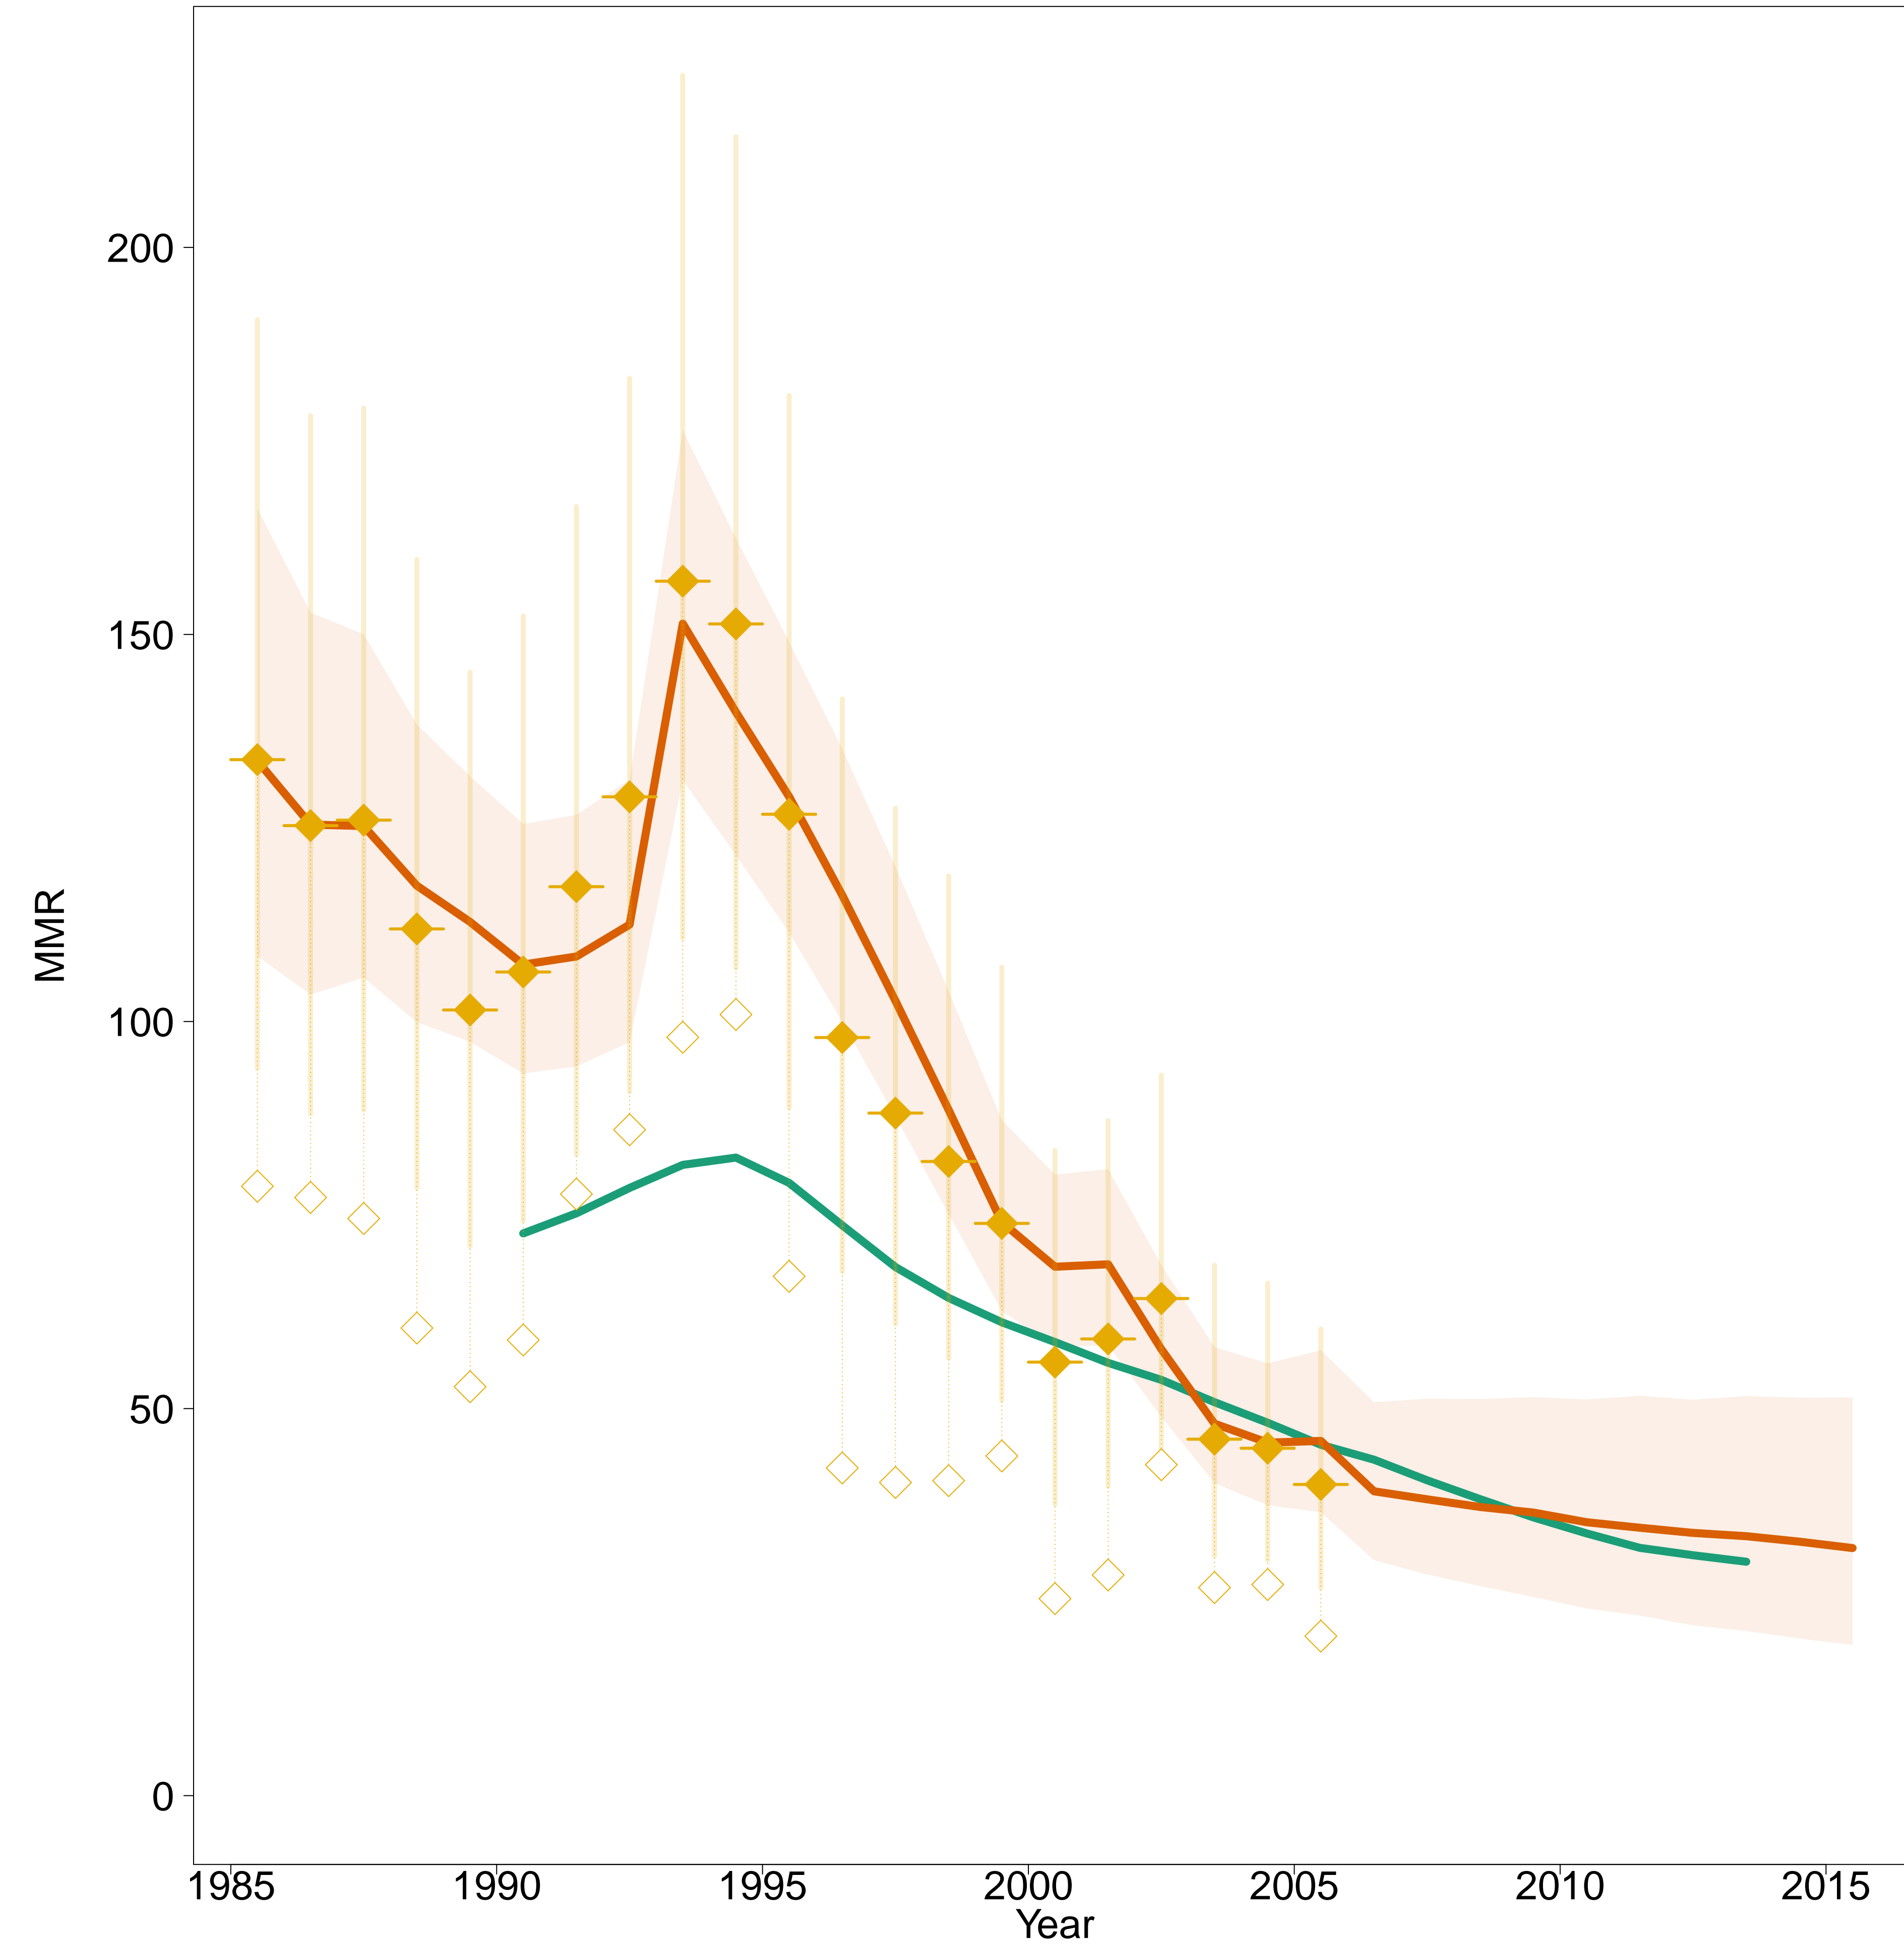

- Estimates –
- MMEIG 2015
- GBD 2013
- MMR Database 2015 –
- Observed Data
- Adjusted Data
- Data type –
- VR

Tanzania [TZA]  
(Eastern Africa)

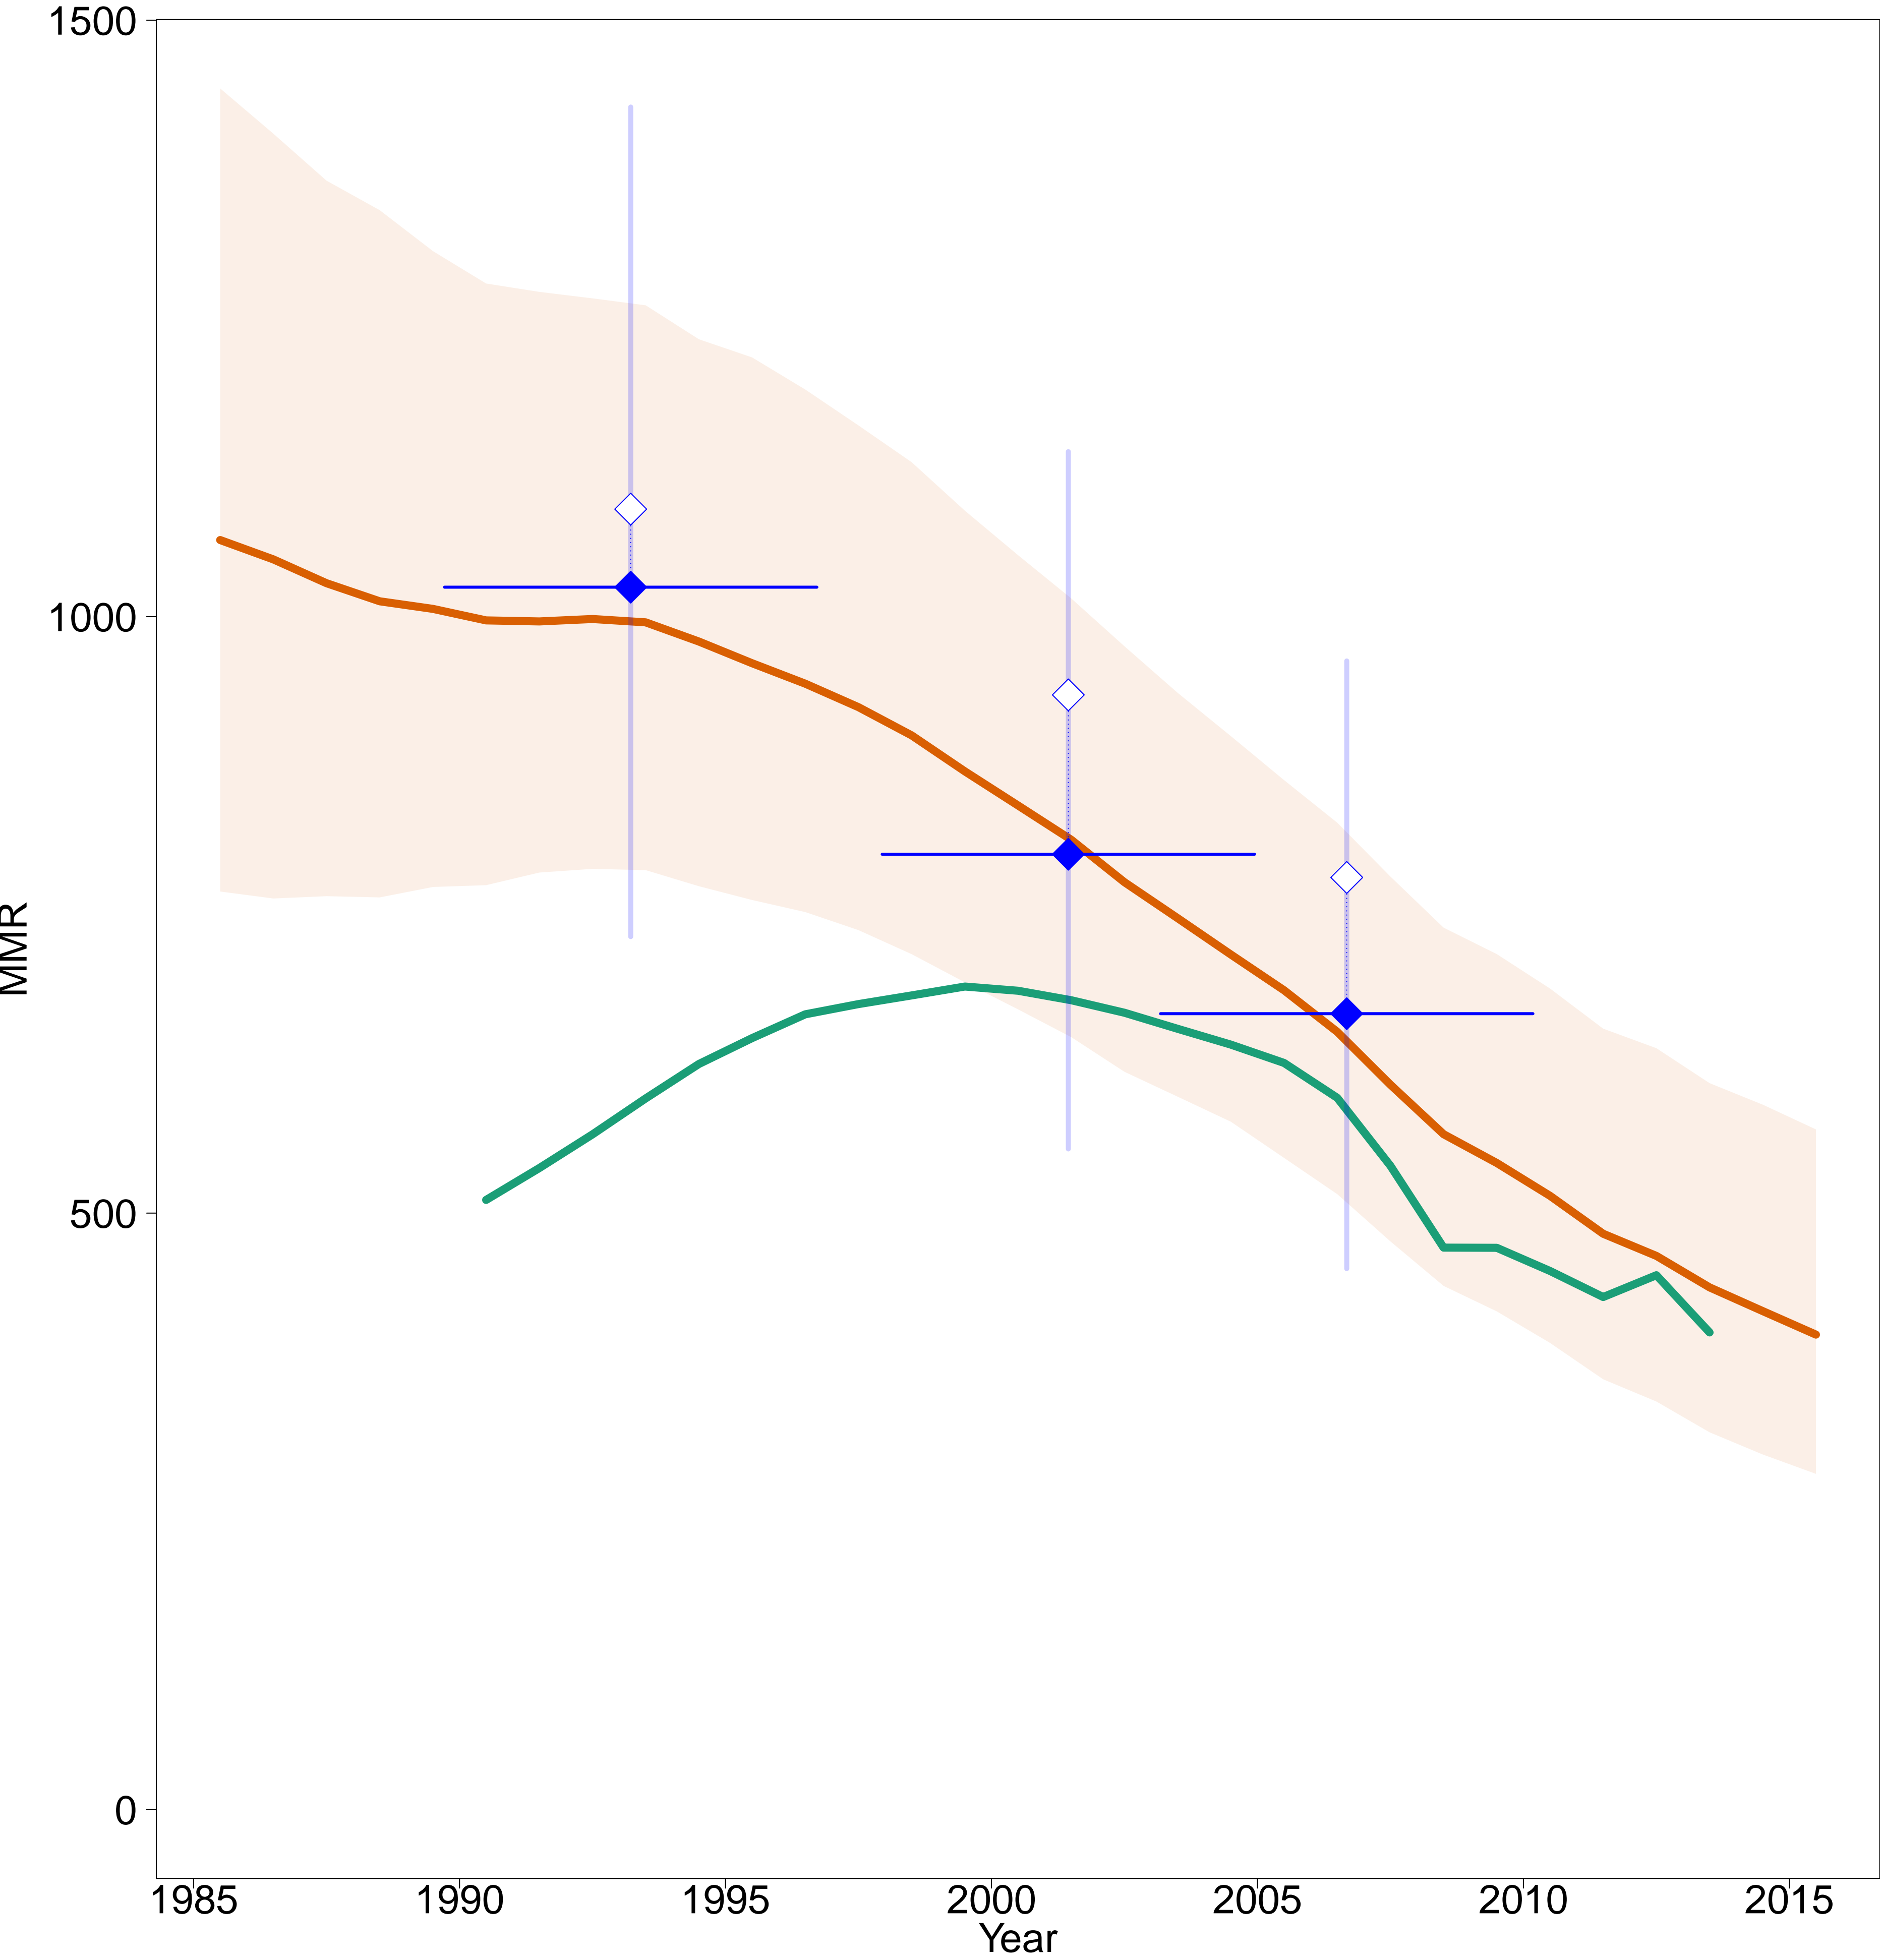

- Estimates -
- MMEIG 2015
- GBD 2013
- MMR Database 2015 -
- Observed Data
- Adjusted Data
- Data type -
- DHS



TFYR Macedonia [MKD]  
 (Transition countries of South-Eastern Europe)

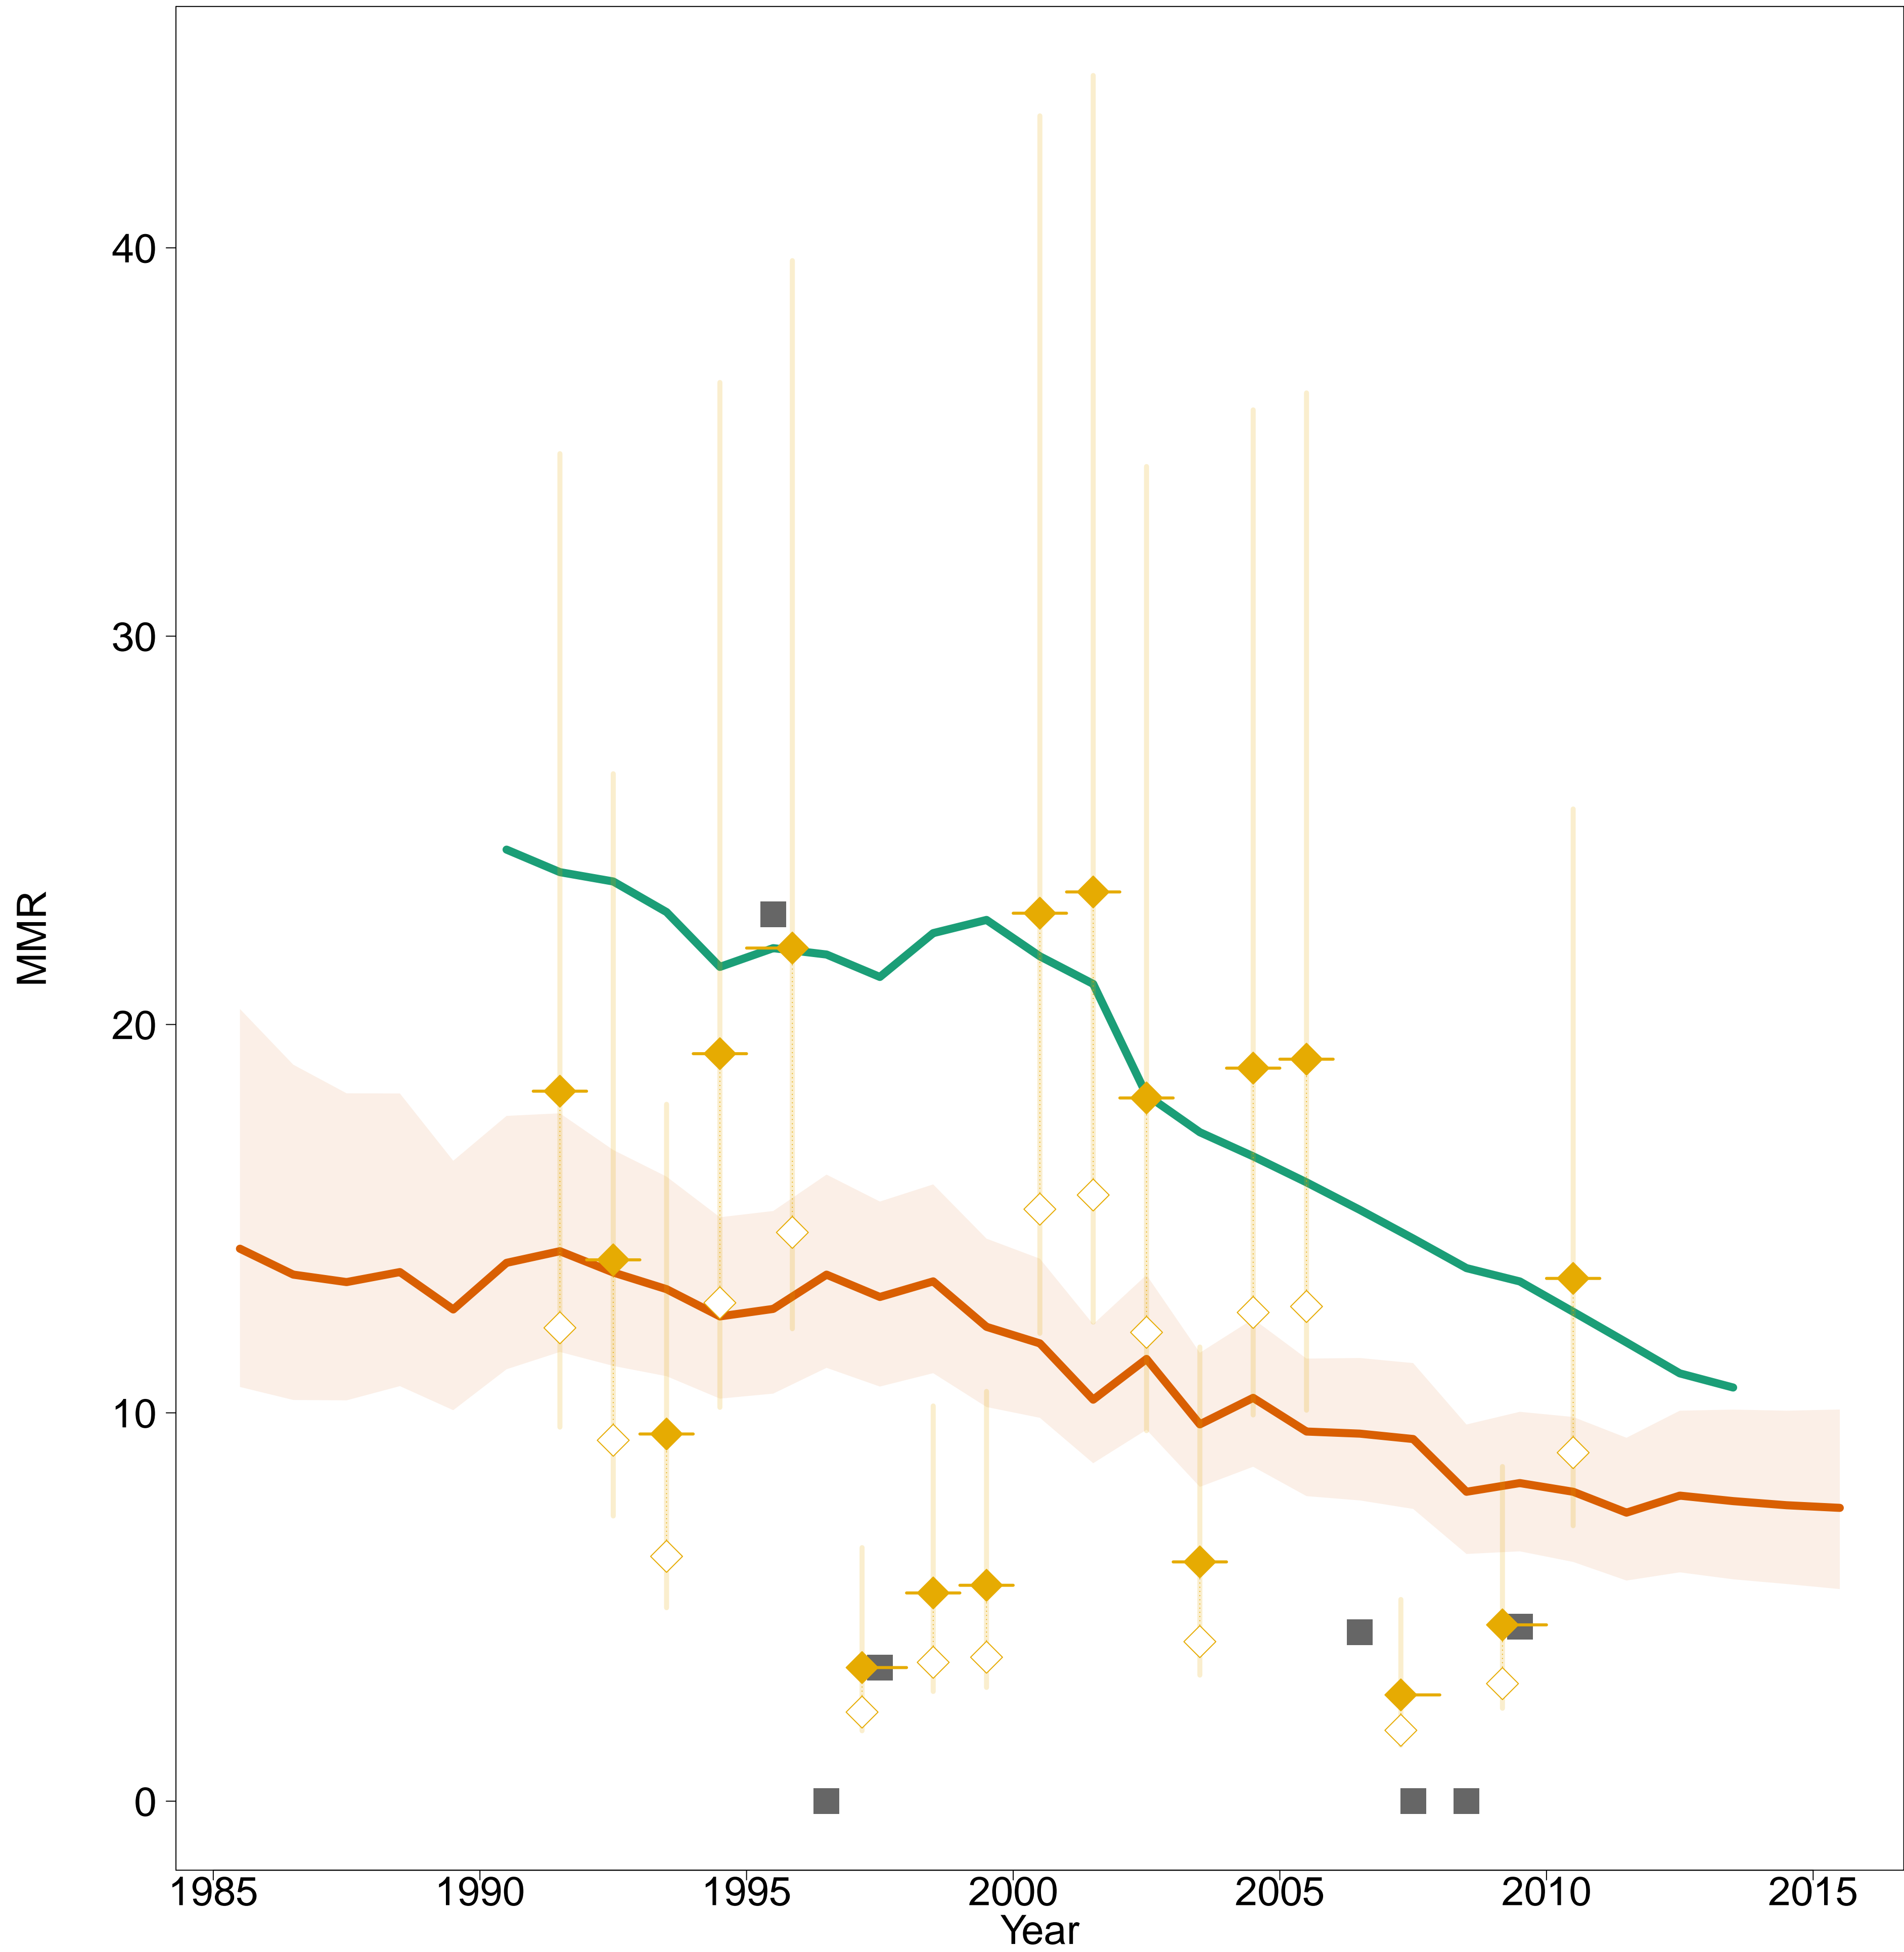

- Estimates –
- MMEIG 2015
- GBD 2013
- MMR Database 2015 –
- Observed Data
- Adjusted Data
- Data type –
- VR
- Reported VR before recalc.  
(related to 0 obs. mat. death)

Thailand [THA]  
(South-Eastern Asia / Oceania)

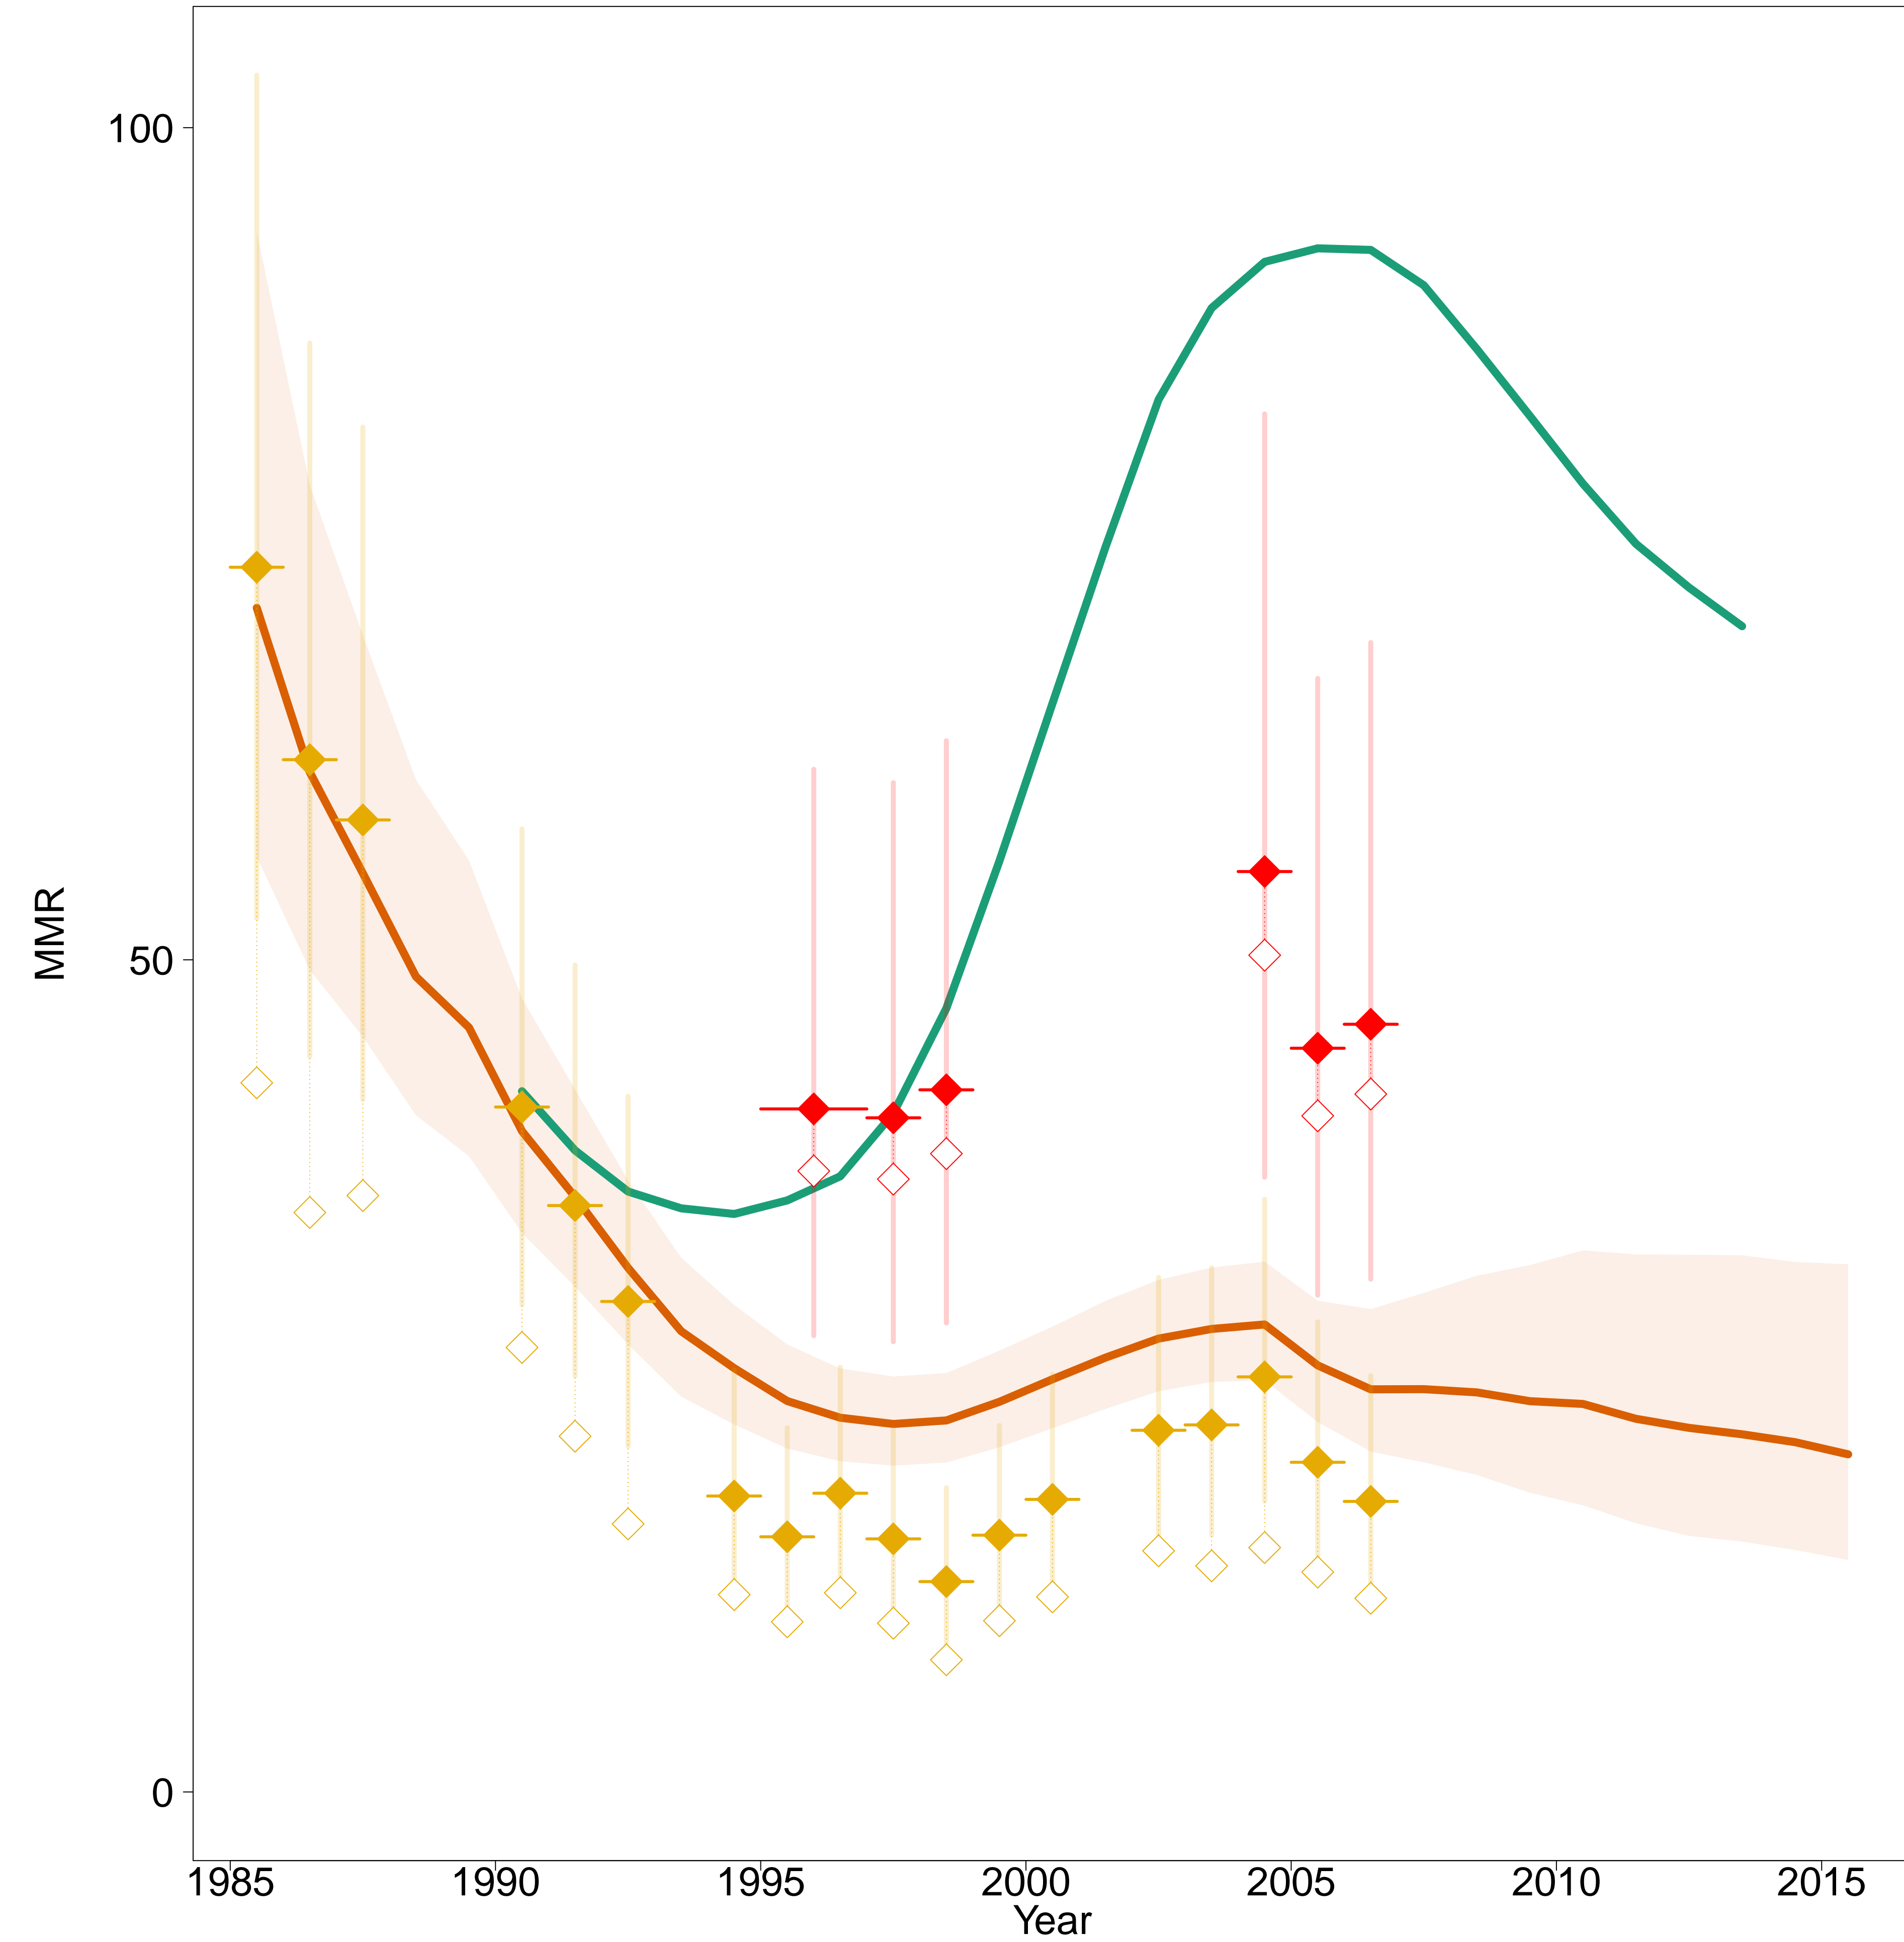

- Estimates –
- MMEIG 2015
- GBD 2013
- MMR Database 2015 –
- Observed Data
- Adjusted Data
- Data type –
- VR
- Misc. studies

Timor-Leste [TLS]  
(South-Eastern Asia / Oceania)

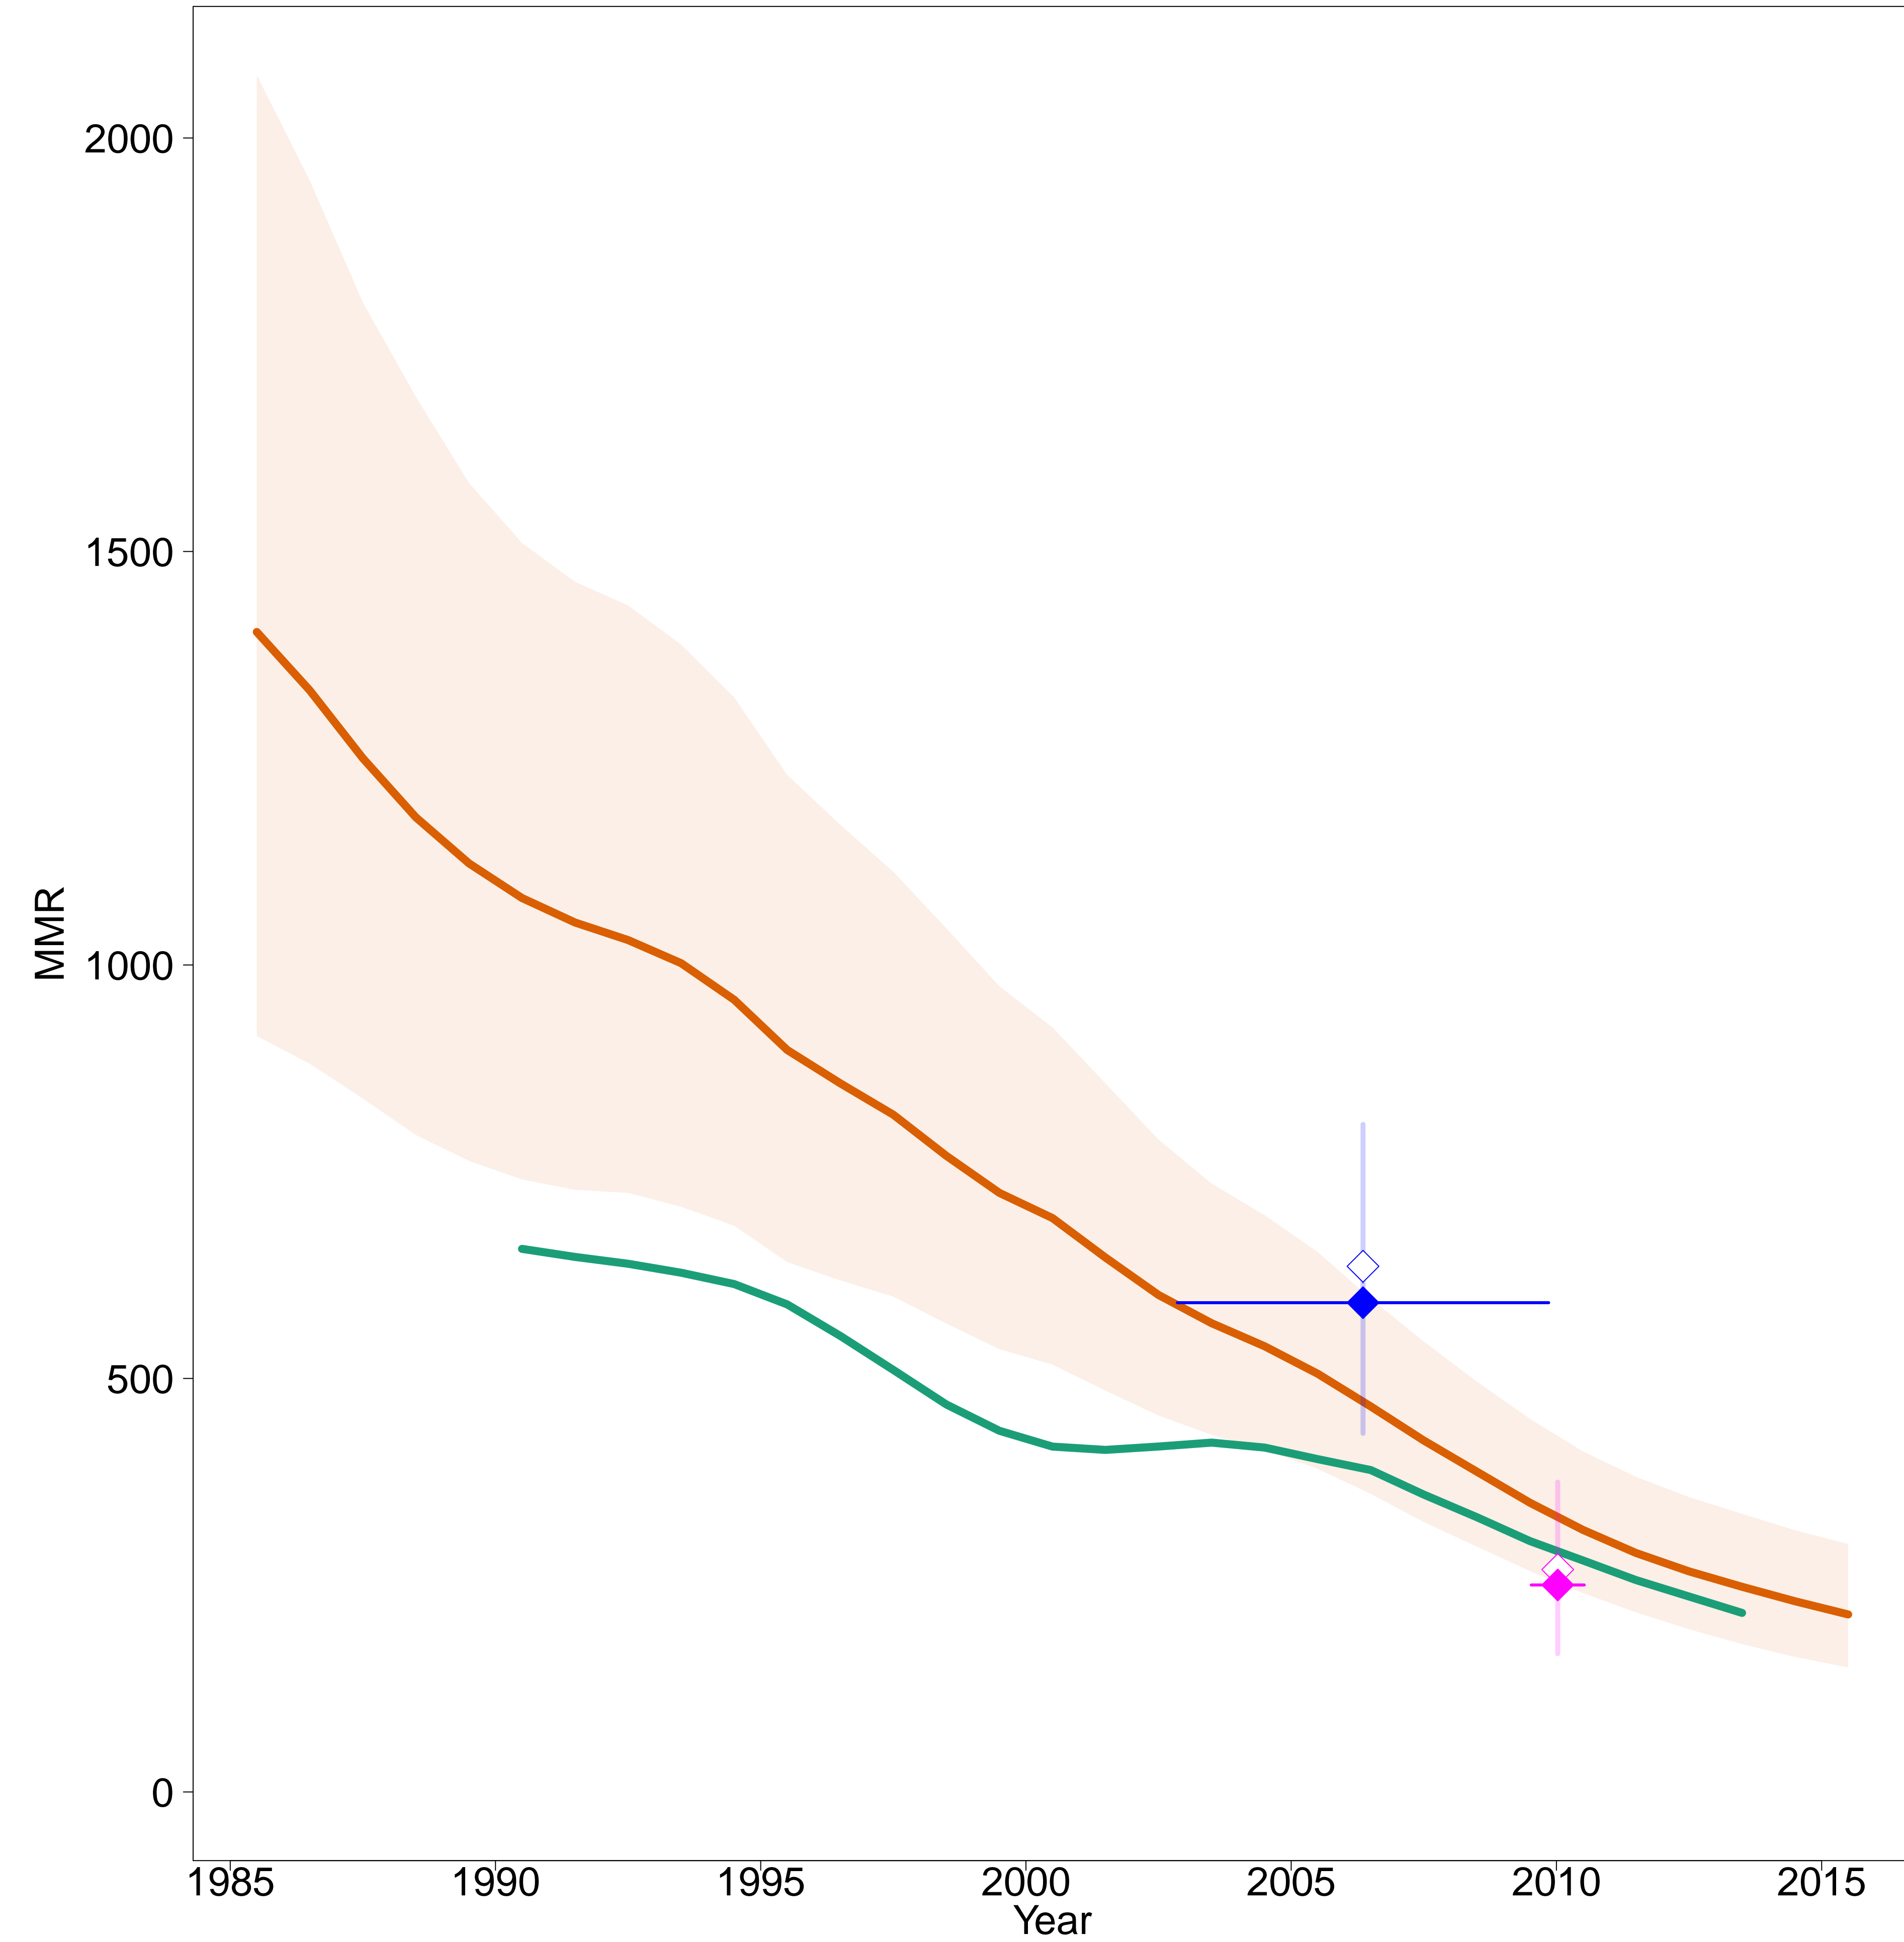

- Estimates -
- MMEIG 2015
- GBD 2013
- MMR Database 2015 -
- Observed Data
- Adjusted Data
- Data type -
- DHS
- Census

Togo [TGO]  
(Western Africa)

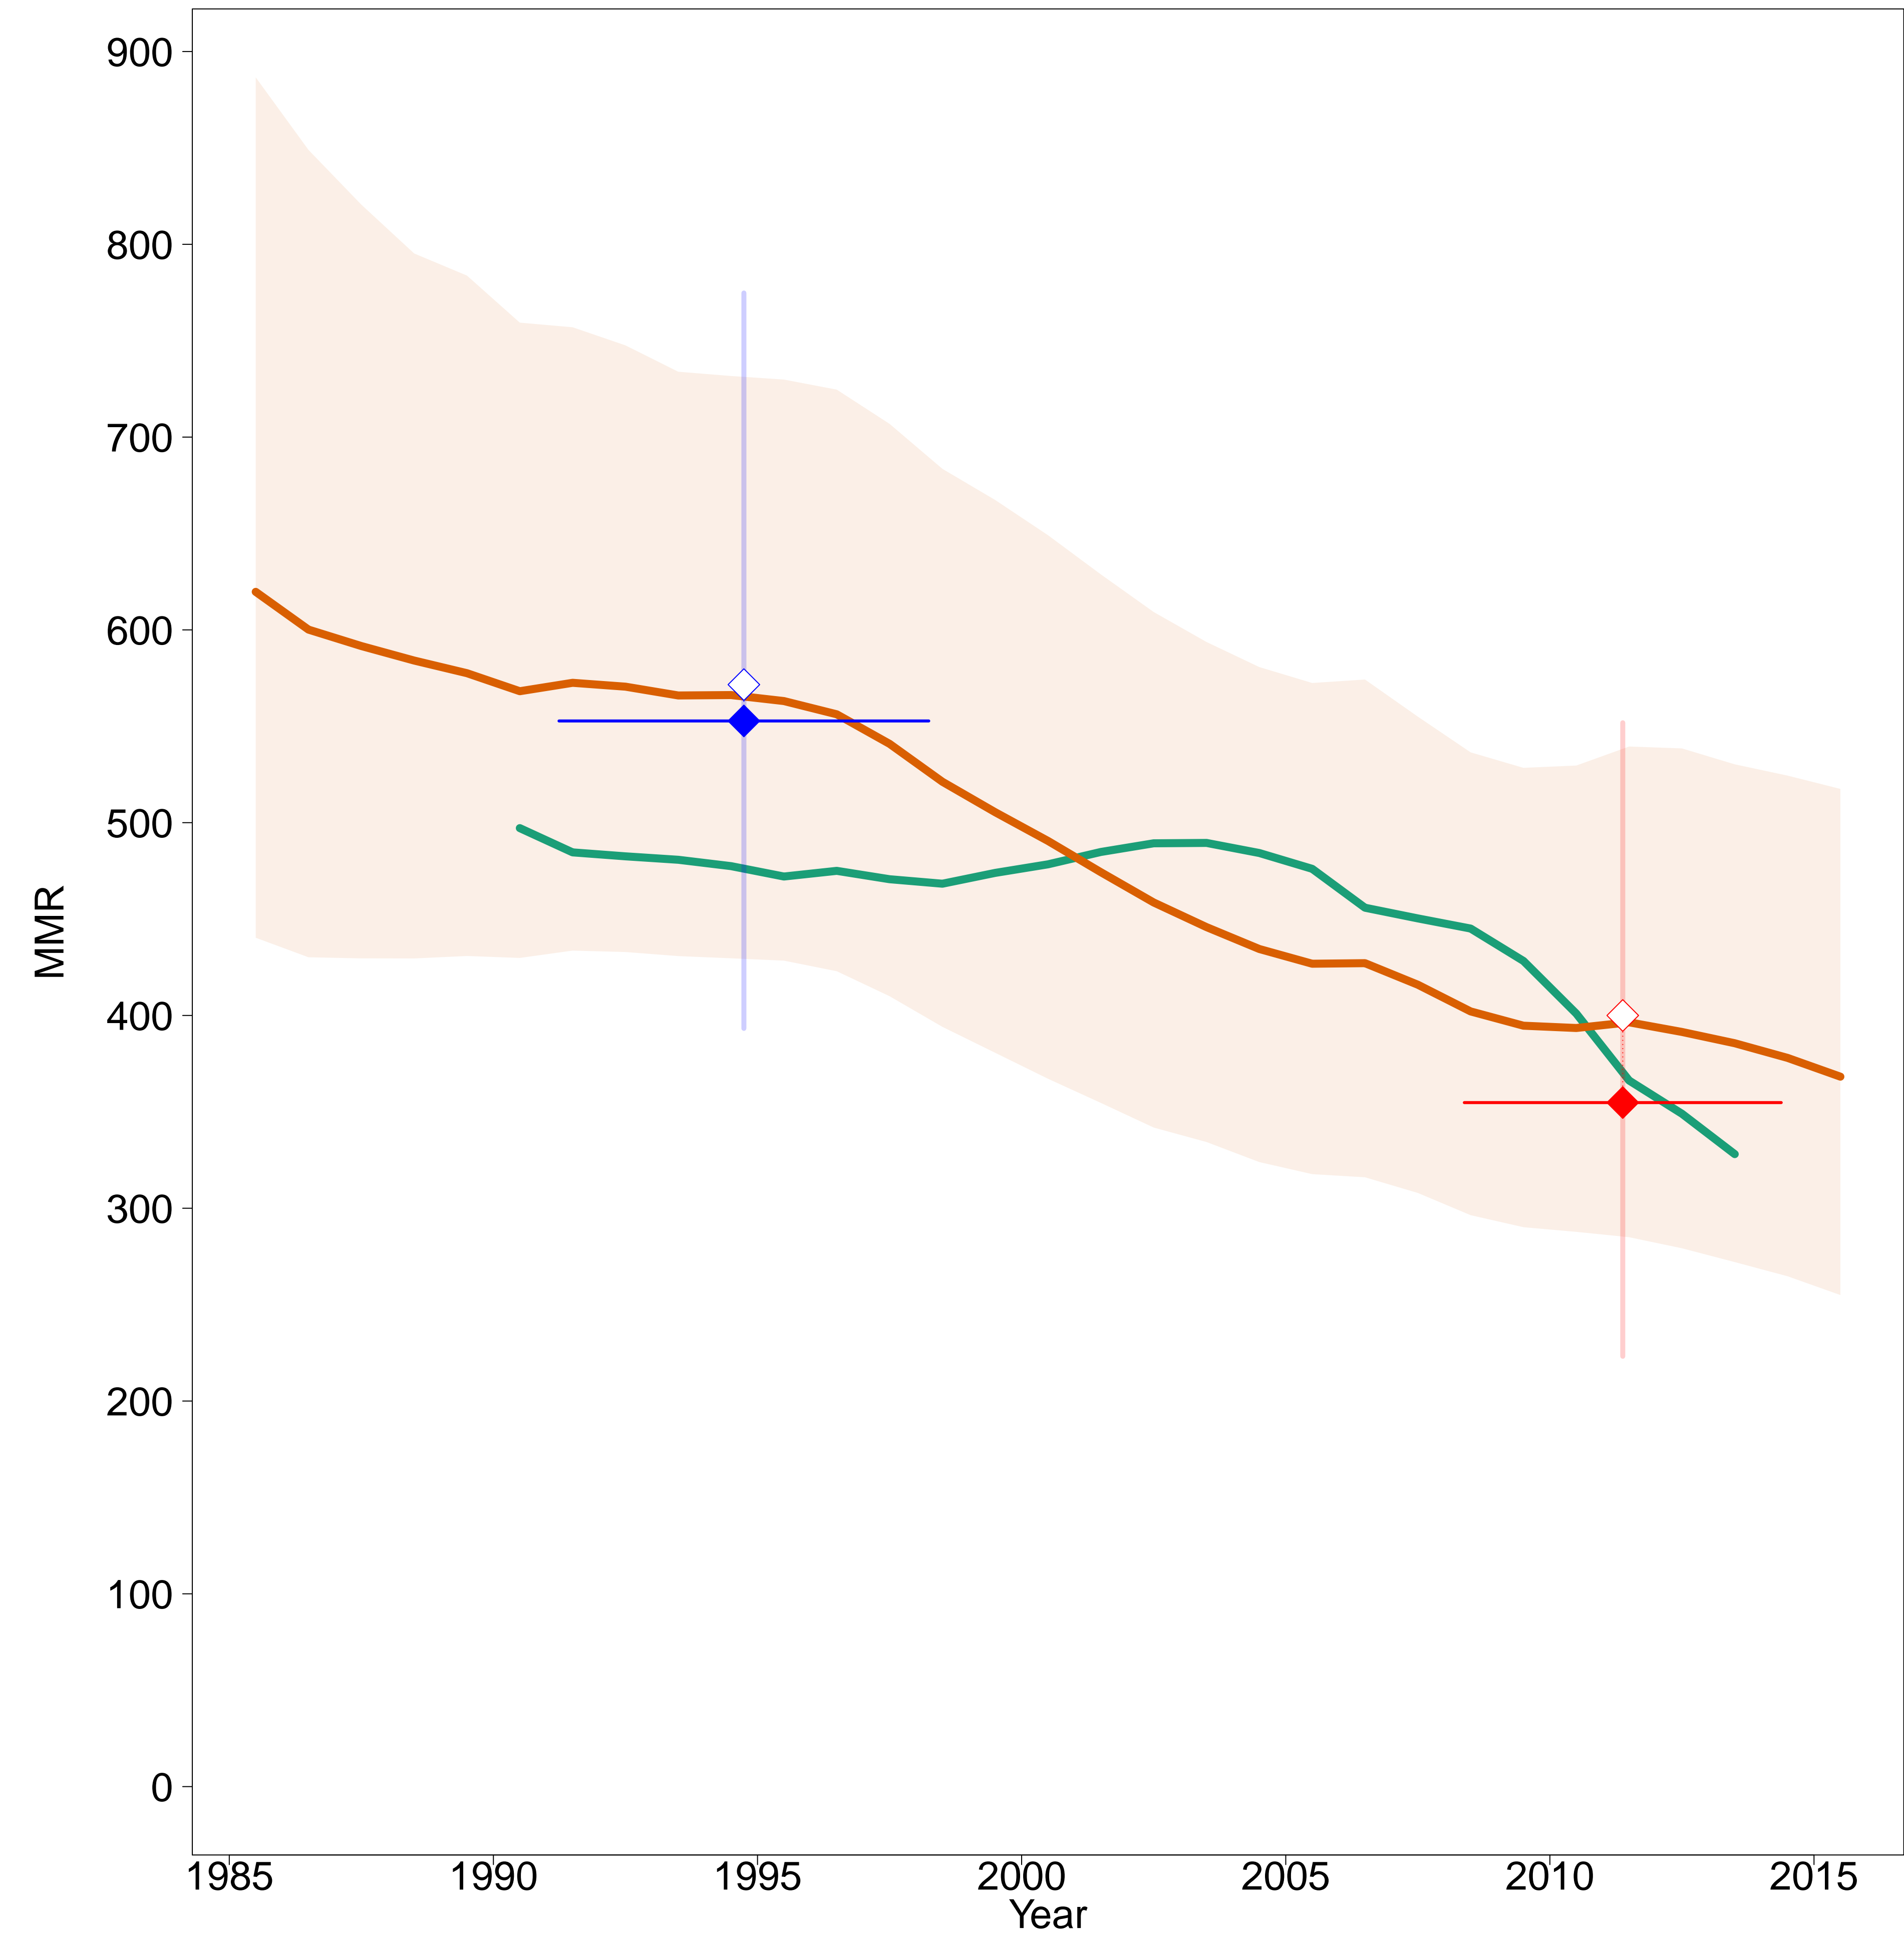

- Estimates -
- MMEIG 2015
- GBD 2013
- MMR Database 2015 -
- Observed Data
- Adjusted Data
- Data type -
- DHS
- Misc. studies

Tonga [TON]  
(South-Eastern Asia / Oceania)

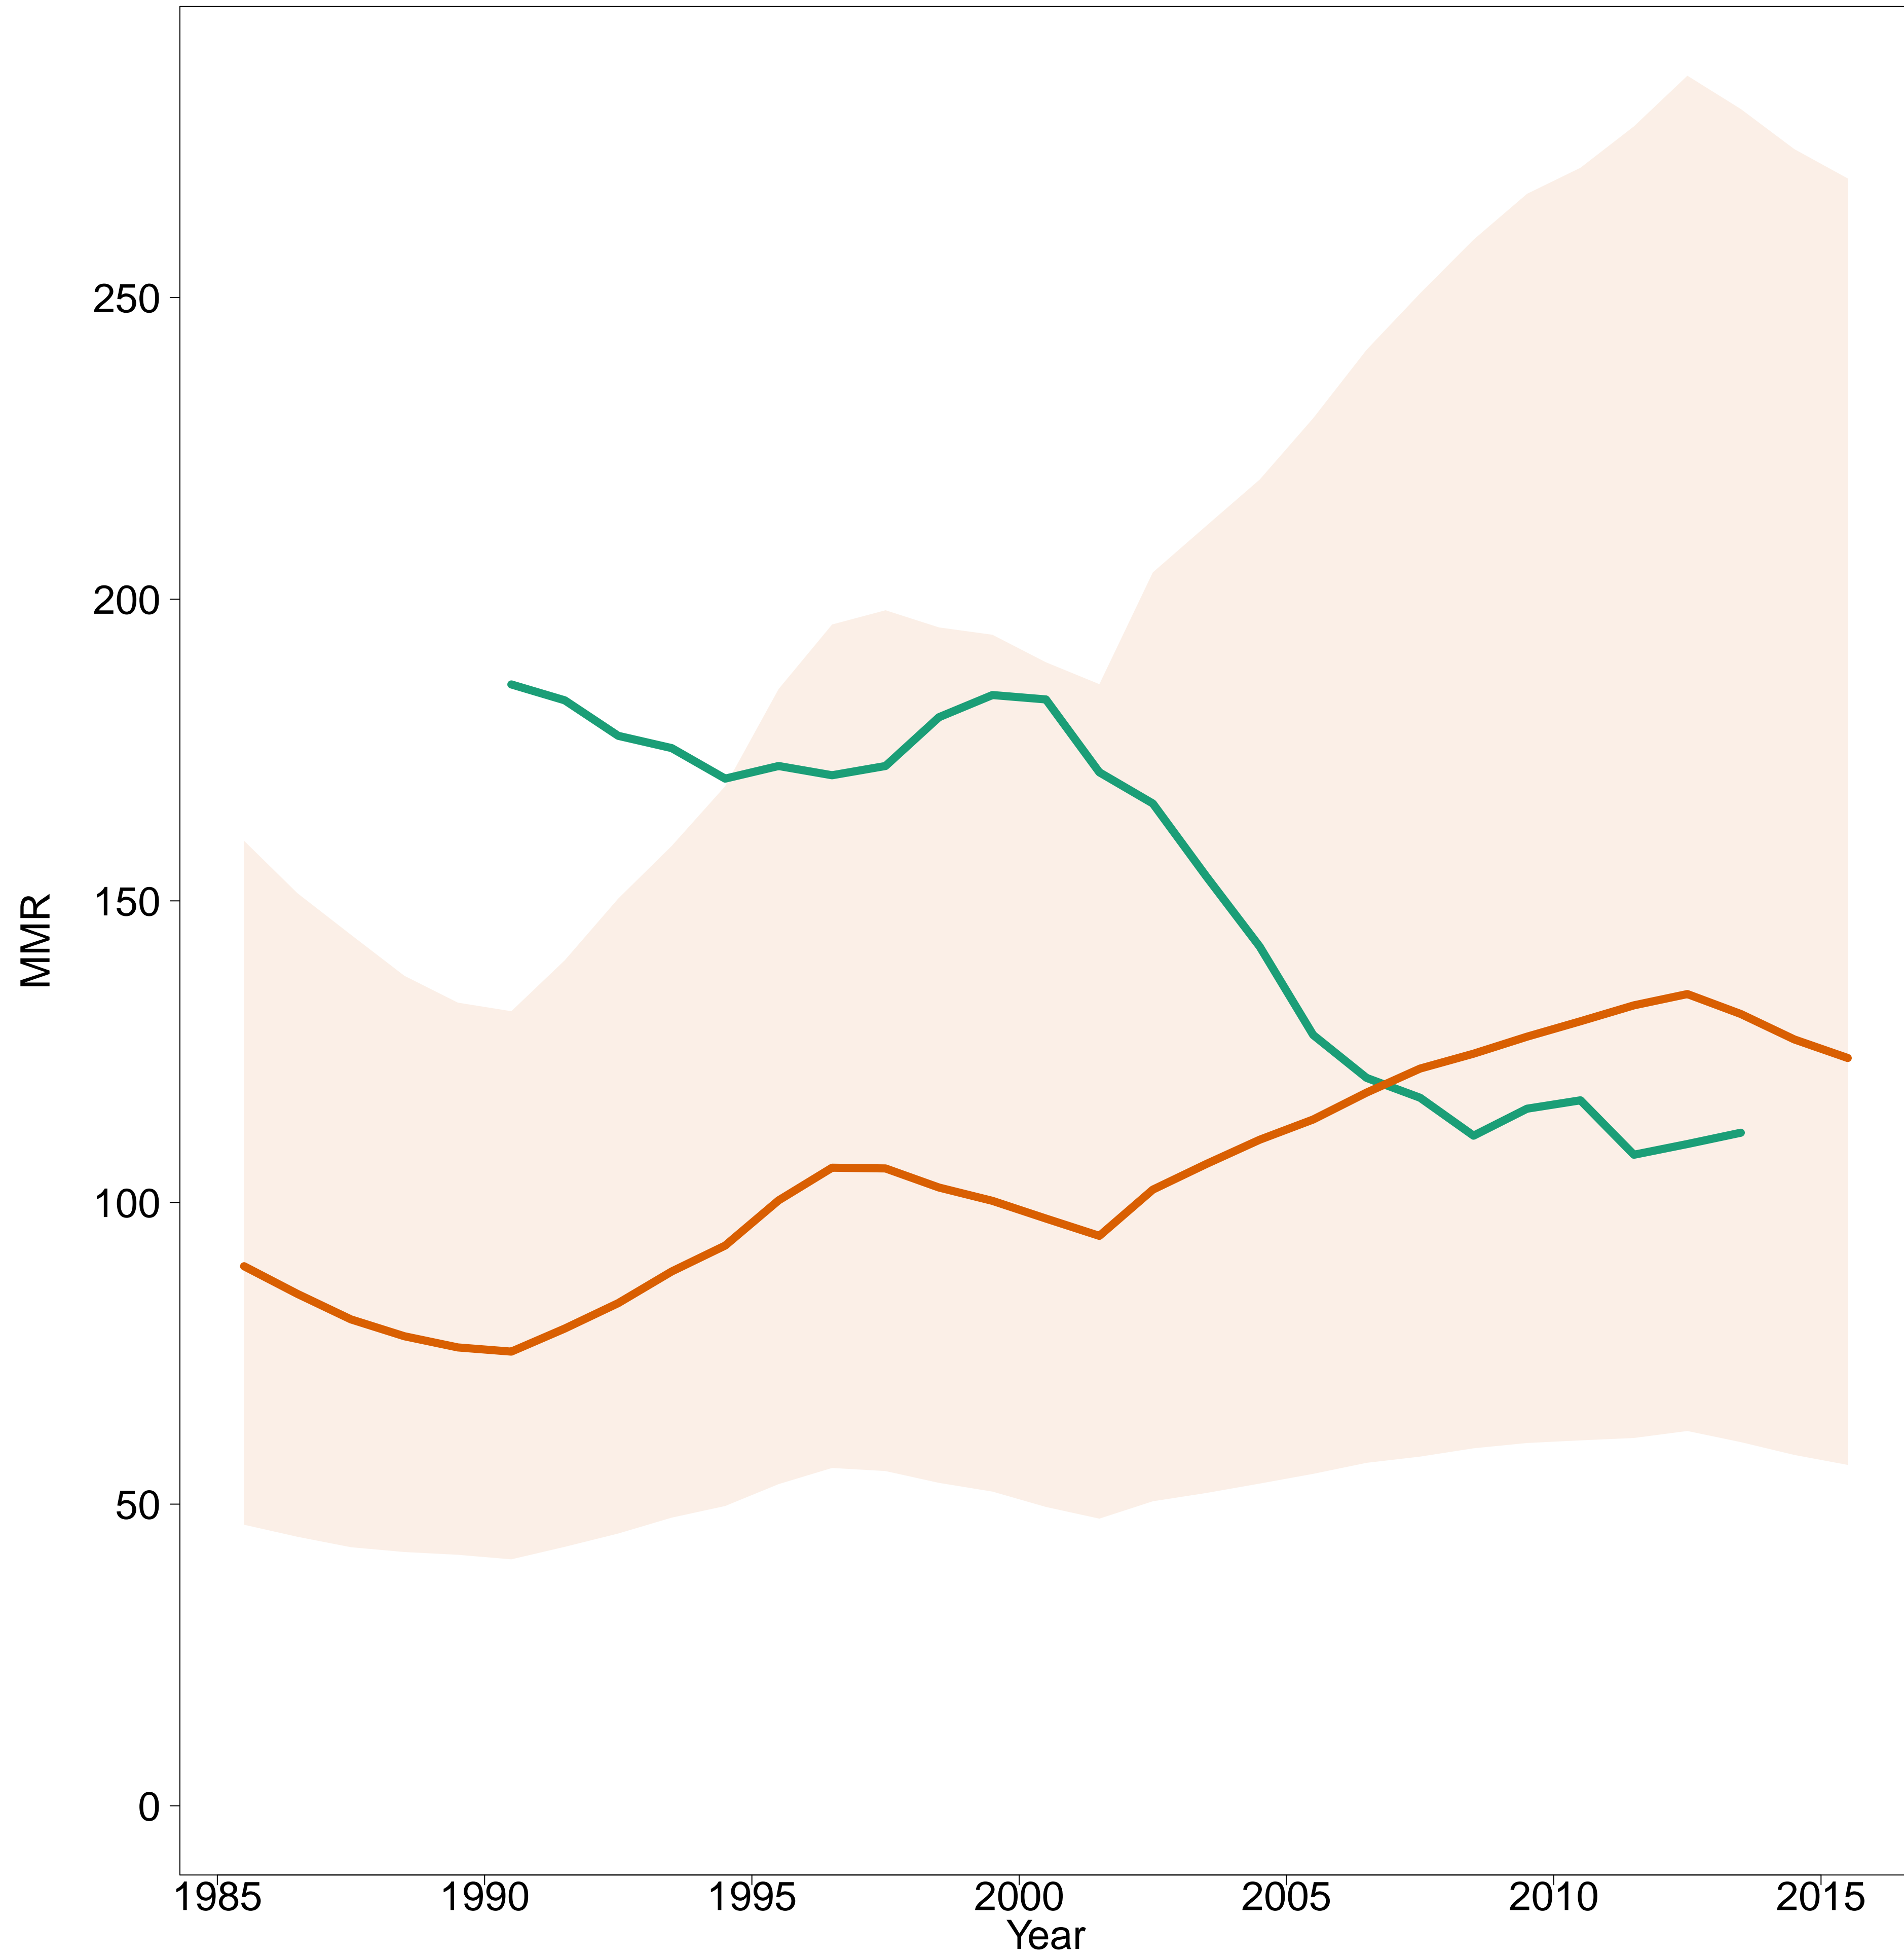

– Estimates –  
MMEIG 2015  
GBD 2013  
– MMR Database 2015 –

Trinidad and Tobago [TTO]  
(Caribbean)

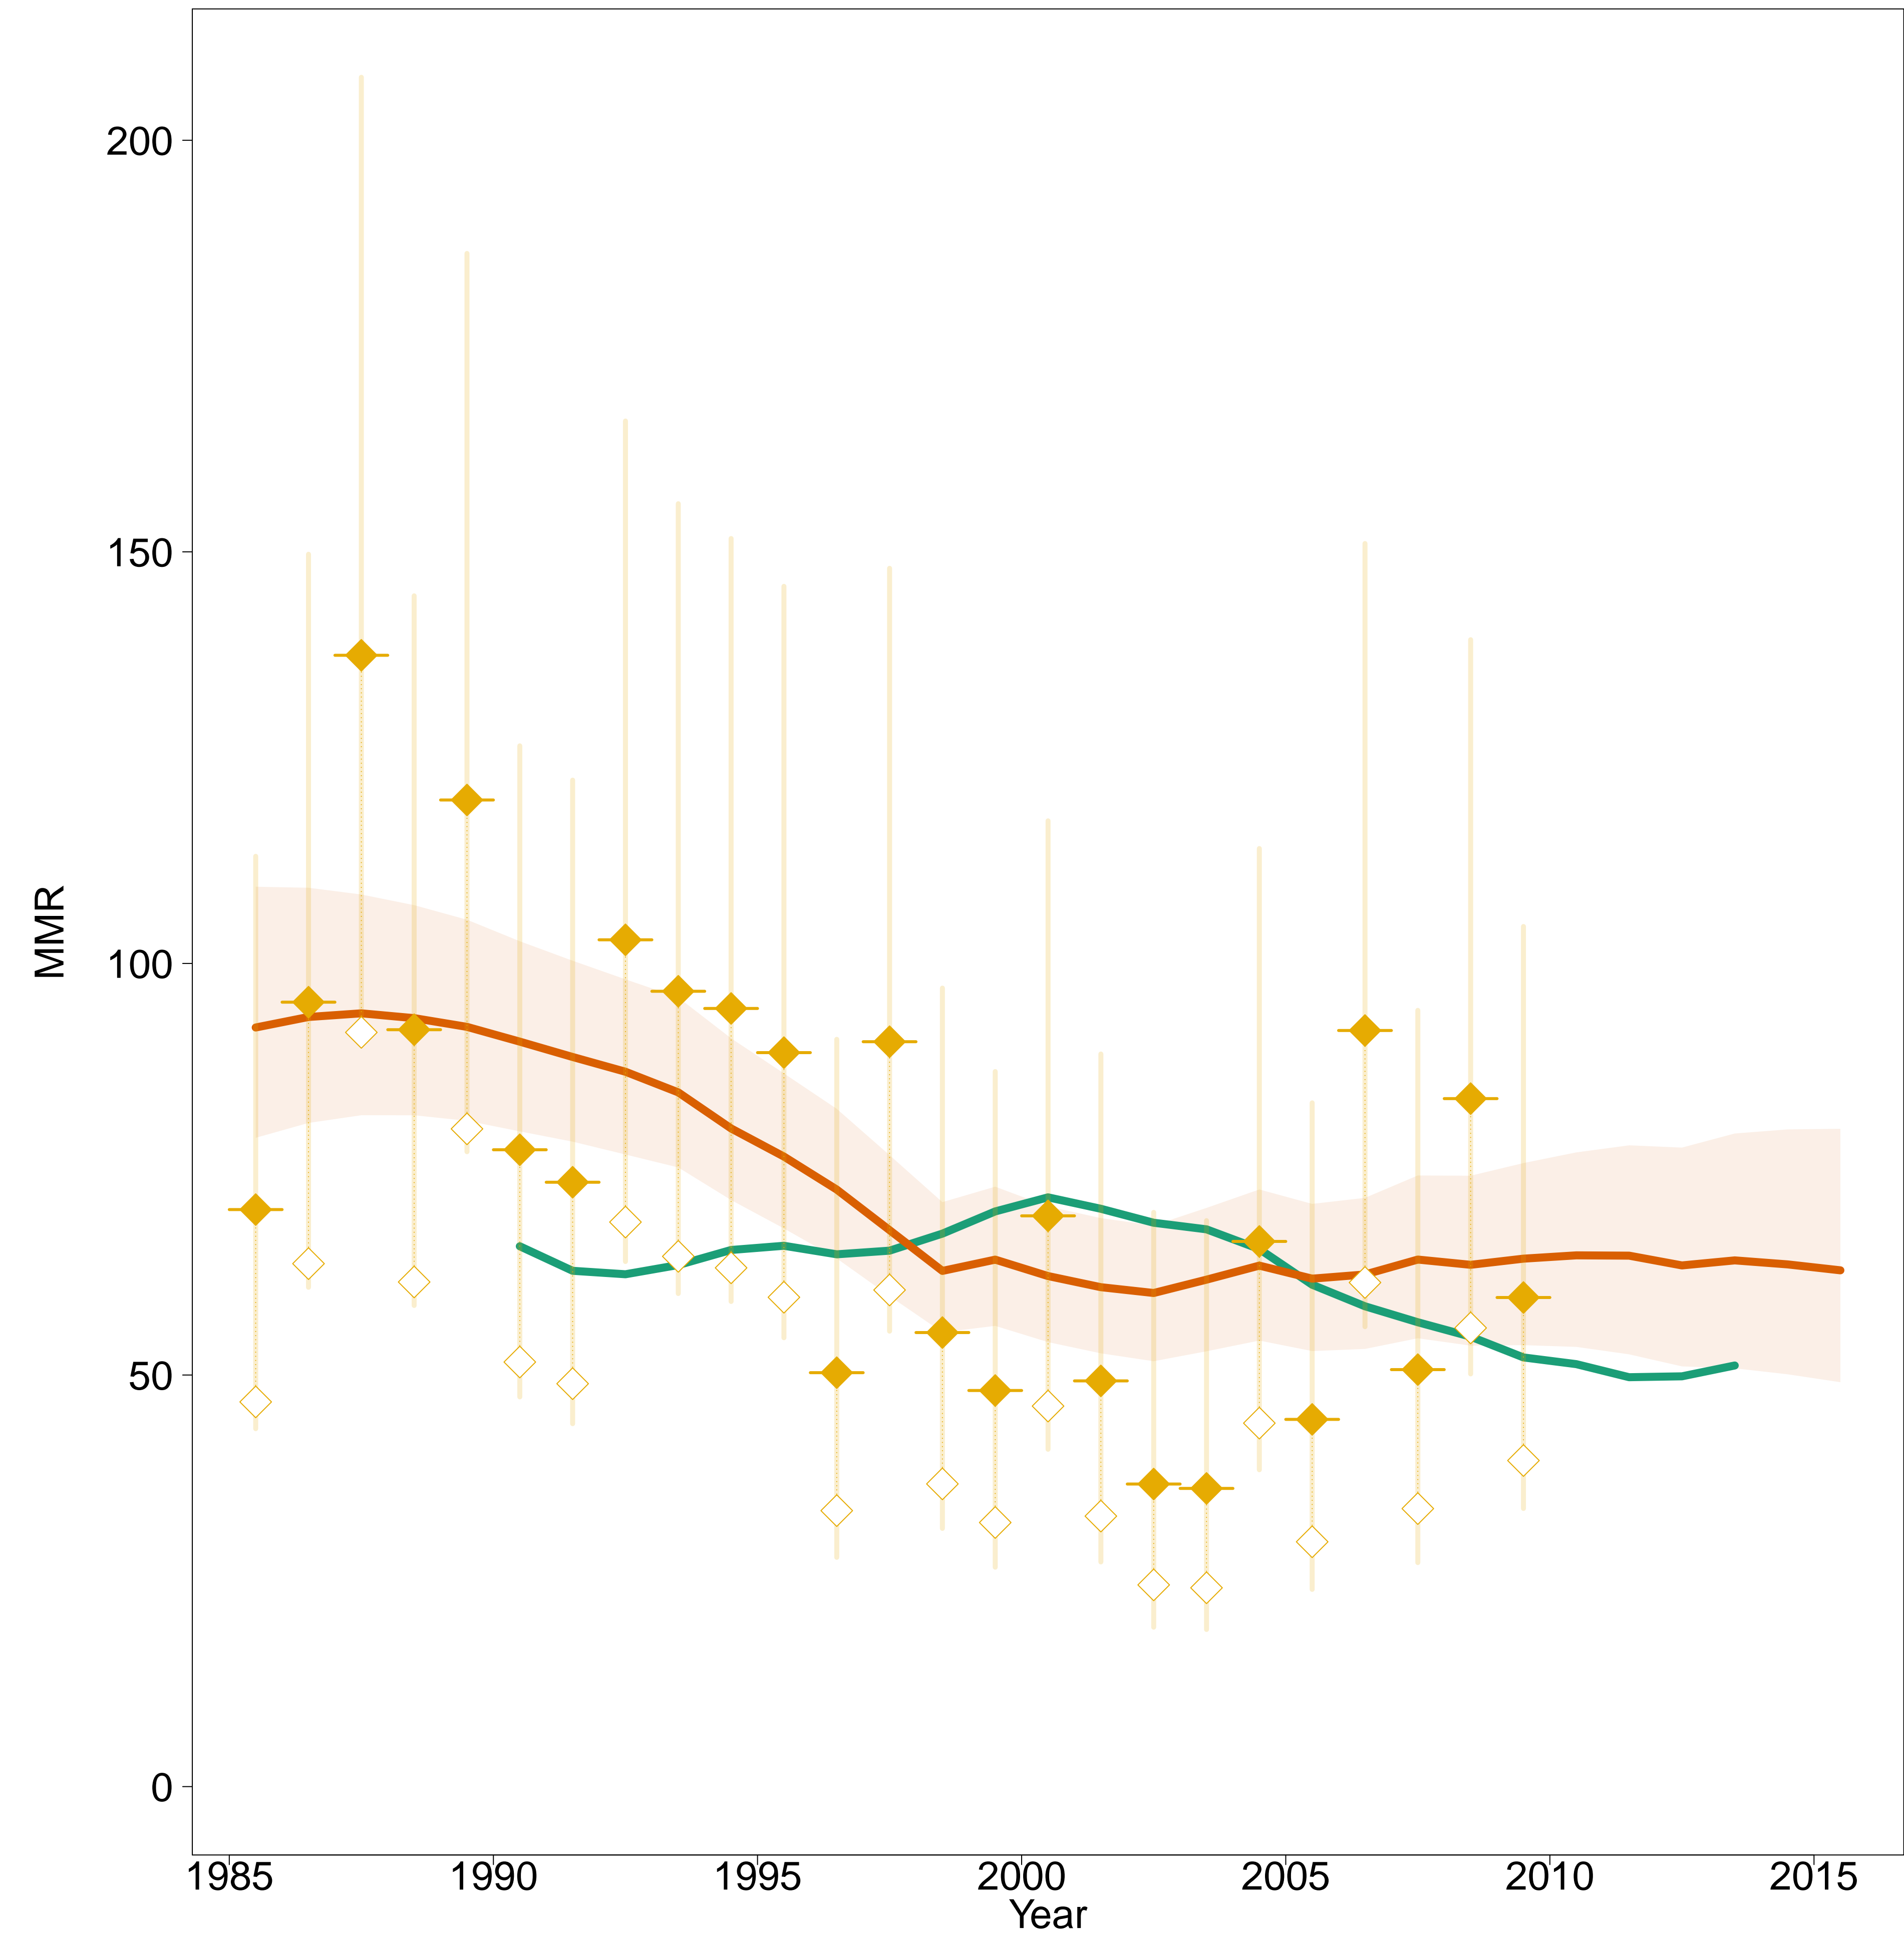

- Estimates –
- MMEIG 2015
- GBD 2013
- MMR Database 2015 –
- ◊ Observed Data
- ◆ Adjusted Data
- Data type –
- ◆ VR

Tunisia [TUN]  
(Northern Africa)

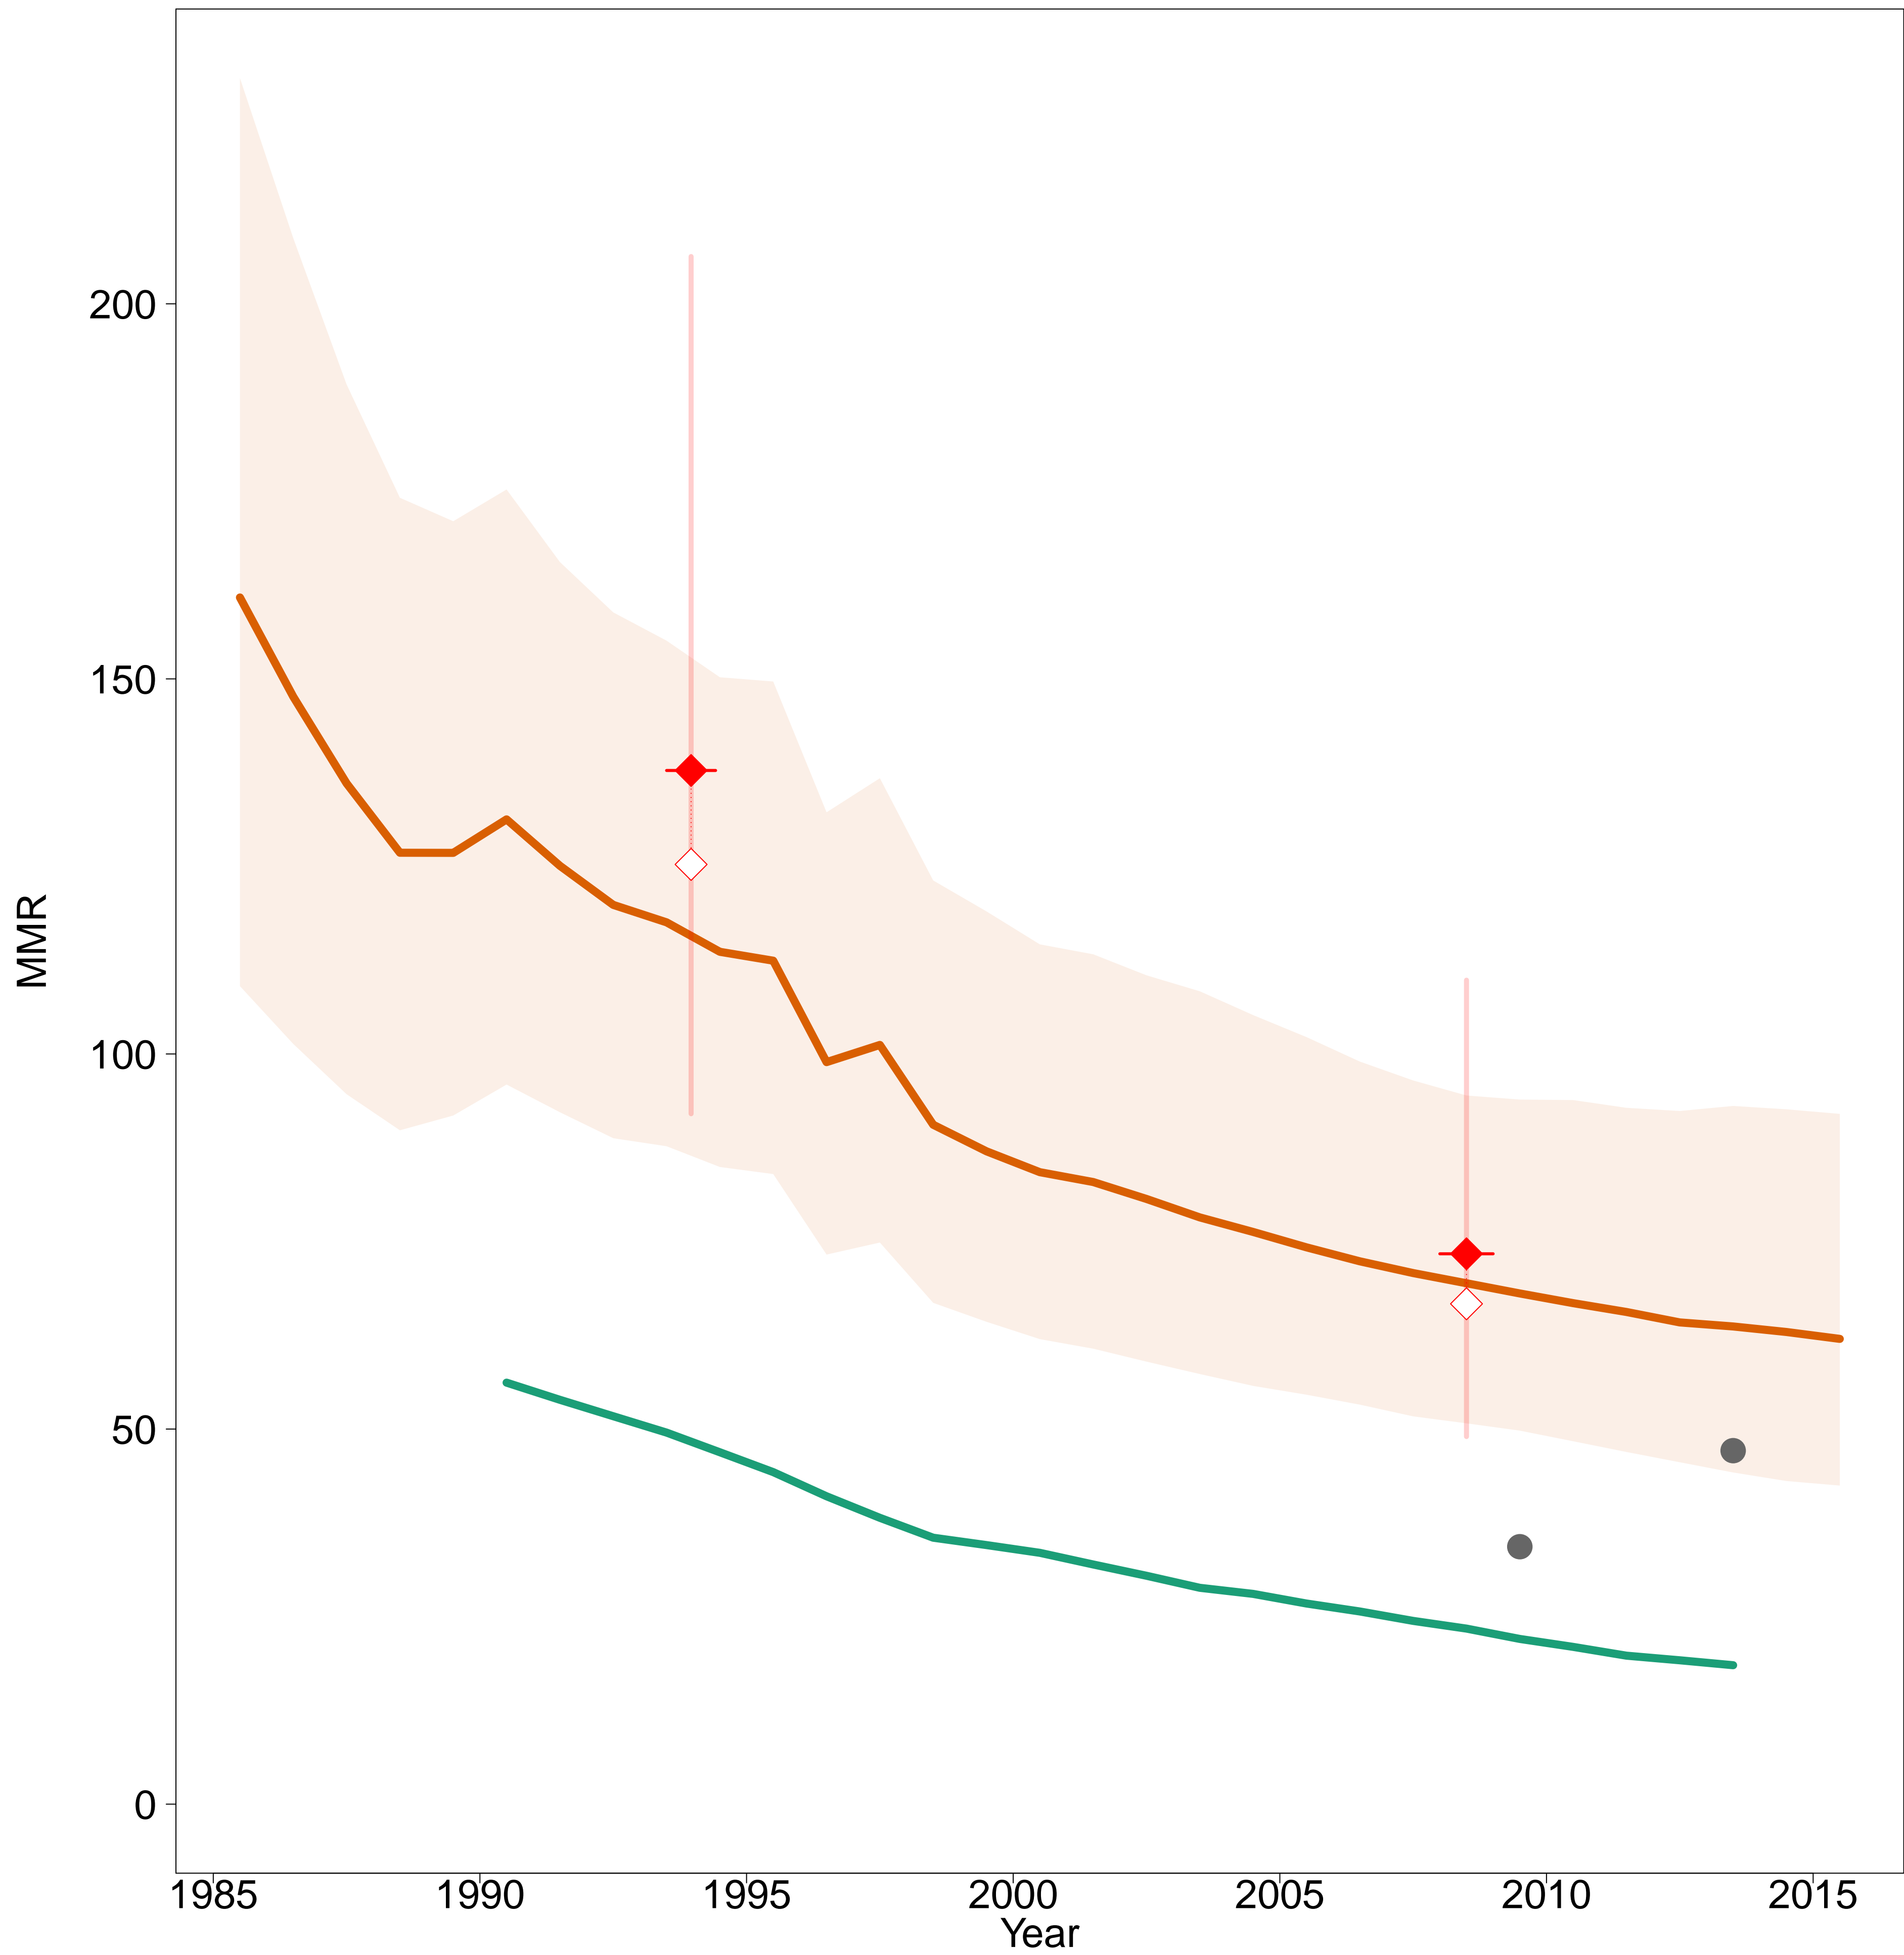

- Estimates -
- MMEIG 2015
- GBD 2013
- MMR Database 2015 -
- Observed Data
- Adjusted Data
- Data type -
- Misc. studies
- Excluded VR data (data quality issues)

Turkey [TUR]  
(Western Asia)

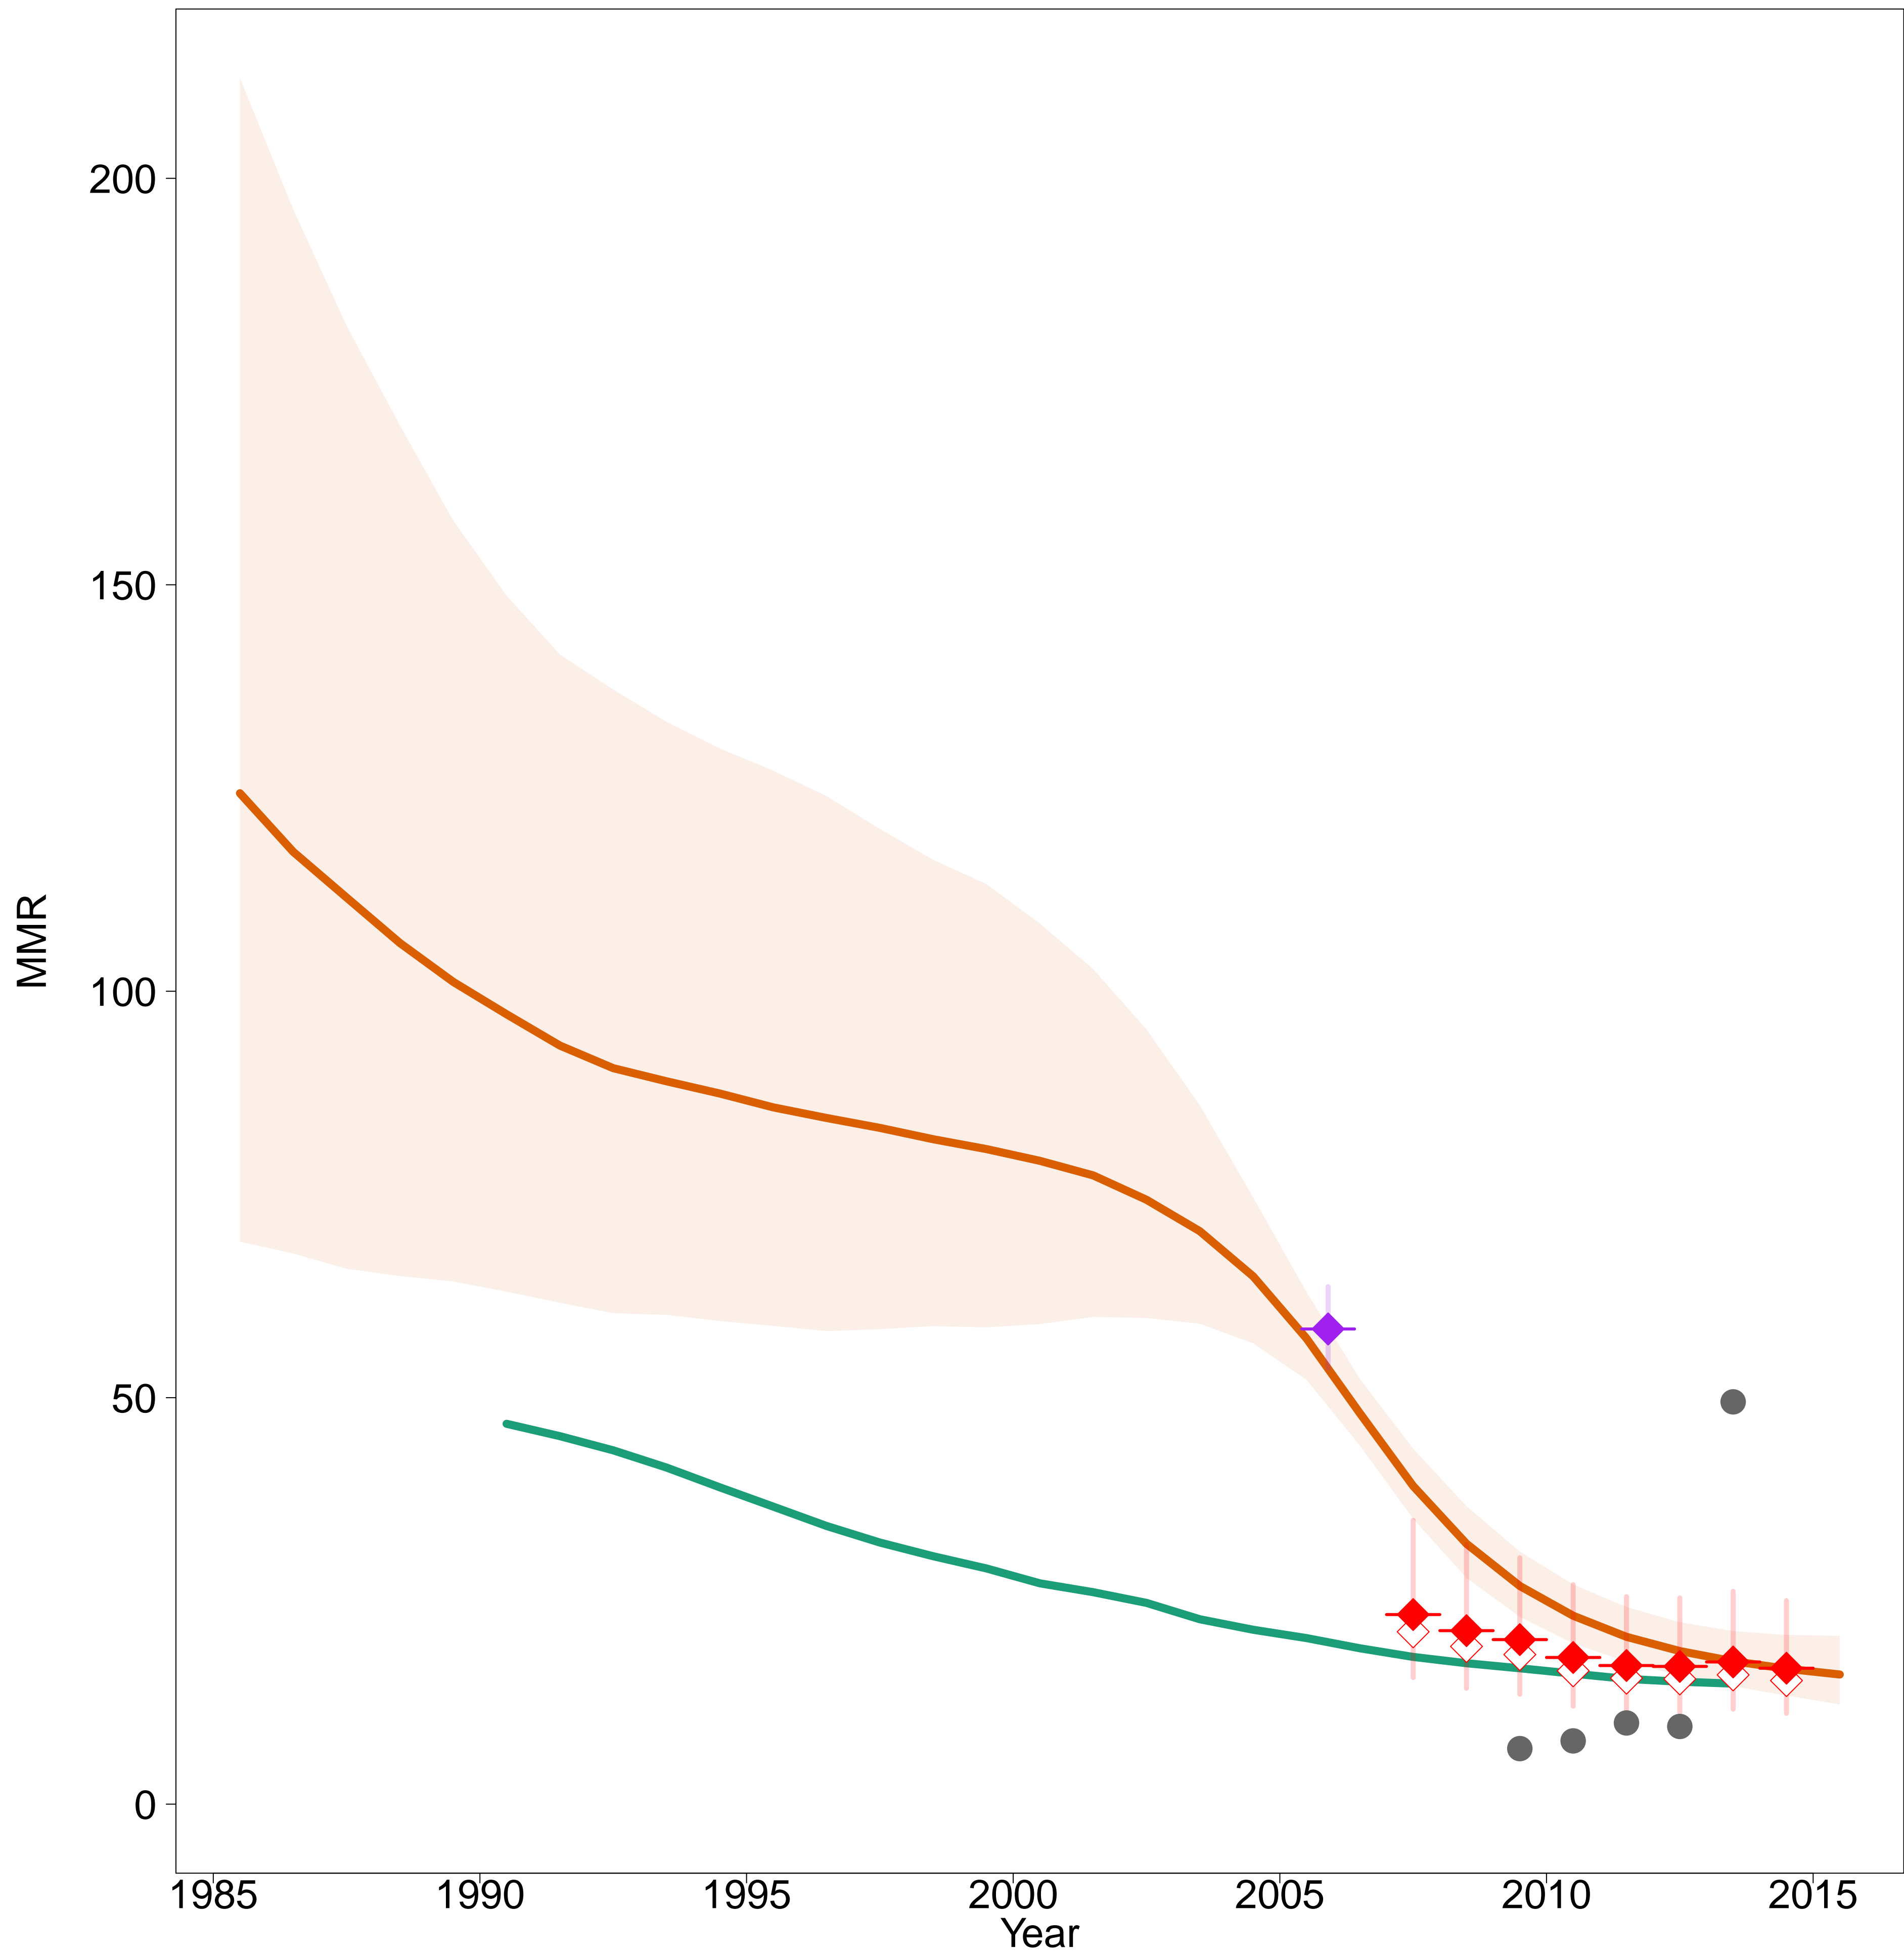

- Estimates -
- MMEIG 2015
- GBD 2013
- MMR Database 2015 -
- Observed Data
- Adjusted Data
- Data type -
- Spec. studies
- Misc. studies
- Excluded VR data (data quality issues)



Turkmenistan [TKM]  
(Central Asia)

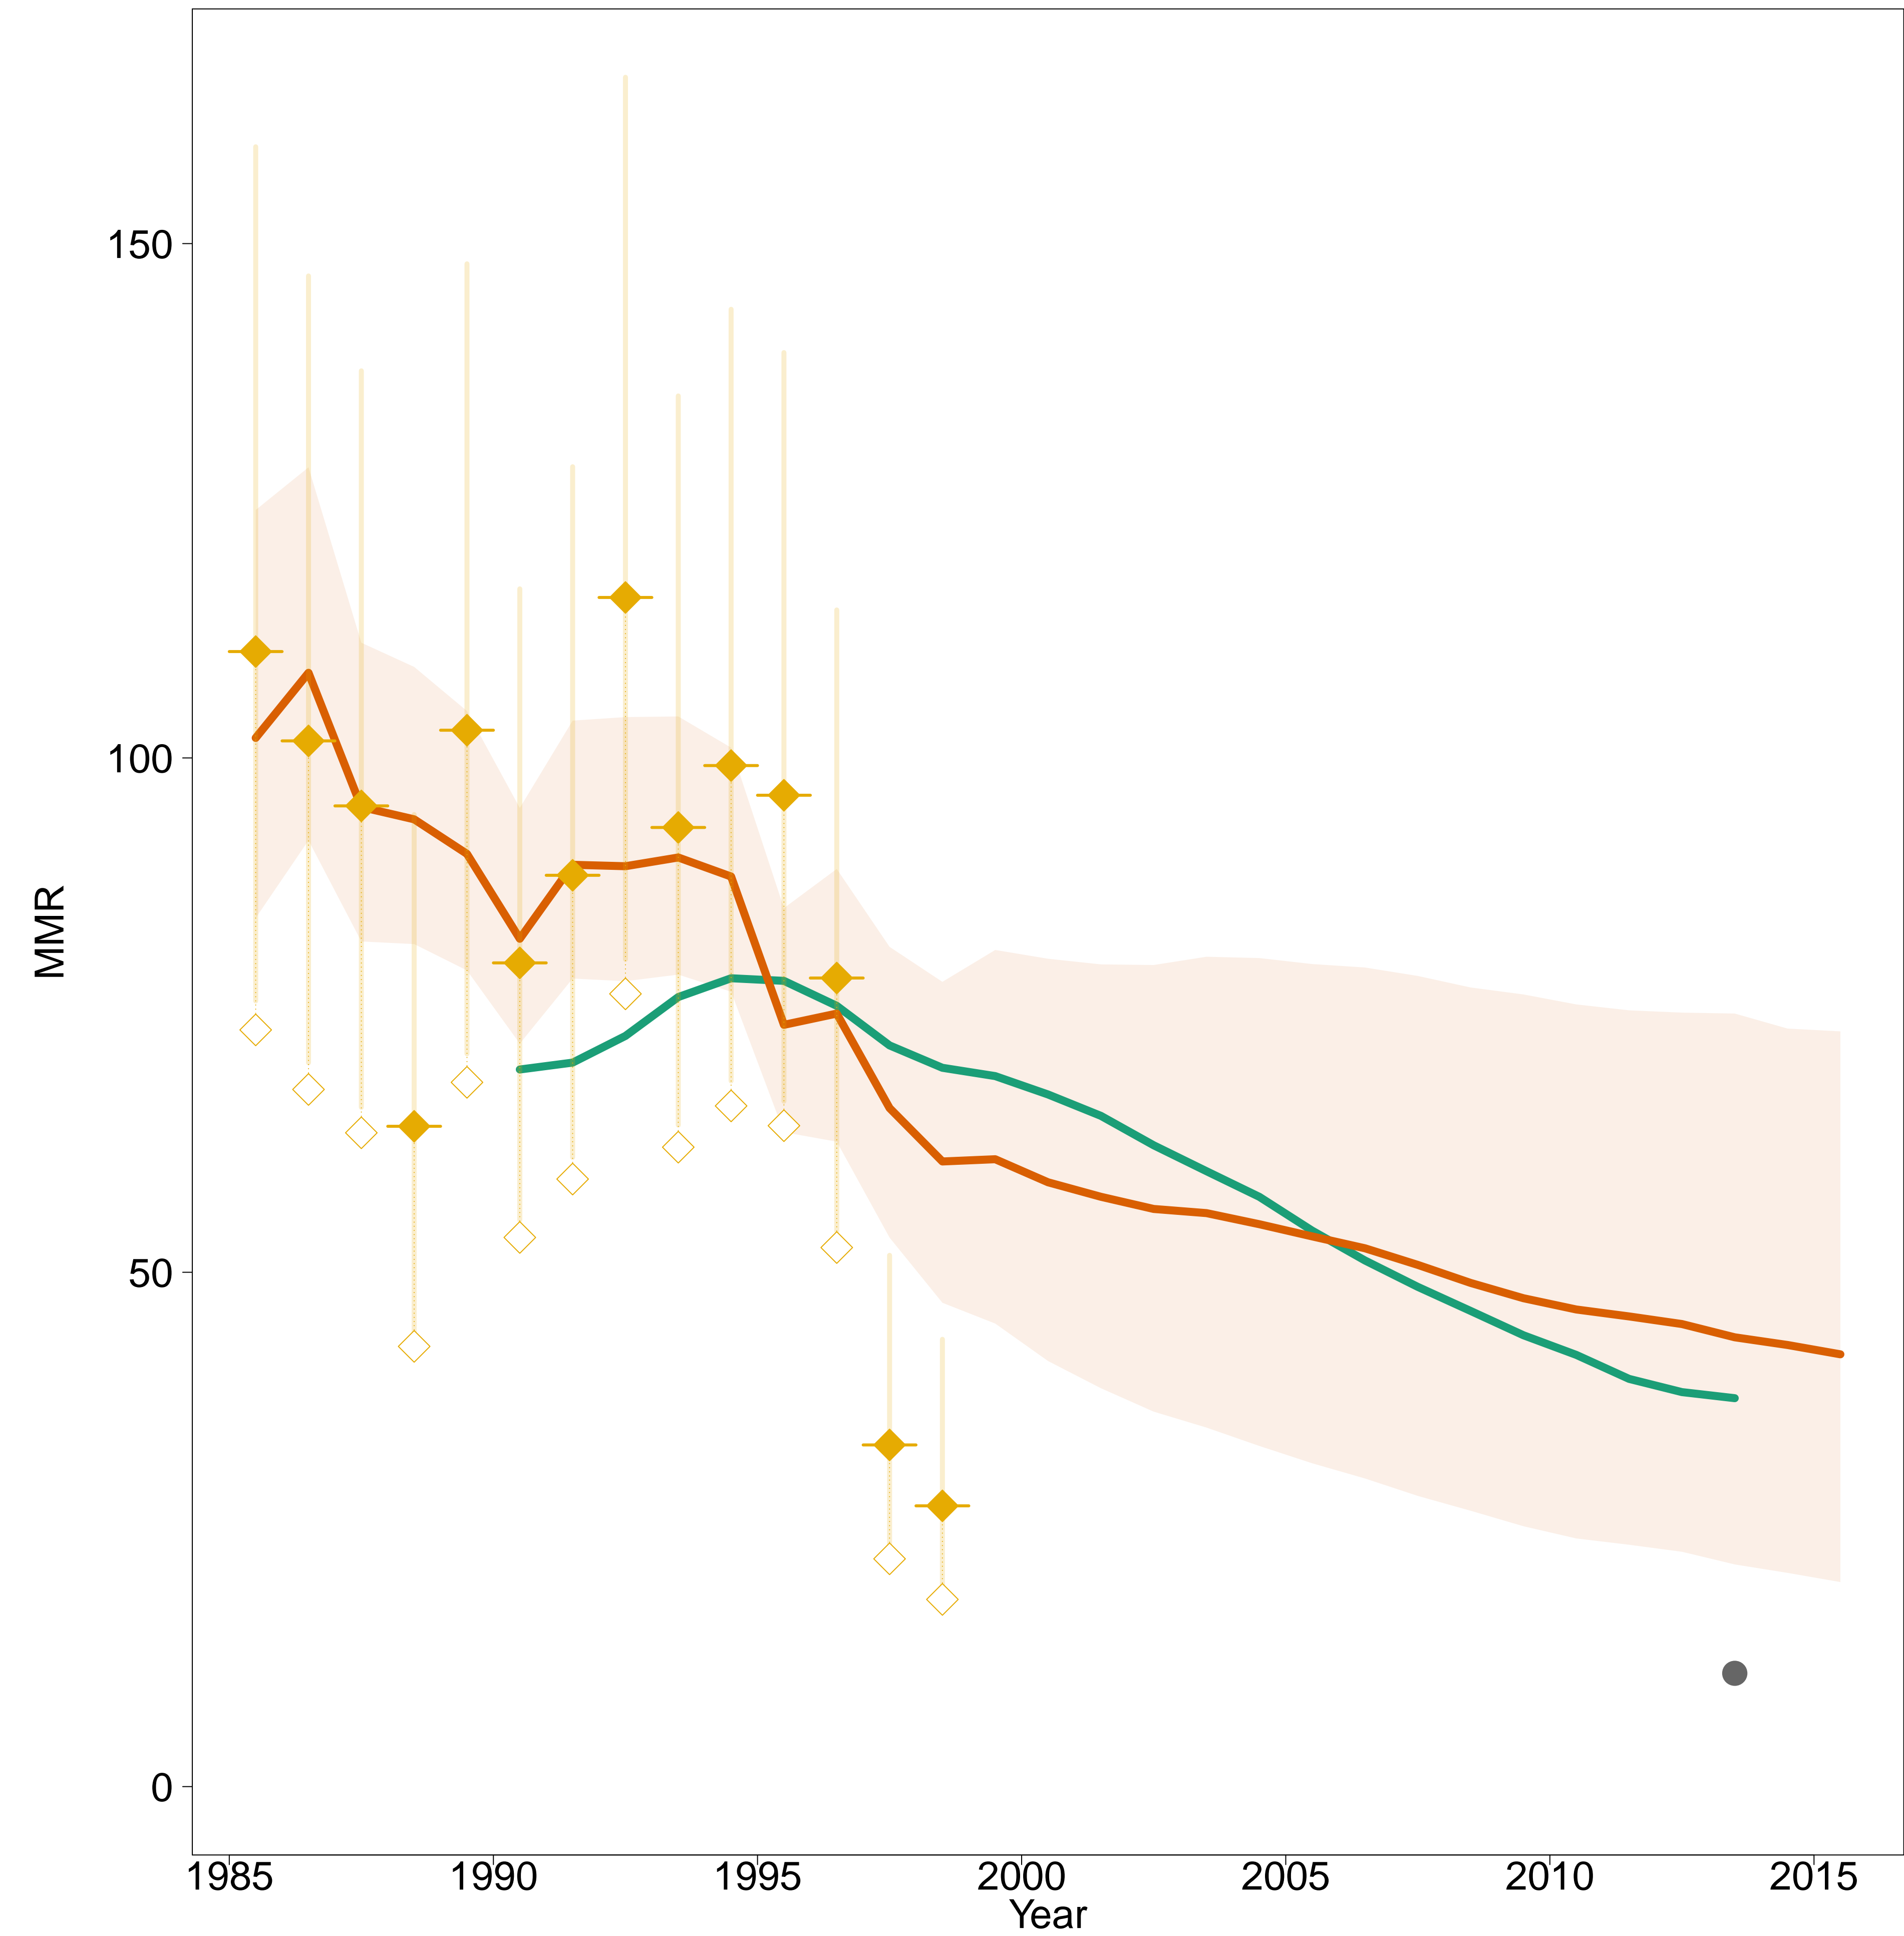

- Estimates –
- MMEIG 2015
- GBD 2013
- MMR Database 2015 –
- ◊ Observed Data
- ◆ Adjusted Data
- Data type –
- ◆ VR
- Excluded VR data (data quality issues)

Uganda [UGA]  
(Eastern Africa)

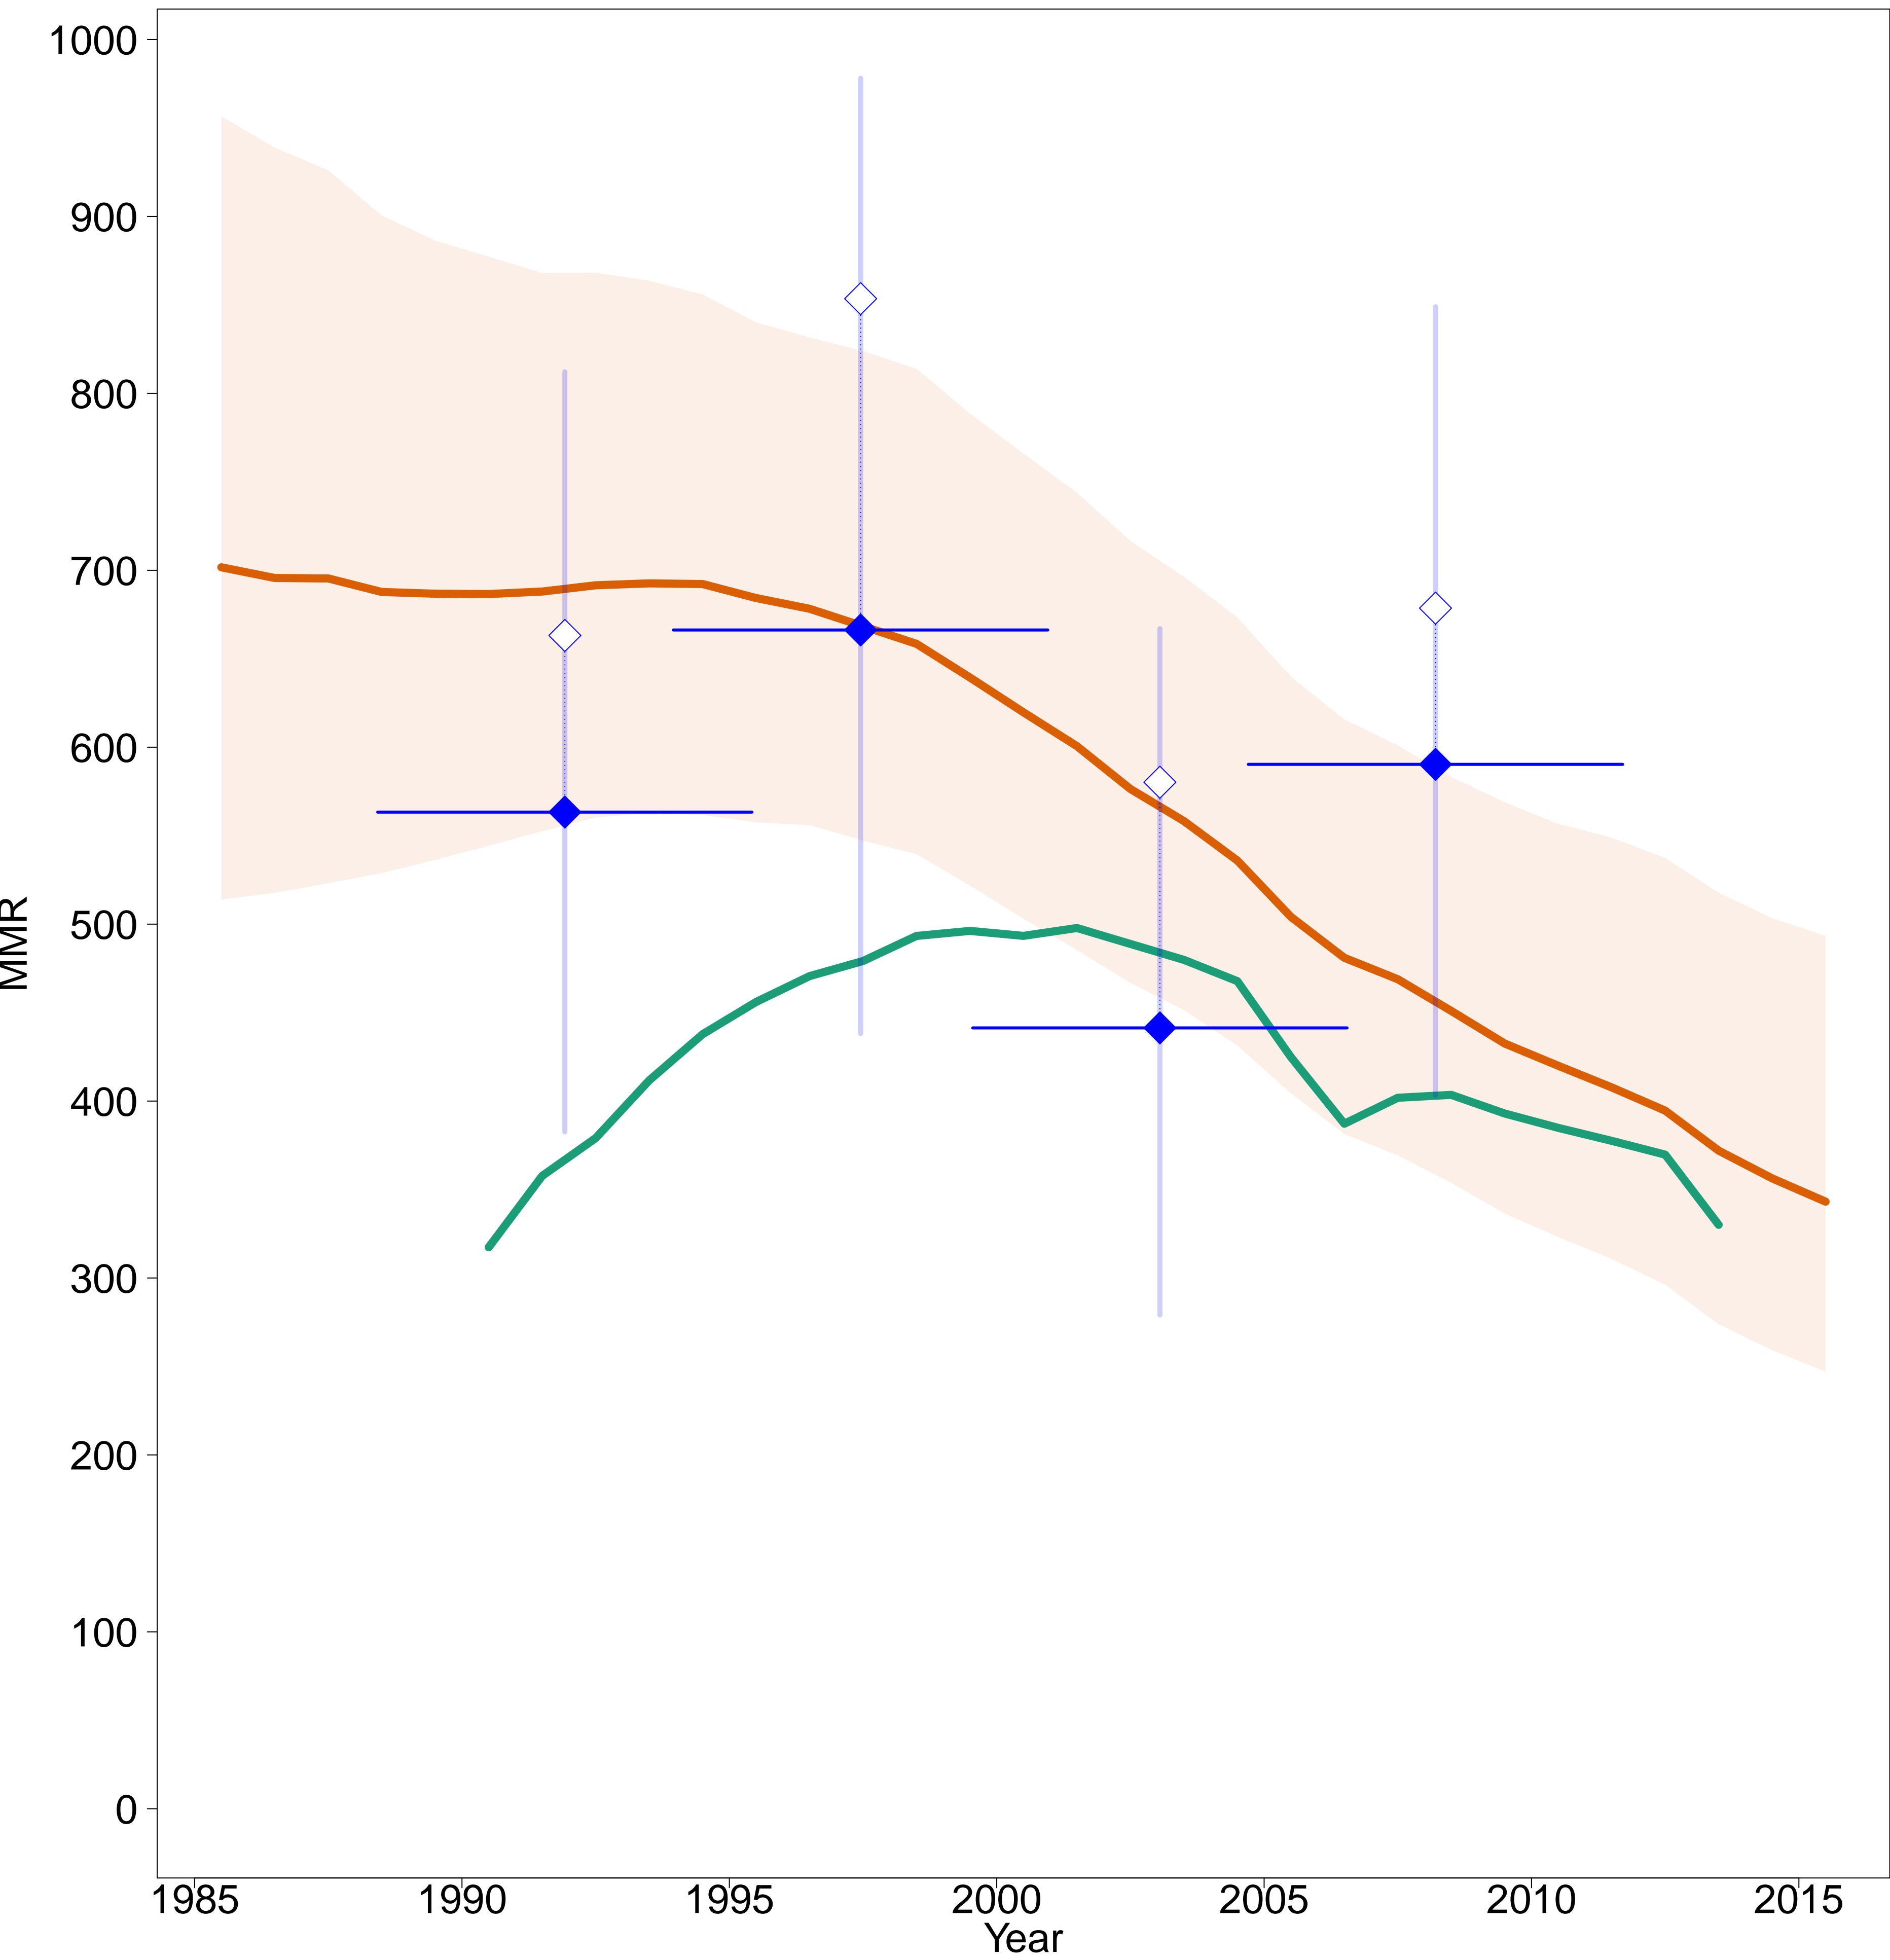

- Estimates -
- MMEIG 2015
- GBD 2013
- MMR Database 2015 -
- Observed Data
- Adjusted Data
- Data type -
- DHS

Ukraine [UKR]  
(Developed regions)

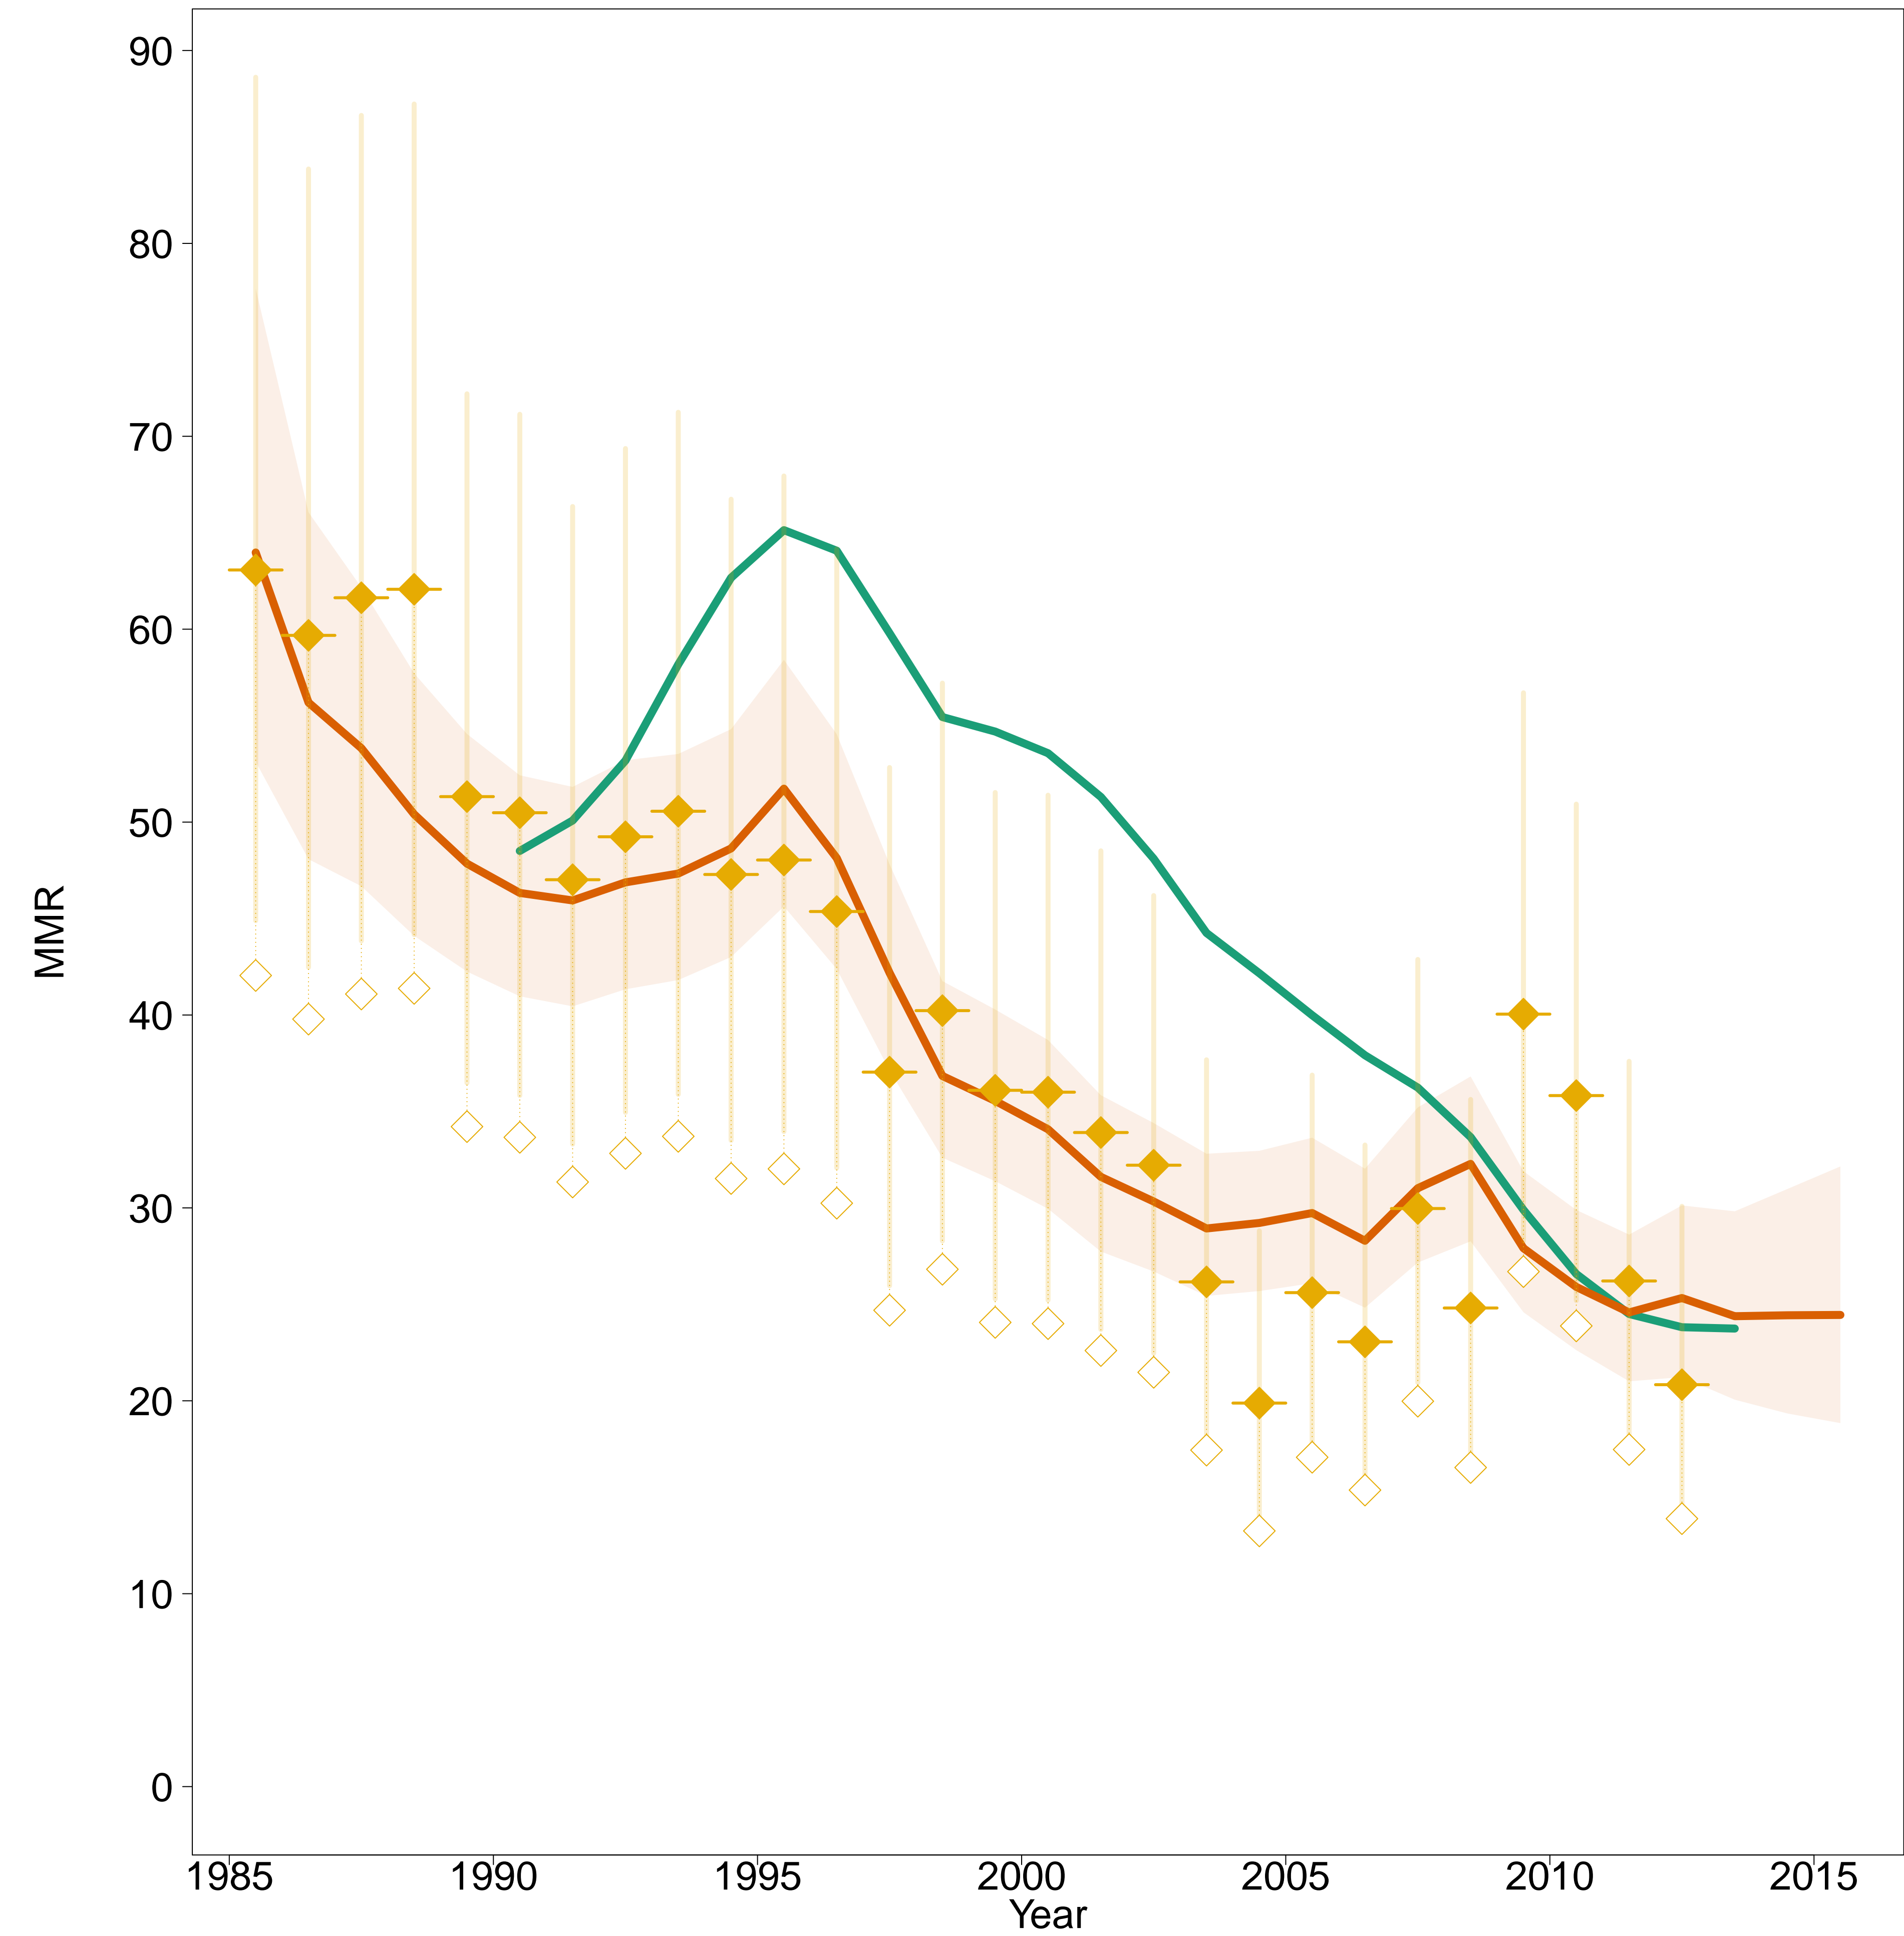

- Estimates –
- MMEIG 2015
- GBD 2013
- MMR Database 2015 –
- Observed Data
- Adjusted Data
- Data type –
- VR

United Arab Emirates [ARE]  
(Western Asia)

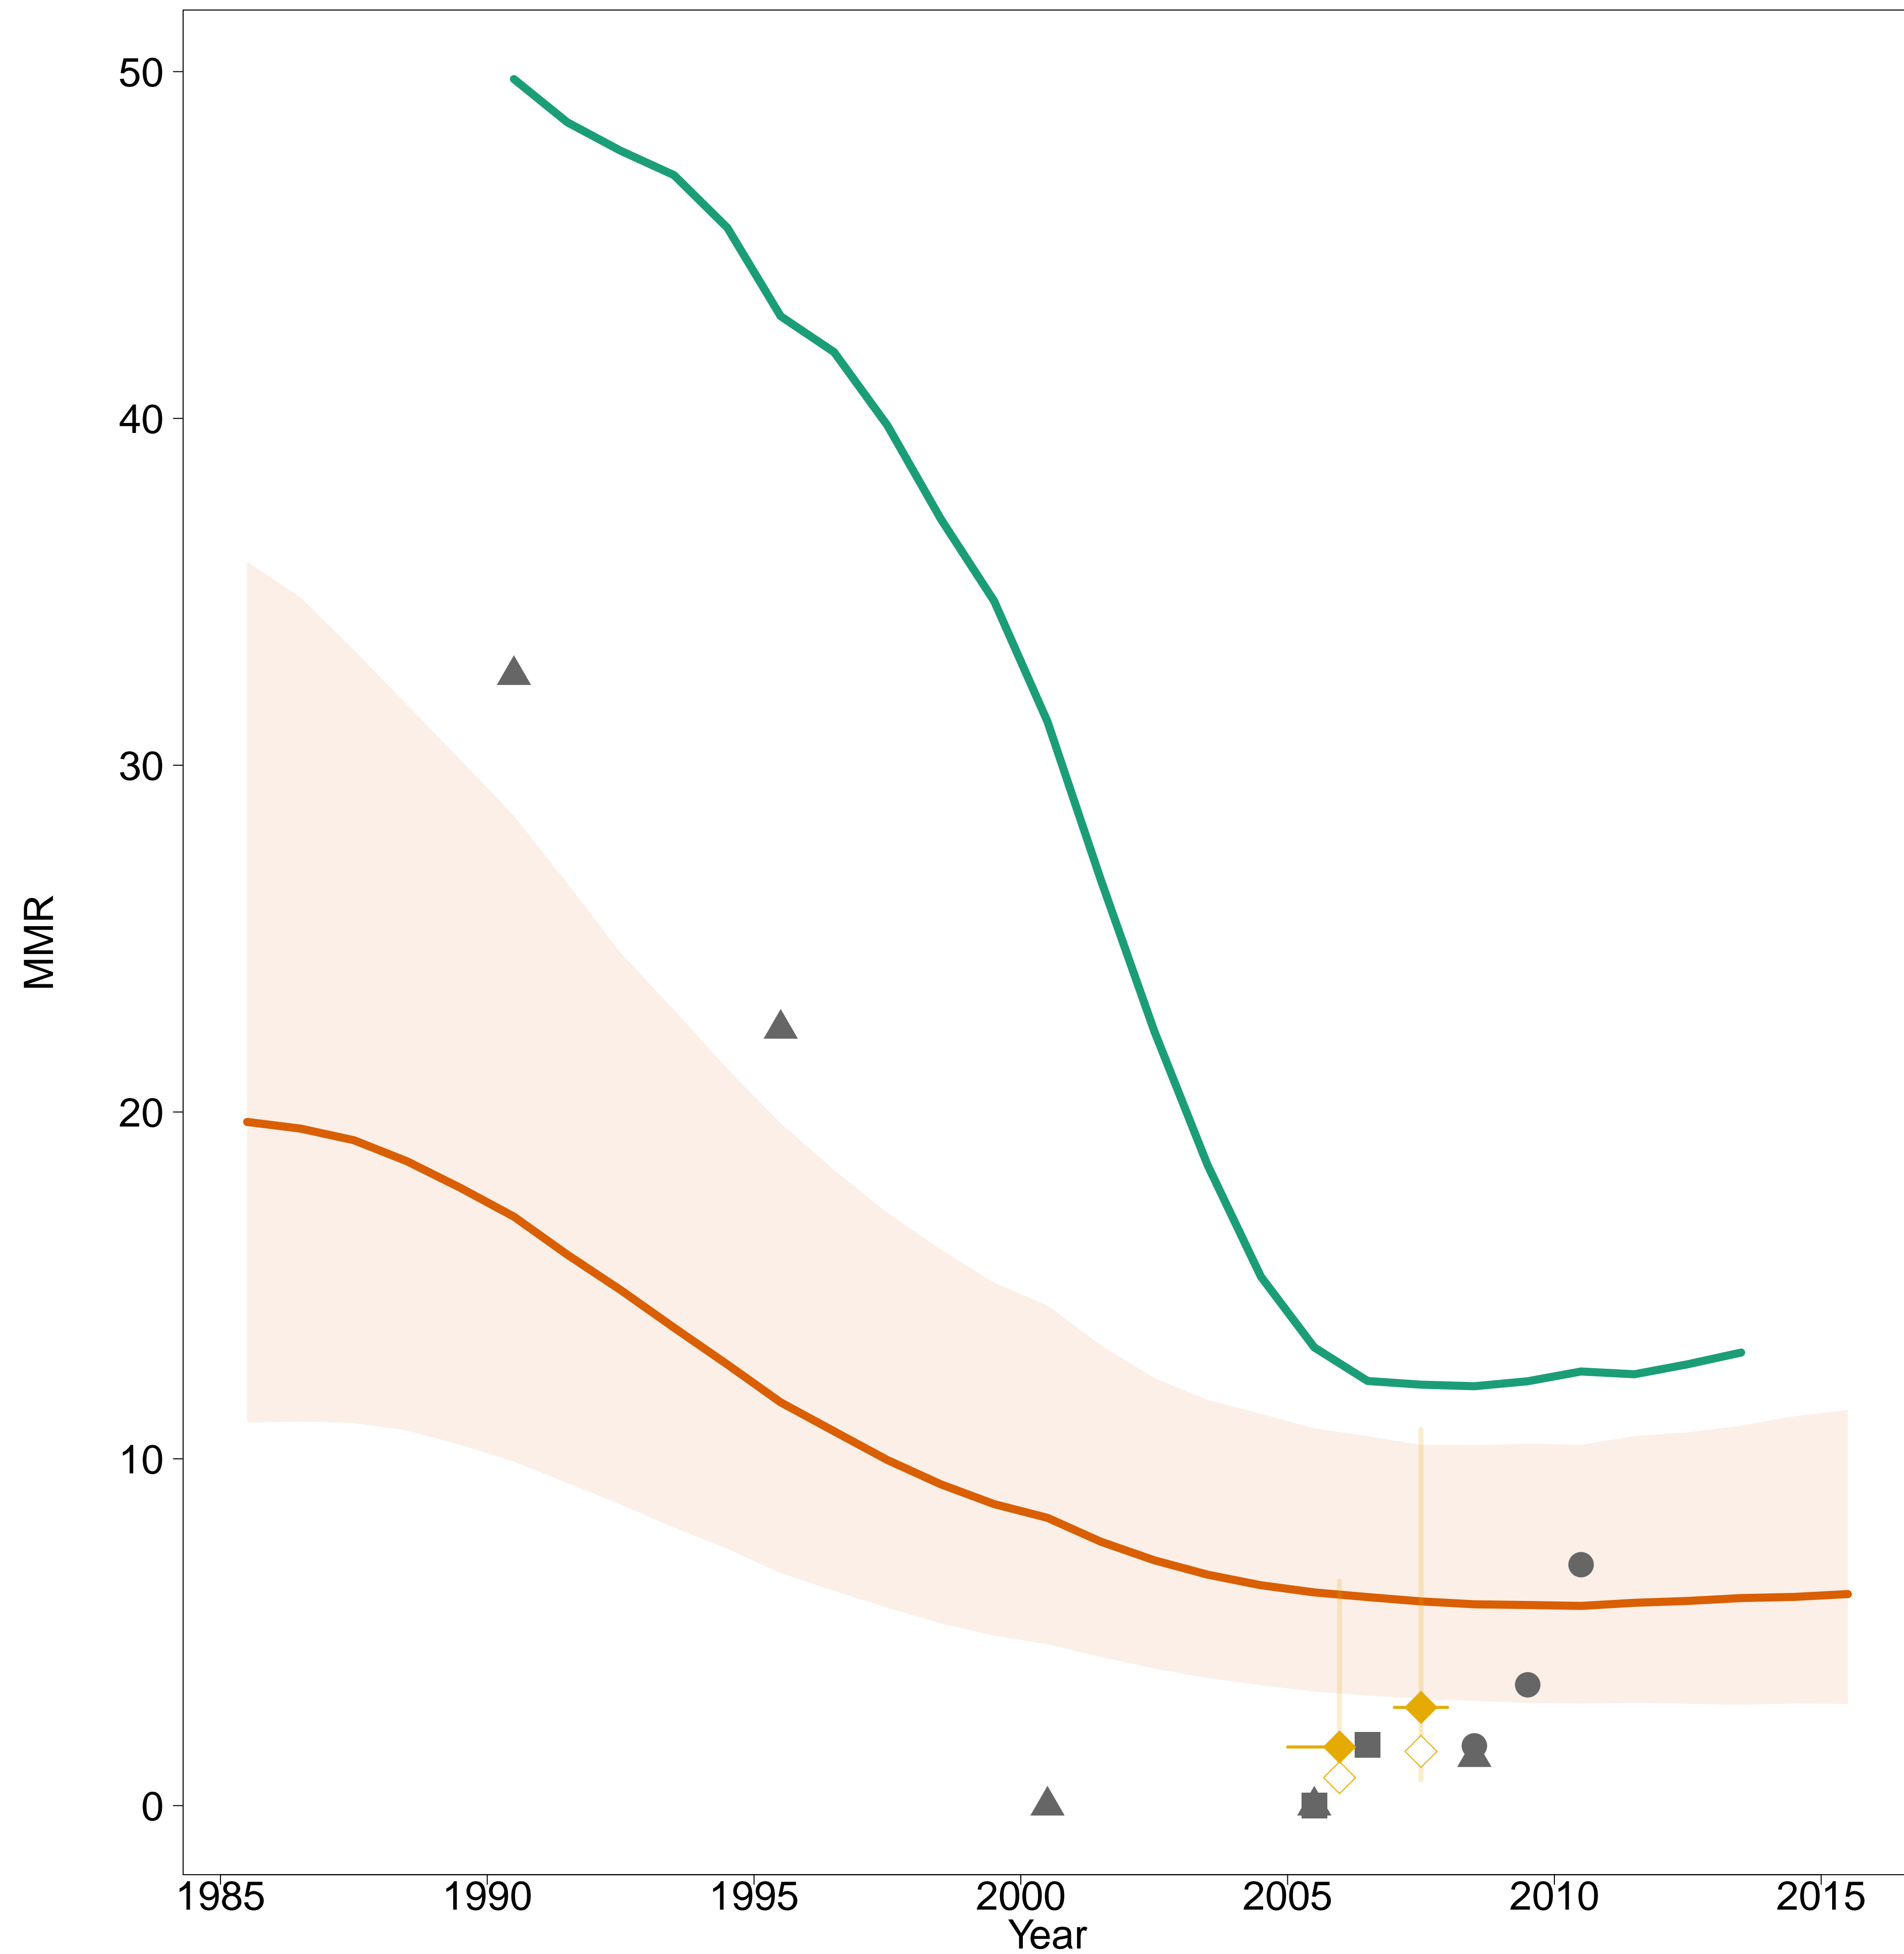

– Estimates –

— MMEIG 2015

— GBD 2013

– MMR Database 2015 –

◊ Observed Data

◆ Adjusted Data

– Data type –

◆ VR

■ Reported VR before recal.  
(related to 0 obs. mat. death)

● Excluded VR data  
(data quality issues)

▲ Excluded misc. studies

United Kingdom [GBR]  
(Developed regions)

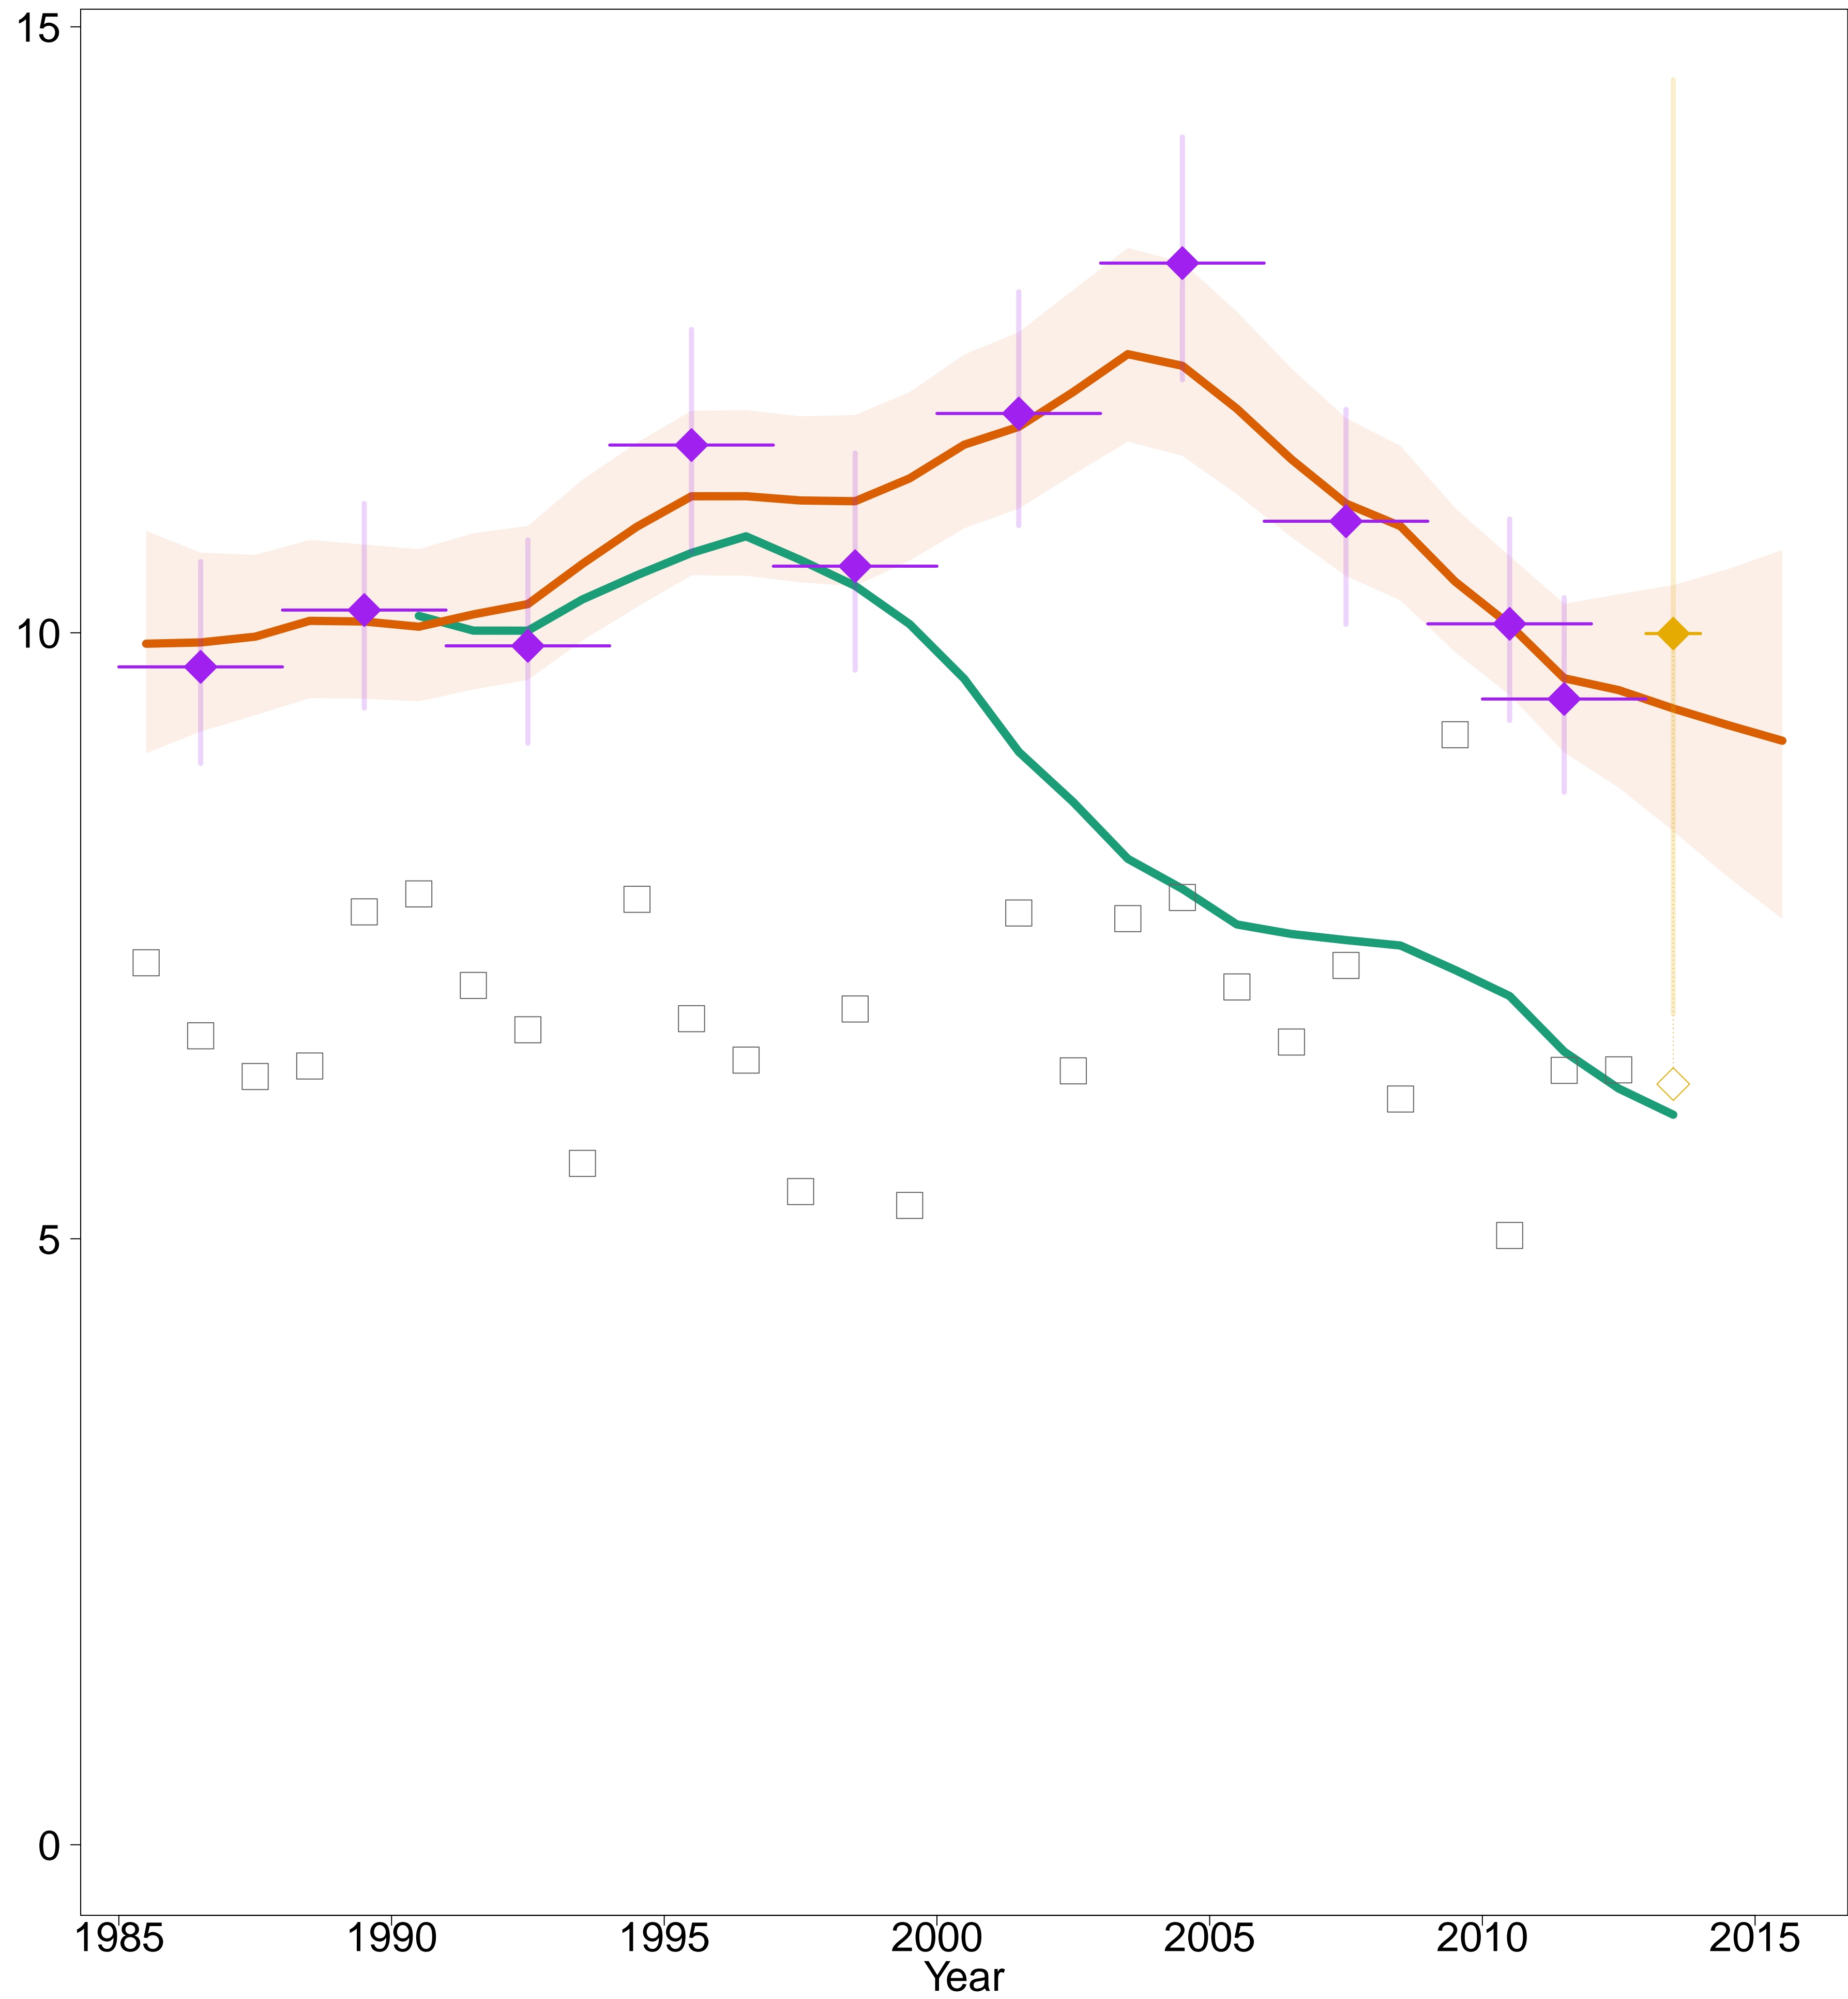

- Estimates –
- MMEIG 2015
- GBD 2013
- MMR Database 2015 –
- Observed Data
- Adjusted Data
- Data type –
- VR
- Spec. studies
- Excluded VR data  
(overlap with specialized study)

United States of America [USA]  
(Developed regions)

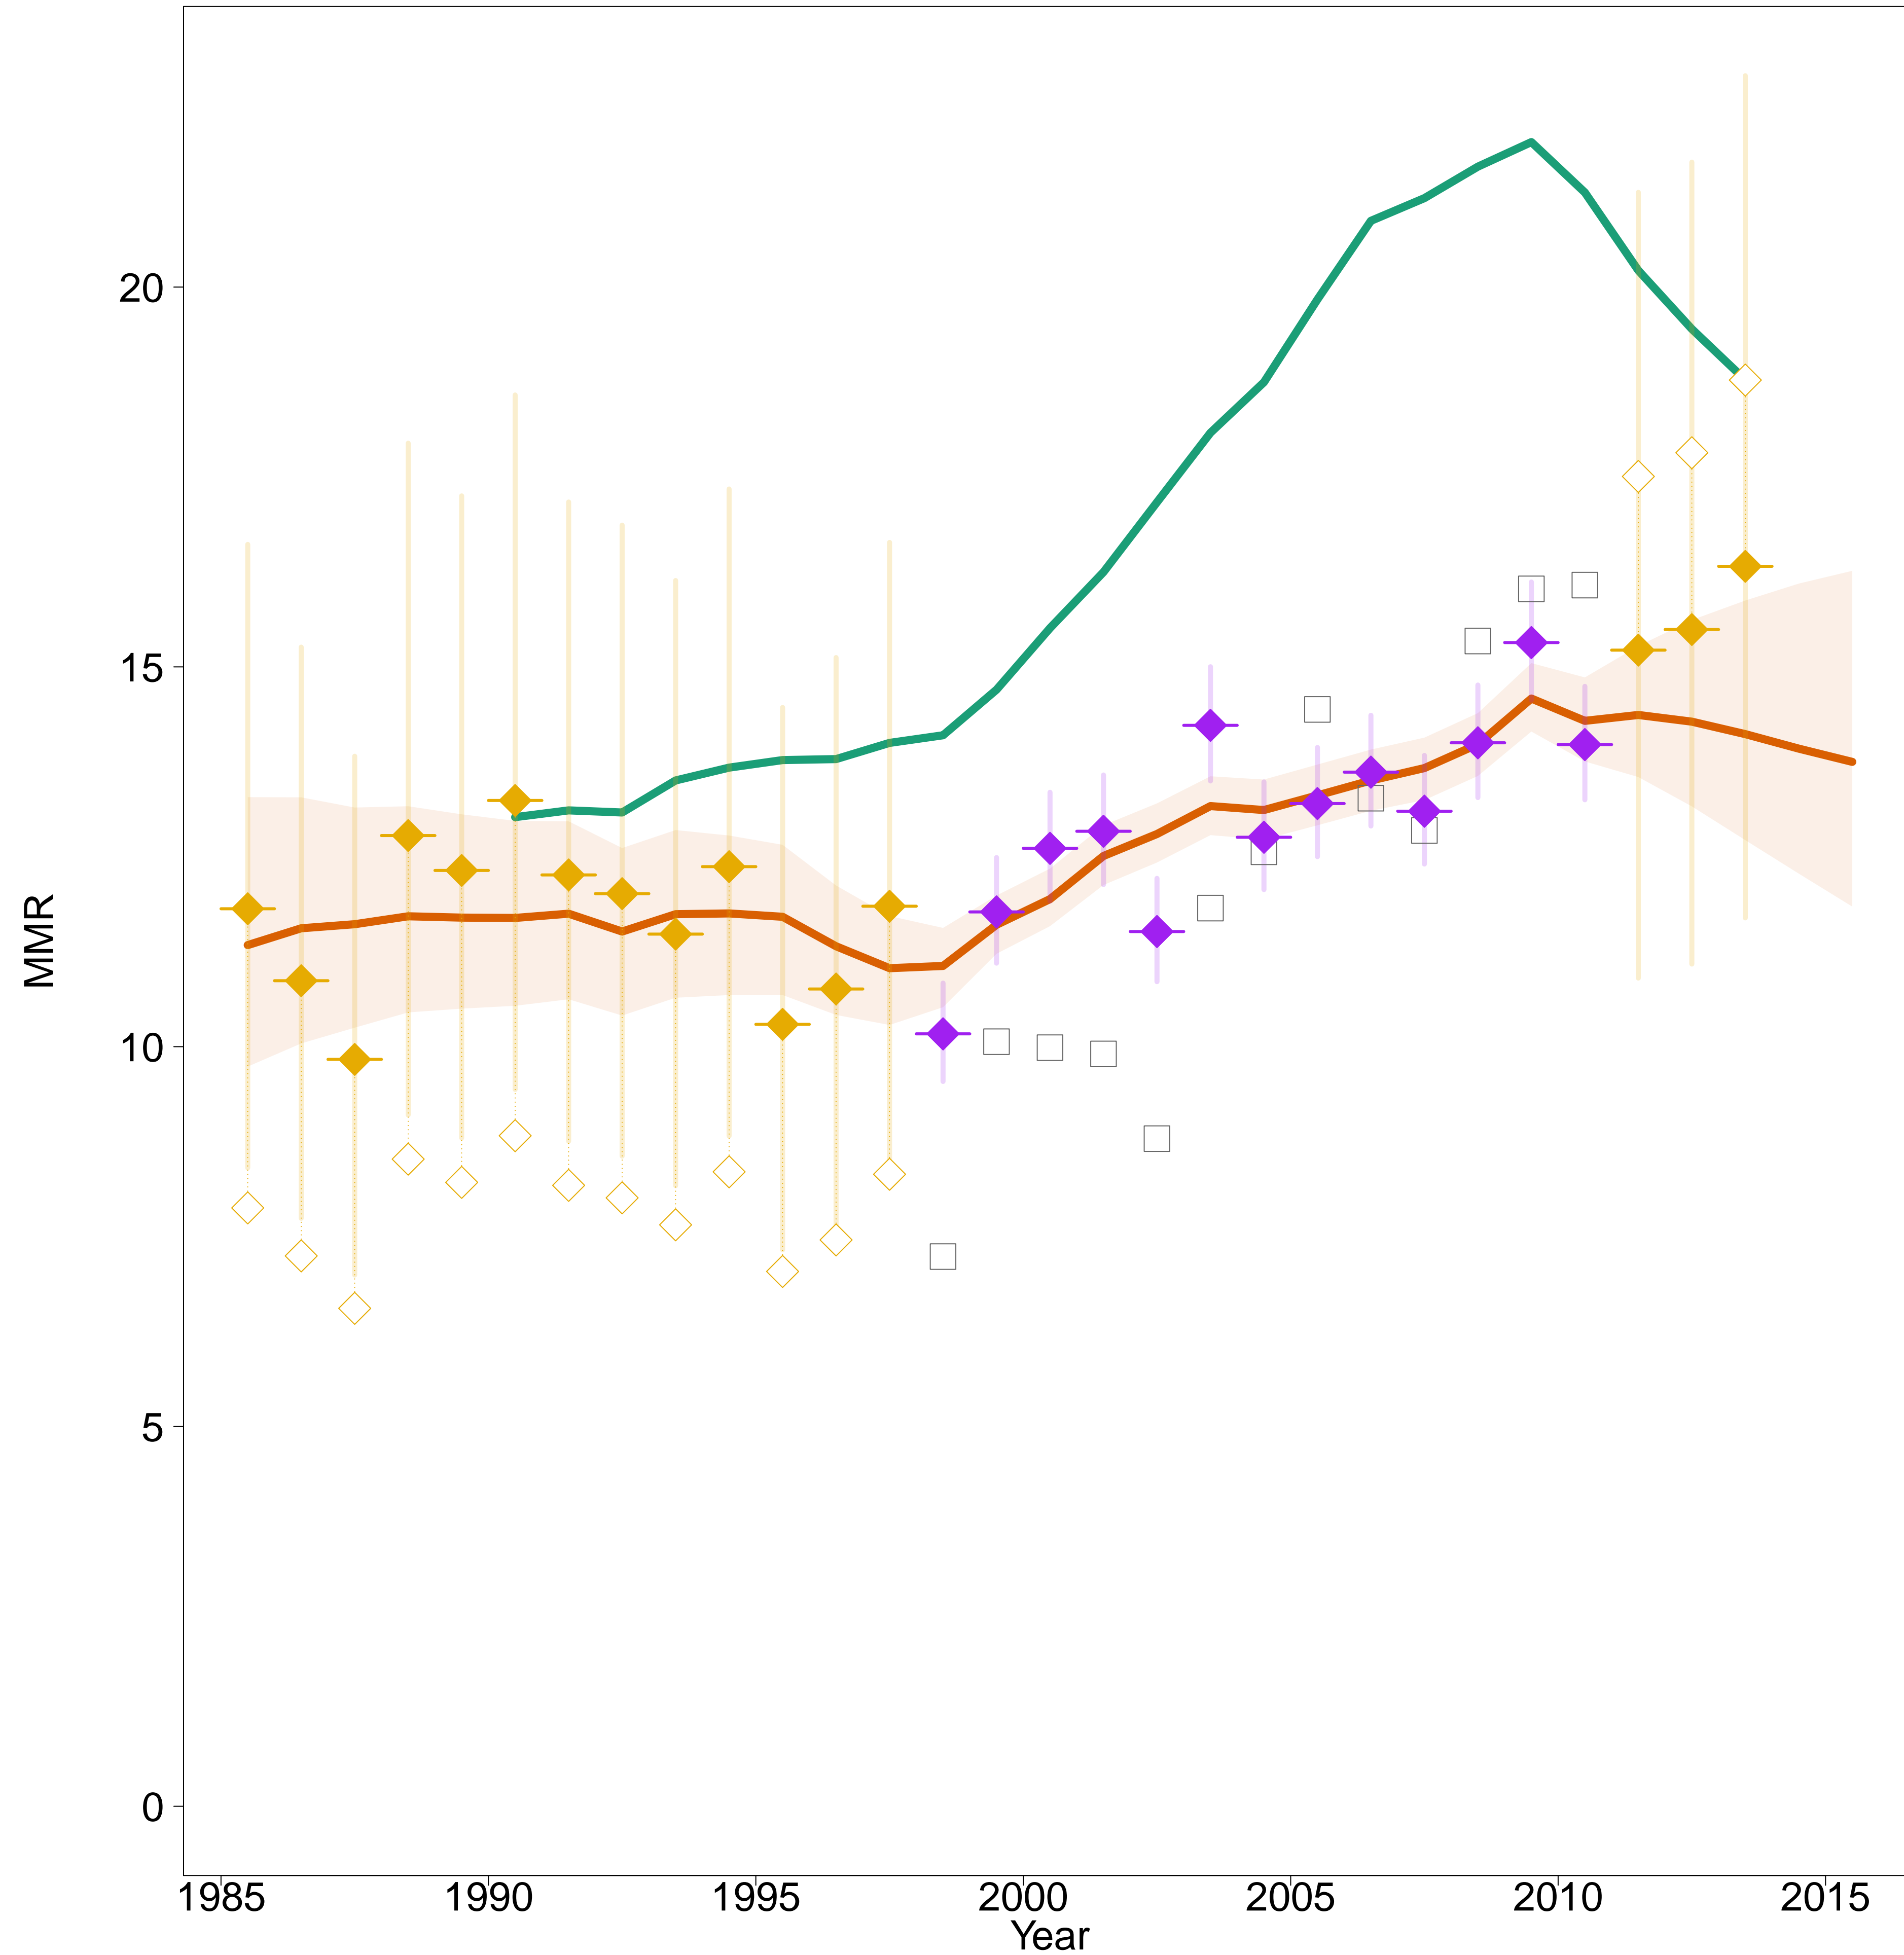

- Estimates –
- MMEIG 2015
- GBD 2013
- MMR Database 2015 –
- Observed Data
- Adjusted Data
- Data type –
- VR
- Spec. studies
- Excluded VR data  
(overlap with specialized study)

Uruguay [URY]  
(South America)

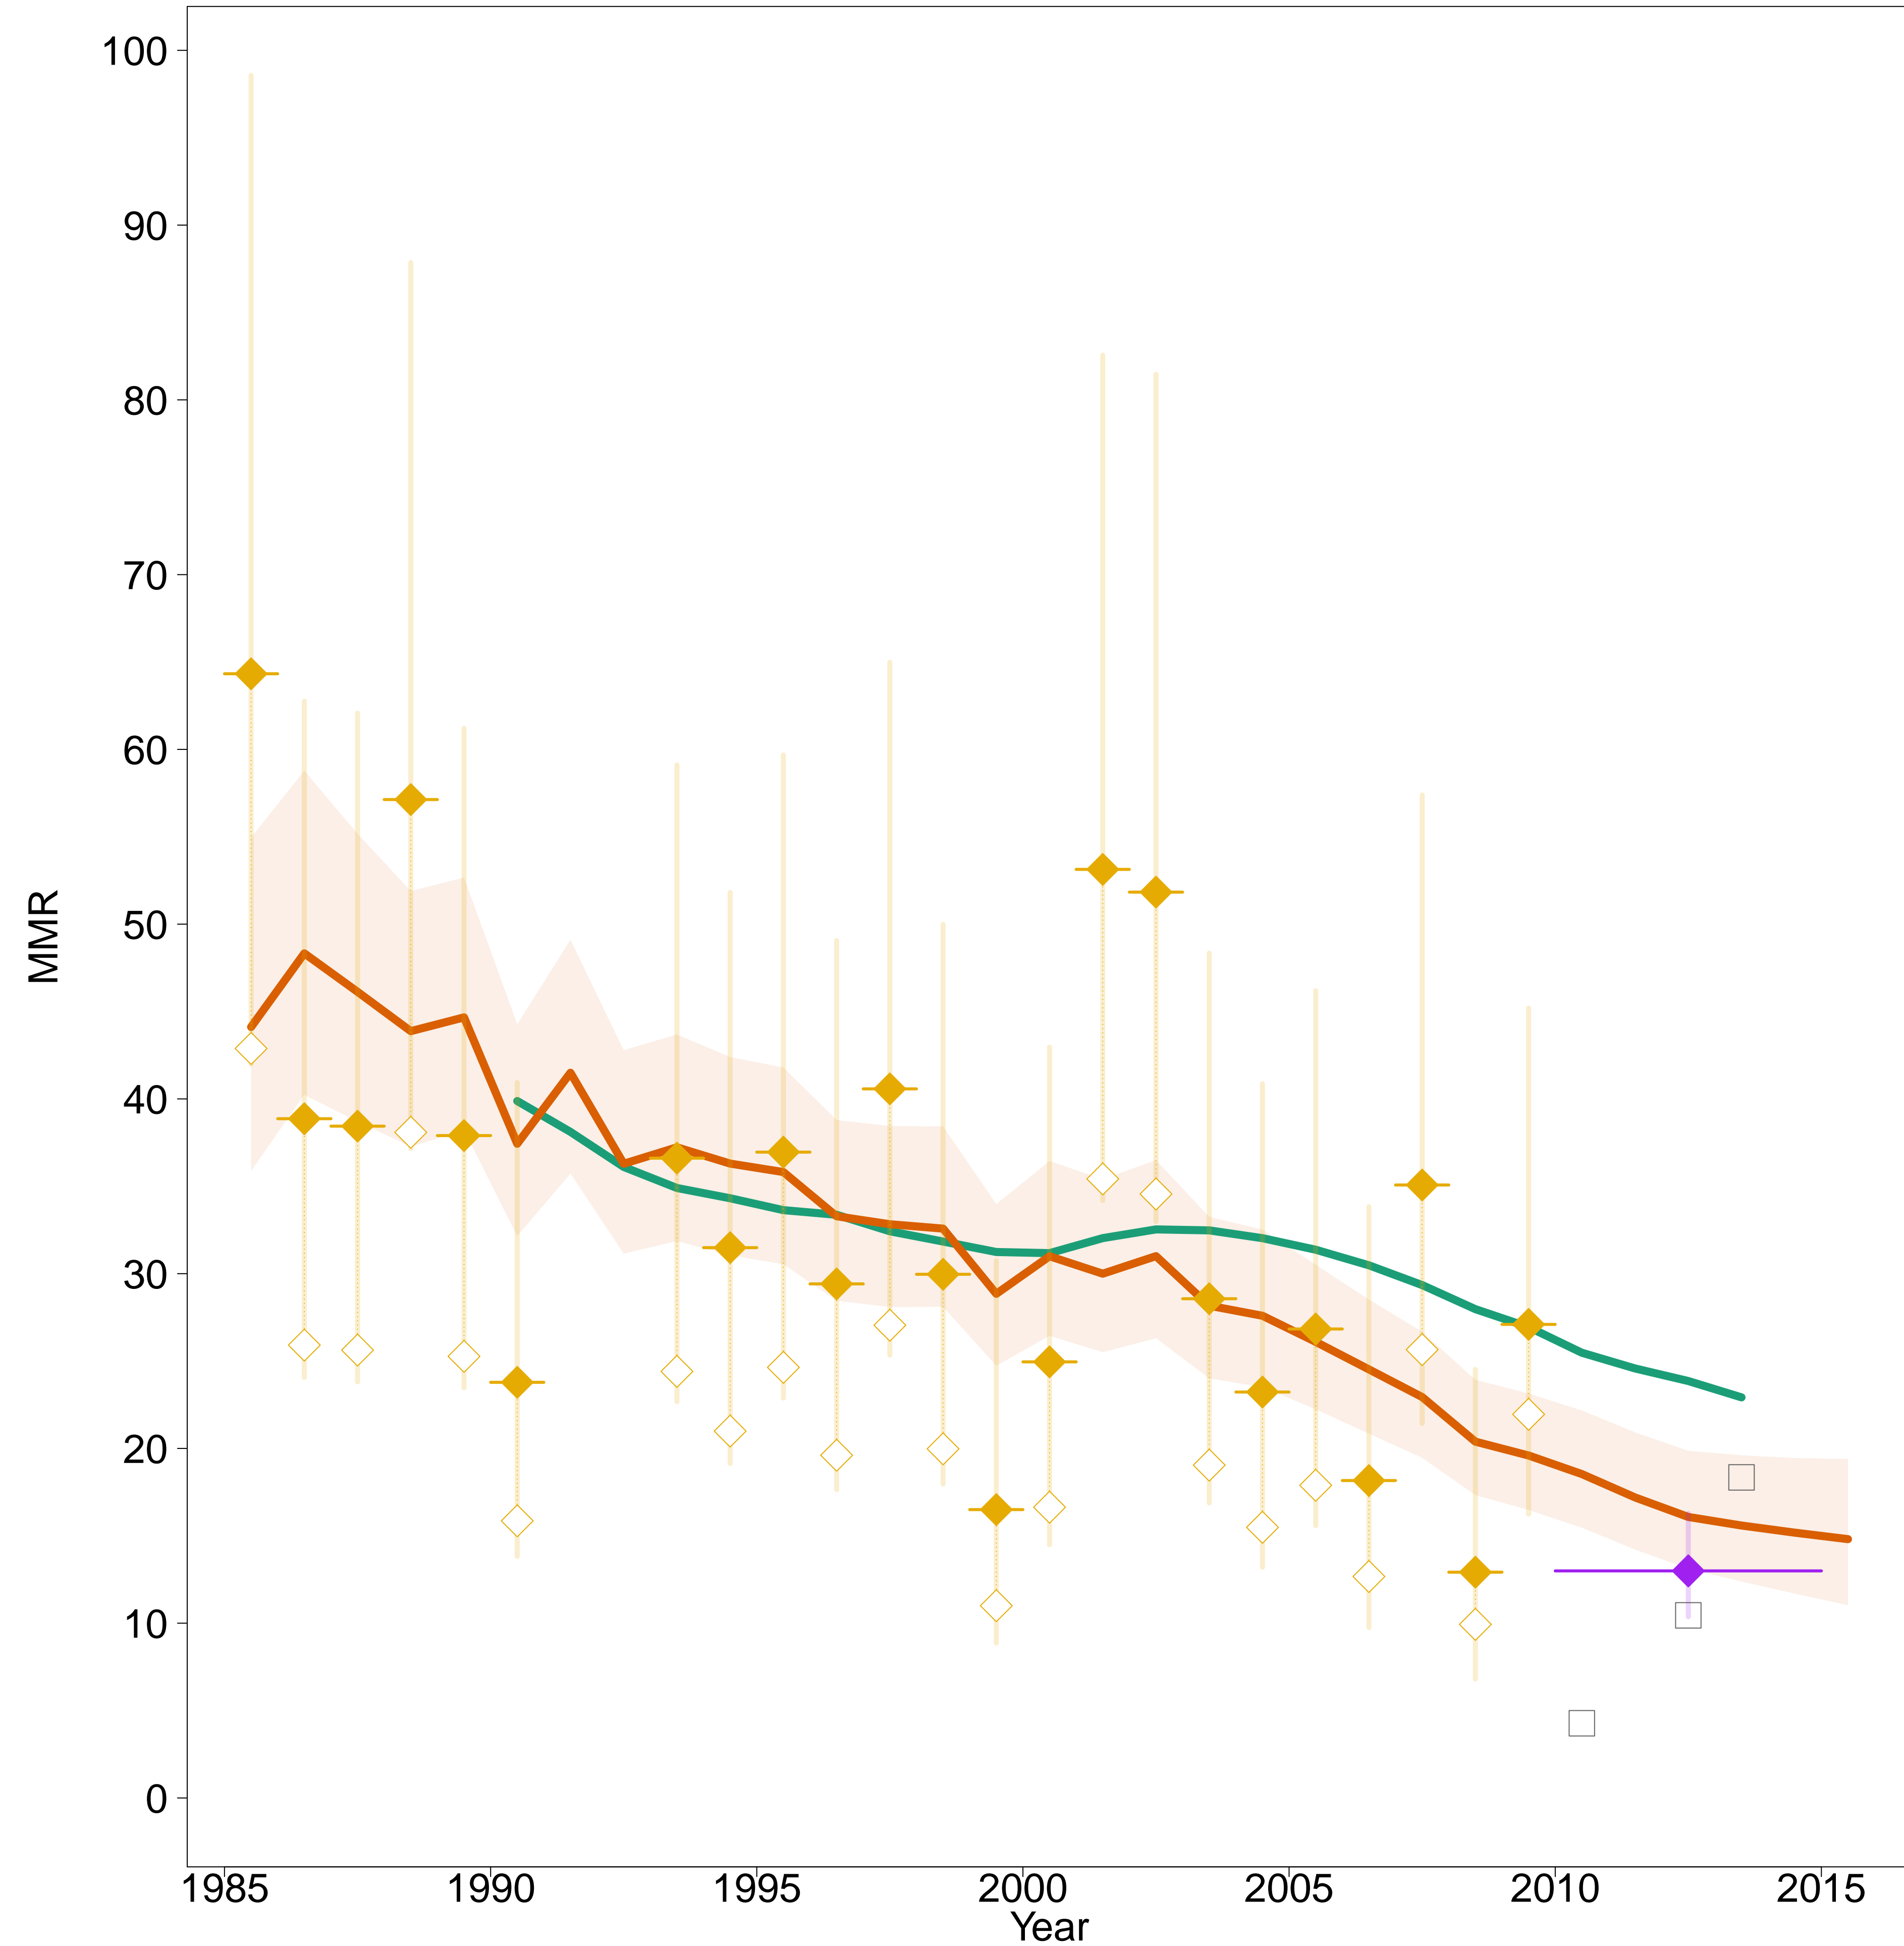

- Estimates –
- MMEIG 2015
- GBD 2013
- MMR Database 2015 –
- ◊ Observed Data
- ◆ Adjusted Data
- Data type –
- ◆ VR
- ◆ Spec. studies
- ◻ Excluded VR data  
(overlap with specialized study)

Uzbekistan [UZB]  
(Central Asia)

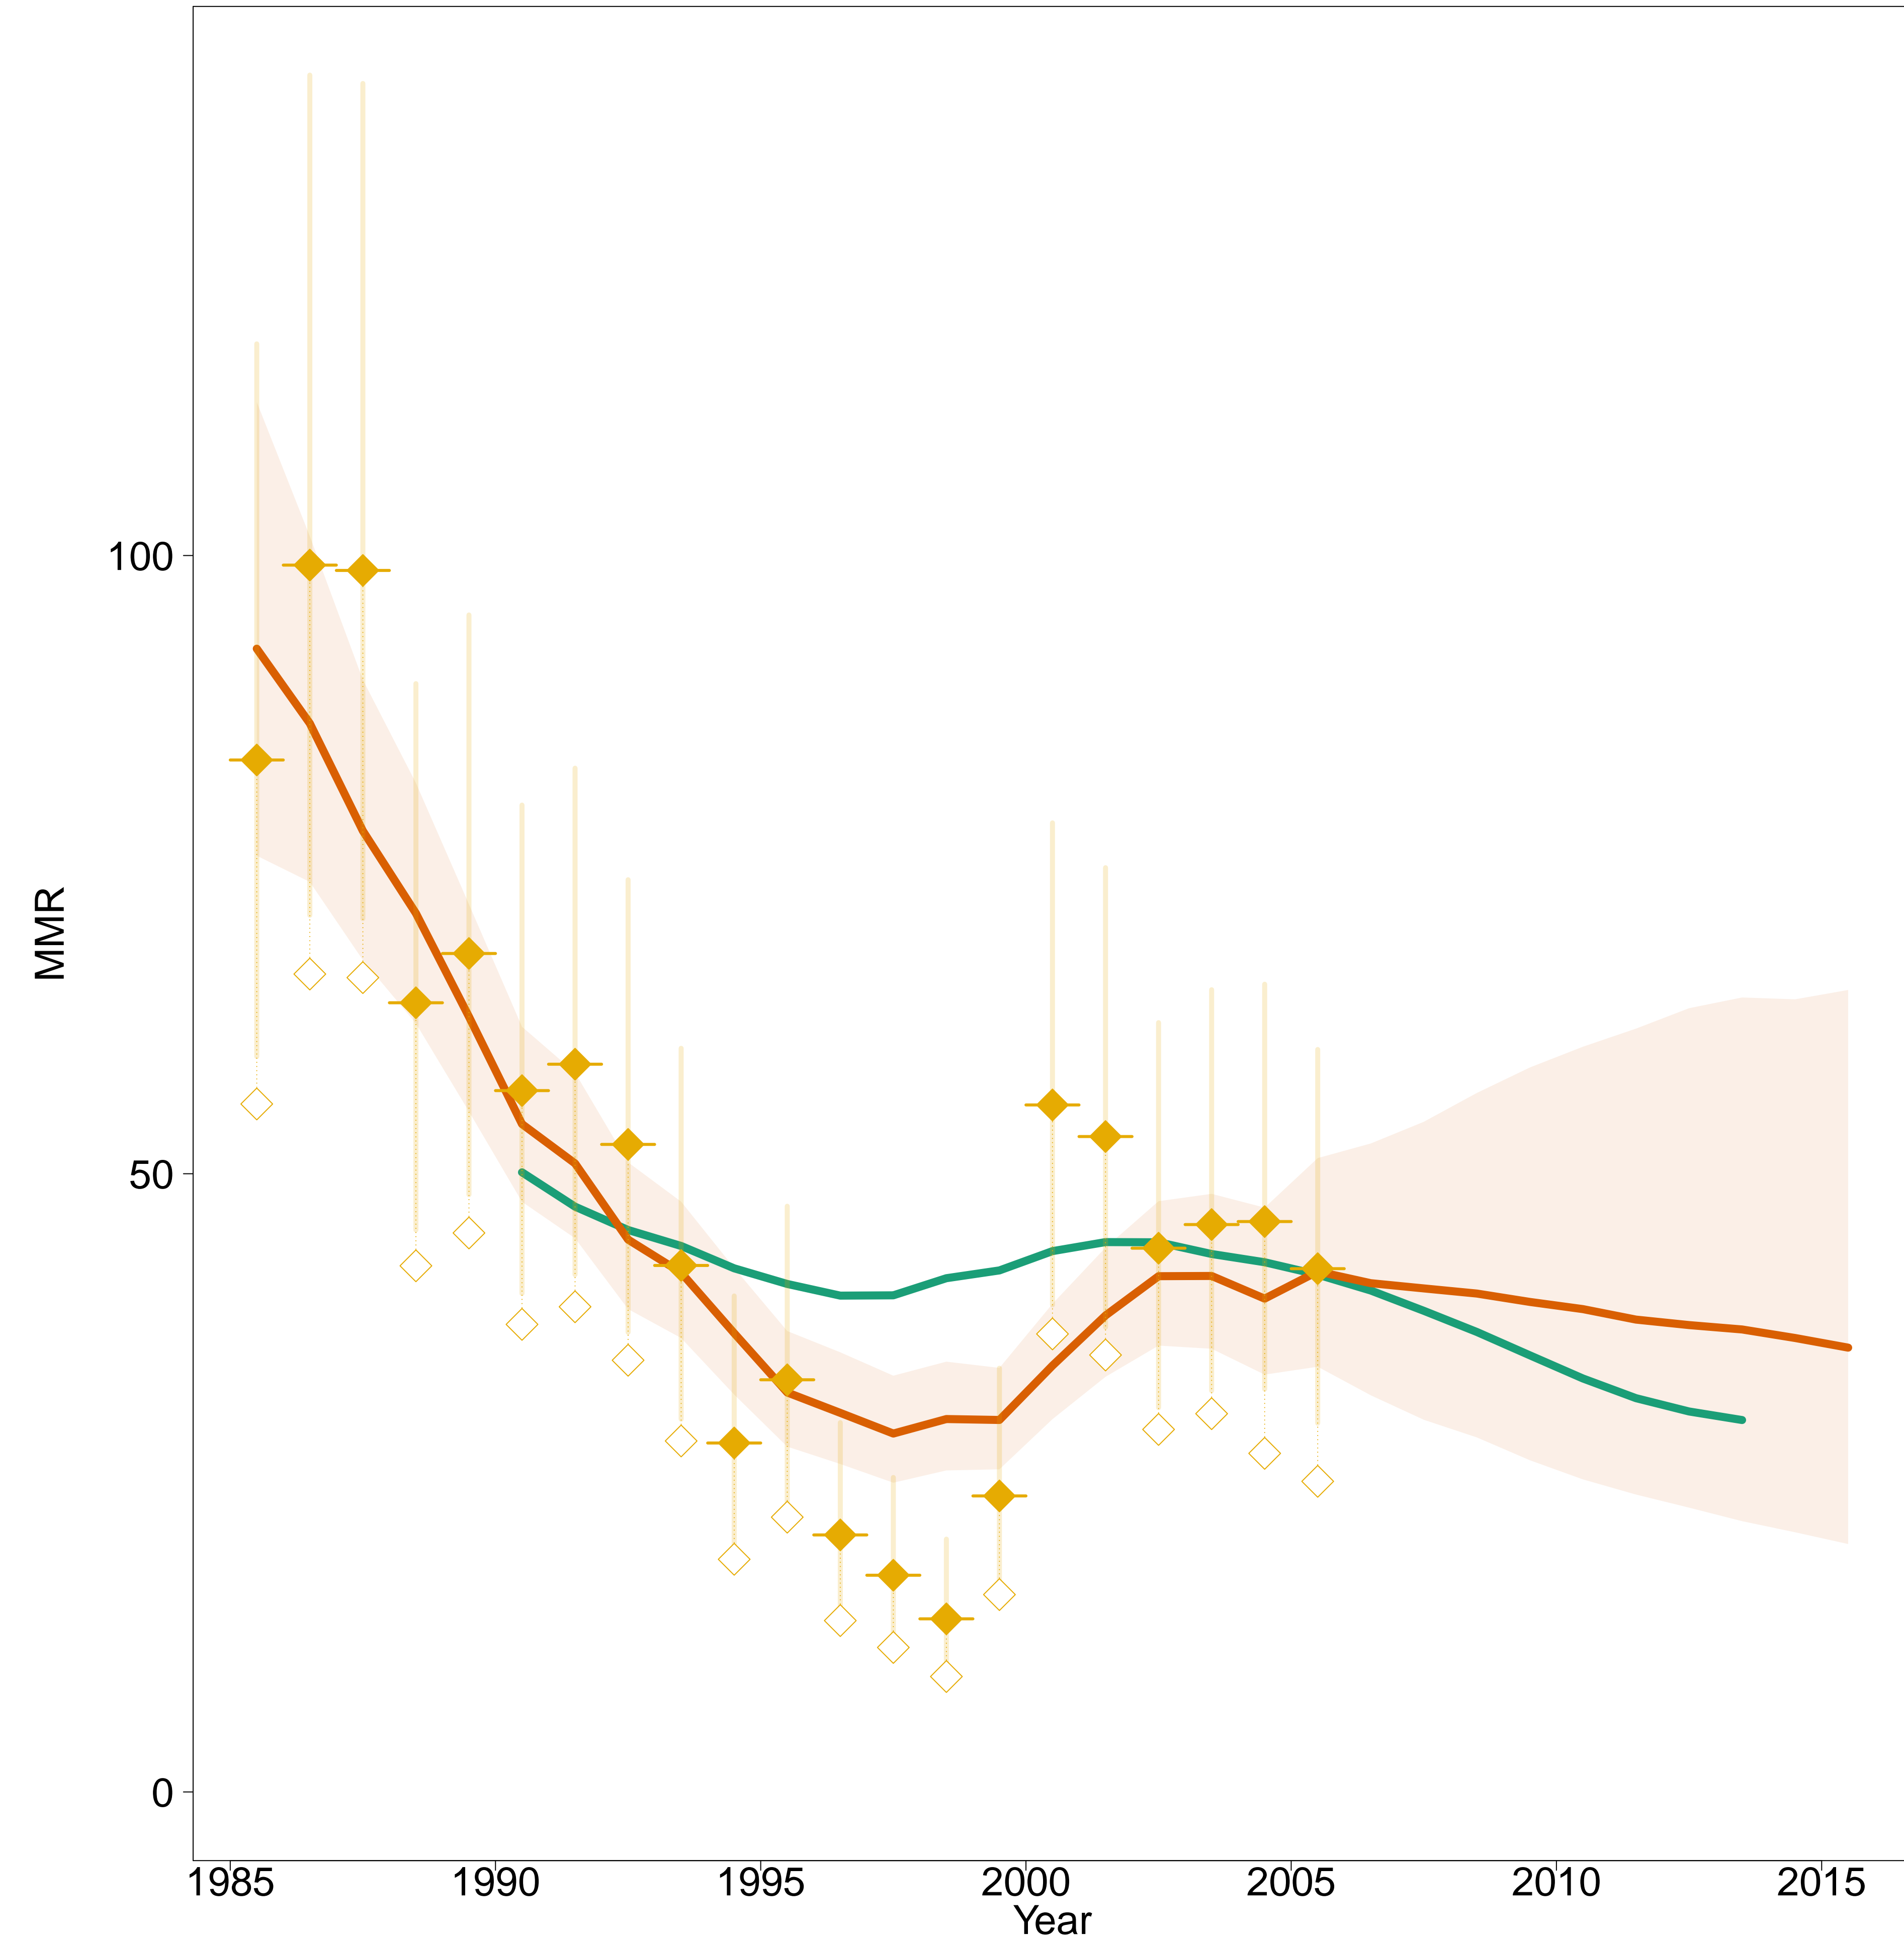

- Estimates -
- MMEIG 2015
- GBD 2013
- MMR Database 2015 -
- Observed Data
- Adjusted Data
- Data type -
- VR



Vanuatu [VUT]  
(South-Eastern Asia / Oceania)

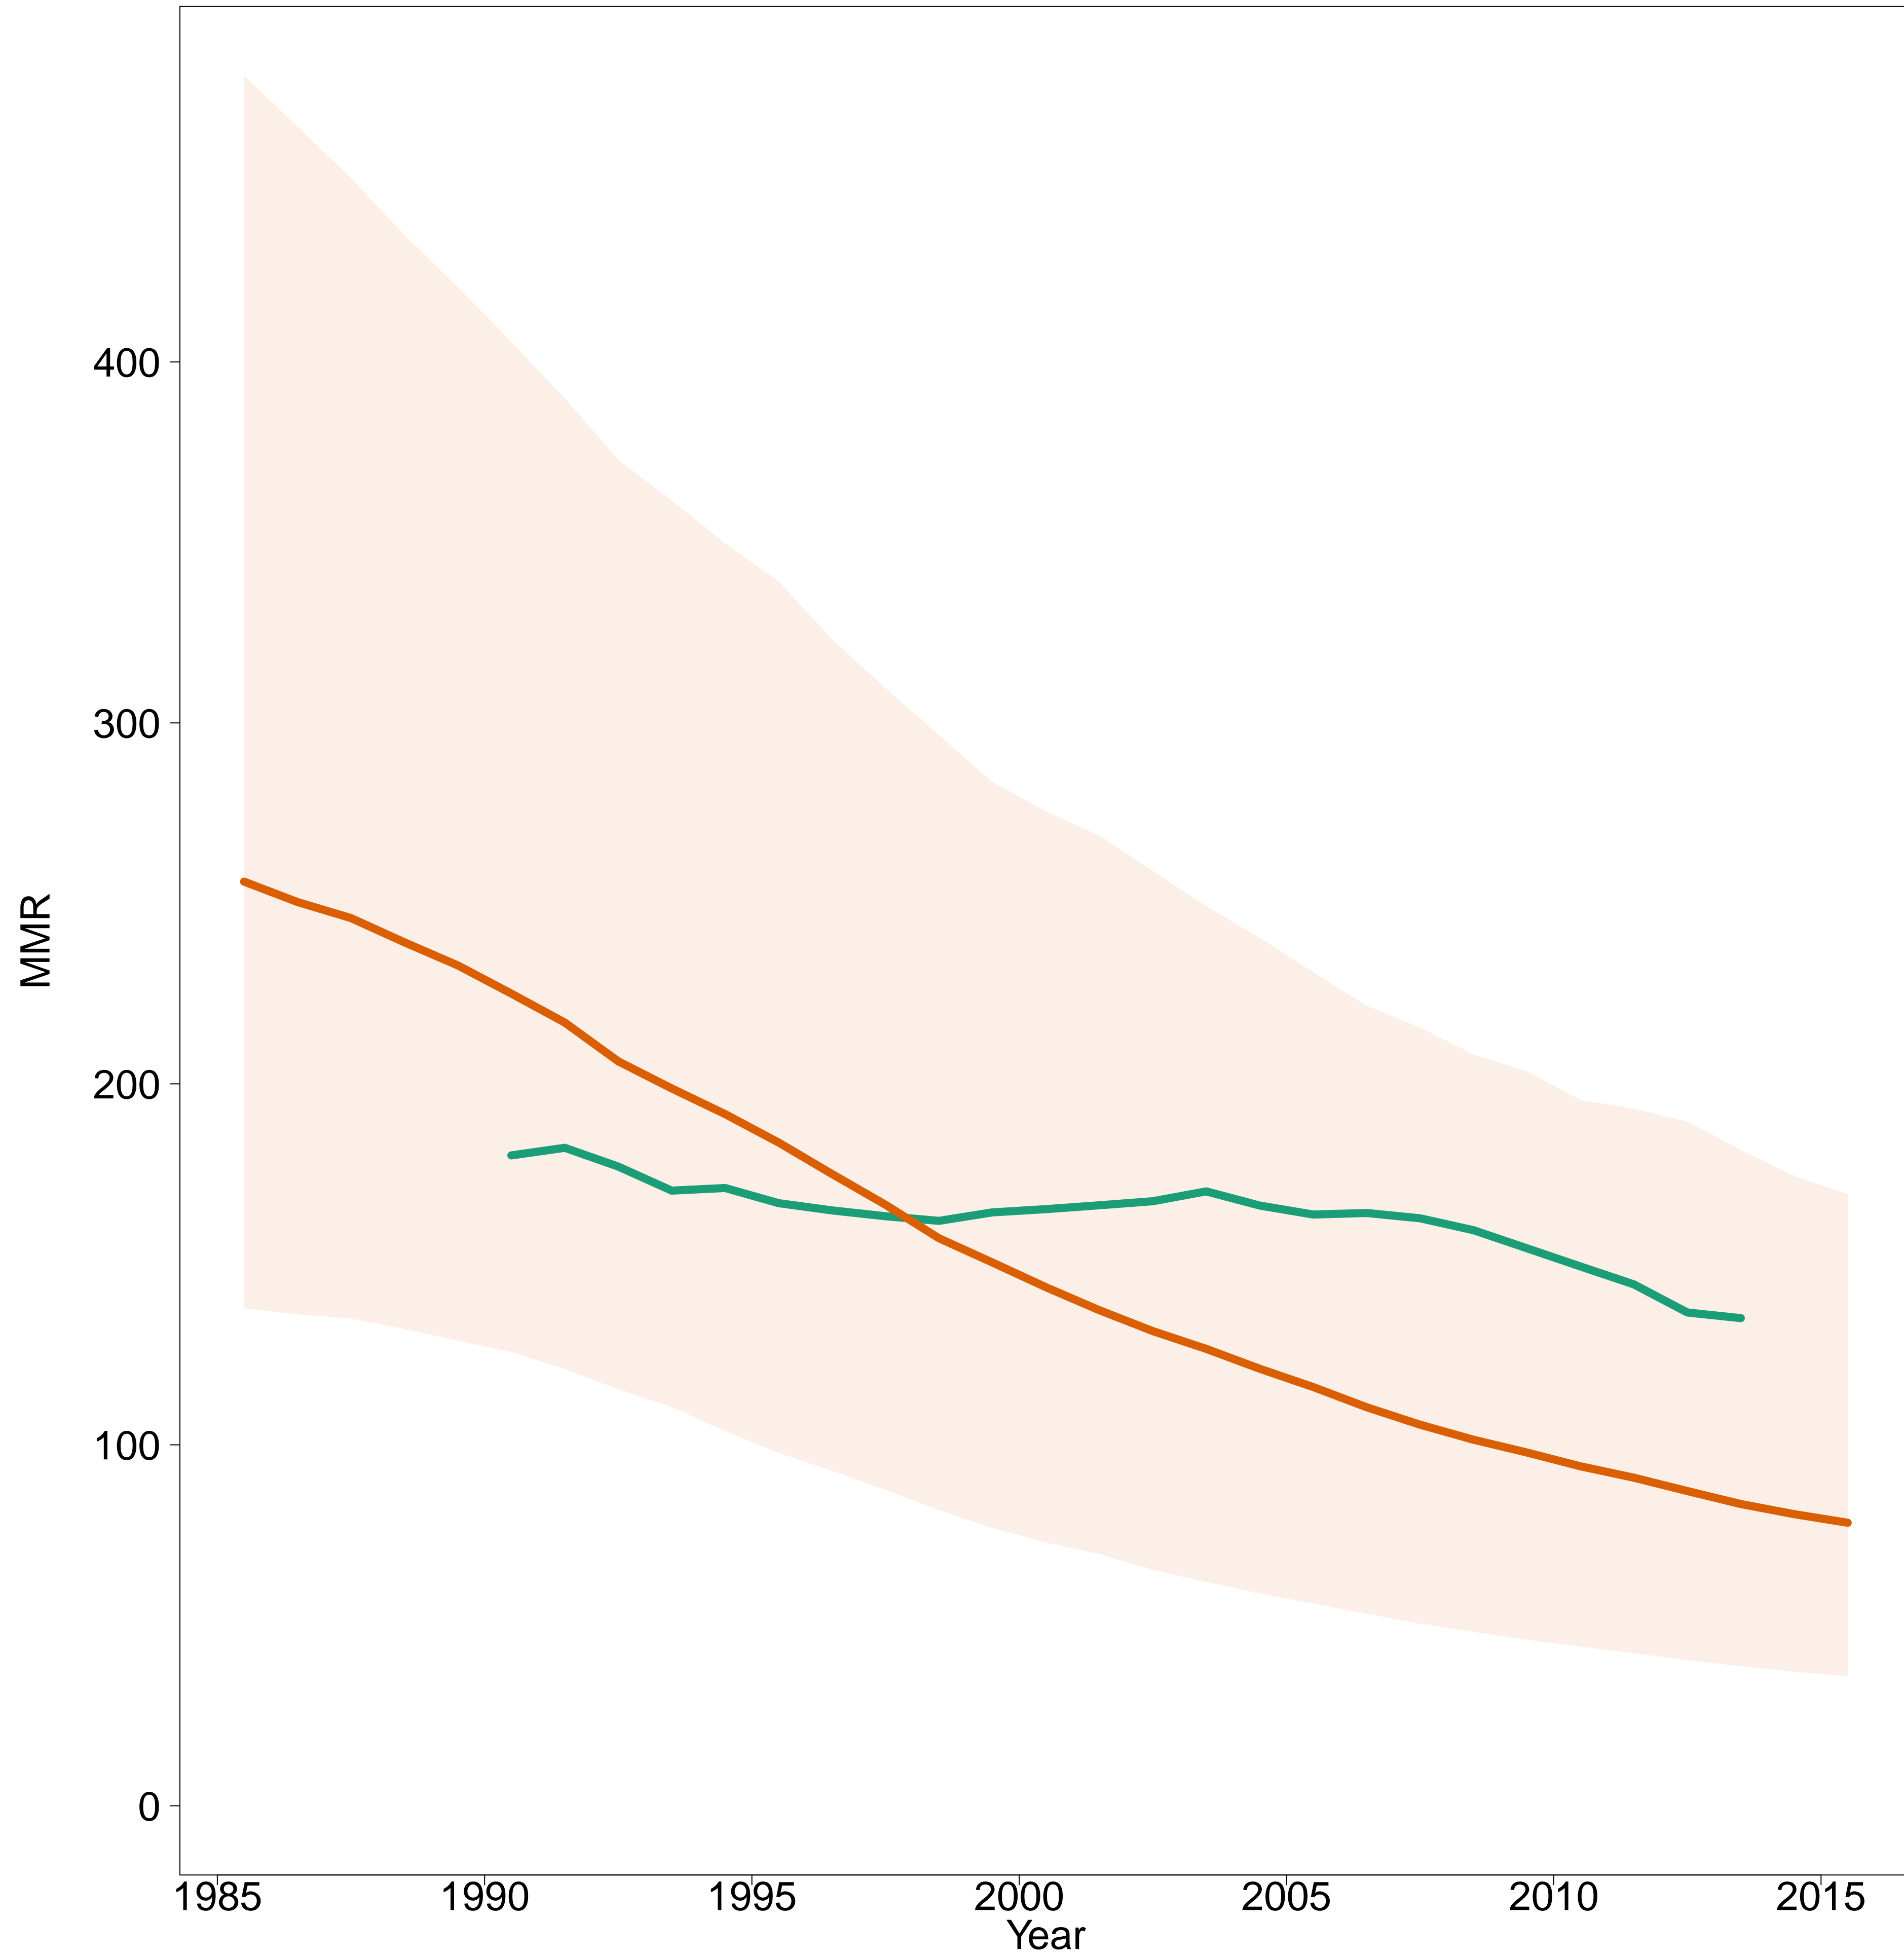

– Estimates –  
MMEIG 2015  
GBD 2013  
– MMR Database 2015 –

Venezuela [VEN]  
(South America)

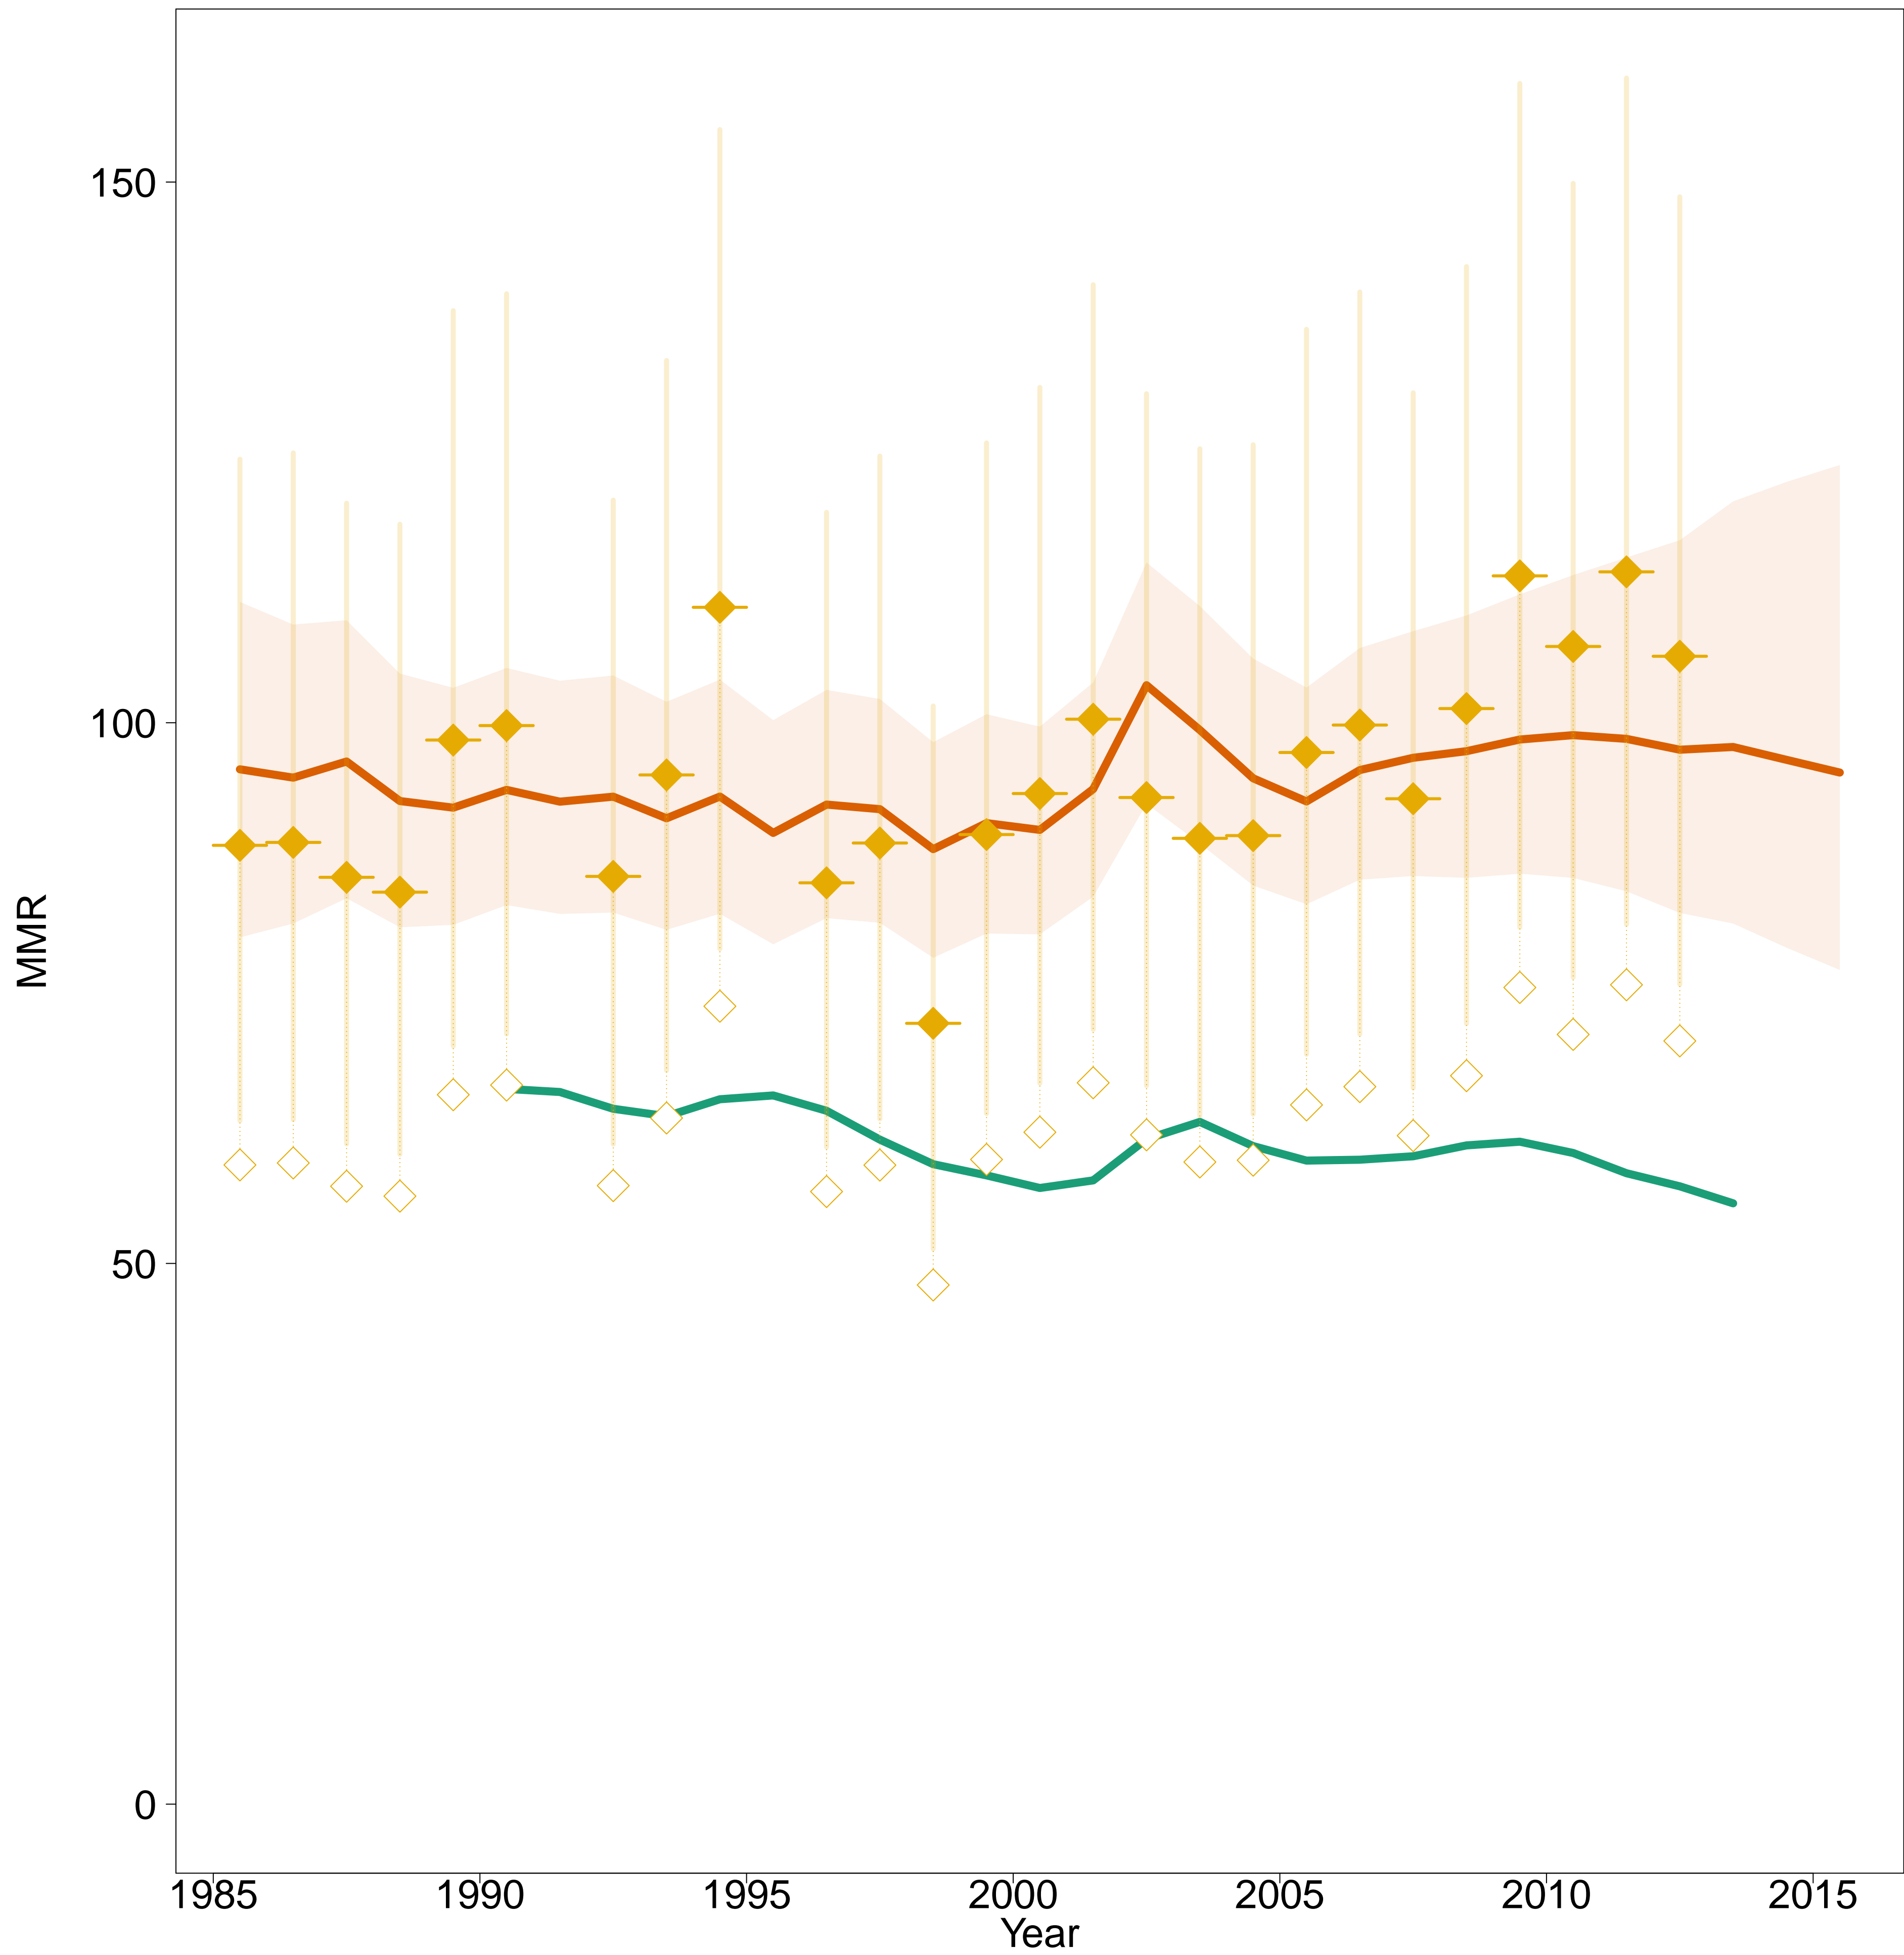

- Estimates –
- MMEIG 2015
- GBD 2013
- MMR Database 2015 –
- Observed Data
- Adjusted Data
- Data type –
- VR

Viet Nam [VNM]  
(South-Eastern Asia / Oceania)

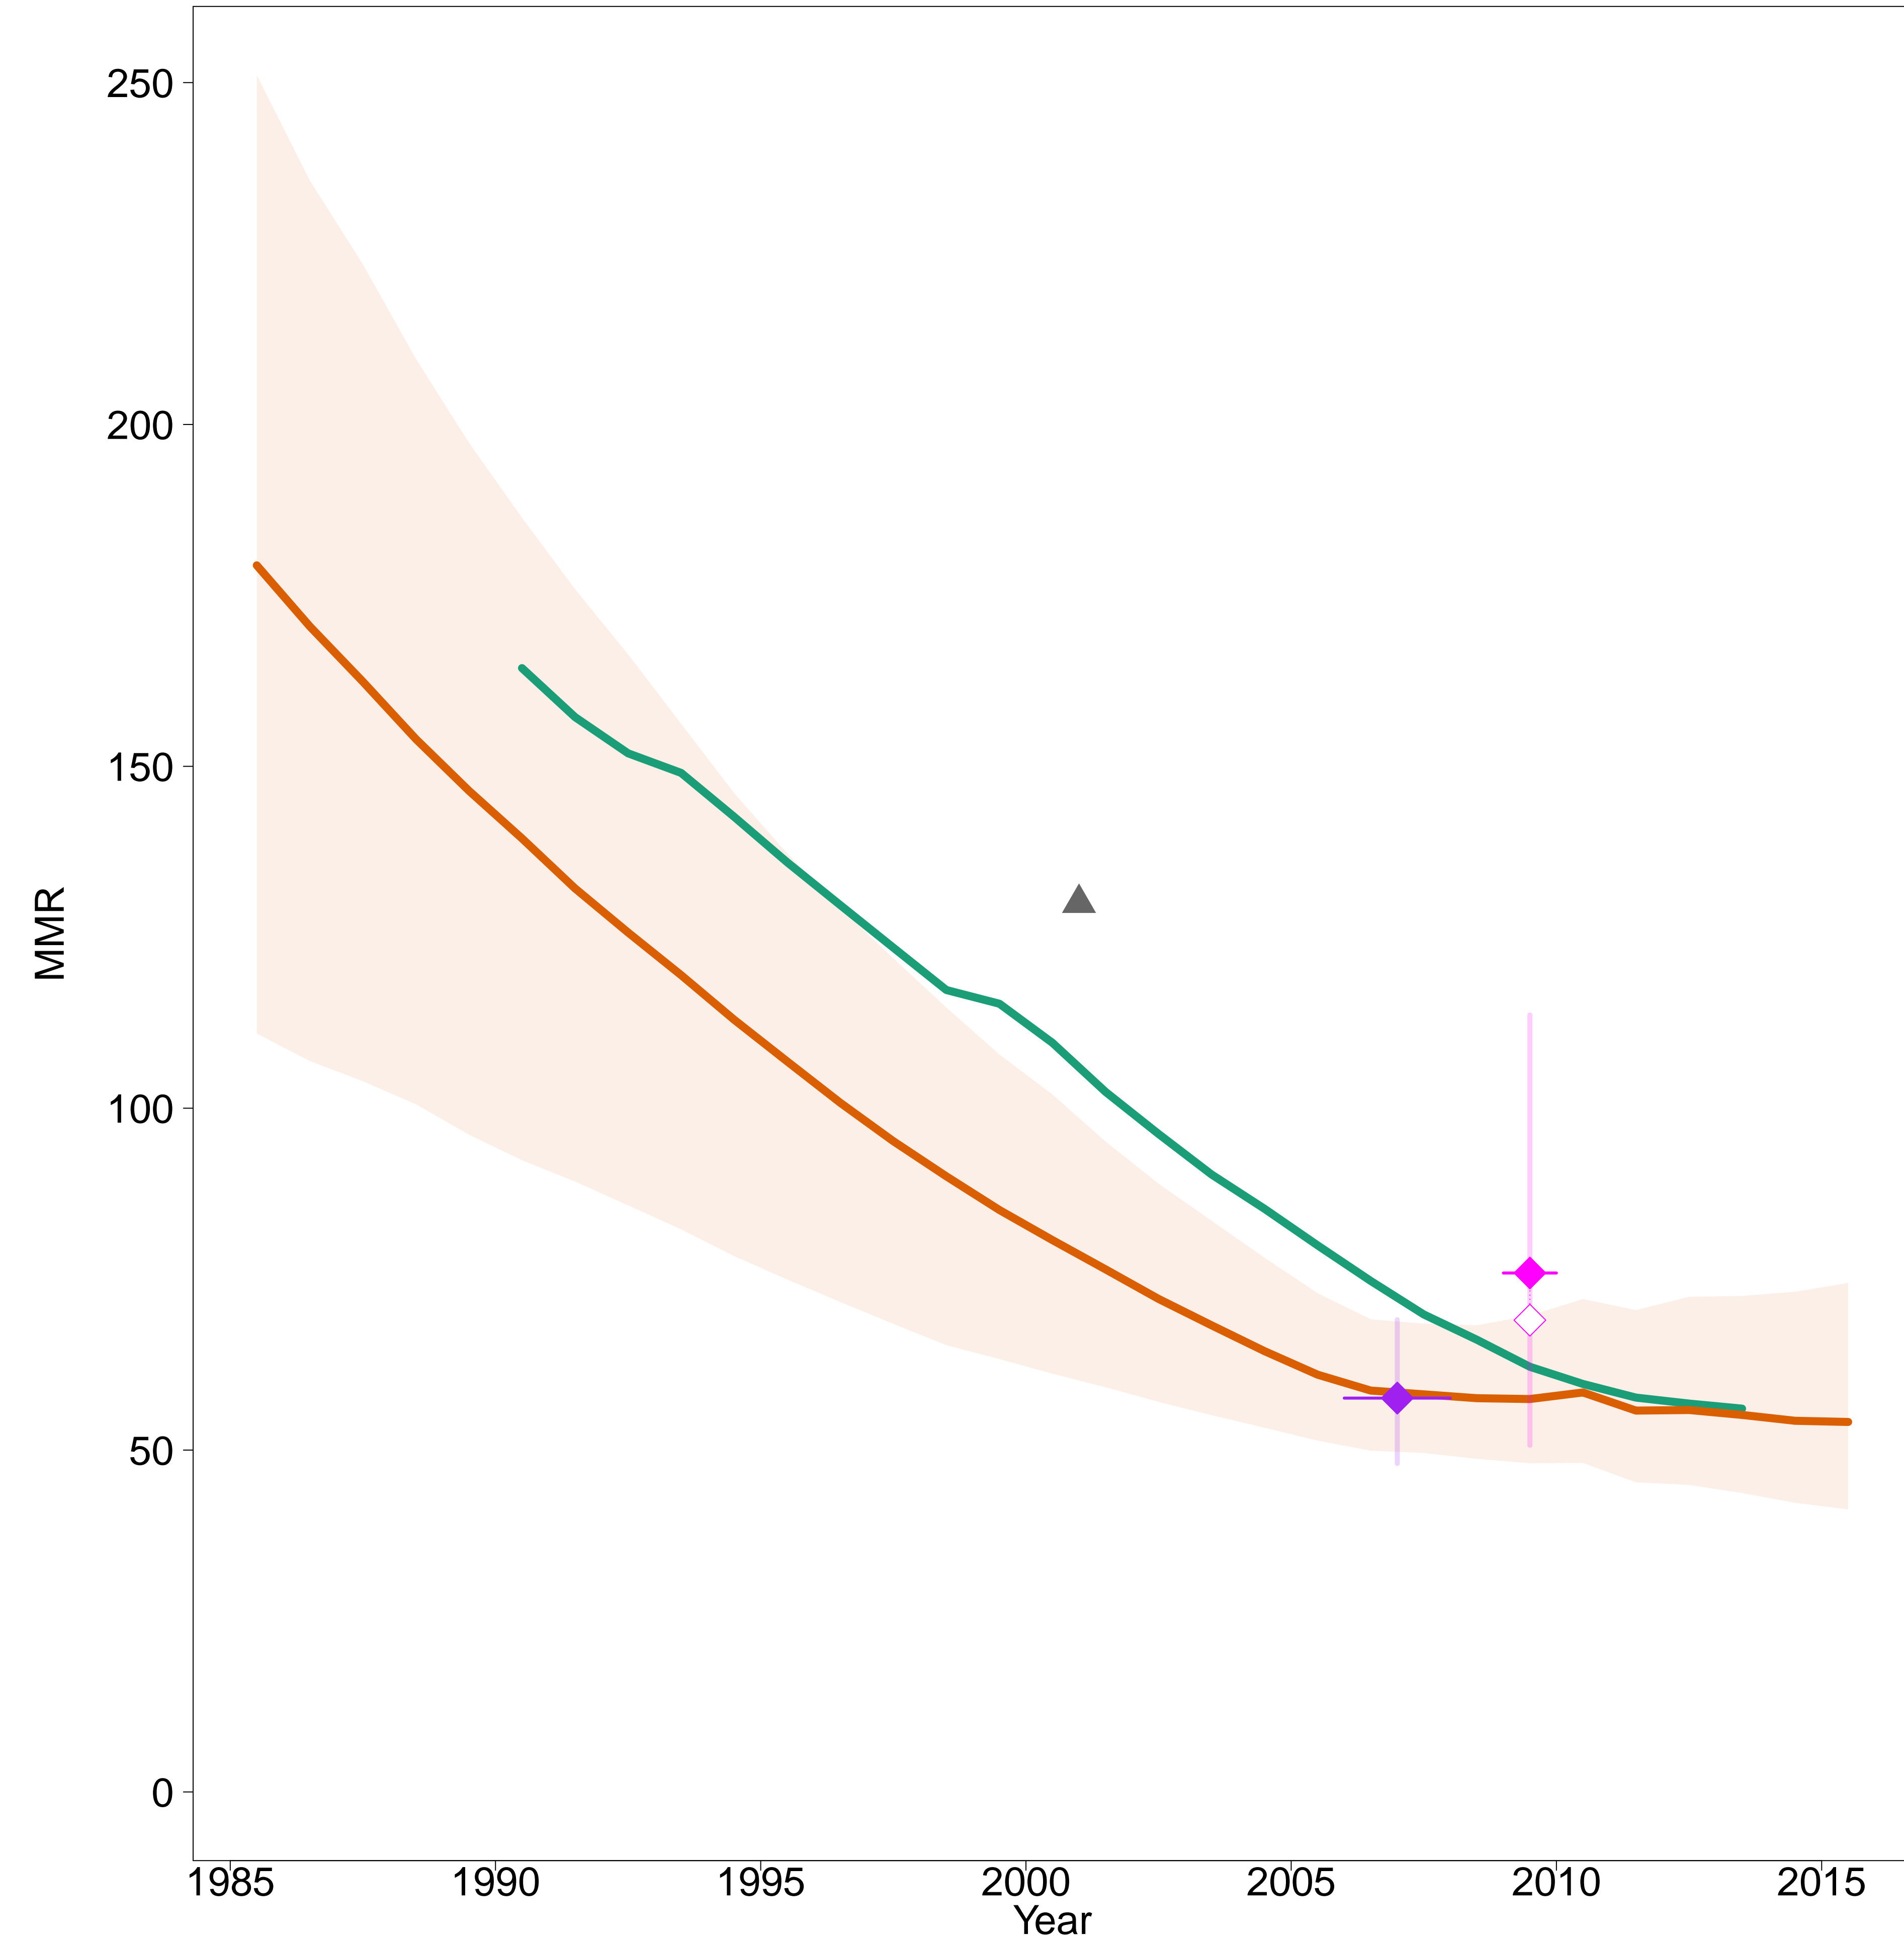

- Estimates –
- MMEIG 2015
- GBD 2013
- MMR Database 2015 –
- ◊ Observed Data
- ◆ Adjusted Data
- Data type –
- ◆ Spec. studies
- ◆ Census
- ▲ Excluded misc. studies

Yemen [YEM]  
(Western Asia)

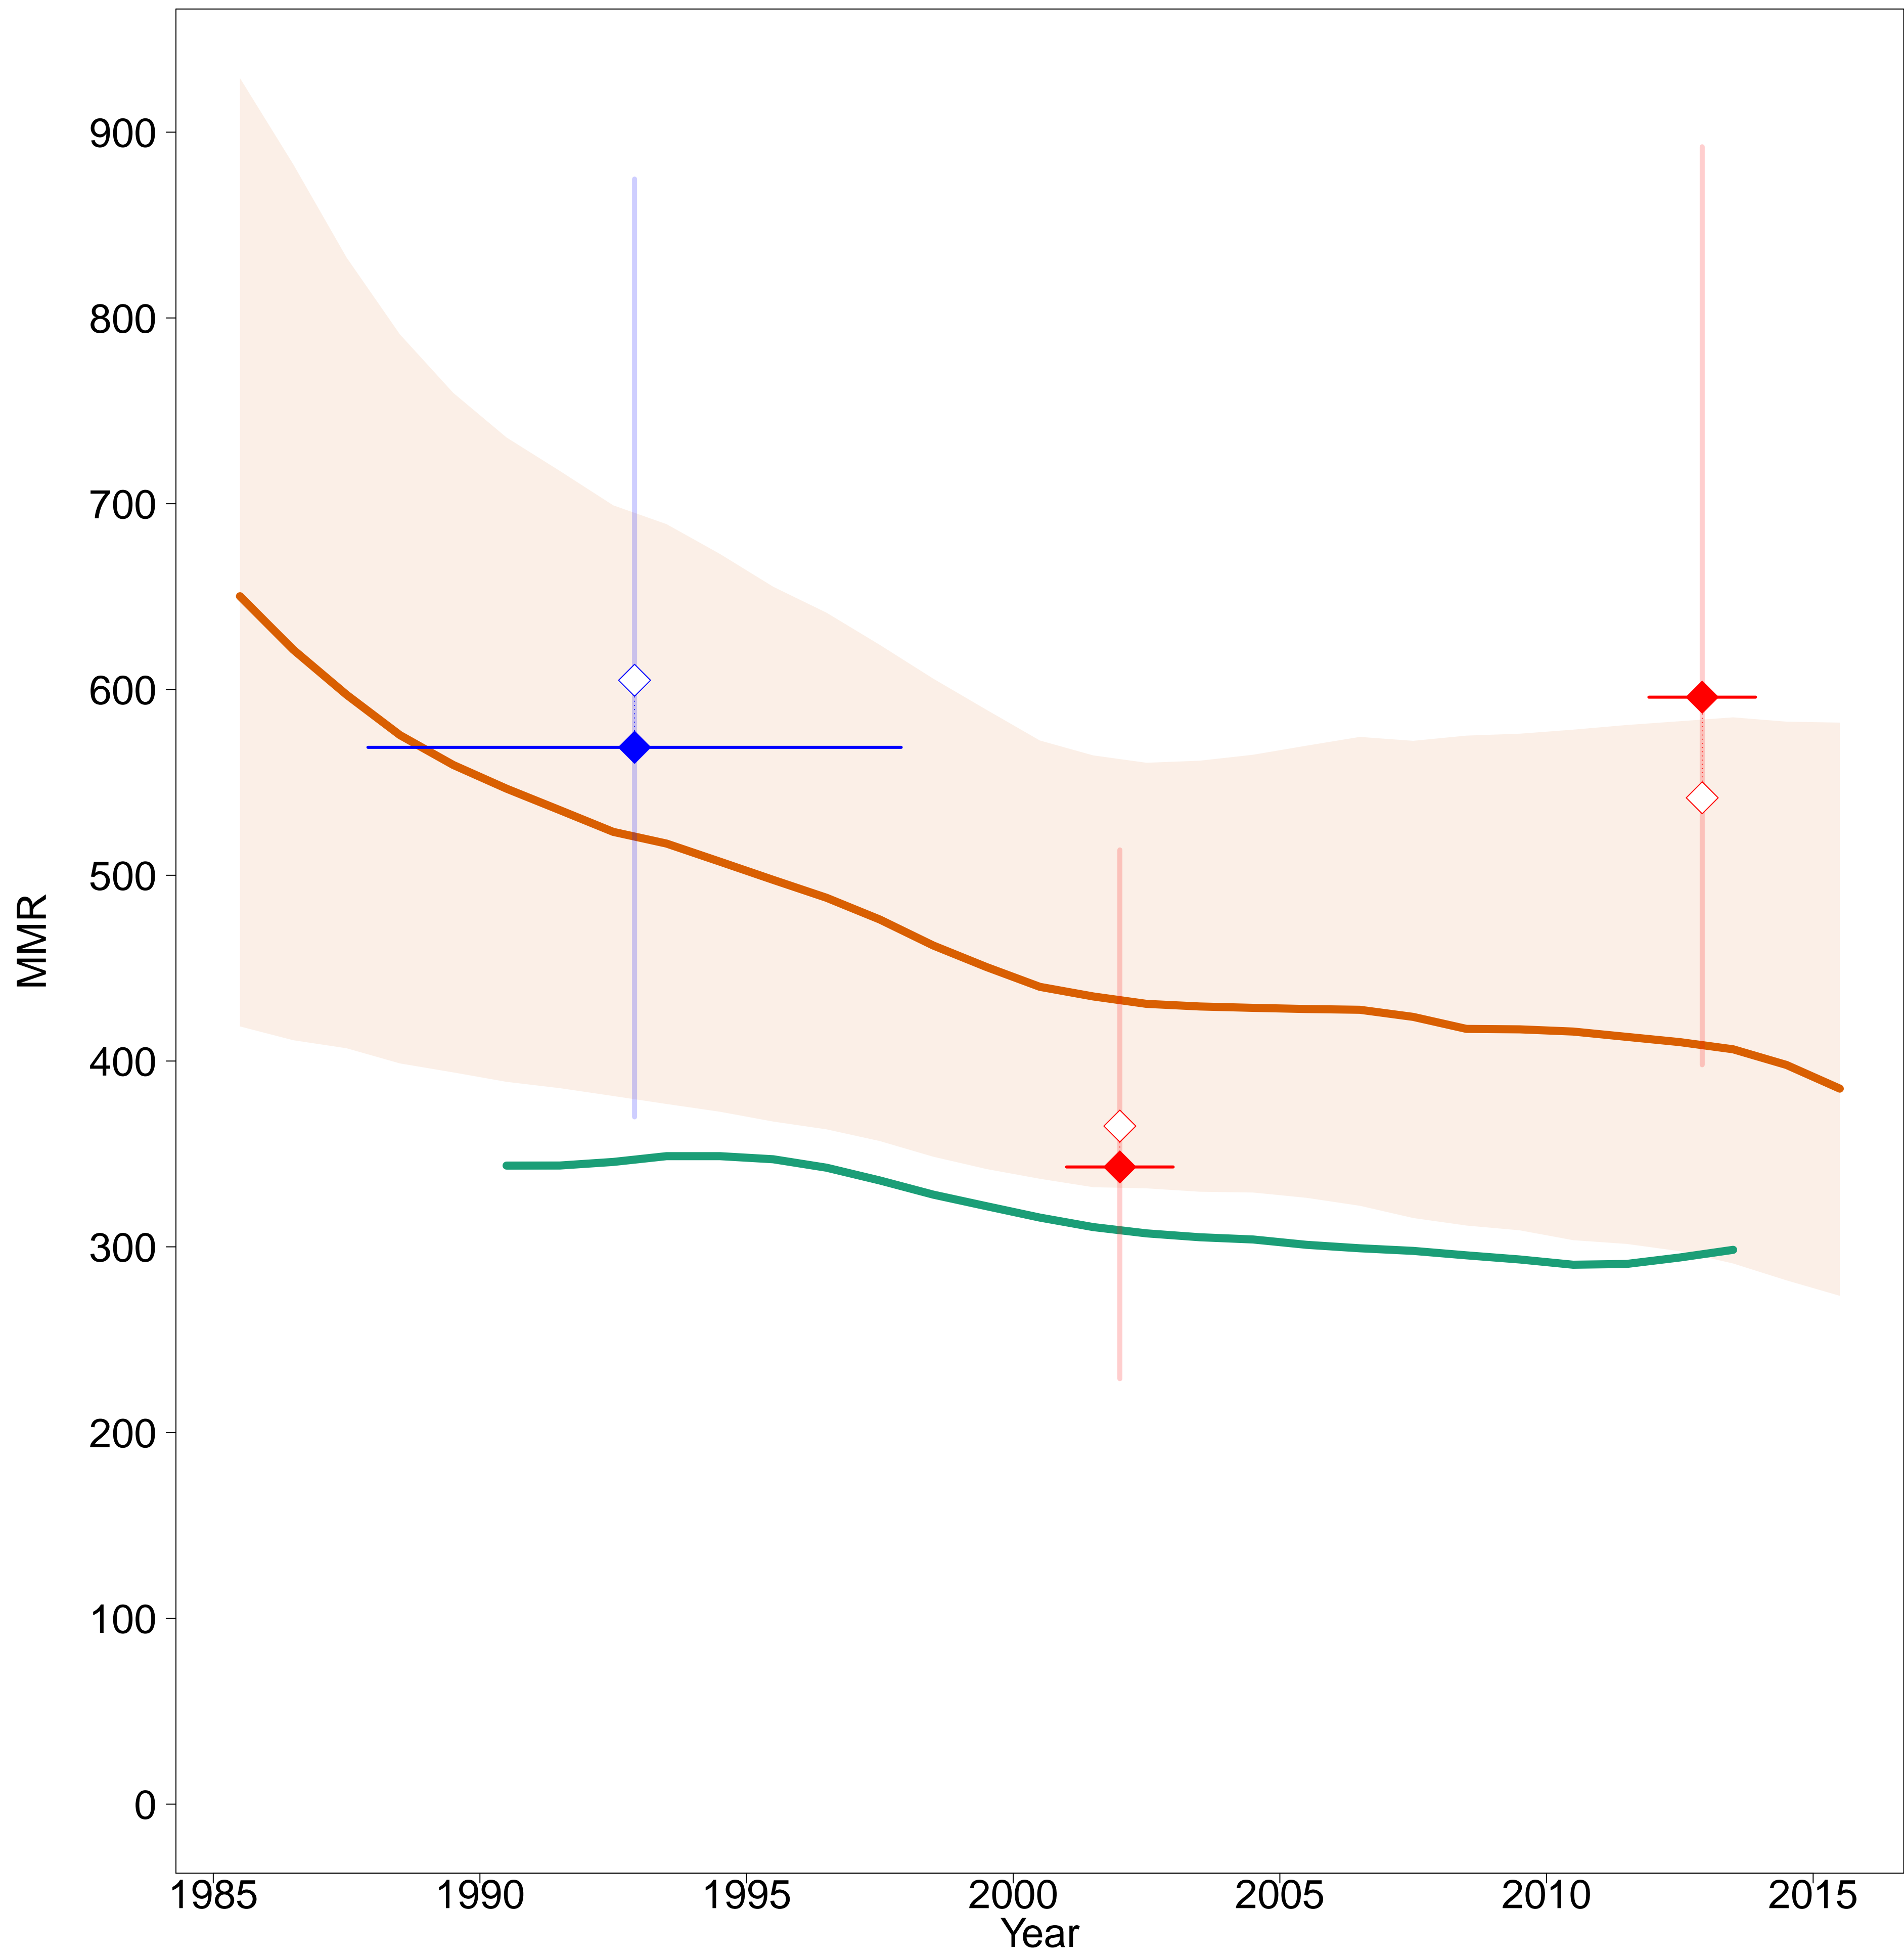

- Estimates -
- MMEIG 2015
- GBD 2013
- MMR Database 2015 -
- Observed Data
- Adjusted Data
- Data type -
- DHS
- Misc. studies

Zambia [ZMB]  
(Eastern Africa)

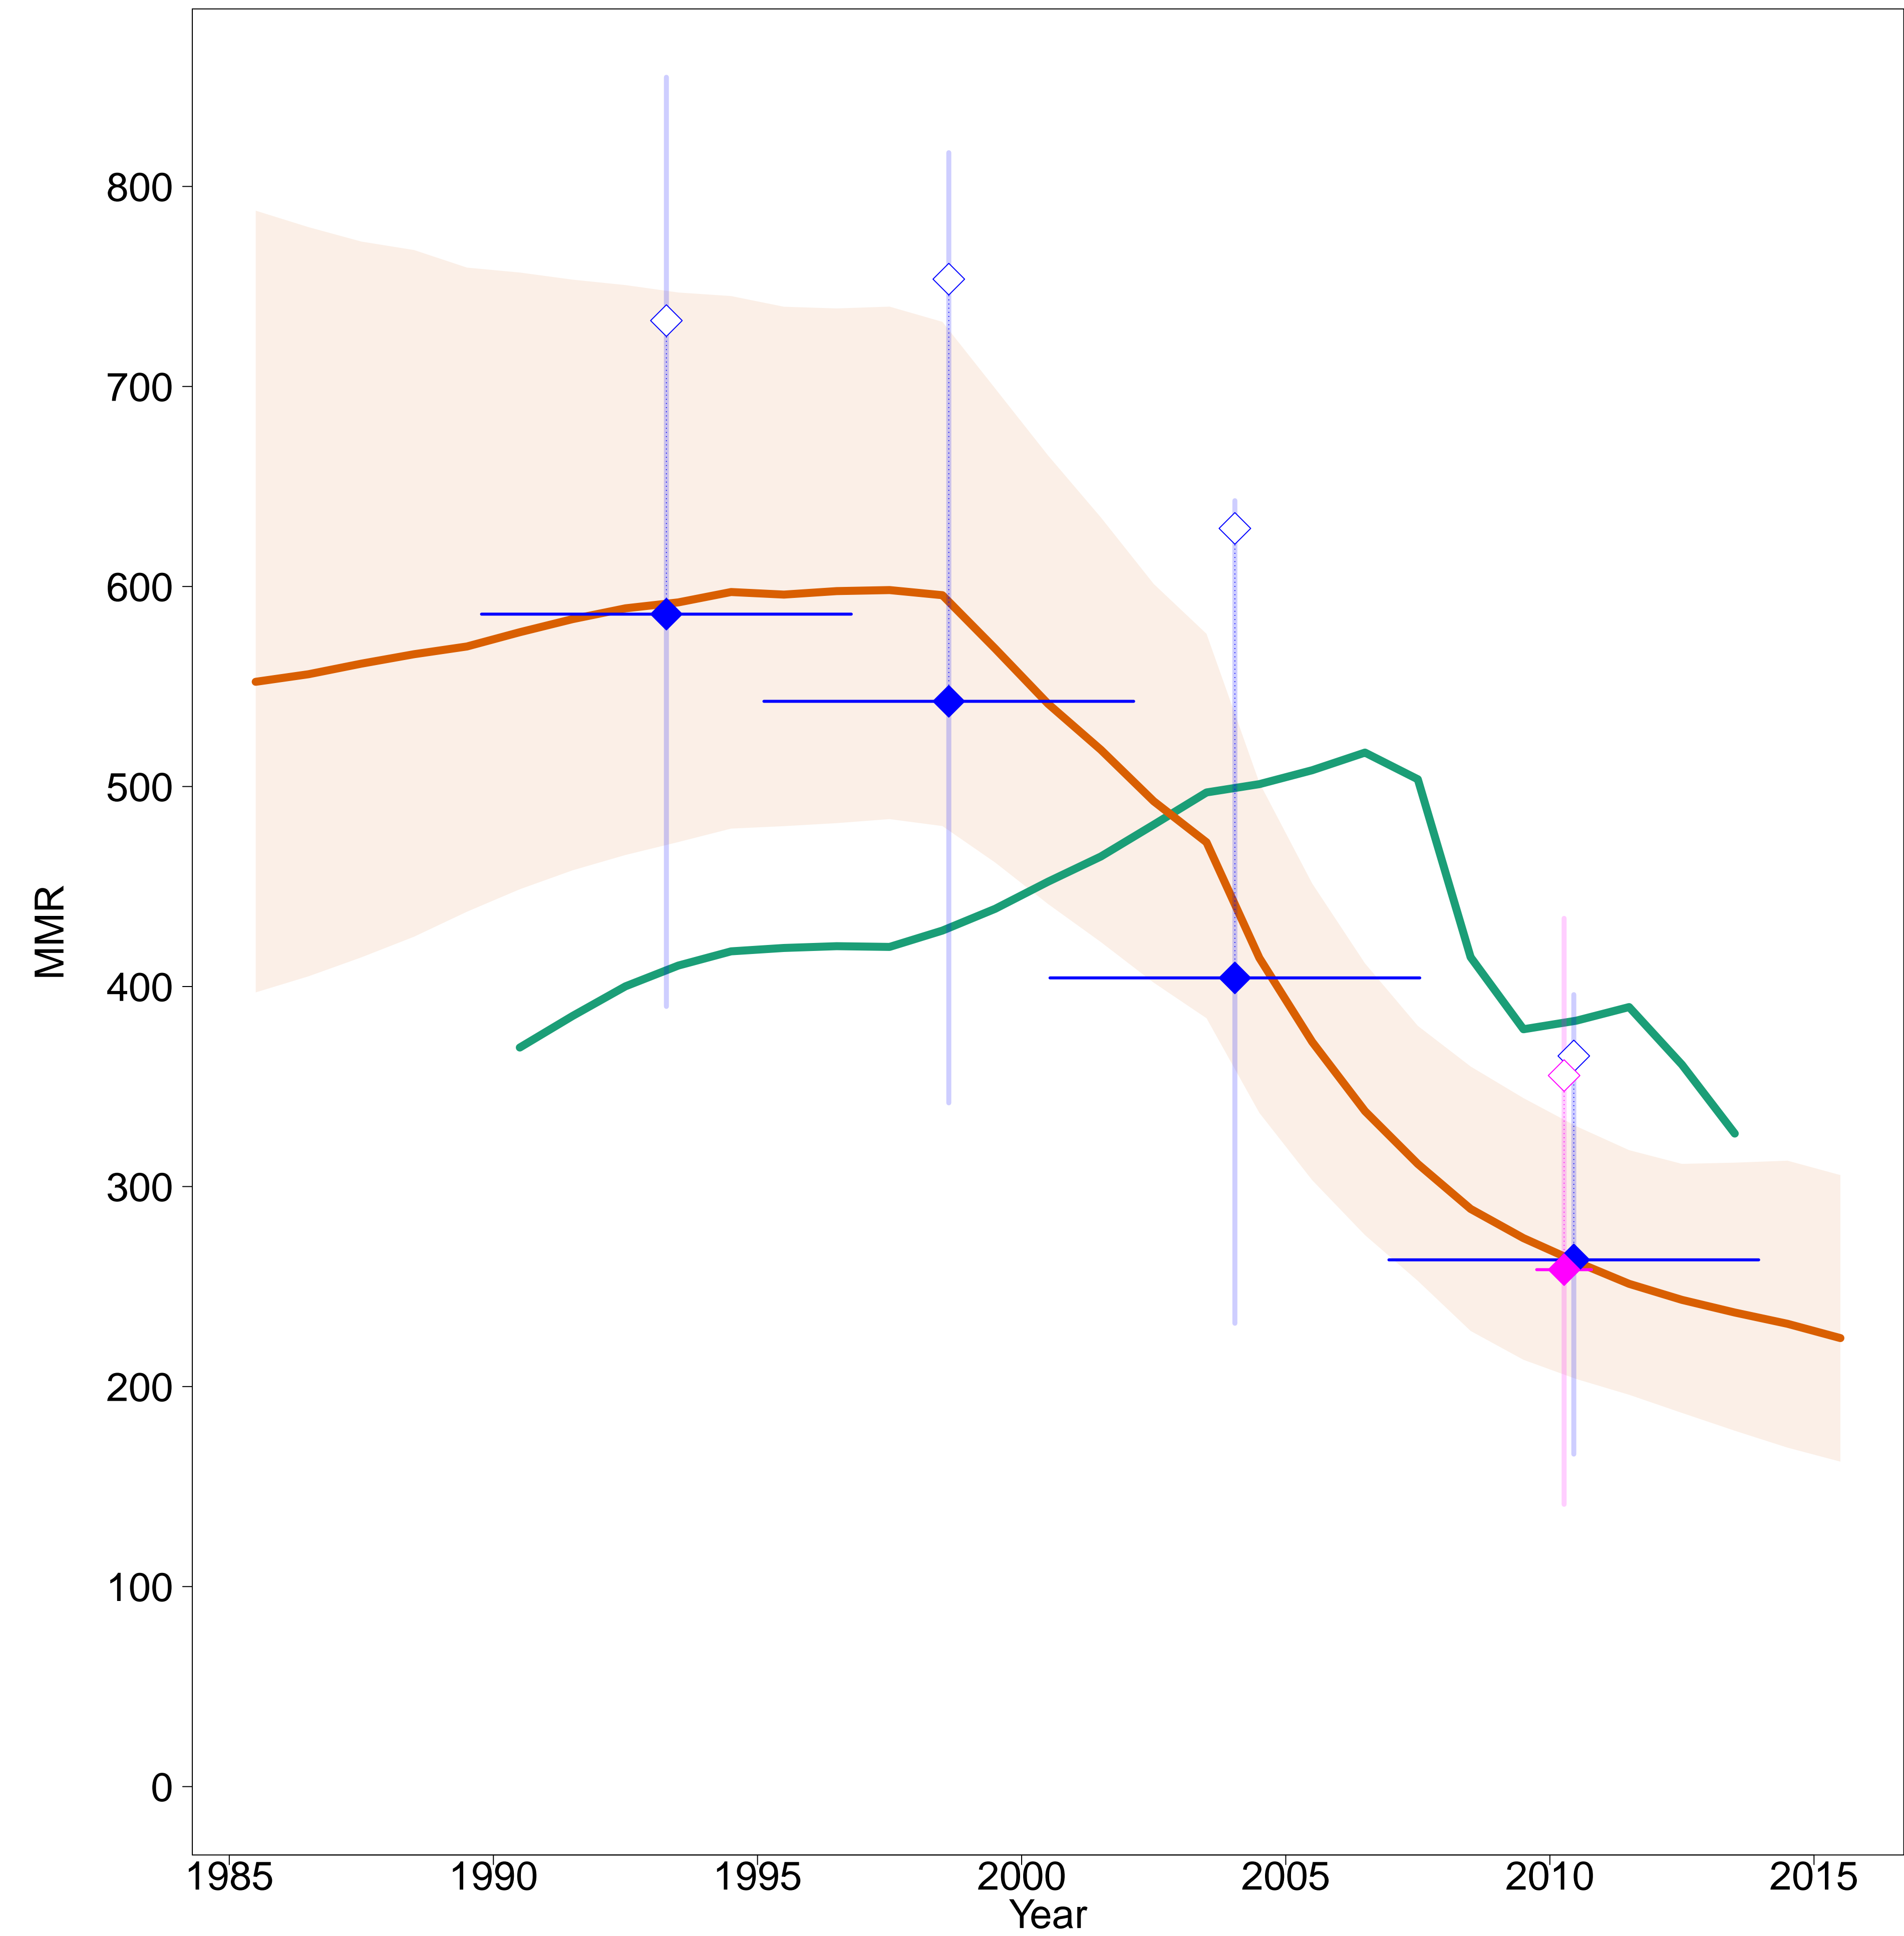

- Estimates –
- MMEIG 2015
- GBD 2013
- MMR Database 2015 –
- Observed Data
- Adjusted Data
- Data type –
- DHS
- Census

Zimbabwe [ZWE]  
(Eastern Africa)

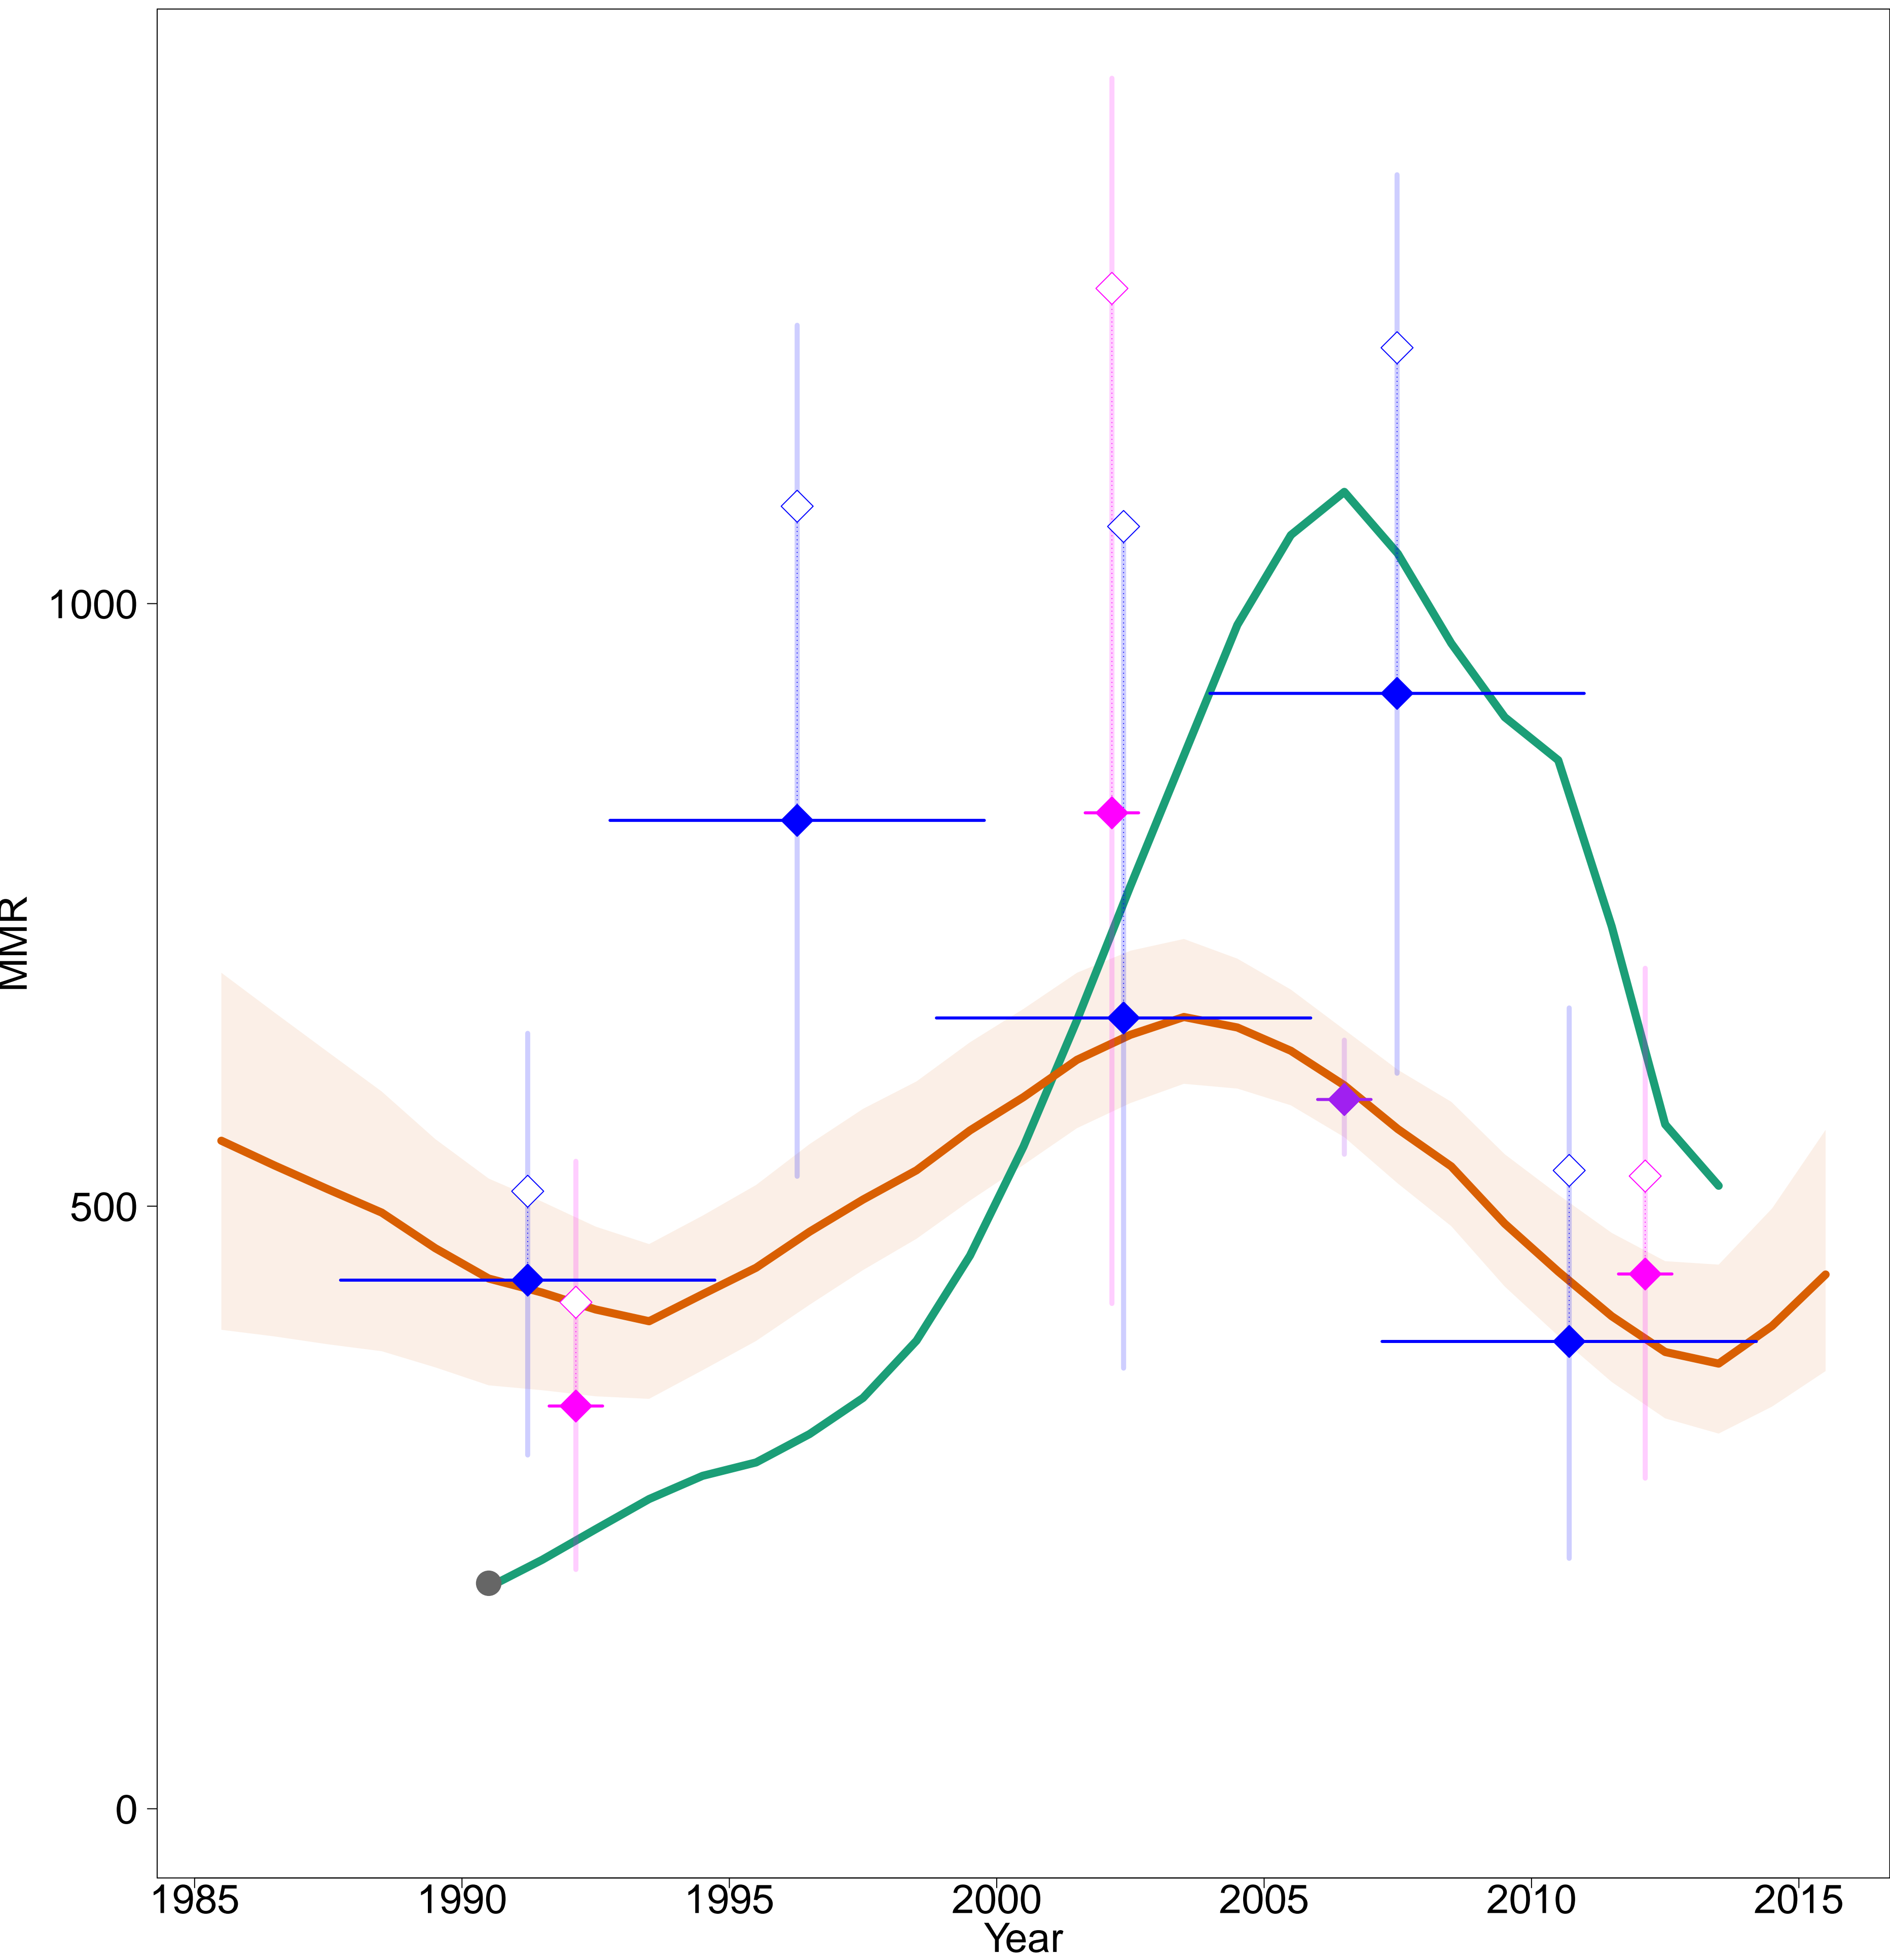

- Estimates -
- MMEIG 2015
- GBD 2013
- MMR Database 2015 -
- Observed Data
- Adjusted Data
- Data type -
- Spec. studies
- DHS
- Census
- Excluded VR data  
(data quality issues)
